# Supplementary material for: Genome-wide high-throughput SNP discovery and genotyping for understanding natural (functional) allelic diversity and domestication patterns in wild chickpea
Source: PubMed Central journal article supplement (PMC4513697; doi:10.1038/srep12468), 2015-07-24
Supplement: srep12468-s1.pdf [file srep12468-s1.pdf]

# **Genome-wide high-throughput SNP discovery and genotyping for understanding natural (functional) allelic diversity and domestication patterns in wild chickpea**

**Deepak Bajaj<sup>1a</sup>, Shouvik Das<sup>1</sup>, Saurabh Badoni<sup>1</sup>, Vinod Kumar<sup>2</sup>, Mohar Singh<sup>3</sup>, Kailash C. Bansal<sup>3</sup>, Akhilesh K. Tyagi<sup>1</sup>, Swarup K. Parida<sup>1\*</sup>**

<sup>1</sup>National Institute of Plant Genome Research (NIPGR), Aruna Asaf Ali Marg, New Delhi 110067, India

<sup>2</sup>National Research Centre on Plant Biotechnology (NRCPB), New Delhi-110012, India

<sup>3</sup>National Bureau of Plant Genetic Resources (NBPGR), New Delhi-110012, India

\*Corresponding author

## **Text S1**

The GBS-based SNPs identified from *desi* chickpea consisted of 12112 and 26399 reference genome- and *de novo*-based SNPs, respectively. The reference genome-based SNPs included 4672 SNPs that were physically mapped on eight *desi* chromosomes with an average map density of 26.6 kb (**Table S3, Fig. S2A**). The remaining 7440 SNPs were physically mapped on *desi* genome scaffolds. The average SNP map density was highest on *desi* chromosome 6 (22.2 kb) and lowest on chromosome 5 (35.9 kb). A higher proportion of SNPs were physically mapped on *desi* chromosome 4 (19.9%, 930 SNPs) (**Table S3**).

## **Text S2**

The structural annotation of 12112 *desi* reference genome-based SNPs identified 5071 (41.9%) SNPs in the intergenic regions and 7041 (58.1%) SNPs in 2827 genes (**Fig. S2B**). The number of SNPs detected in the *desi* genes ranged from 1 to 6, with a mean of 2.5 SNPs/gene. The detailed annotation of SNPs in diverse sequence components of genes showed the occurrence of a maximum proportion (44.4%, 3123 SNPs) of SNPs in the exons (CDS), followed by introns (35.9%, 2531) and 1000-bp downstream regulatory regions (DRRs) (12.8%, 900) and a minimum (6.9%, 487) in the 2000-bp upstream regulatory regions (URRs) (**Fig. S2B**). The coding SNPs included 1838 (58.9%) SNPs within 894 genes revealed synonymous substitutions, while 1285 (41.1%) SNPs in 878 genes showed non-synonymous substitutions. The non-synonymous SNPs comprised of 1258 (97.9%) missense SNPs in 864 genes and 27 (2.1%) nonsense SNPs in 26 genes (**Fig. S2B**). The KOG-based functional annotation (excluding unknown and general functions) of *desi* genes with SNPs showed their primary roles in signal transduction mechanisms (15.9% 13.7%), followed by transcription (11.8%) (**Fig. S3A**).

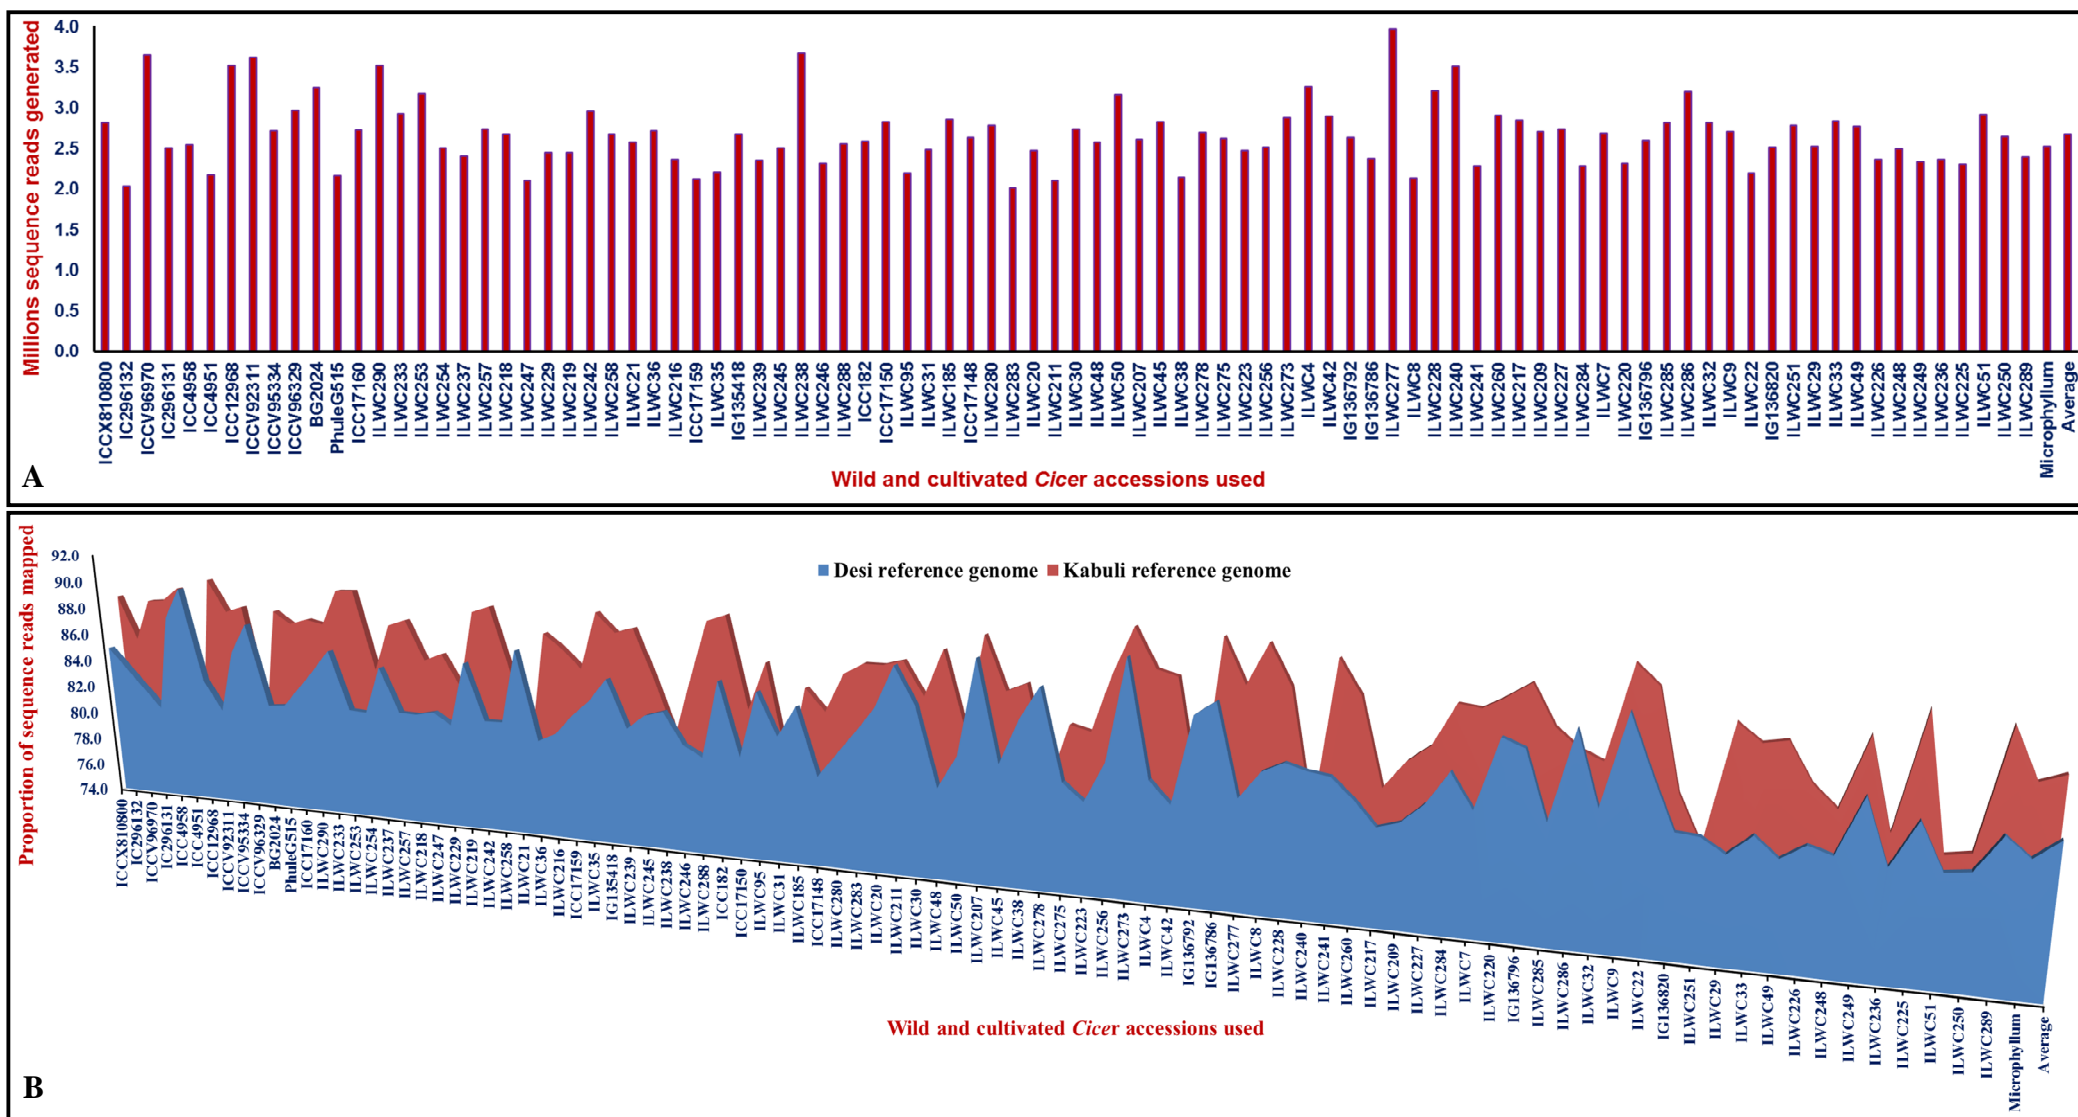

**Fig. S1:** (A) Frequency distribution of millions sequence reads generated from each of the 93 wild and cultivated *Cicer* accessions using a 96-plex GBS assay and proportion of these sequence reads mapped on *desi* and *kabuli* reference genomes (B).

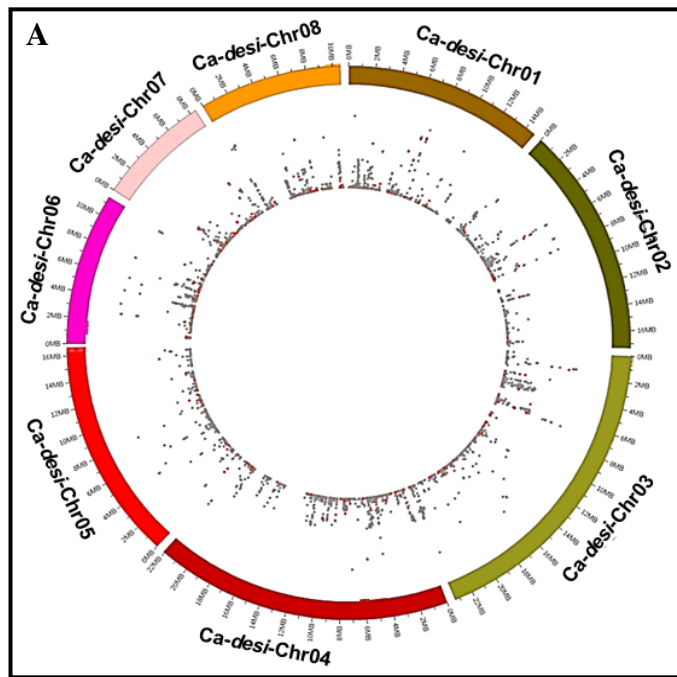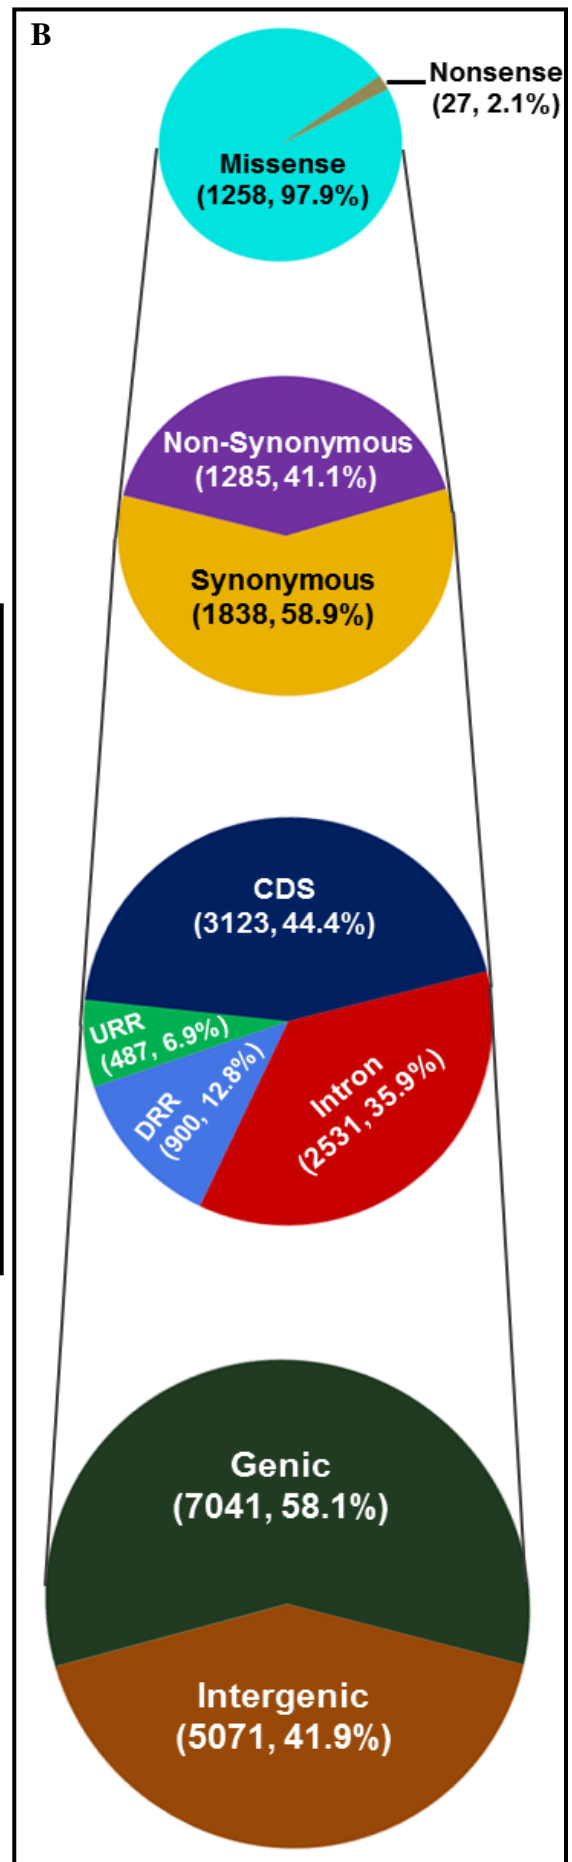

**Fig. S2:** The distribution of 4672 GBS-based genome-wide SNPs physically mapped on eight *desi* chickpea chromosomes are illustrated in the Circos circular ideogram (A). The outermost and innermost circles represent the different colours-coded chromosomes and distribution of SNPs, including non-synonymous SNPs (marked with red dots), respectively. (B) Frequency distribution of 12112 GBS-based SNPs mined in the intergenic regions and diverse coding and non-coding sequence components of 2827 genes annotated from *desi* genome. Number and proportion of SNPs, including synonymous and non-synonymous SNPs annotated in the coding as well as non-coding intronic and regulatory sequences of *desi* chickpea genes and intergenic regions are depicted. The URR (upstream regulatory region) and DRR (downstream regulatory region) of genes were defined as per the gene annotation information of *desi* genome (Jain et al.<sup>22</sup>).

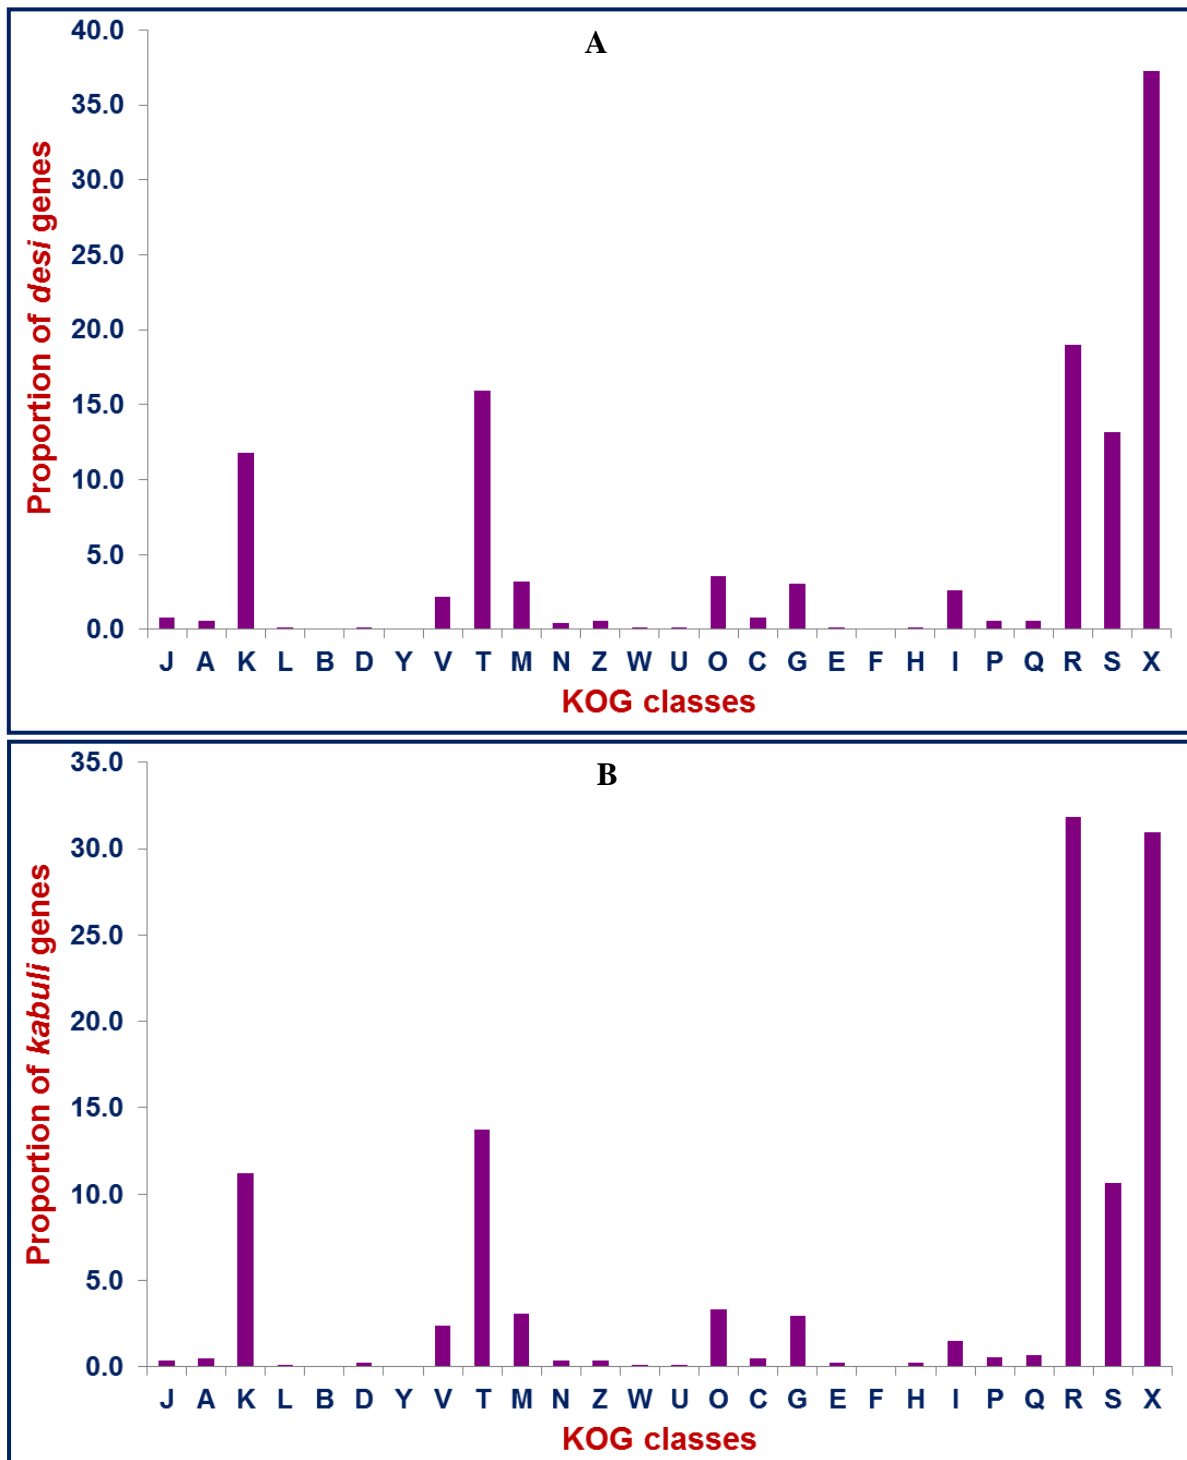

**Fig. S3:** KOG-based putative function determination of SNPs-carrying *desi* (A) and *kabuli* (B) genes. The diverse KOG classes are defined as J: Translation, ribosomal structure and biogenesis, A: RNA processing and modification, K: Transcription, L: Replication, recombination and repair, D: Cell cycle control, cell division and chromosome partitioning, Y: Nuclear structure, V: Defence mechanisms, T: Signal transduction mechanisms, M: Cell wall/membrane/envelope biogenesis, N: Cell motility, Z: Cytoskeleton, W: Extracellular structures, O: Posttranslational modification, protein turnover and chaperones, C: Energy production and conversion, G: Carbohydrate transport and metabolism, E: Amino acid transport and metabolism, H: Coenzyme transport and metabolism, I: Lipid transport and metabolism, P: Inorganic ion transport and metabolism, Q: Secondary metabolites biosynthesis, transport and catabolism, R: General function prediction only, S: Function unknown and X: Unnamed proteins.

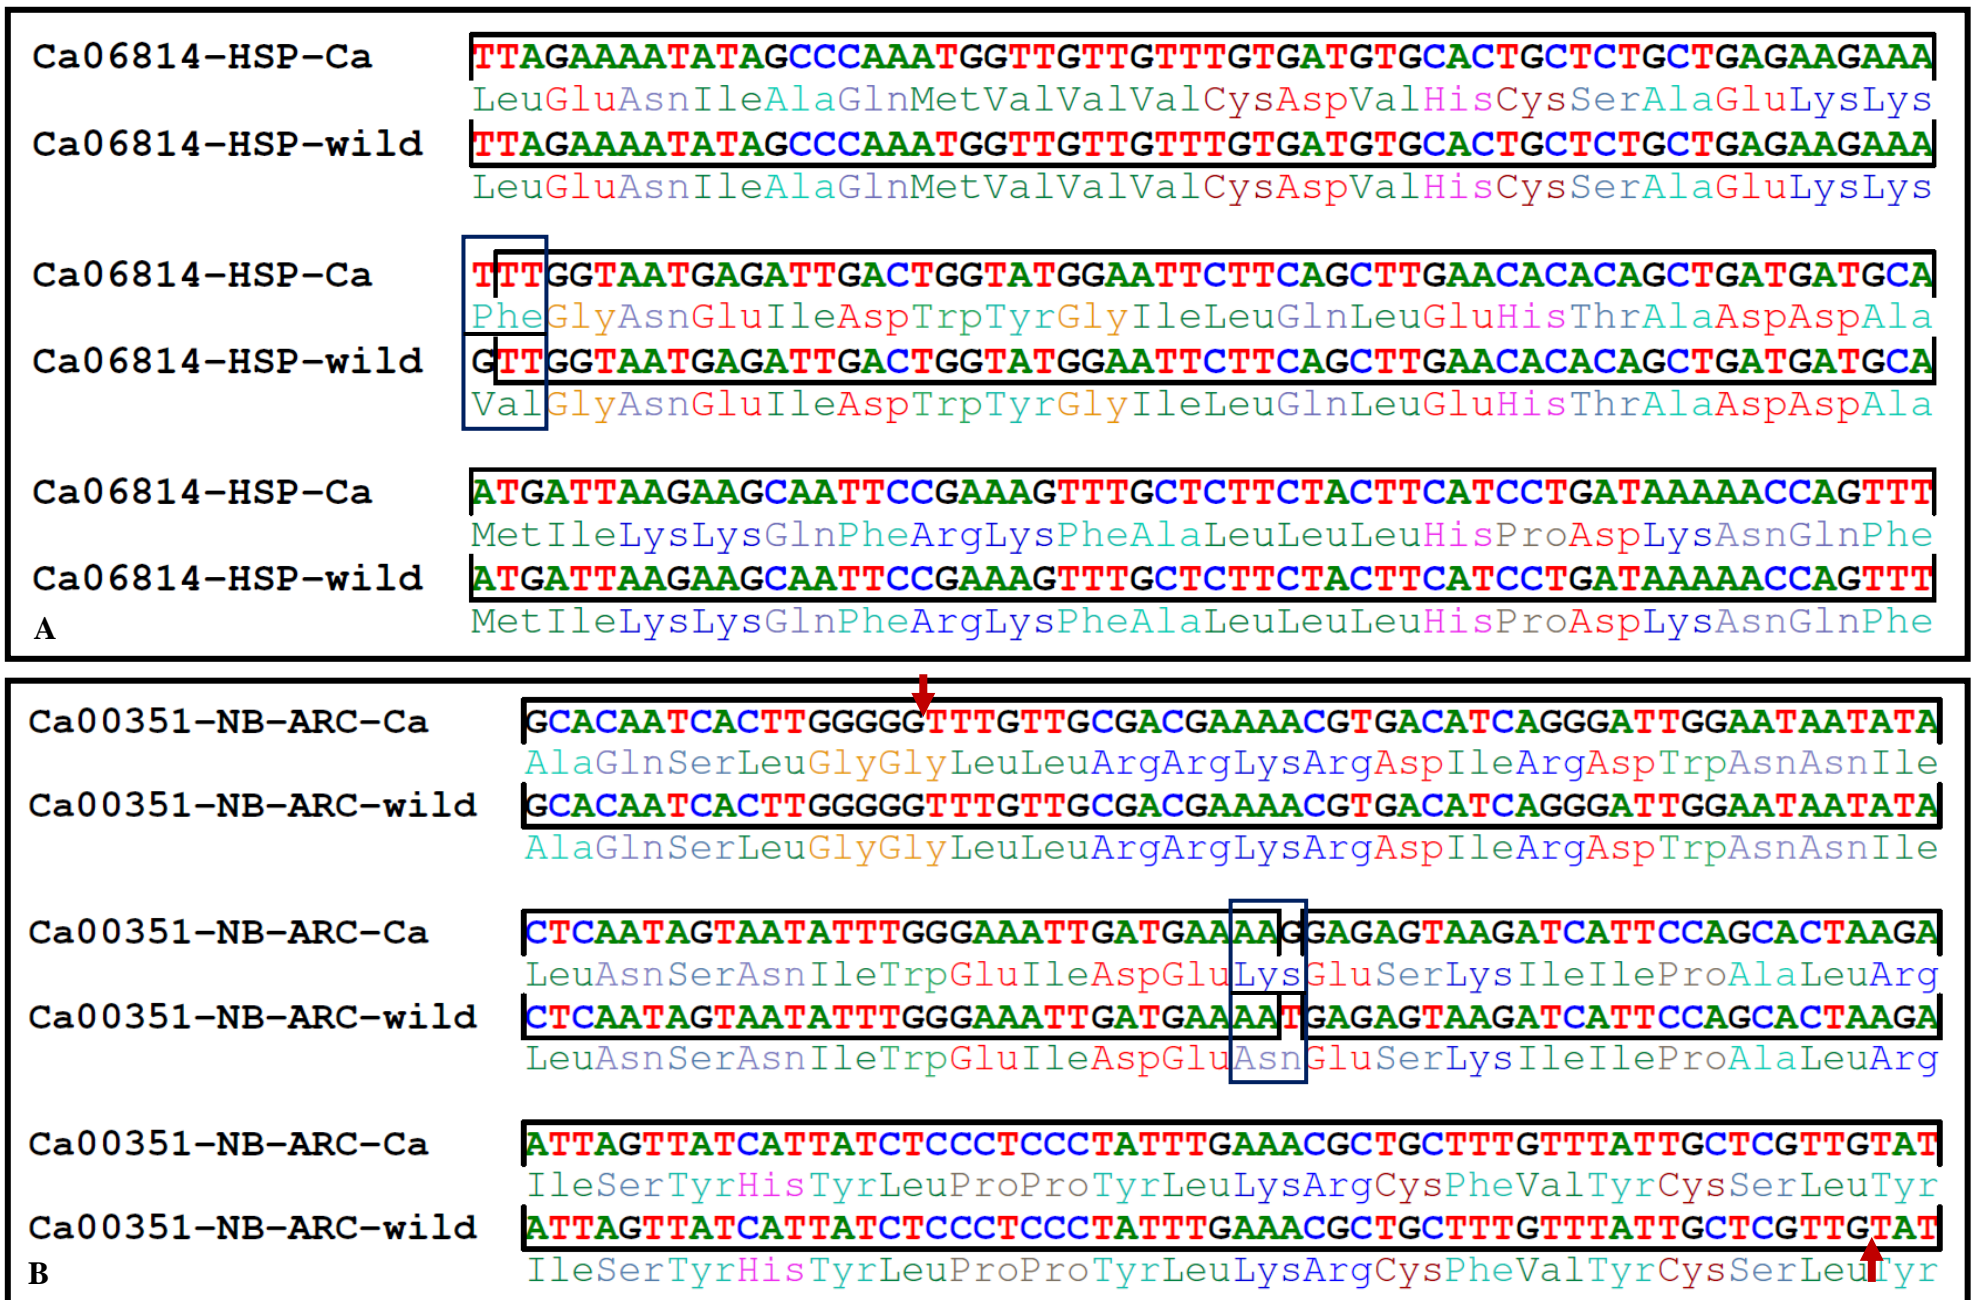

**Fig. S4:** A representative figure depicting the validation of SNP loci (T to G) and (G to T) revealing missense non-synonymous amino acid substitutions [phenylalanine (TTT) to valine (GTT)] and [lysine (AAG) to asparagine (AAT)] in the abiotic and biotic stress responsive HSP (A) and NB-ARC functional domain (marked with arrows) encoding (B) *kabuli* genes, respectively differentiated the known stress tolerant wild *Cicer* accessions from sensitive cultivated *C. arietinum* (Ca) accessions. The non-synonymous SNPs are highlighted with rectangular boxes.

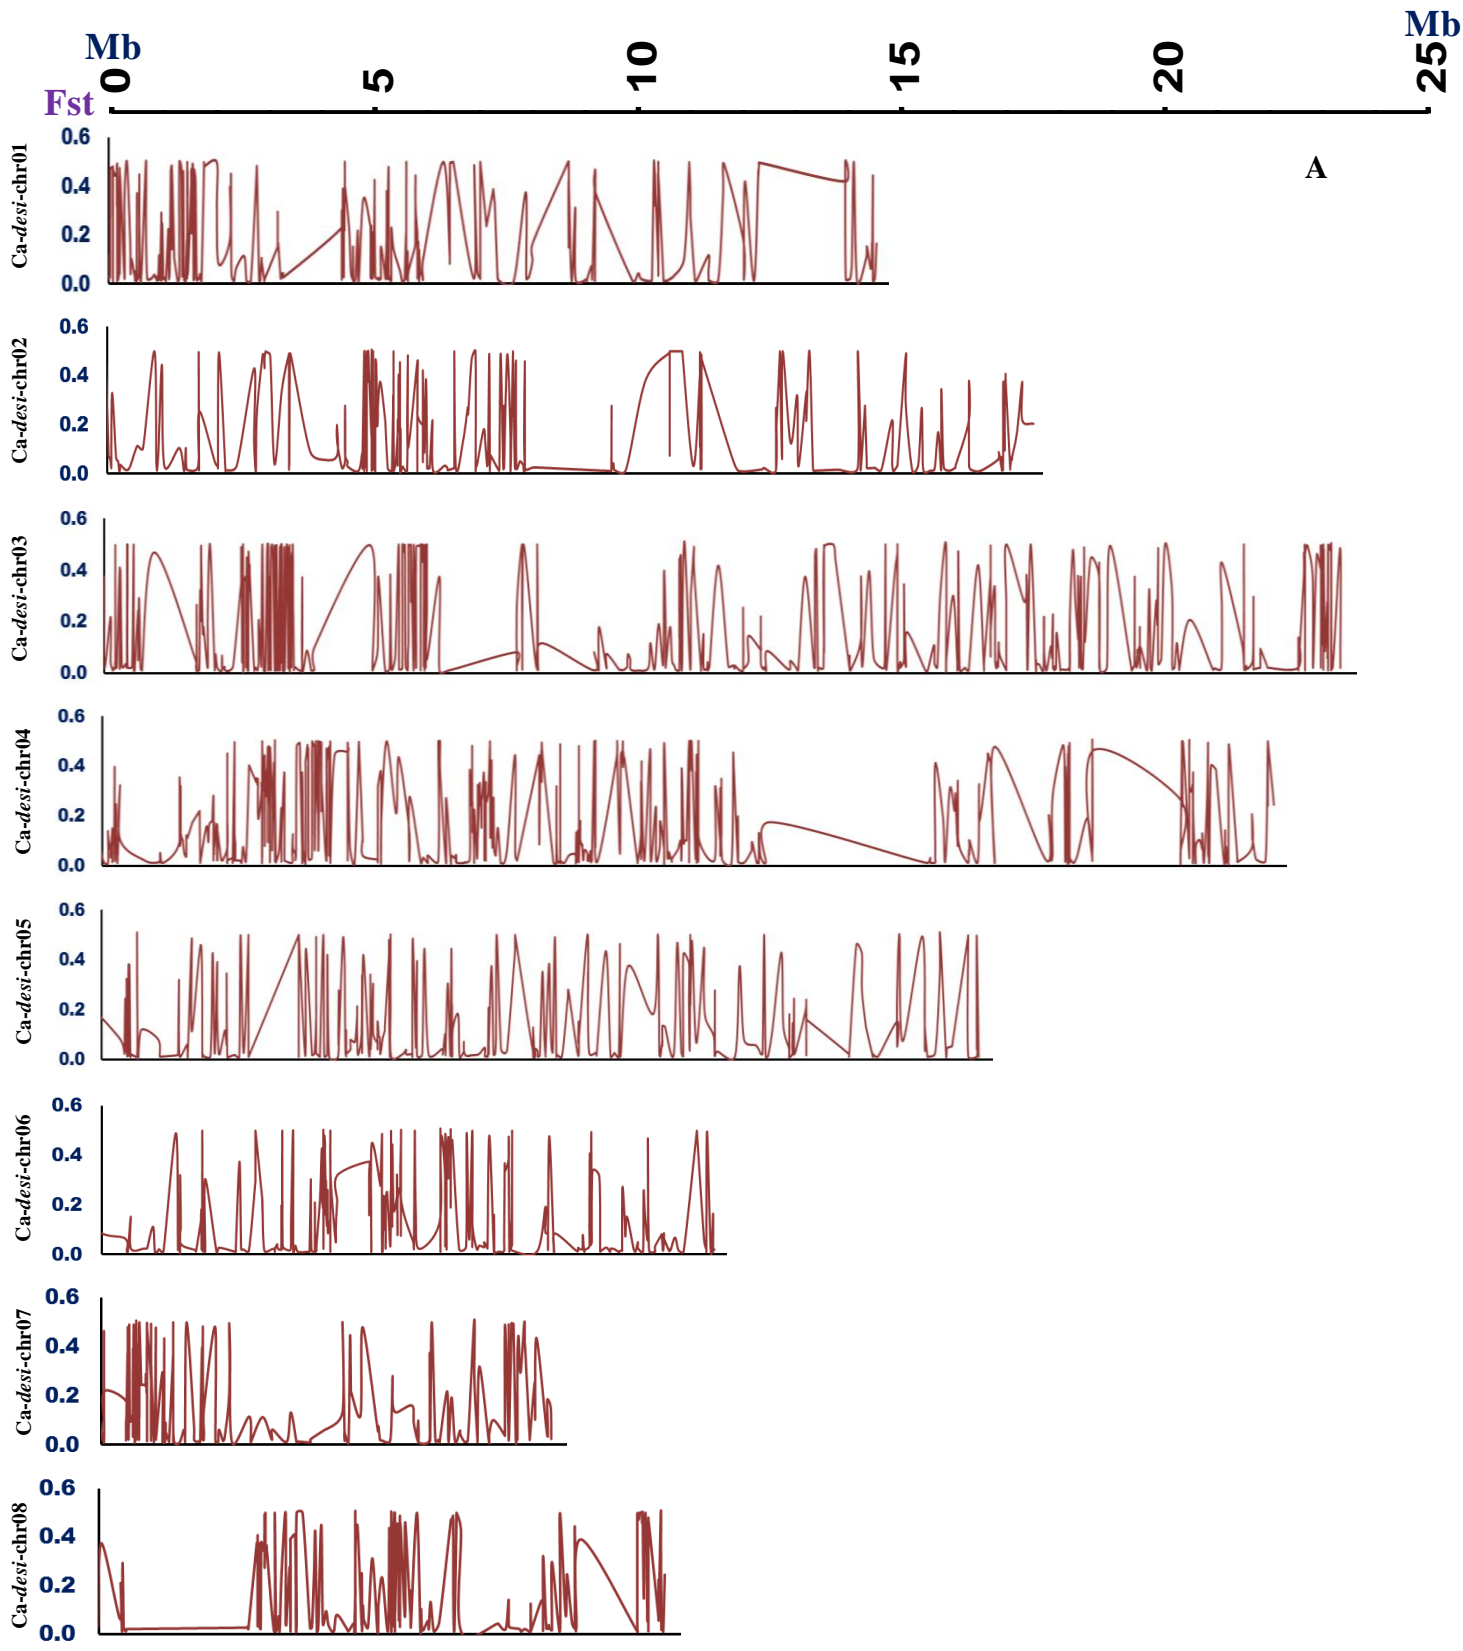



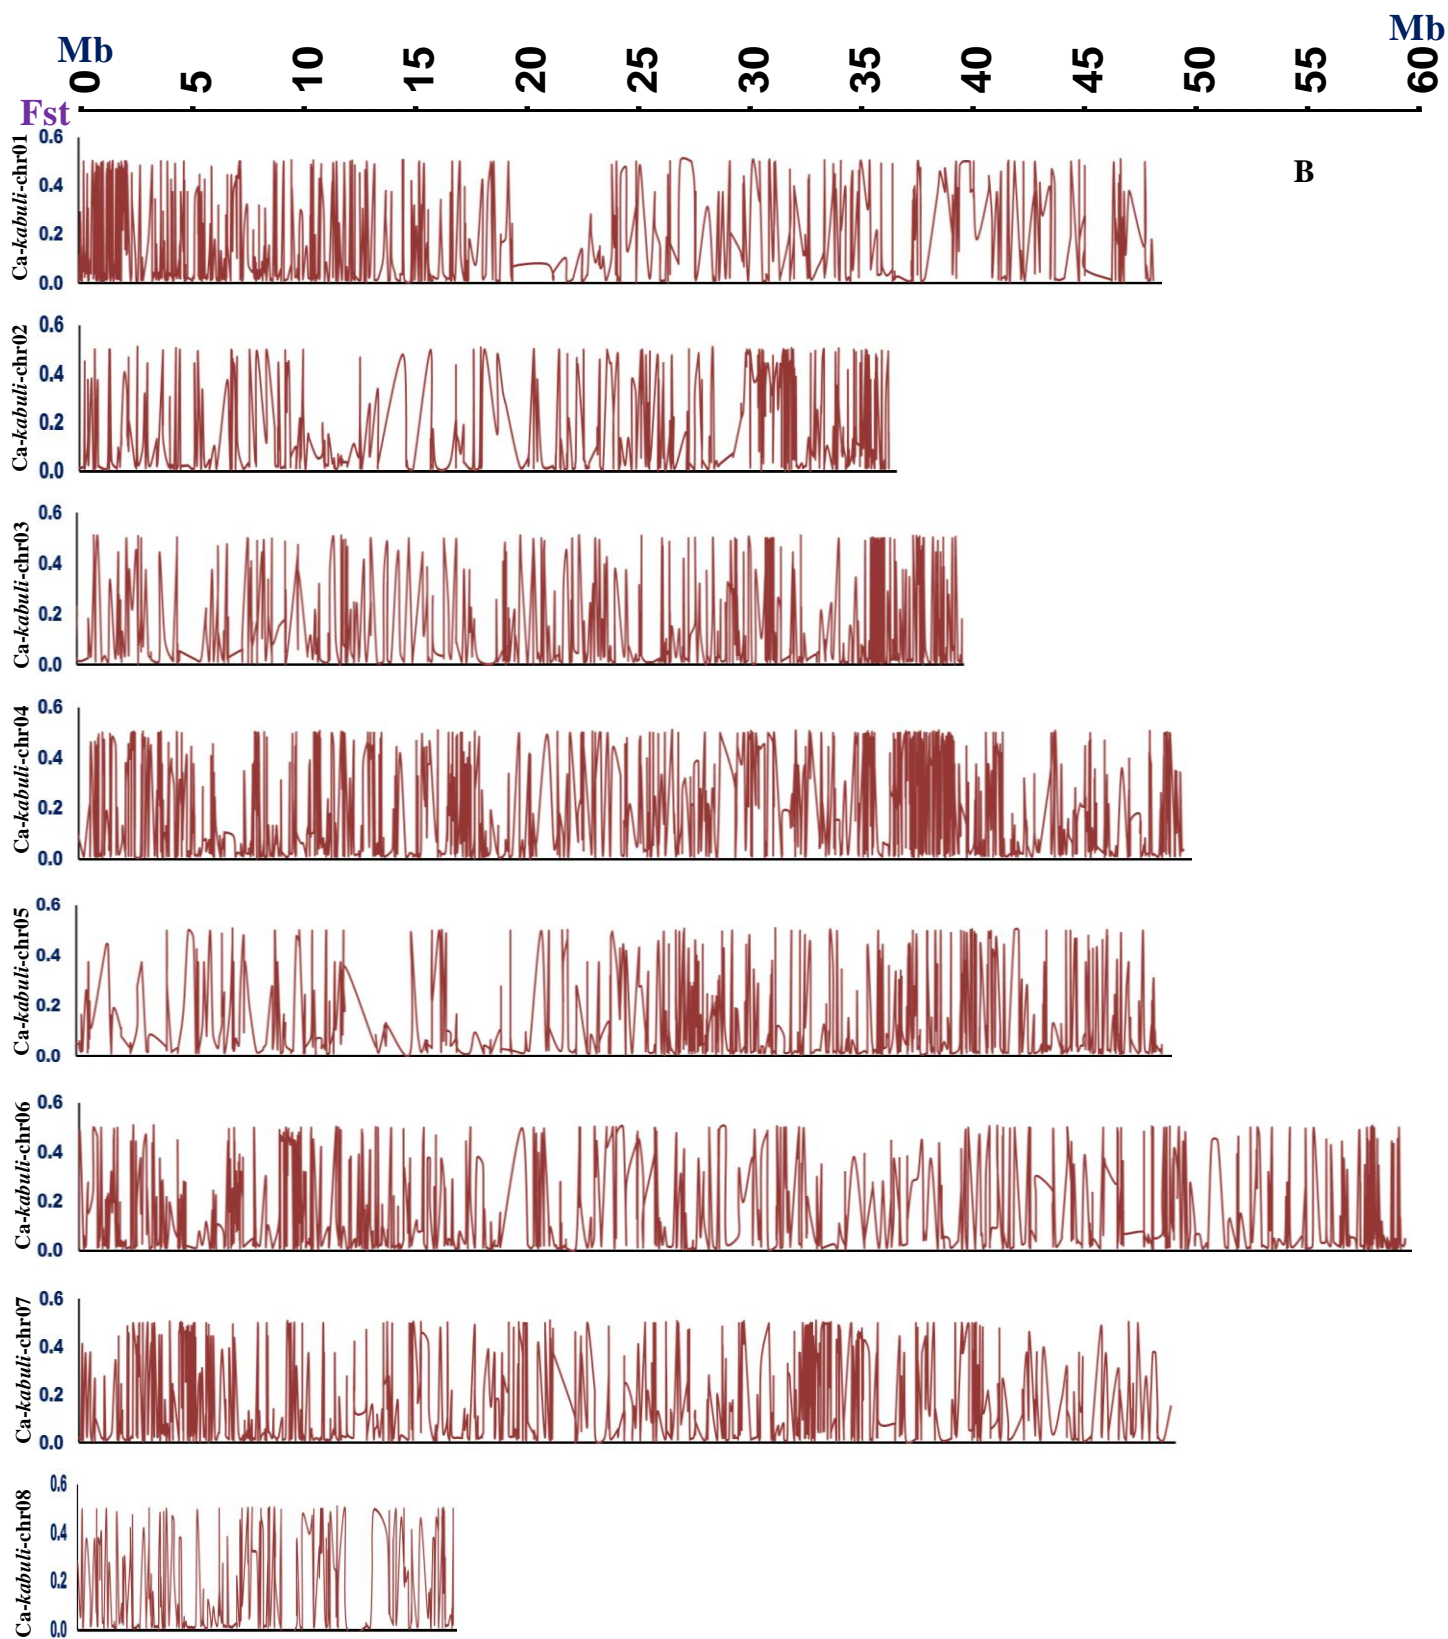

**Fig. S5:** Genomic distribution plots of  $F_{ST}$  in 93 wild and cultivated accessions determined across eight *desi* (A) and *kabuli* (B) chickpea chromosomes using 4672 and 11989 physically mapped GBS-based SNPs, respectively.



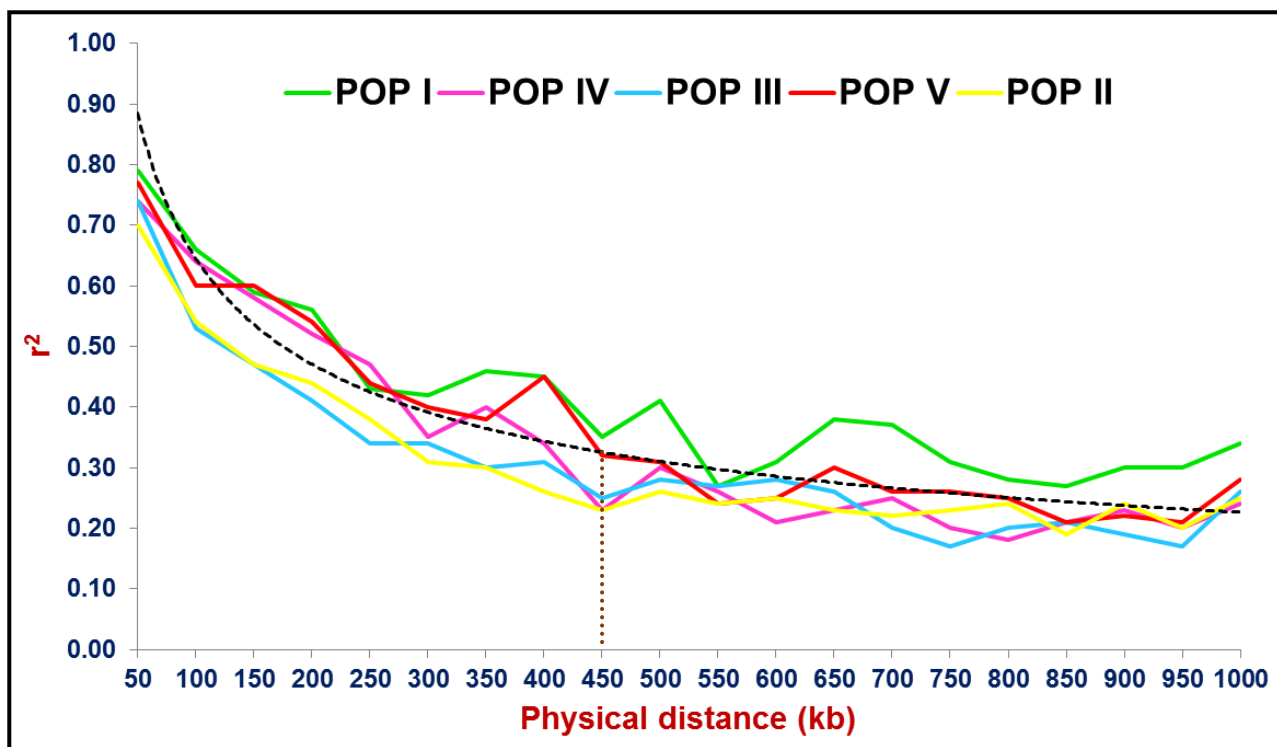

**Fig. S6:** LD decay (mean  $r^2$ ) estimated in five structured populations (POP I - POP V) using 4672 *desi* genome (chromosome)-derived GBS-SNPs. The average  $r^2$  estimated among SNPs spaced with uniform 50 kb physical intervals from 0 to 1000 kb are illustrated by the plotted curved lines. The LD decay for POP VI could not be calculated due to inclusion of only one wild accession within this population group. The dotted lines were plotted between pooled  $r^2$  (across entire five populations) and physical distance (kb) based on nonlinear regression model considering the  $r^2 = 1$  at marker physical distance of 0 kb and the trend of LD decay were estimated in wild and cultivated *Cicer* accessions.

**Table S1: Wild and cultivated *Cicer* accessions selected for genome-wide discovery and high-throughput genotyping of SNPs using GBS-assay**

| S.N. | <i>Cicer</i> species                    | Accession No. | Cultivar types | Geographical origin  |
|------|-----------------------------------------|---------------|----------------|----------------------|
| 1    | <i>C. arietinum</i> (annual cultivated) | ICCX810800    | <i>desi</i>    | India                |
| 2    |                                         | IC296132      | <i>desi</i>    | India                |
| 3    |                                         | ICCV96970     | <i>desi</i>    | India                |
| 4    |                                         | IC296131      | <i>desi</i>    | India                |
| 5    |                                         | ICC4958       | <i>desi</i>    | India                |
| 6    |                                         | ICC4951       | <i>desi</i>    | India                |
| 7    |                                         | ICC12968      | <i>kabuli</i>  | India                |
| 8    |                                         | ICCV92311     | <i>kabuli</i>  | India                |
| 9    |                                         | ICCV95334     | <i>kabuli</i>  | India                |
| 10   |                                         | ICCV96329     | <i>kabuli</i>  | India                |
| 11   |                                         | BG2024        | <i>kabuli</i>  | India                |
| 12   |                                         | PhuleG515     | <i>kabuli</i>  | India                |
| 13   | <i>C. reticulatum</i> (annual wild)     | ICC17160      | Wild           | Turkey               |
| 14   |                                         | ILWC290       | Wild           | Turkey               |
| 15   |                                         | ILWC233       | Wild           | Turkey               |
| 16   |                                         | ILWC253       | Wild           | Turkey               |
| 17   |                                         | ILWC254       | Wild           | Turkey               |
| 18   |                                         | ILWC237       | Wild           | Turkey               |
| 19   |                                         | ILWC257       | Wild           | Turkey               |
| 20   |                                         | ILWC218       | Wild           | Turkey               |
| 21   |                                         | ILWC247       | Wild           | Turkey               |
| 22   |                                         | ILWC229       | Wild           | Turkey               |
| 23   |                                         | ILWC219       | Wild           | Turkey               |
| 24   |                                         | ILWC242       | Wild           | Turkey               |
| 25   |                                         | ILWC258       | Wild           | Turkey               |
| 26   |                                         | ILWC21        | Wild           | Turkey               |
| 27   |                                         | ILWC36        | Wild           | Turkey               |
| 28   |                                         | ILWC216       | Wild           | Turkey               |
| 29   | <i>C. echinospermum</i> (annual wild)   | ICC17159      | Wild           | Turkey               |
| 30   |                                         | ILWC35        | Wild           | Turkey               |
| 31   |                                         | IG135418      | Wild           | Syrian Arab Republic |
| 32   |                                         | ILWC239       | Wild           | Turkey               |
| 33   |                                         | ILWC245       | Wild           | Turkey               |
| 34   |                                         | ILWC238       | Wild           | Turkey               |
| 35   |                                         | ILWC246       | Wild           | Turkey               |
| 36   |                                         | ILWC288       | Wild           | Turkey               |
| 37   | <i>C. judaicum</i> (annual wild)        | ICC182        | Wild           | ICRISAT, India       |
| 38   |                                         | ICC17150      | Wild           | Lebanon              |
| 39   |                                         | ILWC95        | Wild           | ICRISAT, India       |
| 40   |                                         | ILWC31        | Wild           | Jordan               |
| 41   |                                         | ILWC185       | Wild           | ICRISAT, India       |
| 42   |                                         | ICC17148      | Wild           | Lebanon              |
| 43   |                                         | ILWC280       | Wild           | Syrian Arab Republic |
| 44   |                                         | ILWC283       | Wild           | Syrian Arab Republic |
| 45   |                                         | ILWC20        | Wild           | Israel               |
| 46   |                                         | ILWC211       | Wild           | Syrian Arab Republic |
| 47   |                                         | ILWC30        | Wild           | Israel               |

|    |                                                |                                             |       |                      |
|----|------------------------------------------------|---------------------------------------------|-------|----------------------|
| 48 |                                                | ILWC48                                      | Wild  | Syrian Arab Republic |
| 49 |                                                | ILWC50                                      | Wild  | Syrian Arab Republic |
| 50 |                                                | ILWC207                                     | Wild  | Syrian Arab Republic |
| 51 |                                                | ILWC45                                      | Wild  | Syrian Arab Republic |
| 52 |                                                | ILWC38                                      | Wild  | Lebanon              |
| 53 |                                                | ILWC278                                     | Wild  | Syrian Arab Republic |
| 54 |                                                | ILWC275                                     | Wild  | Lebanon              |
| 55 |                                                | ILWC223                                     | Wild  | Lebanon              |
| 56 |                                                | ILWC256                                     | Wild  | Jordan               |
| 57 |                                                | ILWC273                                     | Wild  | Lebanon              |
| 58 |                                                | ILWC4                                       | Wild  | Lebanon              |
| 59 | <b><i>C. bijugum</i> (annual wild)</b>         | ILWC42                                      | Wild  | Syrian Arab Republic |
| 60 |                                                | IG136792                                    | Wild  | Syrian Arab Republic |
| 61 |                                                | IG136786                                    | Wild  | Syrian Arab Republic |
| 62 |                                                | ILWC277                                     | Wild  | Syrian Arab Republic |
| 63 |                                                | ILWC8                                       | Wild  | Turkey               |
| 64 |                                                | ILWC228                                     | Wild  | Turkey               |
| 65 |                                                | ILWC240                                     | Wild  | Turkey               |
| 66 |                                                | ILWC241                                     | Wild  | Turkey               |
| 67 |                                                | ILWC260                                     | Wild  | Turkey               |
| 68 |                                                | ILWC217                                     | Wild  | Turkey               |
| 69 |                                                | ILWC209                                     | Wild  | Syrian Arab Republic |
| 70 |                                                | ILWC227                                     | Wild  | Turkey               |
| 71 |                                                | ILWC284                                     | Wild  | Turkey               |
| 72 |                                                | ILWC7                                       | Wild  | Turkey               |
| 73 |                                                | ILWC220                                     | Wild  | Turkey               |
| 74 |                                                | IG136796                                    | Wild  | Syrian Arab Republic |
| 75 |                                                | ILWC285                                     | Wild  | Turkey               |
| 76 |                                                | ILWC286                                     | Wild  | Turkey               |
| 77 |                                                | ILWC32                                      | Wild  | Turkey               |
| 78 |                                                | <b><i>C. pinnatifidum</i> (annual wild)</b> | ILWC9 | Wild                 |
| 79 | ILWC22                                         |                                             | Wild  | Turkey               |
| 80 | IG136820                                       |                                             | Wild  | Syrian Arab Republic |
| 81 | ILWC251                                        |                                             | Wild  | Turkey               |
| 82 | ILWC29                                         |                                             | Wild  | Turkey               |
| 83 | ILWC33                                         |                                             | Wild  | Turkey               |
| 84 | ILWC49                                         |                                             | Wild  | Syrian Arab Republic |
| 85 | ILWC226                                        |                                             | Wild  | Turkey               |
| 86 | ILWC248                                        |                                             | Wild  | Turkey               |
| 87 | ILWC249                                        |                                             | Wild  | Turkey               |
| 88 | ILWC236                                        |                                             | Wild  | Turkey               |
| 89 | ILWC225                                        |                                             | Wild  | Turkey               |
| 90 | ILWC51                                         |                                             | Wild  | Turkey               |
| 91 | ILWC250                                        |                                             | Wild  | Turkey               |
| 92 | ILWC289                                        |                                             | Wild  | Turkey               |
| 93 | <b><i>C. microphyllum</i> (perennial wild)</b> | <i>microphyllum</i>                         | Wild  | India                |

**Table S2: Structural and functional annotation of 82489 SNPs discovered from 93 wild and cultivated *Cicer* accessions using integrated reference *desi* and *kabuli* genomes- and *de novo*-based GBS assay**

| SNP IDs            | NCBI dbSNP accession IDs (NCBI_SS#) | Chromosomes     | Physical positions (bp) | SNPs | Gene accession IDs | Sequence components of genome | Putative functions                           |
|--------------------|-------------------------------------|-----------------|-------------------------|------|--------------------|-------------------------------|----------------------------------------------|
| Kabuli_wild_462    | 1399931543                          | Ca_kabuli_Chr01 | 462                     | G/C  | NA                 | INTERGENIC                    | NA                                           |
| Kabuli_wild_523    | 1399931544                          | Ca_kabuli_Chr01 | 523                     | G/C  | NA                 | INTERGENIC                    | NA                                           |
| Kabuli_wild_548    | 1399931545                          | Ca_kabuli_Chr01 | 548                     | G/C  | NA                 | INTERGENIC                    | NA                                           |
| Kabuli_wild_578    | 1399931546                          | Ca_kabuli_Chr01 | 578                     | G/A  | NA                 | INTERGENIC                    | NA                                           |
| Kabuli_wild_579    | 1399931547                          | Ca_kabuli_Chr01 | 579                     | T/C  | NA                 | INTERGENIC                    | NA                                           |
| Kabuli_wild_589    | 1399931548                          | Ca_kabuli_Chr01 | 589                     | A/C  | NA                 | INTERGENIC                    | NA                                           |
| Kabuli_wild_627    | 1399931549                          | Ca_kabuli_Chr01 | 627                     | C/A  | NA                 | INTERGENIC                    | NA                                           |
| Kabuli_wild_839    | 1399931550                          | Ca_kabuli_Chr01 | 839                     | A/T  | NA                 | INTERGENIC                    | NA                                           |
| Kabuli_wild_903    | 1399931551                          | Ca_kabuli_Chr01 | 903                     | G/T  | NA                 | INTERGENIC                    | NA                                           |
| Kabuli_wild_927    | 1399931552                          | Ca_kabuli_Chr01 | 927                     | C/A  | NA                 | INTERGENIC                    | NA                                           |
| Kabuli_wild_46421  | 1399931553                          | Ca_kabuli_Chr01 | 46421                   | C/T  | Gene_Ca_00004      | UPSTREAM                      | NA                                           |
| Kabuli_wild_98992  | 1399931554                          | Ca_kabuli_Chr01 | 98992                   | G/T  | Gene_Ca_00007      | INTRON                        | RNA recognition motif domain                 |
| Kabuli_wild_108979 | 1399931555                          | Ca_kabuli_Chr01 | 108979                  | T/G  | Gene_Ca_00008      | INTRON                        | NA                                           |
| Kabuli_wild_108984 | 1399931556                          | Ca_kabuli_Chr01 | 108984                  | G/A  | Gene_Ca_00008      | INTRON                        | NA                                           |
| Kabuli_wild_129401 | 1399931557                          | Ca_kabuli_Chr01 | 129401                  | A/G  | Gene_Ca_00009      | INTRON                        | Oligo peptide transporter                    |
| Kabuli_wild_215000 | 1399931558                          | Ca_kabuli_Chr01 | 215000                  | A/T  | Gene_Ca_00017      | INTRON                        | Protein kinase,catalytic domain              |
| Kabuli_wild_215006 | 1399931559                          | Ca_kabuli_Chr01 | 215006                  | C/T  | Gene_Ca_00017      | INTRON                        | Protein kinase,catalytic domain              |
| Kabuli_wild_215027 | 1399931560                          | Ca_kabuli_Chr01 | 215027                  | T/C  | Gene_Ca_00017      | INTRON                        | Protein kinase,catalytic domain              |
| Kabuli_wild_215029 | 1399931561                          | Ca_kabuli_Chr01 | 215029                  | C/A  | Gene_Ca_00017      | INTRON                        | Protein kinase,catalytic domain              |
| Kabuli_wild_215048 | 1399931562                          | Ca_kabuli_Chr01 | 215048                  | C/T  | Gene_Ca_00017      | INTRON                        | Protein kinase,catalytic domain              |
| Kabuli_wild_215053 | 1399931563                          | Ca_kabuli_Chr01 | 215053                  | T/G  | Gene_Ca_00017      | INTRON                        | Protein kinase,catalytic domain              |
| Kabuli_wild_215058 | 1399931564                          | Ca_kabuli_Chr01 | 215058                  | C/T  | Gene_Ca_00017      | INTRON                        | Protein kinase,catalytic domain              |
| Kabuli_wild_215066 | 1399931565                          | Ca_kabuli_Chr01 | 215066                  | G/T  | Gene_Ca_00017      | INTRON                        | Protein kinase,catalytic domain              |
| Kabuli_wild_236588 | 1399931566                          | Ca_kabuli_Chr01 | 236588                  | T/C  | NA                 | INTERGENIC                    | NA                                           |
| Kabuli_wild_292962 | 1399931567                          | Ca_kabuli_Chr01 | 292962                  | T/C  | Gene_Ca_00028      | SYNONYMOUS_CODING             | Proteasome component (PCI) domain            |
| Kabuli_wild_292972 | 1399931568                          | Ca_kabuli_Chr01 | 292972                  | G/A  | Gene_Ca_00028      | NON_SYNONYMOUS_CODING         | Proteasome component (PCI) domain            |
| Kabuli_wild_292998 | 1399931569                          | Ca_kabuli_Chr01 | 292998                  | T/C  | Gene_Ca_00028      | SYNONYMOUS_CODING             | Proteasome component (PCI) domain            |
| Kabuli_wild_347620 | 1399931570                          | Ca_kabuli_Chr01 | 347620                  | A/C  | Gene_Ca_00036      | DOWNSTREAM                    | WD40 repeat                                  |
| Kabuli_wild_372530 | 1399931571                          | Ca_kabuli_Chr01 | 372530                  | A/G  | Gene_Ca_00038      | INTRON                        | Protein of unknown function DUF803           |
| Kabuli_wild_372865 | 1399931572                          | Ca_kabuli_Chr01 | 372865                  | G/A  | Gene_Ca_00038      | INTRON                        | Protein of unknown function DUF803           |
| Kabuli_wild_389327 | 1399931573                          | Ca_kabuli_Chr01 | 389327                  | C/G  | Gene_Ca_00040      | NON_SYNONYMOUS_CODING         | Transcription factor ,TCP                    |
| Kabuli_wild_406570 | 1399931574                          | Ca_kabuli_Chr01 | 406570                  | A/G  | Gene_Ca_00043      | SYNONYMOUS_CODING             | Glycosyl-phosphatidylinositol-anchored,plant |
| Kabuli_wild_420890 | 1399931575                          | Ca_kabuli_Chr01 | 420890                  | G/T  | NA                 | INTERGENIC                    | NA                                           |
| Kabuli_wild_421346 | 1399931576                          | Ca_kabuli_Chr01 | 421346                  | T/C  | NA                 | INTERGENIC                    | NA                                           |
| Kabuli_wild_425076 | 1399931577                          | Ca_kabuli_Chr01 | 425076                  | A/G  | Gene_Ca_00048      | DOWNSTREAM                    | Nonaspanin(TM9SF)                            |
| Kabuli_wild_425149 | 1399931578                          | Ca_kabuli_Chr01 | 425149                  | T/C  | Gene_Ca_00048      | DOWNSTREAM                    | Nonaspanin(TM9SF)                            |
| Kabuli_wild_435259 | 1399931579                          | Ca_kabuli_Chr01 | 435259                  | A/G  | NA                 | INTERGENIC                    | NA                                           |
| Kabuli_wild_435263 | 1399931580                          | Ca_kabuli_Chr01 | 435263                  | A/T  | NA                 | INTERGENIC                    | NA                                           |
| Kabuli_wild_435264 | 1399931581                          | Ca_kabuli_Chr01 | 435264                  | G/T  | NA                 | INTERGENIC                    | NA                                           |
| Kabuli_wild_435274 | 1399931582                          | Ca_kabuli_Chr01 | 435274                  | G/T  | NA                 | INTERGENIC                    | NA                                           |
| Kabuli_wild_435280 | 1399931583                          | Ca_kabuli_Chr01 | 435280                  | T/C  | NA                 | INTERGENIC                    | NA                                           |

| SNP IDs            | NCBI dbSNP accession IDs (NCBI_SS#) | Chromosomes       | Physical positions (bp) | SNPs | Gene accession IDs | Sequence components of genome | Putative functions                  |
|--------------------|-------------------------------------|-------------------|-------------------------|------|--------------------|-------------------------------|-------------------------------------|
| Kabuli_wild_435297 | 1399931584                          | Ca_kabuli_Chrom01 | 435297                  | G/A  | NA                 | INTERGENIC                    | NA                                  |
| Kabuli_wild_435304 | 1399931585                          | Ca_kabuli_Chrom01 | 435304                  | G/T  | NA                 | INTERGENIC                    | NA                                  |
| Kabuli_wild_435310 | 1399931586                          | Ca_kabuli_Chrom01 | 435310                  | C/T  | NA                 | INTERGENIC                    | NA                                  |
| Kabuli_wild_435338 | 1399931587                          | Ca_kabuli_Chrom01 | 435338                  | T/C  | NA                 | INTERGENIC                    | NA                                  |
| Kabuli_wild_435343 | 1399931588                          | Ca_kabuli_Chrom01 | 435343                  | C/A  | NA                 | INTERGENIC                    | NA                                  |
| Kabuli_wild_441286 | 1399931589                          | Ca_kabuli_Chrom01 | 441286                  | C/T  | Gene_Ca_00050      | INTRON                        | Thiamin emonophosphate synthase     |
| Kabuli_wild_441288 | 1399931590                          | Ca_kabuli_Chrom01 | 441288                  | T/A  | Gene_Ca_00050      | INTRON                        | Thiamin emonophosphate synthase     |
| Kabuli_wild_441343 | 1399931591                          | Ca_kabuli_Chrom01 | 441343                  | T/A  | Gene_Ca_00050      | SYNONYMOUS_CODING             | Thiamin emonophosphate synthase     |
| Kabuli_wild_445947 | 1399931592                          | Ca_kabuli_Chrom01 | 445947                  | T/G  | Gene_Ca_00051      | INTRON                        | Helicase,C-terminal                 |
| Kabuli_wild_446409 | 1399931593                          | Ca_kabuli_Chrom01 | 446409                  | T/C  | Gene_Ca_00051      | SYNONYMOUS_CODING             | Helicase,C-terminal                 |
| Kabuli_wild_446443 | 1399931594                          | Ca_kabuli_Chrom01 | 446443                  | A/G  | Gene_Ca_00051      | NON_SYNONYMOUS_CODING         | Helicase,C-terminal                 |
| Kabuli_wild_446484 | 1399931595                          | Ca_kabuli_Chrom01 | 446484                  | C/T  | Gene_Ca_00051      | SYNONYMOUS_CODING             | Helicase,C-terminal                 |
| Kabuli_wild_446558 | 1399931596                          | Ca_kabuli_Chrom01 | 446558                  | G/T  | Gene_Ca_00051      | INTRON                        | Helicase,C-terminal                 |
| Kabuli_wild_450199 | 1399931597                          | Ca_kabuli_Chrom01 | 450199                  | C/T  | Gene_Ca_00051      | INTRON                        | Helicase,C-terminal                 |
| Kabuli_wild_459968 | 1399931598                          | Ca_kabuli_Chrom01 | 459968                  | T/G  | Gene_Ca_00053      | INTRON                        | CMP/dCMPdeaminase,zinc-binding      |
| Kabuli_wild_463636 | 1399931599                          | Ca_kabuli_Chrom01 | 463636                  | T/G  | Gene_Ca_00053      | INTRON                        | CMP/dCMPdeaminase,zinc-binding      |
| Kabuli_wild_463687 | 1399931600                          | Ca_kabuli_Chrom01 | 463687                  | G/A  | Gene_Ca_00053      | INTRON                        | CMP/dCMPdeaminase,zinc-binding      |
| Kabuli_wild_464039 | 1399931601                          | Ca_kabuli_Chrom01 | 464039                  | A/C  | Gene_Ca_00053      | SYNONYMOUS_CODING             | CMP/dCMPdeaminase,zinc-binding      |
| Kabuli_wild_464040 | 1399931602                          | Ca_kabuli_Chrom01 | 464040                  | G/C  | Gene_Ca_00053      | SYNONYMOUS_CODING             | CMP/dCMPdeaminase,zinc-binding      |
| Kabuli_wild_464043 | 1399931603                          | Ca_kabuli_Chrom01 | 464043                  | C/G  | Gene_Ca_00053      | SYNONYMOUS_CODING             | CMP/dCMPdeaminase,zinc-binding      |
| Kabuli_wild_554677 | 1399931604                          | Ca_kabuli_Chrom01 | 554677                  | G/A  | Gene_Ca_00064      | INTRON                        | Glycosyltransferase,family8         |
| Kabuli_wild_571002 | 1399931605                          | Ca_kabuli_Chrom01 | 571002                  | A/G  | Gene_Ca_00064      | INTRON                        | Glycosyltransferase,family9         |
| Kabuli_wild_571020 | 1399931606                          | Ca_kabuli_Chrom01 | 571020                  | T/G  | Gene_Ca_00064      | INTRON                        | Glycosyltransferase,family10        |
| Kabuli_wild_571044 | 1399931607                          | Ca_kabuli_Chrom01 | 571044                  | T/G  | Gene_Ca_00064      | INTRON                        | Glycosyltransferase,family11        |
| Kabuli_wild_591609 | 1399931608                          | Ca_kabuli_Chrom01 | 591609                  | T/C  | Gene_Ca_00066      | INTRON                        | PeptidaseS16,Lonprotease,C-terminal |
| Kabuli_wild_609751 | 1399931609                          | Ca_kabuli_Chrom01 | 609751                  | T/A  | NA                 | INTERGENIC                    | NA                                  |
| Kabuli_wild_661732 | 1399931610                          | Ca_kabuli_Chrom01 | 661732                  | T/G  | Gene_Ca_00079      | DOWNSTREAM                    | NA                                  |
| Kabuli_wild_696923 | 1399931611                          | Ca_kabuli_Chrom01 | 696923                  | C/A  | NA                 | INTERGENIC                    | NA                                  |
| Kabuli_wild_712110 | 1399931612                          | Ca_kabuli_Chrom01 | 712110                  | T/C  | Gene_Ca_00086      | NON_SYNONYMOUS_CODING         | PeptidaseC50,separase               |
| Kabuli_wild_741514 | 1399931613                          | Ca_kabuli_Chrom01 | 741514                  | G/T  | NA                 | INTERGENIC                    | NA                                  |
| Kabuli_wild_741535 | 1399931614                          | Ca_kabuli_Chrom01 | 741535                  | C/T  | NA                 | INTERGENIC                    | NA                                  |
| Kabuli_wild_742026 | 1399931615                          | Ca_kabuli_Chrom01 | 742026                  | T/G  | NA                 | INTERGENIC                    | NA                                  |
| Kabuli_wild_742043 | 1399931616                          | Ca_kabuli_Chrom01 | 742043                  | G/A  | NA                 | INTERGENIC                    | NA                                  |
| Kabuli_wild_750693 | 1399931617                          | Ca_kabuli_Chrom01 | 750693                  | C/T  | NA                 | INTERGENIC                    | NA                                  |
| Kabuli_wild_777240 | 1399931618                          | Ca_kabuli_Chrom01 | 777240                  | G/A  | NA                 | INTERGENIC                    | NA                                  |
| Kabuli_wild_777273 | 1399931619                          | Ca_kabuli_Chrom01 | 777273                  | C/T  | NA                 | INTERGENIC                    | NA                                  |
| Kabuli_wild_790000 | 1399931620                          | Ca_kabuli_Chrom01 | 790000                  | C/T  | NA                 | INTERGENIC                    | NA                                  |
| Kabuli_wild_790102 | 1399931621                          | Ca_kabuli_Chrom01 | 790102                  | G/T  | NA                 | INTERGENIC                    | NA                                  |
| Kabuli_wild_864351 | 1399931622                          | Ca_kabuli_Chrom01 | 864351                  | T/C  | NA                 | INTERGENIC                    | NA                                  |
| Kabuli_wild_864381 | 1399931623                          | Ca_kabuli_Chrom01 | 864381                  | G/A  | NA                 | INTERGENIC                    | NA                                  |
| Kabuli_wild_864382 | 1399931624                          | Ca_kabuli_Chrom01 | 864382                  | T/C  | NA                 | INTERGENIC                    | NA                                  |
| Kabuli_wild_866872 | 1399931625                          | Ca_kabuli_Chrom01 | 866872                  | T/C  | NA                 | INTERGENIC                    | NA                                  |
| Kabuli_wild_876633 | 1399931626                          | Ca_kabuli_Chrom01 | 876633                  | T/A  | NA                 | INTERGENIC                    | NA                                  |
| Kabuli_wild_881543 | 1399931627                          | Ca_kabuli_Chrom01 | 881543                  | C/A  | NA                 | INTERGENIC                    | NA                                  |

| SNP IDs                    | NCBI dbSNP accession IDs (NCBI_SS#) | Chromosomes            | Physical positions (bp) | SNPs | Gene accession IDs | Sequence components of genome | Putative functions                                           |
|----------------------------|-------------------------------------|------------------------|-------------------------|------|--------------------|-------------------------------|--------------------------------------------------------------|
| <i>Kabuli_wild_881703</i>  | 1399931628                          | <i>Ca_kabuli_Chr01</i> | 881703                  | G/T  | NA                 | INTERGENIC                    | NA                                                           |
| <i>Kabuli_wild_890948</i>  | 1399931629                          | <i>Ca_kabuli_Chr01</i> | 890948                  | C/T  | Gene_Ca_00110      | INTRON                        | Calcium-bindingEF-hand                                       |
| <i>Kabuli_wild_892050</i>  | 1399931630                          | <i>Ca_kabuli_Chr01</i> | 892050                  | G/T  | Gene_Ca_00110      | INTRON                        | Calcium-bindingEF-hand                                       |
| <i>Kabuli_wild_892257</i>  | 1399931631                          | <i>Ca_kabuli_Chr01</i> | 892257                  | T/C  | Gene_Ca_00110      | SYNONYMOUS_CODING             | Calcium-bindingEF-hand                                       |
| <i>Kabuli_wild_910486</i>  | 1399931632                          | <i>Ca_kabuli_Chr01</i> | 910486                  | T/A  | NA                 | INTERGENIC                    | NA                                                           |
| <i>Kabuli_wild_968054</i>  | 1399931633                          | <i>Ca_kabuli_Chr01</i> | 968054                  | G/C  | Gene_Ca_00120      | INTRON                        | Sulphate transporter/antisigma-factor antagonist STAS        |
| <i>Kabuli_wild_968075</i>  | 1399931634                          | <i>Ca_kabuli_Chr01</i> | 968075                  | T/A  | Gene_Ca_00120      | INTRON                        | Sulphate transporter/antisigma-factor antagonist STAS        |
| <i>Kabuli_wild_968079</i>  | 1399931635                          | <i>Ca_kabuli_Chr01</i> | 968079                  | C/A  | Gene_Ca_00120      | INTRON                        | Sulphate transporter/antisigma-factor antagonist STAS        |
| <i>Kabuli_wild_968116</i>  | 1399931636                          | <i>Ca_kabuli_Chr01</i> | 968116                  | C/T  | Gene_Ca_00120      | INTRON                        | Sulphate transporter/antisigma-factor antagonist STAS        |
| <i>Kabuli_wild_996439</i>  | 1399931637                          | <i>Ca_kabuli_Chr01</i> | 996439                  | T/C  | Gene_Ca_00124      | DOWNSTREAM                    | Beta-hydroxyacyl-(acyl-carrier-protein)dehydratase,FabA/FabZ |
| <i>Kabuli_wild_1008895</i> | 1399931638                          | <i>Ca_kabuli_Chr01</i> | 1008895                 | A/G  | Gene_Ca_00126      | DOWNSTREAM                    | Protein kinase,catalytic domain                              |
| <i>Kabuli_wild_1009058</i> | 1399931639                          | <i>Ca_kabuli_Chr01</i> | 1009058                 | A/C  | NA                 | INTERGENIC                    | NA                                                           |
| <i>Kabuli_wild_1018966</i> | 1399931640                          | <i>Ca_kabuli_Chr01</i> | 1018966                 | C/G  | NA                 | INTERGENIC                    | NA                                                           |
| <i>Kabuli_wild_1023550</i> | 1399931641                          | <i>Ca_kabuli_Chr01</i> | 1023550                 | C/T  | NA                 | INTERGENIC                    | NA                                                           |
| <i>Kabuli_wild_1032491</i> | 1399931642                          | <i>Ca_kabuli_Chr01</i> | 1032491                 | A/C  | Gene_Ca_00128      | SYNONYMOUS_CODING             | K+ potassium transporter                                     |
| <i>Kabuli_wild_1032518</i> | 1399931643                          | <i>Ca_kabuli_Chr01</i> | 1032518                 | G/A  | Gene_Ca_00128      | INTRON                        | K+ potassium transporter                                     |
| <i>Kabuli_wild_1032598</i> | 1399931644                          | <i>Ca_kabuli_Chr01</i> | 1032598                 | C/A  | Gene_Ca_00128      | INTRON                        | K+ potassium transporter                                     |
| <i>Kabuli_wild_1032734</i> | 1399931645                          | <i>Ca_kabuli_Chr01</i> | 1032734                 | A/T  | Gene_Ca_00128      | NON_SYNONYMOUS_CODING         | K+ potassium transporter                                     |
| <i>Kabuli_wild_1032898</i> | 1399931646                          | <i>Ca_kabuli_Chr01</i> | 1032898                 | T/A  | Gene_Ca_00128      | INTRON                        | K+ potassium transporter                                     |
| <i>Kabuli_wild_1045095</i> | 1399931647                          | <i>Ca_kabuli_Chr01</i> | 1045095                 | G/C  | NA                 | INTERGENIC                    | NA                                                           |
| <i>Kabuli_wild_1045119</i> | 1399931648                          | <i>Ca_kabuli_Chr01</i> | 1045119                 | C/G  | NA                 | INTERGENIC                    | NA                                                           |
| <i>Kabuli_wild_1059209</i> | 1399931649                          | <i>Ca_kabuli_Chr01</i> | 1059209                 | A/G  | Gene_Ca_00129      | NON_SYNONYMOUS_CODING         | IQ motif,EF-handbinding site                                 |
| <i>Kabuli_wild_1059311</i> | 1399931650                          | <i>Ca_kabuli_Chr01</i> | 1059311                 | A/G  | Gene_Ca_00129      | NON_SYNONYMOUS_CODING         | IQ motif,EF-handbinding site                                 |
| <i>Kabuli_wild_1083388</i> | 1399931651                          | <i>Ca_kabuli_Chr01</i> | 1083388                 | G/A  | NA                 | INTERGENIC                    | NA                                                           |
| <i>Kabuli_wild_1083403</i> | 1399931652                          | <i>Ca_kabuli_Chr01</i> | 1083403                 | C/T  | NA                 | INTERGENIC                    | NA                                                           |
| <i>Kabuli_wild_1085228</i> | 1399931653                          | <i>Ca_kabuli_Chr01</i> | 1085228                 | A/C  | Gene_Ca_00134      | INTRON                        | Peptidase C14,caspase catalytic                              |
| <i>Kabuli_wild_1085230</i> | 1399931654                          | <i>Ca_kabuli_Chr01</i> | 1085230                 | T/G  | Gene_Ca_00134      | INTRON                        | Peptidase C14,caspase catalytic                              |
| <i>Kabuli_wild_1085238</i> | 1399931655                          | <i>Ca_kabuli_Chr01</i> | 1085238                 | A/G  | Gene_Ca_00134      | INTRON                        | Peptidase C14,caspase catalytic                              |
| <i>Kabuli_wild_1085254</i> | 1399931656                          | <i>Ca_kabuli_Chr01</i> | 1085254                 | A/C  | Gene_Ca_00134      | INTRON                        | Peptidase C14,caspase catalytic                              |
| <i>Kabuli_wild_1085263</i> | 1399931657                          | <i>Ca_kabuli_Chr01</i> | 1085263                 | A/C  | Gene_Ca_00134      | INTRON                        | Peptidase C14,caspase catalytic                              |
| <i>Kabuli_wild_1085293</i> | 1399931658                          | <i>Ca_kabuli_Chr01</i> | 1085293                 | G/A  | Gene_Ca_00134      | INTRON                        | Peptidase C14,caspase catalytic                              |
| <i>Kabuli_wild_1091442</i> | 1399931659                          | <i>Ca_kabuli_Chr01</i> | 1091442                 | A/C  | NA                 | INTERGENIC                    | NA                                                           |
| <i>Kabuli_wild_1091504</i> | 1399931660                          | <i>Ca_kabuli_Chr01</i> | 1091504                 | C/T  | NA                 | INTERGENIC                    | NA                                                           |
| <i>Kabuli_wild_1091534</i> | 1399931661                          | <i>Ca_kabuli_Chr01</i> | 1091534                 | A/C  | NA                 | INTERGENIC                    | NA                                                           |
| <i>Kabuli_wild_1091548</i> | 1399931662                          | <i>Ca_kabuli_Chr01</i> | 1091548                 | T/A  | NA                 | INTERGENIC                    | NA                                                           |
| <i>Kabuli_wild_1098703</i> | 1399931663                          | <i>Ca_kabuli_Chr01</i> | 1098703                 | C/G  | NA                 | INTERGENIC                    | NA                                                           |
| <i>Kabuli_wild_1098789</i> | 1399931664                          | <i>Ca_kabuli_Chr01</i> | 1098789                 | A/G  | NA                 | INTERGENIC                    | NA                                                           |
| <i>Kabuli_wild_1115668</i> | 1399931665                          | <i>Ca_kabuli_Chr01</i> | 1115668                 | C/T  | NA                 | INTERGENIC                    | NA                                                           |
| <i>Kabuli_wild_1116043</i> | 1399931666                          | <i>Ca_kabuli_Chr01</i> | 1116043                 | C/T  | NA                 | INTERGENIC                    | NA                                                           |
| <i>Kabuli_wild_1140313</i> | 1399931667                          | <i>Ca_kabuli_Chr01</i> | 1140313                 | A/C  | NA                 | INTERGENIC                    | NA                                                           |
| <i>Kabuli_wild_1140376</i> | 1399931668                          | <i>Ca_kabuli_Chr01</i> | 1140376                 | A/G  | NA                 | INTERGENIC                    | NA                                                           |
| <i>Kabuli_wild_1140405</i> | 1399931669                          | <i>Ca_kabuli_Chr01</i> | 1140405                 | A/T  | NA                 | INTERGENIC                    | NA                                                           |
| <i>Kabuli_wild_1150973</i> | 1399931670                          | <i>Ca_kabuli_Chr01</i> | 1150973                 | C/T  | NA                 | INTERGENIC                    | NA                                                           |
| <i>Kabuli_wild_1159383</i> | 1399931671                          | <i>Ca_kabuli_Chr01</i> | 1159383                 | C/A  | NA                 | INTERGENIC                    | NA                                                           |



| SNP IDs             | NCBI dbSNP accession IDs (NCBI_SS#) | Chromosomes     | Physical positions (bp) | SNPs | Gene accession IDs | Sequence components of genome | Putative functions                                  |
|---------------------|-------------------------------------|-----------------|-------------------------|------|--------------------|-------------------------------|-----------------------------------------------------|
| Kabuli_wild_1204160 | 1399931672                          | Ca_kabuli_Chr01 | 1204160                 | A/C  | Gene_Ca_00148      | INTRON                        | Terpenesynthase-like                                |
| Kabuli_wild_1204350 | 1399931673                          | Ca_kabuli_Chr01 | 1204350                 | A/G  | Gene_Ca_00148      | INTRON                        | Terpenesynthase-like                                |
| Kabuli_wild_1204357 | 1399931674                          | Ca_kabuli_Chr01 | 1204357                 | C/A  | Gene_Ca_00148      | INTRON                        | Terpenesynthase-like                                |
| Kabuli_wild_1204368 | 1399931675                          | Ca_kabuli_Chr01 | 1204368                 | C/G  | Gene_Ca_00148      | INTRON                        | Terpenesynthase-like                                |
| Kabuli_wild_1215024 | 1399931676                          | Ca_kabuli_Chr01 | 1215024                 | T/C  | NA                 | INTERGENIC                    | NA                                                  |
| Kabuli_wild_1225244 | 1399931677                          | Ca_kabuli_Chr01 | 1225244                 | G/T  | NA                 | INTERGENIC                    | NA                                                  |
| Kabuli_wild_1225345 | 1399931678                          | Ca_kabuli_Chr01 | 1225345                 | G/A  | Gene_Ca_00151      | INTRON                        | Peptidyl-prolylcis-transisomerase,FKBP-type, domain |
| Kabuli_wild_1225376 | 1399931679                          | Ca_kabuli_Chr01 | 1225376                 | C/A  | Gene_Ca_00151      | INTRON                        | Peptidyl-prolylcis-transisomerase,FKBP-type, domain |
| Kabuli_wild_1251800 | 1399931680                          | Ca_kabuli_Chr01 | 1251800                 | G/A  | Gene_Ca_00154      | INTRON                        | Carbonicanhydrase                                   |
| Kabuli_wild_1269180 | 1399931681                          | Ca_kabuli_Chr01 | 1269180                 | C/A  | Gene_Ca_00155      | NON_SYNONYMOUS_CODING         | Peptidase C48, SUMO/Sentrin/Ubl1                    |
| Kabuli_wild_1278854 | 1399931682                          | Ca_kabuli_Chr01 | 1278854                 | G/T  | Gene_Ca_00158      | DOWNSTREAM                    | Golgi apparatus membrane protein TVP15              |
| Kabuli_wild_1278884 | 1399931683                          | Ca_kabuli_Chr01 | 1278884                 | G/T  | Gene_Ca_00158      | DOWNSTREAM                    | Golgi apparatus membrane protein TVP15              |
| Kabuli_wild_1278997 | 1399931684                          | Ca_kabuli_Chr01 | 1278997                 | T/A  | Gene_Ca_00158      | DOWNSTREAM                    | Golgi apparatus membrane protein TVP15              |
| Kabuli_wild_1295527 | 1399931685                          | Ca_kabuli_Chr01 | 1295527                 | T/G  | NA                 | INTERGENIC                    | NA                                                  |
| Kabuli_wild_1335518 | 1399931686                          | Ca_kabuli_Chr01 | 1335518                 | A/C  | Gene_Ca_00167      | UPSTREAM                      | Pentatricopeptide repeat                            |
| Kabuli_wild_1385553 | 1399931687                          | Ca_kabuli_Chr01 | 1385553                 | C/A  | NA                 | INTERGENIC                    | NA                                                  |
| Kabuli_wild_1385554 | 1399931688                          | Ca_kabuli_Chr01 | 1385554                 | G/T  | NA                 | INTERGENIC                    | NA                                                  |
| Kabuli_wild_1390073 | 1399931689                          | Ca_kabuli_Chr01 | 1390073                 | A/G  | NA                 | INTERGENIC                    | NA                                                  |
| Kabuli_wild_1411339 | 1399931690                          | Ca_kabuli_Chr01 | 1411339                 | C/T  | NA                 | INTERGENIC                    | NA                                                  |
| Kabuli_wild_1411495 | 1399931691                          | Ca_kabuli_Chr01 | 1411495                 | A/G  | NA                 | INTERGENIC                    | NA                                                  |
| Kabuli_wild_1411498 | 1399931692                          | Ca_kabuli_Chr01 | 1411498                 | T/A  | NA                 | INTERGENIC                    | NA                                                  |
| Kabuli_wild_1411501 | 1399931693                          | Ca_kabuli_Chr01 | 1411501                 | C/T  | NA                 | INTERGENIC                    | NA                                                  |
| Kabuli_wild_1428222 | 1399931694                          | Ca_kabuli_Chr01 | 1428222                 | C/G  | NA                 | INTERGENIC                    | NA                                                  |
| Kabuli_wild_1428251 | 1399931695                          | Ca_kabuli_Chr01 | 1428251                 | T/G  | NA                 | INTERGENIC                    | NA                                                  |
| Kabuli_wild_1428264 | 1399931696                          | Ca_kabuli_Chr01 | 1428264                 | T/G  | NA                 | INTERGENIC                    | NA                                                  |
| Kabuli_wild_1434121 | 1399931697                          | Ca_kabuli_Chr01 | 1434121                 | A/G  | Gene_Ca_00174      | NON_SYNONYMOUS_CODING         | DNA polymerase V                                    |
| Kabuli_wild_1434875 | 1399931698                          | Ca_kabuli_Chr01 | 1434875                 | A/G  | Gene_Ca_00175      | DOWNSTREAM                    | Bromodomain                                         |
| Kabuli_wild_1434883 | 1399931699                          | Ca_kabuli_Chr01 | 1434883                 | A/G  | Gene_Ca_00175      | DOWNSTREAM                    | Bromodomain                                         |
| Kabuli_wild_1449848 | 1399931700                          | Ca_kabuli_Chr01 | 1449848                 | G/A  | Gene_Ca_00177      | SYNONYMOUS_CODING             | Phox/Bem1p                                          |
| Kabuli_wild_1449913 | 1399931701                          | Ca_kabuli_Chr01 | 1449913                 | T/G  | Gene_Ca_00177      | NON_SYNONYMOUS_CODING         | Phox/Bem1p                                          |
| Kabuli_wild_1449949 | 1399931702                          | Ca_kabuli_Chr01 | 1449949                 | G/A  | Gene_Ca_00177      | NON_SYNONYMOUS_CODING         | Phox/Bem1p                                          |
| Kabuli_wild_1449980 | 1399931703                          | Ca_kabuli_Chr01 | 1449980                 | A/G  | Gene_Ca_00177      | SYNONYMOUS_CODING             | Phox/Bem1p                                          |
| Kabuli_wild_1461574 | 1399931704                          | Ca_kabuli_Chr01 | 1461574                 | T/A  | NA                 | INTERGENIC                    | NA                                                  |
| Kabuli_wild_1461600 | 1399931705                          | Ca_kabuli_Chr01 | 1461600                 | T/C  | NA                 | INTERGENIC                    | NA                                                  |
| Kabuli_wild_1467056 | 1399931706                          | Ca_kabuli_Chr01 | 1467056                 | A/G  | NA                 | INTERGENIC                    | NA                                                  |
| Kabuli_wild_1467123 | 1399931707                          | Ca_kabuli_Chr01 | 1467123                 | A/T  | NA                 | INTERGENIC                    | NA                                                  |
| Kabuli_wild_1528325 | 1399931708                          | Ca_kabuli_Chr01 | 1528325                 | G/A  | Gene_Ca_00185      | INTRON                        | Inorganic pyrophosphatase                           |
| Kabuli_wild_1546679 | 1399931709                          | Ca_kabuli_Chr01 | 1546679                 | G/C  | Gene_Ca_00187      | SYNONYMOUS_CODING             | NA                                                  |
| Kabuli_wild_1554144 | 1399931710                          | Ca_kabuli_Chr01 | 1554144                 | G/A  | NA                 | INTERGENIC                    | NA                                                  |
| Kabuli_wild_1615004 | 1399931711                          | Ca_kabuli_Chr01 | 1615004                 | G/A  | NA                 | INTERGENIC                    | NA                                                  |
| Kabuli_wild_1655012 | 1399931712                          | Ca_kabuli_Chr01 | 1655012                 | G/T  | Gene_Ca_00203      | NON_SYNONYMOUS_CODING         | Kinesin, motordomain                                |
| Kabuli_wild_1655018 | 1399931713                          | Ca_kabuli_Chr01 | 1655018                 | G/A  | Gene_Ca_00203      | NON_SYNONYMOUS_CODING         | Kinesin, motordomain                                |
| Kabuli_wild_1738179 | 1399931714                          | Ca_kabuli_Chr01 | 1738179                 | C/G  | NA                 | INTERGENIC                    | NA                                                  |
| Kabuli_wild_1738185 | 1399931715                          | Ca_kabuli_Chr01 | 1738185                 | T/C  | NA                 | INTERGENIC                    | NA                                                  |

| SNP IDs             | NCBI dbSNP accession IDs (NCBI_SS#) | Chromosomes     | Physical positions (bp) | SNPs | Gene accession IDs | Sequence components of genome | Putative functions       |
|---------------------|-------------------------------------|-----------------|-------------------------|------|--------------------|-------------------------------|--------------------------|
| Kabuli_wild_1738341 | 1399931716                          | Ca_kabuli_Chr01 | 1738341                 | A/C  | NA                 | INTERGENIC                    | NA                       |
| Kabuli_wild_1772813 | 1399931717                          | Ca_kabuli_Chr01 | 1772813                 | T/C  | NA                 | INTERGENIC                    | NA                       |
| Kabuli_wild_1782760 | 1399931718                          | Ca_kabuli_Chr01 | 1782760                 | G/A  | Gene_Ca_00224      | INTRON                        | Zinc finger, RING-type   |
| Kabuli_wild_1782793 | 1399931719                          | Ca_kabuli_Chr01 | 1782793                 | G/T  | Gene_Ca_00224      | INTRON                        | Zinc finger, RING-type   |
| Kabuli_wild_1782808 | 1399931720                          | Ca_kabuli_Chr01 | 1782808                 | G/C  | Gene_Ca_00224      | INTRON                        | Zinc finger, RING-type   |
| Kabuli_wild_1782929 | 1399931721                          | Ca_kabuli_Chr01 | 1782929                 | C/T  | Gene_Ca_00224      | INTRON                        | Zinc finger, RING-type   |
| Kabuli_wild_1782930 | 1399931722                          | Ca_kabuli_Chr01 | 1782930                 | A/G  | Gene_Ca_00224      | INTRON                        | Zinc finger, RING-type   |
| Kabuli_wild_1782948 | 1399931723                          | Ca_kabuli_Chr01 | 1782948                 | C/T  | Gene_Ca_00224      | INTRON                        | Zinc finger, RING-type   |
| Kabuli_wild_1782953 | 1399931724                          | Ca_kabuli_Chr01 | 1782953                 | G/A  | Gene_Ca_00224      | INTRON                        | Zinc finger, RING-type   |
| Kabuli_wild_1783207 | 1399931725                          | Ca_kabuli_Chr01 | 1783207                 | G/A  | Gene_Ca_00224      | INTRON                        | Zinc finger, RING-type   |
| Kabuli_wild_1783277 | 1399931726                          | Ca_kabuli_Chr01 | 1783277                 | G/A  | Gene_Ca_00224      | INTRON                        | Zinc finger, RING-type   |
| Kabuli_wild_1783280 | 1399931727                          | Ca_kabuli_Chr01 | 1783280                 | A/C  | Gene_Ca_00224      | INTRON                        | Zinc finger, RING-type   |
| Kabuli_wild_1783343 | 1399931728                          | Ca_kabuli_Chr01 | 1783343                 | T/C  | Gene_Ca_00224      | INTRON                        | Zinc finger, RING-type   |
| Kabuli_wild_1783388 | 1399931729                          | Ca_kabuli_Chr01 | 1783388                 | C/A  | Gene_Ca_00224      | INTRON                        | Zinc finger, RING-type   |
| Kabuli_wild_1783389 | 1399931730                          | Ca_kabuli_Chr01 | 1783389                 | A/G  | Gene_Ca_00224      | INTRON                        | Zinc finger, RING-type   |
| Kabuli_wild_1783923 | 1399931731                          | Ca_kabuli_Chr01 | 1783923                 | C/A  | Gene_Ca_00224      | NON_SYNONYMOUS_CODING         | Zinc finger, RING-type   |
| Kabuli_wild_1784006 | 1399931732                          | Ca_kabuli_Chr01 | 1784006                 | T/C  | Gene_Ca_00224      | SYNONYMOUS_CODING             | Zinc finger, RING-type   |
| Kabuli_wild_1788958 | 1399931733                          | Ca_kabuli_Chr01 | 1788958                 | T/A  | NA                 | INTERGENIC                    | NA                       |
| Kabuli_wild_1789041 | 1399931734                          | Ca_kabuli_Chr01 | 1789041                 | C/T  | NA                 | INTERGENIC                    | NA                       |
| Kabuli_wild_1789087 | 1399931735                          | Ca_kabuli_Chr01 | 1789087                 | T/C  | NA                 | INTERGENIC                    | NA                       |
| Kabuli_wild_1802992 | 1399931736                          | Ca_kabuli_Chr01 | 1802992                 | C/G  | NA                 | INTERGENIC                    | NA                       |
| Kabuli_wild_1825840 | 1399931737                          | Ca_kabuli_Chr01 | 1825840                 | G/A  | Gene_Ca_00230      | SYNONYMOUS_CODING             | Zinc finger, RING-type   |
| Kabuli_wild_1858073 | 1399931738                          | Ca_kabuli_Chr01 | 1858073                 | C/T  | Gene_Ca_00233      | INTRON                        | Inositol monophosphatase |
| Kabuli_wild_1858078 | 1399931739                          | Ca_kabuli_Chr01 | 1858078                 | T/C  | Gene_Ca_00233      | INTRON                        | Inositol monophosphatase |
| Kabuli_wild_1858084 | 1399931740                          | Ca_kabuli_Chr01 | 1858084                 | C/T  | Gene_Ca_00233      | INTRON                        | Inositol monophosphatase |
| Kabuli_wild_1858132 | 1399931741                          | Ca_kabuli_Chr01 | 1858132                 | T/A  | Gene_Ca_00233      | INTRON                        | Inositol monophosphatase |
| Kabuli_wild_1858156 | 1399931742                          | Ca_kabuli_Chr01 | 1858156                 | C/T  | Gene_Ca_00233      | INTRON                        | Inositol monophosphatase |
| Kabuli_wild_1858159 | 1399931743                          | Ca_kabuli_Chr01 | 1858159                 | G/A  | Gene_Ca_00233      | INTRON                        | Inositol monophosphatase |
| Kabuli_wild_1858177 | 1399931744                          | Ca_kabuli_Chr01 | 1858177                 | T/C  | Gene_Ca_00233      | SYNONYMOUS_CODING             | Inositol monophosphatase |
| Kabuli_wild_1858202 | 1399931745                          | Ca_kabuli_Chr01 | 1858202                 | C/T  | Gene_Ca_00233      | NON_SYNONYMOUS_CODING         | Inositol monophosphatase |
| Kabuli_wild_1858226 | 1399931746                          | Ca_kabuli_Chr01 | 1858226                 | A/G  | Gene_Ca_00233      | NON_SYNONYMOUS_CODING         | Inositol monophosphatase |
| Kabuli_wild_1858509 | 1399931747                          | Ca_kabuli_Chr01 | 1858509                 | C/T  | Gene_Ca_00233      | SYNONYMOUS_CODING             | Inositol monophosphatase |
| Kabuli_wild_1858524 | 1399931748                          | Ca_kabuli_Chr01 | 1858524                 | C/G  | Gene_Ca_00233      | NON_SYNONYMOUS_CODING         | Inositol monophosphatase |
| Kabuli_wild_1858600 | 1399931749                          | Ca_kabuli_Chr01 | 1858600                 | G/A  | Gene_Ca_00233      | INTRON                        | Inositol monophosphatase |
| Kabuli_wild_1858608 | 1399931750                          | Ca_kabuli_Chr01 | 1858608                 | T/A  | Gene_Ca_00233      | INTRON                        | Inositol monophosphatase |
| Kabuli_wild_1858664 | 1399931751                          | Ca_kabuli_Chr01 | 1858664                 | G/A  | Gene_Ca_00233      | INTRON                        | Inositol monophosphatase |
| Kabuli_wild_1859789 | 1399931752                          | Ca_kabuli_Chr01 | 1859789                 | C/T  | Gene_Ca_00233      | INTRON                        | Inositol monophosphatase |
| Kabuli_wild_1859857 | 1399931753                          | Ca_kabuli_Chr01 | 1859857                 | A/G  | Gene_Ca_00233      | INTRON                        | Inositol monophosphatase |
| Kabuli_wild_1859902 | 1399931754                          | Ca_kabuli_Chr01 | 1859902                 | G/A  | Gene_Ca_00233      | INTRON                        | Inositol monophosphatase |
| Kabuli_wild_1859914 | 1399931755                          | Ca_kabuli_Chr01 | 1859914                 | G/A  | Gene_Ca_00233      | INTRON                        | Inositol monophosphatase |
| Kabuli_wild_1861696 | 1399931756                          | Ca_kabuli_Chr01 | 1861696                 | C/T  | Gene_Ca_00233      | SYNONYMOUS_CODING             | Inositol monophosphatase |
| Kabuli_wild_1861707 | 1399931757                          | Ca_kabuli_Chr01 | 1861707                 | T/G  | Gene_Ca_00233      | INTRON                        | Inositol monophosphatase |
| Kabuli_wild_1861722 | 1399931758                          | Ca_kabuli_Chr01 | 1861722                 | T/A  | Gene_Ca_00233      | INTRON                        | Inositol monophosphatase |
| Kabuli_wild_1861729 | 1399931759                          | Ca_kabuli_Chr01 | 1861729                 | T/C  | Gene_Ca_00233      | INTRON                        | Inositol monophosphatase |

| SNP IDs             | NCBI dbSNP accession IDs (NCBI_SS#) | Chromosomes     | Physical positions (bp) | SNPs | Gene accession IDs | Sequence components of genome | Putative functions                                               |
|---------------------|-------------------------------------|-----------------|-------------------------|------|--------------------|-------------------------------|------------------------------------------------------------------|
| Kabuli_wild_1861738 | 1399931760                          | Ca_kabuli_Chr01 | 1861738                 | T/G  | Gene_Ca_00233      | INTRON                        | Inositol monophosphatase                                         |
| Kabuli_wild_1861754 | 1399931761                          | Ca_kabuli_Chr01 | 1861754                 | G/A  | Gene_Ca_00233      | INTRON                        | Inositol monophosphatase                                         |
| Kabuli_wild_1861837 | 1399931762                          | Ca_kabuli_Chr01 | 1861837                 | T/G  | Gene_Ca_00233      | SYNONYMOUS_CODING             | Inositol monophosphatase                                         |
| Kabuli_wild_1870469 | 1399931763                          | Ca_kabuli_Chr01 | 1870469                 | C/A  | Gene_Ca_00235      | NON_SYNONYMOUS_CODING         | Pyridine nucleotide-disulphideoxidoreductase, NAD-binding region |
| Kabuli_wild_1904230 | 1399931764                          | Ca_kabuli_Chr01 | 1904230                 | G/T  | Gene_Ca_00238      | INTRON                        | Reverse transcriptase                                            |
| Kabuli_wild_1904233 | 1399931765                          | Ca_kabuli_Chr01 | 1904233                 | T/C  | Gene_Ca_00238      | INTRON                        | Reverse transcriptase                                            |
| Kabuli_wild_1904365 | 1399931766                          | Ca_kabuli_Chr01 | 1904365                 | G/A  | Gene_Ca_00238      | INTRON                        | Reverse transcriptase                                            |
| Kabuli_wild_1904391 | 1399931767                          | Ca_kabuli_Chr01 | 1904391                 | A/G  | Gene_Ca_00238      | INTRON                        | Reverse transcriptase                                            |
| Kabuli_wild_1904474 | 1399931768                          | Ca_kabuli_Chr01 | 1904474                 | G/T  | Gene_Ca_00238      | NON_SYNONYMOUS_CODING         | Reverse transcriptase                                            |
| Kabuli_wild_1904477 | 1399931769                          | Ca_kabuli_Chr01 | 1904477                 | A/C  | Gene_Ca_00238      | SYNONYMOUS_CODING             | Reverse transcriptase                                            |
| Kabuli_wild_1904494 | 1399931770                          | Ca_kabuli_Chr01 | 1904494                 | A/G  | Gene_Ca_00238      | NON_SYNONYMOUS_CODING         | Reverse transcriptase                                            |
| Kabuli_wild_1935729 | 1399931771                          | Ca_kabuli_Chr01 | 1935729                 | A/G  | Gene_Ca_00241      | DOWNSTREAM                    | Diacylglycerolkinase, catalytic domain                           |
| Kabuli_wild_1962876 | 1399931772                          | Ca_kabuli_Chr01 | 1962876                 | A/G  | Gene_Ca_00244      | NON_SYNONYMOUS_CODING         | Transcriptional factor B3                                        |
| Kabuli_wild_1968828 | 1399931773                          | Ca_kabuli_Chr01 | 1968828                 | G/A  | NA                 | INTERGENIC                    | NA                                                               |
| Kabuli_wild_1971924 | 1399931774                          | Ca_kabuli_Chr01 | 1971924                 | T/G  | NA                 | INTERGENIC                    | NA                                                               |
| Kabuli_wild_1973618 | 1399931775                          | Ca_kabuli_Chr01 | 1973618                 | A/T  | Gene_Ca_00246      | INTRON                        | RNA-processing protein, HAThelix                                 |
| Kabuli_wild_1986964 | 1399931776                          | Ca_kabuli_Chr01 | 1986964                 | T/C  | NA                 | INTERGENIC                    | NA                                                               |
| Kabuli_wild_1987101 | 1399931777                          | Ca_kabuli_Chr01 | 1987101                 | C/T  | NA                 | INTERGENIC                    | NA                                                               |
| Kabuli_wild_1987366 | 1399931778                          | Ca_kabuli_Chr01 | 1987366                 | T/C  | NA                 | INTERGENIC                    | NA                                                               |
| Kabuli_wild_2002656 | 1399931779                          | Ca_kabuli_Chr01 | 2002656                 | T/C  | NA                 | INTERGENIC                    | NA                                                               |
| Kabuli_wild_2002844 | 1399931780                          | Ca_kabuli_Chr01 | 2002844                 | G/A  | NA                 | INTERGENIC                    | NA                                                               |
| Kabuli_wild_2002922 | 1399931781                          | Ca_kabuli_Chr01 | 2002922                 | G/T  | NA                 | INTERGENIC                    | NA                                                               |
| Kabuli_wild_2040887 | 1399931782                          | Ca_kabuli_Chr01 | 2040887                 | A/G  | Gene_Ca_00258      | UPSTREAM                      | Disease resistance protein                                       |
| Kabuli_wild_2040943 | 1399931783                          | Ca_kabuli_Chr01 | 2040943                 | C/T  | Gene_Ca_00257      | DOWNSTREAM                    | NA                                                               |
| Kabuli_wild_2040946 | 1399931784                          | Ca_kabuli_Chr01 | 2040946                 | G/T  | Gene_Ca_00257      | DOWNSTREAM                    | NA                                                               |
| Kabuli_wild_2041027 | 1399931785                          | Ca_kabuli_Chr01 | 2041027                 | C/G  | Gene_Ca_00257      | DOWNSTREAM                    | NA                                                               |
| Kabuli_wild_2041126 | 1399931786                          | Ca_kabuli_Chr01 | 2041126                 | C/A  | Gene_Ca_00257      | DOWNSTREAM                    | NA                                                               |
| Kabuli_wild_2041132 | 1399931787                          | Ca_kabuli_Chr01 | 2041132                 | C/T  | Gene_Ca_00257      | DOWNSTREAM                    | NA                                                               |
| Kabuli_wild_2041154 | 1399931788                          | Ca_kabuli_Chr01 | 2041154                 | G/C  | NA                 | INTERGENIC                    | NA                                                               |
| Kabuli_wild_2041174 | 1399931789                          | Ca_kabuli_Chr01 | 2041174                 | C/T  | NA                 | INTERGENIC                    | NA                                                               |
| Kabuli_wild_2041176 | 1399931790                          | Ca_kabuli_Chr01 | 2041176                 | A/G  | NA                 | INTERGENIC                    | NA                                                               |
| Kabuli_wild_2041178 | 1399931791                          | Ca_kabuli_Chr01 | 2041178                 | A/C  | NA                 | INTERGENIC                    | NA                                                               |
| Kabuli_wild_2041180 | 1399931792                          | Ca_kabuli_Chr01 | 2041180                 | T/C  | NA                 | INTERGENIC                    | NA                                                               |
| Kabuli_wild_2041190 | 1399931793                          | Ca_kabuli_Chr01 | 2041190                 | A/C  | NA                 | INTERGENIC                    | NA                                                               |
| Kabuli_wild_2042071 | 1399931794                          | Ca_kabuli_Chr01 | 2042071                 | C/G  | NA                 | INTERGENIC                    | NA                                                               |
| Kabuli_wild_2042149 | 1399931795                          | Ca_kabuli_Chr01 | 2042149                 | G/T  | NA                 | INTERGENIC                    | NA                                                               |
| Kabuli_wild_2042152 | 1399931796                          | Ca_kabuli_Chr01 | 2042152                 | G/C  | NA                 | INTERGENIC                    | NA                                                               |
| Kabuli_wild_2042185 | 1399931797                          | Ca_kabuli_Chr01 | 2042185                 | T/C  | NA                 | INTERGENIC                    | NA                                                               |
| Kabuli_wild_2043957 | 1399931798                          | Ca_kabuli_Chr01 | 2043957                 | C/G  | NA                 | INTERGENIC                    | NA                                                               |
| Kabuli_wild_2044263 | 1399931799                          | Ca_kabuli_Chr01 | 2044263                 | A/C  | Gene_Ca_00259      | DOWNSTREAM                    | SCAMP                                                            |
| Kabuli_wild_2044289 | 1399931800                          | Ca_kabuli_Chr01 | 2044289                 | A/G  | Gene_Ca_00259      | DOWNSTREAM                    | SCAMP                                                            |
| Kabuli_wild_2044359 | 1399931801                          | Ca_kabuli_Chr01 | 2044359                 | C/T  | Gene_Ca_00259      | DOWNSTREAM                    | SCAMP                                                            |
| Kabuli_wild_2044380 | 1399931802                          | Ca_kabuli_Chr01 | 2044380                 | G/C  | Gene_Ca_00259      | DOWNSTREAM                    | SCAMP                                                            |
| Kabuli_wild_2044404 | 1399931803                          | Ca_kabuli_Chr01 | 2044404                 | T/C  | Gene_Ca_00259      | DOWNSTREAM                    | SCAMP                                                            |

| SNP IDs             | NCBI dbSNP accession IDs (NCBI_SS#) | Chromosomes     | Physical positions (bp) | SNPs | Gene accession IDs | Sequence components of genome | Putative functions         |
|---------------------|-------------------------------------|-----------------|-------------------------|------|--------------------|-------------------------------|----------------------------|
| Kabuli_wild_2044408 | 1399931804                          | Ca_kabuli_Chr01 | 2044408                 | A/C  | Gene_Ca_00259      | DOWNSTREAM                    | SCAMP                      |
| Kabuli_wild_2044414 | 1399931805                          | Ca_kabuli_Chr01 | 2044414                 | G/A  | Gene_Ca_00259      | DOWNSTREAM                    | SCAMP                      |
| Kabuli_wild_2044474 | 1399931806                          | Ca_kabuli_Chr01 | 2044474                 | A/G  | Gene_Ca_00259      | DOWNSTREAM                    | SCAMP                      |
| Kabuli_wild_2050187 | 1399931807                          | Ca_kabuli_Chr01 | 2050187                 | C/G  | Gene_Ca_00260      | UPSTREAM                      | Disease resistance protein |
| Kabuli_wild_2050189 | 1399931808                          | Ca_kabuli_Chr01 | 2050189                 | T/C  | Gene_Ca_00260      | UPSTREAM                      | Disease resistance protein |
| Kabuli_wild_2050232 | 1399931809                          | Ca_kabuli_Chr01 | 2050232                 | A/T  | Gene_Ca_00259      | UPSTREAM                      | SCAMP                      |
| Kabuli_wild_2050278 | 1399931810                          | Ca_kabuli_Chr01 | 2050278                 | C/G  | Gene_Ca_00259      | UPSTREAM                      | SCAMP                      |
| Kabuli_wild_2050300 | 1399931811                          | Ca_kabuli_Chr01 | 2050300                 | C/G  | NA                 | INTERGENIC                    | NA                         |
| Kabuli_wild_2050309 | 1399931812                          | Ca_kabuli_Chr01 | 2050309                 | T/C  | NA                 | INTERGENIC                    | NA                         |
| Kabuli_wild_2050313 | 1399931813                          | Ca_kabuli_Chr01 | 2050313                 | C/T  | NA                 | INTERGENIC                    | NA                         |
| Kabuli_wild_2050320 | 1399931814                          | Ca_kabuli_Chr01 | 2050320                 | T/A  | NA                 | INTERGENIC                    | NA                         |
| Kabuli_wild_2050321 | 1399931815                          | Ca_kabuli_Chr01 | 2050321                 | A/C  | NA                 | INTERGENIC                    | NA                         |
| Kabuli_wild_2050328 | 1399931816                          | Ca_kabuli_Chr01 | 2050328                 | C/T  | NA                 | INTERGENIC                    | NA                         |
| Kabuli_wild_2050415 | 1399931817                          | Ca_kabuli_Chr01 | 2050415                 | C/A  | NA                 | INTERGENIC                    | NA                         |
| Kabuli_wild_2050421 | 1399931818                          | Ca_kabuli_Chr01 | 2050421                 | C/T  | NA                 | INTERGENIC                    | NA                         |
| Kabuli_wild_2050463 | 1399931819                          | Ca_kabuli_Chr01 | 2050463                 | C/T  | NA                 | INTERGENIC                    | NA                         |
| Kabuli_wild_2050465 | 1399931820                          | Ca_kabuli_Chr01 | 2050465                 | A/G  | NA                 | INTERGENIC                    | NA                         |
| Kabuli_wild_2050467 | 1399931821                          | Ca_kabuli_Chr01 | 2050467                 | A/C  | NA                 | INTERGENIC                    | NA                         |
| Kabuli_wild_2050469 | 1399931822                          | Ca_kabuli_Chr01 | 2050469                 | T/C  | NA                 | INTERGENIC                    | NA                         |
| Kabuli_wild_2050475 | 1399931823                          | Ca_kabuli_Chr01 | 2050475                 | T/C  | NA                 | INTERGENIC                    | NA                         |
| Kabuli_wild_2050479 | 1399931824                          | Ca_kabuli_Chr01 | 2050479                 | A/C  | NA                 | INTERGENIC                    | NA                         |
| Kabuli_wild_2050484 | 1399931825                          | Ca_kabuli_Chr01 | 2050484                 | C/G  | NA                 | INTERGENIC                    | NA                         |
| Kabuli_wild_2051354 | 1399931826                          | Ca_kabuli_Chr01 | 2051354                 | A/C  | NA                 | INTERGENIC                    | NA                         |
| Kabuli_wild_2051360 | 1399931827                          | Ca_kabuli_Chr01 | 2051360                 | A/G  | NA                 | INTERGENIC                    | NA                         |
| Kabuli_wild_2051379 | 1399931828                          | Ca_kabuli_Chr01 | 2051379                 | C/T  | NA                 | INTERGENIC                    | NA                         |
| Kabuli_wild_2053662 | 1399931829                          | Ca_kabuli_Chr01 | 2053662                 | G/T  | Gene_Ca_00260      | NON_SYNONYMOUS_CODING         | Disease resistance protein |
| Kabuli_wild_2053677 | 1399931830                          | Ca_kabuli_Chr01 | 2053677                 | A/G  | Gene_Ca_00260      | NON_SYNONYMOUS_CODING         | Disease resistance protein |
| Kabuli_wild_2053732 | 1399931831                          | Ca_kabuli_Chr01 | 2053732                 | C/T  | Gene_Ca_00260      | NON_SYNONYMOUS_CODING         | Disease resistance protein |
| Kabuli_wild_2053744 | 1399931832                          | Ca_kabuli_Chr01 | 2053744                 | C/A  | Gene_Ca_00260      | NON_SYNONYMOUS_CODING         | Disease resistance protein |
| Kabuli_wild_2053749 | 1399931833                          | Ca_kabuli_Chr01 | 2053749                 | T/A  | Gene_Ca_00260      | NON_SYNONYMOUS_CODING         | Disease resistance protein |
| Kabuli_wild_2053755 | 1399931834                          | Ca_kabuli_Chr01 | 2053755                 | A/T  | Gene_Ca_00260      | NON_SYNONYMOUS_CODING         | Disease resistance protein |
| Kabuli_wild_2053756 | 1399931835                          | Ca_kabuli_Chr01 | 2053756                 | G/T  | Gene_Ca_00260      | NON_SYNONYMOUS_CODING         | Disease resistance protein |
| Kabuli_wild_2053758 | 1399931836                          | Ca_kabuli_Chr01 | 2053758                 | A/G  | Gene_Ca_00260      | NON_SYNONYMOUS_CODING         | Disease resistance protein |
| Kabuli_wild_2053784 | 1399931837                          | Ca_kabuli_Chr01 | 2053784                 | C/A  | Gene_Ca_00260      | NON_SYNONYMOUS_CODING         | Disease resistance protein |
| Kabuli_wild_2053788 | 1399931838                          | Ca_kabuli_Chr01 | 2053788                 | A/G  | Gene_Ca_00260      | NON_SYNONYMOUS_CODING         | Disease resistance protein |
| Kabuli_wild_2053790 | 1399931839                          | Ca_kabuli_Chr01 | 2053790                 | G/A  | Gene_Ca_00260      | SYNONYMOUS_CODING             | Disease resistance protein |
| Kabuli_wild_2053808 | 1399931840                          | Ca_kabuli_Chr01 | 2053808                 | G/T  | Gene_Ca_00260      | SYNONYMOUS_CODING             | Disease resistance protein |
| Kabuli_wild_2053818 | 1399931841                          | Ca_kabuli_Chr01 | 2053818                 | G/C  | Gene_Ca_00260      | NON_SYNONYMOUS_CODING         | Disease resistance protein |
| Kabuli_wild_2053819 | 1399931842                          | Ca_kabuli_Chr01 | 2053819                 | C/A  | Gene_Ca_00260      | SYNONYMOUS_CODING             | Disease resistance protein |
| Kabuli_wild_2053830 | 1399931843                          | Ca_kabuli_Chr01 | 2053830                 | A/G  | Gene_Ca_00260      | SYNONYMOUS_CODING             | Disease resistance protein |
| Kabuli_wild_2053833 | 1399931844                          | Ca_kabuli_Chr01 | 2053833                 | T/G  | Gene_Ca_00260      | SYNONYMOUS_CODING             | Disease resistance protein |
| Kabuli_wild_2053856 | 1399931845                          | Ca_kabuli_Chr01 | 2053856                 | T/G  | Gene_Ca_00260      | SYNONYMOUS_CODING             | Disease resistance protein |
| Kabuli_wild_2071424 | 1399931846                          | Ca_kabuli_Chr01 | 2071424                 | A/T  | Gene_Ca_00263      | UPSTREAM                      | Disease resistance protein |
| Kabuli_wild_2071448 | 1399931847                          | Ca_kabuli_Chr01 | 2071448                 | A/T  | Gene_Ca_00263      | UPSTREAM                      | Disease resistance protein |

| SNP IDs             | NCBI dbSNP accession IDs (NCBI_SS#) | Chromosomes     | Physical positions (bp) | SNPs | Gene accession IDs | Sequence components of genome | Putative functions                 |
|---------------------|-------------------------------------|-----------------|-------------------------|------|--------------------|-------------------------------|------------------------------------|
| Kabuli_wild_2071456 | 1399931848                          | Ca_kabuli_Chr01 | 2071456                 | T/A  | Gene_Ca_00263      | UPSTREAM                      | Disease resistance protein         |
| Kabuli_wild_2071502 | 1399931849                          | Ca_kabuli_Chr01 | 2071502                 | C/G  | Gene_Ca_00263      | UPSTREAM                      | Disease resistance protein         |
| Kabuli_wild_2071524 | 1399931850                          | Ca_kabuli_Chr01 | 2071524                 | C/G  | Gene_Ca_00263      | UPSTREAM                      | Disease resistance protein         |
| Kabuli_wild_2071533 | 1399931851                          | Ca_kabuli_Chr01 | 2071533                 | T/C  | Gene_Ca_00263      | UPSTREAM                      | Disease resistance protein         |
| Kabuli_wild_2071537 | 1399931852                          | Ca_kabuli_Chr01 | 2071537                 | C/T  | Gene_Ca_00263      | UPSTREAM                      | Disease resistance protein         |
| Kabuli_wild_2071544 | 1399931853                          | Ca_kabuli_Chr01 | 2071544                 | T/A  | Gene_Ca_00263      | UPSTREAM                      | Disease resistance protein         |
| Kabuli_wild_2071545 | 1399931854                          | Ca_kabuli_Chr01 | 2071545                 | A/C  | Gene_Ca_00263      | UPSTREAM                      | Disease resistance protein         |
| Kabuli_wild_2071552 | 1399931855                          | Ca_kabuli_Chr01 | 2071552                 | C/T  | Gene_Ca_00263      | UPSTREAM                      | Disease resistance protein         |
| Kabuli_wild_2071639 | 1399931856                          | Ca_kabuli_Chr01 | 2071639                 | C/A  | Gene_Ca_00263      | UPSTREAM                      | Disease resistance protein         |
| Kabuli_wild_2071645 | 1399931857                          | Ca_kabuli_Chr01 | 2071645                 | C/T  | Gene_Ca_00263      | UPSTREAM                      | Disease resistance protein         |
| Kabuli_wild_2071687 | 1399931858                          | Ca_kabuli_Chr01 | 2071687                 | C/T  | Gene_Ca_00263      | UPSTREAM                      | Disease resistance protein         |
| Kabuli_wild_2071689 | 1399931859                          | Ca_kabuli_Chr01 | 2071689                 | A/G  | Gene_Ca_00263      | UPSTREAM                      | Disease resistance protein         |
| Kabuli_wild_2071691 | 1399931860                          | Ca_kabuli_Chr01 | 2071691                 | A/C  | Gene_Ca_00263      | UPSTREAM                      | Disease resistance protein         |
| Kabuli_wild_2071693 | 1399931861                          | Ca_kabuli_Chr01 | 2071693                 | T/C  | Gene_Ca_00263      | UPSTREAM                      | Disease resistance protein         |
| Kabuli_wild_2071699 | 1399931862                          | Ca_kabuli_Chr01 | 2071699                 | T/C  | Gene_Ca_00263      | UPSTREAM                      | Disease resistance protein         |
| Kabuli_wild_2071703 | 1399931863                          | Ca_kabuli_Chr01 | 2071703                 | A/C  | Gene_Ca_00263      | UPSTREAM                      | Disease resistance protein         |
| Kabuli_wild_2071708 | 1399931864                          | Ca_kabuli_Chr01 | 2071708                 | C/G  | Gene_Ca_00263      | UPSTREAM                      | Disease resistance protein         |
| Kabuli_wild_2072613 | 1399931865                          | Ca_kabuli_Chr01 | 2072613                 | G/A  | Gene_Ca_00264      | UPSTREAM                      | NA                                 |
| Kabuli_wild_2072627 | 1399931866                          | Ca_kabuli_Chr01 | 2072627                 | A/T  | Gene_Ca_00264      | UPSTREAM                      | NA                                 |
| Kabuli_wild_2075009 | 1399931867                          | Ca_kabuli_Chr01 | 2075009                 | C/A  | NA                 | INTERGENIC                    | NA                                 |
| Kabuli_wild_2075013 | 1399931868                          | Ca_kabuli_Chr01 | 2075013                 | A/G  | NA                 | INTERGENIC                    | NA                                 |
| Kabuli_wild_2075015 | 1399931869                          | Ca_kabuli_Chr01 | 2075015                 | G/A  | NA                 | INTERGENIC                    | NA                                 |
| Kabuli_wild_2075043 | 1399931870                          | Ca_kabuli_Chr01 | 2075043                 | C/A  | NA                 | INTERGENIC                    | NA                                 |
| Kabuli_wild_2075044 | 1399931871                          | Ca_kabuli_Chr01 | 2075044                 | A/G  | NA                 | INTERGENIC                    | NA                                 |
| Kabuli_wild_2075045 | 1399931872                          | Ca_kabuli_Chr01 | 2075045                 | C/A  | NA                 | INTERGENIC                    | NA                                 |
| Kabuli_wild_2075057 | 1399931873                          | Ca_kabuli_Chr01 | 2075057                 | G/T  | NA                 | INTERGENIC                    | NA                                 |
| Kabuli_wild_2075087 | 1399931874                          | Ca_kabuli_Chr01 | 2075087                 | A/T  | NA                 | INTERGENIC                    | NA                                 |
| Kabuli_wild_2082760 | 1399931875                          | Ca_kabuli_Chr01 | 2082760                 | C/G  | Gene_Ca_00265      | INTRON                        | Protein of unknown function DUF707 |
| Kabuli_wild_2082801 | 1399931876                          | Ca_kabuli_Chr01 | 2082801                 | G/A  | Gene_Ca_00265      | INTRON                        | Protein of unknown function DUF707 |
| Kabuli_wild_2083003 | 1399931877                          | Ca_kabuli_Chr01 | 2083003                 | G/C  | Gene_Ca_00265      | INTRON                        | Protein of unknown function DUF707 |
| Kabuli_wild_2083059 | 1399931878                          | Ca_kabuli_Chr01 | 2083059                 | A/T  | Gene_Ca_00265      | INTRON                        | Protein of unknown function DUF707 |
| Kabuli_wild_2083073 | 1399931879                          | Ca_kabuli_Chr01 | 2083073                 | C/T  | Gene_Ca_00265      | INTRON                        | Protein of unknown function DUF707 |
| Kabuli_wild_2126267 | 1399931880                          | Ca_kabuli_Chr01 | 2126267                 | G/A  | Gene_Ca_00268      | INTRON                        | Protein kinase,catalytic domain    |
| Kabuli_wild_2148583 | 1399931881                          | Ca_kabuli_Chr01 | 2148583                 | T/G  | Gene_Ca_00270      | DOWNSTREAM                    | NA                                 |
| Kabuli_wild_2170090 | 1399931882                          | Ca_kabuli_Chr01 | 2170090                 | G/C  | Gene_Ca_00273      | DOWNSTREAM                    | LisHdimerisationmotif              |
| Kabuli_wild_2170935 | 1399931883                          | Ca_kabuli_Chr01 | 2170935                 | A/C  | Gene_Ca_00272      | DOWNSTREAM                    | NA                                 |
| Kabuli_wild_2172076 | 1399931884                          | Ca_kabuli_Chr01 | 2172076                 | T/C  | Gene_Ca_00272      | DOWNSTREAM                    | NA                                 |
| Kabuli_wild_2172113 | 1399931885                          | Ca_kabuli_Chr01 | 2172113                 | G/A  | Gene_Ca_00272      | DOWNSTREAM                    | NA                                 |
| Kabuli_wild_2172143 | 1399931886                          | Ca_kabuli_Chr01 | 2172143                 | T/G  | Gene_Ca_00272      | DOWNSTREAM                    | NA                                 |
| Kabuli_wild_2183544 | 1399931887                          | Ca_kabuli_Chr01 | 2183544                 | A/G  | Gene_Ca_00274      | INTRON                        | SNF2-related                       |
| Kabuli_wild_2212073 | 1399931888                          | Ca_kabuli_Chr01 | 2212073                 | A/G  | Gene_Ca_00276      | NON_SYNONYMOUS_CODING         | NA                                 |
| Kabuli_wild_2232779 | 1399931889                          | Ca_kabuli_Chr01 | 2232779                 | A/G  | Gene_Ca_00279      | INTRON                        | Amidohydrolase1                    |
| Kabuli_wild_2252270 | 1399931890                          | Ca_kabuli_Chr01 | 2252270                 | C/T  | Gene_Ca_00281      | INTRON                        | Zinc finger, RING-type             |
| Kabuli_wild_2252343 | 1399931891                          | Ca_kabuli_Chr01 | 2252343                 | G/T  | Gene_Ca_00281      | INTRON                        | NA                                 |

| SNP IDs             | NCBI dbSNP accession IDs (NCBI_SS#) | Chromosomes     | Physical positions (bp) | SNPs | Gene accession IDs | Sequence components of genome | Putative functions                        |
|---------------------|-------------------------------------|-----------------|-------------------------|------|--------------------|-------------------------------|-------------------------------------------|
| Kabuli_wild_2252473 | 1399931892                          | Ca_kabuli_Chr01 | 2252473                 | G/A  | Gene_Ca_00281      | INTRON                        | NA                                        |
| Kabuli_wild_2252513 | 1399931893                          | Ca_kabuli_Chr01 | 2252513                 | C/T  | Gene_Ca_00281      | INTRON                        | NA                                        |
| Kabuli_wild_2269303 | 1399931894                          | Ca_kabuli_Chr01 | 2269303                 | T/C  | NA                 | INTERGENIC                    | NA                                        |
| Kabuli_wild_2269319 | 1399931895                          | Ca_kabuli_Chr01 | 2269319                 | T/G  | NA                 | INTERGENIC                    | NA                                        |
| Kabuli_wild_2269489 | 1399931896                          | Ca_kabuli_Chr01 | 2269489                 | A/C  | NA                 | INTERGENIC                    | NA                                        |
| Kabuli_wild_2277459 | 1399931897                          | Ca_kabuli_Chr01 | 2277459                 | G/A  | Gene_Ca_00285      | INTRON                        | RNA recognition motif domain              |
| Kabuli_wild_2285879 | 1399931898                          | Ca_kabuli_Chr01 | 2285879                 | G/A  | Gene_Ca_00287      | DOWNSTREAM                    | NA                                        |
| Kabuli_wild_2287408 | 1399931899                          | Ca_kabuli_Chr01 | 2287408                 | A/T  | Gene_Ca_00287      | NON_SYNONYMOUS_CODING         | NA                                        |
| Kabuli_wild_2290092 | 1399931900                          | Ca_kabuli_Chr01 | 2290092                 | A/G  | Gene_Ca_00287      | INTRON                        | NA                                        |
| Kabuli_wild_2290150 | 1399931901                          | Ca_kabuli_Chr01 | 2290150                 | C/A  | Gene_Ca_00287      | INTRON                        | NA                                        |
| Kabuli_wild_2305216 | 1399931902                          | Ca_kabuli_Chr01 | 2305216                 | T/G  | NA                 | INTERGENIC                    | NA                                        |
| Kabuli_wild_2305246 | 1399931903                          | Ca_kabuli_Chr01 | 2305246                 | T/A  | NA                 | INTERGENIC                    | NA                                        |
| Kabuli_wild_2305351 | 1399931904                          | Ca_kabuli_Chr01 | 2305351                 | T/A  | NA                 | INTERGENIC                    | NA                                        |
| Kabuli_wild_2305786 | 1399931905                          | Ca_kabuli_Chr01 | 2305786                 | A/T  | NA                 | INTERGENIC                    | NA                                        |
| Kabuli_wild_2305849 | 1399931906                          | Ca_kabuli_Chr01 | 2305849                 | G/A  | NA                 | INTERGENIC                    | NA                                        |
| Kabuli_wild_2305903 | 1399931907                          | Ca_kabuli_Chr01 | 2305903                 | G/A  | NA                 | INTERGENIC                    | NA                                        |
| Kabuli_wild_2306287 | 1399931908                          | Ca_kabuli_Chr01 | 2306287                 | G/A  | NA                 | INTERGENIC                    | NA                                        |
| Kabuli_wild_2306323 | 1399931909                          | Ca_kabuli_Chr01 | 2306323                 | C/T  | NA                 | INTERGENIC                    | NA                                        |
| Kabuli_wild_2306340 | 1399931910                          | Ca_kabuli_Chr01 | 2306340                 | T/C  | NA                 | INTERGENIC                    | NA                                        |
| Kabuli_wild_2366409 | 1399931911                          | Ca_kabuli_Chr01 | 2366409                 | T/A  | NA                 | INTERGENIC                    | NA                                        |
| Kabuli_wild_2366413 | 1399931912                          | Ca_kabuli_Chr01 | 2366413                 | T/C  | NA                 | INTERGENIC                    | NA                                        |
| Kabuli_wild_2373280 | 1399931913                          | Ca_kabuli_Chr01 | 2373280                 | T/C  | Gene_Ca_00301      | INTRON                        | Ribosoma IRNA methyltransferase RrmJ/FtsJ |
| Kabuli_wild_2373480 | 1399931914                          | Ca_kabuli_Chr01 | 2373480                 | G/T  | Gene_Ca_00301      | INTRON                        | Ribosoma IRNA methyltransferase RrmJ/FtsJ |
| Kabuli_wild_2373862 | 1399931915                          | Ca_kabuli_Chr01 | 2373862                 | G/A  | Gene_Ca_00301      | INTRON                        | Ribosoma IRNA methyltransferase RrmJ/FtsJ |
| Kabuli_wild_2373910 | 1399931916                          | Ca_kabuli_Chr01 | 2373910                 | C/T  | Gene_Ca_00301      | INTRON                        | Ribosoma IRNA methyltransferase RrmJ/FtsJ |
| Kabuli_wild_2373954 | 1399931917                          | Ca_kabuli_Chr01 | 2373954                 | G/T  | Gene_Ca_00301      | INTRON                        | Ribosoma IRNA methyltransferase RrmJ/FtsJ |
| Kabuli_wild_2377689 | 1399931918                          | Ca_kabuli_Chr01 | 2377689                 | T/A  | NA                 | INTERGENIC                    | NA                                        |
| Kabuli_wild_2400799 | 1399931919                          | Ca_kabuli_Chr01 | 2400799                 | T/G  | Gene_Ca_00305      | UPSTREAM                      | Protein of unknown function DUF2921       |
| Kabuli_wild_2428531 | 1399931920                          | Ca_kabuli_Chr01 | 2428531                 | A/G  | Gene_Ca_00308      | UPSTREAM                      | Protein of unknown function DUF616        |
| Kabuli_wild_2439915 | 1399931921                          | Ca_kabuli_Chr01 | 2439915                 | G/A  | NA                 | INTERGENIC                    | NA                                        |
| Kabuli_wild_2439917 | 1399931922                          | Ca_kabuli_Chr01 | 2439917                 | A/G  | NA                 | INTERGENIC                    | NA                                        |
| Kabuli_wild_2457925 | 1399931923                          | Ca_kabuli_Chr01 | 2457925                 | C/T  | Gene_Ca_00311      | INTRON                        | Protein kinase,catalytic domain           |
| Kabuli_wild_2473309 | 1399931924                          | Ca_kabuli_Chr01 | 2473309                 | T/C  | NA                 | INTERGENIC                    | NA                                        |
| Kabuli_wild_2513383 | 1399931925                          | Ca_kabuli_Chr01 | 2513383                 | T/C  | Gene_Ca_00314      | SYNONYMOUS_CODING             | Telomerase activating protein Est1        |
| Kabuli_wild_2513516 | 1399931926                          | Ca_kabuli_Chr01 | 2513516                 | T/A  | Gene_Ca_00314      | NON_SYNONYMOUS_CODING         | Telomerase activating protein Est1        |
| Kabuli_wild_2513535 | 1399931927                          | Ca_kabuli_Chr01 | 2513535                 | T/C  | Gene_Ca_00314      | NON_SYNONYMOUS_CODING         | Telomerase activating protein Est1        |
| Kabuli_wild_2513737 | 1399931928                          | Ca_kabuli_Chr01 | 2513737                 | T/C  | Gene_Ca_00314      | SYNONYMOUS_CODING             | Telomerase activating protein Est1        |
| Kabuli_wild_2513792 | 1399931929                          | Ca_kabuli_Chr01 | 2513792                 | A/G  | Gene_Ca_00314      | NON_SYNONYMOUS_CODING         | Telomerase activating protein Est1        |
| Kabuli_wild_2513854 | 1399931930                          | Ca_kabuli_Chr01 | 2513854                 | G/A  | Gene_Ca_00314      | SYNONYMOUS_CODING             | Telomerase activating protein Est1        |
| Kabuli_wild_2513860 | 1399931931                          | Ca_kabuli_Chr01 | 2513860                 | G/A  | Gene_Ca_00314      | SYNONYMOUS_CODING             | Telomerase activating protein Est1        |
| Kabuli_wild_2542652 | 1399931932                          | Ca_kabuli_Chr01 | 2542652                 | G/A  | NA                 | INTERGENIC                    | NA                                        |
| Kabuli_wild_2607973 | 1399931933                          | Ca_kabuli_Chr01 | 2607973                 | C/G  | NA                 | INTERGENIC                    | NA                                        |
| Kabuli_wild_2607974 | 1399931934                          | Ca_kabuli_Chr01 | 2607974                 | G/T  | NA                 | INTERGENIC                    | NA                                        |
| Kabuli_wild_2607994 | 1399931935                          | Ca_kabuli_Chr01 | 2607994                 | A/G  | NA                 | INTERGENIC                    | NA                                        |



| SNP IDs             | NCBI dbSNP accession IDs (NCBI_SS#) | Chromosomes     | Physical positions (bp) | SNPs | Gene accession IDs | Sequence components of genome | Putative functions                                           |
|---------------------|-------------------------------------|-----------------|-------------------------|------|--------------------|-------------------------------|--------------------------------------------------------------|
| Kabuli_wild_2649864 | 1399931936                          | Ca_kabuli_Chr01 | 2649864                 | C/A  | Gene_Ca_00326      | SYNONYMOUS_CODING             | Pathogenesis-related transcriptional factor/ERF, DNA-binding |
| Kabuli_wild_2649974 | 1399931937                          | Ca_kabuli_Chr01 | 2649974                 | A/C  | Gene_Ca_00326      | SYNONYMOUS_CODING             | Pathogenesis-related transcriptional factor/ERF, DNA-binding |
| Kabuli_wild_2649976 | 1399931938                          | Ca_kabuli_Chr01 | 2649976                 | A/T  | Gene_Ca_00326      | NON_SYNONYMOUS_CODING         | Pathogenesis-related transcriptional factor/ERF, DNA-binding |
| Kabuli_wild_2671403 | 1399931939                          | Ca_kabuli_Chr01 | 2671403                 | G/T  | Gene_Ca_00327      | SYNONYMOUS_CODING             | Pathogenesis-related transcriptional factor/ERF, DNA-binding |
| Kabuli_wild_2702124 | 1399931940                          | Ca_kabuli_Chr01 | 2702124                 | T/C  | NA                 | INTERGENIC                    | NA                                                           |
| Kabuli_wild_2702277 | 1399931941                          | Ca_kabuli_Chr01 | 2702277                 | T/C  | NA                 | INTERGENIC                    | NA                                                           |
| Kabuli_wild_2745486 | 1399931942                          | Ca_kabuli_Chr01 | 2745486                 | T/C  | Gene_Ca_00338      | UPSTREAM                      | Pentatricopeptide repeat                                     |
| Kabuli_wild_2745499 | 1399931943                          | Ca_kabuli_Chr01 | 2745499                 | C/A  | Gene_Ca_00338      | UPSTREAM                      | Pentatricopeptide repeat                                     |
| Kabuli_wild_2745514 | 1399931944                          | Ca_kabuli_Chr01 | 2745514                 | A/C  | Gene_Ca_00338      | UPSTREAM                      | Pentatricopeptide repeat                                     |
| Kabuli_wild_2745519 | 1399931945                          | Ca_kabuli_Chr01 | 2745519                 | G/C  | Gene_Ca_00338      | UPSTREAM                      | Pentatricopeptide repeat                                     |
| Kabuli_wild_2754998 | 1399931946                          | Ca_kabuli_Chr01 | 2754998                 | C/T  | Gene_Ca_00340      | SYNONYMOUS_CODING             | Disease resistance protein                                   |
| Kabuli_wild_2755002 | 1399931947                          | Ca_kabuli_Chr01 | 2755002                 | A/C  | Gene_Ca_00340      | NON_SYNONYMOUS_CODING         | Disease resistance protein                                   |
| Kabuli_wild_2755012 | 1399931948                          | Ca_kabuli_Chr01 | 2755012                 | C/T  | Gene_Ca_00340      | SYNONYMOUS_CODING             | Disease resistance protein                                   |
| Kabuli_wild_2755015 | 1399931949                          | Ca_kabuli_Chr01 | 2755015                 | T/C  | Gene_Ca_00340      | SYNONYMOUS_CODING             | Disease resistance protein                                   |
| Kabuli_wild_2755021 | 1399931950                          | Ca_kabuli_Chr01 | 2755021                 | T/G  | Gene_Ca_00340      | NON_SYNONYMOUS_CODING         | Disease resistance protein                                   |
| Kabuli_wild_2755028 | 1399931951                          | Ca_kabuli_Chr01 | 2755028                 | G/T  | Gene_Ca_00340      | NON_SYNONYMOUS_CODING         | Disease resistance protein                                   |
| Kabuli_wild_2755056 | 1399931952                          | Ca_kabuli_Chr01 | 2755056                 | C/T  | Gene_Ca_00340      | SYNONYMOUS_CODING             | Disease resistance protein                                   |
| Kabuli_wild_2755443 | 1399931953                          | Ca_kabuli_Chr01 | 2755443                 | T/A  | Gene_Ca_00340      | NON_SYNONYMOUS_CODING         | Disease resistance protein                                   |
| Kabuli_wild_2755455 | 1399931954                          | Ca_kabuli_Chr01 | 2755455                 | G/A  | Gene_Ca_00340      | SYNONYMOUS_CODING             | Disease resistance protein                                   |
| Kabuli_wild_2755457 | 1399931955                          | Ca_kabuli_Chr01 | 2755457                 | T/C  | Gene_Ca_00340      | SYNONYMOUS_CODING             | Disease resistance protein                                   |
| Kabuli_wild_2755459 | 1399931956                          | Ca_kabuli_Chr01 | 2755459                 | T/G  | Gene_Ca_00340      | SYNONYMOUS_CODING             | Disease resistance protein                                   |
| Kabuli_wild_2755465 | 1399931957                          | Ca_kabuli_Chr01 | 2755465                 | T/A  | Gene_Ca_00340      | SYNONYMOUS_CODING             | Disease resistance protein                                   |
| Kabuli_wild_2755466 | 1399931958                          | Ca_kabuli_Chr01 | 2755466                 | C/G  | Gene_Ca_00340      | SYNONYMOUS_CODING             | Disease resistance protein                                   |
| Kabuli_wild_2755470 | 1399931959                          | Ca_kabuli_Chr01 | 2755470                 | A/T  | Gene_Ca_00340      | SYNONYMOUS_CODING             | Disease resistance protein                                   |
| Kabuli_wild_2755471 | 1399931960                          | Ca_kabuli_Chr01 | 2755471                 | C/A  | Gene_Ca_00340      | SYNONYMOUS_CODING             | Disease resistance protein                                   |
| Kabuli_wild_2755489 | 1399931961                          | Ca_kabuli_Chr01 | 2755489                 | G/A  | Gene_Ca_00340      | NON_SYNONYMOUS_CODING         | Disease resistance protein                                   |
| Kabuli_wild_2755494 | 1399931962                          | Ca_kabuli_Chr01 | 2755494                 | T/C  | Gene_Ca_00340      | SYNONYMOUS_CODING             | Disease resistance protein                                   |
| Kabuli_wild_2755496 | 1399931963                          | Ca_kabuli_Chr01 | 2755496                 | G/A  | Gene_Ca_00340      | SYNONYMOUS_CODING             | Disease resistance protein                                   |
| Kabuli_wild_2755596 | 1399931964                          | Ca_kabuli_Chr01 | 2755596                 | A/C  | Gene_Ca_00340      | SYNONYMOUS_CODING             | Disease resistance protein                                   |
| Kabuli_wild_2755604 | 1399931965                          | Ca_kabuli_Chr01 | 2755604                 | C/A  | Gene_Ca_00340      | SYNONYMOUS_CODING             | Disease resistance protein                                   |
| Kabuli_wild_2755613 | 1399931966                          | Ca_kabuli_Chr01 | 2755613                 | T/G  | Gene_Ca_00340      | SYNONYMOUS_CODING             | Disease resistance protein                                   |
| Kabuli_wild_2757678 | 1399931967                          | Ca_kabuli_Chr01 | 2757678                 | A/G  | Gene_Ca_00340      | SYNONYMOUS_CODING             | Disease resistance protein                                   |
| Kabuli_wild_2757693 | 1399931968                          | Ca_kabuli_Chr01 | 2757693                 | C/T  | Gene_Ca_00340      | SYNONYMOUS_CODING             | Disease resistance protein                                   |
| Kabuli_wild_2757696 | 1399931969                          | Ca_kabuli_Chr01 | 2757696                 | A/G  | Gene_Ca_00340      | SYNONYMOUS_CODING             | Disease resistance protein                                   |
| Kabuli_wild_2757711 | 1399931970                          | Ca_kabuli_Chr01 | 2757711                 | T/G  | Gene_Ca_00340      | SYNONYMOUS_CODING             | Disease resistance protein                                   |
| Kabuli_wild_2758731 | 1399931971                          | Ca_kabuli_Chr01 | 2758731                 | G/A  | Gene_Ca_00340      | SYNONYMOUS_CODING             | Disease resistance protein                                   |
| Kabuli_wild_2758738 | 1399931972                          | Ca_kabuli_Chr01 | 2758738                 | T/G  | Gene_Ca_00340      | NON_SYNONYMOUS_CODING         | Disease resistance protein                                   |
| Kabuli_wild_2758739 | 1399931973                          | Ca_kabuli_Chr01 | 2758739                 | A/T  | Gene_Ca_00340      | NON_SYNONYMOUS_CODING         | Disease resistance protein                                   |
| Kabuli_wild_2758746 | 1399931974                          | Ca_kabuli_Chr01 | 2758746                 | G/A  | Gene_Ca_00340      | SYNONYMOUS_CODING             | Disease resistance protein                                   |
| Kabuli_wild_2758750 | 1399931975                          | Ca_kabuli_Chr01 | 2758750                 | A/G  | Gene_Ca_00340      | NON_SYNONYMOUS_CODING         | Disease resistance protein                                   |
| Kabuli_wild_2758759 | 1399931976                          | Ca_kabuli_Chr01 | 2758759                 | G/C  | Gene_Ca_00340      | NON_SYNONYMOUS_CODING         | Disease resistance protein                                   |
| Kabuli_wild_2758781 | 1399931977                          | Ca_kabuli_Chr01 | 2758781                 | G/C  | Gene_Ca_00340      | NON_SYNONYMOUS_CODING         | Disease resistance protein                                   |
| Kabuli_wild_2758827 | 1399931978                          | Ca_kabuli_Chr01 | 2758827                 | A/T  | Gene_Ca_00340      | NON_SYNONYMOUS_CODING         | Disease resistance protein                                   |
| Kabuli_wild_2758835 | 1399931979                          | Ca_kabuli_Chr01 | 2758835                 | T/A  | Gene_Ca_00340      | UPSTREAM                      | Disease resistance protein                                   |

| SNP IDs             | NCBI dbSNP accession IDs (NCBI_SS#) | Chromosomes       | Physical positions (bp) | SNPs | Gene accession IDs | Sequence components of genome | Putative functions         |
|---------------------|-------------------------------------|-------------------|-------------------------|------|--------------------|-------------------------------|----------------------------|
| Kabuli_wild_2758859 | 1399931980                          | Ca_kabuli_Chrom01 | 2758859                 | A/T  | Gene_Ca_00340      | UPSTREAM                      | Disease resistance protein |
| Kabuli_wild_2786970 | 1399931981                          | Ca_kabuli_Chrom01 | 2786970                 | T/A  | NA                 | INTERGENIC                    | NA                         |
| Kabuli_wild_2786974 | 1399931982                          | Ca_kabuli_Chrom01 | 2786974                 | T/C  | NA                 | INTERGENIC                    | NA                         |
| Kabuli_wild_2786976 | 1399931983                          | Ca_kabuli_Chrom01 | 2786976                 | A/C  | NA                 | INTERGENIC                    | NA                         |
| Kabuli_wild_2786989 | 1399931984                          | Ca_kabuli_Chrom01 | 2786989                 | T/C  | NA                 | INTERGENIC                    | NA                         |
| Kabuli_wild_2786994 | 1399931985                          | Ca_kabuli_Chrom01 | 2786994                 | A/C  | NA                 | INTERGENIC                    | NA                         |
| Kabuli_wild_2807604 | 1399931986                          | Ca_kabuli_Chrom01 | 2807604                 | T/C  | Gene_Ca_00345      | SYNONYMOUS_CODING             | NA                         |
| Kabuli_wild_2807605 | 1399931987                          | Ca_kabuli_Chrom01 | 2807605                 | G/C  | Gene_Ca_00345      | NON_SYNONYMOUS_CODING         | NA                         |
| Kabuli_wild_2807616 | 1399931988                          | Ca_kabuli_Chrom01 | 2807616                 | G/A  | Gene_Ca_00345      | NON_SYNONYMOUS_CODING         | NA                         |
| Kabuli_wild_2807670 | 1399931989                          | Ca_kabuli_Chrom01 | 2807670                 | A/C  | Gene_Ca_00345      | SYNONYMOUS_CODING             | NA                         |
| Kabuli_wild_2808019 | 1399931990                          | Ca_kabuli_Chrom01 | 2808019                 | T/C  | Gene_Ca_00345      | SYNONYMOUS_CODING             | NA                         |
| Kabuli_wild_2808035 | 1399931991                          | Ca_kabuli_Chrom01 | 2808035                 | C/A  | Gene_Ca_00345      | SYNONYMOUS_CODING             | NA                         |
| Kabuli_wild_2808039 | 1399931992                          | Ca_kabuli_Chrom01 | 2808039                 | A/G  | Gene_Ca_00345      | SYNONYMOUS_CODING             | NA                         |
| Kabuli_wild_2808079 | 1399931993                          | Ca_kabuli_Chrom01 | 2808079                 | T/G  | Gene_Ca_00345      | SYNONYMOUS_CODING             | NA                         |
| Kabuli_wild_2832792 | 1399931994                          | Ca_kabuli_Chrom01 | 2832792                 | G/A  | NA                 | INTERGENIC                    | NA                         |
| Kabuli_wild_2832939 | 1399931995                          | Ca_kabuli_Chrom01 | 2832939                 | G/T  | Gene_Ca_00347      | NON_SYNONYMOUS_CODING         | Transcriptional factor B3  |
| Kabuli_wild_2832969 | 1399931996                          | Ca_kabuli_Chrom01 | 2832969                 | G/A  | Gene_Ca_00347      | SYNONYMOUS_CODING             | Transcriptional factor B3  |
| Kabuli_wild_2833448 | 1399931997                          | Ca_kabuli_Chrom01 | 2833448                 | C/A  | Gene_Ca_00347      | NON_SYNONYMOUS_CODING         | Transcriptional factor B3  |
| Kabuli_wild_2833454 | 1399931998                          | Ca_kabuli_Chrom01 | 2833454                 | T/G  | Gene_Ca_00347      | SYNONYMOUS_CODING             | Transcriptional factor B3  |
| Kabuli_wild_2833560 | 1399931999                          | Ca_kabuli_Chrom01 | 2833560                 | T/C  | Gene_Ca_00347      | SYNONYMOUS_CODING             | Transcriptional factor B3  |
| Kabuli_wild_2834380 | 1399932000                          | Ca_kabuli_Chrom01 | 2834380                 | G/A  | Gene_Ca_00347      | INTRON                        | Transcriptional factor B3  |
| Kabuli_wild_2834456 | 1399932001                          | Ca_kabuli_Chrom01 | 2834456                 | T/A  | Gene_Ca_00347      | INTRON                        | Transcriptional factor B3  |
| Kabuli_wild_2855857 | 1399932002                          | Ca_kabuli_Chrom01 | 2855857                 | T/G  | NA                 | INTERGENIC                    | NA                         |
| Kabuli_wild_2855866 | 1399932003                          | Ca_kabuli_Chrom01 | 2855866                 | T/G  | NA                 | INTERGENIC                    | NA                         |
| Kabuli_wild_2855927 | 1399932004                          | Ca_kabuli_Chrom01 | 2855927                 | T/A  | NA                 | INTERGENIC                    | NA                         |
| Kabuli_wild_2856003 | 1399932005                          | Ca_kabuli_Chrom01 | 2856003                 | T/C  | NA                 | INTERGENIC                    | NA                         |
| Kabuli_wild_2856045 | 1399932006                          | Ca_kabuli_Chrom01 | 2856045                 | C/T  | NA                 | INTERGENIC                    | NA                         |
| Kabuli_wild_2856079 | 1399932007                          | Ca_kabuli_Chrom01 | 2856079                 | T/G  | NA                 | INTERGENIC                    | NA                         |
| Kabuli_wild_2856094 | 1399932008                          | Ca_kabuli_Chrom01 | 2856094                 | T/G  | NA                 | INTERGENIC                    | NA                         |
| Kabuli_wild_2856120 | 1399932009                          | Ca_kabuli_Chrom01 | 2856120                 | T/G  | NA                 | INTERGENIC                    | NA                         |
| Kabuli_wild_2856126 | 1399932010                          | Ca_kabuli_Chrom01 | 2856126                 | C/T  | NA                 | INTERGENIC                    | NA                         |
| Kabuli_wild_2856534 | 1399932011                          | Ca_kabuli_Chrom01 | 2856534                 | T/A  | NA                 | INTERGENIC                    | NA                         |
| Kabuli_wild_2858250 | 1399932012                          | Ca_kabuli_Chrom01 | 2858250                 | G/A  | NA                 | INTERGENIC                    | NA                         |
| Kabuli_wild_2858258 | 1399932013                          | Ca_kabuli_Chrom01 | 2858258                 | T/C  | NA                 | INTERGENIC                    | NA                         |
| Kabuli_wild_2858263 | 1399932014                          | Ca_kabuli_Chrom01 | 2858263                 | A/G  | NA                 | INTERGENIC                    | NA                         |
| Kabuli_wild_2858299 | 1399932015                          | Ca_kabuli_Chrom01 | 2858299                 | C/A  | NA                 | INTERGENIC                    | NA                         |
| Kabuli_wild_2868942 | 1399932016                          | Ca_kabuli_Chrom01 | 2868942                 | G/A  | NA                 | INTERGENIC                    | NA                         |
| Kabuli_wild_2881386 | 1399932017                          | Ca_kabuli_Chrom01 | 2881386                 | G/T  | Gene_Ca_00351      | NON_SYNONYMOUS_CODING         | Disease resistance protein |
| Kabuli_wild_2881389 | 1399932018                          | Ca_kabuli_Chrom01 | 2881389                 | G/C  | Gene_Ca_00351      | NON_SYNONYMOUS_CODING         | Disease resistance protein |
| Kabuli_wild_2881422 | 1399932019                          | Ca_kabuli_Chrom01 | 2881422                 | T/C  | Gene_Ca_00351      | SYNONYMOUS_CODING             | Disease resistance protein |
| Kabuli_wild_2883625 | 1399932020                          | Ca_kabuli_Chrom01 | 2883625                 | T/A  | Gene_Ca_00351      | STOP_GAINED                   | Disease resistance protein |
| Kabuli_wild_2883634 | 1399932021                          | Ca_kabuli_Chrom01 | 2883634                 | T/A  | Gene_Ca_00351      | DOWNSTREAM                    | Disease resistance protein |
| Kabuli_wild_2883635 | 1399932022                          | Ca_kabuli_Chrom01 | 2883635                 | A/G  | Gene_Ca_00351      | DOWNSTREAM                    | Disease resistance protein |
| Kabuli_wild_2883660 | 1399932023                          | Ca_kabuli_Chrom01 | 2883660                 | C/A  | Gene_Ca_00351      | DOWNSTREAM                    | Disease resistance protein |

| SNP IDs             | NCBI dbSNP accession IDs (NCBI_SS#) | Chromosomes     | Physical positions (bp) | SNPs | Gene accession IDs | Sequence components of genome | Putative functions                                 |
|---------------------|-------------------------------------|-----------------|-------------------------|------|--------------------|-------------------------------|----------------------------------------------------|
| Kabuli_wild_2883666 | 1399932024                          | Ca_kabuli_Chr01 | 2883666                 | G/A  | Gene_Ca_00351      | DOWNSTREAM                    | Disease resistance protein                         |
| Kabuli_wild_2883684 | 1399932025                          | Ca_kabuli_Chr01 | 2883684                 | T/G  | Gene_Ca_00351      | DOWNSTREAM                    | Disease resistance protein                         |
| Kabuli_wild_2883716 | 1399932026                          | Ca_kabuli_Chr01 | 2883716                 | A/C  | Gene_Ca_00351      | DOWNSTREAM                    | Disease resistance protein                         |
| Kabuli_wild_2883717 | 1399932027                          | Ca_kabuli_Chr01 | 2883717                 | C/A  | Gene_Ca_00351      | DOWNSTREAM                    | Disease resistance protein                         |
| Kabuli_wild_2885508 | 1399932028                          | Ca_kabuli_Chr01 | 2885508                 | T/C  | Gene_Ca_00351      | DOWNSTREAM                    | Disease resistance protein                         |
| Kabuli_wild_2885525 | 1399932029                          | Ca_kabuli_Chr01 | 2885525                 | T/C  | Gene_Ca_00351      | DOWNSTREAM                    | Disease resistance protein                         |
| Kabuli_wild_2885531 | 1399932030                          | Ca_kabuli_Chr01 | 2885531                 | C/T  | Gene_Ca_00351      | DOWNSTREAM                    | Disease resistance protein                         |
| Kabuli_wild_2885580 | 1399932031                          | Ca_kabuli_Chr01 | 2885580                 | A/G  | Gene_Ca_00351      | DOWNSTREAM                    | Disease resistance protein                         |
| Kabuli_wild_2885626 | 1399932032                          | Ca_kabuli_Chr01 | 2885626                 | A/G  | Gene_Ca_00351      | DOWNSTREAM                    | Disease resistance protein                         |
| Kabuli_wild_2885673 | 1399932033                          | Ca_kabuli_Chr01 | 2885673                 | G/C  | NA                 | INTERGENIC                    | NA                                                 |
| Kabuli_wild_2885892 | 1399932034                          | Ca_kabuli_Chr01 | 2885892                 | T/A  | NA                 | INTERGENIC                    | NA                                                 |
| Kabuli_wild_2885923 | 1399932035                          | Ca_kabuli_Chr01 | 2885923                 | C/G  | NA                 | INTERGENIC                    | NA                                                 |
| Kabuli_wild_2885955 | 1399932036                          | Ca_kabuli_Chr01 | 2885955                 | C/T  | NA                 | INTERGENIC                    | NA                                                 |
| Kabuli_wild_2885987 | 1399932037                          | Ca_kabuli_Chr01 | 2885987                 | T/A  | NA                 | INTERGENIC                    | NA                                                 |
| Kabuli_wild_2885988 | 1399932038                          | Ca_kabuli_Chr01 | 2885988                 | C/G  | NA                 | INTERGENIC                    | NA                                                 |
| Kabuli_wild_2885997 | 1399932039                          | Ca_kabuli_Chr01 | 2885997                 | G/A  | NA                 | INTERGENIC                    | NA                                                 |
| Kabuli_wild_2886005 | 1399932040                          | Ca_kabuli_Chr01 | 2886005                 | G/A  | NA                 | INTERGENIC                    | NA                                                 |
| Kabuli_wild_2886025 | 1399932041                          | Ca_kabuli_Chr01 | 2886025                 | A/G  | NA                 | INTERGENIC                    | NA                                                 |
| Kabuli_wild_2948211 | 1399932042                          | Ca_kabuli_Chr01 | 2948211                 | C/T  | NA                 | INTERGENIC                    | NA                                                 |
| Kabuli_wild_2948249 | 1399932043                          | Ca_kabuli_Chr01 | 2948249                 | C/A  | NA                 | INTERGENIC                    | NA                                                 |
| Kabuli_wild_2989941 | 1399932044                          | Ca_kabuli_Chr01 | 2989941                 | G/A  | NA                 | INTERGENIC                    | NA                                                 |
| Kabuli_wild_3001002 | 1399932045                          | Ca_kabuli_Chr01 | 3001002                 | G/T  | Gene_Ca_00364      | INTRON                        | Helicase,C-terminal                                |
| Kabuli_wild_3001003 | 1399932046                          | Ca_kabuli_Chr01 | 3001003                 | A/T  | Gene_Ca_00364      | INTRON                        | Helicase,C-terminal                                |
| Kabuli_wild_3001141 | 1399932047                          | Ca_kabuli_Chr01 | 3001141                 | G/A  | Gene_Ca_00364      | SYNONYMOUS_CODING             | Helicase,C-terminal                                |
| Kabuli_wild_3032061 | 1399932048                          | Ca_kabuli_Chr01 | 3032061                 | C/A  | NA                 | INTERGENIC                    | NA                                                 |
| Kabuli_wild_3047634 | 1399932049                          | Ca_kabuli_Chr01 | 3047634                 | G/A  | Gene_Ca_00371      | INTRON                        | Lipase,GDSL                                        |
| Kabuli_wild_3052100 | 1399932050                          | Ca_kabuli_Chr01 | 3052100                 | T/G  | Gene_Ca_00372      | UPSTREAM                      | Thocomplexsubunit7/Mft1p                           |
| Kabuli_wild_3052101 | 1399932051                          | Ca_kabuli_Chr01 | 3052101                 | T/A  | Gene_Ca_00372      | UPSTREAM                      | Thocomplexsubunit7/Mft1p                           |
| Kabuli_wild_3081850 | 1399932052                          | Ca_kabuli_Chr01 | 3081850                 | C/A  | Gene_Ca_00376      | INTRON                        | Lipase,GDSL                                        |
| Kabuli_wild_3081851 | 1399932053                          | Ca_kabuli_Chr01 | 3081851                 | T/G  | Gene_Ca_00376      | INTRON                        | Lipase,GDSL                                        |
| Kabuli_wild_3081902 | 1399932054                          | Ca_kabuli_Chr01 | 3081902                 | A/C  | Gene_Ca_00376      | INTRON                        | Lipase,GDSL                                        |
| Kabuli_wild_3081938 | 1399932055                          | Ca_kabuli_Chr01 | 3081938                 | A/G  | Gene_Ca_00376      | INTRON                        | Lipase,GDSL                                        |
| Kabuli_wild_3081945 | 1399932056                          | Ca_kabuli_Chr01 | 3081945                 | A/G  | Gene_Ca_00376      | INTRON                        | Lipase,GDSL                                        |
| Kabuli_wild_3081954 | 1399932057                          | Ca_kabuli_Chr01 | 3081954                 | G/A  | Gene_Ca_00376      | INTRON                        | Lipase,GDSL                                        |
| Kabuli_wild_3082280 | 1399932058                          | Ca_kabuli_Chr01 | 3082280                 | G/A  | Gene_Ca_00376      | SYNONYMOUS_CODING             | Lipase,GDSL                                        |
| Kabuli_wild_3114779 | 1399932059                          | Ca_kabuli_Chr01 | 3114779                 | C/T  | NA                 | INTERGENIC                    | NA                                                 |
| Kabuli_wild_3114789 | 1399932060                          | Ca_kabuli_Chr01 | 3114789                 | T/G  | NA                 | INTERGENIC                    | NA                                                 |
| Kabuli_wild_3114810 | 1399932061                          | Ca_kabuli_Chr01 | 3114810                 | G/C  | NA                 | INTERGENIC                    | NA                                                 |
| Kabuli_wild_3114814 | 1399932062                          | Ca_kabuli_Chr01 | 3114814                 | T/C  | NA                 | INTERGENIC                    | NA                                                 |
| Kabuli_wild_3140881 | 1399932063                          | Ca_kabuli_Chr01 | 3140881                 | T/G  | NA                 | INTERGENIC                    | NA                                                 |
| Kabuli_wild_3141059 | 1399932064                          | Ca_kabuli_Chr01 | 3141059                 | T/C  | NA                 | INTERGENIC                    | NA                                                 |
| Kabuli_wild_3145280 | 1399932065                          | Ca_kabuli_Chr01 | 3145280                 | G/A  | NA                 | INTERGENIC                    | NA                                                 |
| Kabuli_wild_3150964 | 1399932066                          | Ca_kabuli_Chr01 | 3150964                 | C/G  | Gene_Ca_00385      | UPSTREAM                      | LPPG:FO2-phospho-L-lactatettransferaseCofD/UPF0052 |
| Kabuli_wild_3150986 | 1399932067                          | Ca_kabuli_Chr01 | 3150986                 | T/C  | Gene_Ca_00385      | UPSTREAM                      | LPPG:FO2-phospho-L-lactatettransferaseCofD/UPF0052 |

| SNP IDs             | NCBI dbSNP accession IDs (NCBI_SS#) | Chromosomes     | Physical positions (bp) | SNPs | Gene accession IDs | Sequence components of genome | Putative functions                                      |
|---------------------|-------------------------------------|-----------------|-------------------------|------|--------------------|-------------------------------|---------------------------------------------------------|
| Kabuli_wild_3151007 | 1399932068                          | Ca_kabuli_Chr01 | 3151007                 | G/A  | Gene_Ca_00385      | UPSTREAM                      | LPPG:FO2-phospho-L-lactatetransferaseCofD/UPF0052       |
| Kabuli_wild_3258027 | 1399932069                          | Ca_kabuli_Chr01 | 3258027                 | G/A  | NA                 | INTERGENIC                    | NA                                                      |
| Kabuli_wild_3298327 | 1399932070                          | Ca_kabuli_Chr01 | 3298327                 | C/G  | NA                 | INTERGENIC                    | NA                                                      |
| Kabuli_wild_3338775 | 1399932071                          | Ca_kabuli_Chr01 | 3338775                 | T/G  | Gene_Ca_00403      | NON_SYNONYMOUS_CODING         | Protein kinase,catalytic domain                         |
| Kabuli_wild_3347041 | 1399932072                          | Ca_kabuli_Chr01 | 3347041                 | C/G  | NA                 | INTERGENIC                    | NA                                                      |
| Kabuli_wild_3349259 | 1399932073                          | Ca_kabuli_Chr01 | 3349259                 | C/G  | Gene_Ca_00404      | DOWNSTREAM                    | Xanthine/uracil/vitamin C permease                      |
| Kabuli_wild_3364952 | 1399932074                          | Ca_kabuli_Chr01 | 3364952                 | A/C  | NA                 | INTERGENIC                    | NA                                                      |
| Kabuli_wild_3503059 | 1399932075                          | Ca_kabuli_Chr01 | 3503059                 | C/A  | Gene_Ca_00425      | NON_SYNONYMOUS_CODING         | Armadillo                                               |
| Kabuli_wild_3542263 | 1399932076                          | Ca_kabuli_Chr01 | 3542263                 | A/C  | NA                 | INTERGENIC                    | NA                                                      |
| Kabuli_wild_3611231 | 1399932077                          | Ca_kabuli_Chr01 | 3611231                 | C/A  | NA                 | INTERGENIC                    | NA                                                      |
| Kabuli_wild_3711498 | 1399932078                          | Ca_kabuli_Chr01 | 3711498                 | T/G  | NA                 | INTERGENIC                    | NA                                                      |
| Kabuli_wild_3711525 | 1399932079                          | Ca_kabuli_Chr01 | 3711525                 | T/G  | NA                 | INTERGENIC                    | NA                                                      |
| Kabuli_wild_3751829 | 1399932080                          | Ca_kabuli_Chr01 | 3751829                 | T/C  | Gene_Ca_00456      | INTRON                        | Proteasome-interactingthioredoxin-likedomain,C-terminal |
| Kabuli_wild_3777137 | 1399932081                          | Ca_kabuli_Chr01 | 3777137                 | T/C  | Gene_Ca_00457      | DOWNSTREAM                    | ABC transporter,trans membrane domain                   |
| Kabuli_wild_3777292 | 1399932082                          | Ca_kabuli_Chr01 | 3777292                 | C/G  | Gene_Ca_00457      | DOWNSTREAM                    | ABC transporter,trans membrane domain                   |
| Kabuli_wild_3806415 | 1399932083                          | Ca_kabuli_Chr01 | 3806415                 | G/T  | NA                 | INTERGENIC                    | NA                                                      |
| Kabuli_wild_3806532 | 1399932084                          | Ca_kabuli_Chr01 | 3806532                 | G/A  | NA                 | INTERGENIC                    | NA                                                      |
| Kabuli_wild_3852035 | 1399932085                          | Ca_kabuli_Chr01 | 3852035                 | A/C  | Gene_Ca_00467      | INTRON                        | AUX/IAAprotein                                          |
| Kabuli_wild_3852476 | 1399932086                          | Ca_kabuli_Chr01 | 3852476                 | A/C  | Gene_Ca_00467      | INTRON                        | AUX/IAAprotein                                          |
| Kabuli_wild_4073941 | 1399932087                          | Ca_kabuli_Chr01 | 4073941                 | A/C  | NA                 | INTERGENIC                    | NA                                                      |
| Kabuli_wild_4189333 | 1399932088                          | Ca_kabuli_Chr01 | 4189333                 | C/T  | NA                 | INTERGENIC                    | NA                                                      |
| Kabuli_wild_4244206 | 1399932089                          | Ca_kabuli_Chr01 | 4244206                 | G/A  | NA                 | INTERGENIC                    | NA                                                      |
| Kabuli_wild_4244650 | 1399932090                          | Ca_kabuli_Chr01 | 4244650                 | A/C  | Gene_Ca_00506      | UPSTREAM                      | RNA recognition motif domain                            |
| Kabuli_wild_4245058 | 1399932091                          | Ca_kabuli_Chr01 | 4245058                 | C/G  | Gene_Ca_00506      | UPSTREAM                      | RNA recognition motif domain                            |
| Kabuli_wild_4245073 | 1399932092                          | Ca_kabuli_Chr01 | 4245073                 | C/G  | Gene_Ca_00506      | UPSTREAM                      | RNA recognition motif domain                            |
| Kabuli_wild_4245176 | 1399932093                          | Ca_kabuli_Chr01 | 4245176                 | G/T  | Gene_Ca_00506      | UPSTREAM                      | RNA recognition motif domain                            |
| Kabuli_wild_4292981 | 1399932094                          | Ca_kabuli_Chr01 | 4292981                 | G/C  | Gene_Ca_00510      | DOWNSTREAM                    | RibosomalproteinL18a                                    |
| Kabuli_wild_4302669 | 1399932095                          | Ca_kabuli_Chr01 | 4302669                 | G/C  | NA                 | INTERGENIC                    | NA                                                      |
| Kabuli_wild_4302751 | 1399932096                          | Ca_kabuli_Chr01 | 4302751                 | T/C  | NA                 | INTERGENIC                    | NA                                                      |
| Kabuli_wild_4302770 | 1399932097                          | Ca_kabuli_Chr01 | 4302770                 | A/C  | NA                 | INTERGENIC                    | NA                                                      |
| Kabuli_wild_4334299 | 1399932098                          | Ca_kabuli_Chr01 | 4334299                 | A/T  | Gene_Ca_00517      | INTRON                        | Tetra tricopeptide repeat-containing                    |
| Kabuli_wild_4334336 | 1399932099                          | Ca_kabuli_Chr01 | 4334336                 | A/G  | Gene_Ca_00517      | INTRON                        | Tetra tricopeptide repeat-containing                    |
| Kabuli_wild_4375322 | 1399932100                          | Ca_kabuli_Chr01 | 4375322                 | G/C  | Gene_Ca_00522      | INTRON                        | Protein kinase,catalytic domain                         |
| Kabuli_wild_4375710 | 1399932101                          | Ca_kabuli_Chr01 | 4375710                 | T/C  | Gene_Ca_00522      | SYNONYMOUS_CODING             | Protein kinase,catalytic domain                         |
| Kabuli_wild_4386111 | 1399932102                          | Ca_kabuli_Chr01 | 4386111                 | T/C  | Gene_Ca_00523      | INTRON                        | SNF2-related                                            |
| Kabuli_wild_4386114 | 1399932103                          | Ca_kabuli_Chr01 | 4386114                 | T/G  | Gene_Ca_00523      | INTRON                        | SNF2-related                                            |
| Kabuli_wild_4392680 | 1399932104                          | Ca_kabuli_Chr01 | 4392680                 | A/G  | Gene_Ca_00524      | INTRON                        | Lipase,class3                                           |
| Kabuli_wild_4414410 | 1399932105                          | Ca_kabuli_Chr01 | 4414410                 | A/T  | NA                 | INTERGENIC                    | NA                                                      |
| Kabuli_wild_4418679 | 1399932106                          | Ca_kabuli_Chr01 | 4418679                 | A/G  | NA                 | INTERGENIC                    | NA                                                      |
| Kabuli_wild_4429044 | 1399932107                          | Ca_kabuli_Chr01 | 4429044                 | C/T  | Gene_Ca_00530      | NON_SYNONYMOUS_CODING         | DNA-directed RNA polymerase,subunit 2, domain 6         |
| Kabuli_wild_4456648 | 1399932108                          | Ca_kabuli_Chr01 | 4456648                 | T/C  | Gene_Ca_00531      | NON_SYNONYMOUS_CODING         | DNA-directed RNA polymerase,subunit 2, domain 6         |
| Kabuli_wild_4456654 | 1399932109                          | Ca_kabuli_Chr01 | 4456654                 | A/C  | Gene_Ca_00531      | SYNONYMOUS_CODING             | DNA-directed RNA polymerase,subunit 2, domain 6         |
| Kabuli_wild_4456662 | 1399932110                          | Ca_kabuli_Chr01 | 4456662                 | G/A  | Gene_Ca_00531      | NON_SYNONYMOUS_CODING         | DNA-directed RNA polymerase,subunit 2, domain 6         |
| Kabuli_wild_4457588 | 1399932111                          | Ca_kabuli_Chr01 | 4457588                 | A/G  | Gene_Ca_00531      | INTRON                        | DNA-directed RNA polymerase,subunit 2, domain 6         |

| SNP IDs             | NCBI dbSNP accession IDs (NCBI_SS#) | Chromosomes     | Physical positions (bp) | SNPs | Gene accession IDs | Sequence components of genome | Putative functions                              |
|---------------------|-------------------------------------|-----------------|-------------------------|------|--------------------|-------------------------------|-------------------------------------------------|
| Kabuli_wild_4460112 | 1399932112                          | Ca_kabuli_Chr01 | 4460112                 | A/T  | Gene_Ca_00531      | INTRON                        | DNA-directed RNA polymerase,subunit 2, domain 6 |
| Kabuli_wild_4494270 | 1399932113                          | Ca_kabuli_Chr01 | 4494270                 | C/T  | Gene_Ca_00534      | SYNONYMOUS_CODING             | Protein kinase,catalytic domain                 |
| Kabuli_wild_4494467 | 1399932114                          | Ca_kabuli_Chr01 | 4494467                 | A/G  | Gene_Ca_00534      | INTRON                        | Protein kinase,catalytic domain                 |
| Kabuli_wild_4512566 | 1399932115                          | Ca_kabuli_Chr01 | 4512566                 | T/C  | NA                 | INTERGENIC                    | NA                                              |
| Kabuli_wild_4512835 | 1399932116                          | Ca_kabuli_Chr01 | 4512835                 | T/C  | NA                 | INTERGENIC                    | NA                                              |
| Kabuli_wild_4528117 | 1399932117                          | Ca_kabuli_Chr01 | 4528117                 | A/G  | Gene_Ca_00537      | INTRON                        | NA                                              |
| Kabuli_wild_4528184 | 1399932118                          | Ca_kabuli_Chr01 | 4528184                 | C/T  | Gene_Ca_00537      | INTRON                        | NA                                              |
| Kabuli_wild_4530304 | 1399932119                          | Ca_kabuli_Chr01 | 4530304                 | T/C  | Gene_Ca_00537      | SYNONYMOUS_CODING             | NA                                              |
| Kabuli_wild_4560792 | 1399932120                          | Ca_kabuli_Chr01 | 4560792                 | C/T  | Gene_Ca_00541      | SYNONYMOUS_CODING             | Protein kinase,catalytic domain                 |
| Kabuli_wild_4560920 | 1399932121                          | Ca_kabuli_Chr01 | 4560920                 | G/A  | Gene_Ca_00541      | NON_SYNONYMOUS_CODING         | Protein kinase,catalytic domain                 |
| Kabuli_wild_4571539 | 1399932122                          | Ca_kabuli_Chr01 | 4571539                 | G/A  | Gene_Ca_00542      | DOWNSTREAM                    | NA                                              |
| Kabuli_wild_4571540 | 1399932123                          | Ca_kabuli_Chr01 | 4571540                 | C/G  | Gene_Ca_00542      | DOWNSTREAM                    | NA                                              |
| Kabuli_wild_4576888 | 1399932124                          | Ca_kabuli_Chr01 | 4576888                 | A/G  | Gene_Ca_00543      | NON_SYNONYMOUS_CODING         | BRCT                                            |
| Kabuli_wild_4578967 | 1399932125                          | Ca_kabuli_Chr01 | 4578967                 | T/G  | Gene_Ca_00543      | INTRON                        | BRCT                                            |
| Kabuli_wild_4578999 | 1399932126                          | Ca_kabuli_Chr01 | 4578999                 | T/A  | Gene_Ca_00543      | INTRON                        | BRCT                                            |
| Kabuli_wild_4582189 | 1399932127                          | Ca_kabuli_Chr01 | 4582189                 | C/T  | NA                 | INTERGENIC                    | NA                                              |
| Kabuli_wild_4626099 | 1399932128                          | Ca_kabuli_Chr01 | 4626099                 | T/G  | NA                 | INTERGENIC                    | NA                                              |
| Kabuli_wild_4626148 | 1399932129                          | Ca_kabuli_Chr01 | 4626148                 | A/C  | NA                 | INTERGENIC                    | NA                                              |
| Kabuli_wild_4626149 | 1399932130                          | Ca_kabuli_Chr01 | 4626149                 | G/C  | NA                 | INTERGENIC                    | NA                                              |
| Kabuli_wild_4631467 | 1399932131                          | Ca_kabuli_Chr01 | 4631467                 | G/A  | NA                 | INTERGENIC                    | NA                                              |
| Kabuli_wild_4632188 | 1399932132                          | Ca_kabuli_Chr01 | 4632188                 | G/A  | NA                 | INTERGENIC                    | NA                                              |
| Kabuli_wild_4632965 | 1399932133                          | Ca_kabuli_Chr01 | 4632965                 | G/A  | NA                 | INTERGENIC                    | NA                                              |
| Kabuli_wild_4634413 | 1399932134                          | Ca_kabuli_Chr01 | 4634413                 | C/T  | Gene_Ca_00548      | SYNONYMOUS_CODING             | Dehydrogenase,E1component                       |
| Kabuli_wild_4662564 | 1399932135                          | Ca_kabuli_Chr01 | 4662564                 | A/G  | Gene_Ca_00550      | INTRON                        | Transcription factor ,SBP-box                   |
| Kabuli_wild_4672439 | 1399932136                          | Ca_kabuli_Chr01 | 4672439                 | G/A  | Gene_Ca_00551      | NON_SYNONYMOUS_CODING         | Sugar/inositol transporter                      |
| Kabuli_wild_4715563 | 1399932137                          | Ca_kabuli_Chr01 | 4715563                 | T/C  | Gene_Ca_00555      | NON_SYNONYMOUS_CODING         | Protein kinase,catalytic domain                 |
| Kabuli_wild_4723311 | 1399932138                          | Ca_kabuli_Chr01 | 4723311                 | C/T  | Gene_Ca_00555      | INTRON                        | Protein kinase,catalytic domain                 |
| Kabuli_wild_4723345 | 1399932139                          | Ca_kabuli_Chr01 | 4723345                 | C/T  | Gene_Ca_00555      | INTRON                        | Protein kinase,catalytic domain                 |
| Kabuli_wild_4723367 | 1399932140                          | Ca_kabuli_Chr01 | 4723367                 | A/G  | Gene_Ca_00555      | INTRON                        | Protein kinase,catalytic domain                 |
| Kabuli_wild_4723434 | 1399932141                          | Ca_kabuli_Chr01 | 4723434                 | A/T  | Gene_Ca_00555      | INTRON                        | Protein kinase,catalytic domain                 |
| Kabuli_wild_4780172 | 1399932142                          | Ca_kabuli_Chr01 | 4780172                 | T/C  | Gene_Ca_00562      | SYNONYMOUS_CODING             | Zinc finger, RING-type                          |
| Kabuli_wild_4780345 | 1399932143                          | Ca_kabuli_Chr01 | 4780345                 | G/T  | Gene_Ca_00562      | NON_SYNONYMOUS_CODING         | Zinc finger, RING-type                          |
| Kabuli_wild_4780496 | 1399932144                          | Ca_kabuli_Chr01 | 4780496                 | G/T  | Gene_Ca_00562      | INTRON                        | Zinc finger, RING-type                          |
| Kabuli_wild_4780544 | 1399932145                          | Ca_kabuli_Chr01 | 4780544                 | C/T  | Gene_Ca_00562      | INTRON                        | Zinc finger, RING-type                          |
| Kabuli_wild_4781362 | 1399932146                          | Ca_kabuli_Chr01 | 4781362                 | C/T  | Gene_Ca_00562      | SYNONYMOUS_CODING             | Zinc finger, RING-type                          |
| Kabuli_wild_4781416 | 1399932147                          | Ca_kabuli_Chr01 | 4781416                 | G/A  | Gene_Ca_00562      | SYNONYMOUS_CODING             | Zinc finger, RING-type                          |
| Kabuli_wild_4781704 | 1399932148                          | Ca_kabuli_Chr01 | 4781704                 | G/A  | Gene_Ca_00562      | SYNONYMOUS_CODING             | Zinc finger, RING-type                          |
| Kabuli_wild_4808910 | 1399932149                          | Ca_kabuli_Chr01 | 4808910                 | A/T  | Gene_Ca_00566      | INTRON                        | SAC3/GANP/Nin1/mts3/eIF-3p25                    |
| Kabuli_wild_4878683 | 1399932150                          | Ca_kabuli_Chr01 | 4878683                 | T/C  | NA                 | INTERGENIC                    | NA                                              |
| Kabuli_wild_4878691 | 1399932151                          | Ca_kabuli_Chr01 | 4878691                 | A/C  | NA                 | INTERGENIC                    | NA                                              |
| Kabuli_wild_4878695 | 1399932152                          | Ca_kabuli_Chr01 | 4878695                 | T/C  | NA                 | INTERGENIC                    | NA                                              |
| Kabuli_wild_4878823 | 1399932153                          | Ca_kabuli_Chr01 | 4878823                 | A/G  | NA                 | INTERGENIC                    | NA                                              |
| Kabuli_wild_4878845 | 1399932154                          | Ca_kabuli_Chr01 | 4878845                 | G/T  | NA                 | INTERGENIC                    | NA                                              |
| Kabuli_wild_4903185 | 1399932155                          | Ca_kabuli_Chr01 | 4903185                 | T/A  | NA                 | INTERGENIC                    | NA                                              |

| SNP IDs             | NCBI dbSNP accession IDs (NCBI_SS#) | Chromosomes     | Physical positions (bp) | SNPs | Gene accession IDs | Sequence components of genome | Putative functions                                        |
|---------------------|-------------------------------------|-----------------|-------------------------|------|--------------------|-------------------------------|-----------------------------------------------------------|
| Kabuli_wild_4906816 | 1399932156                          | Ca_kabuli_Chr01 | 4906816                 | A/G  | Gene_Ca_00577      | DOWNSTREAM                    | Disease resistance protein                                |
| Kabuli_wild_4906854 | 1399932157                          | Ca_kabuli_Chr01 | 4906854                 | A/G  | Gene_Ca_00577      | DOWNSTREAM                    | Disease resistance protein                                |
| Kabuli_wild_4906859 | 1399932158                          | Ca_kabuli_Chr01 | 4906859                 | T/C  | Gene_Ca_00577      | DOWNSTREAM                    | Disease resistance protein                                |
| Kabuli_wild_4906862 | 1399932159                          | Ca_kabuli_Chr01 | 4906862                 | C/G  | Gene_Ca_00577      | DOWNSTREAM                    | Disease resistance protein                                |
| Kabuli_wild_4909253 | 1399932160                          | Ca_kabuli_Chr01 | 4909253                 | A/G  | Gene_Ca_00577      | SYNONYMOUS_CODING             | Disease resistance protein                                |
| Kabuli_wild_4909268 | 1399932161                          | Ca_kabuli_Chr01 | 4909268                 | C/T  | Gene_Ca_00577      | SYNONYMOUS_CODING             | Disease resistance protein                                |
| Kabuli_wild_4909271 | 1399932162                          | Ca_kabuli_Chr01 | 4909271                 | A/G  | Gene_Ca_00577      | SYNONYMOUS_CODING             | Disease resistance protein                                |
| Kabuli_wild_4909286 | 1399932163                          | Ca_kabuli_Chr01 | 4909286                 | T/G  | Gene_Ca_00577      | SYNONYMOUS_CODING             | Disease resistance protein                                |
| Kabuli_wild_4910494 | 1399932164                          | Ca_kabuli_Chr01 | 4910494                 | C/A  | Gene_Ca_00577      | SYNONYMOUS_CODING             | Disease resistance protein                                |
| Kabuli_wild_4910497 | 1399932165                          | Ca_kabuli_Chr01 | 4910497                 | A/G  | Gene_Ca_00577      | SYNONYMOUS_CODING             | Disease resistance protein                                |
| Kabuli_wild_4910553 | 1399932166                          | Ca_kabuli_Chr01 | 4910553                 | T/C  | Gene_Ca_00577      | UPSTREAM                      | Disease resistance protein                                |
| Kabuli_wild_4948608 | 1399932167                          | Ca_kabuli_Chr01 | 4948608                 | G/A  | Gene_Ca_00583      | DOWNSTREAM                    | Protein synthesis factor, GTP-binding                     |
| Kabuli_wild_4948669 | 1399932168                          | Ca_kabuli_Chr01 | 4948669                 | T/C  | Gene_Ca_00583      | DOWNSTREAM                    | Protein synthesis factor, GTP-binding                     |
| Kabuli_wild_4948740 | 1399932169                          | Ca_kabuli_Chr01 | 4948740                 | A/T  | Gene_Ca_00583      | DOWNSTREAM                    | Protein synthesis factor, GTP-binding                     |
| Kabuli_wild_4948764 | 1399932170                          | Ca_kabuli_Chr01 | 4948764                 | G/T  | Gene_Ca_00583      | DOWNSTREAM                    | Protein synthesis factor, GTP-binding                     |
| Kabuli_wild_4949509 | 1399932171                          | Ca_kabuli_Chr01 | 4949509                 | A/G  | Gene_Ca_00583      | DOWNSTREAM                    | Protein synthesis factor, GTP-binding                     |
| Kabuli_wild_4949578 | 1399932172                          | Ca_kabuli_Chr01 | 4949578                 | A/T  | NA                 | INTERGENIC                    | NA                                                        |
| Kabuli_wild_4950726 | 1399932173                          | Ca_kabuli_Chr01 | 4950726                 | G/T  | NA                 | INTERGENIC                    | NA                                                        |
| Kabuli_wild_4959562 | 1399932174                          | Ca_kabuli_Chr01 | 4959562                 | A/C  | NA                 | INTERGENIC                    | NA                                                        |
| Kabuli_wild_4961673 | 1399932175                          | Ca_kabuli_Chr01 | 4961673                 | A/G  | Gene_Ca_00586      | INTRON                        | Protein kinase,catalytic domain                           |
| Kabuli_wild_4996404 | 1399932176                          | Ca_kabuli_Chr01 | 4996404                 | A/C  | Gene_Ca_00587      | SYNONYMOUS_CODING             | NA                                                        |
| Kabuli_wild_4996459 | 1399932177                          | Ca_kabuli_Chr01 | 4996459                 | T/C  | Gene_Ca_00587      | SYNONYMOUS_CODING             | NA                                                        |
| Kabuli_wild_4996476 | 1399932178                          | Ca_kabuli_Chr01 | 4996476                 | G/A  | Gene_Ca_00587      | SYNONYMOUS_CODING             | NA                                                        |
| Kabuli_wild_4996536 | 1399932179                          | Ca_kabuli_Chr01 | 4996536                 | C/T  | Gene_Ca_00587      | SYNONYMOUS_CODING             | NA                                                        |
| Kabuli_wild_5071158 | 1399932180                          | Ca_kabuli_Chr01 | 5071158                 | G/A  | Gene_Ca_00593      | INTRON                        | RNA recognition motif domain                              |
| Kabuli_wild_5072022 | 1399932181                          | Ca_kabuli_Chr01 | 5072022                 | C/A  | Gene_Ca_00593      | SYNONYMOUS_CODING             | RNA recognition motif domain                              |
| Kabuli_wild_5080345 | 1399932182                          | Ca_kabuli_Chr01 | 5080345                 | A/G  | NA                 | INTERGENIC                    | NA                                                        |
| Kabuli_wild_5080358 | 1399932183                          | Ca_kabuli_Chr01 | 5080358                 | G/A  | NA                 | INTERGENIC                    | NA                                                        |
| Kabuli_wild_5080445 | 1399932184                          | Ca_kabuli_Chr01 | 5080445                 | T/A  | NA                 | INTERGENIC                    | NA                                                        |
| Kabuli_wild_5087428 | 1399932185                          | Ca_kabuli_Chr01 | 5087428                 | T/C  | NA                 | INTERGENIC                    | NA                                                        |
| Kabuli_wild_5093607 | 1399932186                          | Ca_kabuli_Chr01 | 5093607                 | T/C  | Gene_Ca_00597      | DOWNSTREAM                    | NA                                                        |
| Kabuli_wild_5101381 | 1399932187                          | Ca_kabuli_Chr01 | 5101381                 | G/A  | Gene_Ca_00599      | DOWNSTREAM                    | Adenosine/AMPdeaminase                                    |
| Kabuli_wild_5101449 | 1399932188                          | Ca_kabuli_Chr01 | 5101449                 | T/A  | Gene_Ca_00599      | DOWNSTREAM                    | Adenosine/AMPdeaminase                                    |
| Kabuli_wild_5101453 | 1399932189                          | Ca_kabuli_Chr01 | 5101453                 | G/C  | Gene_Ca_00599      | DOWNSTREAM                    | Adenosine/AMPdeaminase                                    |
| Kabuli_wild_5122663 | 1399932190                          | Ca_kabuli_Chr01 | 5122663                 | A/G  | Gene_Ca_00602      | DOWNSTREAM                    | Glycosidehydrolase,family1                                |
| Kabuli_wild_5140801 | 1399932191                          | Ca_kabuli_Chr01 | 5140801                 | C/A  | NA                 | INTERGENIC                    | NA                                                        |
| Kabuli_wild_5141009 | 1399932192                          | Ca_kabuli_Chr01 | 5141009                 | G/C  | NA                 | INTERGENIC                    | NA                                                        |
| Kabuli_wild_5146657 | 1399932193                          | Ca_kabuli_Chr01 | 5146657                 | G/A  | NA                 | INTERGENIC                    | NA                                                        |
| Kabuli_wild_5146658 | 1399932194                          | Ca_kabuli_Chr01 | 5146658                 | C/A  | NA                 | INTERGENIC                    | NA                                                        |
| Kabuli_wild_5146696 | 1399932195                          | Ca_kabuli_Chr01 | 5146696                 | T/A  | NA                 | INTERGENIC                    | NA                                                        |
| Kabuli_wild_5164127 | 1399932196                          | Ca_kabuli_Chr01 | 5164127                 | A/G  | Gene_Ca_00607      | DOWNSTREAM                    | Domain of unknown function DUF231,plant                   |
| Kabuli_wild_5164136 | 1399932197                          | Ca_kabuli_Chr01 | 5164136                 | C/T  | Gene_Ca_00607      | DOWNSTREAM                    | Domain of unknown function DUF231,plant                   |
| Kabuli_wild_5164198 | 1399932198                          | Ca_kabuli_Chr01 | 5164198                 | C/A  | Gene_Ca_00607      | DOWNSTREAM                    | Domain of unknown function DUF231,plant                   |
| Kabuli_wild_5197461 | 1399932199                          | Ca_kabuli_Chr01 | 5197461                 | C/T  | Gene_Ca_00608      | INTRON                        | Uncharacterised protein family,carbohydratekinase-related |



| SNP IDs                    | NCBI dbSNP accession IDs (NCBI_SS#) | Chromosomes            | Physical positions (bp) | SNPs | Gene accession IDs | Sequence components of genome | Putative functions                                        |
|----------------------------|-------------------------------------|------------------------|-------------------------|------|--------------------|-------------------------------|-----------------------------------------------------------|
| <i>Kabuli_wild_5197475</i> | 1399932200                          | <i>Ca_kabuli_Chr01</i> | 5197475                 | T/A  | Gene_Ca_00608      | INTRON                        | Uncharacterised protein family,carbohydratekinase-related |
| <i>Kabuli_wild_5197531</i> | 1399932201                          | <i>Ca_kabuli_Chr01</i> | 5197531                 | T/G  | Gene_Ca_00608      | INTRON                        | Uncharacterised protein family,carbohydratekinase-related |
| <i>Kabuli_wild_5197540</i> | 1399932202                          | <i>Ca_kabuli_Chr01</i> | 5197540                 | G/T  | Gene_Ca_00608      | INTRON                        | Uncharacterised protein family,carbohydratekinase-related |
| <i>Kabuli_wild_5200250</i> | 1399932203                          | <i>Ca_kabuli_Chr01</i> | 5200250                 | T/G  | Gene_Ca_00608      | INTRON                        | Uncharacterised protein family,carbohydratekinase-related |
| <i>Kabuli_wild_5200289</i> | 1399932204                          | <i>Ca_kabuli_Chr01</i> | 5200289                 | G/T  | Gene_Ca_00608      | INTRON                        | Uncharacterised protein family,carbohydratekinase-related |
| <i>Kabuli_wild_5249839</i> | 1399932205                          | <i>Ca_kabuli_Chr01</i> | 5249839                 | G/A  | Gene_Ca_00613      | NON_SYNONYMOUS_CODING         | Protein of unknown function DUF584                        |
| <i>Kabuli_wild_5249846</i> | 1399932206                          | <i>Ca_kabuli_Chr01</i> | 5249846                 | A/C  | Gene_Ca_00613      | SYNONYMOUS_CODING             | Protein of unknown function DUF584                        |
| <i>Kabuli_wild_5249868</i> | 1399932207                          | <i>Ca_kabuli_Chr01</i> | 5249868                 | G/A  | Gene_Ca_00613      | SYNONYMOUS_CODING             | Protein of unknown function DUF584                        |
| <i>Kabuli_wild_5288262</i> | 1399932208                          | <i>Ca_kabuli_Chr01</i> | 5288262                 | T/G  | Gene_Ca_00616      | SYNONYMOUS_CODING             | Heavy metal transport/detoxification protein              |
| <i>Kabuli_wild_5288421</i> | 1399932209                          | <i>Ca_kabuli_Chr01</i> | 5288421                 | A/C  | Gene_Ca_00616      | SYNONYMOUS_CODING             | Heavy metal transport/detoxification protein              |
| <i>Kabuli_wild_5321398</i> | 1399932210                          | <i>Ca_kabuli_Chr01</i> | 5321398                 | A/G  | Gene_Ca_00618      | DOWNSTREAM                    | RassmallGTPase,Rabtype                                    |
| <i>Kabuli_wild_5430700</i> | 1399932211                          | <i>Ca_kabuli_Chr01</i> | 5430700                 | A/C  | Gene_Ca_00628      | SYNONYMOUS_CODING             | Protein of unknown function DUF584                        |
| <i>Kabuli_wild_5430703</i> | 1399932212                          | <i>Ca_kabuli_Chr01</i> | 5430703                 | T/G  | Gene_Ca_00628      | SYNONYMOUS_CODING             | Protein of unknown function DUF584                        |
| <i>Kabuli_wild_5430809</i> | 1399932213                          | <i>Ca_kabuli_Chr01</i> | 5430809                 | G/A  | Gene_Ca_00628      | NON_SYNONYMOUS_CODING         | Protein of unknown function DUF584                        |
| <i>Kabuli_wild_5444130</i> | 1399932214                          | <i>Ca_kabuli_Chr01</i> | 5444130                 | A/C  | Gene_Ca_00630      | UPSTREAM                      | NA                                                        |
| <i>Kabuli_wild_5444142</i> | 1399932215                          | <i>Ca_kabuli_Chr01</i> | 5444142                 | A/T  | Gene_Ca_00630      | UPSTREAM                      | NA                                                        |
| <i>Kabuli_wild_5487535</i> | 1399932216                          | <i>Ca_kabuli_Chr01</i> | 5487535                 | A/G  | Gene_Ca_00634      | NON_SYNONYMOUS_CODING         | NA                                                        |
| <i>Kabuli_wild_5489806</i> | 1399932217                          | <i>Ca_kabuli_Chr01</i> | 5489806                 | C/G  | Gene_Ca_00634      | INTRON                        | NA                                                        |
| <i>Kabuli_wild_5498150</i> | 1399932218                          | <i>Ca_kabuli_Chr01</i> | 5498150                 | G/A  | NA                 | INTERGENIC                    | NA                                                        |
| <i>Kabuli_wild_5498164</i> | 1399932219                          | <i>Ca_kabuli_Chr01</i> | 5498164                 | C/T  | NA                 | INTERGENIC                    | NA                                                        |
| <i>Kabuli_wild_5498186</i> | 1399932220                          | <i>Ca_kabuli_Chr01</i> | 5498186                 | G/T  | NA                 | INTERGENIC                    | NA                                                        |
| <i>Kabuli_wild_5607717</i> | 1399932221                          | <i>Ca_kabuli_Chr01</i> | 5607717                 | T/A  | NA                 | INTERGENIC                    | NA                                                        |
| <i>Kabuli_wild_5607745</i> | 1399932222                          | <i>Ca_kabuli_Chr01</i> | 5607745                 | A/T  | NA                 | INTERGENIC                    | NA                                                        |
| <i>Kabuli_wild_5635435</i> | 1399932223                          | <i>Ca_kabuli_Chr01</i> | 5635435                 | G/A  | Gene_Ca_00651      | UPSTREAM                      | NA                                                        |
| <i>Kabuli_wild_5637388</i> | 1399932224                          | <i>Ca_kabuli_Chr01</i> | 5637388                 | T/A  | NA                 | INTERGENIC                    | NA                                                        |
| <i>Kabuli_wild_5637442</i> | 1399932225                          | <i>Ca_kabuli_Chr01</i> | 5637442                 | C/T  | NA                 | INTERGENIC                    | NA                                                        |
| <i>Kabuli_wild_5666178</i> | 1399932226                          | <i>Ca_kabuli_Chr01</i> | 5666178                 | A/C  | Gene_Ca_00656      | SYNONYMOUS_CODING             | DNA-binding WRKY                                          |
| <i>Kabuli_wild_5666217</i> | 1399932227                          | <i>Ca_kabuli_Chr01</i> | 5666217                 | C/A  | Gene_Ca_00656      | NON_SYNONYMOUS_CODING         | DNA-binding WRKY                                          |
| <i>Kabuli_wild_5666260</i> | 1399932228                          | <i>Ca_kabuli_Chr01</i> | 5666260                 | T/G  | Gene_Ca_00656      | SYNONYMOUS_CODING             | DNA-binding WRKY                                          |
| <i>Kabuli_wild_5666263</i> | 1399932229                          | <i>Ca_kabuli_Chr01</i> | 5666263                 | T/G  | Gene_Ca_00656      | SYNONYMOUS_CODING             | DNA-binding WRKY                                          |
| <i>Kabuli_wild_5666266</i> | 1399932230                          | <i>Ca_kabuli_Chr01</i> | 5666266                 | T/G  | Gene_Ca_00656      | NON_SYNONYMOUS_CODING         | DNA-binding WRKY                                          |
| <i>Kabuli_wild_5666355</i> | 1399932231                          | <i>Ca_kabuli_Chr01</i> | 5666355                 | T/G  | Gene_Ca_00656      | NON_SYNONYMOUS_CODING         | DNA-binding WRKY                                          |
| <i>Kabuli_wild_5666401</i> | 1399932232                          | <i>Ca_kabuli_Chr01</i> | 5666401                 | T/G  | Gene_Ca_00656      | SYNONYMOUS_CODING             | DNA-binding WRKY                                          |
| <i>Kabuli_wild_5667605</i> | 1399932233                          | <i>Ca_kabuli_Chr01</i> | 5667605                 | G/A  | Gene_Ca_00656      | SYNONYMOUS_CODING             | DNA-binding WRKY                                          |
| <i>Kabuli_wild_5706344</i> | 1399932234                          | <i>Ca_kabuli_Chr01</i> | 5706344                 | A/C  | Gene_Ca_00662      | SYNONYMOUS_CODING             | Glycosyltransferase,family14                              |
| <i>Kabuli_wild_5706345</i> | 1399932235                          | <i>Ca_kabuli_Chr01</i> | 5706345                 | G/T  | Gene_Ca_00662      | NON_SYNONYMOUS_CODING         | Glycosyltransferase,family14                              |
| <i>Kabuli_wild_5706858</i> | 1399932236                          | <i>Ca_kabuli_Chr01</i> | 5706858                 | A/T  | Gene_Ca_00663      | DOWNSTREAM                    | Transcription factor jumonji/aspartylbeta-hydroxylase     |
| <i>Kabuli_wild_5706920</i> | 1399932237                          | <i>Ca_kabuli_Chr01</i> | 5706920                 | G/A  | Gene_Ca_00663      | DOWNSTREAM                    | Transcription factor jumonji/aspartylbeta-hydroxylase     |
| <i>Kabuli_wild_5706944</i> | 1399932238                          | <i>Ca_kabuli_Chr01</i> | 5706944                 | T/G  | Gene_Ca_00663      | DOWNSTREAM                    | Transcription factor jumonji/aspartylbeta-hydroxylase     |
| <i>Kabuli_wild_5706948</i> | 1399932239                          | <i>Ca_kabuli_Chr01</i> | 5706948                 | A/T  | Gene_Ca_00663      | DOWNSTREAM                    | Transcription factor jumonji/aspartylbeta-hydroxylase     |
| <i>Kabuli_wild_5706961</i> | 1399932240                          | <i>Ca_kabuli_Chr01</i> | 5706961                 | G/T  | Gene_Ca_00663      | DOWNSTREAM                    | Transcription factor jumonji/aspartylbeta-hydroxylase     |
| <i>Kabuli_wild_5721616</i> | 1399932241                          | <i>Ca_kabuli_Chr01</i> | 5721616                 | A/T  | Gene_Ca_00664      | INTRON                        | Protein kinase,catalytic domain                           |
| <i>Kabuli_wild_5749456</i> | 1399932242                          | <i>Ca_kabuli_Chr01</i> | 5749456                 | C/T  | NA                 | INTERGENIC                    | NA                                                        |
| <i>Kabuli_wild_5791118</i> | 1399932243                          | <i>Ca_kabuli_Chr01</i> | 5791118                 | T/G  | NA                 | INTERGENIC                    | NA                                                        |

| SNP IDs             | NCBI dbSNP accession IDs (NCBI_SS#) | Chromosomes     | Physical positions (bp) | SNPs | Gene accession IDs | Sequence components of genome | Putative functions                                          |
|---------------------|-------------------------------------|-----------------|-------------------------|------|--------------------|-------------------------------|-------------------------------------------------------------|
| Kabuli_wild_5793815 | 1399932244                          | Ca_kabuli_Chr01 | 5793815                 | G/A  | NA                 | INTERGENIC                    | NA                                                          |
| Kabuli_wild_5796146 | 1399932245                          | Ca_kabuli_Chr01 | 5796146                 | C/T  | NA                 | INTERGENIC                    | NA                                                          |
| Kabuli_wild_5796886 | 1399932246                          | Ca_kabuli_Chr01 | 5796886                 | A/G  | Gene_Ca_00670      | INTRON                        | UBX                                                         |
| Kabuli_wild_5807492 | 1399932247                          | Ca_kabuli_Chr01 | 5807492                 | T/C  | Gene_Ca_00671      | UPSTREAM                      | ATPase,AAA+type,core                                        |
| Kabuli_wild_5812283 | 1399932248                          | Ca_kabuli_Chr01 | 5812283                 | G/T  | NA                 | INTERGENIC                    | NA                                                          |
| Kabuli_wild_5862565 | 1399932249                          | Ca_kabuli_Chr01 | 5862565                 | C/T  | NA                 | INTERGENIC                    | NA                                                          |
| Kabuli_wild_6011689 | 1399932250                          | Ca_kabuli_Chr01 | 6011689                 | G/A  | NA                 | INTERGENIC                    | NA                                                          |
| Kabuli_wild_6011697 | 1399932251                          | Ca_kabuli_Chr01 | 6011697                 | T/G  | NA                 | INTERGENIC                    | NA                                                          |
| Kabuli_wild_6011761 | 1399932252                          | Ca_kabuli_Chr01 | 6011761                 | C/T  | NA                 | INTERGENIC                    | NA                                                          |
| Kabuli_wild_6066933 | 1399932253                          | Ca_kabuli_Chr01 | 6066933                 | C/T  | Gene_Ca_00693      | INTRON                        | RHO protein GDP dissociation inhibitor                      |
| Kabuli_wild_6066936 | 1399932254                          | Ca_kabuli_Chr01 | 6066936                 | A/G  | Gene_Ca_00693      | INTRON                        | RHO protein GDP dissociation inhibitor                      |
| Kabuli_wild_6066972 | 1399932255                          | Ca_kabuli_Chr01 | 6066972                 | C/T  | Gene_Ca_00693      | INTRON                        | RHO protein GDP dissociation inhibitor                      |
| Kabuli_wild_6067846 | 1399932256                          | Ca_kabuli_Chr01 | 6067846                 | T/C  | Gene_Ca_00693      | INTRON                        | RHO protein GDP dissociation inhibitor                      |
| Kabuli_wild_6088283 | 1399932257                          | Ca_kabuli_Chr01 | 6088283                 | C/T  | NA                 | INTERGENIC                    | NA                                                          |
| Kabuli_wild_6126772 | 1399932258                          | Ca_kabuli_Chr01 | 6126772                 | G/A  | Gene_Ca_00697      | INTRON                        | RibosomalproteinL14b/L23e                                   |
| Kabuli_wild_6257653 | 1399932259                          | Ca_kabuli_Chr01 | 6257653                 | C/G  | Gene_Ca_07885      | INTRON                        | Thymidinekinase                                             |
| Kabuli_wild_6257712 | 1399932260                          | Ca_kabuli_Chr01 | 6257712                 | A/T  | Gene_Ca_07885      | INTRON                        | Thymidinekinase                                             |
| Kabuli_wild_6262461 | 1399932261                          | Ca_kabuli_Chr01 | 6262461                 | A/G  | NA                 | INTERGENIC                    | NA                                                          |
| Kabuli_wild_6262529 | 1399932262                          | Ca_kabuli_Chr01 | 6262529                 | T/G  | NA                 | INTERGENIC                    | NA                                                          |
| Kabuli_wild_6262577 | 1399932263                          | Ca_kabuli_Chr01 | 6262577                 | A/G  | NA                 | INTERGENIC                    | NA                                                          |
| Kabuli_wild_6268630 | 1399932264                          | Ca_kabuli_Chr01 | 6268630                 | G/A  | Gene_Ca_07887      | UPSTREAM                      | Transcription facto rGRAS                                   |
| Kabuli_wild_6268776 | 1399932265                          | Ca_kabuli_Chr01 | 6268776                 | C/T  | Gene_Ca_07887      | UPSTREAM                      | Transcription facto rGRAS                                   |
| Kabuli_wild_6278572 | 1399932266                          | Ca_kabuli_Chr01 | 6278572                 | T/C  | NA                 | INTERGENIC                    | NA                                                          |
| Kabuli_wild_6278625 | 1399932267                          | Ca_kabuli_Chr01 | 6278625                 | T/C  | NA                 | INTERGENIC                    | NA                                                          |
| Kabuli_wild_6279644 | 1399932268                          | Ca_kabuli_Chr01 | 6279644                 | G/T  | NA                 | INTERGENIC                    | NA                                                          |
| Kabuli_wild_6296858 | 1399932269                          | Ca_kabuli_Chr01 | 6296858                 | G/A  | Gene_Ca_07890      | INTRON                        | Uncharacterised protein family UPF0497,trans-membrane plant |
| Kabuli_wild_6296986 | 1399932270                          | Ca_kabuli_Chr01 | 6296986                 | C/A  | Gene_Ca_07890      | INTRON                        | Uncharacterised protein family UPF0497,trans-membrane plant |
| Kabuli_wild_6315337 | 1399932271                          | Ca_kabuli_Chr01 | 6315337                 | G/T  | Gene_Ca_07892      | INTRON                        | Zinc finger,ZZ-type                                         |
| Kabuli_wild_6315397 | 1399932272                          | Ca_kabuli_Chr01 | 6315397                 | C/G  | Gene_Ca_07892      | INTRON                        | Zinc finger,ZZ-type                                         |
| Kabuli_wild_6315399 | 1399932273                          | Ca_kabuli_Chr01 | 6315399                 | T/G  | Gene_Ca_07892      | INTRON                        | Zinc finger,ZZ-type                                         |
| Kabuli_wild_6315402 | 1399932274                          | Ca_kabuli_Chr01 | 6315402                 | C/T  | Gene_Ca_07892      | INTRON                        | Zinc finger,ZZ-type                                         |
| Kabuli_wild_6328801 | 1399932275                          | Ca_kabuli_Chr01 | 6328801                 | T/A  | NA                 | INTERGENIC                    | NA                                                          |
| Kabuli_wild_6328957 | 1399932276                          | Ca_kabuli_Chr01 | 6328957                 | C/T  | NA                 | INTERGENIC                    | NA                                                          |
| Kabuli_wild_6328963 | 1399932277                          | Ca_kabuli_Chr01 | 6328963                 | A/G  | NA                 | INTERGENIC                    | NA                                                          |
| Kabuli_wild_6329466 | 1399932278                          | Ca_kabuli_Chr01 | 6329466                 | G/A  | Gene_Ca_07893      | SYNONYMOUS_CODING             | Bromoadjacenthomology(BAH)domain                            |
| Kabuli_wild_6329814 | 1399932279                          | Ca_kabuli_Chr01 | 6329814                 | T/A  | Gene_Ca_07893      | SYNONYMOUS_CODING             | Bromoadjacenthomology(BAH)domain                            |
| Kabuli_wild_6329847 | 1399932280                          | Ca_kabuli_Chr01 | 6329847                 | A/G  | Gene_Ca_07893      | SYNONYMOUS_CODING             | Bromoadjacenthomology(BAH)domain                            |
| Kabuli_wild_6331686 | 1399932281                          | Ca_kabuli_Chr01 | 6331686                 | G/A  | Gene_Ca_07893      | INTRON                        | Bromoadjacenthomology(BAH)domain                            |
| Kabuli_wild_6332104 | 1399932282                          | Ca_kabuli_Chr01 | 6332104                 | G/A  | Gene_Ca_07893      | INTRON                        | Bromoadjacenthomology(BAH)domain                            |
| Kabuli_wild_6381191 | 1399932283                          | Ca_kabuli_Chr01 | 6381191                 | T/C  | Gene_Ca_07900      | DOWNSTREAM                    | NA                                                          |
| Kabuli_wild_6390541 | 1399932284                          | Ca_kabuli_Chr01 | 6390541                 | T/A  | Gene_Ca_07902      | DOWNSTREAM                    | Smrprotein/MutS2C-terminal                                  |
| Kabuli_wild_6390775 | 1399932285                          | Ca_kabuli_Chr01 | 6390775                 | A/C  | Gene_Ca_07901      | UPSTREAM                      | Smrprotein/MutS2C-terminal                                  |
| Kabuli_wild_6390849 | 1399932286                          | Ca_kabuli_Chr01 | 6390849                 | G/A  | NA                 | INTERGENIC                    | NA                                                          |
| Kabuli_wild_6390882 | 1399932287                          | Ca_kabuli_Chr01 | 6390882                 | T/C  | NA                 | INTERGENIC                    | NA                                                          |

| SNP IDs                    | NCBI dbSNP accession IDs (NCBI_SS#) | Chromosomes            | Physical positions (bp) | SNPs | Gene accession IDs | Sequence components of genome | Putative functions                                        |
|----------------------------|-------------------------------------|------------------------|-------------------------|------|--------------------|-------------------------------|-----------------------------------------------------------|
| <i>Kabuli_wild_6391017</i> | 1399932288                          | <i>Ca_kabuli_Chr01</i> | 6391017                 | T/C  | NA                 | INTERGENIC                    | NA                                                        |
| <i>Kabuli_wild_6414867</i> | 1399932289                          | <i>Ca_kabuli_Chr01</i> | 6414867                 | T/C  | Gene_Ca_07905      | INTRON                        | Heavy metal transport/detoxification protein              |
| <i>Kabuli_wild_6433592</i> | 1399932290                          | <i>Ca_kabuli_Chr01</i> | 6433592                 | T/G  | NA                 | INTERGENIC                    | NA                                                        |
| <i>Kabuli_wild_6433826</i> | 1399932291                          | <i>Ca_kabuli_Chr01</i> | 6433826                 | G/A  | Gene_Ca_07907      | SYNONYMOUS_CODING             | NUDIX hydrolase domain                                    |
| <i>Kabuli_wild_6433838</i> | 1399932292                          | <i>Ca_kabuli_Chr01</i> | 6433838                 | C/T  | Gene_Ca_07907      | SYNONYMOUS_CODING             | NUDIX hydrolase domain                                    |
| <i>Kabuli_wild_6433841</i> | 1399932293                          | <i>Ca_kabuli_Chr01</i> | 6433841                 | C/T  | Gene_Ca_07907      | SYNONYMOUS_CODING             | NUDIX hydrolase domain                                    |
| <i>Kabuli_wild_6433883</i> | 1399932294                          | <i>Ca_kabuli_Chr01</i> | 6433883                 | A/G  | Gene_Ca_07907      | SYNONYMOUS_CODING             | NUDIX hydrolase domain                                    |
| <i>Kabuli_wild_6433925</i> | 1399932295                          | <i>Ca_kabuli_Chr01</i> | 6433925                 | C/T  | Gene_Ca_07907      | SYNONYMOUS_CODING             | NUDIX hydrolase domain                                    |
| <i>Kabuli_wild_6433934</i> | 1399932296                          | <i>Ca_kabuli_Chr01</i> | 6433934                 | T/A  | Gene_Ca_07907      | SYNONYMOUS_CODING             | NUDIX hydrolase domain                                    |
| <i>Kabuli_wild_6435499</i> | 1399932297                          | <i>Ca_kabuli_Chr01</i> | 6435499                 | T/C  | Gene_Ca_07907      | INTRON                        | NUDIX hydrolase domain                                    |
| <i>Kabuli_wild_6437643</i> | 1399932298                          | <i>Ca_kabuli_Chr01</i> | 6437643                 | G/A  | NA                 | INTERGENIC                    | NA                                                        |
| <i>Kabuli_wild_6470708</i> | 1399932299                          | <i>Ca_kabuli_Chr01</i> | 6470708                 | T/C  | Gene_Ca_07910      | SYNONYMOUS_CODING             | tRNA(guanine-N1-)-methyltransferase,eukaryotic            |
| <i>Kabuli_wild_6478736</i> | 1399932300                          | <i>Ca_kabuli_Chr01</i> | 6478736                 | A/G  | NA                 | INTERGENIC                    | NA                                                        |
| <i>Kabuli_wild_6478758</i> | 1399932301                          | <i>Ca_kabuli_Chr01</i> | 6478758                 | A/G  | NA                 | INTERGENIC                    | NA                                                        |
| <i>Kabuli_wild_6486446</i> | 1399932302                          | <i>Ca_kabuli_Chr01</i> | 6486446                 | G/C  | Gene_Ca_07911      | INTRON                        | NA                                                        |
| <i>Kabuli_wild_6490978</i> | 1399932303                          | <i>Ca_kabuli_Chr01</i> | 6490978                 | A/T  | Gene_Ca_07911      | INTRON                        | NA                                                        |
| <i>Kabuli_wild_6491008</i> | 1399932304                          | <i>Ca_kabuli_Chr01</i> | 6491008                 | A/T  | Gene_Ca_07911      | INTRON                        | NA                                                        |
| <i>Kabuli_wild_6491017</i> | 1399932305                          | <i>Ca_kabuli_Chr01</i> | 6491017                 | T/C  | Gene_Ca_07911      | INTRON                        | NA                                                        |
| <i>Kabuli_wild_6491030</i> | 1399932306                          | <i>Ca_kabuli_Chr01</i> | 6491030                 | T/G  | Gene_Ca_07911      | INTRON                        | NA                                                        |
| <i>Kabuli_wild_6521670</i> | 1399932307                          | <i>Ca_kabuli_Chr01</i> | 6521670                 | C/T  | NA                 | INTERGENIC                    | NA                                                        |
| <i>Kabuli_wild_6521673</i> | 1399932308                          | <i>Ca_kabuli_Chr01</i> | 6521673                 | G/A  | NA                 | INTERGENIC                    | NA                                                        |
| <i>Kabuli_wild_6521856</i> | 1399932309                          | <i>Ca_kabuli_Chr01</i> | 6521856                 | A/G  | NA                 | INTERGENIC                    | NA                                                        |
| <i>Kabuli_wild_6521859</i> | 1399932310                          | <i>Ca_kabuli_Chr01</i> | 6521859                 | T/A  | NA                 | INTERGENIC                    | NA                                                        |
| <i>Kabuli_wild_6521970</i> | 1399932311                          | <i>Ca_kabuli_Chr01</i> | 6521970                 | C/T  | Gene_Ca_07917      | DOWNSTREAM                    | Cellular retinaldehyde-binding/triplefunction, C-terminal |
| <i>Kabuli_wild_6540056</i> | 1399932312                          | <i>Ca_kabuli_Chr01</i> | 6540056                 | C/T  | Gene_Ca_07918      | DOWNSTREAM                    | NA                                                        |
| <i>Kabuli_wild_6540170</i> | 1399932313                          | <i>Ca_kabuli_Chr01</i> | 6540170                 | G/A  | Gene_Ca_07918      | DOWNSTREAM                    | NA                                                        |
| <i>Kabuli_wild_6551979</i> | 1399932314                          | <i>Ca_kabuli_Chr01</i> | 6551979                 | A/C  | NA                 | INTERGENIC                    | NA                                                        |
| <i>Kabuli_wild_6551981</i> | 1399932315                          | <i>Ca_kabuli_Chr01</i> | 6551981                 | T/C  | NA                 | INTERGENIC                    | NA                                                        |
| <i>Kabuli_wild_6552001</i> | 1399932316                          | <i>Ca_kabuli_Chr01</i> | 6552001                 | T/C  | NA                 | INTERGENIC                    | NA                                                        |
| <i>Kabuli_wild_6552013</i> | 1399932317                          | <i>Ca_kabuli_Chr01</i> | 6552013                 | G/A  | NA                 | INTERGENIC                    | NA                                                        |
| <i>Kabuli_wild_6553107</i> | 1399932318                          | <i>Ca_kabuli_Chr01</i> | 6553107                 | A/C  | Gene_Ca_07920      | INTRON                        | NA                                                        |
| <i>Kabuli_wild_6554029</i> | 1399932319                          | <i>Ca_kabuli_Chr01</i> | 6554029                 | A/C  | Gene_Ca_07920      | INTRON                        | NA                                                        |
| <i>Kabuli_wild_6564716</i> | 1399932320                          | <i>Ca_kabuli_Chr01</i> | 6564716                 | C/T  | Gene_Ca_07921      | SYNONYMOUS_CODING             | Polyprenylsynthetase                                      |
| <i>Kabuli_wild_6591506</i> | 1399932321                          | <i>Ca_kabuli_Chr01</i> | 6591506                 | G/C  | NA                 | INTERGENIC                    | NA                                                        |
| <i>Kabuli_wild_6599917</i> | 1399932322                          | <i>Ca_kabuli_Chr01</i> | 6599917                 | C/A  | NA                 | INTERGENIC                    | NA                                                        |
| <i>Kabuli_wild_6634482</i> | 1399932323                          | <i>Ca_kabuli_Chr01</i> | 6634482                 | G/C  | NA                 | INTERGENIC                    | NA                                                        |
| <i>Kabuli_wild_6635366</i> | 1399932324                          | <i>Ca_kabuli_Chr01</i> | 6635366                 | T/C  | NA                 | INTERGENIC                    | NA                                                        |
| <i>Kabuli_wild_6658519</i> | 1399932325                          | <i>Ca_kabuli_Chr01</i> | 6658519                 | A/T  | NA                 | INTERGENIC                    | NA                                                        |
| <i>Kabuli_wild_6658558</i> | 1399932326                          | <i>Ca_kabuli_Chr01</i> | 6658558                 | T/C  | NA                 | INTERGENIC                    | NA                                                        |
| <i>Kabuli_wild_6679253</i> | 1399932327                          | <i>Ca_kabuli_Chr01</i> | 6679253                 | A/G  | Gene_Ca_07932      | SYNONYMOUS_CODING             | WD40 repeat                                               |
| <i>Kabuli_wild_6679329</i> | 1399932328                          | <i>Ca_kabuli_Chr01</i> | 6679329                 | A/G  | Gene_Ca_07932      | NON_SYNONYMOUS_CODING         | WD40 repeat                                               |
| <i>Kabuli_wild_6765539</i> | 1399932329                          | <i>Ca_kabuli_Chr01</i> | 6765539                 | C/T  | Gene_Ca_07941      | INTRON                        | Histidine phosphatase superfamily,clade-1                 |
| <i>Kabuli_wild_6803364</i> | 1399932330                          | <i>Ca_kabuli_Chr01</i> | 6803364                 | G/A  | NA                 | INTERGENIC                    | NA                                                        |
| <i>Kabuli_wild_6804110</i> | 1399932331                          | <i>Ca_kabuli_Chr01</i> | 6804110                 | A/T  | NA                 | INTERGENIC                    | NA                                                        |

| SNP IDs             | NCBI dbSNP accession IDs (NCBI_SS#) | Chromosomes     | Physical positions (bp) | SNPs | Gene accession IDs | Sequence components of genome | Putative functions                             |
|---------------------|-------------------------------------|-----------------|-------------------------|------|--------------------|-------------------------------|------------------------------------------------|
| Kabuli_wild_6833811 | 1399932332                          | Ca_kabuli_Chr01 | 6833811                 | G/A  | NA                 | INTERGENIC                    | NA                                             |
| Kabuli_wild_6833846 | 1399932333                          | Ca_kabuli_Chr01 | 6833846                 | C/A  | NA                 | INTERGENIC                    | NA                                             |
| Kabuli_wild_6848560 | 1399932334                          | Ca_kabuli_Chr01 | 6848560                 | A/C  | Gene_Ca_07951      | INTRON                        | Vps53-like,N-terminal                          |
| Kabuli_wild_6849437 | 1399932335                          | Ca_kabuli_Chr01 | 6849437                 | C/T  | Gene_Ca_07951      | INTRON                        | Vps53-like,N-terminal                          |
| Kabuli_wild_6849512 | 1399932336                          | Ca_kabuli_Chr01 | 6849512                 | G/C  | Gene_Ca_07951      | INTRON                        | Vps53-like,N-terminal                          |
| Kabuli_wild_6880837 | 1399932337                          | Ca_kabuli_Chr01 | 6880837                 | A/G  | NA                 | INTERGENIC                    | NA                                             |
| Kabuli_wild_6880867 | 1399932338                          | Ca_kabuli_Chr01 | 6880867                 | T/C  | NA                 | INTERGENIC                    | NA                                             |
| Kabuli_wild_6904278 | 1399932339                          | Ca_kabuli_Chr01 | 6904278                 | A/C  | Gene_Ca_07956      | NON_SYNONYMOUS_CODING         | Protein kinase,catalytic domain                |
| Kabuli_wild_6904338 | 1399932340                          | Ca_kabuli_Chr01 | 6904338                 | C/T  | Gene_Ca_07956      | INTRON                        | Protein kinase,catalytic domain                |
| Kabuli_wild_6988656 | 1399932341                          | Ca_kabuli_Chr01 | 6988656                 | A/C  | NA                 | INTERGENIC                    | NA                                             |
| Kabuli_wild_7050825 | 1399932342                          | Ca_kabuli_Chr01 | 7050825                 | G/A  | NA                 | INTERGENIC                    | NA                                             |
| Kabuli_wild_7050953 | 1399932343                          | Ca_kabuli_Chr01 | 7050953                 | C/T  | NA                 | INTERGENIC                    | NA                                             |
| Kabuli_wild_7050958 | 1399932344                          | Ca_kabuli_Chr01 | 7050958                 | C/T  | NA                 | INTERGENIC                    | NA                                             |
| Kabuli_wild_7104985 | 1399932345                          | Ca_kabuli_Chr01 | 7104985                 | G/T  | NA                 | INTERGENIC                    | NA                                             |
| Kabuli_wild_7127843 | 1399932346                          | Ca_kabuli_Chr01 | 7127843                 | A/G  | Gene_Ca_07973      | SYNONYMOUS_CODING             | Sec8 exocyst complex component specific domain |
| Kabuli_wild_7136677 | 1399932347                          | Ca_kabuli_Chr01 | 7136677                 | T/C  | Gene_Ca_07973      | DOWNSTREAM                    | Sec8 exocyst complex component specific domain |
| Kabuli_wild_7147651 | 1399932348                          | Ca_kabuli_Chr01 | 7147651                 | T/A  | Gene_Ca_07974      | INTRON                        | NA                                             |
| Kabuli_wild_7154433 | 1399932349                          | Ca_kabuli_Chr01 | 7154433                 | C/T  | Gene_Ca_07974      | INTRON                        | NA                                             |
| Kabuli_wild_7155344 | 1399932350                          | Ca_kabuli_Chr01 | 7155344                 | A/G  | Gene_Ca_07974      | INTRON                        | NA                                             |
| Kabuli_wild_7157057 | 1399932351                          | Ca_kabuli_Chr01 | 7157057                 | A/C  | Gene_Ca_07974      | INTRON                        | NA                                             |
| Kabuli_wild_7157112 | 1399932352                          | Ca_kabuli_Chr01 | 7157112                 | T/C  | Gene_Ca_07974      | INTRON                        | NA                                             |
| Kabuli_wild_7160649 | 1399932353                          | Ca_kabuli_Chr01 | 7160649                 | T/C  | Gene_Ca_07974      | INTRON                        | NA                                             |
| Kabuli_wild_7160695 | 1399932354                          | Ca_kabuli_Chr01 | 7160695                 | G/A  | Gene_Ca_07974      | INTRON                        | NA                                             |
| Kabuli_wild_7160754 | 1399932355                          | Ca_kabuli_Chr01 | 7160754                 | A/T  | Gene_Ca_07974      | INTRON                        | NA                                             |
| Kabuli_wild_7160773 | 1399932356                          | Ca_kabuli_Chr01 | 7160773                 | G/A  | Gene_Ca_07974      | INTRON                        | NA                                             |
| Kabuli_wild_7160781 | 1399932357                          | Ca_kabuli_Chr01 | 7160781                 | A/C  | Gene_Ca_07974      | INTRON                        | NA                                             |
| Kabuli_wild_7160868 | 1399932358                          | Ca_kabuli_Chr01 | 7160868                 | C/T  | Gene_Ca_07974      | INTRON                        | NA                                             |
| Kabuli_wild_7184813 | 1399932359                          | Ca_kabuli_Chr01 | 7184813                 | A/C  | Gene_Ca_07975      | SYNONYMOUS_CODING             | Root hai rdefective 3GTP-binding               |
| Kabuli_wild_7187934 | 1399932360                          | Ca_kabuli_Chr01 | 7187934                 | A/G  | Gene_Ca_07976      | DOWNSTREAM                    | NA                                             |
| Kabuli_wild_7196570 | 1399932361                          | Ca_kabuli_Chr01 | 7196570                 | T/C  | NA                 | INTERGENIC                    | NA                                             |
| Kabuli_wild_7196601 | 1399932362                          | Ca_kabuli_Chr01 | 7196601                 | T/C  | NA                 | INTERGENIC                    | NA                                             |
| Kabuli_wild_7231750 | 1399932363                          | Ca_kabuli_Chr01 | 7231750                 | A/C  | NA                 | INTERGENIC                    | NA                                             |
| Kabuli_wild_7267812 | 1399932364                          | Ca_kabuli_Chr01 | 7267812                 | G/C  | Gene_Ca_07984      | INTRON                        | Plantperoxidase                                |
| Kabuli_wild_7325164 | 1399932365                          | Ca_kabuli_Chr01 | 7325164                 | T/A  | NA                 | INTERGENIC                    | NA                                             |
| Kabuli_wild_7417788 | 1399932366                          | Ca_kabuli_Chr01 | 7417788                 | G/A  | Gene_Ca_07994      | INTRON                        | Homeobox                                       |
| Kabuli_wild_7417997 | 1399932367                          | Ca_kabuli_Chr01 | 7417997                 | A/G  | Gene_Ca_07994      | SYNONYMOUS_CODING             | Homeobox                                       |
| Kabuli_wild_7439427 | 1399932368                          | Ca_kabuli_Chr01 | 7439427                 | C/T  | Gene_Ca_07995      | NON_SYNONYMOUS_CODING         | CCAAT-bindingTranscription factor ,subunitB    |
| Kabuli_wild_7467280 | 1399932369                          | Ca_kabuli_Chr01 | 7467280                 | A/G  | Gene_Ca_07999      | INTRON                        | AMP-dependentsynthetase/ligase                 |
| Kabuli_wild_7478022 | 1399932370                          | Ca_kabuli_Chr01 | 7478022                 | G/A  | Gene_Ca_08000      | SYNONYMOUS_CODING             | NA                                             |
| Kabuli_wild_7478046 | 1399932371                          | Ca_kabuli_Chr01 | 7478046                 | T/G  | Gene_Ca_08000      | NON_SYNONYMOUS_CODING         | NA                                             |
| Kabuli_wild_7478121 | 1399932372                          | Ca_kabuli_Chr01 | 7478121                 | C/T  | Gene_Ca_08000      | SYNONYMOUS_CODING             | NA                                             |
| Kabuli_wild_7486102 | 1399932373                          | Ca_kabuli_Chr01 | 7486102                 | C/T  | NA                 | INTERGENIC                    | NA                                             |
| Kabuli_wild_7486148 | 1399932374                          | Ca_kabuli_Chr01 | 7486148                 | T/G  | NA                 | INTERGENIC                    | NA                                             |
| Kabuli_wild_7486263 | 1399932375                          | Ca_kabuli_Chr01 | 7486263                 | C/A  | NA                 | INTERGENIC                    | NA                                             |

| SNP IDs             | NCBI dbSNP accession IDs (NCBI_SS#) | Chromosomes       | Physical positions (bp) | SNPs | Gene accession IDs | Sequence components of genome | Putative functions                               |
|---------------------|-------------------------------------|-------------------|-------------------------|------|--------------------|-------------------------------|--------------------------------------------------|
| Kabuli_wild_7486273 | 1399932376                          | Ca_kabuli_Chrom01 | 7486273                 | T/C  | NA                 | INTERGENIC                    | NA                                               |
| Kabuli_wild_7486282 | 1399932377                          | Ca_kabuli_Chrom01 | 7486282                 | G/A  | NA                 | INTERGENIC                    | NA                                               |
| Kabuli_wild_7497334 | 1399932378                          | Ca_kabuli_Chrom01 | 7497334                 | C/A  | Gene_Ca_08003      | UPSTREAM                      | Protein kinase,catalytic domain                  |
| Kabuli_wild_7497362 | 1399932379                          | Ca_kabuli_Chrom01 | 7497362                 | T/C  | Gene_Ca_08003      | UPSTREAM                      | Protein kinase,catalytic domain                  |
| Kabuli_wild_7500494 | 1399932380                          | Ca_kabuli_Chrom01 | 7500494                 | T/G  | Gene_Ca_08003      | SYNONYMOUS_CODING             | Protein kinase,catalytic domain                  |
| Kabuli_wild_7500524 | 1399932381                          | Ca_kabuli_Chrom01 | 7500524                 | T/C  | Gene_Ca_08003      | SYNONYMOUS_CODING             | Protein kinase,catalytic domain                  |
| Kabuli_wild_7500728 | 1399932382                          | Ca_kabuli_Chrom01 | 7500728                 | G/A  | Gene_Ca_08003      | SYNONYMOUS_CODING             | Protein kinase,catalytic domain                  |
| Kabuli_wild_7505779 | 1399932383                          | Ca_kabuli_Chrom01 | 7505779                 | A/T  | NA                 | INTERGENIC                    | NA                                               |
| Kabuli_wild_7515002 | 1399932384                          | Ca_kabuli_Chrom01 | 7515002                 | T/C  | NA                 | INTERGENIC                    | NA                                               |
| Kabuli_wild_7515029 | 1399932385                          | Ca_kabuli_Chrom01 | 7515029                 | A/C  | NA                 | INTERGENIC                    | NA                                               |
| Kabuli_wild_7515578 | 1399932386                          | Ca_kabuli_Chrom01 | 7515578                 | A/C  | NA                 | INTERGENIC                    | NA                                               |
| Kabuli_wild_7515605 | 1399932387                          | Ca_kabuli_Chrom01 | 7515605                 | T/C  | NA                 | INTERGENIC                    | NA                                               |
| Kabuli_wild_7549977 | 1399932388                          | Ca_kabuli_Chrom01 | 7549977                 | C/G  | Gene_Ca_08008      | SYNONYMOUS_CODING             | NA                                               |
| Kabuli_wild_7550130 | 1399932389                          | Ca_kabuli_Chrom01 | 7550130                 | A/G  | Gene_Ca_08008      | INTRON                        | NA                                               |
| Kabuli_wild_7550169 | 1399932390                          | Ca_kabuli_Chrom01 | 7550169                 | G/A  | Gene_Ca_08008      | INTRON                        | NA                                               |
| Kabuli_wild_7550170 | 1399932391                          | Ca_kabuli_Chrom01 | 7550170                 | A/G  | Gene_Ca_08008      | INTRON                        | NA                                               |
| Kabuli_wild_7552484 | 1399932392                          | Ca_kabuli_Chrom01 | 7552484                 | T/C  | Gene_Ca_08008      | SYNONYMOUS_CODING             | NA                                               |
| Kabuli_wild_7552499 | 1399932393                          | Ca_kabuli_Chrom01 | 7552499                 | G/A  | Gene_Ca_08008      | SYNONYMOUS_CODING             | NA                                               |
| Kabuli_wild_7552507 | 1399932394                          | Ca_kabuli_Chrom01 | 7552507                 | G/T  | Gene_Ca_08008      | NON_SYNONYMOUS_CODING         | NA                                               |
| Kabuli_wild_7557751 | 1399932395                          | Ca_kabuli_Chrom01 | 7557751                 | T/G  | Gene_Ca_08009      | INTRON                        | Histidinol dehydrogenase, conservedsite          |
| Kabuli_wild_7557811 | 1399932396                          | Ca_kabuli_Chrom01 | 7557811                 | A/T  | Gene_Ca_08009      | INTRON                        | Histidinol dehydrogenase, conservedsite          |
| Kabuli_wild_7690613 | 1399932397                          | Ca_kabuli_Chrom01 | 7690613                 | T/G  | Gene_Ca_08021      | NON_SYNONYMOUS_CODING         | NA                                               |
| Kabuli_wild_7690620 | 1399932398                          | Ca_kabuli_Chrom01 | 7690620                 | T/G  | Gene_Ca_08021      | NON_SYNONYMOUS_CODING         | NA                                               |
| Kabuli_wild_7690625 | 1399932399                          | Ca_kabuli_Chrom01 | 7690625                 | A/C  | Gene_Ca_08021      | SYNONYMOUS_CODING             | NA                                               |
| Kabuli_wild_7695776 | 1399932400                          | Ca_kabuli_Chrom01 | 7695776                 | T/C  | Gene_Ca_08021      | INTRON                        | NA                                               |
| Kabuli_wild_7695844 | 1399932401                          | Ca_kabuli_Chrom01 | 7695844                 | T/C  | Gene_Ca_08021      | INTRON                        | NA                                               |
| Kabuli_wild_7722337 | 1399932402                          | Ca_kabuli_Chrom01 | 7722337                 | T/C  | Gene_Ca_08024      | SYNONYMOUS_CODING             | FADlinkedoxidase,N-terminal                      |
| Kabuli_wild_7772059 | 1399932403                          | Ca_kabuli_Chrom01 | 7772059                 | G/A  | NA                 | INTERGENIC                    | NA                                               |
| Kabuli_wild_7811388 | 1399932404                          | Ca_kabuli_Chrom01 | 7811388                 | C/T  | NA                 | INTERGENIC                    | NA                                               |
| Kabuli_wild_7925666 | 1399932405                          | Ca_kabuli_Chrom01 | 7925666                 | A/C  | Gene_Ca_08042      | SYNONYMOUS_CODING             | Biopterin transport-related protein BT1          |
| Kabuli_wild_7925774 | 1399932406                          | Ca_kabuli_Chrom01 | 7925774                 | C/T  | Gene_Ca_08042      | SYNONYMOUS_CODING             | Biopterin transport-related protein BT1          |
| Kabuli_wild_7969202 | 1399932407                          | Ca_kabuli_Chrom01 | 7969202                 | A/C  | NA                 | INTERGENIC                    | NA                                               |
| Kabuli_wild_7969218 | 1399932408                          | Ca_kabuli_Chrom01 | 7969218                 | T/C  | NA                 | INTERGENIC                    | NA                                               |
| Kabuli_wild_8036666 | 1399932409                          | Ca_kabuli_Chrom01 | 8036666                 | C/T  | Gene_Ca_08051      | INTRON                        | NAD-dependentepimerase/dehydratase               |
| Kabuli_wild_8036706 | 1399932410                          | Ca_kabuli_Chrom01 | 8036706                 | A/G  | Gene_Ca_08051      | INTRON                        | NAD-dependentepimerase/dehydratase               |
| Kabuli_wild_8036903 | 1399932411                          | Ca_kabuli_Chrom01 | 8036903                 | A/T  | Gene_Ca_08051      | INTRON                        | NAD-dependentepimerase/dehydratase               |
| Kabuli_wild_8036917 | 1399932412                          | Ca_kabuli_Chrom01 | 8036917                 | T/G  | Gene_Ca_08051      | INTRON                        | NAD-dependentepimerase/dehydratase               |
| Kabuli_wild_8075742 | 1399932413                          | Ca_kabuli_Chrom01 | 8075742                 | G/T  | NA                 | INTERGENIC                    | NA                                               |
| Kabuli_wild_8075776 | 1399932414                          | Ca_kabuli_Chrom01 | 8075776                 | A/C  | NA                 | INTERGENIC                    | NA                                               |
| Kabuli_wild_8101072 | 1399932415                          | Ca_kabuli_Chrom01 | 8101072                 | C/T  | NA                 | INTERGENIC                    | NA                                               |
| Kabuli_wild_8107967 | 1399932416                          | Ca_kabuli_Chrom01 | 8107967                 | A/C  | Gene_Ca_08057      | NON_SYNONYMOUS_CODING         | RNAhelicase,ATP-dependent,DEAD-box,conservedsite |
| Kabuli_wild_8108014 | 1399932417                          | Ca_kabuli_Chrom01 | 8108014                 | C/T  | Gene_Ca_08057      | NON_SYNONYMOUS_CODING         | RNAhelicase,ATP-dependent,DEAD-box,conservedsite |
| Kabuli_wild_8111588 | 1399932418                          | Ca_kabuli_Chrom01 | 8111588                 | G/A  | Gene_Ca_08057      | INTRON                        | RNAhelicase,ATP-dependent,DEAD-box,conservedsite |
| Kabuli_wild_8112247 | 1399932419                          | Ca_kabuli_Chrom01 | 8112247                 | A/G  | Gene_Ca_08057      | SYNONYMOUS_CODING             | RNAhelicase,ATP-dependent,DEAD-box,conservedsite |

| SNP IDs             | NCBI dbSNP accession IDs (NCBI_SS#) | Chromosomes       | Physical positions (bp) | SNPs | Gene accession IDs | Sequence components of genome | Putative functions                                                  |
|---------------------|-------------------------------------|-------------------|-------------------------|------|--------------------|-------------------------------|---------------------------------------------------------------------|
| Kabuli_wild_8112343 | 1399932420                          | Ca_kabuli_Chrom01 | 8112343                 | C/T  | Gene_Ca_08057      | SYNONYMOUS_CODING             | RNAhelicase,ATP-dependent,DEAD-box,conservedsite                    |
| Kabuli_wild_8112996 | 1399932421                          | Ca_kabuli_Chrom01 | 8112996                 | T/G  | Gene_Ca_08057      | SYNONYMOUS_CODING             | RNAhelicase,ATP-dependent,DEAD-box,conservedsite                    |
| Kabuli_wild_8113235 | 1399932422                          | Ca_kabuli_Chrom01 | 8113235                 | G/T  | Gene_Ca_08057      | NON_SYNONYMOUS_CODING         | RNAhelicase,ATP-dependent,DEAD-box,conservedsite                    |
| Kabuli_wild_8113398 | 1399932423                          | Ca_kabuli_Chrom01 | 8113398                 | C/G  | Gene_Ca_08057      | NON_SYNONYMOUS_CODING         | RNAhelicase,ATP-dependent,DEAD-box,conservedsite                    |
| Kabuli_wild_8113403 | 1399932424                          | Ca_kabuli_Chrom01 | 8113403                 | A/T  | Gene_Ca_08057      | NON_SYNONYMOUS_CODING         | RNAhelicase,ATP-dependent,DEAD-box,conservedsite                    |
| Kabuli_wild_8113449 | 1399932425                          | Ca_kabuli_Chrom01 | 8113449                 | T/A  | Gene_Ca_08057      | SYNONYMOUS_CODING             | RNAhelicase,ATP-dependent,DEAD-box,conservedsite                    |
| Kabuli_wild_8123033 | 1399932426                          | Ca_kabuli_Chrom01 | 8123033                 | A/G  | NA                 | INTERGENIC                    | NA                                                                  |
| Kabuli_wild_8123257 | 1399932427                          | Ca_kabuli_Chrom01 | 8123257                 | G/A  | NA                 | INTERGENIC                    | NA                                                                  |
| Kabuli_wild_8123481 | 1399932428                          | Ca_kabuli_Chrom01 | 8123481                 | G/A  | NA                 | INTERGENIC                    | NA                                                                  |
| Kabuli_wild_8131096 | 1399932429                          | Ca_kabuli_Chrom01 | 8131096                 | A/C  | Gene_Ca_08059      | SYNONYMOUS_CODING             | Bicarbonatetransporter,eukaryotic                                   |
| Kabuli_wild_8131157 | 1399932430                          | Ca_kabuli_Chrom01 | 8131157                 | T/G  | Gene_Ca_08059      | NON_SYNONYMOUS_CODING         | Bicarbonatetransporter,eukaryotic                                   |
| Kabuli_wild_8134368 | 1399932431                          | Ca_kabuli_Chrom01 | 8134368                 | T/C  | NA                 | INTERGENIC                    | NA                                                                  |
| Kabuli_wild_8192580 | 1399932432                          | Ca_kabuli_Chrom01 | 8192580                 | T/C  | Gene_Ca_08066      | DOWNSTREAM                    | Ribosomal protein S1 ,RNA-binding domain                            |
| Kabuli_wild_8238639 | 1399932433                          | Ca_kabuli_Chrom01 | 8238639                 | A/C  | Gene_Ca_08068      | SYNONYMOUS_CODING             | HECT                                                                |
| Kabuli_wild_8278870 | 1399932434                          | Ca_kabuli_Chrom01 | 8278870                 | T/G  | NA                 | INTERGENIC                    | NA                                                                  |
| Kabuli_wild_8422972 | 1399932435                          | Ca_kabuli_Chrom01 | 8422972                 | G/A  | NA                 | INTERGENIC                    | NA                                                                  |
| Kabuli_wild_8464621 | 1399932436                          | Ca_kabuli_Chrom01 | 8464621                 | C/G  | Gene_Ca_08082      | INTRON                        | NA                                                                  |
| Kabuli_wild_8665705 | 1399932437                          | Ca_kabuli_Chrom01 | 8665705                 | T/G  | Gene_Ca_02944      | INTRON                        | ATPase,P-type,K/Mg/Cd/Cu/Zn/Na/Ca/Na/H-transporter                  |
| Kabuli_wild_8677819 | 1399932438                          | Ca_kabuli_Chrom01 | 8677819                 | C/A  | Gene_Ca_02944      | INTRON                        | ATPase,P-type,K/Mg/Cd/Cu/Zn/Na/Ca/Na/H-transporter                  |
| Kabuli_wild_8677877 | 1399932439                          | Ca_kabuli_Chrom01 | 8677877                 | A/C  | Gene_Ca_02944      | INTRON                        | ATPase,P-type,K/Mg/Cd/Cu/Zn/Na/Ca/Na/H-transporter                  |
| Kabuli_wild_8677900 | 1399932440                          | Ca_kabuli_Chrom01 | 8677900                 | T/C  | Gene_Ca_02944      | INTRON                        | ATPase,P-type,K/Mg/Cd/Cu/Zn/Na/Ca/Na/H-transporter                  |
| Kabuli_wild_8694455 | 1399932441                          | Ca_kabuli_Chrom01 | 8694455                 | G/C  | Gene_Ca_02942      | INTRON                        | Sodium/calciumexchangemembraneregion                                |
| Kabuli_wild_8697177 | 1399932442                          | Ca_kabuli_Chrom01 | 8697177                 | G/T  | Gene_Ca_02942      | INTRON                        | Sodium/calciumexchangemembraneregion                                |
| Kabuli_wild_8735727 | 1399932443                          | Ca_kabuli_Chrom01 | 8735727                 | G/C  | Gene_Ca_02937      | INTRON                        | Ubiquitin-associated/translation elongation factor EF1B, N-terminal |
| Kabuli_wild_8735740 | 1399932444                          | Ca_kabuli_Chrom01 | 8735740                 | G/T  | Gene_Ca_02937      | INTRON                        | Ubiquitin-associated/translation elongation factor EF1B, N-terminal |
| Kabuli_wild_8736512 | 1399932445                          | Ca_kabuli_Chrom01 | 8736512                 | G/A  | Gene_Ca_02937      | INTRON                        | Ubiquitin-associated/translation elongation factor EF1B, N-terminal |
| Kabuli_wild_8736711 | 1399932446                          | Ca_kabuli_Chrom01 | 8736711                 | G/T  | Gene_Ca_02937      | INTRON                        | Ubiquitin-associated/translation elongation factor EF1B, N-terminal |
| Kabuli_wild_8736733 | 1399932447                          | Ca_kabuli_Chrom01 | 8736733                 | G/A  | Gene_Ca_02937      | INTRON                        | Ubiquitin-associated/translation elongation factor EF1B, N-terminal |
| Kabuli_wild_8737380 | 1399932448                          | Ca_kabuli_Chrom01 | 8737380                 | A/G  | Gene_Ca_02937      | SYNONYMOUS_CODING             | Ubiquitin-associated/translation elongation factor EF1B, N-terminal |
| Kabuli_wild_8767121 | 1399932449                          | Ca_kabuli_Chrom01 | 8767121                 | A/T  | Gene_Ca_02933      | INTRON                        | Pentatric peptide repeat                                            |
| Kabuli_wild_8767122 | 1399932450                          | Ca_kabuli_Chrom01 | 8767122                 | T/A  | Gene_Ca_02933      | INTRON                        | Pentatric peptide repeat                                            |
| Kabuli_wild_8798877 | 1399932451                          | Ca_kabuli_Chrom01 | 8798877                 | G/T  | NA                 | INTERGENIC                    | NA                                                                  |
| Kabuli_wild_8799685 | 1399932452                          | Ca_kabuli_Chrom01 | 8799685                 | T/G  | Gene_Ca_02929      | DOWNSTREAM                    | KinasebindingproteinCGI-121                                         |
| Kabuli_wild_8799701 | 1399932453                          | Ca_kabuli_Chrom01 | 8799701                 | T/C  | Gene_Ca_02929      | DOWNSTREAM                    | KinasebindingproteinCGI-121                                         |
| Kabuli_wild_8799708 | 1399932454                          | Ca_kabuli_Chrom01 | 8799708                 | T/C  | Gene_Ca_02929      | DOWNSTREAM                    | KinasebindingproteinCGI-121                                         |
| Kabuli_wild_8809121 | 1399932455                          | Ca_kabuli_Chrom01 | 8809121                 | T/C  | Gene_Ca_02928      | INTRON                        | ABC transporter,trans membrane domain                               |
| Kabuli_wild_8809188 | 1399932456                          | Ca_kabuli_Chrom01 | 8809188                 | T/A  | Gene_Ca_02928      | INTRON                        | ABC transporter,trans membrane domain                               |
| Kabuli_wild_8809191 | 1399932457                          | Ca_kabuli_Chrom01 | 8809191                 | C/T  | Gene_Ca_02928      | INTRON                        | ABC transporter,trans membrane domain                               |
| Kabuli_wild_8809295 | 1399932458                          | Ca_kabuli_Chrom01 | 8809295                 | A/T  | Gene_Ca_02928      | INTRON                        | ABC transporter,trans membrane domain                               |
| Kabuli_wild_8809517 | 1399932459                          | Ca_kabuli_Chrom01 | 8809517                 | C/G  | Gene_Ca_02928      | INTRON                        | ABC transporter,trans membrane domain                               |
| Kabuli_wild_8822366 | 1399932460                          | Ca_kabuli_Chrom01 | 8822366                 | T/A  | NA                 | INTERGENIC                    | NA                                                                  |
| Kabuli_wild_8822375 | 1399932461                          | Ca_kabuli_Chrom01 | 8822375                 | G/A  | NA                 | INTERGENIC                    | NA                                                                  |
| Kabuli_wild_8852863 | 1399932462                          | Ca_kabuli_Chrom01 | 8852863                 | G/T  | NA                 | INTERGENIC                    | NA                                                                  |
| Kabuli_wild_8852928 | 1399932463                          | Ca_kabuli_Chrom01 | 8852928                 | T/A  | NA                 | INTERGENIC                    | NA                                                                  |

| SNP IDs             | NCBI dbSNP accession IDs (NCBI_SS#) | Chromosomes     | Physical positions (bp) | SNPs | Gene accession IDs | Sequence components of genome | Putative functions                                                |
|---------------------|-------------------------------------|-----------------|-------------------------|------|--------------------|-------------------------------|-------------------------------------------------------------------|
| Kabuli_wild_8852943 | 1399932464                          | Ca_kabuli_Chr01 | 8852943                 | C/A  | NA                 | INTERGENIC                    | NA                                                                |
| Kabuli_wild_8852981 | 1399932465                          | Ca_kabuli_Chr01 | 8852981                 | C/A  | NA                 | INTERGENIC                    | NA                                                                |
| Kabuli_wild_8853010 | 1399932466                          | Ca_kabuli_Chr01 | 8853010                 | A/G  | NA                 | INTERGENIC                    | NA                                                                |
| Kabuli_wild_8854211 | 1399932467                          | Ca_kabuli_Chr01 | 8854211                 | G/T  | Gene_Ca_02923      | INTRON                        | Natural resistance-associated macrophage protein                  |
| Kabuli_wild_8891438 | 1399932468                          | Ca_kabuli_Chr01 | 8891438                 | T/G  | Gene_Ca_02918      | SYNONYMOUS_CODING             | ATPase, P-type, H+ transporting proton pump                       |
| Kabuli_wild_8891443 | 1399932469                          | Ca_kabuli_Chr01 | 8891443                 | C/G  | Gene_Ca_02918      | NON_SYNONYMOUS_CODING         | ATPase, P-type, H+ transporting proton pump                       |
| Kabuli_wild_8891458 | 1399932470                          | Ca_kabuli_Chr01 | 8891458                 | T/G  | Gene_Ca_02918      | INTRON                        | ATPase, P-type, H+ transporting proton pump                       |
| Kabuli_wild_8891469 | 1399932471                          | Ca_kabuli_Chr01 | 8891469                 | T/A  | Gene_Ca_02918      | INTRON                        | ATPase, P-type, H+ transporting proton pump                       |
| Kabuli_wild_8891485 | 1399932472                          | Ca_kabuli_Chr01 | 8891485                 | T/G  | Gene_Ca_02918      | INTRON                        | ATPase, P-type, H+ transporting proton pump                       |
| Kabuli_wild_8891508 | 1399932473                          | Ca_kabuli_Chr01 | 8891508                 | G/T  | Gene_Ca_02918      | INTRON                        | ATPase, P-type, H+ transporting proton pump                       |
| Kabuli_wild_8891512 | 1399932474                          | Ca_kabuli_Chr01 | 8891512                 | C/T  | Gene_Ca_02918      | INTRON                        | ATPase, P-type, H+ transporting proton pump                       |
| Kabuli_wild_8893985 | 1399932475                          | Ca_kabuli_Chr01 | 8893985                 | G/A  | NA                 | INTERGENIC                    | NA                                                                |
| Kabuli_wild_8901769 | 1399932476                          | Ca_kabuli_Chr01 | 8901769                 | C/A  | NA                 | INTERGENIC                    | NA                                                                |
| Kabuli_wild_8901842 | 1399932477                          | Ca_kabuli_Chr01 | 8901842                 | T/A  | NA                 | INTERGENIC                    | NA                                                                |
| Kabuli_wild_8941004 | 1399932478                          | Ca_kabuli_Chr01 | 8941004                 | A/C  | NA                 | INTERGENIC                    | NA                                                                |
| Kabuli_wild_8941029 | 1399932479                          | Ca_kabuli_Chr01 | 8941029                 | G/A  | NA                 | INTERGENIC                    | NA                                                                |
| Kabuli_wild_8941031 | 1399932480                          | Ca_kabuli_Chr01 | 8941031                 | G/C  | NA                 | INTERGENIC                    | NA                                                                |
| Kabuli_wild_8941471 | 1399932481                          | Ca_kabuli_Chr01 | 8941471                 | T/C  | NA                 | INTERGENIC                    | NA                                                                |
| Kabuli_wild_8942131 | 1399932482                          | Ca_kabuli_Chr01 | 8942131                 | T/C  | Gene_Ca_02909      | NON_SYNONYMOUS_CODING         | Zinc finger,UBP-type                                              |
| Kabuli_wild_8942137 | 1399932483                          | Ca_kabuli_Chr01 | 8942137                 | T/C  | Gene_Ca_02909      | NON_SYNONYMOUS_CODING         | Zinc finger,UBP-type                                              |
| Kabuli_wild_8942179 | 1399932484                          | Ca_kabuli_Chr01 | 8942179                 | C/G  | Gene_Ca_02909      | NON_SYNONYMOUS_CODING         | Zinc finger,UBP-type                                              |
| Kabuli_wild_8942198 | 1399932485                          | Ca_kabuli_Chr01 | 8942198                 | A/G  | Gene_Ca_02909      | SYNONYMOUS_CODING             | Zinc finger,UBP-type                                              |
| Kabuli_wild_8949723 | 1399932486                          | Ca_kabuli_Chr01 | 8949723                 | G/T  | NA                 | INTERGENIC                    | NA                                                                |
| Kabuli_wild_8960630 | 1399932487                          | Ca_kabuli_Chr01 | 8960630                 | T/C  | NA                 | INTERGENIC                    | NA                                                                |
| Kabuli_wild_8969321 | 1399932488                          | Ca_kabuli_Chr01 | 8969321                 | C/T  | Gene_Ca_02904      | INTRON                        | NA                                                                |
| Kabuli_wild_8971718 | 1399932489                          | Ca_kabuli_Chr01 | 8971718                 | C/G  | Gene_Ca_02904      | NON_SYNONYMOUS_CODING         | NA                                                                |
| Kabuli_wild_8976169 | 1399932490                          | Ca_kabuli_Chr01 | 8976169                 | A/T  | Gene_Ca_02904      | NON_SYNONYMOUS_CODING         | NA                                                                |
| Kabuli_wild_9008179 | 1399932491                          | Ca_kabuli_Chr01 | 9008179                 | G/T  | Gene_Ca_02900      | SYNONYMOUS_CODING             | Aminoacid transporter,transmembrane                               |
| Kabuli_wild_9008180 | 1399932492                          | Ca_kabuli_Chr01 | 9008180                 | C/G  | Gene_Ca_02900      | SYNONYMOUS_CODING             | Aminoacid transporter,transmembrane                               |
| Kabuli_wild_9031825 | 1399932493                          | Ca_kabuli_Chr01 | 9031825                 | G/T  | Gene_Ca_02896      | UPSTREAM                      | DNAglycosylase/APIyase,catalytic domain                           |
| Kabuli_wild_9035744 | 1399932494                          | Ca_kabuli_Chr01 | 9035744                 | G/A  | NA                 | INTERGENIC                    | NA                                                                |
| Kabuli_wild_9040419 | 1399932495                          | Ca_kabuli_Chr01 | 9040419                 | T/A  | NA                 | INTERGENIC                    | NA                                                                |
| Kabuli_wild_9048675 | 1399932496                          | Ca_kabuli_Chr01 | 9048675                 | A/T  | NA                 | INTERGENIC                    | NA                                                                |
| Kabuli_wild_9063898 | 1399932497                          | Ca_kabuli_Chr01 | 9063898                 | G/T  | Gene_Ca_02891      | NON_SYNONYMOUS_CODING         | Heat shock protein DnaJ, cysteine-richdomain                      |
| Kabuli_wild_9065933 | 1399932498                          | Ca_kabuli_Chr01 | 9065933                 | T/C  | Gene_Ca_02891      | UPSTREAM                      | Heat shock protein DnaJ, cysteine-richdomain                      |
| Kabuli_wild_9074283 | 1399932499                          | Ca_kabuli_Chr01 | 9074283                 | G/T  | Gene_Ca_02889      | SYNONYMOUS_CODING             | Mov34/MPN/PAD-1                                                   |
| Kabuli_wild_9093812 | 1399932500                          | Ca_kabuli_Chr01 | 9093812                 | C/G  | NA                 | INTERGENIC                    | NA                                                                |
| Kabuli_wild_9093964 | 1399932501                          | Ca_kabuli_Chr01 | 9093964                 | T/A  | NA                 | INTERGENIC                    | NA                                                                |
| Kabuli_wild_9097869 | 1399932502                          | Ca_kabuli_Chr01 | 9097869                 | G/T  | Gene_Ca_02886      | UPSTREAM                      | Signal transduction histidine kinase,phosphotransfer (Hpt) domain |
| Kabuli_wild_9097877 | 1399932503                          | Ca_kabuli_Chr01 | 9097877                 | C/A  | Gene_Ca_02886      | UPSTREAM                      | Signal transduction histidine kinase,phosphotransfer (Hpt) domain |
| Kabuli_wild_9097878 | 1399932504                          | Ca_kabuli_Chr01 | 9097878                 | A/G  | Gene_Ca_02886      | UPSTREAM                      | Signal transduction histidine kinase,phosphotransfer (Hpt) domain |
| Kabuli_wild_9097879 | 1399932505                          | Ca_kabuli_Chr01 | 9097879                 | C/A  | Gene_Ca_02886      | UPSTREAM                      | Signal transduction histidine kinase,phosphotransfer (Hpt) domain |
| Kabuli_wild_9097881 | 1399932506                          | Ca_kabuli_Chr01 | 9097881                 | C/G  | Gene_Ca_02886      | UPSTREAM                      | Signal transduction histidine kinase,phosphotransfer (Hpt) domain |
| Kabuli_wild_9097885 | 1399932507                          | Ca_kabuli_Chr01 | 9097885                 | A/G  | Gene_Ca_02886      | UPSTREAM                      | Signal transduction histidine kinase,phosphotransfer (Hpt) domain |



| SNP IDs              | NCBI dbSNP accession IDs (NCBI_SS#) | Chromosomes     | Physical positions (bp) | SNPs | Gene accession IDs | Sequence components of genome | Putative functions                                                |
|----------------------|-------------------------------------|-----------------|-------------------------|------|--------------------|-------------------------------|-------------------------------------------------------------------|
| Kabuli_wild_9097949  | 1399932508                          | Ca_kabuli_Chr01 | 9097949                 | A/C  | Gene_Ca_02886      | UPSTREAM                      | Signal transduction histidine kinase,phosphotransfer (Hpt) domain |
| Kabuli_wild_9098003  | 1399932509                          | Ca_kabuli_Chr01 | 9098003                 | C/T  | Gene_Ca_02886      | UPSTREAM                      | Signal transduction histidine kinase,phosphotransfer (Hpt) domain |
| Kabuli_wild_9105432  | 1399932510                          | Ca_kabuli_Chr01 | 9105432                 | C/T  | Gene_Ca_02885      | SYNONYMOUS_CODING             | Initiation factor2B-related                                       |
| Kabuli_wild_9169979  | 1399932511                          | Ca_kabuli_Chr01 | 9169979                 | A/G  | NA                 | INTERGENIC                    | NA                                                                |
| Kabuli_wild_9170005  | 1399932512                          | Ca_kabuli_Chr01 | 9170005                 | T/A  | NA                 | INTERGENIC                    | NA                                                                |
| Kabuli_wild_9170035  | 1399932513                          | Ca_kabuli_Chr01 | 9170035                 | G/A  | NA                 | INTERGENIC                    | NA                                                                |
| Kabuli_wild_9195312  | 1399932514                          | Ca_kabuli_Chr01 | 9195312                 | G/A  | NA                 | INTERGENIC                    | NA                                                                |
| Kabuli_wild_9199591  | 1399932515                          | Ca_kabuli_Chr01 | 9199591                 | T/C  | NA                 | INTERGENIC                    | NA                                                                |
| Kabuli_wild_9199610  | 1399932516                          | Ca_kabuli_Chr01 | 9199610                 | A/G  | NA                 | INTERGENIC                    | NA                                                                |
| Kabuli_wild_9199616  | 1399932517                          | Ca_kabuli_Chr01 | 9199616                 | C/T  | NA                 | INTERGENIC                    | NA                                                                |
| Kabuli_wild_9199619  | 1399932518                          | Ca_kabuli_Chr01 | 9199619                 | A/G  | NA                 | INTERGENIC                    | NA                                                                |
| Kabuli_wild_9206737  | 1399932519                          | Ca_kabuli_Chr01 | 9206737                 | G/A  | NA                 | INTERGENIC                    | NA                                                                |
| Kabuli_wild_9206740  | 1399932520                          | Ca_kabuli_Chr01 | 9206740                 | T/C  | NA                 | INTERGENIC                    | NA                                                                |
| Kabuli_wild_9206742  | 1399932521                          | Ca_kabuli_Chr01 | 9206742                 | C/G  | NA                 | INTERGENIC                    | NA                                                                |
| Kabuli_wild_9237766  | 1399932522                          | Ca_kabuli_Chr01 | 9237766                 | T/G  | NA                 | INTERGENIC                    | NA                                                                |
| Kabuli_wild_9237805  | 1399932523                          | Ca_kabuli_Chr01 | 9237805                 | T/C  | NA                 | INTERGENIC                    | NA                                                                |
| Kabuli_wild_9237813  | 1399932524                          | Ca_kabuli_Chr01 | 9237813                 | G/T  | NA                 | INTERGENIC                    | NA                                                                |
| Kabuli_wild_9264758  | 1399932525                          | Ca_kabuli_Chr01 | 9264758                 | G/T  | Gene_Ca_02867      | INTRON                        | Nucleoporininter acting component Nup93/Nic96                     |
| Kabuli_wild_9264794  | 1399932526                          | Ca_kabuli_Chr01 | 9264794                 | T/G  | Gene_Ca_02867      | INTRON                        | Nucleoporininter acting component Nup93/Nic96                     |
| Kabuli_wild_9264912  | 1399932527                          | Ca_kabuli_Chr01 | 9264912                 | C/T  | Gene_Ca_02867      | SYNONYMOUS_CODING             | Nucleoporininter acting component Nup93/Nic96                     |
| Kabuli_wild_9269888  | 1399932528                          | Ca_kabuli_Chr01 | 9269888                 | T/A  | Gene_Ca_02867      | NON_SYNONYMOUS_CODING         | Nucleoporininter acting component Nup93/Nic96                     |
| Kabuli_wild_9379381  | 1399932529                          | Ca_kabuli_Chr01 | 9379381                 | G/A  | NA                 | INTERGENIC                    | NA                                                                |
| Kabuli_wild_9392590  | 1399932530                          | Ca_kabuli_Chr01 | 9392590                 | G/C  | NA                 | INTERGENIC                    | NA                                                                |
| Kabuli_wild_9433717  | 1399932531                          | Ca_kabuli_Chr01 | 9433717                 | A/G  | Gene_Ca_02853      | INTRON                        | Ferredoxin                                                        |
| Kabuli_wild_9434678  | 1399932532                          | Ca_kabuli_Chr01 | 9434678                 | A/C  | Gene_Ca_02853      | UPSTREAM                      | Ferredoxin                                                        |
| Kabuli_wild_9544561  | 1399932533                          | Ca_kabuli_Chr01 | 9544561                 | A/G  | NA                 | INTERGENIC                    | NA                                                                |
| Kabuli_wild_9603896  | 1399932534                          | Ca_kabuli_Chr01 | 9603896                 | T/A  | Gene_Ca_02837      | SYNONYMOUS_CODING             | WD40 repeat                                                       |
| Kabuli_wild_9634823  | 1399932535                          | Ca_kabuli_Chr01 | 9634823                 | C/T  | Gene_Ca_02835      | SYNONYMOUS_CODING             | PeptidaseC14,caspasenon-catalyticsubunitp10                       |
| Kabuli_wild_9659316  | 1399932536                          | Ca_kabuli_Chr01 | 9659316                 | C/T  | NA                 | INTERGENIC                    | NA                                                                |
| Kabuli_wild_9705162  | 1399932537                          | Ca_kabuli_Chr01 | 9705162                 | C/A  | NA                 | INTERGENIC                    | NA                                                                |
| Kabuli_wild_9736498  | 1399932538                          | Ca_kabuli_Chr01 | 9736498                 | A/C  | NA                 | INTERGENIC                    | NA                                                                |
| Kabuli_wild_9886208  | 1399932539                          | Ca_kabuli_Chr01 | 9886208                 | A/G  | Gene_Ca_02799      | SYNONYMOUS_CODING             | NA                                                                |
| Kabuli_wild_9918080  | 1399932540                          | Ca_kabuli_Chr01 | 9918080                 | A/G  | Gene_Ca_02796      | SYNONYMOUS_CODING             | RibonucleaseZc3h12a-like                                          |
| Kabuli_wild_10022317 | 1399932541                          | Ca_kabuli_Chr01 | 10022317                | A/T  | Gene_Ca_02786      | NON_SYNONYMOUS_CODING         | SANT domain,DNA binding                                           |
| Kabuli_wild_10032933 | 1399932542                          | Ca_kabuli_Chr01 | 10032933                | A/T  | NA                 | INTERGENIC                    | NA                                                                |
| Kabuli_wild_10038569 | 1399932543                          | Ca_kabuli_Chr01 | 10038569                | A/G  | NA                 | INTERGENIC                    | NA                                                                |
| Kabuli_wild_10191578 | 1399932544                          | Ca_kabuli_Chr01 | 10191578                | A/C  | NA                 | INTERGENIC                    | NA                                                                |
| Kabuli_wild_10213111 | 1399932545                          | Ca_kabuli_Chr01 | 10213111                | T/C  | NA                 | INTERGENIC                    | NA                                                                |
| Kabuli_wild_10364986 | 1399932546                          | Ca_kabuli_Chr01 | 10364986                | C/G  | Gene_Ca_02742      | DOWNSTREAM                    | Protein kinase,catalytic domain                                   |
| Kabuli_wild_10364999 | 1399932547                          | Ca_kabuli_Chr01 | 10364999                | G/A  | Gene_Ca_02742      | DOWNSTREAM                    | Protein kinase,catalytic domain                                   |
| Kabuli_wild_10365024 | 1399932548                          | Ca_kabuli_Chr01 | 10365024                | G/A  | Gene_Ca_02742      | DOWNSTREAM                    | Protein kinase,catalytic domain                                   |
| Kabuli_wild_10365029 | 1399932549                          | Ca_kabuli_Chr01 | 10365029                | T/A  | Gene_Ca_02742      | DOWNSTREAM                    | Protein kinase,catalytic domain                                   |
| Kabuli_wild_10366420 | 1399932550                          | Ca_kabuli_Chr01 | 10366420                | A/C  | Gene_Ca_02742      | DOWNSTREAM                    | Protein kinase,catalytic domain                                   |
| Kabuli_wild_10377691 | 1399932551                          | Ca_kabuli_Chr01 | 10377691                | T/C  | Gene_Ca_02740      | INTRON                        | Glycosidehydrolase, family35                                      |

| SNP IDs              | NCBI dbSNP accession IDs (NCBI_SS#) | Chromosomes     | Physical positions (bp) | SNPs | Gene accession IDs | Sequence components of genome | Putative functions                                      |
|----------------------|-------------------------------------|-----------------|-------------------------|------|--------------------|-------------------------------|---------------------------------------------------------|
| Kabuli_wild_10377698 | 1399932552                          | Ca_kabuli_Chr01 | 10377698                | T/C  | Gene_Ca_02740      | INTRON                        | Glycosidehydrolase, family35                            |
| Kabuli_wild_10377700 | 1399932553                          | Ca_kabuli_Chr01 | 10377700                | G/C  | Gene_Ca_02740      | INTRON                        | Glycosidehydrolase, family35                            |
| Kabuli_wild_10377860 | 1399932554                          | Ca_kabuli_Chr01 | 10377860                | T/A  | Gene_Ca_02740      | INTRON                        | Glycosidehydrolase, family35                            |
| Kabuli_wild_10527733 | 1399932555                          | Ca_kabuli_Chr01 | 10527733                | A/G  | NA                 | INTERGENIC                    | NA                                                      |
| Kabuli_wild_10601318 | 1399932556                          | Ca_kabuli_Chr01 | 10601318                | T/G  | Gene_Ca_02710      | NON_SYNONYMOUS_CODING         | Pentatricopeptide repeat                                |
| Kabuli_wild_10623359 | 1399932557                          | Ca_kabuli_Chr01 | 10623359                | T/G  | Gene_Ca_02705      | UPSTREAM                      | Rab-GAP/TBCdomain                                       |
| Kabuli_wild_10655633 | 1399932558                          | Ca_kabuli_Chr01 | 10655633                | G/T  | Gene_Ca_02700      | INTRON                        | Protein of unknown function DUF3755                     |
| Kabuli_wild_10672248 | 1399932559                          | Ca_kabuli_Chr01 | 10672248                | A/C  | NA                 | INTERGENIC                    | NA                                                      |
| Kabuli_wild_10697955 | 1399932560                          | Ca_kabuli_Chr01 | 10697955                | T/C  | Gene_Ca_02694      | INTRON                        | Protein of unknown function DUF936, plant               |
| Kabuli_wild_10710672 | 1399932561                          | Ca_kabuli_Chr01 | 10710672                | T/G  | NA                 | INTERGENIC                    | NA                                                      |
| Kabuli_wild_10713001 | 1399932562                          | Ca_kabuli_Chr01 | 10713001                | T/A  | Gene_Ca_02691      | DOWNSTREAM                    | Electron transfer flavoprotein-ubiquinoneoxidoreductase |
| Kabuli_wild_10715185 | 1399932563                          | Ca_kabuli_Chr01 | 10715185                | G/A  | Gene_Ca_02691      | INTRON                        | Electron transfer flavoprotein-ubiquinoneoxidoreductase |
| Kabuli_wild_10761609 | 1399932564                          | Ca_kabuli_Chr01 | 10761609                | G/T  | NA                 | INTERGENIC                    | NA                                                      |
| Kabuli_wild_10837203 | 1399932565                          | Ca_kabuli_Chr01 | 10837203                | C/T  | NA                 | INTERGENIC                    | NA                                                      |
| Kabuli_wild_10861326 | 1399932566                          | Ca_kabuli_Chr01 | 10861326                | T/G  | Gene_Ca_02673      | INTRON                        | Glycosidehydrolase, family1                             |
| Kabuli_wild_10861332 | 1399932567                          | Ca_kabuli_Chr01 | 10861332                | C/G  | Gene_Ca_02673      | INTRON                        | Glycosidehydrolase, family1                             |
| Kabuli_wild_10869336 | 1399932568                          | Ca_kabuli_Chr01 | 10869336                | G/A  | Gene_Ca_02671      | INTRON                        | Oxidoreductase, N-terminal                              |
| Kabuli_wild_10869361 | 1399932569                          | Ca_kabuli_Chr01 | 10869361                | C/A  | Gene_Ca_02671      | INTRON                        | Oxidoreductase, N-terminal                              |
| Kabuli_wild_10896308 | 1399932570                          | Ca_kabuli_Chr01 | 10896308                | A/G  | Gene_Ca_02669      | NON_SYNONYMOUS_CODING         | Ethylene insensitive3                                   |
| Kabuli_wild_11027385 | 1399932571                          | Ca_kabuli_Chr01 | 11027385                | G/A  | NA                 | INTERGENIC                    | NA                                                      |
| Kabuli_wild_11103176 | 1399932572                          | Ca_kabuli_Chr01 | 11103176                | T/C  | NA                 | INTERGENIC                    | NA                                                      |
| Kabuli_wild_11185782 | 1399932573                          | Ca_kabuli_Chr01 | 11185782                | T/A  | NA                 | INTERGENIC                    | NA                                                      |
| Kabuli_wild_11193242 | 1399932574                          | Ca_kabuli_Chr01 | 11193242                | G/A  | NA                 | INTERGENIC                    | NA                                                      |
| Kabuli_wild_11193246 | 1399932575                          | Ca_kabuli_Chr01 | 11193246                | A/C  | NA                 | INTERGENIC                    | NA                                                      |
| Kabuli_wild_11193277 | 1399932576                          | Ca_kabuli_Chr01 | 11193277                | G/C  | NA                 | INTERGENIC                    | NA                                                      |
| Kabuli_wild_11193282 | 1399932577                          | Ca_kabuli_Chr01 | 11193282                | C/T  | NA                 | INTERGENIC                    | NA                                                      |
| Kabuli_wild_11193334 | 1399932578                          | Ca_kabuli_Chr01 | 11193334                | G/C  | NA                 | INTERGENIC                    | NA                                                      |
| Kabuli_wild_11225828 | 1399932579                          | Ca_kabuli_Chr01 | 11225828                | T/C  | NA                 | INTERGENIC                    | NA                                                      |
| Kabuli_wild_11227613 | 1399932580                          | Ca_kabuli_Chr01 | 11227613                | G/A  | NA                 | INTERGENIC                    | NA                                                      |
| Kabuli_wild_11227614 | 1399932581                          | Ca_kabuli_Chr01 | 11227614                | T/C  | NA                 | INTERGENIC                    | NA                                                      |
| Kabuli_wild_11230109 | 1399932582                          | Ca_kabuli_Chr01 | 11230109                | T/C  | Gene_Ca_02632      | NON_SYNONYMOUS_CODING         | Pumilio RNA-binding repeat                              |
| Kabuli_wild_11230115 | 1399932583                          | Ca_kabuli_Chr01 | 11230115                | G/C  | Gene_Ca_02632      | NON_SYNONYMOUS_CODING         | Pumilio RNA-binding repeat                              |
| Kabuli_wild_11230116 | 1399932584                          | Ca_kabuli_Chr01 | 11230116                | T/C  | Gene_Ca_02632      | SYNONYMOUS_CODING             | Pumilio RNA-binding repeat                              |
| Kabuli_wild_11230118 | 1399932585                          | Ca_kabuli_Chr01 | 11230118                | A/T  | Gene_Ca_02632      | NON_SYNONYMOUS_CODING         | Pumilio RNA-binding repeat                              |
| Kabuli_wild_11230125 | 1399932586                          | Ca_kabuli_Chr01 | 11230125                | A/C  | Gene_Ca_02632      | SYNONYMOUS_CODING             | Pumilio RNA-binding repeat                              |
| Kabuli_wild_11230126 | 1399932587                          | Ca_kabuli_Chr01 | 11230126                | G/T  | Gene_Ca_02632      | NON_SYNONYMOUS_CODING         | Pumilio RNA-binding repeat                              |
| Kabuli_wild_11230127 | 1399932588                          | Ca_kabuli_Chr01 | 11230127                | G/T  | Gene_Ca_02632      | NON_SYNONYMOUS_CODING         | Pumilio RNA-binding repeat                              |
| Kabuli_wild_11230128 | 1399932589                          | Ca_kabuli_Chr01 | 11230128                | T/G  | Gene_Ca_02632      | SYNONYMOUS_CODING             | Pumilio RNA-binding repeat                              |
| Kabuli_wild_11230133 | 1399932590                          | Ca_kabuli_Chr01 | 11230133                | G/A  | Gene_Ca_02632      | NON_SYNONYMOUS_CODING         | Pumilio RNA-binding repeat                              |
| Kabuli_wild_11230998 | 1399932591                          | Ca_kabuli_Chr01 | 11230998                | A/T  | Gene_Ca_02632      | SYNONYMOUS_CODING             | Pumilio RNA-binding repeat                              |
| Kabuli_wild_11231064 | 1399932592                          | Ca_kabuli_Chr01 | 11231064                | A/G  | Gene_Ca_02632      | SYNONYMOUS_CODING             | Pumilio RNA-binding repeat                              |
| Kabuli_wild_11231077 | 1399932593                          | Ca_kabuli_Chr01 | 11231077                | T/C  | Gene_Ca_02632      | NON_SYNONYMOUS_CODING         | Pumilio RNA-binding repeat                              |
| Kabuli_wild_11232152 | 1399932594                          | Ca_kabuli_Chr01 | 11232152                | T/C  | Gene_Ca_02632      | SYNONYMOUS_CODING             | Pumilio RNA-binding repeat                              |
| Kabuli_wild_11235211 | 1399932595                          | Ca_kabuli_Chr01 | 11235211                | C/T  | NA                 | INTERGENIC                    | NA                                                      |

| SNP IDs              | NCBI dbSNP accession IDs (NCBI_SS#) | Chromosomes     | Physical positions (bp) | SNPs | Gene accession IDs | Sequence components of genome | Putative functions              |
|----------------------|-------------------------------------|-----------------|-------------------------|------|--------------------|-------------------------------|---------------------------------|
| Kabuli_wild_11246551 | 1399932596                          | Ca_kabuli_Chr01 | 11246551                | T/C  | NA                 | INTERGENIC                    | NA                              |
| Kabuli_wild_11265367 | 1399932597                          | Ca_kabuli_Chr01 | 11265367                | T/C  | NA                 | INTERGENIC                    | NA                              |
| Kabuli_wild_11277703 | 1399932598                          | Ca_kabuli_Chr01 | 11277703                | T/A  | NA                 | INTERGENIC                    | NA                              |
| Kabuli_wild_11277964 | 1399932599                          | Ca_kabuli_Chr01 | 11277964                | C/T  | NA                 | INTERGENIC                    | NA                              |
| Kabuli_wild_11284183 | 1399932600                          | Ca_kabuli_Chr01 | 11284183                | T/C  | NA                 | INTERGENIC                    | NA                              |
| Kabuli_wild_11285192 | 1399932601                          | Ca_kabuli_Chr01 | 11285192                | G/A  | Gene_Ca_02625      | SYNONYMOUS_CODING             | Transcription facto rGRAS       |
| Kabuli_wild_11285247 | 1399932602                          | Ca_kabuli_Chr01 | 11285247                | T/C  | Gene_Ca_02625      | SYNONYMOUS_CODING             | Transcription facto rGRAS       |
| Kabuli_wild_11291516 | 1399932603                          | Ca_kabuli_Chr01 | 11291516                | G/A  | NA                 | INTERGENIC                    | NA                              |
| Kabuli_wild_11291737 | 1399932604                          | Ca_kabuli_Chr01 | 11291737                | C/A  | Gene_Ca_02624      | INTRON                        | SANT domain,DNA binding         |
| Kabuli_wild_11291740 | 1399932605                          | Ca_kabuli_Chr01 | 11291740                | T/A  | Gene_Ca_02624      | INTRON                        | SANT domain,DNA binding         |
| Kabuli_wild_11291741 | 1399932606                          | Ca_kabuli_Chr01 | 11291741                | A/C  | Gene_Ca_02624      | INTRON                        | SANT domain,DNA binding         |
| Kabuli_wild_11293696 | 1399932607                          | Ca_kabuli_Chr01 | 11293696                | A/G  | NA                 | INTERGENIC                    | NA                              |
| Kabuli_wild_11319112 | 1399932608                          | Ca_kabuli_Chr01 | 11319112                | A/T  | NA                 | INTERGENIC                    | NA                              |
| Kabuli_wild_11319264 | 1399932609                          | Ca_kabuli_Chr01 | 11319264                | A/C  | NA                 | INTERGENIC                    | NA                              |
| Kabuli_wild_11321670 | 1399932610                          | Ca_kabuli_Chr01 | 11321670                | G/C  | Gene_Ca_02623      | DOWNSTREAM                    | Rab5-interacting                |
| Kabuli_wild_11324018 | 1399932611                          | Ca_kabuli_Chr01 | 11324018                | C/A  | NA                 | INTERGENIC                    | NA                              |
| Kabuli_wild_11324023 | 1399932612                          | Ca_kabuli_Chr01 | 11324023                | C/T  | NA                 | INTERGENIC                    | NA                              |
| Kabuli_wild_11324035 | 1399932613                          | Ca_kabuli_Chr01 | 11324035                | C/T  | NA                 | INTERGENIC                    | NA                              |
| Kabuli_wild_11324050 | 1399932614                          | Ca_kabuli_Chr01 | 11324050                | G/T  | NA                 | INTERGENIC                    | NA                              |
| Kabuli_wild_11328770 | 1399932615                          | Ca_kabuli_Chr01 | 11328770                | T/C  | NA                 | INTERGENIC                    | NA                              |
| Kabuli_wild_11328785 | 1399932616                          | Ca_kabuli_Chr01 | 11328785                | A/C  | NA                 | INTERGENIC                    | NA                              |
| Kabuli_wild_11328920 | 1399932617                          | Ca_kabuli_Chr01 | 11328920                | A/T  | NA                 | INTERGENIC                    | NA                              |
| Kabuli_wild_11342388 | 1399932618                          | Ca_kabuli_Chr01 | 11342388                | T/C  | NA                 | INTERGENIC                    | NA                              |
| Kabuli_wild_11359718 | 1399932619                          | Ca_kabuli_Chr01 | 11359718                | G/A  | NA                 | INTERGENIC                    | NA                              |
| Kabuli_wild_11361583 | 1399932620                          | Ca_kabuli_Chr01 | 11361583                | T/C  | Gene_Ca_02617      | SYNONYMOUS_CODING             | Protein kinase,catalytic domain |
| Kabuli_wild_11361588 | 1399932621                          | Ca_kabuli_Chr01 | 11361588                | T/G  | Gene_Ca_02617      | NON_SYNONYMOUS_CODING         | Protein kinase,catalytic domain |
| Kabuli_wild_11405015 | 1399932622                          | Ca_kabuli_Chr01 | 11405015                | A/G  | Gene_Ca_02611      | NON_SYNONYMOUS_CODING         | Protein kinase,catalytic domain |
| Kabuli_wild_11411702 | 1399932623                          | Ca_kabuli_Chr01 | 11411702                | C/G  | NA                 | INTERGENIC                    | NA                              |
| Kabuli_wild_11423778 | 1399932624                          | Ca_kabuli_Chr01 | 11423778                | A/C  | Gene_Ca_02609      | NON_SYNONYMOUS_CODING         | Zinc finger, RING-type          |
| Kabuli_wild_11502148 | 1399932625                          | Ca_kabuli_Chr01 | 11502148                | C/A  | NA                 | INTERGENIC                    | NA                              |
| Kabuli_wild_11514888 | 1399932626                          | Ca_kabuli_Chr01 | 11514888                | T/A  | Gene_Ca_02599      | INTRON                        | HistoneH2A                      |
| Kabuli_wild_11522875 | 1399932627                          | Ca_kabuli_Chr01 | 11522875                | C/T  | Gene_Ca_02598      | SYNONYMOUS_CODING             | HistoneH2A                      |
| Kabuli_wild_11592120 | 1399932628                          | Ca_kabuli_Chr01 | 11592120                | A/T  | NA                 | INTERGENIC                    | NA                              |
| Kabuli_wild_11592128 | 1399932629                          | Ca_kabuli_Chr01 | 11592128                | A/T  | NA                 | INTERGENIC                    | NA                              |
| Kabuli_wild_11601347 | 1399932630                          | Ca_kabuli_Chr01 | 11601347                | T/C  | Gene_Ca_02586      | INTRON                        | RNA recognition motif domain    |
| Kabuli_wild_11617567 | 1399932631                          | Ca_kabuli_Chr01 | 11617567                | C/T  | NA                 | INTERGENIC                    | NA                              |
| Kabuli_wild_11624419 | 1399932632                          | Ca_kabuli_Chr01 | 11624419                | C/G  | NA                 | INTERGENIC                    | NA                              |
| Kabuli_wild_11624464 | 1399932633                          | Ca_kabuli_Chr01 | 11624464                | C/T  | NA                 | INTERGENIC                    | NA                              |
| Kabuli_wild_11669794 | 1399932634                          | Ca_kabuli_Chr01 | 11669794                | T/G  | Gene_Ca_02583      | SYNONYMOUS_CODING             | Ankyrinrepeat                   |
| Kabuli_wild_11673478 | 1399932635                          | Ca_kabuli_Chr01 | 11673478                | A/C  | NA                 | INTERGENIC                    | NA                              |
| Kabuli_wild_11673667 | 1399932636                          | Ca_kabuli_Chr01 | 11673667                | T/G  | NA                 | INTERGENIC                    | NA                              |
| Kabuli_wild_11673673 | 1399932637                          | Ca_kabuli_Chr01 | 11673673                | T/A  | NA                 | INTERGENIC                    | NA                              |
| Kabuli_wild_11677097 | 1399932638                          | Ca_kabuli_Chr01 | 11677097                | C/A  | NA                 | INTERGENIC                    | NA                              |
| Kabuli_wild_11685769 | 1399932639                          | Ca_kabuli_Chr01 | 11685769                | A/G  | Gene_Ca_02582      | SYNONYMOUS_CODING             | Protein kinase,catalytic domain |

| SNP IDs              | NCBI dbSNP accession IDs (NCBI_SS#) | Chromosomes     | Physical positions (bp) | SNPs | Gene accession IDs | Sequence components of genome | Putative functions                                 |
|----------------------|-------------------------------------|-----------------|-------------------------|------|--------------------|-------------------------------|----------------------------------------------------|
| Kabuli_wild_11685790 | 1399932640                          | Ca_kabuli_Chr01 | 11685790                | T/C  | Gene_Ca_02582      | SYNONYMOUS_CODING             | Protein kinase,catalytic domain                    |
| Kabuli_wild_11685865 | 1399932641                          | Ca_kabuli_Chr01 | 11685865                | T/C  | Gene_Ca_02582      | SYNONYMOUS_CODING             | Protein kinase,catalytic domain                    |
| Kabuli_wild_11793443 | 1399932642                          | Ca_kabuli_Chr01 | 11793443                | C/A  | Gene_Ca_02573      | NON_SYNONYMOUS_CODING         | Alcohol dehydrogenase superfamily, zinc-containing |
| Kabuli_wild_11822305 | 1399932643                          | Ca_kabuli_Chr01 | 11822305                | G/T  | Gene_Ca_02567      | DOWNSTREAM                    | Glycosidehydrolase,family29                        |
| Kabuli_wild_11822309 | 1399932644                          | Ca_kabuli_Chr01 | 11822309                | C/A  | Gene_Ca_02567      | DOWNSTREAM                    | Glycosidehydrolase,family29                        |
| Kabuli_wild_11898340 | 1399932645                          | Ca_kabuli_Chr01 | 11898340                | T/C  | Gene_Ca_02562      | INTRON                        | NA                                                 |
| Kabuli_wild_12017225 | 1399932646                          | Ca_kabuli_Chr01 | 12017225                | T/C  | Gene_Ca_02553      | INTRON                        | SNF2-related                                       |
| Kabuli_wild_12169598 | 1399932647                          | Ca_kabuli_Chr01 | 12169598                | G/A  | Gene_Ca_02539      | INTRON                        | Homeobox                                           |
| Kabuli_wild_12189822 | 1399932648                          | Ca_kabuli_Chr01 | 12189822                | T/G  | Gene_Ca_02538      | SYNONYMOUS_CODING             | Double-strandedRNA-binding                         |
| Kabuli_wild_12198858 | 1399932649                          | Ca_kabuli_Chr01 | 12198858                | C/A  | Gene_Ca_02537      | NON_SYNONYMOUS_CODING         | Vacuola rfusion protein MON1                       |
| Kabuli_wild_12326230 | 1399932650                          | Ca_kabuli_Chr01 | 12326230                | A/G  | NA                 | INTERGENIC                    | NA                                                 |
| Kabuli_wild_12337445 | 1399932651                          | Ca_kabuli_Chr01 | 12337445                | C/T  | Gene_Ca_02516      | SYNONYMOUS_CODING             | AUX/IAAprotein                                     |
| Kabuli_wild_12391141 | 1399932652                          | Ca_kabuli_Chr01 | 12391141                | C/A  | Gene_Ca_02511      | UPSTREAM                      | NA                                                 |
| Kabuli_wild_12413012 | 1399932653                          | Ca_kabuli_Chr01 | 12413012                | G/T  | Gene_Ca_02509      | NON_SYNONYMOUS_CODING         | NA                                                 |
| Kabuli_wild_12413016 | 1399932654                          | Ca_kabuli_Chr01 | 12413016                | T/A  | Gene_Ca_02509      | NON_SYNONYMOUS_CODING         | NA                                                 |
| Kabuli_wild_12413025 | 1399932655                          | Ca_kabuli_Chr01 | 12413025                | G/C  | Gene_Ca_02509      | NON_SYNONYMOUS_CODING         | NA                                                 |
| Kabuli_wild_12465927 | 1399932656                          | Ca_kabuli_Chr01 | 12465927                | T/A  | NA                 | INTERGENIC                    | NA                                                 |
| Kabuli_wild_12465978 | 1399932657                          | Ca_kabuli_Chr01 | 12465978                | C/T  | NA                 | INTERGENIC                    | NA                                                 |
| Kabuli_wild_12588525 | 1399932658                          | Ca_kabuli_Chr01 | 12588525                | A/G  | Gene_Ca_02496      | INTRON                        | NA                                                 |
| Kabuli_wild_12674088 | 1399932659                          | Ca_kabuli_Chr01 | 12674088                | G/T  | Gene_Ca_02486      | INTRON                        | Haloaciddehydrogenase/epoxidehydrolase             |
| Kabuli_wild_12688435 | 1399932660                          | Ca_kabuli_Chr01 | 12688435                | A/C  | NA                 | INTERGENIC                    | NA                                                 |
| Kabuli_wild_12736353 | 1399932661                          | Ca_kabuli_Chr01 | 12736353                | A/C  | NA                 | INTERGENIC                    | NA                                                 |
| Kabuli_wild_12736354 | 1399932662                          | Ca_kabuli_Chr01 | 12736354                | G/C  | NA                 | INTERGENIC                    | NA                                                 |
| Kabuli_wild_12800597 | 1399932663                          | Ca_kabuli_Chr01 | 12800597                | G/T  | NA                 | INTERGENIC                    | NA                                                 |
| Kabuli_wild_12800601 | 1399932664                          | Ca_kabuli_Chr01 | 12800601                | T/A  | NA                 | INTERGENIC                    | NA                                                 |
| Kabuli_wild_12800607 | 1399932665                          | Ca_kabuli_Chr01 | 12800607                | T/A  | NA                 | INTERGENIC                    | NA                                                 |
| Kabuli_wild_12800610 | 1399932666                          | Ca_kabuli_Chr01 | 12800610                | A/C  | NA                 | INTERGENIC                    | NA                                                 |
| Kabuli_wild_12845445 | 1399932667                          | Ca_kabuli_Chr01 | 12845445                | A/C  | NA                 | INTERGENIC                    | NA                                                 |
| Kabuli_wild_12880408 | 1399932668                          | Ca_kabuli_Chr01 | 12880408                | G/A  | Gene_Ca_02457      | DOWNSTREAM                    | No apical meristem (NAM) protein                   |
| Kabuli_wild_12912656 | 1399932669                          | Ca_kabuli_Chr01 | 12912656                | C/A  | NA                 | INTERGENIC                    | NA                                                 |
| Kabuli_wild_12947367 | 1399932670                          | Ca_kabuli_Chr01 | 12947367                | T/C  | NA                 | INTERGENIC                    | NA                                                 |
| Kabuli_wild_12947378 | 1399932671                          | Ca_kabuli_Chr01 | 12947378                | G/A  | NA                 | INTERGENIC                    | NA                                                 |
| Kabuli_wild_12947395 | 1399932672                          | Ca_kabuli_Chr01 | 12947395                | C/T  | NA                 | INTERGENIC                    | NA                                                 |
| Kabuli_wild_12948174 | 1399932673                          | Ca_kabuli_Chr01 | 12948174                | A/G  | NA                 | INTERGENIC                    | NA                                                 |
| Kabuli_wild_12948219 | 1399932674                          | Ca_kabuli_Chr01 | 12948219                | G/A  | NA                 | INTERGENIC                    | NA                                                 |
| Kabuli_wild_12948257 | 1399932675                          | Ca_kabuli_Chr01 | 12948257                | A/T  | NA                 | INTERGENIC                    | NA                                                 |
| Kabuli_wild_12992423 | 1399932676                          | Ca_kabuli_Chr01 | 12992423                | A/C  | NA                 | INTERGENIC                    | NA                                                 |
| Kabuli_wild_12992445 | 1399932677                          | Ca_kabuli_Chr01 | 12992445                | A/C  | NA                 | INTERGENIC                    | NA                                                 |
| Kabuli_wild_12992569 | 1399932678                          | Ca_kabuli_Chr01 | 12992569                | A/G  | NA                 | INTERGENIC                    | NA                                                 |
| Kabuli_wild_13034707 | 1399932679                          | Ca_kabuli_Chr01 | 13034707                | C/A  | NA                 | INTERGENIC                    | NA                                                 |
| Kabuli_wild_13034708 | 1399932680                          | Ca_kabuli_Chr01 | 13034708                | T/G  | NA                 | INTERGENIC                    | NA                                                 |
| Kabuli_wild_13040645 | 1399932681                          | Ca_kabuli_Chr01 | 13040645                | T/G  | Gene_Ca_14068      | INTRON                        | ATPase,P-type,K/Mg/Cd/Cu/Zn/Na/Ca/Na/H-transporter |
| Kabuli_wild_13076695 | 1399932682                          | Ca_kabuli_Chr01 | 13076695                | G/A  | Gene_Ca_14071      | NON_SYNONYMOUS_CODING         | Zinc finger, RING-type                             |
| Kabuli_wild_13156427 | 1399932683                          | Ca_kabuli_Chr01 | 13156427                | A/C  | NA                 | INTERGENIC                    | NA                                                 |

| SNP IDs              | NCBI dbSNP accession IDs (NCBI_SS#) | Chromosomes     | Physical positions (bp) | SNPs | Gene accession IDs | Sequence components of genome | Putative functions                                                  |
|----------------------|-------------------------------------|-----------------|-------------------------|------|--------------------|-------------------------------|---------------------------------------------------------------------|
| Kabuli_wild_13156467 | 1399932684                          | Ca_kabuli_Chr01 | 13156467                | A/C  | NA                 | INTERGENIC                    | NA                                                                  |
| Kabuli_wild_13156473 | 1399932685                          | Ca_kabuli_Chr01 | 13156473                | A/C  | NA                 | INTERGENIC                    | NA                                                                  |
| Kabuli_wild_13158100 | 1399932686                          | Ca_kabuli_Chr01 | 13158100                | A/G  | NA                 | INTERGENIC                    | NA                                                                  |
| Kabuli_wild_13158110 | 1399932687                          | Ca_kabuli_Chr01 | 13158110                | G/C  | NA                 | INTERGENIC                    | NA                                                                  |
| Kabuli_wild_13158139 | 1399932688                          | Ca_kabuli_Chr01 | 13158139                | G/A  | NA                 | INTERGENIC                    | NA                                                                  |
| Kabuli_wild_13158142 | 1399932689                          | Ca_kabuli_Chr01 | 13158142                | C/T  | NA                 | INTERGENIC                    | NA                                                                  |
| Kabuli_wild_13158171 | 1399932690                          | Ca_kabuli_Chr01 | 13158171                | T/A  | NA                 | INTERGENIC                    | NA                                                                  |
| Kabuli_wild_13158192 | 1399932691                          | Ca_kabuli_Chr01 | 13158192                | T/C  | NA                 | INTERGENIC                    | NA                                                                  |
| Kabuli_wild_13158201 | 1399932692                          | Ca_kabuli_Chr01 | 13158201                | C/T  | NA                 | INTERGENIC                    | NA                                                                  |
| Kabuli_wild_13158244 | 1399932693                          | Ca_kabuli_Chr01 | 13158244                | C/T  | NA                 | INTERGENIC                    | NA                                                                  |
| Kabuli_wild_13369666 | 1399932694                          | Ca_kabuli_Chr01 | 13369666                | T/C  | Gene_Ca_14101      | INTRON                        | Protein kinase,catalytic domain                                     |
| Kabuli_wild_13370020 | 1399932695                          | Ca_kabuli_Chr01 | 13370020                | C/A  | Gene_Ca_14101      | NON_SYNONYMOUS_CODING         | Protein kinase,catalytic domain                                     |
| Kabuli_wild_13370021 | 1399932696                          | Ca_kabuli_Chr01 | 13370021                | A/G  | Gene_Ca_14101      | SYNONYMOUS_CODING             | Protein kinase,catalytic domain                                     |
| Kabuli_wild_13406001 | 1399932697                          | Ca_kabuli_Chr01 | 13406001                | A/C  | Gene_Ca_14104      | UPSTREAM                      | Forminotransferase,N-terminalsubdomain                              |
| Kabuli_wild_13497488 | 1399932698                          | Ca_kabuli_Chr01 | 13497488                | G/A  | Gene_Ca_14116      | INTRON                        | PhotosystemII Psp29,biogenesis                                      |
| Kabuli_wild_13497572 | 1399932699                          | Ca_kabuli_Chr01 | 13497572                | G/T  | Gene_Ca_14116      | INTRON                        | PhotosystemII Psp29,biogenesis                                      |
| Kabuli_wild_13549635 | 1399932700                          | Ca_kabuli_Chr01 | 13549635                | T/C  | Gene_Ca_14121      | SYNONYMOUS_CODING             | Kinesin,motordomain                                                 |
| Kabuli_wild_13550600 | 1399932701                          | Ca_kabuli_Chr01 | 13550600                | G/A  | Gene_Ca_14121      | INTRON                        | Kinesin,motordomain                                                 |
| Kabuli_wild_13560364 | 1399932702                          | Ca_kabuli_Chr01 | 13560364                | T/G  | Gene_Ca_14122      | UPSTREAM                      | Delayed-early response protein/equilibrative nucleoside transporter |
| Kabuli_wild_13590903 | 1399932703                          | Ca_kabuli_Chr01 | 13590903                | G/T  | Gene_Ca_14125      | SYNONYMOUS_CODING             | Protein kinase,catalytic domain                                     |
| Kabuli_wild_13591177 | 1399932704                          | Ca_kabuli_Chr01 | 13591177                | G/A  | Gene_Ca_14125      | NON_SYNONYMOUS_CODING         | Protein kinase,catalytic domain                                     |
| Kabuli_wild_13591203 | 1399932705                          | Ca_kabuli_Chr01 | 13591203                | C/G  | Gene_Ca_14125      | NON_SYNONYMOUS_CODING         | Protein kinase,catalytic domain                                     |
| Kabuli_wild_13596411 | 1399932706                          | Ca_kabuli_Chr01 | 13596411                | G/T  | NA                 | INTERGENIC                    | NA                                                                  |
| Kabuli_wild_13596528 | 1399932707                          | Ca_kabuli_Chr01 | 13596528                | T/A  | NA                 | INTERGENIC                    | NA                                                                  |
| Kabuli_wild_13596539 | 1399932708                          | Ca_kabuli_Chr01 | 13596539                | A/G  | NA                 | INTERGENIC                    | NA                                                                  |
| Kabuli_wild_13596590 | 1399932709                          | Ca_kabuli_Chr01 | 13596590                | T/C  | NA                 | INTERGENIC                    | NA                                                                  |
| Kabuli_wild_13596593 | 1399932710                          | Ca_kabuli_Chr01 | 13596593                | A/G  | NA                 | INTERGENIC                    | NA                                                                  |
| Kabuli_wild_13596621 | 1399932711                          | Ca_kabuli_Chr01 | 13596621                | C/T  | NA                 | INTERGENIC                    | NA                                                                  |
| Kabuli_wild_13596631 | 1399932712                          | Ca_kabuli_Chr01 | 13596631                | C/T  | NA                 | INTERGENIC                    | NA                                                                  |
| Kabuli_wild_13596659 | 1399932713                          | Ca_kabuli_Chr01 | 13596659                | T/A  | NA                 | INTERGENIC                    | NA                                                                  |
| Kabuli_wild_13607141 | 1399932714                          | Ca_kabuli_Chr01 | 13607141                | G/A  | Gene_Ca_14127      | SYNONYMOUS_CODING             | Protein kinase,catalytic domain                                     |
| Kabuli_wild_13607486 | 1399932715                          | Ca_kabuli_Chr01 | 13607486                | A/C  | Gene_Ca_14127      | SYNONYMOUS_CODING             | Protein kinase,catalytic domain                                     |
| Kabuli_wild_13641293 | 1399932716                          | Ca_kabuli_Chr01 | 13641293                | T/A  | Gene_Ca_14129      | INTRON                        | CCAAT-binding factor                                                |
| Kabuli_wild_13668759 | 1399932717                          | Ca_kabuli_Chr01 | 13668759                | T/A  | Gene_Ca_14130      | DOWNSTREAM                    | Calcium-bindingEF-hand                                              |
| Kabuli_wild_13680008 | 1399932718                          | Ca_kabuli_Chr01 | 13680008                | G/C  | NA                 | INTERGENIC                    | NA                                                                  |
| Kabuli_wild_13757012 | 1399932719                          | Ca_kabuli_Chr01 | 13757012                | C/T  | Gene_Ca_14138      | SYNONYMOUS_CODING             | SET domain                                                          |
| Kabuli_wild_13757052 | 1399932720                          | Ca_kabuli_Chr01 | 13757052                | A/C  | Gene_Ca_14138      | SYNONYMOUS_CODING             | SET domain                                                          |
| Kabuli_wild_13762410 | 1399932721                          | Ca_kabuli_Chr01 | 13762410                | C/A  | Gene_Ca_14138      | NON_SYNONYMOUS_CODING         | SET domain                                                          |
| Kabuli_wild_13769771 | 1399932722                          | Ca_kabuli_Chr01 | 13769771                | T/C  | NA                 | INTERGENIC                    | NA                                                                  |
| Kabuli_wild_13769805 | 1399932723                          | Ca_kabuli_Chr01 | 13769805                | C/T  | NA                 | INTERGENIC                    | NA                                                                  |
| Kabuli_wild_13782049 | 1399932724                          | Ca_kabuli_Chr01 | 13782049                | C/T  | Gene_Ca_14141      | SYNONYMOUS_CODING             | Glycosidehydrolase,family14B,plant                                  |
| Kabuli_wild_13828744 | 1399932725                          | Ca_kabuli_Chr01 | 13828744                | A/T  | Gene_Ca_14148      | INTRON                        | CCTdomain                                                           |
| Kabuli_wild_14015757 | 1399932726                          | Ca_kabuli_Chr01 | 14015757                | T/C  | Gene_Ca_07128      | NON_SYNONYMOUS_CODING         | Ionotropicglutamate receptor                                        |
| Kabuli_wild_14015865 | 1399932727                          | Ca_kabuli_Chr01 | 14015865                | A/C  | Gene_Ca_07128      | NON_SYNONYMOUS_CODING         | Ionotropicglutamate receptor                                        |

| SNP IDs              | NCBI dbSNP accession IDs (NCBI_SS#) | Chromosomes     | Physical positions (bp) | SNPs | Gene accession IDs | Sequence components of genome | Putative functions                                       |
|----------------------|-------------------------------------|-----------------|-------------------------|------|--------------------|-------------------------------|----------------------------------------------------------|
| Kabuli_wild_14047190 | 1399932728                          | Ca_kabuli_Chr01 | 14047190                | A/G  | Gene_Ca_07124      | NON_SYNONYMOUS_CODING         | AconitaseA/isopropylmalatedehydratasesmallsubunit,swivel |
| Kabuli_wild_14101640 | 1399932729                          | Ca_kabuli_Chr01 | 14101640                | T/C  | Gene_Ca_07122      | INTRON                        | Glycosyltransferase,family31                             |
| Kabuli_wild_14163718 | 1399932730                          | Ca_kabuli_Chr01 | 14163718                | T/G  | Gene_Ca_07118      | NON_SYNONYMOUS_CODING         | Prephenate dehydratase                                   |
| Kabuli_wild_14237273 | 1399932731                          | Ca_kabuli_Chr01 | 14237273                | A/T  | Gene_Ca_07112      | NON_SYNONYMOUS_CODING         | Cellulose synthase                                       |
| Kabuli_wild_14402048 | 1399932732                          | Ca_kabuli_Chr01 | 14402048                | A/G  | Gene_Ca_07094      | SYNONYMOUS_CODING             | Metallo-dependentphosphatase                             |
| Kabuli_wild_14511051 | 1399932733                          | Ca_kabuli_Chr01 | 14511051                | T/A  | Gene_Ca_07083      | INTRON                        | Protein kinase,catalytic domain                          |
| Kabuli_wild_14511053 | 1399932734                          | Ca_kabuli_Chr01 | 14511053                | T/A  | Gene_Ca_07083      | INTRON                        | Protein kinase,catalytic domain                          |
| Kabuli_wild_14511057 | 1399932735                          | Ca_kabuli_Chr01 | 14511057                | A/C  | Gene_Ca_07083      | INTRON                        | Protein kinase,catalytic domain                          |
| Kabuli_wild_14623271 | 1399932736                          | Ca_kabuli_Chr01 | 14623271                | T/C  | Gene_Ca_07072      | UPSTREAM                      | Dcp1-likedecapping                                       |
| Kabuli_wild_14623294 | 1399932737                          | Ca_kabuli_Chr01 | 14623294                | T/A  | Gene_Ca_07072      | UPSTREAM                      | Dcp1-likedecapping                                       |
| Kabuli_wild_14698492 | 1399932738                          | Ca_kabuli_Chr01 | 14698492                | G/C  | Gene_Ca_07061      | INTRON                        | Glycosidehydrolase,family17                              |
| Kabuli_wild_14698499 | 1399932739                          | Ca_kabuli_Chr01 | 14698499                | T/A  | Gene_Ca_07061      | INTRON                        | Glycosidehydrolase,family17                              |
| Kabuli_wild_14769866 | 1399932740                          | Ca_kabuli_Chr01 | 14769866                | T/C  | Gene_Ca_07053      | INTRON                        | NA                                                       |
| Kabuli_wild_14769887 | 1399932741                          | Ca_kabuli_Chr01 | 14769887                | G/A  | Gene_Ca_07053      | INTRON                        | NA                                                       |
| Kabuli_wild_14916633 | 1399932742                          | Ca_kabuli_Chr01 | 14916633                | G/C  | Gene_Ca_07041      | UPSTREAM                      | Ribosomal protein 60S                                    |
| Kabuli_wild_14959965 | 1399932743                          | Ca_kabuli_Chr01 | 14959965                | G/C  | Gene_Ca_07037      | INTRON                        | Golgin,RAB6-interacting                                  |
| Kabuli_wild_15140980 | 1399932744                          | Ca_kabuli_Chr01 | 15140980                | T/G  | Gene_Ca_07020      | INTRON                        | Zinc finger,PHD-type                                     |
| Kabuli_wild_15149240 | 1399932745                          | Ca_kabuli_Chr01 | 15149240                | A/C  | Gene_Ca_07019      | INTRON                        | Clathrin/coatmeradaptor,adaptin-like,N-terminal          |
| Kabuli_wild_15241302 | 1399932746                          | Ca_kabuli_Chr01 | 15241302                | A/G  | Gene_Ca_07010      | INTRON                        | ATP aseassembly factor ATP10, mitochondria               |
| Kabuli_wild_15246375 | 1399932747                          | Ca_kabuli_Chr01 | 15246375                | T/G  | NA                 | INTERGENIC                    | NA                                                       |
| Kabuli_wild_15253285 | 1399932748                          | Ca_kabuli_Chr01 | 15253285                | A/G  | Gene_Ca_07009      | UPSTREAM                      | PIG-P                                                    |
| Kabuli_wild_15291773 | 1399932749                          | Ca_kabuli_Chr01 | 15291773                | C/G  | NA                 | INTERGENIC                    | NA                                                       |
| Kabuli_wild_15319181 | 1399932750                          | Ca_kabuli_Chr01 | 15319181                | T/C  | Gene_Ca_07002      | SYNONYMOUS_CODING             | Zinc finger,PHD-type                                     |
| Kabuli_wild_15613071 | 1399932751                          | Ca_kabuli_Chr01 | 15613071                | A/C  | Gene_Ca_06983      | INTRON                        | RasGTPase                                                |
| Kabuli_wild_15636900 | 1399932752                          | Ca_kabuli_Chr01 | 15636900                | A/C  | NA                 | INTERGENIC                    | NA                                                       |
| Kabuli_wild_15683101 | 1399932753                          | Ca_kabuli_Chr01 | 15683101                | A/C  | NA                 | INTERGENIC                    | NA                                                       |
| Kabuli_wild_15683117 | 1399932754                          | Ca_kabuli_Chr01 | 15683117                | G/T  | NA                 | INTERGENIC                    | NA                                                       |
| Kabuli_wild_15760638 | 1399932755                          | Ca_kabuli_Chr01 | 15760638                | C/A  | Gene_Ca_06971      | INTRON                        | Domain of unknown function DUF1692                       |
| Kabuli_wild_15783972 | 1399932756                          | Ca_kabuli_Chr01 | 15783972                | T/G  | Gene_Ca_06969      | SYNONYMOUS_CODING             | Rab-GAP/TBCdomain                                        |
| Kabuli_wild_15862538 | 1399932757                          | Ca_kabuli_Chr01 | 15862538                | G/T  | Gene_Ca_06964      | STOP_GAINED                   | Oxoglutarate/iron-dependent oxygenase                    |
| Kabuli_wild_15960425 | 1399932758                          | Ca_kabuli_Chr01 | 15960425                | A/C  | Gene_Ca_06958      | INTRON                        | Glycosyltransferase,family8                              |
| Kabuli_wild_15965278 | 1399932759                          | Ca_kabuli_Chr01 | 15965278                | G/A  | NA                 | INTERGENIC                    | NA                                                       |
| Kabuli_wild_15989032 | 1399932760                          | Ca_kabuli_Chr01 | 15989032                | C/T  | Gene_Ca_06953      | NON_SYNONYMOUS_CODING         | Kinesin,motordomain                                      |
| Kabuli_wild_16061385 | 1399932761                          | Ca_kabuli_Chr01 | 16061385                | A/G  | Gene_Ca_06944      | DOWNSTREAM                    | Translation initiation factor1A(eIF-1A)                  |
| Kabuli_wild_16081360 | 1399932762                          | Ca_kabuli_Chr01 | 16081360                | A/C  | NA                 | INTERGENIC                    | NA                                                       |
| Kabuli_wild_16099437 | 1399932763                          | Ca_kabuli_Chr01 | 16099437                | T/G  | NA                 | INTERGENIC                    | NA                                                       |
| Kabuli_wild_16099438 | 1399932764                          | Ca_kabuli_Chr01 | 16099438                | G/A  | NA                 | INTERGENIC                    | NA                                                       |
| Kabuli_wild_16099444 | 1399932765                          | Ca_kabuli_Chr01 | 16099444                | T/C  | NA                 | INTERGENIC                    | NA                                                       |
| Kabuli_wild_16099457 | 1399932766                          | Ca_kabuli_Chr01 | 16099457                | T/C  | NA                 | INTERGENIC                    | NA                                                       |
| Kabuli_wild_16099459 | 1399932767                          | Ca_kabuli_Chr01 | 16099459                | T/C  | NA                 | INTERGENIC                    | NA                                                       |
| Kabuli_wild_16099460 | 1399932768                          | Ca_kabuli_Chr01 | 16099460                | G/A  | NA                 | INTERGENIC                    | NA                                                       |
| Kabuli_wild_16099468 | 1399932769                          | Ca_kabuli_Chr01 | 16099468                | G/A  | NA                 | INTERGENIC                    | NA                                                       |
| Kabuli_wild_16099476 | 1399932770                          | Ca_kabuli_Chr01 | 16099476                | T/G  | NA                 | INTERGENIC                    | NA                                                       |
| Kabuli_wild_16104255 | 1399932771                          | Ca_kabuli_Chr01 | 16104255                | G/T  | Gene_Ca_06941      | DOWNSTREAM                    | Integrase,catalyticcore                                  |

| SNP IDs              | NCBI dbSNP accession IDs (NCBI_SS#) | Chromosomes     | Physical positions (bp) | SNPs | Gene accession IDs | Sequence components of genome | Putative functions                                                  |
|----------------------|-------------------------------------|-----------------|-------------------------|------|--------------------|-------------------------------|---------------------------------------------------------------------|
| Kabuli_wild_16104275 | 1399932772                          | Ca_kabuli_Chr01 | 16104275                | C/T  | Gene_Ca_06941      | DOWNSTREAM                    | Integrase,catalyticcore                                             |
| Kabuli_wild_16104298 | 1399932773                          | Ca_kabuli_Chr01 | 16104298                | C/T  | Gene_Ca_06941      | DOWNSTREAM                    | Integrase,catalyticcore                                             |
| Kabuli_wild_16104334 | 1399932774                          | Ca_kabuli_Chr01 | 16104334                | T/G  | Gene_Ca_06941      | DOWNSTREAM                    | Integrase,catalyticcore                                             |
| Kabuli_wild_16104351 | 1399932775                          | Ca_kabuli_Chr01 | 16104351                | G/A  | Gene_Ca_06941      | DOWNSTREAM                    | Integrase,catalyticcore                                             |
| Kabuli_wild_16114607 | 1399932776                          | Ca_kabuli_Chr01 | 16114607                | C/A  | Gene_Ca_06940      | NON_SYNONYMOUS_CODING         | General substrate transporter                                       |
| Kabuli_wild_16196930 | 1399932777                          | Ca_kabuli_Chr01 | 16196930                | A/G  | NA                 | INTERGENIC                    | NA                                                                  |
| Kabuli_wild_16228039 | 1399932778                          | Ca_kabuli_Chr01 | 16228039                | C/A  | Gene_Ca_06935      | INTRON                        | NA                                                                  |
| Kabuli_wild_16228049 | 1399932779                          | Ca_kabuli_Chr01 | 16228049                | C/A  | Gene_Ca_06935      | INTRON                        | NA                                                                  |
| Kabuli_wild_16329161 | 1399932780                          | Ca_kabuli_Chr01 | 16329161                | G/A  | NA                 | INTERGENIC                    | NA                                                                  |
| Kabuli_wild_16376254 | 1399932781                          | Ca_kabuli_Chr01 | 16376254                | G/T  | Gene_Ca_06927      | NON_SYNONYMOUS_CODING         | Ubiquitin-associated/translation elongation factor EF1B, N-terminal |
| Kabuli_wild_16379239 | 1399932782                          | Ca_kabuli_Chr01 | 16379239                | A/G  | Gene_Ca_06927      | INTRON                        | NADPH-dependent FMN reductase                                       |
| Kabuli_wild_16379258 | 1399932783                          | Ca_kabuli_Chr01 | 16379258                | C/T  | Gene_Ca_06927      | INTRON                        | NADPH-dependent FMN reductase                                       |
| Kabuli_wild_16385920 | 1399932784                          | Ca_kabuli_Chr01 | 16385920                | A/G  | NA                 | INTERGENIC                    | NA                                                                  |
| Kabuli_wild_16454432 | 1399932785                          | Ca_kabuli_Chr01 | 16454432                | C/T  | NA                 | INTERGENIC                    | NA                                                                  |
| Kabuli_wild_16454462 | 1399932786                          | Ca_kabuli_Chr01 | 16454462                | T/C  | NA                 | INTERGENIC                    | NA                                                                  |
| Kabuli_wild_16474738 | 1399932787                          | Ca_kabuli_Chr01 | 16474738                | A/G  | Gene_Ca_06916      | INTRON                        | IQ motif,EF-handbinding site                                        |
| Kabuli_wild_16493894 | 1399932788                          | Ca_kabuli_Chr01 | 16493894                | A/G  | Gene_Ca_06914      | SYNONYMOUS_CODING             | PeptidaseS54,rhomboid                                               |
| Kabuli_wild_16575167 | 1399932789                          | Ca_kabuli_Chr01 | 16575167                | A/G  | Gene_Ca_06906      | INTRON                        | Proteinphosphatase2C-like                                           |
| Kabuli_wild_16578172 | 1399932790                          | Ca_kabuli_Chr01 | 16578172                | C/T  | NA                 | INTERGENIC                    | NA                                                                  |
| Kabuli_wild_16813611 | 1399932791                          | Ca_kabuli_Chr01 | 16813611                | T/G  | Gene_Ca_06890      | INTRON                        | NA                                                                  |
| Kabuli_wild_16933430 | 1399932792                          | Ca_kabuli_Chr01 | 16933430                | C/A  | NA                 | INTERGENIC                    | NA                                                                  |
| Kabuli_wild_16933431 | 1399932793                          | Ca_kabuli_Chr01 | 16933431                | T/G  | NA                 | INTERGENIC                    | NA                                                                  |
| Kabuli_wild_17023111 | 1399932794                          | Ca_kabuli_Chr01 | 17023111                | G/C  | Gene_Ca_06866      | NON_SYNONYMOUS_CODING         | Protein kinase,catalytic domain                                     |
| Kabuli_wild_17093640 | 1399932795                          | Ca_kabuli_Chr01 | 17093640                | T/C  | Gene_Ca_06863      | NON_SYNONYMOUS_CODING         | NA                                                                  |
| Kabuli_wild_17167019 | 1399932796                          | Ca_kabuli_Chr01 | 17167019                | G/A  | NA                 | INTERGENIC                    | NA                                                                  |
| Kabuli_wild_17167030 | 1399932797                          | Ca_kabuli_Chr01 | 17167030                | A/G  | NA                 | INTERGENIC                    | NA                                                                  |
| Kabuli_wild_17170727 | 1399932798                          | Ca_kabuli_Chr01 | 17170727                | T/C  | NA                 | INTERGENIC                    | NA                                                                  |
| Kabuli_wild_17194835 | 1399932799                          | Ca_kabuli_Chr01 | 17194835                | C/T  | NA                 | INTERGENIC                    | NA                                                                  |
| Kabuli_wild_17326647 | 1399932800                          | Ca_kabuli_Chr01 | 17326647                | A/C  | NA                 | INTERGENIC                    | NA                                                                  |
| Kabuli_wild_17328721 | 1399932801                          | Ca_kabuli_Chr01 | 17328721                | G/A  | Gene_Ca_22781      | SYNONYMOUS_CODING             | Bromodomain                                                         |
| Kabuli_wild_17359686 | 1399932802                          | Ca_kabuli_Chr01 | 17359686                | C/T  | Gene_Ca_22785      | INTRON                        | Domain of unknown function DUF625                                   |
| Kabuli_wild_17359688 | 1399932803                          | Ca_kabuli_Chr01 | 17359688                | A/C  | Gene_Ca_22785      | INTRON                        | Domain of unknown function DUF625                                   |
| Kabuli_wild_17363322 | 1399932804                          | Ca_kabuli_Chr01 | 17363322                | G/A  | Gene_Ca_22785      | INTRON                        | Domain of unknown function DUF625                                   |
| Kabuli_wild_17386808 | 1399932805                          | Ca_kabuli_Chr01 | 17386808                | T/C  | Gene_Ca_22785      | INTRON                        | Domain of unknown function DUF625                                   |
| Kabuli_wild_17395543 | 1399932806                          | Ca_kabuli_Chr01 | 17395543                | C/A  | Gene_Ca_22785      | NON_SYNONYMOUS_CODING         | Domain of unknown function DUF625                                   |
| Kabuli_wild_17404511 | 1399932807                          | Ca_kabuli_Chr01 | 17404511                | C/A  | NA                 | INTERGENIC                    | NA                                                                  |
| Kabuli_wild_17437336 | 1399932808                          | Ca_kabuli_Chr01 | 17437336                | G/C  | Gene_Ca_14789      | SYNONYMOUS_CODING             | Glycosidehydrolase,family19,catalytic                               |
| Kabuli_wild_17462563 | 1399932809                          | Ca_kabuli_Chr01 | 17462563                | C/A  | NA                 | INTERGENIC                    | NA                                                                  |
| Kabuli_wild_17462564 | 1399932810                          | Ca_kabuli_Chr01 | 17462564                | G/A  | NA                 | INTERGENIC                    | NA                                                                  |
| Kabuli_wild_17462577 | 1399932811                          | Ca_kabuli_Chr01 | 17462577                | C/T  | NA                 | INTERGENIC                    | NA                                                                  |
| Kabuli_wild_17462593 | 1399932812                          | Ca_kabuli_Chr01 | 17462593                | G/T  | NA                 | INTERGENIC                    | NA                                                                  |
| Kabuli_wild_17560161 | 1399932813                          | Ca_kabuli_Chr01 | 17560161                | C/T  | Gene_Ca_14780      | NON_SYNONYMOUS_CODING         | Signal transduction response regulator, receiverdomain              |
| Kabuli_wild_17763947 | 1399932814                          | Ca_kabuli_Chr01 | 17763947                | G/A  | Gene_Ca_14761      | SYNONYMOUS_CODING             | Lipase,class3                                                       |
| Kabuli_wild_17799655 | 1399932815                          | Ca_kabuli_Chr01 | 17799655                | C/A  | Gene_Ca_14758      | NON_SYNONYMOUS_CODING         | Pathogenesis-related transcriptional factor/ERF, DNA-binding        |



| SNP IDs              | NCBI dbSNP accession IDs (NCBI_SS#) | Chromosomes     | Physical positions (bp) | SNPs | Gene accession IDs | Sequence components of genome | Putative functions                |
|----------------------|-------------------------------------|-----------------|-------------------------|------|--------------------|-------------------------------|-----------------------------------|
| Kabuli_wild_17963953 | 1399932816                          | Ca_kabuli_Chr01 | 17963953                | A/C  | Gene_Ca_14746      | SYNONYMOUS_CODING             | Crotonase,core                    |
| Kabuli_wild_17983301 | 1399932817                          | Ca_kabuli_Chr01 | 17983301                | T/G  | Gene_Ca_14744      | SYNONYMOUS_CODING             | RAG1-activatingprotein-1-related  |
| Kabuli_wild_17983310 | 1399932818                          | Ca_kabuli_Chr01 | 17983310                | T/G  | Gene_Ca_14744      | SYNONYMOUS_CODING             | RAG1-activatingprotein-1-related  |
| Kabuli_wild_17983319 | 1399932819                          | Ca_kabuli_Chr01 | 17983319                | T/G  | Gene_Ca_14744      | SYNONYMOUS_CODING             | RAG1-activatingprotein-1-related  |
| Kabuli_wild_18015888 | 1399932820                          | Ca_kabuli_Chr01 | 18015888                | A/G  | Gene_Ca_14741      | NON_SYNONYMOUS_CODING         | Pentatricopeptide repeat          |
| Kabuli_wild_18016481 | 1399932821                          | Ca_kabuli_Chr01 | 18016481                | G/A  | Gene_Ca_14741      | NON_SYNONYMOUS_CODING         | Pentatricopeptide repeat          |
| Kabuli_wild_18017316 | 1399932822                          | Ca_kabuli_Chr01 | 18017316                | T/C  | Gene_Ca_14741      | DOWNSTREAM                    | Pentatricopeptide repeat          |
| Kabuli_wild_18064930 | 1399932823                          | Ca_kabuli_Chr01 | 18064930                | C/T  | Gene_Ca_14736      | NON_SYNONYMOUS_CODING         | NA                                |
| Kabuli_wild_18065022 | 1399932824                          | Ca_kabuli_Chr01 | 18065022                | G/A  | Gene_Ca_14736      | SYNONYMOUS_CODING             | NA                                |
| Kabuli_wild_18065239 | 1399932825                          | Ca_kabuli_Chr01 | 18065239                | T/C  | Gene_Ca_14736      | NON_SYNONYMOUS_CODING         | NA                                |
| Kabuli_wild_18068126 | 1399932826                          | Ca_kabuli_Chr01 | 18068126                | T/C  | Gene_Ca_14736      | NON_SYNONYMOUS_CODING         | NA                                |
| Kabuli_wild_18092704 | 1399932827                          | Ca_kabuli_Chr01 | 18092704                | T/G  | NA                 | INTERGENIC                    | NA                                |
| Kabuli_wild_18131516 | 1399932828                          | Ca_kabuli_Chr01 | 18131516                | T/G  | NA                 | INTERGENIC                    | NA                                |
| Kabuli_wild_18150178 | 1399932829                          | Ca_kabuli_Chr01 | 18150178                | G/A  | NA                 | INTERGENIC                    | NA                                |
| Kabuli_wild_18156634 | 1399932830                          | Ca_kabuli_Chr01 | 18156634                | A/G  | Gene_Ca_14728      | UPSTREAM                      | Skb1 methyltransferase            |
| Kabuli_wild_18172762 | 1399932831                          | Ca_kabuli_Chr01 | 18172762                | G/T  | NA                 | INTERGENIC                    | NA                                |
| Kabuli_wild_18198444 | 1399932832                          | Ca_kabuli_Chr01 | 18198444                | C/T  | Gene_Ca_14723      | INTRON                        | NA                                |
| Kabuli_wild_18488172 | 1399932833                          | Ca_kabuli_Chr01 | 18488172                | G/A  | NA                 | INTERGENIC                    | NA                                |
| Kabuli_wild_18763911 | 1399932834                          | Ca_kabuli_Chr01 | 18763911                | C/A  | Gene_Ca_17380      | INTRON                        | SET domain                        |
| Kabuli_wild_18763916 | 1399932835                          | Ca_kabuli_Chr01 | 18763916                | G/A  | Gene_Ca_17380      | INTRON                        | SET domain                        |
| Kabuli_wild_18764225 | 1399932836                          | Ca_kabuli_Chr01 | 18764225                | C/T  | Gene_Ca_17380      | INTRON                        | SET domain                        |
| Kabuli_wild_18797321 | 1399932837                          | Ca_kabuli_Chr01 | 18797321                | C/G  | NA                 | INTERGENIC                    | NA                                |
| Kabuli_wild_18890616 | 1399932838                          | Ca_kabuli_Chr01 | 18890616                | G/A  | Gene_Ca_17371      | SYNONYMOUS_CODING             | Parallelbeta-helixrepeat          |
| Kabuli_wild_18910202 | 1399932839                          | Ca_kabuli_Chr01 | 18910202                | G/A  | NA                 | INTERGENIC                    | NA                                |
| Kabuli_wild_19000445 | 1399932840                          | Ca_kabuli_Chr01 | 19000445                | T/C  | NA                 | INTERGENIC                    | NA                                |
| Kabuli_wild_19130872 | 1399932841                          | Ca_kabuli_Chr01 | 19130872                | G/A  | NA                 | INTERGENIC                    | NA                                |
| Kabuli_wild_19130883 | 1399932842                          | Ca_kabuli_Chr01 | 19130883                | C/A  | NA                 | INTERGENIC                    | NA                                |
| Kabuli_wild_19130884 | 1399932843                          | Ca_kabuli_Chr01 | 19130884                | C/A  | NA                 | INTERGENIC                    | NA                                |
| Kabuli_wild_19130894 | 1399932844                          | Ca_kabuli_Chr01 | 19130894                | T/C  | NA                 | INTERGENIC                    | NA                                |
| Kabuli_wild_19165730 | 1399932845                          | Ca_kabuli_Chr01 | 19165730                | A/T  | NA                 | INTERGENIC                    | NA                                |
| Kabuli_wild_19165742 | 1399932846                          | Ca_kabuli_Chr01 | 19165742                | G/T  | NA                 | INTERGENIC                    | NA                                |
| Kabuli_wild_19218067 | 1399932847                          | Ca_kabuli_Chr01 | 19218067                | G/A  | NA                 | INTERGENIC                    | NA                                |
| Kabuli_wild_19218069 | 1399932848                          | Ca_kabuli_Chr01 | 19218069                | T/A  | NA                 | INTERGENIC                    | NA                                |
| Kabuli_wild_19218093 | 1399932849                          | Ca_kabuli_Chr01 | 19218093                | T/G  | NA                 | INTERGENIC                    | NA                                |
| Kabuli_wild_19218136 | 1399932850                          | Ca_kabuli_Chr01 | 19218136                | G/A  | NA                 | INTERGENIC                    | NA                                |
| Kabuli_wild_19218140 | 1399932851                          | Ca_kabuli_Chr01 | 19218140                | C/A  | NA                 | INTERGENIC                    | NA                                |
| Kabuli_wild_19254161 | 1399932852                          | Ca_kabuli_Chr01 | 19254161                | A/G  | Gene_Ca_17349      | INTRON                        | NA                                |
| Kabuli_wild_19359812 | 1399932853                          | Ca_kabuli_Chr01 | 19359812                | A/C  | Gene_Ca_17340      | SYNONYMOUS_CODING             | Pentatricopeptide repeat          |
| Kabuli_wild_19359844 | 1399932854                          | Ca_kabuli_Chr01 | 19359844                | C/A  | Gene_Ca_17340      | NON_SYNONYMOUS_CODING         | Pentatricopeptide repeat          |
| Kabuli_wild_19526320 | 1399932855                          | Ca_kabuli_Chr01 | 19526320                | T/C  | Gene_Ca_08868      | NON_SYNONYMOUS_CODING         | Aldose1-epimerase                 |
| Kabuli_wild_19526652 | 1399932856                          | Ca_kabuli_Chr01 | 19526652                | G/T  | Gene_Ca_08868      | INTRON                        | Aldose1-epimerase                 |
| Kabuli_wild_19572408 | 1399932857                          | Ca_kabuli_Chr01 | 19572408                | C/T  | Gene_Ca_08866      | INTRON                        | Pumilio RNA-binding repeat        |
| Kabuli_wild_19572494 | 1399932858                          | Ca_kabuli_Chr01 | 19572494                | G/C  | Gene_Ca_08866      | INTRON                        | Pumilio RNA-binding repeat        |
| Kabuli_wild_19591671 | 1399932859                          | Ca_kabuli_Chr01 | 19591671                | A/G  | Gene_Ca_08863      | DOWNSTREAM                    | Domain of unknown function DUF630 |

| SNP IDs              | NCBI dbSNP accession IDs (NCBI_SS#) | Chromosomes       | Physical positions (bp) | SNPs | Gene accession IDs | Sequence components of genome | Putative functions                           |
|----------------------|-------------------------------------|-------------------|-------------------------|------|--------------------|-------------------------------|----------------------------------------------|
| Kabuli_wild_19787122 | 1399932860                          | Ca_kabuli_Chrom01 | 19787122                | G/A  | NA                 | INTERGENIC                    | NA                                           |
| Kabuli_wild_19903665 | 1399932861                          | Ca_kabuli_Chrom01 | 19903665                | A/G  | Gene_Ca_08847      | INTRON                        | RNA polymerase I associated factor, A49-like |
| Kabuli_wild_19903683 | 1399932862                          | Ca_kabuli_Chrom01 | 19903683                | G/A  | Gene_Ca_08847      | INTRON                        | RNA polymerase I associated factor, A49-like |
| Kabuli_wild_19903686 | 1399932863                          | Ca_kabuli_Chrom01 | 19903686                | T/A  | Gene_Ca_08847      | INTRON                        | RNA polymerase I associated factor, A49-like |
| Kabuli_wild_19903690 | 1399932864                          | Ca_kabuli_Chrom01 | 19903690                | A/G  | Gene_Ca_08847      | INTRON                        | RNA polymerase I associated factor, A49-like |
| Kabuli_wild_19903693 | 1399932865                          | Ca_kabuli_Chrom01 | 19903693                | G/T  | Gene_Ca_08847      | INTRON                        | RNA polymerase I associated factor, A49-like |
| Kabuli_wild_19903701 | 1399932866                          | Ca_kabuli_Chrom01 | 19903701                | G/A  | Gene_Ca_08847      | INTRON                        | RNA polymerase I associated factor, A49-like |
| Kabuli_wild_19903704 | 1399932867                          | Ca_kabuli_Chrom01 | 19903704                | G/A  | Gene_Ca_08847      | INTRON                        | RNA polymerase I associated factor, A49-like |
| Kabuli_wild_20016525 | 1399932868                          | Ca_kabuli_Chrom01 | 20016525                | C/T  | Gene_Ca_08842      | DOWNSTREAM                    | NA                                           |
| Kabuli_wild_20021166 | 1399932869                          | Ca_kabuli_Chrom01 | 20021166                | T/C  | Gene_Ca_08841      | INTRON                        | ANTH                                         |
| Kabuli_wild_20069962 | 1399932870                          | Ca_kabuli_Chrom01 | 20069962                | A/G  | Gene_Ca_08835      | UPSTREAM                      | NA                                           |
| Kabuli_wild_20069963 | 1399932871                          | Ca_kabuli_Chrom01 | 20069963                | A/G  | Gene_Ca_08835      | UPSTREAM                      | NA                                           |
| Kabuli_wild_20070090 | 1399932872                          | Ca_kabuli_Chrom01 | 20070090                | G/A  | Gene_Ca_08835      | UPSTREAM                      | NA                                           |
| Kabuli_wild_20070102 | 1399932873                          | Ca_kabuli_Chrom01 | 20070102                | C/T  | Gene_Ca_08835      | UPSTREAM                      | NA                                           |
| Kabuli_wild_20070103 | 1399932874                          | Ca_kabuli_Chrom01 | 20070103                | C/T  | Gene_Ca_08835      | UPSTREAM                      | NA                                           |
| Kabuli_wild_20070104 | 1399932875                          | Ca_kabuli_Chrom01 | 20070104                | A/G  | Gene_Ca_08835      | UPSTREAM                      | NA                                           |
| Kabuli_wild_20091291 | 1399932876                          | Ca_kabuli_Chrom01 | 20091291                | T/G  | Gene_Ca_08834      | NON_SYNONYMOUS_CODING         | BRCT                                         |
| Kabuli_wild_20113571 | 1399932877                          | Ca_kabuli_Chrom01 | 20113571                | G/C  | Gene_Ca_08833      | INTRON                        | Metallo-dependentphosphatase                 |
| Kabuli_wild_21577377 | 1399932878                          | Ca_kabuli_Chrom01 | 21577377                | C/T  | Gene_Ca_22120      | NON_SYNONYMOUS_CODING         | NA                                           |
| Kabuli_wild_21881142 | 1399932879                          | Ca_kabuli_Chrom01 | 21881142                | G/A  | Gene_Ca_22109      | NON_SYNONYMOUS_CODING         | NA                                           |
| Kabuli_wild_21881174 | 1399932880                          | Ca_kabuli_Chrom01 | 21881174                | G/T  | Gene_Ca_22109      | SYNONYMOUS_CODING             | NA                                           |
| Kabuli_wild_21881178 | 1399932881                          | Ca_kabuli_Chrom01 | 21881178                | G/T  | Gene_Ca_22109      | NON_SYNONYMOUS_CODING         | NA                                           |
| Kabuli_wild_22422226 | 1399932882                          | Ca_kabuli_Chrom01 | 22422226                | C/T  | Gene_Ca_20627      | SYNONYMOUS_CODING             | NA                                           |
| Kabuli_wild_22465555 | 1399932883                          | Ca_kabuli_Chrom01 | 22465555                | C/T  | NA                 | INTERGENIC                    | NA                                           |
| Kabuli_wild_22719581 | 1399932884                          | Ca_kabuli_Chrom01 | 22719581                | T/G  | NA                 | INTERGENIC                    | NA                                           |
| Kabuli_wild_22743361 | 1399932885                          | Ca_kabuli_Chrom01 | 22743361                | T/G  | Gene_Ca_20613      | NON_SYNONYMOUS_CODING         | Nucleosome assembl yprotein (NAP)            |
| Kabuli_wild_23129094 | 1399932886                          | Ca_kabuli_Chrom01 | 23129094                | C/T  | Gene_Ca_22358      | INTRON                        | Helicase,C-terminal                          |
| Kabuli_wild_23131178 | 1399932887                          | Ca_kabuli_Chrom01 | 23131178                | A/C  | Gene_Ca_22358      | INTRON                        | Helicase,C-terminal                          |
| Kabuli_wild_23148736 | 1399932888                          | Ca_kabuli_Chrom01 | 23148736                | A/C  | Gene_Ca_22359      | SYNONYMOUS_CODING             | Initiation factor2B-related                  |
| Kabuli_wild_23149053 | 1399932889                          | Ca_kabuli_Chrom01 | 23149053                | A/G  | Gene_Ca_22359      | SYNONYMOUS_CODING             | Initiation factor2B-related                  |
| Kabuli_wild_23149096 | 1399932890                          | Ca_kabuli_Chrom01 | 23149096                | A/C  | Gene_Ca_22359      | NON_SYNONYMOUS_CODING         | Initiation factor2B-related                  |
| Kabuli_wild_23382483 | 1399932891                          | Ca_kabuli_Chrom01 | 23382483                | T/A  | NA                 | INTERGENIC                    | NA                                           |
| Kabuli_wild_23382682 | 1399932892                          | Ca_kabuli_Chrom01 | 23382682                | T/A  | NA                 | INTERGENIC                    | NA                                           |
| Kabuli_wild_23522587 | 1399932893                          | Ca_kabuli_Chrom01 | 23522587                | G/A  | NA                 | INTERGENIC                    | NA                                           |
| Kabuli_wild_23555158 | 1399932894                          | Ca_kabuli_Chrom01 | 23555158                | T/G  | Gene_Ca_19312      | SYNONYMOUS_CODING             | vonWille brand factor,typeA                  |
| Kabuli_wild_23724947 | 1399932895                          | Ca_kabuli_Chrom01 | 23724947                | C/A  | Gene_Ca_19301      | NON_SYNONYMOUS_CODING         | Peptidase C48, SUMO/Sentrin/Ubl1             |
| Kabuli_wild_23885494 | 1399932896                          | Ca_kabuli_Chrom01 | 23885494                | G/C  | NA                 | INTERGENIC                    | NA                                           |
| Kabuli_wild_23885509 | 1399932897                          | Ca_kabuli_Chrom01 | 23885509                | T/C  | NA                 | INTERGENIC                    | NA                                           |
| Kabuli_wild_23926963 | 1399932898                          | Ca_kabuli_Chrom01 | 23926963                | T/C  | NA                 | INTERGENIC                    | NA                                           |
| Kabuli_wild_23926980 | 1399932899                          | Ca_kabuli_Chrom01 | 23926980                | C/T  | NA                 | INTERGENIC                    | NA                                           |
| Kabuli_wild_23926983 | 1399932900                          | Ca_kabuli_Chrom01 | 23926983                | G/T  | NA                 | INTERGENIC                    | NA                                           |
| Kabuli_wild_23926985 | 1399932901                          | Ca_kabuli_Chrom01 | 23926985                | C/T  | NA                 | INTERGENIC                    | NA                                           |
| Kabuli_wild_23926986 | 1399932902                          | Ca_kabuli_Chrom01 | 23926986                | T/C  | NA                 | INTERGENIC                    | NA                                           |
| Kabuli_wild_23927016 | 1399932903                          | Ca_kabuli_Chrom01 | 23927016                | G/A  | NA                 | INTERGENIC                    | NA                                           |

| SNP IDs              | NCBI dbSNP accession IDs (NCBI_SS#) | Chromosomes     | Physical positions (bp) | SNPs | Gene accession IDs | Sequence components of genome | Putative functions               |
|----------------------|-------------------------------------|-----------------|-------------------------|------|--------------------|-------------------------------|----------------------------------|
| Kabuli_wild_23927018 | 1399932904                          | Ca_kabuli_Chr01 | 23927018                | T/A  | NA                 | INTERGENIC                    | NA                               |
| Kabuli_wild_23927022 | 1399932905                          | Ca_kabuli_Chr01 | 23927022                | T/A  | NA                 | INTERGENIC                    | NA                               |
| Kabuli_wild_23941438 | 1399932906                          | Ca_kabuli_Chr01 | 23941438                | G/A  | NA                 | INTERGENIC                    | NA                               |
| Kabuli_wild_24021013 | 1399932907                          | Ca_kabuli_Chr01 | 24021013                | C/T  | NA                 | INTERGENIC                    | NA                               |
| Kabuli_wild_24071014 | 1399932908                          | Ca_kabuli_Chr01 | 24071014                | T/G  | Gene_Ca_19289      | INTRON                        | AUX/IAAprotein                   |
| Kabuli_wild_24173273 | 1399932909                          | Ca_kabuli_Chr01 | 24173273                | A/G  | NA                 | INTERGENIC                    | NA                               |
| Kabuli_wild_24226808 | 1399932910                          | Ca_kabuli_Chr01 | 24226808                | A/G  | Gene_Ca_19284      | NON_SYNONYMOUS_CODING         | Beta-ketoacylsynthase            |
| Kabuli_wild_24450415 | 1399932911                          | Ca_kabuli_Chr01 | 24450415                | T/C  | Gene_Ca_18343      | INTRON                        | Ribulose-phosphate3-epimerase    |
| Kabuli_wild_24450483 | 1399932912                          | Ca_kabuli_Chr01 | 24450483                | T/G  | Gene_Ca_18343      | INTRON                        | Ribulose-phosphate3-epimerase    |
| Kabuli_wild_24450511 | 1399932913                          | Ca_kabuli_Chr01 | 24450511                | A/G  | Gene_Ca_18343      | INTRON                        | Ribulose-phosphate3-epimerase    |
| Kabuli_wild_24560005 | 1399932914                          | Ca_kabuli_Chr01 | 24560005                | A/C  | NA                 | INTERGENIC                    | NA                               |
| Kabuli_wild_24560013 | 1399932915                          | Ca_kabuli_Chr01 | 24560013                | A/C  | NA                 | INTERGENIC                    | NA                               |
| Kabuli_wild_24625378 | 1399932916                          | Ca_kabuli_Chr01 | 24625378                | G/A  | NA                 | INTERGENIC                    | NA                               |
| Kabuli_wild_24625381 | 1399932917                          | Ca_kabuli_Chr01 | 24625381                | G/A  | NA                 | INTERGENIC                    | NA                               |
| Kabuli_wild_24625390 | 1399932918                          | Ca_kabuli_Chr01 | 24625390                | T/A  | NA                 | INTERGENIC                    | NA                               |
| Kabuli_wild_24625417 | 1399932919                          | Ca_kabuli_Chr01 | 24625417                | G/A  | NA                 | INTERGENIC                    | NA                               |
| Kabuli_wild_24625442 | 1399932920                          | Ca_kabuli_Chr01 | 24625442                | G/A  | NA                 | INTERGENIC                    | NA                               |
| Kabuli_wild_24625496 | 1399932921                          | Ca_kabuli_Chr01 | 24625496                | A/G  | NA                 | INTERGENIC                    | NA                               |
| Kabuli_wild_24636949 | 1399932922                          | Ca_kabuli_Chr01 | 24636949                | C/T  | NA                 | INTERGENIC                    | NA                               |
| Kabuli_wild_24658560 | 1399932923                          | Ca_kabuli_Chr01 | 24658560                | A/T  | Gene_Ca_18337      | STOP_GAINED                   | AuxinresponsiveSAURprotein       |
| Kabuli_wild_24693443 | 1399932924                          | Ca_kabuli_Chr01 | 24693443                | G/A  | NA                 | INTERGENIC                    | NA                               |
| Kabuli_wild_24693477 | 1399932925                          | Ca_kabuli_Chr01 | 24693477                | C/T  | NA                 | INTERGENIC                    | NA                               |
| Kabuli_wild_24693518 | 1399932926                          | Ca_kabuli_Chr01 | 24693518                | G/A  | NA                 | INTERGENIC                    | NA                               |
| Kabuli_wild_24693521 | 1399932927                          | Ca_kabuli_Chr01 | 24693521                | G/A  | NA                 | INTERGENIC                    | NA                               |
| Kabuli_wild_24693527 | 1399932928                          | Ca_kabuli_Chr01 | 24693527                | G/A  | NA                 | INTERGENIC                    | NA                               |
| Kabuli_wild_24693533 | 1399932929                          | Ca_kabuli_Chr01 | 24693533                | G/A  | NA                 | INTERGENIC                    | NA                               |
| Kabuli_wild_24693550 | 1399932930                          | Ca_kabuli_Chr01 | 24693550                | G/A  | NA                 | INTERGENIC                    | NA                               |
| Kabuli_wild_24693555 | 1399932931                          | Ca_kabuli_Chr01 | 24693555                | G/A  | NA                 | INTERGENIC                    | NA                               |
| Kabuli_wild_24693571 | 1399932932                          | Ca_kabuli_Chr01 | 24693571                | G/A  | NA                 | INTERGENIC                    | NA                               |
| Kabuli_wild_24693585 | 1399932933                          | Ca_kabuli_Chr01 | 24693585                | T/A  | NA                 | INTERGENIC                    | NA                               |
| Kabuli_wild_24693603 | 1399932934                          | Ca_kabuli_Chr01 | 24693603                | T/C  | NA                 | INTERGENIC                    | NA                               |
| Kabuli_wild_24828245 | 1399932935                          | Ca_kabuli_Chr01 | 24828245                | A/C  | NA                 | INTERGENIC                    | NA                               |
| Kabuli_wild_24845148 | 1399932936                          | Ca_kabuli_Chr01 | 24845148                | A/C  | Gene_Ca_18325      | SYNONYMOUS_CODING             | Zinc finger, RING-type           |
| Kabuli_wild_25083482 | 1399932937                          | Ca_kabuli_Chr01 | 25083482                | A/C  | Gene_Ca_18313      | INTRON                        | Pectinesterase,catalytic         |
| Kabuli_wild_25121972 | 1399932938                          | Ca_kabuli_Chr01 | 25121972                | G/A  | Gene_Ca_18312      | UPSTREAM                      | Pectinesterase,catalytic         |
| Kabuli_wild_25524375 | 1399932939                          | Ca_kabuli_Chr01 | 25524375                | C/T  | Gene_Ca_25081      | NON_SYNONYMOUS_CODING         | Peptidase C48, SUMO/Sentrin/Ubl1 |
| Kabuli_wild_25524377 | 1399932940                          | Ca_kabuli_Chr01 | 25524377                | A/G  | Gene_Ca_25081      | START_LOST                    | Peptidase C48, SUMO/Sentrin/Ubl1 |
| Kabuli_wild_25524382 | 1399932941                          | Ca_kabuli_Chr01 | 25524382                | C/T  | NA                 | INTERGENIC                    | NA                               |
| Kabuli_wild_25524410 | 1399932942                          | Ca_kabuli_Chr01 | 25524410                | C/T  | NA                 | INTERGENIC                    | NA                               |
| Kabuli_wild_25524423 | 1399932943                          | Ca_kabuli_Chr01 | 25524423                | G/T  | NA                 | INTERGENIC                    | NA                               |
| Kabuli_wild_25524425 | 1399932944                          | Ca_kabuli_Chr01 | 25524425                | C/T  | NA                 | INTERGENIC                    | NA                               |
| Kabuli_wild_25524441 | 1399932945                          | Ca_kabuli_Chr01 | 25524441                | T/C  | NA                 | INTERGENIC                    | NA                               |
| Kabuli_wild_25524450 | 1399932946                          | Ca_kabuli_Chr01 | 25524450                | C/T  | NA                 | INTERGENIC                    | NA                               |
| Kabuli_wild_25524451 | 1399932947                          | Ca_kabuli_Chr01 | 25524451                | A/T  | NA                 | INTERGENIC                    | NA                               |

| SNP IDs               | NCBI dbSNP accession IDs (NCBI_SS#) | Chromosomes     | Physical positions (bp) | SNPs | Gene accession IDs | Sequence components of genome | Putative functions                       |
|-----------------------|-------------------------------------|-----------------|-------------------------|------|--------------------|-------------------------------|------------------------------------------|
| Kabuli_wild_25524452  | 1399932948                          | Ca_kabuli_Chr01 | 25524452                | G/A  | NA                 | INTERGENIC                    | NA                                       |
| Kabuli_wild_25524453  | 1399932949                          | Ca_kabuli_Chr01 | 25524453                | C/T  | NA                 | INTERGENIC                    | NA                                       |
| Kabuli_wild_25524455  | 1399932950                          | Ca_kabuli_Chr01 | 25524455                | A/G  | NA                 | INTERGENIC                    | NA                                       |
| Kabuli_wild_25524456  | 1399932951                          | Ca_kabuli_Chr01 | 25524456                | C/T  | NA                 | INTERGENIC                    | NA                                       |
| Kabuli_wild_25524458  | 1399932952                          | Ca_kabuli_Chr01 | 25524458                | G/A  | NA                 | INTERGENIC                    | NA                                       |
| Kabuli_wild_25524460  | 1399932953                          | Ca_kabuli_Chr01 | 25524460                | G/A  | NA                 | INTERGENIC                    | NA                                       |
| Kabuli_wild_25524465  | 1399932954                          | Ca_kabuli_Chr01 | 25524465                | A/G  | NA                 | INTERGENIC                    | NA                                       |
| Kabuli_wild_25524470  | 1399932955                          | Ca_kabuli_Chr01 | 25524470                | C/T  | NA                 | INTERGENIC                    | NA                                       |
| Kabuli_wild_25524473  | 1399932956                          | Ca_kabuli_Chr01 | 25524473                | C/T  | NA                 | INTERGENIC                    | NA                                       |
| Kabuli_wild_25524478  | 1399932957                          | Ca_kabuli_Chr01 | 25524478                | C/A  | NA                 | INTERGENIC                    | NA                                       |
| Kabuli_wild_25524480  | 1399932958                          | Ca_kabuli_Chr01 | 25524480                | G/A  | NA                 | INTERGENIC                    | NA                                       |
| Kabuli_wild_25524481  | 1399932959                          | Ca_kabuli_Chr01 | 25524481                | T/A  | NA                 | INTERGENIC                    | NA                                       |
| Kabuli_wild_25524488  | 1399932960                          | Ca_kabuli_Chr01 | 25524488                | G/T  | NA                 | INTERGENIC                    | NA                                       |
| Kabuli_wild_25524494  | 1399932961                          | Ca_kabuli_Chr01 | 25524494                | A/G  | NA                 | INTERGENIC                    | NA                                       |
| Kabuli_wild_25524504  | 1399932962                          | Ca_kabuli_Chr01 | 25524504                | C/T  | NA                 | INTERGENIC                    | NA                                       |
| Kabuli_wild_25524505  | 1399932963                          | Ca_kabuli_Chr01 | 25524505                | A/G  | NA                 | INTERGENIC                    | NA                                       |
| Kabuli_wild_25524519  | 1399932964                          | Ca_kabuli_Chr01 | 25524519                | C/T  | NA                 | INTERGENIC                    | NA                                       |
| Kabuli_wild_25524520  | 1399932965                          | Ca_kabuli_Chr01 | 25524520                | C/T  | NA                 | INTERGENIC                    | NA                                       |
| Kabuli_wild_25524524  | 1399932966                          | Ca_kabuli_Chr01 | 25524524                | C/T  | NA                 | INTERGENIC                    | NA                                       |
| Kabuli_wild_25524537  | 1399932967                          | Ca_kabuli_Chr01 | 25524537                | C/T  | NA                 | INTERGENIC                    | NA                                       |
| Kabuli_wild_25664814  | 1399932968                          | Ca_kabuli_Chr01 | 25664814                | T/C  | NA                 | INTERGENIC                    | NA                                       |
| Kabuli_wild_25887539  | 1399932969                          | Ca_kabuli_Chr01 | 25887539                | G/A  | NA                 | INTERGENIC                    | NA                                       |
| Kabuli_wild_26129816  | 1399932970                          | Ca_kabuli_Chr01 | 26129816                | A/G  | Gene_Ca_18595      | SYNONYMOUS_CODING             | S-adenosylmethioninesynthetase           |
| Kabuli_wild_26347869  | 1399932971                          | Ca_kabuli_Chr01 | 26347869                | T/C  | NA                 | INTERGENIC                    | NA                                       |
| Kabuli_wild_26347894  | 1399932972                          | Ca_kabuli_Chr01 | 26347894                | T/C  | NA                 | INTERGENIC                    | NA                                       |
| Kabuli_wild_26348859  | 1399932973                          | Ca_kabuli_Chr01 | 26348859                | G/A  | NA                 | INTERGENIC                    | NA                                       |
| Kabuli_wild_26574061  | 1399932974                          | Ca_kabuli_Chr01 | 26574061                | G/A  | Gene_Ca_18614      | NON_SYNONYMOUS_CODING         | Peptidase C48, SUMO/Sentrin/Ubl1         |
| Kabuli_wild_26574062  | 1399932975                          | Ca_kabuli_Chr01 | 26574062                | C/A  | Gene_Ca_18614      | NON_SYNONYMOUS_CODING         | Peptidase C48, SUMO/Sentrin/Ubl1         |
| Kabuli_wild_26574133  | 1399932976                          | Ca_kabuli_Chr01 | 26574133                | A/G  | Gene_Ca_18614      | NON_SYNONYMOUS_CODING         | Peptidase C48, SUMO/Sentrin/Ubl1         |
| Kabuli_wild_26574138  | 1399932977                          | Ca_kabuli_Chr01 | 26574138                | G/A  | Gene_Ca_18614      | SYNONYMOUS_CODING             | Peptidase C48, SUMO/Sentrin/Ubl1         |
| Kabuli_wild_26574146  | 1399932978                          | Ca_kabuli_Chr01 | 26574146                | C/T  | Gene_Ca_18614      | NON_SYNONYMOUS_CODING         | Peptidase C48, SUMO/Sentrin/Ubl1         |
| Kabuli_wild_26574172  | 1399932979                          | Ca_kabuli_Chr01 | 26574172                | C/T  | Gene_Ca_18614      | NON_SYNONYMOUS_CODING         | Peptidase C48, SUMO/Sentrin/Ubl1         |
| Kabuli_wild_26579621  | 1399932980                          | Ca_kabuli_Chr01 | 26579621                | A/C  | NA                 | INTERGENIC                    | NA                                       |
| Kabuli_wild_26633828  | 1399932981                          | Ca_kabuli_Chr01 | 26633828                | G/A  | Gene_Ca_18617      | NON_SYNONYMOUS_CODING         | UDP-glucuronosyl/UDP-glucosyltransferase |
| Kabuli_wild_26807395  | 1399932982                          | Ca_kabuli_Chr01 | 26807395                | T/G  | NA                 | INTERGENIC                    | NA                                       |
| Kabuli_wild_26807401  | 1399932983                          | Ca_kabuli_Chr01 | 26807401                | A/G  | NA                 | INTERGENIC                    | NA                                       |
| Kabuli_wild_26856541  | 1399932984                          | Ca_kabuli_Chr01 | 26856541                | A/T  | Gene_Ca_20289      | NON_SYNONYMOUS_CODING         | NA                                       |
| Kabuli_wild_26856691  | 1399932985                          | Ca_kabuli_Chr01 | 26856691                | G/A  | Gene_Ca_20289      | SYNONYMOUS_CODING             | NA                                       |
| Kabuli_wild_269221471 | 1399932986                          | Ca_kabuli_Chr01 | 269221471               | C/T  | Gene_Ca_20293      | DOWNSTREAM                    | Pentatric peptide repeat                 |
| Kabuli_wild_26922011  | 1399932987                          | Ca_kabuli_Chr01 | 26922011                | T/G  | Gene_Ca_20293      | DOWNSTREAM                    | Pentatric peptide repeat                 |
| Kabuli_wild_26922526  | 1399932988                          | Ca_kabuli_Chr01 | 26922526                | A/G  | NA                 | INTERGENIC                    | NA                                       |
| Kabuli_wild_26953535  | 1399932989                          | Ca_kabuli_Chr01 | 26953535                | C/T  | NA                 | INTERGENIC                    | NA                                       |
| Kabuli_wild_27012495  | 1399932990                          | Ca_kabuli_Chr01 | 27012495                | C/T  | NA                 | INTERGENIC                    | NA                                       |
| Kabuli_wild_27012660  | 1399932991                          | Ca_kabuli_Chr01 | 27012660                | G/C  | NA                 | INTERGENIC                    | NA                                       |

| SNP IDs              | NCBI dbSNP accession IDs (NCBI_SS#) | Chromosomes     | Physical positions (bp) | SNPs | Gene accession IDs | Sequence components of genome | Putative functions                                  |
|----------------------|-------------------------------------|-----------------|-------------------------|------|--------------------|-------------------------------|-----------------------------------------------------|
| Kabuli_wild_27014895 | 1399932992                          | Ca_kabuli_Chr01 | 27014895                | T/G  | NA                 | INTERGENIC                    | NA                                                  |
| Kabuli_wild_27014951 | 1399932993                          | Ca_kabuli_Chr01 | 27014951                | A/C  | NA                 | INTERGENIC                    | NA                                                  |
| Kabuli_wild_27014981 | 1399932994                          | Ca_kabuli_Chr01 | 27014981                | A/G  | NA                 | INTERGENIC                    | NA                                                  |
| Kabuli_wild_27016101 | 1399932995                          | Ca_kabuli_Chr01 | 27016101                | G/A  | NA                 | INTERGENIC                    | NA                                                  |
| Kabuli_wild_27016206 | 1399932996                          | Ca_kabuli_Chr01 | 27016206                | T/A  | NA                 | INTERGENIC                    | NA                                                  |
| Kabuli_wild_27017559 | 1399932997                          | Ca_kabuli_Chr01 | 27017559                | G/A  | Gene_Ca_20299      | INTRON                        | Cystathioninebeta-synthase,core                     |
| Kabuli_wild_27017560 | 1399932998                          | Ca_kabuli_Chr01 | 27017560                | A/G  | Gene_Ca_20299      | INTRON                        | Cystathioninebeta-synthase,core                     |
| Kabuli_wild_27017570 | 1399932999                          | Ca_kabuli_Chr01 | 27017570                | A/G  | Gene_Ca_20299      | INTRON                        | Cystathioninebeta-synthase,core                     |
| Kabuli_wild_27017604 | 1399933000                          | Ca_kabuli_Chr01 | 27017604                | T/G  | Gene_Ca_20299      | INTRON                        | Cystathioninebeta-synthase,core                     |
| Kabuli_wild_27017606 | 1399933001                          | Ca_kabuli_Chr01 | 27017606                | C/T  | Gene_Ca_20299      | INTRON                        | Cystathioninebeta-synthase,core                     |
| Kabuli_wild_27017617 | 1399933002                          | Ca_kabuli_Chr01 | 27017617                | G/A  | Gene_Ca_20299      | INTRON                        | Cystathioninebeta-synthase,core                     |
| Kabuli_wild_27017626 | 1399933003                          | Ca_kabuli_Chr01 | 27017626                | A/C  | Gene_Ca_20299      | INTRON                        | Cystathioninebeta-synthase,core                     |
| Kabuli_wild_27017628 | 1399933004                          | Ca_kabuli_Chr01 | 27017628                | C/A  | Gene_Ca_20299      | INTRON                        | Cystathioninebeta-synthase,core                     |
| Kabuli_wild_27017644 | 1399933005                          | Ca_kabuli_Chr01 | 27017644                | C/T  | Gene_Ca_20299      | INTRON                        | Cystathioninebeta-synthase,core                     |
| Kabuli_wild_27017734 | 1399933006                          | Ca_kabuli_Chr01 | 27017734                | T/C  | Gene_Ca_20299      | INTRON                        | Cystathioninebeta-synthase,core                     |
| Kabuli_wild_27017765 | 1399933007                          | Ca_kabuli_Chr01 | 27017765                | A/T  | Gene_Ca_20299      | INTRON                        | Cystathioninebeta-synthase,core                     |
| Kabuli_wild_27017771 | 1399933008                          | Ca_kabuli_Chr01 | 27017771                | G/A  | Gene_Ca_20299      | INTRON                        | Cystathioninebeta-synthase,core                     |
| Kabuli_wild_27020193 | 1399933009                          | Ca_kabuli_Chr01 | 27020193                | T/C  | Gene_Ca_20299      | INTRON                        | Cystathioninebeta-synthase,core                     |
| Kabuli_wild_27020354 | 1399933010                          | Ca_kabuli_Chr01 | 27020354                | C/A  | Gene_Ca_20299      | INTRON                        | Cystathioninebeta-synthase,core                     |
| Kabuli_wild_27385788 | 1399933011                          | Ca_kabuli_Chr01 | 27385788                | G/A  | NA                 | INTERGENIC                    | NA                                                  |
| Kabuli_wild_27385816 | 1399933012                          | Ca_kabuli_Chr01 | 27385816                | A/G  | NA                 | INTERGENIC                    | NA                                                  |
| Kabuli_wild_27461930 | 1399933013                          | Ca_kabuli_Chr01 | 27461930                | T/C  | NA                 | INTERGENIC                    | NA                                                  |
| Kabuli_wild_27958553 | 1399933014                          | Ca_kabuli_Chr01 | 27958553                | T/C  | Gene_Ca_18528      | SYNONYMOUS_CODING             | Reverse transcriptase, RNA-dependent DNA polymerase |
| Kabuli_wild_27958570 | 1399933015                          | Ca_kabuli_Chr01 | 27958570                | T/A  | Gene_Ca_18528      | NON_SYNONYMOUS_CODING         | Reverse transcriptase, RNA-dependent DNA polymerase |
| Kabuli_wild_28088501 | 1399933016                          | Ca_kabuli_Chr01 | 28088501                | T/C  | Gene_Ca_18523      | SYNONYMOUS_CODING             | Vps54-like                                          |
| Kabuli_wild_28106756 | 1399933017                          | Ca_kabuli_Chr01 | 28106756                | G/A  | NA                 | INTERGENIC                    | NA                                                  |
| Kabuli_wild_28126010 | 1399933018                          | Ca_kabuli_Chr01 | 28126010                | A/G  | NA                 | INTERGENIC                    | NA                                                  |
| Kabuli_wild_28133814 | 1399933019                          | Ca_kabuli_Chr01 | 28133814                | C/T  | Gene_Ca_18521      | INTRON                        | Leucine-rich repeat                                 |
| Kabuli_wild_28133830 | 1399933020                          | Ca_kabuli_Chr01 | 28133830                | A/T  | Gene_Ca_18521      | INTRON                        | Leucine-rich repeat                                 |
| Kabuli_wild_28133844 | 1399933021                          | Ca_kabuli_Chr01 | 28133844                | T/C  | Gene_Ca_18521      | INTRON                        | Leucine-rich repeat                                 |
| Kabuli_wild_28133847 | 1399933022                          | Ca_kabuli_Chr01 | 28133847                | A/G  | Gene_Ca_18521      | INTRON                        | Leucine-rich repeat                                 |
| Kabuli_wild_28143955 | 1399933023                          | Ca_kabuli_Chr01 | 28143955                | G/A  | Gene_Ca_18521      | INTRON                        | Leucine-rich repeat                                 |
| Kabuli_wild_28152260 | 1399933024                          | Ca_kabuli_Chr01 | 28152260                | A/G  | Gene_Ca_18521      | INTRON                        | Leucine-rich repeat                                 |
| Kabuli_wild_28656197 | 1399933025                          | Ca_kabuli_Chr01 | 28656197                | C/A  | NA                 | INTERGENIC                    | NA                                                  |
| Kabuli_wild_28907617 | 1399933026                          | Ca_kabuli_Chr01 | 28907617                | G/A  | Gene_Ca_18486      | NON_SYNONYMOUS_CODING         | Sugar/inositol transporter                          |
| Kabuli_wild_28909019 | 1399933027                          | Ca_kabuli_Chr01 | 28909019                | T/G  | Gene_Ca_18486      | SYNONYMOUS_CODING             | Sugar/inositol transporter                          |
| Kabuli_wild_28909059 | 1399933028                          | Ca_kabuli_Chr01 | 28909059                | T/A  | Gene_Ca_18486      | NON_SYNONYMOUS_CODING         | Sugar/inositol transporter                          |
| Kabuli_wild_29020220 | 1399933029                          | Ca_kabuli_Chr01 | 29020220                | T/G  | NA                 | INTERGENIC                    | NA                                                  |
| Kabuli_wild_29149338 | 1399933030                          | Ca_kabuli_Chr01 | 29149338                | G/A  | Gene_Ca_22571      | NON_SYNONYMOUS_CODING         | CCTdomain                                           |
| Kabuli_wild_29171283 | 1399933031                          | Ca_kabuli_Chr01 | 29171283                | T/G  | Gene_Ca_22570      | NON_SYNONYMOUS_CODING         | Pentatricopeptide repeat                            |
| Kabuli_wild_29331630 | 1399933032                          | Ca_kabuli_Chr01 | 29331630                | A/G  | Gene_Ca_22563      | INTRON                        | Peptidase C48, SUMO/Sentrin/Ubl1                    |
| Kabuli_wild_29331681 | 1399933033                          | Ca_kabuli_Chr01 | 29331681                | A/G  | Gene_Ca_22563      | SYNONYMOUS_CODING             | Peptidase C48, SUMO/Sentrin/Ubl1                    |
| Kabuli_wild_29331706 | 1399933034                          | Ca_kabuli_Chr01 | 29331706                | C/A  | Gene_Ca_22563      | SYNONYMOUS_CODING             | Peptidase C48, SUMO/Sentrin/Ubl1                    |
| Kabuli_wild_29460440 | 1399933035                          | Ca_kabuli_Chr01 | 29460440                | C/A  | Gene_Ca_22559      | NON_SYNONYMOUS_CODING         | NA                                                  |

| SNP IDs              | NCBI dbSNP accession IDs (NCBI_SS#) | Chromosomes     | Physical positions (bp) | SNPs | Gene accession IDs | Sequence components of genome | Putative functions                       |
|----------------------|-------------------------------------|-----------------|-------------------------|------|--------------------|-------------------------------|------------------------------------------|
| Kabuli_wild_29637342 | 1399933036                          | Ca_kabuli_Chr01 | 29637342                | A/G  | Gene_Ca_24382      | INTRON                        | K Homology.type1                         |
| Kabuli_wild_29637509 | 1399933037                          | Ca_kabuli_Chr01 | 29637509                | A/C  | Gene_Ca_24382      | INTRON                        | K Homology.type1                         |
| Kabuli_wild_29637526 | 1399933038                          | Ca_kabuli_Chr01 | 29637526                | C/T  | Gene_Ca_24382      | INTRON                        | K Homology.type1                         |
| Kabuli_wild_29637571 | 1399933039                          | Ca_kabuli_Chr01 | 29637571                | T/G  | Gene_Ca_24382      | INTRON                        | K Homology.type1                         |
| Kabuli_wild_29637572 | 1399933040                          | Ca_kabuli_Chr01 | 29637572                | T/G  | Gene_Ca_24382      | INTRON                        | K Homology.type1                         |
| Kabuli_wild_29661949 | 1399933041                          | Ca_kabuli_Chr01 | 29661949                | T/C  | Gene_Ca_24383      | SYNONYMOUS_CODING             | NA                                       |
| Kabuli_wild_29661962 | 1399933042                          | Ca_kabuli_Chr01 | 29661962                | A/C  | Gene_Ca_24383      | NON_SYNONYMOUS_CODING         | NA                                       |
| Kabuli_wild_30105943 | 1399933043                          | Ca_kabuli_Chr01 | 30105943                | G/T  | NA                 | INTERGENIC                    | NA                                       |
| Kabuli_wild_30210662 | 1399933044                          | Ca_kabuli_Chr01 | 30210662                | G/C  | NA                 | INTERGENIC                    | NA                                       |
| Kabuli_wild_30232233 | 1399933045                          | Ca_kabuli_Chr01 | 30232233                | T/C  | NA                 | INTERGENIC                    | NA                                       |
| Kabuli_wild_30261132 | 1399933046                          | Ca_kabuli_Chr01 | 30261132                | T/C  | Gene_Ca_22465      | SYNONYMOUS_CODING             | Kinesin,motordomain                      |
| Kabuli_wild_30261572 | 1399933047                          | Ca_kabuli_Chr01 | 30261572                | G/A  | Gene_Ca_22465      | NON_SYNONYMOUS_CODING         | Kinesin,motordomain                      |
| Kabuli_wild_30262124 | 1399933048                          | Ca_kabuli_Chr01 | 30262124                | A/G  | Gene_Ca_22465      | NON_SYNONYMOUS_CODING         | Kinesin,motordomain                      |
| Kabuli_wild_30447050 | 1399933049                          | Ca_kabuli_Chr01 | 30447050                | A/G  | NA                 | INTERGENIC                    | NA                                       |
| Kabuli_wild_30630357 | 1399933050                          | Ca_kabuli_Chr01 | 30630357                | T/C  | NA                 | INTERGENIC                    | NA                                       |
| Kabuli_wild_30948055 | 1399933051                          | Ca_kabuli_Chr01 | 30948055                | T/C  | NA                 | INTERGENIC                    | NA                                       |
| Kabuli_wild_30948066 | 1399933052                          | Ca_kabuli_Chr01 | 30948066                | A/G  | NA                 | INTERGENIC                    | NA                                       |
| Kabuli_wild_30990317 | 1399933053                          | Ca_kabuli_Chr01 | 30990317                | G/A  | NA                 | INTERGENIC                    | NA                                       |
| Kabuli_wild_31080673 | 1399933054                          | Ca_kabuli_Chr01 | 31080673                | T/G  | Gene_Ca_25827      | INTRON                        | Enolase                                  |
| Kabuli_wild_31080792 | 1399933055                          | Ca_kabuli_Chr01 | 31080792                | T/C  | Gene_Ca_25827      | INTRON                        | NA                                       |
| Kabuli_wild_31240370 | 1399933056                          | Ca_kabuli_Chr01 | 31240370                | A/G  | NA                 | INTERGENIC                    | NA                                       |
| Kabuli_wild_31240491 | 1399933057                          | Ca_kabuli_Chr01 | 31240491                | G/A  | NA                 | INTERGENIC                    | NA                                       |
| Kabuli_wild_31359837 | 1399933058                          | Ca_kabuli_Chr01 | 31359837                | G/A  | NA                 | INTERGENIC                    | NA                                       |
| Kabuli_wild_31359855 | 1399933059                          | Ca_kabuli_Chr01 | 31359855                | G/A  | NA                 | INTERGENIC                    | NA                                       |
| Kabuli_wild_31359868 | 1399933060                          | Ca_kabuli_Chr01 | 31359868                | G/A  | NA                 | INTERGENIC                    | NA                                       |
| Kabuli_wild_31359912 | 1399933061                          | Ca_kabuli_Chr01 | 31359912                | T/C  | NA                 | INTERGENIC                    | NA                                       |
| Kabuli_wild_31360001 | 1399933062                          | Ca_kabuli_Chr01 | 31360001                | T/C  | NA                 | INTERGENIC                    | NA                                       |
| Kabuli_wild_31360028 | 1399933063                          | Ca_kabuli_Chr01 | 31360028                | A/G  | NA                 | INTERGENIC                    | NA                                       |
| Kabuli_wild_31360032 | 1399933064                          | Ca_kabuli_Chr01 | 31360032                | A/T  | NA                 | INTERGENIC                    | NA                                       |
| Kabuli_wild_31369599 | 1399933065                          | Ca_kabuli_Chr01 | 31369599                | T/C  | Gene_Ca_21855      | INTRON                        | PeptidaseC13,legumain                    |
| Kabuli_wild_31393408 | 1399933066                          | Ca_kabuli_Chr01 | 31393408                | A/T  | NA                 | INTERGENIC                    | NA                                       |
| Kabuli_wild_31535190 | 1399933067                          | Ca_kabuli_Chr01 | 31535190                | A/C  | Gene_Ca_21865      | INTRON                        | PeptidaseS49                             |
| Kabuli_wild_31590263 | 1399933068                          | Ca_kabuli_Chr01 | 31590263                | C/G  | Gene_Ca_21868      | INTRON                        | Orotidine5'-phosphatedecarboxylasedomain |
| Kabuli_wild_31590510 | 1399933069                          | Ca_kabuli_Chr01 | 31590510                | G/A  | Gene_Ca_21868      | SYNONYMOUS_CODING             | Orotidine5'-phosphatedecarboxylasedomain |
| Kabuli_wild_31590548 | 1399933070                          | Ca_kabuli_Chr01 | 31590548                | C/T  | Gene_Ca_21868      | NON_SYNONYMOUS_CODING         | Orotidine5'-phosphatedecarboxylasedomain |
| Kabuli_wild_31638260 | 1399933071                          | Ca_kabuli_Chr01 | 31638260                | A/G  | NA                 | INTERGENIC                    | NA                                       |
| Kabuli_wild_31638267 | 1399933072                          | Ca_kabuli_Chr01 | 31638267                | G/T  | NA                 | INTERGENIC                    | NA                                       |
| Kabuli_wild_31638511 | 1399933073                          | Ca_kabuli_Chr01 | 31638511                | T/C  | NA                 | INTERGENIC                    | NA                                       |
| Kabuli_wild_31838192 | 1399933074                          | Ca_kabuli_Chr01 | 31838192                | C/T  | NA                 | INTERGENIC                    | NA                                       |
| Kabuli_wild_31838198 | 1399933075                          | Ca_kabuli_Chr01 | 31838198                | C/T  | NA                 | INTERGENIC                    | NA                                       |
| Kabuli_wild_31838228 | 1399933076                          | Ca_kabuli_Chr01 | 31838228                | C/T  | NA                 | INTERGENIC                    | NA                                       |
| Kabuli_wild_31838250 | 1399933077                          | Ca_kabuli_Chr01 | 31838250                | A/C  | NA                 | INTERGENIC                    | NA                                       |
| Kabuli_wild_32286466 | 1399933078                          | Ca_kabuli_Chr01 | 32286466                | A/G  | NA                 | INTERGENIC                    | NA                                       |
| Kabuli_wild_32286469 | 1399933079                          | Ca_kabuli_Chr01 | 32286469                | G/A  | NA                 | INTERGENIC                    | NA                                       |

| SNP IDs              | NCBI dbSNP accession IDs (NCBI_SS#) | Chromosomes     | Physical positions (bp) | SNPs | Gene accession IDs | Sequence components of genome | Putative functions         |
|----------------------|-------------------------------------|-----------------|-------------------------|------|--------------------|-------------------------------|----------------------------|
| Kabuli_wild_32286517 | 1399933080                          | Ca_kabuli_Chr01 | 32286517                | G/A  | NA                 | INTERGENIC                    | NA                         |
| Kabuli_wild_32286518 | 1399933081                          | Ca_kabuli_Chr01 | 32286518                | C/A  | NA                 | INTERGENIC                    | NA                         |
| Kabuli_wild_32286534 | 1399933082                          | Ca_kabuli_Chr01 | 32286534                | G/C  | NA                 | INTERGENIC                    | NA                         |
| Kabuli_wild_32286536 | 1399933083                          | Ca_kabuli_Chr01 | 32286536                | G/A  | NA                 | INTERGENIC                    | NA                         |
| Kabuli_wild_32286538 | 1399933084                          | Ca_kabuli_Chr01 | 32286538                | C/T  | NA                 | INTERGENIC                    | NA                         |
| Kabuli_wild_32286550 | 1399933085                          | Ca_kabuli_Chr01 | 32286550                | G/A  | NA                 | INTERGENIC                    | NA                         |
| Kabuli_wild_32286551 | 1399933086                          | Ca_kabuli_Chr01 | 32286551                | C/T  | NA                 | INTERGENIC                    | NA                         |
| Kabuli_wild_32286558 | 1399933087                          | Ca_kabuli_Chr01 | 32286558                | A/G  | NA                 | INTERGENIC                    | NA                         |
| Kabuli_wild_32286564 | 1399933088                          | Ca_kabuli_Chr01 | 32286564                | C/T  | NA                 | INTERGENIC                    | NA                         |
| Kabuli_wild_32286566 | 1399933089                          | Ca_kabuli_Chr01 | 32286566                | C/A  | NA                 | INTERGENIC                    | NA                         |
| Kabuli_wild_32286567 | 1399933090                          | Ca_kabuli_Chr01 | 32286567                | C/T  | NA                 | INTERGENIC                    | NA                         |
| Kabuli_wild_32286568 | 1399933091                          | Ca_kabuli_Chr01 | 32286568                | A/C  | NA                 | INTERGENIC                    | NA                         |
| Kabuli_wild_32286578 | 1399933092                          | Ca_kabuli_Chr01 | 32286578                | G/A  | NA                 | INTERGENIC                    | NA                         |
| Kabuli_wild_32468053 | 1399933093                          | Ca_kabuli_Chr01 | 32468053                | A/C  | NA                 | INTERGENIC                    | NA                         |
| Kabuli_wild_32468080 | 1399933094                          | Ca_kabuli_Chr01 | 32468080                | A/T  | NA                 | INTERGENIC                    | NA                         |
| Kabuli_wild_32468105 | 1399933095                          | Ca_kabuli_Chr01 | 32468105                | C/G  | NA                 | INTERGENIC                    | NA                         |
| Kabuli_wild_32468116 | 1399933096                          | Ca_kabuli_Chr01 | 32468116                | A/G  | NA                 | INTERGENIC                    | NA                         |
| Kabuli_wild_32468119 | 1399933097                          | Ca_kabuli_Chr01 | 32468119                | T/C  | NA                 | INTERGENIC                    | NA                         |
| Kabuli_wild_32871698 | 1399933098                          | Ca_kabuli_Chr01 | 32871698                | C/T  | NA                 | INTERGENIC                    | NA                         |
| Kabuli_wild_32871716 | 1399933099                          | Ca_kabuli_Chr01 | 32871716                | T/C  | NA                 | INTERGENIC                    | NA                         |
| Kabuli_wild_32956292 | 1399933100                          | Ca_kabuli_Chr01 | 32956292                | T/G  | NA                 | INTERGENIC                    | NA                         |
| Kabuli_wild_32956357 | 1399933101                          | Ca_kabuli_Chr01 | 32956357                | C/G  | NA                 | INTERGENIC                    | NA                         |
| Kabuli_wild_33058743 | 1399933102                          | Ca_kabuli_Chr01 | 33058743                | T/C  | Gene_Ca_19437      | INTRON                        | Argonaute/Dicerprotein,PAZ |
| Kabuli_wild_33063207 | 1399933103                          | Ca_kabuli_Chr01 | 33063207                | C/T  | Gene_Ca_19437      | INTRON                        | Argonaute/Dicerprotein,PAZ |
| Kabuli_wild_33095557 | 1399933104                          | Ca_kabuli_Chr01 | 33095557                | T/C  | NA                 | INTERGENIC                    | NA                         |
| Kabuli_wild_33095577 | 1399933105                          | Ca_kabuli_Chr01 | 33095577                | C/T  | NA                 | INTERGENIC                    | NA                         |
| Kabuli_wild_33095591 | 1399933106                          | Ca_kabuli_Chr01 | 33095591                | G/A  | NA                 | INTERGENIC                    | NA                         |
| Kabuli_wild_33095594 | 1399933107                          | Ca_kabuli_Chr01 | 33095594                | C/A  | NA                 | INTERGENIC                    | NA                         |
| Kabuli_wild_33125824 | 1399933108                          | Ca_kabuli_Chr01 | 33125824                | C/T  | Gene_Ca_19439      | INTRON                        | NA                         |
| Kabuli_wild_33125909 | 1399933109                          | Ca_kabuli_Chr01 | 33125909                | C/T  | Gene_Ca_19439      | INTRON                        | NA                         |
| Kabuli_wild_33194600 | 1399933110                          | Ca_kabuli_Chr01 | 33194600                | T/C  | Gene_Ca_19440      | INTRON                        | Helicase,C-terminal        |
| Kabuli_wild_33495709 | 1399933111                          | Ca_kabuli_Chr01 | 33495709                | C/T  | NA                 | INTERGENIC                    | NA                         |
| Kabuli_wild_33804148 | 1399933112                          | Ca_kabuli_Chr01 | 33804148                | C/T  | Gene_Ca_19463      | SYNONYMOUS_CODING             | NA                         |
| Kabuli_wild_33804152 | 1399933113                          | Ca_kabuli_Chr01 | 33804152                | C/T  | Gene_Ca_19463      | NON_SYNONYMOUS_CODING         | NA                         |
| Kabuli_wild_33804153 | 1399933114                          | Ca_kabuli_Chr01 | 33804153                | C/T  | Gene_Ca_19463      | SYNONYMOUS_CODING             | NA                         |
| Kabuli_wild_33804155 | 1399933115                          | Ca_kabuli_Chr01 | 33804155                | T/C  | Gene_Ca_19463      | NON_SYNONYMOUS_CODING         | NA                         |
| Kabuli_wild_33804186 | 1399933116                          | Ca_kabuli_Chr01 | 33804186                | G/T  | Gene_Ca_19463      | NON_SYNONYMOUS_CODING         | NA                         |
| Kabuli_wild_33804189 | 1399933117                          | Ca_kabuli_Chr01 | 33804189                | C/T  | Gene_Ca_19463      | NON_SYNONYMOUS_CODING         | NA                         |
| Kabuli_wild_33804201 | 1399933118                          | Ca_kabuli_Chr01 | 33804201                | C/T  | Gene_Ca_19463      | NON_SYNONYMOUS_CODING         | NA                         |
| Kabuli_wild_33804232 | 1399933119                          | Ca_kabuli_Chr01 | 33804232                | T/G  | Gene_Ca_19463      | SYNONYMOUS_CODING             | NA                         |
| Kabuli_wild_33804242 | 1399933120                          | Ca_kabuli_Chr01 | 33804242                | T/G  | Gene_Ca_19463      | NON_SYNONYMOUS_CODING         | NA                         |
| Kabuli_wild_33804246 | 1399933121                          | Ca_kabuli_Chr01 | 33804246                | C/G  | Gene_Ca_19463      | NON_SYNONYMOUS_CODING         | NA                         |
| Kabuli_wild_33804247 | 1399933122                          | Ca_kabuli_Chr01 | 33804247                | A/G  | Gene_Ca_19463      | SYNONYMOUS_CODING             | NA                         |
| Kabuli_wild_33804248 | 1399933123                          | Ca_kabuli_Chr01 | 33804248                | G/A  | Gene_Ca_19463      | NON_SYNONYMOUS_CODING         | NA                         |



| SNP IDs              | NCBI dbSNP accession IDs (NCBI_SS#) | Chromosomes     | Physical positions (bp) | SNPs | Gene accession IDs | Sequence components of genome | Putative functions                     |
|----------------------|-------------------------------------|-----------------|-------------------------|------|--------------------|-------------------------------|----------------------------------------|
| Kabuli_wild_33804261 | 1399933124                          | Ca_kabuli_Chr01 | 33804261                | C/T  | Gene_Ca_19463      | NON_SYNONYMOUS_CODING         | NA                                     |
| Kabuli_wild_33804262 | 1399933125                          | Ca_kabuli_Chr01 | 33804262                | G/C  | Gene_Ca_19463      | SYNONYMOUS_CODING             | NA                                     |
| Kabuli_wild_33804263 | 1399933126                          | Ca_kabuli_Chr01 | 33804263                | G/A  | Gene_Ca_19463      | NON_SYNONYMOUS_CODING         | NA                                     |
| Kabuli_wild_33804274 | 1399933127                          | Ca_kabuli_Chr01 | 33804274                | T/C  | Gene_Ca_19463      | SYNONYMOUS_CODING             | NA                                     |
| Kabuli_wild_34161921 | 1399933128                          | Ca_kabuli_Chr01 | 34161921                | G/A  | NA                 | INTERGENIC                    | NA                                     |
| Kabuli_wild_34193834 | 1399933129                          | Ca_kabuli_Chr01 | 34193834                | A/G  | NA                 | INTERGENIC                    | NA                                     |
| Kabuli_wild_34261155 | 1399933130                          | Ca_kabuli_Chr01 | 34261155                | C/A  | Gene_Ca_25475      | INTRON                        | Glycosyltransferase,family48           |
| Kabuli_wild_34261158 | 1399933131                          | Ca_kabuli_Chr01 | 34261158                | C/A  | Gene_Ca_25475      | INTRON                        | Glycosyltransferase,family48           |
| Kabuli_wild_34261166 | 1399933132                          | Ca_kabuli_Chr01 | 34261166                | C/A  | Gene_Ca_25475      | INTRON                        | Glycosyltransferase,family48           |
| Kabuli_wild_34272001 | 1399933133                          | Ca_kabuli_Chr01 | 34272001                | C/G  | NA                 | INTERGENIC                    | NA                                     |
| Kabuli_wild_34272024 | 1399933134                          | Ca_kabuli_Chr01 | 34272024                | A/G  | NA                 | INTERGENIC                    | NA                                     |
| Kabuli_wild_34272025 | 1399933135                          | Ca_kabuli_Chr01 | 34272025                | A/G  | NA                 | INTERGENIC                    | NA                                     |
| Kabuli_wild_34311145 | 1399933136                          | Ca_kabuli_Chr01 | 34311145                | T/G  | Gene_Ca_25478      | SYNONYMOUS_CODING             | GTP-bindingprotein,HSR1-related        |
| Kabuli_wild_34437096 | 1399933137                          | Ca_kabuli_Chr01 | 34437096                | G/A  | NA                 | INTERGENIC                    | NA                                     |
| Kabuli_wild_34437121 | 1399933138                          | Ca_kabuli_Chr01 | 34437121                | G/T  | NA                 | INTERGENIC                    | NA                                     |
| Kabuli_wild_34437144 | 1399933139                          | Ca_kabuli_Chr01 | 34437144                | G/A  | NA                 | INTERGENIC                    | NA                                     |
| Kabuli_wild_34475825 | 1399933140                          | Ca_kabuli_Chr01 | 34475825                | A/C  | Gene_Ca_27319      | NON_SYNONYMOUS_CODING         | NA                                     |
| Kabuli_wild_34524314 | 1399933141                          | Ca_kabuli_Chr01 | 34524314                | T/G  | Gene_Ca_27321      | INTRON                        | Methyltransferasetype11                |
| Kabuli_wild_34524315 | 1399933142                          | Ca_kabuli_Chr01 | 34524315                | G/T  | Gene_Ca_27321      | INTRON                        | Methyltransferasetype11                |
| Kabuli_wild_34727251 | 1399933143                          | Ca_kabuli_Chr01 | 34727251                | T/G  | Gene_Ca_21419      | SYNONYMOUS_CODING             | Zinc finger,CCCH-type                  |
| Kabuli_wild_34728328 | 1399933144                          | Ca_kabuli_Chr01 | 34728328                | T/C  | Gene_Ca_21419      | SYNONYMOUS_CODING             | Zinc finger,CCCH-type                  |
| Kabuli_wild_34772813 | 1399933145                          | Ca_kabuli_Chr01 | 34772813                | T/A  | Gene_Ca_21416      | NON_SYNONYMOUS_CODING         | NA                                     |
| Kabuli_wild_34866709 | 1399933146                          | Ca_kabuli_Chr01 | 34866709                | C/A  | NA                 | INTERGENIC                    | NA                                     |
| Kabuli_wild_34948934 | 1399933147                          | Ca_kabuli_Chr01 | 34948934                | A/G  | Gene_Ca_21408      | INTRON                        | Proteasome,alpha-subunit,conservedsite |
| Kabuli_wild_34969122 | 1399933148                          | Ca_kabuli_Chr01 | 34969122                | T/C  | NA                 | INTERGENIC                    | NA                                     |
| Kabuli_wild_35041241 | 1399933149                          | Ca_kabuli_Chr01 | 35041241                | T/G  | NA                 | INTERGENIC                    | NA                                     |
| Kabuli_wild_35041324 | 1399933150                          | Ca_kabuli_Chr01 | 35041324                | G/T  | NA                 | INTERGENIC                    | NA                                     |
| Kabuli_wild_35260363 | 1399933151                          | Ca_kabuli_Chr01 | 35260363                | G/A  | NA                 | INTERGENIC                    | NA                                     |
| Kabuli_wild_35260397 | 1399933152                          | Ca_kabuli_Chr01 | 35260397                | T/A  | NA                 | INTERGENIC                    | NA                                     |
| Kabuli_wild_35313277 | 1399933153                          | Ca_kabuli_Chr01 | 35313277                | A/G  | NA                 | INTERGENIC                    | NA                                     |
| Kabuli_wild_35313309 | 1399933154                          | Ca_kabuli_Chr01 | 35313309                | G/A  | NA                 | INTERGENIC                    | NA                                     |
| Kabuli_wild_35315327 | 1399933155                          | Ca_kabuli_Chr01 | 35315327                | T/A  | NA                 | INTERGENIC                    | NA                                     |
| Kabuli_wild_35315347 | 1399933156                          | Ca_kabuli_Chr01 | 35315347                | C/T  | NA                 | INTERGENIC                    | NA                                     |
| Kabuli_wild_35315379 | 1399933157                          | Ca_kabuli_Chr01 | 35315379                | A/T  | NA                 | INTERGENIC                    | NA                                     |
| Kabuli_wild_35315381 | 1399933158                          | Ca_kabuli_Chr01 | 35315381                | T/A  | NA                 | INTERGENIC                    | NA                                     |
| Kabuli_wild_35315419 | 1399933159                          | Ca_kabuli_Chr01 | 35315419                | C/T  | NA                 | INTERGENIC                    | NA                                     |
| Kabuli_wild_35315436 | 1399933160                          | Ca_kabuli_Chr01 | 35315436                | G/A  | NA                 | INTERGENIC                    | NA                                     |
| Kabuli_wild_35315454 | 1399933161                          | Ca_kabuli_Chr01 | 35315454                | G/A  | NA                 | INTERGENIC                    | NA                                     |
| Kabuli_wild_35315467 | 1399933162                          | Ca_kabuli_Chr01 | 35315467                | C/A  | NA                 | INTERGENIC                    | NA                                     |
| Kabuli_wild_35315476 | 1399933163                          | Ca_kabuli_Chr01 | 35315476                | G/A  | NA                 | INTERGENIC                    | NA                                     |
| Kabuli_wild_35315483 | 1399933164                          | Ca_kabuli_Chr01 | 35315483                | G/A  | NA                 | INTERGENIC                    | NA                                     |
| Kabuli_wild_35315488 | 1399933165                          | Ca_kabuli_Chr01 | 35315488                | C/T  | NA                 | INTERGENIC                    | NA                                     |
| Kabuli_wild_35315496 | 1399933166                          | Ca_kabuli_Chr01 | 35315496                | T/A  | NA                 | INTERGENIC                    | NA                                     |
| Kabuli_wild_35315504 | 1399933167                          | Ca_kabuli_Chr01 | 35315504                | T/G  | NA                 | INTERGENIC                    | NA                                     |

| SNP IDs              | NCBI dbSNP accession IDs (NCBI_SS#) | Chromosomes       | Physical positions (bp) | SNPs | Gene accession IDs | Sequence components of genome | Putative functions               |
|----------------------|-------------------------------------|-------------------|-------------------------|------|--------------------|-------------------------------|----------------------------------|
| Kabuli_wild_35315505 | 1399933168                          | Ca_kabuli_Chrom01 | 35315505                | G/T  | NA                 | INTERGENIC                    | NA                               |
| Kabuli_wild_35315507 | 1399933169                          | Ca_kabuli_Chrom01 | 35315507                | G/T  | NA                 | INTERGENIC                    | NA                               |
| Kabuli_wild_35315509 | 1399933170                          | Ca_kabuli_Chrom01 | 35315509                | C/T  | NA                 | INTERGENIC                    | NA                               |
| Kabuli_wild_35379871 | 1399933171                          | Ca_kabuli_Chrom01 | 35379871                | G/C  | NA                 | INTERGENIC                    | NA                               |
| Kabuli_wild_35708841 | 1399933172                          | Ca_kabuli_Chrom01 | 35708841                | C/T  | Gene_Ca_24110      | SYNONYMOUS_CODING             | Mediatorcomplex,subunitMed10     |
| Kabuli_wild_35790429 | 1399933173                          | Ca_kabuli_Chrom01 | 35790429                | T/C  | NA                 | INTERGENIC                    | NA                               |
| Kabuli_wild_35838114 | 1399933174                          | Ca_kabuli_Chrom01 | 35838114                | C/T  | NA                 | INTERGENIC                    | NA                               |
| Kabuli_wild_35838121 | 1399933175                          | Ca_kabuli_Chrom01 | 35838121                | T/C  | NA                 | INTERGENIC                    | NA                               |
| Kabuli_wild_36105280 | 1399933176                          | Ca_kabuli_Chrom01 | 36105280                | G/A  | NA                 | INTERGENIC                    | NA                               |
| Kabuli_wild_36126090 | 1399933177                          | Ca_kabuli_Chrom01 | 36126090                | C/T  | NA                 | INTERGENIC                    | NA                               |
| Kabuli_wild_36296608 | 1399933178                          | Ca_kabuli_Chrom01 | 36296608                | G/A  | NA                 | INTERGENIC                    | NA                               |
| Kabuli_wild_36296637 | 1399933179                          | Ca_kabuli_Chrom01 | 36296637                | T/A  | NA                 | INTERGENIC                    | NA                               |
| Kabuli_wild_36296641 | 1399933180                          | Ca_kabuli_Chrom01 | 36296641                | G/A  | NA                 | INTERGENIC                    | NA                               |
| Kabuli_wild_36296692 | 1399933181                          | Ca_kabuli_Chrom01 | 36296692                | G/A  | NA                 | INTERGENIC                    | NA                               |
| Kabuli_wild_36328960 | 1399933182                          | Ca_kabuli_Chrom01 | 36328960                | C/T  | Gene_Ca_21682      | DOWNSTREAM                    | NA                               |
| Kabuli_wild_36528365 | 1399933183                          | Ca_kabuli_Chrom01 | 36528365                | T/C  | NA                 | INTERGENIC                    | NA                               |
| Kabuli_wild_36794727 | 1399933184                          | Ca_kabuli_Chrom01 | 36794727                | G/A  | Gene_Ca_21700      | SYNONYMOUS_CODING             | Peptidase C48, SUMO/Sentrin/Ubl1 |
| Kabuli_wild_36794729 | 1399933185                          | Ca_kabuli_Chrom01 | 36794729                | C/T  | Gene_Ca_21700      | NON_SYNONYMOUS_CODING         | Peptidase C48, SUMO/Sentrin/Ubl1 |
| Kabuli_wild_36794731 | 1399933186                          | Ca_kabuli_Chrom01 | 36794731                | A/G  | Gene_Ca_21700      | NON_SYNONYMOUS_CODING         | Peptidase C48, SUMO/Sentrin/Ubl1 |
| Kabuli_wild_36794779 | 1399933187                          | Ca_kabuli_Chrom01 | 36794779                | C/T  | Gene_Ca_21700      | SYNONYMOUS_CODING             | Peptidase C48, SUMO/Sentrin/Ubl1 |
| Kabuli_wild_36794797 | 1399933188                          | Ca_kabuli_Chrom01 | 36794797                | G/A  | Gene_Ca_21700      | NON_SYNONYMOUS_CODING         | Peptidase C48, SUMO/Sentrin/Ubl1 |
| Kabuli_wild_36794800 | 1399933189                          | Ca_kabuli_Chrom01 | 36794800                | G/T  | Gene_Ca_21700      | NON_SYNONYMOUS_CODING         | Peptidase C48, SUMO/Sentrin/Ubl1 |
| Kabuli_wild_36794806 | 1399933190                          | Ca_kabuli_Chrom01 | 36794806                | G/T  | Gene_Ca_21700      | NON_SYNONYMOUS_CODING         | Peptidase C48, SUMO/Sentrin/Ubl1 |
| Kabuli_wild_36794810 | 1399933191                          | Ca_kabuli_Chrom01 | 36794810                | C/A  | Gene_Ca_21700      | NON_SYNONYMOUS_CODING         | Peptidase C48, SUMO/Sentrin/Ubl1 |
| Kabuli_wild_36794813 | 1399933192                          | Ca_kabuli_Chrom01 | 36794813                | C/T  | Gene_Ca_21700      | SYNONYMOUS_CODING             | Peptidase C48, SUMO/Sentrin/Ubl1 |
| Kabuli_wild_36794815 | 1399933193                          | Ca_kabuli_Chrom01 | 36794815                | G/A  | Gene_Ca_21700      | NON_SYNONYMOUS_CODING         | Peptidase C48, SUMO/Sentrin/Ubl1 |
| Kabuli_wild_36794826 | 1399933194                          | Ca_kabuli_Chrom01 | 36794826                | A/G  | Gene_Ca_21700      | SYNONYMOUS_CODING             | Peptidase C48, SUMO/Sentrin/Ubl1 |
| Kabuli_wild_36794832 | 1399933195                          | Ca_kabuli_Chrom01 | 36794832                | T/A  | Gene_Ca_21700      | NON_SYNONYMOUS_CODING         | Peptidase C48, SUMO/Sentrin/Ubl1 |
| Kabuli_wild_36794839 | 1399933196                          | Ca_kabuli_Chrom01 | 36794839                | G/C  | Gene_Ca_21700      | NON_SYNONYMOUS_CODING         | Peptidase C48, SUMO/Sentrin/Ubl1 |
| Kabuli_wild_36794849 | 1399933197                          | Ca_kabuli_Chrom01 | 36794849                | G/C  | Gene_Ca_21700      | NON_SYNONYMOUS_CODING         | Peptidase C48, SUMO/Sentrin/Ubl1 |
| Kabuli_wild_36794850 | 1399933198                          | Ca_kabuli_Chrom01 | 36794850                | T/A  | Gene_Ca_21700      | NON_SYNONYMOUS_CODING         | Peptidase C48, SUMO/Sentrin/Ubl1 |
| Kabuli_wild_36794855 | 1399933199                          | Ca_kabuli_Chrom01 | 36794855                | C/G  | Gene_Ca_21700      | NON_SYNONYMOUS_CODING         | Peptidase C48, SUMO/Sentrin/Ubl1 |
| Kabuli_wild_36794856 | 1399933200                          | Ca_kabuli_Chrom01 | 36794856                | A/G  | Gene_Ca_21700      | SYNONYMOUS_CODING             | Peptidase C48, SUMO/Sentrin/Ubl1 |
| Kabuli_wild_36794857 | 1399933201                          | Ca_kabuli_Chrom01 | 36794857                | G/A  | Gene_Ca_21700      | NON_SYNONYMOUS_CODING         | Peptidase C48, SUMO/Sentrin/Ubl1 |
| Kabuli_wild_36794865 | 1399933202                          | Ca_kabuli_Chrom01 | 36794865                | A/T  | Gene_Ca_21700      | SYNONYMOUS_CODING             | Peptidase C48, SUMO/Sentrin/Ubl1 |
| Kabuli_wild_36794866 | 1399933203                          | Ca_kabuli_Chrom01 | 36794866                | C/T  | Gene_Ca_21700      | NON_SYNONYMOUS_CODING         | Peptidase C48, SUMO/Sentrin/Ubl1 |
| Kabuli_wild_36794870 | 1399933204                          | Ca_kabuli_Chrom01 | 36794870                | C/T  | Gene_Ca_21700      | NON_SYNONYMOUS_CODING         | Peptidase C48, SUMO/Sentrin/Ubl1 |
| Kabuli_wild_36794873 | 1399933205                          | Ca_kabuli_Chrom01 | 36794873                | G/A  | Gene_Ca_21700      | NON_SYNONYMOUS_CODING         | Peptidase C48, SUMO/Sentrin/Ubl1 |
| Kabuli_wild_36794883 | 1399933206                          | Ca_kabuli_Chrom01 | 36794883                | T/C  | Gene_Ca_21700      | SYNONYMOUS_CODING             | Peptidase C48, SUMO/Sentrin/Ubl1 |
| Kabuli_wild_36794887 | 1399933207                          | Ca_kabuli_Chrom01 | 36794887                | G/A  | Gene_Ca_21700      | NON_SYNONYMOUS_CODING         | Peptidase C48, SUMO/Sentrin/Ubl1 |
| Kabuli_wild_36794891 | 1399933208                          | Ca_kabuli_Chrom01 | 36794891                | C/T  | Gene_Ca_21700      | NON_SYNONYMOUS_CODING         | Peptidase C48, SUMO/Sentrin/Ubl1 |
| Kabuli_wild_36794906 | 1399933209                          | Ca_kabuli_Chrom01 | 36794906                | A/T  | Gene_Ca_21700      | NON_SYNONYMOUS_CODING         | Peptidase C48, SUMO/Sentrin/Ubl1 |
| Kabuli_wild_36794908 | 1399933210                          | Ca_kabuli_Chrom01 | 36794908                | T/C  | Gene_Ca_21700      | NON_SYNONYMOUS_CODING         | Peptidase C48, SUMO/Sentrin/Ubl1 |
| Kabuli_wild_36794912 | 1399933211                          | Ca_kabuli_Chrom01 | 36794912                | G/T  | Gene_Ca_21700      | NON_SYNONYMOUS_CODING         | Peptidase C48, SUMO/Sentrin/Ubl1 |

| SNP IDs              | NCBI dbSNP accession IDs (NCBI_SS#) | Chromosomes       | Physical positions (bp) | SNPs | Gene accession IDs | Sequence components of genome | Putative functions                 |
|----------------------|-------------------------------------|-------------------|-------------------------|------|--------------------|-------------------------------|------------------------------------|
| Kabuli_wild_36794917 | 1399933212                          | Ca_kabuli_Chrom01 | 36794917                | T/C  | Gene_Ca_21700      | NON_SYNONYMOUS_CODING         | Peptidase C48, SUMO/Sentrin/Ubl1   |
| Kabuli_wild_36892535 | 1399933213                          | Ca_kabuli_Chrom01 | 36892535                | G/A  | Gene_Ca_27231      | NON_SYNONYMOUS_CODING         | Peptidase C48, SUMO/Sentrin/Ubl1   |
| Kabuli_wild_36892550 | 1399933214                          | Ca_kabuli_Chrom01 | 36892550                | C/T  | Gene_Ca_27231      | SYNONYMOUS_CODING             | Peptidase C48, SUMO/Sentrin/Ubl1   |
| Kabuli_wild_36892558 | 1399933215                          | Ca_kabuli_Chrom01 | 36892558                | T/C  | Gene_Ca_27231      | SYNONYMOUS_CODING             | Peptidase C48, SUMO/Sentrin/Ubl1   |
| Kabuli_wild_36892592 | 1399933216                          | Ca_kabuli_Chrom01 | 36892592                | C/T  | Gene_Ca_27231      | SYNONYMOUS_CODING             | Peptidase C48, SUMO/Sentrin/Ubl1   |
| Kabuli_wild_36892599 | 1399933217                          | Ca_kabuli_Chrom01 | 36892599                | G/A  | Gene_Ca_27231      | NON_SYNONYMOUS_CODING         | Peptidase C48, SUMO/Sentrin/Ubl1   |
| Kabuli_wild_36892602 | 1399933218                          | Ca_kabuli_Chrom01 | 36892602                | G/A  | Gene_Ca_27231      | NON_SYNONYMOUS_CODING         | Peptidase C48, SUMO/Sentrin/Ubl1   |
| Kabuli_wild_36892608 | 1399933219                          | Ca_kabuli_Chrom01 | 36892608                | C/T  | Gene_Ca_27231      | NON_SYNONYMOUS_CODING         | Peptidase C48, SUMO/Sentrin/Ubl1   |
| Kabuli_wild_36892617 | 1399933220                          | Ca_kabuli_Chrom01 | 36892617                | C/T  | Gene_Ca_27231      | NON_SYNONYMOUS_CODING         | Peptidase C48, SUMO/Sentrin/Ubl1   |
| Kabuli_wild_37026302 | 1399933221                          | Ca_kabuli_Chrom01 | 37026302                | C/T  | NA                 | INTERGENIC                    | NA                                 |
| Kabuli_wild_37607868 | 1399933222                          | Ca_kabuli_Chrom01 | 37607868                | A/T  | NA                 | INTERGENIC                    | NA                                 |
| Kabuli_wild_37624771 | 1399933223                          | Ca_kabuli_Chrom01 | 37624771                | C/T  | NA                 | INTERGENIC                    | NA                                 |
| Kabuli_wild_37624794 | 1399933224                          | Ca_kabuli_Chrom01 | 37624794                | T/C  | NA                 | INTERGENIC                    | NA                                 |
| Kabuli_wild_37624807 | 1399933225                          | Ca_kabuli_Chrom01 | 37624807                | C/T  | NA                 | INTERGENIC                    | NA                                 |
| Kabuli_wild_37624823 | 1399933226                          | Ca_kabuli_Chrom01 | 37624823                | G/A  | NA                 | INTERGENIC                    | NA                                 |
| Kabuli_wild_37642546 | 1399933227                          | Ca_kabuli_Chrom01 | 37642546                | G/A  | NA                 | INTERGENIC                    | NA                                 |
| Kabuli_wild_37690416 | 1399933228                          | Ca_kabuli_Chrom01 | 37690416                | G/A  | Gene_Ca_23533      | INTRON                        | Myb,DNA-binding                    |
| Kabuli_wild_37690465 | 1399933229                          | Ca_kabuli_Chrom01 | 37690465                | T/C  | Gene_Ca_23533      | INTRON                        | Myb,DNA-binding                    |
| Kabuli_wild_37690497 | 1399933230                          | Ca_kabuli_Chrom01 | 37690497                | A/T  | Gene_Ca_23533      | INTRON                        | Myb,DNA-binding                    |
| Kabuli_wild_37690498 | 1399933231                          | Ca_kabuli_Chrom01 | 37690498                | C/A  | Gene_Ca_23533      | INTRON                        | Myb,DNA-binding                    |
| Kabuli_wild_37699036 | 1399933232                          | Ca_kabuli_Chrom01 | 37699036                | T/C  | NA                 | INTERGENIC                    | NA                                 |
| Kabuli_wild_37699039 | 1399933233                          | Ca_kabuli_Chrom01 | 37699039                | T/G  | NA                 | INTERGENIC                    | NA                                 |
| Kabuli_wild_37722095 | 1399933234                          | Ca_kabuli_Chrom01 | 37722095                | G/A  | Gene_Ca_23534      | SYNONYMOUS_CODING             | Protein of unknown function DUF620 |
| Kabuli_wild_37722143 | 1399933235                          | Ca_kabuli_Chrom01 | 37722143                | G/C  | Gene_Ca_23534      | SYNONYMOUS_CODING             | Protein of unknown function DUF620 |
| Kabuli_wild_37768179 | 1399933236                          | Ca_kabuli_Chrom01 | 37768179                | T/A  | NA                 | INTERGENIC                    | NA                                 |
| Kabuli_wild_37768299 | 1399933237                          | Ca_kabuli_Chrom01 | 37768299                | A/G  | NA                 | INTERGENIC                    | NA                                 |
| Kabuli_wild_37768333 | 1399933238                          | Ca_kabuli_Chrom01 | 37768333                | C/T  | NA                 | INTERGENIC                    | NA                                 |
| Kabuli_wild_37787046 | 1399933239                          | Ca_kabuli_Chrom01 | 37787046                | C/A  | NA                 | INTERGENIC                    | NA                                 |
| Kabuli_wild_37787052 | 1399933240                          | Ca_kabuli_Chrom01 | 37787052                | A/G  | NA                 | INTERGENIC                    | NA                                 |
| Kabuli_wild_37869136 | 1399933241                          | Ca_kabuli_Chrom01 | 37869136                | G/T  | Gene_Ca_23539      | INTRON                        | Zinc finger,PHD-type               |
| Kabuli_wild_37880995 | 1399933242                          | Ca_kabuli_Chrom01 | 37880995                | T/C  | Gene_Ca_23539      | INTRON                        | Zinc finger,PHD-type               |
| Kabuli_wild_37892088 | 1399933243                          | Ca_kabuli_Chrom01 | 37892088                | A/C  | Gene_Ca_23539      | DOWNSTREAM                    | Zinc finger,PHD-type               |
| Kabuli_wild_37892089 | 1399933244                          | Ca_kabuli_Chrom01 | 37892089                | C/T  | Gene_Ca_23539      | DOWNSTREAM                    | Zinc finger,PHD-type               |
| Kabuli_wild_37892139 | 1399933245                          | Ca_kabuli_Chrom01 | 37892139                | A/T  | Gene_Ca_23539      | DOWNSTREAM                    | Zinc finger,PHD-type               |
| Kabuli_wild_38023935 | 1399933246                          | Ca_kabuli_Chrom01 | 38023935                | G/A  | Gene_Ca_27443      | INTRON                        | Zinc finger,GRF-type               |
| Kabuli_wild_38023940 | 1399933247                          | Ca_kabuli_Chrom01 | 38023940                | C/T  | Gene_Ca_27443      | INTRON                        | Zinc finger,GRF-type               |
| Kabuli_wild_38023969 | 1399933248                          | Ca_kabuli_Chrom01 | 38023969                | A/G  | Gene_Ca_27443      | INTRON                        | Zinc finger,GRF-type               |
| Kabuli_wild_38023972 | 1399933249                          | Ca_kabuli_Chrom01 | 38023972                | C/T  | Gene_Ca_27443      | INTRON                        | Zinc finger,GRF-type               |
| Kabuli_wild_38023974 | 1399933250                          | Ca_kabuli_Chrom01 | 38023974                | G/A  | Gene_Ca_27443      | INTRON                        | Zinc finger,GRF-type               |
| Kabuli_wild_38024016 | 1399933251                          | Ca_kabuli_Chrom01 | 38024016                | A/C  | Gene_Ca_27443      | INTRON                        | Zinc finger,GRF-type               |
| Kabuli_wild_38025854 | 1399933252                          | Ca_kabuli_Chrom01 | 38025854                | G/A  | Gene_Ca_27443      | SYNONYMOUS_CODING             | Zinc finger,GRF-type               |
| Kabuli_wild_38049721 | 1399933253                          | Ca_kabuli_Chrom01 | 38049721                | C/T  | Gene_Ca_27444      | NON_SYNONYMOUS_CODING         | Cation efflux protein              |
| Kabuli_wild_38226909 | 1399933254                          | Ca_kabuli_Chrom01 | 38226909                | G/A  | NA                 | INTERGENIC                    | NA                                 |
| Kabuli_wild_38782963 | 1399933255                          | Ca_kabuli_Chrom01 | 38782963                | C/A  | NA                 | INTERGENIC                    | NA                                 |

| SNP IDs              | NCBI dbSNP accession IDs (NCBI_SS#) | Chromosomes     | Physical positions (bp) | SNPs | Gene accession IDs | Sequence components of genome | Putative functions                  |
|----------------------|-------------------------------------|-----------------|-------------------------|------|--------------------|-------------------------------|-------------------------------------|
| Kabuli_wild_38877670 | 1399933256                          | Ca_kabuli_Chr01 | 38877670                | T/C  | NA                 | INTERGENIC                    | NA                                  |
| Kabuli_wild_39107076 | 1399933257                          | Ca_kabuli_Chr01 | 39107076                | A/C  | NA                 | INTERGENIC                    | NA                                  |
| Kabuli_wild_39107216 | 1399933258                          | Ca_kabuli_Chr01 | 39107216                | A/T  | NA                 | INTERGENIC                    | NA                                  |
| Kabuli_wild_39436182 | 1399933259                          | Ca_kabuli_Chr01 | 39436182                | T/C  | Gene_Ca_13931      | SYNONYMOUS_CODING             | IQ motif,EF-handbinding site        |
| Kabuli_wild_39436291 | 1399933260                          | Ca_kabuli_Chr01 | 39436291                | T/C  | Gene_Ca_13931      | INTRON                        | IQ motif,EF-handbinding site        |
| Kabuli_wild_39438070 | 1399933261                          | Ca_kabuli_Chr01 | 39438070                | A/C  | Gene_Ca_13931      | NON_SYNONYMOUS_CODING         | IQ motif,EF-handbinding site        |
| Kabuli_wild_39587402 | 1399933262                          | Ca_kabuli_Chr01 | 39587402                | A/G  | NA                 | INTERGENIC                    | NA                                  |
| Kabuli_wild_39599655 | 1399933263                          | Ca_kabuli_Chr01 | 39599655                | C/T  | NA                 | INTERGENIC                    | NA                                  |
| Kabuli_wild_39601982 | 1399933264                          | Ca_kabuli_Chr01 | 39601982                | T/G  | NA                 | INTERGENIC                    | NA                                  |
| Kabuli_wild_39602021 | 1399933265                          | Ca_kabuli_Chr01 | 39602021                | T/C  | NA                 | INTERGENIC                    | NA                                  |
| Kabuli_wild_39602029 | 1399933266                          | Ca_kabuli_Chr01 | 39602029                | G/T  | NA                 | INTERGENIC                    | NA                                  |
| Kabuli_wild_39616139 | 1399933267                          | Ca_kabuli_Chr01 | 39616139                | A/C  | Gene_Ca_13924      | SYNONYMOUS_CODING             | CTPsynthase,N-terminal              |
| Kabuli_wild_39663432 | 1399933268                          | Ca_kabuli_Chr01 | 39663432                | C/G  | Gene_Ca_13922      | INTRON                        | ABC transporter-like                |
| Kabuli_wild_39712581 | 1399933269                          | Ca_kabuli_Chr01 | 39712581                | G/A  | Gene_Ca_13918      | DOWNSTREAM                    | NA                                  |
| Kabuli_wild_39746444 | 1399933270                          | Ca_kabuli_Chr01 | 39746444                | C/G  | NA                 | INTERGENIC                    | NA                                  |
| Kabuli_wild_39904837 | 1399933271                          | Ca_kabuli_Chr01 | 39904837                | G/C  | NA                 | INTERGENIC                    | NA                                  |
| Kabuli_wild_40199841 | 1399933272                          | Ca_kabuli_Chr01 | 40199841                | T/A  | NA                 | INTERGENIC                    | NA                                  |
| Kabuli_wild_40199917 | 1399933273                          | Ca_kabuli_Chr01 | 40199917                | T/C  | NA                 | INTERGENIC                    | NA                                  |
| Kabuli_wild_40199920 | 1399933274                          | Ca_kabuli_Chr01 | 40199920                | G/C  | NA                 | INTERGENIC                    | NA                                  |
| Kabuli_wild_40199922 | 1399933275                          | Ca_kabuli_Chr01 | 40199922                | C/A  | NA                 | INTERGENIC                    | NA                                  |
| Kabuli_wild_40199972 | 1399933276                          | Ca_kabuli_Chr01 | 40199972                | T/C  | NA                 | INTERGENIC                    | NA                                  |
| Kabuli_wild_40224804 | 1399933277                          | Ca_kabuli_Chr01 | 40224804                | A/G  | NA                 | INTERGENIC                    | NA                                  |
| Kabuli_wild_40224834 | 1399933278                          | Ca_kabuli_Chr01 | 40224834                | C/G  | NA                 | INTERGENIC                    | NA                                  |
| Kabuli_wild_40224835 | 1399933279                          | Ca_kabuli_Chr01 | 40224835                | T/A  | NA                 | INTERGENIC                    | NA                                  |
| Kabuli_wild_40343216 | 1399933280                          | Ca_kabuli_Chr01 | 40343216                | G/T  | Gene_Ca_13893      | INTRON                        | Tetratricopeptide,MLP1/MLP2-like    |
| Kabuli_wild_40346280 | 1399933281                          | Ca_kabuli_Chr01 | 40346280                | A/C  | Gene_Ca_13893      | INTRON                        | Tetratricopeptide,MLP1/MLP2-like    |
| Kabuli_wild_40358693 | 1399933282                          | Ca_kabuli_Chr01 | 40358693                | C/T  | Gene_Ca_13893      | INTRON                        | Tetratricopeptide,MLP1/MLP2-like    |
| Kabuli_wild_40358747 | 1399933283                          | Ca_kabuli_Chr01 | 40358747                | T/G  | Gene_Ca_13893      | INTRON                        | Tetratricopeptide,MLP1/MLP2-like    |
| Kabuli_wild_40366858 | 1399933284                          | Ca_kabuli_Chr01 | 40366858                | T/C  | Gene_Ca_13893      | INTRON                        | Tetratricopeptide,MLP1/MLP2-like    |
| Kabuli_wild_40366862 | 1399933285                          | Ca_kabuli_Chr01 | 40366862                | G/A  | Gene_Ca_13893      | INTRON                        | Tetratricopeptide,MLP1/MLP2-like    |
| Kabuli_wild_40366866 | 1399933286                          | Ca_kabuli_Chr01 | 40366866                | G/C  | Gene_Ca_13893      | INTRON                        | Tetratricopeptide,MLP1/MLP2-like    |
| Kabuli_wild_40367940 | 1399933287                          | Ca_kabuli_Chr01 | 40367940                | G/A  | Gene_Ca_13893      | INTRON                        | Tetratricopeptide,MLP1/MLP2-like    |
| Kabuli_wild_40499629 | 1399933288                          | Ca_kabuli_Chr01 | 40499629                | C/T  | Gene_Ca_18443      | NON_SYNONYMOUS_CODING         | CWC16 protein                       |
| Kabuli_wild_41008946 | 1399933289                          | Ca_kabuli_Chr01 | 41008946                | C/A  | Gene_Ca_18469      | INTRON                        | X8                                  |
| Kabuli_wild_41029732 | 1399933290                          | Ca_kabuli_Chr01 | 41029732                | C/T  | NA                 | INTERGENIC                    | NA                                  |
| Kabuli_wild_41169218 | 1399933291                          | Ca_kabuli_Chr01 | 41169218                | G/T  | NA                 | INTERGENIC                    | NA                                  |
| Kabuli_wild_41185512 | 1399933292                          | Ca_kabuli_Chr01 | 41185512                | T/G  | NA                 | INTERGENIC                    | NA                                  |
| Kabuli_wild_41380061 | 1399933293                          | Ca_kabuli_Chr01 | 41380061                | G/T  | Gene_Ca_23111      | SYNONYMOUS_CODING             | GlutathioneS-transferase,N-terminal |
| Kabuli_wild_41451912 | 1399933294                          | Ca_kabuli_Chr01 | 41451912                | G/T  | Gene_Ca_23119      | SYNONYMOUS_CODING             | Peptidase C48, SUMO/Sentrin/Ubl1    |
| Kabuli_wild_41451929 | 1399933295                          | Ca_kabuli_Chr01 | 41451929                | C/T  | Gene_Ca_23119      | NON_SYNONYMOUS_CODING         | Peptidase C48, SUMO/Sentrin/Ubl1    |
| Kabuli_wild_41451974 | 1399933296                          | Ca_kabuli_Chr01 | 41451974                | C/T  | Gene_Ca_23119      | NON_SYNONYMOUS_CODING         | Peptidase C48, SUMO/Sentrin/Ubl1    |
| Kabuli_wild_41564809 | 1399933297                          | Ca_kabuli_Chr01 | 41564809                | T/C  | NA                 | INTERGENIC                    | NA                                  |
| Kabuli_wild_41566032 | 1399933298                          | Ca_kabuli_Chr01 | 41566032                | T/A  | Gene_Ca_25795      | UPSTREAM                      | BolAprotein                         |
| Kabuli_wild_41571912 | 1399933299                          | Ca_kabuli_Chr01 | 41571912                | T/C  | NA                 | INTERGENIC                    | NA                                  |

| SNP IDs              | NCBI dbSNP accession IDs (NCBI_SS#) | Chromosomes       | Physical positions (bp) | SNPs | Gene accession IDs | Sequence components of genome | Putative functions                             |
|----------------------|-------------------------------------|-------------------|-------------------------|------|--------------------|-------------------------------|------------------------------------------------|
| Kabuli_wild_41730109 | 1399933300                          | Ca_kabuli_Chrom01 | 41730109                | T/A  | Gene_Ca_22515      | NON_SYNONYMOUS_CODING         | RNA-bindingS4                                  |
| Kabuli_wild_41730114 | 1399933301                          | Ca_kabuli_Chrom01 | 41730114                | A/C  | Gene_Ca_22515      | NON_SYNONYMOUS_CODING         | RNA-bindingS4                                  |
| Kabuli_wild_41782890 | 1399933302                          | Ca_kabuli_Chrom01 | 41782890                | A/G  | Gene_Ca_22517      | NON_SYNONYMOUS_CODING         | ClassIIaldolase/adducin,N-terminal             |
| Kabuli_wild_41827388 | 1399933303                          | Ca_kabuli_Chrom01 | 41827388                | T/C  | NA                 | INTERGENIC                    | NA                                             |
| Kabuli_wild_41867035 | 1399933304                          | Ca_kabuli_Chrom01 | 41867035                | C/T  | NA                 | INTERGENIC                    | NA                                             |
| Kabuli_wild_41897211 | 1399933305                          | Ca_kabuli_Chrom01 | 41897211                | C/A  | Gene_Ca_22528      | INTRON                        | NA                                             |
| Kabuli_wild_41897212 | 1399933306                          | Ca_kabuli_Chrom01 | 41897212                | G/T  | Gene_Ca_22528      | INTRON                        | NA                                             |
| Kabuli_wild_41897216 | 1399933307                          | Ca_kabuli_Chrom01 | 41897216                | C/A  | Gene_Ca_22528      | INTRON                        | NA                                             |
| Kabuli_wild_41897304 | 1399933308                          | Ca_kabuli_Chrom01 | 41897304                | A/C  | Gene_Ca_22528      | INTRON                        | NA                                             |
| Kabuli_wild_41946005 | 1399933309                          | Ca_kabuli_Chrom01 | 41946005                | A/G  | NA                 | INTERGENIC                    | NA                                             |
| Kabuli_wild_42015396 | 1399933310                          | Ca_kabuli_Chrom01 | 42015396                | G/T  | NA                 | INTERGENIC                    | NA                                             |
| Kabuli_wild_42160998 | 1399933311                          | Ca_kabuli_Chrom01 | 42160998                | C/T  | NA                 | INTERGENIC                    | NA                                             |
| Kabuli_wild_42161200 | 1399933312                          | Ca_kabuli_Chrom01 | 42161200                | A/C  | NA                 | INTERGENIC                    | NA                                             |
| Kabuli_wild_42161207 | 1399933313                          | Ca_kabuli_Chrom01 | 42161207                | C/T  | NA                 | INTERGENIC                    | NA                                             |
| Kabuli_wild_42161225 | 1399933314                          | Ca_kabuli_Chrom01 | 42161225                | C/T  | NA                 | INTERGENIC                    | NA                                             |
| Kabuli_wild_42161231 | 1399933315                          | Ca_kabuli_Chrom01 | 42161231                | C/T  | NA                 | INTERGENIC                    | NA                                             |
| Kabuli_wild_42439646 | 1399933316                          | Ca_kabuli_Chrom01 | 42439646                | C/T  | Gene_Ca_22662      | DOWNSTREAM                    | NA                                             |
| Kabuli_wild_42439650 | 1399933317                          | Ca_kabuli_Chrom01 | 42439650                | C/A  | Gene_Ca_22662      | DOWNSTREAM                    | NA                                             |
| Kabuli_wild_42439722 | 1399933318                          | Ca_kabuli_Chrom01 | 42439722                | T/G  | Gene_Ca_22662      | DOWNSTREAM                    | NA                                             |
| Kabuli_wild_42439795 | 1399933319                          | Ca_kabuli_Chrom01 | 42439795                | A/C  | Gene_Ca_22662      | DOWNSTREAM                    | NA                                             |
| Kabuli_wild_42452939 | 1399933320                          | Ca_kabuli_Chrom01 | 42452939                | G/T  | Gene_Ca_13620      | NON_SYNONYMOUS_CODING         | Transcription factor CBF/NF-Y/archaeal histone |
| Kabuli_wild_42551585 | 1399933321                          | Ca_kabuli_Chrom01 | 42551585                | C/A  | NA                 | INTERGENIC                    | NA                                             |
| Kabuli_wild_42552658 | 1399933322                          | Ca_kabuli_Chrom01 | 42552658                | A/C  | Gene_Ca_13613      | DOWNSTREAM                    | PeptidaseA1                                    |
| Kabuli_wild_42552710 | 1399933323                          | Ca_kabuli_Chrom01 | 42552710                | A/C  | Gene_Ca_13613      | DOWNSTREAM                    | PeptidaseA1                                    |
| Kabuli_wild_42605239 | 1399933324                          | Ca_kabuli_Chrom01 | 42605239                | T/G  | NA                 | INTERGENIC                    | NA                                             |
| Kabuli_wild_42613060 | 1399933325                          | Ca_kabuli_Chrom01 | 42613060                | T/G  | NA                 | INTERGENIC                    | NA                                             |
| Kabuli_wild_43048137 | 1399933326                          | Ca_kabuli_Chrom01 | 43048137                | G/T  | NA                 | INTERGENIC                    | NA                                             |
| Kabuli_wild_43053424 | 1399933327                          | Ca_kabuli_Chrom01 | 43053424                | G/C  | NA                 | INTERGENIC                    | NA                                             |
| Kabuli_wild_43053583 | 1399933328                          | Ca_kabuli_Chrom01 | 43053583                | A/C  | NA                 | INTERGENIC                    | NA                                             |
| Kabuli_wild_43273910 | 1399933329                          | Ca_kabuli_Chrom01 | 43273910                | G/T  | NA                 | INTERGENIC                    | NA                                             |
| Kabuli_wild_43273922 | 1399933330                          | Ca_kabuli_Chrom01 | 43273922                | T/C  | NA                 | INTERGENIC                    | NA                                             |
| Kabuli_wild_43273925 | 1399933331                          | Ca_kabuli_Chrom01 | 43273925                | A/G  | NA                 | INTERGENIC                    | NA                                             |
| Kabuli_wild_43273931 | 1399933332                          | Ca_kabuli_Chrom01 | 43273931                | G/A  | NA                 | INTERGENIC                    | NA                                             |
| Kabuli_wild_43273941 | 1399933333                          | Ca_kabuli_Chrom01 | 43273941                | C/G  | NA                 | INTERGENIC                    | NA                                             |
| Kabuli_wild_43273943 | 1399933334                          | Ca_kabuli_Chrom01 | 43273943                | A/G  | NA                 | INTERGENIC                    | NA                                             |
| Kabuli_wild_43273961 | 1399933335                          | Ca_kabuli_Chrom01 | 43273961                | C/T  | NA                 | INTERGENIC                    | NA                                             |
| Kabuli_wild_43273962 | 1399933336                          | Ca_kabuli_Chrom01 | 43273962                | A/G  | NA                 | INTERGENIC                    | NA                                             |
| Kabuli_wild_43273968 | 1399933337                          | Ca_kabuli_Chrom01 | 43273968                | T/G  | NA                 | INTERGENIC                    | NA                                             |
| Kabuli_wild_43273972 | 1399933338                          | Ca_kabuli_Chrom01 | 43273972                | C/T  | NA                 | INTERGENIC                    | NA                                             |
| Kabuli_wild_43273981 | 1399933339                          | Ca_kabuli_Chrom01 | 43273981                | G/T  | NA                 | INTERGENIC                    | NA                                             |
| Kabuli_wild_43273985 | 1399933340                          | Ca_kabuli_Chrom01 | 43273985                | G/A  | NA                 | INTERGENIC                    | NA                                             |
| Kabuli_wild_43386968 | 1399933341                          | Ca_kabuli_Chrom01 | 43386968                | G/A  | Gene_Ca_13577      | NON_SYNONYMOUS_CODING         | Cyclin                                         |
| Kabuli_wild_43725269 | 1399933342                          | Ca_kabuli_Chrom01 | 43725269                | T/G  | Gene_Ca_13554      | SYNONYMOUS_CODING             | NA                                             |
| Kabuli_wild_43727884 | 1399933343                          | Ca_kabuli_Chrom01 | 43727884                | G/A  | Gene_Ca_13554      | NON_SYNONYMOUS_CODING         | NA                                             |

| SNP IDs              | NCBI dbSNP accession IDs (NCBI_SS#) | Chromosomes     | Physical positions (bp) | SNPs | Gene accession IDs | Sequence components of genome | Putative functions              |
|----------------------|-------------------------------------|-----------------|-------------------------|------|--------------------|-------------------------------|---------------------------------|
| Kabuli_wild_43752723 | 1399933344                          | Ca_kabuli_Chr01 | 43752723                | A/C  | Gene_Ca_13553      | SYNONYMOUS_CODING             | NA                              |
| Kabuli_wild_43753900 | 1399933345                          | Ca_kabuli_Chr01 | 43753900                | C/T  | Gene_Ca_13553      | NON_SYNONYMOUS_CODING         | NA                              |
| Kabuli_wild_43782277 | 1399933346                          | Ca_kabuli_Chr01 | 43782277                | G/T  | Gene_Ca_13549      | INTRON                        | NA                              |
| Kabuli_wild_43792565 | 1399933347                          | Ca_kabuli_Chr01 | 43792565                | G/A  | NA                 | INTERGENIC                    | NA                              |
| Kabuli_wild_43924593 | 1399933348                          | Ca_kabuli_Chr01 | 43924593                | T/G  | Gene_Ca_13540      | INTRON                        | NA                              |
| Kabuli_wild_43930138 | 1399933349                          | Ca_kabuli_Chr01 | 43930138                | T/C  | NA                 | INTERGENIC                    | NA                              |
| Kabuli_wild_43930143 | 1399933350                          | Ca_kabuli_Chr01 | 43930143                | A/T  | NA                 | INTERGENIC                    | NA                              |
| Kabuli_wild_43933629 | 1399933351                          | Ca_kabuli_Chr01 | 43933629                | T/C  | Gene_Ca_13539      | SYNONYMOUS_CODING             | NA                              |
| Kabuli_wild_43933984 | 1399933352                          | Ca_kabuli_Chr01 | 43933984                | T/C  | NA                 | INTERGENIC                    | NA                              |
| Kabuli_wild_44085069 | 1399933353                          | Ca_kabuli_Chr01 | 44085069                | C/T  | Gene_Ca_13530      | INTRON                        | Endosulphine                    |
| Kabuli_wild_44349004 | 1399933354                          | Ca_kabuli_Chr01 | 44349004                | T/C  | Gene_Ca_23498      | NON_SYNONYMOUS_CODING         | Ribonucleasell/R                |
| Kabuli_wild_44350953 | 1399933355                          | Ca_kabuli_Chr01 | 44350953                | G/T  | Gene_Ca_23498      | INTRON                        | Ribonucleasell/R                |
| Kabuli_wild_44635858 | 1399933356                          | Ca_kabuli_Chr01 | 44635858                | G/T  | NA                 | INTERGENIC                    | NA                              |
| Kabuli_wild_44635893 | 1399933357                          | Ca_kabuli_Chr01 | 44635893                | G/A  | NA                 | INTERGENIC                    | NA                              |
| Kabuli_wild_44635926 | 1399933358                          | Ca_kabuli_Chr01 | 44635926                | G/A  | NA                 | INTERGENIC                    | NA                              |
| Kabuli_wild_44635939 | 1399933359                          | Ca_kabuli_Chr01 | 44635939                | T/C  | NA                 | INTERGENIC                    | NA                              |
| Kabuli_wild_44643830 | 1399933360                          | Ca_kabuli_Chr01 | 44643830                | T/C  | NA                 | INTERGENIC                    | NA                              |
| Kabuli_wild_44643859 | 1399933361                          | Ca_kabuli_Chr01 | 44643859                | T/A  | NA                 | INTERGENIC                    | NA                              |
| Kabuli_wild_44976735 | 1399933362                          | Ca_kabuli_Chr01 | 44976735                | C/T  | Gene_Ca_25713      | INTRON                        | Protein kinase,catalytic domain |
| Kabuli_wild_44976738 | 1399933363                          | Ca_kabuli_Chr01 | 44976738                | T/A  | Gene_Ca_25713      | INTRON                        | Protein kinase,catalytic domain |
| Kabuli_wild_44988344 | 1399933364                          | Ca_kabuli_Chr01 | 44988344                | A/G  | NA                 | INTERGENIC                    | NA                              |
| Kabuli_wild_45003190 | 1399933365                          | Ca_kabuli_Chr01 | 45003190                | G/A  | Gene_Ca_25714      | NON_SYNONYMOUS_CODING         | NA                              |
| Kabuli_wild_45003229 | 1399933366                          | Ca_kabuli_Chr01 | 45003229                | A/G  | Gene_Ca_25714      | NON_SYNONYMOUS_CODING         | NA                              |
| Kabuli_wild_45003230 | 1399933367                          | Ca_kabuli_Chr01 | 45003230                | A/G  | Gene_Ca_25714      | SYNONYMOUS_CODING             | NA                              |
| Kabuli_wild_45003270 | 1399933368                          | Ca_kabuli_Chr01 | 45003270                | T/A  | Gene_Ca_25714      | SYNONYMOUS_CODING             | NA                              |
| Kabuli_wild_45003329 | 1399933369                          | Ca_kabuli_Chr01 | 45003329                | T/G  | Gene_Ca_25714      | NON_SYNONYMOUS_CODING         | NA                              |
| Kabuli_wild_45003434 | 1399933370                          | Ca_kabuli_Chr01 | 45003434                | A/G  | Gene_Ca_25714      | INTRON                        | NA                              |
| Kabuli_wild_45003450 | 1399933371                          | Ca_kabuli_Chr01 | 45003450                | G/T  | Gene_Ca_25714      | INTRON                        | NA                              |
| Kabuli_wild_45003456 | 1399933372                          | Ca_kabuli_Chr01 | 45003456                | C/A  | Gene_Ca_25714      | INTRON                        | NA                              |
| Kabuli_wild_45003505 | 1399933373                          | Ca_kabuli_Chr01 | 45003505                | A/C  | Gene_Ca_25714      | INTRON                        | NA                              |
| Kabuli_wild_45003509 | 1399933374                          | Ca_kabuli_Chr01 | 45003509                | C/A  | Gene_Ca_25714      | INTRON                        | NA                              |
| Kabuli_wild_45003514 | 1399933375                          | Ca_kabuli_Chr01 | 45003514                | G/A  | Gene_Ca_25714      | NON_SYNONYMOUS_CODING         | NA                              |
| Kabuli_wild_45003938 | 1399933376                          | Ca_kabuli_Chr01 | 45003938                | A/G  | Gene_Ca_25714      | INTRON                        | NA                              |
| Kabuli_wild_45003939 | 1399933377                          | Ca_kabuli_Chr01 | 45003939                | T/A  | Gene_Ca_25714      | INTRON                        | NA                              |
| Kabuli_wild_45003940 | 1399933378                          | Ca_kabuli_Chr01 | 45003940                | T/G  | Gene_Ca_25714      | INTRON                        | NA                              |
| Kabuli_wild_45003944 | 1399933379                          | Ca_kabuli_Chr01 | 45003944                | T/C  | Gene_Ca_25714      | INTRON                        | NA                              |
| Kabuli_wild_45003945 | 1399933380                          | Ca_kabuli_Chr01 | 45003945                | T/A  | Gene_Ca_25714      | INTRON                        | NA                              |
| Kabuli_wild_45003946 | 1399933381                          | Ca_kabuli_Chr01 | 45003946                | T/G  | Gene_Ca_25714      | INTRON                        | NA                              |
| Kabuli_wild_45003947 | 1399933382                          | Ca_kabuli_Chr01 | 45003947                | C/A  | Gene_Ca_25714      | INTRON                        | NA                              |
| Kabuli_wild_45003965 | 1399933383                          | Ca_kabuli_Chr01 | 45003965                | T/C  | Gene_Ca_25714      | INTRON                        | NA                              |
| Kabuli_wild_45003972 | 1399933384                          | Ca_kabuli_Chr01 | 45003972                | A/G  | Gene_Ca_25714      | INTRON                        | NA                              |
| Kabuli_wild_45003973 | 1399933385                          | Ca_kabuli_Chr01 | 45003973                | T/C  | Gene_Ca_25714      | INTRON                        | NA                              |
| Kabuli_wild_45003985 | 1399933386                          | Ca_kabuli_Chr01 | 45003985                | G/T  | Gene_Ca_25714      | INTRON                        | NA                              |
| Kabuli_wild_45003998 | 1399933387                          | Ca_kabuli_Chr01 | 45003998                | G/A  | Gene_Ca_25714      | INTRON                        | NA                              |

| SNP IDs              | NCBI dbSNP accession IDs (NCBI_SS#) | Chromosomes     | Physical positions (bp) | SNPs | Gene accession IDs | Sequence components of genome | Putative functions |
|----------------------|-------------------------------------|-----------------|-------------------------|------|--------------------|-------------------------------|--------------------|
| Kabuli_wild_45004001 | 1399933388                          | Ca_kabuli_Chr01 | 45004001                | C/T  | Gene_Ca_25714      | INTRON                        | NA                 |
| Kabuli_wild_45004016 | 1399933389                          | Ca_kabuli_Chr01 | 45004016                | G/T  | Gene_Ca_25714      | INTRON                        | NA                 |
| Kabuli_wild_45004017 | 1399933390                          | Ca_kabuli_Chr01 | 45004017                | C/G  | Gene_Ca_25714      | INTRON                        | NA                 |
| Kabuli_wild_45004200 | 1399933391                          | Ca_kabuli_Chr01 | 45004200                | G/T  | Gene_Ca_25714      | INTRON                        | NA                 |
| Kabuli_wild_45004205 | 1399933392                          | Ca_kabuli_Chr01 | 45004205                | C/T  | Gene_Ca_25714      | INTRON                        | NA                 |
| Kabuli_wild_45004284 | 1399933393                          | Ca_kabuli_Chr01 | 45004284                | G/A  | Gene_Ca_25714      | SYNONYMOUS_CODING             | NA                 |
| Kabuli_wild_45007032 | 1399933394                          | Ca_kabuli_Chr01 | 45007032                | A/C  | Gene_Ca_25714      | INTRON                        | NA                 |
| Kabuli_wild_45007090 | 1399933395                          | Ca_kabuli_Chr01 | 45007090                | G/A  | Gene_Ca_25714      | INTRON                        | NA                 |
| Kabuli_wild_45007194 | 1399933396                          | Ca_kabuli_Chr01 | 45007194                | G/T  | Gene_Ca_25714      | INTRON                        | NA                 |
| Kabuli_wild_45007197 | 1399933397                          | Ca_kabuli_Chr01 | 45007197                | T/A  | Gene_Ca_25714      | INTRON                        | NA                 |
| Kabuli_wild_45007200 | 1399933398                          | Ca_kabuli_Chr01 | 45007200                | T/A  | Gene_Ca_25714      | INTRON                        | NA                 |
| Kabuli_wild_45007223 | 1399933399                          | Ca_kabuli_Chr01 | 45007223                | A/C  | Gene_Ca_25714      | INTRON                        | NA                 |
| Kabuli_wild_45007227 | 1399933400                          | Ca_kabuli_Chr01 | 45007227                | T/C  | Gene_Ca_25714      | INTRON                        | NA                 |
| Kabuli_wild_45007238 | 1399933401                          | Ca_kabuli_Chr01 | 45007238                | A/G  | Gene_Ca_25714      | INTRON                        | NA                 |
| Kabuli_wild_45007256 | 1399933402                          | Ca_kabuli_Chr01 | 45007256                | A/T  | Gene_Ca_25714      | INTRON                        | NA                 |
| Kabuli_wild_45007259 | 1399933403                          | Ca_kabuli_Chr01 | 45007259                | A/G  | Gene_Ca_25714      | INTRON                        | NA                 |
| Kabuli_wild_45007331 | 1399933404                          | Ca_kabuli_Chr01 | 45007331                | C/T  | Gene_Ca_25714      | INTRON                        | NA                 |
| Kabuli_wild_45008004 | 1399933405                          | Ca_kabuli_Chr01 | 45008004                | C/T  | Gene_Ca_25714      | INTRON                        | NA                 |
| Kabuli_wild_45008006 | 1399933406                          | Ca_kabuli_Chr01 | 45008006                | C/A  | Gene_Ca_25714      | INTRON                        | NA                 |
| Kabuli_wild_45008009 | 1399933407                          | Ca_kabuli_Chr01 | 45008009                | C/T  | Gene_Ca_25714      | INTRON                        | NA                 |
| Kabuli_wild_45008015 | 1399933408                          | Ca_kabuli_Chr01 | 45008015                | G/A  | Gene_Ca_25714      | INTRON                        | NA                 |
| Kabuli_wild_45008016 | 1399933409                          | Ca_kabuli_Chr01 | 45008016                | T/A  | Gene_Ca_25714      | INTRON                        | NA                 |
| Kabuli_wild_45008044 | 1399933410                          | Ca_kabuli_Chr01 | 45008044                | T/C  | Gene_Ca_25714      | INTRON                        | NA                 |
| Kabuli_wild_45008050 | 1399933411                          | Ca_kabuli_Chr01 | 45008050                | C/G  | Gene_Ca_25714      | INTRON                        | NA                 |
| Kabuli_wild_45008071 | 1399933412                          | Ca_kabuli_Chr01 | 45008071                | G/C  | Gene_Ca_25714      | INTRON                        | NA                 |
| Kabuli_wild_45008073 | 1399933413                          | Ca_kabuli_Chr01 | 45008073                | T/G  | Gene_Ca_25714      | INTRON                        | NA                 |
| Kabuli_wild_45008075 | 1399933414                          | Ca_kabuli_Chr01 | 45008075                | T/C  | Gene_Ca_25714      | INTRON                        | NA                 |
| Kabuli_wild_45008076 | 1399933415                          | Ca_kabuli_Chr01 | 45008076                | G/A  | Gene_Ca_25714      | INTRON                        | NA                 |
| Kabuli_wild_45250802 | 1399933416                          | Ca_kabuli_Chr01 | 45250802                | C/T  | NA                 | INTERGENIC                    | NA                 |
| Kabuli_wild_45250803 | 1399933417                          | Ca_kabuli_Chr01 | 45250803                | A/G  | NA                 | INTERGENIC                    | NA                 |
| Kabuli_wild_45250804 | 1399933418                          | Ca_kabuli_Chr01 | 45250804                | G/A  | NA                 | INTERGENIC                    | NA                 |
| Kabuli_wild_45250805 | 1399933419                          | Ca_kabuli_Chr01 | 45250805                | A/C  | NA                 | INTERGENIC                    | NA                 |
| Kabuli_wild_45250807 | 1399933420                          | Ca_kabuli_Chr01 | 45250807                | C/G  | NA                 | INTERGENIC                    | NA                 |
| Kabuli_wild_45250828 | 1399933421                          | Ca_kabuli_Chr01 | 45250828                | G/C  | NA                 | INTERGENIC                    | NA                 |
| Kabuli_wild_45250834 | 1399933422                          | Ca_kabuli_Chr01 | 45250834                | A/G  | NA                 | INTERGENIC                    | NA                 |
| Kabuli_wild_45250862 | 1399933423                          | Ca_kabuli_Chr01 | 45250862                | A/T  | NA                 | INTERGENIC                    | NA                 |
| Kabuli_wild_45250863 | 1399933424                          | Ca_kabuli_Chr01 | 45250863                | C/T  | NA                 | INTERGENIC                    | NA                 |
| Kabuli_wild_45250869 | 1399933425                          | Ca_kabuli_Chr01 | 45250869                | G/A  | NA                 | INTERGENIC                    | NA                 |
| Kabuli_wild_45250872 | 1399933426                          | Ca_kabuli_Chr01 | 45250872                | G/T  | NA                 | INTERGENIC                    | NA                 |
| Kabuli_wild_45250874 | 1399933427                          | Ca_kabuli_Chr01 | 45250874                | G/A  | NA                 | INTERGENIC                    | NA                 |
| Kabuli_wild_46429309 | 1399933428                          | Ca_kabuli_Chr01 | 46429309                | T/C  | Gene_Ca_21547      | INTRON                        | Adenylatekinase    |
| Kabuli_wild_46437023 | 1399933429                          | Ca_kabuli_Chr01 | 46437023                | T/G  | Gene_Ca_21547      | SYNONYMOUS_CODING             | Adenylatekinase    |
| Kabuli_wild_46523221 | 1399933430                          | Ca_kabuli_Chr01 | 46523221                | C/T  | Gene_Ca_21550      | SYNONYMOUS_CODING             | NA                 |
| Kabuli_wild_46597131 | 1399933431                          | Ca_kabuli_Chr01 | 46597131                | T/G  | NA                 | INTERGENIC                    | NA                 |



| SNP IDs              | NCBI dbSNP accession IDs (NCBI_SS#) | Chromosomes     | Physical positions (bp) | SNPs | Gene accession IDs | Sequence components of genome | Putative functions                        |
|----------------------|-------------------------------------|-----------------|-------------------------|------|--------------------|-------------------------------|-------------------------------------------|
| Kabuli_wild_46597160 | 1399933432                          | Ca_kabuli_Chr01 | 46597160                | A/C  | NA                 | INTERGENIC                    | NA                                        |
| Kabuli_wild_46597180 | 1399933433                          | Ca_kabuli_Chr01 | 46597180                | G/A  | NA                 | INTERGENIC                    | NA                                        |
| Kabuli_wild_46597197 | 1399933434                          | Ca_kabuli_Chr01 | 46597197                | C/T  | NA                 | INTERGENIC                    | NA                                        |
| Kabuli_wild_46597199 | 1399933435                          | Ca_kabuli_Chr01 | 46597199                | A/G  | NA                 | INTERGENIC                    | NA                                        |
| Kabuli_wild_46597220 | 1399933436                          | Ca_kabuli_Chr01 | 46597220                | G/T  | NA                 | INTERGENIC                    | NA                                        |
| Kabuli_wild_46597221 | 1399933437                          | Ca_kabuli_Chr01 | 46597221                | G/A  | NA                 | INTERGENIC                    | NA                                        |
| Kabuli_wild_46597223 | 1399933438                          | Ca_kabuli_Chr01 | 46597223                | C/T  | NA                 | INTERGENIC                    | NA                                        |
| Kabuli_wild_46597235 | 1399933439                          | Ca_kabuli_Chr01 | 46597235                | C/T  | NA                 | INTERGENIC                    | NA                                        |
| Kabuli_wild_46597238 | 1399933440                          | Ca_kabuli_Chr01 | 46597238                | C/T  | NA                 | INTERGENIC                    | NA                                        |
| Kabuli_wild_46717271 | 1399933441                          | Ca_kabuli_Chr01 | 46717271                | C/T  | Gene_Ca_25108      | INTRON                        | NA                                        |
| Kabuli_wild_46737928 | 1399933442                          | Ca_kabuli_Chr01 | 46737928                | A/C  | Gene_Ca_25111      | INTRON                        | Protein of unknown function DUF3754       |
| Kabuli_wild_46745628 | 1399933443                          | Ca_kabuli_Chr01 | 46745628                | C/A  | Gene_Ca_25111      | INTRON                        | Protein of unknown function DUF3754       |
| Kabuli_wild_46778814 | 1399933444                          | Ca_kabuli_Chr01 | 46778814                | A/C  | Gene_Ca_25114      | NON_SYNONYMOUS_CODING         | Protein kinase,catalytic domain           |
| Kabuli_wild_46778958 | 1399933445                          | Ca_kabuli_Chr01 | 46778958                | A/G  | Gene_Ca_25114      | SYNONYMOUS_CODING             | Protein kinase,catalytic domain           |
| Kabuli_wild_46791939 | 1399933446                          | Ca_kabuli_Chr01 | 46791939                | T/G  | NA                 | INTERGENIC                    | NA                                        |
| Kabuli_wild_46793357 | 1399933447                          | Ca_kabuli_Chr01 | 46793357                | T/C  | NA                 | INTERGENIC                    | NA                                        |
| Kabuli_wild_46816041 | 1399933448                          | Ca_kabuli_Chr01 | 46816041                | A/T  | NA                 | INTERGENIC                    | NA                                        |
| Kabuli_wild_46825084 | 1399933449                          | Ca_kabuli_Chr01 | 46825084                | C/A  | Gene_Ca_25116      | INTRON                        | NA                                        |
| Kabuli_wild_46825211 | 1399933450                          | Ca_kabuli_Chr01 | 46825211                | G/A  | Gene_Ca_25116      | INTRON                        | NA                                        |
| Kabuli_wild_46825213 | 1399933451                          | Ca_kabuli_Chr01 | 46825213                | G/C  | Gene_Ca_25116      | INTRON                        | NA                                        |
| Kabuli_wild_46829662 | 1399933452                          | Ca_kabuli_Chr01 | 46829662                | C/T  | Gene_Ca_25116      | INTRON                        | NA                                        |
| Kabuli_wild_46832306 | 1399933453                          | Ca_kabuli_Chr01 | 46832306                | T/G  | Gene_Ca_25116      | INTRON                        | NA                                        |
| Kabuli_wild_46832383 | 1399933454                          | Ca_kabuli_Chr01 | 46832383                | T/C  | Gene_Ca_25116      | INTRON                        | NA                                        |
| Kabuli_wild_46832395 | 1399933455                          | Ca_kabuli_Chr01 | 46832395                | A/G  | Gene_Ca_25116      | INTRON                        | NA                                        |
| Kabuli_wild_46920524 | 1399933456                          | Ca_kabuli_Chr01 | 46920524                | C/T  | Gene_Ca_12949      | INTRON                        | NA                                        |
| Kabuli_wild_46936201 | 1399933457                          | Ca_kabuli_Chr01 | 46936201                | C/T  | NA                 | INTERGENIC                    | NA                                        |
| Kabuli_wild_46969221 | 1399933458                          | Ca_kabuli_Chr01 | 46969221                | T/A  | Gene_Ca_12942      | INTRON                        | Glycosyltransferase,family20              |
| Kabuli_wild_46969650 | 1399933459                          | Ca_kabuli_Chr01 | 46969650                | C/T  | Gene_Ca_12942      | SYNONYMOUS_CODING             | Glycosyltransferase,family20              |
| Kabuli_wild_47042798 | 1399933460                          | Ca_kabuli_Chr01 | 47042798                | T/A  | Gene_Ca_12938      | NON_SYNONYMOUS_CODING         | Protein of unknown function DUF92,TMEM19  |
| Kabuli_wild_47181534 | 1399933461                          | Ca_kabuli_Chr01 | 47181534                | C/A  | Gene_Ca_12931      | INTRON                        | Protein kinase,catalytic domain           |
| Kabuli_wild_47331080 | 1399933462                          | Ca_kabuli_Chr01 | 47331080                | T/C  | NA                 | INTERGENIC                    | NA                                        |
| Kabuli_wild_47331082 | 1399933463                          | Ca_kabuli_Chr01 | 47331082                | T/C  | NA                 | INTERGENIC                    | NA                                        |
| Kabuli_wild_47891286 | 1399933464                          | Ca_kabuli_Chr01 | 47891286                | T/A  | Gene_Ca_12888      | NON_SYNONYMOUS_CODING         | Phosphoenolpyruvatecarboxylase,activesite |
| Kabuli_wild_47891289 | 1399933465                          | Ca_kabuli_Chr01 | 47891289                | C/A  | Gene_Ca_12888      | SYNONYMOUS_CODING             | Phosphoenolpyruvatecarboxylase,activesite |
| Kabuli_wild_47897914 | 1399933466                          | Ca_kabuli_Chr01 | 47897914                | C/T  | Gene_Ca_12887      | INTRON                        | GPI mannosyl transferase                  |
| Kabuli_wild_47938884 | 1399933467                          | Ca_kabuli_Chr01 | 47938884                | T/G  | Gene_Ca_12883      | INTRON                        | Ubiquitin-conjugating enzyme, E2          |
| Kabuli_wild_47947163 | 1399933468                          | Ca_kabuli_Chr01 | 47947163                | G/A  | Gene_Ca_12882      | STOP_GAINED                   | TetratricopeptideTPR-1                    |
| Kabuli_wild_48026664 | 1399933469                          | Ca_kabuli_Chr01 | 48026664                | G/T  | NA                 | INTERGENIC                    | NA                                        |
| Kabuli_wild_48026727 | 1399933470                          | Ca_kabuli_Chr01 | 48026727                | A/C  | NA                 | INTERGENIC                    | NA                                        |
| Kabuli_wild_48028094 | 1399933471                          | Ca_kabuli_Chr01 | 48028094                | G/A  | NA                 | INTERGENIC                    | NA                                        |
| Kabuli_wild_48028282 | 1399933472                          | Ca_kabuli_Chr01 | 48028282                | T/G  | NA                 | INTERGENIC                    | NA                                        |
| Kabuli_wild_48132521 | 1399933473                          | Ca_kabuli_Chr01 | 48132521                | A/C  | NA                 | INTERGENIC                    | NA                                        |
| Kabuli_wild_48154076 | 1399933474                          | Ca_kabuli_Chr01 | 48154076                | C/A  | NA                 | INTERGENIC                    | NA                                        |
| Kabuli_wild_48191532 | 1399933475                          | Ca_kabuli_Chr01 | 48191532                | C/A  | Gene_Ca_12861      | UPSTREAM                      | Plantnuclearmatrix1                       |

| SNP IDs              | NCBI dbSNP accession IDs (NCBI_SS#) | Chromosomes     | Physical positions (bp) | SNPs | Gene accession IDs | Sequence components of genome | Putative functions                     |
|----------------------|-------------------------------------|-----------------|-------------------------|------|--------------------|-------------------------------|----------------------------------------|
| Kabuli_wild_48265590 | 1399933476                          | Ca_kabuli_Chr01 | 48265590                | T/G  | Gene_Ca_12856      | SYNONYMOUS_CODING             | NA                                     |
| Kabuli_wild_137850   | 1399933477                          | Ca_kabuli_Chr02 | 137850                  | C/A  | NA                 | INTERGENIC                    | NA                                     |
| Kabuli_wild_233589   | 1399933478                          | Ca_kabuli_Chr02 | 233589                  | C/T  | Gene_Ca_16975      | DOWNSTREAM                    | NA                                     |
| Kabuli_wild_354695   | 1399933479                          | Ca_kabuli_Chr02 | 354695                  | G/T  | Gene_Ca_16982      | NON_SYNONYMOUS_CODING         | Lateral organ boundaries, LOB          |
| Kabuli_wild_355813   | 1399933480                          | Ca_kabuli_Chr02 | 355813                  | T/G  | Gene_Ca_16982      | NON_SYNONYMOUS_CODING         | Lateral organ boundaries, LOB          |
| Kabuli_wild_355818   | 1399933481                          | Ca_kabuli_Chr02 | 355818                  | T/G  | Gene_Ca_16982      | SYNONYMOUS_CODING             | Lateral organ boundaries, LOB          |
| Kabuli_wild_355930   | 1399933482                          | Ca_kabuli_Chr02 | 355930                  | T/G  | Gene_Ca_16982      | NON_SYNONYMOUS_CODING         | Lateral organ boundaries, LOB          |
| Kabuli_wild_522943   | 1399933483                          | Ca_kabuli_Chr02 | 522943                  | A/G  | NA                 | INTERGENIC                    | NA                                     |
| Kabuli_wild_669303   | 1399933484                          | Ca_kabuli_Chr02 | 669303                  | G/A  | Gene_Ca_16997      | INTRON                        | 14-3-3protein                          |
| Kabuli_wild_737183   | 1399933485                          | Ca_kabuli_Chr02 | 737183                  | T/G  | Gene_Ca_17000      | SYNONYMOUS_CODING             | NA                                     |
| Kabuli_wild_746353   | 1399933486                          | Ca_kabuli_Chr02 | 746353                  | C/A  | Gene_Ca_17000      | INTRON                        | NA                                     |
| Kabuli_wild_770150   | 1399933487                          | Ca_kabuli_Chr02 | 770150                  | C/T  | Gene_Ca_17001      | NON_SYNONYMOUS_CODING         | Peptidase C48, SUMO/Sentrin/Ubl1       |
| Kabuli_wild_770152   | 1399933488                          | Ca_kabuli_Chr02 | 770152                  | G/A  | Gene_Ca_17001      | NON_SYNONYMOUS_CODING         | Peptidase C48, SUMO/Sentrin/Ubl1       |
| Kabuli_wild_770164   | 1399933489                          | Ca_kabuli_Chr02 | 770164                  | A/C  | Gene_Ca_17001      | SYNONYMOUS_CODING             | Peptidase C48, SUMO/Sentrin/Ubl1       |
| Kabuli_wild_770183   | 1399933490                          | Ca_kabuli_Chr02 | 770183                  | C/T  | Gene_Ca_17001      | NON_SYNONYMOUS_CODING         | Peptidase C48, SUMO/Sentrin/Ubl1       |
| Kabuli_wild_770194   | 1399933491                          | Ca_kabuli_Chr02 | 770194                  | G/C  | Gene_Ca_17001      | NON_SYNONYMOUS_CODING         | Peptidase C48, SUMO/Sentrin/Ubl1       |
| Kabuli_wild_770225   | 1399933492                          | Ca_kabuli_Chr02 | 770225                  | C/T  | Gene_Ca_17001      | NON_SYNONYMOUS_CODING         | Peptidase C48, SUMO/Sentrin/Ubl1       |
| Kabuli_wild_770231   | 1399933493                          | Ca_kabuli_Chr02 | 770231                  | C/T  | Gene_Ca_17001      | NON_SYNONYMOUS_CODING         | Peptidase C48, SUMO/Sentrin/Ubl1       |
| Kabuli_wild_770234   | 1399933494                          | Ca_kabuli_Chr02 | 770234                  | C/T  | Gene_Ca_17001      | NON_SYNONYMOUS_CODING         | Peptidase C48, SUMO/Sentrin/Ubl1       |
| Kabuli_wild_770237   | 1399933495                          | Ca_kabuli_Chr02 | 770237                  | C/A  | Gene_Ca_17001      | NON_SYNONYMOUS_CODING         | Peptidase C48, SUMO/Sentrin/Ubl1       |
| Kabuli_wild_770248   | 1399933496                          | Ca_kabuli_Chr02 | 770248                  | A/G  | Gene_Ca_17001      | NON_SYNONYMOUS_CODING         | Peptidase C48, SUMO/Sentrin/Ubl1       |
| Kabuli_wild_770259   | 1399933497                          | Ca_kabuli_Chr02 | 770259                  | G/A  | Gene_Ca_17001      | SYNONYMOUS_CODING             | Peptidase C48, SUMO/Sentrin/Ubl1       |
| Kabuli_wild_770260   | 1399933498                          | Ca_kabuli_Chr02 | 770260                  | C/T  | Gene_Ca_17001      | NON_SYNONYMOUS_CODING         | Peptidase C48, SUMO/Sentrin/Ubl1       |
| Kabuli_wild_770266   | 1399933499                          | Ca_kabuli_Chr02 | 770266                  | C/A  | Gene_Ca_17001      | NON_SYNONYMOUS_CODING         | Peptidase C48, SUMO/Sentrin/Ubl1       |
| Kabuli_wild_770283   | 1399933500                          | Ca_kabuli_Chr02 | 770283                  | G/A  | Gene_Ca_17001      | SYNONYMOUS_CODING             | Peptidase C48, SUMO/Sentrin/Ubl1       |
| Kabuli_wild_770290   | 1399933501                          | Ca_kabuli_Chr02 | 770290                  | G/A  | Gene_Ca_17001      | NON_SYNONYMOUS_CODING         | Peptidase C48, SUMO/Sentrin/Ubl1       |
| Kabuli_wild_770299   | 1399933502                          | Ca_kabuli_Chr02 | 770299                  | A/C  | Gene_Ca_17001      | NON_SYNONYMOUS_CODING         | Peptidase C48, SUMO/Sentrin/Ubl1       |
| Kabuli_wild_1198469  | 1399933503                          | Ca_kabuli_Chr02 | 1198469                 | A/G  | NA                 | INTERGENIC                    | NA                                     |
| Kabuli_wild_1198497  | 1399933504                          | Ca_kabuli_Chr02 | 1198497                 | G/T  | NA                 | INTERGENIC                    | NA                                     |
| Kabuli_wild_1198509  | 1399933505                          | Ca_kabuli_Chr02 | 1198509                 | G/A  | NA                 | INTERGENIC                    | NA                                     |
| Kabuli_wild_1198529  | 1399933506                          | Ca_kabuli_Chr02 | 1198529                 | A/T  | NA                 | INTERGENIC                    | NA                                     |
| Kabuli_wild_1231500  | 1399933507                          | Ca_kabuli_Chr02 | 1231500                 | A/G  | NA                 | INTERGENIC                    | NA                                     |
| Kabuli_wild_1231618  | 1399933508                          | Ca_kabuli_Chr02 | 1231618                 | G/A  | NA                 | INTERGENIC                    | NA                                     |
| Kabuli_wild_1234932  | 1399933509                          | Ca_kabuli_Chr02 | 1234932                 | C/T  | NA                 | INTERGENIC                    | NA                                     |
| Kabuli_wild_1234983  | 1399933510                          | Ca_kabuli_Chr02 | 1234983                 | T/C  | NA                 | INTERGENIC                    | NA                                     |
| Kabuli_wild_1368910  | 1399933511                          | Ca_kabuli_Chr02 | 1368910                 | C/A  | NA                 | INTERGENIC                    | NA                                     |
| Kabuli_wild_1368911  | 1399933512                          | Ca_kabuli_Chr02 | 1368911                 | A/G  | NA                 | INTERGENIC                    | NA                                     |
| Kabuli_wild_1389661  | 1399933513                          | Ca_kabuli_Chr02 | 1389661                 | A/G  | NA                 | INTERGENIC                    | NA                                     |
| Kabuli_wild_1493971  | 1399933514                          | Ca_kabuli_Chr02 | 1493971                 | A/G  | NA                 | INTERGENIC                    | NA                                     |
| Kabuli_wild_1537000  | 1399933515                          | Ca_kabuli_Chr02 | 1537000                 | T/C  | NA                 | INTERGENIC                    | NA                                     |
| Kabuli_wild_1610477  | 1399933516                          | Ca_kabuli_Chr02 | 1610477                 | G/T  | Gene_Ca_12629      | NON_SYNONYMOUS_CODING         | Diacylglycerolkinase, catalytic domain |
| Kabuli_wild_1668116  | 1399933517                          | Ca_kabuli_Chr02 | 1668116                 | A/G  | Gene_Ca_12622      | UPSTREAM                      | NA                                     |
| Kabuli_wild_1671279  | 1399933518                          | Ca_kabuli_Chr02 | 1671279                 | T/C  | Gene_Ca_12621      | INTRON                        | HEAT                                   |
| Kabuli_wild_1704328  | 1399933519                          | Ca_kabuli_Chr02 | 1704328                 | G/T  | NA                 | INTERGENIC                    | NA                                     |

| SNP IDs             | NCBI dbSNP accession IDs (NCBI_SS#) | Chromosomes      | Physical positions (bp) | SNPs | Gene accession IDs | Sequence components of genome | Putative functions                     |
|---------------------|-------------------------------------|------------------|-------------------------|------|--------------------|-------------------------------|----------------------------------------|
| Kabuli_wild_1713343 | 1399933520                          | Ca_kabuli_Chrom2 | 1713343                 | T/C  | Gene_Ca_12614      | UPSTREAM                      | RNA-binding,CRMdomain                  |
| Kabuli_wild_1802536 | 1399933521                          | Ca_kabuli_Chrom2 | 1802536                 | T/C  | Gene_Ca_12605      | INTRON                        | Domain of unknown function DUF3730     |
| Kabuli_wild_1828406 | 1399933522                          | Ca_kabuli_Chrom2 | 1828406                 | G/A  | Gene_Ca_12602      | NON_SYNONYMOUS_CODING         | Protein of unknown function DUF1421    |
| Kabuli_wild_1867041 | 1399933523                          | Ca_kabuli_Chrom2 | 1867041                 | C/A  | Gene_Ca_12598      | INTRON                        | BacterialIg-like.group2                |
| Kabuli_wild_1960343 | 1399933524                          | Ca_kabuli_Chrom2 | 1960343                 | T/G  | Gene_Ca_12584      | NON_SYNONYMOUS_CODING         | Exoribonuclease.phosphorolytic domain1 |
| Kabuli_wild_2230056 | 1399933525                          | Ca_kabuli_Chrom2 | 2230056                 | T/C  | NA                 | INTERGENIC                    | NA                                     |
| Kabuli_wild_2278984 | 1399933526                          | Ca_kabuli_Chrom2 | 2278984                 | A/G  | Gene_Ca_12550      | UPSTREAM                      | NA                                     |
| Kabuli_wild_2279017 | 1399933527                          | Ca_kabuli_Chrom2 | 2279017                 | A/T  | Gene_Ca_12550      | UPSTREAM                      | NA                                     |
| Kabuli_wild_2311915 | 1399933528                          | Ca_kabuli_Chrom2 | 2311915                 | C/A  | NA                 | INTERGENIC                    | NA                                     |
| Kabuli_wild_2311917 | 1399933529                          | Ca_kabuli_Chrom2 | 2311917                 | A/C  | NA                 | INTERGENIC                    | NA                                     |
| Kabuli_wild_2311948 | 1399933530                          | Ca_kabuli_Chrom2 | 2311948                 | T/C  | NA                 | INTERGENIC                    | NA                                     |
| Kabuli_wild_2312029 | 1399933531                          | Ca_kabuli_Chrom2 | 2312029                 | C/T  | NA                 | INTERGENIC                    | NA                                     |
| Kabuli_wild_2312032 | 1399933532                          | Ca_kabuli_Chrom2 | 2312032                 | T/C  | NA                 | INTERGENIC                    | NA                                     |
| Kabuli_wild_2312034 | 1399933533                          | Ca_kabuli_Chrom2 | 2312034                 | C/A  | NA                 | INTERGENIC                    | NA                                     |
| Kabuli_wild_2312037 | 1399933534                          | Ca_kabuli_Chrom2 | 2312037                 | T/G  | NA                 | INTERGENIC                    | NA                                     |
| Kabuli_wild_2312104 | 1399933535                          | Ca_kabuli_Chrom2 | 2312104                 | C/T  | NA                 | INTERGENIC                    | NA                                     |
| Kabuli_wild_2344777 | 1399933536                          | Ca_kabuli_Chrom2 | 2344777                 | A/G  | Gene_Ca_12544      | SYNONYMOUS_CODING             | Oligo peptide transporter              |
| Kabuli_wild_2344778 | 1399933537                          | Ca_kabuli_Chrom2 | 2344778                 | A/G  | Gene_Ca_12544      | NON_SYNONYMOUS_CODING         | Oligo peptide transporter              |
| Kabuli_wild_2344786 | 1399933538                          | Ca_kabuli_Chrom2 | 2344786                 | A/G  | Gene_Ca_12544      | SYNONYMOUS_CODING             | Oligo peptide transporter              |
| Kabuli_wild_2344807 | 1399933539                          | Ca_kabuli_Chrom2 | 2344807                 | T/G  | Gene_Ca_12544      | SYNONYMOUS_CODING             | Oligo peptide transporter              |
| Kabuli_wild_2344835 | 1399933540                          | Ca_kabuli_Chrom2 | 2344835                 | G/T  | Gene_Ca_12544      | STOP_GAINED                   | Oligo peptide transporter              |
| Kabuli_wild_2416422 | 1399933541                          | Ca_kabuli_Chrom2 | 2416422                 | C/T  | NA                 | INTERGENIC                    | NA                                     |
| Kabuli_wild_2650373 | 1399933542                          | Ca_kabuli_Chrom2 | 2650373                 | A/T  | NA                 | INTERGENIC                    | NA                                     |
| Kabuli_wild_2650375 | 1399933543                          | Ca_kabuli_Chrom2 | 2650375                 | T/C  | NA                 | INTERGENIC                    | NA                                     |
| Kabuli_wild_2697688 | 1399933544                          | Ca_kabuli_Chrom2 | 2697688                 | G/C  | Gene_Ca_10574      | NON_SYNONYMOUS_CODING         | RNA-binding,CRMdomain                  |
| Kabuli_wild_2708805 | 1399933545                          | Ca_kabuli_Chrom2 | 2708805                 | G/C  | NA                 | INTERGENIC                    | NA                                     |
| Kabuli_wild_2780302 | 1399933546                          | Ca_kabuli_Chrom2 | 2780302                 | C/T  | NA                 | INTERGENIC                    | NA                                     |
| Kabuli_wild_2780325 | 1399933547                          | Ca_kabuli_Chrom2 | 2780325                 | C/A  | NA                 | INTERGENIC                    | NA                                     |
| Kabuli_wild_2783727 | 1399933548                          | Ca_kabuli_Chrom2 | 2783727                 | G/A  | NA                 | INTERGENIC                    | NA                                     |
| Kabuli_wild_2846667 | 1399933549                          | Ca_kabuli_Chrom2 | 2846667                 | T/C  | Gene_Ca_10559      | INTRON                        | Phosphoglucoseisomerase(PGI)           |
| Kabuli_wild_2846774 | 1399933550                          | Ca_kabuli_Chrom2 | 2846774                 | C/A  | Gene_Ca_10559      | NON_SYNONYMOUS_CODING         | Phosphoglucoseisomerase(PGI)           |
| Kabuli_wild_2849370 | 1399933551                          | Ca_kabuli_Chrom2 | 2849370                 | A/G  | Gene_Ca_10559      | INTRON                        | Phosphoglucoseisomerase(PGI)           |
| Kabuli_wild_2965867 | 1399933552                          | Ca_kabuli_Chrom2 | 2965867                 | G/A  | NA                 | INTERGENIC                    | NA                                     |
| Kabuli_wild_3093987 | 1399933553                          | Ca_kabuli_Chrom2 | 3093987                 | T/G  | Gene_Ca_10541      | SYNONYMOUS_CODING             | Protein kinase,catalytic domain        |
| Kabuli_wild_3100116 | 1399933554                          | Ca_kabuli_Chrom2 | 3100116                 | A/G  | NA                 | INTERGENIC                    | NA                                     |
| Kabuli_wild_3113514 | 1399933555                          | Ca_kabuli_Chrom2 | 3113514                 | G/A  | Gene_Ca_10538      | INTRON                        | Auxin efflux carrier                   |
| Kabuli_wild_3113560 | 1399933556                          | Ca_kabuli_Chrom2 | 3113560                 | G/A  | Gene_Ca_10538      | INTRON                        | Auxin efflux carrier                   |
| Kabuli_wild_3141128 | 1399933557                          | Ca_kabuli_Chrom2 | 3141128                 | A/C  | Gene_Ca_10534      | DOWNSTREAM                    | NA                                     |
| Kabuli_wild_3151192 | 1399933558                          | Ca_kabuli_Chrom2 | 3151192                 | C/A  | Gene_Ca_10532      | NON_SYNONYMOUS_CODING         | WD40 repeat                            |
| Kabuli_wild_3164285 | 1399933559                          | Ca_kabuli_Chrom2 | 3164285                 | T/C  | Gene_Ca_10531      | DOWNSTREAM                    | Cysteaminedioxygenase                  |
| Kabuli_wild_3164287 | 1399933560                          | Ca_kabuli_Chrom2 | 3164287                 | T/A  | Gene_Ca_10531      | DOWNSTREAM                    | Cysteaminedioxygenase                  |
| Kabuli_wild_3164292 | 1399933561                          | Ca_kabuli_Chrom2 | 3164292                 | T/A  | Gene_Ca_10531      | DOWNSTREAM                    | Cysteaminedioxygenase                  |
| Kabuli_wild_3164304 | 1399933562                          | Ca_kabuli_Chrom2 | 3164304                 | C/T  | Gene_Ca_10531      | DOWNSTREAM                    | Cysteaminedioxygenase                  |
| Kabuli_wild_3164308 | 1399933563                          | Ca_kabuli_Chrom2 | 3164308                 | T/A  | Gene_Ca_10531      | DOWNSTREAM                    | Cysteaminedioxygenase                  |

| SNP IDs             | NCBI dbSNP accession IDs (NCBI_SS#) | Chromosomes     | Physical positions (bp) | SNPs | Gene accession IDs | Sequence components of genome | Putative functions                                      |
|---------------------|-------------------------------------|-----------------|-------------------------|------|--------------------|-------------------------------|---------------------------------------------------------|
| Kabuli_wild_3164323 | 1399933564                          | Ca_kabuli_Chr02 | 3164323                 | G/T  | Gene_Ca_10531      | DOWNSTREAM                    | Cysteaminedioxygenase                                   |
| Kabuli_wild_3164326 | 1399933565                          | Ca_kabuli_Chr02 | 3164326                 | A/C  | Gene_Ca_10531      | DOWNSTREAM                    | Cysteaminedioxygenase                                   |
| Kabuli_wild_3164355 | 1399933566                          | Ca_kabuli_Chr02 | 3164355                 | G/A  | Gene_Ca_10531      | DOWNSTREAM                    | Cysteaminedioxygenase                                   |
| Kabuli_wild_3164404 | 1399933567                          | Ca_kabuli_Chr02 | 3164404                 | A/G  | Gene_Ca_10531      | DOWNSTREAM                    | Cysteaminedioxygenase                                   |
| Kabuli_wild_3174868 | 1399933568                          | Ca_kabuli_Chr02 | 3174868                 | G/C  | NA                 | INTERGENIC                    | NA                                                      |
| Kabuli_wild_3450904 | 1399933569                          | Ca_kabuli_Chr02 | 3450904                 | C/A  | Gene_Ca_10514      | SYNONYMOUS_CODING             | ZF-HD homeobox protein,Cys/His-rich dimerisation domain |
| Kabuli_wild_3482714 | 1399933570                          | Ca_kabuli_Chr02 | 3482714                 | A/C  | Gene_Ca_10512      | NON_SYNONYMOUS_CODING         | Glycosyltransferase,group1                              |
| Kabuli_wild_3503750 | 1399933571                          | Ca_kabuli_Chr02 | 3503750                 | C/G  | NA                 | INTERGENIC                    | NA                                                      |
| Kabuli_wild_3503753 | 1399933572                          | Ca_kabuli_Chr02 | 3503753                 | C/G  | NA                 | INTERGENIC                    | NA                                                      |
| Kabuli_wild_3503759 | 1399933573                          | Ca_kabuli_Chr02 | 3503759                 | T/A  | NA                 | INTERGENIC                    | NA                                                      |
| Kabuli_wild_3503763 | 1399933574                          | Ca_kabuli_Chr02 | 3503763                 | T/G  | NA                 | INTERGENIC                    | NA                                                      |
| Kabuli_wild_3552688 | 1399933575                          | Ca_kabuli_Chr02 | 3552688                 | A/G  | NA                 | INTERGENIC                    | NA                                                      |
| Kabuli_wild_3553182 | 1399933576                          | Ca_kabuli_Chr02 | 3553182                 | G/T  | NA                 | INTERGENIC                    | NA                                                      |
| Kabuli_wild_3561979 | 1399933577                          | Ca_kabuli_Chr02 | 3561979                 | A/T  | NA                 | INTERGENIC                    | NA                                                      |
| Kabuli_wild_3789808 | 1399933578                          | Ca_kabuli_Chr02 | 3789808                 | G/T  | NA                 | INTERGENIC                    | NA                                                      |
| Kabuli_wild_3870877 | 1399933579                          | Ca_kabuli_Chr02 | 3870877                 | G/A  | NA                 | INTERGENIC                    | NA                                                      |
| Kabuli_wild_3904814 | 1399933580                          | Ca_kabuli_Chr02 | 3904814                 | C/A  | NA                 | INTERGENIC                    | NA                                                      |
| Kabuli_wild_3916353 | 1399933581                          | Ca_kabuli_Chr02 | 3916353                 | A/C  | Gene_Ca_10464      | SYNONYMOUS_CODING             | Biotin/lipoylattachment                                 |
| Kabuli_wild_3941397 | 1399933582                          | Ca_kabuli_Chr02 | 3941397                 | A/T  | NA                 | INTERGENIC                    | NA                                                      |
| Kabuli_wild_3994150 | 1399933583                          | Ca_kabuli_Chr02 | 3994150                 | A/C  | NA                 | INTERGENIC                    | NA                                                      |
| Kabuli_wild_4039854 | 1399933584                          | Ca_kabuli_Chr02 | 4039854                 | G/A  | NA                 | INTERGENIC                    | NA                                                      |
| Kabuli_wild_4404733 | 1399933585                          | Ca_kabuli_Chr02 | 4404733                 | G/A  | Gene_Ca_21106      | INTRON                        | Glycosylhydrolase,family13,catalytic domain             |
| Kabuli_wild_4404779 | 1399933586                          | Ca_kabuli_Chr02 | 4404779                 | G/A  | Gene_Ca_21106      | INTRON                        | Glycosylhydrolase,family13,catalytic domain             |
| Kabuli_wild_4404813 | 1399933587                          | Ca_kabuli_Chr02 | 4404813                 | C/T  | Gene_Ca_21106      | INTRON                        | Glycosylhydrolase,family13,catalytic domain             |
| Kabuli_wild_4452054 | 1399933588                          | Ca_kabuli_Chr02 | 4452054                 | T/C  | NA                 | INTERGENIC                    | NA                                                      |
| Kabuli_wild_4678076 | 1399933589                          | Ca_kabuli_Chr02 | 4678076                 | G/A  | NA                 | INTERGENIC                    | NA                                                      |
| Kabuli_wild_4678087 | 1399933590                          | Ca_kabuli_Chr02 | 4678087                 | A/G  | NA                 | INTERGENIC                    | NA                                                      |
| Kabuli_wild_4678099 | 1399933591                          | Ca_kabuli_Chr02 | 4678099                 | A/G  | NA                 | INTERGENIC                    | NA                                                      |
| Kabuli_wild_4678140 | 1399933592                          | Ca_kabuli_Chr02 | 4678140                 | C/T  | NA                 | INTERGENIC                    | NA                                                      |
| Kabuli_wild_4678155 | 1399933593                          | Ca_kabuli_Chr02 | 4678155                 | C/T  | NA                 | INTERGENIC                    | NA                                                      |
| Kabuli_wild_4678564 | 1399933594                          | Ca_kabuli_Chr02 | 4678564                 | G/T  | NA                 | INTERGENIC                    | NA                                                      |
| Kabuli_wild_4966216 | 1399933595                          | Ca_kabuli_Chr02 | 4966216                 | C/T  | Gene_Ca_14714      | NON_SYNONYMOUS_CODING         | DNAIlgase,ATP-dependent,N-terminal                      |
| Kabuli_wild_4968352 | 1399933596                          | Ca_kabuli_Chr02 | 4968352                 | A/G  | Gene_Ca_14714      | INTRON                        | DNAIlgase,ATP-dependent,N-terminal                      |
| Kabuli_wild_4981626 | 1399933597                          | Ca_kabuli_Chr02 | 4981626                 | A/G  | NA                 | INTERGENIC                    | NA                                                      |
| Kabuli_wild_4981666 | 1399933598                          | Ca_kabuli_Chr02 | 4981666                 | G/C  | NA                 | INTERGENIC                    | NA                                                      |
| Kabuli_wild_4994657 | 1399933599                          | Ca_kabuli_Chr02 | 4994657                 | C/T  | Gene_Ca_14711      | SYNONYMOUS_CODING             | Sugar/inositol transporter                              |
| Kabuli_wild_5079639 | 1399933600                          | Ca_kabuli_Chr02 | 5079639                 | C/T  | Gene_Ca_14702      | NON_SYNONYMOUS_CODING         | Zinc finger, RING-type                                  |
| Kabuli_wild_5165847 | 1399933601                          | Ca_kabuli_Chr02 | 5165847                 | A/G  | NA                 | INTERGENIC                    | NA                                                      |
| Kabuli_wild_5247557 | 1399933602                          | Ca_kabuli_Chr02 | 5247557                 | A/C  | Gene_Ca_14685      | DOWNSTREAM                    | Cystinosin/ERS1prepeat                                  |
| Kabuli_wild_5247558 | 1399933603                          | Ca_kabuli_Chr02 | 5247558                 | G/T  | Gene_Ca_14685      | DOWNSTREAM                    | Cystinosin/ERS1prepeat                                  |
| Kabuli_wild_5259254 | 1399933604                          | Ca_kabuli_Chr02 | 5259254                 | T/C  | Gene_Ca_14682      | NON_SYNONYMOUS_CODING         | NA                                                      |
| Kabuli_wild_5342864 | 1399933605                          | Ca_kabuli_Chr02 | 5342864                 | C/A  | NA                 | INTERGENIC                    | NA                                                      |
| Kabuli_wild_5342923 | 1399933606                          | Ca_kabuli_Chr02 | 5342923                 | A/G  | NA                 | INTERGENIC                    | NA                                                      |
| Kabuli_wild_5343118 | 1399933607                          | Ca_kabuli_Chr02 | 5343118                 | A/C  | NA                 | INTERGENIC                    | NA                                                      |

| SNP IDs             | NCBI dbSNP accession IDs (NCBI_SS#) | Chromosomes     | Physical positions (bp) | SNPs | Gene accession IDs | Sequence components of genome | Putative functions                                         |
|---------------------|-------------------------------------|-----------------|-------------------------|------|--------------------|-------------------------------|------------------------------------------------------------|
| Kabuli_wild_5419121 | 1399933608                          | Ca_kabuli_Chr02 | 5419121                 | C/G  | NA                 | INTERGENIC                    | NA                                                         |
| Kabuli_wild_5449978 | 1399933609                          | Ca_kabuli_Chr02 | 5449978                 | T/C  | NA                 | INTERGENIC                    | NA                                                         |
| Kabuli_wild_5475344 | 1399933610                          | Ca_kabuli_Chr02 | 5475344                 | A/G  | Gene_Ca_14660      | INTRON                        | Proteasome component (PCI) domain                          |
| Kabuli_wild_5787862 | 1399933611                          | Ca_kabuli_Chr02 | 5787862                 | G/A  | Gene_Ca_19683      | SYNONYMOUS_CODING             | Plan tspecific mitochondrial import receptor subunit TOM20 |
| Kabuli_wild_5787887 | 1399933612                          | Ca_kabuli_Chr02 | 5787887                 | A/C  | Gene_Ca_19683      | INTRON                        | Plan tspecific mitochondrial import receptor subunit TOM20 |
| Kabuli_wild_6052668 | 1399933613                          | Ca_kabuli_Chr02 | 6052668                 | A/C  | Gene_Ca_19707      | NON_SYNONYMOUS_CODING         | Transcription factor TFIIIB-related                        |
| Kabuli_wild_6060151 | 1399933614                          | Ca_kabuli_Chr02 | 6060151                 | C/T  | Gene_Ca_19707      | INTRON                        | Transcription factor TFIIIB-related                        |
| Kabuli_wild_6162378 | 1399933615                          | Ca_kabuli_Chr02 | 6162378                 | T/G  | Gene_Ca_19714      | INTRON                        | Aminoacid/polyaminetransporter1                            |
| Kabuli_wild_6213520 | 1399933616                          | Ca_kabuli_Chr02 | 6213520                 | G/T  | Gene_Ca_20925      | NON_SYNONYMOUS_CODING         | NA                                                         |
| Kabuli_wild_6213530 | 1399933617                          | Ca_kabuli_Chr02 | 6213530                 | C/A  | Gene_Ca_20925      | NON_SYNONYMOUS_CODING         | NA                                                         |
| Kabuli_wild_6213566 | 1399933618                          | Ca_kabuli_Chr02 | 6213566                 | C/T  | Gene_Ca_20925      | NON_SYNONYMOUS_CODING         | NA                                                         |
| Kabuli_wild_6213582 | 1399933619                          | Ca_kabuli_Chr02 | 6213582                 | A/T  | Gene_Ca_20925      | SYNONYMOUS_CODING             | NA                                                         |
| Kabuli_wild_6349208 | 1399933620                          | Ca_kabuli_Chr02 | 6349208                 | T/G  | Gene_Ca_20931      | INTRON                        | Helicase/RNaseDC-terminal,HRDCdomain                       |
| Kabuli_wild_6367704 | 1399933621                          | Ca_kabuli_Chr02 | 6367704                 | A/G  | NA                 | INTERGENIC                    | NA                                                         |
| Kabuli_wild_6408406 | 1399933622                          | Ca_kabuli_Chr02 | 6408406                 | C/A  | Gene_Ca_20937      | INTRON                        | Double-strandedRNA-binding                                 |
| Kabuli_wild_6478646 | 1399933623                          | Ca_kabuli_Chr02 | 6478646                 | T/C  | NA                 | INTERGENIC                    | NA                                                         |
| Kabuli_wild_6478747 | 1399933624                          | Ca_kabuli_Chr02 | 6478747                 | T/C  | NA                 | INTERGENIC                    | NA                                                         |
| Kabuli_wild_6478754 | 1399933625                          | Ca_kabuli_Chr02 | 6478754                 | G/T  | NA                 | INTERGENIC                    | NA                                                         |
| Kabuli_wild_6534776 | 1399933626                          | Ca_kabuli_Chr02 | 6534776                 | C/A  | Gene_Ca_20948      | INTRON                        | Target SNARE coiled-coil domain                            |
| Kabuli_wild_6728716 | 1399933627                          | Ca_kabuli_Chr02 | 6728716                 | A/T  | Gene_Ca_19158      | INTRON                        | Glutamate/phenylalanine/leucine/valinedehydrogenase        |
| Kabuli_wild_6728719 | 1399933628                          | Ca_kabuli_Chr02 | 6728719                 | C/T  | Gene_Ca_19158      | INTRON                        | Glutamate/phenylalanine/leucine/valinedehydrogenase        |
| Kabuli_wild_6936872 | 1399933629                          | Ca_kabuli_Chr02 | 6936872                 | A/C  | Gene_Ca_19141      | SYNONYMOUS_CODING             | Phosphatidylethanolamine-binding,conservedsite             |
| Kabuli_wild_7027093 | 1399933630                          | Ca_kabuli_Chr02 | 7027093                 | G/A  | Gene_Ca_19136      | INTRON                        | RNA recognition motif domain                               |
| Kabuli_wild_7125992 | 1399933631                          | Ca_kabuli_Chr02 | 7125992                 | T/G  | Gene_Ca_19128      | NON_SYNONYMOUS_CODING         | Oxidoreductase,N-terminal                                  |
| Kabuli_wild_7507259 | 1399933632                          | Ca_kabuli_Chr02 | 7507259                 | C/A  | Gene_Ca_18111      | NON_SYNONYMOUS_CODING         | PeptidaseC19,ubiquitincoiled-coil-terminalhydrolase2       |
| Kabuli_wild_7591207 | 1399933633                          | Ca_kabuli_Chr02 | 7591207                 | T/C  | NA                 | INTERGENIC                    | NA                                                         |
| Kabuli_wild_7633515 | 1399933634                          | Ca_kabuli_Chr02 | 7633515                 | G/T  | NA                 | INTERGENIC                    | NA                                                         |
| Kabuli_wild_7633520 | 1399933635                          | Ca_kabuli_Chr02 | 7633520                 | G/A  | NA                 | INTERGENIC                    | NA                                                         |
| Kabuli_wild_7633547 | 1399933636                          | Ca_kabuli_Chr02 | 7633547                 | C/T  | NA                 | INTERGENIC                    | NA                                                         |
| Kabuli_wild_7633564 | 1399933637                          | Ca_kabuli_Chr02 | 7633564                 | G/T  | NA                 | INTERGENIC                    | NA                                                         |
| Kabuli_wild_7633572 | 1399933638                          | Ca_kabuli_Chr02 | 7633572                 | T/C  | NA                 | INTERGENIC                    | NA                                                         |
| Kabuli_wild_7633585 | 1399933639                          | Ca_kabuli_Chr02 | 7633585                 | G/A  | NA                 | INTERGENIC                    | NA                                                         |
| Kabuli_wild_7633592 | 1399933640                          | Ca_kabuli_Chr02 | 7633592                 | G/A  | NA                 | INTERGENIC                    | NA                                                         |
| Kabuli_wild_7633631 | 1399933641                          | Ca_kabuli_Chr02 | 7633631                 | C/A  | NA                 | INTERGENIC                    | NA                                                         |
| Kabuli_wild_7633711 | 1399933642                          | Ca_kabuli_Chr02 | 7633711                 | C/T  | NA                 | INTERGENIC                    | NA                                                         |
| Kabuli_wild_7633793 | 1399933643                          | Ca_kabuli_Chr02 | 7633793                 | C/T  | NA                 | INTERGENIC                    | NA                                                         |
| Kabuli_wild_7633813 | 1399933644                          | Ca_kabuli_Chr02 | 7633813                 | G/T  | NA                 | INTERGENIC                    | NA                                                         |
| Kabuli_wild_7633816 | 1399933645                          | Ca_kabuli_Chr02 | 7633816                 | G/A  | NA                 | INTERGENIC                    | NA                                                         |
| Kabuli_wild_7633818 | 1399933646                          | Ca_kabuli_Chr02 | 7633818                 | G/A  | NA                 | INTERGENIC                    | NA                                                         |
| Kabuli_wild_7633821 | 1399933647                          | Ca_kabuli_Chr02 | 7633821                 | C/T  | NA                 | INTERGENIC                    | NA                                                         |
| Kabuli_wild_7633826 | 1399933648                          | Ca_kabuli_Chr02 | 7633826                 | G/A  | NA                 | INTERGENIC                    | NA                                                         |
| Kabuli_wild_7633869 | 1399933649                          | Ca_kabuli_Chr02 | 7633869                 | G/A  | NA                 | INTERGENIC                    | NA                                                         |
| Kabuli_wild_7633955 | 1399933650                          | Ca_kabuli_Chr02 | 7633955                 | G/A  | NA                 | INTERGENIC                    | NA                                                         |
| Kabuli_wild_7633994 | 1399933651                          | Ca_kabuli_Chr02 | 7633994                 | C/T  | NA                 | INTERGENIC                    | NA                                                         |

| SNP IDs             | NCBI dbSNP accession IDs (NCBI_SS#) | Chromosomes     | Physical positions (bp) | SNPs | Gene accession IDs | Sequence components of genome | Putative functions                        |
|---------------------|-------------------------------------|-----------------|-------------------------|------|--------------------|-------------------------------|-------------------------------------------|
| Kabuli_wild_7634002 | 1399933652                          | Ca_kabuli_Chr02 | 7634002                 | T/C  | NA                 | INTERGENIC                    | NA                                        |
| Kabuli_wild_7668490 | 1399933653                          | Ca_kabuli_Chr02 | 7668490                 | C/T  | NA                 | INTERGENIC                    | NA                                        |
| Kabuli_wild_7668502 | 1399933654                          | Ca_kabuli_Chr02 | 7668502                 | A/C  | NA                 | INTERGENIC                    | NA                                        |
| Kabuli_wild_7668537 | 1399933655                          | Ca_kabuli_Chr02 | 7668537                 | A/C  | NA                 | INTERGENIC                    | NA                                        |
| Kabuli_wild_7679627 | 1399933656                          | Ca_kabuli_Chr02 | 7679627                 | A/T  | Gene_Ca_18121      | NON_SYNONYMOUS_CODING         | Multiantimicrobial extrusion protein      |
| Kabuli_wild_7679693 | 1399933657                          | Ca_kabuli_Chr02 | 7679693                 | C/G  | Gene_Ca_18121      | NON_SYNONYMOUS_CODING         | Multiantimicrobial extrusion protein      |
| Kabuli_wild_7686563 | 1399933658                          | Ca_kabuli_Chr02 | 7686563                 | C/G  | NA                 | INTERGENIC                    | NA                                        |
| Kabuli_wild_7686598 | 1399933659                          | Ca_kabuli_Chr02 | 7686598                 | T/G  | NA                 | INTERGENIC                    | NA                                        |
| Kabuli_wild_7686606 | 1399933660                          | Ca_kabuli_Chr02 | 7686606                 | T/A  | NA                 | INTERGENIC                    | NA                                        |
| Kabuli_wild_7701189 | 1399933661                          | Ca_kabuli_Chr02 | 7701189                 | T/G  | Gene_Ca_18123      | NON_SYNONYMOUS_CODING         | Multiantimicrobial extrusion protein      |
| Kabuli_wild_7701199 | 1399933662                          | Ca_kabuli_Chr02 | 7701199                 | T/G  | Gene_Ca_18123      | NON_SYNONYMOUS_CODING         | Multiantimicrobial extrusion protein      |
| Kabuli_wild_7701230 | 1399933663                          | Ca_kabuli_Chr02 | 7701230                 | T/G  | Gene_Ca_18123      | SYNONYMOUS_CODING             | Multiantimicrobial extrusion protein      |
| Kabuli_wild_7701249 | 1399933664                          | Ca_kabuli_Chr02 | 7701249                 | A/G  | Gene_Ca_18123      | NON_SYNONYMOUS_CODING         | Multiantimicrobial extrusion protein      |
| Kabuli_wild_7702468 | 1399933665                          | Ca_kabuli_Chr02 | 7702468                 | A/T  | Gene_Ca_18123      | INTRON                        | Multiantimicrobial extrusion protein      |
| Kabuli_wild_7702505 | 1399933666                          | Ca_kabuli_Chr02 | 7702505                 | G/T  | Gene_Ca_18123      | INTRON                        | Multiantimicrobial extrusion protein      |
| Kabuli_wild_7702520 | 1399933667                          | Ca_kabuli_Chr02 | 7702520                 | T/C  | Gene_Ca_18123      | NON_SYNONYMOUS_CODING         | Multiantimicrobial extrusion protein      |
| Kabuli_wild_7708596 | 1399933668                          | Ca_kabuli_Chr02 | 7708596                 | T/C  | NA                 | INTERGENIC                    | NA                                        |
| Kabuli_wild_7708630 | 1399933669                          | Ca_kabuli_Chr02 | 7708630                 | C/A  | NA                 | INTERGENIC                    | NA                                        |
| Kabuli_wild_7708660 | 1399933670                          | Ca_kabuli_Chr02 | 7708660                 | G/A  | NA                 | INTERGENIC                    | NA                                        |
| Kabuli_wild_7708663 | 1399933671                          | Ca_kabuli_Chr02 | 7708663                 | T/C  | NA                 | INTERGENIC                    | NA                                        |
| Kabuli_wild_7708669 | 1399933672                          | Ca_kabuli_Chr02 | 7708669                 | G/T  | NA                 | INTERGENIC                    | NA                                        |
| Kabuli_wild_7708678 | 1399933673                          | Ca_kabuli_Chr02 | 7708678                 | C/T  | NA                 | INTERGENIC                    | NA                                        |
| Kabuli_wild_7712181 | 1399933674                          | Ca_kabuli_Chr02 | 7712181                 | C/T  | NA                 | INTERGENIC                    | NA                                        |
| Kabuli_wild_7714220 | 1399933675                          | Ca_kabuli_Chr02 | 7714220                 | G/A  | NA                 | INTERGENIC                    | NA                                        |
| Kabuli_wild_7714258 | 1399933676                          | Ca_kabuli_Chr02 | 7714258                 | T/C  | Gene_Ca_18124      | SYNONYMOUS_CODING             | NA                                        |
| Kabuli_wild_7714392 | 1399933677                          | Ca_kabuli_Chr02 | 7714392                 | G/A  | Gene_Ca_18124      | NON_SYNONYMOUS_CODING         | NA                                        |
| Kabuli_wild_7714454 | 1399933678                          | Ca_kabuli_Chr02 | 7714454                 | A/G  | Gene_Ca_18124      | SYNONYMOUS_CODING             | NA                                        |
| Kabuli_wild_7714463 | 1399933679                          | Ca_kabuli_Chr02 | 7714463                 | T/C  | Gene_Ca_18124      | SYNONYMOUS_CODING             | NA                                        |
| Kabuli_wild_7714488 | 1399933680                          | Ca_kabuli_Chr02 | 7714488                 | A/G  | Gene_Ca_18124      | SYNONYMOUS_CODING             | NA                                        |
| Kabuli_wild_7714491 | 1399933681                          | Ca_kabuli_Chr02 | 7714491                 | C/T  | Gene_Ca_18124      | SYNONYMOUS_CODING             | NA                                        |
| Kabuli_wild_7714495 | 1399933682                          | Ca_kabuli_Chr02 | 7714495                 | G/A  | Gene_Ca_18124      | SYNONYMOUS_CODING             | NA                                        |
| Kabuli_wild_7714499 | 1399933683                          | Ca_kabuli_Chr02 | 7714499                 | C/T  | Gene_Ca_18124      | SYNONYMOUS_CODING             | NA                                        |
| Kabuli_wild_7714506 | 1399933684                          | Ca_kabuli_Chr02 | 7714506                 | A/C  | Gene_Ca_18124      | SYNONYMOUS_CODING             | NA                                        |
| Kabuli_wild_7753419 | 1399933685                          | Ca_kabuli_Chr02 | 7753419                 | G/C  | NA                 | INTERGENIC                    | NA                                        |
| Kabuli_wild_7753425 | 1399933686                          | Ca_kabuli_Chr02 | 7753425                 | T/C  | NA                 | INTERGENIC                    | NA                                        |
| Kabuli_wild_7753440 | 1399933687                          | Ca_kabuli_Chr02 | 7753440                 | C/T  | NA                 | INTERGENIC                    | NA                                        |
| Kabuli_wild_7819281 | 1399933688                          | Ca_kabuli_Chr02 | 7819281                 | T/C  | NA                 | INTERGENIC                    | NA                                        |
| Kabuli_wild_7870919 | 1399933689                          | Ca_kabuli_Chr02 | 7870919                 | G/T  | NA                 | INTERGENIC                    | NA                                        |
| Kabuli_wild_7870943 | 1399933690                          | Ca_kabuli_Chr02 | 7870943                 | T/G  | NA                 | INTERGENIC                    | NA                                        |
| Kabuli_wild_7938890 | 1399933691                          | Ca_kabuli_Chr02 | 7938890                 | C/T  | Gene_Ca_18144      | SYNONYMOUS_CODING             | Allinase,C-terminal                       |
| Kabuli_wild_7956166 | 1399933692                          | Ca_kabuli_Chr02 | 7956166                 | C/A  | Gene_Ca_18145      | INTRON                        | NA                                        |
| Kabuli_wild_8201025 | 1399933693                          | Ca_kabuli_Chr02 | 8201025                 | A/C  | Gene_Ca_21477      | SYNONYMOUS_CODING             | Protein kinase,catalytic domain           |
| Kabuli_wild_8337517 | 1399933694                          | Ca_kabuli_Chr02 | 8337517                 | C/T  | Gene_Ca_21468      | INTRON                        | Phosphatidylinositol3-/4-kinase,catalytic |
| Kabuli_wild_8429212 | 1399933695                          | Ca_kabuli_Chr02 | 8429212                 | T/A  | NA                 | INTERGENIC                    | NA                                        |

| SNP IDs              | NCBI dbSNP accession IDs (NCBI_SS#) | Chromosomes     | Physical positions (bp) | SNPs | Gene accession IDs | Sequence components of genome | Putative functions                                        |
|----------------------|-------------------------------------|-----------------|-------------------------|------|--------------------|-------------------------------|-----------------------------------------------------------|
| Kabuli_wild_8484840  | 1399933696                          | Ca_kabuli_Chr02 | 8484840                 | A/T  | NA                 | INTERGENIC                    | NA                                                        |
| Kabuli_wild_8487331  | 1399933697                          | Ca_kabuli_Chr02 | 8487331                 | T/A  | Gene_Ca_21454      | UPSTREAM                      | NA                                                        |
| Kabuli_wild_8487343  | 1399933698                          | Ca_kabuli_Chr02 | 8487343                 | C/T  | Gene_Ca_21454      | UPSTREAM                      | NA                                                        |
| Kabuli_wild_8487346  | 1399933699                          | Ca_kabuli_Chr02 | 8487346                 | C/T  | Gene_Ca_21454      | UPSTREAM                      | NA                                                        |
| Kabuli_wild_8489172  | 1399933700                          | Ca_kabuli_Chr02 | 8489172                 | C/A  | NA                 | INTERGENIC                    | NA                                                        |
| Kabuli_wild_8489237  | 1399933701                          | Ca_kabuli_Chr02 | 8489237                 | G/A  | NA                 | INTERGENIC                    | NA                                                        |
| Kabuli_wild_8489241  | 1399933702                          | Ca_kabuli_Chr02 | 8489241                 | C/A  | NA                 | INTERGENIC                    | NA                                                        |
| Kabuli_wild_8730067  | 1399933703                          | Ca_kabuli_Chr02 | 8730067                 | C/T  | Gene_Ca_22308      | INTRON                        | Clathrin/coatomeradaptor,adaptin-like,N-terminal          |
| Kabuli_wild_8782756  | 1399933704                          | Ca_kabuli_Chr02 | 8782756                 | T/C  | NA                 | INTERGENIC                    | NA                                                        |
| Kabuli_wild_8782820  | 1399933705                          | Ca_kabuli_Chr02 | 8782820                 | G/T  | Gene_Ca_22304      | NON_SYNONYMOUS_CODING         | Aminoacyl-tRNAsynthetase,classII(G/H/P/S),conserveddomain |
| Kabuli_wild_8802121  | 1399933706                          | Ca_kabuli_Chr02 | 8802121                 | T/C  | NA                 | INTERGENIC                    | NA                                                        |
| Kabuli_wild_9231268  | 1399933707                          | Ca_kabuli_Chr02 | 9231268                 | T/C  | NA                 | INTERGENIC                    | NA                                                        |
| Kabuli_wild_9231314  | 1399933708                          | Ca_kabuli_Chr02 | 9231314                 | A/G  | NA                 | INTERGENIC                    | NA                                                        |
| Kabuli_wild_9599251  | 1399933709                          | Ca_kabuli_Chr02 | 9599251                 | C/A  | Gene_Ca_25087      | NON_SYNONYMOUS_CODING         | Transposase,Ptta/En/Spm,plant                             |
| Kabuli_wild_9599253  | 1399933710                          | Ca_kabuli_Chr02 | 9599253                 | C/A  | Gene_Ca_25087      | NON_SYNONYMOUS_CODING         | Transposase,Ptta/En/Spm,plant                             |
| Kabuli_wild_9621953  | 1399933711                          | Ca_kabuli_Chr02 | 9621953                 | A/C  | Gene_Ca_25089      | SYNONYMOUS_CODING             | Actin-bindingFH2/DRFautoregulatory                        |
| Kabuli_wild_9739955  | 1399933712                          | Ca_kabuli_Chr02 | 9739955                 | C/T  | NA                 | INTERGENIC                    | NA                                                        |
| Kabuli_wild_9739959  | 1399933713                          | Ca_kabuli_Chr02 | 9739959                 | T/C  | NA                 | INTERGENIC                    | NA                                                        |
| Kabuli_wild_9739965  | 1399933714                          | Ca_kabuli_Chr02 | 9739965                 | A/G  | NA                 | INTERGENIC                    | NA                                                        |
| Kabuli_wild_9739969  | 1399933715                          | Ca_kabuli_Chr02 | 9739969                 | A/G  | NA                 | INTERGENIC                    | NA                                                        |
| Kabuli_wild_9739974  | 1399933716                          | Ca_kabuli_Chr02 | 9739974                 | T/C  | NA                 | INTERGENIC                    | NA                                                        |
| Kabuli_wild_9739980  | 1399933717                          | Ca_kabuli_Chr02 | 9739980                 | G/C  | NA                 | INTERGENIC                    | NA                                                        |
| Kabuli_wild_9739998  | 1399933718                          | Ca_kabuli_Chr02 | 9739998                 | A/G  | NA                 | INTERGENIC                    | NA                                                        |
| Kabuli_wild_9740007  | 1399933719                          | Ca_kabuli_Chr02 | 9740007                 | A/G  | NA                 | INTERGENIC                    | NA                                                        |
| Kabuli_wild_9740010  | 1399933720                          | Ca_kabuli_Chr02 | 9740010                 | A/G  | NA                 | INTERGENIC                    | NA                                                        |
| Kabuli_wild_9756910  | 1399933721                          | Ca_kabuli_Chr02 | 9756910                 | G/A  | NA                 | INTERGENIC                    | NA                                                        |
| Kabuli_wild_9756955  | 1399933722                          | Ca_kabuli_Chr02 | 9756955                 | G/A  | NA                 | INTERGENIC                    | NA                                                        |
| Kabuli_wild_9835940  | 1399933723                          | Ca_kabuli_Chr02 | 9835940                 | T/G  | NA                 | INTERGENIC                    | NA                                                        |
| Kabuli_wild_9841774  | 1399933724                          | Ca_kabuli_Chr02 | 9841774                 | A/T  | NA                 | INTERGENIC                    | NA                                                        |
| Kabuli_wild_9862794  | 1399933725                          | Ca_kabuli_Chr02 | 9862794                 | A/G  | Gene_Ca_20401      | INTRON                        | Protein kinase,catalytic domain                           |
| Kabuli_wild_10048153 | 1399933726                          | Ca_kabuli_Chr02 | 10048153                | T/A  | Gene_Ca_20381      | INTRON                        | NA                                                        |
| Kabuli_wild_10060196 | 1399933727                          | Ca_kabuli_Chr02 | 10060196                | G/T  | NA                 | INTERGENIC                    | NA                                                        |
| Kabuli_wild_10060200 | 1399933728                          | Ca_kabuli_Chr02 | 10060200                | G/T  | NA                 | INTERGENIC                    | NA                                                        |
| Kabuli_wild_10060207 | 1399933729                          | Ca_kabuli_Chr02 | 10060207                | C/T  | NA                 | INTERGENIC                    | NA                                                        |
| Kabuli_wild_10067195 | 1399933730                          | Ca_kabuli_Chr02 | 10067195                | T/A  | Gene_Ca_20380      | INTRON                        | SANT domain,DNA binding                                   |
| Kabuli_wild_10067451 | 1399933731                          | Ca_kabuli_Chr02 | 10067451                | A/T  | Gene_Ca_20380      | INTRON                        | SANT domain,DNA binding                                   |
| Kabuli_wild_10070602 | 1399933732                          | Ca_kabuli_Chr02 | 10070602                | A/C  | NA                 | INTERGENIC                    | NA                                                        |
| Kabuli_wild_10115838 | 1399933733                          | Ca_kabuli_Chr02 | 10115838                | A/G  | NA                 | INTERGENIC                    | NA                                                        |
| Kabuli_wild_10131438 | 1399933734                          | Ca_kabuli_Chr02 | 10131438                | G/A  | NA                 | INTERGENIC                    | NA                                                        |
| Kabuli_wild_10131443 | 1399933735                          | Ca_kabuli_Chr02 | 10131443                | T/C  | NA                 | INTERGENIC                    | NA                                                        |
| Kabuli_wild_10220396 | 1399933736                          | Ca_kabuli_Chr02 | 10220396                | T/C  | NA                 | INTERGENIC                    | NA                                                        |
| Kabuli_wild_10294635 | 1399933737                          | Ca_kabuli_Chr02 | 10294635                | T/C  | Gene_Ca_17594      | INTRON                        | ATPase,P-type,K/Mg/Cd/Cu/Zn/Na/Ca/Na/H-transporter        |
| Kabuli_wild_10294712 | 1399933738                          | Ca_kabuli_Chr02 | 10294712                | C/A  | Gene_Ca_17594      | NON_SYNONYMOUS_CODING         | ATPase,P-type,K/Mg/Cd/Cu/Zn/Na/Ca/Na/H-transporter        |
| Kabuli_wild_10540735 | 1399933739                          | Ca_kabuli_Chr02 | 10540735                | C/T  | Gene_Ca_17577      | NON_SYNONYMOUS_CODING         | NA                                                        |



| SNP IDs              | NCBI dbSNP accession IDs (NCBI_SS#) | Chromosomes     | Physical positions (bp) | SNPs | Gene accession IDs | Sequence components of genome | Putative functions                   |
|----------------------|-------------------------------------|-----------------|-------------------------|------|--------------------|-------------------------------|--------------------------------------|
| Kabuli_wild_10540812 | 1399933740                          | Ca_kabuli_Chr02 | 10540812                | G/A  | Gene_Ca_17577      | NON_SYNONYMOUS_CODING         | NA                                   |
| Kabuli_wild_10705898 | 1399933741                          | Ca_kabuli_Chr02 | 10705898                | C/A  | Gene_Ca_17568      | DOWNSTREAM                    | NA                                   |
| Kabuli_wild_10705915 | 1399933742                          | Ca_kabuli_Chr02 | 10705915                | C/T  | Gene_Ca_17568      | DOWNSTREAM                    | NA                                   |
| Kabuli_wild_10705957 | 1399933743                          | Ca_kabuli_Chr02 | 10705957                | C/A  | Gene_Ca_17568      | DOWNSTREAM                    | NA                                   |
| Kabuli_wild_10705963 | 1399933744                          | Ca_kabuli_Chr02 | 10705963                | C/T  | Gene_Ca_17568      | DOWNSTREAM                    | NA                                   |
| Kabuli_wild_10705976 | 1399933745                          | Ca_kabuli_Chr02 | 10705976                | T/C  | Gene_Ca_17568      | DOWNSTREAM                    | NA                                   |
| Kabuli_wild_10705982 | 1399933746                          | Ca_kabuli_Chr02 | 10705982                | C/T  | Gene_Ca_17568      | DOWNSTREAM                    | NA                                   |
| Kabuli_wild_10760939 | 1399933747                          | Ca_kabuli_Chr02 | 10760939                | G/A  | NA                 | INTERGENIC                    | NA                                   |
| Kabuli_wild_10761036 | 1399933748                          | Ca_kabuli_Chr02 | 10761036                | C/G  | NA                 | INTERGENIC                    | NA                                   |
| Kabuli_wild_10852911 | 1399933749                          | Ca_kabuli_Chr02 | 10852911                | T/C  | NA                 | INTERGENIC                    | NA                                   |
| Kabuli_wild_10852945 | 1399933750                          | Ca_kabuli_Chr02 | 10852945                | C/T  | NA                 | INTERGENIC                    | NA                                   |
| Kabuli_wild_10852949 | 1399933751                          | Ca_kabuli_Chr02 | 10852949                | C/T  | NA                 | INTERGENIC                    | NA                                   |
| Kabuli_wild_10942528 | 1399933752                          | Ca_kabuli_Chr02 | 10942528                | A/G  | Gene_Ca_17555      | INTRON                        | 5-formyltetrahydrofolatecyclo-ligase |
| Kabuli_wild_11064243 | 1399933753                          | Ca_kabuli_Chr02 | 11064243                | G/A  | NA                 | INTERGENIC                    | NA                                   |
| Kabuli_wild_11121418 | 1399933754                          | Ca_kabuli_Chr02 | 11121418                | C/T  | Gene_Ca_17550      | SYNONYMOUS_CODING             | Protein kinase,catalytic domain      |
| Kabuli_wild_11457037 | 1399933755                          | Ca_kabuli_Chr02 | 11457037                | A/T  | NA                 | INTERGENIC                    | NA                                   |
| Kabuli_wild_11702730 | 1399933756                          | Ca_kabuli_Chr02 | 11702730                | G/T  | Gene_Ca_18774      | INTRON                        | Helix-loop-helixDNA-binding domain   |
| Kabuli_wild_11702738 | 1399933757                          | Ca_kabuli_Chr02 | 11702738                | T/A  | Gene_Ca_18774      | INTRON                        | Helix-loop-helixDNA-binding domain   |
| Kabuli_wild_11702740 | 1399933758                          | Ca_kabuli_Chr02 | 11702740                | T/A  | Gene_Ca_18774      | INTRON                        | Helix-loop-helixDNA-binding domain   |
| Kabuli_wild_11799459 | 1399933759                          | Ca_kabuli_Chr02 | 11799459                | G/T  | NA                 | INTERGENIC                    | NA                                   |
| Kabuli_wild_11799472 | 1399933760                          | Ca_kabuli_Chr02 | 11799472                | G/A  | NA                 | INTERGENIC                    | NA                                   |
| Kabuli_wild_11799510 | 1399933761                          | Ca_kabuli_Chr02 | 11799510                | A/G  | NA                 | INTERGENIC                    | NA                                   |
| Kabuli_wild_11799555 | 1399933762                          | Ca_kabuli_Chr02 | 11799555                | G/A  | NA                 | INTERGENIC                    | NA                                   |
| Kabuli_wild_11819827 | 1399933763                          | Ca_kabuli_Chr02 | 11819827                | A/G  | NA                 | INTERGENIC                    | NA                                   |
| Kabuli_wild_11955578 | 1399933764                          | Ca_kabuli_Chr02 | 11955578                | C/A  | Gene_Ca_18763      | INTRON                        | Transposase,Ptta/En/Spm,plant        |
| Kabuli_wild_11955608 | 1399933765                          | Ca_kabuli_Chr02 | 11955608                | C/A  | Gene_Ca_18763      | INTRON                        | Transposase,Ptta/En/Spm,plant        |
| Kabuli_wild_12135192 | 1399933766                          | Ca_kabuli_Chr02 | 12135192                | C/T  | NA                 | INTERGENIC                    | NA                                   |
| Kabuli_wild_12135216 | 1399933767                          | Ca_kabuli_Chr02 | 12135216                | T/G  | NA                 | INTERGENIC                    | NA                                   |
| Kabuli_wild_12135242 | 1399933768                          | Ca_kabuli_Chr02 | 12135242                | C/G  | NA                 | INTERGENIC                    | NA                                   |
| Kabuli_wild_12211028 | 1399933769                          | Ca_kabuli_Chr02 | 12211028                | A/G  | Gene_Ca_18057      | NON_SYNONYMOUS_CODING         | Peptidase C48, SUMO/Sentrin/Ubl1     |
| Kabuli_wild_12211033 | 1399933770                          | Ca_kabuli_Chr02 | 12211033                | C/T  | Gene_Ca_18057      | SYNONYMOUS_CODING             | Peptidase C48, SUMO/Sentrin/Ubl1     |
| Kabuli_wild_12211052 | 1399933771                          | Ca_kabuli_Chr02 | 12211052                | C/T  | Gene_Ca_18057      | NON_SYNONYMOUS_CODING         | Peptidase C48, SUMO/Sentrin/Ubl1     |
| Kabuli_wild_12211128 | 1399933772                          | Ca_kabuli_Chr02 | 12211128                | A/G  | Gene_Ca_18057      | SYNONYMOUS_CODING             | Peptidase C48, SUMO/Sentrin/Ubl1     |
| Kabuli_wild_12252370 | 1399933773                          | Ca_kabuli_Chr02 | 12252370                | A/G  | NA                 | INTERGENIC                    | NA                                   |
| Kabuli_wild_12327894 | 1399933774                          | Ca_kabuli_Chr02 | 12327894                | G/A  | NA                 | INTERGENIC                    | NA                                   |
| Kabuli_wild_12389083 | 1399933775                          | Ca_kabuli_Chr02 | 12389083                | C/T  | NA                 | INTERGENIC                    | NA                                   |
| Kabuli_wild_12389100 | 1399933776                          | Ca_kabuli_Chr02 | 12389100                | C/T  | NA                 | INTERGENIC                    | NA                                   |
| Kabuli_wild_12389109 | 1399933777                          | Ca_kabuli_Chr02 | 12389109                | A/G  | NA                 | INTERGENIC                    | NA                                   |
| Kabuli_wild_12389111 | 1399933778                          | Ca_kabuli_Chr02 | 12389111                | A/G  | NA                 | INTERGENIC                    | NA                                   |
| Kabuli_wild_12389112 | 1399933779                          | Ca_kabuli_Chr02 | 12389112                | G/A  | NA                 | INTERGENIC                    | NA                                   |
| Kabuli_wild_12389161 | 1399933780                          | Ca_kabuli_Chr02 | 12389161                | G/A  | NA                 | INTERGENIC                    | NA                                   |
| Kabuli_wild_12389166 | 1399933781                          | Ca_kabuli_Chr02 | 12389166                | G/T  | NA                 | INTERGENIC                    | NA                                   |
| Kabuli_wild_12389168 | 1399933782                          | Ca_kabuli_Chr02 | 12389168                | C/T  | NA                 | INTERGENIC                    | NA                                   |
| Kabuli_wild_12518246 | 1399933783                          | Ca_kabuli_Chr02 | 12518246                | A/T  | Gene_Ca_18078      | INTRON                        | NA                                   |

| SNP IDs              | NCBI dbSNP accession IDs (NCBI_SS#) | Chromosomes     | Physical positions (bp) | SNPs | Gene accession IDs | Sequence components of genome | Putative functions                                       |
|----------------------|-------------------------------------|-----------------|-------------------------|------|--------------------|-------------------------------|----------------------------------------------------------|
| Kabuli_wild_12528825 | 1399933784                          | Ca_kabuli_Chr02 | 12528825                | C/G  | Gene_Ca_18079      | NON_SYNONYMOUS_CODING         | Zinc finger,Dof-type                                     |
| Kabuli_wild_12583471 | 1399933785                          | Ca_kabuli_Chr02 | 12583471                | G/A  | NA                 | INTERGENIC                    | NA                                                       |
| Kabuli_wild_12583487 | 1399933786                          | Ca_kabuli_Chr02 | 12583487                | T/C  | NA                 | INTERGENIC                    | NA                                                       |
| Kabuli_wild_12583488 | 1399933787                          | Ca_kabuli_Chr02 | 12583488                | A/C  | NA                 | INTERGENIC                    | NA                                                       |
| Kabuli_wild_12583504 | 1399933788                          | Ca_kabuli_Chr02 | 12583504                | G/T  | NA                 | INTERGENIC                    | NA                                                       |
| Kabuli_wild_12583517 | 1399933789                          | Ca_kabuli_Chr02 | 12583517                | G/A  | NA                 | INTERGENIC                    | NA                                                       |
| Kabuli_wild_12792903 | 1399933790                          | Ca_kabuli_Chr02 | 12792903                | T/C  | Gene_Ca_18093      | INTRON                        | EF-HAND2                                                 |
| Kabuli_wild_12794438 | 1399933791                          | Ca_kabuli_Chr02 | 12794438                | G/A  | Gene_Ca_18093      | NON_SYNONYMOUS_CODING         | EF-HAND2                                                 |
| Kabuli_wild_13079445 | 1399933792                          | Ca_kabuli_Chr02 | 13079445                | T/G  | Gene_Ca_11686      | SYNONYMOUS_CODING             | Protein of unknown function DUF3110                      |
| Kabuli_wild_13312498 | 1399933793                          | Ca_kabuli_Chr02 | 13312498                | T/C  | NA                 | INTERGENIC                    | NA                                                       |
| Kabuli_wild_13355018 | 1399933794                          | Ca_kabuli_Chr02 | 13355018                | T/G  | NA                 | INTERGENIC                    | NA                                                       |
| Kabuli_wild_13355022 | 1399933795                          | Ca_kabuli_Chr02 | 13355022                | G/T  | NA                 | INTERGENIC                    | NA                                                       |
| Kabuli_wild_13355033 | 1399933796                          | Ca_kabuli_Chr02 | 13355033                | A/T  | NA                 | INTERGENIC                    | NA                                                       |
| Kabuli_wild_13355615 | 1399933797                          | Ca_kabuli_Chr02 | 13355615                | T/G  | NA                 | INTERGENIC                    | NA                                                       |
| Kabuli_wild_13434995 | 1399933798                          | Ca_kabuli_Chr02 | 13434995                | A/C  | Gene_Ca_11665      | INTRON                        | Glutamyl-tRNA(Gln)amidotransferase,subunitB/E,N-terminal |
| Kabuli_wild_13437317 | 1399933799                          | Ca_kabuli_Chr02 | 13437317                | A/G  | Gene_Ca_11665      | INTRON                        | Glutamyl-tRNA(Gln)amidotransferase,subunitB/E,N-terminal |
| Kabuli_wild_13529057 | 1399933800                          | Ca_kabuli_Chr02 | 13529057                | G/A  | NA                 | INTERGENIC                    | NA                                                       |
| Kabuli_wild_13782905 | 1399933801                          | Ca_kabuli_Chr02 | 13782905                | G/C  | Gene_Ca_11639      | INTRON                        | Remorin,C-terminal                                       |
| Kabuli_wild_13782906 | 1399933802                          | Ca_kabuli_Chr02 | 13782906                | C/A  | Gene_Ca_11639      | INTRON                        | Remorin,C-terminal                                       |
| Kabuli_wild_14136013 | 1399933803                          | Ca_kabuli_Chr02 | 14136013                | T/G  | Gene_Ca_11622      | DOWNSTREAM                    | NA                                                       |
| Kabuli_wild_14136195 | 1399933804                          | Ca_kabuli_Chr02 | 14136195                | A/C  | Gene_Ca_11622      | DOWNSTREAM                    | NA                                                       |
| Kabuli_wild_14136223 | 1399933805                          | Ca_kabuli_Chr02 | 14136223                | A/C  | Gene_Ca_11622      | DOWNSTREAM                    | NA                                                       |
| Kabuli_wild_15234951 | 1399933806                          | Ca_kabuli_Chr02 | 15234951                | C/A  | Gene_Ca_18564      | SYNONYMOUS_CODING             | Protein of unknown function DUF1675                      |
| Kabuli_wild_15390662 | 1399933807                          | Ca_kabuli_Chr02 | 15390662                | T/C  | Gene_Ca_18558      | INTRON                        | Protein kinase,catalytic domain                          |
| Kabuli_wild_15390673 | 1399933808                          | Ca_kabuli_Chr02 | 15390673                | A/G  | Gene_Ca_18558      | INTRON                        | Protein kinase,catalytic domain                          |
| Kabuli_wild_15412962 | 1399933809                          | Ca_kabuli_Chr02 | 15412962                | G/A  | NA                 | INTERGENIC                    | NA                                                       |
| Kabuli_wild_15470128 | 1399933810                          | Ca_kabuli_Chr02 | 15470128                | T/C  | NA                 | INTERGENIC                    | NA                                                       |
| Kabuli_wild_15690131 | 1399933811                          | Ca_kabuli_Chr02 | 15690131                | T/C  | Gene_Ca_18540      | NON_SYNONYMOUS_CODING         | Alpha-1,4-glucan-proteinsynthase,UDP-forming             |
| Kabuli_wild_16460097 | 1399933812                          | Ca_kabuli_Chr02 | 16460097                | A/C  | NA                 | INTERGENIC                    | NA                                                       |
| Kabuli_wild_16460129 | 1399933813                          | Ca_kabuli_Chr02 | 16460129                | C/A  | NA                 | INTERGENIC                    | NA                                                       |
| Kabuli_wild_16460142 | 1399933814                          | Ca_kabuli_Chr02 | 16460142                | A/G  | NA                 | INTERGENIC                    | NA                                                       |
| Kabuli_wild_16460174 | 1399933815                          | Ca_kabuli_Chr02 | 16460174                | G/A  | NA                 | INTERGENIC                    | NA                                                       |
| Kabuli_wild_16460175 | 1399933816                          | Ca_kabuli_Chr02 | 16460175                | C/A  | NA                 | INTERGENIC                    | NA                                                       |
| Kabuli_wild_16462089 | 1399933817                          | Ca_kabuli_Chr02 | 16462089                | C/T  | NA                 | INTERGENIC                    | NA                                                       |
| Kabuli_wild_16462095 | 1399933818                          | Ca_kabuli_Chr02 | 16462095                | A/G  | NA                 | INTERGENIC                    | NA                                                       |
| Kabuli_wild_16555733 | 1399933819                          | Ca_kabuli_Chr02 | 16555733                | C/T  | Gene_Ca_22041      | INTRON                        | BSD                                                      |
| Kabuli_wild_16555790 | 1399933820                          | Ca_kabuli_Chr02 | 16555790                | C/G  | Gene_Ca_22041      | INTRON                        | BSD                                                      |
| Kabuli_wild_16555835 | 1399933821                          | Ca_kabuli_Chr02 | 16555835                | C/T  | Gene_Ca_22041      | INTRON                        | BSD                                                      |
| Kabuli_wild_16563117 | 1399933822                          | Ca_kabuli_Chr02 | 16563117                | A/T  | Gene_Ca_22041      | INTRON                        | BSD                                                      |
| Kabuli_wild_16563121 | 1399933823                          | Ca_kabuli_Chr02 | 16563121                | A/T  | Gene_Ca_22041      | INTRON                        | BSD                                                      |
| Kabuli_wild_16563123 | 1399933824                          | Ca_kabuli_Chr02 | 16563123                | C/T  | Gene_Ca_22041      | INTRON                        | BSD                                                      |
| Kabuli_wild_16563125 | 1399933825                          | Ca_kabuli_Chr02 | 16563125                | A/T  | Gene_Ca_22041      | INTRON                        | BSD                                                      |
| Kabuli_wild_16563133 | 1399933826                          | Ca_kabuli_Chr02 | 16563133                | A/T  | Gene_Ca_22041      | INTRON                        | BSD                                                      |
| Kabuli_wild_16705119 | 1399933827                          | Ca_kabuli_Chr02 | 16705119                | C/T  | NA                 | INTERGENIC                    | NA                                                       |

| SNP IDs              | NCBI dbSNP accession IDs (NCBI_SS#) | Chromosomes     | Physical positions (bp) | SNPs | Gene accession IDs | Sequence components of genome | Putative functions              |
|----------------------|-------------------------------------|-----------------|-------------------------|------|--------------------|-------------------------------|---------------------------------|
| Kabuli_wild_17296609 | 1399933828                          | Ca_kabuli_Chr02 | 17296609                | T/C  | NA                 | INTERGENIC                    | NA                              |
| Kabuli_wild_17578623 | 1399933829                          | Ca_kabuli_Chr02 | 17578623                | G/A  | NA                 | INTERGENIC                    | NA                              |
| Kabuli_wild_17578628 | 1399933830                          | Ca_kabuli_Chr02 | 17578628                | C/T  | NA                 | INTERGENIC                    | NA                              |
| Kabuli_wild_17578633 | 1399933831                          | Ca_kabuli_Chr02 | 17578633                | C/G  | NA                 | INTERGENIC                    | NA                              |
| Kabuli_wild_17578666 | 1399933832                          | Ca_kabuli_Chr02 | 17578666                | T/A  | NA                 | INTERGENIC                    | NA                              |
| Kabuli_wild_17578676 | 1399933833                          | Ca_kabuli_Chr02 | 17578676                | T/C  | NA                 | INTERGENIC                    | NA                              |
| Kabuli_wild_17578677 | 1399933834                          | Ca_kabuli_Chr02 | 17578677                | G/C  | NA                 | INTERGENIC                    | NA                              |
| Kabuli_wild_17578689 | 1399933835                          | Ca_kabuli_Chr02 | 17578689                | G/A  | NA                 | INTERGENIC                    | NA                              |
| Kabuli_wild_17578695 | 1399933836                          | Ca_kabuli_Chr02 | 17578695                | G/A  | NA                 | INTERGENIC                    | NA                              |
| Kabuli_wild_17578701 | 1399933837                          | Ca_kabuli_Chr02 | 17578701                | A/C  | NA                 | INTERGENIC                    | NA                              |
| Kabuli_wild_17578706 | 1399933838                          | Ca_kabuli_Chr02 | 17578706                | A/T  | NA                 | INTERGENIC                    | NA                              |
| Kabuli_wild_17578707 | 1399933839                          | Ca_kabuli_Chr02 | 17578707                | T/A  | NA                 | INTERGENIC                    | NA                              |
| Kabuli_wild_17578740 | 1399933840                          | Ca_kabuli_Chr02 | 17578740                | A/G  | NA                 | INTERGENIC                    | NA                              |
| Kabuli_wild_17681915 | 1399933841                          | Ca_kabuli_Chr02 | 17681915                | C/T  | Gene_Ca_15998      | DOWNSTREAM                    | Transposase,PttA/En/Spm,plant   |
| Kabuli_wild_17789421 | 1399933842                          | Ca_kabuli_Chr02 | 17789421                | A/G  | Gene_Ca_15993      | INTRON                        | Protein kinase,catalytic domain |
| Kabuli_wild_17916096 | 1399933843                          | Ca_kabuli_Chr02 | 17916096                | C/T  | NA                 | INTERGENIC                    | NA                              |
| Kabuli_wild_17916100 | 1399933844                          | Ca_kabuli_Chr02 | 17916100                | G/T  | NA                 | INTERGENIC                    | NA                              |
| Kabuli_wild_17916119 | 1399933845                          | Ca_kabuli_Chr02 | 17916119                | T/C  | NA                 | INTERGENIC                    | NA                              |
| Kabuli_wild_17916125 | 1399933846                          | Ca_kabuli_Chr02 | 17916125                | C/T  | NA                 | INTERGENIC                    | NA                              |
| Kabuli_wild_17916132 | 1399933847                          | Ca_kabuli_Chr02 | 17916132                | C/T  | NA                 | INTERGENIC                    | NA                              |
| Kabuli_wild_17916148 | 1399933848                          | Ca_kabuli_Chr02 | 17916148                | G/A  | NA                 | INTERGENIC                    | NA                              |
| Kabuli_wild_17916158 | 1399933849                          | Ca_kabuli_Chr02 | 17916158                | G/A  | NA                 | INTERGENIC                    | NA                              |
| Kabuli_wild_18312200 | 1399933850                          | Ca_kabuli_Chr02 | 18312200                | T/C  | NA                 | INTERGENIC                    | NA                              |
| Kabuli_wild_18355889 | 1399933851                          | Ca_kabuli_Chr02 | 18355889                | G/A  | NA                 | INTERGENIC                    | NA                              |
| Kabuli_wild_18395410 | 1399933852                          | Ca_kabuli_Chr02 | 18395410                | T/C  | Gene_Ca_15975      | DOWNSTREAM                    | NA                              |
| Kabuli_wild_18581752 | 1399933853                          | Ca_kabuli_Chr02 | 18581752                | A/G  | NA                 | INTERGENIC                    | NA                              |
| Kabuli_wild_18631522 | 1399933854                          | Ca_kabuli_Chr02 | 18631522                | A/C  | Gene_Ca_15968      | UPSTREAM                      | Zinc/ironpermease               |
| Kabuli_wild_18671488 | 1399933855                          | Ca_kabuli_Chr02 | 18671488                | A/G  | NA                 | INTERGENIC                    | NA                              |
| Kabuli_wild_18671574 | 1399933856                          | Ca_kabuli_Chr02 | 18671574                | G/A  | NA                 | INTERGENIC                    | NA                              |
| Kabuli_wild_18671618 | 1399933857                          | Ca_kabuli_Chr02 | 18671618                | T/G  | NA                 | INTERGENIC                    | NA                              |
| Kabuli_wild_18671637 | 1399933858                          | Ca_kabuli_Chr02 | 18671637                | G/A  | NA                 | INTERGENIC                    | NA                              |
| Kabuli_wild_18671645 | 1399933859                          | Ca_kabuli_Chr02 | 18671645                | C/T  | NA                 | INTERGENIC                    | NA                              |
| Kabuli_wild_18671666 | 1399933860                          | Ca_kabuli_Chr02 | 18671666                | C/T  | NA                 | INTERGENIC                    | NA                              |
| Kabuli_wild_18671672 | 1399933861                          | Ca_kabuli_Chr02 | 18671672                | T/A  | NA                 | INTERGENIC                    | NA                              |
| Kabuli_wild_18671680 | 1399933862                          | Ca_kabuli_Chr02 | 18671680                | C/T  | NA                 | INTERGENIC                    | NA                              |
| Kabuli_wild_18671692 | 1399933863                          | Ca_kabuli_Chr02 | 18671692                | C/A  | NA                 | INTERGENIC                    | NA                              |
| Kabuli_wild_18671696 | 1399933864                          | Ca_kabuli_Chr02 | 18671696                | G/A  | NA                 | INTERGENIC                    | NA                              |
| Kabuli_wild_18671723 | 1399933865                          | Ca_kabuli_Chr02 | 18671723                | C/G  | NA                 | INTERGENIC                    | NA                              |
| Kabuli_wild_18671746 | 1399933866                          | Ca_kabuli_Chr02 | 18671746                | C/T  | NA                 | INTERGENIC                    | NA                              |
| Kabuli_wild_18671756 | 1399933867                          | Ca_kabuli_Chr02 | 18671756                | T/A  | NA                 | INTERGENIC                    | NA                              |
| Kabuli_wild_18671765 | 1399933868                          | Ca_kabuli_Chr02 | 18671765                | C/A  | NA                 | INTERGENIC                    | NA                              |
| Kabuli_wild_18671791 | 1399933869                          | Ca_kabuli_Chr02 | 18671791                | A/C  | NA                 | INTERGENIC                    | NA                              |
| Kabuli_wild_18671830 | 1399933870                          | Ca_kabuli_Chr02 | 18671830                | A/G  | NA                 | INTERGENIC                    | NA                              |
| Kabuli_wild_18712473 | 1399933871                          | Ca_kabuli_Chr02 | 18712473                | C/T  | NA                 | INTERGENIC                    | NA                              |

| SNP IDs              | NCBI dbSNP accession IDs (NCBI_SS#) | Chromosomes     | Physical positions (bp) | SNPs | Gene accession IDs | Sequence components of genome | Putative functions                           |
|----------------------|-------------------------------------|-----------------|-------------------------|------|--------------------|-------------------------------|----------------------------------------------|
| Kabuli_wild_18712505 | 1399933872                          | Ca_kabuli_Chr02 | 18712505                | T/A  | NA                 | INTERGENIC                    | NA                                           |
| Kabuli_wild_18823154 | 1399933873                          | Ca_kabuli_Chr02 | 18823154                | T/C  | NA                 | INTERGENIC                    | NA                                           |
| Kabuli_wild_19395571 | 1399933874                          | Ca_kabuli_Chr02 | 19395571                | G/T  | NA                 | INTERGENIC                    | NA                                           |
| Kabuli_wild_19395619 | 1399933875                          | Ca_kabuli_Chr02 | 19395619                | C/T  | NA                 | INTERGENIC                    | NA                                           |
| Kabuli_wild_19653215 | 1399933876                          | Ca_kabuli_Chr02 | 19653215                | A/G  | Gene_Ca_24537      | SYNONYMOUS_CODING             | Aminotransferase-like,plant mobile domain    |
| Kabuli_wild_19765839 | 1399933877                          | Ca_kabuli_Chr02 | 19765839                | T/C  | NA                 | INTERGENIC                    | NA                                           |
| Kabuli_wild_19765846 | 1399933878                          | Ca_kabuli_Chr02 | 19765846                | G/A  | NA                 | INTERGENIC                    | NA                                           |
| Kabuli_wild_19765873 | 1399933879                          | Ca_kabuli_Chr02 | 19765873                | A/G  | NA                 | INTERGENIC                    | NA                                           |
| Kabuli_wild_19765908 | 1399933880                          | Ca_kabuli_Chr02 | 19765908                | T/C  | NA                 | INTERGENIC                    | NA                                           |
| Kabuli_wild_19765917 | 1399933881                          | Ca_kabuli_Chr02 | 19765917                | A/T  | NA                 | INTERGENIC                    | NA                                           |
| Kabuli_wild_20392224 | 1399933882                          | Ca_kabuli_Chr02 | 20392224                | A/G  | Gene_Ca_25924      | SYNONYMOUS_CODING             | NA                                           |
| Kabuli_wild_20762180 | 1399933883                          | Ca_kabuli_Chr02 | 20762180                | T/A  | Gene_Ca_23762      | NON_SYNONYMOUS_CODING         | NA                                           |
| Kabuli_wild_20762199 | 1399933884                          | Ca_kabuli_Chr02 | 20762199                | T/C  | Gene_Ca_23762      | SYNONYMOUS_CODING             | NA                                           |
| Kabuli_wild_20762205 | 1399933885                          | Ca_kabuli_Chr02 | 20762205                | A/T  | Gene_Ca_23762      | SYNONYMOUS_CODING             | NA                                           |
| Kabuli_wild_20762209 | 1399933886                          | Ca_kabuli_Chr02 | 20762209                | T/C  | Gene_Ca_23762      | NON_SYNONYMOUS_CODING         | NA                                           |
| Kabuli_wild_20762222 | 1399933887                          | Ca_kabuli_Chr02 | 20762222                | C/T  | Gene_Ca_23762      | NON_SYNONYMOUS_CODING         | NA                                           |
| Kabuli_wild_20762223 | 1399933888                          | Ca_kabuli_Chr02 | 20762223                | G/A  | Gene_Ca_23762      | SYNONYMOUS_CODING             | NA                                           |
| Kabuli_wild_21000433 | 1399933889                          | Ca_kabuli_Chr02 | 21000433                | C/T  | NA                 | INTERGENIC                    | NA                                           |
| Kabuli_wild_21000463 | 1399933890                          | Ca_kabuli_Chr02 | 21000463                | C/T  | NA                 | INTERGENIC                    | NA                                           |
| Kabuli_wild_21000466 | 1399933891                          | Ca_kabuli_Chr02 | 21000466                | C/T  | NA                 | INTERGENIC                    | NA                                           |
| Kabuli_wild_21000498 | 1399933892                          | Ca_kabuli_Chr02 | 21000498                | A/C  | NA                 | INTERGENIC                    | NA                                           |
| Kabuli_wild_21000509 | 1399933893                          | Ca_kabuli_Chr02 | 21000509                | C/T  | NA                 | INTERGENIC                    | NA                                           |
| Kabuli_wild_21159203 | 1399933894                          | Ca_kabuli_Chr02 | 21159203                | C/A  | NA                 | INTERGENIC                    | NA                                           |
| Kabuli_wild_21159222 | 1399933895                          | Ca_kabuli_Chr02 | 21159222                | T/C  | NA                 | INTERGENIC                    | NA                                           |
| Kabuli_wild_21159228 | 1399933896                          | Ca_kabuli_Chr02 | 21159228                | C/T  | NA                 | INTERGENIC                    | NA                                           |
| Kabuli_wild_21159254 | 1399933897                          | Ca_kabuli_Chr02 | 21159254                | C/T  | NA                 | INTERGENIC                    | NA                                           |
| Kabuli_wild_21159275 | 1399933898                          | Ca_kabuli_Chr02 | 21159275                | G/A  | NA                 | INTERGENIC                    | NA                                           |
| Kabuli_wild_21159306 | 1399933899                          | Ca_kabuli_Chr02 | 21159306                | C/T  | NA                 | INTERGENIC                    | NA                                           |
| Kabuli_wild_21372522 | 1399933900                          | Ca_kabuli_Chr02 | 21372522                | C/T  | Gene_Ca_24629      | INTRON                        | Heat shock protein DnaJ, cysteine-richdomain |
| Kabuli_wild_21849839 | 1399933901                          | Ca_kabuli_Chr02 | 21849839                | C/G  | Gene_Ca_23059      | INTRON                        | NA                                           |
| Kabuli_wild_21849874 | 1399933902                          | Ca_kabuli_Chr02 | 21849874                | A/T  | Gene_Ca_23059      | INTRON                        | NA                                           |
| Kabuli_wild_21965347 | 1399933903                          | Ca_kabuli_Chr02 | 21965347                | C/A  | NA                 | INTERGENIC                    | NA                                           |
| Kabuli_wild_21965365 | 1399933904                          | Ca_kabuli_Chr02 | 21965365                | T/C  | NA                 | INTERGENIC                    | NA                                           |
| Kabuli_wild_21965371 | 1399933905                          | Ca_kabuli_Chr02 | 21965371                | G/A  | NA                 | INTERGENIC                    | NA                                           |
| Kabuli_wild_21965404 | 1399933906                          | Ca_kabuli_Chr02 | 21965404                | T/G  | NA                 | INTERGENIC                    | NA                                           |
| Kabuli_wild_21965423 | 1399933907                          | Ca_kabuli_Chr02 | 21965423                | A/G  | NA                 | INTERGENIC                    | NA                                           |
| Kabuli_wild_22112434 | 1399933908                          | Ca_kabuli_Chr02 | 22112434                | A/G  | NA                 | INTERGENIC                    | NA                                           |
| Kabuli_wild_22158496 | 1399933909                          | Ca_kabuli_Chr02 | 22158496                | C/A  | Gene_Ca_15007      | NON_SYNONYMOUS_CODING         | Peptidase C48, SUMO/Sentrin/Ubl1             |
| Kabuli_wild_22158517 | 1399933910                          | Ca_kabuli_Chr02 | 22158517                | G/A  | Gene_Ca_15007      | NON_SYNONYMOUS_CODING         | Peptidase C48, SUMO/Sentrin/Ubl1             |
| Kabuli_wild_22158518 | 1399933911                          | Ca_kabuli_Chr02 | 22158518                | C/T  | Gene_Ca_15007      | NON_SYNONYMOUS_CODING         | Peptidase C48, SUMO/Sentrin/Ubl1             |
| Kabuli_wild_22158520 | 1399933912                          | Ca_kabuli_Chr02 | 22158520                | G/A  | Gene_Ca_15007      | NON_SYNONYMOUS_CODING         | Peptidase C48, SUMO/Sentrin/Ubl1             |
| Kabuli_wild_22158543 | 1399933913                          | Ca_kabuli_Chr02 | 22158543                | T/A  | Gene_Ca_15007      | SYNONYMOUS_CODING             | Peptidase C48, SUMO/Sentrin/Ubl1             |
| Kabuli_wild_22158554 | 1399933914                          | Ca_kabuli_Chr02 | 22158554                | C/T  | Gene_Ca_15007      | NON_SYNONYMOUS_CODING         | Peptidase C48, SUMO/Sentrin/Ubl1             |
| Kabuli_wild_22158578 | 1399933915                          | Ca_kabuli_Chr02 | 22158578                | T/A  | Gene_Ca_15007      | NON_SYNONYMOUS_CODING         | Peptidase C48, SUMO/Sentrin/Ubl1             |

| SNP IDs              | NCBI dbSNP accession IDs (NCBI_SS#) | Chromosomes     | Physical positions (bp) | SNPs | Gene accession IDs | Sequence components of genome | Putative functions                                 |
|----------------------|-------------------------------------|-----------------|-------------------------|------|--------------------|-------------------------------|----------------------------------------------------|
| Kabuli_wild_22158602 | 1399933916                          | Ca_kabuli_Chr02 | 22158602                | C/T  | Gene_Ca_15007      | NON_SYNONYMOUS_CODING         | Peptidase C48, SUMO/Sentrin/Ubl1                   |
| Kabuli_wild_22158604 | 1399933917                          | Ca_kabuli_Chr02 | 22158604                | G/A  | Gene_Ca_15007      | NON_SYNONYMOUS_CODING         | Peptidase C48, SUMO/Sentrin/Ubl1                   |
| Kabuli_wild_22190621 | 1399933918                          | Ca_kabuli_Chr02 | 22190621                | C/G  | NA                 | INTERGENIC                    | NA                                                 |
| Kabuli_wild_22190743 | 1399933919                          | Ca_kabuli_Chr02 | 22190743                | C/T  | NA                 | INTERGENIC                    | NA                                                 |
| Kabuli_wild_22190748 | 1399933920                          | Ca_kabuli_Chr02 | 22190748                | G/T  | NA                 | INTERGENIC                    | NA                                                 |
| Kabuli_wild_22190751 | 1399933921                          | Ca_kabuli_Chr02 | 22190751                | C/T  | NA                 | INTERGENIC                    | NA                                                 |
| Kabuli_wild_22190753 | 1399933922                          | Ca_kabuli_Chr02 | 22190753                | C/T  | NA                 | INTERGENIC                    | NA                                                 |
| Kabuli_wild_22190776 | 1399933923                          | Ca_kabuli_Chr02 | 22190776                | G/A  | NA                 | INTERGENIC                    | NA                                                 |
| Kabuli_wild_22190815 | 1399933924                          | Ca_kabuli_Chr02 | 22190815                | C/T  | NA                 | INTERGENIC                    | NA                                                 |
| Kabuli_wild_22347405 | 1399933925                          | Ca_kabuli_Chr02 | 22347405                | C/T  | Gene_Ca_15004      | INTRON                        | NA                                                 |
| Kabuli_wild_22457183 | 1399933926                          | Ca_kabuli_Chr02 | 22457183                | C/T  | NA                 | INTERGENIC                    | NA                                                 |
| Kabuli_wild_22457215 | 1399933927                          | Ca_kabuli_Chr02 | 22457215                | G/A  | NA                 | INTERGENIC                    | NA                                                 |
| Kabuli_wild_22457216 | 1399933928                          | Ca_kabuli_Chr02 | 22457216                | C/T  | NA                 | INTERGENIC                    | NA                                                 |
| Kabuli_wild_22457233 | 1399933929                          | Ca_kabuli_Chr02 | 22457233                | C/T  | NA                 | INTERGENIC                    | NA                                                 |
| Kabuli_wild_22457234 | 1399933930                          | Ca_kabuli_Chr02 | 22457234                | G/A  | NA                 | INTERGENIC                    | NA                                                 |
| Kabuli_wild_22457237 | 1399933931                          | Ca_kabuli_Chr02 | 22457237                | G/A  | NA                 | INTERGENIC                    | NA                                                 |
| Kabuli_wild_22457257 | 1399933932                          | Ca_kabuli_Chr02 | 22457257                | G/A  | NA                 | INTERGENIC                    | NA                                                 |
| Kabuli_wild_22457263 | 1399933933                          | Ca_kabuli_Chr02 | 22457263                | G/A  | NA                 | INTERGENIC                    | NA                                                 |
| Kabuli_wild_22457345 | 1399933934                          | Ca_kabuli_Chr02 | 22457345                | C/T  | NA                 | INTERGENIC                    | NA                                                 |
| Kabuli_wild_22457347 | 1399933935                          | Ca_kabuli_Chr02 | 22457347                | G/A  | NA                 | INTERGENIC                    | NA                                                 |
| Kabuli_wild_22457360 | 1399933936                          | Ca_kabuli_Chr02 | 22457360                | C/T  | NA                 | INTERGENIC                    | NA                                                 |
| Kabuli_wild_22483000 | 1399933937                          | Ca_kabuli_Chr02 | 22483000                | C/T  | NA                 | INTERGENIC                    | NA                                                 |
| Kabuli_wild_22483003 | 1399933938                          | Ca_kabuli_Chr02 | 22483003                | A/C  | NA                 | INTERGENIC                    | NA                                                 |
| Kabuli_wild_22483019 | 1399933939                          | Ca_kabuli_Chr02 | 22483019                | A/T  | NA                 | INTERGENIC                    | NA                                                 |
| Kabuli_wild_22483022 | 1399933940                          | Ca_kabuli_Chr02 | 22483022                | C/G  | NA                 | INTERGENIC                    | NA                                                 |
| Kabuli_wild_22483052 | 1399933941                          | Ca_kabuli_Chr02 | 22483052                | C/T  | NA                 | INTERGENIC                    | NA                                                 |
| Kabuli_wild_22483067 | 1399933942                          | Ca_kabuli_Chr02 | 22483067                | G/A  | NA                 | INTERGENIC                    | NA                                                 |
| Kabuli_wild_22483072 | 1399933943                          | Ca_kabuli_Chr02 | 22483072                | C/T  | NA                 | INTERGENIC                    | NA                                                 |
| Kabuli_wild_22536226 | 1399933944                          | Ca_kabuli_Chr02 | 22536226                | T/C  | Gene_Ca_14996      | SYNONYMOUS_CODING             | NA                                                 |
| Kabuli_wild_22702616 | 1399933945                          | Ca_kabuli_Chr02 | 22702616                | T/C  | Gene_Ca_14990      | INTRON                        | Cyclin,C-terminal                                  |
| Kabuli_wild_22703091 | 1399933946                          | Ca_kabuli_Chr02 | 22703091                | A/C  | Gene_Ca_14990      | INTRON                        | Cyclin,C-terminal                                  |
| Kabuli_wild_22720115 | 1399933947                          | Ca_kabuli_Chr02 | 22720115                | A/G  | Gene_Ca_14990      | NON_SYNONYMOUS_CODING         | Cyclin,C-terminal                                  |
| Kabuli_wild_22820588 | 1399933948                          | Ca_kabuli_Chr02 | 22820588                | A/C  | Gene_Ca_14985      | INTRON                        | PeptidaseC19,ubiquitincoarboxyl-terminalhydrolase2 |
| Kabuli_wild_22820616 | 1399933949                          | Ca_kabuli_Chr02 | 22820616                | C/G  | Gene_Ca_14985      | INTRON                        | Rho GTPase-activating protein domain               |
| Kabuli_wild_22849000 | 1399933950                          | Ca_kabuli_Chr02 | 22849000                | A/G  | Gene_Ca_14984      | SYNONYMOUS_CODING             | Domain of unknown function DUF296                  |
| Kabuli_wild_22897647 | 1399933951                          | Ca_kabuli_Chr02 | 22897647                | T/C  | NA                 | INTERGENIC                    | NA                                                 |
| Kabuli_wild_22897694 | 1399933952                          | Ca_kabuli_Chr02 | 22897694                | A/G  | NA                 | INTERGENIC                    | NA                                                 |
| Kabuli_wild_22943923 | 1399933953                          | Ca_kabuli_Chr02 | 22943923                | G/A  | NA                 | INTERGENIC                    | NA                                                 |
| Kabuli_wild_23111588 | 1399933954                          | Ca_kabuli_Chr02 | 23111588                | T/C  | NA                 | INTERGENIC                    | NA                                                 |
| Kabuli_wild_23193577 | 1399933955                          | Ca_kabuli_Chr02 | 23193577                | A/G  | NA                 | INTERGENIC                    | NA                                                 |
| Kabuli_wild_23193620 | 1399933956                          | Ca_kabuli_Chr02 | 23193620                | C/A  | NA                 | INTERGENIC                    | NA                                                 |
| Kabuli_wild_23193632 | 1399933957                          | Ca_kabuli_Chr02 | 23193632                | C/T  | NA                 | INTERGENIC                    | NA                                                 |
| Kabuli_wild_23193680 | 1399933958                          | Ca_kabuli_Chr02 | 23193680                | G/T  | NA                 | INTERGENIC                    | NA                                                 |
| Kabuli_wild_23219939 | 1399933959                          | Ca_kabuli_Chr02 | 23219939                | C/A  | Gene_Ca_14970      | NON_SYNONYMOUS_CODING         | Protein kinase,catalytic domain                    |

| SNP IDs              | NCBI dbSNP accession IDs (NCBI_SS#) | Chromosomes     | Physical positions (bp) | SNPs | Gene accession IDs | Sequence components of genome | Putative functions                                                  |
|----------------------|-------------------------------------|-----------------|-------------------------|------|--------------------|-------------------------------|---------------------------------------------------------------------|
| Kabuli_wild_23247801 | 1399933960                          | Ca_kabuli_Chr02 | 23247801                | C/T  | NA                 | INTERGENIC                    | NA                                                                  |
| Kabuli_wild_23282374 | 1399933961                          | Ca_kabuli_Chr02 | 23282374                | T/C  | Gene_Ca_14968      | DOWNSTREAM                    | Zinc finger,GATA-type                                               |
| Kabuli_wild_23329424 | 1399933962                          | Ca_kabuli_Chr02 | 23329424                | C/T  | NA                 | INTERGENIC                    | NA                                                                  |
| Kabuli_wild_23329440 | 1399933963                          | Ca_kabuli_Chr02 | 23329440                | G/A  | NA                 | INTERGENIC                    | NA                                                                  |
| Kabuli_wild_23346297 | 1399933964                          | Ca_kabuli_Chr02 | 23346297                | A/C  | Gene_Ca_14963      | INTRON                        | Domain of unknown function FMP27,domain-4                           |
| Kabuli_wild_23429747 | 1399933965                          | Ca_kabuli_Chr02 | 23429747                | A/C  | Gene_Ca_14961      | SYNONYMOUS_CODING             | HECT                                                                |
| Kabuli_wild_23439966 | 1399933966                          | Ca_kabuli_Chr02 | 23439966                | T/C  | Gene_Ca_14960      | NON_SYNONYMOUS_CODING         | NA                                                                  |
| Kabuli_wild_23442057 | 1399933967                          | Ca_kabuli_Chr02 | 23442057                | T/C  | Gene_Ca_14960      | NON_SYNONYMOUS_CODING         | Ubiquitin-associated/translation elongation factor EF1B, N-terminal |
| Kabuli_wild_23797957 | 1399933968                          | Ca_kabuli_Chr02 | 23797957                | C/T  | NA                 | INTERGENIC                    | NA                                                                  |
| Kabuli_wild_23797987 | 1399933969                          | Ca_kabuli_Chr02 | 23797987                | T/C  | NA                 | INTERGENIC                    | NA                                                                  |
| Kabuli_wild_23798081 | 1399933970                          | Ca_kabuli_Chr02 | 23798081                | T/C  | NA                 | INTERGENIC                    | NA                                                                  |
| Kabuli_wild_23798111 | 1399933971                          | Ca_kabuli_Chr02 | 23798111                | G/T  | NA                 | INTERGENIC                    | NA                                                                  |
| Kabuli_wild_23819055 | 1399933972                          | Ca_kabuli_Chr02 | 23819055                | C/A  | Gene_Ca_14945      | NON_SYNONYMOUS_CODING         | NA                                                                  |
| Kabuli_wild_23910254 | 1399933973                          | Ca_kabuli_Chr02 | 23910254                | T/C  | NA                 | INTERGENIC                    | NA                                                                  |
| Kabuli_wild_23923393 | 1399933974                          | Ca_kabuli_Chr02 | 23923393                | G/C  | NA                 | INTERGENIC                    | NA                                                                  |
| Kabuli_wild_24048087 | 1399933975                          | Ca_kabuli_Chr02 | 24048087                | A/C  | Gene_Ca_21673      | INTRON                        | PUCC protein                                                        |
| Kabuli_wild_24226527 | 1399933976                          | Ca_kabuli_Chr02 | 24226527                | T/C  | Gene_Ca_21666      | INTRON                        | SNF2-related                                                        |
| Kabuli_wild_24226618 | 1399933977                          | Ca_kabuli_Chr02 | 24226618                | G/T  | Gene_Ca_21666      | INTRON                        | SNF2-related                                                        |
| Kabuli_wild_24226892 | 1399933978                          | Ca_kabuli_Chr02 | 24226892                | C/A  | Gene_Ca_21666      | INTRON                        | SNF2-related                                                        |
| Kabuli_wild_24353119 | 1399933979                          | Ca_kabuli_Chr02 | 24353119                | A/C  | NA                 | INTERGENIC                    | NA                                                                  |
| Kabuli_wild_24353120 | 1399933980                          | Ca_kabuli_Chr02 | 24353120                | G/C  | NA                 | INTERGENIC                    | NA                                                                  |
| Kabuli_wild_24353123 | 1399933981                          | Ca_kabuli_Chr02 | 24353123                | C/G  | NA                 | INTERGENIC                    | NA                                                                  |
| Kabuli_wild_24407365 | 1399933982                          | Ca_kabuli_Chr02 | 24407365                | C/T  | NA                 | INTERGENIC                    | NA                                                                  |
| Kabuli_wild_24511053 | 1399933983                          | Ca_kabuli_Chr02 | 24511053                | G/A  | NA                 | INTERGENIC                    | NA                                                                  |
| Kabuli_wild_24511114 | 1399933984                          | Ca_kabuli_Chr02 | 24511114                | G/A  | NA                 | INTERGENIC                    | NA                                                                  |
| Kabuli_wild_24511116 | 1399933985                          | Ca_kabuli_Chr02 | 24511116                | C/A  | NA                 | INTERGENIC                    | NA                                                                  |
| Kabuli_wild_24511119 | 1399933986                          | Ca_kabuli_Chr02 | 24511119                | T/G  | NA                 | INTERGENIC                    | NA                                                                  |
| Kabuli_wild_24511121 | 1399933987                          | Ca_kabuli_Chr02 | 24511121                | G/A  | NA                 | INTERGENIC                    | NA                                                                  |
| Kabuli_wild_24709295 | 1399933988                          | Ca_kabuli_Chr02 | 24709295                | G/A  | Gene_Ca_22892      | INTRON                        | DNA mismatch repair protein MutS,C-terminal domain                  |
| Kabuli_wild_24741195 | 1399933989                          | Ca_kabuli_Chr02 | 24741195                | C/T  | NA                 | INTERGENIC                    | NA                                                                  |
| Kabuli_wild_24817895 | 1399933990                          | Ca_kabuli_Chr02 | 24817895                | C/T  | NA                 | INTERGENIC                    | NA                                                                  |
| Kabuli_wild_24817921 | 1399933991                          | Ca_kabuli_Chr02 | 24817921                | G/A  | NA                 | INTERGENIC                    | NA                                                                  |
| Kabuli_wild_24817928 | 1399933992                          | Ca_kabuli_Chr02 | 24817928                | G/A  | NA                 | INTERGENIC                    | NA                                                                  |
| Kabuli_wild_24817934 | 1399933993                          | Ca_kabuli_Chr02 | 24817934                | A/G  | NA                 | INTERGENIC                    | NA                                                                  |
| Kabuli_wild_24817940 | 1399933994                          | Ca_kabuli_Chr02 | 24817940                | G/A  | NA                 | INTERGENIC                    | NA                                                                  |
| Kabuli_wild_24817945 | 1399933995                          | Ca_kabuli_Chr02 | 24817945                | C/T  | NA                 | INTERGENIC                    | NA                                                                  |
| Kabuli_wild_24817953 | 1399933996                          | Ca_kabuli_Chr02 | 24817953                | C/A  | NA                 | INTERGENIC                    | NA                                                                  |
| Kabuli_wild_24817957 | 1399933997                          | Ca_kabuli_Chr02 | 24817957                | G/A  | NA                 | INTERGENIC                    | NA                                                                  |
| Kabuli_wild_25022971 | 1399933998                          | Ca_kabuli_Chr02 | 25022971                | A/G  | Gene_Ca_14236      | NON_SYNONYMOUS_CODING         | Zinc finger,B-box                                                   |
| Kabuli_wild_25163062 | 1399933999                          | Ca_kabuli_Chr02 | 25163062                | C/G  | Gene_Ca_14248      | INTRON                        | Glycosyl dehydroxylase, family 3, N-terminal                        |
| Kabuli_wild_25317391 | 1399934000                          | Ca_kabuli_Chr02 | 25317391                | A/G  | Gene_Ca_14265      | SYNONYMOUS_CODING             | ABC transporter-like                                                |
| Kabuli_wild_25318862 | 1399934001                          | Ca_kabuli_Chr02 | 25318862                | A/T  | Gene_Ca_14265      | INTRON                        | ABC transporter-like                                                |
| Kabuli_wild_25493973 | 1399934002                          | Ca_kabuli_Chr02 | 25493973                | T/G  | Gene_Ca_14279      | SYNONYMOUS_CODING             | ChaperoninClpA/B                                                    |
| Kabuli_wild_25508605 | 1399934003                          | Ca_kabuli_Chr02 | 25508605                | T/C  | Gene_Ca_14280      | NON_SYNONYMOUS_CODING         | Zinc finger,CCCH-type                                               |

| SNP IDs              | NCBI dbSNP accession IDs (NCBI_SS#) | Chromosomes     | Physical positions (bp) | SNPs | Gene accession IDs | Sequence components of genome | Putative functions                                    |
|----------------------|-------------------------------------|-----------------|-------------------------|------|--------------------|-------------------------------|-------------------------------------------------------|
| Kabuli_wild_25508679 | 1399934004                          | Ca_kabuli_Chr02 | 25508679                | A/G  | Gene_Ca_14280      | NON_SYNONYMOUS_CODING         | Zinc finger,CCCH-type                                 |
| Kabuli_wild_25725688 | 1399934005                          | Ca_kabuli_Chr02 | 25725688                | G/A  | NA                 | INTERGENIC                    | NA                                                    |
| Kabuli_wild_25725726 | 1399934006                          | Ca_kabuli_Chr02 | 25725726                | C/A  | NA                 | INTERGENIC                    | NA                                                    |
| Kabuli_wild_25725748 | 1399934007                          | Ca_kabuli_Chr02 | 25725748                | T/C  | NA                 | INTERGENIC                    | NA                                                    |
| Kabuli_wild_25725816 | 1399934008                          | Ca_kabuli_Chr02 | 25725816                | G/T  | NA                 | INTERGENIC                    | NA                                                    |
| Kabuli_wild_25751994 | 1399934009                          | Ca_kabuli_Chr02 | 25751994                | T/C  | NA                 | INTERGENIC                    | NA                                                    |
| Kabuli_wild_25752001 | 1399934010                          | Ca_kabuli_Chr02 | 25752001                | C/G  | NA                 | INTERGENIC                    | NA                                                    |
| Kabuli_wild_25788209 | 1399934011                          | Ca_kabuli_Chr02 | 25788209                | A/G  | Gene_Ca_14295      | INTRON                        | RNA recognition motif domain                          |
| Kabuli_wild_25930490 | 1399934012                          | Ca_kabuli_Chr02 | 25930490                | G/A  | Gene_Ca_14304      | NON_SYNONYMOUS_CODING         | Phosphoglycerate/bisphosphoglyceratemetase,activesite |
| Kabuli_wild_25941107 | 1399934013                          | Ca_kabuli_Chr02 | 25941107                | T/A  | Gene_Ca_14304      | INTRON                        | Phosphoglycerate/bisphosphoglyceratemetase,activesite |
| Kabuli_wild_25941128 | 1399934014                          | Ca_kabuli_Chr02 | 25941128                | A/T  | Gene_Ca_14304      | INTRON                        | Phosphoglycerate/bisphosphoglyceratemetase,activesite |
| Kabuli_wild_25941178 | 1399934015                          | Ca_kabuli_Chr02 | 25941178                | C/T  | Gene_Ca_14304      | INTRON                        | Phosphoglycerate/bisphosphoglyceratemetase,activesite |
| Kabuli_wild_26035894 | 1399934016                          | Ca_kabuli_Chr02 | 26035894                | C/T  | Gene_Ca_14310      | SYNONYMOUS_CODING             | NA                                                    |
| Kabuli_wild_26051667 | 1399934017                          | Ca_kabuli_Chr02 | 26051667                | T/G  | Gene_Ca_14311      | UPSTREAM                      | Protein kinase,catalytic domain                       |
| Kabuli_wild_26092881 | 1399934018                          | Ca_kabuli_Chr02 | 26092881                | C/G  | NA                 | INTERGENIC                    | NA                                                    |
| Kabuli_wild_26092913 | 1399934019                          | Ca_kabuli_Chr02 | 26092913                | C/A  | NA                 | INTERGENIC                    | NA                                                    |
| Kabuli_wild_26092928 | 1399934020                          | Ca_kabuli_Chr02 | 26092928                | T/G  | NA                 | INTERGENIC                    | NA                                                    |
| Kabuli_wild_26121491 | 1399934021                          | Ca_kabuli_Chr02 | 26121491                | T/G  | Gene_Ca_14316      | SYNONYMOUS_CODING             | NA                                                    |
| Kabuli_wild_26121495 | 1399934022                          | Ca_kabuli_Chr02 | 26121495                | A/C  | Gene_Ca_14316      | SYNONYMOUS_CODING             | NA                                                    |
| Kabuli_wild_26457480 | 1399934023                          | Ca_kabuli_Chr02 | 26457480                | A/G  | Gene_Ca_17247      | INTRON                        | Metallo-dependentphosphatase                          |
| Kabuli_wild_26461867 | 1399934024                          | Ca_kabuli_Chr02 | 26461867                | C/G  | Gene_Ca_17247      | NON_SYNONYMOUS_CODING         | Metallo-dependentphosphatase                          |
| Kabuli_wild_26486039 | 1399934025                          | Ca_kabuli_Chr02 | 26486039                | G/T  | NA                 | INTERGENIC                    | NA                                                    |
| Kabuli_wild_26486125 | 1399934026                          | Ca_kabuli_Chr02 | 26486125                | G/A  | NA                 | INTERGENIC                    | NA                                                    |
| Kabuli_wild_26502153 | 1399934027                          | Ca_kabuli_Chr02 | 26502153                | T/C  | NA                 | INTERGENIC                    | NA                                                    |
| Kabuli_wild_26503263 | 1399934028                          | Ca_kabuli_Chr02 | 26503263                | A/G  | NA                 | INTERGENIC                    | NA                                                    |
| Kabuli_wild_26503308 | 1399934029                          | Ca_kabuli_Chr02 | 26503308                | T/G  | NA                 | INTERGENIC                    | NA                                                    |
| Kabuli_wild_26567054 | 1399934030                          | Ca_kabuli_Chr02 | 26567054                | T/G  | NA                 | INTERGENIC                    | NA                                                    |
| Kabuli_wild_26704451 | 1399934031                          | Ca_kabuli_Chr02 | 26704451                | A/G  | Gene_Ca_17261      | DOWNSTREAM                    | NA                                                    |
| Kabuli_wild_26704515 | 1399934032                          | Ca_kabuli_Chr02 | 26704515                | A/C  | Gene_Ca_17261      | DOWNSTREAM                    | NA                                                    |
| Kabuli_wild_26706782 | 1399934033                          | Ca_kabuli_Chr02 | 26706782                | G/A  | NA                 | INTERGENIC                    | NA                                                    |
| Kabuli_wild_26706849 | 1399934034                          | Ca_kabuli_Chr02 | 26706849                | A/G  | NA                 | INTERGENIC                    | NA                                                    |
| Kabuli_wild_26771724 | 1399934035                          | Ca_kabuli_Chr02 | 26771724                | T/C  | NA                 | INTERGENIC                    | NA                                                    |
| Kabuli_wild_26994834 | 1399934036                          | Ca_kabuli_Chr02 | 26994834                | A/T  | NA                 | INTERGENIC                    | NA                                                    |
| Kabuli_wild_26994861 | 1399934037                          | Ca_kabuli_Chr02 | 26994861                | T/A  | NA                 | INTERGENIC                    | NA                                                    |
| Kabuli_wild_26994912 | 1399934038                          | Ca_kabuli_Chr02 | 26994912                | C/T  | NA                 | INTERGENIC                    | NA                                                    |
| Kabuli_wild_26994929 | 1399934039                          | Ca_kabuli_Chr02 | 26994929                | A/T  | NA                 | INTERGENIC                    | NA                                                    |
| Kabuli_wild_27044272 | 1399934040                          | Ca_kabuli_Chr02 | 27044272                | T/C  | Gene_Ca_15635      | INTRON                        | NA                                                    |
| Kabuli_wild_27057582 | 1399934041                          | Ca_kabuli_Chr02 | 27057582                | C/T  | Gene_Ca_15636      | INTRON                        | NA                                                    |
| Kabuli_wild_27063749 | 1399934042                          | Ca_kabuli_Chr02 | 27063749                | C/A  | Gene_Ca_15636      | NON_SYNONYMOUS_CODING         | NA                                                    |
| Kabuli_wild_27081030 | 1399934043                          | Ca_kabuli_Chr02 | 27081030                | G/A  | NA                 | INTERGENIC                    | NA                                                    |
| Kabuli_wild_27134560 | 1399934044                          | Ca_kabuli_Chr02 | 27134560                | G/T  | NA                 | INTERGENIC                    | NA                                                    |
| Kabuli_wild_27134574 | 1399934045                          | Ca_kabuli_Chr02 | 27134574                | A/G  | NA                 | INTERGENIC                    | NA                                                    |
| Kabuli_wild_27172582 | 1399934046                          | Ca_kabuli_Chr02 | 27172582                | G/A  | NA                 | INTERGENIC                    | NA                                                    |
| Kabuli_wild_27182855 | 1399934047                          | Ca_kabuli_Chr02 | 27182855                | T/C  | Gene_Ca_15643      | DOWNSTREAM                    | Protein kinase,catalytic domain                       |



| SNP IDs              | NCBI dbSNP accession IDs (NCBI_SS#) | Chromosomes     | Physical positions (bp) | SNPs | Gene accession IDs | Sequence components of genome | Putative functions                                          |
|----------------------|-------------------------------------|-----------------|-------------------------|------|--------------------|-------------------------------|-------------------------------------------------------------|
| Kabuli_wild_27703400 | 1399934048                          | Ca_kabuli_Chr02 | 27703400                | A/C  | Gene_Ca_15672      | SYNONYMOUS_CODING             | Ubiquitin-conjugating enzyme, E2                            |
| Kabuli_wild_27724425 | 1399934049                          | Ca_kabuli_Chr02 | 27724425                | G/T  | Gene_Ca_15674      | SYNONYMOUS_CODING             | BTB/POZ-like                                                |
| Kabuli_wild_27766561 | 1399934050                          | Ca_kabuli_Chr02 | 27766561                | T/A  | Gene_Ca_15677      | NON_SYNONYMOUS_CODING         | Cation efflux protein                                       |
| Kabuli_wild_27766594 | 1399934051                          | Ca_kabuli_Chr02 | 27766594                | C/A  | Gene_Ca_15677      | NON_SYNONYMOUS_CODING         | Cation efflux protein                                       |
| Kabuli_wild_27766605 | 1399934052                          | Ca_kabuli_Chr02 | 27766605                | A/C  | Gene_Ca_15677      | SYNONYMOUS_CODING             | Cation efflux protein                                       |
| Kabuli_wild_27831355 | 1399934053                          | Ca_kabuli_Chr02 | 27831355                | A/G  | Gene_Ca_15681      | INTRON                        | ABC transporter,trans membrane domain                       |
| Kabuli_wild_27835825 | 1399934054                          | Ca_kabuli_Chr02 | 27835825                | T/A  | NA                 | INTERGENIC                    | NA                                                          |
| Kabuli_wild_27835832 | 1399934055                          | Ca_kabuli_Chr02 | 27835832                | T/C  | NA                 | INTERGENIC                    | NA                                                          |
| Kabuli_wild_27835837 | 1399934056                          | Ca_kabuli_Chr02 | 27835837                | C/T  | NA                 | INTERGENIC                    | NA                                                          |
| Kabuli_wild_27835843 | 1399934057                          | Ca_kabuli_Chr02 | 27835843                | C/A  | NA                 | INTERGENIC                    | NA                                                          |
| Kabuli_wild_27835846 | 1399934058                          | Ca_kabuli_Chr02 | 27835846                | A/G  | NA                 | INTERGENIC                    | NA                                                          |
| Kabuli_wild_27835850 | 1399934059                          | Ca_kabuli_Chr02 | 27835850                | G/A  | NA                 | INTERGENIC                    | NA                                                          |
| Kabuli_wild_27835869 | 1399934060                          | Ca_kabuli_Chr02 | 27835869                | G/A  | NA                 | INTERGENIC                    | NA                                                          |
| Kabuli_wild_27835871 | 1399934061                          | Ca_kabuli_Chr02 | 27835871                | G/A  | NA                 | INTERGENIC                    | NA                                                          |
| Kabuli_wild_28017165 | 1399934062                          | Ca_kabuli_Chr02 | 28017165                | C/T  | Gene_Ca_15693      | DOWNSTREAM                    | BURP                                                        |
| Kabuli_wild_28018158 | 1399934063                          | Ca_kabuli_Chr02 | 28018158                | T/C  | NA                 | INTERGENIC                    | NA                                                          |
| Kabuli_wild_28061049 | 1399934064                          | Ca_kabuli_Chr02 | 28061049                | G/T  | Gene_Ca_14397      | STOP_GAINED                   | Uncharacterised protein family UPF0497,trans-membrane plant |
| Kabuli_wild_28084953 | 1399934065                          | Ca_kabuli_Chr02 | 28084953                | C/T  | NA                 | INTERGENIC                    | NA                                                          |
| Kabuli_wild_28097357 | 1399934066                          | Ca_kabuli_Chr02 | 28097357                | C/T  | Gene_Ca_14393      | INTRON                        | SET domain                                                  |
| Kabuli_wild_28097394 | 1399934067                          | Ca_kabuli_Chr02 | 28097394                | C/T  | Gene_Ca_14393      | INTRON                        | SET domain                                                  |
| Kabuli_wild_28261718 | 1399934068                          | Ca_kabuli_Chr02 | 28261718                | G/T  | NA                 | INTERGENIC                    | NA                                                          |
| Kabuli_wild_28261722 | 1399934069                          | Ca_kabuli_Chr02 | 28261722                | C/A  | NA                 | INTERGENIC                    | NA                                                          |
| Kabuli_wild_28261723 | 1399934070                          | Ca_kabuli_Chr02 | 28261723                | A/T  | NA                 | INTERGENIC                    | NA                                                          |
| Kabuli_wild_28407316 | 1399934071                          | Ca_kabuli_Chr02 | 28407316                | T/C  | Gene_Ca_14370      | DOWNSTREAM                    | Transposase,Ptta/En/Spm,plant                               |
| Kabuli_wild_28407324 | 1399934072                          | Ca_kabuli_Chr02 | 28407324                | C/T  | Gene_Ca_14370      | DOWNSTREAM                    | Transposase,Ptta/En/Spm,plant                               |
| Kabuli_wild_28407356 | 1399934073                          | Ca_kabuli_Chr02 | 28407356                | C/T  | Gene_Ca_14370      | DOWNSTREAM                    | Transposase,Ptta/En/Spm,plant                               |
| Kabuli_wild_28407362 | 1399934074                          | Ca_kabuli_Chr02 | 28407362                | A/C  | Gene_Ca_14370      | DOWNSTREAM                    | Transposase,Ptta/En/Spm,plant                               |
| Kabuli_wild_28534235 | 1399934075                          | Ca_kabuli_Chr02 | 28534235                | T/C  | NA                 | INTERGENIC                    | NA                                                          |
| Kabuli_wild_28707104 | 1399934076                          | Ca_kabuli_Chr02 | 28707104                | T/A  | Gene_Ca_14360      | NON_SYNONYMOUS_CODING         | CCAAT-binding factor                                        |
| Kabuli_wild_28727817 | 1399934077                          | Ca_kabuli_Chr02 | 28727817                | C/T  | Gene_Ca_14358      | SYNONYMOUS_CODING             | NA                                                          |
| Kabuli_wild_28741764 | 1399934078                          | Ca_kabuli_Chr02 | 28741764                | T/C  | NA                 | INTERGENIC                    | NA                                                          |
| Kabuli_wild_28813403 | 1399934079                          | Ca_kabuli_Chr02 | 28813403                | G/A  | NA                 | INTERGENIC                    | NA                                                          |
| Kabuli_wild_28813493 | 1399934080                          | Ca_kabuli_Chr02 | 28813493                | A/G  | NA                 | INTERGENIC                    | NA                                                          |
| Kabuli_wild_28813495 | 1399934081                          | Ca_kabuli_Chr02 | 28813495                | G/A  | NA                 | INTERGENIC                    | NA                                                          |
| Kabuli_wild_28887773 | 1399934082                          | Ca_kabuli_Chr02 | 28887773                | T/C  | NA                 | INTERGENIC                    | NA                                                          |
| Kabuli_wild_28944707 | 1399934083                          | Ca_kabuli_Chr02 | 28944707                | A/C  | NA                 | INTERGENIC                    | NA                                                          |
| Kabuli_wild_28944712 | 1399934084                          | Ca_kabuli_Chr02 | 28944712                | T/C  | NA                 | INTERGENIC                    | NA                                                          |
| Kabuli_wild_28949911 | 1399934085                          | Ca_kabuli_Chr02 | 28949911                | A/C  | Gene_Ca_14342      | NON_SYNONYMOUS_CODING         | Glycosidehydrolase,family17                                 |
| Kabuli_wild_28949919 | 1399934086                          | Ca_kabuli_Chr02 | 28949919                | A/T  | Gene_Ca_14342      | NON_SYNONYMOUS_CODING         | Glycosidehydrolase,family17                                 |
| Kabuli_wild_29044466 | 1399934087                          | Ca_kabuli_Chr02 | 29044466                | C/T  | Gene_Ca_14334      | INTRON                        | RNA polymerase I associated factor, A49-like                |
| Kabuli_wild_29122589 | 1399934088                          | Ca_kabuli_Chr02 | 29122589                | T/G  | Gene_Ca_14327      | NON_SYNONYMOUS_CODING         | PeptidaseA1                                                 |
| Kabuli_wild_29208805 | 1399934089                          | Ca_kabuli_Chr02 | 29208805                | T/C  | NA                 | INTERGENIC                    | NA                                                          |
| Kabuli_wild_29778330 | 1399934090                          | Ca_kabuli_Chr02 | 29778330                | C/T  | Gene_Ca_16110      | NON_SYNONYMOUS_CODING         | Peptidyl-prolylcis-transisomerase,FKBP-type,domain          |
| Kabuli_wild_29778340 | 1399934091                          | Ca_kabuli_Chr02 | 29778340                | C/T  | Gene_Ca_16110      | SYNONYMOUS_CODING             | Peptidyl-prolylcis-transisomerase,FKBP-type,domain          |

| SNP IDs              | NCBI dbSNP accession IDs (NCBI_SS#) | Chromosomes     | Physical positions (bp) | SNPs | Gene accession IDs | Sequence components of genome | Putative functions                                   |
|----------------------|-------------------------------------|-----------------|-------------------------|------|--------------------|-------------------------------|------------------------------------------------------|
| Kabuli_wild_29778357 | 1399934092                          | Ca_kabuli_Chr02 | 29778357                | T/C  | Gene_Ca_16110      | NON_SYNONYMOUS_CODING         | Peptidyl-prolylcis-transisomerase,FKBP-type,domain   |
| Kabuli_wild_30133060 | 1399934093                          | Ca_kabuli_Chr02 | 30133060                | G/C  | Gene_Ca_16079      | NON_SYNONYMOUS_CODING         | PeptidaseS8/S53,subtilisin/kexin/sedolisin           |
| Kabuli_wild_30133068 | 1399934094                          | Ca_kabuli_Chr02 | 30133068                | A/G  | Gene_Ca_16079      | SYNONYMOUS_CODING             | PeptidaseS8/S53,subtilisin/kexin/sedolisin           |
| Kabuli_wild_30133074 | 1399934095                          | Ca_kabuli_Chr02 | 30133074                | T/C  | Gene_Ca_16079      | SYNONYMOUS_CODING             | PeptidaseS8/S53,subtilisin/kexin/sedolisin           |
| Kabuli_wild_30133076 | 1399934096                          | Ca_kabuli_Chr02 | 30133076                | C/T  | Gene_Ca_16079      | NON_SYNONYMOUS_CODING         | PeptidaseS8/S53,subtilisin/kexin/sedolisin           |
| Kabuli_wild_30133084 | 1399934097                          | Ca_kabuli_Chr02 | 30133084                | T/A  | Gene_Ca_16079      | NON_SYNONYMOUS_CODING         | PeptidaseS8/S53,subtilisin/kexin/sedolisin           |
| Kabuli_wild_30133085 | 1399934098                          | Ca_kabuli_Chr02 | 30133085                | C/T  | Gene_Ca_16079      | NON_SYNONYMOUS_CODING         | PeptidaseS8/S53,subtilisin/kexin/sedolisin           |
| Kabuli_wild_30133107 | 1399934099                          | Ca_kabuli_Chr02 | 30133107                | A/T  | Gene_Ca_16079      | SYNONYMOUS_CODING             | PeptidaseS8/S53,subtilisin/kexin/sedolisin           |
| Kabuli_wild_30133110 | 1399934100                          | Ca_kabuli_Chr02 | 30133110                | C/T  | Gene_Ca_16079      | SYNONYMOUS_CODING             | PeptidaseS8/S53,subtilisin/kexin/sedolisin           |
| Kabuli_wild_30133113 | 1399934101                          | Ca_kabuli_Chr02 | 30133113                | T/G  | Gene_Ca_16079      | SYNONYMOUS_CODING             | PeptidaseS8/S53,subtilisin/kexin/sedolisin           |
| Kabuli_wild_30133119 | 1399934102                          | Ca_kabuli_Chr02 | 30133119                | G/A  | Gene_Ca_16079      | SYNONYMOUS_CODING             | PeptidaseS8/S53,subtilisin/kexin/sedolisin           |
| Kabuli_wild_30133128 | 1399934103                          | Ca_kabuli_Chr02 | 30133128                | A/T  | Gene_Ca_16079      | SYNONYMOUS_CODING             | PeptidaseS8/S53,subtilisin/kexin/sedolisin           |
| Kabuli_wild_30133134 | 1399934104                          | Ca_kabuli_Chr02 | 30133134                | A/T  | Gene_Ca_16079      | SYNONYMOUS_CODING             | PeptidaseS8/S53,subtilisin/kexin/sedolisin           |
| Kabuli_wild_30133140 | 1399934105                          | Ca_kabuli_Chr02 | 30133140                | G/A  | Gene_Ca_16079      | SYNONYMOUS_CODING             | PeptidaseS8/S53,subtilisin/kexin/sedolisin           |
| Kabuli_wild_30230544 | 1399934106                          | Ca_kabuli_Chr02 | 30230544                | T/A  | NA                 | INTERGENIC                    | NA                                                   |
| Kabuli_wild_30335160 | 1399934107                          | Ca_kabuli_Chr02 | 30335160                | T/C  | Gene_Ca_12520      | UPSTREAM                      | GDP-fucoseproteinO-fucosyltransferase                |
| Kabuli_wild_30335194 | 1399934108                          | Ca_kabuli_Chr02 | 30335194                | A/G  | Gene_Ca_12520      | UPSTREAM                      | GDP-fucoseproteinO-fucosyltransferase                |
| Kabuli_wild_30335212 | 1399934109                          | Ca_kabuli_Chr02 | 30335212                | T/A  | Gene_Ca_12520      | UPSTREAM                      | GDP-fucoseproteinO-fucosyltransferase                |
| Kabuli_wild_30363957 | 1399934110                          | Ca_kabuli_Chr02 | 30363957                | C/A  | Gene_Ca_12516      | DOWNSTREAM                    | NA                                                   |
| Kabuli_wild_30364025 | 1399934111                          | Ca_kabuli_Chr02 | 30364025                | T/C  | Gene_Ca_12516      | DOWNSTREAM                    | NA                                                   |
| Kabuli_wild_30364042 | 1399934112                          | Ca_kabuli_Chr02 | 30364042                | A/G  | Gene_Ca_12516      | DOWNSTREAM                    | NA                                                   |
| Kabuli_wild_30364073 | 1399934113                          | Ca_kabuli_Chr02 | 30364073                | T/A  | Gene_Ca_12516      | DOWNSTREAM                    | NA                                                   |
| Kabuli_wild_30370148 | 1399934114                          | Ca_kabuli_Chr02 | 30370148                | G/T  | NA                 | INTERGENIC                    | NA                                                   |
| Kabuli_wild_30370411 | 1399934115                          | Ca_kabuli_Chr02 | 30370411                | T/C  | NA                 | INTERGENIC                    | NA                                                   |
| Kabuli_wild_30387702 | 1399934116                          | Ca_kabuli_Chr02 | 30387702                | A/G  | NA                 | INTERGENIC                    | NA                                                   |
| Kabuli_wild_30389175 | 1399934117                          | Ca_kabuli_Chr02 | 30389175                | A/C  | Gene_Ca_12512      | SYNONYMOUS_CODING             | Leucine-rich repeat,cysteine-containingsubtype       |
| Kabuli_wild_30389433 | 1399934118                          | Ca_kabuli_Chr02 | 30389433                | C/T  | Gene_Ca_12512      | SYNONYMOUS_CODING             | Leucine-rich repeat,cysteine-containingsubtype       |
| Kabuli_wild_30467551 | 1399934119                          | Ca_kabuli_Chr02 | 30467551                | A/T  | Gene_Ca_12503      | INTRON                        | Mov34/MPN/PAD-1                                      |
| Kabuli_wild_30508454 | 1399934120                          | Ca_kabuli_Chr02 | 30508454                | T/C  | Gene_Ca_12501      | INTRON                        | EXTL2,alpha-1,4-N-acetylhexosaminyltransferase       |
| Kabuli_wild_30521544 | 1399934121                          | Ca_kabuli_Chr02 | 30521544                | G/A  | NA                 | INTERGENIC                    | NA                                                   |
| Kabuli_wild_30530607 | 1399934122                          | Ca_kabuli_Chr02 | 30530607                | T/G  | Gene_Ca_12498      | NON_SYNONYMOUS_CODING         | RibosomalproteinL10/acidicP0                         |
| Kabuli_wild_30530642 | 1399934123                          | Ca_kabuli_Chr02 | 30530642                | A/T  | Gene_Ca_12498      | SYNONYMOUS_CODING             | RibosomalproteinL10/acidicP0                         |
| Kabuli_wild_30537667 | 1399934124                          | Ca_kabuli_Chr02 | 30537667                | A/T  | NA                 | INTERGENIC                    | NA                                                   |
| Kabuli_wild_30537673 | 1399934125                          | Ca_kabuli_Chr02 | 30537673                | A/G  | NA                 | INTERGENIC                    | NA                                                   |
| Kabuli_wild_30537687 | 1399934126                          | Ca_kabuli_Chr02 | 30537687                | T/C  | NA                 | INTERGENIC                    | NA                                                   |
| Kabuli_wild_30537701 | 1399934127                          | Ca_kabuli_Chr02 | 30537701                | T/A  | NA                 | INTERGENIC                    | NA                                                   |
| Kabuli_wild_30537953 | 1399934128                          | Ca_kabuli_Chr02 | 30537953                | T/C  | NA                 | INTERGENIC                    | NA                                                   |
| Kabuli_wild_30686920 | 1399934129                          | Ca_kabuli_Chr02 | 30686920                | C/T  | Gene_Ca_12488      | INTRON                        | HAD-superfamilyhydrolase,subfamilyIG,5'-nucleotidase |
| Kabuli_wild_30867547 | 1399934130                          | Ca_kabuli_Chr02 | 30867547                | G/A  | NA                 | INTERGENIC                    | NA                                                   |
| Kabuli_wild_30867931 | 1399934131                          | Ca_kabuli_Chr02 | 30867931                | A/G  | NA                 | INTERGENIC                    | NA                                                   |
| Kabuli_wild_30880148 | 1399934132                          | Ca_kabuli_Chr02 | 30880148                | A/G  | Gene_Ca_12473      | INTRON                        | Synaptobrevin                                        |
| Kabuli_wild_30880243 | 1399934133                          | Ca_kabuli_Chr02 | 30880243                | G/C  | Gene_Ca_12473      | INTRON                        | Synaptobrevin                                        |
| Kabuli_wild_30880246 | 1399934134                          | Ca_kabuli_Chr02 | 30880246                | G/A  | Gene_Ca_12473      | INTRON                        | Synaptobrevin                                        |
| Kabuli_wild_30880282 | 1399934135                          | Ca_kabuli_Chr02 | 30880282                | A/G  | Gene_Ca_12473      | INTRON                        | Synaptobrevin                                        |

| SNP IDs              | NCBI dbSNP accession IDs (NCBI_SS#) | Chromosomes     | Physical positions (bp) | SNPs | Gene accession IDs | Sequence components of genome | Putative functions                                           |
|----------------------|-------------------------------------|-----------------|-------------------------|------|--------------------|-------------------------------|--------------------------------------------------------------|
| Kabuli_wild_30880302 | 1399934136                          | Ca_kabuli_Chr02 | 30880302                | T/C  | Gene_Ca_12473      | INTRON                        | Synaptobrevin                                                |
| Kabuli_wild_30880303 | 1399934137                          | Ca_kabuli_Chr02 | 30880303                | T/A  | Gene_Ca_12473      | INTRON                        | Synaptobrevin                                                |
| Kabuli_wild_30920461 | 1399934138                          | Ca_kabuli_Chr02 | 30920461                | C/T  | Gene_Ca_12470      | INTRON                        | NA                                                           |
| Kabuli_wild_30921092 | 1399934139                          | Ca_kabuli_Chr02 | 30921092                | C/A  | Gene_Ca_12470      | SYNONYMOUS_CODING             | NA                                                           |
| Kabuli_wild_30921562 | 1399934140                          | Ca_kabuli_Chr02 | 30921562                | C/T  | Gene_Ca_12470      | INTRON                        | NA                                                           |
| Kabuli_wild_30921579 | 1399934141                          | Ca_kabuli_Chr02 | 30921579                | T/C  | Gene_Ca_12470      | INTRON                        | NA                                                           |
| Kabuli_wild_30921583 | 1399934142                          | Ca_kabuli_Chr02 | 30921583                | T/C  | Gene_Ca_12470      | INTRON                        | NA                                                           |
| Kabuli_wild_30921602 | 1399934143                          | Ca_kabuli_Chr02 | 30921602                | C/T  | Gene_Ca_12470      | INTRON                        | NA                                                           |
| Kabuli_wild_30921629 | 1399934144                          | Ca_kabuli_Chr02 | 30921629                | A/C  | Gene_Ca_12470      | INTRON                        | NA                                                           |
| Kabuli_wild_30921645 | 1399934145                          | Ca_kabuli_Chr02 | 30921645                | A/C  | Gene_Ca_12470      | INTRON                        | NA                                                           |
| Kabuli_wild_30921758 | 1399934146                          | Ca_kabuli_Chr02 | 30921758                | C/T  | Gene_Ca_12470      | INTRON                        | NA                                                           |
| Kabuli_wild_30921917 | 1399934147                          | Ca_kabuli_Chr02 | 30921917                | C/A  | Gene_Ca_12470      | INTRON                        | NA                                                           |
| Kabuli_wild_30921923 | 1399934148                          | Ca_kabuli_Chr02 | 30921923                | A/G  | Gene_Ca_12470      | INTRON                        | NA                                                           |
| Kabuli_wild_30925755 | 1399934149                          | Ca_kabuli_Chr02 | 30925755                | A/T  | Gene_Ca_12470      | INTRON                        | NA                                                           |
| Kabuli_wild_30925784 | 1399934150                          | Ca_kabuli_Chr02 | 30925784                | C/T  | Gene_Ca_12470      | INTRON                        | NA                                                           |
| Kabuli_wild_30951724 | 1399934151                          | Ca_kabuli_Chr02 | 30951724                | T/A  | Gene_Ca_12469      | SYNONYMOUS_CODING             | Clathrin,heavychain/VPS,7-foldrepeat                         |
| Kabuli_wild_30954305 | 1399934152                          | Ca_kabuli_Chr02 | 30954305                | T/G  | Gene_Ca_12469      | INTRON                        | Clathrin,heavychain/VPS,7-foldrepeat                         |
| Kabuli_wild_30954317 | 1399934153                          | Ca_kabuli_Chr02 | 30954317                | G/A  | Gene_Ca_12469      | INTRON                        | Clathrin,heavychain/VPS,7-foldrepeat                         |
| Kabuli_wild_30977508 | 1399934154                          | Ca_kabuli_Chr02 | 30977508                | A/T  | NA                 | INTERGENIC                    | NA                                                           |
| Kabuli_wild_30977522 | 1399934155                          | Ca_kabuli_Chr02 | 30977522                | A/T  | NA                 | INTERGENIC                    | NA                                                           |
| Kabuli_wild_30977528 | 1399934156                          | Ca_kabuli_Chr02 | 30977528                | C/T  | NA                 | INTERGENIC                    | NA                                                           |
| Kabuli_wild_30977572 | 1399934157                          | Ca_kabuli_Chr02 | 30977572                | A/G  | NA                 | INTERGENIC                    | NA                                                           |
| Kabuli_wild_30997769 | 1399934158                          | Ca_kabuli_Chr02 | 30997769                | T/A  | Gene_Ca_12465      | SYNONYMOUS_CODING             | Pathogenesis-related transcriptional factor/ERF, DNA-binding |
| Kabuli_wild_30997780 | 1399934159                          | Ca_kabuli_Chr02 | 30997780                | A/C  | Gene_Ca_12465      | SYNONYMOUS_CODING             | Pathogenesis-related transcriptional factor/ERF, DNA-binding |
| Kabuli_wild_30997784 | 1399934160                          | Ca_kabuli_Chr02 | 30997784                | T/A  | Gene_Ca_12465      | SYNONYMOUS_CODING             | Pathogenesis-related transcriptional factor/ERF, DNA-binding |
| Kabuli_wild_31005670 | 1399934161                          | Ca_kabuli_Chr02 | 31005670                | G/T  | Gene_Ca_12464      | SYNONYMOUS_CODING             | Lateral organ boundaries, LOB                                |
| Kabuli_wild_31005845 | 1399934162                          | Ca_kabuli_Chr02 | 31005845                | C/T  | Gene_Ca_12464      | SYNONYMOUS_CODING             | Lateral organ boundaries, LOB                                |
| Kabuli_wild_31005847 | 1399934163                          | Ca_kabuli_Chr02 | 31005847                | T/G  | Gene_Ca_12464      | SYNONYMOUS_CODING             | Lateral organ boundaries, LOB                                |
| Kabuli_wild_31014263 | 1399934164                          | Ca_kabuli_Chr02 | 31014263                | C/T  | NA                 | INTERGENIC                    | NA                                                           |
| Kabuli_wild_31015879 | 1399934165                          | Ca_kabuli_Chr02 | 31015879                | G/A  | NA                 | INTERGENIC                    | NA                                                           |
| Kabuli_wild_31015888 | 1399934166                          | Ca_kabuli_Chr02 | 31015888                | A/G  | NA                 | INTERGENIC                    | NA                                                           |
| Kabuli_wild_31055007 | 1399934167                          | Ca_kabuli_Chr02 | 31055007                | G/A  | Gene_Ca_12459      | INTRON                        | Rad21/Rec8-likeprotein,C-terminal,eukaryotic                 |
| Kabuli_wild_31055148 | 1399934168                          | Ca_kabuli_Chr02 | 31055148                | G/A  | Gene_Ca_12459      | INTRON                        | Rad21/Rec8-likeprotein,C-terminal,eukaryotic                 |
| Kabuli_wild_31055163 | 1399934169                          | Ca_kabuli_Chr02 | 31055163                | A/T  | Gene_Ca_12459      | INTRON                        | Rad21/Rec8-likeprotein,C-terminal,eukaryotic                 |
| Kabuli_wild_31055164 | 1399934170                          | Ca_kabuli_Chr02 | 31055164                | C/T  | Gene_Ca_12459      | INTRON                        | Rad21/Rec8-likeprotein,C-terminal,eukaryotic                 |
| Kabuli_wild_31055173 | 1399934171                          | Ca_kabuli_Chr02 | 31055173                | T/C  | Gene_Ca_12459      | INTRON                        | Rad21/Rec8-likeprotein,C-terminal,eukaryotic                 |
| Kabuli_wild_31088645 | 1399934172                          | Ca_kabuli_Chr02 | 31088645                | A/C  | NA                 | INTERGENIC                    | NA                                                           |
| Kabuli_wild_31088648 | 1399934173                          | Ca_kabuli_Chr02 | 31088648                | A/G  | NA                 | INTERGENIC                    | NA                                                           |
| Kabuli_wild_31088670 | 1399934174                          | Ca_kabuli_Chr02 | 31088670                | C/T  | NA                 | INTERGENIC                    | NA                                                           |
| Kabuli_wild_31088676 | 1399934175                          | Ca_kabuli_Chr02 | 31088676                | G/C  | NA                 | INTERGENIC                    | NA                                                           |
| Kabuli_wild_31088681 | 1399934176                          | Ca_kabuli_Chr02 | 31088681                | G/T  | NA                 | INTERGENIC                    | NA                                                           |
| Kabuli_wild_31088778 | 1399934177                          | Ca_kabuli_Chr02 | 31088778                | A/T  | NA                 | INTERGENIC                    | NA                                                           |
| Kabuli_wild_31088800 | 1399934178                          | Ca_kabuli_Chr02 | 31088800                | T/C  | NA                 | INTERGENIC                    | NA                                                           |
| Kabuli_wild_31088882 | 1399934179                          | Ca_kabuli_Chr02 | 31088882                | A/G  | NA                 | INTERGENIC                    | NA                                                           |

| SNP IDs              | NCBI dbSNP accession IDs (NCBI_SS#) | Chromosomes     | Physical positions (bp) | SNPs | Gene accession IDs | Sequence components of genome | Putative functions                               |
|----------------------|-------------------------------------|-----------------|-------------------------|------|--------------------|-------------------------------|--------------------------------------------------|
| Kabuli_wild_31103457 | 1399934180                          | Ca_kabuli_Chr02 | 31103457                | C/A  | Gene_Ca_12452      | INTRON                        | Glutamineamidotransferasetype1                   |
| Kabuli_wild_31109311 | 1399934181                          | Ca_kabuli_Chr02 | 31109311                | G/T  | NA                 | INTERGENIC                    | NA                                               |
| Kabuli_wild_31109358 | 1399934182                          | Ca_kabuli_Chr02 | 31109358                | C/T  | NA                 | INTERGENIC                    | NA                                               |
| Kabuli_wild_31109427 | 1399934183                          | Ca_kabuli_Chr02 | 31109427                | C/T  | NA                 | INTERGENIC                    | NA                                               |
| Kabuli_wild_31109435 | 1399934184                          | Ca_kabuli_Chr02 | 31109435                | G/A  | NA                 | INTERGENIC                    | NA                                               |
| Kabuli_wild_31109441 | 1399934185                          | Ca_kabuli_Chr02 | 31109441                | C/G  | NA                 | INTERGENIC                    | NA                                               |
| Kabuli_wild_31109481 | 1399934186                          | Ca_kabuli_Chr02 | 31109481                | G/A  | NA                 | INTERGENIC                    | NA                                               |
| Kabuli_wild_31113429 | 1399934187                          | Ca_kabuli_Chr02 | 31113429                | C/A  | Gene_Ca_12451      | INTRON                        | Glutamineamidotransferasetype1                   |
| Kabuli_wild_31113485 | 1399934188                          | Ca_kabuli_Chr02 | 31113485                | G/T  | Gene_Ca_12451      | INTRON                        | Glutamineamidotransferasetype1                   |
| Kabuli_wild_31113601 | 1399934189                          | Ca_kabuli_Chr02 | 31113601                | A/C  | Gene_Ca_12451      | INTRON                        | Glutamineamidotransferasetype1                   |
| Kabuli_wild_31113621 | 1399934190                          | Ca_kabuli_Chr02 | 31113621                | G/A  | Gene_Ca_12451      | INTRON                        | Glutamineamidotransferasetype1                   |
| Kabuli_wild_31113636 | 1399934191                          | Ca_kabuli_Chr02 | 31113636                | G/A  | Gene_Ca_12451      | INTRON                        | Glutamineamidotransferasetype1                   |
| Kabuli_wild_31141019 | 1399934192                          | Ca_kabuli_Chr02 | 31141019                | G/A  | NA                 | INTERGENIC                    | NA                                               |
| Kabuli_wild_31188355 | 1399934193                          | Ca_kabuli_Chr02 | 31188355                | A/G  | Gene_Ca_12445      | SYNONYMOUS_CODING             | Multicopperoxidase.type1                         |
| Kabuli_wild_31188546 | 1399934194                          | Ca_kabuli_Chr02 | 31188546                | T/C  | Gene_Ca_12445      | INTRON                        | Multicopperoxidase.type1                         |
| Kabuli_wild_31188553 | 1399934195                          | Ca_kabuli_Chr02 | 31188553                | A/T  | Gene_Ca_12445      | INTRON                        | Multicopperoxidase.type1                         |
| Kabuli_wild_31201859 | 1399934196                          | Ca_kabuli_Chr02 | 31201859                | T/A  | Gene_Ca_12444      | INTRON                        | Phoxhomologousdomain                             |
| Kabuli_wild_31201872 | 1399934197                          | Ca_kabuli_Chr02 | 31201872                | T/C  | Gene_Ca_12444      | INTRON                        | Phoxhomologousdomain                             |
| Kabuli_wild_31203154 | 1399934198                          | Ca_kabuli_Chr02 | 31203154                | G/A  | Gene_Ca_12444      | SYNONYMOUS_CODING             | Phoxhomologousdomain                             |
| Kabuli_wild_31306639 | 1399934199                          | Ca_kabuli_Chr02 | 31306639                | T/C  | NA                 | INTERGENIC                    | NA                                               |
| Kabuli_wild_31427861 | 1399934200                          | Ca_kabuli_Chr02 | 31427861                | A/G  | Gene_Ca_12419      | NON_SYNONYMOUS_CODING         | Protein of unknown function DUF827.plant         |
| Kabuli_wild_31427902 | 1399934201                          | Ca_kabuli_Chr02 | 31427902                | G/C  | Gene_Ca_12419      | NON_SYNONYMOUS_CODING         | Protein of unknown function DUF827.plant         |
| Kabuli_wild_31428024 | 1399934202                          | Ca_kabuli_Chr02 | 31428024                | T/G  | Gene_Ca_12419      | NON_SYNONYMOUS_CODING         | Protein of unknown function DUF827.plant         |
| Kabuli_wild_31428132 | 1399934203                          | Ca_kabuli_Chr02 | 31428132                | G/A  | Gene_Ca_12419      | SYNONYMOUS_CODING             | Protein of unknown function DUF827.plant         |
| Kabuli_wild_31428279 | 1399934204                          | Ca_kabuli_Chr02 | 31428279                | T/C  | Gene_Ca_12419      | SYNONYMOUS_CODING             | Protein of unknown function DUF827.plant         |
| Kabuli_wild_31428405 | 1399934205                          | Ca_kabuli_Chr02 | 31428405                | T/C  | Gene_Ca_12419      | SYNONYMOUS_CODING             | Protein of unknown function DUF827.plant         |
| Kabuli_wild_31428429 | 1399934206                          | Ca_kabuli_Chr02 | 31428429                | T/G  | Gene_Ca_12419      | NON_SYNONYMOUS_CODING         | Protein of unknown function DUF827.plant         |
| Kabuli_wild_31534265 | 1399934207                          | Ca_kabuli_Chr02 | 31534265                | A/C  | NA                 | INTERGENIC                    | NA                                               |
| Kabuli_wild_31534283 | 1399934208                          | Ca_kabuli_Chr02 | 31534283                | G/A  | NA                 | INTERGENIC                    | NA                                               |
| Kabuli_wild_31534455 | 1399934209                          | Ca_kabuli_Chr02 | 31534455                | T/C  | NA                 | INTERGENIC                    | NA                                               |
| Kabuli_wild_31534463 | 1399934210                          | Ca_kabuli_Chr02 | 31534463                | T/C  | NA                 | INTERGENIC                    | NA                                               |
| Kabuli_wild_31584313 | 1399934211                          | Ca_kabuli_Chr02 | 31584313                | A/C  | Gene_Ca_17856      | INTRON                        | Indole-3-glycerolphosphatesynthase.conservedsite |
| Kabuli_wild_31686714 | 1399934212                          | Ca_kabuli_Chr02 | 31686714                | C/T  | NA                 | INTERGENIC                    | NA                                               |
| Kabuli_wild_31715974 | 1399934213                          | Ca_kabuli_Chr02 | 31715974                | T/A  | NA                 | INTERGENIC                    | NA                                               |
| Kabuli_wild_31756777 | 1399934214                          | Ca_kabuli_Chr02 | 31756777                | G/T  | NA                 | INTERGENIC                    | NA                                               |
| Kabuli_wild_31847033 | 1399934215                          | Ca_kabuli_Chr02 | 31847033                | A/C  | NA                 | INTERGENIC                    | NA                                               |
| Kabuli_wild_31881918 | 1399934216                          | Ca_kabuli_Chr02 | 31881918                | G/T  | Gene_Ca_17830      | NON_SYNONYMOUS_CODING         | RZZcomplex.subunitZw10                           |
| Kabuli_wild_31885934 | 1399934217                          | Ca_kabuli_Chr02 | 31885934                | A/G  | NA                 | INTERGENIC                    | NA                                               |
| Kabuli_wild_31908694 | 1399934218                          | Ca_kabuli_Chr02 | 31908694                | G/A  | Gene_Ca_17826      | SYNONYMOUS_CODING             | Zinc finger, RING-type                           |
| Kabuli_wild_31908742 | 1399934219                          | Ca_kabuli_Chr02 | 31908742                | G/A  | Gene_Ca_17826      | SYNONYMOUS_CODING             | Zinc finger, RING-type                           |
| Kabuli_wild_31908787 | 1399934220                          | Ca_kabuli_Chr02 | 31908787                | G/A  | Gene_Ca_17826      | INTRON                        | Zinc finger, RING-type                           |
| Kabuli_wild_31908803 | 1399934221                          | Ca_kabuli_Chr02 | 31908803                | C/T  | Gene_Ca_17826      | INTRON                        | Zinc finger, RING-type                           |
| Kabuli_wild_31908845 | 1399934222                          | Ca_kabuli_Chr02 | 31908845                | T/A  | Gene_Ca_17826      | INTRON                        | Zinc finger, RING-type                           |
| Kabuli_wild_31908857 | 1399934223                          | Ca_kabuli_Chr02 | 31908857                | C/T  | Gene_Ca_17826      | INTRON                        | Zinc finger, RING-type                           |

| SNP IDs              | NCBI dbSNP accession IDs (NCBI_SS#) | Chromosomes     | Physical positions (bp) | SNPs | Gene accession IDs | Sequence components of genome | Putative functions    |
|----------------------|-------------------------------------|-----------------|-------------------------|------|--------------------|-------------------------------|-----------------------|
| Kabuli_wild_31941463 | 1399934224                          | Ca_kabuli_Chr02 | 31941463                | T/C  | Gene_Ca_17823      | SYNONYMOUS_CODING             | Zinc finger,CCCH-type |
| Kabuli_wild_31941554 | 1399934225                          | Ca_kabuli_Chr02 | 31941554                | A/T  | Gene_Ca_17823      | INTRON                        | Zinc finger,CCCH-type |
| Kabuli_wild_32003536 | 1399934226                          | Ca_kabuli_Chr02 | 32003536                | G/T  | NA                 | INTERGENIC                    | NA                    |
| Kabuli_wild_32017361 | 1399934227                          | Ca_kabuli_Chr02 | 32017361                | G/A  | NA                 | INTERGENIC                    | NA                    |
| Kabuli_wild_32049523 | 1399934228                          | Ca_kabuli_Chr02 | 32049523                | C/A  | Gene_Ca_17817      | NON_SYNONYMOUS_CODING         | NA                    |
| Kabuli_wild_32049525 | 1399934229                          | Ca_kabuli_Chr02 | 32049525                | A/C  | Gene_Ca_17817      | SYNONYMOUS_CODING             | NA                    |
| Kabuli_wild_32058591 | 1399934230                          | Ca_kabuli_Chr02 | 32058591                | T/C  | Gene_Ca_17816      | SYNONYMOUS_CODING             | Ankyrinrepeat         |
| Kabuli_wild_32061053 | 1399934231                          | Ca_kabuli_Chr02 | 32061053                | C/T  | Gene_Ca_17816      | INTRON                        | Ankyrinrepeat         |
| Kabuli_wild_32061054 | 1399934232                          | Ca_kabuli_Chr02 | 32061054                | T/C  | Gene_Ca_17816      | INTRON                        | Ankyrinrepeat         |
| Kabuli_wild_32061083 | 1399934233                          | Ca_kabuli_Chr02 | 32061083                | A/G  | Gene_Ca_17816      | INTRON                        | Ankyrinrepeat         |
| Kabuli_wild_32062010 | 1399934234                          | Ca_kabuli_Chr02 | 32062010                | A/C  | Gene_Ca_17816      | SYNONYMOUS_CODING             | Ankyrinrepeat         |
| Kabuli_wild_32071084 | 1399934235                          | Ca_kabuli_Chr02 | 32071084                | G/T  | NA                 | INTERGENIC                    | NA                    |
| Kabuli_wild_32071107 | 1399934236                          | Ca_kabuli_Chr02 | 32071107                | C/G  | NA                 | INTERGENIC                    | NA                    |
| Kabuli_wild_32080002 | 1399934237                          | Ca_kabuli_Chr02 | 32080002                | T/C  | NA                 | INTERGENIC                    | NA                    |
| Kabuli_wild_32080007 | 1399934238                          | Ca_kabuli_Chr02 | 32080007                | C/T  | NA                 | INTERGENIC                    | NA                    |
| Kabuli_wild_32080010 | 1399934239                          | Ca_kabuli_Chr02 | 32080010                | C/G  | NA                 | INTERGENIC                    | NA                    |
| Kabuli_wild_32080016 | 1399934240                          | Ca_kabuli_Chr02 | 32080016                | A/T  | NA                 | INTERGENIC                    | NA                    |
| Kabuli_wild_32080022 | 1399934241                          | Ca_kabuli_Chr02 | 32080022                | C/A  | NA                 | INTERGENIC                    | NA                    |
| Kabuli_wild_32080037 | 1399934242                          | Ca_kabuli_Chr02 | 32080037                | A/G  | NA                 | INTERGENIC                    | NA                    |
| Kabuli_wild_32096172 | 1399934243                          | Ca_kabuli_Chr02 | 32096172                | C/T  | NA                 | INTERGENIC                    | NA                    |
| Kabuli_wild_32096177 | 1399934244                          | Ca_kabuli_Chr02 | 32096177                | C/T  | NA                 | INTERGENIC                    | NA                    |
| Kabuli_wild_32096180 | 1399934245                          | Ca_kabuli_Chr02 | 32096180                | C/G  | NA                 | INTERGENIC                    | NA                    |
| Kabuli_wild_32096186 | 1399934246                          | Ca_kabuli_Chr02 | 32096186                | T/A  | NA                 | INTERGENIC                    | NA                    |
| Kabuli_wild_32096192 | 1399934247                          | Ca_kabuli_Chr02 | 32096192                | A/C  | NA                 | INTERGENIC                    | NA                    |
| Kabuli_wild_32099907 | 1399934248                          | Ca_kabuli_Chr02 | 32099907                | T/C  | NA                 | INTERGENIC                    | NA                    |
| Kabuli_wild_32109805 | 1399934249                          | Ca_kabuli_Chr02 | 32109805                | G/A  | NA                 | INTERGENIC                    | NA                    |
| Kabuli_wild_32109811 | 1399934250                          | Ca_kabuli_Chr02 | 32109811                | G/A  | NA                 | INTERGENIC                    | NA                    |
| Kabuli_wild_32109813 | 1399934251                          | Ca_kabuli_Chr02 | 32109813                | C/T  | NA                 | INTERGENIC                    | NA                    |
| Kabuli_wild_32109821 | 1399934252                          | Ca_kabuli_Chr02 | 32109821                | G/A  | NA                 | INTERGENIC                    | NA                    |
| Kabuli_wild_32109827 | 1399934253                          | Ca_kabuli_Chr02 | 32109827                | T/C  | NA                 | INTERGENIC                    | NA                    |
| Kabuli_wild_32109859 | 1399934254                          | Ca_kabuli_Chr02 | 32109859                | A/C  | NA                 | INTERGENIC                    | NA                    |
| Kabuli_wild_32109892 | 1399934255                          | Ca_kabuli_Chr02 | 32109892                | T/A  | NA                 | INTERGENIC                    | NA                    |
| Kabuli_wild_32109895 | 1399934256                          | Ca_kabuli_Chr02 | 32109895                | A/G  | NA                 | INTERGENIC                    | NA                    |
| Kabuli_wild_32109904 | 1399934257                          | Ca_kabuli_Chr02 | 32109904                | T/A  | NA                 | INTERGENIC                    | NA                    |
| Kabuli_wild_32119094 | 1399934258                          | Ca_kabuli_Chr02 | 32119094                | A/T  | NA                 | INTERGENIC                    | NA                    |
| Kabuli_wild_32119268 | 1399934259                          | Ca_kabuli_Chr02 | 32119268                | T/A  | NA                 | INTERGENIC                    | NA                    |
| Kabuli_wild_32119274 | 1399934260                          | Ca_kabuli_Chr02 | 32119274                | T/C  | NA                 | INTERGENIC                    | NA                    |
| Kabuli_wild_32119328 | 1399934261                          | Ca_kabuli_Chr02 | 32119328                | T/G  | NA                 | INTERGENIC                    | NA                    |
| Kabuli_wild_32119331 | 1399934262                          | Ca_kabuli_Chr02 | 32119331                | A/T  | NA                 | INTERGENIC                    | NA                    |
| Kabuli_wild_32119358 | 1399934263                          | Ca_kabuli_Chr02 | 32119358                | A/T  | NA                 | INTERGENIC                    | NA                    |
| Kabuli_wild_32129272 | 1399934264                          | Ca_kabuli_Chr02 | 32129272                | T/C  | Gene_Ca_17812      | DOWNSTREAM                    | Ubiquitin             |
| Kabuli_wild_32129395 | 1399934265                          | Ca_kabuli_Chr02 | 32129395                | C/G  | Gene_Ca_17812      | DOWNSTREAM                    | Ubiquitin             |
| Kabuli_wild_32140939 | 1399934266                          | Ca_kabuli_Chr02 | 32140939                | A/T  | NA                 | INTERGENIC                    | NA                    |
| Kabuli_wild_32140948 | 1399934267                          | Ca_kabuli_Chr02 | 32140948                | A/C  | NA                 | INTERGENIC                    | NA                    |

| SNP IDs              | NCBI dbSNP accession IDs (NCBI_SS#) | Chromosomes     | Physical positions (bp) | SNPs | Gene accession IDs | Sequence components of genome | Putative functions                         |
|----------------------|-------------------------------------|-----------------|-------------------------|------|--------------------|-------------------------------|--------------------------------------------|
| Kabuli_wild_32140987 | 1399934268                          | Ca_kabuli_Chr02 | 32140987                | A/G  | NA                 | INTERGENIC                    | NA                                         |
| Kabuli_wild_32140990 | 1399934269                          | Ca_kabuli_Chr02 | 32140990                | G/A  | NA                 | INTERGENIC                    | NA                                         |
| Kabuli_wild_32140998 | 1399934270                          | Ca_kabuli_Chr02 | 32140998                | G/T  | NA                 | INTERGENIC                    | NA                                         |
| Kabuli_wild_32141002 | 1399934271                          | Ca_kabuli_Chr02 | 32141002                | A/T  | NA                 | INTERGENIC                    | NA                                         |
| Kabuli_wild_32141013 | 1399934272                          | Ca_kabuli_Chr02 | 32141013                | G/C  | NA                 | INTERGENIC                    | NA                                         |
| Kabuli_wild_32141019 | 1399934273                          | Ca_kabuli_Chr02 | 32141019                | G/A  | NA                 | INTERGENIC                    | NA                                         |
| Kabuli_wild_32141038 | 1399934274                          | Ca_kabuli_Chr02 | 32141038                | T/C  | NA                 | INTERGENIC                    | NA                                         |
| Kabuli_wild_32141047 | 1399934275                          | Ca_kabuli_Chr02 | 32141047                | A/G  | NA                 | INTERGENIC                    | NA                                         |
| Kabuli_wild_32183297 | 1399934276                          | Ca_kabuli_Chr02 | 32183297                | A/T  | NA                 | INTERGENIC                    | NA                                         |
| Kabuli_wild_32183325 | 1399934277                          | Ca_kabuli_Chr02 | 32183325                | T/A  | NA                 | INTERGENIC                    | NA                                         |
| Kabuli_wild_32183328 | 1399934278                          | Ca_kabuli_Chr02 | 32183328                | T/C  | NA                 | INTERGENIC                    | NA                                         |
| Kabuli_wild_32183364 | 1399934279                          | Ca_kabuli_Chr02 | 32183364                | T/C  | NA                 | INTERGENIC                    | NA                                         |
| Kabuli_wild_32183408 | 1399934280                          | Ca_kabuli_Chr02 | 32183408                | A/C  | NA                 | INTERGENIC                    | NA                                         |
| Kabuli_wild_32202980 | 1399934281                          | Ca_kabuli_Chr02 | 32202980                | G/T  | Gene_Ca_10295      | SYNONYMOUS_CODING             | PeptidaseS8/S53,subtilisin/kexin/sedolisin |
| Kabuli_wild_32203030 | 1399934282                          | Ca_kabuli_Chr02 | 32203030                | C/T  | Gene_Ca_10295      | NON_SYNONYMOUS_CODING         | PeptidaseS8/S53,subtilisin/kexin/sedolisin |
| Kabuli_wild_32203032 | 1399934283                          | Ca_kabuli_Chr02 | 32203032                | A/G  | Gene_Ca_10295      | SYNONYMOUS_CODING             | PeptidaseS8/S53,subtilisin/kexin/sedolisin |
| Kabuli_wild_32203036 | 1399934284                          | Ca_kabuli_Chr02 | 32203036                | T/A  | Gene_Ca_10295      | SYNONYMOUS_CODING             | PeptidaseS8/S53,subtilisin/kexin/sedolisin |
| Kabuli_wild_32203053 | 1399934285                          | Ca_kabuli_Chr02 | 32203053                | T/A  | Gene_Ca_10295      | SYNONYMOUS_CODING             | PeptidaseS8/S53,subtilisin/kexin/sedolisin |
| Kabuli_wild_32203056 | 1399934286                          | Ca_kabuli_Chr02 | 32203056                | A/G  | Gene_Ca_10295      | SYNONYMOUS_CODING             | PeptidaseS8/S53,subtilisin/kexin/sedolisin |
| Kabuli_wild_32242759 | 1399934287                          | Ca_kabuli_Chr02 | 32242759                | T/G  | NA                 | INTERGENIC                    | NA                                         |
| Kabuli_wild_32242818 | 1399934288                          | Ca_kabuli_Chr02 | 32242818                | T/G  | NA                 | INTERGENIC                    | NA                                         |
| Kabuli_wild_32276589 | 1399934289                          | Ca_kabuli_Chr02 | 32276589                | C/T  | Gene_Ca_10288      | INTRON                        | UBX                                        |
| Kabuli_wild_32348054 | 1399934290                          | Ca_kabuli_Chr02 | 32348054                | T/A  | Gene_Ca_10283      | INTRON                        | NA                                         |
| Kabuli_wild_32348087 | 1399934291                          | Ca_kabuli_Chr02 | 32348087                | A/C  | Gene_Ca_10283      | INTRON                        | NA                                         |
| Kabuli_wild_32348119 | 1399934292                          | Ca_kabuli_Chr02 | 32348119                | G/T  | Gene_Ca_10283      | INTRON                        | NA                                         |
| Kabuli_wild_32348689 | 1399934293                          | Ca_kabuli_Chr02 | 32348689                | T/C  | Gene_Ca_10283      | SYNONYMOUS_CODING             | NA                                         |
| Kabuli_wild_32348793 | 1399934294                          | Ca_kabuli_Chr02 | 32348793                | G/A  | Gene_Ca_10283      | INTRON                        | NA                                         |
| Kabuli_wild_32348809 | 1399934295                          | Ca_kabuli_Chr02 | 32348809                | A/C  | Gene_Ca_10283      | INTRON                        | NA                                         |
| Kabuli_wild_32348870 | 1399934296                          | Ca_kabuli_Chr02 | 32348870                | T/C  | Gene_Ca_10283      | INTRON                        | NA                                         |
| Kabuli_wild_32351821 | 1399934297                          | Ca_kabuli_Chr02 | 32351821                | T/C  | Gene_Ca_10283      | SYNONYMOUS_CODING             | NA                                         |
| Kabuli_wild_32351839 | 1399934298                          | Ca_kabuli_Chr02 | 32351839                | G/A  | Gene_Ca_10283      | SYNONYMOUS_CODING             | NA                                         |
| Kabuli_wild_32351977 | 1399934299                          | Ca_kabuli_Chr02 | 32351977                | T/C  | Gene_Ca_10283      | INTRON                        | NA                                         |
| Kabuli_wild_32351986 | 1399934300                          | Ca_kabuli_Chr02 | 32351986                | C/A  | Gene_Ca_10283      | INTRON                        | NA                                         |
| Kabuli_wild_32351989 | 1399934301                          | Ca_kabuli_Chr02 | 32351989                | T/A  | Gene_Ca_10283      | INTRON                        | NA                                         |
| Kabuli_wild_32352022 | 1399934302                          | Ca_kabuli_Chr02 | 32352022                | T/C  | Gene_Ca_10283      | INTRON                        | NA                                         |
| Kabuli_wild_32352044 | 1399934303                          | Ca_kabuli_Chr02 | 32352044                | C/T  | Gene_Ca_10283      | INTRON                        | NA                                         |
| Kabuli_wild_32352045 | 1399934304                          | Ca_kabuli_Chr02 | 32352045                | A/G  | Gene_Ca_10283      | INTRON                        | NA                                         |
| Kabuli_wild_32352046 | 1399934305                          | Ca_kabuli_Chr02 | 32352046                | T/C  | Gene_Ca_10283      | INTRON                        | NA                                         |
| Kabuli_wild_32411986 | 1399934306                          | Ca_kabuli_Chr02 | 32411986                | G/T  | NA                 | INTERGENIC                    | NA                                         |
| Kabuli_wild_32411994 | 1399934307                          | Ca_kabuli_Chr02 | 32411994                | G/T  | NA                 | INTERGENIC                    | NA                                         |
| Kabuli_wild_32412000 | 1399934308                          | Ca_kabuli_Chr02 | 32412000                | G/T  | NA                 | INTERGENIC                    | NA                                         |
| Kabuli_wild_32415809 | 1399934309                          | Ca_kabuli_Chr02 | 32415809                | C/T  | Gene_Ca_10278      | SYNONYMOUS_CODING             | Protein kinase,catalytic domain            |
| Kabuli_wild_32415818 | 1399934310                          | Ca_kabuli_Chr02 | 32415818                | C/T  | Gene_Ca_10278      | SYNONYMOUS_CODING             | Protein kinase,catalytic domain            |
| Kabuli_wild_32416098 | 1399934311                          | Ca_kabuli_Chr02 | 32416098                | G/A  | Gene_Ca_10278      | INTRON                        | Protein kinase,catalytic domain            |



| SNP IDs              | NCBI dbSNP accession IDs (NCBI_SS#) | Chromosomes     | Physical positions (bp) | SNPs | Gene accession IDs | Sequence components of genome | Putative functions                                  |
|----------------------|-------------------------------------|-----------------|-------------------------|------|--------------------|-------------------------------|-----------------------------------------------------|
| Kabuli_wild_32416166 | 1399934312                          | Ca_kabuli_Chr02 | 32416166                | T/C  | Gene_Ca_10278      | SYNONYMOUS_CODING             | Protein kinase,catalytic domain                     |
| Kabuli_wild_32425910 | 1399934313                          | Ca_kabuli_Chr02 | 32425910                | A/C  | NA                 | INTERGENIC                    | NA                                                  |
| Kabuli_wild_32481969 | 1399934314                          | Ca_kabuli_Chr02 | 32481969                | C/T  | NA                 | INTERGENIC                    | NA                                                  |
| Kabuli_wild_32481983 | 1399934315                          | Ca_kabuli_Chr02 | 32481983                | G/T  | NA                 | INTERGENIC                    | NA                                                  |
| Kabuli_wild_32482739 | 1399934316                          | Ca_kabuli_Chr02 | 32482739                | T/C  | Gene_Ca_10272      | INTRON                        | Domain of unknown function DUF221                   |
| Kabuli_wild_32488307 | 1399934317                          | Ca_kabuli_Chr02 | 32488307                | A/C  | NA                 | INTERGENIC                    | NA                                                  |
| Kabuli_wild_32509087 | 1399934318                          | Ca_kabuli_Chr02 | 32509087                | A/G  | Gene_Ca_10271      | INTRON                        | PeptidaseC19,ubiquitincarboxyl-terminalhydrolase2   |
| Kabuli_wild_32545320 | 1399934319                          | Ca_kabuli_Chr02 | 32545320                | A/G  | Gene_Ca_10268      | SYNONYMOUS_CODING             | Zinc finger,CCHC-type                               |
| Kabuli_wild_32564427 | 1399934320                          | Ca_kabuli_Chr02 | 32564427                | T/C  | Gene_Ca_10266      | INTRON                        | RecF/RecN/SMC                                       |
| Kabuli_wild_32564480 | 1399934321                          | Ca_kabuli_Chr02 | 32564480                | G/A  | Gene_Ca_10266      | INTRON                        | RecF/RecN/SMC                                       |
| Kabuli_wild_32564579 | 1399934322                          | Ca_kabuli_Chr02 | 32564579                | G/A  | Gene_Ca_10266      | INTRON                        | RecF/RecN/SMC                                       |
| Kabuli_wild_32564701 | 1399934323                          | Ca_kabuli_Chr02 | 32564701                | C/T  | Gene_Ca_10266      | INTRON                        | RecF/RecN/SMC                                       |
| Kabuli_wild_32564770 | 1399934324                          | Ca_kabuli_Chr02 | 32564770                | G/T  | Gene_Ca_10266      | INTRON                        | RecF/RecN/SMC                                       |
| Kabuli_wild_32564796 | 1399934325                          | Ca_kabuli_Chr02 | 32564796                | A/T  | Gene_Ca_10266      | INTRON                        | RecF/RecN/SMC                                       |
| Kabuli_wild_32570394 | 1399934326                          | Ca_kabuli_Chr02 | 32570394                | G/A  | Gene_Ca_10266      | INTRON                        | RecF/RecN/SMC                                       |
| Kabuli_wild_32570429 | 1399934327                          | Ca_kabuli_Chr02 | 32570429                | G/A  | Gene_Ca_10266      | INTRON                        | RecF/RecN/SMC                                       |
| Kabuli_wild_32570504 | 1399934328                          | Ca_kabuli_Chr02 | 32570504                | G/C  | Gene_Ca_10266      | INTRON                        | RecF/RecN/SMC                                       |
| Kabuli_wild_32577285 | 1399934329                          | Ca_kabuli_Chr02 | 32577285                | G/T  | Gene_Ca_10266      | INTRON                        | RecF/RecN/SMC                                       |
| Kabuli_wild_32579849 | 1399934330                          | Ca_kabuli_Chr02 | 32579849                | T/C  | Gene_Ca_10266      | SYNONYMOUS_CODING             | RecF/RecN/SMC                                       |
| Kabuli_wild_32579900 | 1399934331                          | Ca_kabuli_Chr02 | 32579900                | C/G  | Gene_Ca_10266      | SYNONYMOUS_CODING             | RecF/RecN/SMC                                       |
| Kabuli_wild_32611601 | 1399934332                          | Ca_kabuli_Chr02 | 32611601                | G/T  | Gene_Ca_10261      | NON_SYNONYMOUS_CODING         | Aldehydeoxidase/xanthinedehydrogenase,a/bhammerhead |
| Kabuli_wild_32611624 | 1399934333                          | Ca_kabuli_Chr02 | 32611624                | C/T  | Gene_Ca_10261      | SYNONYMOUS_CODING             | Aldehydeoxidase/xanthinedehydrogenase,a/bhammerhead |
| Kabuli_wild_32670181 | 1399934334                          | Ca_kabuli_Chr02 | 32670181                | T/G  | Gene_Ca_10254      | NON_SYNONYMOUS_CODING         | BTB/POZ-like                                        |
| Kabuli_wild_32790977 | 1399934335                          | Ca_kabuli_Chr02 | 32790977                | A/T  | Gene_Ca_10242      | INTRON                        | Transferrinreceptor-like,dimerisationdomain         |
| Kabuli_wild_32844751 | 1399934336                          | Ca_kabuli_Chr02 | 32844751                | C/T  | Gene_Ca_10238      | NON_SYNONYMOUS_CODING         | Late embryo genesis abundant protein, group2        |
| Kabuli_wild_32844754 | 1399934337                          | Ca_kabuli_Chr02 | 32844754                | T/G  | Gene_Ca_10238      | NON_SYNONYMOUS_CODING         | Late embryo genesis abundant protein, group2        |
| Kabuli_wild_32936908 | 1399934338                          | Ca_kabuli_Chr02 | 32936908                | G/A  | Gene_Ca_10230      | NON_SYNONYMOUS_CODING         | Proteinofunknown functionDM15                       |
| Kabuli_wild_32958034 | 1399934339                          | Ca_kabuli_Chr02 | 32958034                | C/G  | NA                 | INTERGENIC                    | NA                                                  |
| Kabuli_wild_32958148 | 1399934340                          | Ca_kabuli_Chr02 | 32958148                | T/G  | NA                 | INTERGENIC                    | NA                                                  |
| Kabuli_wild_32989205 | 1399934341                          | Ca_kabuli_Chr02 | 32989205                | G/T  | NA                 | INTERGENIC                    | NA                                                  |
| Kabuli_wild_33103766 | 1399934342                          | Ca_kabuli_Chr02 | 33103766                | G/A  | NA                 | INTERGENIC                    | NA                                                  |
| Kabuli_wild_33184262 | 1399934343                          | Ca_kabuli_Chr02 | 33184262                | T/C  | Gene_Ca_10203      | NON_SYNONYMOUS_CODING         | NA                                                  |
| Kabuli_wild_33198837 | 1399934344                          | Ca_kabuli_Chr02 | 33198837                | A/C  | Gene_Ca_10203      | INTRON                        | NA                                                  |
| Kabuli_wild_33198838 | 1399934345                          | Ca_kabuli_Chr02 | 33198838                | G/C  | Gene_Ca_10203      | INTRON                        | NA                                                  |
| Kabuli_wild_33326509 | 1399934346                          | Ca_kabuli_Chr02 | 33326509                | A/C  | Gene_Ca_10194      | DOWNSTREAM                    | Synaptobrevin                                       |
| Kabuli_wild_33326510 | 1399934347                          | Ca_kabuli_Chr02 | 33326510                | C/G  | Gene_Ca_10194      | DOWNSTREAM                    | Synaptobrevin                                       |
| Kabuli_wild_33398527 | 1399934348                          | Ca_kabuli_Chr02 | 33398527                | T/G  | NA                 | INTERGENIC                    | NA                                                  |
| Kabuli_wild_33398549 | 1399934349                          | Ca_kabuli_Chr02 | 33398549                | T/C  | NA                 | INTERGENIC                    | NA                                                  |
| Kabuli_wild_33398550 | 1399934350                          | Ca_kabuli_Chr02 | 33398550                | G/A  | NA                 | INTERGENIC                    | NA                                                  |
| Kabuli_wild_33398561 | 1399934351                          | Ca_kabuli_Chr02 | 33398561                | C/T  | NA                 | INTERGENIC                    | NA                                                  |
| Kabuli_wild_33399045 | 1399934352                          | Ca_kabuli_Chr02 | 33399045                | A/C  | Gene_Ca_10186      | SYNONYMOUS_CODING             | Disease resistance protein                          |
| Kabuli_wild_33399063 | 1399934353                          | Ca_kabuli_Chr02 | 33399063                | C/T  | Gene_Ca_10186      | SYNONYMOUS_CODING             | Disease resistance protein                          |
| Kabuli_wild_33399098 | 1399934354                          | Ca_kabuli_Chr02 | 33399098                | G/A  | Gene_Ca_10186      | NON_SYNONYMOUS_CODING         | Disease resistance protein                          |
| Kabuli_wild_33399342 | 1399934355                          | Ca_kabuli_Chr02 | 33399342                | A/C  | Gene_Ca_10186      | NON_SYNONYMOUS_CODING         | Disease resistance protein                          |



| SNP IDs              | NCBI dbSNP accession IDs (NCBI_SS#) | Chromosomes     | Physical positions (bp) | SNPs | Gene accession IDs | Sequence components of genome | Putative functions                       |
|----------------------|-------------------------------------|-----------------|-------------------------|------|--------------------|-------------------------------|------------------------------------------|
| Kabuli_wild_33399381 | 1399934356                          | Ca_kabuli_Chr02 | 33399381                | C/T  | Gene_Ca_10186      | SYNONYMOUS_CODING             | Disease resistance protein               |
| Kabuli_wild_33399393 | 1399934357                          | Ca_kabuli_Chr02 | 33399393                | C/A  | Gene_Ca_10186      | NON_SYNONYMOUS_CODING         | Disease resistance protein               |
| Kabuli_wild_33399397 | 1399934358                          | Ca_kabuli_Chr02 | 33399397                | C/T  | Gene_Ca_10186      | NON_SYNONYMOUS_CODING         | Disease resistance protein               |
| Kabuli_wild_33399404 | 1399934359                          | Ca_kabuli_Chr02 | 33399404                | C/A  | Gene_Ca_10186      | NON_SYNONYMOUS_CODING         | Disease resistance protein               |
| Kabuli_wild_33399405 | 1399934360                          | Ca_kabuli_Chr02 | 33399405                | C/T  | Gene_Ca_10186      | SYNONYMOUS_CODING             | Disease resistance protein               |
| Kabuli_wild_33399619 | 1399934361                          | Ca_kabuli_Chr02 | 33399619                | C/T  | Gene_Ca_10186      | STOP_GAINED                   | Disease resistance protein               |
| Kabuli_wild_33401608 | 1399934362                          | Ca_kabuli_Chr02 | 33401608                | A/G  | Gene_Ca_10186      | SYNONYMOUS_CODING             | Disease resistance protein               |
| Kabuli_wild_33490058 | 1399934363                          | Ca_kabuli_Chr02 | 33490058                | C/A  | Gene_Ca_10183      | NON_SYNONYMOUS_CODING         | Telomerase activating protein Est1       |
| Kabuli_wild_33575286 | 1399934364                          | Ca_kabuli_Chr02 | 33575286                | A/C  | Gene_Ca_10178      | UPSTREAM                      | Fc2pre-rRNAprocessing                    |
| Kabuli_wild_33575432 | 1399934365                          | Ca_kabuli_Chr02 | 33575432                | G/A  | Gene_Ca_10178      | UPSTREAM                      | Fc2pre-rRNAprocessing                    |
| Kabuli_wild_33582897 | 1399934366                          | Ca_kabuli_Chr02 | 33582897                | G/A  | Gene_Ca_10177      | NON_SYNONYMOUS_CODING         | Peptidase C48, SUMO/Sentrin/Ubl1         |
| Kabuli_wild_33582900 | 1399934367                          | Ca_kabuli_Chr02 | 33582900                | G/A  | Gene_Ca_10177      | NON_SYNONYMOUS_CODING         | Peptidase C48, SUMO/Sentrin/Ubl1         |
| Kabuli_wild_33582907 | 1399934368                          | Ca_kabuli_Chr02 | 33582907                | C/T  | Gene_Ca_10177      | NON_SYNONYMOUS_CODING         | Peptidase C48, SUMO/Sentrin/Ubl1         |
| Kabuli_wild_33582909 | 1399934369                          | Ca_kabuli_Chr02 | 33582909                | G/A  | Gene_Ca_10177      | NON_SYNONYMOUS_CODING         | Peptidase C48, SUMO/Sentrin/Ubl1         |
| Kabuli_wild_33582925 | 1399934370                          | Ca_kabuli_Chr02 | 33582925                | G/T  | Gene_Ca_10177      | NON_SYNONYMOUS_CODING         | Peptidase C48, SUMO/Sentrin/Ubl1         |
| Kabuli_wild_33582948 | 1399934371                          | Ca_kabuli_Chr02 | 33582948                | G/A  | Gene_Ca_10177      | NON_SYNONYMOUS_CODING         | Peptidase C48, SUMO/Sentrin/Ubl1         |
| Kabuli_wild_33582959 | 1399934372                          | Ca_kabuli_Chr02 | 33582959                | A/C  | Gene_Ca_10177      | SYNONYMOUS_CODING             | Peptidase C48, SUMO/Sentrin/Ubl1         |
| Kabuli_wild_33582967 | 1399934373                          | Ca_kabuli_Chr02 | 33582967                | G/A  | Gene_Ca_10177      | SYNONYMOUS_CODING             | Peptidase C48, SUMO/Sentrin/Ubl1         |
| Kabuli_wild_33582984 | 1399934374                          | Ca_kabuli_Chr02 | 33582984                | G/T  | Gene_Ca_10177      | NON_SYNONYMOUS_CODING         | Peptidase C48, SUMO/Sentrin/Ubl1         |
| Kabuli_wild_33650447 | 1399934375                          | Ca_kabuli_Chr02 | 33650447                | A/T  | NA                 | INTERGENIC                    | NA                                       |
| Kabuli_wild_33651408 | 1399934376                          | Ca_kabuli_Chr02 | 33651408                | A/G  | NA                 | INTERGENIC                    | NA                                       |
| Kabuli_wild_33651426 | 1399934377                          | Ca_kabuli_Chr02 | 33651426                | G/A  | Gene_Ca_10173      | SYNONYMOUS_CODING             | Pentatricopeptide repeat                 |
| Kabuli_wild_33661177 | 1399934378                          | Ca_kabuli_Chr02 | 33661177                | C/T  | Gene_Ca_10172      | SYNONYMOUS_CODING             | NA                                       |
| Kabuli_wild_33713018 | 1399934379                          | Ca_kabuli_Chr02 | 33713018                | G/A  | NA                 | INTERGENIC                    | NA                                       |
| Kabuli_wild_33782771 | 1399934380                          | Ca_kabuli_Chr02 | 33782771                | T/C  | NA                 | INTERGENIC                    | NA                                       |
| Kabuli_wild_33786243 | 1399934381                          | Ca_kabuli_Chr02 | 33786243                | G/A  | Gene_Ca_10158      | DOWNSTREAM                    | Multiantimicrobial extrusion protein     |
| Kabuli_wild_33788913 | 1399934382                          | Ca_kabuli_Chr02 | 33788913                | A/C  | NA                 | INTERGENIC                    | NA                                       |
| Kabuli_wild_33816213 | 1399934383                          | Ca_kabuli_Chr02 | 33816213                | C/T  | NA                 | INTERGENIC                    | NA                                       |
| Kabuli_wild_33920720 | 1399934384                          | Ca_kabuli_Chr02 | 33920720                | A/G  | NA                 | INTERGENIC                    | NA                                       |
| Kabuli_wild_34152352 | 1399934385                          | Ca_kabuli_Chr02 | 34152352                | T/C  | Gene_Ca_15238      | INTRON                        | NA                                       |
| Kabuli_wild_34155090 | 1399934386                          | Ca_kabuli_Chr02 | 34155090                | A/G  | Gene_Ca_15238      | INTRON                        | NA                                       |
| Kabuli_wild_34191825 | 1399934387                          | Ca_kabuli_Chr02 | 34191825                | T/G  | NA                 | INTERGENIC                    | NA                                       |
| Kabuli_wild_34223049 | 1399934388                          | Ca_kabuli_Chr02 | 34223049                | T/C  | Gene_Ca_15247      | NON_SYNONYMOUS_CODING         | ConservedoligomericGolgiicompex.subunit5 |
| Kabuli_wild_34250067 | 1399934389                          | Ca_kabuli_Chr02 | 34250067                | C/T  | NA                 | INTERGENIC                    | NA                                       |
| Kabuli_wild_34266320 | 1399934390                          | Ca_kabuli_Chr02 | 34266320                | T/G  | Gene_Ca_15250      | SYNONYMOUS_CODING             | Protein kinase,catalytic domain          |
| Kabuli_wild_34288116 | 1399934391                          | Ca_kabuli_Chr02 | 34288116                | G/C  | Gene_Ca_15252      | DOWNSTREAM                    | NA                                       |
| Kabuli_wild_34299074 | 1399934392                          | Ca_kabuli_Chr02 | 34299074                | A/C  | Gene_Ca_15256      | DOWNSTREAM                    | Pentatricopeptide repeat                 |
| Kabuli_wild_34299079 | 1399934393                          | Ca_kabuli_Chr02 | 34299079                | A/C  | Gene_Ca_15256      | DOWNSTREAM                    | Pentatricopeptide repeat                 |
| Kabuli_wild_34343478 | 1399934394                          | Ca_kabuli_Chr02 | 34343478                | C/G  | NA                 | INTERGENIC                    | NA                                       |
| Kabuli_wild_34343705 | 1399934395                          | Ca_kabuli_Chr02 | 34343705                | G/A  | NA                 | INTERGENIC                    | NA                                       |
| Kabuli_wild_34346842 | 1399934396                          | Ca_kabuli_Chr02 | 34346842                | T/C  | NA                 | INTERGENIC                    | NA                                       |
| Kabuli_wild_34346849 | 1399934397                          | Ca_kabuli_Chr02 | 34346849                | C/T  | NA                 | INTERGENIC                    | NA                                       |
| Kabuli_wild_34372503 | 1399934398                          | Ca_kabuli_Chr02 | 34372503                | T/G  | NA                 | INTERGENIC                    | NA                                       |
| Kabuli_wild_34428978 | 1399934399                          | Ca_kabuli_Chr02 | 34428978                | A/C  | Gene_Ca_15270      | DOWNSTREAM                    | NA                                       |

| SNP IDs              | NCBI dbSNP accession IDs (NCBI_SS#) | Chromosomes     | Physical positions (bp) | SNPs | Gene accession IDs | Sequence components of genome | Putative functions                                                                 |
|----------------------|-------------------------------------|-----------------|-------------------------|------|--------------------|-------------------------------|------------------------------------------------------------------------------------|
| Kabuli_wild_34428979 | 1399934400                          | Ca_kabuli_Chr02 | 34428979                | G/C  | Gene_Ca_15270      | DOWNSTREAM                    | NA                                                                                 |
| Kabuli_wild_34551849 | 1399934401                          | Ca_kabuli_Chr02 | 34551849                | A/C  | Gene_Ca_15282      | UPSTREAM                      | Drug/metabolitetransporter                                                         |
| Kabuli_wild_34554164 | 1399934402                          | Ca_kabuli_Chr02 | 34554164                | A/C  | Gene_Ca_15281      | UPSTREAM                      | Vacuolar protein sorting-associated protein Like-Smribonucleo protein (LSM) domain |
| Kabuli_wild_34601444 | 1399934403                          | Ca_kabuli_Chr02 | 34601444                | C/A  | Gene_Ca_15284      | SYNONYMOUS_CODING             | Lipocalin                                                                          |
| Kabuli_wild_34630993 | 1399934404                          | Ca_kabuli_Chr02 | 34630993                | G/A  | NA                 | INTERGENIC                    | NA                                                                                 |
| Kabuli_wild_34638955 | 1399934405                          | Ca_kabuli_Chr02 | 34638955                | T/A  | NA                 | INTERGENIC                    | NA                                                                                 |
| Kabuli_wild_34734379 | 1399934406                          | Ca_kabuli_Chr02 | 34734379                | G/A  | Gene_Ca_16897      | SYNONYMOUS_CODING             | Heat shock protein Hsp70                                                           |
| Kabuli_wild_34734475 | 1399934407                          | Ca_kabuli_Chr02 | 34734475                | A/G  | Gene_Ca_16897      | SYNONYMOUS_CODING             | Heat shock protein Hsp70                                                           |
| Kabuli_wild_34820075 | 1399934408                          | Ca_kabuli_Chr02 | 34820075                | C/T  | NA                 | INTERGENIC                    | NA                                                                                 |
| Kabuli_wild_34830995 | 1399934409                          | Ca_kabuli_Chr02 | 34830995                | A/G  | NA                 | INTERGENIC                    | NA                                                                                 |
| Kabuli_wild_34847681 | 1399934410                          | Ca_kabuli_Chr02 | 34847681                | C/A  | Gene_Ca_16883      | SYNONYMOUS_CODING             | Bromodomain                                                                        |
| Kabuli_wild_34848053 | 1399934411                          | Ca_kabuli_Chr02 | 34848053                | G/A  | Gene_Ca_16883      | SYNONYMOUS_CODING             | Bromodomain                                                                        |
| Kabuli_wild_34848480 | 1399934412                          | Ca_kabuli_Chr02 | 34848480                | T/C  | Gene_Ca_16883      | NON_SYNONYMOUS_CODING         | Bromodomain                                                                        |
| Kabuli_wild_34862276 | 1399934413                          | Ca_kabuli_Chr02 | 34862276                | C/G  | Gene_Ca_16882      | NON_SYNONYMOUS_CODING         | Lipase,GDSL                                                                        |
| Kabuli_wild_34884068 | 1399934414                          | Ca_kabuli_Chr02 | 34884068                | T/G  | Gene_Ca_16880      | SYNONYMOUS_CODING             | NA                                                                                 |
| Kabuli_wild_34884122 | 1399934415                          | Ca_kabuli_Chr02 | 34884122                | T/C  | Gene_Ca_16880      | SYNONYMOUS_CODING             | NA                                                                                 |
| Kabuli_wild_34884228 | 1399934416                          | Ca_kabuli_Chr02 | 34884228                | A/G  | Gene_Ca_16880      | NON_SYNONYMOUS_CODING         | NA                                                                                 |
| Kabuli_wild_34888414 | 1399934417                          | Ca_kabuli_Chr02 | 34888414                | T/C  | Gene_Ca_16880      | DOWNSTREAM                    | NA                                                                                 |
| Kabuli_wild_35013084 | 1399934418                          | Ca_kabuli_Chr02 | 35013084                | T/C  | Gene_Ca_16871      | DOWNSTREAM                    | Celldifferentiation,Fcd1-like                                                      |
| Kabuli_wild_35013088 | 1399934419                          | Ca_kabuli_Chr02 | 35013088                | G/C  | Gene_Ca_16871      | DOWNSTREAM                    | Celldifferentiation,Fcd1-like                                                      |
| Kabuli_wild_35046954 | 1399934420                          | Ca_kabuli_Chr02 | 35046954                | C/A  | Gene_Ca_16869      | NON_SYNONYMOUS_CODING         | SWAP/Surp                                                                          |
| Kabuli_wild_35052930 | 1399934421                          | Ca_kabuli_Chr02 | 35052930                | C/A  | Gene_Ca_16868      | INTRON                        | Aspartate carbamoyltransferase, eukaryotic                                         |
| Kabuli_wild_35054244 | 1399934422                          | Ca_kabuli_Chr02 | 35054244                | C/A  | Gene_Ca_16868      | INTRON                        | Aspartate carbamoyltransferase, eukaryotic                                         |
| Kabuli_wild_35059434 | 1399934423                          | Ca_kabuli_Chr02 | 35059434                | T/C  | NA                 | INTERGENIC                    | NA                                                                                 |
| Kabuli_wild_35059446 | 1399934424                          | Ca_kabuli_Chr02 | 35059446                | A/T  | NA                 | INTERGENIC                    | NA                                                                                 |
| Kabuli_wild_35060171 | 1399934425                          | Ca_kabuli_Chr02 | 35060171                | A/G  | NA                 | INTERGENIC                    | NA                                                                                 |
| Kabuli_wild_35060178 | 1399934426                          | Ca_kabuli_Chr02 | 35060178                | A/T  | NA                 | INTERGENIC                    | NA                                                                                 |
| Kabuli_wild_35060228 | 1399934427                          | Ca_kabuli_Chr02 | 35060228                | T/C  | NA                 | INTERGENIC                    | NA                                                                                 |
| Kabuli_wild_35060264 | 1399934428                          | Ca_kabuli_Chr02 | 35060264                | A/T  | NA                 | INTERGENIC                    | NA                                                                                 |
| Kabuli_wild_35060273 | 1399934429                          | Ca_kabuli_Chr02 | 35060273                | G/A  | NA                 | INTERGENIC                    | NA                                                                                 |
| Kabuli_wild_35064514 | 1399934430                          | Ca_kabuli_Chr02 | 35064514                | A/T  | Gene_Ca_16867      | UPSTREAM                      | UBA/THIF-typeNAD/FADbindingfold                                                    |
| Kabuli_wild_35064519 | 1399934431                          | Ca_kabuli_Chr02 | 35064519                | T/C  | Gene_Ca_16867      | UPSTREAM                      | UBA/THIF-typeNAD/FADbindingfold                                                    |
| Kabuli_wild_35066138 | 1399934432                          | Ca_kabuli_Chr02 | 35066138                | G/A  | NA                 | INTERGENIC                    | NA                                                                                 |
| Kabuli_wild_35096629 | 1399934433                          | Ca_kabuli_Chr02 | 35096629                | C/A  | Gene_Ca_16862      | INTRON                        | Microtubule-associatedprotein,MAP65/ASE1-type                                      |
| Kabuli_wild_35096630 | 1399934434                          | Ca_kabuli_Chr02 | 35096630                | C/G  | Gene_Ca_16862      | INTRON                        | Microtubule-associatedprotein,MAP65/ASE1-type                                      |
| Kabuli_wild_35096631 | 1399934435                          | Ca_kabuli_Chr02 | 35096631                | A/C  | Gene_Ca_16862      | INTRON                        | Microtubule-associatedprotein,MAP65/ASE1-type                                      |
| Kabuli_wild_35096633 | 1399934436                          | Ca_kabuli_Chr02 | 35096633                | C/T  | Gene_Ca_16862      | INTRON                        | Microtubule-associatedprotein,MAP65/ASE1-type                                      |
| Kabuli_wild_35102042 | 1399934437                          | Ca_kabuli_Chr02 | 35102042                | A/C  | NA                 | INTERGENIC                    | NA                                                                                 |
| Kabuli_wild_35120761 | 1399934438                          | Ca_kabuli_Chr02 | 35120761                | G/A  | Gene_Ca_16857      | SYNONYMOUS_CODING             | Metallo-dependentphosphatase                                                       |
| Kabuli_wild_35122109 | 1399934439                          | Ca_kabuli_Chr02 | 35122109                | C/G  | Gene_Ca_16857      | INTRON                        | Metallo-dependentphosphatase                                                       |
| Kabuli_wild_35154603 | 1399934440                          | Ca_kabuli_Chr02 | 35154603                | G/A  | Gene_Ca_16851      | DOWNSTREAM                    | Pentatric peptide repeat                                                           |
| Kabuli_wild_35154629 | 1399934441                          | Ca_kabuli_Chr02 | 35154629                | C/A  | Gene_Ca_16851      | DOWNSTREAM                    | Pentatric peptide repeat                                                           |
| Kabuli_wild_35171882 | 1399934442                          | Ca_kabuli_Chr02 | 35171882                | T/G  | Gene_Ca_16849      | SYNONYMOUS_CODING             | Glycerophosphoryldiester phosphodiesterase                                         |
| Kabuli_wild_35189471 | 1399934443                          | Ca_kabuli_Chr02 | 35189471                | C/T  | NA                 | INTERGENIC                    | NA                                                                                 |

| SNP IDs                     | NCBI dbSNP accession IDs (NCBI_SS#) | Chromosomes            | Physical positions (bp) | SNPs | Gene accession IDs | Sequence components of genome | Putative functions                                                |
|-----------------------------|-------------------------------------|------------------------|-------------------------|------|--------------------|-------------------------------|-------------------------------------------------------------------|
| <i>Kabuli_wild_35189750</i> | 1399934444                          | <i>Ca_kabuli_Chr02</i> | 35189750                | T/A  | NA                 | INTERGENIC                    | NA                                                                |
| <i>Kabuli_wild_35209940</i> | 1399934445                          | <i>Ca_kabuli_Chr02</i> | 35209940                | C/T  | Gene_Ca_16844      | NON_SYNONYMOUS_CODING         | C2 calcium-dependent membrane targeting                           |
| <i>Kabuli_wild_35362587</i> | 1399934446                          | <i>Ca_kabuli_Chr02</i> | 35362587                | A/G  | NA                 | INTERGENIC                    | NA                                                                |
| <i>Kabuli_wild_35362642</i> | 1399934447                          | <i>Ca_kabuli_Chr02</i> | 35362642                | A/G  | NA                 | INTERGENIC                    | NA                                                                |
| <i>Kabuli_wild_35362729</i> | 1399934448                          | <i>Ca_kabuli_Chr02</i> | 35362729                | A/G  | Gene_Ca_09693      | SYNONYMOUS_CODING             | Frigida-like                                                      |
| <i>Kabuli_wild_35363501</i> | 1399934449                          | <i>Ca_kabuli_Chr02</i> | 35363501                | T/C  | Gene_Ca_09693      | NON_SYNONYMOUS_CODING         | Frigida-like                                                      |
| <i>Kabuli_wild_35365029</i> | 1399934450                          | <i>Ca_kabuli_Chr02</i> | 35365029                | C/T  | Gene_Ca_09693      | NON_SYNONYMOUS_CODING         | Frigida-like                                                      |
| <i>Kabuli_wild_35377057</i> | 1399934451                          | <i>Ca_kabuli_Chr02</i> | 35377057                | A/T  | Gene_Ca_09694      | SYNONYMOUS_CODING             | DNA-binding WRKY                                                  |
| <i>Kabuli_wild_35413400</i> | 1399934452                          | <i>Ca_kabuli_Chr02</i> | 35413400                | T/A  | NA                 | INTERGENIC                    | NA                                                                |
| <i>Kabuli_wild_35441174</i> | 1399934453                          | <i>Ca_kabuli_Chr02</i> | 35441174                | T/G  | Gene_Ca_09704      | UPSTREAM                      | Pentatricopeptide repeat                                          |
| <i>Kabuli_wild_35441180</i> | 1399934454                          | <i>Ca_kabuli_Chr02</i> | 35441180                | A/G  | Gene_Ca_09704      | UPSTREAM                      | Pentatricopeptide repeat                                          |
| <i>Kabuli_wild_35447976</i> | 1399934455                          | <i>Ca_kabuli_Chr02</i> | 35447976                | A/G  | NA                 | INTERGENIC                    | NA                                                                |
| <i>Kabuli_wild_35449653</i> | 1399934456                          | <i>Ca_kabuli_Chr02</i> | 35449653                | G/A  | Gene_Ca_09705      | INTRON                        | ABC transporter,trans membrane domain                             |
| <i>Kabuli_wild_35473250</i> | 1399934457                          | <i>Ca_kabuli_Chr02</i> | 35473250                | C/T  | Gene_Ca_09708      | UPSTREAM                      | Domain of unknown function DUF2040                                |
| <i>Kabuli_wild_35505791</i> | 1399934458                          | <i>Ca_kabuli_Chr02</i> | 35505791                | C/G  | NA                 | INTERGENIC                    | NA                                                                |
| <i>Kabuli_wild_35505874</i> | 1399934459                          | <i>Ca_kabuli_Chr02</i> | 35505874                | T/G  | NA                 | INTERGENIC                    | NA                                                                |
| <i>Kabuli_wild_35593103</i> | 1399934460                          | <i>Ca_kabuli_Chr02</i> | 35593103                | T/A  | NA                 | INTERGENIC                    | NA                                                                |
| <i>Kabuli_wild_35593355</i> | 1399934461                          | <i>Ca_kabuli_Chr02</i> | 35593355                | C/G  | NA                 | INTERGENIC                    | NA                                                                |
| <i>Kabuli_wild_35593363</i> | 1399934462                          | <i>Ca_kabuli_Chr02</i> | 35593363                | C/T  | NA                 | INTERGENIC                    | NA                                                                |
| <i>Kabuli_wild_35593518</i> | 1399934463                          | <i>Ca_kabuli_Chr02</i> | 35593518                | G/A  | Gene_Ca_09728      | NON_SYNONYMOUS_CODING         | BacterialFmu(Sun)/eukaryoticnucleolarNOL1/Nop2p                   |
| <i>Kabuli_wild_35593692</i> | 1399934464                          | <i>Ca_kabuli_Chr02</i> | 35593692                | C/G  | Gene_Ca_09728      | INTRON                        | BacterialFmu(Sun)/eukaryoticnucleolarNOL1/Nop2p                   |
| <i>Kabuli_wild_35593713</i> | 1399934465                          | <i>Ca_kabuli_Chr02</i> | 35593713                | T/C  | Gene_Ca_09728      | INTRON                        | BacterialFmu(Sun)/eukaryoticnucleolarNOL1/Nop2p                   |
| <i>Kabuli_wild_35593731</i> | 1399934466                          | <i>Ca_kabuli_Chr02</i> | 35593731                | A/G  | Gene_Ca_09728      | INTRON                        | BacterialFmu(Sun)/eukaryoticnucleolarNOL1/Nop2p                   |
| <i>Kabuli_wild_35593749</i> | 1399934467                          | <i>Ca_kabuli_Chr02</i> | 35593749                | T/C  | Gene_Ca_09728      | SYNONYMOUS_CODING             | BacterialFmu(Sun)/eukaryoticnucleolarNOL1/Nop2p                   |
| <i>Kabuli_wild_35593797</i> | 1399934468                          | <i>Ca_kabuli_Chr02</i> | 35593797                | G/T  | Gene_Ca_09728      | SYNONYMOUS_CODING             | BacterialFmu(Sun)/eukaryoticnucleolarNOL1/Nop2p                   |
| <i>Kabuli_wild_35593824</i> | 1399934469                          | <i>Ca_kabuli_Chr02</i> | 35593824                | A/C  | Gene_Ca_09728      | SYNONYMOUS_CODING             | BacterialFmu(Sun)/eukaryoticnucleolarNOL1/Nop2p                   |
| <i>Kabuli_wild_35593827</i> | 1399934470                          | <i>Ca_kabuli_Chr02</i> | 35593827                | A/G  | Gene_Ca_09728      | SYNONYMOUS_CODING             | BacterialFmu(Sun)/eukaryoticnucleolarNOL1/Nop2p                   |
| <i>Kabuli_wild_35593940</i> | 1399934471                          | <i>Ca_kabuli_Chr02</i> | 35593940                | G/A  | Gene_Ca_09728      | INTRON                        | BacterialFmu(Sun)/eukaryoticnucleolarNOL1/Nop2p                   |
| <i>Kabuli_wild_35593956</i> | 1399934472                          | <i>Ca_kabuli_Chr02</i> | 35593956                | A/G  | Gene_Ca_09728      | INTRON                        | BacterialFmu(Sun)/eukaryoticnucleolarNOL1/Nop2p                   |
| <i>Kabuli_wild_35593965</i> | 1399934473                          | <i>Ca_kabuli_Chr02</i> | 35593965                | C/T  | Gene_Ca_09728      | INTRON                        | BacterialFmu(Sun)/eukaryoticnucleolarNOL1/Nop2p                   |
| <i>Kabuli_wild_35593985</i> | 1399934474                          | <i>Ca_kabuli_Chr02</i> | 35593985                | A/G  | Gene_Ca_09728      | INTRON                        | BacterialFmu(Sun)/eukaryoticnucleolarNOL1/Nop2p                   |
| <i>Kabuli_wild_35594013</i> | 1399934475                          | <i>Ca_kabuli_Chr02</i> | 35594013                | C/T  | Gene_Ca_09728      | INTRON                        | BacterialFmu(Sun)/eukaryoticnucleolarNOL1/Nop2p                   |
| <i>Kabuli_wild_35594018</i> | 1399934476                          | <i>Ca_kabuli_Chr02</i> | 35594018                | A/T  | Gene_Ca_09728      | INTRON                        | BacterialFmu(Sun)/eukaryoticnucleolarNOL1/Nop2p                   |
| <i>Kabuli_wild_35601566</i> | 1399934477                          | <i>Ca_kabuli_Chr02</i> | 35601566                | T/C  | Gene_Ca_09729      | DOWNSTREAM                    | Pathogenic type III effect or avirulence factor Avr cleavage site |
| <i>Kabuli_wild_35601571</i> | 1399934478                          | <i>Ca_kabuli_Chr02</i> | 35601571                | A/C  | Gene_Ca_09729      | DOWNSTREAM                    | Pathogenic type III effect or avirulence factor Avr cleavage site |
| <i>Kabuli_wild_35601578</i> | 1399934479                          | <i>Ca_kabuli_Chr02</i> | 35601578                | C/T  | Gene_Ca_09729      | DOWNSTREAM                    | Pathogenic type III effect or avirulence factor Avr cleavage site |
| <i>Kabuli_wild_35601632</i> | 1399934480                          | <i>Ca_kabuli_Chr02</i> | 35601632                | G/T  | Gene_Ca_09729      | DOWNSTREAM                    | Pathogenic type III effect or avirulence factor Avr cleavage site |
| <i>Kabuli_wild_35601641</i> | 1399934481                          | <i>Ca_kabuli_Chr02</i> | 35601641                | T/A  | Gene_Ca_09729      | DOWNSTREAM                    | Pathogenic type III effect or avirulence factor Avr cleavage site |
| <i>Kabuli_wild_35601657</i> | 1399934482                          | <i>Ca_kabuli_Chr02</i> | 35601657                | T/C  | Gene_Ca_09729      | DOWNSTREAM                    | Pathogenic type III effect or avirulence factor Avr cleavage site |
| <i>Kabuli_wild_35601691</i> | 1399934483                          | <i>Ca_kabuli_Chr02</i> | 35601691                | A/G  | Gene_Ca_09729      | DOWNSTREAM                    | Pathogenic type III effect or avirulence factor Avr cleavage site |
| <i>Kabuli_wild_35612587</i> | 1399934484                          | <i>Ca_kabuli_Chr02</i> | 35612587                | C/A  | Gene_Ca_09731      | SYNONYMOUS_CODING             | Protein of unknown function DUF827,plant                          |
| <i>Kabuli_wild_35612644</i> | 1399934485                          | <i>Ca_kabuli_Chr02</i> | 35612644                | G/A  | Gene_Ca_09731      | SYNONYMOUS_CODING             | Protein of unknown function DUF827,plant                          |
| <i>Kabuli_wild_35612895</i> | 1399934486                          | <i>Ca_kabuli_Chr02</i> | 35612895                | T/C  | Gene_Ca_09731      | NON_SYNONYMOUS_CODING         | Protein of unknown function DUF827,plant                          |
| <i>Kabuli_wild_35612900</i> | 1399934487                          | <i>Ca_kabuli_Chr02</i> | 35612900                | C/T  | Gene_Ca_09731      | NON_SYNONYMOUS_CODING         | Protein of unknown function DUF827,plant                          |

| SNP IDs                     | NCBI dbSNP accession IDs (NCBI_SS#) | Chromosomes            | Physical positions (bp) | SNPs | Gene accession IDs | Sequence components of genome | Putative functions                       |
|-----------------------------|-------------------------------------|------------------------|-------------------------|------|--------------------|-------------------------------|------------------------------------------|
| <i>Kabuli_wild_35613135</i> | 1399934488                          | <i>Ca_kabuli_Chr02</i> | 35613135                | T/C  | Gene_Ca_09731      | DOWNSTREAM                    | Protein of unknown function DUF827_plant |
| <i>Kabuli_wild_35618351</i> | 1399934489                          | <i>Ca_kabuli_Chr02</i> | 35618351                | T/C  | Gene_Ca_09732      | SYNONYMOUS_CODING             | Sucraseferredoxin-like                   |
| <i>Kabuli_wild_35658537</i> | 1399934490                          | <i>Ca_kabuli_Chr02</i> | 35658537                | T/C  | Gene_Ca_09735      | SYNONYMOUS_CODING             | Oligo peptide transporterOPTsuperfamily  |
| <i>Kabuli_wild_35661053</i> | 1399934491                          | <i>Ca_kabuli_Chr02</i> | 35661053                | C/T  | Gene_Ca_09735      | NON_SYNONYMOUS_CODING         | Oligo peptide transporterOPTsuperfamily  |
| <i>Kabuli_wild_35670478</i> | 1399934492                          | <i>Ca_kabuli_Chr02</i> | 35670478                | A/G  | Gene_Ca_09737      | INTRON                        | Protein of unknown function DUF1296      |
| <i>Kabuli_wild_35672503</i> | 1399934493                          | <i>Ca_kabuli_Chr02</i> | 35672503                | T/G  | Gene_Ca_09737      | NON_SYNONYMOUS_CODING         | Protein of unknown function DUF1296      |
| <i>Kabuli_wild_35673262</i> | 1399934494                          | <i>Ca_kabuli_Chr02</i> | 35673262                | T/C  | Gene_Ca_09737      | INTRON                        | Protein of unknown function DUF1296      |
| <i>Kabuli_wild_35676127</i> | 1399934495                          | <i>Ca_kabuli_Chr02</i> | 35676127                | G/A  | Gene_Ca_09737      | SYNONYMOUS_CODING             | Protein of unknown function DUF1296      |
| <i>Kabuli_wild_35676160</i> | 1399934496                          | <i>Ca_kabuli_Chr02</i> | 35676160                | C/T  | Gene_Ca_09737      | SYNONYMOUS_CODING             | Protein of unknown function DUF1296      |
| <i>Kabuli_wild_35704018</i> | 1399934497                          | <i>Ca_kabuli_Chr02</i> | 35704018                | A/G  | NA                 | INTERGENIC                    | NA                                       |
| <i>Kabuli_wild_35704069</i> | 1399934498                          | <i>Ca_kabuli_Chr02</i> | 35704069                | G/A  | NA                 | INTERGENIC                    | NA                                       |
| <i>Kabuli_wild_35704104</i> | 1399934499                          | <i>Ca_kabuli_Chr02</i> | 35704104                | G/T  | NA                 | INTERGENIC                    | NA                                       |
| <i>Kabuli_wild_35704178</i> | 1399934500                          | <i>Ca_kabuli_Chr02</i> | 35704178                | G/A  | NA                 | INTERGENIC                    | NA                                       |
| <i>Kabuli_wild_35704180</i> | 1399934501                          | <i>Ca_kabuli_Chr02</i> | 35704180                | A/G  | NA                 | INTERGENIC                    | NA                                       |
| <i>Kabuli_wild_35704200</i> | 1399934502                          | <i>Ca_kabuli_Chr02</i> | 35704200                | T/C  | NA                 | INTERGENIC                    | NA                                       |
| <i>Kabuli_wild_35704204</i> | 1399934503                          | <i>Ca_kabuli_Chr02</i> | 35704204                | T/C  | NA                 | INTERGENIC                    | NA                                       |
| <i>Kabuli_wild_35704213</i> | 1399934504                          | <i>Ca_kabuli_Chr02</i> | 35704213                | A/G  | NA                 | INTERGENIC                    | NA                                       |
| <i>Kabuli_wild_35704228</i> | 1399934505                          | <i>Ca_kabuli_Chr02</i> | 35704228                | C/A  | NA                 | INTERGENIC                    | NA                                       |
| <i>Kabuli_wild_35721109</i> | 1399934506                          | <i>Ca_kabuli_Chr02</i> | 35721109                | T/C  | NA                 | INTERGENIC                    | NA                                       |
| <i>Kabuli_wild_35721111</i> | 1399934507                          | <i>Ca_kabuli_Chr02</i> | 35721111                | C/G  | NA                 | INTERGENIC                    | NA                                       |
| <i>Kabuli_wild_35721124</i> | 1399934508                          | <i>Ca_kabuli_Chr02</i> | 35721124                | G/A  | NA                 | INTERGENIC                    | NA                                       |
| <i>Kabuli_wild_35721134</i> | 1399934509                          | <i>Ca_kabuli_Chr02</i> | 35721134                | C/A  | NA                 | INTERGENIC                    | NA                                       |
| <i>Kabuli_wild_35721150</i> | 1399934510                          | <i>Ca_kabuli_Chr02</i> | 35721150                | T/C  | NA                 | INTERGENIC                    | NA                                       |
| <i>Kabuli_wild_35727800</i> | 1399934511                          | <i>Ca_kabuli_Chr02</i> | 35727800                | A/G  | Gene_Ca_09744      | DOWNSTREAM                    | NA                                       |
| <i>Kabuli_wild_35728285</i> | 1399934512                          | <i>Ca_kabuli_Chr02</i> | 35728285                | T/A  | Gene_Ca_09744      | DOWNSTREAM                    | NA                                       |
| <i>Kabuli_wild_35754287</i> | 1399934513                          | <i>Ca_kabuli_Chr02</i> | 35754287                | T/C  | NA                 | INTERGENIC                    | NA                                       |
| <i>Kabuli_wild_35754296</i> | 1399934514                          | <i>Ca_kabuli_Chr02</i> | 35754296                | A/G  | NA                 | INTERGENIC                    | NA                                       |
| <i>Kabuli_wild_35754350</i> | 1399934515                          | <i>Ca_kabuli_Chr02</i> | 35754350                | A/G  | NA                 | INTERGENIC                    | NA                                       |
| <i>Kabuli_wild_35754352</i> | 1399934516                          | <i>Ca_kabuli_Chr02</i> | 35754352                | A/G  | NA                 | INTERGENIC                    | NA                                       |
| <i>Kabuli_wild_35754557</i> | 1399934517                          | <i>Ca_kabuli_Chr02</i> | 35754557                | C/T  | Gene_Ca_09749      | DOWNSTREAM                    | NA                                       |
| <i>Kabuli_wild_35754617</i> | 1399934518                          | <i>Ca_kabuli_Chr02</i> | 35754617                | G/T  | Gene_Ca_09749      | DOWNSTREAM                    | Regulatory protein RecX                  |
| <i>Kabuli_wild_35754656</i> | 1399934519                          | <i>Ca_kabuli_Chr02</i> | 35754656                | C/T  | Gene_Ca_09749      | DOWNSTREAM                    | Regulatory protein RecX                  |
| <i>Kabuli_wild_35754680</i> | 1399934520                          | <i>Ca_kabuli_Chr02</i> | 35754680                | C/T  | Gene_Ca_09749      | DOWNSTREAM                    | Regulatory protein RecX                  |
| <i>Kabuli_wild_35754681</i> | 1399934521                          | <i>Ca_kabuli_Chr02</i> | 35754681                | T/G  | Gene_Ca_09749      | DOWNSTREAM                    | Regulatory protein RecX                  |
| <i>Kabuli_wild_35754682</i> | 1399934522                          | <i>Ca_kabuli_Chr02</i> | 35754682                | A/G  | Gene_Ca_09749      | DOWNSTREAM                    | Regulatory protein RecX                  |
| <i>Kabuli_wild_35754757</i> | 1399934523                          | <i>Ca_kabuli_Chr02</i> | 35754757                | G/C  | Gene_Ca_09749      | DOWNSTREAM                    | Regulatory protein RecX                  |
| <i>Kabuli_wild_35754806</i> | 1399934524                          | <i>Ca_kabuli_Chr02</i> | 35754806                | G/C  | Gene_Ca_09749      | DOWNSTREAM                    | Regulatory protein RecX                  |
| <i>Kabuli_wild_35759932</i> | 1399934525                          | <i>Ca_kabuli_Chr02</i> | 35759932                | A/T  | Gene_Ca_09749      | INTRON                        | Regulatory protein RecX                  |
| <i>Kabuli_wild_35759940</i> | 1399934526                          | <i>Ca_kabuli_Chr02</i> | 35759940                | T/C  | Gene_Ca_09749      | INTRON                        | Regulatory protein RecX                  |
| <i>Kabuli_wild_35759981</i> | 1399934527                          | <i>Ca_kabuli_Chr02</i> | 35759981                | G/A  | Gene_Ca_09749      | INTRON                        | Regulatory protein RecX                  |
| <i>Kabuli_wild_35760062</i> | 1399934528                          | <i>Ca_kabuli_Chr02</i> | 35760062                | G/C  | Gene_Ca_09749      | INTRON                        | Regulatory protein RecX                  |
| <i>Kabuli_wild_35760073</i> | 1399934529                          | <i>Ca_kabuli_Chr02</i> | 35760073                | A/T  | Gene_Ca_09749      | INTRON                        | Regulatory protein RecX                  |
| <i>Kabuli_wild_35760155</i> | 1399934530                          | <i>Ca_kabuli_Chr02</i> | 35760155                | G/A  | Gene_Ca_09749      | INTRON                        | Regulatory protein RecX                  |
| <i>Kabuli_wild_35760170</i> | 1399934531                          | <i>Ca_kabuli_Chr02</i> | 35760170                | A/G  | Gene_Ca_09749      | INTRON                        | Regulatory protein RecX                  |

| SNP IDs              | NCBI dbSNP accession IDs (NCBI_SS#) | Chromosomes     | Physical positions (bp) | SNPs | Gene accession IDs | Sequence components of genome | Putative functions                                     |
|----------------------|-------------------------------------|-----------------|-------------------------|------|--------------------|-------------------------------|--------------------------------------------------------|
| Kabuli_wild_35795383 | 1399934532                          | Ca_kabuli_Chr02 | 35795383                | T/G  | Gene_Ca_09754      | SYNONYMOUS_CODING             | PeptidaseS8/S53,subtilisin/kexin/sedolisin             |
| Kabuli_wild_35795395 | 1399934533                          | Ca_kabuli_Chr02 | 35795395                | A/G  | Gene_Ca_09754      | SYNONYMOUS_CODING             | PeptidaseS8/S53,subtilisin/kexin/sedolisin             |
| Kabuli_wild_35795494 | 1399934534                          | Ca_kabuli_Chr02 | 35795494                | G/A  | Gene_Ca_09754      | SYNONYMOUS_CODING             | PeptidaseS8/S53,subtilisin/kexin/sedolisin             |
| Kabuli_wild_35795496 | 1399934535                          | Ca_kabuli_Chr02 | 35795496                | G/T  | Gene_Ca_09754      | NON_SYNONYMOUS_CODING         | PeptidaseS8/S53,subtilisin/kexin/sedolisin             |
| Kabuli_wild_35795521 | 1399934536                          | Ca_kabuli_Chr02 | 35795521                | T/C  | Gene_Ca_09754      | SYNONYMOUS_CODING             | PeptidaseS8/S53,subtilisin/kexin/sedolisin             |
| Kabuli_wild_35835232 | 1399934537                          | Ca_kabuli_Chr02 | 35835232                | A/C  | NA                 | INTERGENIC                    | NA                                                     |
| Kabuli_wild_35835234 | 1399934538                          | Ca_kabuli_Chr02 | 35835234                | C/T  | NA                 | INTERGENIC                    | NA                                                     |
| Kabuli_wild_35842676 | 1399934539                          | Ca_kabuli_Chr02 | 35842676                | C/T  | NA                 | INTERGENIC                    | NA                                                     |
| Kabuli_wild_35862878 | 1399934540                          | Ca_kabuli_Chr02 | 35862878                | T/G  | Gene_Ca_09762      | INTRON                        | Armadillo                                              |
| Kabuli_wild_35862891 | 1399934541                          | Ca_kabuli_Chr02 | 35862891                | C/A  | Gene_Ca_09762      | INTRON                        | Armadillo                                              |
| Kabuli_wild_35917717 | 1399934542                          | Ca_kabuli_Chr02 | 35917717                | A/G  | Gene_Ca_09767      | INTRON                        | Nucleotidyltransferase                                 |
| Kabuli_wild_35930699 | 1399934543                          | Ca_kabuli_Chr02 | 35930699                | T/G  | NA                 | INTERGENIC                    | NA                                                     |
| Kabuli_wild_35987869 | 1399934544                          | Ca_kabuli_Chr02 | 35987869                | T/C  | Gene_Ca_09773      | DOWNSTREAM                    | Disease resistance protein                             |
| Kabuli_wild_35987871 | 1399934545                          | Ca_kabuli_Chr02 | 35987871                | T/C  | Gene_Ca_09773      | DOWNSTREAM                    | Disease resistance protein                             |
| Kabuli_wild_35987920 | 1399934546                          | Ca_kabuli_Chr02 | 35987920                | A/C  | Gene_Ca_09773      | DOWNSTREAM                    | Disease resistance protein                             |
| Kabuli_wild_35993178 | 1399934547                          | Ca_kabuli_Chr02 | 35993178                | G/A  | Gene_Ca_09773      | SYNONYMOUS_CODING             | Disease resistance protein                             |
| Kabuli_wild_36013809 | 1399934548                          | Ca_kabuli_Chr02 | 36013809                | A/G  | Gene_Ca_09776      | INTRON                        | Nucleoporin,Nup133/Nup155-like,C-terminal              |
| Kabuli_wild_36016810 | 1399934549                          | Ca_kabuli_Chr02 | 36016810                | C/T  | Gene_Ca_09776      | INTRON                        | Nucleoporin,Nup133/Nup155-like,C-terminal              |
| Kabuli_wild_36039364 | 1399934550                          | Ca_kabuli_Chr02 | 36039364                | G/T  | Gene_Ca_09779      | DOWNSTREAM                    | ChlorophyllA-Bbindingprotein,plant                     |
| Kabuli_wild_36039428 | 1399934551                          | Ca_kabuli_Chr02 | 36039428                | C/T  | Gene_Ca_09779      | DOWNSTREAM                    | ChlorophyllA-Bbindingprotein,plant                     |
| Kabuli_wild_36046593 | 1399934552                          | Ca_kabuli_Chr02 | 36046593                | G/T  | NA                 | INTERGENIC                    | NA                                                     |
| Kabuli_wild_36046595 | 1399934553                          | Ca_kabuli_Chr02 | 36046595                | T/G  | NA                 | INTERGENIC                    | NA                                                     |
| Kabuli_wild_36046720 | 1399934554                          | Ca_kabuli_Chr02 | 36046720                | T/A  | NA                 | INTERGENIC                    | NA                                                     |
| Kabuli_wild_36046741 | 1399934555                          | Ca_kabuli_Chr02 | 36046741                | G/A  | NA                 | INTERGENIC                    | NA                                                     |
| Kabuli_wild_36046767 | 1399934556                          | Ca_kabuli_Chr02 | 36046767                | T/A  | NA                 | INTERGENIC                    | NA                                                     |
| Kabuli_wild_36046820 | 1399934557                          | Ca_kabuli_Chr02 | 36046820                | T/A  | NA                 | INTERGENIC                    | NA                                                     |
| Kabuli_wild_36051175 | 1399934558                          | Ca_kabuli_Chr02 | 36051175                | T/G  | NA                 | INTERGENIC                    | NA                                                     |
| Kabuli_wild_36054956 | 1399934559                          | Ca_kabuli_Chr02 | 36054956                | G/T  | NA                 | INTERGENIC                    | NA                                                     |
| Kabuli_wild_36057418 | 1399934560                          | Ca_kabuli_Chr02 | 36057418                | A/G  | Gene_Ca_09782      | DOWNSTREAM                    | Zinc finger,PHD-type                                   |
| Kabuli_wild_36068124 | 1399934561                          | Ca_kabuli_Chr02 | 36068124                | C/T  | Gene_Ca_09784      | SYNONYMOUS_CODING             | Signal transduction response regulator, receiverdomain |
| Kabuli_wild_36069340 | 1399934562                          | Ca_kabuli_Chr02 | 36069340                | T/C  | Gene_Ca_09784      | SYNONYMOUS_CODING             | Signal transduction response regulator, receiverdomain |
| Kabuli_wild_36072247 | 1399934563                          | Ca_kabuli_Chr02 | 36072247                | C/A  | Gene_Ca_09785      | UPSTREAM                      | X8                                                     |
| Kabuli_wild_36074147 | 1399934564                          | Ca_kabuli_Chr02 | 36074147                | T/C  | NA                 | INTERGENIC                    | NA                                                     |
| Kabuli_wild_36088577 | 1399934565                          | Ca_kabuli_Chr02 | 36088577                | A/T  | Gene_Ca_09787      | DOWNSTREAM                    | DNA-binding WRKY                                       |
| Kabuli_wild_36088676 | 1399934566                          | Ca_kabuli_Chr02 | 36088676                | T/C  | Gene_Ca_09787      | DOWNSTREAM                    | DNA-binding WRKY                                       |
| Kabuli_wild_36088853 | 1399934567                          | Ca_kabuli_Chr02 | 36088853                | G/A  | Gene_Ca_09787      | DOWNSTREAM                    | DNA-binding WRKY                                       |
| Kabuli_wild_36101358 | 1399934568                          | Ca_kabuli_Chr02 | 36101358                | A/G  | NA                 | INTERGENIC                    | NA                                                     |
| Kabuli_wild_36101379 | 1399934569                          | Ca_kabuli_Chr02 | 36101379                | A/G  | NA                 | INTERGENIC                    | NA                                                     |
| Kabuli_wild_36117467 | 1399934570                          | Ca_kabuli_Chr02 | 36117467                | T/C  | Gene_Ca_09790      | SYNONYMOUS_CODING             | RNA recognition motif domain                           |
| Kabuli_wild_36117616 | 1399934571                          | Ca_kabuli_Chr02 | 36117616                | A/C  | Gene_Ca_09790      | DOWNSTREAM                    | RNA recognition motif domain                           |
| Kabuli_wild_36117647 | 1399934572                          | Ca_kabuli_Chr02 | 36117647                | G/A  | Gene_Ca_09790      | DOWNSTREAM                    | RNA recognition motif domain                           |
| Kabuli_wild_36117695 | 1399934573                          | Ca_kabuli_Chr02 | 36117695                | T/A  | Gene_Ca_09790      | DOWNSTREAM                    | RNA recognition motif domain                           |
| Kabuli_wild_36276791 | 1399934574                          | Ca_kabuli_Chr02 | 36276791                | G/A  | NA                 | INTERGENIC                    | NA                                                     |
| Kabuli_wild_36326361 | 1399934575                          | Ca_kabuli_Chr02 | 36326361                | A/C  | NA                 | INTERGENIC                    | NA                                                     |

| SNP IDs              | NCBI dbSNP accession IDs (NCBI_SS#) | Chromosomes     | Physical positions (bp) | SNPs | Gene accession IDs | Sequence components of genome | Putative functions                                               |
|----------------------|-------------------------------------|-----------------|-------------------------|------|--------------------|-------------------------------|------------------------------------------------------------------|
| Kabuli_wild_36335252 | 1399934576                          | Ca_kabuli_Chr02 | 36335252                | A/C  | NA                 | INTERGENIC                    | NA                                                               |
| Kabuli_wild_36346216 | 1399934577                          | Ca_kabuli_Chr02 | 36346216                | A/T  | Gene_Ca_09821      | DOWNSTREAM                    | CoproporphyrinogenIIIoxidase                                     |
| Kabuli_wild_36346336 | 1399934578                          | Ca_kabuli_Chr02 | 36346336                | A/G  | Gene_Ca_09821      | DOWNSTREAM                    | CoproporphyrinogenIIIoxidase                                     |
| Kabuli_wild_36387245 | 1399934579                          | Ca_kabuli_Chr02 | 36387245                | T/C  | Gene_Ca_09828      | NON_SYNONYMOUS_CODING         | GDP-fucoseproteinO-fucosyltransferase                            |
| Kabuli_wild_36403621 | 1399934580                          | Ca_kabuli_Chr02 | 36403621                | T/C  | NA                 | INTERGENIC                    | NA                                                               |
| Kabuli_wild_36429512 | 1399934581                          | Ca_kabuli_Chr02 | 36429512                | T/C  | Gene_Ca_09832      | NON_SYNONYMOUS_CODING         | Phox/Bem1p                                                       |
| Kabuli_wild_36444409 | 1399934582                          | Ca_kabuli_Chr02 | 36444409                | T/G  | Gene_Ca_09833      | INTRON                        | Sterol-sensingdomain                                             |
| Kabuli_wild_36461953 | 1399934583                          | Ca_kabuli_Chr02 | 36461953                | C/A  | NA                 | INTERGENIC                    | NA                                                               |
| Kabuli_wild_36467100 | 1399934584                          | Ca_kabuli_Chr02 | 36467100                | A/C  | NA                 | INTERGENIC                    | NA                                                               |
| Kabuli_wild_36469921 | 1399934585                          | Ca_kabuli_Chr02 | 36469921                | A/G  | Gene_Ca_09835      | INTRON                        | EPS15homology(EH)                                                |
| Kabuli_wild_36484643 | 1399934586                          | Ca_kabuli_Chr02 | 36484643                | G/A  | Gene_Ca_09836      | SYNONYMOUS_CODING             | Protein kinase,catalytic domain                                  |
| Kabuli_wild_36505316 | 1399934587                          | Ca_kabuli_Chr02 | 36505316                | C/A  | NA                 | INTERGENIC                    | NA                                                               |
| Kabuli_wild_36609730 | 1399934588                          | Ca_kabuli_Chr02 | 36609730                | T/A  | NA                 | INTERGENIC                    | NA                                                               |
| Kabuli_wild_36609743 | 1399934589                          | Ca_kabuli_Chr02 | 36609743                | C/T  | NA                 | INTERGENIC                    | NA                                                               |
| Kabuli_wild_36609744 | 1399934590                          | Ca_kabuli_Chr02 | 36609744                | G/C  | NA                 | INTERGENIC                    | NA                                                               |
| Kabuli_wild_36609950 | 1399934591                          | Ca_kabuli_Chr02 | 36609950                | C/T  | NA                 | INTERGENIC                    | NA                                                               |
| Kabuli_wild_36609968 | 1399934592                          | Ca_kabuli_Chr02 | 36609968                | C/T  | NA                 | INTERGENIC                    | NA                                                               |
| Kabuli_wild_36634234 | 1399934593                          | Ca_kabuli_Chr02 | 36634234                | T/C  | NA                 | INTERGENIC                    | NA                                                               |
| Kabuli_wild_36634297 | 1399934594                          | Ca_kabuli_Chr02 | 36634297                | C/G  | NA                 | INTERGENIC                    | NA                                                               |
| Kabuli_wild_171675   | 1399934595                          | Ca_kabuli_Chr03 | 171675                  | T/A  | Gene_Ca_22938      | SYNONYMOUS_CODING             | NAD-dependentepimerase/dehydratase                               |
| Kabuli_wild_220568   | 1399934596                          | Ca_kabuli_Chr03 | 220568                  | A/T  | Gene_Ca_22935      | INTRON                        | Glycosyltransferase,family48                                     |
| Kabuli_wild_220572   | 1399934597                          | Ca_kabuli_Chr03 | 220572                  | T/C  | Gene_Ca_22935      | INTRON                        | Glycosyltransferase,family48                                     |
| Kabuli_wild_220573   | 1399934598                          | Ca_kabuli_Chr03 | 220573                  | G/T  | Gene_Ca_22935      | INTRON                        | Glycosyltransferase,family48                                     |
| Kabuli_wild_419715   | 1399934599                          | Ca_kabuli_Chr03 | 419715                  | T/G  | NA                 | INTERGENIC                    | NA                                                               |
| Kabuli_wild_972745   | 1399934600                          | Ca_kabuli_Chr03 | 972745                  | A/G  | NA                 | INTERGENIC                    | NA                                                               |
| Kabuli_wild_976189   | 1399934601                          | Ca_kabuli_Chr03 | 976189                  | T/G  | NA                 | INTERGENIC                    | NA                                                               |
| Kabuli_wild_981846   | 1399934602                          | Ca_kabuli_Chr03 | 981846                  | A/G  | NA                 | INTERGENIC                    | NA                                                               |
| Kabuli_wild_981852   | 1399934603                          | Ca_kabuli_Chr03 | 981852                  | T/C  | NA                 | INTERGENIC                    | NA                                                               |
| Kabuli_wild_988477   | 1399934604                          | Ca_kabuli_Chr03 | 988477                  | G/A  | NA                 | INTERGENIC                    | NA                                                               |
| Kabuli_wild_1499006  | 1399934605                          | Ca_kabuli_Chr03 | 1499006                 | A/G  | NA                 | INTERGENIC                    | NA                                                               |
| Kabuli_wild_1499021  | 1399934606                          | Ca_kabuli_Chr03 | 1499021                 | G/A  | NA                 | INTERGENIC                    | NA                                                               |
| Kabuli_wild_1499025  | 1399934607                          | Ca_kabuli_Chr03 | 1499025                 | G/T  | NA                 | INTERGENIC                    | NA                                                               |
| Kabuli_wild_1499038  | 1399934608                          | Ca_kabuli_Chr03 | 1499038                 | G/A  | NA                 | INTERGENIC                    | NA                                                               |
| Kabuli_wild_1507113  | 1399934609                          | Ca_kabuli_Chr03 | 1507113                 | T/G  | NA                 | INTERGENIC                    | NA                                                               |
| Kabuli_wild_1507162  | 1399934610                          | Ca_kabuli_Chr03 | 1507162                 | G/A  | NA                 | INTERGENIC                    | NA                                                               |
| Kabuli_wild_1507166  | 1399934611                          | Ca_kabuli_Chr03 | 1507166                 | A/T  | NA                 | INTERGENIC                    | NA                                                               |
| Kabuli_wild_1507167  | 1399934612                          | Ca_kabuli_Chr03 | 1507167                 | C/T  | NA                 | INTERGENIC                    | NA                                                               |
| Kabuli_wild_1507177  | 1399934613                          | Ca_kabuli_Chr03 | 1507177                 | C/T  | NA                 | INTERGENIC                    | NA                                                               |
| Kabuli_wild_1507187  | 1399934614                          | Ca_kabuli_Chr03 | 1507187                 | T/C  | NA                 | INTERGENIC                    | NA                                                               |
| Kabuli_wild_1507225  | 1399934615                          | Ca_kabuli_Chr03 | 1507225                 | C/T  | NA                 | INTERGENIC                    | NA                                                               |
| Kabuli_wild_1624802  | 1399934616                          | Ca_kabuli_Chr03 | 1624802                 | T/G  | Gene_Ca_19409      | NON_SYNONYMOUS_CODING         | Pyridine nucleotide-disulphideoxido reductase,NAD-binding region |
| Kabuli_wild_1746388  | 1399934617                          | Ca_kabuli_Chr03 | 1746388                 | C/A  | Gene_Ca_19405      | INTRON                        | Helicase,C-terminal                                              |
| Kabuli_wild_1746389  | 1399934618                          | Ca_kabuli_Chr03 | 1746389                 | A/G  | Gene_Ca_19405      | INTRON                        | NA                                                               |
| Kabuli_wild_1829414  | 1399934619                          | Ca_kabuli_Chr03 | 1829414                 | T/C  | NA                 | INTERGENIC                    | NA                                                               |

| SNP IDs             | NCBI dbSNP accession IDs (NCBI_SS#) | Chromosomes     | Physical positions (bp) | SNPs | Gene accession IDs | Sequence components of genome | Putative functions                                      |
|---------------------|-------------------------------------|-----------------|-------------------------|------|--------------------|-------------------------------|---------------------------------------------------------|
| Kabuli_wild_1829423 | 1399934620                          | Ca_kabuli_Chr03 | 1829423                 | A/C  | NA                 | INTERGENIC                    | NA                                                      |
| Kabuli_wild_1923783 | 1399934621                          | Ca_kabuli_Chr03 | 1923783                 | A/T  | NA                 | INTERGENIC                    | NA                                                      |
| Kabuli_wild_2097376 | 1399934622                          | Ca_kabuli_Chr03 | 2097376                 | T/G  | Gene_Ca_19398      | DOWNSTREAM                    | Alpha/betahydrolasefold-3                               |
| Kabuli_wild_2097413 | 1399934623                          | Ca_kabuli_Chr03 | 2097413                 | A/G  | Gene_Ca_19398      | DOWNSTREAM                    | Alpha/betahydrolasefold-3                               |
| Kabuli_wild_2240403 | 1399934624                          | Ca_kabuli_Chr03 | 2240403                 | G/A  | NA                 | INTERGENIC                    | NA                                                      |
| Kabuli_wild_2391515 | 1399934625                          | Ca_kabuli_Chr03 | 2391515                 | T/G  | Gene_Ca_26372      | SYNONYMOUS_CODING             | NHLrepeat                                               |
| Kabuli_wild_2461914 | 1399934626                          | Ca_kabuli_Chr03 | 2461914                 | G/A  | NA                 | INTERGENIC                    | NA                                                      |
| Kabuli_wild_2708703 | 1399934627                          | Ca_kabuli_Chr03 | 2708703                 | C/T  | Gene_Ca_22148      | NON_SYNONYMOUS_CODING         | Zinc finger,B-box                                       |
| Kabuli_wild_2825464 | 1399934628                          | Ca_kabuli_Chr03 | 2825464                 | C/A  | NA                 | INTERGENIC                    | NA                                                      |
| Kabuli_wild_2825546 | 1399934629                          | Ca_kabuli_Chr03 | 2825546                 | G/T  | NA                 | INTERGENIC                    | NA                                                      |
| Kabuli_wild_2828273 | 1399934630                          | Ca_kabuli_Chr03 | 2828273                 | A/G  | Gene_Ca_22150      | SYNONYMOUS_CODING             | Protein kinase,catalytic domain                         |
| Kabuli_wild_2850400 | 1399934631                          | Ca_kabuli_Chr03 | 2850400                 | T/A  | NA                 | INTERGENIC                    | NA                                                      |
| Kabuli_wild_2927148 | 1399934632                          | Ca_kabuli_Chr03 | 2927148                 | T/A  | NA                 | INTERGENIC                    | NA                                                      |
| Kabuli_wild_2927150 | 1399934633                          | Ca_kabuli_Chr03 | 2927150                 | A/T  | NA                 | INTERGENIC                    | NA                                                      |
| Kabuli_wild_2930974 | 1399934634                          | Ca_kabuli_Chr03 | 2930974                 | A/C  | Gene_Ca_22158      | INTRON                        | Tetra tricopeptide repeat-containing                    |
| Kabuli_wild_2931012 | 1399934635                          | Ca_kabuli_Chr03 | 2931012                 | A/C  | Gene_Ca_22158      | INTRON                        | Tetra tricopeptide repeat-containing                    |
| Kabuli_wild_2969615 | 1399934636                          | Ca_kabuli_Chr03 | 2969615                 | A/G  | NA                 | INTERGENIC                    | NA                                                      |
| Kabuli_wild_2975179 | 1399934637                          | Ca_kabuli_Chr03 | 2975179                 | T/C  | Gene_Ca_22161      | SYNONYMOUS_CODING             | NA                                                      |
| Kabuli_wild_2998671 | 1399934638                          | Ca_kabuli_Chr03 | 2998671                 | A/G  | NA                 | INTERGENIC                    | NA                                                      |
| Kabuli_wild_3127079 | 1399934639                          | Ca_kabuli_Chr03 | 3127079                 | G/T  | NA                 | INTERGENIC                    | NA                                                      |
| Kabuli_wild_3182276 | 1399934640                          | Ca_kabuli_Chr03 | 3182276                 | T/G  | NA                 | INTERGENIC                    | NA                                                      |
| Kabuli_wild_3280478 | 1399934641                          | Ca_kabuli_Chr03 | 3280478                 | C/T  | Gene_Ca_24555      | NON_SYNONYMOUS_CODING         | RNA recognition motif domain                            |
| Kabuli_wild_3299145 | 1399934642                          | Ca_kabuli_Chr03 | 3299145                 | G/A  | NA                 | INTERGENIC                    | NA                                                      |
| Kabuli_wild_3442270 | 1399934643                          | Ca_kabuli_Chr03 | 3442270                 | G/A  | NA                 | INTERGENIC                    | NA                                                      |
| Kabuli_wild_3617555 | 1399934644                          | Ca_kabuli_Chr03 | 3617555                 | G/A  | Gene_Ca_21346      | NON_SYNONYMOUS_CODING         | ZF-HD homeobox protein,Cys/His-rich dimerisation domain |
| Kabuli_wild_3701370 | 1399934645                          | Ca_kabuli_Chr03 | 3701370                 | G/A  | Gene_Ca_21344      | INTRON                        | Gibberellin regulated protein                           |
| Kabuli_wild_3701394 | 1399934646                          | Ca_kabuli_Chr03 | 3701394                 | A/T  | Gene_Ca_21344      | INTRON                        | Gibberellin regulated protein                           |
| Kabuli_wild_3701396 | 1399934647                          | Ca_kabuli_Chr03 | 3701396                 | C/T  | Gene_Ca_21344      | INTRON                        | Gibberellin regulated protein                           |
| Kabuli_wild_3701398 | 1399934648                          | Ca_kabuli_Chr03 | 3701398                 | T/A  | Gene_Ca_21344      | INTRON                        | Gibberellin regulated protein                           |
| Kabuli_wild_3701401 | 1399934649                          | Ca_kabuli_Chr03 | 3701401                 | A/T  | Gene_Ca_21344      | INTRON                        | Gibberellin regulated protein                           |
| Kabuli_wild_3701405 | 1399934650                          | Ca_kabuli_Chr03 | 3701405                 | G/T  | Gene_Ca_21344      | INTRON                        | Gibberellin regulated protein                           |
| Kabuli_wild_3701415 | 1399934651                          | Ca_kabuli_Chr03 | 3701415                 | C/T  | Gene_Ca_21344      | INTRON                        | Gibberellin regulated protein                           |
| Kabuli_wild_3701422 | 1399934652                          | Ca_kabuli_Chr03 | 3701422                 | C/T  | Gene_Ca_21344      | INTRON                        | Gibberellin regulated protein                           |
| Kabuli_wild_3701426 | 1399934653                          | Ca_kabuli_Chr03 | 3701426                 | T/C  | Gene_Ca_21344      | INTRON                        | Gibberellin regulated protein                           |
| Kabuli_wild_3701435 | 1399934654                          | Ca_kabuli_Chr03 | 3701435                 | A/T  | Gene_Ca_21344      | INTRON                        | Gibberellin regulated protein                           |
| Kabuli_wild_3701437 | 1399934655                          | Ca_kabuli_Chr03 | 3701437                 | A/T  | Gene_Ca_21344      | INTRON                        | Gibberellin regulated protein                           |
| Kabuli_wild_3701440 | 1399934656                          | Ca_kabuli_Chr03 | 3701440                 | G/T  | Gene_Ca_21344      | INTRON                        | Gibberellin regulated protein                           |
| Kabuli_wild_3701441 | 1399934657                          | Ca_kabuli_Chr03 | 3701441                 | T/C  | Gene_Ca_21344      | INTRON                        | Gibberellin regulated protein                           |
| Kabuli_wild_3701442 | 1399934658                          | Ca_kabuli_Chr03 | 3701442                 | C/T  | Gene_Ca_21344      | INTRON                        | Gibberellin regulated protein                           |
| Kabuli_wild_3723580 | 1399934659                          | Ca_kabuli_Chr03 | 3723580                 | C/A  | NA                 | INTERGENIC                    | NA                                                      |
| Kabuli_wild_3825806 | 1399934660                          | Ca_kabuli_Chr03 | 3825806                 | G/A  | Gene_Ca_21335      | DOWNSTREAM                    | Transposase,Ptta/En/Spm,plant                           |
| Kabuli_wild_3825807 | 1399934661                          | Ca_kabuli_Chr03 | 3825807                 | C/T  | Gene_Ca_21335      | DOWNSTREAM                    | Transposase,Ptta/En/Spm,plant                           |
| Kabuli_wild_3825824 | 1399934662                          | Ca_kabuli_Chr03 | 3825824                 | T/C  | Gene_Ca_21335      | DOWNSTREAM                    | Transposase,Ptta/En/Spm,plant                           |
| Kabuli_wild_3825852 | 1399934663                          | Ca_kabuli_Chr03 | 3825852                 | G/T  | Gene_Ca_21335      | DOWNSTREAM                    | Transposase,Ptta/En/Spm,plant                           |



| SNP IDs             | NCBI dbSNP accession IDs (NCBI_SS#) | Chromosomes     | Physical positions (bp) | SNPs | Gene accession IDs | Sequence components of genome | Putative functions                             |
|---------------------|-------------------------------------|-----------------|-------------------------|------|--------------------|-------------------------------|------------------------------------------------|
| Kabuli_wild_3825858 | 1399934664                          | Ca_kabuli_Chr03 | 3825858                 | G/A  | Gene_Ca_21335      | DOWNSTREAM                    | Transposase,Ptta/En/Spm,plant                  |
| Kabuli_wild_3825903 | 1399934665                          | Ca_kabuli_Chr03 | 3825903                 | T/A  | Gene_Ca_21335      | DOWNSTREAM                    | Transposase,Ptta/En/Spm,plant                  |
| Kabuli_wild_3831950 | 1399934666                          | Ca_kabuli_Chr03 | 3831950                 | C/T  | NA                 | INTERGENIC                    | NA                                             |
| Kabuli_wild_3858878 | 1399934667                          | Ca_kabuli_Chr03 | 3858878                 | T/G  | Gene_Ca_21333      | INTRON                        | Major intrinsic protein                        |
| Kabuli_wild_3915645 | 1399934668                          | Ca_kabuli_Chr03 | 3915645                 | T/C  | Gene_Ca_21331      | NON_SYNONYMOUS_CODING         | Peptidase C48, SUMO/Sentrin/Ubl1               |
| Kabuli_wild_3915794 | 1399934669                          | Ca_kabuli_Chr03 | 3915794                 | C/T  | Gene_Ca_21331      | NON_SYNONYMOUS_CODING         | Peptidase C48, SUMO/Sentrin/Ubl1               |
| Kabuli_wild_4035581 | 1399934670                          | Ca_kabuli_Chr03 | 4035581                 | A/C  | NA                 | INTERGENIC                    | NA                                             |
| Kabuli_wild_4035583 | 1399934671                          | Ca_kabuli_Chr03 | 4035583                 | G/A  | NA                 | INTERGENIC                    | NA                                             |
| Kabuli_wild_4145743 | 1399934672                          | Ca_kabuli_Chr03 | 4145743                 | G/A  | Gene_Ca_22385      | INTRON                        | Domain of unknown function DUF298              |
| Kabuli_wild_4178154 | 1399934673                          | Ca_kabuli_Chr03 | 4178154                 | C/T  | NA                 | INTERGENIC                    | NA                                             |
| Kabuli_wild_4266680 | 1399934674                          | Ca_kabuli_Chr03 | 4266680                 | T/G  | NA                 | INTERGENIC                    | NA                                             |
| Kabuli_wild_4266696 | 1399934675                          | Ca_kabuli_Chr03 | 4266696                 | G/A  | NA                 | INTERGENIC                    | NA                                             |
| Kabuli_wild_4266705 | 1399934676                          | Ca_kabuli_Chr03 | 4266705                 | G/A  | NA                 | INTERGENIC                    | NA                                             |
| Kabuli_wild_4266708 | 1399934677                          | Ca_kabuli_Chr03 | 4266708                 | C/T  | NA                 | INTERGENIC                    | NA                                             |
| Kabuli_wild_4266716 | 1399934678                          | Ca_kabuli_Chr03 | 4266716                 | A/G  | NA                 | INTERGENIC                    | NA                                             |
| Kabuli_wild_4266721 | 1399934679                          | Ca_kabuli_Chr03 | 4266721                 | G/A  | NA                 | INTERGENIC                    | NA                                             |
| Kabuli_wild_4266733 | 1399934680                          | Ca_kabuli_Chr03 | 4266733                 | C/G  | NA                 | INTERGENIC                    | NA                                             |
| Kabuli_wild_4629747 | 1399934681                          | Ca_kabuli_Chr03 | 4629747                 | A/C  | Gene_Ca_22084      | INTRON                        | NA                                             |
| Kabuli_wild_4639410 | 1399934682                          | Ca_kabuli_Chr03 | 4639410                 | T/C  | NA                 | INTERGENIC                    | NA                                             |
| Kabuli_wild_4878361 | 1399934683                          | Ca_kabuli_Chr03 | 4878361                 | A/G  | Gene_Ca_22093      | INTRON                        | Biotin/lipoylattachment                        |
| Kabuli_wild_5224781 | 1399934684                          | Ca_kabuli_Chr03 | 5224781                 | A/G  | Gene_Ca_23868      | NON_SYNONYMOUS_CODING         | NA                                             |
| Kabuli_wild_5224976 | 1399934685                          | Ca_kabuli_Chr03 | 5224976                 | A/G  | Gene_Ca_23868      | NON_SYNONYMOUS_CODING         | NA                                             |
| Kabuli_wild_5225108 | 1399934686                          | Ca_kabuli_Chr03 | 5225108                 | T/G  | Gene_Ca_23868      | NON_SYNONYMOUS_CODING         | NA                                             |
| Kabuli_wild_5410879 | 1399934687                          | Ca_kabuli_Chr03 | 5410879                 | C/A  | NA                 | INTERGENIC                    | NA                                             |
| Kabuli_wild_5410880 | 1399934688                          | Ca_kabuli_Chr03 | 5410880                 | A/G  | NA                 | INTERGENIC                    | NA                                             |
| Kabuli_wild_5415765 | 1399934689                          | Ca_kabuli_Chr03 | 5415765                 | T/G  | Gene_Ca_20660      | DOWNSTREAM                    | Alpha-1,4-glucan-proteinsynthase,UDP-forming   |
| Kabuli_wild_5436267 | 1399934690                          | Ca_kabuli_Chr03 | 5436267                 | A/G  | NA                 | INTERGENIC                    | NA                                             |
| Kabuli_wild_5436272 | 1399934691                          | Ca_kabuli_Chr03 | 5436272                 | T/C  | NA                 | INTERGENIC                    | NA                                             |
| Kabuli_wild_5436277 | 1399934692                          | Ca_kabuli_Chr03 | 5436277                 | C/T  | NA                 | INTERGENIC                    | NA                                             |
| Kabuli_wild_5436288 | 1399934693                          | Ca_kabuli_Chr03 | 5436288                 | G/T  | NA                 | INTERGENIC                    | NA                                             |
| Kabuli_wild_5436295 | 1399934694                          | Ca_kabuli_Chr03 | 5436295                 | G/A  | NA                 | INTERGENIC                    | NA                                             |
| Kabuli_wild_5436296 | 1399934695                          | Ca_kabuli_Chr03 | 5436296                 | C/T  | NA                 | INTERGENIC                    | NA                                             |
| Kabuli_wild_5436299 | 1399934696                          | Ca_kabuli_Chr03 | 5436299                 | A/C  | NA                 | INTERGENIC                    | NA                                             |
| Kabuli_wild_5436317 | 1399934697                          | Ca_kabuli_Chr03 | 5436317                 | C/T  | NA                 | INTERGENIC                    | NA                                             |
| Kabuli_wild_5436331 | 1399934698                          | Ca_kabuli_Chr03 | 5436331                 | C/A  | NA                 | INTERGENIC                    | NA                                             |
| Kabuli_wild_5514176 | 1399934699                          | Ca_kabuli_Chr03 | 5514176                 | A/G  | NA                 | INTERGENIC                    | NA                                             |
| Kabuli_wild_5514206 | 1399934700                          | Ca_kabuli_Chr03 | 5514206                 | G/T  | NA                 | INTERGENIC                    | NA                                             |
| Kabuli_wild_5514287 | 1399934701                          | Ca_kabuli_Chr03 | 5514287                 | C/A  | NA                 | INTERGENIC                    | NA                                             |
| Kabuli_wild_6169510 | 1399934702                          | Ca_kabuli_Chr03 | 6169510                 | A/C  | Gene_Ca_24827      | DOWNSTREAM                    | Leucine-rich repeat,cysteine-containingsubtype |
| Kabuli_wild_6467014 | 1399934703                          | Ca_kabuli_Chr03 | 6467014                 | G/A  | NA                 | INTERGENIC                    | NA                                             |
| Kabuli_wild_6683587 | 1399934704                          | Ca_kabuli_Chr03 | 6683587                 | T/A  | Gene_Ca_25772      | INTRON                        | NA                                             |
| Kabuli_wild_6683646 | 1399934705                          | Ca_kabuli_Chr03 | 6683646                 | A/G  | Gene_Ca_25772      | INTRON                        | NA                                             |
| Kabuli_wild_6807698 | 1399934706                          | Ca_kabuli_Chr03 | 6807698                 | G/A  | NA                 | INTERGENIC                    | NA                                             |
| Kabuli_wild_6828181 | 1399934707                          | Ca_kabuli_Chr03 | 6828181                 | A/T  | NA                 | INTERGENIC                    | NA                                             |

| SNP IDs             | NCBI dbSNP accession IDs (NCBI_SS#) | Chromosomes     | Physical positions (bp) | SNPs | Gene accession IDs | Sequence components of genome | Putative functions               |
|---------------------|-------------------------------------|-----------------|-------------------------|------|--------------------|-------------------------------|----------------------------------|
| Kabuli_wild_6840644 | 1399934708                          | Ca_kabuli_Chr03 | 6840644                 | C/T  | Gene_Ca_16550      | SYNONYMOUS_CODING             | WD40 repeat                      |
| Kabuli_wild_6948882 | 1399934709                          | Ca_kabuli_Chr03 | 6948882                 | G/C  | NA                 | INTERGENIC                    | NA                               |
| Kabuli_wild_7013496 | 1399934710                          | Ca_kabuli_Chr03 | 7013496                 | A/C  | Gene_Ca_16540      | INTRON                        | Zinc finger,ZZ-type              |
| Kabuli_wild_7015213 | 1399934711                          | Ca_kabuli_Chr03 | 7015213                 | T/G  | Gene_Ca_16540      | NON_SYNONYMOUS_CODING         | Zinc finger,ZZ-type              |
| Kabuli_wild_7026579 | 1399934712                          | Ca_kabuli_Chr03 | 7026579                 | T/G  | Gene_Ca_16540      | SYNONYMOUS_CODING             | Zinc finger,ZZ-type              |
| Kabuli_wild_7203321 | 1399934713                          | Ca_kabuli_Chr03 | 7203321                 | C/A  | NA                 | INTERGENIC                    | NA                               |
| Kabuli_wild_7203327 | 1399934714                          | Ca_kabuli_Chr03 | 7203327                 | A/G  | NA                 | INTERGENIC                    | NA                               |
| Kabuli_wild_7204053 | 1399934715                          | Ca_kabuli_Chr03 | 7204053                 | G/A  | NA                 | INTERGENIC                    | NA                               |
| Kabuli_wild_7204071 | 1399934716                          | Ca_kabuli_Chr03 | 7204071                 | T/C  | NA                 | INTERGENIC                    | NA                               |
| Kabuli_wild_7204087 | 1399934717                          | Ca_kabuli_Chr03 | 7204087                 | C/T  | NA                 | INTERGENIC                    | NA                               |
| Kabuli_wild_7204088 | 1399934718                          | Ca_kabuli_Chr03 | 7204088                 | G/C  | NA                 | INTERGENIC                    | NA                               |
| Kabuli_wild_7204098 | 1399934719                          | Ca_kabuli_Chr03 | 7204098                 | G/A  | NA                 | INTERGENIC                    | NA                               |
| Kabuli_wild_7204099 | 1399934720                          | Ca_kabuli_Chr03 | 7204099                 | C/T  | NA                 | INTERGENIC                    | NA                               |
| Kabuli_wild_7204111 | 1399934721                          | Ca_kabuli_Chr03 | 7204111                 | G/A  | NA                 | INTERGENIC                    | NA                               |
| Kabuli_wild_7204112 | 1399934722                          | Ca_kabuli_Chr03 | 7204112                 | G/A  | NA                 | INTERGENIC                    | NA                               |
| Kabuli_wild_7204133 | 1399934723                          | Ca_kabuli_Chr03 | 7204133                 | G/T  | NA                 | INTERGENIC                    | NA                               |
| Kabuli_wild_7226632 | 1399934724                          | Ca_kabuli_Chr03 | 7226632                 | G/T  | Gene_Ca_16534      | NON_SYNONYMOUS_CODING         | Peptidase C48, SUMO/Sentrin/Ubl1 |
| Kabuli_wild_7226661 | 1399934725                          | Ca_kabuli_Chr03 | 7226661                 | G/T  | Gene_Ca_16534      | NON_SYNONYMOUS_CODING         | Peptidase C48, SUMO/Sentrin/Ubl1 |
| Kabuli_wild_7226689 | 1399934726                          | Ca_kabuli_Chr03 | 7226689                 | T/C  | Gene_Ca_16534      | NON_SYNONYMOUS_CODING         | Peptidase C48, SUMO/Sentrin/Ubl1 |
| Kabuli_wild_7420705 | 1399934727                          | Ca_kabuli_Chr03 | 7420705                 | G/A  | NA                 | INTERGENIC                    | NA                               |
| Kabuli_wild_7461812 | 1399934728                          | Ca_kabuli_Chr03 | 7461812                 | T/A  | Gene_Ca_16524      | SYNONYMOUS_CODING             | Smrprotein/MutS2C-terminal       |
| Kabuli_wild_7482871 | 1399934729                          | Ca_kabuli_Chr03 | 7482871                 | C/T  | NA                 | INTERGENIC                    | NA                               |
| Kabuli_wild_7606901 | 1399934730                          | Ca_kabuli_Chr03 | 7606901                 | T/C  | NA                 | INTERGENIC                    | NA                               |
| Kabuli_wild_7608075 | 1399934731                          | Ca_kabuli_Chr03 | 7608075                 | T/C  | NA                 | INTERGENIC                    | NA                               |
| Kabuli_wild_7660311 | 1399934732                          | Ca_kabuli_Chr03 | 7660311                 | A/G  | NA                 | INTERGENIC                    | NA                               |
| Kabuli_wild_7660504 | 1399934733                          | Ca_kabuli_Chr03 | 7660504                 | A/C  | NA                 | INTERGENIC                    | NA                               |
| Kabuli_wild_7665072 | 1399934734                          | Ca_kabuli_Chr03 | 7665072                 | G/T  | NA                 | INTERGENIC                    | NA                               |
| Kabuli_wild_7665073 | 1399934735                          | Ca_kabuli_Chr03 | 7665073                 | C/T  | NA                 | INTERGENIC                    | NA                               |
| Kabuli_wild_7665075 | 1399934736                          | Ca_kabuli_Chr03 | 7665075                 | G/A  | NA                 | INTERGENIC                    | NA                               |
| Kabuli_wild_7665090 | 1399934737                          | Ca_kabuli_Chr03 | 7665090                 | C/T  | NA                 | INTERGENIC                    | NA                               |
| Kabuli_wild_7665098 | 1399934738                          | Ca_kabuli_Chr03 | 7665098                 | C/T  | NA                 | INTERGENIC                    | NA                               |
| Kabuli_wild_7665112 | 1399934739                          | Ca_kabuli_Chr03 | 7665112                 | C/T  | NA                 | INTERGENIC                    | NA                               |
| Kabuli_wild_7665114 | 1399934740                          | Ca_kabuli_Chr03 | 7665114                 | G/A  | NA                 | INTERGENIC                    | NA                               |
| Kabuli_wild_7665118 | 1399934741                          | Ca_kabuli_Chr03 | 7665118                 | G/C  | NA                 | INTERGENIC                    | NA                               |
| Kabuli_wild_7665123 | 1399934742                          | Ca_kabuli_Chr03 | 7665123                 | G/A  | NA                 | INTERGENIC                    | NA                               |
| Kabuli_wild_7665142 | 1399934743                          | Ca_kabuli_Chr03 | 7665142                 | G/A  | NA                 | INTERGENIC                    | NA                               |
| Kabuli_wild_7665149 | 1399934744                          | Ca_kabuli_Chr03 | 7665149                 | T/G  | NA                 | INTERGENIC                    | NA                               |
| Kabuli_wild_7665156 | 1399934745                          | Ca_kabuli_Chr03 | 7665156                 | G/A  | NA                 | INTERGENIC                    | NA                               |
| Kabuli_wild_7665157 | 1399934746                          | Ca_kabuli_Chr03 | 7665157                 | C/T  | NA                 | INTERGENIC                    | NA                               |
| Kabuli_wild_7665172 | 1399934747                          | Ca_kabuli_Chr03 | 7665172                 | C/A  | NA                 | INTERGENIC                    | NA                               |
| Kabuli_wild_7665173 | 1399934748                          | Ca_kabuli_Chr03 | 7665173                 | C/T  | NA                 | INTERGENIC                    | NA                               |
| Kabuli_wild_7665184 | 1399934749                          | Ca_kabuli_Chr03 | 7665184                 | G/A  | NA                 | INTERGENIC                    | NA                               |
| Kabuli_wild_8279444 | 1399934750                          | Ca_kabuli_Chr03 | 8279444                 | C/A  | NA                 | INTERGENIC                    | NA                               |
| Kabuli_wild_8279461 | 1399934751                          | Ca_kabuli_Chr03 | 8279461                 | C/T  | NA                 | INTERGENIC                    | NA                               |

| SNP IDs             | NCBI dbSNP accession IDs (NCBI_SS#) | Chromosomes     | Physical positions (bp) | SNPs | Gene accession IDs | Sequence components of genome | Putative functions                      |
|---------------------|-------------------------------------|-----------------|-------------------------|------|--------------------|-------------------------------|-----------------------------------------|
| Kabuli_wild_8279519 | 1399934752                          | Ca_kabuli_Chr03 | 8279519                 | C/T  | NA                 | INTERGENIC                    | NA                                      |
| Kabuli_wild_8280956 | 1399934753                          | Ca_kabuli_Chr03 | 8280956                 | G/A  | Gene_Ca_24378      | UPSTREAM                      | Domain of unknown function DUF231,plant |
| Kabuli_wild_8503308 | 1399934754                          | Ca_kabuli_Chr03 | 8503308                 | T/C  | NA                 | INTERGENIC                    | NA                                      |
| Kabuli_wild_8536213 | 1399934755                          | Ca_kabuli_Chr03 | 8536213                 | T/C  | NA                 | INTERGENIC                    | NA                                      |
| Kabuli_wild_8536275 | 1399934756                          | Ca_kabuli_Chr03 | 8536275                 | C/T  | NA                 | INTERGENIC                    | NA                                      |
| Kabuli_wild_8536295 | 1399934757                          | Ca_kabuli_Chr03 | 8536295                 | A/T  | NA                 | INTERGENIC                    | NA                                      |
| Kabuli_wild_8536301 | 1399934758                          | Ca_kabuli_Chr03 | 8536301                 | G/T  | NA                 | INTERGENIC                    | NA                                      |
| Kabuli_wild_8536425 | 1399934759                          | Ca_kabuli_Chr03 | 8536425                 | C/A  | NA                 | INTERGENIC                    | NA                                      |
| Kabuli_wild_8536498 | 1399934760                          | Ca_kabuli_Chr03 | 8536498                 | T/A  | NA                 | INTERGENIC                    | NA                                      |
| Kabuli_wild_8638915 | 1399934761                          | Ca_kabuli_Chr03 | 8638915                 | A/C  | NA                 | INTERGENIC                    | NA                                      |
| Kabuli_wild_8638935 | 1399934762                          | Ca_kabuli_Chr03 | 8638935                 | T/C  | NA                 | INTERGENIC                    | NA                                      |
| Kabuli_wild_8668628 | 1399934763                          | Ca_kabuli_Chr03 | 8668628                 | A/C  | NA                 | INTERGENIC                    | NA                                      |
| Kabuli_wild_8668858 | 1399934764                          | Ca_kabuli_Chr03 | 8668858                 | A/T  | Gene_Ca_23713      | NON_SYNONYMOUS_CODING         | Protein kinase,catalytic domain         |
| Kabuli_wild_8669004 | 1399934765                          | Ca_kabuli_Chr03 | 8669004                 | A/T  | Gene_Ca_23713      | NON_SYNONYMOUS_CODING         | Protein kinase,catalytic domain         |
| Kabuli_wild_8669132 | 1399934766                          | Ca_kabuli_Chr03 | 8669132                 | T/A  | Gene_Ca_23713      | SYNONYMOUS_CODING             | Protein kinase,catalytic domain         |
| Kabuli_wild_8674483 | 1399934767                          | Ca_kabuli_Chr03 | 8674483                 | A/C  | NA                 | INTERGENIC                    | NA                                      |
| Kabuli_wild_8697186 | 1399934768                          | Ca_kabuli_Chr03 | 8697186                 | A/G  | NA                 | INTERGENIC                    | NA                                      |
| Kabuli_wild_8706645 | 1399934769                          | Ca_kabuli_Chr03 | 8706645                 | G/C  | Gene_Ca_23716      | INTRON                        | Aspartate/glutamate/uridylatekinase     |
| Kabuli_wild_8706658 | 1399934770                          | Ca_kabuli_Chr03 | 8706658                 | A/G  | Gene_Ca_23716      | INTRON                        | Aspartate/glutamate/uridylatekinase     |
| Kabuli_wild_8933037 | 1399934771                          | Ca_kabuli_Chr03 | 8933037                 | T/C  | Gene_Ca_25280      | INTRON                        | ABC transporter-like                    |
| Kabuli_wild_8933084 | 1399934772                          | Ca_kabuli_Chr03 | 8933084                 | G/A  | Gene_Ca_25280      | INTRON                        | ABC transporter-like                    |
| Kabuli_wild_8933086 | 1399934773                          | Ca_kabuli_Chr03 | 8933086                 | C/A  | Gene_Ca_25280      | INTRON                        | ABC transporter-like                    |
| Kabuli_wild_8933183 | 1399934774                          | Ca_kabuli_Chr03 | 8933183                 | A/G  | Gene_Ca_25280      | INTRON                        | ABC transporter-like                    |
| Kabuli_wild_8933221 | 1399934775                          | Ca_kabuli_Chr03 | 8933221                 | T/A  | Gene_Ca_25280      | INTRON                        | ABC transporter-like                    |
| Kabuli_wild_8933255 | 1399934776                          | Ca_kabuli_Chr03 | 8933255                 | A/T  | Gene_Ca_25280      | INTRON                        | ABC transporter-like                    |
| Kabuli_wild_8933266 | 1399934777                          | Ca_kabuli_Chr03 | 8933266                 | G/T  | Gene_Ca_25280      | INTRON                        | ABC transporter-like                    |
| Kabuli_wild_8933355 | 1399934778                          | Ca_kabuli_Chr03 | 8933355                 | A/T  | Gene_Ca_25280      | INTRON                        | ABC transporter-like                    |
| Kabuli_wild_8933362 | 1399934779                          | Ca_kabuli_Chr03 | 8933362                 | C/T  | Gene_Ca_25280      | INTRON                        | ABC transporter-like                    |
| Kabuli_wild_8933370 | 1399934780                          | Ca_kabuli_Chr03 | 8933370                 | A/G  | Gene_Ca_25280      | INTRON                        | ABC transporter-like                    |
| Kabuli_wild_8933409 | 1399934781                          | Ca_kabuli_Chr03 | 8933409                 | A/C  | Gene_Ca_25280      | INTRON                        | ABC transporter-like                    |
| Kabuli_wild_9146761 | 1399934782                          | Ca_kabuli_Chr03 | 9146761                 | T/C  | NA                 | INTERGENIC                    | NA                                      |
| Kabuli_wild_9146812 | 1399934783                          | Ca_kabuli_Chr03 | 9146812                 | G/A  | NA                 | INTERGENIC                    | NA                                      |
| Kabuli_wild_9223875 | 1399934784                          | Ca_kabuli_Chr03 | 9223875                 | G/A  | NA                 | INTERGENIC                    | NA                                      |
| Kabuli_wild_9296469 | 1399934785                          | Ca_kabuli_Chr03 | 9296469                 | T/G  | Gene_Ca_20960      | SYNONYMOUS_CODING             | Arf GTPase activating protein           |
| Kabuli_wild_9384227 | 1399934786                          | Ca_kabuli_Chr03 | 9384227                 | A/T  | Gene_Ca_20966      | DOWNSTREAM                    | NA                                      |
| Kabuli_wild_9411779 | 1399934787                          | Ca_kabuli_Chr03 | 9411779                 | C/T  | Gene_Ca_20969      | UPSTREAM                      | Pectinesterase,catalytic                |
| Kabuli_wild_9411780 | 1399934788                          | Ca_kabuli_Chr03 | 9411780                 | G/A  | Gene_Ca_20969      | UPSTREAM                      | Pectinesterase,catalytic                |
| Kabuli_wild_9411810 | 1399934789                          | Ca_kabuli_Chr03 | 9411810                 | A/G  | Gene_Ca_20969      | UPSTREAM                      | Pectinesterase,catalytic                |
| Kabuli_wild_9411842 | 1399934790                          | Ca_kabuli_Chr03 | 9411842                 | T/C  | Gene_Ca_20969      | UPSTREAM                      | Pectinesterase,catalytic                |
| Kabuli_wild_9411849 | 1399934791                          | Ca_kabuli_Chr03 | 9411849                 | T/G  | Gene_Ca_20969      | UPSTREAM                      | Pectinesterase,catalytic                |
| Kabuli_wild_9577170 | 1399934792                          | Ca_kabuli_Chr03 | 9577170                 | G/A  | Gene_Ca_20977      | NON_SYNONYMOUS_CODING         | NA                                      |
| Kabuli_wild_9577402 | 1399934793                          | Ca_kabuli_Chr03 | 9577402                 | G/A  | Gene_Ca_20977      | NON_SYNONYMOUS_CODING         | NA                                      |
| Kabuli_wild_9579805 | 1399934794                          | Ca_kabuli_Chr03 | 9579805                 | A/T  | Gene_Ca_20977      | DOWNSTREAM                    | NA                                      |
| Kabuli_wild_9579808 | 1399934795                          | Ca_kabuli_Chr03 | 9579808                 | C/T  | Gene_Ca_20977      | DOWNSTREAM                    | NA                                      |

| SNP IDs              | NCBI dbSNP accession IDs (NCBI_SS#) | Chromosomes     | Physical positions (bp) | SNPs | Gene accession IDs | Sequence components of genome | Putative functions                    |
|----------------------|-------------------------------------|-----------------|-------------------------|------|--------------------|-------------------------------|---------------------------------------|
| Kabuli_wild_9579811  | 1399934796                          | Ca_kabuli_Chr03 | 9579811                 | G/C  | Gene_Ca_20977      | DOWNSTREAM                    | NA                                    |
| Kabuli_wild_9579817  | 1399934797                          | Ca_kabuli_Chr03 | 9579817                 | G/A  | Gene_Ca_20977      | DOWNSTREAM                    | NA                                    |
| Kabuli_wild_9579818  | 1399934798                          | Ca_kabuli_Chr03 | 9579818                 | G/T  | Gene_Ca_20977      | DOWNSTREAM                    | NA                                    |
| Kabuli_wild_9579824  | 1399934799                          | Ca_kabuli_Chr03 | 9579824                 | A/G  | Gene_Ca_20977      | DOWNSTREAM                    | NA                                    |
| Kabuli_wild_9579830  | 1399934800                          | Ca_kabuli_Chr03 | 9579830                 | T/A  | Gene_Ca_20977      | DOWNSTREAM                    | NA                                    |
| Kabuli_wild_9579831  | 1399934801                          | Ca_kabuli_Chr03 | 9579831                 | C/G  | Gene_Ca_20977      | DOWNSTREAM                    | NA                                    |
| Kabuli_wild_9894316  | 1399934802                          | Ca_kabuli_Chr03 | 9894316                 | C/T  | Gene_Ca_18799      | DOWNSTREAM                    | Reverse transcriptase                 |
| Kabuli_wild_10142152 | 1399934803                          | Ca_kabuli_Chr03 | 10142152                | C/A  | Gene_Ca_18811      | INTRON                        | WD40 repeat                           |
| Kabuli_wild_10159836 | 1399934804                          | Ca_kabuli_Chr03 | 10159836                | A/C  | NA                 | INTERGENIC                    | NA                                    |
| Kabuli_wild_10159859 | 1399934805                          | Ca_kabuli_Chr03 | 10159859                | G/A  | NA                 | INTERGENIC                    | NA                                    |
| Kabuli_wild_10159867 | 1399934806                          | Ca_kabuli_Chr03 | 10159867                | C/T  | NA                 | INTERGENIC                    | NA                                    |
| Kabuli_wild_10159871 | 1399934807                          | Ca_kabuli_Chr03 | 10159871                | C/T  | NA                 | INTERGENIC                    | NA                                    |
| Kabuli_wild_10159875 | 1399934808                          | Ca_kabuli_Chr03 | 10159875                | C/T  | NA                 | INTERGENIC                    | NA                                    |
| Kabuli_wild_10159941 | 1399934809                          | Ca_kabuli_Chr03 | 10159941                | C/A  | NA                 | INTERGENIC                    | NA                                    |
| Kabuli_wild_10159943 | 1399934810                          | Ca_kabuli_Chr03 | 10159943                | G/A  | NA                 | INTERGENIC                    | NA                                    |
| Kabuli_wild_10159944 | 1399934811                          | Ca_kabuli_Chr03 | 10159944                | T/C  | NA                 | INTERGENIC                    | NA                                    |
| Kabuli_wild_10186857 | 1399934812                          | Ca_kabuli_Chr03 | 10186857                | A/G  | Gene_Ca_18812      | INTRON                        | NA                                    |
| Kabuli_wild_10186861 | 1399934813                          | Ca_kabuli_Chr03 | 10186861                | G/T  | Gene_Ca_18812      | INTRON                        | NA                                    |
| Kabuli_wild_10186880 | 1399934814                          | Ca_kabuli_Chr03 | 10186880                | A/G  | Gene_Ca_18812      | INTRON                        | NA                                    |
| Kabuli_wild_10186889 | 1399934815                          | Ca_kabuli_Chr03 | 10186889                | G/A  | Gene_Ca_18812      | INTRON                        | NA                                    |
| Kabuli_wild_10186891 | 1399934816                          | Ca_kabuli_Chr03 | 10186891                | C/G  | Gene_Ca_18812      | INTRON                        | NA                                    |
| Kabuli_wild_10186893 | 1399934817                          | Ca_kabuli_Chr03 | 10186893                | G/C  | Gene_Ca_18812      | INTRON                        | NA                                    |
| Kabuli_wild_10201361 | 1399934818                          | Ca_kabuli_Chr03 | 10201361                | G/T  | Gene_Ca_18813      | SYNONYMOUS_CODING             | VRR-NUC                               |
| Kabuli_wild_10201393 | 1399934819                          | Ca_kabuli_Chr03 | 10201393                | T/C  | Gene_Ca_18813      | NON_SYNONYMOUS_CODING         | VRR-NUC                               |
| Kabuli_wild_10722771 | 1399934820                          | Ca_kabuli_Chr03 | 10722771                | G/C  | Gene_Ca_18831      | INTRON                        | NA                                    |
| Kabuli_wild_10722779 | 1399934821                          | Ca_kabuli_Chr03 | 10722779                | G/A  | Gene_Ca_18831      | INTRON                        | NA                                    |
| Kabuli_wild_10722780 | 1399934822                          | Ca_kabuli_Chr03 | 10722780                | G/T  | Gene_Ca_18831      | INTRON                        | NA                                    |
| Kabuli_wild_10722818 | 1399934823                          | Ca_kabuli_Chr03 | 10722818                | T/C  | Gene_Ca_18831      | INTRON                        | NA                                    |
| Kabuli_wild_10722829 | 1399934824                          | Ca_kabuli_Chr03 | 10722829                | C/G  | Gene_Ca_18831      | INTRON                        | NA                                    |
| Kabuli_wild_10722859 | 1399934825                          | Ca_kabuli_Chr03 | 10722859                | G/A  | Gene_Ca_18831      | INTRON                        | NA                                    |
| Kabuli_wild_10722901 | 1399934826                          | Ca_kabuli_Chr03 | 10722901                | T/C  | Gene_Ca_18831      | INTRON                        | NA                                    |
| Kabuli_wild_10722904 | 1399934827                          | Ca_kabuli_Chr03 | 10722904                | G/T  | Gene_Ca_18831      | INTRON                        | NA                                    |
| Kabuli_wild_11143751 | 1399934828                          | Ca_kabuli_Chr03 | 11143751                | G/A  | Gene_Ca_19368      | NON_SYNONYMOUS_CODING         | NA                                    |
| Kabuli_wild_11143754 | 1399934829                          | Ca_kabuli_Chr03 | 11143754                | G/A  | Gene_Ca_19368      | NON_SYNONYMOUS_CODING         | NA                                    |
| Kabuli_wild_11143818 | 1399934830                          | Ca_kabuli_Chr03 | 11143818                | G/A  | Gene_Ca_19368      | SYNONYMOUS_CODING             | NA                                    |
| Kabuli_wild_11143833 | 1399934831                          | Ca_kabuli_Chr03 | 11143833                | C/T  | Gene_Ca_19368      | NON_SYNONYMOUS_CODING         | NA                                    |
| Kabuli_wild_11273777 | 1399934832                          | Ca_kabuli_Chr03 | 11273777                | A/C  | NA                 | INTERGENIC                    | NA                                    |
| Kabuli_wild_11378425 | 1399934833                          | Ca_kabuli_Chr03 | 11378425                | G/T  | Gene_Ca_19376      | NON_SYNONYMOUS_CODING         | ABC transporter,trans membrane domain |
| Kabuli_wild_11470115 | 1399934834                          | Ca_kabuli_Chr03 | 11470115                | C/T  | NA                 | INTERGENIC                    | NA                                    |
| Kabuli_wild_11470185 | 1399934835                          | Ca_kabuli_Chr03 | 11470185                | A/G  | NA                 | INTERGENIC                    | NA                                    |
| Kabuli_wild_11470186 | 1399934836                          | Ca_kabuli_Chr03 | 11470186                | C/T  | NA                 | INTERGENIC                    | NA                                    |
| Kabuli_wild_11504763 | 1399934837                          | Ca_kabuli_Chr03 | 11504763                | C/T  | NA                 | INTERGENIC                    | NA                                    |
| Kabuli_wild_11504764 | 1399934838                          | Ca_kabuli_Chr03 | 11504764                | T/C  | NA                 | INTERGENIC                    | NA                                    |
| Kabuli_wild_11590793 | 1399934839                          | Ca_kabuli_Chr03 | 11590793                | C/T  | NA                 | INTERGENIC                    | NA                                    |

| SNP IDs              | NCBI dbSNP accession IDs (NCBI_SS#) | Chromosomes     | Physical positions (bp) | SNPs | Gene accession IDs | Sequence components of genome | Putative functions        |
|----------------------|-------------------------------------|-----------------|-------------------------|------|--------------------|-------------------------------|---------------------------|
| Kabuli_wild_11590814 | 1399934840                          | Ca_kabuli_Chr03 | 11590814                | T/C  | NA                 | INTERGENIC                    | NA                        |
| Kabuli_wild_11590832 | 1399934841                          | Ca_kabuli_Chr03 | 11590832                | G/A  | NA                 | INTERGENIC                    | NA                        |
| Kabuli_wild_11590860 | 1399934842                          | Ca_kabuli_Chr03 | 11590860                | G/A  | NA                 | INTERGENIC                    | NA                        |
| Kabuli_wild_11590874 | 1399934843                          | Ca_kabuli_Chr03 | 11590874                | A/G  | NA                 | INTERGENIC                    | NA                        |
| Kabuli_wild_11610455 | 1399934844                          | Ca_kabuli_Chr03 | 11610455                | G/C  | NA                 | INTERGENIC                    | NA                        |
| Kabuli_wild_11610459 | 1399934845                          | Ca_kabuli_Chr03 | 11610459                | C/T  | NA                 | INTERGENIC                    | NA                        |
| Kabuli_wild_11610460 | 1399934846                          | Ca_kabuli_Chr03 | 11610460                | A/G  | NA                 | INTERGENIC                    | NA                        |
| Kabuli_wild_11610461 | 1399934847                          | Ca_kabuli_Chr03 | 11610461                | C/T  | NA                 | INTERGENIC                    | NA                        |
| Kabuli_wild_11610481 | 1399934848                          | Ca_kabuli_Chr03 | 11610481                | C/T  | NA                 | INTERGENIC                    | NA                        |
| Kabuli_wild_11610482 | 1399934849                          | Ca_kabuli_Chr03 | 11610482                | A/G  | NA                 | INTERGENIC                    | NA                        |
| Kabuli_wild_11610500 | 1399934850                          | Ca_kabuli_Chr03 | 11610500                | A/G  | NA                 | INTERGENIC                    | NA                        |
| Kabuli_wild_11653927 | 1399934851                          | Ca_kabuli_Chr03 | 11653927                | G/C  | NA                 | INTERGENIC                    | NA                        |
| Kabuli_wild_11684683 | 1399934852                          | Ca_kabuli_Chr03 | 11684683                | A/C  | NA                 | INTERGENIC                    | NA                        |
| Kabuli_wild_11811685 | 1399934853                          | Ca_kabuli_Chr03 | 11811685                | A/G  | Gene_Ca_19392      | INTRON                        | Putativezinc-fingerdomain |
| Kabuli_wild_12051826 | 1399934854                          | Ca_kabuli_Chr03 | 12051826                | A/C  | NA                 | INTERGENIC                    | NA                        |
| Kabuli_wild_12056637 | 1399934855                          | Ca_kabuli_Chr03 | 12056637                | C/T  | Gene_Ca_22246      | SYNONYMOUS_CODING             | NA                        |
| Kabuli_wild_12058576 | 1399934856                          | Ca_kabuli_Chr03 | 12058576                | T/C  | Gene_Ca_22246      | INTRON                        | NA                        |
| Kabuli_wild_12067458 | 1399934857                          | Ca_kabuli_Chr03 | 12067458                | A/C  | Gene_Ca_22246      | INTRON                        | NA                        |
| Kabuli_wild_12069026 | 1399934858                          | Ca_kabuli_Chr03 | 12069026                | A/C  | Gene_Ca_22246      | SYNONYMOUS_CODING             | NA                        |
| Kabuli_wild_12069092 | 1399934859                          | Ca_kabuli_Chr03 | 12069092                | T/G  | Gene_Ca_22246      | SYNONYMOUS_CODING             | NA                        |
| Kabuli_wild_12095571 | 1399934860                          | Ca_kabuli_Chr03 | 12095571                | T/G  | Gene_Ca_22245      | SYNONYMOUS_CODING             | Crotonase,core            |
| Kabuli_wild_12095632 | 1399934861                          | Ca_kabuli_Chr03 | 12095632                | C/T  | Gene_Ca_22245      | NON_SYNONYMOUS_CODING         | Crotonase,core            |
| Kabuli_wild_12124099 | 1399934862                          | Ca_kabuli_Chr03 | 12124099                | G/A  | NA                 | INTERGENIC                    | NA                        |
| Kabuli_wild_12129021 | 1399934863                          | Ca_kabuli_Chr03 | 12129021                | A/G  | NA                 | INTERGENIC                    | NA                        |
| Kabuli_wild_12294240 | 1399934864                          | Ca_kabuli_Chr03 | 12294240                | C/T  | NA                 | INTERGENIC                    | NA                        |
| Kabuli_wild_12394742 | 1399934865                          | Ca_kabuli_Chr03 | 12394742                | G/A  | NA                 | INTERGENIC                    | NA                        |
| Kabuli_wild_12599496 | 1399934866                          | Ca_kabuli_Chr03 | 12599496                | A/C  | Gene_Ca_21021      | SYNONYMOUS_CODING             | Zinc finger,Dof-type      |
| Kabuli_wild_12622503 | 1399934867                          | Ca_kabuli_Chr03 | 12622503                | G/A  | NA                 | INTERGENIC                    | NA                        |
| Kabuli_wild_12622534 | 1399934868                          | Ca_kabuli_Chr03 | 12622534                | T/C  | NA                 | INTERGENIC                    | NA                        |
| Kabuli_wild_12622543 | 1399934869                          | Ca_kabuli_Chr03 | 12622543                | G/A  | NA                 | INTERGENIC                    | NA                        |
| Kabuli_wild_12622567 | 1399934870                          | Ca_kabuli_Chr03 | 12622567                | A/C  | NA                 | INTERGENIC                    | NA                        |
| Kabuli_wild_12622578 | 1399934871                          | Ca_kabuli_Chr03 | 12622578                | G/A  | NA                 | INTERGENIC                    | NA                        |
| Kabuli_wild_12627143 | 1399934872                          | Ca_kabuli_Chr03 | 12627143                | T/G  | Gene_Ca_21019      | DOWNSTREAM                    | Integrase,catalyticcore   |
| Kabuli_wild_12627144 | 1399934873                          | Ca_kabuli_Chr03 | 12627144                | G/A  | Gene_Ca_21019      | DOWNSTREAM                    | Integrase,catalyticcore   |
| Kabuli_wild_12627154 | 1399934874                          | Ca_kabuli_Chr03 | 12627154                | C/T  | Gene_Ca_21019      | DOWNSTREAM                    | Integrase,catalyticcore   |
| Kabuli_wild_12627166 | 1399934875                          | Ca_kabuli_Chr03 | 12627166                | G/A  | Gene_Ca_21019      | DOWNSTREAM                    | Integrase,catalyticcore   |
| Kabuli_wild_12627174 | 1399934876                          | Ca_kabuli_Chr03 | 12627174                | G/A  | Gene_Ca_21019      | DOWNSTREAM                    | Integrase,catalyticcore   |
| Kabuli_wild_12627233 | 1399934877                          | Ca_kabuli_Chr03 | 12627233                | T/A  | Gene_Ca_21019      | DOWNSTREAM                    | Integrase,catalyticcore   |
| Kabuli_wild_12709003 | 1399934878                          | Ca_kabuli_Chr03 | 12709003                | G/A  | Gene_Ca_21017      | NON_SYNONYMOUS_CODING         | NA                        |
| Kabuli_wild_12709005 | 1399934879                          | Ca_kabuli_Chr03 | 12709005                | T/A  | Gene_Ca_21017      | NON_SYNONYMOUS_CODING         | NA                        |
| Kabuli_wild_12709027 | 1399934880                          | Ca_kabuli_Chr03 | 12709027                | G/A  | Gene_Ca_21017      | NON_SYNONYMOUS_CODING         | NA                        |
| Kabuli_wild_12709036 | 1399934881                          | Ca_kabuli_Chr03 | 12709036                | C/T  | Gene_Ca_21017      | NON_SYNONYMOUS_CODING         | NA                        |
| Kabuli_wild_12709044 | 1399934882                          | Ca_kabuli_Chr03 | 12709044                | G/A  | Gene_Ca_21017      | SYNONYMOUS_CODING             | NA                        |
| Kabuli_wild_12709048 | 1399934883                          | Ca_kabuli_Chr03 | 12709048                | G/A  | Gene_Ca_21017      | NON_SYNONYMOUS_CODING         | NA                        |

| SNP IDs              | NCBI dbSNP accession IDs (NCBI_SS#) | Chromosomes     | Physical positions (bp) | SNPs | Gene accession IDs | Sequence components of genome | Putative functions  |
|----------------------|-------------------------------------|-----------------|-------------------------|------|--------------------|-------------------------------|---------------------|
| Kabuli_wild_12709050 | 1399934884                          | Ca_kabuli_Chr03 | 12709050                | G/A  | Gene_Ca_21017      | SYNONYMOUS_CODING             | NA                  |
| Kabuli_wild_12709080 | 1399934885                          | Ca_kabuli_Chr03 | 12709080                | T/G  | Gene_Ca_21017      | SYNONYMOUS_CODING             | NA                  |
| Kabuli_wild_12809286 | 1399934886                          | Ca_kabuli_Chr03 | 12809286                | A/G  | Gene_Ca_21015      | INTRON                        | Kinesin,motordomain |
| Kabuli_wild_12809794 | 1399934887                          | Ca_kabuli_Chr03 | 12809794                | T/C  | Gene_Ca_21015      | NON_SYNONYMOUS_CODING         | Kinesin,motordomain |
| Kabuli_wild_12814558 | 1399934888                          | Ca_kabuli_Chr03 | 12814558                | A/G  | NA                 | INTERGENIC                    | NA                  |
| Kabuli_wild_12814571 | 1399934889                          | Ca_kabuli_Chr03 | 12814571                | C/A  | NA                 | INTERGENIC                    | NA                  |
| Kabuli_wild_12814597 | 1399934890                          | Ca_kabuli_Chr03 | 12814597                | T/A  | NA                 | INTERGENIC                    | NA                  |
| Kabuli_wild_12814599 | 1399934891                          | Ca_kabuli_Chr03 | 12814599                | A/T  | NA                 | INTERGENIC                    | NA                  |
| Kabuli_wild_12814600 | 1399934892                          | Ca_kabuli_Chr03 | 12814600                | A/G  | NA                 | INTERGENIC                    | NA                  |
| Kabuli_wild_12814603 | 1399934893                          | Ca_kabuli_Chr03 | 12814603                | T/C  | NA                 | INTERGENIC                    | NA                  |
| Kabuli_wild_12814631 | 1399934894                          | Ca_kabuli_Chr03 | 12814631                | C/T  | NA                 | INTERGENIC                    | NA                  |
| Kabuli_wild_12897831 | 1399934895                          | Ca_kabuli_Chr03 | 12897831                | C/A  | NA                 | INTERGENIC                    | NA                  |
| Kabuli_wild_12897839 | 1399934896                          | Ca_kabuli_Chr03 | 12897839                | G/A  | NA                 | INTERGENIC                    | NA                  |
| Kabuli_wild_12897841 | 1399934897                          | Ca_kabuli_Chr03 | 12897841                | C/A  | NA                 | INTERGENIC                    | NA                  |
| Kabuli_wild_12897869 | 1399934898                          | Ca_kabuli_Chr03 | 12897869                | C/T  | NA                 | INTERGENIC                    | NA                  |
| Kabuli_wild_12897881 | 1399934899                          | Ca_kabuli_Chr03 | 12897881                | C/T  | NA                 | INTERGENIC                    | NA                  |
| Kabuli_wild_12897882 | 1399934900                          | Ca_kabuli_Chr03 | 12897882                | T/G  | NA                 | INTERGENIC                    | NA                  |
| Kabuli_wild_12897883 | 1399934901                          | Ca_kabuli_Chr03 | 12897883                | G/T  | NA                 | INTERGENIC                    | NA                  |
| Kabuli_wild_12897884 | 1399934902                          | Ca_kabuli_Chr03 | 12897884                | C/T  | NA                 | INTERGENIC                    | NA                  |
| Kabuli_wild_12897886 | 1399934903                          | Ca_kabuli_Chr03 | 12897886                | G/A  | NA                 | INTERGENIC                    | NA                  |
| Kabuli_wild_12897887 | 1399934904                          | Ca_kabuli_Chr03 | 12897887                | T/C  | NA                 | INTERGENIC                    | NA                  |
| Kabuli_wild_12897898 | 1399934905                          | Ca_kabuli_Chr03 | 12897898                | G/T  | NA                 | INTERGENIC                    | NA                  |
| Kabuli_wild_12897906 | 1399934906                          | Ca_kabuli_Chr03 | 12897906                | C/A  | NA                 | INTERGENIC                    | NA                  |
| Kabuli_wild_12897926 | 1399934907                          | Ca_kabuli_Chr03 | 12897926                | A/C  | NA                 | INTERGENIC                    | NA                  |
| Kabuli_wild_13041991 | 1399934908                          | Ca_kabuli_Chr03 | 13041991                | T/G  | NA                 | INTERGENIC                    | NA                  |
| Kabuli_wild_13041993 | 1399934909                          | Ca_kabuli_Chr03 | 13041993                | T/A  | NA                 | INTERGENIC                    | NA                  |
| Kabuli_wild_13042006 | 1399934910                          | Ca_kabuli_Chr03 | 13042006                | C/T  | NA                 | INTERGENIC                    | NA                  |
| Kabuli_wild_13042042 | 1399934911                          | Ca_kabuli_Chr03 | 13042042                | G/C  | NA                 | INTERGENIC                    | NA                  |
| Kabuli_wild_13042056 | 1399934912                          | Ca_kabuli_Chr03 | 13042056                | C/G  | NA                 | INTERGENIC                    | NA                  |
| Kabuli_wild_13185490 | 1399934913                          | Ca_kabuli_Chr03 | 13185490                | G/T  | Gene_Ca_22687      | NON_SYNONYMOUS_CODING         | NA                  |
| Kabuli_wild_13185493 | 1399934914                          | Ca_kabuli_Chr03 | 13185493                | G/A  | Gene_Ca_22687      | NON_SYNONYMOUS_CODING         | NA                  |
| Kabuli_wild_13185499 | 1399934915                          | Ca_kabuli_Chr03 | 13185499                | A/G  | Gene_Ca_22687      | NON_SYNONYMOUS_CODING         | NA                  |
| Kabuli_wild_13185502 | 1399934916                          | Ca_kabuli_Chr03 | 13185502                | G/A  | Gene_Ca_22687      | NON_SYNONYMOUS_CODING         | NA                  |
| Kabuli_wild_13185508 | 1399934917                          | Ca_kabuli_Chr03 | 13185508                | C/T  | Gene_Ca_22687      | NON_SYNONYMOUS_CODING         | NA                  |
| Kabuli_wild_13185516 | 1399934918                          | Ca_kabuli_Chr03 | 13185516                | C/T  | Gene_Ca_22687      | SYNONYMOUS_CODING             | NA                  |
| Kabuli_wild_13185518 | 1399934919                          | Ca_kabuli_Chr03 | 13185518                | G/T  | Gene_Ca_22687      | NON_SYNONYMOUS_CODING         | NA                  |
| Kabuli_wild_13185530 | 1399934920                          | Ca_kabuli_Chr03 | 13185530                | C/T  | Gene_Ca_22687      | NON_SYNONYMOUS_CODING         | NA                  |
| Kabuli_wild_13185532 | 1399934921                          | Ca_kabuli_Chr03 | 13185532                | G/T  | Gene_Ca_22687      | NON_SYNONYMOUS_CODING         | NA                  |
| Kabuli_wild_13185541 | 1399934922                          | Ca_kabuli_Chr03 | 13185541                | G/A  | Gene_Ca_22687      | NON_SYNONYMOUS_CODING         | NA                  |
| Kabuli_wild_13185560 | 1399934923                          | Ca_kabuli_Chr03 | 13185560                | G/A  | Gene_Ca_22687      | NON_SYNONYMOUS_CODING         | NA                  |
| Kabuli_wild_13185567 | 1399934924                          | Ca_kabuli_Chr03 | 13185567                | T/G  | Gene_Ca_22687      | SYNONYMOUS_CODING             | NA                  |
| Kabuli_wild_13185574 | 1399934925                          | Ca_kabuli_Chr03 | 13185574                | G/A  | Gene_Ca_22687      | NON_SYNONYMOUS_CODING         | NA                  |
| Kabuli_wild_13185575 | 1399934926                          | Ca_kabuli_Chr03 | 13185575                | C/T  | Gene_Ca_22687      | NON_SYNONYMOUS_CODING         | NA                  |
| Kabuli_wild_13185591 | 1399934927                          | Ca_kabuli_Chr03 | 13185591                | C/T  | Gene_Ca_22687      | SYNONYMOUS_CODING             | NA                  |

| SNP IDs              | NCBI dbSNP accession IDs (NCBI_SS#) | Chromosomes     | Physical positions (bp) | SNPs | Gene accession IDs | Sequence components of genome | Putative functions                                  |
|----------------------|-------------------------------------|-----------------|-------------------------|------|--------------------|-------------------------------|-----------------------------------------------------|
| Kabuli_wild_13185602 | 1399934928                          | Ca_kabuli_Chr03 | 13185602                | G/A  | Gene_Ca_22687      | NON_SYNONYMOUS_CODING         | NA                                                  |
| Kabuli_wild_13202952 | 1399934929                          | Ca_kabuli_Chr03 | 13202952                | G/A  | Gene_Ca_22688      | NON_SYNONYMOUS_CODING         | NA                                                  |
| Kabuli_wild_13202959 | 1399934930                          | Ca_kabuli_Chr03 | 13202959                | C/T  | Gene_Ca_22688      | NON_SYNONYMOUS_CODING         | NA                                                  |
| Kabuli_wild_13203014 | 1399934931                          | Ca_kabuli_Chr03 | 13203014                | C/T  | Gene_Ca_22688      | SYNONYMOUS_CODING             | NA                                                  |
| Kabuli_wild_13203019 | 1399934932                          | Ca_kabuli_Chr03 | 13203019                | G/A  | Gene_Ca_22688      | SYNONYMOUS_CODING             | NA                                                  |
| Kabuli_wild_13203037 | 1399934933                          | Ca_kabuli_Chr03 | 13203037                | C/T  | Gene_Ca_22688      | NON_SYNONYMOUS_CODING         | NA                                                  |
| Kabuli_wild_13303783 | 1399934934                          | Ca_kabuli_Chr03 | 13303783                | T/A  | NA                 | INTERGENIC                    | NA                                                  |
| Kabuli_wild_13396906 | 1399934935                          | Ca_kabuli_Chr03 | 13396906                | A/C  | Gene_Ca_22695      | INTRON                        | Glycosyltransferase, family2                        |
| Kabuli_wild_13396925 | 1399934936                          | Ca_kabuli_Chr03 | 13396925                | A/T  | Gene_Ca_22695      | INTRON                        | Glycosyltransferase, family2                        |
| Kabuli_wild_13397207 | 1399934937                          | Ca_kabuli_Chr03 | 13397207                | A/C  | Gene_Ca_22695      | INTRON                        | Glycosyltransferase, family2                        |
| Kabuli_wild_13420872 | 1399934938                          | Ca_kabuli_Chr03 | 13420872                | T/C  | Gene_Ca_22697      | UPSTREAM                      | Kinesin, motor domain                               |
| Kabuli_wild_13617948 | 1399934939                          | Ca_kabuli_Chr03 | 13617948                | A/C  | Gene_Ca_25319      | SYNONYMOUS_CODING             | NA                                                  |
| Kabuli_wild_13654047 | 1399934940                          | Ca_kabuli_Chr03 | 13654047                | T/C  | Gene_Ca_25322      | NON_SYNONYMOUS_CODING         | Exo70 exocyst complex subunit                       |
| Kabuli_wild_13746900 | 1399934941                          | Ca_kabuli_Chr03 | 13746900                | C/T  | Gene_Ca_25324      | SYNONYMOUS_CODING             | NA                                                  |
| Kabuli_wild_13923713 | 1399934942                          | Ca_kabuli_Chr03 | 13923713                | G/T  | NA                 | INTERGENIC                    | NA                                                  |
| Kabuli_wild_13923718 | 1399934943                          | Ca_kabuli_Chr03 | 13923718                | G/A  | NA                 | INTERGENIC                    | NA                                                  |
| Kabuli_wild_13923728 | 1399934944                          | Ca_kabuli_Chr03 | 13923728                | T/C  | NA                 | INTERGENIC                    | NA                                                  |
| Kabuli_wild_13923761 | 1399934945                          | Ca_kabuli_Chr03 | 13923761                | T/C  | NA                 | INTERGENIC                    | NA                                                  |
| Kabuli_wild_14200381 | 1399934946                          | Ca_kabuli_Chr03 | 14200381                | A/C  | NA                 | INTERGENIC                    | NA                                                  |
| Kabuli_wild_14470345 | 1399934947                          | Ca_kabuli_Chr03 | 14470345                | T/A  | NA                 | INTERGENIC                    | NA                                                  |
| Kabuli_wild_14497290 | 1399934948                          | Ca_kabuli_Chr03 | 14497290                | C/G  | NA                 | INTERGENIC                    | NA                                                  |
| Kabuli_wild_14497374 | 1399934949                          | Ca_kabuli_Chr03 | 14497374                | C/A  | NA                 | INTERGENIC                    | NA                                                  |
| Kabuli_wild_14653193 | 1399934950                          | Ca_kabuli_Chr03 | 14653193                | T/G  | Gene_Ca_22505      | INTRON                        | Zinc finger, RING-type                              |
| Kabuli_wild_14653194 | 1399934951                          | Ca_kabuli_Chr03 | 14653194                | C/T  | Gene_Ca_22505      | INTRON                        | Zinc finger, RING-type                              |
| Kabuli_wild_14653195 | 1399934952                          | Ca_kabuli_Chr03 | 14653195                | G/T  | Gene_Ca_22505      | INTRON                        | Zinc finger, RING-type                              |
| Kabuli_wild_14653270 | 1399934953                          | Ca_kabuli_Chr03 | 14653270                | C/A  | Gene_Ca_22505      | INTRON                        | Zinc finger, RING-type                              |
| Kabuli_wild_14653271 | 1399934954                          | Ca_kabuli_Chr03 | 14653271                | G/A  | Gene_Ca_22505      | INTRON                        | Zinc finger, RING-type                              |
| Kabuli_wild_14658175 | 1399934955                          | Ca_kabuli_Chr03 | 14658175                | A/C  | Gene_Ca_22505      | INTRON                        | Zinc finger, RING-type                              |
| Kabuli_wild_14812960 | 1399934956                          | Ca_kabuli_Chr03 | 14812960                | A/C  | Gene_Ca_22500      | NON_SYNONYMOUS_CODING         | UDP-glucuronosyl/UDP-glucosyltransferase            |
| Kabuli_wild_15042402 | 1399934957                          | Ca_kabuli_Chr03 | 15042402                | C/T  | NA                 | INTERGENIC                    | NA                                                  |
| Kabuli_wild_15145910 | 1399934958                          | Ca_kabuli_Chr03 | 15145910                | A/C  | Gene_Ca_17017      | SYNONYMOUS_CODING             | NA                                                  |
| Kabuli_wild_15217116 | 1399934959                          | Ca_kabuli_Chr03 | 15217116                | A/G  | NA                 | INTERGENIC                    | NA                                                  |
| Kabuli_wild_15386481 | 1399934960                          | Ca_kabuli_Chr03 | 15386481                | A/G  | Gene_Ca_17028      | SYNONYMOUS_CODING             | NA                                                  |
| Kabuli_wild_15386673 | 1399934961                          | Ca_kabuli_Chr03 | 15386673                | A/G  | Gene_Ca_17028      | SYNONYMOUS_CODING             | NA                                                  |
| Kabuli_wild_15596603 | 1399934962                          | Ca_kabuli_Chr03 | 15596603                | G/T  | Gene_Ca_17041      | STOP_GAINED                   | NA                                                  |
| Kabuli_wild_15596639 | 1399934963                          | Ca_kabuli_Chr03 | 15596639                | G/T  | Gene_Ca_17041      | NON_SYNONYMOUS_CODING         | NA                                                  |
| Kabuli_wild_15745152 | 1399934964                          | Ca_kabuli_Chr03 | 15745152                | A/C  | Gene_Ca_17048      | INTRON                        | Fork head-associated (FHA) domain                   |
| Kabuli_wild_15758068 | 1399934965                          | Ca_kabuli_Chr03 | 15758068                | A/C  | Gene_Ca_17049      | NON_SYNONYMOUS_CODING         | Pectinesterase, catalytic                           |
| Kabuli_wild_16202937 | 1399934966                          | Ca_kabuli_Chr03 | 16202937                | A/T  | NA                 | INTERGENIC                    | NA                                                  |
| Kabuli_wild_16202975 | 1399934967                          | Ca_kabuli_Chr03 | 16202975                | T/C  | NA                 | INTERGENIC                    | NA                                                  |
| Kabuli_wild_16243228 | 1399934968                          | Ca_kabuli_Chr03 | 16243228                | C/T  | Gene_Ca_18253      | UPSTREAM                      | NA                                                  |
| Kabuli_wild_16396582 | 1399934969                          | Ca_kabuli_Chr03 | 16396582                | G/T  | Gene_Ca_18261      | NON_SYNONYMOUS_CODING         | Glyoxalase/bleomycin resistance protein/dioxygenase |
| Kabuli_wild_16396673 | 1399934970                          | Ca_kabuli_Chr03 | 16396673                | C/A  | Gene_Ca_18261      | NON_SYNONYMOUS_CODING         | Glyoxalase/bleomycin resistance protein/dioxygenase |
| Kabuli_wild_16436250 | 1399934971                          | Ca_kabuli_Chr03 | 16436250                | C/T  | NA                 | INTERGENIC                    | NA                                                  |



| SNP IDs              | NCBI dbSNP accession IDs (NCBI_SS#) | Chromosomes     | Physical positions (bp) | SNPs | Gene accession IDs | Sequence components of genome | Putative functions                  |
|----------------------|-------------------------------------|-----------------|-------------------------|------|--------------------|-------------------------------|-------------------------------------|
| Kabuli_wild_16436259 | 1399934972                          | Ca_kabuli_Chr03 | 16436259                | C/T  | NA                 | INTERGENIC                    | NA                                  |
| Kabuli_wild_16436300 | 1399934973                          | Ca_kabuli_Chr03 | 16436300                | G/A  | NA                 | INTERGENIC                    | NA                                  |
| Kabuli_wild_16436319 | 1399934974                          | Ca_kabuli_Chr03 | 16436319                | G/A  | NA                 | INTERGENIC                    | NA                                  |
| Kabuli_wild_16436334 | 1399934975                          | Ca_kabuli_Chr03 | 16436334                | C/T  | NA                 | INTERGENIC                    | NA                                  |
| Kabuli_wild_16436337 | 1399934976                          | Ca_kabuli_Chr03 | 16436337                | C/T  | NA                 | INTERGENIC                    | NA                                  |
| Kabuli_wild_16436342 | 1399934977                          | Ca_kabuli_Chr03 | 16436342                | T/C  | NA                 | INTERGENIC                    | NA                                  |
| Kabuli_wild_16436349 | 1399934978                          | Ca_kabuli_Chr03 | 16436349                | C/T  | NA                 | INTERGENIC                    | NA                                  |
| Kabuli_wild_16587623 | 1399934979                          | Ca_kabuli_Chr03 | 16587623                | A/G  | Gene_Ca_18274      | INTRON                        | Ribosomal protein L32e              |
| Kabuli_wild_16624487 | 1399934980                          | Ca_kabuli_Chr03 | 16624487                | T/C  | NA                 | INTERGENIC                    | NA                                  |
| Kabuli_wild_16648598 | 1399934981                          | Ca_kabuli_Chr03 | 16648598                | G/A  | Gene_Ca_18277      | SYNONYMOUS_CODING             | U box domain                        |
| Kabuli_wild_16682375 | 1399934982                          | Ca_kabuli_Chr03 | 16682375                | C/G  | NA                 | INTERGENIC                    | NA                                  |
| Kabuli_wild_17126652 | 1399934983                          | Ca_kabuli_Chr03 | 17126652                | A/G  | NA                 | INTERGENIC                    | NA                                  |
| Kabuli_wild_17136027 | 1399934984                          | Ca_kabuli_Chr03 | 17136027                | G/A  | NA                 | INTERGENIC                    | NA                                  |
| Kabuli_wild_17136071 | 1399934985                          | Ca_kabuli_Chr03 | 17136071                | C/G  | NA                 | INTERGENIC                    | NA                                  |
| Kabuli_wild_17136097 | 1399934986                          | Ca_kabuli_Chr03 | 17136097                | C/T  | NA                 | INTERGENIC                    | NA                                  |
| Kabuli_wild_17334924 | 1399934987                          | Ca_kabuli_Chr03 | 17334924                | G/T  | NA                 | INTERGENIC                    | NA                                  |
| Kabuli_wild_17362983 | 1399934988                          | Ca_kabuli_Chr03 | 17362983                | C/G  | NA                 | INTERGENIC                    | NA                                  |
| Kabuli_wild_17460012 | 1399934989                          | Ca_kabuli_Chr03 | 17460012                | C/A  | NA                 | INTERGENIC                    | NA                                  |
| Kabuli_wild_17679404 | 1399934990                          | Ca_kabuli_Chr03 | 17679404                | C/T  | Gene_Ca_21115      | SYNONYMOUS_CODING             | NA                                  |
| Kabuli_wild_17679409 | 1399934991                          | Ca_kabuli_Chr03 | 17679409                | C/T  | Gene_Ca_21115      | SYNONYMOUS_CODING             | NA                                  |
| Kabuli_wild_17679436 | 1399934992                          | Ca_kabuli_Chr03 | 17679436                | G/A  | Gene_Ca_21115      | NON_SYNONYMOUS_CODING         | NA                                  |
| Kabuli_wild_17679479 | 1399934993                          | Ca_kabuli_Chr03 | 17679479                | G/C  | Gene_Ca_21115      | NON_SYNONYMOUS_CODING         | NA                                  |
| Kabuli_wild_17679510 | 1399934994                          | Ca_kabuli_Chr03 | 17679510                | G/A  | Gene_Ca_21115      | SYNONYMOUS_CODING             | NA                                  |
| Kabuli_wild_17914677 | 1399934995                          | Ca_kabuli_Chr03 | 17914677                | T/G  | Gene_Ca_21129      | DOWNSTREAM                    | Zinc finger,N-recognin              |
| Kabuli_wild_17936677 | 1399934996                          | Ca_kabuli_Chr03 | 17936677                | A/G  | NA                 | INTERGENIC                    | NA                                  |
| Kabuli_wild_17936842 | 1399934997                          | Ca_kabuli_Chr03 | 17936842                | A/G  | NA                 | INTERGENIC                    | NA                                  |
| Kabuli_wild_17984978 | 1399934998                          | Ca_kabuli_Chr03 | 17984978                | T/G  | Gene_Ca_21132      | SYNONYMOUS_CODING             | Protein kinase,catalytic domain     |
| Kabuli_wild_17986521 | 1399934999                          | Ca_kabuli_Chr03 | 17986521                | G/C  | Gene_Ca_21132      | INTRON                        | Protein kinase,catalytic domain     |
| Kabuli_wild_17986525 | 1399935000                          | Ca_kabuli_Chr03 | 17986525                | G/T  | Gene_Ca_21132      | INTRON                        | Protein kinase,catalytic domain     |
| Kabuli_wild_17986529 | 1399935001                          | Ca_kabuli_Chr03 | 17986529                | A/G  | Gene_Ca_21132      | NON_SYNONYMOUS_CODING         | Protein kinase,catalytic domain     |
| Kabuli_wild_18024415 | 1399935002                          | Ca_kabuli_Chr03 | 18024415                | A/C  | NA                 | INTERGENIC                    | NA                                  |
| Kabuli_wild_18110655 | 1399935003                          | Ca_kabuli_Chr03 | 18110655                | T/C  | Gene_Ca_21138      | NON_SYNONYMOUS_CODING         | Transcription facto rGRAS           |
| Kabuli_wild_18215321 | 1399935004                          | Ca_kabuli_Chr03 | 18215321                | G/C  | Gene_Ca_19612      | SYNONYMOUS_CODING             | Oligo peptide transporter           |
| Kabuli_wild_18215332 | 1399935005                          | Ca_kabuli_Chr03 | 18215332                | T/C  | Gene_Ca_19612      | NON_SYNONYMOUS_CODING         | Oligo peptide transporter           |
| Kabuli_wild_18264564 | 1399935006                          | Ca_kabuli_Chr03 | 18264564                | A/G  | Gene_Ca_19613      | INTRON                        | PI31proteasomeregulator             |
| Kabuli_wild_18264593 | 1399935007                          | Ca_kabuli_Chr03 | 18264593                | T/C  | Gene_Ca_19613      | INTRON                        | PI31proteasomeregulator             |
| Kabuli_wild_18264613 | 1399935008                          | Ca_kabuli_Chr03 | 18264613                | C/T  | Gene_Ca_19613      | INTRON                        | PI31proteasomeregulator             |
| Kabuli_wild_18264614 | 1399935009                          | Ca_kabuli_Chr03 | 18264614                | A/T  | Gene_Ca_19613      | INTRON                        | PI31proteasomeregulator             |
| Kabuli_wild_18265036 | 1399935010                          | Ca_kabuli_Chr03 | 18265036                | A/G  | Gene_Ca_19613      | NON_SYNONYMOUS_CODING         | PI31proteasomeregulator             |
| Kabuli_wild_18330208 | 1399935011                          | Ca_kabuli_Chr03 | 18330208                | G/A  | NA                 | INTERGENIC                    | NA                                  |
| Kabuli_wild_18355427 | 1399935012                          | Ca_kabuli_Chr03 | 18355427                | T/C  | Gene_Ca_19620      | SYNONYMOUS_CODING             | Protein of unknown function DUF3411 |
| Kabuli_wild_18355445 | 1399935013                          | Ca_kabuli_Chr03 | 18355445                | T/C  | Gene_Ca_19620      | SYNONYMOUS_CODING             | Protein of unknown function DUF3411 |
| Kabuli_wild_18375547 | 1399935014                          | Ca_kabuli_Chr03 | 18375547                | T/C  | Gene_Ca_19623      | DOWNSTREAM                    | GlutathioneS-transferase,N-terminal |
| Kabuli_wild_18382404 | 1399935015                          | Ca_kabuli_Chr03 | 18382404                | T/C  | Gene_Ca_19625      | DOWNSTREAM                    | GlutathioneS-transferase,N-terminal |

| SNP IDs              | NCBI dbSNP accession IDs (NCBI_SS#) | Chromosomes     | Physical positions (bp) | SNPs | Gene accession IDs | Sequence components of genome | Putative functions                                 |
|----------------------|-------------------------------------|-----------------|-------------------------|------|--------------------|-------------------------------|----------------------------------------------------|
| Kabuli_wild_18383884 | 1399935016                          | Ca_kabuli_Chr03 | 18383884                | T/C  | NA                 | INTERGENIC                    | NA                                                 |
| Kabuli_wild_18383900 | 1399935017                          | Ca_kabuli_Chr03 | 18383900                | C/G  | NA                 | INTERGENIC                    | NA                                                 |
| Kabuli_wild_18467707 | 1399935018                          | Ca_kabuli_Chr03 | 18467707                | C/G  | Gene_Ca_19629      | INTRON                        | NA                                                 |
| Kabuli_wild_18476006 | 1399935019                          | Ca_kabuli_Chr03 | 18476006                | A/G  | NA                 | INTERGENIC                    | NA                                                 |
| Kabuli_wild_18476065 | 1399935020                          | Ca_kabuli_Chr03 | 18476065                | C/A  | NA                 | INTERGENIC                    | NA                                                 |
| Kabuli_wild_18658494 | 1399935021                          | Ca_kabuli_Chr03 | 18658494                | T/G  | NA                 | INTERGENIC                    | NA                                                 |
| Kabuli_wild_19372722 | 1399935022                          | Ca_kabuli_Chr03 | 19372722                | G/T  | NA                 | INTERGENIC                    | NA                                                 |
| Kabuli_wild_19442839 | 1399935023                          | Ca_kabuli_Chr03 | 19442839                | G/A  | NA                 | INTERGENIC                    | NA                                                 |
| Kabuli_wild_19442847 | 1399935024                          | Ca_kabuli_Chr03 | 19442847                | C/T  | NA                 | INTERGENIC                    | NA                                                 |
| Kabuli_wild_19442884 | 1399935025                          | Ca_kabuli_Chr03 | 19442884                | G/C  | NA                 | INTERGENIC                    | NA                                                 |
| Kabuli_wild_19445920 | 1399935026                          | Ca_kabuli_Chr03 | 19445920                | T/A  | NA                 | INTERGENIC                    | NA                                                 |
| Kabuli_wild_19445925 | 1399935027                          | Ca_kabuli_Chr03 | 19445925                | A/G  | NA                 | INTERGENIC                    | NA                                                 |
| Kabuli_wild_19475095 | 1399935028                          | Ca_kabuli_Chr03 | 19475095                | G/T  | Gene_Ca_19344      | DOWNSTREAM                    | Alcohol dehydrogenase superfamily, zinc-containing |
| Kabuli_wild_19490587 | 1399935029                          | Ca_kabuli_Chr03 | 19490587                | G/A  | Gene_Ca_19346      | INTRON                        | Sodium/calciumexchangermembraneregion              |
| Kabuli_wild_19742530 | 1399935030                          | Ca_kabuli_Chr03 | 19742530                | C/T  | NA                 | INTERGENIC                    | NA                                                 |
| Kabuli_wild_19742549 | 1399935031                          | Ca_kabuli_Chr03 | 19742549                | C/T  | NA                 | INTERGENIC                    | NA                                                 |
| Kabuli_wild_19742600 | 1399935032                          | Ca_kabuli_Chr03 | 19742600                | G/A  | NA                 | INTERGENIC                    | NA                                                 |
| Kabuli_wild_19788512 | 1399935033                          | Ca_kabuli_Chr03 | 19788512                | G/A  | NA                 | INTERGENIC                    | NA                                                 |
| Kabuli_wild_19802763 | 1399935034                          | Ca_kabuli_Chr03 | 19802763                | C/T  | Gene_Ca_09383      | INTRON                        | Adenosine/AMPdeaminase                             |
| Kabuli_wild_19804985 | 1399935035                          | Ca_kabuli_Chr03 | 19804985                | T/C  | Gene_Ca_09383      | SYNONYMOUS_CODING             | Adenosine/AMPdeaminase                             |
| Kabuli_wild_19805063 | 1399935036                          | Ca_kabuli_Chr03 | 19805063                | A/C  | Gene_Ca_09383      | SYNONYMOUS_CODING             | Adenosine/AMPdeaminase                             |
| Kabuli_wild_19829510 | 1399935037                          | Ca_kabuli_Chr03 | 19829510                | G/T  | Gene_Ca_09385      | UPSTREAM                      | Disease resistance protein                         |
| Kabuli_wild_19850532 | 1399935038                          | Ca_kabuli_Chr03 | 19850532                | T/C  | Gene_Ca_09386      | DOWNSTREAM                    | Ubi Aprenyltransferase family                      |
| Kabuli_wild_19850589 | 1399935039                          | Ca_kabuli_Chr03 | 19850589                | C/T  | Gene_Ca_09386      | DOWNSTREAM                    | Ubi Aprenyltransferase family                      |
| Kabuli_wild_19851504 | 1399935040                          | Ca_kabuli_Chr03 | 19851504                | T/C  | Gene_Ca_09386      | DOWNSTREAM                    | Ubi Aprenyltransferase family                      |
| Kabuli_wild_19851520 | 1399935041                          | Ca_kabuli_Chr03 | 19851520                | T/C  | Gene_Ca_09386      | DOWNSTREAM                    | Ubi Aprenyltransferase family                      |
| Kabuli_wild_19857613 | 1399935042                          | Ca_kabuli_Chr03 | 19857613                | T/A  | Gene_Ca_09388      | INTRON                        | PeptidaseM24.structural domain                     |
| Kabuli_wild_19878913 | 1399935043                          | Ca_kabuli_Chr03 | 19878913                | T/C  | NA                 | INTERGENIC                    | NA                                                 |
| Kabuli_wild_19883927 | 1399935044                          | Ca_kabuli_Chr03 | 19883927                | A/G  | Gene_Ca_09392      | NON_SYNONYMOUS_CODING         | Importin-beta,N-terminal                           |
| Kabuli_wild_19896800 | 1399935045                          | Ca_kabuli_Chr03 | 19896800                | C/A  | Gene_Ca_09393      | NON_SYNONYMOUS_CODING         | Peptidase C48, SUMO/Sentrin/Ubl1                   |
| Kabuli_wild_19896809 | 1399935046                          | Ca_kabuli_Chr03 | 19896809                | A/G  | Gene_Ca_09393      | NON_SYNONYMOUS_CODING         | Peptidase C48, SUMO/Sentrin/Ubl1                   |
| Kabuli_wild_19896819 | 1399935047                          | Ca_kabuli_Chr03 | 19896819                | C/T  | Gene_Ca_09393      | NON_SYNONYMOUS_CODING         | Peptidase C48, SUMO/Sentrin/Ubl1                   |
| Kabuli_wild_19896848 | 1399935048                          | Ca_kabuli_Chr03 | 19896848                | C/T  | Gene_Ca_09393      | NON_SYNONYMOUS_CODING         | Peptidase C48, SUMO/Sentrin/Ubl1                   |
| Kabuli_wild_19896858 | 1399935049                          | Ca_kabuli_Chr03 | 19896858                | C/T  | Gene_Ca_09393      | NON_SYNONYMOUS_CODING         | Peptidase C48, SUMO/Sentrin/Ubl1                   |
| Kabuli_wild_19896867 | 1399935050                          | Ca_kabuli_Chr03 | 19896867                | C/T  | Gene_Ca_09393      | NON_SYNONYMOUS_CODING         | Peptidase C48, SUMO/Sentrin/Ubl1                   |
| Kabuli_wild_19907774 | 1399935051                          | Ca_kabuli_Chr03 | 19907774                | T/C  | NA                 | INTERGENIC                    | NA                                                 |
| Kabuli_wild_19956343 | 1399935052                          | Ca_kabuli_Chr03 | 19956343                | C/T  | NA                 | INTERGENIC                    | NA                                                 |
| Kabuli_wild_19956391 | 1399935053                          | Ca_kabuli_Chr03 | 19956391                | C/T  | Gene_Ca_09398      | INTRON                        | Ubiquitin                                          |
| Kabuli_wild_19956452 | 1399935054                          | Ca_kabuli_Chr03 | 19956452                | G/A  | Gene_Ca_09398      | INTRON                        | Ubiquitin                                          |
| Kabuli_wild_19978334 | 1399935055                          | Ca_kabuli_Chr03 | 19978334                | A/C  | Gene_Ca_09399      | NON_SYNONYMOUS_CODING         | Ammoniumtransporter                                |
| Kabuli_wild_19978343 | 1399935056                          | Ca_kabuli_Chr03 | 19978343                | A/C  | Gene_Ca_09399      | NON_SYNONYMOUS_CODING         | Ammoniumtransporter                                |
| Kabuli_wild_19978407 | 1399935057                          | Ca_kabuli_Chr03 | 19978407                | C/T  | Gene_Ca_09399      | SYNONYMOUS_CODING             | Ammoniumtransporter                                |
| Kabuli_wild_19979288 | 1399935058                          | Ca_kabuli_Chr03 | 19979288                | A/T  | Gene_Ca_09399      | SYNONYMOUS_CODING             | Ammoniumtransporter                                |
| Kabuli_wild_19979318 | 1399935059                          | Ca_kabuli_Chr03 | 19979318                | C/A  | Gene_Ca_09399      | SYNONYMOUS_CODING             | Ammoniumtransporter                                |

| SNP IDs              | NCBI dbSNP accession IDs (NCBI_SS#) | Chromosomes     | Physical positions (bp) | SNPs | Gene accession IDs | Sequence components of genome | Putative functions                                 |
|----------------------|-------------------------------------|-----------------|-------------------------|------|--------------------|-------------------------------|----------------------------------------------------|
| Kabuli_wild_20000967 | 1399935060                          | Ca_kabuli_Chr03 | 20000967                | C/G  | Gene_Ca_09401      | UPSTREAM                      | Aminotransferase-like,plant mobile domain          |
| Kabuli_wild_20021912 | 1399935061                          | Ca_kabuli_Chr03 | 20021912                | C/A  | Gene_Ca_09405      | NON_SYNONYMOUS_CODING         | Tetra tricopeptide repeat                          |
| Kabuli_wild_20022247 | 1399935062                          | Ca_kabuli_Chr03 | 20022247                | G/A  | Gene_Ca_09405      | SYNONYMOUS_CODING             | Tetra tricopeptide repeat                          |
| Kabuli_wild_20022253 | 1399935063                          | Ca_kabuli_Chr03 | 20022253                | G/A  | Gene_Ca_09405      | SYNONYMOUS_CODING             | Tetra tricopeptide repeat                          |
| Kabuli_wild_20025220 | 1399935064                          | Ca_kabuli_Chr03 | 20025220                | A/G  | Gene_Ca_09405      | INTRON                        | Tetra tricopeptide repeat                          |
| Kabuli_wild_20025221 | 1399935065                          | Ca_kabuli_Chr03 | 20025221                | T/G  | Gene_Ca_09405      | INTRON                        | Tetra tricopeptide repeat                          |
| Kabuli_wild_20025423 | 1399935066                          | Ca_kabuli_Chr03 | 20025423                | A/T  | Gene_Ca_09405      | INTRON                        | Tetra tricopeptide repeat                          |
| Kabuli_wild_20030298 | 1399935067                          | Ca_kabuli_Chr03 | 20030298                | G/A  | Gene_Ca_09405      | DOWNSTREAM                    | Tetra tricopeptide repeat                          |
| Kabuli_wild_20240118 | 1399935068                          | Ca_kabuli_Chr03 | 20240118                | T/G  | Gene_Ca_09424      | INTRON                        | CCAAT-binding factor                               |
| Kabuli_wild_20242663 | 1399935069                          | Ca_kabuli_Chr03 | 20242663                | C/T  | Gene_Ca_09424      | INTRON                        | CCAAT-binding factor                               |
| Kabuli_wild_20269329 | 1399935070                          | Ca_kabuli_Chr03 | 20269329                | G/A  | Gene_Ca_09427      | NON_SYNONYMOUS_CODING         | NA                                                 |
| Kabuli_wild_20365442 | 1399935071                          | Ca_kabuli_Chr03 | 20365442                | A/C  | NA                 | INTERGENIC                    | NA                                                 |
| Kabuli_wild_20415615 | 1399935072                          | Ca_kabuli_Chr03 | 20415615                | A/G  | NA                 | INTERGENIC                    | NA                                                 |
| Kabuli_wild_20487325 | 1399935073                          | Ca_kabuli_Chr03 | 20487325                | A/T  | NA                 | INTERGENIC                    | NA                                                 |
| Kabuli_wild_20552836 | 1399935074                          | Ca_kabuli_Chr03 | 20552836                | T/G  | Gene_Ca_09446      | NON_SYNONYMOUS_CODING         | NA                                                 |
| Kabuli_wild_20794976 | 1399935075                          | Ca_kabuli_Chr03 | 20794976                | A/C  | Gene_Ca_09455      | INTRON                        | Integrase,catalyticcore                            |
| Kabuli_wild_20794993 | 1399935076                          | Ca_kabuli_Chr03 | 20794993                | A/G  | Gene_Ca_09455      | INTRON                        | Integrase,catalyticcore                            |
| Kabuli_wild_20795014 | 1399935077                          | Ca_kabuli_Chr03 | 20795014                | C/T  | Gene_Ca_09455      | INTRON                        | Integrase,catalyticcore                            |
| Kabuli_wild_20795015 | 1399935078                          | Ca_kabuli_Chr03 | 20795015                | A/C  | Gene_Ca_09455      | INTRON                        | Integrase,catalyticcore                            |
| Kabuli_wild_20799763 | 1399935079                          | Ca_kabuli_Chr03 | 20799763                | T/G  | Gene_Ca_09455      | UPSTREAM                      | Integrase,catalyticcore                            |
| Kabuli_wild_20799811 | 1399935080                          | Ca_kabuli_Chr03 | 20799811                | C/T  | Gene_Ca_09455      | UPSTREAM                      | Integrase,catalyticcore                            |
| Kabuli_wild_20799817 | 1399935081                          | Ca_kabuli_Chr03 | 20799817                | G/A  | Gene_Ca_09455      | UPSTREAM                      | Integrase,catalyticcore                            |
| Kabuli_wild_20799820 | 1399935082                          | Ca_kabuli_Chr03 | 20799820                | A/G  | Gene_Ca_09455      | UPSTREAM                      | Integrase,catalyticcore                            |
| Kabuli_wild_20799835 | 1399935083                          | Ca_kabuli_Chr03 | 20799835                | A/G  | Gene_Ca_09455      | UPSTREAM                      | Integrase,catalyticcore                            |
| Kabuli_wild_20799841 | 1399935084                          | Ca_kabuli_Chr03 | 20799841                | C/T  | Gene_Ca_09455      | UPSTREAM                      | Integrase,catalyticcore                            |
| Kabuli_wild_20829399 | 1399935085                          | Ca_kabuli_Chr03 | 20829399                | A/G  | Gene_Ca_09459      | INTRON                        | HEAT                                               |
| Kabuli_wild_21069672 | 1399935086                          | Ca_kabuli_Chr03 | 21069672                | A/G  | Gene_Ca_09474      | SYNONYMOUS_CODING             | Aminoacyl-tRNAsynthetase,classII(D/K/N)            |
| Kabuli_wild_21069714 | 1399935087                          | Ca_kabuli_Chr03 | 21069714                | G/A  | Gene_Ca_09474      | INTRON                        | Aminoacyl-tRNAsynthetase,classII(D/K/N)            |
| Kabuli_wild_21069910 | 1399935088                          | Ca_kabuli_Chr03 | 21069910                | C/T  | Gene_Ca_09474      | SYNONYMOUS_CODING             | Aminoacyl-tRNAsynthetase,classII(D/K/N)            |
| Kabuli_wild_21069916 | 1399935089                          | Ca_kabuli_Chr03 | 21069916                | C/T  | Gene_Ca_09474      | SYNONYMOUS_CODING             | Aminoacyl-tRNAsynthetase,classII(D/K/N)            |
| Kabuli_wild_21069917 | 1399935090                          | Ca_kabuli_Chr03 | 21069917                | G/A  | Gene_Ca_09474      | NON_SYNONYMOUS_CODING         | Aminoacyl-tRNAsynthetase,classII(D/K/N)            |
| Kabuli_wild_21069959 | 1399935091                          | Ca_kabuli_Chr03 | 21069959                | G/A  | Gene_Ca_09474      | INTRON                        | Aminoacyl-tRNAsynthetase,classII(D/K/N)            |
| Kabuli_wild_21069986 | 1399935092                          | Ca_kabuli_Chr03 | 21069986                | A/C  | Gene_Ca_09474      | INTRON                        | Aminoacyl-tRNAsynthetase,classII(D/K/N)            |
| Kabuli_wild_21246629 | 1399935093                          | Ca_kabuli_Chr03 | 21246629                | T/C  | Gene_Ca_09487      | INTRON                        | TranslationelongationfactorP/YeiP,central          |
| Kabuli_wild_21246877 | 1399935094                          | Ca_kabuli_Chr03 | 21246877                | T/C  | Gene_Ca_09487      | INTRON                        | TranslationelongationfactorP/YeiP,central          |
| Kabuli_wild_21280166 | 1399935095                          | Ca_kabuli_Chr03 | 21280166                | A/G  | Gene_Ca_09490      | SYNONYMOUS_CODING             | Protein kinase,catalytic domain                    |
| Kabuli_wild_21385460 | 1399935096                          | Ca_kabuli_Chr03 | 21385460                | A/C  | Gene_Ca_09496      | NON_SYNONYMOUS_CODING         | ATPase,P-type,K/Mg/Cd/Cu/Zn/Na/Ca/Na/H-transporter |
| Kabuli_wild_21421082 | 1399935097                          | Ca_kabuli_Chr03 | 21421082                | A/G  | NA                 | INTERGENIC                    | NA                                                 |
| Kabuli_wild_21421146 | 1399935098                          | Ca_kabuli_Chr03 | 21421146                | C/A  | NA                 | INTERGENIC                    | NA                                                 |
| Kabuli_wild_21421162 | 1399935099                          | Ca_kabuli_Chr03 | 21421162                | G/A  | NA                 | INTERGENIC                    | NA                                                 |
| Kabuli_wild_21421358 | 1399935100                          | Ca_kabuli_Chr03 | 21421358                | G/A  | NA                 | INTERGENIC                    | NA                                                 |
| Kabuli_wild_21421362 | 1399935101                          | Ca_kabuli_Chr03 | 21421362                | T/A  | NA                 | INTERGENIC                    | NA                                                 |
| Kabuli_wild_21421369 | 1399935102                          | Ca_kabuli_Chr03 | 21421369                | G/A  | NA                 | INTERGENIC                    | NA                                                 |
| Kabuli_wild_21421424 | 1399935103                          | Ca_kabuli_Chr03 | 21421424                | G/A  | NA                 | INTERGENIC                    | NA                                                 |

| SNP IDs              | NCBI dbSNP accession IDs (NCBI_SS#) | Chromosomes     | Physical positions (bp) | SNPs | Gene accession IDs | Sequence components of genome | Putative functions                                  |
|----------------------|-------------------------------------|-----------------|-------------------------|------|--------------------|-------------------------------|-----------------------------------------------------|
| Kabuli_wild_21421440 | 1399935104                          | Ca_kabuli_Chr03 | 21421440                | C/T  | NA                 | INTERGENIC                    | NA                                                  |
| Kabuli_wild_21489004 | 1399935105                          | Ca_kabuli_Chr03 | 21489004                | T/G  | Gene_Ca_09505      | NON_SYNONYMOUS_CODING         | Ubiquitin-conjugating enzyme, E2                    |
| Kabuli_wild_21500178 | 1399935106                          | Ca_kabuli_Chr03 | 21500178                | G/A  | Gene_Ca_09506      | DOWNSTREAM                    | RasGTPase                                           |
| Kabuli_wild_21500179 | 1399935107                          | Ca_kabuli_Chr03 | 21500179                | A/T  | Gene_Ca_09506      | DOWNSTREAM                    | RasGTPase                                           |
| Kabuli_wild_21524296 | 1399935108                          | Ca_kabuli_Chr03 | 21524296                | G/T  | NA                 | INTERGENIC                    | NA                                                  |
| Kabuli_wild_21524379 | 1399935109                          | Ca_kabuli_Chr03 | 21524379                | A/G  | NA                 | INTERGENIC                    | NA                                                  |
| Kabuli_wild_21558354 | 1399935110                          | Ca_kabuli_Chr03 | 21558354                | G/A  | NA                 | INTERGENIC                    | NA                                                  |
| Kabuli_wild_21558357 | 1399935111                          | Ca_kabuli_Chr03 | 21558357                | T/G  | NA                 | INTERGENIC                    | NA                                                  |
| Kabuli_wild_21687953 | 1399935112                          | Ca_kabuli_Chr03 | 21687953                | C/T  | Gene_Ca_09523      | NON_SYNONYMOUS_CODING         | NA                                                  |
| Kabuli_wild_21687956 | 1399935113                          | Ca_kabuli_Chr03 | 21687956                | C/T  | Gene_Ca_09523      | SYNONYMOUS_CODING             | NA                                                  |
| Kabuli_wild_21687959 | 1399935114                          | Ca_kabuli_Chr03 | 21687959                | T/C  | Gene_Ca_09523      | NON_SYNONYMOUS_CODING         | NA                                                  |
| Kabuli_wild_21687960 | 1399935115                          | Ca_kabuli_Chr03 | 21687960                | G/A  | Gene_Ca_09523      | NON_SYNONYMOUS_CODING         | NA                                                  |
| Kabuli_wild_21687961 | 1399935116                          | Ca_kabuli_Chr03 | 21687961                | C/A  | Gene_Ca_09523      | STOP_GAINED                   | NA                                                  |
| Kabuli_wild_21687966 | 1399935117                          | Ca_kabuli_Chr03 | 21687966                | C/A  | Gene_Ca_09523      | NON_SYNONYMOUS_CODING         | NA                                                  |
| Kabuli_wild_21741769 | 1399935118                          | Ca_kabuli_Chr03 | 21741769                | C/T  | NA                 | INTERGENIC                    | NA                                                  |
| Kabuli_wild_21809498 | 1399935119                          | Ca_kabuli_Chr03 | 21809498                | T/G  | NA                 | INTERGENIC                    | NA                                                  |
| Kabuli_wild_21809503 | 1399935120                          | Ca_kabuli_Chr03 | 21809503                | T/C  | NA                 | INTERGENIC                    | NA                                                  |
| Kabuli_wild_21809546 | 1399935121                          | Ca_kabuli_Chr03 | 21809546                | T/A  | NA                 | INTERGENIC                    | NA                                                  |
| Kabuli_wild_21950053 | 1399935122                          | Ca_kabuli_Chr03 | 21950053                | C/G  | Gene_Ca_20431      | INTRON                        | Domain of unknown function DUF296                   |
| Kabuli_wild_22008087 | 1399935123                          | Ca_kabuli_Chr03 | 22008087                | G/A  | Gene_Ca_20426      | NON_SYNONYMOUS_CODING         | SEC7-like                                           |
| Kabuli_wild_22026111 | 1399935124                          | Ca_kabuli_Chr03 | 22026111                | A/G  | Gene_Ca_20423      | INTRON                        | Armadillo                                           |
| Kabuli_wild_22062091 | 1399935125                          | Ca_kabuli_Chr03 | 22062091                | T/G  | Gene_Ca_20420      | INTRON                        | Fork head-associated (FHA) domain                   |
| Kabuli_wild_22062137 | 1399935126                          | Ca_kabuli_Chr03 | 22062137                | A/T  | Gene_Ca_20420      | INTRON                        | Fork head-associated (FHA) domain                   |
| Kabuli_wild_22062965 | 1399935127                          | Ca_kabuli_Chr03 | 22062965                | C/T  | Gene_Ca_20420      | INTRON                        | Fork head-associated (FHA) domain                   |
| Kabuli_wild_22188933 | 1399935128                          | Ca_kabuli_Chr03 | 22188933                | C/T  | Gene_Ca_20411      | SYNONYMOUS_CODING             | Domain of unknown function DUF1088                  |
| Kabuli_wild_22200927 | 1399935129                          | Ca_kabuli_Chr03 | 22200927                | T/C  | Gene_Ca_20410      | SYNONYMOUS_CODING             | NA                                                  |
| Kabuli_wild_22202485 | 1399935130                          | Ca_kabuli_Chr03 | 22202485                | T/G  | Gene_Ca_20410      | NON_SYNONYMOUS_CODING         | NA                                                  |
| Kabuli_wild_22253842 | 1399935131                          | Ca_kabuli_Chr03 | 22253842                | T/C  | Gene_Ca_20405      | INTRON                        | Glycosyltransferase, family8                        |
| Kabuli_wild_22346294 | 1399935132                          | Ca_kabuli_Chr03 | 22346294                | T/C  | Gene_Ca_06276      | NON_SYNONYMOUS_CODING         | PeptidaseS8/S53, subtilisin/kexin/sedolisin         |
| Kabuli_wild_22404660 | 1399935133                          | Ca_kabuli_Chr03 | 22404660                | G/T  | NA                 | INTERGENIC                    | NA                                                  |
| Kabuli_wild_22539182 | 1399935134                          | Ca_kabuli_Chr03 | 22539182                | C/T  | Gene_Ca_06260      | NON_SYNONYMOUS_CODING         | Armadillo                                           |
| Kabuli_wild_22659967 | 1399935135                          | Ca_kabuli_Chr03 | 22659967                | A/C  | Gene_Ca_06245      | NON_SYNONYMOUS_CODING         | SPX, N-terminal                                     |
| Kabuli_wild_22727393 | 1399935136                          | Ca_kabuli_Chr03 | 22727393                | G/A  | Gene_Ca_06238      | NON_SYNONYMOUS_CODING         | Malicioxidoreductase                                |
| Kabuli_wild_22727439 | 1399935137                          | Ca_kabuli_Chr03 | 22727439                | A/C  | Gene_Ca_06238      | SYNONYMOUS_CODING             | Malicioxidoreductase                                |
| Kabuli_wild_22730700 | 1399935138                          | Ca_kabuli_Chr03 | 22730700                | T/G  | Gene_Ca_06238      | SYNONYMOUS_CODING             | Malicioxidoreductase                                |
| Kabuli_wild_22730976 | 1399935139                          | Ca_kabuli_Chr03 | 22730976                | A/G  | Gene_Ca_06238      | NON_SYNONYMOUS_CODING         | Malicioxidoreductase                                |
| Kabuli_wild_22765862 | 1399935140                          | Ca_kabuli_Chr03 | 22765862                | T/C  | NA                 | INTERGENIC                    | NA                                                  |
| Kabuli_wild_22765987 | 1399935141                          | Ca_kabuli_Chr03 | 22765987                | G/T  | NA                 | INTERGENIC                    | NA                                                  |
| Kabuli_wild_22772579 | 1399935142                          | Ca_kabuli_Chr03 | 22772579                | A/G  | NA                 | INTERGENIC                    | NA                                                  |
| Kabuli_wild_22846051 | 1399935143                          | Ca_kabuli_Chr03 | 22846051                | G/A  | Gene_Ca_06225      | INTRON                        | RNAhelicase, ATP-dependent, DEAD-box, conservedsite |
| Kabuli_wild_22990523 | 1399935144                          | Ca_kabuli_Chr03 | 22990523                | C/T  | Gene_Ca_06210      | NON_SYNONYMOUS_CODING         | Glycosidehydrolase, family14                        |
| Kabuli_wild_23042249 | 1399935145                          | Ca_kabuli_Chr03 | 23042249                | A/C  | Gene_Ca_06206      | NON_SYNONYMOUS_CODING         | Mediatorcomplex, subunitMed12                       |
| Kabuli_wild_23053066 | 1399935146                          | Ca_kabuli_Chr03 | 23053066                | A/C  | NA                 | INTERGENIC                    | NA                                                  |
| Kabuli_wild_23088854 | 1399935147                          | Ca_kabuli_Chr03 | 23088854                | C/G  | Gene_Ca_06203      | NON_SYNONYMOUS_CODING         | Down-regulated-in-metastasisprotein                 |

| SNP IDs              | NCBI dbSNP accession IDs (NCBI_SS#) | Chromosomes     | Physical positions (bp) | SNPs | Gene accession IDs | Sequence components of genome | Putative functions                                                 |
|----------------------|-------------------------------------|-----------------|-------------------------|------|--------------------|-------------------------------|--------------------------------------------------------------------|
| Kabuli_wild_23279589 | 1399935148                          | Ca_kabuli_Chr03 | 23279589                | T/C  | Gene_Ca_06189      | NON_SYNONYMOUS_CODING         | SNF2-related                                                       |
| Kabuli_wild_23299089 | 1399935149                          | Ca_kabuli_Chr03 | 23299089                | G/A  | Gene_Ca_06188      | NON_SYNONYMOUS_CODING         | ARID/BRIGHTDNA-binding domain                                      |
| Kabuli_wild_23341087 | 1399935150                          | Ca_kabuli_Chr03 | 23341087                | A/C  | Gene_Ca_06186      | INTRON                        | Protein of unknown function DUF3522                                |
| Kabuli_wild_23341416 | 1399935151                          | Ca_kabuli_Chr03 | 23341416                | C/A  | Gene_Ca_06186      | INTRON                        | Protein of unknown function DUF3522                                |
| Kabuli_wild_23400864 | 1399935152                          | Ca_kabuli_Chr03 | 23400864                | A/C  | NA                 | INTERGENIC                    | NA                                                                 |
| Kabuli_wild_23455008 | 1399935153                          | Ca_kabuli_Chr03 | 23455008                | A/G  | Gene_Ca_06180      | DOWNSTREAM                    | Glycosidehydrolase, family28                                       |
| Kabuli_wild_23455128 | 1399935154                          | Ca_kabuli_Chr03 | 23455128                | A/G  | Gene_Ca_06180      | DOWNSTREAM                    | Glycosidehydrolase, family28                                       |
| Kabuli_wild_23461370 | 1399935155                          | Ca_kabuli_Chr03 | 23461370                | C/A  | NA                 | INTERGENIC                    | NA                                                                 |
| Kabuli_wild_23570083 | 1399935156                          | Ca_kabuli_Chr03 | 23570083                | C/A  | Gene_Ca_06172      | UPSTREAM                      | D-isomerspecific2-hydroxyaciddehydrogenase, NAD-binding            |
| Kabuli_wild_23593275 | 1399935157                          | Ca_kabuli_Chr03 | 23593275                | G/A  | NA                 | INTERGENIC                    | NA                                                                 |
| Kabuli_wild_23593287 | 1399935158                          | Ca_kabuli_Chr03 | 23593287                | T/G  | NA                 | INTERGENIC                    | NA                                                                 |
| Kabuli_wild_23593288 | 1399935159                          | Ca_kabuli_Chr03 | 23593288                | G/A  | NA                 | INTERGENIC                    | NA                                                                 |
| Kabuli_wild_23593294 | 1399935160                          | Ca_kabuli_Chr03 | 23593294                | T/C  | NA                 | INTERGENIC                    | NA                                                                 |
| Kabuli_wild_23593308 | 1399935161                          | Ca_kabuli_Chr03 | 23593308                | G/A  | NA                 | INTERGENIC                    | NA                                                                 |
| Kabuli_wild_23593309 | 1399935162                          | Ca_kabuli_Chr03 | 23593309                | T/C  | NA                 | INTERGENIC                    | NA                                                                 |
| Kabuli_wild_23593314 | 1399935163                          | Ca_kabuli_Chr03 | 23593314                | C/G  | NA                 | INTERGENIC                    | NA                                                                 |
| Kabuli_wild_23593318 | 1399935164                          | Ca_kabuli_Chr03 | 23593318                | G/A  | NA                 | INTERGENIC                    | NA                                                                 |
| Kabuli_wild_23593326 | 1399935165                          | Ca_kabuli_Chr03 | 23593326                | T/G  | NA                 | INTERGENIC                    | NA                                                                 |
| Kabuli_wild_23593328 | 1399935166                          | Ca_kabuli_Chr03 | 23593328                | C/A  | NA                 | INTERGENIC                    | NA                                                                 |
| Kabuli_wild_23695061 | 1399935167                          | Ca_kabuli_Chr03 | 23695061                | G/T  | Gene_Ca_06159      | NON_SYNONYMOUS_CODING         | PeptidaseS8/S53, subtilisin/kexin/sedolisin                        |
| Kabuli_wild_23744259 | 1399935168                          | Ca_kabuli_Chr03 | 23744259                | T/C  | Gene_Ca_06154      | INTRON                        | UDP-glucuronosyl/UDP-glucosyltransferase                           |
| Kabuli_wild_23786875 | 1399935169                          | Ca_kabuli_Chr03 | 23786875                | T/G  | NA                 | INTERGENIC                    | NA                                                                 |
| Kabuli_wild_23918105 | 1399935170                          | Ca_kabuli_Chr03 | 23918105                | T/C  | NA                 | INTERGENIC                    | NA                                                                 |
| Kabuli_wild_23966110 | 1399935171                          | Ca_kabuli_Chr03 | 23966110                | G/A  | Gene_Ca_06124      | SYNONYMOUS_CODING             | DNA-binding WRKY                                                   |
| Kabuli_wild_24024507 | 1399935172                          | Ca_kabuli_Chr03 | 24024507                | A/C  | NA                 | INTERGENIC                    | NA                                                                 |
| Kabuli_wild_24024509 | 1399935173                          | Ca_kabuli_Chr03 | 24024509                | T/C  | NA                 | INTERGENIC                    | NA                                                                 |
| Kabuli_wild_24024513 | 1399935174                          | Ca_kabuli_Chr03 | 24024513                | A/C  | NA                 | INTERGENIC                    | NA                                                                 |
| Kabuli_wild_24099599 | 1399935175                          | Ca_kabuli_Chr03 | 24099599                | A/T  | NA                 | INTERGENIC                    | NA                                                                 |
| Kabuli_wild_24136623 | 1399935176                          | Ca_kabuli_Chr03 | 24136623                | A/G  | Gene_Ca_06105      | NON_SYNONYMOUS_CODING         | Short-chaindehydrogenase/reductaseSDR                              |
| Kabuli_wild_24161791 | 1399935177                          | Ca_kabuli_Chr03 | 24161791                | T/C  | Gene_Ca_06103      | NON_SYNONYMOUS_CODING         | Lectin:cholesterolacyltransferase                                  |
| Kabuli_wild_24194574 | 1399935178                          | Ca_kabuli_Chr03 | 24194574                | C/T  | NA                 | INTERGENIC                    | NA                                                                 |
| Kabuli_wild_24209881 | 1399935179                          | Ca_kabuli_Chr03 | 24209881                | T/A  | NA                 | INTERGENIC                    | NA                                                                 |
| Kabuli_wild_24297894 | 1399935180                          | Ca_kabuli_Chr03 | 24297894                | C/A  | Gene_Ca_06091      | NON_SYNONYMOUS_CODING         | NA                                                                 |
| Kabuli_wild_24355197 | 1399935181                          | Ca_kabuli_Chr03 | 24355197                | T/G  | NA                 | INTERGENIC                    | NA                                                                 |
| Kabuli_wild_24417498 | 1399935182                          | Ca_kabuli_Chr03 | 24417498                | A/C  | Gene_Ca_06076      | SYNONYMOUS_CODING             | Actin-bindingFH2/DRFautoregulatory                                 |
| Kabuli_wild_24417507 | 1399935183                          | Ca_kabuli_Chr03 | 24417507                | A/C  | Gene_Ca_06076      | SYNONYMOUS_CODING             | Actin-bindingFH2/DRFautoregulatory                                 |
| Kabuli_wild_24464677 | 1399935184                          | Ca_kabuli_Chr03 | 24464677                | G/A  | Gene_Ca_06070      | NON_SYNONYMOUS_CODING         | Protein phosphatase 2C, manganese/magnesium aspartate binding site |
| Kabuli_wild_24475663 | 1399935185                          | Ca_kabuli_Chr03 | 24475663                | A/T  | Gene_Ca_06069      | INTRON                        | Sedlin                                                             |
| Kabuli_wild_24475712 | 1399935186                          | Ca_kabuli_Chr03 | 24475712                | A/G  | Gene_Ca_06069      | INTRON                        | Sedlin                                                             |
| Kabuli_wild_24531720 | 1399935187                          | Ca_kabuli_Chr03 | 24531720                | C/T  | NA                 | INTERGENIC                    | NA                                                                 |
| Kabuli_wild_24538726 | 1399935188                          | Ca_kabuli_Chr03 | 24538726                | A/C  | NA                 | INTERGENIC                    | NA                                                                 |
| Kabuli_wild_24637834 | 1399935189                          | Ca_kabuli_Chr03 | 24637834                | G/T  | NA                 | INTERGENIC                    | NA                                                                 |
| Kabuli_wild_24637837 | 1399935190                          | Ca_kabuli_Chr03 | 24637837                | A/C  | NA                 | INTERGENIC                    | NA                                                                 |
| Kabuli_wild_24664550 | 1399935191                          | Ca_kabuli_Chr03 | 24664550                | T/G  | NA                 | INTERGENIC                    | NA                                                                 |

| SNP IDs              | NCBI dbSNP accession IDs (NCBI_SS#) | Chromosomes     | Physical positions (bp) | SNPs | Gene accession IDs | Sequence components of genome | Putative functions                                         |
|----------------------|-------------------------------------|-----------------|-------------------------|------|--------------------|-------------------------------|------------------------------------------------------------|
| Kabuli_wild_24664582 | 1399935192                          | Ca_kabuli_Chr03 | 24664582                | G/T  | NA                 | INTERGENIC                    | NA                                                         |
| Kabuli_wild_25062362 | 1399935193                          | Ca_kabuli_Chr03 | 25062362                | G/A  | Gene_Ca_06022      | SYNONYMOUS_CODING             | Protein kinase,catalytic domain                            |
| Kabuli_wild_25145247 | 1399935194                          | Ca_kabuli_Chr03 | 25145247                | T/C  | Gene_Ca_06015      | SYNONYMOUS_CODING             | LisHdimerisationmotif                                      |
| Kabuli_wild_25241115 | 1399935195                          | Ca_kabuli_Chr03 | 25241115                | G/A  | Gene_Ca_06005      | NON_SYNONYMOUS_CODING         | DNArepairmetallo-beta-lactamase                            |
| Kabuli_wild_25244194 | 1399935196                          | Ca_kabuli_Chr03 | 25244194                | A/C  | Gene_Ca_06004      | SYNONYMOUS_CODING             | Methyltransferasesmall                                     |
| Kabuli_wild_25462086 | 1399935197                          | Ca_kabuli_Chr03 | 25462086                | A/G  | Gene_Ca_05988      | NON_SYNONYMOUS_CODING         | Glycerophosphoryldiester phosphodiesterase                 |
| Kabuli_wild_25462227 | 1399935198                          | Ca_kabuli_Chr03 | 25462227                | A/C  | Gene_Ca_05988      | NON_SYNONYMOUS_CODING         | Glycerophosphoryldiester phosphodiesterase                 |
| Kabuli_wild_25504708 | 1399935199                          | Ca_kabuli_Chr03 | 25504708                | A/G  | Gene_Ca_05985      | DOWNSTREAM                    | Zinc finger,B-box                                          |
| Kabuli_wild_25504743 | 1399935200                          | Ca_kabuli_Chr03 | 25504743                | G/A  | Gene_Ca_05985      | DOWNSTREAM                    | Zinc finger,B-box                                          |
| Kabuli_wild_25580072 | 1399935201                          | Ca_kabuli_Chr03 | 25580072                | A/T  | Gene_Ca_05977      | NON_SYNONYMOUS_CODING         | Nodulin-like                                               |
| Kabuli_wild_25614515 | 1399935202                          | Ca_kabuli_Chr03 | 25614515                | T/G  | NA                 | INTERGENIC                    | NA                                                         |
| Kabuli_wild_25688341 | 1399935203                          | Ca_kabuli_Chr03 | 25688341                | G/A  | NA                 | INTERGENIC                    | NA                                                         |
| Kabuli_wild_25718827 | 1399935204                          | Ca_kabuli_Chr03 | 25718827                | T/A  | NA                 | INTERGENIC                    | NA                                                         |
| Kabuli_wild_25718829 | 1399935205                          | Ca_kabuli_Chr03 | 25718829                | C/A  | NA                 | INTERGENIC                    | NA                                                         |
| Kabuli_wild_25757693 | 1399935206                          | Ca_kabuli_Chr03 | 25757693                | C/T  | Gene_Ca_23882      | SYNONYMOUS_CODING             | SET domain                                                 |
| Kabuli_wild_25822511 | 1399935207                          | Ca_kabuli_Chr03 | 25822511                | C/A  | NA                 | INTERGENIC                    | NA                                                         |
| Kabuli_wild_25822530 | 1399935208                          | Ca_kabuli_Chr03 | 25822530                | T/C  | NA                 | INTERGENIC                    | NA                                                         |
| Kabuli_wild_25822560 | 1399935209                          | Ca_kabuli_Chr03 | 25822560                | C/T  | NA                 | INTERGENIC                    | NA                                                         |
| Kabuli_wild_25822584 | 1399935210                          | Ca_kabuli_Chr03 | 25822584                | A/T  | NA                 | INTERGENIC                    | NA                                                         |
| Kabuli_wild_25987849 | 1399935211                          | Ca_kabuli_Chr03 | 25987849                | A/T  | Gene_Ca_08296      | NON_SYNONYMOUS_CODING         | Protein of unknown function DUF677                         |
| Kabuli_wild_26163449 | 1399935212                          | Ca_kabuli_Chr03 | 26163449                | G/A  | Gene_Ca_08289      | NON_SYNONYMOUS_CODING         | Calcium-bindingEF-hand                                     |
| Kabuli_wild_26335889 | 1399935213                          | Ca_kabuli_Chr03 | 26335889                | T/A  | Gene_Ca_08268      | SYNONYMOUS_CODING             | Exportin-1/Importin-beta-like                              |
| Kabuli_wild_26339286 | 1399935214                          | Ca_kabuli_Chr03 | 26339286                | T/C  | Gene_Ca_08268      | NON_SYNONYMOUS_CODING         | Exportin-1/Importin-beta-like                              |
| Kabuli_wild_26562046 | 1399935215                          | Ca_kabuli_Chr03 | 26562046                | T/C  | Gene_Ca_08253      | INTRON                        | Thioredoxin                                                |
| Kabuli_wild_26573902 | 1399935216                          | Ca_kabuli_Chr03 | 26573902                | A/G  | Gene_Ca_08252      | NON_SYNONYMOUS_CODING         | NotCCR4-Notcomplexcomponent,N-terminal                     |
| Kabuli_wild_26574831 | 1399935217                          | Ca_kabuli_Chr03 | 26574831                | A/G  | Gene_Ca_08252      | SYNONYMOUS_CODING             | NotCCR4-Notcomplexcomponent,N-terminal                     |
| Kabuli_wild_26577216 | 1399935218                          | Ca_kabuli_Chr03 | 26577216                | C/T  | Gene_Ca_08252      | STOP_GAINED                   | NotCCR4-Notcomplexcomponent,N-terminal                     |
| Kabuli_wild_26627150 | 1399935219                          | Ca_kabuli_Chr03 | 26627150                | T/G  | Gene_Ca_08246      | INTRON                        | YTHdomain                                                  |
| Kabuli_wild_26678262 | 1399935220                          | Ca_kabuli_Chr03 | 26678262                | G/A  | NA                 | INTERGENIC                    | NA                                                         |
| Kabuli_wild_26678433 | 1399935221                          | Ca_kabuli_Chr03 | 26678433                | T/G  | NA                 | INTERGENIC                    | NA                                                         |
| Kabuli_wild_26726897 | 1399935222                          | Ca_kabuli_Chr03 | 26726897                | A/C  | NA                 | INTERGENIC                    | NA                                                         |
| Kabuli_wild_26752814 | 1399935223                          | Ca_kabuli_Chr03 | 26752814                | A/G  | Gene_Ca_08231      | INTRON                        | HEAT                                                       |
| Kabuli_wild_26754514 | 1399935224                          | Ca_kabuli_Chr03 | 26754514                | A/G  | Gene_Ca_08231      | INTRON                        | HEAT                                                       |
| Kabuli_wild_26758452 | 1399935225                          | Ca_kabuli_Chr03 | 26758452                | C/A  | Gene_Ca_08231      | NON_SYNONYMOUS_CODING         | HEAT                                                       |
| Kabuli_wild_26788423 | 1399935226                          | Ca_kabuli_Chr03 | 26788423                | C/T  | NA                 | INTERGENIC                    | NA                                                         |
| Kabuli_wild_26848870 | 1399935227                          | Ca_kabuli_Chr03 | 26848870                | G/C  | Gene_Ca_08222      | NON_SYNONYMOUS_CODING         | Regulatorofchromosomecondensation,RCC1                     |
| Kabuli_wild_26849288 | 1399935228                          | Ca_kabuli_Chr03 | 26849288                | T/A  | Gene_Ca_08222      | NON_SYNONYMOUS_CODING         | Regulatorofchromosomecondensation,RCC1                     |
| Kabuli_wild_26878028 | 1399935229                          | Ca_kabuli_Chr03 | 26878028                | A/T  | Gene_Ca_08220      | DOWNSTREAM                    | Protein of unknown function DUF284,transmembraneeukaryotic |
| Kabuli_wild_26900271 | 1399935230                          | Ca_kabuli_Chr03 | 26900271                | T/A  | NA                 | INTERGENIC                    | NA                                                         |
| Kabuli_wild_26901920 | 1399935231                          | Ca_kabuli_Chr03 | 26901920                | C/T  | Gene_Ca_08215      | INTRON                        | MIF4G-like,type3                                           |
| Kabuli_wild_26902037 | 1399935232                          | Ca_kabuli_Chr03 | 26902037                | C/T  | Gene_Ca_08215      | INTRON                        | MIF4G-like,type4                                           |
| Kabuli_wild_26911443 | 1399935233                          | Ca_kabuli_Chr03 | 26911443                | A/T  | Gene_Ca_08214      | INTRON                        | Methionine synthase, vitamin-B12 independent               |
| Kabuli_wild_26911514 | 1399935234                          | Ca_kabuli_Chr03 | 26911514                | A/G  | Gene_Ca_08214      | INTRON                        | Methionine synthase, vitamin-B12 independent               |
| Kabuli_wild_26911723 | 1399935235                          | Ca_kabuli_Chr03 | 26911723                | T/A  | Gene_Ca_08214      | INTRON                        | Methionine synthase, vitamin-B12 independent               |

| SNP IDs              | NCBI dbSNP accession IDs (NCBI_SS#) | Chromosomes     | Physical positions (bp) | SNPs | Gene accession IDs | Sequence components of genome | Putative functions                                                  |
|----------------------|-------------------------------------|-----------------|-------------------------|------|--------------------|-------------------------------|---------------------------------------------------------------------|
| Kabuli_wild_26911792 | 1399935236                          | Ca_kabuli_Chr03 | 26911792                | A/G  | Gene_Ca_08214      | SYNONYMOUS_CODING             | Methionine synthase, vitamin-B12 independent                        |
| Kabuli_wild_26932964 | 1399935237                          | Ca_kabuli_Chr03 | 26932964                | C/A  | NA                 | INTERGENIC                    | NA                                                                  |
| Kabuli_wild_27010875 | 1399935238                          | Ca_kabuli_Chr03 | 27010875                | G/T  | NA                 | INTERGENIC                    | NA                                                                  |
| Kabuli_wild_27043121 | 1399935239                          | Ca_kabuli_Chr03 | 27043121                | A/T  | Gene_Ca_08199      | INTRON                        | BTB/POZ-like                                                        |
| Kabuli_wild_27047847 | 1399935240                          | Ca_kabuli_Chr03 | 27047847                | A/C  | Gene_Ca_08199      | SYNONYMOUS_CODING             | BTB/POZ-like                                                        |
| Kabuli_wild_27074877 | 1399935241                          | Ca_kabuli_Chr03 | 27074877                | T/A  | NA                 | INTERGENIC                    | NA                                                                  |
| Kabuli_wild_27074884 | 1399935242                          | Ca_kabuli_Chr03 | 27074884                | G/A  | NA                 | INTERGENIC                    | NA                                                                  |
| Kabuli_wild_27074913 | 1399935243                          | Ca_kabuli_Chr03 | 27074913                | T/C  | NA                 | INTERGENIC                    | NA                                                                  |
| Kabuli_wild_27076716 | 1399935244                          | Ca_kabuli_Chr03 | 27076716                | T/C  | NA                 | INTERGENIC                    | NA                                                                  |
| Kabuli_wild_27076735 | 1399935245                          | Ca_kabuli_Chr03 | 27076735                | T/G  | NA                 | INTERGENIC                    | NA                                                                  |
| Kabuli_wild_27076744 | 1399935246                          | Ca_kabuli_Chr03 | 27076744                | C/A  | NA                 | INTERGENIC                    | NA                                                                  |
| Kabuli_wild_27105602 | 1399935247                          | Ca_kabuli_Chr03 | 27105602                | A/G  | NA                 | INTERGENIC                    | NA                                                                  |
| Kabuli_wild_27157852 | 1399935248                          | Ca_kabuli_Chr03 | 27157852                | C/A  | Gene_Ca_08188      | INTRON                        | Transcription factor TFIIIB-related                                 |
| Kabuli_wild_27338521 | 1399935249                          | Ca_kabuli_Chr03 | 27338521                | T/C  | NA                 | INTERGENIC                    | NA                                                                  |
| Kabuli_wild_27478173 | 1399935250                          | Ca_kabuli_Chr03 | 27478173                | C/T  | Gene_Ca_08159      | UPSTREAM                      | Cellularretinaldehydebinding/alpha-tocopheroltransport              |
| Kabuli_wild_27529608 | 1399935251                          | Ca_kabuli_Chr03 | 27529608                | T/C  | NA                 | INTERGENIC                    | NA                                                                  |
| Kabuli_wild_27611527 | 1399935252                          | Ca_kabuli_Chr03 | 27611527                | A/G  | Gene_Ca_08147      | UPSTREAM                      | NA                                                                  |
| Kabuli_wild_27632100 | 1399935253                          | Ca_kabuli_Chr03 | 27632100                | G/A  | Gene_Ca_08144      | NON_SYNONYMOUS_CODING         | Myb,DNA-binding                                                     |
| Kabuli_wild_27654798 | 1399935254                          | Ca_kabuli_Chr03 | 27654798                | A/C  | Gene_Ca_08142      | SYNONYMOUS_CODING             | RNA recognition motif domain                                        |
| Kabuli_wild_27673727 | 1399935255                          | Ca_kabuli_Chr03 | 27673727                | C/A  | Gene_Ca_08139      | NON_SYNONYMOUS_CODING         | NA                                                                  |
| Kabuli_wild_27716358 | 1399935256                          | Ca_kabuli_Chr03 | 27716358                | T/C  | NA                 | INTERGENIC                    | NA                                                                  |
| Kabuli_wild_27716396 | 1399935257                          | Ca_kabuli_Chr03 | 27716396                | C/T  | NA                 | INTERGENIC                    | NA                                                                  |
| Kabuli_wild_27824683 | 1399935258                          | Ca_kabuli_Chr03 | 27824683                | C/T  | Gene_Ca_08124      | NON_SYNONYMOUS_CODING         | VQ                                                                  |
| Kabuli_wild_27877479 | 1399935259                          | Ca_kabuli_Chr03 | 27877479                | C/T  | Gene_Ca_08121      | SYNONYMOUS_CODING             | Ubiquitin-associated/translation elongation factor EF1B, N-terminal |
| Kabuli_wild_27887405 | 1399935260                          | Ca_kabuli_Chr03 | 27887405                | C/T  | Gene_Ca_08120      | INTRON                        | Ribosomal protein S1 ,RNA-binding domain                            |
| Kabuli_wild_27889107 | 1399935261                          | Ca_kabuli_Chr03 | 27889107                | A/G  | Gene_Ca_08120      | NON_SYNONYMOUS_CODING         | Ribosomal protein S1 ,RNA-binding domain                            |
| Kabuli_wild_27890801 | 1399935262                          | Ca_kabuli_Chr03 | 27890801                | A/G  | Gene_Ca_08120      | SYNONYMOUS_CODING             | Ribosomal protein S1 ,RNA-binding domain                            |
| Kabuli_wild_27890849 | 1399935263                          | Ca_kabuli_Chr03 | 27890849                | C/T  | Gene_Ca_08120      | SYNONYMOUS_CODING             | Ribosomal protein S1 ,RNA-binding domain                            |
| Kabuli_wild_27906044 | 1399935264                          | Ca_kabuli_Chr03 | 27906044                | A/C  | Gene_Ca_08119      | NON_SYNONYMOUS_CODING         | NA                                                                  |
| Kabuli_wild_27969207 | 1399935265                          | Ca_kabuli_Chr03 | 27969207                | C/T  | Gene_Ca_08113      | NON_SYNONYMOUS_CODING         | Zinc finger,C2H2-type                                               |
| Kabuli_wild_28174497 | 1399935266                          | Ca_kabuli_Chr03 | 28174497                | G/T  | Gene_Ca_26949      | INTRON                        | WD40 repeat                                                         |
| Kabuli_wild_28176333 | 1399935267                          | Ca_kabuli_Chr03 | 28176333                | A/C  | Gene_Ca_26949      | DOWNSTREAM                    | WD40 repeat                                                         |
| Kabuli_wild_28176380 | 1399935268                          | Ca_kabuli_Chr03 | 28176380                | A/C  | Gene_Ca_26949      | DOWNSTREAM                    | WD40 repeat                                                         |
| Kabuli_wild_28277883 | 1399935269                          | Ca_kabuli_Chr03 | 28277883                | T/C  | Gene_Ca_07143      | INTRON                        | Single-strandednucleicacidbindingR3H                                |
| Kabuli_wild_28375082 | 1399935270                          | Ca_kabuli_Chr03 | 28375082                | G/A  | Gene_Ca_07151      | INTRON                        | Transcriptionelongationfactor,TFIIS/CRSP70,N-terminal,sub-type      |
| Kabuli_wild_28420948 | 1399935271                          | Ca_kabuli_Chr03 | 28420948                | C/T  | NA                 | INTERGENIC                    | NA                                                                  |
| Kabuli_wild_28680710 | 1399935272                          | Ca_kabuli_Chr03 | 28680710                | A/G  | Gene_Ca_07175      | INTRON                        | Glutamineamidotransferase,class-II                                  |
| Kabuli_wild_28680858 | 1399935273                          | Ca_kabuli_Chr03 | 28680858                | C/T  | Gene_Ca_07175      | INTRON                        | Glutamineamidotransferase,class-II                                  |
| Kabuli_wild_28716340 | 1399935274                          | Ca_kabuli_Chr03 | 28716340                | A/G  | Gene_Ca_07177      | NON_SYNONYMOUS_CODING         | Cellular retinaldehyde-binding/triplefunction, C-terminal           |
| Kabuli_wild_28747799 | 1399935275                          | Ca_kabuli_Chr03 | 28747799                | T/C  | Gene_Ca_07179      | INTRON                        | Fattyacidhydroxylase                                                |
| Kabuli_wild_28845958 | 1399935276                          | Ca_kabuli_Chr03 | 28845958                | A/C  | NA                 | INTERGENIC                    | NA                                                                  |
| Kabuli_wild_28943989 | 1399935277                          | Ca_kabuli_Chr03 | 28943989                | G/T  | NA                 | INTERGENIC                    | NA                                                                  |
| Kabuli_wild_28964133 | 1399935278                          | Ca_kabuli_Chr03 | 28964133                | A/C  | Gene_Ca_07204      | SYNONYMOUS_CODING             | N-acetylglucosaminyltransferasecomponent                            |
| Kabuli_wild_29056768 | 1399935279                          | Ca_kabuli_Chr03 | 29056768                | T/C  | Gene_Ca_07211      | SYNONYMOUS_CODING             | ATPase,AAA+type,core                                                |



| SNP IDs                     | NCBI dbSNP accession IDs (NCBI_SS#) | Chromosomes            | Physical positions (bp) | SNPs | Gene accession IDs | Sequence components of genome | Putative functions                                           |
|-----------------------------|-------------------------------------|------------------------|-------------------------|------|--------------------|-------------------------------|--------------------------------------------------------------|
| <i>Kabuli_wild_29107776</i> | 1399935280                          | <i>Ca_kabuli_Chr03</i> | 29107776                | A/G  | Gene_Ca_07215      | INTRON                        | Heat shock protein DnaJ,N-terminal                           |
| <i>Kabuli_wild_29155741</i> | 1399935281                          | <i>Ca_kabuli_Chr03</i> | 29155741                | C/G  | Gene_Ca_07220      | INTRON                        | Rhoterminationfactor,N-terminal                              |
| <i>Kabuli_wild_29177885</i> | 1399935282                          | <i>Ca_kabuli_Chr03</i> | 29177885                | A/C  | Gene_Ca_07223      | UPSTREAM                      | NA                                                           |
| <i>Kabuli_wild_29207338</i> | 1399935283                          | <i>Ca_kabuli_Chr03</i> | 29207338                | G/A  | NA                 | INTERGENIC                    | NA                                                           |
| <i>Kabuli_wild_29293798</i> | 1399935284                          | <i>Ca_kabuli_Chr03</i> | 29293798                | C/T  | Gene_Ca_07236      | INTRON                        | NA                                                           |
| <i>Kabuli_wild_29302251</i> | 1399935285                          | <i>Ca_kabuli_Chr03</i> | 29302251                | C/T  | Gene_Ca_07237      | INTRON                        | Pathogenesis-related transcriptional factor/ERF, DNA-binding |
| <i>Kabuli_wild_29303144</i> | 1399935286                          | <i>Ca_kabuli_Chr03</i> | 29303144                | A/C  | Gene_Ca_07237      | INTRON                        | Pathogenesis-related transcriptional factor/ERF, DNA-binding |
| <i>Kabuli_wild_29304116</i> | 1399935287                          | <i>Ca_kabuli_Chr03</i> | 29304116                | A/G  | Gene_Ca_07237      | UPSTREAM                      | Pathogenesis-related transcriptional factor/ERF, DNA-binding |
| <i>Kabuli_wild_29508831</i> | 1399935288                          | <i>Ca_kabuli_Chr03</i> | 29508831                | C/T  | Gene_Ca_07256      | NON_SYNONYMOUS_CODING         | Protein kinase,catalytic domain                              |
| <i>Kabuli_wild_29509310</i> | 1399935289                          | <i>Ca_kabuli_Chr03</i> | 29509310                | G/T  | Gene_Ca_07256      | SYNONYMOUS_CODING             | Protein kinase,catalytic domain                              |
| <i>Kabuli_wild_29568218</i> | 1399935290                          | <i>Ca_kabuli_Chr03</i> | 29568218                | A/T  | Gene_Ca_07261      | SYNONYMOUS_CODING             | Zinc finger,CCCH-type                                        |
| <i>Kabuli_wild_29568611</i> | 1399935291                          | <i>Ca_kabuli_Chr03</i> | 29568611                | A/G  | Gene_Ca_07261      | SYNONYMOUS_CODING             | Zinc finger,CCCH-type                                        |
| <i>Kabuli_wild_29603720</i> | 1399935292                          | <i>Ca_kabuli_Chr03</i> | 29603720                | T/C  | NA                 | INTERGENIC                    | NA                                                           |
| <i>Kabuli_wild_29666633</i> | 1399935293                          | <i>Ca_kabuli_Chr03</i> | 29666633                | C/T  | NA                 | INTERGENIC                    | NA                                                           |
| <i>Kabuli_wild_29698166</i> | 1399935294                          | <i>Ca_kabuli_Chr03</i> | 29698166                | G/T  | NA                 | INTERGENIC                    | NA                                                           |
| <i>Kabuli_wild_29698273</i> | 1399935295                          | <i>Ca_kabuli_Chr03</i> | 29698273                | A/C  | NA                 | INTERGENIC                    | NA                                                           |
| <i>Kabuli_wild_29698289</i> | 1399935296                          | <i>Ca_kabuli_Chr03</i> | 29698289                | G/A  | NA                 | INTERGENIC                    | NA                                                           |
| <i>Kabuli_wild_29730019</i> | 1399935297                          | <i>Ca_kabuli_Chr03</i> | 29730019                | G/T  | Gene_Ca_07280      | DOWNSTREAM                    | tRNA intronendo nuclease, catalytic domain-like              |
| <i>Kabuli_wild_29744878</i> | 1399935298                          | <i>Ca_kabuli_Chr03</i> | 29744878                | T/G  | Gene_Ca_07282      | SYNONYMOUS_CODING             | NA                                                           |
| <i>Kabuli_wild_29803866</i> | 1399935299                          | <i>Ca_kabuli_Chr03</i> | 29803866                | C/T  | NA                 | INTERGENIC                    | NA                                                           |
| <i>Kabuli_wild_29803962</i> | 1399935300                          | <i>Ca_kabuli_Chr03</i> | 29803962                | A/G  | NA                 | INTERGENIC                    | NA                                                           |
| <i>Kabuli_wild_29807091</i> | 1399935301                          | <i>Ca_kabuli_Chr03</i> | 29807091                | C/G  | NA                 | INTERGENIC                    | NA                                                           |
| <i>Kabuli_wild_29807248</i> | 1399935302                          | <i>Ca_kabuli_Chr03</i> | 29807248                | A/G  | NA                 | INTERGENIC                    | NA                                                           |
| <i>Kabuli_wild_29836337</i> | 1399935303                          | <i>Ca_kabuli_Chr03</i> | 29836337                | C/A  | Gene_Ca_07291      | UPSTREAM                      | Leucine-rich repeat                                          |
| <i>Kabuli_wild_29840012</i> | 1399935304                          | <i>Ca_kabuli_Chr03</i> | 29840012                | A/T  | NA                 | INTERGENIC                    | NA                                                           |
| <i>Kabuli_wild_29840022</i> | 1399935305                          | <i>Ca_kabuli_Chr03</i> | 29840022                | C/A  | NA                 | INTERGENIC                    | NA                                                           |
| <i>Kabuli_wild_29840028</i> | 1399935306                          | <i>Ca_kabuli_Chr03</i> | 29840028                | T/C  | NA                 | INTERGENIC                    | NA                                                           |
| <i>Kabuli_wild_29840029</i> | 1399935307                          | <i>Ca_kabuli_Chr03</i> | 29840029                | C/G  | NA                 | INTERGENIC                    | NA                                                           |
| <i>Kabuli_wild_29844509</i> | 1399935308                          | <i>Ca_kabuli_Chr03</i> | 29844509                | T/A  | Gene_Ca_07292      | INTRON                        | Basic-leucine zipper (bZIP ) Transcription factor            |
| <i>Kabuli_wild_29869190</i> | 1399935309                          | <i>Ca_kabuli_Chr03</i> | 29869190                | G/T  | Gene_Ca_07295      | INTRON                        | CARPmotif                                                    |
| <i>Kabuli_wild_29869380</i> | 1399935310                          | <i>Ca_kabuli_Chr03</i> | 29869380                | G/A  | Gene_Ca_07295      | NON_SYNONYMOUS_CODING         | CARPmotif                                                    |
| <i>Kabuli_wild_29869381</i> | 1399935311                          | <i>Ca_kabuli_Chr03</i> | 29869381                | G/A  | Gene_Ca_07295      | NON_SYNONYMOUS_CODING         | CARPmotif                                                    |
| <i>Kabuli_wild_29872643</i> | 1399935312                          | <i>Ca_kabuli_Chr03</i> | 29872643                | A/G  | Gene_Ca_07295      | INTRON                        | CARPmotif                                                    |
| <i>Kabuli_wild_29872682</i> | 1399935313                          | <i>Ca_kabuli_Chr03</i> | 29872682                | G/A  | Gene_Ca_07295      | INTRON                        | CARPmotif                                                    |
| <i>Kabuli_wild_29912488</i> | 1399935314                          | <i>Ca_kabuli_Chr03</i> | 29912488                | A/G  | NA                 | INTERGENIC                    | NA                                                           |
| <i>Kabuli_wild_29915510</i> | 1399935315                          | <i>Ca_kabuli_Chr03</i> | 29915510                | G/A  | Gene_Ca_07303      | DOWNSTREAM                    | Myb,DNA-binding                                              |
| <i>Kabuli_wild_29932378</i> | 1399935316                          | <i>Ca_kabuli_Chr03</i> | 29932378                | C/G  | Gene_Ca_07304      | INTRON                        | Myb,DNA-binding                                              |
| <i>Kabuli_wild_29932502</i> | 1399935317                          | <i>Ca_kabuli_Chr03</i> | 29932502                | G/C  | Gene_Ca_07304      | INTRON                        | Myb,DNA-binding                                              |
| <i>Kabuli_wild_29932504</i> | 1399935318                          | <i>Ca_kabuli_Chr03</i> | 29932504                | T/A  | Gene_Ca_07304      | INTRON                        | Myb,DNA-binding                                              |
| <i>Kabuli_wild_29954498</i> | 1399935319                          | <i>Ca_kabuli_Chr03</i> | 29954498                | G/A  | NA                 | INTERGENIC                    | NA                                                           |
| <i>Kabuli_wild_29954533</i> | 1399935320                          | <i>Ca_kabuli_Chr03</i> | 29954533                | A/G  | NA                 | INTERGENIC                    | NA                                                           |
| <i>Kabuli_wild_29954612</i> | 1399935321                          | <i>Ca_kabuli_Chr03</i> | 29954612                | T/G  | NA                 | INTERGENIC                    | NA                                                           |
| <i>Kabuli_wild_29954648</i> | 1399935322                          | <i>Ca_kabuli_Chr03</i> | 29954648                | A/T  | NA                 | INTERGENIC                    | NA                                                           |
| <i>Kabuli_wild_29958891</i> | 1399935323                          | <i>Ca_kabuli_Chr03</i> | 29958891                | G/C  | Gene_Ca_07306      | NON_SYNONYMOUS_CODING         | Nse4                                                         |

| SNP IDs              | NCBI dbSNP accession IDs (NCBI_SS#) | Chromosomes     | Physical positions (bp) | SNPs | Gene accession IDs | Sequence components of genome | Putative functions                    |
|----------------------|-------------------------------------|-----------------|-------------------------|------|--------------------|-------------------------------|---------------------------------------|
| Kabuli_wild_29974532 | 1399935324                          | Ca_kabuli_Chr03 | 29974532                | A/G  | Gene_Ca_07307      | SYNONYMOUS_CODING             | Zinc finger,CCCH-type                 |
| Kabuli_wild_29974595 | 1399935325                          | Ca_kabuli_Chr03 | 29974595                | C/T  | Gene_Ca_07307      | SYNONYMOUS_CODING             | Zinc finger,CCCH-type                 |
| Kabuli_wild_29982638 | 1399935326                          | Ca_kabuli_Chr03 | 29982638                | A/G  | NA                 | INTERGENIC                    | NA                                    |
| Kabuli_wild_29982644 | 1399935327                          | Ca_kabuli_Chr03 | 29982644                | T/C  | NA                 | INTERGENIC                    | NA                                    |
| Kabuli_wild_29982671 | 1399935328                          | Ca_kabuli_Chr03 | 29982671                | A/G  | NA                 | INTERGENIC                    | NA                                    |
| Kabuli_wild_30004204 | 1399935329                          | Ca_kabuli_Chr03 | 30004204                | G/T  | NA                 | INTERGENIC                    | NA                                    |
| Kabuli_wild_30004207 | 1399935330                          | Ca_kabuli_Chr03 | 30004207                | C/T  | NA                 | INTERGENIC                    | NA                                    |
| Kabuli_wild_30004233 | 1399935331                          | Ca_kabuli_Chr03 | 30004233                | A/T  | NA                 | INTERGENIC                    | NA                                    |
| Kabuli_wild_30004295 | 1399935332                          | Ca_kabuli_Chr03 | 30004295                | A/G  | NA                 | INTERGENIC                    | NA                                    |
| Kabuli_wild_30004311 | 1399935333                          | Ca_kabuli_Chr03 | 30004311                | T/G  | NA                 | INTERGENIC                    | NA                                    |
| Kabuli_wild_30009751 | 1399935334                          | Ca_kabuli_Chr03 | 30009751                | A/C  | NA                 | INTERGENIC                    | NA                                    |
| Kabuli_wild_30011584 | 1399935335                          | Ca_kabuli_Chr03 | 30011584                | T/C  | NA                 | INTERGENIC                    | NA                                    |
| Kabuli_wild_30011620 | 1399935336                          | Ca_kabuli_Chr03 | 30011620                | C/T  | NA                 | INTERGENIC                    | NA                                    |
| Kabuli_wild_30011621 | 1399935337                          | Ca_kabuli_Chr03 | 30011621                | C/T  | NA                 | INTERGENIC                    | NA                                    |
| Kabuli_wild_30011642 | 1399935338                          | Ca_kabuli_Chr03 | 30011642                | T/A  | NA                 | INTERGENIC                    | NA                                    |
| Kabuli_wild_30011669 | 1399935339                          | Ca_kabuli_Chr03 | 30011669                | A/G  | NA                 | INTERGENIC                    | NA                                    |
| Kabuli_wild_30011759 | 1399935340                          | Ca_kabuli_Chr03 | 30011759                | T/C  | NA                 | INTERGENIC                    | NA                                    |
| Kabuli_wild_30029817 | 1399935341                          | Ca_kabuli_Chr03 | 30029817                | T/G  | Gene_Ca_07318      | INTRON                        | NUDIX hydrolase domain                |
| Kabuli_wild_30029842 | 1399935342                          | Ca_kabuli_Chr03 | 30029842                | G/C  | Gene_Ca_07318      | INTRON                        | NUDIX hydrolase domain                |
| Kabuli_wild_30029858 | 1399935343                          | Ca_kabuli_Chr03 | 30029858                | T/A  | Gene_Ca_07318      | NON_SYNONYMOUS_CODING         | NUDIX hydrolase domain                |
| Kabuli_wild_30084154 | 1399935344                          | Ca_kabuli_Chr03 | 30084154                | T/C  | Gene_Ca_07322      | DOWNSTREAM                    | Homeobox                              |
| Kabuli_wild_30101476 | 1399935345                          | Ca_kabuli_Chr03 | 30101476                | A/C  | Gene_Ca_07324      | INTRON                        | Methyltransferase-related             |
| Kabuli_wild_30144223 | 1399935346                          | Ca_kabuli_Chr03 | 30144223                | T/G  | Gene_Ca_07331      | UPSTREAM                      | NA                                    |
| Kabuli_wild_30148952 | 1399935347                          | Ca_kabuli_Chr03 | 30148952                | G/T  | NA                 | INTERGENIC                    | NA                                    |
| Kabuli_wild_30148953 | 1399935348                          | Ca_kabuli_Chr03 | 30148953                | A/G  | NA                 | INTERGENIC                    | NA                                    |
| Kabuli_wild_30206461 | 1399935349                          | Ca_kabuli_Chr03 | 30206461                | T/C  | Gene_Ca_07336      | INTRON                        | Kinesin,motordomain                   |
| Kabuli_wild_30311541 | 1399935350                          | Ca_kabuli_Chr03 | 30311541                | A/C  | Gene_Ca_07347      | UPSTREAM                      | NA                                    |
| Kabuli_wild_30311582 | 1399935351                          | Ca_kabuli_Chr03 | 30311582                | C/T  | Gene_Ca_07347      | UPSTREAM                      | NA                                    |
| Kabuli_wild_30311715 | 1399935352                          | Ca_kabuli_Chr03 | 30311715                | A/G  | Gene_Ca_07347      | UPSTREAM                      | NA                                    |
| Kabuli_wild_30321177 | 1399935353                          | Ca_kabuli_Chr03 | 30321177                | C/G  | Gene_Ca_07349      | DOWNSTREAM                    | BSD                                   |
| Kabuli_wild_30376319 | 1399935354                          | Ca_kabuli_Chr03 | 30376319                | G/A  | Gene_Ca_07358      | SYNONYMOUS_CODING             | Short-chaindehydrogenase/reductaseSDR |
| Kabuli_wild_30383534 | 1399935355                          | Ca_kabuli_Chr03 | 30383534                | T/C  | Gene_Ca_07359      | SYNONYMOUS_CODING             | NA                                    |
| Kabuli_wild_30385153 | 1399935356                          | Ca_kabuli_Chr03 | 30385153                | T/A  | Gene_Ca_07359      | INTRON                        | NA                                    |
| Kabuli_wild_30397261 | 1399935357                          | Ca_kabuli_Chr03 | 30397261                | C/A  | Gene_Ca_07359      | INTRON                        | NA                                    |
| Kabuli_wild_30397262 | 1399935358                          | Ca_kabuli_Chr03 | 30397262                | A/T  | Gene_Ca_07359      | INTRON                        | NA                                    |
| Kabuli_wild_30397271 | 1399935359                          | Ca_kabuli_Chr03 | 30397271                | C/T  | Gene_Ca_07359      | INTRON                        | NA                                    |
| Kabuli_wild_30397293 | 1399935360                          | Ca_kabuli_Chr03 | 30397293                | C/T  | Gene_Ca_07359      | INTRON                        | NA                                    |
| Kabuli_wild_30510333 | 1399935361                          | Ca_kabuli_Chr03 | 30510333                | C/T  | Gene_Ca_07371      | UPSTREAM                      | NA                                    |
| Kabuli_wild_30525213 | 1399935362                          | Ca_kabuli_Chr03 | 30525213                | A/C  | Gene_Ca_07374      | SYNONYMOUS_CODING             | RasGTPase                             |
| Kabuli_wild_30614369 | 1399935363                          | Ca_kabuli_Chr03 | 30614369                | T/C  | NA                 | INTERGENIC                    | NA                                    |
| Kabuli_wild_30675468 | 1399935364                          | Ca_kabuli_Chr03 | 30675468                | T/G  | Gene_Ca_07388      | DOWNSTREAM                    | Helicase,C-terminal                   |
| Kabuli_wild_30837265 | 1399935365                          | Ca_kabuli_Chr03 | 30837265                | T/C  | NA                 | INTERGENIC                    | NA                                    |
| Kabuli_wild_30837284 | 1399935366                          | Ca_kabuli_Chr03 | 30837284                | C/T  | NA                 | INTERGENIC                    | NA                                    |
| Kabuli_wild_31091987 | 1399935367                          | Ca_kabuli_Chr03 | 31091987                | A/C  | Gene_Ca_12206      | SYNONYMOUS_CODING             | HistoneH1/H5                          |

| SNP IDs              | NCBI dbSNP accession IDs (NCBI_SS#) | Chromosomes     | Physical positions (bp) | SNPs | Gene accession IDs | Sequence components of genome | Putative functions                                    |
|----------------------|-------------------------------------|-----------------|-------------------------|------|--------------------|-------------------------------|-------------------------------------------------------|
| Kabuli_wild_31267639 | 1399935368                          | Ca_kabuli_Chr03 | 31267639                | T/A  | NA                 | INTERGENIC                    | NA                                                    |
| Kabuli_wild_31267675 | 1399935369                          | Ca_kabuli_Chr03 | 31267675                | A/G  | NA                 | INTERGENIC                    | NA                                                    |
| Kabuli_wild_31267681 | 1399935370                          | Ca_kabuli_Chr03 | 31267681                | G/A  | NA                 | INTERGENIC                    | NA                                                    |
| Kabuli_wild_31267828 | 1399935371                          | Ca_kabuli_Chr03 | 31267828                | A/G  | NA                 | INTERGENIC                    | NA                                                    |
| Kabuli_wild_31267927 | 1399935372                          | Ca_kabuli_Chr03 | 31267927                | T/G  | NA                 | INTERGENIC                    | NA                                                    |
| Kabuli_wild_31268143 | 1399935373                          | Ca_kabuli_Chr03 | 31268143                | A/G  | NA                 | INTERGENIC                    | NA                                                    |
| Kabuli_wild_31271040 | 1399935374                          | Ca_kabuli_Chr03 | 31271040                | T/C  | NA                 | INTERGENIC                    | NA                                                    |
| Kabuli_wild_31279605 | 1399935375                          | Ca_kabuli_Chr03 | 31279605                | G/A  | Gene_Ca_12224      | INTRON                        | Protein of unknown function DUF647                    |
| Kabuli_wild_31279606 | 1399935376                          | Ca_kabuli_Chr03 | 31279606                | G/A  | Gene_Ca_12224      | INTRON                        | Protein of unknown function DUF647                    |
| Kabuli_wild_31279616 | 1399935377                          | Ca_kabuli_Chr03 | 31279616                | T/A  | Gene_Ca_12224      | INTRON                        | Protein of unknown function DUF647                    |
| Kabuli_wild_31287909 | 1399935378                          | Ca_kabuli_Chr03 | 31287909                | A/G  | Gene_Ca_12225      | SYNONYMOUS_CODING             | General substrate transporter                         |
| Kabuli_wild_31288008 | 1399935379                          | Ca_kabuli_Chr03 | 31288008                | T/G  | Gene_Ca_12225      | SYNONYMOUS_CODING             | General substrate transporter                         |
| Kabuli_wild_31288143 | 1399935380                          | Ca_kabuli_Chr03 | 31288143                | T/C  | Gene_Ca_12225      | SYNONYMOUS_CODING             | General substrate transporter                         |
| Kabuli_wild_31301783 | 1399935381                          | Ca_kabuli_Chr03 | 31301783                | A/G  | NA                 | INTERGENIC                    | NA                                                    |
| Kabuli_wild_31302060 | 1399935382                          | Ca_kabuli_Chr03 | 31302060                | T/C  | NA                 | INTERGENIC                    | NA                                                    |
| Kabuli_wild_31313021 | 1399935383                          | Ca_kabuli_Chr03 | 31313021                | G/T  | NA                 | INTERGENIC                    | NA                                                    |
| Kabuli_wild_31317521 | 1399935384                          | Ca_kabuli_Chr03 | 31317521                | T/G  | NA                 | INTERGENIC                    | NA                                                    |
| Kabuli_wild_31321725 | 1399935385                          | Ca_kabuli_Chr03 | 31321725                | A/G  | NA                 | INTERGENIC                    | NA                                                    |
| Kabuli_wild_31321778 | 1399935386                          | Ca_kabuli_Chr03 | 31321778                | G/A  | NA                 | INTERGENIC                    | NA                                                    |
| Kabuli_wild_31321850 | 1399935387                          | Ca_kabuli_Chr03 | 31321850                | A/G  | NA                 | INTERGENIC                    | NA                                                    |
| Kabuli_wild_31341335 | 1399935388                          | Ca_kabuli_Chr03 | 31341335                | C/T  | Gene_Ca_12234      | SYNONYMOUS_CODING             | Domain of unknown function DUF640                     |
| Kabuli_wild_31341386 | 1399935389                          | Ca_kabuli_Chr03 | 31341386                | A/C  | Gene_Ca_12234      | SYNONYMOUS_CODING             | Domain of unknown function DUF640                     |
| Kabuli_wild_31342119 | 1399935390                          | Ca_kabuli_Chr03 | 31342119                | A/T  | NA                 | INTERGENIC                    | NA                                                    |
| Kabuli_wild_31354988 | 1399935391                          | Ca_kabuli_Chr03 | 31354988                | C/G  | NA                 | INTERGENIC                    | NA                                                    |
| Kabuli_wild_31355001 | 1399935392                          | Ca_kabuli_Chr03 | 31355001                | T/C  | NA                 | INTERGENIC                    | NA                                                    |
| Kabuli_wild_31355026 | 1399935393                          | Ca_kabuli_Chr03 | 31355026                | C/T  | NA                 | INTERGENIC                    | NA                                                    |
| Kabuli_wild_31357799 | 1399935394                          | Ca_kabuli_Chr03 | 31357799                | T/C  | Gene_Ca_12236      | SYNONYMOUS_CODING             | Transcription factor jumonji/asparyl-beta-hydroxylase |
| Kabuli_wild_31358024 | 1399935395                          | Ca_kabuli_Chr03 | 31358024                | C/T  | Gene_Ca_12236      | SYNONYMOUS_CODING             | Transcription factor jumonji/asparyl-beta-hydroxylase |
| Kabuli_wild_31358137 | 1399935396                          | Ca_kabuli_Chr03 | 31358137                | G/T  | Gene_Ca_12236      | NON_SYNONYMOUS_CODING         | Transcription factor jumonji/asparyl-beta-hydroxylase |
| Kabuli_wild_31431216 | 1399935397                          | Ca_kabuli_Chr03 | 31431216                | C/T  | Gene_Ca_12240      | INTRON                        | Protein kinase,catalytic domain                       |
| Kabuli_wild_31431297 | 1399935398                          | Ca_kabuli_Chr03 | 31431297                | C/T  | Gene_Ca_12240      | INTRON                        | Protein kinase,catalytic domain                       |
| Kabuli_wild_31457191 | 1399935399                          | Ca_kabuli_Chr03 | 31457191                | C/T  | Gene_Ca_12244      | SYNONYMOUS_CODING             | Phytochelatin synthase                                |
| Kabuli_wild_31478804 | 1399935400                          | Ca_kabuli_Chr03 | 31478804                | T/C  | Gene_Ca_12246      | SYNONYMOUS_CODING             | Glucose-methanol-choline oxidoreductase,N-terminal    |
| Kabuli_wild_31478882 | 1399935401                          | Ca_kabuli_Chr03 | 31478882                | C/T  | Gene_Ca_12246      | SYNONYMOUS_CODING             | Glucose-methanol-choline oxidoreductase,N-terminal    |
| Kabuli_wild_31480603 | 1399935402                          | Ca_kabuli_Chr03 | 31480603                | T/C  | NA                 | INTERGENIC                    | NA                                                    |
| Kabuli_wild_31516662 | 1399935403                          | Ca_kabuli_Chr03 | 31516662                | G/T  | NA                 | INTERGENIC                    | NA                                                    |
| Kabuli_wild_31516766 | 1399935404                          | Ca_kabuli_Chr03 | 31516766                | T/C  | NA                 | INTERGENIC                    | NA                                                    |
| Kabuli_wild_31517136 | 1399935405                          | Ca_kabuli_Chr03 | 31517136                | A/G  | NA                 | INTERGENIC                    | NA                                                    |
| Kabuli_wild_31517201 | 1399935406                          | Ca_kabuli_Chr03 | 31517201                | G/A  | NA                 | INTERGENIC                    | NA                                                    |
| Kabuli_wild_31519880 | 1399935407                          | Ca_kabuli_Chr03 | 31519880                | C/T  | Gene_Ca_12250      | UPSTREAM                      | Oligo peptide transporter                             |
| Kabuli_wild_31520119 | 1399935408                          | Ca_kabuli_Chr03 | 31520119                | C/T  | Gene_Ca_12250      | UPSTREAM                      | Oligo peptide transporter                             |
| Kabuli_wild_31520190 | 1399935409                          | Ca_kabuli_Chr03 | 31520190                | T/C  | Gene_Ca_12250      | UPSTREAM                      | Oligo peptide transporter                             |
| Kabuli_wild_31520198 | 1399935410                          | Ca_kabuli_Chr03 | 31520198                | G/A  | NA                 | INTERGENIC                    | NA                                                    |
| Kabuli_wild_31520225 | 1399935411                          | Ca_kabuli_Chr03 | 31520225                | A/T  | NA                 | INTERGENIC                    | NA                                                    |

| SNP IDs              | NCBI dbSNP accession IDs (NCBI_SS#) | Chromosomes     | Physical positions (bp) | SNPs | Gene accession IDs | Sequence components of genome | Putative functions                         |
|----------------------|-------------------------------------|-----------------|-------------------------|------|--------------------|-------------------------------|--------------------------------------------|
| Kabuli_wild_31521142 | 1399935412                          | Ca_kabuli_Chr03 | 31521142                | T/C  | NA                 | INTERGENIC                    | NA                                         |
| Kabuli_wild_31521155 | 1399935413                          | Ca_kabuli_Chr03 | 31521155                | T/A  | NA                 | INTERGENIC                    | NA                                         |
| Kabuli_wild_31589329 | 1399935414                          | Ca_kabuli_Chr03 | 31589329                | C/T  | Gene_Ca_12258      | INTRON                        | SET domain                                 |
| Kabuli_wild_31589355 | 1399935415                          | Ca_kabuli_Chr03 | 31589355                | A/G  | Gene_Ca_12258      | INTRON                        | SET domain                                 |
| Kabuli_wild_31626736 | 1399935416                          | Ca_kabuli_Chr03 | 31626736                | C/T  | Gene_Ca_12261      | INTRON                        | RNA-processing protein, HAThelix           |
| Kabuli_wild_31630195 | 1399935417                          | Ca_kabuli_Chr03 | 31630195                | T/C  | Gene_Ca_12262      | INTRON                        | RNA recognition motif domain               |
| Kabuli_wild_31630512 | 1399935418                          | Ca_kabuli_Chr03 | 31630512                | T/A  | Gene_Ca_12262      | INTRON                        | RNA recognition motif domain               |
| Kabuli_wild_31631451 | 1399935419                          | Ca_kabuli_Chr03 | 31631451                | A/C  | Gene_Ca_12262      | NON_SYNONYMOUS_CODING         | RNA recognition motif domain               |
| Kabuli_wild_31631534 | 1399935420                          | Ca_kabuli_Chr03 | 31631534                | A/G  | Gene_Ca_12262      | SYNONYMOUS_CODING             | RNA recognition motif domain               |
| Kabuli_wild_31631561 | 1399935421                          | Ca_kabuli_Chr03 | 31631561                | G/A  | Gene_Ca_12262      | SYNONYMOUS_CODING             | RNA recognition motif domain               |
| Kabuli_wild_31631622 | 1399935422                          | Ca_kabuli_Chr03 | 31631622                | G/A  | Gene_Ca_12262      | INTRON                        | RNA recognition motif domain               |
| Kabuli_wild_31631644 | 1399935423                          | Ca_kabuli_Chr03 | 31631644                | A/C  | Gene_Ca_12262      | INTRON                        | RNA recognition motif domain               |
| Kabuli_wild_31646802 | 1399935424                          | Ca_kabuli_Chr03 | 31646802                | G/A  | NA                 | INTERGENIC                    | NA                                         |
| Kabuli_wild_31683906 | 1399935425                          | Ca_kabuli_Chr03 | 31683906                | A/G  | Gene_Ca_12270      | NON_SYNONYMOUS_CODING         | PeptidaseS8/S53,subtilisin/kexin/sedolisin |
| Kabuli_wild_31689128 | 1399935426                          | Ca_kabuli_Chr03 | 31689128                | C/T  | NA                 | INTERGENIC                    | NA                                         |
| Kabuli_wild_31698493 | 1399935427                          | Ca_kabuli_Chr03 | 31698493                | A/C  | Gene_Ca_12272      | INTRON                        | ABC transporter,trans membrane domain      |
| Kabuli_wild_31771314 | 1399935428                          | Ca_kabuli_Chr03 | 31771314                | C/A  | NA                 | INTERGENIC                    | NA                                         |
| Kabuli_wild_31814796 | 1399935429                          | Ca_kabuli_Chr03 | 31814796                | T/A  | Gene_Ca_12284      | SYNONYMOUS_CODING             | WD40 repeat                                |
| Kabuli_wild_31931014 | 1399935430                          | Ca_kabuli_Chr03 | 31931014                | A/C  | Gene_Ca_12294      | SYNONYMOUS_CODING             | NA                                         |
| Kabuli_wild_31951994 | 1399935431                          | Ca_kabuli_Chr03 | 31951994                | G/A  | Gene_Ca_12295      | SYNONYMOUS_CODING             | HEAT                                       |
| Kabuli_wild_31952316 | 1399935432                          | Ca_kabuli_Chr03 | 31952316                | T/G  | Gene_Ca_12295      | SYNONYMOUS_CODING             | HEAT                                       |
| Kabuli_wild_31952326 | 1399935433                          | Ca_kabuli_Chr03 | 31952326                | C/A  | Gene_Ca_12295      | NON_SYNONYMOUS_CODING         | HEAT                                       |
| Kabuli_wild_31952330 | 1399935434                          | Ca_kabuli_Chr03 | 31952330                | T/C  | Gene_Ca_12295      | SYNONYMOUS_CODING             | HEAT                                       |
| Kabuli_wild_31952333 | 1399935435                          | Ca_kabuli_Chr03 | 31952333                | T/G  | Gene_Ca_12295      | SYNONYMOUS_CODING             | HEAT                                       |
| Kabuli_wild_31952348 | 1399935436                          | Ca_kabuli_Chr03 | 31952348                | T/A  | Gene_Ca_12295      | NON_SYNONYMOUS_CODING         | HEAT                                       |
| Kabuli_wild_31952354 | 1399935437                          | Ca_kabuli_Chr03 | 31952354                | G/A  | Gene_Ca_12295      | SYNONYMOUS_CODING             | HEAT                                       |
| Kabuli_wild_31952361 | 1399935438                          | Ca_kabuli_Chr03 | 31952361                | G/A  | Gene_Ca_12295      | NON_SYNONYMOUS_CODING         | HEAT                                       |
| Kabuli_wild_31952364 | 1399935439                          | Ca_kabuli_Chr03 | 31952364                | G/A  | Gene_Ca_12295      | NON_SYNONYMOUS_CODING         | HEAT                                       |
| Kabuli_wild_31953466 | 1399935440                          | Ca_kabuli_Chr03 | 31953466                | G/A  | Gene_Ca_12295      | INTRON                        | HEAT                                       |
| Kabuli_wild_31953517 | 1399935441                          | Ca_kabuli_Chr03 | 31953517                | A/G  | Gene_Ca_12295      | INTRON                        | HEAT                                       |
| Kabuli_wild_32351031 | 1399935442                          | Ca_kabuli_Chr03 | 32351031                | G/C  | Gene_Ca_11958      | SYNONYMOUS_CODING             | Heat shock protein Hsp70                   |
| Kabuli_wild_32351052 | 1399935443                          | Ca_kabuli_Chr03 | 32351052                | C/T  | Gene_Ca_11958      | SYNONYMOUS_CODING             | Heat shock protein Hsp70                   |
| Kabuli_wild_32357578 | 1399935444                          | Ca_kabuli_Chr03 | 32357578                | G/C  | Gene_Ca_11959      | SYNONYMOUS_CODING             | Heat shock protein Hsp70                   |
| Kabuli_wild_32357599 | 1399935445                          | Ca_kabuli_Chr03 | 32357599                | C/T  | Gene_Ca_11959      | SYNONYMOUS_CODING             | Heat shock protein Hsp70                   |
| Kabuli_wild_32357604 | 1399935446                          | Ca_kabuli_Chr03 | 32357604                | T/A  | Gene_Ca_11959      | NON_SYNONYMOUS_CODING         | Heat shock protein Hsp70                   |
| Kabuli_wild_32466597 | 1399935447                          | Ca_kabuli_Chr03 | 32466597                | A/G  | Gene_Ca_11969      | INTRON                        | Proteasome component (PCI) domain          |
| Kabuli_wild_32473017 | 1399935448                          | Ca_kabuli_Chr03 | 32473017                | A/T  | Gene_Ca_11970      | DOWNSTREAM                    | RNA recognition motif domain               |
| Kabuli_wild_32476774 | 1399935449                          | Ca_kabuli_Chr03 | 32476774                | A/G  | NA                 | INTERGENIC                    | NA                                         |
| Kabuli_wild_32510033 | 1399935450                          | Ca_kabuli_Chr03 | 32510033                | T/G  | NA                 | INTERGENIC                    | NA                                         |
| Kabuli_wild_32510071 | 1399935451                          | Ca_kabuli_Chr03 | 32510071                | G/T  | NA                 | INTERGENIC                    | NA                                         |
| Kabuli_wild_32510081 | 1399935452                          | Ca_kabuli_Chr03 | 32510081                | C/T  | NA                 | INTERGENIC                    | NA                                         |
| Kabuli_wild_32510090 | 1399935453                          | Ca_kabuli_Chr03 | 32510090                | A/G  | NA                 | INTERGENIC                    | NA                                         |
| Kabuli_wild_32510101 | 1399935454                          | Ca_kabuli_Chr03 | 32510101                | G/A  | NA                 | INTERGENIC                    | NA                                         |
| Kabuli_wild_32510111 | 1399935455                          | Ca_kabuli_Chr03 | 32510111                | C/T  | NA                 | INTERGENIC                    | NA                                         |

| SNP IDs              | NCBI dbSNP accession IDs (NCBI_SS#) | Chromosomes     | Physical positions (bp) | SNPs | Gene accession IDs | Sequence components of genome | Putative functions                               |
|----------------------|-------------------------------------|-----------------|-------------------------|------|--------------------|-------------------------------|--------------------------------------------------|
| Kabuli_wild_32510124 | 1399935456                          | Ca_kabuli_Chr03 | 32510124                | C/T  | NA                 | INTERGENIC                    | NA                                               |
| Kabuli_wild_32514859 | 1399935457                          | Ca_kabuli_Chr03 | 32514859                | C/T  | NA                 | INTERGENIC                    | NA                                               |
| Kabuli_wild_32514867 | 1399935458                          | Ca_kabuli_Chr03 | 32514867                | C/T  | NA                 | INTERGENIC                    | NA                                               |
| Kabuli_wild_32514868 | 1399935459                          | Ca_kabuli_Chr03 | 32514868                | A/G  | NA                 | INTERGENIC                    | NA                                               |
| Kabuli_wild_32514883 | 1399935460                          | Ca_kabuli_Chr03 | 32514883                | A/G  | NA                 | INTERGENIC                    | NA                                               |
| Kabuli_wild_32514889 | 1399935461                          | Ca_kabuli_Chr03 | 32514889                | C/T  | NA                 | INTERGENIC                    | NA                                               |
| Kabuli_wild_32514908 | 1399935462                          | Ca_kabuli_Chr03 | 32514908                | A/G  | NA                 | INTERGENIC                    | NA                                               |
| Kabuli_wild_32525128 | 1399935463                          | Ca_kabuli_Chr03 | 32525128                | G/T  | Gene_Ca_11978      | NON_SYNONYMOUS_CODING         | RasGTPase                                        |
| Kabuli_wild_32535281 | 1399935464                          | Ca_kabuli_Chr03 | 32535281                | A/G  | NA                 | INTERGENIC                    | NA                                               |
| Kabuli_wild_32663059 | 1399935465                          | Ca_kabuli_Chr03 | 32663059                | A/C  | Gene_Ca_11994      | NON_SYNONYMOUS_CODING         | RNA recognition motif domain                     |
| Kabuli_wild_32743093 | 1399935466                          | Ca_kabuli_Chr03 | 32743093                | C/T  | NA                 | INTERGENIC                    | NA                                               |
| Kabuli_wild_32757632 | 1399935467                          | Ca_kabuli_Chr03 | 32757632                | A/T  | NA                 | INTERGENIC                    | NA                                               |
| Kabuli_wild_32785350 | 1399935468                          | Ca_kabuli_Chr03 | 32785350                | T/G  | Gene_Ca_12012      | NON_SYNONYMOUS_CODING         | Protein kinase,catalytic domain                  |
| Kabuli_wild_32810787 | 1399935469                          | Ca_kabuli_Chr03 | 32810787                | T/C  | NA                 | INTERGENIC                    | NA                                               |
| Kabuli_wild_32827062 | 1399935470                          | Ca_kabuli_Chr03 | 32827062                | A/G  | NA                 | INTERGENIC                    | NA                                               |
| Kabuli_wild_32827065 | 1399935471                          | Ca_kabuli_Chr03 | 32827065                | T/G  | NA                 | INTERGENIC                    | NA                                               |
| Kabuli_wild_32827067 | 1399935472                          | Ca_kabuli_Chr03 | 32827067                | G/C  | NA                 | INTERGENIC                    | NA                                               |
| Kabuli_wild_32827069 | 1399935473                          | Ca_kabuli_Chr03 | 32827069                | G/C  | NA                 | INTERGENIC                    | NA                                               |
| Kabuli_wild_32845395 | 1399935474                          | Ca_kabuli_Chr03 | 32845395                | C/A  | NA                 | INTERGENIC                    | NA                                               |
| Kabuli_wild_32865530 | 1399935475                          | Ca_kabuli_Chr03 | 32865530                | C/G  | Gene_Ca_12023      | INTRON                        | Helicase,C-terminal                              |
| Kabuli_wild_32949471 | 1399935476                          | Ca_kabuli_Chr03 | 32949471                | A/G  | NA                 | INTERGENIC                    | NA                                               |
| Kabuli_wild_32965908 | 1399935477                          | Ca_kabuli_Chr03 | 32965908                | C/T  | Gene_Ca_12035      | INTRON                        | WD40 repeat                                      |
| Kabuli_wild_33056117 | 1399935478                          | Ca_kabuli_Chr03 | 33056117                | T/G  | Gene_Ca_12043      | NON_SYNONYMOUS_CODING         | Natural resistance-associated macrophage protein |
| Kabuli_wild_33080350 | 1399935479                          | Ca_kabuli_Chr03 | 33080350                | C/T  | NA                 | INTERGENIC                    | NA                                               |
| Kabuli_wild_33091737 | 1399935480                          | Ca_kabuli_Chr03 | 33091737                | A/C  | Gene_Ca_12046      | INTRON                        | SNF2-related                                     |
| Kabuli_wild_33120825 | 1399935481                          | Ca_kabuli_Chr03 | 33120825                | G/A  | NA                 | INTERGENIC                    | NA                                               |
| Kabuli_wild_33492669 | 1399935482                          | Ca_kabuli_Chr03 | 33492669                | A/G  | Gene_Ca_23669      | INTRON                        | NA                                               |
| Kabuli_wild_33520560 | 1399935483                          | Ca_kabuli_Chr03 | 33520560                | A/G  | Gene_Ca_23669      | NON_SYNONYMOUS_CODING         | NA                                               |
| Kabuli_wild_33520615 | 1399935484                          | Ca_kabuli_Chr03 | 33520615                | A/C  | Gene_Ca_23669      | NON_SYNONYMOUS_CODING         | NA                                               |
| Kabuli_wild_33522974 | 1399935485                          | Ca_kabuli_Chr03 | 33522974                | G/A  | Gene_Ca_23669      | INTRON                        | NA                                               |
| Kabuli_wild_33621317 | 1399935486                          | Ca_kabuli_Chr03 | 33621317                | G/A  | Gene_Ca_23664      | INTRON                        | NA                                               |
| Kabuli_wild_33627826 | 1399935487                          | Ca_kabuli_Chr03 | 33627826                | A/C  | NA                 | INTERGENIC                    | NA                                               |
| Kabuli_wild_33715215 | 1399935488                          | Ca_kabuli_Chr03 | 33715215                | G/T  | Gene_Ca_20869      | INTRON                        | Alpha/betahydrolasefold-1                        |
| Kabuli_wild_33900522 | 1399935489                          | Ca_kabuli_Chr03 | 33900522                | A/G  | Gene_Ca_20884      | INTRON                        | ABC transporter,trans membrane domain            |
| Kabuli_wild_33904394 | 1399935490                          | Ca_kabuli_Chr03 | 33904394                | T/A  | Gene_Ca_20884      | DOWNSTREAM                    | ABC transporter,trans membrane domain            |
| Kabuli_wild_33904409 | 1399935491                          | Ca_kabuli_Chr03 | 33904409                | C/T  | Gene_Ca_20884      | DOWNSTREAM                    | ABC transporter,trans membrane domain            |
| Kabuli_wild_34167672 | 1399935492                          | Ca_kabuli_Chr03 | 34167672                | G/T  | Gene_Ca_20896      | NON_SYNONYMOUS_CODING         | NA                                               |
| Kabuli_wild_34167695 | 1399935493                          | Ca_kabuli_Chr03 | 34167695                | A/C  | Gene_Ca_20896      | SYNONYMOUS_CODING             | NA                                               |
| Kabuli_wild_34247736 | 1399935494                          | Ca_kabuli_Chr03 | 34247736                | T/G  | Gene_Ca_00702      | NON_SYNONYMOUS_CODING         | ABC transporter,trans membrane domain            |
| Kabuli_wild_34352385 | 1399935495                          | Ca_kabuli_Chr03 | 34352385                | A/C  | NA                 | INTERGENIC                    | NA                                               |
| Kabuli_wild_34496982 | 1399935496                          | Ca_kabuli_Chr03 | 34496982                | G/C  | Gene_Ca_00725      | SYNONYMOUS_CODING             | WD40 repeat                                      |
| Kabuli_wild_34524656 | 1399935497                          | Ca_kabuli_Chr03 | 34524656                | C/A  | Gene_Ca_00726      | NON_SYNONYMOUS_CODING         | NA                                               |
| Kabuli_wild_34543039 | 1399935498                          | Ca_kabuli_Chr03 | 34543039                | C/T  | Gene_Ca_00726      | NON_SYNONYMOUS_CODING         | NA                                               |
| Kabuli_wild_34543111 | 1399935499                          | Ca_kabuli_Chr03 | 34543111                | A/G  | Gene_Ca_00726      | NON_SYNONYMOUS_CODING         | NA                                               |

| SNP IDs              | NCBI dbSNP accession IDs (NCBI_SS#) | Chromosomes     | Physical positions (bp) | SNPs | Gene accession IDs | Sequence components of genome | Putative functions                                           |
|----------------------|-------------------------------------|-----------------|-------------------------|------|--------------------|-------------------------------|--------------------------------------------------------------|
| Kabuli_wild_34547052 | 1399935500                          | Ca_kabuli_Chr03 | 34547052                | A/T  | Gene_Ca_00726      | NON_SYNONYMOUS_CODING         | NA                                                           |
| Kabuli_wild_34547069 | 1399935501                          | Ca_kabuli_Chr03 | 34547069                | G/T  | Gene_Ca_00726      | NON_SYNONYMOUS_CODING         | NA                                                           |
| Kabuli_wild_34603669 | 1399935502                          | Ca_kabuli_Chr03 | 34603669                | T/A  | Gene_Ca_00732      | NON_SYNONYMOUS_CODING         | Zinc finger,PHD-type                                         |
| Kabuli_wild_34662736 | 1399935503                          | Ca_kabuli_Chr03 | 34662736                | T/G  | Gene_Ca_00740      | INTRON                        | RNA recognition motif domain                                 |
| Kabuli_wild_34699073 | 1399935504                          | Ca_kabuli_Chr03 | 34699073                | C/A  | Gene_Ca_00745      | NON_SYNONYMOUS_CODING         | HECT                                                         |
| Kabuli_wild_34699076 | 1399935505                          | Ca_kabuli_Chr03 | 34699076                | T/C  | Gene_Ca_00745      | NON_SYNONYMOUS_CODING         | HECT                                                         |
| Kabuli_wild_34699114 | 1399935506                          | Ca_kabuli_Chr03 | 34699114                | C/A  | Gene_Ca_00745      | NON_SYNONYMOUS_CODING         | HECT                                                         |
| Kabuli_wild_34722508 | 1399935507                          | Ca_kabuli_Chr03 | 34722508                | A/T  | Gene_Ca_00746      | DOWNSTREAM                    | Exostosin-like                                               |
| Kabuli_wild_34722931 | 1399935508                          | Ca_kabuli_Chr03 | 34722931                | A/G  | NA                 | INTERGENIC                    | NA                                                           |
| Kabuli_wild_34722979 | 1399935509                          | Ca_kabuli_Chr03 | 34722979                | T/C  | NA                 | INTERGENIC                    | NA                                                           |
| Kabuli_wild_34730463 | 1399935510                          | Ca_kabuli_Chr03 | 34730463                | T/C  | Gene_Ca_00748      | INTRON                        | Protein of unknown function DUF81                            |
| Kabuli_wild_34730954 | 1399935511                          | Ca_kabuli_Chr03 | 34730954                | G/A  | Gene_Ca_00748      | DOWNSTREAM                    | Protein of unknown function DUF81                            |
| Kabuli_wild_34736963 | 1399935512                          | Ca_kabuli_Chr03 | 34736963                | T/C  | Gene_Ca_00749      | NON_SYNONYMOUS_CODING         | RibosomalproteinL24e                                         |
| Kabuli_wild_34757571 | 1399935513                          | Ca_kabuli_Chr03 | 34757571                | T/C  | Gene_Ca_00751      | INTRON                        | F-boxdomain,cyclin-like                                      |
| Kabuli_wild_34757578 | 1399935514                          | Ca_kabuli_Chr03 | 34757578                | T/C  | Gene_Ca_00751      | INTRON                        | F-boxdomain,cyclin-like                                      |
| Kabuli_wild_34852030 | 1399935515                          | Ca_kabuli_Chr03 | 34852030                | G/A  | NA                 | INTERGENIC                    | NA                                                           |
| Kabuli_wild_34852070 | 1399935516                          | Ca_kabuli_Chr03 | 34852070                | T/G  | NA                 | INTERGENIC                    | NA                                                           |
| Kabuli_wild_34889316 | 1399935517                          | Ca_kabuli_Chr03 | 34889316                | C/G  | Gene_Ca_00767      | SYNONYMOUS_CODING             | Fructose-bisphosphatealdolase,class-I                        |
| Kabuli_wild_34911621 | 1399935518                          | Ca_kabuli_Chr03 | 34911621                | G/A  | Gene_Ca_00768      | SYNONYMOUS_CODING             | Pathogenesis-related transcriptional factor/ERF, DNA-binding |
| Kabuli_wild_34982544 | 1399935519                          | Ca_kabuli_Chr03 | 34982544                | T/C  | Gene_Ca_00773      | INTRON                        | Glycosylhydrolase,family13,catalytic domain                  |
| Kabuli_wild_35071821 | 1399935520                          | Ca_kabuli_Chr03 | 35071821                | A/G  | Gene_Ca_00779      | INTRON                        | Protein kinase,catalytic domain                              |
| Kabuli_wild_35071852 | 1399935521                          | Ca_kabuli_Chr03 | 35071852                | T/G  | Gene_Ca_00779      | INTRON                        | Protein kinase,catalytic domain                              |
| Kabuli_wild_35085559 | 1399935522                          | Ca_kabuli_Chr03 | 35085559                | T/A  | Gene_Ca_00781      | SYNONYMOUS_CODING             | PeptidaseS8/S53,subtilisin/kexin/sedolisin                   |
| Kabuli_wild_35085658 | 1399935523                          | Ca_kabuli_Chr03 | 35085658                | C/A  | Gene_Ca_00781      | SYNONYMOUS_CODING             | PeptidaseS8/S53,subtilisin/kexin/sedolisin                   |
| Kabuli_wild_35126649 | 1399935524                          | Ca_kabuli_Chr03 | 35126649                | C/G  | Gene_Ca_00786      | NON_SYNONYMOUS_CODING         | NA                                                           |
| Kabuli_wild_35126760 | 1399935525                          | Ca_kabuli_Chr03 | 35126760                | G/A  | Gene_Ca_00786      | NON_SYNONYMOUS_CODING         | NA                                                           |
| Kabuli_wild_35241163 | 1399935526                          | Ca_kabuli_Chr03 | 35241163                | G/A  | NA                 | INTERGENIC                    | NA                                                           |
| Kabuli_wild_35332088 | 1399935527                          | Ca_kabuli_Chr03 | 35332088                | T/A  | Gene_Ca_00812      | NON_SYNONYMOUS_CODING         | Kinesin,motordomain                                          |
| Kabuli_wild_35345385 | 1399935528                          | Ca_kabuli_Chr03 | 35345385                | A/T  | Gene_Ca_00814      | NON_SYNONYMOUS_CODING         | Oxoglutarate/iron-dependent oxygenase                        |
| Kabuli_wild_35383318 | 1399935529                          | Ca_kabuli_Chr03 | 35383318                | C/T  | Gene_Ca_00819      | INTRON                        | Peptidyl-prolylcis-transisomerase,cyclophilin-type           |
| Kabuli_wild_35403074 | 1399935530                          | Ca_kabuli_Chr03 | 35403074                | A/G  | NA                 | INTERGENIC                    | NA                                                           |
| Kabuli_wild_35420099 | 1399935531                          | Ca_kabuli_Chr03 | 35420099                | A/G  | Gene_Ca_00824      | INTRON                        | LETM1-like                                                   |
| Kabuli_wild_35420108 | 1399935532                          | Ca_kabuli_Chr03 | 35420108                | T/A  | Gene_Ca_00824      | INTRON                        | LETM1-like                                                   |
| Kabuli_wild_35424877 | 1399935533                          | Ca_kabuli_Chr03 | 35424877                | C/T  | NA                 | INTERGENIC                    | NA                                                           |
| Kabuli_wild_35424914 | 1399935534                          | Ca_kabuli_Chr03 | 35424914                | G/C  | NA                 | INTERGENIC                    | NA                                                           |
| Kabuli_wild_35424994 | 1399935535                          | Ca_kabuli_Chr03 | 35424994                | T/C  | NA                 | INTERGENIC                    | NA                                                           |
| Kabuli_wild_35483932 | 1399935536                          | Ca_kabuli_Chr03 | 35483932                | T/C  | NA                 | INTERGENIC                    | NA                                                           |
| Kabuli_wild_35483960 | 1399935537                          | Ca_kabuli_Chr03 | 35483960                | T/C  | NA                 | INTERGENIC                    | NA                                                           |
| Kabuli_wild_35484034 | 1399935538                          | Ca_kabuli_Chr03 | 35484034                | G/C  | NA                 | INTERGENIC                    | NA                                                           |
| Kabuli_wild_35487736 | 1399935539                          | Ca_kabuli_Chr03 | 35487736                | T/C  | Gene_Ca_00831      | UPSTREAM                      | Zinc finger,MYND-type                                        |
| Kabuli_wild_35488597 | 1399935540                          | Ca_kabuli_Chr03 | 35488597                | T/C  | NA                 | INTERGENIC                    | NA                                                           |
| Kabuli_wild_35490951 | 1399935541                          | Ca_kabuli_Chr03 | 35490951                | C/T  | NA                 | INTERGENIC                    | NA                                                           |
| Kabuli_wild_35490991 | 1399935542                          | Ca_kabuli_Chr03 | 35490991                | A/G  | NA                 | INTERGENIC                    | NA                                                           |
| Kabuli_wild_35543614 | 1399935543                          | Ca_kabuli_Chr03 | 35543614                | C/T  | NA                 | INTERGENIC                    | NA                                                           |

| SNP IDs              | NCBI dbSNP accession IDs (NCBI_SS#) | Chromosomes     | Physical positions (bp) | SNPs | Gene accession IDs | Sequence components of genome | Putative functions                                                  |
|----------------------|-------------------------------------|-----------------|-------------------------|------|--------------------|-------------------------------|---------------------------------------------------------------------|
| Kabuli_wild_35631679 | 1399935544                          | Ca_kabuli_Chr03 | 35631679                | C/G  | NA                 | INTERGENIC                    | NA                                                                  |
| Kabuli_wild_35631689 | 1399935545                          | Ca_kabuli_Chr03 | 35631689                | C/A  | NA                 | INTERGENIC                    | NA                                                                  |
| Kabuli_wild_35631723 | 1399935546                          | Ca_kabuli_Chr03 | 35631723                | A/G  | NA                 | INTERGENIC                    | NA                                                                  |
| Kabuli_wild_35653816 | 1399935547                          | Ca_kabuli_Chr03 | 35653816                | T/G  | Gene_Ca_00853      | SYNONYMOUS_CODING             | NA                                                                  |
| Kabuli_wild_35673890 | 1399935548                          | Ca_kabuli_Chr03 | 35673890                | T/C  | Gene_Ca_00855      | INTRON                        | Glycosyltransferase,group1                                          |
| Kabuli_wild_35747394 | 1399935549                          | Ca_kabuli_Chr03 | 35747394                | C/G  | NA                 | INTERGENIC                    | NA                                                                  |
| Kabuli_wild_35763648 | 1399935550                          | Ca_kabuli_Chr03 | 35763648                | T/C  | Gene_Ca_00862      | INTRON                        | NA                                                                  |
| Kabuli_wild_35807265 | 1399935551                          | Ca_kabuli_Chr03 | 35807265                | T/C  | NA                 | INTERGENIC                    | NA                                                                  |
| Kabuli_wild_35807407 | 1399935552                          | Ca_kabuli_Chr03 | 35807407                | A/T  | NA                 | INTERGENIC                    | NA                                                                  |
| Kabuli_wild_35829834 | 1399935553                          | Ca_kabuli_Chr03 | 35829834                | A/G  | NA                 | INTERGENIC                    | NA                                                                  |
| Kabuli_wild_35876164 | 1399935554                          | Ca_kabuli_Chr03 | 35876164                | T/A  | NA                 | INTERGENIC                    | NA                                                                  |
| Kabuli_wild_35876175 | 1399935555                          | Ca_kabuli_Chr03 | 35876175                | A/G  | NA                 | INTERGENIC                    | NA                                                                  |
| Kabuli_wild_35898221 | 1399935556                          | Ca_kabuli_Chr03 | 35898221                | C/A  | NA                 | INTERGENIC                    | NA                                                                  |
| Kabuli_wild_35920684 | 1399935557                          | Ca_kabuli_Chr03 | 35920684                | A/C  | NA                 | INTERGENIC                    | NA                                                                  |
| Kabuli_wild_35948487 | 1399935558                          | Ca_kabuli_Chr03 | 35948487                | G/A  | Gene_Ca_00889      | DOWNSTREAM                    | RibosomalproteinL35A                                                |
| Kabuli_wild_35979293 | 1399935559                          | Ca_kabuli_Chr03 | 35979293                | A/G  | Gene_Ca_00892      | INTRON                        | FAD-linkedoxidase,C-terminal                                        |
| Kabuli_wild_35979412 | 1399935560                          | Ca_kabuli_Chr03 | 35979412                | G/T  | Gene_Ca_00892      | SYNONYMOUS_CODING             | FAD-linkedoxidase,C-terminal                                        |
| Kabuli_wild_35991024 | 1399935561                          | Ca_kabuli_Chr03 | 35991024                | A/G  | NA                 | INTERGENIC                    | NA                                                                  |
| Kabuli_wild_36003682 | 1399935562                          | Ca_kabuli_Chr03 | 36003682                | G/T  | Gene_Ca_00896      | INTRON                        | Protease-associateddomain,PA                                        |
| Kabuli_wild_36003699 | 1399935563                          | Ca_kabuli_Chr03 | 36003699                | G/A  | Gene_Ca_00896      | INTRON                        | Protease-associateddomain,PA                                        |
| Kabuli_wild_36004668 | 1399935564                          | Ca_kabuli_Chr03 | 36004668                | A/G  | Gene_Ca_00896      | INTRON                        | Protease-associateddomain,PA                                        |
| Kabuli_wild_36010614 | 1399935565                          | Ca_kabuli_Chr03 | 36010614                | T/C  | NA                 | INTERGENIC                    | NA                                                                  |
| Kabuli_wild_36034934 | 1399935566                          | Ca_kabuli_Chr03 | 36034934                | A/C  | Gene_Ca_00902      | INTRON                        | Ubiquitin-associated/translation elongation factor EF1B, N-terminal |
| Kabuli_wild_36046938 | 1399935567                          | Ca_kabuli_Chr03 | 36046938                | C/T  | Gene_Ca_00903      | SYNONYMOUS_CODING             | SWAP/Surp                                                           |
| Kabuli_wild_36046956 | 1399935568                          | Ca_kabuli_Chr03 | 36046956                | A/C  | Gene_Ca_00903      | SYNONYMOUS_CODING             | SWAP/Surp                                                           |
| Kabuli_wild_36050259 | 1399935569                          | Ca_kabuli_Chr03 | 36050259                | T/G  | Gene_Ca_00903      | SYNONYMOUS_CODING             | SWAP/Surp                                                           |
| Kabuli_wild_36050319 | 1399935570                          | Ca_kabuli_Chr03 | 36050319                | T/C  | Gene_Ca_00903      | SYNONYMOUS_CODING             | SWAP/Surp                                                           |
| Kabuli_wild_36071033 | 1399935571                          | Ca_kabuli_Chr03 | 36071033                | G/A  | Gene_Ca_00904      | DOWNSTREAM                    | Cleavage/polyadenylation specificity factor, A subunit, C-terminalr |
| Kabuli_wild_36085966 | 1399935572                          | Ca_kabuli_Chr03 | 36085966                | G/A  | NA                 | INTERGENIC                    | NA                                                                  |
| Kabuli_wild_36117521 | 1399935573                          | Ca_kabuli_Chr03 | 36117521                | A/G  | Gene_Ca_00911      | SYNONYMOUS_CODING             | NA                                                                  |
| Kabuli_wild_36117734 | 1399935574                          | Ca_kabuli_Chr03 | 36117734                | T/C  | Gene_Ca_00911      | INTRON                        | NA                                                                  |
| Kabuli_wild_36118120 | 1399935575                          | Ca_kabuli_Chr03 | 36118120                | T/C  | Gene_Ca_00911      | INTRON                        | NA                                                                  |
| Kabuli_wild_36118156 | 1399935576                          | Ca_kabuli_Chr03 | 36118156                | C/T  | Gene_Ca_00911      | INTRON                        | NA                                                                  |
| Kabuli_wild_36119592 | 1399935577                          | Ca_kabuli_Chr03 | 36119592                | T/C  | Gene_Ca_00911      | NON_SYNONYMOUS_CODING         | NA                                                                  |
| Kabuli_wild_36119602 | 1399935578                          | Ca_kabuli_Chr03 | 36119602                | C/A  | Gene_Ca_00911      | NON_SYNONYMOUS_CODING         | NA                                                                  |
| Kabuli_wild_36130561 | 1399935579                          | Ca_kabuli_Chr03 | 36130561                | T/A  | NA                 | INTERGENIC                    | NA                                                                  |
| Kabuli_wild_36130610 | 1399935580                          | Ca_kabuli_Chr03 | 36130610                | C/A  | NA                 | INTERGENIC                    | NA                                                                  |
| Kabuli_wild_36132401 | 1399935581                          | Ca_kabuli_Chr03 | 36132401                | C/T  | Gene_Ca_00912      | INTRON                        | NPL4                                                                |
| Kabuli_wild_36132437 | 1399935582                          | Ca_kabuli_Chr03 | 36132437                | C/T  | Gene_Ca_00912      | INTRON                        | NPL4                                                                |
| Kabuli_wild_36132440 | 1399935583                          | Ca_kabuli_Chr03 | 36132440                | T/C  | Gene_Ca_00912      | INTRON                        | NPL4                                                                |
| Kabuli_wild_36132480 | 1399935584                          | Ca_kabuli_Chr03 | 36132480                | C/T  | Gene_Ca_00912      | INTRON                        | NPL4                                                                |
| Kabuli_wild_36132539 | 1399935585                          | Ca_kabuli_Chr03 | 36132539                | C/T  | Gene_Ca_00912      | INTRON                        | NPL4                                                                |
| Kabuli_wild_36132554 | 1399935586                          | Ca_kabuli_Chr03 | 36132554                | A/T  | Gene_Ca_00912      | INTRON                        | NPL4                                                                |
| Kabuli_wild_36132570 | 1399935587                          | Ca_kabuli_Chr03 | 36132570                | G/A  | Gene_Ca_00912      | INTRON                        | NPL4                                                                |



| SNP IDs              | NCBI dbSNP accession IDs (NCBI_SS#) | Chromosomes      | Physical positions (bp) | SNPs | Gene accession IDs | Sequence components of genome | Putative functions                      |
|----------------------|-------------------------------------|------------------|-------------------------|------|--------------------|-------------------------------|-----------------------------------------|
| Kabuli_wild_36132586 | 1399935588                          | Ca_kabuli_Chrom3 | 36132586                | T/G  | Gene_Ca_00912      | INTRON                        | NPL4                                    |
| Kabuli_wild_36150717 | 1399935589                          | Ca_kabuli_Chrom3 | 36150717                | T/C  | NA                 | INTERGENIC                    | NA                                      |
| Kabuli_wild_36150722 | 1399935590                          | Ca_kabuli_Chrom3 | 36150722                | G/A  | NA                 | INTERGENIC                    | NA                                      |
| Kabuli_wild_36164925 | 1399935591                          | Ca_kabuli_Chrom3 | 36164925                | A/G  | NA                 | INTERGENIC                    | NA                                      |
| Kabuli_wild_36167136 | 1399935592                          | Ca_kabuli_Chrom3 | 36167136                | G/T  | Gene_Ca_00918      | DOWNSTREAM                    | BRCT                                    |
| Kabuli_wild_36177201 | 1399935593                          | Ca_kabuli_Chrom3 | 36177201                | T/C  | Gene_Ca_00919      | DOWNSTREAM                    | Short-chain dehydrogenase/reductase SDR |
| Kabuli_wild_36205806 | 1399935594                          | Ca_kabuli_Chrom3 | 36205806                | T/G  | NA                 | INTERGENIC                    | NA                                      |
| Kabuli_wild_36205819 | 1399935595                          | Ca_kabuli_Chrom3 | 36205819                | A/G  | NA                 | INTERGENIC                    | NA                                      |
| Kabuli_wild_36205845 | 1399935596                          | Ca_kabuli_Chrom3 | 36205845                | A/G  | NA                 | INTERGENIC                    | NA                                      |
| Kabuli_wild_36206046 | 1399935597                          | Ca_kabuli_Chrom3 | 36206046                | T/C  | NA                 | INTERGENIC                    | NA                                      |
| Kabuli_wild_36206615 | 1399935598                          | Ca_kabuli_Chrom3 | 36206615                | A/C  | Gene_Ca_00925      | INTRON                        | rRNAprocessing                          |
| Kabuli_wild_36212809 | 1399935599                          | Ca_kabuli_Chrom3 | 36212809                | G/A  | NA                 | INTERGENIC                    | NA                                      |
| Kabuli_wild_36212843 | 1399935600                          | Ca_kabuli_Chrom3 | 36212843                | T/A  | NA                 | INTERGENIC                    | NA                                      |
| Kabuli_wild_36217686 | 1399935601                          | Ca_kabuli_Chrom3 | 36217686                | G/A  | Gene_Ca_00927      | INTRON                        | Zinc finger,B-box                       |
| Kabuli_wild_36227548 | 1399935602                          | Ca_kabuli_Chrom3 | 36227548                | G/T  | Gene_Ca_00929      | UPSTREAM                      | Ribosomal protein S19/S15               |
| Kabuli_wild_36227565 | 1399935603                          | Ca_kabuli_Chrom3 | 36227565                | T/A  | Gene_Ca_00929      | UPSTREAM                      | Ribosomal protein S19/S15               |
| Kabuli_wild_36227566 | 1399935604                          | Ca_kabuli_Chrom3 | 36227566                | T/A  | Gene_Ca_00929      | UPSTREAM                      | Ribosomal protein S19/S15               |
| Kabuli_wild_36227567 | 1399935605                          | Ca_kabuli_Chrom3 | 36227567                | T/C  | Gene_Ca_00929      | UPSTREAM                      | Ribosomal protein S19/S15               |
| Kabuli_wild_36227948 | 1399935606                          | Ca_kabuli_Chrom3 | 36227948                | A/G  | Gene_Ca_00929      | UPSTREAM                      | Ribosomal protein S19/S15               |
| Kabuli_wild_36228032 | 1399935607                          | Ca_kabuli_Chrom3 | 36228032                | G/T  | Gene_Ca_00929      | UPSTREAM                      | Ribosomal protein S19/S15               |
| Kabuli_wild_36228121 | 1399935608                          | Ca_kabuli_Chrom3 | 36228121                | T/A  | Gene_Ca_00929      | INTRON                        | Ribosomal protein S19/S15               |
| Kabuli_wild_36228142 | 1399935609                          | Ca_kabuli_Chrom3 | 36228142                | A/G  | Gene_Ca_00929      | INTRON                        | Ribosomal protein S19/S15               |
| Kabuli_wild_36242480 | 1399935610                          | Ca_kabuli_Chrom3 | 36242480                | G/C  | NA                 | INTERGENIC                    | NA                                      |
| Kabuli_wild_36242490 | 1399935611                          | Ca_kabuli_Chrom3 | 36242490                | G/T  | NA                 | INTERGENIC                    | NA                                      |
| Kabuli_wild_36242504 | 1399935612                          | Ca_kabuli_Chrom3 | 36242504                | C/T  | NA                 | INTERGENIC                    | NA                                      |
| Kabuli_wild_36247792 | 1399935613                          | Ca_kabuli_Chrom3 | 36247792                | T/C  | Gene_Ca_00932      | DOWNSTREAM                    | Ovariantumour,otubain                   |
| Kabuli_wild_36260865 | 1399935614                          | Ca_kabuli_Chrom3 | 36260865                | C/A  | NA                 | INTERGENIC                    | NA                                      |
| Kabuli_wild_36282091 | 1399935615                          | Ca_kabuli_Chrom3 | 36282091                | T/G  | Gene_Ca_00938      | NON_SYNONYMOUS_CODING         | Domain of unknown function DUF255       |
| Kabuli_wild_36293589 | 1399935616                          | Ca_kabuli_Chrom3 | 36293589                | A/G  | Gene_Ca_00939      | SYNONYMOUS_CODING             | Zinc finger,CW-type                     |
| Kabuli_wild_36293625 | 1399935617                          | Ca_kabuli_Chrom3 | 36293625                | C/T  | Gene_Ca_00939      | SYNONYMOUS_CODING             | Zinc finger,CW-type                     |
| Kabuli_wild_36293637 | 1399935618                          | Ca_kabuli_Chrom3 | 36293637                | C/T  | Gene_Ca_00939      | SYNONYMOUS_CODING             | Zinc finger,CW-type                     |
| Kabuli_wild_36298180 | 1399935619                          | Ca_kabuli_Chrom3 | 36298180                | G/A  | Gene_Ca_00939      | NON_SYNONYMOUS_CODING         | Zinc finger,CW-type                     |
| Kabuli_wild_36298200 | 1399935620                          | Ca_kabuli_Chrom3 | 36298200                | T/G  | Gene_Ca_00939      | INTRON                        | Zinc finger,CW-type                     |
| Kabuli_wild_36298273 | 1399935621                          | Ca_kabuli_Chrom3 | 36298273                | A/G  | Gene_Ca_00939      | INTRON                        | Zinc finger,CW-type                     |
| Kabuli_wild_36330750 | 1399935622                          | Ca_kabuli_Chrom3 | 36330750                | A/G  | Gene_Ca_00942      | NON_SYNONYMOUS_CODING         | Homeobox                                |
| Kabuli_wild_36330815 | 1399935623                          | Ca_kabuli_Chrom3 | 36330815                | T/C  | Gene_Ca_00942      | SYNONYMOUS_CODING             | Homeobox                                |
| Kabuli_wild_36334577 | 1399935624                          | Ca_kabuli_Chrom3 | 36334577                | G/C  | Gene_Ca_00942      | INTRON                        | Homeobox                                |
| Kabuli_wild_36334594 | 1399935625                          | Ca_kabuli_Chrom3 | 36334594                | G/A  | Gene_Ca_00942      | INTRON                        | Homeobox                                |
| Kabuli_wild_36334595 | 1399935626                          | Ca_kabuli_Chrom3 | 36334595                | C/T  | Gene_Ca_00942      | INTRON                        | Homeobox                                |
| Kabuli_wild_36334653 | 1399935627                          | Ca_kabuli_Chrom3 | 36334653                | G/A  | Gene_Ca_00942      | INTRON                        | Homeobox                                |
| Kabuli_wild_36345158 | 1399935628                          | Ca_kabuli_Chrom3 | 36345158                | T/C  | Gene_Ca_00943      | NON_SYNONYMOUS_CODING         | Zinc finger,C2H2-type                   |
| Kabuli_wild_36357622 | 1399935629                          | Ca_kabuli_Chrom3 | 36357622                | A/G  | Gene_Ca_00944      | NON_SYNONYMOUS_CODING         | NA                                      |
| Kabuli_wild_36361339 | 1399935630                          | Ca_kabuli_Chrom3 | 36361339                | C/T  | Gene_Ca_00944      | UPSTREAM                      | NA                                      |
| Kabuli_wild_36378294 | 1399935631                          | Ca_kabuli_Chrom3 | 36378294                | G/T  | Gene_Ca_00946      | SYNONYMOUS_CODING             | Protein kinase,catalytic domain         |

| SNP IDs              | NCBI dbSNP accession IDs (NCBI_SS#) | Chromosomes     | Physical positions (bp) | SNPs | Gene accession IDs | Sequence components of genome | Putative functions                          |
|----------------------|-------------------------------------|-----------------|-------------------------|------|--------------------|-------------------------------|---------------------------------------------|
| Kabuli_wild_36378299 | 1399935632                          | Ca_kabuli_Chr03 | 36378299                | C/G  | Gene_Ca_00946      | INTRON                        | Protein kinase,catalytic domain             |
| Kabuli_wild_36378358 | 1399935633                          | Ca_kabuli_Chr03 | 36378358                | G/A  | Gene_Ca_00946      | INTRON                        | Protein kinase,catalytic domain             |
| Kabuli_wild_36387615 | 1399935634                          | Ca_kabuli_Chr03 | 36387615                | A/T  | NA                 | INTERGENIC                    | NA                                          |
| Kabuli_wild_36387718 | 1399935635                          | Ca_kabuli_Chr03 | 36387718                | C/T  | NA                 | INTERGENIC                    | NA                                          |
| Kabuli_wild_36387732 | 1399935636                          | Ca_kabuli_Chr03 | 36387732                | G/A  | NA                 | INTERGENIC                    | NA                                          |
| Kabuli_wild_36396559 | 1399935637                          | Ca_kabuli_Chr03 | 36396559                | C/A  | NA                 | INTERGENIC                    | NA                                          |
| Kabuli_wild_36396604 | 1399935638                          | Ca_kabuli_Chr03 | 36396604                | T/A  | NA                 | INTERGENIC                    | NA                                          |
| Kabuli_wild_36417896 | 1399935639                          | Ca_kabuli_Chr03 | 36417896                | A/G  | Gene_Ca_00954      | SYNONYMOUS_CODING             | Glycosyltransferase,ALG3                    |
| Kabuli_wild_36417921 | 1399935640                          | Ca_kabuli_Chr03 | 36417921                | G/A  | Gene_Ca_00954      | SYNONYMOUS_CODING             | Glycosyltransferase,ALG3                    |
| Kabuli_wild_36432389 | 1399935641                          | Ca_kabuli_Chr03 | 36432389                | G/A  | Gene_Ca_00957      | SYNONYMOUS_CODING             | Thiamin pyrophospho kinase,catalytic domain |
| Kabuli_wild_36441575 | 1399935642                          | Ca_kabuli_Chr03 | 36441575                | G/A  | NA                 | INTERGENIC                    | NA                                          |
| Kabuli_wild_36441593 | 1399935643                          | Ca_kabuli_Chr03 | 36441593                | T/A  | NA                 | INTERGENIC                    | NA                                          |
| Kabuli_wild_36441594 | 1399935644                          | Ca_kabuli_Chr03 | 36441594                | G/A  | NA                 | INTERGENIC                    | NA                                          |
| Kabuli_wild_36441595 | 1399935645                          | Ca_kabuli_Chr03 | 36441595                | T/C  | NA                 | INTERGENIC                    | NA                                          |
| Kabuli_wild_36441977 | 1399935646                          | Ca_kabuli_Chr03 | 36441977                | T/C  | NA                 | INTERGENIC                    | NA                                          |
| Kabuli_wild_36447274 | 1399935647                          | Ca_kabuli_Chr03 | 36447274                | G/A  | NA                 | INTERGENIC                    | NA                                          |
| Kabuli_wild_36447364 | 1399935648                          | Ca_kabuli_Chr03 | 36447364                | T/A  | NA                 | INTERGENIC                    | NA                                          |
| Kabuli_wild_36447520 | 1399935649                          | Ca_kabuli_Chr03 | 36447520                | T/A  | NA                 | INTERGENIC                    | NA                                          |
| Kabuli_wild_36447525 | 1399935650                          | Ca_kabuli_Chr03 | 36447525                | C/T  | NA                 | INTERGENIC                    | NA                                          |
| Kabuli_wild_36447605 | 1399935651                          | Ca_kabuli_Chr03 | 36447605                | C/T  | NA                 | INTERGENIC                    | NA                                          |
| Kabuli_wild_36447622 | 1399935652                          | Ca_kabuli_Chr03 | 36447622                | C/A  | NA                 | INTERGENIC                    | NA                                          |
| Kabuli_wild_36447666 | 1399935653                          | Ca_kabuli_Chr03 | 36447666                | A/T  | NA                 | INTERGENIC                    | NA                                          |
| Kabuli_wild_36462914 | 1399935654                          | Ca_kabuli_Chr03 | 36462914                | C/T  | Gene_Ca_00963      | DOWNSTREAM                    | NA                                          |
| Kabuli_wild_36462916 | 1399935655                          | Ca_kabuli_Chr03 | 36462916                | T/C  | Gene_Ca_00963      | DOWNSTREAM                    | NA                                          |
| Kabuli_wild_36488722 | 1399935656                          | Ca_kabuli_Chr03 | 36488722                | T/A  | Gene_Ca_00966      | DOWNSTREAM                    | Alpha/betahydrolasefold-1                   |
| Kabuli_wild_36488736 | 1399935657                          | Ca_kabuli_Chr03 | 36488736                | T/C  | Gene_Ca_00966      | DOWNSTREAM                    | Alpha/betahydrolasefold-1                   |
| Kabuli_wild_36488853 | 1399935658                          | Ca_kabuli_Chr03 | 36488853                | A/G  | Gene_Ca_00966      | DOWNSTREAM                    | Alpha/betahydrolasefold-1                   |
| Kabuli_wild_36503906 | 1399935659                          | Ca_kabuli_Chr03 | 36503906                | C/T  | Gene_Ca_00967      | NON_SYNONYMOUS_CODING         | Small-subunitprocessome,Utp14               |
| Kabuli_wild_36503912 | 1399935660                          | Ca_kabuli_Chr03 | 36503912                | T/C  | Gene_Ca_00967      | NON_SYNONYMOUS_CODING         | Small-subunitprocessome,Utp14               |
| Kabuli_wild_36524598 | 1399935661                          | Ca_kabuli_Chr03 | 36524598                | G/C  | NA                 | INTERGENIC                    | NA                                          |
| Kabuli_wild_36524635 | 1399935662                          | Ca_kabuli_Chr03 | 36524635                | A/G  | NA                 | INTERGENIC                    | NA                                          |
| Kabuli_wild_36524659 | 1399935663                          | Ca_kabuli_Chr03 | 36524659                | T/C  | NA                 | INTERGENIC                    | NA                                          |
| Kabuli_wild_36531151 | 1399935664                          | Ca_kabuli_Chr03 | 36531151                | C/A  | NA                 | INTERGENIC                    | NA                                          |
| Kabuli_wild_36588856 | 1399935665                          | Ca_kabuli_Chr03 | 36588856                | C/T  | Gene_Ca_00978      | SYNONYMOUS_CODING             | Pectinesterase,catalytic                    |
| Kabuli_wild_36588896 | 1399935666                          | Ca_kabuli_Chr03 | 36588896                | C/G  | Gene_Ca_00978      | NON_SYNONYMOUS_CODING         | Pectinesterase,catalytic                    |
| Kabuli_wild_36609043 | 1399935667                          | Ca_kabuli_Chr03 | 36609043                | G/A  | Gene_Ca_00980      | NON_SYNONYMOUS_CODING         | Metal-dependent phosphohydrolase, HD domain |
| Kabuli_wild_36616855 | 1399935668                          | Ca_kabuli_Chr03 | 36616855                | T/C  | NA                 | INTERGENIC                    | NA                                          |
| Kabuli_wild_36644117 | 1399935669                          | Ca_kabuli_Chr03 | 36644117                | A/T  | Gene_Ca_00985      | SYNONYMOUS_CODING             | Target SNARE coiled-coil domain             |
| Kabuli_wild_36721275 | 1399935670                          | Ca_kabuli_Chr03 | 36721275                | C/T  | Gene_Ca_00996      | INTRON                        | Lipase,class3                               |
| Kabuli_wild_36733103 | 1399935671                          | Ca_kabuli_Chr03 | 36733103                | T/G  | Gene_Ca_00997      | SYNONYMOUS_CODING             | Heat shock protein DnaJ,N-terminal          |
| Kabuli_wild_36733211 | 1399935672                          | Ca_kabuli_Chr03 | 36733211                | A/G  | Gene_Ca_00997      | SYNONYMOUS_CODING             | Heat shock protein DnaJ,N-terminal          |
| Kabuli_wild_36749775 | 1399935673                          | Ca_kabuli_Chr03 | 36749775                | T/A  | Gene_Ca_00998      | SYNONYMOUS_CODING             | Glycosi dehydrolase,family 3, N-terminal    |
| Kabuli_wild_36749826 | 1399935674                          | Ca_kabuli_Chr03 | 36749826                | G/A  | Gene_Ca_00998      | SYNONYMOUS_CODING             | Glycosi dehydrolase,family 3, N-terminal    |
| Kabuli_wild_36749829 | 1399935675                          | Ca_kabuli_Chr03 | 36749829                | T/C  | Gene_Ca_00998      | NON_SYNONYMOUS_CODING         | Glycosi dehydrolase,family 3, N-terminal    |

| SNP IDs              | NCBI dbSNP accession IDs (NCBI_SS#) | Chromosomes     | Physical positions (bp) | SNPs | Gene accession IDs | Sequence components of genome | Putative functions                        |
|----------------------|-------------------------------------|-----------------|-------------------------|------|--------------------|-------------------------------|-------------------------------------------|
| Kabuli_wild_36749831 | 1399935676                          | Ca_kabuli_Chr03 | 36749831                | T/C  | Gene_Ca_00998      | NON_SYNONYMOUS_CODING         | Glycosi dehydrolase, family 3, N-terminal |
| Kabuli_wild_36749871 | 1399935677                          | Ca_kabuli_Chr03 | 36749871                | T/C  | Gene_Ca_00998      | SYNONYMOUS_CODING             | Glycosi dehydrolase, family 3, N-terminal |
| Kabuli_wild_36749916 | 1399935678                          | Ca_kabuli_Chr03 | 36749916                | C/A  | Gene_Ca_00998      | NON_SYNONYMOUS_CODING         | Glycosi dehydrolase, family 3, N-terminal |
| Kabuli_wild_36770026 | 1399935679                          | Ca_kabuli_Chr03 | 36770026                | G/A  | NA                 | INTERGENIC                    | NA                                        |
| Kabuli_wild_36783494 | 1399935680                          | Ca_kabuli_Chr03 | 36783494                | T/A  | NA                 | INTERGENIC                    | NA                                        |
| Kabuli_wild_36860134 | 1399935681                          | Ca_kabuli_Chr03 | 36860134                | A/G  | Gene_Ca_01010      | DOWNSTREAM                    | DNA-binding WRKY                          |
| Kabuli_wild_36866054 | 1399935682                          | Ca_kabuli_Chr03 | 36866054                | G/A  | NA                 | INTERGENIC                    | NA                                        |
| Kabuli_wild_36873683 | 1399935683                          | Ca_kabuli_Chr03 | 36873683                | C/T  | Gene_Ca_01013      | NON_SYNONYMOUS_CODING         | Protein kinase, catalytic domain          |
| Kabuli_wild_36883268 | 1399935684                          | Ca_kabuli_Chr03 | 36883268                | T/C  | NA                 | INTERGENIC                    | NA                                        |
| Kabuli_wild_36883333 | 1399935685                          | Ca_kabuli_Chr03 | 36883333                | A/T  | NA                 | INTERGENIC                    | NA                                        |
| Kabuli_wild_36895362 | 1399935686                          | Ca_kabuli_Chr03 | 36895362                | T/C  | Gene_Ca_01015      | INTRON                        | NA                                        |
| Kabuli_wild_36938148 | 1399935687                          | Ca_kabuli_Chr03 | 36938148                | A/G  | Gene_Ca_01019      | INTRON                        | RNA recognition motif domain              |
| Kabuli_wild_36938271 | 1399935688                          | Ca_kabuli_Chr03 | 36938271                | G/C  | Gene_Ca_01019      | INTRON                        | RNA recognition motif domain              |
| Kabuli_wild_36943514 | 1399935689                          | Ca_kabuli_Chr03 | 36943514                | A/T  | Gene_Ca_01021      | UPSTREAM                      | Zinc finger, CCHC-type                    |
| Kabuli_wild_36943522 | 1399935690                          | Ca_kabuli_Chr03 | 36943522                | A/G  | Gene_Ca_01021      | UPSTREAM                      | Zinc finger, CCHC-type                    |
| Kabuli_wild_36967269 | 1399935691                          | Ca_kabuli_Chr03 | 36967269                | C/G  | NA                 | INTERGENIC                    | NA                                        |
| Kabuli_wild_36991718 | 1399935692                          | Ca_kabuli_Chr03 | 36991718                | C/A  | Gene_Ca_01027      | INTRON                        | RassmallGTPase, Rabtype                   |
| Kabuli_wild_37003976 | 1399935693                          | Ca_kabuli_Chr03 | 37003976                | C/T  | NA                 | INTERGENIC                    | NA                                        |
| Kabuli_wild_37004026 | 1399935694                          | Ca_kabuli_Chr03 | 37004026                | A/G  | NA                 | INTERGENIC                    | NA                                        |
| Kabuli_wild_37067095 | 1399935695                          | Ca_kabuli_Chr03 | 37067095                | T/G  | Gene_Ca_01033      | SYNONYMOUS_CODING             | Zinc finger, RING-type                    |
| Kabuli_wild_37072312 | 1399935696                          | Ca_kabuli_Chr03 | 37072312                | T/C  | Gene_Ca_01034      | INTRON                        | WD40 repeat                               |
| Kabuli_wild_37077212 | 1399935697                          | Ca_kabuli_Chr03 | 37077212                | T/A  | Gene_Ca_01034      | INTRON                        | Transcription factor ,SBP-box             |
| Kabuli_wild_37090968 | 1399935698                          | Ca_kabuli_Chr03 | 37090968                | T/C  | NA                 | INTERGENIC                    | NA                                        |
| Kabuli_wild_37093962 | 1399935699                          | Ca_kabuli_Chr03 | 37093962                | G/T  | Gene_Ca_01036      | DOWNSTREAM                    | Transcription factor ,SBP-box             |
| Kabuli_wild_37097271 | 1399935700                          | Ca_kabuli_Chr03 | 37097271                | A/G  | Gene_Ca_01036      | INTRON                        | Transcription factor ,SBP-box             |
| Kabuli_wild_37100897 | 1399935701                          | Ca_kabuli_Chr03 | 37100897                | G/T  | Gene_Ca_01036      | INTRON                        | Transcription factor ,SBP-box             |
| Kabuli_wild_37101339 | 1399935702                          | Ca_kabuli_Chr03 | 37101339                | A/T  | Gene_Ca_01036      | NON_SYNONYMOUS_CODING         | Transcription factor ,SBP-box             |
| Kabuli_wild_37101409 | 1399935703                          | Ca_kabuli_Chr03 | 37101409                | A/G  | Gene_Ca_01036      | SYNONYMOUS_CODING             | Transcription factor ,SBP-box             |
| Kabuli_wild_37101433 | 1399935704                          | Ca_kabuli_Chr03 | 37101433                | T/G  | Gene_Ca_01036      | NON_SYNONYMOUS_CODING         | Transcription factor ,SBP-box             |
| Kabuli_wild_37108904 | 1399935705                          | Ca_kabuli_Chr03 | 37108904                | A/T  | Gene_Ca_01037      | INTRON                        | Protein kinase, catalytic domain          |
| Kabuli_wild_37108908 | 1399935706                          | Ca_kabuli_Chr03 | 37108908                | A/G  | Gene_Ca_01037      | INTRON                        | Protein kinase, catalytic domain          |
| Kabuli_wild_37110070 | 1399935707                          | Ca_kabuli_Chr03 | 37110070                | A/G  | Gene_Ca_01037      | NON_SYNONYMOUS_CODING         | Protein kinase, catalytic domain          |
| Kabuli_wild_37110124 | 1399935708                          | Ca_kabuli_Chr03 | 37110124                | A/T  | Gene_Ca_01037      | INTRON                        | Protein kinase, catalytic domain          |
| Kabuli_wild_37146766 | 1399935709                          | Ca_kabuli_Chr03 | 37146766                | C/G  | Gene_Ca_01044      | NON_SYNONYMOUS_CODING         | Potassiumchannel, twopore-domain          |
| Kabuli_wild_37146840 | 1399935710                          | Ca_kabuli_Chr03 | 37146840                | A/G  | Gene_Ca_01044      | SYNONYMOUS_CODING             | Potassiumchannel, twopore-domain          |
| Kabuli_wild_37154761 | 1399935711                          | Ca_kabuli_Chr03 | 37154761                | T/G  | Gene_Ca_01045      | DOWNSTREAM                    | Transferase                               |
| Kabuli_wild_37154857 | 1399935712                          | Ca_kabuli_Chr03 | 37154857                | T/C  | Gene_Ca_01045      | DOWNSTREAM                    | Transferase                               |
| Kabuli_wild_37154938 | 1399935713                          | Ca_kabuli_Chr03 | 37154938                | A/C  | Gene_Ca_01045      | DOWNSTREAM                    | Transferase                               |
| Kabuli_wild_37155925 | 1399935714                          | Ca_kabuli_Chr03 | 37155925                | G/A  | Gene_Ca_01045      | DOWNSTREAM                    | Transferase                               |
| Kabuli_wild_37156951 | 1399935715                          | Ca_kabuli_Chr03 | 37156951                | A/G  | NA                 | INTERGENIC                    | NA                                        |
| Kabuli_wild_37160822 | 1399935716                          | Ca_kabuli_Chr03 | 37160822                | G/T  | Gene_Ca_01047      | SYNONYMOUS_CODING             | Zinc finger, Sec23/Sec24-type             |
| Kabuli_wild_37160939 | 1399935717                          | Ca_kabuli_Chr03 | 37160939                | A/G  | Gene_Ca_01047      | SYNONYMOUS_CODING             | Zinc finger, Sec23/Sec24-type             |
| Kabuli_wild_37183961 | 1399935718                          | Ca_kabuli_Chr03 | 37183961                | G/A  | NA                 | INTERGENIC                    | NA                                        |
| Kabuli_wild_37184049 | 1399935719                          | Ca_kabuli_Chr03 | 37184049                | A/T  | NA                 | INTERGENIC                    | NA                                        |

| SNP IDs              | NCBI dbSNP accession IDs (NCBI_SS#) | Chromosomes     | Physical positions (bp) | SNPs | Gene accession IDs | Sequence components of genome | Putative functions                                  |
|----------------------|-------------------------------------|-----------------|-------------------------|------|--------------------|-------------------------------|-----------------------------------------------------|
| Kabuli_wild_37303478 | 1399935720                          | Ca_kabuli_Chr03 | 37303478                | G/A  | Gene_Ca_01064      | SYNONYMOUS_CODING             | WD40 repeat                                         |
| Kabuli_wild_37303655 | 1399935721                          | Ca_kabuli_Chr03 | 37303655                | T/A  | Gene_Ca_01064      | SYNONYMOUS_CODING             | WD40 repeat                                         |
| Kabuli_wild_37309420 | 1399935722                          | Ca_kabuli_Chr03 | 37309420                | A/C  | Gene_Ca_01064      | INTRON                        | WD40 repeat                                         |
| Kabuli_wild_37355013 | 1399935723                          | Ca_kabuli_Chr03 | 37355013                | A/G  | Gene_Ca_01069      | NON_SYNONYMOUS_CODING         | PAS                                                 |
| Kabuli_wild_37444451 | 1399935724                          | Ca_kabuli_Chr03 | 37444451                | C/A  | NA                 | INTERGENIC                    | NA                                                  |
| Kabuli_wild_37467145 | 1399935725                          | Ca_kabuli_Chr03 | 37467145                | T/C  | Gene_Ca_01080      | SYNONYMOUS_CODING             | Domain of unknown function DUF88                    |
| Kabuli_wild_37535860 | 1399935726                          | Ca_kabuli_Chr03 | 37535860                | C/G  | NA                 | INTERGENIC                    | NA                                                  |
| Kabuli_wild_37535992 | 1399935727                          | Ca_kabuli_Chr03 | 37535992                | A/G  | NA                 | INTERGENIC                    | NA                                                  |
| Kabuli_wild_37566766 | 1399935728                          | Ca_kabuli_Chr03 | 37566766                | T/C  | Gene_Ca_01093      | UPSTREAM                      | Clathrinadaptor,musubunit                           |
| Kabuli_wild_37599142 | 1399935729                          | Ca_kabuli_Chr03 | 37599142                | T/C  | NA                 | INTERGENIC                    | NA                                                  |
| Kabuli_wild_37630502 | 1399935730                          | Ca_kabuli_Chr03 | 37630502                | T/C  | NA                 | INTERGENIC                    | NA                                                  |
| Kabuli_wild_37635909 | 1399935731                          | Ca_kabuli_Chr03 | 37635909                | G/A  | NA                 | INTERGENIC                    | NA                                                  |
| Kabuli_wild_37685596 | 1399935732                          | Ca_kabuli_Chr03 | 37685596                | A/G  | Gene_Ca_01107      | NON_SYNONYMOUS_CODING         | NHLrepeat                                           |
| Kabuli_wild_37688838 | 1399935733                          | Ca_kabuli_Chr03 | 37688838                | A/G  | NA                 | INTERGENIC                    | NA                                                  |
| Kabuli_wild_37734399 | 1399935734                          | Ca_kabuli_Chr03 | 37734399                | T/C  | Gene_Ca_01110      | INTRON                        | NHLrepeat                                           |
| Kabuli_wild_37759329 | 1399935735                          | Ca_kabuli_Chr03 | 37759329                | G/A  | Gene_Ca_01114      | INTRON                        | Armadillo                                           |
| Kabuli_wild_37765702 | 1399935736                          | Ca_kabuli_Chr03 | 37765702                | G/A  | Gene_Ca_01115      | UPSTREAM                      | Zinc finger,GATA-type                               |
| Kabuli_wild_37765767 | 1399935737                          | Ca_kabuli_Chr03 | 37765767                | A/C  | Gene_Ca_01115      | UPSTREAM                      | Zinc finger,GATA-type                               |
| Kabuli_wild_37887009 | 1399935738                          | Ca_kabuli_Chr03 | 37887009                | A/G  | NA                 | INTERGENIC                    | NA                                                  |
| Kabuli_wild_37896181 | 1399935739                          | Ca_kabuli_Chr03 | 37896181                | A/G  | NA                 | INTERGENIC                    | NA                                                  |
| Kabuli_wild_37908034 | 1399935740                          | Ca_kabuli_Chr03 | 37908034                | C/A  | NA                 | INTERGENIC                    | NA                                                  |
| Kabuli_wild_37908035 | 1399935741                          | Ca_kabuli_Chr03 | 37908035                | C/G  | NA                 | INTERGENIC                    | NA                                                  |
| Kabuli_wild_37908317 | 1399935742                          | Ca_kabuli_Chr03 | 37908317                | T/C  | NA                 | INTERGENIC                    | NA                                                  |
| Kabuli_wild_37908492 | 1399935743                          | Ca_kabuli_Chr03 | 37908492                | A/C  | NA                 | INTERGENIC                    | NA                                                  |
| Kabuli_wild_37910881 | 1399935744                          | Ca_kabuli_Chr03 | 37910881                | A/G  | NA                 | INTERGENIC                    | NA                                                  |
| Kabuli_wild_37942807 | 1399935745                          | Ca_kabuli_Chr03 | 37942807                | A/G  | NA                 | INTERGENIC                    | NA                                                  |
| Kabuli_wild_37942962 | 1399935746                          | Ca_kabuli_Chr03 | 37942962                | T/C  | NA                 | INTERGENIC                    | NA                                                  |
| Kabuli_wild_37949374 | 1399935747                          | Ca_kabuli_Chr03 | 37949374                | A/G  | Gene_Ca_01133      | INTRON                        | NA                                                  |
| Kabuli_wild_37985776 | 1399935748                          | Ca_kabuli_Chr03 | 37985776                | T/A  | NA                 | INTERGENIC                    | NA                                                  |
| Kabuli_wild_37985947 | 1399935749                          | Ca_kabuli_Chr03 | 37985947                | A/T  | NA                 | INTERGENIC                    | NA                                                  |
| Kabuli_wild_37985977 | 1399935750                          | Ca_kabuli_Chr03 | 37985977                | A/G  | NA                 | INTERGENIC                    | NA                                                  |
| Kabuli_wild_37992875 | 1399935751                          | Ca_kabuli_Chr03 | 37992875                | G/C  | NA                 | INTERGENIC                    | NA                                                  |
| Kabuli_wild_38015973 | 1399935752                          | Ca_kabuli_Chr03 | 38015973                | C/G  | NA                 | INTERGENIC                    | NA                                                  |
| Kabuli_wild_38026450 | 1399935753                          | Ca_kabuli_Chr03 | 38026450                | G/A  | NA                 | INTERGENIC                    | NA                                                  |
| Kabuli_wild_38026539 | 1399935754                          | Ca_kabuli_Chr03 | 38026539                | A/G  | NA                 | INTERGENIC                    | NA                                                  |
| Kabuli_wild_38026725 | 1399935755                          | Ca_kabuli_Chr03 | 38026725                | G/A  | NA                 | INTERGENIC                    | NA                                                  |
| Kabuli_wild_38029095 | 1399935756                          | Ca_kabuli_Chr03 | 38029095                | G/C  | Gene_Ca_01143      | NON_SYNONYMOUS_CODING         | NA                                                  |
| Kabuli_wild_38033969 | 1399935757                          | Ca_kabuli_Chr03 | 38033969                | A/G  | NA                 | INTERGENIC                    | NA                                                  |
| Kabuli_wild_38046510 | 1399935758                          | Ca_kabuli_Chr03 | 38046510                | T/C  | Gene_Ca_01146      | UPSTREAM                      | WASH complex, F-actincapping protein, alpha subunit |
| Kabuli_wild_38046522 | 1399935759                          | Ca_kabuli_Chr03 | 38046522                | A/G  | Gene_Ca_01146      | UPSTREAM                      | WASH complex, F-actincapping protein, alpha subunit |
| Kabuli_wild_38046954 | 1399935760                          | Ca_kabuli_Chr03 | 38046954                | G/A  | Gene_Ca_01146      | UPSTREAM                      | WASH complex, F-actincapping protein, alpha subunit |
| Kabuli_wild_38049940 | 1399935761                          | Ca_kabuli_Chr03 | 38049940                | A/G  | NA                 | INTERGENIC                    | NA                                                  |
| Kabuli_wild_38049996 | 1399935762                          | Ca_kabuli_Chr03 | 38049996                | A/G  | NA                 | INTERGENIC                    | NA                                                  |
| Kabuli_wild_38051020 | 1399935763                          | Ca_kabuli_Chr03 | 38051020                | A/G  | Gene_Ca_01147      | UPSTREAM                      | Tafazzin                                            |

| SNP IDs              | NCBI dbSNP accession IDs (NCBI_SS#) | Chromosomes     | Physical positions (bp) | SNPs | Gene accession IDs | Sequence components of genome | Putative functions                                          |
|----------------------|-------------------------------------|-----------------|-------------------------|------|--------------------|-------------------------------|-------------------------------------------------------------|
| Kabuli_wild_38059303 | 1399935764                          | Ca_kabuli_Chr03 | 38059303                | T/C  | NA                 | INTERGENIC                    | NA                                                          |
| Kabuli_wild_38059311 | 1399935765                          | Ca_kabuli_Chr03 | 38059311                | T/A  | NA                 | INTERGENIC                    | NA                                                          |
| Kabuli_wild_38060742 | 1399935766                          | Ca_kabuli_Chr03 | 38060742                | C/T  | NA                 | INTERGENIC                    | NA                                                          |
| Kabuli_wild_38060755 | 1399935767                          | Ca_kabuli_Chr03 | 38060755                | T/C  | NA                 | INTERGENIC                    | NA                                                          |
| Kabuli_wild_38060814 | 1399935768                          | Ca_kabuli_Chr03 | 38060814                | A/G  | NA                 | INTERGENIC                    | NA                                                          |
| Kabuli_wild_38074259 | 1399935769                          | Ca_kabuli_Chr03 | 38074259                | C/A  | NA                 | INTERGENIC                    | NA                                                          |
| Kabuli_wild_38103375 | 1399935770                          | Ca_kabuli_Chr03 | 38103375                | T/C  | Gene_Ca_01154      | INTRON                        | PeptidaseS1/S6,chymotrypsin/Hap                             |
| Kabuli_wild_38103378 | 1399935771                          | Ca_kabuli_Chr03 | 38103378                | C/T  | Gene_Ca_01154      | INTRON                        | PeptidaseS1/S6,chymotrypsin/Hap                             |
| Kabuli_wild_38103385 | 1399935772                          | Ca_kabuli_Chr03 | 38103385                | C/T  | Gene_Ca_01154      | INTRON                        | PeptidaseS1/S6,chymotrypsin/Hap                             |
| Kabuli_wild_38103524 | 1399935773                          | Ca_kabuli_Chr03 | 38103524                | C/T  | Gene_Ca_01154      | SYNONYMOUS_CODING             | PeptidaseS1/S6,chymotrypsin/Hap                             |
| Kabuli_wild_38112801 | 1399935774                          | Ca_kabuli_Chr03 | 38112801                | C/T  | NA                 | INTERGENIC                    | NA                                                          |
| Kabuli_wild_38112802 | 1399935775                          | Ca_kabuli_Chr03 | 38112802                | T/C  | NA                 | INTERGENIC                    | NA                                                          |
| Kabuli_wild_38112971 | 1399935776                          | Ca_kabuli_Chr03 | 38112971                | A/G  | NA                 | INTERGENIC                    | NA                                                          |
| Kabuli_wild_38117169 | 1399935777                          | Ca_kabuli_Chr03 | 38117169                | C/T  | Gene_Ca_01156      | INTRON                        | Acyl-CoA-bindingprotein,ACBP                                |
| Kabuli_wild_38130410 | 1399935778                          | Ca_kabuli_Chr03 | 38130410                | A/G  | Gene_Ca_01157      | DOWNSTREAM                    | SANT,eukarya                                                |
| Kabuli_wild_38145010 | 1399935779                          | Ca_kabuli_Chr03 | 38145010                | T/G  | Gene_Ca_01158      | NON_SYNONYMOUS_CODING         | Cystathioninebeta-synthase,core                             |
| Kabuli_wild_38145115 | 1399935780                          | Ca_kabuli_Chr03 | 38145115                | C/T  | Gene_Ca_01158      | SYNONYMOUS_CODING             | Cystathioninebeta-synthase,core                             |
| Kabuli_wild_38169101 | 1399935781                          | Ca_kabuli_Chr03 | 38169101                | G/A  | Gene_Ca_01160      | INTRON                        | DNA-directedDNApolymerase,familyB,exonucleasedomain         |
| Kabuli_wild_38169102 | 1399935782                          | Ca_kabuli_Chr03 | 38169102                | G/T  | Gene_Ca_01160      | INTRON                        | DNA-directedDNApolymerase,familyB,exonucleasedomain         |
| Kabuli_wild_38169157 | 1399935783                          | Ca_kabuli_Chr03 | 38169157                | A/G  | Gene_Ca_01160      | INTRON                        | DNA-directedDNApolymerase,familyB,exonucleasedomain         |
| Kabuli_wild_38171434 | 1399935784                          | Ca_kabuli_Chr03 | 38171434                | G/A  | Gene_Ca_01160      | SYNONYMOUS_CODING             | DNA-directedDNApolymerase,familyB,exonucleasedomain         |
| Kabuli_wild_38199284 | 1399935785                          | Ca_kabuli_Chr03 | 38199284                | A/T  | Gene_Ca_01163      | SYNONYMOUS_CODING             | Creatinase                                                  |
| Kabuli_wild_38200668 | 1399935786                          | Ca_kabuli_Chr03 | 38200668                | T/C  | Gene_Ca_01163      | NON_SYNONYMOUS_CODING         | Creatinase                                                  |
| Kabuli_wild_38201469 | 1399935787                          | Ca_kabuli_Chr03 | 38201469                | G/A  | Gene_Ca_01163      | INTRON                        | Creatinase                                                  |
| Kabuli_wild_38201557 | 1399935788                          | Ca_kabuli_Chr03 | 38201557                | G/A  | Gene_Ca_01163      | NON_SYNONYMOUS_CODING         | Creatinase                                                  |
| Kabuli_wild_38202223 | 1399935789                          | Ca_kabuli_Chr03 | 38202223                | T/C  | Gene_Ca_01163      | INTRON                        | Creatinase                                                  |
| Kabuli_wild_38205470 | 1399935790                          | Ca_kabuli_Chr03 | 38205470                | A/G  | Gene_Ca_01163      | INTRON                        | Creatinase                                                  |
| Kabuli_wild_38205481 | 1399935791                          | Ca_kabuli_Chr03 | 38205481                | A/T  | Gene_Ca_01163      | INTRON                        | Creatinase                                                  |
| Kabuli_wild_38205491 | 1399935792                          | Ca_kabuli_Chr03 | 38205491                | C/A  | Gene_Ca_01163      | INTRON                        | Creatinase                                                  |
| Kabuli_wild_38205503 | 1399935793                          | Ca_kabuli_Chr03 | 38205503                | G/C  | Gene_Ca_01163      | INTRON                        | Creatinase                                                  |
| Kabuli_wild_38205525 | 1399935794                          | Ca_kabuli_Chr03 | 38205525                | A/G  | Gene_Ca_01163      | INTRON                        | Creatinase                                                  |
| Kabuli_wild_38220910 | 1399935795                          | Ca_kabuli_Chr03 | 38220910                | T/C  | NA                 | INTERGENIC                    | NA                                                          |
| Kabuli_wild_38220958 | 1399935796                          | Ca_kabuli_Chr03 | 38220958                | A/G  | NA                 | INTERGENIC                    | NA                                                          |
| Kabuli_wild_38222733 | 1399935797                          | Ca_kabuli_Chr03 | 38222733                | C/G  | NA                 | INTERGENIC                    | NA                                                          |
| Kabuli_wild_38222747 | 1399935798                          | Ca_kabuli_Chr03 | 38222747                | G/A  | NA                 | INTERGENIC                    | NA                                                          |
| Kabuli_wild_38222750 | 1399935799                          | Ca_kabuli_Chr03 | 38222750                | A/C  | NA                 | INTERGENIC                    | NA                                                          |
| Kabuli_wild_38228118 | 1399935800                          | Ca_kabuli_Chr03 | 38228118                | G/T  | NA                 | INTERGENIC                    | NA                                                          |
| Kabuli_wild_38230625 | 1399935801                          | Ca_kabuli_Chr03 | 38230625                | C/T  | NA                 | INTERGENIC                    | NA                                                          |
| Kabuli_wild_38237347 | 1399935802                          | Ca_kabuli_Chr03 | 38237347                | G/A  | Gene_Ca_01169      | INTRON                        | Glycosidehydrolase,family2,immunoglobulin-likebeta-sandwich |
| Kabuli_wild_38237606 | 1399935803                          | Ca_kabuli_Chr03 | 38237606                | A/G  | Gene_Ca_01169      | INTRON                        | Glycosidehydrolase,family2,immunoglobulin-likebeta-sandwich |
| Kabuli_wild_38237628 | 1399935804                          | Ca_kabuli_Chr03 | 38237628                | A/G  | Gene_Ca_01169      | INTRON                        | Glycosidehydrolase,family2,immunoglobulin-likebeta-sandwich |
| Kabuli_wild_38294315 | 1399935805                          | Ca_kabuli_Chr03 | 38294315                | C/A  | Gene_Ca_01177      | DOWNSTREAM                    | Signalpeptidase22kDasubunit                                 |
| Kabuli_wild_38386392 | 1399935806                          | Ca_kabuli_Chr03 | 38386392                | T/C  | NA                 | INTERGENIC                    | NA                                                          |
| Kabuli_wild_38452060 | 1399935807                          | Ca_kabuli_Chr03 | 38452060                | A/C  | Gene_Ca_01198      | NON_SYNONYMOUS_CODING         | Heat shock protein DnaJ,N-terminal                          |

| SNP IDs              | NCBI dbSNP accession IDs (NCBI_SS#) | Chromosomes     | Physical positions (bp) | SNPs | Gene accession IDs | Sequence components of genome | Putative functions                                |
|----------------------|-------------------------------------|-----------------|-------------------------|------|--------------------|-------------------------------|---------------------------------------------------|
| Kabuli_wild_38539721 | 1399935808                          | Ca_kabuli_Chr03 | 38539721                | T/G  | Gene_Ca_01207      | NON_SYNONYMOUS_CODING         | Alpha/betahydrolasefold-1                         |
| Kabuli_wild_38551142 | 1399935809                          | Ca_kabuli_Chr03 | 38551142                | C/T  | Gene_Ca_01208      | INTRON                        | WD40 repeat                                       |
| Kabuli_wild_38629643 | 1399935810                          | Ca_kabuli_Chr03 | 38629643                | A/G  | Gene_Ca_01218      | SYNONYMOUS_CODING             | NA                                                |
| Kabuli_wild_38672176 | 1399935811                          | Ca_kabuli_Chr03 | 38672176                | G/A  | NA                 | INTERGENIC                    | NA                                                |
| Kabuli_wild_38672863 | 1399935812                          | Ca_kabuli_Chr03 | 38672863                | C/A  | Gene_Ca_01223      | UPSTREAM                      | Pseudouridinesynthase,TruD                        |
| Kabuli_wild_38731466 | 1399935813                          | Ca_kabuli_Chr03 | 38731466                | T/G  | Gene_Ca_01231      | NON_SYNONYMOUS_CODING         | Ammoniumtransporter                               |
| Kabuli_wild_38764390 | 1399935814                          | Ca_kabuli_Chr03 | 38764390                | A/C  | Gene_Ca_01234      | DOWNSTREAM                    | Basic-leucine zipper (bZIP ) Transcription factor |
| Kabuli_wild_38766174 | 1399935815                          | Ca_kabuli_Chr03 | 38766174                | A/G  | NA                 | INTERGENIC                    | NA                                                |
| Kabuli_wild_38766311 | 1399935816                          | Ca_kabuli_Chr03 | 38766311                | A/C  | NA                 | INTERGENIC                    | NA                                                |
| Kabuli_wild_38776419 | 1399935817                          | Ca_kabuli_Chr03 | 38776419                | C/T  | Gene_Ca_01236      | SYNONYMOUS_CODING             | Mediatorcomplex,subunitMed14                      |
| Kabuli_wild_38805831 | 1399935818                          | Ca_kabuli_Chr03 | 38805831                | A/C  | Gene_Ca_01240      | INTRON                        | Ankyrinrepeat                                     |
| Kabuli_wild_38818313 | 1399935819                          | Ca_kabuli_Chr03 | 38818313                | T/G  | Gene_Ca_01243      | DOWNSTREAM                    | NA                                                |
| Kabuli_wild_38821990 | 1399935820                          | Ca_kabuli_Chr03 | 38821990                | A/G  | NA                 | INTERGENIC                    | NA                                                |
| Kabuli_wild_38831533 | 1399935821                          | Ca_kabuli_Chr03 | 38831533                | T/C  | Gene_Ca_01244      | UPSTREAM                      | Xklp2targetingprotein                             |
| Kabuli_wild_38848407 | 1399935822                          | Ca_kabuli_Chr03 | 38848407                | T/C  | Gene_Ca_01245      | NON_SYNONYMOUS_CODING         | K Homology                                        |
| Kabuli_wild_38848409 | 1399935823                          | Ca_kabuli_Chr03 | 38848409                | C/T  | Gene_Ca_01245      | SYNONYMOUS_CODING             | K Homology                                        |
| Kabuli_wild_38848412 | 1399935824                          | Ca_kabuli_Chr03 | 38848412                | C/G  | Gene_Ca_01245      | SYNONYMOUS_CODING             | K Homology                                        |
| Kabuli_wild_38878839 | 1399935825                          | Ca_kabuli_Chr03 | 38878839                | A/G  | NA                 | INTERGENIC                    | NA                                                |
| Kabuli_wild_38890736 | 1399935826                          | Ca_kabuli_Chr03 | 38890736                | G/T  | Gene_Ca_01248      | NON_SYNONYMOUS_CODING         | IQ motif,EF-handbinding site                      |
| Kabuli_wild_38913449 | 1399935827                          | Ca_kabuli_Chr03 | 38913449                | T/C  | NA                 | INTERGENIC                    | NA                                                |
| Kabuli_wild_38923321 | 1399935828                          | Ca_kabuli_Chr03 | 38923321                | C/T  | Gene_Ca_01252      | SYNONYMOUS_CODING             | Glycosyltransferase, family8                      |
| Kabuli_wild_38965610 | 1399935829                          | Ca_kabuli_Chr03 | 38965610                | T/A  | Gene_Ca_01258      | NON_SYNONYMOUS_CODING         | SANT domain,DNA binding                           |
| Kabuli_wild_38969199 | 1399935830                          | Ca_kabuli_Chr03 | 38969199                | C/T  | Gene_Ca_01258      | SYNONYMOUS_CODING             | SANT domain,DNA binding                           |
| Kabuli_wild_38982481 | 1399935831                          | Ca_kabuli_Chr03 | 38982481                | A/G  | Gene_Ca_01260      | INTRON                        | NA                                                |
| Kabuli_wild_38987916 | 1399935832                          | Ca_kabuli_Chr03 | 38987916                | A/C  | NA                 | INTERGENIC                    | NA                                                |
| Kabuli_wild_39034246 | 1399935833                          | Ca_kabuli_Chr03 | 39034246                | C/T  | Gene_Ca_01265      | NON_SYNONYMOUS_CODING         | NA                                                |
| Kabuli_wild_39036130 | 1399935834                          | Ca_kabuli_Chr03 | 39036130                | T/C  | Gene_Ca_01265      | INTRON                        | NA                                                |
| Kabuli_wild_39053719 | 1399935835                          | Ca_kabuli_Chr03 | 39053719                | T/G  | Gene_Ca_01268      | INTRON                        | NA                                                |
| Kabuli_wild_39055529 | 1399935836                          | Ca_kabuli_Chr03 | 39055529                | C/T  | Gene_Ca_01268      | INTRON                        | EF-Hand1,calcium-bindingsite                      |
| Kabuli_wild_39081040 | 1399935837                          | Ca_kabuli_Chr03 | 39081040                | A/G  | NA                 | INTERGENIC                    | NA                                                |
| Kabuli_wild_39084916 | 1399935838                          | Ca_kabuli_Chr03 | 39084916                | T/A  | Gene_Ca_01271      | STOP_GAINED                   | Domain of unknown function DUF296                 |
| Kabuli_wild_39084979 | 1399935839                          | Ca_kabuli_Chr03 | 39084979                | A/C  | Gene_Ca_01271      | SYNONYMOUS_CODING             | Domain of unknown function DUF296                 |
| Kabuli_wild_39093215 | 1399935840                          | Ca_kabuli_Chr03 | 39093215                | G/A  | NA                 | INTERGENIC                    | NA                                                |
| Kabuli_wild_39093242 | 1399935841                          | Ca_kabuli_Chr03 | 39093242                | G/A  | NA                 | INTERGENIC                    | NA                                                |
| Kabuli_wild_39093243 | 1399935842                          | Ca_kabuli_Chr03 | 39093243                | C/A  | NA                 | INTERGENIC                    | NA                                                |
| Kabuli_wild_39093245 | 1399935843                          | Ca_kabuli_Chr03 | 39093245                | T/A  | NA                 | INTERGENIC                    | NA                                                |
| Kabuli_wild_39115274 | 1399935844                          | Ca_kabuli_Chr03 | 39115274                | A/C  | Gene_Ca_01274      | INTRON                        | HEAT                                              |
| Kabuli_wild_39115970 | 1399935845                          | Ca_kabuli_Chr03 | 39115970                | T/G  | Gene_Ca_01274      | INTRON                        | HEAT                                              |
| Kabuli_wild_39115972 | 1399935846                          | Ca_kabuli_Chr03 | 39115972                | T/A  | Gene_Ca_01274      | INTRON                        | HEAT                                              |
| Kabuli_wild_39115979 | 1399935847                          | Ca_kabuli_Chr03 | 39115979                | A/G  | Gene_Ca_01274      | INTRON                        | HEAT                                              |
| Kabuli_wild_39115986 | 1399935848                          | Ca_kabuli_Chr03 | 39115986                | C/G  | Gene_Ca_01274      | INTRON                        | HEAT                                              |
| Kabuli_wild_39118510 | 1399935849                          | Ca_kabuli_Chr03 | 39118510                | C/T  | Gene_Ca_01274      | INTRON                        | HEAT                                              |
| Kabuli_wild_39124896 | 1399935850                          | Ca_kabuli_Chr03 | 39124896                | A/T  | Gene_Ca_01274      | INTRON                        | HEAT                                              |
| Kabuli_wild_39126018 | 1399935851                          | Ca_kabuli_Chr03 | 39126018                | A/G  | Gene_Ca_01274      | INTRON                        | HEAT                                              |

| SNP IDs              | NCBI dbSNP accession IDs (NCBI_SS#) | Chromosomes     | Physical positions (bp) | SNPs | Gene accession IDs | Sequence components of genome | Putative functions                                           |
|----------------------|-------------------------------------|-----------------|-------------------------|------|--------------------|-------------------------------|--------------------------------------------------------------|
| Kabuli_wild_39200690 | 1399935852                          | Ca_kabuli_Chr03 | 39200690                | C/T  | Gene_Ca_01277      | INTRON                        | CytoplasmicFMR1-interacting                                  |
| Kabuli_wild_39207112 | 1399935853                          | Ca_kabuli_Chr03 | 39207112                | A/C  | Gene_Ca_01277      | SYNONYMOUS_CODING             | CytoplasmicFMR1-interacting                                  |
| Kabuli_wild_39215327 | 1399935854                          | Ca_kabuli_Chr03 | 39215327                | C/T  | Gene_Ca_01278      | NON_SYNONYMOUS_CODING         | Armadillo                                                    |
| Kabuli_wild_39215476 | 1399935855                          | Ca_kabuli_Chr03 | 39215476                | G/A  | Gene_Ca_01278      | SYNONYMOUS_CODING             | Armadillo                                                    |
| Kabuli_wild_39254527 | 1399935856                          | Ca_kabuli_Chr03 | 39254527                | T/G  | NA                 | INTERGENIC                    | NA                                                           |
| Kabuli_wild_39255709 | 1399935857                          | Ca_kabuli_Chr03 | 39255709                | A/T  | NA                 | INTERGENIC                    | NA                                                           |
| Kabuli_wild_39255713 | 1399935858                          | Ca_kabuli_Chr03 | 39255713                | C/A  | NA                 | INTERGENIC                    | NA                                                           |
| Kabuli_wild_39255714 | 1399935859                          | Ca_kabuli_Chr03 | 39255714                | C/T  | NA                 | INTERGENIC                    | NA                                                           |
| Kabuli_wild_39255715 | 1399935860                          | Ca_kabuli_Chr03 | 39255715                | G/A  | NA                 | INTERGENIC                    | NA                                                           |
| Kabuli_wild_39255721 | 1399935861                          | Ca_kabuli_Chr03 | 39255721                | A/C  | NA                 | INTERGENIC                    | NA                                                           |
| Kabuli_wild_39255754 | 1399935862                          | Ca_kabuli_Chr03 | 39255754                | A/C  | NA                 | INTERGENIC                    | NA                                                           |
| Kabuli_wild_39257226 | 1399935863                          | Ca_kabuli_Chr03 | 39257226                | A/G  | Gene_Ca_01285      | INTRON                        | NA                                                           |
| Kabuli_wild_39321667 | 1399935864                          | Ca_kabuli_Chr03 | 39321667                | T/A  | NA                 | INTERGENIC                    | NA                                                           |
| Kabuli_wild_39405252 | 1399935865                          | Ca_kabuli_Chr03 | 39405252                | C/A  | Gene_Ca_01306      | NON_SYNONYMOUS_CODING         | Lipase_class3                                                |
| Kabuli_wild_39426267 | 1399935866                          | Ca_kabuli_Chr03 | 39426267                | A/G  | NA                 | INTERGENIC                    | NA                                                           |
| Kabuli_wild_39426273 | 1399935867                          | Ca_kabuli_Chr03 | 39426273                | A/G  | NA                 | INTERGENIC                    | NA                                                           |
| Kabuli_wild_39485205 | 1399935868                          | Ca_kabuli_Chr03 | 39485205                | C/T  | NA                 | INTERGENIC                    | NA                                                           |
| Kabuli_wild_39504242 | 1399935869                          | Ca_kabuli_Chr03 | 39504242                | A/G  | Gene_Ca_01321      | DOWNSTREAM                    | Zinc finger, RING-type                                       |
| Kabuli_wild_39546789 | 1399935870                          | Ca_kabuli_Chr03 | 39546789                | T/G  | Gene_Ca_01325      | NON_SYNONYMOUS_CODING         | Pathogenesis-related transcriptional factor/ERF, DNA-binding |
| Kabuli_wild_39592340 | 1399935871                          | Ca_kabuli_Chr03 | 39592340                | C/T  | NA                 | INTERGENIC                    | NA                                                           |
| Kabuli_wild_39612447 | 1399935872                          | Ca_kabuli_Chr03 | 39612447                | C/A  | Gene_Ca_01338      | INTRON                        | Profilin/allergen                                            |
| Kabuli_wild_39612458 | 1399935873                          | Ca_kabuli_Chr03 | 39612458                | C/A  | Gene_Ca_01338      | INTRON                        | Profilin/allergen                                            |
| Kabuli_wild_39612466 | 1399935874                          | Ca_kabuli_Chr03 | 39612466                | T/C  | Gene_Ca_01338      | INTRON                        | Profilin/allergen                                            |
| Kabuli_wild_39612568 | 1399935875                          | Ca_kabuli_Chr03 | 39612568                | A/T  | Gene_Ca_01338      | NON_SYNONYMOUS_CODING         | Profilin/allergen                                            |
| Kabuli_wild_39628916 | 1399935876                          | Ca_kabuli_Chr03 | 39628916                | G/A  | NA                 | INTERGENIC                    | NA                                                           |
| Kabuli_wild_39715789 | 1399935877                          | Ca_kabuli_Chr03 | 39715789                | C/T  | NA                 | INTERGENIC                    | NA                                                           |
| Kabuli_wild_39722314 | 1399935878                          | Ca_kabuli_Chr03 | 39722314                | C/T  | Gene_Ca_01355      | NON_SYNONYMOUS_CODING         | Dehydrogenase,E1component                                    |
| Kabuli_wild_39787513 | 1399935879                          | Ca_kabuli_Chr03 | 39787513                | A/C  | Gene_Ca_01365      | SYNONYMOUS_CODING             | NA                                                           |
| Kabuli_wild_39801213 | 1399935880                          | Ca_kabuli_Chr03 | 39801213                | A/G  | Gene_Ca_01367      | INTRON                        | RibonucleaseIII                                              |
| Kabuli_wild_39817122 | 1399935881                          | Ca_kabuli_Chr03 | 39817122                | G/A  | Gene_Ca_01368      | SYNONYMOUS_CODING             | Transcriptional factor B3                                    |
| Kabuli_wild_39839742 | 1399935882                          | Ca_kabuli_Chr03 | 39839742                | T/C  | Gene_Ca_01370      | INTRON                        | ATPase, P-type, H+ transporting proton pump                  |
| Kabuli_wild_39839763 | 1399935883                          | Ca_kabuli_Chr03 | 39839763                | T/G  | Gene_Ca_01370      | INTRON                        | ATPase, P-type, H+ transporting proton pump                  |
| Kabuli_wild_39839767 | 1399935884                          | Ca_kabuli_Chr03 | 39839767                | T/G  | Gene_Ca_01370      | INTRON                        | ATPase, P-type, H+ transporting proton pump                  |
| Kabuli_wild_39890991 | 1399935885                          | Ca_kabuli_Chr03 | 39890991                | A/T  | Gene_Ca_01375      | INTRON                        | Exportin-1/Importin-beta-like                                |
| Kabuli_wild_39908983 | 1399935886                          | Ca_kabuli_Chr03 | 39908983                | C/G  | NA                 | INTERGENIC                    | NA                                                           |
| Kabuli_wild_39909183 | 1399935887                          | Ca_kabuli_Chr03 | 39909183                | A/C  | NA                 | INTERGENIC                    | NA                                                           |
| Kabuli_wild_39909824 | 1399935888                          | Ca_kabuli_Chr03 | 39909824                | C/G  | NA                 | INTERGENIC                    | NA                                                           |
| Kabuli_wild_39914344 | 1399935889                          | Ca_kabuli_Chr03 | 39914344                | T/G  | Gene_Ca_01376      | INTRON                        | RNA recognition motif domain                                 |
| Kabuli_wild_20066    | 1399935890                          | Ca_kabuli_Chr04 | 20066                   | T/G  | Gene_Ca_27693      | SYNONYMOUS_CODING             | Basic-leucine zipper (bZIP ) Transcription factor            |
| Kabuli_wild_20297    | 1399935891                          | Ca_kabuli_Chr04 | 20297                   | A/G  | Gene_Ca_27693      | SYNONYMOUS_CODING             | Basic-leucine zipper (bZIP ) Transcription factor            |
| Kabuli_wild_20466    | 1399935892                          | Ca_kabuli_Chr04 | 20466                   | G/T  | Gene_Ca_27693      | INTRON                        | Basic-leucine zipper (bZIP ) Transcription factor            |
| Kabuli_wild_20495    | 1399935893                          | Ca_kabuli_Chr04 | 20495                   | G/C  | Gene_Ca_27693      | INTRON                        | Basic-leucine zipper (bZIP ) Transcription factor            |
| Kabuli_wild_115171   | 1399935894                          | Ca_kabuli_Chr04 | 115171                  | C/G  | NA                 | INTERGENIC                    | NA                                                           |
| Kabuli_wild_115173   | 1399935895                          | Ca_kabuli_Chr04 | 115173                  | C/T  | NA                 | INTERGENIC                    | NA                                                           |



| SNP IDs             | NCBI dbSNP accession IDs (NCBI_SS#) | Chromosomes     | Physical positions (bp) | SNPs | Gene accession IDs | Sequence components of genome | Putative functions                                           |
|---------------------|-------------------------------------|-----------------|-------------------------|------|--------------------|-------------------------------|--------------------------------------------------------------|
| Kabuli_wild_122309  | 1399935896                          | Ca_kabuli_Chr04 | 122309                  | C/G  | NA                 | INTERGENIC                    | NA                                                           |
| Kabuli_wild_122311  | 1399935897                          | Ca_kabuli_Chr04 | 122311                  | C/T  | NA                 | INTERGENIC                    | NA                                                           |
| Kabuli_wild_167229  | 1399935898                          | Ca_kabuli_Chr04 | 167229                  | T/G  | Gene_Ca_07652      | SYNONYMOUS_CODING             | LNS2,Lipin/Ned1/Smp2                                         |
| Kabuli_wild_338721  | 1399935899                          | Ca_kabuli_Chr04 | 338721                  | C/T  | NA                 | INTERGENIC                    | NA                                                           |
| Kabuli_wild_349309  | 1399935900                          | Ca_kabuli_Chr04 | 349309                  | C/T  | Gene_Ca_07667      | NON_SYNONYMOUS_CODING         | Multiantimicrobial extrusion protein                         |
| Kabuli_wild_369258  | 1399935901                          | Ca_kabuli_Chr04 | 369258                  | C/T  | Gene_Ca_07669      | NON_SYNONYMOUS_CODING         | Multiantimicrobial extrusion protein                         |
| Kabuli_wild_394661  | 1399935902                          | Ca_kabuli_Chr04 | 394661                  | C/G  | Gene_Ca_07671      | NON_SYNONYMOUS_CODING         | Inorganic pyrophosphatase                                    |
| Kabuli_wild_412017  | 1399935903                          | Ca_kabuli_Chr04 | 412017                  | C/A  | Gene_Ca_07673      | NON_SYNONYMOUS_CODING         | Arf GTPase activating protein                                |
| Kabuli_wild_455361  | 1399935904                          | Ca_kabuli_Chr04 | 455361                  | A/G  | Gene_Ca_07679      | INTRON                        | ArgininebiosynthesisproteinArgJ                              |
| Kabuli_wild_479818  | 1399935905                          | Ca_kabuli_Chr04 | 479818                  | A/C  | Gene_Ca_07682      | SYNONYMOUS_CODING             | NA                                                           |
| Kabuli_wild_480138  | 1399935906                          | Ca_kabuli_Chr04 | 480138                  | C/A  | Gene_Ca_07682      | NON_SYNONYMOUS_CODING         | NA                                                           |
| Kabuli_wild_586558  | 1399935907                          | Ca_kabuli_Chr04 | 586558                  | C/A  | NA                 | INTERGENIC                    | NA                                                           |
| Kabuli_wild_586703  | 1399935908                          | Ca_kabuli_Chr04 | 586703                  | T/C  | NA                 | INTERGENIC                    | NA                                                           |
| Kabuli_wild_589191  | 1399935909                          | Ca_kabuli_Chr04 | 589191                  | A/G  | Gene_Ca_07691      | DOWNSTREAM                    | Helix-loop-helixDNA-binding domain                           |
| Kabuli_wild_589204  | 1399935910                          | Ca_kabuli_Chr04 | 589204                  | G/A  | Gene_Ca_07691      | DOWNSTREAM                    | Helix-loop-helixDNA-binding domain                           |
| Kabuli_wild_589220  | 1399935911                          | Ca_kabuli_Chr04 | 589220                  | A/C  | Gene_Ca_07691      | DOWNSTREAM                    | Helix-loop-helixDNA-binding domain                           |
| Kabuli_wild_595982  | 1399935912                          | Ca_kabuli_Chr04 | 595982                  | C/G  | Gene_Ca_07691      | SYNONYMOUS_CODING             | Helix-loop-helixDNA-binding domain                           |
| Kabuli_wild_646567  | 1399935913                          | Ca_kabuli_Chr04 | 646567                  | C/T  | Gene_Ca_07695      | DOWNSTREAM                    | Protein of unknown function DUF3741                          |
| Kabuli_wild_660029  | 1399935914                          | Ca_kabuli_Chr04 | 660029                  | T/G  | NA                 | INTERGENIC                    | NA                                                           |
| Kabuli_wild_660034  | 1399935915                          | Ca_kabuli_Chr04 | 660034                  | A/C  | NA                 | INTERGENIC                    | NA                                                           |
| Kabuli_wild_663666  | 1399935916                          | Ca_kabuli_Chr04 | 663666                  | T/G  | NA                 | INTERGENIC                    | NA                                                           |
| Kabuli_wild_705393  | 1399935917                          | Ca_kabuli_Chr04 | 705393                  | C/G  | Gene_Ca_07701      | INTRON                        | IQ motif,EF-handbinding site                                 |
| Kabuli_wild_783262  | 1399935918                          | Ca_kabuli_Chr04 | 783262                  | G/A  | NA                 | INTERGENIC                    | NA                                                           |
| Kabuli_wild_789090  | 1399935919                          | Ca_kabuli_Chr04 | 789090                  | C/T  | Gene_Ca_07707      | UPSTREAM                      | Beta-ketoacetyl synthase                                     |
| Kabuli_wild_827593  | 1399935920                          | Ca_kabuli_Chr04 | 827593                  | G/T  | Gene_Ca_07712      | DOWNSTREAM                    | ABC transporter,trans membrane domain                        |
| Kabuli_wild_1190184 | 1399935921                          | Ca_kabuli_Chr04 | 1190184                 | A/C  | Gene_Ca_07749      | INTRON                        | Ribosomal protein L21e                                       |
| Kabuli_wild_1228320 | 1399935922                          | Ca_kabuli_Chr04 | 1228320                 | A/G  | Gene_Ca_07755      | SYNONYMOUS_CODING             | Pathogenesis-related transcriptional factor/ERF, DNA-binding |
| Kabuli_wild_1492741 | 1399935923                          | Ca_kabuli_Chr04 | 1492741                 | A/C  | Gene_Ca_07779      | NON_SYNONYMOUS_CODING         | DNA-binding WRKY                                             |
| Kabuli_wild_1493946 | 1399935924                          | Ca_kabuli_Chr04 | 1493946                 | T/G  | Gene_Ca_07779      | NON_SYNONYMOUS_CODING         | DNA-binding WRKY                                             |
| Kabuli_wild_1526270 | 1399935925                          | Ca_kabuli_Chr04 | 1526270                 | T/C  | NA                 | INTERGENIC                    | NA                                                           |
| Kabuli_wild_1687346 | 1399935926                          | Ca_kabuli_Chr04 | 1687346                 | A/G  | NA                 | INTERGENIC                    | NA                                                           |
| Kabuli_wild_1691555 | 1399935927                          | Ca_kabuli_Chr04 | 1691555                 | T/G  | NA                 | INTERGENIC                    | NA                                                           |
| Kabuli_wild_1708370 | 1399935928                          | Ca_kabuli_Chr04 | 1708370                 | C/T  | Gene_Ca_07797      | SYNONYMOUS_CODING             | BEACHdomain                                                  |
| Kabuli_wild_1711864 | 1399935929                          | Ca_kabuli_Chr04 | 1711864                 | A/C  | Gene_Ca_07797      | SYNONYMOUS_CODING             | BEACHdomain                                                  |
| Kabuli_wild_1711865 | 1399935930                          | Ca_kabuli_Chr04 | 1711865                 | G/A  | Gene_Ca_07797      | SYNONYMOUS_CODING             | BEACHdomain                                                  |
| Kabuli_wild_1720642 | 1399935931                          | Ca_kabuli_Chr04 | 1720642                 | A/G  | Gene_Ca_07797      | INTRON                        | BEACHdomain                                                  |
| Kabuli_wild_1755066 | 1399935932                          | Ca_kabuli_Chr04 | 1755066                 | G/C  | NA                 | INTERGENIC                    | NA                                                           |
| Kabuli_wild_1773886 | 1399935933                          | Ca_kabuli_Chr04 | 1773886                 | C/G  | NA                 | INTERGENIC                    | NA                                                           |
| Kabuli_wild_1773939 | 1399935934                          | Ca_kabuli_Chr04 | 1773939                 | C/T  | NA                 | INTERGENIC                    | NA                                                           |
| Kabuli_wild_1773951 | 1399935935                          | Ca_kabuli_Chr04 | 1773951                 | C/G  | NA                 | INTERGENIC                    | NA                                                           |
| Kabuli_wild_1783500 | 1399935936                          | Ca_kabuli_Chr04 | 1783500                 | T/C  | Gene_Ca_07801      | SYNONYMOUS_CODING             | Protein kinase,catalytic domain                              |
| Kabuli_wild_1785705 | 1399935937                          | Ca_kabuli_Chr04 | 1785705                 | G/C  | Gene_Ca_07801      | INTRON                        | Protein kinase,catalytic domain                              |
| Kabuli_wild_1791439 | 1399935938                          | Ca_kabuli_Chr04 | 1791439                 | C/T  | Gene_Ca_07801      | INTRON                        | Protein kinase,catalytic domain                              |
| Kabuli_wild_1791448 | 1399935939                          | Ca_kabuli_Chr04 | 1791448                 | C/T  | Gene_Ca_07801      | INTRON                        | Protein kinase,catalytic domain                              |

| SNP IDs             | NCBI dbSNP accession IDs (NCBI_SS#) | Chromosomes     | Physical positions (bp) | SNPs | Gene accession IDs | Sequence components of genome | Putative functions                                    |
|---------------------|-------------------------------------|-----------------|-------------------------|------|--------------------|-------------------------------|-------------------------------------------------------|
| Kabuli_wild_1806745 | 1399935940                          | Ca_kabuli_Chr04 | 1806745                 | G/A  | Gene_Ca_07801      | INTRON                        | Protein kinase,catalytic domain                       |
| Kabuli_wild_1833725 | 1399935941                          | Ca_kabuli_Chr04 | 1833725                 | C/T  | NA                 | INTERGENIC                    | NA                                                    |
| Kabuli_wild_1833872 | 1399935942                          | Ca_kabuli_Chr04 | 1833872                 | A/C  | NA                 | INTERGENIC                    | NA                                                    |
| Kabuli_wild_1842147 | 1399935943                          | Ca_kabuli_Chr04 | 1842147                 | C/T  | Gene_Ca_07806      | DOWNSTREAM                    | Protein kinase,catalytic domain                       |
| Kabuli_wild_1844095 | 1399935944                          | Ca_kabuli_Chr04 | 1844095                 | G/C  | Gene_Ca_07805      | UPSTREAM                      | Oxoglutarate/iron-dependent oxygenase                 |
| Kabuli_wild_1867921 | 1399935945                          | Ca_kabuli_Chr04 | 1867921                 | G/A  | Gene_Ca_07807      | INTRON                        | Sulphate transporter/antisigma-factor antagonist STAS |
| Kabuli_wild_1869577 | 1399935946                          | Ca_kabuli_Chr04 | 1869577                 | C/T  | Gene_Ca_07807      | DOWNSTREAM                    | Sulphate transporter/antisigma-factor antagonist STAS |
| Kabuli_wild_1870317 | 1399935947                          | Ca_kabuli_Chr04 | 1870317                 | T/C  | NA                 | INTERGENIC                    | NA                                                    |
| Kabuli_wild_1870333 | 1399935948                          | Ca_kabuli_Chr04 | 1870333                 | A/G  | NA                 | INTERGENIC                    | NA                                                    |
| Kabuli_wild_1870666 | 1399935949                          | Ca_kabuli_Chr04 | 1870666                 | G/C  | NA                 | INTERGENIC                    | NA                                                    |
| Kabuli_wild_1870802 | 1399935950                          | Ca_kabuli_Chr04 | 1870802                 | C/T  | NA                 | INTERGENIC                    | NA                                                    |
| Kabuli_wild_1870806 | 1399935951                          | Ca_kabuli_Chr04 | 1870806                 | C/A  | NA                 | INTERGENIC                    | NA                                                    |
| Kabuli_wild_1873733 | 1399935952                          | Ca_kabuli_Chr04 | 1873733                 | T/C  | Gene_Ca_07808      | NON_SYNONYMOUS_CODING         | KIP1-like                                             |
| Kabuli_wild_1873758 | 1399935953                          | Ca_kabuli_Chr04 | 1873758                 | A/G  | Gene_Ca_07808      | SYNONYMOUS_CODING             | KIP1-like                                             |
| Kabuli_wild_1941089 | 1399935954                          | Ca_kabuli_Chr04 | 1941089                 | C/T  | NA                 | INTERGENIC                    | NA                                                    |
| Kabuli_wild_2008053 | 1399935955                          | Ca_kabuli_Chr04 | 2008053                 | A/C  | Gene_Ca_07819      | INTRON                        | NA                                                    |
| Kabuli_wild_2032449 | 1399935956                          | Ca_kabuli_Chr04 | 2032449                 | G/A  | Gene_Ca_07822      | SYNONYMOUS_CODING             | RNA-processing protein, HAThelix                      |
| Kabuli_wild_2032475 | 1399935957                          | Ca_kabuli_Chr04 | 2032475                 | G/A  | Gene_Ca_07822      | INTRON                        | RNA-processing protein, HAThelix                      |
| Kabuli_wild_2032480 | 1399935958                          | Ca_kabuli_Chr04 | 2032480                 | C/T  | Gene_Ca_07822      | INTRON                        | RNA-processing protein, HAThelix                      |
| Kabuli_wild_2032481 | 1399935959                          | Ca_kabuli_Chr04 | 2032481                 | T/G  | Gene_Ca_07822      | INTRON                        | RNA-processing protein, HAThelix                      |
| Kabuli_wild_2032510 | 1399935960                          | Ca_kabuli_Chr04 | 2032510                 | T/A  | Gene_Ca_07822      | INTRON                        | RNA-processing protein, HAThelix                      |
| Kabuli_wild_2032529 | 1399935961                          | Ca_kabuli_Chr04 | 2032529                 | A/G  | Gene_Ca_07822      | INTRON                        | RNA-processing protein, HAThelix                      |
| Kabuli_wild_2032773 | 1399935962                          | Ca_kabuli_Chr04 | 2032773                 | T/A  | Gene_Ca_07822      | INTRON                        | RNA-processing protein, HAThelix                      |
| Kabuli_wild_2034266 | 1399935963                          | Ca_kabuli_Chr04 | 2034266                 | T/C  | Gene_Ca_07822      | SYNONYMOUS_CODING             | RNA-processing protein, HAThelix                      |
| Kabuli_wild_2034304 | 1399935964                          | Ca_kabuli_Chr04 | 2034304                 | A/G  | Gene_Ca_07822      | SYNONYMOUS_CODING             | RNA-processing protein, HAThelix                      |
| Kabuli_wild_2034340 | 1399935965                          | Ca_kabuli_Chr04 | 2034340                 | C/A  | Gene_Ca_07822      | SYNONYMOUS_CODING             | RNA-processing protein, HAThelix                      |
| Kabuli_wild_2034385 | 1399935966                          | Ca_kabuli_Chr04 | 2034385                 | C/A  | Gene_Ca_07822      | INTRON                        | RNA-processing protein, HAThelix                      |
| Kabuli_wild_2034396 | 1399935967                          | Ca_kabuli_Chr04 | 2034396                 | A/G  | Gene_Ca_07822      | INTRON                        | RNA-processing protein, HAThelix                      |
| Kabuli_wild_2034398 | 1399935968                          | Ca_kabuli_Chr04 | 2034398                 | C/T  | Gene_Ca_07822      | INTRON                        | RNA-processing protein, HAThelix                      |
| Kabuli_wild_2034429 | 1399935969                          | Ca_kabuli_Chr04 | 2034429                 | C/A  | Gene_Ca_07822      | INTRON                        | RNA-processing protein, HAThelix                      |
| Kabuli_wild_2034739 | 1399935970                          | Ca_kabuli_Chr04 | 2034739                 | A/C  | Gene_Ca_07822      | INTRON                        | RNA-processing protein, HAThelix                      |
| Kabuli_wild_2035797 | 1399935971                          | Ca_kabuli_Chr04 | 2035797                 | G/A  | Gene_Ca_07822      | SYNONYMOUS_CODING             | RNA-processing protein, HAThelix                      |
| Kabuli_wild_2035801 | 1399935972                          | Ca_kabuli_Chr04 | 2035801                 | G/A  | Gene_Ca_07822      | SYNONYMOUS_CODING             | RNA-processing protein, HAThelix                      |
| Kabuli_wild_2035841 | 1399935973                          | Ca_kabuli_Chr04 | 2035841                 | C/T  | Gene_Ca_07823      | DOWNSTREAM                    | Reverse transcriptase, RNA-dependent DNA polymerase   |
| Kabuli_wild_2035894 | 1399935974                          | Ca_kabuli_Chr04 | 2035894                 | C/A  | Gene_Ca_07823      | DOWNSTREAM                    | Reverse transcriptase, RNA-dependent DNA polymerase   |
| Kabuli_wild_2113227 | 1399935975                          | Ca_kabuli_Chr04 | 2113227                 | C/T  | NA                 | INTERGENIC                    | NA                                                    |
| Kabuli_wild_2125774 | 1399935976                          | Ca_kabuli_Chr04 | 2125774                 | G/A  | Gene_Ca_07833      | NON_SYNONYMOUS_CODING         | RasGTPase                                             |
| Kabuli_wild_2126436 | 1399935977                          | Ca_kabuli_Chr04 | 2126436                 | T/C  | Gene_Ca_07833      | INTRON                        | RasGTPase                                             |
| Kabuli_wild_2213710 | 1399935978                          | Ca_kabuli_Chr04 | 2213710                 | G/A  | NA                 | INTERGENIC                    | NA                                                    |
| Kabuli_wild_2311779 | 1399935979                          | Ca_kabuli_Chr04 | 2311779                 | T/G  | Gene_Ca_07853      | INTRON                        | Glucosylceramidase                                    |
| Kabuli_wild_2311789 | 1399935980                          | Ca_kabuli_Chr04 | 2311789                 | T/G  | Gene_Ca_07853      | INTRON                        | Glucosylceramidase                                    |
| Kabuli_wild_2311813 | 1399935981                          | Ca_kabuli_Chr04 | 2311813                 | G/A  | Gene_Ca_07853      | INTRON                        | Glucosylceramidase                                    |
| Kabuli_wild_2361038 | 1399935982                          | Ca_kabuli_Chr04 | 2361038                 | C/T  | Gene_Ca_07858      | INTRON                        | ABC transporter-like                                  |
| Kabuli_wild_2361088 | 1399935983                          | Ca_kabuli_Chr04 | 2361088                 | T/A  | Gene_Ca_07858      | INTRON                        | ABC transporter-like                                  |

| SNP IDs             | NCBI dbSNP accession IDs (NCBI_SS#) | Chromosomes     | Physical positions (bp) | SNPs | Gene accession IDs | Sequence components of genome | Putative functions                                     |
|---------------------|-------------------------------------|-----------------|-------------------------|------|--------------------|-------------------------------|--------------------------------------------------------|
| Kabuli_wild_2362761 | 1399935984                          | Ca_kabuli_Chr04 | 2362761                 | T/A  | Gene_Ca_07858      | INTRON                        | ABC transporter-like                                   |
| Kabuli_wild_2380206 | 1399935985                          | Ca_kabuli_Chr04 | 2380206                 | A/G  | Gene_Ca_07859      | DOWNSTREAM                    | PWWP                                                   |
| Kabuli_wild_2393033 | 1399935986                          | Ca_kabuli_Chr04 | 2393033                 | T/G  | Gene_Ca_07861      | INTRON                        | DNAhelicase,UvrD/REtype                                |
| Kabuli_wild_2411925 | 1399935987                          | Ca_kabuli_Chr04 | 2411925                 | G/T  | Gene_Ca_07861      | INTRON                        | DNAhelicase,UvrD/REtype                                |
| Kabuli_wild_2411967 | 1399935988                          | Ca_kabuli_Chr04 | 2411967                 | G/A  | Gene_Ca_07861      | INTRON                        | DNAhelicase,UvrD/REtype                                |
| Kabuli_wild_2449947 | 1399935989                          | Ca_kabuli_Chr04 | 2449947                 | C/T  | Gene_Ca_07864      | SYNONYMOUS_CODING             | NA                                                     |
| Kabuli_wild_2609945 | 1399935990                          | Ca_kabuli_Chr04 | 2609945                 | C/T  | Gene_Ca_12061      | DOWNSTREAM                    | Acidphosphatase(ClassB)                                |
| Kabuli_wild_2632382 | 1399935991                          | Ca_kabuli_Chr04 | 2632382                 | T/G  | Gene_Ca_12066      | SYNONYMOUS_CODING             | RNA recognition motif domain                           |
| Kabuli_wild_2632395 | 1399935992                          | Ca_kabuli_Chr04 | 2632395                 | A/G  | Gene_Ca_12066      | NON_SYNONYMOUS_CODING         | Signal transduction response regulator, receiverdomain |
| Kabuli_wild_2676174 | 1399935993                          | Ca_kabuli_Chr04 | 2676174                 | C/T  | Gene_Ca_12071      | SYNONYMOUS_CODING             | Actin-like                                             |
| Kabuli_wild_2726353 | 1399935994                          | Ca_kabuli_Chr04 | 2726353                 | G/A  | Gene_Ca_12075      | INTRON                        | General substrate transporter                          |
| Kabuli_wild_2886775 | 1399935995                          | Ca_kabuli_Chr04 | 2886775                 | T/G  | Gene_Ca_12085      | SYNONYMOUS_CODING             | Thioredoxin domain                                     |
| Kabuli_wild_2907919 | 1399935996                          | Ca_kabuli_Chr04 | 2907919                 | G/A  | Gene_Ca_12088      | UPSTREAM                      | Tetratric peptide TPR-1                                |
| Kabuli_wild_3037899 | 1399935997                          | Ca_kabuli_Chr04 | 3037899                 | A/C  | NA                 | INTERGENIC                    | NA                                                     |
| Kabuli_wild_3037929 | 1399935998                          | Ca_kabuli_Chr04 | 3037929                 | T/G  | NA                 | INTERGENIC                    | NA                                                     |
| Kabuli_wild_3037986 | 1399935999                          | Ca_kabuli_Chr04 | 3037986                 | T/A  | NA                 | INTERGENIC                    | NA                                                     |
| Kabuli_wild_3038022 | 1399936000                          | Ca_kabuli_Chr04 | 3038022                 | C/T  | NA                 | INTERGENIC                    | NA                                                     |
| Kabuli_wild_3046920 | 1399936001                          | Ca_kabuli_Chr04 | 3046920                 | A/G  | Gene_Ca_12103      | INTRON                        | NA                                                     |
| Kabuli_wild_3158321 | 1399936002                          | Ca_kabuli_Chr04 | 3158321                 | A/G  | NA                 | INTERGENIC                    | NA                                                     |
| Kabuli_wild_3158323 | 1399936003                          | Ca_kabuli_Chr04 | 3158323                 | T/G  | NA                 | INTERGENIC                    | NA                                                     |
| Kabuli_wild_3158328 | 1399936004                          | Ca_kabuli_Chr04 | 3158328                 | G/T  | NA                 | INTERGENIC                    | NA                                                     |
| Kabuli_wild_3158331 | 1399936005                          | Ca_kabuli_Chr04 | 3158331                 | A/T  | NA                 | INTERGENIC                    | NA                                                     |
| Kabuli_wild_3158426 | 1399936006                          | Ca_kabuli_Chr04 | 3158426                 | G/A  | NA                 | INTERGENIC                    | NA                                                     |
| Kabuli_wild_3158504 | 1399936007                          | Ca_kabuli_Chr04 | 3158504                 | A/T  | NA                 | INTERGENIC                    | NA                                                     |
| Kabuli_wild_3158525 | 1399936008                          | Ca_kabuli_Chr04 | 3158525                 | A/G  | NA                 | INTERGENIC                    | NA                                                     |
| Kabuli_wild_3158549 | 1399936009                          | Ca_kabuli_Chr04 | 3158549                 | A/G  | NA                 | INTERGENIC                    | NA                                                     |
| Kabuli_wild_3164083 | 1399936010                          | Ca_kabuli_Chr04 | 3164083                 | G/A  | Gene_Ca_12117      | DOWNSTREAM                    | NA                                                     |
| Kabuli_wild_3164168 | 1399936011                          | Ca_kabuli_Chr04 | 3164168                 | G/A  | Gene_Ca_12117      | DOWNSTREAM                    | NA                                                     |
| Kabuli_wild_3164195 | 1399936012                          | Ca_kabuli_Chr04 | 3164195                 | T/C  | Gene_Ca_12117      | DOWNSTREAM                    | NA                                                     |
| Kabuli_wild_3164223 | 1399936013                          | Ca_kabuli_Chr04 | 3164223                 | C/T  | Gene_Ca_12117      | DOWNSTREAM                    | NA                                                     |
| Kabuli_wild_3166657 | 1399936014                          | Ca_kabuli_Chr04 | 3166657                 | C/T  | Gene_Ca_12117      | INTRON                        | NA                                                     |
| Kabuli_wild_3166663 | 1399936015                          | Ca_kabuli_Chr04 | 3166663                 | C/T  | Gene_Ca_12117      | INTRON                        | NA                                                     |
| Kabuli_wild_3166674 | 1399936016                          | Ca_kabuli_Chr04 | 3166674                 | G/T  | Gene_Ca_12117      | INTRON                        | NA                                                     |
| Kabuli_wild_3171162 | 1399936017                          | Ca_kabuli_Chr04 | 3171162                 | G/A  | Gene_Ca_12117      | SYNONYMOUS_CODING             | NA                                                     |
| Kabuli_wild_3171358 | 1399936018                          | Ca_kabuli_Chr04 | 3171358                 | A/T  | Gene_Ca_12117      | INTRON                        | NA                                                     |
| Kabuli_wild_3171385 | 1399936019                          | Ca_kabuli_Chr04 | 3171385                 | A/G  | Gene_Ca_12117      | INTRON                        | NA                                                     |
| Kabuli_wild_3171428 | 1399936020                          | Ca_kabuli_Chr04 | 3171428                 | T/C  | Gene_Ca_12117      | INTRON                        | NA                                                     |
| Kabuli_wild_3171551 | 1399936021                          | Ca_kabuli_Chr04 | 3171551                 | C/T  | Gene_Ca_12117      | INTRON                        | NA                                                     |
| Kabuli_wild_3245405 | 1399936022                          | Ca_kabuli_Chr04 | 3245405                 | C/T  | Gene_Ca_12124      | INTRON                        | Protein kinase,catalytic domain                        |
| Kabuli_wild_3264351 | 1399936023                          | Ca_kabuli_Chr04 | 3264351                 | T/C  | Gene_Ca_12126      | SYNONYMOUS_CODING             | Domain of unknown function DUF640                      |
| Kabuli_wild_3280217 | 1399936024                          | Ca_kabuli_Chr04 | 3280217                 | A/G  | NA                 | INTERGENIC                    | NA                                                     |
| Kabuli_wild_3281050 | 1399936025                          | Ca_kabuli_Chr04 | 3281050                 | T/G  | NA                 | INTERGENIC                    | NA                                                     |
| Kabuli_wild_3290298 | 1399936026                          | Ca_kabuli_Chr04 | 3290298                 | T/G  | NA                 | INTERGENIC                    | NA                                                     |
| Kabuli_wild_3290400 | 1399936027                          | Ca_kabuli_Chr04 | 3290400                 | A/C  | NA                 | INTERGENIC                    | NA                                                     |

| SNP IDs             | NCBI dbSNP accession IDs (NCBI_SS#) | Chromosomes     | Physical positions (bp) | SNPs | Gene accession IDs | Sequence components of genome | Putative functions                                         |
|---------------------|-------------------------------------|-----------------|-------------------------|------|--------------------|-------------------------------|------------------------------------------------------------|
| Kabuli_wild_3307908 | 1399936028                          | Ca_kabuli_Chr04 | 3307908                 | A/T  | Gene_Ca_12131      | INTRON                        | Actin-binding,cofilin/tropomyosintype                      |
| Kabuli_wild_3353586 | 1399936029                          | Ca_kabuli_Chr04 | 3353586                 | G/A  | Gene_Ca_12138      | INTRON                        | Mg2+transporterprotein,CorA-like                           |
| Kabuli_wild_3356242 | 1399936030                          | Ca_kabuli_Chr04 | 3356242                 | C/G  | NA                 | INTERGENIC                    | NA                                                         |
| Kabuli_wild_3356252 | 1399936031                          | Ca_kabuli_Chr04 | 3356252                 | C/G  | NA                 | INTERGENIC                    | NA                                                         |
| Kabuli_wild_3400828 | 1399936032                          | Ca_kabuli_Chr04 | 3400828                 | G/C  | Gene_Ca_12141      | INTRON                        | Glycosidehydrolase,family47                                |
| Kabuli_wild_3427396 | 1399936033                          | Ca_kabuli_Chr04 | 3427396                 | A/G  | Gene_Ca_12144      | INTRON                        | Castor/Polluxionchannel                                    |
| Kabuli_wild_3428929 | 1399936034                          | Ca_kabuli_Chr04 | 3428929                 | T/C  | Gene_Ca_12144      | SYNONYMOUS_CODING             | Castor/Polluxionchannel                                    |
| Kabuli_wild_3429035 | 1399936035                          | Ca_kabuli_Chr04 | 3429035                 | A/G  | Gene_Ca_12144      | INTRON                        | Castor/Polluxionchannel                                    |
| Kabuli_wild_3429059 | 1399936036                          | Ca_kabuli_Chr04 | 3429059                 | A/C  | Gene_Ca_12144      | INTRON                        | Castor/Polluxionchannel                                    |
| Kabuli_wild_3453072 | 1399936037                          | Ca_kabuli_Chr04 | 3453072                 | A/G  | NA                 | INTERGENIC                    | NA                                                         |
| Kabuli_wild_3453084 | 1399936038                          | Ca_kabuli_Chr04 | 3453084                 | C/G  | NA                 | INTERGENIC                    | NA                                                         |
| Kabuli_wild_3453306 | 1399936039                          | Ca_kabuli_Chr04 | 3453306                 | G/A  | NA                 | INTERGENIC                    | NA                                                         |
| Kabuli_wild_3453320 | 1399936040                          | Ca_kabuli_Chr04 | 3453320                 | G/A  | Gene_Ca_12146      | SYNONYMOUS_CODING             | Armadillo                                                  |
| Kabuli_wild_3453350 | 1399936041                          | Ca_kabuli_Chr04 | 3453350                 | T/A  | Gene_Ca_12146      | SYNONYMOUS_CODING             | Armadillo                                                  |
| Kabuli_wild_3455047 | 1399936042                          | Ca_kabuli_Chr04 | 3455047                 | G/A  | Gene_Ca_12146      | NON_SYNONYMOUS_CODING         | Armadillo                                                  |
| Kabuli_wild_3456434 | 1399936043                          | Ca_kabuli_Chr04 | 3456434                 | C/T  | Gene_Ca_12146      | NON_SYNONYMOUS_CODING         | Armadillo                                                  |
| Kabuli_wild_3689840 | 1399936044                          | Ca_kabuli_Chr04 | 3689840                 | T/C  | Gene_Ca_12165      | INTRON                        | ATPase,AAA+type,core                                       |
| Kabuli_wild_3735377 | 1399936045                          | Ca_kabuli_Chr04 | 3735377                 | T/C  | NA                 | INTERGENIC                    | NA                                                         |
| Kabuli_wild_3741522 | 1399936046                          | Ca_kabuli_Chr04 | 3741522                 | T/G  | NA                 | INTERGENIC                    | NA                                                         |
| Kabuli_wild_3741539 | 1399936047                          | Ca_kabuli_Chr04 | 3741539                 | T/G  | NA                 | INTERGENIC                    | NA                                                         |
| Kabuli_wild_3762559 | 1399936048                          | Ca_kabuli_Chr04 | 3762559                 | T/C  | NA                 | INTERGENIC                    | NA                                                         |
| Kabuli_wild_3762561 | 1399936049                          | Ca_kabuli_Chr04 | 3762561                 | C/A  | NA                 | INTERGENIC                    | NA                                                         |
| Kabuli_wild_3762585 | 1399936050                          | Ca_kabuli_Chr04 | 3762585                 | T/G  | NA                 | INTERGENIC                    | NA                                                         |
| Kabuli_wild_3764547 | 1399936051                          | Ca_kabuli_Chr04 | 3764547                 | T/G  | Gene_Ca_12178      | DOWNSTREAM                    | NA                                                         |
| Kabuli_wild_3794764 | 1399936052                          | Ca_kabuli_Chr04 | 3794764                 | G/A  | Gene_Ca_12180      | DOWNSTREAM                    | NA                                                         |
| Kabuli_wild_3794885 | 1399936053                          | Ca_kabuli_Chr04 | 3794885                 | C/A  | Gene_Ca_12180      | DOWNSTREAM                    | NA                                                         |
| Kabuli_wild_3888185 | 1399936054                          | Ca_kabuli_Chr04 | 3888185                 | A/G  | Gene_Ca_03864      | UPSTREAM                      | NA                                                         |
| Kabuli_wild_3888328 | 1399936055                          | Ca_kabuli_Chr04 | 3888328                 | C/T  | Gene_Ca_03864      | UPSTREAM                      | NA                                                         |
| Kabuli_wild_3888529 | 1399936056                          | Ca_kabuli_Chr04 | 3888529                 | T/G  | Gene_Ca_03864      | UPSTREAM                      | NA                                                         |
| Kabuli_wild_3888535 | 1399936057                          | Ca_kabuli_Chr04 | 3888535                 | T/G  | Gene_Ca_03864      | UPSTREAM                      | NA                                                         |
| Kabuli_wild_4027829 | 1399936058                          | Ca_kabuli_Chr04 | 4027829                 | A/T  | NA                 | INTERGENIC                    | NA                                                         |
| Kabuli_wild_4027872 | 1399936059                          | Ca_kabuli_Chr04 | 4027872                 | A/C  | NA                 | INTERGENIC                    | NA                                                         |
| Kabuli_wild_4097935 | 1399936060                          | Ca_kabuli_Chr04 | 4097935                 | T/C  | Gene_Ca_03846      | INTRON                        | UBX                                                        |
| Kabuli_wild_4097989 | 1399936061                          | Ca_kabuli_Chr04 | 4097989                 | G/A  | Gene_Ca_03846      | SYNONYMOUS_CODING             | UBX                                                        |
| Kabuli_wild_4144618 | 1399936062                          | Ca_kabuli_Chr04 | 4144618                 | A/G  | NA                 | INTERGENIC                    | NA                                                         |
| Kabuli_wild_4148061 | 1399936063                          | Ca_kabuli_Chr04 | 4148061                 | T/C  | Gene_Ca_03841      | SYNONYMOUS_CODING             | Plan tspecific mitochondrial import receptor subunit TOM20 |
| Kabuli_wild_4148250 | 1399936064                          | Ca_kabuli_Chr04 | 4148250                 | A/G  | Gene_Ca_03841      | INTRON                        | Plant specific mitochondrial import receptor subunit TOM21 |
| Kabuli_wild_4154507 | 1399936065                          | Ca_kabuli_Chr04 | 4154507                 | G/T  | Gene_Ca_03840      | INTRON                        | NA                                                         |
| Kabuli_wild_4305891 | 1399936066                          | Ca_kabuli_Chr04 | 4305891                 | A/C  | Gene_Ca_03829      | SYNONYMOUS_CODING             | Inositolpolyphosphate-relatedphosphatase                   |
| Kabuli_wild_4327229 | 1399936067                          | Ca_kabuli_Chr04 | 4327229                 | A/G  | Gene_Ca_03827      | INTRON                        | RNA recognition motif domain                               |
| Kabuli_wild_4410351 | 1399936068                          | Ca_kabuli_Chr04 | 4410351                 | T/C  | Gene_Ca_03820      | SYNONYMOUS_CODING             | Single-strandednucleicacidbindingR3H                       |
| Kabuli_wild_4426659 | 1399936069                          | Ca_kabuli_Chr04 | 4426659                 | C/T  | NA                 | INTERGENIC                    | NA                                                         |
| Kabuli_wild_4426796 | 1399936070                          | Ca_kabuli_Chr04 | 4426796                 | A/C  | NA                 | INTERGENIC                    | NA                                                         |
| Kabuli_wild_4452018 | 1399936071                          | Ca_kabuli_Chr04 | 4452018                 | T/A  | Gene_Ca_03812      | DOWNSTREAM                    | Armadillo                                                  |

| SNP IDs             | NCBI dbSNP accession IDs (NCBI_SS#) | Chromosomes       | Physical positions (bp) | SNPs | Gene accession IDs | Sequence components of genome | Putative functions                                    |
|---------------------|-------------------------------------|-------------------|-------------------------|------|--------------------|-------------------------------|-------------------------------------------------------|
| Kabuli_wild_4452380 | 1399936072                          | Ca_kabuli_Chrom04 | 4452380                 | C/G  | Gene_Ca_03812      | DOWNSTREAM                    | Armadillo                                             |
| Kabuli_wild_4454305 | 1399936073                          | Ca_kabuli_Chrom04 | 4454305                 | A/C  | Gene_Ca_03813      | DOWNSTREAM                    | Protein kinase,catalytic domain                       |
| Kabuli_wild_4454464 | 1399936074                          | Ca_kabuli_Chrom04 | 4454464                 | A/G  | NA                 | INTERGENIC                    | NA                                                    |
| Kabuli_wild_4454537 | 1399936075                          | Ca_kabuli_Chrom04 | 4454537                 | C/T  | NA                 | INTERGENIC                    | NA                                                    |
| Kabuli_wild_4454608 | 1399936076                          | Ca_kabuli_Chrom04 | 4454608                 | C/T  | NA                 | INTERGENIC                    | NA                                                    |
| Kabuli_wild_4461562 | 1399936077                          | Ca_kabuli_Chrom04 | 4461562                 | G/C  | Gene_Ca_03811      | INTRON                        | TRM13/UPF0224family,U11-48K-likeCHHCZinc fingerdomain |
| Kabuli_wild_4468394 | 1399936078                          | Ca_kabuli_Chrom04 | 4468394                 | C/T  | Gene_Ca_03810      | INTRON                        | TetratricopeptideTPR-1                                |
| Kabuli_wild_4535519 | 1399936079                          | Ca_kabuli_Chrom04 | 4535519                 | T/G  | NA                 | INTERGENIC                    | NA                                                    |
| Kabuli_wild_4535611 | 1399936080                          | Ca_kabuli_Chrom04 | 4535611                 | A/T  | NA                 | INTERGENIC                    | NA                                                    |
| Kabuli_wild_4536286 | 1399936081                          | Ca_kabuli_Chrom04 | 4536286                 | G/C  | NA                 | INTERGENIC                    | NA                                                    |
| Kabuli_wild_4536310 | 1399936082                          | Ca_kabuli_Chrom04 | 4536310                 | A/G  | NA                 | INTERGENIC                    | NA                                                    |
| Kabuli_wild_4578593 | 1399936083                          | Ca_kabuli_Chrom04 | 4578593                 | G/T  | NA                 | INTERGENIC                    | NA                                                    |
| Kabuli_wild_4578604 | 1399936084                          | Ca_kabuli_Chrom04 | 4578604                 | C/A  | NA                 | INTERGENIC                    | NA                                                    |
| Kabuli_wild_4578836 | 1399936085                          | Ca_kabuli_Chrom04 | 4578836                 | C/T  | NA                 | INTERGENIC                    | NA                                                    |
| Kabuli_wild_4579158 | 1399936086                          | Ca_kabuli_Chrom04 | 4579158                 | A/G  | NA                 | INTERGENIC                    | NA                                                    |
| Kabuli_wild_4579412 | 1399936087                          | Ca_kabuli_Chrom04 | 4579412                 | C/T  | NA                 | INTERGENIC                    | NA                                                    |
| Kabuli_wild_4605340 | 1399936088                          | Ca_kabuli_Chrom04 | 4605340                 | A/C  | NA                 | INTERGENIC                    | NA                                                    |
| Kabuli_wild_4628243 | 1399936089                          | Ca_kabuli_Chrom04 | 4628243                 | G/A  | Gene_Ca_03793      | DOWNSTREAM                    | ASCH domain                                           |
| Kabuli_wild_4628250 | 1399936090                          | Ca_kabuli_Chrom04 | 4628250                 | T/C  | Gene_Ca_03793      | DOWNSTREAM                    | ASCH domain                                           |
| Kabuli_wild_4630407 | 1399936091                          | Ca_kabuli_Chrom04 | 4630407                 | G/A  | NA                 | INTERGENIC                    | NA                                                    |
| Kabuli_wild_4633913 | 1399936092                          | Ca_kabuli_Chrom04 | 4633913                 | T/G  | Gene_Ca_03793      | UPSTREAM                      | ASCH domain                                           |
| Kabuli_wild_4634542 | 1399936093                          | Ca_kabuli_Chrom04 | 4634542                 | A/T  | NA                 | INTERGENIC                    | NA                                                    |
| Kabuli_wild_4634659 | 1399936094                          | Ca_kabuli_Chrom04 | 4634659                 | G/A  | NA                 | INTERGENIC                    | NA                                                    |
| Kabuli_wild_4634817 | 1399936095                          | Ca_kabuli_Chrom04 | 4634817                 | C/T  | NA                 | INTERGENIC                    | NA                                                    |
| Kabuli_wild_4670913 | 1399936096                          | Ca_kabuli_Chrom04 | 4670913                 | A/G  | Gene_Ca_03789      | INTRON                        | EF-Hand1,calcium-bindingsite                          |
| Kabuli_wild_4675166 | 1399936097                          | Ca_kabuli_Chrom04 | 4675166                 | A/T  | NA                 | INTERGENIC                    | NA                                                    |
| Kabuli_wild_4675171 | 1399936098                          | Ca_kabuli_Chrom04 | 4675171                 | T/A  | NA                 | INTERGENIC                    | NA                                                    |
| Kabuli_wild_4675172 | 1399936099                          | Ca_kabuli_Chrom04 | 4675172                 | T/A  | NA                 | INTERGENIC                    | NA                                                    |
| Kabuli_wild_4675176 | 1399936100                          | Ca_kabuli_Chrom04 | 4675176                 | T/G  | NA                 | INTERGENIC                    | NA                                                    |
| Kabuli_wild_4675177 | 1399936101                          | Ca_kabuli_Chrom04 | 4675177                 | T/A  | NA                 | INTERGENIC                    | NA                                                    |
| Kabuli_wild_4675181 | 1399936102                          | Ca_kabuli_Chrom04 | 4675181                 | A/C  | NA                 | INTERGENIC                    | NA                                                    |
| Kabuli_wild_4675182 | 1399936103                          | Ca_kabuli_Chrom04 | 4675182                 | T/G  | NA                 | INTERGENIC                    | NA                                                    |
| Kabuli_wild_4679236 | 1399936104                          | Ca_kabuli_Chrom04 | 4679236                 | A/G  | Gene_Ca_03788      | SYNONYMOUS_CODING             | Pentatricopeptide repeat                              |
| Kabuli_wild_4680896 | 1399936105                          | Ca_kabuli_Chrom04 | 4680896                 | A/G  | Gene_Ca_03788      | UPSTREAM                      | Pentatricopeptide repeat                              |
| Kabuli_wild_4746818 | 1399936106                          | Ca_kabuli_Chrom04 | 4746818                 | T/C  | Gene_Ca_03781      | SYNONYMOUS_CODING             | SET domain                                            |
| Kabuli_wild_4799116 | 1399936107                          | Ca_kabuli_Chrom04 | 4799116                 | C/T  | Gene_Ca_03778      | NON_SYNONYMOUS_CODING         | SNF2-related                                          |
| Kabuli_wild_4799122 | 1399936108                          | Ca_kabuli_Chrom04 | 4799122                 | C/T  | Gene_Ca_03778      | NON_SYNONYMOUS_CODING         | SNF2-related                                          |
| Kabuli_wild_4799146 | 1399936109                          | Ca_kabuli_Chrom04 | 4799146                 | C/T  | Gene_Ca_03778      | NON_SYNONYMOUS_CODING         | SNF2-related                                          |
| Kabuli_wild_4828832 | 1399936110                          | Ca_kabuli_Chrom04 | 4828832                 | T/A  | NA                 | INTERGENIC                    | NA                                                    |
| Kabuli_wild_4896153 | 1399936111                          | Ca_kabuli_Chrom04 | 4896153                 | A/T  | NA                 | INTERGENIC                    | NA                                                    |
| Kabuli_wild_4907987 | 1399936112                          | Ca_kabuli_Chrom04 | 4907987                 | G/A  | NA                 | INTERGENIC                    | NA                                                    |
| Kabuli_wild_4911083 | 1399936113                          | Ca_kabuli_Chrom04 | 4911083                 | T/C  | Gene_Ca_03767      | INTRON                        | Phosphoribosyl amino imidazolecarboxylase,core        |
| Kabuli_wild_4911130 | 1399936114                          | Ca_kabuli_Chrom04 | 4911130                 | T/C  | Gene_Ca_03767      | INTRON                        | Phosphoribosyl amino imidazolecarboxylase,core        |
| Kabuli_wild_4911209 | 1399936115                          | Ca_kabuli_Chrom04 | 4911209                 | A/G  | Gene_Ca_03767      | SYNONYMOUS_CODING             | Phosphoribosyl amino imidazolecarboxylase,core        |

| SNP IDs             | NCBI dbSNP accession IDs (NCBI_SS#) | Chromosomes     | Physical positions (bp) | SNPs | Gene accession IDs | Sequence components of genome | Putative functions                                 |
|---------------------|-------------------------------------|-----------------|-------------------------|------|--------------------|-------------------------------|----------------------------------------------------|
| Kabuli_wild_4911217 | 1399936116                          | Ca_kabuli_Chr04 | 4911217                 | A/C  | Gene_Ca_03767      | SYNONYMOUS_CODING             | Phosphoribosyl amino imidazolecarboxylase,core     |
| Kabuli_wild_4920706 | 1399936117                          | Ca_kabuli_Chr04 | 4920706                 | T/C  | Gene_Ca_03766      | NON_SYNONYMOUS_CODING         | Zinc finger,PMZ-type                               |
| Kabuli_wild_4920712 | 1399936118                          | Ca_kabuli_Chr04 | 4920712                 | A/T  | Gene_Ca_03766      | NON_SYNONYMOUS_CODING         | Zinc finger,PMZ-type                               |
| Kabuli_wild_4920719 | 1399936119                          | Ca_kabuli_Chr04 | 4920719                 | A/G  | Gene_Ca_03766      | NON_SYNONYMOUS_CODING         | Zinc finger,PMZ-type                               |
| Kabuli_wild_4922410 | 1399936120                          | Ca_kabuli_Chr04 | 4922410                 | A/C  | Gene_Ca_03766      | DOWNSTREAM                    | Zinc finger,PMZ-type                               |
| Kabuli_wild_4928764 | 1399936121                          | Ca_kabuli_Chr04 | 4928764                 | T/C  | NA                 | INTERGENIC                    | NA                                                 |
| Kabuli_wild_4928890 | 1399936122                          | Ca_kabuli_Chr04 | 4928890                 | A/G  | NA                 | INTERGENIC                    | NA                                                 |
| Kabuli_wild_4953629 | 1399936123                          | Ca_kabuli_Chr04 | 4953629                 | C/A  | NA                 | INTERGENIC                    | NA                                                 |
| Kabuli_wild_5038300 | 1399936124                          | Ca_kabuli_Chr04 | 5038300                 | G/C  | NA                 | INTERGENIC                    | NA                                                 |
| Kabuli_wild_5050390 | 1399936125                          | Ca_kabuli_Chr04 | 5050390                 | T/C  | NA                 | INTERGENIC                    | NA                                                 |
| Kabuli_wild_5155647 | 1399936126                          | Ca_kabuli_Chr04 | 5155647                 | C/A  | NA                 | INTERGENIC                    | NA                                                 |
| Kabuli_wild_5186401 | 1399936127                          | Ca_kabuli_Chr04 | 5186401                 | A/G  | Gene_Ca_03734      | NON_SYNONYMOUS_CODING         | Pyridoxalphosphate-dependent enzyme,beta subunit   |
| Kabuli_wild_5204288 | 1399936128                          | Ca_kabuli_Chr04 | 5204288                 | G/A  | Gene_Ca_03733      | INTRON                        | Domain of unknown function DUF1981,SEC7 associated |
| Kabuli_wild_5204319 | 1399936129                          | Ca_kabuli_Chr04 | 5204319                 | A/G  | Gene_Ca_03733      | INTRON                        | Domain of unknown function DUF1981,SEC7 associated |
| Kabuli_wild_5222851 | 1399936130                          | Ca_kabuli_Chr04 | 5222851                 | C/T  | Gene_Ca_03733      | INTRON                        | Domain of unknown function DUF1981,SEC7 associated |
| Kabuli_wild_5223068 | 1399936131                          | Ca_kabuli_Chr04 | 5223068                 | A/G  | Gene_Ca_03733      | INTRON                        | Domain of unknown function DUF1981,SEC7 associated |
| Kabuli_wild_5223100 | 1399936132                          | Ca_kabuli_Chr04 | 5223100                 | G/A  | Gene_Ca_03733      | INTRON                        | Domain of unknown function DUF1981,SEC7 associated |
| Kabuli_wild_5232364 | 1399936133                          | Ca_kabuli_Chr04 | 5232364                 | T/C  | NA                 | INTERGENIC                    | NA                                                 |
| Kabuli_wild_5258348 | 1399936134                          | Ca_kabuli_Chr04 | 5258348                 | T/A  | Gene_Ca_03730      | DOWNSTREAM                    | Protein kinase,catalytic domain                    |
| Kabuli_wild_5258351 | 1399936135                          | Ca_kabuli_Chr04 | 5258351                 | C/A  | Gene_Ca_03730      | DOWNSTREAM                    | Protein kinase,catalytic domain                    |
| Kabuli_wild_5258355 | 1399936136                          | Ca_kabuli_Chr04 | 5258355                 | C/A  | Gene_Ca_03730      | DOWNSTREAM                    | Protein kinase,catalytic domain                    |
| Kabuli_wild_5263199 | 1399936137                          | Ca_kabuli_Chr04 | 5263199                 | A/G  | NA                 | INTERGENIC                    | NA                                                 |
| Kabuli_wild_5268995 | 1399936138                          | Ca_kabuli_Chr04 | 5268995                 | A/C  | NA                 | INTERGENIC                    | NA                                                 |
| Kabuli_wild_5282131 | 1399936139                          | Ca_kabuli_Chr04 | 5282131                 | T/C  | NA                 | INTERGENIC                    | NA                                                 |
| Kabuli_wild_5306231 | 1399936140                          | Ca_kabuli_Chr04 | 5306231                 | G/A  | Gene_Ca_03727      | DOWNSTREAM                    | IsopenicillinNsynthase                             |
| Kabuli_wild_5390317 | 1399936141                          | Ca_kabuli_Chr04 | 5390317                 | G/A  | NA                 | INTERGENIC                    | NA                                                 |
| Kabuli_wild_5473174 | 1399936142                          | Ca_kabuli_Chr04 | 5473174                 | C/T  | NA                 | INTERGENIC                    | NA                                                 |
| Kabuli_wild_5484220 | 1399936143                          | Ca_kabuli_Chr04 | 5484220                 | A/G  | NA                 | INTERGENIC                    | NA                                                 |
| Kabuli_wild_5484236 | 1399936144                          | Ca_kabuli_Chr04 | 5484236                 | C/T  | NA                 | INTERGENIC                    | NA                                                 |
| Kabuli_wild_5484238 | 1399936145                          | Ca_kabuli_Chr04 | 5484238                 | G/A  | NA                 | INTERGENIC                    | NA                                                 |
| Kabuli_wild_5484257 | 1399936146                          | Ca_kabuli_Chr04 | 5484257                 | G/C  | NA                 | INTERGENIC                    | NA                                                 |
| Kabuli_wild_5484259 | 1399936147                          | Ca_kabuli_Chr04 | 5484259                 | G/T  | NA                 | INTERGENIC                    | NA                                                 |
| Kabuli_wild_5484979 | 1399936148                          | Ca_kabuli_Chr04 | 5484979                 | T/G  | NA                 | INTERGENIC                    | NA                                                 |
| Kabuli_wild_5485013 | 1399936149                          | Ca_kabuli_Chr04 | 5485013                 | A/G  | NA                 | INTERGENIC                    | NA                                                 |
| Kabuli_wild_5485029 | 1399936150                          | Ca_kabuli_Chr04 | 5485029                 | C/T  | NA                 | INTERGENIC                    | NA                                                 |
| Kabuli_wild_5485031 | 1399936151                          | Ca_kabuli_Chr04 | 5485031                 | G/A  | NA                 | INTERGENIC                    | NA                                                 |
| Kabuli_wild_5485050 | 1399936152                          | Ca_kabuli_Chr04 | 5485050                 | G/C  | NA                 | INTERGENIC                    | NA                                                 |
| Kabuli_wild_5485052 | 1399936153                          | Ca_kabuli_Chr04 | 5485052                 | G/T  | NA                 | INTERGENIC                    | NA                                                 |
| Kabuli_wild_5528418 | 1399936154                          | Ca_kabuli_Chr04 | 5528418                 | T/G  | Gene_Ca_03702      | SYNONYMOUS_CODING             | Zinc finger, RING-type                             |
| Kabuli_wild_5528421 | 1399936155                          | Ca_kabuli_Chr04 | 5528421                 | T/G  | Gene_Ca_03702      | SYNONYMOUS_CODING             | Zinc finger, RING-type                             |
| Kabuli_wild_5528469 | 1399936156                          | Ca_kabuli_Chr04 | 5528469                 | T/G  | Gene_Ca_03702      | SYNONYMOUS_CODING             | Zinc finger, RING-type                             |
| Kabuli_wild_5561063 | 1399936157                          | Ca_kabuli_Chr04 | 5561063                 | A/G  | Gene_Ca_03699      | SYNONYMOUS_CODING             | Heavy metal transport/detoxification protein       |
| Kabuli_wild_5701873 | 1399936158                          | Ca_kabuli_Chr04 | 5701873                 | A/C  | NA                 | INTERGENIC                    | NA                                                 |
| Kabuli_wild_5701900 | 1399936159                          | Ca_kabuli_Chr04 | 5701900                 | G/T  | NA                 | INTERGENIC                    | NA                                                 |

| SNP IDs             | NCBI dbSNP accession IDs (NCBI_SS#) | Chromosomes     | Physical positions (bp) | SNPs | Gene accession IDs | Sequence components of genome | Putative functions                  |
|---------------------|-------------------------------------|-----------------|-------------------------|------|--------------------|-------------------------------|-------------------------------------|
| Kabuli_wild_5701902 | 1399936160                          | Ca_kabuli_Chr04 | 5701902                 | C/T  | NA                 | INTERGENIC                    | NA                                  |
| Kabuli_wild_5701907 | 1399936161                          | Ca_kabuli_Chr04 | 5701907                 | G/T  | NA                 | INTERGENIC                    | NA                                  |
| Kabuli_wild_5779698 | 1399936162                          | Ca_kabuli_Chr04 | 5779698                 | A/G  | Gene_Ca_03672      | DOWNSTREAM                    | Helicase,C-terminal                 |
| Kabuli_wild_5787722 | 1399936163                          | Ca_kabuli_Chr04 | 5787722                 | G/A  | NA                 | INTERGENIC                    | NA                                  |
| Kabuli_wild_5787727 | 1399936164                          | Ca_kabuli_Chr04 | 5787727                 | G/A  | NA                 | INTERGENIC                    | NA                                  |
| Kabuli_wild_5853798 | 1399936165                          | Ca_kabuli_Chr04 | 5853798                 | T/G  | Gene_Ca_03664      | INTRON                        | Zinc finger, RING-type              |
| Kabuli_wild_5900290 | 1399936166                          | Ca_kabuli_Chr04 | 5900290                 | T/C  | Gene_Ca_03661      | DOWNSTREAM                    | Hypoxiainducedprotein,domain        |
| Kabuli_wild_5905385 | 1399936167                          | Ca_kabuli_Chr04 | 5905385                 | G/A  | NA                 | INTERGENIC                    | NA                                  |
| Kabuli_wild_5907409 | 1399936168                          | Ca_kabuli_Chr04 | 5907409                 | T/G  | Gene_Ca_03658      | UPSTREAM                      | Dormancy auxin associated           |
| Kabuli_wild_5907421 | 1399936169                          | Ca_kabuli_Chr04 | 5907421                 | T/G  | Gene_Ca_03658      | UPSTREAM                      | Dormancy auxin associated           |
| Kabuli_wild_5907465 | 1399936170                          | Ca_kabuli_Chr04 | 5907465                 | C/A  | Gene_Ca_03658      | UPSTREAM                      | Dormancy auxin associated           |
| Kabuli_wild_5999964 | 1399936171                          | Ca_kabuli_Chr04 | 5999964                 | T/C  | Gene_Ca_03648      | INTRON                        | WD40 repeat                         |
| Kabuli_wild_5999985 | 1399936172                          | Ca_kabuli_Chr04 | 5999985                 | T/C  | Gene_Ca_03648      | INTRON                        | WD40 repeat                         |
| Kabuli_wild_6000010 | 1399936173                          | Ca_kabuli_Chr04 | 6000010                 | T/A  | Gene_Ca_03648      | INTRON                        | WD40 repeat                         |
| Kabuli_wild_6000013 | 1399936174                          | Ca_kabuli_Chr04 | 6000013                 | A/C  | Gene_Ca_03648      | INTRON                        | WD40 repeat                         |
| Kabuli_wild_6000037 | 1399936175                          | Ca_kabuli_Chr04 | 6000037                 | T/G  | Gene_Ca_03648      | INTRON                        | WD40 repeat                         |
| Kabuli_wild_6000046 | 1399936176                          | Ca_kabuli_Chr04 | 6000046                 | T/C  | Gene_Ca_03648      | INTRON                        | WD40 repeat                         |
| Kabuli_wild_6041117 | 1399936177                          | Ca_kabuli_Chr04 | 6041117                 | C/T  | NA                 | INTERGENIC                    | NA                                  |
| Kabuli_wild_6041120 | 1399936178                          | Ca_kabuli_Chr04 | 6041120                 | G/T  | NA                 | INTERGENIC                    | NA                                  |
| Kabuli_wild_6041126 | 1399936179                          | Ca_kabuli_Chr04 | 6041126                 | A/G  | NA                 | INTERGENIC                    | NA                                  |
| Kabuli_wild_6041130 | 1399936180                          | Ca_kabuli_Chr04 | 6041130                 | C/A  | NA                 | INTERGENIC                    | NA                                  |
| Kabuli_wild_6041134 | 1399936181                          | Ca_kabuli_Chr04 | 6041134                 | A/C  | NA                 | INTERGENIC                    | NA                                  |
| Kabuli_wild_6134389 | 1399936182                          | Ca_kabuli_Chr04 | 6134389                 | A/C  | NA                 | INTERGENIC                    | NA                                  |
| Kabuli_wild_6157625 | 1399936183                          | Ca_kabuli_Chr04 | 6157625                 | T/C  | Gene_Ca_03628      | NON_SYNONYMOUS_CODING         | PeptidaseS16,Lonprotease,C-terminal |
| Kabuli_wild_6201137 | 1399936184                          | Ca_kabuli_Chr04 | 6201137                 | T/C  | NA                 | INTERGENIC                    | NA                                  |
| Kabuli_wild_6201162 | 1399936185                          | Ca_kabuli_Chr04 | 6201162                 | A/C  | NA                 | INTERGENIC                    | NA                                  |
| Kabuli_wild_6264731 | 1399936186                          | Ca_kabuli_Chr04 | 6264731                 | G/A  | NA                 | INTERGENIC                    | NA                                  |
| Kabuli_wild_6281228 | 1399936187                          | Ca_kabuli_Chr04 | 6281228                 | A/C  | NA                 | INTERGENIC                    | NA                                  |
| Kabuli_wild_6387938 | 1399936188                          | Ca_kabuli_Chr04 | 6387938                 | T/G  | NA                 | INTERGENIC                    | NA                                  |
| Kabuli_wild_6403910 | 1399936189                          | Ca_kabuli_Chr04 | 6403910                 | A/C  | Gene_Ca_03599      | DOWNSTREAM                    | NA                                  |
| Kabuli_wild_6408543 | 1399936190                          | Ca_kabuli_Chr04 | 6408543                 | T/G  | NA                 | INTERGENIC                    | NA                                  |
| Kabuli_wild_6544337 | 1399936191                          | Ca_kabuli_Chr04 | 6544337                 | A/C  | NA                 | INTERGENIC                    | NA                                  |
| Kabuli_wild_6544342 | 1399936192                          | Ca_kabuli_Chr04 | 6544342                 | A/C  | NA                 | INTERGENIC                    | NA                                  |
| Kabuli_wild_6680212 | 1399936193                          | Ca_kabuli_Chr04 | 6680212                 | C/T  | Gene_Ca_03578      | INTRON                        | NA                                  |
| Kabuli_wild_6688218 | 1399936194                          | Ca_kabuli_Chr04 | 6688218                 | G/A  | Gene_Ca_03578      | DOWNSTREAM                    | NA                                  |
| Kabuli_wild_6749550 | 1399936195                          | Ca_kabuli_Chr04 | 6749550                 | G/A  | NA                 | INTERGENIC                    | NA                                  |
| Kabuli_wild_6759998 | 1399936196                          | Ca_kabuli_Chr04 | 6759998                 | T/C  | Gene_Ca_03565      | INTRON                        | Pectinacetylerase                   |
| Kabuli_wild_6761778 | 1399936197                          | Ca_kabuli_Chr04 | 6761778                 | C/A  | Gene_Ca_03565      | STOP_GAINED                   | Pectinacetylerase                   |
| Kabuli_wild_6765884 | 1399936198                          | Ca_kabuli_Chr04 | 6765884                 | T/C  | Gene_Ca_03564      | NON_SYNONYMOUS_CODING         | SANT domain,DNA binding             |
| Kabuli_wild_6801632 | 1399936199                          | Ca_kabuli_Chr04 | 6801632                 | C/A  | NA                 | INTERGENIC                    | NA                                  |
| Kabuli_wild_6841854 | 1399936200                          | Ca_kabuli_Chr04 | 6841854                 | G/A  | NA                 | INTERGENIC                    | NA                                  |
| Kabuli_wild_6841856 | 1399936201                          | Ca_kabuli_Chr04 | 6841856                 | G/A  | NA                 | INTERGENIC                    | NA                                  |
| Kabuli_wild_6841857 | 1399936202                          | Ca_kabuli_Chr04 | 6841857                 | A/C  | NA                 | INTERGENIC                    | NA                                  |
| Kabuli_wild_6841858 | 1399936203                          | Ca_kabuli_Chr04 | 6841858                 | G/A  | NA                 | INTERGENIC                    | NA                                  |



| SNP IDs             | NCBI dbSNP accession IDs (NCBI_SS#) | Chromosomes     | Physical positions (bp) | SNPs | Gene accession IDs | Sequence components of genome | Putative functions                                                |
|---------------------|-------------------------------------|-----------------|-------------------------|------|--------------------|-------------------------------|-------------------------------------------------------------------|
| Kabuli_wild_6841859 | 1399936204                          | Ca_kabuli_Chr04 | 6841859                 | A/C  | NA                 | INTERGENIC                    | NA                                                                |
| Kabuli_wild_6841860 | 1399936205                          | Ca_kabuli_Chr04 | 6841860                 | G/A  | NA                 | INTERGENIC                    | NA                                                                |
| Kabuli_wild_6841862 | 1399936206                          | Ca_kabuli_Chr04 | 6841862                 | G/A  | NA                 | INTERGENIC                    | NA                                                                |
| Kabuli_wild_6854530 | 1399936207                          | Ca_kabuli_Chr04 | 6854530                 | C/T  | Gene_Ca_03554      | INTRON                        | ABC transporter,trans membrane domain                             |
| Kabuli_wild_6854533 | 1399936208                          | Ca_kabuli_Chr04 | 6854533                 | C/A  | Gene_Ca_03554      | INTRON                        | ABC transporter,trans membrane domain                             |
| Kabuli_wild_6889964 | 1399936209                          | Ca_kabuli_Chr04 | 6889964                 | T/G  | NA                 | INTERGENIC                    | NA                                                                |
| Kabuli_wild_6889974 | 1399936210                          | Ca_kabuli_Chr04 | 6889974                 | T/G  | NA                 | INTERGENIC                    | NA                                                                |
| Kabuli_wild_6889994 | 1399936211                          | Ca_kabuli_Chr04 | 6889994                 | T/G  | Gene_Ca_03550      | NON_SYNONYMOUS_CODING         | Pectinesterase,catalytic                                          |
| Kabuli_wild_6890000 | 1399936212                          | Ca_kabuli_Chr04 | 6890000                 | A/G  | Gene_Ca_03550      | SYNONYMOUS_CODING             | Pectinesterase,catalytic                                          |
| Kabuli_wild_6890005 | 1399936213                          | Ca_kabuli_Chr04 | 6890005                 | C/T  | Gene_Ca_03550      | NON_SYNONYMOUS_CODING         | Pectinesterase,catalytic                                          |
| Kabuli_wild_6890014 | 1399936214                          | Ca_kabuli_Chr04 | 6890014                 | G/T  | Gene_Ca_03550      | NON_SYNONYMOUS_CODING         | Pectinesterase,catalytic                                          |
| Kabuli_wild_6895804 | 1399936215                          | Ca_kabuli_Chr04 | 6895804                 | G/A  | Gene_Ca_03549      | SYNONYMOUS_CODING             | Protein kinase,catalytic domain                                   |
| Kabuli_wild_6919896 | 1399936216                          | Ca_kabuli_Chr04 | 6919896                 | C/T  | Gene_Ca_03548      | NON_SYNONYMOUS_CODING         | Transcription factor ,SBP-box                                     |
| Kabuli_wild_6969799 | 1399936217                          | Ca_kabuli_Chr04 | 6969799                 | T/C  | NA                 | INTERGENIC                    | NA                                                                |
| Kabuli_wild_7142498 | 1399936218                          | Ca_kabuli_Chr04 | 7142498                 | G/A  | Gene_Ca_03523      | DOWNSTREAM                    | Cytochromec-552/DMSOreductase-like,haem-binding domain            |
| Kabuli_wild_7143238 | 1399936219                          | Ca_kabuli_Chr04 | 7143238                 | C/T  | NA                 | INTERGENIC                    | NA                                                                |
| Kabuli_wild_7155826 | 1399936220                          | Ca_kabuli_Chr04 | 7155826                 | G/A  | Gene_Ca_03519      | UPSTREAM                      | Pectinesterase inhibitor                                          |
| Kabuli_wild_7205223 | 1399936221                          | Ca_kabuli_Chr04 | 7205223                 | T/G  | NA                 | INTERGENIC                    | NA                                                                |
| Kabuli_wild_7268040 | 1399936222                          | Ca_kabuli_Chr04 | 7268040                 | T/A  | Gene_Ca_03508      | INTRON                        | Zinc finger,RING-CH-type                                          |
| Kabuli_wild_7301617 | 1399936223                          | Ca_kabuli_Chr04 | 7301617                 | C/T  | NA                 | INTERGENIC                    | NA                                                                |
| Kabuli_wild_7335587 | 1399936224                          | Ca_kabuli_Chr04 | 7335587                 | C/T  | Gene_Ca_03503      | NON_SYNONYMOUS_CODING         | BRCT                                                              |
| Kabuli_wild_7335668 | 1399936225                          | Ca_kabuli_Chr04 | 7335668                 | T/C  | Gene_Ca_03503      | NON_SYNONYMOUS_CODING         | BRCT                                                              |
| Kabuli_wild_7349948 | 1399936226                          | Ca_kabuli_Chr04 | 7349948                 | T/C  | Gene_Ca_03501      | SYNONYMOUS_CODING             | Lipase,class3                                                     |
| Kabuli_wild_7349958 | 1399936227                          | Ca_kabuli_Chr04 | 7349958                 | T/C  | Gene_Ca_03501      | NON_SYNONYMOUS_CODING         | Lipase,class3                                                     |
| Kabuli_wild_7350192 | 1399936228                          | Ca_kabuli_Chr04 | 7350192                 | G/T  | Gene_Ca_03501      | NON_SYNONYMOUS_CODING         | Lipase,class3                                                     |
| Kabuli_wild_7371708 | 1399936229                          | Ca_kabuli_Chr04 | 7371708                 | T/C  | Gene_Ca_03500      | DOWNSTREAM                    | Transcription initiation factor IID,18 kDa subunit                |
| Kabuli_wild_7746286 | 1399936230                          | Ca_kabuli_Chr04 | 7746286                 | C/T  | NA                 | INTERGENIC                    | NA                                                                |
| Kabuli_wild_7819865 | 1399936231                          | Ca_kabuli_Chr04 | 7819865                 | T/C  | Gene_Ca_03457      | INTRON                        | Glycosidehydrolase,family1                                        |
| Kabuli_wild_7868480 | 1399936232                          | Ca_kabuli_Chr04 | 7868480                 | A/T  | NA                 | INTERGENIC                    | NA                                                                |
| Kabuli_wild_7892628 | 1399936233                          | Ca_kabuli_Chr04 | 7892628                 | T/C  | Gene_Ca_03447      | INTRON                        | ATPase,AAA+type,core                                              |
| Kabuli_wild_8050770 | 1399936234                          | Ca_kabuli_Chr04 | 8050770                 | T/C  | Gene_Ca_03429      | NON_SYNONYMOUS_CODING         | Tubby,C-terminal                                                  |
| Kabuli_wild_8051306 | 1399936235                          | Ca_kabuli_Chr04 | 8051306                 | T/C  | Gene_Ca_03429      | INTRON                        | Tubby,C-terminal                                                  |
| Kabuli_wild_8067599 | 1399936236                          | Ca_kabuli_Chr04 | 8067599                 | C/G  | Gene_Ca_03426      | DOWNSTREAM                    | PeptidaseS1/S6,chymotrypsin/Hap                                   |
| Kabuli_wild_8131433 | 1399936237                          | Ca_kabuli_Chr04 | 8131433                 | T/G  | Gene_Ca_03419      | INTRON                        | Metallo-dependentphosphatase                                      |
| Kabuli_wild_8186660 | 1399936238                          | Ca_kabuli_Chr04 | 8186660                 | A/C  | Gene_Ca_08308      | NON_SYNONYMOUS_CODING         | Signal transduction histidine kinase,phosphotransfer (Hpt) domain |
| Kabuli_wild_8198702 | 1399936239                          | Ca_kabuli_Chr04 | 8198702                 | T/G  | Gene_Ca_08309      | NON_SYNONYMOUS_CODING         | WD40 repeat                                                       |
| Kabuli_wild_8269099 | 1399936240                          | Ca_kabuli_Chr04 | 8269099                 | T/G  | Gene_Ca_08315      | INTRON                        | Protein of unknown function DUF3595                               |
| Kabuli_wild_8269347 | 1399936241                          | Ca_kabuli_Chr04 | 8269347                 | C/G  | Gene_Ca_08315      | INTRON                        | Protein of unknown function DUF3595                               |
| Kabuli_wild_8369437 | 1399936242                          | Ca_kabuli_Chr04 | 8369437                 | C/A  | Gene_Ca_08325      | STOP_GAINED                   | NA                                                                |
| Kabuli_wild_8383890 | 1399936243                          | Ca_kabuli_Chr04 | 8383890                 | G/A  | Gene_Ca_08327      | INTRON                        | BSD                                                               |
| Kabuli_wild_8396837 | 1399936244                          | Ca_kabuli_Chr04 | 8396837                 | T/G  | Gene_Ca_08328      | DOWNSTREAM                    | Pentatric peptide repeat                                          |
| Kabuli_wild_8396861 | 1399936245                          | Ca_kabuli_Chr04 | 8396861                 | T/A  | Gene_Ca_08328      | DOWNSTREAM                    | Pentatric peptide repeat                                          |
| Kabuli_wild_8401109 | 1399936246                          | Ca_kabuli_Chr04 | 8401109                 | A/G  | Gene_Ca_08329      | INTRON                        | Chaperonin Cpn60                                                  |
| Kabuli_wild_8401126 | 1399936247                          | Ca_kabuli_Chr04 | 8401126                 | G/T  | Gene_Ca_08329      | INTRON                        | Chaperonin Cpn60                                                  |

| SNP IDs             | NCBI dbSNP accession IDs (NCBI_SS#) | Chromosomes     | Physical positions (bp) | SNPs | Gene accession IDs | Sequence components of genome | Putative functions                      |
|---------------------|-------------------------------------|-----------------|-------------------------|------|--------------------|-------------------------------|-----------------------------------------|
| Kabuli_wild_8401143 | 1399936248                          | Ca_kabuli_Chr04 | 8401143                 | A/T  | Gene_Ca_08329      | SYNONYMOUS_CODING             | Chaperonin Cpn60                        |
| Kabuli_wild_8401230 | 1399936249                          | Ca_kabuli_Chr04 | 8401230                 | A/G  | Gene_Ca_08329      | UPSTREAM                      | Chaperonin Cpn60                        |
| Kabuli_wild_8401248 | 1399936250                          | Ca_kabuli_Chr04 | 8401248                 | T/A  | Gene_Ca_08329      | UPSTREAM                      | Chaperonin Cpn60                        |
| Kabuli_wild_8404165 | 1399936251                          | Ca_kabuli_Chr04 | 8404165                 | C/A  | NA                 | INTERGENIC                    | NA                                      |
| Kabuli_wild_8471029 | 1399936252                          | Ca_kabuli_Chr04 | 8471029                 | G/A  | NA                 | INTERGENIC                    | NA                                      |
| Kabuli_wild_8473120 | 1399936253                          | Ca_kabuli_Chr04 | 8473120                 | G/A  | Gene_Ca_08339      | INTRON                        | Phospho fructokinase domain             |
| Kabuli_wild_8473127 | 1399936254                          | Ca_kabuli_Chr04 | 8473127                 | G/A  | Gene_Ca_08339      | INTRON                        | Phospho fructokinase domain             |
| Kabuli_wild_8473246 | 1399936255                          | Ca_kabuli_Chr04 | 8473246                 | T/C  | Gene_Ca_08339      | INTRON                        | Phospho fructokinase domain             |
| Kabuli_wild_8473288 | 1399936256                          | Ca_kabuli_Chr04 | 8473288                 | A/G  | Gene_Ca_08339      | INTRON                        | Phospho fructokinase domain             |
| Kabuli_wild_8473294 | 1399936257                          | Ca_kabuli_Chr04 | 8473294                 | G/A  | Gene_Ca_08339      | INTRON                        | Phospho fructokinase domain             |
| Kabuli_wild_8474316 | 1399936258                          | Ca_kabuli_Chr04 | 8474316                 | T/C  | Gene_Ca_08339      | INTRON                        | Phospho fructokinase domain             |
| Kabuli_wild_8475634 | 1399936259                          | Ca_kabuli_Chr04 | 8475634                 | A/C  | Gene_Ca_08339      | SYNONYMOUS_CODING             | Phospho fructokinase domain             |
| Kabuli_wild_8483482 | 1399936260                          | Ca_kabuli_Chr04 | 8483482                 | T/C  | Gene_Ca_08340      | SYNONYMOUS_CODING             | WD40 repeat                             |
| Kabuli_wild_8483494 | 1399936261                          | Ca_kabuli_Chr04 | 8483494                 | T/C  | Gene_Ca_08340      | SYNONYMOUS_CODING             | WD40 repeat                             |
| Kabuli_wild_8485918 | 1399936262                          | Ca_kabuli_Chr04 | 8485918                 | A/G  | Gene_Ca_08340      | NON_SYNONYMOUS_CODING         | WD40 repeat                             |
| Kabuli_wild_8496641 | 1399936263                          | Ca_kabuli_Chr04 | 8496641                 | C/A  | Gene_Ca_08341      | SYNONYMOUS_CODING             | WD40 repeat                             |
| Kabuli_wild_8496853 | 1399936264                          | Ca_kabuli_Chr04 | 8496853                 | A/G  | Gene_Ca_08341      | SYNONYMOUS_CODING             | WD40 repeat                             |
| Kabuli_wild_8496910 | 1399936265                          | Ca_kabuli_Chr04 | 8496910                 | A/G  | Gene_Ca_08341      | SYNONYMOUS_CODING             | WD40 repeat                             |
| Kabuli_wild_8510011 | 1399936266                          | Ca_kabuli_Chr04 | 8510011                 | A/C  | Gene_Ca_08343      | SYNONYMOUS_CODING             | NA                                      |
| Kabuli_wild_8512095 | 1399936267                          | Ca_kabuli_Chr04 | 8512095                 | G/A  | Gene_Ca_08343      | SYNONYMOUS_CODING             | NA                                      |
| Kabuli_wild_8512441 | 1399936268                          | Ca_kabuli_Chr04 | 8512441                 | T/C  | Gene_Ca_08343      | SYNONYMOUS_CODING             | NA                                      |
| Kabuli_wild_8518979 | 1399936269                          | Ca_kabuli_Chr04 | 8518979                 | G/A  | NA                 | INTERGENIC                    | NA                                      |
| Kabuli_wild_8570712 | 1399936270                          | Ca_kabuli_Chr04 | 8570712                 | T/G  | NA                 | INTERGENIC                    | NA                                      |
| Kabuli_wild_8570714 | 1399936271                          | Ca_kabuli_Chr04 | 8570714                 | T/G  | NA                 | INTERGENIC                    | NA                                      |
| Kabuli_wild_8570718 | 1399936272                          | Ca_kabuli_Chr04 | 8570718                 | G/T  | NA                 | INTERGENIC                    | NA                                      |
| Kabuli_wild_8601364 | 1399936273                          | Ca_kabuli_Chr04 | 8601364                 | T/G  | Gene_Ca_08354      | INTRON                        | Exo70 exocystcomplex subunit            |
| Kabuli_wild_8627547 | 1399936274                          | Ca_kabuli_Chr04 | 8627547                 | G/A  | Gene_Ca_08356      | SYNONYMOUS_CODING             | Shugoshin,C-terminal                    |
| Kabuli_wild_8656398 | 1399936275                          | Ca_kabuli_Chr04 | 8656398                 | G/A  | Gene_Ca_08360      | UPSTREAM                      | Disease resistance protein              |
| Kabuli_wild_8656635 | 1399936276                          | Ca_kabuli_Chr04 | 8656635                 | C/T  | Gene_Ca_08360      | UPSTREAM                      | Disease resistance protein              |
| Kabuli_wild_8659774 | 1399936277                          | Ca_kabuli_Chr04 | 8659774                 | A/G  | NA                 | INTERGENIC                    | NA                                      |
| Kabuli_wild_8660115 | 1399936278                          | Ca_kabuli_Chr04 | 8660115                 | A/T  | NA                 | INTERGENIC                    | NA                                      |
| Kabuli_wild_8668648 | 1399936279                          | Ca_kabuli_Chr04 | 8668648                 | G/A  | NA                 | INTERGENIC                    | NA                                      |
| Kabuli_wild_8668753 | 1399936280                          | Ca_kabuli_Chr04 | 8668753                 | A/G  | NA                 | INTERGENIC                    | NA                                      |
| Kabuli_wild_8668945 | 1399936281                          | Ca_kabuli_Chr04 | 8668945                 | T/C  | NA                 | INTERGENIC                    | NA                                      |
| Kabuli_wild_8669505 | 1399936282                          | Ca_kabuli_Chr04 | 8669505                 | G/T  | NA                 | INTERGENIC                    | NA                                      |
| Kabuli_wild_8669513 | 1399936283                          | Ca_kabuli_Chr04 | 8669513                 | G/A  | NA                 | INTERGENIC                    | NA                                      |
| Kabuli_wild_8669515 | 1399936284                          | Ca_kabuli_Chr04 | 8669515                 | C/T  | NA                 | INTERGENIC                    | NA                                      |
| Kabuli_wild_8681949 | 1399936285                          | Ca_kabuli_Chr04 | 8681949                 | G/A  | NA                 | INTERGENIC                    | NA                                      |
| Kabuli_wild_8682003 | 1399936286                          | Ca_kabuli_Chr04 | 8682003                 | A/G  | NA                 | INTERGENIC                    | NA                                      |
| Kabuli_wild_8682176 | 1399936287                          | Ca_kabuli_Chr04 | 8682176                 | C/A  | NA                 | INTERGENIC                    | NA                                      |
| Kabuli_wild_8682191 | 1399936288                          | Ca_kabuli_Chr04 | 8682191                 | C/T  | NA                 | INTERGENIC                    | NA                                      |
| Kabuli_wild_8686156 | 1399936289                          | Ca_kabuli_Chr04 | 8686156                 | C/A  | NA                 | INTERGENIC                    | NA                                      |
| Kabuli_wild_8686216 | 1399936290                          | Ca_kabuli_Chr04 | 8686216                 | T/A  | NA                 | INTERGENIC                    | NA                                      |
| Kabuli_wild_8695562 | 1399936291                          | Ca_kabuli_Chr04 | 8695562                 | C/T  | Gene_Ca_08365      | INTRON                        | Glycosidehydrolase, family13,N-terminal |

| SNP IDs             | NCBI dbSNP accession IDs (NCBI_SS#) | Chromosomes     | Physical positions (bp) | SNPs | Gene accession IDs | Sequence components of genome | Putative functions               |
|---------------------|-------------------------------------|-----------------|-------------------------|------|--------------------|-------------------------------|----------------------------------|
| Kabuli_wild_8721421 | 1399936292                          | Ca_kabuli_Chr04 | 8721421                 | C/A  | Gene_Ca_08368      | UPSTREAM                      | Multicopperoxidase,type1         |
| Kabuli_wild_8751588 | 1399936293                          | Ca_kabuli_Chr04 | 8751588                 | A/C  | NA                 | INTERGENIC                    | NA                               |
| Kabuli_wild_8751591 | 1399936294                          | Ca_kabuli_Chr04 | 8751591                 | A/C  | NA                 | INTERGENIC                    | NA                               |
| Kabuli_wild_8751618 | 1399936295                          | Ca_kabuli_Chr04 | 8751618                 | A/C  | Gene_Ca_08371      | NON_SYNONYMOUS_CODING         | No apical meristem (NAM) protein |
| Kabuli_wild_8751629 | 1399936296                          | Ca_kabuli_Chr04 | 8751629                 | T/C  | Gene_Ca_08371      | SYNONYMOUS_CODING             | No apical meristem (NAM) protein |
| Kabuli_wild_8751638 | 1399936297                          | Ca_kabuli_Chr04 | 8751638                 | A/C  | Gene_Ca_08371      | SYNONYMOUS_CODING             | No apical meristem (NAM) protein |
| Kabuli_wild_8782879 | 1399936298                          | Ca_kabuli_Chr04 | 8782879                 | G/C  | NA                 | INTERGENIC                    | NA                               |
| Kabuli_wild_8791654 | 1399936299                          | Ca_kabuli_Chr04 | 8791654                 | A/G  | Gene_Ca_08375      | SYNONYMOUS_CODING             | Kelchrepeat type2                |
| Kabuli_wild_8805504 | 1399936300                          | Ca_kabuli_Chr04 | 8805504                 | A/G  | NA                 | INTERGENIC                    | NA                               |
| Kabuli_wild_8805578 | 1399936301                          | Ca_kabuli_Chr04 | 8805578                 | A/C  | NA                 | INTERGENIC                    | NA                               |
| Kabuli_wild_8805667 | 1399936302                          | Ca_kabuli_Chr04 | 8805667                 | C/T  | NA                 | INTERGENIC                    | NA                               |
| Kabuli_wild_8805803 | 1399936303                          | Ca_kabuli_Chr04 | 8805803                 | G/A  | NA                 | INTERGENIC                    | NA                               |
| Kabuli_wild_8805839 | 1399936304                          | Ca_kabuli_Chr04 | 8805839                 | G/A  | NA                 | INTERGENIC                    | NA                               |
| Kabuli_wild_8805867 | 1399936305                          | Ca_kabuli_Chr04 | 8805867                 | A/C  | NA                 | INTERGENIC                    | NA                               |
| Kabuli_wild_8809032 | 1399936306                          | Ca_kabuli_Chr04 | 8809032                 | C/T  | Gene_Ca_08378      | INTRON                        | K Homology                       |
| Kabuli_wild_8809064 | 1399936307                          | Ca_kabuli_Chr04 | 8809064                 | T/C  | Gene_Ca_08378      | SYNONYMOUS_CODING             | K Homology                       |
| Kabuli_wild_8809456 | 1399936308                          | Ca_kabuli_Chr04 | 8809456                 | A/C  | Gene_Ca_08378      | UPSTREAM                      | K Homology                       |
| Kabuli_wild_8844846 | 1399936309                          | Ca_kabuli_Chr04 | 8844846                 | A/G  | Gene_Ca_08381      | SYNONYMOUS_CODING             | Zinc finger, RING-type           |
| Kabuli_wild_8848648 | 1399936310                          | Ca_kabuli_Chr04 | 8848648                 | C/A  | Gene_Ca_08381      | SYNONYMOUS_CODING             | Zinc finger, RING-type           |
| Kabuli_wild_8848652 | 1399936311                          | Ca_kabuli_Chr04 | 8848652                 | G/C  | Gene_Ca_08381      | NON_SYNONYMOUS_CODING         | Zinc finger, RING-type           |
| Kabuli_wild_8848653 | 1399936312                          | Ca_kabuli_Chr04 | 8848653                 | T/C  | Gene_Ca_08381      | NON_SYNONYMOUS_CODING         | Zinc finger, RING-type           |
| Kabuli_wild_8848654 | 1399936313                          | Ca_kabuli_Chr04 | 8848654                 | C/T  | Gene_Ca_08381      | SYNONYMOUS_CODING             | Zinc finger, RING-type           |
| Kabuli_wild_8852420 | 1399936314                          | Ca_kabuli_Chr04 | 8852420                 | C/T  | Gene_Ca_08382      | NON_SYNONYMOUS_CODING         | NA                               |
| Kabuli_wild_8865427 | 1399936315                          | Ca_kabuli_Chr04 | 8865427                 | A/G  | Gene_Ca_08384      | DOWNSTREAM                    | PeptidaseM22.glycoprotease       |
| Kabuli_wild_8919395 | 1399936316                          | Ca_kabuli_Chr04 | 8919395                 | A/G  | NA                 | INTERGENIC                    | NA                               |
| Kabuli_wild_8926380 | 1399936317                          | Ca_kabuli_Chr04 | 8926380                 | A/G  | Gene_Ca_08389      | NON_SYNONYMOUS_CODING         | Glycosyltransferase,group1       |
| Kabuli_wild_8985998 | 1399936318                          | Ca_kabuli_Chr04 | 8985998                 | T/A  | NA                 | INTERGENIC                    | NA                               |
| Kabuli_wild_8986002 | 1399936319                          | Ca_kabuli_Chr04 | 8986002                 | T/A  | NA                 | INTERGENIC                    | NA                               |
| Kabuli_wild_8986008 | 1399936320                          | Ca_kabuli_Chr04 | 8986008                 | T/A  | NA                 | INTERGENIC                    | NA                               |
| Kabuli_wild_8986018 | 1399936321                          | Ca_kabuli_Chr04 | 8986018                 | G/A  | NA                 | INTERGENIC                    | NA                               |
| Kabuli_wild_8986024 | 1399936322                          | Ca_kabuli_Chr04 | 8986024                 | T/A  | NA                 | INTERGENIC                    | NA                               |
| Kabuli_wild_8986026 | 1399936323                          | Ca_kabuli_Chr04 | 8986026                 | T/A  | NA                 | INTERGENIC                    | NA                               |
| Kabuli_wild_8986031 | 1399936324                          | Ca_kabuli_Chr04 | 8986031                 | T/A  | NA                 | INTERGENIC                    | NA                               |
| Kabuli_wild_9075395 | 1399936325                          | Ca_kabuli_Chr04 | 9075395                 | A/G  | NA                 | INTERGENIC                    | NA                               |
| Kabuli_wild_9075398 | 1399936326                          | Ca_kabuli_Chr04 | 9075398                 | G/A  | NA                 | INTERGENIC                    | NA                               |
| Kabuli_wild_9075459 | 1399936327                          | Ca_kabuli_Chr04 | 9075459                 | C/T  | NA                 | INTERGENIC                    | NA                               |
| Kabuli_wild_9075520 | 1399936328                          | Ca_kabuli_Chr04 | 9075520                 | C/T  | NA                 | INTERGENIC                    | NA                               |
| Kabuli_wild_9075543 | 1399936329                          | Ca_kabuli_Chr04 | 9075543                 | T/C  | NA                 | INTERGENIC                    | NA                               |
| Kabuli_wild_9075565 | 1399936330                          | Ca_kabuli_Chr04 | 9075565                 | A/G  | NA                 | INTERGENIC                    | NA                               |
| Kabuli_wild_9075671 | 1399936331                          | Ca_kabuli_Chr04 | 9075671                 | A/G  | NA                 | INTERGENIC                    | NA                               |
| Kabuli_wild_9075677 | 1399936332                          | Ca_kabuli_Chr04 | 9075677                 | T/C  | NA                 | INTERGENIC                    | NA                               |
| Kabuli_wild_9075682 | 1399936333                          | Ca_kabuli_Chr04 | 9075682                 | G/A  | NA                 | INTERGENIC                    | NA                               |
| Kabuli_wild_9075737 | 1399936334                          | Ca_kabuli_Chr04 | 9075737                 | G/A  | NA                 | INTERGENIC                    | NA                               |
| Kabuli_wild_9075744 | 1399936335                          | Ca_kabuli_Chr04 | 9075744                 | T/G  | NA                 | INTERGENIC                    | NA                               |

| SNP IDs              | NCBI dbSNP accession IDs (NCBI_SS#) | Chromosomes     | Physical positions (bp) | SNPs | Gene accession IDs | Sequence components of genome | Putative functions                                           |
|----------------------|-------------------------------------|-----------------|-------------------------|------|--------------------|-------------------------------|--------------------------------------------------------------|
| Kabuli_wild_9075746  | 1399936336                          | Ca_kabuli_Chr04 | 9075746                 | T/G  | NA                 | INTERGENIC                    | NA                                                           |
| Kabuli_wild_9187887  | 1399936337                          | Ca_kabuli_Chr04 | 9187887                 | G/C  | Gene_Ca_08410      | NON_SYNONYMOUS_CODING         | Vps51/Vps67                                                  |
| Kabuli_wild_9187973  | 1399936338                          | Ca_kabuli_Chr04 | 9187973                 | T/G  | Gene_Ca_08410      | SYNONYMOUS_CODING             | Vps51/Vps68                                                  |
| Kabuli_wild_9189976  | 1399936339                          | Ca_kabuli_Chr04 | 9189976                 | T/A  | Gene_Ca_08410      | NON_SYNONYMOUS_CODING         | Vps51/Vps69                                                  |
| Kabuli_wild_9257171  | 1399936340                          | Ca_kabuli_Chr04 | 9257171                 | G/A  | NA                 | INTERGENIC                    | NA                                                           |
| Kabuli_wild_9331949  | 1399936341                          | Ca_kabuli_Chr04 | 9331949                 | C/T  | NA                 | INTERGENIC                    | NA                                                           |
| Kabuli_wild_9421565  | 1399936342                          | Ca_kabuli_Chr04 | 9421565                 | T/C  | Gene_Ca_08432      | NON_SYNONYMOUS_CODING         | PeptidaseM18                                                 |
| Kabuli_wild_9450986  | 1399936343                          | Ca_kabuli_Chr04 | 9450986                 | T/C  | Gene_Ca_08434      | NON_SYNONYMOUS_CODING         | Myb,DNA-binding                                              |
| Kabuli_wild_9451850  | 1399936344                          | Ca_kabuli_Chr04 | 9451850                 | T/G  | NA                 | INTERGENIC                    | NA                                                           |
| Kabuli_wild_9451895  | 1399936345                          | Ca_kabuli_Chr04 | 9451895                 | T/A  | NA                 | INTERGENIC                    | NA                                                           |
| Kabuli_wild_9470957  | 1399936346                          | Ca_kabuli_Chr04 | 9470957                 | C/G  | Gene_Ca_08436      | NON_SYNONYMOUS_CODING         | Pathogenesis-related transcriptional factor/ERF, DNA-binding |
| Kabuli_wild_9491723  | 1399936347                          | Ca_kabuli_Chr04 | 9491723                 | A/T  | Gene_Ca_08437      | INTRON                        | Malectin                                                     |
| Kabuli_wild_9571887  | 1399936348                          | Ca_kabuli_Chr04 | 9571887                 | T/C  | NA                 | INTERGENIC                    | NA                                                           |
| Kabuli_wild_9579517  | 1399936349                          | Ca_kabuli_Chr04 | 9579517                 | T/C  | NA                 | INTERGENIC                    | NA                                                           |
| Kabuli_wild_9579519  | 1399936350                          | Ca_kabuli_Chr04 | 9579519                 | A/T  | NA                 | INTERGENIC                    | NA                                                           |
| Kabuli_wild_9614905  | 1399936351                          | Ca_kabuli_Chr04 | 9614905                 | C/A  | Gene_Ca_08443      | NON_SYNONYMOUS_CODING         | NA                                                           |
| Kabuli_wild_9706453  | 1399936352                          | Ca_kabuli_Chr04 | 9706453                 | T/G  | NA                 | INTERGENIC                    | NA                                                           |
| Kabuli_wild_9803227  | 1399936353                          | Ca_kabuli_Chr04 | 9803227                 | C/T  | Gene_Ca_08457      | DOWNSTREAM                    | Peptidase,cysteine peptidase active site                     |
| Kabuli_wild_9803230  | 1399936354                          | Ca_kabuli_Chr04 | 9803230                 | C/T  | Gene_Ca_08457      | DOWNSTREAM                    | Peptidase,cysteine peptidase active site                     |
| Kabuli_wild_9803233  | 1399936355                          | Ca_kabuli_Chr04 | 9803233                 | C/T  | Gene_Ca_08457      | DOWNSTREAM                    | Peptidase,cysteine peptidase active site                     |
| Kabuli_wild_9803236  | 1399936356                          | Ca_kabuli_Chr04 | 9803236                 | C/T  | Gene_Ca_08457      | DOWNSTREAM                    | Peptidase,cysteine peptidase active site                     |
| Kabuli_wild_9803244  | 1399936357                          | Ca_kabuli_Chr04 | 9803244                 | C/T  | Gene_Ca_08457      | DOWNSTREAM                    | Peptidase,cysteine peptidase active site                     |
| Kabuli_wild_9824234  | 1399936358                          | Ca_kabuli_Chr04 | 9824234                 | C/T  | NA                 | INTERGENIC                    | NA                                                           |
| Kabuli_wild_9824281  | 1399936359                          | Ca_kabuli_Chr04 | 9824281                 | A/G  | NA                 | INTERGENIC                    | NA                                                           |
| Kabuli_wild_9836559  | 1399936360                          | Ca_kabuli_Chr04 | 9836559                 | G/T  | Gene_Ca_08462      | INTRON                        | VHS                                                          |
| Kabuli_wild_10007069 | 1399936361                          | Ca_kabuli_Chr04 | 10007069                | A/G  | NA                 | INTERGENIC                    | NA                                                           |
| Kabuli_wild_10116516 | 1399936362                          | Ca_kabuli_Chr04 | 10116516                | T/G  | Gene_Ca_08486      | SYNONYMOUS_CODING             | Pleckstrinhomologydomain                                     |
| Kabuli_wild_10151943 | 1399936363                          | Ca_kabuli_Chr04 | 10151943                | C/T  | Gene_Ca_08487      | NON_SYNONYMOUS_CODING         | Zinc finger,GATA-type                                        |
| Kabuli_wild_10184427 | 1399936364                          | Ca_kabuli_Chr04 | 10184427                | C/A  | Gene_Ca_08489      | SYNONYMOUS_CODING             | GCN5-related N-acetyltransferase (GNAT) domain               |
| Kabuli_wild_10184428 | 1399936365                          | Ca_kabuli_Chr04 | 10184428                | G/T  | Gene_Ca_08489      | NON_SYNONYMOUS_CODING         | GCN5-related N-acetyltransferase (GNAT) domain               |
| Kabuli_wild_10187627 | 1399936366                          | Ca_kabuli_Chr04 | 10187627                | A/C  | Gene_Ca_08489      | INTRON                        | GCN5-related N-acetyltransferase (GNAT) domain               |
| Kabuli_wild_10294380 | 1399936367                          | Ca_kabuli_Chr04 | 10294380                | A/G  | Gene_Ca_08496      | INTRON                        | Carbamoyl-phosphatesynthase,GATase domain                    |
| Kabuli_wild_10305285 | 1399936368                          | Ca_kabuli_Chr04 | 10305285                | C/A  | Gene_Ca_08496      | INTRON                        | Carbamoyl-phosphatesynthase,GATase domain                    |
| Kabuli_wild_10305286 | 1399936369                          | Ca_kabuli_Chr04 | 10305286                | G/A  | Gene_Ca_08496      | INTRON                        | Carbamoyl-phosphatesynthase,GATase domain                    |
| Kabuli_wild_10411809 | 1399936370                          | Ca_kabuli_Chr04 | 10411809                | G/A  | NA                 | INTERGENIC                    | NA                                                           |
| Kabuli_wild_10418170 | 1399936371                          | Ca_kabuli_Chr04 | 10418170                | T/G  | Gene_Ca_04277      | SYNONYMOUS_CODING             | SANT domain,DNA binding                                      |
| Kabuli_wild_10422142 | 1399936372                          | Ca_kabuli_Chr04 | 10422142                | A/T  | Gene_Ca_04277      | DOWNSTREAM                    | NA                                                           |
| Kabuli_wild_10422469 | 1399936373                          | Ca_kabuli_Chr04 | 10422469                | C/A  | NA                 | INTERGENIC                    | NA                                                           |
| Kabuli_wild_10430574 | 1399936374                          | Ca_kabuli_Chr04 | 10430574                | A/T  | NA                 | INTERGENIC                    | NA                                                           |
| Kabuli_wild_10430588 | 1399936375                          | Ca_kabuli_Chr04 | 10430588                | T/C  | NA                 | INTERGENIC                    | NA                                                           |
| Kabuli_wild_10430595 | 1399936376                          | Ca_kabuli_Chr04 | 10430595                | A/C  | NA                 | INTERGENIC                    | NA                                                           |
| Kabuli_wild_10430603 | 1399936377                          | Ca_kabuli_Chr04 | 10430603                | G/A  | NA                 | INTERGENIC                    | NA                                                           |
| Kabuli_wild_10430613 | 1399936378                          | Ca_kabuli_Chr04 | 10430613                | C/A  | NA                 | INTERGENIC                    | NA                                                           |
| Kabuli_wild_10430617 | 1399936379                          | Ca_kabuli_Chr04 | 10430617                | A/C  | NA                 | INTERGENIC                    | NA                                                           |

| SNP IDs              | NCBI dbSNP accession IDs (NCBI_SS#) | Chromosomes     | Physical positions (bp) | SNPs | Gene accession IDs | Sequence components of genome | Putative functions                   |
|----------------------|-------------------------------------|-----------------|-------------------------|------|--------------------|-------------------------------|--------------------------------------|
| Kabuli_wild_10430622 | 1399936380                          | Ca_kabuli_Chr04 | 10430622                | A/C  | NA                 | INTERGENIC                    | NA                                   |
| Kabuli_wild_10464927 | 1399936381                          | Ca_kabuli_Chr04 | 10464927                | T/G  | NA                 | INTERGENIC                    | NA                                   |
| Kabuli_wild_10465328 | 1399936382                          | Ca_kabuli_Chr04 | 10465328                | T/C  | NA                 | INTERGENIC                    | NA                                   |
| Kabuli_wild_10465981 | 1399936383                          | Ca_kabuli_Chr04 | 10465981                | A/C  | NA                 | INTERGENIC                    | NA                                   |
| Kabuli_wild_10465982 | 1399936384                          | Ca_kabuli_Chr04 | 10465982                | G/T  | NA                 | INTERGENIC                    | NA                                   |
| Kabuli_wild_10465985 | 1399936385                          | Ca_kabuli_Chr04 | 10465985                | C/G  | NA                 | INTERGENIC                    | NA                                   |
| Kabuli_wild_10665122 | 1399936386                          | Ca_kabuli_Chr04 | 10665122                | G/A  | NA                 | INTERGENIC                    | NA                                   |
| Kabuli_wild_10771276 | 1399936387                          | Ca_kabuli_Chr04 | 10771276                | A/T  | Gene_Ca_04314      | INTRON                        | Vps51/Vps67                          |
| Kabuli_wild_10901282 | 1399936388                          | Ca_kabuli_Chr04 | 10901282                | T/C  | NA                 | INTERGENIC                    | NA                                   |
| Kabuli_wild_10911500 | 1399936389                          | Ca_kabuli_Chr04 | 10911500                | T/C  | NA                 | INTERGENIC                    | NA                                   |
| Kabuli_wild_10917717 | 1399936390                          | Ca_kabuli_Chr04 | 10917717                | C/G  | NA                 | INTERGENIC                    | NA                                   |
| Kabuli_wild_10925490 | 1399936391                          | Ca_kabuli_Chr04 | 10925490                | G/A  | Gene_Ca_04326      | SYNONYMOUS_CODING             | Filamin/ABP280repeat-like            |
| Kabuli_wild_10928963 | 1399936392                          | Ca_kabuli_Chr04 | 10928963                | T/C  | Gene_Ca_04326      | INTRON                        | Filamin/ABP280repeat-like            |
| Kabuli_wild_10931884 | 1399936393                          | Ca_kabuli_Chr04 | 10931884                | A/G  | Gene_Ca_04326      | DOWNSTREAM                    | Filamin/ABP280repeat-like            |
| Kabuli_wild_10931908 | 1399936394                          | Ca_kabuli_Chr04 | 10931908                | C/T  | Gene_Ca_04326      | DOWNSTREAM                    | Filamin/ABP280repeat-like            |
| Kabuli_wild_10932217 | 1399936395                          | Ca_kabuli_Chr04 | 10932217                | A/G  | Gene_Ca_04326      | DOWNSTREAM                    | Filamin/ABP280repeat-like            |
| Kabuli_wild_10971039 | 1399936396                          | Ca_kabuli_Chr04 | 10971039                | C/A  | Gene_Ca_04330      | INTRON                        | WD40 repeat                          |
| Kabuli_wild_10989311 | 1399936397                          | Ca_kabuli_Chr04 | 10989311                | C/T  | Gene_Ca_04331      | SYNONYMOUS_CODING             | Protein kinase,catalytic domain      |
| Kabuli_wild_10990000 | 1399936398                          | Ca_kabuli_Chr04 | 10990000                | T/C  | Gene_Ca_04331      | INTRON                        | Protein kinase,catalytic domain      |
| Kabuli_wild_10990049 | 1399936399                          | Ca_kabuli_Chr04 | 10990049                | G/T  | Gene_Ca_04331      | INTRON                        | Protein kinase,catalytic domain      |
| Kabuli_wild_10990058 | 1399936400                          | Ca_kabuli_Chr04 | 10990058                | T/C  | Gene_Ca_04331      | INTRON                        | Protein kinase,catalytic domain      |
| Kabuli_wild_10990265 | 1399936401                          | Ca_kabuli_Chr04 | 10990265                | T/A  | Gene_Ca_04331      | INTRON                        | Protein kinase,catalytic domain      |
| Kabuli_wild_10991842 | 1399936402                          | Ca_kabuli_Chr04 | 10991842                | G/A  | Gene_Ca_04331      | INTRON                        | Protein kinase,catalytic domain      |
| Kabuli_wild_10991910 | 1399936403                          | Ca_kabuli_Chr04 | 10991910                | C/T  | Gene_Ca_04331      | INTRON                        | Protein kinase,catalytic domain      |
| Kabuli_wild_11040108 | 1399936404                          | Ca_kabuli_Chr04 | 11040108                | C/T  | Gene_Ca_04335      | DOWNSTREAM                    | Uncharacterised protein family Ycf19 |
| Kabuli_wild_11051335 | 1399936405                          | Ca_kabuli_Chr04 | 11051335                | C/T  | Gene_Ca_04337      | NON_SYNONYMOUS_CODING         | No apical meristem (NAM) protein     |
| Kabuli_wild_11059403 | 1399936406                          | Ca_kabuli_Chr04 | 11059403                | T/G  | NA                 | INTERGENIC                    | NA                                   |
| Kabuli_wild_11059404 | 1399936407                          | Ca_kabuli_Chr04 | 11059404                | T/G  | NA                 | INTERGENIC                    | NA                                   |
| Kabuli_wild_11059414 | 1399936408                          | Ca_kabuli_Chr04 | 11059414                | T/G  | NA                 | INTERGENIC                    | NA                                   |
| Kabuli_wild_11091683 | 1399936409                          | Ca_kabuli_Chr04 | 11091683                | T/A  | NA                 | INTERGENIC                    | NA                                   |
| Kabuli_wild_11096225 | 1399936410                          | Ca_kabuli_Chr04 | 11096225                | A/G  | Gene_Ca_04343      | DOWNSTREAM                    | Protein of unknown function DUF1475  |
| Kabuli_wild_11096290 | 1399936411                          | Ca_kabuli_Chr04 | 11096290                | G/A  | Gene_Ca_04343      | DOWNSTREAM                    | Protein of unknown function DUF1475  |
| Kabuli_wild_11113277 | 1399936412                          | Ca_kabuli_Chr04 | 11113277                | A/C  | Gene_Ca_04344      | SYNONYMOUS_CODING             | RNA recognition motif domain         |
| Kabuli_wild_11142202 | 1399936413                          | Ca_kabuli_Chr04 | 11142202                | A/G  | NA                 | INTERGENIC                    | NA                                   |
| Kabuli_wild_11142227 | 1399936414                          | Ca_kabuli_Chr04 | 11142227                | C/T  | NA                 | INTERGENIC                    | NA                                   |
| Kabuli_wild_11230397 | 1399936415                          | Ca_kabuli_Chr04 | 11230397                | G/C  | Gene_Ca_04356      | DOWNSTREAM                    | Choline/ethanolaminekinase           |
| Kabuli_wild_11230400 | 1399936416                          | Ca_kabuli_Chr04 | 11230400                | T/A  | Gene_Ca_04356      | DOWNSTREAM                    | Choline/ethanolaminekinase           |
| Kabuli_wild_11230403 | 1399936417                          | Ca_kabuli_Chr04 | 11230403                | G/T  | Gene_Ca_04356      | DOWNSTREAM                    | Choline/ethanolaminekinase           |
| Kabuli_wild_11231127 | 1399936418                          | Ca_kabuli_Chr04 | 11231127                | C/A  | Gene_Ca_04356      | DOWNSTREAM                    | Choline/ethanolaminekinase           |
| Kabuli_wild_11231135 | 1399936419                          | Ca_kabuli_Chr04 | 11231135                | C/T  | Gene_Ca_04356      | DOWNSTREAM                    | Choline/ethanolaminekinase           |
| Kabuli_wild_11231137 | 1399936420                          | Ca_kabuli_Chr04 | 11231137                | A/G  | Gene_Ca_04356      | DOWNSTREAM                    | Choline/ethanolaminekinase           |
| Kabuli_wild_11231142 | 1399936421                          | Ca_kabuli_Chr04 | 11231142                | A/G  | Gene_Ca_04356      | DOWNSTREAM                    | Choline/ethanolaminekinase           |
| Kabuli_wild_11234130 | 1399936422                          | Ca_kabuli_Chr04 | 11234130                | A/G  | NA                 | INTERGENIC                    | NA                                   |
| Kabuli_wild_11234397 | 1399936423                          | Ca_kabuli_Chr04 | 11234397                | G/A  | NA                 | INTERGENIC                    | NA                                   |

| SNP IDs              | NCBI dbSNP accession IDs (NCBI_SS#) | Chromosomes     | Physical positions (bp) | SNPs | Gene accession IDs | Sequence components of genome | Putative functions                         |
|----------------------|-------------------------------------|-----------------|-------------------------|------|--------------------|-------------------------------|--------------------------------------------|
| Kabuli_wild_11234418 | 1399936424                          | Ca_kabuli_Chr04 | 11234418                | A/G  | NA                 | INTERGENIC                    | NA                                         |
| Kabuli_wild_11244334 | 1399936425                          | Ca_kabuli_Chr04 | 11244334                | T/G  | NA                 | INTERGENIC                    | NA                                         |
| Kabuli_wild_11244395 | 1399936426                          | Ca_kabuli_Chr04 | 11244395                | G/T  | NA                 | INTERGENIC                    | NA                                         |
| Kabuli_wild_11246093 | 1399936427                          | Ca_kabuli_Chr04 | 11246093                | G/A  | NA                 | INTERGENIC                    | NA                                         |
| Kabuli_wild_11246164 | 1399936428                          | Ca_kabuli_Chr04 | 11246164                | G/A  | NA                 | INTERGENIC                    | NA                                         |
| Kabuli_wild_11246173 | 1399936429                          | Ca_kabuli_Chr04 | 11246173                | C/T  | NA                 | INTERGENIC                    | NA                                         |
| Kabuli_wild_11248605 | 1399936430                          | Ca_kabuli_Chr04 | 11248605                | A/T  | NA                 | INTERGENIC                    | NA                                         |
| Kabuli_wild_11273328 | 1399936431                          | Ca_kabuli_Chr04 | 11273328                | C/T  | Gene_Ca_04359      | INTRON                        | NA                                         |
| Kabuli_wild_11273405 | 1399936432                          | Ca_kabuli_Chr04 | 11273405                | A/T  | Gene_Ca_04359      | INTRON                        | NA                                         |
| Kabuli_wild_11274281 | 1399936433                          | Ca_kabuli_Chr04 | 11274281                | T/C  | Gene_Ca_04359      | SYNONYMOUS_CODING             | NA                                         |
| Kabuli_wild_11275171 | 1399936434                          | Ca_kabuli_Chr04 | 11275171                | T/C  | Gene_Ca_04359      | SYNONYMOUS_CODING             | NA                                         |
| Kabuli_wild_11276225 | 1399936435                          | Ca_kabuli_Chr04 | 11276225                | C/T  | Gene_Ca_04359      | SYNONYMOUS_CODING             | NA                                         |
| Kabuli_wild_11276413 | 1399936436                          | Ca_kabuli_Chr04 | 11276413                | G/C  | Gene_Ca_04359      | INTRON                        | NA                                         |
| Kabuli_wild_11276484 | 1399936437                          | Ca_kabuli_Chr04 | 11276484                | T/C  | Gene_Ca_04359      | SYNONYMOUS_CODING             | NA                                         |
| Kabuli_wild_11277138 | 1399936438                          | Ca_kabuli_Chr04 | 11277138                | A/G  | Gene_Ca_04359      | SYNONYMOUS_CODING             | NA                                         |
| Kabuli_wild_11277181 | 1399936439                          | Ca_kabuli_Chr04 | 11277181                | G/T  | Gene_Ca_04359      | NON_SYNONYMOUS_CODING         | NA                                         |
| Kabuli_wild_11277297 | 1399936440                          | Ca_kabuli_Chr04 | 11277297                | G/A  | Gene_Ca_04359      | SYNONYMOUS_CODING             | NA                                         |
| Kabuli_wild_11277574 | 1399936441                          | Ca_kabuli_Chr04 | 11277574                | G/C  | Gene_Ca_04359      | NON_SYNONYMOUS_CODING         | NA                                         |
| Kabuli_wild_11305745 | 1399936442                          | Ca_kabuli_Chr04 | 11305745                | G/T  | Gene_Ca_04362      | DOWNSTREAM                    | NA                                         |
| Kabuli_wild_11328191 | 1399936443                          | Ca_kabuli_Chr04 | 11328191                | T/C  | Gene_Ca_04366      | DOWNSTREAM                    | Protein kinase,catalytic domain            |
| Kabuli_wild_11328194 | 1399936444                          | Ca_kabuli_Chr04 | 11328194                | A/C  | Gene_Ca_04366      | DOWNSTREAM                    | Protein kinase,catalytic domain            |
| Kabuli_wild_11328227 | 1399936445                          | Ca_kabuli_Chr04 | 11328227                | T/G  | Gene_Ca_04366      | DOWNSTREAM                    | Protein kinase,catalytic domain            |
| Kabuli_wild_11334343 | 1399936446                          | Ca_kabuli_Chr04 | 11334343                | A/T  | NA                 | INTERGENIC                    | NA                                         |
| Kabuli_wild_11334350 | 1399936447                          | Ca_kabuli_Chr04 | 11334350                | A/G  | NA                 | INTERGENIC                    | NA                                         |
| Kabuli_wild_11343230 | 1399936448                          | Ca_kabuli_Chr04 | 11343230                | G/C  | Gene_Ca_04368      | INTRON                        | Zinc finger,DHHC-type,palmitoyltransferase |
| Kabuli_wild_11343257 | 1399936449                          | Ca_kabuli_Chr04 | 11343257                | T/C  | Gene_Ca_04368      | INTRON                        | Zinc finger,DHHC-type,palmitoyltransferase |
| Kabuli_wild_11379077 | 1399936450                          | Ca_kabuli_Chr04 | 11379077                | T/C  | NA                 | INTERGENIC                    | NA                                         |
| Kabuli_wild_11398682 | 1399936451                          | Ca_kabuli_Chr04 | 11398682                | G/A  | Gene_Ca_04373      | UPSTREAM                      | RibosomalproteinL3                         |
| Kabuli_wild_11398699 | 1399936452                          | Ca_kabuli_Chr04 | 11398699                | A/G  | Gene_Ca_04373      | UPSTREAM                      | RibosomalproteinL4                         |
| Kabuli_wild_11398889 | 1399936453                          | Ca_kabuli_Chr04 | 11398889                | A/G  | Gene_Ca_04373      | UPSTREAM                      | RibosomalproteinL5                         |
| Kabuli_wild_11435380 | 1399936454                          | Ca_kabuli_Chr04 | 11435380                | C/T  | Gene_Ca_04379      | UPSTREAM                      | Thioredoxin                                |
| Kabuli_wild_11435651 | 1399936455                          | Ca_kabuli_Chr04 | 11435651                | A/G  | Gene_Ca_04379      | UPSTREAM                      | Thioredoxin                                |
| Kabuli_wild_11441604 | 1399936456                          | Ca_kabuli_Chr04 | 11441604                | T/A  | NA                 | INTERGENIC                    | NA                                         |
| Kabuli_wild_11441673 | 1399936457                          | Ca_kabuli_Chr04 | 11441673                | G/A  | NA                 | INTERGENIC                    | NA                                         |
| Kabuli_wild_11441735 | 1399936458                          | Ca_kabuli_Chr04 | 11441735                | G/T  | NA                 | INTERGENIC                    | NA                                         |
| Kabuli_wild_11442061 | 1399936459                          | Ca_kabuli_Chr04 | 11442061                | C/T  | NA                 | INTERGENIC                    | NA                                         |
| Kabuli_wild_11465057 | 1399936460                          | Ca_kabuli_Chr04 | 11465057                | C/G  | NA                 | INTERGENIC                    | NA                                         |
| Kabuli_wild_11465075 | 1399936461                          | Ca_kabuli_Chr04 | 11465075                | T/C  | NA                 | INTERGENIC                    | NA                                         |
| Kabuli_wild_11465113 | 1399936462                          | Ca_kabuli_Chr04 | 11465113                | C/T  | NA                 | INTERGENIC                    | NA                                         |
| Kabuli_wild_11490100 | 1399936463                          | Ca_kabuli_Chr04 | 11490100                | C/T  | Gene_Ca_04384      | SYNONYMOUS_CODING             | Tubby,C-terminal                           |
| Kabuli_wild_11490125 | 1399936464                          | Ca_kabuli_Chr04 | 11490125                | G/T  | Gene_Ca_04384      | SYNONYMOUS_CODING             | Tubby,C-terminal                           |
| Kabuli_wild_11490154 | 1399936465                          | Ca_kabuli_Chr04 | 11490154                | A/T  | Gene_Ca_04384      | SYNONYMOUS_CODING             | Tubby,C-terminal                           |
| Kabuli_wild_11490496 | 1399936466                          | Ca_kabuli_Chr04 | 11490496                | G/A  | Gene_Ca_04384      | SYNONYMOUS_CODING             | Tubby,C-terminal                           |
| Kabuli_wild_11491864 | 1399936467                          | Ca_kabuli_Chr04 | 11491864                | A/C  | Gene_Ca_04384      | UPSTREAM                      | Tubby,C-terminal                           |

| SNP IDs              | NCBI dbSNP accession IDs (NCBI_SS#) | Chromosomes     | Physical positions (bp) | SNPs | Gene accession IDs | Sequence components of genome | Putative functions                                |
|----------------------|-------------------------------------|-----------------|-------------------------|------|--------------------|-------------------------------|---------------------------------------------------|
| Kabuli_wild_11517517 | 1399936468                          | Ca_kabuli_Chr04 | 11517517                | C/A  | NA                 | INTERGENIC                    | NA                                                |
| Kabuli_wild_11517582 | 1399936469                          | Ca_kabuli_Chr04 | 11517582                | C/T  | NA                 | INTERGENIC                    | NA                                                |
| Kabuli_wild_11572051 | 1399936470                          | Ca_kabuli_Chr04 | 11572051                | C/T  | NA                 | INTERGENIC                    | NA                                                |
| Kabuli_wild_11620964 | 1399936471                          | Ca_kabuli_Chr04 | 11620964                | C/T  | Gene_Ca_04388      | SYNONYMOUS_CODING             | Ubiquitininteractingmotif                         |
| Kabuli_wild_11646453 | 1399936472                          | Ca_kabuli_Chr04 | 11646453                | G/A  | Gene_Ca_04392      | NON_SYNONYMOUS_CODING         | Protein synthesis factor, GTP-binding             |
| Kabuli_wild_11658314 | 1399936473                          | Ca_kabuli_Chr04 | 11658314                | A/G  | NA                 | INTERGENIC                    | NA                                                |
| Kabuli_wild_11689611 | 1399936474                          | Ca_kabuli_Chr04 | 11689611                | C/T  | Gene_Ca_04395      | NON_SYNONYMOUS_CODING         | Basic-leucine zipper (bZIP ) Transcription factor |
| Kabuli_wild_11752855 | 1399936475                          | Ca_kabuli_Chr04 | 11752855                | A/G  | Gene_Ca_04400      | NON_SYNONYMOUS_CODING         | NA                                                |
| Kabuli_wild_11752862 | 1399936476                          | Ca_kabuli_Chr04 | 11752862                | A/G  | Gene_Ca_04400      | SYNONYMOUS_CODING             | NA                                                |
| Kabuli_wild_11772023 | 1399936477                          | Ca_kabuli_Chr04 | 11772023                | G/T  | Gene_Ca_04401      | NON_SYNONYMOUS_CODING         | Zinc finger,FYVE-type                             |
| Kabuli_wild_11774322 | 1399936478                          | Ca_kabuli_Chr04 | 11774322                | A/G  | Gene_Ca_04401      | SYNONYMOUS_CODING             | Zinc finger,FYVE-type                             |
| Kabuli_wild_11774328 | 1399936479                          | Ca_kabuli_Chr04 | 11774328                | A/G  | Gene_Ca_04401      | SYNONYMOUS_CODING             | Zinc finger,FYVE-type                             |
| Kabuli_wild_11847494 | 1399936480                          | Ca_kabuli_Chr04 | 11847494                | C/T  | NA                 | INTERGENIC                    | NA                                                |
| Kabuli_wild_11852425 | 1399936481                          | Ca_kabuli_Chr04 | 11852425                | C/G  | NA                 | INTERGENIC                    | NA                                                |
| Kabuli_wild_11926352 | 1399936482                          | Ca_kabuli_Chr04 | 11926352                | G/C  | Gene_Ca_04414      | INTRON                        | ATPase,AAA+type,core                              |
| Kabuli_wild_11931643 | 1399936483                          | Ca_kabuli_Chr04 | 11931643                | T/G  | Gene_Ca_04415      | INTRON                        | ATPase,AAA+type,core                              |
| Kabuli_wild_12004082 | 1399936484                          | Ca_kabuli_Chr04 | 12004082                | A/T  | NA                 | INTERGENIC                    | NA                                                |
| Kabuli_wild_12004205 | 1399936485                          | Ca_kabuli_Chr04 | 12004205                | A/C  | NA                 | INTERGENIC                    | NA                                                |
| Kabuli_wild_12004209 | 1399936486                          | Ca_kabuli_Chr04 | 12004209                | C/T  | NA                 | INTERGENIC                    | NA                                                |
| Kabuli_wild_12093051 | 1399936487                          | Ca_kabuli_Chr04 | 12093051                | C/T  | Gene_Ca_04433      | SYNONYMOUS_CODING             | Fattyacidhydroxylase                              |
| Kabuli_wild_12131914 | 1399936488                          | Ca_kabuli_Chr04 | 12131914                | T/C  | Gene_Ca_04435      | SYNONYMOUS_CODING             | Glycosidehydrolase, family28                      |
| Kabuli_wild_12165713 | 1399936489                          | Ca_kabuli_Chr04 | 12165713                | A/G  | Gene_Ca_04439      | DOWNSTREAM                    | Protein of unknown function DUF819                |
| Kabuli_wild_12167328 | 1399936490                          | Ca_kabuli_Chr04 | 12167328                | A/G  | NA                 | INTERGENIC                    | NA                                                |
| Kabuli_wild_12167568 | 1399936491                          | Ca_kabuli_Chr04 | 12167568                | G/A  | NA                 | INTERGENIC                    | NA                                                |
| Kabuli_wild_12234364 | 1399936492                          | Ca_kabuli_Chr04 | 12234364                | A/C  | Gene_Ca_04445      | DOWNSTREAM                    | DNAmethylase,N-6adenine-specific,conservedsite    |
| Kabuli_wild_12249494 | 1399936493                          | Ca_kabuli_Chr04 | 12249494                | T/C  | Gene_Ca_04448      | INTRON                        | Protein kinase,catalytic domain                   |
| Kabuli_wild_12420390 | 1399936494                          | Ca_kabuli_Chr04 | 12420390                | A/T  | NA                 | INTERGENIC                    | NA                                                |
| Kabuli_wild_12462644 | 1399936495                          | Ca_kabuli_Chr04 | 12462644                | C/T  | Gene_Ca_04469      | INTRON                        | Zinc finger,CCHC-type                             |
| Kabuli_wild_12484911 | 1399936496                          | Ca_kabuli_Chr04 | 12484911                | A/T  | NA                 | INTERGENIC                    | NA                                                |
| Kabuli_wild_12506440 | 1399936497                          | Ca_kabuli_Chr04 | 12506440                | A/G  | NA                 | INTERGENIC                    | NA                                                |
| Kabuli_wild_12506450 | 1399936498                          | Ca_kabuli_Chr04 | 12506450                | T/A  | NA                 | INTERGENIC                    | NA                                                |
| Kabuli_wild_12514706 | 1399936499                          | Ca_kabuli_Chr04 | 12514706                | G/A  | NA                 | INTERGENIC                    | NA                                                |
| Kabuli_wild_12514724 | 1399936500                          | Ca_kabuli_Chr04 | 12514724                | T/C  | NA                 | INTERGENIC                    | NA                                                |
| Kabuli_wild_12514726 | 1399936501                          | Ca_kabuli_Chr04 | 12514726                | C/T  | NA                 | INTERGENIC                    | NA                                                |
| Kabuli_wild_12514728 | 1399936502                          | Ca_kabuli_Chr04 | 12514728                | G/A  | NA                 | INTERGENIC                    | NA                                                |
| Kabuli_wild_12525313 | 1399936503                          | Ca_kabuli_Chr04 | 12525313                | C/G  | Gene_Ca_04475      | SYNONYMOUS_CODING             | Cytochromeb561,eukaryote                          |
| Kabuli_wild_12525328 | 1399936504                          | Ca_kabuli_Chr04 | 12525328                | A/G  | Gene_Ca_04475      | SYNONYMOUS_CODING             | Cytochromeb561,eukaryote                          |
| Kabuli_wild_12525563 | 1399936505                          | Ca_kabuli_Chr04 | 12525563                | A/G  | Gene_Ca_04475      | INTRON                        | Cytochromeb561,eukaryote                          |
| Kabuli_wild_12525639 | 1399936506                          | Ca_kabuli_Chr04 | 12525639                | T/A  | Gene_Ca_04475      | INTRON                        | Cytochromeb561,eukaryote                          |
| Kabuli_wild_12534847 | 1399936507                          | Ca_kabuli_Chr04 | 12534847                | T/C  | Gene_Ca_04476      | DOWNSTREAM                    | Remorin,C-terminal                                |
| Kabuli_wild_12558541 | 1399936508                          | Ca_kabuli_Chr04 | 12558541                | T/C  | Gene_Ca_04478      | INTRON                        | NUDIX hydrolase domain                            |
| Kabuli_wild_12558680 | 1399936509                          | Ca_kabuli_Chr04 | 12558680                | C/T  | Gene_Ca_04478      | INTRON                        | NUDIX hydrolase domain                            |
| Kabuli_wild_12568599 | 1399936510                          | Ca_kabuli_Chr04 | 12568599                | A/G  | Gene_Ca_04479      | SYNONYMOUS_CODING             | Homoserine kinase                                 |
| Kabuli_wild_12568602 | 1399936511                          | Ca_kabuli_Chr04 | 12568602                | C/T  | Gene_Ca_04479      | SYNONYMOUS_CODING             | Homoserine kinase                                 |



| SNP IDs              | NCBI dbSNP accession IDs (NCBI_SS#) | Chromosomes     | Physical positions (bp) | SNPs | Gene accession IDs | Sequence components of genome | Putative functions                                 |
|----------------------|-------------------------------------|-----------------|-------------------------|------|--------------------|-------------------------------|----------------------------------------------------|
| Kabuli_wild_12568707 | 1399936512                          | Ca_kabuli_Chr04 | 12568707                | A/G  | Gene_Ca_04479      | SYNONYMOUS_CODING             | Homoserine kinase                                  |
| Kabuli_wild_12568845 | 1399936513                          | Ca_kabuli_Chr04 | 12568845                | G/T  | Gene_Ca_04479      | SYNONYMOUS_CODING             | Homoserine kinase                                  |
| Kabuli_wild_12568905 | 1399936514                          | Ca_kabuli_Chr04 | 12568905                | G/A  | Gene_Ca_04479      | SYNONYMOUS_CODING             | Homoserine kinase                                  |
| Kabuli_wild_12568944 | 1399936515                          | Ca_kabuli_Chr04 | 12568944                | A/G  | Gene_Ca_04479      | SYNONYMOUS_CODING             | Homoserine kinase                                  |
| Kabuli_wild_12569022 | 1399936516                          | Ca_kabuli_Chr04 | 12569022                | A/C  | Gene_Ca_04479      | SYNONYMOUS_CODING             | Homoserine kinase                                  |
| Kabuli_wild_12574650 | 1399936517                          | Ca_kabuli_Chr04 | 12574650                | G/A  | Gene_Ca_04480      | NON_SYNONYMOUS_CODING         | DNA mismatch repair protein MutS,C-terminal domain |
| Kabuli_wild_12578259 | 1399936518                          | Ca_kabuli_Chr04 | 12578259                | A/G  | Gene_Ca_04480      | SYNONYMOUS_CODING             | DNA mismatch repair protein MutS,C-terminal domain |
| Kabuli_wild_12578350 | 1399936519                          | Ca_kabuli_Chr04 | 12578350                | A/G  | Gene_Ca_04480      | INTRON                        | DNA mismatch repair protein MutS,C-terminal domain |
| Kabuli_wild_12581371 | 1399936520                          | Ca_kabuli_Chr04 | 12581371                | G/T  | Gene_Ca_04480      | SYNONYMOUS_CODING             | DNA mismatch repair protein MutS,C-terminal domain |
| Kabuli_wild_12740280 | 1399936521                          | Ca_kabuli_Chr04 | 12740280                | G/A  | Gene_Ca_04493      | NON_SYNONYMOUS_CODING         | IQ motif,EF-handbinding site                       |
| Kabuli_wild_12740351 | 1399936522                          | Ca_kabuli_Chr04 | 12740351                | T/G  | Gene_Ca_04493      | SYNONYMOUS_CODING             | IQ motif,EF-handbinding site                       |
| Kabuli_wild_12811599 | 1399936523                          | Ca_kabuli_Chr04 | 12811599                | C/A  | NA                 | INTERGENIC                    | NA                                                 |
| Kabuli_wild_12869023 | 1399936524                          | Ca_kabuli_Chr04 | 12869023                | C/T  | NA                 | INTERGENIC                    | NA                                                 |
| Kabuli_wild_12973657 | 1399936525                          | Ca_kabuli_Chr04 | 12973657                | C/A  | Gene_Ca_04519      | NON_SYNONYMOUS_CODING         | GDP-fucoseproteinO-fucosyltransferase              |
| Kabuli_wild_12982420 | 1399936526                          | Ca_kabuli_Chr04 | 12982420                | G/A  | Gene_Ca_04520      | INTRON                        | Alpha-D-phosphohexomutase                          |
| Kabuli_wild_13179829 | 1399936527                          | Ca_kabuli_Chr04 | 13179829                | T/C  | NA                 | INTERGENIC                    | NA                                                 |
| Kabuli_wild_13203008 | 1399936528                          | Ca_kabuli_Chr04 | 13203008                | A/T  | Gene_Ca_04544      | DOWNSTREAM                    | BromodomainTranscription factor                    |
| Kabuli_wild_13203164 | 1399936529                          | Ca_kabuli_Chr04 | 13203164                | G/T  | Gene_Ca_04544      | DOWNSTREAM                    | BromodomainTranscription factor                    |
| Kabuli_wild_13229035 | 1399936530                          | Ca_kabuli_Chr04 | 13229035                | C/T  | Gene_Ca_04545      | DOWNSTREAM                    | Argonaute/Dicerprotein,PAZ                         |
| Kabuli_wild_13252015 | 1399936531                          | Ca_kabuli_Chr04 | 13252015                | A/T  | Gene_Ca_04547      | UPSTREAM                      | NA                                                 |
| Kabuli_wild_13252077 | 1399936532                          | Ca_kabuli_Chr04 | 13252077                | C/G  | Gene_Ca_04547      | UPSTREAM                      | NA                                                 |
| Kabuli_wild_13252212 | 1399936533                          | Ca_kabuli_Chr04 | 13252212                | G/A  | Gene_Ca_04547      | UPSTREAM                      | NA                                                 |
| Kabuli_wild_13282984 | 1399936534                          | Ca_kabuli_Chr04 | 13282984                | A/C  | NA                 | INTERGENIC                    | NA                                                 |
| Kabuli_wild_13310630 | 1399936535                          | Ca_kabuli_Chr04 | 13310630                | G/A  | NA                 | INTERGENIC                    | NA                                                 |
| Kabuli_wild_13376428 | 1399936536                          | Ca_kabuli_Chr04 | 13376428                | A/C  | Gene_Ca_04560      | NON_SYNONYMOUS_CODING         | Domain of unknown function DUF828                  |
| Kabuli_wild_13376464 | 1399936537                          | Ca_kabuli_Chr04 | 13376464                | G/A  | Gene_Ca_04560      | NON_SYNONYMOUS_CODING         | Domain of unknown function DUF828                  |
| Kabuli_wild_13575422 | 1399936538                          | Ca_kabuli_Chr04 | 13575422                | T/G  | Gene_Ca_04575      | INTRON                        | Plantlipidtransferprotein/Parallergen              |
| Kabuli_wild_13576867 | 1399936539                          | Ca_kabuli_Chr04 | 13576867                | T/G  | Gene_Ca_04575      | DOWNSTREAM                    | Plantlipidtransferprotein/Parallergen              |
| Kabuli_wild_13586365 | 1399936540                          | Ca_kabuli_Chr04 | 13586365                | A/C  | Gene_Ca_04577      | UPSTREAM                      | Biopterin transport-related protein BT1            |
| Kabuli_wild_13588928 | 1399936541                          | Ca_kabuli_Chr04 | 13588928                | T/C  | Gene_Ca_04577      | INTRON                        | Biopterin transport-related protein BT1            |
| Kabuli_wild_13588956 | 1399936542                          | Ca_kabuli_Chr04 | 13588956                | C/T  | Gene_Ca_04577      | SYNONYMOUS_CODING             | Biopterin transport-related protein BT1            |
| Kabuli_wild_13646794 | 1399936543                          | Ca_kabuli_Chr04 | 13646794                | T/A  | NA                 | INTERGENIC                    | NA                                                 |
| Kabuli_wild_13660846 | 1399936544                          | Ca_kabuli_Chr04 | 13660846                | G/A  | NA                 | INTERGENIC                    | NA                                                 |
| Kabuli_wild_13687456 | 1399936545                          | Ca_kabuli_Chr04 | 13687456                | G/A  | Gene_Ca_04589      | INTRON                        | Frigida-like                                       |
| Kabuli_wild_13687570 | 1399936546                          | Ca_kabuli_Chr04 | 13687570                | G/C  | Gene_Ca_04589      | INTRON                        | Frigida-like                                       |
| Kabuli_wild_13687578 | 1399936547                          | Ca_kabuli_Chr04 | 13687578                | G/A  | Gene_Ca_04589      | INTRON                        | Frigida-like                                       |
| Kabuli_wild_13687728 | 1399936548                          | Ca_kabuli_Chr04 | 13687728                | C/T  | Gene_Ca_04589      | INTRON                        | Frigida-like                                       |
| Kabuli_wild_13698262 | 1399936549                          | Ca_kabuli_Chr04 | 13698262                | T/C  | NA                 | INTERGENIC                    | NA                                                 |
| Kabuli_wild_13698283 | 1399936550                          | Ca_kabuli_Chr04 | 13698283                | T/A  | NA                 | INTERGENIC                    | NA                                                 |
| Kabuli_wild_13699663 | 1399936551                          | Ca_kabuli_Chr04 | 13699663                | G/A  | NA                 | INTERGENIC                    | NA                                                 |
| Kabuli_wild_13702641 | 1399936552                          | Ca_kabuli_Chr04 | 13702641                | G/A  | Gene_Ca_04591      | INTRON                        | XSdomain                                           |
| Kabuli_wild_13713367 | 1399936553                          | Ca_kabuli_Chr04 | 13713367                | G/C  | Gene_Ca_04593      | UPSTREAM                      | NA                                                 |
| Kabuli_wild_13713380 | 1399936554                          | Ca_kabuli_Chr04 | 13713380                | G/T  | Gene_Ca_04593      | UPSTREAM                      | NA                                                 |
| Kabuli_wild_13724666 | 1399936555                          | Ca_kabuli_Chr04 | 13724666                | G/C  | Gene_Ca_04596      | NON_SYNONYMOUS_CODING         | Zinc finger,PHD-type                               |

| SNP IDs                     | NCBI dbSNP accession IDs (NCBI_SS#) | Chromosomes            | Physical positions (bp) | SNPs | Gene accession IDs | Sequence components of genome | Putative functions                                  |
|-----------------------------|-------------------------------------|------------------------|-------------------------|------|--------------------|-------------------------------|-----------------------------------------------------|
| <i>Kabuli_wild_13787448</i> | 1399936556                          | <i>Ca_kabuli_Chr04</i> | 13787448                | A/C  | NA                 | INTERGENIC                    | NA                                                  |
| <i>Kabuli_wild_13787649</i> | 1399936557                          | <i>Ca_kabuli_Chr04</i> | 13787649                | T/C  | Gene_Ca_04604      | DOWNSTREAM                    | Copperamineoxidase                                  |
| <i>Kabuli_wild_13787720</i> | 1399936558                          | <i>Ca_kabuli_Chr04</i> | 13787720                | G/C  | Gene_Ca_04604      | DOWNSTREAM                    | Copperamineoxidase                                  |
| <i>Kabuli_wild_13823643</i> | 1399936559                          | <i>Ca_kabuli_Chr04</i> | 13823643                | A/G  | NA                 | INTERGENIC                    | NA                                                  |
| <i>Kabuli_wild_13838706</i> | 1399936560                          | <i>Ca_kabuli_Chr04</i> | 13838706                | G/C  | Gene_Ca_04608      | SYNONYMOUS_CODING             | NA                                                  |
| <i>Kabuli_wild_13838796</i> | 1399936561                          | <i>Ca_kabuli_Chr04</i> | 13838796                | A/G  | Gene_Ca_04608      | SYNONYMOUS_CODING             | NA                                                  |
| <i>Kabuli_wild_13839288</i> | 1399936562                          | <i>Ca_kabuli_Chr04</i> | 13839288                | G/A  | Gene_Ca_04608      | SYNONYMOUS_CODING             | NA                                                  |
| <i>Kabuli_wild_13839294</i> | 1399936563                          | <i>Ca_kabuli_Chr04</i> | 13839294                | A/G  | Gene_Ca_04608      | SYNONYMOUS_CODING             | NA                                                  |
| <i>Kabuli_wild_13839357</i> | 1399936564                          | <i>Ca_kabuli_Chr04</i> | 13839357                | T/C  | Gene_Ca_04608      | SYNONYMOUS_CODING             | NA                                                  |
| <i>Kabuli_wild_13840191</i> | 1399936565                          | <i>Ca_kabuli_Chr04</i> | 13840191                | T/A  | Gene_Ca_04608      | SYNONYMOUS_CODING             | NA                                                  |
| <i>Kabuli_wild_13840227</i> | 1399936566                          | <i>Ca_kabuli_Chr04</i> | 13840227                | A/C  | Gene_Ca_04608      | SYNONYMOUS_CODING             | NA                                                  |
| <i>Kabuli_wild_13840251</i> | 1399936567                          | <i>Ca_kabuli_Chr04</i> | 13840251                | A/G  | Gene_Ca_04608      | SYNONYMOUS_CODING             | NA                                                  |
| <i>Kabuli_wild_13840484</i> | 1399936568                          | <i>Ca_kabuli_Chr04</i> | 13840484                | T/C  | Gene_Ca_04608      | SYNONYMOUS_CODING             | NA                                                  |
| <i>Kabuli_wild_13841340</i> | 1399936569                          | <i>Ca_kabuli_Chr04</i> | 13841340                | G/T  | Gene_Ca_04608      | NON_SYNONYMOUS_CODING         | NA                                                  |
| <i>Kabuli_wild_13845581</i> | 1399936570                          | <i>Ca_kabuli_Chr04</i> | 13845581                | A/T  | Gene_Ca_04608      | UPSTREAM                      | NA                                                  |
| <i>Kabuli_wild_13845639</i> | 1399936571                          | <i>Ca_kabuli_Chr04</i> | 13845639                | A/C  | Gene_Ca_04608      | UPSTREAM                      | NA                                                  |
| <i>Kabuli_wild_13845675</i> | 1399936572                          | <i>Ca_kabuli_Chr04</i> | 13845675                | T/A  | NA                 | INTERGENIC                    | NA                                                  |
| <i>Kabuli_wild_13858799</i> | 1399936573                          | <i>Ca_kabuli_Chr04</i> | 13858799                | C/T  | Gene_Ca_04609      | INTRON                        | Sugar/inositol transporter                          |
| <i>Kabuli_wild_13858801</i> | 1399936574                          | <i>Ca_kabuli_Chr04</i> | 13858801                | A/C  | Gene_Ca_04609      | INTRON                        | Sugar/inositol transporter                          |
| <i>Kabuli_wild_13858972</i> | 1399936575                          | <i>Ca_kabuli_Chr04</i> | 13858972                | A/G  | Gene_Ca_04609      | SYNONYMOUS_CODING             | Sugar/inositol transporter                          |
| <i>Kabuli_wild_13897588</i> | 1399936576                          | <i>Ca_kabuli_Chr04</i> | 13897588                | C/T  | NA                 | INTERGENIC                    | NA                                                  |
| <i>Kabuli_wild_13899990</i> | 1399936577                          | <i>Ca_kabuli_Chr04</i> | 13899990                | T/C  | NA                 | INTERGENIC                    | NA                                                  |
| <i>Kabuli_wild_13900013</i> | 1399936578                          | <i>Ca_kabuli_Chr04</i> | 13900013                | A/G  | NA                 | INTERGENIC                    | NA                                                  |
| <i>Kabuli_wild_13923215</i> | 1399936579                          | <i>Ca_kabuli_Chr04</i> | 13923215                | T/A  | NA                 | INTERGENIC                    | NA                                                  |
| <i>Kabuli_wild_13923411</i> | 1399936580                          | <i>Ca_kabuli_Chr04</i> | 13923411                | T/A  | NA                 | INTERGENIC                    | NA                                                  |
| <i>Kabuli_wild_13949513</i> | 1399936581                          | <i>Ca_kabuli_Chr04</i> | 13949513                | A/C  | NA                 | INTERGENIC                    | NA                                                  |
| <i>Kabuli_wild_13949580</i> | 1399936582                          | <i>Ca_kabuli_Chr04</i> | 13949580                | C/G  | NA                 | INTERGENIC                    | NA                                                  |
| <i>Kabuli_wild_13954832</i> | 1399936583                          | <i>Ca_kabuli_Chr04</i> | 13954832                | G/A  | Gene_Ca_04617      | DOWNSTREAM                    | Glycosyltransferase.group1                          |
| <i>Kabuli_wild_13968291</i> | 1399936584                          | <i>Ca_kabuli_Chr04</i> | 13968291                | C/T  | Gene_Ca_04621      | DOWNSTREAM                    | Leucine-rich repeat, ribonuclease inhibitor subtype |
| <i>Kabuli_wild_13968354</i> | 1399936585                          | <i>Ca_kabuli_Chr04</i> | 13968354                | A/G  | Gene_Ca_04621      | DOWNSTREAM                    | Leucine-rich repeat, ribonuclease inhibitor subtype |
| <i>Kabuli_wild_13968397</i> | 1399936586                          | <i>Ca_kabuli_Chr04</i> | 13968397                | A/G  | Gene_Ca_04621      | DOWNSTREAM                    | Leucine-rich repeat, ribonuclease inhibitor subtype |
| <i>Kabuli_wild_13982970</i> | 1399936587                          | <i>Ca_kabuli_Chr04</i> | 13982970                | G/A  | NA                 | INTERGENIC                    | NA                                                  |
| <i>Kabuli_wild_13985087</i> | 1399936588                          | <i>Ca_kabuli_Chr04</i> | 13985087                | A/G  | Gene_Ca_04623      | INTRON                        | Protein of unknown function DUF171                  |
| <i>Kabuli_wild_14031548</i> | 1399936589                          | <i>Ca_kabuli_Chr04</i> | 14031548                | A/G  | Gene_Ca_04628      | DOWNSTREAM                    | NA                                                  |
| <i>Kabuli_wild_14056908</i> | 1399936590                          | <i>Ca_kabuli_Chr04</i> | 14056908                | A/G  | NA                 | INTERGENIC                    | NA                                                  |
| <i>Kabuli_wild_14073004</i> | 1399936591                          | <i>Ca_kabuli_Chr04</i> | 14073004                | C/A  | NA                 | INTERGENIC                    | NA                                                  |
| <i>Kabuli_wild_14073044</i> | 1399936592                          | <i>Ca_kabuli_Chr04</i> | 14073044                | C/T  | NA                 | INTERGENIC                    | NA                                                  |
| <i>Kabuli_wild_14073045</i> | 1399936593                          | <i>Ca_kabuli_Chr04</i> | 14073045                | G/A  | NA                 | INTERGENIC                    | NA                                                  |
| <i>Kabuli_wild_14073056</i> | 1399936594                          | <i>Ca_kabuli_Chr04</i> | 14073056                | C/T  | NA                 | INTERGENIC                    | NA                                                  |
| <i>Kabuli_wild_14073059</i> | 1399936595                          | <i>Ca_kabuli_Chr04</i> | 14073059                | C/T  | NA                 | INTERGENIC                    | NA                                                  |
| <i>Kabuli_wild_14082157</i> | 1399936596                          | <i>Ca_kabuli_Chr04</i> | 14082157                | C/A  | Gene_Ca_04635      | INTRON                        | PDZ-bindingprotein,CRIPT                            |
| <i>Kabuli_wild_14082158</i> | 1399936597                          | <i>Ca_kabuli_Chr04</i> | 14082158                | T/G  | Gene_Ca_04635      | INTRON                        | PDZ-bindingprotein,CRIPT                            |
| <i>Kabuli_wild_14082186</i> | 1399936598                          | <i>Ca_kabuli_Chr04</i> | 14082186                | G/A  | Gene_Ca_04635      | INTRON                        | PDZ-bindingprotein,CRIPT                            |
| <i>Kabuli_wild_14082210</i> | 1399936599                          | <i>Ca_kabuli_Chr04</i> | 14082210                | T/C  | Gene_Ca_04635      | INTRON                        | PDZ-bindingprotein,CRIPT                            |

| SNP IDs              | NCBI dbSNP accession IDs (NCBI_SS#) | Chromosomes       | Physical positions (bp) | SNPs | Gene accession IDs | Sequence components of genome | Putative functions              |
|----------------------|-------------------------------------|-------------------|-------------------------|------|--------------------|-------------------------------|---------------------------------|
| Kabuli_wild_14082285 | 1399936600                          | Ca_kabuli_Chrom04 | 14082285                | C/G  | Gene_Ca_04635      | DOWNSTREAM                    | PDZ-bindingprotein,CRIPT        |
| Kabuli_wild_14093027 | 1399936601                          | Ca_kabuli_Chrom04 | 14093027                | A/G  | Gene_Ca_04636      | SYNONYMOUS_CODING             | Ubiquitin                       |
| Kabuli_wild_14093096 | 1399936602                          | Ca_kabuli_Chrom04 | 14093096                | A/C  | Gene_Ca_04636      | SYNONYMOUS_CODING             | Ubiquitin                       |
| Kabuli_wild_14093105 | 1399936603                          | Ca_kabuli_Chrom04 | 14093105                | C/A  | Gene_Ca_04636      | SYNONYMOUS_CODING             | Ubiquitin                       |
| Kabuli_wild_14093108 | 1399936604                          | Ca_kabuli_Chrom04 | 14093108                | A/T  | Gene_Ca_04636      | SYNONYMOUS_CODING             | Ubiquitin                       |
| Kabuli_wild_14093110 | 1399936605                          | Ca_kabuli_Chrom04 | 14093110                | G/A  | Gene_Ca_04636      | NON_SYNONYMOUS_CODING         | Ubiquitin                       |
| Kabuli_wild_14093111 | 1399936606                          | Ca_kabuli_Chrom04 | 14093111                | G/A  | Gene_Ca_04636      | SYNONYMOUS_CODING             | Ubiquitin                       |
| Kabuli_wild_14093116 | 1399936607                          | Ca_kabuli_Chrom04 | 14093116                | G/A  | Gene_Ca_04636      | NON_SYNONYMOUS_CODING         | Ubiquitin                       |
| Kabuli_wild_14093117 | 1399936608                          | Ca_kabuli_Chrom04 | 14093117                | G/A  | Gene_Ca_04636      | SYNONYMOUS_CODING             | Ubiquitin                       |
| Kabuli_wild_14093120 | 1399936609                          | Ca_kabuli_Chrom04 | 14093120                | T/G  | Gene_Ca_04636      | SYNONYMOUS_CODING             | Ubiquitin                       |
| Kabuli_wild_14093132 | 1399936610                          | Ca_kabuli_Chrom04 | 14093132                | G/A  | Gene_Ca_04636      | SYNONYMOUS_CODING             | Ubiquitin                       |
| Kabuli_wild_14093144 | 1399936611                          | Ca_kabuli_Chrom04 | 14093144                | A/T  | Gene_Ca_04636      | SYNONYMOUS_CODING             | Ubiquitin                       |
| Kabuli_wild_14093147 | 1399936612                          | Ca_kabuli_Chrom04 | 14093147                | T/A  | Gene_Ca_04636      | NON_SYNONYMOUS_CODING         | Ubiquitin                       |
| Kabuli_wild_14093156 | 1399936613                          | Ca_kabuli_Chrom04 | 14093156                | G/A  | Gene_Ca_04636      | SYNONYMOUS_CODING             | Ubiquitin                       |
| Kabuli_wild_14093159 | 1399936614                          | Ca_kabuli_Chrom04 | 14093159                | A/G  | Gene_Ca_04636      | SYNONYMOUS_CODING             | Ubiquitin                       |
| Kabuli_wild_14104096 | 1399936615                          | Ca_kabuli_Chrom04 | 14104096                | A/C  | NA                 | INTERGENIC                    | NA                              |
| Kabuli_wild_14112911 | 1399936616                          | Ca_kabuli_Chrom04 | 14112911                | C/A  | Gene_Ca_04640      | UPSTREAM                      | Ubiquitin                       |
| Kabuli_wild_14113281 | 1399936617                          | Ca_kabuli_Chrom04 | 14113281                | G/C  | Gene_Ca_04640      | UPSTREAM                      | Ubiquitin                       |
| Kabuli_wild_14132659 | 1399936618                          | Ca_kabuli_Chrom04 | 14132659                | A/C  | NA                 | INTERGENIC                    | NA                              |
| Kabuli_wild_14132677 | 1399936619                          | Ca_kabuli_Chrom04 | 14132677                | T/G  | NA                 | INTERGENIC                    | NA                              |
| Kabuli_wild_14132711 | 1399936620                          | Ca_kabuli_Chrom04 | 14132711                | A/G  | NA                 | INTERGENIC                    | NA                              |
| Kabuli_wild_14132715 | 1399936621                          | Ca_kabuli_Chrom04 | 14132715                | A/T  | NA                 | INTERGENIC                    | NA                              |
| Kabuli_wild_14132717 | 1399936622                          | Ca_kabuli_Chrom04 | 14132717                | G/A  | NA                 | INTERGENIC                    | NA                              |
| Kabuli_wild_14132719 | 1399936623                          | Ca_kabuli_Chrom04 | 14132719                | A/C  | NA                 | INTERGENIC                    | NA                              |
| Kabuli_wild_14132724 | 1399936624                          | Ca_kabuli_Chrom04 | 14132724                | A/G  | NA                 | INTERGENIC                    | NA                              |
| Kabuli_wild_14132729 | 1399936625                          | Ca_kabuli_Chrom04 | 14132729                | T/A  | NA                 | INTERGENIC                    | NA                              |
| Kabuli_wild_14132733 | 1399936626                          | Ca_kabuli_Chrom04 | 14132733                | G/C  | NA                 | INTERGENIC                    | NA                              |
| Kabuli_wild_14132734 | 1399936627                          | Ca_kabuli_Chrom04 | 14132734                | T/G  | NA                 | INTERGENIC                    | NA                              |
| Kabuli_wild_14132747 | 1399936628                          | Ca_kabuli_Chrom04 | 14132747                | G/T  | NA                 | INTERGENIC                    | NA                              |
| Kabuli_wild_14132749 | 1399936629                          | Ca_kabuli_Chrom04 | 14132749                | A/T  | NA                 | INTERGENIC                    | NA                              |
| Kabuli_wild_14132752 | 1399936630                          | Ca_kabuli_Chrom04 | 14132752                | T/A  | NA                 | INTERGENIC                    | NA                              |
| Kabuli_wild_14132760 | 1399936631                          | Ca_kabuli_Chrom04 | 14132760                | A/C  | NA                 | INTERGENIC                    | NA                              |
| Kabuli_wild_14132781 | 1399936632                          | Ca_kabuli_Chrom04 | 14132781                | A/C  | NA                 | INTERGENIC                    | NA                              |
| Kabuli_wild_14149357 | 1399936633                          | Ca_kabuli_Chrom04 | 14149357                | G/A  | Gene_Ca_04645      | NON_SYNONYMOUS_CODING         | Protein kinase,catalytic domain |
| Kabuli_wild_14149588 | 1399936634                          | Ca_kabuli_Chrom04 | 14149588                | A/G  | Gene_Ca_04645      | NON_SYNONYMOUS_CODING         | Protein kinase,catalytic domain |
| Kabuli_wild_14149589 | 1399936635                          | Ca_kabuli_Chrom04 | 14149589                | G/A  | Gene_Ca_04645      | NON_SYNONYMOUS_CODING         | Protein kinase,catalytic domain |
| Kabuli_wild_14155419 | 1399936636                          | Ca_kabuli_Chrom04 | 14155419                | C/T  | Gene_Ca_04646      | NON_SYNONYMOUS_CODING         | Protein kinase,catalytic domain |
| Kabuli_wild_14155978 | 1399936637                          | Ca_kabuli_Chrom04 | 14155978                | A/G  | Gene_Ca_04646      | SYNONYMOUS_CODING             | Protein kinase,catalytic domain |
| Kabuli_wild_14156014 | 1399936638                          | Ca_kabuli_Chrom04 | 14156014                | C/T  | Gene_Ca_04646      | SYNONYMOUS_CODING             | Protein kinase,catalytic domain |
| Kabuli_wild_14163122 | 1399936639                          | Ca_kabuli_Chrom04 | 14163122                | T/C  | NA                 | INTERGENIC                    | NA                              |
| Kabuli_wild_14177500 | 1399936640                          | Ca_kabuli_Chrom04 | 14177500                | A/C  | NA                 | INTERGENIC                    | NA                              |
| Kabuli_wild_14181589 | 1399936641                          | Ca_kabuli_Chrom04 | 14181589                | A/C  | NA                 | INTERGENIC                    | NA                              |
| Kabuli_wild_14189356 | 1399936642                          | Ca_kabuli_Chrom04 | 14189356                | A/C  | Gene_Ca_04652      | NON_SYNONYMOUS_CODING         | Protein kinase,catalytic domain |
| Kabuli_wild_14199331 | 1399936643                          | Ca_kabuli_Chrom04 | 14199331                | A/C  | Gene_Ca_04653      | SYNONYMOUS_CODING             | Protein kinase,catalytic domain |

| SNP IDs              | NCBI dbSNP accession IDs (NCBI_SS#) | Chromosomes     | Physical positions (bp) | SNPs | Gene accession IDs | Sequence components of genome | Putative functions                 |
|----------------------|-------------------------------------|-----------------|-------------------------|------|--------------------|-------------------------------|------------------------------------|
| Kabuli_wild_14270758 | 1399936644                          | Ca_kabuli_Chr04 | 14270758                | C/T  | NA                 | INTERGENIC                    | NA                                 |
| Kabuli_wild_14270763 | 1399936645                          | Ca_kabuli_Chr04 | 14270763                | G/A  | NA                 | INTERGENIC                    | NA                                 |
| Kabuli_wild_14270765 | 1399936646                          | Ca_kabuli_Chr04 | 14270765                | A/C  | NA                 | INTERGENIC                    | NA                                 |
| Kabuli_wild_14270766 | 1399936647                          | Ca_kabuli_Chr04 | 14270766                | G/A  | NA                 | INTERGENIC                    | NA                                 |
| Kabuli_wild_14270827 | 1399936648                          | Ca_kabuli_Chr04 | 14270827                | C/T  | NA                 | INTERGENIC                    | NA                                 |
| Kabuli_wild_14270830 | 1399936649                          | Ca_kabuli_Chr04 | 14270830                | G/A  | NA                 | INTERGENIC                    | NA                                 |
| Kabuli_wild_14270847 | 1399936650                          | Ca_kabuli_Chr04 | 14270847                | G/T  | NA                 | INTERGENIC                    | NA                                 |
| Kabuli_wild_14271784 | 1399936651                          | Ca_kabuli_Chr04 | 14271784                | C/T  | NA                 | INTERGENIC                    | NA                                 |
| Kabuli_wild_14271793 | 1399936652                          | Ca_kabuli_Chr04 | 14271793                | A/G  | NA                 | INTERGENIC                    | NA                                 |
| Kabuli_wild_14399908 | 1399936653                          | Ca_kabuli_Chr04 | 14399908                | A/G  | Gene_Ca_05664      | DOWNSTREAM                    | Transposase,Ptta/En/Spm,plant      |
| Kabuli_wild_14515543 | 1399936654                          | Ca_kabuli_Chr04 | 14515543                | T/A  | NA                 | INTERGENIC                    | NA                                 |
| Kabuli_wild_14657743 | 1399936655                          | Ca_kabuli_Chr04 | 14657743                | C/T  | Gene_Ca_05639      | INTRON                        | Protein of unknown function DUF566 |
| Kabuli_wild_14699291 | 1399936656                          | Ca_kabuli_Chr04 | 14699291                | C/A  | Gene_Ca_05634      | NON_SYNONYMOUS_CODING         | NA                                 |
| Kabuli_wild_14748051 | 1399936657                          | Ca_kabuli_Chr04 | 14748051                | A/C  | Gene_Ca_05628      | SYNONYMOUS_CODING             | Protein of unknown function DUF620 |
| Kabuli_wild_14770435 | 1399936658                          | Ca_kabuli_Chr04 | 14770435                | G/A  | Gene_Ca_05627      | NON_SYNONYMOUS_CODING         | Peptidase C48, SUMO/Sentrin/Ubl1   |
| Kabuli_wild_14770448 | 1399936659                          | Ca_kabuli_Chr04 | 14770448                | C/T  | Gene_Ca_05627      | NON_SYNONYMOUS_CODING         | Peptidase C48, SUMO/Sentrin/Ubl1   |
| Kabuli_wild_14785557 | 1399936660                          | Ca_kabuli_Chr04 | 14785557                | A/C  | Gene_Ca_05626      | DOWNSTREAM                    | WD40 repeat                        |
| Kabuli_wild_14831204 | 1399936661                          | Ca_kabuli_Chr04 | 14831204                | A/T  | NA                 | INTERGENIC                    | NA                                 |
| Kabuli_wild_14834479 | 1399936662                          | Ca_kabuli_Chr04 | 14834479                | T/C  | NA                 | INTERGENIC                    | NA                                 |
| Kabuli_wild_14870641 | 1399936663                          | Ca_kabuli_Chr04 | 14870641                | G/A  | Gene_Ca_05614      | SYNONYMOUS_CODING             | Aminoglycoside phosphotransferase  |
| Kabuli_wild_14870658 | 1399936664                          | Ca_kabuli_Chr04 | 14870658                | T/G  | Gene_Ca_05614      | NON_SYNONYMOUS_CODING         | Aminoglycoside phosphotransferase  |
| Kabuli_wild_14985754 | 1399936665                          | Ca_kabuli_Chr04 | 14985754                | C/A  | NA                 | INTERGENIC                    | NA                                 |
| Kabuli_wild_15240678 | 1399936666                          | Ca_kabuli_Chr04 | 15240678                | T/C  | NA                 | INTERGENIC                    | NA                                 |
| Kabuli_wild_15357695 | 1399936667                          | Ca_kabuli_Chr04 | 15357695                | A/G  | NA                 | INTERGENIC                    | NA                                 |
| Kabuli_wild_15394470 | 1399936668                          | Ca_kabuli_Chr04 | 15394470                | T/C  | NA                 | INTERGENIC                    | NA                                 |
| Kabuli_wild_15542597 | 1399936669                          | Ca_kabuli_Chr04 | 15542597                | A/G  | Gene_Ca_05547      | SYNONYMOUS_CODING             | Zinc finger,CCCH-type              |
| Kabuli_wild_15552690 | 1399936670                          | Ca_kabuli_Chr04 | 15552690                | C/T  | NA                 | INTERGENIC                    | NA                                 |
| Kabuli_wild_15697128 | 1399936671                          | Ca_kabuli_Chr04 | 15697128                | A/G  | Gene_Ca_05536      | NON_SYNONYMOUS_CODING         | Phox/Bem1p                         |
| Kabuli_wild_15697303 | 1399936672                          | Ca_kabuli_Chr04 | 15697303                | G/T  | Gene_Ca_05536      | SYNONYMOUS_CODING             | Phox/Bem1p                         |
| Kabuli_wild_15697492 | 1399936673                          | Ca_kabuli_Chr04 | 15697492                | G/A  | Gene_Ca_05536      | SYNONYMOUS_CODING             | Phox/Bem1p                         |
| Kabuli_wild_15698179 | 1399936674                          | Ca_kabuli_Chr04 | 15698179                | G/A  | NA                 | INTERGENIC                    | NA                                 |
| Kabuli_wild_15698212 | 1399936675                          | Ca_kabuli_Chr04 | 15698212                | G/T  | NA                 | INTERGENIC                    | NA                                 |
| Kabuli_wild_15698233 | 1399936676                          | Ca_kabuli_Chr04 | 15698233                | A/C  | NA                 | INTERGENIC                    | NA                                 |
| Kabuli_wild_15698305 | 1399936677                          | Ca_kabuli_Chr04 | 15698305                | T/C  | NA                 | INTERGENIC                    | NA                                 |
| Kabuli_wild_15698420 | 1399936678                          | Ca_kabuli_Chr04 | 15698420                | G/C  | NA                 | INTERGENIC                    | NA                                 |
| Kabuli_wild_15698444 | 1399936679                          | Ca_kabuli_Chr04 | 15698444                | C/T  | NA                 | INTERGENIC                    | NA                                 |
| Kabuli_wild_15698456 | 1399936680                          | Ca_kabuli_Chr04 | 15698456                | T/C  | NA                 | INTERGENIC                    | NA                                 |
| Kabuli_wild_15698486 | 1399936681                          | Ca_kabuli_Chr04 | 15698486                | T/C  | NA                 | INTERGENIC                    | NA                                 |
| Kabuli_wild_15700603 | 1399936682                          | Ca_kabuli_Chr04 | 15700603                | A/T  | Gene_Ca_05535      | DOWNSTREAM                    | WD40 repeat                        |
| Kabuli_wild_15736619 | 1399936683                          | Ca_kabuli_Chr04 | 15736619                | T/G  | Gene_Ca_05530      | INTRON                        | Cytidyltransferase                 |
| Kabuli_wild_15736633 | 1399936684                          | Ca_kabuli_Chr04 | 15736633                | T/G  | Gene_Ca_05530      | INTRON                        | Cytidyltransferase                 |
| Kabuli_wild_15752567 | 1399936685                          | Ca_kabuli_Chr04 | 15752567                | G/C  | Gene_Ca_05529      | NON_SYNONYMOUS_CODING         | Glycosyltransferase,family20       |
| Kabuli_wild_15766601 | 1399936686                          | Ca_kabuli_Chr04 | 15766601                | G/T  | NA                 | INTERGENIC                    | NA                                 |
| Kabuli_wild_15766606 | 1399936687                          | Ca_kabuli_Chr04 | 15766606                | T/A  | NA                 | INTERGENIC                    | NA                                 |

| SNP IDs              | NCBI dbSNP accession IDs (NCBI_SS#) | Chromosomes     | Physical positions (bp) | SNPs | Gene accession IDs | Sequence components of genome | Putative functions                           |
|----------------------|-------------------------------------|-----------------|-------------------------|------|--------------------|-------------------------------|----------------------------------------------|
| Kabuli_wild_15766610 | 1399936688                          | Ca_kabuli_Chr04 | 15766610                | T/G  | NA                 | INTERGENIC                    | NA                                           |
| Kabuli_wild_15766626 | 1399936689                          | Ca_kabuli_Chr04 | 15766626                | G/A  | NA                 | INTERGENIC                    | NA                                           |
| Kabuli_wild_15766631 | 1399936690                          | Ca_kabuli_Chr04 | 15766631                | G/T  | NA                 | INTERGENIC                    | NA                                           |
| Kabuli_wild_15766640 | 1399936691                          | Ca_kabuli_Chr04 | 15766640                | T/G  | NA                 | INTERGENIC                    | NA                                           |
| Kabuli_wild_15772275 | 1399936692                          | Ca_kabuli_Chr04 | 15772275                | A/G  | Gene_Ca_05528      | SYNONYMOUS_CODING             | Reticulon                                    |
| Kabuli_wild_15825621 | 1399936693                          | Ca_kabuli_Chr04 | 15825621                | A/T  | Gene_Ca_05524      | INTRON                        | Protein of unknown function DUF789           |
| Kabuli_wild_15860359 | 1399936694                          | Ca_kabuli_Chr04 | 15860359                | C/A  | NA                 | INTERGENIC                    | NA                                           |
| Kabuli_wild_15860388 | 1399936695                          | Ca_kabuli_Chr04 | 15860388                | A/G  | NA                 | INTERGENIC                    | NA                                           |
| Kabuli_wild_15900602 | 1399936696                          | Ca_kabuli_Chr04 | 15900602                | G/A  | NA                 | INTERGENIC                    | NA                                           |
| Kabuli_wild_15914525 | 1399936697                          | Ca_kabuli_Chr04 | 15914525                | T/C  | Gene_Ca_05516      | SYNONYMOUS_CODING             | Protein kinase,catalytic domain              |
| Kabuli_wild_15925936 | 1399936698                          | Ca_kabuli_Chr04 | 15925936                | T/G  | NA                 | INTERGENIC                    | NA                                           |
| Kabuli_wild_15926160 | 1399936699                          | Ca_kabuli_Chr04 | 15926160                | A/G  | NA                 | INTERGENIC                    | NA                                           |
| Kabuli_wild_15934607 | 1399936700                          | Ca_kabuli_Chr04 | 15934607                | A/T  | Gene_Ca_05513      | INTRON                        | Beta-lactamase-like                          |
| Kabuli_wild_15934901 | 1399936701                          | Ca_kabuli_Chr04 | 15934901                | T/G  | NA                 | INTERGENIC                    | NA                                           |
| Kabuli_wild_15942209 | 1399936702                          | Ca_kabuli_Chr04 | 15942209                | C/T  | Gene_Ca_05512      | INTRON                        | Heat shock protein DnaJ,N-terminal           |
| Kabuli_wild_15942388 | 1399936703                          | Ca_kabuli_Chr04 | 15942388                | C/T  | Gene_Ca_05512      | INTRON                        | Heat shock protein DnaJ,N-terminal           |
| Kabuli_wild_15957070 | 1399936704                          | Ca_kabuli_Chr04 | 15957070                | T/A  | Gene_Ca_05511      | DOWNSTREAM                    | Zinc finger,C2H2-type                        |
| Kabuli_wild_16045870 | 1399936705                          | Ca_kabuli_Chr04 | 16045870                | G/A  | Gene_Ca_05504      | INTRON                        | Glutamyl/glutaminyl-tRNA synthetase, class c |
| Kabuli_wild_16046928 | 1399936706                          | Ca_kabuli_Chr04 | 16046928                | T/C  | Gene_Ca_05504      | SYNONYMOUS_CODING             | Glutamyl/glutaminyl-tRNA synthetase, class c |
| Kabuli_wild_16078354 | 1399936707                          | Ca_kabuli_Chr04 | 16078354                | T/C  | NA                 | INTERGENIC                    | NA                                           |
| Kabuli_wild_16148668 | 1399936708                          | Ca_kabuli_Chr04 | 16148668                | A/C  | NA                 | INTERGENIC                    | NA                                           |
| Kabuli_wild_16149795 | 1399936709                          | Ca_kabuli_Chr04 | 16149795                | C/T  | NA                 | INTERGENIC                    | NA                                           |
| Kabuli_wild_16149998 | 1399936710                          | Ca_kabuli_Chr04 | 16149998                | T/C  | NA                 | INTERGENIC                    | NA                                           |
| Kabuli_wild_16150106 | 1399936711                          | Ca_kabuli_Chr04 | 16150106                | T/C  | NA                 | INTERGENIC                    | NA                                           |
| Kabuli_wild_16184259 | 1399936712                          | Ca_kabuli_Chr04 | 16184259                | T/G  | Gene_Ca_05493      | INTRON                        | Domain of unknown function DUF292,eukaryotic |
| Kabuli_wild_16184265 | 1399936713                          | Ca_kabuli_Chr04 | 16184265                | A/T  | Gene_Ca_05493      | INTRON                        | Domain of unknown function DUF292,eukaryotic |
| Kabuli_wild_16184275 | 1399936714                          | Ca_kabuli_Chr04 | 16184275                | T/C  | Gene_Ca_05493      | INTRON                        | Domain of unknown function DUF292,eukaryotic |
| Kabuli_wild_16184284 | 1399936715                          | Ca_kabuli_Chr04 | 16184284                | T/C  | Gene_Ca_05493      | INTRON                        | Domain of unknown function DUF292,eukaryotic |
| Kabuli_wild_16184343 | 1399936716                          | Ca_kabuli_Chr04 | 16184343                | A/G  | Gene_Ca_05493      | INTRON                        | Domain of unknown function DUF292,eukaryotic |
| Kabuli_wild_16278600 | 1399936717                          | Ca_kabuli_Chr04 | 16278600                | C/T  | Gene_Ca_05487      | NON_SYNONYMOUS_CODING         | Zinc finger,B-box                            |
| Kabuli_wild_16278671 | 1399936718                          | Ca_kabuli_Chr04 | 16278671                | T/A  | Gene_Ca_05487      | SYNONYMOUS_CODING             | Zinc finger,B-box                            |
| Kabuli_wild_16571288 | 1399936719                          | Ca_kabuli_Chr04 | 16571288                | T/C  | Gene_Ca_05467      | INTRON                        | ATPase,AAA+type,core                         |
| Kabuli_wild_16622514 | 1399936720                          | Ca_kabuli_Chr04 | 16622514                | C/A  | Gene_Ca_05461      | NON_SYNONYMOUS_CODING         | KOW                                          |
| Kabuli_wild_16628529 | 1399936721                          | Ca_kabuli_Chr04 | 16628529                | C/A  | NA                 | INTERGENIC                    | NA                                           |
| Kabuli_wild_16628540 | 1399936722                          | Ca_kabuli_Chr04 | 16628540                | G/A  | NA                 | INTERGENIC                    | NA                                           |
| Kabuli_wild_16628559 | 1399936723                          | Ca_kabuli_Chr04 | 16628559                | T/G  | NA                 | INTERGENIC                    | NA                                           |
| Kabuli_wild_16628568 | 1399936724                          | Ca_kabuli_Chr04 | 16628568                | T/G  | NA                 | INTERGENIC                    | NA                                           |
| Kabuli_wild_16628591 | 1399936725                          | Ca_kabuli_Chr04 | 16628591                | G/T  | NA                 | INTERGENIC                    | NA                                           |
| Kabuli_wild_16628594 | 1399936726                          | Ca_kabuli_Chr04 | 16628594                | T/G  | NA                 | INTERGENIC                    | NA                                           |
| Kabuli_wild_16629559 | 1399936727                          | Ca_kabuli_Chr04 | 16629559                | T/G  | NA                 | INTERGENIC                    | NA                                           |
| Kabuli_wild_16629560 | 1399936728                          | Ca_kabuli_Chr04 | 16629560                | G/T  | NA                 | INTERGENIC                    | NA                                           |
| Kabuli_wild_16629638 | 1399936729                          | Ca_kabuli_Chr04 | 16629638                | C/A  | NA                 | INTERGENIC                    | NA                                           |
| Kabuli_wild_16669866 | 1399936730                          | Ca_kabuli_Chr04 | 16669866                | C/G  | Gene_Ca_05457      | NON_SYNONYMOUS_CODING         | Inner centromere protein, ARK-binding domain |
| Kabuli_wild_16749740 | 1399936731                          | Ca_kabuli_Chr04 | 16749740                | A/G  | Gene_Ca_05450      | UPSTREAM                      | RNA recognition motif domain                 |

| SNP IDs              | NCBI dbSNP accession IDs (NCBI_SS#) | Chromosomes       | Physical positions (bp) | SNPs | Gene accession IDs | Sequence components of genome | Putative functions                                                 |
|----------------------|-------------------------------------|-------------------|-------------------------|------|--------------------|-------------------------------|--------------------------------------------------------------------|
| Kabuli_wild_16750416 | 1399936732                          | Ca_kabuli_Chrom04 | 16750416                | A/G  | Gene_Ca_05450      | UPSTREAM                      | RNA recognition motif domain                                       |
| Kabuli_wild_16789476 | 1399936733                          | Ca_kabuli_Chrom04 | 16789476                | G/A  | Gene_Ca_05446      | SYNONYMOUS_CODING             | Haemerythrin/HHEcation-bindingmotif                                |
| Kabuli_wild_16926614 | 1399936734                          | Ca_kabuli_Chrom04 | 16926614                | A/T  | Gene_Ca_05430      | NON_SYNONYMOUS_CODING         | Zinc finger,C2H2-type                                              |
| Kabuli_wild_16975510 | 1399936735                          | Ca_kabuli_Chrom04 | 16975510                | A/G  | Gene_Ca_05427      | INTRON                        | Nucleotide-diphospho-sugartransferase,predicted                    |
| Kabuli_wild_17028368 | 1399936736                          | Ca_kabuli_Chrom04 | 17028368                | G/A  | NA                 | INTERGENIC                    | NA                                                                 |
| Kabuli_wild_17032673 | 1399936737                          | Ca_kabuli_Chrom04 | 17032673                | C/T  | NA                 | INTERGENIC                    | NA                                                                 |
| Kabuli_wild_17032676 | 1399936738                          | Ca_kabuli_Chrom04 | 17032676                | T/C  | NA                 | INTERGENIC                    | NA                                                                 |
| Kabuli_wild_17038805 | 1399936739                          | Ca_kabuli_Chrom04 | 17038805                | C/G  | Gene_Ca_05419      | INTRON                        | D-isomerspecific2-hydroxyaciddehydrogenase,catalytic domain        |
| Kabuli_wild_17039135 | 1399936740                          | Ca_kabuli_Chrom04 | 17039135                | T/C  | Gene_Ca_05419      | NON_SYNONYMOUS_CODING         | D-isomerspecific2-hydroxyaciddehydrogenase,catalytic domain        |
| Kabuli_wild_17059519 | 1399936741                          | Ca_kabuli_Chrom04 | 17059519                | G/T  | Gene_Ca_05417      | SYNONYMOUS_CODING             | Phospholipase-like,arabidopsis                                     |
| Kabuli_wild_17097879 | 1399936742                          | Ca_kabuli_Chrom04 | 17097879                | A/G  | NA                 | INTERGENIC                    | NA                                                                 |
| Kabuli_wild_17097928 | 1399936743                          | Ca_kabuli_Chrom04 | 17097928                | A/G  | NA                 | INTERGENIC                    | NA                                                                 |
| Kabuli_wild_17120563 | 1399936744                          | Ca_kabuli_Chrom04 | 17120563                | C/T  | Gene_Ca_05412      | INTRON                        | Monooxygenase,FAD-binding                                          |
| Kabuli_wild_17147875 | 1399936745                          | Ca_kabuli_Chrom04 | 17147875                | C/T  | Gene_Ca_05409      | DOWNSTREAM                    | NA                                                                 |
| Kabuli_wild_17147926 | 1399936746                          | Ca_kabuli_Chrom04 | 17147926                | T/C  | Gene_Ca_05409      | DOWNSTREAM                    | NA                                                                 |
| Kabuli_wild_17187560 | 1399936747                          | Ca_kabuli_Chrom04 | 17187560                | C/G  | NA                 | INTERGENIC                    | NA                                                                 |
| Kabuli_wild_17191562 | 1399936748                          | Ca_kabuli_Chrom04 | 17191562                | T/A  | Gene_Ca_05405      | SYNONYMOUS_CODING             | Protein phosphatase 2C, manganese/magnesium aspartate binding site |
| Kabuli_wild_17199316 | 1399936749                          | Ca_kabuli_Chrom04 | 17199316                | T/C  | Gene_Ca_05404      | SYNONYMOUS_CODING             | Domain of unknown function DUF632                                  |
| Kabuli_wild_17199477 | 1399936750                          | Ca_kabuli_Chrom04 | 17199477                | G/A  | Gene_Ca_05404      | SYNONYMOUS_CODING             | Domain of unknown function DUF632                                  |
| Kabuli_wild_17199573 | 1399936751                          | Ca_kabuli_Chrom04 | 17199573                | A/G  | Gene_Ca_05404      | SYNONYMOUS_CODING             | Domain of unknown function DUF632                                  |
| Kabuli_wild_17202770 | 1399936752                          | Ca_kabuli_Chrom04 | 17202770                | A/G  | NA                 | INTERGENIC                    | NA                                                                 |
| Kabuli_wild_17225332 | 1399936753                          | Ca_kabuli_Chrom04 | 17225332                | C/A  | Gene_Ca_05400      | NON_SYNONYMOUS_CODING         | HEAT                                                               |
| Kabuli_wild_17225334 | 1399936754                          | Ca_kabuli_Chrom04 | 17225334                | G/A  | Gene_Ca_05400      | SYNONYMOUS_CODING             | HEAT                                                               |
| Kabuli_wild_17237119 | 1399936755                          | Ca_kabuli_Chrom04 | 17237119                | G/A  | Gene_Ca_05400      | INTRON                        | HEAT                                                               |
| Kabuli_wild_17264248 | 1399936756                          | Ca_kabuli_Chrom04 | 17264248                | C/A  | Gene_Ca_05398      | SYNONYMOUS_CODING             | Major facilitator superfamily MFS-1                                |
| Kabuli_wild_17264592 | 1399936757                          | Ca_kabuli_Chrom04 | 17264592                | G/A  | Gene_Ca_05398      | INTRON                        | Major facilitator superfamily MFS-1                                |
| Kabuli_wild_17264621 | 1399936758                          | Ca_kabuli_Chrom04 | 17264621                | C/G  | Gene_Ca_05398      | INTRON                        | Major facilitator superfamily MFS-1                                |
| Kabuli_wild_17264637 | 1399936759                          | Ca_kabuli_Chrom04 | 17264637                | C/T  | Gene_Ca_05398      | INTRON                        | Major facilitator superfamily MFS-1                                |
| Kabuli_wild_17273774 | 1399936760                          | Ca_kabuli_Chrom04 | 17273774                | C/T  | NA                 | INTERGENIC                    | NA                                                                 |
| Kabuli_wild_17275870 | 1399936761                          | Ca_kabuli_Chrom04 | 17275870                | C/T  | NA                 | INTERGENIC                    | NA                                                                 |
| Kabuli_wild_17275977 | 1399936762                          | Ca_kabuli_Chrom04 | 17275977                | A/G  | NA                 | INTERGENIC                    | NA                                                                 |
| Kabuli_wild_17281374 | 1399936763                          | Ca_kabuli_Chrom04 | 17281374                | G/A  | NA                 | INTERGENIC                    | NA                                                                 |
| Kabuli_wild_17282119 | 1399936764                          | Ca_kabuli_Chrom04 | 17282119                | T/C  | NA                 | INTERGENIC                    | NA                                                                 |
| Kabuli_wild_17282148 | 1399936765                          | Ca_kabuli_Chrom04 | 17282148                | G/C  | NA                 | INTERGENIC                    | NA                                                                 |
| Kabuli_wild_17282336 | 1399936766                          | Ca_kabuli_Chrom04 | 17282336                | G/T  | NA                 | INTERGENIC                    | NA                                                                 |
| Kabuli_wild_17282345 | 1399936767                          | Ca_kabuli_Chrom04 | 17282345                | G/C  | NA                 | INTERGENIC                    | NA                                                                 |
| Kabuli_wild_17289594 | 1399936768                          | Ca_kabuli_Chrom04 | 17289594                | G/C  | Gene_Ca_05393      | UPSTREAM                      | Ankyrinrepeat-containingdomain                                     |
| Kabuli_wild_17297498 | 1399936769                          | Ca_kabuli_Chrom04 | 17297498                | G/T  | Gene_Ca_05392      | INTRON                        | Ankyrinrepeat-containingdomain                                     |
| Kabuli_wild_17297563 | 1399936770                          | Ca_kabuli_Chrom04 | 17297563                | A/G  | Gene_Ca_05392      | INTRON                        | Ankyrinrepeat-containingdomain                                     |
| Kabuli_wild_17297567 | 1399936771                          | Ca_kabuli_Chrom04 | 17297567                | G/A  | Gene_Ca_05392      | INTRON                        | Ankyrinrepeat-containingdomain                                     |
| Kabuli_wild_17309656 | 1399936772                          | Ca_kabuli_Chrom04 | 17309656                | A/C  | Gene_Ca_05391      | SYNONYMOUS_CODING             | Phosphatidylinositol3-/4-kinase,catalytic                          |
| Kabuli_wild_17345436 | 1399936773                          | Ca_kabuli_Chrom04 | 17345436                | G/T  | Gene_Ca_05389      | INTRON                        | Fibrillarlin                                                       |
| Kabuli_wild_17345483 | 1399936774                          | Ca_kabuli_Chrom04 | 17345483                | C/A  | Gene_Ca_05389      | INTRON                        | Fibrillarlin                                                       |
| Kabuli_wild_17345500 | 1399936775                          | Ca_kabuli_Chrom04 | 17345500                | G/A  | Gene_Ca_05389      | SYNONYMOUS_CODING             | Fibrillarlin                                                       |

| SNP IDs              | NCBI dbSNP accession IDs (NCBI_SS#) | Chromosomes     | Physical positions (bp) | SNPs | Gene accession IDs | Sequence components of genome | Putative functions                                   |
|----------------------|-------------------------------------|-----------------|-------------------------|------|--------------------|-------------------------------|------------------------------------------------------|
| Kabuli_wild_17358736 | 1399936776                          | Ca_kabuli_Chr04 | 17358736                | C/T  | Gene_Ca_05388      | INTRON                        | Protein kinase,catalytic domain                      |
| Kabuli_wild_17361143 | 1399936777                          | Ca_kabuli_Chr04 | 17361143                | T/A  | Gene_Ca_05388      | INTRON                        | Protein kinase,catalytic domain                      |
| Kabuli_wild_17396325 | 1399936778                          | Ca_kabuli_Chr04 | 17396325                | A/G  | Gene_Ca_05386      | INTRON                        | Zinc finger, RING-type                               |
| Kabuli_wild_17396349 | 1399936779                          | Ca_kabuli_Chr04 | 17396349                | T/G  | Gene_Ca_05386      | INTRON                        | Zinc finger, RING-type                               |
| Kabuli_wild_17396352 | 1399936780                          | Ca_kabuli_Chr04 | 17396352                | T/G  | Gene_Ca_05386      | INTRON                        | Zinc finger, RING-type                               |
| Kabuli_wild_17429456 | 1399936781                          | Ca_kabuli_Chr04 | 17429456                | A/T  | Gene_Ca_05384      | SYNONYMOUS_CODING             | Transcription factor jumonji/asparylbeta-hydroxylase |
| Kabuli_wild_17429457 | 1399936782                          | Ca_kabuli_Chr04 | 17429457                | A/T  | Gene_Ca_05384      | SYNONYMOUS_CODING             | Transcription factor jumonji/asparylbeta-hydroxylase |
| Kabuli_wild_17429468 | 1399936783                          | Ca_kabuli_Chr04 | 17429468                | T/C  | Gene_Ca_05384      | SYNONYMOUS_CODING             | Transcription factor jumonji/asparylbeta-hydroxylase |
| Kabuli_wild_17429699 | 1399936784                          | Ca_kabuli_Chr04 | 17429699                | G/C  | Gene_Ca_05384      | SYNONYMOUS_CODING             | Transcription factor jumonji/asparylbeta-hydroxylase |
| Kabuli_wild_17429735 | 1399936785                          | Ca_kabuli_Chr04 | 17429735                | A/G  | Gene_Ca_05384      | SYNONYMOUS_CODING             | Transcription factor jumonji/asparylbeta-hydroxylase |
| Kabuli_wild_17429742 | 1399936786                          | Ca_kabuli_Chr04 | 17429742                | A/G  | Gene_Ca_05384      | SYNONYMOUS_CODING             | Transcription factor jumonji/asparylbeta-hydroxylase |
| Kabuli_wild_17429747 | 1399936787                          | Ca_kabuli_Chr04 | 17429747                | G/A  | Gene_Ca_05384      | SYNONYMOUS_CODING             | Transcription factor jumonji/asparylbeta-hydroxylase |
| Kabuli_wild_17432425 | 1399936788                          | Ca_kabuli_Chr04 | 17432425                | G/T  | Gene_Ca_05384      | INTRON                        | Transcription factor jumonji/asparylbeta-hydroxylase |
| Kabuli_wild_17432500 | 1399936789                          | Ca_kabuli_Chr04 | 17432500                | G/C  | Gene_Ca_05384      | INTRON                        | Transcription factor jumonji/asparylbeta-hydroxylase |
| Kabuli_wild_17433782 | 1399936790                          | Ca_kabuli_Chr04 | 17433782                | G/A  | Gene_Ca_05384      | INTRON                        | Transcription factor jumonji/asparylbeta-hydroxylase |
| Kabuli_wild_17433914 | 1399936791                          | Ca_kabuli_Chr04 | 17433914                | G/A  | Gene_Ca_05384      | INTRON                        | Transcription factor jumonji/asparylbeta-hydroxylase |
| Kabuli_wild_17444578 | 1399936792                          | Ca_kabuli_Chr04 | 17444578                | A/C  | Gene_Ca_05384      | DOWNSTREAM                    | Transcription factor jumonji/asparylbeta-hydroxylase |
| Kabuli_wild_17472992 | 1399936793                          | Ca_kabuli_Chr04 | 17472992                | T/G  | NA                 | INTERGENIC                    | NA                                                   |
| Kabuli_wild_17473234 | 1399936794                          | Ca_kabuli_Chr04 | 17473234                | C/A  | NA                 | INTERGENIC                    | NA                                                   |
| Kabuli_wild_17473500 | 1399936795                          | Ca_kabuli_Chr04 | 17473500                | T/C  | NA                 | INTERGENIC                    | NA                                                   |
| Kabuli_wild_17603613 | 1399936796                          | Ca_kabuli_Chr04 | 17603613                | T/C  | NA                 | INTERGENIC                    | NA                                                   |
| Kabuli_wild_17609694 | 1399936797                          | Ca_kabuli_Chr04 | 17609694                | G/A  | Gene_Ca_05370      | DOWNSTREAM                    | Prefoldinsubunit                                     |
| Kabuli_wild_17620966 | 1399936798                          | Ca_kabuli_Chr04 | 17620966                | A/G  | Gene_Ca_05368      | INTRON                        | Dihydroorotatedehydrogenase, conserved site          |
| Kabuli_wild_17620969 | 1399936799                          | Ca_kabuli_Chr04 | 17620969                | A/T  | Gene_Ca_05368      | INTRON                        | Dihydroorotatedehydrogenase, conserved site          |
| Kabuli_wild_17620973 | 1399936800                          | Ca_kabuli_Chr04 | 17620973                | G/T  | Gene_Ca_05368      | INTRON                        | Dihydroorotatedehydrogenase, conserved site          |
| Kabuli_wild_17621035 | 1399936801                          | Ca_kabuli_Chr04 | 17621035                | G/T  | Gene_Ca_05368      | INTRON                        | Dihydroorotatedehydrogenase, conserved site          |
| Kabuli_wild_17621609 | 1399936802                          | Ca_kabuli_Chr04 | 17621609                | G/A  | Gene_Ca_05368      | NON_SYNONYMOUS_CODING         | Dihydroorotatedehydrogenase, conserved site          |
| Kabuli_wild_17647558 | 1399936803                          | Ca_kabuli_Chr04 | 17647558                | G/A  | NA                 | INTERGENIC                    | NA                                                   |
| Kabuli_wild_17685058 | 1399936804                          | Ca_kabuli_Chr04 | 17685058                | T/G  | Gene_Ca_05358      | DOWNSTREAM                    | GRAM                                                 |
| Kabuli_wild_17685113 | 1399936805                          | Ca_kabuli_Chr04 | 17685113                | C/A  | Gene_Ca_05358      | DOWNSTREAM                    | GRAM                                                 |
| Kabuli_wild_17718494 | 1399936806                          | Ca_kabuli_Chr04 | 17718494                | C/T  | NA                 | INTERGENIC                    | NA                                                   |
| Kabuli_wild_17718536 | 1399936807                          | Ca_kabuli_Chr04 | 17718536                | C/A  | NA                 | INTERGENIC                    | NA                                                   |
| Kabuli_wild_17718540 | 1399936808                          | Ca_kabuli_Chr04 | 17718540                | C/T  | NA                 | INTERGENIC                    | NA                                                   |
| Kabuli_wild_17718922 | 1399936809                          | Ca_kabuli_Chr04 | 17718922                | T/G  | NA                 | INTERGENIC                    | NA                                                   |
| Kabuli_wild_17718997 | 1399936810                          | Ca_kabuli_Chr04 | 17718997                | C/A  | NA                 | INTERGENIC                    | NA                                                   |
| Kabuli_wild_17728434 | 1399936811                          | Ca_kabuli_Chr04 | 17728434                | T/A  | Gene_Ca_05352      | INTRON                        | SNF2-related                                         |
| Kabuli_wild_17728462 | 1399936812                          | Ca_kabuli_Chr04 | 17728462                | G/A  | Gene_Ca_05352      | INTRON                        | SNF2-related                                         |
| Kabuli_wild_17729988 | 1399936813                          | Ca_kabuli_Chr04 | 17729988                | A/C  | Gene_Ca_05352      | INTRON                        | SNF2-related                                         |
| Kabuli_wild_17748171 | 1399936814                          | Ca_kabuli_Chr04 | 17748171                | A/T  | NA                 | INTERGENIC                    | NA                                                   |
| Kabuli_wild_17748696 | 1399936815                          | Ca_kabuli_Chr04 | 17748696                | G/A  | Gene_Ca_05350      | DOWNSTREAM                    | Leucine-rich repeat                                  |
| Kabuli_wild_17752013 | 1399936816                          | Ca_kabuli_Chr04 | 17752013                | C/T  | NA                 | INTERGENIC                    | NA                                                   |
| Kabuli_wild_17760671 | 1399936817                          | Ca_kabuli_Chr04 | 17760671                | G/A  | Gene_Ca_05349      | INTRON                        | PeptidaseS9,prolylilgopeptidase,catalytic domain     |
| Kabuli_wild_17760759 | 1399936818                          | Ca_kabuli_Chr04 | 17760759                | G/A  | Gene_Ca_05349      | INTRON                        | PeptidaseS9,prolylilgopeptidase,catalytic domain     |
| Kabuli_wild_17760841 | 1399936819                          | Ca_kabuli_Chr04 | 17760841                | A/G  | Gene_Ca_05349      | INTRON                        | PeptidaseS9,prolylilgopeptidase,catalytic domain     |



| SNP IDs              | NCBI dbSNP accession IDs (NCBI_SS#) | Chromosomes     | Physical positions (bp) | SNPs | Gene accession IDs | Sequence components of genome | Putative functions                                          |
|----------------------|-------------------------------------|-----------------|-------------------------|------|--------------------|-------------------------------|-------------------------------------------------------------|
| Kabuli_wild_17760853 | 1399936820                          | Ca_kabuli_Chr04 | 17760853                | T/G  | Gene_Ca_05349      | INTRON                        | PeptidaseS9,prolylloleptidase,catalytic domain              |
| Kabuli_wild_17771708 | 1399936821                          | Ca_kabuli_Chr04 | 17771708                | C/G  | Gene_Ca_05348      | UPSTREAM                      | NA                                                          |
| Kabuli_wild_17784792 | 1399936822                          | Ca_kabuli_Chr04 | 17784792                | T/A  | Gene_Ca_05346      | INTRON                        | Protein of unknown function DUF639                          |
| Kabuli_wild_17826472 | 1399936823                          | Ca_kabuli_Chr04 | 17826472                | G/A  | NA                 | INTERGENIC                    | NA                                                          |
| Kabuli_wild_17826533 | 1399936824                          | Ca_kabuli_Chr04 | 17826533                | A/C  | NA                 | INTERGENIC                    | NA                                                          |
| Kabuli_wild_17826543 | 1399936825                          | Ca_kabuli_Chr04 | 17826543                | T/C  | NA                 | INTERGENIC                    | NA                                                          |
| Kabuli_wild_17826580 | 1399936826                          | Ca_kabuli_Chr04 | 17826580                | C/G  | NA                 | INTERGENIC                    | NA                                                          |
| Kabuli_wild_17826601 | 1399936827                          | Ca_kabuli_Chr04 | 17826601                | T/C  | NA                 | INTERGENIC                    | NA                                                          |
| Kabuli_wild_17840078 | 1399936828                          | Ca_kabuli_Chr04 | 17840078                | G/A  | Gene_Ca_18620      | SYNONYMOUS_CODING             | Uncharacterised protein family UPF0497,trans-membrane plant |
| Kabuli_wild_17847854 | 1399936829                          | Ca_kabuli_Chr04 | 17847854                | T/C  | Gene_Ca_18621      | INTRON                        | Methionyl-tRNAsynthetase                                    |
| Kabuli_wild_17847919 | 1399936830                          | Ca_kabuli_Chr04 | 17847919                | C/T  | Gene_Ca_18621      | SYNONYMOUS_CODING             | Methionyl-tRNAsynthetase                                    |
| Kabuli_wild_17847929 | 1399936831                          | Ca_kabuli_Chr04 | 17847929                | G/A  | Gene_Ca_18621      | SYNONYMOUS_CODING             | Methionyl-tRNAsynthetase                                    |
| Kabuli_wild_17856307 | 1399936832                          | Ca_kabuli_Chr04 | 17856307                | T/C  | Gene_Ca_18622      | SYNONYMOUS_CODING             | IKI3                                                        |
| Kabuli_wild_17856311 | 1399936833                          | Ca_kabuli_Chr04 | 17856311                | T/G  | Gene_Ca_18622      | SYNONYMOUS_CODING             | IKI3                                                        |
| Kabuli_wild_17856334 | 1399936834                          | Ca_kabuli_Chr04 | 17856334                | A/G  | Gene_Ca_18622      | SYNONYMOUS_CODING             | IKI3                                                        |
| Kabuli_wild_17857753 | 1399936835                          | Ca_kabuli_Chr04 | 17857753                | C/T  | Gene_Ca_18622      | SYNONYMOUS_CODING             | IKI3                                                        |
| Kabuli_wild_17858122 | 1399936836                          | Ca_kabuli_Chr04 | 17858122                | T/G  | Gene_Ca_18622      | INTRON                        | IKI3                                                        |
| Kabuli_wild_17858133 | 1399936837                          | Ca_kabuli_Chr04 | 17858133                | C/T  | Gene_Ca_18622      | INTRON                        | IKI3                                                        |
| Kabuli_wild_17858135 | 1399936838                          | Ca_kabuli_Chr04 | 17858135                | G/A  | Gene_Ca_18622      | INTRON                        | IKI3                                                        |
| Kabuli_wild_17858140 | 1399936839                          | Ca_kabuli_Chr04 | 17858140                | A/C  | Gene_Ca_18622      | INTRON                        | IKI3                                                        |
| Kabuli_wild_17858143 | 1399936840                          | Ca_kabuli_Chr04 | 17858143                | A/T  | Gene_Ca_18622      | INTRON                        | IKI3                                                        |
| Kabuli_wild_17858144 | 1399936841                          | Ca_kabuli_Chr04 | 17858144                | G/C  | Gene_Ca_18622      | INTRON                        | IKI3                                                        |
| Kabuli_wild_17858152 | 1399936842                          | Ca_kabuli_Chr04 | 17858152                | A/T  | Gene_Ca_18622      | INTRON                        | IKI3                                                        |
| Kabuli_wild_17858159 | 1399936843                          | Ca_kabuli_Chr04 | 17858159                | C/A  | Gene_Ca_18622      | INTRON                        | IKI3                                                        |
| Kabuli_wild_17858226 | 1399936844                          | Ca_kabuli_Chr04 | 17858226                | C/T  | Gene_Ca_18622      | INTRON                        | IKI3                                                        |
| Kabuli_wild_17871763 | 1399936845                          | Ca_kabuli_Chr04 | 17871763                | T/C  | NA                 | INTERGENIC                    | NA                                                          |
| Kabuli_wild_17871804 | 1399936846                          | Ca_kabuli_Chr04 | 17871804                | T/C  | NA                 | INTERGENIC                    | NA                                                          |
| Kabuli_wild_17871828 | 1399936847                          | Ca_kabuli_Chr04 | 17871828                | A/C  | NA                 | INTERGENIC                    | NA                                                          |
| Kabuli_wild_17871915 | 1399936848                          | Ca_kabuli_Chr04 | 17871915                | T/A  | NA                 | INTERGENIC                    | NA                                                          |
| Kabuli_wild_17871919 | 1399936849                          | Ca_kabuli_Chr04 | 17871919                | A/G  | NA                 | INTERGENIC                    | NA                                                          |
| Kabuli_wild_17913682 | 1399936850                          | Ca_kabuli_Chr04 | 17913682                | C/A  | NA                 | INTERGENIC                    | NA                                                          |
| Kabuli_wild_17913698 | 1399936851                          | Ca_kabuli_Chr04 | 17913698                | C/T  | NA                 | INTERGENIC                    | NA                                                          |
| Kabuli_wild_17913719 | 1399936852                          | Ca_kabuli_Chr04 | 17913719                | G/C  | NA                 | INTERGENIC                    | NA                                                          |
| Kabuli_wild_17913726 | 1399936853                          | Ca_kabuli_Chr04 | 17913726                | G/A  | NA                 | INTERGENIC                    | NA                                                          |
| Kabuli_wild_17913731 | 1399936854                          | Ca_kabuli_Chr04 | 17913731                | A/C  | NA                 | INTERGENIC                    | NA                                                          |
| Kabuli_wild_17920613 | 1399936855                          | Ca_kabuli_Chr04 | 17920613                | T/G  | Gene_Ca_18632      | SYNONYMOUS_CODING             | ABC transporter,trans membrane domain                       |
| Kabuli_wild_17920616 | 1399936856                          | Ca_kabuli_Chr04 | 17920616                | C/G  | Gene_Ca_18632      | SYNONYMOUS_CODING             | ABC transporter,trans membrane domain                       |
| Kabuli_wild_17920619 | 1399936857                          | Ca_kabuli_Chr04 | 17920619                | C/G  | Gene_Ca_18632      | NON_SYNONYMOUS_CODING         | ABC transporter,trans membrane domain                       |
| Kabuli_wild_18013299 | 1399936858                          | Ca_kabuli_Chr04 | 18013299                | G/A  | NA                 | INTERGENIC                    | NA                                                          |
| Kabuli_wild_18020942 | 1399936859                          | Ca_kabuli_Chr04 | 18020942                | A/C  | NA                 | INTERGENIC                    | NA                                                          |
| Kabuli_wild_18031975 | 1399936860                          | Ca_kabuli_Chr04 | 18031975                | T/C  | Gene_Ca_18645      | NON_SYNONYMOUS_CODING         | NA                                                          |
| Kabuli_wild_18037013 | 1399936861                          | Ca_kabuli_Chr04 | 18037013                | T/C  | NA                 | INTERGENIC                    | NA                                                          |
| Kabuli_wild_18070293 | 1399936862                          | Ca_kabuli_Chr04 | 18070293                | G/T  | Gene_Ca_18648      | NON_SYNONYMOUS_CODING         | Ankyrinrepeat                                               |
| Kabuli_wild_18071114 | 1399936863                          | Ca_kabuli_Chr04 | 18071114                | C/A  | Gene_Ca_18648      | NON_SYNONYMOUS_CODING         | Ankyrinrepeat                                               |

| SNP IDs              | NCBI dbSNP accession IDs (NCBI_SS#) | Chromosomes     | Physical positions (bp) | SNPs | Gene accession IDs | Sequence components of genome | Putative functions                   |
|----------------------|-------------------------------------|-----------------|-------------------------|------|--------------------|-------------------------------|--------------------------------------|
| Kabuli_wild_18071324 | 1399936864                          | Ca_kabuli_Chr04 | 18071324                | G/A  | Gene_Ca_18648      | NON_SYNONYMOUS_CODING         | Ankyrinrepeat                        |
| Kabuli_wild_18089423 | 1399936865                          | Ca_kabuli_Chr04 | 18089423                | G/C  | Gene_Ca_18650      | SYNONYMOUS_CODING             | NA                                   |
| Kabuli_wild_18117833 | 1399936866                          | Ca_kabuli_Chr04 | 18117833                | T/C  | NA                 | INTERGENIC                    | NA                                   |
| Kabuli_wild_18223721 | 1399936867                          | Ca_kabuli_Chr04 | 18223721                | A/G  | Gene_Ca_18659      | INTRON                        | SET domain                           |
| Kabuli_wild_18228846 | 1399936868                          | Ca_kabuli_Chr04 | 18228846                | G/A  | Gene_Ca_18659      | INTRON                        | SET domain                           |
| Kabuli_wild_18231382 | 1399936869                          | Ca_kabuli_Chr04 | 18231382                | T/C  | Gene_Ca_18659      | INTRON                        | SET domain                           |
| Kabuli_wild_18231407 | 1399936870                          | Ca_kabuli_Chr04 | 18231407                | C/T  | Gene_Ca_18659      | INTRON                        | SET domain                           |
| Kabuli_wild_18231443 | 1399936871                          | Ca_kabuli_Chr04 | 18231443                | T/C  | Gene_Ca_18659      | INTRON                        | SET domain                           |
| Kabuli_wild_18231463 | 1399936872                          | Ca_kabuli_Chr04 | 18231463                | T/C  | Gene_Ca_18659      | INTRON                        | SET domain                           |
| Kabuli_wild_18231466 | 1399936873                          | Ca_kabuli_Chr04 | 18231466                | T/C  | Gene_Ca_18659      | INTRON                        | SET domain                           |
| Kabuli_wild_18231651 | 1399936874                          | Ca_kabuli_Chr04 | 18231651                | A/G  | Gene_Ca_18659      | INTRON                        | SET domain                           |
| Kabuli_wild_18241936 | 1399936875                          | Ca_kabuli_Chr04 | 18241936                | T/C  | Gene_Ca_18659      | INTRON                        | SET domain                           |
| Kabuli_wild_18241995 | 1399936876                          | Ca_kabuli_Chr04 | 18241995                | G/C  | Gene_Ca_18659      | INTRON                        | SET domain                           |
| Kabuli_wild_18242020 | 1399936877                          | Ca_kabuli_Chr04 | 18242020                | C/G  | Gene_Ca_18659      | INTRON                        | SET domain                           |
| Kabuli_wild_18427384 | 1399936878                          | Ca_kabuli_Chr04 | 18427384                | C/T  | Gene_Ca_21626      | INTRON                        | LisHdimerisationmotif                |
| Kabuli_wild_18427385 | 1399936879                          | Ca_kabuli_Chr04 | 18427385                | G/T  | Gene_Ca_21626      | INTRON                        | LisHdimerisationmotif                |
| Kabuli_wild_18429139 | 1399936880                          | Ca_kabuli_Chr04 | 18429139                | C/T  | Gene_Ca_21625      | DOWNSTREAM                    | Pre-mRNACleavagecomplexIIc1p1        |
| Kabuli_wild_18489456 | 1399936881                          | Ca_kabuli_Chr04 | 18489456                | G/C  | Gene_Ca_21622      | UPSTREAM                      | Ubi Aprenyltransferase family        |
| Kabuli_wild_18545489 | 1399936882                          | Ca_kabuli_Chr04 | 18545489                | A/T  | Gene_Ca_21616      | INTRON                        | Protein kinase,catalytic domain      |
| Kabuli_wild_18546209 | 1399936883                          | Ca_kabuli_Chr04 | 18546209                | T/G  | Gene_Ca_21616      | SYNONYMOUS_CODING             | Protein kinase,catalytic domain      |
| Kabuli_wild_18628582 | 1399936884                          | Ca_kabuli_Chr04 | 18628582                | A/G  | Gene_Ca_21604      | SYNONYMOUS_CODING             | Glycosyltransferase,family48         |
| Kabuli_wild_18710941 | 1399936885                          | Ca_kabuli_Chr04 | 18710941                | T/G  | Gene_Ca_13978      | INTRON                        | NA                                   |
| Kabuli_wild_18719417 | 1399936886                          | Ca_kabuli_Chr04 | 18719417                | A/G  | Gene_Ca_13978      | INTRON                        | NA                                   |
| Kabuli_wild_18764659 | 1399936887                          | Ca_kabuli_Chr04 | 18764659                | A/C  | NA                 | INTERGENIC                    | NA                                   |
| Kabuli_wild_18812610 | 1399936888                          | Ca_kabuli_Chr04 | 18812610                | T/C  | NA                 | INTERGENIC                    | NA                                   |
| Kabuli_wild_18916472 | 1399936889                          | Ca_kabuli_Chr04 | 18916472                | G/A  | NA                 | INTERGENIC                    | NA                                   |
| Kabuli_wild_18923641 | 1399936890                          | Ca_kabuli_Chr04 | 18923641                | G/T  | Gene_Ca_13991      | INTRON                        | Nucleotide-sugartransporter          |
| Kabuli_wild_19024699 | 1399936891                          | Ca_kabuli_Chr04 | 19024699                | T/C  | NA                 | INTERGENIC                    | NA                                   |
| Kabuli_wild_19227691 | 1399936892                          | Ca_kabuli_Chr04 | 19227691                | G/C  | Gene_Ca_14021      | NON_SYNONYMOUS_CODING         | Protein kinase,catalytic domain      |
| Kabuli_wild_19263967 | 1399936893                          | Ca_kabuli_Chr04 | 19263967                | T/G  | Gene_Ca_14024      | INTRON                        | NA                                   |
| Kabuli_wild_19267581 | 1399936894                          | Ca_kabuli_Chr04 | 19267581                | A/G  | Gene_Ca_14024      | INTRON                        | NA                                   |
| Kabuli_wild_19540632 | 1399936895                          | Ca_kabuli_Chr04 | 19540632                | A/C  | Gene_Ca_14045      | NON_SYNONYMOUS_CODING         | Spo11/DNAtopoisomeraseVI,subunitA    |
| Kabuli_wild_19579442 | 1399936896                          | Ca_kabuli_Chr04 | 19579442                | C/A  | NA                 | INTERGENIC                    | NA                                   |
| Kabuli_wild_19668502 | 1399936897                          | Ca_kabuli_Chr04 | 19668502                | T/G  | Gene_Ca_14053      | SYNONYMOUS_CODING             | Pentatric peptide repeat             |
| Kabuli_wild_19713311 | 1399936898                          | Ca_kabuli_Chr04 | 19713311                | T/G  | Gene_Ca_14059      | SYNONYMOUS_CODING             | NA                                   |
| Kabuli_wild_19734934 | 1399936899                          | Ca_kabuli_Chr04 | 19734934                | A/G  | Gene_Ca_14061      | SYNONYMOUS_CODING             | Heat shock protein DnaJ,N-terminal   |
| Kabuli_wild_19869729 | 1399936900                          | Ca_kabuli_Chr04 | 19869729                | G/T  | Gene_Ca_17123      | NON_SYNONYMOUS_CODING         | Target SNARE coiled-coil domain      |
| Kabuli_wild_20161601 | 1399936901                          | Ca_kabuli_Chr04 | 20161601                | A/G  | Gene_Ca_17138      | SYNONYMOUS_CODING             | BTB/POZ-like                         |
| Kabuli_wild_20193257 | 1399936902                          | Ca_kabuli_Chr04 | 20193257                | A/G  | NA                 | INTERGENIC                    | NA                                   |
| Kabuli_wild_20308992 | 1399936903                          | Ca_kabuli_Chr04 | 20308992                | C/A  | Gene_Ca_17144      | SYNONYMOUS_CODING             | Phenylalanine/histidineammonia-lyase |
| Kabuli_wild_20398685 | 1399936904                          | Ca_kabuli_Chr04 | 20398685                | A/C  | Gene_Ca_17149      | NON_SYNONYMOUS_CODING         | NA                                   |
| Kabuli_wild_20599050 | 1399936905                          | Ca_kabuli_Chr04 | 20599050                | A/G  | NA                 | INTERGENIC                    | NA                                   |
| Kabuli_wild_20599051 | 1399936906                          | Ca_kabuli_Chr04 | 20599051                | G/A  | NA                 | INTERGENIC                    | NA                                   |
| Kabuli_wild_20599058 | 1399936907                          | Ca_kabuli_Chr04 | 20599058                | T/C  | NA                 | INTERGENIC                    | NA                                   |

| SNP IDs              | NCBI dbSNP accession IDs (NCBI_SS#) | Chromosomes     | Physical positions (bp) | SNPs | Gene accession IDs | Sequence components of genome | Putative functions                                          |
|----------------------|-------------------------------------|-----------------|-------------------------|------|--------------------|-------------------------------|-------------------------------------------------------------|
| Kabuli_wild_20599081 | 1399936908                          | Ca_kabuli_Chr04 | 20599081                | C/T  | NA                 | INTERGENIC                    | NA                                                          |
| Kabuli_wild_20599091 | 1399936909                          | Ca_kabuli_Chr04 | 20599091                | T/G  | NA                 | INTERGENIC                    | NA                                                          |
| Kabuli_wild_20656170 | 1399936910                          | Ca_kabuli_Chr04 | 20656170                | T/G  | Gene_Ca_17165      | SYNONYMOUS_CODING             | NucleoporinNup120/160                                       |
| Kabuli_wild_20657494 | 1399936911                          | Ca_kabuli_Chr04 | 20657494                | C/A  | Gene_Ca_17165      | NON_SYNONYMOUS_CODING         | NucleoporinNup120/160                                       |
| Kabuli_wild_20669174 | 1399936912                          | Ca_kabuli_Chr04 | 20669174                | T/C  | Gene_Ca_17165      | INTRON                        | NucleoporinNup120/160                                       |
| Kabuli_wild_20669442 | 1399936913                          | Ca_kabuli_Chr04 | 20669442                | G/A  | Gene_Ca_17165      | INTRON                        | NucleoporinNup120/160                                       |
| Kabuli_wild_20696952 | 1399936914                          | Ca_kabuli_Chr04 | 20696952                | G/T  | Gene_Ca_17166      | SYNONYMOUS_CODING             | ABC transporter,trans membrane domain                       |
| Kabuli_wild_20774180 | 1399936915                          | Ca_kabuli_Chr04 | 20774180                | C/T  | Gene_Ca_17170      | INTRON                        | NA                                                          |
| Kabuli_wild_20774211 | 1399936916                          | Ca_kabuli_Chr04 | 20774211                | C/T  | Gene_Ca_17170      | INTRON                        | NA                                                          |
| Kabuli_wild_20774238 | 1399936917                          | Ca_kabuli_Chr04 | 20774238                | G/T  | Gene_Ca_17170      | INTRON                        | NA                                                          |
| Kabuli_wild_20774255 | 1399936918                          | Ca_kabuli_Chr04 | 20774255                | C/A  | Gene_Ca_17170      | INTRON                        | NA                                                          |
| Kabuli_wild_20905036 | 1399936919                          | Ca_kabuli_Chr04 | 20905036                | T/A  | Gene_Ca_19045      | INTRON                        | Serine/threoninedehydratase,pyridoxal-phosphate-bindingsite |
| Kabuli_wild_20905105 | 1399936920                          | Ca_kabuli_Chr04 | 20905105                | G/A  | Gene_Ca_19045      | INTRON                        | Serine/threoninedehydratase,pyridoxal-phosphate-bindingsite |
| Kabuli_wild_20943719 | 1399936921                          | Ca_kabuli_Chr04 | 20943719                | T/C  | Gene_Ca_19046      | NON_SYNONYMOUS_CODING         | NA                                                          |
| Kabuli_wild_21385308 | 1399936922                          | Ca_kabuli_Chr04 | 21385308                | A/T  | Gene_Ca_19066      | SYNONYMOUS_CODING             | PeptidaseA1                                                 |
| Kabuli_wild_21687162 | 1399936923                          | Ca_kabuli_Chr04 | 21687162                | T/C  | Gene_Ca_19074      | SYNONYMOUS_CODING             | PeptidaseA1                                                 |
| Kabuli_wild_21835446 | 1399936924                          | Ca_kabuli_Chr04 | 21835446                | T/A  | NA                 | INTERGENIC                    | NA                                                          |
| Kabuli_wild_21835448 | 1399936925                          | Ca_kabuli_Chr04 | 21835448                | G/A  | NA                 | INTERGENIC                    | NA                                                          |
| Kabuli_wild_21835453 | 1399936926                          | Ca_kabuli_Chr04 | 21835453                | C/A  | NA                 | INTERGENIC                    | NA                                                          |
| Kabuli_wild_21835454 | 1399936927                          | Ca_kabuli_Chr04 | 21835454                | C/A  | NA                 | INTERGENIC                    | NA                                                          |
| Kabuli_wild_21835457 | 1399936928                          | Ca_kabuli_Chr04 | 21835457                | T/A  | NA                 | INTERGENIC                    | NA                                                          |
| Kabuli_wild_21835459 | 1399936929                          | Ca_kabuli_Chr04 | 21835459                | T/A  | NA                 | INTERGENIC                    | NA                                                          |
| Kabuli_wild_21931523 | 1399936930                          | Ca_kabuli_Chr04 | 21931523                | T/C  | NA                 | INTERGENIC                    | NA                                                          |
| Kabuli_wild_21931541 | 1399936931                          | Ca_kabuli_Chr04 | 21931541                | C/T  | NA                 | INTERGENIC                    | NA                                                          |
| Kabuli_wild_21931558 | 1399936932                          | Ca_kabuli_Chr04 | 21931558                | G/A  | NA                 | INTERGENIC                    | NA                                                          |
| Kabuli_wild_21931559 | 1399936933                          | Ca_kabuli_Chr04 | 21931559                | G/A  | NA                 | INTERGENIC                    | NA                                                          |
| Kabuli_wild_22081566 | 1399936934                          | Ca_kabuli_Chr04 | 22081566                | C/T  | Gene_Ca_20137      | NON_SYNONYMOUS_CODING         | HhH-GPDdomain                                               |
| Kabuli_wild_22124841 | 1399936935                          | Ca_kabuli_Chr04 | 22124841                | T/C  | Gene_Ca_20135      | NON_SYNONYMOUS_CODING         | NA                                                          |
| Kabuli_wild_22266662 | 1399936936                          | Ca_kabuli_Chr04 | 22266662                | C/T  | NA                 | INTERGENIC                    | NA                                                          |
| Kabuli_wild_22293495 | 1399936937                          | Ca_kabuli_Chr04 | 22293495                | T/C  | NA                 | INTERGENIC                    | NA                                                          |
| Kabuli_wild_22375357 | 1399936938                          | Ca_kabuli_Chr04 | 22375357                | T/G  | Gene_Ca_20122      | INTRON                        | Ribosomal protein 60S                                       |
| Kabuli_wild_22384143 | 1399936939                          | Ca_kabuli_Chr04 | 22384143                | G/A  | Gene_Ca_20121      | SYNONYMOUS_CODING             | NA                                                          |
| Kabuli_wild_22725220 | 1399936940                          | Ca_kabuli_Chr04 | 22725220                | C/T  | Gene_Ca_14476      | DOWNSTREAM                    | Protein of unknown function DUF593                          |
| Kabuli_wild_22725533 | 1399936941                          | Ca_kabuli_Chr04 | 22725533                | T/C  | NA                 | INTERGENIC                    | NA                                                          |
| Kabuli_wild_22850596 | 1399936942                          | Ca_kabuli_Chr04 | 22850596                | C/G  | Gene_Ca_14467      | NON_SYNONYMOUS_CODING         | NA                                                          |
| Kabuli_wild_22859422 | 1399936943                          | Ca_kabuli_Chr04 | 22859422                | G/A  | NA                 | INTERGENIC                    | NA                                                          |
| Kabuli_wild_22860281 | 1399936944                          | Ca_kabuli_Chr04 | 22860281                | A/C  | NA                 | INTERGENIC                    | NA                                                          |
| Kabuli_wild_22860656 | 1399936945                          | Ca_kabuli_Chr04 | 22860656                | C/A  | NA                 | INTERGENIC                    | NA                                                          |
| Kabuli_wild_22865389 | 1399936946                          | Ca_kabuli_Chr04 | 22865389                | C/T  | NA                 | INTERGENIC                    | NA                                                          |
| Kabuli_wild_22865390 | 1399936947                          | Ca_kabuli_Chr04 | 22865390                | G/A  | NA                 | INTERGENIC                    | NA                                                          |
| Kabuli_wild_22865436 | 1399936948                          | Ca_kabuli_Chr04 | 22865436                | A/T  | NA                 | INTERGENIC                    | NA                                                          |
| Kabuli_wild_22904152 | 1399936949                          | Ca_kabuli_Chr04 | 22904152                | G/T  | NA                 | INTERGENIC                    | NA                                                          |
| Kabuli_wild_22904166 | 1399936950                          | Ca_kabuli_Chr04 | 22904166                | T/G  | NA                 | INTERGENIC                    | NA                                                          |
| Kabuli_wild_22908360 | 1399936951                          | Ca_kabuli_Chr04 | 22908360                | A/G  | Gene_Ca_14463      | SYNONYMOUS_CODING             | Pentatric peptide repeat                                    |

| SNP IDs              | NCBI dbSNP accession IDs (NCBI_SS#) | Chromosomes     | Physical positions (bp) | SNPs | Gene accession IDs | Sequence components of genome | Putative functions                        |
|----------------------|-------------------------------------|-----------------|-------------------------|------|--------------------|-------------------------------|-------------------------------------------|
| Kabuli_wild_22971608 | 1399936952                          | Ca_kabuli_Chr04 | 22971608                | T/A  | Gene_Ca_14460      | NON_SYNONYMOUS_CODING         | NA                                        |
| Kabuli_wild_22971614 | 1399936953                          | Ca_kabuli_Chr04 | 22971614                | C/T  | Gene_Ca_14460      | SYNONYMOUS_CODING             | NA                                        |
| Kabuli_wild_22971623 | 1399936954                          | Ca_kabuli_Chr04 | 22971623                | C/T  | Gene_Ca_14460      | SYNONYMOUS_CODING             | NA                                        |
| Kabuli_wild_22971660 | 1399936955                          | Ca_kabuli_Chr04 | 22971660                | G/A  | Gene_Ca_14460      | NON_SYNONYMOUS_CODING         | NA                                        |
| Kabuli_wild_22971744 | 1399936956                          | Ca_kabuli_Chr04 | 22971744                | A/C  | Gene_Ca_14460      | NON_SYNONYMOUS_CODING         | NA                                        |
| Kabuli_wild_22971746 | 1399936957                          | Ca_kabuli_Chr04 | 22971746                | G/A  | Gene_Ca_14460      | SYNONYMOUS_CODING             | NA                                        |
| Kabuli_wild_22971766 | 1399936958                          | Ca_kabuli_Chr04 | 22971766                | A/G  | Gene_Ca_14460      | NON_SYNONYMOUS_CODING         | NA                                        |
| Kabuli_wild_22971847 | 1399936959                          | Ca_kabuli_Chr04 | 22971847                | C/A  | Gene_Ca_14460      | NON_SYNONYMOUS_CODING         | NA                                        |
| Kabuli_wild_22971853 | 1399936960                          | Ca_kabuli_Chr04 | 22971853                | C/A  | Gene_Ca_14460      | NON_SYNONYMOUS_CODING         | NA                                        |
| Kabuli_wild_22971884 | 1399936961                          | Ca_kabuli_Chr04 | 22971884                | G/A  | Gene_Ca_14460      | SYNONYMOUS_CODING             | NA                                        |
| Kabuli_wild_23314665 | 1399936962                          | Ca_kabuli_Chr04 | 23314665                | A/C  | NA                 | INTERGENIC                    | NA                                        |
| Kabuli_wild_23337312 | 1399936963                          | Ca_kabuli_Chr04 | 23337312                | T/G  | NA                 | INTERGENIC                    | NA                                        |
| Kabuli_wild_23361115 | 1399936964                          | Ca_kabuli_Chr04 | 23361115                | G/T  | NA                 | INTERGENIC                    | NA                                        |
| Kabuli_wild_23362978 | 1399936965                          | Ca_kabuli_Chr04 | 23362978                | G/A  | Gene_Ca_14445      | SYNONYMOUS_CODING             | Exodeoxyribonuclease IIIxth               |
| Kabuli_wild_23481919 | 1399936966                          | Ca_kabuli_Chr04 | 23481919                | G/A  | NA                 | INTERGENIC                    | NA                                        |
| Kabuli_wild_23481927 | 1399936967                          | Ca_kabuli_Chr04 | 23481927                | G/T  | NA                 | INTERGENIC                    | NA                                        |
| Kabuli_wild_23481962 | 1399936968                          | Ca_kabuli_Chr04 | 23481962                | G/A  | NA                 | INTERGENIC                    | NA                                        |
| Kabuli_wild_23481990 | 1399936969                          | Ca_kabuli_Chr04 | 23481990                | A/C  | NA                 | INTERGENIC                    | NA                                        |
| Kabuli_wild_23481998 | 1399936970                          | Ca_kabuli_Chr04 | 23481998                | T/C  | NA                 | INTERGENIC                    | NA                                        |
| Kabuli_wild_23482033 | 1399936971                          | Ca_kabuli_Chr04 | 23482033                | A/G  | NA                 | INTERGENIC                    | NA                                        |
| Kabuli_wild_23482042 | 1399936972                          | Ca_kabuli_Chr04 | 23482042                | G/A  | NA                 | INTERGENIC                    | NA                                        |
| Kabuli_wild_23482051 | 1399936973                          | Ca_kabuli_Chr04 | 23482051                | G/A  | NA                 | INTERGENIC                    | NA                                        |
| Kabuli_wild_23486812 | 1399936974                          | Ca_kabuli_Chr04 | 23486812                | A/G  | NA                 | INTERGENIC                    | NA                                        |
| Kabuli_wild_23486824 | 1399936975                          | Ca_kabuli_Chr04 | 23486824                | T/C  | NA                 | INTERGENIC                    | NA                                        |
| Kabuli_wild_23486859 | 1399936976                          | Ca_kabuli_Chr04 | 23486859                | A/G  | NA                 | INTERGENIC                    | NA                                        |
| Kabuli_wild_23486868 | 1399936977                          | Ca_kabuli_Chr04 | 23486868                | G/A  | NA                 | INTERGENIC                    | NA                                        |
| Kabuli_wild_23486877 | 1399936978                          | Ca_kabuli_Chr04 | 23486877                | G/A  | NA                 | INTERGENIC                    | NA                                        |
| Kabuli_wild_23663942 | 1399936979                          | Ca_kabuli_Chr04 | 23663942                | C/T  | NA                 | INTERGENIC                    | NA                                        |
| Kabuli_wild_23718271 | 1399936980                          | Ca_kabuli_Chr04 | 23718271                | C/T  | NA                 | INTERGENIC                    | NA                                        |
| Kabuli_wild_23812574 | 1399936981                          | Ca_kabuli_Chr04 | 23812574                | T/G  | Gene_Ca_14420      | NON_SYNONYMOUS_CODING         | NA                                        |
| Kabuli_wild_24013394 | 1399936982                          | Ca_kabuli_Chr04 | 24013394                | A/C  | Gene_Ca_14412      | UPSTREAM                      | Aminotransferase-like,plant mobile domain |
| Kabuli_wild_24120866 | 1399936983                          | Ca_kabuli_Chr04 | 24120866                | A/G  | NA                 | INTERGENIC                    | NA                                        |
| Kabuli_wild_24179449 | 1399936984                          | Ca_kabuli_Chr04 | 24179449                | T/G  | Gene_Ca_14403      | DOWNSTREAM                    | NA                                        |
| Kabuli_wild_24261779 | 1399936985                          | Ca_kabuli_Chr04 | 24261779                | C/A  | NA                 | INTERGENIC                    | NA                                        |
| Kabuli_wild_24587085 | 1399936986                          | Ca_kabuli_Chr04 | 24587085                | A/G  | NA                 | INTERGENIC                    | NA                                        |
| Kabuli_wild_24587112 | 1399936987                          | Ca_kabuli_Chr04 | 24587112                | C/T  | NA                 | INTERGENIC                    | NA                                        |
| Kabuli_wild_24614582 | 1399936988                          | Ca_kabuli_Chr04 | 24614582                | G/T  | NA                 | INTERGENIC                    | NA                                        |
| Kabuli_wild_24729302 | 1399936989                          | Ca_kabuli_Chr04 | 24729302                | T/C  | Gene_Ca_20853      | INTRON                        | Protein kinase,catalytic domain           |
| Kabuli_wild_24732990 | 1399936990                          | Ca_kabuli_Chr04 | 24732990                | T/C  | Gene_Ca_20853      | INTRON                        | Protein kinase,catalytic domain           |
| Kabuli_wild_24732991 | 1399936991                          | Ca_kabuli_Chr04 | 24732991                | G/T  | Gene_Ca_20853      | INTRON                        | Protein kinase,catalytic domain           |
| Kabuli_wild_24771737 | 1399936992                          | Ca_kabuli_Chr04 | 24771737                | T/A  | Gene_Ca_20851      | NON_SYNONYMOUS_CODING         | NA                                        |
| Kabuli_wild_24782714 | 1399936993                          | Ca_kabuli_Chr04 | 24782714                | C/A  | Gene_Ca_20850      | NON_SYNONYMOUS_CODING         | NA                                        |
| Kabuli_wild_24782715 | 1399936994                          | Ca_kabuli_Chr04 | 24782715                | A/G  | Gene_Ca_20850      | NON_SYNONYMOUS_CODING         | NA                                        |
| Kabuli_wild_24856115 | 1399936995                          | Ca_kabuli_Chr04 | 24856115                | A/C  | Gene_Ca_20847      | NON_SYNONYMOUS_CODING         | Protein kinase,catalytic domain           |

| SNP IDs              | NCBI dbSNP accession IDs (NCBI_SS#) | Chromosomes     | Physical positions (bp) | SNPs | Gene accession IDs | Sequence components of genome | Putative functions                |
|----------------------|-------------------------------------|-----------------|-------------------------|------|--------------------|-------------------------------|-----------------------------------|
| Kabuli_wild_24857501 | 1399936996                          | Ca_kabuli_Chr04 | 24857501                | A/G  | Gene_Ca_20847      | INTRON                        | Protein kinase,catalytic domain   |
| Kabuli_wild_24861477 | 1399936997                          | Ca_kabuli_Chr04 | 24861477                | T/G  | Gene_Ca_20847      | INTRON                        | Protein kinase,catalytic domain   |
| Kabuli_wild_24861500 | 1399936998                          | Ca_kabuli_Chr04 | 24861500                | A/C  | Gene_Ca_20847      | INTRON                        | Protein kinase,catalytic domain   |
| Kabuli_wild_24979942 | 1399936999                          | Ca_kabuli_Chr04 | 24979942                | A/T  | Gene_Ca_20842      | DOWNSTREAM                    | Lipase,GDSL                       |
| Kabuli_wild_25318255 | 1399937000                          | Ca_kabuli_Chr04 | 25318255                | T/C  | NA                 | INTERGENIC                    | NA                                |
| Kabuli_wild_25401714 | 1399937001                          | Ca_kabuli_Chr04 | 25401714                | T/C  | NA                 | INTERGENIC                    | NA                                |
| Kabuli_wild_25446684 | 1399937002                          | Ca_kabuli_Chr04 | 25446684                | T/C  | NA                 | INTERGENIC                    | NA                                |
| Kabuli_wild_25455156 | 1399937003                          | Ca_kabuli_Chr04 | 25455156                | G/A  | NA                 | INTERGENIC                    | NA                                |
| Kabuli_wild_25455204 | 1399937004                          | Ca_kabuli_Chr04 | 25455204                | A/G  | NA                 | INTERGENIC                    | NA                                |
| Kabuli_wild_25455208 | 1399937005                          | Ca_kabuli_Chr04 | 25455208                | C/A  | NA                 | INTERGENIC                    | NA                                |
| Kabuli_wild_25463680 | 1399937006                          | Ca_kabuli_Chr04 | 25463680                | A/C  | NA                 | INTERGENIC                    | NA                                |
| Kabuli_wild_25592484 | 1399937007                          | Ca_kabuli_Chr04 | 25592484                | A/C  | NA                 | INTERGENIC                    | NA                                |
| Kabuli_wild_25592487 | 1399937008                          | Ca_kabuli_Chr04 | 25592487                | A/G  | NA                 | INTERGENIC                    | NA                                |
| Kabuli_wild_25729905 | 1399937009                          | Ca_kabuli_Chr04 | 25729905                | C/A  | NA                 | INTERGENIC                    | NA                                |
| Kabuli_wild_25729977 | 1399937010                          | Ca_kabuli_Chr04 | 25729977                | C/T  | NA                 | INTERGENIC                    | NA                                |
| Kabuli_wild_25747256 | 1399937011                          | Ca_kabuli_Chr04 | 25747256                | T/C  | NA                 | INTERGENIC                    | NA                                |
| Kabuli_wild_25747262 | 1399937012                          | Ca_kabuli_Chr04 | 25747262                | G/A  | NA                 | INTERGENIC                    | NA                                |
| Kabuli_wild_25747274 | 1399937013                          | Ca_kabuli_Chr04 | 25747274                | T/C  | NA                 | INTERGENIC                    | NA                                |
| Kabuli_wild_25747275 | 1399937014                          | Ca_kabuli_Chr04 | 25747275                | G/A  | NA                 | INTERGENIC                    | NA                                |
| Kabuli_wild_25747281 | 1399937015                          | Ca_kabuli_Chr04 | 25747281                | T/C  | NA                 | INTERGENIC                    | NA                                |
| Kabuli_wild_25747295 | 1399937016                          | Ca_kabuli_Chr04 | 25747295                | G/A  | NA                 | INTERGENIC                    | NA                                |
| Kabuli_wild_25747296 | 1399937017                          | Ca_kabuli_Chr04 | 25747296                | T/C  | NA                 | INTERGENIC                    | NA                                |
| Kabuli_wild_25747301 | 1399937018                          | Ca_kabuli_Chr04 | 25747301                | C/G  | NA                 | INTERGENIC                    | NA                                |
| Kabuli_wild_25747313 | 1399937019                          | Ca_kabuli_Chr04 | 25747313                | T/G  | NA                 | INTERGENIC                    | NA                                |
| Kabuli_wild_25747353 | 1399937020                          | Ca_kabuli_Chr04 | 25747353                | A/C  | NA                 | INTERGENIC                    | NA                                |
| Kabuli_wild_25809665 | 1399937021                          | Ca_kabuli_Chr04 | 25809665                | T/C  | Gene_Ca_16599      | INTRON                        | Aminoglycoside phosphotransferase |
| Kabuli_wild_25810557 | 1399937022                          | Ca_kabuli_Chr04 | 25810557                | T/C  | Gene_Ca_16599      | INTRON                        | Aminoglycoside phosphotransferase |
| Kabuli_wild_25840345 | 1399937023                          | Ca_kabuli_Chr04 | 25840345                | T/A  | Gene_Ca_16601      | INTRON                        | Ankyrinrepeat                     |
| Kabuli_wild_25855756 | 1399937024                          | Ca_kabuli_Chr04 | 25855756                | C/A  | NA                 | INTERGENIC                    | NA                                |
| Kabuli_wild_25873290 | 1399937025                          | Ca_kabuli_Chr04 | 25873290                | A/G  | Gene_Ca_16604      | INTRON                        | Zinc finger, RING-type            |
| Kabuli_wild_25921165 | 1399937026                          | Ca_kabuli_Chr04 | 25921165                | T/C  | Gene_Ca_16606      | INTRON                        | Thiolase                          |
| Kabuli_wild_26000444 | 1399937027                          | Ca_kabuli_Chr04 | 26000444                | C/T  | NA                 | INTERGENIC                    | NA                                |
| Kabuli_wild_26000454 | 1399937028                          | Ca_kabuli_Chr04 | 26000454                | C/T  | NA                 | INTERGENIC                    | NA                                |
| Kabuli_wild_26000483 | 1399937029                          | Ca_kabuli_Chr04 | 26000483                | T/A  | NA                 | INTERGENIC                    | NA                                |
| Kabuli_wild_26000532 | 1399937030                          | Ca_kabuli_Chr04 | 26000532                | C/T  | NA                 | INTERGENIC                    | NA                                |
| Kabuli_wild_26002991 | 1399937031                          | Ca_kabuli_Chr04 | 26002991                | C/A  | Gene_Ca_16610      | INTRON                        | Aldo/ketoreductase                |
| Kabuli_wild_26008744 | 1399937032                          | Ca_kabuli_Chr04 | 26008744                | G/A  | NA                 | INTERGENIC                    | NA                                |
| Kabuli_wild_26008745 | 1399937033                          | Ca_kabuli_Chr04 | 26008745                | G/A  | NA                 | INTERGENIC                    | NA                                |
| Kabuli_wild_26008748 | 1399937034                          | Ca_kabuli_Chr04 | 26008748                | C/T  | NA                 | INTERGENIC                    | NA                                |
| Kabuli_wild_26008768 | 1399937035                          | Ca_kabuli_Chr04 | 26008768                | A/G  | NA                 | INTERGENIC                    | NA                                |
| Kabuli_wild_26008772 | 1399937036                          | Ca_kabuli_Chr04 | 26008772                | C/T  | NA                 | INTERGENIC                    | NA                                |
| Kabuli_wild_26008816 | 1399937037                          | Ca_kabuli_Chr04 | 26008816                | A/C  | NA                 | INTERGENIC                    | NA                                |
| Kabuli_wild_26008835 | 1399937038                          | Ca_kabuli_Chr04 | 26008835                | C/T  | NA                 | INTERGENIC                    | NA                                |
| Kabuli_wild_26009438 | 1399937039                          | Ca_kabuli_Chr04 | 26009438                | G/T  | NA                 | INTERGENIC                    | NA                                |

| SNP IDs              | NCBI dbSNP accession IDs (NCBI_SS#) | Chromosomes     | Physical positions (bp) | SNPs | Gene accession IDs | Sequence components of genome | Putative functions                      |
|----------------------|-------------------------------------|-----------------|-------------------------|------|--------------------|-------------------------------|-----------------------------------------|
| Kabuli_wild_26009439 | 1399937040                          | Ca_kabuli_Chr04 | 26009439                | G/T  | NA                 | INTERGENIC                    | NA                                      |
| Kabuli_wild_26028734 | 1399937041                          | Ca_kabuli_Chr04 | 26028734                | G/A  | NA                 | INTERGENIC                    | NA                                      |
| Kabuli_wild_26028738 | 1399937042                          | Ca_kabuli_Chr04 | 26028738                | T/G  | NA                 | INTERGENIC                    | NA                                      |
| Kabuli_wild_26028770 | 1399937043                          | Ca_kabuli_Chr04 | 26028770                | C/T  | NA                 | INTERGENIC                    | NA                                      |
| Kabuli_wild_26089832 | 1399937044                          | Ca_kabuli_Chr04 | 26089832                | C/T  | NA                 | INTERGENIC                    | NA                                      |
| Kabuli_wild_26221888 | 1399937045                          | Ca_kabuli_Chr04 | 26221888                | T/C  | NA                 | INTERGENIC                    | NA                                      |
| Kabuli_wild_26222180 | 1399937046                          | Ca_kabuli_Chr04 | 26222180                | A/G  | NA                 | INTERGENIC                    | NA                                      |
| Kabuli_wild_26242006 | 1399937047                          | Ca_kabuli_Chr04 | 26242006                | A/G  | Gene_Ca_16616      | SYNONYMOUS_CODING             | NA                                      |
| Kabuli_wild_26358597 | 1399937048                          | Ca_kabuli_Chr04 | 26358597                | C/T  | NA                 | INTERGENIC                    | NA                                      |
| Kabuli_wild_26470555 | 1399937049                          | Ca_kabuli_Chr04 | 26470555                | G/A  | NA                 | INTERGENIC                    | NA                                      |
| Kabuli_wild_26511506 | 1399937050                          | Ca_kabuli_Chr04 | 26511506                | A/T  | NA                 | INTERGENIC                    | NA                                      |
| Kabuli_wild_26511507 | 1399937051                          | Ca_kabuli_Chr04 | 26511507                | G/C  | NA                 | INTERGENIC                    | NA                                      |
| Kabuli_wild_26511513 | 1399937052                          | Ca_kabuli_Chr04 | 26511513                | G/C  | NA                 | INTERGENIC                    | NA                                      |
| Kabuli_wild_26511514 | 1399937053                          | Ca_kabuli_Chr04 | 26511514                | G/A  | NA                 | INTERGENIC                    | NA                                      |
| Kabuli_wild_26511520 | 1399937054                          | Ca_kabuli_Chr04 | 26511520                | G/A  | NA                 | INTERGENIC                    | NA                                      |
| Kabuli_wild_26511526 | 1399937055                          | Ca_kabuli_Chr04 | 26511526                | G/A  | NA                 | INTERGENIC                    | NA                                      |
| Kabuli_wild_26511530 | 1399937056                          | Ca_kabuli_Chr04 | 26511530                | A/T  | NA                 | INTERGENIC                    | NA                                      |
| Kabuli_wild_26511538 | 1399937057                          | Ca_kabuli_Chr04 | 26511538                | G/A  | NA                 | INTERGENIC                    | NA                                      |
| Kabuli_wild_26511551 | 1399937058                          | Ca_kabuli_Chr04 | 26511551                | G/A  | NA                 | INTERGENIC                    | NA                                      |
| Kabuli_wild_26511563 | 1399937059                          | Ca_kabuli_Chr04 | 26511563                | G/A  | NA                 | INTERGENIC                    | NA                                      |
| Kabuli_wild_26511571 | 1399937060                          | Ca_kabuli_Chr04 | 26511571                | A/G  | NA                 | INTERGENIC                    | NA                                      |
| Kabuli_wild_26511577 | 1399937061                          | Ca_kabuli_Chr04 | 26511577                | A/T  | NA                 | INTERGENIC                    | NA                                      |
| Kabuli_wild_26529606 | 1399937062                          | Ca_kabuli_Chr04 | 26529606                | C/T  | Gene_Ca_25003      | INTRON                        | RNA recognition motif domain            |
| Kabuli_wild_26532763 | 1399937063                          | Ca_kabuli_Chr04 | 26532763                | T/G  | Gene_Ca_25003      | INTRON                        | RNA recognition motif domain            |
| Kabuli_wild_26537053 | 1399937064                          | Ca_kabuli_Chr04 | 26537053                | C/T  | Gene_Ca_25003      | DOWNSTREAM                    | RNA recognition motif domain            |
| Kabuli_wild_26537258 | 1399937065                          | Ca_kabuli_Chr04 | 26537258                | A/C  | Gene_Ca_25003      | DOWNSTREAM                    | RNA recognition motif domain            |
| Kabuli_wild_26544731 | 1399937066                          | Ca_kabuli_Chr04 | 26544731                | T/G  | Gene_Ca_25002      | NON_SYNONYMOUS_CODING         | C2 calcium-dependent membrane targeting |
| Kabuli_wild_26815871 | 1399937067                          | Ca_kabuli_Chr04 | 26815871                | A/T  | NA                 | INTERGENIC                    | NA                                      |
| Kabuli_wild_26834570 | 1399937068                          | Ca_kabuli_Chr04 | 26834570                | C/A  | Gene_Ca_20439      | NON_SYNONYMOUS_CODING         | Ammoniumtransporter                     |
| Kabuli_wild_26915621 | 1399937069                          | Ca_kabuli_Chr04 | 26915621                | G/A  | NA                 | INTERGENIC                    | NA                                      |
| Kabuli_wild_26915626 | 1399937070                          | Ca_kabuli_Chr04 | 26915626                | C/T  | NA                 | INTERGENIC                    | NA                                      |
| Kabuli_wild_26915638 | 1399937071                          | Ca_kabuli_Chr04 | 26915638                | G/A  | NA                 | INTERGENIC                    | NA                                      |
| Kabuli_wild_26989204 | 1399937072                          | Ca_kabuli_Chr04 | 26989204                | A/C  | Gene_Ca_20453      | NON_SYNONYMOUS_CODING         | RibosomalproteinS3,C-terminal           |
| Kabuli_wild_27078914 | 1399937073                          | Ca_kabuli_Chr04 | 27078914                | C/A  | NA                 | INTERGENIC                    | NA                                      |
| Kabuli_wild_27078987 | 1399937074                          | Ca_kabuli_Chr04 | 27078987                | A/G  | NA                 | INTERGENIC                    | NA                                      |
| Kabuli_wild_27095371 | 1399937075                          | Ca_kabuli_Chr04 | 27095371                | A/G  | NA                 | INTERGENIC                    | NA                                      |
| Kabuli_wild_27095401 | 1399937076                          | Ca_kabuli_Chr04 | 27095401                | A/T  | NA                 | INTERGENIC                    | NA                                      |
| Kabuli_wild_27102817 | 1399937077                          | Ca_kabuli_Chr04 | 27102817                | A/C  | NA                 | INTERGENIC                    | NA                                      |
| Kabuli_wild_27102833 | 1399937078                          | Ca_kabuli_Chr04 | 27102833                | G/T  | NA                 | INTERGENIC                    | NA                                      |
| Kabuli_wild_27228499 | 1399937079                          | Ca_kabuli_Chr04 | 27228499                | T/C  | Gene_Ca_20460      | NON_SYNONYMOUS_CODING         | Protein of unknown function DUF3527     |
| Kabuli_wild_27262893 | 1399937080                          | Ca_kabuli_Chr04 | 27262893                | G/A  | NA                 | INTERGENIC                    | NA                                      |
| Kabuli_wild_27268238 | 1399937081                          | Ca_kabuli_Chr04 | 27268238                | T/A  | NA                 | INTERGENIC                    | NA                                      |
| Kabuli_wild_27268301 | 1399937082                          | Ca_kabuli_Chr04 | 27268301                | G/A  | Gene_Ca_20462      | UPSTREAM                      | General substrate transporter           |
| Kabuli_wild_27274063 | 1399937083                          | Ca_kabuli_Chr04 | 27274063                | G/A  | NA                 | INTERGENIC                    | NA                                      |

| SNP IDs              | NCBI dbSNP accession IDs (NCBI_SS#) | Chromosomes     | Physical positions (bp) | SNPs | Gene accession IDs | Sequence components of genome | Putative functions                         |
|----------------------|-------------------------------------|-----------------|-------------------------|------|--------------------|-------------------------------|--------------------------------------------|
| Kabuli_wild_27388419 | 1399937084                          | Ca_kabuli_Chr04 | 27388419                | A/G  | NA                 | INTERGENIC                    | NA                                         |
| Kabuli_wild_27388431 | 1399937085                          | Ca_kabuli_Chr04 | 27388431                | T/C  | NA                 | INTERGENIC                    | NA                                         |
| Kabuli_wild_27493010 | 1399937086                          | Ca_kabuli_Chr04 | 27493010                | G/T  | Gene_Ca_21317      | SYNONYMOUS_CODING             | Protein of unknown function DUF716, TMEM45 |
| Kabuli_wild_27613432 | 1399937087                          | Ca_kabuli_Chr04 | 27613432                | G/A  | Gene_Ca_21314      | INTRON                        | Peptidase C48, SUMO/Sentrin/Ubl1           |
| Kabuli_wild_27613450 | 1399937088                          | Ca_kabuli_Chr04 | 27613450                | C/T  | Gene_Ca_21314      | INTRON                        | Peptidase C48, SUMO/Sentrin/Ubl1           |
| Kabuli_wild_27613452 | 1399937089                          | Ca_kabuli_Chr04 | 27613452                | G/A  | Gene_Ca_21314      | INTRON                        | Peptidase C48, SUMO/Sentrin/Ubl1           |
| Kabuli_wild_27617803 | 1399937090                          | Ca_kabuli_Chr04 | 27617803                | A/G  | NA                 | INTERGENIC                    | NA                                         |
| Kabuli_wild_27625368 | 1399937091                          | Ca_kabuli_Chr04 | 27625368                | T/A  | Gene_Ca_21312      | INTRON                        | Protein of unknown function DUF810         |
| Kabuli_wild_27626559 | 1399937092                          | Ca_kabuli_Chr04 | 27626559                | G/A  | Gene_Ca_21312      | SYNONYMOUS_CODING             | Protein of unknown function DUF810         |
| Kabuli_wild_27626999 | 1399937093                          | Ca_kabuli_Chr04 | 27626999                | C/T  | Gene_Ca_21312      | SYNONYMOUS_CODING             | Protein of unknown function DUF810         |
| Kabuli_wild_27661241 | 1399937094                          | Ca_kabuli_Chr04 | 27661241                | T/G  | Gene_Ca_21309      | SYNONYMOUS_CODING             | NA                                         |
| Kabuli_wild_27661326 | 1399937095                          | Ca_kabuli_Chr04 | 27661326                | A/G  | Gene_Ca_21309      | NON_SYNONYMOUS_CODING         | NA                                         |
| Kabuli_wild_27669829 | 1399937096                          | Ca_kabuli_Chr04 | 27669829                | C/G  | NA                 | INTERGENIC                    | NA                                         |
| Kabuli_wild_27777968 | 1399937097                          | Ca_kabuli_Chr04 | 27777968                | A/C  | Gene_Ca_21303      | INTRON                        | MATH                                       |
| Kabuli_wild_27786162 | 1399937098                          | Ca_kabuli_Chr04 | 27786162                | G/C  | Gene_Ca_21303      | INTRON                        | MATH                                       |
| Kabuli_wild_27786356 | 1399937099                          | Ca_kabuli_Chr04 | 27786356                | G/C  | Gene_Ca_21303      | INTRON                        | MATH                                       |
| Kabuli_wild_27970989 | 1399937100                          | Ca_kabuli_Chr04 | 27970989                | T/G  | Gene_Ca_21299      | SYNONYMOUS_CODING             | GAF                                        |
| Kabuli_wild_27971211 | 1399937101                          | Ca_kabuli_Chr04 | 27971211                | A/T  | Gene_Ca_21299      | NON_SYNONYMOUS_CODING         | GAF                                        |
| Kabuli_wild_28061002 | 1399937102                          | Ca_kabuli_Chr04 | 28061002                | A/C  | Gene_Ca_23178      | SYNONYMOUS_CODING             | NA                                         |
| Kabuli_wild_28092609 | 1399937103                          | Ca_kabuli_Chr04 | 28092609                | G/A  | Gene_Ca_23175      | NON_SYNONYMOUS_CODING         | Crotonase,core                             |
| Kabuli_wild_28092724 | 1399937104                          | Ca_kabuli_Chr04 | 28092724                | T/A  | Gene_Ca_23175      | NON_SYNONYMOUS_CODING         | Crotonase,core                             |
| Kabuli_wild_28092725 | 1399937105                          | Ca_kabuli_Chr04 | 28092725                | T/G  | Gene_Ca_23175      | NON_SYNONYMOUS_CODING         | Crotonase,core                             |
| Kabuli_wild_28092727 | 1399937106                          | Ca_kabuli_Chr04 | 28092727                | T/A  | Gene_Ca_23175      | NON_SYNONYMOUS_CODING         | Crotonase,core                             |
| Kabuli_wild_28246738 | 1399937107                          | Ca_kabuli_Chr04 | 28246738                | T/C  | NA                 | INTERGENIC                    | NA                                         |
| Kabuli_wild_28246744 | 1399937108                          | Ca_kabuli_Chr04 | 28246744                | C/T  | NA                 | INTERGENIC                    | NA                                         |
| Kabuli_wild_28246755 | 1399937109                          | Ca_kabuli_Chr04 | 28246755                | C/T  | NA                 | INTERGENIC                    | NA                                         |
| Kabuli_wild_28289900 | 1399937110                          | Ca_kabuli_Chr04 | 28289900                | C/A  | NA                 | INTERGENIC                    | NA                                         |
| Kabuli_wild_28299238 | 1399937111                          | Ca_kabuli_Chr04 | 28299238                | G/A  | Gene_Ca_23164      | DOWNSTREAM                    | Cryptochrome/DNAphotolyase,class1          |
| Kabuli_wild_28300544 | 1399937112                          | Ca_kabuli_Chr04 | 28300544                | C/A  | Gene_Ca_23165      | DOWNSTREAM                    | General substrate transporter              |
| Kabuli_wild_28301853 | 1399937113                          | Ca_kabuli_Chr04 | 28301853                | T/C  | Gene_Ca_23165      | DOWNSTREAM                    | General substrate transporter              |
| Kabuli_wild_28376900 | 1399937114                          | Ca_kabuli_Chr04 | 28376900                | T/C  | Gene_Ca_23162      | SYNONYMOUS_CODING             | Lactate/malatedehydrogenase,N-terminal     |
| Kabuli_wild_28423079 | 1399937115                          | Ca_kabuli_Chr04 | 28423079                | T/C  | NA                 | INTERGENIC                    | NA                                         |
| Kabuli_wild_28423140 | 1399937116                          | Ca_kabuli_Chr04 | 28423140                | A/G  | NA                 | INTERGENIC                    | NA                                         |
| Kabuli_wild_28423188 | 1399937117                          | Ca_kabuli_Chr04 | 28423188                | A/G  | NA                 | INTERGENIC                    | NA                                         |
| Kabuli_wild_28431706 | 1399937118                          | Ca_kabuli_Chr04 | 28431706                | G/A  | NA                 | INTERGENIC                    | NA                                         |
| Kabuli_wild_28516385 | 1399937119                          | Ca_kabuli_Chr04 | 28516385                | T/G  | Gene_Ca_26231      | SYNONYMOUS_CODING             | Protein of unknown function DUF668         |
| Kabuli_wild_28516428 | 1399937120                          | Ca_kabuli_Chr04 | 28516428                | T/G  | Gene_Ca_26231      | NON_SYNONYMOUS_CODING         | Protein of unknown function DUF668         |
| Kabuli_wild_28570657 | 1399937121                          | Ca_kabuli_Chr04 | 28570657                | C/T  | NA                 | INTERGENIC                    | NA                                         |
| Kabuli_wild_28669453 | 1399937122                          | Ca_kabuli_Chr04 | 28669453                | C/T  | NA                 | INTERGENIC                    | NA                                         |
| Kabuli_wild_28669477 | 1399937123                          | Ca_kabuli_Chr04 | 28669477                | A/C  | NA                 | INTERGENIC                    | NA                                         |
| Kabuli_wild_28669515 | 1399937124                          | Ca_kabuli_Chr04 | 28669515                | T/G  | NA                 | INTERGENIC                    | NA                                         |
| Kabuli_wild_28790085 | 1399937125                          | Ca_kabuli_Chr04 | 28790085                | A/G  | NA                 | INTERGENIC                    | NA                                         |
| Kabuli_wild_28891107 | 1399937126                          | Ca_kabuli_Chr04 | 28891107                | G/A  | NA                 | INTERGENIC                    | NA                                         |
| Kabuli_wild_28911272 | 1399937127                          | Ca_kabuli_Chr04 | 28911272                | T/A  | NA                 | INTERGENIC                    | NA                                         |



| SNP IDs              | NCBI dbSNP accession IDs (NCBI_SS#) | Chromosomes     | Physical positions (bp) | SNPs | Gene accession IDs | Sequence components of genome | Putative functions                                          |
|----------------------|-------------------------------------|-----------------|-------------------------|------|--------------------|-------------------------------|-------------------------------------------------------------|
| Kabuli_wild_28911274 | 1399937128                          | Ca_kabuli_Chr04 | 28911274                | G/A  | NA                 | INTERGENIC                    | NA                                                          |
| Kabuli_wild_29582219 | 1399937129                          | Ca_kabuli_Chr04 | 29582219                | A/C  | NA                 | INTERGENIC                    | NA                                                          |
| Kabuli_wild_29582227 | 1399937130                          | Ca_kabuli_Chr04 | 29582227                | G/A  | NA                 | INTERGENIC                    | NA                                                          |
| Kabuli_wild_29582228 | 1399937131                          | Ca_kabuli_Chr04 | 29582228                | G/A  | NA                 | INTERGENIC                    | NA                                                          |
| Kabuli_wild_29582232 | 1399937132                          | Ca_kabuli_Chr04 | 29582232                | C/T  | NA                 | INTERGENIC                    | NA                                                          |
| Kabuli_wild_29582235 | 1399937133                          | Ca_kabuli_Chr04 | 29582235                | T/A  | NA                 | INTERGENIC                    | NA                                                          |
| Kabuli_wild_29582249 | 1399937134                          | Ca_kabuli_Chr04 | 29582249                | C/T  | NA                 | INTERGENIC                    | NA                                                          |
| Kabuli_wild_29582252 | 1399937135                          | Ca_kabuli_Chr04 | 29582252                | G/A  | NA                 | INTERGENIC                    | NA                                                          |
| Kabuli_wild_29582255 | 1399937136                          | Ca_kabuli_Chr04 | 29582255                | C/T  | NA                 | INTERGENIC                    | NA                                                          |
| Kabuli_wild_29582257 | 1399937137                          | Ca_kabuli_Chr04 | 29582257                | G/A  | NA                 | INTERGENIC                    | NA                                                          |
| Kabuli_wild_29582268 | 1399937138                          | Ca_kabuli_Chr04 | 29582268                | C/G  | NA                 | INTERGENIC                    | NA                                                          |
| Kabuli_wild_29582271 | 1399937139                          | Ca_kabuli_Chr04 | 29582271                | C/T  | NA                 | INTERGENIC                    | NA                                                          |
| Kabuli_wild_29582273 | 1399937140                          | Ca_kabuli_Chr04 | 29582273                | G/A  | NA                 | INTERGENIC                    | NA                                                          |
| Kabuli_wild_29582282 | 1399937141                          | Ca_kabuli_Chr04 | 29582282                | C/A  | NA                 | INTERGENIC                    | NA                                                          |
| Kabuli_wild_29582285 | 1399937142                          | Ca_kabuli_Chr04 | 29582285                | C/A  | NA                 | INTERGENIC                    | NA                                                          |
| Kabuli_wild_29582286 | 1399937143                          | Ca_kabuli_Chr04 | 29582286                | T/A  | NA                 | INTERGENIC                    | NA                                                          |
| Kabuli_wild_29582289 | 1399937144                          | Ca_kabuli_Chr04 | 29582289                | G/A  | NA                 | INTERGENIC                    | NA                                                          |
| Kabuli_wild_29582294 | 1399937145                          | Ca_kabuli_Chr04 | 29582294                | G/A  | NA                 | INTERGENIC                    | NA                                                          |
| Kabuli_wild_29582296 | 1399937146                          | Ca_kabuli_Chr04 | 29582296                | C/T  | NA                 | INTERGENIC                    | NA                                                          |
| Kabuli_wild_29582301 | 1399937147                          | Ca_kabuli_Chr04 | 29582301                | G/T  | NA                 | INTERGENIC                    | NA                                                          |
| Kabuli_wild_29671563 | 1399937148                          | Ca_kabuli_Chr04 | 29671563                | G/A  | NA                 | INTERGENIC                    | NA                                                          |
| Kabuli_wild_29671606 | 1399937149                          | Ca_kabuli_Chr04 | 29671606                | G/A  | NA                 | INTERGENIC                    | NA                                                          |
| Kabuli_wild_29683718 | 1399937150                          | Ca_kabuli_Chr04 | 29683718                | A/T  | Gene_Ca_14166      | NON_SYNONYMOUS_CODING         | Kinesin,motordomain                                         |
| Kabuli_wild_29855493 | 1399937151                          | Ca_kabuli_Chr04 | 29855493                | T/G  | NA                 | INTERGENIC                    | NA                                                          |
| Kabuli_wild_29923380 | 1399937152                          | Ca_kabuli_Chr04 | 29923380                | G/A  | Gene_Ca_14177      | SYNONYMOUS_CODING             | Plantperoxidase                                             |
| Kabuli_wild_29958113 | 1399937153                          | Ca_kabuli_Chr04 | 29958113                | G/A  | NA                 | INTERGENIC                    | NA                                                          |
| Kabuli_wild_29958122 | 1399937154                          | Ca_kabuli_Chr04 | 29958122                | T/G  | NA                 | INTERGENIC                    | NA                                                          |
| Kabuli_wild_29972268 | 1399937155                          | Ca_kabuli_Chr04 | 29972268                | T/G  | NA                 | INTERGENIC                    | NA                                                          |
| Kabuli_wild_30028206 | 1399937156                          | Ca_kabuli_Chr04 | 30028206                | C/A  | NA                 | INTERGENIC                    | NA                                                          |
| Kabuli_wild_30131105 | 1399937157                          | Ca_kabuli_Chr04 | 30131105                | T/C  | NA                 | INTERGENIC                    | NA                                                          |
| Kabuli_wild_30153390 | 1399937158                          | Ca_kabuli_Chr04 | 30153390                | G/A  | Gene_Ca_14185      | DOWNSTREAM                    | Plastid lipid-associated protein/fibrillin conserved domain |
| Kabuli_wild_30153448 | 1399937159                          | Ca_kabuli_Chr04 | 30153448                | T/C  | Gene_Ca_14185      | DOWNSTREAM                    | Plastid lipid-associated protein/fibrillin conserved domain |
| Kabuli_wild_30153505 | 1399937160                          | Ca_kabuli_Chr04 | 30153505                | C/G  | Gene_Ca_14185      | DOWNSTREAM                    | Plastid lipid-associated protein/fibrillin conserved domain |
| Kabuli_wild_30156596 | 1399937161                          | Ca_kabuli_Chr04 | 30156596                | C/G  | NA                 | INTERGENIC                    | NA                                                          |
| Kabuli_wild_30156624 | 1399937162                          | Ca_kabuli_Chr04 | 30156624                | A/T  | NA                 | INTERGENIC                    | NA                                                          |
| Kabuli_wild_30258044 | 1399937163                          | Ca_kabuli_Chr04 | 30258044                | A/T  | Gene_Ca_14190      | DOWNSTREAM                    | Zinc finger,CCCH-type                                       |
| Kabuli_wild_30258045 | 1399937164                          | Ca_kabuli_Chr04 | 30258045                | A/T  | Gene_Ca_14190      | DOWNSTREAM                    | Zinc finger,CCCH-type                                       |
| Kabuli_wild_30258056 | 1399937165                          | Ca_kabuli_Chr04 | 30258056                | A/G  | Gene_Ca_14190      | DOWNSTREAM                    | Zinc finger,CCCH-type                                       |
| Kabuli_wild_30258484 | 1399937166                          | Ca_kabuli_Chr04 | 30258484                | G/C  | Gene_Ca_14190      | DOWNSTREAM                    | Zinc finger,CCCH-type                                       |
| Kabuli_wild_30258567 | 1399937167                          | Ca_kabuli_Chr04 | 30258567                | C/A  | Gene_Ca_14190      | DOWNSTREAM                    | Zinc finger,CCCH-type                                       |
| Kabuli_wild_30258596 | 1399937168                          | Ca_kabuli_Chr04 | 30258596                | G/C  | Gene_Ca_14190      | DOWNSTREAM                    | Zinc finger,CCCH-type                                       |
| Kabuli_wild_30258604 | 1399937169                          | Ca_kabuli_Chr04 | 30258604                | C/A  | Gene_Ca_14190      | DOWNSTREAM                    | Zinc finger,CCCH-type                                       |
| Kabuli_wild_30258607 | 1399937170                          | Ca_kabuli_Chr04 | 30258607                | C/A  | Gene_Ca_14190      | DOWNSTREAM                    | Zinc finger,CCCH-type                                       |
| Kabuli_wild_30258613 | 1399937171                          | Ca_kabuli_Chr04 | 30258613                | C/A  | Gene_Ca_14190      | DOWNSTREAM                    | Zinc finger,CCCH-type                                       |

| SNP IDs                     | NCBI dbSNP accession IDs (NCBI_SS#) | Chromosomes            | Physical positions (bp) | SNPs | Gene accession IDs | Sequence components of genome | Putative functions                                |
|-----------------------------|-------------------------------------|------------------------|-------------------------|------|--------------------|-------------------------------|---------------------------------------------------|
| <i>Kabuli_wild_30258621</i> | 1399937172                          | <i>Ca_kabuli_Chr04</i> | 30258621                | T/G  | Gene_Ca_14190      | DOWNSTREAM                    | Zinc finger,CCCH-type                             |
| <i>Kabuli_wild_30260485</i> | 1399937173                          | <i>Ca_kabuli_Chr04</i> | 30260485                | C/A  | Gene_Ca_14189      | DOWNSTREAM                    | Late embryo genesis abundant protein, group1      |
| <i>Kabuli_wild_30281991</i> | 1399937174                          | <i>Ca_kabuli_Chr04</i> | 30281991                | A/G  | NA                 | INTERGENIC                    | NA                                                |
| <i>Kabuli_wild_30282333</i> | 1399937175                          | <i>Ca_kabuli_Chr04</i> | 30282333                | C/A  | NA                 | INTERGENIC                    | NA                                                |
| <i>Kabuli_wild_30300334</i> | 1399937176                          | <i>Ca_kabuli_Chr04</i> | 30300334                | T/C  | Gene_Ca_14192      | SYNONYMOUS_CODING             | SNF2-related                                      |
| <i>Kabuli_wild_30301002</i> | 1399937177                          | <i>Ca_kabuli_Chr04</i> | 30301002                | T/G  | Gene_Ca_14192      | SYNONYMOUS_CODING             | SNF2-related                                      |
| <i>Kabuli_wild_30308719</i> | 1399937178                          | <i>Ca_kabuli_Chr04</i> | 30308719                | A/C  | Gene_Ca_14192      | INTRON                        | SNF2-related                                      |
| <i>Kabuli_wild_30308788</i> | 1399937179                          | <i>Ca_kabuli_Chr04</i> | 30308788                | T/C  | Gene_Ca_14192      | INTRON                        | SNF2-related                                      |
| <i>Kabuli_wild_30308812</i> | 1399937180                          | <i>Ca_kabuli_Chr04</i> | 30308812                | G/A  | Gene_Ca_14192      | INTRON                        | SNF2-related                                      |
| <i>Kabuli_wild_30334005</i> | 1399937181                          | <i>Ca_kabuli_Chr04</i> | 30334005                | G/A  | NA                 | INTERGENIC                    | NA                                                |
| <i>Kabuli_wild_30463063</i> | 1399937182                          | <i>Ca_kabuli_Chr04</i> | 30463063                | T/C  | NA                 | INTERGENIC                    | NA                                                |
| <i>Kabuli_wild_30463117</i> | 1399937183                          | <i>Ca_kabuli_Chr04</i> | 30463117                | C/A  | NA                 | INTERGENIC                    | NA                                                |
| <i>Kabuli_wild_30566722</i> | 1399937184                          | <i>Ca_kabuli_Chr04</i> | 30566722                | C/T  | NA                 | INTERGENIC                    | NA                                                |
| <i>Kabuli_wild_30579785</i> | 1399937185                          | <i>Ca_kabuli_Chr04</i> | 30579785                | T/C  | Gene_Ca_14206      | UPSTREAM                      | D111/G-patch                                      |
| <i>Kabuli_wild_30579795</i> | 1399937186                          | <i>Ca_kabuli_Chr04</i> | 30579795                | G/A  | Gene_Ca_14206      | UPSTREAM                      | D111/G-patch                                      |
| <i>Kabuli_wild_30579835</i> | 1399937187                          | <i>Ca_kabuli_Chr04</i> | 30579835                | G/T  | Gene_Ca_14206      | UPSTREAM                      | D111/G-patch                                      |
| <i>Kabuli_wild_30580184</i> | 1399937188                          | <i>Ca_kabuli_Chr04</i> | 30580184                | G/A  | NA                 | INTERGENIC                    | NA                                                |
| <i>Kabuli_wild_30599096</i> | 1399937189                          | <i>Ca_kabuli_Chr04</i> | 30599096                | C/A  | Gene_Ca_14207      | SYNONYMOUS_CODING             | Protein kinase,catalytic domain                   |
| <i>Kabuli_wild_30599188</i> | 1399937190                          | <i>Ca_kabuli_Chr04</i> | 30599188                | C/T  | Gene_Ca_14207      | INTRON                        | Protein kinase,catalytic domain                   |
| <i>Kabuli_wild_30668893</i> | 1399937191                          | <i>Ca_kabuli_Chr04</i> | 30668893                | A/C  | NA                 | INTERGENIC                    | NA                                                |
| <i>Kabuli_wild_30851027</i> | 1399937192                          | <i>Ca_kabuli_Chr04</i> | 30851027                | A/T  | Gene_Ca_14212      | INTRON                        | Basic-leucine zipper (bZIP ) Transcription factor |
| <i>Kabuli_wild_30851411</i> | 1399937193                          | <i>Ca_kabuli_Chr04</i> | 30851411                | T/G  | Gene_Ca_14212      | INTRON                        | Basic-leucine zipper (bZIP ) Transcription factor |
| <i>Kabuli_wild_30851840</i> | 1399937194                          | <i>Ca_kabuli_Chr04</i> | 30851840                | A/T  | Gene_Ca_14212      | INTRON                        | Basic-leucine zipper (bZIP ) Transcription factor |
| <i>Kabuli_wild_30852212</i> | 1399937195                          | <i>Ca_kabuli_Chr04</i> | 30852212                | C/G  | Gene_Ca_14212      | INTRON                        | Basic-leucine zipper (bZIP ) Transcription factor |
| <i>Kabuli_wild_30852224</i> | 1399937196                          | <i>Ca_kabuli_Chr04</i> | 30852224                | T/G  | Gene_Ca_14212      | INTRON                        | Basic-leucine zipper (bZIP ) Transcription factor |
| <i>Kabuli_wild_30861487</i> | 1399937197                          | <i>Ca_kabuli_Chr04</i> | 30861487                | C/A  | NA                 | INTERGENIC                    | NA                                                |
| <i>Kabuli_wild_30861508</i> | 1399937198                          | <i>Ca_kabuli_Chr04</i> | 30861508                | T/C  | NA                 | INTERGENIC                    | NA                                                |
| <i>Kabuli_wild_30861515</i> | 1399937199                          | <i>Ca_kabuli_Chr04</i> | 30861515                | T/C  | NA                 | INTERGENIC                    | NA                                                |
| <i>Kabuli_wild_30861537</i> | 1399937200                          | <i>Ca_kabuli_Chr04</i> | 30861537                | T/C  | NA                 | INTERGENIC                    | NA                                                |
| <i>Kabuli_wild_30931586</i> | 1399937201                          | <i>Ca_kabuli_Chr04</i> | 30931586                | G/T  | NA                 | INTERGENIC                    | NA                                                |
| <i>Kabuli_wild_30950605</i> | 1399937202                          | <i>Ca_kabuli_Chr04</i> | 30950605                | A/G  | NA                 | INTERGENIC                    | NA                                                |
| <i>Kabuli_wild_30998138</i> | 1399937203                          | <i>Ca_kabuli_Chr04</i> | 30998138                | A/G  | Gene_Ca_14216      | DOWNSTREAM                    | Transposase,Ptta/En/Spm,plant                     |
| <i>Kabuli_wild_30998185</i> | 1399937204                          | <i>Ca_kabuli_Chr04</i> | 30998185                | C/T  | Gene_Ca_14216      | DOWNSTREAM                    | Transposase,Ptta/En/Spm,plant                     |
| <i>Kabuli_wild_31218647</i> | 1399937205                          | <i>Ca_kabuli_Chr04</i> | 31218647                | T/C  | Gene_Ca_14226      | INTRON                        | Ovariantumour,otubain                             |
| <i>Kabuli_wild_31221226</i> | 1399937206                          | <i>Ca_kabuli_Chr04</i> | 31221226                | T/A  | Gene_Ca_14226      | UPSTREAM                      | Ovariantumour,otubain                             |
| <i>Kabuli_wild_31221253</i> | 1399937207                          | <i>Ca_kabuli_Chr04</i> | 31221253                | G/A  | Gene_Ca_14226      | UPSTREAM                      | Ovariantumour,otubain                             |
| <i>Kabuli_wild_31221264</i> | 1399937208                          | <i>Ca_kabuli_Chr04</i> | 31221264                | T/G  | Gene_Ca_14226      | UPSTREAM                      | Ovariantumour,otubain                             |
| <i>Kabuli_wild_31224001</i> | 1399937209                          | <i>Ca_kabuli_Chr04</i> | 31224001                | G/A  | NA                 | INTERGENIC                    | NA                                                |
| <i>Kabuli_wild_31262596</i> | 1399937210                          | <i>Ca_kabuli_Chr04</i> | 31262596                | T/A  | NA                 | INTERGENIC                    | NA                                                |
| <i>Kabuli_wild_31263205</i> | 1399937211                          | <i>Ca_kabuli_Chr04</i> | 31263205                | A/T  | Gene_Ca_14230      | SYNONYMOUS_CODING             | Pentatricopeptide repeat                          |
| <i>Kabuli_wild_31591279</i> | 1399937212                          | <i>Ca_kabuli_Chr04</i> | 31591279                | G/A  | NA                 | INTERGENIC                    | NA                                                |
| <i>Kabuli_wild_31594126</i> | 1399937213                          | <i>Ca_kabuli_Chr04</i> | 31594126                | A/C  | NA                 | INTERGENIC                    | NA                                                |
| <i>Kabuli_wild_31618922</i> | 1399937214                          | <i>Ca_kabuli_Chr04</i> | 31618922                | T/C  | NA                 | INTERGENIC                    | NA                                                |
| <i>Kabuli_wild_31618949</i> | 1399937215                          | <i>Ca_kabuli_Chr04</i> | 31618949                | T/A  | NA                 | INTERGENIC                    | NA                                                |

| SNP IDs              | NCBI dbSNP accession IDs (NCBI_SS#) | Chromosomes       | Physical positions (bp) | SNPs | Gene accession IDs | Sequence components of genome | Putative functions                               |
|----------------------|-------------------------------------|-------------------|-------------------------|------|--------------------|-------------------------------|--------------------------------------------------|
| Kabuli_wild_31918275 | 1399937216                          | Ca_kabuli_Chrom04 | 31918275                | A/G  | NA                 | INTERGENIC                    | NA                                               |
| Kabuli_wild_31987297 | 1399937217                          | Ca_kabuli_Chrom04 | 31987297                | G/T  | Gene_Ca_15457      | INTRON                        | Protein of unknown function DUF2363              |
| Kabuli_wild_31987890 | 1399937218                          | Ca_kabuli_Chrom04 | 31987890                | A/C  | Gene_Ca_15457      | UPSTREAM                      | Protein of unknown function DUF2363              |
| Kabuli_wild_32042488 | 1399937219                          | Ca_kabuli_Chrom04 | 32042488                | T/G  | Gene_Ca_15459      | SYNONYMOUS_CODING             | Domain of unknown function DUF828                |
| Kabuli_wild_32068961 | 1399937220                          | Ca_kabuli_Chrom04 | 32068961                | A/G  | Gene_Ca_15461      | SYNONYMOUS_CODING             | Ankyrinrepeat                                    |
| Kabuli_wild_32073549 | 1399937221                          | Ca_kabuli_Chrom04 | 32073549                | G/C  | NA                 | INTERGENIC                    | NA                                               |
| Kabuli_wild_32073550 | 1399937222                          | Ca_kabuli_Chrom04 | 32073550                | C/G  | NA                 | INTERGENIC                    | NA                                               |
| Kabuli_wild_32073552 | 1399937223                          | Ca_kabuli_Chrom04 | 32073552                | T/C  | NA                 | INTERGENIC                    | NA                                               |
| Kabuli_wild_32162032 | 1399937224                          | Ca_kabuli_Chrom04 | 32162032                | C/T  | NA                 | INTERGENIC                    | NA                                               |
| Kabuli_wild_32162075 | 1399937225                          | Ca_kabuli_Chrom04 | 32162075                | T/C  | NA                 | INTERGENIC                    | NA                                               |
| Kabuli_wild_32162081 | 1399937226                          | Ca_kabuli_Chrom04 | 32162081                | G/T  | NA                 | INTERGENIC                    | NA                                               |
| Kabuli_wild_32166557 | 1399937227                          | Ca_kabuli_Chrom04 | 32166557                | T/A  | NA                 | INTERGENIC                    | NA                                               |
| Kabuli_wild_32166559 | 1399937228                          | Ca_kabuli_Chrom04 | 32166559                | C/G  | NA                 | INTERGENIC                    | NA                                               |
| Kabuli_wild_32183307 | 1399937229                          | Ca_kabuli_Chrom04 | 32183307                | C/G  | Gene_Ca_15464      | SYNONYMOUS_CODING             | Pentatric peptide repeat                         |
| Kabuli_wild_32183366 | 1399937230                          | Ca_kabuli_Chrom04 | 32183366                | A/G  | Gene_Ca_15464      | NON_SYNONYMOUS_CODING         | Pentatric peptide repeat                         |
| Kabuli_wild_32184523 | 1399937231                          | Ca_kabuli_Chrom04 | 32184523                | T/G  | Gene_Ca_15464      | SYNONYMOUS_CODING             | Pentatric peptide repeat                         |
| Kabuli_wild_32184628 | 1399937232                          | Ca_kabuli_Chrom04 | 32184628                | A/G  | Gene_Ca_15464      | SYNONYMOUS_CODING             | Pentatric peptide repeat                         |
| Kabuli_wild_32212899 | 1399937233                          | Ca_kabuli_Chrom04 | 32212899                | A/G  | NA                 | INTERGENIC                    | NA                                               |
| Kabuli_wild_32297764 | 1399937234                          | Ca_kabuli_Chrom04 | 32297764                | A/G  | Gene_Ca_15471      | UPSTREAM                      | NA                                               |
| Kabuli_wild_32303394 | 1399937235                          | Ca_kabuli_Chrom04 | 32303394                | C/T  | NA                 | INTERGENIC                    | NA                                               |
| Kabuli_wild_32405927 | 1399937236                          | Ca_kabuli_Chrom04 | 32405927                | T/C  | NA                 | INTERGENIC                    | NA                                               |
| Kabuli_wild_32429222 | 1399937237                          | Ca_kabuli_Chrom04 | 32429222                | A/C  | Gene_Ca_15476      | SYNONYMOUS_CODING             | Armadillo                                        |
| Kabuli_wild_32429228 | 1399937238                          | Ca_kabuli_Chrom04 | 32429228                | A/T  | Gene_Ca_15476      | NON_SYNONYMOUS_CODING         | Armadillo                                        |
| Kabuli_wild_32521346 | 1399937239                          | Ca_kabuli_Chrom04 | 32521346                | T/C  | Gene_Ca_15480      | INTRON                        | NA                                               |
| Kabuli_wild_32602658 | 1399937240                          | Ca_kabuli_Chrom04 | 32602658                | C/T  | NA                 | INTERGENIC                    | NA                                               |
| Kabuli_wild_32604510 | 1399937241                          | Ca_kabuli_Chrom04 | 32604510                | A/C  | Gene_Ca_15484      | NON_SYNONYMOUS_CODING         | Pentatric peptide repeat                         |
| Kabuli_wild_32604538 | 1399937242                          | Ca_kabuli_Chrom04 | 32604538                | T/C  | Gene_Ca_15484      | SYNONYMOUS_CODING             | Pentatric peptide repeat                         |
| Kabuli_wild_32625733 | 1399937243                          | Ca_kabuli_Chrom04 | 32625733                | T/G  | Gene_Ca_15485      | INTRON                        | PeptidaseS9,prolyllolepeptidase,catalytic domain |
| Kabuli_wild_32635638 | 1399937244                          | Ca_kabuli_Chrom04 | 32635638                | A/G  | NA                 | INTERGENIC                    | NA                                               |
| Kabuli_wild_32636315 | 1399937245                          | Ca_kabuli_Chrom04 | 32636315                | T/C  | NA                 | INTERGENIC                    | NA                                               |
| Kabuli_wild_32636428 | 1399937246                          | Ca_kabuli_Chrom04 | 32636428                | C/A  | NA                 | INTERGENIC                    | NA                                               |
| Kabuli_wild_32636459 | 1399937247                          | Ca_kabuli_Chrom04 | 32636459                | A/G  | NA                 | INTERGENIC                    | NA                                               |
| Kabuli_wild_32636690 | 1399937248                          | Ca_kabuli_Chrom04 | 32636690                | C/T  | NA                 | INTERGENIC                    | NA                                               |
| Kabuli_wild_32637114 | 1399937249                          | Ca_kabuli_Chrom04 | 32637114                | A/C  | NA                 | INTERGENIC                    | NA                                               |
| Kabuli_wild_32639118 | 1399937250                          | Ca_kabuli_Chrom04 | 32639118                | A/C  | Gene_Ca_15486      | UPSTREAM                      | Pentatric peptide repeat                         |
| Kabuli_wild_32639121 | 1399937251                          | Ca_kabuli_Chrom04 | 32639121                | C/T  | Gene_Ca_15486      | UPSTREAM                      | Pentatric peptide repeat                         |
| Kabuli_wild_32639172 | 1399937252                          | Ca_kabuli_Chrom04 | 32639172                | A/C  | Gene_Ca_15486      | UPSTREAM                      | Pentatric peptide repeat                         |
| Kabuli_wild_32639188 | 1399937253                          | Ca_kabuli_Chrom04 | 32639188                | C/G  | Gene_Ca_15486      | UPSTREAM                      | Pentatric peptide repeat                         |
| Kabuli_wild_32639315 | 1399937254                          | Ca_kabuli_Chrom04 | 32639315                | A/G  | Gene_Ca_15486      | UPSTREAM                      | Pentatric peptide repeat                         |
| Kabuli_wild_32639317 | 1399937255                          | Ca_kabuli_Chrom04 | 32639317                | A/C  | Gene_Ca_15486      | UPSTREAM                      | Pentatric peptide repeat                         |
| Kabuli_wild_32639654 | 1399937256                          | Ca_kabuli_Chrom04 | 32639654                | T/C  | Gene_Ca_15486      | UPSTREAM                      | Pentatric peptide repeat                         |
| Kabuli_wild_32639681 | 1399937257                          | Ca_kabuli_Chrom04 | 32639681                | C/T  | NA                 | INTERGENIC                    | NA                                               |
| Kabuli_wild_32647877 | 1399937258                          | Ca_kabuli_Chrom04 | 32647877                | A/C  | Gene_Ca_15487      | NON_SYNONYMOUS_CODING         | NA                                               |
| Kabuli_wild_32793291 | 1399937259                          | Ca_kabuli_Chrom04 | 32793291                | A/T  | NA                 | INTERGENIC                    | NA                                               |

| SNP IDs              | NCBI dbSNP accession IDs (NCBI_SS#) | Chromosomes     | Physical positions (bp) | SNPs | Gene accession IDs | Sequence components of genome | Putative functions                               |
|----------------------|-------------------------------------|-----------------|-------------------------|------|--------------------|-------------------------------|--------------------------------------------------|
| Kabuli_wild_32841664 | 1399937260                          | Ca_kabuli_Chr04 | 32841664                | A/C  | NA                 | INTERGENIC                    | NA                                               |
| Kabuli_wild_32853834 | 1399937261                          | Ca_kabuli_Chr04 | 32853834                | T/C  | Gene_Ca_15495      | INTRON                        | DNAtopoisomeraseI,C-terminal                     |
| Kabuli_wild_32853838 | 1399937262                          | Ca_kabuli_Chr04 | 32853838                | G/T  | Gene_Ca_15495      | INTRON                        | DNAtopoisomeraseI,C-terminal                     |
| Kabuli_wild_33231667 | 1399937263                          | Ca_kabuli_Chr04 | 33231667                | C/T  | NA                 | INTERGENIC                    | NA                                               |
| Kabuli_wild_33231669 | 1399937264                          | Ca_kabuli_Chr04 | 33231669                | G/A  | NA                 | INTERGENIC                    | NA                                               |
| Kabuli_wild_33231699 | 1399937265                          | Ca_kabuli_Chr04 | 33231699                | G/A  | NA                 | INTERGENIC                    | NA                                               |
| Kabuli_wild_33276702 | 1399937266                          | Ca_kabuli_Chr04 | 33276702                | C/A  | Gene_Ca_24020      | SYNONYMOUS_CODING             | Putativeesterase                                 |
| Kabuli_wild_33316940 | 1399937267                          | Ca_kabuli_Chr04 | 33316940                | C/A  | NA                 | INTERGENIC                    | NA                                               |
| Kabuli_wild_33374107 | 1399937268                          | Ca_kabuli_Chr04 | 33374107                | G/A  | NA                 | INTERGENIC                    | NA                                               |
| Kabuli_wild_33374112 | 1399937269                          | Ca_kabuli_Chr04 | 33374112                | T/C  | NA                 | INTERGENIC                    | NA                                               |
| Kabuli_wild_33374135 | 1399937270                          | Ca_kabuli_Chr04 | 33374135                | C/T  | NA                 | INTERGENIC                    | NA                                               |
| Kabuli_wild_33374152 | 1399937271                          | Ca_kabuli_Chr04 | 33374152                | T/A  | NA                 | INTERGENIC                    | NA                                               |
| Kabuli_wild_33374153 | 1399937272                          | Ca_kabuli_Chr04 | 33374153                | T/C  | NA                 | INTERGENIC                    | NA                                               |
| Kabuli_wild_33509759 | 1399937273                          | Ca_kabuli_Chr04 | 33509759                | A/C  | NA                 | INTERGENIC                    | NA                                               |
| Kabuli_wild_33509762 | 1399937274                          | Ca_kabuli_Chr04 | 33509762                | G/A  | NA                 | INTERGENIC                    | NA                                               |
| Kabuli_wild_33509803 | 1399937275                          | Ca_kabuli_Chr04 | 33509803                | C/T  | NA                 | INTERGENIC                    | NA                                               |
| Kabuli_wild_33509808 | 1399937276                          | Ca_kabuli_Chr04 | 33509808                | G/A  | NA                 | INTERGENIC                    | NA                                               |
| Kabuli_wild_33509823 | 1399937277                          | Ca_kabuli_Chr04 | 33509823                | G/A  | NA                 | INTERGENIC                    | NA                                               |
| Kabuli_wild_33626927 | 1399937278                          | Ca_kabuli_Chr04 | 33626927                | C/A  | NA                 | INTERGENIC                    | NA                                               |
| Kabuli_wild_33626928 | 1399937279                          | Ca_kabuli_Chr04 | 33626928                | C/T  | NA                 | INTERGENIC                    | NA                                               |
| Kabuli_wild_33626948 | 1399937280                          | Ca_kabuli_Chr04 | 33626948                | C/T  | NA                 | INTERGENIC                    | NA                                               |
| Kabuli_wild_33626981 | 1399937281                          | Ca_kabuli_Chr04 | 33626981                | T/A  | NA                 | INTERGENIC                    | NA                                               |
| Kabuli_wild_33641757 | 1399937282                          | Ca_kabuli_Chr04 | 33641757                | C/T  | Gene_Ca_24030      | INTRON                        | SNF2-related                                     |
| Kabuli_wild_33820657 | 1399937283                          | Ca_kabuli_Chr04 | 33820657                | A/C  | NA                 | INTERGENIC                    | NA                                               |
| Kabuli_wild_33828673 | 1399937284                          | Ca_kabuli_Chr04 | 33828673                | T/C  | Gene_Ca_20369      | INTRON                        | Uricase                                          |
| Kabuli_wild_33828705 | 1399937285                          | Ca_kabuli_Chr04 | 33828705                | T/A  | Gene_Ca_20369      | INTRON                        | Uricase                                          |
| Kabuli_wild_33874313 | 1399937286                          | Ca_kabuli_Chr04 | 33874313                | G/A  | NA                 | INTERGENIC                    | NA                                               |
| Kabuli_wild_33874327 | 1399937287                          | Ca_kabuli_Chr04 | 33874327                | T/C  | NA                 | INTERGENIC                    | NA                                               |
| Kabuli_wild_33874346 | 1399937288                          | Ca_kabuli_Chr04 | 33874346                | T/C  | NA                 | INTERGENIC                    | NA                                               |
| Kabuli_wild_33874375 | 1399937289                          | Ca_kabuli_Chr04 | 33874375                | G/C  | NA                 | INTERGENIC                    | NA                                               |
| Kabuli_wild_33919432 | 1399937290                          | Ca_kabuli_Chr04 | 33919432                | A/T  | Gene_Ca_20365      | SYNONYMOUS_CODING             | NA                                               |
| Kabuli_wild_33928810 | 1399937291                          | Ca_kabuli_Chr04 | 33928810                | T/G  | Gene_Ca_20365      | INTRON                        | PeptidaseC19,ubiquitinC-terminalhydrolyase2      |
| Kabuli_wild_33929777 | 1399937292                          | Ca_kabuli_Chr04 | 33929777                | C/T  | Gene_Ca_20365      | INTRON                        | PeptidaseC19,ubiquitinC-terminalhydrolyase2      |
| Kabuli_wild_34110771 | 1399937293                          | Ca_kabuli_Chr04 | 34110771                | G/A  | Gene_Ca_20361      | DOWNSTREAM                    | NA                                               |
| Kabuli_wild_34112210 | 1399937294                          | Ca_kabuli_Chr04 | 34112210                | C/T  | Gene_Ca_20362      | DOWNSTREAM                    | NA                                               |
| Kabuli_wild_34155076 | 1399937295                          | Ca_kabuli_Chr04 | 34155076                | G/A  | Gene_Ca_20360      | NON_SYNONYMOUS_CODING         | Peptidase C48, SUMO/Sentrin/Ubl1                 |
| Kabuli_wild_34155084 | 1399937296                          | Ca_kabuli_Chr04 | 34155084                | C/T  | Gene_Ca_20360      | SYNONYMOUS_CODING             | Peptidase C48, SUMO/Sentrin/Ubl1                 |
| Kabuli_wild_34155141 | 1399937297                          | Ca_kabuli_Chr04 | 34155141                | C/T  | Gene_Ca_20360      | SYNONYMOUS_CODING             | Peptidase C48, SUMO/Sentrin/Ubl1                 |
| Kabuli_wild_34155157 | 1399937298                          | Ca_kabuli_Chr04 | 34155157                | G/C  | Gene_Ca_20360      | NON_SYNONYMOUS_CODING         | Peptidase C48, SUMO/Sentrin/Ubl1                 |
| Kabuli_wild_34155160 | 1399937299                          | Ca_kabuli_Chr04 | 34155160                | G/T  | Gene_Ca_20360      | NON_SYNONYMOUS_CODING         | Peptidase C48, SUMO/Sentrin/Ubl1                 |
| Kabuli_wild_34222783 | 1399937300                          | Ca_kabuli_Chr04 | 34222783                | T/C  | NA                 | INTERGENIC                    | NA                                               |
| Kabuli_wild_34222792 | 1399937301                          | Ca_kabuli_Chr04 | 34222792                | G/C  | NA                 | INTERGENIC                    | NA                                               |
| Kabuli_wild_34354519 | 1399937302                          | Ca_kabuli_Chr04 | 34354519                | G/T  | NA                 | INTERGENIC                    | NA                                               |
| Kabuli_wild_34487064 | 1399937303                          | Ca_kabuli_Chr04 | 34487064                | T/G  | Gene_Ca_20350      | INTRON                        | Domain of unknown function DUF676,hydrolase-like |

| SNP IDs              | NCBI dbSNP accession IDs (NCBI_SS#) | Chromosomes       | Physical positions (bp) | SNPs | Gene accession IDs | Sequence components of genome | Putative functions                                  |
|----------------------|-------------------------------------|-------------------|-------------------------|------|--------------------|-------------------------------|-----------------------------------------------------|
| Kabuli_wild_34784285 | 1399937304                          | Ca_kabuli_Chrom04 | 34784285                | G/A  | Gene_Ca_19990      | NON_SYNONYMOUS_CODING         | RibosomalproteinL22/L17                             |
| Kabuli_wild_34797959 | 1399937305                          | Ca_kabuli_Chrom04 | 34797959                | A/G  | NA                 | INTERGENIC                    | NA                                                  |
| Kabuli_wild_34798597 | 1399937306                          | Ca_kabuli_Chrom04 | 34798597                | C/A  | Gene_Ca_19992      | INTRON                        | Pentatricopeptide repeat                            |
| Kabuli_wild_34798602 | 1399937307                          | Ca_kabuli_Chrom04 | 34798602                | G/A  | Gene_Ca_19992      | INTRON                        | Pentatricopeptide repeat                            |
| Kabuli_wild_34798657 | 1399937308                          | Ca_kabuli_Chrom04 | 34798657                | C/A  | Gene_Ca_19992      | INTRON                        | Pentatricopeptide repeat                            |
| Kabuli_wild_34915986 | 1399937309                          | Ca_kabuli_Chrom04 | 34915986                | C/T  | Gene_Ca_19997      | INTRON                        | Inosine/uridine-preferringnucleosidehydrolasedomain |
| Kabuli_wild_34916032 | 1399937310                          | Ca_kabuli_Chrom04 | 34916032                | C/T  | Gene_Ca_19997      | INTRON                        | Inosine/uridine-preferringnucleosidehydrolasedomain |
| Kabuli_wild_34916994 | 1399937311                          | Ca_kabuli_Chrom04 | 34916994                | G/A  | Gene_Ca_19997      | INTRON                        | Inosine/uridine-preferringnucleosidehydrolasedomain |
| Kabuli_wild_34924575 | 1399937312                          | Ca_kabuli_Chrom04 | 34924575                | C/T  | Gene_Ca_19998      | NON_SYNONYMOUS_CODING         | Metallo-dependentphosphatase                        |
| Kabuli_wild_34955953 | 1399937313                          | Ca_kabuli_Chrom04 | 34955953                | A/G  | Gene_Ca_19999      | NON_SYNONYMOUS_CODING         | Peptidase C48, SUMO/Sentrin/Ubl1                    |
| Kabuli_wild_34955985 | 1399937314                          | Ca_kabuli_Chrom04 | 34955985                | C/T  | Gene_Ca_19999      | SYNONYMOUS_CODING             | Peptidase C48, SUMO/Sentrin/Ubl1                    |
| Kabuli_wild_34956006 | 1399937315                          | Ca_kabuli_Chrom04 | 34956006                | C/T  | Gene_Ca_19999      | SYNONYMOUS_CODING             | Peptidase C48, SUMO/Sentrin/Ubl1                    |
| Kabuli_wild_34956023 | 1399937316                          | Ca_kabuli_Chrom04 | 34956023                | C/T  | Gene_Ca_19999      | NON_SYNONYMOUS_CODING         | Peptidase C48, SUMO/Sentrin/Ubl1                    |
| Kabuli_wild_34956031 | 1399937317                          | Ca_kabuli_Chrom04 | 34956031                | G/A  | Gene_Ca_19999      | NON_SYNONYMOUS_CODING         | Peptidase C48, SUMO/Sentrin/Ubl1                    |
| Kabuli_wild_34956034 | 1399937318                          | Ca_kabuli_Chrom04 | 34956034                | G/A  | Gene_Ca_19999      | NON_SYNONYMOUS_CODING         | Peptidase C48, SUMO/Sentrin/Ubl1                    |
| Kabuli_wild_34956035 | 1399937319                          | Ca_kabuli_Chrom04 | 34956035                | C/T  | Gene_Ca_19999      | NON_SYNONYMOUS_CODING         | Peptidase C48, SUMO/Sentrin/Ubl1                    |
| Kabuli_wild_34956083 | 1399937320                          | Ca_kabuli_Chrom04 | 34956083                | C/T  | Gene_Ca_19999      | NON_SYNONYMOUS_CODING         | Peptidase C48, SUMO/Sentrin/Ubl1                    |
| Kabuli_wild_34956093 | 1399937321                          | Ca_kabuli_Chrom04 | 34956093                | C/T  | Gene_Ca_19999      | SYNONYMOUS_CODING             | Peptidase C48, SUMO/Sentrin/Ubl1                    |
| Kabuli_wild_34956098 | 1399937322                          | Ca_kabuli_Chrom04 | 34956098                | G/A  | Gene_Ca_19999      | SYNONYMOUS_CODING             | Peptidase C48, SUMO/Sentrin/Ubl1                    |
| Kabuli_wild_34956113 | 1399937323                          | Ca_kabuli_Chrom04 | 34956113                | C/T  | Gene_Ca_19999      | NON_SYNONYMOUS_CODING         | Peptidase C48, SUMO/Sentrin/Ubl1                    |
| Kabuli_wild_35141194 | 1399937324                          | Ca_kabuli_Chrom04 | 35141194                | A/G  | Gene_Ca_20010      | INTRON                        | Glycosidehydrolase,family9                          |
| Kabuli_wild_35141281 | 1399937325                          | Ca_kabuli_Chrom04 | 35141281                | A/T  | Gene_Ca_20010      | NON_SYNONYMOUS_CODING         | Glycosidehydrolase,family9                          |
| Kabuli_wild_35141309 | 1399937326                          | Ca_kabuli_Chrom04 | 35141309                | A/C  | Gene_Ca_20010      | SYNONYMOUS_CODING             | Glycosidehydrolase,family9                          |
| Kabuli_wild_35141327 | 1399937327                          | Ca_kabuli_Chrom04 | 35141327                | G/T  | Gene_Ca_20010      | NON_SYNONYMOUS_CODING         | Glycosidehydrolase,family9                          |
| Kabuli_wild_35141340 | 1399937328                          | Ca_kabuli_Chrom04 | 35141340                | G/A  | Gene_Ca_20010      | INTRON                        | Glycosidehydrolase,family9                          |
| Kabuli_wild_35141353 | 1399937329                          | Ca_kabuli_Chrom04 | 35141353                | C/G  | Gene_Ca_20010      | INTRON                        | Glycosidehydrolase,family9                          |
| Kabuli_wild_35141359 | 1399937330                          | Ca_kabuli_Chrom04 | 35141359                | C/G  | Gene_Ca_20010      | INTRON                        | Glycosidehydrolase,family9                          |
| Kabuli_wild_35141375 | 1399937331                          | Ca_kabuli_Chrom04 | 35141375                | A/G  | Gene_Ca_20010      | INTRON                        | Glycosidehydrolase,family9                          |
| Kabuli_wild_35141403 | 1399937332                          | Ca_kabuli_Chrom04 | 35141403                | C/T  | Gene_Ca_20010      | INTRON                        | Glycosidehydrolase,family9                          |
| Kabuli_wild_35168915 | 1399937333                          | Ca_kabuli_Chrom04 | 35168915                | C/T  | Gene_Ca_20011      | INTRON                        | NA                                                  |
| Kabuli_wild_35168939 | 1399937334                          | Ca_kabuli_Chrom04 | 35168939                | C/T  | Gene_Ca_20011      | INTRON                        | NA                                                  |
| Kabuli_wild_35168985 | 1399937335                          | Ca_kabuli_Chrom04 | 35168985                | C/T  | Gene_Ca_20011      | INTRON                        | NA                                                  |
| Kabuli_wild_35168995 | 1399937336                          | Ca_kabuli_Chrom04 | 35168995                | C/A  | Gene_Ca_20011      | INTRON                        | NA                                                  |
| Kabuli_wild_35171506 | 1399937337                          | Ca_kabuli_Chrom04 | 35171506                | C/T  | Gene_Ca_20011      | NON_SYNONYMOUS_CODING         | NA                                                  |
| Kabuli_wild_35171719 | 1399937338                          | Ca_kabuli_Chrom04 | 35171719                | T/C  | Gene_Ca_20011      | INTRON                        | NA                                                  |
| Kabuli_wild_35229659 | 1399937339                          | Ca_kabuli_Chrom04 | 35229659                | T/C  | Gene_Ca_20015      | INTRON                        | NA                                                  |
| Kabuli_wild_35229850 | 1399937340                          | Ca_kabuli_Chrom04 | 35229850                | A/T  | Gene_Ca_20015      | INTRON                        | NA                                                  |
| Kabuli_wild_35229966 | 1399937341                          | Ca_kabuli_Chrom04 | 35229966                | C/T  | Gene_Ca_20015      | NON_SYNONYMOUS_CODING         | NA                                                  |
| Kabuli_wild_35230106 | 1399937342                          | Ca_kabuli_Chrom04 | 35230106                | G/A  | NA                 | INTERGENIC                    | NA                                                  |
| Kabuli_wild_35231891 | 1399937343                          | Ca_kabuli_Chrom04 | 35231891                | C/T  | NA                 | INTERGENIC                    | NA                                                  |
| Kabuli_wild_35304102 | 1399937344                          | Ca_kabuli_Chrom04 | 35304102                | C/T  | Gene_Ca_20017      | SYNONYMOUS_CODING             | NA                                                  |
| Kabuli_wild_35304108 | 1399937345                          | Ca_kabuli_Chrom04 | 35304108                | C/A  | Gene_Ca_20017      | NON_SYNONYMOUS_CODING         | NA                                                  |
| Kabuli_wild_35304327 | 1399937346                          | Ca_kabuli_Chrom04 | 35304327                | G/A  | Gene_Ca_20017      | SYNONYMOUS_CODING             | NA                                                  |
| Kabuli_wild_35309709 | 1399937347                          | Ca_kabuli_Chrom04 | 35309709                | A/G  | Gene_Ca_20017      | INTRON                        | NA                                                  |

| SNP IDs              | NCBI dbSNP accession IDs (NCBI_SS#) | Chromosomes     | Physical positions (bp) | SNPs | Gene accession IDs | Sequence components of genome | Putative functions               |
|----------------------|-------------------------------------|-----------------|-------------------------|------|--------------------|-------------------------------|----------------------------------|
| Kabuli_wild_35311815 | 1399937348                          | Ca_kabuli_Chr04 | 35311815                | A/C  | Gene_Ca_20017      | SYNONYMOUS_CODING             | NA                               |
| Kabuli_wild_35337282 | 1399937349                          | Ca_kabuli_Chr04 | 35337282                | A/G  | Gene_Ca_20018      | INTRON                        | IQ motif,EF-handbinding site     |
| Kabuli_wild_35344323 | 1399937350                          | Ca_kabuli_Chr04 | 35344323                | C/T  | Gene_Ca_20018      | INTRON                        | IQ motif,EF-handbinding site     |
| Kabuli_wild_35344336 | 1399937351                          | Ca_kabuli_Chr04 | 35344336                | A/C  | Gene_Ca_20018      | INTRON                        | IQ motif,EF-handbinding site     |
| Kabuli_wild_35344339 | 1399937352                          | Ca_kabuli_Chr04 | 35344339                | A/T  | Gene_Ca_20018      | INTRON                        | IQ motif,EF-handbinding site     |
| Kabuli_wild_35344353 | 1399937353                          | Ca_kabuli_Chr04 | 35344353                | T/C  | Gene_Ca_20018      | INTRON                        | IQ motif,EF-handbinding site     |
| Kabuli_wild_35344356 | 1399937354                          | Ca_kabuli_Chr04 | 35344356                | A/G  | Gene_Ca_20018      | INTRON                        | IQ motif,EF-handbinding site     |
| Kabuli_wild_35346354 | 1399937355                          | Ca_kabuli_Chr04 | 35346354                | C/A  | Gene_Ca_20018      | INTRON                        | IQ motif,EF-handbinding site     |
| Kabuli_wild_35346364 | 1399937356                          | Ca_kabuli_Chr04 | 35346364                | C/T  | Gene_Ca_20018      | INTRON                        | IQ motif,EF-handbinding site     |
| Kabuli_wild_35346386 | 1399937357                          | Ca_kabuli_Chr04 | 35346386                | C/T  | Gene_Ca_20018      | INTRON                        | IQ motif,EF-handbinding site     |
| Kabuli_wild_35346417 | 1399937358                          | Ca_kabuli_Chr04 | 35346417                | C/T  | Gene_Ca_20018      | INTRON                        | IQ motif,EF-handbinding site     |
| Kabuli_wild_35346465 | 1399937359                          | Ca_kabuli_Chr04 | 35346465                | G/T  | Gene_Ca_20018      | INTRON                        | IQ motif,EF-handbinding site     |
| Kabuli_wild_35346558 | 1399937360                          | Ca_kabuli_Chr04 | 35346558                | G/T  | Gene_Ca_20018      | INTRON                        | IQ motif,EF-handbinding site     |
| Kabuli_wild_35346563 | 1399937361                          | Ca_kabuli_Chr04 | 35346563                | G/T  | Gene_Ca_20018      | INTRON                        | IQ motif,EF-handbinding site     |
| Kabuli_wild_35346576 | 1399937362                          | Ca_kabuli_Chr04 | 35346576                | C/G  | Gene_Ca_20018      | INTRON                        | IQ motif,EF-handbinding site     |
| Kabuli_wild_35346624 | 1399937363                          | Ca_kabuli_Chr04 | 35346624                | G/A  | Gene_Ca_20018      | INTRON                        | IQ motif,EF-handbinding site     |
| Kabuli_wild_35346785 | 1399937364                          | Ca_kabuli_Chr04 | 35346785                | G/A  | Gene_Ca_20018      | INTRON                        | IQ motif,EF-handbinding site     |
| Kabuli_wild_35346804 | 1399937365                          | Ca_kabuli_Chr04 | 35346804                | G/A  | Gene_Ca_20018      | INTRON                        | IQ motif,EF-handbinding site     |
| Kabuli_wild_35346808 | 1399937366                          | Ca_kabuli_Chr04 | 35346808                | G/A  | Gene_Ca_20018      | INTRON                        | IQ motif,EF-handbinding site     |
| Kabuli_wild_35381267 | 1399937367                          | Ca_kabuli_Chr04 | 35381267                | T/C  | Gene_Ca_20020      | SYNONYMOUS_CODING             | Peptidase C48, SUMO/Sentrin/Ubl1 |
| Kabuli_wild_35381289 | 1399937368                          | Ca_kabuli_Chr04 | 35381289                | T/G  | Gene_Ca_20020      | NON_SYNONYMOUS_CODING         | Peptidase C48, SUMO/Sentrin/Ubl1 |
| Kabuli_wild_35393505 | 1399937369                          | Ca_kabuli_Chr04 | 35393505                | G/T  | Gene_Ca_20021      | SYNONYMOUS_CODING             | Transcription factor ,TCP        |
| Kabuli_wild_35393643 | 1399937370                          | Ca_kabuli_Chr04 | 35393643                | G/A  | Gene_Ca_20021      | SYNONYMOUS_CODING             | Transcription factor ,TCP        |
| Kabuli_wild_35455062 | 1399937371                          | Ca_kabuli_Chr04 | 35455062                | A/T  | NA                 | INTERGENIC                    | NA                               |
| Kabuli_wild_35455095 | 1399937372                          | Ca_kabuli_Chr04 | 35455095                | A/C  | NA                 | INTERGENIC                    | NA                               |
| Kabuli_wild_35455708 | 1399937373                          | Ca_kabuli_Chr04 | 35455708                | G/A  | NA                 | INTERGENIC                    | NA                               |
| Kabuli_wild_35469224 | 1399937374                          | Ca_kabuli_Chr04 | 35469224                | C/T  | Gene_Ca_22431      | SYNONYMOUS_CODING             | Sugar/inositol transporter       |
| Kabuli_wild_35469304 | 1399937375                          | Ca_kabuli_Chr04 | 35469304                | G/A  | Gene_Ca_22431      | NON_SYNONYMOUS_CODING         | Sugar/inositol transporter       |
| Kabuli_wild_35469308 | 1399937376                          | Ca_kabuli_Chr04 | 35469308                | T/G  | Gene_Ca_22431      | NON_SYNONYMOUS_CODING         | Sugar/inositol transporter       |
| Kabuli_wild_35483917 | 1399937377                          | Ca_kabuli_Chr04 | 35483917                | A/C  | NA                 | INTERGENIC                    | NA                               |
| Kabuli_wild_35483942 | 1399937378                          | Ca_kabuli_Chr04 | 35483942                | C/A  | NA                 | INTERGENIC                    | NA                               |
| Kabuli_wild_35483950 | 1399937379                          | Ca_kabuli_Chr04 | 35483950                | G/C  | NA                 | INTERGENIC                    | NA                               |
| Kabuli_wild_35487471 | 1399937380                          | Ca_kabuli_Chr04 | 35487471                | A/C  | NA                 | INTERGENIC                    | NA                               |
| Kabuli_wild_35487496 | 1399937381                          | Ca_kabuli_Chr04 | 35487496                | C/A  | NA                 | INTERGENIC                    | NA                               |
| Kabuli_wild_35487504 | 1399937382                          | Ca_kabuli_Chr04 | 35487504                | G/C  | NA                 | INTERGENIC                    | NA                               |
| Kabuli_wild_35488920 | 1399937383                          | Ca_kabuli_Chr04 | 35488920                | C/T  | NA                 | INTERGENIC                    | NA                               |
| Kabuli_wild_35528758 | 1399937384                          | Ca_kabuli_Chr04 | 35528758                | C/A  | Gene_Ca_22434      | INTRON                        | NA                               |
| Kabuli_wild_35528763 | 1399937385                          | Ca_kabuli_Chr04 | 35528763                | G/A  | Gene_Ca_22434      | INTRON                        | NA                               |
| Kabuli_wild_35528893 | 1399937386                          | Ca_kabuli_Chr04 | 35528893                | A/T  | Gene_Ca_22434      | INTRON                        | NA                               |
| Kabuli_wild_35529030 | 1399937387                          | Ca_kabuli_Chr04 | 35529030                | G/A  | Gene_Ca_22434      | INTRON                        | NA                               |
| Kabuli_wild_35529076 | 1399937388                          | Ca_kabuli_Chr04 | 35529076                | G/A  | Gene_Ca_22434      | INTRON                        | NA                               |
| Kabuli_wild_35534777 | 1399937389                          | Ca_kabuli_Chr04 | 35534777                | G/C  | Gene_Ca_22434      | INTRON                        | NA                               |
| Kabuli_wild_35534834 | 1399937390                          | Ca_kabuli_Chr04 | 35534834                | G/A  | Gene_Ca_22434      | INTRON                        | NA                               |
| Kabuli_wild_35534877 | 1399937391                          | Ca_kabuli_Chr04 | 35534877                | T/C  | Gene_Ca_22434      | INTRON                        | NA                               |

| SNP IDs              | NCBI dbSNP accession IDs (NCBI_SS#) | Chromosomes     | Physical positions (bp) | SNPs | Gene accession IDs | Sequence components of genome | Putative functions                                        |
|----------------------|-------------------------------------|-----------------|-------------------------|------|--------------------|-------------------------------|-----------------------------------------------------------|
| Kabuli_wild_35534891 | 1399937392                          | Ca_kabuli_Chr04 | 35534891                | C/T  | Gene_Ca_22434      | INTRON                        | NA                                                        |
| Kabuli_wild_35543068 | 1399937393                          | Ca_kabuli_Chr04 | 35543068                | G/T  | Gene_Ca_22434      | INTRON                        | NA                                                        |
| Kabuli_wild_35574088 | 1399937394                          | Ca_kabuli_Chr04 | 35574088                | C/G  | NA                 | INTERGENIC                    | NA                                                        |
| Kabuli_wild_35574112 | 1399937395                          | Ca_kabuli_Chr04 | 35574112                | G/A  | NA                 | INTERGENIC                    | NA                                                        |
| Kabuli_wild_35634712 | 1399937396                          | Ca_kabuli_Chr04 | 35634712                | G/A  | Gene_Ca_22441      | DOWNSTREAM                    | Translation elongation factor EFG/EF2, C-terminal         |
| Kabuli_wild_35634751 | 1399937397                          | Ca_kabuli_Chr04 | 35634751                | G/A  | Gene_Ca_22441      | DOWNSTREAM                    | Translation elongation factor EFG/EF2, C-terminal         |
| Kabuli_wild_35634873 | 1399937398                          | Ca_kabuli_Chr04 | 35634873                | G/T  | Gene_Ca_22441      | DOWNSTREAM                    | Translation elongation factor EFG/EF2, C-terminal         |
| Kabuli_wild_35635574 | 1399937399                          | Ca_kabuli_Chr04 | 35635574                | C/T  | NA                 | INTERGENIC                    | NA                                                        |
| Kabuli_wild_35635586 | 1399937400                          | Ca_kabuli_Chr04 | 35635586                | A/C  | NA                 | INTERGENIC                    | NA                                                        |
| Kabuli_wild_35635605 | 1399937401                          | Ca_kabuli_Chr04 | 35635605                | C/T  | NA                 | INTERGENIC                    | NA                                                        |
| Kabuli_wild_35635610 | 1399937402                          | Ca_kabuli_Chr04 | 35635610                | C/T  | NA                 | INTERGENIC                    | NA                                                        |
| Kabuli_wild_35635651 | 1399937403                          | Ca_kabuli_Chr04 | 35635651                | T/C  | NA                 | INTERGENIC                    | NA                                                        |
| Kabuli_wild_35780668 | 1399937404                          | Ca_kabuli_Chr04 | 35780668                | G/C  | NA                 | INTERGENIC                    | NA                                                        |
| Kabuli_wild_35961593 | 1399937405                          | Ca_kabuli_Chr04 | 35961593                | A/C  | NA                 | INTERGENIC                    | NA                                                        |
| Kabuli_wild_35977422 | 1399937406                          | Ca_kabuli_Chr04 | 35977422                | G/A  | NA                 | INTERGENIC                    | NA                                                        |
| Kabuli_wild_36005847 | 1399937407                          | Ca_kabuli_Chr04 | 36005847                | T/G  | NA                 | INTERGENIC                    | NA                                                        |
| Kabuli_wild_36010756 | 1399937408                          | Ca_kabuli_Chr04 | 36010756                | T/G  | NA                 | INTERGENIC                    | NA                                                        |
| Kabuli_wild_36155087 | 1399937409                          | Ca_kabuli_Chr04 | 36155087                | G/A  | Gene_Ca_14852      | DOWNSTREAM                    | Cellular retinaldehyde-binding/triplefunction, C-terminal |
| Kabuli_wild_36222862 | 1399937410                          | Ca_kabuli_Chr04 | 36222862                | G/T  | Gene_Ca_14848      | NON_SYNONYMOUS_CODING         | ABC transporter-like                                      |
| Kabuli_wild_36277383 | 1399937411                          | Ca_kabuli_Chr04 | 36277383                | C/T  | Gene_Ca_14843      | NON_SYNONYMOUS_CODING         | Helicase,C-terminal                                       |
| Kabuli_wild_36311877 | 1399937412                          | Ca_kabuli_Chr04 | 36311877                | C/T  | NA                 | INTERGENIC                    | NA                                                        |
| Kabuli_wild_36311927 | 1399937413                          | Ca_kabuli_Chr04 | 36311927                | A/G  | NA                 | INTERGENIC                    | NA                                                        |
| Kabuli_wild_36311949 | 1399937414                          | Ca_kabuli_Chr04 | 36311949                | A/T  | NA                 | INTERGENIC                    | NA                                                        |
| Kabuli_wild_36311957 | 1399937415                          | Ca_kabuli_Chr04 | 36311957                | C/T  | NA                 | INTERGENIC                    | NA                                                        |
| Kabuli_wild_36311969 | 1399937416                          | Ca_kabuli_Chr04 | 36311969                | G/A  | NA                 | INTERGENIC                    | NA                                                        |
| Kabuli_wild_36445345 | 1399937417                          | Ca_kabuli_Chr04 | 36445345                | G/A  | Gene_Ca_14833      | SYNONYMOUS_CODING             | Armadillo                                                 |
| Kabuli_wild_36445367 | 1399937418                          | Ca_kabuli_Chr04 | 36445367                | A/G  | Gene_Ca_14833      | NON_SYNONYMOUS_CODING         | Armadillo                                                 |
| Kabuli_wild_36449101 | 1399937419                          | Ca_kabuli_Chr04 | 36449101                | C/T  | Gene_Ca_14833      | INTRON                        | Armadillo                                                 |
| Kabuli_wild_36461836 | 1399937420                          | Ca_kabuli_Chr04 | 36461836                | A/G  | NA                 | INTERGENIC                    | NA                                                        |
| Kabuli_wild_36466198 | 1399937421                          | Ca_kabuli_Chr04 | 36466198                | G/A  | NA                 | INTERGENIC                    | NA                                                        |
| Kabuli_wild_36466237 | 1399937422                          | Ca_kabuli_Chr04 | 36466237                | A/G  | NA                 | INTERGENIC                    | NA                                                        |
| Kabuli_wild_36467928 | 1399937423                          | Ca_kabuli_Chr04 | 36467928                | C/T  | NA                 | INTERGENIC                    | NA                                                        |
| Kabuli_wild_36467943 | 1399937424                          | Ca_kabuli_Chr04 | 36467943                | A/G  | NA                 | INTERGENIC                    | NA                                                        |
| Kabuli_wild_36467964 | 1399937425                          | Ca_kabuli_Chr04 | 36467964                | G/A  | NA                 | INTERGENIC                    | NA                                                        |
| Kabuli_wild_36467967 | 1399937426                          | Ca_kabuli_Chr04 | 36467967                | T/C  | NA                 | INTERGENIC                    | NA                                                        |
| Kabuli_wild_36467980 | 1399937427                          | Ca_kabuli_Chr04 | 36467980                | C/A  | NA                 | INTERGENIC                    | NA                                                        |
| Kabuli_wild_36467988 | 1399937428                          | Ca_kabuli_Chr04 | 36467988                | C/T  | NA                 | INTERGENIC                    | NA                                                        |
| Kabuli_wild_36467990 | 1399937429                          | Ca_kabuli_Chr04 | 36467990                | T/G  | NA                 | INTERGENIC                    | NA                                                        |
| Kabuli_wild_36468003 | 1399937430                          | Ca_kabuli_Chr04 | 36468003                | T/A  | NA                 | INTERGENIC                    | NA                                                        |
| Kabuli_wild_36468053 | 1399937431                          | Ca_kabuli_Chr04 | 36468053                | A/G  | NA                 | INTERGENIC                    | NA                                                        |
| Kabuli_wild_36488955 | 1399937432                          | Ca_kabuli_Chr04 | 36488955                | T/G  | Gene_Ca_14828      | NON_SYNONYMOUS_CODING         | NA                                                        |
| Kabuli_wild_36490201 | 1399937433                          | Ca_kabuli_Chr04 | 36490201                | T/C  | Gene_Ca_14828      | INTRON                        | NA                                                        |
| Kabuli_wild_36537118 | 1399937434                          | Ca_kabuli_Chr04 | 36537118                | C/T  | Gene_Ca_14825      | SYNONYMOUS_CODING             | Transcriptional factor B3                                 |
| Kabuli_wild_36537124 | 1399937435                          | Ca_kabuli_Chr04 | 36537124                | C/T  | Gene_Ca_14825      | SYNONYMOUS_CODING             | Transcriptional factor B3                                 |



| SNP IDs              | NCBI dbSNP accession IDs (NCBI_SS#) | Chromosomes     | Physical positions (bp) | SNPs | Gene accession IDs | Sequence components of genome | Putative functions                           |
|----------------------|-------------------------------------|-----------------|-------------------------|------|--------------------|-------------------------------|----------------------------------------------|
| Kabuli_wild_36537145 | 1399937436                          | Ca_kabuli_Chr04 | 36537145                | T/C  | Gene_Ca_14825      | SYNONYMOUS_CODING             | Transcriptional factor B3                    |
| Kabuli_wild_36537170 | 1399937437                          | Ca_kabuli_Chr04 | 36537170                | C/T  | Gene_Ca_14825      | NON_SYNONYMOUS_CODING         | Transcriptional factor B3                    |
| Kabuli_wild_36541075 | 1399937438                          | Ca_kabuli_Chr04 | 36541075                | G/A  | NA                 | INTERGENIC                    | NA                                           |
| Kabuli_wild_36541083 | 1399937439                          | Ca_kabuli_Chr04 | 36541083                | A/C  | NA                 | INTERGENIC                    | NA                                           |
| Kabuli_wild_36541087 | 1399937440                          | Ca_kabuli_Chr04 | 36541087                | T/C  | NA                 | INTERGENIC                    | NA                                           |
| Kabuli_wild_36541088 | 1399937441                          | Ca_kabuli_Chr04 | 36541088                | G/T  | NA                 | INTERGENIC                    | NA                                           |
| Kabuli_wild_36639333 | 1399937442                          | Ca_kabuli_Chr04 | 36639333                | A/T  | Gene_Ca_14816      | DOWNSTREAM                    | FAD dependent oxidoreductase                 |
| Kabuli_wild_36639382 | 1399937443                          | Ca_kabuli_Chr04 | 36639382                | T/C  | Gene_Ca_14816      | DOWNSTREAM                    | FAD dependent oxidoreductase                 |
| Kabuli_wild_36639442 | 1399937444                          | Ca_kabuli_Chr04 | 36639442                | G/A  | Gene_Ca_14816      | DOWNSTREAM                    | FAD dependent oxidoreductase                 |
| Kabuli_wild_36643459 | 1399937445                          | Ca_kabuli_Chr04 | 36643459                | A/G  | Gene_Ca_14816      | INTRON                        | FAD dependent oxidoreductase                 |
| Kabuli_wild_36670226 | 1399937446                          | Ca_kabuli_Chr04 | 36670226                | A/G  | Gene_Ca_14814      | INTRON                        | ATPase,AAA+type,core                         |
| Kabuli_wild_36670248 | 1399937447                          | Ca_kabuli_Chr04 | 36670248                | G/A  | Gene_Ca_14814      | INTRON                        | ATPase,AAA+type,core                         |
| Kabuli_wild_36673677 | 1399937448                          | Ca_kabuli_Chr04 | 36673677                | C/A  | Gene_Ca_14813      | DOWNSTREAM                    | Domain of unknown function DUF862,eukaryotic |
| Kabuli_wild_36682211 | 1399937449                          | Ca_kabuli_Chr04 | 36682211                | G/A  | Gene_Ca_14812      | SYNONYMOUS_CODING             | NA                                           |
| Kabuli_wild_36682213 | 1399937450                          | Ca_kabuli_Chr04 | 36682213                | C/T  | Gene_Ca_14812      | NON_SYNONYMOUS_CODING         | NA                                           |
| Kabuli_wild_36682215 | 1399937451                          | Ca_kabuli_Chr04 | 36682215                | G/A  | Gene_Ca_14812      | NON_SYNONYMOUS_CODING         | NA                                           |
| Kabuli_wild_36682231 | 1399937452                          | Ca_kabuli_Chr04 | 36682231                | G/T  | Gene_Ca_14812      | NON_SYNONYMOUS_CODING         | NA                                           |
| Kabuli_wild_36682253 | 1399937453                          | Ca_kabuli_Chr04 | 36682253                | T/G  | Gene_Ca_14812      | SYNONYMOUS_CODING             | NA                                           |
| Kabuli_wild_36709731 | 1399937454                          | Ca_kabuli_Chr04 | 36709731                | G/A  | NA                 | INTERGENIC                    | NA                                           |
| Kabuli_wild_36712600 | 1399937455                          | Ca_kabuli_Chr04 | 36712600                | A/T  | NA                 | INTERGENIC                    | NA                                           |
| Kabuli_wild_36712662 | 1399937456                          | Ca_kabuli_Chr04 | 36712662                | A/C  | NA                 | INTERGENIC                    | NA                                           |
| Kabuli_wild_36712806 | 1399937457                          | Ca_kabuli_Chr04 | 36712806                | C/T  | NA                 | INTERGENIC                    | NA                                           |
| Kabuli_wild_36712838 | 1399937458                          | Ca_kabuli_Chr04 | 36712838                | C/T  | NA                 | INTERGENIC                    | NA                                           |
| Kabuli_wild_36712840 | 1399937459                          | Ca_kabuli_Chr04 | 36712840                | C/G  | NA                 | INTERGENIC                    | NA                                           |
| Kabuli_wild_36754121 | 1399937460                          | Ca_kabuli_Chr04 | 36754121                | T/C  | Gene_Ca_14808      | INTRON                        | Phospho fructokinase domain                  |
| Kabuli_wild_36754290 | 1399937461                          | Ca_kabuli_Chr04 | 36754290                | A/T  | Gene_Ca_14808      | INTRON                        | Phospho fructokinase domain                  |
| Kabuli_wild_36754327 | 1399937462                          | Ca_kabuli_Chr04 | 36754327                | G/A  | Gene_Ca_14808      | INTRON                        | Phospho fructokinase domain                  |
| Kabuli_wild_36754328 | 1399937463                          | Ca_kabuli_Chr04 | 36754328                | C/T  | Gene_Ca_14808      | INTRON                        | Phospho fructokinase domain                  |
| Kabuli_wild_36754343 | 1399937464                          | Ca_kabuli_Chr04 | 36754343                | A/C  | Gene_Ca_14808      | INTRON                        | Phospho fructokinase domain                  |
| Kabuli_wild_36754348 | 1399937465                          | Ca_kabuli_Chr04 | 36754348                | T/C  | Gene_Ca_14808      | INTRON                        | Phospho fructokinase domain                  |
| Kabuli_wild_36754377 | 1399937466                          | Ca_kabuli_Chr04 | 36754377                | A/T  | Gene_Ca_14808      | INTRON                        | Phospho fructokinase domain                  |
| Kabuli_wild_36754378 | 1399937467                          | Ca_kabuli_Chr04 | 36754378                | T/C  | Gene_Ca_14808      | INTRON                        | Phospho fructokinase domain                  |
| Kabuli_wild_36754453 | 1399937468                          | Ca_kabuli_Chr04 | 36754453                | A/G  | Gene_Ca_14808      | SYNONYMOUS_CODING             | Phospho fructokinase domain                  |
| Kabuli_wild_36754468 | 1399937469                          | Ca_kabuli_Chr04 | 36754468                | G/A  | Gene_Ca_14808      | SYNONYMOUS_CODING             | Phospho fructokinase domain                  |
| Kabuli_wild_36754542 | 1399937470                          | Ca_kabuli_Chr04 | 36754542                | A/T  | Gene_Ca_14808      | INTRON                        | Phospho fructokinase domain                  |
| Kabuli_wild_36755322 | 1399937471                          | Ca_kabuli_Chr04 | 36755322                | G/C  | Gene_Ca_14808      | INTRON                        | Phospho fructokinase domain                  |
| Kabuli_wild_36755324 | 1399937472                          | Ca_kabuli_Chr04 | 36755324                | G/A  | Gene_Ca_14808      | INTRON                        | Phospho fructokinase domain                  |
| Kabuli_wild_36797039 | 1399937473                          | Ca_kabuli_Chr04 | 36797039                | T/C  | NA                 | INTERGENIC                    | NA                                           |
| Kabuli_wild_36799551 | 1399937474                          | Ca_kabuli_Chr04 | 36799551                | C/T  | Gene_Ca_14807      | SYNONYMOUS_CODING             | RNA recognition motif domain                 |
| Kabuli_wild_36831199 | 1399937475                          | Ca_kabuli_Chr04 | 36831199                | G/A  | Gene_Ca_14805      | NON_SYNONYMOUS_CODING         | NA                                           |
| Kabuli_wild_36831267 | 1399937476                          | Ca_kabuli_Chr04 | 36831267                | A/C  | Gene_Ca_14805      | SYNONYMOUS_CODING             | NA                                           |
| Kabuli_wild_36955706 | 1399937477                          | Ca_kabuli_Chr04 | 36955706                | G/T  | Gene_Ca_14797      | NON_SYNONYMOUS_CODING         | Zinc finger,C2H2-type                        |
| Kabuli_wild_36975360 | 1399937478                          | Ca_kabuli_Chr04 | 36975360                | G/A  | Gene_Ca_14796      | INTRON                        | Helicase,C-terminal                          |
| Kabuli_wild_36975361 | 1399937479                          | Ca_kabuli_Chr04 | 36975361                | C/A  | Gene_Ca_14796      | INTRON                        | Helicase,C-terminal                          |

| SNP IDs              | NCBI dbSNP accession IDs (NCBI_SS#) | Chromosomes     | Physical positions (bp) | SNPs | Gene accession IDs | Sequence components of genome | Putative functions                                     |
|----------------------|-------------------------------------|-----------------|-------------------------|------|--------------------|-------------------------------|--------------------------------------------------------|
| Kabuli_wild_36975381 | 1399937480                          | Ca_kabuli_Chr04 | 36975381                | A/G  | Gene_Ca_14796      | INTRON                        | Helicase,C-terminal                                    |
| Kabuli_wild_36977109 | 1399937481                          | Ca_kabuli_Chr04 | 36977109                | G/A  | Gene_Ca_14796      | NON_SYNONYMOUS_CODING         | Helicase,C-terminal                                    |
| Kabuli_wild_36977113 | 1399937482                          | Ca_kabuli_Chr04 | 36977113                | G/A  | Gene_Ca_14796      | NON_SYNONYMOUS_CODING         | Helicase,C-terminal                                    |
| Kabuli_wild_36977131 | 1399937483                          | Ca_kabuli_Chr04 | 36977131                | A/G  | NA                 | INTERGENIC                    | NA                                                     |
| Kabuli_wild_36977192 | 1399937484                          | Ca_kabuli_Chr04 | 36977192                | C/T  | NA                 | INTERGENIC                    | NA                                                     |
| Kabuli_wild_36977194 | 1399937485                          | Ca_kabuli_Chr04 | 36977194                | G/A  | NA                 | INTERGENIC                    | NA                                                     |
| Kabuli_wild_36977280 | 1399937486                          | Ca_kabuli_Chr04 | 36977280                | A/C  | NA                 | INTERGENIC                    | NA                                                     |
| Kabuli_wild_36977283 | 1399937487                          | Ca_kabuli_Chr04 | 36977283                | G/A  | NA                 | INTERGENIC                    | NA                                                     |
| Kabuli_wild_36977287 | 1399937488                          | Ca_kabuli_Chr04 | 36977287                | G/C  | NA                 | INTERGENIC                    | NA                                                     |
| Kabuli_wild_36979879 | 1399937489                          | Ca_kabuli_Chr04 | 36979879                | C/T  | NA                 | INTERGENIC                    | NA                                                     |
| Kabuli_wild_36979926 | 1399937490                          | Ca_kabuli_Chr04 | 36979926                | G/T  | NA                 | INTERGENIC                    | NA                                                     |
| Kabuli_wild_36984727 | 1399937491                          | Ca_kabuli_Chr04 | 36984727                | C/G  | Gene_Ca_14795      | INTRON                        | SNF2-related                                           |
| Kabuli_wild_36984795 | 1399937492                          | Ca_kabuli_Chr04 | 36984795                | T/A  | Gene_Ca_14795      | INTRON                        | SNF2-related                                           |
| Kabuli_wild_36997937 | 1399937493                          | Ca_kabuli_Chr04 | 36997937                | T/C  | NA                 | INTERGENIC                    | NA                                                     |
| Kabuli_wild_36998201 | 1399937494                          | Ca_kabuli_Chr04 | 36998201                | A/C  | NA                 | INTERGENIC                    | NA                                                     |
| Kabuli_wild_36998231 | 1399937495                          | Ca_kabuli_Chr04 | 36998231                | C/T  | NA                 | INTERGENIC                    | NA                                                     |
| Kabuli_wild_36998252 | 1399937496                          | Ca_kabuli_Chr04 | 36998252                | C/A  | NA                 | INTERGENIC                    | NA                                                     |
| Kabuli_wild_37006188 | 1399937497                          | Ca_kabuli_Chr04 | 37006188                | G/A  | NA                 | INTERGENIC                    | NA                                                     |
| Kabuli_wild_37010855 | 1399937498                          | Ca_kabuli_Chr04 | 37010855                | C/A  | NA                 | INTERGENIC                    | NA                                                     |
| Kabuli_wild_37063558 | 1399937499                          | Ca_kabuli_Chr04 | 37063558                | A/C  | NA                 | INTERGENIC                    | NA                                                     |
| Kabuli_wild_37064588 | 1399937500                          | Ca_kabuli_Chr04 | 37064588                | A/G  | NA                 | INTERGENIC                    | NA                                                     |
| Kabuli_wild_37064630 | 1399937501                          | Ca_kabuli_Chr04 | 37064630                | G/A  | NA                 | INTERGENIC                    | NA                                                     |
| Kabuli_wild_37160622 | 1399937502                          | Ca_kabuli_Chr04 | 37160622                | T/C  | NA                 | INTERGENIC                    | NA                                                     |
| Kabuli_wild_37160625 | 1399937503                          | Ca_kabuli_Chr04 | 37160625                | G/A  | NA                 | INTERGENIC                    | NA                                                     |
| Kabuli_wild_37160654 | 1399937504                          | Ca_kabuli_Chr04 | 37160654                | C/T  | NA                 | INTERGENIC                    | NA                                                     |
| Kabuli_wild_37183865 | 1399937505                          | Ca_kabuli_Chr04 | 37183865                | A/T  | Gene_Ca_15153      | NON_SYNONYMOUS_CODING         | RNA-dependent RNA polymerase, eukaryotic-type          |
| Kabuli_wild_37185576 | 1399937506                          | Ca_kabuli_Chr04 | 37185576                | T/A  | Gene_Ca_15153      | INTRON                        | RNA-dependent RNA polymerase, eukaryotic-type          |
| Kabuli_wild_37185577 | 1399937507                          | Ca_kabuli_Chr04 | 37185577                | T/A  | Gene_Ca_15153      | INTRON                        | RNA-dependent RNA polymerase, eukaryotic-type          |
| Kabuli_wild_37185578 | 1399937508                          | Ca_kabuli_Chr04 | 37185578                | T/A  | Gene_Ca_15153      | INTRON                        | RNA-dependent RNA polymerase, eukaryotic-type          |
| Kabuli_wild_37237211 | 1399937509                          | Ca_kabuli_Chr04 | 37237211                | G/A  | NA                 | INTERGENIC                    | NA                                                     |
| Kabuli_wild_37237276 | 1399937510                          | Ca_kabuli_Chr04 | 37237276                | T/C  | NA                 | INTERGENIC                    | NA                                                     |
| Kabuli_wild_37241235 | 1399937511                          | Ca_kabuli_Chr04 | 37241235                | A/G  | Gene_Ca_15151      | SYNONYMOUS_CODING             | Signal transduction response regulator, receiverdomain |
| Kabuli_wild_37241262 | 1399937512                          | Ca_kabuli_Chr04 | 37241262                | G/A  | Gene_Ca_15151      | SYNONYMOUS_CODING             | Signal transduction response regulator, receiverdomain |
| Kabuli_wild_37241962 | 1399937513                          | Ca_kabuli_Chr04 | 37241962                | T/C  | Gene_Ca_15151      | INTRON                        | Signal transduction response regulator, receiverdomain |
| Kabuli_wild_37260701 | 1399937514                          | Ca_kabuli_Chr04 | 37260701                | A/T  | Gene_Ca_15149      | INTRON                        | Dynamincentral domain                                  |
| Kabuli_wild_37260841 | 1399937515                          | Ca_kabuli_Chr04 | 37260841                | T/A  | Gene_Ca_15149      | INTRON                        | Dynamincentral domain                                  |
| Kabuli_wild_37260873 | 1399937516                          | Ca_kabuli_Chr04 | 37260873                | A/G  | Gene_Ca_15149      | SYNONYMOUS_CODING             | Dynamincentral domain                                  |
| Kabuli_wild_37264628 | 1399937517                          | Ca_kabuli_Chr04 | 37264628                | G/A  | Gene_Ca_15149      | INTRON                        | Dynamincentral domain                                  |
| Kabuli_wild_37264685 | 1399937518                          | Ca_kabuli_Chr04 | 37264685                | T/C  | Gene_Ca_15149      | INTRON                        | Dynamincentral domain                                  |
| Kabuli_wild_37274931 | 1399937519                          | Ca_kabuli_Chr04 | 37274931                | C/T  | Gene_Ca_15148      | SYNONYMOUS_CODING             | MyosinII heavychain-like                               |
| Kabuli_wild_37275816 | 1399937520                          | Ca_kabuli_Chr04 | 37275816                | G/A  | Gene_Ca_15148      | INTRON                        | MyosinII heavychain-like                               |
| Kabuli_wild_37286591 | 1399937521                          | Ca_kabuli_Chr04 | 37286591                | T/A  | Gene_Ca_15147      | INTRON                        | NA                                                     |
| Kabuli_wild_37286625 | 1399937522                          | Ca_kabuli_Chr04 | 37286625                | C/A  | Gene_Ca_15147      | INTRON                        | NA                                                     |
| Kabuli_wild_37286632 | 1399937523                          | Ca_kabuli_Chr04 | 37286632                | G/A  | Gene_Ca_15147      | INTRON                        | NA                                                     |

| SNP IDs              | NCBI dbSNP accession IDs (NCBI_SS#) | Chromosomes     | Physical positions (bp) | SNPs | Gene accession IDs | Sequence components of genome | Putative functions                    |
|----------------------|-------------------------------------|-----------------|-------------------------|------|--------------------|-------------------------------|---------------------------------------|
| Kabuli_wild_37286663 | 1399937524                          | Ca_kabuli_Chr04 | 37286663                | A/G  | Gene_Ca_15147      | INTRON                        | NA                                    |
| Kabuli_wild_37289370 | 1399937525                          | Ca_kabuli_Chr04 | 37289370                | C/T  | Gene_Ca_15147      | DOWNSTREAM                    | NA                                    |
| Kabuli_wild_37293752 | 1399937526                          | Ca_kabuli_Chr04 | 37293752                | G/A  | NA                 | INTERGENIC                    | NA                                    |
| Kabuli_wild_37293769 | 1399937527                          | Ca_kabuli_Chr04 | 37293769                | C/A  | NA                 | INTERGENIC                    | NA                                    |
| Kabuli_wild_37293773 | 1399937528                          | Ca_kabuli_Chr04 | 37293773                | A/T  | NA                 | INTERGENIC                    | NA                                    |
| Kabuli_wild_37293780 | 1399937529                          | Ca_kabuli_Chr04 | 37293780                | T/A  | NA                 | INTERGENIC                    | NA                                    |
| Kabuli_wild_37293825 | 1399937530                          | Ca_kabuli_Chr04 | 37293825                | C/G  | NA                 | INTERGENIC                    | NA                                    |
| Kabuli_wild_37294720 | 1399937531                          | Ca_kabuli_Chr04 | 37294720                | A/G  | NA                 | INTERGENIC                    | NA                                    |
| Kabuli_wild_37316574 | 1399937532                          | Ca_kabuli_Chr04 | 37316574                | T/A  | Gene_Ca_15144      | SYNONYMOUS_CODING             | Zinc finger, RING-type                |
| Kabuli_wild_37316697 | 1399937533                          | Ca_kabuli_Chr04 | 37316697                | A/C  | Gene_Ca_15144      | NON_SYNONYMOUS_CODING         | Zinc finger, RING-type                |
| Kabuli_wild_37316700 | 1399937534                          | Ca_kabuli_Chr04 | 37316700                | C/A  | Gene_Ca_15144      | NON_SYNONYMOUS_CODING         | Zinc finger, RING-type                |
| Kabuli_wild_37316713 | 1399937535                          | Ca_kabuli_Chr04 | 37316713                | A/T  | Gene_Ca_15144      | NON_SYNONYMOUS_CODING         | Zinc finger, RING-type                |
| Kabuli_wild_37316738 | 1399937536                          | Ca_kabuli_Chr04 | 37316738                | C/T  | Gene_Ca_15144      | NON_SYNONYMOUS_CODING         | Zinc finger, RING-type                |
| Kabuli_wild_37316748 | 1399937537                          | Ca_kabuli_Chr04 | 37316748                | T/A  | Gene_Ca_15144      | SYNONYMOUS_CODING             | Zinc finger, RING-type                |
| Kabuli_wild_37349071 | 1399937538                          | Ca_kabuli_Chr04 | 37349071                | T/C  | Gene_Ca_15141      | INTRON                        | MethyltransferaseTRM13                |
| Kabuli_wild_37349212 | 1399937539                          | Ca_kabuli_Chr04 | 37349212                | A/C  | Gene_Ca_15141      | SYNONYMOUS_CODING             | MethyltransferaseTRM13                |
| Kabuli_wild_37349239 | 1399937540                          | Ca_kabuli_Chr04 | 37349239                | C/G  | Gene_Ca_15141      | INTRON                        | MethyltransferaseTRM13                |
| Kabuli_wild_37349304 | 1399937541                          | Ca_kabuli_Chr04 | 37349304                | T/C  | Gene_Ca_15141      | INTRON                        | MethyltransferaseTRM13                |
| Kabuli_wild_37349321 | 1399937542                          | Ca_kabuli_Chr04 | 37349321                | T/C  | Gene_Ca_15141      | INTRON                        | MethyltransferaseTRM13                |
| Kabuli_wild_37349331 | 1399937543                          | Ca_kabuli_Chr04 | 37349331                | C/T  | Gene_Ca_15141      | INTRON                        | MethyltransferaseTRM13                |
| Kabuli_wild_37356865 | 1399937544                          | Ca_kabuli_Chr04 | 37356865                | C/A  | Gene_Ca_15140      | SYNONYMOUS_CODING             | HEAT                                  |
| Kabuli_wild_37356889 | 1399937545                          | Ca_kabuli_Chr04 | 37356889                | C/T  | Gene_Ca_15140      | INTRON                        | HEAT                                  |
| Kabuli_wild_37356892 | 1399937546                          | Ca_kabuli_Chr04 | 37356892                | C/T  | Gene_Ca_15140      | INTRON                        | HEAT                                  |
| Kabuli_wild_37356919 | 1399937547                          | Ca_kabuli_Chr04 | 37356919                | A/T  | Gene_Ca_15140      | INTRON                        | HEAT                                  |
| Kabuli_wild_37356951 | 1399937548                          | Ca_kabuli_Chr04 | 37356951                | C/T  | Gene_Ca_15140      | INTRON                        | HEAT                                  |
| Kabuli_wild_37357109 | 1399937549                          | Ca_kabuli_Chr04 | 37357109                | T/C  | Gene_Ca_15140      | INTRON                        | HEAT                                  |
| Kabuli_wild_37362545 | 1399937550                          | Ca_kabuli_Chr04 | 37362545                | A/C  | Gene_Ca_15140      | NON_SYNONYMOUS_CODING         | HEAT                                  |
| Kabuli_wild_37362558 | 1399937551                          | Ca_kabuli_Chr04 | 37362558                | G/A  | Gene_Ca_15140      | SYNONYMOUS_CODING             | HEAT                                  |
| Kabuli_wild_37362599 | 1399937552                          | Ca_kabuli_Chr04 | 37362599                | G/A  | Gene_Ca_15140      | INTRON                        | HEAT                                  |
| Kabuli_wild_37364980 | 1399937553                          | Ca_kabuli_Chr04 | 37364980                | G/A  | Gene_Ca_15140      | SYNONYMOUS_CODING             | HEAT                                  |
| Kabuli_wild_37365148 | 1399937554                          | Ca_kabuli_Chr04 | 37365148                | A/G  | Gene_Ca_15140      | SYNONYMOUS_CODING             | HEAT                                  |
| Kabuli_wild_37367903 | 1399937555                          | Ca_kabuli_Chr04 | 37367903                | G/A  | Gene_Ca_15139      | SYNONYMOUS_CODING             | Ankyrinrepeat                         |
| Kabuli_wild_37371262 | 1399937556                          | Ca_kabuli_Chr04 | 37371262                | G/A  | Gene_Ca_15139      | SYNONYMOUS_CODING             | Ankyrinrepeat                         |
| Kabuli_wild_37371263 | 1399937557                          | Ca_kabuli_Chr04 | 37371263                | G/A  | Gene_Ca_15139      | NON_SYNONYMOUS_CODING         | Ankyrinrepeat                         |
| Kabuli_wild_37433459 | 1399937558                          | Ca_kabuli_Chr04 | 37433459                | G/T  | Gene_Ca_15133      | DOWNSTREAM                    | Integrase, catalyticcore              |
| Kabuli_wild_37450206 | 1399937559                          | Ca_kabuli_Chr04 | 37450206                | A/C  | Gene_Ca_15131      | SYNONYMOUS_CODING             | Oxoglutarate/iron-dependent oxygenase |
| Kabuli_wild_37450294 | 1399937560                          | Ca_kabuli_Chr04 | 37450294                | T/C  | Gene_Ca_15131      | SYNONYMOUS_CODING             | Oxoglutarate/iron-dependent oxygenase |
| Kabuli_wild_37450326 | 1399937561                          | Ca_kabuli_Chr04 | 37450326                | A/T  | Gene_Ca_15131      | SYNONYMOUS_CODING             | Oxoglutarate/iron-dependent oxygenase |
| Kabuli_wild_37453449 | 1399937562                          | Ca_kabuli_Chr04 | 37453449                | A/G  | NA                 | INTERGENIC                    | NA                                    |
| Kabuli_wild_37453493 | 1399937563                          | Ca_kabuli_Chr04 | 37453493                | C/T  | NA                 | INTERGENIC                    | NA                                    |
| Kabuli_wild_37453497 | 1399937564                          | Ca_kabuli_Chr04 | 37453497                | C/G  | NA                 | INTERGENIC                    | NA                                    |
| Kabuli_wild_37453586 | 1399937565                          | Ca_kabuli_Chr04 | 37453586                | C/A  | NA                 | INTERGENIC                    | NA                                    |
| Kabuli_wild_37453590 | 1399937566                          | Ca_kabuli_Chr04 | 37453590                | C/A  | NA                 | INTERGENIC                    | NA                                    |
| Kabuli_wild_37454296 | 1399937567                          | Ca_kabuli_Chr04 | 37454296                | A/G  | NA                 | INTERGENIC                    | NA                                    |

| SNP IDs              | NCBI dbSNP accession IDs (NCBI_SS#) | Chromosomes     | Physical positions (bp) | SNPs | Gene accession IDs | Sequence components of genome | Putative functions                      |
|----------------------|-------------------------------------|-----------------|-------------------------|------|--------------------|-------------------------------|-----------------------------------------|
| Kabuli_wild_37454374 | 1399937568                          | Ca_kabuli_Chr04 | 37454374                | C/T  | NA                 | INTERGENIC                    | NA                                      |
| Kabuli_wild_37454428 | 1399937569                          | Ca_kabuli_Chr04 | 37454428                | A/C  | NA                 | INTERGENIC                    | NA                                      |
| Kabuli_wild_37454567 | 1399937570                          | Ca_kabuli_Chr04 | 37454567                | G/A  | NA                 | INTERGENIC                    | NA                                      |
| Kabuli_wild_37454571 | 1399937571                          | Ca_kabuli_Chr04 | 37454571                | T/C  | NA                 | INTERGENIC                    | NA                                      |
| Kabuli_wild_37454593 | 1399937572                          | Ca_kabuli_Chr04 | 37454593                | G/A  | NA                 | INTERGENIC                    | NA                                      |
| Kabuli_wild_37454603 | 1399937573                          | Ca_kabuli_Chr04 | 37454603                | T/C  | NA                 | INTERGENIC                    | NA                                      |
| Kabuli_wild_37454636 | 1399937574                          | Ca_kabuli_Chr04 | 37454636                | G/A  | NA                 | INTERGENIC                    | NA                                      |
| Kabuli_wild_37492422 | 1399937575                          | Ca_kabuli_Chr04 | 37492422                | C/A  | Gene_Ca_15129      | DOWNSTREAM                    | Caleosin                                |
| Kabuli_wild_37549871 | 1399937576                          | Ca_kabuli_Chr04 | 37549871                | A/T  | Gene_Ca_15125      | INTRON                        | Mediator complex subunit Med23          |
| Kabuli_wild_37549883 | 1399937577                          | Ca_kabuli_Chr04 | 37549883                | T/C  | Gene_Ca_15125      | INTRON                        | Mediator complex subunit Med23          |
| Kabuli_wild_37549987 | 1399937578                          | Ca_kabuli_Chr04 | 37549987                | C/T  | Gene_Ca_15125      | INTRON                        | Mediator complex subunit Med23          |
| Kabuli_wild_37550122 | 1399937579                          | Ca_kabuli_Chr04 | 37550122                | G/A  | Gene_Ca_15125      | INTRON                        | Mediator complex subunit Med23          |
| Kabuli_wild_37550161 | 1399937580                          | Ca_kabuli_Chr04 | 37550161                | T/G  | Gene_Ca_15125      | INTRON                        | Mediator complex subunit Med23          |
| Kabuli_wild_37552973 | 1399937581                          | Ca_kabuli_Chr04 | 37552973                | C/T  | Gene_Ca_15125      | INTRON                        | Mediator complex subunit Med23          |
| Kabuli_wild_37558880 | 1399937582                          | Ca_kabuli_Chr04 | 37558880                | C/T  | Gene_Ca_15125      | INTRON                        | Mediator complex subunit Med23          |
| Kabuli_wild_37558881 | 1399937583                          | Ca_kabuli_Chr04 | 37558881                | G/T  | Gene_Ca_15125      | INTRON                        | Mediator complex subunit Med23          |
| Kabuli_wild_37575621 | 1399937584                          | Ca_kabuli_Chr04 | 37575621                | G/A  | Gene_Ca_15125      | INTRON                        | Mediator complex subunit Med23          |
| Kabuli_wild_37575636 | 1399937585                          | Ca_kabuli_Chr04 | 37575636                | C/T  | Gene_Ca_15125      | INTRON                        | Mediator complex subunit Med23          |
| Kabuli_wild_37575670 | 1399937586                          | Ca_kabuli_Chr04 | 37575670                | T/C  | Gene_Ca_15125      | INTRON                        | Mediator complex subunit Med23          |
| Kabuli_wild_37575709 | 1399937587                          | Ca_kabuli_Chr04 | 37575709                | C/T  | Gene_Ca_15125      | INTRON                        | Mediator complex subunit Med23          |
| Kabuli_wild_37576713 | 1399937588                          | Ca_kabuli_Chr04 | 37576713                | T/A  | Gene_Ca_15125      | INTRON                        | Mediator complex subunit Med23          |
| Kabuli_wild_37612154 | 1399937589                          | Ca_kabuli_Chr04 | 37612154                | A/G  | Gene_Ca_15121      | SYNONYMOUS_CODING             | Glycosidehydrolase, family17            |
| Kabuli_wild_37630404 | 1399937590                          | Ca_kabuli_Chr04 | 37630404                | A/G  | NA                 | INTERGENIC                    | NA                                      |
| Kabuli_wild_37630445 | 1399937591                          | Ca_kabuli_Chr04 | 37630445                | A/G  | NA                 | INTERGENIC                    | NA                                      |
| Kabuli_wild_37630520 | 1399937592                          | Ca_kabuli_Chr04 | 37630520                | G/C  | NA                 | INTERGENIC                    | NA                                      |
| Kabuli_wild_37630521 | 1399937593                          | Ca_kabuli_Chr04 | 37630521                | G/A  | NA                 | INTERGENIC                    | NA                                      |
| Kabuli_wild_37630527 | 1399937594                          | Ca_kabuli_Chr04 | 37630527                | A/G  | NA                 | INTERGENIC                    | NA                                      |
| Kabuli_wild_37632801 | 1399937595                          | Ca_kabuli_Chr04 | 37632801                | C/T  | Gene_Ca_15118      | DOWNSTREAM                    | NA                                      |
| Kabuli_wild_37632972 | 1399937596                          | Ca_kabuli_Chr04 | 37632972                | T/C  | Gene_Ca_15118      | DOWNSTREAM                    | NA                                      |
| Kabuli_wild_37632973 | 1399937597                          | Ca_kabuli_Chr04 | 37632973                | A/G  | Gene_Ca_15118      | DOWNSTREAM                    | NA                                      |
| Kabuli_wild_37633044 | 1399937598                          | Ca_kabuli_Chr04 | 37633044                | C/T  | Gene_Ca_15118      | DOWNSTREAM                    | NA                                      |
| Kabuli_wild_37635217 | 1399937599                          | Ca_kabuli_Chr04 | 37635217                | C/T  | Gene_Ca_15118      | UPSTREAM                      | NA                                      |
| Kabuli_wild_37635300 | 1399937600                          | Ca_kabuli_Chr04 | 37635300                | T/A  | Gene_Ca_15118      | UPSTREAM                      | NA                                      |
| Kabuli_wild_37685824 | 1399937601                          | Ca_kabuli_Chr04 | 37685824                | T/C  | Gene_Ca_15113      | SYNONYMOUS_CODING             | Armadillo                               |
| Kabuli_wild_37685842 | 1399937602                          | Ca_kabuli_Chr04 | 37685842                | T/G  | Gene_Ca_15113      | SYNONYMOUS_CODING             | Armadillo                               |
| Kabuli_wild_37699140 | 1399937603                          | Ca_kabuli_Chr04 | 37699140                | C/T  | Gene_Ca_15111      | SYNONYMOUS_CODING             | ATP-graspfold                           |
| Kabuli_wild_37699141 | 1399937604                          | Ca_kabuli_Chr04 | 37699141                | T/G  | Gene_Ca_15111      | SYNONYMOUS_CODING             | ATP-graspfold                           |
| Kabuli_wild_37699176 | 1399937605                          | Ca_kabuli_Chr04 | 37699176                | G/A  | Gene_Ca_15111      | SYNONYMOUS_CODING             | ATP-graspfold                           |
| Kabuli_wild_37703649 | 1399937606                          | Ca_kabuli_Chr04 | 37703649                | A/C  | Gene_Ca_15110      | UPSTREAM                      | Cytochromecoxidase subunit IIC-terminal |
| Kabuli_wild_37703653 | 1399937607                          | Ca_kabuli_Chr04 | 37703653                | A/C  | Gene_Ca_15110      | UPSTREAM                      | Cytochromecoxidase subunit IIC-terminal |
| Kabuli_wild_37708260 | 1399937608                          | Ca_kabuli_Chr04 | 37708260                | A/G  | NA                 | INTERGENIC                    | NA                                      |
| Kabuli_wild_37708334 | 1399937609                          | Ca_kabuli_Chr04 | 37708334                | T/A  | NA                 | INTERGENIC                    | NA                                      |
| Kabuli_wild_37708348 | 1399937610                          | Ca_kabuli_Chr04 | 37708348                | T/G  | NA                 | INTERGENIC                    | NA                                      |
| Kabuli_wild_37753479 | 1399937611                          | Ca_kabuli_Chr04 | 37753479                | C/T  | Gene_Ca_15104      | INTRON                        | NA                                      |

| SNP IDs              | NCBI dbSNP accession IDs (NCBI_SS#) | Chromosomes       | Physical positions (bp) | SNPs | Gene accession IDs | Sequence components of genome | Putative functions                            |
|----------------------|-------------------------------------|-------------------|-------------------------|------|--------------------|-------------------------------|-----------------------------------------------|
| Kabuli_wild_37754999 | 1399937612                          | Ca_kabuli_Chrom04 | 37754999                | C/A  | Gene_Ca_15104      | INTRON                        | NA                                            |
| Kabuli_wild_37772619 | 1399937613                          | Ca_kabuli_Chrom04 | 37772619                | G/A  | NA                 | INTERGENIC                    | NA                                            |
| Kabuli_wild_37797651 | 1399937614                          | Ca_kabuli_Chrom04 | 37797651                | G/C  | NA                 | INTERGENIC                    | NA                                            |
| Kabuli_wild_37797676 | 1399937615                          | Ca_kabuli_Chrom04 | 37797676                | C/T  | NA                 | INTERGENIC                    | NA                                            |
| Kabuli_wild_37806689 | 1399937616                          | Ca_kabuli_Chrom04 | 37806689                | T/C  | Gene_Ca_15095      | DOWNSTREAM                    | NUDIX hydrolase domain                        |
| Kabuli_wild_37812917 | 1399937617                          | Ca_kabuli_Chrom04 | 37812917                | G/C  | NA                 | INTERGENIC                    | NA                                            |
| Kabuli_wild_37859069 | 1399937618                          | Ca_kabuli_Chrom04 | 37859069                | T/G  | Gene_Ca_15089      | SYNONYMOUS_CODING             | Auxin efflux carrier                          |
| Kabuli_wild_37897261 | 1399937619                          | Ca_kabuli_Chrom04 | 37897261                | T/G  | NA                 | INTERGENIC                    | NA                                            |
| Kabuli_wild_37897266 | 1399937620                          | Ca_kabuli_Chrom04 | 37897266                | A/T  | NA                 | INTERGENIC                    | NA                                            |
| Kabuli_wild_37897351 | 1399937621                          | Ca_kabuli_Chrom04 | 37897351                | A/C  | NA                 | INTERGENIC                    | NA                                            |
| Kabuli_wild_37898404 | 1399937622                          | Ca_kabuli_Chrom04 | 37898404                | A/G  | NA                 | INTERGENIC                    | NA                                            |
| Kabuli_wild_37901584 | 1399937623                          | Ca_kabuli_Chrom04 | 37901584                | C/T  | NA                 | INTERGENIC                    | NA                                            |
| Kabuli_wild_38008062 | 1399937624                          | Ca_kabuli_Chrom04 | 38008062                | T/A  | NA                 | INTERGENIC                    | NA                                            |
| Kabuli_wild_38008082 | 1399937625                          | Ca_kabuli_Chrom04 | 38008082                | T/C  | NA                 | INTERGENIC                    | NA                                            |
| Kabuli_wild_38008174 | 1399937626                          | Ca_kabuli_Chrom04 | 38008174                | A/G  | NA                 | INTERGENIC                    | NA                                            |
| Kabuli_wild_38008186 | 1399937627                          | Ca_kabuli_Chrom04 | 38008186                | A/C  | NA                 | INTERGENIC                    | NA                                            |
| Kabuli_wild_38008204 | 1399937628                          | Ca_kabuli_Chrom04 | 38008204                | G/A  | NA                 | INTERGENIC                    | NA                                            |
| Kabuli_wild_38008205 | 1399937629                          | Ca_kabuli_Chrom04 | 38008205                | A/G  | NA                 | INTERGENIC                    | NA                                            |
| Kabuli_wild_38008213 | 1399937630                          | Ca_kabuli_Chrom04 | 38008213                | C/T  | NA                 | INTERGENIC                    | NA                                            |
| Kabuli_wild_38008227 | 1399937631                          | Ca_kabuli_Chrom04 | 38008227                | G/T  | NA                 | INTERGENIC                    | NA                                            |
| Kabuli_wild_38008243 | 1399937632                          | Ca_kabuli_Chrom04 | 38008243                | C/T  | NA                 | INTERGENIC                    | NA                                            |
| Kabuli_wild_38020224 | 1399937633                          | Ca_kabuli_Chrom04 | 38020224                | C/T  | Gene_Ca_13143      | SYNONYMOUS_CODING             | Aminoacid/polyaminetransporterI               |
| Kabuli_wild_38029077 | 1399937634                          | Ca_kabuli_Chrom04 | 38029077                | G/A  | Gene_Ca_13142      | INTRON                        | ChaperoninTCP-1,conservedsite                 |
| Kabuli_wild_38029136 | 1399937635                          | Ca_kabuli_Chrom04 | 38029136                | G/T  | Gene_Ca_13142      | NON_SYNONYMOUS_CODING         | ChaperoninTCP-1,conservedsite                 |
| Kabuli_wild_38029208 | 1399937636                          | Ca_kabuli_Chrom04 | 38029208                | G/A  | Gene_Ca_13142      | SYNONYMOUS_CODING             | ChaperoninTCP-1,conservedsite                 |
| Kabuli_wild_38029215 | 1399937637                          | Ca_kabuli_Chrom04 | 38029215                | A/T  | Gene_Ca_13142      | INTRON                        | ChaperoninTCP-1,conservedsite                 |
| Kabuli_wild_38029358 | 1399937638                          | Ca_kabuli_Chrom04 | 38029358                | A/G  | Gene_Ca_13142      | INTRON                        | ChaperoninTCP-1,conservedsite                 |
| Kabuli_wild_38029380 | 1399937639                          | Ca_kabuli_Chrom04 | 38029380                | G/A  | Gene_Ca_13142      | INTRON                        | ChaperoninTCP-1,conservedsite                 |
| Kabuli_wild_38038865 | 1399937640                          | Ca_kabuli_Chrom04 | 38038865                | C/T  | Gene_Ca_13141      | NON_SYNONYMOUS_CODING         | Protein of unknown function DUF3326           |
| Kabuli_wild_38038959 | 1399937641                          | Ca_kabuli_Chrom04 | 38038959                | A/G  | Gene_Ca_13141      | INTRON                        | Protein of unknown function DUF3326           |
| Kabuli_wild_38039037 | 1399937642                          | Ca_kabuli_Chrom04 | 38039037                | C/T  | Gene_Ca_13141      | INTRON                        | Protein of unknown function DUF3326           |
| Kabuli_wild_38039046 | 1399937643                          | Ca_kabuli_Chrom04 | 38039046                | C/T  | Gene_Ca_13141      | INTRON                        | Protein of unknown function DUF3326           |
| Kabuli_wild_38039076 | 1399937644                          | Ca_kabuli_Chrom04 | 38039076                | A/G  | Gene_Ca_13141      | INTRON                        | Protein of unknown function DUF3326           |
| Kabuli_wild_38039088 | 1399937645                          | Ca_kabuli_Chrom04 | 38039088                | T/C  | Gene_Ca_13141      | INTRON                        | Protein of unknown function DUF3326           |
| Kabuli_wild_38039251 | 1399937646                          | Ca_kabuli_Chrom04 | 38039251                | G/C  | Gene_Ca_13141      | INTRON                        | Protein of unknown function DUF3326           |
| Kabuli_wild_38039252 | 1399937647                          | Ca_kabuli_Chrom04 | 38039252                | T/A  | Gene_Ca_13141      | INTRON                        | Protein of unknown function DUF3326           |
| Kabuli_wild_38039255 | 1399937648                          | Ca_kabuli_Chrom04 | 38039255                | T/C  | Gene_Ca_13141      | INTRON                        | Protein of unknown function DUF3326           |
| Kabuli_wild_38039289 | 1399937649                          | Ca_kabuli_Chrom04 | 38039289                | G/A  | Gene_Ca_13141      | INTRON                        | Protein of unknown function DUF3326           |
| Kabuli_wild_38039297 | 1399937650                          | Ca_kabuli_Chrom04 | 38039297                | C/T  | Gene_Ca_13141      | NON_SYNONYMOUS_CODING         | Protein of unknown function DUF3326           |
| Kabuli_wild_38142776 | 1399937651                          | Ca_kabuli_Chrom04 | 38142776                | G/A  | NA                 | INTERGENIC                    | NA                                            |
| Kabuli_wild_38153183 | 1399937652                          | Ca_kabuli_Chrom04 | 38153183                | C/A  | Gene_Ca_13138      | SYNONYMOUS_CODING             | Tetrahydrofolate dehydrogenase/cyclohydrolase |
| Kabuli_wild_38153195 | 1399937653                          | Ca_kabuli_Chrom04 | 38153195                | T/C  | Gene_Ca_13138      | SYNONYMOUS_CODING             | Tetrahydrofolate dehydrogenase/cyclohydrolase |
| Kabuli_wild_38153198 | 1399937654                          | Ca_kabuli_Chrom04 | 38153198                | G/T  | Gene_Ca_13138      | SYNONYMOUS_CODING             | Tetrahydrofolate dehydrogenase/cyclohydrolase |
| Kabuli_wild_38153216 | 1399937655                          | Ca_kabuli_Chrom04 | 38153216                | T/C  | Gene_Ca_13138      | SYNONYMOUS_CODING             | Tetrahydrofolate dehydrogenase/cyclohydrolase |

| SNP IDs              | NCBI dbSNP accession IDs (NCBI_SS#) | Chromosomes     | Physical positions (bp) | SNPs | Gene accession IDs | Sequence components of genome | Putative functions                                    |
|----------------------|-------------------------------------|-----------------|-------------------------|------|--------------------|-------------------------------|-------------------------------------------------------|
| Kabuli_wild_38153275 | 1399937656                          | Ca_kabuli_Chr04 | 38153275                | C/A  | Gene_Ca_13138      | INTRON                        | Tetrahydrofolate dehydrogenase/cyclohydrolase         |
| Kabuli_wild_38153277 | 1399937657                          | Ca_kabuli_Chr04 | 38153277                | A/G  | Gene_Ca_13138      | INTRON                        | Tetrahydrofolate dehydrogenase/cyclohydrolase         |
| Kabuli_wild_38156918 | 1399937658                          | Ca_kabuli_Chr04 | 38156918                | A/T  | NA                 | INTERGENIC                    | NA                                                    |
| Kabuli_wild_38157210 | 1399937659                          | Ca_kabuli_Chr04 | 38157210                | G/T  | NA                 | INTERGENIC                    | NA                                                    |
| Kabuli_wild_38157279 | 1399937660                          | Ca_kabuli_Chr04 | 38157279                | T/A  | NA                 | INTERGENIC                    | NA                                                    |
| Kabuli_wild_38179583 | 1399937661                          | Ca_kabuli_Chr04 | 38179583                | A/C  | NA                 | INTERGENIC                    | NA                                                    |
| Kabuli_wild_38179614 | 1399937662                          | Ca_kabuli_Chr04 | 38179614                | G/C  | NA                 | INTERGENIC                    | NA                                                    |
| Kabuli_wild_38179621 | 1399937663                          | Ca_kabuli_Chr04 | 38179621                | A/T  | NA                 | INTERGENIC                    | NA                                                    |
| Kabuli_wild_38179624 | 1399937664                          | Ca_kabuli_Chr04 | 38179624                | A/C  | NA                 | INTERGENIC                    | NA                                                    |
| Kabuli_wild_38181292 | 1399937665                          | Ca_kabuli_Chr04 | 38181292                | G/A  | Gene_Ca_13135      | NON_SYNONYMOUS_CODING         | NA                                                    |
| Kabuli_wild_38195044 | 1399937666                          | Ca_kabuli_Chr04 | 38195044                | G/C  | Gene_Ca_13134      | INTRON                        | Domain of unknown function DUF250                     |
| Kabuli_wild_38195346 | 1399937667                          | Ca_kabuli_Chr04 | 38195346                | G/A  | Gene_Ca_13134      | SYNONYMOUS_CODING             | Domain of unknown function DUF250                     |
| Kabuli_wild_38195411 | 1399937668                          | Ca_kabuli_Chr04 | 38195411                | T/A  | Gene_Ca_13134      | NON_SYNONYMOUS_CODING         | Domain of unknown function DUF250                     |
| Kabuli_wild_38195438 | 1399937669                          | Ca_kabuli_Chr04 | 38195438                | C/T  | Gene_Ca_13134      | NON_SYNONYMOUS_CODING         | Domain of unknown function DUF250                     |
| Kabuli_wild_38215267 | 1399937670                          | Ca_kabuli_Chr04 | 38215267                | G/A  | Gene_Ca_13132      | INTRON                        | AMP-dependentsynthetase/ligase                        |
| Kabuli_wild_38221009 | 1399937671                          | Ca_kabuli_Chr04 | 38221009                | A/G  | Gene_Ca_13131      | SYNONYMOUS_CODING             | Lipase,GDSL                                           |
| Kabuli_wild_38288823 | 1399937672                          | Ca_kabuli_Chr04 | 38288823                | G/T  | Gene_Ca_13128      | SYNONYMOUS_CODING             | Protein of unknown function DUF869,plant              |
| Kabuli_wild_38288877 | 1399937673                          | Ca_kabuli_Chr04 | 38288877                | C/G  | Gene_Ca_13128      | NON_SYNONYMOUS_CODING         | Protein of unknown function DUF869,plant              |
| Kabuli_wild_38288997 | 1399937674                          | Ca_kabuli_Chr04 | 38288997                | T/A  | Gene_Ca_13128      | SYNONYMOUS_CODING             | Protein of unknown function DUF869,plant              |
| Kabuli_wild_38289052 | 1399937675                          | Ca_kabuli_Chr04 | 38289052                | G/A  | Gene_Ca_13128      | SYNONYMOUS_CODING             | Protein of unknown function DUF869,plant              |
| Kabuli_wild_38289066 | 1399937676                          | Ca_kabuli_Chr04 | 38289066                | G/A  | Gene_Ca_13128      | SYNONYMOUS_CODING             | Protein of unknown function DUF869,plant              |
| Kabuli_wild_38343633 | 1399937677                          | Ca_kabuli_Chr04 | 38343633                | A/T  | NA                 | INTERGENIC                    | NA                                                    |
| Kabuli_wild_38343687 | 1399937678                          | Ca_kabuli_Chr04 | 38343687                | C/T  | NA                 | INTERGENIC                    | NA                                                    |
| Kabuli_wild_38343750 | 1399937679                          | Ca_kabuli_Chr04 | 38343750                | C/T  | NA                 | INTERGENIC                    | NA                                                    |
| Kabuli_wild_38343796 | 1399937680                          | Ca_kabuli_Chr04 | 38343796                | C/T  | NA                 | INTERGENIC                    | NA                                                    |
| Kabuli_wild_38343837 | 1399937681                          | Ca_kabuli_Chr04 | 38343837                | A/G  | NA                 | INTERGENIC                    | NA                                                    |
| Kabuli_wild_38358067 | 1399937682                          | Ca_kabuli_Chr04 | 38358067                | A/G  | Gene_Ca_13120      | NON_SYNONYMOUS_CODING         | C2 calcium-dependent membrane targeting               |
| Kabuli_wild_38358398 | 1399937683                          | Ca_kabuli_Chr04 | 38358398                | A/G  | Gene_Ca_13120      | SYNONYMOUS_CODING             | C2 calcium-dependent membrane targeting               |
| Kabuli_wild_38358677 | 1399937684                          | Ca_kabuli_Chr04 | 38358677                | G/A  | Gene_Ca_13120      | SYNONYMOUS_CODING             | C2 calcium-dependent membrane targeting               |
| Kabuli_wild_38358887 | 1399937685                          | Ca_kabuli_Chr04 | 38358887                | G/A  | Gene_Ca_13120      | SYNONYMOUS_CODING             | C2 calcium-dependent membrane targeting               |
| Kabuli_wild_38359395 | 1399937686                          | Ca_kabuli_Chr04 | 38359395                | A/C  | Gene_Ca_13120      | NON_SYNONYMOUS_CODING         | C2 calcium-dependent membrane targeting               |
| Kabuli_wild_38362132 | 1399937687                          | Ca_kabuli_Chr04 | 38362132                | T/A  | Gene_Ca_13120      | SYNONYMOUS_CODING             | C2 calcium-dependent membrane targeting               |
| Kabuli_wild_38362575 | 1399937688                          | Ca_kabuli_Chr04 | 38362575                | T/C  | Gene_Ca_13120      | NON_SYNONYMOUS_CODING         | C2 calcium-dependent membrane targeting               |
| Kabuli_wild_38370848 | 1399937689                          | Ca_kabuli_Chr04 | 38370848                | A/G  | NA                 | INTERGENIC                    | NA                                                    |
| Kabuli_wild_38370864 | 1399937690                          | Ca_kabuli_Chr04 | 38370864                | G/A  | NA                 | INTERGENIC                    | NA                                                    |
| Kabuli_wild_38370905 | 1399937691                          | Ca_kabuli_Chr04 | 38370905                | A/G  | NA                 | INTERGENIC                    | NA                                                    |
| Kabuli_wild_38370921 | 1399937692                          | Ca_kabuli_Chr04 | 38370921                | T/G  | NA                 | INTERGENIC                    | NA                                                    |
| Kabuli_wild_38370925 | 1399937693                          | Ca_kabuli_Chr04 | 38370925                | G/A  | NA                 | INTERGENIC                    | NA                                                    |
| Kabuli_wild_38370926 | 1399937694                          | Ca_kabuli_Chr04 | 38370926                | T/C  | NA                 | INTERGENIC                    | NA                                                    |
| Kabuli_wild_38370941 | 1399937695                          | Ca_kabuli_Chr04 | 38370941                | A/G  | NA                 | INTERGENIC                    | NA                                                    |
| Kabuli_wild_38370966 | 1399937696                          | Ca_kabuli_Chr04 | 38370966                | T/C  | NA                 | INTERGENIC                    | NA                                                    |
| Kabuli_wild_38382889 | 1399937697                          | Ca_kabuli_Chr04 | 38382889                | C/A  | Gene_Ca_13119      | NON_SYNONYMOUS_CODING         | Aminoacid transporter,transmembrane                   |
| Kabuli_wild_38382890 | 1399937698                          | Ca_kabuli_Chr04 | 38382890                | C/G  | Gene_Ca_13119      | SYNONYMOUS_CODING             | Aminoacid transporter,transmembrane                   |
| Kabuli_wild_38405123 | 1399937699                          | Ca_kabuli_Chr04 | 38405123                | C/T  | Gene_Ca_13117      | INTRON                        | Protein of unknown function DUF248, methyltransferase |

| SNP IDs              | NCBI dbSNP accession IDs (NCBI_SS#) | Chromosomes     | Physical positions (bp) | SNPs | Gene accession IDs | Sequence components of genome | Putative functions                                    |
|----------------------|-------------------------------------|-----------------|-------------------------|------|--------------------|-------------------------------|-------------------------------------------------------|
| Kabuli_wild_38405153 | 1399937700                          | Ca_kabuli_Chr04 | 38405153                | C/T  | Gene_Ca_13117      | INTRON                        | Protein of unknown function DUF248, methyltransferase |
| Kabuli_wild_38421798 | 1399937701                          | Ca_kabuli_Chr04 | 38421798                | A/C  | Gene_Ca_13115      | INTRON                        | Zinc finger,CCCH-type                                 |
| Kabuli_wild_38422037 | 1399937702                          | Ca_kabuli_Chr04 | 38422037                | C/T  | Gene_Ca_13115      | INTRON                        | Zinc finger,CCCH-type                                 |
| Kabuli_wild_38425675 | 1399937703                          | Ca_kabuli_Chr04 | 38425675                | A/G  | Gene_Ca_13115      | SYNONYMOUS_CODING             | Zinc finger,CCCH-type                                 |
| Kabuli_wild_38425720 | 1399937704                          | Ca_kabuli_Chr04 | 38425720                | T/A  | Gene_Ca_13115      | NON_SYNONYMOUS_CODING         | Zinc finger,CCCH-type                                 |
| Kabuli_wild_38434000 | 1399937705                          | Ca_kabuli_Chr04 | 38434000                | T/C  | Gene_Ca_13114      | SYNONYMOUS_CODING             | Protein kinase,catalytic domain                       |
| Kabuli_wild_38473653 | 1399937706                          | Ca_kabuli_Chr04 | 38473653                | T/C  | Gene_Ca_13112      | INTRON                        | NA                                                    |
| Kabuli_wild_38474108 | 1399937707                          | Ca_kabuli_Chr04 | 38474108                | T/C  | Gene_Ca_13112      | INTRON                        | NA                                                    |
| Kabuli_wild_38474123 | 1399937708                          | Ca_kabuli_Chr04 | 38474123                | A/T  | Gene_Ca_13112      | INTRON                        | NA                                                    |
| Kabuli_wild_38474192 | 1399937709                          | Ca_kabuli_Chr04 | 38474192                | T/C  | Gene_Ca_13112      | INTRON                        | NA                                                    |
| Kabuli_wild_38475310 | 1399937710                          | Ca_kabuli_Chr04 | 38475310                | A/C  | Gene_Ca_13112      | INTRON                        | NA                                                    |
| Kabuli_wild_38475424 | 1399937711                          | Ca_kabuli_Chr04 | 38475424                | C/G  | Gene_Ca_13112      | INTRON                        | NA                                                    |
| Kabuli_wild_38475425 | 1399937712                          | Ca_kabuli_Chr04 | 38475425                | A/G  | Gene_Ca_13112      | INTRON                        | NA                                                    |
| Kabuli_wild_38475442 | 1399937713                          | Ca_kabuli_Chr04 | 38475442                | A/G  | Gene_Ca_13112      | INTRON                        | NA                                                    |
| Kabuli_wild_38475449 | 1399937714                          | Ca_kabuli_Chr04 | 38475449                | T/A  | Gene_Ca_13112      | INTRON                        | NA                                                    |
| Kabuli_wild_38475517 | 1399937715                          | Ca_kabuli_Chr04 | 38475517                | G/A  | Gene_Ca_13112      | INTRON                        | NA                                                    |
| Kabuli_wild_38475547 | 1399937716                          | Ca_kabuli_Chr04 | 38475547                | C/T  | Gene_Ca_13112      | INTRON                        | NA                                                    |
| Kabuli_wild_38536170 | 1399937717                          | Ca_kabuli_Chr04 | 38536170                | G/A  | NA                 | INTERGENIC                    | NA                                                    |
| Kabuli_wild_38536332 | 1399937718                          | Ca_kabuli_Chr04 | 38536332                | A/C  | NA                 | INTERGENIC                    | NA                                                    |
| Kabuli_wild_38540201 | 1399937719                          | Ca_kabuli_Chr04 | 38540201                | C/T  | NA                 | INTERGENIC                    | NA                                                    |
| Kabuli_wild_38540247 | 1399937720                          | Ca_kabuli_Chr04 | 38540247                | G/A  | NA                 | INTERGENIC                    | NA                                                    |
| Kabuli_wild_38554024 | 1399937721                          | Ca_kabuli_Chr04 | 38554024                | T/C  | NA                 | INTERGENIC                    | NA                                                    |
| Kabuli_wild_38612245 | 1399937722                          | Ca_kabuli_Chr04 | 38612245                | C/T  | NA                 | INTERGENIC                    | NA                                                    |
| Kabuli_wild_38620579 | 1399937723                          | Ca_kabuli_Chr04 | 38620579                | C/T  | NA                 | INTERGENIC                    | NA                                                    |
| Kabuli_wild_38620620 | 1399937724                          | Ca_kabuli_Chr04 | 38620620                | A/T  | NA                 | INTERGENIC                    | NA                                                    |
| Kabuli_wild_38659377 | 1399937725                          | Ca_kabuli_Chr04 | 38659377                | T/C  | NA                 | INTERGENIC                    | NA                                                    |
| Kabuli_wild_38659398 | 1399937726                          | Ca_kabuli_Chr04 | 38659398                | G/A  | NA                 | INTERGENIC                    | NA                                                    |
| Kabuli_wild_38659534 | 1399937727                          | Ca_kabuli_Chr04 | 38659534                | T/A  | NA                 | INTERGENIC                    | NA                                                    |
| Kabuli_wild_38659607 | 1399937728                          | Ca_kabuli_Chr04 | 38659607                | T/C  | NA                 | INTERGENIC                    | NA                                                    |
| Kabuli_wild_38679987 | 1399937729                          | Ca_kabuli_Chr04 | 38679987                | A/G  | Gene_Ca_13099      | INTRON                        | LIM binding protein                                   |
| Kabuli_wild_38680371 | 1399937730                          | Ca_kabuli_Chr04 | 38680371                | G/A  | Gene_Ca_13099      | STOP_GAINED                   | LIM binding protein                                   |
| Kabuli_wild_38721154 | 1399937731                          | Ca_kabuli_Chr04 | 38721154                | A/G  | Gene_Ca_13098      | INTRON                        | Exostosin-like                                        |
| Kabuli_wild_38721160 | 1399937732                          | Ca_kabuli_Chr04 | 38721160                | A/G  | Gene_Ca_13098      | INTRON                        | Exostosin-like                                        |
| Kabuli_wild_38721207 | 1399937733                          | Ca_kabuli_Chr04 | 38721207                | A/C  | Gene_Ca_13098      | INTRON                        | Exostosin-like                                        |
| Kabuli_wild_38756507 | 1399937734                          | Ca_kabuli_Chr04 | 38756507                | C/T  | Gene_Ca_13097      | SYNONYMOUS_CODING             | Auxin efflux carrier                                  |
| Kabuli_wild_38756510 | 1399937735                          | Ca_kabuli_Chr04 | 38756510                | C/G  | Gene_Ca_13097      | NON_SYNONYMOUS_CODING         | Auxin efflux carrier                                  |
| Kabuli_wild_38759640 | 1399937736                          | Ca_kabuli_Chr04 | 38759640                | A/C  | Gene_Ca_13097      | INTRON                        | Auxin efflux carrier                                  |
| Kabuli_wild_38770348 | 1399937737                          | Ca_kabuli_Chr04 | 38770348                | T/A  | Gene_Ca_13096      | NON_SYNONYMOUS_CODING         | Fattyaciddesaturase,type2                             |
| Kabuli_wild_38770370 | 1399937738                          | Ca_kabuli_Chr04 | 38770370                | G/C  | Gene_Ca_13096      | NON_SYNONYMOUS_CODING         | Fattyaciddesaturase,type2                             |
| Kabuli_wild_38770450 | 1399937739                          | Ca_kabuli_Chr04 | 38770450                | C/G  | Gene_Ca_13096      | SYNONYMOUS_CODING             | Fattyaciddesaturase,type2                             |
| Kabuli_wild_38770510 | 1399937740                          | Ca_kabuli_Chr04 | 38770510                | G/A  | Gene_Ca_13096      | SYNONYMOUS_CODING             | Fattyaciddesaturase,type2                             |
| Kabuli_wild_38770582 | 1399937741                          | Ca_kabuli_Chr04 | 38770582                | G/A  | Gene_Ca_13096      | SYNONYMOUS_CODING             | Fattyaciddesaturase,type2                             |
| Kabuli_wild_38770606 | 1399937742                          | Ca_kabuli_Chr04 | 38770606                | G/A  | Gene_Ca_13096      | SYNONYMOUS_CODING             | Fattyaciddesaturase,type2                             |
| Kabuli_wild_38785535 | 1399937743                          | Ca_kabuli_Chr04 | 38785535                | G/A  | NA                 | INTERGENIC                    | NA                                                    |



| SNP IDs              | NCBI dbSNP accession IDs (NCBI_SS#) | Chromosomes     | Physical positions (bp) | SNPs | Gene accession IDs | Sequence components of genome | Putative functions                              |
|----------------------|-------------------------------------|-----------------|-------------------------|------|--------------------|-------------------------------|-------------------------------------------------|
| Kabuli_wild_38829959 | 1399937744                          | Ca_kabuli_Chr04 | 38829959                | T/G  | NA                 | INTERGENIC                    | NA                                              |
| Kabuli_wild_38831427 | 1399937745                          | Ca_kabuli_Chr04 | 38831427                | C/T  | Gene_Ca_13091      | DOWNSTREAM                    | NA                                              |
| Kabuli_wild_38833280 | 1399937746                          | Ca_kabuli_Chr04 | 38833280                | C/T  | Gene_Ca_13092      | DOWNSTREAM                    | Ribosomalbiogenesis,methyltransferase,EMG1/NEP1 |
| Kabuli_wild_38833304 | 1399937747                          | Ca_kabuli_Chr04 | 38833304                | C/A  | Gene_Ca_13092      | DOWNSTREAM                    | Ribosomalbiogenesis,methyltransferase,EMG1/NEP2 |
| Kabuli_wild_38833333 | 1399937748                          | Ca_kabuli_Chr04 | 38833333                | A/C  | Gene_Ca_13092      | DOWNSTREAM                    | Ribosomalbiogenesis,methyltransferase,EMG1/NEP3 |
| Kabuli_wild_38833521 | 1399937749                          | Ca_kabuli_Chr04 | 38833521                | G/A  | Gene_Ca_13092      | DOWNSTREAM                    | Ribosomalbiogenesis,methyltransferase,EMG1/NEP4 |
| Kabuli_wild_38833525 | 1399937750                          | Ca_kabuli_Chr04 | 38833525                | A/C  | Gene_Ca_13092      | DOWNSTREAM                    | Ribosomalbiogenesis,methyltransferase,EMG1/NEP5 |
| Kabuli_wild_38833535 | 1399937751                          | Ca_kabuli_Chr04 | 38833535                | A/G  | NA                 | INTERGENIC                    | NA                                              |
| Kabuli_wild_38833778 | 1399937752                          | Ca_kabuli_Chr04 | 38833778                | T/C  | NA                 | INTERGENIC                    | NA                                              |
| Kabuli_wild_38833779 | 1399937753                          | Ca_kabuli_Chr04 | 38833779                | T/A  | NA                 | INTERGENIC                    | NA                                              |
| Kabuli_wild_38833810 | 1399937754                          | Ca_kabuli_Chr04 | 38833810                | A/G  | NA                 | INTERGENIC                    | NA                                              |
| Kabuli_wild_38833843 | 1399937755                          | Ca_kabuli_Chr04 | 38833843                | A/T  | NA                 | INTERGENIC                    | NA                                              |
| Kabuli_wild_38833859 | 1399937756                          | Ca_kabuli_Chr04 | 38833859                | C/G  | NA                 | INTERGENIC                    | NA                                              |
| Kabuli_wild_38834383 | 1399937757                          | Ca_kabuli_Chr04 | 38834383                | G/A  | NA                 | INTERGENIC                    | NA                                              |
| Kabuli_wild_38834405 | 1399937758                          | Ca_kabuli_Chr04 | 38834405                | G/A  | NA                 | INTERGENIC                    | NA                                              |
| Kabuli_wild_38834423 | 1399937759                          | Ca_kabuli_Chr04 | 38834423                | G/C  | NA                 | INTERGENIC                    | NA                                              |
| Kabuli_wild_38834431 | 1399937760                          | Ca_kabuli_Chr04 | 38834431                | G/A  | NA                 | INTERGENIC                    | NA                                              |
| Kabuli_wild_38834474 | 1399937761                          | Ca_kabuli_Chr04 | 38834474                | G/A  | NA                 | INTERGENIC                    | NA                                              |
| Kabuli_wild_38834477 | 1399937762                          | Ca_kabuli_Chr04 | 38834477                | A/G  | NA                 | INTERGENIC                    | NA                                              |
| Kabuli_wild_38836356 | 1399937763                          | Ca_kabuli_Chr04 | 38836356                | T/C  | NA                 | INTERGENIC                    | NA                                              |
| Kabuli_wild_38836381 | 1399937764                          | Ca_kabuli_Chr04 | 38836381                | T/A  | NA                 | INTERGENIC                    | NA                                              |
| Kabuli_wild_38836398 | 1399937765                          | Ca_kabuli_Chr04 | 38836398                | C/T  | NA                 | INTERGENIC                    | NA                                              |
| Kabuli_wild_38836436 | 1399937766                          | Ca_kabuli_Chr04 | 38836436                | G/T  | NA                 | INTERGENIC                    | NA                                              |
| Kabuli_wild_38836459 | 1399937767                          | Ca_kabuli_Chr04 | 38836459                | T/C  | NA                 | INTERGENIC                    | NA                                              |
| Kabuli_wild_38836488 | 1399937768                          | Ca_kabuli_Chr04 | 38836488                | A/G  | NA                 | INTERGENIC                    | NA                                              |
| Kabuli_wild_38836649 | 1399937769                          | Ca_kabuli_Chr04 | 38836649                | C/T  | Gene_Ca_13091      | SYNONYMOUS_CODING             | NA                                              |
| Kabuli_wild_38888779 | 1399937770                          | Ca_kabuli_Chr04 | 38888779                | C/T  | Gene_Ca_13087      | SYNONYMOUS_CODING             | Protein kinase,catalytic domain                 |
| Kabuli_wild_38888791 | 1399937771                          | Ca_kabuli_Chr04 | 38888791                | G/C  | Gene_Ca_13087      | SYNONYMOUS_CODING             | Protein kinase,catalytic domain                 |
| Kabuli_wild_38889023 | 1399937772                          | Ca_kabuli_Chr04 | 38889023                | C/T  | Gene_Ca_13087      | NON_SYNONYMOUS_CODING         | Protein kinase,catalytic domain                 |
| Kabuli_wild_38918394 | 1399937773                          | Ca_kabuli_Chr04 | 38918394                | A/T  | Gene_Ca_13086      | SYNONYMOUS_CODING             | General substrate transporter                   |
| Kabuli_wild_38918396 | 1399937774                          | Ca_kabuli_Chr04 | 38918396                | T/C  | Gene_Ca_13086      | NON_SYNONYMOUS_CODING         | General substrate transporter                   |
| Kabuli_wild_38918424 | 1399937775                          | Ca_kabuli_Chr04 | 38918424                | G/A  | Gene_Ca_13086      | SYNONYMOUS_CODING             | General substrate transporter                   |
| Kabuli_wild_38918430 | 1399937776                          | Ca_kabuli_Chr04 | 38918430                | C/A  | Gene_Ca_13086      | SYNONYMOUS_CODING             | General substrate transporter                   |
| Kabuli_wild_38918541 | 1399937777                          | Ca_kabuli_Chr04 | 38918541                | T/C  | Gene_Ca_13086      | SYNONYMOUS_CODING             | General substrate transporter                   |
| Kabuli_wild_38918547 | 1399937778                          | Ca_kabuli_Chr04 | 38918547                | C/T  | Gene_Ca_13086      | SYNONYMOUS_CODING             | General substrate transporter                   |
| Kabuli_wild_38918628 | 1399937779                          | Ca_kabuli_Chr04 | 38918628                | C/T  | Gene_Ca_13086      | SYNONYMOUS_CODING             | General substrate transporter                   |
| Kabuli_wild_38918649 | 1399937780                          | Ca_kabuli_Chr04 | 38918649                | G/C  | Gene_Ca_13086      | SYNONYMOUS_CODING             | General substrate transporter                   |
| Kabuli_wild_38918724 | 1399937781                          | Ca_kabuli_Chr04 | 38918724                | A/C  | Gene_Ca_13086      | SYNONYMOUS_CODING             | General substrate transporter                   |
| Kabuli_wild_38921338 | 1399937782                          | Ca_kabuli_Chr04 | 38921338                | C/T  | Gene_Ca_13086      | DOWNSTREAM                    | General substrate transporter                   |
| Kabuli_wild_38921373 | 1399937783                          | Ca_kabuli_Chr04 | 38921373                | G/T  | Gene_Ca_13086      | DOWNSTREAM                    | General substrate transporter                   |
| Kabuli_wild_38921378 | 1399937784                          | Ca_kabuli_Chr04 | 38921378                | A/G  | Gene_Ca_13086      | DOWNSTREAM                    | General substrate transporter                   |
| Kabuli_wild_38921411 | 1399937785                          | Ca_kabuli_Chr04 | 38921411                | T/C  | Gene_Ca_13086      | DOWNSTREAM                    | General substrate transporter                   |
| Kabuli_wild_38921413 | 1399937786                          | Ca_kabuli_Chr04 | 38921413                | G/A  | Gene_Ca_13086      | DOWNSTREAM                    | General substrate transporter                   |
| Kabuli_wild_38921434 | 1399937787                          | Ca_kabuli_Chr04 | 38921434                | T/C  | Gene_Ca_13086      | DOWNSTREAM                    | General substrate transporter                   |

| SNP IDs              | NCBI dbSNP accession IDs (NCBI_SS#) | Chromosomes     | Physical positions (bp) | SNPs | Gene accession IDs | Sequence components of genome | Putative functions                                                 |
|----------------------|-------------------------------------|-----------------|-------------------------|------|--------------------|-------------------------------|--------------------------------------------------------------------|
| Kabuli_wild_38921589 | 1399937788                          | Ca_kabuli_Chr04 | 38921589                | C/T  | NA                 | INTERGENIC                    | NA                                                                 |
| Kabuli_wild_38921614 | 1399937789                          | Ca_kabuli_Chr04 | 38921614                | G/T  | NA                 | INTERGENIC                    | NA                                                                 |
| Kabuli_wild_38921615 | 1399937790                          | Ca_kabuli_Chr04 | 38921615                | A/C  | NA                 | INTERGENIC                    | NA                                                                 |
| Kabuli_wild_38921628 | 1399937791                          | Ca_kabuli_Chr04 | 38921628                | T/A  | NA                 | INTERGENIC                    | NA                                                                 |
| Kabuli_wild_38921678 | 1399937792                          | Ca_kabuli_Chr04 | 38921678                | G/A  | NA                 | INTERGENIC                    | NA                                                                 |
| Kabuli_wild_38921685 | 1399937793                          | Ca_kabuli_Chr04 | 38921685                | A/G  | NA                 | INTERGENIC                    | NA                                                                 |
| Kabuli_wild_38921721 | 1399937794                          | Ca_kabuli_Chr04 | 38921721                | G/A  | NA                 | INTERGENIC                    | NA                                                                 |
| Kabuli_wild_38921728 | 1399937795                          | Ca_kabuli_Chr04 | 38921728                | A/T  | NA                 | INTERGENIC                    | NA                                                                 |
| Kabuli_wild_38929681 | 1399937796                          | Ca_kabuli_Chr04 | 38929681                | A/G  | Gene_Ca_13085      | SYNONYMOUS_CODING             | NA                                                                 |
| Kabuli_wild_38948414 | 1399937797                          | Ca_kabuli_Chr04 | 38948414                | C/A  | Gene_Ca_13084      | NON_SYNONYMOUS_CODING         | Pathogenesis-related transcriptional factor/ERF, DNA-binding       |
| Kabuli_wild_38961521 | 1399937798                          | Ca_kabuli_Chr04 | 38961521                | G/A  | Gene_Ca_13083      | INTRON                        | Ubiquitin-conjugating enzyme, E2                                   |
| Kabuli_wild_38976822 | 1399937799                          | Ca_kabuli_Chr04 | 38976822                | C/A  | Gene_Ca_13081      | INTRON                        | Folypolyglutamatesynthetase                                        |
| Kabuli_wild_38976835 | 1399937800                          | Ca_kabuli_Chr04 | 38976835                | G/T  | Gene_Ca_13081      | INTRON                        | Folypolyglutamatesynthetase                                        |
| Kabuli_wild_38976865 | 1399937801                          | Ca_kabuli_Chr04 | 38976865                | T/C  | Gene_Ca_13081      | INTRON                        | Folypolyglutamatesynthetase                                        |
| Kabuli_wild_38978462 | 1399937802                          | Ca_kabuli_Chr04 | 38978462                | A/G  | Gene_Ca_13081      | SYNONYMOUS_CODING             | Folypolyglutamatesynthetase                                        |
| Kabuli_wild_38979193 | 1399937803                          | Ca_kabuli_Chr04 | 38979193                | G/T  | Gene_Ca_13081      | INTRON                        | Folypolyglutamatesynthetase                                        |
| Kabuli_wild_38979228 | 1399937804                          | Ca_kabuli_Chr04 | 38979228                | G/T  | Gene_Ca_13081      | INTRON                        | Folypolyglutamatesynthetase                                        |
| Kabuli_wild_38979508 | 1399937805                          | Ca_kabuli_Chr04 | 38979508                | G/A  | Gene_Ca_13081      | INTRON                        | Folypolyglutamatesynthetase                                        |
| Kabuli_wild_39031801 | 1399937806                          | Ca_kabuli_Chr04 | 39031801                | C/T  | Gene_Ca_13078      | NON_SYNONYMOUS_CODING         | RNA recognition motif domain                                       |
| Kabuli_wild_39031823 | 1399937807                          | Ca_kabuli_Chr04 | 39031823                | G/A  | Gene_Ca_13078      | SYNONYMOUS_CODING             | RNA recognition motif domain                                       |
| Kabuli_wild_39031970 | 1399937808                          | Ca_kabuli_Chr04 | 39031970                | T/G  | Gene_Ca_13078      | SYNONYMOUS_CODING             | RNA recognition motif domain                                       |
| Kabuli_wild_39032138 | 1399937809                          | Ca_kabuli_Chr04 | 39032138                | A/T  | Gene_Ca_13078      | INTRON                        | RNA recognition motif domain                                       |
| Kabuli_wild_39033052 | 1399937810                          | Ca_kabuli_Chr04 | 39033052                | A/G  | Gene_Ca_13078      | INTRON                        | RNA recognition motif domain                                       |
| Kabuli_wild_39033073 | 1399937811                          | Ca_kabuli_Chr04 | 39033073                | G/C  | Gene_Ca_13078      | INTRON                        | RNA recognition motif domain                                       |
| Kabuli_wild_39033838 | 1399937812                          | Ca_kabuli_Chr04 | 39033838                | C/A  | Gene_Ca_13078      | INTRON                        | RNA recognition motif domain                                       |
| Kabuli_wild_39042921 | 1399937813                          | Ca_kabuli_Chr04 | 39042921                | T/C  | Gene_Ca_13077      | INTRON                        | PeptidaseM41                                                       |
| Kabuli_wild_39042938 | 1399937814                          | Ca_kabuli_Chr04 | 39042938                | T/G  | Gene_Ca_13077      | INTRON                        | PeptidaseM41                                                       |
| Kabuli_wild_39057991 | 1399937815                          | Ca_kabuli_Chr04 | 39057991                | T/C  | NA                 | INTERGENIC                    | NA                                                                 |
| Kabuli_wild_39058011 | 1399937816                          | Ca_kabuli_Chr04 | 39058011                | G/C  | NA                 | INTERGENIC                    | NA                                                                 |
| Kabuli_wild_39081951 | 1399937817                          | Ca_kabuli_Chr04 | 39081951                | A/G  | Gene_Ca_13074      | INTRON                        | Cyclicnucleotide-binding domain                                    |
| Kabuli_wild_39086017 | 1399937818                          | Ca_kabuli_Chr04 | 39086017                | T/A  | Gene_Ca_13074      | DOWNSTREAM                    | Cyclicnucleotide-binding domain                                    |
| Kabuli_wild_39086269 | 1399937819                          | Ca_kabuli_Chr04 | 39086269                | A/G  | Gene_Ca_13074      | DOWNSTREAM                    | Cyclicnucleotide-binding domain                                    |
| Kabuli_wild_39110473 | 1399937820                          | Ca_kabuli_Chr04 | 39110473                | T/A  | Gene_Ca_13071      | DOWNSTREAM                    | WD40 repeat                                                        |
| Kabuli_wild_39113327 | 1399937821                          | Ca_kabuli_Chr04 | 39113327                | G/A  | NA                 | INTERGENIC                    | NA                                                                 |
| Kabuli_wild_39113330 | 1399937822                          | Ca_kabuli_Chr04 | 39113330                | G/A  | NA                 | INTERGENIC                    | NA                                                                 |
| Kabuli_wild_39113401 | 1399937823                          | Ca_kabuli_Chr04 | 39113401                | A/T  | NA                 | INTERGENIC                    | NA                                                                 |
| Kabuli_wild_39116656 | 1399937824                          | Ca_kabuli_Chr04 | 39116656                | G/A  | Gene_Ca_13071      | UPSTREAM                      | WD40 repeat                                                        |
| Kabuli_wild_39116795 | 1399937825                          | Ca_kabuli_Chr04 | 39116795                | G/C  | Gene_Ca_13071      | UPSTREAM                      | WD40 repeat                                                        |
| Kabuli_wild_39136826 | 1399937826                          | Ca_kabuli_Chr04 | 39136826                | C/T  | Gene_Ca_13069      | DOWNSTREAM                    | Protein phosphatase 2C, manganese/magnesium aspartate binding site |
| Kabuli_wild_39268707 | 1399937827                          | Ca_kabuli_Chr04 | 39268707                | A/C  | NA                 | INTERGENIC                    | NA                                                                 |
| Kabuli_wild_39268770 | 1399937828                          | Ca_kabuli_Chr04 | 39268770                | C/G  | NA                 | INTERGENIC                    | NA                                                                 |
| Kabuli_wild_39306891 | 1399937829                          | Ca_kabuli_Chr04 | 39306891                | G/A  | NA                 | INTERGENIC                    | NA                                                                 |
| Kabuli_wild_39306900 | 1399937830                          | Ca_kabuli_Chr04 | 39306900                | G/A  | NA                 | INTERGENIC                    | NA                                                                 |
| Kabuli_wild_39306915 | 1399937831                          | Ca_kabuli_Chr04 | 39306915                | G/T  | NA                 | INTERGENIC                    | NA                                                                 |

| SNP IDs              | NCBI dbSNP accession IDs (NCBI_SS#) | Chromosomes     | Physical positions (bp) | SNPs | Gene accession IDs | Sequence components of genome | Putative functions                                           |
|----------------------|-------------------------------------|-----------------|-------------------------|------|--------------------|-------------------------------|--------------------------------------------------------------|
| Kabuli_wild_39306938 | 1399937832                          | Ca_kabuli_Chr04 | 39306938                | T/C  | NA                 | INTERGENIC                    | NA                                                           |
| Kabuli_wild_39379990 | 1399937833                          | Ca_kabuli_Chr04 | 39379990                | T/C  | NA                 | INTERGENIC                    | NA                                                           |
| Kabuli_wild_39380084 | 1399937834                          | Ca_kabuli_Chr04 | 39380084                | T/C  | NA                 | INTERGENIC                    | NA                                                           |
| Kabuli_wild_39380114 | 1399937835                          | Ca_kabuli_Chr04 | 39380114                | G/T  | NA                 | INTERGENIC                    | NA                                                           |
| Kabuli_wild_39635683 | 1399937836                          | Ca_kabuli_Chr04 | 39635683                | G/A  | NA                 | INTERGENIC                    | NA                                                           |
| Kabuli_wild_39635718 | 1399937837                          | Ca_kabuli_Chr04 | 39635718                | C/T  | NA                 | INTERGENIC                    | NA                                                           |
| Kabuli_wild_39635720 | 1399937838                          | Ca_kabuli_Chr04 | 39635720                | G/A  | NA                 | INTERGENIC                    | NA                                                           |
| Kabuli_wild_39635721 | 1399937839                          | Ca_kabuli_Chr04 | 39635721                | A/G  | NA                 | INTERGENIC                    | NA                                                           |
| Kabuli_wild_39635742 | 1399937840                          | Ca_kabuli_Chr04 | 39635742                | A/T  | NA                 | INTERGENIC                    | NA                                                           |
| Kabuli_wild_39635746 | 1399937841                          | Ca_kabuli_Chr04 | 39635746                | A/T  | NA                 | INTERGENIC                    | NA                                                           |
| Kabuli_wild_39650872 | 1399937842                          | Ca_kabuli_Chr04 | 39650872                | T/C  | NA                 | INTERGENIC                    | NA                                                           |
| Kabuli_wild_39659750 | 1399937843                          | Ca_kabuli_Chr04 | 39659750                | G/A  | Gene_Ca_14935      | DOWNSTREAM                    | Protein kinase,catalytic domain                              |
| Kabuli_wild_39659757 | 1399937844                          | Ca_kabuli_Chr04 | 39659757                | C/T  | Gene_Ca_14935      | DOWNSTREAM                    | Protein kinase,catalytic domain                              |
| Kabuli_wild_39715087 | 1399937845                          | Ca_kabuli_Chr04 | 39715087                | A/G  | Gene_Ca_14929      | SYNONYMOUS_CODING             | Glutamineamidotransferase,class-II                           |
| Kabuli_wild_39719606 | 1399937846                          | Ca_kabuli_Chr04 | 39719606                | C/G  | Gene_Ca_14929      | SYNONYMOUS_CODING             | Glutamineamidotransferase,class-II                           |
| Kabuli_wild_39719747 | 1399937847                          | Ca_kabuli_Chr04 | 39719747                | G/T  | Gene_Ca_14929      | SYNONYMOUS_CODING             | Glutamineamidotransferase,class-II                           |
| Kabuli_wild_39779563 | 1399937848                          | Ca_kabuli_Chr04 | 39779563                | G/A  | Gene_Ca_14927      | NON_SYNONYMOUS_CODING         | Protein of unknown function DUF81                            |
| Kabuli_wild_39803305 | 1399937849                          | Ca_kabuli_Chr04 | 39803305                | T/C  | Gene_Ca_14925      | SYNONYMOUS_CODING             | SANT domain,DNA binding                                      |
| Kabuli_wild_39964930 | 1399937850                          | Ca_kabuli_Chr04 | 39964930                | T/C  | Gene_Ca_14914      | SYNONYMOUS_CODING             | Exostosin-like                                               |
| Kabuli_wild_40010119 | 1399937851                          | Ca_kabuli_Chr04 | 40010119                | A/C  | Gene_Ca_14911      | NON_SYNONYMOUS_CODING         | Pathogenesis-related transcriptional factor/ERF, DNA-binding |
| Kabuli_wild_40010165 | 1399937852                          | Ca_kabuli_Chr04 | 40010165                | A/C  | Gene_Ca_14911      | NON_SYNONYMOUS_CODING         | Pathogenesis-related transcriptional factor/ERF, DNA-binding |
| Kabuli_wild_40010177 | 1399937853                          | Ca_kabuli_Chr04 | 40010177                | G/A  | Gene_Ca_14911      | SYNONYMOUS_CODING             | Pathogenesis-related transcriptional factor/ERF, DNA-binding |
| Kabuli_wild_40010201 | 1399937854                          | Ca_kabuli_Chr04 | 40010201                | A/G  | Gene_Ca_14911      | SYNONYMOUS_CODING             | Pathogenesis-related transcriptional factor/ERF, DNA-binding |
| Kabuli_wild_40060063 | 1399937855                          | Ca_kabuli_Chr04 | 40060063                | G/T  | Gene_Ca_14910      | SYNONYMOUS_CODING             | Nuclearpore complex protein, Nucleoporin Nup85-like          |
| Kabuli_wild_40061195 | 1399937856                          | Ca_kabuli_Chr04 | 40061195                | T/C  | Gene_Ca_14910      | INTRON                        | Nuclearpore complex protein, Nucleoporin Nup85-like          |
| Kabuli_wild_40061262 | 1399937857                          | Ca_kabuli_Chr04 | 40061262                | A/C  | Gene_Ca_14910      | INTRON                        | Nuclearpore complex protein, Nucleoporin Nup85-like          |
| Kabuli_wild_40065505 | 1399937858                          | Ca_kabuli_Chr04 | 40065505                | T/A  | Gene_Ca_14910      | INTRON                        | Nuclearpore complex protein, Nucleoporin Nup85-like          |
| Kabuli_wild_40134460 | 1399937859                          | Ca_kabuli_Chr04 | 40134460                | A/G  | Gene_Ca_14906      | INTRON                        | Exoribonuclease,phosphorolytic domain1                       |
| Kabuli_wild_40134518 | 1399937860                          | Ca_kabuli_Chr04 | 40134518                | T/C  | Gene_Ca_14906      | INTRON                        | Exoribonuclease,phosphorolytic domain1                       |
| Kabuli_wild_40149132 | 1399937861                          | Ca_kabuli_Chr04 | 40149132                | G/C  | Gene_Ca_14905      | INTRON                        | NA                                                           |
| Kabuli_wild_40149324 | 1399937862                          | Ca_kabuli_Chr04 | 40149324                | G/C  | Gene_Ca_14905      | INTRON                        | NA                                                           |
| Kabuli_wild_40166667 | 1399937863                          | Ca_kabuli_Chr04 | 40166667                | G/C  | Gene_Ca_14903      | NON_SYNONYMOUS_CODING         | PeptidaseS16,IonN-terminal                                   |
| Kabuli_wild_40169176 | 1399937864                          | Ca_kabuli_Chr04 | 40169176                | T/G  | Gene_Ca_14903      | UPSTREAM                      | PeptidaseS16,IonN-terminal                                   |
| Kabuli_wild_40185606 | 1399937865                          | Ca_kabuli_Chr04 | 40185606                | A/G  | Gene_Ca_14901      | NON_SYNONYMOUS_CODING         | Aminoacid transporter,transmembrane                          |
| Kabuli_wild_40185699 | 1399937866                          | Ca_kabuli_Chr04 | 40185699                | G/C  | Gene_Ca_14901      | INTRON                        | Aminoacid transporter,transmembrane                          |
| Kabuli_wild_40199692 | 1399937867                          | Ca_kabuli_Chr04 | 40199692                | A/C  | Gene_Ca_14900      | INTRON                        | Cofprotein                                                   |
| Kabuli_wild_40218375 | 1399937868                          | Ca_kabuli_Chr04 | 40218375                | G/T  | NA                 | INTERGENIC                    | NA                                                           |
| Kabuli_wild_40218410 | 1399937869                          | Ca_kabuli_Chr04 | 40218410                | G/A  | NA                 | INTERGENIC                    | NA                                                           |
| Kabuli_wild_40267713 | 1399937870                          | Ca_kabuli_Chr04 | 40267713                | G/T  | NA                 | INTERGENIC                    | NA                                                           |
| Kabuli_wild_40267719 | 1399937871                          | Ca_kabuli_Chr04 | 40267719                | G/A  | NA                 | INTERGENIC                    | NA                                                           |
| Kabuli_wild_40279513 | 1399937872                          | Ca_kabuli_Chr04 | 40279513                | G/T  | NA                 | INTERGENIC                    | NA                                                           |
| Kabuli_wild_40279578 | 1399937873                          | Ca_kabuli_Chr04 | 40279578                | G/C  | NA                 | INTERGENIC                    | NA                                                           |
| Kabuli_wild_40313721 | 1399937874                          | Ca_kabuli_Chr04 | 40313721                | A/G  | NA                 | INTERGENIC                    | NA                                                           |
| Kabuli_wild_40349170 | 1399937875                          | Ca_kabuli_Chr04 | 40349170                | C/T  | Gene_Ca_14888      | UPSTREAM                      | RibosomalproteinL28                                          |

| SNP IDs              | NCBI dbSNP accession IDs (NCBI_SS#) | Chromosomes     | Physical positions (bp) | SNPs | Gene accession IDs | Sequence components of genome | Putative functions                                |
|----------------------|-------------------------------------|-----------------|-------------------------|------|--------------------|-------------------------------|---------------------------------------------------|
| Kabuli_wild_40368278 | 1399937876                          | Ca_kabuli_Chr04 | 40368278                | T/C  | NA                 | INTERGENIC                    | NA                                                |
| Kabuli_wild_40368765 | 1399937877                          | Ca_kabuli_Chr04 | 40368765                | G/A  | NA                 | INTERGENIC                    | NA                                                |
| Kabuli_wild_40375361 | 1399937878                          | Ca_kabuli_Chr04 | 40375361                | A/G  | NA                 | INTERGENIC                    | NA                                                |
| Kabuli_wild_40375386 | 1399937879                          | Ca_kabuli_Chr04 | 40375386                | C/T  | NA                 | INTERGENIC                    | NA                                                |
| Kabuli_wild_40387959 | 1399937880                          | Ca_kabuli_Chr04 | 40387959                | A/G  | NA                 | INTERGENIC                    | NA                                                |
| Kabuli_wild_40429387 | 1399937881                          | Ca_kabuli_Chr04 | 40429387                | G/A  | NA                 | INTERGENIC                    | NA                                                |
| Kabuli_wild_40471412 | 1399937882                          | Ca_kabuli_Chr04 | 40471412                | G/C  | NA                 | INTERGENIC                    | NA                                                |
| Kabuli_wild_40472097 | 1399937883                          | Ca_kabuli_Chr04 | 40472097                | A/G  | NA                 | INTERGENIC                    | NA                                                |
| Kabuli_wild_40481316 | 1399937884                          | Ca_kabuli_Chr04 | 40481316                | G/T  | Gene_Ca_14877      | SYNONYMOUS_CODING             | Alpha/betahydrolasefold-1                         |
| Kabuli_wild_40481332 | 1399937885                          | Ca_kabuli_Chr04 | 40481332                | G/T  | Gene_Ca_14877      | SYNONYMOUS_CODING             | Alpha/betahydrolasefold-1                         |
| Kabuli_wild_40513733 | 1399937886                          | Ca_kabuli_Chr04 | 40513733                | C/T  | Gene_Ca_14874      | SYNONYMOUS_CODING             | IQ motif,EF-handbinding site                      |
| Kabuli_wild_40544727 | 1399937887                          | Ca_kabuli_Chr04 | 40544727                | C/T  | NA                 | INTERGENIC                    | NA                                                |
| Kabuli_wild_40554370 | 1399937888                          | Ca_kabuli_Chr04 | 40554370                | G/A  | Gene_Ca_14870      | NON_SYNONYMOUS_CODING         | NA                                                |
| Kabuli_wild_40583205 | 1399937889                          | Ca_kabuli_Chr04 | 40583205                | G/T  | Gene_Ca_14868      | STOP_GAINED                   | Zinc finger, RING-type                            |
| Kabuli_wild_40583206 | 1399937890                          | Ca_kabuli_Chr04 | 40583206                | A/T  | Gene_Ca_14868      | NON_SYNONYMOUS_CODING         | Zinc finger, RING-type                            |
| Kabuli_wild_40583211 | 1399937891                          | Ca_kabuli_Chr04 | 40583211                | G/T  | Gene_Ca_14868      | STOP_GAINED                   | Zinc finger, RING-type                            |
| Kabuli_wild_40583214 | 1399937892                          | Ca_kabuli_Chr04 | 40583214                | G/A  | Gene_Ca_14868      | NON_SYNONYMOUS_CODING         | Zinc finger, RING-type                            |
| Kabuli_wild_40583216 | 1399937893                          | Ca_kabuli_Chr04 | 40583216                | C/A  | Gene_Ca_14868      | NON_SYNONYMOUS_CODING         | Zinc finger, RING-type                            |
| Kabuli_wild_40583217 | 1399937894                          | Ca_kabuli_Chr04 | 40583217                | G/A  | Gene_Ca_14868      | NON_SYNONYMOUS_CODING         | Zinc finger, RING-type                            |
| Kabuli_wild_40583219 | 1399937895                          | Ca_kabuli_Chr04 | 40583219                | G/A  | Gene_Ca_14868      | SYNONYMOUS_CODING             | Zinc finger, RING-type                            |
| Kabuli_wild_40594404 | 1399937896                          | Ca_kabuli_Chr04 | 40594404                | G/A  | NA                 | INTERGENIC                    | NA                                                |
| Kabuli_wild_40594445 | 1399937897                          | Ca_kabuli_Chr04 | 40594445                | A/T  | NA                 | INTERGENIC                    | NA                                                |
| Kabuli_wild_40594470 | 1399937898                          | Ca_kabuli_Chr04 | 40594470                | A/C  | NA                 | INTERGENIC                    | NA                                                |
| Kabuli_wild_40597192 | 1399937899                          | Ca_kabuli_Chr04 | 40597192                | G/A  | NA                 | INTERGENIC                    | NA                                                |
| Kabuli_wild_40597464 | 1399937900                          | Ca_kabuli_Chr04 | 40597464                | G/A  | NA                 | INTERGENIC                    | NA                                                |
| Kabuli_wild_40597534 | 1399937901                          | Ca_kabuli_Chr04 | 40597534                | A/G  | NA                 | INTERGENIC                    | NA                                                |
| Kabuli_wild_40705818 | 1399937902                          | Ca_kabuli_Chr04 | 40705818                | C/A  | NA                 | INTERGENIC                    | NA                                                |
| Kabuli_wild_40723208 | 1399937903                          | Ca_kabuli_Chr04 | 40723208                | C/G  | NA                 | INTERGENIC                    | NA                                                |
| Kabuli_wild_40723212 | 1399937904                          | Ca_kabuli_Chr04 | 40723212                | G/A  | NA                 | INTERGENIC                    | NA                                                |
| Kabuli_wild_40734572 | 1399937905                          | Ca_kabuli_Chr04 | 40734572                | T/G  | Gene_Ca_23909      | INTRON                        | PeptidaseS54,rhomboid                             |
| Kabuli_wild_40734765 | 1399937906                          | Ca_kabuli_Chr04 | 40734765                | G/A  | Gene_Ca_23909      | SYNONYMOUS_CODING             | PeptidaseS54,rhomboid                             |
| Kabuli_wild_40738927 | 1399937907                          | Ca_kabuli_Chr04 | 40738927                | C/T  | Gene_Ca_23908      | SYNONYMOUS_CODING             | Pentatric peptide repeat                          |
| Kabuli_wild_40795060 | 1399937908                          | Ca_kabuli_Chr04 | 40795060                | G/A  | Gene_Ca_23903      | DOWNSTREAM                    | BURP                                              |
| Kabuli_wild_40795085 | 1399937909                          | Ca_kabuli_Chr04 | 40795085                | C/G  | Gene_Ca_23903      | DOWNSTREAM                    | BURP                                              |
| Kabuli_wild_40800814 | 1399937910                          | Ca_kabuli_Chr04 | 40800814                | A/G  | Gene_Ca_23902      | SYNONYMOUS_CODING             | DNA-directed DNA polymerase,family A, palm domain |
| Kabuli_wild_40801783 | 1399937911                          | Ca_kabuli_Chr04 | 40801783                | T/C  | Gene_Ca_23902      | SYNONYMOUS_CODING             | DNA-directed DNA polymerase,family A, palm domain |
| Kabuli_wild_40801790 | 1399937912                          | Ca_kabuli_Chr04 | 40801790                | T/C  | Gene_Ca_23902      | NON_SYNONYMOUS_CODING         | DNA-directed DNA polymerase,family A, palm domain |
| Kabuli_wild_40801791 | 1399937913                          | Ca_kabuli_Chr04 | 40801791                | C/G  | Gene_Ca_23902      | NON_SYNONYMOUS_CODING         | DNA-directed DNA polymerase,family A, palm domain |
| Kabuli_wild_40805740 | 1399937914                          | Ca_kabuli_Chr04 | 40805740                | C/A  | Gene_Ca_23902      | SYNONYMOUS_CODING             | DNA-directed DNA polymerase,family A, palm domain |
| Kabuli_wild_40805952 | 1399937915                          | Ca_kabuli_Chr04 | 40805952                | A/C  | Gene_Ca_23902      | NON_SYNONYMOUS_CODING         | DNA-directed DNA polymerase,family A, palm domain |
| Kabuli_wild_40806993 | 1399937916                          | Ca_kabuli_Chr04 | 40806993                | A/G  | Gene_Ca_23902      | SYNONYMOUS_CODING             | DNA-directed DNA polymerase,family A, palm domain |
| Kabuli_wild_40806995 | 1399937917                          | Ca_kabuli_Chr04 | 40806995                | C/T  | Gene_Ca_23902      | SYNONYMOUS_CODING             | DNA-directed DNA polymerase,family A, palm domain |
| Kabuli_wild_40807053 | 1399937918                          | Ca_kabuli_Chr04 | 40807053                | G/T  | Gene_Ca_23902      | SYNONYMOUS_CODING             | DNA-directed DNA polymerase,family A, palm domain |
| Kabuli_wild_40839949 | 1399937919                          | Ca_kabuli_Chr04 | 40839949                | G/A  | NA                 | INTERGENIC                    | NA                                                |

| SNP IDs              | NCBI dbSNP accession IDs (NCBI_SS#) | Chromosomes     | Physical positions (bp) | SNPs | Gene accession IDs | Sequence components of genome | Putative functions                                |
|----------------------|-------------------------------------|-----------------|-------------------------|------|--------------------|-------------------------------|---------------------------------------------------|
| Kabuli_wild_40839967 | 1399937920                          | Ca_kabuli_Chr04 | 40839967                | G/A  | NA                 | INTERGENIC                    | NA                                                |
| Kabuli_wild_40852381 | 1399937921                          | Ca_kabuli_Chr04 | 40852381                | C/A  | Gene_Ca_23897      | SYNONYMOUS_CODING             | Globin, truncated bacterial-like                  |
| Kabuli_wild_40852475 | 1399937922                          | Ca_kabuli_Chr04 | 40852475                | T/C  | Gene_Ca_23897      | INTRON                        | Globin, truncated bacterial-like                  |
| Kabuli_wild_40912528 | 1399937923                          | Ca_kabuli_Chr04 | 40912528                | T/C  | Gene_Ca_11017      | UPSTREAM                      | Beta-lactamase-related                            |
| Kabuli_wild_40912537 | 1399937924                          | Ca_kabuli_Chr04 | 40912537                | G/T  | Gene_Ca_11017      | UPSTREAM                      | Beta-lactamase-related                            |
| Kabuli_wild_40912677 | 1399937925                          | Ca_kabuli_Chr04 | 40912677                | A/G  | Gene_Ca_11017      | UPSTREAM                      | Beta-lactamase-related                            |
| Kabuli_wild_40912681 | 1399937926                          | Ca_kabuli_Chr04 | 40912681                | A/G  | Gene_Ca_11017      | UPSTREAM                      | Beta-lactamase-related                            |
| Kabuli_wild_40912714 | 1399937927                          | Ca_kabuli_Chr04 | 40912714                | C/G  | Gene_Ca_11017      | UPSTREAM                      | Beta-lactamase-related                            |
| Kabuli_wild_40912731 | 1399937928                          | Ca_kabuli_Chr04 | 40912731                | C/T  | Gene_Ca_11017      | UPSTREAM                      | Beta-lactamase-related                            |
| Kabuli_wild_40917776 | 1399937929                          | Ca_kabuli_Chr04 | 40917776                | C/A  | NA                 | INTERGENIC                    | NA                                                |
| Kabuli_wild_40917777 | 1399937930                          | Ca_kabuli_Chr04 | 40917777                | T/A  | NA                 | INTERGENIC                    | NA                                                |
| Kabuli_wild_40917807 | 1399937931                          | Ca_kabuli_Chr04 | 40917807                | C/T  | NA                 | INTERGENIC                    | NA                                                |
| Kabuli_wild_40941283 | 1399937932                          | Ca_kabuli_Chr04 | 40941283                | A/G  | Gene_Ca_11014      | SYNONYMOUS_CODING             | Proteasome component (PCI) domain                 |
| Kabuli_wild_41032564 | 1399937933                          | Ca_kabuli_Chr04 | 41032564                | A/G  | Gene_Ca_11007      | INTRON                        | GHMPkinase                                        |
| Kabuli_wild_41032590 | 1399937934                          | Ca_kabuli_Chr04 | 41032590                | C/A  | Gene_Ca_11007      | INTRON                        | GHMPkinase                                        |
| Kabuli_wild_41032599 | 1399937935                          | Ca_kabuli_Chr04 | 41032599                | T/C  | Gene_Ca_11007      | INTRON                        | GHMPkinase                                        |
| Kabuli_wild_41094082 | 1399937936                          | Ca_kabuli_Chr04 | 41094082                | T/C  | Gene_Ca_10999      | NON_SYNONYMOUS_CODING         | Protein kinase,catalytic domain                   |
| Kabuli_wild_41094554 | 1399937937                          | Ca_kabuli_Chr04 | 41094554                | A/C  | Gene_Ca_10999      | INTRON                        | Protein kinase,catalytic domain                   |
| Kabuli_wild_41117822 | 1399937938                          | Ca_kabuli_Chr04 | 41117822                | C/A  | Gene_Ca_10997      | INTRON                        | DNAtopoisomerase,typeIA                           |
| Kabuli_wild_41140101 | 1399937939                          | Ca_kabuli_Chr04 | 41140101                | T/C  | Gene_Ca_10994      | NON_SYNONYMOUS_CODING         | NA                                                |
| Kabuli_wild_41141086 | 1399937940                          | Ca_kabuli_Chr04 | 41141086                | G/T  | Gene_Ca_10994      | NON_SYNONYMOUS_CODING         | NA                                                |
| Kabuli_wild_41142288 | 1399937941                          | Ca_kabuli_Chr04 | 41142288                | T/C  | Gene_Ca_10994      | NON_SYNONYMOUS_CODING         | NA                                                |
| Kabuli_wild_41142290 | 1399937942                          | Ca_kabuli_Chr04 | 41142290                | A/G  | Gene_Ca_10994      | SYNONYMOUS_CODING             | NA                                                |
| Kabuli_wild_41142299 | 1399937943                          | Ca_kabuli_Chr04 | 41142299                | T/C  | Gene_Ca_10994      | SYNONYMOUS_CODING             | NA                                                |
| Kabuli_wild_41144277 | 1399937944                          | Ca_kabuli_Chr04 | 41144277                | T/A  | Gene_Ca_10994      | NON_SYNONYMOUS_CODING         | NA                                                |
| Kabuli_wild_41144411 | 1399937945                          | Ca_kabuli_Chr04 | 41144411                | A/G  | Gene_Ca_10994      | NON_SYNONYMOUS_CODING         | NA                                                |
| Kabuli_wild_41145767 | 1399937946                          | Ca_kabuli_Chr04 | 41145767                | C/T  | Gene_Ca_10994      | SYNONYMOUS_CODING             | NA                                                |
| Kabuli_wild_41145875 | 1399937947                          | Ca_kabuli_Chr04 | 41145875                | G/A  | Gene_Ca_10994      | SYNONYMOUS_CODING             | NA                                                |
| Kabuli_wild_41207354 | 1399937948                          | Ca_kabuli_Chr04 | 41207354                | A/C  | Gene_Ca_10990      | INTRON                        | Cystathioninebeta-synthase,core                   |
| Kabuli_wild_41207356 | 1399937949                          | Ca_kabuli_Chr04 | 41207356                | C/T  | Gene_Ca_10990      | INTRON                        | Cystathioninebeta-synthase,core                   |
| Kabuli_wild_41209697 | 1399937950                          | Ca_kabuli_Chr04 | 41209697                | C/A  | Gene_Ca_10990      | INTRON                        | Cystathioninebeta-synthase,core                   |
| Kabuli_wild_41209711 | 1399937951                          | Ca_kabuli_Chr04 | 41209711                | A/C  | Gene_Ca_10990      | INTRON                        | Cystathioninebeta-synthase,core                   |
| Kabuli_wild_41215850 | 1399937952                          | Ca_kabuli_Chr04 | 41215850                | A/C  | NA                 | INTERGENIC                    | NA                                                |
| Kabuli_wild_41229605 | 1399937953                          | Ca_kabuli_Chr04 | 41229605                | C/T  | NA                 | INTERGENIC                    | NA                                                |
| Kabuli_wild_41264870 | 1399937954                          | Ca_kabuli_Chr04 | 41264870                | A/T  | Gene_Ca_10983      | NON_SYNONYMOUS_CODING         | Pentatrico peptide repeat                         |
| Kabuli_wild_41292152 | 1399937955                          | Ca_kabuli_Chr04 | 41292152                | T/C  | Gene_Ca_10980      | NON_SYNONYMOUS_CODING         | ATPase, P-type, H+ transporting proton pump       |
| Kabuli_wild_41292870 | 1399937956                          | Ca_kabuli_Chr04 | 41292870                | A/C  | Gene_Ca_10980      | NON_SYNONYMOUS_CODING         | ATPase, P-type, H+ transporting proton pump       |
| Kabuli_wild_41427086 | 1399937957                          | Ca_kabuli_Chr04 | 41427086                | C/A  | Gene_Ca_10964      | UPSTREAM                      | Pentatrico peptide repeat                         |
| Kabuli_wild_41445209 | 1399937958                          | Ca_kabuli_Chr04 | 41445209                | A/G  | Gene_Ca_10963      | NON_SYNONYMOUS_CODING         | PeptidaseC19,ubiquitincarboxyl-terminalhydrolase2 |
| Kabuli_wild_41445225 | 1399937959                          | Ca_kabuli_Chr04 | 41445225                | A/T  | Gene_Ca_10963      | INTRON                        | PeptidaseC19,ubiquitincarboxyl-terminalhydrolase2 |
| Kabuli_wild_41512840 | 1399937960                          | Ca_kabuli_Chr04 | 41512840                | G/A  | Gene_Ca_10956      | INTRON                        | Skb1 methyltransferase                            |
| Kabuli_wild_41568682 | 1399937961                          | Ca_kabuli_Chr04 | 41568682                | A/C  | NA                 | INTERGENIC                    | NA                                                |
| Kabuli_wild_41572031 | 1399937962                          | Ca_kabuli_Chr04 | 41572031                | G/A  | Gene_Ca_10953      | NON_SYNONYMOUS_CODING         | Skb1 methyltransferase                            |
| Kabuli_wild_41600485 | 1399937963                          | Ca_kabuli_Chr04 | 41600485                | A/C  | NA                 | INTERGENIC                    | NA                                                |

| SNP IDs              | NCBI dbSNP accession IDs (NCBI_SS#) | Chromosomes       | Physical positions (bp) | SNPs | Gene accession IDs | Sequence components of genome | Putative functions                          |
|----------------------|-------------------------------------|-------------------|-------------------------|------|--------------------|-------------------------------|---------------------------------------------|
| Kabuli_wild_41629852 | 1399937964                          | Ca_kabuli_Chrom04 | 41629852                | T/A  | NA                 | INTERGENIC                    | NA                                          |
| Kabuli_wild_41629907 | 1399937965                          | Ca_kabuli_Chrom04 | 41629907                | C/A  | NA                 | INTERGENIC                    | NA                                          |
| Kabuli_wild_41648927 | 1399937966                          | Ca_kabuli_Chrom04 | 41648927                | C/T  | Gene_Ca_10946      | SYNONYMOUS_CODING             | NA                                          |
| Kabuli_wild_41648998 | 1399937967                          | Ca_kabuli_Chrom04 | 41648998                | A/G  | Gene_Ca_10946      | SYNONYMOUS_CODING             | NA                                          |
| Kabuli_wild_41698291 | 1399937968                          | Ca_kabuli_Chrom04 | 41698291                | A/G  | NA                 | INTERGENIC                    | NA                                          |
| Kabuli_wild_41698386 | 1399937969                          | Ca_kabuli_Chrom04 | 41698386                | A/G  | NA                 | INTERGENIC                    | NA                                          |
| Kabuli_wild_41702800 | 1399937970                          | Ca_kabuli_Chrom04 | 41702800                | C/A  | Gene_Ca_10942      | NON_SYNONYMOUS_CODING         | Enhancerofpolycomb-like,N-terminal          |
| Kabuli_wild_41702801 | 1399937971                          | Ca_kabuli_Chrom04 | 41702801                | C/G  | Gene_Ca_10942      | NON_SYNONYMOUS_CODING         | Enhancerofpolycomb-like,N-terminal          |
| Kabuli_wild_41721187 | 1399937972                          | Ca_kabuli_Chrom04 | 41721187                | G/A  | Gene_Ca_10941      | SYNONYMOUS_CODING             | NA                                          |
| Kabuli_wild_41721289 | 1399937973                          | Ca_kabuli_Chrom04 | 41721289                | G/A  | Gene_Ca_10941      | SYNONYMOUS_CODING             | NA                                          |
| Kabuli_wild_41722384 | 1399937974                          | Ca_kabuli_Chrom04 | 41722384                | G/A  | Gene_Ca_10941      | SYNONYMOUS_CODING             | NA                                          |
| Kabuli_wild_41722408 | 1399937975                          | Ca_kabuli_Chrom04 | 41722408                | C/T  | Gene_Ca_10941      | SYNONYMOUS_CODING             | NA                                          |
| Kabuli_wild_41739416 | 1399937976                          | Ca_kabuli_Chrom04 | 41739416                | G/A  | Gene_Ca_10940      | INTRON                        | Protein of unknown function DUF490          |
| Kabuli_wild_41739587 | 1399937977                          | Ca_kabuli_Chrom04 | 41739587                | A/G  | Gene_Ca_10940      | INTRON                        | Protein of unknown function DUF490          |
| Kabuli_wild_41772690 | 1399937978                          | Ca_kabuli_Chrom04 | 41772690                | C/T  | Gene_Ca_10937      | DOWNSTREAM                    | Cyclin,C-terminal                           |
| Kabuli_wild_41772794 | 1399937979                          | Ca_kabuli_Chrom04 | 41772794                | T/C  | Gene_Ca_10938      | DOWNSTREAM                    | Proteinphosphatase2A,regulatoryBsubunit,B56 |
| Kabuli_wild_41772796 | 1399937980                          | Ca_kabuli_Chrom04 | 41772796                | T/A  | Gene_Ca_10938      | DOWNSTREAM                    | Proteinphosphatase2A,regulatoryBsubunit,B56 |
| Kabuli_wild_41774272 | 1399937981                          | Ca_kabuli_Chrom04 | 41774272                | A/G  | Gene_Ca_10937      | INTRON                        | Cyclin,C-terminal                           |
| Kabuli_wild_41864826 | 1399937982                          | Ca_kabuli_Chrom04 | 41864826                | G/A  | Gene_Ca_10932      | SYNONYMOUS_CODING             | WD40 repeat                                 |
| Kabuli_wild_41864846 | 1399937983                          | Ca_kabuli_Chrom04 | 41864846                | C/G  | Gene_Ca_10932      | NON_SYNONYMOUS_CODING         | WD40 repeat                                 |
| Kabuli_wild_41864916 | 1399937984                          | Ca_kabuli_Chrom04 | 41864916                | A/T  | Gene_Ca_10932      | SYNONYMOUS_CODING             | WD40 repeat                                 |
| Kabuli_wild_41865090 | 1399937985                          | Ca_kabuli_Chrom04 | 41865090                | T/C  | Gene_Ca_10932      | SYNONYMOUS_CODING             | WD40 repeat                                 |
| Kabuli_wild_41865128 | 1399937986                          | Ca_kabuli_Chrom04 | 41865128                | G/A  | Gene_Ca_10932      | STOP_GAINED                   | WD40 repeat                                 |
| Kabuli_wild_41956050 | 1399937987                          | Ca_kabuli_Chrom04 | 41956050                | C/G  | NA                 | INTERGENIC                    | NA                                          |
| Kabuli_wild_41956085 | 1399937988                          | Ca_kabuli_Chrom04 | 41956085                | T/C  | NA                 | INTERGENIC                    | NA                                          |
| Kabuli_wild_41987193 | 1399937989                          | Ca_kabuli_Chrom04 | 41987193                | A/G  | Gene_Ca_10923      | INTRON                        | HistoneH2A                                  |
| Kabuli_wild_42092379 | 1399937990                          | Ca_kabuli_Chrom04 | 42092379                | T/G  | Gene_Ca_10914      | INTRON                        | Tesmin/TSO1-like,CXC                        |
| Kabuli_wild_42092381 | 1399937991                          | Ca_kabuli_Chrom04 | 42092381                | A/G  | Gene_Ca_10914      | INTRON                        | Tesmin/TSO1-like,CXC                        |
| Kabuli_wild_42092385 | 1399937992                          | Ca_kabuli_Chrom04 | 42092385                | G/A  | Gene_Ca_10914      | INTRON                        | Tesmin/TSO1-like,CXC                        |
| Kabuli_wild_42105701 | 1399937993                          | Ca_kabuli_Chrom04 | 42105701                | A/T  | Gene_Ca_10912      | INTRON                        | ATPase,AAA+type,core                        |
| Kabuli_wild_42105737 | 1399937994                          | Ca_kabuli_Chrom04 | 42105737                | C/T  | Gene_Ca_10912      | INTRON                        | ATPase,AAA+type,core                        |
| Kabuli_wild_42143775 | 1399937995                          | Ca_kabuli_Chrom04 | 42143775                | A/G  | Gene_Ca_10910      | INTRON                        | Glycosidehydrolase,family28                 |
| Kabuli_wild_42143779 | 1399937996                          | Ca_kabuli_Chrom04 | 42143779                | G/A  | Gene_Ca_10910      | INTRON                        | Glycosidehydrolase,family28                 |
| Kabuli_wild_42143805 | 1399937997                          | Ca_kabuli_Chrom04 | 42143805                | T/A  | Gene_Ca_10910      | INTRON                        | Glycosidehydrolase,family28                 |
| Kabuli_wild_42143836 | 1399937998                          | Ca_kabuli_Chrom04 | 42143836                | A/G  | Gene_Ca_10910      | INTRON                        | Glycosidehydrolase,family28                 |
| Kabuli_wild_42246527 | 1399937999                          | Ca_kabuli_Chrom04 | 42246527                | C/A  | Gene_Ca_10904      | UPSTREAM                      | NA                                          |
| Kabuli_wild_42246565 | 1399938000                          | Ca_kabuli_Chrom04 | 42246565                | T/G  | Gene_Ca_10904      | UPSTREAM                      | NA                                          |
| Kabuli_wild_42246591 | 1399938001                          | Ca_kabuli_Chrom04 | 42246591                | G/T  | Gene_Ca_10904      | UPSTREAM                      | NA                                          |
| Kabuli_wild_42246594 | 1399938002                          | Ca_kabuli_Chrom04 | 42246594                | C/T  | Gene_Ca_10904      | UPSTREAM                      | NA                                          |
| Kabuli_wild_42246796 | 1399938003                          | Ca_kabuli_Chrom04 | 42246796                | A/G  | Gene_Ca_10904      | UPSTREAM                      | NA                                          |
| Kabuli_wild_42273231 | 1399938004                          | Ca_kabuli_Chrom04 | 42273231                | C/T  | Gene_Ca_10903      | INTRON                        | Methyltransferasetype11                     |
| Kabuli_wild_42273252 | 1399938005                          | Ca_kabuli_Chrom04 | 42273252                | G/A  | Gene_Ca_10903      | INTRON                        | Methyltransferasetype11                     |
| Kabuli_wild_42273291 | 1399938006                          | Ca_kabuli_Chrom04 | 42273291                | G/A  | Gene_Ca_10903      | INTRON                        | Methyltransferasetype11                     |
| Kabuli_wild_42273294 | 1399938007                          | Ca_kabuli_Chrom04 | 42273294                | C/T  | Gene_Ca_10903      | INTRON                        | Methyltransferasetype11                     |



| SNP IDs              | NCBI dbSNP accession IDs (NCBI_SS#) | Chromosomes     | Physical positions (bp) | SNPs | Gene accession IDs | Sequence components of genome | Putative functions                                     |
|----------------------|-------------------------------------|-----------------|-------------------------|------|--------------------|-------------------------------|--------------------------------------------------------|
| Kabuli_wild_42499699 | 1399938008                          | Ca_kabuli_Chr04 | 42499699                | A/T  | Gene_Ca_10898      | NON_SYNONYMOUS_CODING         | Protein kinase,catalytic domain                        |
| Kabuli_wild_42592151 | 1399938009                          | Ca_kabuli_Chr04 | 42592151                | C/T  | NA                 | INTERGENIC                    | NA                                                     |
| Kabuli_wild_42592198 | 1399938010                          | Ca_kabuli_Chr04 | 42592198                | G/A  | NA                 | INTERGENIC                    | NA                                                     |
| Kabuli_wild_42592212 | 1399938011                          | Ca_kabuli_Chr04 | 42592212                | A/G  | NA                 | INTERGENIC                    | NA                                                     |
| Kabuli_wild_42592218 | 1399938012                          | Ca_kabuli_Chr04 | 42592218                | C/T  | NA                 | INTERGENIC                    | NA                                                     |
| Kabuli_wild_42592232 | 1399938013                          | Ca_kabuli_Chr04 | 42592232                | G/A  | NA                 | INTERGENIC                    | NA                                                     |
| Kabuli_wild_42715882 | 1399938014                          | Ca_kabuli_Chr04 | 42715882                | A/G  | Gene_Ca_10890      | NON_SYNONYMOUS_CODING         | Tetra tricopeptide repeat-containing                   |
| Kabuli_wild_42768142 | 1399938015                          | Ca_kabuli_Chr04 | 42768142                | T/G  | NA                 | INTERGENIC                    | NA                                                     |
| Kabuli_wild_42807483 | 1399938016                          | Ca_kabuli_Chr04 | 42807483                | G/A  | NA                 | INTERGENIC                    | NA                                                     |
| Kabuli_wild_42807518 | 1399938017                          | Ca_kabuli_Chr04 | 42807518                | A/G  | NA                 | INTERGENIC                    | NA                                                     |
| Kabuli_wild_43319846 | 1399938018                          | Ca_kabuli_Chr04 | 43319846                | A/G  | Gene_Ca_23683      | SYNONYMOUS_CODING             | Cyclin,C-terminal                                      |
| Kabuli_wild_43324547 | 1399938019                          | Ca_kabuli_Chr04 | 43324547                | G/C  | NA                 | INTERGENIC                    | NA                                                     |
| Kabuli_wild_43324746 | 1399938020                          | Ca_kabuli_Chr04 | 43324746                | C/T  | NA                 | INTERGENIC                    | NA                                                     |
| Kabuli_wild_43431770 | 1399938021                          | Ca_kabuli_Chr04 | 43431770                | C/T  | NA                 | INTERGENIC                    | NA                                                     |
| Kabuli_wild_43431772 | 1399938022                          | Ca_kabuli_Chr04 | 43431772                | T/A  | NA                 | INTERGENIC                    | NA                                                     |
| Kabuli_wild_43431815 | 1399938023                          | Ca_kabuli_Chr04 | 43431815                | T/G  | NA                 | INTERGENIC                    | NA                                                     |
| Kabuli_wild_43447256 | 1399938024                          | Ca_kabuli_Chr04 | 43447256                | G/A  | NA                 | INTERGENIC                    | NA                                                     |
| Kabuli_wild_43447262 | 1399938025                          | Ca_kabuli_Chr04 | 43447262                | A/T  | NA                 | INTERGENIC                    | NA                                                     |
| Kabuli_wild_43475977 | 1399938026                          | Ca_kabuli_Chr04 | 43475977                | T/C  | NA                 | INTERGENIC                    | NA                                                     |
| Kabuli_wild_43476035 | 1399938027                          | Ca_kabuli_Chr04 | 43476035                | T/A  | NA                 | INTERGENIC                    | NA                                                     |
| Kabuli_wild_43476193 | 1399938028                          | Ca_kabuli_Chr04 | 43476193                | T/C  | Gene_Ca_23692      | SYNONYMOUS_CODING             | Pollen Oleo1 allergen/extensin                         |
| Kabuli_wild_43510426 | 1399938029                          | Ca_kabuli_Chr04 | 43510426                | G/A  | NA                 | INTERGENIC                    | NA                                                     |
| Kabuli_wild_43653225 | 1399938030                          | Ca_kabuli_Chr04 | 43653225                | A/G  | NA                 | INTERGENIC                    | NA                                                     |
| Kabuli_wild_43653226 | 1399938031                          | Ca_kabuli_Chr04 | 43653226                | C/T  | NA                 | INTERGENIC                    | NA                                                     |
| Kabuli_wild_43662224 | 1399938032                          | Ca_kabuli_Chr04 | 43662224                | A/C  | NA                 | INTERGENIC                    | NA                                                     |
| Kabuli_wild_43676507 | 1399938033                          | Ca_kabuli_Chr04 | 43676507                | T/A  | Gene_Ca_09052      | SYNONYMOUS_CODING             | Leucine-rich repeat                                    |
| Kabuli_wild_43677006 | 1399938034                          | Ca_kabuli_Chr04 | 43677006                | T/G  | Gene_Ca_09052      | NON_SYNONYMOUS_CODING         | Leucine-rich repeat                                    |
| Kabuli_wild_43722727 | 1399938035                          | Ca_kabuli_Chr04 | 43722727                | A/G  | NA                 | INTERGENIC                    | NA                                                     |
| Kabuli_wild_43722728 | 1399938036                          | Ca_kabuli_Chr04 | 43722728                | T/C  | NA                 | INTERGENIC                    | NA                                                     |
| Kabuli_wild_43726240 | 1399938037                          | Ca_kabuli_Chr04 | 43726240                | A/T  | NA                 | INTERGENIC                    | NA                                                     |
| Kabuli_wild_43726406 | 1399938038                          | Ca_kabuli_Chr04 | 43726406                | C/T  | NA                 | INTERGENIC                    | NA                                                     |
| Kabuli_wild_43730671 | 1399938039                          | Ca_kabuli_Chr04 | 43730671                | A/T  | NA                 | INTERGENIC                    | NA                                                     |
| Kabuli_wild_43730719 | 1399938040                          | Ca_kabuli_Chr04 | 43730719                | C/T  | NA                 | INTERGENIC                    | NA                                                     |
| Kabuli_wild_43763791 | 1399938041                          | Ca_kabuli_Chr04 | 43763791                | A/G  | NA                 | INTERGENIC                    | NA                                                     |
| Kabuli_wild_43807399 | 1399938042                          | Ca_kabuli_Chr04 | 43807399                | C/T  | Gene_Ca_09060      | SYNONYMOUS_CODING             | WD40 repeat                                            |
| Kabuli_wild_43807460 | 1399938043                          | Ca_kabuli_Chr04 | 43807460                | C/T  | Gene_Ca_09060      | INTRON                        | WD40 repeat                                            |
| Kabuli_wild_43840650 | 1399938044                          | Ca_kabuli_Chr04 | 43840650                | C/T  | NA                 | INTERGENIC                    | NA                                                     |
| Kabuli_wild_43889033 | 1399938045                          | Ca_kabuli_Chr04 | 43889033                | A/T  | Gene_Ca_09068      | NON_SYNONYMOUS_CODING         | Homeobox                                               |
| Kabuli_wild_43979065 | 1399938046                          | Ca_kabuli_Chr04 | 43979065                | A/G  | NA                 | INTERGENIC                    | NA                                                     |
| Kabuli_wild_44059060 | 1399938047                          | Ca_kabuli_Chr04 | 44059060                | C/T  | Gene_Ca_09080      | NON_SYNONYMOUS_CODING         | Signal transduction response regulator, receiverdomain |
| Kabuli_wild_44090715 | 1399938048                          | Ca_kabuli_Chr04 | 44090715                | A/T  | Gene_Ca_09082      | INTRON                        | Armadillo                                              |
| Kabuli_wild_44239883 | 1399938049                          | Ca_kabuli_Chr04 | 44239883                | A/T  | Gene_Ca_09098      | UPSTREAM                      | Crotonase,core                                         |
| Kabuli_wild_44250159 | 1399938050                          | Ca_kabuli_Chr04 | 44250159                | C/T  | NA                 | INTERGENIC                    | NA                                                     |
| Kabuli_wild_44261184 | 1399938051                          | Ca_kabuli_Chr04 | 44261184                | A/C  | Gene_Ca_09100      | SYNONYMOUS_CODING             | Actin-bindingFH2/DRFautoregulatory                     |



| SNP IDs              | NCBI dbSNP accession IDs (NCBI_SS#) | Chromosomes     | Physical positions (bp) | SNPs | Gene accession IDs | Sequence components of genome | Putative functions                                                 |
|----------------------|-------------------------------------|-----------------|-------------------------|------|--------------------|-------------------------------|--------------------------------------------------------------------|
| Kabuli_wild_44261211 | 1399938052                          | Ca_kabuli_Chr04 | 44261211                | A/C  | Gene_Ca_09100      | SYNONYMOUS_CODING             | Actin-bindingFH2/DRFautoregulatory                                 |
| Kabuli_wild_44261535 | 1399938053                          | Ca_kabuli_Chr04 | 44261535                | A/C  | Gene_Ca_09100      | SYNONYMOUS_CODING             | Actin-bindingFH2/DRFautoregulatory                                 |
| Kabuli_wild_44266692 | 1399938054                          | Ca_kabuli_Chr04 | 44266692                | T/A  | Gene_Ca_09100      | DOWNSTREAM                    | Actin-bindingFH2/DRFautoregulatory                                 |
| Kabuli_wild_44294229 | 1399938055                          | Ca_kabuli_Chr04 | 44294229                | T/G  | NA                 | INTERGENIC                    | NA                                                                 |
| Kabuli_wild_44353343 | 1399938056                          | Ca_kabuli_Chr04 | 44353343                | G/A  | Gene_Ca_09105      | INTRON                        | Protein of unknown function DUF1077, TMEM85                        |
| Kabuli_wild_44353354 | 1399938057                          | Ca_kabuli_Chr04 | 44353354                | C/T  | Gene_Ca_09105      | INTRON                        | Protein of unknown function DUF1077, TMEM85                        |
| Kabuli_wild_44375761 | 1399938058                          | Ca_kabuli_Chr04 | 44375761                | T/C  | Gene_Ca_09108      | SYNONYMOUS_CODING             | NA                                                                 |
| Kabuli_wild_44375779 | 1399938059                          | Ca_kabuli_Chr04 | 44375779                | T/C  | Gene_Ca_09108      | SYNONYMOUS_CODING             | NA                                                                 |
| Kabuli_wild_44375831 | 1399938060                          | Ca_kabuli_Chr04 | 44375831                | T/C  | Gene_Ca_09108      | INTRON                        | NA                                                                 |
| Kabuli_wild_44382515 | 1399938061                          | Ca_kabuli_Chr04 | 44382515                | A/G  | NA                 | INTERGENIC                    | NA                                                                 |
| Kabuli_wild_44382602 | 1399938062                          | Ca_kabuli_Chr04 | 44382602                | A/G  | NA                 | INTERGENIC                    | NA                                                                 |
| Kabuli_wild_44382614 | 1399938063                          | Ca_kabuli_Chr04 | 44382614                | C/A  | NA                 | INTERGENIC                    | NA                                                                 |
| Kabuli_wild_44382671 | 1399938064                          | Ca_kabuli_Chr04 | 44382671                | C/G  | NA                 | INTERGENIC                    | NA                                                                 |
| Kabuli_wild_44382677 | 1399938065                          | Ca_kabuli_Chr04 | 44382677                | C/T  | NA                 | INTERGENIC                    | NA                                                                 |
| Kabuli_wild_44386579 | 1399938066                          | Ca_kabuli_Chr04 | 44386579                | A/G  | Gene_Ca_09109      | SYNONYMOUS_CODING             | Protein phosphatase 2C, manganese/magnesium aspartate binding site |
| Kabuli_wild_44388391 | 1399938067                          | Ca_kabuli_Chr04 | 44388391                | G/C  | Gene_Ca_09109      | SYNONYMOUS_CODING             | Protein phosphatase 2C, manganese/magnesium aspartate binding site |
| Kabuli_wild_44388394 | 1399938068                          | Ca_kabuli_Chr04 | 44388394                | C/T  | Gene_Ca_09109      | SYNONYMOUS_CODING             | Protein phosphatase 2C, manganese/magnesium aspartate binding site |
| Kabuli_wild_44388671 | 1399938069                          | Ca_kabuli_Chr04 | 44388671                | C/G  | NA                 | INTERGENIC                    | NA                                                                 |
| Kabuli_wild_44431319 | 1399938070                          | Ca_kabuli_Chr04 | 44431319                | A/C  | Gene_Ca_09114      | INTRON                        | PeptidaseC19, ubiquitin carboxyl-terminal hydrolase2               |
| Kabuli_wild_44439492 | 1399938071                          | Ca_kabuli_Chr04 | 44439492                | G/T  | NA                 | INTERGENIC                    | NA                                                                 |
| Kabuli_wild_44439495 | 1399938072                          | Ca_kabuli_Chr04 | 44439495                | G/A  | NA                 | INTERGENIC                    | NA                                                                 |
| Kabuli_wild_44439503 | 1399938073                          | Ca_kabuli_Chr04 | 44439503                | C/A  | NA                 | INTERGENIC                    | NA                                                                 |
| Kabuli_wild_44446468 | 1399938074                          | Ca_kabuli_Chr04 | 44446468                | G/A  | NA                 | INTERGENIC                    | NA                                                                 |
| Kabuli_wild_44446503 | 1399938075                          | Ca_kabuli_Chr04 | 44446503                | T/G  | NA                 | INTERGENIC                    | NA                                                                 |
| Kabuli_wild_44446575 | 1399938076                          | Ca_kabuli_Chr04 | 44446575                | G/A  | NA                 | INTERGENIC                    | NA                                                                 |
| Kabuli_wild_44472237 | 1399938077                          | Ca_kabuli_Chr04 | 44472237                | T/A  | Gene_Ca_09119      | UPSTREAM                      | NA                                                                 |
| Kabuli_wild_44472278 | 1399938078                          | Ca_kabuli_Chr04 | 44472278                | A/G  | Gene_Ca_09119      | UPSTREAM                      | NA                                                                 |
| Kabuli_wild_44590652 | 1399938079                          | Ca_kabuli_Chr04 | 44590652                | T/C  | Gene_Ca_09131      | SYNONYMOUS_CODING             | Protein phosphatase 2C, manganese/magnesium aspartate binding site |
| Kabuli_wild_44590678 | 1399938080                          | Ca_kabuli_Chr04 | 44590678                | G/A  | Gene_Ca_09131      | NON_SYNONYMOUS_CODING         | Protein phosphatase 2C, manganese/magnesium aspartate binding site |
| Kabuli_wild_44590697 | 1399938081                          | Ca_kabuli_Chr04 | 44590697                | A/C  | Gene_Ca_09131      | SYNONYMOUS_CODING             | Protein phosphatase 2C, manganese/magnesium aspartate binding site |
| Kabuli_wild_44591405 | 1399938082                          | Ca_kabuli_Chr04 | 44591405                | G/T  | Gene_Ca_09131      | INTRON                        | Protein phosphatase 2C, manganese/magnesium aspartate binding site |
| Kabuli_wild_44754355 | 1399938083                          | Ca_kabuli_Chr04 | 44754355                | C/T  | Gene_Ca_09143      | INTRON                        | F-box domain, cyclin-like                                          |
| Kabuli_wild_44802364 | 1399938084                          | Ca_kabuli_Chr04 | 44802364                | A/C  | Gene_Ca_09145      | INTRON                        | PhosphoribosyltransferaseC-terminal                                |
| Kabuli_wild_44802374 | 1399938085                          | Ca_kabuli_Chr04 | 44802374                | G/A  | Gene_Ca_09145      | INTRON                        | PhosphoribosyltransferaseC-terminal                                |
| Kabuli_wild_44803694 | 1399938086                          | Ca_kabuli_Chr04 | 44803694                | T/A  | Gene_Ca_09145      | INTRON                        | PhosphoribosyltransferaseC-terminal                                |
| Kabuli_wild_44811519 | 1399938087                          | Ca_kabuli_Chr04 | 44811519                | G/A  | Gene_Ca_09145      | UPSTREAM                      | PhosphoribosyltransferaseC-terminal                                |
| Kabuli_wild_44814857 | 1399938088                          | Ca_kabuli_Chr04 | 44814857                | A/G  | NA                 | INTERGENIC                    | NA                                                                 |
| Kabuli_wild_44814981 | 1399938089                          | Ca_kabuli_Chr04 | 44814981                | T/C  | NA                 | INTERGENIC                    | NA                                                                 |
| Kabuli_wild_44814982 | 1399938090                          | Ca_kabuli_Chr04 | 44814982                | A/G  | NA                 | INTERGENIC                    | NA                                                                 |
| Kabuli_wild_44824103 | 1399938091                          | Ca_kabuli_Chr04 | 44824103                | G/T  | NA                 | INTERGENIC                    | NA                                                                 |
| Kabuli_wild_44824105 | 1399938092                          | Ca_kabuli_Chr04 | 44824105                | T/G  | NA                 | INTERGENIC                    | NA                                                                 |
| Kabuli_wild_44832121 | 1399938093                          | Ca_kabuli_Chr04 | 44832121                | G/C  | Gene_Ca_09147      | DOWNSTREAM                    | Dilute                                                             |
| Kabuli_wild_44832144 | 1399938094                          | Ca_kabuli_Chr04 | 44832144                | T/C  | Gene_Ca_09147      | DOWNSTREAM                    | Dilute                                                             |
| Kabuli_wild_44906128 | 1399938095                          | Ca_kabuli_Chr04 | 44906128                | C/A  | Gene_Ca_09153      | INTRON                        | Protein of unknown function DUF803                                 |

| SNP IDs              | NCBI dbSNP accession IDs (NCBI_SS#) | Chromosomes     | Physical positions (bp) | SNPs | Gene accession IDs | Sequence components of genome | Putative functions                                            |
|----------------------|-------------------------------------|-----------------|-------------------------|------|--------------------|-------------------------------|---------------------------------------------------------------|
| Kabuli_wild_44906255 | 1399938096                          | Ca_kabuli_Chr04 | 44906255                | A/G  | Gene_Ca_09153      | SYNONYMOUS_CODING             | Protein of unknown function DUF803                            |
| Kabuli_wild_44947524 | 1399938097                          | Ca_kabuli_Chr04 | 44947524                | T/C  | Gene_Ca_09157      | NON_SYNONYMOUS_CODING         | Glycosidehydrolase, family32                                  |
| Kabuli_wild_44979108 | 1399938098                          | Ca_kabuli_Chr04 | 44979108                | G/A  | NA                 | INTERGENIC                    | NA                                                            |
| Kabuli_wild_45019764 | 1399938099                          | Ca_kabuli_Chr04 | 45019764                | T/C  | NA                 | INTERGENIC                    | NA                                                            |
| Kabuli_wild_45019778 | 1399938100                          | Ca_kabuli_Chr04 | 45019778                | T/C  | NA                 | INTERGENIC                    | NA                                                            |
| Kabuli_wild_45019805 | 1399938101                          | Ca_kabuli_Chr04 | 45019805                | C/A  | NA                 | INTERGENIC                    | NA                                                            |
| Kabuli_wild_45019807 | 1399938102                          | Ca_kabuli_Chr04 | 45019807                | C/T  | NA                 | INTERGENIC                    | NA                                                            |
| Kabuli_wild_45019814 | 1399938103                          | Ca_kabuli_Chr04 | 45019814                | C/A  | NA                 | INTERGENIC                    | NA                                                            |
| Kabuli_wild_45019820 | 1399938104                          | Ca_kabuli_Chr04 | 45019820                | C/T  | NA                 | INTERGENIC                    | NA                                                            |
| Kabuli_wild_45019824 | 1399938105                          | Ca_kabuli_Chr04 | 45019824                | A/C  | NA                 | INTERGENIC                    | NA                                                            |
| Kabuli_wild_45019825 | 1399938106                          | Ca_kabuli_Chr04 | 45019825                | A/T  | NA                 | INTERGENIC                    | NA                                                            |
| Kabuli_wild_45019826 | 1399938107                          | Ca_kabuli_Chr04 | 45019826                | A/G  | NA                 | INTERGENIC                    | NA                                                            |
| Kabuli_wild_45019848 | 1399938108                          | Ca_kabuli_Chr04 | 45019848                | C/T  | NA                 | INTERGENIC                    | NA                                                            |
| Kabuli_wild_45019867 | 1399938109                          | Ca_kabuli_Chr04 | 45019867                | C/G  | NA                 | INTERGENIC                    | NA                                                            |
| Kabuli_wild_45022634 | 1399938110                          | Ca_kabuli_Chr04 | 45022634                | G/C  | Gene_Ca_09165      | INTRON                        | Mrp, conserved site                                           |
| Kabuli_wild_45035589 | 1399938111                          | Ca_kabuli_Chr04 | 45035589                | G/T  | NA                 | INTERGENIC                    | NA                                                            |
| Kabuli_wild_45035745 | 1399938112                          | Ca_kabuli_Chr04 | 45035745                | A/G  | NA                 | INTERGENIC                    | NA                                                            |
| Kabuli_wild_45089570 | 1399938113                          | Ca_kabuli_Chr04 | 45089570                | T/C  | Gene_Ca_09169      | DOWNSTREAM                    | Glycine cleavage system P-protein, N-terminal                 |
| Kabuli_wild_45104767 | 1399938114                          | Ca_kabuli_Chr04 | 45104767                | G/A  | NA                 | INTERGENIC                    | NA                                                            |
| Kabuli_wild_45104779 | 1399938115                          | Ca_kabuli_Chr04 | 45104779                | C/A  | NA                 | INTERGENIC                    | NA                                                            |
| Kabuli_wild_45141973 | 1399938116                          | Ca_kabuli_Chr04 | 45141973                | A/C  | NA                 | INTERGENIC                    | NA                                                            |
| Kabuli_wild_45165191 | 1399938117                          | Ca_kabuli_Chr04 | 45165191                | T/C  | Gene_Ca_09179      | DOWNSTREAM                    | Cation/H+exchanger                                            |
| Kabuli_wild_45165231 | 1399938118                          | Ca_kabuli_Chr04 | 45165231                | A/C  | Gene_Ca_09179      | DOWNSTREAM                    | Cation/H+exchanger                                            |
| Kabuli_wild_45165240 | 1399938119                          | Ca_kabuli_Chr04 | 45165240                | T/C  | Gene_Ca_09179      | DOWNSTREAM                    | Cation/H+exchanger                                            |
| Kabuli_wild_45204033 | 1399938120                          | Ca_kabuli_Chr04 | 45204033                | A/G  | Gene_Ca_09182      | INTRON                        | NA                                                            |
| Kabuli_wild_45204213 | 1399938121                          | Ca_kabuli_Chr04 | 45204213                | G/A  | Gene_Ca_09182      | NON_SYNONYMOUS_CODING         | NA                                                            |
| Kabuli_wild_45206209 | 1399938122                          | Ca_kabuli_Chr04 | 45206209                | G/C  | Gene_Ca_09183      | UPSTREAM                      | SAC3/GANP/Nin1/mts3/eIF-3p25                                  |
| Kabuli_wild_45220084 | 1399938123                          | Ca_kabuli_Chr04 | 45220084                | G/T  | Gene_Ca_09184      | SYNONYMOUS_CODING             | K Homology                                                    |
| Kabuli_wild_45220916 | 1399938124                          | Ca_kabuli_Chr04 | 45220916                | T/C  | Gene_Ca_09184      | NON_SYNONYMOUS_CODING         | K Homology                                                    |
| Kabuli_wild_45224997 | 1399938125                          | Ca_kabuli_Chr04 | 45224997                | G/C  | NA                 | INTERGENIC                    | NA                                                            |
| Kabuli_wild_45225059 | 1399938126                          | Ca_kabuli_Chr04 | 45225059                | G/A  | NA                 | INTERGENIC                    | NA                                                            |
| Kabuli_wild_45225063 | 1399938127                          | Ca_kabuli_Chr04 | 45225063                | T/C  | NA                 | INTERGENIC                    | NA                                                            |
| Kabuli_wild_45225077 | 1399938128                          | Ca_kabuli_Chr04 | 45225077                | A/T  | NA                 | INTERGENIC                    | NA                                                            |
| Kabuli_wild_45225093 | 1399938129                          | Ca_kabuli_Chr04 | 45225093                | G/A  | NA                 | INTERGENIC                    | NA                                                            |
| Kabuli_wild_45225145 | 1399938130                          | Ca_kabuli_Chr04 | 45225145                | T/A  | NA                 | INTERGENIC                    | NA                                                            |
| Kabuli_wild_45225155 | 1399938131                          | Ca_kabuli_Chr04 | 45225155                | C/A  | NA                 | INTERGENIC                    | NA                                                            |
| Kabuli_wild_45225165 | 1399938132                          | Ca_kabuli_Chr04 | 45225165                | T/C  | NA                 | INTERGENIC                    | NA                                                            |
| Kabuli_wild_45231839 | 1399938133                          | Ca_kabuli_Chr04 | 45231839                | T/C  | Gene_Ca_09187      | DOWNSTREAM                    | Phosphorylated adapter RNA export protein, RNA-binding domain |
| Kabuli_wild_45231893 | 1399938134                          | Ca_kabuli_Chr04 | 45231893                | G/T  | Gene_Ca_09187      | DOWNSTREAM                    | Phosphorylated adapter RNA export protein, RNA-binding domain |
| Kabuli_wild_45292787 | 1399938135                          | Ca_kabuli_Chr04 | 45292787                | C/T  | Gene_Ca_09192      | SYNONYMOUS_CODING             | NA                                                            |
| Kabuli_wild_45292832 | 1399938136                          | Ca_kabuli_Chr04 | 45292832                | G/A  | Gene_Ca_09192      | SYNONYMOUS_CODING             | NA                                                            |
| Kabuli_wild_45292885 | 1399938137                          | Ca_kabuli_Chr04 | 45292885                | C/A  | Gene_Ca_09192      | NON_SYNONYMOUS_CODING         | NA                                                            |
| Kabuli_wild_45292918 | 1399938138                          | Ca_kabuli_Chr04 | 45292918                | T/G  | Gene_Ca_09192      | UPSTREAM                      | NA                                                            |
| Kabuli_wild_45292960 | 1399938139                          | Ca_kabuli_Chr04 | 45292960                | A/T  | Gene_Ca_09192      | UPSTREAM                      | NA                                                            |

| SNP IDs              | NCBI dbSNP accession IDs (NCBI_SS#) | Chromosomes     | Physical positions (bp) | SNPs | Gene accession IDs | Sequence components of genome | Putative functions                                           |
|----------------------|-------------------------------------|-----------------|-------------------------|------|--------------------|-------------------------------|--------------------------------------------------------------|
| Kabuli_wild_45292969 | 1399938140                          | Ca_kabuli_Chr04 | 45292969                | T/A  | Gene_Ca_09192      | UPSTREAM                      | NA                                                           |
| Kabuli_wild_45292981 | 1399938141                          | Ca_kabuli_Chr04 | 45292981                | G/T  | Gene_Ca_09192      | UPSTREAM                      | NA                                                           |
| Kabuli_wild_45615407 | 1399938142                          | Ca_kabuli_Chr04 | 45615407                | T/C  | Gene_Ca_09217      | INTRON                        | WW/Rsp5/WWP                                                  |
| Kabuli_wild_45615443 | 1399938143                          | Ca_kabuli_Chr04 | 45615443                | G/C  | Gene_Ca_09217      | INTRON                        | WW/Rsp5/WWP                                                  |
| Kabuli_wild_45643913 | 1399938144                          | Ca_kabuli_Chr04 | 45643913                | G/A  | NA                 | INTERGENIC                    | NA                                                           |
| Kabuli_wild_45645922 | 1399938145                          | Ca_kabuli_Chr04 | 45645922                | G/A  | NA                 | INTERGENIC                    | NA                                                           |
| Kabuli_wild_45645935 | 1399938146                          | Ca_kabuli_Chr04 | 45645935                | C/A  | NA                 | INTERGENIC                    | NA                                                           |
| Kabuli_wild_45645944 | 1399938147                          | Ca_kabuli_Chr04 | 45645944                | G/A  | NA                 | INTERGENIC                    | NA                                                           |
| Kabuli_wild_45645951 | 1399938148                          | Ca_kabuli_Chr04 | 45645951                | G/A  | NA                 | INTERGENIC                    | NA                                                           |
| Kabuli_wild_45645957 | 1399938149                          | Ca_kabuli_Chr04 | 45645957                | A/G  | NA                 | INTERGENIC                    | NA                                                           |
| Kabuli_wild_45645964 | 1399938150                          | Ca_kabuli_Chr04 | 45645964                | T/A  | NA                 | INTERGENIC                    | NA                                                           |
| Kabuli_wild_45645972 | 1399938151                          | Ca_kabuli_Chr04 | 45645972                | T/G  | NA                 | INTERGENIC                    | NA                                                           |
| Kabuli_wild_45645973 | 1399938152                          | Ca_kabuli_Chr04 | 45645973                | G/T  | NA                 | INTERGENIC                    | NA                                                           |
| Kabuli_wild_45645975 | 1399938153                          | Ca_kabuli_Chr04 | 45645975                | G/T  | NA                 | INTERGENIC                    | NA                                                           |
| Kabuli_wild_45645996 | 1399938154                          | Ca_kabuli_Chr04 | 45645996                | A/G  | NA                 | INTERGENIC                    | NA                                                           |
| Kabuli_wild_45645999 | 1399938155                          | Ca_kabuli_Chr04 | 45645999                | C/G  | NA                 | INTERGENIC                    | NA                                                           |
| Kabuli_wild_45708895 | 1399938156                          | Ca_kabuli_Chr04 | 45708895                | C/A  | NA                 | INTERGENIC                    | NA                                                           |
| Kabuli_wild_45736291 | 1399938157                          | Ca_kabuli_Chr04 | 45736291                | G/C  | Gene_Ca_18387      | NON_SYNONYMOUS_CODING         | Pathogenesis-related transcriptional factor/ERF, DNA-binding |
| Kabuli_wild_45736334 | 1399938158                          | Ca_kabuli_Chr04 | 45736334                | G/A  | Gene_Ca_18387      | SYNONYMOUS_CODING             | Pathogenesis-related transcriptional factor/ERF, DNA-binding |
| Kabuli_wild_45752844 | 1399938159                          | Ca_kabuli_Chr04 | 45752844                | G/A  | Gene_Ca_18386      | UPSTREAM                      | NA                                                           |
| Kabuli_wild_45752869 | 1399938160                          | Ca_kabuli_Chr04 | 45752869                | G/T  | Gene_Ca_18386      | UPSTREAM                      | NA                                                           |
| Kabuli_wild_45752874 | 1399938161                          | Ca_kabuli_Chr04 | 45752874                | A/T  | Gene_Ca_18386      | UPSTREAM                      | NA                                                           |
| Kabuli_wild_45753229 | 1399938162                          | Ca_kabuli_Chr04 | 45753229                | C/T  | Gene_Ca_18386      | UPSTREAM                      | NA                                                           |
| Kabuli_wild_45817472 | 1399938163                          | Ca_kabuli_Chr04 | 45817472                | G/A  | Gene_Ca_18379      | SYNONYMOUS_CODING             | NA                                                           |
| Kabuli_wild_45869030 | 1399938164                          | Ca_kabuli_Chr04 | 45869030                | T/C  | NA                 | INTERGENIC                    | NA                                                           |
| Kabuli_wild_45918350 | 1399938165                          | Ca_kabuli_Chr04 | 45918350                | T/C  | NA                 | INTERGENIC                    | NA                                                           |
| Kabuli_wild_45918351 | 1399938166                          | Ca_kabuli_Chr04 | 45918351                | A/C  | NA                 | INTERGENIC                    | NA                                                           |
| Kabuli_wild_45935594 | 1399938167                          | Ca_kabuli_Chr04 | 45935594                | A/C  | Gene_Ca_18367      | NON_SYNONYMOUS_CODING         | RNA recognition motif domain                                 |
| Kabuli_wild_46079203 | 1399938168                          | Ca_kabuli_Chr04 | 46079203                | T/A  | Gene_Ca_18362      | UPSTREAM                      | Protein of unknown function DUF566                           |
| Kabuli_wild_46148985 | 1399938169                          | Ca_kabuli_Chr04 | 46148985                | A/T  | Gene_Ca_18357      | INTRON                        | Zinc finger, RING-type                                       |
| Kabuli_wild_46149013 | 1399938170                          | Ca_kabuli_Chr04 | 46149013                | A/G  | Gene_Ca_18357      | INTRON                        | Zinc finger, RING-type                                       |
| Kabuli_wild_46150670 | 1399938171                          | Ca_kabuli_Chr04 | 46150670                | T/C  | Gene_Ca_18357      | INTRON                        | Zinc finger, RING-type                                       |
| Kabuli_wild_46202862 | 1399938172                          | Ca_kabuli_Chr04 | 46202862                | A/G  | NA                 | INTERGENIC                    | NA                                                           |
| Kabuli_wild_46392506 | 1399938173                          | Ca_kabuli_Chr04 | 46392506                | C/T  | NA                 | INTERGENIC                    | NA                                                           |
| Kabuli_wild_46612244 | 1399938174                          | Ca_kabuli_Chr04 | 46612244                | C/T  | Gene_Ca_19257      | DOWNSTREAM                    | Glycosidehydrolase, family13                                 |
| Kabuli_wild_46613068 | 1399938175                          | Ca_kabuli_Chr04 | 46613068                | T/G  | Gene_Ca_19257      | DOWNSTREAM                    | Glycosidehydrolase, family13                                 |
| Kabuli_wild_46668821 | 1399938176                          | Ca_kabuli_Chr04 | 46668821                | T/C  | Gene_Ca_19252      | NON_SYNONYMOUS_CODING         | Proteinphosphatase2C-like                                    |
| Kabuli_wild_46694919 | 1399938177                          | Ca_kabuli_Chr04 | 46694919                | T/A  | NA                 | INTERGENIC                    | NA                                                           |
| Kabuli_wild_46695008 | 1399938178                          | Ca_kabuli_Chr04 | 46695008                | T/C  | NA                 | INTERGENIC                    | NA                                                           |
| Kabuli_wild_46695043 | 1399938179                          | Ca_kabuli_Chr04 | 46695043                | A/C  | NA                 | INTERGENIC                    | NA                                                           |
| Kabuli_wild_46705167 | 1399938180                          | Ca_kabuli_Chr04 | 46705167                | A/G  | Gene_Ca_19247      | NON_SYNONYMOUS_CODING         | Patatin/PhospholipaseA2-related                              |
| Kabuli_wild_46705178 | 1399938181                          | Ca_kabuli_Chr04 | 46705178                | A/T  | Gene_Ca_19247      | SYNONYMOUS_CODING             | Patatin/PhospholipaseA2-related                              |
| Kabuli_wild_46705225 | 1399938182                          | Ca_kabuli_Chr04 | 46705225                | A/C  | Gene_Ca_19247      | INTRON                        | Patatin/PhospholipaseA2-related                              |
| Kabuli_wild_46713907 | 1399938183                          | Ca_kabuli_Chr04 | 46713907                | T/G  | Gene_Ca_19246      | SYNONYMOUS_CODING             | PGAP1-like                                                   |

| SNP IDs              | NCBI dbSNP accession IDs (NCBI_SS#) | Chromosomes     | Physical positions (bp) | SNPs | Gene accession IDs | Sequence components of genome | Putative functions                   |
|----------------------|-------------------------------------|-----------------|-------------------------|------|--------------------|-------------------------------|--------------------------------------|
| Kabuli_wild_46713972 | 1399938184                          | Ca_kabuli_Chr04 | 46713972                | C/T  | Gene_Ca_19246      | NON_SYNONYMOUS_CODING         | PGAP1-like                           |
| Kabuli_wild_46715350 | 1399938185                          | Ca_kabuli_Chr04 | 46715350                | T/C  | Gene_Ca_19246      | SYNONYMOUS_CODING             | PGAP1-like                           |
| Kabuli_wild_46717153 | 1399938186                          | Ca_kabuli_Chr04 | 46717153                | C/T  | Gene_Ca_19246      | INTRON                        | PGAP1-like                           |
| Kabuli_wild_46717200 | 1399938187                          | Ca_kabuli_Chr04 | 46717200                | C/T  | Gene_Ca_19246      | INTRON                        | PGAP1-like                           |
| Kabuli_wild_46717508 | 1399938188                          | Ca_kabuli_Chr04 | 46717508                | G/A  | Gene_Ca_19246      | INTRON                        | PGAP1-like                           |
| Kabuli_wild_46733965 | 1399938189                          | Ca_kabuli_Chr04 | 46733965                | A/G  | NA                 | INTERGENIC                    | NA                                   |
| Kabuli_wild_46763540 | 1399938190                          | Ca_kabuli_Chr04 | 46763540                | C/T  | Gene_Ca_19242      | SYNONYMOUS_CODING             | RNA recognition motif domain         |
| Kabuli_wild_46763555 | 1399938191                          | Ca_kabuli_Chr04 | 46763555                | C/T  | Gene_Ca_19242      | SYNONYMOUS_CODING             | RNA recognition motif domain         |
| Kabuli_wild_46763696 | 1399938192                          | Ca_kabuli_Chr04 | 46763696                | C/A  | Gene_Ca_19242      | INTRON                        | RNA recognition motif domain         |
| Kabuli_wild_46763841 | 1399938193                          | Ca_kabuli_Chr04 | 46763841                | A/C  | Gene_Ca_19242      | INTRON                        | RNA recognition motif domain         |
| Kabuli_wild_46763868 | 1399938194                          | Ca_kabuli_Chr04 | 46763868                | T/C  | Gene_Ca_19242      | INTRON                        | RNA recognition motif domain         |
| Kabuli_wild_47172795 | 1399938195                          | Ca_kabuli_Chr04 | 47172795                | T/C  | Gene_Ca_10864      | NON_SYNONYMOUS_CODING         | Domain of unknown function DUF547    |
| Kabuli_wild_47184837 | 1399938196                          | Ca_kabuli_Chr04 | 47184837                | G/A  | NA                 | INTERGENIC                    | NA                                   |
| Kabuli_wild_47223016 | 1399938197                          | Ca_kabuli_Chr04 | 47223016                | T/C  | Gene_Ca_10859      | INTRON                        | Xanthine/uracil/vitamin C permease   |
| Kabuli_wild_47223047 | 1399938198                          | Ca_kabuli_Chr04 | 47223047                | A/G  | Gene_Ca_10859      | INTRON                        | Xanthine/uracil/vitamin C permease   |
| Kabuli_wild_47223635 | 1399938199                          | Ca_kabuli_Chr04 | 47223635                | G/A  | Gene_Ca_10859      | SYNONYMOUS_CODING             | Xanthine/uracil/vitamin C permease   |
| Kabuli_wild_47223668 | 1399938200                          | Ca_kabuli_Chr04 | 47223668                | T/G  | Gene_Ca_10859      | SYNONYMOUS_CODING             | Xanthine/uracil/vitamin C permease   |
| Kabuli_wild_47296164 | 1399938201                          | Ca_kabuli_Chr04 | 47296164                | A/C  | NA                 | INTERGENIC                    | NA                                   |
| Kabuli_wild_47296232 | 1399938202                          | Ca_kabuli_Chr04 | 47296232                | A/G  | NA                 | INTERGENIC                    | NA                                   |
| Kabuli_wild_47351262 | 1399938203                          | Ca_kabuli_Chr04 | 47351262                | G/A  | Gene_Ca_10849      | INTRON                        | Exocyst complex,component Exoc1      |
| Kabuli_wild_47351308 | 1399938204                          | Ca_kabuli_Chr04 | 47351308                | T/C  | Gene_Ca_10849      | SYNONYMOUS_CODING             | Exocyst complex,component Exoc1      |
| Kabuli_wild_47379992 | 1399938205                          | Ca_kabuli_Chr04 | 47379992                | C/T  | NA                 | INTERGENIC                    | NA                                   |
| Kabuli_wild_47405685 | 1399938206                          | Ca_kabuli_Chr04 | 47405685                | T/A  | NA                 | INTERGENIC                    | NA                                   |
| Kabuli_wild_47419514 | 1399938207                          | Ca_kabuli_Chr04 | 47419514                | A/G  | NA                 | INTERGENIC                    | NA                                   |
| Kabuli_wild_47419517 | 1399938208                          | Ca_kabuli_Chr04 | 47419517                | C/T  | NA                 | INTERGENIC                    | NA                                   |
| Kabuli_wild_47428580 | 1399938209                          | Ca_kabuli_Chr04 | 47428580                | C/T  | Gene_Ca_10845      | INTRON                        | Multiantimicrobial extrusion protein |
| Kabuli_wild_47428599 | 1399938210                          | Ca_kabuli_Chr04 | 47428599                | C/T  | Gene_Ca_10845      | INTRON                        | Multiantimicrobial extrusion protein |
| Kabuli_wild_47428733 | 1399938211                          | Ca_kabuli_Chr04 | 47428733                | A/G  | Gene_Ca_10845      | SYNONYMOUS_CODING             | Multiantimicrobial extrusion protein |
| Kabuli_wild_47450409 | 1399938212                          | Ca_kabuli_Chr04 | 47450409                | C/T  | Gene_Ca_10842      | DOWNSTREAM                    | Zinc finger,LIM-type                 |
| Kabuli_wild_47572228 | 1399938213                          | Ca_kabuli_Chr04 | 47572228                | G/A  | NA                 | INTERGENIC                    | NA                                   |
| Kabuli_wild_47572276 | 1399938214                          | Ca_kabuli_Chr04 | 47572276                | C/T  | NA                 | INTERGENIC                    | NA                                   |
| Kabuli_wild_47578556 | 1399938215                          | Ca_kabuli_Chr04 | 47578556                | T/G  | Gene_Ca_10832      | INTRON                        | MT-A70                               |
| Kabuli_wild_47578596 | 1399938216                          | Ca_kabuli_Chr04 | 47578596                | C/T  | Gene_Ca_10832      | INTRON                        | MT-A70                               |
| Kabuli_wild_47588760 | 1399938217                          | Ca_kabuli_Chr04 | 47588760                | G/A  | Gene_Ca_10830      | INTRON                        | Phospholipid/glycerolacyltransferase |
| Kabuli_wild_47592406 | 1399938218                          | Ca_kabuli_Chr04 | 47592406                | A/C  | Gene_Ca_10830      | INTRON                        | Phospholipid/glycerolacyltransferase |
| Kabuli_wild_47592455 | 1399938219                          | Ca_kabuli_Chr04 | 47592455                | C/T  | Gene_Ca_10830      | INTRON                        | Phospholipid/glycerolacyltransferase |
| Kabuli_wild_47612395 | 1399938220                          | Ca_kabuli_Chr04 | 47612395                | C/A  | Gene_Ca_10828      | UPSTREAM                      | Reticulon                            |
| Kabuli_wild_47612396 | 1399938221                          | Ca_kabuli_Chr04 | 47612396                | G/T  | Gene_Ca_10828      | UPSTREAM                      | Reticulon                            |
| Kabuli_wild_47622112 | 1399938222                          | Ca_kabuli_Chr04 | 47622112                | G/T  | NA                 | INTERGENIC                    | NA                                   |
| Kabuli_wild_47672832 | 1399938223                          | Ca_kabuli_Chr04 | 47672832                | G/A  | NA                 | INTERGENIC                    | NA                                   |
| Kabuli_wild_47672986 | 1399938224                          | Ca_kabuli_Chr04 | 47672986                | T/C  | Gene_Ca_10821      | NON_SYNONYMOUS_CODING         | GYF                                  |
| Kabuli_wild_47675596 | 1399938225                          | Ca_kabuli_Chr04 | 47675596                | A/C  | Gene_Ca_10821      | SYNONYMOUS_CODING             | GYF                                  |
| Kabuli_wild_47675818 | 1399938226                          | Ca_kabuli_Chr04 | 47675818                | T/A  | Gene_Ca_10821      | SYNONYMOUS_CODING             | GYF                                  |
| Kabuli_wild_47711051 | 1399938227                          | Ca_kabuli_Chr04 | 47711051                | T/C  | Gene_Ca_10818      | STOP_LOST                     | RibosomalproteinL13e                 |

| SNP IDs              | NCBI dbSNP accession IDs (NCBI_SS#) | Chromosomes     | Physical positions (bp) | SNPs | Gene accession IDs | Sequence components of genome | Putative functions                              |
|----------------------|-------------------------------------|-----------------|-------------------------|------|--------------------|-------------------------------|-------------------------------------------------|
| Kabuli_wild_47798580 | 1399938228                          | Ca_kabuli_Chr04 | 47798580                | A/G  | Gene_Ca_10814      | UPSTREAM                      | Domain of unknown function DUF250               |
| Kabuli_wild_48008987 | 1399938229                          | Ca_kabuli_Chr04 | 48008987                | T/C  | Gene_Ca_10788      | SYNONYMOUS_CODING             | Heat shock protein DnaJ,N-terminal              |
| Kabuli_wild_48082684 | 1399938230                          | Ca_kabuli_Chr04 | 48082684                | G/C  | NA                 | INTERGENIC                    | NA                                              |
| Kabuli_wild_48098508 | 1399938231                          | Ca_kabuli_Chr04 | 48098508                | A/T  | NA                 | INTERGENIC                    | NA                                              |
| Kabuli_wild_48103153 | 1399938232                          | Ca_kabuli_Chr04 | 48103153                | A/C  | Gene_Ca_10777      | SYNONYMOUS_CODING             | Plantperoxidase                                 |
| Kabuli_wild_48151187 | 1399938233                          | Ca_kabuli_Chr04 | 48151187                | T/C  | NA                 | INTERGENIC                    | NA                                              |
| Kabuli_wild_48228061 | 1399938234                          | Ca_kabuli_Chr04 | 48228061                | G/A  | NA                 | INTERGENIC                    | NA                                              |
| Kabuli_wild_48228110 | 1399938235                          | Ca_kabuli_Chr04 | 48228110                | C/A  | NA                 | INTERGENIC                    | NA                                              |
| Kabuli_wild_48238919 | 1399938236                          | Ca_kabuli_Chr04 | 48238919                | C/T  | Gene_Ca_10764      | NON_SYNONYMOUS_CODING         | NA                                              |
| Kabuli_wild_48239048 | 1399938237                          | Ca_kabuli_Chr04 | 48239048                | A/G  | Gene_Ca_10764      | INTRON                        | NA                                              |
| Kabuli_wild_48263603 | 1399938238                          | Ca_kabuli_Chr04 | 48263603                | G/A  | Gene_Ca_10761      | SYNONYMOUS_CODING             | DNA-directed RNA polymerase,subunit 2, domain 6 |
| Kabuli_wild_48269138 | 1399938239                          | Ca_kabuli_Chr04 | 48269138                | G/C  | Gene_Ca_10760      | INTRON                        | Amineoxidase                                    |
| Kabuli_wild_48275016 | 1399938240                          | Ca_kabuli_Chr04 | 48275016                | C/T  | Gene_Ca_10760      | SYNONYMOUS_CODING             | Amineoxidase                                    |
| Kabuli_wild_48305147 | 1399938241                          | Ca_kabuli_Chr04 | 48305147                | C/G  | NA                 | INTERGENIC                    | NA                                              |
| Kabuli_wild_48322502 | 1399938242                          | Ca_kabuli_Chr04 | 48322502                | C/T  | Gene_Ca_10754      | DOWNSTREAM                    | Cytochrome P450                                 |
| Kabuli_wild_48322507 | 1399938243                          | Ca_kabuli_Chr04 | 48322507                | C/T  | Gene_Ca_10754      | DOWNSTREAM                    | Amineoxidase                                    |
| Kabuli_wild_48331069 | 1399938244                          | Ca_kabuli_Chr04 | 48331069                | C/A  | Gene_Ca_10753      | NON_SYNONYMOUS_CODING         | RibosomalproteinL13                             |
| Kabuli_wild_48345604 | 1399938245                          | Ca_kabuli_Chr04 | 48345604                | A/G  | Gene_Ca_10752      | INTRON                        | IQ motif,EF-handbinding site                    |
| Kabuli_wild_48345608 | 1399938246                          | Ca_kabuli_Chr04 | 48345608                | G/T  | Gene_Ca_10752      | INTRON                        | IQ motif,EF-handbinding site                    |
| Kabuli_wild_48345655 | 1399938247                          | Ca_kabuli_Chr04 | 48345655                | A/C  | Gene_Ca_10752      | INTRON                        | IQ motif,EF-handbinding site                    |
| Kabuli_wild_48355358 | 1399938248                          | Ca_kabuli_Chr04 | 48355358                | A/T  | Gene_Ca_10751      | INTRON                        | Exonuclease                                     |
| Kabuli_wild_48355468 | 1399938249                          | Ca_kabuli_Chr04 | 48355468                | G/T  | Gene_Ca_10751      | INTRON                        | Exonuclease                                     |
| Kabuli_wild_48364170 | 1399938250                          | Ca_kabuli_Chr04 | 48364170                | G/A  | Gene_Ca_10750      | INTRON                        | Helicase,C-terminal                             |
| Kabuli_wild_48365208 | 1399938251                          | Ca_kabuli_Chr04 | 48365208                | C/A  | Gene_Ca_10750      | DOWNSTREAM                    | Helicase,C-terminal                             |
| Kabuli_wild_48365388 | 1399938252                          | Ca_kabuli_Chr04 | 48365388                | A/G  | Gene_Ca_10750      | DOWNSTREAM                    | Helicase,C-terminal                             |
| Kabuli_wild_48382666 | 1399938253                          | Ca_kabuli_Chr04 | 48382666                | C/G  | Gene_Ca_10748      | NON_SYNONYMOUS_CODING         | AUX/IAAprotein                                  |
| Kabuli_wild_48455591 | 1399938254                          | Ca_kabuli_Chr04 | 48455591                | T/G  | Gene_Ca_10747      | NON_SYNONYMOUS_CODING         | Protein of unknown function DUF869,plant        |
| Kabuli_wild_48457876 | 1399938255                          | Ca_kabuli_Chr04 | 48457876                | C/T  | Gene_Ca_10747      | INTRON                        | Protein of unknown function DUF869,plant        |
| Kabuli_wild_48457943 | 1399938256                          | Ca_kabuli_Chr04 | 48457943                | C/T  | Gene_Ca_10747      | INTRON                        | Protein of unknown function DUF869,plant        |
| Kabuli_wild_48464493 | 1399938257                          | Ca_kabuli_Chr04 | 48464493                | T/C  | Gene_Ca_10746      | NON_SYNONYMOUS_CODING         | Zinc finger,CCHC-type                           |
| Kabuli_wild_48467653 | 1399938258                          | Ca_kabuli_Chr04 | 48467653                | G/A  | Gene_Ca_10746      | NON_SYNONYMOUS_CODING         | Zinc finger,CCHC-type                           |
| Kabuli_wild_48470477 | 1399938259                          | Ca_kabuli_Chr04 | 48470477                | A/G  | Gene_Ca_10746      | INTRON                        | Zinc finger,CCHC-type                           |
| Kabuli_wild_48475447 | 1399938260                          | Ca_kabuli_Chr04 | 48475447                | T/C  | NA                 | INTERGENIC                    | NA                                              |
| Kabuli_wild_48475461 | 1399938261                          | Ca_kabuli_Chr04 | 48475461                | G/A  | NA                 | INTERGENIC                    | NA                                              |
| Kabuli_wild_48478018 | 1399938262                          | Ca_kabuli_Chr04 | 48478018                | G/A  | NA                 | INTERGENIC                    | NA                                              |
| Kabuli_wild_48478058 | 1399938263                          | Ca_kabuli_Chr04 | 48478058                | C/T  | NA                 | INTERGENIC                    | NA                                              |
| Kabuli_wild_48478303 | 1399938264                          | Ca_kabuli_Chr04 | 48478303                | G/A  | Gene_Ca_10745      | SYNONYMOUS_CODING             | Appr-1-pprocessing                              |
| Kabuli_wild_48478359 | 1399938265                          | Ca_kabuli_Chr04 | 48478359                | T/A  | Gene_Ca_10745      | NON_SYNONYMOUS_CODING         | Appr-1-pprocessing                              |
| Kabuli_wild_48478524 | 1399938266                          | Ca_kabuli_Chr04 | 48478524                | C/T  | Gene_Ca_10745      | NON_SYNONYMOUS_CODING         | Appr-1-pprocessing                              |
| Kabuli_wild_48484453 | 1399938267                          | Ca_kabuli_Chr04 | 48484453                | A/T  | NA                 | INTERGENIC                    | NA                                              |
| Kabuli_wild_48497714 | 1399938268                          | Ca_kabuli_Chr04 | 48497714                | A/G  | NA                 | INTERGENIC                    | NA                                              |
| Kabuli_wild_48497725 | 1399938269                          | Ca_kabuli_Chr04 | 48497725                | A/C  | NA                 | INTERGENIC                    | NA                                              |
| Kabuli_wild_48497731 | 1399938270                          | Ca_kabuli_Chr04 | 48497731                | A/C  | NA                 | INTERGENIC                    | NA                                              |
| Kabuli_wild_48497756 | 1399938271                          | Ca_kabuli_Chr04 | 48497756                | A/G  | NA                 | INTERGENIC                    | NA                                              |

| SNP IDs              | NCBI dbSNP accession IDs (NCBI_SS#) | Chromosomes     | Physical positions (bp) | SNPs | Gene accession IDs | Sequence components of genome | Putative functions                             |
|----------------------|-------------------------------------|-----------------|-------------------------|------|--------------------|-------------------------------|------------------------------------------------|
| Kabuli_wild_48497765 | 1399938272                          | Ca_kabuli_Chr04 | 48497765                | G/A  | NA                 | INTERGENIC                    | NA                                             |
| Kabuli_wild_48497839 | 1399938273                          | Ca_kabuli_Chr04 | 48497839                | G/A  | NA                 | INTERGENIC                    | NA                                             |
| Kabuli_wild_48497926 | 1399938274                          | Ca_kabuli_Chr04 | 48497926                | T/A  | NA                 | INTERGENIC                    | NA                                             |
| Kabuli_wild_48497934 | 1399938275                          | Ca_kabuli_Chr04 | 48497934                | T/C  | NA                 | INTERGENIC                    | NA                                             |
| Kabuli_wild_48498133 | 1399938276                          | Ca_kabuli_Chr04 | 48498133                | C/T  | Gene_Ca_10741      | DOWNSTREAM                    | Eukaryotic initiation factor 3, gamma subunit  |
| Kabuli_wild_48498166 | 1399938277                          | Ca_kabuli_Chr04 | 48498166                | A/G  | Gene_Ca_10741      | DOWNSTREAM                    | Eukaryotic initiation factor 3, gamma subunit  |
| Kabuli_wild_48498181 | 1399938278                          | Ca_kabuli_Chr04 | 48498181                | G/C  | Gene_Ca_10742      | DOWNSTREAM                    | TB2/DP1/HVA22-relatedprotein                   |
| Kabuli_wild_48498312 | 1399938279                          | Ca_kabuli_Chr04 | 48498312                | T/C  | Gene_Ca_10742      | DOWNSTREAM                    | TB2/DP1/HVA22-relatedprotein                   |
| Kabuli_wild_48498331 | 1399938280                          | Ca_kabuli_Chr04 | 48498331                | T/A  | Gene_Ca_10742      | DOWNSTREAM                    | TB2/DP1/HVA22-relatedprotein                   |
| Kabuli_wild_48498334 | 1399938281                          | Ca_kabuli_Chr04 | 48498334                | T/G  | Gene_Ca_10742      | DOWNSTREAM                    | TB2/DP1/HVA22-relatedprotein                   |
| Kabuli_wild_48498368 | 1399938282                          | Ca_kabuli_Chr04 | 48498368                | C/T  | Gene_Ca_10742      | DOWNSTREAM                    | TB2/DP1/HVA22-relatedprotein                   |
| Kabuli_wild_48501662 | 1399938283                          | Ca_kabuli_Chr04 | 48501662                | A/T  | Gene_Ca_10741      | SYNONYMOUS_CODING             | Eukaryotic initiation factor 3, gamma subunit  |
| Kabuli_wild_48502554 | 1399938284                          | Ca_kabuli_Chr04 | 48502554                | G/T  | Gene_Ca_10741      | INTRON                        | Eukaryotic initiation factor 3, gamma subunit  |
| Kabuli_wild_48502687 | 1399938285                          | Ca_kabuli_Chr04 | 48502687                | G/A  | Gene_Ca_10741      | INTRON                        | Eukaryotic initiation factor 3, gamma subunit  |
| Kabuli_wild_48502714 | 1399938286                          | Ca_kabuli_Chr04 | 48502714                | T/C  | Gene_Ca_10741      | INTRON                        | Eukaryotic initiation factor 3, gamma subunit  |
| Kabuli_wild_48502718 | 1399938287                          | Ca_kabuli_Chr04 | 48502718                | G/C  | Gene_Ca_10741      | INTRON                        | Eukaryotic initiation factor 3, gamma subunit  |
| Kabuli_wild_48678692 | 1399938288                          | Ca_kabuli_Chr04 | 48678692                | T/C  | Gene_Ca_23018      | SYNONYMOUS_CODING             | Transcription factor IIS,N-terminal            |
| Kabuli_wild_48688766 | 1399938289                          | Ca_kabuli_Chr04 | 48688766                | A/G  | Gene_Ca_23019      | SYNONYMOUS_CODING             | C2 calcium-dependent membrane targeting        |
| Kabuli_wild_48705487 | 1399938290                          | Ca_kabuli_Chr04 | 48705487                | T/C  | Gene_Ca_23020      | INTRON                        | ABC transporter,trans membrane domain          |
| Kabuli_wild_48714847 | 1399938291                          | Ca_kabuli_Chr04 | 48714847                | A/T  | Gene_Ca_23021      | INTRON                        | Vacuolar protein sorting-associated protein 35 |
| Kabuli_wild_48714912 | 1399938292                          | Ca_kabuli_Chr04 | 48714912                | G/A  | Gene_Ca_23021      | INTRON                        | Vacuolar protein sorting-associated protein 35 |
| Kabuli_wild_48715028 | 1399938293                          | Ca_kabuli_Chr04 | 48715028                | A/G  | Gene_Ca_23021      | INTRON                        | Vacuolar protein sorting-associated protein 35 |
| Kabuli_wild_48720266 | 1399938294                          | Ca_kabuli_Chr04 | 48720266                | C/T  | NA                 | INTERGENIC                    | NA                                             |
| Kabuli_wild_48720330 | 1399938295                          | Ca_kabuli_Chr04 | 48720330                | C/T  | NA                 | INTERGENIC                    | NA                                             |
| Kabuli_wild_48765860 | 1399938296                          | Ca_kabuli_Chr04 | 48765860                | C/A  | Gene_Ca_23023      | INTRON                        | Lipase,GDSL                                    |
| Kabuli_wild_48784151 | 1399938297                          | Ca_kabuli_Chr04 | 48784151                | T/G  | NA                 | INTERGENIC                    | NA                                             |
| Kabuli_wild_48784176 | 1399938298                          | Ca_kabuli_Chr04 | 48784176                | T/C  | NA                 | INTERGENIC                    | NA                                             |
| Kabuli_wild_48784178 | 1399938299                          | Ca_kabuli_Chr04 | 48784178                | C/G  | NA                 | INTERGENIC                    | NA                                             |
| Kabuli_wild_48784179 | 1399938300                          | Ca_kabuli_Chr04 | 48784179                | G/A  | NA                 | INTERGENIC                    | NA                                             |
| Kabuli_wild_48784189 | 1399938301                          | Ca_kabuli_Chr04 | 48784189                | A/T  | NA                 | INTERGENIC                    | NA                                             |
| Kabuli_wild_48784202 | 1399938302                          | Ca_kabuli_Chr04 | 48784202                | A/C  | NA                 | INTERGENIC                    | NA                                             |
| Kabuli_wild_48784204 | 1399938303                          | Ca_kabuli_Chr04 | 48784204                | G/C  | NA                 | INTERGENIC                    | NA                                             |
| Kabuli_wild_48936654 | 1399938304                          | Ca_kabuli_Chr04 | 48936654                | A/C  | NA                 | INTERGENIC                    | NA                                             |
| Kabuli_wild_48936819 | 1399938305                          | Ca_kabuli_Chr04 | 48936819                | C/T  | NA                 | INTERGENIC                    | NA                                             |
| Kabuli_wild_49012756 | 1399938306                          | Ca_kabuli_Chr04 | 49012756                | C/T  | Gene_Ca_20771      | DOWNSTREAM                    | Glycosidehydrolase, family13                   |
| Kabuli_wild_49080099 | 1399938307                          | Ca_kabuli_Chr04 | 49080099                | A/G  | Gene_Ca_20777      | NON_SYNONYMOUS_CODING         | 3-betahydroxysteroiddehydrogenase/isomerase    |
| Kabuli_wild_131558   | 1399938308                          | Ca_kabuli_Chr05 | 131558                  | A/C  | Gene_Ca_18168      | DOWNSTREAM                    | NA                                             |
| Kabuli_wild_154084   | 1399938309                          | Ca_kabuli_Chr05 | 154084                  | T/G  | NA                 | INTERGENIC                    | NA                                             |
| Kabuli_wild_154095   | 1399938310                          | Ca_kabuli_Chr05 | 154095                  | C/G  | NA                 | INTERGENIC                    | NA                                             |
| Kabuli_wild_154097   | 1399938311                          | Ca_kabuli_Chr05 | 154097                  | A/T  | NA                 | INTERGENIC                    | NA                                             |
| Kabuli_wild_154128   | 1399938312                          | Ca_kabuli_Chr05 | 154128                  | G/T  | NA                 | INTERGENIC                    | NA                                             |
| Kabuli_wild_154162   | 1399938313                          | Ca_kabuli_Chr05 | 154162                  | C/T  | NA                 | INTERGENIC                    | NA                                             |
| Kabuli_wild_166259   | 1399938314                          | Ca_kabuli_Chr05 | 166259                  | A/T  | Gene_Ca_18171      | NON_SYNONYMOUS_CODING         | No apical meristem (NAM) protein               |
| Kabuli_wild_166261   | 1399938315                          | Ca_kabuli_Chr05 | 166261                  | G/T  | Gene_Ca_18171      | SYNONYMOUS_CODING             | No apical meristem (NAM) protein               |

| SNP IDs            | NCBI dbSNP accession IDs (NCBI_SS#) | Chromosomes     | Physical positions (bp) | SNPs | Gene accession IDs | Sequence components of genome | Putative functions                                      |
|--------------------|-------------------------------------|-----------------|-------------------------|------|--------------------|-------------------------------|---------------------------------------------------------|
| Kabuli_wild_166341 | 1399938316                          | Ca_kabuli_Chr05 | 166341                  | C/A  | Gene_Ca_18171      | NON_SYNONYMOUS_CODING         | No apical meristem (NAM) protein                        |
| Kabuli_wild_166381 | 1399938317                          | Ca_kabuli_Chr05 | 166381                  | A/G  | Gene_Ca_18171      | SYNONYMOUS_CODING             | No apical meristem (NAM) protein                        |
| Kabuli_wild_210649 | 1399938318                          | Ca_kabuli_Chr05 | 210649                  | C/A  | Gene_Ca_18176      | DOWNSTREAM                    | F-boxdomain,cyclin-like                                 |
| Kabuli_wild_222637 | 1399938319                          | Ca_kabuli_Chr05 | 222637                  | C/T  | NA                 | INTERGENIC                    | NA                                                      |
| Kabuli_wild_222641 | 1399938320                          | Ca_kabuli_Chr05 | 222641                  | C/T  | NA                 | INTERGENIC                    | NA                                                      |
| Kabuli_wild_222651 | 1399938321                          | Ca_kabuli_Chr05 | 222651                  | A/C  | NA                 | INTERGENIC                    | NA                                                      |
| Kabuli_wild_222653 | 1399938322                          | Ca_kabuli_Chr05 | 222653                  | A/C  | NA                 | INTERGENIC                    | NA                                                      |
| Kabuli_wild_222657 | 1399938323                          | Ca_kabuli_Chr05 | 222657                  | G/A  | NA                 | INTERGENIC                    | NA                                                      |
| Kabuli_wild_223384 | 1399938324                          | Ca_kabuli_Chr05 | 223384                  | C/G  | Gene_Ca_18177      | SYNONYMOUS_CODING             | ZF-HD homeobox protein,Cys/His-rich dimerisation domain |
| Kabuli_wild_234247 | 1399938325                          | Ca_kabuli_Chr05 | 234247                  | T/C  | Gene_Ca_18178      | INTRON                        | Protein of unknown function DUF647                      |
| Kabuli_wild_234302 | 1399938326                          | Ca_kabuli_Chr05 | 234302                  | T/A  | Gene_Ca_18178      | INTRON                        | Protein of unknown function DUF647                      |
| Kabuli_wild_234303 | 1399938327                          | Ca_kabuli_Chr05 | 234303                  | C/A  | Gene_Ca_18178      | INTRON                        | Protein of unknown function DUF647                      |
| Kabuli_wild_234305 | 1399938328                          | Ca_kabuli_Chr05 | 234305                  | T/A  | Gene_Ca_18178      | INTRON                        | Protein of unknown function DUF647                      |
| Kabuli_wild_234311 | 1399938329                          | Ca_kabuli_Chr05 | 234311                  | T/A  | Gene_Ca_18178      | INTRON                        | Protein of unknown function DUF647                      |
| Kabuli_wild_234319 | 1399938330                          | Ca_kabuli_Chr05 | 234319                  | T/A  | Gene_Ca_18178      | INTRON                        | Protein of unknown function DUF647                      |
| Kabuli_wild_234323 | 1399938331                          | Ca_kabuli_Chr05 | 234323                  | T/A  | Gene_Ca_18178      | INTRON                        | Protein of unknown function DUF647                      |
| Kabuli_wild_234410 | 1399938332                          | Ca_kabuli_Chr05 | 234410                  | A/C  | Gene_Ca_18178      | NON_SYNONYMOUS_CODING         | Protein of unknown function DUF647                      |
| Kabuli_wild_235757 | 1399938333                          | Ca_kabuli_Chr05 | 235757                  | T/G  | Gene_Ca_18178      | SYNONYMOUS_CODING             | Protein of unknown function DUF647                      |
| Kabuli_wild_235850 | 1399938334                          | Ca_kabuli_Chr05 | 235850                  | A/C  | Gene_Ca_18178      | SYNONYMOUS_CODING             | Protein of unknown function DUF647                      |
| Kabuli_wild_245850 | 1399938335                          | Ca_kabuli_Chr05 | 245850                  | T/G  | Gene_Ca_18179      | INTRON                        | HEAT                                                    |
| Kabuli_wild_245863 | 1399938336                          | Ca_kabuli_Chr05 | 245863                  | A/T  | Gene_Ca_18179      | INTRON                        | HEAT                                                    |
| Kabuli_wild_245896 | 1399938337                          | Ca_kabuli_Chr05 | 245896                  | A/T  | Gene_Ca_18179      | INTRON                        | HEAT                                                    |
| Kabuli_wild_246466 | 1399938338                          | Ca_kabuli_Chr05 | 246466                  | A/T  | Gene_Ca_18179      | INTRON                        | HEAT                                                    |
| Kabuli_wild_272863 | 1399938339                          | Ca_kabuli_Chr05 | 272863                  | A/T  | Gene_Ca_18181      | INTRON                        | Mitoticcheckpoint                                       |
| Kabuli_wild_272972 | 1399938340                          | Ca_kabuli_Chr05 | 272972                  | T/A  | Gene_Ca_18181      | INTRON                        | Mitoticcheckpoint                                       |
| Kabuli_wild_277040 | 1399938341                          | Ca_kabuli_Chr05 | 277040                  | G/A  | Gene_Ca_18181      | SYNONYMOUS_CODING             | Mitoticcheckpoint                                       |
| Kabuli_wild_314007 | 1399938342                          | Ca_kabuli_Chr05 | 314007                  | G/C  | Gene_Ca_18187      | NON_SYNONYMOUS_CODING         | Dynamincentral domain                                   |
| Kabuli_wild_438442 | 1399938343                          | Ca_kabuli_Chr05 | 438442                  | T/C  | Gene_Ca_18196      | INTRON                        | NA                                                      |
| Kabuli_wild_438445 | 1399938344                          | Ca_kabuli_Chr05 | 438445                  | C/A  | Gene_Ca_18196      | INTRON                        | NA                                                      |
| Kabuli_wild_438448 | 1399938345                          | Ca_kabuli_Chr05 | 438448                  | C/A  | Gene_Ca_18196      | INTRON                        | NA                                                      |
| Kabuli_wild_443309 | 1399938346                          | Ca_kabuli_Chr05 | 443309                  | A/T  | NA                 | INTERGENIC                    | NA                                                      |
| Kabuli_wild_468414 | 1399938347                          | Ca_kabuli_Chr05 | 468414                  | C/A  | Gene_Ca_18200      | NON_SYNONYMOUS_CODING         | Inositolpolyphosphate-relatedphosphatase                |
| Kabuli_wild_469397 | 1399938348                          | Ca_kabuli_Chr05 | 469397                  | G/A  | Gene_Ca_18200      | SYNONYMOUS_CODING             | Inositolpolyphosphate-relatedphosphatase                |
| Kabuli_wild_665998 | 1399938349                          | Ca_kabuli_Chr05 | 665998                  | A/G  | Gene_Ca_23223      | SYNONYMOUS_CODING             | NA                                                      |
| Kabuli_wild_665999 | 1399938350                          | Ca_kabuli_Chr05 | 665999                  | C/A  | Gene_Ca_23223      | NON_SYNONYMOUS_CODING         | NA                                                      |
| Kabuli_wild_666057 | 1399938351                          | Ca_kabuli_Chr05 | 666057                  | C/T  | Gene_Ca_23223      | SYNONYMOUS_CODING             | NA                                                      |
| Kabuli_wild_666078 | 1399938352                          | Ca_kabuli_Chr05 | 666078                  | T/A  | Gene_Ca_23223      | SYNONYMOUS_CODING             | NA                                                      |
| Kabuli_wild_666103 | 1399938353                          | Ca_kabuli_Chr05 | 666103                  | A/T  | Gene_Ca_23223      | NON_SYNONYMOUS_CODING         | NA                                                      |
| Kabuli_wild_666123 | 1399938354                          | Ca_kabuli_Chr05 | 666123                  | G/A  | Gene_Ca_23223      | SYNONYMOUS_CODING             | NA                                                      |
| Kabuli_wild_805859 | 1399938355                          | Ca_kabuli_Chr05 | 805859                  | C/T  | NA                 | INTERGENIC                    | NA                                                      |
| Kabuli_wild_805860 | 1399938356                          | Ca_kabuli_Chr05 | 805860                  | A/G  | NA                 | INTERGENIC                    | NA                                                      |
| Kabuli_wild_805896 | 1399938357                          | Ca_kabuli_Chr05 | 805896                  | T/C  | NA                 | INTERGENIC                    | NA                                                      |
| Kabuli_wild_805929 | 1399938358                          | Ca_kabuli_Chr05 | 805929                  | G/A  | NA                 | INTERGENIC                    | NA                                                      |
| Kabuli_wild_805961 | 1399938359                          | Ca_kabuli_Chr05 | 805961                  | T/G  | NA                 | INTERGENIC                    | NA                                                      |



| SNP IDs             | NCBI dbSNP accession IDs (NCBI_SS#) | Chromosomes     | Physical positions (bp) | SNPs | Gene accession IDs | Sequence components of genome | Putative functions                             |
|---------------------|-------------------------------------|-----------------|-------------------------|------|--------------------|-------------------------------|------------------------------------------------|
| Kabuli_wild_870867  | 1399938360                          | Ca_kabuli_Chr05 | 870867                  | A/G  | NA                 | INTERGENIC                    | NA                                             |
| Kabuli_wild_870909  | 1399938361                          | Ca_kabuli_Chr05 | 870909                  | G/A  | NA                 | INTERGENIC                    | NA                                             |
| Kabuli_wild_925554  | 1399938362                          | Ca_kabuli_Chr05 | 925554                  | T/C  | NA                 | INTERGENIC                    | NA                                             |
| Kabuli_wild_1141746 | 1399938363                          | Ca_kabuli_Chr05 | 1141746                 | C/T  | Gene_Ca_23234      | NON_SYNONYMOUS_CODING         | NA                                             |
| Kabuli_wild_1141753 | 1399938364                          | Ca_kabuli_Chr05 | 1141753                 | T/C  | Gene_Ca_23234      | SYNONYMOUS_CODING             | NA                                             |
| Kabuli_wild_1141755 | 1399938365                          | Ca_kabuli_Chr05 | 1141755                 | C/T  | Gene_Ca_23234      | NON_SYNONYMOUS_CODING         | NA                                             |
| Kabuli_wild_1141758 | 1399938366                          | Ca_kabuli_Chr05 | 1141758                 | G/A  | Gene_Ca_23234      | NON_SYNONYMOUS_CODING         | NA                                             |
| Kabuli_wild_1141772 | 1399938367                          | Ca_kabuli_Chr05 | 1141772                 | G/T  | Gene_Ca_23234      | NON_SYNONYMOUS_CODING         | NA                                             |
| Kabuli_wild_1141785 | 1399938368                          | Ca_kabuli_Chr05 | 1141785                 | C/T  | Gene_Ca_23234      | NON_SYNONYMOUS_CODING         | NA                                             |
| Kabuli_wild_1220867 | 1399938369                          | Ca_kabuli_Chr05 | 1220867                 | A/G  | Gene_Ca_26284      | INTRON                        | YbaK/aminoacyl-tRNAsynthetase-associateddomain |
| Kabuli_wild_1221219 | 1399938370                          | Ca_kabuli_Chr05 | 1221219                 | A/C  | Gene_Ca_26284      | INTRON                        | YbaK/aminoacyl-tRNAsynthetase-associateddomain |
| Kabuli_wild_1221260 | 1399938371                          | Ca_kabuli_Chr05 | 1221260                 | A/T  | Gene_Ca_26284      | INTRON                        | YbaK/aminoacyl-tRNAsynthetase-associateddomain |
| Kabuli_wild_1252388 | 1399938372                          | Ca_kabuli_Chr05 | 1252388                 | A/T  | Gene_Ca_26282      | INTRON                        | MORNmotif                                      |
| Kabuli_wild_1270830 | 1399938373                          | Ca_kabuli_Chr05 | 1270830                 | T/C  | Gene_Ca_26280      | SYNONYMOUS_CODING             | 1-aminocyclopropane-1-carboxylatesynthase      |
| Kabuli_wild_1272581 | 1399938374                          | Ca_kabuli_Chr05 | 1272581                 | T/C  | Gene_Ca_26280      | UPSTREAM                      | 1-aminocyclopropane-1-carboxylatesynthase      |
| Kabuli_wild_1280977 | 1399938375                          | Ca_kabuli_Chr05 | 1280977                 | T/G  | Gene_Ca_26279      | NON_SYNONYMOUS_CODING         | Transcription facto rGRAS                      |
| Kabuli_wild_1281017 | 1399938376                          | Ca_kabuli_Chr05 | 1281017                 | G/A  | Gene_Ca_26279      | SYNONYMOUS_CODING             | Transcription facto rGRAS                      |
| Kabuli_wild_1281021 | 1399938377                          | Ca_kabuli_Chr05 | 1281021                 | C/T  | Gene_Ca_26279      | SYNONYMOUS_CODING             | Transcription facto rGRAS                      |
| Kabuli_wild_1418656 | 1399938378                          | Ca_kabuli_Chr05 | 1418656                 | C/T  | NA                 | INTERGENIC                    | NA                                             |
| Kabuli_wild_1495676 | 1399938379                          | Ca_kabuli_Chr05 | 1495676                 | C/A  | Gene_Ca_26446      | NON_SYNONYMOUS_CODING         | Peptidase C48, SUMO/Sentrin/Ubl1               |
| Kabuli_wild_1495701 | 1399938380                          | Ca_kabuli_Chr05 | 1495701                 | T/C  | Gene_Ca_26446      | SYNONYMOUS_CODING             | Peptidase C48, SUMO/Sentrin/Ubl1               |
| Kabuli_wild_1495735 | 1399938381                          | Ca_kabuli_Chr05 | 1495735                 | C/A  | Gene_Ca_26446      | NON_SYNONYMOUS_CODING         | Peptidase C48, SUMO/Sentrin/Ubl1               |
| Kabuli_wild_1495742 | 1399938382                          | Ca_kabuli_Chr05 | 1495742                 | G/A  | Gene_Ca_26446      | NON_SYNONYMOUS_CODING         | Peptidase C48, SUMO/Sentrin/Ubl1               |
| Kabuli_wild_1524631 | 1399938383                          | Ca_kabuli_Chr05 | 1524631                 | T/C  | NA                 | INTERGENIC                    | NA                                             |
| Kabuli_wild_1524651 | 1399938384                          | Ca_kabuli_Chr05 | 1524651                 | T/A  | NA                 | INTERGENIC                    | NA                                             |
| Kabuli_wild_1534820 | 1399938385                          | Ca_kabuli_Chr05 | 1534820                 | C/G  | NA                 | INTERGENIC                    | NA                                             |
| Kabuli_wild_1534883 | 1399938386                          | Ca_kabuli_Chr05 | 1534883                 | C/T  | NA                 | INTERGENIC                    | NA                                             |
| Kabuli_wild_1534907 | 1399938387                          | Ca_kabuli_Chr05 | 1534907                 | T/C  | NA                 | INTERGENIC                    | NA                                             |
| Kabuli_wild_1534935 | 1399938388                          | Ca_kabuli_Chr05 | 1534935                 | C/T  | NA                 | INTERGENIC                    | NA                                             |
| Kabuli_wild_1534937 | 1399938389                          | Ca_kabuli_Chr05 | 1534937                 | G/A  | NA                 | INTERGENIC                    | NA                                             |
| Kabuli_wild_1575600 | 1399938390                          | Ca_kabuli_Chr05 | 1575600                 | C/A  | Gene_Ca_26447      | NON_SYNONYMOUS_CODING         | NA                                             |
| Kabuli_wild_1585268 | 1399938391                          | Ca_kabuli_Chr05 | 1585268                 | C/A  | NA                 | INTERGENIC                    | NA                                             |
| Kabuli_wild_1666880 | 1399938392                          | Ca_kabuli_Chr05 | 1666880                 | G/A  | NA                 | INTERGENIC                    | NA                                             |
| Kabuli_wild_2300030 | 1399938393                          | Ca_kabuli_Chr05 | 2300030                 | C/A  | Gene_Ca_26508      | NON_SYNONYMOUS_CODING         | Peptidase C48, SUMO/Sentrin/Ubl1               |
| Kabuli_wild_2380051 | 1399938394                          | Ca_kabuli_Chr05 | 2380051                 | A/G  | Gene_Ca_18664      | INTRON                        | NA                                             |
| Kabuli_wild_2472198 | 1399938395                          | Ca_kabuli_Chr05 | 2472198                 | C/T  | Gene_Ca_18665      | NON_SYNONYMOUS_CODING         | NA                                             |
| Kabuli_wild_2519949 | 1399938396                          | Ca_kabuli_Chr05 | 2519949                 | C/T  | NA                 | INTERGENIC                    | NA                                             |
| Kabuli_wild_2519960 | 1399938397                          | Ca_kabuli_Chr05 | 2519960                 | G/A  | NA                 | INTERGENIC                    | NA                                             |
| Kabuli_wild_2519961 | 1399938398                          | Ca_kabuli_Chr05 | 2519961                 | G/A  | NA                 | INTERGENIC                    | NA                                             |
| Kabuli_wild_2519977 | 1399938399                          | Ca_kabuli_Chr05 | 2519977                 | C/T  | NA                 | INTERGENIC                    | NA                                             |
| Kabuli_wild_2519991 | 1399938400                          | Ca_kabuli_Chr05 | 2519991                 | C/T  | NA                 | INTERGENIC                    | NA                                             |
| Kabuli_wild_2519996 | 1399938401                          | Ca_kabuli_Chr05 | 2519996                 | G/T  | NA                 | INTERGENIC                    | NA                                             |
| Kabuli_wild_2520015 | 1399938402                          | Ca_kabuli_Chr05 | 2520015                 | C/G  | NA                 | INTERGENIC                    | NA                                             |
| Kabuli_wild_2520037 | 1399938403                          | Ca_kabuli_Chr05 | 2520037                 | A/G  | NA                 | INTERGENIC                    | NA                                             |

| SNP IDs             | NCBI dbSNP accession IDs (NCBI_SS#) | Chromosomes     | Physical positions (bp) | SNPs | Gene accession IDs | Sequence components of genome | Putative functions |
|---------------------|-------------------------------------|-----------------|-------------------------|------|--------------------|-------------------------------|--------------------|
| Kabuli_wild_2520048 | 1399938404                          | Ca_kabuli_Chr05 | 2520048                 | T/C  | NA                 | INTERGENIC                    | NA                 |
| Kabuli_wild_2520049 | 1399938405                          | Ca_kabuli_Chr05 | 2520049                 | C/T  | NA                 | INTERGENIC                    | NA                 |
| Kabuli_wild_2520050 | 1399938406                          | Ca_kabuli_Chr05 | 2520050                 | G/C  | NA                 | INTERGENIC                    | NA                 |
| Kabuli_wild_2520051 | 1399938407                          | Ca_kabuli_Chr05 | 2520051                 | G/T  | NA                 | INTERGENIC                    | NA                 |
| Kabuli_wild_2520055 | 1399938408                          | Ca_kabuli_Chr05 | 2520055                 | C/T  | NA                 | INTERGENIC                    | NA                 |
| Kabuli_wild_2520058 | 1399938409                          | Ca_kabuli_Chr05 | 2520058                 | C/T  | NA                 | INTERGENIC                    | NA                 |
| Kabuli_wild_2520061 | 1399938410                          | Ca_kabuli_Chr05 | 2520061                 | C/A  | NA                 | INTERGENIC                    | NA                 |
| Kabuli_wild_2520067 | 1399938411                          | Ca_kabuli_Chr05 | 2520067                 | C/A  | NA                 | INTERGENIC                    | NA                 |
| Kabuli_wild_2520068 | 1399938412                          | Ca_kabuli_Chr05 | 2520068                 | T/A  | NA                 | INTERGENIC                    | NA                 |
| Kabuli_wild_2520069 | 1399938413                          | Ca_kabuli_Chr05 | 2520069                 | C/T  | NA                 | INTERGENIC                    | NA                 |
| Kabuli_wild_2520070 | 1399938414                          | Ca_kabuli_Chr05 | 2520070                 | C/T  | NA                 | INTERGENIC                    | NA                 |
| Kabuli_wild_2520093 | 1399938415                          | Ca_kabuli_Chr05 | 2520093                 | G/A  | NA                 | INTERGENIC                    | NA                 |
| Kabuli_wild_2520094 | 1399938416                          | Ca_kabuli_Chr05 | 2520094                 | G/A  | NA                 | INTERGENIC                    | NA                 |
| Kabuli_wild_2520101 | 1399938417                          | Ca_kabuli_Chr05 | 2520101                 | C/T  | NA                 | INTERGENIC                    | NA                 |
| Kabuli_wild_2520109 | 1399938418                          | Ca_kabuli_Chr05 | 2520109                 | G/A  | NA                 | INTERGENIC                    | NA                 |
| Kabuli_wild_2520114 | 1399938419                          | Ca_kabuli_Chr05 | 2520114                 | G/A  | NA                 | INTERGENIC                    | NA                 |
| Kabuli_wild_2520136 | 1399938420                          | Ca_kabuli_Chr05 | 2520136                 | T/C  | NA                 | INTERGENIC                    | NA                 |
| Kabuli_wild_2613423 | 1399938421                          | Ca_kabuli_Chr05 | 2613423                 | T/G  | NA                 | INTERGENIC                    | NA                 |
| Kabuli_wild_2948530 | 1399938422                          | Ca_kabuli_Chr05 | 2948530                 | G/T  | Gene_Ca_18681      | INTRON                        | NA                 |
| Kabuli_wild_2948531 | 1399938423                          | Ca_kabuli_Chr05 | 2948531                 | T/C  | Gene_Ca_18681      | INTRON                        | NA                 |
| Kabuli_wild_2948549 | 1399938424                          | Ca_kabuli_Chr05 | 2948549                 | C/A  | Gene_Ca_18681      | INTRON                        | NA                 |
| Kabuli_wild_2948592 | 1399938425                          | Ca_kabuli_Chr05 | 2948592                 | T/C  | Gene_Ca_18681      | INTRON                        | NA                 |
| Kabuli_wild_2948616 | 1399938426                          | Ca_kabuli_Chr05 | 2948616                 | G/A  | Gene_Ca_18681      | INTRON                        | NA                 |
| Kabuli_wild_2948688 | 1399938427                          | Ca_kabuli_Chr05 | 2948688                 | C/T  | Gene_Ca_18681      | INTRON                        | NA                 |
| Kabuli_wild_2948689 | 1399938428                          | Ca_kabuli_Chr05 | 2948689                 | A/G  | Gene_Ca_18681      | INTRON                        | NA                 |
| Kabuli_wild_2948693 | 1399938429                          | Ca_kabuli_Chr05 | 2948693                 | G/T  | Gene_Ca_18681      | INTRON                        | NA                 |
| Kabuli_wild_2948716 | 1399938430                          | Ca_kabuli_Chr05 | 2948716                 | G/A  | Gene_Ca_18681      | INTRON                        | NA                 |
| Kabuli_wild_2948726 | 1399938431                          | Ca_kabuli_Chr05 | 2948726                 | C/T  | Gene_Ca_18681      | INTRON                        | NA                 |
| Kabuli_wild_2948736 | 1399938432                          | Ca_kabuli_Chr05 | 2948736                 | A/G  | Gene_Ca_18681      | INTRON                        | NA                 |
| Kabuli_wild_3348310 | 1399938433                          | Ca_kabuli_Chr05 | 3348310                 | A/G  | NA                 | INTERGENIC                    | NA                 |
| Kabuli_wild_3348328 | 1399938434                          | Ca_kabuli_Chr05 | 3348328                 | C/A  | NA                 | INTERGENIC                    | NA                 |
| Kabuli_wild_3348366 | 1399938435                          | Ca_kabuli_Chr05 | 3348366                 | G/C  | NA                 | INTERGENIC                    | NA                 |
| Kabuli_wild_3353013 | 1399938436                          | Ca_kabuli_Chr05 | 3353013                 | T/G  | NA                 | INTERGENIC                    | NA                 |
| Kabuli_wild_3353052 | 1399938437                          | Ca_kabuli_Chr05 | 3353052                 | A/G  | NA                 | INTERGENIC                    | NA                 |
| Kabuli_wild_3353055 | 1399938438                          | Ca_kabuli_Chr05 | 3353055                 | G/A  | NA                 | INTERGENIC                    | NA                 |
| Kabuli_wild_3353056 | 1399938439                          | Ca_kabuli_Chr05 | 3353056                 | C/A  | NA                 | INTERGENIC                    | NA                 |
| Kabuli_wild_3643160 | 1399938440                          | Ca_kabuli_Chr05 | 3643160                 | C/T  | NA                 | INTERGENIC                    | NA                 |
| Kabuli_wild_3643216 | 1399938441                          | Ca_kabuli_Chr05 | 3643216                 | C/T  | NA                 | INTERGENIC                    | NA                 |
| Kabuli_wild_3643241 | 1399938442                          | Ca_kabuli_Chr05 | 3643241                 | G/A  | NA                 | INTERGENIC                    | NA                 |
| Kabuli_wild_3838136 | 1399938443                          | Ca_kabuli_Chr05 | 3838136                 | A/G  | NA                 | INTERGENIC                    | NA                 |
| Kabuli_wild_3838149 | 1399938444                          | Ca_kabuli_Chr05 | 3838149                 | C/A  | NA                 | INTERGENIC                    | NA                 |
| Kabuli_wild_4042797 | 1399938445                          | Ca_kabuli_Chr05 | 4042797                 | A/C  | NA                 | INTERGENIC                    | NA                 |
| Kabuli_wild_4122342 | 1399938446                          | Ca_kabuli_Chr05 | 4122342                 | T/C  | NA                 | INTERGENIC                    | NA                 |
| Kabuli_wild_4122395 | 1399938447                          | Ca_kabuli_Chr05 | 4122395                 | T/C  | NA                 | INTERGENIC                    | NA                 |

| SNP IDs             | NCBI dbSNP accession IDs (NCBI_SS#) | Chromosomes     | Physical positions (bp) | SNPs | Gene accession IDs | Sequence components of genome | Putative functions               |
|---------------------|-------------------------------------|-----------------|-------------------------|------|--------------------|-------------------------------|----------------------------------|
| Kabuli_wild_4200223 | 1399938448                          | Ca_kabuli_Chr05 | 4200223                 | A/C  | NA                 | INTERGENIC                    | NA                               |
| Kabuli_wild_4890611 | 1399938449                          | Ca_kabuli_Chr05 | 4890611                 | C/T  | NA                 | INTERGENIC                    | NA                               |
| Kabuli_wild_4928256 | 1399938450                          | Ca_kabuli_Chr05 | 4928256                 | A/G  | NA                 | INTERGENIC                    | NA                               |
| Kabuli_wild_4928311 | 1399938451                          | Ca_kabuli_Chr05 | 4928311                 | T/C  | NA                 | INTERGENIC                    | NA                               |
| Kabuli_wild_4928373 | 1399938452                          | Ca_kabuli_Chr05 | 4928373                 | A/C  | NA                 | INTERGENIC                    | NA                               |
| Kabuli_wild_4928382 | 1399938453                          | Ca_kabuli_Chr05 | 4928382                 | G/T  | NA                 | INTERGENIC                    | NA                               |
| Kabuli_wild_4938033 | 1399938454                          | Ca_kabuli_Chr05 | 4938033                 | C/T  | NA                 | INTERGENIC                    | NA                               |
| Kabuli_wild_4938039 | 1399938455                          | Ca_kabuli_Chr05 | 4938039                 | A/G  | NA                 | INTERGENIC                    | NA                               |
| Kabuli_wild_5133643 | 1399938456                          | Ca_kabuli_Chr05 | 5133643                 | A/T  | Gene_Ca_25551      | INTRON                        | Zinc finger,U1-type              |
| Kabuli_wild_5133644 | 1399938457                          | Ca_kabuli_Chr05 | 5133644                 | A/G  | Gene_Ca_25551      | INTRON                        | Zinc finger,U1-type              |
| Kabuli_wild_5404114 | 1399938458                          | Ca_kabuli_Chr05 | 5404114                 | A/G  | NA                 | INTERGENIC                    | NA                               |
| Kabuli_wild_5404199 | 1399938459                          | Ca_kabuli_Chr05 | 5404199                 | T/C  | NA                 | INTERGENIC                    | NA                               |
| Kabuli_wild_5404210 | 1399938460                          | Ca_kabuli_Chr05 | 5404210                 | A/G  | NA                 | INTERGENIC                    | NA                               |
| Kabuli_wild_5404261 | 1399938461                          | Ca_kabuli_Chr05 | 5404261                 | G/A  | NA                 | INTERGENIC                    | NA                               |
| Kabuli_wild_5647938 | 1399938462                          | Ca_kabuli_Chr05 | 5647938                 | A/C  | NA                 | INTERGENIC                    | NA                               |
| Kabuli_wild_5854899 | 1399938463                          | Ca_kabuli_Chr05 | 5854899                 | T/G  | NA                 | INTERGENIC                    | NA                               |
| Kabuli_wild_6082113 | 1399938464                          | Ca_kabuli_Chr05 | 6082113                 | C/A  | Gene_Ca_20732      | DOWNSTREAM                    | Transposase,Ptta/En/Spm,plant    |
| Kabuli_wild_6186221 | 1399938465                          | Ca_kabuli_Chr05 | 6186221                 | C/T  | Gene_Ca_20736      | SYNONYMOUS_CODING             | NA                               |
| Kabuli_wild_6190494 | 1399938466                          | Ca_kabuli_Chr05 | 6190494                 | T/C  | NA                 | INTERGENIC                    | NA                               |
| Kabuli_wild_6225392 | 1399938467                          | Ca_kabuli_Chr05 | 6225392                 | G/A  | NA                 | INTERGENIC                    | NA                               |
| Kabuli_wild_6225397 | 1399938468                          | Ca_kabuli_Chr05 | 6225397                 | G/A  | NA                 | INTERGENIC                    | NA                               |
| Kabuli_wild_6225410 | 1399938469                          | Ca_kabuli_Chr05 | 6225410                 | A/T  | NA                 | INTERGENIC                    | NA                               |
| Kabuli_wild_6225415 | 1399938470                          | Ca_kabuli_Chr05 | 6225415                 | C/G  | NA                 | INTERGENIC                    | NA                               |
| Kabuli_wild_6225426 | 1399938471                          | Ca_kabuli_Chr05 | 6225426                 | T/A  | NA                 | INTERGENIC                    | NA                               |
| Kabuli_wild_6290453 | 1399938472                          | Ca_kabuli_Chr05 | 6290453                 | G/A  | Gene_Ca_20739      | INTRON                        | RNA recognition motif domain     |
| Kabuli_wild_6300337 | 1399938473                          | Ca_kabuli_Chr05 | 6300337                 | C/A  | Gene_Ca_20739      | INTRON                        | RNA recognition motif domain     |
| Kabuli_wild_6300502 | 1399938474                          | Ca_kabuli_Chr05 | 6300502                 | C/A  | Gene_Ca_20739      | INTRON                        | RNA recognition motif domain     |
| Kabuli_wild_6317014 | 1399938475                          | Ca_kabuli_Chr05 | 6317014                 | C/T  | NA                 | INTERGENIC                    | NA                               |
| Kabuli_wild_6480629 | 1399938476                          | Ca_kabuli_Chr05 | 6480629                 | A/G  | NA                 | INTERGENIC                    | NA                               |
| Kabuli_wild_6539792 | 1399938477                          | Ca_kabuli_Chr05 | 6539792                 | T/A  | Gene_Ca_20752      | DOWNSTREAM                    | NA                               |
| Kabuli_wild_6539848 | 1399938478                          | Ca_kabuli_Chr05 | 6539848                 | C/A  | Gene_Ca_20752      | DOWNSTREAM                    | NA                               |
| Kabuli_wild_6654053 | 1399938479                          | Ca_kabuli_Chr05 | 6654053                 | C/A  | Gene_Ca_20754      | DOWNSTREAM                    | NA                               |
| Kabuli_wild_6654072 | 1399938480                          | Ca_kabuli_Chr05 | 6654072                 | C/T  | Gene_Ca_20754      | DOWNSTREAM                    | NA                               |
| Kabuli_wild_6805221 | 1399938481                          | Ca_kabuli_Chr05 | 6805221                 | T/A  | NA                 | INTERGENIC                    | NA                               |
| Kabuli_wild_6931865 | 1399938482                          | Ca_kabuli_Chr05 | 6931865                 | A/G  | NA                 | INTERGENIC                    | NA                               |
| Kabuli_wild_7138725 | 1399938483                          | Ca_kabuli_Chr05 | 7138725                 | T/C  | NA                 | INTERGENIC                    | NA                               |
| Kabuli_wild_7214400 | 1399938484                          | Ca_kabuli_Chr05 | 7214400                 | G/A  | Gene_Ca_21567      | NON_SYNONYMOUS_CODING         | Peptidase C48, SUMO/Sentrin/Ubl1 |
| Kabuli_wild_7316705 | 1399938485                          | Ca_kabuli_Chr05 | 7316705                 | A/T  | Gene_Ca_21573      | UPSTREAM                      | NA                               |
| Kabuli_wild_7316706 | 1399938486                          | Ca_kabuli_Chr05 | 7316706                 | T/C  | Gene_Ca_21573      | UPSTREAM                      | NA                               |
| Kabuli_wild_7316754 | 1399938487                          | Ca_kabuli_Chr05 | 7316754                 | T/C  | Gene_Ca_21573      | UPSTREAM                      | NA                               |
| Kabuli_wild_7316809 | 1399938488                          | Ca_kabuli_Chr05 | 7316809                 | T/C  | Gene_Ca_21572      | DOWNSTREAM                    | NA                               |
| Kabuli_wild_7424999 | 1399938489                          | Ca_kabuli_Chr05 | 7424999                 | G/A  | NA                 | INTERGENIC                    | NA                               |
| Kabuli_wild_7425006 | 1399938490                          | Ca_kabuli_Chr05 | 7425006                 | G/T  | NA                 | INTERGENIC                    | NA                               |
| Kabuli_wild_7425116 | 1399938491                          | Ca_kabuli_Chr05 | 7425116                 | C/T  | NA                 | INTERGENIC                    | NA                               |

| SNP IDs             | NCBI dbSNP accession IDs (NCBI_SS#) | Chromosomes     | Physical positions (bp) | SNPs | Gene accession IDs | Sequence components of genome | Putative functions                                              |
|---------------------|-------------------------------------|-----------------|-------------------------|------|--------------------|-------------------------------|-----------------------------------------------------------------|
| Kabuli_wild_7664421 | 1399938492                          | Ca_kabuli_Chr05 | 7664421                 | T/C  | Gene_Ca_18734      | NON_SYNONYMOUS_CODING         | Regulatorofnonsense-mediateddecay,UPF3                          |
| Kabuli_wild_7775298 | 1399938493                          | Ca_kabuli_Chr05 | 7775298                 | A/T  | NA                 | INTERGENIC                    | NA                                                              |
| Kabuli_wild_7775456 | 1399938494                          | Ca_kabuli_Chr05 | 7775456                 | T/C  | NA                 | INTERGENIC                    | NA                                                              |
| Kabuli_wild_7775472 | 1399938495                          | Ca_kabuli_Chr05 | 7775472                 | G/A  | NA                 | INTERGENIC                    | NA                                                              |
| Kabuli_wild_7775497 | 1399938496                          | Ca_kabuli_Chr05 | 7775497                 | G/C  | NA                 | INTERGENIC                    | NA                                                              |
| Kabuli_wild_7775516 | 1399938497                          | Ca_kabuli_Chr05 | 7775516                 | A/G  | NA                 | INTERGENIC                    | NA                                                              |
| Kabuli_wild_7775543 | 1399938498                          | Ca_kabuli_Chr05 | 7775543                 | T/C  | NA                 | INTERGENIC                    | NA                                                              |
| Kabuli_wild_7775915 | 1399938499                          | Ca_kabuli_Chr05 | 7775915                 | A/T  | NA                 | INTERGENIC                    | NA                                                              |
| Kabuli_wild_7775916 | 1399938500                          | Ca_kabuli_Chr05 | 7775916                 | C/G  | NA                 | INTERGENIC                    | NA                                                              |
| Kabuli_wild_7775918 | 1399938501                          | Ca_kabuli_Chr05 | 7775918                 | C/T  | NA                 | INTERGENIC                    | NA                                                              |
| Kabuli_wild_7789021 | 1399938502                          | Ca_kabuli_Chr05 | 7789021                 | G/T  | NA                 | INTERGENIC                    | NA                                                              |
| Kabuli_wild_7789065 | 1399938503                          | Ca_kabuli_Chr05 | 7789065                 | A/G  | NA                 | INTERGENIC                    | NA                                                              |
| Kabuli_wild_7826274 | 1399938504                          | Ca_kabuli_Chr05 | 7826274                 | A/G  | NA                 | INTERGENIC                    | NA                                                              |
| Kabuli_wild_7826338 | 1399938505                          | Ca_kabuli_Chr05 | 7826338                 | T/G  | NA                 | INTERGENIC                    | NA                                                              |
| Kabuli_wild_7826356 | 1399938506                          | Ca_kabuli_Chr05 | 7826356                 | G/A  | NA                 | INTERGENIC                    | NA                                                              |
| Kabuli_wild_7826366 | 1399938507                          | Ca_kabuli_Chr05 | 7826366                 | G/A  | NA                 | INTERGENIC                    | NA                                                              |
| Kabuli_wild_7848711 | 1399938508                          | Ca_kabuli_Chr05 | 7848711                 | C/T  | NA                 | INTERGENIC                    | NA                                                              |
| Kabuli_wild_7920989 | 1399938509                          | Ca_kabuli_Chr05 | 7920989                 | G/A  | NA                 | INTERGENIC                    | NA                                                              |
| Kabuli_wild_8052248 | 1399938510                          | Ca_kabuli_Chr05 | 8052248                 | C/T  | NA                 | INTERGENIC                    | NA                                                              |
| Kabuli_wild_8112387 | 1399938511                          | Ca_kabuli_Chr05 | 8112387                 | C/G  | Gene_Ca_18714      | NON_SYNONYMOUS_CODING         | NA                                                              |
| Kabuli_wild_8263483 | 1399938512                          | Ca_kabuli_Chr05 | 8263483                 | A/G  | NA                 | INTERGENIC                    | NA                                                              |
| Kabuli_wild_8272359 | 1399938513                          | Ca_kabuli_Chr05 | 8272359                 | G/A  | Gene_Ca_18709      | NON_SYNONYMOUS_CODING         | Protein kinase,catalytic domain                                 |
| Kabuli_wild_8308830 | 1399938514                          | Ca_kabuli_Chr05 | 8308830                 | T/A  | NA                 | INTERGENIC                    | NA                                                              |
| Kabuli_wild_8486712 | 1399938515                          | Ca_kabuli_Chr05 | 8486712                 | A/C  | NA                 | INTERGENIC                    | NA                                                              |
| Kabuli_wild_8535619 | 1399938516                          | Ca_kabuli_Chr05 | 8535619                 | A/C  | NA                 | INTERGENIC                    | NA                                                              |
| Kabuli_wild_8814637 | 1399938517                          | Ca_kabuli_Chr05 | 8814637                 | T/C  | Gene_Ca_20335      | NON_SYNONYMOUS_CODING         | Chromodomain                                                    |
| Kabuli_wild_9077465 | 1399938518                          | Ca_kabuli_Chr05 | 9077465                 | C/T  | Gene_Ca_19962      | NON_SYNONYMOUS_CODING         | Prohibitin                                                      |
| Kabuli_wild_9121616 | 1399938519                          | Ca_kabuli_Chr05 | 9121616                 | T/C  | NA                 | INTERGENIC                    | NA                                                              |
| Kabuli_wild_9226404 | 1399938520                          | Ca_kabuli_Chr05 | 9226404                 | A/C  | Gene_Ca_19969      | INTRON                        | FMN-dependentdehydrogenase                                      |
| Kabuli_wild_9483731 | 1399938521                          | Ca_kabuli_Chr05 | 9483731                 | A/T  | NA                 | INTERGENIC                    | NA                                                              |
| Kabuli_wild_9519382 | 1399938522                          | Ca_kabuli_Chr05 | 9519382                 | C/A  | Gene_Ca_23779      | DOWNSTREAM                    | NA                                                              |
| Kabuli_wild_9519390 | 1399938523                          | Ca_kabuli_Chr05 | 9519390                 | G/A  | Gene_Ca_23779      | DOWNSTREAM                    | NA                                                              |
| Kabuli_wild_9600407 | 1399938524                          | Ca_kabuli_Chr05 | 9600407                 | C/T  | NA                 | INTERGENIC                    | NA                                                              |
| Kabuli_wild_9609066 | 1399938525                          | Ca_kabuli_Chr05 | 9609066                 | A/C  | Gene_Ca_23788      | SYNONYMOUS_CODING             | Pyridine nucleotide-disulphideoxidoreductase,NAD-binding region |
| Kabuli_wild_9620998 | 1399938526                          | Ca_kabuli_Chr05 | 9620998                 | C/A  | NA                 | INTERGENIC                    | NA                                                              |
| Kabuli_wild_9728591 | 1399938527                          | Ca_kabuli_Chr05 | 9728591                 | A/G  | NA                 | INTERGENIC                    | NA                                                              |
| Kabuli_wild_9728992 | 1399938528                          | Ca_kabuli_Chr05 | 9728992                 | A/T  | NA                 | INTERGENIC                    | NA                                                              |
| Kabuli_wild_9729039 | 1399938529                          | Ca_kabuli_Chr05 | 9729039                 | G/A  | NA                 | INTERGENIC                    | NA                                                              |
| Kabuli_wild_9729050 | 1399938530                          | Ca_kabuli_Chr05 | 9729050                 | T/G  | NA                 | INTERGENIC                    | NA                                                              |
| Kabuli_wild_9729058 | 1399938531                          | Ca_kabuli_Chr05 | 9729058                 | C/T  | NA                 | INTERGENIC                    | NA                                                              |
| Kabuli_wild_9729070 | 1399938532                          | Ca_kabuli_Chr05 | 9729070                 | G/A  | NA                 | INTERGENIC                    | NA                                                              |
| Kabuli_wild_9868796 | 1399938533                          | Ca_kabuli_Chr05 | 9868796                 | T/C  | Gene_Ca_20504      | INTRON                        | Ankyrinrepeat                                                   |
| Kabuli_wild_9869005 | 1399938534                          | Ca_kabuli_Chr05 | 9869005                 | T/G  | Gene_Ca_20504      | SYNONYMOUS_CODING             | Ankyrinrepeat                                                   |
| Kabuli_wild_9961380 | 1399938535                          | Ca_kabuli_Chr05 | 9961380                 | C/T  | Gene_Ca_20508      | NON_SYNONYMOUS_CODING         | DNA-binding WRKY                                                |

| SNP IDs              | NCBI dbSNP accession IDs (NCBI_SS#) | Chromosomes     | Physical positions (bp) | SNPs | Gene accession IDs | Sequence components of genome | Putative functions                                          |
|----------------------|-------------------------------------|-----------------|-------------------------|------|--------------------|-------------------------------|-------------------------------------------------------------|
| Kabuli_wild_9965848  | 1399938536                          | Ca_kabuli_Chr05 | 9965848                 | T/C  | NA                 | INTERGENIC                    | NA                                                          |
| Kabuli_wild_10004427 | 1399938537                          | Ca_kabuli_Chr05 | 10004427                | T/G  | Gene_Ca_20512      | SYNONYMOUS_CODING             | NA                                                          |
| Kabuli_wild_10004430 | 1399938538                          | Ca_kabuli_Chr05 | 10004430                | T/G  | Gene_Ca_20512      | SYNONYMOUS_CODING             | NA                                                          |
| Kabuli_wild_10004451 | 1399938539                          | Ca_kabuli_Chr05 | 10004451                | T/G  | Gene_Ca_20512      | SYNONYMOUS_CODING             | NA                                                          |
| Kabuli_wild_10072358 | 1399938540                          | Ca_kabuli_Chr05 | 10072358                | G/A  | NA                 | INTERGENIC                    | NA                                                          |
| Kabuli_wild_10072403 | 1399938541                          | Ca_kabuli_Chr05 | 10072403                | G/C  | NA                 | INTERGENIC                    | NA                                                          |
| Kabuli_wild_10072460 | 1399938542                          | Ca_kabuli_Chr05 | 10072460                | G/A  | NA                 | INTERGENIC                    | NA                                                          |
| Kabuli_wild_10293447 | 1399938543                          | Ca_kabuli_Chr05 | 10293447                | C/A  | Gene_Ca_21242      | NON_SYNONYMOUS_CODING         | Protein kinase,catalytic domain                             |
| Kabuli_wild_10318833 | 1399938544                          | Ca_kabuli_Chr05 | 10318833                | A/G  | NA                 | INTERGENIC                    | NA                                                          |
| Kabuli_wild_10365031 | 1399938545                          | Ca_kabuli_Chr05 | 10365031                | C/T  | Gene_Ca_21234      | SYNONYMOUS_CODING             | Dual specificity phosphatase, catalytic domain              |
| Kabuli_wild_10406562 | 1399938546                          | Ca_kabuli_Chr05 | 10406562                | C/A  | NA                 | INTERGENIC                    | NA                                                          |
| Kabuli_wild_10406602 | 1399938547                          | Ca_kabuli_Chr05 | 10406602                | C/T  | NA                 | INTERGENIC                    | NA                                                          |
| Kabuli_wild_10406636 | 1399938548                          | Ca_kabuli_Chr05 | 10406636                | A/G  | NA                 | INTERGENIC                    | NA                                                          |
| Kabuli_wild_10545265 | 1399938549                          | Ca_kabuli_Chr05 | 10545265                | A/C  | Gene_Ca_21227      | INTRON                        | D-isomerspecific2-hydroxyaciddehydrogenase,catalytic domain |
| Kabuli_wild_10675252 | 1399938550                          | Ca_kabuli_Chr05 | 10675252                | A/G  | NA                 | INTERGENIC                    | NA                                                          |
| Kabuli_wild_10675279 | 1399938551                          | Ca_kabuli_Chr05 | 10675279                | C/G  | NA                 | INTERGENIC                    | NA                                                          |
| Kabuli_wild_10675294 | 1399938552                          | Ca_kabuli_Chr05 | 10675294                | A/G  | NA                 | INTERGENIC                    | NA                                                          |
| Kabuli_wild_10675421 | 1399938553                          | Ca_kabuli_Chr05 | 10675421                | A/G  | NA                 | INTERGENIC                    | NA                                                          |
| Kabuli_wild_10858050 | 1399938554                          | Ca_kabuli_Chr05 | 10858050                | A/G  | NA                 | INTERGENIC                    | NA                                                          |
| Kabuli_wild_10858490 | 1399938555                          | Ca_kabuli_Chr05 | 10858490                | C/T  | NA                 | INTERGENIC                    | NA                                                          |
| Kabuli_wild_10918368 | 1399938556                          | Ca_kabuli_Chr05 | 10918368                | A/G  | Gene_Ca_23750      | NON_SYNONYMOUS_CODING         | MoeA,C-terminal,domainIV                                    |
| Kabuli_wild_10919284 | 1399938557                          | Ca_kabuli_Chr05 | 10919284                | A/G  | Gene_Ca_23750      | INTRON                        | MoeA,C-terminal,domainIV                                    |
| Kabuli_wild_10919289 | 1399938558                          | Ca_kabuli_Chr05 | 10919289                | C/A  | Gene_Ca_23750      | INTRON                        | MoeA,C-terminal,domainIV                                    |
| Kabuli_wild_10919332 | 1399938559                          | Ca_kabuli_Chr05 | 10919332                | T/G  | Gene_Ca_23750      | INTRON                        | MoeA,C-terminal,domainIV                                    |
| Kabuli_wild_11191786 | 1399938560                          | Ca_kabuli_Chr05 | 11191786                | T/C  | NA                 | INTERGENIC                    | NA                                                          |
| Kabuli_wild_11222728 | 1399938561                          | Ca_kabuli_Chr05 | 11222728                | T/C  | NA                 | INTERGENIC                    | NA                                                          |
| Kabuli_wild_11230617 | 1399938562                          | Ca_kabuli_Chr05 | 11230617                | C/G  | NA                 | INTERGENIC                    | NA                                                          |
| Kabuli_wild_11230627 | 1399938563                          | Ca_kabuli_Chr05 | 11230627                | A/G  | NA                 | INTERGENIC                    | NA                                                          |
| Kabuli_wild_11230648 | 1399938564                          | Ca_kabuli_Chr05 | 11230648                | G/A  | NA                 | INTERGENIC                    | NA                                                          |
| Kabuli_wild_11230671 | 1399938565                          | Ca_kabuli_Chr05 | 11230671                | T/C  | NA                 | INTERGENIC                    | NA                                                          |
| Kabuli_wild_11230677 | 1399938566                          | Ca_kabuli_Chr05 | 11230677                | C/T  | NA                 | INTERGENIC                    | NA                                                          |
| Kabuli_wild_11263571 | 1399938567                          | Ca_kabuli_Chr05 | 11263571                | C/G  | NA                 | INTERGENIC                    | NA                                                          |
| Kabuli_wild_11263574 | 1399938568                          | Ca_kabuli_Chr05 | 11263574                | C/A  | NA                 | INTERGENIC                    | NA                                                          |
| Kabuli_wild_11317487 | 1399938569                          | Ca_kabuli_Chr05 | 11317487                | C/T  | NA                 | INTERGENIC                    | NA                                                          |
| Kabuli_wild_11317502 | 1399938570                          | Ca_kabuli_Chr05 | 11317502                | C/A  | NA                 | INTERGENIC                    | NA                                                          |
| Kabuli_wild_11385780 | 1399938571                          | Ca_kabuli_Chr05 | 11385780                | A/C  | Gene_Ca_23356      | NON_SYNONYMOUS_CODING         | RNA recognition motif domain                                |
| Kabuli_wild_11385874 | 1399938572                          | Ca_kabuli_Chr05 | 11385874                | A/G  | Gene_Ca_23356      | SYNONYMOUS_CODING             | RNA recognition motif domain                                |
| Kabuli_wild_11409971 | 1399938573                          | Ca_kabuli_Chr05 | 11409971                | A/G  | Gene_Ca_23355      | NON_SYNONYMOUS_CODING         | Peptidase C48, SUMO/Sentrin/Ubl1                            |
| Kabuli_wild_11637017 | 1399938574                          | Ca_kabuli_Chr05 | 11637017                | C/T  | NA                 | INTERGENIC                    | NA                                                          |
| Kabuli_wild_11637056 | 1399938575                          | Ca_kabuli_Chr05 | 11637056                | G/A  | NA                 | INTERGENIC                    | NA                                                          |
| Kabuli_wild_11777112 | 1399938576                          | Ca_kabuli_Chr05 | 11777112                | C/T  | NA                 | INTERGENIC                    | NA                                                          |
| Kabuli_wild_11777128 | 1399938577                          | Ca_kabuli_Chr05 | 11777128                | A/T  | NA                 | INTERGENIC                    | NA                                                          |
| Kabuli_wild_11777145 | 1399938578                          | Ca_kabuli_Chr05 | 11777145                | A/G  | NA                 | INTERGENIC                    | NA                                                          |
| Kabuli_wild_11835392 | 1399938579                          | Ca_kabuli_Chr05 | 11835392                | T/C  | NA                 | INTERGENIC                    | NA                                                          |

| SNP IDs              | NCBI dbSNP accession IDs (NCBI_SS#) | Chromosomes     | Physical positions (bp) | SNPs | Gene accession IDs | Sequence components of genome | Putative functions                         |
|----------------------|-------------------------------------|-----------------|-------------------------|------|--------------------|-------------------------------|--------------------------------------------|
| Kabuli_wild_11835482 | 1399938580                          | Ca_kabuli_Chr05 | 11835482                | C/T  | NA                 | INTERGENIC                    | NA                                         |
| Kabuli_wild_11848105 | 1399938581                          | Ca_kabuli_Chr05 | 11848105                | A/T  | Gene_Ca_17111      | INTRON                        | ABC transporter,trans membrane domain      |
| Kabuli_wild_11853090 | 1399938582                          | Ca_kabuli_Chr05 | 11853090                | C/T  | Gene_Ca_17111      | INTRON                        | ABC transporter,trans membrane domain      |
| Kabuli_wild_11864959 | 1399938583                          | Ca_kabuli_Chr05 | 11864959                | T/C  | Gene_Ca_17110      | NON_SYNONYMOUS_CODING         | Zinc finger,CCHC-type                      |
| Kabuli_wild_11983063 | 1399938584                          | Ca_kabuli_Chr05 | 11983063                | A/C  | Gene_Ca_17105      | UPSTREAM                      | Pentatrico peptide repeat                  |
| Kabuli_wild_11983126 | 1399938585                          | Ca_kabuli_Chr05 | 11983126                | A/T  | Gene_Ca_17105      | UPSTREAM                      | Pentatrico peptide repeat                  |
| Kabuli_wild_11983214 | 1399938586                          | Ca_kabuli_Chr05 | 11983214                | A/C  | Gene_Ca_17105      | UPSTREAM                      | Pentatrico peptide repeat                  |
| Kabuli_wild_12157678 | 1399938587                          | Ca_kabuli_Chr05 | 12157678                | A/G  | NA                 | INTERGENIC                    | NA                                         |
| Kabuli_wild_12157688 | 1399938588                          | Ca_kabuli_Chr05 | 12157688                | C/T  | NA                 | INTERGENIC                    | NA                                         |
| Kabuli_wild_12157699 | 1399938589                          | Ca_kabuli_Chr05 | 12157699                | G/T  | NA                 | INTERGENIC                    | NA                                         |
| Kabuli_wild_12157728 | 1399938590                          | Ca_kabuli_Chr05 | 12157728                | C/T  | NA                 | INTERGENIC                    | NA                                         |
| Kabuli_wild_12157729 | 1399938591                          | Ca_kabuli_Chr05 | 12157729                | G/A  | NA                 | INTERGENIC                    | NA                                         |
| Kabuli_wild_12157783 | 1399938592                          | Ca_kabuli_Chr05 | 12157783                | T/C  | NA                 | INTERGENIC                    | NA                                         |
| Kabuli_wild_12157787 | 1399938593                          | Ca_kabuli_Chr05 | 12157787                | A/C  | NA                 | INTERGENIC                    | NA                                         |
| Kabuli_wild_12162160 | 1399938594                          | Ca_kabuli_Chr05 | 12162160                | G/A  | NA                 | INTERGENIC                    | NA                                         |
| Kabuli_wild_12162205 | 1399938595                          | Ca_kabuli_Chr05 | 12162205                | A/C  | NA                 | INTERGENIC                    | NA                                         |
| Kabuli_wild_12162213 | 1399938596                          | Ca_kabuli_Chr05 | 12162213                | C/T  | NA                 | INTERGENIC                    | NA                                         |
| Kabuli_wild_12210122 | 1399938597                          | Ca_kabuli_Chr05 | 12210122                | G/A  | NA                 | INTERGENIC                    | NA                                         |
| Kabuli_wild_12247539 | 1399938598                          | Ca_kabuli_Chr05 | 12247539                | C/A  | NA                 | INTERGENIC                    | NA                                         |
| Kabuli_wild_12461965 | 1399938599                          | Ca_kabuli_Chr05 | 12461965                | G/A  | NA                 | INTERGENIC                    | NA                                         |
| Kabuli_wild_12463017 | 1399938600                          | Ca_kabuli_Chr05 | 12463017                | G/A  | NA                 | INTERGENIC                    | NA                                         |
| Kabuli_wild_12480948 | 1399938601                          | Ca_kabuli_Chr05 | 12480948                | T/G  | Gene_Ca_17080      | INTRON                        | Choline/ethanolaminekinase                 |
| Kabuli_wild_12553469 | 1399938602                          | Ca_kabuli_Chr05 | 12553469                | A/C  | Gene_Ca_17074      | UPSTREAM                      | NA                                         |
| Kabuli_wild_12553470 | 1399938603                          | Ca_kabuli_Chr05 | 12553470                | G/C  | Gene_Ca_17074      | UPSTREAM                      | NA                                         |
| Kabuli_wild_12590478 | 1399938604                          | Ca_kabuli_Chr05 | 12590478                | T/C  | Gene_Ca_17072      | SYNONYMOUS_CODING             | Glycerophosphoryldiester phosphodiesterase |
| Kabuli_wild_12590512 | 1399938605                          | Ca_kabuli_Chr05 | 12590512                | G/A  | Gene_Ca_17072      | SYNONYMOUS_CODING             | Glycerophosphoryldiester phosphodiesterase |
| Kabuli_wild_12648059 | 1399938606                          | Ca_kabuli_Chr05 | 12648059                | A/C  | Gene_Ca_17067      | NON_SYNONYMOUS_CODING         | Protein kinase,catalytic domain            |
| Kabuli_wild_12662138 | 1399938607                          | Ca_kabuli_Chr05 | 12662138                | G/T  | Gene_Ca_17066      | INTRON                        | Protein kinase,catalytic domain            |
| Kabuli_wild_13982000 | 1399938608                          | Ca_kabuli_Chr05 | 13982000                | T/G  | Gene_Ca_20821      | NON_SYNONYMOUS_CODING         | Protein kinase,catalytic domain            |
| Kabuli_wild_13982041 | 1399938609                          | Ca_kabuli_Chr05 | 13982041                | C/T  | Gene_Ca_20821      | SYNONYMOUS_CODING             | Protein kinase,catalytic domain            |
| Kabuli_wild_14108868 | 1399938610                          | Ca_kabuli_Chr05 | 14108868                | C/T  | Gene_Ca_20826      | DOWNSTREAM                    | Short-chaindehydrogenase/reductaseSDR      |
| Kabuli_wild_14425390 | 1399938611                          | Ca_kabuli_Chr05 | 14425390                | C/T  | NA                 | INTERGENIC                    | NA                                         |
| Kabuli_wild_14425420 | 1399938612                          | Ca_kabuli_Chr05 | 14425420                | G/A  | NA                 | INTERGENIC                    | NA                                         |
| Kabuli_wild_14425421 | 1399938613                          | Ca_kabuli_Chr05 | 14425421                | C/T  | NA                 | INTERGENIC                    | NA                                         |
| Kabuli_wild_15476405 | 1399938614                          | Ca_kabuli_Chr05 | 15476405                | T/A  | Gene_Ca_21644      | DOWNSTREAM                    | NA                                         |
| Kabuli_wild_15524860 | 1399938615                          | Ca_kabuli_Chr05 | 15524860                | A/G  | NA                 | INTERGENIC                    | NA                                         |
| Kabuli_wild_15524885 | 1399938616                          | Ca_kabuli_Chr05 | 15524885                | C/G  | NA                 | INTERGENIC                    | NA                                         |
| Kabuli_wild_15524904 | 1399938617                          | Ca_kabuli_Chr05 | 15524904                | C/A  | NA                 | INTERGENIC                    | NA                                         |
| Kabuli_wild_15524907 | 1399938618                          | Ca_kabuli_Chr05 | 15524907                | G/C  | NA                 | INTERGENIC                    | NA                                         |
| Kabuli_wild_15780122 | 1399938619                          | Ca_kabuli_Chr05 | 15780122                | T/A  | Gene_Ca_26865      | INTRON                        | RNA recognition motif domain               |
| Kabuli_wild_15952395 | 1399938620                          | Ca_kabuli_Chr05 | 15952395                | C/T  | NA                 | INTERGENIC                    | NA                                         |
| Kabuli_wild_16152881 | 1399938621                          | Ca_kabuli_Chr05 | 16152881                | C/T  | NA                 | INTERGENIC                    | NA                                         |
| Kabuli_wild_16152933 | 1399938622                          | Ca_kabuli_Chr05 | 16152933                | A/C  | NA                 | INTERGENIC                    | NA                                         |
| Kabuli_wild_16152934 | 1399938623                          | Ca_kabuli_Chr05 | 16152934                | G/A  | NA                 | INTERGENIC                    | NA                                         |

| SNP IDs              | NCBI dbSNP accession IDs (NCBI_SS#) | Chromosomes     | Physical positions (bp) | SNPs | Gene accession IDs | Sequence components of genome | Putative functions                       |
|----------------------|-------------------------------------|-----------------|-------------------------|------|--------------------|-------------------------------|------------------------------------------|
| Kabuli_wild_16152935 | 1399938624                          | Ca_kabuli_Chr05 | 16152935                | C/T  | NA                 | INTERGENIC                    | NA                                       |
| Kabuli_wild_16227319 | 1399938625                          | Ca_kabuli_Chr05 | 16227319                | G/T  | Gene_Ca_17915      | SYNONYMOUS_CODING             | Peptidase C48, SUMO/Sentrin/Ubl1         |
| Kabuli_wild_16227342 | 1399938626                          | Ca_kabuli_Chr05 | 16227342                | T/G  | Gene_Ca_17915      | NON_SYNONYMOUS_CODING         | Peptidase C48, SUMO/Sentrin/Ubl1         |
| Kabuli_wild_16227353 | 1399938627                          | Ca_kabuli_Chr05 | 16227353                | G/A  | Gene_Ca_17915      | NON_SYNONYMOUS_CODING         | Peptidase C48, SUMO/Sentrin/Ubl1         |
| Kabuli_wild_16227355 | 1399938628                          | Ca_kabuli_Chr05 | 16227355                | C/T  | Gene_Ca_17915      | SYNONYMOUS_CODING             | Peptidase C48, SUMO/Sentrin/Ubl1         |
| Kabuli_wild_16227357 | 1399938629                          | Ca_kabuli_Chr05 | 16227357                | C/A  | Gene_Ca_17915      | NON_SYNONYMOUS_CODING         | Peptidase C48, SUMO/Sentrin/Ubl1         |
| Kabuli_wild_16227358 | 1399938630                          | Ca_kabuli_Chr05 | 16227358                | G/A  | Gene_Ca_17915      | SYNONYMOUS_CODING             | Peptidase C48, SUMO/Sentrin/Ubl1         |
| Kabuli_wild_16227371 | 1399938631                          | Ca_kabuli_Chr05 | 16227371                | C/T  | Gene_Ca_17915      | NON_SYNONYMOUS_CODING         | Peptidase C48, SUMO/Sentrin/Ubl1         |
| Kabuli_wild_16227401 | 1399938632                          | Ca_kabuli_Chr05 | 16227401                | G/A  | Gene_Ca_17915      | NON_SYNONYMOUS_CODING         | Peptidase C48, SUMO/Sentrin/Ubl1         |
| Kabuli_wild_16227402 | 1399938633                          | Ca_kabuli_Chr05 | 16227402                | C/T  | Gene_Ca_17915      | NON_SYNONYMOUS_CODING         | Peptidase C48, SUMO/Sentrin/Ubl1         |
| Kabuli_wild_16227404 | 1399938634                          | Ca_kabuli_Chr05 | 16227404                | G/A  | Gene_Ca_17915      | NON_SYNONYMOUS_CODING         | Peptidase C48, SUMO/Sentrin/Ubl1         |
| Kabuli_wild_16227449 | 1399938635                          | Ca_kabuli_Chr05 | 16227449                | G/A  | Gene_Ca_17915      | NON_SYNONYMOUS_CODING         | Peptidase C48, SUMO/Sentrin/Ubl1         |
| Kabuli_wild_16227460 | 1399938636                          | Ca_kabuli_Chr05 | 16227460                | A/T  | Gene_Ca_17915      | SYNONYMOUS_CODING             | Peptidase C48, SUMO/Sentrin/Ubl1         |
| Kabuli_wild_16227466 | 1399938637                          | Ca_kabuli_Chr05 | 16227466                | C/T  | Gene_Ca_17915      | SYNONYMOUS_CODING             | Peptidase C48, SUMO/Sentrin/Ubl1         |
| Kabuli_wild_16227468 | 1399938638                          | Ca_kabuli_Chr05 | 16227468                | G/A  | Gene_Ca_17915      | SYNONYMOUS_CODING             | Peptidase C48, SUMO/Sentrin/Ubl1         |
| Kabuli_wild_16227485 | 1399938639                          | Ca_kabuli_Chr05 | 16227485                | G/T  | Gene_Ca_17915      | NON_SYNONYMOUS_CODING         | Peptidase C48, SUMO/Sentrin/Ubl1         |
| Kabuli_wild_16426569 | 1399938640                          | Ca_kabuli_Chr05 | 16426569                | G/A  | NA                 | INTERGENIC                    | NA                                       |
| Kabuli_wild_16426575 | 1399938641                          | Ca_kabuli_Chr05 | 16426575                | G/A  | NA                 | INTERGENIC                    | NA                                       |
| Kabuli_wild_16426642 | 1399938642                          | Ca_kabuli_Chr05 | 16426642                | G/A  | NA                 | INTERGENIC                    | NA                                       |
| Kabuli_wild_16426656 | 1399938643                          | Ca_kabuli_Chr05 | 16426656                | A/G  | NA                 | INTERGENIC                    | NA                                       |
| Kabuli_wild_16426662 | 1399938644                          | Ca_kabuli_Chr05 | 16426662                | C/T  | NA                 | INTERGENIC                    | NA                                       |
| Kabuli_wild_16751536 | 1399938645                          | Ca_kabuli_Chr05 | 16751536                | C/T  | NA                 | INTERGENIC                    | NA                                       |
| Kabuli_wild_16821369 | 1399938646                          | Ca_kabuli_Chr05 | 16821369                | T/G  | NA                 | INTERGENIC                    | NA                                       |
| Kabuli_wild_16848621 | 1399938647                          | Ca_kabuli_Chr05 | 16848621                | G/A  | Gene_Ca_17946      | DOWNSTREAM                    | NA                                       |
| Kabuli_wild_16929860 | 1399938648                          | Ca_kabuli_Chr05 | 16929860                | T/A  | Gene_Ca_17949      | INTRON                        | tRNA-dihydrouridinesynthase              |
| Kabuli_wild_16929897 | 1399938649                          | Ca_kabuli_Chr05 | 16929897                | A/G  | Gene_Ca_17949      | INTRON                        | tRNA-dihydrouridinesynthase              |
| Kabuli_wild_16929903 | 1399938650                          | Ca_kabuli_Chr05 | 16929903                | C/G  | Gene_Ca_17949      | INTRON                        | tRNA-dihydrouridinesynthase              |
| Kabuli_wild_17037918 | 1399938651                          | Ca_kabuli_Chr05 | 17037918                | T/G  | NA                 | INTERGENIC                    | NA                                       |
| Kabuli_wild_17037994 | 1399938652                          | Ca_kabuli_Chr05 | 17037994                | T/G  | NA                 | INTERGENIC                    | NA                                       |
| Kabuli_wild_17044340 | 1399938653                          | Ca_kabuli_Chr05 | 17044340                | G/A  | NA                 | INTERGENIC                    | NA                                       |
| Kabuli_wild_17045235 | 1399938654                          | Ca_kabuli_Chr05 | 17045235                | T/C  | Gene_Ca_17956      | DOWNSTREAM                    | UDP-glucuronosyl/UDP-glucosyltransferase |
| Kabuli_wild_17045244 | 1399938655                          | Ca_kabuli_Chr05 | 17045244                | A/G  | Gene_Ca_17956      | DOWNSTREAM                    | UDP-glucuronosyl/UDP-glucosyltransferase |
| Kabuli_wild_17239611 | 1399938656                          | Ca_kabuli_Chr05 | 17239611                | C/T  | NA                 | INTERGENIC                    | NA                                       |
| Kabuli_wild_17239612 | 1399938657                          | Ca_kabuli_Chr05 | 17239612                | T/C  | NA                 | INTERGENIC                    | NA                                       |
| Kabuli_wild_17494672 | 1399938658                          | Ca_kabuli_Chr05 | 17494672                | C/T  | NA                 | INTERGENIC                    | NA                                       |
| Kabuli_wild_17494676 | 1399938659                          | Ca_kabuli_Chr05 | 17494676                | A/G  | NA                 | INTERGENIC                    | NA                                       |
| Kabuli_wild_17494697 | 1399938660                          | Ca_kabuli_Chr05 | 17494697                | C/T  | NA                 | INTERGENIC                    | NA                                       |
| Kabuli_wild_17494699 | 1399938661                          | Ca_kabuli_Chr05 | 17494699                | C/A  | NA                 | INTERGENIC                    | NA                                       |
| Kabuli_wild_17494700 | 1399938662                          | Ca_kabuli_Chr05 | 17494700                | T/C  | NA                 | INTERGENIC                    | NA                                       |
| Kabuli_wild_17494702 | 1399938663                          | Ca_kabuli_Chr05 | 17494702                | G/A  | NA                 | INTERGENIC                    | NA                                       |
| Kabuli_wild_17494714 | 1399938664                          | Ca_kabuli_Chr05 | 17494714                | A/G  | NA                 | INTERGENIC                    | NA                                       |
| Kabuli_wild_18044808 | 1399938665                          | Ca_kabuli_Chr05 | 18044808                | C/G  | NA                 | INTERGENIC                    | NA                                       |
| Kabuli_wild_18288260 | 1399938666                          | Ca_kabuli_Chr05 | 18288260                | A/G  | NA                 | INTERGENIC                    | NA                                       |
| Kabuli_wild_18664706 | 1399938667                          | Ca_kabuli_Chr05 | 18664706                | C/T  | Gene_Ca_24483      | NON_SYNONYMOUS_CODING         | NA                                       |



| SNP IDs              | NCBI dbSNP accession IDs (NCBI_SS#) | Chromosomes       | Physical positions (bp) | SNPs | Gene accession IDs | Sequence components of genome | Putative functions               |
|----------------------|-------------------------------------|-------------------|-------------------------|------|--------------------|-------------------------------|----------------------------------|
| Kabuli_wild_18664816 | 1399938668                          | Ca_kabuli_Chrom05 | 18664816                | A/T  | Gene_Ca_24483      | NON_SYNONYMOUS_CODING         | NA                               |
| Kabuli_wild_18665097 | 1399938669                          | Ca_kabuli_Chrom05 | 18665097                | C/T  | Gene_Ca_24483      | SYNONYMOUS_CODING             | NA                               |
| Kabuli_wild_18682788 | 1399938670                          | Ca_kabuli_Chrom05 | 18682788                | A/C  | NA                 | INTERGENIC                    | NA                               |
| Kabuli_wild_18682792 | 1399938671                          | Ca_kabuli_Chrom05 | 18682792                | T/C  | NA                 | INTERGENIC                    | NA                               |
| Kabuli_wild_18682793 | 1399938672                          | Ca_kabuli_Chrom05 | 18682793                | A/G  | NA                 | INTERGENIC                    | NA                               |
| Kabuli_wild_18682794 | 1399938673                          | Ca_kabuli_Chrom05 | 18682794                | A/G  | NA                 | INTERGENIC                    | NA                               |
| Kabuli_wild_18682812 | 1399938674                          | Ca_kabuli_Chrom05 | 18682812                | A/G  | NA                 | INTERGENIC                    | NA                               |
| Kabuli_wild_18682814 | 1399938675                          | Ca_kabuli_Chrom05 | 18682814                | T/A  | NA                 | INTERGENIC                    | NA                               |
| Kabuli_wild_18682822 | 1399938676                          | Ca_kabuli_Chrom05 | 18682822                | A/G  | NA                 | INTERGENIC                    | NA                               |
| Kabuli_wild_18682827 | 1399938677                          | Ca_kabuli_Chrom05 | 18682827                | C/G  | NA                 | INTERGENIC                    | NA                               |
| Kabuli_wild_18682830 | 1399938678                          | Ca_kabuli_Chrom05 | 18682830                | G/A  | NA                 | INTERGENIC                    | NA                               |
| Kabuli_wild_18682834 | 1399938679                          | Ca_kabuli_Chrom05 | 18682834                | A/G  | NA                 | INTERGENIC                    | NA                               |
| Kabuli_wild_18682840 | 1399938680                          | Ca_kabuli_Chrom05 | 18682840                | T/C  | NA                 | INTERGENIC                    | NA                               |
| Kabuli_wild_18682843 | 1399938681                          | Ca_kabuli_Chrom05 | 18682843                | G/C  | NA                 | INTERGENIC                    | NA                               |
| Kabuli_wild_18682849 | 1399938682                          | Ca_kabuli_Chrom05 | 18682849                | T/C  | NA                 | INTERGENIC                    | NA                               |
| Kabuli_wild_18684334 | 1399938683                          | Ca_kabuli_Chrom05 | 18684334                | C/T  | NA                 | INTERGENIC                    | NA                               |
| Kabuli_wild_18971085 | 1399938684                          | Ca_kabuli_Chrom05 | 18971085                | G/A  | NA                 | INTERGENIC                    | NA                               |
| Kabuli_wild_18971088 | 1399938685                          | Ca_kabuli_Chrom05 | 18971088                | C/A  | NA                 | INTERGENIC                    | NA                               |
| Kabuli_wild_18971091 | 1399938686                          | Ca_kabuli_Chrom05 | 18971091                | T/G  | NA                 | INTERGENIC                    | NA                               |
| Kabuli_wild_18971101 | 1399938687                          | Ca_kabuli_Chrom05 | 18971101                | T/G  | NA                 | INTERGENIC                    | NA                               |
| Kabuli_wild_18971263 | 1399938688                          | Ca_kabuli_Chrom05 | 18971263                | G/C  | NA                 | INTERGENIC                    | NA                               |
| Kabuli_wild_19383304 | 1399938689                          | Ca_kabuli_Chrom05 | 19383304                | A/C  | NA                 | INTERGENIC                    | NA                               |
| Kabuli_wild_19421820 | 1399938690                          | Ca_kabuli_Chrom05 | 19421820                | C/T  | Gene_Ca_23514      | NON_SYNONYMOUS_CODING         | Peptidase C48, SUMO/Sentrin/Ubl1 |
| Kabuli_wild_19421868 | 1399938691                          | Ca_kabuli_Chrom05 | 19421868                | C/T  | Gene_Ca_23514      | NON_SYNONYMOUS_CODING         | Peptidase C48, SUMO/Sentrin/Ubl1 |
| Kabuli_wild_19421946 | 1399938692                          | Ca_kabuli_Chrom05 | 19421946                | T/C  | Gene_Ca_23514      | NON_SYNONYMOUS_CODING         | Peptidase C48, SUMO/Sentrin/Ubl1 |
| Kabuli_wild_19423339 | 1399938693                          | Ca_kabuli_Chrom05 | 19423339                | G/A  | NA                 | INTERGENIC                    | NA                               |
| Kabuli_wild_19423342 | 1399938694                          | Ca_kabuli_Chrom05 | 19423342                | G/A  | NA                 | INTERGENIC                    | NA                               |
| Kabuli_wild_19423358 | 1399938695                          | Ca_kabuli_Chrom05 | 19423358                | G/A  | NA                 | INTERGENIC                    | NA                               |
| Kabuli_wild_19423382 | 1399938696                          | Ca_kabuli_Chrom05 | 19423382                | G/C  | NA                 | INTERGENIC                    | NA                               |
| Kabuli_wild_19828124 | 1399938697                          | Ca_kabuli_Chrom05 | 19828124                | G/A  | NA                 | INTERGENIC                    | NA                               |
| Kabuli_wild_19828135 | 1399938698                          | Ca_kabuli_Chrom05 | 19828135                | A/G  | NA                 | INTERGENIC                    | NA                               |
| Kabuli_wild_19828142 | 1399938699                          | Ca_kabuli_Chrom05 | 19828142                | A/G  | NA                 | INTERGENIC                    | NA                               |
| Kabuli_wild_19828151 | 1399938700                          | Ca_kabuli_Chrom05 | 19828151                | C/A  | NA                 | INTERGENIC                    | NA                               |
| Kabuli_wild_19828154 | 1399938701                          | Ca_kabuli_Chrom05 | 19828154                | C/T  | NA                 | INTERGENIC                    | NA                               |
| Kabuli_wild_19828163 | 1399938702                          | Ca_kabuli_Chrom05 | 19828163                | T/C  | NA                 | INTERGENIC                    | NA                               |
| Kabuli_wild_19828166 | 1399938703                          | Ca_kabuli_Chrom05 | 19828166                | C/T  | NA                 | INTERGENIC                    | NA                               |
| Kabuli_wild_19828167 | 1399938704                          | Ca_kabuli_Chrom05 | 19828167                | A/C  | NA                 | INTERGENIC                    | NA                               |
| Kabuli_wild_19828172 | 1399938705                          | Ca_kabuli_Chrom05 | 19828172                | T/G  | NA                 | INTERGENIC                    | NA                               |
| Kabuli_wild_19828190 | 1399938706                          | Ca_kabuli_Chrom05 | 19828190                | T/C  | NA                 | INTERGENIC                    | NA                               |
| Kabuli_wild_19828203 | 1399938707                          | Ca_kabuli_Chrom05 | 19828203                | C/A  | NA                 | INTERGENIC                    | NA                               |
| Kabuli_wild_19828226 | 1399938708                          | Ca_kabuli_Chrom05 | 19828226                | G/A  | NA                 | INTERGENIC                    | NA                               |
| Kabuli_wild_19884124 | 1399938709                          | Ca_kabuli_Chrom05 | 19884124                | A/G  | Gene_Ca_22815      | INTRON                        | Vps16,C-terminal                 |
| Kabuli_wild_19884132 | 1399938710                          | Ca_kabuli_Chrom05 | 19884132                | C/T  | Gene_Ca_22815      | INTRON                        | Vps16,C-terminal                 |
| Kabuli_wild_20354352 | 1399938711                          | Ca_kabuli_Chrom05 | 20354352                | T/C  | NA                 | INTERGENIC                    | NA                               |

| SNP IDs              | NCBI dbSNP accession IDs (NCBI_SS#) | Chromosomes     | Physical positions (bp) | SNPs | Gene accession IDs | Sequence components of genome | Putative functions                                     |
|----------------------|-------------------------------------|-----------------|-------------------------|------|--------------------|-------------------------------|--------------------------------------------------------|
| Kabuli_wild_20460859 | 1399938712                          | Ca_kabuli_Chr05 | 20460859                | T/G  | Gene_Ca_18208      | NON_SYNONYMOUS_CODING         | TetratricopeptideTPR-1                                 |
| Kabuli_wild_20493370 | 1399938713                          | Ca_kabuli_Chr05 | 20493370                | C/T  | Gene_Ca_18211      | DOWNSTREAM                    | NA                                                     |
| Kabuli_wild_20493429 | 1399938714                          | Ca_kabuli_Chr05 | 20493429                | A/G  | Gene_Ca_18211      | DOWNSTREAM                    | NA                                                     |
| Kabuli_wild_20546385 | 1399938715                          | Ca_kabuli_Chr05 | 20546385                | T/G  | NA                 | INTERGENIC                    | NA                                                     |
| Kabuli_wild_20546402 | 1399938716                          | Ca_kabuli_Chr05 | 20546402                | T/C  | NA                 | INTERGENIC                    | NA                                                     |
| Kabuli_wild_20644984 | 1399938717                          | Ca_kabuli_Chr05 | 20644984                | C/A  | Gene_Ca_18219      | NON_SYNONYMOUS_CODING         | Amidase                                                |
| Kabuli_wild_21163371 | 1399938718                          | Ca_kabuli_Chr05 | 21163371                | G/A  | NA                 | INTERGENIC                    | NA                                                     |
| Kabuli_wild_21385948 | 1399938719                          | Ca_kabuli_Chr05 | 21385948                | T/C  | Gene_Ca_18243      | SYNONYMOUS_CODING             | Signal transduction response regulator, receiverdomain |
| Kabuli_wild_21495508 | 1399938720                          | Ca_kabuli_Chr05 | 21495508                | G/A  | NA                 | INTERGENIC                    | NA                                                     |
| Kabuli_wild_21495562 | 1399938721                          | Ca_kabuli_Chr05 | 21495562                | C/T  | NA                 | INTERGENIC                    | NA                                                     |
| Kabuli_wild_21495583 | 1399938722                          | Ca_kabuli_Chr05 | 21495583                | C/A  | NA                 | INTERGENIC                    | NA                                                     |
| Kabuli_wild_21495631 | 1399938723                          | Ca_kabuli_Chr05 | 21495631                | C/T  | NA                 | INTERGENIC                    | NA                                                     |
| Kabuli_wild_21495672 | 1399938724                          | Ca_kabuli_Chr05 | 21495672                | G/A  | NA                 | INTERGENIC                    | NA                                                     |
| Kabuli_wild_21495674 | 1399938725                          | Ca_kabuli_Chr05 | 21495674                | G/A  | NA                 | INTERGENIC                    | NA                                                     |
| Kabuli_wild_21495679 | 1399938726                          | Ca_kabuli_Chr05 | 21495679                | G/A  | NA                 | INTERGENIC                    | NA                                                     |
| Kabuli_wild_21495707 | 1399938727                          | Ca_kabuli_Chr05 | 21495707                | A/G  | NA                 | INTERGENIC                    | NA                                                     |
| Kabuli_wild_22065518 | 1399938728                          | Ca_kabuli_Chr05 | 22065518                | C/T  | Gene_Ca_21161      | INTRON                        | NA                                                     |
| Kabuli_wild_22065859 | 1399938729                          | Ca_kabuli_Chr05 | 22065859                | A/G  | Gene_Ca_21161      | SYNONYMOUS_CODING             | NA                                                     |
| Kabuli_wild_22115925 | 1399938730                          | Ca_kabuli_Chr05 | 22115925                | T/G  | NA                 | INTERGENIC                    | NA                                                     |
| Kabuli_wild_22116961 | 1399938731                          | Ca_kabuli_Chr05 | 22116961                | T/G  | NA                 | INTERGENIC                    | NA                                                     |
| Kabuli_wild_22302338 | 1399938732                          | Ca_kabuli_Chr05 | 22302338                | G/A  | Gene_Ca_21151      | NON_SYNONYMOUS_CODING         | Ribosome60SbiogenesisN-terminal                        |
| Kabuli_wild_22302350 | 1399938733                          | Ca_kabuli_Chr05 | 22302350                | C/A  | Gene_Ca_21151      | NON_SYNONYMOUS_CODING         | Ribosome60SbiogenesisN-terminal                        |
| Kabuli_wild_22344868 | 1399938734                          | Ca_kabuli_Chr05 | 22344868                | A/G  | Gene_Ca_21149      | SYNONYMOUS_CODING             | NA                                                     |
| Kabuli_wild_22526689 | 1399938735                          | Ca_kabuli_Chr05 | 22526689                | A/G  | Gene_Ca_20087      | INTRON                        | NA                                                     |
| Kabuli_wild_22627341 | 1399938736                          | Ca_kabuli_Chr05 | 22627341                | A/C  | Gene_Ca_20079      | SYNONYMOUS_CODING             | Bromodomain                                            |
| Kabuli_wild_22657146 | 1399938737                          | Ca_kabuli_Chr05 | 22657146                | T/C  | Gene_Ca_20077      | DOWNSTREAM                    | NA                                                     |
| Kabuli_wild_22679380 | 1399938738                          | Ca_kabuli_Chr05 | 22679380                | C/A  | NA                 | INTERGENIC                    | NA                                                     |
| Kabuli_wild_22679381 | 1399938739                          | Ca_kabuli_Chr05 | 22679381                | G/T  | NA                 | INTERGENIC                    | NA                                                     |
| Kabuli_wild_22690192 | 1399938740                          | Ca_kabuli_Chr05 | 22690192                | A/G  | NA                 | INTERGENIC                    | NA                                                     |
| Kabuli_wild_22690194 | 1399938741                          | Ca_kabuli_Chr05 | 22690194                | T/G  | NA                 | INTERGENIC                    | NA                                                     |
| Kabuli_wild_22699980 | 1399938742                          | Ca_kabuli_Chr05 | 22699980                | A/G  | Gene_Ca_20068      | DOWNSTREAM                    | ATPase,F0complex,subunitB,mitochondrial                |
| Kabuli_wild_22699982 | 1399938743                          | Ca_kabuli_Chr05 | 22699982                | T/G  | Gene_Ca_20068      | DOWNSTREAM                    | ATPase,F0complex,subunitB,mitochondrial                |
| Kabuli_wild_23049683 | 1399938744                          | Ca_kabuli_Chr05 | 23049683                | C/A  | Gene_Ca_21972      | DOWNSTREAM                    | Target SNARE coiled-coildomain                         |
| Kabuli_wild_23151998 | 1399938745                          | Ca_kabuli_Chr05 | 23151998                | G/T  | Gene_Ca_21977      | INTRON                        | Zinc finger,PHD-type                                   |
| Kabuli_wild_23152038 | 1399938746                          | Ca_kabuli_Chr05 | 23152038                | A/C  | Gene_Ca_21977      | INTRON                        | Zinc finger,PHD-type                                   |
| Kabuli_wild_23157944 | 1399938747                          | Ca_kabuli_Chr05 | 23157944                | A/C  | Gene_Ca_21977      | INTRON                        | Zinc finger,PHD-type                                   |
| Kabuli_wild_23161492 | 1399938748                          | Ca_kabuli_Chr05 | 23161492                | A/T  | Gene_Ca_21977      | SYNONYMOUS_CODING             | Zinc finger,PHD-type                                   |
| Kabuli_wild_23162705 | 1399938749                          | Ca_kabuli_Chr05 | 23162705                | T/G  | NA                 | INTERGENIC                    | NA                                                     |
| Kabuli_wild_23162727 | 1399938750                          | Ca_kabuli_Chr05 | 23162727                | A/G  | NA                 | INTERGENIC                    | NA                                                     |
| Kabuli_wild_23262157 | 1399938751                          | Ca_kabuli_Chr05 | 23262157                | T/C  | NA                 | INTERGENIC                    | NA                                                     |
| Kabuli_wild_23323541 | 1399938752                          | Ca_kabuli_Chr05 | 23323541                | A/T  | NA                 | INTERGENIC                    | NA                                                     |
| Kabuli_wild_23560225 | 1399938753                          | Ca_kabuli_Chr05 | 23560225                | G/A  | NA                 | INTERGENIC                    | NA                                                     |
| Kabuli_wild_23561851 | 1399938754                          | Ca_kabuli_Chr05 | 23561851                | A/G  | Gene_Ca_17690      | INTRON                        | NA                                                     |
| Kabuli_wild_23562152 | 1399938755                          | Ca_kabuli_Chr05 | 23562152                | T/G  | Gene_Ca_17690      | INTRON                        | NA                                                     |

| SNP IDs              | NCBI dbSNP accession IDs (NCBI_SS#) | Chromosomes     | Physical positions (bp) | SNPs | Gene accession IDs | Sequence components of genome | Putative functions                   |
|----------------------|-------------------------------------|-----------------|-------------------------|------|--------------------|-------------------------------|--------------------------------------|
| Kabuli_wild_23562203 | 1399938756                          | Ca_kabuli_Chr05 | 23562203                | C/T  | Gene_Ca_17690      | NON_SYNONYMOUS_CODING         | NA                                   |
| Kabuli_wild_23562467 | 1399938757                          | Ca_kabuli_Chr05 | 23562467                | A/G  | Gene_Ca_17690      | NON_SYNONYMOUS_CODING         | NA                                   |
| Kabuli_wild_23562482 | 1399938758                          | Ca_kabuli_Chr05 | 23562482                | G/A  | Gene_Ca_17690      | NON_SYNONYMOUS_CODING         | NA                                   |
| Kabuli_wild_23562595 | 1399938759                          | Ca_kabuli_Chr05 | 23562595                | G/A  | Gene_Ca_17690      | NON_SYNONYMOUS_CODING         | NA                                   |
| Kabuli_wild_23562827 | 1399938760                          | Ca_kabuli_Chr05 | 23562827                | G/A  | Gene_Ca_17690      | INTRON                        | NA                                   |
| Kabuli_wild_23564746 | 1399938761                          | Ca_kabuli_Chr05 | 23564746                | A/T  | NA                 | INTERGENIC                    | NA                                   |
| Kabuli_wild_23664529 | 1399938762                          | Ca_kabuli_Chr05 | 23664529                | T/C  | NA                 | INTERGENIC                    | NA                                   |
| Kabuli_wild_23674814 | 1399938763                          | Ca_kabuli_Chr05 | 23674814                | C/G  | NA                 | INTERGENIC                    | NA                                   |
| Kabuli_wild_23674815 | 1399938764                          | Ca_kabuli_Chr05 | 23674815                | C/T  | NA                 | INTERGENIC                    | NA                                   |
| Kabuli_wild_23674845 | 1399938765                          | Ca_kabuli_Chr05 | 23674845                | G/C  | NA                 | INTERGENIC                    | NA                                   |
| Kabuli_wild_23709142 | 1399938766                          | Ca_kabuli_Chr05 | 23709142                | T/C  | NA                 | INTERGENIC                    | NA                                   |
| Kabuli_wild_24090515 | 1399938767                          | Ca_kabuli_Chr05 | 24090515                | A/C  | Gene_Ca_17656      | DOWNSTREAM                    | Protein of unknown function DUF3437  |
| Kabuli_wild_24090523 | 1399938768                          | Ca_kabuli_Chr05 | 24090523                | A/C  | Gene_Ca_17656      | DOWNSTREAM                    | Protein of unknown function DUF3437  |
| Kabuli_wild_24090533 | 1399938769                          | Ca_kabuli_Chr05 | 24090533                | C/T  | Gene_Ca_17656      | DOWNSTREAM                    | Protein of unknown function DUF3437  |
| Kabuli_wild_24090749 | 1399938770                          | Ca_kabuli_Chr05 | 24090749                | A/C  | Gene_Ca_17656      | DOWNSTREAM                    | Protein of unknown function DUF3437  |
| Kabuli_wild_24107319 | 1399938771                          | Ca_kabuli_Chr05 | 24107319                | A/G  | Gene_Ca_17656      | INTRON                        | Protein of unknown function DUF3437  |
| Kabuli_wild_24153138 | 1399938772                          | Ca_kabuli_Chr05 | 24153138                | G/A  | Gene_Ca_17653      | NON_SYNONYMOUS_CODING         | Protein of unknown function DUF3437  |
| Kabuli_wild_24153158 | 1399938773                          | Ca_kabuli_Chr05 | 24153158                | C/T  | Gene_Ca_17653      | SYNONYMOUS_CODING             | Protein of unknown function DUF3437  |
| Kabuli_wild_24153199 | 1399938774                          | Ca_kabuli_Chr05 | 24153199                | C/T  | Gene_Ca_17653      | NON_SYNONYMOUS_CODING         | Protein of unknown function DUF3437  |
| Kabuli_wild_24153202 | 1399938775                          | Ca_kabuli_Chr05 | 24153202                | A/C  | Gene_Ca_17653      | NON_SYNONYMOUS_CODING         | Protein of unknown function DUF3437  |
| Kabuli_wild_24153205 | 1399938776                          | Ca_kabuli_Chr05 | 24153205                | T/C  | Gene_Ca_17653      | NON_SYNONYMOUS_CODING         | Protein of unknown function DUF3437  |
| Kabuli_wild_24153273 | 1399938777                          | Ca_kabuli_Chr05 | 24153273                | T/C  | Gene_Ca_17653      | NON_SYNONYMOUS_CODING         | Protein of unknown function DUF3437  |
| Kabuli_wild_24165982 | 1399938778                          | Ca_kabuli_Chr05 | 24165982                | G/A  | Gene_Ca_17652      | INTRON                        | Protein of unknown function DUF3437  |
| Kabuli_wild_24165995 | 1399938779                          | Ca_kabuli_Chr05 | 24165995                | A/G  | Gene_Ca_17652      | INTRON                        | Protein of unknown function DUF3437  |
| Kabuli_wild_24166003 | 1399938780                          | Ca_kabuli_Chr05 | 24166003                | T/C  | Gene_Ca_17652      | INTRON                        | Protein of unknown function DUF3437  |
| Kabuli_wild_24166015 | 1399938781                          | Ca_kabuli_Chr05 | 24166015                | G/T  | Gene_Ca_17652      | INTRON                        | Protein of unknown function DUF3437  |
| Kabuli_wild_24166046 | 1399938782                          | Ca_kabuli_Chr05 | 24166046                | G/A  | Gene_Ca_17652      | INTRON                        | Protein of unknown function DUF3437  |
| Kabuli_wild_24166047 | 1399938783                          | Ca_kabuli_Chr05 | 24166047                | C/T  | Gene_Ca_17652      | INTRON                        | Protein of unknown function DUF3437  |
| Kabuli_wild_24166082 | 1399938784                          | Ca_kabuli_Chr05 | 24166082                | G/A  | Gene_Ca_17652      | INTRON                        | Protein of unknown function DUF3437  |
| Kabuli_wild_24166095 | 1399938785                          | Ca_kabuli_Chr05 | 24166095                | G/A  | Gene_Ca_17652      | INTRON                        | Protein of unknown function DUF3437  |
| Kabuli_wild_24166103 | 1399938786                          | Ca_kabuli_Chr05 | 24166103                | C/T  | Gene_Ca_17652      | INTRON                        | Protein of unknown function DUF3437  |
| Kabuli_wild_24176199 | 1399938787                          | Ca_kabuli_Chr05 | 24176199                | G/A  | Gene_Ca_17652      | INTRON                        | Protein of unknown function DUF3437  |
| Kabuli_wild_24181228 | 1399938788                          | Ca_kabuli_Chr05 | 24181228                | C/A  | Gene_Ca_17652      | INTRON                        | Protein of unknown function DUF3437  |
| Kabuli_wild_24181232 | 1399938789                          | Ca_kabuli_Chr05 | 24181232                | A/C  | Gene_Ca_17652      | INTRON                        | Protein of unknown function DUF3437  |
| Kabuli_wild_24245308 | 1399938790                          | Ca_kabuli_Chr05 | 24245308                | C/A  | Gene_Ca_15567      | INTRON                        | Protein of unknown function DUF3437  |
| Kabuli_wild_24245312 | 1399938791                          | Ca_kabuli_Chr05 | 24245312                | A/C  | Gene_Ca_15567      | INTRON                        | Protein of unknown function DUF3437  |
| Kabuli_wild_24453088 | 1399938792                          | Ca_kabuli_Chr05 | 24453088                | A/C  | Gene_Ca_15581      | SYNONYMOUS_CODING             | Neutral/alkalinenonlysomalceramidase |
| Kabuli_wild_24576960 | 1399938793                          | Ca_kabuli_Chr05 | 24576960                | C/T  | NA                 | INTERGENIC                    | NA                                   |
| Kabuli_wild_24576970 | 1399938794                          | Ca_kabuli_Chr05 | 24576970                | A/G  | NA                 | INTERGENIC                    | NA                                   |
| Kabuli_wild_24576993 | 1399938795                          | Ca_kabuli_Chr05 | 24576993                | T/G  | NA                 | INTERGENIC                    | NA                                   |
| Kabuli_wild_24724942 | 1399938796                          | Ca_kabuli_Chr05 | 24724942                | T/A  | NA                 | INTERGENIC                    | NA                                   |
| Kabuli_wild_24822661 | 1399938797                          | Ca_kabuli_Chr05 | 24822661                | T/C  | NA                 | INTERGENIC                    | NA                                   |
| Kabuli_wild_24830048 | 1399938798                          | Ca_kabuli_Chr05 | 24830048                | G/C  | NA                 | INTERGENIC                    | NA                                   |
| Kabuli_wild_24843015 | 1399938799                          | Ca_kabuli_Chr05 | 24843015                | G/T  | NA                 | INTERGENIC                    | NA                                   |

| SNP IDs              | NCBI dbSNP accession IDs (NCBI_SS#) | Chromosomes      | Physical positions (bp) | SNPs | Gene accession IDs | Sequence components of genome | Putative functions                                |
|----------------------|-------------------------------------|------------------|-------------------------|------|--------------------|-------------------------------|---------------------------------------------------|
| Kabuli_wild_25006250 | 1399938800                          | Ca_kabuli_Chrom5 | 25006250                | C/A  | Gene_Ca_15616      | UPSTREAM                      | RNA-processing protein, HAThelix                  |
| Kabuli_wild_25092157 | 1399938801                          | Ca_kabuli_Chrom5 | 25092157                | T/C  | Gene_Ca_15620      | INTRON                        | Villinheadpiece                                   |
| Kabuli_wild_25121200 | 1399938802                          | Ca_kabuli_Chrom5 | 25121200                | A/G  | Gene_Ca_15623      | DOWNSTREAM                    | Zinc finger, RING-type                            |
| Kabuli_wild_25399115 | 1399938803                          | Ca_kabuli_Chrom5 | 25399115                | T/G  | Gene_Ca_09042      | SYNONYMOUS_CODING             | Zinc finger,CCCH-type                             |
| Kabuli_wild_25399443 | 1399938804                          | Ca_kabuli_Chrom5 | 25399443                | C/A  | Gene_Ca_09042      | NON_SYNONYMOUS_CODING         | Zinc finger,CCCH-type                             |
| Kabuli_wild_25506629 | 1399938805                          | Ca_kabuli_Chrom5 | 25506629                | G/A  | NA                 | INTERGENIC                    | NA                                                |
| Kabuli_wild_25678975 | 1399938806                          | Ca_kabuli_Chrom5 | 25678975                | G/T  | NA                 | INTERGENIC                    | NA                                                |
| Kabuli_wild_25687210 | 1399938807                          | Ca_kabuli_Chrom5 | 25687210                | A/C  | Gene_Ca_09027      | SYNONYMOUS_CODING             | Clathrin,heavychain/VPS,7-foldrepeat              |
| Kabuli_wild_25697487 | 1399938808                          | Ca_kabuli_Chrom5 | 25697487                | C/G  | NA                 | INTERGENIC                    | NA                                                |
| Kabuli_wild_25805020 | 1399938809                          | Ca_kabuli_Chrom5 | 25805020                | A/G  | Gene_Ca_09020      | INTRON                        | Peptidase C48, SUMO/Sentrin/Ubl1                  |
| Kabuli_wild_25805073 | 1399938810                          | Ca_kabuli_Chrom5 | 25805073                | A/C  | Gene_Ca_09020      | INTRON                        | Peptidase C48, SUMO/Sentrin/Ubl1                  |
| Kabuli_wild_26025356 | 1399938811                          | Ca_kabuli_Chrom5 | 26025356                | A/T  | Gene_Ca_09010      | DOWNSTREAM                    | Protein kinase,catalytic domain                   |
| Kabuli_wild_26083559 | 1399938812                          | Ca_kabuli_Chrom5 | 26083559                | T/G  | NA                 | INTERGENIC                    | NA                                                |
| Kabuli_wild_26121156 | 1399938813                          | Ca_kabuli_Chrom5 | 26121156                | G/A  | Gene_Ca_09005      | NON_SYNONYMOUS_CODING         | NA                                                |
| Kabuli_wild_26124240 | 1399938814                          | Ca_kabuli_Chrom5 | 26124240                | T/C  | Gene_Ca_09005      | INTRON                        | NA                                                |
| Kabuli_wild_26238262 | 1399938815                          | Ca_kabuli_Chrom5 | 26238262                | G/A  | Gene_Ca_08997      | DOWNSTREAM                    | NAD-dependentepimerase/dehydratase                |
| Kabuli_wild_26384636 | 1399938816                          | Ca_kabuli_Chrom5 | 26384636                | C/G  | NA                 | INTERGENIC                    | NA                                                |
| Kabuli_wild_26474910 | 1399938817                          | Ca_kabuli_Chrom5 | 26474910                | A/C  | Gene_Ca_08972      | INTRON                        | NA                                                |
| Kabuli_wild_26496197 | 1399938818                          | Ca_kabuli_Chrom5 | 26496197                | A/G  | Gene_Ca_08970      | NON_SYNONYMOUS_CODING         | Aminotransferaseclass-III                         |
| Kabuli_wild_26569443 | 1399938819                          | Ca_kabuli_Chrom5 | 26569443                | A/C  | Gene_Ca_08965      | SYNONYMOUS_CODING             | NA                                                |
| Kabuli_wild_26615934 | 1399938820                          | Ca_kabuli_Chrom5 | 26615934                | C/T  | Gene_Ca_08961      | NON_SYNONYMOUS_CODING         | Armadillo                                         |
| Kabuli_wild_26626855 | 1399938821                          | Ca_kabuli_Chrom5 | 26626855                | T/G  | Gene_Ca_08960      | NON_SYNONYMOUS_CODING         | Aminoacyl-tRNAsynthetase,classI,conservedsite     |
| Kabuli_wild_26679306 | 1399938822                          | Ca_kabuli_Chrom5 | 26679306                | C/T  | NA                 | INTERGENIC                    | NA                                                |
| Kabuli_wild_26679390 | 1399938823                          | Ca_kabuli_Chrom5 | 26679390                | C/T  | NA                 | INTERGENIC                    | NA                                                |
| Kabuli_wild_26679836 | 1399938824                          | Ca_kabuli_Chrom5 | 26679836                | C/T  | NA                 | INTERGENIC                    | NA                                                |
| Kabuli_wild_26696412 | 1399938825                          | Ca_kabuli_Chrom5 | 26696412                | C/A  | NA                 | INTERGENIC                    | NA                                                |
| Kabuli_wild_26696441 | 1399938826                          | Ca_kabuli_Chrom5 | 26696441                | A/T  | NA                 | INTERGENIC                    | NA                                                |
| Kabuli_wild_26696533 | 1399938827                          | Ca_kabuli_Chrom5 | 26696533                | C/T  | NA                 | INTERGENIC                    | NA                                                |
| Kabuli_wild_26696547 | 1399938828                          | Ca_kabuli_Chrom5 | 26696547                | C/T  | NA                 | INTERGENIC                    | NA                                                |
| Kabuli_wild_26696578 | 1399938829                          | Ca_kabuli_Chrom5 | 26696578                | G/A  | NA                 | INTERGENIC                    | NA                                                |
| Kabuli_wild_26696624 | 1399938830                          | Ca_kabuli_Chrom5 | 26696624                | G/A  | NA                 | INTERGENIC                    | NA                                                |
| Kabuli_wild_26785123 | 1399938831                          | Ca_kabuli_Chrom5 | 26785123                | C/A  | NA                 | INTERGENIC                    | NA                                                |
| Kabuli_wild_26785140 | 1399938832                          | Ca_kabuli_Chrom5 | 26785140                | G/A  | NA                 | INTERGENIC                    | NA                                                |
| Kabuli_wild_26997335 | 1399938833                          | Ca_kabuli_Chrom5 | 26997335                | T/G  | NA                 | INTERGENIC                    | NA                                                |
| Kabuli_wild_26999793 | 1399938834                          | Ca_kabuli_Chrom5 | 26999793                | C/T  | NA                 | INTERGENIC                    | NA                                                |
| Kabuli_wild_27000104 | 1399938835                          | Ca_kabuli_Chrom5 | 27000104                | C/A  | NA                 | INTERGENIC                    | NA                                                |
| Kabuli_wild_27000127 | 1399938836                          | Ca_kabuli_Chrom5 | 27000127                | C/G  | NA                 | INTERGENIC                    | NA                                                |
| Kabuli_wild_27000278 | 1399938837                          | Ca_kabuli_Chrom5 | 27000278                | T/A  | NA                 | INTERGENIC                    | NA                                                |
| Kabuli_wild_27000280 | 1399938838                          | Ca_kabuli_Chrom5 | 27000280                | T/G  | NA                 | INTERGENIC                    | NA                                                |
| Kabuli_wild_27117953 | 1399938839                          | Ca_kabuli_Chrom5 | 27117953                | A/G  | Gene_Ca_08929      | INTRON                        | Basic-leucine zipper (bZIP ) Transcription factor |
| Kabuli_wild_27150550 | 1399938840                          | Ca_kabuli_Chrom5 | 27150550                | A/G  | Gene_Ca_08924      | INTRON                        | Transcriptional factor B3                         |
| Kabuli_wild_27189958 | 1399938841                          | Ca_kabuli_Chrom5 | 27189958                | C/T  | Gene_Ca_08921      | DOWNSTREAM                    | GlutathioneS-transferase,N-terminal               |
| Kabuli_wild_27190008 | 1399938842                          | Ca_kabuli_Chrom5 | 27190008                | G/A  | Gene_Ca_08921      | DOWNSTREAM                    | GlutathioneS-transferase,N-terminal               |
| Kabuli_wild_27334056 | 1399938843                          | Ca_kabuli_Chrom5 | 27334056                | A/C  | NA                 | INTERGENIC                    | NA                                                |

| SNP IDs              | NCBI dbSNP accession IDs (NCBI_SS#) | Chromosomes     | Physical positions (bp) | SNPs | Gene accession IDs | Sequence components of genome | Putative functions                  |
|----------------------|-------------------------------------|-----------------|-------------------------|------|--------------------|-------------------------------|-------------------------------------|
| Kabuli_wild_27334057 | 1399938844                          | Ca_kabuli_Chr05 | 27334057                | G/C  | NA                 | INTERGENIC                    | NA                                  |
| Kabuli_wild_27334061 | 1399938845                          | Ca_kabuli_Chr05 | 27334061                | G/C  | NA                 | INTERGENIC                    | NA                                  |
| Kabuli_wild_27361579 | 1399938846                          | Ca_kabuli_Chr05 | 27361579                | T/G  | Gene_Ca_08907      | SYNONYMOUS_CODING             | BTB/POZ-like                        |
| Kabuli_wild_27361668 | 1399938847                          | Ca_kabuli_Chr05 | 27361668                | G/T  | Gene_Ca_08907      | SYNONYMOUS_CODING             | BTB/POZ-like                        |
| Kabuli_wild_27362570 | 1399938848                          | Ca_kabuli_Chr05 | 27362570                | G/T  | Gene_Ca_08907      | NON_SYNONYMOUS_CODING         | BTB/POZ-like                        |
| Kabuli_wild_27362573 | 1399938849                          | Ca_kabuli_Chr05 | 27362573                | A/G  | Gene_Ca_08907      | NON_SYNONYMOUS_CODING         | BTB/POZ-like                        |
| Kabuli_wild_27362584 | 1399938850                          | Ca_kabuli_Chr05 | 27362584                | T/G  | Gene_Ca_08907      | SYNONYMOUS_CODING             | BTB/POZ-like                        |
| Kabuli_wild_27452484 | 1399938851                          | Ca_kabuli_Chr05 | 27452484                | C/G  | Gene_Ca_08906      | SYNONYMOUS_CODING             | Protein kinase,catalytic domain     |
| Kabuli_wild_27552106 | 1399938852                          | Ca_kabuli_Chr05 | 27552106                | A/C  | NA                 | INTERGENIC                    | NA                                  |
| Kabuli_wild_27568016 | 1399938853                          | Ca_kabuli_Chr05 | 27568016                | G/A  | Gene_Ca_08898      | NON_SYNONYMOUS_CODING         | NA                                  |
| Kabuli_wild_27568028 | 1399938854                          | Ca_kabuli_Chr05 | 27568028                | A/T  | Gene_Ca_08898      | NON_SYNONYMOUS_CODING         | NA                                  |
| Kabuli_wild_27568029 | 1399938855                          | Ca_kabuli_Chr05 | 27568029                | G/A  | Gene_Ca_08898      | NON_SYNONYMOUS_CODING         | NA                                  |
| Kabuli_wild_27568033 | 1399938856                          | Ca_kabuli_Chr05 | 27568033                | G/A  | Gene_Ca_08898      | SYNONYMOUS_CODING             | NA                                  |
| Kabuli_wild_27568059 | 1399938857                          | Ca_kabuli_Chr05 | 27568059                | C/T  | Gene_Ca_08898      | NON_SYNONYMOUS_CODING         | NA                                  |
| Kabuli_wild_27568064 | 1399938858                          | Ca_kabuli_Chr05 | 27568064                | A/C  | Gene_Ca_08898      | NON_SYNONYMOUS_CODING         | NA                                  |
| Kabuli_wild_27568081 | 1399938859                          | Ca_kabuli_Chr05 | 27568081                | G/C  | Gene_Ca_08898      | SYNONYMOUS_CODING             | NA                                  |
| Kabuli_wild_27568082 | 1399938860                          | Ca_kabuli_Chr05 | 27568082                | G/A  | Gene_Ca_08898      | NON_SYNONYMOUS_CODING         | NA                                  |
| Kabuli_wild_27568091 | 1399938861                          | Ca_kabuli_Chr05 | 27568091                | G/A  | Gene_Ca_08898      | NON_SYNONYMOUS_CODING         | NA                                  |
| Kabuli_wild_27568095 | 1399938862                          | Ca_kabuli_Chr05 | 27568095                | C/A  | Gene_Ca_08898      | NON_SYNONYMOUS_CODING         | NA                                  |
| Kabuli_wild_27568097 | 1399938863                          | Ca_kabuli_Chr05 | 27568097                | G/A  | Gene_Ca_08898      | NON_SYNONYMOUS_CODING         | NA                                  |
| Kabuli_wild_27568098 | 1399938864                          | Ca_kabuli_Chr05 | 27568098                | C/T  | Gene_Ca_08898      | NON_SYNONYMOUS_CODING         | NA                                  |
| Kabuli_wild_27568107 | 1399938865                          | Ca_kabuli_Chr05 | 27568107                | C/G  | Gene_Ca_08898      | NON_SYNONYMOUS_CODING         | NA                                  |
| Kabuli_wild_27568118 | 1399938866                          | Ca_kabuli_Chr05 | 27568118                | A/G  | Gene_Ca_08898      | NON_SYNONYMOUS_CODING         | NA                                  |
| Kabuli_wild_27568133 | 1399938867                          | Ca_kabuli_Chr05 | 27568133                | G/T  | Gene_Ca_08898      | NON_SYNONYMOUS_CODING         | NA                                  |
| Kabuli_wild_27568141 | 1399938868                          | Ca_kabuli_Chr05 | 27568141                | C/T  | Gene_Ca_08898      | SYNONYMOUS_CODING             | NA                                  |
| Kabuli_wild_27568156 | 1399938869                          | Ca_kabuli_Chr05 | 27568156                | C/G  | Gene_Ca_08898      | NON_SYNONYMOUS_CODING         | NA                                  |
| Kabuli_wild_27568176 | 1399938870                          | Ca_kabuli_Chr05 | 27568176                | T/C  | Gene_Ca_08898      | NON_SYNONYMOUS_CODING         | NA                                  |
| Kabuli_wild_27568177 | 1399938871                          | Ca_kabuli_Chr05 | 27568177                | G/C  | Gene_Ca_08898      | NON_SYNONYMOUS_CODING         | NA                                  |
| Kabuli_wild_27568180 | 1399938872                          | Ca_kabuli_Chr05 | 27568180                | C/T  | Gene_Ca_08898      | SYNONYMOUS_CODING             | NA                                  |
| Kabuli_wild_27605037 | 1399938873                          | Ca_kabuli_Chr05 | 27605037                | A/T  | Gene_Ca_08894      | DOWNSTREAM                    | Uncharacterised protein familyYcf54 |
| Kabuli_wild_27605063 | 1399938874                          | Ca_kabuli_Chr05 | 27605063                | T/A  | Gene_Ca_08894      | DOWNSTREAM                    | Uncharacterised protein familyYcf54 |
| Kabuli_wild_27605081 | 1399938875                          | Ca_kabuli_Chr05 | 27605081                | C/T  | Gene_Ca_08894      | DOWNSTREAM                    | Uncharacterised protein familyYcf54 |
| Kabuli_wild_27605095 | 1399938876                          | Ca_kabuli_Chr05 | 27605095                | G/C  | Gene_Ca_08894      | DOWNSTREAM                    | Uncharacterised protein familyYcf54 |
| Kabuli_wild_27631258 | 1399938877                          | Ca_kabuli_Chr05 | 27631258                | A/G  | Gene_Ca_08891      | NON_SYNONYMOUS_CODING         | Helicase,C-terminal                 |
| Kabuli_wild_27692818 | 1399938878                          | Ca_kabuli_Chr05 | 27692818                | C/T  | Gene_Ca_08882      | UPSTREAM                      | NA                                  |
| Kabuli_wild_27692822 | 1399938879                          | Ca_kabuli_Chr05 | 27692822                | C/T  | Gene_Ca_08882      | UPSTREAM                      | NA                                  |
| Kabuli_wild_27692823 | 1399938880                          | Ca_kabuli_Chr05 | 27692823                | A/T  | Gene_Ca_08882      | UPSTREAM                      | NA                                  |
| Kabuli_wild_27692831 | 1399938881                          | Ca_kabuli_Chr05 | 27692831                | A/T  | Gene_Ca_08882      | UPSTREAM                      | NA                                  |
| Kabuli_wild_27692836 | 1399938882                          | Ca_kabuli_Chr05 | 27692836                | G/T  | Gene_Ca_08882      | UPSTREAM                      | NA                                  |
| Kabuli_wild_27694205 | 1399938883                          | Ca_kabuli_Chr05 | 27694205                | C/A  | NA                 | INTERGENIC                    | NA                                  |
| Kabuli_wild_27694215 | 1399938884                          | Ca_kabuli_Chr05 | 27694215                | A/G  | NA                 | INTERGENIC                    | NA                                  |
| Kabuli_wild_27694216 | 1399938885                          | Ca_kabuli_Chr05 | 27694216                | C/G  | NA                 | INTERGENIC                    | NA                                  |
| Kabuli_wild_27697470 | 1399938886                          | Ca_kabuli_Chr05 | 27697470                | C/A  | Gene_Ca_08882      | DOWNSTREAM                    | NA                                  |
| Kabuli_wild_27749174 | 1399938887                          | Ca_kabuli_Chr05 | 27749174                | A/T  | Gene_Ca_08872      | NON_SYNONYMOUS_CODING         | AUX/IAAprotein                      |

| SNP IDs              | NCBI dbSNP accession IDs (NCBI_SS#) | Chromosomes     | Physical positions (bp) | SNPs | Gene accession IDs | Sequence components of genome | Putative functions                               |
|----------------------|-------------------------------------|-----------------|-------------------------|------|--------------------|-------------------------------|--------------------------------------------------|
| Kabuli_wild_27786025 | 1399938888                          | Ca_kabuli_Chr05 | 27786025                | T/C  | Gene_Ca_08871      | INTRON                        | NA                                               |
| Kabuli_wild_27820210 | 1399938889                          | Ca_kabuli_Chr05 | 27820210                | A/C  | NA                 | INTERGENIC                    | NA                                               |
| Kabuli_wild_27838003 | 1399938890                          | Ca_kabuli_Chr05 | 27838003                | C/T  | NA                 | INTERGENIC                    | NA                                               |
| Kabuli_wild_27895972 | 1399938891                          | Ca_kabuli_Chr05 | 27895972                | C/A  | Gene_Ca_13427      | NON_SYNONYMOUS_CODING         | NA                                               |
| Kabuli_wild_27896939 | 1399938892                          | Ca_kabuli_Chr05 | 27896939                | C/T  | Gene_Ca_13427      | INTRON                        | NA                                               |
| Kabuli_wild_27932017 | 1399938893                          | Ca_kabuli_Chr05 | 27932017                | G/A  | NA                 | INTERGENIC                    | NA                                               |
| Kabuli_wild_27939128 | 1399938894                          | Ca_kabuli_Chr05 | 27939128                | A/G  | NA                 | INTERGENIC                    | NA                                               |
| Kabuli_wild_27939134 | 1399938895                          | Ca_kabuli_Chr05 | 27939134                | A/T  | NA                 | INTERGENIC                    | NA                                               |
| Kabuli_wild_27939135 | 1399938896                          | Ca_kabuli_Chr05 | 27939135                | G/C  | NA                 | INTERGENIC                    | NA                                               |
| Kabuli_wild_27939162 | 1399938897                          | Ca_kabuli_Chr05 | 27939162                | G/A  | NA                 | INTERGENIC                    | NA                                               |
| Kabuli_wild_27974632 | 1399938898                          | Ca_kabuli_Chr05 | 27974632                | G/T  | Gene_Ca_13421      | INTRON                        | ABC-1                                            |
| Kabuli_wild_27974691 | 1399938899                          | Ca_kabuli_Chr05 | 27974691                | G/T  | Gene_Ca_13421      | INTRON                        | ABC-1                                            |
| Kabuli_wild_27989926 | 1399938900                          | Ca_kabuli_Chr05 | 27989926                | G/A  | Gene_Ca_13419      | NON_SYNONYMOUS_CODING         | Helicase-associateddomain                        |
| Kabuli_wild_27989938 | 1399938901                          | Ca_kabuli_Chr05 | 27989938                | A/G  | Gene_Ca_13419      | NON_SYNONYMOUS_CODING         | Helicase-associateddomain                        |
| Kabuli_wild_28016628 | 1399938902                          | Ca_kabuli_Chr05 | 28016628                | C/T  | NA                 | INTERGENIC                    | NA                                               |
| Kabuli_wild_28016669 | 1399938903                          | Ca_kabuli_Chr05 | 28016669                | A/G  | NA                 | INTERGENIC                    | NA                                               |
| Kabuli_wild_28071467 | 1399938904                          | Ca_kabuli_Chr05 | 28071467                | A/G  | NA                 | INTERGENIC                    | NA                                               |
| Kabuli_wild_28071547 | 1399938905                          | Ca_kabuli_Chr05 | 28071547                | G/A  | NA                 | INTERGENIC                    | NA                                               |
| Kabuli_wild_28115151 | 1399938906                          | Ca_kabuli_Chr05 | 28115151                | A/T  | Gene_Ca_13409      | INTRON                        | NA                                               |
| Kabuli_wild_28116988 | 1399938907                          | Ca_kabuli_Chr05 | 28116988                | A/T  | Gene_Ca_13409      | DOWNSTREAM                    | NA                                               |
| Kabuli_wild_28117011 | 1399938908                          | Ca_kabuli_Chr05 | 28117011                | C/T  | Gene_Ca_13409      | DOWNSTREAM                    | NA                                               |
| Kabuli_wild_28143644 | 1399938909                          | Ca_kabuli_Chr05 | 28143644                | T/C  | NA                 | INTERGENIC                    | NA                                               |
| Kabuli_wild_28143679 | 1399938910                          | Ca_kabuli_Chr05 | 28143679                | T/C  | NA                 | INTERGENIC                    | NA                                               |
| Kabuli_wild_28164985 | 1399938911                          | Ca_kabuli_Chr05 | 28164985                | G/C  | Gene_Ca_13404      | INTRON                        | Clathrin,heavychain/VPS,7-foldrepeat             |
| Kabuli_wild_28166322 | 1399938912                          | Ca_kabuli_Chr05 | 28166322                | T/G  | Gene_Ca_13404      | NON_SYNONYMOUS_CODING         | NA                                               |
| Kabuli_wild_28168910 | 1399938913                          | Ca_kabuli_Chr05 | 28168910                | A/G  | NA                 | INTERGENIC                    | NA                                               |
| Kabuli_wild_28169475 | 1399938914                          | Ca_kabuli_Chr05 | 28169475                | T/C  | NA                 | INTERGENIC                    | NA                                               |
| Kabuli_wild_28175039 | 1399938915                          | Ca_kabuli_Chr05 | 28175039                | A/G  | Gene_Ca_13403      | NON_SYNONYMOUS_CODING         | Clathrin,heavychain/VPS,7-foldrepeat             |
| Kabuli_wild_28266046 | 1399938916                          | Ca_kabuli_Chr05 | 28266046                | T/G  | Gene_Ca_13399      | SYNONYMOUS_CODING             | NA                                               |
| Kabuli_wild_28266074 | 1399938917                          | Ca_kabuli_Chr05 | 28266074                | T/C  | Gene_Ca_13399      | NON_SYNONYMOUS_CODING         | NA                                               |
| Kabuli_wild_28271638 | 1399938918                          | Ca_kabuli_Chr05 | 28271638                | G/C  | Gene_Ca_13398      | INTRON                        | Bacterial surface antigen(D15)                   |
| Kabuli_wild_28271732 | 1399938919                          | Ca_kabuli_Chr05 | 28271732                | C/T  | Gene_Ca_13398      | INTRON                        | Bacterial surface antigen(D15)                   |
| Kabuli_wild_28271742 | 1399938920                          | Ca_kabuli_Chr05 | 28271742                | G/A  | Gene_Ca_13398      | INTRON                        | Bacterial surface antigen(D15)                   |
| Kabuli_wild_28271767 | 1399938921                          | Ca_kabuli_Chr05 | 28271767                | G/C  | Gene_Ca_13398      | INTRON                        | Bacterial surface antigen(D15)                   |
| Kabuli_wild_28327832 | 1399938922                          | Ca_kabuli_Chr05 | 28327832                | T/G  | NA                 | INTERGENIC                    | NA                                               |
| Kabuli_wild_28327856 | 1399938923                          | Ca_kabuli_Chr05 | 28327856                | T/C  | NA                 | INTERGENIC                    | NA                                               |
| Kabuli_wild_28327868 | 1399938924                          | Ca_kabuli_Chr05 | 28327868                | G/A  | NA                 | INTERGENIC                    | NA                                               |
| Kabuli_wild_28327870 | 1399938925                          | Ca_kabuli_Chr05 | 28327870                | T/C  | NA                 | INTERGENIC                    | NA                                               |
| Kabuli_wild_28327883 | 1399938926                          | Ca_kabuli_Chr05 | 28327883                | G/A  | NA                 | INTERGENIC                    | NA                                               |
| Kabuli_wild_28335455 | 1399938927                          | Ca_kabuli_Chr05 | 28335455                | A/C  | Gene_Ca_13389      | SYNONYMOUS_CODING             | Histidinephosphatasesuperfamily,clade-2          |
| Kabuli_wild_28346497 | 1399938928                          | Ca_kabuli_Chr05 | 28346497                | C/T  | Gene_Ca_13388      | SYNONYMOUS_CODING             | Lateral organ boundaries, LOB                    |
| Kabuli_wild_28353952 | 1399938929                          | Ca_kabuli_Chr05 | 28353952                | G/C  | Gene_Ca_13387      | INTRON                        | Glycosidehydrolase, family85                     |
| Kabuli_wild_28353953 | 1399938930                          | Ca_kabuli_Chr05 | 28353953                | A/G  | Gene_Ca_13387      | INTRON                        | Glycosidehydrolase, family85                     |
| Kabuli_wild_28360017 | 1399938931                          | Ca_kabuli_Chr05 | 28360017                | G/A  | Gene_Ca_13386      | DOWNSTREAM                    | RNAhelicase,ATP-dependent,DEAD-box,conservedsite |



| SNP IDs              | NCBI dbSNP accession IDs (NCBI_SS#) | Chromosomes     | Physical positions (bp) | SNPs | Gene accession IDs | Sequence components of genome | Putative functions                        |
|----------------------|-------------------------------------|-----------------|-------------------------|------|--------------------|-------------------------------|-------------------------------------------|
| Kabuli_wild_28360492 | 1399938932                          | Ca_kabuli_Chr05 | 28360492                | C/T  | Gene_Ca_13387      | UPSTREAM                      | Glycosidehydrolase, family85              |
| Kabuli_wild_28360495 | 1399938933                          | Ca_kabuli_Chr05 | 28360495                | C/T  | Gene_Ca_13387      | UPSTREAM                      | Glycosidehydrolase, family85              |
| Kabuli_wild_28360585 | 1399938934                          | Ca_kabuli_Chr05 | 28360585                | A/G  | NA                 | INTERGENIC                    | NA                                        |
| Kabuli_wild_28383374 | 1399938935                          | Ca_kabuli_Chr05 | 28383374                | G/T  | Gene_Ca_13385      | INTRON                        | Autophagy-related protein27               |
| Kabuli_wild_28402498 | 1399938936                          | Ca_kabuli_Chr05 | 28402498                | A/G  | NA                 | INTERGENIC                    | NA                                        |
| Kabuli_wild_28562734 | 1399938937                          | Ca_kabuli_Chr05 | 28562734                | G/A  | Gene_Ca_13369      | DOWNSTREAM                    | Prephenatedehydrogenase                   |
| Kabuli_wild_28581814 | 1399938938                          | Ca_kabuli_Chr05 | 28581814                | A/G  | NA                 | INTERGENIC                    | NA                                        |
| Kabuli_wild_28581815 | 1399938939                          | Ca_kabuli_Chr05 | 28581815                | C/G  | NA                 | INTERGENIC                    | NA                                        |
| Kabuli_wild_28581827 | 1399938940                          | Ca_kabuli_Chr05 | 28581827                | T/C  | NA                 | INTERGENIC                    | NA                                        |
| Kabuli_wild_28581866 | 1399938941                          | Ca_kabuli_Chr05 | 28581866                | T/C  | NA                 | INTERGENIC                    | NA                                        |
| Kabuli_wild_28582525 | 1399938942                          | Ca_kabuli_Chr05 | 28582525                | C/T  | NA                 | INTERGENIC                    | NA                                        |
| Kabuli_wild_28582763 | 1399938943                          | Ca_kabuli_Chr05 | 28582763                | A/G  | NA                 | INTERGENIC                    | NA                                        |
| Kabuli_wild_28582806 | 1399938944                          | Ca_kabuli_Chr05 | 28582806                | T/C  | NA                 | INTERGENIC                    | NA                                        |
| Kabuli_wild_28583375 | 1399938945                          | Ca_kabuli_Chr05 | 28583375                | C/G  | Gene_Ca_13367      | INTRON                        | Self-like                                 |
| Kabuli_wild_28583402 | 1399938946                          | Ca_kabuli_Chr05 | 28583402                | G/A  | Gene_Ca_13367      | INTRON                        | Self-like                                 |
| Kabuli_wild_28683045 | 1399938947                          | Ca_kabuli_Chr05 | 28683045                | G/A  | Gene_Ca_13361      | SYNONYMOUS_CODING             | BTB/POZ-like                              |
| Kabuli_wild_28717362 | 1399938948                          | Ca_kabuli_Chr05 | 28717362                | C/T  | Gene_Ca_13358      | NON_SYNONYMOUS_CODING         | Oligo peptide transporter                 |
| Kabuli_wild_28717384 | 1399938949                          | Ca_kabuli_Chr05 | 28717384                | C/T  | Gene_Ca_13358      | SYNONYMOUS_CODING             | Oligo peptide transporter                 |
| Kabuli_wild_28721236 | 1399938950                          | Ca_kabuli_Chr05 | 28721236                | C/T  | NA                 | INTERGENIC                    | NA                                        |
| Kabuli_wild_28721237 | 1399938951                          | Ca_kabuli_Chr05 | 28721237                | A/G  | NA                 | INTERGENIC                    | NA                                        |
| Kabuli_wild_28721383 | 1399938952                          | Ca_kabuli_Chr05 | 28721383                | A/C  | NA                 | INTERGENIC                    | NA                                        |
| Kabuli_wild_28721386 | 1399938953                          | Ca_kabuli_Chr05 | 28721386                | T/C  | NA                 | INTERGENIC                    | NA                                        |
| Kabuli_wild_28746139 | 1399938954                          | Ca_kabuli_Chr05 | 28746139                | A/G  | Gene_Ca_13355      | NON_SYNONYMOUS_CODING         | Haloaciddehalogenase-like hydrolase       |
| Kabuli_wild_28757467 | 1399938955                          | Ca_kabuli_Chr05 | 28757467                | A/T  | Gene_Ca_13354      | NON_SYNONYMOUS_CODING         | Protein of unknown function DUF827, plant |
| Kabuli_wild_28757485 | 1399938956                          | Ca_kabuli_Chr05 | 28757485                | A/C  | Gene_Ca_13354      | NON_SYNONYMOUS_CODING         | Protein of unknown function DUF827, plant |
| Kabuli_wild_28757507 | 1399938957                          | Ca_kabuli_Chr05 | 28757507                | A/T  | Gene_Ca_13354      | NON_SYNONYMOUS_CODING         | Protein of unknown function DUF827, plant |
| Kabuli_wild_28758723 | 1399938958                          | Ca_kabuli_Chr05 | 28758723                | A/G  | Gene_Ca_13354      | INTRON                        | Protein of unknown function DUF827, plant |
| Kabuli_wild_28817832 | 1399938959                          | Ca_kabuli_Chr05 | 28817832                | A/G  | Gene_Ca_13351      | DOWNSTREAM                    | Domain of unknown function DUF250         |
| Kabuli_wild_28827467 | 1399938960                          | Ca_kabuli_Chr05 | 28827467                | A/G  | NA                 | INTERGENIC                    | NA                                        |
| Kabuli_wild_28843579 | 1399938961                          | Ca_kabuli_Chr05 | 28843579                | A/G  | Gene_Ca_13348      | INTRON                        | Peptidoglycan-binding Lysin subgroup      |
| Kabuli_wild_28843674 | 1399938962                          | Ca_kabuli_Chr05 | 28843674                | T/C  | Gene_Ca_13348      | SYNONYMOUS_CODING             | Peptidoglycan-binding Lysin subgroup      |
| Kabuli_wild_28854486 | 1399938963                          | Ca_kabuli_Chr05 | 28854486                | C/T  | Gene_Ca_13347      | DOWNSTREAM                    | Transcription factor Tfb4                 |
| Kabuli_wild_28886131 | 1399938964                          | Ca_kabuli_Chr05 | 28886131                | T/C  | NA                 | INTERGENIC                    | NA                                        |
| Kabuli_wild_28905203 | 1399938965                          | Ca_kabuli_Chr05 | 28905203                | A/C  | Gene_Ca_13344      | NON_SYNONYMOUS_CODING         | Drug/metabolite transporter               |
| Kabuli_wild_29007844 | 1399938966                          | Ca_kabuli_Chr05 | 29007844                | T/C  | Gene_Ca_23834      | SYNONYMOUS_CODING             | Camphor resistance CrcB protein           |
| Kabuli_wild_29007847 | 1399938967                          | Ca_kabuli_Chr05 | 29007847                | A/C  | Gene_Ca_23834      | SYNONYMOUS_CODING             | Camphor resistance CrcB protein           |
| Kabuli_wild_29007879 | 1399938968                          | Ca_kabuli_Chr05 | 29007879                | T/C  | Gene_Ca_23834      | NON_SYNONYMOUS_CODING         | Camphor resistance CrcB protein           |
| Kabuli_wild_29007882 | 1399938969                          | Ca_kabuli_Chr05 | 29007882                | A/C  | Gene_Ca_23834      | NON_SYNONYMOUS_CODING         | Camphor resistance CrcB protein           |
| Kabuli_wild_29007884 | 1399938970                          | Ca_kabuli_Chr05 | 29007884                | A/C  | Gene_Ca_23834      | NON_SYNONYMOUS_CODING         | Camphor resistance CrcB protein           |
| Kabuli_wild_29007886 | 1399938971                          | Ca_kabuli_Chr05 | 29007886                | C/A  | Gene_Ca_23834      | SYNONYMOUS_CODING             | Camphor resistance CrcB protein           |
| Kabuli_wild_29007895 | 1399938972                          | Ca_kabuli_Chr05 | 29007895                | T/C  | Gene_Ca_23834      | SYNONYMOUS_CODING             | Camphor resistance CrcB protein           |
| Kabuli_wild_29080060 | 1399938973                          | Ca_kabuli_Chr05 | 29080060                | C/T  | Gene_Ca_23829      | SYNONYMOUS_CODING             | Protein kinase, catalytic domain          |
| Kabuli_wild_29114055 | 1399938974                          | Ca_kabuli_Chr05 | 29114055                | A/T  | Gene_Ca_23826      | NON_SYNONYMOUS_CODING         | Oxysterol-binding protein                 |
| Kabuli_wild_29222381 | 1399938975                          | Ca_kabuli_Chr05 | 29222381                | T/C  | Gene_Ca_16618      | NON_SYNONYMOUS_CODING         | NA                                        |



| SNP IDs              | NCBI dbSNP accession IDs (NCBI_SS#) | Chromosomes      | Physical positions (bp) | SNPs | Gene accession IDs | Sequence components of genome | Putative functions                                    |
|----------------------|-------------------------------------|------------------|-------------------------|------|--------------------|-------------------------------|-------------------------------------------------------|
| Kabuli_wild_29285397 | 1399938976                          | Ca_kabuli_Chrom5 | 29285397                | T/A  | Gene_Ca_16623      | SYNONYMOUS_CODING             | Carboxyltransferase                                   |
| Kabuli_wild_29340206 | 1399938977                          | Ca_kabuli_Chrom5 | 29340206                | C/T  | NA                 | INTERGENIC                    | NA                                                    |
| Kabuli_wild_29354269 | 1399938978                          | Ca_kabuli_Chrom5 | 29354269                | A/T  | NA                 | INTERGENIC                    | NA                                                    |
| Kabuli_wild_29437139 | 1399938979                          | Ca_kabuli_Chrom5 | 29437139                | C/T  | NA                 | INTERGENIC                    | NA                                                    |
| Kabuli_wild_29437146 | 1399938980                          | Ca_kabuli_Chrom5 | 29437146                | C/A  | NA                 | INTERGENIC                    | NA                                                    |
| Kabuli_wild_29437162 | 1399938981                          | Ca_kabuli_Chrom5 | 29437162                | A/C  | NA                 | INTERGENIC                    | NA                                                    |
| Kabuli_wild_29437171 | 1399938982                          | Ca_kabuli_Chrom5 | 29437171                | A/T  | NA                 | INTERGENIC                    | NA                                                    |
| Kabuli_wild_29437181 | 1399938983                          | Ca_kabuli_Chrom5 | 29437181                | A/C  | NA                 | INTERGENIC                    | NA                                                    |
| Kabuli_wild_29437193 | 1399938984                          | Ca_kabuli_Chrom5 | 29437193                | C/A  | NA                 | INTERGENIC                    | NA                                                    |
| Kabuli_wild_29468456 | 1399938985                          | Ca_kabuli_Chrom5 | 29468456                | T/C  | NA                 | INTERGENIC                    | NA                                                    |
| Kabuli_wild_29528904 | 1399938986                          | Ca_kabuli_Chrom5 | 29528904                | T/G  | Gene_Ca_16640      | NON_SYNONYMOUS_CODING         | Sugar/inositol transporter                            |
| Kabuli_wild_29567676 | 1399938987                          | Ca_kabuli_Chrom5 | 29567676                | T/C  | NA                 | INTERGENIC                    | NA                                                    |
| Kabuli_wild_29567820 | 1399938988                          | Ca_kabuli_Chrom5 | 29567820                | T/C  | NA                 | INTERGENIC                    | NA                                                    |
| Kabuli_wild_29576716 | 1399938989                          | Ca_kabuli_Chrom5 | 29576716                | A/C  | NA                 | INTERGENIC                    | NA                                                    |
| Kabuli_wild_29608657 | 1399938990                          | Ca_kabuli_Chrom5 | 29608657                | T/C  | NA                 | INTERGENIC                    | NA                                                    |
| Kabuli_wild_29641659 | 1399938991                          | Ca_kabuli_Chrom5 | 29641659                | T/C  | NA                 | INTERGENIC                    | NA                                                    |
| Kabuli_wild_29658280 | 1399938992                          | Ca_kabuli_Chrom5 | 29658280                | A/C  | Gene_Ca_16650      | INTRON                        | Protein of unknown function DUF248, methyltransferase |
| Kabuli_wild_29788248 | 1399938993                          | Ca_kabuli_Chrom5 | 29788248                | T/G  | Gene_Ca_16661      | NON_SYNONYMOUS_CODING         | Fork head-associated (FHA) domain                     |
| Kabuli_wild_29824218 | 1399938994                          | Ca_kabuli_Chrom5 | 29824218                | T/G  | NA                 | INTERGENIC                    | NA                                                    |
| Kabuli_wild_29999414 | 1399938995                          | Ca_kabuli_Chrom5 | 29999414                | C/T  | NA                 | INTERGENIC                    | NA                                                    |
| Kabuli_wild_29999433 | 1399938996                          | Ca_kabuli_Chrom5 | 29999433                | C/A  | NA                 | INTERGENIC                    | NA                                                    |
| Kabuli_wild_29999439 | 1399938997                          | Ca_kabuli_Chrom5 | 29999439                | A/G  | NA                 | INTERGENIC                    | NA                                                    |
| Kabuli_wild_29999465 | 1399938998                          | Ca_kabuli_Chrom5 | 29999465                | T/G  | NA                 | INTERGENIC                    | NA                                                    |
| Kabuli_wild_29999476 | 1399938999                          | Ca_kabuli_Chrom5 | 29999476                | G/A  | NA                 | INTERGENIC                    | NA                                                    |
| Kabuli_wild_30035732 | 1399939000                          | Ca_kabuli_Chrom5 | 30035732                | T/A  | Gene_Ca_04680      | STOP_GAINED                   | Sugar/inositol transporter                            |
| Kabuli_wild_30035763 | 1399939001                          | Ca_kabuli_Chrom5 | 30035763                | A/T  | Gene_Ca_04680      | SYNONYMOUS_CODING             | Sugar/inositol transporter                            |
| Kabuli_wild_30049265 | 1399939002                          | Ca_kabuli_Chrom5 | 30049265                | G/A  | NA                 | INTERGENIC                    | NA                                                    |
| Kabuli_wild_30053540 | 1399939003                          | Ca_kabuli_Chrom5 | 30053540                | C/G  | Gene_Ca_04681      | UPSTREAM                      | Glycosyltransferase, family13                         |
| Kabuli_wild_30060160 | 1399939004                          | Ca_kabuli_Chrom5 | 30060160                | C/T  | NA                 | INTERGENIC                    | NA                                                    |
| Kabuli_wild_30086232 | 1399939005                          | Ca_kabuli_Chrom5 | 30086232                | A/C  | NA                 | INTERGENIC                    | NA                                                    |
| Kabuli_wild_30090906 | 1399939006                          | Ca_kabuli_Chrom5 | 30090906                | A/G  | NA                 | INTERGENIC                    | NA                                                    |
| Kabuli_wild_30091063 | 1399939007                          | Ca_kabuli_Chrom5 | 30091063                | G/A  | NA                 | INTERGENIC                    | NA                                                    |
| Kabuli_wild_30124077 | 1399939008                          | Ca_kabuli_Chrom5 | 30124077                | G/C  | Gene_Ca_04688      | NON_SYNONYMOUS_CODING         | NA                                                    |
| Kabuli_wild_30124086 | 1399939009                          | Ca_kabuli_Chrom5 | 30124086                | C/G  | Gene_Ca_04688      | SYNONYMOUS_CODING             | NA                                                    |
| Kabuli_wild_30191389 | 1399939010                          | Ca_kabuli_Chrom5 | 30191389                | C/A  | NA                 | INTERGENIC                    | NA                                                    |
| Kabuli_wild_30248447 | 1399939011                          | Ca_kabuli_Chrom5 | 30248447                | C/A  | NA                 | INTERGENIC                    | NA                                                    |
| Kabuli_wild_30367349 | 1399939012                          | Ca_kabuli_Chrom5 | 30367349                | G/T  | Gene_Ca_04714      | NON_SYNONYMOUS_CODING         | HECT                                                  |
| Kabuli_wild_30373542 | 1399939013                          | Ca_kabuli_Chrom5 | 30373542                | A/G  | Gene_Ca_04715      | NON_SYNONYMOUS_CODING         | Armadillo                                             |
| Kabuli_wild_30373783 | 1399939014                          | Ca_kabuli_Chrom5 | 30373783                | T/A  | Gene_Ca_04715      | SYNONYMOUS_CODING             | Armadillo                                             |
| Kabuli_wild_30376670 | 1399939015                          | Ca_kabuli_Chrom5 | 30376670                | C/A  | Gene_Ca_04715      | INTRON                        | Armadillo                                             |
| Kabuli_wild_30439348 | 1399939016                          | Ca_kabuli_Chrom5 | 30439348                | A/C  | Gene_Ca_04723      | DOWNSTREAM                    | PollenOlee1 allergen/extensin                         |
| Kabuli_wild_30444264 | 1399939017                          | Ca_kabuli_Chrom5 | 30444264                | G/A  | NA                 | INTERGENIC                    | NA                                                    |
| Kabuli_wild_30456581 | 1399939018                          | Ca_kabuli_Chrom5 | 30456581                | T/C  | Gene_Ca_04727      | UPSTREAM                      | Plantneutralinvertase                                 |
| Kabuli_wild_30562524 | 1399939019                          | Ca_kabuli_Chrom5 | 30562524                | G/T  | NA                 | INTERGENIC                    | NA                                                    |

| SNP IDs              | NCBI dbSNP accession IDs (NCBI_SS#) | Chromosomes     | Physical positions (bp) | SNPs | Gene accession IDs | Sequence components of genome | Putative functions                               |
|----------------------|-------------------------------------|-----------------|-------------------------|------|--------------------|-------------------------------|--------------------------------------------------|
| Kabuli_wild_30577985 | 1399939020                          | Ca_kabuli_Chr05 | 30577985                | T/G  | Gene_Ca_04750      | SYNONYMOUS_CODING             | Zinc finger,CCCH-type                            |
| Kabuli_wild_30623408 | 1399939021                          | Ca_kabuli_Chr05 | 30623408                | C/T  | Gene_Ca_04755      | NON_SYNONYMOUS_CODING         | Ironhydrogenase,smallsubunit-like                |
| Kabuli_wild_30632697 | 1399939022                          | Ca_kabuli_Chr05 | 30632697                | A/G  | Gene_Ca_04756      | INTRON                        | NA                                               |
| Kabuli_wild_30656058 | 1399939023                          | Ca_kabuli_Chr05 | 30656058                | A/T  | Gene_Ca_04757      | INTRON                        | Kinesin,motordomain                              |
| Kabuli_wild_30690885 | 1399939024                          | Ca_kabuli_Chr05 | 30690885                | A/G  | NA                 | INTERGENIC                    | NA                                               |
| Kabuli_wild_30690891 | 1399939025                          | Ca_kabuli_Chr05 | 30690891                | T/G  | NA                 | INTERGENIC                    | NA                                               |
| Kabuli_wild_30691510 | 1399939026                          | Ca_kabuli_Chr05 | 30691510                | A/G  | NA                 | INTERGENIC                    | NA                                               |
| Kabuli_wild_30691515 | 1399939027                          | Ca_kabuli_Chr05 | 30691515                | G/A  | NA                 | INTERGENIC                    | NA                                               |
| Kabuli_wild_30691543 | 1399939028                          | Ca_kabuli_Chr05 | 30691543                | A/G  | NA                 | INTERGENIC                    | NA                                               |
| Kabuli_wild_30697113 | 1399939029                          | Ca_kabuli_Chr05 | 30697113                | T/C  | Gene_Ca_04764      | DOWNSTREAM                    | Zinc finger, RING-type                           |
| Kabuli_wild_30697511 | 1399939030                          | Ca_kabuli_Chr05 | 30697511                | G/A  | NA                 | INTERGENIC                    | NA                                               |
| Kabuli_wild_30796451 | 1399939031                          | Ca_kabuli_Chr05 | 30796451                | C/T  | NA                 | INTERGENIC                    | NA                                               |
| Kabuli_wild_30811250 | 1399939032                          | Ca_kabuli_Chr05 | 30811250                | A/T  | NA                 | INTERGENIC                    | NA                                               |
| Kabuli_wild_30868695 | 1399939033                          | Ca_kabuli_Chr05 | 30868695                | G/C  | Gene_Ca_04783      | UPSTREAM                      | Glycosidehydrolase, family17                     |
| Kabuli_wild_30868696 | 1399939034                          | Ca_kabuli_Chr05 | 30868696                | A/G  | Gene_Ca_04783      | UPSTREAM                      | Glycosidehydrolase, family17                     |
| Kabuli_wild_31025764 | 1399939035                          | Ca_kabuli_Chr05 | 31025764                | G/T  | Gene_Ca_04800      | DOWNSTREAM                    | RNA recognition motif domain                     |
| Kabuli_wild_31036938 | 1399939036                          | Ca_kabuli_Chr05 | 31036938                | A/G  | NA                 | INTERGENIC                    | NA                                               |
| Kabuli_wild_31108863 | 1399939037                          | Ca_kabuli_Chr05 | 31108863                | C/A  | Gene_Ca_04812      | INTRON                        | Zinc finger,DHHC-type,palmitoyltransferase       |
| Kabuli_wild_31126125 | 1399939038                          | Ca_kabuli_Chr05 | 31126125                | C/T  | NA                 | INTERGENIC                    | NA                                               |
| Kabuli_wild_31131830 | 1399939039                          | Ca_kabuli_Chr05 | 31131830                | T/C  | Gene_Ca_04815      | INTRON                        | NA                                               |
| Kabuli_wild_31132568 | 1399939040                          | Ca_kabuli_Chr05 | 31132568                | A/T  | Gene_Ca_04815      | SYNONYMOUS_CODING             | NA                                               |
| Kabuli_wild_31141947 | 1399939041                          | Ca_kabuli_Chr05 | 31141947                | A/C  | NA                 | INTERGENIC                    | NA                                               |
| Kabuli_wild_31157892 | 1399939042                          | Ca_kabuli_Chr05 | 31157892                | A/G  | NA                 | INTERGENIC                    | NA                                               |
| Kabuli_wild_31158252 | 1399939043                          | Ca_kabuli_Chr05 | 31158252                | C/T  | NA                 | INTERGENIC                    | NA                                               |
| Kabuli_wild_31162533 | 1399939044                          | Ca_kabuli_Chr05 | 31162533                | G/A  | NA                 | INTERGENIC                    | NA                                               |
| Kabuli_wild_31164387 | 1399939045                          | Ca_kabuli_Chr05 | 31164387                | G/C  | Gene_Ca_04820      | INTRON                        | Armadillo                                        |
| Kabuli_wild_31164539 | 1399939046                          | Ca_kabuli_Chr05 | 31164539                | T/C  | Gene_Ca_04820      | SYNONYMOUS_CODING             | Armadillo                                        |
| Kabuli_wild_31165002 | 1399939047                          | Ca_kabuli_Chr05 | 31165002                | A/C  | Gene_Ca_04820      | NON_SYNONYMOUS_CODING         | Armadillo                                        |
| Kabuli_wild_31165033 | 1399939048                          | Ca_kabuli_Chr05 | 31165033                | A/C  | Gene_Ca_04820      | NON_SYNONYMOUS_CODING         | Armadillo                                        |
| Kabuli_wild_31165035 | 1399939049                          | Ca_kabuli_Chr05 | 31165035                | T/C  | Gene_Ca_04820      | NON_SYNONYMOUS_CODING         | Armadillo                                        |
| Kabuli_wild_31165039 | 1399939050                          | Ca_kabuli_Chr05 | 31165039                | T/C  | Gene_Ca_04820      | SYNONYMOUS_CODING             | Armadillo                                        |
| Kabuli_wild_31165048 | 1399939051                          | Ca_kabuli_Chr05 | 31165048                | T/C  | Gene_Ca_04820      | SYNONYMOUS_CODING             | Armadillo                                        |
| Kabuli_wild_31165057 | 1399939052                          | Ca_kabuli_Chr05 | 31165057                | A/G  | Gene_Ca_04820      | SYNONYMOUS_CODING             | Armadillo                                        |
| Kabuli_wild_31176844 | 1399939053                          | Ca_kabuli_Chr05 | 31176844                | G/A  | Gene_Ca_04822      | INTRON                        | EPS15homology(EH)                                |
| Kabuli_wild_31194974 | 1399939054                          | Ca_kabuli_Chr05 | 31194974                | T/C  | Gene_Ca_04824      | DOWNSTREAM                    | NADH:flavinoxidoreductase/NADHoxidase,N-terminal |
| Kabuli_wild_31215109 | 1399939055                          | Ca_kabuli_Chr05 | 31215109                | C/T  | NA                 | INTERGENIC                    | NA                                               |
| Kabuli_wild_31313858 | 1399939056                          | Ca_kabuli_Chr05 | 31313858                | T/C  | Gene_Ca_04834      | NON_SYNONYMOUS_CODING         | Phox/Bem1p                                       |
| Kabuli_wild_31314012 | 1399939057                          | Ca_kabuli_Chr05 | 31314012                | A/C  | Gene_Ca_04834      | SYNONYMOUS_CODING             | Catalase                                         |
| Kabuli_wild_31314056 | 1399939058                          | Ca_kabuli_Chr05 | 31314056                | A/C  | Gene_Ca_04834      | SYNONYMOUS_CODING             | NA                                               |
| Kabuli_wild_31330773 | 1399939059                          | Ca_kabuli_Chr05 | 31330773                | C/A  | Gene_Ca_04835      | INTRON                        | NA                                               |
| Kabuli_wild_31390319 | 1399939060                          | Ca_kabuli_Chr05 | 31390319                | C/T  | Gene_Ca_04841      | INTRON                        | NA                                               |
| Kabuli_wild_31687891 | 1399939061                          | Ca_kabuli_Chr05 | 31687891                | A/C  | Gene_Ca_04871      | NON_SYNONYMOUS_CODING         | RNA-bindingproteinLupusLa                        |
| Kabuli_wild_31694063 | 1399939062                          | Ca_kabuli_Chr05 | 31694063                | T/G  | NA                 | INTERGENIC                    | NA                                               |
| Kabuli_wild_31704649 | 1399939063                          | Ca_kabuli_Chr05 | 31704649                | T/G  | Gene_Ca_04873      | NON_SYNONYMOUS_CODING         | PeptidaseS8/S53,subtilisin/kexin/sedolisin       |

| SNP IDs              | NCBI dbSNP accession IDs (NCBI_SS#) | Chromosomes     | Physical positions (bp) | SNPs | Gene accession IDs | Sequence components of genome | Putative functions                                      |
|----------------------|-------------------------------------|-----------------|-------------------------|------|--------------------|-------------------------------|---------------------------------------------------------|
| Kabuli_wild_31750242 | 1399939064                          | Ca_kabuli_Chr05 | 31750242                | A/G  | NA                 | INTERGENIC                    | NA                                                      |
| Kabuli_wild_31935674 | 1399939065                          | Ca_kabuli_Chr05 | 31935674                | T/C  | Gene_Ca_04898      | NON_SYNONYMOUS_CODING         | Protein of unknown function DUF869,plant                |
| Kabuli_wild_32011781 | 1399939066                          | Ca_kabuli_Chr05 | 32011781                | G/T  | Gene_Ca_04904      | INTRON                        | Kinesin,motordomain                                     |
| Kabuli_wild_32011792 | 1399939067                          | Ca_kabuli_Chr05 | 32011792                | T/G  | Gene_Ca_04904      | INTRON                        | Kinesin,motordomain                                     |
| Kabuli_wild_32171632 | 1399939068                          | Ca_kabuli_Chr05 | 32171632                | G/A  | Gene_Ca_04917      | INTRON                        | Tetrapyrrolemethylase                                   |
| Kabuli_wild_32291118 | 1399939069                          | Ca_kabuli_Chr05 | 32291118                | G/A  | NA                 | INTERGENIC                    | NA                                                      |
| Kabuli_wild_32291124 | 1399939070                          | Ca_kabuli_Chr05 | 32291124                | G/A  | NA                 | INTERGENIC                    | NA                                                      |
| Kabuli_wild_32291133 | 1399939071                          | Ca_kabuli_Chr05 | 32291133                | T/A  | NA                 | INTERGENIC                    | NA                                                      |
| Kabuli_wild_32291134 | 1399939072                          | Ca_kabuli_Chr05 | 32291134                | A/G  | Gene_Ca_04927      | START_LOST                    | Aminotransferase-like,plant mobile domain               |
| Kabuli_wild_32291136 | 1399939073                          | Ca_kabuli_Chr05 | 32291136                | G/T  | Gene_Ca_04927      | START_LOST                    | Aminotransferase-like,plant mobile domain               |
| Kabuli_wild_32291157 | 1399939074                          | Ca_kabuli_Chr05 | 32291157                | G/A  | Gene_Ca_04927      | SYNONYMOUS_CODING             | Aminotransferase-like,plant mobile domain               |
| Kabuli_wild_32291158 | 1399939075                          | Ca_kabuli_Chr05 | 32291158                | C/T  | Gene_Ca_04927      | STOP_GAINED                   | Aminotransferase-like,plant mobile domain               |
| Kabuli_wild_32291160 | 1399939076                          | Ca_kabuli_Chr05 | 32291160                | G/A  | Gene_Ca_04927      | SYNONYMOUS_CODING             | Aminotransferase-like,plant mobile domain               |
| Kabuli_wild_32291166 | 1399939077                          | Ca_kabuli_Chr05 | 32291166                | T/G  | Gene_Ca_04927      | NON_SYNONYMOUS_CODING         | Aminotransferase-like,plant mobile domain               |
| Kabuli_wild_32357511 | 1399939078                          | Ca_kabuli_Chr05 | 32357511                | G/A  | Gene_Ca_04934      | NON_SYNONYMOUS_CODING         | Pseudouridinesynthase/archaeosinetransglycosylase       |
| Kabuli_wild_32368485 | 1399939079                          | Ca_kabuli_Chr05 | 32368485                | G/C  | NA                 | INTERGENIC                    | NA                                                      |
| Kabuli_wild_32383745 | 1399939080                          | Ca_kabuli_Chr05 | 32383745                | G/A  | NA                 | INTERGENIC                    | NA                                                      |
| Kabuli_wild_32383807 | 1399939081                          | Ca_kabuli_Chr05 | 32383807                | G/A  | NA                 | INTERGENIC                    | NA                                                      |
| Kabuli_wild_32383828 | 1399939082                          | Ca_kabuli_Chr05 | 32383828                | G/A  | NA                 | INTERGENIC                    | NA                                                      |
| Kabuli_wild_32383871 | 1399939083                          | Ca_kabuli_Chr05 | 32383871                | G/C  | NA                 | INTERGENIC                    | NA                                                      |
| Kabuli_wild_32383875 | 1399939084                          | Ca_kabuli_Chr05 | 32383875                | T/G  | NA                 | INTERGENIC                    | NA                                                      |
| Kabuli_wild_32399391 | 1399939085                          | Ca_kabuli_Chr05 | 32399391                | T/A  | NA                 | INTERGENIC                    | NA                                                      |
| Kabuli_wild_32516773 | 1399939086                          | Ca_kabuli_Chr05 | 32516773                | T/A  | Gene_Ca_04958      | INTRON                        | NA                                                      |
| Kabuli_wild_32524646 | 1399939087                          | Ca_kabuli_Chr05 | 32524646                | T/C  | Gene_Ca_04959      | INTRON                        | NA                                                      |
| Kabuli_wild_32598221 | 1399939088                          | Ca_kabuli_Chr05 | 32598221                | C/A  | Gene_Ca_04965      | DOWNSTREAM                    | Epidermalgrowthfactor-like,type3                        |
| Kabuli_wild_32598281 | 1399939089                          | Ca_kabuli_Chr05 | 32598281                | C/A  | Gene_Ca_04965      | DOWNSTREAM                    | Epidermalgrowthfactor-like,type3                        |
| Kabuli_wild_32816626 | 1399939090                          | Ca_kabuli_Chr05 | 32816626                | G/T  | NA                 | INTERGENIC                    | NA                                                      |
| Kabuli_wild_32840522 | 1399939091                          | Ca_kabuli_Chr05 | 32840522                | T/C  | Gene_Ca_04983      | NON_SYNONYMOUS_CODING         | Quinate/shikimate5-dehydrogenase/glutamyl-tRNAreductase |
| Kabuli_wild_32840541 | 1399939092                          | Ca_kabuli_Chr05 | 32840541                | T/G  | Gene_Ca_04983      | NON_SYNONYMOUS_CODING         | Quinate/shikimate5-dehydrogenase/glutamyl-tRNAreductase |
| Kabuli_wild_32859504 | 1399939093                          | Ca_kabuli_Chr05 | 32859504                | T/G  | Gene_Ca_04985      | INTRON                        | Protein of unknown function DUF3453                     |
| Kabuli_wild_32859515 | 1399939094                          | Ca_kabuli_Chr05 | 32859515                | T/G  | Gene_Ca_04985      | INTRON                        | Protein of unknown function DUF3453                     |
| Kabuli_wild_32860087 | 1399939095                          | Ca_kabuli_Chr05 | 32860087                | C/T  | Gene_Ca_04985      | INTRON                        | Protein of unknown function DUF3453                     |
| Kabuli_wild_32978975 | 1399939096                          | Ca_kabuli_Chr05 | 32978975                | A/T  | Gene_Ca_04995      | DOWNSTREAM                    | Cation/H+exchanger                                      |
| Kabuli_wild_33052329 | 1399939097                          | Ca_kabuli_Chr05 | 33052329                | C/G  | NA                 | INTERGENIC                    | NA                                                      |
| Kabuli_wild_33236167 | 1399939098                          | Ca_kabuli_Chr05 | 33236167                | C/T  | Gene_Ca_05015      | NON_SYNONYMOUS_CODING         | Aminoacyl-tRNAsynthetase,classI,conservedsite           |
| Kabuli_wild_33255823 | 1399939099                          | Ca_kabuli_Chr05 | 33255823                | T/G  | NA                 | INTERGENIC                    | NA                                                      |
| Kabuli_wild_33422813 | 1399939100                          | Ca_kabuli_Chr05 | 33422813                | C/T  | NA                 | INTERGENIC                    | NA                                                      |
| Kabuli_wild_33523676 | 1399939101                          | Ca_kabuli_Chr05 | 33523676                | T/C  | NA                 | INTERGENIC                    | NA                                                      |
| Kabuli_wild_33523686 | 1399939102                          | Ca_kabuli_Chr05 | 33523686                | G/A  | NA                 | INTERGENIC                    | NA                                                      |
| Kabuli_wild_33532807 | 1399939103                          | Ca_kabuli_Chr05 | 33532807                | A/G  | NA                 | INTERGENIC                    | NA                                                      |
| Kabuli_wild_33574724 | 1399939104                          | Ca_kabuli_Chr05 | 33574724                | T/C  | NA                 | INTERGENIC                    | NA                                                      |
| Kabuli_wild_33627132 | 1399939105                          | Ca_kabuli_Chr05 | 33627132                | T/C  | NA                 | INTERGENIC                    | NA                                                      |
| Kabuli_wild_33631108 | 1399939106                          | Ca_kabuli_Chr05 | 33631108                | A/G  | NA                 | INTERGENIC                    | NA                                                      |
| Kabuli_wild_33631266 | 1399939107                          | Ca_kabuli_Chr05 | 33631266                | T/A  | NA                 | INTERGENIC                    | NA                                                      |

| SNP IDs              | NCBI dbSNP accession IDs (NCBI_SS#) | Chromosomes     | Physical positions (bp) | SNPs | Gene accession IDs | Sequence components of genome | Putative functions                                  |
|----------------------|-------------------------------------|-----------------|-------------------------|------|--------------------|-------------------------------|-----------------------------------------------------|
| Kabuli_wild_33631274 | 1399939108                          | Ca_kabuli_Chr05 | 33631274                | C/A  | NA                 | INTERGENIC                    | NA                                                  |
| Kabuli_wild_33673894 | 1399939109                          | Ca_kabuli_Chr05 | 33673894                | T/C  | NA                 | INTERGENIC                    | NA                                                  |
| Kabuli_wild_33675481 | 1399939110                          | Ca_kabuli_Chr05 | 33675481                | C/G  | Gene_Ca_01888      | NON_SYNONYMOUS_CODING         | VHS                                                 |
| Kabuli_wild_33812213 | 1399939111                          | Ca_kabuli_Chr05 | 33812213                | A/C  | Gene_Ca_01876      | INTRON                        | NA                                                  |
| Kabuli_wild_33812363 | 1399939112                          | Ca_kabuli_Chr05 | 33812363                | T/A  | Gene_Ca_01876      | INTRON                        | NA                                                  |
| Kabuli_wild_33818742 | 1399939113                          | Ca_kabuli_Chr05 | 33818742                | T/A  | Gene_Ca_01875      | NON_SYNONYMOUS_CODING         | RNA recognition motif domain                        |
| Kabuli_wild_33818823 | 1399939114                          | Ca_kabuli_Chr05 | 33818823                | A/G  | Gene_Ca_01875      | NON_SYNONYMOUS_CODING         | RNA recognition motif domain                        |
| Kabuli_wild_33892596 | 1399939115                          | Ca_kabuli_Chr05 | 33892596                | A/C  | Gene_Ca_01864      | NON_SYNONYMOUS_CODING         | Proteasome component (PCI) domain                   |
| Kabuli_wild_33937307 | 1399939116                          | Ca_kabuli_Chr05 | 33937307                | G/A  | Gene_Ca_01859      | DOWNSTREAM                    | Tetrapyrrolemethylase                               |
| Kabuli_wild_33937316 | 1399939117                          | Ca_kabuli_Chr05 | 33937316                | G/A  | Gene_Ca_01859      | DOWNSTREAM                    | Tetrapyrrolemethylase                               |
| Kabuli_wild_33963525 | 1399939118                          | Ca_kabuli_Chr05 | 33963525                | G/C  | NA                 | INTERGENIC                    | NA                                                  |
| Kabuli_wild_33986253 | 1399939119                          | Ca_kabuli_Chr05 | 33986253                | C/A  | Gene_Ca_01852      | SYNONYMOUS_CODING             | Protein kinase,catalytic domain                     |
| Kabuli_wild_34041827 | 1399939120                          | Ca_kabuli_Chr05 | 34041827                | A/C  | NA                 | INTERGENIC                    | NA                                                  |
| Kabuli_wild_34129856 | 1399939121                          | Ca_kabuli_Chr05 | 34129856                | A/G  | Gene_Ca_01835      | NON_SYNONYMOUS_CODING         | ATPase, P-type, H+ transporting proton pump         |
| Kabuli_wild_34129900 | 1399939122                          | Ca_kabuli_Chr05 | 34129900                | A/C  | Gene_Ca_01835      | NON_SYNONYMOUS_CODING         | ATPase, P-type, H+ transporting proton pump         |
| Kabuli_wild_34189654 | 1399939123                          | Ca_kabuli_Chr05 | 34189654                | A/T  | Gene_Ca_01828      | NON_SYNONYMOUS_CODING         | Domain of unknown function DUF2296                  |
| Kabuli_wild_34190000 | 1399939124                          | Ca_kabuli_Chr05 | 34190000                | A/G  | Gene_Ca_01828      | SYNONYMOUS_CODING             | Domain of unknown function DUF2296                  |
| Kabuli_wild_34202075 | 1399939125                          | Ca_kabuli_Chr05 | 34202075                | T/G  | Gene_Ca_01827      | NON_SYNONYMOUS_CODING         | PeptidaseC19,ubiquitincoaxyl-terminalhydrolase2     |
| Kabuli_wild_34244641 | 1399939126                          | Ca_kabuli_Chr05 | 34244641                | A/G  | Gene_Ca_01824      | INTRON                        | WD40 repeat                                         |
| Kabuli_wild_34334936 | 1399939127                          | Ca_kabuli_Chr05 | 34334936                | A/G  | Gene_Ca_01813      | SYNONYMOUS_CODING             | RibosomalproteinL10/acidicP0                        |
| Kabuli_wild_34411801 | 1399939128                          | Ca_kabuli_Chr05 | 34411801                | T/C  | NA                 | INTERGENIC                    | NA                                                  |
| Kabuli_wild_34441581 | 1399939129                          | Ca_kabuli_Chr05 | 34441581                | A/C  | Gene_Ca_01800      | NON_SYNONYMOUS_CODING         | Transcription elongation factor S-II, centraldomain |
| Kabuli_wild_34482017 | 1399939130                          | Ca_kabuli_Chr05 | 34482017                | T/G  | Gene_Ca_01795      | SYNONYMOUS_CODING             | Glycosyltransferase,family8                         |
| Kabuli_wild_34531222 | 1399939131                          | Ca_kabuli_Chr05 | 34531222                | A/G  | Gene_Ca_01787      | INTRON                        | ABC transporter-like                                |
| Kabuli_wild_34535758 | 1399939132                          | Ca_kabuli_Chr05 | 34535758                | T/C  | Gene_Ca_01787      | NON_SYNONYMOUS_CODING         | ABC transporter-like                                |
| Kabuli_wild_34535893 | 1399939133                          | Ca_kabuli_Chr05 | 34535893                | G/T  | Gene_Ca_01787      | UPSTREAM                      | ABC transporter-like                                |
| Kabuli_wild_34603263 | 1399939134                          | Ca_kabuli_Chr05 | 34603263                | A/C  | Gene_Ca_01780      | INTRON                        | RanGTPase                                           |
| Kabuli_wild_34603284 | 1399939135                          | Ca_kabuli_Chr05 | 34603284                | A/G  | Gene_Ca_01780      | INTRON                        | RanGTPase                                           |
| Kabuli_wild_34646956 | 1399939136                          | Ca_kabuli_Chr05 | 34646956                | A/G  | Gene_Ca_01776      | UPSTREAM                      | Phospholipase/carboxylesterase                      |
| Kabuli_wild_34807540 | 1399939137                          | Ca_kabuli_Chr05 | 34807540                | A/T  | Gene_Ca_01760      | NON_SYNONYMOUS_CODING         | F-boxdomain,cyclin-like                             |
| Kabuli_wild_34808850 | 1399939138                          | Ca_kabuli_Chr05 | 34808850                | T/G  | NA                 | INTERGENIC                    | NA                                                  |
| Kabuli_wild_34824749 | 1399939139                          | Ca_kabuli_Chr05 | 34824749                | A/T  | Gene_Ca_01757      | DOWNSTREAM                    | Protein kinase,catalytic domain                     |
| Kabuli_wild_34845398 | 1399939140                          | Ca_kabuli_Chr05 | 34845398                | T/G  | NA                 | INTERGENIC                    | NA                                                  |
| Kabuli_wild_34857308 | 1399939141                          | Ca_kabuli_Chr05 | 34857308                | T/G  | Gene_Ca_01754      | INTRON                        | AUX/IAAprotein                                      |
| Kabuli_wild_34882263 | 1399939142                          | Ca_kabuli_Chr05 | 34882263                | T/G  | Gene_Ca_01752      | DOWNSTREAM                    | Ubiquitin supe rgroup                               |
| Kabuli_wild_34974703 | 1399939143                          | Ca_kabuli_Chr05 | 34974703                | C/T  | NA                 | INTERGENIC                    | NA                                                  |
| Kabuli_wild_35191371 | 1399939144                          | Ca_kabuli_Chr05 | 35191371                | C/G  | Gene_Ca_01716      | NON_SYNONYMOUS_CODING         | Proteasome component (PCI) domain                   |
| Kabuli_wild_35302645 | 1399939145                          | Ca_kabuli_Chr05 | 35302645                | A/C  | NA                 | INTERGENIC                    | NA                                                  |
| Kabuli_wild_35312501 | 1399939146                          | Ca_kabuli_Chr05 | 35312501                | G/A  | Gene_Ca_01705      | DOWNSTREAM                    | Pentatricopeptide repeat                            |
| Kabuli_wild_35500751 | 1399939147                          | Ca_kabuli_Chr05 | 35500751                | T/C  | Gene_Ca_01682      | SYNONYMOUS_CODING             | Sterilealpha motif domain                           |
| Kabuli_wild_35532133 | 1399939148                          | Ca_kabuli_Chr05 | 35532133                | A/C  | Gene_Ca_01678      | INTRON                        | BRCT                                                |
| Kabuli_wild_35555184 | 1399939149                          | Ca_kabuli_Chr05 | 35555184                | A/G  | Gene_Ca_01676      | UPSTREAM                      | Pentatricopeptide repeat                            |
| Kabuli_wild_35617798 | 1399939150                          | Ca_kabuli_Chr05 | 35617798                | A/C  | NA                 | INTERGENIC                    | NA                                                  |
| Kabuli_wild_35690996 | 1399939151                          | Ca_kabuli_Chr05 | 35690996                | G/A  | NA                 | INTERGENIC                    | NA                                                  |

| SNP IDs              | NCBI dbSNP accession IDs (NCBI_SS#) | Chromosomes     | Physical positions (bp) | SNPs | Gene accession IDs | Sequence components of genome | Putative functions                                           |
|----------------------|-------------------------------------|-----------------|-------------------------|------|--------------------|-------------------------------|--------------------------------------------------------------|
| Kabuli_wild_35715548 | 1399939152                          | Ca_kabuli_Chr05 | 35715548                | T/C  | NA                 | INTERGENIC                    | NA                                                           |
| Kabuli_wild_35715571 | 1399939153                          | Ca_kabuli_Chr05 | 35715571                | A/C  | NA                 | INTERGENIC                    | NA                                                           |
| Kabuli_wild_35773044 | 1399939154                          | Ca_kabuli_Chr05 | 35773044                | A/G  | NA                 | INTERGENIC                    | NA                                                           |
| Kabuli_wild_35789373 | 1399939155                          | Ca_kabuli_Chr05 | 35789373                | T/A  | Gene_Ca_01646      | INTRON                        | Protein kinase,catalytic domain                              |
| Kabuli_wild_35839233 | 1399939156                          | Ca_kabuli_Chr05 | 35839233                | G/A  | Gene_Ca_01642      | SYNONYMOUS_CODING             | Mitochondrial carrier protein                                |
| Kabuli_wild_35844295 | 1399939157                          | Ca_kabuli_Chr05 | 35844295                | G/T  | NA                 | INTERGENIC                    | NA                                                           |
| Kabuli_wild_35877505 | 1399939158                          | Ca_kabuli_Chr05 | 35877505                | T/C  | Gene_Ca_01638      | SYNONYMOUS_CODING             | Mitochondrial carrier protein                                |
| Kabuli_wild_35937842 | 1399939159                          | Ca_kabuli_Chr05 | 35937842                | G/T  | Gene_Ca_01631      | NON_SYNONYMOUS_CODING         | NADH:ubiquinone oxidoreductase-like,20 kDa subunit           |
| Kabuli_wild_35937912 | 1399939160                          | Ca_kabuli_Chr05 | 35937912                | C/A  | Gene_Ca_01631      | NON_SYNONYMOUS_CODING         | NADH:ubiquinone oxidoreductase-like,20 kDa subunit           |
| Kabuli_wild_35957499 | 1399939161                          | Ca_kabuli_Chr05 | 35957499                | T/C  | Gene_Ca_01628      | INTRON                        | Phosphorylated adapter RNA export protein,RNA-binding domain |
| Kabuli_wild_35967605 | 1399939162                          | Ca_kabuli_Chr05 | 35967605                | T/C  | Gene_Ca_01627      | INTRON                        | PeptidaseC13,legumain                                        |
| Kabuli_wild_36011980 | 1399939163                          | Ca_kabuli_Chr05 | 36011980                | T/A  | Gene_Ca_01621      | DOWNSTREAM                    | Domain of unknown function DUF239,plant                      |
| Kabuli_wild_36128655 | 1399939164                          | Ca_kabuli_Chr05 | 36128655                | G/T  | Gene_Ca_01611      | INTRON                        | NA                                                           |
| Kabuli_wild_36131156 | 1399939165                          | Ca_kabuli_Chr05 | 36131156                | A/C  | Gene_Ca_01611      | INTRON                        | NA                                                           |
| Kabuli_wild_36238630 | 1399939166                          | Ca_kabuli_Chr05 | 36238630                | G/A  | Gene_Ca_01601      | INTRON                        | ATPase,P-type,K/Mg/Cd/Cu/Zn/Na/Ca/Na/H-transporter           |
| Kabuli_wild_36238655 | 1399939167                          | Ca_kabuli_Chr05 | 36238655                | G/A  | Gene_Ca_01601      | INTRON                        | ATPase,P-type,K/Mg/Cd/Cu/Zn/Na/Ca/Na/H-transporter           |
| Kabuli_wild_36238656 | 1399939168                          | Ca_kabuli_Chr05 | 36238656                | G/A  | Gene_Ca_01601      | INTRON                        | ATPase,P-type,K/Mg/Cd/Cu/Zn/Na/Ca/Na/H-transporter           |
| Kabuli_wild_36238663 | 1399939169                          | Ca_kabuli_Chr05 | 36238663                | C/A  | Gene_Ca_01601      | INTRON                        | ATPase,P-type,K/Mg/Cd/Cu/Zn/Na/Ca/Na/H-transporter           |
| Kabuli_wild_36248623 | 1399939170                          | Ca_kabuli_Chr05 | 36248623                | A/C  | Gene_Ca_01601      | INTRON                        | ATPase,P-type,K/Mg/Cd/Cu/Zn/Na/Ca/Na/H-transporter           |
| Kabuli_wild_36408719 | 1399939171                          | Ca_kabuli_Chr05 | 36408719                | G/A  | Gene_Ca_01583      | DOWNSTREAM                    | Ankyrinrepeat                                                |
| Kabuli_wild_36534056 | 1399939172                          | Ca_kabuli_Chr05 | 36534056                | G/C  | Gene_Ca_01566      | INTRON                        | MRG                                                          |
| Kabuli_wild_36534063 | 1399939173                          | Ca_kabuli_Chr05 | 36534063                | C/T  | Gene_Ca_01566      | INTRON                        | MRG                                                          |
| Kabuli_wild_36613606 | 1399939174                          | Ca_kabuli_Chr05 | 36613606                | T/G  | Gene_Ca_01559      | NON_SYNONYMOUS_CODING         | Protein kinase,catalytic domain                              |
| Kabuli_wild_36619837 | 1399939175                          | Ca_kabuli_Chr05 | 36619837                | A/G  | Gene_Ca_01558      | INTRON                        | Kinesin,motordomain                                          |
| Kabuli_wild_36621872 | 1399939176                          | Ca_kabuli_Chr05 | 36621872                | A/T  | Gene_Ca_01558      | NON_SYNONYMOUS_CODING         | Kinesin,motordomain                                          |
| Kabuli_wild_36643373 | 1399939177                          | Ca_kabuli_Chr05 | 36643373                | G/T  | NA                 | INTERGENIC                    | NA                                                           |
| Kabuli_wild_36672147 | 1399939178                          | Ca_kabuli_Chr05 | 36672147                | C/T  | Gene_Ca_01555      | NON_SYNONYMOUS_CODING         | RNA recognition motif domain                                 |
| Kabuli_wild_36673950 | 1399939179                          | Ca_kabuli_Chr05 | 36673950                | C/A  | NA                 | INTERGENIC                    | NA                                                           |
| Kabuli_wild_36735459 | 1399939180                          | Ca_kabuli_Chr05 | 36735459                | A/T  | Gene_Ca_01550      | NON_SYNONYMOUS_CODING         | Helix-loop-helixDNA-binding domain                           |
| Kabuli_wild_36751625 | 1399939181                          | Ca_kabuli_Chr05 | 36751625                | C/T  | Gene_Ca_01548      | DOWNSTREAM                    | Basic-leucine zipper (bZIP ) Transcription factor            |
| Kabuli_wild_36751851 | 1399939182                          | Ca_kabuli_Chr05 | 36751851                | T/A  | Gene_Ca_01548      | DOWNSTREAM                    | Basic-leucine zipper (bZIP ) Transcription factor            |
| Kabuli_wild_36757408 | 1399939183                          | Ca_kabuli_Chr05 | 36757408                | G/A  | Gene_Ca_01548      | UPSTREAM                      | Basic-leucine zipper (bZIP ) Transcription factor            |
| Kabuli_wild_36797187 | 1399939184                          | Ca_kabuli_Chr05 | 36797187                | G/T  | NA                 | INTERGENIC                    | NA                                                           |
| Kabuli_wild_36800139 | 1399939185                          | Ca_kabuli_Chr05 | 36800139                | G/A  | NA                 | INTERGENIC                    | NA                                                           |
| Kabuli_wild_36978227 | 1399939186                          | Ca_kabuli_Chr05 | 36978227                | T/G  | NA                 | INTERGENIC                    | NA                                                           |
| Kabuli_wild_36999074 | 1399939187                          | Ca_kabuli_Chr05 | 36999074                | G/C  | Gene_Ca_01518      | NON_SYNONYMOUS_CODING         | Protein kinase,catalytic domain                              |
| Kabuli_wild_37012335 | 1399939188                          | Ca_kabuli_Chr05 | 37012335                | T/G  | NA                 | INTERGENIC                    | NA                                                           |
| Kabuli_wild_37012371 | 1399939189                          | Ca_kabuli_Chr05 | 37012371                | A/T  | NA                 | INTERGENIC                    | NA                                                           |
| Kabuli_wild_37016704 | 1399939190                          | Ca_kabuli_Chr05 | 37016704                | C/G  | NA                 | INTERGENIC                    | NA                                                           |
| Kabuli_wild_37039246 | 1399939191                          | Ca_kabuli_Chr05 | 37039246                | A/T  | NA                 | INTERGENIC                    | NA                                                           |
| Kabuli_wild_37039300 | 1399939192                          | Ca_kabuli_Chr05 | 37039300                | A/G  | NA                 | INTERGENIC                    | NA                                                           |
| Kabuli_wild_37040045 | 1399939193                          | Ca_kabuli_Chr05 | 37040045                | G/A  | NA                 | INTERGENIC                    | NA                                                           |
| Kabuli_wild_37066540 | 1399939194                          | Ca_kabuli_Chr05 | 37066540                | G/A  | Gene_Ca_01509      | SYNONYMOUS_CODING             | Aminoacyl-tRNAsynthetase,classII(G/H/P/S),conserveddomain    |
| Kabuli_wild_37067293 | 1399939195                          | Ca_kabuli_Chr05 | 37067293                | A/G  | Gene_Ca_01509      | INTRON                        | Aminoacyl-tRNAsynthetase,classII(G/H/P/S),conserveddomain    |

| SNP IDs              | NCBI dbSNP accession IDs (NCBI_SS#) | Chromosomes     | Physical positions (bp) | SNPs | Gene accession IDs | Sequence components of genome | Putative functions                                                              |
|----------------------|-------------------------------------|-----------------|-------------------------|------|--------------------|-------------------------------|---------------------------------------------------------------------------------|
| Kabuli_wild_37082797 | 1399939196                          | Ca_kabuli_Chr05 | 37082797                | G/T  | Gene_Ca_01507      | SYNONYMOUS_CODING             | GRAM                                                                            |
| Kabuli_wild_37083275 | 1399939197                          | Ca_kabuli_Chr05 | 37083275                | G/T  | Gene_Ca_01507      | INTRON                        | GRAM                                                                            |
| Kabuli_wild_37083276 | 1399939198                          | Ca_kabuli_Chr05 | 37083276                | T/G  | Gene_Ca_01507      | INTRON                        | GRAM                                                                            |
| Kabuli_wild_37113187 | 1399939199                          | Ca_kabuli_Chr05 | 37113187                | C/A  | Gene_Ca_01505      | INTRON                        | WD40 repeat                                                                     |
| Kabuli_wild_37126371 | 1399939200                          | Ca_kabuli_Chr05 | 37126371                | A/G  | NA                 | INTERGENIC                    | NA                                                                              |
| Kabuli_wild_37174786 | 1399939201                          | Ca_kabuli_Chr05 | 37174786                | T/C  | Gene_Ca_01500      | SYNONYMOUS_CODING             | Rho GTPase-activating protein domain                                            |
| Kabuli_wild_37197321 | 1399939202                          | Ca_kabuli_Chr05 | 37197321                | C/A  | Gene_Ca_01498      | DOWNSTREAM                    | NA                                                                              |
| Kabuli_wild_37207855 | 1399939203                          | Ca_kabuli_Chr05 | 37207855                | G/T  | Gene_Ca_01496      | NON_SYNONYMOUS_CODING         | PeptidaseC19,ubiquitincarboxyl-terminalhydrolase2                               |
| Kabuli_wild_37260632 | 1399939204                          | Ca_kabuli_Chr05 | 37260632                | T/C  | NA                 | INTERGENIC                    | NA                                                                              |
| Kabuli_wild_37274572 | 1399939205                          | Ca_kabuli_Chr05 | 37274572                | C/T  | NA                 | INTERGENIC                    | NA                                                                              |
| Kabuli_wild_37274583 | 1399939206                          | Ca_kabuli_Chr05 | 37274583                | C/T  | NA                 | INTERGENIC                    | NA                                                                              |
| Kabuli_wild_37274616 | 1399939207                          | Ca_kabuli_Chr05 | 37274616                | C/G  | NA                 | INTERGENIC                    | NA                                                                              |
| Kabuli_wild_37309935 | 1399939208                          | Ca_kabuli_Chr05 | 37309935                | T/G  | Gene_Ca_01488      | NON_SYNONYMOUS_CODING         | GDP-fucoseproteinO-fucosyltransferase                                           |
| Kabuli_wild_37339094 | 1399939209                          | Ca_kabuli_Chr05 | 37339094                | C/A  | Gene_Ca_01485      | NON_SYNONYMOUS_CODING         | NA                                                                              |
| Kabuli_wild_37375575 | 1399939210                          | Ca_kabuli_Chr05 | 37375575                | C/G  | Gene_Ca_01480      | INTRON                        | Flavodoxin                                                                      |
| Kabuli_wild_37425779 | 1399939211                          | Ca_kabuli_Chr05 | 37425779                | T/C  | Gene_Ca_01477      | NON_SYNONYMOUS_CODING         | Double-strandedRNA-binding                                                      |
| Kabuli_wild_37460979 | 1399939212                          | Ca_kabuli_Chr05 | 37460979                | C/A  | NA                 | INTERGENIC                    | NA                                                                              |
| Kabuli_wild_37460980 | 1399939213                          | Ca_kabuli_Chr05 | 37460980                | A/G  | NA                 | INTERGENIC                    | NA                                                                              |
| Kabuli_wild_37472968 | 1399939214                          | Ca_kabuli_Chr05 | 37472968                | A/G  | NA                 | INTERGENIC                    | NA                                                                              |
| Kabuli_wild_37555846 | 1399939215                          | Ca_kabuli_Chr05 | 37555846                | T/A  | Gene_Ca_01465      | INTRON                        | Domain of unknown function FMP27,domain-4                                       |
| Kabuli_wild_37555877 | 1399939216                          | Ca_kabuli_Chr05 | 37555877                | A/G  | Gene_Ca_01465      | INTRON                        | Domain of unknown function FMP27,domain-4                                       |
| Kabuli_wild_37578999 | 1399939217                          | Ca_kabuli_Chr05 | 37578999                | T/G  | Gene_Ca_01463      | INTRON                        | Protein of unknown function DUF914,eukaryotic                                   |
| Kabuli_wild_37596144 | 1399939218                          | Ca_kabuli_Chr05 | 37596144                | T/A  | Gene_Ca_01462      | SYNONYMOUS_CODING             | Ubiquitin-associated/translation elongation factor EF1B, N-terminal             |
| Kabuli_wild_37604030 | 1399939219                          | Ca_kabuli_Chr05 | 37604030                | T/C  | NA                 | INTERGENIC                    | NA                                                                              |
| Kabuli_wild_37874725 | 1399939220                          | Ca_kabuli_Chr05 | 37874725                | A/C  | Gene_Ca_01436      | UPSTREAM                      | NA                                                                              |
| Kabuli_wild_37886413 | 1399939221                          | Ca_kabuli_Chr05 | 37886413                | C/G  | Gene_Ca_01435      | DOWNSTREAM                    | NA                                                                              |
| Kabuli_wild_37886417 | 1399939222                          | Ca_kabuli_Chr05 | 37886417                | T/G  | Gene_Ca_01435      | DOWNSTREAM                    | NA                                                                              |
| Kabuli_wild_37899098 | 1399939223                          | Ca_kabuli_Chr05 | 37899098                | T/C  | NA                 | INTERGENIC                    | NA                                                                              |
| Kabuli_wild_37899183 | 1399939224                          | Ca_kabuli_Chr05 | 37899183                | A/C  | NA                 | INTERGENIC                    | NA                                                                              |
| Kabuli_wild_37911818 | 1399939225                          | Ca_kabuli_Chr05 | 37911818                | A/C  | Gene_Ca_01431      | UPSTREAM                      | NA                                                                              |
| Kabuli_wild_37911819 | 1399939226                          | Ca_kabuli_Chr05 | 37911819                | G/A  | Gene_Ca_01431      | UPSTREAM                      | NA                                                                              |
| Kabuli_wild_38018552 | 1399939227                          | Ca_kabuli_Chr05 | 38018552                | A/T  | NA                 | INTERGENIC                    | NA                                                                              |
| Kabuli_wild_38018558 | 1399939228                          | Ca_kabuli_Chr05 | 38018558                | G/C  | NA                 | INTERGENIC                    | NA                                                                              |
| Kabuli_wild_38018575 | 1399939229                          | Ca_kabuli_Chr05 | 38018575                | C/T  | NA                 | INTERGENIC                    | NA                                                                              |
| Kabuli_wild_38057582 | 1399939230                          | Ca_kabuli_Chr05 | 38057582                | C/T  | Gene_Ca_01417      | NON_SYNONYMOUS_CODING         | Zinc finger,DHHC-type,palmitoyltransferase                                      |
| Kabuli_wild_38062576 | 1399939231                          | Ca_kabuli_Chr05 | 38062576                | G/A  | Gene_Ca_01415      | UPSTREAM                      | Mitochondrial inner membrane translocase complex,Tim 8/9/10/13-Zinc finger-like |
| Kabuli_wild_38066502 | 1399939232                          | Ca_kabuli_Chr05 | 38066502                | C/G  | NA                 | INTERGENIC                    | NA                                                                              |
| Kabuli_wild_38066557 | 1399939233                          | Ca_kabuli_Chr05 | 38066557                | C/G  | NA                 | INTERGENIC                    | NA                                                                              |
| Kabuli_wild_38080226 | 1399939234                          | Ca_kabuli_Chr05 | 38080226                | A/G  | Gene_Ca_01411      | SYNONYMOUS_CODING             | Protein kinase,catalytic domain                                                 |
| Kabuli_wild_38080349 | 1399939235                          | Ca_kabuli_Chr05 | 38080349                | C/T  | Gene_Ca_01411      | SYNONYMOUS_CODING             | Protein kinase,catalytic domain                                                 |
| Kabuli_wild_38092606 | 1399939236                          | Ca_kabuli_Chr05 | 38092606                | G/A  | NA                 | INTERGENIC                    | NA                                                                              |
| Kabuli_wild_38092685 | 1399939237                          | Ca_kabuli_Chr05 | 38092685                | T/A  | NA                 | INTERGENIC                    | NA                                                                              |
| Kabuli_wild_38092732 | 1399939238                          | Ca_kabuli_Chr05 | 38092732                | C/T  | NA                 | INTERGENIC                    | NA                                                                              |
| Kabuli_wild_38092735 | 1399939239                          | Ca_kabuli_Chr05 | 38092735                | C/T  | NA                 | INTERGENIC                    | NA                                                                              |



| SNP IDs              | NCBI dbSNP accession IDs (NCBI_SS#) | Chromosomes     | Physical positions (bp) | SNPs | Gene accession IDs | Sequence components of genome | Putative functions                                  |
|----------------------|-------------------------------------|-----------------|-------------------------|------|--------------------|-------------------------------|-----------------------------------------------------|
| Kabuli_wild_38092793 | 1399939240                          | Ca_kabuli_Chr05 | 38092793                | C/T  | NA                 | INTERGENIC                    | NA                                                  |
| Kabuli_wild_38102941 | 1399939241                          | Ca_kabuli_Chr05 | 38102941                | T/G  | Gene_Ca_01408      | SYNONYMOUS_CODING             | NA                                                  |
| Kabuli_wild_38108396 | 1399939242                          | Ca_kabuli_Chr05 | 38108396                | G/A  | Gene_Ca_01407      | NON_SYNONYMOUS_CODING         | NA                                                  |
| Kabuli_wild_38110219 | 1399939243                          | Ca_kabuli_Chr05 | 38110219                | T/G  | NA                 | INTERGENIC                    | NA                                                  |
| Kabuli_wild_38183662 | 1399939244                          | Ca_kabuli_Chr05 | 38183662                | T/A  | Gene_Ca_01400      | INTRON                        | NA                                                  |
| Kabuli_wild_38216058 | 1399939245                          | Ca_kabuli_Chr05 | 38216058                | T/C  | NA                 | INTERGENIC                    | NA                                                  |
| Kabuli_wild_38220843 | 1399939246                          | Ca_kabuli_Chr05 | 38220843                | G/A  | NA                 | INTERGENIC                    | NA                                                  |
| Kabuli_wild_38248788 | 1399939247                          | Ca_kabuli_Chr05 | 38248788                | T/G  | Gene_Ca_01398      | SYNONYMOUS_CODING             | Dual specificity phosphatase, catalytic domain      |
| Kabuli_wild_38307036 | 1399939248                          | Ca_kabuli_Chr05 | 38307036                | G/A  | Gene_Ca_01392      | SYNONYMOUS_CODING             | Glycosidehydrolase,family38,core                    |
| Kabuli_wild_38347201 | 1399939249                          | Ca_kabuli_Chr05 | 38347201                | A/C  | Gene_Ca_01389      | SYNONYMOUS_CODING             | WD40 repeat                                         |
| Kabuli_wild_38347202 | 1399939250                          | Ca_kabuli_Chr05 | 38347202                | G/T  | Gene_Ca_01389      | NON_SYNONYMOUS_CODING         | WD40 repeat                                         |
| Kabuli_wild_38455563 | 1399939251                          | Ca_kabuli_Chr05 | 38455563                | A/C  | Gene_Ca_07405      | SYNONYMOUS_CODING             | Telomerel ength regulation protein,conserved domain |
| Kabuli_wild_38483396 | 1399939252                          | Ca_kabuli_Chr05 | 38483396                | G/T  | Gene_Ca_07407      | DOWNSTREAM                    | Elongatorprotein3/MiaB/NifB                         |
| Kabuli_wild_38509657 | 1399939253                          | Ca_kabuli_Chr05 | 38509657                | A/C  | Gene_Ca_07410      | INTRON                        | Transcriptional factor B3                           |
| Kabuli_wild_38538904 | 1399939254                          | Ca_kabuli_Chr05 | 38538904                | A/G  | Gene_Ca_07411      | INTRON                        | Glycosyltransferase,family48                        |
| Kabuli_wild_38551438 | 1399939255                          | Ca_kabuli_Chr05 | 38551438                | C/T  | Gene_Ca_07411      | DOWNSTREAM                    | Glycosyltransferase,family48                        |
| Kabuli_wild_38636510 | 1399939256                          | Ca_kabuli_Chr05 | 38636510                | A/G  | NA                 | INTERGENIC                    | NA                                                  |
| Kabuli_wild_38783578 | 1399939257                          | Ca_kabuli_Chr05 | 38783578                | C/A  | Gene_Ca_07428      | NON_SYNONYMOUS_CODING         | Mediator complex subunit Med28                      |
| Kabuli_wild_38783604 | 1399939258                          | Ca_kabuli_Chr05 | 38783604                | C/A  | Gene_Ca_07428      | NON_SYNONYMOUS_CODING         | Mediator complex subunit Med28                      |
| Kabuli_wild_38857904 | 1399939259                          | Ca_kabuli_Chr05 | 38857904                | T/C  | Gene_Ca_07437      | DOWNSTREAM                    | Cytochrome P450                                     |
| Kabuli_wild_38892558 | 1399939260                          | Ca_kabuli_Chr05 | 38892558                | T/G  | NA                 | INTERGENIC                    | NA                                                  |
| Kabuli_wild_38892604 | 1399939261                          | Ca_kabuli_Chr05 | 38892604                | A/C  | NA                 | INTERGENIC                    | NA                                                  |
| Kabuli_wild_38892618 | 1399939262                          | Ca_kabuli_Chr05 | 38892618                | A/G  | NA                 | INTERGENIC                    | NA                                                  |
| Kabuli_wild_38898971 | 1399939263                          | Ca_kabuli_Chr05 | 38898971                | G/A  | NA                 | INTERGENIC                    | NA                                                  |
| Kabuli_wild_38909701 | 1399939264                          | Ca_kabuli_Chr05 | 38909701                | C/T  | Gene_Ca_07443      | NON_SYNONYMOUS_CODING         | Droughtinduced19/RING finger protein114             |
| Kabuli_wild_38931963 | 1399939265                          | Ca_kabuli_Chr05 | 38931963                | C/T  | NA                 | INTERGENIC                    | NA                                                  |
| Kabuli_wild_38931980 | 1399939266                          | Ca_kabuli_Chr05 | 38931980                | G/A  | NA                 | INTERGENIC                    | NA                                                  |
| Kabuli_wild_38937344 | 1399939267                          | Ca_kabuli_Chr05 | 38937344                | A/C  | Gene_Ca_07446      | NON_SYNONYMOUS_CODING         | ChaperoninClpA/B                                    |
| Kabuli_wild_38939524 | 1399939268                          | Ca_kabuli_Chr05 | 38939524                | A/C  | Gene_Ca_07446      | NON_SYNONYMOUS_CODING         | ChaperoninClpA/B                                    |
| Kabuli_wild_38977439 | 1399939269                          | Ca_kabuli_Chr05 | 38977439                | A/C  | NA                 | INTERGENIC                    | NA                                                  |
| Kabuli_wild_39283856 | 1399939270                          | Ca_kabuli_Chr05 | 39283856                | G/A  | Gene_Ca_07474      | INTRON                        | NA                                                  |
| Kabuli_wild_39326933 | 1399939271                          | Ca_kabuli_Chr05 | 39326933                | G/T  | NA                 | INTERGENIC                    | NA                                                  |
| Kabuli_wild_39364522 | 1399939272                          | Ca_kabuli_Chr05 | 39364522                | T/C  | NA                 | INTERGENIC                    | NA                                                  |
| Kabuli_wild_39364569 | 1399939273                          | Ca_kabuli_Chr05 | 39364569                | G/A  | NA                 | INTERGENIC                    | NA                                                  |
| Kabuli_wild_39364571 | 1399939274                          | Ca_kabuli_Chr05 | 39364571                | C/A  | NA                 | INTERGENIC                    | NA                                                  |
| Kabuli_wild_39364667 | 1399939275                          | Ca_kabuli_Chr05 | 39364667                | T/A  | NA                 | INTERGENIC                    | NA                                                  |
| Kabuli_wild_39364695 | 1399939276                          | Ca_kabuli_Chr05 | 39364695                | A/C  | NA                 | INTERGENIC                    | NA                                                  |
| Kabuli_wild_39364700 | 1399939277                          | Ca_kabuli_Chr05 | 39364700                | C/A  | NA                 | INTERGENIC                    | NA                                                  |
| Kabuli_wild_39364720 | 1399939278                          | Ca_kabuli_Chr05 | 39364720                | A/T  | NA                 | INTERGENIC                    | NA                                                  |
| Kabuli_wild_39364741 | 1399939279                          | Ca_kabuli_Chr05 | 39364741                | A/T  | NA                 | INTERGENIC                    | NA                                                  |
| Kabuli_wild_39364752 | 1399939280                          | Ca_kabuli_Chr05 | 39364752                | G/T  | NA                 | INTERGENIC                    | NA                                                  |
| Kabuli_wild_39364841 | 1399939281                          | Ca_kabuli_Chr05 | 39364841                | A/T  | NA                 | INTERGENIC                    | NA                                                  |
| Kabuli_wild_39364848 | 1399939282                          | Ca_kabuli_Chr05 | 39364848                | C/T  | NA                 | INTERGENIC                    | NA                                                  |
| Kabuli_wild_39364856 | 1399939283                          | Ca_kabuli_Chr05 | 39364856                | A/G  | NA                 | INTERGENIC                    | NA                                                  |



| SNP IDs              | NCBI dbSNP accession IDs (NCBI_SS#) | Chromosomes     | Physical positions (bp) | SNPs | Gene accession IDs | Sequence components of genome | Putative functions                         |
|----------------------|-------------------------------------|-----------------|-------------------------|------|--------------------|-------------------------------|--------------------------------------------|
| Kabuli_wild_39364895 | 1399939284                          | Ca_kabuli_Chr05 | 39364895                | A/C  | NA                 | INTERGENIC                    | NA                                         |
| Kabuli_wild_39366353 | 1399939285                          | Ca_kabuli_Chr05 | 39366353                | C/G  | NA                 | INTERGENIC                    | NA                                         |
| Kabuli_wild_39385592 | 1399939286                          | Ca_kabuli_Chr05 | 39385592                | C/G  | NA                 | INTERGENIC                    | NA                                         |
| Kabuli_wild_39385603 | 1399939287                          | Ca_kabuli_Chr05 | 39385603                | T/G  | NA                 | INTERGENIC                    | NA                                         |
| Kabuli_wild_39385630 | 1399939288                          | Ca_kabuli_Chr05 | 39385630                | C/T  | NA                 | INTERGENIC                    | NA                                         |
| Kabuli_wild_39385676 | 1399939289                          | Ca_kabuli_Chr05 | 39385676                | G/A  | NA                 | INTERGENIC                    | NA                                         |
| Kabuli_wild_39385682 | 1399939290                          | Ca_kabuli_Chr05 | 39385682                | A/T  | NA                 | INTERGENIC                    | NA                                         |
| Kabuli_wild_39385688 | 1399939291                          | Ca_kabuli_Chr05 | 39385688                | T/C  | NA                 | INTERGENIC                    | NA                                         |
| Kabuli_wild_39410329 | 1399939292                          | Ca_kabuli_Chr05 | 39410329                | T/G  | Gene_Ca_07478      | INTRON                        | Glycosyltransferase, family3               |
| Kabuli_wild_39421069 | 1399939293                          | Ca_kabuli_Chr05 | 39421069                | T/G  | Gene_Ca_07479      | INTRON                        | Phoxhomologousdomain                       |
| Kabuli_wild_39489155 | 1399939294                          | Ca_kabuli_Chr05 | 39489155                | A/G  | Gene_Ca_07485      | UPSTREAM                      | NA                                         |
| Kabuli_wild_39489160 | 1399939295                          | Ca_kabuli_Chr05 | 39489160                | C/A  | Gene_Ca_07485      | UPSTREAM                      | NA                                         |
| Kabuli_wild_39489173 | 1399939296                          | Ca_kabuli_Chr05 | 39489173                | C/A  | Gene_Ca_07485      | UPSTREAM                      | NA                                         |
| Kabuli_wild_39489179 | 1399939297                          | Ca_kabuli_Chr05 | 39489179                | C/A  | Gene_Ca_07485      | UPSTREAM                      | NA                                         |
| Kabuli_wild_39489212 | 1399939298                          | Ca_kabuli_Chr05 | 39489212                | G/A  | Gene_Ca_07485      | UPSTREAM                      | NA                                         |
| Kabuli_wild_39489217 | 1399939299                          | Ca_kabuli_Chr05 | 39489217                | C/G  | Gene_Ca_07485      | UPSTREAM                      | NA                                         |
| Kabuli_wild_39543929 | 1399939300                          | Ca_kabuli_Chr05 | 39543929                | C/T  | Gene_Ca_07489      | NON_SYNONYMOUS_CODING         | Phosphatidylinositol3-/4-kinase, catalytic |
| Kabuli_wild_39576823 | 1399939301                          | Ca_kabuli_Chr05 | 39576823                | C/T  | Gene_Ca_07489      | INTRON                        | Phosphatidylinositol3-/4-kinase, catalytic |
| Kabuli_wild_39576836 | 1399939302                          | Ca_kabuli_Chr05 | 39576836                | T/A  | Gene_Ca_07489      | INTRON                        | Phosphatidylinositol3-/4-kinase, catalytic |
| Kabuli_wild_39576839 | 1399939303                          | Ca_kabuli_Chr05 | 39576839                | C/T  | Gene_Ca_07489      | INTRON                        | Phosphatidylinositol3-/4-kinase, catalytic |
| Kabuli_wild_39576841 | 1399939304                          | Ca_kabuli_Chr05 | 39576841                | G/A  | Gene_Ca_07489      | INTRON                        | Phosphatidylinositol3-/4-kinase, catalytic |
| Kabuli_wild_39576864 | 1399939305                          | Ca_kabuli_Chr05 | 39576864                | C/A  | Gene_Ca_07489      | INTRON                        | Phosphatidylinositol3-/4-kinase, catalytic |
| Kabuli_wild_39576870 | 1399939306                          | Ca_kabuli_Chr05 | 39576870                | C/T  | Gene_Ca_07489      | INTRON                        | Phosphatidylinositol3-/4-kinase, catalytic |
| Kabuli_wild_39576874 | 1399939307                          | Ca_kabuli_Chr05 | 39576874                | G/T  | Gene_Ca_07489      | INTRON                        | Phosphatidylinositol3-/4-kinase, catalytic |
| Kabuli_wild_39576969 | 1399939308                          | Ca_kabuli_Chr05 | 39576969                | C/T  | Gene_Ca_07489      | INTRON                        | Phosphatidylinositol3-/4-kinase, catalytic |
| Kabuli_wild_39597485 | 1399939309                          | Ca_kabuli_Chr05 | 39597485                | C/T  | Gene_Ca_07489      | INTRON                        | Phosphatidylinositol3-/4-kinase, catalytic |
| Kabuli_wild_39608204 | 1399939310                          | Ca_kabuli_Chr05 | 39608204                | A/G  | Gene_Ca_07489      | SYNONYMOUS_CODING             | Phosphatidylinositol3-/4-kinase, catalytic |
| Kabuli_wild_39608209 | 1399939311                          | Ca_kabuli_Chr05 | 39608209                | G/T  | Gene_Ca_07489      | INTRON                        | Phosphatidylinositol3-/4-kinase, catalytic |
| Kabuli_wild_39760214 | 1399939312                          | Ca_kabuli_Chr05 | 39760214                | T/A  | NA                 | INTERGENIC                    | NA                                         |
| Kabuli_wild_39776123 | 1399939313                          | Ca_kabuli_Chr05 | 39776123                | C/T  | NA                 | INTERGENIC                    | NA                                         |
| Kabuli_wild_39776818 | 1399939314                          | Ca_kabuli_Chr05 | 39776818                | C/T  | NA                 | INTERGENIC                    | NA                                         |
| Kabuli_wild_39776917 | 1399939315                          | Ca_kabuli_Chr05 | 39776917                | T/C  | NA                 | INTERGENIC                    | NA                                         |
| Kabuli_wild_39776919 | 1399939316                          | Ca_kabuli_Chr05 | 39776919                | A/G  | NA                 | INTERGENIC                    | NA                                         |
| Kabuli_wild_39776920 | 1399939317                          | Ca_kabuli_Chr05 | 39776920                | G/A  | NA                 | INTERGENIC                    | NA                                         |
| Kabuli_wild_39776938 | 1399939318                          | Ca_kabuli_Chr05 | 39776938                | C/G  | NA                 | INTERGENIC                    | NA                                         |
| Kabuli_wild_39776940 | 1399939319                          | Ca_kabuli_Chr05 | 39776940                | T/G  | NA                 | INTERGENIC                    | NA                                         |
| Kabuli_wild_39831632 | 1399939320                          | Ca_kabuli_Chr05 | 39831632                | T/A  | Gene_Ca_07508      | SYNONYMOUS_CODING             | Glycosyltransferase, family20              |
| Kabuli_wild_39847512 | 1399939321                          | Ca_kabuli_Chr05 | 39847512                | C/T  | NA                 | INTERGENIC                    | NA                                         |
| Kabuli_wild_39869398 | 1399939322                          | Ca_kabuli_Chr05 | 39869398                | C/T  | Gene_Ca_07512      | SYNONYMOUS_CODING             | Xanthine/uracil/vitamin C permease         |
| Kabuli_wild_39943275 | 1399939323                          | Ca_kabuli_Chr05 | 39943275                | T/C  | NA                 | INTERGENIC                    | NA                                         |
| Kabuli_wild_39943298 | 1399939324                          | Ca_kabuli_Chr05 | 39943298                | T/C  | NA                 | INTERGENIC                    | NA                                         |
| Kabuli_wild_39985332 | 1399939325                          | Ca_kabuli_Chr05 | 39985332                | A/G  | NA                 | INTERGENIC                    | NA                                         |
| Kabuli_wild_40018264 | 1399939326                          | Ca_kabuli_Chr05 | 40018264                | A/C  | NA                 | INTERGENIC                    | NA                                         |
| Kabuli_wild_40025376 | 1399939327                          | Ca_kabuli_Chr05 | 40025376                | A/G  | Gene_Ca_07531      | INTRON                        | Argonaute/Dicerprotein, PAZ                |

| SNP IDs              | NCBI dbSNP accession IDs (NCBI_SS#) | Chromosomes     | Physical positions (bp) | SNPs | Gene accession IDs | Sequence components of genome | Putative functions                           |
|----------------------|-------------------------------------|-----------------|-------------------------|------|--------------------|-------------------------------|----------------------------------------------|
| Kabuli_wild_40025377 | 1399939328                          | Ca_kabuli_Chr05 | 40025377                | T/A  | Gene_Ca_07531      | INTRON                        | Argonaute/Dicerprotein,PAZ                   |
| Kabuli_wild_40159359 | 1399939329                          | Ca_kabuli_Chr05 | 40159359                | C/T  | Gene_Ca_07540      | SYNONYMOUS_CODING             | Nse1 non-SMC component of SMC5-6 complex     |
| Kabuli_wild_40162755 | 1399939330                          | Ca_kabuli_Chr05 | 40162755                | T/C  | NA                 | INTERGENIC                    | NA                                           |
| Kabuli_wild_40164176 | 1399939331                          | Ca_kabuli_Chr05 | 40164176                | C/G  | NA                 | INTERGENIC                    | NA                                           |
| Kabuli_wild_40164221 | 1399939332                          | Ca_kabuli_Chr05 | 40164221                | C/T  | NA                 | INTERGENIC                    | NA                                           |
| Kabuli_wild_40184049 | 1399939333                          | Ca_kabuli_Chr05 | 40184049                | G/A  | NA                 | INTERGENIC                    | NA                                           |
| Kabuli_wild_40213494 | 1399939334                          | Ca_kabuli_Chr05 | 40213494                | T/C  | NA                 | INTERGENIC                    | NA                                           |
| Kabuli_wild_40213545 | 1399939335                          | Ca_kabuli_Chr05 | 40213545                | G/A  | NA                 | INTERGENIC                    | NA                                           |
| Kabuli_wild_40464449 | 1399939336                          | Ca_kabuli_Chr05 | 40464449                | T/A  | NA                 | INTERGENIC                    | NA                                           |
| Kabuli_wild_40464608 | 1399939337                          | Ca_kabuli_Chr05 | 40464608                | A/G  | NA                 | INTERGENIC                    | NA                                           |
| Kabuli_wild_40465463 | 1399939338                          | Ca_kabuli_Chr05 | 40465463                | A/C  | Gene_Ca_07566      | INTRON                        | Methionine synthase, vitamin-B12 independent |
| Kabuli_wild_40505573 | 1399939339                          | Ca_kabuli_Chr05 | 40505573                | T/C  | Gene_Ca_07571      | INTRON                        | Zinc finger,CCHC-type                        |
| Kabuli_wild_40505592 | 1399939340                          | Ca_kabuli_Chr05 | 40505592                | T/C  | Gene_Ca_07571      | NON_SYNONYMOUS_CODING         | Zinc finger,CCHC-type                        |
| Kabuli_wild_40507018 | 1399939341                          | Ca_kabuli_Chr05 | 40507018                | T/A  | Gene_Ca_07571      | INTRON                        | Zinc finger,CCHC-type                        |
| Kabuli_wild_40527587 | 1399939342                          | Ca_kabuli_Chr05 | 40527587                | G/T  | NA                 | INTERGENIC                    | NA                                           |
| Kabuli_wild_40532433 | 1399939343                          | Ca_kabuli_Chr05 | 40532433                | G/T  | NA                 | INTERGENIC                    | NA                                           |
| Kabuli_wild_40532435 | 1399939344                          | Ca_kabuli_Chr05 | 40532435                | A/G  | NA                 | INTERGENIC                    | NA                                           |
| Kabuli_wild_40532449 | 1399939345                          | Ca_kabuli_Chr05 | 40532449                | T/G  | NA                 | INTERGENIC                    | NA                                           |
| Kabuli_wild_40555799 | 1399939346                          | Ca_kabuli_Chr05 | 40555799                | T/C  | NA                 | INTERGENIC                    | NA                                           |
| Kabuli_wild_40632788 | 1399939347                          | Ca_kabuli_Chr05 | 40632788                | C/T  | NA                 | INTERGENIC                    | NA                                           |
| Kabuli_wild_40666174 | 1399939348                          | Ca_kabuli_Chr05 | 40666174                | C/T  | Gene_Ca_07586      | INTRON                        | Sugar/inositol transporter                   |
| Kabuli_wild_40666176 | 1399939349                          | Ca_kabuli_Chr05 | 40666176                | G/T  | Gene_Ca_07586      | INTRON                        | Sugar/inositol transporter                   |
| Kabuli_wild_40666178 | 1399939350                          | Ca_kabuli_Chr05 | 40666178                | A/T  | Gene_Ca_07586      | INTRON                        | Sugar/inositol transporter                   |
| Kabuli_wild_40700318 | 1399939351                          | Ca_kabuli_Chr05 | 40700318                | C/A  | Gene_Ca_07589      | NON_SYNONYMOUS_CODING         | Glycosidehydrolase,family17                  |
| Kabuli_wild_40734317 | 1399939352                          | Ca_kabuli_Chr05 | 40734317                | T/C  | Gene_Ca_07594      | INTRON                        | NA                                           |
| Kabuli_wild_40736291 | 1399939353                          | Ca_kabuli_Chr05 | 40736291                | C/G  | Gene_Ca_07594      | INTRON                        | NA                                           |
| Kabuli_wild_40828566 | 1399939354                          | Ca_kabuli_Chr05 | 40828566                | A/C  | NA                 | INTERGENIC                    | NA                                           |
| Kabuli_wild_40828567 | 1399939355                          | Ca_kabuli_Chr05 | 40828567                | G/C  | NA                 | INTERGENIC                    | NA                                           |
| Kabuli_wild_40841690 | 1399939356                          | Ca_kabuli_Chr05 | 40841690                | C/T  | Gene_Ca_07604      | NON_SYNONYMOUS_CODING         | Oligo peptide transporterOPTsuperfamily      |
| Kabuli_wild_40883438 | 1399939357                          | Ca_kabuli_Chr05 | 40883438                | C/A  | NA                 | INTERGENIC                    | NA                                           |
| Kabuli_wild_41063657 | 1399939358                          | Ca_kabuli_Chr05 | 41063657                | C/T  | NA                 | INTERGENIC                    | NA                                           |
| Kabuli_wild_41063696 | 1399939359                          | Ca_kabuli_Chr05 | 41063696                | G/A  | NA                 | INTERGENIC                    | NA                                           |
| Kabuli_wild_41066644 | 1399939360                          | Ca_kabuli_Chr05 | 41066644                | C/G  | NA                 | INTERGENIC                    | NA                                           |
| Kabuli_wild_41066664 | 1399939361                          | Ca_kabuli_Chr05 | 41066664                | T/C  | NA                 | INTERGENIC                    | NA                                           |
| Kabuli_wild_41066667 | 1399939362                          | Ca_kabuli_Chr05 | 41066667                | C/A  | NA                 | INTERGENIC                    | NA                                           |
| Kabuli_wild_41197909 | 1399939363                          | Ca_kabuli_Chr05 | 41197909                | A/T  | NA                 | INTERGENIC                    | NA                                           |
| Kabuli_wild_41197924 | 1399939364                          | Ca_kabuli_Chr05 | 41197924                | A/T  | NA                 | INTERGENIC                    | NA                                           |
| Kabuli_wild_41201628 | 1399939365                          | Ca_kabuli_Chr05 | 41201628                | A/T  | NA                 | INTERGENIC                    | NA                                           |
| Kabuli_wild_41228098 | 1399939366                          | Ca_kabuli_Chr05 | 41228098                | T/C  | Gene_Ca_07639      | NON_SYNONYMOUS_CODING         | NA                                           |
| Kabuli_wild_41282635 | 1399939367                          | Ca_kabuli_Chr05 | 41282635                | A/G  | NA                 | INTERGENIC                    | NA                                           |
| Kabuli_wild_41283253 | 1399939368                          | Ca_kabuli_Chr05 | 41283253                | T/C  | Gene_Ca_07642      | NON_SYNONYMOUS_CODING         | Protein of unknown function DUF1296          |
| Kabuli_wild_41283453 | 1399939369                          | Ca_kabuli_Chr05 | 41283453                | A/C  | Gene_Ca_07642      | NON_SYNONYMOUS_CODING         | Protein of unknown function DUF1296          |
| Kabuli_wild_41407105 | 1399939370                          | Ca_kabuli_Chr05 | 41407105                | A/G  | NA                 | INTERGENIC                    | NA                                           |
| Kabuli_wild_41407253 | 1399939371                          | Ca_kabuli_Chr05 | 41407253                | T/C  | NA                 | INTERGENIC                    | NA                                           |

| SNP IDs              | NCBI dbSNP accession IDs (NCBI_SS#) | Chromosomes     | Physical positions (bp) | SNPs | Gene accession IDs | Sequence components of genome | Putative functions                                     |
|----------------------|-------------------------------------|-----------------|-------------------------|------|--------------------|-------------------------------|--------------------------------------------------------|
| Kabuli_wild_41678144 | 1399939372                          | Ca_kabuli_Chr05 | 41678144                | C/T  | Gene_Ca_19215      | SYNONYMOUS_CODING             | Argonaute/Dicerprotein,PAZ                             |
| Kabuli_wild_41863617 | 1399939373                          | Ca_kabuli_Chr05 | 41863617                | G/T  | NA                 | INTERGENIC                    | NA                                                     |
| Kabuli_wild_41887872 | 1399939374                          | Ca_kabuli_Chr05 | 41887872                | C/A  | Gene_Ca_11425      | DOWNSTREAM                    | NA                                                     |
| Kabuli_wild_41887879 | 1399939375                          | Ca_kabuli_Chr05 | 41887879                | C/A  | Gene_Ca_11425      | DOWNSTREAM                    | NA                                                     |
| Kabuli_wild_41902363 | 1399939376                          | Ca_kabuli_Chr05 | 41902363                | G/A  | Gene_Ca_11423      | NON_SYNONYMOUS_CODING         | PeptidaseC19,ubiquitincarboxyl-terminalhydrolase2      |
| Kabuli_wild_41945308 | 1399939377                          | Ca_kabuli_Chr05 | 41945308                | G/A  | Gene_Ca_11418      | NON_SYNONYMOUS_CODING         | Helicase,C-terminal                                    |
| Kabuli_wild_42004600 | 1399939378                          | Ca_kabuli_Chr05 | 42004600                | T/G  | Gene_Ca_11412      | INTRON                        | Rab-GAP/TBCdomain                                      |
| Kabuli_wild_42004602 | 1399939379                          | Ca_kabuli_Chr05 | 42004602                | A/G  | Gene_Ca_11412      | INTRON                        | Rab-GAP/TBCdomain                                      |
| Kabuli_wild_42044863 | 1399939380                          | Ca_kabuli_Chr05 | 42044863                | T/G  | Gene_Ca_11405      | SYNONYMOUS_CODING             | Rhodanese-like                                         |
| Kabuli_wild_42225634 | 1399939381                          | Ca_kabuli_Chr05 | 42225634                | G/A  | NA                 | INTERGENIC                    | NA                                                     |
| Kabuli_wild_42282252 | 1399939382                          | Ca_kabuli_Chr05 | 42282252                | C/T  | Gene_Ca_11387      | INTRON                        | AMP-dependentsynthetase/ligase                         |
| Kabuli_wild_42413430 | 1399939383                          | Ca_kabuli_Chr05 | 42413430                | A/C  | Gene_Ca_11377      | INTRON                        | Zinc finger,Sec23/Sec24-type                           |
| Kabuli_wild_42436972 | 1399939384                          | Ca_kabuli_Chr05 | 42436972                | A/G  | Gene_Ca_11373      | UPSTREAM                      | DNAtopoisomerase,typeIA                                |
| Kabuli_wild_42436976 | 1399939385                          | Ca_kabuli_Chr05 | 42436976                | A/T  | Gene_Ca_11373      | UPSTREAM                      | DNAtopoisomerase,typeIA                                |
| Kabuli_wild_42528744 | 1399939386                          | Ca_kabuli_Chr05 | 42528744                | T/G  | Gene_Ca_11361      | NON_SYNONYMOUS_CODING         | IQ motif,EF-handbinding site                           |
| Kabuli_wild_42528934 | 1399939387                          | Ca_kabuli_Chr05 | 42528934                | A/G  | Gene_Ca_11361      | NON_SYNONYMOUS_CODING         | IQ motif,EF-handbinding site                           |
| Kabuli_wild_42540636 | 1399939388                          | Ca_kabuli_Chr05 | 42540636                | G/C  | Gene_Ca_11358      | NON_SYNONYMOUS_CODING         | Signal transduction response regulator, receiverdomain |
| Kabuli_wild_42749499 | 1399939389                          | Ca_kabuli_Chr05 | 42749499                | C/T  | Gene_Ca_11334      | INTRON                        | NA                                                     |
| Kabuli_wild_42863366 | 1399939390                          | Ca_kabuli_Chr05 | 42863366                | C/T  | NA                 | INTERGENIC                    | NA                                                     |
| Kabuli_wild_42863405 | 1399939391                          | Ca_kabuli_Chr05 | 42863405                | G/T  | NA                 | INTERGENIC                    | NA                                                     |
| Kabuli_wild_42883163 | 1399939392                          | Ca_kabuli_Chr05 | 42883163                | T/C  | NA                 | INTERGENIC                    | NA                                                     |
| Kabuli_wild_42910653 | 1399939393                          | Ca_kabuli_Chr05 | 42910653                | A/G  | NA                 | INTERGENIC                    | NA                                                     |
| Kabuli_wild_42924167 | 1399939394                          | Ca_kabuli_Chr05 | 42924167                | G/A  | NA                 | INTERGENIC                    | NA                                                     |
| Kabuli_wild_42928986 | 1399939395                          | Ca_kabuli_Chr05 | 42928986                | T/G  | Gene_Ca_11315      | SYNONYMOUS_CODING             | SANT domain,DNA binding                                |
| Kabuli_wild_42928995 | 1399939396                          | Ca_kabuli_Chr05 | 42928995                | T/G  | Gene_Ca_11315      | SYNONYMOUS_CODING             | SANT domain,DNA binding                                |
| Kabuli_wild_42929087 | 1399939397                          | Ca_kabuli_Chr05 | 42929087                | A/C  | Gene_Ca_11315      | UPSTREAM                      | SANT domain,DNA binding                                |
| Kabuli_wild_42977337 | 1399939398                          | Ca_kabuli_Chr05 | 42977337                | C/A  | NA                 | INTERGENIC                    | NA                                                     |
| Kabuli_wild_43012119 | 1399939399                          | Ca_kabuli_Chr05 | 43012119                | A/C  | NA                 | INTERGENIC                    | NA                                                     |
| Kabuli_wild_43037863 | 1399939400                          | Ca_kabuli_Chr05 | 43037863                | G/A  | Gene_Ca_11305      | NON_SYNONYMOUS_CODING         | RegulatorofGproteinsignalling                          |
| Kabuli_wild_43056159 | 1399939401                          | Ca_kabuli_Chr05 | 43056159                | G/T  | Gene_Ca_11302      | NON_SYNONYMOUS_CODING         | NA                                                     |
| Kabuli_wild_43067905 | 1399939402                          | Ca_kabuli_Chr05 | 43067905                | A/C  | Gene_Ca_11300      | SYNONYMOUS_CODING             | Membraneinsertionprotein,OxaA/YidC                     |
| Kabuli_wild_43080493 | 1399939403                          | Ca_kabuli_Chr05 | 43080493                | G/A  | Gene_Ca_11299      | NON_SYNONYMOUS_CODING         | Regulatorofchromosomecondensation,RCC1                 |
| Kabuli_wild_43167549 | 1399939404                          | Ca_kabuli_Chr05 | 43167549                | C/T  | Gene_Ca_12742      | INTRON                        | SDA1                                                   |
| Kabuli_wild_43231220 | 1399939405                          | Ca_kabuli_Chr05 | 43231220                | T/C  | Gene_Ca_12734      | SYNONYMOUS_CODING             | Protein kinase,catalytic domain                        |
| Kabuli_wild_43275472 | 1399939406                          | Ca_kabuli_Chr05 | 43275472                | T/C  | NA                 | INTERGENIC                    | NA                                                     |
| Kabuli_wild_43366590 | 1399939407                          | Ca_kabuli_Chr05 | 43366590                | G/T  | Gene_Ca_12719      | NON_SYNONYMOUS_CODING         | Aminotransferase-like,plant mobile domain              |
| Kabuli_wild_43710359 | 1399939408                          | Ca_kabuli_Chr05 | 43710359                | T/G  | Gene_Ca_12681      | DOWNSTREAM                    | Sulphate transporter/antisigma-factor antagonist STAS  |
| Kabuli_wild_43710362 | 1399939409                          | Ca_kabuli_Chr05 | 43710362                | A/T  | Gene_Ca_12681      | DOWNSTREAM                    | Sulphate transporter/antisigma-factor antagonist STAS  |
| Kabuli_wild_43710366 | 1399939410                          | Ca_kabuli_Chr05 | 43710366                | G/T  | Gene_Ca_12681      | DOWNSTREAM                    | Sulphate transporter/antisigma-factor antagonist STAS  |
| Kabuli_wild_43710372 | 1399939411                          | Ca_kabuli_Chr05 | 43710372                | A/T  | Gene_Ca_12681      | DOWNSTREAM                    | Sulphate transporter/antisigma-factor antagonist STAS  |
| Kabuli_wild_43710391 | 1399939412                          | Ca_kabuli_Chr05 | 43710391                | A/G  | Gene_Ca_12681      | DOWNSTREAM                    | Sulphate transporter/antisigma-factor antagonist STAS  |
| Kabuli_wild_43742448 | 1399939413                          | Ca_kabuli_Chr05 | 43742448                | C/T  | NA                 | INTERGENIC                    | NA                                                     |
| Kabuli_wild_43742456 | 1399939414                          | Ca_kabuli_Chr05 | 43742456                | G/A  | NA                 | INTERGENIC                    | NA                                                     |
| Kabuli_wild_43759059 | 1399939415                          | Ca_kabuli_Chr05 | 43759059                | A/C  | Gene_Ca_12676      | NON_SYNONYMOUS_CODING         | C2 calcium-dependent membrane targeting                |

| SNP IDs                     | NCBI dbSNP accession IDs (NCBI_SS#) | Chromosomes            | Physical positions (bp) | SNPs | Gene accession IDs | Sequence components of genome | Putative functions                               |
|-----------------------------|-------------------------------------|------------------------|-------------------------|------|--------------------|-------------------------------|--------------------------------------------------|
| <i>Kabuli_wild_43786846</i> | 1399939416                          | <i>Ca_kabuli_Chr05</i> | 43786846                | T/C  | Gene_Ca_12674      | NON_SYNONYMOUS_CODING         | RNApolymerasell,largesubunit,CTD                 |
| <i>Kabuli_wild_43789957</i> | 1399939417                          | <i>Ca_kabuli_Chr05</i> | 43789957                | G/T  | NA                 | INTERGENIC                    | NA                                               |
| <i>Kabuli_wild_43904489</i> | 1399939418                          | <i>Ca_kabuli_Chr05</i> | 43904489                | T/A  | NA                 | INTERGENIC                    | NA                                               |
| <i>Kabuli_wild_43919009</i> | 1399939419                          | <i>Ca_kabuli_Chr05</i> | 43919009                | C/T  | NA                 | INTERGENIC                    | NA                                               |
| <i>Kabuli_wild_43919017</i> | 1399939420                          | <i>Ca_kabuli_Chr05</i> | 43919017                | T/G  | NA                 | INTERGENIC                    | NA                                               |
| <i>Kabuli_wild_43919022</i> | 1399939421                          | <i>Ca_kabuli_Chr05</i> | 43919022                | G/C  | NA                 | INTERGENIC                    | NA                                               |
| <i>Kabuli_wild_43919028</i> | 1399939422                          | <i>Ca_kabuli_Chr05</i> | 43919028                | A/G  | NA                 | INTERGENIC                    | NA                                               |
| <i>Kabuli_wild_43952287</i> | 1399939423                          | <i>Ca_kabuli_Chr05</i> | 43952287                | C/T  | Gene_Ca_12660      | NON_SYNONYMOUS_CODING         | No apical meristem (NAM) protein                 |
| <i>Kabuli_wild_43952312</i> | 1399939424                          | <i>Ca_kabuli_Chr05</i> | 43952312                | T/C  | Gene_Ca_12660      | NON_SYNONYMOUS_CODING         | No apical meristem (NAM) protein                 |
| <i>Kabuli_wild_43952345</i> | 1399939425                          | <i>Ca_kabuli_Chr05</i> | 43952345                | C/T  | Gene_Ca_12660      | NON_SYNONYMOUS_CODING         | No apical meristem (NAM) protein                 |
| <i>Kabuli_wild_44098507</i> | 1399939426                          | <i>Ca_kabuli_Chr05</i> | 44098507                | T/A  | Gene_Ca_12648      | STOP_GAINED                   | Tetrapyrrolebiosynthesis,porphobilinogensynthase |
| <i>Kabuli_wild_44109260</i> | 1399939427                          | <i>Ca_kabuli_Chr05</i> | 44109260                | T/G  | Gene_Ca_12646      | SYNONYMOUS_CODING             | NA                                               |
| <i>Kabuli_wild_44159237</i> | 1399939428                          | <i>Ca_kabuli_Chr05</i> | 44159237                | C/G  | NA                 | INTERGENIC                    | NA                                               |
| <i>Kabuli_wild_44299577</i> | 1399939429                          | <i>Ca_kabuli_Chr05</i> | 44299577                | A/C  | Gene_Ca_03876      | SYNONYMOUS_CODING             | Aminoacid transporter,transmembrane              |
| <i>Kabuli_wild_44373968</i> | 1399939430                          | <i>Ca_kabuli_Chr05</i> | 44373968                | G/T  | Gene_Ca_03885      | NON_SYNONYMOUS_CODING         | NA                                               |
| <i>Kabuli_wild_44378178</i> | 1399939431                          | <i>Ca_kabuli_Chr05</i> | 44378178                | C/A  | Gene_Ca_03885      | INTRON                        | NA                                               |
| <i>Kabuli_wild_44422711</i> | 1399939432                          | <i>Ca_kabuli_Chr05</i> | 44422711                | C/T  | Gene_Ca_03889      | INTRON                        | SET domain                                       |
| <i>Kabuli_wild_44555718</i> | 1399939433                          | <i>Ca_kabuli_Chr05</i> | 44555718                | A/C  | NA                 | INTERGENIC                    | NA                                               |
| <i>Kabuli_wild_44656921</i> | 1399939434                          | <i>Ca_kabuli_Chr05</i> | 44656921                | G/A  | NA                 | INTERGENIC                    | NA                                               |
| <i>Kabuli_wild_44667297</i> | 1399939435                          | <i>Ca_kabuli_Chr05</i> | 44667297                | C/T  | NA                 | INTERGENIC                    | NA                                               |
| <i>Kabuli_wild_44760347</i> | 1399939436                          | <i>Ca_kabuli_Chr05</i> | 44760347                | G/T  | Gene_Ca_03920      | NON_SYNONYMOUS_CODING         | Transcription facto rGRAS                        |
| <i>Kabuli_wild_44760403</i> | 1399939437                          | <i>Ca_kabuli_Chr05</i> | 44760403                | A/G  | Gene_Ca_03920      | SYNONYMOUS_CODING             | Transcription facto rGRAS                        |
| <i>Kabuli_wild_44760469</i> | 1399939438                          | <i>Ca_kabuli_Chr05</i> | 44760469                | C/T  | Gene_Ca_03920      | SYNONYMOUS_CODING             | Transcription facto rGRAS                        |
| <i>Kabuli_wild_44769623</i> | 1399939439                          | <i>Ca_kabuli_Chr05</i> | 44769623                | T/G  | NA                 | INTERGENIC                    | NA                                               |
| <i>Kabuli_wild_44772326</i> | 1399939440                          | <i>Ca_kabuli_Chr05</i> | 44772326                | G/A  | NA                 | INTERGENIC                    | NA                                               |
| <i>Kabuli_wild_44772443</i> | 1399939441                          | <i>Ca_kabuli_Chr05</i> | 44772443                | C/T  | NA                 | INTERGENIC                    | NA                                               |
| <i>Kabuli_wild_44887105</i> | 1399939442                          | <i>Ca_kabuli_Chr05</i> | 44887105                | T/G  | Gene_Ca_03932      | INTRON                        | Sec1-likeprotein                                 |
| <i>Kabuli_wild_44887234</i> | 1399939443                          | <i>Ca_kabuli_Chr05</i> | 44887234                | A/C  | Gene_Ca_03932      | INTRON                        | Sec1-likeprotein                                 |
| <i>Kabuli_wild_44887241</i> | 1399939444                          | <i>Ca_kabuli_Chr05</i> | 44887241                | T/C  | Gene_Ca_03932      | INTRON                        | Sec1-likeprotein                                 |
| <i>Kabuli_wild_44890500</i> | 1399939445                          | <i>Ca_kabuli_Chr05</i> | 44890500                | A/G  | Gene_Ca_03933      | UPSTREAM                      | Protein of unknown function DUF300               |
| <i>Kabuli_wild_44891401</i> | 1399939446                          | <i>Ca_kabuli_Chr05</i> | 44891401                | G/A  | Gene_Ca_03933      | UPSTREAM                      | Protein of unknown function DUF301               |
| <i>Kabuli_wild_44891426</i> | 1399939447                          | <i>Ca_kabuli_Chr05</i> | 44891426                | G/C  | Gene_Ca_03933      | UPSTREAM                      | Protein of unknown function DUF301               |
| <i>Kabuli_wild_44911842</i> | 1399939448                          | <i>Ca_kabuli_Chr05</i> | 44911842                | C/T  | NA                 | INTERGENIC                    | NA                                               |
| <i>Kabuli_wild_44918947</i> | 1399939449                          | <i>Ca_kabuli_Chr05</i> | 44918947                | C/A  | Gene_Ca_03937      | DOWNSTREAM                    | Glycolipidtransferproteindomain                  |
| <i>Kabuli_wild_44938814</i> | 1399939450                          | <i>Ca_kabuli_Chr05</i> | 44938814                | A/T  | NA                 | INTERGENIC                    | NA                                               |
| <i>Kabuli_wild_44939033</i> | 1399939451                          | <i>Ca_kabuli_Chr05</i> | 44939033                | G/A  | NA                 | INTERGENIC                    | NA                                               |
| <i>Kabuli_wild_44939058</i> | 1399939452                          | <i>Ca_kabuli_Chr05</i> | 44939058                | C/G  | NA                 | INTERGENIC                    | NA                                               |
| <i>Kabuli_wild_44975251</i> | 1399939453                          | <i>Ca_kabuli_Chr05</i> | 44975251                | A/C  | Gene_Ca_03944      | NON_SYNONYMOUS_CODING         | Glycosyltransferase,family31                     |
| <i>Kabuli_wild_44979963</i> | 1399939454                          | <i>Ca_kabuli_Chr05</i> | 44979963                | T/G  | NA                 | INTERGENIC                    | NA                                               |
| <i>Kabuli_wild_45087140</i> | 1399939455                          | <i>Ca_kabuli_Chr05</i> | 45087140                | C/A  | NA                 | INTERGENIC                    | NA                                               |
| <i>Kabuli_wild_45087146</i> | 1399939456                          | <i>Ca_kabuli_Chr05</i> | 45087146                | C/G  | NA                 | INTERGENIC                    | NA                                               |
| <i>Kabuli_wild_45087156</i> | 1399939457                          | <i>Ca_kabuli_Chr05</i> | 45087156                | A/G  | NA                 | INTERGENIC                    | NA                                               |
| <i>Kabuli_wild_45087170</i> | 1399939458                          | <i>Ca_kabuli_Chr05</i> | 45087170                | G/A  | NA                 | INTERGENIC                    | NA                                               |
| <i>Kabuli_wild_45087202</i> | 1399939459                          | <i>Ca_kabuli_Chr05</i> | 45087202                | G/C  | NA                 | INTERGENIC                    | NA                                               |

| SNP IDs              | NCBI dbSNP accession IDs (NCBI_SS#) | Chromosomes     | Physical positions (bp) | SNPs | Gene accession IDs | Sequence components of genome | Putative functions                                               |
|----------------------|-------------------------------------|-----------------|-------------------------|------|--------------------|-------------------------------|------------------------------------------------------------------|
| Kabuli_wild_45087209 | 1399939460                          | Ca_kabuli_Chr05 | 45087209                | T/C  | NA                 | INTERGENIC                    | NA                                                               |
| Kabuli_wild_45087219 | 1399939461                          | Ca_kabuli_Chr05 | 45087219                | T/C  | NA                 | INTERGENIC                    | NA                                                               |
| Kabuli_wild_45087261 | 1399939462                          | Ca_kabuli_Chr05 | 45087261                | C/T  | NA                 | INTERGENIC                    | NA                                                               |
| Kabuli_wild_45185408 | 1399939463                          | Ca_kabuli_Chr05 | 45185408                | T/C  | Gene_Ca_03961      | INTRON                        | Short-chain dehydrogenase/reductase SDR                          |
| Kabuli_wild_45254112 | 1399939464                          | Ca_kabuli_Chr05 | 45254112                | T/G  | Gene_Ca_03969      | NON_SYNONYMOUS_CODING         | Zinc finger,C2H2-typematrixin                                    |
| Kabuli_wild_45337307 | 1399939465                          | Ca_kabuli_Chr05 | 45337307                | C/T  | Gene_Ca_03976      | SYNONYMOUS_CODING             | Pectinesterase,catalytic                                         |
| Kabuli_wild_45407044 | 1399939466                          | Ca_kabuli_Chr05 | 45407044                | A/C  | Gene_Ca_03983      | INTRON                        | NA                                                               |
| Kabuli_wild_45428234 | 1399939467                          | Ca_kabuli_Chr05 | 45428234                | T/G  | NA                 | INTERGENIC                    | NA                                                               |
| Kabuli_wild_45429486 | 1399939468                          | Ca_kabuli_Chr05 | 45429486                | A/C  | Gene_Ca_03986      | DOWNSTREAM                    | Longin                                                           |
| Kabuli_wild_45480175 | 1399939469                          | Ca_kabuli_Chr05 | 45480175                | T/G  | Gene_Ca_03993      | DOWNSTREAM                    | NA                                                               |
| Kabuli_wild_45501379 | 1399939470                          | Ca_kabuli_Chr05 | 45501379                | C/T  | Gene_Ca_03996      | UPSTREAM                      | K Homology                                                       |
| Kabuli_wild_45507463 | 1399939471                          | Ca_kabuli_Chr05 | 45507463                | A/G  | NA                 | INTERGENIC                    | NA                                                               |
| Kabuli_wild_45646693 | 1399939472                          | Ca_kabuli_Chr05 | 45646693                | C/A  | Gene_Ca_04010      | NON_SYNONYMOUS_CODING         | SecretorypathwaySec39                                            |
| Kabuli_wild_45694453 | 1399939473                          | Ca_kabuli_Chr05 | 45694453                | T/G  | Gene_Ca_04017      | SYNONYMOUS_CODING             | ATPase,AAA+type,core                                             |
| Kabuli_wild_45704206 | 1399939474                          | Ca_kabuli_Chr05 | 45704206                | C/T  | NA                 | INTERGENIC                    | NA                                                               |
| Kabuli_wild_45704207 | 1399939475                          | Ca_kabuli_Chr05 | 45704207                | G/T  | NA                 | INTERGENIC                    | NA                                                               |
| Kabuli_wild_45704298 | 1399939476                          | Ca_kabuli_Chr05 | 45704298                | C/A  | NA                 | INTERGENIC                    | NA                                                               |
| Kabuli_wild_45710476 | 1399939477                          | Ca_kabuli_Chr05 | 45710476                | A/G  | Gene_Ca_04018      | UPSTREAM                      | ATPase,AAA+type,core                                             |
| Kabuli_wild_45710509 | 1399939478                          | Ca_kabuli_Chr05 | 45710509                | G/A  | Gene_Ca_04018      | UPSTREAM                      | ATPase,AAA+type,core                                             |
| Kabuli_wild_45726955 | 1399939479                          | Ca_kabuli_Chr05 | 45726955                | A/C  | Gene_Ca_04021      | INTRON                        | Cytochromeb5                                                     |
| Kabuli_wild_45750121 | 1399939480                          | Ca_kabuli_Chr05 | 45750121                | A/T  | Gene_Ca_04024      | INTRON                        | Glucosamine/galactosamine-6-phosphateisomerase                   |
| Kabuli_wild_45831932 | 1399939481                          | Ca_kabuli_Chr05 | 45831932                | A/G  | Gene_Ca_04031      | INTRON                        | NA                                                               |
| Kabuli_wild_45842438 | 1399939482                          | Ca_kabuli_Chr05 | 45842438                | A/C  | NA                 | INTERGENIC                    | NA                                                               |
| Kabuli_wild_45845081 | 1399939483                          | Ca_kabuli_Chr05 | 45845081                | A/C  | Gene_Ca_04032      | UPSTREAM                      | SSXT                                                             |
| Kabuli_wild_45971233 | 1399939484                          | Ca_kabuli_Chr05 | 45971233                | A/T  | NA                 | INTERGENIC                    | NA                                                               |
| Kabuli_wild_46018939 | 1399939485                          | Ca_kabuli_Chr05 | 46018939                | C/T  | NA                 | INTERGENIC                    | NA                                                               |
| Kabuli_wild_46022566 | 1399939486                          | Ca_kabuli_Chr05 | 46022566                | C/T  | NA                 | INTERGENIC                    | NA                                                               |
| Kabuli_wild_46022598 | 1399939487                          | Ca_kabuli_Chr05 | 46022598                | T/C  | NA                 | INTERGENIC                    | NA                                                               |
| Kabuli_wild_46056900 | 1399939488                          | Ca_kabuli_Chr05 | 46056900                | A/C  | NA                 | INTERGENIC                    | NA                                                               |
| Kabuli_wild_46077201 | 1399939489                          | Ca_kabuli_Chr05 | 46077201                | T/A  | Gene_Ca_04056      | INTRON                        | Signal transduction response regulator, receiverdomain           |
| Kabuli_wild_46077302 | 1399939490                          | Ca_kabuli_Chr05 | 46077302                | G/A  | Gene_Ca_04056      | NON_SYNONYMOUS_CODING         | Signal transduction response regulator, receiverdomain           |
| Kabuli_wild_46130289 | 1399939491                          | Ca_kabuli_Chr05 | 46130289                | A/C  | NA                 | INTERGENIC                    | NA                                                               |
| Kabuli_wild_46156213 | 1399939492                          | Ca_kabuli_Chr05 | 46156213                | A/C  | NA                 | INTERGENIC                    | NA                                                               |
| Kabuli_wild_46176443 | 1399939493                          | Ca_kabuli_Chr05 | 46176443                | G/A  | NA                 | INTERGENIC                    | NA                                                               |
| Kabuli_wild_46197746 | 1399939494                          | Ca_kabuli_Chr05 | 46197746                | T/G  | Gene_Ca_04072      | INTRON                        | Band7protein                                                     |
| Kabuli_wild_46240664 | 1399939495                          | Ca_kabuli_Chr05 | 46240664                | T/G  | NA                 | INTERGENIC                    | NA                                                               |
| Kabuli_wild_46252605 | 1399939496                          | Ca_kabuli_Chr05 | 46252605                | C/A  | Gene_Ca_04077      | DOWNSTREAM                    | NA                                                               |
| Kabuli_wild_46252643 | 1399939497                          | Ca_kabuli_Chr05 | 46252643                | T/A  | Gene_Ca_04077      | DOWNSTREAM                    | NA                                                               |
| Kabuli_wild_46260828 | 1399939498                          | Ca_kabuli_Chr05 | 46260828                | A/C  | Gene_Ca_04079      | SYNONYMOUS_CODING             | Mitochondrial inner membrane translocase complex,subunitTim17/22 |
| Kabuli_wild_46301639 | 1399939499                          | Ca_kabuli_Chr05 | 46301639                | A/G  | Gene_Ca_04083      | SYNONYMOUS_CODING             | NA                                                               |
| Kabuli_wild_46328627 | 1399939500                          | Ca_kabuli_Chr05 | 46328627                | A/G  | Gene_Ca_04088      | DOWNSTREAM                    | Alpha/betahydrolasefold-1                                        |
| Kabuli_wild_46328895 | 1399939501                          | Ca_kabuli_Chr05 | 46328895                | T/C  | Gene_Ca_04088      | DOWNSTREAM                    | Protein of unknown function DUF2044,membrane                     |
| Kabuli_wild_46422869 | 1399939502                          | Ca_kabuli_Chr05 | 46422869                | A/T  | NA                 | INTERGENIC                    | NA                                                               |
| Kabuli_wild_46526963 | 1399939503                          | Ca_kabuli_Chr05 | 46526963                | A/C  | Gene_Ca_04110      | SYNONYMOUS_CODING             | Pentatricopeptide repeat                                         |

| SNP IDs              | NCBI dbSNP accession IDs (NCBI_SS#) | Chromosomes     | Physical positions (bp) | SNPs | Gene accession IDs | Sequence components of genome | Putative functions                        |
|----------------------|-------------------------------------|-----------------|-------------------------|------|--------------------|-------------------------------|-------------------------------------------|
| Kabuli_wild_46537319 | 1399939504                          | Ca_kabuli_Chr05 | 46537319                | T/C  | NA                 | INTERGENIC                    | NA                                        |
| Kabuli_wild_46632867 | 1399939505                          | Ca_kabuli_Chr05 | 46632867                | G/C  | Gene_Ca_04122      | DOWNSTREAM                    | ABC-1                                     |
| Kabuli_wild_46632887 | 1399939506                          | Ca_kabuli_Chr05 | 46632887                | T/C  | Gene_Ca_04122      | DOWNSTREAM                    | ABC-1                                     |
| Kabuli_wild_46704196 | 1399939507                          | Ca_kabuli_Chr05 | 46704196                | G/A  | Gene_Ca_04129      | INTRON                        | NA                                        |
| Kabuli_wild_46713780 | 1399939508                          | Ca_kabuli_Chr05 | 46713780                | A/C  | Gene_Ca_04129      | SYNONYMOUS_CODING             | NA                                        |
| Kabuli_wild_46713781 | 1399939509                          | Ca_kabuli_Chr05 | 46713781                | G/T  | Gene_Ca_04129      | NON_SYNONYMOUS_CODING         | NA                                        |
| Kabuli_wild_47068061 | 1399939510                          | Ca_kabuli_Chr05 | 47068061                | C/T  | NA                 | INTERGENIC                    | NA                                        |
| Kabuli_wild_47073011 | 1399939511                          | Ca_kabuli_Chr05 | 47073011                | A/T  | NA                 | INTERGENIC                    | NA                                        |
| Kabuli_wild_47083588 | 1399939512                          | Ca_kabuli_Chr05 | 47083588                | C/T  | Gene_Ca_04166      | NON_SYNONYMOUS_CODING         | Autophagy-relatedprotein13                |
| Kabuli_wild_47151831 | 1399939513                          | Ca_kabuli_Chr05 | 47151831                | A/T  | Gene_Ca_04172      | SYNONYMOUS_CODING             | WD40 repeat                               |
| Kabuli_wild_47252496 | 1399939514                          | Ca_kabuli_Chr05 | 47252496                | T/A  | Gene_Ca_04182      | INTRON                        | GDP-fucoseproteinO-fucosyltransferase     |
| Kabuli_wild_47298345 | 1399939515                          | Ca_kabuli_Chr05 | 47298345                | A/G  | Gene_Ca_04186      | INTRON                        | Phosphatidylinositol3-/4-kinase,catalytic |
| Kabuli_wild_47329979 | 1399939516                          | Ca_kabuli_Chr05 | 47329979                | T/G  | Gene_Ca_04190      | NON_SYNONYMOUS_CODING         | Glycosyltransferase,family48              |
| Kabuli_wild_47362666 | 1399939517                          | Ca_kabuli_Chr05 | 47362666                | T/G  | Gene_Ca_04193      | DOWNSTREAM                    | NAD(P)H-quinoneoxidoreductasesubunitO     |
| Kabuli_wild_47435931 | 1399939518                          | Ca_kabuli_Chr05 | 47435931                | A/G  | Gene_Ca_04206      | DOWNSTREAM                    | Pentatric peptide repeat                  |
| Kabuli_wild_47436163 | 1399939519                          | Ca_kabuli_Chr05 | 47436163                | T/A  | Gene_Ca_04206      | DOWNSTREAM                    | Pentatric peptide repeat                  |
| Kabuli_wild_47515887 | 1399939520                          | Ca_kabuli_Chr05 | 47515887                | G/C  | NA                 | INTERGENIC                    | NA                                        |
| Kabuli_wild_47628599 | 1399939521                          | Ca_kabuli_Chr05 | 47628599                | T/C  | Gene_Ca_04223      | INTRON                        | Regulatorofchromosomecondensation,RCC1    |
| Kabuli_wild_47635816 | 1399939522                          | Ca_kabuli_Chr05 | 47635816                | A/G  | NA                 | INTERGENIC                    | NA                                        |
| Kabuli_wild_47641458 | 1399939523                          | Ca_kabuli_Chr05 | 47641458                | C/T  | Gene_Ca_04224      | NON_SYNONYMOUS_CODING         | Heat shock protein DnaJ,N-terminal        |
| Kabuli_wild_47641567 | 1399939524                          | Ca_kabuli_Chr05 | 47641567                | A/G  | Gene_Ca_04224      | NON_SYNONYMOUS_CODING         | Heat shock protein DnaJ,N-terminal        |
| Kabuli_wild_47641628 | 1399939525                          | Ca_kabuli_Chr05 | 47641628                | T/C  | Gene_Ca_04224      | SYNONYMOUS_CODING             | Heat shock protein DnaJ,N-terminal        |
| Kabuli_wild_47643992 | 1399939526                          | Ca_kabuli_Chr05 | 47643992                | G/T  | Gene_Ca_04224      | INTRON                        | Heat shock protein DnaJ,N-terminal        |
| Kabuli_wild_47670649 | 1399939527                          | Ca_kabuli_Chr05 | 47670649                | G/A  | Gene_Ca_04227      | NON_SYNONYMOUS_CODING         | Aminoacid transporter,transmembrane       |
| Kabuli_wild_47684226 | 1399939528                          | Ca_kabuli_Chr05 | 47684226                | A/G  | NA                 | INTERGENIC                    | NA                                        |
| Kabuli_wild_47684281 | 1399939529                          | Ca_kabuli_Chr05 | 47684281                | G/C  | NA                 | INTERGENIC                    | NA                                        |
| Kabuli_wild_47718830 | 1399939530                          | Ca_kabuli_Chr05 | 47718830                | A/G  | Gene_Ca_04232      | INTRON                        | Glycosidehydrolase,family35               |
| Kabuli_wild_47759752 | 1399939531                          | Ca_kabuli_Chr05 | 47759752                | T/A  | Gene_Ca_04237      | INTRON                        | Protein kinase,catalytic domain           |
| Kabuli_wild_47759789 | 1399939532                          | Ca_kabuli_Chr05 | 47759789                | A/C  | Gene_Ca_04237      | INTRON                        | Protein kinase,catalytic domain           |
| Kabuli_wild_47770909 | 1399939533                          | Ca_kabuli_Chr05 | 47770909                | T/G  | Gene_Ca_04238      | INTRON                        | Amidase                                   |
| Kabuli_wild_47812041 | 1399939534                          | Ca_kabuli_Chr05 | 47812041                | C/T  | NA                 | INTERGENIC                    | NA                                        |
| Kabuli_wild_47829331 | 1399939535                          | Ca_kabuli_Chr05 | 47829331                | T/A  | Gene_Ca_04244      | UPSTREAM                      | NA                                        |
| Kabuli_wild_47965279 | 1399939536                          | Ca_kabuli_Chr05 | 47965279                | G/A  | Gene_Ca_04258      | NON_SYNONYMOUS_CODING         | NA                                        |
| Kabuli_wild_47994780 | 1399939537                          | Ca_kabuli_Chr05 | 47994780                | A/C  | Gene_Ca_04259      | INTRON                        | Cofprotein                                |
| Kabuli_wild_48063074 | 1399939538                          | Ca_kabuli_Chr05 | 48063074                | T/A  | NA                 | INTERGENIC                    | NA                                        |
| Kabuli_wild_48069833 | 1399939539                          | Ca_kabuli_Chr05 | 48069833                | G/A  | NA                 | INTERGENIC                    | NA                                        |
| Kabuli_wild_146795   | 1399939540                          | Ca_kabuli_Chr06 | 146795                  | C/G  | NA                 | INTERGENIC                    | NA                                        |
| Kabuli_wild_146797   | 1399939541                          | Ca_kabuli_Chr06 | 146797                  | C/T  | NA                 | INTERGENIC                    | NA                                        |
| Kabuli_wild_152513   | 1399939542                          | Ca_kabuli_Chr06 | 152513                  | C/T  | NA                 | INTERGENIC                    | NA                                        |
| Kabuli_wild_166787   | 1399939543                          | Ca_kabuli_Chr06 | 166787                  | T/A  | NA                 | INTERGENIC                    | NA                                        |
| Kabuli_wild_166793   | 1399939544                          | Ca_kabuli_Chr06 | 166793                  | G/A  | NA                 | INTERGENIC                    | NA                                        |
| Kabuli_wild_166800   | 1399939545                          | Ca_kabuli_Chr06 | 166800                  | G/T  | NA                 | INTERGENIC                    | NA                                        |
| Kabuli_wild_166806   | 1399939546                          | Ca_kabuli_Chr06 | 166806                  | C/T  | NA                 | INTERGENIC                    | NA                                        |
| Kabuli_wild_166822   | 1399939547                          | Ca_kabuli_Chr06 | 166822                  | G/C  | NA                 | INTERGENIC                    | NA                                        |



| SNP IDs             | NCBI dbSNP accession IDs (NCBI_SS#) | Chromosomes     | Physical positions (bp) | SNPs | Gene accession IDs | Sequence components of genome | Putative functions                        |
|---------------------|-------------------------------------|-----------------|-------------------------|------|--------------------|-------------------------------|-------------------------------------------|
| Kabuli_wild_166823  | 1399939548                          | Ca_kabuli_Chr06 | 166823                  | G/A  | NA                 | INTERGENIC                    | NA                                        |
| Kabuli_wild_166916  | 1399939549                          | Ca_kabuli_Chr06 | 166916                  | C/T  | NA                 | INTERGENIC                    | NA                                        |
| Kabuli_wild_166917  | 1399939550                          | Ca_kabuli_Chr06 | 166917                  | G/A  | NA                 | INTERGENIC                    | NA                                        |
| Kabuli_wild_166932  | 1399939551                          | Ca_kabuli_Chr06 | 166932                  | G/A  | NA                 | INTERGENIC                    | NA                                        |
| Kabuli_wild_166934  | 1399939552                          | Ca_kabuli_Chr06 | 166934                  | G/A  | NA                 | INTERGENIC                    | NA                                        |
| Kabuli_wild_166938  | 1399939553                          | Ca_kabuli_Chr06 | 166938                  | G/T  | NA                 | INTERGENIC                    | NA                                        |
| Kabuli_wild_166943  | 1399939554                          | Ca_kabuli_Chr06 | 166943                  | G/A  | NA                 | INTERGENIC                    | NA                                        |
| Kabuli_wild_166959  | 1399939555                          | Ca_kabuli_Chr06 | 166959                  | G/A  | NA                 | INTERGENIC                    | NA                                        |
| Kabuli_wild_204368  | 1399939556                          | Ca_kabuli_Chr06 | 204368                  | G/A  | Gene_Ca_13250      | INTRON                        | Flavin-containingamineoxidase             |
| Kabuli_wild_204412  | 1399939557                          | Ca_kabuli_Chr06 | 204412                  | C/G  | Gene_Ca_13250      | INTRON                        | Flavin-containingamineoxidase             |
| Kabuli_wild_204438  | 1399939558                          | Ca_kabuli_Chr06 | 204438                  | C/T  | Gene_Ca_13250      | INTRON                        | Flavin-containingamineoxidase             |
| Kabuli_wild_324301  | 1399939559                          | Ca_kabuli_Chr06 | 324301                  | C/T  | Gene_Ca_13257      | NON_SYNONYMOUS_CODING         | Zinc finger,FYVE-type                     |
| Kabuli_wild_375684  | 1399939560                          | Ca_kabuli_Chr06 | 375684                  | T/G  | Gene_Ca_13262      | SYNONYMOUS_CODING             | Pyridoxalphosphate-dependentdecarboxylase |
| Kabuli_wild_386250  | 1399939561                          | Ca_kabuli_Chr06 | 386250                  | A/G  | NA                 | INTERGENIC                    | NA                                        |
| Kabuli_wild_386289  | 1399939562                          | Ca_kabuli_Chr06 | 386289                  | G/A  | NA                 | INTERGENIC                    | NA                                        |
| Kabuli_wild_474489  | 1399939563                          | Ca_kabuli_Chr06 | 474489                  | C/A  | NA                 | INTERGENIC                    | NA                                        |
| Kabuli_wild_505875  | 1399939564                          | Ca_kabuli_Chr06 | 505875                  | T/C  | Gene_Ca_13271      | NON_SYNONYMOUS_CODING         | NA                                        |
| Kabuli_wild_551130  | 1399939565                          | Ca_kabuli_Chr06 | 551130                  | T/G  | Gene_Ca_13276      | NON_SYNONYMOUS_CODING         | Nicastrin                                 |
| Kabuli_wild_580616  | 1399939566                          | Ca_kabuli_Chr06 | 580616                  | G/C  | Gene_Ca_13279      | DOWNSTREAM                    | PeptidaseA1                               |
| Kabuli_wild_647322  | 1399939567                          | Ca_kabuli_Chr06 | 647322                  | A/C  | Gene_Ca_13283      | SYNONYMOUS_CODING             | NA                                        |
| Kabuli_wild_697138  | 1399939568                          | Ca_kabuli_Chr06 | 697138                  | C/T  | NA                 | INTERGENIC                    | NA                                        |
| Kabuli_wild_697147  | 1399939569                          | Ca_kabuli_Chr06 | 697147                  | A/G  | NA                 | INTERGENIC                    | NA                                        |
| Kabuli_wild_697168  | 1399939570                          | Ca_kabuli_Chr06 | 697168                  | C/T  | NA                 | INTERGENIC                    | NA                                        |
| Kabuli_wild_948945  | 1399939571                          | Ca_kabuli_Chr06 | 948945                  | A/G  | Gene_Ca_13307      | NON_SYNONYMOUS_CODING         | Protein kinase,catalytic domain           |
| Kabuli_wild_961805  | 1399939572                          | Ca_kabuli_Chr06 | 961805                  | C/T  | NA                 | INTERGENIC                    | NA                                        |
| Kabuli_wild_961875  | 1399939573                          | Ca_kabuli_Chr06 | 961875                  | T/C  | NA                 | INTERGENIC                    | NA                                        |
| Kabuli_wild_979827  | 1399939574                          | Ca_kabuli_Chr06 | 979827                  | C/A  | NA                 | INTERGENIC                    | NA                                        |
| Kabuli_wild_997997  | 1399939575                          | Ca_kabuli_Chr06 | 997997                  | T/A  | NA                 | INTERGENIC                    | NA                                        |
| Kabuli_wild_998014  | 1399939576                          | Ca_kabuli_Chr06 | 998014                  | G/A  | NA                 | INTERGENIC                    | NA                                        |
| Kabuli_wild_998031  | 1399939577                          | Ca_kabuli_Chr06 | 998031                  | A/T  | NA                 | INTERGENIC                    | NA                                        |
| Kabuli_wild_1034087 | 1399939578                          | Ca_kabuli_Chr06 | 1034087                 | A/T  | NA                 | INTERGENIC                    | NA                                        |
| Kabuli_wild_1208372 | 1399939579                          | Ca_kabuli_Chr06 | 1208372                 | A/G  | Gene_Ca_13327      | INTRON                        | Short-chaindehydrogenase/reductaseSDR     |
| Kabuli_wild_1220460 | 1399939580                          | Ca_kabuli_Chr06 | 1220460                 | G/C  | NA                 | INTERGENIC                    | NA                                        |
| Kabuli_wild_1290413 | 1399939581                          | Ca_kabuli_Chr06 | 1290413                 | C/G  | Gene_Ca_13334      | INTRON                        | Regulatorofchromosomecondensation,RCC1    |
| Kabuli_wild_1315583 | 1399939582                          | Ca_kabuli_Chr06 | 1315583                 | G/C  | Gene_Ca_13338      | INTRON                        | Aspartate/glutamate/uridylatekinase       |
| Kabuli_wild_1362779 | 1399939583                          | Ca_kabuli_Chr06 | 1362779                 | C/A  | NA                 | INTERGENIC                    | NA                                        |
| Kabuli_wild_1400132 | 1399939584                          | Ca_kabuli_Chr06 | 1400132                 | T/A  | NA                 | INTERGENIC                    | NA                                        |
| Kabuli_wild_1400135 | 1399939585                          | Ca_kabuli_Chr06 | 1400135                 | C/A  | NA                 | INTERGENIC                    | NA                                        |
| Kabuli_wild_1400170 | 1399939586                          | Ca_kabuli_Chr06 | 1400170                 | C/A  | NA                 | INTERGENIC                    | NA                                        |
| Kabuli_wild_1400182 | 1399939587                          | Ca_kabuli_Chr06 | 1400182                 | G/T  | NA                 | INTERGENIC                    | NA                                        |
| Kabuli_wild_1400202 | 1399939588                          | Ca_kabuli_Chr06 | 1400202                 | C/A  | NA                 | INTERGENIC                    | NA                                        |
| Kabuli_wild_1626712 | 1399939589                          | Ca_kabuli_Chr06 | 1626712                 | C/T  | NA                 | INTERGENIC                    | NA                                        |
| Kabuli_wild_1626723 | 1399939590                          | Ca_kabuli_Chr06 | 1626723                 | T/C  | NA                 | INTERGENIC                    | NA                                        |
| Kabuli_wild_1815245 | 1399939591                          | Ca_kabuli_Chr06 | 1815245                 | T/C  | Gene_Ca_10308      | DOWNSTREAM                    | Zinc finger,LIM-type                      |



| SNP IDs             | NCBI dbSNP accession IDs (NCBI_SS#) | Chromosomes      | Physical positions (bp) | SNPs | Gene accession IDs | Sequence components of genome | Putative functions                               |
|---------------------|-------------------------------------|------------------|-------------------------|------|--------------------|-------------------------------|--------------------------------------------------|
| Kabuli_wild_1815278 | 1399939592                          | Ca_kabuli_Chrom6 | 1815278                 | G/A  | Gene_Ca_10308      | DOWNSTREAM                    | Zinc finger,LIM-type                             |
| Kabuli_wild_1817599 | 1399939593                          | Ca_kabuli_Chrom6 | 1817599                 | C/T  | Gene_Ca_10308      | INTRON                        | Zinc finger,LIM-type                             |
| Kabuli_wild_1817602 | 1399939594                          | Ca_kabuli_Chrom6 | 1817602                 | A/T  | Gene_Ca_10308      | INTRON                        | Zinc finger,LIM-type                             |
| Kabuli_wild_1817607 | 1399939595                          | Ca_kabuli_Chrom6 | 1817607                 | T/C  | Gene_Ca_10308      | INTRON                        | Zinc finger,LIM-type                             |
| Kabuli_wild_1817616 | 1399939596                          | Ca_kabuli_Chrom6 | 1817616                 | G/C  | Gene_Ca_10308      | INTRON                        | Zinc finger,LIM-type                             |
| Kabuli_wild_1818205 | 1399939597                          | Ca_kabuli_Chrom6 | 1818205                 | T/G  | Gene_Ca_10308      | INTRON                        | Zinc finger,LIM-type                             |
| Kabuli_wild_1818225 | 1399939598                          | Ca_kabuli_Chrom6 | 1818225                 | A/G  | Gene_Ca_10308      | INTRON                        | Zinc finger,LIM-type                             |
| Kabuli_wild_1818234 | 1399939599                          | Ca_kabuli_Chrom6 | 1818234                 | C/T  | Gene_Ca_10308      | INTRON                        | Zinc finger,LIM-type                             |
| Kabuli_wild_1878470 | 1399939600                          | Ca_kabuli_Chrom6 | 1878470                 | T/C  | Gene_Ca_10314      | SYNONYMOUS_CODING             | Transferase                                      |
| Kabuli_wild_1878506 | 1399939601                          | Ca_kabuli_Chrom6 | 1878506                 | G/A  | Gene_Ca_10314      | SYNONYMOUS_CODING             | Transferase                                      |
| Kabuli_wild_1932175 | 1399939602                          | Ca_kabuli_Chrom6 | 1932175                 | G/A  | Gene_Ca_10319      | INTRON                        | Major intrinsic protein                          |
| Kabuli_wild_1966137 | 1399939603                          | Ca_kabuli_Chrom6 | 1966137                 | T/C  | Gene_Ca_10321      | DOWNSTREAM                    | NA                                               |
| Kabuli_wild_1978864 | 1399939604                          | Ca_kabuli_Chrom6 | 1978864                 | A/C  | Gene_Ca_10322      | INTRON                        | NA                                               |
| Kabuli_wild_1978867 | 1399939605                          | Ca_kabuli_Chrom6 | 1978867                 | A/T  | Gene_Ca_10322      | INTRON                        | NA                                               |
| Kabuli_wild_2037620 | 1399939606                          | Ca_kabuli_Chrom6 | 2037620                 | T/G  | NA                 | INTERGENIC                    | NA                                               |
| Kabuli_wild_2045611 | 1399939607                          | Ca_kabuli_Chrom6 | 2045611                 | G/C  | Gene_Ca_10325      | NON_SYNONYMOUS_CODING         | Pyridoxalphosphate-dependent enzyme,beta subunit |
| Kabuli_wild_2049344 | 1399939608                          | Ca_kabuli_Chrom6 | 2049344                 | A/G  | NA                 | INTERGENIC                    | NA                                               |
| Kabuli_wild_2061459 | 1399939609                          | Ca_kabuli_Chrom6 | 2061459                 | A/G  | NA                 | INTERGENIC                    | NA                                               |
| Kabuli_wild_2079137 | 1399939610                          | Ca_kabuli_Chrom6 | 2079137                 | T/G  | NA                 | INTERGENIC                    | NA                                               |
| Kabuli_wild_2079186 | 1399939611                          | Ca_kabuli_Chrom6 | 2079186                 | G/T  | NA                 | INTERGENIC                    | NA                                               |
| Kabuli_wild_2083805 | 1399939612                          | Ca_kabuli_Chrom6 | 2083805                 | G/A  | Gene_Ca_10330      | SYNONYMOUS_CODING             | K+ potassium transporter                         |
| Kabuli_wild_2083813 | 1399939613                          | Ca_kabuli_Chrom6 | 2083813                 | T/C  | Gene_Ca_10330      | NON_SYNONYMOUS_CODING         | K+ potassium transporter                         |
| Kabuli_wild_2126667 | 1399939614                          | Ca_kabuli_Chrom6 | 2126667                 | C/T  | NA                 | INTERGENIC                    | NA                                               |
| Kabuli_wild_2140189 | 1399939615                          | Ca_kabuli_Chrom6 | 2140189                 | G/T  | Gene_Ca_10336      | NON_SYNONYMOUS_CODING         | Leucine-rich repeat                              |
| Kabuli_wild_2140406 | 1399939616                          | Ca_kabuli_Chrom6 | 2140406                 | G/A  | Gene_Ca_10336      | SYNONYMOUS_CODING             | Leucine-rich repeat                              |
| Kabuli_wild_2172005 | 1399939617                          | Ca_kabuli_Chrom6 | 2172005                 | C/T  | Gene_Ca_10341      | NON_SYNONYMOUS_CODING         | Self-like                                        |
| Kabuli_wild_2175820 | 1399939618                          | Ca_kabuli_Chrom6 | 2175820                 | C/T  | NA                 | INTERGENIC                    | NA                                               |
| Kabuli_wild_2176110 | 1399939619                          | Ca_kabuli_Chrom6 | 2176110                 | C/T  | NA                 | INTERGENIC                    | NA                                               |
| Kabuli_wild_2176221 | 1399939620                          | Ca_kabuli_Chrom6 | 2176221                 | C/A  | NA                 | INTERGENIC                    | NA                                               |
| Kabuli_wild_2193379 | 1399939621                          | Ca_kabuli_Chrom6 | 2193379                 | C/A  | NA                 | INTERGENIC                    | NA                                               |
| Kabuli_wild_2193748 | 1399939622                          | Ca_kabuli_Chrom6 | 2193748                 | T/A  | Gene_Ca_10344      | INTRON                        | Auxin efflux carrier                             |
| Kabuli_wild_2193763 | 1399939623                          | Ca_kabuli_Chrom6 | 2193763                 | A/C  | Gene_Ca_10344      | INTRON                        | Auxin efflux carrier                             |
| Kabuli_wild_2193803 | 1399939624                          | Ca_kabuli_Chrom6 | 2193803                 | G/A  | Gene_Ca_10344      | SYNONYMOUS_CODING             | Auxin efflux carrier                             |
| Kabuli_wild_2214131 | 1399939625                          | Ca_kabuli_Chrom6 | 2214131                 | T/A  | Gene_Ca_10348      | INTRON                        | Amidase                                          |
| Kabuli_wild_2214178 | 1399939626                          | Ca_kabuli_Chrom6 | 2214178                 | T/C  | Gene_Ca_10348      | INTRON                        | Amidase                                          |
| Kabuli_wild_2214247 | 1399939627                          | Ca_kabuli_Chrom6 | 2214247                 | A/G  | Gene_Ca_10348      | INTRON                        | Amidase                                          |
| Kabuli_wild_2223544 | 1399939628                          | Ca_kabuli_Chrom6 | 2223544                 | A/T  | Gene_Ca_10351      | DOWNSTREAM                    | Pentatric peptide repeat                         |
| Kabuli_wild_2223578 | 1399939629                          | Ca_kabuli_Chrom6 | 2223578                 | T/G  | Gene_Ca_10351      | DOWNSTREAM                    | Pentatric peptide repeat                         |
| Kabuli_wild_2223664 | 1399939630                          | Ca_kabuli_Chrom6 | 2223664                 | A/C  | Gene_Ca_10351      | DOWNSTREAM                    | Pentatric peptide repeat                         |
| Kabuli_wild_2233314 | 1399939631                          | Ca_kabuli_Chrom6 | 2233314                 | T/G  | Gene_Ca_10352      | NON_SYNONYMOUS_CODING         | Homeobox                                         |
| Kabuli_wild_2233318 | 1399939632                          | Ca_kabuli_Chrom6 | 2233318                 | T/C  | Gene_Ca_10352      | NON_SYNONYMOUS_CODING         | Homeobox                                         |
| Kabuli_wild_2244901 | 1399939633                          | Ca_kabuli_Chrom6 | 2244901                 | A/C  | NA                 | INTERGENIC                    | NA                                               |
| Kabuli_wild_2275505 | 1399939634                          | Ca_kabuli_Chrom6 | 2275505                 | A/G  | Gene_Ca_10356      | NON_SYNONYMOUS_CODING         | NA                                               |
| Kabuli_wild_2275524 | 1399939635                          | Ca_kabuli_Chrom6 | 2275524                 | G/A  | Gene_Ca_10356      | SYNONYMOUS_CODING             | NA                                               |

| SNP IDs             | NCBI dbSNP accession IDs (NCBI_SS#) | Chromosomes     | Physical positions (bp) | SNPs | Gene accession IDs | Sequence components of genome | Putative functions                              |
|---------------------|-------------------------------------|-----------------|-------------------------|------|--------------------|-------------------------------|-------------------------------------------------|
| Kabuli_wild_2275553 | 1399939636                          | Ca_kabuli_Chr06 | 2275553                 | A/G  | Gene_Ca_10356      | NON_SYNONYMOUS_CODING         | NA                                              |
| Kabuli_wild_2275824 | 1399939637                          | Ca_kabuli_Chr06 | 2275824                 | C/T  | Gene_Ca_10356      | SYNONYMOUS_CODING             | NA                                              |
| Kabuli_wild_2275825 | 1399939638                          | Ca_kabuli_Chr06 | 2275825                 | T/A  | Gene_Ca_10356      | NON_SYNONYMOUS_CODING         | NA                                              |
| Kabuli_wild_2280734 | 1399939639                          | Ca_kabuli_Chr06 | 2280734                 | T/A  | Gene_Ca_10356      | INTRON                        | NA                                              |
| Kabuli_wild_2280752 | 1399939640                          | Ca_kabuli_Chr06 | 2280752                 | A/G  | Gene_Ca_10356      | INTRON                        | NA                                              |
| Kabuli_wild_2286237 | 1399939641                          | Ca_kabuli_Chr06 | 2286237                 | C/T  | Gene_Ca_10358      | DOWNSTREAM                    | 3-oxo-5-alpha-steroid4-dehydrogenase,C-terminal |
| Kabuli_wild_2294911 | 1399939642                          | Ca_kabuli_Chr06 | 2294911                 | T/G  | Gene_Ca_10360      | DOWNSTREAM                    | Protein kinase,catalytic domain                 |
| Kabuli_wild_2303123 | 1399939643                          | Ca_kabuli_Chr06 | 2303123                 | T/G  | Gene_Ca_10360      | INTRON                        | Protein kinase,catalytic domain                 |
| Kabuli_wild_2313683 | 1399939644                          | Ca_kabuli_Chr06 | 2313683                 | A/C  | Gene_Ca_10361      | NON_SYNONYMOUS_CODING         | HistoneH1/H5                                    |
| Kabuli_wild_2313710 | 1399939645                          | Ca_kabuli_Chr06 | 2313710                 | T/G  | Gene_Ca_10361      | SYNONYMOUS_CODING             | HistoneH1/H5                                    |
| Kabuli_wild_2313828 | 1399939646                          | Ca_kabuli_Chr06 | 2313828                 | G/A  | Gene_Ca_10361      | NON_SYNONYMOUS_CODING         | HistoneH1/H5                                    |
| Kabuli_wild_2314029 | 1399939647                          | Ca_kabuli_Chr06 | 2314029                 | T/C  | Gene_Ca_10361      | NON_SYNONYMOUS_CODING         | HistoneH1/H5                                    |
| Kabuli_wild_2420148 | 1399939648                          | Ca_kabuli_Chr06 | 2420148                 | T/C  | NA                 | INTERGENIC                    | NA                                              |
| Kabuli_wild_2462481 | 1399939649                          | Ca_kabuli_Chr06 | 2462481                 | C/T  | NA                 | INTERGENIC                    | NA                                              |
| Kabuli_wild_2470723 | 1399939650                          | Ca_kabuli_Chr06 | 2470723                 | C/T  | Gene_Ca_10378      | NON_SYNONYMOUS_CODING         | Double-strandedRNA-binding                      |
| Kabuli_wild_2502485 | 1399939651                          | Ca_kabuli_Chr06 | 2502485                 | A/G  | NA                 | INTERGENIC                    | NA                                              |
| Kabuli_wild_2527768 | 1399939652                          | Ca_kabuli_Chr06 | 2527768                 | A/G  | NA                 | INTERGENIC                    | NA                                              |
| Kabuli_wild_2540711 | 1399939653                          | Ca_kabuli_Chr06 | 2540711                 | C/T  | Gene_Ca_10386      | NON_SYNONYMOUS_CODING         | Phox/Bem1p                                      |
| Kabuli_wild_2540749 | 1399939654                          | Ca_kabuli_Chr06 | 2540749                 | C/T  | Gene_Ca_10386      | SYNONYMOUS_CODING             | Phox/Bem1p                                      |
| Kabuli_wild_2541032 | 1399939655                          | Ca_kabuli_Chr06 | 2541032                 | G/A  | Gene_Ca_10386      | NON_SYNONYMOUS_CODING         | Phox/Bem1p                                      |
| Kabuli_wild_2541088 | 1399939656                          | Ca_kabuli_Chr06 | 2541088                 | T/A  | Gene_Ca_10386      | SYNONYMOUS_CODING             | Phox/Bem1p                                      |
| Kabuli_wild_2542942 | 1399939657                          | Ca_kabuli_Chr06 | 2542942                 | T/A  | NA                 | INTERGENIC                    | NA                                              |
| Kabuli_wild_2542981 | 1399939658                          | Ca_kabuli_Chr06 | 2542981                 | C/T  | NA                 | INTERGENIC                    | NA                                              |
| Kabuli_wild_2543062 | 1399939659                          | Ca_kabuli_Chr06 | 2543062                 | A/G  | NA                 | INTERGENIC                    | NA                                              |
| Kabuli_wild_2543096 | 1399939660                          | Ca_kabuli_Chr06 | 2543096                 | C/T  | NA                 | INTERGENIC                    | NA                                              |
| Kabuli_wild_2548412 | 1399939661                          | Ca_kabuli_Chr06 | 2548412                 | A/G  | Gene_Ca_10387      | SYNONYMOUS_CODING             | Zinc finger, RING-type                          |
| Kabuli_wild_2549991 | 1399939662                          | Ca_kabuli_Chr06 | 2549991                 | T/C  | Gene_Ca_10387      | SYNONYMOUS_CODING             | Zinc finger, RING-type                          |
| Kabuli_wild_2550154 | 1399939663                          | Ca_kabuli_Chr06 | 2550154                 | A/C  | Gene_Ca_10387      | SYNONYMOUS_CODING             | Zinc finger, RING-type                          |
| Kabuli_wild_2625793 | 1399939664                          | Ca_kabuli_Chr06 | 2625793                 | C/G  | Gene_Ca_10393      | INTRON                        | THO complex,subunitTHOC2,N-terminal             |
| Kabuli_wild_2639558 | 1399939665                          | Ca_kabuli_Chr06 | 2639558                 | T/A  | NA                 | INTERGENIC                    | NA                                              |
| Kabuli_wild_2639606 | 1399939666                          | Ca_kabuli_Chr06 | 2639606                 | A/G  | NA                 | INTERGENIC                    | NA                                              |
| Kabuli_wild_2639607 | 1399939667                          | Ca_kabuli_Chr06 | 2639607                 | T/C  | NA                 | INTERGENIC                    | NA                                              |
| Kabuli_wild_2639644 | 1399939668                          | Ca_kabuli_Chr06 | 2639644                 | T/C  | NA                 | INTERGENIC                    | NA                                              |
| Kabuli_wild_2639716 | 1399939669                          | Ca_kabuli_Chr06 | 2639716                 | T/C  | NA                 | INTERGENIC                    | NA                                              |
| Kabuli_wild_2639768 | 1399939670                          | Ca_kabuli_Chr06 | 2639768                 | A/C  | NA                 | INTERGENIC                    | NA                                              |
| Kabuli_wild_2639770 | 1399939671                          | Ca_kabuli_Chr06 | 2639770                 | A/C  | NA                 | INTERGENIC                    | NA                                              |
| Kabuli_wild_2639800 | 1399939672                          | Ca_kabuli_Chr06 | 2639800                 | A/G  | NA                 | INTERGENIC                    | NA                                              |
| Kabuli_wild_2696209 | 1399939673                          | Ca_kabuli_Chr06 | 2696209                 | T/C  | NA                 | INTERGENIC                    | NA                                              |
| Kabuli_wild_2696212 | 1399939674                          | Ca_kabuli_Chr06 | 2696212                 | T/C  | NA                 | INTERGENIC                    | NA                                              |
| Kabuli_wild_2696213 | 1399939675                          | Ca_kabuli_Chr06 | 2696213                 | T/A  | NA                 | INTERGENIC                    | NA                                              |
| Kabuli_wild_2714897 | 1399939676                          | Ca_kabuli_Chr06 | 2714897                 | C/A  | NA                 | INTERGENIC                    | NA                                              |
| Kabuli_wild_2717150 | 1399939677                          | Ca_kabuli_Chr06 | 2717150                 | G/A  | Gene_Ca_10406      | DOWNSTREAM                    | Heat shock factor(HSF)-type,DNA-binding         |
| Kabuli_wild_2719151 | 1399939678                          | Ca_kabuli_Chr06 | 2719151                 | A/G  | NA                 | INTERGENIC                    | NA                                              |
| Kabuli_wild_2740765 | 1399939679                          | Ca_kabuli_Chr06 | 2740765                 | A/G  | Gene_Ca_10407      | DOWNSTREAM                    | Glycosyltransferase,family20                    |

| SNP IDs             | NCBI dbSNP accession IDs (NCBI_SS#) | Chromosomes      | Physical positions (bp) | SNPs | Gene accession IDs | Sequence components of genome | Putative functions            |
|---------------------|-------------------------------------|------------------|-------------------------|------|--------------------|-------------------------------|-------------------------------|
| Kabuli_wild_2740784 | 1399939680                          | Ca_kabuli_Chrom6 | 2740784                 | T/C  | Gene_Ca_10407      | DOWNSTREAM                    | Glycosyltransferase, family20 |
| Kabuli_wild_2789573 | 1399939681                          | Ca_kabuli_Chrom6 | 2789573                 | A/G  | Gene_Ca_10413      | INTRON                        | MyosinI heavychain-like       |
| Kabuli_wild_2802942 | 1399939682                          | Ca_kabuli_Chrom6 | 2802942                 | C/A  | Gene_Ca_10415      | SYNONYMOUS_CODING             | NA                            |
| Kabuli_wild_2811345 | 1399939683                          | Ca_kabuli_Chrom6 | 2811345                 | A/G  | Gene_Ca_10416      | NON_SYNONYMOUS_CODING         | Nucleoporin, Nup155-like      |
| Kabuli_wild_2812710 | 1399939684                          | Ca_kabuli_Chrom6 | 2812710                 | T/A  | Gene_Ca_10416      | SYNONYMOUS_CODING             | Nucleoporin, Nup155-like      |
| Kabuli_wild_2812719 | 1399939685                          | Ca_kabuli_Chrom6 | 2812719                 | G/A  | Gene_Ca_10416      | SYNONYMOUS_CODING             | Nucleoporin, Nup155-like      |
| Kabuli_wild_2812794 | 1399939686                          | Ca_kabuli_Chrom6 | 2812794                 | A/C  | Gene_Ca_10416      | SYNONYMOUS_CODING             | Nucleoporin, Nup155-like      |
| Kabuli_wild_2813118 | 1399939687                          | Ca_kabuli_Chrom6 | 2813118                 | G/C  | Gene_Ca_10416      | SYNONYMOUS_CODING             | Nucleoporin, Nup155-like      |
| Kabuli_wild_2813244 | 1399939688                          | Ca_kabuli_Chrom6 | 2813244                 | G/A  | Gene_Ca_10416      | SYNONYMOUS_CODING             | Nucleoporin, Nup155-like      |
| Kabuli_wild_2821836 | 1399939689                          | Ca_kabuli_Chrom6 | 2821836                 | G/T  | Gene_Ca_10417      | INTRON                        | HEAT                          |
| Kabuli_wild_2855691 | 1399939690                          | Ca_kabuli_Chrom6 | 2855691                 | C/G  | Gene_Ca_10421      | INTRON                        | 4Fe-4S binding domain         |
| Kabuli_wild_2864713 | 1399939691                          | Ca_kabuli_Chrom6 | 2864713                 | G/A  | NA                 | INTERGENIC                    | NA                            |
| Kabuli_wild_2884970 | 1399939692                          | Ca_kabuli_Chrom6 | 2884970                 | T/G  | Gene_Ca_10426      | DOWNSTREAM                    | XAP5protein                   |
| Kabuli_wild_2884974 | 1399939693                          | Ca_kabuli_Chrom6 | 2884974                 | T/C  | Gene_Ca_10426      | DOWNSTREAM                    | XAP5protein                   |
| Kabuli_wild_2919355 | 1399939694                          | Ca_kabuli_Chrom6 | 2919355                 | A/C  | Gene_Ca_10430      | INTRON                        | UBX                           |
| Kabuli_wild_2925908 | 1399939695                          | Ca_kabuli_Chrom6 | 2925908                 | A/G  | NA                 | INTERGENIC                    | NA                            |
| Kabuli_wild_2926006 | 1399939696                          | Ca_kabuli_Chrom6 | 2926006                 | T/C  | NA                 | INTERGENIC                    | NA                            |
| Kabuli_wild_2927271 | 1399939697                          | Ca_kabuli_Chrom6 | 2927271                 | G/A  | NA                 | INTERGENIC                    | NA                            |
| Kabuli_wild_2927386 | 1399939698                          | Ca_kabuli_Chrom6 | 2927386                 | C/G  | Gene_Ca_10432      | UPSTREAM                      | Glycosidehydrolase, family17  |
| Kabuli_wild_2927387 | 1399939699                          | Ca_kabuli_Chrom6 | 2927387                 | T/C  | Gene_Ca_10432      | UPSTREAM                      | Glycosidehydrolase, family17  |
| Kabuli_wild_2930459 | 1399939700                          | Ca_kabuli_Chrom6 | 2930459                 | C/T  | NA                 | INTERGENIC                    | NA                            |
| Kabuli_wild_2930504 | 1399939701                          | Ca_kabuli_Chrom6 | 2930504                 | T/C  | NA                 | INTERGENIC                    | NA                            |
| Kabuli_wild_2932051 | 1399939702                          | Ca_kabuli_Chrom6 | 2932051                 | G/A  | Gene_Ca_10433      | DOWNSTREAM                    | F-boxdomain, cyclin-like      |
| Kabuli_wild_2932143 | 1399939703                          | Ca_kabuli_Chrom6 | 2932143                 | C/A  | Gene_Ca_10433      | DOWNSTREAM                    | F-boxdomain, cyclin-like      |
| Kabuli_wild_2932168 | 1399939704                          | Ca_kabuli_Chrom6 | 2932168                 | A/C  | Gene_Ca_10433      | DOWNSTREAM                    | F-boxdomain, cyclin-like      |
| Kabuli_wild_2932179 | 1399939705                          | Ca_kabuli_Chrom6 | 2932179                 | T/G  | Gene_Ca_10433      | DOWNSTREAM                    | F-boxdomain, cyclin-like      |
| Kabuli_wild_2972301 | 1399939706                          | Ca_kabuli_Chrom6 | 2972301                 | T/C  | Gene_Ca_10439      | INTRON                        | Alpha-D-phosphohexomutase     |
| Kabuli_wild_2972319 | 1399939707                          | Ca_kabuli_Chrom6 | 2972319                 | C/T  | Gene_Ca_10439      | INTRON                        | Alpha-D-phosphohexomutase     |
| Kabuli_wild_2973756 | 1399939708                          | Ca_kabuli_Chrom6 | 2973756                 | A/C  | Gene_Ca_10439      | INTRON                        | Alpha-D-phosphohexomutase     |
| Kabuli_wild_3060502 | 1399939709                          | Ca_kabuli_Chrom6 | 3060502                 | G/A  | NA                 | INTERGENIC                    | NA                            |
| Kabuli_wild_3060508 | 1399939710                          | Ca_kabuli_Chrom6 | 3060508                 | G/A  | NA                 | INTERGENIC                    | NA                            |
| Kabuli_wild_3060542 | 1399939711                          | Ca_kabuli_Chrom6 | 3060542                 | C/T  | NA                 | INTERGENIC                    | NA                            |
| Kabuli_wild_3060544 | 1399939712                          | Ca_kabuli_Chrom6 | 3060544                 | G/A  | NA                 | INTERGENIC                    | NA                            |
| Kabuli_wild_3283199 | 1399939713                          | Ca_kabuli_Chrom6 | 3283199                 | T/A  | Gene_Ca_25241      | INTRON                        | Aldehydedehydrogenasedomain   |
| Kabuli_wild_3288441 | 1399939714                          | Ca_kabuli_Chrom6 | 3288441                 | A/G  | NA                 | INTERGENIC                    | NA                            |
| Kabuli_wild_3288444 | 1399939715                          | Ca_kabuli_Chrom6 | 3288444                 | G/A  | NA                 | INTERGENIC                    | NA                            |
| Kabuli_wild_3288481 | 1399939716                          | Ca_kabuli_Chrom6 | 3288481                 | C/A  | NA                 | INTERGENIC                    | NA                            |
| Kabuli_wild_3288505 | 1399939717                          | Ca_kabuli_Chrom6 | 3288505                 | G/T  | NA                 | INTERGENIC                    | NA                            |
| Kabuli_wild_3297086 | 1399939718                          | Ca_kabuli_Chrom6 | 3297086                 | G/A  | Gene_Ca_25243      | INTRON                        | Peptidyl-tRNAhydrolase        |
| Kabuli_wild_3298952 | 1399939719                          | Ca_kabuli_Chrom6 | 3298952                 | A/T  | Gene_Ca_25243      | INTRON                        | Peptidyl-tRNAhydrolase        |
| Kabuli_wild_3395024 | 1399939720                          | Ca_kabuli_Chrom6 | 3395024                 | G/A  | NA                 | INTERGENIC                    | NA                            |
| Kabuli_wild_3395075 | 1399939721                          | Ca_kabuli_Chrom6 | 3395075                 | T/G  | NA                 | INTERGENIC                    | NA                            |
| Kabuli_wild_3395253 | 1399939722                          | Ca_kabuli_Chrom6 | 3395253                 | A/G  | NA                 | INTERGENIC                    | NA                            |
| Kabuli_wild_3395370 | 1399939723                          | Ca_kabuli_Chrom6 | 3395370                 | C/T  | NA                 | INTERGENIC                    | NA                            |

| SNP IDs             | NCBI dbSNP accession IDs (NCBI_SS#) | Chromosomes     | Physical positions (bp) | SNPs | Gene accession IDs | Sequence components of genome | Putative functions                                         |
|---------------------|-------------------------------------|-----------------|-------------------------|------|--------------------|-------------------------------|------------------------------------------------------------|
| Kabuli_wild_3397650 | 1399939724                          | Ca_kabuli_Chr06 | 3397650                 | A/G  | Gene_Ca_05972      | DOWNSTREAM                    | Domain of unknown function DUF292,eukaryotic               |
| Kabuli_wild_3400331 | 1399939725                          | Ca_kabuli_Chr06 | 3400331                 | A/C  | Gene_Ca_05972      | NON_SYNONYMOUS_CODING         | Domain of unknown function DUF292,eukaryotic               |
| Kabuli_wild_3482411 | 1399939726                          | Ca_kabuli_Chr06 | 3482411                 | A/G  | NA                 | INTERGENIC                    | NA                                                         |
| Kabuli_wild_3505662 | 1399939727                          | Ca_kabuli_Chr06 | 3505662                 | C/A  | Gene_Ca_05959      | NON_SYNONYMOUS_CODING         | Oligo peptide transporter                                  |
| Kabuli_wild_3530094 | 1399939728                          | Ca_kabuli_Chr06 | 3530094                 | T/C  | Gene_Ca_05957      | INTRON                        | FAD-dependent pyridine nucleotide-disulphideoxidoreductase |
| Kabuli_wild_3530137 | 1399939729                          | Ca_kabuli_Chr06 | 3530137                 | A/G  | Gene_Ca_05957      | INTRON                        | FAD-dependent pyridine nucleotide-disulphideoxidoreductase |
| Kabuli_wild_3548114 | 1399939730                          | Ca_kabuli_Chr06 | 3548114                 | A/C  | NA                 | INTERGENIC                    | NA                                                         |
| Kabuli_wild_3548121 | 1399939731                          | Ca_kabuli_Chr06 | 3548121                 | C/A  | NA                 | INTERGENIC                    | NA                                                         |
| Kabuli_wild_3711483 | 1399939732                          | Ca_kabuli_Chr06 | 3711483                 | C/T  | NA                 | INTERGENIC                    | NA                                                         |
| Kabuli_wild_3711486 | 1399939733                          | Ca_kabuli_Chr06 | 3711486                 | T/C  | NA                 | INTERGENIC                    | NA                                                         |
| Kabuli_wild_3729810 | 1399939734                          | Ca_kabuli_Chr06 | 3729810                 | T/C  | Gene_Ca_05932      | INTRON                        | Malicoxidoreductase                                        |
| Kabuli_wild_3786843 | 1399939735                          | Ca_kabuli_Chr06 | 3786843                 | A/G  | NA                 | INTERGENIC                    | NA                                                         |
| Kabuli_wild_3787239 | 1399939736                          | Ca_kabuli_Chr06 | 3787239                 | C/A  | NA                 | INTERGENIC                    | NA                                                         |
| Kabuli_wild_3829070 | 1399939737                          | Ca_kabuli_Chr06 | 3829070                 | C/A  | Gene_Ca_05920      | NON_SYNONYMOUS_CODING         | Glycosidehydrolase,family17                                |
| Kabuli_wild_3962516 | 1399939738                          | Ca_kabuli_Chr06 | 3962516                 | A/C  | Gene_Ca_05905      | DOWNSTREAM                    | Snf7                                                       |
| Kabuli_wild_3985519 | 1399939739                          | Ca_kabuli_Chr06 | 3985519                 | G/A  | Gene_Ca_05902      | UPSTREAM                      | NA                                                         |
| Kabuli_wild_3992419 | 1399939740                          | Ca_kabuli_Chr06 | 3992419                 | C/T  | Gene_Ca_05900      | DOWNSTREAM                    | NA                                                         |
| Kabuli_wild_4112085 | 1399939741                          | Ca_kabuli_Chr06 | 4112085                 | T/C  | Gene_Ca_05885      | UPSTREAM                      | PhospholipaseA2,eukaryotic                                 |
| Kabuli_wild_4226924 | 1399939742                          | Ca_kabuli_Chr06 | 4226924                 | G/T  | NA                 | INTERGENIC                    | NA                                                         |
| Kabuli_wild_4226947 | 1399939743                          | Ca_kabuli_Chr06 | 4226947                 | A/T  | NA                 | INTERGENIC                    | NA                                                         |
| Kabuli_wild_4226949 | 1399939744                          | Ca_kabuli_Chr06 | 4226949                 | T/C  | NA                 | INTERGENIC                    | NA                                                         |
| Kabuli_wild_4226956 | 1399939745                          | Ca_kabuli_Chr06 | 4226956                 | G/A  | NA                 | INTERGENIC                    | NA                                                         |
| Kabuli_wild_4228814 | 1399939746                          | Ca_kabuli_Chr06 | 4228814                 | A/T  | NA                 | INTERGENIC                    | NA                                                         |
| Kabuli_wild_4228884 | 1399939747                          | Ca_kabuli_Chr06 | 4228884                 | T/C  | NA                 | INTERGENIC                    | NA                                                         |
| Kabuli_wild_4229046 | 1399939748                          | Ca_kabuli_Chr06 | 4229046                 | T/A  | NA                 | INTERGENIC                    | NA                                                         |
| Kabuli_wild_4229069 | 1399939749                          | Ca_kabuli_Chr06 | 4229069                 | C/T  | NA                 | INTERGENIC                    | NA                                                         |
| Kabuli_wild_4287714 | 1399939750                          | Ca_kabuli_Chr06 | 4287714                 | A/G  | NA                 | INTERGENIC                    | NA                                                         |
| Kabuli_wild_4288557 | 1399939751                          | Ca_kabuli_Chr06 | 4288557                 | G/C  | Gene_Ca_05873      | DOWNSTREAM                    | Protein kinase,catalytic domain                            |
| Kabuli_wild_4288560 | 1399939752                          | Ca_kabuli_Chr06 | 4288560                 | C/T  | Gene_Ca_05873      | DOWNSTREAM                    | Protein kinase,catalytic domain                            |
| Kabuli_wild_4290347 | 1399939753                          | Ca_kabuli_Chr06 | 4290347                 | A/G  | Gene_Ca_05873      | DOWNSTREAM                    | Protein kinase,catalytic domain                            |
| Kabuli_wild_4344604 | 1399939754                          | Ca_kabuli_Chr06 | 4344604                 | T/C  | Gene_Ca_05866      | SYNONYMOUS_CODING             | Srchomology-3domain                                        |
| Kabuli_wild_4350822 | 1399939755                          | Ca_kabuli_Chr06 | 4350822                 | A/T  | Gene_Ca_05866      | NON_SYNONYMOUS_CODING         | Srchomology-3domain                                        |
| Kabuli_wild_4350867 | 1399939756                          | Ca_kabuli_Chr06 | 4350867                 | A/C  | Gene_Ca_05866      | NON_SYNONYMOUS_CODING         | Srchomology-3domain                                        |
| Kabuli_wild_4350883 | 1399939757                          | Ca_kabuli_Chr06 | 4350883                 | A/C  | Gene_Ca_05866      | SYNONYMOUS_CODING             | Srchomology-3domain                                        |
| Kabuli_wild_4350889 | 1399939758                          | Ca_kabuli_Chr06 | 4350889                 | A/C  | Gene_Ca_05866      | SYNONYMOUS_CODING             | Srchomology-3domain                                        |
| Kabuli_wild_4418397 | 1399939759                          | Ca_kabuli_Chr06 | 4418397                 | T/C  | NA                 | INTERGENIC                    | NA                                                         |
| Kabuli_wild_4418403 | 1399939760                          | Ca_kabuli_Chr06 | 4418403                 | G/T  | NA                 | INTERGENIC                    | NA                                                         |
| Kabuli_wild_4440034 | 1399939761                          | Ca_kabuli_Chr06 | 4440034                 | T/G  | NA                 | INTERGENIC                    | NA                                                         |
| Kabuli_wild_4524443 | 1399939762                          | Ca_kabuli_Chr06 | 4524443                 | G/A  | Gene_Ca_05849      | DOWNSTREAM                    | RAG1-activatingprotein-1-related                           |
| Kabuli_wild_4562263 | 1399939763                          | Ca_kabuli_Chr06 | 4562263                 | C/A  | NA                 | INTERGENIC                    | NA                                                         |
| Kabuli_wild_4562264 | 1399939764                          | Ca_kabuli_Chr06 | 4562264                 | C/G  | NA                 | INTERGENIC                    | NA                                                         |
| Kabuli_wild_4593891 | 1399939765                          | Ca_kabuli_Chr06 | 4593891                 | C/A  | NA                 | INTERGENIC                    | NA                                                         |
| Kabuli_wild_4601303 | 1399939766                          | Ca_kabuli_Chr06 | 4601303                 | C/A  | Gene_Ca_05837      | NON_SYNONYMOUS_CODING         | ATPase,AAA+type,core                                       |
| Kabuli_wild_4624907 | 1399939767                          | Ca_kabuli_Chr06 | 4624907                 | A/C  | NA                 | INTERGENIC                    | NA                                                         |

| SNP IDs             | NCBI dbSNP accession IDs (NCBI_SS#) | Chromosomes      | Physical positions (bp) | SNPs | Gene accession IDs | Sequence components of genome | Putative functions                                              |
|---------------------|-------------------------------------|------------------|-------------------------|------|--------------------|-------------------------------|-----------------------------------------------------------------|
| Kabuli_wild_4637595 | 1399939768                          | Ca_kabuli_Chrom6 | 4637595                 | A/G  | NA                 | INTERGENIC                    | NA                                                              |
| Kabuli_wild_4678523 | 1399939769                          | Ca_kabuli_Chrom6 | 4678523                 | A/C  | NA                 | INTERGENIC                    | NA                                                              |
| Kabuli_wild_4743563 | 1399939770                          | Ca_kabuli_Chrom6 | 4743563                 | C/G  | Gene_Ca_05822      | DOWNSTREAM                    | AMP-dependentsynthetase/ligase                                  |
| Kabuli_wild_4743608 | 1399939771                          | Ca_kabuli_Chrom6 | 4743608                 | C/T  | Gene_Ca_05822      | DOWNSTREAM                    | AMP-dependentsynthetase/ligase                                  |
| Kabuli_wild_4807908 | 1399939772                          | Ca_kabuli_Chrom6 | 4807908                 | G/C  | NA                 | INTERGENIC                    | NA                                                              |
| Kabuli_wild_4807958 | 1399939773                          | Ca_kabuli_Chrom6 | 4807958                 | C/G  | NA                 | INTERGENIC                    | NA                                                              |
| Kabuli_wild_4861184 | 1399939774                          | Ca_kabuli_Chrom6 | 4861184                 | T/G  | Gene_Ca_05808      | SYNONYMOUS_CODING             | NA                                                              |
| Kabuli_wild_4861500 | 1399939775                          | Ca_kabuli_Chrom6 | 4861500                 | T/C  | Gene_Ca_05808      | NON_SYNONYMOUS_CODING         | NA                                                              |
| Kabuli_wild_4981078 | 1399939776                          | Ca_kabuli_Chrom6 | 4981078                 | G/T  | NA                 | INTERGENIC                    | NA                                                              |
| Kabuli_wild_4994876 | 1399939777                          | Ca_kabuli_Chrom6 | 4994876                 | T/A  | Gene_Ca_05794      | NON_SYNONYMOUS_CODING         | K+ potassium transporter                                        |
| Kabuli_wild_5185380 | 1399939778                          | Ca_kabuli_Chrom6 | 5185380                 | A/G  | NA                 | INTERGENIC                    | NA                                                              |
| Kabuli_wild_5341441 | 1399939779                          | Ca_kabuli_Chrom6 | 5341441                 | C/A  | Gene_Ca_05766      | NON_SYNONYMOUS_CODING         | ARID/BRIGHTDNA-binding domain                                   |
| Kabuli_wild_5341510 | 1399939780                          | Ca_kabuli_Chrom6 | 5341510                 | C/A  | Gene_Ca_05766      | NON_SYNONYMOUS_CODING         | ARID/BRIGHTDNA-binding domain                                   |
| Kabuli_wild_5366145 | 1399939781                          | Ca_kabuli_Chrom6 | 5366145                 | T/A  | NA                 | INTERGENIC                    | NA                                                              |
| Kabuli_wild_5366191 | 1399939782                          | Ca_kabuli_Chrom6 | 5366191                 | T/C  | NA                 | INTERGENIC                    | NA                                                              |
| Kabuli_wild_5392185 | 1399939783                          | Ca_kabuli_Chrom6 | 5392185                 | T/C  | Gene_Ca_05761      | SYNONYMOUS_CODING             | PeptidaseM1,alanineaminopeptidase/leukotrieneA4hydrolase        |
| Kabuli_wild_5396888 | 1399939784                          | Ca_kabuli_Chrom6 | 5396888                 | T/G  | Gene_Ca_05761      | INTRON                        | PeptidaseM1,alanineaminopeptidase/leukotrieneA4hydrolase        |
| Kabuli_wild_5396890 | 1399939785                          | Ca_kabuli_Chrom6 | 5396890                 | T/G  | Gene_Ca_05761      | INTRON                        | PeptidaseM1,alanineaminopeptidase/leukotrieneA4hydrolase        |
| Kabuli_wild_5396897 | 1399939786                          | Ca_kabuli_Chrom6 | 5396897                 | T/G  | Gene_Ca_05761      | INTRON                        | PeptidaseM1,alanineaminopeptidase/leukotrieneA4hydrolase        |
| Kabuli_wild_5396905 | 1399939787                          | Ca_kabuli_Chrom6 | 5396905                 | C/T  | Gene_Ca_05761      | NON_SYNONYMOUS_CODING         | PeptidaseM1,alanineaminopeptidase/leukotrieneA4hydrolase        |
| Kabuli_wild_5453512 | 1399939788                          | Ca_kabuli_Chrom6 | 5453512                 | A/G  | Gene_Ca_05756      | NON_SYNONYMOUS_CODING         | Protein kinase,catalytic domain                                 |
| Kabuli_wild_5498898 | 1399939789                          | Ca_kabuli_Chrom6 | 5498898                 | C/T  | Gene_Ca_05751      | SYNONYMOUS_CODING             | GMPsynthase,C-terminal                                          |
| Kabuli_wild_5567368 | 1399939790                          | Ca_kabuli_Chrom6 | 5567368                 | A/G  | Gene_Ca_05742      | DOWNSTREAM                    | Haloaciddehalogenase-likehydrolase                              |
| Kabuli_wild_5589373 | 1399939791                          | Ca_kabuli_Chrom6 | 5589373                 | T/C  | NA                 | INTERGENIC                    | NA                                                              |
| Kabuli_wild_5589991 | 1399939792                          | Ca_kabuli_Chrom6 | 5589991                 | T/C  | NA                 | INTERGENIC                    | NA                                                              |
| Kabuli_wild_5590085 | 1399939793                          | Ca_kabuli_Chrom6 | 5590085                 | G/A  | NA                 | INTERGENIC                    | NA                                                              |
| Kabuli_wild_5616566 | 1399939794                          | Ca_kabuli_Chrom6 | 5616566                 | C/A  | NA                 | INTERGENIC                    | NA                                                              |
| Kabuli_wild_5628956 | 1399939795                          | Ca_kabuli_Chrom6 | 5628956                 | T/G  | NA                 | INTERGENIC                    | NA                                                              |
| Kabuli_wild_5694397 | 1399939796                          | Ca_kabuli_Chrom6 | 5694397                 | G/T  | Gene_Ca_05725      | INTRON                        | Ribosomal protein S1 ,RNA-binding domain                        |
| Kabuli_wild_5704845 | 1399939797                          | Ca_kabuli_Chrom6 | 5704845                 | T/C  | NA                 | INTERGENIC                    | NA                                                              |
| Kabuli_wild_5706649 | 1399939798                          | Ca_kabuli_Chrom6 | 5706649                 | C/T  | NA                 | INTERGENIC                    | NA                                                              |
| Kabuli_wild_6110805 | 1399939799                          | Ca_kabuli_Chrom6 | 6110805                 | T/C  | Gene_Ca_05684      | NON_SYNONYMOUS_CODING         | PeptidaseS10,serinecarboxypeptidase                             |
| Kabuli_wild_6193105 | 1399939800                          | Ca_kabuli_Chrom6 | 6193105                 | G/C  | Gene_Ca_05679      | STOP_GAINED                   | NA                                                              |
| Kabuli_wild_6295624 | 1399939801                          | Ca_kabuli_Chrom6 | 6295624                 | A/G  | Gene_Ca_16900      | INTRON                        | Exostosin-like                                                  |
| Kabuli_wild_6415818 | 1399939802                          | Ca_kabuli_Chrom6 | 6415818                 | A/G  | NA                 | INTERGENIC                    | NA                                                              |
| Kabuli_wild_6517785 | 1399939803                          | Ca_kabuli_Chrom6 | 6517785                 | T/C  | NA                 | INTERGENIC                    | NA                                                              |
| Kabuli_wild_6607761 | 1399939804                          | Ca_kabuli_Chrom6 | 6607761                 | G/A  | Gene_Ca_16921      | SYNONYMOUS_CODING             | Membrane attack complex component/perforin (MACPF) domain       |
| Kabuli_wild_6764394 | 1399939805                          | Ca_kabuli_Chrom6 | 6764394                 | A/G  | Gene_Ca_16937      | DOWNSTREAM                    | Phox/Bem1p                                                      |
| Kabuli_wild_6779147 | 1399939806                          | Ca_kabuli_Chrom6 | 6779147                 | G/C  | Gene_Ca_16938      | NON_SYNONYMOUS_CODING         | Protein of unknown function DUF869,plant                        |
| Kabuli_wild_6802259 | 1399939807                          | Ca_kabuli_Chrom6 | 6802259                 | C/T  | Gene_Ca_16940      | INTRON                        | Pyridine nucleotide-disulphideoxid reductase,NAD-binding region |
| Kabuli_wild_6815594 | 1399939808                          | Ca_kabuli_Chrom6 | 6815594                 | G/A  | Gene_Ca_16941      | DOWNSTREAM                    | NA                                                              |
| Kabuli_wild_6871350 | 1399939809                          | Ca_kabuli_Chrom6 | 6871350                 | A/T  | Gene_Ca_16949      | SYNONYMOUS_CODING             | Aminoacid transporter,transmembrane                             |
| Kabuli_wild_6877088 | 1399939810                          | Ca_kabuli_Chrom6 | 6877088                 | C/A  | Gene_Ca_16950      | NON_SYNONYMOUS_CODING         | Heat shock protein DnaJ,N-terminal                              |
| Kabuli_wild_6877163 | 1399939811                          | Ca_kabuli_Chrom6 | 6877163                 | T/C  | Gene_Ca_16950      | NON_SYNONYMOUS_CODING         | Heat shock protein DnaJ,N-terminal                              |



| SNP IDs             | NCBI dbSNP accession IDs (NCBI_SS#) | Chromosomes     | Physical positions (bp) | SNPs | Gene accession IDs | Sequence components of genome | Putative functions                                                   |
|---------------------|-------------------------------------|-----------------|-------------------------|------|--------------------|-------------------------------|----------------------------------------------------------------------|
| Kabuli_wild_6877284 | 1399939812                          | Ca_kabuli_Chr06 | 6877284                 | C/T  | Gene_Ca_16950      | SYNONYMOUS_CODING             | Heat shock protein DnaJ,N-terminal                                   |
| Kabuli_wild_6913622 | 1399939813                          | Ca_kabuli_Chr06 | 6913622                 | A/C  | NA                 | INTERGENIC                    | NA                                                                   |
| Kabuli_wild_6913695 | 1399939814                          | Ca_kabuli_Chr06 | 6913695                 | G/A  | NA                 | INTERGENIC                    | NA                                                                   |
| Kabuli_wild_6913844 | 1399939815                          | Ca_kabuli_Chr06 | 6913844                 | C/T  | NA                 | INTERGENIC                    | NA                                                                   |
| Kabuli_wild_6913879 | 1399939816                          | Ca_kabuli_Chr06 | 6913879                 | C/T  | NA                 | INTERGENIC                    | NA                                                                   |
| Kabuli_wild_6939908 | 1399939817                          | Ca_kabuli_Chr06 | 6939908                 | A/G  | Gene_Ca_09689      | NON_SYNONYMOUS_CODING         | Oxoglutarate/iron-dependent oxygenase                                |
| Kabuli_wild_7026481 | 1399939818                          | Ca_kabuli_Chr06 | 7026481                 | G/C  | Gene_Ca_09682      | DOWNSTREAM                    | Cation/H+exchanger                                                   |
| Kabuli_wild_7040216 | 1399939819                          | Ca_kabuli_Chr06 | 7040216                 | C/T  | NA                 | INTERGENIC                    | NA                                                                   |
| Kabuli_wild_7072268 | 1399939820                          | Ca_kabuli_Chr06 | 7072268                 | T/C  | Gene_Ca_09675      | INTRON                        | Glycosyltransferase, family48                                        |
| Kabuli_wild_7349517 | 1399939821                          | Ca_kabuli_Chr06 | 7349517                 | A/C  | Gene_Ca_09645      | DOWNSTREAM                    | NA                                                                   |
| Kabuli_wild_7398761 | 1399939822                          | Ca_kabuli_Chr06 | 7398761                 | C/G  | Gene_Ca_09641      | NON_SYNONYMOUS_CODING         | Zinc finger, RING-type                                               |
| Kabuli_wild_7406219 | 1399939823                          | Ca_kabuli_Chr06 | 7406219                 | A/G  | NA                 | INTERGENIC                    | NA                                                                   |
| Kabuli_wild_7449180 | 1399939824                          | Ca_kabuli_Chr06 | 7449180                 | T/G  | Gene_Ca_09636      | INTRON                        | PeptidaseC19,ubiquitin carboxyl-terminal hydrolase2                  |
| Kabuli_wild_7566842 | 1399939825                          | Ca_kabuli_Chr06 | 7566842                 | G/A  | Gene_Ca_09627      | SYNONYMOUS_CODING             | NA                                                                   |
| Kabuli_wild_7571950 | 1399939826                          | Ca_kabuli_Chr06 | 7571950                 | T/C  | Gene_Ca_09627      | NON_SYNONYMOUS_CODING         | NA                                                                   |
| Kabuli_wild_7575102 | 1399939827                          | Ca_kabuli_Chr06 | 7575102                 | A/T  | Gene_Ca_09627      | NON_SYNONYMOUS_CODING         | NA                                                                   |
| Kabuli_wild_7581799 | 1399939828                          | Ca_kabuli_Chr06 | 7581799                 | T/C  | NA                 | INTERGENIC                    | NA                                                                   |
| Kabuli_wild_7581956 | 1399939829                          | Ca_kabuli_Chr06 | 7581956                 | C/G  | NA                 | INTERGENIC                    | NA                                                                   |
| Kabuli_wild_7582726 | 1399939830                          | Ca_kabuli_Chr06 | 7582726                 | G/T  | NA                 | INTERGENIC                    | NA                                                                   |
| Kabuli_wild_7600817 | 1399939831                          | Ca_kabuli_Chr06 | 7600817                 | G/A  | Gene_Ca_09624      | INTRON                        | Domain of unknown function DUF699,exodeoxyribonucleaseValphachain    |
| Kabuli_wild_7603134 | 1399939832                          | Ca_kabuli_Chr06 | 7603134                 | C/T  | Gene_Ca_09624      | INTRON                        | Domain of unknown function DUF699,exodeoxyribonuclease V alpha chain |
| Kabuli_wild_7603178 | 1399939833                          | Ca_kabuli_Chr06 | 7603178                 | A/C  | Gene_Ca_09624      | INTRON                        | Domain of unknown function DUF699,exodeoxyribonucleaseValphachain    |
| Kabuli_wild_7603195 | 1399939834                          | Ca_kabuli_Chr06 | 7603195                 | G/A  | Gene_Ca_09624      | NON_SYNONYMOUS_CODING         | Domain of unknown function DUF699,exodeoxyribonucleaseValphachain    |
| Kabuli_wild_7609380 | 1399939835                          | Ca_kabuli_Chr06 | 7609380                 | G/A  | Gene_Ca_09623      | DOWNSTREAM                    | NA                                                                   |
| Kabuli_wild_7609453 | 1399939836                          | Ca_kabuli_Chr06 | 7609453                 | T/G  | Gene_Ca_09623      | DOWNSTREAM                    | NA                                                                   |
| Kabuli_wild_7609573 | 1399939837                          | Ca_kabuli_Chr06 | 7609573                 | G/A  | Gene_Ca_09623      | DOWNSTREAM                    | NA                                                                   |
| Kabuli_wild_7618391 | 1399939838                          | Ca_kabuli_Chr06 | 7618391                 | C/G  | NA                 | INTERGENIC                    | NA                                                                   |
| Kabuli_wild_7647907 | 1399939839                          | Ca_kabuli_Chr06 | 7647907                 | T/G  | Gene_Ca_09618      | SYNONYMOUS_CODING             | RasGTPase                                                            |
| Kabuli_wild_7647931 | 1399939840                          | Ca_kabuli_Chr06 | 7647931                 | G/A  | Gene_Ca_09618      | SYNONYMOUS_CODING             | RasGTPase                                                            |
| Kabuli_wild_7661924 | 1399939841                          | Ca_kabuli_Chr06 | 7661924                 | T/C  | NA                 | INTERGENIC                    | NA                                                                   |
| Kabuli_wild_7661930 | 1399939842                          | Ca_kabuli_Chr06 | 7661930                 | T/G  | NA                 | INTERGENIC                    | NA                                                                   |
| Kabuli_wild_7667301 | 1399939843                          | Ca_kabuli_Chr06 | 7667301                 | T/C  | NA                 | INTERGENIC                    | NA                                                                   |
| Kabuli_wild_7667328 | 1399939844                          | Ca_kabuli_Chr06 | 7667328                 | A/T  | NA                 | INTERGENIC                    | NA                                                                   |
| Kabuli_wild_7694609 | 1399939845                          | Ca_kabuli_Chr06 | 7694609                 | A/T  | NA                 | INTERGENIC                    | NA                                                                   |
| Kabuli_wild_7694696 | 1399939846                          | Ca_kabuli_Chr06 | 7694696                 | T/C  | NA                 | INTERGENIC                    | NA                                                                   |
| Kabuli_wild_7704483 | 1399939847                          | Ca_kabuli_Chr06 | 7704483                 | G/A  | NA                 | INTERGENIC                    | NA                                                                   |
| Kabuli_wild_7705311 | 1399939848                          | Ca_kabuli_Chr06 | 7705311                 | G/A  | Gene_Ca_09609      | DOWNSTREAM                    | NA                                                                   |
| Kabuli_wild_7719800 | 1399939849                          | Ca_kabuli_Chr06 | 7719800                 | C/A  | NA                 | INTERGENIC                    | NA                                                                   |
| Kabuli_wild_7719829 | 1399939850                          | Ca_kabuli_Chr06 | 7719829                 | C/T  | NA                 | INTERGENIC                    | NA                                                                   |
| Kabuli_wild_7719857 | 1399939851                          | Ca_kabuli_Chr06 | 7719857                 | G/T  | NA                 | INTERGENIC                    | NA                                                                   |
| Kabuli_wild_7719877 | 1399939852                          | Ca_kabuli_Chr06 | 7719877                 | T/C  | NA                 | INTERGENIC                    | NA                                                                   |
| Kabuli_wild_7744730 | 1399939853                          | Ca_kabuli_Chr06 | 7744730                 | A/G  | Gene_Ca_09604      | INTRON                        | ABC-1                                                                |
| Kabuli_wild_7745641 | 1399939854                          | Ca_kabuli_Chr06 | 7745641                 | A/G  | Gene_Ca_09604      | INTRON                        | ABC-1                                                                |
| Kabuli_wild_7747254 | 1399939855                          | Ca_kabuli_Chr06 | 7747254                 | G/A  | Gene_Ca_09604      | SYNONYMOUS_CODING             | ABC-1                                                                |

| SNP IDs             | NCBI dbSNP accession IDs (NCBI_SS#) | Chromosomes     | Physical positions (bp) | SNPs | Gene accession IDs | Sequence components of genome | Putative functions                                  |
|---------------------|-------------------------------------|-----------------|-------------------------|------|--------------------|-------------------------------|-----------------------------------------------------|
| Kabuli_wild_7770357 | 1399939856                          | Ca_kabuli_Chr06 | 7770357                 | C/T  | NA                 | INTERGENIC                    | NA                                                  |
| Kabuli_wild_7822666 | 1399939857                          | Ca_kabuli_Chr06 | 7822666                 | C/A  | NA                 | INTERGENIC                    | NA                                                  |
| Kabuli_wild_7829485 | 1399939858                          | Ca_kabuli_Chr06 | 7829485                 | G/A  | NA                 | INTERGENIC                    | NA                                                  |
| Kabuli_wild_7829627 | 1399939859                          | Ca_kabuli_Chr06 | 7829627                 | T/G  | NA                 | INTERGENIC                    | NA                                                  |
| Kabuli_wild_7831214 | 1399939860                          | Ca_kabuli_Chr06 | 7831214                 | C/T  | Gene_Ca_09595      | SYNONYMOUS_CODING             | C2 calcium-dependent membrane targeting             |
| Kabuli_wild_7831409 | 1399939861                          | Ca_kabuli_Chr06 | 7831409                 | C/T  | Gene_Ca_09595      | SYNONYMOUS_CODING             | C2 calcium-dependent membrane targeting             |
| Kabuli_wild_7831874 | 1399939862                          | Ca_kabuli_Chr06 | 7831874                 | A/G  | Gene_Ca_09595      | SYNONYMOUS_CODING             | C2 calcium-dependent membrane targeting             |
| Kabuli_wild_7831899 | 1399939863                          | Ca_kabuli_Chr06 | 7831899                 | G/A  | Gene_Ca_09595      | NON_SYNONYMOUS_CODING         | C2 calcium-dependent membrane targeting             |
| Kabuli_wild_7832023 | 1399939864                          | Ca_kabuli_Chr06 | 7832023                 | C/T  | Gene_Ca_09595      | NON_SYNONYMOUS_CODING         | C2 calcium-dependent membrane targeting             |
| Kabuli_wild_7832029 | 1399939865                          | Ca_kabuli_Chr06 | 7832029                 | C/T  | Gene_Ca_09595      | NON_SYNONYMOUS_CODING         | C2 calcium-dependent membrane targeting             |
| Kabuli_wild_7834595 | 1399939866                          | Ca_kabuli_Chr06 | 7834595                 | C/T  | Gene_Ca_09595      | SYNONYMOUS_CODING             | C2 calcium-dependent membrane targeting             |
| Kabuli_wild_7834895 | 1399939867                          | Ca_kabuli_Chr06 | 7834895                 | G/T  | Gene_Ca_09595      | SYNONYMOUS_CODING             | C2 calcium-dependent membrane targeting             |
| Kabuli_wild_7834922 | 1399939868                          | Ca_kabuli_Chr06 | 7834922                 | G/A  | Gene_Ca_09595      | SYNONYMOUS_CODING             | C2 calcium-dependent membrane targeting             |
| Kabuli_wild_7834976 | 1399939869                          | Ca_kabuli_Chr06 | 7834976                 | G/A  | Gene_Ca_09595      | SYNONYMOUS_CODING             | C2 calcium-dependent membrane targeting             |
| Kabuli_wild_7835024 | 1399939870                          | Ca_kabuli_Chr06 | 7835024                 | T/A  | Gene_Ca_09595      | SYNONYMOUS_CODING             | C2 calcium-dependent membrane targeting             |
| Kabuli_wild_7835427 | 1399939871                          | Ca_kabuli_Chr06 | 7835427                 | G/A  | Gene_Ca_09595      | NON_SYNONYMOUS_CODING         | C2 calcium-dependent membrane targeting             |
| Kabuli_wild_7835510 | 1399939872                          | Ca_kabuli_Chr06 | 7835510                 | A/G  | Gene_Ca_09595      | SYNONYMOUS_CODING             | C2 calcium-dependent membrane targeting             |
| Kabuli_wild_7835738 | 1399939873                          | Ca_kabuli_Chr06 | 7835738                 | C/T  | Gene_Ca_09595      | SYNONYMOUS_CODING             | C2 calcium-dependent membrane targeting             |
| Kabuli_wild_7835984 | 1399939874                          | Ca_kabuli_Chr06 | 7835984                 | T/A  | Gene_Ca_09595      | NON_SYNONYMOUS_CODING         | C2 calcium-dependent membrane targeting             |
| Kabuli_wild_7851000 | 1399939875                          | Ca_kabuli_Chr06 | 7851000                 | G/C  | Gene_Ca_09593      | UPSTREAM                      | Peptidyl-prolylcis-transisomerase,FKBP-type, domain |
| Kabuli_wild_7852466 | 1399939876                          | Ca_kabuli_Chr06 | 7852466                 | T/C  | NA                 | INTERGENIC                    | NA                                                  |
| Kabuli_wild_7852481 | 1399939877                          | Ca_kabuli_Chr06 | 7852481                 | G/A  | NA                 | INTERGENIC                    | NA                                                  |
| Kabuli_wild_7876049 | 1399939878                          | Ca_kabuli_Chr06 | 7876049                 | A/C  | Gene_Ca_09590      | DOWNSTREAM                    | 1-aminocyclopropane-1-carboxylatesynthase           |
| Kabuli_wild_7926416 | 1399939879                          | Ca_kabuli_Chr06 | 7926416                 | C/A  | Gene_Ca_09581      | DOWNSTREAM                    | Acyl-CoAoxidase,C-terminal                          |
| Kabuli_wild_7929263 | 1399939880                          | Ca_kabuli_Chr06 | 7929263                 | C/T  | NA                 | INTERGENIC                    | NA                                                  |
| Kabuli_wild_7929338 | 1399939881                          | Ca_kabuli_Chr06 | 7929338                 | T/C  | NA                 | INTERGENIC                    | NA                                                  |
| Kabuli_wild_7929339 | 1399939882                          | Ca_kabuli_Chr06 | 7929339                 | G/A  | NA                 | INTERGENIC                    | NA                                                  |
| Kabuli_wild_7929348 | 1399939883                          | Ca_kabuli_Chr06 | 7929348                 | C/T  | NA                 | INTERGENIC                    | NA                                                  |
| Kabuli_wild_7929384 | 1399939884                          | Ca_kabuli_Chr06 | 7929384                 | T/C  | NA                 | INTERGENIC                    | NA                                                  |
| Kabuli_wild_7929607 | 1399939885                          | Ca_kabuli_Chr06 | 7929607                 | A/C  | NA                 | INTERGENIC                    | NA                                                  |
| Kabuli_wild_7929628 | 1399939886                          | Ca_kabuli_Chr06 | 7929628                 | C/T  | NA                 | INTERGENIC                    | NA                                                  |
| Kabuli_wild_7929647 | 1399939887                          | Ca_kabuli_Chr06 | 7929647                 | A/C  | NA                 | INTERGENIC                    | NA                                                  |
| Kabuli_wild_7939281 | 1399939888                          | Ca_kabuli_Chr06 | 7939281                 | T/G  | Gene_Ca_09580      | NON_SYNONYMOUS_CODING         | NA                                                  |
| Kabuli_wild_7939345 | 1399939889                          | Ca_kabuli_Chr06 | 7939345                 | T/G  | Gene_Ca_09580      | NON_SYNONYMOUS_CODING         | NA                                                  |
| Kabuli_wild_7939465 | 1399939890                          | Ca_kabuli_Chr06 | 7939465                 | A/G  | Gene_Ca_09580      | INTRON                        | NA                                                  |
| Kabuli_wild_7994732 | 1399939891                          | Ca_kabuli_Chr06 | 7994732                 | G/T  | NA                 | INTERGENIC                    | NA                                                  |
| Kabuli_wild_8006728 | 1399939892                          | Ca_kabuli_Chr06 | 8006728                 | C/A  | Gene_Ca_09573      | UPSTREAM                      | Major facilitator superfamily MFS-1                 |
| Kabuli_wild_8006729 | 1399939893                          | Ca_kabuli_Chr06 | 8006729                 | G/T  | Gene_Ca_09573      | UPSTREAM                      | Major facilitator superfamily MFS-1                 |
| Kabuli_wild_8011685 | 1399939894                          | Ca_kabuli_Chr06 | 8011685                 | G/T  | NA                 | INTERGENIC                    | NA                                                  |
| Kabuli_wild_8029226 | 1399939895                          | Ca_kabuli_Chr06 | 8029226                 | C/T  | Gene_Ca_09571      | SYNONYMOUS_CODING             | NA                                                  |
| Kabuli_wild_8029310 | 1399939896                          | Ca_kabuli_Chr06 | 8029310                 | G/C  | Gene_Ca_09571      | SYNONYMOUS_CODING             | NA                                                  |
| Kabuli_wild_8029340 | 1399939897                          | Ca_kabuli_Chr06 | 8029340                 | G/A  | Gene_Ca_09571      | SYNONYMOUS_CODING             | NA                                                  |
| Kabuli_wild_8052987 | 1399939898                          | Ca_kabuli_Chr06 | 8052987                 | G/C  | Gene_Ca_09568      | INTRON                        | TLDc                                                |
| Kabuli_wild_8070427 | 1399939899                          | Ca_kabuli_Chr06 | 8070427                 | T/C  | NA                 | INTERGENIC                    | NA                                                  |



| SNP IDs             | NCBI dbSNP accession IDs (NCBI_SS#) | Chromosomes      | Physical positions (bp) | SNPs | Gene accession IDs | Sequence components of genome | Putative functions                            |
|---------------------|-------------------------------------|------------------|-------------------------|------|--------------------|-------------------------------|-----------------------------------------------|
| Kabuli_wild_8076394 | 1399939900                          | Ca_kabuli_Chrom6 | 8076394                 | T/C  | NA                 | INTERGENIC                    | NA                                            |
| Kabuli_wild_8076446 | 1399939901                          | Ca_kabuli_Chrom6 | 8076446                 | G/A  | NA                 | INTERGENIC                    | NA                                            |
| Kabuli_wild_8081800 | 1399939902                          | Ca_kabuli_Chrom6 | 8081800                 | C/G  | NA                 | INTERGENIC                    | NA                                            |
| Kabuli_wild_8084950 | 1399939903                          | Ca_kabuli_Chrom6 | 8084950                 | T/A  | Gene_Ca_09563      | DOWNSTREAM                    | Mitochondrial carrier protein                 |
| Kabuli_wild_8090739 | 1399939904                          | Ca_kabuli_Chrom6 | 8090739                 | T/A  | Gene_Ca_09562      | NON_SYNONYMOUS_CODING         | IQ motif,EF-handbinding site                  |
| Kabuli_wild_8090918 | 1399939905                          | Ca_kabuli_Chrom6 | 8090918                 | A/C  | Gene_Ca_09562      | NON_SYNONYMOUS_CODING         | IQ motif,EF-handbinding site                  |
| Kabuli_wild_8090980 | 1399939906                          | Ca_kabuli_Chrom6 | 8090980                 | A/G  | Gene_Ca_09562      | SYNONYMOUS_CODING             | IQ motif,EF-handbinding site                  |
| Kabuli_wild_8091050 | 1399939907                          | Ca_kabuli_Chrom6 | 8091050                 | A/G  | Gene_Ca_09562      | NON_SYNONYMOUS_CODING         | IQ motif,EF-handbinding site                  |
| Kabuli_wild_8094879 | 1399939908                          | Ca_kabuli_Chrom6 | 8094879                 | T/A  | Gene_Ca_09562      | DOWNSTREAM                    | IQ motif,EF-handbinding site                  |
| Kabuli_wild_8095458 | 1399939909                          | Ca_kabuli_Chrom6 | 8095458                 | C/T  | NA                 | INTERGENIC                    | NA                                            |
| Kabuli_wild_8134381 | 1399939910                          | Ca_kabuli_Chrom6 | 8134381                 | T/C  | Gene_Ca_09555      | DOWNSTREAM                    | ATPase, P-type, H+ transporting proton pump   |
| Kabuli_wild_8139446 | 1399939911                          | Ca_kabuli_Chrom6 | 8139446                 | C/A  | NA                 | INTERGENIC                    | NA                                            |
| Kabuli_wild_8166317 | 1399939912                          | Ca_kabuli_Chrom6 | 8166317                 | T/C  | NA                 | INTERGENIC                    | NA                                            |
| Kabuli_wild_8166339 | 1399939913                          | Ca_kabuli_Chrom6 | 8166339                 | T/C  | NA                 | INTERGENIC                    | NA                                            |
| Kabuli_wild_8166435 | 1399939914                          | Ca_kabuli_Chrom6 | 8166435                 | A/G  | NA                 | INTERGENIC                    | NA                                            |
| Kabuli_wild_8166462 | 1399939915                          | Ca_kabuli_Chrom6 | 8166462                 | A/T  | NA                 | INTERGENIC                    | NA                                            |
| Kabuli_wild_8170583 | 1399939916                          | Ca_kabuli_Chrom6 | 8170583                 | C/T  | Gene_Ca_09552      | INTRON                        | Enhancerofpolycomb-like,N-terminal            |
| Kabuli_wild_8170633 | 1399939917                          | Ca_kabuli_Chrom6 | 8170633                 | A/G  | Gene_Ca_09552      | INTRON                        | Enhancerofpolycomb-like,N-terminal            |
| Kabuli_wild_8179815 | 1399939918                          | Ca_kabuli_Chrom6 | 8179815                 | T/C  | NA                 | INTERGENIC                    | NA                                            |
| Kabuli_wild_8221204 | 1399939919                          | Ca_kabuli_Chrom6 | 8221204                 | C/A  | Gene_Ca_09549      | NON_SYNONYMOUS_CODING         | DNA-dependentATPaseMCM                        |
| Kabuli_wild_8221205 | 1399939920                          | Ca_kabuli_Chrom6 | 8221205                 | G/T  | Gene_Ca_09549      | NON_SYNONYMOUS_CODING         | DNA-dependentATPaseMCM                        |
| Kabuli_wild_8223986 | 1399939921                          | Ca_kabuli_Chrom6 | 8223986                 | C/G  | Gene_Ca_09549      | NON_SYNONYMOUS_CODING         | DNA-dependentATPaseMCM                        |
| Kabuli_wild_8237286 | 1399939922                          | Ca_kabuli_Chrom6 | 8237286                 | A/G  | Gene_Ca_09547      | INTRON                        | RNA recognition motif domain                  |
| Kabuli_wild_8246187 | 1399939923                          | Ca_kabuli_Chrom6 | 8246187                 | A/C  | Gene_Ca_09546      | DOWNSTREAM                    | NA                                            |
| Kabuli_wild_8655336 | 1399939924                          | Ca_kabuli_Chrom6 | 8655336                 | T/G  | NA                 | INTERGENIC                    | NA                                            |
| Kabuli_wild_8655742 | 1399939925                          | Ca_kabuli_Chrom6 | 8655742                 | A/C  | NA                 | INTERGENIC                    | NA                                            |
| Kabuli_wild_8710064 | 1399939926                          | Ca_kabuli_Chrom6 | 8710064                 | A/T  | Gene_Ca_16763      | UPSTREAM                      | Actin-like                                    |
| Kabuli_wild_8711737 | 1399939927                          | Ca_kabuli_Chrom6 | 8711737                 | A/T  | Gene_Ca_16763      | SYNONYMOUS_CODING             | Actin-like                                    |
| Kabuli_wild_8787557 | 1399939928                          | Ca_kabuli_Chrom6 | 8787557                 | T/C  | Gene_Ca_16756      | NON_SYNONYMOUS_CODING         | Protein kinase,catalytic domain               |
| Kabuli_wild_8787562 | 1399939929                          | Ca_kabuli_Chrom6 | 8787562                 | C/T  | Gene_Ca_16756      | NON_SYNONYMOUS_CODING         | Protein kinase,catalytic domain               |
| Kabuli_wild_8787564 | 1399939930                          | Ca_kabuli_Chrom6 | 8787564                 | G/T  | Gene_Ca_16756      | SYNONYMOUS_CODING             | Protein kinase,catalytic domain               |
| Kabuli_wild_8787568 | 1399939931                          | Ca_kabuli_Chrom6 | 8787568                 | G/T  | Gene_Ca_16756      | STOP_GAINED                   | Protein kinase,catalytic domain               |
| Kabuli_wild_8787572 | 1399939932                          | Ca_kabuli_Chrom6 | 8787572                 | T/A  | Gene_Ca_16756      | NON_SYNONYMOUS_CODING         | Protein kinase,catalytic domain               |
| Kabuli_wild_8787573 | 1399939933                          | Ca_kabuli_Chrom6 | 8787573                 | G/A  | Gene_Ca_16756      | SYNONYMOUS_CODING             | Protein kinase,catalytic domain               |
| Kabuli_wild_8968068 | 1399939934                          | Ca_kabuli_Chrom6 | 8968068                 | G/A  | Gene_Ca_16741      | INTRON                        | Phosphatidylinositol-4-phosphate5-kinase,core |
| Kabuli_wild_9227767 | 1399939935                          | Ca_kabuli_Chrom6 | 9227767                 | C/A  | NA                 | INTERGENIC                    | NA                                            |
| Kabuli_wild_9228004 | 1399939936                          | Ca_kabuli_Chrom6 | 9228004                 | C/A  | NA                 | INTERGENIC                    | NA                                            |
| Kabuli_wild_9229496 | 1399939937                          | Ca_kabuli_Chrom6 | 9229496                 | T/G  | NA                 | INTERGENIC                    | NA                                            |
| Kabuli_wild_9324122 | 1399939938                          | Ca_kabuli_Chrom6 | 9324122                 | A/C  | Gene_Ca_08667      | NON_SYNONYMOUS_CODING         | Homeobox                                      |
| Kabuli_wild_9523228 | 1399939939                          | Ca_kabuli_Chrom6 | 9523228                 | T/C  | Gene_Ca_08648      | INTRON                        | RNA-processing protein, HAThelix              |
| Kabuli_wild_9542944 | 1399939940                          | Ca_kabuli_Chrom6 | 9542944                 | A/G  | NA                 | INTERGENIC                    | NA                                            |
| Kabuli_wild_9814378 | 1399939941                          | Ca_kabuli_Chrom6 | 9814378                 | G/T  | Gene_Ca_08611      | INTRON                        | ProteinTransporter,Pam16                      |
| Kabuli_wild_9833725 | 1399939942                          | Ca_kabuli_Chrom6 | 9833725                 | C/T  | Gene_Ca_08608      | INTRON                        | WD40 repeat                                   |
| Kabuli_wild_9833832 | 1399939943                          | Ca_kabuli_Chrom6 | 9833832                 | T/A  | Gene_Ca_08608      | INTRON                        | WD40 repeat                                   |

| SNP IDs              | NCBI dbSNP accession IDs (NCBI_SS#) | Chromosomes     | Physical positions (bp) | SNPs | Gene accession IDs | Sequence components of genome | Putative functions                          |
|----------------------|-------------------------------------|-----------------|-------------------------|------|--------------------|-------------------------------|---------------------------------------------|
| Kabuli_wild_9834183  | 1399939944                          | Ca_kabuli_Chr06 | 9834183                 | C/T  | Gene_Ca_08608      | NON_SYNONYMOUS_CODING         | WD40 repeat                                 |
| Kabuli_wild_9834184  | 1399939945                          | Ca_kabuli_Chr06 | 9834184                 | A/T  | Gene_Ca_08608      | SYNONYMOUS_CODING             | WD40 repeat                                 |
| Kabuli_wild_9834187  | 1399939946                          | Ca_kabuli_Chr06 | 9834187                 | A/T  | Gene_Ca_08608      | NON_SYNONYMOUS_CODING         | WD40 repeat                                 |
| Kabuli_wild_9834198  | 1399939947                          | Ca_kabuli_Chr06 | 9834198                 | C/A  | Gene_Ca_08608      | NON_SYNONYMOUS_CODING         | WD40 repeat                                 |
| Kabuli_wild_9834199  | 1399939948                          | Ca_kabuli_Chr06 | 9834199                 | T/C  | Gene_Ca_08608      | SYNONYMOUS_CODING             | WD40 repeat                                 |
| Kabuli_wild_9841836  | 1399939949                          | Ca_kabuli_Chr06 | 9841836                 | G/A  | NA                 | INTERGENIC                    | NA                                          |
| Kabuli_wild_9872634  | 1399939950                          | Ca_kabuli_Chr06 | 9872634                 | A/G  | Gene_Ca_08602      | SYNONYMOUS_CODING             | Xanthine/uracil/vitamin C permease          |
| Kabuli_wild_9872657  | 1399939951                          | Ca_kabuli_Chr06 | 9872657                 | C/T  | Gene_Ca_08602      | NON_SYNONYMOUS_CODING         | Xanthine/uracil/vitamin C permease          |
| Kabuli_wild_9872988  | 1399939952                          | Ca_kabuli_Chr06 | 9872988                 | A/T  | Gene_Ca_08602      | INTRON                        | Xanthine/uracil/vitamin C permease          |
| Kabuli_wild_9959686  | 1399939953                          | Ca_kabuli_Chr06 | 9959686                 | T/C  | Gene_Ca_08594      | SYNONYMOUS_CODING             | PreproteintranslocaseSec,Sec61-beta subunit |
| Kabuli_wild_10013651 | 1399939954                          | Ca_kabuli_Chr06 | 10013651                | C/T  | NA                 | INTERGENIC                    | NA                                          |
| Kabuli_wild_10020177 | 1399939955                          | Ca_kabuli_Chr06 | 10020177                | C/G  | NA                 | INTERGENIC                    | NA                                          |
| Kabuli_wild_10020187 | 1399939956                          | Ca_kabuli_Chr06 | 10020187                | A/G  | NA                 | INTERGENIC                    | NA                                          |
| Kabuli_wild_10020438 | 1399939957                          | Ca_kabuli_Chr06 | 10020438                | G/C  | NA                 | INTERGENIC                    | NA                                          |
| Kabuli_wild_10020464 | 1399939958                          | Ca_kabuli_Chr06 | 10020464                | C/G  | NA                 | INTERGENIC                    | NA                                          |
| Kabuli_wild_10020475 | 1399939959                          | Ca_kabuli_Chr06 | 10020475                | A/T  | NA                 | INTERGENIC                    | NA                                          |
| Kabuli_wild_10020491 | 1399939960                          | Ca_kabuli_Chr06 | 10020491                | A/G  | NA                 | INTERGENIC                    | NA                                          |
| Kabuli_wild_10025113 | 1399939961                          | Ca_kabuli_Chr06 | 10025113                | C/G  | NA                 | INTERGENIC                    | NA                                          |
| Kabuli_wild_10025115 | 1399939962                          | Ca_kabuli_Chr06 | 10025115                | A/C  | NA                 | INTERGENIC                    | NA                                          |
| Kabuli_wild_10028504 | 1399939963                          | Ca_kabuli_Chr06 | 10028504                | A/G  | Gene_Ca_08589      | DOWNSTREAM                    | Mitochondrialsubstrate/solute carrier       |
| Kabuli_wild_10028508 | 1399939964                          | Ca_kabuli_Chr06 | 10028508                | G/C  | Gene_Ca_08589      | DOWNSTREAM                    | Mitochondrialsubstrate/solute carrier       |
| Kabuli_wild_10045644 | 1399939965                          | Ca_kabuli_Chr06 | 10045644                | A/C  | Gene_Ca_08587      | SYNONYMOUS_CODING             | AMP-dependentsynthetase/ligase              |
| Kabuli_wild_10045844 | 1399939966                          | Ca_kabuli_Chr06 | 10045844                | A/G  | Gene_Ca_08587      | UPSTREAM                      | AMP-dependentsynthetase/ligase              |
| Kabuli_wild_10088984 | 1399939967                          | Ca_kabuli_Chr06 | 10088984                | A/G  | NA                 | INTERGENIC                    | NA                                          |
| Kabuli_wild_10100863 | 1399939968                          | Ca_kabuli_Chr06 | 10100863                | C/G  | Gene_Ca_08581      | SYNONYMOUS_CODING             | HEAT                                        |
| Kabuli_wild_10111488 | 1399939969                          | Ca_kabuli_Chr06 | 10111488                | C/G  | Gene_Ca_08580      | INTRON                        | Peptidyl-tRNAhydrolase                      |
| Kabuli_wild_10111520 | 1399939970                          | Ca_kabuli_Chr06 | 10111520                | G/C  | Gene_Ca_08580      | INTRON                        | Peptidyl-tRNAhydrolase                      |
| Kabuli_wild_10111870 | 1399939971                          | Ca_kabuli_Chr06 | 10111870                | A/G  | Gene_Ca_08580      | INTRON                        | Peptidyl-tRNAhydrolase                      |
| Kabuli_wild_10111927 | 1399939972                          | Ca_kabuli_Chr06 | 10111927                | G/T  | Gene_Ca_08580      | INTRON                        | Peptidyl-tRNAhydrolase                      |
| Kabuli_wild_10116403 | 1399939973                          | Ca_kabuli_Chr06 | 10116403                | T/A  | Gene_Ca_08580      | INTRON                        | Peptidyl-tRNAhydrolase                      |
| Kabuli_wild_10116475 | 1399939974                          | Ca_kabuli_Chr06 | 10116475                | A/C  | Gene_Ca_08580      | INTRON                        | Peptidyl-tRNAhydrolase                      |
| Kabuli_wild_10116608 | 1399939975                          | Ca_kabuli_Chr06 | 10116608                | G/T  | Gene_Ca_08580      | INTRON                        | Peptidyl-tRNAhydrolase                      |
| Kabuli_wild_10116647 | 1399939976                          | Ca_kabuli_Chr06 | 10116647                | C/T  | Gene_Ca_08580      | INTRON                        | Peptidyl-tRNAhydrolase                      |
| Kabuli_wild_10119556 | 1399939977                          | Ca_kabuli_Chr06 | 10119556                | G/C  | Gene_Ca_08580      | SYNONYMOUS_CODING             | Peptidyl-tRNAhydrolase                      |
| Kabuli_wild_10134177 | 1399939978                          | Ca_kabuli_Chr06 | 10134177                | A/G  | NA                 | INTERGENIC                    | NA                                          |
| Kabuli_wild_10137249 | 1399939979                          | Ca_kabuli_Chr06 | 10137249                | A/G  | Gene_Ca_08579      | INTRON                        | NA                                          |
| Kabuli_wild_10137277 | 1399939980                          | Ca_kabuli_Chr06 | 10137277                | T/G  | Gene_Ca_08579      | INTRON                        | NA                                          |
| Kabuli_wild_10151973 | 1399939981                          | Ca_kabuli_Chr06 | 10151973                | A/G  | Gene_Ca_08577      | INTRON                        | NA                                          |
| Kabuli_wild_10158620 | 1399939982                          | Ca_kabuli_Chr06 | 10158620                | C/A  | Gene_Ca_08576      | NON_SYNONYMOUS_CODING         | Pheophorbideoxygenase                       |
| Kabuli_wild_10158850 | 1399939983                          | Ca_kabuli_Chr06 | 10158850                | T/C  | Gene_Ca_08576      | INTRON                        | Protein of unknown function DUF616          |
| Kabuli_wild_10188400 | 1399939984                          | Ca_kabuli_Chr06 | 10188400                | G/T  | Gene_Ca_08570      | UPSTREAM                      | AMP-dependentsynthetase/ligase              |
| Kabuli_wild_10192015 | 1399939985                          | Ca_kabuli_Chr06 | 10192015                | A/G  | NA                 | INTERGENIC                    | NA                                          |
| Kabuli_wild_10192017 | 1399939986                          | Ca_kabuli_Chr06 | 10192017                | C/T  | NA                 | INTERGENIC                    | NA                                          |
| Kabuli_wild_10192247 | 1399939987                          | Ca_kabuli_Chr06 | 10192247                | A/G  | NA                 | INTERGENIC                    | NA                                          |

| SNP IDs              | NCBI dbSNP accession IDs (NCBI_SS#) | Chromosomes     | Physical positions (bp) | SNPs | Gene accession IDs | Sequence components of genome | Putative functions                              |
|----------------------|-------------------------------------|-----------------|-------------------------|------|--------------------|-------------------------------|-------------------------------------------------|
| Kabuli_wild_10192296 | 1399939988                          | Ca_kabuli_Chr06 | 10192296                | G/T  | NA                 | INTERGENIC                    | NA                                              |
| Kabuli_wild_10215262 | 1399939989                          | Ca_kabuli_Chr06 | 10215262                | T/G  | NA                 | INTERGENIC                    | NA                                              |
| Kabuli_wild_10230617 | 1399939990                          | Ca_kabuli_Chr06 | 10230617                | G/A  | Gene_Ca_08566      | INTRON                        | Metallo-dependentphosphatase                    |
| Kabuli_wild_10230657 | 1399939991                          | Ca_kabuli_Chr06 | 10230657                | G/A  | Gene_Ca_08566      | INTRON                        | Metallo-dependentphosphatase                    |
| Kabuli_wild_10231092 | 1399939992                          | Ca_kabuli_Chr06 | 10231092                | T/G  | Gene_Ca_08566      | SYNONYMOUS_CODING             | Metallo-dependentphosphatase                    |
| Kabuli_wild_10231095 | 1399939993                          | Ca_kabuli_Chr06 | 10231095                | G/T  | Gene_Ca_08566      | SYNONYMOUS_CODING             | Metallo-dependentphosphatase                    |
| Kabuli_wild_10231188 | 1399939994                          | Ca_kabuli_Chr06 | 10231188                | T/G  | Gene_Ca_08566      | SYNONYMOUS_CODING             | Metallo-dependentphosphatase                    |
| Kabuli_wild_10231199 | 1399939995                          | Ca_kabuli_Chr06 | 10231199                | A/G  | Gene_Ca_08566      | INTRON                        | Metallo-dependentphosphatase                    |
| Kabuli_wild_10234241 | 1399939996                          | Ca_kabuli_Chr06 | 10234241                | A/G  | Gene_Ca_08566      | INTRON                        | Metallo-dependentphosphatase                    |
| Kabuli_wild_10259614 | 1399939997                          | Ca_kabuli_Chr06 | 10259614                | C/T  | NA                 | INTERGENIC                    | NA                                              |
| Kabuli_wild_10260274 | 1399939998                          | Ca_kabuli_Chr06 | 10260274                | C/T  | Gene_Ca_08563      | SYNONYMOUS_CODING             | Mediatorcomplex,subunitMed10                    |
| Kabuli_wild_10314993 | 1399939999                          | Ca_kabuli_Chr06 | 10314993                | C/G  | NA                 | INTERGENIC                    | NA                                              |
| Kabuli_wild_10394743 | 1399940000                          | Ca_kabuli_Chr06 | 10394743                | G/A  | Gene_Ca_08553      | INTRON                        | Smallubiquitin-relatedmodifier,SUMO             |
| Kabuli_wild_10395273 | 1399940001                          | Ca_kabuli_Chr06 | 10395273                | T/G  | Gene_Ca_08553      | INTRON                        | Smallubiquitin-relatedmodifier,SUMO             |
| Kabuli_wild_10395356 | 1399940002                          | Ca_kabuli_Chr06 | 10395356                | T/A  | Gene_Ca_08553      | INTRON                        | Smallubiquitin-relatedmodifier,SUMO             |
| Kabuli_wild_10395379 | 1399940003                          | Ca_kabuli_Chr06 | 10395379                | T/C  | Gene_Ca_08553      | INTRON                        | Smallubiquitin-relatedmodifier,SUMO             |
| Kabuli_wild_10395411 | 1399940004                          | Ca_kabuli_Chr06 | 10395411                | G/A  | Gene_Ca_08553      | INTRON                        | Smallubiquitin-relatedmodifier,SUMO             |
| Kabuli_wild_10441705 | 1399940005                          | Ca_kabuli_Chr06 | 10441705                | T/C  | Gene_Ca_08551      | UPSTREAM                      | NA                                              |
| Kabuli_wild_10441736 | 1399940006                          | Ca_kabuli_Chr06 | 10441736                | A/C  | Gene_Ca_08551      | NON_SYNONYMOUS_CODING         | NA                                              |
| Kabuli_wild_10442148 | 1399940007                          | Ca_kabuli_Chr06 | 10442148                | A/C  | Gene_Ca_08551      | SYNONYMOUS_CODING             | NA                                              |
| Kabuli_wild_10445185 | 1399940008                          | Ca_kabuli_Chr06 | 10445185                | C/T  | Gene_Ca_08551      | INTRON                        | NA                                              |
| Kabuli_wild_10445274 | 1399940009                          | Ca_kabuli_Chr06 | 10445274                | G/A  | Gene_Ca_08551      | INTRON                        | NA                                              |
| Kabuli_wild_10456774 | 1399940010                          | Ca_kabuli_Chr06 | 10456774                | A/G  | Gene_Ca_08551      | SYNONYMOUS_CODING             | NA                                              |
| Kabuli_wild_10456854 | 1399940011                          | Ca_kabuli_Chr06 | 10456854                | G/T  | Gene_Ca_08551      | SYNONYMOUS_CODING             | NA                                              |
| Kabuli_wild_10494055 | 1399940012                          | Ca_kabuli_Chr06 | 10494055                | T/A  | Gene_Ca_08547      | INTRON                        | D-galactoside/L-rhamnosebindingSUEllectindomain |
| Kabuli_wild_10494057 | 1399940013                          | Ca_kabuli_Chr06 | 10494057                | C/A  | Gene_Ca_08547      | INTRON                        | D-galactoside/L-rhamnosebindingSUEllectindomain |
| Kabuli_wild_10494134 | 1399940014                          | Ca_kabuli_Chr06 | 10494134                | C/T  | Gene_Ca_08547      | INTRON                        | D-galactoside/L-rhamnosebindingSUEllectindomain |
| Kabuli_wild_10495747 | 1399940015                          | Ca_kabuli_Chr06 | 10495747                | G/T  | Gene_Ca_08547      | INTRON                        | D-galactoside/L-rhamnosebindingSUEllectindomain |
| Kabuli_wild_10510996 | 1399940016                          | Ca_kabuli_Chr06 | 10510996                | T/C  | NA                 | INTERGENIC                    | NA                                              |
| Kabuli_wild_10520958 | 1399940017                          | Ca_kabuli_Chr06 | 10520958                | C/T  | Gene_Ca_08543      | INTRON                        | RNA recognition motif domain                    |
| Kabuli_wild_10522298 | 1399940018                          | Ca_kabuli_Chr06 | 10522298                | A/G  | Gene_Ca_08543      | SYNONYMOUS_CODING             | RNA recognition motif domain                    |
| Kabuli_wild_10531399 | 1399940019                          | Ca_kabuli_Chr06 | 10531399                | C/T  | Gene_Ca_08542      | INTRON                        | RNA recognition motif domain                    |
| Kabuli_wild_10532178 | 1399940020                          | Ca_kabuli_Chr06 | 10532178                | G/T  | Gene_Ca_08542      | NON_SYNONYMOUS_CODING         | RNA recognition motif domain                    |
| Kabuli_wild_10532182 | 1399940021                          | Ca_kabuli_Chr06 | 10532182                | A/T  | Gene_Ca_08542      | NON_SYNONYMOUS_CODING         | RNA recognition motif domain                    |
| Kabuli_wild_10532739 | 1399940022                          | Ca_kabuli_Chr06 | 10532739                | A/G  | Gene_Ca_08542      | SYNONYMOUS_CODING             | RNA recognition motif domain                    |
| Kabuli_wild_10539918 | 1399940023                          | Ca_kabuli_Chr06 | 10539918                | A/C  | NA                 | INTERGENIC                    | NA                                              |
| Kabuli_wild_10539977 | 1399940024                          | Ca_kabuli_Chr06 | 10539977                | C/T  | NA                 | INTERGENIC                    | NA                                              |
| Kabuli_wild_10539994 | 1399940025                          | Ca_kabuli_Chr06 | 10539994                | A/C  | NA                 | INTERGENIC                    | NA                                              |
| Kabuli_wild_10567518 | 1399940026                          | Ca_kabuli_Chr06 | 10567518                | A/G  | NA                 | INTERGENIC                    | NA                                              |
| Kabuli_wild_10574535 | 1399940027                          | Ca_kabuli_Chr06 | 10574535                | T/C  | NA                 | INTERGENIC                    | NA                                              |
| Kabuli_wild_10588030 | 1399940028                          | Ca_kabuli_Chr06 | 10588030                | C/T  | Gene_Ca_08539      | DOWNSTREAM                    | Lateembryogenesisabundantprotein,group6         |
| Kabuli_wild_10613546 | 1399940029                          | Ca_kabuli_Chr06 | 10613546                | A/G  | Gene_Ca_08536      | SYNONYMOUS_CODING             | Heat shock factor(HSF)-type,DNA-binding         |
| Kabuli_wild_10613612 | 1399940030                          | Ca_kabuli_Chr06 | 10613612                | A/G  | Gene_Ca_08536      | SYNONYMOUS_CODING             | Heat shock factor(HSF)-type,DNA-binding         |
| Kabuli_wild_10631937 | 1399940031                          | Ca_kabuli_Chr06 | 10631937                | C/T  | NA                 | INTERGENIC                    | NA                                              |

| SNP IDs              | NCBI dbSNP accession IDs (NCBI_SS#) | Chromosomes     | Physical positions (bp) | SNPs | Gene accession IDs | Sequence components of genome | Putative functions                  |
|----------------------|-------------------------------------|-----------------|-------------------------|------|--------------------|-------------------------------|-------------------------------------|
| Kabuli_wild_10632293 | 1399940032                          | Ca_kabuli_Chr06 | 10632293                | A/G  | NA                 | INTERGENIC                    | NA                                  |
| Kabuli_wild_10641737 | 1399940033                          | Ca_kabuli_Chr06 | 10641737                | C/A  | NA                 | INTERGENIC                    | NA                                  |
| Kabuli_wild_10641752 | 1399940034                          | Ca_kabuli_Chr06 | 10641752                | A/G  | NA                 | INTERGENIC                    | NA                                  |
| Kabuli_wild_10641757 | 1399940035                          | Ca_kabuli_Chr06 | 10641757                | T/G  | NA                 | INTERGENIC                    | NA                                  |
| Kabuli_wild_10641758 | 1399940036                          | Ca_kabuli_Chr06 | 10641758                | T/A  | NA                 | INTERGENIC                    | NA                                  |
| Kabuli_wild_10641769 | 1399940037                          | Ca_kabuli_Chr06 | 10641769                | T/C  | NA                 | INTERGENIC                    | NA                                  |
| Kabuli_wild_10641770 | 1399940038                          | Ca_kabuli_Chr06 | 10641770                | G/A  | NA                 | INTERGENIC                    | NA                                  |
| Kabuli_wild_10641771 | 1399940039                          | Ca_kabuli_Chr06 | 10641771                | A/G  | NA                 | INTERGENIC                    | NA                                  |
| Kabuli_wild_10641773 | 1399940040                          | Ca_kabuli_Chr06 | 10641773                | C/T  | NA                 | INTERGENIC                    | NA                                  |
| Kabuli_wild_10641800 | 1399940041                          | Ca_kabuli_Chr06 | 10641800                | A/G  | NA                 | INTERGENIC                    | NA                                  |
| Kabuli_wild_10641802 | 1399940042                          | Ca_kabuli_Chr06 | 10641802                | C/A  | NA                 | INTERGENIC                    | NA                                  |
| Kabuli_wild_10667559 | 1399940043                          | Ca_kabuli_Chr06 | 10667559                | T/C  | NA                 | INTERGENIC                    | NA                                  |
| Kabuli_wild_10670368 | 1399940044                          | Ca_kabuli_Chr06 | 10670368                | G/A  | Gene_Ca_08530      | INTRON                        | Aspartate/glutamate/uridylatekinase |
| Kabuli_wild_10670409 | 1399940045                          | Ca_kabuli_Chr06 | 10670409                | G/A  | Gene_Ca_08530      | INTRON                        | Aspartate/glutamate/uridylatekinase |
| Kabuli_wild_10670482 | 1399940046                          | Ca_kabuli_Chr06 | 10670482                | C/T  | Gene_Ca_08530      | INTRON                        | Aspartate/glutamate/uridylatekinase |
| Kabuli_wild_10670582 | 1399940047                          | Ca_kabuli_Chr06 | 10670582                | G/A  | Gene_Ca_08530      | INTRON                        | Aspartate/glutamate/uridylatekinase |
| Kabuli_wild_10670694 | 1399940048                          | Ca_kabuli_Chr06 | 10670694                | G/A  | Gene_Ca_08530      | INTRON                        | Aspartate/glutamate/uridylatekinase |
| Kabuli_wild_10670773 | 1399940049                          | Ca_kabuli_Chr06 | 10670773                | A/C  | Gene_Ca_08530      | INTRON                        | Aspartate/glutamate/uridylatekinase |
| Kabuli_wild_10670959 | 1399940050                          | Ca_kabuli_Chr06 | 10670959                | T/C  | Gene_Ca_08530      | INTRON                        | Aspartate/glutamate/uridylatekinase |
| Kabuli_wild_10671444 | 1399940051                          | Ca_kabuli_Chr06 | 10671444                | A/C  | Gene_Ca_08530      | INTRON                        | Aspartate/glutamate/uridylatekinase |
| Kabuli_wild_10671458 | 1399940052                          | Ca_kabuli_Chr06 | 10671458                | T/C  | Gene_Ca_08530      | INTRON                        | Aspartate/glutamate/uridylatekinase |
| Kabuli_wild_10672468 | 1399940053                          | Ca_kabuli_Chr06 | 10672468                | C/T  | Gene_Ca_08530      | INTRON                        | Aspartate/glutamate/uridylatekinase |
| Kabuli_wild_10677469 | 1399940054                          | Ca_kabuli_Chr06 | 10677469                | A/G  | Gene_Ca_08530      | INTRON                        | Aspartate/glutamate/uridylatekinase |
| Kabuli_wild_10677501 | 1399940055                          | Ca_kabuli_Chr06 | 10677501                | C/T  | Gene_Ca_08530      | INTRON                        | Aspartate/glutamate/uridylatekinase |
| Kabuli_wild_10682201 | 1399940056                          | Ca_kabuli_Chr06 | 10682201                | C/G  | Gene_Ca_08530      | DOWNSTREAM                    | Aspartate/glutamate/uridylatekinase |
| Kabuli_wild_10682221 | 1399940057                          | Ca_kabuli_Chr06 | 10682221                | G/T  | Gene_Ca_08530      | DOWNSTREAM                    | Aspartate/glutamate/uridylatekinase |
| Kabuli_wild_10683193 | 1399940058                          | Ca_kabuli_Chr06 | 10683193                | C/T  | NA                 | INTERGENIC                    | NA                                  |
| Kabuli_wild_10684042 | 1399940059                          | Ca_kabuli_Chr06 | 10684042                | T/C  | NA                 | INTERGENIC                    | NA                                  |
| Kabuli_wild_10696986 | 1399940060                          | Ca_kabuli_Chr06 | 10696986                | A/T  | Gene_Ca_08528      | INTRON                        | Protein kinase,catalytic domain     |
| Kabuli_wild_10696990 | 1399940061                          | Ca_kabuli_Chr06 | 10696990                | T/C  | Gene_Ca_08528      | INTRON                        | Protein kinase,catalytic domain     |
| Kabuli_wild_10697064 | 1399940062                          | Ca_kabuli_Chr06 | 10697064                | T/A  | Gene_Ca_08528      | INTRON                        | Protein kinase,catalytic domain     |
| Kabuli_wild_10716933 | 1399940063                          | Ca_kabuli_Chr06 | 10716933                | T/G  | NA                 | INTERGENIC                    | NA                                  |
| Kabuli_wild_10716968 | 1399940064                          | Ca_kabuli_Chr06 | 10716968                | G/A  | Gene_Ca_08526      | SYNONYMOUS_CODING             | NA                                  |
| Kabuli_wild_10716986 | 1399940065                          | Ca_kabuli_Chr06 | 10716986                | G/A  | Gene_Ca_08526      | SYNONYMOUS_CODING             | NA                                  |
| Kabuli_wild_10718770 | 1399940066                          | Ca_kabuli_Chr06 | 10718770                | G/A  | Gene_Ca_08526      | SYNONYMOUS_CODING             | NA                                  |
| Kabuli_wild_10734364 | 1399940067                          | Ca_kabuli_Chr06 | 10734364                | A/G  | Gene_Ca_08524      | INTRON                        | Tic22-like                          |
| Kabuli_wild_10743996 | 1399940068                          | Ca_kabuli_Chr06 | 10743996                | A/T  | NA                 | INTERGENIC                    | NA                                  |
| Kabuli_wild_10744029 | 1399940069                          | Ca_kabuli_Chr06 | 10744029                | C/A  | NA                 | INTERGENIC                    | NA                                  |
| Kabuli_wild_10748707 | 1399940070                          | Ca_kabuli_Chr06 | 10748707                | C/A  | Gene_Ca_08523      | NON_SYNONYMOUS_CODING         | NA                                  |
| Kabuli_wild_10778506 | 1399940071                          | Ca_kabuli_Chr06 | 10778506                | G/A  | Gene_Ca_08519      | INTRON                        | Kinesin,motordomain                 |
| Kabuli_wild_10779623 | 1399940072                          | Ca_kabuli_Chr06 | 10779623                | T/C  | Gene_Ca_08519      | SYNONYMOUS_CODING             | Kinesin,motordomain                 |
| Kabuli_wild_10779714 | 1399940073                          | Ca_kabuli_Chr06 | 10779714                | C/A  | Gene_Ca_08519      | SYNONYMOUS_CODING             | Kinesin,motordomain                 |
| Kabuli_wild_10779837 | 1399940074                          | Ca_kabuli_Chr06 | 10779837                | G/A  | Gene_Ca_08519      | NON_SYNONYMOUS_CODING         | Kinesin,motordomain                 |
| Kabuli_wild_10780228 | 1399940075                          | Ca_kabuli_Chr06 | 10780228                | C/T  | Gene_Ca_08519      | INTRON                        | Kinesin,motordomain                 |

| SNP IDs              | NCBI dbSNP accession IDs (NCBI_SS#) | Chromosomes      | Physical positions (bp) | SNPs | Gene accession IDs | Sequence components of genome | Putative functions                                     |
|----------------------|-------------------------------------|------------------|-------------------------|------|--------------------|-------------------------------|--------------------------------------------------------|
| Kabuli_wild_10780240 | 1399940076                          | Ca_kabuli_Chrom6 | 10780240                | T/C  | Gene_Ca_08519      | INTRON                        | Kinesin,motordomain                                    |
| Kabuli_wild_10781522 | 1399940077                          | Ca_kabuli_Chrom6 | 10781522                | G/T  | Gene_Ca_08519      | INTRON                        | Kinesin,motordomain                                    |
| Kabuli_wild_10785480 | 1399940078                          | Ca_kabuli_Chrom6 | 10785480                | T/G  | NA                 | INTERGENIC                    | NA                                                     |
| Kabuli_wild_10822140 | 1399940079                          | Ca_kabuli_Chrom6 | 10822140                | G/A  | NA                 | INTERGENIC                    | NA                                                     |
| Kabuli_wild_10822184 | 1399940080                          | Ca_kabuli_Chrom6 | 10822184                | G/A  | NA                 | INTERGENIC                    | NA                                                     |
| Kabuli_wild_10870187 | 1399940081                          | Ca_kabuli_Chrom6 | 10870187                | T/G  | Gene_Ca_08511      | NON_SYNONYMOUS_CODING         | IQ motif,EF-handbinding site                           |
| Kabuli_wild_10870534 | 1399940082                          | Ca_kabuli_Chrom6 | 10870534                | A/G  | Gene_Ca_08511      | SYNONYMOUS_CODING             | IQ motif,EF-handbinding site                           |
| Kabuli_wild_10873180 | 1399940083                          | Ca_kabuli_Chrom6 | 10873180                | G/A  | Gene_Ca_08510      | DOWNSTREAM                    | Nucleartransportfactor2                                |
| Kabuli_wild_10880791 | 1399940084                          | Ca_kabuli_Chrom6 | 10880791                | C/T  | Gene_Ca_08509      | INTRON                        | Signal transduction response regulator, receiverdomain |
| Kabuli_wild_10880819 | 1399940085                          | Ca_kabuli_Chrom6 | 10880819                | T/G  | Gene_Ca_08509      | INTRON                        | Signal transduction response regulator, receiverdomain |
| Kabuli_wild_10880962 | 1399940086                          | Ca_kabuli_Chrom6 | 10880962                | G/T  | Gene_Ca_08509      | INTRON                        | Signal transduction response regulator, receiverdomain |
| Kabuli_wild_10880985 | 1399940087                          | Ca_kabuli_Chrom6 | 10880985                | C/T  | Gene_Ca_08509      | INTRON                        | Signal transduction response regulator, receiverdomain |
| Kabuli_wild_10881002 | 1399940088                          | Ca_kabuli_Chrom6 | 10881002                | A/G  | Gene_Ca_08509      | INTRON                        | Signal transduction response regulator, receiverdomain |
| Kabuli_wild_10900193 | 1399940089                          | Ca_kabuli_Chrom6 | 10900193                | A/G  | Gene_Ca_08507      | INTRON                        | WD40 repeat                                            |
| Kabuli_wild_10900225 | 1399940090                          | Ca_kabuli_Chrom6 | 10900225                | T/C  | Gene_Ca_08507      | INTRON                        | WD40 repeat                                            |
| Kabuli_wild_10900678 | 1399940091                          | Ca_kabuli_Chrom6 | 10900678                | G/T  | Gene_Ca_08507      | INTRON                        | WD40 repeat                                            |
| Kabuli_wild_10991652 | 1399940092                          | Ca_kabuli_Chrom6 | 10991652                | C/A  | Gene_Ca_20467      | NON_SYNONYMOUS_CODING         | Zinc finger,MYND-type                                  |
| Kabuli_wild_10991717 | 1399940093                          | Ca_kabuli_Chrom6 | 10991717                | T/A  | Gene_Ca_20467      | NON_SYNONYMOUS_CODING         | Zinc finger,MYND-type                                  |
| Kabuli_wild_10991737 | 1399940094                          | Ca_kabuli_Chrom6 | 10991737                | A/C  | Gene_Ca_20467      | SYNONYMOUS_CODING             | Zinc finger,MYND-type                                  |
| Kabuli_wild_11011847 | 1399940095                          | Ca_kabuli_Chrom6 | 11011847                | C/G  | Gene_Ca_20469      | NON_SYNONYMOUS_CODING         | Rubberelongationfactor                                 |
| Kabuli_wild_11053302 | 1399940096                          | Ca_kabuli_Chrom6 | 11053302                | T/C  | Gene_Ca_20472      | INTRON                        | PeptidaseM28                                           |
| Kabuli_wild_11131010 | 1399940097                          | Ca_kabuli_Chrom6 | 11131010                | T/A  | Gene_Ca_20479      | INTRON                        | Glycosidehydrolase,family63                            |
| Kabuli_wild_11131464 | 1399940098                          | Ca_kabuli_Chrom6 | 11131464                | G/A  | Gene_Ca_20479      | INTRON                        | Glycosidehydrolase,family63                            |
| Kabuli_wild_11188803 | 1399940099                          | Ca_kabuli_Chrom6 | 11188803                | G/A  | Gene_Ca_20485      | NON_SYNONYMOUS_CODING         | Protein kinase,catalytic domain                        |
| Kabuli_wild_11189051 | 1399940100                          | Ca_kabuli_Chrom6 | 11189051                | A/G  | Gene_Ca_20485      | SYNONYMOUS_CODING             | Protein kinase,catalytic domain                        |
| Kabuli_wild_11219633 | 1399940101                          | Ca_kabuli_Chrom6 | 11219633                | A/C  | Gene_Ca_20488      | INTRON                        | Pre-mRNAAcleavagecomplexIIc1p1                         |
| Kabuli_wild_11229102 | 1399940102                          | Ca_kabuli_Chrom6 | 11229102                | C/T  | Gene_Ca_20489      | SYNONYMOUS_CODING             | Ankyrinrepeat                                          |
| Kabuli_wild_11229144 | 1399940103                          | Ca_kabuli_Chrom6 | 11229144                | C/G  | Gene_Ca_20489      | NON_SYNONYMOUS_CODING         | Ankyrinrepeat                                          |
| Kabuli_wild_11229302 | 1399940104                          | Ca_kabuli_Chrom6 | 11229302                | G/A  | Gene_Ca_20489      | SYNONYMOUS_CODING             | Ankyrinrepeat                                          |
| Kabuli_wild_11229379 | 1399940105                          | Ca_kabuli_Chrom6 | 11229379                | C/G  | Gene_Ca_20489      | NON_SYNONYMOUS_CODING         | Ankyrinrepeat                                          |
| Kabuli_wild_11229388 | 1399940106                          | Ca_kabuli_Chrom6 | 11229388                | C/T  | Gene_Ca_20489      | NON_SYNONYMOUS_CODING         | Ankyrinrepeat                                          |
| Kabuli_wild_11300549 | 1399940107                          | Ca_kabuli_Chrom6 | 11300549                | A/C  | Gene_Ca_20493      | SYNONYMOUS_CODING             | Signalrecognitionparticle,SRP72subunit,RNA-binding     |
| Kabuli_wild_11302033 | 1399940108                          | Ca_kabuli_Chrom6 | 11302033                | T/C  | Gene_Ca_20493      | NON_SYNONYMOUS_CODING         | NA                                                     |
| Kabuli_wild_11302037 | 1399940109                          | Ca_kabuli_Chrom6 | 11302037                | A/C  | Gene_Ca_20493      | NON_SYNONYMOUS_CODING         | NA                                                     |
| Kabuli_wild_11314537 | 1399940110                          | Ca_kabuli_Chrom6 | 11314537                | G/A  | Gene_Ca_20494      | SYNONYMOUS_CODING             | Pentatric peptide repeat                               |
| Kabuli_wild_11314581 | 1399940111                          | Ca_kabuli_Chrom6 | 11314581                | C/T  | Gene_Ca_20494      | NON_SYNONYMOUS_CODING         | Pentatric peptide repeat                               |
| Kabuli_wild_11508816 | 1399940112                          | Ca_kabuli_Chrom6 | 11508816                | A/C  | Gene_Ca_23431      | NON_SYNONYMOUS_CODING         | Heat shock protein DnaJ,N-terminal                     |
| Kabuli_wild_11508817 | 1399940113                          | Ca_kabuli_Chrom6 | 11508817                | G/A  | Gene_Ca_23431      | NON_SYNONYMOUS_CODING         | Heat shock protein DnaJ,N-terminal                     |
| Kabuli_wild_11508824 | 1399940114                          | Ca_kabuli_Chrom6 | 11508824                | T/G  | Gene_Ca_23431      | STOP_GAINED                   | Heat shock protein DnaJ,N-terminal                     |
| Kabuli_wild_11508828 | 1399940115                          | Ca_kabuli_Chrom6 | 11508828                | C/T  | Gene_Ca_23431      | NON_SYNONYMOUS_CODING         | Heat shock protein DnaJ,N-terminal                     |
| Kabuli_wild_11514852 | 1399940116                          | Ca_kabuli_Chrom6 | 11514852                | A/T  | Gene_Ca_23432      | NON_SYNONYMOUS_CODING         | NA                                                     |
| Kabuli_wild_11514868 | 1399940117                          | Ca_kabuli_Chrom6 | 11514868                | G/A  | Gene_Ca_23432      | NON_SYNONYMOUS_CODING         | NA                                                     |
| Kabuli_wild_11514875 | 1399940118                          | Ca_kabuli_Chrom6 | 11514875                | C/T  | Gene_Ca_23432      | NON_SYNONYMOUS_CODING         | NA                                                     |
| Kabuli_wild_11514950 | 1399940119                          | Ca_kabuli_Chrom6 | 11514950                | C/T  | Gene_Ca_23432      | NON_SYNONYMOUS_CODING         | NA                                                     |



| SNP IDs              | NCBI dbSNP accession IDs (NCBI_SS#) | Chromosomes     | Physical positions (bp) | SNPs | Gene accession IDs | Sequence components of genome | Putative functions              |
|----------------------|-------------------------------------|-----------------|-------------------------|------|--------------------|-------------------------------|---------------------------------|
| Kabuli_wild_11514952 | 1399940120                          | Ca_kabuli_Chr06 | 11514952                | G/A  | Gene_Ca_23432      | NON_SYNONYMOUS_CODING         | NA                              |
| Kabuli_wild_11543618 | 1399940121                          | Ca_kabuli_Chr06 | 11543618                | T/G  | NA                 | INTERGENIC                    | NA                              |
| Kabuli_wild_11665233 | 1399940122                          | Ca_kabuli_Chr06 | 11665233                | G/A  | Gene_Ca_25061      | SYNONYMOUS_CODING             | Amineoxidase                    |
| Kabuli_wild_11665338 | 1399940123                          | Ca_kabuli_Chr06 | 11665338                | T/G  | Gene_Ca_25061      | SYNONYMOUS_CODING             | Amineoxidase                    |
| Kabuli_wild_11839188 | 1399940124                          | Ca_kabuli_Chr06 | 11839188                | T/C  | NA                 | INTERGENIC                    | NA                              |
| Kabuli_wild_11992488 | 1399940125                          | Ca_kabuli_Chr06 | 11992488                | C/T  | NA                 | INTERGENIC                    | NA                              |
| Kabuli_wild_12003393 | 1399940126                          | Ca_kabuli_Chr06 | 12003393                | G/A  | NA                 | INTERGENIC                    | NA                              |
| Kabuli_wild_12029759 | 1399940127                          | Ca_kabuli_Chr06 | 12029759                | C/T  | NA                 | INTERGENIC                    | NA                              |
| Kabuli_wild_12324310 | 1399940128                          | Ca_kabuli_Chr06 | 12324310                | G/A  | NA                 | INTERGENIC                    | NA                              |
| Kabuli_wild_12324315 | 1399940129                          | Ca_kabuli_Chr06 | 12324315                | C/T  | NA                 | INTERGENIC                    | NA                              |
| Kabuli_wild_12324367 | 1399940130                          | Ca_kabuli_Chr06 | 12324367                | C/G  | NA                 | INTERGENIC                    | NA                              |
| Kabuli_wild_12324389 | 1399940131                          | Ca_kabuli_Chr06 | 12324389                | G/A  | NA                 | INTERGENIC                    | NA                              |
| Kabuli_wild_12437130 | 1399940132                          | Ca_kabuli_Chr06 | 12437130                | C/A  | Gene_Ca_05025      | NON_SYNONYMOUS_CODING         | AUX/IAAprotein                  |
| Kabuli_wild_12437275 | 1399940133                          | Ca_kabuli_Chr06 | 12437275                | A/T  | Gene_Ca_05025      | NON_SYNONYMOUS_CODING         | AUX/IAAprotein                  |
| Kabuli_wild_12437284 | 1399940134                          | Ca_kabuli_Chr06 | 12437284                | A/C  | Gene_Ca_05025      | NON_SYNONYMOUS_CODING         | AUX/IAAprotein                  |
| Kabuli_wild_12437285 | 1399940135                          | Ca_kabuli_Chr06 | 12437285                | A/G  | Gene_Ca_05025      | SYNONYMOUS_CODING             | AUX/IAAprotein                  |
| Kabuli_wild_12437286 | 1399940136                          | Ca_kabuli_Chr06 | 12437286                | C/G  | Gene_Ca_05025      | NON_SYNONYMOUS_CODING         | AUX/IAAprotein                  |
| Kabuli_wild_12437288 | 1399940137                          | Ca_kabuli_Chr06 | 12437288                | G/A  | Gene_Ca_05025      | SYNONYMOUS_CODING             | AUX/IAAprotein                  |
| Kabuli_wild_12437319 | 1399940138                          | Ca_kabuli_Chr06 | 12437319                | C/T  | Gene_Ca_05025      | STOP_GAINED                   | AUX/IAAprotein                  |
| Kabuli_wild_12437330 | 1399940139                          | Ca_kabuli_Chr06 | 12437330                | A/C  | Gene_Ca_05025      | SYNONYMOUS_CODING             | AUX/IAAprotein                  |
| Kabuli_wild_12490253 | 1399940140                          | Ca_kabuli_Chr06 | 12490253                | C/A  | Gene_Ca_05028      | NON_SYNONYMOUS_CODING         | Zinc finger,C3HC-like           |
| Kabuli_wild_12532947 | 1399940141                          | Ca_kabuli_Chr06 | 12532947                | A/T  | NA                 | INTERGENIC                    | NA                              |
| Kabuli_wild_12535733 | 1399940142                          | Ca_kabuli_Chr06 | 12535733                | C/G  | Gene_Ca_05031      | NON_SYNONYMOUS_CODING         | Sugar/inositol transporter      |
| Kabuli_wild_12642779 | 1399940143                          | Ca_kabuli_Chr06 | 12642779                | G/T  | Gene_Ca_05040      | UPSTREAM                      | Integrase,catalyticcore         |
| Kabuli_wild_12799890 | 1399940144                          | Ca_kabuli_Chr06 | 12799890                | T/G  | NA                 | INTERGENIC                    | NA                              |
| Kabuli_wild_12893335 | 1399940145                          | Ca_kabuli_Chr06 | 12893335                | C/A  | NA                 | INTERGENIC                    | NA                              |
| Kabuli_wild_12893424 | 1399940146                          | Ca_kabuli_Chr06 | 12893424                | C/T  | NA                 | INTERGENIC                    | NA                              |
| Kabuli_wild_12905457 | 1399940147                          | Ca_kabuli_Chr06 | 12905457                | G/A  | Gene_Ca_05064      | SYNONYMOUS_CODING             | Protein kinase,catalytic domain |
| Kabuli_wild_12905458 | 1399940148                          | Ca_kabuli_Chr06 | 12905458                | T/A  | Gene_Ca_05064      | SYNONYMOUS_CODING             | Protein kinase,catalytic domain |
| Kabuli_wild_12906599 | 1399940149                          | Ca_kabuli_Chr06 | 12906599                | G/A  | Gene_Ca_05064      | INTRON                        | Protein kinase,catalytic domain |
| Kabuli_wild_12906669 | 1399940150                          | Ca_kabuli_Chr06 | 12906669                | G/A  | Gene_Ca_05064      | INTRON                        | Protein kinase,catalytic domain |
| Kabuli_wild_12906680 | 1399940151                          | Ca_kabuli_Chr06 | 12906680                | T/C  | Gene_Ca_05064      | INTRON                        | Protein kinase,catalytic domain |
| Kabuli_wild_12973765 | 1399940152                          | Ca_kabuli_Chr06 | 12973765                | A/G  | Gene_Ca_05070      | UPSTREAM                      | RibosomalproteinS17e            |
| Kabuli_wild_12976473 | 1399940153                          | Ca_kabuli_Chr06 | 12976473                | A/T  | Gene_Ca_05070      | DOWNSTREAM                    | RibosomalproteinS17e            |
| Kabuli_wild_12976513 | 1399940154                          | Ca_kabuli_Chr06 | 12976513                | G/A  | Gene_Ca_05070      | DOWNSTREAM                    | RibosomalproteinS17e            |
| Kabuli_wild_12977129 | 1399940155                          | Ca_kabuli_Chr06 | 12977129                | A/G  | Gene_Ca_05070      | DOWNSTREAM                    | RibosomalproteinS17e            |
| Kabuli_wild_12977196 | 1399940156                          | Ca_kabuli_Chr06 | 12977196                | A/G  | Gene_Ca_05070      | DOWNSTREAM                    | RibosomalproteinS17e            |
| Kabuli_wild_12977204 | 1399940157                          | Ca_kabuli_Chr06 | 12977204                | T/G  | Gene_Ca_05070      | DOWNSTREAM                    | RibosomalproteinS17e            |
| Kabuli_wild_12985896 | 1399940158                          | Ca_kabuli_Chr06 | 12985896                | A/C  | NA                 | INTERGENIC                    | NA                              |
| Kabuli_wild_12985908 | 1399940159                          | Ca_kabuli_Chr06 | 12985908                | C/G  | NA                 | INTERGENIC                    | NA                              |
| Kabuli_wild_12985910 | 1399940160                          | Ca_kabuli_Chr06 | 12985910                | C/T  | NA                 | INTERGENIC                    | NA                              |
| Kabuli_wild_12986776 | 1399940161                          | Ca_kabuli_Chr06 | 12986776                | A/G  | NA                 | INTERGENIC                    | NA                              |
| Kabuli_wild_12986833 | 1399940162                          | Ca_kabuli_Chr06 | 12986833                | A/C  | NA                 | INTERGENIC                    | NA                              |
| Kabuli_wild_13136955 | 1399940163                          | Ca_kabuli_Chr06 | 13136955                | G/A  | Gene_Ca_05086      | INTRON                        | Cyclicnucleotide-binding domain |

| SNP IDs              | NCBI dbSNP accession IDs (NCBI_SS#) | Chromosomes      | Physical positions (bp) | SNPs | Gene accession IDs | Sequence components of genome | Putative functions                                  |
|----------------------|-------------------------------------|------------------|-------------------------|------|--------------------|-------------------------------|-----------------------------------------------------|
| Kabuli_wild_13188119 | 1399940164                          | Ca_kabuli_Chrom6 | 13188119                | A/C  | NA                 | INTERGENIC                    | NA                                                  |
| Kabuli_wild_13228589 | 1399940165                          | Ca_kabuli_Chrom6 | 13228589                | T/C  | NA                 | INTERGENIC                    | NA                                                  |
| Kabuli_wild_13228714 | 1399940166                          | Ca_kabuli_Chrom6 | 13228714                | G/A  | NA                 | INTERGENIC                    | NA                                                  |
| Kabuli_wild_13243036 | 1399940167                          | Ca_kabuli_Chrom6 | 13243036                | T/C  | Gene_Ca_05097      | SYNONYMOUS_CODING             | Zinc finger,CCCH-type                               |
| Kabuli_wild_13326910 | 1399940168                          | Ca_kabuli_Chrom6 | 13326910                | A/C  | Gene_Ca_05104      | SYNONYMOUS_CODING             | Zinc finger, RING-type                              |
| Kabuli_wild_13340012 | 1399940169                          | Ca_kabuli_Chrom6 | 13340012                | A/G  | NA                 | INTERGENIC                    | NA                                                  |
| Kabuli_wild_13340762 | 1399940170                          | Ca_kabuli_Chrom6 | 13340762                | G/A  | NA                 | INTERGENIC                    | NA                                                  |
| Kabuli_wild_13413848 | 1399940171                          | Ca_kabuli_Chrom6 | 13413848                | C/G  | NA                 | INTERGENIC                    | NA                                                  |
| Kabuli_wild_13413912 | 1399940172                          | Ca_kabuli_Chrom6 | 13413912                | T/C  | NA                 | INTERGENIC                    | NA                                                  |
| Kabuli_wild_13462423 | 1399940173                          | Ca_kabuli_Chrom6 | 13462423                | G/C  | Gene_Ca_05116      | SYNONYMOUS_CODING             | Homeobox                                            |
| Kabuli_wild_13462428 | 1399940174                          | Ca_kabuli_Chrom6 | 13462428                | C/T  | Gene_Ca_05116      | SYNONYMOUS_CODING             | Homeobox                                            |
| Kabuli_wild_13462461 | 1399940175                          | Ca_kabuli_Chrom6 | 13462461                | G/T  | Gene_Ca_05116      | SYNONYMOUS_CODING             | Homeobox                                            |
| Kabuli_wild_13462467 | 1399940176                          | Ca_kabuli_Chrom6 | 13462467                | G/T  | Gene_Ca_05116      | SYNONYMOUS_CODING             | Homeobox                                            |
| Kabuli_wild_13462480 | 1399940177                          | Ca_kabuli_Chrom6 | 13462480                | G/T  | Gene_Ca_05116      | SYNONYMOUS_CODING             | Homeobox                                            |
| Kabuli_wild_13462485 | 1399940178                          | Ca_kabuli_Chrom6 | 13462485                | T/C  | Gene_Ca_05116      | SYNONYMOUS_CODING             | Homeobox                                            |
| Kabuli_wild_13462943 | 1399940179                          | Ca_kabuli_Chrom6 | 13462943                | A/G  | Gene_Ca_05116      | NON_SYNONYMOUS_CODING         | Homeobox                                            |
| Kabuli_wild_13483841 | 1399940180                          | Ca_kabuli_Chrom6 | 13483841                | T/G  | Gene_Ca_05119      | UPSTREAM                      | MitochondrialmatrixMmp37                            |
| Kabuli_wild_13565990 | 1399940181                          | Ca_kabuli_Chrom6 | 13565990                | C/T  | Gene_Ca_05127      | NON_SYNONYMOUS_CODING         | HECT                                                |
| Kabuli_wild_13566007 | 1399940182                          | Ca_kabuli_Chrom6 | 13566007                | C/T  | Gene_Ca_05127      | SYNONYMOUS_CODING             | HECT                                                |
| Kabuli_wild_13566012 | 1399940183                          | Ca_kabuli_Chrom6 | 13566012                | T/G  | Gene_Ca_05127      | NON_SYNONYMOUS_CODING         | HECT                                                |
| Kabuli_wild_13566041 | 1399940184                          | Ca_kabuli_Chrom6 | 13566041                | C/T  | Gene_Ca_05127      | NON_SYNONYMOUS_CODING         | HECT                                                |
| Kabuli_wild_13566110 | 1399940185                          | Ca_kabuli_Chrom6 | 13566110                | A/G  | Gene_Ca_05127      | NON_SYNONYMOUS_CODING         | HECT                                                |
| Kabuli_wild_13566136 | 1399940186                          | Ca_kabuli_Chrom6 | 13566136                | A/C  | Gene_Ca_05127      | SYNONYMOUS_CODING             | HECT                                                |
| Kabuli_wild_13572221 | 1399940187                          | Ca_kabuli_Chrom6 | 13572221                | A/C  | Gene_Ca_05127      | INTRON                        | HECT                                                |
| Kabuli_wild_13572236 | 1399940188                          | Ca_kabuli_Chrom6 | 13572236                | A/T  | Gene_Ca_05127      | INTRON                        | HECT                                                |
| Kabuli_wild_13576963 | 1399940189                          | Ca_kabuli_Chrom6 | 13576963                | T/A  | Gene_Ca_05127      | INTRON                        | HECT                                                |
| Kabuli_wild_13584845 | 1399940190                          | Ca_kabuli_Chrom6 | 13584845                | T/C  | NA                 | INTERGENIC                    | NA                                                  |
| Kabuli_wild_13591590 | 1399940191                          | Ca_kabuli_Chrom6 | 13591590                | T/G  | NA                 | INTERGENIC                    | NA                                                  |
| Kabuli_wild_13593600 | 1399940192                          | Ca_kabuli_Chrom6 | 13593600                | T/C  | NA                 | INTERGENIC                    | NA                                                  |
| Kabuli_wild_13619538 | 1399940193                          | Ca_kabuli_Chrom6 | 13619538                | C/T  | Gene_Ca_05131      | NON_SYNONYMOUS_CODING         | HECT                                                |
| Kabuli_wild_13619555 | 1399940194                          | Ca_kabuli_Chrom6 | 13619555                | C/T  | Gene_Ca_05131      | SYNONYMOUS_CODING             | HECT                                                |
| Kabuli_wild_13619560 | 1399940195                          | Ca_kabuli_Chrom6 | 13619560                | T/G  | Gene_Ca_05131      | NON_SYNONYMOUS_CODING         | HECT                                                |
| Kabuli_wild_13619589 | 1399940196                          | Ca_kabuli_Chrom6 | 13619589                | C/T  | Gene_Ca_05131      | NON_SYNONYMOUS_CODING         | HECT                                                |
| Kabuli_wild_13619658 | 1399940197                          | Ca_kabuli_Chrom6 | 13619658                | A/G  | Gene_Ca_05131      | NON_SYNONYMOUS_CODING         | HECT                                                |
| Kabuli_wild_13619684 | 1399940198                          | Ca_kabuli_Chrom6 | 13619684                | A/C  | Gene_Ca_05131      | SYNONYMOUS_CODING             | HECT                                                |
| Kabuli_wild_13622292 | 1399940199                          | Ca_kabuli_Chrom6 | 13622292                | C/T  | Gene_Ca_05131      | NON_SYNONYMOUS_CODING         | HECT                                                |
| Kabuli_wild_13622301 | 1399940200                          | Ca_kabuli_Chrom6 | 13622301                | A/G  | Gene_Ca_05131      | NON_SYNONYMOUS_CODING         | HECT                                                |
| Kabuli_wild_13625388 | 1399940201                          | Ca_kabuli_Chrom6 | 13625388                | A/G  | Gene_Ca_05132      | DOWNSTREAM                    | E3ubiquitinligase,Domain of unknown function DUF908 |
| Kabuli_wild_13668916 | 1399940202                          | Ca_kabuli_Chrom6 | 13668916                | T/A  | NA                 | INTERGENIC                    | NA                                                  |
| Kabuli_wild_13668995 | 1399940203                          | Ca_kabuli_Chrom6 | 13668995                | A/G  | NA                 | INTERGENIC                    | NA                                                  |
| Kabuli_wild_13669006 | 1399940204                          | Ca_kabuli_Chrom6 | 13669006                | G/C  | NA                 | INTERGENIC                    | NA                                                  |
| Kabuli_wild_13669018 | 1399940205                          | Ca_kabuli_Chrom6 | 13669018                | G/A  | NA                 | INTERGENIC                    | NA                                                  |
| Kabuli_wild_13669042 | 1399940206                          | Ca_kabuli_Chrom6 | 13669042                | A/G  | NA                 | INTERGENIC                    | NA                                                  |
| Kabuli_wild_13669048 | 1399940207                          | Ca_kabuli_Chrom6 | 13669048                | T/A  | NA                 | INTERGENIC                    | NA                                                  |



| SNP IDs              | NCBI dbSNP accession IDs (NCBI_SS#) | Chromosomes     | Physical positions (bp) | SNPs | Gene accession IDs | Sequence components of genome | Putative functions                                  |
|----------------------|-------------------------------------|-----------------|-------------------------|------|--------------------|-------------------------------|-----------------------------------------------------|
| Kabuli_wild_13669049 | 1399940208                          | Ca_kabuli_Chr06 | 13669049                | C/T  | NA                 | INTERGENIC                    | NA                                                  |
| Kabuli_wild_13669052 | 1399940209                          | Ca_kabuli_Chr06 | 13669052                | G/C  | NA                 | INTERGENIC                    | NA                                                  |
| Kabuli_wild_13714741 | 1399940210                          | Ca_kabuli_Chr06 | 13714741                | C/T  | NA                 | INTERGENIC                    | NA                                                  |
| Kabuli_wild_13820285 | 1399940211                          | Ca_kabuli_Chr06 | 13820285                | C/T  | NA                 | INTERGENIC                    | NA                                                  |
| Kabuli_wild_13827452 | 1399940212                          | Ca_kabuli_Chr06 | 13827452                | C/G  | Gene_Ca_05146      | INTRON                        | Aspartate carbamoyltransferase, eukaryotic          |
| Kabuli_wild_13827484 | 1399940213                          | Ca_kabuli_Chr06 | 13827484                | C/T  | Gene_Ca_05146      | SYNONYMOUS_CODING             | Aspartate carbamoyltransferase, eukaryotic          |
| Kabuli_wild_13913539 | 1399940214                          | Ca_kabuli_Chr06 | 13913539                | A/G  | Gene_Ca_05156      | INTRON                        | DNA-dependentATPaseMCM                              |
| Kabuli_wild_13921930 | 1399940215                          | Ca_kabuli_Chr06 | 13921930                | A/C  | NA                 | INTERGENIC                    | NA                                                  |
| Kabuli_wild_13938232 | 1399940216                          | Ca_kabuli_Chr06 | 13938232                | A/G  | Gene_Ca_05159      | DOWNSTREAM                    | Domain of unknown function DUF1084                  |
| Kabuli_wild_13942036 | 1399940217                          | Ca_kabuli_Chr06 | 13942036                | A/C  | Gene_Ca_05159      | INTRON                        | Domain of unknown function DUF1085                  |
| Kabuli_wild_13948732 | 1399940218                          | Ca_kabuli_Chr06 | 13948732                | G/T  | NA                 | INTERGENIC                    | NA                                                  |
| Kabuli_wild_13948778 | 1399940219                          | Ca_kabuli_Chr06 | 13948778                | A/C  | NA                 | INTERGENIC                    | NA                                                  |
| Kabuli_wild_13986559 | 1399940220                          | Ca_kabuli_Chr06 | 13986559                | A/G  | NA                 | INTERGENIC                    | NA                                                  |
| Kabuli_wild_14017464 | 1399940221                          | Ca_kabuli_Chr06 | 14017464                | T/A  | NA                 | INTERGENIC                    | NA                                                  |
| Kabuli_wild_14031802 | 1399940222                          | Ca_kabuli_Chr06 | 14031802                | A/T  | NA                 | INTERGENIC                    | NA                                                  |
| Kabuli_wild_14042859 | 1399940223                          | Ca_kabuli_Chr06 | 14042859                | A/T  | Gene_Ca_05169      | UPSTREAM                      | Glycosyltransferase.group1                          |
| Kabuli_wild_14067312 | 1399940224                          | Ca_kabuli_Chr06 | 14067312                | A/C  | NA                 | INTERGENIC                    | NA                                                  |
| Kabuli_wild_14067326 | 1399940225                          | Ca_kabuli_Chr06 | 14067326                | C/T  | NA                 | INTERGENIC                    | NA                                                  |
| Kabuli_wild_14112542 | 1399940226                          | Ca_kabuli_Chr06 | 14112542                | A/G  | Gene_Ca_05177      | INTRON                        | Stressup-regulatedNod19                             |
| Kabuli_wild_14148771 | 1399940227                          | Ca_kabuli_Chr06 | 14148771                | A/G  | Gene_Ca_05181      | DOWNSTREAM                    | Disease resistance protein                          |
| Kabuli_wild_14155543 | 1399940228                          | Ca_kabuli_Chr06 | 14155543                | C/T  | NA                 | INTERGENIC                    | NA                                                  |
| Kabuli_wild_14155643 | 1399940229                          | Ca_kabuli_Chr06 | 14155643                | A/C  | NA                 | INTERGENIC                    | NA                                                  |
| Kabuli_wild_14155662 | 1399940230                          | Ca_kabuli_Chr06 | 14155662                | T/C  | NA                 | INTERGENIC                    | NA                                                  |
| Kabuli_wild_14160332 | 1399940231                          | Ca_kabuli_Chr06 | 14160332                | A/G  | Gene_Ca_05182      | INTRON                        | N-acetylglucosaminylphosphatidylinositoldeacetylase |
| Kabuli_wild_14161084 | 1399940232                          | Ca_kabuli_Chr06 | 14161084                | G/C  | Gene_Ca_05182      | INTRON                        | N-acetylglucosaminylphosphatidylinositoldeacetylase |
| Kabuli_wild_14161141 | 1399940233                          | Ca_kabuli_Chr06 | 14161141                | A/G  | Gene_Ca_05182      | INTRON                        | N-acetylglucosaminylphosphatidylinositoldeacetylase |
| Kabuli_wild_14169755 | 1399940234                          | Ca_kabuli_Chr06 | 14169755                | A/G  | Gene_Ca_05183      | DOWNSTREAM                    | Tubulin                                             |
| Kabuli_wild_14169779 | 1399940235                          | Ca_kabuli_Chr06 | 14169779                | A/G  | Gene_Ca_05183      | DOWNSTREAM                    | Tubulin                                             |
| Kabuli_wild_14169808 | 1399940236                          | Ca_kabuli_Chr06 | 14169808                | C/G  | Gene_Ca_05183      | DOWNSTREAM                    | Tubulin                                             |
| Kabuli_wild_14200997 | 1399940237                          | Ca_kabuli_Chr06 | 14200997                | G/A  | NA                 | INTERGENIC                    | NA                                                  |
| Kabuli_wild_14201001 | 1399940238                          | Ca_kabuli_Chr06 | 14201001                | T/C  | NA                 | INTERGENIC                    | NA                                                  |
| Kabuli_wild_14204400 | 1399940239                          | Ca_kabuli_Chr06 | 14204400                | T/C  | NA                 | INTERGENIC                    | NA                                                  |
| Kabuli_wild_14204469 | 1399940240                          | Ca_kabuli_Chr06 | 14204469                | G/A  | NA                 | INTERGENIC                    | NA                                                  |
| Kabuli_wild_14211297 | 1399940241                          | Ca_kabuli_Chr06 | 14211297                | G/T  | NA                 | INTERGENIC                    | NA                                                  |
| Kabuli_wild_14254394 | 1399940242                          | Ca_kabuli_Chr06 | 14254394                | A/G  | NA                 | INTERGENIC                    | NA                                                  |
| Kabuli_wild_14309042 | 1399940243                          | Ca_kabuli_Chr06 | 14309042                | C/T  | NA                 | INTERGENIC                    | NA                                                  |
| Kabuli_wild_14330533 | 1399940244                          | Ca_kabuli_Chr06 | 14330533                | T/C  | NA                 | INTERGENIC                    | NA                                                  |
| Kabuli_wild_14332018 | 1399940245                          | Ca_kabuli_Chr06 | 14332018                | A/C  | NA                 | INTERGENIC                    | NA                                                  |
| Kabuli_wild_14332404 | 1399940246                          | Ca_kabuli_Chr06 | 14332404                | A/G  | NA                 | INTERGENIC                    | NA                                                  |
| Kabuli_wild_14343605 | 1399940247                          | Ca_kabuli_Chr06 | 14343605                | A/G  | Gene_Ca_05204      | INTRON                        | DNA-binding WRKY                                    |
| Kabuli_wild_14343619 | 1399940248                          | Ca_kabuli_Chr06 | 14343619                | C/A  | Gene_Ca_05204      | INTRON                        | DNA-binding WRKY                                    |
| Kabuli_wild_14343645 | 1399940249                          | Ca_kabuli_Chr06 | 14343645                | G/A  | Gene_Ca_05204      | INTRON                        | DNA-binding WRKY                                    |
| Kabuli_wild_14353598 | 1399940250                          | Ca_kabuli_Chr06 | 14353598                | C/T  | NA                 | INTERGENIC                    | NA                                                  |
| Kabuli_wild_14353624 | 1399940251                          | Ca_kabuli_Chr06 | 14353624                | G/A  | NA                 | INTERGENIC                    | NA                                                  |

| SNP IDs                     | NCBI dbSNP accession IDs (NCBI_SS#) | Chromosomes            | Physical positions (bp) | SNPs | Gene accession IDs | Sequence components of genome | Putative functions                                 |
|-----------------------------|-------------------------------------|------------------------|-------------------------|------|--------------------|-------------------------------|----------------------------------------------------|
| <i>Kabuli_wild_14371493</i> | 1399940252                          | <i>Ca_kabuli_Chr06</i> | 14371493                | C/T  | Gene_Ca_05207      | SYNONYMOUS_CODING             | Sec1-likeprotein                                   |
| <i>Kabuli_wild_14371530</i> | 1399940253                          | <i>Ca_kabuli_Chr06</i> | 14371530                | C/T  | Gene_Ca_05207      | SYNONYMOUS_CODING             | Sec1-likeprotein                                   |
| <i>Kabuli_wild_14375135</i> | 1399940254                          | <i>Ca_kabuli_Chr06</i> | 14375135                | G/A  | NA                 | INTERGENIC                    | NA                                                 |
| <i>Kabuli_wild_14375141</i> | 1399940255                          | <i>Ca_kabuli_Chr06</i> | 14375141                | G/C  | NA                 | INTERGENIC                    | NA                                                 |
| <i>Kabuli_wild_14375172</i> | 1399940256                          | <i>Ca_kabuli_Chr06</i> | 14375172                | A/G  | NA                 | INTERGENIC                    | NA                                                 |
| <i>Kabuli_wild_14375196</i> | 1399940257                          | <i>Ca_kabuli_Chr06</i> | 14375196                | G/A  | NA                 | INTERGENIC                    | NA                                                 |
| <i>Kabuli_wild_14375207</i> | 1399940258                          | <i>Ca_kabuli_Chr06</i> | 14375207                | C/T  | NA                 | INTERGENIC                    | NA                                                 |
| <i>Kabuli_wild_14416981</i> | 1399940259                          | <i>Ca_kabuli_Chr06</i> | 14416981                | A/G  | Gene_Ca_05213      | SYNONYMOUS_CODING             | Domain of unknown function DUF676,hydrolase-like   |
| <i>Kabuli_wild_14416997</i> | 1399940260                          | <i>Ca_kabuli_Chr06</i> | 14416997                | A/G  | Gene_Ca_05213      | NON_SYNONYMOUS_CODING         | Domain of unknown function DUF676,hydrolase-like   |
| <i>Kabuli_wild_14419832</i> | 1399940261                          | <i>Ca_kabuli_Chr06</i> | 14419832                | C/T  | Gene_Ca_05213      | SYNONYMOUS_CODING             | Domain of unknown function DUF676,hydrolase-like   |
| <i>Kabuli_wild_14526540</i> | 1399940262                          | <i>Ca_kabuli_Chr06</i> | 14526540                | A/T  | NA                 | INTERGENIC                    | NA                                                 |
| <i>Kabuli_wild_14589480</i> | 1399940263                          | <i>Ca_kabuli_Chr06</i> | 14589480                | T/C  | NA                 | INTERGENIC                    | NA                                                 |
| <i>Kabuli_wild_14589520</i> | 1399940264                          | <i>Ca_kabuli_Chr06</i> | 14589520                | G/C  | NA                 | INTERGENIC                    | NA                                                 |
| <i>Kabuli_wild_14589744</i> | 1399940265                          | <i>Ca_kabuli_Chr06</i> | 14589744                | C/T  | Gene_Ca_05228      | INTRON                        | Dynamin,GTPasedomain                               |
| <i>Kabuli_wild_14589807</i> | 1399940266                          | <i>Ca_kabuli_Chr06</i> | 14589807                | T/G  | Gene_Ca_05228      | SYNONYMOUS_CODING             | Dynamin,GTPasedomain                               |
| <i>Kabuli_wild_14589873</i> | 1399940267                          | <i>Ca_kabuli_Chr06</i> | 14589873                | T/C  | Gene_Ca_05228      | SYNONYMOUS_CODING             | Dynamin,GTPasedomain                               |
| <i>Kabuli_wild_14589944</i> | 1399940268                          | <i>Ca_kabuli_Chr06</i> | 14589944                | G/A  | Gene_Ca_05228      | INTRON                        | Dynamin,GTPasedomain                               |
| <i>Kabuli_wild_14606892</i> | 1399940269                          | <i>Ca_kabuli_Chr06</i> | 14606892                | A/C  | NA                 | INTERGENIC                    | NA                                                 |
| <i>Kabuli_wild_14628213</i> | 1399940270                          | <i>Ca_kabuli_Chr06</i> | 14628213                | A/T  | Gene_Ca_05233      | SYNONYMOUS_CODING             | Glycosi dehydrolase,family 3, N-terminal           |
| <i>Kabuli_wild_14628215</i> | 1399940271                          | <i>Ca_kabuli_Chr06</i> | 14628215                | T/C  | Gene_Ca_05233      | NON_SYNONYMOUS_CODING         | Glycosi dehydrolase,family 3, N-terminal           |
| <i>Kabuli_wild_14628216</i> | 1399940272                          | <i>Ca_kabuli_Chr06</i> | 14628216                | A/C  | Gene_Ca_05233      | SYNONYMOUS_CODING             | Glycosi dehydrolase,family 3, N-terminal           |
| <i>Kabuli_wild_14753113</i> | 1399940273                          | <i>Ca_kabuli_Chr06</i> | 14753113                | C/A  | NA                 | INTERGENIC                    | NA                                                 |
| <i>Kabuli_wild_14753122</i> | 1399940274                          | <i>Ca_kabuli_Chr06</i> | 14753122                | C/T  | NA                 | INTERGENIC                    | NA                                                 |
| <i>Kabuli_wild_14753145</i> | 1399940275                          | <i>Ca_kabuli_Chr06</i> | 14753145                | C/A  | NA                 | INTERGENIC                    | NA                                                 |
| <i>Kabuli_wild_14753158</i> | 1399940276                          | <i>Ca_kabuli_Chr06</i> | 14753158                | A/G  | NA                 | INTERGENIC                    | NA                                                 |
| <i>Kabuli_wild_14753190</i> | 1399940277                          | <i>Ca_kabuli_Chr06</i> | 14753190                | G/A  | NA                 | INTERGENIC                    | NA                                                 |
| <i>Kabuli_wild_14753191</i> | 1399940278                          | <i>Ca_kabuli_Chr06</i> | 14753191                | C/A  | NA                 | INTERGENIC                    | NA                                                 |
| <i>Kabuli_wild_14762493</i> | 1399940279                          | <i>Ca_kabuli_Chr06</i> | 14762493                | A/G  | Gene_Ca_05249      | NON_SYNONYMOUS_CODING         | K+ potassium transporter                           |
| <i>Kabuli_wild_14771602</i> | 1399940280                          | <i>Ca_kabuli_Chr06</i> | 14771602                | T/G  | Gene_Ca_05250      | INTRON                        | ATPase,P-type,K/Mg/Cd/Cu/Zn/Na/Ca/Na/H-transporter |
| <i>Kabuli_wild_14773716</i> | 1399940281                          | <i>Ca_kabuli_Chr06</i> | 14773716                | G/A  | Gene_Ca_05250      | INTRON                        | ATPase,P-type,K/Mg/Cd/Cu/Zn/Na/Ca/Na/H-transporter |
| <i>Kabuli_wild_14786015</i> | 1399940282                          | <i>Ca_kabuli_Chr06</i> | 14786015                | T/G  | Gene_Ca_05251      | UPSTREAM                      | NA                                                 |
| <i>Kabuli_wild_14857680</i> | 1399940283                          | <i>Ca_kabuli_Chr06</i> | 14857680                | G/A  | NA                 | INTERGENIC                    | NA                                                 |
| <i>Kabuli_wild_14857709</i> | 1399940284                          | <i>Ca_kabuli_Chr06</i> | 14857709                | A/G  | NA                 | INTERGENIC                    | NA                                                 |
| <i>Kabuli_wild_14857722</i> | 1399940285                          | <i>Ca_kabuli_Chr06</i> | 14857722                | C/A  | NA                 | INTERGENIC                    | NA                                                 |
| <i>Kabuli_wild_14861487</i> | 1399940286                          | <i>Ca_kabuli_Chr06</i> | 14861487                | T/A  | Gene_Ca_05260      | UPSTREAM                      | Integrase,catalyticcore                            |
| <i>Kabuli_wild_14871864</i> | 1399940287                          | <i>Ca_kabuli_Chr06</i> | 14871864                | T/A  | NA                 | INTERGENIC                    | NA                                                 |
| <i>Kabuli_wild_14884604</i> | 1399940288                          | <i>Ca_kabuli_Chr06</i> | 14884604                | T/G  | NA                 | INTERGENIC                    | NA                                                 |
| <i>Kabuli_wild_14901725</i> | 1399940289                          | <i>Ca_kabuli_Chr06</i> | 14901725                | T/C  | Gene_Ca_05264      | SYNONYMOUS_CODING             | ABC transporter-like                               |
| <i>Kabuli_wild_14983391</i> | 1399940290                          | <i>Ca_kabuli_Chr06</i> | 14983391                | C/T  | Gene_Ca_05273      | SYNONYMOUS_CODING             | BTB/POZ-like                                       |
| <i>Kabuli_wild_15051094</i> | 1399940291                          | <i>Ca_kabuli_Chr06</i> | 15051094                | T/C  | NA                 | INTERGENIC                    | NA                                                 |
| <i>Kabuli_wild_15056637</i> | 1399940292                          | <i>Ca_kabuli_Chr06</i> | 15056637                | C/A  | Gene_Ca_05286      | INTRON                        | Protein of unknown function DUF3506                |
| <i>Kabuli_wild_15061717</i> | 1399940293                          | <i>Ca_kabuli_Chr06</i> | 15061717                | G/A  | Gene_Ca_05286      | INTRON                        | Protein of unknown function DUF3507                |
| <i>Kabuli_wild_15123739</i> | 1399940294                          | <i>Ca_kabuli_Chr06</i> | 15123739                | C/T  | Gene_Ca_05293      | INTRON                        | Dynamincentral domain                              |
| <i>Kabuli_wild_15185722</i> | 1399940295                          | <i>Ca_kabuli_Chr06</i> | 15185722                | A/C  | NA                 | INTERGENIC                    | NA                                                 |

| SNP IDs              | NCBI dbSNP accession IDs (NCBI_SS#) | Chromosomes     | Physical positions (bp) | SNPs | Gene accession IDs | Sequence components of genome | Putative functions                                 |
|----------------------|-------------------------------------|-----------------|-------------------------|------|--------------------|-------------------------------|----------------------------------------------------|
| Kabuli_wild_15289797 | 1399940296                          | Ca_kabuli_Chr06 | 15289797                | A/C  | Gene_Ca_05311      | UPSTREAM                      | Phox/Bem1p                                         |
| Kabuli_wild_15294329 | 1399940297                          | Ca_kabuli_Chr06 | 15294329                | A/C  | Gene_Ca_05312      | UPSTREAM                      | Histidine phosphatase superfamily,clade-1          |
| Kabuli_wild_15294331 | 1399940298                          | Ca_kabuli_Chr06 | 15294331                | C/T  | Gene_Ca_05312      | UPSTREAM                      | Histidinephosphatasesuperfamily,clade-2            |
| Kabuli_wild_15294332 | 1399940299                          | Ca_kabuli_Chr06 | 15294332                | T/G  | Gene_Ca_05312      | UPSTREAM                      | Histidinephosphatasesuperfamily,clade-3            |
| Kabuli_wild_15301137 | 1399940300                          | Ca_kabuli_Chr06 | 15301137                | C/T  | NA                 | INTERGENIC                    | NA                                                 |
| Kabuli_wild_15313655 | 1399940301                          | Ca_kabuli_Chr06 | 15313655                | G/T  | Gene_Ca_05316      | NON_SYNONYMOUS_CODING         | RegulatorofK+conductance,N-terminal                |
| Kabuli_wild_15463289 | 1399940302                          | Ca_kabuli_Chr06 | 15463289                | A/G  | NA                 | INTERGENIC                    | NA                                                 |
| Kabuli_wild_15488309 | 1399940303                          | Ca_kabuli_Chr06 | 15488309                | G/A  | Gene_Ca_05332      | INTRON                        | Kinesin,motordomain                                |
| Kabuli_wild_15500046 | 1399940304                          | Ca_kabuli_Chr06 | 15500046                | C/T  | NA                 | INTERGENIC                    | NA                                                 |
| Kabuli_wild_15537908 | 1399940305                          | Ca_kabuli_Chr06 | 15537908                | A/C  | Gene_Ca_05338      | SYNONYMOUS_CODING             | NA                                                 |
| Kabuli_wild_15543286 | 1399940306                          | Ca_kabuli_Chr06 | 15543286                | G/A  | Gene_Ca_05339      | NON_SYNONYMOUS_CODING         | Tetra tricopeptide repeat                          |
| Kabuli_wild_15543293 | 1399940307                          | Ca_kabuli_Chr06 | 15543293                | T/G  | Gene_Ca_05339      | NON_SYNONYMOUS_CODING         | Tetra tricopeptide repeat                          |
| Kabuli_wild_15543295 | 1399940308                          | Ca_kabuli_Chr06 | 15543295                | C/G  | Gene_Ca_05339      | NON_SYNONYMOUS_CODING         | Tetra tricopeptide repeat                          |
| Kabuli_wild_15582726 | 1399940309                          | Ca_kabuli_Chr06 | 15582726                | T/C  | Gene_Ca_05341      | INTRON                        | Terpenesynthase-like                               |
| Kabuli_wild_15589885 | 1399940310                          | Ca_kabuli_Chr06 | 15589885                | G/T  | Gene_Ca_05341      | INTRON                        | Terpenesynthase-like                               |
| Kabuli_wild_15644412 | 1399940311                          | Ca_kabuli_Chr06 | 15644412                | A/T  | Gene_Ca_05343      | INTRON                        | Terpenesynthase-like                               |
| Kabuli_wild_15644796 | 1399940312                          | Ca_kabuli_Chr06 | 15644796                | A/T  | Gene_Ca_05343      | INTRON                        | Terpenesynthase-like                               |
| Kabuli_wild_15861278 | 1399940313                          | Ca_kabuli_Chr06 | 15861278                | G/A  | Gene_Ca_22020      | UPSTREAM                      | ABC-1                                              |
| Kabuli_wild_15923061 | 1399940314                          | Ca_kabuli_Chr06 | 15923061                | A/G  | Gene_Ca_22026      | NON_SYNONYMOUS_CODING         | Leucine-rich repeat,cysteine-containingsubtype     |
| Kabuli_wild_16113521 | 1399940315                          | Ca_kabuli_Chr06 | 16113521                | G/T  | NA                 | INTERGENIC                    | NA                                                 |
| Kabuli_wild_16113522 | 1399940316                          | Ca_kabuli_Chr06 | 16113522                | A/T  | NA                 | INTERGENIC                    | NA                                                 |
| Kabuli_wild_16113523 | 1399940317                          | Ca_kabuli_Chr06 | 16113523                | T/C  | NA                 | INTERGENIC                    | NA                                                 |
| Kabuli_wild_16148277 | 1399940318                          | Ca_kabuli_Chr06 | 16148277                | A/C  | Gene_Ca_19676      | INTRON                        | Calmodulinbindingprotein-like                      |
| Kabuli_wild_16189692 | 1399940319                          | Ca_kabuli_Chr06 | 16189692                | A/C  | Gene_Ca_19671      | SYNONYMOUS_CODING             | S1/P1nuclease                                      |
| Kabuli_wild_16189693 | 1399940320                          | Ca_kabuli_Chr06 | 16189693                | G/T  | Gene_Ca_19671      | SYNONYMOUS_CODING             | S1/P1nuclease                                      |
| Kabuli_wild_16196582 | 1399940321                          | Ca_kabuli_Chr06 | 16196582                | G/C  | Gene_Ca_19670      | SYNONYMOUS_CODING             | Sugar/inositol transporter                         |
| Kabuli_wild_16332377 | 1399940322                          | Ca_kabuli_Chr06 | 16332377                | G/A  | Gene_Ca_19665      | INTRON                        | Protein of unknown function DUF707                 |
| Kabuli_wild_16352068 | 1399940323                          | Ca_kabuli_Chr06 | 16352068                | T/C  | Gene_Ca_19662      | UPSTREAM                      | Armadillo                                          |
| Kabuli_wild_16460495 | 1399940324                          | Ca_kabuli_Chr06 | 16460495                | A/C  | Gene_Ca_19651      | SYNONYMOUS_CODING             | NA                                                 |
| Kabuli_wild_16460501 | 1399940325                          | Ca_kabuli_Chr06 | 16460501                | A/C  | Gene_Ca_19651      | SYNONYMOUS_CODING             | NA                                                 |
| Kabuli_wild_16635061 | 1399940326                          | Ca_kabuli_Chr06 | 16635061                | C/T  | Gene_Ca_06293      | INTRON                        | Double-strandedRNA-binding                         |
| Kabuli_wild_16646713 | 1399940327                          | Ca_kabuli_Chr06 | 16646713                | T/G  | Gene_Ca_06294      | DOWNSTREAM                    | Pentatric peptide repeat                           |
| Kabuli_wild_16667858 | 1399940328                          | Ca_kabuli_Chr06 | 16667858                | C/T  | Gene_Ca_06297      | INTRON                        | NA                                                 |
| Kabuli_wild_16719918 | 1399940329                          | Ca_kabuli_Chr06 | 16719918                | C/A  | Gene_Ca_06303      | NON_SYNONYMOUS_CODING         | DNA mismatch repair protein MutS,C-terminal domain |
| Kabuli_wild_16719919 | 1399940330                          | Ca_kabuli_Chr06 | 16719919                | T/G  | Gene_Ca_06303      | SYNONYMOUS_CODING             | DNA mismatch repair protein MutS,C-terminal domain |
| Kabuli_wild_16741897 | 1399940331                          | Ca_kabuli_Chr06 | 16741897                | T/C  | Gene_Ca_06306      | INTRON                        | Zinc finger, RING-type                             |
| Kabuli_wild_16931756 | 1399940332                          | Ca_kabuli_Chr06 | 16931756                | C/A  | Gene_Ca_06319      | NON_SYNONYMOUS_CODING         | WD40 repeat                                        |
| Kabuli_wild_16955695 | 1399940333                          | Ca_kabuli_Chr06 | 16955695                | A/G  | NA                 | INTERGENIC                    | NA                                                 |
| Kabuli_wild_17096214 | 1399940334                          | Ca_kabuli_Chr06 | 17096214                | C/T  | Gene_Ca_06327      | INTRON                        | Mitochondrialsubstrate/solutecarrier               |
| Kabuli_wild_17096224 | 1399940335                          | Ca_kabuli_Chr06 | 17096224                | C/T  | Gene_Ca_06327      | INTRON                        | Mitochondrialsubstrate/solutecarrier               |
| Kabuli_wild_17129574 | 1399940336                          | Ca_kabuli_Chr06 | 17129574                | A/G  | NA                 | INTERGENIC                    | NA                                                 |
| Kabuli_wild_17175334 | 1399940337                          | Ca_kabuli_Chr06 | 17175334                | C/A  | Gene_Ca_06337      | DOWNSTREAM                    | Droughtinduced19/RING finger protein114            |
| Kabuli_wild_17258886 | 1399940338                          | Ca_kabuli_Chr06 | 17258886                | T/G  | Gene_Ca_06343      | NON_SYNONYMOUS_CODING         | Homeobox                                           |
| Kabuli_wild_17262283 | 1399940339                          | Ca_kabuli_Chr06 | 17262283                | C/T  | Gene_Ca_06343      | SYNONYMOUS_CODING             | Homeobox                                           |

| SNP IDs              | NCBI dbSNP accession IDs (NCBI_SS#) | Chromosomes      | Physical positions (bp) | SNPs | Gene accession IDs | Sequence components of genome | Putative functions                                       |
|----------------------|-------------------------------------|------------------|-------------------------|------|--------------------|-------------------------------|----------------------------------------------------------|
| Kabuli_wild_17263126 | 1399940340                          | Ca_kabuli_Chrom6 | 17263126                | G/A  | Gene_Ca_06343      | SYNONYMOUS_CODING             | Homeobox                                                 |
| Kabuli_wild_17369613 | 1399940341                          | Ca_kabuli_Chrom6 | 17369613                | A/G  | Gene_Ca_06352      | SYNONYMOUS_CODING             | Transcriptional factor B3                                |
| Kabuli_wild_17396315 | 1399940342                          | Ca_kabuli_Chrom6 | 17396315                | A/G  | Gene_Ca_06354      | SYNONYMOUS_CODING             | O-methyltransferase, family2                             |
| Kabuli_wild_17445945 | 1399940343                          | Ca_kabuli_Chrom6 | 17445945                | T/G  | NA                 | INTERGENIC                    | NA                                                       |
| Kabuli_wild_17477741 | 1399940344                          | Ca_kabuli_Chrom6 | 17477741                | A/G  | Gene_Ca_06361      | SYNONYMOUS_CODING             | NA                                                       |
| Kabuli_wild_17478220 | 1399940345                          | Ca_kabuli_Chrom6 | 17478220                | G/A  | Gene_Ca_06361      | SYNONYMOUS_CODING             | NA                                                       |
| Kabuli_wild_17480486 | 1399940346                          | Ca_kabuli_Chrom6 | 17480486                | G/C  | Gene_Ca_06361      | SYNONYMOUS_CODING             | NA                                                       |
| Kabuli_wild_17481288 | 1399940347                          | Ca_kabuli_Chrom6 | 17481288                | T/C  | NA                 | INTERGENIC                    | NA                                                       |
| Kabuli_wild_17481307 | 1399940348                          | Ca_kabuli_Chrom6 | 17481307                | C/A  | NA                 | INTERGENIC                    | NA                                                       |
| Kabuli_wild_17481392 | 1399940349                          | Ca_kabuli_Chrom6 | 17481392                | A/G  | Gene_Ca_06362      | DOWNSTREAM                    | Protein of unknown function DUF701, zinc-bindingputative |
| Kabuli_wild_17481403 | 1399940350                          | Ca_kabuli_Chrom6 | 17481403                | T/G  | Gene_Ca_06362      | DOWNSTREAM                    | Protein of unknown function DUF701, zinc-bindingputative |
| Kabuli_wild_17482626 | 1399940351                          | Ca_kabuli_Chrom6 | 17482626                | A/G  | Gene_Ca_06362      | DOWNSTREAM                    | Protein of unknown function DUF701, zinc-bindingputative |
| Kabuli_wild_17482640 | 1399940352                          | Ca_kabuli_Chrom6 | 17482640                | C/T  | Gene_Ca_06362      | DOWNSTREAM                    | Protein of unknown function DUF701, zinc-bindingputative |
| Kabuli_wild_17482649 | 1399940353                          | Ca_kabuli_Chrom6 | 17482649                | A/G  | Gene_Ca_06362      | DOWNSTREAM                    | Protein of unknown function DUF701, zinc-bindingputative |
| Kabuli_wild_17482697 | 1399940354                          | Ca_kabuli_Chrom6 | 17482697                | A/G  | Gene_Ca_06362      | DOWNSTREAM                    | Protein of unknown function DUF701, zinc-bindingputative |
| Kabuli_wild_17482718 | 1399940355                          | Ca_kabuli_Chrom6 | 17482718                | G/A  | Gene_Ca_06362      | DOWNSTREAM                    | Protein of unknown function DUF701, zinc-bindingputative |
| Kabuli_wild_17573309 | 1399940356                          | Ca_kabuli_Chrom6 | 17573309                | A/G  | Gene_Ca_06374      | INTRON                        | Apoptosisinhibitory5                                     |
| Kabuli_wild_17659067 | 1399940357                          | Ca_kabuli_Chrom6 | 17659067                | A/C  | NA                 | INTERGENIC                    | NA                                                       |
| Kabuli_wild_17726996 | 1399940358                          | Ca_kabuli_Chrom6 | 17726996                | A/C  | NA                 | INTERGENIC                    | NA                                                       |
| Kabuli_wild_17741078 | 1399940359                          | Ca_kabuli_Chrom6 | 17741078                | G/A  | Gene_Ca_06393      | SYNONYMOUS_CODING             | WW/Rsp5/WWP                                              |
| Kabuli_wild_17766868 | 1399940360                          | Ca_kabuli_Chrom6 | 17766868                | A/G  | NA                 | INTERGENIC                    | NA                                                       |
| Kabuli_wild_18027391 | 1399940361                          | Ca_kabuli_Chrom6 | 18027391                | G/A  | Gene_Ca_06422      | INTRON                        | Myb, DNA-binding                                         |
| Kabuli_wild_18048738 | 1399940362                          | Ca_kabuli_Chrom6 | 18048738                | T/A  | NA                 | INTERGENIC                    | NA                                                       |
| Kabuli_wild_18048770 | 1399940363                          | Ca_kabuli_Chrom6 | 18048770                | C/T  | NA                 | INTERGENIC                    | NA                                                       |
| Kabuli_wild_18094691 | 1399940364                          | Ca_kabuli_Chrom6 | 18094691                | C/A  | Gene_Ca_06428      | UPSTREAM                      | NA                                                       |
| Kabuli_wild_18125422 | 1399940365                          | Ca_kabuli_Chrom6 | 18125422                | T/G  | NA                 | INTERGENIC                    | NA                                                       |
| Kabuli_wild_18125613 | 1399940366                          | Ca_kabuli_Chrom6 | 18125613                | C/A  | NA                 | INTERGENIC                    | NA                                                       |
| Kabuli_wild_18241362 | 1399940367                          | Ca_kabuli_Chrom6 | 18241362                | C/A  | NA                 | INTERGENIC                    | NA                                                       |
| Kabuli_wild_18241363 | 1399940368                          | Ca_kabuli_Chrom6 | 18241363                | G/T  | NA                 | INTERGENIC                    | NA                                                       |
| Kabuli_wild_18389661 | 1399940369                          | Ca_kabuli_Chrom6 | 18389661                | A/C  | Gene_Ca_06455      | INTRON                        | Glycosyltransferase, family10                            |
| Kabuli_wild_18389704 | 1399940370                          | Ca_kabuli_Chrom6 | 18389704                | T/G  | Gene_Ca_06455      | INTRON                        | Glycosyltransferase, family10                            |
| Kabuli_wild_18444725 | 1399940371                          | Ca_kabuli_Chrom6 | 18444725                | T/C  | NA                 | INTERGENIC                    | NA                                                       |
| Kabuli_wild_18528804 | 1399940372                          | Ca_kabuli_Chrom6 | 18528804                | T/G  | Gene_Ca_06465      | NON_SYNONYMOUS_CODING         | U box domain                                             |
| Kabuli_wild_18796322 | 1399940373                          | Ca_kabuli_Chrom6 | 18796322                | T/C  | NA                 | INTERGENIC                    | NA                                                       |
| Kabuli_wild_18798685 | 1399940374                          | Ca_kabuli_Chrom6 | 18798685                | T/G  | Gene_Ca_06490      | INTRON                        | Heat shock protein DnaJ, N-terminal                      |
| Kabuli_wild_18853331 | 1399940375                          | Ca_kabuli_Chrom6 | 18853331                | G/A  | Gene_Ca_06494      | SYNONYMOUS_CODING             | Auxin efflux carrier                                     |
| Kabuli_wild_18916616 | 1399940376                          | Ca_kabuli_Chrom6 | 18916616                | A/C  | Gene_Ca_06499      | INTRON                        | Uridinekinase                                            |
| Kabuli_wild_18987220 | 1399940377                          | Ca_kabuli_Chrom6 | 18987220                | T/G  | NA                 | INTERGENIC                    | NA                                                       |
| Kabuli_wild_19125254 | 1399940378                          | Ca_kabuli_Chrom6 | 19125254                | G/A  | NA                 | INTERGENIC                    | NA                                                       |
| Kabuli_wild_19143420 | 1399940379                          | Ca_kabuli_Chrom6 | 19143420                | A/G  | NA                 | INTERGENIC                    | NA                                                       |
| Kabuli_wild_19198359 | 1399940380                          | Ca_kabuli_Chrom6 | 19198359                | T/C  | Gene_Ca_06528      | INTRON                        | GlutathioneS-transferase, C-terminal                     |
| Kabuli_wild_19308544 | 1399940381                          | Ca_kabuli_Chrom6 | 19308544                | C/T  | Gene_Ca_06537      | INTRON                        | Zinc finger, ZPR1-type                                   |
| Kabuli_wild_19308589 | 1399940382                          | Ca_kabuli_Chrom6 | 19308589                | A/C  | Gene_Ca_06537      | INTRON                        | Zinc finger, ZPR1-type                                   |
| Kabuli_wild_19450845 | 1399940383                          | Ca_kabuli_Chrom6 | 19450845                | T/A  | Gene_Ca_06550      | INTRON                        | ATPase, AAA+type, core                                   |

| SNP IDs              | NCBI dbSNP accession IDs (NCBI_SS#) | Chromosomes      | Physical positions (bp) | SNPs | Gene accession IDs | Sequence components of genome | Putative functions                        |
|----------------------|-------------------------------------|------------------|-------------------------|------|--------------------|-------------------------------|-------------------------------------------|
| Kabuli_wild_19551459 | 1399940384                          | Ca_kabuli_Chrom6 | 19551459                | G/A  | Gene_Ca_06563      | INTRON                        | Asparaginesynthase                        |
| Kabuli_wild_19551504 | 1399940385                          | Ca_kabuli_Chrom6 | 19551504                | G/C  | Gene_Ca_06563      | INTRON                        | Asparaginesynthase                        |
| Kabuli_wild_19551561 | 1399940386                          | Ca_kabuli_Chrom6 | 19551561                | G/A  | Gene_Ca_06563      | INTRON                        | Asparaginesynthase                        |
| Kabuli_wild_19557154 | 1399940387                          | Ca_kabuli_Chrom6 | 19557154                | A/G  | Gene_Ca_06563      | INTRON                        | Asparaginesynthase                        |
| Kabuli_wild_20505641 | 1399940388                          | Ca_kabuli_Chrom6 | 20505641                | T/A  | Gene_Ca_16381      | SYNONYMOUS_CODING             | RNA recognition motif domain              |
| Kabuli_wild_20766377 | 1399940389                          | Ca_kabuli_Chrom6 | 20766377                | C/A  | Gene_Ca_16355      | NON_SYNONYMOUS_CODING         | Helix-loop-helixDNA-binding domain        |
| Kabuli_wild_20766386 | 1399940390                          | Ca_kabuli_Chrom6 | 20766386                | C/T  | Gene_Ca_16355      | NON_SYNONYMOUS_CODING         | Cullin,N-terminal                         |
| Kabuli_wild_20830353 | 1399940391                          | Ca_kabuli_Chrom6 | 20830353                | T/G  | NA                 | INTERGENIC                    | NA                                        |
| Kabuli_wild_20917713 | 1399940392                          | Ca_kabuli_Chrom6 | 20917713                | A/C  | Gene_Ca_16338      | DOWNSTREAM                    | Domain of unknown function DUF1692        |
| Kabuli_wild_21025673 | 1399940393                          | Ca_kabuli_Chrom6 | 21025673                | C/T  | NA                 | INTERGENIC                    | NA                                        |
| Kabuli_wild_21025677 | 1399940394                          | Ca_kabuli_Chrom6 | 21025677                | T/A  | NA                 | INTERGENIC                    | NA                                        |
| Kabuli_wild_21025706 | 1399940395                          | Ca_kabuli_Chrom6 | 21025706                | C/T  | NA                 | INTERGENIC                    | NA                                        |
| Kabuli_wild_21025742 | 1399940396                          | Ca_kabuli_Chrom6 | 21025742                | T/G  | NA                 | INTERGENIC                    | NA                                        |
| Kabuli_wild_21025759 | 1399940397                          | Ca_kabuli_Chrom6 | 21025759                | T/A  | NA                 | INTERGENIC                    | NA                                        |
| Kabuli_wild_21025797 | 1399940398                          | Ca_kabuli_Chrom6 | 21025797                | T/A  | NA                 | INTERGENIC                    | NA                                        |
| Kabuli_wild_21025889 | 1399940399                          | Ca_kabuli_Chrom6 | 21025889                | C/T  | NA                 | INTERGENIC                    | NA                                        |
| Kabuli_wild_21025894 | 1399940400                          | Ca_kabuli_Chrom6 | 21025894                | G/T  | NA                 | INTERGENIC                    | NA                                        |
| Kabuli_wild_21135764 | 1399940401                          | Ca_kabuli_Chrom6 | 21135764                | C/T  | Gene_Ca_19889      | NON_SYNONYMOUS_CODING         | NA                                        |
| Kabuli_wild_21136106 | 1399940402                          | Ca_kabuli_Chrom6 | 21136106                | A/T  | Gene_Ca_19889      | NON_SYNONYMOUS_CODING         | NA                                        |
| Kabuli_wild_21139038 | 1399940403                          | Ca_kabuli_Chrom6 | 21139038                | C/G  | NA                 | INTERGENIC                    | NA                                        |
| Kabuli_wild_21165999 | 1399940404                          | Ca_kabuli_Chrom6 | 21165999                | G/T  | Gene_Ca_19887      | DOWNSTREAM                    | RibosomalproteinL1                        |
| Kabuli_wild_21237395 | 1399940405                          | Ca_kabuli_Chrom6 | 21237395                | T/G  | Gene_Ca_19881      | DOWNSTREAM                    | Protein kinase,catalytic domain           |
| Kabuli_wild_21238707 | 1399940406                          | Ca_kabuli_Chrom6 | 21238707                | G/T  | NA                 | INTERGENIC                    | NA                                        |
| Kabuli_wild_21276479 | 1399940407                          | Ca_kabuli_Chrom6 | 21276479                | G/T  | NA                 | INTERGENIC                    | NA                                        |
| Kabuli_wild_21323378 | 1399940408                          | Ca_kabuli_Chrom6 | 21323378                | A/G  | Gene_Ca_19873      | INTRON                        | Phosphoenolpyruvatecarboxylase,activesite |
| Kabuli_wild_21323438 | 1399940409                          | Ca_kabuli_Chrom6 | 21323438                | T/C  | Gene_Ca_19873      | SYNONYMOUS_CODING             | Phosphoenolpyruvatecarboxylase,activesite |
| Kabuli_wild_21385915 | 1399940410                          | Ca_kabuli_Chrom6 | 21385915                | C/A  | NA                 | INTERGENIC                    | NA                                        |
| Kabuli_wild_21478816 | 1399940411                          | Ca_kabuli_Chrom6 | 21478816                | C/T  | NA                 | INTERGENIC                    | NA                                        |
| Kabuli_wild_21478820 | 1399940412                          | Ca_kabuli_Chrom6 | 21478820                | T/G  | NA                 | INTERGENIC                    | NA                                        |
| Kabuli_wild_21483425 | 1399940413                          | Ca_kabuli_Chrom6 | 21483425                | T/G  | NA                 | INTERGENIC                    | NA                                        |
| Kabuli_wild_21483429 | 1399940414                          | Ca_kabuli_Chrom6 | 21483429                | C/T  | NA                 | INTERGENIC                    | NA                                        |
| Kabuli_wild_21483494 | 1399940415                          | Ca_kabuli_Chrom6 | 21483494                | T/G  | NA                 | INTERGENIC                    | NA                                        |
| Kabuli_wild_21659607 | 1399940416                          | Ca_kabuli_Chrom6 | 21659607                | A/G  | Gene_Ca_11274      | NON_SYNONYMOUS_CODING         | Zinc finger,C2H2-type                     |
| Kabuli_wild_21718674 | 1399940417                          | Ca_kabuli_Chrom6 | 21718674                | G/T  | Gene_Ca_11268      | NON_SYNONYMOUS_CODING         | Myb,DNA-binding                           |
| Kabuli_wild_21718891 | 1399940418                          | Ca_kabuli_Chrom6 | 21718891                | A/C  | Gene_Ca_11268      | SYNONYMOUS_CODING             | Myb,DNA-binding                           |
| Kabuli_wild_21763468 | 1399940419                          | Ca_kabuli_Chrom6 | 21763468                | G/A  | Gene_Ca_11263      | UPSTREAM                      | Pentatric peptide repeat                  |
| Kabuli_wild_21940793 | 1399940420                          | Ca_kabuli_Chrom6 | 21940793                | T/C  | NA                 | INTERGENIC                    | NA                                        |
| Kabuli_wild_22017180 | 1399940421                          | Ca_kabuli_Chrom6 | 22017180                | T/C  | Gene_Ca_11238      | NON_SYNONYMOUS_CODING         | Glycosyltransferase, family48             |
| Kabuli_wild_22038857 | 1399940422                          | Ca_kabuli_Chrom6 | 22038857                | A/G  | Gene_Ca_11236      | UPSTREAM                      | NA                                        |
| Kabuli_wild_22137464 | 1399940423                          | Ca_kabuli_Chrom6 | 22137464                | G/A  | Gene_Ca_11225      | UPSTREAM                      | Cytochrome P450                           |
| Kabuli_wild_22192498 | 1399940424                          | Ca_kabuli_Chrom6 | 22192498                | A/C  | Gene_Ca_11219      | NON_SYNONYMOUS_CODING         | Exostosin-like                            |
| Kabuli_wild_22192503 | 1399940425                          | Ca_kabuli_Chrom6 | 22192503                | G/A  | Gene_Ca_11219      | SYNONYMOUS_CODING             | Exostosin-like                            |
| Kabuli_wild_22194387 | 1399940426                          | Ca_kabuli_Chrom6 | 22194387                | C/A  | Gene_Ca_11219      | STOP_GAINED                   | Exostosin-like                            |
| Kabuli_wild_22208093 | 1399940427                          | Ca_kabuli_Chrom6 | 22208093                | G/A  | NA                 | INTERGENIC                    | NA                                        |

| SNP IDs              | NCBI dbSNP accession IDs (NCBI_SS#) | Chromosomes      | Physical positions (bp) | SNPs | Gene accession IDs | Sequence components of genome | Putative functions                                                  |
|----------------------|-------------------------------------|------------------|-------------------------|------|--------------------|-------------------------------|---------------------------------------------------------------------|
| Kabuli_wild_22208125 | 1399940428                          | Ca_kabuli_Chrom6 | 22208125                | G/A  | NA                 | INTERGENIC                    | NA                                                                  |
| Kabuli_wild_22211777 | 1399940429                          | Ca_kabuli_Chrom6 | 22211777                | T/C  | NA                 | INTERGENIC                    | NA                                                                  |
| Kabuli_wild_22211823 | 1399940430                          | Ca_kabuli_Chrom6 | 22211823                | T/C  | NA                 | INTERGENIC                    | NA                                                                  |
| Kabuli_wild_22217157 | 1399940431                          | Ca_kabuli_Chrom6 | 22217157                | T/G  | Gene_Ca_11217      | DOWNSTREAM                    | ATPase,AAA+type,core                                                |
| Kabuli_wild_22217158 | 1399940432                          | Ca_kabuli_Chrom6 | 22217158                | A/G  | Gene_Ca_11217      | DOWNSTREAM                    | ATPase,AAA+type,core                                                |
| Kabuli_wild_22225288 | 1399940433                          | Ca_kabuli_Chrom6 | 22225288                | T/G  | NA                 | INTERGENIC                    | NA                                                                  |
| Kabuli_wild_22236515 | 1399940434                          | Ca_kabuli_Chrom6 | 22236515                | G/C  | NA                 | INTERGENIC                    | NA                                                                  |
| Kabuli_wild_22252149 | 1399940435                          | Ca_kabuli_Chrom6 | 22252149                | G/A  | Gene_Ca_11212      | DOWNSTREAM                    | Transcription facto rGRAS                                           |
| Kabuli_wild_22263388 | 1399940436                          | Ca_kabuli_Chrom6 | 22263388                | A/G  | Gene_Ca_11210      | DOWNSTREAM                    | Zinc finger, RING-type                                              |
| Kabuli_wild_22352976 | 1399940437                          | Ca_kabuli_Chrom6 | 22352976                | T/C  | NA                 | INTERGENIC                    | NA                                                                  |
| Kabuli_wild_22370242 | 1399940438                          | Ca_kabuli_Chrom6 | 22370242                | C/T  | NA                 | INTERGENIC                    | NA                                                                  |
| Kabuli_wild_22446556 | 1399940439                          | Ca_kabuli_Chrom6 | 22446556                | G/A  | Gene_Ca_11195      | NON_SYNONYMOUS_CODING         | Peptidase C48, SUMO/Sentrin/Ubl1                                    |
| Kabuli_wild_22446562 | 1399940440                          | Ca_kabuli_Chrom6 | 22446562                | G/A  | Gene_Ca_11195      | NON_SYNONYMOUS_CODING         | Peptidase C48, SUMO/Sentrin/Ubl1                                    |
| Kabuli_wild_22446571 | 1399940441                          | Ca_kabuli_Chrom6 | 22446571                | G/A  | Gene_Ca_11195      | NON_SYNONYMOUS_CODING         | Peptidase C48, SUMO/Sentrin/Ubl1                                    |
| Kabuli_wild_22446610 | 1399940442                          | Ca_kabuli_Chrom6 | 22446610                | G/A  | Gene_Ca_11195      | NON_SYNONYMOUS_CODING         | Peptidase C48, SUMO/Sentrin/Ubl1                                    |
| Kabuli_wild_22446646 | 1399940443                          | Ca_kabuli_Chrom6 | 22446646                | G/A  | Gene_Ca_11195      | NON_SYNONYMOUS_CODING         | Peptidase C48, SUMO/Sentrin/Ubl1                                    |
| Kabuli_wild_22446649 | 1399940444                          | Ca_kabuli_Chrom6 | 22446649                | C/T  | Gene_Ca_11195      | NON_SYNONYMOUS_CODING         | Peptidase C48, SUMO/Sentrin/Ubl1                                    |
| Kabuli_wild_22482366 | 1399940445                          | Ca_kabuli_Chrom6 | 22482366                | A/C  | Gene_Ca_11192      | INTRON                        | Nitrite/sulphitereductase,hemoproteinbeta-component,ferrodoxin-like |
| Kabuli_wild_22881205 | 1399940446                          | Ca_kabuli_Chrom6 | 22881205                | A/G  | Gene_Ca_11157      | INTRON                        | Inorganicpolyphosphate/ATP-NADkinase,predicted                      |
| Kabuli_wild_23023346 | 1399940447                          | Ca_kabuli_Chrom6 | 23023346                | A/C  | NA                 | INTERGENIC                    | NA                                                                  |
| Kabuli_wild_23039097 | 1399940448                          | Ca_kabuli_Chrom6 | 23039097                | C/T  | Gene_Ca_11144      | DOWNSTREAM                    | NA                                                                  |
| Kabuli_wild_23039125 | 1399940449                          | Ca_kabuli_Chrom6 | 23039125                | G/A  | Gene_Ca_11144      | DOWNSTREAM                    | NA                                                                  |
| Kabuli_wild_23039145 | 1399940450                          | Ca_kabuli_Chrom6 | 23039145                | A/G  | Gene_Ca_11144      | DOWNSTREAM                    | NA                                                                  |
| Kabuli_wild_23039147 | 1399940451                          | Ca_kabuli_Chrom6 | 23039147                | A/G  | Gene_Ca_11144      | DOWNSTREAM                    | NA                                                                  |
| Kabuli_wild_23039165 | 1399940452                          | Ca_kabuli_Chrom6 | 23039165                | T/C  | Gene_Ca_11144      | DOWNSTREAM                    | NA                                                                  |
| Kabuli_wild_23039776 | 1399940453                          | Ca_kabuli_Chrom6 | 23039776                | G/A  | NA                 | INTERGENIC                    | NA                                                                  |
| Kabuli_wild_23043274 | 1399940454                          | Ca_kabuli_Chrom6 | 23043274                | T/C  | Gene_Ca_11143      | NON_SYNONYMOUS_CODING         | Glycosidehydrolase,family17                                         |
| Kabuli_wild_23043295 | 1399940455                          | Ca_kabuli_Chrom6 | 23043295                | T/G  | Gene_Ca_11143      | SYNONYMOUS_CODING             | Glycosidehydrolase,family17                                         |
| Kabuli_wild_23043309 | 1399940456                          | Ca_kabuli_Chrom6 | 23043309                | T/A  | Gene_Ca_11143      | NON_SYNONYMOUS_CODING         | Glycosidehydrolase,family17                                         |
| Kabuli_wild_23043338 | 1399940457                          | Ca_kabuli_Chrom6 | 23043338                | C/A  | Gene_Ca_11143      | SYNONYMOUS_CODING             | Glycosidehydrolase,family17                                         |
| Kabuli_wild_23076791 | 1399940458                          | Ca_kabuli_Chrom6 | 23076791                | C/T  | NA                 | INTERGENIC                    | NA                                                                  |
| Kabuli_wild_23076819 | 1399940459                          | Ca_kabuli_Chrom6 | 23076819                | G/A  | NA                 | INTERGENIC                    | NA                                                                  |
| Kabuli_wild_23076839 | 1399940460                          | Ca_kabuli_Chrom6 | 23076839                | A/G  | NA                 | INTERGENIC                    | NA                                                                  |
| Kabuli_wild_23076841 | 1399940461                          | Ca_kabuli_Chrom6 | 23076841                | A/G  | NA                 | INTERGENIC                    | NA                                                                  |
| Kabuli_wild_23076859 | 1399940462                          | Ca_kabuli_Chrom6 | 23076859                | T/C  | NA                 | INTERGENIC                    | NA                                                                  |
| Kabuli_wild_23380698 | 1399940463                          | Ca_kabuli_Chrom6 | 23380698                | T/G  | Gene_Ca_11121      | SYNONYMOUS_CODING             | Ropnucleotideexchanger,PRONE                                        |
| Kabuli_wild_23549267 | 1399940464                          | Ca_kabuli_Chrom6 | 23549267                | T/G  | NA                 | INTERGENIC                    | NA                                                                  |
| Kabuli_wild_23580007 | 1399940465                          | Ca_kabuli_Chrom6 | 23580007                | A/G  | Gene_Ca_11098      | UPSTREAM                      | NA                                                                  |
| Kabuli_wild_23696243 | 1399940466                          | Ca_kabuli_Chrom6 | 23696243                | C/G  | Gene_Ca_11083      | NON_SYNONYMOUS_CODING         | ATPase,AAA+type,core                                                |
| Kabuli_wild_23705409 | 1399940467                          | Ca_kabuli_Chrom6 | 23705409                | A/G  | Gene_Ca_11083      | INTRON                        | ATPase,AAA+type,core                                                |
| Kabuli_wild_23766943 | 1399940468                          | Ca_kabuli_Chrom6 | 23766943                | C/T  | Gene_Ca_11079      | INTRON                        | Tetra tricopeptide repeat-containing                                |
| Kabuli_wild_23767700 | 1399940469                          | Ca_kabuli_Chrom6 | 23767700                | C/A  | Gene_Ca_11079      | NON_SYNONYMOUS_CODING         | Tetra tricopeptide repeat-containing                                |
| Kabuli_wild_23809179 | 1399940470                          | Ca_kabuli_Chrom6 | 23809179                | C/T  | Gene_Ca_11078      | NON_SYNONYMOUS_CODING         | Alanyl-tRNAsynthetase,classIIc                                      |
| Kabuli_wild_23973410 | 1399940471                          | Ca_kabuli_Chrom6 | 23973410                | G/A  | Gene_Ca_11064      | INTRON                        | RNA recognition motif domain                                        |

| SNP IDs              | NCBI dbSNP accession IDs (NCBI_SS#) | Chromosomes     | Physical positions (bp) | SNPs | Gene accession IDs | Sequence components of genome | Putative functions                         |
|----------------------|-------------------------------------|-----------------|-------------------------|------|--------------------|-------------------------------|--------------------------------------------|
| Kabuli_wild_23993044 | 1399940472                          | Ca_kabuli_Chr06 | 23993044                | T/C  | Gene_Ca_11063      | INTRON                        | NA                                         |
| Kabuli_wild_24007185 | 1399940473                          | Ca_kabuli_Chr06 | 24007185                | C/T  | NA                 | INTERGENIC                    | NA                                         |
| Kabuli_wild_24235632 | 1399940474                          | Ca_kabuli_Chr06 | 24235632                | C/T  | NA                 | INTERGENIC                    | NA                                         |
| Kabuli_wild_24235675 | 1399940475                          | Ca_kabuli_Chr06 | 24235675                | C/T  | NA                 | INTERGENIC                    | NA                                         |
| Kabuli_wild_24403316 | 1399940476                          | Ca_kabuli_Chr06 | 24403316                | G/T  | Gene_Ca_11029      | NON_SYNONYMOUS_CODING         | PeptidaseS8/S53,subtilisin/kexin/sedolisin |
| Kabuli_wild_24455026 | 1399940477                          | Ca_kabuli_Chr06 | 24455026                | A/G  | Gene_Ca_11025      | INTRON                        | Haemperoxidase,plant/fungal/bacterial      |
| Kabuli_wild_24516532 | 1399940478                          | Ca_kabuli_Chr06 | 24516532                | T/C  | Gene_Ca_27822      | SYNONYMOUS_CODING             | NA                                         |
| Kabuli_wild_24586237 | 1399940479                          | Ca_kabuli_Chr06 | 24586237                | G/T  | NA                 | INTERGENIC                    | NA                                         |
| Kabuli_wild_24661895 | 1399940480                          | Ca_kabuli_Chr06 | 24661895                | G/A  | NA                 | INTERGENIC                    | NA                                         |
| Kabuli_wild_24661916 | 1399940481                          | Ca_kabuli_Chr06 | 24661916                | C/T  | NA                 | INTERGENIC                    | NA                                         |
| Kabuli_wild_24661937 | 1399940482                          | Ca_kabuli_Chr06 | 24661937                | C/T  | NA                 | INTERGENIC                    | NA                                         |
| Kabuli_wild_24661945 | 1399940483                          | Ca_kabuli_Chr06 | 24661945                | T/A  | NA                 | INTERGENIC                    | NA                                         |
| Kabuli_wild_24661986 | 1399940484                          | Ca_kabuli_Chr06 | 24661986                | G/A  | NA                 | INTERGENIC                    | NA                                         |
| Kabuli_wild_24661999 | 1399940485                          | Ca_kabuli_Chr06 | 24661999                | G/A  | NA                 | INTERGENIC                    | NA                                         |
| Kabuli_wild_24662035 | 1399940486                          | Ca_kabuli_Chr06 | 24662035                | T/G  | NA                 | INTERGENIC                    | NA                                         |
| Kabuli_wild_24662615 | 1399940487                          | Ca_kabuli_Chr06 | 24662615                | T/C  | NA                 | INTERGENIC                    | NA                                         |
| Kabuli_wild_24965983 | 1399940488                          | Ca_kabuli_Chr06 | 24965983                | T/A  | NA                 | INTERGENIC                    | NA                                         |
| Kabuli_wild_25106229 | 1399940489                          | Ca_kabuli_Chr06 | 25106229                | C/T  | Gene_Ca_25128      | INTRON                        | NA                                         |
| Kabuli_wild_25106238 | 1399940490                          | Ca_kabuli_Chr06 | 25106238                | G/T  | Gene_Ca_25128      | INTRON                        | NA                                         |
| Kabuli_wild_25106241 | 1399940491                          | Ca_kabuli_Chr06 | 25106241                | G/T  | Gene_Ca_25128      | INTRON                        | NA                                         |
| Kabuli_wild_25118039 | 1399940492                          | Ca_kabuli_Chr06 | 25118039                | C/T  | NA                 | INTERGENIC                    | NA                                         |
| Kabuli_wild_25574947 | 1399940493                          | Ca_kabuli_Chr06 | 25574947                | C/T  | Gene_Ca_24008      | SYNONYMOUS_CODING             | NA                                         |
| Kabuli_wild_25574994 | 1399940494                          | Ca_kabuli_Chr06 | 25574994                | T/C  | Gene_Ca_24008      | NON_SYNONYMOUS_CODING         | NA                                         |
| Kabuli_wild_25575016 | 1399940495                          | Ca_kabuli_Chr06 | 25575016                | G/A  | Gene_Ca_24008      | SYNONYMOUS_CODING             | NA                                         |
| Kabuli_wild_25575045 | 1399940496                          | Ca_kabuli_Chr06 | 25575045                | C/A  | Gene_Ca_24008      | NON_SYNONYMOUS_CODING         | NA                                         |
| Kabuli_wild_25575062 | 1399940497                          | Ca_kabuli_Chr06 | 25575062                | G/A  | Gene_Ca_24008      | NON_SYNONYMOUS_CODING         | NA                                         |
| Kabuli_wild_25575078 | 1399940498                          | Ca_kabuli_Chr06 | 25575078                | C/T  | Gene_Ca_24008      | NON_SYNONYMOUS_CODING         | NA                                         |
| Kabuli_wild_25575097 | 1399940499                          | Ca_kabuli_Chr06 | 25575097                | C/T  | Gene_Ca_24008      | SYNONYMOUS_CODING             | NA                                         |
| Kabuli_wild_25604922 | 1399940500                          | Ca_kabuli_Chr06 | 25604922                | A/G  | NA                 | INTERGENIC                    | NA                                         |
| Kabuli_wild_25604931 | 1399940501                          | Ca_kabuli_Chr06 | 25604931                | C/A  | NA                 | INTERGENIC                    | NA                                         |
| Kabuli_wild_25604936 | 1399940502                          | Ca_kabuli_Chr06 | 25604936                | C/T  | NA                 | INTERGENIC                    | NA                                         |
| Kabuli_wild_25604942 | 1399940503                          | Ca_kabuli_Chr06 | 25604942                | C/A  | NA                 | INTERGENIC                    | NA                                         |
| Kabuli_wild_25604943 | 1399940504                          | Ca_kabuli_Chr06 | 25604943                | T/G  | NA                 | INTERGENIC                    | NA                                         |
| Kabuli_wild_25604954 | 1399940505                          | Ca_kabuli_Chr06 | 25604954                | C/T  | NA                 | INTERGENIC                    | NA                                         |
| Kabuli_wild_25604959 | 1399940506                          | Ca_kabuli_Chr06 | 25604959                | G/A  | NA                 | INTERGENIC                    | NA                                         |
| Kabuli_wild_25604962 | 1399940507                          | Ca_kabuli_Chr06 | 25604962                | G/A  | NA                 | INTERGENIC                    | NA                                         |
| Kabuli_wild_25604963 | 1399940508                          | Ca_kabuli_Chr06 | 25604963                | C/T  | NA                 | INTERGENIC                    | NA                                         |
| Kabuli_wild_25604987 | 1399940509                          | Ca_kabuli_Chr06 | 25604987                | G/C  | NA                 | INTERGENIC                    | NA                                         |
| Kabuli_wild_25604988 | 1399940510                          | Ca_kabuli_Chr06 | 25604988                | C/T  | NA                 | INTERGENIC                    | NA                                         |
| Kabuli_wild_25605006 | 1399940511                          | Ca_kabuli_Chr06 | 25605006                | C/A  | NA                 | INTERGENIC                    | NA                                         |
| Kabuli_wild_25605009 | 1399940512                          | Ca_kabuli_Chr06 | 25605009                | C/T  | NA                 | INTERGENIC                    | NA                                         |
| Kabuli_wild_25605022 | 1399940513                          | Ca_kabuli_Chr06 | 25605022                | C/T  | NA                 | INTERGENIC                    | NA                                         |
| Kabuli_wild_25605023 | 1399940514                          | Ca_kabuli_Chr06 | 25605023                | C/A  | NA                 | INTERGENIC                    | NA                                         |
| Kabuli_wild_25605038 | 1399940515                          | Ca_kabuli_Chr06 | 25605038                | T/C  | NA                 | INTERGENIC                    | NA                                         |



| SNP IDs              | NCBI dbSNP accession IDs (NCBI_SS#) | Chromosomes     | Physical positions (bp) | SNPs | Gene accession IDs | Sequence components of genome | Putative functions                                           |
|----------------------|-------------------------------------|-----------------|-------------------------|------|--------------------|-------------------------------|--------------------------------------------------------------|
| Kabuli_wild_25632536 | 1399940516                          | Ca_kabuli_Chr06 | 25632536                | C/A  | NA                 | INTERGENIC                    | NA                                                           |
| Kabuli_wild_25850673 | 1399940517                          | Ca_kabuli_Chr06 | 25850673                | A/G  | Gene_Ca_24011      | NON_SYNONYMOUS_CODING         | NA                                                           |
| Kabuli_wild_25850736 | 1399940518                          | Ca_kabuli_Chr06 | 25850736                | C/T  | Gene_Ca_24011      | NON_SYNONYMOUS_CODING         | NA                                                           |
| Kabuli_wild_25850759 | 1399940519                          | Ca_kabuli_Chr06 | 25850759                | C/A  | Gene_Ca_24011      | NON_SYNONYMOUS_CODING         | NA                                                           |
| Kabuli_wild_25850768 | 1399940520                          | Ca_kabuli_Chr06 | 25850768                | G/A  | Gene_Ca_24011      | NON_SYNONYMOUS_CODING         | NA                                                           |
| Kabuli_wild_25850773 | 1399940521                          | Ca_kabuli_Chr06 | 25850773                | A/G  | Gene_Ca_24011      | SYNONYMOUS_CODING             | NA                                                           |
| Kabuli_wild_25850777 | 1399940522                          | Ca_kabuli_Chr06 | 25850777                | G/A  | Gene_Ca_24011      | NON_SYNONYMOUS_CODING         | NA                                                           |
| Kabuli_wild_25850780 | 1399940523                          | Ca_kabuli_Chr06 | 25850780                | G/A  | Gene_Ca_24011      | NON_SYNONYMOUS_CODING         | NA                                                           |
| Kabuli_wild_25850783 | 1399940524                          | Ca_kabuli_Chr06 | 25850783                | G/A  | Gene_Ca_24011      | NON_SYNONYMOUS_CODING         | NA                                                           |
| Kabuli_wild_25850813 | 1399940525                          | Ca_kabuli_Chr06 | 25850813                | C/T  | Gene_Ca_24011      | NON_SYNONYMOUS_CODING         | NA                                                           |
| Kabuli_wild_25850816 | 1399940526                          | Ca_kabuli_Chr06 | 25850816                | C/A  | Gene_Ca_24011      | NON_SYNONYMOUS_CODING         | NA                                                           |
| Kabuli_wild_25850827 | 1399940527                          | Ca_kabuli_Chr06 | 25850827                | C/T  | Gene_Ca_24011      | SYNONYMOUS_CODING             | NA                                                           |
| Kabuli_wild_25850866 | 1399940528                          | Ca_kabuli_Chr06 | 25850866                | C/G  | Gene_Ca_24011      | SYNONYMOUS_CODING             | NA                                                           |
| Kabuli_wild_26349434 | 1399940529                          | Ca_kabuli_Chr06 | 26349434                | G/A  | NA                 | INTERGENIC                    | NA                                                           |
| Kabuli_wild_26349451 | 1399940530                          | Ca_kabuli_Chr06 | 26349451                | T/C  | NA                 | INTERGENIC                    | NA                                                           |
| Kabuli_wild_26353512 | 1399940531                          | Ca_kabuli_Chr06 | 26353512                | C/T  | NA                 | INTERGENIC                    | NA                                                           |
| Kabuli_wild_26353740 | 1399940532                          | Ca_kabuli_Chr06 | 26353740                | G/C  | NA                 | INTERGENIC                    | NA                                                           |
| Kabuli_wild_26357149 | 1399940533                          | Ca_kabuli_Chr06 | 26357149                | C/G  | NA                 | INTERGENIC                    | NA                                                           |
| Kabuli_wild_26360367 | 1399940534                          | Ca_kabuli_Chr06 | 26360367                | C/A  | Gene_Ca_16679      | SYNONYMOUS_CODING             | Oxysterol-bindingprotein                                     |
| Kabuli_wild_26371255 | 1399940535                          | Ca_kabuli_Chr06 | 26371255                | G/C  | NA                 | INTERGENIC                    | NA                                                           |
| Kabuli_wild_26383440 | 1399940536                          | Ca_kabuli_Chr06 | 26383440                | C/A  | NA                 | INTERGENIC                    | NA                                                           |
| Kabuli_wild_26383500 | 1399940537                          | Ca_kabuli_Chr06 | 26383500                | G/C  | NA                 | INTERGENIC                    | NA                                                           |
| Kabuli_wild_26385432 | 1399940538                          | Ca_kabuli_Chr06 | 26385432                | T/C  | NA                 | INTERGENIC                    | NA                                                           |
| Kabuli_wild_26426239 | 1399940539                          | Ca_kabuli_Chr06 | 26426239                | C/A  | NA                 | INTERGENIC                    | NA                                                           |
| Kabuli_wild_26426252 | 1399940540                          | Ca_kabuli_Chr06 | 26426252                | A/G  | NA                 | INTERGENIC                    | NA                                                           |
| Kabuli_wild_26426283 | 1399940541                          | Ca_kabuli_Chr06 | 26426283                | G/A  | NA                 | INTERGENIC                    | NA                                                           |
| Kabuli_wild_26439443 | 1399940542                          | Ca_kabuli_Chr06 | 26439443                | C/T  | NA                 | INTERGENIC                    | NA                                                           |
| Kabuli_wild_26439474 | 1399940543                          | Ca_kabuli_Chr06 | 26439474                | C/T  | NA                 | INTERGENIC                    | NA                                                           |
| Kabuli_wild_26527161 | 1399940544                          | Ca_kabuli_Chr06 | 26527161                | C/G  | Gene_Ca_16688      | INTRON                        | Zinc finger, RING-type                                       |
| Kabuli_wild_26549168 | 1399940545                          | Ca_kabuli_Chr06 | 26549168                | T/G  | Gene_Ca_16689      | INTRON                        | Armadillo                                                    |
| Kabuli_wild_26551586 | 1399940546                          | Ca_kabuli_Chr06 | 26551586                | C/A  | Gene_Ca_16689      | SYNONYMOUS_CODING             | Armadillo                                                    |
| Kabuli_wild_26559728 | 1399940547                          | Ca_kabuli_Chr06 | 26559728                | G/A  | NA                 | INTERGENIC                    | NA                                                           |
| Kabuli_wild_26567360 | 1399940548                          | Ca_kabuli_Chr06 | 26567360                | A/G  | Gene_Ca_16690      | SYNONYMOUS_CODING             | Zinc finger,Dof-type                                         |
| Kabuli_wild_26616292 | 1399940549                          | Ca_kabuli_Chr06 | 26616292                | G/T  | Gene_Ca_16692      | NON_SYNONYMOUS_CODING         | NA                                                           |
| Kabuli_wild_26616317 | 1399940550                          | Ca_kabuli_Chr06 | 26616317                | A/G  | Gene_Ca_16692      | INTRON                        | NA                                                           |
| Kabuli_wild_26698265 | 1399940551                          | Ca_kabuli_Chr06 | 26698265                | A/C  | Gene_Ca_16698      | SYNONYMOUS_CODING             | Cellular retinaldehyde-binding/triplefunction, C-terminal    |
| Kabuli_wild_26769087 | 1399940552                          | Ca_kabuli_Chr06 | 26769087                | C/A  | Gene_Ca_16707      | NON_SYNONYMOUS_CODING         | RasGTPase                                                    |
| Kabuli_wild_26800873 | 1399940553                          | Ca_kabuli_Chr06 | 26800873                | A/T  | NA                 | INTERGENIC                    | NA                                                           |
| Kabuli_wild_26912205 | 1399940554                          | Ca_kabuli_Chr06 | 26912205                | T/G  | Gene_Ca_16724      | UPSTREAM                      | Plantdiseaseresistanceresponseprotein                        |
| Kabuli_wild_27156217 | 1399940555                          | Ca_kabuli_Chr06 | 27156217                | T/G  | Gene_Ca_14630      | INTRON                        | CCTdomain                                                    |
| Kabuli_wild_27310315 | 1399940556                          | Ca_kabuli_Chr06 | 27310315                | C/T  | Gene_Ca_14618      | INTRON                        | Pathogenesis-related transcriptional factor/ERF, DNA-binding |
| Kabuli_wild_27310316 | 1399940557                          | Ca_kabuli_Chr06 | 27310316                | A/T  | Gene_Ca_14618      | INTRON                        | Pathogenesis-related transcriptional factor/ERF, DNA-binding |
| Kabuli_wild_27310325 | 1399940558                          | Ca_kabuli_Chr06 | 27310325                | G/T  | Gene_Ca_14618      | INTRON                        | Pathogenesis-related transcriptional factor/ERF, DNA-binding |
| Kabuli_wild_27310327 | 1399940559                          | Ca_kabuli_Chr06 | 27310327                | A/T  | Gene_Ca_14618      | INTRON                        | Pathogenesis-related transcriptional factor/ERF, DNA-binding |

| SNP IDs              | NCBI dbSNP accession IDs (NCBI_SS#) | Chromosomes     | Physical positions (bp) | SNPs | Gene accession IDs | Sequence components of genome | Putative functions                                           |
|----------------------|-------------------------------------|-----------------|-------------------------|------|--------------------|-------------------------------|--------------------------------------------------------------|
| Kabuli_wild_27310328 | 1399940560                          | Ca_kabuli_Chr06 | 27310328                | T/A  | Gene_Ca_14618      | INTRON                        | Pathogenesis-related transcriptional factor/ERF, DNA-binding |
| Kabuli_wild_27310333 | 1399940561                          | Ca_kabuli_Chr06 | 27310333                | C/T  | Gene_Ca_14618      | INTRON                        | Pathogenesis-related transcriptional factor/ERF, DNA-binding |
| Kabuli_wild_27310336 | 1399940562                          | Ca_kabuli_Chr06 | 27310336                | A/T  | Gene_Ca_14618      | INTRON                        | Pathogenesis-related transcriptional factor/ERF, DNA-binding |
| Kabuli_wild_27310341 | 1399940563                          | Ca_kabuli_Chr06 | 27310341                | G/T  | Gene_Ca_14618      | INTRON                        | Pathogenesis-related transcriptional factor/ERF, DNA-binding |
| Kabuli_wild_27310342 | 1399940564                          | Ca_kabuli_Chr06 | 27310342                | A/T  | Gene_Ca_14618      | INTRON                        | Pathogenesis-related transcriptional factor/ERF, DNA-binding |
| Kabuli_wild_27310358 | 1399940565                          | Ca_kabuli_Chr06 | 27310358                | A/T  | Gene_Ca_14618      | INTRON                        | Pathogenesis-related transcriptional factor/ERF, DNA-binding |
| Kabuli_wild_27310360 | 1399940566                          | Ca_kabuli_Chr06 | 27310360                | C/T  | Gene_Ca_14618      | INTRON                        | Pathogenesis-related transcriptional factor/ERF, DNA-binding |
| Kabuli_wild_27312785 | 1399940567                          | Ca_kabuli_Chr06 | 27312785                | A/C  | Gene_Ca_14618      | SYNONYMOUS_CODING             | Pathogenesis-related transcriptional factor/ERF, DNA-binding |
| Kabuli_wild_27331165 | 1399940568                          | Ca_kabuli_Chr06 | 27331165                | T/C  | Gene_Ca_14617      | NON_SYNONYMOUS_CODING         | RNA recognition motif domain                                 |
| Kabuli_wild_27383744 | 1399940569                          | Ca_kabuli_Chr06 | 27383744                | G/T  | NA                 | INTERGENIC                    | NA                                                           |
| Kabuli_wild_27383745 | 1399940570                          | Ca_kabuli_Chr06 | 27383745                | G/T  | NA                 | INTERGENIC                    | NA                                                           |
| Kabuli_wild_27383746 | 1399940571                          | Ca_kabuli_Chr06 | 27383746                | A/T  | NA                 | INTERGENIC                    | NA                                                           |
| Kabuli_wild_27515293 | 1399940572                          | Ca_kabuli_Chr06 | 27515293                | G/A  | Gene_Ca_14606      | SYNONYMOUS_CODING             | Tetraspanin, subgroup                                        |
| Kabuli_wild_27536125 | 1399940573                          | Ca_kabuli_Chr06 | 27536125                | T/C  | Gene_Ca_14604      | INTRON                        | Zinc finger, RING-type                                       |
| Kabuli_wild_27652790 | 1399940574                          | Ca_kabuli_Chr06 | 27652790                | A/G  | Gene_Ca_14592      | DOWNSTREAM                    | CytochromeB561-related                                       |
| Kabuli_wild_27655605 | 1399940575                          | Ca_kabuli_Chr06 | 27655605                | A/G  | Gene_Ca_14592      | NON_SYNONYMOUS_CODING         | CytochromeB561-related                                       |
| Kabuli_wild_27710401 | 1399940576                          | Ca_kabuli_Chr06 | 27710401                | G/T  | Gene_Ca_14588      | UPSTREAM                      | PreproteintranslocaseSec,Sec61-beta subunit                  |
| Kabuli_wild_27710528 | 1399940577                          | Ca_kabuli_Chr06 | 27710528                | T/G  | Gene_Ca_14589      | UPSTREAM                      | NA                                                           |
| Kabuli_wild_27710531 | 1399940578                          | Ca_kabuli_Chr06 | 27710531                | T/G  | Gene_Ca_14589      | UPSTREAM                      | NA                                                           |
| Kabuli_wild_27717504 | 1399940579                          | Ca_kabuli_Chr06 | 27717504                | C/G  | Gene_Ca_14587      | NON_SYNONYMOUS_CODING         | Zinc finger, C2H2-type                                       |
| Kabuli_wild_27787738 | 1399940580                          | Ca_kabuli_Chr06 | 27787738                | T/C  | NA                 | INTERGENIC                    | NA                                                           |
| Kabuli_wild_27986719 | 1399940581                          | Ca_kabuli_Chr06 | 27986719                | A/G  | Gene_Ca_14567      | NON_SYNONYMOUS_CODING         | Ribosomal protein L11                                        |
| Kabuli_wild_28021899 | 1399940582                          | Ca_kabuli_Chr06 | 28021899                | C/T  | Gene_Ca_14563      | NON_SYNONYMOUS_CODING         | DNA-directed DNA polymerase, family B, exonuclease domain    |
| Kabuli_wild_28044830 | 1399940583                          | Ca_kabuli_Chr06 | 28044830                | C/A  | Gene_Ca_14563      | NON_SYNONYMOUS_CODING         | DNA-directed DNA polymerase, family B, exonuclease domain    |
| Kabuli_wild_28052463 | 1399940584                          | Ca_kabuli_Chr06 | 28052463                | T/G  | Gene_Ca_14562      | SYNONYMOUS_CODING             | Vacuolar fusion protein MON1                                 |
| Kabuli_wild_28177387 | 1399940585                          | Ca_kabuli_Chr06 | 28177387                | C/T  | Gene_Ca_26122      | INTRON                        | SIT4 phosphatase-associated protein family                   |
| Kabuli_wild_28261211 | 1399940586                          | Ca_kabuli_Chr06 | 28261211                | C/A  | Gene_Ca_26119      | INTRON                        | Heparan sulphate 6-sulfotransferase                          |
| Kabuli_wild_28284375 | 1399940587                          | Ca_kabuli_Chr06 | 28284375                | T/C  | NA                 | INTERGENIC                    | NA                                                           |
| Kabuli_wild_28325392 | 1399940588                          | Ca_kabuli_Chr06 | 28325392                | C/T  | Gene_Ca_25968      | NON_SYNONYMOUS_CODING         | Ribonuclease T2                                              |
| Kabuli_wild_28372130 | 1399940589                          | Ca_kabuli_Chr06 | 28372130                | C/T  | NA                 | INTERGENIC                    | NA                                                           |
| Kabuli_wild_28518596 | 1399940590                          | Ca_kabuli_Chr06 | 28518596                | C/A  | NA                 | INTERGENIC                    | NA                                                           |
| Kabuli_wild_28518597 | 1399940591                          | Ca_kabuli_Chr06 | 28518597                | A/T  | NA                 | INTERGENIC                    | NA                                                           |
| Kabuli_wild_28518603 | 1399940592                          | Ca_kabuli_Chr06 | 28518603                | G/A  | NA                 | INTERGENIC                    | NA                                                           |
| Kabuli_wild_28728293 | 1399940593                          | Ca_kabuli_Chr06 | 28728293                | A/C  | Gene_Ca_17478      | NON_SYNONYMOUS_CODING         | Chaperonin Cpn60                                             |
| Kabuli_wild_28755308 | 1399940594                          | Ca_kabuli_Chr06 | 28755308                | A/T  | Gene_Ca_17477      | INTRON                        | NA                                                           |
| Kabuli_wild_28755310 | 1399940595                          | Ca_kabuli_Chr06 | 28755310                | C/T  | Gene_Ca_17477      | INTRON                        | NA                                                           |
| Kabuli_wild_28757139 | 1399940596                          | Ca_kabuli_Chr06 | 28757139                | C/A  | Gene_Ca_17477      | INTRON                        | NA                                                           |
| Kabuli_wild_28757204 | 1399940597                          | Ca_kabuli_Chr06 | 28757204                | G/A  | Gene_Ca_17477      | INTRON                        | NA                                                           |
| Kabuli_wild_28757208 | 1399940598                          | Ca_kabuli_Chr06 | 28757208                | C/A  | Gene_Ca_17477      | INTRON                        | NA                                                           |
| Kabuli_wild_28887188 | 1399940599                          | Ca_kabuli_Chr06 | 28887188                | G/T  | NA                 | INTERGENIC                    | NA                                                           |
| Kabuli_wild_28947529 | 1399940600                          | Ca_kabuli_Chr06 | 28947529                | A/C  | Gene_Ca_17471      | NON_SYNONYMOUS_CODING         | Glyoxalase/bleomycin resistance protein/dioxygenase          |
| Kabuli_wild_29085558 | 1399940601                          | Ca_kabuli_Chr06 | 29085558                | T/C  | NA                 | INTERGENIC                    | NA                                                           |
| Kabuli_wild_29163022 | 1399940602                          | Ca_kabuli_Chr06 | 29163022                | G/C  | NA                 | INTERGENIC                    | NA                                                           |
| Kabuli_wild_29163640 | 1399940603                          | Ca_kabuli_Chr06 | 29163640                | A/C  | NA                 | INTERGENIC                    | NA                                                           |

| SNP IDs              | NCBI dbSNP accession IDs (NCBI_SS#) | Chromosomes     | Physical positions (bp) | SNPs | Gene accession IDs | Sequence components of genome | Putative functions                                |
|----------------------|-------------------------------------|-----------------|-------------------------|------|--------------------|-------------------------------|---------------------------------------------------|
| Kabuli_wild_29163642 | 1399940604                          | Ca_kabuli_Chr06 | 29163642                | G/A  | NA                 | INTERGENIC                    | NA                                                |
| Kabuli_wild_29163667 | 1399940605                          | Ca_kabuli_Chr06 | 29163667                | C/A  | NA                 | INTERGENIC                    | NA                                                |
| Kabuli_wild_29205260 | 1399940606                          | Ca_kabuli_Chr06 | 29205260                | A/G  | Gene_Ca_17457      | INTRON                        | NA                                                |
| Kabuli_wild_29205940 | 1399940607                          | Ca_kabuli_Chr06 | 29205940                | A/G  | Gene_Ca_17457      | NON_SYNONYMOUS_CODING         | DNAIlgase,ATP-dependent,N-terminal                |
| Kabuli_wild_29485220 | 1399940608                          | Ca_kabuli_Chr06 | 29485220                | C/T  | NA                 | INTERGENIC                    | NA                                                |
| Kabuli_wild_29495856 | 1399940609                          | Ca_kabuli_Chr06 | 29495856                | C/T  | Gene_Ca_17443      | SYNONYMOUS_CODING             | NA                                                |
| Kabuli_wild_30048584 | 1399940610                          | Ca_kabuli_Chr06 | 30048584                | A/G  | NA                 | INTERGENIC                    | NA                                                |
| Kabuli_wild_30048627 | 1399940611                          | Ca_kabuli_Chr06 | 30048627                | C/A  | NA                 | INTERGENIC                    | NA                                                |
| Kabuli_wild_30073799 | 1399940612                          | Ca_kabuli_Chr06 | 30073799                | C/T  | Gene_Ca_24051      | SYNONYMOUS_CODING             | NA                                                |
| Kabuli_wild_30257284 | 1399940613                          | Ca_kabuli_Chr06 | 30257284                | A/C  | Gene_Ca_16442      | INTRON                        | Peptidase C48, SUMO/Sentrin/Ubl1                  |
| Kabuli_wild_30676031 | 1399940614                          | Ca_kabuli_Chr06 | 30676031                | G/T  | Gene_Ca_16465      | SYNONYMOUS_CODING             | Translation elongation factor EFG/EF2, C-terminal |
| Kabuli_wild_30676153 | 1399940615                          | Ca_kabuli_Chr06 | 30676153                | A/G  | Gene_Ca_16465      | NON_SYNONYMOUS_CODING         | Translation elongation factor EFG/EF2, C-terminal |
| Kabuli_wild_30676248 | 1399940616                          | Ca_kabuli_Chr06 | 30676248                | C/T  | Gene_Ca_16465      | SYNONYMOUS_CODING             | Translation elongation factor EFG/EF2, C-terminal |
| Kabuli_wild_30756237 | 1399940617                          | Ca_kabuli_Chr06 | 30756237                | A/T  | NA                 | INTERGENIC                    | NA                                                |
| Kabuli_wild_30756238 | 1399940618                          | Ca_kabuli_Chr06 | 30756238                | T/G  | NA                 | INTERGENIC                    | NA                                                |
| Kabuli_wild_30756242 | 1399940619                          | Ca_kabuli_Chr06 | 30756242                | A/C  | NA                 | INTERGENIC                    | NA                                                |
| Kabuli_wild_30926084 | 1399940620                          | Ca_kabuli_Chr06 | 30926084                | G/A  | Gene_Ca_16485      | NON_SYNONYMOUS_CODING         | NA                                                |
| Kabuli_wild_30927221 | 1399940621                          | Ca_kabuli_Chr06 | 30927221                | C/G  | Gene_Ca_16485      | NON_SYNONYMOUS_CODING         | NA                                                |
| Kabuli_wild_31024935 | 1399940622                          | Ca_kabuli_Chr06 | 31024935                | A/C  | Gene_Ca_16493      | NON_SYNONYMOUS_CODING         | Zinc finger,Sec23/Sec24-type                      |
| Kabuli_wild_31048949 | 1399940623                          | Ca_kabuli_Chr06 | 31048949                | T/C  | Gene_Ca_16497      | SYNONYMOUS_CODING             | Late embryo genesis abundant protein, group2      |
| Kabuli_wild_31049015 | 1399940624                          | Ca_kabuli_Chr06 | 31049015                | A/C  | Gene_Ca_16497      | NON_SYNONYMOUS_CODING         | Late embryo genesis abundant protein, group2      |
| Kabuli_wild_31057806 | 1399940625                          | Ca_kabuli_Chr06 | 31057806                | C/T  | NA                 | INTERGENIC                    | NA                                                |
| Kabuli_wild_31324962 | 1399940626                          | Ca_kabuli_Chr06 | 31324962                | A/C  | NA                 | INTERGENIC                    | NA                                                |
| Kabuli_wild_31324976 | 1399940627                          | Ca_kabuli_Chr06 | 31324976                | A/G  | NA                 | INTERGENIC                    | NA                                                |
| Kabuli_wild_31356463 | 1399940628                          | Ca_kabuli_Chr06 | 31356463                | C/T  | NA                 | INTERGENIC                    | NA                                                |
| Kabuli_wild_31717567 | 1399940629                          | Ca_kabuli_Chr06 | 31717567                | G/A  | NA                 | INTERGENIC                    | NA                                                |
| Kabuli_wild_31717574 | 1399940630                          | Ca_kabuli_Chr06 | 31717574                | T/C  | NA                 | INTERGENIC                    | NA                                                |
| Kabuli_wild_31719586 | 1399940631                          | Ca_kabuli_Chr06 | 31719586                | C/A  | NA                 | INTERGENIC                    | NA                                                |
| Kabuli_wild_31719620 | 1399940632                          | Ca_kabuli_Chr06 | 31719620                | A/C  | NA                 | INTERGENIC                    | NA                                                |
| Kabuli_wild_31747956 | 1399940633                          | Ca_kabuli_Chr06 | 31747956                | C/T  | Gene_Ca_15193      | DOWNSTREAM                    | NA                                                |
| Kabuli_wild_31747964 | 1399940634                          | Ca_kabuli_Chr06 | 31747964                | G/C  | Gene_Ca_15193      | DOWNSTREAM                    | NA                                                |
| Kabuli_wild_31747979 | 1399940635                          | Ca_kabuli_Chr06 | 31747979                | A/G  | Gene_Ca_15193      | DOWNSTREAM                    | NA                                                |
| Kabuli_wild_31747986 | 1399940636                          | Ca_kabuli_Chr06 | 31747986                | T/G  | Gene_Ca_15193      | DOWNSTREAM                    | NA                                                |
| Kabuli_wild_31748011 | 1399940637                          | Ca_kabuli_Chr06 | 31748011                | C/T  | Gene_Ca_15193      | DOWNSTREAM                    | NA                                                |
| Kabuli_wild_31748022 | 1399940638                          | Ca_kabuli_Chr06 | 31748022                | G/T  | Gene_Ca_15193      | DOWNSTREAM                    | NA                                                |
| Kabuli_wild_31895264 | 1399940639                          | Ca_kabuli_Chr06 | 31895264                | C/T  | Gene_Ca_15200      | INTRON                        | Metallo-dependentphosphatase                      |
| Kabuli_wild_31900781 | 1399940640                          | Ca_kabuli_Chr06 | 31900781                | G/T  | Gene_Ca_15200      | INTRON                        | Metallo-dependentphosphatase                      |
| Kabuli_wild_31900785 | 1399940641                          | Ca_kabuli_Chr06 | 31900785                | T/G  | Gene_Ca_15200      | INTRON                        | Metallo-dependentphosphatase                      |
| Kabuli_wild_31900790 | 1399940642                          | Ca_kabuli_Chr06 | 31900790                | A/C  | Gene_Ca_15200      | INTRON                        | Metallo-dependentphosphatase                      |
| Kabuli_wild_31902063 | 1399940643                          | Ca_kabuli_Chr06 | 31902063                | A/C  | Gene_Ca_15200      | SYNONYMOUS_CODING             | Metallo-dependentphosphatase                      |
| Kabuli_wild_31992907 | 1399940644                          | Ca_kabuli_Chr06 | 31992907                | A/G  | Gene_Ca_15204      | INTRON                        | NA                                                |
| Kabuli_wild_32048545 | 1399940645                          | Ca_kabuli_Chr06 | 32048545                | C/T  | Gene_Ca_15208      | INTRON                        | MD-2-relatedlipid-recognition                     |
| Kabuli_wild_32048566 | 1399940646                          | Ca_kabuli_Chr06 | 32048566                | C/T  | Gene_Ca_15208      | INTRON                        | MD-2-relatedlipid-recognition                     |
| Kabuli_wild_32140428 | 1399940647                          | Ca_kabuli_Chr06 | 32140428                | C/A  | Gene_Ca_15214      | NON_SYNONYMOUS_CODING         | BRCT                                              |

| SNP IDs              | NCBI dbSNP accession IDs (NCBI_SS#) | Chromosomes      | Physical positions (bp) | SNPs | Gene accession IDs | Sequence components of genome | Putative functions           |
|----------------------|-------------------------------------|------------------|-------------------------|------|--------------------|-------------------------------|------------------------------|
| Kabuli_wild_32140429 | 1399940648                          | Ca_kabuli_Chrom6 | 32140429                | G/T  | Gene_Ca_15214      | SYNONYMOUS_CODING             | BRCT                         |
| Kabuli_wild_32201419 | 1399940649                          | Ca_kabuli_Chrom6 | 32201419                | A/C  | Gene_Ca_15217      | NON_SYNONYMOUS_CODING         | NA                           |
| Kabuli_wild_32261594 | 1399940650                          | Ca_kabuli_Chrom6 | 32261594                | A/C  | NA                 | INTERGENIC                    | NA                           |
| Kabuli_wild_32262807 | 1399940651                          | Ca_kabuli_Chrom6 | 32262807                | T/C  | NA                 | INTERGENIC                    | NA                           |
| Kabuli_wild_32262855 | 1399940652                          | Ca_kabuli_Chrom6 | 32262855                | C/T  | NA                 | INTERGENIC                    | NA                           |
| Kabuli_wild_32328468 | 1399940653                          | Ca_kabuli_Chrom6 | 32328468                | T/C  | Gene_Ca_15224      | NON_SYNONYMOUS_CODING         | DNA-binding WRKY             |
| Kabuli_wild_32328749 | 1399940654                          | Ca_kabuli_Chrom6 | 32328749                | A/C  | Gene_Ca_15224      | SYNONYMOUS_CODING             | DNA-binding WRKY             |
| Kabuli_wild_32682315 | 1399940655                          | Ca_kabuli_Chrom6 | 32682315                | C/A  | Gene_Ca_22218      | INTRON                        | Protease-associateddomain,PA |
| Kabuli_wild_32682316 | 1399940656                          | Ca_kabuli_Chrom6 | 32682316                | G/T  | Gene_Ca_22218      | INTRON                        | Protease-associateddomain,PA |
| Kabuli_wild_32717450 | 1399940657                          | Ca_kabuli_Chrom6 | 32717450                | G/A  | NA                 | INTERGENIC                    | NA                           |
| Kabuli_wild_32717665 | 1399940658                          | Ca_kabuli_Chrom6 | 32717665                | C/A  | NA                 | INTERGENIC                    | NA                           |
| Kabuli_wild_32825547 | 1399940659                          | Ca_kabuli_Chrom6 | 32825547                | A/G  | NA                 | INTERGENIC                    | NA                           |
| Kabuli_wild_32825556 | 1399940660                          | Ca_kabuli_Chrom6 | 32825556                | C/A  | NA                 | INTERGENIC                    | NA                           |
| Kabuli_wild_32825561 | 1399940661                          | Ca_kabuli_Chrom6 | 32825561                | C/T  | NA                 | INTERGENIC                    | NA                           |
| Kabuli_wild_32825567 | 1399940662                          | Ca_kabuli_Chrom6 | 32825567                | C/A  | NA                 | INTERGENIC                    | NA                           |
| Kabuli_wild_32825576 | 1399940663                          | Ca_kabuli_Chrom6 | 32825576                | G/C  | NA                 | INTERGENIC                    | NA                           |
| Kabuli_wild_32825587 | 1399940664                          | Ca_kabuli_Chrom6 | 32825587                | G/A  | NA                 | INTERGENIC                    | NA                           |
| Kabuli_wild_32825619 | 1399940665                          | Ca_kabuli_Chrom6 | 32825619                | T/C  | NA                 | INTERGENIC                    | NA                           |
| Kabuli_wild_32825623 | 1399940666                          | Ca_kabuli_Chrom6 | 32825623                | G/A  | NA                 | INTERGENIC                    | NA                           |
| Kabuli_wild_32825631 | 1399940667                          | Ca_kabuli_Chrom6 | 32825631                | C/A  | NA                 | INTERGENIC                    | NA                           |
| Kabuli_wild_32825634 | 1399940668                          | Ca_kabuli_Chrom6 | 32825634                | C/T  | NA                 | INTERGENIC                    | NA                           |
| Kabuli_wild_32914927 | 1399940669                          | Ca_kabuli_Chrom6 | 32914927                | G/C  | Gene_Ca_22229      | INTRON                        | PeptidaseM48                 |
| Kabuli_wild_33039319 | 1399940670                          | Ca_kabuli_Chrom6 | 33039319                | C/T  | NA                 | INTERGENIC                    | NA                           |
| Kabuli_wild_33039370 | 1399940671                          | Ca_kabuli_Chrom6 | 33039370                | G/A  | NA                 | INTERGENIC                    | NA                           |
| Kabuli_wild_33039394 | 1399940672                          | Ca_kabuli_Chrom6 | 33039394                | T/C  | NA                 | INTERGENIC                    | NA                           |
| Kabuli_wild_33068889 | 1399940673                          | Ca_kabuli_Chrom6 | 33068889                | A/G  | NA                 | INTERGENIC                    | NA                           |
| Kabuli_wild_33068917 | 1399940674                          | Ca_kabuli_Chrom6 | 33068917                | G/C  | NA                 | INTERGENIC                    | NA                           |
| Kabuli_wild_33068924 | 1399940675                          | Ca_kabuli_Chrom6 | 33068924                | C/A  | NA                 | INTERGENIC                    | NA                           |
| Kabuli_wild_33229649 | 1399940676                          | Ca_kabuli_Chrom6 | 33229649                | A/G  | NA                 | INTERGENIC                    | NA                           |
| Kabuli_wild_33502994 | 1399940677                          | Ca_kabuli_Chrom6 | 33502994                | C/A  | NA                 | INTERGENIC                    | NA                           |
| Kabuli_wild_33503007 | 1399940678                          | Ca_kabuli_Chrom6 | 33503007                | T/C  | NA                 | INTERGENIC                    | NA                           |
| Kabuli_wild_33503018 | 1399940679                          | Ca_kabuli_Chrom6 | 33503018                | C/T  | NA                 | INTERGENIC                    | NA                           |
| Kabuli_wild_33503028 | 1399940680                          | Ca_kabuli_Chrom6 | 33503028                | C/T  | NA                 | INTERGENIC                    | NA                           |
| Kabuli_wild_33503032 | 1399940681                          | Ca_kabuli_Chrom6 | 33503032                | A/C  | NA                 | INTERGENIC                    | NA                           |
| Kabuli_wild_33503051 | 1399940682                          | Ca_kabuli_Chrom6 | 33503051                | G/C  | NA                 | INTERGENIC                    | NA                           |
| Kabuli_wild_33503057 | 1399940683                          | Ca_kabuli_Chrom6 | 33503057                | A/T  | NA                 | INTERGENIC                    | NA                           |
| Kabuli_wild_33503063 | 1399940684                          | Ca_kabuli_Chrom6 | 33503063                | C/G  | NA                 | INTERGENIC                    | NA                           |
| Kabuli_wild_33503065 | 1399940685                          | Ca_kabuli_Chrom6 | 33503065                | C/A  | NA                 | INTERGENIC                    | NA                           |
| Kabuli_wild_33503071 | 1399940686                          | Ca_kabuli_Chrom6 | 33503071                | A/G  | NA                 | INTERGENIC                    | NA                           |
| Kabuli_wild_33598926 | 1399940687                          | Ca_kabuli_Chrom6 | 33598926                | G/A  | Gene_Ca_22069      | INTRON                        | NA                           |
| Kabuli_wild_33704792 | 1399940688                          | Ca_kabuli_Chrom6 | 33704792                | C/T  | NA                 | INTERGENIC                    | NA                           |
| Kabuli_wild_33704807 | 1399940689                          | Ca_kabuli_Chrom6 | 33704807                | C/A  | NA                 | INTERGENIC                    | NA                           |
| Kabuli_wild_33704820 | 1399940690                          | Ca_kabuli_Chrom6 | 33704820                | T/C  | NA                 | INTERGENIC                    | NA                           |
| Kabuli_wild_33733252 | 1399940691                          | Ca_kabuli_Chrom6 | 33733252                | T/G  | Gene_Ca_22063      | NON_SYNONYMOUS_CODING         | Zinc finger, RING-type       |

| SNP IDs              | NCBI dbSNP accession IDs (NCBI_SS#) | Chromosomes     | Physical positions (bp) | SNPs | Gene accession IDs | Sequence components of genome | Putative functions                                  |
|----------------------|-------------------------------------|-----------------|-------------------------|------|--------------------|-------------------------------|-----------------------------------------------------|
| Kabuli_wild_33733259 | 1399940692                          | Ca_kabuli_Chr06 | 33733259                | A/G  | Gene_Ca_22063      | SYNONYMOUS_CODING             | Zinc finger, RING-type                              |
| Kabuli_wild_34247329 | 1399940693                          | Ca_kabuli_Chr06 | 34247329                | A/C  | NA                 | INTERGENIC                    | NA                                                  |
| Kabuli_wild_34407309 | 1399940694                          | Ca_kabuli_Chr06 | 34407309                | T/C  | NA                 | INTERGENIC                    | NA                                                  |
| Kabuli_wild_34481256 | 1399940695                          | Ca_kabuli_Chr06 | 34481256                | C/T  | Gene_Ca_15818      | INTRON                        | NA                                                  |
| Kabuli_wild_34481266 | 1399940696                          | Ca_kabuli_Chr06 | 34481266                | A/G  | Gene_Ca_15818      | INTRON                        | NA                                                  |
| Kabuli_wild_34596792 | 1399940697                          | Ca_kabuli_Chr06 | 34596792                | A/G  | NA                 | INTERGENIC                    | NA                                                  |
| Kabuli_wild_34744433 | 1399940698                          | Ca_kabuli_Chr06 | 34744433                | A/G  | NA                 | INTERGENIC                    | NA                                                  |
| Kabuli_wild_34744438 | 1399940699                          | Ca_kabuli_Chr06 | 34744438                | T/G  | NA                 | INTERGENIC                    | NA                                                  |
| Kabuli_wild_34744480 | 1399940700                          | Ca_kabuli_Chr06 | 34744480                | C/T  | NA                 | INTERGENIC                    | NA                                                  |
| Kabuli_wild_34744665 | 1399940701                          | Ca_kabuli_Chr06 | 34744665                | G/A  | NA                 | INTERGENIC                    | NA                                                  |
| Kabuli_wild_34744670 | 1399940702                          | Ca_kabuli_Chr06 | 34744670                | A/G  | NA                 | INTERGENIC                    | NA                                                  |
| Kabuli_wild_34744681 | 1399940703                          | Ca_kabuli_Chr06 | 34744681                | T/G  | NA                 | INTERGENIC                    | NA                                                  |
| Kabuli_wild_34771344 | 1399940704                          | Ca_kabuli_Chr06 | 34771344                | A/C  | Gene_Ca_15807      | SYNONYMOUS_CODING             | NA                                                  |
| Kabuli_wild_34773450 | 1399940705                          | Ca_kabuli_Chr06 | 34773450                | C/A  | Gene_Ca_15807      | INTRON                        | NA                                                  |
| Kabuli_wild_34773517 | 1399940706                          | Ca_kabuli_Chr06 | 34773517                | C/T  | Gene_Ca_15807      | INTRON                        | NA                                                  |
| Kabuli_wild_35129588 | 1399940707                          | Ca_kabuli_Chr06 | 35129588                | G/A  | Gene_Ca_15788      | SYNONYMOUS_CODING             | Zinc finger, PHD-type                               |
| Kabuli_wild_35596064 | 1399940708                          | Ca_kabuli_Chr06 | 35596064                | T/C  | NA                 | INTERGENIC                    | NA                                                  |
| Kabuli_wild_35596070 | 1399940709                          | Ca_kabuli_Chr06 | 35596070                | G/A  | NA                 | INTERGENIC                    | NA                                                  |
| Kabuli_wild_35596161 | 1399940710                          | Ca_kabuli_Chr06 | 35596161                | C/T  | NA                 | INTERGENIC                    | NA                                                  |
| Kabuli_wild_35596184 | 1399940711                          | Ca_kabuli_Chr06 | 35596184                | A/G  | NA                 | INTERGENIC                    | NA                                                  |
| Kabuli_wild_35596195 | 1399940712                          | Ca_kabuli_Chr06 | 35596195                | G/C  | NA                 | INTERGENIC                    | NA                                                  |
| Kabuli_wild_35596197 | 1399940713                          | Ca_kabuli_Chr06 | 35596197                | G/A  | NA                 | INTERGENIC                    | NA                                                  |
| Kabuli_wild_35596207 | 1399940714                          | Ca_kabuli_Chr06 | 35596207                | G/T  | NA                 | INTERGENIC                    | NA                                                  |
| Kabuli_wild_35596218 | 1399940715                          | Ca_kabuli_Chr06 | 35596218                | T/C  | NA                 | INTERGENIC                    | NA                                                  |
| Kabuli_wild_35596220 | 1399940716                          | Ca_kabuli_Chr06 | 35596220                | G/A  | NA                 | INTERGENIC                    | NA                                                  |
| Kabuli_wild_35596230 | 1399940717                          | Ca_kabuli_Chr06 | 35596230                | T/A  | NA                 | INTERGENIC                    | NA                                                  |
| Kabuli_wild_35962309 | 1399940718                          | Ca_kabuli_Chr06 | 35962309                | C/T  | NA                 | INTERGENIC                    | NA                                                  |
| Kabuli_wild_35962320 | 1399940719                          | Ca_kabuli_Chr06 | 35962320                | T/C  | NA                 | INTERGENIC                    | NA                                                  |
| Kabuli_wild_35962360 | 1399940720                          | Ca_kabuli_Chr06 | 35962360                | T/C  | NA                 | INTERGENIC                    | NA                                                  |
| Kabuli_wild_35962364 | 1399940721                          | Ca_kabuli_Chr06 | 35962364                | T/G  | NA                 | INTERGENIC                    | NA                                                  |
| Kabuli_wild_35962365 | 1399940722                          | Ca_kabuli_Chr06 | 35962365                | T/C  | NA                 | INTERGENIC                    | NA                                                  |
| Kabuli_wild_35962366 | 1399940723                          | Ca_kabuli_Chr06 | 35962366                | G/A  | NA                 | INTERGENIC                    | NA                                                  |
| Kabuli_wild_36228879 | 1399940724                          | Ca_kabuli_Chr06 | 36228879                | A/G  | Gene_Ca_23958      | INTRON                        | Peptidyl-prolylcis-transisomerase,FKBP-type, domain |
| Kabuli_wild_36378706 | 1399940725                          | Ca_kabuli_Chr06 | 36378706                | A/G  | Gene_Ca_23965      | INTRON                        | UvrABCcomplex,subunitB                              |
| Kabuli_wild_36411933 | 1399940726                          | Ca_kabuli_Chr06 | 36411933                | G/A  | NA                 | INTERGENIC                    | NA                                                  |
| Kabuli_wild_36574836 | 1399940727                          | Ca_kabuli_Chr06 | 36574836                | A/G  | NA                 | INTERGENIC                    | NA                                                  |
| Kabuli_wild_36774699 | 1399940728                          | Ca_kabuli_Chr06 | 36774699                | G/T  | NA                 | INTERGENIC                    | NA                                                  |
| Kabuli_wild_36774702 | 1399940729                          | Ca_kabuli_Chr06 | 36774702                | A/G  | NA                 | INTERGENIC                    | NA                                                  |
| Kabuli_wild_36774717 | 1399940730                          | Ca_kabuli_Chr06 | 36774717                | T/C  | NA                 | INTERGENIC                    | NA                                                  |
| Kabuli_wild_36774718 | 1399940731                          | Ca_kabuli_Chr06 | 36774718                | C/G  | NA                 | INTERGENIC                    | NA                                                  |
| Kabuli_wild_36790428 | 1399940732                          | Ca_kabuli_Chr06 | 36790428                | G/A  | Gene_Ca_19812      | NON_SYNONYMOUS_CODING         | NA                                                  |
| Kabuli_wild_36790441 | 1399940733                          | Ca_kabuli_Chr06 | 36790441                | C/A  | Gene_Ca_19812      | NON_SYNONYMOUS_CODING         | NA                                                  |
| Kabuli_wild_36790455 | 1399940734                          | Ca_kabuli_Chr06 | 36790455                | C/T  | Gene_Ca_19812      | NON_SYNONYMOUS_CODING         | NA                                                  |
| Kabuli_wild_36790458 | 1399940735                          | Ca_kabuli_Chr06 | 36790458                | G/A  | Gene_Ca_19812      | NON_SYNONYMOUS_CODING         | NA                                                  |

| SNP IDs              | NCBI dbSNP accession IDs (NCBI_SS#) | Chromosomes     | Physical positions (bp) | SNPs | Gene accession IDs | Sequence components of genome | Putative functions                    |
|----------------------|-------------------------------------|-----------------|-------------------------|------|--------------------|-------------------------------|---------------------------------------|
| Kabuli_wild_36790467 | 1399940736                          | Ca_kabuli_Chr06 | 36790467                | G/A  | Gene_Ca_19812      | NON_SYNONYMOUS_CODING         | NA                                    |
| Kabuli_wild_36889465 | 1399940737                          | Ca_kabuli_Chr06 | 36889465                | C/T  | Gene_Ca_19808      | NON_SYNONYMOUS_CODING         | NA                                    |
| Kabuli_wild_36892197 | 1399940738                          | Ca_kabuli_Chr06 | 36892197                | G/A  | NA                 | INTERGENIC                    | NA                                    |
| Kabuli_wild_37139418 | 1399940739                          | Ca_kabuli_Chr06 | 37139418                | C/T  | Gene_Ca_19803      | NON_SYNONYMOUS_CODING         | Peptidase C48, SUMO/Sentrin/Ubl1      |
| Kabuli_wild_37139420 | 1399940740                          | Ca_kabuli_Chr06 | 37139420                | A/G  | Gene_Ca_19803      | NON_SYNONYMOUS_CODING         | Peptidase C48, SUMO/Sentrin/Ubl1      |
| Kabuli_wild_37139425 | 1399940741                          | Ca_kabuli_Chr06 | 37139425                | C/T  | Gene_Ca_19803      | SYNONYMOUS_CODING             | Peptidase C48, SUMO/Sentrin/Ubl1      |
| Kabuli_wild_37139426 | 1399940742                          | Ca_kabuli_Chr06 | 37139426                | C/T  | Gene_Ca_19803      | NON_SYNONYMOUS_CODING         | Peptidase C48, SUMO/Sentrin/Ubl1      |
| Kabuli_wild_37139453 | 1399940743                          | Ca_kabuli_Chr06 | 37139453                | C/T  | Gene_Ca_19803      | NON_SYNONYMOUS_CODING         | Peptidase C48, SUMO/Sentrin/Ubl1      |
| Kabuli_wild_37139466 | 1399940744                          | Ca_kabuli_Chr06 | 37139466                | G/C  | Gene_Ca_19803      | SYNONYMOUS_CODING             | Peptidase C48, SUMO/Sentrin/Ubl1      |
| Kabuli_wild_37139484 | 1399940745                          | Ca_kabuli_Chr06 | 37139484                | T/C  | Gene_Ca_19803      | NON_SYNONYMOUS_CODING         | Peptidase C48, SUMO/Sentrin/Ubl1      |
| Kabuli_wild_37139499 | 1399940746                          | Ca_kabuli_Chr06 | 37139499                | C/G  | Gene_Ca_19803      | NON_SYNONYMOUS_CODING         | Peptidase C48, SUMO/Sentrin/Ubl1      |
| Kabuli_wild_37139502 | 1399940747                          | Ca_kabuli_Chr06 | 37139502                | C/G  | Gene_Ca_19803      | NON_SYNONYMOUS_CODING         | Peptidase C48, SUMO/Sentrin/Ubl1      |
| Kabuli_wild_37139514 | 1399940748                          | Ca_kabuli_Chr06 | 37139514                | C/T  | Gene_Ca_19803      | NON_SYNONYMOUS_CODING         | Peptidase C48, SUMO/Sentrin/Ubl1      |
| Kabuli_wild_37139604 | 1399940749                          | Ca_kabuli_Chr06 | 37139604                | G/T  | Gene_Ca_19803      | NON_SYNONYMOUS_CODING         | Peptidase C48, SUMO/Sentrin/Ubl1      |
| Kabuli_wild_37139610 | 1399940750                          | Ca_kabuli_Chr06 | 37139610                | T/G  | Gene_Ca_19803      | NON_SYNONYMOUS_CODING         | Peptidase C48, SUMO/Sentrin/Ubl1      |
| Kabuli_wild_37221699 | 1399940751                          | Ca_kabuli_Chr06 | 37221699                | C/G  | NA                 | INTERGENIC                    | NA                                    |
| Kabuli_wild_37476426 | 1399940752                          | Ca_kabuli_Chr06 | 37476426                | C/T  | NA                 | INTERGENIC                    | NA                                    |
| Kabuli_wild_37476465 | 1399940753                          | Ca_kabuli_Chr06 | 37476465                | G/A  | NA                 | INTERGENIC                    | NA                                    |
| Kabuli_wild_37476516 | 1399940754                          | Ca_kabuli_Chr06 | 37476516                | G/T  | NA                 | INTERGENIC                    | NA                                    |
| Kabuli_wild_37484467 | 1399940755                          | Ca_kabuli_Chr06 | 37484467                | C/T  | NA                 | INTERGENIC                    | NA                                    |
| Kabuli_wild_37484468 | 1399940756                          | Ca_kabuli_Chr06 | 37484468                | G/T  | NA                 | INTERGENIC                    | NA                                    |
| Kabuli_wild_37484470 | 1399940757                          | Ca_kabuli_Chr06 | 37484470                | C/A  | NA                 | INTERGENIC                    | NA                                    |
| Kabuli_wild_37484489 | 1399940758                          | Ca_kabuli_Chr06 | 37484489                | C/G  | NA                 | INTERGENIC                    | NA                                    |
| Kabuli_wild_37484509 | 1399940759                          | Ca_kabuli_Chr06 | 37484509                | T/C  | NA                 | INTERGENIC                    | NA                                    |
| Kabuli_wild_37484513 | 1399940760                          | Ca_kabuli_Chr06 | 37484513                | T/C  | NA                 | INTERGENIC                    | NA                                    |
| Kabuli_wild_37692569 | 1399940761                          | Ca_kabuli_Chr06 | 37692569                | C/A  | NA                 | INTERGENIC                    | NA                                    |
| Kabuli_wild_37943905 | 1399940762                          | Ca_kabuli_Chr06 | 37943905                | C/T  | Gene_Ca_19549      | DOWNSTREAM                    | NA                                    |
| Kabuli_wild_38136025 | 1399940763                          | Ca_kabuli_Chr06 | 38136025                | A/G  | NA                 | INTERGENIC                    | NA                                    |
| Kabuli_wild_38194797 | 1399940764                          | Ca_kabuli_Chr06 | 38194797                | C/T  | Gene_Ca_19560      | SYNONYMOUS_CODING             | Transposase,Ptta/En/Spm.plant         |
| Kabuli_wild_38194819 | 1399940765                          | Ca_kabuli_Chr06 | 38194819                | G/T  | Gene_Ca_19560      | NON_SYNONYMOUS_CODING         | Transposase,Ptta/En/Spm.plant         |
| Kabuli_wild_38308827 | 1399940766                          | Ca_kabuli_Chr06 | 38308827                | T/C  | Gene_Ca_19565      | INTRON                        | Neutral/alkalinenolysosomalceramidase |
| Kabuli_wild_38514183 | 1399940767                          | Ca_kabuli_Chr06 | 38514183                | A/C  | NA                 | INTERGENIC                    | NA                                    |
| Kabuli_wild_38816345 | 1399940768                          | Ca_kabuli_Chr06 | 38816345                | C/T  | Gene_Ca_15898      | SYNONYMOUS_CODING             | Transcription facto rGRAS             |
| Kabuli_wild_38838320 | 1399940769                          | Ca_kabuli_Chr06 | 38838320                | A/G  | Gene_Ca_15899      | NON_SYNONYMOUS_CODING         | Calcium-bindingEF-hand                |
| Kabuli_wild_38840273 | 1399940770                          | Ca_kabuli_Chr06 | 38840273                | G/A  | Gene_Ca_15899      | DOWNSTREAM                    | Calcium-bindingEF-hand                |
| Kabuli_wild_38840279 | 1399940771                          | Ca_kabuli_Chr06 | 38840279                | G/A  | Gene_Ca_15899      | DOWNSTREAM                    | Calcium-bindingEF-hand                |
| Kabuli_wild_38840286 | 1399940772                          | Ca_kabuli_Chr06 | 38840286                | C/G  | Gene_Ca_15899      | DOWNSTREAM                    | Calcium-bindingEF-hand                |
| Kabuli_wild_38840313 | 1399940773                          | Ca_kabuli_Chr06 | 38840313                | C/T  | Gene_Ca_15899      | DOWNSTREAM                    | Calcium-bindingEF-hand                |
| Kabuli_wild_38881909 | 1399940774                          | Ca_kabuli_Chr06 | 38881909                | C/A  | NA                 | INTERGENIC                    | NA                                    |
| Kabuli_wild_38886735 | 1399940775                          | Ca_kabuli_Chr06 | 38886735                | C/A  | NA                 | INTERGENIC                    | NA                                    |
| Kabuli_wild_38994879 | 1399940776                          | Ca_kabuli_Chr06 | 38994879                | A/G  | Gene_Ca_15903      | NON_SYNONYMOUS_CODING         | NA                                    |
| Kabuli_wild_38994925 | 1399940777                          | Ca_kabuli_Chr06 | 38994925                | G/T  | Gene_Ca_15903      | NON_SYNONYMOUS_CODING         | NA                                    |
| Kabuli_wild_38994954 | 1399940778                          | Ca_kabuli_Chr06 | 38994954                | A/G  | Gene_Ca_15903      | NON_SYNONYMOUS_CODING         | NA                                    |
| Kabuli_wild_38994962 | 1399940779                          | Ca_kabuli_Chr06 | 38994962                | G/A  | Gene_Ca_15903      | SYNONYMOUS_CODING             | NA                                    |

| SNP IDs              | NCBI dbSNP accession IDs (NCBI_SS#) | Chromosomes     | Physical positions (bp) | SNPs | Gene accession IDs | Sequence components of genome | Putative functions                        |
|----------------------|-------------------------------------|-----------------|-------------------------|------|--------------------|-------------------------------|-------------------------------------------|
| Kabuli_wild_39107166 | 1399940780                          | Ca_kabuli_Chr06 | 39107166                | A/G  | NA                 | INTERGENIC                    | NA                                        |
| Kabuli_wild_39107177 | 1399940781                          | Ca_kabuli_Chr06 | 39107177                | G/A  | NA                 | INTERGENIC                    | NA                                        |
| Kabuli_wild_39107187 | 1399940782                          | Ca_kabuli_Chr06 | 39107187                | C/T  | NA                 | INTERGENIC                    | NA                                        |
| Kabuli_wild_39317016 | 1399940783                          | Ca_kabuli_Chr06 | 39317016                | T/G  | Gene_Ca_15914      | INTRON                        | PAP/25A-associated                        |
| Kabuli_wild_39380625 | 1399940784                          | Ca_kabuli_Chr06 | 39380625                | A/C  | Gene_Ca_15918      | INTRON                        | Resolvase,hollidayjunction-type,YqgF-like |
| Kabuli_wild_39505343 | 1399940785                          | Ca_kabuli_Chr06 | 39505343                | T/A  | NA                 | INTERGENIC                    | NA                                        |
| Kabuli_wild_39724016 | 1399940786                          | Ca_kabuli_Chr06 | 39724016                | A/C  | NA                 | INTERGENIC                    | NA                                        |
| Kabuli_wild_39724022 | 1399940787                          | Ca_kabuli_Chr06 | 39724022                | A/G  | NA                 | INTERGENIC                    | NA                                        |
| Kabuli_wild_39863065 | 1399940788                          | Ca_kabuli_Chr06 | 39863065                | C/T  | NA                 | INTERGENIC                    | NA                                        |
| Kabuli_wild_39863077 | 1399940789                          | Ca_kabuli_Chr06 | 39863077                | C/T  | NA                 | INTERGENIC                    | NA                                        |
| Kabuli_wild_39863085 | 1399940790                          | Ca_kabuli_Chr06 | 39863085                | C/T  | NA                 | INTERGENIC                    | NA                                        |
| Kabuli_wild_39864744 | 1399940791                          | Ca_kabuli_Chr06 | 39864744                | A/G  | NA                 | INTERGENIC                    | NA                                        |
| Kabuli_wild_39864787 | 1399940792                          | Ca_kabuli_Chr06 | 39864787                | C/A  | NA                 | INTERGENIC                    | NA                                        |
| Kabuli_wild_39864799 | 1399940793                          | Ca_kabuli_Chr06 | 39864799                | C/T  | NA                 | INTERGENIC                    | NA                                        |
| Kabuli_wild_39908314 | 1399940794                          | Ca_kabuli_Chr06 | 39908314                | T/G  | NA                 | INTERGENIC                    | NA                                        |
| Kabuli_wild_40047823 | 1399940795                          | Ca_kabuli_Chr06 | 40047823                | G/A  | Gene_Ca_15938      | SYNONYMOUS_CODING             | Chromodomain                              |
| Kabuli_wild_40047893 | 1399940796                          | Ca_kabuli_Chr06 | 40047893                | C/T  | Gene_Ca_15938      | NON_SYNONYMOUS_CODING         | Chromodomain                              |
| Kabuli_wild_40128644 | 1399940797                          | Ca_kabuli_Chr06 | 40128644                | T/C  | Gene_Ca_15942      | UPSTREAM                      | PhosphotransferaseKptA/Tpt1               |
| Kabuli_wild_40166834 | 1399940798                          | Ca_kabuli_Chr06 | 40166834                | T/C  | NA                 | INTERGENIC                    | NA                                        |
| Kabuli_wild_40166840 | 1399940799                          | Ca_kabuli_Chr06 | 40166840                | T/G  | NA                 | INTERGENIC                    | NA                                        |
| Kabuli_wild_40468356 | 1399940800                          | Ca_kabuli_Chr06 | 40468356                | T/A  | Gene_Ca_21602      | INTRON                        | NA                                        |
| Kabuli_wild_40477285 | 1399940801                          | Ca_kabuli_Chr06 | 40477285                | G/A  | Gene_Ca_21600      | NON_SYNONYMOUS_CODING         | Nitroreductase-like                       |
| Kabuli_wild_40657695 | 1399940802                          | Ca_kabuli_Chr06 | 40657695                | A/C  | Gene_Ca_21596      | SYNONYMOUS_CODING             | PeptidaseM22.glycoprotease                |
| Kabuli_wild_40735186 | 1399940803                          | Ca_kabuli_Chr06 | 40735186                | C/A  | Gene_Ca_21592      | UPSTREAM                      | DNArepairproteinRadA                      |
| Kabuli_wild_40767566 | 1399940804                          | Ca_kabuli_Chr06 | 40767566                | A/G  | NA                 | INTERGENIC                    | NA                                        |
| Kabuli_wild_40821354 | 1399940805                          | Ca_kabuli_Chr06 | 40821354                | C/T  | Gene_Ca_21586      | INTRON                        | Transketolase,N-terminal                  |
| Kabuli_wild_40924233 | 1399940806                          | Ca_kabuli_Chr06 | 40924233                | A/G  | Gene_Ca_21582      | INTRON                        | ExocystcomplexcomponentSec6               |
| Kabuli_wild_40935441 | 1399940807                          | Ca_kabuli_Chr06 | 40935441                | A/T  | Gene_Ca_21581      | INTRON                        | ExocystcomplexcomponentSec6               |
| Kabuli_wild_40947803 | 1399940808                          | Ca_kabuli_Chr06 | 40947803                | C/A  | Gene_Ca_21580      | INTRON                        | ExocystcomplexcomponentSec6               |
| Kabuli_wild_41099629 | 1399940809                          | Ca_kabuli_Chr06 | 41099629                | A/G  | NA                 | INTERGENIC                    | NA                                        |
| Kabuli_wild_41099664 | 1399940810                          | Ca_kabuli_Chr06 | 41099664                | G/A  | NA                 | INTERGENIC                    | NA                                        |
| Kabuli_wild_41099671 | 1399940811                          | Ca_kabuli_Chr06 | 41099671                | A/G  | NA                 | INTERGENIC                    | NA                                        |
| Kabuli_wild_41121287 | 1399940812                          | Ca_kabuli_Chr06 | 41121287                | G/A  | Gene_Ca_23143      | SYNONYMOUS_CODING             | NA                                        |
| Kabuli_wild_41121330 | 1399940813                          | Ca_kabuli_Chr06 | 41121330                | G/A  | Gene_Ca_23143      | NON_SYNONYMOUS_CODING         | NA                                        |
| Kabuli_wild_41121378 | 1399940814                          | Ca_kabuli_Chr06 | 41121378                | G/A  | Gene_Ca_23143      | NON_SYNONYMOUS_CODING         | NA                                        |
| Kabuli_wild_41121397 | 1399940815                          | Ca_kabuli_Chr06 | 41121397                | G/A  | Gene_Ca_23143      | SYNONYMOUS_CODING             | NA                                        |
| Kabuli_wild_41121412 | 1399940816                          | Ca_kabuli_Chr06 | 41121412                | C/T  | Gene_Ca_23143      | NON_SYNONYMOUS_CODING         | NA                                        |
| Kabuli_wild_41214997 | 1399940817                          | Ca_kabuli_Chr06 | 41214997                | C/T  | Gene_Ca_23146      | DOWNSTREAM                    | NA                                        |
| Kabuli_wild_41448947 | 1399940818                          | Ca_kabuli_Chr06 | 41448947                | C/A  | NA                 | INTERGENIC                    | NA                                        |
| Kabuli_wild_41448969 | 1399940819                          | Ca_kabuli_Chr06 | 41448969                | A/T  | NA                 | INTERGENIC                    | NA                                        |
| Kabuli_wild_41448988 | 1399940820                          | Ca_kabuli_Chr06 | 41448988                | T/C  | NA                 | INTERGENIC                    | NA                                        |
| Kabuli_wild_41682943 | 1399940821                          | Ca_kabuli_Chr06 | 41682943                | T/C  | NA                 | INTERGENIC                    | NA                                        |
| Kabuli_wild_41682966 | 1399940822                          | Ca_kabuli_Chr06 | 41682966                | T/C  | NA                 | INTERGENIC                    | NA                                        |
| Kabuli_wild_41682983 | 1399940823                          | Ca_kabuli_Chr06 | 41682983                | T/C  | NA                 | INTERGENIC                    | NA                                        |



| SNP IDs              | NCBI dbSNP accession IDs (NCBI_SS#) | Chromosomes      | Physical positions (bp) | SNPs | Gene accession IDs | Sequence components of genome | Putative functions                       |
|----------------------|-------------------------------------|------------------|-------------------------|------|--------------------|-------------------------------|------------------------------------------|
| Kabuli_wild_41697812 | 1399940824                          | Ca_kabuli_Chrom6 | 41697812                | T/G  | Gene_Ca_21940      | INTRON                        | Ribonucleasell/R                         |
| Kabuli_wild_41708154 | 1399940825                          | Ca_kabuli_Chrom6 | 41708154                | T/G  | NA                 | INTERGENIC                    | NA                                       |
| Kabuli_wild_41708270 | 1399940826                          | Ca_kabuli_Chrom6 | 41708270                | G/C  | NA                 | INTERGENIC                    | NA                                       |
| Kabuli_wild_41708295 | 1399940827                          | Ca_kabuli_Chrom6 | 41708295                | G/C  | NA                 | INTERGENIC                    | NA                                       |
| Kabuli_wild_41708299 | 1399940828                          | Ca_kabuli_Chrom6 | 41708299                | C/T  | NA                 | INTERGENIC                    | NA                                       |
| Kabuli_wild_41708306 | 1399940829                          | Ca_kabuli_Chrom6 | 41708306                | G/A  | NA                 | INTERGENIC                    | NA                                       |
| Kabuli_wild_41708309 | 1399940830                          | Ca_kabuli_Chrom6 | 41708309                | G/A  | NA                 | INTERGENIC                    | NA                                       |
| Kabuli_wild_41708328 | 1399940831                          | Ca_kabuli_Chrom6 | 41708328                | A/G  | NA                 | INTERGENIC                    | NA                                       |
| Kabuli_wild_41708474 | 1399940832                          | Ca_kabuli_Chrom6 | 41708474                | G/A  | NA                 | INTERGENIC                    | NA                                       |
| Kabuli_wild_41708523 | 1399940833                          | Ca_kabuli_Chrom6 | 41708523                | T/G  | NA                 | INTERGENIC                    | NA                                       |
| Kabuli_wild_41708530 | 1399940834                          | Ca_kabuli_Chrom6 | 41708530                | C/A  | NA                 | INTERGENIC                    | NA                                       |
| Kabuli_wild_41907459 | 1399940835                          | Ca_kabuli_Chrom6 | 41907459                | C/G  | NA                 | INTERGENIC                    | NA                                       |
| Kabuli_wild_42004813 | 1399940836                          | Ca_kabuli_Chrom6 | 42004813                | C/T  | Gene_Ca_21951      | SYNONYMOUS_CODING             | TGS                                      |
| Kabuli_wild_42004818 | 1399940837                          | Ca_kabuli_Chrom6 | 42004818                | C/G  | Gene_Ca_21951      | SYNONYMOUS_CODING             | TGS                                      |
| Kabuli_wild_42004829 | 1399940838                          | Ca_kabuli_Chrom6 | 42004829                | T/G  | Gene_Ca_21951      | SYNONYMOUS_CODING             | TGS                                      |
| Kabuli_wild_42004842 | 1399940839                          | Ca_kabuli_Chrom6 | 42004842                | C/A  | Gene_Ca_21951      | NON_SYNONYMOUS_CODING         | TGS                                      |
| Kabuli_wild_42004851 | 1399940840                          | Ca_kabuli_Chrom6 | 42004851                | A/G  | Gene_Ca_21951      | NON_SYNONYMOUS_CODING         | TGS                                      |
| Kabuli_wild_42161857 | 1399940841                          | Ca_kabuli_Chrom6 | 42161857                | C/G  | NA                 | INTERGENIC                    | NA                                       |
| Kabuli_wild_42161866 | 1399940842                          | Ca_kabuli_Chrom6 | 42161866                | T/G  | NA                 | INTERGENIC                    | NA                                       |
| Kabuli_wild_42161887 | 1399940843                          | Ca_kabuli_Chrom6 | 42161887                | T/C  | NA                 | INTERGENIC                    | NA                                       |
| Kabuli_wild_42171905 | 1399940844                          | Ca_kabuli_Chrom6 | 42171905                | A/C  | Gene_Ca_21956      | SYNONYMOUS_CODING             | NA                                       |
| Kabuli_wild_42171916 | 1399940845                          | Ca_kabuli_Chrom6 | 42171916                | T/C  | Gene_Ca_21956      | SYNONYMOUS_CODING             | NA                                       |
| Kabuli_wild_42207407 | 1399940846                          | Ca_kabuli_Chrom6 | 42207407                | T/C  | NA                 | INTERGENIC                    | NA                                       |
| Kabuli_wild_42207459 | 1399940847                          | Ca_kabuli_Chrom6 | 42207459                | T/C  | NA                 | INTERGENIC                    | NA                                       |
| Kabuli_wild_42521162 | 1399940848                          | Ca_kabuli_Chrom6 | 42521162                | G/T  | Gene_Ca_23238      | INTRON                        | UDP-glucuronosyl/UDP-glucosyltransferase |
| Kabuli_wild_42663847 | 1399940849                          | Ca_kabuli_Chrom6 | 42663847                | A/T  | Gene_Ca_23243      | SYNONYMOUS_CODING             | Thiolase                                 |
| Kabuli_wild_42840647 | 1399940850                          | Ca_kabuli_Chrom6 | 42840647                | C/G  | NA                 | INTERGENIC                    | NA                                       |
| Kabuli_wild_42840687 | 1399940851                          | Ca_kabuli_Chrom6 | 42840687                | T/C  | NA                 | INTERGENIC                    | NA                                       |
| Kabuli_wild_42840729 | 1399940852                          | Ca_kabuli_Chrom6 | 42840729                | G/A  | NA                 | INTERGENIC                    | NA                                       |
| Kabuli_wild_42840747 | 1399940853                          | Ca_kabuli_Chrom6 | 42840747                | C/T  | NA                 | INTERGENIC                    | NA                                       |
| Kabuli_wild_42855091 | 1399940854                          | Ca_kabuli_Chrom6 | 42855091                | T/G  | Gene_Ca_23252      | NON_SYNONYMOUS_CODING         | BTB/POZ-like                             |
| Kabuli_wild_42905012 | 1399940855                          | Ca_kabuli_Chrom6 | 42905012                | G/A  | Gene_Ca_23254      | SYNONYMOUS_CODING             | Peptidase C48, SUMO/Sentrin/Ubl1         |
| Kabuli_wild_42905035 | 1399940856                          | Ca_kabuli_Chrom6 | 42905035                | T/A  | Gene_Ca_23254      | NON_SYNONYMOUS_CODING         | Peptidase C48, SUMO/Sentrin/Ubl1         |
| Kabuli_wild_42905039 | 1399940857                          | Ca_kabuli_Chrom6 | 42905039                | C/T  | Gene_Ca_23254      | NON_SYNONYMOUS_CODING         | Peptidase C48, SUMO/Sentrin/Ubl1         |
| Kabuli_wild_42905058 | 1399940858                          | Ca_kabuli_Chrom6 | 42905058                | C/G  | Gene_Ca_23254      | NON_SYNONYMOUS_CODING         | Peptidase C48, SUMO/Sentrin/Ubl1         |
| Kabuli_wild_42905059 | 1399940859                          | Ca_kabuli_Chrom6 | 42905059                | A/G  | Gene_Ca_23254      | SYNONYMOUS_CODING             | Peptidase C48, SUMO/Sentrin/Ubl1         |
| Kabuli_wild_42905073 | 1399940860                          | Ca_kabuli_Chrom6 | 42905073                | C/T  | Gene_Ca_23254      | NON_SYNONYMOUS_CODING         | Peptidase C48, SUMO/Sentrin/Ubl1         |
| Kabuli_wild_42905086 | 1399940861                          | Ca_kabuli_Chrom6 | 42905086                | T/C  | Gene_Ca_23254      | SYNONYMOUS_CODING             | Peptidase C48, SUMO/Sentrin/Ubl1         |
| Kabuli_wild_42905090 | 1399940862                          | Ca_kabuli_Chrom6 | 42905090                | A/G  | Gene_Ca_23254      | SYNONYMOUS_CODING             | Peptidase C48, SUMO/Sentrin/Ubl1         |
| Kabuli_wild_42905094 | 1399940863                          | Ca_kabuli_Chrom6 | 42905094                | C/T  | Gene_Ca_23254      | NON_SYNONYMOUS_CODING         | Peptidase C48, SUMO/Sentrin/Ubl1         |
| Kabuli_wild_42905115 | 1399940864                          | Ca_kabuli_Chrom6 | 42905115                | G/T  | Gene_Ca_23254      | NON_SYNONYMOUS_CODING         | Peptidase C48, SUMO/Sentrin/Ubl1         |
| Kabuli_wild_42905116 | 1399940865                          | Ca_kabuli_Chrom6 | 42905116                | A/T  | Gene_Ca_23254      | SYNONYMOUS_CODING             | Peptidase C48, SUMO/Sentrin/Ubl1         |
| Kabuli_wild_42923969 | 1399940866                          | Ca_kabuli_Chrom6 | 42923969                | A/C  | Gene_Ca_23255      | DOWNSTREAM                    | Zinc finger, RING-type                   |
| Kabuli_wild_43148784 | 1399940867                          | Ca_kabuli_Chrom6 | 43148784                | C/G  | NA                 | INTERGENIC                    | NA                                       |

| SNP IDs              | NCBI dbSNP accession IDs (NCBI_SS#) | Chromosomes     | Physical positions (bp) | SNPs | Gene accession IDs | Sequence components of genome | Putative functions                          |
|----------------------|-------------------------------------|-----------------|-------------------------|------|--------------------|-------------------------------|---------------------------------------------|
| Kabuli_wild_43148793 | 1399940868                          | Ca_kabuli_Chr06 | 43148793                | T/G  | NA                 | INTERGENIC                    | NA                                          |
| Kabuli_wild_43150118 | 1399940869                          | Ca_kabuli_Chr06 | 43150118                | G/T  | NA                 | INTERGENIC                    | NA                                          |
| Kabuli_wild_43150146 | 1399940870                          | Ca_kabuli_Chr06 | 43150146                | A/T  | NA                 | INTERGENIC                    | NA                                          |
| Kabuli_wild_43878892 | 1399940871                          | Ca_kabuli_Chr06 | 43878892                | G/T  | NA                 | INTERGENIC                    | NA                                          |
| Kabuli_wild_43879105 | 1399940872                          | Ca_kabuli_Chr06 | 43879105                | C/T  | NA                 | INTERGENIC                    | NA                                          |
| Kabuli_wild_43905486 | 1399940873                          | Ca_kabuli_Chr06 | 43905486                | G/T  | NA                 | INTERGENIC                    | NA                                          |
| Kabuli_wild_43905509 | 1399940874                          | Ca_kabuli_Chr06 | 43905509                | A/T  | NA                 | INTERGENIC                    | NA                                          |
| Kabuli_wild_43905518 | 1399940875                          | Ca_kabuli_Chr06 | 43905518                | G/A  | NA                 | INTERGENIC                    | NA                                          |
| Kabuli_wild_43905519 | 1399940876                          | Ca_kabuli_Chr06 | 43905519                | G/A  | NA                 | INTERGENIC                    | NA                                          |
| Kabuli_wild_43907424 | 1399940877                          | Ca_kabuli_Chr06 | 43907424                | G/T  | NA                 | INTERGENIC                    | NA                                          |
| Kabuli_wild_43907445 | 1399940878                          | Ca_kabuli_Chr06 | 43907445                | T/C  | NA                 | INTERGENIC                    | NA                                          |
| Kabuli_wild_44022191 | 1399940879                          | Ca_kabuli_Chr06 | 44022191                | T/G  | Gene_Ca_24870      | NON_SYNONYMOUS_CODING         | Protein of unknown function DUF1421         |
| Kabuli_wild_44293637 | 1399940880                          | Ca_kabuli_Chr06 | 44293637                | C/T  | NA                 | INTERGENIC                    | NA                                          |
| Kabuli_wild_44293647 | 1399940881                          | Ca_kabuli_Chr06 | 44293647                | T/A  | NA                 | INTERGENIC                    | NA                                          |
| Kabuli_wild_44293648 | 1399940882                          | Ca_kabuli_Chr06 | 44293648                | T/A  | NA                 | INTERGENIC                    | NA                                          |
| Kabuli_wild_44293649 | 1399940883                          | Ca_kabuli_Chr06 | 44293649                | A/G  | NA                 | INTERGENIC                    | NA                                          |
| Kabuli_wild_44293651 | 1399940884                          | Ca_kabuli_Chr06 | 44293651                | G/T  | NA                 | INTERGENIC                    | NA                                          |
| Kabuli_wild_44293673 | 1399940885                          | Ca_kabuli_Chr06 | 44293673                | C/T  | NA                 | INTERGENIC                    | NA                                          |
| Kabuli_wild_44293675 | 1399940886                          | Ca_kabuli_Chr06 | 44293675                | G/A  | NA                 | INTERGENIC                    | NA                                          |
| Kabuli_wild_44293681 | 1399940887                          | Ca_kabuli_Chr06 | 44293681                | T/A  | NA                 | INTERGENIC                    | NA                                          |
| Kabuli_wild_44530888 | 1399940888                          | Ca_kabuli_Chr06 | 44530888                | C/A  | Gene_Ca_24241      | NON_SYNONYMOUS_CODING         | Aspartate/glutamate/uridylatekinase         |
| Kabuli_wild_44530889 | 1399940889                          | Ca_kabuli_Chr06 | 44530889                | A/G  | Gene_Ca_24241      | SYNONYMOUS_CODING             | Aspartate/glutamate/uridylatekinase         |
| Kabuli_wild_44707313 | 1399940890                          | Ca_kabuli_Chr06 | 44707313                | T/A  | NA                 | INTERGENIC                    | NA                                          |
| Kabuli_wild_44711166 | 1399940891                          | Ca_kabuli_Chr06 | 44711166                | A/G  | NA                 | INTERGENIC                    | NA                                          |
| Kabuli_wild_44711168 | 1399940892                          | Ca_kabuli_Chr06 | 44711168                | T/G  | NA                 | INTERGENIC                    | NA                                          |
| Kabuli_wild_44711216 | 1399940893                          | Ca_kabuli_Chr06 | 44711216                | G/A  | NA                 | INTERGENIC                    | NA                                          |
| Kabuli_wild_44711238 | 1399940894                          | Ca_kabuli_Chr06 | 44711238                | C/G  | NA                 | INTERGENIC                    | NA                                          |
| Kabuli_wild_44792457 | 1399940895                          | Ca_kabuli_Chr06 | 44792457                | G/A  | Gene_Ca_13807      | NON_SYNONYMOUS_CODING         | NA                                          |
| Kabuli_wild_44792461 | 1399940896                          | Ca_kabuli_Chr06 | 44792461                | C/G  | Gene_Ca_13807      | NON_SYNONYMOUS_CODING         | NA                                          |
| Kabuli_wild_44792553 | 1399940897                          | Ca_kabuli_Chr06 | 44792553                | G/A  | Gene_Ca_13807      | SYNONYMOUS_CODING             | NA                                          |
| Kabuli_wild_44792566 | 1399940898                          | Ca_kabuli_Chr06 | 44792566                | G/C  | Gene_Ca_13807      | SYNONYMOUS_CODING             | NA                                          |
| Kabuli_wild_44814082 | 1399940899                          | Ca_kabuli_Chr06 | 44814082                | G/A  | NA                 | INTERGENIC                    | NA                                          |
| Kabuli_wild_44944917 | 1399940900                          | Ca_kabuli_Chr06 | 44944917                | G/A  | Gene_Ca_13813      | NON_SYNONYMOUS_CODING         | Carbohydrate/puinekinase,PfkB,conservedsite |
| Kabuli_wild_44959884 | 1399940901                          | Ca_kabuli_Chr06 | 44959884                | A/C  | NA                 | INTERGENIC                    | NA                                          |
| Kabuli_wild_44959886 | 1399940902                          | Ca_kabuli_Chr06 | 44959886                | G/T  | NA                 | INTERGENIC                    | NA                                          |
| Kabuli_wild_44959905 | 1399940903                          | Ca_kabuli_Chr06 | 44959905                | A/C  | NA                 | INTERGENIC                    | NA                                          |
| Kabuli_wild_45178044 | 1399940904                          | Ca_kabuli_Chr06 | 45178044                | G/A  | NA                 | INTERGENIC                    | NA                                          |
| Kabuli_wild_45178060 | 1399940905                          | Ca_kabuli_Chr06 | 45178060                | G/A  | NA                 | INTERGENIC                    | NA                                          |
| Kabuli_wild_45178061 | 1399940906                          | Ca_kabuli_Chr06 | 45178061                | C/T  | NA                 | INTERGENIC                    | NA                                          |
| Kabuli_wild_45178077 | 1399940907                          | Ca_kabuli_Chr06 | 45178077                | C/A  | NA                 | INTERGENIC                    | NA                                          |
| Kabuli_wild_45293271 | 1399940908                          | Ca_kabuli_Chr06 | 45293271                | T/C  | NA                 | INTERGENIC                    | NA                                          |
| Kabuli_wild_45500961 | 1399940909                          | Ca_kabuli_Chr06 | 45500961                | T/A  | Gene_Ca_13841      | NON_SYNONYMOUS_CODING         | Ankyrinrepeat                               |
| Kabuli_wild_45505942 | 1399940910                          | Ca_kabuli_Chr06 | 45505942                | A/G  | Gene_Ca_13841      | NON_SYNONYMOUS_CODING         | Ankyrinrepeat                               |
| Kabuli_wild_45524526 | 1399940911                          | Ca_kabuli_Chr06 | 45524526                | G/C  | NA                 | INTERGENIC                    | NA                                          |

| SNP IDs              | NCBI dbSNP accession IDs (NCBI_SS#) | Chromosomes      | Physical positions (bp) | SNPs | Gene accession IDs | Sequence components of genome | Putative functions                                 |
|----------------------|-------------------------------------|------------------|-------------------------|------|--------------------|-------------------------------|----------------------------------------------------|
| Kabuli_wild_45538329 | 1399940912                          | Ca_kabuli_Chrom6 | 45538329                | A/G  | Gene_Ca_13846      | INTRON                        | Thiolase                                           |
| Kabuli_wild_45550031 | 1399940913                          | Ca_kabuli_Chrom6 | 45550031                | C/A  | NA                 | INTERGENIC                    | NA                                                 |
| Kabuli_wild_45554040 | 1399940914                          | Ca_kabuli_Chrom6 | 45554040                | G/A  | Gene_Ca_13847      | DOWNSTREAM                    | C2 calcium-dependent membrane targeting            |
| Kabuli_wild_45637276 | 1399940915                          | Ca_kabuli_Chrom6 | 45637276                | G/A  | Gene_Ca_13850      | NON_SYNONYMOUS_CODING         | NA                                                 |
| Kabuli_wild_45637284 | 1399940916                          | Ca_kabuli_Chrom6 | 45637284                | A/G  | Gene_Ca_13850      | SYNONYMOUS_CODING             | NA                                                 |
| Kabuli_wild_45637292 | 1399940917                          | Ca_kabuli_Chrom6 | 45637292                | C/A  | Gene_Ca_13850      | STOP_GAINED                   | NA                                                 |
| Kabuli_wild_45637293 | 1399940918                          | Ca_kabuli_Chrom6 | 45637293                | T/C  | Gene_Ca_13850      | SYNONYMOUS_CODING             | NA                                                 |
| Kabuli_wild_45637308 | 1399940919                          | Ca_kabuli_Chrom6 | 45637308                | G/T  | Gene_Ca_13850      | SYNONYMOUS_CODING             | NA                                                 |
| Kabuli_wild_45637309 | 1399940920                          | Ca_kabuli_Chrom6 | 45637309                | G/A  | Gene_Ca_13850      | NON_SYNONYMOUS_CODING         | NA                                                 |
| Kabuli_wild_45637315 | 1399940921                          | Ca_kabuli_Chrom6 | 45637315                | C/A  | Gene_Ca_13850      | NON_SYNONYMOUS_CODING         | NA                                                 |
| Kabuli_wild_45637322 | 1399940922                          | Ca_kabuli_Chrom6 | 45637322                | C/A  | Gene_Ca_13850      | NON_SYNONYMOUS_CODING         | NA                                                 |
| Kabuli_wild_45637328 | 1399940923                          | Ca_kabuli_Chrom6 | 45637328                | A/G  | Gene_Ca_13850      | SYNONYMOUS_CODING             | NA                                                 |
| Kabuli_wild_45637331 | 1399940924                          | Ca_kabuli_Chrom6 | 45637331                | T/G  | Gene_Ca_13850      | NON_SYNONYMOUS_CODING         | NA                                                 |
| Kabuli_wild_45693275 | 1399940925                          | Ca_kabuli_Chrom6 | 45693275                | G/A  | NA                 | INTERGENIC                    | NA                                                 |
| Kabuli_wild_45978263 | 1399940926                          | Ca_kabuli_Chrom6 | 45978263                | G/A  | NA                 | INTERGENIC                    | NA                                                 |
| Kabuli_wild_45982145 | 1399940927                          | Ca_kabuli_Chrom6 | 45982145                | T/C  | Gene_Ca_13868      | NON_SYNONYMOUS_CODING         | NA                                                 |
| Kabuli_wild_46113631 | 1399940928                          | Ca_kabuli_Chrom6 | 46113631                | T/G  | Gene_Ca_13877      | SYNONYMOUS_CODING             | NA                                                 |
| Kabuli_wild_46113656 | 1399940929                          | Ca_kabuli_Chrom6 | 46113656                | T/G  | Gene_Ca_13877      | SYNONYMOUS_CODING             | NA                                                 |
| Kabuli_wild_46113696 | 1399940930                          | Ca_kabuli_Chrom6 | 46113696                | C/G  | Gene_Ca_13877      | SYNONYMOUS_CODING             | NA                                                 |
| Kabuli_wild_46113717 | 1399940931                          | Ca_kabuli_Chrom6 | 46113717                | T/C  | Gene_Ca_13877      | SYNONYMOUS_CODING             | NA                                                 |
| Kabuli_wild_46157942 | 1399940932                          | Ca_kabuli_Chrom6 | 46157942                | A/C  | Gene_Ca_13881      | NON_SYNONYMOUS_CODING         | Aminoacyl-tRNA synthetase, class I, conserved site |
| Kabuli_wild_46157943 | 1399940933                          | Ca_kabuli_Chrom6 | 46157943                | G/T  | Gene_Ca_13881      | NON_SYNONYMOUS_CODING         | Aminoacyl-tRNA synthetase, class I, conserved site |
| Kabuli_wild_46268499 | 1399940934                          | Ca_kabuli_Chrom6 | 46268499                | C/A  | NA                 | INTERGENIC                    | NA                                                 |
| Kabuli_wild_46734668 | 1399940935                          | Ca_kabuli_Chrom6 | 46734668                | A/C  | NA                 | INTERGENIC                    | NA                                                 |
| Kabuli_wild_46734706 | 1399940936                          | Ca_kabuli_Chrom6 | 46734706                | C/G  | NA                 | INTERGENIC                    | NA                                                 |
| Kabuli_wild_46734717 | 1399940937                          | Ca_kabuli_Chrom6 | 46734717                | A/G  | NA                 | INTERGENIC                    | NA                                                 |
| Kabuli_wild_46734725 | 1399940938                          | Ca_kabuli_Chrom6 | 46734725                | G/A  | NA                 | INTERGENIC                    | NA                                                 |
| Kabuli_wild_46734726 | 1399940939                          | Ca_kabuli_Chrom6 | 46734726                | T/C  | NA                 | INTERGENIC                    | NA                                                 |
| Kabuli_wild_46734782 | 1399940940                          | Ca_kabuli_Chrom6 | 46734782                | C/A  | NA                 | INTERGENIC                    | NA                                                 |
| Kabuli_wild_46734817 | 1399940941                          | Ca_kabuli_Chrom6 | 46734817                | G/T  | NA                 | INTERGENIC                    | NA                                                 |
| Kabuli_wild_46765659 | 1399940942                          | Ca_kabuli_Chrom6 | 46765659                | G/A  | Gene_Ca_17737      | NON_SYNONYMOUS_CODING         | Peptidase C48, SUMO/Sentrin/Ubl1                   |
| Kabuli_wild_46765661 | 1399940943                          | Ca_kabuli_Chrom6 | 46765661                | A/T  | Gene_Ca_17737      | SYNONYMOUS_CODING             | Peptidase C48, SUMO/Sentrin/Ubl1                   |
| Kabuli_wild_46765670 | 1399940944                          | Ca_kabuli_Chrom6 | 46765670                | T/A  | Gene_Ca_17737      | NON_SYNONYMOUS_CODING         | Peptidase C48, SUMO/Sentrin/Ubl1                   |
| Kabuli_wild_46765673 | 1399940945                          | Ca_kabuli_Chrom6 | 46765673                | G/A  | Gene_Ca_17737      | SYNONYMOUS_CODING             | Peptidase C48, SUMO/Sentrin/Ubl1                   |
| Kabuli_wild_46765696 | 1399940946                          | Ca_kabuli_Chrom6 | 46765696                | C/T  | Gene_Ca_17737      | NON_SYNONYMOUS_CODING         | Peptidase C48, SUMO/Sentrin/Ubl1                   |
| Kabuli_wild_46765704 | 1399940947                          | Ca_kabuli_Chrom6 | 46765704                | G/A  | Gene_Ca_17737      | NON_SYNONYMOUS_CODING         | Peptidase C48, SUMO/Sentrin/Ubl1                   |
| Kabuli_wild_46765725 | 1399940948                          | Ca_kabuli_Chrom6 | 46765725                | C/T  | Gene_Ca_17737      | NON_SYNONYMOUS_CODING         | Peptidase C48, SUMO/Sentrin/Ubl1                   |
| Kabuli_wild_46765741 | 1399940949                          | Ca_kabuli_Chrom6 | 46765741                | G/A  | Gene_Ca_17737      | NON_SYNONYMOUS_CODING         | Peptidase C48, SUMO/Sentrin/Ubl1                   |
| Kabuli_wild_46765753 | 1399940950                          | Ca_kabuli_Chrom6 | 46765753                | A/G  | Gene_Ca_17737      | NON_SYNONYMOUS_CODING         | Peptidase C48, SUMO/Sentrin/Ubl1                   |
| Kabuli_wild_46765778 | 1399940951                          | Ca_kabuli_Chrom6 | 46765778                | C/A  | Gene_Ca_17737      | SYNONYMOUS_CODING             | Peptidase C48, SUMO/Sentrin/Ubl1                   |
| Kabuli_wild_46896903 | 1399940952                          | Ca_kabuli_Chrom6 | 46896903                | C/T  | NA                 | INTERGENIC                    | NA                                                 |
| Kabuli_wild_46896910 | 1399940953                          | Ca_kabuli_Chrom6 | 46896910                | A/C  | NA                 | INTERGENIC                    | NA                                                 |
| Kabuli_wild_46898225 | 1399940954                          | Ca_kabuli_Chrom6 | 46898225                | A/C  | NA                 | INTERGENIC                    | NA                                                 |
| Kabuli_wild_46898305 | 1399940955                          | Ca_kabuli_Chrom6 | 46898305                | T/G  | NA                 | INTERGENIC                    | NA                                                 |

| SNP IDs              | NCBI dbSNP accession IDs (NCBI_SS#) | Chromosomes     | Physical positions (bp) | SNPs | Gene accession IDs | Sequence components of genome | Putative functions                          |
|----------------------|-------------------------------------|-----------------|-------------------------|------|--------------------|-------------------------------|---------------------------------------------|
| Kabuli_wild_46898316 | 1399940956                          | Ca_kabuli_Chr06 | 46898316                | T/G  | NA                 | INTERGENIC                    | NA                                          |
| Kabuli_wild_46898317 | 1399940957                          | Ca_kabuli_Chr06 | 46898317                | C/T  | NA                 | INTERGENIC                    | NA                                          |
| Kabuli_wild_46898661 | 1399940958                          | Ca_kabuli_Chr06 | 46898661                | C/A  | NA                 | INTERGENIC                    | NA                                          |
| Kabuli_wild_46898699 | 1399940959                          | Ca_kabuli_Chr06 | 46898699                | G/T  | NA                 | INTERGENIC                    | NA                                          |
| Kabuli_wild_46899229 | 1399940960                          | Ca_kabuli_Chr06 | 46899229                | G/A  | NA                 | INTERGENIC                    | NA                                          |
| Kabuli_wild_46979240 | 1399940961                          | Ca_kabuli_Chr06 | 46979240                | C/T  | Gene_Ca_17728      | UPSTREAM                      | Pentatricopeptide repeat                    |
| Kabuli_wild_46979267 | 1399940962                          | Ca_kabuli_Chr06 | 46979267                | C/A  | Gene_Ca_17728      | UPSTREAM                      | Pentatricopeptide repeat                    |
| Kabuli_wild_46998962 | 1399940963                          | Ca_kabuli_Chr06 | 46998962                | G/A  | NA                 | INTERGENIC                    | NA                                          |
| Kabuli_wild_46998967 | 1399940964                          | Ca_kabuli_Chr06 | 46998967                | A/G  | NA                 | INTERGENIC                    | NA                                          |
| Kabuli_wild_46998973 | 1399940965                          | Ca_kabuli_Chr06 | 46998973                | C/T  | NA                 | INTERGENIC                    | NA                                          |
| Kabuli_wild_46999001 | 1399940966                          | Ca_kabuli_Chr06 | 46999001                | C/T  | NA                 | INTERGENIC                    | NA                                          |
| Kabuli_wild_46999004 | 1399940967                          | Ca_kabuli_Chr06 | 46999004                | C/T  | NA                 | INTERGENIC                    | NA                                          |
| Kabuli_wild_46999007 | 1399940968                          | Ca_kabuli_Chr06 | 46999007                | T/C  | NA                 | INTERGENIC                    | NA                                          |
| Kabuli_wild_46999033 | 1399940969                          | Ca_kabuli_Chr06 | 46999033                | G/A  | NA                 | INTERGENIC                    | NA                                          |
| Kabuli_wild_46999035 | 1399940970                          | Ca_kabuli_Chr06 | 46999035                | A/T  | NA                 | INTERGENIC                    | NA                                          |
| Kabuli_wild_46999052 | 1399940971                          | Ca_kabuli_Chr06 | 46999052                | A/G  | NA                 | INTERGENIC                    | NA                                          |
| Kabuli_wild_47024720 | 1399940972                          | Ca_kabuli_Chr06 | 47024720                | A/G  | NA                 | INTERGENIC                    | NA                                          |
| Kabuli_wild_47906599 | 1399940973                          | Ca_kabuli_Chr06 | 47906599                | A/G  | Gene_Ca_23445      | INTRON                        | Zinc finger,CCHC-type                       |
| Kabuli_wild_47906615 | 1399940974                          | Ca_kabuli_Chr06 | 47906615                | A/T  | Gene_Ca_23445      | INTRON                        | Zinc finger,CCHC-type                       |
| Kabuli_wild_47906629 | 1399940975                          | Ca_kabuli_Chr06 | 47906629                | T/G  | Gene_Ca_23445      | INTRON                        | Zinc finger,CCHC-type                       |
| Kabuli_wild_47906647 | 1399940976                          | Ca_kabuli_Chr06 | 47906647                | T/C  | Gene_Ca_23445      | INTRON                        | Zinc finger,CCHC-type                       |
| Kabuli_wild_47906677 | 1399940977                          | Ca_kabuli_Chr06 | 47906677                | G/A  | Gene_Ca_23445      | INTRON                        | Zinc finger,CCHC-type                       |
| Kabuli_wild_47906680 | 1399940978                          | Ca_kabuli_Chr06 | 47906680                | C/T  | Gene_Ca_23445      | INTRON                        | Zinc finger,CCHC-type                       |
| Kabuli_wild_47906683 | 1399940979                          | Ca_kabuli_Chr06 | 47906683                | G/A  | Gene_Ca_23445      | INTRON                        | Zinc finger,CCHC-type                       |
| Kabuli_wild_48088550 | 1399940980                          | Ca_kabuli_Chr06 | 48088550                | G/A  | NA                 | INTERGENIC                    | NA                                          |
| Kabuli_wild_48088561 | 1399940981                          | Ca_kabuli_Chr06 | 48088561                | C/T  | NA                 | INTERGENIC                    | NA                                          |
| Kabuli_wild_48088592 | 1399940982                          | Ca_kabuli_Chr06 | 48088592                | C/T  | NA                 | INTERGENIC                    | NA                                          |
| Kabuli_wild_48088621 | 1399940983                          | Ca_kabuli_Chr06 | 48088621                | G/A  | NA                 | INTERGENIC                    | NA                                          |
| Kabuli_wild_48251190 | 1399940984                          | Ca_kabuli_Chr06 | 48251190                | T/G  | Gene_Ca_24603      | INTRON                        | Queuine/otherRNA-ribosyltransferase         |
| Kabuli_wild_48251264 | 1399940985                          | Ca_kabuli_Chr06 | 48251264                | T/C  | Gene_Ca_24603      | INTRON                        | Queuine/otherRNA-ribosyltransferase         |
| Kabuli_wild_48255380 | 1399940986                          | Ca_kabuli_Chr06 | 48255380                | A/C  | Gene_Ca_24604      | DOWNSTREAM                    | DNA/RNAhelicase,DEAD/DEAHboxtype,N-terminal |
| Kabuli_wild_48255392 | 1399940987                          | Ca_kabuli_Chr06 | 48255392                | G/A  | Gene_Ca_24604      | DOWNSTREAM                    | DNA/RNAhelicase,DEAD/DEAHboxtype,N-terminal |
| Kabuli_wild_48255538 | 1399940988                          | Ca_kabuli_Chr06 | 48255538                | A/G  | Gene_Ca_24604      | DOWNSTREAM                    | DNA/RNAhelicase,DEAD/DEAHboxtype,N-terminal |
| Kabuli_wild_48255558 | 1399940989                          | Ca_kabuli_Chr06 | 48255558                | C/T  | Gene_Ca_24604      | DOWNSTREAM                    | DNA/RNAhelicase,DEAD/DEAHboxtype,N-terminal |
| Kabuli_wild_48255559 | 1399940990                          | Ca_kabuli_Chr06 | 48255559                | A/G  | Gene_Ca_24604      | DOWNSTREAM                    | DNA/RNAhelicase,DEAD/DEAHboxtype,N-terminal |
| Kabuli_wild_48255568 | 1399940991                          | Ca_kabuli_Chr06 | 48255568                | A/G  | Gene_Ca_24604      | DOWNSTREAM                    | DNA/RNAhelicase,DEAD/DEAHboxtype,N-terminal |
| Kabuli_wild_48255599 | 1399940992                          | Ca_kabuli_Chr06 | 48255599                | C/A  | Gene_Ca_24604      | DOWNSTREAM                    | DNA/RNAhelicase,DEAD/DEAHboxtype,N-terminal |
| Kabuli_wild_48314052 | 1399940993                          | Ca_kabuli_Chr06 | 48314052                | T/A  | Gene_Ca_24606      | SYNONYMOUS_CODING             | NA                                          |
| Kabuli_wild_48314122 | 1399940994                          | Ca_kabuli_Chr06 | 48314122                | C/G  | Gene_Ca_24606      | NON_SYNONYMOUS_CODING         | NA                                          |
| Kabuli_wild_48314744 | 1399940995                          | Ca_kabuli_Chr06 | 48314744                | T/C  | Gene_Ca_24606      | DOWNSTREAM                    | NA                                          |
| Kabuli_wild_48314834 | 1399940996                          | Ca_kabuli_Chr06 | 48314834                | C/T  | Gene_Ca_24606      | DOWNSTREAM                    | NA                                          |
| Kabuli_wild_48315189 | 1399940997                          | Ca_kabuli_Chr06 | 48315189                | C/T  | Gene_Ca_24606      | DOWNSTREAM                    | NA                                          |
| Kabuli_wild_48315194 | 1399940998                          | Ca_kabuli_Chr06 | 48315194                | C/A  | Gene_Ca_24606      | DOWNSTREAM                    | NA                                          |
| Kabuli_wild_48315278 | 1399940999                          | Ca_kabuli_Chr06 | 48315278                | G/A  | Gene_Ca_24606      | DOWNSTREAM                    | NA                                          |

| SNP IDs              | NCBI dbSNP accession IDs (NCBI_SS#) | Chromosomes      | Physical positions (bp) | SNPs | Gene accession IDs | Sequence components of genome | Putative functions                |
|----------------------|-------------------------------------|------------------|-------------------------|------|--------------------|-------------------------------|-----------------------------------|
| Kabuli_wild_48315340 | 1399941000                          | Ca_kabuli_Chrom6 | 48315340                | C/A  | Gene_Ca_24606      | DOWNSTREAM                    | NA                                |
| Kabuli_wild_48315343 | 1399941001                          | Ca_kabuli_Chrom6 | 48315343                | G/T  | Gene_Ca_24606      | DOWNSTREAM                    | NA                                |
| Kabuli_wild_48709584 | 1399941002                          | Ca_kabuli_Chrom6 | 48709584                | T/C  | NA                 | INTERGENIC                    | NA                                |
| Kabuli_wild_48709664 | 1399941003                          | Ca_kabuli_Chrom6 | 48709664                | C/T  | NA                 | INTERGENIC                    | NA                                |
| Kabuli_wild_48792532 | 1399941004                          | Ca_kabuli_Chrom6 | 48792532                | A/G  | Gene_Ca_20702      | SYNONYMOUS_CODING             | NA                                |
| Kabuli_wild_48792602 | 1399941005                          | Ca_kabuli_Chrom6 | 48792602                | C/T  | Gene_Ca_20702      | SYNONYMOUS_CODING             | NA                                |
| Kabuli_wild_48792604 | 1399941006                          | Ca_kabuli_Chrom6 | 48792604                | A/G  | Gene_Ca_20702      | SYNONYMOUS_CODING             | NA                                |
| Kabuli_wild_48792609 | 1399941007                          | Ca_kabuli_Chrom6 | 48792609                | G/T  | Gene_Ca_20702      | SYNONYMOUS_CODING             | NA                                |
| Kabuli_wild_48799366 | 1399941008                          | Ca_kabuli_Chrom6 | 48799366                | T/A  | NA                 | INTERGENIC                    | NA                                |
| Kabuli_wild_48799368 | 1399941009                          | Ca_kabuli_Chrom6 | 48799368                | A/T  | NA                 | INTERGENIC                    | NA                                |
| Kabuli_wild_48799372 | 1399941010                          | Ca_kabuli_Chrom6 | 48799372                | C/T  | NA                 | INTERGENIC                    | NA                                |
| Kabuli_wild_48799388 | 1399941011                          | Ca_kabuli_Chrom6 | 48799388                | C/A  | NA                 | INTERGENIC                    | NA                                |
| Kabuli_wild_48799407 | 1399941012                          | Ca_kabuli_Chrom6 | 48799407                | T/C  | NA                 | INTERGENIC                    | NA                                |
| Kabuli_wild_48799413 | 1399941013                          | Ca_kabuli_Chrom6 | 48799413                | T/C  | NA                 | INTERGENIC                    | NA                                |
| Kabuli_wild_48799427 | 1399941014                          | Ca_kabuli_Chrom6 | 48799427                | G/T  | NA                 | INTERGENIC                    | NA                                |
| Kabuli_wild_48864625 | 1399941015                          | Ca_kabuli_Chrom6 | 48864625                | G/A  | NA                 | INTERGENIC                    | NA                                |
| Kabuli_wild_48864639 | 1399941016                          | Ca_kabuli_Chrom6 | 48864639                | A/C  | NA                 | INTERGENIC                    | NA                                |
| Kabuli_wild_48864699 | 1399941017                          | Ca_kabuli_Chrom6 | 48864699                | T/C  | NA                 | INTERGENIC                    | NA                                |
| Kabuli_wild_48869449 | 1399941018                          | Ca_kabuli_Chrom6 | 48869449                | A/G  | Gene_Ca_20706      | UPSTREAM                      | Integrase,catalyticcore           |
| Kabuli_wild_48869452 | 1399941019                          | Ca_kabuli_Chrom6 | 48869452                | T/C  | Gene_Ca_20706      | UPSTREAM                      | Integrase,catalyticcore           |
| Kabuli_wild_48869512 | 1399941020                          | Ca_kabuli_Chrom6 | 48869512                | G/C  | Gene_Ca_20706      | UPSTREAM                      | Integrase,catalyticcore           |
| Kabuli_wild_48869529 | 1399941021                          | Ca_kabuli_Chrom6 | 48869529                | T/C  | Gene_Ca_20706      | UPSTREAM                      | Integrase,catalyticcore           |
| Kabuli_wild_48869539 | 1399941022                          | Ca_kabuli_Chrom6 | 48869539                | A/G  | Gene_Ca_20706      | UPSTREAM                      | Integrase,catalyticcore           |
| Kabuli_wild_48869577 | 1399941023                          | Ca_kabuli_Chrom6 | 48869577                | C/T  | Gene_Ca_20706      | UPSTREAM                      | Integrase,catalyticcore           |
| Kabuli_wild_48897552 | 1399941024                          | Ca_kabuli_Chrom6 | 48897552                | G/A  | NA                 | INTERGENIC                    | NA                                |
| Kabuli_wild_48940386 | 1399941025                          | Ca_kabuli_Chrom6 | 48940386                | A/C  | Gene_Ca_20710      | SYNONYMOUS_CODING             | Clathrinadaptorcomplex,smallchain |
| Kabuli_wild_49044772 | 1399941026                          | Ca_kabuli_Chrom6 | 49044772                | A/C  | NA                 | INTERGENIC                    | NA                                |
| Kabuli_wild_49044780 | 1399941027                          | Ca_kabuli_Chrom6 | 49044780                | G/A  | NA                 | INTERGENIC                    | NA                                |
| Kabuli_wild_49044785 | 1399941028                          | Ca_kabuli_Chrom6 | 49044785                | C/T  | NA                 | INTERGENIC                    | NA                                |
| Kabuli_wild_49044788 | 1399941029                          | Ca_kabuli_Chrom6 | 49044788                | T/A  | NA                 | INTERGENIC                    | NA                                |
| Kabuli_wild_49044794 | 1399941030                          | Ca_kabuli_Chrom6 | 49044794                | T/A  | NA                 | INTERGENIC                    | NA                                |
| Kabuli_wild_49044802 | 1399941031                          | Ca_kabuli_Chrom6 | 49044802                | C/T  | NA                 | INTERGENIC                    | NA                                |
| Kabuli_wild_49044805 | 1399941032                          | Ca_kabuli_Chrom6 | 49044805                | G/A  | NA                 | INTERGENIC                    | NA                                |
| Kabuli_wild_49044808 | 1399941033                          | Ca_kabuli_Chrom6 | 49044808                | C/T  | NA                 | INTERGENIC                    | NA                                |
| Kabuli_wild_49044810 | 1399941034                          | Ca_kabuli_Chrom6 | 49044810                | G/A  | NA                 | INTERGENIC                    | NA                                |
| Kabuli_wild_49044814 | 1399941035                          | Ca_kabuli_Chrom6 | 49044814                | G/T  | NA                 | INTERGENIC                    | NA                                |
| Kabuli_wild_49044821 | 1399941036                          | Ca_kabuli_Chrom6 | 49044821                | C/G  | NA                 | INTERGENIC                    | NA                                |
| Kabuli_wild_49044824 | 1399941037                          | Ca_kabuli_Chrom6 | 49044824                | C/T  | NA                 | INTERGENIC                    | NA                                |
| Kabuli_wild_49044826 | 1399941038                          | Ca_kabuli_Chrom6 | 49044826                | G/A  | NA                 | INTERGENIC                    | NA                                |
| Kabuli_wild_49044835 | 1399941039                          | Ca_kabuli_Chrom6 | 49044835                | C/A  | NA                 | INTERGENIC                    | NA                                |
| Kabuli_wild_49044838 | 1399941040                          | Ca_kabuli_Chrom6 | 49044838                | C/A  | NA                 | INTERGENIC                    | NA                                |
| Kabuli_wild_49044839 | 1399941041                          | Ca_kabuli_Chrom6 | 49044839                | T/A  | NA                 | INTERGENIC                    | NA                                |
| Kabuli_wild_49044842 | 1399941042                          | Ca_kabuli_Chrom6 | 49044842                | G/A  | NA                 | INTERGENIC                    | NA                                |
| Kabuli_wild_49044847 | 1399941043                          | Ca_kabuli_Chrom6 | 49044847                | G/A  | NA                 | INTERGENIC                    | NA                                |

| SNP IDs              | NCBI dbSNP accession IDs (NCBI_SS#) | Chromosomes      | Physical positions (bp) | SNPs | Gene accession IDs | Sequence components of genome | Putative functions               |
|----------------------|-------------------------------------|------------------|-------------------------|------|--------------------|-------------------------------|----------------------------------|
| Kabuli_wild_49044850 | 1399941044                          | Ca_kabuli_Chrom6 | 49044850                | C/A  | NA                 | INTERGENIC                    | NA                               |
| Kabuli_wild_49044915 | 1399941045                          | Ca_kabuli_Chrom6 | 49044915                | A/G  | NA                 | INTERGENIC                    | NA                               |
| Kabuli_wild_49044928 | 1399941046                          | Ca_kabuli_Chrom6 | 49044928                | C/A  | NA                 | INTERGENIC                    | NA                               |
| Kabuli_wild_49044937 | 1399941047                          | Ca_kabuli_Chrom6 | 49044937                | A/G  | NA                 | INTERGENIC                    | NA                               |
| Kabuli_wild_49044944 | 1399941048                          | Ca_kabuli_Chrom6 | 49044944                | A/G  | NA                 | INTERGENIC                    | NA                               |
| Kabuli_wild_49044947 | 1399941049                          | Ca_kabuli_Chrom6 | 49044947                | C/G  | NA                 | INTERGENIC                    | NA                               |
| Kabuli_wild_49044966 | 1399941050                          | Ca_kabuli_Chrom6 | 49044966                | G/T  | NA                 | INTERGENIC                    | NA                               |
| Kabuli_wild_49044968 | 1399941051                          | Ca_kabuli_Chrom6 | 49044968                | G/T  | NA                 | INTERGENIC                    | NA                               |
| Kabuli_wild_49101908 | 1399941052                          | Ca_kabuli_Chrom6 | 49101908                | C/A  | NA                 | INTERGENIC                    | NA                               |
| Kabuli_wild_49167340 | 1399941053                          | Ca_kabuli_Chrom6 | 49167340                | C/T  | NA                 | INTERGENIC                    | NA                               |
| Kabuli_wild_49167341 | 1399941054                          | Ca_kabuli_Chrom6 | 49167341                | T/G  | NA                 | INTERGENIC                    | NA                               |
| Kabuli_wild_49190196 | 1399941055                          | Ca_kabuli_Chrom6 | 49190196                | C/T  | Gene_Ca_20723      | SYNONYMOUS_CODING             | Peptidase C48, SUMO/Sentrin/Ubl1 |
| Kabuli_wild_49190223 | 1399941056                          | Ca_kabuli_Chrom6 | 49190223                | T/A  | Gene_Ca_20723      | SYNONYMOUS_CODING             | Peptidase C48, SUMO/Sentrin/Ubl1 |
| Kabuli_wild_49190255 | 1399941057                          | Ca_kabuli_Chrom6 | 49190255                | G/A  | Gene_Ca_20723      | SYNONYMOUS_CODING             | Peptidase C48, SUMO/Sentrin/Ubl1 |
| Kabuli_wild_49190264 | 1399941058                          | Ca_kabuli_Chrom6 | 49190264                | G/A  | Gene_Ca_20723      | SYNONYMOUS_CODING             | Peptidase C48, SUMO/Sentrin/Ubl1 |
| Kabuli_wild_49190269 | 1399941059                          | Ca_kabuli_Chrom6 | 49190269                | G/C  | Gene_Ca_20723      | NON_SYNONYMOUS_CODING         | Peptidase C48, SUMO/Sentrin/Ubl1 |
| Kabuli_wild_49190272 | 1399941060                          | Ca_kabuli_Chrom6 | 49190272                | G/T  | Gene_Ca_20723      | NON_SYNONYMOUS_CODING         | Peptidase C48, SUMO/Sentrin/Ubl1 |
| Kabuli_wild_49222235 | 1399941061                          | Ca_kabuli_Chrom6 | 49222235                | G/C  | NA                 | INTERGENIC                    | NA                               |
| Kabuli_wild_49222251 | 1399941062                          | Ca_kabuli_Chrom6 | 49222251                | G/A  | NA                 | INTERGENIC                    | NA                               |
| Kabuli_wild_49222268 | 1399941063                          | Ca_kabuli_Chrom6 | 49222268                | T/A  | NA                 | INTERGENIC                    | NA                               |
| Kabuli_wild_49222275 | 1399941064                          | Ca_kabuli_Chrom6 | 49222275                | A/C  | NA                 | INTERGENIC                    | NA                               |
| Kabuli_wild_49222290 | 1399941065                          | Ca_kabuli_Chrom6 | 49222290                | C/T  | NA                 | INTERGENIC                    | NA                               |
| Kabuli_wild_49222291 | 1399941066                          | Ca_kabuli_Chrom6 | 49222291                | G/A  | NA                 | INTERGENIC                    | NA                               |
| Kabuli_wild_49377275 | 1399941067                          | Ca_kabuli_Chrom6 | 49377275                | G/A  | Gene_Ca_13522      | DOWNSTREAM                    | Leucine-rich repeat              |
| Kabuli_wild_49377353 | 1399941068                          | Ca_kabuli_Chrom6 | 49377353                | A/C  | Gene_Ca_13522      | DOWNSTREAM                    | Leucine-rich repeat              |
| Kabuli_wild_49445785 | 1399941069                          | Ca_kabuli_Chrom6 | 49445785                | A/G  | NA                 | INTERGENIC                    | NA                               |
| Kabuli_wild_49524179 | 1399941070                          | Ca_kabuli_Chrom6 | 49524179                | A/T  | NA                 | INTERGENIC                    | NA                               |
| Kabuli_wild_49565934 | 1399941071                          | Ca_kabuli_Chrom6 | 49565934                | C/T  | Gene_Ca_13509      | START_LOST                    | RibosomalproteinL37e             |
| Kabuli_wild_49629674 | 1399941072                          | Ca_kabuli_Chrom6 | 49629674                | G/A  | NA                 | INTERGENIC                    | NA                               |
| Kabuli_wild_49724431 | 1399941073                          | Ca_kabuli_Chrom6 | 49724431                | C/A  | NA                 | INTERGENIC                    | NA                               |
| Kabuli_wild_49724472 | 1399941074                          | Ca_kabuli_Chrom6 | 49724472                | C/G  | Gene_Ca_13494      | DOWNSTREAM                    | NA                               |
| Kabuli_wild_49724476 | 1399941075                          | Ca_kabuli_Chrom6 | 49724476                | C/T  | Gene_Ca_13494      | DOWNSTREAM                    | NA                               |
| Kabuli_wild_49724558 | 1399941076                          | Ca_kabuli_Chrom6 | 49724558                | C/T  | Gene_Ca_13494      | DOWNSTREAM                    | NA                               |
| Kabuli_wild_49724574 | 1399941077                          | Ca_kabuli_Chrom6 | 49724574                | A/C  | Gene_Ca_13494      | DOWNSTREAM                    | NA                               |
| Kabuli_wild_49724585 | 1399941078                          | Ca_kabuli_Chrom6 | 49724585                | A/T  | Gene_Ca_13494      | DOWNSTREAM                    | NA                               |
| Kabuli_wild_49726711 | 1399941079                          | Ca_kabuli_Chrom6 | 49726711                | C/T  | Gene_Ca_13495      | DOWNSTREAM                    | Peptidase C48, SUMO/Sentrin/Ubl1 |
| Kabuli_wild_49726723 | 1399941080                          | Ca_kabuli_Chrom6 | 49726723                | G/A  | Gene_Ca_13495      | DOWNSTREAM                    | Peptidase C48, SUMO/Sentrin/Ubl1 |
| Kabuli_wild_49726729 | 1399941081                          | Ca_kabuli_Chrom6 | 49726729                | G/A  | Gene_Ca_13495      | DOWNSTREAM                    | Peptidase C48, SUMO/Sentrin/Ubl1 |
| Kabuli_wild_49726734 | 1399941082                          | Ca_kabuli_Chrom6 | 49726734                | G/C  | Gene_Ca_13495      | DOWNSTREAM                    | Peptidase C48, SUMO/Sentrin/Ubl1 |
| Kabuli_wild_49830299 | 1399941083                          | Ca_kabuli_Chrom6 | 49830299                | A/G  | Gene_Ca_13490      | NON_SYNONYMOUS_CODING         | Heat shock protein Hsp70         |
| Kabuli_wild_49846303 | 1399941084                          | Ca_kabuli_Chrom6 | 49846303                | T/G  | Gene_Ca_13488      | SYNONYMOUS_CODING             | Heat shock protein Hsp70         |
| Kabuli_wild_49940602 | 1399941085                          | Ca_kabuli_Chrom6 | 49940602                | C/A  | Gene_Ca_13485      | NON_SYNONYMOUS_CODING         | Pentatricopeptide repeat         |
| Kabuli_wild_49940603 | 1399941086                          | Ca_kabuli_Chrom6 | 49940603                | A/G  | Gene_Ca_13485      | SYNONYMOUS_CODING             | Pentatricopeptide repeat         |
| Kabuli_wild_50152053 | 1399941087                          | Ca_kabuli_Chrom6 | 50152053                | C/T  | NA                 | INTERGENIC                    | NA                               |

| SNP IDs              | NCBI dbSNP accession IDs (NCBI_SS#) | Chromosomes     | Physical positions (bp) | SNPs | Gene accession IDs | Sequence components of genome | Putative functions         |
|----------------------|-------------------------------------|-----------------|-------------------------|------|--------------------|-------------------------------|----------------------------|
| Kabuli_wild_50152082 | 1399941088                          | Ca_kabuli_Chr06 | 50152082                | G/A  | NA                 | INTERGENIC                    | NA                         |
| Kabuli_wild_50152092 | 1399941089                          | Ca_kabuli_Chr06 | 50152092                | T/A  | NA                 | INTERGENIC                    | NA                         |
| Kabuli_wild_50152113 | 1399941090                          | Ca_kabuli_Chr06 | 50152113                | G/A  | NA                 | INTERGENIC                    | NA                         |
| Kabuli_wild_50152124 | 1399941091                          | Ca_kabuli_Chr06 | 50152124                | C/T  | NA                 | INTERGENIC                    | NA                         |
| Kabuli_wild_50152775 | 1399941092                          | Ca_kabuli_Chr06 | 50152775                | C/T  | NA                 | INTERGENIC                    | NA                         |
| Kabuli_wild_50152787 | 1399941093                          | Ca_kabuli_Chr06 | 50152787                | G/A  | NA                 | INTERGENIC                    | NA                         |
| Kabuli_wild_50152840 | 1399941094                          | Ca_kabuli_Chr06 | 50152840                | C/T  | NA                 | INTERGENIC                    | NA                         |
| Kabuli_wild_50152841 | 1399941095                          | Ca_kabuli_Chr06 | 50152841                | G/T  | NA                 | INTERGENIC                    | NA                         |
| Kabuli_wild_50356255 | 1399941096                          | Ca_kabuli_Chr06 | 50356255                | G/A  | NA                 | INTERGENIC                    | NA                         |
| Kabuli_wild_50477672 | 1399941097                          | Ca_kabuli_Chr06 | 50477672                | A/C  | Gene_Ca_13459      | SYNONYMOUS_CODING             | NA                         |
| Kabuli_wild_50617932 | 1399941098                          | Ca_kabuli_Chr06 | 50617932                | G/A  | Gene_Ca_13450      | SYNONYMOUS_CODING             | NA                         |
| Kabuli_wild_50649899 | 1399941099                          | Ca_kabuli_Chr06 | 50649899                | C/T  | NA                 | INTERGENIC                    | NA                         |
| Kabuli_wild_50723595 | 1399941100                          | Ca_kabuli_Chr06 | 50723595                | T/C  | NA                 | INTERGENIC                    | NA                         |
| Kabuli_wild_50890769 | 1399941101                          | Ca_kabuli_Chr06 | 50890769                | G/A  | NA                 | INTERGENIC                    | NA                         |
| Kabuli_wild_51157939 | 1399941102                          | Ca_kabuli_Chr06 | 51157939                | A/C  | Gene_Ca_19183      | NON_SYNONYMOUS_CODING         | NA                         |
| Kabuli_wild_51471573 | 1399941103                          | Ca_kabuli_Chr06 | 51471573                | T/C  | Gene_Ca_19165      | NON_SYNONYMOUS_CODING         | NA                         |
| Kabuli_wild_51606991 | 1399941104                          | Ca_kabuli_Chr06 | 51606991                | T/A  | Gene_Ca_25851      | NON_SYNONYMOUS_CODING         | RibosomalproteinL1         |
| Kabuli_wild_51617288 | 1399941105                          | Ca_kabuli_Chr06 | 51617288                | C/A  | NA                 | INTERGENIC                    | NA                         |
| Kabuli_wild_51692501 | 1399941106                          | Ca_kabuli_Chr06 | 51692501                | C/T  | NA                 | INTERGENIC                    | NA                         |
| Kabuli_wild_51692515 | 1399941107                          | Ca_kabuli_Chr06 | 51692515                | G/C  | NA                 | INTERGENIC                    | NA                         |
| Kabuli_wild_51692534 | 1399941108                          | Ca_kabuli_Chr06 | 51692534                | A/G  | NA                 | INTERGENIC                    | NA                         |
| Kabuli_wild_51692540 | 1399941109                          | Ca_kabuli_Chr06 | 51692540                | G/A  | NA                 | INTERGENIC                    | NA                         |
| Kabuli_wild_51692548 | 1399941110                          | Ca_kabuli_Chr06 | 51692548                | C/T  | NA                 | INTERGENIC                    | NA                         |
| Kabuli_wild_51692550 | 1399941111                          | Ca_kabuli_Chr06 | 51692550                | T/A  | NA                 | INTERGENIC                    | NA                         |
| Kabuli_wild_51692553 | 1399941112                          | Ca_kabuli_Chr06 | 51692553                | T/A  | NA                 | INTERGENIC                    | NA                         |
| Kabuli_wild_52007211 | 1399941113                          | Ca_kabuli_Chr06 | 52007211                | T/C  | NA                 | INTERGENIC                    | NA                         |
| Kabuli_wild_52007225 | 1399941114                          | Ca_kabuli_Chr06 | 52007225                | T/C  | NA                 | INTERGENIC                    | NA                         |
| Kabuli_wild_52007228 | 1399941115                          | Ca_kabuli_Chr06 | 52007228                | C/T  | NA                 | INTERGENIC                    | NA                         |
| Kabuli_wild_52007238 | 1399941116                          | Ca_kabuli_Chr06 | 52007238                | A/T  | NA                 | INTERGENIC                    | NA                         |
| Kabuli_wild_52007266 | 1399941117                          | Ca_kabuli_Chr06 | 52007266                | C/A  | NA                 | INTERGENIC                    | NA                         |
| Kabuli_wild_52007306 | 1399941118                          | Ca_kabuli_Chr06 | 52007306                | G/T  | NA                 | INTERGENIC                    | NA                         |
| Kabuli_wild_52007318 | 1399941119                          | Ca_kabuli_Chr06 | 52007318                | G/A  | NA                 | INTERGENIC                    | NA                         |
| Kabuli_wild_52007353 | 1399941120                          | Ca_kabuli_Chr06 | 52007353                | G/A  | NA                 | INTERGENIC                    | NA                         |
| Kabuli_wild_52007380 | 1399941121                          | Ca_kabuli_Chr06 | 52007380                | A/C  | NA                 | INTERGENIC                    | NA                         |
| Kabuli_wild_52007392 | 1399941122                          | Ca_kabuli_Chr06 | 52007392                | C/A  | NA                 | INTERGENIC                    | NA                         |
| Kabuli_wild_52007427 | 1399941123                          | Ca_kabuli_Chr06 | 52007427                | T/G  | NA                 | INTERGENIC                    | NA                         |
| Kabuli_wild_52007440 | 1399941124                          | Ca_kabuli_Chr06 | 52007440                | C/T  | NA                 | INTERGENIC                    | NA                         |
| Kabuli_wild_52007464 | 1399941125                          | Ca_kabuli_Chr06 | 52007464                | C/G  | NA                 | INTERGENIC                    | NA                         |
| Kabuli_wild_52007471 | 1399941126                          | Ca_kabuli_Chr06 | 52007471                | C/T  | NA                 | INTERGENIC                    | NA                         |
| Kabuli_wild_52012401 | 1399941127                          | Ca_kabuli_Chr06 | 52012401                | C/T  | NA                 | INTERGENIC                    | NA                         |
| Kabuli_wild_52021996 | 1399941128                          | Ca_kabuli_Chr06 | 52021996                | G/A  | Gene_Ca_17498      | DOWNSTREAM                    | AuxinresponsiveSAURprotein |
| Kabuli_wild_52065393 | 1399941129                          | Ca_kabuli_Chr06 | 52065393                | C/A  | NA                 | INTERGENIC                    | NA                         |
| Kabuli_wild_52065395 | 1399941130                          | Ca_kabuli_Chr06 | 52065395                | G/T  | NA                 | INTERGENIC                    | NA                         |
| Kabuli_wild_52065527 | 1399941131                          | Ca_kabuli_Chr06 | 52065527                | T/A  | NA                 | INTERGENIC                    | NA                         |



| SNP IDs              | NCBI dbSNP accession IDs (NCBI_SS#) | Chromosomes     | Physical positions (bp) | SNPs | Gene accession IDs | Sequence components of genome | Putative functions                                                 |
|----------------------|-------------------------------------|-----------------|-------------------------|------|--------------------|-------------------------------|--------------------------------------------------------------------|
| Kabuli_wild_52164571 | 1399941132                          | Ca_kabuli_Chr06 | 52164571                | C/A  | Gene_Ca_17518      | INTRON                        | ATPase,P-type,K/Mg/Cd/Cu/Zn/Na/Ca/Na/H-transporter                 |
| Kabuli_wild_52416534 | 1399941133                          | Ca_kabuli_Chr06 | 52416534                | T/C  | NA                 | INTERGENIC                    | NA                                                                 |
| Kabuli_wild_52567474 | 1399941134                          | Ca_kabuli_Chr06 | 52567474                | A/C  | Gene_Ca_17540      | NON_SYNONYMOUS_CODING         | Transferase                                                        |
| Kabuli_wild_52596616 | 1399941135                          | Ca_kabuli_Chr06 | 52596616                | T/C  | Gene_Ca_17541      | INTRON                        | Protein phosphatase 2C, manganese/magnesium aspartate binding site |
| Kabuli_wild_52597243 | 1399941136                          | Ca_kabuli_Chr06 | 52597243                | G/A  | Gene_Ca_17541      | INTRON                        | Protein phosphatase 2C, manganese/magnesium aspartate binding site |
| Kabuli_wild_52630806 | 1399941137                          | Ca_kabuli_Chr06 | 52630806                | A/C  | NA                 | INTERGENIC                    | NA                                                                 |
| Kabuli_wild_52684148 | 1399941138                          | Ca_kabuli_Chr06 | 52684148                | T/G  | Gene_Ca_17547      | SYNONYMOUS_CODING             | HhH-GPDdomain                                                      |
| Kabuli_wild_52851852 | 1399941139                          | Ca_kabuli_Chr06 | 52851852                | G/C  | NA                 | INTERGENIC                    | NA                                                                 |
| Kabuli_wild_52858359 | 1399941140                          | Ca_kabuli_Chr06 | 52858359                | A/G  | NA                 | INTERGENIC                    | NA                                                                 |
| Kabuli_wild_52890682 | 1399941141                          | Ca_kabuli_Chr06 | 52890682                | G/C  | NA                 | INTERGENIC                    | NA                                                                 |
| Kabuli_wild_52899485 | 1399941142                          | Ca_kabuli_Chr06 | 52899485                | A/T  | NA                 | INTERGENIC                    | NA                                                                 |
| Kabuli_wild_52993231 | 1399941143                          | Ca_kabuli_Chr06 | 52993231                | A/G  | NA                 | INTERGENIC                    | NA                                                                 |
| Kabuli_wild_53097803 | 1399941144                          | Ca_kabuli_Chr06 | 53097803                | A/G  | Gene_Ca_22909      | DOWNSTREAM                    | IQ motif,EF-handbinding site                                       |
| Kabuli_wild_53097833 | 1399941145                          | Ca_kabuli_Chr06 | 53097833                | G/C  | Gene_Ca_22909      | DOWNSTREAM                    | IQ motif,EF-handbinding site                                       |
| Kabuli_wild_53124182 | 1399941146                          | Ca_kabuli_Chr06 | 53124182                | G/T  | Gene_Ca_22912      | NON_SYNONYMOUS_CODING         | 3-Oxoacyl-[acyl-carrier-protein(ACP)]synthaseIIIC-terminal         |
| Kabuli_wild_53348993 | 1399941147                          | Ca_kabuli_Chr06 | 53348993                | C/A  | Gene_Ca_18877      | INTRON                        | Sodium/sulphatesymporter                                           |
| Kabuli_wild_53349034 | 1399941148                          | Ca_kabuli_Chr06 | 53349034                | G/A  | Gene_Ca_18877      | INTRON                        | Sodium/sulphatesymporter                                           |
| Kabuli_wild_53382949 | 1399941149                          | Ca_kabuli_Chr06 | 53382949                | C/T  | Gene_Ca_18880      | INTRON                        | GTP-bindingprotein,HSR1-related                                    |
| Kabuli_wild_53383076 | 1399941150                          | Ca_kabuli_Chr06 | 53383076                | C/T  | Gene_Ca_18880      | INTRON                        | GTP-bindingprotein,HSR1-related                                    |
| Kabuli_wild_53461883 | 1399941151                          | Ca_kabuli_Chr06 | 53461883                | A/G  | NA                 | INTERGENIC                    | NA                                                                 |
| Kabuli_wild_53461929 | 1399941152                          | Ca_kabuli_Chr06 | 53461929                | C/A  | NA                 | INTERGENIC                    | NA                                                                 |
| Kabuli_wild_53541031 | 1399941153                          | Ca_kabuli_Chr06 | 53541031                | G/A  | Gene_Ca_18891      | DOWNSTREAM                    | Zinc/ironpermease                                                  |
| Kabuli_wild_53541094 | 1399941154                          | Ca_kabuli_Chr06 | 53541094                | C/G  | Gene_Ca_18890      | UPSTREAM                      | Ctrcoppertransporter                                               |
| Kabuli_wild_53541111 | 1399941155                          | Ca_kabuli_Chr06 | 53541111                | T/G  | Gene_Ca_18890      | UPSTREAM                      | Ctrcoppertransporter                                               |
| Kabuli_wild_53551878 | 1399941156                          | Ca_kabuli_Chr06 | 53551878                | C/A  | NA                 | INTERGENIC                    | NA                                                                 |
| Kabuli_wild_53558430 | 1399941157                          | Ca_kabuli_Chr06 | 53558430                | A/C  | NA                 | INTERGENIC                    | NA                                                                 |
| Kabuli_wild_53566496 | 1399941158                          | Ca_kabuli_Chr06 | 53566496                | G/A  | Gene_Ca_18894      | NON_SYNONYMOUS_CODING         | Pathogenesis-related transcriptional factor/ERF, DNA-binding       |
| Kabuli_wild_53625264 | 1399941159                          | Ca_kabuli_Chr06 | 53625264                | A/C  | Gene_Ca_18898      | SYNONYMOUS_CODING             | Leucine-rich repeat                                                |
| Kabuli_wild_53683746 | 1399941160                          | Ca_kabuli_Chr06 | 53683746                | C/T  | Gene_Ca_18901      | INTRON                        | NA                                                                 |
| Kabuli_wild_53683753 | 1399941161                          | Ca_kabuli_Chr06 | 53683753                | T/C  | Gene_Ca_18901      | INTRON                        | NA                                                                 |
| Kabuli_wild_53683780 | 1399941162                          | Ca_kabuli_Chr06 | 53683780                | T/A  | Gene_Ca_18901      | INTRON                        | NA                                                                 |
| Kabuli_wild_53683876 | 1399941163                          | Ca_kabuli_Chr06 | 53683876                | C/T  | Gene_Ca_18901      | INTRON                        | NA                                                                 |
| Kabuli_wild_53683885 | 1399941164                          | Ca_kabuli_Chr06 | 53683885                | C/T  | Gene_Ca_18901      | INTRON                        | NA                                                                 |
| Kabuli_wild_53683891 | 1399941165                          | Ca_kabuli_Chr06 | 53683891                | C/A  | Gene_Ca_18901      | INTRON                        | NA                                                                 |
| Kabuli_wild_53692784 | 1399941166                          | Ca_kabuli_Chr06 | 53692784                | G/A  | NA                 | INTERGENIC                    | NA                                                                 |
| Kabuli_wild_53769160 | 1399941167                          | Ca_kabuli_Chr06 | 53769160                | C/T  | NA                 | INTERGENIC                    | NA                                                                 |
| Kabuli_wild_53840760 | 1399941168                          | Ca_kabuli_Chr06 | 53840760                | T/C  | Gene_Ca_18914      | INTRON                        | Glycosidehydrolase,family1                                         |
| Kabuli_wild_54092038 | 1399941169                          | Ca_kabuli_Chr06 | 54092038                | T/C  | NA                 | INTERGENIC                    | NA                                                                 |
| Kabuli_wild_54151902 | 1399941170                          | Ca_kabuli_Chr06 | 54151902                | T/G  | Gene_Ca_16270      | DOWNSTREAM                    | Pentatric peptide repeat                                           |
| Kabuli_wild_54151966 | 1399941171                          | Ca_kabuli_Chr06 | 54151966                | G/C  | Gene_Ca_16270      | DOWNSTREAM                    | Pentatric peptide repeat                                           |
| Kabuli_wild_54151969 | 1399941172                          | Ca_kabuli_Chr06 | 54151969                | T/G  | Gene_Ca_16270      | DOWNSTREAM                    | Pentatric peptide repeat                                           |
| Kabuli_wild_54157694 | 1399941173                          | Ca_kabuli_Chr06 | 54157694                | T/C  | NA                 | INTERGENIC                    | NA                                                                 |
| Kabuli_wild_54157719 | 1399941174                          | Ca_kabuli_Chr06 | 54157719                | G/T  | NA                 | INTERGENIC                    | NA                                                                 |
| Kabuli_wild_54203356 | 1399941175                          | Ca_kabuli_Chr06 | 54203356                | G/A  | Gene_Ca_16276      | NON_SYNONYMOUS_CODING         | NmrA-like                                                          |

| SNP IDs              | NCBI dbSNP accession IDs (NCBI_SS#) | Chromosomes     | Physical positions (bp) | SNPs | Gene accession IDs | Sequence components of genome | Putative functions                     |
|----------------------|-------------------------------------|-----------------|-------------------------|------|--------------------|-------------------------------|----------------------------------------|
| Kabuli_wild_54203400 | 1399941176                          | Ca_kabuli_Chr06 | 54203400                | C/T  | Gene_Ca_16276      | SYNONYMOUS_CODING             | NmrA-like                              |
| Kabuli_wild_54208203 | 1399941177                          | Ca_kabuli_Chr06 | 54208203                | G/T  | NA                 | INTERGENIC                    | NA                                     |
| Kabuli_wild_54229449 | 1399941178                          | Ca_kabuli_Chr06 | 54229449                | G/T  | Gene_Ca_16279      | DOWNSTREAM                    | NA                                     |
| Kabuli_wild_54237764 | 1399941179                          | Ca_kabuli_Chr06 | 54237764                | A/C  | Gene_Ca_16281      | UPSTREAM                      | Pentatric peptide repeat               |
| Kabuli_wild_54241792 | 1399941180                          | Ca_kabuli_Chr06 | 54241792                | A/G  | Gene_Ca_16281      | DOWNSTREAM                    | Pentatric peptide repeat               |
| Kabuli_wild_54250702 | 1399941181                          | Ca_kabuli_Chr06 | 54250702                | C/T  | Gene_Ca_16283      | NON_SYNONYMOUS_CODING         | Pumilio RNA-binding repeat             |
| Kabuli_wild_54250743 | 1399941182                          | Ca_kabuli_Chr06 | 54250743                | G/A  | Gene_Ca_16283      | NON_SYNONYMOUS_CODING         | Pumilio RNA-binding repeat             |
| Kabuli_wild_54333329 | 1399941183                          | Ca_kabuli_Chr06 | 54333329                | G/A  | NA                 | INTERGENIC                    | NA                                     |
| Kabuli_wild_54368267 | 1399941184                          | Ca_kabuli_Chr06 | 54368267                | G/A  | Gene_Ca_16294      | DOWNSTREAM                    | Transcription facto rGRAS              |
| Kabuli_wild_54869600 | 1399941185                          | Ca_kabuli_Chr06 | 54869600                | C/A  | Gene_Ca_21207      | NON_SYNONYMOUS_CODING         | Peptidase C48, SUMO/Sentrin/Ubl1       |
| Kabuli_wild_54869625 | 1399941186                          | Ca_kabuli_Chr06 | 54869625                | T/G  | Gene_Ca_21207      | SYNONYMOUS_CODING             | Peptidase C48, SUMO/Sentrin/Ubl1       |
| Kabuli_wild_54869683 | 1399941187                          | Ca_kabuli_Chr06 | 54869683                | G/A  | Gene_Ca_21207      | NON_SYNONYMOUS_CODING         | Peptidase C48, SUMO/Sentrin/Ubl1       |
| Kabuli_wild_55024071 | 1399941188                          | Ca_kabuli_Chr06 | 55024071                | C/T  | Gene_Ca_21213      | NON_SYNONYMOUS_CODING         | NA                                     |
| Kabuli_wild_55024093 | 1399941189                          | Ca_kabuli_Chr06 | 55024093                | G/C  | Gene_Ca_21213      | NON_SYNONYMOUS_CODING         | NA                                     |
| Kabuli_wild_55024108 | 1399941190                          | Ca_kabuli_Chr06 | 55024108                | C/T  | Gene_Ca_21213      | SYNONYMOUS_CODING             | NA                                     |
| Kabuli_wild_55024112 | 1399941191                          | Ca_kabuli_Chr06 | 55024112                | C/G  | Gene_Ca_21213      | NON_SYNONYMOUS_CODING         | NA                                     |
| Kabuli_wild_55024130 | 1399941192                          | Ca_kabuli_Chr06 | 55024130                | T/A  | Gene_Ca_21213      | NON_SYNONYMOUS_CODING         | NA                                     |
| Kabuli_wild_55024140 | 1399941193                          | Ca_kabuli_Chr06 | 55024140                | G/A  | Gene_Ca_21213      | NON_SYNONYMOUS_CODING         | NA                                     |
| Kabuli_wild_55024146 | 1399941194                          | Ca_kabuli_Chr06 | 55024146                | C/T  | Gene_Ca_21213      | NON_SYNONYMOUS_CODING         | NA                                     |
| Kabuli_wild_55024159 | 1399941195                          | Ca_kabuli_Chr06 | 55024159                | T/A  | Gene_Ca_21213      | SYNONYMOUS_CODING             | NA                                     |
| Kabuli_wild_55024198 | 1399941196                          | Ca_kabuli_Chr06 | 55024198                | T/G  | Gene_Ca_21213      | SYNONYMOUS_CODING             | NA                                     |
| Kabuli_wild_55074979 | 1399941197                          | Ca_kabuli_Chr06 | 55074979                | T/A  | NA                 | INTERGENIC                    | NA                                     |
| Kabuli_wild_55083311 | 1399941198                          | Ca_kabuli_Chr06 | 55083311                | T/A  | Gene_Ca_21214      | INTRON                        | Oligo peptide transporter              |
| Kabuli_wild_55083721 | 1399941199                          | Ca_kabuli_Chr06 | 55083721                | T/A  | Gene_Ca_21214      | SYNONYMOUS_CODING             | Oligo peptide transporter              |
| Kabuli_wild_55332515 | 1399941200                          | Ca_kabuli_Chr06 | 55332515                | G/A  | Gene_Ca_21219      | SYNONYMOUS_CODING             | Homeobox                               |
| Kabuli_wild_55378104 | 1399941201                          | Ca_kabuli_Chr06 | 55378104                | A/C  | NA                 | INTERGENIC                    | NA                                     |
| Kabuli_wild_55683478 | 1399941202                          | Ca_kabuli_Chr06 | 55683478                | T/A  | NA                 | INTERGENIC                    | NA                                     |
| Kabuli_wild_55922843 | 1399941203                          | Ca_kabuli_Chr06 | 55922843                | T/A  | Gene_Ca_19023      | NON_SYNONYMOUS_CODING         | Proteinofunknown functionwound-induced |
| Kabuli_wild_55942105 | 1399941204                          | Ca_kabuli_Chr06 | 55942105                | A/G  | Gene_Ca_19025      | UPSTREAM                      | Zinc finger, RING-type                 |
| Kabuli_wild_55953320 | 1399941205                          | Ca_kabuli_Chr06 | 55953320                | T/A  | Gene_Ca_19026      | NON_SYNONYMOUS_CODING         | Proteinofunknown functionwound-induced |
| Kabuli_wild_56137857 | 1399941206                          | Ca_kabuli_Chr06 | 56137857                | G/T  | NA                 | INTERGENIC                    | NA                                     |
| Kabuli_wild_56137878 | 1399941207                          | Ca_kabuli_Chr06 | 56137878                | T/C  | NA                 | INTERGENIC                    | NA                                     |
| Kabuli_wild_56248243 | 1399941208                          | Ca_kabuli_Chr06 | 56248243                | C/A  | NA                 | INTERGENIC                    | NA                                     |
| Kabuli_wild_56248258 | 1399941209                          | Ca_kabuli_Chr06 | 56248258                | A/C  | NA                 | INTERGENIC                    | NA                                     |
| Kabuli_wild_56505281 | 1399941210                          | Ca_kabuli_Chr06 | 56505281                | T/C  | NA                 | INTERGENIC                    | NA                                     |
| Kabuli_wild_56538737 | 1399941211                          | Ca_kabuli_Chr06 | 56538737                | T/C  | Gene_Ca_17391      | NON_SYNONYMOUS_CODING         | NA                                     |
| Kabuli_wild_56553930 | 1399941212                          | Ca_kabuli_Chr06 | 56553930                | G/A  | Gene_Ca_17393      | NON_SYNONYMOUS_CODING         | TetratricopeptideTPR-1                 |
| Kabuli_wild_56564038 | 1399941213                          | Ca_kabuli_Chr06 | 56564038                | T/A  | NA                 | INTERGENIC                    | NA                                     |
| Kabuli_wild_56564249 | 1399941214                          | Ca_kabuli_Chr06 | 56564249                | G/C  | NA                 | INTERGENIC                    | NA                                     |
| Kabuli_wild_56587094 | 1399941215                          | Ca_kabuli_Chr06 | 56587094                | C/G  | Gene_Ca_17396      | DOWNSTREAM                    | Prolinedehydrogenase                   |
| Kabuli_wild_56593121 | 1399941216                          | Ca_kabuli_Chr06 | 56593121                | T/G  | Gene_Ca_17397      | SYNONYMOUS_CODING             | Helicase,C-terminal                    |
| Kabuli_wild_56624316 | 1399941217                          | Ca_kabuli_Chr06 | 56624316                | A/T  | Gene_Ca_17398      | INTRON                        | Prolinedehydrogenase                   |
| Kabuli_wild_56624515 | 1399941218                          | Ca_kabuli_Chr06 | 56624515                | C/T  | Gene_Ca_17398      | SYNONYMOUS_CODING             | Prolinedehydrogenase                   |
| Kabuli_wild_56624674 | 1399941219                          | Ca_kabuli_Chr06 | 56624674                | T/C  | Gene_Ca_17398      | INTRON                        | Prolinedehydrogenase                   |

| SNP IDs              | NCBI dbSNP accession IDs (NCBI_SS#) | Chromosomes      | Physical positions (bp) | SNPs | Gene accession IDs | Sequence components of genome | Putative functions                          |
|----------------------|-------------------------------------|------------------|-------------------------|------|--------------------|-------------------------------|---------------------------------------------|
| Kabuli_wild_56624718 | 1399941220                          | Ca_kabuli_Chrom6 | 56624718                | C/A  | Gene_Ca_17398      | INTRON                        | Prolinedehydrogenase                        |
| Kabuli_wild_56674138 | 1399941221                          | Ca_kabuli_Chrom6 | 56674138                | G/C  | NA                 | INTERGENIC                    | NA                                          |
| Kabuli_wild_56674158 | 1399941222                          | Ca_kabuli_Chrom6 | 56674158                | G/C  | NA                 | INTERGENIC                    | NA                                          |
| Kabuli_wild_56694898 | 1399941223                          | Ca_kabuli_Chrom6 | 56694898                | T/C  | Gene_Ca_17408      | NON_SYNONYMOUS_CODING         | ATPase,AAA+type,core                        |
| Kabuli_wild_56706490 | 1399941224                          | Ca_kabuli_Chrom6 | 56706490                | A/T  | Gene_Ca_17409      | INTRON                        | Rab-GAP/TBCdomain                           |
| Kabuli_wild_56793021 | 1399941225                          | Ca_kabuli_Chrom6 | 56793021                | G/T  | NA                 | INTERGENIC                    | NA                                          |
| Kabuli_wild_56793037 | 1399941226                          | Ca_kabuli_Chrom6 | 56793037                | A/T  | NA                 | INTERGENIC                    | NA                                          |
| Kabuli_wild_56793077 | 1399941227                          | Ca_kabuli_Chrom6 | 56793077                | G/A  | NA                 | INTERGENIC                    | NA                                          |
| Kabuli_wild_56793122 | 1399941228                          | Ca_kabuli_Chrom6 | 56793122                | C/T  | NA                 | INTERGENIC                    | NA                                          |
| Kabuli_wild_56822060 | 1399941229                          | Ca_kabuli_Chrom6 | 56822060                | G/A  | Gene_Ca_17420      | INTRON                        | Domain of unknown function DUF231,plant     |
| Kabuli_wild_56822084 | 1399941230                          | Ca_kabuli_Chrom6 | 56822084                | G/T  | Gene_Ca_17420      | INTRON                        | Domain of unknown function DUF231,plant     |
| Kabuli_wild_56840030 | 1399941231                          | Ca_kabuli_Chrom6 | 56840030                | A/C  | NA                 | INTERGENIC                    | NA                                          |
| Kabuli_wild_56840063 | 1399941232                          | Ca_kabuli_Chrom6 | 56840063                | T/A  | NA                 | INTERGENIC                    | NA                                          |
| Kabuli_wild_56854753 | 1399941233                          | Ca_kabuli_Chrom6 | 56854753                | T/C  | Gene_Ca_17422      | SYNONYMOUS_CODING             | NA                                          |
| Kabuli_wild_56918016 | 1399941234                          | Ca_kabuli_Chrom6 | 56918016                | C/T  | NA                 | INTERGENIC                    | NA                                          |
| Kabuli_wild_56950487 | 1399941235                          | Ca_kabuli_Chrom6 | 56950487                | G/T  | NA                 | INTERGENIC                    | NA                                          |
| Kabuli_wild_56959697 | 1399941236                          | Ca_kabuli_Chrom6 | 56959697                | G/A  | NA                 | INTERGENIC                    | NA                                          |
| Kabuli_wild_56980286 | 1399941237                          | Ca_kabuli_Chrom6 | 56980286                | T/C  | Gene_Ca_17429      | INTRON                        | GDP-fucoseproteinO-fucosyltransferase       |
| Kabuli_wild_56980313 | 1399941238                          | Ca_kabuli_Chrom6 | 56980313                | T/C  | Gene_Ca_17429      | INTRON                        | GDP-fucoseproteinO-fucosyltransferase       |
| Kabuli_wild_56980321 | 1399941239                          | Ca_kabuli_Chrom6 | 56980321                | T/C  | Gene_Ca_17429      | INTRON                        | GDP-fucoseproteinO-fucosyltransferase       |
| Kabuli_wild_57198837 | 1399941240                          | Ca_kabuli_Chrom6 | 57198837                | G/A  | Gene_Ca_17442      | INTRON                        | NA                                          |
| Kabuli_wild_57272593 | 1399941241                          | Ca_kabuli_Chrom6 | 57272593                | C/A  | NA                 | INTERGENIC                    | NA                                          |
| Kabuli_wild_57272601 | 1399941242                          | Ca_kabuli_Chrom6 | 57272601                | T/C  | NA                 | INTERGENIC                    | NA                                          |
| Kabuli_wild_57272604 | 1399941243                          | Ca_kabuli_Chrom6 | 57272604                | A/G  | NA                 | INTERGENIC                    | NA                                          |
| Kabuli_wild_57272605 | 1399941244                          | Ca_kabuli_Chrom6 | 57272605                | C/T  | NA                 | INTERGENIC                    | NA                                          |
| Kabuli_wild_57272607 | 1399941245                          | Ca_kabuli_Chrom6 | 57272607                | G/A  | NA                 | INTERGENIC                    | NA                                          |
| Kabuli_wild_57272608 | 1399941246                          | Ca_kabuli_Chrom6 | 57272608                | C/A  | NA                 | INTERGENIC                    | NA                                          |
| Kabuli_wild_57277440 | 1399941247                          | Ca_kabuli_Chrom6 | 57277440                | C/T  | Gene_Ca_13709      | DOWNSTREAM                    | Integrase,catalyticcore                     |
| Kabuli_wild_57382220 | 1399941248                          | Ca_kabuli_Chrom6 | 57382220                | G/A  | Gene_Ca_13705      | NON_SYNONYMOUS_CODING         | Zinc finger, RING-type                      |
| Kabuli_wild_57425447 | 1399941249                          | Ca_kabuli_Chrom6 | 57425447                | T/C  | Gene_Ca_13701      | INTRON                        | NA                                          |
| Kabuli_wild_57425496 | 1399941250                          | Ca_kabuli_Chrom6 | 57425496                | T/C  | Gene_Ca_13701      | INTRON                        | NA                                          |
| Kabuli_wild_57436320 | 1399941251                          | Ca_kabuli_Chrom6 | 57436320                | T/G  | Gene_Ca_13700      | NON_SYNONYMOUS_CODING         | Bromodomain                                 |
| Kabuli_wild_57437904 | 1399941252                          | Ca_kabuli_Chrom6 | 57437904                | A/G  | Gene_Ca_13700      | SYNONYMOUS_CODING             | Bromodomain                                 |
| Kabuli_wild_57438007 | 1399941253                          | Ca_kabuli_Chrom6 | 57438007                | C/T  | Gene_Ca_13700      | NON_SYNONYMOUS_CODING         | Bromodomain                                 |
| Kabuli_wild_57449892 | 1399941254                          | Ca_kabuli_Chrom6 | 57449892                | A/G  | Gene_Ca_13699      | NON_SYNONYMOUS_CODING         | NA                                          |
| Kabuli_wild_57533087 | 1399941255                          | Ca_kabuli_Chrom6 | 57533087                | G/A  | NA                 | INTERGENIC                    | NA                                          |
| Kabuli_wild_57579768 | 1399941256                          | Ca_kabuli_Chrom6 | 57579768                | C/T  | Gene_Ca_13686      | SYNONYMOUS_CODING             | RNA recognition motif domain                |
| Kabuli_wild_57579770 | 1399941257                          | Ca_kabuli_Chrom6 | 57579770                | G/T  | Gene_Ca_13686      | SYNONYMOUS_CODING             | RNA recognition motif domain                |
| Kabuli_wild_57603257 | 1399941258                          | Ca_kabuli_Chrom6 | 57603257                | T/A  | Gene_Ca_13685      | INTRON                        | 3-betahydroxysteroiddehydrogenase/isomerase |
| Kabuli_wild_57625134 | 1399941259                          | Ca_kabuli_Chrom6 | 57625134                | G/A  | Gene_Ca_13683      | INTRON                        | Calreticulin/calnexin                       |
| Kabuli_wild_57625320 | 1399941260                          | Ca_kabuli_Chrom6 | 57625320                | G/A  | Gene_Ca_13683      | SYNONYMOUS_CODING             | Calreticulin/calnexin                       |
| Kabuli_wild_57632486 | 1399941261                          | Ca_kabuli_Chrom6 | 57632486                | C/T  | Gene_Ca_13682      | SYNONYMOUS_CODING             | Protein of unknown function DUF936,plant    |
| Kabuli_wild_57632584 | 1399941262                          | Ca_kabuli_Chrom6 | 57632584                | T/C  | Gene_Ca_13682      | INTRON                        | Protein of unknown function DUF936,plant    |
| Kabuli_wild_57634387 | 1399941263                          | Ca_kabuli_Chrom6 | 57634387                | G/T  | Gene_Ca_13682      | NON_SYNONYMOUS_CODING         | Protein of unknown function DUF936,plant    |

| SNP IDs              | NCBI dbSNP accession IDs (NCBI_SS#) | Chromosomes     | Physical positions (bp) | SNPs | Gene accession IDs | Sequence components of genome | Putative functions                        |
|----------------------|-------------------------------------|-----------------|-------------------------|------|--------------------|-------------------------------|-------------------------------------------|
| Kabuli_wild_57634677 | 1399941264                          | Ca_kabuli_Chr06 | 57634677                | G/A  | Gene_Ca_13682      | SYNONYMOUS_CODING             | Protein of unknown function DUF936,plant  |
| Kabuli_wild_57637075 | 1399941265                          | Ca_kabuli_Chr06 | 57637075                | C/T  | NA                 | INTERGENIC                    | NA                                        |
| Kabuli_wild_57637083 | 1399941266                          | Ca_kabuli_Chr06 | 57637083                | T/G  | NA                 | INTERGENIC                    | NA                                        |
| Kabuli_wild_57637091 | 1399941267                          | Ca_kabuli_Chr06 | 57637091                | G/A  | NA                 | INTERGENIC                    | NA                                        |
| Kabuli_wild_57667515 | 1399941268                          | Ca_kabuli_Chr06 | 57667515                | A/T  | NA                 | INTERGENIC                    | NA                                        |
| Kabuli_wild_57704057 | 1399941269                          | Ca_kabuli_Chr06 | 57704057                | C/T  | NA                 | INTERGENIC                    | NA                                        |
| Kabuli_wild_57704802 | 1399941270                          | Ca_kabuli_Chr06 | 57704802                | T/C  | Gene_Ca_13673      | UPSTREAM                      | Triggerfactor,ribosome-binding,bacterial  |
| Kabuli_wild_57704994 | 1399941271                          | Ca_kabuli_Chr06 | 57704994                | A/G  | Gene_Ca_13673      | UPSTREAM                      | Triggerfactor,ribosome-binding,bacterial  |
| Kabuli_wild_57705011 | 1399941272                          | Ca_kabuli_Chr06 | 57705011                | G/A  | Gene_Ca_13673      | UPSTREAM                      | Triggerfactor,ribosome-binding,bacterial  |
| Kabuli_wild_57707716 | 1399941273                          | Ca_kabuli_Chr06 | 57707716                | C/T  | Gene_Ca_13674      | DOWNSTREAM                    | Orn/Lys/Argdecarboxylase,majordomain      |
| Kabuli_wild_57707724 | 1399941274                          | Ca_kabuli_Chr06 | 57707724                | A/C  | Gene_Ca_13674      | DOWNSTREAM                    | Orn/Lys/Argdecarboxylase,majordomain      |
| Kabuli_wild_57707727 | 1399941275                          | Ca_kabuli_Chr06 | 57707727                | T/G  | Gene_Ca_13674      | DOWNSTREAM                    | Orn/Lys/Argdecarboxylase,majordomain      |
| Kabuli_wild_57707846 | 1399941276                          | Ca_kabuli_Chr06 | 57707846                | G/A  | NA                 | INTERGENIC                    | NA                                        |
| Kabuli_wild_57707848 | 1399941277                          | Ca_kabuli_Chr06 | 57707848                | A/G  | NA                 | INTERGENIC                    | NA                                        |
| Kabuli_wild_57707912 | 1399941278                          | Ca_kabuli_Chr06 | 57707912                | G/C  | NA                 | INTERGENIC                    | NA                                        |
| Kabuli_wild_57708019 | 1399941279                          | Ca_kabuli_Chr06 | 57708019                | A/G  | NA                 | INTERGENIC                    | NA                                        |
| Kabuli_wild_57708101 | 1399941280                          | Ca_kabuli_Chr06 | 57708101                | T/G  | NA                 | INTERGENIC                    | NA                                        |
| Kabuli_wild_57708130 | 1399941281                          | Ca_kabuli_Chr06 | 57708130                | T/C  | NA                 | INTERGENIC                    | NA                                        |
| Kabuli_wild_57708198 | 1399941282                          | Ca_kabuli_Chr06 | 57708198                | C/T  | NA                 | INTERGENIC                    | NA                                        |
| Kabuli_wild_57710133 | 1399941283                          | Ca_kabuli_Chr06 | 57710133                | C/G  | NA                 | INTERGENIC                    | NA                                        |
| Kabuli_wild_57720161 | 1399941284                          | Ca_kabuli_Chr06 | 57720161                | A/T  | Gene_Ca_13671      | SYNONYMOUS_CODING             | Transcriptional factor B3                 |
| Kabuli_wild_57720446 | 1399941285                          | Ca_kabuli_Chr06 | 57720446                | T/C  | Gene_Ca_13671      | SYNONYMOUS_CODING             | Transcriptional factor B3                 |
| Kabuli_wild_57725358 | 1399941286                          | Ca_kabuli_Chr06 | 57725358                | T/G  | NA                 | INTERGENIC                    | NA                                        |
| Kabuli_wild_57746989 | 1399941287                          | Ca_kabuli_Chr06 | 57746989                | C/T  | Gene_Ca_13666      | NON_SYNONYMOUS_CODING         | NA                                        |
| Kabuli_wild_57747101 | 1399941288                          | Ca_kabuli_Chr06 | 57747101                | C/T  | Gene_Ca_13666      | SYNONYMOUS_CODING             | NA                                        |
| Kabuli_wild_57748565 | 1399941289                          | Ca_kabuli_Chr06 | 57748565                | A/G  | Gene_Ca_13666      | SYNONYMOUS_CODING             | NA                                        |
| Kabuli_wild_57748602 | 1399941290                          | Ca_kabuli_Chr06 | 57748602                | A/T  | Gene_Ca_13666      | NON_SYNONYMOUS_CODING         | NA                                        |
| Kabuli_wild_57753076 | 1399941291                          | Ca_kabuli_Chr06 | 57753076                | T/C  | Gene_Ca_13665      | UPSTREAM                      | Phosphatidylinositol3-/4-kinase,catalytic |
| Kabuli_wild_57753193 | 1399941292                          | Ca_kabuli_Chr06 | 57753193                | C/T  | Gene_Ca_13665      | UPSTREAM                      | Phosphatidylinositol3-/4-kinase,catalytic |
| Kabuli_wild_57756158 | 1399941293                          | Ca_kabuli_Chr06 | 57756158                | A/G  | Gene_Ca_13665      | NON_SYNONYMOUS_CODING         | Phosphatidylinositol3-/4-kinase,catalytic |
| Kabuli_wild_57756699 | 1399941294                          | Ca_kabuli_Chr06 | 57756699                | G/A  | Gene_Ca_13665      | INTRON                        | Phosphatidylinositol3-/4-kinase,catalytic |
| Kabuli_wild_57760176 | 1399941295                          | Ca_kabuli_Chr06 | 57760176                | C/T  | Gene_Ca_13665      | INTRON                        | Phosphatidylinositol3-/4-kinase,catalytic |
| Kabuli_wild_57760216 | 1399941296                          | Ca_kabuli_Chr06 | 57760216                | G/C  | Gene_Ca_13665      | NON_SYNONYMOUS_CODING         | Phosphatidylinositol3-/4-kinase,catalytic |
| Kabuli_wild_57760227 | 1399941297                          | Ca_kabuli_Chr06 | 57760227                | C/T  | Gene_Ca_13665      | SYNONYMOUS_CODING             | Phosphatidylinositol3-/4-kinase,catalytic |
| Kabuli_wild_57760360 | 1399941298                          | Ca_kabuli_Chr06 | 57760360                | A/G  | Gene_Ca_13665      | INTRON                        | Phosphatidylinositol3-/4-kinase,catalytic |
| Kabuli_wild_57761758 | 1399941299                          | Ca_kabuli_Chr06 | 57761758                | G/A  | Gene_Ca_13665      | NON_SYNONYMOUS_CODING         | Phosphatidylinositol3-/4-kinase,catalytic |
| Kabuli_wild_57766444 | 1399941300                          | Ca_kabuli_Chr06 | 57766444                | C/T  | NA                 | INTERGENIC                    | NA                                        |
| Kabuli_wild_57766570 | 1399941301                          | Ca_kabuli_Chr06 | 57766570                | C/T  | NA                 | INTERGENIC                    | NA                                        |
| Kabuli_wild_57766588 | 1399941302                          | Ca_kabuli_Chr06 | 57766588                | G/A  | NA                 | INTERGENIC                    | NA                                        |
| Kabuli_wild_57766598 | 1399941303                          | Ca_kabuli_Chr06 | 57766598                | G/A  | NA                 | INTERGENIC                    | NA                                        |
| Kabuli_wild_57801985 | 1399941304                          | Ca_kabuli_Chr06 | 57801985                | A/C  | Gene_Ca_13661      | INTRON                        | Proteasomeassemblychaperone2              |
| Kabuli_wild_57831040 | 1399941305                          | Ca_kabuli_Chr06 | 57831040                | T/C  | NA                 | INTERGENIC                    | NA                                        |
| Kabuli_wild_57831049 | 1399941306                          | Ca_kabuli_Chr06 | 57831049                | C/T  | NA                 | INTERGENIC                    | NA                                        |
| Kabuli_wild_57831050 | 1399941307                          | Ca_kabuli_Chr06 | 57831050                | G/T  | NA                 | INTERGENIC                    | NA                                        |

| SNP IDs              | NCBI dbSNP accession IDs (NCBI_SS#) | Chromosomes     | Physical positions (bp) | SNPs | Gene accession IDs | Sequence components of genome | Putative functions                               |
|----------------------|-------------------------------------|-----------------|-------------------------|------|--------------------|-------------------------------|--------------------------------------------------|
| Kabuli_wild_57835093 | 1399941308                          | Ca_kabuli_Chr06 | 57835093                | T/A  | Gene_Ca_13657      | DOWNSTREAM                    | ColdacclimationWCOR413                           |
| Kabuli_wild_57835120 | 1399941309                          | Ca_kabuli_Chr06 | 57835120                | G/A  | Gene_Ca_13657      | DOWNSTREAM                    | ColdacclimationWCOR413                           |
| Kabuli_wild_57835132 | 1399941310                          | Ca_kabuli_Chr06 | 57835132                | G/A  | Gene_Ca_13657      | DOWNSTREAM                    | ColdacclimationWCOR413                           |
| Kabuli_wild_57835899 | 1399941311                          | Ca_kabuli_Chr06 | 57835899                | C/T  | NA                 | INTERGENIC                    | NA                                               |
| Kabuli_wild_57835917 | 1399941312                          | Ca_kabuli_Chr06 | 57835917                | G/C  | NA                 | INTERGENIC                    | NA                                               |
| Kabuli_wild_57836024 | 1399941313                          | Ca_kabuli_Chr06 | 57836024                | G/A  | NA                 | INTERGENIC                    | NA                                               |
| Kabuli_wild_57836237 | 1399941314                          | Ca_kabuli_Chr06 | 57836237                | A/G  | NA                 | INTERGENIC                    | NA                                               |
| Kabuli_wild_57836240 | 1399941315                          | Ca_kabuli_Chr06 | 57836240                | T/A  | NA                 | INTERGENIC                    | NA                                               |
| Kabuli_wild_57836284 | 1399941316                          | Ca_kabuli_Chr06 | 57836284                | G/A  | NA                 | INTERGENIC                    | NA                                               |
| Kabuli_wild_57836314 | 1399941317                          | Ca_kabuli_Chr06 | 57836314                | T/A  | NA                 | INTERGENIC                    | NA                                               |
| Kabuli_wild_57836316 | 1399941318                          | Ca_kabuli_Chr06 | 57836316                | G/A  | NA                 | INTERGENIC                    | NA                                               |
| Kabuli_wild_57839564 | 1399941319                          | Ca_kabuli_Chr06 | 57839564                | T/C  | NA                 | INTERGENIC                    | NA                                               |
| Kabuli_wild_57853458 | 1399941320                          | Ca_kabuli_Chr06 | 57853458                | C/T  | Gene_Ca_13655      | SYNONYMOUS_CODING             | Protein kinase,catalytic domain                  |
| Kabuli_wild_57870893 | 1399941321                          | Ca_kabuli_Chr06 | 57870893                | C/A  | NA                 | INTERGENIC                    | NA                                               |
| Kabuli_wild_57877446 | 1399941322                          | Ca_kabuli_Chr06 | 57877446                | C/A  | NA                 | INTERGENIC                    | NA                                               |
| Kabuli_wild_57882514 | 1399941323                          | Ca_kabuli_Chr06 | 57882514                | C/T  | NA                 | INTERGENIC                    | NA                                               |
| Kabuli_wild_57882773 | 1399941324                          | Ca_kabuli_Chr06 | 57882773                | G/T  | NA                 | INTERGENIC                    | NA                                               |
| Kabuli_wild_57894369 | 1399941325                          | Ca_kabuli_Chr06 | 57894369                | G/T  | Gene_Ca_13650      | DOWNSTREAM                    | NA                                               |
| Kabuli_wild_57894377 | 1399941326                          | Ca_kabuli_Chr06 | 57894377                | A/G  | Gene_Ca_13650      | DOWNSTREAM                    | NA                                               |
| Kabuli_wild_57894495 | 1399941327                          | Ca_kabuli_Chr06 | 57894495                | C/G  | NA                 | INTERGENIC                    | NA                                               |
| Kabuli_wild_57894585 | 1399941328                          | Ca_kabuli_Chr06 | 57894585                | T/G  | NA                 | INTERGENIC                    | NA                                               |
| Kabuli_wild_57894590 | 1399941329                          | Ca_kabuli_Chr06 | 57894590                | G/C  | NA                 | INTERGENIC                    | NA                                               |
| Kabuli_wild_57899764 | 1399941330                          | Ca_kabuli_Chr06 | 57899764                | A/T  | Gene_Ca_13648      | DOWNSTREAM                    | Domain of unknown function DUF547                |
| Kabuli_wild_57904540 | 1399941331                          | Ca_kabuli_Chr06 | 57904540                | T/G  | NA                 | INTERGENIC                    | NA                                               |
| Kabuli_wild_57931382 | 1399941332                          | Ca_kabuli_Chr06 | 57931382                | A/T  | Gene_Ca_13645      | SYNONYMOUS_CODING             | NmrA-like                                        |
| Kabuli_wild_57943585 | 1399941333                          | Ca_kabuli_Chr06 | 57943585                | A/T  | Gene_Ca_13643      | UPSTREAM                      | NA                                               |
| Kabuli_wild_57943626 | 1399941334                          | Ca_kabuli_Chr06 | 57943626                | G/A  | Gene_Ca_13643      | UPSTREAM                      | NA                                               |
| Kabuli_wild_57943628 | 1399941335                          | Ca_kabuli_Chr06 | 57943628                | A/C  | Gene_Ca_13643      | UPSTREAM                      | NA                                               |
| Kabuli_wild_57960875 | 1399941336                          | Ca_kabuli_Chr06 | 57960875                | G/A  | Gene_Ca_13640      | INTRON                        | WD40 repeat                                      |
| Kabuli_wild_57960878 | 1399941337                          | Ca_kabuli_Chr06 | 57960878                | G/A  | Gene_Ca_13640      | INTRON                        | WD40 repeat                                      |
| Kabuli_wild_57968924 | 1399941338                          | Ca_kabuli_Chr06 | 57968924                | A/T  | Gene_Ca_13640      | INTRON                        | WD40 repeat                                      |
| Kabuli_wild_57994242 | 1399941339                          | Ca_kabuli_Chr06 | 57994242                | G/A  | NA                 | INTERGENIC                    | NA                                               |
| Kabuli_wild_58029408 | 1399941340                          | Ca_kabuli_Chr06 | 58029408                | G/A  | NA                 | INTERGENIC                    | NA                                               |
| Kabuli_wild_58036471 | 1399941341                          | Ca_kabuli_Chr06 | 58036471                | C/T  | Gene_Ca_13632      | UPSTREAM                      | BURP                                             |
| Kabuli_wild_58053528 | 1399941342                          | Ca_kabuli_Chr06 | 58053528                | C/A  | Gene_Ca_13631      | INTRON                        | PeptidaseS14,ClpP                                |
| Kabuli_wild_58053568 | 1399941343                          | Ca_kabuli_Chr06 | 58053568                | G/A  | Gene_Ca_13631      | SYNONYMOUS_CODING             | PeptidaseS14,ClpP                                |
| Kabuli_wild_58053878 | 1399941344                          | Ca_kabuli_Chr06 | 58053878                | T/A  | NA                 | INTERGENIC                    | NA                                               |
| Kabuli_wild_58110541 | 1399941345                          | Ca_kabuli_Chr06 | 58110541                | T/C  | NA                 | INTERGENIC                    | NA                                               |
| Kabuli_wild_58110605 | 1399941346                          | Ca_kabuli_Chr06 | 58110605                | C/T  | NA                 | INTERGENIC                    | NA                                               |
| Kabuli_wild_58159915 | 1399941347                          | Ca_kabuli_Chr06 | 58159915                | T/C  | Gene_Ca_13624      | SYNONYMOUS_CODING             | Clathrin/coatomeradaptor,adaptin-like,N-terminal |
| Kabuli_wild_58165739 | 1399941348                          | Ca_kabuli_Chr06 | 58165739                | T/A  | NA                 | INTERGENIC                    | NA                                               |
| Kabuli_wild_58174702 | 1399941349                          | Ca_kabuli_Chr06 | 58174702                | T/C  | Gene_Ca_13623      | INTRON                        | Glycosidehydrolase,family17                      |
| Kabuli_wild_58174737 | 1399941350                          | Ca_kabuli_Chr06 | 58174737                | A/C  | Gene_Ca_13623      | INTRON                        | Glycosidehydrolase,family17                      |
| Kabuli_wild_58187822 | 1399941351                          | Ca_kabuli_Chr06 | 58187822                | T/G  | Gene_Ca_13622      | INTRON                        | Adenylatecyclase-associatedCAP                   |

| SNP IDs              | NCBI dbSNP accession IDs (NCBI_SS#) | Chromosomes      | Physical positions (bp) | SNPs | Gene accession IDs | Sequence components of genome | Putative functions                                       |
|----------------------|-------------------------------------|------------------|-------------------------|------|--------------------|-------------------------------|----------------------------------------------------------|
| Kabuli_wild_58187957 | 1399941352                          | Ca_kabuli_Chrom6 | 58187957                | A/G  | Gene_Ca_13622      | SYNONYMOUS_CODING             | Adenylatecyclase-associatedCAP                           |
| Kabuli_wild_58188477 | 1399941353                          | Ca_kabuli_Chrom6 | 58188477                | A/T  | Gene_Ca_13622      | INTRON                        | Adenylatecyclase-associatedCAP                           |
| Kabuli_wild_58190725 | 1399941354                          | Ca_kabuli_Chrom6 | 58190725                | G/A  | Gene_Ca_13622      | INTRON                        | Adenylatecyclase-associatedCAP                           |
| Kabuli_wild_58190730 | 1399941355                          | Ca_kabuli_Chrom6 | 58190730                | G/A  | Gene_Ca_13622      | INTRON                        | Adenylatecyclase-associatedCAP                           |
| Kabuli_wild_58224023 | 1399941356                          | Ca_kabuli_Chrom6 | 58224023                | G/T  | NA                 | INTERGENIC                    | NA                                                       |
| Kabuli_wild_58227006 | 1399941357                          | Ca_kabuli_Chrom6 | 58227006                | T/C  | NA                 | INTERGENIC                    | NA                                                       |
| Kabuli_wild_58237503 | 1399941358                          | Ca_kabuli_Chrom6 | 58237503                | A/T  | NA                 | INTERGENIC                    | NA                                                       |
| Kabuli_wild_58243505 | 1399941359                          | Ca_kabuli_Chrom6 | 58243505                | G/A  | Gene_Ca_15368      | SYNONYMOUS_CODING             | Zinc finger,C2HC5-type                                   |
| Kabuli_wild_58243652 | 1399941360                          | Ca_kabuli_Chrom6 | 58243652                | G/A  | Gene_Ca_15368      | INTRON                        | Mitochondrialtranscriptionterminationfactor-related      |
| Kabuli_wild_58244128 | 1399941361                          | Ca_kabuli_Chrom6 | 58244128                | T/C  | Gene_Ca_15368      | INTRON                        | Mitochondrialtranscriptionterminationfactor-related      |
| Kabuli_wild_58244129 | 1399941362                          | Ca_kabuli_Chrom6 | 58244129                | G/A  | Gene_Ca_15368      | INTRON                        | Mitochondrialtranscriptionterminationfactor-related      |
| Kabuli_wild_58326344 | 1399941363                          | Ca_kabuli_Chrom6 | 58326344                | A/T  | NA                 | INTERGENIC                    | NA                                                       |
| Kabuli_wild_58380367 | 1399941364                          | Ca_kabuli_Chrom6 | 58380367                | T/C  | Gene_Ca_15376      | SYNONYMOUS_CODING             | Ribosoma IRNA methyltransferase RrmJ/FtsJ                |
| Kabuli_wild_58380394 | 1399941365                          | Ca_kabuli_Chrom6 | 58380394                | G/A  | Gene_Ca_15376      | SYNONYMOUS_CODING             | Ribosoma IRNA methyltransferase RrmJ/FtsJ                |
| Kabuli_wild_58380563 | 1399941366                          | Ca_kabuli_Chrom6 | 58380563                | G/A  | Gene_Ca_15376      | NON_SYNONYMOUS_CODING         | Ribosoma IRNA methyltransferase RrmJ/FtsJ                |
| Kabuli_wild_58434138 | 1399941367                          | Ca_kabuli_Chrom6 | 58434138                | C/T  | Gene_Ca_15379      | STOP_GAINED                   | NA                                                       |
| Kabuli_wild_58434217 | 1399941368                          | Ca_kabuli_Chrom6 | 58434217                | C/G  | Gene_Ca_15379      | NON_SYNONYMOUS_CODING         | NA                                                       |
| Kabuli_wild_58452843 | 1399941369                          | Ca_kabuli_Chrom6 | 58452843                | A/C  | NA                 | INTERGENIC                    | NA                                                       |
| Kabuli_wild_58569569 | 1399941370                          | Ca_kabuli_Chrom6 | 58569569                | T/C  | Gene_Ca_15398      | SYNONYMOUS_CODING             | Pre-mRNAprcessingribonucleoprotein,snoRNA-binding domain |
| Kabuli_wild_58569576 | 1399941371                          | Ca_kabuli_Chrom6 | 58569576                | G/T  | Gene_Ca_15398      | NON_SYNONYMOUS_CODING         | Pre-mRNAprcessingribonucleoprotein,snoRNA-binding domain |
| Kabuli_wild_58571660 | 1399941372                          | Ca_kabuli_Chrom6 | 58571660                | T/C  | Gene_Ca_15398      | SYNONYMOUS_CODING             | Pre-mRNAprcessingribonucleoprotein,snoRNA-binding domain |
| Kabuli_wild_58596821 | 1399941373                          | Ca_kabuli_Chrom6 | 58596821                | T/G  | NA                 | INTERGENIC                    | NA                                                       |
| Kabuli_wild_58596878 | 1399941374                          | Ca_kabuli_Chrom6 | 58596878                | C/A  | NA                 | INTERGENIC                    | NA                                                       |
| Kabuli_wild_58618628 | 1399941375                          | Ca_kabuli_Chrom6 | 58618628                | A/C  | NA                 | INTERGENIC                    | NA                                                       |
| Kabuli_wild_58618921 | 1399941376                          | Ca_kabuli_Chrom6 | 58618921                | T/C  | NA                 | INTERGENIC                    | NA                                                       |
| Kabuli_wild_58623095 | 1399941377                          | Ca_kabuli_Chrom6 | 58623095                | A/G  | Gene_Ca_15407      | INTRON                        | ATPase,V0/A0complex,116kDasubunit                        |
| Kabuli_wild_58623096 | 1399941378                          | Ca_kabuli_Chrom6 | 58623096                | A/T  | Gene_Ca_15407      | INTRON                        | ATPase,V0/A0complex,116kDasubunit                        |
| Kabuli_wild_58624183 | 1399941379                          | Ca_kabuli_Chrom6 | 58624183                | G/A  | Gene_Ca_15407      | INTRON                        | ATPase,V0/A0complex,116kDasubunit                        |
| Kabuli_wild_58624233 | 1399941380                          | Ca_kabuli_Chrom6 | 58624233                | C/A  | Gene_Ca_15407      | INTRON                        | ATPase,V0/A0complex,116kDasubunit                        |
| Kabuli_wild_58624299 | 1399941381                          | Ca_kabuli_Chrom6 | 58624299                | A/G  | Gene_Ca_15407      | INTRON                        | ATPase,V0/A0complex,116kDasubunit                        |
| Kabuli_wild_58650318 | 1399941382                          | Ca_kabuli_Chrom6 | 58650318                | A/C  | Gene_Ca_15410      | SYNONYMOUS_CODING             | WD40 repeat                                              |
| Kabuli_wild_58650459 | 1399941383                          | Ca_kabuli_Chrom6 | 58650459                | A/T  | Gene_Ca_15410      | NON_SYNONYMOUS_CODING         | WD40 repeat                                              |
| Kabuli_wild_58650491 | 1399941384                          | Ca_kabuli_Chrom6 | 58650491                | A/G  | Gene_Ca_15410      | NON_SYNONYMOUS_CODING         | WD40 repeat                                              |
| Kabuli_wild_58652881 | 1399941385                          | Ca_kabuli_Chrom6 | 58652881                | A/G  | Gene_Ca_15410      | SYNONYMOUS_CODING             | WD40 repeat                                              |
| Kabuli_wild_58672317 | 1399941386                          | Ca_kabuli_Chrom6 | 58672317                | A/G  | NA                 | INTERGENIC                    | NA                                                       |
| Kabuli_wild_58675749 | 1399941387                          | Ca_kabuli_Chrom6 | 58675749                | T/C  | Gene_Ca_15413      | SYNONYMOUS_CODING             | Kinesin,motordomain                                      |
| Kabuli_wild_58676507 | 1399941388                          | Ca_kabuli_Chrom6 | 58676507                | A/G  | Gene_Ca_15413      | SYNONYMOUS_CODING             | Kinesin,motordomain                                      |
| Kabuli_wild_58676517 | 1399941389                          | Ca_kabuli_Chrom6 | 58676517                | A/C  | Gene_Ca_15413      | NON_SYNONYMOUS_CODING         | Kinesin,motordomain                                      |
| Kabuli_wild_58682397 | 1399941390                          | Ca_kabuli_Chrom6 | 58682397                | G/A  | Gene_Ca_15413      | INTRON                        | Kinesin,motordomain                                      |
| Kabuli_wild_58732423 | 1399941391                          | Ca_kabuli_Chrom6 | 58732423                | C/T  | Gene_Ca_15417      | INTRON                        | NA                                                       |
| Kabuli_wild_58732424 | 1399941392                          | Ca_kabuli_Chrom6 | 58732424                | G/T  | Gene_Ca_15417      | INTRON                        | Multiantimicrobial extrusion protein                     |
| Kabuli_wild_58732451 | 1399941393                          | Ca_kabuli_Chrom6 | 58732451                | T/C  | Gene_Ca_15417      | SYNONYMOUS_CODING             | Multiantimicrobial extrusion protein                     |
| Kabuli_wild_58732475 | 1399941394                          | Ca_kabuli_Chrom6 | 58732475                | G/A  | Gene_Ca_15417      | SYNONYMOUS_CODING             | Multiantimicrobial extrusion protein                     |
| Kabuli_wild_58745356 | 1399941395                          | Ca_kabuli_Chrom6 | 58745356                | A/G  | Gene_Ca_15419      | SYNONYMOUS_CODING             | Multiantimicrobial extrusion protein                     |

| SNP IDs                     | NCBI dbSNP accession IDs (NCBI_SS#) | Chromosomes            | Physical positions (bp) | SNPs | Gene accession IDs | Sequence components of genome | Putative functions                               |
|-----------------------------|-------------------------------------|------------------------|-------------------------|------|--------------------|-------------------------------|--------------------------------------------------|
| <i>Kabuli_wild_58745426</i> | 1399941396                          | <i>Ca_kabuli_Chr06</i> | 58745426                | T/C  | Gene_Ca_15419      | INTRON                        | Multiantimicrobial extrusion protein             |
| <i>Kabuli_wild_58745473</i> | 1399941397                          | <i>Ca_kabuli_Chr06</i> | 58745473                | A/G  | Gene_Ca_15419      | SYNONYMOUS_CODING             | Multiantimicrobial extrusion protein             |
| <i>Kabuli_wild_58745583</i> | 1399941398                          | <i>Ca_kabuli_Chr06</i> | 58745583                | C/T  | Gene_Ca_15419      | NON_SYNONYMOUS_CODING         | Multiantimicrobial extrusion protein             |
| <i>Kabuli_wild_58761879</i> | 1399941399                          | <i>Ca_kabuli_Chr06</i> | 58761879                | G/A  | NA                 | INTERGENIC                    | NA                                               |
| <i>Kabuli_wild_58779344</i> | 1399941400                          | <i>Ca_kabuli_Chr06</i> | 58779344                | A/G  | Gene_Ca_15421      | INTRON                        | Srchomology-3domain                              |
| <i>Kabuli_wild_58779389</i> | 1399941401                          | <i>Ca_kabuli_Chr06</i> | 58779389                | T/G  | Gene_Ca_15421      | SYNONYMOUS_CODING             | Srchomology-3domain                              |
| <i>Kabuli_wild_58820632</i> | 1399941402                          | <i>Ca_kabuli_Chr06</i> | 58820632                | A/C  | NA                 | INTERGENIC                    | NA                                               |
| <i>Kabuli_wild_58844717</i> | 1399941403                          | <i>Ca_kabuli_Chr06</i> | 58844717                | T/C  | NA                 | INTERGENIC                    | NA                                               |
| <i>Kabuli_wild_58844776</i> | 1399941404                          | <i>Ca_kabuli_Chr06</i> | 58844776                | C/G  | NA                 | INTERGENIC                    | NA                                               |
| <i>Kabuli_wild_58878604</i> | 1399941405                          | <i>Ca_kabuli_Chr06</i> | 58878604                | C/G  | Gene_Ca_15428      | SYNONYMOUS_CODING             | Ornithine/DAP/Argdecarboxylase                   |
| <i>Kabuli_wild_58879570</i> | 1399941406                          | <i>Ca_kabuli_Chr06</i> | 58879570                | T/C  | Gene_Ca_15428      | SYNONYMOUS_CODING             | Ornithine/DAP/Argdecarboxylase                   |
| <i>Kabuli_wild_58903346</i> | 1399941407                          | <i>Ca_kabuli_Chr06</i> | 58903346                | G/A  | Gene_Ca_15431      | INTRON                        | Aldo/ketoreductase                               |
| <i>Kabuli_wild_58903381</i> | 1399941408                          | <i>Ca_kabuli_Chr06</i> | 58903381                | G/A  | Gene_Ca_15431      | INTRON                        | Aldo/ketoreductase                               |
| <i>Kabuli_wild_58903395</i> | 1399941409                          | <i>Ca_kabuli_Chr06</i> | 58903395                | A/G  | Gene_Ca_15431      | INTRON                        | Aldo/ketoreductase                               |
| <i>Kabuli_wild_58903416</i> | 1399941410                          | <i>Ca_kabuli_Chr06</i> | 58903416                | T/G  | Gene_Ca_15431      | INTRON                        | Aldo/ketoreductase                               |
| <i>Kabuli_wild_58903497</i> | 1399941411                          | <i>Ca_kabuli_Chr06</i> | 58903497                | G/C  | Gene_Ca_15431      | INTRON                        | Aldo/ketoreductase                               |
| <i>Kabuli_wild_58903538</i> | 1399941412                          | <i>Ca_kabuli_Chr06</i> | 58903538                | G/A  | Gene_Ca_15431      | INTRON                        | Aldo/ketoreductase                               |
| <i>Kabuli_wild_58907318</i> | 1399941413                          | <i>Ca_kabuli_Chr06</i> | 58907318                | C/A  | Gene_Ca_15431      | SYNONYMOUS_CODING             | Aldo/ketoreductase                               |
| <i>Kabuli_wild_58907544</i> | 1399941414                          | <i>Ca_kabuli_Chr06</i> | 58907544                | T/C  | Gene_Ca_15431      | INTRON                        | Aldo/ketoreductase                               |
| <i>Kabuli_wild_58907606</i> | 1399941415                          | <i>Ca_kabuli_Chr06</i> | 58907606                | A/G  | Gene_Ca_15431      | INTRON                        | Aldo/ketoreductase                               |
| <i>Kabuli_wild_58908024</i> | 1399941416                          | <i>Ca_kabuli_Chr06</i> | 58908024                | G/A  | Gene_Ca_15431      | SYNONYMOUS_CODING             | Aldo/ketoreductase                               |
| <i>Kabuli_wild_58908069</i> | 1399941417                          | <i>Ca_kabuli_Chr06</i> | 58908069                | G/A  | Gene_Ca_15431      | SYNONYMOUS_CODING             | Aldo/ketoreductase                               |
| <i>Kabuli_wild_58951079</i> | 1399941418                          | <i>Ca_kabuli_Chr06</i> | 58951079                | T/C  | Gene_Ca_18874      | SYNONYMOUS_CODING             | Clathrin/coatomeradaptor,adaptin-like,N-terminal |
| <i>Kabuli_wild_58953219</i> | 1399941419                          | <i>Ca_kabuli_Chr06</i> | 58953219                | A/G  | Gene_Ca_18874      | INTRON                        | Clathrin/coatomeradaptor,adaptin-like,N-terminal |
| <i>Kabuli_wild_58984925</i> | 1399941420                          | <i>Ca_kabuli_Chr06</i> | 58984925                | A/C  | NA                 | INTERGENIC                    | NA                                               |
| <i>Kabuli_wild_59003792</i> | 1399941421                          | <i>Ca_kabuli_Chr06</i> | 59003792                | A/C  | Gene_Ca_18871      | INTRON                        | RNA recognition motif domain                     |
| <i>Kabuli_wild_59064798</i> | 1399941422                          | <i>Ca_kabuli_Chr06</i> | 59064798                | G/T  | NA                 | INTERGENIC                    | NA                                               |
| <i>Kabuli_wild_59064815</i> | 1399941423                          | <i>Ca_kabuli_Chr06</i> | 59064815                | C/T  | NA                 | INTERGENIC                    | NA                                               |
| <i>Kabuli_wild_59081169</i> | 1399941424                          | <i>Ca_kabuli_Chr06</i> | 59081169                | C/T  | Gene_Ca_18866      | SYNONYMOUS_CODING             | Glycosyltransferase, family2                     |
| <i>Kabuli_wild_59107007</i> | 1399941425                          | <i>Ca_kabuli_Chr06</i> | 59107007                | G/T  | Gene_Ca_18863      | NON_SYNONYMOUS_CODING         | RNA-binding, CRMdomain                           |
| <i>Kabuli_wild_59107027</i> | 1399941426                          | <i>Ca_kabuli_Chr06</i> | 59107027                | A/T  | Gene_Ca_18863      | NON_SYNONYMOUS_CODING         | RNA-binding, CRMdomain                           |
| <i>Kabuli_wild_59135944</i> | 1399941427                          | <i>Ca_kabuli_Chr06</i> | 59135944                | A/C  | Gene_Ca_18861      | SYNONYMOUS_CODING             | Protein kinase, catalytic domain                 |
| <i>Kabuli_wild_59178844</i> | 1399941428                          | <i>Ca_kabuli_Chr06</i> | 59178844                | A/G  | NA                 | INTERGENIC                    | NA                                               |
| <i>Kabuli_wild_59178848</i> | 1399941429                          | <i>Ca_kabuli_Chr06</i> | 59178848                | G/C  | NA                 | INTERGENIC                    | NA                                               |
| <i>Kabuli_wild_59193994</i> | 1399941430                          | <i>Ca_kabuli_Chr06</i> | 59193994                | G/T  | Gene_Ca_18855      | SYNONYMOUS_CODING             | NA                                               |
| <i>Kabuli_wild_59194015</i> | 1399941431                          | <i>Ca_kabuli_Chr06</i> | 59194015                | C/G  | Gene_Ca_18855      | SYNONYMOUS_CODING             | NA                                               |
| <i>Kabuli_wild_59194081</i> | 1399941432                          | <i>Ca_kabuli_Chr06</i> | 59194081                | T/A  | Gene_Ca_18855      | SYNONYMOUS_CODING             | NA                                               |
| <i>Kabuli_wild_59219099</i> | 1399941433                          | <i>Ca_kabuli_Chr06</i> | 59219099                | T/C  | Gene_Ca_18853      | SYNONYMOUS_CODING             | ErgosterolbiosynthesisERG4/ERG24                 |
| <i>Kabuli_wild_59222759</i> | 1399941434                          | <i>Ca_kabuli_Chr06</i> | 59222759                | T/C  | NA                 | INTERGENIC                    | NA                                               |
| <i>Kabuli_wild_59222848</i> | 1399941435                          | <i>Ca_kabuli_Chr06</i> | 59222848                | C/T  | NA                 | INTERGENIC                    | NA                                               |
| <i>Kabuli_wild_59296368</i> | 1399941436                          | <i>Ca_kabuli_Chr06</i> | 59296368                | C/T  | Gene_Ca_18847      | NON_SYNONYMOUS_CODING         | YTHdomain                                        |
| <i>Kabuli_wild_59360004</i> | 1399941437                          | <i>Ca_kabuli_Chr06</i> | 59360004                | A/T  | NA                 | INTERGENIC                    | NA                                               |
| <i>Kabuli_wild_59407761</i> | 1399941438                          | <i>Ca_kabuli_Chr06</i> | 59407761                | G/A  | NA                 | INTERGENIC                    | NA                                               |
| <i>Kabuli_wild_59407904</i> | 1399941439                          | <i>Ca_kabuli_Chr06</i> | 59407904                | A/T  | NA                 | INTERGENIC                    | NA                                               |



| SNP IDs            | NCBI dbSNP accession IDs (NCBI_SS#) | Chromosomes     | Physical positions (bp) | SNPs | Gene accession IDs | Sequence components of genome | Putative functions                               |
|--------------------|-------------------------------------|-----------------|-------------------------|------|--------------------|-------------------------------|--------------------------------------------------|
| Kabuli_wild_16881  | 1399941440                          | Ca_kabuli_Chr07 | 16881                   | A/G  | Gene_Ca_20246      | NON_SYNONYMOUS_CODING         | RNAhelicase,ATP-dependent,DEAD-box,conservedsite |
| Kabuli_wild_122600 | 1399941441                          | Ca_kabuli_Chr07 | 122600                  | T/G  | Gene_Ca_20232      | SYNONYMOUS_CODING             | MyosinII heavychain-like                         |
| Kabuli_wild_343562 | 1399941442                          | Ca_kabuli_Chr07 | 343562                  | T/A  | Gene_Ca_24406      | UPSTREAM                      | Retroviralspartylprotease                        |
| Kabuli_wild_343588 | 1399941443                          | Ca_kabuli_Chr07 | 343588                  | C/T  | Gene_Ca_24406      | UPSTREAM                      | Retroviralspartylprotease                        |
| Kabuli_wild_343627 | 1399941444                          | Ca_kabuli_Chr07 | 343627                  | C/T  | Gene_Ca_24406      | UPSTREAM                      | Retroviralspartylprotease                        |
| Kabuli_wild_393001 | 1399941445                          | Ca_kabuli_Chr07 | 393001                  | C/T  | Gene_Ca_24407      | NON_SYNONYMOUS_CODING         | Domain of unknown function DUF1767               |
| Kabuli_wild_419280 | 1399941446                          | Ca_kabuli_Chr07 | 419280                  | C/T  | NA                 | INTERGENIC                    | NA                                               |
| Kabuli_wild_419283 | 1399941447                          | Ca_kabuli_Chr07 | 419283                  | G/A  | NA                 | INTERGENIC                    | NA                                               |
| Kabuli_wild_419301 | 1399941448                          | Ca_kabuli_Chr07 | 419301                  | C/T  | NA                 | INTERGENIC                    | NA                                               |
| Kabuli_wild_419316 | 1399941449                          | Ca_kabuli_Chr07 | 419316                  | A/G  | NA                 | INTERGENIC                    | NA                                               |
| Kabuli_wild_419334 | 1399941450                          | Ca_kabuli_Chr07 | 419334                  | A/C  | NA                 | INTERGENIC                    | NA                                               |
| Kabuli_wild_419355 | 1399941451                          | Ca_kabuli_Chr07 | 419355                  | G/A  | NA                 | INTERGENIC                    | NA                                               |
| Kabuli_wild_419364 | 1399941452                          | Ca_kabuli_Chr07 | 419364                  | T/C  | NA                 | INTERGENIC                    | NA                                               |
| Kabuli_wild_419385 | 1399941453                          | Ca_kabuli_Chr07 | 419385                  | T/G  | NA                 | INTERGENIC                    | NA                                               |
| Kabuli_wild_419462 | 1399941454                          | Ca_kabuli_Chr07 | 419462                  | G/A  | NA                 | INTERGENIC                    | NA                                               |
| Kabuli_wild_419628 | 1399941455                          | Ca_kabuli_Chr07 | 419628                  | A/C  | NA                 | INTERGENIC                    | NA                                               |
| Kabuli_wild_419692 | 1399941456                          | Ca_kabuli_Chr07 | 419692                  | G/A  | NA                 | INTERGENIC                    | NA                                               |
| Kabuli_wild_528521 | 1399941457                          | Ca_kabuli_Chr07 | 528521                  | G/A  | Gene_Ca_24410      | DOWNSTREAM                    | NA                                               |
| Kabuli_wild_601475 | 1399941458                          | Ca_kabuli_Chr07 | 601475                  | G/C  | NA                 | INTERGENIC                    | NA                                               |
| Kabuli_wild_601496 | 1399941459                          | Ca_kabuli_Chr07 | 601496                  | C/T  | NA                 | INTERGENIC                    | NA                                               |
| Kabuli_wild_601502 | 1399941460                          | Ca_kabuli_Chr07 | 601502                  | G/T  | NA                 | INTERGENIC                    | NA                                               |
| Kabuli_wild_601513 | 1399941461                          | Ca_kabuli_Chr07 | 601513                  | C/G  | NA                 | INTERGENIC                    | NA                                               |
| Kabuli_wild_601516 | 1399941462                          | Ca_kabuli_Chr07 | 601516                  | G/A  | NA                 | INTERGENIC                    | NA                                               |
| Kabuli_wild_601521 | 1399941463                          | Ca_kabuli_Chr07 | 601521                  | G/A  | NA                 | INTERGENIC                    | NA                                               |
| Kabuli_wild_601538 | 1399941464                          | Ca_kabuli_Chr07 | 601538                  | C/A  | NA                 | INTERGENIC                    | NA                                               |
| Kabuli_wild_601545 | 1399941465                          | Ca_kabuli_Chr07 | 601545                  | C/T  | NA                 | INTERGENIC                    | NA                                               |
| Kabuli_wild_601551 | 1399941466                          | Ca_kabuli_Chr07 | 601551                  | T/C  | NA                 | INTERGENIC                    | NA                                               |
| Kabuli_wild_601560 | 1399941467                          | Ca_kabuli_Chr07 | 601560                  | C/G  | NA                 | INTERGENIC                    | NA                                               |
| Kabuli_wild_601563 | 1399941468                          | Ca_kabuli_Chr07 | 601563                  | T/A  | NA                 | INTERGENIC                    | NA                                               |
| Kabuli_wild_601586 | 1399941469                          | Ca_kabuli_Chr07 | 601586                  | T/C  | NA                 | INTERGENIC                    | NA                                               |
| Kabuli_wild_601601 | 1399941470                          | Ca_kabuli_Chr07 | 601601                  | C/T  | NA                 | INTERGENIC                    | NA                                               |
| Kabuli_wild_601612 | 1399941471                          | Ca_kabuli_Chr07 | 601612                  | G/A  | NA                 | INTERGENIC                    | NA                                               |
| Kabuli_wild_601622 | 1399941472                          | Ca_kabuli_Chr07 | 601622                  | G/C  | NA                 | INTERGENIC                    | NA                                               |
| Kabuli_wild_601643 | 1399941473                          | Ca_kabuli_Chr07 | 601643                  | G/T  | NA                 | INTERGENIC                    | NA                                               |
| Kabuli_wild_601647 | 1399941474                          | Ca_kabuli_Chr07 | 601647                  | C/T  | NA                 | INTERGENIC                    | NA                                               |
| Kabuli_wild_601657 | 1399941475                          | Ca_kabuli_Chr07 | 601657                  | T/C  | NA                 | INTERGENIC                    | NA                                               |
| Kabuli_wild_601709 | 1399941476                          | Ca_kabuli_Chr07 | 601709                  | A/C  | NA                 | INTERGENIC                    | NA                                               |
| Kabuli_wild_601714 | 1399941477                          | Ca_kabuli_Chr07 | 601714                  | A/T  | NA                 | INTERGENIC                    | NA                                               |
| Kabuli_wild_601718 | 1399941478                          | Ca_kabuli_Chr07 | 601718                  | G/C  | NA                 | INTERGENIC                    | NA                                               |
| Kabuli_wild_601719 | 1399941479                          | Ca_kabuli_Chr07 | 601719                  | G/T  | NA                 | INTERGENIC                    | NA                                               |
| Kabuli_wild_610723 | 1399941480                          | Ca_kabuli_Chr07 | 610723                  | G/T  | Gene_Ca_24417      | NON_SYNONYMOUS_CODING         | Transcription facto rGRAS                        |
| Kabuli_wild_610737 | 1399941481                          | Ca_kabuli_Chr07 | 610737                  | C/A  | Gene_Ca_24417      | NON_SYNONYMOUS_CODING         | Transcription facto rGRAS                        |
| Kabuli_wild_674791 | 1399941482                          | Ca_kabuli_Chr07 | 674791                  | A/T  | Gene_Ca_03417      | INTRON                        | HECT                                             |
| Kabuli_wild_676785 | 1399941483                          | Ca_kabuli_Chr07 | 676785                  | G/T  | Gene_Ca_03417      | DOWNSTREAM                    | HECT                                             |

| SNP IDs             | NCBI dbSNP accession IDs (NCBI_SS#) | Chromosomes     | Physical positions (bp) | SNPs | Gene accession IDs | Sequence components of genome | Putative functions                                    |
|---------------------|-------------------------------------|-----------------|-------------------------|------|--------------------|-------------------------------|-------------------------------------------------------|
| Kabuli_wild_676786  | 1399941484                          | Ca_kabuli_Chr07 | 676786                  | G/A  | Gene_Ca_03417      | DOWNSTREAM                    | HECT                                                  |
| Kabuli_wild_676790  | 1399941485                          | Ca_kabuli_Chr07 | 676790                  | T/C  | Gene_Ca_03417      | DOWNSTREAM                    | HECT                                                  |
| Kabuli_wild_767708  | 1399941486                          | Ca_kabuli_Chr07 | 767708                  | G/A  | Gene_Ca_03402      | STOP_GAINED                   | EPS15homology(EH)                                     |
| Kabuli_wild_781409  | 1399941487                          | Ca_kabuli_Chr07 | 781409                  | A/G  | NA                 | INTERGENIC                    | NA                                                    |
| Kabuli_wild_807110  | 1399941488                          | Ca_kabuli_Chr07 | 807110                  | T/C  | Gene_Ca_03397      | INTRON                        | Phospho fructokinase domain                           |
| Kabuli_wild_815526  | 1399941489                          | Ca_kabuli_Chr07 | 815526                  | C/A  | Gene_Ca_03396      | NON_SYNONYMOUS_CODING         | NA                                                    |
| Kabuli_wild_831159  | 1399941490                          | Ca_kabuli_Chr07 | 831159                  | T/A  | Gene_Ca_03395      | DOWNSTREAM                    | PeptidaseS8/S53,subtilisin/kexin/sedolisin            |
| Kabuli_wild_838581  | 1399941491                          | Ca_kabuli_Chr07 | 838581                  | C/A  | NA                 | INTERGENIC                    | NA                                                    |
| Kabuli_wild_838651  | 1399941492                          | Ca_kabuli_Chr07 | 838651                  | C/A  | NA                 | INTERGENIC                    | NA                                                    |
| Kabuli_wild_841988  | 1399941493                          | Ca_kabuli_Chr07 | 841988                  | T/C  | Gene_Ca_03393      | INTRON                        | Domain of unknown function DUF221                     |
| Kabuli_wild_865096  | 1399941494                          | Ca_kabuli_Chr07 | 865096                  | A/C  | Gene_Ca_03392      | INTRON                        | Aminoacyl-tRNAsynthetase,classIa                      |
| Kabuli_wild_873110  | 1399941495                          | Ca_kabuli_Chr07 | 873110                  | A/C  | NA                 | INTERGENIC                    | NA                                                    |
| Kabuli_wild_975236  | 1399941496                          | Ca_kabuli_Chr07 | 975236                  | T/A  | Gene_Ca_03381      | INTRON                        | Multicopperoxidase,type1                              |
| Kabuli_wild_1096379 | 1399941497                          | Ca_kabuli_Chr07 | 1096379                 | C/T  | Gene_Ca_03366      | SYNONYMOUS_CODING             | IQ motif,EF-handbinding site                          |
| Kabuli_wild_1096440 | 1399941498                          | Ca_kabuli_Chr07 | 1096440                 | T/C  | Gene_Ca_03366      | NON_SYNONYMOUS_CODING         | IQ motif,EF-handbinding site                          |
| Kabuli_wild_1153267 | 1399941499                          | Ca_kabuli_Chr07 | 1153267                 | A/C  | NA                 | INTERGENIC                    | NA                                                    |
| Kabuli_wild_1174240 | 1399941500                          | Ca_kabuli_Chr07 | 1174240                 | T/C  | Gene_Ca_03356      | INTRON                        | Helicase,C-terminal                                   |
| Kabuli_wild_1184557 | 1399941501                          | Ca_kabuli_Chr07 | 1184557                 | A/C  | Gene_Ca_03354      | NON_SYNONYMOUS_CODING         | Ubiquitin/SUMO-activatingenzymeE1                     |
| Kabuli_wild_1293601 | 1399941502                          | Ca_kabuli_Chr07 | 1293601                 | C/G  | Gene_Ca_03339      | SYNONYMOUS_CODING             | Protein kinase,catalytic domain                       |
| Kabuli_wild_1350605 | 1399941503                          | Ca_kabuli_Chr07 | 1350605                 | C/T  | Gene_Ca_03334      | NON_SYNONYMOUS_CODING         | PeptidaseC19,ubiquitincoaxyl-terminalhydrolase2       |
| Kabuli_wild_1414206 | 1399941504                          | Ca_kabuli_Chr07 | 1414206                 | C/A  | NA                 | INTERGENIC                    | NA                                                    |
| Kabuli_wild_1505965 | 1399941505                          | Ca_kabuli_Chr07 | 1505965                 | A/G  | Gene_Ca_03315      | INTRON                        | Pentatricopeptide repeat                              |
| Kabuli_wild_1511252 | 1399941506                          | Ca_kabuli_Chr07 | 1511252                 | C/T  | Gene_Ca_03315      | INTRON                        | Pentatricopeptide repeat                              |
| Kabuli_wild_1585622 | 1399941507                          | Ca_kabuli_Chr07 | 1585622                 | T/C  | Gene_Ca_03309      | UPSTREAM                      | RibonucleaseH2,subunitC                               |
| Kabuli_wild_1704780 | 1399941508                          | Ca_kabuli_Chr07 | 1704780                 | T/G  | NA                 | INTERGENIC                    | NA                                                    |
| Kabuli_wild_1705197 | 1399941509                          | Ca_kabuli_Chr07 | 1705197                 | A/C  | Gene_Ca_03296      | NON_SYNONYMOUS_CODING         | Cytochromecoxidase,subunitVIb                         |
| Kabuli_wild_1707283 | 1399941510                          | Ca_kabuli_Chr07 | 1707283                 | G/T  | Gene_Ca_03296      | NON_SYNONYMOUS_CODING         | Cytochromecoxidase,subunitVIb                         |
| Kabuli_wild_1991578 | 1399941511                          | Ca_kabuli_Chr07 | 1991578                 | A/G  | Gene_Ca_03275      | NON_SYNONYMOUS_CODING         | Zinc finger,B-box                                     |
| Kabuli_wild_2045614 | 1399941512                          | Ca_kabuli_Chr07 | 2045614                 | T/C  | NA                 | INTERGENIC                    | NA                                                    |
| Kabuli_wild_2075694 | 1399941513                          | Ca_kabuli_Chr07 | 2075694                 | A/C  | NA                 | INTERGENIC                    | NA                                                    |
| Kabuli_wild_2103626 | 1399941514                          | Ca_kabuli_Chr07 | 2103626                 | C/T  | Gene_Ca_03262      | INTRON                        | Calmodulinbindingprotein-like                         |
| Kabuli_wild_2121515 | 1399941515                          | Ca_kabuli_Chr07 | 2121515                 | T/A  | NA                 | INTERGENIC                    | NA                                                    |
| Kabuli_wild_2170700 | 1399941516                          | Ca_kabuli_Chr07 | 2170700                 | T/G  | Gene_Ca_03253      | INTRON                        | Porin,eukaryotictype                                  |
| Kabuli_wild_2219829 | 1399941517                          | Ca_kabuli_Chr07 | 2219829                 | T/C  | NA                 | INTERGENIC                    | NA                                                    |
| Kabuli_wild_2391350 | 1399941518                          | Ca_kabuli_Chr07 | 2391350                 | T/G  | Gene_Ca_03236      | INTRON                        | WD40 repeat                                           |
| Kabuli_wild_2450980 | 1399941519                          | Ca_kabuli_Chr07 | 2450980                 | A/C  | NA                 | INTERGENIC                    | NA                                                    |
| Kabuli_wild_2609831 | 1399941520                          | Ca_kabuli_Chr07 | 2609831                 | C/A  | NA                 | INTERGENIC                    | NA                                                    |
| Kabuli_wild_2684213 | 1399941521                          | Ca_kabuli_Chr07 | 2684213                 | A/G  | Gene_Ca_03210      | INTRON                        | LisHdimerisationmotif                                 |
| Kabuli_wild_2707564 | 1399941522                          | Ca_kabuli_Chr07 | 2707564                 | T/C  | NA                 | INTERGENIC                    | NA                                                    |
| Kabuli_wild_2734680 | 1399941523                          | Ca_kabuli_Chr07 | 2734680                 | A/G  | Gene_Ca_03205      | INTRON                        | Protein kinase,catalytic domain                       |
| Kabuli_wild_2745652 | 1399941524                          | Ca_kabuli_Chr07 | 2745652                 | T/A  | NA                 | INTERGENIC                    | NA                                                    |
| Kabuli_wild_2745656 | 1399941525                          | Ca_kabuli_Chr07 | 2745656                 | A/C  | NA                 | INTERGENIC                    | NA                                                    |
| Kabuli_wild_2745665 | 1399941526                          | Ca_kabuli_Chr07 | 2745665                 | A/C  | NA                 | INTERGENIC                    | NA                                                    |
| Kabuli_wild_2757247 | 1399941527                          | Ca_kabuli_Chr07 | 2757247                 | A/G  | Gene_Ca_03202      | NON_SYNONYMOUS_CODING         | Transcription factor jumonji/aspartylbeta-hydroxylase |

| SNP IDs             | NCBI dbSNP accession IDs (NCBI_SS#) | Chromosomes     | Physical positions (bp) | SNPs | Gene accession IDs | Sequence components of genome | Putative functions                                    |
|---------------------|-------------------------------------|-----------------|-------------------------|------|--------------------|-------------------------------|-------------------------------------------------------|
| Kabuli_wild_2757253 | 1399941528                          | Ca_kabuli_Chr07 | 2757253                 | T/G  | Gene_Ca_03202      | NON_SYNONYMOUS_CODING         | Transcription factor jumonji/aspartylbeta-hydroxylase |
| Kabuli_wild_2757255 | 1399941529                          | Ca_kabuli_Chr07 | 2757255                 | G/C  | Gene_Ca_03202      | NON_SYNONYMOUS_CODING         | Transcription factor jumonji/aspartylbeta-hydroxylase |
| Kabuli_wild_2762396 | 1399941530                          | Ca_kabuli_Chr07 | 2762396                 | G/A  | NA                 | INTERGENIC                    | NA                                                    |
| Kabuli_wild_2832369 | 1399941531                          | Ca_kabuli_Chr07 | 2832369                 | C/T  | Gene_Ca_03193      | SYNONYMOUS_CODING             | Zinc finger,GATA-type                                 |
| Kabuli_wild_2857630 | 1399941532                          | Ca_kabuli_Chr07 | 2857630                 | T/G  | Gene_Ca_03190      | INTRON                        | Protein kinase,catalytic domain                       |
| Kabuli_wild_2864694 | 1399941533                          | Ca_kabuli_Chr07 | 2864694                 | G/T  | Gene_Ca_03189      | NON_SYNONYMOUS_CODING         | Zinc finger,CCCH-type                                 |
| Kabuli_wild_2909176 | 1399941534                          | Ca_kabuli_Chr07 | 2909176                 | C/A  | NA                 | INTERGENIC                    | NA                                                    |
| Kabuli_wild_2915375 | 1399941535                          | Ca_kabuli_Chr07 | 2915375                 | C/G  | Gene_Ca_03185      | UPSTREAM                      | DNArecombinationandrepairproteinRecA                  |
| Kabuli_wild_2915420 | 1399941536                          | Ca_kabuli_Chr07 | 2915420                 | C/T  | Gene_Ca_03185      | UPSTREAM                      | DNArecombinationandrepairproteinRecA                  |
| Kabuli_wild_3023154 | 1399941537                          | Ca_kabuli_Chr07 | 3023154                 | T/C  | Gene_Ca_03170      | INTRON                        | NA                                                    |
| Kabuli_wild_3070531 | 1399941538                          | Ca_kabuli_Chr07 | 3070531                 | A/C  | NA                 | INTERGENIC                    | NA                                                    |
| Kabuli_wild_3093979 | 1399941539                          | Ca_kabuli_Chr07 | 3093979                 | A/G  | Gene_Ca_03163      | SYNONYMOUS_CODING             | IQ motif,EF-handbinding site                          |
| Kabuli_wild_3094087 | 1399941540                          | Ca_kabuli_Chr07 | 3094087                 | A/G  | Gene_Ca_03163      | SYNONYMOUS_CODING             | IQ motif,EF-handbinding site                          |
| Kabuli_wild_3109250 | 1399941541                          | Ca_kabuli_Chr07 | 3109250                 | T/C  | Gene_Ca_03162      | DOWNSTREAM                    | Peptidoglycan-bindingLysinsubgroup                    |
| Kabuli_wild_3109352 | 1399941542                          | Ca_kabuli_Chr07 | 3109352                 | T/C  | Gene_Ca_03162      | DOWNSTREAM                    | Peptidoglycan-bindingLysinsubgroup                    |
| Kabuli_wild_3130069 | 1399941543                          | Ca_kabuli_Chr07 | 3130069                 | A/G  | Gene_Ca_03158      | NON_SYNONYMOUS_CODING         | PhotosystemIIIPsbX                                    |
| Kabuli_wild_3130070 | 1399941544                          | Ca_kabuli_Chr07 | 3130070                 | A/G  | Gene_Ca_03158      | NON_SYNONYMOUS_CODING         | PhotosystemIIIPsbX                                    |
| Kabuli_wild_3143409 | 1399941545                          | Ca_kabuli_Chr07 | 3143409                 | C/T  | NA                 | INTERGENIC                    | NA                                                    |
| Kabuli_wild_3186262 | 1399941546                          | Ca_kabuli_Chr07 | 3186262                 | T/G  | NA                 | INTERGENIC                    | NA                                                    |
| Kabuli_wild_3186341 | 1399941547                          | Ca_kabuli_Chr07 | 3186341                 | C/T  | NA                 | INTERGENIC                    | NA                                                    |
| Kabuli_wild_3297683 | 1399941548                          | Ca_kabuli_Chr07 | 3297683                 | C/T  | Gene_Ca_03139      | SYNONYMOUS_CODING             | Domain of unknown function DUF231,plant               |
| Kabuli_wild_3315157 | 1399941549                          | Ca_kabuli_Chr07 | 3315157                 | A/G  | NA                 | INTERGENIC                    | NA                                                    |
| Kabuli_wild_3356399 | 1399941550                          | Ca_kabuli_Chr07 | 3356399                 | G/A  | Gene_Ca_03128      | INTRON                        | AUX/IAAprotein                                        |
| Kabuli_wild_3357452 | 1399941551                          | Ca_kabuli_Chr07 | 3357452                 | G/A  | Gene_Ca_03128      | NON_SYNONYMOUS_CODING         | AUX/IAAprotein                                        |
| Kabuli_wild_3374547 | 1399941552                          | Ca_kabuli_Chr07 | 3374547                 | G/T  | Gene_Ca_03127      | INTRON                        | NUDIX hydrolase domain                                |
| Kabuli_wild_3374551 | 1399941553                          | Ca_kabuli_Chr07 | 3374551                 | C/T  | Gene_Ca_03127      | INTRON                        | NUDIX hydrolase domain                                |
| Kabuli_wild_3504900 | 1399941554                          | Ca_kabuli_Chr07 | 3504900                 | G/A  | NA                 | INTERGENIC                    | NA                                                    |
| Kabuli_wild_3505012 | 1399941555                          | Ca_kabuli_Chr07 | 3505012                 | A/C  | NA                 | INTERGENIC                    | NA                                                    |
| Kabuli_wild_3518048 | 1399941556                          | Ca_kabuli_Chr07 | 3518048                 | G/A  | Gene_Ca_03116      | SYNONYMOUS_CODING             | Synaptojanin,N-terminal                               |
| Kabuli_wild_3519510 | 1399941557                          | Ca_kabuli_Chr07 | 3519510                 | A/G  | Gene_Ca_03116      | INTRON                        | Synaptojanin,N-terminal                               |
| Kabuli_wild_3519701 | 1399941558                          | Ca_kabuli_Chr07 | 3519701                 | A/C  | Gene_Ca_03116      | INTRON                        | Synaptojanin,N-terminal                               |
| Kabuli_wild_3520759 | 1399941559                          | Ca_kabuli_Chr07 | 3520759                 | C/T  | Gene_Ca_03116      | INTRON                        | Synaptojanin,N-terminal                               |
| Kabuli_wild_3521150 | 1399941560                          | Ca_kabuli_Chr07 | 3521150                 | A/G  | Gene_Ca_03116      | INTRON                        | Synaptojanin,N-terminal                               |
| Kabuli_wild_3521167 | 1399941561                          | Ca_kabuli_Chr07 | 3521167                 | C/G  | Gene_Ca_03116      | INTRON                        | Synaptojanin,N-terminal                               |
| Kabuli_wild_3521192 | 1399941562                          | Ca_kabuli_Chr07 | 3521192                 | C/A  | Gene_Ca_03116      | INTRON                        | Synaptojanin,N-terminal                               |
| Kabuli_wild_3521257 | 1399941563                          | Ca_kabuli_Chr07 | 3521257                 | G/A  | Gene_Ca_03116      | INTRON                        | Synaptojanin,N-terminal                               |
| Kabuli_wild_3536194 | 1399941564                          | Ca_kabuli_Chr07 | 3536194                 | C/T  | NA                 | INTERGENIC                    | NA                                                    |
| Kabuli_wild_3536233 | 1399941565                          | Ca_kabuli_Chr07 | 3536233                 | T/C  | NA                 | INTERGENIC                    | NA                                                    |
| Kabuli_wild_3543765 | 1399941566                          | Ca_kabuli_Chr07 | 3543765                 | A/G  | NA                 | INTERGENIC                    | NA                                                    |
| Kabuli_wild_3543768 | 1399941567                          | Ca_kabuli_Chr07 | 3543768                 | T/C  | NA                 | INTERGENIC                    | NA                                                    |
| Kabuli_wild_3557570 | 1399941568                          | Ca_kabuli_Chr07 | 3557570                 | C/T  | Gene_Ca_03113      | INTRON                        | Zinc finger,FYVE-type                                 |
| Kabuli_wild_3560182 | 1399941569                          | Ca_kabuli_Chr07 | 3560182                 | G/A  | Gene_Ca_03113      | NON_SYNONYMOUS_CODING         | Zinc finger,FYVE-type                                 |
| Kabuli_wild_3572963 | 1399941570                          | Ca_kabuli_Chr07 | 3572963                 | T/C  | Gene_Ca_03112      | INTRON                        | Sec34-likeprotein                                     |
| Kabuli_wild_3573456 | 1399941571                          | Ca_kabuli_Chr07 | 3573456                 | G/A  | Gene_Ca_03112      | INTRON                        | Sec34-likeprotein                                     |

| SNP IDs             | NCBI dbSNP accession IDs (NCBI_SS#) | Chromosomes     | Physical positions (bp) | SNPs | Gene accession IDs | Sequence components of genome | Putative functions                               |
|---------------------|-------------------------------------|-----------------|-------------------------|------|--------------------|-------------------------------|--------------------------------------------------|
| Kabuli_wild_3573477 | 1399941572                          | Ca_kabuli_Chr07 | 3573477                 | C/G  | Gene_Ca_03112      | INTRON                        | Sec34-likeprotein                                |
| Kabuli_wild_3581123 | 1399941573                          | Ca_kabuli_Chr07 | 3581123                 | G/A  | Gene_Ca_03112      | INTRON                        | Sec34-likeprotein                                |
| Kabuli_wild_3600826 | 1399941574                          | Ca_kabuli_Chr07 | 3600826                 | C/T  | NA                 | INTERGENIC                    | NA                                               |
| Kabuli_wild_3600833 | 1399941575                          | Ca_kabuli_Chr07 | 3600833                 | T/G  | NA                 | INTERGENIC                    | NA                                               |
| Kabuli_wild_3600866 | 1399941576                          | Ca_kabuli_Chr07 | 3600866                 | T/C  | NA                 | INTERGENIC                    | NA                                               |
| Kabuli_wild_3600867 | 1399941577                          | Ca_kabuli_Chr07 | 3600867                 | C/T  | NA                 | INTERGENIC                    | NA                                               |
| Kabuli_wild_3600987 | 1399941578                          | Ca_kabuli_Chr07 | 3600987                 | A/C  | NA                 | INTERGENIC                    | NA                                               |
| Kabuli_wild_3628086 | 1399941579                          | Ca_kabuli_Chr07 | 3628086                 | G/A  | Gene_Ca_03106      | INTRON                        | Saccharopinedehydrogenase/Homospermidinesynthase |
| Kabuli_wild_3634037 | 1399941580                          | Ca_kabuli_Chr07 | 3634037                 | C/T  | Gene_Ca_03106      | INTRON                        | Saccharopinedehydrogenase/Homospermidinesynthase |
| Kabuli_wild_3634052 | 1399941581                          | Ca_kabuli_Chr07 | 3634052                 | C/T  | Gene_Ca_03106      | INTRON                        | Saccharopinedehydrogenase/Homospermidinesynthase |
| Kabuli_wild_3634427 | 1399941582                          | Ca_kabuli_Chr07 | 3634427                 | G/C  | Gene_Ca_03106      | SYNONYMOUS_CODING             | Saccharopinedehydrogenase/Homospermidinesynthase |
| Kabuli_wild_3634430 | 1399941583                          | Ca_kabuli_Chr07 | 3634430                 | A/T  | Gene_Ca_03106      | NON_SYNONYMOUS_CODING         | Saccharopinedehydrogenase/Homospermidinesynthase |
| Kabuli_wild_3634459 | 1399941584                          | Ca_kabuli_Chr07 | 3634459                 | T/C  | Gene_Ca_03106      | NON_SYNONYMOUS_CODING         | Saccharopinedehydrogenase/Homospermidinesynthase |
| Kabuli_wild_3634478 | 1399941585                          | Ca_kabuli_Chr07 | 3634478                 | A/G  | Gene_Ca_03106      | SYNONYMOUS_CODING             | Saccharopinedehydrogenase/Homospermidinesynthase |
| Kabuli_wild_3634497 | 1399941586                          | Ca_kabuli_Chr07 | 3634497                 | A/G  | Gene_Ca_03106      | NON_SYNONYMOUS_CODING         | Saccharopinedehydrogenase/Homospermidinesynthase |
| Kabuli_wild_3635307 | 1399941587                          | Ca_kabuli_Chr07 | 3635307                 | G/A  | Gene_Ca_03106      | INTRON                        | Saccharopinedehydrogenase/Homospermidinesynthase |
| Kabuli_wild_3635309 | 1399941588                          | Ca_kabuli_Chr07 | 3635309                 | C/T  | Gene_Ca_03106      | INTRON                        | Saccharopinedehydrogenase/Homospermidinesynthase |
| Kabuli_wild_3635318 | 1399941589                          | Ca_kabuli_Chr07 | 3635318                 | T/A  | Gene_Ca_03106      | INTRON                        | Saccharopinedehydrogenase/Homospermidinesynthase |
| Kabuli_wild_3635325 | 1399941590                          | Ca_kabuli_Chr07 | 3635325                 | T/C  | Gene_Ca_03106      | INTRON                        | Saccharopinedehydrogenase/Homospermidinesynthase |
| Kabuli_wild_3635369 | 1399941591                          | Ca_kabuli_Chr07 | 3635369                 | G/T  | Gene_Ca_03106      | INTRON                        | Saccharopinedehydrogenase/Homospermidinesynthase |
| Kabuli_wild_3650893 | 1399941592                          | Ca_kabuli_Chr07 | 3650893                 | T/A  | Gene_Ca_03103      | INTRON                        | SEC7-like                                        |
| Kabuli_wild_3651051 | 1399941593                          | Ca_kabuli_Chr07 | 3651051                 | T/C  | Gene_Ca_03103      | INTRON                        | SEC7-like                                        |
| Kabuli_wild_3665651 | 1399941594                          | Ca_kabuli_Chr07 | 3665651                 | G/C  | Gene_Ca_03103      | SYNONYMOUS_CODING             | SEC7-like                                        |
| Kabuli_wild_3672192 | 1399941595                          | Ca_kabuli_Chr07 | 3672192                 | T/C  | Gene_Ca_03102      | INTRON                        | Zinc finger,FYVE-type                            |
| Kabuli_wild_3672236 | 1399941596                          | Ca_kabuli_Chr07 | 3672236                 | G/A  | Gene_Ca_03102      | INTRON                        | Zinc finger,FYVE-type                            |
| Kabuli_wild_3796826 | 1399941597                          | Ca_kabuli_Chr07 | 3796826                 | A/G  | Gene_Ca_03085      | INTRON                        | SNF2-related                                     |
| Kabuli_wild_3802188 | 1399941598                          | Ca_kabuli_Chr07 | 3802188                 | T/A  | NA                 | INTERGENIC                    | NA                                               |
| Kabuli_wild_3817112 | 1399941599                          | Ca_kabuli_Chr07 | 3817112                 | C/T  | Gene_Ca_03082      | NON_SYNONYMOUS_CODING         | ABC transporter,trans membrane domain            |
| Kabuli_wild_3817733 | 1399941600                          | Ca_kabuli_Chr07 | 3817733                 | T/G  | Gene_Ca_03082      | NON_SYNONYMOUS_CODING         | ABC transporter,trans membrane domain            |
| Kabuli_wild_3817740 | 1399941601                          | Ca_kabuli_Chr07 | 3817740                 | G/T  | Gene_Ca_03082      | NON_SYNONYMOUS_CODING         | ABC transporter,trans membrane domain            |
| Kabuli_wild_3817743 | 1399941602                          | Ca_kabuli_Chr07 | 3817743                 | C/A  | Gene_Ca_03082      | SYNONYMOUS_CODING             | ABC transporter,trans membrane domain            |
| Kabuli_wild_3867250 | 1399941603                          | Ca_kabuli_Chr07 | 3867250                 | A/G  | Gene_Ca_03077      | NON_SYNONYMOUS_CODING         | NA                                               |
| Kabuli_wild_3867273 | 1399941604                          | Ca_kabuli_Chr07 | 3867273                 | A/T  | Gene_Ca_03077      | SYNONYMOUS_CODING             | NA                                               |
| Kabuli_wild_3867279 | 1399941605                          | Ca_kabuli_Chr07 | 3867279                 | T/C  | Gene_Ca_03077      | SYNONYMOUS_CODING             | NA                                               |
| Kabuli_wild_3867377 | 1399941606                          | Ca_kabuli_Chr07 | 3867377                 | A/G  | Gene_Ca_03077      | NON_SYNONYMOUS_CODING         | NA                                               |
| Kabuli_wild_3883678 | 1399941607                          | Ca_kabuli_Chr07 | 3883678                 | C/T  | Gene_Ca_03076      | DOWNSTREAM                    | Protein kinase,catalytic domain                  |
| Kabuli_wild_3916849 | 1399941608                          | Ca_kabuli_Chr07 | 3916849                 | A/C  | NA                 | INTERGENIC                    | NA                                               |
| Kabuli_wild_4017780 | 1399941609                          | Ca_kabuli_Chr07 | 4017780                 | T/C  | Gene_Ca_03061      | INTRON                        | NA                                               |
| Kabuli_wild_4017838 | 1399941610                          | Ca_kabuli_Chr07 | 4017838                 | T/G  | Gene_Ca_03061      | INTRON                        | NA                                               |
| Kabuli_wild_4017851 | 1399941611                          | Ca_kabuli_Chr07 | 4017851                 | T/C  | Gene_Ca_03061      | INTRON                        | NA                                               |
| Kabuli_wild_4017920 | 1399941612                          | Ca_kabuli_Chr07 | 4017920                 | A/C  | Gene_Ca_03061      | INTRON                        | NA                                               |
| Kabuli_wild_4028506 | 1399941613                          | Ca_kabuli_Chr07 | 4028506                 | T/C  | NA                 | INTERGENIC                    | NA                                               |
| Kabuli_wild_4095293 | 1399941614                          | Ca_kabuli_Chr07 | 4095293                 | A/G  | Gene_Ca_03057      | NON_SYNONYMOUS_CODING         | Galectin,carbohydraterecognitiondomain           |
| Kabuli_wild_4183185 | 1399941615                          | Ca_kabuli_Chr07 | 4183185                 | G/A  | Gene_Ca_03046      | INTRON                        | Cas1p-like                                       |

| SNP IDs             | NCBI dbSNP accession IDs (NCBI_SS#) | Chromosomes     | Physical positions (bp) | SNPs | Gene accession IDs | Sequence components of genome | Putative functions                                              |
|---------------------|-------------------------------------|-----------------|-------------------------|------|--------------------|-------------------------------|-----------------------------------------------------------------|
| Kabuli_wild_4194809 | 1399941616                          | Ca_kabuli_Chr07 | 4194809                 | T/A  | Gene_Ca_03043      | DOWNSTREAM                    | NA                                                              |
| Kabuli_wild_4194890 | 1399941617                          | Ca_kabuli_Chr07 | 4194890                 | C/A  | Gene_Ca_03043      | DOWNSTREAM                    | NA                                                              |
| Kabuli_wild_4194891 | 1399941618                          | Ca_kabuli_Chr07 | 4194891                 | C/G  | Gene_Ca_03043      | DOWNSTREAM                    | NA                                                              |
| Kabuli_wild_4198812 | 1399941619                          | Ca_kabuli_Chr07 | 4198812                 | A/C  | Gene_Ca_03043      | UPSTREAM                      | NA                                                              |
| Kabuli_wild_4209425 | 1399941620                          | Ca_kabuli_Chr07 | 4209425                 | C/T  | NA                 | INTERGENIC                    | NA                                                              |
| Kabuli_wild_4209465 | 1399941621                          | Ca_kabuli_Chr07 | 4209465                 | A/C  | NA                 | INTERGENIC                    | NA                                                              |
| Kabuli_wild_4300584 | 1399941622                          | Ca_kabuli_Chr07 | 4300584                 | C/T  | Gene_Ca_03028      | DOWNSTREAM                    | Integrase,catalyticcore                                         |
| Kabuli_wild_4300592 | 1399941623                          | Ca_kabuli_Chr07 | 4300592                 | G/A  | Gene_Ca_03028      | DOWNSTREAM                    | Integrase,catalyticcore                                         |
| Kabuli_wild_4300645 | 1399941624                          | Ca_kabuli_Chr07 | 4300645                 | C/T  | Gene_Ca_03028      | DOWNSTREAM                    | Integrase,catalyticcore                                         |
| Kabuli_wild_4300650 | 1399941625                          | Ca_kabuli_Chr07 | 4300650                 | T/C  | Gene_Ca_03028      | DOWNSTREAM                    | Integrase,catalyticcore                                         |
| Kabuli_wild_4305424 | 1399941626                          | Ca_kabuli_Chr07 | 4305424                 | G/T  | NA                 | INTERGENIC                    | NA                                                              |
| Kabuli_wild_4431138 | 1399941627                          | Ca_kabuli_Chr07 | 4431138                 | A/G  | Gene_Ca_03015      | NON_SYNONYMOUS_CODING         | NA                                                              |
| Kabuli_wild_4461990 | 1399941628                          | Ca_kabuli_Chr07 | 4461990                 | A/C  | Gene_Ca_03012      | DOWNSTREAM                    | NA                                                              |
| Kabuli_wild_4498899 | 1399941629                          | Ca_kabuli_Chr07 | 4498899                 | G/A  | NA                 | INTERGENIC                    | NA                                                              |
| Kabuli_wild_4520617 | 1399941630                          | Ca_kabuli_Chr07 | 4520617                 | C/A  | Gene_Ca_03001      | NON_SYNONYMOUS_CODING         | Pyridine nucleotide-disulphideoxidoreductase,NAD-binding region |
| Kabuli_wild_4552790 | 1399941631                          | Ca_kabuli_Chr07 | 4552790                 | T/C  | NA                 | INTERGENIC                    | NA                                                              |
| Kabuli_wild_4573236 | 1399941632                          | Ca_kabuli_Chr07 | 4573236                 | G/A  | NA                 | INTERGENIC                    | NA                                                              |
| Kabuli_wild_4625723 | 1399941633                          | Ca_kabuli_Chr07 | 4625723                 | C/T  | Gene_Ca_02989      | SYNONYMOUS_CODING             | Signal transduction response regulator, receiverdomain          |
| Kabuli_wild_4652083 | 1399941634                          | Ca_kabuli_Chr07 | 4652083                 | G/A  | Gene_Ca_02988      | INTRON                        | Protein of unknown function DUF789                              |
| Kabuli_wild_4707650 | 1399941635                          | Ca_kabuli_Chr07 | 4707650                 | T/G  | Gene_Ca_02979      | UPSTREAM                      | WD40 repeat                                                     |
| Kabuli_wild_4749212 | 1399941636                          | Ca_kabuli_Chr07 | 4749212                 | T/G  | NA                 | INTERGENIC                    | NA                                                              |
| Kabuli_wild_4764034 | 1399941637                          | Ca_kabuli_Chr07 | 4764034                 | G/T  | NA                 | INTERGENIC                    | NA                                                              |
| Kabuli_wild_4834177 | 1399941638                          | Ca_kabuli_Chr07 | 4834177                 | G/T  | Gene_Ca_02961      | UPSTREAM                      | Lateembryogenesisabundantprotein,group3                         |
| Kabuli_wild_4884236 | 1399941639                          | Ca_kabuli_Chr07 | 4884236                 | A/C  | NA                 | INTERGENIC                    | NA                                                              |
| Kabuli_wild_4981846 | 1399941640                          | Ca_kabuli_Chr07 | 4981846                 | T/C  | NA                 | INTERGENIC                    | NA                                                              |
| Kabuli_wild_4981870 | 1399941641                          | Ca_kabuli_Chr07 | 4981870                 | C/A  | NA                 | INTERGENIC                    | NA                                                              |
| Kabuli_wild_4981871 | 1399941642                          | Ca_kabuli_Chr07 | 4981871                 | C/G  | NA                 | INTERGENIC                    | NA                                                              |
| Kabuli_wild_5057515 | 1399941643                          | Ca_kabuli_Chr07 | 5057515                 | G/T  | Gene_Ca_06859      | NON_SYNONYMOUS_CODING         | Peptidase C48, SUMO/Sentrin/Ubl1                                |
| Kabuli_wild_5106231 | 1399941644                          | Ca_kabuli_Chr07 | 5106231                 | G/A  | Gene_Ca_06855      | DOWNSTREAM                    | Transcriptionalcoactivator/pterindehydratase                    |
| Kabuli_wild_5122426 | 1399941645                          | Ca_kabuli_Chr07 | 5122426                 | A/G  | NA                 | INTERGENIC                    | NA                                                              |
| Kabuli_wild_5122536 | 1399941646                          | Ca_kabuli_Chr07 | 5122536                 | T/G  | NA                 | INTERGENIC                    | NA                                                              |
| Kabuli_wild_5383564 | 1399941647                          | Ca_kabuli_Chr07 | 5383564                 | G/C  | NA                 | INTERGENIC                    | NA                                                              |
| Kabuli_wild_5383566 | 1399941648                          | Ca_kabuli_Chr07 | 5383566                 | A/T  | NA                 | INTERGENIC                    | NA                                                              |
| Kabuli_wild_5383671 | 1399941649                          | Ca_kabuli_Chr07 | 5383671                 | G/T  | NA                 | INTERGENIC                    | NA                                                              |
| Kabuli_wild_5383695 | 1399941650                          | Ca_kabuli_Chr07 | 5383695                 | T/G  | NA                 | INTERGENIC                    | NA                                                              |
| Kabuli_wild_5383767 | 1399941651                          | Ca_kabuli_Chr07 | 5383767                 | G/A  | NA                 | INTERGENIC                    | NA                                                              |
| Kabuli_wild_5384447 | 1399941652                          | Ca_kabuli_Chr07 | 5384447                 | G/C  | Gene_Ca_06832      | DOWNSTREAM                    | Pentatricopeptide repeat                                        |
| Kabuli_wild_5406524 | 1399941653                          | Ca_kabuli_Chr07 | 5406524                 | T/G  | NA                 | INTERGENIC                    | NA                                                              |
| Kabuli_wild_5421847 | 1399941654                          | Ca_kabuli_Chr07 | 5421847                 | A/C  | Gene_Ca_06826      | INTRON                        | SNF2-related                                                    |
| Kabuli_wild_5421861 | 1399941655                          | Ca_kabuli_Chr07 | 5421861                 | A/T  | Gene_Ca_06826      | INTRON                        | SNF2-related                                                    |
| Kabuli_wild_5464193 | 1399941656                          | Ca_kabuli_Chr07 | 5464193                 | G/A  | NA                 | INTERGENIC                    | NA                                                              |
| Kabuli_wild_5464941 | 1399941657                          | Ca_kabuli_Chr07 | 5464941                 | G/A  | Gene_Ca_06820      | DOWNSTREAM                    | F-boxdomain,cyclin-like                                         |
| Kabuli_wild_5464942 | 1399941658                          | Ca_kabuli_Chr07 | 5464942                 | A/G  | Gene_Ca_06820      | DOWNSTREAM                    | F-boxdomain,cyclin-like                                         |
| Kabuli_wild_5467296 | 1399941659                          | Ca_kabuli_Chr07 | 5467296                 | T/A  | NA                 | INTERGENIC                    | NA                                                              |

| SNP IDs             | NCBI dbSNP accession IDs (NCBI_SS#) | Chromosomes     | Physical positions (bp) | SNPs | Gene accession IDs | Sequence components of genome | Putative functions                                     |
|---------------------|-------------------------------------|-----------------|-------------------------|------|--------------------|-------------------------------|--------------------------------------------------------|
| Kabuli_wild_5467645 | 1399941660                          | Ca_kabuli_Chr07 | 5467645                 | G/A  | NA                 | INTERGENIC                    | NA                                                     |
| Kabuli_wild_5467744 | 1399941661                          | Ca_kabuli_Chr07 | 5467744                 | G/C  | NA                 | INTERGENIC                    | NA                                                     |
| Kabuli_wild_5474255 | 1399941662                          | Ca_kabuli_Chr07 | 5474255                 | C/T  | NA                 | INTERGENIC                    | NA                                                     |
| Kabuli_wild_5500202 | 1399941663                          | Ca_kabuli_Chr07 | 5500202                 | A/G  | Gene_Ca_06816      | INTRON                        | SNF2-related                                           |
| Kabuli_wild_5504454 | 1399941664                          | Ca_kabuli_Chr07 | 5504454                 | T/C  | Gene_Ca_06816      | INTRON                        | SNF2-related                                           |
| Kabuli_wild_5508162 | 1399941665                          | Ca_kabuli_Chr07 | 5508162                 | A/C  | Gene_Ca_06816      | SYNONYMOUS_CODING             | SNF2-related                                           |
| Kabuli_wild_5509712 | 1399941666                          | Ca_kabuli_Chr07 | 5509712                 | T/G  | Gene_Ca_06816      | NON_SYNONYMOUS_CODING         | SNF2-related                                           |
| Kabuli_wild_5520720 | 1399941667                          | Ca_kabuli_Chr07 | 5520720                 | T/G  | Gene_Ca_06814      | NON_SYNONYMOUS_CODING         | Heat shock protein DnaJ,N-terminal                     |
| Kabuli_wild_5520934 | 1399941668                          | Ca_kabuli_Chr07 | 5520934                 | T/C  | Gene_Ca_06814      | NON_SYNONYMOUS_CODING         | Heat shock protein DnaJ,N-terminal                     |
| Kabuli_wild_5521596 | 1399941669                          | Ca_kabuli_Chr07 | 5521596                 | T/C  | Gene_Ca_06814      | NON_SYNONYMOUS_CODING         | Heat shock protein DnaJ,N-terminal                     |
| Kabuli_wild_5521659 | 1399941670                          | Ca_kabuli_Chr07 | 5521659                 | G/T  | Gene_Ca_06814      | NON_SYNONYMOUS_CODING         | Heat shock protein DnaJ,N-terminal                     |
| Kabuli_wild_5529110 | 1399941671                          | Ca_kabuli_Chr07 | 5529110                 | A/G  | NA                 | INTERGENIC                    | NA                                                     |
| Kabuli_wild_5529573 | 1399941672                          | Ca_kabuli_Chr07 | 5529573                 | C/G  | NA                 | INTERGENIC                    | NA                                                     |
| Kabuli_wild_5529577 | 1399941673                          | Ca_kabuli_Chr07 | 5529577                 | T/G  | NA                 | INTERGENIC                    | NA                                                     |
| Kabuli_wild_5529729 | 1399941674                          | Ca_kabuli_Chr07 | 5529729                 | A/G  | NA                 | INTERGENIC                    | NA                                                     |
| Kabuli_wild_5529844 | 1399941675                          | Ca_kabuli_Chr07 | 5529844                 | C/A  | NA                 | INTERGENIC                    | NA                                                     |
| Kabuli_wild_5529888 | 1399941676                          | Ca_kabuli_Chr07 | 5529888                 | A/G  | NA                 | INTERGENIC                    | NA                                                     |
| Kabuli_wild_5537851 | 1399941677                          | Ca_kabuli_Chr07 | 5537851                 | G/C  | Gene_Ca_06811      | INTRON                        | ProtamineP1                                            |
| Kabuli_wild_5537880 | 1399941678                          | Ca_kabuli_Chr07 | 5537880                 | G/T  | Gene_Ca_06811      | INTRON                        | ProtamineP2                                            |
| Kabuli_wild_5542812 | 1399941679                          | Ca_kabuli_Chr07 | 5542812                 | A/C  | NA                 | INTERGENIC                    | NA                                                     |
| Kabuli_wild_5561607 | 1399941680                          | Ca_kabuli_Chr07 | 5561607                 | G/T  | Gene_Ca_06808      | INTRON                        | Inosine/uridine-preferringnucleosidehydrolasedomain    |
| Kabuli_wild_5568114 | 1399941681                          | Ca_kabuli_Chr07 | 5568114                 | C/A  | Gene_Ca_06807      | UPSTREAM                      | Metridin-likeShKtoxin                                  |
| Kabuli_wild_5577258 | 1399941682                          | Ca_kabuli_Chr07 | 5577258                 | T/G  | NA                 | INTERGENIC                    | NA                                                     |
| Kabuli_wild_5577311 | 1399941683                          | Ca_kabuli_Chr07 | 5577311                 | T/C  | Gene_Ca_06805      | SYNONYMOUS_CODING             | NA                                                     |
| Kabuli_wild_5577321 | 1399941684                          | Ca_kabuli_Chr07 | 5577321                 | C/A  | Gene_Ca_06805      | NON_SYNONYMOUS_CODING         | NA                                                     |
| Kabuli_wild_5577439 | 1399941685                          | Ca_kabuli_Chr07 | 5577439                 | A/G  | Gene_Ca_06805      | NON_SYNONYMOUS_CODING         | NA                                                     |
| Kabuli_wild_5577467 | 1399941686                          | Ca_kabuli_Chr07 | 5577467                 | G/T  | Gene_Ca_06805      | SYNONYMOUS_CODING             | NA                                                     |
| Kabuli_wild_5581968 | 1399941687                          | Ca_kabuli_Chr07 | 5581968                 | G/C  | NA                 | INTERGENIC                    | NA                                                     |
| Kabuli_wild_5658445 | 1399941688                          | Ca_kabuli_Chr07 | 5658445                 | G/T  | NA                 | INTERGENIC                    | NA                                                     |
| Kabuli_wild_5671874 | 1399941689                          | Ca_kabuli_Chr07 | 5671874                 | G/T  | NA                 | INTERGENIC                    | NA                                                     |
| Kabuli_wild_5671902 | 1399941690                          | Ca_kabuli_Chr07 | 5671902                 | G/T  | NA                 | INTERGENIC                    | NA                                                     |
| Kabuli_wild_5672156 | 1399941691                          | Ca_kabuli_Chr07 | 5672156                 | T/C  | NA                 | INTERGENIC                    | NA                                                     |
| Kabuli_wild_5678992 | 1399941692                          | Ca_kabuli_Chr07 | 5678992                 | T/C  | Gene_Ca_06789      | INTRON                        | RNApolymerasespecifictranscriptioninitiationfactorRRN3 |
| Kabuli_wild_5683412 | 1399941693                          | Ca_kabuli_Chr07 | 5683412                 | T/A  | Gene_Ca_06789      | INTRON                        | RNApolymerasespecifictranscriptioninitiationfactorRRN3 |
| Kabuli_wild_5713977 | 1399941694                          | Ca_kabuli_Chr07 | 5713977                 | T/C  | Gene_Ca_06787      | DOWNSTREAM                    | Copperamineoxidase                                     |
| Kabuli_wild_5730386 | 1399941695                          | Ca_kabuli_Chr07 | 5730386                 | C/G  | Gene_Ca_06785      | DOWNSTREAM                    | Alpha/betahydrolasefold-1                              |
| Kabuli_wild_5735547 | 1399941696                          | Ca_kabuli_Chr07 | 5735547                 | A/G  | Gene_Ca_06783      | INTRON                        | Protein kinase,catalytic domain                        |
| Kabuli_wild_5737305 | 1399941697                          | Ca_kabuli_Chr07 | 5737305                 | G/A  | Gene_Ca_06783      | SYNONYMOUS_CODING             | Protein kinase,catalytic domain                        |
| Kabuli_wild_5756173 | 1399941698                          | Ca_kabuli_Chr07 | 5756173                 | T/C  | NA                 | INTERGENIC                    | NA                                                     |
| Kabuli_wild_5756269 | 1399941699                          | Ca_kabuli_Chr07 | 5756269                 | C/T  | NA                 | INTERGENIC                    | NA                                                     |
| Kabuli_wild_5756832 | 1399941700                          | Ca_kabuli_Chr07 | 5756832                 | A/C  | NA                 | INTERGENIC                    | NA                                                     |
| Kabuli_wild_5774218 | 1399941701                          | Ca_kabuli_Chr07 | 5774218                 | T/A  | Gene_Ca_06781      | INTRON                        | Dienelactonehydrolase                                  |
| Kabuli_wild_5774219 | 1399941702                          | Ca_kabuli_Chr07 | 5774219                 | T/A  | Gene_Ca_06781      | INTRON                        | Dienelactonehydrolase                                  |
| Kabuli_wild_5774220 | 1399941703                          | Ca_kabuli_Chr07 | 5774220                 | T/A  | Gene_Ca_06781      | INTRON                        | Dienelactonehydrolase                                  |

| SNP IDs             | NCBI dbSNP accession IDs (NCBI_SS#) | Chromosomes     | Physical positions (bp) | SNPs | Gene accession IDs | Sequence components of genome | Putative functions                          |
|---------------------|-------------------------------------|-----------------|-------------------------|------|--------------------|-------------------------------|---------------------------------------------|
| Kabuli_wild_5774221 | 1399941704                          | Ca_kabuli_Chr07 | 5774221                 | A/T  | Gene_Ca_06781      | INTRON                        | Dienelactonehydrolase                       |
| Kabuli_wild_5774230 | 1399941705                          | Ca_kabuli_Chr07 | 5774230                 | G/A  | Gene_Ca_06781      | INTRON                        | Dienelactonehydrolase                       |
| Kabuli_wild_5774257 | 1399941706                          | Ca_kabuli_Chr07 | 5774257                 | C/T  | Gene_Ca_06781      | INTRON                        | Dienelactonehydrolase                       |
| Kabuli_wild_5774310 | 1399941707                          | Ca_kabuli_Chr07 | 5774310                 | A/G  | Gene_Ca_06781      | INTRON                        | Dienelactonehydrolase                       |
| Kabuli_wild_5801997 | 1399941708                          | Ca_kabuli_Chr07 | 5801997                 | T/A  | NA                 | INTERGENIC                    | NA                                          |
| Kabuli_wild_5802607 | 1399941709                          | Ca_kabuli_Chr07 | 5802607                 | T/G  | Gene_Ca_06778      | NON_SYNONYMOUS_CODING         | RNA recognition motif domain                |
| Kabuli_wild_5802631 | 1399941710                          | Ca_kabuli_Chr07 | 5802631                 | C/A  | Gene_Ca_06778      | NON_SYNONYMOUS_CODING         | RNA recognition motif domain                |
| Kabuli_wild_5802916 | 1399941711                          | Ca_kabuli_Chr07 | 5802916                 | A/C  | NA                 | INTERGENIC                    | NA                                          |
| Kabuli_wild_5810043 | 1399941712                          | Ca_kabuli_Chr07 | 5810043                 | A/C  | NA                 | INTERGENIC                    | NA                                          |
| Kabuli_wild_5811097 | 1399941713                          | Ca_kabuli_Chr07 | 5811097                 | G/A  | NA                 | INTERGENIC                    | NA                                          |
| Kabuli_wild_5836421 | 1399941714                          | Ca_kabuli_Chr07 | 5836421                 | A/T  | NA                 | INTERGENIC                    | NA                                          |
| Kabuli_wild_5846477 | 1399941715                          | Ca_kabuli_Chr07 | 5846477                 | A/G  | NA                 | INTERGENIC                    | NA                                          |
| Kabuli_wild_5849904 | 1399941716                          | Ca_kabuli_Chr07 | 5849904                 | C/A  | Gene_Ca_06774      | DOWNSTREAM                    | SNARE associated Golgi protein              |
| Kabuli_wild_5849936 | 1399941717                          | Ca_kabuli_Chr07 | 5849936                 | C/T  | Gene_Ca_06774      | DOWNSTREAM                    | SNARE associated Golgi protein              |
| Kabuli_wild_5850058 | 1399941718                          | Ca_kabuli_Chr07 | 5850058                 | T/C  | Gene_Ca_06774      | DOWNSTREAM                    | SNARE associated Golgi protein              |
| Kabuli_wild_5854491 | 1399941719                          | Ca_kabuli_Chr07 | 5854491                 | T/G  | NA                 | INTERGENIC                    | NA                                          |
| Kabuli_wild_5854598 | 1399941720                          | Ca_kabuli_Chr07 | 5854598                 | C/T  | NA                 | INTERGENIC                    | NA                                          |
| Kabuli_wild_5925751 | 1399941721                          | Ca_kabuli_Chr07 | 5925751                 | T/C  | Gene_Ca_06765      | UPSTREAM                      | Domain of unknown function DUF298           |
| Kabuli_wild_5928979 | 1399941722                          | Ca_kabuli_Chr07 | 5928979                 | T/G  | Gene_Ca_06764      | INTRON                        | ATPase, P-type, H+ transporting proton pump |
| Kabuli_wild_5929009 | 1399941723                          | Ca_kabuli_Chr07 | 5929009                 | G/C  | Gene_Ca_06764      | INTRON                        | ATPase, P-type, H+ transporting proton pump |
| Kabuli_wild_5946113 | 1399941724                          | Ca_kabuli_Chr07 | 5946113                 | G/A  | NA                 | INTERGENIC                    | NA                                          |
| Kabuli_wild_5946536 | 1399941725                          | Ca_kabuli_Chr07 | 5946536                 | G/C  | NA                 | INTERGENIC                    | NA                                          |
| Kabuli_wild_5947944 | 1399941726                          | Ca_kabuli_Chr07 | 5947944                 | A/G  | NA                 | INTERGENIC                    | NA                                          |
| Kabuli_wild_5948771 | 1399941727                          | Ca_kabuli_Chr07 | 5948771                 | A/G  | Gene_Ca_06762      | INTRON                        | DNA-dependentATPaseMCM                      |
| Kabuli_wild_5950352 | 1399941728                          | Ca_kabuli_Chr07 | 5950352                 | T/A  | Gene_Ca_06762      | INTRON                        | DNA-dependentATPaseMCM                      |
| Kabuli_wild_5950492 | 1399941729                          | Ca_kabuli_Chr07 | 5950492                 | T/C  | Gene_Ca_06762      | SYNONYMOUS_CODING             | DNA-dependentATPaseMCM                      |
| Kabuli_wild_5957696 | 1399941730                          | Ca_kabuli_Chr07 | 5957696                 | T/C  | Gene_Ca_06761      | INTRON                        | RibonucleaseIII                             |
| Kabuli_wild_5963609 | 1399941731                          | Ca_kabuli_Chr07 | 5963609                 | C/A  | Gene_Ca_06761      | INTRON                        | RibonucleaseIII                             |
| Kabuli_wild_5963611 | 1399941732                          | Ca_kabuli_Chr07 | 5963611                 | C/G  | Gene_Ca_06761      | INTRON                        | RibonucleaseIII                             |
| Kabuli_wild_6012089 | 1399941733                          | Ca_kabuli_Chr07 | 6012089                 | T/C  | NA                 | INTERGENIC                    | NA                                          |
| Kabuli_wild_6012363 | 1399941734                          | Ca_kabuli_Chr07 | 6012363                 | T/A  | NA                 | INTERGENIC                    | NA                                          |
| Kabuli_wild_6012561 | 1399941735                          | Ca_kabuli_Chr07 | 6012561                 | A/C  | NA                 | INTERGENIC                    | NA                                          |
| Kabuli_wild_6012611 | 1399941736                          | Ca_kabuli_Chr07 | 6012611                 | A/C  | NA                 | INTERGENIC                    | NA                                          |
| Kabuli_wild_6023906 | 1399941737                          | Ca_kabuli_Chr07 | 6023906                 | G/A  | Gene_Ca_06757      | INTRON                        | Sugar/inositol transporter                  |
| Kabuli_wild_6029990 | 1399941738                          | Ca_kabuli_Chr07 | 6029990                 | C/G  | NA                 | INTERGENIC                    | NA                                          |
| Kabuli_wild_6066322 | 1399941739                          | Ca_kabuli_Chr07 | 6066322                 | G/A  | Gene_Ca_06752      | DOWNSTREAM                    | Phox/Bem1p                                  |
| Kabuli_wild_6069979 | 1399941740                          | Ca_kabuli_Chr07 | 6069979                 | T/C  | Gene_Ca_06752      | INTRON                        | Phox/Bem1p                                  |
| Kabuli_wild_6074408 | 1399941741                          | Ca_kabuli_Chr07 | 6074408                 | T/A  | Gene_Ca_06752      | SYNONYMOUS_CODING             | Phox/Bem1p                                  |
| Kabuli_wild_6075124 | 1399941742                          | Ca_kabuli_Chr07 | 6075124                 | T/G  | Gene_Ca_06752      | NON_SYNONYMOUS_CODING         | Phox/Bem1p                                  |
| Kabuli_wild_6075218 | 1399941743                          | Ca_kabuli_Chr07 | 6075218                 | C/G  | Gene_Ca_06752      | START_LOST                    | Phox/Bem1p                                  |
| Kabuli_wild_6096238 | 1399941744                          | Ca_kabuli_Chr07 | 6096238                 | C/A  | NA                 | INTERGENIC                    | NA                                          |
| Kabuli_wild_6108535 | 1399941745                          | Ca_kabuli_Chr07 | 6108535                 | G/T  | NA                 | INTERGENIC                    | NA                                          |
| Kabuli_wild_6110019 | 1399941746                          | Ca_kabuli_Chr07 | 6110019                 | T/C  | NA                 | INTERGENIC                    | NA                                          |
| Kabuli_wild_6132021 | 1399941747                          | Ca_kabuli_Chr07 | 6132021                 | G/A  | Gene_Ca_06744      | INTRON                        | Ubiquitin                                   |



| SNP IDs             | NCBI dbSNP accession IDs (NCBI_SS#) | Chromosomes     | Physical positions (bp) | SNPs | Gene accession IDs | Sequence components of genome | Putative functions                                  |
|---------------------|-------------------------------------|-----------------|-------------------------|------|--------------------|-------------------------------|-----------------------------------------------------|
| Kabuli_wild_6232777 | 1399941748                          | Ca_kabuli_Chr07 | 6232777                 | T/C  | NA                 | INTERGENIC                    | NA                                                  |
| Kabuli_wild_6299248 | 1399941749                          | Ca_kabuli_Chr07 | 6299248                 | A/G  | NA                 | INTERGENIC                    | NA                                                  |
| Kabuli_wild_6299249 | 1399941750                          | Ca_kabuli_Chr07 | 6299249                 | C/G  | NA                 | INTERGENIC                    | NA                                                  |
| Kabuli_wild_6307554 | 1399941751                          | Ca_kabuli_Chr07 | 6307554                 | A/G  | NA                 | INTERGENIC                    | NA                                                  |
| Kabuli_wild_6393366 | 1399941752                          | Ca_kabuli_Chr07 | 6393366                 | G/A  | Gene_Ca_06712      | INTRON                        | Metallo-dependentphosphatase                        |
| Kabuli_wild_6467903 | 1399941753                          | Ca_kabuli_Chr07 | 6467903                 | C/T  | Gene_Ca_06705      | SYNONYMOUS_CODING             | Mak10subunit,NatCN(alpha)-terminalacetyltransferase |
| Kabuli_wild_6540601 | 1399941754                          | Ca_kabuli_Chr07 | 6540601                 | G/C  | Gene_Ca_06700      | INTRON                        | Rap1-interactingfactor1N-terminal                   |
| Kabuli_wild_6540602 | 1399941755                          | Ca_kabuli_Chr07 | 6540602                 | G/A  | Gene_Ca_06700      | INTRON                        | Rap1-interactingfactor1N-terminal                   |
| Kabuli_wild_6540624 | 1399941756                          | Ca_kabuli_Chr07 | 6540624                 | A/G  | Gene_Ca_06700      | INTRON                        | Rap1-interactingfactor1N-terminal                   |
| Kabuli_wild_6553205 | 1399941757                          | Ca_kabuli_Chr07 | 6553205                 | A/T  | NA                 | INTERGENIC                    | NA                                                  |
| Kabuli_wild_6566263 | 1399941758                          | Ca_kabuli_Chr07 | 6566263                 | A/G  | NA                 | INTERGENIC                    | NA                                                  |
| Kabuli_wild_6566322 | 1399941759                          | Ca_kabuli_Chr07 | 6566322                 | T/C  | NA                 | INTERGENIC                    | NA                                                  |
| Kabuli_wild_6573160 | 1399941760                          | Ca_kabuli_Chr07 | 6573160                 | G/A  | NA                 | INTERGENIC                    | NA                                                  |
| Kabuli_wild_6573169 | 1399941761                          | Ca_kabuli_Chr07 | 6573169                 | C/T  | NA                 | INTERGENIC                    | NA                                                  |
| Kabuli_wild_6573175 | 1399941762                          | Ca_kabuli_Chr07 | 6573175                 | G/T  | NA                 | INTERGENIC                    | NA                                                  |
| Kabuli_wild_6573218 | 1399941763                          | Ca_kabuli_Chr07 | 6573218                 | C/T  | NA                 | INTERGENIC                    | NA                                                  |
| Kabuli_wild_6644942 | 1399941764                          | Ca_kabuli_Chr07 | 6644942                 | T/G  | NA                 | INTERGENIC                    | NA                                                  |
| Kabuli_wild_6680973 | 1399941765                          | Ca_kabuli_Chr07 | 6680973                 | T/G  | Gene_Ca_06692      | NON_SYNONYMOUS_CODING         | Glycosyltransferase,family17                        |
| Kabuli_wild_6680976 | 1399941766                          | Ca_kabuli_Chr07 | 6680976                 | C/G  | Gene_Ca_06692      | NON_SYNONYMOUS_CODING         | Glycosyltransferase,family17                        |
| Kabuli_wild_6682439 | 1399941767                          | Ca_kabuli_Chr07 | 6682439                 | T/A  | NA                 | INTERGENIC                    | NA                                                  |
| Kabuli_wild_6682443 | 1399941768                          | Ca_kabuli_Chr07 | 6682443                 | C/T  | NA                 | INTERGENIC                    | NA                                                  |
| Kabuli_wild_6682448 | 1399941769                          | Ca_kabuli_Chr07 | 6682448                 | T/C  | NA                 | INTERGENIC                    | NA                                                  |
| Kabuli_wild_6682453 | 1399941770                          | Ca_kabuli_Chr07 | 6682453                 | G/T  | NA                 | INTERGENIC                    | NA                                                  |
| Kabuli_wild_6682454 | 1399941771                          | Ca_kabuli_Chr07 | 6682454                 | A/G  | NA                 | INTERGENIC                    | NA                                                  |
| Kabuli_wild_6682455 | 1399941772                          | Ca_kabuli_Chr07 | 6682455                 | G/T  | NA                 | INTERGENIC                    | NA                                                  |
| Kabuli_wild_6699937 | 1399941773                          | Ca_kabuli_Chr07 | 6699937                 | A/G  | Gene_Ca_06691      | INTRON                        | WD40 repeat                                         |
| Kabuli_wild_6703849 | 1399941774                          | Ca_kabuli_Chr07 | 6703849                 | G/T  | Gene_Ca_06691      | NON_SYNONYMOUS_CODING         | WD40 repeat                                         |
| Kabuli_wild_6780836 | 1399941775                          | Ca_kabuli_Chr07 | 6780836                 | A/C  | Gene_Ca_06684      | SYNONYMOUS_CODING             | Glycosidehydrolase,family17                         |
| Kabuli_wild_6792606 | 1399941776                          | Ca_kabuli_Chr07 | 6792606                 | T/G  | Gene_Ca_06683      | DOWNSTREAM                    | NA                                                  |
| Kabuli_wild_6814752 | 1399941777                          | Ca_kabuli_Chr07 | 6814752                 | A/G  | Gene_Ca_06681      | INTRON                        | YABBYprotein                                        |
| Kabuli_wild_6859511 | 1399941778                          | Ca_kabuli_Chr07 | 6859511                 | C/G  | Gene_Ca_06677      | DOWNSTREAM                    | Protein kinase,catalytic domain                     |
| Kabuli_wild_6884304 | 1399941779                          | Ca_kabuli_Chr07 | 6884304                 | T/A  | NA                 | INTERGENIC                    | NA                                                  |
| Kabuli_wild_6963056 | 1399941780                          | Ca_kabuli_Chr07 | 6963056                 | T/C  | Gene_Ca_06667      | UPSTREAM                      | Protein kinase,catalytic domain                     |
| Kabuli_wild_7026516 | 1399941781                          | Ca_kabuli_Chr07 | 7026516                 | T/C  | NA                 | INTERGENIC                    | NA                                                  |
| Kabuli_wild_7119653 | 1399941782                          | Ca_kabuli_Chr07 | 7119653                 | C/G  | Gene_Ca_06647      | DOWNSTREAM                    | Pentatric peptide repeat                            |
| Kabuli_wild_7146159 | 1399941783                          | Ca_kabuli_Chr07 | 7146159                 | C/G  | NA                 | INTERGENIC                    | NA                                                  |
| Kabuli_wild_7265386 | 1399941784                          | Ca_kabuli_Chr07 | 7265386                 | T/A  | Gene_Ca_06635      | DOWNSTREAM                    | Cyclicnucleotide-binding domain                     |
| Kabuli_wild_7423419 | 1399941785                          | Ca_kabuli_Chr07 | 7423419                 | G/A  | Gene_Ca_06617      | NON_SYNONYMOUS_CODING         | Heat shock protein DnaJ,N-terminal                  |
| Kabuli_wild_7424203 | 1399941786                          | Ca_kabuli_Chr07 | 7424203                 | G/A  | Gene_Ca_06617      | NON_SYNONYMOUS_CODING         | Heat shock protein DnaJ,N-terminal                  |
| Kabuli_wild_7428102 | 1399941787                          | Ca_kabuli_Chr07 | 7428102                 | T/C  | Gene_Ca_06617      | NON_SYNONYMOUS_CODING         | Heat shock protein DnaJ,N-terminal                  |
| Kabuli_wild_7432208 | 1399941788                          | Ca_kabuli_Chr07 | 7432208                 | T/G  | Gene_Ca_06617      | NON_SYNONYMOUS_CODING         | Heat shock protein DnaJ,N-terminal                  |
| Kabuli_wild_7576668 | 1399941789                          | Ca_kabuli_Chr07 | 7576668                 | A/C  | NA                 | INTERGENIC                    | NA                                                  |
| Kabuli_wild_7576690 | 1399941790                          | Ca_kabuli_Chr07 | 7576690                 | C/T  | NA                 | INTERGENIC                    | NA                                                  |
| Kabuli_wild_7580101 | 1399941791                          | Ca_kabuli_Chr07 | 7580101                 | T/G  | NA                 | INTERGENIC                    | NA                                                  |

| SNP IDs             | NCBI dbSNP accession IDs (NCBI_SS#) | Chromosomes     | Physical positions (bp) | SNPs | Gene accession IDs | Sequence components of genome | Putative functions                             |
|---------------------|-------------------------------------|-----------------|-------------------------|------|--------------------|-------------------------------|------------------------------------------------|
| Kabuli_wild_7580158 | 1399941792                          | Ca_kabuli_Chr07 | 7580158                 | T/C  | NA                 | INTERGENIC                    | NA                                             |
| Kabuli_wild_7706816 | 1399941793                          | Ca_kabuli_Chr07 | 7706816                 | A/G  | Gene_Ca_06588      | DOWNSTREAM                    | Protein of unknown function DUF3353            |
| Kabuli_wild_7737850 | 1399941794                          | Ca_kabuli_Chr07 | 7737850                 | T/G  | NA                 | INTERGENIC                    | NA                                             |
| Kabuli_wild_7737855 | 1399941795                          | Ca_kabuli_Chr07 | 7737855                 | T/C  | NA                 | INTERGENIC                    | NA                                             |
| Kabuli_wild_7737899 | 1399941796                          | Ca_kabuli_Chr07 | 7737899                 | C/T  | NA                 | INTERGENIC                    | NA                                             |
| Kabuli_wild_7756452 | 1399941797                          | Ca_kabuli_Chr07 | 7756452                 | C/T  | Gene_Ca_13243      | NON_SYNONYMOUS_CODING         | SNF2-related                                   |
| Kabuli_wild_7756455 | 1399941798                          | Ca_kabuli_Chr07 | 7756455                 | C/T  | Gene_Ca_13243      | NON_SYNONYMOUS_CODING         | SNF2-related                                   |
| Kabuli_wild_7756566 | 1399941799                          | Ca_kabuli_Chr07 | 7756566                 | G/A  | Gene_Ca_13243      | INTRON                        | SNF2-related                                   |
| Kabuli_wild_7781888 | 1399941800                          | Ca_kabuli_Chr07 | 7781888                 | A/G  | Gene_Ca_13241      | INTRON                        | Peptidyl-argininedeiminase, Porphyromonas-type |
| Kabuli_wild_7809179 | 1399941801                          | Ca_kabuli_Chr07 | 7809179                 | T/G  | Gene_Ca_13237      | INTRON                        | PeptidaseS49                                   |
| Kabuli_wild_7809192 | 1399941802                          | Ca_kabuli_Chr07 | 7809192                 | A/C  | Gene_Ca_13237      | INTRON                        | PeptidaseS49                                   |
| Kabuli_wild_7983809 | 1399941803                          | Ca_kabuli_Chr07 | 7983809                 | G/A  | Gene_Ca_13220      | NON_SYNONYMOUS_CODING         | ABC transporter,trans membrane domain          |
| Kabuli_wild_8061808 | 1399941804                          | Ca_kabuli_Chr07 | 8061808                 | A/G  | Gene_Ca_13209      | SYNONYMOUS_CODING             | Nucleicacidbinding,OB-fold,tRNA/helicase-type  |
| Kabuli_wild_8169478 | 1399941805                          | Ca_kabuli_Chr07 | 8169478                 | A/G  | Gene_Ca_13198      | UPSTREAM                      | X8                                             |
| Kabuli_wild_8169947 | 1399941806                          | Ca_kabuli_Chr07 | 8169947                 | T/C  | NA                 | INTERGENIC                    | NA                                             |
| Kabuli_wild_8187181 | 1399941807                          | Ca_kabuli_Chr07 | 8187181                 | G/A  | Gene_Ca_13195      | SYNONYMOUS_CODING             | ChaperoninClpA/B                               |
| Kabuli_wild_8188004 | 1399941808                          | Ca_kabuli_Chr07 | 8188004                 | C/G  | Gene_Ca_13195      | NON_SYNONYMOUS_CODING         | ChaperoninClpA/B                               |
| Kabuli_wild_8249693 | 1399941809                          | Ca_kabuli_Chr07 | 8249693                 | A/T  | Gene_Ca_13190      | SYNONYMOUS_CODING             | Zinc finger,C2H2-type                          |
| Kabuli_wild_8261062 | 1399941810                          | Ca_kabuli_Chr07 | 8261062                 | C/A  | NA                 | INTERGENIC                    | NA                                             |
| Kabuli_wild_8282670 | 1399941811                          | Ca_kabuli_Chr07 | 8282670                 | T/G  | Gene_Ca_13185      | NON_SYNONYMOUS_CODING         | NA                                             |
| Kabuli_wild_8388062 | 1399941812                          | Ca_kabuli_Chr07 | 8388062                 | A/G  | Gene_Ca_13170      | DOWNSTREAM                    | NA                                             |
| Kabuli_wild_8404852 | 1399941813                          | Ca_kabuli_Chr07 | 8404852                 | T/A  | NA                 | INTERGENIC                    | NA                                             |
| Kabuli_wild_8434392 | 1399941814                          | Ca_kabuli_Chr07 | 8434392                 | C/A  | NA                 | INTERGENIC                    | NA                                             |
| Kabuli_wild_8490611 | 1399941815                          | Ca_kabuli_Chr07 | 8490611                 | A/C  | Gene_Ca_13158      | DOWNSTREAM                    | HNHendonuclease                                |
| Kabuli_wild_8569632 | 1399941816                          | Ca_kabuli_Chr07 | 8569632                 | A/G  | NA                 | INTERGENIC                    | NA                                             |
| Kabuli_wild_8583890 | 1399941817                          | Ca_kabuli_Chr07 | 8583890                 | T/C  | Gene_Ca_15359      | SYNONYMOUS_CODING             | Ubiquitin-conjugating enzyme, E2               |
| Kabuli_wild_8609982 | 1399941818                          | Ca_kabuli_Chr07 | 8609982                 | A/C  | NA                 | INTERGENIC                    | NA                                             |
| Kabuli_wild_8626875 | 1399941819                          | Ca_kabuli_Chr07 | 8626875                 | A/T  | NA                 | INTERGENIC                    | NA                                             |
| Kabuli_wild_8723939 | 1399941820                          | Ca_kabuli_Chr07 | 8723939                 | A/G  | Gene_Ca_15344      | UPSTREAM                      | NA                                             |
| Kabuli_wild_8835601 | 1399941821                          | Ca_kabuli_Chr07 | 8835601                 | A/G  | NA                 | INTERGENIC                    | NA                                             |
| Kabuli_wild_8835602 | 1399941822                          | Ca_kabuli_Chr07 | 8835602                 | G/A  | NA                 | INTERGENIC                    | NA                                             |
| Kabuli_wild_8835610 | 1399941823                          | Ca_kabuli_Chr07 | 8835610                 | A/G  | NA                 | INTERGENIC                    | NA                                             |
| Kabuli_wild_8835631 | 1399941824                          | Ca_kabuli_Chr07 | 8835631                 | T/G  | NA                 | INTERGENIC                    | NA                                             |
| Kabuli_wild_8835659 | 1399941825                          | Ca_kabuli_Chr07 | 8835659                 | T/G  | NA                 | INTERGENIC                    | NA                                             |
| Kabuli_wild_8835705 | 1399941826                          | Ca_kabuli_Chr07 | 8835705                 | T/A  | NA                 | INTERGENIC                    | NA                                             |
| Kabuli_wild_8835718 | 1399941827                          | Ca_kabuli_Chr07 | 8835718                 | T/G  | NA                 | INTERGENIC                    | NA                                             |
| Kabuli_wild_8835757 | 1399941828                          | Ca_kabuli_Chr07 | 8835757                 | T/C  | NA                 | INTERGENIC                    | NA                                             |
| Kabuli_wild_8848940 | 1399941829                          | Ca_kabuli_Chr07 | 8848940                 | A/C  | Gene_Ca_15327      | INTRON                        | ATPase, P-type, H+ transporting proton pump    |
| Kabuli_wild_8849200 | 1399941830                          | Ca_kabuli_Chr07 | 8849200                 | A/C  | Gene_Ca_15327      | INTRON                        | ATPase, P-type, H+ transporting proton pump    |
| Kabuli_wild_8895450 | 1399941831                          | Ca_kabuli_Chr07 | 8895450                 | T/G  | Gene_Ca_15325      | SYNONYMOUS_CODING             | Domain of unknown function DUF629              |
| Kabuli_wild_8937376 | 1399941832                          | Ca_kabuli_Chr07 | 8937376                 | A/G  | Gene_Ca_15321      | SYNONYMOUS_CODING             | WWdomainbindingprotein11                       |
| Kabuli_wild_8937379 | 1399941833                          | Ca_kabuli_Chr07 | 8937379                 | T/C  | Gene_Ca_15321      | SYNONYMOUS_CODING             | WWdomainbindingprotein11                       |
| Kabuli_wild_9028286 | 1399941834                          | Ca_kabuli_Chr07 | 9028286                 | G/A  | Gene_Ca_15313      | INTRON                        | Exportin-1/Importin-beta-like                  |
| Kabuli_wild_9128044 | 1399941835                          | Ca_kabuli_Chr07 | 9128044                 | A/G  | NA                 | INTERGENIC                    | NA                                             |

| SNP IDs             | NCBI dbSNP accession IDs (NCBI_SS#) | Chromosomes     | Physical positions (bp) | SNPs | Gene accession IDs | Sequence components of genome | Putative functions                                |
|---------------------|-------------------------------------|-----------------|-------------------------|------|--------------------|-------------------------------|---------------------------------------------------|
| Kabuli_wild_9128050 | 1399941836                          | Ca_kabuli_Chr07 | 9128050                 | C/A  | NA                 | INTERGENIC                    | NA                                                |
| Kabuli_wild_9147366 | 1399941837                          | Ca_kabuli_Chr07 | 9147366                 | T/G  | Gene_Ca_15301      | INTRON                        | Transcription factor E2F/dimerisationpartner(TDP) |
| Kabuli_wild_9147367 | 1399941838                          | Ca_kabuli_Chr07 | 9147367                 | A/T  | Gene_Ca_15301      | INTRON                        | Transcription factor E2F/dimerisationpartner(TDP) |
| Kabuli_wild_9147386 | 1399941839                          | Ca_kabuli_Chr07 | 9147386                 | A/C  | Gene_Ca_15301      | INTRON                        | Transcription factor E2F/dimerisationpartner(TDP) |
| Kabuli_wild_9147502 | 1399941840                          | Ca_kabuli_Chr07 | 9147502                 | C/T  | Gene_Ca_15301      | INTRON                        | Transcription factor E2F/dimerisationpartner(TDP) |
| Kabuli_wild_9151709 | 1399941841                          | Ca_kabuli_Chr07 | 9151709                 | T/G  | NA                 | INTERGENIC                    | NA                                                |
| Kabuli_wild_9151755 | 1399941842                          | Ca_kabuli_Chr07 | 9151755                 | C/T  | NA                 | INTERGENIC                    | NA                                                |
| Kabuli_wild_9152949 | 1399941843                          | Ca_kabuli_Chr07 | 9152949                 | T/C  | NA                 | INTERGENIC                    | NA                                                |
| Kabuli_wild_9152984 | 1399941844                          | Ca_kabuli_Chr07 | 9152984                 | C/G  | NA                 | INTERGENIC                    | NA                                                |
| Kabuli_wild_9153062 | 1399941845                          | Ca_kabuli_Chr07 | 9153062                 | G/A  | NA                 | INTERGENIC                    | NA                                                |
| Kabuli_wild_9153104 | 1399941846                          | Ca_kabuli_Chr07 | 9153104                 | C/A  | NA                 | INTERGENIC                    | NA                                                |
| Kabuli_wild_9214422 | 1399941847                          | Ca_kabuli_Chr07 | 9214422                 | C/T  | NA                 | INTERGENIC                    | NA                                                |
| Kabuli_wild_9214457 | 1399941848                          | Ca_kabuli_Chr07 | 9214457                 | T/A  | NA                 | INTERGENIC                    | NA                                                |
| Kabuli_wild_9223172 | 1399941849                          | Ca_kabuli_Chr07 | 9223172                 | C/T  | NA                 | INTERGENIC                    | NA                                                |
| Kabuli_wild_9223204 | 1399941850                          | Ca_kabuli_Chr07 | 9223204                 | A/T  | NA                 | INTERGENIC                    | NA                                                |
| Kabuli_wild_9223209 | 1399941851                          | Ca_kabuli_Chr07 | 9223209                 | C/T  | NA                 | INTERGENIC                    | NA                                                |
| Kabuli_wild_9266762 | 1399941852                          | Ca_kabuli_Chr07 | 9266762                 | A/G  | Gene_Ca_17334      | INTRON                        | Lipoxygenase,C-terminal                           |
| Kabuli_wild_9268649 | 1399941853                          | Ca_kabuli_Chr07 | 9268649                 | G/C  | NA                 | INTERGENIC                    | NA                                                |
| Kabuli_wild_9268684 | 1399941854                          | Ca_kabuli_Chr07 | 9268684                 | A/G  | NA                 | INTERGENIC                    | NA                                                |
| Kabuli_wild_9281622 | 1399941855                          | Ca_kabuli_Chr07 | 9281622                 | G/T  | Gene_Ca_17333      | DOWNSTREAM                    | WD40 repeat                                       |
| Kabuli_wild_9281669 | 1399941856                          | Ca_kabuli_Chr07 | 9281669                 | T/C  | Gene_Ca_17333      | DOWNSTREAM                    | WD40 repeat                                       |
| Kabuli_wild_9301825 | 1399941857                          | Ca_kabuli_Chr07 | 9301825                 | G/C  | Gene_Ca_17330      | NON_SYNONYMOUS_CODING         | rRNAsmallsubunitmethyltransferaseG                |
| Kabuli_wild_9301881 | 1399941858                          | Ca_kabuli_Chr07 | 9301881                 | C/T  | Gene_Ca_17330      | UPSTREAM                      | rRNAsmallsubunitmethyltransferaseG                |
| Kabuli_wild_9348281 | 1399941859                          | Ca_kabuli_Chr07 | 9348281                 | T/C  | NA                 | INTERGENIC                    | NA                                                |
| Kabuli_wild_9350506 | 1399941860                          | Ca_kabuli_Chr07 | 9350506                 | T/G  | NA                 | INTERGENIC                    | NA                                                |
| Kabuli_wild_9350535 | 1399941861                          | Ca_kabuli_Chr07 | 9350535                 | A/C  | NA                 | INTERGENIC                    | NA                                                |
| Kabuli_wild_9351783 | 1399941862                          | Ca_kabuli_Chr07 | 9351783                 | C/G  | Gene_Ca_17325      | INTRON                        | Glycosidehydrolase,family47                       |
| Kabuli_wild_9351863 | 1399941863                          | Ca_kabuli_Chr07 | 9351863                 | G/A  | Gene_Ca_17325      | NON_SYNONYMOUS_CODING         | Glycosidehydrolase,family47                       |
| Kabuli_wild_9475275 | 1399941864                          | Ca_kabuli_Chr07 | 9475275                 | T/G  | NA                 | INTERGENIC                    | NA                                                |
| Kabuli_wild_9523902 | 1399941865                          | Ca_kabuli_Chr07 | 9523902                 | C/T  | NA                 | INTERGENIC                    | NA                                                |
| Kabuli_wild_9528073 | 1399941866                          | Ca_kabuli_Chr07 | 9528073                 | G/C  | NA                 | INTERGENIC                    | NA                                                |
| Kabuli_wild_9612558 | 1399941867                          | Ca_kabuli_Chr07 | 9612558                 | A/C  | NA                 | INTERGENIC                    | NA                                                |
| Kabuli_wild_9671210 | 1399941868                          | Ca_kabuli_Chr07 | 9671210                 | T/C  | NA                 | INTERGENIC                    | NA                                                |
| Kabuli_wild_9696620 | 1399941869                          | Ca_kabuli_Chr07 | 9696620                 | A/G  | Gene_Ca_17285      | DOWNSTREAM                    | NA                                                |
| Kabuli_wild_9744436 | 1399941870                          | Ca_kabuli_Chr07 | 9744436                 | G/T  | NA                 | INTERGENIC                    | NA                                                |
| Kabuli_wild_9897698 | 1399941871                          | Ca_kabuli_Chr07 | 9897698                 | T/G  | NA                 | INTERGENIC                    | NA                                                |
| Kabuli_wild_9914745 | 1399941872                          | Ca_kabuli_Chr07 | 9914745                 | T/C  | NA                 | INTERGENIC                    | NA                                                |
| Kabuli_wild_9914751 | 1399941873                          | Ca_kabuli_Chr07 | 9914751                 | G/A  | NA                 | INTERGENIC                    | NA                                                |
| Kabuli_wild_9914763 | 1399941874                          | Ca_kabuli_Chr07 | 9914763                 | T/G  | NA                 | INTERGENIC                    | NA                                                |
| Kabuli_wild_9914764 | 1399941875                          | Ca_kabuli_Chr07 | 9914764                 | G/A  | NA                 | INTERGENIC                    | NA                                                |
| Kabuli_wild_9914784 | 1399941876                          | Ca_kabuli_Chr07 | 9914784                 | G/A  | NA                 | INTERGENIC                    | NA                                                |
| Kabuli_wild_9914785 | 1399941877                          | Ca_kabuli_Chr07 | 9914785                 | T/C  | NA                 | INTERGENIC                    | NA                                                |
| Kabuli_wild_9914790 | 1399941878                          | Ca_kabuli_Chr07 | 9914790                 | C/G  | NA                 | INTERGENIC                    | NA                                                |
| Kabuli_wild_9914794 | 1399941879                          | Ca_kabuli_Chr07 | 9914794                 | G/A  | NA                 | INTERGENIC                    | NA                                                |

| SNP IDs              | NCBI dbSNP accession IDs (NCBI_SS#) | Chromosomes     | Physical positions (bp) | SNPs | Gene accession IDs | Sequence components of genome | Putative functions                                           |
|----------------------|-------------------------------------|-----------------|-------------------------|------|--------------------|-------------------------------|--------------------------------------------------------------|
| Kabuli_wild_9914802  | 1399941880                          | Ca_kabuli_Chr07 | 9914802                 | T/G  | NA                 | INTERGENIC                    | NA                                                           |
| Kabuli_wild_9914804  | 1399941881                          | Ca_kabuli_Chr07 | 9914804                 | C/A  | NA                 | INTERGENIC                    | NA                                                           |
| Kabuli_wild_10049904 | 1399941882                          | Ca_kabuli_Chr07 | 10049904                | G/A  | NA                 | INTERGENIC                    | NA                                                           |
| Kabuli_wild_10115618 | 1399941883                          | Ca_kabuli_Chr07 | 10115618                | T/G  | Gene_Ca_12774      | NON_SYNONYMOUS_CODING         | Pathogenesis-related transcriptional factor/ERF, DNA-binding |
| Kabuli_wild_10207510 | 1399941884                          | Ca_kabuli_Chr07 | 10207510                | A/T  | Gene_Ca_12782      | DOWNSTREAM                    | RasGTPase                                                    |
| Kabuli_wild_10208029 | 1399941885                          | Ca_kabuli_Chr07 | 10208029                | T/C  | Gene_Ca_12782      | DOWNSTREAM                    | RasGTPase                                                    |
| Kabuli_wild_10208267 | 1399941886                          | Ca_kabuli_Chr07 | 10208267                | G/A  | Gene_Ca_12782      | DOWNSTREAM                    | RasGTPase                                                    |
| Kabuli_wild_10216831 | 1399941887                          | Ca_kabuli_Chr07 | 10216831                | A/G  | NA                 | INTERGENIC                    | NA                                                           |
| Kabuli_wild_10223027 | 1399941888                          | Ca_kabuli_Chr07 | 10223027                | G/T  | NA                 | INTERGENIC                    | NA                                                           |
| Kabuli_wild_10223040 | 1399941889                          | Ca_kabuli_Chr07 | 10223040                | T/A  | NA                 | INTERGENIC                    | NA                                                           |
| Kabuli_wild_10223068 | 1399941890                          | Ca_kabuli_Chr07 | 10223068                | G/T  | NA                 | INTERGENIC                    | NA                                                           |
| Kabuli_wild_10223069 | 1399941891                          | Ca_kabuli_Chr07 | 10223069                | G/T  | NA                 | INTERGENIC                    | NA                                                           |
| Kabuli_wild_10223071 | 1399941892                          | Ca_kabuli_Chr07 | 10223071                | T/A  | NA                 | INTERGENIC                    | NA                                                           |
| Kabuli_wild_10223074 | 1399941893                          | Ca_kabuli_Chr07 | 10223074                | G/T  | NA                 | INTERGENIC                    | NA                                                           |
| Kabuli_wild_10223075 | 1399941894                          | Ca_kabuli_Chr07 | 10223075                | C/T  | NA                 | INTERGENIC                    | NA                                                           |
| Kabuli_wild_10231755 | 1399941895                          | Ca_kabuli_Chr07 | 10231755                | C/T  | NA                 | INTERGENIC                    | NA                                                           |
| Kabuli_wild_10276530 | 1399941896                          | Ca_kabuli_Chr07 | 10276530                | A/G  | NA                 | INTERGENIC                    | NA                                                           |
| Kabuli_wild_10283596 | 1399941897                          | Ca_kabuli_Chr07 | 10283596                | G/A  | NA                 | INTERGENIC                    | NA                                                           |
| Kabuli_wild_10322726 | 1399941898                          | Ca_kabuli_Chr07 | 10322726                | T/C  | Gene_Ca_12794      | SYNONYMOUS_CODING             | tRNA/rRNAmethyltransferase,SpoU                              |
| Kabuli_wild_10429442 | 1399941899                          | Ca_kabuli_Chr07 | 10429442                | G/A  | Gene_Ca_12802      | SYNONYMOUS_CODING             | MORNmotif                                                    |
| Kabuli_wild_10435983 | 1399941900                          | Ca_kabuli_Chr07 | 10435983                | C/A  | Gene_Ca_12803      | NON_SYNONYMOUS_CODING         | CaseinkinaseII,regulatorysubunit                             |
| Kabuli_wild_10483883 | 1399941901                          | Ca_kabuli_Chr07 | 10483883                | T/G  | Gene_Ca_12810      | INTRON                        | Protein of unknown function DUF702                           |
| Kabuli_wild_10484200 | 1399941902                          | Ca_kabuli_Chr07 | 10484200                | G/A  | Gene_Ca_12810      | INTRON                        | Protein of unknown function DUF702                           |
| Kabuli_wild_10485397 | 1399941903                          | Ca_kabuli_Chr07 | 10485397                | C/G  | Gene_Ca_12810      | NON_SYNONYMOUS_CODING         | Protein of unknown function DUF702                           |
| Kabuli_wild_10521449 | 1399941904                          | Ca_kabuli_Chr07 | 10521449                | C/A  | Gene_Ca_12811      | NON_SYNONYMOUS_CODING         | Zinc finger, RING-type                                       |
| Kabuli_wild_10640289 | 1399941905                          | Ca_kabuli_Chr07 | 10640289                | C/G  | Gene_Ca_12821      | DOWNSTREAM                    | Expansin/pollenallergen,DPBBdomain                           |
| Kabuli_wild_10688189 | 1399941906                          | Ca_kabuli_Chr07 | 10688189                | T/G  | Gene_Ca_12825      | INTRON                        | Signal transduction response regulator, receiverdomain       |
| Kabuli_wild_10703569 | 1399941907                          | Ca_kabuli_Chr07 | 10703569                | A/T  | NA                 | INTERGENIC                    | NA                                                           |
| Kabuli_wild_10703595 | 1399941908                          | Ca_kabuli_Chr07 | 10703595                | T/A  | NA                 | INTERGENIC                    | NA                                                           |
| Kabuli_wild_10703685 | 1399941909                          | Ca_kabuli_Chr07 | 10703685                | G/T  | NA                 | INTERGENIC                    | NA                                                           |
| Kabuli_wild_10703704 | 1399941910                          | Ca_kabuli_Chr07 | 10703704                | G/A  | NA                 | INTERGENIC                    | NA                                                           |
| Kabuli_wild_10712162 | 1399941911                          | Ca_kabuli_Chr07 | 10712162                | T/G  | NA                 | INTERGENIC                    | NA                                                           |
| Kabuli_wild_10712198 | 1399941912                          | Ca_kabuli_Chr07 | 10712198                | T/C  | NA                 | INTERGENIC                    | NA                                                           |
| Kabuli_wild_10712203 | 1399941913                          | Ca_kabuli_Chr07 | 10712203                | C/A  | NA                 | INTERGENIC                    | NA                                                           |
| Kabuli_wild_10712231 | 1399941914                          | Ca_kabuli_Chr07 | 10712231                | G/A  | NA                 | INTERGENIC                    | NA                                                           |
| Kabuli_wild_10775843 | 1399941915                          | Ca_kabuli_Chr07 | 10775843                | A/C  | NA                 | INTERGENIC                    | NA                                                           |
| Kabuli_wild_10775857 | 1399941916                          | Ca_kabuli_Chr07 | 10775857                | G/A  | NA                 | INTERGENIC                    | NA                                                           |
| Kabuli_wild_10775859 | 1399941917                          | Ca_kabuli_Chr07 | 10775859                | C/T  | NA                 | INTERGENIC                    | NA                                                           |
| Kabuli_wild_10775860 | 1399941918                          | Ca_kabuli_Chr07 | 10775860                | A/G  | NA                 | INTERGENIC                    | NA                                                           |
| Kabuli_wild_10775881 | 1399941919                          | Ca_kabuli_Chr07 | 10775881                | C/T  | NA                 | INTERGENIC                    | NA                                                           |
| Kabuli_wild_10780680 | 1399941920                          | Ca_kabuli_Chr07 | 10780680                | C/G  | NA                 | INTERGENIC                    | NA                                                           |
| Kabuli_wild_10780682 | 1399941921                          | Ca_kabuli_Chr07 | 10780682                | G/A  | NA                 | INTERGENIC                    | NA                                                           |
| Kabuli_wild_10780686 | 1399941922                          | Ca_kabuli_Chr07 | 10780686                | T/C  | NA                 | INTERGENIC                    | NA                                                           |
| Kabuli_wild_10780716 | 1399941923                          | Ca_kabuli_Chr07 | 10780716                | T/C  | NA                 | INTERGENIC                    | NA                                                           |

| SNP IDs              | NCBI dbSNP accession IDs (NCBI_SS#) | Chromosomes     | Physical positions (bp) | SNPs | Gene accession IDs | Sequence components of genome | Putative functions                                           |
|----------------------|-------------------------------------|-----------------|-------------------------|------|--------------------|-------------------------------|--------------------------------------------------------------|
| Kabuli_wild_10797204 | 1399941924                          | Ca_kabuli_Chr07 | 10797204                | T/C  | Gene_Ca_12832      | INTRON                        | Protein kinase,catalytic domain                              |
| Kabuli_wild_10816523 | 1399941925                          | Ca_kabuli_Chr07 | 10816523                | T/G  | NA                 | INTERGENIC                    | NA                                                           |
| Kabuli_wild_10900910 | 1399941926                          | Ca_kabuli_Chr07 | 10900910                | T/C  | NA                 | INTERGENIC                    | NA                                                           |
| Kabuli_wild_11048796 | 1399941927                          | Ca_kabuli_Chr07 | 11048796                | C/A  | Gene_Ca_09380      | STOP_GAINED                   | Reverse transcriptase, RNA-dependent DNA polymerase          |
| Kabuli_wild_11105847 | 1399941928                          | Ca_kabuli_Chr07 | 11105847                | C/G  | Gene_Ca_09376      | NON_SYNONYMOUS_CODING         | Hexokinase                                                   |
| Kabuli_wild_11183385 | 1399941929                          | Ca_kabuli_Chr07 | 11183385                | G/A  | Gene_Ca_09372      | NON_SYNONYMOUS_CODING         | Glycosidehydrolase, family16                                 |
| Kabuli_wild_11192703 | 1399941930                          | Ca_kabuli_Chr07 | 11192703                | A/C  | Gene_Ca_09371      | SYNONYMOUS_CODING             | Homeobox                                                     |
| Kabuli_wild_11261924 | 1399941931                          | Ca_kabuli_Chr07 | 11261924                | G/A  | NA                 | INTERGENIC                    | NA                                                           |
| Kabuli_wild_11393795 | 1399941932                          | Ca_kabuli_Chr07 | 11393795                | A/G  | NA                 | INTERGENIC                    | NA                                                           |
| Kabuli_wild_11545846 | 1399941933                          | Ca_kabuli_Chr07 | 11545846                | A/G  | Gene_Ca_09342      | NON_SYNONYMOUS_CODING         | Lateral organ boundaries, LOB                                |
| Kabuli_wild_11568963 | 1399941934                          | Ca_kabuli_Chr07 | 11568963                | T/A  | NA                 | INTERGENIC                    | NA                                                           |
| Kabuli_wild_11630509 | 1399941935                          | Ca_kabuli_Chr07 | 11630509                | A/G  | NA                 | INTERGENIC                    | NA                                                           |
| Kabuli_wild_11696995 | 1399941936                          | Ca_kabuli_Chr07 | 11696995                | A/G  | NA                 | INTERGENIC                    | NA                                                           |
| Kabuli_wild_11725204 | 1399941937                          | Ca_kabuli_Chr07 | 11725204                | A/G  | Gene_Ca_09325      | DOWNSTREAM                    | NA                                                           |
| Kabuli_wild_11731021 | 1399941938                          | Ca_kabuli_Chr07 | 11731021                | G/C  | Gene_Ca_09324      | UPSTREAM                      | NA                                                           |
| Kabuli_wild_11734921 | 1399941939                          | Ca_kabuli_Chr07 | 11734921                | T/G  | NA                 | INTERGENIC                    | NA                                                           |
| Kabuli_wild_11735368 | 1399941940                          | Ca_kabuli_Chr07 | 11735368                | G/C  | NA                 | INTERGENIC                    | NA                                                           |
| Kabuli_wild_11803091 | 1399941941                          | Ca_kabuli_Chr07 | 11803091                | T/G  | NA                 | INTERGENIC                    | NA                                                           |
| Kabuli_wild_11858425 | 1399941942                          | Ca_kabuli_Chr07 | 11858425                | C/T  | NA                 | INTERGENIC                    | NA                                                           |
| Kabuli_wild_11886954 | 1399941943                          | Ca_kabuli_Chr07 | 11886954                | A/G  | NA                 | INTERGENIC                    | NA                                                           |
| Kabuli_wild_12010426 | 1399941944                          | Ca_kabuli_Chr07 | 12010426                | T/C  | NA                 | INTERGENIC                    | NA                                                           |
| Kabuli_wild_12010432 | 1399941945                          | Ca_kabuli_Chr07 | 12010432                | G/A  | NA                 | INTERGENIC                    | NA                                                           |
| Kabuli_wild_12010457 | 1399941946                          | Ca_kabuli_Chr07 | 12010457                | C/T  | NA                 | INTERGENIC                    | NA                                                           |
| Kabuli_wild_12010471 | 1399941947                          | Ca_kabuli_Chr07 | 12010471                | C/T  | NA                 | INTERGENIC                    | NA                                                           |
| Kabuli_wild_12010483 | 1399941948                          | Ca_kabuli_Chr07 | 12010483                | C/T  | NA                 | INTERGENIC                    | NA                                                           |
| Kabuli_wild_12010489 | 1399941949                          | Ca_kabuli_Chr07 | 12010489                | C/T  | NA                 | INTERGENIC                    | NA                                                           |
| Kabuli_wild_12010491 | 1399941950                          | Ca_kabuli_Chr07 | 12010491                | G/T  | NA                 | INTERGENIC                    | NA                                                           |
| Kabuli_wild_12010494 | 1399941951                          | Ca_kabuli_Chr07 | 12010494                | G/A  | NA                 | INTERGENIC                    | NA                                                           |
| Kabuli_wild_12010499 | 1399941952                          | Ca_kabuli_Chr07 | 12010499                | C/A  | NA                 | INTERGENIC                    | NA                                                           |
| Kabuli_wild_12010504 | 1399941953                          | Ca_kabuli_Chr07 | 12010504                | G/A  | NA                 | INTERGENIC                    | NA                                                           |
| Kabuli_wild_12010547 | 1399941954                          | Ca_kabuli_Chr07 | 12010547                | G/A  | NA                 | INTERGENIC                    | NA                                                           |
| Kabuli_wild_12030080 | 1399941955                          | Ca_kabuli_Chr07 | 12030080                | A/C  | Gene_Ca_09301      | SYNONYMOUS_CODING             | PeptidaseA1                                                  |
| Kabuli_wild_12071764 | 1399941956                          | Ca_kabuli_Chr07 | 12071764                | T/C  | Gene_Ca_09297      | INTRON                        | tRNA-dihydrouridinesynthase                                  |
| Kabuli_wild_12149119 | 1399941957                          | Ca_kabuli_Chr07 | 12149119                | A/G  | Gene_Ca_09294      | INTRON                        | Kinesin,motordomain                                          |
| Kabuli_wild_12192653 | 1399941958                          | Ca_kabuli_Chr07 | 12192653                | G/A  | Gene_Ca_09289      | DOWNSTREAM                    | Ovariantumour,otubain                                        |
| Kabuli_wild_12200656 | 1399941959                          | Ca_kabuli_Chr07 | 12200656                | G/A  | NA                 | INTERGENIC                    | NA                                                           |
| Kabuli_wild_12244259 | 1399941960                          | Ca_kabuli_Chr07 | 12244259                | G/A  | Gene_Ca_09285      | INTRON                        | PhospholipaseC,phosphatidylinositol-specific,Xdomain         |
| Kabuli_wild_12384170 | 1399941961                          | Ca_kabuli_Chr07 | 12384170                | T/C  | Gene_Ca_09276      | DOWNSTREAM                    | Nicotinate phosphoribosyltransferase-related                 |
| Kabuli_wild_12390774 | 1399941962                          | Ca_kabuli_Chr07 | 12390774                | G/A  | Gene_Ca_09275      | SYNONYMOUS_CODING             | Pathogenesis-related transcriptional factor/ERF, DNA-binding |
| Kabuli_wild_12476679 | 1399941963                          | Ca_kabuli_Chr07 | 12476679                | A/C  | Gene_Ca_09269      | NON_SYNONYMOUS_CODING         | CTLH,C-terminalLisHmotif                                     |
| Kabuli_wild_12481556 | 1399941964                          | Ca_kabuli_Chr07 | 12481556                | G/C  | NA                 | INTERGENIC                    | NA                                                           |
| Kabuli_wild_12482953 | 1399941965                          | Ca_kabuli_Chr07 | 12482953                | A/C  | NA                 | INTERGENIC                    | NA                                                           |
| Kabuli_wild_12483290 | 1399941966                          | Ca_kabuli_Chr07 | 12483290                | A/C  | NA                 | INTERGENIC                    | NA                                                           |
| Kabuli_wild_12718820 | 1399941967                          | Ca_kabuli_Chr07 | 12718820                | C/G  | NA                 | INTERGENIC                    | NA                                                           |

| SNP IDs              | NCBI dbSNP accession IDs (NCBI_SS#) | Chromosomes     | Physical positions (bp) | SNPs | Gene accession IDs | Sequence components of genome | Putative functions                              |
|----------------------|-------------------------------------|-----------------|-------------------------|------|--------------------|-------------------------------|-------------------------------------------------|
| Kabuli_wild_12718853 | 1399941968                          | Ca_kabuli_Chr07 | 12718853                | G/A  | NA                 | INTERGENIC                    | NA                                              |
| Kabuli_wild_12730600 | 1399941969                          | Ca_kabuli_Chr07 | 12730600                | C/A  | NA                 | INTERGENIC                    | NA                                              |
| Kabuli_wild_12737516 | 1399941970                          | Ca_kabuli_Chr07 | 12737516                | T/C  | NA                 | INTERGENIC                    | NA                                              |
| Kabuli_wild_12893655 | 1399941971                          | Ca_kabuli_Chr07 | 12893655                | C/T  | NA                 | INTERGENIC                    | NA                                              |
| Kabuli_wild_13020754 | 1399941972                          | Ca_kabuli_Chr07 | 13020754                | G/A  | Gene_Ca_09225      | INTRON                        | Vacuolar protein sorting-associated protein     |
| Kabuli_wild_13059710 | 1399941973                          | Ca_kabuli_Chr07 | 13059710                | C/A  | Gene_Ca_09222      | NON_SYNONYMOUS_CODING         | BTB/POZ-like                                    |
| Kabuli_wild_13059712 | 1399941974                          | Ca_kabuli_Chr07 | 13059712                | C/A  | Gene_Ca_09222      | NON_SYNONYMOUS_CODING         | BTB/POZ-like                                    |
| Kabuli_wild_13059852 | 1399941975                          | Ca_kabuli_Chr07 | 13059852                | G/A  | Gene_Ca_09222      | SYNONYMOUS_CODING             | BTB/POZ-like                                    |
| Kabuli_wild_13069842 | 1399941976                          | Ca_kabuli_Chr07 | 13069842                | C/A  | Gene_Ca_09221      | NON_SYNONYMOUS_CODING         | ColdacclimationWCOR413                          |
| Kabuli_wild_13514074 | 1399941977                          | Ca_kabuli_Chr07 | 13514074                | C/T  | Gene_Ca_16037      | SYNONYMOUS_CODING             | Protein of unknown function DUF677              |
| Kabuli_wild_13581088 | 1399941978                          | Ca_kabuli_Chr07 | 13581088                | T/C  | Gene_Ca_16043      | SYNONYMOUS_CODING             | Transcription facto rGRAS                       |
| Kabuli_wild_13581091 | 1399941979                          | Ca_kabuli_Chr07 | 13581091                | T/C  | Gene_Ca_16043      | SYNONYMOUS_CODING             | Transcription facto rGRAS                       |
| Kabuli_wild_13605188 | 1399941980                          | Ca_kabuli_Chr07 | 13605188                | A/C  | Gene_Ca_16044      | SYNONYMOUS_CODING             | Zinc finger,C2H2-type                           |
| Kabuli_wild_13605191 | 1399941981                          | Ca_kabuli_Chr07 | 13605191                | A/C  | Gene_Ca_16044      | SYNONYMOUS_CODING             | Zinc finger,C2H2-type                           |
| Kabuli_wild_13605200 | 1399941982                          | Ca_kabuli_Chr07 | 13605200                | A/C  | Gene_Ca_16044      | SYNONYMOUS_CODING             | Zinc finger,C2H2-type                           |
| Kabuli_wild_13605574 | 1399941983                          | Ca_kabuli_Chr07 | 13605574                | T/G  | Gene_Ca_16044      | NON_SYNONYMOUS_CODING         | Zinc finger,C2H2-type                           |
| Kabuli_wild_13605578 | 1399941984                          | Ca_kabuli_Chr07 | 13605578                | C/G  | Gene_Ca_16044      | SYNONYMOUS_CODING             | Zinc finger,C2H2-type                           |
| Kabuli_wild_13832484 | 1399941985                          | Ca_kabuli_Chr07 | 13832484                | G/T  | Gene_Ca_16060      | INTRON                        | Sugar/inositol transporter                      |
| Kabuli_wild_13903980 | 1399941986                          | Ca_kabuli_Chr07 | 13903980                | T/G  | Gene_Ca_16064      | NON_SYNONYMOUS_CODING         | Tubby,C-terminal                                |
| Kabuli_wild_13949259 | 1399941987                          | Ca_kabuli_Chr07 | 13949259                | A/G  | Gene_Ca_16067      | NON_SYNONYMOUS_CODING         | Heat shock protein DnaJ,N-terminal              |
| Kabuli_wild_14051146 | 1399941988                          | Ca_kabuli_Chr07 | 14051146                | G/T  | Gene_Ca_16074      | INTRON                        | NA                                              |
| Kabuli_wild_14051162 | 1399941989                          | Ca_kabuli_Chr07 | 14051162                | C/T  | Gene_Ca_16074      | INTRON                        | NA                                              |
| Kabuli_wild_14051168 | 1399941990                          | Ca_kabuli_Chr07 | 14051168                | C/T  | Gene_Ca_16074      | INTRON                        | NA                                              |
| Kabuli_wild_14051191 | 1399941991                          | Ca_kabuli_Chr07 | 14051191                | G/A  | Gene_Ca_16074      | INTRON                        | NA                                              |
| Kabuli_wild_14161235 | 1399941992                          | Ca_kabuli_Chr07 | 14161235                | A/G  | Gene_Ca_23031      | NON_SYNONYMOUS_CODING         | NA                                              |
| Kabuli_wild_14281993 | 1399941993                          | Ca_kabuli_Chr07 | 14281993                | G/T  | Gene_Ca_23042      | NON_SYNONYMOUS_CODING         | Protein of unknown function DUF702              |
| Kabuli_wild_14321726 | 1399941994                          | Ca_kabuli_Chr07 | 14321726                | T/C  | NA                 | INTERGENIC                    | NA                                              |
| Kabuli_wild_14328583 | 1399941995                          | Ca_kabuli_Chr07 | 14328583                | G/A  | NA                 | INTERGENIC                    | NA                                              |
| Kabuli_wild_14328602 | 1399941996                          | Ca_kabuli_Chr07 | 14328602                | T/G  | NA                 | INTERGENIC                    | NA                                              |
| Kabuli_wild_14328649 | 1399941997                          | Ca_kabuli_Chr07 | 14328649                | T/C  | NA                 | INTERGENIC                    | NA                                              |
| Kabuli_wild_14328993 | 1399941998                          | Ca_kabuli_Chr07 | 14328993                | C/G  | NA                 | INTERGENIC                    | NA                                              |
| Kabuli_wild_14329077 | 1399941999                          | Ca_kabuli_Chr07 | 14329077                | A/C  | NA                 | INTERGENIC                    | NA                                              |
| Kabuli_wild_14329126 | 1399942000                          | Ca_kabuli_Chr07 | 14329126                | C/T  | NA                 | INTERGENIC                    | NA                                              |
| Kabuli_wild_14329167 | 1399942001                          | Ca_kabuli_Chr07 | 14329167                | A/T  | NA                 | INTERGENIC                    | NA                                              |
| Kabuli_wild_14329175 | 1399942002                          | Ca_kabuli_Chr07 | 14329175                | G/A  | NA                 | INTERGENIC                    | NA                                              |
| Kabuli_wild_14329184 | 1399942003                          | Ca_kabuli_Chr07 | 14329184                | T/C  | NA                 | INTERGENIC                    | NA                                              |
| Kabuli_wild_14329196 | 1399942004                          | Ca_kabuli_Chr07 | 14329196                | G/A  | NA                 | INTERGENIC                    | NA                                              |
| Kabuli_wild_14329217 | 1399942005                          | Ca_kabuli_Chr07 | 14329217                | T/C  | NA                 | INTERGENIC                    | NA                                              |
| Kabuli_wild_14345799 | 1399942006                          | Ca_kabuli_Chr07 | 14345799                | T/A  | Gene_Ca_23045      | NON_SYNONYMOUS_CODING         | D-galactoside/L-rhamnosebindingSUELlectindomain |
| Kabuli_wild_14470549 | 1399942007                          | Ca_kabuli_Chr07 | 14470549                | C/G  | Gene_Ca_09992      | NON_SYNONYMOUS_CODING         | Fork head-associated (FHA) domain               |
| Kabuli_wild_14492116 | 1399942008                          | Ca_kabuli_Chr07 | 14492116                | A/G  | NA                 | INTERGENIC                    | NA                                              |
| Kabuli_wild_14492267 | 1399942009                          | Ca_kabuli_Chr07 | 14492267                | G/T  | NA                 | INTERGENIC                    | NA                                              |
| Kabuli_wild_14492285 | 1399942010                          | Ca_kabuli_Chr07 | 14492285                | T/C  | NA                 | INTERGENIC                    | NA                                              |
| Kabuli_wild_14492289 | 1399942011                          | Ca_kabuli_Chr07 | 14492289                | C/T  | NA                 | INTERGENIC                    | NA                                              |

| SNP IDs                     | NCBI dbSNP accession IDs (NCBI_SS#) | Chromosomes            | Physical positions (bp) | SNPs | Gene accession IDs | Sequence components of genome | Putative functions                                                  |
|-----------------------------|-------------------------------------|------------------------|-------------------------|------|--------------------|-------------------------------|---------------------------------------------------------------------|
| <i>Kabuli_wild_14492341</i> | 1399942012                          | <i>Ca_kabuli_Chr07</i> | 14492341                | C/G  | NA                 | INTERGENIC                    | NA                                                                  |
| <i>Kabuli_wild_14559055</i> | 1399942013                          | <i>Ca_kabuli_Chr07</i> | 14559055                | A/C  | Gene_Ca_09987      | INTRON                        | Protein of unknown function DUF726                                  |
| <i>Kabuli_wild_14573229</i> | 1399942014                          | <i>Ca_kabuli_Chr07</i> | 14573229                | C/G  | Gene_Ca_09985      | INTRON                        | PeptidaseS28                                                        |
| <i>Kabuli_wild_14573245</i> | 1399942015                          | <i>Ca_kabuli_Chr07</i> | 14573245                | T/C  | Gene_Ca_09985      | INTRON                        | PeptidaseS28                                                        |
| <i>Kabuli_wild_14573373</i> | 1399942016                          | <i>Ca_kabuli_Chr07</i> | 14573373                | C/A  | Gene_Ca_09985      | INTRON                        | PeptidaseS28                                                        |
| <i>Kabuli_wild_14685011</i> | 1399942017                          | <i>Ca_kabuli_Chr07</i> | 14685011                | G/C  | Gene_Ca_09976      | DOWNSTREAM                    | Zinc finger,RanBP2-type                                             |
| <i>Kabuli_wild_14685017</i> | 1399942018                          | <i>Ca_kabuli_Chr07</i> | 14685017                | C/T  | Gene_Ca_09976      | DOWNSTREAM                    | Zinc finger,RanBP2-type                                             |
| <i>Kabuli_wild_14685024</i> | 1399942019                          | <i>Ca_kabuli_Chr07</i> | 14685024                | A/G  | Gene_Ca_09976      | DOWNSTREAM                    | Zinc finger,RanBP2-type                                             |
| <i>Kabuli_wild_14712518</i> | 1399942020                          | <i>Ca_kabuli_Chr07</i> | 14712518                | C/A  | NA                 | INTERGENIC                    | NA                                                                  |
| <i>Kabuli_wild_14712550</i> | 1399942021                          | <i>Ca_kabuli_Chr07</i> | 14712550                | G/A  | NA                 | INTERGENIC                    | NA                                                                  |
| <i>Kabuli_wild_14712568</i> | 1399942022                          | <i>Ca_kabuli_Chr07</i> | 14712568                | C/A  | NA                 | INTERGENIC                    | NA                                                                  |
| <i>Kabuli_wild_14712572</i> | 1399942023                          | <i>Ca_kabuli_Chr07</i> | 14712572                | A/G  | NA                 | INTERGENIC                    | NA                                                                  |
| <i>Kabuli_wild_14712589</i> | 1399942024                          | <i>Ca_kabuli_Chr07</i> | 14712589                | T/C  | NA                 | INTERGENIC                    | NA                                                                  |
| <i>Kabuli_wild_14712596</i> | 1399942025                          | <i>Ca_kabuli_Chr07</i> | 14712596                | T/C  | NA                 | INTERGENIC                    | NA                                                                  |
| <i>Kabuli_wild_14712601</i> | 1399942026                          | <i>Ca_kabuli_Chr07</i> | 14712601                | C/T  | NA                 | INTERGENIC                    | NA                                                                  |
| <i>Kabuli_wild_14712608</i> | 1399942027                          | <i>Ca_kabuli_Chr07</i> | 14712608                | T/A  | NA                 | INTERGENIC                    | NA                                                                  |
| <i>Kabuli_wild_14712617</i> | 1399942028                          | <i>Ca_kabuli_Chr07</i> | 14712617                | T/C  | NA                 | INTERGENIC                    | NA                                                                  |
| <i>Kabuli_wild_14748257</i> | 1399942029                          | <i>Ca_kabuli_Chr07</i> | 14748257                | T/A  | NA                 | INTERGENIC                    | NA                                                                  |
| <i>Kabuli_wild_14776054</i> | 1399942030                          | <i>Ca_kabuli_Chr07</i> | 14776054                | T/G  | NA                 | INTERGENIC                    | NA                                                                  |
| <i>Kabuli_wild_14782627</i> | 1399942031                          | <i>Ca_kabuli_Chr07</i> | 14782627                | G/C  | Gene_Ca_09968      | SYNONYMOUS_CODING             | Heat shock protein DnaJ,N-terminal                                  |
| <i>Kabuli_wild_14948610</i> | 1399942032                          | <i>Ca_kabuli_Chr07</i> | 14948610                | C/A  | Gene_Ca_09958      | INTRON                        | Senescence/spartin-associated                                       |
| <i>Kabuli_wild_14997794</i> | 1399942033                          | <i>Ca_kabuli_Chr07</i> | 14997794                | G/A  | Gene_Ca_09954      | NON_SYNONYMOUS_CODING         | RNAhelicase,ATP-dependent,DEAD-box,conservedsite                    |
| <i>Kabuli_wild_15039606</i> | 1399942034                          | <i>Ca_kabuli_Chr07</i> | 15039606                | T/A  | Gene_Ca_09950      | DOWNSTREAM                    | Pentatricopeptide repeat                                            |
| <i>Kabuli_wild_15070091</i> | 1399942035                          | <i>Ca_kabuli_Chr07</i> | 15070091                | T/A  | Gene_Ca_09947      | INTRON                        | Uncharacterised protein familyCys-rich                              |
| <i>Kabuli_wild_15125638</i> | 1399942036                          | <i>Ca_kabuli_Chr07</i> | 15125638                | G/C  | Gene_Ca_09942      | NON_SYNONYMOUS_CODING         | PeptidaseA1                                                         |
| <i>Kabuli_wild_15399369</i> | 1399942037                          | <i>Ca_kabuli_Chr07</i> | 15399369                | A/C  | Gene_Ca_09920      | SYNONYMOUS_CODING             | Glycosidehydrolase,family19,catalytic                               |
| <i>Kabuli_wild_15399421</i> | 1399942038                          | <i>Ca_kabuli_Chr07</i> | 15399421                | T/C  | Gene_Ca_09920      | NON_SYNONYMOUS_CODING         | Glycosidehydrolase,family19,catalytic                               |
| <i>Kabuli_wild_15441347</i> | 1399942039                          | <i>Ca_kabuli_Chr07</i> | 15441347                | T/G  | NA                 | INTERGENIC                    | NA                                                                  |
| <i>Kabuli_wild_15462772</i> | 1399942040                          | <i>Ca_kabuli_Chr07</i> | 15462772                | A/T  | Gene_Ca_09916      | NON_SYNONYMOUS_CODING         | AMP-dependentsynthetase/ligase                                      |
| <i>Kabuli_wild_15462807</i> | 1399942041                          | <i>Ca_kabuli_Chr07</i> | 15462807                | G/C  | Gene_Ca_09916      | SYNONYMOUS_CODING             | AMP-dependentsynthetase/ligase                                      |
| <i>Kabuli_wild_15463169</i> | 1399942042                          | <i>Ca_kabuli_Chr07</i> | 15463169                | G/A  | Gene_Ca_09916      | SYNONYMOUS_CODING             | AMP-dependentsynthetase/ligase                                      |
| <i>Kabuli_wild_15463183</i> | 1399942043                          | <i>Ca_kabuli_Chr07</i> | 15463183                | G/T  | Gene_Ca_09916      | NON_SYNONYMOUS_CODING         | AMP-dependentsynthetase/ligase                                      |
| <i>Kabuli_wild_15529918</i> | 1399942044                          | <i>Ca_kabuli_Chr07</i> | 15529918                | T/A  | Gene_Ca_09913      | SYNONYMOUS_CODING             | AMP-dependentsynthetase/ligase                                      |
| <i>Kabuli_wild_15529953</i> | 1399942045                          | <i>Ca_kabuli_Chr07</i> | 15529953                | C/G  | Gene_Ca_09913      | SYNONYMOUS_CODING             | AMP-dependentsynthetase/ligase                                      |
| <i>Kabuli_wild_15530315</i> | 1399942046                          | <i>Ca_kabuli_Chr07</i> | 15530315                | G/A  | Gene_Ca_09913      | SYNONYMOUS_CODING             | AMP-dependentsynthetase/ligase                                      |
| <i>Kabuli_wild_15530329</i> | 1399942047                          | <i>Ca_kabuli_Chr07</i> | 15530329                | G/T  | Gene_Ca_09913      | NON_SYNONYMOUS_CODING         | AMP-dependentsynthetase/ligase                                      |
| <i>Kabuli_wild_15568017</i> | 1399942048                          | <i>Ca_kabuli_Chr07</i> | 15568017                | C/A  | NA                 | INTERGENIC                    | NA                                                                  |
| <i>Kabuli_wild_15568046</i> | 1399942049                          | <i>Ca_kabuli_Chr07</i> | 15568046                | G/A  | NA                 | INTERGENIC                    | NA                                                                  |
| <i>Kabuli_wild_15568060</i> | 1399942050                          | <i>Ca_kabuli_Chr07</i> | 15568060                | G/T  | NA                 | INTERGENIC                    | NA                                                                  |
| <i>Kabuli_wild_15622251</i> | 1399942051                          | <i>Ca_kabuli_Chr07</i> | 15622251                | C/T  | Gene_Ca_09907      | INTRON                        | Ubiquitin-associated/translation elongation factor EF1B, N-terminal |
| <i>Kabuli_wild_15624645</i> | 1399942052                          | <i>Ca_kabuli_Chr07</i> | 15624645                | T/G  | Gene_Ca_09907      | SYNONYMOUS_CODING             | Ubiquitin-associated/translation elongation factor EF1B, N-terminal |
| <i>Kabuli_wild_15826588</i> | 1399942053                          | <i>Ca_kabuli_Chr07</i> | 15826588                | A/C  | Gene_Ca_09889      | SYNONYMOUS_CODING             | Lipid-bindingSTART                                                  |
| <i>Kabuli_wild_15830468</i> | 1399942054                          | <i>Ca_kabuli_Chr07</i> | 15830468                | C/T  | Gene_Ca_09889      | UPSTREAM                      | Lipid-bindingSTART                                                  |
| <i>Kabuli_wild_15966680</i> | 1399942055                          | <i>Ca_kabuli_Chr07</i> | 15966680                | A/G  | Gene_Ca_09880      | SYNONYMOUS_CODING             | Sugar/inositol transporter                                          |



| SNP IDs              | NCBI dbSNP accession IDs (NCBI_SS#) | Chromosomes     | Physical positions (bp) | SNPs | Gene accession IDs | Sequence components of genome | Putative functions                                |
|----------------------|-------------------------------------|-----------------|-------------------------|------|--------------------|-------------------------------|---------------------------------------------------|
| Kabuli_wild_15966709 | 1399942056                          | Ca_kabuli_Chr07 | 15966709                | T/C  | Gene_Ca_09880      | NON_SYNONYMOUS_CODING         | Sugar/inositol transporter                        |
| Kabuli_wild_15966714 | 1399942057                          | Ca_kabuli_Chr07 | 15966714                | G/A  | Gene_Ca_09880      | NON_SYNONYMOUS_CODING         | Sugar/inositol transporter                        |
| Kabuli_wild_15966727 | 1399942058                          | Ca_kabuli_Chr07 | 15966727                | T/C  | Gene_Ca_09880      | NON_SYNONYMOUS_CODING         | Sugar/inositol transporter                        |
| Kabuli_wild_15966762 | 1399942059                          | Ca_kabuli_Chr07 | 15966762                | G/A  | Gene_Ca_09880      | NON_SYNONYMOUS_CODING         | Sugar/inositol transporter                        |
| Kabuli_wild_15966798 | 1399942060                          | Ca_kabuli_Chr07 | 15966798                | C/A  | Gene_Ca_09880      | SYNONYMOUS_CODING             | Sugar/inositol transporter                        |
| Kabuli_wild_16289794 | 1399942061                          | Ca_kabuli_Chr07 | 16289794                | G/T  | Gene_Ca_09857      | NON_SYNONYMOUS_CODING         | Tafazzin                                          |
| Kabuli_wild_16324985 | 1399942062                          | Ca_kabuli_Chr07 | 16324985                | T/C  | Gene_Ca_09853      | INTRON                        | Drug/metabolitetransporter                        |
| Kabuli_wild_16526921 | 1399942063                          | Ca_kabuli_Chr07 | 16526921                | A/G  | Gene_Ca_20554      | NON_SYNONYMOUS_CODING         | Sugar/inositol transporter                        |
| Kabuli_wild_16624789 | 1399942064                          | Ca_kabuli_Chr07 | 16624789                | A/C  | Gene_Ca_20562      | NON_SYNONYMOUS_CODING         | Nodulin-like                                      |
| Kabuli_wild_16626047 | 1399942065                          | Ca_kabuli_Chr07 | 16626047                | T/G  | Gene_Ca_20562      | SYNONYMOUS_CODING             | Nodulin-like                                      |
| Kabuli_wild_16663311 | 1399942066                          | Ca_kabuli_Chr07 | 16663311                | A/C  | Gene_Ca_20568      | SYNONYMOUS_CODING             | Tetra tricopeptide repeat-containing              |
| Kabuli_wild_16665577 | 1399942067                          | Ca_kabuli_Chr07 | 16665577                | A/G  | Gene_Ca_20568      | SYNONYMOUS_CODING             | Tetra tricopeptide repeat-containing              |
| Kabuli_wild_16735437 | 1399942068                          | Ca_kabuli_Chr07 | 16735437                | G/A  | Gene_Ca_20573      | UPSTREAM                      | Brevisradix-likedomain                            |
| Kabuli_wild_16821274 | 1399942069                          | Ca_kabuli_Chr07 | 16821274                | A/C  | Gene_Ca_20581      | NON_SYNONYMOUS_CODING         | NA                                                |
| Kabuli_wild_16936123 | 1399942070                          | Ca_kabuli_Chr07 | 16936123                | C/A  | Gene_Ca_15885      | NON_SYNONYMOUS_CODING         | H/ACARibonucleoproteincomplex,subunitNop10        |
| Kabuli_wild_17133005 | 1399942071                          | Ca_kabuli_Chr07 | 17133005                | G/A  | NA                 | INTERGENIC                    | NA                                                |
| Kabuli_wild_17133013 | 1399942072                          | Ca_kabuli_Chr07 | 17133013                | C/A  | NA                 | INTERGENIC                    | NA                                                |
| Kabuli_wild_17133036 | 1399942073                          | Ca_kabuli_Chr07 | 17133036                | T/C  | NA                 | INTERGENIC                    | NA                                                |
| Kabuli_wild_17133046 | 1399942074                          | Ca_kabuli_Chr07 | 17133046                | T/G  | NA                 | INTERGENIC                    | NA                                                |
| Kabuli_wild_17133061 | 1399942075                          | Ca_kabuli_Chr07 | 17133061                | C/T  | NA                 | INTERGENIC                    | NA                                                |
| Kabuli_wild_17133076 | 1399942076                          | Ca_kabuli_Chr07 | 17133076                | A/G  | NA                 | INTERGENIC                    | NA                                                |
| Kabuli_wild_17133111 | 1399942077                          | Ca_kabuli_Chr07 | 17133111                | T/G  | NA                 | INTERGENIC                    | NA                                                |
| Kabuli_wild_17140664 | 1399942078                          | Ca_kabuli_Chr07 | 17140664                | C/T  | NA                 | INTERGENIC                    | NA                                                |
| Kabuli_wild_17223116 | 1399942079                          | Ca_kabuli_Chr07 | 17223116                | A/C  | Gene_Ca_15866      | SYNONYMOUS_CODING             | NA                                                |
| Kabuli_wild_17228904 | 1399942080                          | Ca_kabuli_Chr07 | 17228904                | T/G  | NA                 | INTERGENIC                    | NA                                                |
| Kabuli_wild_17318119 | 1399942081                          | Ca_kabuli_Chr07 | 17318119                | A/G  | Gene_Ca_15859      | SYNONYMOUS_CODING             | NA                                                |
| Kabuli_wild_17318174 | 1399942082                          | Ca_kabuli_Chr07 | 17318174                | G/T  | Gene_Ca_15859      | NON_SYNONYMOUS_CODING         | NA                                                |
| Kabuli_wild_17588267 | 1399942083                          | Ca_kabuli_Chr07 | 17588267                | A/C  | Gene_Ca_15850      | INTRON                        | SET domain                                        |
| Kabuli_wild_17766914 | 1399942084                          | Ca_kabuli_Chr07 | 17766914                | C/A  | NA                 | INTERGENIC                    | NA                                                |
| Kabuli_wild_17766952 | 1399942085                          | Ca_kabuli_Chr07 | 17766952                | T/A  | NA                 | INTERGENIC                    | NA                                                |
| Kabuli_wild_17779414 | 1399942086                          | Ca_kabuli_Chr07 | 17779414                | A/G  | Gene_Ca_15839      | NON_SYNONYMOUS_CODING         | Bromodomain                                       |
| Kabuli_wild_17879307 | 1399942087                          | Ca_kabuli_Chr07 | 17879307                | T/G  | NA                 | INTERGENIC                    | NA                                                |
| Kabuli_wild_17879391 | 1399942088                          | Ca_kabuli_Chr07 | 17879391                | G/C  | NA                 | INTERGENIC                    | NA                                                |
| Kabuli_wild_18005844 | 1399942089                          | Ca_kabuli_Chr07 | 18005844                | G/A  | NA                 | INTERGENIC                    | NA                                                |
| Kabuli_wild_18011500 | 1399942090                          | Ca_kabuli_Chr07 | 18011500                | A/C  | Gene_Ca_15826      | INTRON                        | Protein kinase,catalytic domain                   |
| Kabuli_wild_18011604 | 1399942091                          | Ca_kabuli_Chr07 | 18011604                | G/C  | Gene_Ca_15826      | NON_SYNONYMOUS_CODING         | Basic-leucine zipper (bZIP ) Transcription factor |
| Kabuli_wild_18090289 | 1399942092                          | Ca_kabuli_Chr07 | 18090289                | T/A  | NA                 | INTERGENIC                    | NA                                                |
| Kabuli_wild_18319049 | 1399942093                          | Ca_kabuli_Chr07 | 18319049                | T/G  | NA                 | INTERGENIC                    | NA                                                |
| Kabuli_wild_18319073 | 1399942094                          | Ca_kabuli_Chr07 | 18319073                | T/G  | NA                 | INTERGENIC                    | NA                                                |
| Kabuli_wild_18319079 | 1399942095                          | Ca_kabuli_Chr07 | 18319079                | C/A  | NA                 | INTERGENIC                    | NA                                                |
| Kabuli_wild_18365218 | 1399942096                          | Ca_kabuli_Chr07 | 18365218                | G/A  | NA                 | INTERGENIC                    | NA                                                |
| Kabuli_wild_18398083 | 1399942097                          | Ca_kabuli_Chr07 | 18398083                | T/G  | NA                 | INTERGENIC                    | NA                                                |
| Kabuli_wild_18462115 | 1399942098                          | Ca_kabuli_Chr07 | 18462115                | G/C  | Gene_Ca_22127      | INTRON                        | NA                                                |
| Kabuli_wild_18469422 | 1399942099                          | Ca_kabuli_Chr07 | 18469422                | C/T  | Gene_Ca_22127      | NON_SYNONYMOUS_CODING         | NA                                                |

| SNP IDs              | NCBI dbSNP accession IDs (NCBI_SS#) | Chromosomes     | Physical positions (bp) | SNPs | Gene accession IDs | Sequence components of genome | Putative functions                                           |
|----------------------|-------------------------------------|-----------------|-------------------------|------|--------------------|-------------------------------|--------------------------------------------------------------|
| Kabuli_wild_18638565 | 1399942100                          | Ca_kabuli_Chr07 | 18638565                | A/G  | Gene_Ca_12302      | NON_SYNONYMOUS_CODING         | NA                                                           |
| Kabuli_wild_18642538 | 1399942101                          | Ca_kabuli_Chr07 | 18642538                | A/G  | Gene_Ca_12302      | NON_SYNONYMOUS_CODING         | NA                                                           |
| Kabuli_wild_18658563 | 1399942102                          | Ca_kabuli_Chr07 | 18658563                | C/G  | Gene_Ca_12303      | SYNONYMOUS_CODING             | Phosphatetransporter                                         |
| Kabuli_wild_18696645 | 1399942103                          | Ca_kabuli_Chr07 | 18696645                | G/A  | NA                 | INTERGENIC                    | NA                                                           |
| Kabuli_wild_18728531 | 1399942104                          | Ca_kabuli_Chr07 | 18728531                | G/C  | Gene_Ca_12306      | INTRON                        | GRAM                                                         |
| Kabuli_wild_18910468 | 1399942105                          | Ca_kabuli_Chr07 | 18910468                | A/G  | Gene_Ca_12312      | DOWNSTREAM                    | WD40 repeat                                                  |
| Kabuli_wild_18946770 | 1399942106                          | Ca_kabuli_Chr07 | 18946770                | A/C  | Gene_Ca_12313      | SYNONYMOUS_CODING             | Mitochondrialbrownfatuncouplingprotein                       |
| Kabuli_wild_19042183 | 1399942107                          | Ca_kabuli_Chr07 | 19042183                | C/T  | Gene_Ca_12316      | INTRON                        | Kinesin,motordomain                                          |
| Kabuli_wild_19189784 | 1399942108                          | Ca_kabuli_Chr07 | 19189784                | C/A  | Gene_Ca_12326      | UPSTREAM                      | Xanthine/uracil/vitamin C permease                           |
| Kabuli_wild_19195625 | 1399942109                          | Ca_kabuli_Chr07 | 19195625                | A/C  | Gene_Ca_12326      | NON_SYNONYMOUS_CODING         | Xanthine/uracil/vitamin C permease                           |
| Kabuli_wild_19217501 | 1399942110                          | Ca_kabuli_Chr07 | 19217501                | A/C  | Gene_Ca_12328      | NON_SYNONYMOUS_CODING         | Pathogenesis-related transcriptional factor/ERF, DNA-binding |
| Kabuli_wild_19241112 | 1399942111                          | Ca_kabuli_Chr07 | 19241112                | T/C  | Gene_Ca_12331      | NON_SYNONYMOUS_CODING         | WD40 repeat                                                  |
| Kabuli_wild_19252437 | 1399942112                          | Ca_kabuli_Chr07 | 19252437                | T/C  | Gene_Ca_12332      | INTRON                        | Dehydrogenase,E1component                                    |
| Kabuli_wild_19365654 | 1399942113                          | Ca_kabuli_Chr07 | 19365654                | G/A  | NA                 | INTERGENIC                    | NA                                                           |
| Kabuli_wild_19418115 | 1399942114                          | Ca_kabuli_Chr07 | 19418115                | T/C  | NA                 | INTERGENIC                    | NA                                                           |
| Kabuli_wild_19472689 | 1399942115                          | Ca_kabuli_Chr07 | 19472689                | T/A  | NA                 | INTERGENIC                    | NA                                                           |
| Kabuli_wild_19519093 | 1399942116                          | Ca_kabuli_Chr07 | 19519093                | T/C  | Gene_Ca_12347      | INTRON                        | tRNA-dihydrouridinesynthase                                  |
| Kabuli_wild_19538108 | 1399942117                          | Ca_kabuli_Chr07 | 19538108                | T/G  | Gene_Ca_12348      | INTRON                        | Phosphoenolpyruvatecarboxykinase,ATP-utilising               |
| Kabuli_wild_19576442 | 1399942118                          | Ca_kabuli_Chr07 | 19576442                | T/C  | NA                 | INTERGENIC                    | NA                                                           |
| Kabuli_wild_19576447 | 1399942119                          | Ca_kabuli_Chr07 | 19576447                | C/T  | NA                 | INTERGENIC                    | NA                                                           |
| Kabuli_wild_19576457 | 1399942120                          | Ca_kabuli_Chr07 | 19576457                | G/A  | NA                 | INTERGENIC                    | NA                                                           |
| Kabuli_wild_19576472 | 1399942121                          | Ca_kabuli_Chr07 | 19576472                | C/A  | NA                 | INTERGENIC                    | NA                                                           |
| Kabuli_wild_19787497 | 1399942122                          | Ca_kabuli_Chr07 | 19787497                | C/A  | NA                 | INTERGENIC                    | NA                                                           |
| Kabuli_wild_19818757 | 1399942123                          | Ca_kabuli_Chr07 | 19818757                | G/C  | NA                 | INTERGENIC                    | NA                                                           |
| Kabuli_wild_19818759 | 1399942124                          | Ca_kabuli_Chr07 | 19818759                | G/C  | NA                 | INTERGENIC                    | NA                                                           |
| Kabuli_wild_19818761 | 1399942125                          | Ca_kabuli_Chr07 | 19818761                | C/T  | NA                 | INTERGENIC                    | NA                                                           |
| Kabuli_wild_19818770 | 1399942126                          | Ca_kabuli_Chr07 | 19818770                | T/C  | NA                 | INTERGENIC                    | NA                                                           |
| Kabuli_wild_19818789 | 1399942127                          | Ca_kabuli_Chr07 | 19818789                | C/A  | NA                 | INTERGENIC                    | NA                                                           |
| Kabuli_wild_19818793 | 1399942128                          | Ca_kabuli_Chr07 | 19818793                | T/C  | NA                 | INTERGENIC                    | NA                                                           |
| Kabuli_wild_19989645 | 1399942129                          | Ca_kabuli_Chr07 | 19989645                | G/C  | NA                 | INTERGENIC                    | NA                                                           |
| Kabuli_wild_20031805 | 1399942130                          | Ca_kabuli_Chr07 | 20031805                | T/C  | NA                 | INTERGENIC                    | NA                                                           |
| Kabuli_wild_20032205 | 1399942131                          | Ca_kabuli_Chr07 | 20032205                | A/C  | Gene_Ca_12371      | SYNONYMOUS_CODING             | General substrate transporter                                |
| Kabuli_wild_20097908 | 1399942132                          | Ca_kabuli_Chr07 | 20097908                | A/G  | Gene_Ca_12375      | NON_SYNONYMOUS_CODING         | Target SNARE coiled-coil domain                              |
| Kabuli_wild_20175669 | 1399942133                          | Ca_kabuli_Chr07 | 20175669                | T/C  | Gene_Ca_12380      | UPSTREAM                      | NA                                                           |
| Kabuli_wild_20213416 | 1399942134                          | Ca_kabuli_Chr07 | 20213416                | A/G  | NA                 | INTERGENIC                    | NA                                                           |
| Kabuli_wild_20252133 | 1399942135                          | Ca_kabuli_Chr07 | 20252133                | T/C  | Gene_Ca_12383      | DOWNSTREAM                    | Protein of unknown function DUF220                           |
| Kabuli_wild_20252134 | 1399942136                          | Ca_kabuli_Chr07 | 20252134                | G/A  | Gene_Ca_12383      | DOWNSTREAM                    | Protein of unknown function DUF220                           |
| Kabuli_wild_20252135 | 1399942137                          | Ca_kabuli_Chr07 | 20252135                | A/G  | Gene_Ca_12383      | DOWNSTREAM                    | Protein of unknown function DUF220                           |
| Kabuli_wild_20252144 | 1399942138                          | Ca_kabuli_Chr07 | 20252144                | G/A  | Gene_Ca_12383      | DOWNSTREAM                    | Protein of unknown function DUF220                           |
| Kabuli_wild_20252145 | 1399942139                          | Ca_kabuli_Chr07 | 20252145                | G/A  | Gene_Ca_12383      | DOWNSTREAM                    | Protein of unknown function DUF220                           |
| Kabuli_wild_20252179 | 1399942140                          | Ca_kabuli_Chr07 | 20252179                | T/G  | Gene_Ca_12383      | DOWNSTREAM                    | Protein of unknown function DUF220                           |
| Kabuli_wild_20252181 | 1399942141                          | Ca_kabuli_Chr07 | 20252181                | C/T  | Gene_Ca_12383      | DOWNSTREAM                    | Protein of unknown function DUF220                           |
| Kabuli_wild_20252192 | 1399942142                          | Ca_kabuli_Chr07 | 20252192                | G/A  | Gene_Ca_12383      | DOWNSTREAM                    | Protein of unknown function DUF220                           |
| Kabuli_wild_20252201 | 1399942143                          | Ca_kabuli_Chr07 | 20252201                | C/A  | Gene_Ca_12383      | DOWNSTREAM                    | Protein of unknown function DUF220                           |

| SNP IDs              | NCBI dbSNP accession IDs (NCBI_SS#) | Chromosomes     | Physical positions (bp) | SNPs | Gene accession IDs | Sequence components of genome | Putative functions                                           |
|----------------------|-------------------------------------|-----------------|-------------------------|------|--------------------|-------------------------------|--------------------------------------------------------------|
| Kabuli_wild_20252219 | 1399942144                          | Ca_kabuli_Chr07 | 20252219                | C/T  | Gene_Ca_12383      | DOWNSTREAM                    | Protein of unknown function DUF220                           |
| Kabuli_wild_20252221 | 1399942145                          | Ca_kabuli_Chr07 | 20252221                | T/C  | Gene_Ca_12383      | DOWNSTREAM                    | Protein of unknown function DUF220                           |
| Kabuli_wild_20252233 | 1399942146                          | Ca_kabuli_Chr07 | 20252233                | C/T  | Gene_Ca_12383      | DOWNSTREAM                    | Protein of unknown function DUF220                           |
| Kabuli_wild_20252309 | 1399942147                          | Ca_kabuli_Chr07 | 20252309                | T/C  | Gene_Ca_12383      | DOWNSTREAM                    | Protein of unknown function DUF220                           |
| Kabuli_wild_20252334 | 1399942148                          | Ca_kabuli_Chr07 | 20252334                | A/T  | Gene_Ca_12383      | DOWNSTREAM                    | Protein of unknown function DUF220                           |
| Kabuli_wild_20252340 | 1399942149                          | Ca_kabuli_Chr07 | 20252340                | A/G  | Gene_Ca_12383      | DOWNSTREAM                    | Protein of unknown function DUF220                           |
| Kabuli_wild_20414703 | 1399942150                          | Ca_kabuli_Chr07 | 20414703                | C/A  | Gene_Ca_12394      | DOWNSTREAM                    | DNA-directedRNApolymerase,bacteriophage type                 |
| Kabuli_wild_20414704 | 1399942151                          | Ca_kabuli_Chr07 | 20414704                | G/A  | Gene_Ca_12394      | DOWNSTREAM                    | DNA-directedRNApolymerase,bacteriophage type                 |
| Kabuli_wild_20425287 | 1399942152                          | Ca_kabuli_Chr07 | 20425287                | A/G  | Gene_Ca_12394      | NON_SYNONYMOUS_CODING         | DNA-directedRNApolymerase,bacteriophage type                 |
| Kabuli_wild_20452278 | 1399942153                          | Ca_kabuli_Chr07 | 20452278                | A/G  | Gene_Ca_12396      | SYNONYMOUS_CODING             | Protein kinase,catalytic domain                              |
| Kabuli_wild_20452457 | 1399942154                          | Ca_kabuli_Chr07 | 20452457                | G/A  | Gene_Ca_12396      | NON_SYNONYMOUS_CODING         | Protein kinase,catalytic domain                              |
| Kabuli_wild_20496303 | 1399942155                          | Ca_kabuli_Chr07 | 20496303                | C/T  | Gene_Ca_12400      | SYNONYMOUS_CODING             | Pathogenesis-related transcriptional factor/ERF, DNA-binding |
| Kabuli_wild_20496378 | 1399942156                          | Ca_kabuli_Chr07 | 20496378                | G/A  | Gene_Ca_12400      | SYNONYMOUS_CODING             | Pathogenesis-related transcriptional factor/ERF, DNA-binding |
| Kabuli_wild_20496438 | 1399942157                          | Ca_kabuli_Chr07 | 20496438                | C/T  | Gene_Ca_12400      | SYNONYMOUS_CODING             | Pathogenesis-related transcriptional factor/ERF, DNA-binding |
| Kabuli_wild_20498552 | 1399942158                          | Ca_kabuli_Chr07 | 20498552                | T/C  | Gene_Ca_12400      | INTRON                        | Pathogenesis-related transcriptional factor/ERF, DNA-binding |
| Kabuli_wild_20498626 | 1399942159                          | Ca_kabuli_Chr07 | 20498626                | G/T  | Gene_Ca_12400      | INTRON                        | Pathogenesis-related transcriptional factor/ERF, DNA-binding |
| Kabuli_wild_20540780 | 1399942160                          | Ca_kabuli_Chr07 | 20540780                | C/T  | Gene_Ca_12403      | DOWNSTREAM                    | Protein kinase,catalytic domain                              |
| Kabuli_wild_20540791 | 1399942161                          | Ca_kabuli_Chr07 | 20540791                | G/A  | Gene_Ca_12403      | DOWNSTREAM                    | Protein kinase,catalytic domain                              |
| Kabuli_wild_20543112 | 1399942162                          | Ca_kabuli_Chr07 | 20543112                | T/C  | NA                 | INTERGENIC                    | NA                                                           |
| Kabuli_wild_20543119 | 1399942163                          | Ca_kabuli_Chr07 | 20543119                | T/C  | NA                 | INTERGENIC                    | NA                                                           |
| Kabuli_wild_20550563 | 1399942164                          | Ca_kabuli_Chr07 | 20550563                | G/A  | NA                 | INTERGENIC                    | NA                                                           |
| Kabuli_wild_20550575 | 1399942165                          | Ca_kabuli_Chr07 | 20550575                | C/G  | NA                 | INTERGENIC                    | NA                                                           |
| Kabuli_wild_20550619 | 1399942166                          | Ca_kabuli_Chr07 | 20550619                | A/G  | NA                 | INTERGENIC                    | NA                                                           |
| Kabuli_wild_20552041 | 1399942167                          | Ca_kabuli_Chr07 | 20552041                | G/A  | Gene_Ca_12405      | SYNONYMOUS_CODING             | SGT1                                                         |
| Kabuli_wild_20552053 | 1399942168                          | Ca_kabuli_Chr07 | 20552053                | C/G  | Gene_Ca_12405      | SYNONYMOUS_CODING             | SGT1                                                         |
| Kabuli_wild_20556466 | 1399942169                          | Ca_kabuli_Chr07 | 20556466                | G/C  | NA                 | INTERGENIC                    | NA                                                           |
| Kabuli_wild_20556576 | 1399942170                          | Ca_kabuli_Chr07 | 20556576                | C/T  | NA                 | INTERGENIC                    | NA                                                           |
| Kabuli_wild_20560421 | 1399942171                          | Ca_kabuli_Chr07 | 20560421                | G/A  | NA                 | INTERGENIC                    | NA                                                           |
| Kabuli_wild_20563931 | 1399942172                          | Ca_kabuli_Chr07 | 20563931                | G/A  | Gene_Ca_12406      | SYNONYMOUS_CODING             | KIP1-like                                                    |
| Kabuli_wild_20564024 | 1399942173                          | Ca_kabuli_Chr07 | 20564024                | G/A  | Gene_Ca_12406      | SYNONYMOUS_CODING             | KIP1-like                                                    |
| Kabuli_wild_20564266 | 1399942174                          | Ca_kabuli_Chr07 | 20564266                | G/A  | Gene_Ca_12406      | NON_SYNONYMOUS_CODING         | KIP1-like                                                    |
| Kabuli_wild_20564269 | 1399942175                          | Ca_kabuli_Chr07 | 20564269                | C/T  | Gene_Ca_12406      | NON_SYNONYMOUS_CODING         | KIP1-like                                                    |
| Kabuli_wild_20564297 | 1399942176                          | Ca_kabuli_Chr07 | 20564297                | A/G  | Gene_Ca_12406      | SYNONYMOUS_CODING             | KIP1-like                                                    |
| Kabuli_wild_20579963 | 1399942177                          | Ca_kabuli_Chr07 | 20579963                | G/T  | NA                 | INTERGENIC                    | NA                                                           |
| Kabuli_wild_20579974 | 1399942178                          | Ca_kabuli_Chr07 | 20579974                | A/T  | NA                 | INTERGENIC                    | NA                                                           |
| Kabuli_wild_20586045 | 1399942179                          | Ca_kabuli_Chr07 | 20586045                | G/T  | Gene_Ca_12409      | DOWNSTREAM                    | Integrase,catalytic core                                     |
| Kabuli_wild_20605373 | 1399942180                          | Ca_kabuli_Chr07 | 20605373                | A/C  | Gene_Ca_12411      | DOWNSTREAM                    | NA                                                           |
| Kabuli_wild_20605384 | 1399942181                          | Ca_kabuli_Chr07 | 20605384                | C/G  | Gene_Ca_12411      | DOWNSTREAM                    | NA                                                           |
| Kabuli_wild_20605389 | 1399942182                          | Ca_kabuli_Chr07 | 20605389                | A/G  | Gene_Ca_12411      | DOWNSTREAM                    | NA                                                           |
| Kabuli_wild_20610728 | 1399942183                          | Ca_kabuli_Chr07 | 20610728                | A/C  | Gene_Ca_12413      | DOWNSTREAM                    | MechanosensitiveionchannelMscS                               |
| Kabuli_wild_20610732 | 1399942184                          | Ca_kabuli_Chr07 | 20610732                | T/G  | Gene_Ca_12413      | DOWNSTREAM                    | NA                                                           |
| Kabuli_wild_20613547 | 1399942185                          | Ca_kabuli_Chr07 | 20613547                | A/G  | NA                 | INTERGENIC                    | NA                                                           |
| Kabuli_wild_20613659 | 1399942186                          | Ca_kabuli_Chr07 | 20613659                | T/A  | NA                 | INTERGENIC                    | NA                                                           |
| Kabuli_wild_20613718 | 1399942187                          | Ca_kabuli_Chr07 | 20613718                | C/T  | NA                 | INTERGENIC                    | NA                                                           |

| SNP IDs              | NCBI dbSNP accession IDs (NCBI_SS#) | Chromosomes     | Physical positions (bp) | SNPs | Gene accession IDs | Sequence components of genome | Putative functions                                 |
|----------------------|-------------------------------------|-----------------|-------------------------|------|--------------------|-------------------------------|----------------------------------------------------|
| Kabuli_wild_20632901 | 1399942188                          | Ca_kabuli_Chr07 | 20632901                | C/T  | NA                 | INTERGENIC                    | NA                                                 |
| Kabuli_wild_20633040 | 1399942189                          | Ca_kabuli_Chr07 | 20633040                | A/G  | NA                 | INTERGENIC                    | NA                                                 |
| Kabuli_wild_20637152 | 1399942190                          | Ca_kabuli_Chr07 | 20637152                | G/A  | Gene_Ca_12415      | SYNONYMOUS_CODING             | Protein synthesis factor, GTP-binding              |
| Kabuli_wild_20917740 | 1399942191                          | Ca_kabuli_Chr07 | 20917740                | A/G  | NA                 | INTERGENIC                    | NA                                                 |
| Kabuli_wild_20917742 | 1399942192                          | Ca_kabuli_Chr07 | 20917742                | C/A  | NA                 | INTERGENIC                    | NA                                                 |
| Kabuli_wild_20917743 | 1399942193                          | Ca_kabuli_Chr07 | 20917743                | T/G  | NA                 | INTERGENIC                    | NA                                                 |
| Kabuli_wild_20917747 | 1399942194                          | Ca_kabuli_Chr07 | 20917747                | A/G  | NA                 | INTERGENIC                    | NA                                                 |
| Kabuli_wild_21073385 | 1399942195                          | Ca_kabuli_Chr07 | 21073385                | A/C  | Gene_Ca_14490      | NON_SYNONYMOUS_CODING         | Alcohol dehydrogenase superfamily, zinc-containing |
| Kabuli_wild_21099782 | 1399942196                          | Ca_kabuli_Chr07 | 21099782                | G/T  | NA                 | INTERGENIC                    | NA                                                 |
| Kabuli_wild_21401261 | 1399942197                          | Ca_kabuli_Chr07 | 21401261                | C/T  | Gene_Ca_14503      | NON_SYNONYMOUS_CODING         | Aldehydedehydrogenasedomain                        |
| Kabuli_wild_21402075 | 1399942198                          | Ca_kabuli_Chr07 | 21402075                | A/G  | Gene_Ca_14503      | SYNONYMOUS_CODING             | Aldehydedehydrogenasedomain                        |
| Kabuli_wild_21402117 | 1399942199                          | Ca_kabuli_Chr07 | 21402117                | A/C  | Gene_Ca_14503      | INTRON                        | Aldehydedehydrogenasedomain                        |
| Kabuli_wild_21595525 | 1399942200                          | Ca_kabuli_Chr07 | 21595525                | C/T  | NA                 | INTERGENIC                    | NA                                                 |
| Kabuli_wild_21616285 | 1399942201                          | Ca_kabuli_Chr07 | 21616285                | A/G  | Gene_Ca_14512      | INTRON                        | Clathrin/coatomeradaptor,adaptin-like,N-terminal   |
| Kabuli_wild_21616287 | 1399942202                          | Ca_kabuli_Chr07 | 21616287                | T/G  | Gene_Ca_14512      | INTRON                        | Clathrin/coatomeradaptor,adaptin-like,N-terminal   |
| Kabuli_wild_21616290 | 1399942203                          | Ca_kabuli_Chr07 | 21616290                | A/G  | Gene_Ca_14512      | INTRON                        | Clathrin/coatomeradaptor,adaptin-like,N-terminal   |
| Kabuli_wild_21616294 | 1399942204                          | Ca_kabuli_Chr07 | 21616294                | T/G  | Gene_Ca_14512      | INTRON                        | Clathrin/coatomeradaptor,adaptin-like,N-terminal   |
| Kabuli_wild_21633103 | 1399942205                          | Ca_kabuli_Chr07 | 21633103                | C/G  | Gene_Ca_14515      | UPSTREAM                      | Clathrin/coatomeradaptor,adaptin-like,N-terminal   |
| Kabuli_wild_21639234 | 1399942206                          | Ca_kabuli_Chr07 | 21639234                | G/A  | Gene_Ca_14515      | INTRON                        | Clathrin/coatomeradaptor,adaptin-like,N-terminal   |
| Kabuli_wild_21639238 | 1399942207                          | Ca_kabuli_Chr07 | 21639238                | G/A  | Gene_Ca_14515      | INTRON                        | Clathrin/coatomeradaptor,adaptin-like,N-terminal   |
| Kabuli_wild_21639244 | 1399942208                          | Ca_kabuli_Chr07 | 21639244                | T/G  | Gene_Ca_14515      | INTRON                        | Clathrin/coatomeradaptor,adaptin-like,N-terminal   |
| Kabuli_wild_21639251 | 1399942209                          | Ca_kabuli_Chr07 | 21639251                | T/G  | Gene_Ca_14515      | INTRON                        | Clathrin/coatomeradaptor,adaptin-like,N-terminal   |
| Kabuli_wild_21639254 | 1399942210                          | Ca_kabuli_Chr07 | 21639254                | T/G  | Gene_Ca_14515      | INTRON                        | Clathrin/coatomeradaptor,adaptin-like,N-terminal   |
| Kabuli_wild_21639375 | 1399942211                          | Ca_kabuli_Chr07 | 21639375                | T/G  | Gene_Ca_14515      | INTRON                        | Clathrin/coatomeradaptor,adaptin-like,N-terminal   |
| Kabuli_wild_21644279 | 1399942212                          | Ca_kabuli_Chr07 | 21644279                | C/T  | Gene_Ca_14515      | DOWNSTREAM                    | Clathrin/coatomeradaptor,adaptin-like,N-terminal   |
| Kabuli_wild_21644342 | 1399942213                          | Ca_kabuli_Chr07 | 21644342                | G/A  | Gene_Ca_14515      | DOWNSTREAM                    | Clathrin/coatomeradaptor,adaptin-like,N-terminal   |
| Kabuli_wild_21690733 | 1399942214                          | Ca_kabuli_Chr07 | 21690733                | T/C  | NA                 | INTERGENIC                    | NA                                                 |
| Kabuli_wild_21713147 | 1399942215                          | Ca_kabuli_Chr07 | 21713147                | T/G  | Gene_Ca_14519      | INTRON                        | NA                                                 |
| Kabuli_wild_21744514 | 1399942216                          | Ca_kabuli_Chr07 | 21744514                | T/C  | NA                 | INTERGENIC                    | NA                                                 |
| Kabuli_wild_21756162 | 1399942217                          | Ca_kabuli_Chr07 | 21756162                | A/G  | NA                 | INTERGENIC                    | NA                                                 |
| Kabuli_wild_21756166 | 1399942218                          | Ca_kabuli_Chr07 | 21756166                | T/C  | NA                 | INTERGENIC                    | NA                                                 |
| Kabuli_wild_22698940 | 1399942219                          | Ca_kabuli_Chr07 | 22698940                | G/A  | Gene_Ca_19532      | SYNONYMOUS_CODING             | Kinesin, motordomain                               |
| Kabuli_wild_22721332 | 1399942220                          | Ca_kabuli_Chr07 | 22721332                | G/C  | Gene_Ca_19530      | NON_SYNONYMOUS_CODING         | Haloaciddehalogenase-likehydrolase                 |
| Kabuli_wild_22721356 | 1399942221                          | Ca_kabuli_Chr07 | 22721356                | A/C  | Gene_Ca_19530      | SYNONYMOUS_CODING             | Haloaciddehalogenase-likehydrolase                 |
| Kabuli_wild_22738152 | 1399942222                          | Ca_kabuli_Chr07 | 22738152                | C/G  | Gene_Ca_19530      | INTRON                        | Haloaciddehalogenase-likehydrolase                 |
| Kabuli_wild_22738482 | 1399942223                          | Ca_kabuli_Chr07 | 22738482                | A/G  | Gene_Ca_19530      | INTRON                        | Haloaciddehalogenase-likehydrolase                 |
| Kabuli_wild_22803861 | 1399942224                          | Ca_kabuli_Chr07 | 22803861                | A/C  | NA                 | INTERGENIC                    | NA                                                 |
| Kabuli_wild_22803872 | 1399942225                          | Ca_kabuli_Chr07 | 22803872                | C/T  | NA                 | INTERGENIC                    | NA                                                 |
| Kabuli_wild_22803878 | 1399942226                          | Ca_kabuli_Chr07 | 22803878                | G/T  | NA                 | INTERGENIC                    | NA                                                 |
| Kabuli_wild_22803926 | 1399942227                          | Ca_kabuli_Chr07 | 22803926                | C/T  | NA                 | INTERGENIC                    | NA                                                 |
| Kabuli_wild_22808687 | 1399942228                          | Ca_kabuli_Chr07 | 22808687                | C/T  | NA                 | INTERGENIC                    | NA                                                 |
| Kabuli_wild_22808696 | 1399942229                          | Ca_kabuli_Chr07 | 22808696                | A/G  | NA                 | INTERGENIC                    | NA                                                 |
| Kabuli_wild_22808717 | 1399942230                          | Ca_kabuli_Chr07 | 22808717                | C/T  | NA                 | INTERGENIC                    | NA                                                 |
| Kabuli_wild_22808718 | 1399942231                          | Ca_kabuli_Chr07 | 22808718                | A/C  | NA                 | INTERGENIC                    | NA                                                 |

| SNP IDs              | NCBI dbSNP accession IDs (NCBI_SS#) | Chromosomes     | Physical positions (bp) | SNPs | Gene accession IDs | Sequence components of genome | Putative functions                                      |
|----------------------|-------------------------------------|-----------------|-------------------------|------|--------------------|-------------------------------|---------------------------------------------------------|
| Kabuli_wild_22808736 | 1399942232                          | Ca_kabuli_Chr07 | 22808736                | A/G  | NA                 | INTERGENIC                    | NA                                                      |
| Kabuli_wild_22839776 | 1399942233                          | Ca_kabuli_Chr07 | 22839776                | G/A  | NA                 | INTERGENIC                    | NA                                                      |
| Kabuli_wild_22973144 | 1399942234                          | Ca_kabuli_Chr07 | 22973144                | G/A  | Gene_Ca_19520      | INTRON                        | F-boxdomain,cyclin-like                                 |
| Kabuli_wild_22973145 | 1399942235                          | Ca_kabuli_Chr07 | 22973145                | C/A  | Gene_Ca_19520      | INTRON                        | F-boxdomain,cyclin-like                                 |
| Kabuli_wild_22987768 | 1399942236                          | Ca_kabuli_Chr07 | 22987768                | G/A  | NA                 | INTERGENIC                    | NA                                                      |
| Kabuli_wild_22987777 | 1399942237                          | Ca_kabuli_Chr07 | 22987777                | A/T  | NA                 | INTERGENIC                    | NA                                                      |
| Kabuli_wild_22987782 | 1399942238                          | Ca_kabuli_Chr07 | 22987782                | G/A  | NA                 | INTERGENIC                    | NA                                                      |
| Kabuli_wild_22987803 | 1399942239                          | Ca_kabuli_Chr07 | 22987803                | C/T  | NA                 | INTERGENIC                    | NA                                                      |
| Kabuli_wild_22987809 | 1399942240                          | Ca_kabuli_Chr07 | 22987809                | C/T  | NA                 | INTERGENIC                    | NA                                                      |
| Kabuli_wild_23243057 | 1399942241                          | Ca_kabuli_Chr07 | 23243057                | T/C  | NA                 | INTERGENIC                    | NA                                                      |
| Kabuli_wild_23243077 | 1399942242                          | Ca_kabuli_Chr07 | 23243077                | T/C  | NA                 | INTERGENIC                    | NA                                                      |
| Kabuli_wild_23574823 | 1399942243                          | Ca_kabuli_Chr07 | 23574823                | C/T  | NA                 | INTERGENIC                    | NA                                                      |
| Kabuli_wild_23575629 | 1399942244                          | Ca_kabuli_Chr07 | 23575629                | G/A  | Gene_Ca_26017      | NON_SYNONYMOUS_CODING         | Phosphatidylinositol3-/4-kinase,catalytic               |
| Kabuli_wild_23616050 | 1399942245                          | Ca_kabuli_Chr07 | 23616050                | A/G  | Gene_Ca_26014      | INTRON                        | Translin                                                |
| Kabuli_wild_24021690 | 1399942246                          | Ca_kabuli_Chr07 | 24021690                | T/A  | Gene_Ca_19916      | NON_SYNONYMOUS_CODING         | ZF-HD homeobox protein,Cys/His-rich dimerisation domain |
| Kabuli_wild_24181321 | 1399942247                          | Ca_kabuli_Chr07 | 24181321                | G/A  | Gene_Ca_19912      | NON_SYNONYMOUS_CODING         | Zinc finger,RING-CH-type                                |
| Kabuli_wild_24190633 | 1399942248                          | Ca_kabuli_Chr07 | 24190633                | G/A  | NA                 | INTERGENIC                    | NA                                                      |
| Kabuli_wild_24190636 | 1399942249                          | Ca_kabuli_Chr07 | 24190636                | G/A  | NA                 | INTERGENIC                    | NA                                                      |
| Kabuli_wild_24190645 | 1399942250                          | Ca_kabuli_Chr07 | 24190645                | A/T  | NA                 | INTERGENIC                    | NA                                                      |
| Kabuli_wild_24190650 | 1399942251                          | Ca_kabuli_Chr07 | 24190650                | G/A  | NA                 | INTERGENIC                    | NA                                                      |
| Kabuli_wild_24190671 | 1399942252                          | Ca_kabuli_Chr07 | 24190671                | C/T  | NA                 | INTERGENIC                    | NA                                                      |
| Kabuli_wild_24190691 | 1399942253                          | Ca_kabuli_Chr07 | 24190691                | G/C  | NA                 | INTERGENIC                    | NA                                                      |
| Kabuli_wild_24190700 | 1399942254                          | Ca_kabuli_Chr07 | 24190700                | G/C  | NA                 | INTERGENIC                    | NA                                                      |
| Kabuli_wild_24190706 | 1399942255                          | Ca_kabuli_Chr07 | 24190706                | A/G  | NA                 | INTERGENIC                    | NA                                                      |
| Kabuli_wild_24190722 | 1399942256                          | Ca_kabuli_Chr07 | 24190722                | C/G  | NA                 | INTERGENIC                    | NA                                                      |
| Kabuli_wild_24245096 | 1399942257                          | Ca_kabuli_Chr07 | 24245096                | C/T  | NA                 | INTERGENIC                    | NA                                                      |
| Kabuli_wild_24590545 | 1399942258                          | Ca_kabuli_Chr07 | 24590545                | G/A  | NA                 | INTERGENIC                    | NA                                                      |
| Kabuli_wild_24590587 | 1399942259                          | Ca_kabuli_Chr07 | 24590587                | G/A  | NA                 | INTERGENIC                    | NA                                                      |
| Kabuli_wild_24590598 | 1399942260                          | Ca_kabuli_Chr07 | 24590598                | C/T  | NA                 | INTERGENIC                    | NA                                                      |
| Kabuli_wild_24867394 | 1399942261                          | Ca_kabuli_Chr07 | 24867394                | T/C  | NA                 | INTERGENIC                    | NA                                                      |
| Kabuli_wild_24867409 | 1399942262                          | Ca_kabuli_Chr07 | 24867409                | C/T  | NA                 | INTERGENIC                    | NA                                                      |
| Kabuli_wild_24867420 | 1399942263                          | Ca_kabuli_Chr07 | 24867420                | G/A  | NA                 | INTERGENIC                    | NA                                                      |
| Kabuli_wild_24867435 | 1399942264                          | Ca_kabuli_Chr07 | 24867435                | G/C  | NA                 | INTERGENIC                    | NA                                                      |
| Kabuli_wild_24867436 | 1399942265                          | Ca_kabuli_Chr07 | 24867436                | T/A  | NA                 | INTERGENIC                    | NA                                                      |
| Kabuli_wild_24867442 | 1399942266                          | Ca_kabuli_Chr07 | 24867442                | C/T  | NA                 | INTERGENIC                    | NA                                                      |
| Kabuli_wild_24867451 | 1399942267                          | Ca_kabuli_Chr07 | 24867451                | G/T  | NA                 | INTERGENIC                    | NA                                                      |
| Kabuli_wild_24867458 | 1399942268                          | Ca_kabuli_Chr07 | 24867458                | C/A  | NA                 | INTERGENIC                    | NA                                                      |
| Kabuli_wild_24867491 | 1399942269                          | Ca_kabuli_Chr07 | 24867491                | G/A  | NA                 | INTERGENIC                    | NA                                                      |
| Kabuli_wild_24882334 | 1399942270                          | Ca_kabuli_Chr07 | 24882334                | C/A  | NA                 | INTERGENIC                    | NA                                                      |
| Kabuli_wild_25218341 | 1399942271                          | Ca_kabuli_Chr07 | 25218341                | A/C  | NA                 | INTERGENIC                    | NA                                                      |
| Kabuli_wild_25218387 | 1399942272                          | Ca_kabuli_Chr07 | 25218387                | A/C  | NA                 | INTERGENIC                    | NA                                                      |
| Kabuli_wild_25218407 | 1399942273                          | Ca_kabuli_Chr07 | 25218407                | C/T  | NA                 | INTERGENIC                    | NA                                                      |
| Kabuli_wild_25313174 | 1399942274                          | Ca_kabuli_Chr07 | 25313174                | T/C  | NA                 | INTERGENIC                    | NA                                                      |
| Kabuli_wild_25313195 | 1399942275                          | Ca_kabuli_Chr07 | 25313195                | C/T  | NA                 | INTERGENIC                    | NA                                                      |

| SNP IDs              | NCBI dbSNP accession IDs (NCBI_SS#) | Chromosomes      | Physical positions (bp) | SNPs | Gene accession IDs | Sequence components of genome | Putative functions               |
|----------------------|-------------------------------------|------------------|-------------------------|------|--------------------|-------------------------------|----------------------------------|
| Kabuli_wild_25313199 | 1399942276                          | Ca_kabuli_Chrom7 | 25313199                | G/C  | NA                 | INTERGENIC                    | NA                               |
| Kabuli_wild_25313215 | 1399942277                          | Ca_kabuli_Chrom7 | 25313215                | A/T  | NA                 | INTERGENIC                    | NA                               |
| Kabuli_wild_25362272 | 1399942278                          | Ca_kabuli_Chrom7 | 25362272                | T/C  | Gene_Ca_23606      | UPSTREAM                      | RNA-binding,CRMdomain            |
| Kabuli_wild_25428518 | 1399942279                          | Ca_kabuli_Chrom7 | 25428518                | T/C  | NA                 | INTERGENIC                    | NA                               |
| Kabuli_wild_25428548 | 1399942280                          | Ca_kabuli_Chrom7 | 25428548                | G/T  | NA                 | INTERGENIC                    | NA                               |
| Kabuli_wild_25428566 | 1399942281                          | Ca_kabuli_Chrom7 | 25428566                | T/C  | NA                 | INTERGENIC                    | NA                               |
| Kabuli_wild_25428660 | 1399942282                          | Ca_kabuli_Chrom7 | 25428660                | G/A  | NA                 | INTERGENIC                    | NA                               |
| Kabuli_wild_25485247 | 1399942283                          | Ca_kabuli_Chrom7 | 25485247                | A/C  | NA                 | INTERGENIC                    | NA                               |
| Kabuli_wild_25569657 | 1399942284                          | Ca_kabuli_Chrom7 | 25569657                | T/C  | Gene_Ca_23609      | INTRON                        | Zinc finger,PHD-type             |
| Kabuli_wild_25569665 | 1399942285                          | Ca_kabuli_Chrom7 | 25569665                | T/G  | Gene_Ca_23609      | INTRON                        | Zinc finger,PHD-type             |
| Kabuli_wild_25774486 | 1399942286                          | Ca_kabuli_Chrom7 | 25774486                | T/C  | NA                 | INTERGENIC                    | NA                               |
| Kabuli_wild_25777137 | 1399942287                          | Ca_kabuli_Chrom7 | 25777137                | T/G  | NA                 | INTERGENIC                    | NA                               |
| Kabuli_wild_25777161 | 1399942288                          | Ca_kabuli_Chrom7 | 25777161                | T/A  | NA                 | INTERGENIC                    | NA                               |
| Kabuli_wild_25777197 | 1399942289                          | Ca_kabuli_Chrom7 | 25777197                | C/T  | NA                 | INTERGENIC                    | NA                               |
| Kabuli_wild_25777198 | 1399942290                          | Ca_kabuli_Chrom7 | 25777198                | T/C  | NA                 | INTERGENIC                    | NA                               |
| Kabuli_wild_25830689 | 1399942291                          | Ca_kabuli_Chrom7 | 25830689                | C/T  | Gene_Ca_23632      | NON_SYNONYMOUS_CODING         | NA                               |
| Kabuli_wild_25891658 | 1399942292                          | Ca_kabuli_Chrom7 | 25891658                | C/T  | Gene_Ca_23633      | STOP_GAINED                   | Peptidase C48, SUMO/Sentrin/Ubl1 |
| Kabuli_wild_26066416 | 1399942293                          | Ca_kabuli_Chrom7 | 26066416                | T/C  | NA                 | INTERGENIC                    | NA                               |
| Kabuli_wild_26070513 | 1399942294                          | Ca_kabuli_Chrom7 | 26070513                | G/T  | NA                 | INTERGENIC                    | NA                               |
| Kabuli_wild_26070515 | 1399942295                          | Ca_kabuli_Chrom7 | 26070515                | A/G  | NA                 | INTERGENIC                    | NA                               |
| Kabuli_wild_26094562 | 1399942296                          | Ca_kabuli_Chrom7 | 26094562                | G/T  | NA                 | INTERGENIC                    | NA                               |
| Kabuli_wild_26094567 | 1399942297                          | Ca_kabuli_Chrom7 | 26094567                | G/A  | NA                 | INTERGENIC                    | NA                               |
| Kabuli_wild_26137315 | 1399942298                          | Ca_kabuli_Chrom7 | 26137315                | T/C  | Gene_Ca_23640      | SYNONYMOUS_CODING             | IQ motif,EF-handbinding site     |
| Kabuli_wild_26144246 | 1399942299                          | Ca_kabuli_Chrom7 | 26144246                | A/C  | Gene_Ca_23640      | INTRON                        | IQ motif,EF-handbinding site     |
| Kabuli_wild_26146779 | 1399942300                          | Ca_kabuli_Chrom7 | 26146779                | C/T  | Gene_Ca_23640      | INTRON                        | IQ motif,EF-handbinding site     |
| Kabuli_wild_26226146 | 1399942301                          | Ca_kabuli_Chrom7 | 26226146                | G/C  | NA                 | INTERGENIC                    | NA                               |
| Kabuli_wild_26256883 | 1399942302                          | Ca_kabuli_Chrom7 | 26256883                | T/C  | Gene_Ca_23644      | UPSTREAM                      | NA                               |
| Kabuli_wild_26332655 | 1399942303                          | Ca_kabuli_Chrom7 | 26332655                | A/T  | NA                 | INTERGENIC                    | NA                               |
| Kabuli_wild_26692128 | 1399942304                          | Ca_kabuli_Chrom7 | 26692128                | A/C  | NA                 | INTERGENIC                    | NA                               |
| Kabuli_wild_26692130 | 1399942305                          | Ca_kabuli_Chrom7 | 26692130                | C/T  | NA                 | INTERGENIC                    | NA                               |
| Kabuli_wild_26692131 | 1399942306                          | Ca_kabuli_Chrom7 | 26692131                | T/G  | NA                 | INTERGENIC                    | NA                               |
| Kabuli_wild_26692194 | 1399942307                          | Ca_kabuli_Chrom7 | 26692194                | C/A  | Gene_Ca_16250      | DOWNSTREAM                    | NA                               |
| Kabuli_wild_26692195 | 1399942308                          | Ca_kabuli_Chrom7 | 26692195                | G/T  | Gene_Ca_16250      | DOWNSTREAM                    | NA                               |
| Kabuli_wild_26694365 | 1399942309                          | Ca_kabuli_Chrom7 | 26694365                | G/A  | NA                 | INTERGENIC                    | NA                               |
| Kabuli_wild_26694440 | 1399942310                          | Ca_kabuli_Chrom7 | 26694440                | C/A  | NA                 | INTERGENIC                    | NA                               |
| Kabuli_wild_26694441 | 1399942311                          | Ca_kabuli_Chrom7 | 26694441                | G/A  | NA                 | INTERGENIC                    | NA                               |
| Kabuli_wild_26697772 | 1399942312                          | Ca_kabuli_Chrom7 | 26697772                | C/A  | NA                 | INTERGENIC                    | NA                               |
| Kabuli_wild_26697867 | 1399942313                          | Ca_kabuli_Chrom7 | 26697867                | A/G  | NA                 | INTERGENIC                    | NA                               |
| Kabuli_wild_26701547 | 1399942314                          | Ca_kabuli_Chrom7 | 26701547                | C/T  | NA                 | INTERGENIC                    | NA                               |
| Kabuli_wild_26897883 | 1399942315                          | Ca_kabuli_Chrom7 | 26897883                | C/T  | NA                 | INTERGENIC                    | NA                               |
| Kabuli_wild_26897884 | 1399942316                          | Ca_kabuli_Chrom7 | 26897884                | G/A  | NA                 | INTERGENIC                    | NA                               |
| Kabuli_wild_26897901 | 1399942317                          | Ca_kabuli_Chrom7 | 26897901                | G/A  | NA                 | INTERGENIC                    | NA                               |
| Kabuli_wild_26897910 | 1399942318                          | Ca_kabuli_Chrom7 | 26897910                | A/G  | NA                 | INTERGENIC                    | NA                               |
| Kabuli_wild_26897920 | 1399942319                          | Ca_kabuli_Chrom7 | 26897920                | A/G  | NA                 | INTERGENIC                    | NA                               |

| SNP IDs              | NCBI dbSNP accession IDs (NCBI_SS#) | Chromosomes     | Physical positions (bp) | SNPs | Gene accession IDs | Sequence components of genome | Putative functions                     |
|----------------------|-------------------------------------|-----------------|-------------------------|------|--------------------|-------------------------------|----------------------------------------|
| Kabuli_wild_26897923 | 1399942320                          | Ca_kabuli_Chr07 | 26897923                | G/A  | NA                 | INTERGENIC                    | NA                                     |
| Kabuli_wild_26897948 | 1399942321                          | Ca_kabuli_Chr07 | 26897948                | A/T  | NA                 | INTERGENIC                    | NA                                     |
| Kabuli_wild_26897958 | 1399942322                          | Ca_kabuli_Chr07 | 26897958                | G/T  | NA                 | INTERGENIC                    | NA                                     |
| Kabuli_wild_26940917 | 1399942323                          | Ca_kabuli_Chr07 | 26940917                | G/A  | Gene_Ca_16240      | NON_SYNONYMOUS_CODING         | Plastocyanin-like                      |
| Kabuli_wild_26940967 | 1399942324                          | Ca_kabuli_Chr07 | 26940967                | A/G  | Gene_Ca_16240      | SYNONYMOUS_CODING             | Plastocyanin-like                      |
| Kabuli_wild_26940979 | 1399942325                          | Ca_kabuli_Chr07 | 26940979                | A/G  | Gene_Ca_16240      | SYNONYMOUS_CODING             | Plastocyanin-like                      |
| Kabuli_wild_26940985 | 1399942326                          | Ca_kabuli_Chr07 | 26940985                | T/G  | Gene_Ca_16240      | SYNONYMOUS_CODING             | Plastocyanin-like                      |
| Kabuli_wild_27050259 | 1399942327                          | Ca_kabuli_Chr07 | 27050259                | C/G  | Gene_Ca_16234      | NON_SYNONYMOUS_CODING         | Dynamin,GTPasedomain                   |
| Kabuli_wild_27174078 | 1399942328                          | Ca_kabuli_Chr07 | 27174078                | G/C  | Gene_Ca_16229      | NON_SYNONYMOUS_CODING         | Lactate/malatedehydrogenase,N-terminal |
| Kabuli_wild_27176481 | 1399942329                          | Ca_kabuli_Chr07 | 27176481                | C/A  | Gene_Ca_16229      | NON_SYNONYMOUS_CODING         | Lactate/malatedehydrogenase,N-terminal |
| Kabuli_wild_27210848 | 1399942330                          | Ca_kabuli_Chr07 | 27210848                | A/T  | NA                 | INTERGENIC                    | NA                                     |
| Kabuli_wild_27210853 | 1399942331                          | Ca_kabuli_Chr07 | 27210853                | A/G  | NA                 | INTERGENIC                    | NA                                     |
| Kabuli_wild_27210858 | 1399942332                          | Ca_kabuli_Chr07 | 27210858                | C/T  | NA                 | INTERGENIC                    | NA                                     |
| Kabuli_wild_27210871 | 1399942333                          | Ca_kabuli_Chr07 | 27210871                | C/A  | NA                 | INTERGENIC                    | NA                                     |
| Kabuli_wild_27210881 | 1399942334                          | Ca_kabuli_Chr07 | 27210881                | C/T  | NA                 | INTERGENIC                    | NA                                     |
| Kabuli_wild_27210894 | 1399942335                          | Ca_kabuli_Chr07 | 27210894                | T/C  | NA                 | INTERGENIC                    | NA                                     |
| Kabuli_wild_27210918 | 1399942336                          | Ca_kabuli_Chr07 | 27210918                | C/A  | NA                 | INTERGENIC                    | NA                                     |
| Kabuli_wild_27210919 | 1399942337                          | Ca_kabuli_Chr07 | 27210919                | C/T  | NA                 | INTERGENIC                    | NA                                     |
| Kabuli_wild_27210935 | 1399942338                          | Ca_kabuli_Chr07 | 27210935                | G/T  | NA                 | INTERGENIC                    | NA                                     |
| Kabuli_wild_27210940 | 1399942339                          | Ca_kabuli_Chr07 | 27210940                | G/A  | NA                 | INTERGENIC                    | NA                                     |
| Kabuli_wild_27210988 | 1399942340                          | Ca_kabuli_Chr07 | 27210988                | T/C  | NA                 | INTERGENIC                    | NA                                     |
| Kabuli_wild_27210989 | 1399942341                          | Ca_kabuli_Chr07 | 27210989                | C/T  | NA                 | INTERGENIC                    | NA                                     |
| Kabuli_wild_27210992 | 1399942342                          | Ca_kabuli_Chr07 | 27210992                | C/A  | NA                 | INTERGENIC                    | NA                                     |
| Kabuli_wild_27211004 | 1399942343                          | Ca_kabuli_Chr07 | 27211004                | T/C  | NA                 | INTERGENIC                    | NA                                     |
| Kabuli_wild_27211036 | 1399942344                          | Ca_kabuli_Chr07 | 27211036                | G/A  | NA                 | INTERGENIC                    | NA                                     |
| Kabuli_wild_27211051 | 1399942345                          | Ca_kabuli_Chr07 | 27211051                | C/A  | NA                 | INTERGENIC                    | NA                                     |
| Kabuli_wild_27211057 | 1399942346                          | Ca_kabuli_Chr07 | 27211057                | A/G  | NA                 | INTERGENIC                    | NA                                     |
| Kabuli_wild_27232405 | 1399942347                          | Ca_kabuli_Chr07 | 27232405                | G/T  | NA                 | INTERGENIC                    | NA                                     |
| Kabuli_wild_27350825 | 1399942348                          | Ca_kabuli_Chr07 | 27350825                | T/G  | Gene_Ca_16224      | SYNONYMOUS_CODING             | NA                                     |
| Kabuli_wild_27350830 | 1399942349                          | Ca_kabuli_Chr07 | 27350830                | T/C  | Gene_Ca_16224      | NON_SYNONYMOUS_CODING         | NA                                     |
| Kabuli_wild_27350854 | 1399942350                          | Ca_kabuli_Chr07 | 27350854                | T/A  | Gene_Ca_16224      | NON_SYNONYMOUS_CODING         | NA                                     |
| Kabuli_wild_27350880 | 1399942351                          | Ca_kabuli_Chr07 | 27350880                | G/A  | Gene_Ca_16224      | SYNONYMOUS_CODING             | NA                                     |
| Kabuli_wild_27633960 | 1399942352                          | Ca_kabuli_Chr07 | 27633960                | C/A  | NA                 | INTERGENIC                    | NA                                     |
| Kabuli_wild_27648163 | 1399942353                          | Ca_kabuli_Chr07 | 27648163                | T/G  | Gene_Ca_16215      | UPSTREAM                      | NA                                     |
| Kabuli_wild_27648165 | 1399942354                          | Ca_kabuli_Chr07 | 27648165                | T/C  | Gene_Ca_16215      | UPSTREAM                      | NA                                     |
| Kabuli_wild_27648216 | 1399942355                          | Ca_kabuli_Chr07 | 27648216                | G/T  | Gene_Ca_16215      | UPSTREAM                      | NA                                     |
| Kabuli_wild_27648224 | 1399942356                          | Ca_kabuli_Chr07 | 27648224                | C/G  | Gene_Ca_16215      | UPSTREAM                      | NA                                     |
| Kabuli_wild_27711878 | 1399942357                          | Ca_kabuli_Chr07 | 27711878                | G/A  | NA                 | INTERGENIC                    | NA                                     |
| Kabuli_wild_27711879 | 1399942358                          | Ca_kabuli_Chr07 | 27711879                | C/T  | NA                 | INTERGENIC                    | NA                                     |
| Kabuli_wild_27735234 | 1399942359                          | Ca_kabuli_Chr07 | 27735234                | A/G  | Gene_Ca_16212      | INTRON                        | Cyclin,C-terminal                      |
| Kabuli_wild_27743487 | 1399942360                          | Ca_kabuli_Chr07 | 27743487                | T/A  | Gene_Ca_16212      | INTRON                        | Cyclin,C-terminal                      |
| Kabuli_wild_27899782 | 1399942361                          | Ca_kabuli_Chr07 | 27899782                | T/C  | NA                 | INTERGENIC                    | NA                                     |
| Kabuli_wild_27971176 | 1399942362                          | Ca_kabuli_Chr07 | 27971176                | T/C  | NA                 | INTERGENIC                    | NA                                     |
| Kabuli_wild_27971192 | 1399942363                          | Ca_kabuli_Chr07 | 27971192                | T/C  | NA                 | INTERGENIC                    | NA                                     |



| SNP IDs              | NCBI dbSNP accession IDs (NCBI_SS#) | Chromosomes      | Physical positions (bp) | SNPs | Gene accession IDs | Sequence components of genome | Putative functions                           |
|----------------------|-------------------------------------|------------------|-------------------------|------|--------------------|-------------------------------|----------------------------------------------|
| Kabuli_wild_27971193 | 1399942364                          | Ca_kabuli_Chrom7 | 27971193                | T/C  | NA                 | INTERGENIC                    | NA                                           |
| Kabuli_wild_27971195 | 1399942365                          | Ca_kabuli_Chrom7 | 27971195                | A/C  | NA                 | INTERGENIC                    | NA                                           |
| Kabuli_wild_28414473 | 1399942366                          | Ca_kabuli_Chrom7 | 28414473                | G/A  | Gene_Ca_18928      | DOWNSTREAM                    | Acidphosphatase(ClassB)                      |
| Kabuli_wild_28503199 | 1399942367                          | Ca_kabuli_Chrom7 | 28503199                | G/A  | Gene_Ca_18937      | UPSTREAM                      | NA                                           |
| Kabuli_wild_28520368 | 1399942368                          | Ca_kabuli_Chrom7 | 28520368                | A/C  | NA                 | INTERGENIC                    | NA                                           |
| Kabuli_wild_28520385 | 1399942369                          | Ca_kabuli_Chrom7 | 28520385                | A/C  | NA                 | INTERGENIC                    | NA                                           |
| Kabuli_wild_28567015 | 1399942370                          | Ca_kabuli_Chrom7 | 28567015                | A/T  | NA                 | INTERGENIC                    | NA                                           |
| Kabuli_wild_28620851 | 1399942371                          | Ca_kabuli_Chrom7 | 28620851                | C/T  | Gene_Ca_18949      | INTRON                        | Heat shock protein DnaJ, cysteine-richdomain |
| Kabuli_wild_28931212 | 1399942372                          | Ca_kabuli_Chrom7 | 28931212                | A/C  | NA                 | INTERGENIC                    | NA                                           |
| Kabuli_wild_28931223 | 1399942373                          | Ca_kabuli_Chrom7 | 28931223                | C/A  | NA                 | INTERGENIC                    | NA                                           |
| Kabuli_wild_29148471 | 1399942374                          | Ca_kabuli_Chrom7 | 29148471                | C/T  | Gene_Ca_11791      | NON_SYNONYMOUS_CODING         | NA                                           |
| Kabuli_wild_29150927 | 1399942375                          | Ca_kabuli_Chrom7 | 29150927                | A/C  | Gene_Ca_11791      | INTRON                        | NA                                           |
| Kabuli_wild_29153994 | 1399942376                          | Ca_kabuli_Chrom7 | 29153994                | T/C  | Gene_Ca_11791      | SYNONYMOUS_CODING             | NA                                           |
| Kabuli_wild_29157286 | 1399942377                          | Ca_kabuli_Chrom7 | 29157286                | A/G  | Gene_Ca_11791      | SYNONYMOUS_CODING             | NA                                           |
| Kabuli_wild_29168980 | 1399942378                          | Ca_kabuli_Chrom7 | 29168980                | C/T  | NA                 | INTERGENIC                    | NA                                           |
| Kabuli_wild_29168982 | 1399942379                          | Ca_kabuli_Chrom7 | 29168982                | A/G  | NA                 | INTERGENIC                    | NA                                           |
| Kabuli_wild_29190659 | 1399942380                          | Ca_kabuli_Chrom7 | 29190659                | T/G  | Gene_Ca_11786      | NON_SYNONYMOUS_CODING         | Glutamyl/glutaminyl-tRNAsynthetase.classlc   |
| Kabuli_wild_29223723 | 1399942381                          | Ca_kabuli_Chrom7 | 29223723                | T/C  | Gene_Ca_11784      | UPSTREAM                      | Protein of unknown function DUF3550/UPF0682  |
| Kabuli_wild_29225348 | 1399942382                          | Ca_kabuli_Chrom7 | 29225348                | G/C  | NA                 | INTERGENIC                    | NA                                           |
| Kabuli_wild_29225351 | 1399942383                          | Ca_kabuli_Chrom7 | 29225351                | T/G  | NA                 | INTERGENIC                    | NA                                           |
| Kabuli_wild_29225385 | 1399942384                          | Ca_kabuli_Chrom7 | 29225385                | T/G  | NA                 | INTERGENIC                    | NA                                           |
| Kabuli_wild_29229965 | 1399942385                          | Ca_kabuli_Chrom7 | 29229965                | A/G  | NA                 | INTERGENIC                    | NA                                           |
| Kabuli_wild_29313051 | 1399942386                          | Ca_kabuli_Chrom7 | 29313051                | T/C  | NA                 | INTERGENIC                    | NA                                           |
| Kabuli_wild_29313058 | 1399942387                          | Ca_kabuli_Chrom7 | 29313058                | T/C  | NA                 | INTERGENIC                    | NA                                           |
| Kabuli_wild_29313059 | 1399942388                          | Ca_kabuli_Chrom7 | 29313059                | G/A  | NA                 | INTERGENIC                    | NA                                           |
| Kabuli_wild_29313067 | 1399942389                          | Ca_kabuli_Chrom7 | 29313067                | G/T  | NA                 | INTERGENIC                    | NA                                           |
| Kabuli_wild_29313080 | 1399942390                          | Ca_kabuli_Chrom7 | 29313080                | T/C  | NA                 | INTERGENIC                    | NA                                           |
| Kabuli_wild_29313257 | 1399942391                          | Ca_kabuli_Chrom7 | 29313257                | G/A  | NA                 | INTERGENIC                    | NA                                           |
| Kabuli_wild_29435190 | 1399942392                          | Ca_kabuli_Chrom7 | 29435190                | T/C  | NA                 | INTERGENIC                    | NA                                           |
| Kabuli_wild_29449916 | 1399942393                          | Ca_kabuli_Chrom7 | 29449916                | T/G  | NA                 | INTERGENIC                    | NA                                           |
| Kabuli_wild_29450027 | 1399942394                          | Ca_kabuli_Chrom7 | 29450027                | A/T  | NA                 | INTERGENIC                    | NA                                           |
| Kabuli_wild_29482556 | 1399942395                          | Ca_kabuli_Chrom7 | 29482556                | G/A  | Gene_Ca_11768      | UPSTREAM                      | Protein kinase,catalytic domain              |
| Kabuli_wild_29484304 | 1399942396                          | Ca_kabuli_Chrom7 | 29484304                | G/A  | Gene_Ca_11768      | UPSTREAM                      | Protein kinase,catalytic domain              |
| Kabuli_wild_29548425 | 1399942397                          | Ca_kabuli_Chrom7 | 29548425                | A/G  | Gene_Ca_11767      | INTRON                        | Profilin/allergen                            |
| Kabuli_wild_29607943 | 1399942398                          | Ca_kabuli_Chrom7 | 29607943                | C/T  | NA                 | INTERGENIC                    | NA                                           |
| Kabuli_wild_29613699 | 1399942399                          | Ca_kabuli_Chrom7 | 29613699                | C/T  | Gene_Ca_11764      | SYNONYMOUS_CODING             | F-boxdomain,cyclin-like                      |
| Kabuli_wild_29625884 | 1399942400                          | Ca_kabuli_Chrom7 | 29625884                | T/C  | Gene_Ca_11763      | UPSTREAM                      | NA                                           |
| Kabuli_wild_29704336 | 1399942401                          | Ca_kabuli_Chrom7 | 29704336                | G/A  | Gene_Ca_11752      | NON_SYNONYMOUS_CODING         | NA                                           |
| Kabuli_wild_29705457 | 1399942402                          | Ca_kabuli_Chrom7 | 29705457                | G/T  | Gene_Ca_11752      | SYNONYMOUS_CODING             | NA                                           |
| Kabuli_wild_29705499 | 1399942403                          | Ca_kabuli_Chrom7 | 29705499                | T/C  | Gene_Ca_11752      | NON_SYNONYMOUS_CODING         | NA                                           |
| Kabuli_wild_29705531 | 1399942404                          | Ca_kabuli_Chrom7 | 29705531                | T/G  | Gene_Ca_11752      | NON_SYNONYMOUS_CODING         | NA                                           |
| Kabuli_wild_29796564 | 1399942405                          | Ca_kabuli_Chrom7 | 29796564                | G/T  | Gene_Ca_11746      | NON_SYNONYMOUS_CODING         | Spc97/Spc98                                  |
| Kabuli_wild_29801148 | 1399942406                          | Ca_kabuli_Chrom7 | 29801148                | A/G  | Gene_Ca_11746      | NON_SYNONYMOUS_CODING         | Spc97/Spc98                                  |
| Kabuli_wild_29801154 | 1399942407                          | Ca_kabuli_Chrom7 | 29801154                | T/C  | Gene_Ca_11746      | NON_SYNONYMOUS_CODING         | Spc97/Spc98                                  |

| SNP IDs              | NCBI dbSNP accession IDs (NCBI_SS#) | Chromosomes     | Physical positions (bp) | SNPs | Gene accession IDs | Sequence components of genome | Putative functions                                 |
|----------------------|-------------------------------------|-----------------|-------------------------|------|--------------------|-------------------------------|----------------------------------------------------|
| Kabuli_wild_29837035 | 1399942408                          | Ca_kabuli_Chr07 | 29837035                | G/A  | NA                 | INTERGENIC                    | NA                                                 |
| Kabuli_wild_29838073 | 1399942409                          | Ca_kabuli_Chr07 | 29838073                | C/T  | NA                 | INTERGENIC                    | NA                                                 |
| Kabuli_wild_29848248 | 1399942410                          | Ca_kabuli_Chr07 | 29848248                | T/C  | Gene_Ca_11739      | INTRON                        | Lipase,class3                                      |
| Kabuli_wild_29848433 | 1399942411                          | Ca_kabuli_Chr07 | 29848433                | C/T  | Gene_Ca_11739      | SYNONYMOUS_CODING             | Lipase,class3                                      |
| Kabuli_wild_29849509 | 1399942412                          | Ca_kabuli_Chr07 | 29849509                | C/T  | Gene_Ca_11739      | NON_SYNONYMOUS_CODING         | Lipase,class3                                      |
| Kabuli_wild_29849544 | 1399942413                          | Ca_kabuli_Chr07 | 29849544                | A/G  | Gene_Ca_11739      | SYNONYMOUS_CODING             | Lipase,class3                                      |
| Kabuli_wild_29850432 | 1399942414                          | Ca_kabuli_Chr07 | 29850432                | T/A  | Gene_Ca_11739      | INTRON                        | Lipase,class3                                      |
| Kabuli_wild_29850452 | 1399942415                          | Ca_kabuli_Chr07 | 29850452                | A/C  | Gene_Ca_11739      | INTRON                        | Lipase,class3                                      |
| Kabuli_wild_29850460 | 1399942416                          | Ca_kabuli_Chr07 | 29850460                | C/T  | Gene_Ca_11739      | INTRON                        | Lipase,class3                                      |
| Kabuli_wild_29850470 | 1399942417                          | Ca_kabuli_Chr07 | 29850470                | T/C  | Gene_Ca_11739      | INTRON                        | Lipase,class3                                      |
| Kabuli_wild_29884718 | 1399942418                          | Ca_kabuli_Chr07 | 29884718                | C/A  | Gene_Ca_11736      | SYNONYMOUS_CODING             | TetratricopeptideTPR-1                             |
| Kabuli_wild_29884719 | 1399942419                          | Ca_kabuli_Chr07 | 29884719                | G/T  | Gene_Ca_11736      | NON_SYNONYMOUS_CODING         | TetratricopeptideTPR-1                             |
| Kabuli_wild_29925008 | 1399942420                          | Ca_kabuli_Chr07 | 29925008                | G/A  | NA                 | INTERGENIC                    | NA                                                 |
| Kabuli_wild_30004767 | 1399942421                          | Ca_kabuli_Chr07 | 30004767                | T/C  | NA                 | INTERGENIC                    | NA                                                 |
| Kabuli_wild_30004934 | 1399942422                          | Ca_kabuli_Chr07 | 30004934                | A/C  | NA                 | INTERGENIC                    | NA                                                 |
| Kabuli_wild_30026017 | 1399942423                          | Ca_kabuli_Chr07 | 30026017                | C/T  | Gene_Ca_11727      | INTRON                        | Glycosyltransferase,family2                        |
| Kabuli_wild_30026039 | 1399942424                          | Ca_kabuli_Chr07 | 30026039                | T/G  | Gene_Ca_11727      | INTRON                        | Glycosyltransferase,family2                        |
| Kabuli_wild_30029793 | 1399942425                          | Ca_kabuli_Chr07 | 30029793                | A/C  | NA                 | INTERGENIC                    | NA                                                 |
| Kabuli_wild_30029820 | 1399942426                          | Ca_kabuli_Chr07 | 30029820                | T/C  | NA                 | INTERGENIC                    | NA                                                 |
| Kabuli_wild_30038061 | 1399942427                          | Ca_kabuli_Chr07 | 30038061                | A/C  | Gene_Ca_11725      | UPSTREAM                      | PlantECmetallothionein-likeprotein,family15        |
| Kabuli_wild_30060299 | 1399942428                          | Ca_kabuli_Chr07 | 30060299                | C/A  | Gene_Ca_11722      | SYNONYMOUS_CODING             | ATPase,P-type,K/Mg/Cd/Cu/Zn/Na/Ca/Na/H-transporter |
| Kabuli_wild_30085847 | 1399942429                          | Ca_kabuli_Chr07 | 30085847                | C/T  | Gene_Ca_11718      | NON_SYNONYMOUS_CODING         | Domain of unknown function DUF828                  |
| Kabuli_wild_30085883 | 1399942430                          | Ca_kabuli_Chr07 | 30085883                | T/G  | Gene_Ca_11718      | NON_SYNONYMOUS_CODING         | Domain of unknown function DUF828                  |
| Kabuli_wild_30085906 | 1399942431                          | Ca_kabuli_Chr07 | 30085906                | C/T  | NA                 | INTERGENIC                    | NA                                                 |
| Kabuli_wild_30085910 | 1399942432                          | Ca_kabuli_Chr07 | 30085910                | T/A  | NA                 | INTERGENIC                    | NA                                                 |
| Kabuli_wild_30099003 | 1399942433                          | Ca_kabuli_Chr07 | 30099003                | C/T  | NA                 | INTERGENIC                    | NA                                                 |
| Kabuli_wild_30107340 | 1399942434                          | Ca_kabuli_Chr07 | 30107340                | G/A  | NA                 | INTERGENIC                    | NA                                                 |
| Kabuli_wild_30403618 | 1399942435                          | Ca_kabuli_Chr07 | 30403618                | G/A  | Gene_Ca_11689      | DOWNSTREAM                    | Integrase,catalyticcore                            |
| Kabuli_wild_30403619 | 1399942436                          | Ca_kabuli_Chr07 | 30403619                | C/A  | Gene_Ca_11689      | DOWNSTREAM                    | Integrase,catalyticcore                            |
| Kabuli_wild_30403633 | 1399942437                          | Ca_kabuli_Chr07 | 30403633                | G/A  | Gene_Ca_11689      | DOWNSTREAM                    | Integrase,catalyticcore                            |
| Kabuli_wild_30691280 | 1399942438                          | Ca_kabuli_Chr07 | 30691280                | A/C  | Gene_Ca_23327      | NON_SYNONYMOUS_CODING         | NA                                                 |
| Kabuli_wild_30691318 | 1399942439                          | Ca_kabuli_Chr07 | 30691318                | A/C  | Gene_Ca_23327      | NON_SYNONYMOUS_CODING         | NA                                                 |
| Kabuli_wild_30691324 | 1399942440                          | Ca_kabuli_Chr07 | 30691324                | A/C  | Gene_Ca_23327      | NON_SYNONYMOUS_CODING         | NA                                                 |
| Kabuli_wild_30768315 | 1399942441                          | Ca_kabuli_Chr07 | 30768315                | G/A  | NA                 | INTERGENIC                    | NA                                                 |
| Kabuli_wild_30809971 | 1399942442                          | Ca_kabuli_Chr07 | 30809971                | T/A  | Gene_Ca_23321      | NON_SYNONYMOUS_CODING         | PeptidaseM16,N-terminal                            |
| Kabuli_wild_30850950 | 1399942443                          | Ca_kabuli_Chr07 | 30850950                | A/C  | NA                 | INTERGENIC                    | NA                                                 |
| Kabuli_wild_31190059 | 1399942444                          | Ca_kabuli_Chr07 | 31190059                | G/A  | Gene_Ca_10139      | SYNONYMOUS_CODING             | RNApolymeraseII-associated,Paf1                    |
| Kabuli_wild_31193786 | 1399942445                          | Ca_kabuli_Chr07 | 31193786                | T/G  | Gene_Ca_10139      | SYNONYMOUS_CODING             | RNApolymeraseII-associated,Paf1                    |
| Kabuli_wild_31298240 | 1399942446                          | Ca_kabuli_Chr07 | 31298240                | T/C  | Gene_Ca_10130      | INTRON                        | PeptidaseM16,zinc-bindingsite                      |
| Kabuli_wild_31314421 | 1399942447                          | Ca_kabuli_Chr07 | 31314421                | T/A  | NA                 | INTERGENIC                    | NA                                                 |
| Kabuli_wild_31324279 | 1399942448                          | Ca_kabuli_Chr07 | 31324279                | A/G  | NA                 | INTERGENIC                    | NA                                                 |
| Kabuli_wild_31342254 | 1399942449                          | Ca_kabuli_Chr07 | 31342254                | T/C  | Gene_Ca_10124      | UPSTREAM                      | Pentatricopeptide repeat                           |
| Kabuli_wild_31395704 | 1399942450                          | Ca_kabuli_Chr07 | 31395704                | C/T  | Gene_Ca_10119      | DOWNSTREAM                    | Peptidase C48, SUMO/Sentrin/Ubl1                   |
| Kabuli_wild_31395721 | 1399942451                          | Ca_kabuli_Chr07 | 31395721                | C/T  | NA                 | INTERGENIC                    | NA                                                 |

| SNP IDs              | NCBI dbSNP accession IDs (NCBI_SS#) | Chromosomes     | Physical positions (bp) | SNPs | Gene accession IDs | Sequence components of genome | Putative functions                                             |
|----------------------|-------------------------------------|-----------------|-------------------------|------|--------------------|-------------------------------|----------------------------------------------------------------|
| Kabuli_wild_31395736 | 1399942452                          | Ca_kabuli_Chr07 | 31395736                | G/A  | NA                 | INTERGENIC                    | NA                                                             |
| Kabuli_wild_31395740 | 1399942453                          | Ca_kabuli_Chr07 | 31395740                | C/T  | NA                 | INTERGENIC                    | NA                                                             |
| Kabuli_wild_31395773 | 1399942454                          | Ca_kabuli_Chr07 | 31395773                | G/A  | NA                 | INTERGENIC                    | NA                                                             |
| Kabuli_wild_31395788 | 1399942455                          | Ca_kabuli_Chr07 | 31395788                | C/T  | NA                 | INTERGENIC                    | NA                                                             |
| Kabuli_wild_31401807 | 1399942456                          | Ca_kabuli_Chr07 | 31401807                | T/C  | NA                 | INTERGENIC                    | NA                                                             |
| Kabuli_wild_31442425 | 1399942457                          | Ca_kabuli_Chr07 | 31442425                | A/C  | Gene_Ca_10114      | INTRON                        | PWWP                                                           |
| Kabuli_wild_31461273 | 1399942458                          | Ca_kabuli_Chr07 | 31461273                | T/C  | Gene_Ca_10112      | INTRON                        | Glutamate/phenylalanine/leucine/valinedehydrogenase,C-terminal |
| Kabuli_wild_31487441 | 1399942459                          | Ca_kabuli_Chr07 | 31487441                | C/T  | Gene_Ca_10109      | SYNONYMOUS_CODING             | Occludin/RNApolymeraseIIelongationfactor,ELLdomain             |
| Kabuli_wild_31612697 | 1399942460                          | Ca_kabuli_Chr07 | 31612697                | T/A  | Gene_Ca_10100      | NON_SYNONYMOUS_CODING         | ABC transporter,trans membrane domain                          |
| Kabuli_wild_31639701 | 1399942461                          | Ca_kabuli_Chr07 | 31639701                | C/T  | Gene_Ca_10099      | INTRON                        | Domain of unknown function DUF250                              |
| Kabuli_wild_31830238 | 1399942462                          | Ca_kabuli_Chr07 | 31830238                | A/G  | NA                 | INTERGENIC                    | NA                                                             |
| Kabuli_wild_31851096 | 1399942463                          | Ca_kabuli_Chr07 | 31851096                | T/A  | Gene_Ca_10079      | NON_SYNONYMOUS_CODING         | Prenyltransferase/squaleneoxidase                              |
| Kabuli_wild_31873079 | 1399942464                          | Ca_kabuli_Chr07 | 31873079                | G/T  | Gene_Ca_10078      | DOWNSTREAM                    | Chaperonin Cpn60                                               |
| Kabuli_wild_31996345 | 1399942465                          | Ca_kabuli_Chr07 | 31996345                | A/C  | NA                 | INTERGENIC                    | NA                                                             |
| Kabuli_wild_32017221 | 1399942466                          | Ca_kabuli_Chr07 | 32017221                | C/T  | NA                 | INTERGENIC                    | NA                                                             |
| Kabuli_wild_32017228 | 1399942467                          | Ca_kabuli_Chr07 | 32017228                | G/A  | NA                 | INTERGENIC                    | NA                                                             |
| Kabuli_wild_32017238 | 1399942468                          | Ca_kabuli_Chr07 | 32017238                | C/T  | NA                 | INTERGENIC                    | NA                                                             |
| Kabuli_wild_32017252 | 1399942469                          | Ca_kabuli_Chr07 | 32017252                | G/A  | NA                 | INTERGENIC                    | NA                                                             |
| Kabuli_wild_32017286 | 1399942470                          | Ca_kabuli_Chr07 | 32017286                | T/G  | NA                 | INTERGENIC                    | NA                                                             |
| Kabuli_wild_32017288 | 1399942471                          | Ca_kabuli_Chr07 | 32017288                | G/T  | NA                 | INTERGENIC                    | NA                                                             |
| Kabuli_wild_32105467 | 1399942472                          | Ca_kabuli_Chr07 | 32105467                | G/A  | NA                 | INTERGENIC                    | NA                                                             |
| Kabuli_wild_32127288 | 1399942473                          | Ca_kabuli_Chr07 | 32127288                | T/A  | NA                 | INTERGENIC                    | NA                                                             |
| Kabuli_wild_32283585 | 1399942474                          | Ca_kabuli_Chr07 | 32283585                | T/G  | Gene_Ca_10045      | INTRON                        | vonWille brand factor,typeA                                    |
| Kabuli_wild_32288840 | 1399942475                          | Ca_kabuli_Chr07 | 32288840                | G/C  | Gene_Ca_10045      | NON_SYNONYMOUS_CODING         | vonWille brand factor,typeA                                    |
| Kabuli_wild_32309372 | 1399942476                          | Ca_kabuli_Chr07 | 32309372                | T/G  | Gene_Ca_10045      | INTRON                        | vonWille brand factor,typeA                                    |
| Kabuli_wild_32309376 | 1399942477                          | Ca_kabuli_Chr07 | 32309376                | C/G  | Gene_Ca_10045      | INTRON                        | vonWille brand factor,typeA                                    |
| Kabuli_wild_32309377 | 1399942478                          | Ca_kabuli_Chr07 | 32309377                | C/T  | Gene_Ca_10045      | INTRON                        | vonWille brand factor,typeA                                    |
| Kabuli_wild_32309397 | 1399942479                          | Ca_kabuli_Chr07 | 32309397                | A/T  | Gene_Ca_10045      | INTRON                        | vonWille brand factor,typeA                                    |
| Kabuli_wild_32309411 | 1399942480                          | Ca_kabuli_Chr07 | 32309411                | G/T  | Gene_Ca_10045      | INTRON                        | vonWille brand factor,typeA                                    |
| Kabuli_wild_32309415 | 1399942481                          | Ca_kabuli_Chr07 | 32309415                | C/T  | Gene_Ca_10045      | INTRON                        | vonWille brand factor,typeA                                    |
| Kabuli_wild_32309429 | 1399942482                          | Ca_kabuli_Chr07 | 32309429                | C/T  | Gene_Ca_10045      | INTRON                        | vonWille brand factor,typeA                                    |
| Kabuli_wild_32309908 | 1399942483                          | Ca_kabuli_Chr07 | 32309908                | T/G  | Gene_Ca_10045      | NON_SYNONYMOUS_CODING         | vonWille brand factor,typeA                                    |
| Kabuli_wild_32374244 | 1399942484                          | Ca_kabuli_Chr07 | 32374244                | A/T  | NA                 | INTERGENIC                    | NA                                                             |
| Kabuli_wild_32399759 | 1399942485                          | Ca_kabuli_Chr07 | 32399759                | C/T  | Gene_Ca_10038      | SYNONYMOUS_CODING             | LsmADdomain                                                    |
| Kabuli_wild_32404932 | 1399942486                          | Ca_kabuli_Chr07 | 32404932                | T/C  | NA                 | INTERGENIC                    | NA                                                             |
| Kabuli_wild_32409413 | 1399942487                          | Ca_kabuli_Chr07 | 32409413                | A/G  | NA                 | INTERGENIC                    | NA                                                             |
| Kabuli_wild_32409453 | 1399942488                          | Ca_kabuli_Chr07 | 32409453                | G/T  | NA                 | INTERGENIC                    | NA                                                             |
| Kabuli_wild_32451377 | 1399942489                          | Ca_kabuli_Chr07 | 32451377                | A/C  | Gene_Ca_10034      | INTRON                        | Protein of unknown function DUF1296                            |
| Kabuli_wild_32492991 | 1399942490                          | Ca_kabuli_Chr07 | 32492991                | C/A  | NA                 | INTERGENIC                    | NA                                                             |
| Kabuli_wild_32522201 | 1399942491                          | Ca_kabuli_Chr07 | 32522201                | A/G  | Gene_Ca_10028      | SYNONYMOUS_CODING             | SANT domain,DNA binding                                        |
| Kabuli_wild_32522203 | 1399942492                          | Ca_kabuli_Chr07 | 32522203                | A/G  | Gene_Ca_10028      | NON_SYNONYMOUS_CODING         | SANT domain,DNA binding                                        |
| Kabuli_wild_32522207 | 1399942493                          | Ca_kabuli_Chr07 | 32522207                | T/G  | Gene_Ca_10028      | SYNONYMOUS_CODING             | SANT domain,DNA binding                                        |
| Kabuli_wild_32522213 | 1399942494                          | Ca_kabuli_Chr07 | 32522213                | A/G  | Gene_Ca_10028      | SYNONYMOUS_CODING             | SANT domain,DNA binding                                        |
| Kabuli_wild_32522230 | 1399942495                          | Ca_kabuli_Chr07 | 32522230                | T/G  | Gene_Ca_10028      | NON_SYNONYMOUS_CODING         | SANT domain,DNA binding                                        |

| SNP IDs              | NCBI dbSNP accession IDs (NCBI_SS#) | Chromosomes     | Physical positions (bp) | SNPs | Gene accession IDs | Sequence components of genome | Putative functions                 |
|----------------------|-------------------------------------|-----------------|-------------------------|------|--------------------|-------------------------------|------------------------------------|
| Kabuli_wild_32528503 | 1399942496                          | Ca_kabuli_Chr07 | 32528503                | T/C  | NA                 | INTERGENIC                    | NA                                 |
| Kabuli_wild_32528545 | 1399942497                          | Ca_kabuli_Chr07 | 32528545                | A/G  | NA                 | INTERGENIC                    | NA                                 |
| Kabuli_wild_32528578 | 1399942498                          | Ca_kabuli_Chr07 | 32528578                | G/A  | NA                 | INTERGENIC                    | NA                                 |
| Kabuli_wild_32557548 | 1399942499                          | Ca_kabuli_Chr07 | 32557548                | A/G  | NA                 | INTERGENIC                    | NA                                 |
| Kabuli_wild_32557599 | 1399942500                          | Ca_kabuli_Chr07 | 32557599                | G/A  | NA                 | INTERGENIC                    | NA                                 |
| Kabuli_wild_32568197 | 1399942501                          | Ca_kabuli_Chr07 | 32568197                | A/C  | NA                 | INTERGENIC                    | NA                                 |
| Kabuli_wild_32568209 | 1399942502                          | Ca_kabuli_Chr07 | 32568209                | T/G  | NA                 | INTERGENIC                    | NA                                 |
| Kabuli_wild_32568244 | 1399942503                          | Ca_kabuli_Chr07 | 32568244                | T/G  | NA                 | INTERGENIC                    | NA                                 |
| Kabuli_wild_32568247 | 1399942504                          | Ca_kabuli_Chr07 | 32568247                | T/A  | NA                 | INTERGENIC                    | NA                                 |
| Kabuli_wild_32669570 | 1399942505                          | Ca_kabuli_Chr07 | 32669570                | A/G  | NA                 | INTERGENIC                    | NA                                 |
| Kabuli_wild_32674163 | 1399942506                          | Ca_kabuli_Chr07 | 32674163                | G/C  | NA                 | INTERGENIC                    | NA                                 |
| Kabuli_wild_32754633 | 1399942507                          | Ca_kabuli_Chr07 | 32754633                | T/G  | Gene_Ca_10017      | INTRON                        | NA                                 |
| Kabuli_wild_32755614 | 1399942508                          | Ca_kabuli_Chr07 | 32755614                | A/C  | Gene_Ca_10017      | SYNONYMOUS_CODING             | NA                                 |
| Kabuli_wild_32755615 | 1399942509                          | Ca_kabuli_Chr07 | 32755615                | G/T  | Gene_Ca_10017      | NON_SYNONYMOUS_CODING         | NA                                 |
| Kabuli_wild_32755662 | 1399942510                          | Ca_kabuli_Chr07 | 32755662                | G/T  | Gene_Ca_10017      | NON_SYNONYMOUS_CODING         | NA                                 |
| Kabuli_wild_32782823 | 1399942511                          | Ca_kabuli_Chr07 | 32782823                | A/G  | Gene_Ca_10015      | SYNONYMOUS_CODING             | TranscriptioninitiationfactorTFIID |
| Kabuli_wild_32784877 | 1399942512                          | Ca_kabuli_Chr07 | 32784877                | C/A  | Gene_Ca_10015      | NON_SYNONYMOUS_CODING         | TranscriptioninitiationfactorTFIID |
| Kabuli_wild_32784903 | 1399942513                          | Ca_kabuli_Chr07 | 32784903                | T/G  | Gene_Ca_10015      | SYNONYMOUS_CODING             | TranscriptioninitiationfactorTFIID |
| Kabuli_wild_32785429 | 1399942514                          | Ca_kabuli_Chr07 | 32785429                | A/G  | Gene_Ca_10015      | INTRON                        | TranscriptioninitiationfactorTFIID |
| Kabuli_wild_32785432 | 1399942515                          | Ca_kabuli_Chr07 | 32785432                | T/C  | Gene_Ca_10015      | INTRON                        | TranscriptioninitiationfactorTFIID |
| Kabuli_wild_32799037 | 1399942516                          | Ca_kabuli_Chr07 | 32799037                | A/G  | NA                 | INTERGENIC                    | NA                                 |
| Kabuli_wild_32807457 | 1399942517                          | Ca_kabuli_Chr07 | 32807457                | T/A  | NA                 | INTERGENIC                    | NA                                 |
| Kabuli_wild_32807499 | 1399942518                          | Ca_kabuli_Chr07 | 32807499                | A/G  | NA                 | INTERGENIC                    | NA                                 |
| Kabuli_wild_32874840 | 1399942519                          | Ca_kabuli_Chr07 | 32874840                | C/T  | NA                 | INTERGENIC                    | NA                                 |
| Kabuli_wild_32874847 | 1399942520                          | Ca_kabuli_Chr07 | 32874847                | C/T  | NA                 | INTERGENIC                    | NA                                 |
| Kabuli_wild_32875799 | 1399942521                          | Ca_kabuli_Chr07 | 32875799                | T/A  | Gene_Ca_10011      | SYNONYMOUS_CODING             | Germin                             |
| Kabuli_wild_32932232 | 1399942522                          | Ca_kabuli_Chr07 | 32932232                | T/G  | NA                 | INTERGENIC                    | NA                                 |
| Kabuli_wild_32932285 | 1399942523                          | Ca_kabuli_Chr07 | 32932285                | T/A  | NA                 | INTERGENIC                    | NA                                 |
| Kabuli_wild_32942072 | 1399942524                          | Ca_kabuli_Chr07 | 32942072                | G/A  | NA                 | INTERGENIC                    | NA                                 |
| Kabuli_wild_32942199 | 1399942525                          | Ca_kabuli_Chr07 | 32942199                | G/A  | NA                 | INTERGENIC                    | NA                                 |
| Kabuli_wild_32942951 | 1399942526                          | Ca_kabuli_Chr07 | 32942951                | T/G  | Gene_Ca_10003      | DOWNSTREAM                    | Zinc finger, RING-type             |
| Kabuli_wild_32948171 | 1399942527                          | Ca_kabuli_Chr07 | 32948171                | A/C  | NA                 | INTERGENIC                    | NA                                 |
| Kabuli_wild_32948203 | 1399942528                          | Ca_kabuli_Chr07 | 32948203                | G/A  | NA                 | INTERGENIC                    | NA                                 |
| Kabuli_wild_32948246 | 1399942529                          | Ca_kabuli_Chr07 | 32948246                | T/G  | NA                 | INTERGENIC                    | NA                                 |
| Kabuli_wild_32989796 | 1399942530                          | Ca_kabuli_Chr07 | 32989796                | T/A  | Gene_Ca_10000      | SYNONYMOUS_CODING             | Protein kinase,catalytic domain    |
| Kabuli_wild_32989838 | 1399942531                          | Ca_kabuli_Chr07 | 32989838                | C/T  | Gene_Ca_10000      | SYNONYMOUS_CODING             | Protein kinase,catalytic domain    |
| Kabuli_wild_32989902 | 1399942532                          | Ca_kabuli_Chr07 | 32989902                | C/A  | Gene_Ca_10000      | INTRON                        | Protein kinase,catalytic domain    |
| Kabuli_wild_32989903 | 1399942533                          | Ca_kabuli_Chr07 | 32989903                | A/G  | Gene_Ca_10000      | INTRON                        | Protein kinase,catalytic domain    |
| Kabuli_wild_33026091 | 1399942534                          | Ca_kabuli_Chr07 | 33026091                | T/G  | Gene_Ca_09997      | INTRON                        | Lipoxygenase                       |
| Kabuli_wild_33026150 | 1399942535                          | Ca_kabuli_Chr07 | 33026150                | T/G  | Gene_Ca_09997      | INTRON                        | Lipoxygenase                       |
| Kabuli_wild_33065611 | 1399942536                          | Ca_kabuli_Chr07 | 33065611                | G/T  | NA                 | INTERGENIC                    | NA                                 |
| Kabuli_wild_33089682 | 1399942537                          | Ca_kabuli_Chr07 | 33089682                | A/G  | Gene_Ca_16140      | SYNONYMOUS_CODING             | NA                                 |
| Kabuli_wild_33099276 | 1399942538                          | Ca_kabuli_Chr07 | 33099276                | C/A  | NA                 | INTERGENIC                    | NA                                 |
| Kabuli_wild_33099299 | 1399942539                          | Ca_kabuli_Chr07 | 33099299                | T/C  | NA                 | INTERGENIC                    | NA                                 |

| SNP IDs              | NCBI dbSNP accession IDs (NCBI_SS#) | Chromosomes     | Physical positions (bp) | SNPs | Gene accession IDs | Sequence components of genome | Putative functions                                           |
|----------------------|-------------------------------------|-----------------|-------------------------|------|--------------------|-------------------------------|--------------------------------------------------------------|
| Kabuli_wild_33099304 | 1399942540                          | Ca_kabuli_Chr07 | 33099304                | C/T  | NA                 | INTERGENIC                    | NA                                                           |
| Kabuli_wild_33099313 | 1399942541                          | Ca_kabuli_Chr07 | 33099313                | A/G  | NA                 | INTERGENIC                    | NA                                                           |
| Kabuli_wild_33115488 | 1399942542                          | Ca_kabuli_Chr07 | 33115488                | C/G  | Gene_Ca_16142      | SYNONYMOUS_CODING             | MyosinII heavychain-like                                     |
| Kabuli_wild_33121640 | 1399942543                          | Ca_kabuli_Chr07 | 33121640                | C/A  | NA                 | INTERGENIC                    | NA                                                           |
| Kabuli_wild_33121674 | 1399942544                          | Ca_kabuli_Chr07 | 33121674                | G/C  | NA                 | INTERGENIC                    | NA                                                           |
| Kabuli_wild_33122473 | 1399942545                          | Ca_kabuli_Chr07 | 33122473                | A/C  | NA                 | INTERGENIC                    | NA                                                           |
| Kabuli_wild_33139304 | 1399942546                          | Ca_kabuli_Chr07 | 33139304                | A/T  | NA                 | INTERGENIC                    | NA                                                           |
| Kabuli_wild_33182932 | 1399942547                          | Ca_kabuli_Chr07 | 33182932                | G/A  | Gene_Ca_16149      | SYNONYMOUS_CODING             | Lipase,class3                                                |
| Kabuli_wild_33198651 | 1399942548                          | Ca_kabuli_Chr07 | 33198651                | T/C  | NA                 | INTERGENIC                    | NA                                                           |
| Kabuli_wild_33251859 | 1399942549                          | Ca_kabuli_Chr07 | 33251859                | A/G  | NA                 | INTERGENIC                    | NA                                                           |
| Kabuli_wild_33267485 | 1399942550                          | Ca_kabuli_Chr07 | 33267485                | T/C  | NA                 | INTERGENIC                    | NA                                                           |
| Kabuli_wild_33267496 | 1399942551                          | Ca_kabuli_Chr07 | 33267496                | T/A  | NA                 | INTERGENIC                    | NA                                                           |
| Kabuli_wild_33333090 | 1399942552                          | Ca_kabuli_Chr07 | 33333090                | C/T  | Gene_Ca_16158      | INTRON                        | RNA recognition motif domain                                 |
| Kabuli_wild_33335978 | 1399942553                          | Ca_kabuli_Chr07 | 33335978                | C/A  | Gene_Ca_16158      | NON_SYNONYMOUS_CODING         | RNA recognition motif domain                                 |
| Kabuli_wild_33358969 | 1399942554                          | Ca_kabuli_Chr07 | 33358969                | T/C  | Gene_Ca_16161      | INTRON                        | Nuclearporeprotein84/107                                     |
| Kabuli_wild_33364329 | 1399942555                          | Ca_kabuli_Chr07 | 33364329                | C/T  | NA                 | INTERGENIC                    | NA                                                           |
| Kabuli_wild_33364354 | 1399942556                          | Ca_kabuli_Chr07 | 33364354                | G/A  | NA                 | INTERGENIC                    | NA                                                           |
| Kabuli_wild_33378427 | 1399942557                          | Ca_kabuli_Chr07 | 33378427                | C/T  | Gene_Ca_16163      | INTRON                        | Spt20family                                                  |
| Kabuli_wild_33411577 | 1399942558                          | Ca_kabuli_Chr07 | 33411577                | G/C  | Gene_Ca_16164      | INTRON                        | Zinc finger,CCCH-type                                        |
| Kabuli_wild_33411746 | 1399942559                          | Ca_kabuli_Chr07 | 33411746                | C/A  | Gene_Ca_16164      | INTRON                        | Zinc finger,CCCH-type                                        |
| Kabuli_wild_33460918 | 1399942560                          | Ca_kabuli_Chr07 | 33460918                | G/A  | Gene_Ca_16167      | SYNONYMOUS_CODING             | ABC transporter,trans membrane domain                        |
| Kabuli_wild_33461145 | 1399942561                          | Ca_kabuli_Chr07 | 33461145                | A/T  | Gene_Ca_16167      | NON_SYNONYMOUS_CODING         | ABC transporter,trans membrane domain                        |
| Kabuli_wild_33461168 | 1399942562                          | Ca_kabuli_Chr07 | 33461168                | A/C  | Gene_Ca_16167      | UPSTREAM                      | ABC transporter,trans membrane domain                        |
| Kabuli_wild_33463300 | 1399942563                          | Ca_kabuli_Chr07 | 33463300                | C/G  | NA                 | INTERGENIC                    | NA                                                           |
| Kabuli_wild_33465781 | 1399942564                          | Ca_kabuli_Chr07 | 33465781                | G/T  | NA                 | INTERGENIC                    | NA                                                           |
| Kabuli_wild_33465800 | 1399942565                          | Ca_kabuli_Chr07 | 33465800                | T/A  | NA                 | INTERGENIC                    | NA                                                           |
| Kabuli_wild_33465802 | 1399942566                          | Ca_kabuli_Chr07 | 33465802                | C/A  | NA                 | INTERGENIC                    | NA                                                           |
| Kabuli_wild_33465805 | 1399942567                          | Ca_kabuli_Chr07 | 33465805                | T/C  | NA                 | INTERGENIC                    | NA                                                           |
| Kabuli_wild_33465818 | 1399942568                          | Ca_kabuli_Chr07 | 33465818                | G/A  | NA                 | INTERGENIC                    | NA                                                           |
| Kabuli_wild_33465828 | 1399942569                          | Ca_kabuli_Chr07 | 33465828                | C/A  | NA                 | INTERGENIC                    | NA                                                           |
| Kabuli_wild_33465855 | 1399942570                          | Ca_kabuli_Chr07 | 33465855                | A/C  | NA                 | INTERGENIC                    | NA                                                           |
| Kabuli_wild_33480940 | 1399942571                          | Ca_kabuli_Chr07 | 33480940                | C/T  | NA                 | INTERGENIC                    | NA                                                           |
| Kabuli_wild_33573605 | 1399942572                          | Ca_kabuli_Chr07 | 33573605                | C/T  | Gene_Ca_16177      | SYNONYMOUS_CODING             | CCAAT-binding factor                                         |
| Kabuli_wild_33573655 | 1399942573                          | Ca_kabuli_Chr07 | 33573655                | A/C  | Gene_Ca_16177      | NON_SYNONYMOUS_CODING         | CCAAT-binding factor                                         |
| Kabuli_wild_33619268 | 1399942574                          | Ca_kabuli_Chr07 | 33619268                | G/C  | NA                 | INTERGENIC                    | NA                                                           |
| Kabuli_wild_33624168 | 1399942575                          | Ca_kabuli_Chr07 | 33624168                | A/G  | NA                 | INTERGENIC                    | NA                                                           |
| Kabuli_wild_33624175 | 1399942576                          | Ca_kabuli_Chr07 | 33624175                | A/G  | NA                 | INTERGENIC                    | NA                                                           |
| Kabuli_wild_33624207 | 1399942577                          | Ca_kabuli_Chr07 | 33624207                | G/T  | NA                 | INTERGENIC                    | NA                                                           |
| Kabuli_wild_33624227 | 1399942578                          | Ca_kabuli_Chr07 | 33624227                | C/T  | NA                 | INTERGENIC                    | NA                                                           |
| Kabuli_wild_33624249 | 1399942579                          | Ca_kabuli_Chr07 | 33624249                | A/G  | NA                 | INTERGENIC                    | NA                                                           |
| Kabuli_wild_33641799 | 1399942580                          | Ca_kabuli_Chr07 | 33641799                | G/T  | Gene_Ca_16180      | SYNONYMOUS_CODING             | Pathogenesis-related transcriptional factor/ERF, DNA-binding |
| Kabuli_wild_33641882 | 1399942581                          | Ca_kabuli_Chr07 | 33641882                | A/T  | Gene_Ca_16180      | INTRON                        | Pathogenesis-related transcriptional factor/ERF, DNA-binding |
| Kabuli_wild_33674454 | 1399942582                          | Ca_kabuli_Chr07 | 33674454                | T/C  | Gene_Ca_16181      | SYNONYMOUS_CODING             | PeptidaseS8/S53,subtilisin/kexin/sedolisin                   |
| Kabuli_wild_33744521 | 1399942583                          | Ca_kabuli_Chr07 | 33744521                | C/G  | Gene_Ca_16182      | INTRON                        | ARID/BRIGHTDNA-binding domain                                |

| SNP IDs              | NCBI dbSNP accession IDs (NCBI_SS#) | Chromosomes     | Physical positions (bp) | SNPs | Gene accession IDs | Sequence components of genome | Putative functions                              |
|----------------------|-------------------------------------|-----------------|-------------------------|------|--------------------|-------------------------------|-------------------------------------------------|
| Kabuli_wild_33753917 | 1399942584                          | Ca_kabuli_Chr07 | 33753917                | A/G  | Gene_Ca_16183      | SYNONYMOUS_CODING             | Initiation factor2B-related                     |
| Kabuli_wild_33761944 | 1399942585                          | Ca_kabuli_Chr07 | 33761944                | G/A  | Gene_Ca_16184      | SYNONYMOUS_CODING             | NA                                              |
| Kabuli_wild_33762053 | 1399942586                          | Ca_kabuli_Chr07 | 33762053                | T/G  | Gene_Ca_16184      | NON_SYNONYMOUS_CODING         | NA                                              |
| Kabuli_wild_33821658 | 1399942587                          | Ca_kabuli_Chr07 | 33821658                | C/T  | Gene_Ca_16190      | INTRON                        | 1-aminocyclopropane-1-carboxylatesynthase       |
| Kabuli_wild_33835856 | 1399942588                          | Ca_kabuli_Chr07 | 33835856                | A/G  | Gene_Ca_16191      | SYNONYMOUS_CODING             | Pectinesterase,catalytic                        |
| Kabuli_wild_33865463 | 1399942589                          | Ca_kabuli_Chr07 | 33865463                | C/T  | Gene_Ca_16193      | INTRON                        | ExocystcomplexcomponentSec10                    |
| Kabuli_wild_33865475 | 1399942590                          | Ca_kabuli_Chr07 | 33865475                | G/A  | Gene_Ca_16193      | INTRON                        | ExocystcomplexcomponentSec10                    |
| Kabuli_wild_33867334 | 1399942591                          | Ca_kabuli_Chr07 | 33867334                | C/T  | Gene_Ca_16193      | INTRON                        | ExocystcomplexcomponentSec10                    |
| Kabuli_wild_33867491 | 1399942592                          | Ca_kabuli_Chr07 | 33867491                | T/C  | Gene_Ca_16193      | INTRON                        | ExocystcomplexcomponentSec10                    |
| Kabuli_wild_33867674 | 1399942593                          | Ca_kabuli_Chr07 | 33867674                | C/T  | Gene_Ca_16193      | INTRON                        | ExocystcomplexcomponentSec10                    |
| Kabuli_wild_33868148 | 1399942594                          | Ca_kabuli_Chr07 | 33868148                | T/C  | Gene_Ca_16193      | SYNONYMOUS_CODING             | ExocystcomplexcomponentSec10                    |
| Kabuli_wild_33869367 | 1399942595                          | Ca_kabuli_Chr07 | 33869367                | G/A  | Gene_Ca_16193      | SYNONYMOUS_CODING             | ExocystcomplexcomponentSec10                    |
| Kabuli_wild_33879017 | 1399942596                          | Ca_kabuli_Chr07 | 33879017                | T/A  | Gene_Ca_16194      | INTRON                        | Ubiquitin-conjugating enzyme, E2                |
| Kabuli_wild_33906614 | 1399942597                          | Ca_kabuli_Chr07 | 33906614                | C/T  | NA                 | INTERGENIC                    | NA                                              |
| Kabuli_wild_33910324 | 1399942598                          | Ca_kabuli_Chr07 | 33910324                | C/A  | NA                 | INTERGENIC                    | NA                                              |
| Kabuli_wild_33910870 | 1399942599                          | Ca_kabuli_Chr07 | 33910870                | C/A  | NA                 | INTERGENIC                    | NA                                              |
| Kabuli_wild_33912719 | 1399942600                          | Ca_kabuli_Chr07 | 33912719                | T/G  | NA                 | INTERGENIC                    | NA                                              |
| Kabuli_wild_33912758 | 1399942601                          | Ca_kabuli_Chr07 | 33912758                | T/C  | NA                 | INTERGENIC                    | NA                                              |
| Kabuli_wild_33912866 | 1399942602                          | Ca_kabuli_Chr07 | 33912866                | C/T  | NA                 | INTERGENIC                    | NA                                              |
| Kabuli_wild_33912899 | 1399942603                          | Ca_kabuli_Chr07 | 33912899                | T/A  | NA                 | INTERGENIC                    | NA                                              |
| Kabuli_wild_33912902 | 1399942604                          | Ca_kabuli_Chr07 | 33912902                | A/T  | NA                 | INTERGENIC                    | NA                                              |
| Kabuli_wild_33912913 | 1399942605                          | Ca_kabuli_Chr07 | 33912913                | A/T  | NA                 | INTERGENIC                    | NA                                              |
| Kabuli_wild_33912916 | 1399942606                          | Ca_kabuli_Chr07 | 33912916                | G/T  | NA                 | INTERGENIC                    | NA                                              |
| Kabuli_wild_33912921 | 1399942607                          | Ca_kabuli_Chr07 | 33912921                | T/G  | NA                 | INTERGENIC                    | NA                                              |
| Kabuli_wild_33912950 | 1399942608                          | Ca_kabuli_Chr07 | 33912950                | C/T  | NA                 | INTERGENIC                    | NA                                              |
| Kabuli_wild_33912965 | 1399942609                          | Ca_kabuli_Chr07 | 33912965                | G/T  | NA                 | INTERGENIC                    | NA                                              |
| Kabuli_wild_33912966 | 1399942610                          | Ca_kabuli_Chr07 | 33912966                | T/C  | NA                 | INTERGENIC                    | NA                                              |
| Kabuli_wild_33913045 | 1399942611                          | Ca_kabuli_Chr07 | 33913045                | G/T  | NA                 | INTERGENIC                    | NA                                              |
| Kabuli_wild_33913047 | 1399942612                          | Ca_kabuli_Chr07 | 33913047                | C/T  | NA                 | INTERGENIC                    | NA                                              |
| Kabuli_wild_33913094 | 1399942613                          | Ca_kabuli_Chr07 | 33913094                | A/G  | NA                 | INTERGENIC                    | NA                                              |
| Kabuli_wild_34079083 | 1399942614                          | Ca_kabuli_Chr07 | 34079083                | C/T  | Gene_Ca_16200      | INTRON                        | NA                                              |
| Kabuli_wild_34107603 | 1399942615                          | Ca_kabuli_Chr07 | 34107603                | C/A  | NA                 | INTERGENIC                    | NA                                              |
| Kabuli_wild_34152124 | 1399942616                          | Ca_kabuli_Chr07 | 34152124                | G/C  | Gene_Ca_21006      | NON_SYNONYMOUS_CODING         | DNA-directed RNA polymerase,subunit 2, domain 6 |
| Kabuli_wild_34152720 | 1399942617                          | Ca_kabuli_Chr07 | 34152720                | G/T  | Gene_Ca_21006      | INTRON                        | DNA-directed RNA polymerase,subunit 2, domain 6 |
| Kabuli_wild_34227428 | 1399942618                          | Ca_kabuli_Chr07 | 34227428                | G/A  | NA                 | INTERGENIC                    | NA                                              |
| Kabuli_wild_34227786 | 1399942619                          | Ca_kabuli_Chr07 | 34227786                | G/A  | NA                 | INTERGENIC                    | NA                                              |
| Kabuli_wild_34271486 | 1399942620                          | Ca_kabuli_Chr07 | 34271486                | A/G  | NA                 | INTERGENIC                    | NA                                              |
| Kabuli_wild_34276965 | 1399942621                          | Ca_kabuli_Chr07 | 34276965                | T/C  | NA                 | INTERGENIC                    | NA                                              |
| Kabuli_wild_34277010 | 1399942622                          | Ca_kabuli_Chr07 | 34277010                | A/G  | NA                 | INTERGENIC                    | NA                                              |
| Kabuli_wild_34277014 | 1399942623                          | Ca_kabuli_Chr07 | 34277014                | G/T  | NA                 | INTERGENIC                    | NA                                              |
| Kabuli_wild_34279357 | 1399942624                          | Ca_kabuli_Chr07 | 34279357                | G/T  | NA                 | INTERGENIC                    | NA                                              |
| Kabuli_wild_34279673 | 1399942625                          | Ca_kabuli_Chr07 | 34279673                | G/A  | NA                 | INTERGENIC                    | NA                                              |
| Kabuli_wild_34279715 | 1399942626                          | Ca_kabuli_Chr07 | 34279715                | A/C  | NA                 | INTERGENIC                    | NA                                              |
| Kabuli_wild_34279725 | 1399942627                          | Ca_kabuli_Chr07 | 34279725                | A/G  | NA                 | INTERGENIC                    | NA                                              |



| SNP IDs              | NCBI dbSNP accession IDs (NCBI_SS#) | Chromosomes     | Physical positions (bp) | SNPs | Gene accession IDs | Sequence components of genome | Putative functions                                           |
|----------------------|-------------------------------------|-----------------|-------------------------|------|--------------------|-------------------------------|--------------------------------------------------------------|
| Kabuli_wild_34318860 | 1399942628                          | Ca_kabuli_Chr07 | 34318860                | C/T  | NA                 | INTERGENIC                    | NA                                                           |
| Kabuli_wild_34318862 | 1399942629                          | Ca_kabuli_Chr07 | 34318862                | A/G  | NA                 | INTERGENIC                    | NA                                                           |
| Kabuli_wild_34474614 | 1399942630                          | Ca_kabuli_Chr07 | 34474614                | A/C  | Gene_Ca_17602      | NON_SYNONYMOUS_CODING         | SSXT                                                         |
| Kabuli_wild_34475540 | 1399942631                          | Ca_kabuli_Chr07 | 34475540                | G/A  | Gene_Ca_17602      | DOWNSTREAM                    | SSXT                                                         |
| Kabuli_wild_34796876 | 1399942632                          | Ca_kabuli_Chr07 | 34796876                | C/T  | NA                 | INTERGENIC                    | NA                                                           |
| Kabuli_wild_34801179 | 1399942633                          | Ca_kabuli_Chr07 | 34801179                | T/C  | NA                 | INTERGENIC                    | NA                                                           |
| Kabuli_wild_34801839 | 1399942634                          | Ca_kabuli_Chr07 | 34801839                | A/T  | Gene_Ca_17614      | SYNONYMOUS_CODING             | NA                                                           |
| Kabuli_wild_34857693 | 1399942635                          | Ca_kabuli_Chr07 | 34857693                | C/T  | Gene_Ca_17617      | NON_SYNONYMOUS_CODING         | Armadillo                                                    |
| Kabuli_wild_34879321 | 1399942636                          | Ca_kabuli_Chr07 | 34879321                | T/G  | Gene_Ca_17621      | DOWNSTREAM                    | EF-Hand1,calcium-bindingsite                                 |
| Kabuli_wild_34944888 | 1399942637                          | Ca_kabuli_Chr07 | 34944888                | G/A  | Gene_Ca_17626      | NON_SYNONYMOUS_CODING         | Phosphoribosyltransferase                                    |
| Kabuli_wild_34947729 | 1399942638                          | Ca_kabuli_Chr07 | 34947729                | C/A  | Gene_Ca_17626      | INTRON                        | Phosphoribosyltransferase                                    |
| Kabuli_wild_34947743 | 1399942639                          | Ca_kabuli_Chr07 | 34947743                | A/C  | Gene_Ca_17626      | INTRON                        | Phosphoribosyltransferase                                    |
| Kabuli_wild_35016516 | 1399942640                          | Ca_kabuli_Chr07 | 35016516                | G/C  | Gene_Ca_17628      | DOWNSTREAM                    | Pyridoxamine5'-phosphateoxidase                              |
| Kabuli_wild_35038291 | 1399942641                          | Ca_kabuli_Chr07 | 35038291                | A/C  | NA                 | INTERGENIC                    | NA                                                           |
| Kabuli_wild_35072425 | 1399942642                          | Ca_kabuli_Chr07 | 35072425                | A/T  | NA                 | INTERGENIC                    | NA                                                           |
| Kabuli_wild_35074237 | 1399942643                          | Ca_kabuli_Chr07 | 35074237                | C/G  | NA                 | INTERGENIC                    | NA                                                           |
| Kabuli_wild_35074280 | 1399942644                          | Ca_kabuli_Chr07 | 35074280                | A/C  | NA                 | INTERGENIC                    | NA                                                           |
| Kabuli_wild_35074362 | 1399942645                          | Ca_kabuli_Chr07 | 35074362                | T/C  | NA                 | INTERGENIC                    | NA                                                           |
| Kabuli_wild_35074547 | 1399942646                          | Ca_kabuli_Chr07 | 35074547                | C/T  | NA                 | INTERGENIC                    | NA                                                           |
| Kabuli_wild_35074548 | 1399942647                          | Ca_kabuli_Chr07 | 35074548                | C/A  | NA                 | INTERGENIC                    | NA                                                           |
| Kabuli_wild_35112785 | 1399942648                          | Ca_kabuli_Chr07 | 35112785                | T/C  | Gene_Ca_17637      | SYNONYMOUS_CODING             | Importin-beta,N-terminal                                     |
| Kabuli_wild_35114049 | 1399942649                          | Ca_kabuli_Chr07 | 35114049                | C/T  | Gene_Ca_17637      | NON_SYNONYMOUS_CODING         | Importin-beta,N-terminal                                     |
| Kabuli_wild_35134809 | 1399942650                          | Ca_kabuli_Chr07 | 35134809                | A/C  | Gene_Ca_17638      | NON_SYNONYMOUS_CODING         | Pathogenesis-related transcriptional factor/ERF, DNA-binding |
| Kabuli_wild_35134816 | 1399942651                          | Ca_kabuli_Chr07 | 35134816                | A/C  | Gene_Ca_17638      | NON_SYNONYMOUS_CODING         | Pathogenesis-related transcriptional factor/ERF, DNA-binding |
| Kabuli_wild_35134824 | 1399942652                          | Ca_kabuli_Chr07 | 35134824                | A/C  | Gene_Ca_17638      | SYNONYMOUS_CODING             | Pathogenesis-related transcriptional factor/ERF, DNA-binding |
| Kabuli_wild_35134840 | 1399942653                          | Ca_kabuli_Chr07 | 35134840                | G/T  | Gene_Ca_17638      | NON_SYNONYMOUS_CODING         | Pathogenesis-related transcriptional factor/ERF, DNA-binding |
| Kabuli_wild_35134863 | 1399942654                          | Ca_kabuli_Chr07 | 35134863                | T/C  | Gene_Ca_17638      | SYNONYMOUS_CODING             | Pathogenesis-related transcriptional factor/ERF, DNA-binding |
| Kabuli_wild_35181514 | 1399942655                          | Ca_kabuli_Chr07 | 35181514                | A/T  | Gene_Ca_17639      | NON_SYNONYMOUS_CODING         | Helix-loop-helixDNA-binding domain                           |
| Kabuli_wild_35181619 | 1399942656                          | Ca_kabuli_Chr07 | 35181619                | T/G  | Gene_Ca_17639      | NON_SYNONYMOUS_CODING         | Helix-loop-helixDNA-binding domain                           |
| Kabuli_wild_35181635 | 1399942657                          | Ca_kabuli_Chr07 | 35181635                | G/C  | Gene_Ca_17639      | NON_SYNONYMOUS_CODING         | Helix-loop-helixDNA-binding domain                           |
| Kabuli_wild_35181660 | 1399942658                          | Ca_kabuli_Chr07 | 35181660                | G/A  | Gene_Ca_17639      | NON_SYNONYMOUS_CODING         | Helix-loop-helixDNA-binding domain                           |
| Kabuli_wild_35181661 | 1399942659                          | Ca_kabuli_Chr07 | 35181661                | T/C  | Gene_Ca_17639      | SYNONYMOUS_CODING             | Helix-loop-helixDNA-binding domain                           |
| Kabuli_wild_35227794 | 1399942660                          | Ca_kabuli_Chr07 | 35227794                | A/C  | NA                 | INTERGENIC                    | NA                                                           |
| Kabuli_wild_35258029 | 1399942661                          | Ca_kabuli_Chr07 | 35258029                | T/G  | Gene_Ca_17644      | INTRON                        | Dynamincentral domain                                        |
| Kabuli_wild_35263711 | 1399942662                          | Ca_kabuli_Chr07 | 35263711                | A/T  | Gene_Ca_17645      | UPSTREAM                      | NA                                                           |
| Kabuli_wild_35263712 | 1399942663                          | Ca_kabuli_Chr07 | 35263712                | G/T  | Gene_Ca_17645      | UPSTREAM                      | NA                                                           |
| Kabuli_wild_35263736 | 1399942664                          | Ca_kabuli_Chr07 | 35263736                | C/G  | Gene_Ca_17645      | UPSTREAM                      | NA                                                           |
| Kabuli_wild_35263758 | 1399942665                          | Ca_kabuli_Chr07 | 35263758                | A/G  | Gene_Ca_17645      | UPSTREAM                      | NA                                                           |
| Kabuli_wild_35274368 | 1399942666                          | Ca_kabuli_Chr07 | 35274368                | A/G  | NA                 | INTERGENIC                    | NA                                                           |
| Kabuli_wild_35274680 | 1399942667                          | Ca_kabuli_Chr07 | 35274680                | G/A  | NA                 | INTERGENIC                    | NA                                                           |
| Kabuli_wild_35274828 | 1399942668                          | Ca_kabuli_Chr07 | 35274828                | A/G  | NA                 | INTERGENIC                    | NA                                                           |
| Kabuli_wild_35274858 | 1399942669                          | Ca_kabuli_Chr07 | 35274858                | G/A  | NA                 | INTERGENIC                    | NA                                                           |
| Kabuli_wild_35274859 | 1399942670                          | Ca_kabuli_Chr07 | 35274859                | T/G  | NA                 | INTERGENIC                    | NA                                                           |
| Kabuli_wild_35279675 | 1399942671                          | Ca_kabuli_Chr07 | 35279675                | A/G  | Gene_Ca_17646      | NON_SYNONYMOUS_CODING         | NA                                                           |



| SNP IDs              | NCBI dbSNP accession IDs (NCBI_SS#) | Chromosomes     | Physical positions (bp) | SNPs | Gene accession IDs | Sequence components of genome | Putative functions                        |
|----------------------|-------------------------------------|-----------------|-------------------------|------|--------------------|-------------------------------|-------------------------------------------|
| Kabuli_wild_35280167 | 1399942672                          | Ca_kabuli_Chr07 | 35280167                | A/G  | Gene_Ca_17646      | SYNONYMOUS_CODING             | NA                                        |
| Kabuli_wild_35280189 | 1399942673                          | Ca_kabuli_Chr07 | 35280189                | G/A  | Gene_Ca_17646      | SYNONYMOUS_CODING             | NA                                        |
| Kabuli_wild_35322382 | 1399942674                          | Ca_kabuli_Chr07 | 35322382                | T/C  | Gene_Ca_17647      | INTRON                        | PWWP                                      |
| Kabuli_wild_35342271 | 1399942675                          | Ca_kabuli_Chr07 | 35342271                | A/G  | Gene_Ca_17648      | DOWNSTREAM                    | Zinc finger, RING-type                    |
| Kabuli_wild_35576427 | 1399942676                          | Ca_kabuli_Chr07 | 35576427                | C/A  | Gene_Ca_17765      | NON_SYNONYMOUS_CODING         | Reticulon                                 |
| Kabuli_wild_35619487 | 1399942677                          | Ca_kabuli_Chr07 | 35619487                | G/A  | NA                 | INTERGENIC                    | NA                                        |
| Kabuli_wild_35619518 | 1399942678                          | Ca_kabuli_Chr07 | 35619518                | G/C  | NA                 | INTERGENIC                    | NA                                        |
| Kabuli_wild_35619611 | 1399942679                          | Ca_kabuli_Chr07 | 35619611                | G/A  | NA                 | INTERGENIC                    | NA                                        |
| Kabuli_wild_35622168 | 1399942680                          | Ca_kabuli_Chr07 | 35622168                | A/G  | Gene_Ca_17769      | NON_SYNONYMOUS_CODING         | Ketopantoate hydroxymethyltransferase     |
| Kabuli_wild_35637090 | 1399942681                          | Ca_kabuli_Chr07 | 35637090                | T/C  | NA                 | INTERGENIC                    | NA                                        |
| Kabuli_wild_35680423 | 1399942682                          | Ca_kabuli_Chr07 | 35680423                | A/C  | NA                 | INTERGENIC                    | NA                                        |
| Kabuli_wild_35723912 | 1399942683                          | Ca_kabuli_Chr07 | 35723912                | T/C  | NA                 | INTERGENIC                    | NA                                        |
| Kabuli_wild_35911606 | 1399942684                          | Ca_kabuli_Chr07 | 35911606                | T/C  | NA                 | INTERGENIC                    | NA                                        |
| Kabuli_wild_35911612 | 1399942685                          | Ca_kabuli_Chr07 | 35911612                | T/G  | NA                 | INTERGENIC                    | NA                                        |
| Kabuli_wild_35911615 | 1399942686                          | Ca_kabuli_Chr07 | 35911615                | C/T  | NA                 | INTERGENIC                    | NA                                        |
| Kabuli_wild_35911617 | 1399942687                          | Ca_kabuli_Chr07 | 35911617                | A/C  | NA                 | INTERGENIC                    | NA                                        |
| Kabuli_wild_35911620 | 1399942688                          | Ca_kabuli_Chr07 | 35911620                | T/G  | NA                 | INTERGENIC                    | NA                                        |
| Kabuli_wild_35940587 | 1399942689                          | Ca_kabuli_Chr07 | 35940587                | A/G  | NA                 | INTERGENIC                    | NA                                        |
| Kabuli_wild_35947529 | 1399942690                          | Ca_kabuli_Chr07 | 35947529                | T/C  | Gene_Ca_17800      | NON_SYNONYMOUS_CODING         | Transposase,Ptta/En/Spm,plant             |
| Kabuli_wild_35947538 | 1399942691                          | Ca_kabuli_Chr07 | 35947538                | G/A  | Gene_Ca_17800      | NON_SYNONYMOUS_CODING         | Transposase,Ptta/En/Spm,plant             |
| Kabuli_wild_35947550 | 1399942692                          | Ca_kabuli_Chr07 | 35947550                | C/T  | Gene_Ca_17800      | NON_SYNONYMOUS_CODING         | Transposase,Ptta/En/Spm,plant             |
| Kabuli_wild_35947551 | 1399942693                          | Ca_kabuli_Chr07 | 35947551                | A/G  | Gene_Ca_17800      | SYNONYMOUS_CODING             | Transposase,Ptta/En/Spm,plant             |
| Kabuli_wild_35959825 | 1399942694                          | Ca_kabuli_Chr07 | 35959825                | G/A  | NA                 | INTERGENIC                    | NA                                        |
| Kabuli_wild_35959878 | 1399942695                          | Ca_kabuli_Chr07 | 35959878                | A/G  | NA                 | INTERGENIC                    | NA                                        |
| Kabuli_wild_35972411 | 1399942696                          | Ca_kabuli_Chr07 | 35972411                | G/A  | NA                 | INTERGENIC                    | NA                                        |
| Kabuli_wild_36681308 | 1399942697                          | Ca_kabuli_Chr07 | 36681308                | G/A  | Gene_Ca_13755      | NON_SYNONYMOUS_CODING         | NA                                        |
| Kabuli_wild_36711954 | 1399942698                          | Ca_kabuli_Chr07 | 36711954                | C/A  | Gene_Ca_13756      | NON_SYNONYMOUS_CODING         | Mediatorcomplex,subunitMed12              |
| Kabuli_wild_36715249 | 1399942699                          | Ca_kabuli_Chr07 | 36715249                | T/C  | Gene_Ca_13756      | SYNONYMOUS_CODING             | Mediatorcomplex,subunitMed12              |
| Kabuli_wild_36745439 | 1399942700                          | Ca_kabuli_Chr07 | 36745439                | T/G  | Gene_Ca_13760      | UPSTREAM                      | Oxoglutarate/iron-dependent oxygenase     |
| Kabuli_wild_36916273 | 1399942701                          | Ca_kabuli_Chr07 | 36916273                | T/A  | NA                 | INTERGENIC                    | NA                                        |
| Kabuli_wild_36916275 | 1399942702                          | Ca_kabuli_Chr07 | 36916275                | T/G  | NA                 | INTERGENIC                    | NA                                        |
| Kabuli_wild_36916281 | 1399942703                          | Ca_kabuli_Chr07 | 36916281                | T/G  | NA                 | INTERGENIC                    | NA                                        |
| Kabuli_wild_36933363 | 1399942704                          | Ca_kabuli_Chr07 | 36933363                | A/T  | NA                 | INTERGENIC                    | NA                                        |
| Kabuli_wild_36933370 | 1399942705                          | Ca_kabuli_Chr07 | 36933370                | C/G  | NA                 | INTERGENIC                    | NA                                        |
| Kabuli_wild_36998083 | 1399942706                          | Ca_kabuli_Chr07 | 36998083                | G/A  | Gene_Ca_13784      | NON_SYNONYMOUS_CODING         | Peptidase C48, SUMO/Sentrin/Ubl1          |
| Kabuli_wild_36998096 | 1399942707                          | Ca_kabuli_Chr07 | 36998096                | T/C  | Gene_Ca_13784      | SYNONYMOUS_CODING             | Peptidase C48, SUMO/Sentrin/Ubl1          |
| Kabuli_wild_36998104 | 1399942708                          | Ca_kabuli_Chr07 | 36998104                | T/G  | Gene_Ca_13784      | NON_SYNONYMOUS_CODING         | Peptidase C48, SUMO/Sentrin/Ubl1          |
| Kabuli_wild_36998113 | 1399942709                          | Ca_kabuli_Chr07 | 36998113                | C/T  | Gene_Ca_13784      | SYNONYMOUS_CODING             | Peptidase C48, SUMO/Sentrin/Ubl1          |
| Kabuli_wild_36998163 | 1399942710                          | Ca_kabuli_Chr07 | 36998163                | G/A  | Gene_Ca_13784      | SYNONYMOUS_CODING             | Peptidase C48, SUMO/Sentrin/Ubl1          |
| Kabuli_wild_36998180 | 1399942711                          | Ca_kabuli_Chr07 | 36998180                | C/T  | Gene_Ca_13784      | NON_SYNONYMOUS_CODING         | Peptidase C48, SUMO/Sentrin/Ubl1          |
| Kabuli_wild_37058979 | 1399942712                          | Ca_kabuli_Chr07 | 37058979                | C/T  | Gene_Ca_13790      | NON_SYNONYMOUS_CODING         | Hydroxymethylglutaryl-CoAlyase,activesite |
| Kabuli_wild_37114617 | 1399942713                          | Ca_kabuli_Chr07 | 37114617                | C/T  | NA                 | INTERGENIC                    | NA                                        |
| Kabuli_wild_37187439 | 1399942714                          | Ca_kabuli_Chr07 | 37187439                | A/G  | Gene_Ca_13799      | UPSTREAM                      | Short-chaindehydrogenase/reductaseSDR     |
| Kabuli_wild_37626653 | 1399942715                          | Ca_kabuli_Chr07 | 37626653                | A/C  | Gene_Ca_22806      | NON_SYNONYMOUS_CODING         | Transposase,Ptta/En/Spm,plant             |

| SNP IDs              | NCBI dbSNP accession IDs (NCBI_SS#) | Chromosomes     | Physical positions (bp) | SNPs | Gene accession IDs | Sequence components of genome | Putative functions               |
|----------------------|-------------------------------------|-----------------|-------------------------|------|--------------------|-------------------------------|----------------------------------|
| Kabuli_wild_37626665 | 1399942716                          | Ca_kabuli_Chr07 | 37626665                | G/A  | Gene_Ca_22806      | SYNONYMOUS_CODING             | Transposase,Ptta/En/Spm,plant    |
| Kabuli_wild_37626666 | 1399942717                          | Ca_kabuli_Chr07 | 37626666                | C/T  | Gene_Ca_22806      | NON_SYNONYMOUS_CODING         | Transposase,Ptta/En/Spm,plant    |
| Kabuli_wild_37626687 | 1399942718                          | Ca_kabuli_Chr07 | 37626687                | A/G  | Gene_Ca_22806      | NON_SYNONYMOUS_CODING         | Transposase,Ptta/En/Spm,plant    |
| Kabuli_wild_37626729 | 1399942719                          | Ca_kabuli_Chr07 | 37626729                | G/T  | Gene_Ca_22806      | NON_SYNONYMOUS_CODING         | Transposase,Ptta/En/Spm,plant    |
| Kabuli_wild_37626802 | 1399942720                          | Ca_kabuli_Chr07 | 37626802                | G/A  | Gene_Ca_22806      | SYNONYMOUS_CODING             | Transposase,Ptta/En/Spm,plant    |
| Kabuli_wild_37626805 | 1399942721                          | Ca_kabuli_Chr07 | 37626805                | A/G  | Gene_Ca_22806      | INTRON                        | Transposase,Ptta/En/Spm,plant    |
| Kabuli_wild_37626809 | 1399942722                          | Ca_kabuli_Chr07 | 37626809                | A/T  | Gene_Ca_22806      | INTRON                        | Transposase,Ptta/En/Spm,plant    |
| Kabuli_wild_37626827 | 1399942723                          | Ca_kabuli_Chr07 | 37626827                | A/G  | Gene_Ca_22806      | INTRON                        | Transposase,Ptta/En/Spm,plant    |
| Kabuli_wild_37703912 | 1399942724                          | Ca_kabuli_Chr07 | 37703912                | G/A  | NA                 | INTERGENIC                    | NA                               |
| Kabuli_wild_37703913 | 1399942725                          | Ca_kabuli_Chr07 | 37703913                | C/G  | NA                 | INTERGENIC                    | NA                               |
| Kabuli_wild_37703921 | 1399942726                          | Ca_kabuli_Chr07 | 37703921                | G/T  | NA                 | INTERGENIC                    | NA                               |
| Kabuli_wild_37703925 | 1399942727                          | Ca_kabuli_Chr07 | 37703925                | C/T  | NA                 | INTERGENIC                    | NA                               |
| Kabuli_wild_37703936 | 1399942728                          | Ca_kabuli_Chr07 | 37703936                | C/T  | NA                 | INTERGENIC                    | NA                               |
| Kabuli_wild_37703965 | 1399942729                          | Ca_kabuli_Chr07 | 37703965                | C/T  | NA                 | INTERGENIC                    | NA                               |
| Kabuli_wild_37703966 | 1399942730                          | Ca_kabuli_Chr07 | 37703966                | C/T  | NA                 | INTERGENIC                    | NA                               |
| Kabuli_wild_37703967 | 1399942731                          | Ca_kabuli_Chr07 | 37703967                | G/A  | NA                 | INTERGENIC                    | NA                               |
| Kabuli_wild_37853290 | 1399942732                          | Ca_kabuli_Chr07 | 37853290                | C/T  | NA                 | INTERGENIC                    | NA                               |
| Kabuli_wild_37853314 | 1399942733                          | Ca_kabuli_Chr07 | 37853314                | G/A  | NA                 | INTERGENIC                    | NA                               |
| Kabuli_wild_37853315 | 1399942734                          | Ca_kabuli_Chr07 | 37853315                | C/G  | NA                 | INTERGENIC                    | NA                               |
| Kabuli_wild_37857870 | 1399942735                          | Ca_kabuli_Chr07 | 37857870                | C/T  | NA                 | INTERGENIC                    | NA                               |
| Kabuli_wild_37857887 | 1399942736                          | Ca_kabuli_Chr07 | 37857887                | C/T  | NA                 | INTERGENIC                    | NA                               |
| Kabuli_wild_37857928 | 1399942737                          | Ca_kabuli_Chr07 | 37857928                | A/G  | NA                 | INTERGENIC                    | NA                               |
| Kabuli_wild_37857936 | 1399942738                          | Ca_kabuli_Chr07 | 37857936                | G/A  | NA                 | INTERGENIC                    | NA                               |
| Kabuli_wild_37857951 | 1399942739                          | Ca_kabuli_Chr07 | 37857951                | C/T  | NA                 | INTERGENIC                    | NA                               |
| Kabuli_wild_37886451 | 1399942740                          | Ca_kabuli_Chr07 | 37886451                | T/A  | NA                 | INTERGENIC                    | NA                               |
| Kabuli_wild_37886519 | 1399942741                          | Ca_kabuli_Chr07 | 37886519                | A/C  | NA                 | INTERGENIC                    | NA                               |
| Kabuli_wild_38044503 | 1399942742                          | Ca_kabuli_Chr07 | 38044503                | G/A  | NA                 | INTERGENIC                    | NA                               |
| Kabuli_wild_38044536 | 1399942743                          | Ca_kabuli_Chr07 | 38044536                | G/A  | NA                 | INTERGENIC                    | NA                               |
| Kabuli_wild_38047374 | 1399942744                          | Ca_kabuli_Chr07 | 38047374                | A/G  | NA                 | INTERGENIC                    | NA                               |
| Kabuli_wild_38047378 | 1399942745                          | Ca_kabuli_Chr07 | 38047378                | C/A  | NA                 | INTERGENIC                    | NA                               |
| Kabuli_wild_38143361 | 1399942746                          | Ca_kabuli_Chr07 | 38143361                | A/G  | Gene_Ca_16396      | INTRON                        | Fructosamine/Ketosamine-3-kinase |
| Kabuli_wild_38143452 | 1399942747                          | Ca_kabuli_Chr07 | 38143452                | G/A  | Gene_Ca_16396      | INTRON                        | Fructosamine/Ketosamine-3-kinase |
| Kabuli_wild_38143524 | 1399942748                          | Ca_kabuli_Chr07 | 38143524                | T/A  | Gene_Ca_16396      | INTRON                        | Fructosamine/Ketosamine-3-kinase |
| Kabuli_wild_38167486 | 1399942749                          | Ca_kabuli_Chr07 | 38167486                | T/G  | NA                 | INTERGENIC                    | NA                               |
| Kabuli_wild_38238977 | 1399942750                          | Ca_kabuli_Chr07 | 38238977                | C/T  | Gene_Ca_16402      | INTRON                        | NA                               |
| Kabuli_wild_38409029 | 1399942751                          | Ca_kabuli_Chr07 | 38409029                | T/G  | NA                 | INTERGENIC                    | NA                               |
| Kabuli_wild_38460415 | 1399942752                          | Ca_kabuli_Chr07 | 38460415                | T/G  | NA                 | INTERGENIC                    | NA                               |
| Kabuli_wild_38460425 | 1399942753                          | Ca_kabuli_Chr07 | 38460425                | G/A  | NA                 | INTERGENIC                    | NA                               |
| Kabuli_wild_38460438 | 1399942754                          | Ca_kabuli_Chr07 | 38460438                | C/A  | NA                 | INTERGENIC                    | NA                               |
| Kabuli_wild_38460452 | 1399942755                          | Ca_kabuli_Chr07 | 38460452                | C/T  | NA                 | INTERGENIC                    | NA                               |
| Kabuli_wild_38460455 | 1399942756                          | Ca_kabuli_Chr07 | 38460455                | G/A  | NA                 | INTERGENIC                    | NA                               |
| Kabuli_wild_38460457 | 1399942757                          | Ca_kabuli_Chr07 | 38460457                | A/G  | NA                 | INTERGENIC                    | NA                               |
| Kabuli_wild_38460464 | 1399942758                          | Ca_kabuli_Chr07 | 38460464                | G/A  | NA                 | INTERGENIC                    | NA                               |
| Kabuli_wild_38707437 | 1399942759                          | Ca_kabuli_Chr07 | 38707437                | T/C  | NA                 | INTERGENIC                    | NA                               |

| SNP IDs              | NCBI dbSNP accession IDs (NCBI_SS#) | Chromosomes     | Physical positions (bp) | SNPs | Gene accession IDs | Sequence components of genome | Putative functions                |
|----------------------|-------------------------------------|-----------------|-------------------------|------|--------------------|-------------------------------|-----------------------------------|
| Kabuli_wild_39181763 | 1399942760                          | Ca_kabuli_Chr07 | 39181763                | T/G  | Gene_Ca_19581      | SYNONYMOUS_CODING             | BEACHdomain                       |
| Kabuli_wild_39182564 | 1399942761                          | Ca_kabuli_Chr07 | 39182564                | A/T  | Gene_Ca_19581      | NON_SYNONYMOUS_CODING         | BEACHdomain                       |
| Kabuli_wild_39215009 | 1399942762                          | Ca_kabuli_Chr07 | 39215009                | C/T  | Gene_Ca_19581      | INTRON                        | BEACHdomain                       |
| Kabuli_wild_39339495 | 1399942763                          | Ca_kabuli_Chr07 | 39339495                | G/T  | Gene_Ca_19588      | NON_SYNONYMOUS_CODING         | WRC                               |
| Kabuli_wild_39339498 | 1399942764                          | Ca_kabuli_Chr07 | 39339498                | G/T  | Gene_Ca_19588      | NON_SYNONYMOUS_CODING         | WRC                               |
| Kabuli_wild_39339499 | 1399942765                          | Ca_kabuli_Chr07 | 39339499                | C/T  | Gene_Ca_19588      | NON_SYNONYMOUS_CODING         | WRC                               |
| Kabuli_wild_39339500 | 1399942766                          | Ca_kabuli_Chr07 | 39339500                | G/T  | Gene_Ca_19588      | SYNONYMOUS_CODING             | WRC                               |
| Kabuli_wild_39339501 | 1399942767                          | Ca_kabuli_Chr07 | 39339501                | G/C  | Gene_Ca_19588      | NON_SYNONYMOUS_CODING         | WRC                               |
| Kabuli_wild_39339502 | 1399942768                          | Ca_kabuli_Chr07 | 39339502                | C/A  | Gene_Ca_19588      | NON_SYNONYMOUS_CODING         | WRC                               |
| Kabuli_wild_39339503 | 1399942769                          | Ca_kabuli_Chr07 | 39339503                | C/A  | Gene_Ca_19588      | SYNONYMOUS_CODING             | WRC                               |
| Kabuli_wild_39339508 | 1399942770                          | Ca_kabuli_Chr07 | 39339508                | G/A  | Gene_Ca_19588      | NON_SYNONYMOUS_CODING         | WRC                               |
| Kabuli_wild_39339509 | 1399942771                          | Ca_kabuli_Chr07 | 39339509                | G/A  | Gene_Ca_19588      | SYNONYMOUS_CODING             | WRC                               |
| Kabuli_wild_39339510 | 1399942772                          | Ca_kabuli_Chr07 | 39339510                | T/G  | Gene_Ca_19588      | NON_SYNONYMOUS_CODING         | WRC                               |
| Kabuli_wild_39348139 | 1399942773                          | Ca_kabuli_Chr07 | 39348139                | C/T  | Gene_Ca_19589      | DOWNSTREAM                    | Pentatricopeptide repeat          |
| Kabuli_wild_39399280 | 1399942774                          | Ca_kabuli_Chr07 | 39399280                | T/C  | Gene_Ca_19592      | SYNONYMOUS_CODING             | Domain of unknown function DUF296 |
| Kabuli_wild_39630792 | 1399942775                          | Ca_kabuli_Chr07 | 39630792                | G/A  | NA                 | INTERGENIC                    | NA                                |
| Kabuli_wild_39630798 | 1399942776                          | Ca_kabuli_Chr07 | 39630798                | T/G  | NA                 | INTERGENIC                    | NA                                |
| Kabuli_wild_39630802 | 1399942777                          | Ca_kabuli_Chr07 | 39630802                | G/A  | NA                 | INTERGENIC                    | NA                                |
| Kabuli_wild_39630807 | 1399942778                          | Ca_kabuli_Chr07 | 39630807                | A/G  | NA                 | INTERGENIC                    | NA                                |
| Kabuli_wild_39630812 | 1399942779                          | Ca_kabuli_Chr07 | 39630812                | T/C  | NA                 | INTERGENIC                    | NA                                |
| Kabuli_wild_39680221 | 1399942780                          | Ca_kabuli_Chr07 | 39680221                | C/A  | Gene_Ca_19607      | INTRON                        | Domain of unknown function DUF296 |
| Kabuli_wild_39680222 | 1399942781                          | Ca_kabuli_Chr07 | 39680222                | G/A  | Gene_Ca_19607      | INTRON                        | Domain of unknown function DUF296 |
| Kabuli_wild_39944444 | 1399942782                          | Ca_kabuli_Chr07 | 39944444                | T/C  | Gene_Ca_25106      | SYNONYMOUS_CODING             | Mitochondrial carrier protein     |
| Kabuli_wild_39944474 | 1399942783                          | Ca_kabuli_Chr07 | 39944474                | T/C  | Gene_Ca_25106      | SYNONYMOUS_CODING             | Mitochondrial carrier protein     |
| Kabuli_wild_40092162 | 1399942784                          | Ca_kabuli_Chr07 | 40092162                | T/G  | Gene_Ca_24269      | NON_SYNONYMOUS_CODING         | NA                                |
| Kabuli_wild_40092181 | 1399942785                          | Ca_kabuli_Chr07 | 40092181                | C/T  | Gene_Ca_24269      | NON_SYNONYMOUS_CODING         | NA                                |
| Kabuli_wild_40092185 | 1399942786                          | Ca_kabuli_Chr07 | 40092185                | A/G  | Gene_Ca_24269      | SYNONYMOUS_CODING             | NA                                |
| Kabuli_wild_40092198 | 1399942787                          | Ca_kabuli_Chr07 | 40092198                | G/A  | Gene_Ca_24269      | NON_SYNONYMOUS_CODING         | NA                                |
| Kabuli_wild_40092201 | 1399942788                          | Ca_kabuli_Chr07 | 40092201                | G/A  | Gene_Ca_24269      | NON_SYNONYMOUS_CODING         | NA                                |
| Kabuli_wild_40092211 | 1399942789                          | Ca_kabuli_Chr07 | 40092211                | C/T  | Gene_Ca_24269      | NON_SYNONYMOUS_CODING         | NA                                |
| Kabuli_wild_40092213 | 1399942790                          | Ca_kabuli_Chr07 | 40092213                | G/C  | Gene_Ca_24269      | NON_SYNONYMOUS_CODING         | NA                                |
| Kabuli_wild_40092214 | 1399942791                          | Ca_kabuli_Chr07 | 40092214                | T/C  | Gene_Ca_24269      | SYNONYMOUS_CODING             | NA                                |
| Kabuli_wild_40092218 | 1399942792                          | Ca_kabuli_Chr07 | 40092218                | A/G  | Gene_Ca_24269      | SYNONYMOUS_CODING             | NA                                |
| Kabuli_wild_40092229 | 1399942793                          | Ca_kabuli_Chr07 | 40092229                | C/A  | Gene_Ca_24269      | NON_SYNONYMOUS_CODING         | NA                                |
| Kabuli_wild_40092237 | 1399942794                          | Ca_kabuli_Chr07 | 40092237                | C/T  | Gene_Ca_24269      | SYNONYMOUS_CODING             | NA                                |
| Kabuli_wild_40092250 | 1399942795                          | Ca_kabuli_Chr07 | 40092250                | A/C  | Gene_Ca_24269      | NON_SYNONYMOUS_CODING         | NA                                |
| Kabuli_wild_40092253 | 1399942796                          | Ca_kabuli_Chr07 | 40092253                | C/T  | Gene_Ca_24269      | NON_SYNONYMOUS_CODING         | NA                                |
| Kabuli_wild_40092256 | 1399942797                          | Ca_kabuli_Chr07 | 40092256                | T/C  | Gene_Ca_24269      | NON_SYNONYMOUS_CODING         | NA                                |
| Kabuli_wild_40092267 | 1399942798                          | Ca_kabuli_Chr07 | 40092267                | G/C  | Gene_Ca_24269      | NON_SYNONYMOUS_CODING         | NA                                |
| Kabuli_wild_40092270 | 1399942799                          | Ca_kabuli_Chr07 | 40092270                | A/G  | Gene_Ca_24269      | NON_SYNONYMOUS_CODING         | NA                                |
| Kabuli_wild_40092340 | 1399942800                          | Ca_kabuli_Chr07 | 40092340                | T/C  | Gene_Ca_24269      | NON_SYNONYMOUS_CODING         | NA                                |
| Kabuli_wild_40142149 | 1399942801                          | Ca_kabuli_Chr07 | 40142149                | C/A  | NA                 | INTERGENIC                    | NA                                |
| Kabuli_wild_40183449 | 1399942802                          | Ca_kabuli_Chr07 | 40183449                | C/A  | NA                 | INTERGENIC                    | NA                                |
| Kabuli_wild_40183452 | 1399942803                          | Ca_kabuli_Chr07 | 40183452                | A/C  | NA                 | INTERGENIC                    | NA                                |

| SNP IDs              | NCBI dbSNP accession IDs (NCBI_SS#) | Chromosomes     | Physical positions (bp) | SNPs | Gene accession IDs | Sequence components of genome | Putative functions           |
|----------------------|-------------------------------------|-----------------|-------------------------|------|--------------------|-------------------------------|------------------------------|
| Kabuli_wild_40217527 | 1399942804                          | Ca_kabuli_Chr07 | 40217527                | G/T  | NA                 | INTERGENIC                    | NA                           |
| Kabuli_wild_40242765 | 1399942805                          | Ca_kabuli_Chr07 | 40242765                | A/G  | Gene_Ca_24261      | INTRON                        | RNA recognition motif domain |
| Kabuli_wild_40260831 | 1399942806                          | Ca_kabuli_Chr07 | 40260831                | A/C  | NA                 | INTERGENIC                    | NA                           |
| Kabuli_wild_40260845 | 1399942807                          | Ca_kabuli_Chr07 | 40260845                | A/T  | NA                 | INTERGENIC                    | NA                           |
| Kabuli_wild_40260853 | 1399942808                          | Ca_kabuli_Chr07 | 40260853                | G/T  | NA                 | INTERGENIC                    | NA                           |
| Kabuli_wild_40260889 | 1399942809                          | Ca_kabuli_Chr07 | 40260889                | C/G  | NA                 | INTERGENIC                    | NA                           |
| Kabuli_wild_40260893 | 1399942810                          | Ca_kabuli_Chr07 | 40260893                | G/T  | NA                 | INTERGENIC                    | NA                           |
| Kabuli_wild_40323212 | 1399942811                          | Ca_kabuli_Chr07 | 40323212                | G/A  | Gene_Ca_20251      | DOWNSTREAM                    | NA                           |
| Kabuli_wild_40323213 | 1399942812                          | Ca_kabuli_Chr07 | 40323213                | C/A  | Gene_Ca_20251      | DOWNSTREAM                    | NA                           |
| Kabuli_wild_40323251 | 1399942813                          | Ca_kabuli_Chr07 | 40323251                | T/A  | Gene_Ca_20251      | DOWNSTREAM                    | NA                           |
| Kabuli_wild_40323258 | 1399942814                          | Ca_kabuli_Chr07 | 40323258                | T/G  | Gene_Ca_20251      | DOWNSTREAM                    | NA                           |
| Kabuli_wild_40340104 | 1399942815                          | Ca_kabuli_Chr07 | 40340104                | C/A  | NA                 | INTERGENIC                    | NA                           |
| Kabuli_wild_40340114 | 1399942816                          | Ca_kabuli_Chr07 | 40340114                | A/G  | NA                 | INTERGENIC                    | NA                           |
| Kabuli_wild_40340142 | 1399942817                          | Ca_kabuli_Chr07 | 40340142                | T/G  | NA                 | INTERGENIC                    | NA                           |
| Kabuli_wild_40340145 | 1399942818                          | Ca_kabuli_Chr07 | 40340145                | C/T  | NA                 | INTERGENIC                    | NA                           |
| Kabuli_wild_40385974 | 1399942819                          | Ca_kabuli_Chr07 | 40385974                | T/C  | Gene_Ca_20255      | INTRON                        | WD40 repeat                  |
| Kabuli_wild_40429548 | 1399942820                          | Ca_kabuli_Chr07 | 40429548                | A/G  | NA                 | INTERGENIC                    | NA                           |
| Kabuli_wild_40429552 | 1399942821                          | Ca_kabuli_Chr07 | 40429552                | C/T  | NA                 | INTERGENIC                    | NA                           |
| Kabuli_wild_40429564 | 1399942822                          | Ca_kabuli_Chr07 | 40429564                | G/T  | NA                 | INTERGENIC                    | NA                           |
| Kabuli_wild_40429567 | 1399942823                          | Ca_kabuli_Chr07 | 40429567                | G/A  | NA                 | INTERGENIC                    | NA                           |
| Kabuli_wild_40429573 | 1399942824                          | Ca_kabuli_Chr07 | 40429573                | G/T  | NA                 | INTERGENIC                    | NA                           |
| Kabuli_wild_40429596 | 1399942825                          | Ca_kabuli_Chr07 | 40429596                | G/A  | NA                 | INTERGENIC                    | NA                           |
| Kabuli_wild_40429599 | 1399942826                          | Ca_kabuli_Chr07 | 40429599                | G/A  | NA                 | INTERGENIC                    | NA                           |
| Kabuli_wild_40429600 | 1399942827                          | Ca_kabuli_Chr07 | 40429600                | C/T  | NA                 | INTERGENIC                    | NA                           |
| Kabuli_wild_40429604 | 1399942828                          | Ca_kabuli_Chr07 | 40429604                | C/T  | NA                 | INTERGENIC                    | NA                           |
| Kabuli_wild_40429621 | 1399942829                          | Ca_kabuli_Chr07 | 40429621                | G/T  | NA                 | INTERGENIC                    | NA                           |
| Kabuli_wild_40429629 | 1399942830                          | Ca_kabuli_Chr07 | 40429629                | G/T  | NA                 | INTERGENIC                    | NA                           |
| Kabuli_wild_40429643 | 1399942831                          | Ca_kabuli_Chr07 | 40429643                | G/T  | NA                 | INTERGENIC                    | NA                           |
| Kabuli_wild_40429660 | 1399942832                          | Ca_kabuli_Chr07 | 40429660                | C/T  | NA                 | INTERGENIC                    | NA                           |
| Kabuli_wild_40429661 | 1399942833                          | Ca_kabuli_Chr07 | 40429661                | C/A  | NA                 | INTERGENIC                    | NA                           |
| Kabuli_wild_40429686 | 1399942834                          | Ca_kabuli_Chr07 | 40429686                | T/C  | NA                 | INTERGENIC                    | NA                           |
| Kabuli_wild_40429702 | 1399942835                          | Ca_kabuli_Chr07 | 40429702                | G/C  | NA                 | INTERGENIC                    | NA                           |
| Kabuli_wild_40456574 | 1399942836                          | Ca_kabuli_Chr07 | 40456574                | T/C  | NA                 | INTERGENIC                    | NA                           |
| Kabuli_wild_40555051 | 1399942837                          | Ca_kabuli_Chr07 | 40555051                | G/A  | NA                 | INTERGENIC                    | NA                           |
| Kabuli_wild_40555070 | 1399942838                          | Ca_kabuli_Chr07 | 40555070                | C/T  | NA                 | INTERGENIC                    | NA                           |
| Kabuli_wild_40555075 | 1399942839                          | Ca_kabuli_Chr07 | 40555075                | C/T  | NA                 | INTERGENIC                    | NA                           |
| Kabuli_wild_40555092 | 1399942840                          | Ca_kabuli_Chr07 | 40555092                | A/G  | NA                 | INTERGENIC                    | NA                           |
| Kabuli_wild_40555099 | 1399942841                          | Ca_kabuli_Chr07 | 40555099                | G/A  | NA                 | INTERGENIC                    | NA                           |
| Kabuli_wild_40779909 | 1399942842                          | Ca_kabuli_Chr07 | 40779909                | G/A  | NA                 | INTERGENIC                    | NA                           |
| Kabuli_wild_40779925 | 1399942843                          | Ca_kabuli_Chr07 | 40779925                | G/A  | NA                 | INTERGENIC                    | NA                           |
| Kabuli_wild_40779928 | 1399942844                          | Ca_kabuli_Chr07 | 40779928                | G/T  | NA                 | INTERGENIC                    | NA                           |
| Kabuli_wild_40779934 | 1399942845                          | Ca_kabuli_Chr07 | 40779934                | G/A  | NA                 | INTERGENIC                    | NA                           |
| Kabuli_wild_40872829 | 1399942846                          | Ca_kabuli_Chr07 | 40872829                | C/T  | NA                 | INTERGENIC                    | NA                           |
| Kabuli_wild_40889561 | 1399942847                          | Ca_kabuli_Chr07 | 40889561                | T/C  | NA                 | INTERGENIC                    | NA                           |

| SNP IDs              | NCBI dbSNP accession IDs (NCBI_SS#) | Chromosomes     | Physical positions (bp) | SNPs | Gene accession IDs | Sequence components of genome | Putative functions                       |
|----------------------|-------------------------------------|-----------------|-------------------------|------|--------------------|-------------------------------|------------------------------------------|
| Kabuli_wild_40889575 | 1399942848                          | Ca_kabuli_Chr07 | 40889575                | C/T  | NA                 | INTERGENIC                    | NA                                       |
| Kabuli_wild_40889596 | 1399942849                          | Ca_kabuli_Chr07 | 40889596                | A/C  | NA                 | INTERGENIC                    | NA                                       |
| Kabuli_wild_40889598 | 1399942850                          | Ca_kabuli_Chr07 | 40889598                | C/G  | NA                 | INTERGENIC                    | NA                                       |
| Kabuli_wild_40889632 | 1399942851                          | Ca_kabuli_Chr07 | 40889632                | C/T  | NA                 | INTERGENIC                    | NA                                       |
| Kabuli_wild_40889633 | 1399942852                          | Ca_kabuli_Chr07 | 40889633                | G/A  | NA                 | INTERGENIC                    | NA                                       |
| Kabuli_wild_40889638 | 1399942853                          | Ca_kabuli_Chr07 | 40889638                | C/A  | NA                 | INTERGENIC                    | NA                                       |
| Kabuli_wild_40889640 | 1399942854                          | Ca_kabuli_Chr07 | 40889640                | G/A  | NA                 | INTERGENIC                    | NA                                       |
| Kabuli_wild_40889641 | 1399942855                          | Ca_kabuli_Chr07 | 40889641                | C/T  | NA                 | INTERGENIC                    | NA                                       |
| Kabuli_wild_40889643 | 1399942856                          | Ca_kabuli_Chr07 | 40889643                | G/A  | NA                 | INTERGENIC                    | NA                                       |
| Kabuli_wild_40889644 | 1399942857                          | Ca_kabuli_Chr07 | 40889644                | C/T  | NA                 | INTERGENIC                    | NA                                       |
| Kabuli_wild_40889646 | 1399942858                          | Ca_kabuli_Chr07 | 40889646                | G/A  | NA                 | INTERGENIC                    | NA                                       |
| Kabuli_wild_40889667 | 1399942859                          | Ca_kabuli_Chr07 | 40889667                | C/T  | NA                 | INTERGENIC                    | NA                                       |
| Kabuli_wild_40889670 | 1399942860                          | Ca_kabuli_Chr07 | 40889670                | C/T  | NA                 | INTERGENIC                    | NA                                       |
| Kabuli_wild_40889673 | 1399942861                          | Ca_kabuli_Chr07 | 40889673                | C/A  | NA                 | INTERGENIC                    | NA                                       |
| Kabuli_wild_40889684 | 1399942862                          | Ca_kabuli_Chr07 | 40889684                | C/T  | NA                 | INTERGENIC                    | NA                                       |
| Kabuli_wild_40889723 | 1399942863                          | Ca_kabuli_Chr07 | 40889723                | C/G  | NA                 | INTERGENIC                    | NA                                       |
| Kabuli_wild_41208211 | 1399942864                          | Ca_kabuli_Chr07 | 41208211                | G/A  | NA                 | INTERGENIC                    | NA                                       |
| Kabuli_wild_41208258 | 1399942865                          | Ca_kabuli_Chr07 | 41208258                | C/T  | NA                 | INTERGENIC                    | NA                                       |
| Kabuli_wild_41282883 | 1399942866                          | Ca_kabuli_Chr07 | 41282883                | A/T  | NA                 | INTERGENIC                    | NA                                       |
| Kabuli_wild_41282957 | 1399942867                          | Ca_kabuli_Chr07 | 41282957                | G/A  | NA                 | INTERGENIC                    | NA                                       |
| Kabuli_wild_41282960 | 1399942868                          | Ca_kabuli_Chr07 | 41282960                | A/C  | NA                 | INTERGENIC                    | NA                                       |
| Kabuli_wild_41282961 | 1399942869                          | Ca_kabuli_Chr07 | 41282961                | G/T  | NA                 | INTERGENIC                    | NA                                       |
| Kabuli_wild_41325886 | 1399942870                          | Ca_kabuli_Chr07 | 41325886                | A/G  | Gene_Ca_18002      | SYNONYMOUS_CODING             | Orotidine5'-phosphatedecarboxylasedomain |
| Kabuli_wild_41387475 | 1399942871                          | Ca_kabuli_Chr07 | 41387475                | A/C  | Gene_Ca_17996      | NON_SYNONYMOUS_CODING         | WD40 repeat                              |
| Kabuli_wild_41425049 | 1399942872                          | Ca_kabuli_Chr07 | 41425049                | G/A  | NA                 | INTERGENIC                    | NA                                       |
| Kabuli_wild_41657180 | 1399942873                          | Ca_kabuli_Chr07 | 41657180                | G/T  | Gene_Ca_17988      | INTRON                        | RNA polymerase, alpha subunit            |
| Kabuli_wild_41657241 | 1399942874                          | Ca_kabuli_Chr07 | 41657241                | T/C  | Gene_Ca_17988      | NON_SYNONYMOUS_CODING         | RNA polymerase, alpha subunit            |
| Kabuli_wild_41666809 | 1399942875                          | Ca_kabuli_Chr07 | 41666809                | A/T  | Gene_Ca_17988      | NON_SYNONYMOUS_CODING         | RNA polymerase, alpha subunit            |
| Kabuli_wild_41821410 | 1399942876                          | Ca_kabuli_Chr07 | 41821410                | T/C  | NA                 | INTERGENIC                    | NA                                       |
| Kabuli_wild_42011888 | 1399942877                          | Ca_kabuli_Chr07 | 42011888                | A/C  | Gene_Ca_17974      | SYNONYMOUS_CODING             | Ribosomerecyclingfactor                  |
| Kabuli_wild_42272939 | 1399942878                          | Ca_kabuli_Chr07 | 42272939                | G/C  | NA                 | INTERGENIC                    | NA                                       |
| Kabuli_wild_42291250 | 1399942879                          | Ca_kabuli_Chr07 | 42291250                | C/A  | NA                 | INTERGENIC                    | NA                                       |
| Kabuli_wild_42291274 | 1399942880                          | Ca_kabuli_Chr07 | 42291274                | G/A  | NA                 | INTERGENIC                    | NA                                       |
| Kabuli_wild_42291291 | 1399942881                          | Ca_kabuli_Chr07 | 42291291                | C/T  | NA                 | INTERGENIC                    | NA                                       |
| Kabuli_wild_42354938 | 1399942882                          | Ca_kabuli_Chr07 | 42354938                | C/T  | NA                 | INTERGENIC                    | NA                                       |
| Kabuli_wild_42354946 | 1399942883                          | Ca_kabuli_Chr07 | 42354946                | G/A  | NA                 | INTERGENIC                    | NA                                       |
| Kabuli_wild_42354999 | 1399942884                          | Ca_kabuli_Chr07 | 42354999                | C/T  | NA                 | INTERGENIC                    | NA                                       |
| Kabuli_wild_42355002 | 1399942885                          | Ca_kabuli_Chr07 | 42355002                | T/G  | NA                 | INTERGENIC                    | NA                                       |
| Kabuli_wild_42355011 | 1399942886                          | Ca_kabuli_Chr07 | 42355011                | G/T  | NA                 | INTERGENIC                    | NA                                       |
| Kabuli_wild_42355315 | 1399942887                          | Ca_kabuli_Chr07 | 42355315                | C/G  | NA                 | INTERGENIC                    | NA                                       |
| Kabuli_wild_42474465 | 1399942888                          | Ca_kabuli_Chr07 | 42474465                | T/A  | NA                 | INTERGENIC                    | NA                                       |
| Kabuli_wild_42558871 | 1399942889                          | Ca_kabuli_Chr07 | 42558871                | A/G  | Gene_Ca_20213      | DOWNSTREAM                    | Cytochrome P450                          |
| Kabuli_wild_42587321 | 1399942890                          | Ca_kabuli_Chr07 | 42587321                | A/G  | NA                 | INTERGENIC                    | NA                                       |
| Kabuli_wild_42846800 | 1399942891                          | Ca_kabuli_Chr07 | 42846800                | G/A  | Gene_Ca_20198      | NON_SYNONYMOUS_CODING         | NA                                       |

| SNP IDs              | NCBI dbSNP accession IDs (NCBI_SS#) | Chromosomes     | Physical positions (bp) | SNPs | Gene accession IDs | Sequence components of genome | Putative functions                                           |
|----------------------|-------------------------------------|-----------------|-------------------------|------|--------------------|-------------------------------|--------------------------------------------------------------|
| Kabuli_wild_42846801 | 1399942892                          | Ca_kabuli_Chr07 | 42846801                | C/A  | Gene_Ca_20198      | NON_SYNONYMOUS_CODING         | NA                                                           |
| Kabuli_wild_42846803 | 1399942893                          | Ca_kabuli_Chr07 | 42846803                | G/A  | Gene_Ca_20198      | NON_SYNONYMOUS_CODING         | NA                                                           |
| Kabuli_wild_42846818 | 1399942894                          | Ca_kabuli_Chr07 | 42846818                | C/T  | Gene_Ca_20198      | SYNONYMOUS_CODING             | NA                                                           |
| Kabuli_wild_42846867 | 1399942895                          | Ca_kabuli_Chr07 | 42846867                | G/A  | Gene_Ca_20198      | NON_SYNONYMOUS_CODING         | NA                                                           |
| Kabuli_wild_42846868 | 1399942896                          | Ca_kabuli_Chr07 | 42846868                | G/A  | Gene_Ca_20198      | SYNONYMOUS_CODING             | NA                                                           |
| Kabuli_wild_42913317 | 1399942897                          | Ca_kabuli_Chr07 | 42913317                | T/G  | NA                 | INTERGENIC                    | NA                                                           |
| Kabuli_wild_42915851 | 1399942898                          | Ca_kabuli_Chr07 | 42915851                | G/A  | NA                 | INTERGENIC                    | NA                                                           |
| Kabuli_wild_42915928 | 1399942899                          | Ca_kabuli_Chr07 | 42915928                | G/T  | NA                 | INTERGENIC                    | NA                                                           |
| Kabuli_wild_43080710 | 1399942900                          | Ca_kabuli_Chr07 | 43080710                | G/A  | Gene_Ca_20188      | INTRON                        | NA                                                           |
| Kabuli_wild_43210821 | 1399942901                          | Ca_kabuli_Chr07 | 43210821                | A/T  | NA                 | INTERGENIC                    | NA                                                           |
| Kabuli_wild_43583019 | 1399942902                          | Ca_kabuli_Chr07 | 43583019                | A/C  | NA                 | INTERGENIC                    | NA                                                           |
| Kabuli_wild_43997059 | 1399942903                          | Ca_kabuli_Chr07 | 43997059                | G/A  | NA                 | INTERGENIC                    | NA                                                           |
| Kabuli_wild_44232172 | 1399942904                          | Ca_kabuli_Chr07 | 44232172                | G/A  | Gene_Ca_21369      | NON_SYNONYMOUS_CODING         | NA                                                           |
| Kabuli_wild_44232194 | 1399942905                          | Ca_kabuli_Chr07 | 44232194                | C/T  | Gene_Ca_21369      | NON_SYNONYMOUS_CODING         | NA                                                           |
| Kabuli_wild_44232204 | 1399942906                          | Ca_kabuli_Chr07 | 44232204                | T/A  | Gene_Ca_21369      | SYNONYMOUS_CODING             | NA                                                           |
| Kabuli_wild_44232208 | 1399942907                          | Ca_kabuli_Chr07 | 44232208                | G/A  | Gene_Ca_21369      | NON_SYNONYMOUS_CODING         | NA                                                           |
| Kabuli_wild_44232221 | 1399942908                          | Ca_kabuli_Chr07 | 44232221                | C/T  | Gene_Ca_21369      | NON_SYNONYMOUS_CODING         | NA                                                           |
| Kabuli_wild_44232232 | 1399942909                          | Ca_kabuli_Chr07 | 44232232                | C/T  | Gene_Ca_21369      | NON_SYNONYMOUS_CODING         | NA                                                           |
| Kabuli_wild_44232239 | 1399942910                          | Ca_kabuli_Chr07 | 44232239                | G/A  | Gene_Ca_21369      | SYNONYMOUS_CODING             | NA                                                           |
| Kabuli_wild_44232266 | 1399942911                          | Ca_kabuli_Chr07 | 44232266                | C/T  | Gene_Ca_21369      | NON_SYNONYMOUS_CODING         | NA                                                           |
| Kabuli_wild_44339918 | 1399942912                          | Ca_kabuli_Chr07 | 44339918                | A/G  | NA                 | INTERGENIC                    | NA                                                           |
| Kabuli_wild_44446034 | 1399942913                          | Ca_kabuli_Chr07 | 44446034                | T/C  | NA                 | INTERGENIC                    | NA                                                           |
| Kabuli_wild_44540553 | 1399942914                          | Ca_kabuli_Chr07 | 44540553                | T/G  | NA                 | INTERGENIC                    | NA                                                           |
| Kabuli_wild_44540581 | 1399942915                          | Ca_kabuli_Chr07 | 44540581                | C/A  | NA                 | INTERGENIC                    | NA                                                           |
| Kabuli_wild_44540596 | 1399942916                          | Ca_kabuli_Chr07 | 44540596                | C/A  | NA                 | INTERGENIC                    | NA                                                           |
| Kabuli_wild_44540610 | 1399942917                          | Ca_kabuli_Chr07 | 44540610                | G/A  | NA                 | INTERGENIC                    | NA                                                           |
| Kabuli_wild_44540616 | 1399942918                          | Ca_kabuli_Chr07 | 44540616                | C/A  | NA                 | INTERGENIC                    | NA                                                           |
| Kabuli_wild_44540629 | 1399942919                          | Ca_kabuli_Chr07 | 44540629                | G/A  | NA                 | INTERGENIC                    | NA                                                           |
| Kabuli_wild_44612651 | 1399942920                          | Ca_kabuli_Chr07 | 44612651                | C/A  | Gene_Ca_15697      | NON_SYNONYMOUS_CODING         | Ethylenein sensitive3                                        |
| Kabuli_wild_44728766 | 1399942921                          | Ca_kabuli_Chr07 | 44728766                | G/T  | Gene_Ca_15700      | NON_SYNONYMOUS_CODING         | Inositolpolyphosphate-relatedphosphatase                     |
| Kabuli_wild_44747668 | 1399942922                          | Ca_kabuli_Chr07 | 44747668                | C/T  | Gene_Ca_15701      | SYNONYMOUS_CODING             | NA                                                           |
| Kabuli_wild_44765450 | 1399942923                          | Ca_kabuli_Chr07 | 44765450                | C/T  | Gene_Ca_15703      | SYNONYMOUS_CODING             | Transposase,Ptta/En/Spm,plant                                |
| Kabuli_wild_44765522 | 1399942924                          | Ca_kabuli_Chr07 | 44765522                | A/C  | Gene_Ca_15703      | SYNONYMOUS_CODING             | Transposase,Ptta/En/Spm,plant                                |
| Kabuli_wild_44765582 | 1399942925                          | Ca_kabuli_Chr07 | 44765582                | C/A  | Gene_Ca_15703      | NON_SYNONYMOUS_CODING         | Transposase,Ptta/En/Spm,plant                                |
| Kabuli_wild_44877324 | 1399942926                          | Ca_kabuli_Chr07 | 44877324                | A/C  | Gene_Ca_15708      | NON_SYNONYMOUS_CODING         | Zinc finger,C2H2-type                                        |
| Kabuli_wild_44926768 | 1399942927                          | Ca_kabuli_Chr07 | 44926768                | C/T  | NA                 | INTERGENIC                    | NA                                                           |
| Kabuli_wild_44926783 | 1399942928                          | Ca_kabuli_Chr07 | 44926783                | C/A  | NA                 | INTERGENIC                    | NA                                                           |
| Kabuli_wild_44938708 | 1399942929                          | Ca_kabuli_Chr07 | 44938708                | T/G  | Gene_Ca_15711      | SYNONYMOUS_CODING             | Pathogenesis-related transcriptional factor/ERF, DNA-binding |
| Kabuli_wild_45280659 | 1399942930                          | Ca_kabuli_Chr07 | 45280659                | T/A  | Gene_Ca_15727      | UPSTREAM                      | Protein kinase,catalytic domain                              |
| Kabuli_wild_45300692 | 1399942931                          | Ca_kabuli_Chr07 | 45300692                | A/G  | Gene_Ca_15729      | INTRON                        | Double-strandedRNA-binding                                   |
| Kabuli_wild_45739326 | 1399942932                          | Ca_kabuli_Chr07 | 45739326                | G/A  | NA                 | INTERGENIC                    | NA                                                           |
| Kabuli_wild_45739341 | 1399942933                          | Ca_kabuli_Chr07 | 45739341                | C/A  | NA                 | INTERGENIC                    | NA                                                           |
| Kabuli_wild_45764010 | 1399942934                          | Ca_kabuli_Chr07 | 45764010                | T/C  | Gene_Ca_15751      | INTRON                        | RibosomalproteinL5                                           |
| Kabuli_wild_45936581 | 1399942935                          | Ca_kabuli_Chr07 | 45936581                | C/A  | Gene_Ca_15757      | NON_SYNONYMOUS_CODING         | Dedicatorofcytokinesis                                       |



| SNP IDs              | NCBI dbSNP accession IDs (NCBI_SS#) | Chromosomes     | Physical positions (bp) | SNPs | Gene accession IDs | Sequence components of genome | Putative functions                             |
|----------------------|-------------------------------------|-----------------|-------------------------|------|--------------------|-------------------------------|------------------------------------------------|
| Kabuli_wild_46053109 | 1399942936                          | Ca_kabuli_Chr07 | 46053109                | G/A  | Gene_Ca_15758      | NON_SYNONYMOUS_CODING         | Peptidase C48, SUMO/Sentrin/Ubl1               |
| Kabuli_wild_46053116 | 1399942937                          | Ca_kabuli_Chr07 | 46053116                | C/T  | Gene_Ca_15758      | NON_SYNONYMOUS_CODING         | Peptidase C48, SUMO/Sentrin/Ubl1               |
| Kabuli_wild_46053134 | 1399942938                          | Ca_kabuli_Chr07 | 46053134                | G/T  | Gene_Ca_15758      | NON_SYNONYMOUS_CODING         | Peptidase C48, SUMO/Sentrin/Ubl1               |
| Kabuli_wild_46053176 | 1399942939                          | Ca_kabuli_Chr07 | 46053176                | G/A  | Gene_Ca_15758      | SYNONYMOUS_CODING             | Peptidase C48, SUMO/Sentrin/Ubl1               |
| Kabuli_wild_46053193 | 1399942940                          | Ca_kabuli_Chr07 | 46053193                | G/A  | Gene_Ca_15758      | NON_SYNONYMOUS_CODING         | Peptidase C48, SUMO/Sentrin/Ubl1               |
| Kabuli_wild_46485934 | 1399942941                          | Ca_kabuli_Chr07 | 46485934                | A/G  | Gene_Ca_22756      | INTRON                        | NA                                             |
| Kabuli_wild_46493344 | 1399942942                          | Ca_kabuli_Chr07 | 46493344                | A/G  | NA                 | INTERGENIC                    | NA                                             |
| Kabuli_wild_46549964 | 1399942943                          | Ca_kabuli_Chr07 | 46549964                | T/G  | NA                 | INTERGENIC                    | NA                                             |
| Kabuli_wild_46550010 | 1399942944                          | Ca_kabuli_Chr07 | 46550010                | T/C  | NA                 | INTERGENIC                    | NA                                             |
| Kabuli_wild_46747255 | 1399942945                          | Ca_kabuli_Chr07 | 46747255                | A/C  | Gene_Ca_19471      | DOWNSTREAM                    | Protein of unknown function DUF616             |
| Kabuli_wild_46747283 | 1399942946                          | Ca_kabuli_Chr07 | 46747283                | T/C  | Gene_Ca_19471      | DOWNSTREAM                    | Protein of unknown function DUF617             |
| Kabuli_wild_46747290 | 1399942947                          | Ca_kabuli_Chr07 | 46747290                | G/T  | Gene_Ca_19471      | DOWNSTREAM                    | Protein of unknown function DUF618             |
| Kabuli_wild_46747295 | 1399942948                          | Ca_kabuli_Chr07 | 46747295                | G/C  | Gene_Ca_19471      | DOWNSTREAM                    | Protein of unknown function DUF619             |
| Kabuli_wild_46747309 | 1399942949                          | Ca_kabuli_Chr07 | 46747309                | C/T  | Gene_Ca_19471      | DOWNSTREAM                    | Protein of unknown function DUF620             |
| Kabuli_wild_46747330 | 1399942950                          | Ca_kabuli_Chr07 | 46747330                | G/A  | Gene_Ca_19471      | DOWNSTREAM                    | Protein of unknown function DUF621             |
| Kabuli_wild_46825952 | 1399942951                          | Ca_kabuli_Chr07 | 46825952                | A/G  | Gene_Ca_19475      | SYNONYMOUS_CODING             | Glycosidehydrolase, family18, catalytic domain |
| Kabuli_wild_46825954 | 1399942952                          | Ca_kabuli_Chr07 | 46825954                | T/G  | Gene_Ca_19475      | NON_SYNONYMOUS_CODING         | Glycosidehydrolase, family18, catalytic domain |
| Kabuli_wild_46825957 | 1399942953                          | Ca_kabuli_Chr07 | 46825957                | A/T  | Gene_Ca_19475      | NON_SYNONYMOUS_CODING         | Glycosidehydrolase, family18, catalytic domain |
| Kabuli_wild_46825985 | 1399942954                          | Ca_kabuli_Chr07 | 46825985                | T/G  | Gene_Ca_19475      | SYNONYMOUS_CODING             | Glycosidehydrolase, family18, catalytic domain |
| Kabuli_wild_46825992 | 1399942955                          | Ca_kabuli_Chr07 | 46825992                | T/G  | Gene_Ca_19475      | NON_SYNONYMOUS_CODING         | Glycosidehydrolase, family18, catalytic domain |
| Kabuli_wild_46825997 | 1399942956                          | Ca_kabuli_Chr07 | 46825997                | A/G  | Gene_Ca_19475      | SYNONYMOUS_CODING             | Glycosidehydrolase, family18, catalytic domain |
| Kabuli_wild_46826008 | 1399942957                          | Ca_kabuli_Chr07 | 46826008                | A/T  | Gene_Ca_19475      | NON_SYNONYMOUS_CODING         | Glycosidehydrolase, family18, catalytic domain |
| Kabuli_wild_46826015 | 1399942958                          | Ca_kabuli_Chr07 | 46826015                | G/A  | Gene_Ca_19475      | SYNONYMOUS_CODING             | Glycosidehydrolase, family18, catalytic domain |
| Kabuli_wild_46826020 | 1399942959                          | Ca_kabuli_Chr07 | 46826020                | G/A  | Gene_Ca_19475      | NON_SYNONYMOUS_CODING         | Glycosidehydrolase, family18, catalytic domain |
| Kabuli_wild_46826028 | 1399942960                          | Ca_kabuli_Chr07 | 46826028                | C/A  | Gene_Ca_19475      | NON_SYNONYMOUS_CODING         | Glycosidehydrolase, family18, catalytic domain |
| Kabuli_wild_46826030 | 1399942961                          | Ca_kabuli_Chr07 | 46826030                | T/C  | Gene_Ca_19475      | SYNONYMOUS_CODING             | Glycosidehydrolase, family18, catalytic domain |
| Kabuli_wild_46826036 | 1399942962                          | Ca_kabuli_Chr07 | 46826036                | T/A  | Gene_Ca_19475      | SYNONYMOUS_CODING             | Glycosidehydrolase, family18, catalytic domain |
| Kabuli_wild_46936006 | 1399942963                          | Ca_kabuli_Chr07 | 46936006                | G/A  | NA                 | INTERGENIC                    | NA                                             |
| Kabuli_wild_46936053 | 1399942964                          | Ca_kabuli_Chr07 | 46936053                | G/A  | NA                 | INTERGENIC                    | NA                                             |
| Kabuli_wild_47029851 | 1399942965                          | Ca_kabuli_Chr07 | 47029851                | A/C  | NA                 | INTERGENIC                    | NA                                             |
| Kabuli_wild_47029867 | 1399942966                          | Ca_kabuli_Chr07 | 47029867                | G/T  | NA                 | INTERGENIC                    | NA                                             |
| Kabuli_wild_47029885 | 1399942967                          | Ca_kabuli_Chr07 | 47029885                | A/G  | NA                 | INTERGENIC                    | NA                                             |
| Kabuli_wild_47127331 | 1399942968                          | Ca_kabuli_Chr07 | 47127331                | T/G  | NA                 | INTERGENIC                    | NA                                             |
| Kabuli_wild_47127342 | 1399942969                          | Ca_kabuli_Chr07 | 47127342                | T/A  | NA                 | INTERGENIC                    | NA                                             |
| Kabuli_wild_47127343 | 1399942970                          | Ca_kabuli_Chr07 | 47127343                | C/T  | NA                 | INTERGENIC                    | NA                                             |
| Kabuli_wild_47239763 | 1399942971                          | Ca_kabuli_Chr07 | 47239763                | A/G  | Gene_Ca_19492      | SYNONYMOUS_CODING             | Helix-turn-helixmotif, lambda-likerepressor    |
| Kabuli_wild_47335916 | 1399942972                          | Ca_kabuli_Chr07 | 47335916                | C/G  | NA                 | INTERGENIC                    | NA                                             |
| Kabuli_wild_47335940 | 1399942973                          | Ca_kabuli_Chr07 | 47335940                | G/A  | NA                 | INTERGENIC                    | NA                                             |
| Kabuli_wild_47336169 | 1399942974                          | Ca_kabuli_Chr07 | 47336169                | T/A  | NA                 | INTERGENIC                    | NA                                             |
| Kabuli_wild_47395492 | 1399942975                          | Ca_kabuli_Chr07 | 47395492                | T/C  | NA                 | INTERGENIC                    | NA                                             |
| Kabuli_wild_47524131 | 1399942976                          | Ca_kabuli_Chr07 | 47524131                | C/A  | Gene_Ca_19499      | NON_SYNONYMOUS_CODING         | Protein kinase, catalytic domain               |
| Kabuli_wild_47524173 | 1399942977                          | Ca_kabuli_Chr07 | 47524173                | A/C  | Gene_Ca_19499      | NON_SYNONYMOUS_CODING         | Protein kinase, catalytic domain               |
| Kabuli_wild_47694706 | 1399942978                          | Ca_kabuli_Chr07 | 47694706                | A/C  | Gene_Ca_22539      | DOWNSTREAM                    | NA                                             |
| Kabuli_wild_47839952 | 1399942979                          | Ca_kabuli_Chr07 | 47839952                | G/T  | Gene_Ca_22546      | NON_SYNONYMOUS_CODING         | Ubiquitin-conjugating enzyme, E2               |



| SNP IDs              | NCBI dbSNP accession IDs (NCBI_SS#) | Chromosomes     | Physical positions (bp) | SNPs | Gene accession IDs | Sequence components of genome | Putative functions                                                 |
|----------------------|-------------------------------------|-----------------|-------------------------|------|--------------------|-------------------------------|--------------------------------------------------------------------|
| Kabuli_wild_47840092 | 1399942980                          | Ca_kabuli_Chr07 | 47840092                | A/C  | Gene_Ca_22546      | SYNONYMOUS_CODING             | Ubiquitin-conjugating enzyme, E2                                   |
| Kabuli_wild_47986994 | 1399942981                          | Ca_kabuli_Chr07 | 47986994                | T/C  | NA                 | INTERGENIC                    | NA                                                                 |
| Kabuli_wild_48109885 | 1399942982                          | Ca_kabuli_Chr07 | 48109885                | G/T  | NA                 | INTERGENIC                    | NA                                                                 |
| Kabuli_wild_48200821 | 1399942983                          | Ca_kabuli_Chr07 | 48200821                | C/A  | NA                 | INTERGENIC                    | NA                                                                 |
| Kabuli_wild_48200822 | 1399942984                          | Ca_kabuli_Chr07 | 48200822                | G/A  | NA                 | INTERGENIC                    | NA                                                                 |
| Kabuli_wild_48200823 | 1399942985                          | Ca_kabuli_Chr07 | 48200823                | G/A  | NA                 | INTERGENIC                    | NA                                                                 |
| Kabuli_wild_48200841 | 1399942986                          | Ca_kabuli_Chr07 | 48200841                | T/C  | NA                 | INTERGENIC                    | NA                                                                 |
| Kabuli_wild_48200848 | 1399942987                          | Ca_kabuli_Chr07 | 48200848                | T/C  | NA                 | INTERGENIC                    | NA                                                                 |
| Kabuli_wild_48200865 | 1399942988                          | Ca_kabuli_Chr07 | 48200865                | A/G  | NA                 | INTERGENIC                    | NA                                                                 |
| Kabuli_wild_48461030 | 1399942989                          | Ca_kabuli_Chr07 | 48461030                | A/G  | NA                 | INTERGENIC                    | NA                                                                 |
| Kabuli_wild_48785119 | 1399942990                          | Ca_kabuli_Chr07 | 48785119                | C/T  | NA                 | INTERGENIC                    | NA                                                                 |
| Kabuli_wild_54095    | 1399942991                          | Ca_kabuli_Chr08 | 54095                   | A/C  | Gene_Ca_11935      | SYNONYMOUS_CODING             | Heat shock protein DnaJ,N-terminal                                 |
| Kabuli_wild_171259   | 1399942992                          | Ca_kabuli_Chr08 | 171259                  | T/C  | NA                 | INTERGENIC                    | NA                                                                 |
| Kabuli_wild_184467   | 1399942993                          | Ca_kabuli_Chr08 | 184467                  | A/G  | Gene_Ca_11925      | INTRON                        | Spc97/Spc98                                                        |
| Kabuli_wild_281622   | 1399942994                          | Ca_kabuli_Chr08 | 281622                  | G/A  | Gene_Ca_11908      | DOWNSTREAM                    | EGF-likecalcium-binding                                            |
| Kabuli_wild_281630   | 1399942995                          | Ca_kabuli_Chr08 | 281630                  | A/C  | Gene_Ca_11908      | DOWNSTREAM                    | EGF-likecalcium-binding                                            |
| Kabuli_wild_325107   | 1399942996                          | Ca_kabuli_Chr08 | 325107                  | T/A  | NA                 | INTERGENIC                    | NA                                                                 |
| Kabuli_wild_340712   | 1399942997                          | Ca_kabuli_Chr08 | 340712                  | C/T  | NA                 | INTERGENIC                    | NA                                                                 |
| Kabuli_wild_340827   | 1399942998                          | Ca_kabuli_Chr08 | 340827                  | T/C  | NA                 | INTERGENIC                    | NA                                                                 |
| Kabuli_wild_356295   | 1399942999                          | Ca_kabuli_Chr08 | 356295                  | A/T  | Gene_Ca_11899      | INTRON                        | HEAT                                                               |
| Kabuli_wild_356306   | 1399943000                          | Ca_kabuli_Chr08 | 356306                  | A/G  | Gene_Ca_11899      | INTRON                        | HEAT                                                               |
| Kabuli_wild_356308   | 1399943001                          | Ca_kabuli_Chr08 | 356308                  | G/A  | Gene_Ca_11899      | INTRON                        | HEAT                                                               |
| Kabuli_wild_499819   | 1399943002                          | Ca_kabuli_Chr08 | 499819                  | A/C  | Gene_Ca_11887      | INTRON                        | Protein phosphatase 2C, manganese/magnesium aspartate binding site |
| Kabuli_wild_560746   | 1399943003                          | Ca_kabuli_Chr08 | 560746                  | A/G  | Gene_Ca_11882      | INTRON                        | Cystathioninebeta-synthase,core                                    |
| Kabuli_wild_566094   | 1399943004                          | Ca_kabuli_Chr08 | 566094                  | A/G  | NA                 | INTERGENIC                    | NA                                                                 |
| Kabuli_wild_614299   | 1399943005                          | Ca_kabuli_Chr08 | 614299                  | C/A  | Gene_Ca_11874      | DOWNSTREAM                    | NA                                                                 |
| Kabuli_wild_614301   | 1399943006                          | Ca_kabuli_Chr08 | 614301                  | C/A  | Gene_Ca_11874      | DOWNSTREAM                    | NA                                                                 |
| Kabuli_wild_614324   | 1399943007                          | Ca_kabuli_Chr08 | 614324                  | G/A  | Gene_Ca_11874      | DOWNSTREAM                    | NA                                                                 |
| Kabuli_wild_614327   | 1399943008                          | Ca_kabuli_Chr08 | 614327                  | T/C  | Gene_Ca_11874      | DOWNSTREAM                    | NA                                                                 |
| Kabuli_wild_619444   | 1399943009                          | Ca_kabuli_Chr08 | 619444                  | A/C  | Gene_Ca_11873      | UPSTREAM                      | Survival protein SurE-like phosphatase/nucleotidase                |
| Kabuli_wild_619605   | 1399943010                          | Ca_kabuli_Chr08 | 619605                  | T/C  | Gene_Ca_11873      | UPSTREAM                      | Survival protein SurE-like phosphatase/nucleotidase                |
| Kabuli_wild_634862   | 1399943011                          | Ca_kabuli_Chr08 | 634862                  | C/T  | NA                 | INTERGENIC                    | NA                                                                 |
| Kabuli_wild_649491   | 1399943012                          | Ca_kabuli_Chr08 | 649491                  | A/C  | Gene_Ca_11866      | SYNONYMOUS_CODING             | Protein of unknown function DUF1423,plant                          |
| Kabuli_wild_660610   | 1399943013                          | Ca_kabuli_Chr08 | 660610                  | T/G  | NA                 | INTERGENIC                    | NA                                                                 |
| Kabuli_wild_666010   | 1399943014                          | Ca_kabuli_Chr08 | 666010                  | C/T  | NA                 | INTERGENIC                    | NA                                                                 |
| Kabuli_wild_666069   | 1399943015                          | Ca_kabuli_Chr08 | 666069                  | G/T  | NA                 | INTERGENIC                    | NA                                                                 |
| Kabuli_wild_666088   | 1399943016                          | Ca_kabuli_Chr08 | 666088                  | T/C  | NA                 | INTERGENIC                    | NA                                                                 |
| Kabuli_wild_666274   | 1399943017                          | Ca_kabuli_Chr08 | 666274                  | T/G  | NA                 | INTERGENIC                    | NA                                                                 |
| Kabuli_wild_666284   | 1399943018                          | Ca_kabuli_Chr08 | 666284                  | T/A  | NA                 | INTERGENIC                    | NA                                                                 |
| Kabuli_wild_666288   | 1399943019                          | Ca_kabuli_Chr08 | 666288                  | A/T  | NA                 | INTERGENIC                    | NA                                                                 |
| Kabuli_wild_666294   | 1399943020                          | Ca_kabuli_Chr08 | 666294                  | G/A  | NA                 | INTERGENIC                    | NA                                                                 |
| Kabuli_wild_673820   | 1399943021                          | Ca_kabuli_Chr08 | 673820                  | A/G  | Gene_Ca_11861      | NON_SYNONYMOUS_CODING         | KIP1-like                                                          |
| Kabuli_wild_673893   | 1399943022                          | Ca_kabuli_Chr08 | 673893                  | A/C  | Gene_Ca_11861      | NON_SYNONYMOUS_CODING         | KIP1-like                                                          |
| Kabuli_wild_701803   | 1399943023                          | Ca_kabuli_Chr08 | 701803                  | C/T  | Gene_Ca_11858      | INTRON                        | Protein kinase,catalytic domain                                    |

| SNP IDs             | NCBI dbSNP accession IDs (NCBI_SS#) | Chromosomes     | Physical positions (bp) | SNPs | Gene accession IDs | Sequence components of genome | Putative functions                                 |
|---------------------|-------------------------------------|-----------------|-------------------------|------|--------------------|-------------------------------|----------------------------------------------------|
| Kabuli_wild_701811  | 1399943024                          | Ca_kabuli_Chr08 | 701811                  | T/G  | Gene_Ca_11858      | INTRON                        | NA                                                 |
| Kabuli_wild_701837  | 1399943025                          | Ca_kabuli_Chr08 | 701837                  | G/A  | Gene_Ca_11858      | INTRON                        | NA                                                 |
| Kabuli_wild_706482  | 1399943026                          | Ca_kabuli_Chr08 | 706482                  | G/C  | NA                 | INTERGENIC                    | NA                                                 |
| Kabuli_wild_706514  | 1399943027                          | Ca_kabuli_Chr08 | 706514                  | T/C  | NA                 | INTERGENIC                    | NA                                                 |
| Kabuli_wild_706555  | 1399943028                          | Ca_kabuli_Chr08 | 706555                  | G/A  | NA                 | INTERGENIC                    | NA                                                 |
| Kabuli_wild_706614  | 1399943029                          | Ca_kabuli_Chr08 | 706614                  | C/T  | NA                 | INTERGENIC                    | NA                                                 |
| Kabuli_wild_706793  | 1399943030                          | Ca_kabuli_Chr08 | 706793                  | A/G  | NA                 | INTERGENIC                    | NA                                                 |
| Kabuli_wild_706800  | 1399943031                          | Ca_kabuli_Chr08 | 706800                  | G/A  | NA                 | INTERGENIC                    | NA                                                 |
| Kabuli_wild_707395  | 1399943032                          | Ca_kabuli_Chr08 | 707395                  | A/G  | NA                 | INTERGENIC                    | NA                                                 |
| Kabuli_wild_709063  | 1399943033                          | Ca_kabuli_Chr08 | 709063                  | T/C  | Gene_Ca_11857      | DOWNSTREAM                    | gh                                                 |
| Kabuli_wild_709094  | 1399943034                          | Ca_kabuli_Chr08 | 709094                  | T/C  | Gene_Ca_11857      | DOWNSTREAM                    | Pentatric peptide repeat                           |
| Kabuli_wild_709124  | 1399943035                          | Ca_kabuli_Chr08 | 709124                  | A/T  | Gene_Ca_11857      | DOWNSTREAM                    | Pentatric peptide repeat                           |
| Kabuli_wild_714967  | 1399943036                          | Ca_kabuli_Chr08 | 714967                  | A/G  | NA                 | INTERGENIC                    | NA                                                 |
| Kabuli_wild_714974  | 1399943037                          | Ca_kabuli_Chr08 | 714974                  | G/A  | NA                 | INTERGENIC                    | NA                                                 |
| Kabuli_wild_822302  | 1399943038                          | Ca_kabuli_Chr08 | 822302                  | A/G  | Gene_Ca_11839      | NON_SYNONYMOUS_CODING         | Zinc finger,PHD-type                               |
| Kabuli_wild_839786  | 1399943039                          | Ca_kabuli_Chr08 | 839786                  | C/T  | NA                 | INTERGENIC                    | NA                                                 |
| Kabuli_wild_875236  | 1399943040                          | Ca_kabuli_Chr08 | 875236                  | T/G  | Gene_Ca_11831      | INTRON                        | PeptidaseM16,C-terminal                            |
| Kabuli_wild_894184  | 1399943041                          | Ca_kabuli_Chr08 | 894184                  | C/A  | NA                 | INTERGENIC                    | NA                                                 |
| Kabuli_wild_897714  | 1399943042                          | Ca_kabuli_Chr08 | 897714                  | A/G  | NA                 | INTERGENIC                    | NA                                                 |
| Kabuli_wild_898089  | 1399943043                          | Ca_kabuli_Chr08 | 898089                  | C/T  | NA                 | INTERGENIC                    | NA                                                 |
| Kabuli_wild_924715  | 1399943044                          | Ca_kabuli_Chr08 | 924715                  | A/G  | NA                 | INTERGENIC                    | NA                                                 |
| Kabuli_wild_938347  | 1399943045                          | Ca_kabuli_Chr08 | 938347                  | G/A  | NA                 | INTERGENIC                    | NA                                                 |
| Kabuli_wild_938404  | 1399943046                          | Ca_kabuli_Chr08 | 938404                  | T/C  | NA                 | INTERGENIC                    | NA                                                 |
| Kabuli_wild_938428  | 1399943047                          | Ca_kabuli_Chr08 | 938428                  | T/A  | NA                 | INTERGENIC                    | NA                                                 |
| Kabuli_wild_957405  | 1399943048                          | Ca_kabuli_Chr08 | 957405                  | A/G  | Gene_Ca_11821      | SYNONYMOUS_CODING             | Chalcone/stilbenesynthase,N-terminal               |
| Kabuli_wild_957462  | 1399943049                          | Ca_kabuli_Chr08 | 957462                  | C/T  | Gene_Ca_11821      | SYNONYMOUS_CODING             | Chalcone/stilbenesynthase,N-terminal               |
| Kabuli_wild_957486  | 1399943050                          | Ca_kabuli_Chr08 | 957486                  | T/A  | Gene_Ca_11821      | SYNONYMOUS_CODING             | Chalcone/stilbenesynthase,N-terminal               |
| Kabuli_wild_1011320 | 1399943051                          | Ca_kabuli_Chr08 | 1011320                 | G/T  | NA                 | INTERGENIC                    | NA                                                 |
| Kabuli_wild_1131429 | 1399943052                          | Ca_kabuli_Chr08 | 1131429                 | C/A  | NA                 | INTERGENIC                    | NA                                                 |
| Kabuli_wild_1194886 | 1399943053                          | Ca_kabuli_Chr08 | 1194886                 | G/A  | Gene_Ca_15060      | INTRON                        | Alpha/betahydrolasefold-1                          |
| Kabuli_wild_1222064 | 1399943054                          | Ca_kabuli_Chr08 | 1222064                 | G/A  | Gene_Ca_15058      | DOWNSTREAM                    | De-etiolatedprotein1,Det1                          |
| Kabuli_wild_1241739 | 1399943055                          | Ca_kabuli_Chr08 | 1241739                 | C/T  | NA                 | INTERGENIC                    | NA                                                 |
| Kabuli_wild_1362691 | 1399943056                          | Ca_kabuli_Chr08 | 1362691                 | T/A  | NA                 | INTERGENIC                    | NA                                                 |
| Kabuli_wild_1530812 | 1399943057                          | Ca_kabuli_Chr08 | 1530812                 | A/G  | Gene_Ca_15018      | INTRON                        | ATPase,V1/A1complex,subunitE                       |
| Kabuli_wild_1534461 | 1399943058                          | Ca_kabuli_Chr08 | 1534461                 | A/C  | NA                 | INTERGENIC                    | NA                                                 |
| Kabuli_wild_1540926 | 1399943059                          | Ca_kabuli_Chr08 | 1540926                 | A/G  | Gene_Ca_15017      | UPSTREAM                      | NA                                                 |
| Kabuli_wild_1544916 | 1399943060                          | Ca_kabuli_Chr08 | 1544916                 | C/T  | Gene_Ca_15016      | UPSTREAM                      | NA                                                 |
| Kabuli_wild_1573877 | 1399943061                          | Ca_kabuli_Chr08 | 1573877                 | G/T  | Gene_Ca_15012      | NON_SYNONYMOUS_CODING         | ATPase,AAA+type,core                               |
| Kabuli_wild_1615234 | 1399943062                          | Ca_kabuli_Chr08 | 1615234                 | G/A  | NA                 | INTERGENIC                    | NA                                                 |
| Kabuli_wild_1708860 | 1399943063                          | Ca_kabuli_Chr08 | 1708860                 | T/C  | Gene_Ca_02436      | SYNONYMOUS_CODING             | NA                                                 |
| Kabuli_wild_1782034 | 1399943064                          | Ca_kabuli_Chr08 | 1782034                 | C/G  | NA                 | INTERGENIC                    | NA                                                 |
| Kabuli_wild_1794755 | 1399943065                          | Ca_kabuli_Chr08 | 1794755                 | C/A  | Gene_Ca_02426      | NON_SYNONYMOUS_CODING         | ATPase,P-type,K/Mg/Cd/Cu/Zn/Na/Ca/Na/H-transporter |
| Kabuli_wild_1794756 | 1399943066                          | Ca_kabuli_Chr08 | 1794756                 | G/T  | Gene_Ca_02426      | SYNONYMOUS_CODING             | ATPase,P-type,K/Mg/Cd/Cu/Zn/Na/Ca/Na/H-transporter |
| Kabuli_wild_1794759 | 1399943067                          | Ca_kabuli_Chr08 | 1794759                 | C/T  | Gene_Ca_02426      | SYNONYMOUS_CODING             | ATPase,P-type,K/Mg/Cd/Cu/Zn/Na/Ca/Na/H-transporter |

| SNP IDs                    | NCBI dbSNP accession IDs (NCBI_SS#) | Chromosomes            | Physical positions (bp) | SNPs | Gene accession IDs | Sequence components of genome | Putative functions                                  |
|----------------------------|-------------------------------------|------------------------|-------------------------|------|--------------------|-------------------------------|-----------------------------------------------------|
| <i>Kabuli_wild_1817388</i> | 1399943068                          | <i>Ca_kabuli_Chr08</i> | 1817388                 | T/C  | NA                 | INTERGENIC                    | NA                                                  |
| <i>Kabuli_wild_1817503</i> | 1399943069                          | <i>Ca_kabuli_Chr08</i> | 1817503                 | T/C  | NA                 | INTERGENIC                    | NA                                                  |
| <i>Kabuli_wild_1846603</i> | 1399943070                          | <i>Ca_kabuli_Chr08</i> | 1846603                 | T/C  | Gene_Ca_02422      | DOWNSTREAM                    | Remorin,C-terminal                                  |
| <i>Kabuli_wild_1854899</i> | 1399943071                          | <i>Ca_kabuli_Chr08</i> | 1854899                 | C/T  | Gene_Ca_02420      | NON_SYNONYMOUS_CODING         | Thaumatococcus pathogenesis-related                 |
| <i>Kabuli_wild_1932975</i> | 1399943072                          | <i>Ca_kabuli_Chr08</i> | 1932975                 | T/C  | NA                 | INTERGENIC                    | NA                                                  |
| <i>Kabuli_wild_1932981</i> | 1399943073                          | <i>Ca_kabuli_Chr08</i> | 1932981                 | T/C  | NA                 | INTERGENIC                    | NA                                                  |
| <i>Kabuli_wild_1932990</i> | 1399943074                          | <i>Ca_kabuli_Chr08</i> | 1932990                 | A/C  | NA                 | INTERGENIC                    | NA                                                  |
| <i>Kabuli_wild_1932993</i> | 1399943075                          | <i>Ca_kabuli_Chr08</i> | 1932993                 | C/T  | NA                 | INTERGENIC                    | NA                                                  |
| <i>Kabuli_wild_1932997</i> | 1399943076                          | <i>Ca_kabuli_Chr08</i> | 1932997                 | G/T  | NA                 | INTERGENIC                    | NA                                                  |
| <i>Kabuli_wild_1933026</i> | 1399943077                          | <i>Ca_kabuli_Chr08</i> | 1933026                 | G/A  | NA                 | INTERGENIC                    | NA                                                  |
| <i>Kabuli_wild_1933035</i> | 1399943078                          | <i>Ca_kabuli_Chr08</i> | 1933035                 | T/A  | NA                 | INTERGENIC                    | NA                                                  |
| <i>Kabuli_wild_1933039</i> | 1399943079                          | <i>Ca_kabuli_Chr08</i> | 1933039                 | G/T  | NA                 | INTERGENIC                    | NA                                                  |
| <i>Kabuli_wild_1933052</i> | 1399943080                          | <i>Ca_kabuli_Chr08</i> | 1933052                 | T/C  | NA                 | INTERGENIC                    | NA                                                  |
| <i>Kabuli_wild_1933053</i> | 1399943081                          | <i>Ca_kabuli_Chr08</i> | 1933053                 | G/A  | NA                 | INTERGENIC                    | NA                                                  |
| <i>Kabuli_wild_1933064</i> | 1399943082                          | <i>Ca_kabuli_Chr08</i> | 1933064                 | G/C  | NA                 | INTERGENIC                    | NA                                                  |
| <i>Kabuli_wild_1989343</i> | 1399943083                          | <i>Ca_kabuli_Chr08</i> | 1989343                 | G/A  | NA                 | INTERGENIC                    | NA                                                  |
| <i>Kabuli_wild_2028423</i> | 1399943084                          | <i>Ca_kabuli_Chr08</i> | 2028423                 | G/T  | Gene_Ca_02400      | INTRON                        | Protein of unknown function DUF544                  |
| <i>Kabuli_wild_2088892</i> | 1399943085                          | <i>Ca_kabuli_Chr08</i> | 2088892                 | T/G  | Gene_Ca_02391      | NON_SYNONYMOUS_CODING         | Cell cycle regulated microtubule associated protein |
| <i>Kabuli_wild_2090852</i> | 1399943086                          | <i>Ca_kabuli_Chr08</i> | 2090852                 | A/G  | Gene_Ca_02390      | UPSTREAM                      | 1-aminocyclopropane-1-carboxylatesynthase           |
| <i>Kabuli_wild_2092669</i> | 1399943087                          | <i>Ca_kabuli_Chr08</i> | 2092669                 | T/G  | Gene_Ca_02389      | DOWNSTREAM                    | Protein kinase,catalytic domain                     |
| <i>Kabuli_wild_2095607</i> | 1399943088                          | <i>Ca_kabuli_Chr08</i> | 2095607                 | A/G  | NA                 | INTERGENIC                    | NA                                                  |
| <i>Kabuli_wild_2190581</i> | 1399943089                          | <i>Ca_kabuli_Chr08</i> | 2190581                 | C/T  | Gene_Ca_02376      | INTRON                        | Sec1-likeprotein                                    |
| <i>Kabuli_wild_2250178</i> | 1399943090                          | <i>Ca_kabuli_Chr08</i> | 2250178                 | A/C  | Gene_Ca_02366      | UPSTREAM                      | Squalene/phytoenesynthase                           |
| <i>Kabuli_wild_2306291</i> | 1399943091                          | <i>Ca_kabuli_Chr08</i> | 2306291                 | A/G  | NA                 | INTERGENIC                    | NA                                                  |
| <i>Kabuli_wild_2417474</i> | 1399943092                          | <i>Ca_kabuli_Chr08</i> | 2417474                 | A/T  | Gene_Ca_02345      | SYNONYMOUS_CODING             | NA                                                  |
| <i>Kabuli_wild_2482834</i> | 1399943093                          | <i>Ca_kabuli_Chr08</i> | 2482834                 | A/G  | NA                 | INTERGENIC                    | NA                                                  |
| <i>Kabuli_wild_2515582</i> | 1399943094                          | <i>Ca_kabuli_Chr08</i> | 2515582                 | A/T  | Gene_Ca_02333      | INTRON                        | DNA mismatch repair protein MutS,C-terminal domain  |
| <i>Kabuli_wild_2524148</i> | 1399943095                          | <i>Ca_kabuli_Chr08</i> | 2524148                 | A/G  | NA                 | INTERGENIC                    | NA                                                  |
| <i>Kabuli_wild_2524188</i> | 1399943096                          | <i>Ca_kabuli_Chr08</i> | 2524188                 | A/G  | NA                 | INTERGENIC                    | NA                                                  |
| <i>Kabuli_wild_2543156</i> | 1399943097                          | <i>Ca_kabuli_Chr08</i> | 2543156                 | A/G  | Gene_Ca_02330      | NON_SYNONYMOUS_CODING         | NA                                                  |
| <i>Kabuli_wild_2604759</i> | 1399943098                          | <i>Ca_kabuli_Chr08</i> | 2604759                 | C/T  | Gene_Ca_02321      | INTRON                        | Polycombprotein,VEFS-Box                            |
| <i>Kabuli_wild_2621973</i> | 1399943099                          | <i>Ca_kabuli_Chr08</i> | 2621973                 | T/G  | Gene_Ca_02319      | SYNONYMOUS_CODING             | Monooxygenase,FAD-binding                           |
| <i>Kabuli_wild_2722673</i> | 1399943100                          | <i>Ca_kabuli_Chr08</i> | 2722673                 | C/A  | NA                 | INTERGENIC                    | NA                                                  |
| <i>Kabuli_wild_2827984</i> | 1399943101                          | <i>Ca_kabuli_Chr08</i> | 2827984                 | T/C  | Gene_Ca_02297      | INTRON                        | Pleckstrinhomologydomain                            |
| <i>Kabuli_wild_2838179</i> | 1399943102                          | <i>Ca_kabuli_Chr08</i> | 2838179                 | T/A  | Gene_Ca_02297      | INTRON                        | Pleckstrinhomologydomain                            |
| <i>Kabuli_wild_2871037</i> | 1399943103                          | <i>Ca_kabuli_Chr08</i> | 2871037                 | C/A  | Gene_Ca_02297      | INTRON                        | Pleckstrinhomologydomain                            |
| <i>Kabuli_wild_2871064</i> | 1399943104                          | <i>Ca_kabuli_Chr08</i> | 2871064                 | G/A  | Gene_Ca_02297      | INTRON                        | Pleckstrinhomologydomain                            |
| <i>Kabuli_wild_2871095</i> | 1399943105                          | <i>Ca_kabuli_Chr08</i> | 2871095                 | G/A  | Gene_Ca_02297      | INTRON                        | Pleckstrinhomologydomain                            |
| <i>Kabuli_wild_2888353</i> | 1399943106                          | <i>Ca_kabuli_Chr08</i> | 2888353                 | G/T  | Gene_Ca_02296      | INTRON                        | PeptidaseS16,Lonprotease,C-terminal                 |
| <i>Kabuli_wild_2943631</i> | 1399943107                          | <i>Ca_kabuli_Chr08</i> | 2943631                 | G/T  | NA                 | INTERGENIC                    | NA                                                  |
| <i>Kabuli_wild_3041947</i> | 1399943108                          | <i>Ca_kabuli_Chr08</i> | 3041947                 | A/G  | Gene_Ca_02278      | SYNONYMOUS_CODING             | Protein of unknown function DUF947                  |
| <i>Kabuli_wild_3050452</i> | 1399943109                          | <i>Ca_kabuli_Chr08</i> | 3050452                 | T/C  | NA                 | INTERGENIC                    | NA                                                  |
| <i>Kabuli_wild_3171324</i> | 1399943110                          | <i>Ca_kabuli_Chr08</i> | 3171324                 | C/T  | NA                 | INTERGENIC                    | NA                                                  |
| <i>Kabuli_wild_3179582</i> | 1399943111                          | <i>Ca_kabuli_Chr08</i> | 3179582                 | G/A  | NA                 | INTERGENIC                    | NA                                                  |

| SNP IDs             | NCBI dbSNP accession IDs (NCBI_SS#) | Chromosomes     | Physical positions (bp) | SNPs | Gene accession IDs | Sequence components of genome | Putative functions                                           |
|---------------------|-------------------------------------|-----------------|-------------------------|------|--------------------|-------------------------------|--------------------------------------------------------------|
| Kabuli_wild_3179631 | 1399943112                          | Ca_kabuli_Chr08 | 3179631                 | A/T  | NA                 | INTERGENIC                    | NA                                                           |
| Kabuli_wild_3250707 | 1399943113                          | Ca_kabuli_Chr08 | 3250707                 | C/T  | NA                 | INTERGENIC                    | NA                                                           |
| Kabuli_wild_3250734 | 1399943114                          | Ca_kabuli_Chr08 | 3250734                 | G/T  | NA                 | INTERGENIC                    | NA                                                           |
| Kabuli_wild_3269085 | 1399943115                          | Ca_kabuli_Chr08 | 3269085                 | A/C  | Gene_Ca_02251      | SYNONYMOUS_CODING             | Homeobox                                                     |
| Kabuli_wild_3269088 | 1399943116                          | Ca_kabuli_Chr08 | 3269088                 | A/C  | Gene_Ca_02251      | SYNONYMOUS_CODING             | Homeobox                                                     |
| Kabuli_wild_3297410 | 1399943117                          | Ca_kabuli_Chr08 | 3297410                 | T/C  | Gene_Ca_02249      | NON_SYNONYMOUS_CODING         | SANT domain,DNA binding                                      |
| Kabuli_wild_3394931 | 1399943118                          | Ca_kabuli_Chr08 | 3394931                 | T/C  | Gene_Ca_02240      | DOWNSTREAM                    | BSD                                                          |
| Kabuli_wild_3438361 | 1399943119                          | Ca_kabuli_Chr08 | 3438361                 | A/G  | Gene_Ca_02235      | INTRON                        | Hly-III-related                                              |
| Kabuli_wild_3497315 | 1399943120                          | Ca_kabuli_Chr08 | 3497315                 | G/A  | Gene_Ca_02229      | INTRON                        | RasGTPase                                                    |
| Kabuli_wild_3539690 | 1399943121                          | Ca_kabuli_Chr08 | 3539690                 | A/G  | Gene_Ca_02223      | DOWNSTREAM                    | BTB/POZ-like                                                 |
| Kabuli_wild_3539745 | 1399943122                          | Ca_kabuli_Chr08 | 3539745                 | T/C  | Gene_Ca_02223      | DOWNSTREAM                    | BTB/POZ-like                                                 |
| Kabuli_wild_3568302 | 1399943123                          | Ca_kabuli_Chr08 | 3568302                 | C/T  | NA                 | INTERGENIC                    | NA                                                           |
| Kabuli_wild_3730369 | 1399943124                          | Ca_kabuli_Chr08 | 3730369                 | A/C  | Gene_Ca_02204      | DOWNSTREAM                    | Protein of unknown function DUF791                           |
| Kabuli_wild_3837306 | 1399943125                          | Ca_kabuli_Chr08 | 3837306                 | G/C  | NA                 | INTERGENIC                    | NA                                                           |
| Kabuli_wild_3837321 | 1399943126                          | Ca_kabuli_Chr08 | 3837321                 | G/T  | NA                 | INTERGENIC                    | NA                                                           |
| Kabuli_wild_3951767 | 1399943127                          | Ca_kabuli_Chr08 | 3951767                 | C/A  | NA                 | INTERGENIC                    | NA                                                           |
| Kabuli_wild_3951768 | 1399943128                          | Ca_kabuli_Chr08 | 3951768                 | A/G  | NA                 | INTERGENIC                    | NA                                                           |
| Kabuli_wild_3954880 | 1399943129                          | Ca_kabuli_Chr08 | 3954880                 | A/T  | NA                 | INTERGENIC                    | NA                                                           |
| Kabuli_wild_3954883 | 1399943130                          | Ca_kabuli_Chr08 | 3954883                 | G/A  | NA                 | INTERGENIC                    | NA                                                           |
| Kabuli_wild_3954885 | 1399943131                          | Ca_kabuli_Chr08 | 3954885                 | A/G  | NA                 | INTERGENIC                    | NA                                                           |
| Kabuli_wild_3954889 | 1399943132                          | Ca_kabuli_Chr08 | 3954889                 | T/A  | NA                 | INTERGENIC                    | NA                                                           |
| Kabuli_wild_3954892 | 1399943133                          | Ca_kabuli_Chr08 | 3954892                 | A/C  | NA                 | INTERGENIC                    | NA                                                           |
| Kabuli_wild_4023068 | 1399943134                          | Ca_kabuli_Chr08 | 4023068                 | A/G  | Gene_Ca_02168      | NON_SYNONYMOUS_CODING         | Pathogenesis-related transcriptional factor/ERF, DNA-binding |
| Kabuli_wild_4023125 | 1399943135                          | Ca_kabuli_Chr08 | 4023125                 | G/A  | Gene_Ca_02168      | NON_SYNONYMOUS_CODING         | Pathogenesis-related transcriptional factor/ERF, DNA-binding |
| Kabuli_wild_4042166 | 1399943136                          | Ca_kabuli_Chr08 | 4042166                 | A/C  | NA                 | INTERGENIC                    | NA                                                           |
| Kabuli_wild_4042424 | 1399943137                          | Ca_kabuli_Chr08 | 4042424                 | G/A  | NA                 | INTERGENIC                    | NA                                                           |
| Kabuli_wild_4073528 | 1399943138                          | Ca_kabuli_Chr08 | 4073528                 | C/T  | Gene_Ca_02163      | NON_SYNONYMOUS_CODING         | Zinc finger, RING-type                                       |
| Kabuli_wild_4073603 | 1399943139                          | Ca_kabuli_Chr08 | 4073603                 | A/G  | Gene_Ca_02163      | NON_SYNONYMOUS_CODING         | Zinc finger, RING-type                                       |
| Kabuli_wild_4092418 | 1399943140                          | Ca_kabuli_Chr08 | 4092418                 | T/G  | Gene_Ca_02161      | DOWNSTREAM                    | Nicotinate phosphoribosyltransferase-related                 |
| Kabuli_wild_4097729 | 1399943141                          | Ca_kabuli_Chr08 | 4097729                 | C/T  | Gene_Ca_02160      | NON_SYNONYMOUS_CODING         | DNA-directedDNApolymerase.familyB.exonucleasedomain          |
| Kabuli_wild_4106644 | 1399943142                          | Ca_kabuli_Chr08 | 4106644                 | C/T  | NA                 | INTERGENIC                    | NA                                                           |
| Kabuli_wild_4172356 | 1399943143                          | Ca_kabuli_Chr08 | 4172356                 | G/C  | Gene_Ca_02150      | SYNONYMOUS_CODING             | Fork head-associated (FHA) domain                            |
| Kabuli_wild_4172368 | 1399943144                          | Ca_kabuli_Chr08 | 4172368                 | T/C  | Gene_Ca_02150      | SYNONYMOUS_CODING             | Fork head-associated (FHA) domain                            |
| Kabuli_wild_4198214 | 1399943145                          | Ca_kabuli_Chr08 | 4198214                 | A/C  | Gene_Ca_02148      | NON_SYNONYMOUS_CODING         | Splicing factor, suppressor of whiteapricot                  |
| Kabuli_wild_4344459 | 1399943146                          | Ca_kabuli_Chr08 | 4344459                 | C/A  | NA                 | INTERGENIC                    | NA                                                           |
| Kabuli_wild_4346749 | 1399943147                          | Ca_kabuli_Chr08 | 4346749                 | A/G  | Gene_Ca_02131      | DOWNSTREAM                    | NA                                                           |
| Kabuli_wild_4347373 | 1399943148                          | Ca_kabuli_Chr08 | 4347373                 | G/T  | Gene_Ca_02131      | DOWNSTREAM                    | NA                                                           |
| Kabuli_wild_4347535 | 1399943149                          | Ca_kabuli_Chr08 | 4347535                 | A/C  | Gene_Ca_02131      | DOWNSTREAM                    | NA                                                           |
| Kabuli_wild_4351751 | 1399943150                          | Ca_kabuli_Chr08 | 4351751                 | G/A  | NA                 | INTERGENIC                    | NA                                                           |
| Kabuli_wild_4406956 | 1399943151                          | Ca_kabuli_Chr08 | 4406956                 | C/G  | Gene_Ca_02125      | SYNONYMOUS_CODING             | Lateral organ boundaries, LOB                                |
| Kabuli_wild_4421618 | 1399943152                          | Ca_kabuli_Chr08 | 4421618                 | G/A  | Gene_Ca_02124      | NON_SYNONYMOUS_CODING         | Lateral organ boundaries, LOB                                |
| Kabuli_wild_4430584 | 1399943153                          | Ca_kabuli_Chr08 | 4430584                 | C/A  | Gene_Ca_02123      | NON_SYNONYMOUS_CODING         | Misato Segment II,myosin-like                                |
| Kabuli_wild_4484606 | 1399943154                          | Ca_kabuli_Chr08 | 4484606                 | T/A  | Gene_Ca_02117      | INTRON                        | Zinc finger,LIM-type                                         |
| Kabuli_wild_4512311 | 1399943155                          | Ca_kabuli_Chr08 | 4512311                 | T/C  | NA                 | INTERGENIC                    | NA                                                           |

| SNP IDs             | NCBI dbSNP accession IDs (NCBI_SS#) | Chromosomes      | Physical positions (bp) | SNPs | Gene accession IDs | Sequence components of genome | Putative functions                               |
|---------------------|-------------------------------------|------------------|-------------------------|------|--------------------|-------------------------------|--------------------------------------------------|
| Kabuli_wild_4549690 | 1399943156                          | Ca_kabuli_Chrom8 | 4549690                 | C/A  | NA                 | INTERGENIC                    | NA                                               |
| Kabuli_wild_4549691 | 1399943157                          | Ca_kabuli_Chrom8 | 4549691                 | T/G  | NA                 | INTERGENIC                    | NA                                               |
| Kabuli_wild_4556064 | 1399943158                          | Ca_kabuli_Chrom8 | 4556064                 | T/C  | NA                 | INTERGENIC                    | NA                                               |
| Kabuli_wild_4565771 | 1399943159                          | Ca_kabuli_Chrom8 | 4565771                 | T/G  | NA                 | INTERGENIC                    | NA                                               |
| Kabuli_wild_4611094 | 1399943160                          | Ca_kabuli_Chrom8 | 4611094                 | C/T  | Gene_Ca_02096      | NON_SYNONYMOUS_CODING         | SET domain                                       |
| Kabuli_wild_4614681 | 1399943161                          | Ca_kabuli_Chrom8 | 4614681                 | G/T  | Gene_Ca_02096      | NON_SYNONYMOUS_CODING         | SET domain                                       |
| Kabuli_wild_4659781 | 1399943162                          | Ca_kabuli_Chrom8 | 4659781                 | C/T  | NA                 | INTERGENIC                    | NA                                               |
| Kabuli_wild_4756983 | 1399943163                          | Ca_kabuli_Chrom8 | 4756983                 | G/A  | Gene_Ca_02082      | UPSTREAM                      | Glycosyltransferase, family8                     |
| Kabuli_wild_4773205 | 1399943164                          | Ca_kabuli_Chrom8 | 4773205                 | A/C  | Gene_Ca_02080      | UPSTREAM                      | Coiled-coildomaincontainingprotein109,C-terminal |
| Kabuli_wild_4858262 | 1399943165                          | Ca_kabuli_Chrom8 | 4858262                 | C/A  | Gene_Ca_02071      | NON_SYNONYMOUS_CODING         | NADPH-dependent FMN reductase                    |
| Kabuli_wild_4899982 | 1399943166                          | Ca_kabuli_Chrom8 | 4899982                 | A/C  | NA                 | INTERGENIC                    | NA                                               |
| Kabuli_wild_4899983 | 1399943167                          | Ca_kabuli_Chrom8 | 4899983                 | G/A  | NA                 | INTERGENIC                    | NA                                               |
| Kabuli_wild_4980916 | 1399943168                          | Ca_kabuli_Chrom8 | 4980916                 | C/T  | NA                 | INTERGENIC                    | NA                                               |
| Kabuli_wild_4980949 | 1399943169                          | Ca_kabuli_Chrom8 | 4980949                 | A/T  | NA                 | INTERGENIC                    | NA                                               |
| Kabuli_wild_5091091 | 1399943170                          | Ca_kabuli_Chrom8 | 5091091                 | A/G  | Gene_Ca_02046      | DOWNSTREAM                    | Peptidase C48, SUMO/Sentrin/Ubl1                 |
| Kabuli_wild_5091109 | 1399943171                          | Ca_kabuli_Chrom8 | 5091109                 | T/C  | Gene_Ca_02046      | DOWNSTREAM                    | Peptidase C48, SUMO/Sentrin/Ubl1                 |
| Kabuli_wild_5091127 | 1399943172                          | Ca_kabuli_Chrom8 | 5091127                 | G/T  | Gene_Ca_02046      | DOWNSTREAM                    | Peptidase C48, SUMO/Sentrin/Ubl1                 |
| Kabuli_wild_5091141 | 1399943173                          | Ca_kabuli_Chrom8 | 5091141                 | C/T  | Gene_Ca_02046      | DOWNSTREAM                    | Peptidase C48, SUMO/Sentrin/Ubl1                 |
| Kabuli_wild_5091174 | 1399943174                          | Ca_kabuli_Chrom8 | 5091174                 | G/A  | Gene_Ca_02046      | DOWNSTREAM                    | Peptidase C48, SUMO/Sentrin/Ubl1                 |
| Kabuli_wild_5091183 | 1399943175                          | Ca_kabuli_Chrom8 | 5091183                 | C/T  | Gene_Ca_02046      | DOWNSTREAM                    | Peptidase C48, SUMO/Sentrin/Ubl1                 |
| Kabuli_wild_5091192 | 1399943176                          | Ca_kabuli_Chrom8 | 5091192                 | C/T  | Gene_Ca_02046      | DOWNSTREAM                    | Peptidase C48, SUMO/Sentrin/Ubl1                 |
| Kabuli_wild_5115522 | 1399943177                          | Ca_kabuli_Chrom8 | 5115522                 | G/C  | NA                 | INTERGENIC                    | NA                                               |
| Kabuli_wild_5134706 | 1399943178                          | Ca_kabuli_Chrom8 | 5134706                 | A/C  | NA                 | INTERGENIC                    | NA                                               |
| Kabuli_wild_5184227 | 1399943179                          | Ca_kabuli_Chrom8 | 5184227                 | C/G  | Gene_Ca_02036      | NON_SYNONYMOUS_CODING         | Sugar/inositol transporter                       |
| Kabuli_wild_5197004 | 1399943180                          | Ca_kabuli_Chrom8 | 5197004                 | G/T  | NA                 | INTERGENIC                    | NA                                               |
| Kabuli_wild_5200592 | 1399943181                          | Ca_kabuli_Chrom8 | 5200592                 | A/G  | NA                 | INTERGENIC                    | NA                                               |
| Kabuli_wild_5271566 | 1399943182                          | Ca_kabuli_Chrom8 | 5271566                 | G/A  | Gene_Ca_02025      | INTRON                        | Cytidylyltransferase                             |
| Kabuli_wild_5313768 | 1399943183                          | Ca_kabuli_Chrom8 | 5313768                 | T/C  | NA                 | INTERGENIC                    | NA                                               |
| Kabuli_wild_5389322 | 1399943184                          | Ca_kabuli_Chrom8 | 5389322                 | A/G  | NA                 | INTERGENIC                    | NA                                               |
| Kabuli_wild_5390267 | 1399943185                          | Ca_kabuli_Chrom8 | 5390267                 | T/C  | NA                 | INTERGENIC                    | NA                                               |
| Kabuli_wild_5390602 | 1399943186                          | Ca_kabuli_Chrom8 | 5390602                 | T/C  | NA                 | INTERGENIC                    | NA                                               |
| Kabuli_wild_5399503 | 1399943187                          | Ca_kabuli_Chrom8 | 5399503                 | G/A  | NA                 | INTERGENIC                    | NA                                               |
| Kabuli_wild_5400188 | 1399943188                          | Ca_kabuli_Chrom8 | 5400188                 | A/G  | NA                 | INTERGENIC                    | NA                                               |
| Kabuli_wild_5412489 | 1399943189                          | Ca_kabuli_Chrom8 | 5412489                 | T/C  | Gene_Ca_02004      | SYNONYMOUS_CODING             | Protein of unknown function DUF702               |
| Kabuli_wild_5470357 | 1399943190                          | Ca_kabuli_Chrom8 | 5470357                 | T/A  | NA                 | INTERGENIC                    | NA                                               |
| Kabuli_wild_5487769 | 1399943191                          | Ca_kabuli_Chrom8 | 5487769                 | G/A  | Gene_Ca_01994      | UPSTREAM                      | Transcription factor ,MADS-box                   |
| Kabuli_wild_5538683 | 1399943192                          | Ca_kabuli_Chrom8 | 5538683                 | T/C  | Gene_Ca_01989      | INTRON                        | Protein of unknown function DUF726               |
| Kabuli_wild_5538695 | 1399943193                          | Ca_kabuli_Chrom8 | 5538695                 | T/C  | Gene_Ca_01989      | INTRON                        | Protein of unknown function DUF726               |
| Kabuli_wild_5538696 | 1399943194                          | Ca_kabuli_Chrom8 | 5538696                 | A/C  | Gene_Ca_01989      | INTRON                        | Protein of unknown function DUF726               |
| Kabuli_wild_5712347 | 1399943195                          | Ca_kabuli_Chrom8 | 5712347                 | A/T  | Gene_Ca_01977      | INTRON                        | Protein of unknown function DUF869,plant         |
| Kabuli_wild_5712379 | 1399943196                          | Ca_kabuli_Chrom8 | 5712379                 | A/T  | Gene_Ca_01977      | INTRON                        | Protein of unknown function DUF869,plant         |
| Kabuli_wild_5712396 | 1399943197                          | Ca_kabuli_Chrom8 | 5712396                 | A/G  | Gene_Ca_01977      | NON_SYNONYMOUS_CODING         | Protein of unknown function DUF869,plant         |
| Kabuli_wild_5870664 | 1399943198                          | Ca_kabuli_Chrom8 | 5870664                 | T/C  | Gene_Ca_01965      | NON_SYNONYMOUS_CODING         | Armadillo                                        |
| Kabuli_wild_5935435 | 1399943199                          | Ca_kabuli_Chrom8 | 5935435                 | A/C  | Gene_Ca_01957      | SYNONYMOUS_CODING             | Senescence/spartin-associated                    |

| SNP IDs             | NCBI dbSNP accession IDs (NCBI_SS#) | Chromosomes     | Physical positions (bp) | SNPs | Gene accession IDs | Sequence components of genome | Putative functions                                           |
|---------------------|-------------------------------------|-----------------|-------------------------|------|--------------------|-------------------------------|--------------------------------------------------------------|
| Kabuli_wild_6084527 | 1399943200                          | Ca_kabuli_Chr08 | 6084527                 | G/A  | NA                 | INTERGENIC                    | NA                                                           |
| Kabuli_wild_6084528 | 1399943201                          | Ca_kabuli_Chr08 | 6084528                 | C/T  | NA                 | INTERGENIC                    | NA                                                           |
| Kabuli_wild_6084592 | 1399943202                          | Ca_kabuli_Chr08 | 6084592                 | C/T  | NA                 | INTERGENIC                    | NA                                                           |
| Kabuli_wild_6084594 | 1399943203                          | Ca_kabuli_Chr08 | 6084594                 | G/T  | NA                 | INTERGENIC                    | NA                                                           |
| Kabuli_wild_6084611 | 1399943204                          | Ca_kabuli_Chr08 | 6084611                 | G/A  | NA                 | INTERGENIC                    | NA                                                           |
| Kabuli_wild_6084612 | 1399943205                          | Ca_kabuli_Chr08 | 6084612                 | C/T  | NA                 | INTERGENIC                    | NA                                                           |
| Kabuli_wild_6148862 | 1399943206                          | Ca_kabuli_Chr08 | 6148862                 | T/C  | Gene_Ca_01932      | SYNONYMOUS_CODING             | AconitaseA/isopropyl malatedehydratase small subunit, swivel |
| Kabuli_wild_6192944 | 1399943207                          | Ca_kabuli_Chr08 | 6192944                 | T/G  | Gene_Ca_01927      | SYNONYMOUS_CODING             | Pentatric peptide repeat                                     |
| Kabuli_wild_6193078 | 1399943208                          | Ca_kabuli_Chr08 | 6193078                 | G/A  | Gene_Ca_01927      | NON_SYNONYMOUS_CODING         | Pentatric peptide repeat                                     |
| Kabuli_wild_6346867 | 1399943209                          | Ca_kabuli_Chr08 | 6346867                 | T/G  | NA                 | INTERGENIC                    | NA                                                           |
| Kabuli_wild_6372230 | 1399943210                          | Ca_kabuli_Chr08 | 6372230                 | G/A  | NA                 | INTERGENIC                    | NA                                                           |
| Kabuli_wild_6476249 | 1399943211                          | Ca_kabuli_Chr08 | 6476249                 | T/C  | NA                 | INTERGENIC                    | NA                                                           |
| Kabuli_wild_6503885 | 1399943212                          | Ca_kabuli_Chr08 | 6503885                 | A/C  | Gene_Ca_10738      | STOP_GAINED                   | PolyApolymerase_head domain                                  |
| Kabuli_wild_6504013 | 1399943213                          | Ca_kabuli_Chr08 | 6504013                 | A/G  | Gene_Ca_10738      | NON_SYNONYMOUS_CODING         | PolyApolymerase_head domain                                  |
| Kabuli_wild_6544218 | 1399943214                          | Ca_kabuli_Chr08 | 6544218                 | C/T  | Gene_Ca_10735      | SYNONYMOUS_CODING             | Zinc finger_C2H2-type                                        |
| Kabuli_wild_6600844 | 1399943215                          | Ca_kabuli_Chr08 | 6600844                 | C/A  | Gene_Ca_10728      | NON_SYNONYMOUS_CODING         | RabGTPaseactivator                                           |
| Kabuli_wild_6664509 | 1399943216                          | Ca_kabuli_Chr08 | 6664509                 | T/A  | NA                 | INTERGENIC                    | NA                                                           |
| Kabuli_wild_6748294 | 1399943217                          | Ca_kabuli_Chr08 | 6748294                 | T/C  | Gene_Ca_10708      | NON_SYNONYMOUS_CODING         | Sugar/inositol transporter                                   |
| Kabuli_wild_6780592 | 1399943218                          | Ca_kabuli_Chr08 | 6780592                 | T/G  | Gene_Ca_10705      | NON_SYNONYMOUS_CODING         | ATPase-like,ATP-binding domain                               |
| Kabuli_wild_6835452 | 1399943219                          | Ca_kabuli_Chr08 | 6835452                 | T/C  | Gene_Ca_10703      | INTRON                        | NA                                                           |
| Kabuli_wild_6838416 | 1399943220                          | Ca_kabuli_Chr08 | 6838416                 | C/T  | Gene_Ca_10703      | INTRON                        | NA                                                           |
| Kabuli_wild_6838449 | 1399943221                          | Ca_kabuli_Chr08 | 6838449                 | T/C  | Gene_Ca_10703      | INTRON                        | NA                                                           |
| Kabuli_wild_6838503 | 1399943222                          | Ca_kabuli_Chr08 | 6838503                 | C/T  | Gene_Ca_10703      | INTRON                        | NA                                                           |
| Kabuli_wild_6841931 | 1399943223                          | Ca_kabuli_Chr08 | 6841931                 | G/A  | Gene_Ca_10703      | INTRON                        | NA                                                           |
| Kabuli_wild_6841966 | 1399943224                          | Ca_kabuli_Chr08 | 6841966                 | C/T  | Gene_Ca_10703      | INTRON                        | NA                                                           |
| Kabuli_wild_6845342 | 1399943225                          | Ca_kabuli_Chr08 | 6845342                 | C/T  | Gene_Ca_10703      | INTRON                        | NA                                                           |
| Kabuli_wild_6845375 | 1399943226                          | Ca_kabuli_Chr08 | 6845375                 | T/C  | Gene_Ca_10703      | INTRON                        | NA                                                           |
| Kabuli_wild_6845394 | 1399943227                          | Ca_kabuli_Chr08 | 6845394                 | G/A  | Gene_Ca_10703      | INTRON                        | NA                                                           |
| Kabuli_wild_6845429 | 1399943228                          | Ca_kabuli_Chr08 | 6845429                 | C/T  | Gene_Ca_10703      | INTRON                        | NA                                                           |
| Kabuli_wild_6942651 | 1399943229                          | Ca_kabuli_Chr08 | 6942651                 | G/T  | Gene_Ca_10698      | INTRON                        | ARID/BRIGHTDNA-binding domain                                |
| Kabuli_wild_6987609 | 1399943230                          | Ca_kabuli_Chr08 | 6987609                 | G/T  | Gene_Ca_10694      | NON_SYNONYMOUS_CODING         | PeptidaseS8/S53,subtilisin/kexin/sedolisin                   |
| Kabuli_wild_6987615 | 1399943231                          | Ca_kabuli_Chr08 | 6987615                 | A/C  | Gene_Ca_10694      | NON_SYNONYMOUS_CODING         | PeptidaseS8/S53,subtilisin/kexin/sedolisin                   |
| Kabuli_wild_7013179 | 1399943232                          | Ca_kabuli_Chr08 | 7013179                 | G/A  | Gene_Ca_10690      | INTRON                        | MyTH4domain                                                  |
| Kabuli_wild_7041901 | 1399943233                          | Ca_kabuli_Chr08 | 7041901                 | A/C  | NA                 | INTERGENIC                    | NA                                                           |
| Kabuli_wild_7162826 | 1399943234                          | Ca_kabuli_Chr08 | 7162826                 | T/G  | NA                 | INTERGENIC                    | NA                                                           |
| Kabuli_wild_7174066 | 1399943235                          | Ca_kabuli_Chr08 | 7174066                 | C/T  | Gene_Ca_10671      | SYNONYMOUS_CODING             | F-boxdomain,cyclin-like                                      |
| Kabuli_wild_7175086 | 1399943236                          | Ca_kabuli_Chr08 | 7175086                 | A/C  | Gene_Ca_10671      | INTRON                        | F-boxdomain,cyclin-like                                      |
| Kabuli_wild_7228599 | 1399943237                          | Ca_kabuli_Chr08 | 7228599                 | T/G  | NA                 | INTERGENIC                    | NA                                                           |
| Kabuli_wild_7228623 | 1399943238                          | Ca_kabuli_Chr08 | 7228623                 | C/G  | NA                 | INTERGENIC                    | NA                                                           |
| Kabuli_wild_7228637 | 1399943239                          | Ca_kabuli_Chr08 | 7228637                 | G/A  | NA                 | INTERGENIC                    | NA                                                           |
| Kabuli_wild_7228638 | 1399943240                          | Ca_kabuli_Chr08 | 7228638                 | C/A  | NA                 | INTERGENIC                    | NA                                                           |
| Kabuli_wild_7357583 | 1399943241                          | Ca_kabuli_Chr08 | 7357583                 | T/C  | NA                 | INTERGENIC                    | NA                                                           |
| Kabuli_wild_7357621 | 1399943242                          | Ca_kabuli_Chr08 | 7357621                 | A/G  | NA                 | INTERGENIC                    | NA                                                           |
| Kabuli_wild_7563370 | 1399943243                          | Ca_kabuli_Chr08 | 7563370                 | T/C  | Gene_Ca_10631      | DOWNSTREAM                    | NA                                                           |

| SNP IDs             | NCBI dbSNP accession IDs (NCBI_SS#) | Chromosomes     | Physical positions (bp) | SNPs | Gene accession IDs | Sequence components of genome | Putative functions                                    |
|---------------------|-------------------------------------|-----------------|-------------------------|------|--------------------|-------------------------------|-------------------------------------------------------|
| Kabuli_wild_7563373 | 1399943244                          | Ca_kabuli_Chr08 | 7563373                 | T/A  | Gene_Ca_10631      | DOWNSTREAM                    | NA                                                    |
| Kabuli_wild_7563379 | 1399943245                          | Ca_kabuli_Chr08 | 7563379                 | A/C  | Gene_Ca_10631      | DOWNSTREAM                    | NA                                                    |
| Kabuli_wild_7563385 | 1399943246                          | Ca_kabuli_Chr08 | 7563385                 | C/G  | Gene_Ca_10631      | DOWNSTREAM                    | NA                                                    |
| Kabuli_wild_7563405 | 1399943247                          | Ca_kabuli_Chr08 | 7563405                 | T/C  | NA                 | INTERGENIC                    | NA                                                    |
| Kabuli_wild_7563629 | 1399943248                          | Ca_kabuli_Chr08 | 7563629                 | G/C  | NA                 | INTERGENIC                    | NA                                                    |
| Kabuli_wild_7563641 | 1399943249                          | Ca_kabuli_Chr08 | 7563641                 | G/C  | NA                 | INTERGENIC                    | NA                                                    |
| Kabuli_wild_7665291 | 1399943250                          | Ca_kabuli_Chr08 | 7665291                 | T/C  | Gene_Ca_10625      | DOWNSTREAM                    | NA                                                    |
| Kabuli_wild_7691607 | 1399943251                          | Ca_kabuli_Chr08 | 7691607                 | G/T  | Gene_Ca_10621      | DOWNSTREAM                    | NA                                                    |
| Kabuli_wild_7694746 | 1399943252                          | Ca_kabuli_Chr08 | 7694746                 | C/A  | NA                 | INTERGENIC                    | NA                                                    |
| Kabuli_wild_7694747 | 1399943253                          | Ca_kabuli_Chr08 | 7694747                 | A/G  | NA                 | INTERGENIC                    | NA                                                    |
| Kabuli_wild_7733573 | 1399943254                          | Ca_kabuli_Chr08 | 7733573                 | A/C  | NA                 | INTERGENIC                    | NA                                                    |
| Kabuli_wild_7733574 | 1399943255                          | Ca_kabuli_Chr08 | 7733574                 | G/A  | NA                 | INTERGENIC                    | NA                                                    |
| Kabuli_wild_7733647 | 1399943256                          | Ca_kabuli_Chr08 | 7733647                 | G/T  | NA                 | INTERGENIC                    | NA                                                    |
| Kabuli_wild_7733670 | 1399943257                          | Ca_kabuli_Chr08 | 7733670                 | C/T  | NA                 | INTERGENIC                    | NA                                                    |
| Kabuli_wild_7775908 | 1399943258                          | Ca_kabuli_Chr08 | 7775908                 | G/T  | NA                 | INTERGENIC                    | NA                                                    |
| Kabuli_wild_7776014 | 1399943259                          | Ca_kabuli_Chr08 | 7776014                 | G/T  | NA                 | INTERGENIC                    | NA                                                    |
| Kabuli_wild_7776018 | 1399943260                          | Ca_kabuli_Chr08 | 7776018                 | C/T  | NA                 | INTERGENIC                    | NA                                                    |
| Kabuli_wild_7776041 | 1399943261                          | Ca_kabuli_Chr08 | 7776041                 | A/C  | NA                 | INTERGENIC                    | NA                                                    |
| Kabuli_wild_7776042 | 1399943262                          | Ca_kabuli_Chr08 | 7776042                 | C/T  | NA                 | INTERGENIC                    | NA                                                    |
| Kabuli_wild_7776466 | 1399943263                          | Ca_kabuli_Chr08 | 7776466                 | G/A  | NA                 | INTERGENIC                    | NA                                                    |
| Kabuli_wild_7776592 | 1399943264                          | Ca_kabuli_Chr08 | 7776592                 | T/C  | NA                 | INTERGENIC                    | NA                                                    |
| Kabuli_wild_7776897 | 1399943265                          | Ca_kabuli_Chr08 | 7776897                 | A/T  | NA                 | INTERGENIC                    | NA                                                    |
| Kabuli_wild_7776934 | 1399943266                          | Ca_kabuli_Chr08 | 7776934                 | G/T  | NA                 | INTERGENIC                    | NA                                                    |
| Kabuli_wild_7776970 | 1399943267                          | Ca_kabuli_Chr08 | 7776970                 | T/G  | NA                 | INTERGENIC                    | NA                                                    |
| Kabuli_wild_7777023 | 1399943268                          | Ca_kabuli_Chr08 | 7777023                 | G/A  | NA                 | INTERGENIC                    | NA                                                    |
| Kabuli_wild_8017452 | 1399943269                          | Ca_kabuli_Chr08 | 8017452                 | T/G  | Gene_Ca_11439      | NON_SYNONYMOUS_CODING         | NA                                                    |
| Kabuli_wild_8017477 | 1399943270                          | Ca_kabuli_Chr08 | 8017477                 | T/G  | Gene_Ca_11439      | SYNONYMOUS_CODING             | NA                                                    |
| Kabuli_wild_8017481 | 1399943271                          | Ca_kabuli_Chr08 | 8017481                 | A/G  | Gene_Ca_11439      | SYNONYMOUS_CODING             | NA                                                    |
| Kabuli_wild_8017500 | 1399943272                          | Ca_kabuli_Chr08 | 8017500                 | C/T  | Gene_Ca_11439      | SYNONYMOUS_CODING             | NA                                                    |
| Kabuli_wild_8017501 | 1399943273                          | Ca_kabuli_Chr08 | 8017501                 | G/A  | Gene_Ca_11439      | SYNONYMOUS_CODING             | NA                                                    |
| Kabuli_wild_8066005 | 1399943274                          | Ca_kabuli_Chr08 | 8066005                 | A/G  | NA                 | INTERGENIC                    | NA                                                    |
| Kabuli_wild_8066006 | 1399943275                          | Ca_kabuli_Chr08 | 8066006                 | C/A  | NA                 | INTERGENIC                    | NA                                                    |
| Kabuli_wild_8104884 | 1399943276                          | Ca_kabuli_Chr08 | 8104884                 | T/A  | NA                 | INTERGENIC                    | NA                                                    |
| Kabuli_wild_8194232 | 1399943277                          | Ca_kabuli_Chr08 | 8194232                 | C/A  | Gene_Ca_11454      | NON_SYNONYMOUS_CODING         | Aspartyl/Asparaginyl-tRNAsynthetase,classIIb          |
| Kabuli_wild_8194234 | 1399943278                          | Ca_kabuli_Chr08 | 8194234                 | C/A  | Gene_Ca_11454      | NON_SYNONYMOUS_CODING         | Aspartyl/Asparaginyl-tRNAsynthetase,classIIb          |
| Kabuli_wild_8389117 | 1399943279                          | Ca_kabuli_Chr08 | 8389117                 | C/T  | Gene_Ca_11471      | NON_SYNONYMOUS_CODING         | Transcription factor jumonji/aspartylbeta-hydroxylase |
| Kabuli_wild_8452552 | 1399943280                          | Ca_kabuli_Chr08 | 8452552                 | A/G  | NA                 | INTERGENIC                    | NA                                                    |
| Kabuli_wild_8458383 | 1399943281                          | Ca_kabuli_Chr08 | 8458383                 | G/A  | NA                 | INTERGENIC                    | NA                                                    |
| Kabuli_wild_8509413 | 1399943282                          | Ca_kabuli_Chr08 | 8509413                 | G/A  | Gene_Ca_11483      | NON_SYNONYMOUS_CODING         | RNA recognition motif domain                          |
| Kabuli_wild_8518968 | 1399943283                          | Ca_kabuli_Chr08 | 8518968                 | G/T  | Gene_Ca_11484      | INTRON                        | Target SNARE coiled-coil domain                       |
| Kabuli_wild_8533479 | 1399943284                          | Ca_kabuli_Chr08 | 8533479                 | G/T  | Gene_Ca_11486      | DOWNSTREAM                    | Protein kinase,catalytic domain                       |
| Kabuli_wild_8533978 | 1399943285                          | Ca_kabuli_Chr08 | 8533978                 | G/A  | Gene_Ca_11486      | DOWNSTREAM                    | Protein kinase,catalytic domain                       |
| Kabuli_wild_8560326 | 1399943286                          | Ca_kabuli_Chr08 | 8560326                 | G/T  | Gene_Ca_11489      | UPSTREAM                      | Zinc finger, RING-type                                |
| Kabuli_wild_8560330 | 1399943287                          | Ca_kabuli_Chr08 | 8560330                 | C/A  | Gene_Ca_11489      | UPSTREAM                      | Zinc finger, RING-type                                |



| SNP IDs                    | NCBI dbSNP accession IDs (NCBI_SS#) | Chromosomes            | Physical positions (bp) | SNPs | Gene accession IDs | Sequence components of genome | Putative functions                             |
|----------------------------|-------------------------------------|------------------------|-------------------------|------|--------------------|-------------------------------|------------------------------------------------|
| <i>Kabuli_wild_8560331</i> | 1399943288                          | <i>Ca_kabuli_Chr08</i> | 8560331                 | C/G  | Gene_Ca_11489      | UPSTREAM                      | Zinc finger, RING-type                         |
| <i>Kabuli_wild_8560332</i> | 1399943289                          | <i>Ca_kabuli_Chr08</i> | 8560332                 | A/C  | Gene_Ca_11489      | UPSTREAM                      | Zinc finger, RING-type                         |
| <i>Kabuli_wild_8650188</i> | 1399943290                          | <i>Ca_kabuli_Chr08</i> | 8650188                 | T/G  | Gene_Ca_11495      | SYNONYMOUS_CODING             | Aminotransferase-like,plant mobile domain      |
| <i>Kabuli_wild_8661327</i> | 1399943291                          | <i>Ca_kabuli_Chr08</i> | 8661327                 | T/C  | Gene_Ca_11496      | DOWNSTREAM                    | SNARE associated Golgi protein                 |
| <i>Kabuli_wild_8670242</i> | 1399943292                          | <i>Ca_kabuli_Chr08</i> | 8670242                 | T/G  | Gene_Ca_11498      | NON_SYNONYMOUS_CODING         | Tetra tricopeptide repeat-containing           |
| <i>Kabuli_wild_8772118</i> | 1399943293                          | <i>Ca_kabuli_Chr08</i> | 8772118                 | G/A  | NA                 | INTERGENIC                    | NA                                             |
| <i>Kabuli_wild_8772124</i> | 1399943294                          | <i>Ca_kabuli_Chr08</i> | 8772124                 | G/T  | NA                 | INTERGENIC                    | NA                                             |
| <i>Kabuli_wild_8772131</i> | 1399943295                          | <i>Ca_kabuli_Chr08</i> | 8772131                 | C/G  | NA                 | INTERGENIC                    | NA                                             |
| <i>Kabuli_wild_8842371</i> | 1399943296                          | <i>Ca_kabuli_Chr08</i> | 8842371                 | A/G  | Gene_Ca_11514      | NON_SYNONYMOUS_CODING         | Helix-loop-helixDNA-binding domain             |
| <i>Kabuli_wild_8843831</i> | 1399943297                          | <i>Ca_kabuli_Chr08</i> | 8843831                 | T/C  | Gene_Ca_11514      | DOWNSTREAM                    | Helix-loop-helixDNA-binding domain             |
| <i>Kabuli_wild_8853602</i> | 1399943298                          | <i>Ca_kabuli_Chr08</i> | 8853602                 | G/A  | NA                 | INTERGENIC                    | NA                                             |
| <i>Kabuli_wild_8853664</i> | 1399943299                          | <i>Ca_kabuli_Chr08</i> | 8853664                 | A/G  | NA                 | INTERGENIC                    | NA                                             |
| <i>Kabuli_wild_8856046</i> | 1399943300                          | <i>Ca_kabuli_Chr08</i> | 8856046                 | C/T  | NA                 | INTERGENIC                    | NA                                             |
| <i>Kabuli_wild_8856047</i> | 1399943301                          | <i>Ca_kabuli_Chr08</i> | 8856047                 | C/T  | NA                 | INTERGENIC                    | NA                                             |
| <i>Kabuli_wild_8856143</i> | 1399943302                          | <i>Ca_kabuli_Chr08</i> | 8856143                 | G/A  | NA                 | INTERGENIC                    | NA                                             |
| <i>Kabuli_wild_8856150</i> | 1399943303                          | <i>Ca_kabuli_Chr08</i> | 8856150                 | A/G  | NA                 | INTERGENIC                    | NA                                             |
| <i>Kabuli_wild_8864079</i> | 1399943304                          | <i>Ca_kabuli_Chr08</i> | 8864079                 | C/T  | Gene_Ca_11517      | SYNONYMOUS_CODING             | VQ                                             |
| <i>Kabuli_wild_8864157</i> | 1399943305                          | <i>Ca_kabuli_Chr08</i> | 8864157                 | G/A  | Gene_Ca_11517      | SYNONYMOUS_CODING             | VQ                                             |
| <i>Kabuli_wild_8888412</i> | 1399943306                          | <i>Ca_kabuli_Chr08</i> | 8888412                 | A/G  | NA                 | INTERGENIC                    | NA                                             |
| <i>Kabuli_wild_8888414</i> | 1399943307                          | <i>Ca_kabuli_Chr08</i> | 8888414                 | G/T  | NA                 | INTERGENIC                    | NA                                             |
| <i>Kabuli_wild_8888426</i> | 1399943308                          | <i>Ca_kabuli_Chr08</i> | 8888426                 | T/C  | NA                 | INTERGENIC                    | NA                                             |
| <i>Kabuli_wild_8888476</i> | 1399943309                          | <i>Ca_kabuli_Chr08</i> | 8888476                 | A/C  | NA                 | INTERGENIC                    | NA                                             |
| <i>Kabuli_wild_8888542</i> | 1399943310                          | <i>Ca_kabuli_Chr08</i> | 8888542                 | T/C  | NA                 | INTERGENIC                    | NA                                             |
| <i>Kabuli_wild_8903053</i> | 1399943311                          | <i>Ca_kabuli_Chr08</i> | 8903053                 | T/C  | Gene_Ca_11521      | INTRON                        | Major facilitator superfamily MFS-1            |
| <i>Kabuli_wild_8904346</i> | 1399943312                          | <i>Ca_kabuli_Chr08</i> | 8904346                 | C/A  | Gene_Ca_11521      | INTRON                        | Major facilitator superfamily MFS-1            |
| <i>Kabuli_wild_8904366</i> | 1399943313                          | <i>Ca_kabuli_Chr08</i> | 8904366                 | A/G  | Gene_Ca_11521      | INTRON                        | Major facilitator superfamily MFS-1            |
| <i>Kabuli_wild_8911129</i> | 1399943314                          | <i>Ca_kabuli_Chr08</i> | 8911129                 | G/A  | Gene_Ca_11522      | DOWNSTREAM                    | Starchsynthase,catalytic domain                |
| <i>Kabuli_wild_8911466</i> | 1399943315                          | <i>Ca_kabuli_Chr08</i> | 8911466                 | A/G  | Gene_Ca_11522      | NON_SYNONYMOUS_CODING         | Starchsynthase,catalytic domain                |
| <i>Kabuli_wild_8911478</i> | 1399943316                          | <i>Ca_kabuli_Chr08</i> | 8911478                 | G/A  | Gene_Ca_11522      | SYNONYMOUS_CODING             | Starchsynthase,catalytic domain                |
| <i>Kabuli_wild_8914018</i> | 1399943317                          | <i>Ca_kabuli_Chr08</i> | 8914018                 | A/C  | Gene_Ca_11522      | INTRON                        | Starchsynthase,catalytic domain                |
| <i>Kabuli_wild_8932493</i> | 1399943318                          | <i>Ca_kabuli_Chr08</i> | 8932493                 | A/C  | Gene_Ca_11524      | INTRON                        | Phosphoenolpyruvatecarboxykinase,ATP-utilising |
| <i>Kabuli_wild_9097271</i> | 1399943319                          | <i>Ca_kabuli_Chr08</i> | 9097271                 | T/A  | Gene_Ca_11532      | UPSTREAM                      | NA                                             |
| <i>Kabuli_wild_9097297</i> | 1399943320                          | <i>Ca_kabuli_Chr08</i> | 9097297                 | A/C  | Gene_Ca_11532      | UPSTREAM                      | NA                                             |
| <i>Kabuli_wild_9097300</i> | 1399943321                          | <i>Ca_kabuli_Chr08</i> | 9097300                 | C/G  | Gene_Ca_11532      | UPSTREAM                      | NA                                             |
| <i>Kabuli_wild_9097585</i> | 1399943322                          | <i>Ca_kabuli_Chr08</i> | 9097585                 | A/C  | NA                 | INTERGENIC                    | NA                                             |
| <i>Kabuli_wild_9099798</i> | 1399943323                          | <i>Ca_kabuli_Chr08</i> | 9099798                 | G/T  | NA                 | INTERGENIC                    | NA                                             |
| <i>Kabuli_wild_9100111</i> | 1399943324                          | <i>Ca_kabuli_Chr08</i> | 9100111                 | C/T  | NA                 | INTERGENIC                    | NA                                             |
| <i>Kabuli_wild_9100522</i> | 1399943325                          | <i>Ca_kabuli_Chr08</i> | 9100522                 | G/A  | Gene_Ca_11533      | SYNONYMOUS_CODING             | Glycosi dehydrolase, family 3, N-terminal      |
| <i>Kabuli_wild_9109896</i> | 1399943326                          | <i>Ca_kabuli_Chr08</i> | 9109896                 | A/T  | NA                 | INTERGENIC                    | NA                                             |
| <i>Kabuli_wild_9109907</i> | 1399943327                          | <i>Ca_kabuli_Chr08</i> | 9109907                 | A/T  | NA                 | INTERGENIC                    | NA                                             |
| <i>Kabuli_wild_9109920</i> | 1399943328                          | <i>Ca_kabuli_Chr08</i> | 9109920                 | C/A  | NA                 | INTERGENIC                    | NA                                             |
| <i>Kabuli_wild_9109924</i> | 1399943329                          | <i>Ca_kabuli_Chr08</i> | 9109924                 | T/A  | NA                 | INTERGENIC                    | NA                                             |
| <i>Kabuli_wild_9112172</i> | 1399943330                          | <i>Ca_kabuli_Chr08</i> | 9112172                 | A/C  | Gene_Ca_11534      | SYNONYMOUS_CODING             | Protein of unknown function DUF1399            |
| <i>Kabuli_wild_9112178</i> | 1399943331                          | <i>Ca_kabuli_Chr08</i> | 9112178                 | G/A  | Gene_Ca_11534      | SYNONYMOUS_CODING             | Protein of unknown function DUF1399            |

| SNP IDs                     | NCBI dbSNP accession IDs (NCBI_SS#) | Chromosomes            | Physical positions (bp) | SNPs | Gene accession IDs | Sequence components of genome | Putative functions                               |
|-----------------------------|-------------------------------------|------------------------|-------------------------|------|--------------------|-------------------------------|--------------------------------------------------|
| <i>Kabuli_wild_9112181</i>  | 1399943332                          | <i>Ca_kabuli_Chr08</i> | 9112181                 | A/C  | Gene_Ca_11534      | SYNONYMOUS_CODING             | Protein of unknown function DUF1399              |
| <i>Kabuli_wild_9115081</i>  | 1399943333                          | <i>Ca_kabuli_Chr08</i> | 9115081                 | A/G  | NA                 | INTERGENIC                    | NA                                               |
| <i>Kabuli_wild_9115121</i>  | 1399943334                          | <i>Ca_kabuli_Chr08</i> | 9115121                 | T/G  | NA                 | INTERGENIC                    | NA                                               |
| <i>Kabuli_wild_9118255</i>  | 1399943335                          | <i>Ca_kabuli_Chr08</i> | 9118255                 | A/C  | Gene_Ca_11535      | DOWNSTREAM                    | NA                                               |
| <i>Kabuli_wild_9118582</i>  | 1399943336                          | <i>Ca_kabuli_Chr08</i> | 9118582                 | C/T  | Gene_Ca_11534      | UPSTREAM                      | Protein of unknown function DUF1399              |
| <i>Kabuli_wild_9118667</i>  | 1399943337                          | <i>Ca_kabuli_Chr08</i> | 9118667                 | A/G  | Gene_Ca_11534      | UPSTREAM                      | Protein of unknown function DUF1399              |
| <i>Kabuli_wild_9143840</i>  | 1399943338                          | <i>Ca_kabuli_Chr08</i> | 9143840                 | C/A  | NA                 | INTERGENIC                    | NA                                               |
| <i>Kabuli_wild_9151722</i>  | 1399943339                          | <i>Ca_kabuli_Chr08</i> | 9151722                 | G/T  | Gene_Ca_11539      | SYNONYMOUS_CODING             | PeptidaseM3A/M3B,thimet/oligopeptidaseF          |
| <i>Kabuli_wild_9151805</i>  | 1399943340                          | <i>Ca_kabuli_Chr08</i> | 9151805                 | A/G  | Gene_Ca_11539      | INTRON                        | PeptidaseM3A/M3B,thimet/oligopeptidaseF          |
| <i>Kabuli_wild_9151855</i>  | 1399943341                          | <i>Ca_kabuli_Chr08</i> | 9151855                 | A/T  | Gene_Ca_11539      | INTRON                        | PeptidaseM3A/M3B,thimet/oligopeptidaseF          |
| <i>Kabuli_wild_9386682</i>  | 1399943342                          | <i>Ca_kabuli_Chr08</i> | 9386682                 | C/G  | Gene_Ca_11559      | NON_SYNONYMOUS_CODING         | Initiation factor2B-related                      |
| <i>Kabuli_wild_9388614</i>  | 1399943343                          | <i>Ca_kabuli_Chr08</i> | 9388614                 | A/C  | Gene_Ca_11559      | UPSTREAM                      | Initiation factor2B-related                      |
| <i>Kabuli_wild_9388734</i>  | 1399943344                          | <i>Ca_kabuli_Chr08</i> | 9388734                 | T/A  | Gene_Ca_11559      | UPSTREAM                      | Initiation factor2B-related                      |
| <i>Kabuli_wild_9389347</i>  | 1399943345                          | <i>Ca_kabuli_Chr08</i> | 9389347                 | G/A  | Gene_Ca_11559      | UPSTREAM                      | Initiation factor2B-related                      |
| <i>Kabuli_wild_10004481</i> | 1399943346                          | <i>Ca_kabuli_Chr08</i> | 10004481                | T/C  | Gene_Ca_18400      | DOWNSTREAM                    | NA                                               |
| <i>Kabuli_wild_10022825</i> | 1399943347                          | <i>Ca_kabuli_Chr08</i> | 10022825                | G/A  | NA                 | INTERGENIC                    | NA                                               |
| <i>Kabuli_wild_10022829</i> | 1399943348                          | <i>Ca_kabuli_Chr08</i> | 10022829                | T/G  | NA                 | INTERGENIC                    | NA                                               |
| <i>Kabuli_wild_10022868</i> | 1399943349                          | <i>Ca_kabuli_Chr08</i> | 10022868                | C/A  | NA                 | INTERGENIC                    | NA                                               |
| <i>Kabuli_wild_10031818</i> | 1399943350                          | <i>Ca_kabuli_Chr08</i> | 10031818                | A/C  | NA                 | INTERGENIC                    | NA                                               |
| <i>Kabuli_wild_10155981</i> | 1399943351                          | <i>Ca_kabuli_Chr08</i> | 10155981                | A/C  | Gene_Ca_18411      | SYNONYMOUS_CODING             | NADH:flavinoxidoreductase/NADHoxidase,N-terminal |
| <i>Kabuli_wild_10257655</i> | 1399943352                          | <i>Ca_kabuli_Chr08</i> | 10257655                | T/G  | Gene_Ca_18416      | SYNONYMOUS_CODING             | Zinc finger,PHD-type                             |
| <i>Kabuli_wild_10258892</i> | 1399943353                          | <i>Ca_kabuli_Chr08</i> | 10258892                | G/T  | Gene_Ca_18416      | NON_SYNONYMOUS_CODING         | Zinc finger,PHD-type                             |
| <i>Kabuli_wild_10544361</i> | 1399943354                          | <i>Ca_kabuli_Chr08</i> | 10544361                | G/A  | Gene_Ca_18436      | INTRON                        | ChaperoninTCP-1,conservedsite                    |
| <i>Kabuli_wild_10668346</i> | 1399943355                          | <i>Ca_kabuli_Chr08</i> | 10668346                | A/C  | NA                 | INTERGENIC                    | NA                                               |
| <i>Kabuli_wild_10668405</i> | 1399943356                          | <i>Ca_kabuli_Chr08</i> | 10668405                | C/T  | NA                 | INTERGENIC                    | NA                                               |
| <i>Kabuli_wild_10668422</i> | 1399943357                          | <i>Ca_kabuli_Chr08</i> | 10668422                | A/C  | NA                 | INTERGENIC                    | NA                                               |
| <i>Kabuli_wild_10728226</i> | 1399943358                          | <i>Ca_kabuli_Chr08</i> | 10728226                | T/A  | NA                 | INTERGENIC                    | NA                                               |
| <i>Kabuli_wild_10733404</i> | 1399943359                          | <i>Ca_kabuli_Chr08</i> | 10733404                | A/G  | Gene_Ca_19724      | SYNONYMOUS_CODING             | Ankyrinrepeat                                    |
| <i>Kabuli_wild_10733503</i> | 1399943360                          | <i>Ca_kabuli_Chr08</i> | 10733503                | C/T  | Gene_Ca_19724      | SYNONYMOUS_CODING             | Ankyrinrepeat                                    |
| <i>Kabuli_wild_10733661</i> | 1399943361                          | <i>Ca_kabuli_Chr08</i> | 10733661                | A/G  | Gene_Ca_19724      | NON_SYNONYMOUS_CODING         | Ankyrinrepeat                                    |
| <i>Kabuli_wild_10733747</i> | 1399943362                          | <i>Ca_kabuli_Chr08</i> | 10733747                | C/T  | Gene_Ca_19724      | NON_SYNONYMOUS_CODING         | Ankyrinrepeat                                    |
| <i>Kabuli_wild_10763656</i> | 1399943363                          | <i>Ca_kabuli_Chr08</i> | 10763656                | A/T  | NA                 | INTERGENIC                    | NA                                               |
| <i>Kabuli_wild_10953767</i> | 1399943364                          | <i>Ca_kabuli_Chr08</i> | 10953767                | C/T  | NA                 | INTERGENIC                    | NA                                               |
| <i>Kabuli_wild_10963827</i> | 1399943365                          | <i>Ca_kabuli_Chr08</i> | 10963827                | T/A  | NA                 | INTERGENIC                    | NA                                               |
| <i>Kabuli_wild_10963856</i> | 1399943366                          | <i>Ca_kabuli_Chr08</i> | 10963856                | T/G  | NA                 | INTERGENIC                    | NA                                               |
| <i>Kabuli_wild_11015666</i> | 1399943367                          | <i>Ca_kabuli_Chr08</i> | 11015666                | G/C  | NA                 | INTERGENIC                    | NA                                               |
| <i>Kabuli_wild_11015678</i> | 1399943368                          | <i>Ca_kabuli_Chr08</i> | 11015678                | C/G  | NA                 | INTERGENIC                    | NA                                               |
| <i>Kabuli_wild_11015680</i> | 1399943369                          | <i>Ca_kabuli_Chr08</i> | 11015680                | G/T  | NA                 | INTERGENIC                    | NA                                               |
| <i>Kabuli_wild_11066644</i> | 1399943370                          | <i>Ca_kabuli_Chr08</i> | 11066644                | C/T  | Gene_Ca_16843      | SYNONYMOUS_CODING             | Multiantimicrobial extrusion protein             |
| <i>Kabuli_wild_11066728</i> | 1399943371                          | <i>Ca_kabuli_Chr08</i> | 11066728                | G/A  | Gene_Ca_16843      | INTRON                        | Multiantimicrobial extrusion protein             |
| <i>Kabuli_wild_11066975</i> | 1399943372                          | <i>Ca_kabuli_Chr08</i> | 11066975                | T/C  | Gene_Ca_16843      | INTRON                        | Multiantimicrobial extrusion protein             |
| <i>Kabuli_wild_11067014</i> | 1399943373                          | <i>Ca_kabuli_Chr08</i> | 11067014                | G/A  | Gene_Ca_16843      | INTRON                        | Multiantimicrobial extrusion protein             |
| <i>Kabuli_wild_11067090</i> | 1399943374                          | <i>Ca_kabuli_Chr08</i> | 11067090                | T/C  | Gene_Ca_16843      | SYNONYMOUS_CODING             | Multiantimicrobial extrusion protein             |
| <i>Kabuli_wild_11067096</i> | 1399943375                          | <i>Ca_kabuli_Chr08</i> | 11067096                | T/G  | Gene_Ca_16843      | SYNONYMOUS_CODING             | Multiantimicrobial extrusion protein             |

| SNP IDs              | NCBI dbSNP accession IDs (NCBI_SS#) | Chromosomes     | Physical positions (bp) | SNPs | Gene accession IDs | Sequence components of genome | Putative functions                           |
|----------------------|-------------------------------------|-----------------|-------------------------|------|--------------------|-------------------------------|----------------------------------------------|
| Kabuli_wild_11087123 | 1399943376                          | Ca_kabuli_Chr08 | 11087123                | C/T  | NA                 | INTERGENIC                    | NA                                           |
| Kabuli_wild_11087143 | 1399943377                          | Ca_kabuli_Chr08 | 11087143                | A/G  | NA                 | INTERGENIC                    | NA                                           |
| Kabuli_wild_11087247 | 1399943378                          | Ca_kabuli_Chr08 | 11087247                | T/C  | NA                 | INTERGENIC                    | NA                                           |
| Kabuli_wild_11087250 | 1399943379                          | Ca_kabuli_Chr08 | 11087250                | T/C  | NA                 | INTERGENIC                    | NA                                           |
| Kabuli_wild_11087302 | 1399943380                          | Ca_kabuli_Chr08 | 11087302                | A/T  | NA                 | INTERGENIC                    | NA                                           |
| Kabuli_wild_11102884 | 1399943381                          | Ca_kabuli_Chr08 | 11102884                | T/G  | Gene_Ca_16842      | INTRON                        | Protein kinase,catalytic domain              |
| Kabuli_wild_11102892 | 1399943382                          | Ca_kabuli_Chr08 | 11102892                | T/A  | Gene_Ca_16842      | INTRON                        | Protein kinase,catalytic domain              |
| Kabuli_wild_11186986 | 1399943383                          | Ca_kabuli_Chr08 | 11186986                | A/C  | Gene_Ca_16839      | SYNONYMOUS_CODING             | Zinc finger,RanBP2-type                      |
| Kabuli_wild_11231812 | 1399943384                          | Ca_kabuli_Chr08 | 11231812                | A/G  | Gene_Ca_16835      | SYNONYMOUS_CODING             | Protein kinase,catalytic domain              |
| Kabuli_wild_11240258 | 1399943385                          | Ca_kabuli_Chr08 | 11240258                | C/A  | NA                 | INTERGENIC                    | NA                                           |
| Kabuli_wild_11240598 | 1399943386                          | Ca_kabuli_Chr08 | 11240598                | A/G  | Gene_Ca_16834      | NON_SYNONYMOUS_CODING         | HistoneH1/H5                                 |
| Kabuli_wild_11243256 | 1399943387                          | Ca_kabuli_Chr08 | 11243256                | A/C  | Gene_Ca_16834      | SYNONYMOUS_CODING             | HistoneH1/H6                                 |
| Kabuli_wild_11243260 | 1399943388                          | Ca_kabuli_Chr08 | 11243260                | T/C  | Gene_Ca_16834      | NON_SYNONYMOUS_CODING         | HistoneH1/H7                                 |
| Kabuli_wild_11243263 | 1399943389                          | Ca_kabuli_Chr08 | 11243263                | A/C  | Gene_Ca_16834      | NON_SYNONYMOUS_CODING         | HistoneH1/H8                                 |
| Kabuli_wild_11266447 | 1399943390                          | Ca_kabuli_Chr08 | 11266447                | G/A  | NA                 | INTERGENIC                    | NA                                           |
| Kabuli_wild_11310418 | 1399943391                          | Ca_kabuli_Chr08 | 11310418                | G/A  | Gene_Ca_16827      | DOWNSTREAM                    | Pentatric peptide repeat                     |
| Kabuli_wild_11310460 | 1399943392                          | Ca_kabuli_Chr08 | 11310460                | G/A  | Gene_Ca_16827      | DOWNSTREAM                    | Pentatric peptide repeat                     |
| Kabuli_wild_11310480 | 1399943393                          | Ca_kabuli_Chr08 | 11310480                | T/A  | Gene_Ca_16827      | DOWNSTREAM                    | Pentatric peptide repeat                     |
| Kabuli_wild_11332934 | 1399943394                          | Ca_kabuli_Chr08 | 11332934                | C/T  | NA                 | INTERGENIC                    | NA                                           |
| Kabuli_wild_11332940 | 1399943395                          | Ca_kabuli_Chr08 | 11332940                | T/C  | NA                 | INTERGENIC                    | NA                                           |
| Kabuli_wild_11333057 | 1399943396                          | Ca_kabuli_Chr08 | 11333057                | C/G  | NA                 | INTERGENIC                    | NA                                           |
| Kabuli_wild_11334190 | 1399943397                          | Ca_kabuli_Chr08 | 11334190                | A/T  | NA                 | INTERGENIC                    | NA                                           |
| Kabuli_wild_11334210 | 1399943398                          | Ca_kabuli_Chr08 | 11334210                | C/T  | NA                 | INTERGENIC                    | NA                                           |
| Kabuli_wild_11349891 | 1399943399                          | Ca_kabuli_Chr08 | 11349891                | T/A  | NA                 | INTERGENIC                    | NA                                           |
| Kabuli_wild_11349995 | 1399943400                          | Ca_kabuli_Chr08 | 11349995                | A/G  | NA                 | INTERGENIC                    | NA                                           |
| Kabuli_wild_11403754 | 1399943401                          | Ca_kabuli_Chr08 | 11403754                | G/A  | Gene_Ca_16820      | NON_SYNONYMOUS_CODING         | SANT domain,DNA binding                      |
| Kabuli_wild_11403805 | 1399943402                          | Ca_kabuli_Chr08 | 11403805                | G/A  | Gene_Ca_16820      | SYNONYMOUS_CODING             | SANT domain,DNA binding                      |
| Kabuli_wild_11562814 | 1399943403                          | Ca_kabuli_Chr08 | 11562814                | A/C  | NA                 | INTERGENIC                    | NA                                           |
| Kabuli_wild_11631836 | 1399943404                          | Ca_kabuli_Chr08 | 11631836                | C/T  | Gene_Ca_16809      | NON_SYNONYMOUS_CODING         | Ketose-bisphosphatealdolase,class-II         |
| Kabuli_wild_11656670 | 1399943405                          | Ca_kabuli_Chr08 | 11656670                | A/G  | NA                 | INTERGENIC                    | NA                                           |
| Kabuli_wild_11656675 | 1399943406                          | Ca_kabuli_Chr08 | 11656675                | T/C  | NA                 | INTERGENIC                    | NA                                           |
| Kabuli_wild_11656687 | 1399943407                          | Ca_kabuli_Chr08 | 11656687                | A/G  | NA                 | INTERGENIC                    | NA                                           |
| Kabuli_wild_11656700 | 1399943408                          | Ca_kabuli_Chr08 | 11656700                | G/T  | NA                 | INTERGENIC                    | NA                                           |
| Kabuli_wild_11694220 | 1399943409                          | Ca_kabuli_Chr08 | 11694220                | A/G  | NA                 | INTERGENIC                    | NA                                           |
| Kabuli_wild_11695661 | 1399943410                          | Ca_kabuli_Chr08 | 11695661                | T/C  | Gene_Ca_16803      | SYNONYMOUS_CODING             | Protein kinase,catalytic domain              |
| Kabuli_wild_11702005 | 1399943411                          | Ca_kabuli_Chr08 | 11702005                | A/C  | Gene_Ca_16803      | INTRON                        | Protein kinase,catalytic domain              |
| Kabuli_wild_11702025 | 1399943412                          | Ca_kabuli_Chr08 | 11702025                | C/T  | Gene_Ca_16803      | INTRON                        | Protein kinase,catalytic domain              |
| Kabuli_wild_11721730 | 1399943413                          | Ca_kabuli_Chr08 | 11721730                | G/T  | NA                 | INTERGENIC                    | NA                                           |
| Kabuli_wild_11735882 | 1399943414                          | Ca_kabuli_Chr08 | 11735882                | A/C  | Gene_Ca_16799      | SYNONYMOUS_CODING             | Heat shock protein DnaJ, cysteine-richdomain |
| Kabuli_wild_11760324 | 1399943415                          | Ca_kabuli_Chr08 | 11760324                | G/C  | Gene_Ca_16796      | INTRON                        | NUDIX hydrolase domain                       |
| Kabuli_wild_12022984 | 1399943416                          | Ca_kabuli_Chr08 | 12022984                | G/C  | Gene_Ca_23847      | NON_SYNONYMOUS_CODING         | Peptidyl-tRNAhydrolase                       |
| Kabuli_wild_12076492 | 1399943417                          | Ca_kabuli_Chr08 | 12076492                | A/G  | Gene_Ca_23850      | SYNONYMOUS_CODING             | PutativeRNAmethylase                         |
| Kabuli_wild_12865072 | 1399943418                          | Ca_kabuli_Chr08 | 12865072                | C/A  | NA                 | INTERGENIC                    | NA                                           |
| Kabuli_wild_12875187 | 1399943419                          | Ca_kabuli_Chr08 | 12875187                | T/G  | NA                 | INTERGENIC                    | NA                                           |

| SNP IDs              | NCBI dbSNP accession IDs (NCBI_SS#) | Chromosomes     | Physical positions (bp) | SNPs | Gene accession IDs | Sequence components of genome | Putative functions                                  |
|----------------------|-------------------------------------|-----------------|-------------------------|------|--------------------|-------------------------------|-----------------------------------------------------|
| Kabuli_wild_12875217 | 1399943420                          | Ca_kabuli_Chr08 | 12875217                | A/G  | NA                 | INTERGENIC                    | NA                                                  |
| Kabuli_wild_13062576 | 1399943421                          | Ca_kabuli_Chr08 | 13062576                | A/G  | NA                 | INTERGENIC                    | NA                                                  |
| Kabuli_wild_13137386 | 1399943422                          | Ca_kabuli_Chr08 | 13137386                | T/G  | Gene_Ca_20103      | INTRON                        | NA                                                  |
| Kabuli_wild_13137388 | 1399943423                          | Ca_kabuli_Chr08 | 13137388                | T/G  | Gene_Ca_20103      | INTRON                        | NA                                                  |
| Kabuli_wild_13248268 | 1399943424                          | Ca_kabuli_Chr08 | 13248268                | T/C  | Gene_Ca_20108      | SYNONYMOUS_CODING             | C2 calcium-dependent membrane targeting             |
| Kabuli_wild_13745335 | 1399943425                          | Ca_kabuli_Chr08 | 13745335                | A/G  | NA                 | INTERGENIC                    | NA                                                  |
| Kabuli_wild_13830309 | 1399943426                          | Ca_kabuli_Chr08 | 13830309                | A/T  | Gene_Ca_22724      | NON_SYNONYMOUS_CODING         | Arf GTPase activating protein                       |
| Kabuli_wild_13840865 | 1399943427                          | Ca_kabuli_Chr08 | 13840865                | A/C  | NA                 | INTERGENIC                    | NA                                                  |
| Kabuli_wild_13864026 | 1399943428                          | Ca_kabuli_Chr08 | 13864026                | T/G  | NA                 | INTERGENIC                    | NA                                                  |
| Kabuli_wild_13997371 | 1399943429                          | Ca_kabuli_Chr08 | 13997371                | C/T  | NA                 | INTERGENIC                    | NA                                                  |
| Kabuli_wild_13997386 | 1399943430                          | Ca_kabuli_Chr08 | 13997386                | G/A  | NA                 | INTERGENIC                    | NA                                                  |
| Kabuli_wild_13998102 | 1399943431                          | Ca_kabuli_Chr08 | 13998102                | A/G  | Gene_Ca_22740      | UPSTREAM                      | NA                                                  |
| Kabuli_wild_14006709 | 1399943432                          | Ca_kabuli_Chr08 | 14006709                | G/A  | Gene_Ca_22742      | INTRON                        | NA                                                  |
| Kabuli_wild_14007360 | 1399943433                          | Ca_kabuli_Chr08 | 14007360                | T/A  | Gene_Ca_22742      | INTRON                        | NA                                                  |
| Kabuli_wild_14007431 | 1399943434                          | Ca_kabuli_Chr08 | 14007431                | A/G  | Gene_Ca_22742      | INTRON                        | NA                                                  |
| Kabuli_wild_14124588 | 1399943435                          | Ca_kabuli_Chr08 | 14124588                | C/A  | NA                 | INTERGENIC                    | NA                                                  |
| Kabuli_wild_14129040 | 1399943436                          | Ca_kabuli_Chr08 | 14129040                | G/A  | Gene_Ca_13047      | NON_SYNONYMOUS_CODING         | Proteinphosphatase2C-like                           |
| Kabuli_wild_14325980 | 1399943437                          | Ca_kabuli_Chr08 | 14325980                | C/A  | Gene_Ca_13032      | INTRON                        | Kinesin, motordomain                                |
| Kabuli_wild_14436678 | 1399943438                          | Ca_kabuli_Chr08 | 14436678                | A/T  | NA                 | INTERGENIC                    | NA                                                  |
| Kabuli_wild_14444330 | 1399943439                          | Ca_kabuli_Chr08 | 14444330                | C/T  | NA                 | INTERGENIC                    | NA                                                  |
| Kabuli_wild_14444424 | 1399943440                          | Ca_kabuli_Chr08 | 14444424                | G/A  | NA                 | INTERGENIC                    | NA                                                  |
| Kabuli_wild_14444438 | 1399943441                          | Ca_kabuli_Chr08 | 14444438                | A/C  | NA                 | INTERGENIC                    | NA                                                  |
| Kabuli_wild_14445205 | 1399943442                          | Ca_kabuli_Chr08 | 14445205                | C/A  | NA                 | INTERGENIC                    | NA                                                  |
| Kabuli_wild_14466020 | 1399943443                          | Ca_kabuli_Chr08 | 14466020                | T/C  | Gene_Ca_13020      | INTRON                        | Zinc finger, RING-type                              |
| Kabuli_wild_14466050 | 1399943444                          | Ca_kabuli_Chr08 | 14466050                | A/G  | Gene_Ca_13020      | INTRON                        | Zinc finger, RING-type                              |
| Kabuli_wild_14497891 | 1399943445                          | Ca_kabuli_Chr08 | 14497891                | A/G  | Gene_Ca_13019      | INTRON                        | Protein of unknown function DUF639                  |
| Kabuli_wild_14497919 | 1399943446                          | Ca_kabuli_Chr08 | 14497919                | C/A  | Gene_Ca_13019      | NON_SYNONYMOUS_CODING         | Protein of unknown function DUF639                  |
| Kabuli_wild_14528966 | 1399943447                          | Ca_kabuli_Chr08 | 14528966                | C/G  | NA                 | INTERGENIC                    | NA                                                  |
| Kabuli_wild_14613302 | 1399943448                          | Ca_kabuli_Chr08 | 14613302                | G/A  | Gene_Ca_13006      | INTRON                        | Endonuclease/exonuclease/phosphatase                |
| Kabuli_wild_14626081 | 1399943449                          | Ca_kabuli_Chr08 | 14626081                | G/A  | NA                 | INTERGENIC                    | NA                                                  |
| Kabuli_wild_14626100 | 1399943450                          | Ca_kabuli_Chr08 | 14626100                | T/C  | NA                 | INTERGENIC                    | NA                                                  |
| Kabuli_wild_14629887 | 1399943451                          | Ca_kabuli_Chr08 | 14629887                | G/A  | NA                 | INTERGENIC                    | NA                                                  |
| Kabuli_wild_14629906 | 1399943452                          | Ca_kabuli_Chr08 | 14629906                | T/C  | NA                 | INTERGENIC                    | NA                                                  |
| Kabuli_wild_14640967 | 1399943453                          | Ca_kabuli_Chr08 | 14640967                | A/C  | Gene_Ca_13004      | INTRON                        | Toprimdomain                                        |
| Kabuli_wild_14715495 | 1399943454                          | Ca_kabuli_Chr08 | 14715495                | T/G  | Gene_Ca_12997      | INTRON                        | HEAT                                                |
| Kabuli_wild_14759784 | 1399943455                          | Ca_kabuli_Chr08 | 14759784                | G/T  | NA                 | INTERGENIC                    | NA                                                  |
| Kabuli_wild_14760059 | 1399943456                          | Ca_kabuli_Chr08 | 14760059                | T/C  | NA                 | INTERGENIC                    | NA                                                  |
| Kabuli_wild_14760479 | 1399943457                          | Ca_kabuli_Chr08 | 14760479                | C/G  | NA                 | INTERGENIC                    | NA                                                  |
| Kabuli_wild_14760497 | 1399943458                          | Ca_kabuli_Chr08 | 14760497                | G/A  | NA                 | INTERGENIC                    | NA                                                  |
| Kabuli_wild_14760535 | 1399943459                          | Ca_kabuli_Chr08 | 14760535                | G/T  | NA                 | INTERGENIC                    | NA                                                  |
| Kabuli_wild_14760802 | 1399943460                          | Ca_kabuli_Chr08 | 14760802                | A/G  | NA                 | INTERGENIC                    | NA                                                  |
| Kabuli_wild_14821416 | 1399943461                          | Ca_kabuli_Chr08 | 14821416                | G/A  | Gene_Ca_12987      | SYNONYMOUS_CODING             | Mrp, conservedsite                                  |
| Kabuli_wild_14969330 | 1399943462                          | Ca_kabuli_Chr08 | 14969330                | A/C  | Gene_Ca_12976      | INTRON                        | DNA mismatch repair protein MutS, C-terminal domain |
| Kabuli_wild_15000109 | 1399943463                          | Ca_kabuli_Chr08 | 15000109                | A/G  | Gene_Ca_12972      | NON_SYNONYMOUS_CODING         | Aldehydehydrogenasedomain                           |

| SNP IDs              | NCBI dbSNP accession IDs (NCBI_SS#) | Chromosomes     | Physical positions (bp) | SNPs | Gene accession IDs | Sequence components of genome | Putative functions                            |
|----------------------|-------------------------------------|-----------------|-------------------------|------|--------------------|-------------------------------|-----------------------------------------------|
| Kabuli_wild_15034465 | 1399943464                          | Ca_kabuli_Chr08 | 15034465                | T/C  | NA                 | INTERGENIC                    | NA                                            |
| Kabuli_wild_15131175 | 1399943465                          | Ca_kabuli_Chr08 | 15131175                | G/A  | Gene_Ca_12965      | SYNONYMOUS_CODING             | Sugar/inositol transporter                    |
| Kabuli_wild_15421674 | 1399943466                          | Ca_kabuli_Chr08 | 15421674                | A/T  | Gene_Ca_17898      | DOWNSTREAM                    | Nucleosidephosphorylasedomain                 |
| Kabuli_wild_15473060 | 1399943467                          | Ca_kabuli_Chr08 | 15473060                | T/C  | NA                 | INTERGENIC                    | NA                                            |
| Kabuli_wild_15528709 | 1399943468                          | Ca_kabuli_Chr08 | 15528709                | T/C  | Gene_Ca_17890      | INTRON                        | Protein kinase,catalytic domain               |
| Kabuli_wild_15528710 | 1399943469                          | Ca_kabuli_Chr08 | 15528710                | T/G  | Gene_Ca_17890      | INTRON                        | Protein kinase,catalytic domain               |
| Kabuli_wild_15528717 | 1399943470                          | Ca_kabuli_Chr08 | 15528717                | C/G  | Gene_Ca_17890      | INTRON                        | Protein kinase,catalytic domain               |
| Kabuli_wild_15528719 | 1399943471                          | Ca_kabuli_Chr08 | 15528719                | A/T  | Gene_Ca_17890      | INTRON                        | Protein kinase,catalytic domain               |
| Kabuli_wild_15528720 | 1399943472                          | Ca_kabuli_Chr08 | 15528720                | A/T  | Gene_Ca_17890      | INTRON                        | Protein kinase,catalytic domain               |
| Kabuli_wild_15528721 | 1399943473                          | Ca_kabuli_Chr08 | 15528721                | C/G  | Gene_Ca_17890      | INTRON                        | Protein kinase,catalytic domain               |
| Kabuli_wild_15528724 | 1399943474                          | Ca_kabuli_Chr08 | 15528724                | C/A  | Gene_Ca_17890      | INTRON                        | Protein kinase,catalytic domain               |
| Kabuli_wild_15555771 | 1399943475                          | Ca_kabuli_Chr08 | 15555771                | A/C  | Gene_Ca_17888      | SYNONYMOUS_CODING             | Protein of unknown function DUF1675           |
| Kabuli_wild_15638443 | 1399943476                          | Ca_kabuli_Chr08 | 15638443                | C/A  | NA                 | INTERGENIC                    | NA                                            |
| Kabuli_wild_15692070 | 1399943477                          | Ca_kabuli_Chr08 | 15692070                | G/A  | Gene_Ca_17876      | INTRON                        | RNA-dependent RNA polymerase, eukaryotic-type |
| Kabuli_wild_15699180 | 1399943478                          | Ca_kabuli_Chr08 | 15699180                | T/C  | Gene_Ca_17876      | INTRON                        | RNA-dependent RNA polymerase, eukaryotic-type |
| Kabuli_wild_15764874 | 1399943479                          | Ca_kabuli_Chr08 | 15764874                | G/A  | Gene_Ca_17866      | SYNONYMOUS_CODING             | Chromodomain                                  |
| Kabuli_wild_15857158 | 1399943480                          | Ca_kabuli_Chr08 | 15857158                | G/C  | Gene_Ca_17859      | DOWNSTREAM                    | Pectinesterase,catalytic                      |
| Kabuli_wild_15857192 | 1399943481                          | Ca_kabuli_Chr08 | 15857192                | A/G  | Gene_Ca_17859      | DOWNSTREAM                    | Pectinesterase,catalytic                      |
| Kabuli_wild_15857359 | 1399943482                          | Ca_kabuli_Chr08 | 15857359                | T/G  | Gene_Ca_17859      | DOWNSTREAM                    | Pectinesterase,catalytic                      |
| Kabuli_wild_15871698 | 1399943483                          | Ca_kabuli_Chr08 | 15871698                | T/C  | Gene_Ca_17857      | NON_SYNONYMOUS_CODING         | HEAT                                          |
| Kabuli_wild_15873044 | 1399943484                          | Ca_kabuli_Chr08 | 15873044                | A/G  | Gene_Ca_17857      | SYNONYMOUS_CODING             | HEAT                                          |
| Kabuli_wild_15873071 | 1399943485                          | Ca_kabuli_Chr08 | 15873071                | A/C  | Gene_Ca_17857      | SYNONYMOUS_CODING             | HEAT                                          |
| Kabuli_wild_15873133 | 1399943486                          | Ca_kabuli_Chr08 | 15873133                | A/G  | Gene_Ca_17857      | NON_SYNONYMOUS_CODING         | HEAT                                          |
| Kabuli_wild_16004511 | 1399943487                          | Ca_kabuli_Chr08 | 16004511                | T/C  | Gene_Ca_15508      | DOWNSTREAM                    | Profilin/allergen                             |
| Kabuli_wild_16004976 | 1399943488                          | Ca_kabuli_Chr08 | 16004976                | G/C  | Gene_Ca_15508      | DOWNSTREAM                    | Profilin/allergen                             |
| Kabuli_wild_16005046 | 1399943489                          | Ca_kabuli_Chr08 | 16005046                | C/T  | Gene_Ca_15508      | DOWNSTREAM                    | Profilin/allergen                             |
| Kabuli_wild_16005078 | 1399943490                          | Ca_kabuli_Chr08 | 16005078                | A/G  | Gene_Ca_15508      | DOWNSTREAM                    | Profilin/allergen                             |
| Kabuli_wild_16020239 | 1399943491                          | Ca_kabuli_Chr08 | 16020239                | C/A  | NA                 | INTERGENIC                    | NA                                            |
| Kabuli_wild_16020277 | 1399943492                          | Ca_kabuli_Chr08 | 16020277                | T/G  | NA                 | INTERGENIC                    | NA                                            |
| Kabuli_wild_16020323 | 1399943493                          | Ca_kabuli_Chr08 | 16020323                | G/T  | NA                 | INTERGENIC                    | NA                                            |
| Kabuli_wild_16022287 | 1399943494                          | Ca_kabuli_Chr08 | 16022287                | G/A  | Gene_Ca_15512      | UPSTREAM                      | Acidphosphatase(ClassB)                       |
| Kabuli_wild_16022432 | 1399943495                          | Ca_kabuli_Chr08 | 16022432                | C/T  | Gene_Ca_15512      | UPSTREAM                      | Acidphosphatase(ClassB)                       |
| Kabuli_wild_16027974 | 1399943496                          | Ca_kabuli_Chr08 | 16027974                | A/T  | NA                 | INTERGENIC                    | NA                                            |
| Kabuli_wild_16028040 | 1399943497                          | Ca_kabuli_Chr08 | 16028040                | A/G  | NA                 | INTERGENIC                    | NA                                            |
| Kabuli_wild_16028062 | 1399943498                          | Ca_kabuli_Chr08 | 16028062                | G/A  | NA                 | INTERGENIC                    | NA                                            |
| Kabuli_wild_16028064 | 1399943499                          | Ca_kabuli_Chr08 | 16028064                | G/T  | NA                 | INTERGENIC                    | NA                                            |
| Kabuli_wild_16076161 | 1399943500                          | Ca_kabuli_Chr08 | 16076161                | C/G  | Gene_Ca_15517      | NON_SYNONYMOUS_CODING         | Gamma-glutamyltranspeptidase                  |
| Kabuli_wild_16076168 | 1399943501                          | Ca_kabuli_Chr08 | 16076168                | A/G  | Gene_Ca_15517      | SYNONYMOUS_CODING             | Gamma-glutamyltranspeptidase                  |
| Kabuli_wild_16076170 | 1399943502                          | Ca_kabuli_Chr08 | 16076170                | T/C  | Gene_Ca_15517      | NON_SYNONYMOUS_CODING         | Gamma-glutamyltranspeptidase                  |
| Kabuli_wild_16102414 | 1399943503                          | Ca_kabuli_Chr08 | 16102414                | G/T  | NA                 | INTERGENIC                    | NA                                            |
| Kabuli_wild_16130914 | 1399943504                          | Ca_kabuli_Chr08 | 16130914                | A/C  | NA                 | INTERGENIC                    | NA                                            |
| Kabuli_wild_16144279 | 1399943505                          | Ca_kabuli_Chr08 | 16144279                | T/A  | NA                 | INTERGENIC                    | NA                                            |
| Kabuli_wild_16145275 | 1399943506                          | Ca_kabuli_Chr08 | 16145275                | A/G  | Gene_Ca_15527      | INTRON                        | Domain of unknown function DUF292,eukaryotic  |
| Kabuli_wild_16145370 | 1399943507                          | Ca_kabuli_Chr08 | 16145370                | C/A  | Gene_Ca_15527      | INTRON                        | Domain of unknown function DUF292,eukaryotic  |

| SNP IDs              | NCBI dbSNP accession IDs (NCBI_SS#) | Chromosomes        | Physical positions (bp) | SNPs | Gene accession IDs | Sequence components of genome | Putative functions                           |
|----------------------|-------------------------------------|--------------------|-------------------------|------|--------------------|-------------------------------|----------------------------------------------|
| Kabuli_wild_16145376 | 1399943508                          | Ca_kabuli_Chrom8   | 16145376                | T/A  | Gene_Ca_15527      | INTRON                        | Domain of unknown function DUF292,eukaryotic |
| Kabuli_wild_16145385 | 1399943509                          | Ca_kabuli_Chrom8   | 16145385                | A/C  | Gene_Ca_15527      | INTRON                        | Domain of unknown function DUF292,eukaryotic |
| Kabuli_wild_16145411 | 1399943510                          | Ca_kabuli_Chrom8   | 16145411                | C/G  | Gene_Ca_15527      | NON_SYNONYMOUS_CODING         | Domain of unknown function DUF292,eukaryotic |
| Kabuli_wild_16264310 | 1399943511                          | Ca_kabuli_Chrom8   | 16264310                | G/T  | NA                 | INTERGENIC                    | NA                                           |
| Kabuli_wild_16278758 | 1399943512                          | Ca_kabuli_Chrom8   | 16278758                | T/C  | NA                 | INTERGENIC                    | NA                                           |
| Kabuli_wild_16283660 | 1399943513                          | Ca_kabuli_Chrom8   | 16283660                | C/T  | NA                 | INTERGENIC                    | NA                                           |
| Kabuli_wild_16283661 | 1399943514                          | Ca_kabuli_Chrom8   | 16283661                | A/G  | NA                 | INTERGENIC                    | NA                                           |
| Kabuli_wild_16283722 | 1399943515                          | Ca_kabuli_Chrom8   | 16283722                | A/G  | NA                 | INTERGENIC                    | NA                                           |
| Kabuli_wild_16283738 | 1399943516                          | Ca_kabuli_Chrom8   | 16283738                | G/C  | NA                 | INTERGENIC                    | NA                                           |
| Kabuli_wild_16366536 | 1399943517                          | Ca_kabuli_Chrom8   | 16366536                | T/A  | Gene_Ca_15558      | SYNONYMOUS_CODING             | Prenyltransferase/squaleneoxidase            |
| Kabuli_wild_16411550 | 1399943518                          | Ca_kabuli_Chrom8   | 16411550                | A/G  | Gene_Ca_15562      | INTRON                        | NA                                           |
| Kabuli_wild_16421407 | 1399943519                          | Ca_kabuli_Chrom8   | 16421407                | G/A  | NA                 | INTERGENIC                    | NA                                           |
| Kabuli_wild_16421441 | 1399943520                          | Ca_kabuli_Chrom8   | 16421441                | C/A  | Gene_Ca_15563      | NON_SYNONYMOUS_CODING         | NA                                           |
| Kabuli_wild_16421442 | 1399943521                          | Ca_kabuli_Chrom8   | 16421442                | C/G  | Gene_Ca_15563      | SYNONYMOUS_CODING             | NA                                           |
| Kabuli_wild_16421497 | 1399943522                          | Ca_kabuli_Chrom8   | 16421497                | C/T  | Gene_Ca_15563      | NON_SYNONYMOUS_CODING         | NA                                           |
| Kabuli_wild_16421595 | 1399943523                          | Ca_kabuli_Chrom8   | 16421595                | A/C  | Gene_Ca_15563      | SYNONYMOUS_CODING             | NA                                           |
| Kabuli_wild_16432907 | 1399943524                          | Ca_kabuli_Chrom8   | 16432907                | T/G  | Gene_Ca_15563      | INTRON                        | NA                                           |
| Kabuli_wild_16472919 | 1399943525                          | Ca_kabuli_Chrom8   | 16472919                | T/A  | NA                 | INTERGENIC                    | NA                                           |
| Kabuli_wild_16472932 | 1399943526                          | Ca_kabuli_Chrom8   | 16472932                | T/C  | NA                 | INTERGENIC                    | NA                                           |
| Kabuli_wild_16472933 | 1399943527                          | Ca_kabuli_Chrom8   | 16472933                | C/G  | NA                 | INTERGENIC                    | NA                                           |
| Kabuli_wild_16472998 | 1399943528                          | Ca_kabuli_Chrom8   | 16472998                | C/T  | NA                 | INTERGENIC                    | NA                                           |
| Kabuli_wild_16473139 | 1399943529                          | Ca_kabuli_Chrom8   | 16473139                | C/T  | NA                 | INTERGENIC                    | NA                                           |
| Kabuli_wild_16473157 | 1399943530                          | Ca_kabuli_Chrom8   | 16473157                | C/T  | NA                 | INTERGENIC                    | NA                                           |
| Kabuli_wild_16473290 | 1399943531                          | Ca_kabuli_Chrom8   | 16473290                | A/G  | NA                 | INTERGENIC                    | NA                                           |
| Kabuli_wild_137301   | 1399943532                          | Ca_kabuli_scaffold | 137301                  | G/A  | NA                 | INTERGENIC                    | NA                                           |
| Kabuli_wild_137309   | 1399943533                          | Ca_kabuli_scaffold | 137309                  | T/G  | NA                 | INTERGENIC                    | NA                                           |
| Kabuli_wild_504248   | 1399943534                          | Ca_kabuli_scaffold | 504248                  | G/A  | NA                 | INTERGENIC                    | NA                                           |
| Kabuli_wild_504253   | 1399943535                          | Ca_kabuli_scaffold | 504253                  | C/T  | NA                 | INTERGENIC                    | NA                                           |
| Kabuli_wild_504258   | 1399943536                          | Ca_kabuli_scaffold | 504258                  | C/T  | NA                 | INTERGENIC                    | NA                                           |
| Kabuli_wild_505926   | 1399943537                          | Ca_kabuli_scaffold | 505926                  | C/T  | NA                 | INTERGENIC                    | NA                                           |
| Kabuli_wild_505931   | 1399943538                          | Ca_kabuli_scaffold | 505931                  | C/T  | NA                 | INTERGENIC                    | NA                                           |
| Kabuli_wild_61952    | 1399943539                          | Ca_kabuli_scaffold | 61952                   | G/A  | Gene_Ca_27384      | INTRON                        | NA                                           |
| Kabuli_wild_62027    | 1399943540                          | Ca_kabuli_scaffold | 62027                   | T/G  | Gene_Ca_27384      | INTRON                        | NA                                           |
| Kabuli_wild_41096    | 1399943541                          | Ca_kabuli_scaffold | 41096                   | G/A  | NA                 | INTERGENIC                    | NA                                           |
| Kabuli_wild_90       | 1399943542                          | Ca_kabuli_scaffold | 90                      | C/T  | NA                 | INTERGENIC                    | NA                                           |
| Kabuli_wild_95       | 1399943543                          | Ca_kabuli_scaffold | 95                      | A/G  | NA                 | INTERGENIC                    | NA                                           |
| Kabuli_wild_122      | 1399943544                          | Ca_kabuli_scaffold | 122                     | G/A  | NA                 | INTERGENIC                    | NA                                           |
| Kabuli_wild_126      | 1399943545                          | Ca_kabuli_scaffold | 126                     | T/C  | NA                 | INTERGENIC                    | NA                                           |
| Kabuli_wild_131      | 1399943546                          | Ca_kabuli_scaffold | 131                     | A/C  | NA                 | INTERGENIC                    | NA                                           |
| Kabuli_wild_133      | 1399943547                          | Ca_kabuli_scaffold | 133                     | C/T  | NA                 | INTERGENIC                    | NA                                           |
| Kabuli_wild_134      | 1399943548                          | Ca_kabuli_scaffold | 134                     | C/T  | NA                 | INTERGENIC                    | NA                                           |
| Kabuli_wild_136      | 1399943549                          | Ca_kabuli_scaffold | 136                     | G/A  | NA                 | INTERGENIC                    | NA                                           |
| Kabuli_wild_140      | 1399943550                          | Ca_kabuli_scaffold | 140                     | A/C  | NA                 | INTERGENIC                    | NA                                           |
| Kabuli_wild_145      | 1399943551                          | Ca_kabuli_scaffold | 145                     | T/G  | NA                 | INTERGENIC                    | NA                                           |

| SNP IDs            | NCBI dbSNP accession IDs (NCBI_SS#) | Chromosomes        | Physical positions (bp) | SNPs | Gene accession IDs | Sequence components of genome | Putative functions                 |
|--------------------|-------------------------------------|--------------------|-------------------------|------|--------------------|-------------------------------|------------------------------------|
| Kabuli_wild_11903  | 1399943552                          | Ca_kabuli_scaffold | 11903                   | A/T  | NA                 | INTERGENIC                    | NA                                 |
| Kabuli_wild_32269  | 1399943553                          | Ca_kabuli_scaffold | 32269                   | A/G  | NA                 | INTERGENIC                    | NA                                 |
| Kabuli_wild_32303  | 1399943554                          | Ca_kabuli_scaffold | 32303                   | T/C  | NA                 | INTERGENIC                    | NA                                 |
| Kabuli_wild_32310  | 1399943555                          | Ca_kabuli_scaffold | 32310                   | C/T  | NA                 | INTERGENIC                    | NA                                 |
| Kabuli_wild_60399  | 1399943556                          | Ca_kabuli_scaffold | 60399                   | G/A  | Gene_Ca_22968      | NON_SYNONYMOUS_CODING         | Peptidase C48, SUMO/Sentrin/Ubl1   |
| Kabuli_wild_60403  | 1399943557                          | Ca_kabuli_scaffold | 60403                   | C/G  | Gene_Ca_22968      | NON_SYNONYMOUS_CODING         | Peptidase C48, SUMO/Sentrin/Ubl1   |
| Kabuli_wild_100399 | 1399943558                          | Ca_kabuli_scaffold | 100399                  | C/A  | Gene_Ca_22971      | NON_SYNONYMOUS_CODING         | NA                                 |
| Kabuli_wild_100418 | 1399943559                          | Ca_kabuli_scaffold | 100418                  | G/T  | Gene_Ca_22971      | SYNONYMOUS_CODING             | NA                                 |
| Kabuli_wild_100460 | 1399943560                          | Ca_kabuli_scaffold | 100460                  | G/A  | Gene_Ca_22971      | SYNONYMOUS_CODING             | NA                                 |
| Kabuli_wild_100472 | 1399943561                          | Ca_kabuli_scaffold | 100472                  | A/G  | Gene_Ca_22971      | SYNONYMOUS_CODING             | NA                                 |
| Kabuli_wild_100476 | 1399943562                          | Ca_kabuli_scaffold | 100476                  | G/A  | Gene_Ca_22971      | NON_SYNONYMOUS_CODING         | NA                                 |
| Kabuli_wild_100480 | 1399943563                          | Ca_kabuli_scaffold | 100480                  | C/T  | Gene_Ca_22971      | NON_SYNONYMOUS_CODING         | NA                                 |
| Kabuli_wild_100483 | 1399943564                          | Ca_kabuli_scaffold | 100483                  | C/T  | Gene_Ca_22971      | NON_SYNONYMOUS_CODING         | NA                                 |
| Kabuli_wild_107748 | 1399943565                          | Ca_kabuli_scaffold | 107748                  | C/T  | Gene_Ca_22972      | NON_SYNONYMOUS_CODING         | Peptidase C48, SUMO/Sentrin/Ubl1   |
| Kabuli_wild_107757 | 1399943566                          | Ca_kabuli_scaffold | 107757                  | C/T  | Gene_Ca_22972      | NON_SYNONYMOUS_CODING         | Peptidase C48, SUMO/Sentrin/Ubl1   |
| Kabuli_wild_107774 | 1399943567                          | Ca_kabuli_scaffold | 107774                  | C/T  | Gene_Ca_22972      | NON_SYNONYMOUS_CODING         | Peptidase C48, SUMO/Sentrin/Ubl1   |
| Kabuli_wild_107807 | 1399943568                          | Ca_kabuli_scaffold | 107807                  | G/A  | Gene_Ca_22972      | NON_SYNONYMOUS_CODING         | Peptidase C48, SUMO/Sentrin/Ubl1   |
| Kabuli_wild_107823 | 1399943569                          | Ca_kabuli_scaffold | 107823                  | G/A  | Gene_Ca_22972      | SYNONYMOUS_CODING             | Peptidase C48, SUMO/Sentrin/Ubl1   |
| Kabuli_wild_107828 | 1399943570                          | Ca_kabuli_scaffold | 107828                  | T/C  | Gene_Ca_22972      | NON_SYNONYMOUS_CODING         | Peptidase C48, SUMO/Sentrin/Ubl1   |
| Kabuli_wild_107840 | 1399943571                          | Ca_kabuli_scaffold | 107840                  | G/T  | Gene_Ca_22972      | NON_SYNONYMOUS_CODING         | Peptidase C48, SUMO/Sentrin/Ubl1   |
| Kabuli_wild_200573 | 1399943572                          | Ca_kabuli_scaffold | 200573                  | G/C  | NA                 | INTERGENIC                    | NA                                 |
| Kabuli_wild_224114 | 1399943573                          | Ca_kabuli_scaffold | 224114                  | A/G  | NA                 | INTERGENIC                    | NA                                 |
| Kabuli_wild_331890 | 1399943574                          | Ca_kabuli_scaffold | 331890                  | A/G  | NA                 | INTERGENIC                    | NA                                 |
| Kabuli_wild_332909 | 1399943575                          | Ca_kabuli_scaffold | 332909                  | C/T  | NA                 | INTERGENIC                    | NA                                 |
| Kabuli_wild_332921 | 1399943576                          | Ca_kabuli_scaffold | 332921                  | G/A  | NA                 | INTERGENIC                    | NA                                 |
| Kabuli_wild_332963 | 1399943577                          | Ca_kabuli_scaffold | 332963                  | C/T  | NA                 | INTERGENIC                    | NA                                 |
| Kabuli_wild_62781  | 1399943578                          | Ca_kabuli_scaffold | 62781                   | C/T  | Gene_Ca_28098      | SYNONYMOUS_CODING             | NA                                 |
| Kabuli_wild_62807  | 1399943579                          | Ca_kabuli_scaffold | 62807                   | C/T  | Gene_Ca_28098      | NON_SYNONYMOUS_CODING         | NA                                 |
| Kabuli_wild_167556 | 1399943580                          | Ca_kabuli_scaffold | 167556                  | C/T  | NA                 | INTERGENIC                    | NA                                 |
| Kabuli_wild_226511 | 1399943581                          | Ca_kabuli_scaffold | 226511                  | A/G  | Gene_Ca_25864      | SYNONYMOUS_CODING             | NA                                 |
| Kabuli_wild_167242 | 1399943582                          | Ca_kabuli_scaffold | 167242                  | A/G  | Gene_Ca_27246      | SYNONYMOUS_CODING             | NA                                 |
| Kabuli_wild_69458  | 1399943583                          | Ca_kabuli_scaffold | 69458                   | G/A  | NA                 | INTERGENIC                    | NA                                 |
| Kabuli_wild_69499  | 1399943584                          | Ca_kabuli_scaffold | 69499                   | A/G  | NA                 | INTERGENIC                    | NA                                 |
| Kabuli_wild_69547  | 1399943585                          | Ca_kabuli_scaffold | 69547                   | T/G  | NA                 | INTERGENIC                    | NA                                 |
| Kabuli_wild_288084 | 1399943586                          | Ca_kabuli_scaffold | 288084                  | T/C  | Gene_Ca_23621      | DOWNSTREAM                    | Helix-loop-helixDNA-binding domain |
| Kabuli_wild_413685 | 1399943587                          | Ca_kabuli_scaffold | 413685                  | G/T  | NA                 | INTERGENIC                    | NA                                 |
| Kabuli_wild_413691 | 1399943588                          | Ca_kabuli_scaffold | 413691                  | G/A  | NA                 | INTERGENIC                    | NA                                 |
| Kabuli_wild_413713 | 1399943589                          | Ca_kabuli_scaffold | 413713                  | C/A  | NA                 | INTERGENIC                    | NA                                 |
| Kabuli_wild_413719 | 1399943590                          | Ca_kabuli_scaffold | 413719                  | A/G  | NA                 | INTERGENIC                    | NA                                 |
| Kabuli_wild_457392 | 1399943591                          | Ca_kabuli_scaffold | 457392                  | C/A  | Gene_Ca_23625      | SYNONYMOUS_CODING             | Armadillo                          |
| Kabuli_wild_457596 | 1399943592                          | Ca_kabuli_scaffold | 457596                  | T/A  | Gene_Ca_23625      | INTRON                        | Armadillo                          |
| Kabuli_wild_520311 | 1399943593                          | Ca_kabuli_scaffold | 520311                  | G/A  | NA                 | INTERGENIC                    | NA                                 |
| Kabuli_wild_520372 | 1399943594                          | Ca_kabuli_scaffold | 520372                  | T/G  | NA                 | INTERGENIC                    | NA                                 |
| Kabuli_wild_520377 | 1399943595                          | Ca_kabuli_scaffold | 520377                  | T/C  | NA                 | INTERGENIC                    | NA                                 |



| SNP IDs             | NCBI dbSNP accession IDs (NCBI_SS#) | Chromosomes        | Physical positions (bp) | SNPs | Gene accession IDs | Sequence components of genome | Putative functions      |
|---------------------|-------------------------------------|--------------------|-------------------------|------|--------------------|-------------------------------|-------------------------|
| Kabuli_wild_537036  | 1399943596                          | Ca_kabuli_scaffold | 537036                  | G/T  | NA                 | INTERGENIC                    | NA                      |
| Kabuli_wild_537059  | 1399943597                          | Ca_kabuli_scaffold | 537059                  | A/T  | NA                 | INTERGENIC                    | NA                      |
| Kabuli_wild_537068  | 1399943598                          | Ca_kabuli_scaffold | 537068                  | G/A  | NA                 | INTERGENIC                    | NA                      |
| Kabuli_wild_538657  | 1399943599                          | Ca_kabuli_scaffold | 538657                  | T/C  | NA                 | INTERGENIC                    | NA                      |
| Kabuli_wild_538674  | 1399943600                          | Ca_kabuli_scaffold | 538674                  | G/C  | NA                 | INTERGENIC                    | NA                      |
| Kabuli_wild_538803  | 1399943601                          | Ca_kabuli_scaffold | 538803                  | T/C  | NA                 | INTERGENIC                    | NA                      |
| Kabuli_wild_538909  | 1399943602                          | Ca_kabuli_scaffold | 538909                  | A/G  | NA                 | INTERGENIC                    | NA                      |
| Kabuli_wild_538996  | 1399943603                          | Ca_kabuli_scaffold | 538996                  | T/C  | NA                 | INTERGENIC                    | NA                      |
| Kabuli_wild_539182  | 1399943604                          | Ca_kabuli_scaffold | 539182                  | C/T  | NA                 | INTERGENIC                    | NA                      |
| Kabuli_wild_539215  | 1399943605                          | Ca_kabuli_scaffold | 539215                  | T/C  | NA                 | INTERGENIC                    | NA                      |
| Kabuli_wild_541373  | 1399943606                          | Ca_kabuli_scaffold | 541373                  | T/G  | NA                 | INTERGENIC                    | NA                      |
| Kabuli_wild_386189  | 1399943607                          | Ca_kabuli_scaffold | 386189                  | A/C  | NA                 | INTERGENIC                    | NA                      |
| Kabuli_wild_497729  | 1399943608                          | Ca_kabuli_scaffold | 497729                  | T/C  | Gene_Ca_18973      | NON_SYNONYMOUS_CODING         | F-boxdomain,cyclin-like |
| Kabuli_wild_542951  | 1399943609                          | Ca_kabuli_scaffold | 542951                  | C/G  | Gene_Ca_18975      | INTRON                        | NA                      |
| Kabuli_wild_548453  | 1399943610                          | Ca_kabuli_scaffold | 548453                  | A/G  | Gene_Ca_18975      | INTRON                        | NA                      |
| Kabuli_wild_548499  | 1399943611                          | Ca_kabuli_scaffold | 548499                  | C/A  | Gene_Ca_18975      | INTRON                        | NA                      |
| Kabuli_wild_715064  | 1399943612                          | Ca_kabuli_scaffold | 715064                  | C/T  | Gene_Ca_18984      | NON_SYNONYMOUS_CODING         | NA                      |
| Kabuli_wild_869557  | 1399943613                          | Ca_kabuli_scaffold | 869557                  | T/A  | NA                 | INTERGENIC                    | NA                      |
| Kabuli_wild_871303  | 1399943614                          | Ca_kabuli_scaffold | 871303                  | A/C  | NA                 | INTERGENIC                    | NA                      |
| Kabuli_wild_871346  | 1399943615                          | Ca_kabuli_scaffold | 871346                  | G/A  | NA                 | INTERGENIC                    | NA                      |
| Kabuli_wild_871507  | 1399943616                          | Ca_kabuli_scaffold | 871507                  | C/A  | NA                 | INTERGENIC                    | NA                      |
| Kabuli_wild_910472  | 1399943617                          | Ca_kabuli_scaffold | 910472                  | C/T  | NA                 | INTERGENIC                    | NA                      |
| Kabuli_wild_911602  | 1399943618                          | Ca_kabuli_scaffold | 911602                  | T/G  | Gene_Ca_18994      | INTRON                        | NA                      |
| Kabuli_wild_961089  | 1399943619                          | Ca_kabuli_scaffold | 961089                  | G/A  | NA                 | INTERGENIC                    | NA                      |
| Kabuli_wild_962675  | 1399943620                          | Ca_kabuli_scaffold | 962675                  | G/A  | NA                 | INTERGENIC                    | NA                      |
| Kabuli_wild_968798  | 1399943621                          | Ca_kabuli_scaffold | 968798                  | G/A  | Gene_Ca_18995      | SYNONYMOUS_CODING             | NA                      |
| Kabuli_wild_992642  | 1399943622                          | Ca_kabuli_scaffold | 992642                  | T/G  | Gene_Ca_18996      | NON_SYNONYMOUS_CODING         | NA                      |
| Kabuli_wild_996604  | 1399943623                          | Ca_kabuli_scaffold | 996604                  | T/C  | Gene_Ca_18996      | SYNONYMOUS_CODING             | NA                      |
| Kabuli_wild_1002765 | 1399943624                          | Ca_kabuli_scaffold | 1002765                 | C/G  | Gene_Ca_18997      | SYNONYMOUS_CODING             | NA                      |
| Kabuli_wild_1002801 | 1399943625                          | Ca_kabuli_scaffold | 1002801                 | A/G  | Gene_Ca_18997      | SYNONYMOUS_CODING             | NA                      |
| Kabuli_wild_1014805 | 1399943626                          | Ca_kabuli_scaffold | 1014805                 | C/T  | NA                 | INTERGENIC                    | NA                      |
| Kabuli_wild_1014826 | 1399943627                          | Ca_kabuli_scaffold | 1014826                 | C/T  | NA                 | INTERGENIC                    | NA                      |
| Kabuli_wild_1014834 | 1399943628                          | Ca_kabuli_scaffold | 1014834                 | T/A  | NA                 | INTERGENIC                    | NA                      |
| Kabuli_wild_1014875 | 1399943629                          | Ca_kabuli_scaffold | 1014875                 | G/A  | NA                 | INTERGENIC                    | NA                      |
| Kabuli_wild_1028794 | 1399943630                          | Ca_kabuli_scaffold | 1028794                 | C/A  | NA                 | INTERGENIC                    | NA                      |
| Kabuli_wild_1028830 | 1399943631                          | Ca_kabuli_scaffold | 1028830                 | T/A  | NA                 | INTERGENIC                    | NA                      |
| Kabuli_wild_1039218 | 1399943632                          | Ca_kabuli_scaffold | 1039218                 | T/C  | NA                 | INTERGENIC                    | NA                      |
| Kabuli_wild_1039233 | 1399943633                          | Ca_kabuli_scaffold | 1039233                 | A/T  | NA                 | INTERGENIC                    | NA                      |
| Kabuli_wild_1040956 | 1399943634                          | Ca_kabuli_scaffold | 1040956                 | A/C  | NA                 | INTERGENIC                    | NA                      |
| Kabuli_wild_1041022 | 1399943635                          | Ca_kabuli_scaffold | 1041022                 | A/C  | NA                 | INTERGENIC                    | NA                      |
| Kabuli_wild_1049594 | 1399943636                          | Ca_kabuli_scaffold | 1049594                 | G/A  | Gene_Ca_19000      | INTRON                        | SANT domain,DNA binding |
| Kabuli_wild_1050164 | 1399943637                          | Ca_kabuli_scaffold | 1050164                 | C/T  | Gene_Ca_19000      | INTRON                        | SANT domain,DNA binding |
| Kabuli_wild_1050175 | 1399943638                          | Ca_kabuli_scaffold | 1050175                 | G/C  | Gene_Ca_19000      | INTRON                        | SANT domain,DNA binding |
| Kabuli_wild_1052597 | 1399943639                          | Ca_kabuli_scaffold | 1052597                 | T/C  | Gene_Ca_19000      | INTRON                        | SANT domain,DNA binding |

| SNP IDs                    | NCBI dbSNP accession IDs (NCBI_SS#) | Chromosomes               | Physical positions (bp) | SNPs | Gene accession IDs | Sequence components of genome | Putative functions                                      |
|----------------------------|-------------------------------------|---------------------------|-------------------------|------|--------------------|-------------------------------|---------------------------------------------------------|
| <i>Kabuli_wild_1052983</i> | 1399943640                          | <i>Ca_kabuli_scaffold</i> | 1052983                 | G/A  | Gene_Ca_19000      | INTRON                        | SANT domain,DNA binding                                 |
| <i>Kabuli_wild_1053215</i> | 1399943641                          | <i>Ca_kabuli_scaffold</i> | 1053215                 | G/A  | Gene_Ca_19000      | INTRON                        | SANT domain,DNA binding                                 |
| <i>Kabuli_wild_1053231</i> | 1399943642                          | <i>Ca_kabuli_scaffold</i> | 1053231                 | C/A  | Gene_Ca_19000      | INTRON                        | SANT domain,DNA binding                                 |
| <i>Kabuli_wild_1053232</i> | 1399943643                          | <i>Ca_kabuli_scaffold</i> | 1053232                 | G/T  | Gene_Ca_19000      | INTRON                        | SANT domain,DNA binding                                 |
| <i>Kabuli_wild_1053247</i> | 1399943644                          | <i>Ca_kabuli_scaffold</i> | 1053247                 | G/A  | Gene_Ca_19000      | INTRON                        | SANT domain,DNA binding                                 |
| <i>Kabuli_wild_1053261</i> | 1399943645                          | <i>Ca_kabuli_scaffold</i> | 1053261                 | T/C  | Gene_Ca_19000      | INTRON                        | SANT domain,DNA binding                                 |
| <i>Kabuli_wild_1053416</i> | 1399943646                          | <i>Ca_kabuli_scaffold</i> | 1053416                 | G/C  | Gene_Ca_19000      | INTRON                        | SANT domain,DNA binding                                 |
| <i>Kabuli_wild_1055590</i> | 1399943647                          | <i>Ca_kabuli_scaffold</i> | 1055590                 | G/A  | Gene_Ca_19000      | NON_SYNONYMOUS_CODING         | SANT domain,DNA binding                                 |
| <i>Kabuli_wild_1055634</i> | 1399943648                          | <i>Ca_kabuli_scaffold</i> | 1055634                 | G/A  | Gene_Ca_19000      | SYNONYMOUS_CODING             | SANT domain,DNA binding                                 |
| <i>Kabuli_wild_137462</i>  | 1399943649                          | <i>Ca_kabuli_scaffold</i> | 137462                  | A/G  | NA                 | INTERGENIC                    | NA                                                      |
| <i>Kabuli_wild_66280</i>   | 1399943650                          | <i>Ca_kabuli_scaffold</i> | 66280                   | G/A  | Gene_Ca_25409      | NON_SYNONYMOUS_CODING         | NA                                                      |
| <i>Kabuli_wild_87412</i>   | 1399943651                          | <i>Ca_kabuli_scaffold</i> | 87412                   | G/A  | Gene_Ca_25411      | NON_SYNONYMOUS_CODING         | NA                                                      |
| <i>Kabuli_wild_120510</i>  | 1399943652                          | <i>Ca_kabuli_scaffold</i> | 120510                  | T/C  | Gene_Ca_25412      | NON_SYNONYMOUS_CODING         | Protein kinase,catalytic domain                         |
| <i>Kabuli_wild_39438</i>   | 1399943653                          | <i>Ca_kabuli_scaffold</i> | 39438                   | C/A  | Gene_Ca_27600      | DOWNSTREAM                    | NA                                                      |
| <i>Kabuli_wild_39470</i>   | 1399943654                          | <i>Ca_kabuli_scaffold</i> | 39470                   | T/C  | Gene_Ca_27600      | DOWNSTREAM                    | NA                                                      |
| <i>Kabuli_wild_261719</i>  | 1399943655                          | <i>Ca_kabuli_scaffold</i> | 261719                  | A/G  | NA                 | INTERGENIC                    | NA                                                      |
| <i>Kabuli_wild_191625</i>  | 1399943656                          | <i>Ca_kabuli_scaffold</i> | 191625                  | T/C  | Gene_Ca_24567      | NON_SYNONYMOUS_CODING         | NA                                                      |
| <i>Kabuli_wild_195777</i>  | 1399943657                          | <i>Ca_kabuli_scaffold</i> | 195777                  | A/G  | NA                 | INTERGENIC                    | NA                                                      |
| <i>Kabuli_wild_195828</i>  | 1399943658                          | <i>Ca_kabuli_scaffold</i> | 195828                  | G/C  | NA                 | INTERGENIC                    | NA                                                      |
| <i>Kabuli_wild_201219</i>  | 1399943659                          | <i>Ca_kabuli_scaffold</i> | 201219                  | C/G  | NA                 | INTERGENIC                    | NA                                                      |
| <i>Kabuli_wild_448866</i>  | 1399943660                          | <i>Ca_kabuli_scaffold</i> | 448866                  | G/A  | Gene_Ca_24573      | INTRON                        | NA                                                      |
| <i>Kabuli_wild_49273</i>   | 1399943661                          | <i>Ca_kabuli_scaffold</i> | 49273                   | A/G  | NA                 | INTERGENIC                    | NA                                                      |
| <i>Kabuli_wild_46021</i>   | 1399943662                          | <i>Ca_kabuli_scaffold</i> | 46021                   | C/T  | Gene_Ca_26577      | SYNONYMOUS_CODING             | Peptidase C48, SUMO/Sentrin/Ubl1                        |
| <i>Kabuli_wild_46080</i>   | 1399943663                          | <i>Ca_kabuli_scaffold</i> | 46080                   | G/A  | Gene_Ca_26577      | SYNONYMOUS_CODING             | Peptidase C48, SUMO/Sentrin/Ubl1                        |
| <i>Kabuli_wild_46088</i>   | 1399943664                          | <i>Ca_kabuli_scaffold</i> | 46088                   | C/T  | Gene_Ca_26577      | NON_SYNONYMOUS_CODING         | Peptidase C48, SUMO/Sentrin/Ubl1                        |
| <i>Kabuli_wild_87968</i>   | 1399943665                          | <i>Ca_kabuli_scaffold</i> | 87968                   | G/T  | NA                 | INTERGENIC                    | NA                                                      |
| <i>Kabuli_wild_207676</i>  | 1399943666                          | <i>Ca_kabuli_scaffold</i> | 207676                  | A/G  | NA                 | INTERGENIC                    | NA                                                      |
| <i>Kabuli_wild_34108</i>   | 1399943667                          | <i>Ca_kabuli_scaffold</i> | 34108                   | C/T  | NA                 | INTERGENIC                    | NA                                                      |
| <i>Kabuli_wild_34115</i>   | 1399943668                          | <i>Ca_kabuli_scaffold</i> | 34115                   | G/A  | NA                 | INTERGENIC                    | NA                                                      |
| <i>Kabuli_wild_34160</i>   | 1399943669                          | <i>Ca_kabuli_scaffold</i> | 34160                   | G/T  | NA                 | INTERGENIC                    | NA                                                      |
| <i>Kabuli_wild_34164</i>   | 1399943670                          | <i>Ca_kabuli_scaffold</i> | 34164                   | C/T  | NA                 | INTERGENIC                    | NA                                                      |
| <i>Kabuli_wild_123866</i>  | 1399943671                          | <i>Ca_kabuli_scaffold</i> | 123866                  | G/A  | Gene_Ca_26292      | UPSTREAM                      | Zinc finger,CCHC-type                                   |
| <i>Kabuli_wild_123870</i>  | 1399943672                          | <i>Ca_kabuli_scaffold</i> | 123870                  | T/G  | Gene_Ca_26292      | UPSTREAM                      | NA                                                      |
| <i>Kabuli_wild_123935</i>  | 1399943673                          | <i>Ca_kabuli_scaffold</i> | 123935                  | C/G  | Gene_Ca_26292      | UPSTREAM                      | NA                                                      |
| <i>Kabuli_wild_123936</i>  | 1399943674                          | <i>Ca_kabuli_scaffold</i> | 123936                  | T/G  | Gene_Ca_26292      | UPSTREAM                      | NA                                                      |
| <i>Kabuli_wild_376643</i>  | 1399943675                          | <i>Ca_kabuli_scaffold</i> | 376643                  | A/C  | NA                 | INTERGENIC                    | NA                                                      |
| <i>Kabuli_wild_66090</i>   | 1399943676                          | <i>Ca_kabuli_scaffold</i> | 66090                   | G/A  | NA                 | INTERGENIC                    | NA                                                      |
| <i>Kabuli_wild_8772</i>    | 1399943677                          | <i>Ca_kabuli_scaffold</i> | 8772                    | A/G  | Gene_Ca_23383      | INTRON                        | Peptidase C48, SUMO/Sentrin/Ubl1                        |
| <i>Kabuli_wild_8799</i>    | 1399943678                          | <i>Ca_kabuli_scaffold</i> | 8799                    | G/A  | Gene_Ca_23383      | INTRON                        | Peptidase C48, SUMO/Sentrin/Ubl1                        |
| <i>Kabuli_wild_182781</i>  | 1399943679                          | <i>Ca_kabuli_scaffold</i> | 182781                  | C/A  | Gene_Ca_23388      | NON_SYNONYMOUS_CODING         | PeptidaseS8/S53,subtilisin/kexin/sedolisin              |
| <i>Kabuli_wild_182788</i>  | 1399943680                          | <i>Ca_kabuli_scaffold</i> | 182788                  | A/C  | Gene_Ca_23388      | SYNONYMOUS_CODING             | PeptidaseS8/S53,subtilisin/kexin/sedolisin              |
| <i>Kabuli_wild_240767</i>  | 1399943681                          | <i>Ca_kabuli_scaffold</i> | 240767                  | G/T  | Gene_Ca_23389      | SYNONYMOUS_CODING             | Transposase,PttA/En/Spm,plant                           |
| <i>Kabuli_wild_9982</i>    | 1399943682                          | <i>Ca_kabuli_scaffold</i> | 9982                    | C/A  | Gene_Ca_22168      | INTRON                        | Dakkinase                                               |
| <i>Kabuli_wild_16398</i>   | 1399943683                          | <i>Ca_kabuli_scaffold</i> | 16398                   | C/T  | Gene_Ca_22169      | NON_SYNONYMOUS_CODING         | ZF-HD homeobox protein,Cys/His-rich dimerisation domain |

| SNP IDs            | NCBI dbSNP accession IDs (NCBI_SS#) | Chromosomes        | Physical positions (bp) | SNPs | Gene accession IDs | Sequence components of genome | Putative functions                 |
|--------------------|-------------------------------------|--------------------|-------------------------|------|--------------------|-------------------------------|------------------------------------|
| Kabuli_wild_86009  | 1399943684                          | Ca_kabuli_scaffold | 86009                   | A/C  | NA                 | INTERGENIC                    | NA                                 |
| Kabuli_wild_86027  | 1399943685                          | Ca_kabuli_scaffold | 86027                   | C/T  | NA                 | INTERGENIC                    | NA                                 |
| Kabuli_wild_86048  | 1399943686                          | Ca_kabuli_scaffold | 86048                   | C/G  | NA                 | INTERGENIC                    | NA                                 |
| Kabuli_wild_86053  | 1399943687                          | Ca_kabuli_scaffold | 86053                   | C/T  | NA                 | INTERGENIC                    | NA                                 |
| Kabuli_wild_257162 | 1399943688                          | Ca_kabuli_scaffold | 257162                  | T/A  | NA                 | INTERGENIC                    | NA                                 |
| Kabuli_wild_274006 | 1399943689                          | Ca_kabuli_scaffold | 274006                  | A/G  | Gene_Ca_22187      | INTRON                        | RNA polymerase II subunit A        |
| Kabuli_wild_205677 | 1399943690                          | Ca_kabuli_scaffold | 205677                  | G/A  | Gene_Ca_23069      | SYNONYMOUS_CODING             | Lipoxygenase                       |
| Kabuli_wild_321753 | 1399943691                          | Ca_kabuli_scaffold | 321753                  | A/C  | NA                 | INTERGENIC                    | NA                                 |
| Kabuli_wild_366432 | 1399943692                          | Ca_kabuli_scaffold | 366432                  | C/G  | NA                 | INTERGENIC                    | NA                                 |
| Kabuli_wild_500779 | 1399943693                          | Ca_kabuli_scaffold | 500779                  | G/T  | Gene_Ca_23079      | SYNONYMOUS_CODING             | NA                                 |
| Kabuli_wild_506983 | 1399943694                          | Ca_kabuli_scaffold | 506983                  | C/A  | NA                 | INTERGENIC                    | NA                                 |
| Kabuli_wild_640363 | 1399943695                          | Ca_kabuli_scaffold | 640363                  | G/A  | NA                 | INTERGENIC                    | NA                                 |
| Kabuli_wild_640373 | 1399943696                          | Ca_kabuli_scaffold | 640373                  | A/C  | NA                 | INTERGENIC                    | NA                                 |
| Kabuli_wild_640378 | 1399943697                          | Ca_kabuli_scaffold | 640378                  | C/A  | NA                 | INTERGENIC                    | NA                                 |
| Kabuli_wild_640389 | 1399943698                          | Ca_kabuli_scaffold | 640389                  | G/T  | NA                 | INTERGENIC                    | NA                                 |
| Kabuli_wild_640410 | 1399943699                          | Ca_kabuli_scaffold | 640410                  | A/G  | NA                 | INTERGENIC                    | NA                                 |
| Kabuli_wild_640430 | 1399943700                          | Ca_kabuli_scaffold | 640430                  | C/T  | NA                 | INTERGENIC                    | NA                                 |
| Kabuli_wild_640438 | 1399943701                          | Ca_kabuli_scaffold | 640438                  | G/C  | NA                 | INTERGENIC                    | NA                                 |
| Kabuli_wild_640444 | 1399943702                          | Ca_kabuli_scaffold | 640444                  | G/T  | NA                 | INTERGENIC                    | NA                                 |
| Kabuli_wild_640445 | 1399943703                          | Ca_kabuli_scaffold | 640445                  | C/T  | NA                 | INTERGENIC                    | NA                                 |
| Kabuli_wild_640447 | 1399943704                          | Ca_kabuli_scaffold | 640447                  | G/A  | NA                 | INTERGENIC                    | NA                                 |
| Kabuli_wild_640448 | 1399943705                          | Ca_kabuli_scaffold | 640448                  | T/C  | NA                 | INTERGENIC                    | NA                                 |
| Kabuli_wild_640459 | 1399943706                          | Ca_kabuli_scaffold | 640459                  | G/T  | NA                 | INTERGENIC                    | NA                                 |
| Kabuli_wild_640467 | 1399943707                          | Ca_kabuli_scaffold | 640467                  | C/A  | NA                 | INTERGENIC                    | NA                                 |
| Kabuli_wild_640487 | 1399943708                          | Ca_kabuli_scaffold | 640487                  | A/C  | NA                 | INTERGENIC                    | NA                                 |
| Kabuli_wild_645328 | 1399943709                          | Ca_kabuli_scaffold | 645328                  | A/C  | Gene_Ca_23085      | UPSTREAM                      | Integrase,catalyticcore            |
| Kabuli_wild_645344 | 1399943710                          | Ca_kabuli_scaffold | 645344                  | G/T  | Gene_Ca_23085      | UPSTREAM                      | Integrase,catalyticcore            |
| Kabuli_wild_645385 | 1399943711                          | Ca_kabuli_scaffold | 645385                  | C/T  | Gene_Ca_23085      | UPSTREAM                      | Integrase,catalyticcore            |
| Kabuli_wild_645393 | 1399943712                          | Ca_kabuli_scaffold | 645393                  | G/A  | Gene_Ca_23085      | UPSTREAM                      | Integrase,catalyticcore            |
| Kabuli_wild_645399 | 1399943713                          | Ca_kabuli_scaffold | 645399                  | G/T  | Gene_Ca_23085      | UPSTREAM                      | Integrase,catalyticcore            |
| Kabuli_wild_645400 | 1399943714                          | Ca_kabuli_scaffold | 645400                  | C/T  | Gene_Ca_23085      | UPSTREAM                      | Integrase,catalyticcore            |
| Kabuli_wild_645402 | 1399943715                          | Ca_kabuli_scaffold | 645402                  | G/A  | Gene_Ca_23085      | UPSTREAM                      | Integrase,catalyticcore            |
| Kabuli_wild_645403 | 1399943716                          | Ca_kabuli_scaffold | 645403                  | T/C  | Gene_Ca_23085      | UPSTREAM                      | Integrase,catalyticcore            |
| Kabuli_wild_645414 | 1399943717                          | Ca_kabuli_scaffold | 645414                  | G/T  | Gene_Ca_23085      | UPSTREAM                      | Integrase,catalyticcore            |
| Kabuli_wild_645426 | 1399943718                          | Ca_kabuli_scaffold | 645426                  | G/T  | Gene_Ca_23085      | UPSTREAM                      | Integrase,catalyticcore            |
| Kabuli_wild_645442 | 1399943719                          | Ca_kabuli_scaffold | 645442                  | A/C  | Gene_Ca_23085      | UPSTREAM                      | Integrase,catalyticcore            |
| Kabuli_wild_650955 | 1399943720                          | Ca_kabuli_scaffold | 650955                  | T/C  | NA                 | INTERGENIC                    | NA                                 |
| Kabuli_wild_650958 | 1399943721                          | Ca_kabuli_scaffold | 650958                  | G/A  | NA                 | INTERGENIC                    | NA                                 |
| Kabuli_wild_650968 | 1399943722                          | Ca_kabuli_scaffold | 650968                  | G/A  | NA                 | INTERGENIC                    | NA                                 |
| Kabuli_wild_650981 | 1399943723                          | Ca_kabuli_scaffold | 650981                  | T/C  | NA                 | INTERGENIC                    | NA                                 |
| Kabuli_wild_651018 | 1399943724                          | Ca_kabuli_scaffold | 651018                  | C/T  | NA                 | INTERGENIC                    | NA                                 |
| Kabuli_wild_651020 | 1399943725                          | Ca_kabuli_scaffold | 651020                  | C/T  | NA                 | INTERGENIC                    | NA                                 |
| Kabuli_wild_29042  | 1399943726                          | Ca_kabuli_scaffold | 29042                   | A/G  | Gene_Ca_24077      | NON_SYNONYMOUS_CODING         | Peptidoglycan-bindingLysinsubgroup |
| Kabuli_wild_144260 | 1399943727                          | Ca_kabuli_scaffold | 144260                  | A/C  | NA                 | INTERGENIC                    | NA                                 |

| SNP IDs            | NCBI dbSNP accession IDs (NCBI_SS#) | Chromosomes        | Physical positions (bp) | SNPs | Gene accession IDs | Sequence components of genome | Putative functions                 |
|--------------------|-------------------------------------|--------------------|-------------------------|------|--------------------|-------------------------------|------------------------------------|
| Kabuli_wild_278004 | 1399943728                          | Ca_kabuli_scaffold | 278004                  | A/G  | Gene_Ca_24088      | INTRON                        | Translation initiation factor SUI1 |
| Kabuli_wild_287933 | 1399943729                          | Ca_kabuli_scaffold | 287933                  | T/C  | NA                 | INTERGENIC                    | NA                                 |
| Kabuli_wild_287956 | 1399943730                          | Ca_kabuli_scaffold | 287956                  | T/A  | NA                 | INTERGENIC                    | NA                                 |
| Kabuli_wild_320224 | 1399943731                          | Ca_kabuli_scaffold | 320224                  | G/T  | Gene_Ca_21385      | INTRON                        | NA                                 |
| Kabuli_wild_374574 | 1399943732                          | Ca_kabuli_scaffold | 374574                  | A/T  | NA                 | INTERGENIC                    | NA                                 |
| Kabuli_wild_440243 | 1399943733                          | Ca_kabuli_scaffold | 440243                  | G/C  | NA                 | INTERGENIC                    | NA                                 |
| Kabuli_wild_533476 | 1399943734                          | Ca_kabuli_scaffold | 533476                  | A/G  | Gene_Ca_21397      | SYNONYMOUS_CODING             | Pectinesterase,catalytic           |
| Kabuli_wild_562979 | 1399943735                          | Ca_kabuli_scaffold | 562979                  | G/A  | Gene_Ca_21399      | INTRON                        | Zinc finger,FYVE-type              |
| Kabuli_wild_568221 | 1399943736                          | Ca_kabuli_scaffold | 568221                  | A/C  | Gene_Ca_21399      | SYNONYMOUS_CODING             | Zinc finger,FYVE-type              |
| Kabuli_wild_573779 | 1399943737                          | Ca_kabuli_scaffold | 573779                  | A/T  | NA                 | INTERGENIC                    | NA                                 |
| Kabuli_wild_82135  | 1399943738                          | Ca_kabuli_scaffold | 82135                   | G/A  | NA                 | INTERGENIC                    | NA                                 |
| Kabuli_wild_21714  | 1399943739                          | Ca_kabuli_scaffold | 21714                   | C/T  | Gene_Ca_26111      | NON_SYNONYMOUS_CODING         | NA                                 |
| Kabuli_wild_26572  | 1399943740                          | Ca_kabuli_scaffold | 26572                   | C/A  | Gene_Ca_28117      | SYNONYMOUS_CODING             | NA                                 |
| Kabuli_wild_26575  | 1399943741                          | Ca_kabuli_scaffold | 26575                   | C/A  | Gene_Ca_28117      | SYNONYMOUS_CODING             | NA                                 |
| Kabuli_wild_26601  | 1399943742                          | Ca_kabuli_scaffold | 26601                   | C/A  | Gene_Ca_28117      | SYNONYMOUS_CODING             | NA                                 |
| Kabuli_wild_26603  | 1399943743                          | Ca_kabuli_scaffold | 26603                   | T/G  | Gene_Ca_28117      | NON_SYNONYMOUS_CODING         | NA                                 |
| Kabuli_wild_206399 | 1399943744                          | Ca_kabuli_scaffold | 206399                  | C/T  | Gene_Ca_22950      | STOP_GAINED                   | NA                                 |
| Kabuli_wild_206562 | 1399943745                          | Ca_kabuli_scaffold | 206562                  | A/G  | Gene_Ca_22950      | NON_SYNONYMOUS_CODING         | NA                                 |
| Kabuli_wild_303784 | 1399943746                          | Ca_kabuli_scaffold | 303784                  | A/C  | Gene_Ca_22952      | INTRON                        | Sulfatase                          |
| Kabuli_wild_305694 | 1399943747                          | Ca_kabuli_scaffold | 305694                  | T/C  | Gene_Ca_22952      | INTRON                        | Sulfatase                          |
| Kabuli_wild_311419 | 1399943748                          | Ca_kabuli_scaffold | 311419                  | A/G  | Gene_Ca_22952      | INTRON                        | Sulfatase                          |
| Kabuli_wild_332593 | 1399943749                          | Ca_kabuli_scaffold | 332593                  | T/C  | NA                 | INTERGENIC                    | NA                                 |
| Kabuli_wild_332673 | 1399943750                          | Ca_kabuli_scaffold | 332673                  | T/C  | NA                 | INTERGENIC                    | NA                                 |
| Kabuli_wild_12249  | 1399943751                          | Ca_kabuli_scaffold | 12249                   | T/A  | NA                 | INTERGENIC                    | NA                                 |
| Kabuli_wild_12259  | 1399943752                          | Ca_kabuli_scaffold | 12259                   | A/G  | NA                 | INTERGENIC                    | NA                                 |
| Kabuli_wild_12263  | 1399943753                          | Ca_kabuli_scaffold | 12263                   | C/A  | NA                 | INTERGENIC                    | NA                                 |
| Kabuli_wild_12279  | 1399943754                          | Ca_kabuli_scaffold | 12279                   | G/A  | NA                 | INTERGENIC                    | NA                                 |
| Kabuli_wild_12281  | 1399943755                          | Ca_kabuli_scaffold | 12281                   | G/A  | NA                 | INTERGENIC                    | NA                                 |
| Kabuli_wild_137095 | 1399943756                          | Ca_kabuli_scaffold | 137095                  | G/A  | NA                 | INTERGENIC                    | NA                                 |
| Kabuli_wild_241668 | 1399943757                          | Ca_kabuli_scaffold | 241668                  | C/T  | NA                 | INTERGENIC                    | NA                                 |
| Kabuli_wild_241680 | 1399943758                          | Ca_kabuli_scaffold | 241680                  | G/A  | NA                 | INTERGENIC                    | NA                                 |
| Kabuli_wild_241715 | 1399943759                          | Ca_kabuli_scaffold | 241715                  | C/T  | NA                 | INTERGENIC                    | NA                                 |
| Kabuli_wild_28658  | 1399943760                          | Ca_kabuli_scaffold | 28658                   | T/C  | NA                 | INTERGENIC                    | NA                                 |
| Kabuli_wild_28689  | 1399943761                          | Ca_kabuli_scaffold | 28689                   | T/C  | NA                 | INTERGENIC                    | NA                                 |
| Kabuli_wild_28755  | 1399943762                          | Ca_kabuli_scaffold | 28755                   | C/T  | NA                 | INTERGENIC                    | NA                                 |
| Kabuli_wild_28758  | 1399943763                          | Ca_kabuli_scaffold | 28758                   | T/C  | NA                 | INTERGENIC                    | NA                                 |
| Kabuli_wild_28761  | 1399943764                          | Ca_kabuli_scaffold | 28761                   | C/T  | NA                 | INTERGENIC                    | NA                                 |
| Kabuli_wild_28772  | 1399943765                          | Ca_kabuli_scaffold | 28772                   | G/A  | NA                 | INTERGENIC                    | NA                                 |
| Kabuli_wild_28776  | 1399943766                          | Ca_kabuli_scaffold | 28776                   | T/G  | NA                 | INTERGENIC                    | NA                                 |
| Kabuli_wild_28809  | 1399943767                          | Ca_kabuli_scaffold | 28809                   | A/T  | NA                 | INTERGENIC                    | NA                                 |
| Kabuli_wild_28816  | 1399943768                          | Ca_kabuli_scaffold | 28816                   | G/C  | NA                 | INTERGENIC                    | NA                                 |
| Kabuli_wild_52844  | 1399943769                          | Ca_kabuli_scaffold | 52844                   | A/T  | NA                 | INTERGENIC                    | NA                                 |
| Kabuli_wild_52855  | 1399943770                          | Ca_kabuli_scaffold | 52855                   | G/A  | NA                 | INTERGENIC                    | NA                                 |
| Kabuli_wild_52901  | 1399943771                          | Ca_kabuli_scaffold | 52901                   | T/C  | NA                 | INTERGENIC                    | NA                                 |

| SNP IDs            | NCBI dbSNP accession IDs (NCBI_SS#) | Chromosomes        | Physical positions (bp) | SNPs | Gene accession IDs | Sequence components of genome | Putative functions  |
|--------------------|-------------------------------------|--------------------|-------------------------|------|--------------------|-------------------------------|---------------------|
| Kabuli_wild_52913  | 1399943772                          | Ca_kabuli_scaffold | 52913                   | A/C  | NA                 | INTERGENIC                    | NA                  |
| Kabuli_wild_61225  | 1399943773                          | Ca_kabuli_scaffold | 61225                   | T/G  | NA                 | INTERGENIC                    | NA                  |
| Kabuli_wild_61292  | 1399943774                          | Ca_kabuli_scaffold | 61292                   | G/C  | NA                 | INTERGENIC                    | NA                  |
| Kabuli_wild_61299  | 1399943775                          | Ca_kabuli_scaffold | 61299                   | T/A  | NA                 | INTERGENIC                    | NA                  |
| Kabuli_wild_65328  | 1399943776                          | Ca_kabuli_scaffold | 65328                   | A/G  | NA                 | INTERGENIC                    | NA                  |
| Kabuli_wild_162642 | 1399943777                          | Ca_kabuli_scaffold | 162642                  | T/C  | NA                 | INTERGENIC                    | NA                  |
| Kabuli_wild_263572 | 1399943778                          | Ca_kabuli_scaffold | 263572                  | T/G  | NA                 | INTERGENIC                    | NA                  |
| Kabuli_wild_263586 | 1399943779                          | Ca_kabuli_scaffold | 263586                  | T/A  | NA                 | INTERGENIC                    | NA                  |
| Kabuli_wild_334090 | 1399943780                          | Ca_kabuli_scaffold | 334090                  | C/T  | NA                 | INTERGENIC                    | NA                  |
| Kabuli_wild_334129 | 1399943781                          | Ca_kabuli_scaffold | 334129                  | G/A  | NA                 | INTERGENIC                    | NA                  |
| Kabuli_wild_334180 | 1399943782                          | Ca_kabuli_scaffold | 334180                  | G/T  | NA                 | INTERGENIC                    | NA                  |
| Kabuli_wild_408580 | 1399943783                          | Ca_kabuli_scaffold | 408580                  | C/T  | NA                 | INTERGENIC                    | NA                  |
| Kabuli_wild_408592 | 1399943784                          | Ca_kabuli_scaffold | 408592                  | T/C  | NA                 | INTERGENIC                    | NA                  |
| Kabuli_wild_408593 | 1399943785                          | Ca_kabuli_scaffold | 408593                  | G/C  | NA                 | INTERGENIC                    | NA                  |
| Kabuli_wild_408603 | 1399943786                          | Ca_kabuli_scaffold | 408603                  | G/A  | NA                 | INTERGENIC                    | NA                  |
| Kabuli_wild_408656 | 1399943787                          | Ca_kabuli_scaffold | 408656                  | G/A  | NA                 | INTERGENIC                    | NA                  |
| Kabuli_wild_593782 | 1399943788                          | Ca_kabuli_scaffold | 593782                  | T/C  | NA                 | INTERGENIC                    | NA                  |
| Kabuli_wild_593989 | 1399943789                          | Ca_kabuli_scaffold | 593989                  | T/C  | NA                 | INTERGENIC                    | NA                  |
| Kabuli_wild_860970 | 1399943790                          | Ca_kabuli_scaffold | 860970                  | A/G  | Gene_Ca_21452      | INTRON                        | Helicase,C-terminal |
| Kabuli_wild_860975 | 1399943791                          | Ca_kabuli_scaffold | 860975                  | G/A  | Gene_Ca_21452      | INTRON                        | Helicase,C-terminal |
| Kabuli_wild_860981 | 1399943792                          | Ca_kabuli_scaffold | 860981                  | T/A  | Gene_Ca_21452      | INTRON                        | Helicase,C-terminal |
| Kabuli_wild_860983 | 1399943793                          | Ca_kabuli_scaffold | 860983                  | A/T  | Gene_Ca_21452      | INTRON                        | Helicase,C-terminal |
| Kabuli_wild_860987 | 1399943794                          | Ca_kabuli_scaffold | 860987                  | C/T  | Gene_Ca_21452      | INTRON                        | Helicase,C-terminal |
| Kabuli_wild_861003 | 1399943795                          | Ca_kabuli_scaffold | 861003                  | C/A  | Gene_Ca_21452      | INTRON                        | Helicase,C-terminal |
| Kabuli_wild_861010 | 1399943796                          | Ca_kabuli_scaffold | 861010                  | C/T  | Gene_Ca_21452      | INTRON                        | Helicase,C-terminal |
| Kabuli_wild_861011 | 1399943797                          | Ca_kabuli_scaffold | 861011                  | C/T  | Gene_Ca_21452      | INTRON                        | Helicase,C-terminal |
| Kabuli_wild_861015 | 1399943798                          | Ca_kabuli_scaffold | 861015                  | C/T  | Gene_Ca_21452      | INTRON                        | Helicase,C-terminal |
| Kabuli_wild_861022 | 1399943799                          | Ca_kabuli_scaffold | 861022                  | T/C  | Gene_Ca_21452      | INTRON                        | Helicase,C-terminal |
| Kabuli_wild_861028 | 1399943800                          | Ca_kabuli_scaffold | 861028                  | T/C  | Gene_Ca_21452      | INTRON                        | Helicase,C-terminal |
| Kabuli_wild_861053 | 1399943801                          | Ca_kabuli_scaffold | 861053                  | G/A  | Gene_Ca_21452      | INTRON                        | Helicase,C-terminal |
| Kabuli_wild_861071 | 1399943802                          | Ca_kabuli_scaffold | 861071                  | G/C  | Gene_Ca_21452      | INTRON                        | Helicase,C-terminal |
| Kabuli_wild_887160 | 1399943803                          | Ca_kabuli_scaffold | 887160                  | A/C  | NA                 | INTERGENIC                    | NA                  |
| Kabuli_wild_887173 | 1399943804                          | Ca_kabuli_scaffold | 887173                  | C/T  | NA                 | INTERGENIC                    | NA                  |
| Kabuli_wild_20778  | 1399943805                          | Ca_kabuli_scaffold | 20778                   | G/A  | NA                 | INTERGENIC                    | NA                  |
| Kabuli_wild_20938  | 1399943806                          | Ca_kabuli_scaffold | 20938                   | C/T  | NA                 | INTERGENIC                    | NA                  |
| Kabuli_wild_153328 | 1399943807                          | Ca_kabuli_scaffold | 153328                  | T/C  | NA                 | INTERGENIC                    | NA                  |
| Kabuli_wild_153348 | 1399943808                          | Ca_kabuli_scaffold | 153348                  | T/A  | NA                 | INTERGENIC                    | NA                  |
| Kabuli_wild_153361 | 1399943809                          | Ca_kabuli_scaffold | 153361                  | A/G  | NA                 | INTERGENIC                    | NA                  |
| Kabuli_wild_153364 | 1399943810                          | Ca_kabuli_scaffold | 153364                  | A/G  | NA                 | INTERGENIC                    | NA                  |
| Kabuli_wild_153371 | 1399943811                          | Ca_kabuli_scaffold | 153371                  | C/T  | NA                 | INTERGENIC                    | NA                  |
| Kabuli_wild_218244 | 1399943812                          | Ca_kabuli_scaffold | 218244                  | T/G  | Gene_Ca_22581      | NON_SYNONYMOUS_CODING         | SET domain          |
| Kabuli_wild_218307 | 1399943813                          | Ca_kabuli_scaffold | 218307                  | T/G  | Gene_Ca_22581      | NON_SYNONYMOUS_CODING         | SET domain          |
| Kabuli_wild_218336 | 1399943814                          | Ca_kabuli_scaffold | 218336                  | T/G  | Gene_Ca_22581      | NON_SYNONYMOUS_CODING         | SET domain          |
| Kabuli_wild_218352 | 1399943815                          | Ca_kabuli_scaffold | 218352                  | T/G  | Gene_Ca_22581      | NON_SYNONYMOUS_CODING         | SET domain          |

| SNP IDs            | NCBI dbSNP accession IDs (NCBI_SS#) | Chromosomes        | Physical positions (bp) | SNPs | Gene accession IDs | Sequence components of genome | Putative functions                         |
|--------------------|-------------------------------------|--------------------|-------------------------|------|--------------------|-------------------------------|--------------------------------------------|
| Kabuli_wild_218356 | 1399943816                          | Ca_kabuli_scaffold | 218356                  | G/T  | Gene_Ca_22581      | NON_SYNONYMOUS_CODING         | SET domain                                 |
| Kabuli_wild_218359 | 1399943817                          | Ca_kabuli_scaffold | 218359                  | T/G  | Gene_Ca_22581      | NON_SYNONYMOUS_CODING         | SET domain                                 |
| Kabuli_wild_223318 | 1399943818                          | Ca_kabuli_scaffold | 223318                  | C/T  | Gene_Ca_22581      | INTRON                        | SET domain                                 |
| Kabuli_wild_463570 | 1399943819                          | Ca_kabuli_scaffold | 463570                  | G/T  | NA                 | INTERGENIC                    | NA                                         |
| Kabuli_wild_18492  | 1399943820                          | Ca_kabuli_scaffold | 18492                   | A/G  | NA                 | INTERGENIC                    | NA                                         |
| Kabuli_wild_266998 | 1399943821                          | Ca_kabuli_scaffold | 266998                  | G/A  | Gene_Ca_25631      | NON_SYNONYMOUS_CODING         | LETM1-like                                 |
| Kabuli_wild_267060 | 1399943822                          | Ca_kabuli_scaffold | 267060                  | T/G  | Gene_Ca_25631      | SYNONYMOUS_CODING             | LETM1-like                                 |
| Kabuli_wild_275743 | 1399943823                          | Ca_kabuli_scaffold | 275743                  | T/A  | Gene_Ca_25631      | NON_SYNONYMOUS_CODING         | LETM1-like                                 |
| Kabuli_wild_100228 | 1399943824                          | Ca_kabuli_scaffold | 100228                  | A/G  | Gene_Ca_21065      | SYNONYMOUS_CODING             | RNA recognition motif domain               |
| Kabuli_wild_100364 | 1399943825                          | Ca_kabuli_scaffold | 100364                  | A/T  | Gene_Ca_21065      | INTRON                        | RNA recognition motif domain               |
| Kabuli_wild_100529 | 1399943826                          | Ca_kabuli_scaffold | 100529                  | T/C  | Gene_Ca_21065      | NON_SYNONYMOUS_CODING         | RNA recognition motif domain               |
| Kabuli_wild_103027 | 1399943827                          | Ca_kabuli_scaffold | 103027                  | T/C  | Gene_Ca_21065      | SYNONYMOUS_CODING             | RNA recognition motif domain               |
| Kabuli_wild_106331 | 1399943828                          | Ca_kabuli_scaffold | 106331                  | G/A  | Gene_Ca_21065      | INTRON                        | RNA recognition motif domain               |
| Kabuli_wild_106349 | 1399943829                          | Ca_kabuli_scaffold | 106349                  | C/T  | Gene_Ca_21065      | INTRON                        | RNA recognition motif domain               |
| Kabuli_wild_142843 | 1399943830                          | Ca_kabuli_scaffold | 142843                  | T/C  | NA                 | INTERGENIC                    | NA                                         |
| Kabuli_wild_151081 | 1399943831                          | Ca_kabuli_scaffold | 151081                  | G/A  | Gene_Ca_21070      | NON_SYNONYMOUS_CODING         | Zinc finger,DHHC-type,palmitoyltransferase |
| Kabuli_wild_151131 | 1399943832                          | Ca_kabuli_scaffold | 151131                  | T/A  | Gene_Ca_21070      | SYNONYMOUS_CODING             | Zinc finger,DHHC-type,palmitoyltransferase |
| Kabuli_wild_151177 | 1399943833                          | Ca_kabuli_scaffold | 151177                  | A/G  | Gene_Ca_21070      | INTRON                        | Zinc finger,DHHC-type,palmitoyltransferase |
| Kabuli_wild_151192 | 1399943834                          | Ca_kabuli_scaffold | 151192                  | T/C  | Gene_Ca_21070      | INTRON                        | Zinc finger,DHHC-type,palmitoyltransferase |
| Kabuli_wild_151197 | 1399943835                          | Ca_kabuli_scaffold | 151197                  | T/A  | Gene_Ca_21070      | INTRON                        | Zinc finger,DHHC-type,palmitoyltransferase |
| Kabuli_wild_151199 | 1399943836                          | Ca_kabuli_scaffold | 151199                  | T/A  | Gene_Ca_21070      | INTRON                        | Zinc finger,DHHC-type,palmitoyltransferase |
| Kabuli_wild_213380 | 1399943837                          | Ca_kabuli_scaffold | 213380                  | C/G  | Gene_Ca_21071      | NON_SYNONYMOUS_CODING         | Mitochondrialsubstrate/solutecarrier       |
| Kabuli_wild_213398 | 1399943838                          | Ca_kabuli_scaffold | 213398                  | T/G  | Gene_Ca_21071      | NON_SYNONYMOUS_CODING         | Mitochondrialsubstrate/solutecarrier       |
| Kabuli_wild_213404 | 1399943839                          | Ca_kabuli_scaffold | 213404                  | G/T  | Gene_Ca_21071      | SYNONYMOUS_CODING             | Mitochondrialsubstrate/solutecarrier       |
| Kabuli_wild_213477 | 1399943840                          | Ca_kabuli_scaffold | 213477                  | G/A  | Gene_Ca_21071      | INTRON                        | Mitochondrialsubstrate/solutecarrier       |
| Kabuli_wild_213487 | 1399943841                          | Ca_kabuli_scaffold | 213487                  | G/C  | Gene_Ca_21071      | INTRON                        | Mitochondrialsubstrate/solutecarrier       |
| Kabuli_wild_213518 | 1399943842                          | Ca_kabuli_scaffold | 213518                  | T/C  | Gene_Ca_21071      | INTRON                        | Mitochondrialsubstrate/solutecarrier       |
| Kabuli_wild_229900 | 1399943843                          | Ca_kabuli_scaffold | 229900                  | G/A  | NA                 | INTERGENIC                    | NA                                         |
| Kabuli_wild_229917 | 1399943844                          | Ca_kabuli_scaffold | 229917                  | G/A  | NA                 | INTERGENIC                    | NA                                         |
| Kabuli_wild_321125 | 1399943845                          | Ca_kabuli_scaffold | 321125                  | A/G  | NA                 | INTERGENIC                    | NA                                         |
| Kabuli_wild_321137 | 1399943846                          | Ca_kabuli_scaffold | 321137                  | C/T  | NA                 | INTERGENIC                    | NA                                         |
| Kabuli_wild_321306 | 1399943847                          | Ca_kabuli_scaffold | 321306                  | G/A  | NA                 | INTERGENIC                    | NA                                         |
| Kabuli_wild_321352 | 1399943848                          | Ca_kabuli_scaffold | 321352                  | G/A  | NA                 | INTERGENIC                    | NA                                         |
| Kabuli_wild_321386 | 1399943849                          | Ca_kabuli_scaffold | 321386                  | C/T  | NA                 | INTERGENIC                    | NA                                         |
| Kabuli_wild_326434 | 1399943850                          | Ca_kabuli_scaffold | 326434                  | A/G  | Gene_Ca_21078      | INTRON                        | Protein of unknown function DUF3755        |
| Kabuli_wild_326467 | 1399943851                          | Ca_kabuli_scaffold | 326467                  | C/T  | Gene_Ca_21078      | INTRON                        | Protein of unknown function DUF3755        |
| Kabuli_wild_326494 | 1399943852                          | Ca_kabuli_scaffold | 326494                  | A/G  | Gene_Ca_21078      | INTRON                        | Protein of unknown function DUF3755        |
| Kabuli_wild_326497 | 1399943853                          | Ca_kabuli_scaffold | 326497                  | A/G  | Gene_Ca_21078      | INTRON                        | Protein of unknown function DUF3755        |
| Kabuli_wild_352687 | 1399943854                          | Ca_kabuli_scaffold | 352687                  | C/T  | Gene_Ca_21079      | INTRON                        | DEPdomain                                  |
| Kabuli_wild_352712 | 1399943855                          | Ca_kabuli_scaffold | 352712                  | G/A  | Gene_Ca_21079      | INTRON                        | DEPdomain                                  |
| Kabuli_wild_352747 | 1399943856                          | Ca_kabuli_scaffold | 352747                  | T/C  | Gene_Ca_21079      | INTRON                        | DEPdomain                                  |
| Kabuli_wild_355222 | 1399943857                          | Ca_kabuli_scaffold | 355222                  | G/A  | Gene_Ca_21079      | INTRON                        | DEPdomain                                  |
| Kabuli_wild_469198 | 1399943858                          | Ca_kabuli_scaffold | 469198                  | A/C  | NA                 | INTERGENIC                    | NA                                         |
| Kabuli_wild_512979 | 1399943859                          | Ca_kabuli_scaffold | 512979                  | A/T  | NA                 | INTERGENIC                    | NA                                         |

| SNP IDs            | NCBI dbSNP accession IDs (NCBI_SS#) | Chromosomes        | Physical positions (bp) | SNPs | Gene accession IDs | Sequence components of genome | Putative functions                    |
|--------------------|-------------------------------------|--------------------|-------------------------|------|--------------------|-------------------------------|---------------------------------------|
| Kabuli_wild_512985 | 1399943860                          | Ca_kabuli_scaffold | 512985                  | T/C  | NA                 | INTERGENIC                    | NA                                    |
| Kabuli_wild_513004 | 1399943861                          | Ca_kabuli_scaffold | 513004                  | A/G  | NA                 | INTERGENIC                    | NA                                    |
| Kabuli_wild_534991 | 1399943862                          | Ca_kabuli_scaffold | 534991                  | G/A  | NA                 | INTERGENIC                    | NA                                    |
| Kabuli_wild_535016 | 1399943863                          | Ca_kabuli_scaffold | 535016                  | A/C  | NA                 | INTERGENIC                    | NA                                    |
| Kabuli_wild_535017 | 1399943864                          | Ca_kabuli_scaffold | 535017                  | G/A  | NA                 | INTERGENIC                    | NA                                    |
| Kabuli_wild_535027 | 1399943865                          | Ca_kabuli_scaffold | 535027                  | A/G  | NA                 | INTERGENIC                    | NA                                    |
| Kabuli_wild_535057 | 1399943866                          | Ca_kabuli_scaffold | 535057                  | G/T  | NA                 | INTERGENIC                    | NA                                    |
| Kabuli_wild_535075 | 1399943867                          | Ca_kabuli_scaffold | 535075                  | T/C  | NA                 | INTERGENIC                    | NA                                    |
| Kabuli_wild_535108 | 1399943868                          | Ca_kabuli_scaffold | 535108                  | C/T  | NA                 | INTERGENIC                    | NA                                    |
| Kabuli_wild_535111 | 1399943869                          | Ca_kabuli_scaffold | 535111                  | G/A  | NA                 | INTERGENIC                    | NA                                    |
| Kabuli_wild_295314 | 1399943870                          | Ca_kabuli_scaffold | 295314                  | C/T  | NA                 | INTERGENIC                    | NA                                    |
| Kabuli_wild_10891  | 1399943871                          | Ca_kabuli_scaffold | 10891                   | G/C  | NA                 | INTERGENIC                    | NA                                    |
| Kabuli_wild_10971  | 1399943872                          | Ca_kabuli_scaffold | 10971                   | G/A  | NA                 | INTERGENIC                    | NA                                    |
| Kabuli_wild_11009  | 1399943873                          | Ca_kabuli_scaffold | 11009                   | A/T  | NA                 | INTERGENIC                    | NA                                    |
| Kabuli_wild_11018  | 1399943874                          | Ca_kabuli_scaffold | 11018                   | T/A  | NA                 | INTERGENIC                    | NA                                    |
| Kabuli_wild_73944  | 1399943875                          | Ca_kabuli_scaffold | 73944                   | G/T  | NA                 | INTERGENIC                    | NA                                    |
| Kabuli_wild_137848 | 1399943876                          | Ca_kabuli_scaffold | 137848                  | A/G  | NA                 | INTERGENIC                    | NA                                    |
| Kabuli_wild_137869 | 1399943877                          | Ca_kabuli_scaffold | 137869                  | C/T  | NA                 | INTERGENIC                    | NA                                    |
| Kabuli_wild_239687 | 1399943878                          | Ca_kabuli_scaffold | 239687                  | G/A  | NA                 | INTERGENIC                    | NA                                    |
| Kabuli_wild_303202 | 1399943879                          | Ca_kabuli_scaffold | 303202                  | G/A  | NA                 | INTERGENIC                    | NA                                    |
| Kabuli_wild_303222 | 1399943880                          | Ca_kabuli_scaffold | 303222                  | T/G  | NA                 | INTERGENIC                    | NA                                    |
| Kabuli_wild_327841 | 1399943881                          | Ca_kabuli_scaffold | 327841                  | G/A  | NA                 | INTERGENIC                    | NA                                    |
| Kabuli_wild_327856 | 1399943882                          | Ca_kabuli_scaffold | 327856                  | G/A  | NA                 | INTERGENIC                    | NA                                    |
| Kabuli_wild_96763  | 1399943883                          | Ca_kabuli_scaffold | 96763                   | T/C  | Gene_Ca_25945      | SYNONYMOUS_CODING             | NA                                    |
| Kabuli_wild_183718 | 1399943884                          | Ca_kabuli_scaffold | 183718                  | T/C  | Gene_Ca_25948      | INTRON                        | Short-chaindehydrogenase/reductaseSDR |
| Kabuli_wild_183720 | 1399943885                          | Ca_kabuli_scaffold | 183720                  | C/T  | Gene_Ca_25948      | INTRON                        | Short-chaindehydrogenase/reductaseSDR |
| Kabuli_wild_183721 | 1399943886                          | Ca_kabuli_scaffold | 183721                  | G/A  | Gene_Ca_25948      | INTRON                        | Short-chaindehydrogenase/reductaseSDR |
| Kabuli_wild_183727 | 1399943887                          | Ca_kabuli_scaffold | 183727                  | C/T  | Gene_Ca_25948      | INTRON                        | Short-chaindehydrogenase/reductaseSDR |
| Kabuli_wild_183752 | 1399943888                          | Ca_kabuli_scaffold | 183752                  | T/G  | Gene_Ca_25948      | INTRON                        | Short-chaindehydrogenase/reductaseSDR |
| Kabuli_wild_183755 | 1399943889                          | Ca_kabuli_scaffold | 183755                  | T/G  | Gene_Ca_25948      | INTRON                        | Short-chaindehydrogenase/reductaseSDR |
| Kabuli_wild_183759 | 1399943890                          | Ca_kabuli_scaffold | 183759                  | T/C  | Gene_Ca_25948      | INTRON                        | Short-chaindehydrogenase/reductaseSDR |
| Kabuli_wild_186119 | 1399943891                          | Ca_kabuli_scaffold | 186119                  | T/C  | Gene_Ca_25948      | NON_SYNONYMOUS_CODING         | Short-chaindehydrogenase/reductaseSDR |
| Kabuli_wild_186125 | 1399943892                          | Ca_kabuli_scaffold | 186125                  | C/A  | Gene_Ca_25948      | NON_SYNONYMOUS_CODING         | Short-chaindehydrogenase/reductaseSDR |
| Kabuli_wild_208050 | 1399943893                          | Ca_kabuli_scaffold | 208050                  | A/G  | Gene_Ca_25951      | DOWNSTREAM                    | NA                                    |
| Kabuli_wild_209964 | 1399943894                          | Ca_kabuli_scaffold | 209964                  | G/T  | NA                 | INTERGENIC                    | NA                                    |
| Kabuli_wild_44014  | 1399943895                          | Ca_kabuli_scaffold | 44014                   | T/G  | NA                 | INTERGENIC                    | NA                                    |
| Kabuli_wild_47952  | 1399943896                          | Ca_kabuli_scaffold | 47952                   | A/G  | NA                 | INTERGENIC                    | NA                                    |
| Kabuli_wild_61454  | 1399943897                          | Ca_kabuli_scaffold | 61454                   | T/C  | Gene_Ca_21706      | NON_SYNONYMOUS_CODING         | Protein kinase,catalytic domain       |
| Kabuli_wild_263899 | 1399943898                          | Ca_kabuli_scaffold | 263899                  | G/A  | Gene_Ca_21715      | NON_SYNONYMOUS_CODING         | RNA polymerase,alpha subunit          |
| Kabuli_wild_335077 | 1399943899                          | Ca_kabuli_scaffold | 335077                  | C/T  | Gene_Ca_21719      | INTRON                        | RNA polymerase,alpha subunit          |
| Kabuli_wild_341322 | 1399943900                          | Ca_kabuli_scaffold | 341322                  | C/T  | Gene_Ca_21719      | INTRON                        | RNA polymerase,alpha subunit          |
| Kabuli_wild_414576 | 1399943901                          | Ca_kabuli_scaffold | 414576                  | C/T  | NA                 | INTERGENIC                    | NA                                    |
| Kabuli_wild_414602 | 1399943902                          | Ca_kabuli_scaffold | 414602                  | C/T  | NA                 | INTERGENIC                    | NA                                    |
| Kabuli_wild_457627 | 1399943903                          | Ca_kabuli_scaffold | 457627                  | G/A  | Gene_Ca_21723      | INTRON                        | NA                                    |



| SNP IDs            | NCBI dbSNP accession IDs (NCBI_SS#) | Chromosomes        | Physical positions (bp) | SNPs | Gene accession IDs | Sequence components of genome | Putative functions                |
|--------------------|-------------------------------------|--------------------|-------------------------|------|--------------------|-------------------------------|-----------------------------------|
| Kabuli_wild_11965  | 1399943904                          | Ca_kabuli_scaffold | 11965                   | A/G  | NA                 | INTERGENIC                    | NA                                |
| Kabuli_wild_173228 | 1399943905                          | Ca_kabuli_scaffold | 173228                  | T/C  | Gene_Ca_24795      | INTRON                        | Domain of unknown function DUF632 |
| Kabuli_wild_279942 | 1399943906                          | Ca_kabuli_scaffold | 279942                  | A/G  | NA                 | INTERGENIC                    | NA                                |
| Kabuli_wild_280009 | 1399943907                          | Ca_kabuli_scaffold | 280009                  | G/T  | NA                 | INTERGENIC                    | NA                                |
| Kabuli_wild_280015 | 1399943908                          | Ca_kabuli_scaffold | 280015                  | T/C  | NA                 | INTERGENIC                    | NA                                |
| Kabuli_wild_280023 | 1399943909                          | Ca_kabuli_scaffold | 280023                  | C/T  | NA                 | INTERGENIC                    | NA                                |
| Kabuli_wild_280047 | 1399943910                          | Ca_kabuli_scaffold | 280047                  | A/G  | NA                 | INTERGENIC                    | NA                                |
| Kabuli_wild_280062 | 1399943911                          | Ca_kabuli_scaffold | 280062                  | T/C  | NA                 | INTERGENIC                    | NA                                |
| Kabuli_wild_408886 | 1399943912                          | Ca_kabuli_scaffold | 408886                  | G/C  | NA                 | INTERGENIC                    | NA                                |
| Kabuli_wild_38279  | 1399943913                          | Ca_kabuli_scaffold | 38279                   | C/A  | NA                 | INTERGENIC                    | NA                                |
| Kabuli_wild_58352  | 1399943914                          | Ca_kabuli_scaffold | 58352                   | T/C  | Gene_Ca_25163      | NON_SYNONYMOUS_CODING         | tRNA-binding domain               |
| Kabuli_wild_186486 | 1399943915                          | Ca_kabuli_scaffold | 186486                  | G/A  | NA                 | INTERGENIC                    | NA                                |
| Kabuli_wild_186510 | 1399943916                          | Ca_kabuli_scaffold | 186510                  | C/A  | NA                 | INTERGENIC                    | NA                                |
| Kabuli_wild_186515 | 1399943917                          | Ca_kabuli_scaffold | 186515                  | T/G  | NA                 | INTERGENIC                    | NA                                |
| Kabuli_wild_186523 | 1399943918                          | Ca_kabuli_scaffold | 186523                  | T/C  | NA                 | INTERGENIC                    | NA                                |
| Kabuli_wild_186538 | 1399943919                          | Ca_kabuli_scaffold | 186538                  | C/T  | NA                 | INTERGENIC                    | NA                                |
| Kabuli_wild_186582 | 1399943920                          | Ca_kabuli_scaffold | 186582                  | C/A  | NA                 | INTERGENIC                    | NA                                |
| Kabuli_wild_186587 | 1399943921                          | Ca_kabuli_scaffold | 186587                  | G/T  | NA                 | INTERGENIC                    | NA                                |
| Kabuli_wild_186588 | 1399943922                          | Ca_kabuli_scaffold | 186588                  | C/G  | NA                 | INTERGENIC                    | NA                                |
| Kabuli_wild_186595 | 1399943923                          | Ca_kabuli_scaffold | 186595                  | C/T  | NA                 | INTERGENIC                    | NA                                |
| Kabuli_wild_186598 | 1399943924                          | Ca_kabuli_scaffold | 186598                  | A/G  | NA                 | INTERGENIC                    | NA                                |
| Kabuli_wild_186604 | 1399943925                          | Ca_kabuli_scaffold | 186604                  | T/C  | NA                 | INTERGENIC                    | NA                                |
| Kabuli_wild_186611 | 1399943926                          | Ca_kabuli_scaffold | 186611                  | G/A  | NA                 | INTERGENIC                    | NA                                |
| Kabuli_wild_186639 | 1399943927                          | Ca_kabuli_scaffold | 186639                  | C/T  | NA                 | INTERGENIC                    | NA                                |
| Kabuli_wild_186651 | 1399943928                          | Ca_kabuli_scaffold | 186651                  | T/C  | NA                 | INTERGENIC                    | NA                                |
| Kabuli_wild_186657 | 1399943929                          | Ca_kabuli_scaffold | 186657                  | G/A  | NA                 | INTERGENIC                    | NA                                |
| Kabuli_wild_186661 | 1399943930                          | Ca_kabuli_scaffold | 186661                  | T/C  | NA                 | INTERGENIC                    | NA                                |
| Kabuli_wild_242733 | 1399943931                          | Ca_kabuli_scaffold | 242733                  | G/T  | NA                 | INTERGENIC                    | NA                                |
| Kabuli_wild_242763 | 1399943932                          | Ca_kabuli_scaffold | 242763                  | T/C  | NA                 | INTERGENIC                    | NA                                |
| Kabuli_wild_399283 | 1399943933                          | Ca_kabuli_scaffold | 399283                  | C/A  | NA                 | INTERGENIC                    | NA                                |
| Kabuli_wild_399301 | 1399943934                          | Ca_kabuli_scaffold | 399301                  | G/A  | NA                 | INTERGENIC                    | NA                                |
| Kabuli_wild_399326 | 1399943935                          | Ca_kabuli_scaffold | 399326                  | G/A  | NA                 | INTERGENIC                    | NA                                |
| Kabuli_wild_399340 | 1399943936                          | Ca_kabuli_scaffold | 399340                  | G/A  | NA                 | INTERGENIC                    | NA                                |
| Kabuli_wild_188896 | 1399943937                          | Ca_kabuli_scaffold | 188896                  | G/T  | NA                 | INTERGENIC                    | NA                                |
| Kabuli_wild_188922 | 1399943938                          | Ca_kabuli_scaffold | 188922                  | C/T  | NA                 | INTERGENIC                    | NA                                |
| Kabuli_wild_188926 | 1399943939                          | Ca_kabuli_scaffold | 188926                  | G/A  | NA                 | INTERGENIC                    | NA                                |
| Kabuli_wild_424558 | 1399943940                          | Ca_kabuli_scaffold | 424558                  | G/T  | NA                 | INTERGENIC                    | NA                                |
| Kabuli_wild_586081 | 1399943941                          | Ca_kabuli_scaffold | 586081                  | C/A  | Gene_Ca_20922      | NON_SYNONYMOUS_CODING         | Ribokinase                        |
| Kabuli_wild_631125 | 1399943942                          | Ca_kabuli_scaffold | 631125                  | G/A  | NA                 | INTERGENIC                    | NA                                |
| Kabuli_wild_631140 | 1399943943                          | Ca_kabuli_scaffold | 631140                  | G/A  | NA                 | INTERGENIC                    | NA                                |
| Kabuli_wild_631160 | 1399943944                          | Ca_kabuli_scaffold | 631160                  | G/A  | NA                 | INTERGENIC                    | NA                                |
| Kabuli_wild_631174 | 1399943945                          | Ca_kabuli_scaffold | 631174                  | C/T  | NA                 | INTERGENIC                    | NA                                |
| Kabuli_wild_631175 | 1399943946                          | Ca_kabuli_scaffold | 631175                  | C/A  | NA                 | INTERGENIC                    | NA                                |
| Kabuli_wild_631185 | 1399943947                          | Ca_kabuli_scaffold | 631185                  | G/A  | NA                 | INTERGENIC                    | NA                                |

| SNP IDs            | NCBI dbSNP accession IDs (NCBI_SS#) | Chromosomes        | Physical positions (bp) | SNPs | Gene accession IDs | Sequence components of genome | Putative functions                                                                 |
|--------------------|-------------------------------------|--------------------|-------------------------|------|--------------------|-------------------------------|------------------------------------------------------------------------------------|
| Kabuli_wild_631239 | 1399943948                          | Ca_kabuli_scaffold | 631239                  | T/C  | NA                 | INTERGENIC                    | NA                                                                                 |
| Kabuli_wild_631260 | 1399943949                          | Ca_kabuli_scaffold | 631260                  | G/A  | NA                 | INTERGENIC                    | NA                                                                                 |
| Kabuli_wild_631264 | 1399943950                          | Ca_kabuli_scaffold | 631264                  | C/T  | NA                 | INTERGENIC                    | NA                                                                                 |
| Kabuli_wild_631265 | 1399943951                          | Ca_kabuli_scaffold | 631265                  | G/A  | NA                 | INTERGENIC                    | NA                                                                                 |
| Kabuli_wild_631271 | 1399943952                          | Ca_kabuli_scaffold | 631271                  | T/G  | NA                 | INTERGENIC                    | NA                                                                                 |
| Kabuli_wild_641243 | 1399943953                          | Ca_kabuli_scaffold | 641243                  | A/G  | NA                 | INTERGENIC                    | NA                                                                                 |
| Kabuli_wild_641252 | 1399943954                          | Ca_kabuli_scaffold | 641252                  | A/G  | NA                 | INTERGENIC                    | NA                                                                                 |
| Kabuli_wild_641266 | 1399943955                          | Ca_kabuli_scaffold | 641266                  | C/T  | NA                 | INTERGENIC                    | NA                                                                                 |
| Kabuli_wild_108985 | 1399943956                          | Ca_kabuli_scaffold | 108985                  | G/T  | NA                 | INTERGENIC                    | NA                                                                                 |
| Kabuli_wild_64030  | 1399943957                          | Ca_kabuli_scaffold | 64030                   | A/G  | Gene_Ca_27125      | INTRON                        | NA                                                                                 |
| Kabuli_wild_92532  | 1399943958                          | Ca_kabuli_scaffold | 92532                   | C/A  | Gene_Ca_27126      | INTRON                        | Vacuolar protein sorting-associated protein                                        |
| Kabuli_wild_96281  | 1399943959                          | Ca_kabuli_scaffold | 96281                   | G/A  | Gene_Ca_27126      | INTRON                        | Vacuolar protein sorting-associated protein                                        |
| Kabuli_wild_96333  | 1399943960                          | Ca_kabuli_scaffold | 96333                   | G/A  | Gene_Ca_27126      | INTRON                        | Vacuolar protein sorting-associated protein                                        |
| Kabuli_wild_96363  | 1399943961                          | Ca_kabuli_scaffold | 96363                   | T/G  | Gene_Ca_27126      | INTRON                        | Vacuolar protein sorting-associated protein                                        |
| Kabuli_wild_96394  | 1399943962                          | Ca_kabuli_scaffold | 96394                   | T/A  | Gene_Ca_27126      | INTRON                        | Vacuolar protein sorting-associated protein                                        |
| Kabuli_wild_96397  | 1399943963                          | Ca_kabuli_scaffold | 96397                   | G/A  | Gene_Ca_27126      | INTRON                        | Vacuolar protein sorting-associated protein                                        |
| Kabuli_wild_96444  | 1399943964                          | Ca_kabuli_scaffold | 96444                   | G/A  | Gene_Ca_27126      | INTRON                        | Vacuolar protein sorting-associated protein                                        |
| Kabuli_wild_96456  | 1399943965                          | Ca_kabuli_scaffold | 96456                   | T/C  | Gene_Ca_27126      | INTRON                        | Vacuolar protein sorting-associated protein                                        |
| Kabuli_wild_96464  | 1399943966                          | Ca_kabuli_scaffold | 96464                   | T/G  | Gene_Ca_27126      | INTRON                        | Vacuolar protein sorting-associated protein                                        |
| Kabuli_wild_96532  | 1399943967                          | Ca_kabuli_scaffold | 96532                   | G/T  | Gene_Ca_27126      | INTRON                        | Vacuolar protein sorting-associated protein                                        |
| Kabuli_wild_96580  | 1399943968                          | Ca_kabuli_scaffold | 96580                   | T/G  | Gene_Ca_27126      | INTRON                        | Vacuolar protein sorting-associated protein                                        |
| Kabuli_wild_96589  | 1399943969                          | Ca_kabuli_scaffold | 96589                   | A/T  | Gene_Ca_27126      | INTRON                        | Vacuolar protein sorting-associated protein                                        |
| Kabuli_wild_99123  | 1399943970                          | Ca_kabuli_scaffold | 99123                   | C/T  | Gene_Ca_27127      | DOWNSTREAM                    | Vacuolar protein sorting-associated protein Like-Smribonucleo protein (LSM) domain |
| Kabuli_wild_74397  | 1399943971                          | Ca_kabuli_scaffold | 74397                   | G/A  | NA                 | INTERGENIC                    | NA                                                                                 |
| Kabuli_wild_74399  | 1399943972                          | Ca_kabuli_scaffold | 74399                   | C/T  | NA                 | INTERGENIC                    | NA                                                                                 |
| Kabuli_wild_74424  | 1399943973                          | Ca_kabuli_scaffold | 74424                   | T/C  | NA                 | INTERGENIC                    | NA                                                                                 |
| Kabuli_wild_74430  | 1399943974                          | Ca_kabuli_scaffold | 74430                   | A/G  | NA                 | INTERGENIC                    | NA                                                                                 |
| Kabuli_wild_74432  | 1399943975                          | Ca_kabuli_scaffold | 74432                   | G/A  | NA                 | INTERGENIC                    | NA                                                                                 |
| Kabuli_wild_74448  | 1399943976                          | Ca_kabuli_scaffold | 74448                   | T/G  | NA                 | INTERGENIC                    | NA                                                                                 |
| Kabuli_wild_143338 | 1399943977                          | Ca_kabuli_scaffold | 143338                  | T/C  | NA                 | INTERGENIC                    | NA                                                                                 |
| Kabuli_wild_143353 | 1399943978                          | Ca_kabuli_scaffold | 143353                  | C/G  | NA                 | INTERGENIC                    | NA                                                                                 |
| Kabuli_wild_143356 | 1399943979                          | Ca_kabuli_scaffold | 143356                  | A/G  | NA                 | INTERGENIC                    | NA                                                                                 |
| Kabuli_wild_143400 | 1399943980                          | Ca_kabuli_scaffold | 143400                  | G/A  | NA                 | INTERGENIC                    | NA                                                                                 |
| Kabuli_wild_143406 | 1399943981                          | Ca_kabuli_scaffold | 143406                  | G/C  | NA                 | INTERGENIC                    | NA                                                                                 |
| Kabuli_wild_143409 | 1399943982                          | Ca_kabuli_scaffold | 143409                  | G/A  | NA                 | INTERGENIC                    | NA                                                                                 |
| Kabuli_wild_58349  | 1399943983                          | Ca_kabuli_scaffold | 58349                   | C/A  | Gene_Ca_27283      | INTRON                        | Peptidase C48, SUMO/Sentrin/Ubl1                                                   |
| Kabuli_wild_62985  | 1399943984                          | Ca_kabuli_scaffold | 62985                   | G/A  | Gene_Ca_27283      | STOP_GAINED                   | Peptidase C48, SUMO/Sentrin/Ubl1                                                   |
| Kabuli_wild_344503 | 1399943985                          | Ca_kabuli_scaffold | 344503                  | G/T  | NA                 | INTERGENIC                    | NA                                                                                 |
| Kabuli_wild_344515 | 1399943986                          | Ca_kabuli_scaffold | 344515                  | A/G  | NA                 | INTERGENIC                    | NA                                                                                 |
| Kabuli_wild_344519 | 1399943987                          | Ca_kabuli_scaffold | 344519                  | A/T  | NA                 | INTERGENIC                    | NA                                                                                 |
| Kabuli_wild_344533 | 1399943988                          | Ca_kabuli_scaffold | 344533                  | C/T  | NA                 | INTERGENIC                    | NA                                                                                 |
| Kabuli_wild_344556 | 1399943989                          | Ca_kabuli_scaffold | 344556                  | T/G  | NA                 | INTERGENIC                    | NA                                                                                 |
| Kabuli_wild_59198  | 1399943990                          | Ca_kabuli_scaffold | 59198                   | T/C  | NA                 | INTERGENIC                    | NA                                                                                 |
| Kabuli_wild_59850  | 1399943991                          | Ca_kabuli_scaffold | 59850                   | G/A  | Gene_Ca_26104      | SYNONYMOUS_CODING             | NA                                                                                 |

| SNP IDs            | NCBI dbSNP accession IDs (NCBI_SS#) | Chromosomes        | Physical positions (bp) | SNPs | Gene accession IDs | Sequence components of genome | Putative functions                  |
|--------------------|-------------------------------------|--------------------|-------------------------|------|--------------------|-------------------------------|-------------------------------------|
| Kabuli_wild_404    | 1399943992                          | Ca_kabuli_scaffold | 404                     | G/A  | NA                 | INTERGENIC                    | NA                                  |
| Kabuli_wild_434    | 1399943993                          | Ca_kabuli_scaffold | 434                     | C/T  | NA                 | INTERGENIC                    | NA                                  |
| Kabuli_wild_449    | 1399943994                          | Ca_kabuli_scaffold | 449                     | C/T  | NA                 | INTERGENIC                    | NA                                  |
| Kabuli_wild_615    | 1399943995                          | Ca_kabuli_scaffold | 615                     | G/T  | NA                 | INTERGENIC                    | NA                                  |
| Kabuli_wild_293799 | 1399943996                          | Ca_kabuli_scaffold | 293799                  | G/A  | Gene_Ca_21905      | STOP_GAINED                   | NA                                  |
| Kabuli_wild_355284 | 1399943997                          | Ca_kabuli_scaffold | 355284                  | G/T  | Gene_Ca_21906      | NON_SYNONYMOUS_CODING         | Mitochondrial carrier protein       |
| Kabuli_wild_374106 | 1399943998                          | Ca_kabuli_scaffold | 374106                  | G/T  | NA                 | INTERGENIC                    | NA                                  |
| Kabuli_wild_374149 | 1399943999                          | Ca_kabuli_scaffold | 374149                  | G/C  | NA                 | INTERGENIC                    | NA                                  |
| Kabuli_wild_533416 | 1399944000                          | Ca_kabuli_scaffold | 533416                  | G/A  | Gene_Ca_21912      | NON_SYNONYMOUS_CODING         | Peptidase C48, SUMO/Sentrin/Ubl1    |
| Kabuli_wild_533417 | 1399944001                          | Ca_kabuli_scaffold | 533417                  | C/T  | Gene_Ca_21912      | NON_SYNONYMOUS_CODING         | Peptidase C48, SUMO/Sentrin/Ubl1    |
| Kabuli_wild_533419 | 1399944002                          | Ca_kabuli_scaffold | 533419                  | G/A  | Gene_Ca_21912      | NON_SYNONYMOUS_CODING         | Peptidase C48, SUMO/Sentrin/Ubl1    |
| Kabuli_wild_533441 | 1399944003                          | Ca_kabuli_scaffold | 533441                  | G/T  | Gene_Ca_21912      | NON_SYNONYMOUS_CODING         | Peptidase C48, SUMO/Sentrin/Ubl1    |
| Kabuli_wild_533453 | 1399944004                          | Ca_kabuli_scaffold | 533453                  | C/T  | Gene_Ca_21912      | NON_SYNONYMOUS_CODING         | Peptidase C48, SUMO/Sentrin/Ubl1    |
| Kabuli_wild_533501 | 1399944005                          | Ca_kabuli_scaffold | 533501                  | C/T  | Gene_Ca_21912      | NON_SYNONYMOUS_CODING         | Peptidase C48, SUMO/Sentrin/Ubl1    |
| Kabuli_wild_617358 | 1399944006                          | Ca_kabuli_scaffold | 617358                  | C/A  | NA                 | INTERGENIC                    | NA                                  |
| Kabuli_wild_617373 | 1399944007                          | Ca_kabuli_scaffold | 617373                  | T/C  | NA                 | INTERGENIC                    | NA                                  |
| Kabuli_wild_53841  | 1399944008                          | Ca_kabuli_scaffold | 53841                   | T/G  | Gene_Ca_27612      | SYNONYMOUS_CODING             | AMP-dependentsynthetase/ligase      |
| Kabuli_wild_131234 | 1399944009                          | Ca_kabuli_scaffold | 131234                  | T/C  | Gene_Ca_25621      | NON_SYNONYMOUS_CODING         | Protein of unknown function DUF1997 |
| Kabuli_wild_156278 | 1399944010                          | Ca_kabuli_scaffold | 156278                  | C/T  | NA                 | INTERGENIC                    | NA                                  |
| Kabuli_wild_173215 | 1399944011                          | Ca_kabuli_scaffold | 173215                  | T/C  | Gene_Ca_26343      | INTRON                        | NA                                  |
| Kabuli_wild_142718 | 1399944012                          | Ca_kabuli_scaffold | 142718                  | G/T  | Gene_Ca_25190      | UPSTREAM                      | NA                                  |
| Kabuli_wild_351868 | 1399944013                          | Ca_kabuli_scaffold | 351868                  | G/A  | Gene_Ca_25198      | NON_SYNONYMOUS_CODING         | NA                                  |
| Kabuli_wild_127726 | 1399944014                          | Ca_kabuli_scaffold | 127726                  | C/T  | Gene_Ca_26966      | SYNONYMOUS_CODING             | Peptidase C48, SUMO/Sentrin/Ubl1    |
| Kabuli_wild_127790 | 1399944015                          | Ca_kabuli_scaffold | 127790                  | C/T  | Gene_Ca_26966      | NON_SYNONYMOUS_CODING         | Peptidase C48, SUMO/Sentrin/Ubl1    |
| Kabuli_wild_4781   | 1399944016                          | Ca_kabuli_scaffold | 4781                    | A/G  | NA                 | INTERGENIC                    | NA                                  |
| Kabuli_wild_101349 | 1399944017                          | Ca_kabuli_scaffold | 101349                  | T/G  | NA                 | INTERGENIC                    | NA                                  |
| Kabuli_wild_101416 | 1399944018                          | Ca_kabuli_scaffold | 101416                  | A/G  | NA                 | INTERGENIC                    | NA                                  |
| Kabuli_wild_101417 | 1399944019                          | Ca_kabuli_scaffold | 101417                  | A/G  | NA                 | INTERGENIC                    | NA                                  |
| Kabuli_wild_297700 | 1399944020                          | Ca_kabuli_scaffold | 297700                  | C/G  | NA                 | INTERGENIC                    | NA                                  |
| Kabuli_wild_30857  | 1399944021                          | Ca_kabuli_scaffold | 30857                   | A/G  | NA                 | INTERGENIC                    | NA                                  |
| Kabuli_wild_6152   | 1399944022                          | Ca_kabuli_scaffold | 6152                    | C/T  | NA                 | INTERGENIC                    | NA                                  |
| Kabuli_wild_6193   | 1399944023                          | Ca_kabuli_scaffold | 6193                    | G/A  | NA                 | INTERGENIC                    | NA                                  |
| Kabuli_wild_6201   | 1399944024                          | Ca_kabuli_scaffold | 6201                    | G/A  | NA                 | INTERGENIC                    | NA                                  |
| Kabuli_wild_6231   | 1399944025                          | Ca_kabuli_scaffold | 6231                    | T/A  | NA                 | INTERGENIC                    | NA                                  |
| Kabuli_wild_6242   | 1399944026                          | Ca_kabuli_scaffold | 6242                    | C/A  | NA                 | INTERGENIC                    | NA                                  |
| Kabuli_wild_6248   | 1399944027                          | Ca_kabuli_scaffold | 6248                    | T/G  | NA                 | INTERGENIC                    | NA                                  |
| Kabuli_wild_6252   | 1399944028                          | Ca_kabuli_scaffold | 6252                    | G/A  | NA                 | INTERGENIC                    | NA                                  |
| Kabuli_wild_6254   | 1399944029                          | Ca_kabuli_scaffold | 6254                    | C/A  | NA                 | INTERGENIC                    | NA                                  |
| Kabuli_wild_49847  | 1399944030                          | Ca_kabuli_scaffold | 49847                   | G/A  | Gene_Ca_25655      | SYNONYMOUS_CODING             | NA                                  |
| Kabuli_wild_119119 | 1399944031                          | Ca_kabuli_scaffold | 119119                  | C/T  | Gene_Ca_25659      | NON_SYNONYMOUS_CODING         | Peptidase C48, SUMO/Sentrin/Ubl1    |
| Kabuli_wild_119155 | 1399944032                          | Ca_kabuli_scaffold | 119155                  | C/T  | Gene_Ca_25659      | NON_SYNONYMOUS_CODING         | NA                                  |
| Kabuli_wild_119157 | 1399944033                          | Ca_kabuli_scaffold | 119157                  | G/A  | Gene_Ca_25659      | SYNONYMOUS_CODING             | NA                                  |
| Kabuli_wild_119171 | 1399944034                          | Ca_kabuli_scaffold | 119171                  | G/A  | Gene_Ca_25659      | NON_SYNONYMOUS_CODING         | NA                                  |
| Kabuli_wild_119265 | 1399944035                          | Ca_kabuli_scaffold | 119265                  | C/G  | Gene_Ca_25659      | SYNONYMOUS_CODING             | NA                                  |

| SNP IDs            | NCBI dbSNP accession IDs (NCBI_SS#) | Chromosomes        | Physical positions (bp) | SNPs | Gene accession IDs | Sequence components of genome | Putative functions             |
|--------------------|-------------------------------------|--------------------|-------------------------|------|--------------------|-------------------------------|--------------------------------|
| Kabuli_wild_119267 | 1399944036                          | Ca_kabuli_scaffold | 119267                  | G/C  | Gene_Ca_25659      | NON_SYNONYMOUS_CODING         | NA                             |
| Kabuli_wild_119269 | 1399944037                          | Ca_kabuli_scaffold | 119269                  | C/T  | Gene_Ca_25659      | NON_SYNONYMOUS_CODING         | NA                             |
| Kabuli_wild_119278 | 1399944038                          | Ca_kabuli_scaffold | 119278                  | T/C  | Gene_Ca_25659      | NON_SYNONYMOUS_CODING         | NA                             |
| Kabuli_wild_119297 | 1399944039                          | Ca_kabuli_scaffold | 119297                  | C/A  | Gene_Ca_25659      | STOP_GAINED                   | NA                             |
| Kabuli_wild_119301 | 1399944040                          | Ca_kabuli_scaffold | 119301                  | T/C  | Gene_Ca_25659      | SYNONYMOUS_CODING             | NA                             |
| Kabuli_wild_58481  | 1399944041                          | Ca_kabuli_scaffold | 58481                   | T/A  | Gene_Ca_22259      | INTRON                        | NA                             |
| Kabuli_wild_58689  | 1399944042                          | Ca_kabuli_scaffold | 58689                   | A/T  | Gene_Ca_22259      | NON_SYNONYMOUS_CODING         | NA                             |
| Kabuli_wild_84118  | 1399944043                          | Ca_kabuli_scaffold | 84118                   | G/A  | NA                 | INTERGENIC                    | NA                             |
| Kabuli_wild_293872 | 1399944044                          | Ca_kabuli_scaffold | 293872                  | A/G  | Gene_Ca_22265      | INTRON                        | Raffinosesynthase              |
| Kabuli_wild_6987   | 1399944045                          | Ca_kabuli_scaffold | 6987                    | C/T  | NA                 | INTERGENIC                    | NA                             |
| Kabuli_wild_7000   | 1399944046                          | Ca_kabuli_scaffold | 7000                    | C/T  | NA                 | INTERGENIC                    | NA                             |
| Kabuli_wild_7006   | 1399944047                          | Ca_kabuli_scaffold | 7006                    | C/A  | NA                 | INTERGENIC                    | NA                             |
| Kabuli_wild_7011   | 1399944048                          | Ca_kabuli_scaffold | 7011                    | C/T  | NA                 | INTERGENIC                    | NA                             |
| Kabuli_wild_7063   | 1399944049                          | Ca_kabuli_scaffold | 7063                    | G/A  | NA                 | INTERGENIC                    | NA                             |
| Kabuli_wild_7069   | 1399944050                          | Ca_kabuli_scaffold | 7069                    | C/T  | NA                 | INTERGENIC                    | NA                             |
| Kabuli_wild_38270  | 1399944051                          | Ca_kabuli_scaffold | 38270                   | A/G  | Gene_Ca_27037      | INTRON                        | SH2motif                       |
| Kabuli_wild_78657  | 1399944052                          | Ca_kabuli_scaffold | 78657                   | A/T  | NA                 | INTERGENIC                    | NA                             |
| Kabuli_wild_78792  | 1399944053                          | Ca_kabuli_scaffold | 78792                   | A/T  | NA                 | INTERGENIC                    | NA                             |
| Kabuli_wild_78803  | 1399944054                          | Ca_kabuli_scaffold | 78803                   | G/C  | NA                 | INTERGENIC                    | NA                             |
| Kabuli_wild_78829  | 1399944055                          | Ca_kabuli_scaffold | 78829                   | G/A  | NA                 | INTERGENIC                    | NA                             |
| Kabuli_wild_78861  | 1399944056                          | Ca_kabuli_scaffold | 78861                   | A/C  | NA                 | INTERGENIC                    | NA                             |
| Kabuli_wild_226835 | 1399944057                          | Ca_kabuli_scaffold | 226835                  | C/A  | Gene_Ca_24581      | INTRON                        | ChaperoninTCP-1, conservedsite |
| Kabuli_wild_84629  | 1399944058                          | Ca_kabuli_scaffold | 84629                   | G/T  | NA                 | INTERGENIC                    | NA                             |
| Kabuli_wild_84922  | 1399944059                          | Ca_kabuli_scaffold | 84922                   | A/G  | NA                 | INTERGENIC                    | NA                             |
| Kabuli_wild_84924  | 1399944060                          | Ca_kabuli_scaffold | 84924                   | A/G  | NA                 | INTERGENIC                    | NA                             |
| Kabuli_wild_84952  | 1399944061                          | Ca_kabuli_scaffold | 84952                   | T/G  | NA                 | INTERGENIC                    | NA                             |
| Kabuli_wild_84970  | 1399944062                          | Ca_kabuli_scaffold | 84970                   | T/C  | NA                 | INTERGENIC                    | NA                             |
| Kabuli_wild_85006  | 1399944063                          | Ca_kabuli_scaffold | 85006                   | G/A  | NA                 | INTERGENIC                    | NA                             |
| Kabuli_wild_2940   | 1399944064                          | Ca_kabuli_scaffold | 2940                    | C/T  | NA                 | INTERGENIC                    | NA                             |
| Kabuli_wild_2949   | 1399944065                          | Ca_kabuli_scaffold | 2949                    | G/T  | NA                 | INTERGENIC                    | NA                             |
| Kabuli_wild_3151   | 1399944066                          | Ca_kabuli_scaffold | 3151                    | G/T  | NA                 | INTERGENIC                    | NA                             |
| Kabuli_wild_3158   | 1399944067                          | Ca_kabuli_scaffold | 3158                    | C/G  | NA                 | INTERGENIC                    | NA                             |
| Kabuli_wild_3262   | 1399944068                          | Ca_kabuli_scaffold | 3262                    | T/G  | NA                 | INTERGENIC                    | NA                             |
| Kabuli_wild_87388  | 1399944069                          | Ca_kabuli_scaffold | 87388                   | A/C  | NA                 | INTERGENIC                    | NA                             |
| Kabuli_wild_87547  | 1399944070                          | Ca_kabuli_scaffold | 87547                   | C/T  | NA                 | INTERGENIC                    | NA                             |
| Kabuli_wild_87640  | 1399944071                          | Ca_kabuli_scaffold | 87640                   | A/G  | NA                 | INTERGENIC                    | NA                             |
| Kabuli_wild_87646  | 1399944072                          | Ca_kabuli_scaffold | 87646                   | A/G  | NA                 | INTERGENIC                    | NA                             |
| Kabuli_wild_87658  | 1399944073                          | Ca_kabuli_scaffold | 87658                   | T/C  | NA                 | INTERGENIC                    | NA                             |
| Kabuli_wild_202514 | 1399944074                          | Ca_kabuli_scaffold | 202514                  | T/G  | NA                 | INTERGENIC                    | NA                             |
| Kabuli_wild_208067 | 1399944075                          | Ca_kabuli_scaffold | 208067                  | C/A  | NA                 | INTERGENIC                    | NA                             |
| Kabuli_wild_208768 | 1399944076                          | Ca_kabuli_scaffold | 208768                  | G/A  | NA                 | INTERGENIC                    | NA                             |
| Kabuli_wild_208786 | 1399944077                          | Ca_kabuli_scaffold | 208786                  | G/C  | NA                 | INTERGENIC                    | NA                             |
| Kabuli_wild_208793 | 1399944078                          | Ca_kabuli_scaffold | 208793                  | G/C  | NA                 | INTERGENIC                    | NA                             |
| Kabuli_wild_208821 | 1399944079                          | Ca_kabuli_scaffold | 208821                  | G/T  | NA                 | INTERGENIC                    | NA                             |

| SNP IDs            | NCBI dbSNP accession IDs (NCBI_SS#) | Chromosomes        | Physical positions (bp) | SNPs | Gene accession IDs | Sequence components of genome | Putative functions            |
|--------------------|-------------------------------------|--------------------|-------------------------|------|--------------------|-------------------------------|-------------------------------|
| Kabuli_wild_208904 | 1399944080                          | Ca_kabuli_scaffold | 208904                  | A/G  | NA                 | INTERGENIC                    | NA                            |
| Kabuli_wild_208911 | 1399944081                          | Ca_kabuli_scaffold | 208911                  | A/G  | NA                 | INTERGENIC                    | NA                            |
| Kabuli_wild_208913 | 1399944082                          | Ca_kabuli_scaffold | 208913                  | C/T  | NA                 | INTERGENIC                    | NA                            |
| Kabuli_wild_208914 | 1399944083                          | Ca_kabuli_scaffold | 208914                  | C/G  | NA                 | INTERGENIC                    | NA                            |
| Kabuli_wild_208932 | 1399944084                          | Ca_kabuli_scaffold | 208932                  | G/T  | NA                 | INTERGENIC                    | NA                            |
| Kabuli_wild_208933 | 1399944085                          | Ca_kabuli_scaffold | 208933                  | G/A  | NA                 | INTERGENIC                    | NA                            |
| Kabuli_wild_208939 | 1399944086                          | Ca_kabuli_scaffold | 208939                  | G/A  | NA                 | INTERGENIC                    | NA                            |
| Kabuli_wild_215419 | 1399944087                          | Ca_kabuli_scaffold | 215419                  | G/A  | Gene_Ca_23459      | SYNONYMOUS_CODING             | NA                            |
| Kabuli_wild_230606 | 1399944088                          | Ca_kabuli_scaffold | 230606                  | A/G  | NA                 | INTERGENIC                    | NA                            |
| Kabuli_wild_231895 | 1399944089                          | Ca_kabuli_scaffold | 231895                  | T/A  | NA                 | INTERGENIC                    | NA                            |
| Kabuli_wild_265276 | 1399944090                          | Ca_kabuli_scaffold | 265276                  | C/A  | NA                 | INTERGENIC                    | NA                            |
| Kabuli_wild_347361 | 1399944091                          | Ca_kabuli_scaffold | 347361                  | C/T  | NA                 | INTERGENIC                    | NA                            |
| Kabuli_wild_347384 | 1399944092                          | Ca_kabuli_scaffold | 347384                  | G/A  | NA                 | INTERGENIC                    | NA                            |
| Kabuli_wild_347422 | 1399944093                          | Ca_kabuli_scaffold | 347422                  | C/A  | NA                 | INTERGENIC                    | NA                            |
| Kabuli_wild_404388 | 1399944094                          | Ca_kabuli_scaffold | 404388                  | C/T  | Gene_Ca_23464      | SYNONYMOUS_CODING             | NA                            |
| Kabuli_wild_404429 | 1399944095                          | Ca_kabuli_scaffold | 404429                  | T/C  | Gene_Ca_23464      | NON_SYNONYMOUS_CODING         | NA                            |
| Kabuli_wild_404444 | 1399944096                          | Ca_kabuli_scaffold | 404444                  | C/T  | Gene_Ca_23464      | NON_SYNONYMOUS_CODING         | NA                            |
| Kabuli_wild_404447 | 1399944097                          | Ca_kabuli_scaffold | 404447                  | A/G  | Gene_Ca_23464      | NON_SYNONYMOUS_CODING         | NA                            |
| Kabuli_wild_404464 | 1399944098                          | Ca_kabuli_scaffold | 404464                  | G/A  | Gene_Ca_23464      | NON_SYNONYMOUS_CODING         | NA                            |
| Kabuli_wild_479497 | 1399944099                          | Ca_kabuli_scaffold | 479497                  | C/T  | NA                 | INTERGENIC                    | NA                            |
| Kabuli_wild_561844 | 1399944100                          | Ca_kabuli_scaffold | 561844                  | T/C  | Gene_Ca_23466      | INTRON                        | Helicase,C-terminal           |
| Kabuli_wild_1035   | 1399944101                          | Ca_kabuli_scaffold | 1035                    | C/A  | Gene_Ca_25745      | DOWNSTREAM                    | Sugar/inositol transporter    |
| Kabuli_wild_18278  | 1399944102                          | Ca_kabuli_scaffold | 18278                   | T/G  | Gene_Ca_25747      | SYNONYMOUS_CODING             | Transposase,PttA/En/Spm,plant |
| Kabuli_wild_22190  | 1399944103                          | Ca_kabuli_scaffold | 22190                   | A/C  | NA                 | INTERGENIC                    | NA                            |
| Kabuli_wild_22250  | 1399944104                          | Ca_kabuli_scaffold | 22250                   | C/A  | NA                 | INTERGENIC                    | NA                            |
| Kabuli_wild_72208  | 1399944105                          | Ca_kabuli_scaffold | 72208                   | C/T  | NA                 | INTERGENIC                    | NA                            |
| Kabuli_wild_72305  | 1399944106                          | Ca_kabuli_scaffold | 72305                   | G/A  | NA                 | INTERGENIC                    | NA                            |
| Kabuli_wild_72309  | 1399944107                          | Ca_kabuli_scaffold | 72309                   | G/A  | NA                 | INTERGENIC                    | NA                            |
| Kabuli_wild_72417  | 1399944108                          | Ca_kabuli_scaffold | 72417                   | C/A  | NA                 | INTERGENIC                    | NA                            |
| Kabuli_wild_72434  | 1399944109                          | Ca_kabuli_scaffold | 72434                   | T/A  | NA                 | INTERGENIC                    | NA                            |
| Kabuli_wild_72437  | 1399944110                          | Ca_kabuli_scaffold | 72437                   | G/A  | NA                 | INTERGENIC                    | NA                            |
| Kabuli_wild_72440  | 1399944111                          | Ca_kabuli_scaffold | 72440                   | T/A  | NA                 | INTERGENIC                    | NA                            |
| Kabuli_wild_72449  | 1399944112                          | Ca_kabuli_scaffold | 72449                   | G/A  | NA                 | INTERGENIC                    | NA                            |
| Kabuli_wild_72469  | 1399944113                          | Ca_kabuli_scaffold | 72469                   | A/G  | NA                 | INTERGENIC                    | NA                            |
| Kabuli_wild_72491  | 1399944114                          | Ca_kabuli_scaffold | 72491                   | T/C  | NA                 | INTERGENIC                    | NA                            |
| Kabuli_wild_72495  | 1399944115                          | Ca_kabuli_scaffold | 72495                   | G/A  | NA                 | INTERGENIC                    | NA                            |
| Kabuli_wild_80165  | 1399944116                          | Ca_kabuli_scaffold | 80165                   | A/G  | NA                 | INTERGENIC                    | NA                            |
| Kabuli_wild_69751  | 1399944117                          | Ca_kabuli_scaffold | 69751                   | C/G  | NA                 | INTERGENIC                    | NA                            |
| Kabuli_wild_69760  | 1399944118                          | Ca_kabuli_scaffold | 69760                   | T/G  | NA                 | INTERGENIC                    | NA                            |
| Kabuli_wild_69779  | 1399944119                          | Ca_kabuli_scaffold | 69779                   | G/C  | NA                 | INTERGENIC                    | NA                            |
| Kabuli_wild_69826  | 1399944120                          | Ca_kabuli_scaffold | 69826                   | C/A  | NA                 | INTERGENIC                    | NA                            |
| Kabuli_wild_69839  | 1399944121                          | Ca_kabuli_scaffold | 69839                   | T/A  | NA                 | INTERGENIC                    | NA                            |
| Kabuli_wild_90875  | 1399944122                          | Ca_kabuli_scaffold | 90875                   | G/A  | NA                 | INTERGENIC                    | NA                            |
| Kabuli_wild_90950  | 1399944123                          | Ca_kabuli_scaffold | 90950                   | C/A  | NA                 | INTERGENIC                    | NA                            |

| SNP IDs            | NCBI dbSNP accession IDs (NCBI_SS#) | Chromosomes        | Physical positions (bp) | SNPs | Gene accession IDs | Sequence components of genome | Putative functions                                                |
|--------------------|-------------------------------------|--------------------|-------------------------|------|--------------------|-------------------------------|-------------------------------------------------------------------|
| Kabuli_wild_98176  | 1399944124                          | Ca_kabuli_scaffold | 98176                   | G/T  | NA                 | INTERGENIC                    | NA                                                                |
| Kabuli_wild_99281  | 1399944125                          | Ca_kabuli_scaffold | 99281                   | A/T  | NA                 | INTERGENIC                    | NA                                                                |
| Kabuli_wild_99357  | 1399944126                          | Ca_kabuli_scaffold | 99357                   | C/A  | NA                 | INTERGENIC                    | NA                                                                |
| Kabuli_wild_111084 | 1399944127                          | Ca_kabuli_scaffold | 111084                  | A/C  | NA                 | INTERGENIC                    | NA                                                                |
| Kabuli_wild_111160 | 1399944128                          | Ca_kabuli_scaffold | 111160                  | C/A  | NA                 | INTERGENIC                    | NA                                                                |
| Kabuli_wild_112316 | 1399944129                          | Ca_kabuli_scaffold | 112316                  | A/G  | NA                 | INTERGENIC                    | NA                                                                |
| Kabuli_wild_117703 | 1399944130                          | Ca_kabuli_scaffold | 117703                  | T/A  | NA                 | INTERGENIC                    | NA                                                                |
| Kabuli_wild_117836 | 1399944131                          | Ca_kabuli_scaffold | 117836                  | A/C  | NA                 | INTERGENIC                    | NA                                                                |
| Kabuli_wild_104877 | 1399944132                          | Ca_kabuli_scaffold | 104877                  | T/C  | NA                 | INTERGENIC                    | NA                                                                |
| Kabuli_wild_104878 | 1399944133                          | Ca_kabuli_scaffold | 104878                  | T/G  | NA                 | INTERGENIC                    | NA                                                                |
| Kabuli_wild_104899 | 1399944134                          | Ca_kabuli_scaffold | 104899                  | A/G  | NA                 | INTERGENIC                    | NA                                                                |
| Kabuli_wild_77506  | 1399944135                          | Ca_kabuli_scaffold | 77506                   | C/T  | NA                 | INTERGENIC                    | NA                                                                |
| Kabuli_wild_522764 | 1399944136                          | Ca_kabuli_scaffold | 522764                  | T/G  | Gene_Ca_20600      | SYNONYMOUS_CODING             | Oxidoreductase,molybdopterin-binding domain                       |
| Kabuli_wild_613764 | 1399944137                          | Ca_kabuli_scaffold | 613764                  | G/A  | NA                 | INTERGENIC                    | NA                                                                |
| Kabuli_wild_613811 | 1399944138                          | Ca_kabuli_scaffold | 613811                  | G/A  | NA                 | INTERGENIC                    | NA                                                                |
| Kabuli_wild_613825 | 1399944139                          | Ca_kabuli_scaffold | 613825                  | T/C  | NA                 | INTERGENIC                    | NA                                                                |
| Kabuli_wild_613850 | 1399944140                          | Ca_kabuli_scaffold | 613850                  | C/T  | NA                 | INTERGENIC                    | NA                                                                |
| Kabuli_wild_613855 | 1399944141                          | Ca_kabuli_scaffold | 613855                  | C/A  | NA                 | INTERGENIC                    | NA                                                                |
| Kabuli_wild_613861 | 1399944142                          | Ca_kabuli_scaffold | 613861                  | C/T  | NA                 | INTERGENIC                    | NA                                                                |
| Kabuli_wild_640416 | 1399944143                          | Ca_kabuli_scaffold | 640416                  | G/T  | NA                 | INTERGENIC                    | NA                                                                |
| Kabuli_wild_654585 | 1399944144                          | Ca_kabuli_scaffold | 654585                  | T/G  | Gene_Ca_20605      | SYNONYMOUS_CODING             | GDP-fucoseproteinO-fucosyltransferase                             |
| Kabuli_wild_826644 | 1399944145                          | Ca_kabuli_scaffold | 826644                  | G/A  | NA                 | INTERGENIC                    | NA                                                                |
| Kabuli_wild_826690 | 1399944146                          | Ca_kabuli_scaffold | 826690                  | T/C  | NA                 | INTERGENIC                    | NA                                                                |
| Kabuli_wild_875473 | 1399944147                          | Ca_kabuli_scaffold | 875473                  | G/A  | NA                 | INTERGENIC                    | NA                                                                |
| Kabuli_wild_2879   | 1399944148                          | Ca_kabuli_scaffold | 2879                    | G/A  | Gene_Ca_25379      | NON_SYNONYMOUS_CODING         | NA                                                                |
| Kabuli_wild_3224   | 1399944149                          | Ca_kabuli_scaffold | 3224                    | G/A  | NA                 | INTERGENIC                    | NA                                                                |
| Kabuli_wild_7091   | 1399944150                          | Ca_kabuli_scaffold | 7091                    | T/C  | NA                 | INTERGENIC                    | NA                                                                |
| Kabuli_wild_19032  | 1399944151                          | Ca_kabuli_scaffold | 19032                   | T/C  | NA                 | INTERGENIC                    | NA                                                                |
| Kabuli_wild_163591 | 1399944152                          | Ca_kabuli_scaffold | 163591                  | C/A  | NA                 | INTERGENIC                    | NA                                                                |
| Kabuli_wild_221602 | 1399944153                          | Ca_kabuli_scaffold | 221602                  | C/T  | Gene_Ca_25387      | INTRON                        | Domain of unknown function DUF699,exodeoxyribonucleaseValphachain |
| Kabuli_wild_48847  | 1399944154                          | Ca_kabuli_scaffold | 48847                   | C/T  | Gene_Ca_19823      | NON_SYNONYMOUS_CODING         | Peptidase C48, SUMO/Sentrin/Ubl1                                  |
| Kabuli_wild_123585 | 1399944155                          | Ca_kabuli_scaffold | 123585                  | C/G  | NA                 | INTERGENIC                    | NA                                                                |
| Kabuli_wild_179940 | 1399944156                          | Ca_kabuli_scaffold | 179940                  | G/A  | Gene_Ca_19830      | INTRON                        | Xanthine/uracil/vitamin C permease                                |
| Kabuli_wild_179969 | 1399944157                          | Ca_kabuli_scaffold | 179969                  | A/T  | Gene_Ca_19830      | INTRON                        | Xanthine/uracil/vitamin C permease                                |
| Kabuli_wild_179993 | 1399944158                          | Ca_kabuli_scaffold | 179993                  | C/T  | Gene_Ca_19830      | INTRON                        | Xanthine/uracil/vitamin C permease                                |
| Kabuli_wild_179998 | 1399944159                          | Ca_kabuli_scaffold | 179998                  | T/C  | Gene_Ca_19830      | INTRON                        | Xanthine/uracil/vitamin C permease                                |
| Kabuli_wild_181468 | 1399944160                          | Ca_kabuli_scaffold | 181468                  | C/T  | Gene_Ca_19830      | INTRON                        | Xanthine/uracil/vitamin C permease                                |
| Kabuli_wild_211634 | 1399944161                          | Ca_kabuli_scaffold | 211634                  | A/C  | Gene_Ca_19830      | INTRON                        | Xanthine/uracil/vitamin C permease                                |
| Kabuli_wild_212514 | 1399944162                          | Ca_kabuli_scaffold | 212514                  | C/T  | NA                 | INTERGENIC                    | NA                                                                |
| Kabuli_wild_212536 | 1399944163                          | Ca_kabuli_scaffold | 212536                  | A/C  | NA                 | INTERGENIC                    | NA                                                                |
| Kabuli_wild_234794 | 1399944164                          | Ca_kabuli_scaffold | 234794                  | T/G  | NA                 | INTERGENIC                    | NA                                                                |
| Kabuli_wild_255161 | 1399944165                          | Ca_kabuli_scaffold | 255161                  | G/A  | Gene_Ca_19833      | INTRON                        | Villinheadpiece                                                   |
| Kabuli_wild_515736 | 1399944166                          | Ca_kabuli_scaffold | 515736                  | C/T  | NA                 | INTERGENIC                    | NA                                                                |
| Kabuli_wild_619172 | 1399944167                          | Ca_kabuli_scaffold | 619172                  | G/A  | NA                 | INTERGENIC                    | NA                                                                |

| SNP IDs            | NCBI dbSNP accession IDs (NCBI_SS#) | Chromosomes        | Physical positions (bp) | SNPs | Gene accession IDs | Sequence components of genome | Putative functions                                   |
|--------------------|-------------------------------------|--------------------|-------------------------|------|--------------------|-------------------------------|------------------------------------------------------|
| Kabuli_wild_619186 | 1399944168                          | Ca_kabuli_scaffold | 619186                  | C/T  | NA                 | INTERGENIC                    | NA                                                   |
| Kabuli_wild_626052 | 1399944169                          | Ca_kabuli_scaffold | 626052                  | T/C  | Gene_Ca_19843      | INTRON                        | Pyridinenucleotide-disulphideoxidoreductase,class-II |
| Kabuli_wild_631375 | 1399944170                          | Ca_kabuli_scaffold | 631375                  | G/A  | Gene_Ca_19843      | INTRON                        | Pyridinenucleotide-disulphideoxidoreductase,class-II |
| Kabuli_wild_728010 | 1399944171                          | Ca_kabuli_scaffold | 728010                  | T/A  | NA                 | INTERGENIC                    | NA                                                   |
| Kabuli_wild_800511 | 1399944172                          | Ca_kabuli_scaffold | 800511                  | C/T  | NA                 | INTERGENIC                    | NA                                                   |
| Kabuli_wild_800522 | 1399944173                          | Ca_kabuli_scaffold | 800522                  | C/T  | NA                 | INTERGENIC                    | NA                                                   |
| Kabuli_wild_824906 | 1399944174                          | Ca_kabuli_scaffold | 824906                  | C/T  | NA                 | INTERGENIC                    | NA                                                   |
| Kabuli_wild_824993 | 1399944175                          | Ca_kabuli_scaffold | 824993                  | T/A  | NA                 | INTERGENIC                    | NA                                                   |
| Kabuli_wild_853159 | 1399944176                          | Ca_kabuli_scaffold | 853159                  | C/T  | NA                 | INTERGENIC                    | NA                                                   |
| Kabuli_wild_853161 | 1399944177                          | Ca_kabuli_scaffold | 853161                  | T/A  | NA                 | INTERGENIC                    | NA                                                   |
| Kabuli_wild_853187 | 1399944178                          | Ca_kabuli_scaffold | 853187                  | C/T  | NA                 | INTERGENIC                    | NA                                                   |
| Kabuli_wild_853204 | 1399944179                          | Ca_kabuli_scaffold | 853204                  | G/A  | NA                 | INTERGENIC                    | NA                                                   |
| Kabuli_wild_853215 | 1399944180                          | Ca_kabuli_scaffold | 853215                  | T/A  | NA                 | INTERGENIC                    | NA                                                   |
| Kabuli_wild_853217 | 1399944181                          | Ca_kabuli_scaffold | 853217                  | C/T  | NA                 | INTERGENIC                    | NA                                                   |
| Kabuli_wild_884733 | 1399944182                          | Ca_kabuli_scaffold | 884733                  | C/T  | NA                 | INTERGENIC                    | NA                                                   |
| Kabuli_wild_41422  | 1399944183                          | Ca_kabuli_scaffold | 41422                   | T/G  | Gene_Ca_20526      | INTRON                        | Glycosylhydrolase,family13,catalytic domain          |
| Kabuli_wild_59883  | 1399944184                          | Ca_kabuli_scaffold | 59883                   | A/C  | Gene_Ca_20530      | SYNONYMOUS_CODING             | Alanineracemase,N-terminal                           |
| Kabuli_wild_150359 | 1399944185                          | Ca_kabuli_scaffold | 150359                  | T/C  | NA                 | INTERGENIC                    | NA                                                   |
| Kabuli_wild_150395 | 1399944186                          | Ca_kabuli_scaffold | 150395                  | G/C  | NA                 | INTERGENIC                    | NA                                                   |
| Kabuli_wild_128675 | 1399944187                          | Ca_kabuli_scaffold | 128675                  | A/T  | Gene_Ca_25993      | DOWNSTREAM                    | NA                                                   |
| Kabuli_wild_199050 | 1399944188                          | Ca_kabuli_scaffold | 199050                  | A/T  | Gene_Ca_25997      | UPSTREAM                      | NA                                                   |
| Kabuli_wild_199067 | 1399944189                          | Ca_kabuli_scaffold | 199067                  | A/T  | Gene_Ca_25997      | UPSTREAM                      | NA                                                   |
| Kabuli_wild_199068 | 1399944190                          | Ca_kabuli_scaffold | 199068                  | G/T  | Gene_Ca_25997      | UPSTREAM                      | NA                                                   |
| Kabuli_wild_199073 | 1399944191                          | Ca_kabuli_scaffold | 199073                  | G/A  | Gene_Ca_25997      | UPSTREAM                      | NA                                                   |
| Kabuli_wild_204540 | 1399944192                          | Ca_kabuli_scaffold | 204540                  | G/A  | NA                 | INTERGENIC                    | NA                                                   |
| Kabuli_wild_111887 | 1399944193                          | Ca_kabuli_scaffold | 111887                  | A/C  | Gene_Ca_27306      | NON_SYNONYMOUS_CODING         | NA                                                   |
| Kabuli_wild_111889 | 1399944194                          | Ca_kabuli_scaffold | 111889                  | A/G  | Gene_Ca_27306      | SYNONYMOUS_CODING             | NA                                                   |
| Kabuli_wild_111914 | 1399944195                          | Ca_kabuli_scaffold | 111914                  | C/T  | Gene_Ca_27306      | NON_SYNONYMOUS_CODING         | NA                                                   |
| Kabuli_wild_111924 | 1399944196                          | Ca_kabuli_scaffold | 111924                  | C/T  | Gene_Ca_27306      | NON_SYNONYMOUS_CODING         | NA                                                   |
| Kabuli_wild_111926 | 1399944197                          | Ca_kabuli_scaffold | 111926                  | G/A  | Gene_Ca_27306      | NON_SYNONYMOUS_CODING         | NA                                                   |
| Kabuli_wild_111930 | 1399944198                          | Ca_kabuli_scaffold | 111930                  | T/C  | Gene_Ca_27306      | NON_SYNONYMOUS_CODING         | NA                                                   |
| Kabuli_wild_111933 | 1399944199                          | Ca_kabuli_scaffold | 111933                  | C/T  | Gene_Ca_27306      | NON_SYNONYMOUS_CODING         | NA                                                   |
| Kabuli_wild_111936 | 1399944200                          | Ca_kabuli_scaffold | 111936                  | C/A  | Gene_Ca_27306      | NON_SYNONYMOUS_CODING         | NA                                                   |
| Kabuli_wild_111959 | 1399944201                          | Ca_kabuli_scaffold | 111959                  | C/T  | Gene_Ca_27306      | NON_SYNONYMOUS_CODING         | NA                                                   |
| Kabuli_wild_111964 | 1399944202                          | Ca_kabuli_scaffold | 111964                  | C/T  | Gene_Ca_27306      | SYNONYMOUS_CODING             | NA                                                   |
| Kabuli_wild_111972 | 1399944203                          | Ca_kabuli_scaffold | 111972                  | A/T  | Gene_Ca_27306      | NON_SYNONYMOUS_CODING         | NA                                                   |
| Kabuli_wild_111973 | 1399944204                          | Ca_kabuli_scaffold | 111973                  | A/T  | Gene_Ca_27306      | NON_SYNONYMOUS_CODING         | NA                                                   |
| Kabuli_wild_111976 | 1399944205                          | Ca_kabuli_scaffold | 111976                  | C/T  | Gene_Ca_27306      | SYNONYMOUS_CODING             | NA                                                   |
| Kabuli_wild_112005 | 1399944206                          | Ca_kabuli_scaffold | 112005                  | G/A  | Gene_Ca_27306      | NON_SYNONYMOUS_CODING         | NA                                                   |
| Kabuli_wild_112006 | 1399944207                          | Ca_kabuli_scaffold | 112006                  | G/A  | Gene_Ca_27306      | SYNONYMOUS_CODING             | NA                                                   |
| Kabuli_wild_112011 | 1399944208                          | Ca_kabuli_scaffold | 112011                  | T/C  | Gene_Ca_27306      | NON_SYNONYMOUS_CODING         | NA                                                   |
| Kabuli_wild_18213  | 1399944209                          | Ca_kabuli_scaffold | 18213                   | G/A  | NA                 | INTERGENIC                    | NA                                                   |
| Kabuli_wild_164796 | 1399944210                          | Ca_kabuli_scaffold | 164796                  | G/T  | Gene_Ca_26661      | INTRON                        | NA                                                   |
| Kabuli_wild_164797 | 1399944211                          | Ca_kabuli_scaffold | 164797                  | C/T  | Gene_Ca_26661      | INTRON                        | NA                                                   |



| SNP IDs            | NCBI dbSNP accession IDs (NCBI_SS#) | Chromosomes        | Physical positions (bp) | SNPs | Gene accession IDs | Sequence components of genome | Putative functions                             |
|--------------------|-------------------------------------|--------------------|-------------------------|------|--------------------|-------------------------------|------------------------------------------------|
| Kabuli_wild_49263  | 1399944212                          | Ca_kabuli_scaffold | 49263                   | G/A  | NA                 | INTERGENIC                    | NA                                             |
| Kabuli_wild_49266  | 1399944213                          | Ca_kabuli_scaffold | 49266                   | T/G  | NA                 | INTERGENIC                    | NA                                             |
| Kabuli_wild_138929 | 1399944214                          | Ca_kabuli_scaffold | 138929                  | G/A  | NA                 | INTERGENIC                    | NA                                             |
| Kabuli_wild_194932 | 1399944215                          | Ca_kabuli_scaffold | 194932                  | C/T  | NA                 | INTERGENIC                    | NA                                             |
| Kabuli_wild_195000 | 1399944216                          | Ca_kabuli_scaffold | 195000                  | C/T  | NA                 | INTERGENIC                    | NA                                             |
| Kabuli_wild_19215  | 1399944217                          | Ca_kabuli_scaffold | 19215                   | C/A  | NA                 | INTERGENIC                    | NA                                             |
| Kabuli_wild_85993  | 1399944218                          | Ca_kabuli_scaffold | 85993                   | T/A  | NA                 | INTERGENIC                    | NA                                             |
| Kabuli_wild_88389  | 1399944219                          | Ca_kabuli_scaffold | 88389                   | T/A  | NA                 | INTERGENIC                    | NA                                             |
| Kabuli_wild_88419  | 1399944220                          | Ca_kabuli_scaffold | 88419                   | A/T  | NA                 | INTERGENIC                    | NA                                             |
| Kabuli_wild_410571 | 1399944221                          | Ca_kabuli_scaffold | 410571                  | C/A  | NA                 | INTERGENIC                    | NA                                             |
| Kabuli_wild_86592  | 1399944222                          | Ca_kabuli_scaffold | 86592                   | G/A  | Gene_Ca_26331      | DOWNSTREAM                    | Peptidase C48, SUMO/Sentrin/Ubl1               |
| Kabuli_wild_86595  | 1399944223                          | Ca_kabuli_scaffold | 86595                   | G/A  | Gene_Ca_26331      | DOWNSTREAM                    | Peptidase C48, SUMO/Sentrin/Ubl1               |
| Kabuli_wild_86610  | 1399944224                          | Ca_kabuli_scaffold | 86610                   | C/T  | Gene_Ca_26331      | DOWNSTREAM                    | Peptidase C48, SUMO/Sentrin/Ubl1               |
| Kabuli_wild_86674  | 1399944225                          | Ca_kabuli_scaffold | 86674                   | C/T  | Gene_Ca_26331      | DOWNSTREAM                    | Peptidase C48, SUMO/Sentrin/Ubl1               |
| Kabuli_wild_86676  | 1399944226                          | Ca_kabuli_scaffold | 86676                   | G/A  | Gene_Ca_26331      | DOWNSTREAM                    | Peptidase C48, SUMO/Sentrin/Ubl1               |
| Kabuli_wild_86677  | 1399944227                          | Ca_kabuli_scaffold | 86677                   | C/T  | Gene_Ca_26331      | DOWNSTREAM                    | Peptidase C48, SUMO/Sentrin/Ubl1               |
| Kabuli_wild_88124  | 1399944228                          | Ca_kabuli_scaffold | 88124                   | G/A  | Gene_Ca_26330      | DOWNSTREAM                    | NA                                             |
| Kabuli_wild_40521  | 1399944229                          | Ca_kabuli_scaffold | 40521                   | A/G  | NA                 | INTERGENIC                    | NA                                             |
| Kabuli_wild_432453 | 1399944230                          | Ca_kabuli_scaffold | 432453                  | T/C  | NA                 | INTERGENIC                    | NA                                             |
| Kabuli_wild_432471 | 1399944231                          | Ca_kabuli_scaffold | 432471                  | A/G  | NA                 | INTERGENIC                    | NA                                             |
| Kabuli_wild_535266 | 1399944232                          | Ca_kabuli_scaffold | 535266                  | A/C  | Gene_Ca_21812      | NON_SYNONYMOUS_CODING         | Dual specificity phosphatase, catalytic domain |
| Kabuli_wild_535269 | 1399944233                          | Ca_kabuli_scaffold | 535269                  | A/C  | Gene_Ca_21812      | NON_SYNONYMOUS_CODING         | Dual specificity phosphatase, catalytic domain |
| Kabuli_wild_186066 | 1399944234                          | Ca_kabuli_scaffold | 186066                  | G/T  | NA                 | INTERGENIC                    | NA                                             |
| Kabuli_wild_186103 | 1399944235                          | Ca_kabuli_scaffold | 186103                  | A/G  | NA                 | INTERGENIC                    | NA                                             |
| Kabuli_wild_243142 | 1399944236                          | Ca_kabuli_scaffold | 243142                  | A/C  | NA                 | INTERGENIC                    | NA                                             |
| Kabuli_wild_243466 | 1399944237                          | Ca_kabuli_scaffold | 243466                  | C/G  | NA                 | INTERGENIC                    | NA                                             |
| Kabuli_wild_55475  | 1399944238                          | Ca_kabuli_scaffold | 55475                   | G/A  | NA                 | INTERGENIC                    | NA                                             |
| Kabuli_wild_55479  | 1399944239                          | Ca_kabuli_scaffold | 55479                   | G/T  | NA                 | INTERGENIC                    | NA                                             |
| Kabuli_wild_55589  | 1399944240                          | Ca_kabuli_scaffold | 55589                   | A/T  | NA                 | INTERGENIC                    | NA                                             |
| Kabuli_wild_15569  | 1399944241                          | Ca_kabuli_scaffold | 15569                   | A/C  | Gene_Ca_24910      | NON_SYNONYMOUS_CODING         | NA                                             |
| Kabuli_wild_15574  | 1399944242                          | Ca_kabuli_scaffold | 15574                   | G/A  | Gene_Ca_24910      | SYNONYMOUS_CODING             | NA                                             |
| Kabuli_wild_15581  | 1399944243                          | Ca_kabuli_scaffold | 15581                   | G/C  | Gene_Ca_24910      | NON_SYNONYMOUS_CODING         | NA                                             |
| Kabuli_wild_15588  | 1399944244                          | Ca_kabuli_scaffold | 15588                   | C/T  | Gene_Ca_24910      | NON_SYNONYMOUS_CODING         | NA                                             |
| Kabuli_wild_15590  | 1399944245                          | Ca_kabuli_scaffold | 15590                   | G/T  | Gene_Ca_24910      | NON_SYNONYMOUS_CODING         | NA                                             |
| Kabuli_wild_15593  | 1399944246                          | Ca_kabuli_scaffold | 15593                   | G/A  | Gene_Ca_24910      | NON_SYNONYMOUS_CODING         | NA                                             |
| Kabuli_wild_15594  | 1399944247                          | Ca_kabuli_scaffold | 15594                   | C/A  | Gene_Ca_24910      | NON_SYNONYMOUS_CODING         | NA                                             |
| Kabuli_wild_15614  | 1399944248                          | Ca_kabuli_scaffold | 15614                   | C/T  | Gene_Ca_24910      | STOP_GAINED                   | NA                                             |
| Kabuli_wild_15636  | 1399944249                          | Ca_kabuli_scaffold | 15636                   | G/A  | Gene_Ca_24910      | NON_SYNONYMOUS_CODING         | NA                                             |
| Kabuli_wild_46534  | 1399944250                          | Ca_kabuli_scaffold | 46534                   | T/C  | Gene_Ca_24912      | DOWNSTREAM                    | NA                                             |
| Kabuli_wild_375902 | 1399944251                          | Ca_kabuli_scaffold | 375902                  | T/A  | Gene_Ca_24920      | NON_SYNONYMOUS_CODING         | NA                                             |
| Kabuli_wild_375907 | 1399944252                          | Ca_kabuli_scaffold | 375907                  | T/G  | Gene_Ca_24920      | SYNONYMOUS_CODING             | NA                                             |
| Kabuli_wild_375918 | 1399944253                          | Ca_kabuli_scaffold | 375918                  | C/A  | Gene_Ca_24920      | SYNONYMOUS_CODING             | NA                                             |
| Kabuli_wild_375938 | 1399944254                          | Ca_kabuli_scaffold | 375938                  | C/T  | Gene_Ca_24920      | NON_SYNONYMOUS_CODING         | NA                                             |
| Kabuli_wild_375941 | 1399944255                          | Ca_kabuli_scaffold | 375941                  | C/T  | Gene_Ca_24920      | NON_SYNONYMOUS_CODING         | NA                                             |

| SNP IDs            | NCBI dbSNP accession IDs (NCBI_SS#) | Chromosomes        | Physical positions (bp) | SNPs | Gene accession IDs | Sequence components of genome | Putative functions               |
|--------------------|-------------------------------------|--------------------|-------------------------|------|--------------------|-------------------------------|----------------------------------|
| Kabuli_wild_375958 | 1399944256                          | Ca_kabuli_scaffold | 375958                  | C/T  | Gene_Ca_24920      | STOP_GAINED                   | NA                               |
| Kabuli_wild_132970 | 1399944257                          | Ca_kabuli_scaffold | 132970                  | A/G  | NA                 | INTERGENIC                    | NA                               |
| Kabuli_wild_132976 | 1399944258                          | Ca_kabuli_scaffold | 132976                  | T/C  | NA                 | INTERGENIC                    | NA                               |
| Kabuli_wild_132977 | 1399944259                          | Ca_kabuli_scaffold | 132977                  | T/C  | NA                 | INTERGENIC                    | NA                               |
| Kabuli_wild_133000 | 1399944260                          | Ca_kabuli_scaffold | 133000                  | A/G  | NA                 | INTERGENIC                    | NA                               |
| Kabuli_wild_133028 | 1399944261                          | Ca_kabuli_scaffold | 133028                  | C/T  | NA                 | INTERGENIC                    | NA                               |
| Kabuli_wild_133030 | 1399944262                          | Ca_kabuli_scaffold | 133030                  | T/A  | NA                 | INTERGENIC                    | NA                               |
| Kabuli_wild_133035 | 1399944263                          | Ca_kabuli_scaffold | 133035                  | G/A  | NA                 | INTERGENIC                    | NA                               |
| Kabuli_wild_137400 | 1399944264                          | Ca_kabuli_scaffold | 137400                  | A/G  | NA                 | INTERGENIC                    | NA                               |
| Kabuli_wild_137406 | 1399944265                          | Ca_kabuli_scaffold | 137406                  | T/C  | NA                 | INTERGENIC                    | NA                               |
| Kabuli_wild_137407 | 1399944266                          | Ca_kabuli_scaffold | 137407                  | T/C  | NA                 | INTERGENIC                    | NA                               |
| Kabuli_wild_137430 | 1399944267                          | Ca_kabuli_scaffold | 137430                  | A/G  | NA                 | INTERGENIC                    | NA                               |
| Kabuli_wild_137458 | 1399944268                          | Ca_kabuli_scaffold | 137458                  | C/T  | NA                 | INTERGENIC                    | NA                               |
| Kabuli_wild_137460 | 1399944269                          | Ca_kabuli_scaffold | 137460                  | T/A  | NA                 | INTERGENIC                    | NA                               |
| Kabuli_wild_137465 | 1399944270                          | Ca_kabuli_scaffold | 137465                  | G/A  | NA                 | INTERGENIC                    | NA                               |
| Kabuli_wild_203691 | 1399944271                          | Ca_kabuli_scaffold | 203691                  | T/A  | Gene_Ca_25760      | DOWNSTREAM                    | NA                               |
| Kabuli_wild_203755 | 1399944272                          | Ca_kabuli_scaffold | 203755                  | A/G  | Gene_Ca_25760      | DOWNSTREAM                    | NA                               |
| Kabuli_wild_203756 | 1399944273                          | Ca_kabuli_scaffold | 203756                  | C/T  | Gene_Ca_25760      | DOWNSTREAM                    | NA                               |
| Kabuli_wild_204193 | 1399944274                          | Ca_kabuli_scaffold | 204193                  | G/A  | Gene_Ca_25760      | DOWNSTREAM                    | NA                               |
| Kabuli_wild_204783 | 1399944275                          | Ca_kabuli_scaffold | 204783                  | A/G  | Gene_Ca_25760      | DOWNSTREAM                    | NA                               |
| Kabuli_wild_204785 | 1399944276                          | Ca_kabuli_scaffold | 204785                  | G/A  | Gene_Ca_25760      | DOWNSTREAM                    | NA                               |
| Kabuli_wild_204952 | 1399944277                          | Ca_kabuli_scaffold | 204952                  | G/A  | Gene_Ca_25760      | DOWNSTREAM                    | NA                               |
| Kabuli_wild_43160  | 1399944278                          | Ca_kabuli_scaffold | 43160                   | G/A  | Gene_Ca_25777      | NON_SYNONYMOUS_CODING         | NA                               |
| Kabuli_wild_43241  | 1399944279                          | Ca_kabuli_scaffold | 43241                   | G/C  | Gene_Ca_25777      | NON_SYNONYMOUS_CODING         | NA                               |
| Kabuli_wild_174761 | 1399944280                          | Ca_kabuli_scaffold | 174761                  | G/C  | NA                 | INTERGENIC                    | NA                               |
| Kabuli_wild_60906  | 1399944281                          | Ca_kabuli_scaffold | 60906                   | T/G  | NA                 | INTERGENIC                    | NA                               |
| Kabuli_wild_60950  | 1399944282                          | Ca_kabuli_scaffold | 60950                   | T/C  | NA                 | INTERGENIC                    | NA                               |
| Kabuli_wild_60951  | 1399944283                          | Ca_kabuli_scaffold | 60951                   | T/C  | NA                 | INTERGENIC                    | NA                               |
| Kabuli_wild_60952  | 1399944284                          | Ca_kabuli_scaffold | 60952                   | T/C  | NA                 | INTERGENIC                    | NA                               |
| Kabuli_wild_60956  | 1399944285                          | Ca_kabuli_scaffold | 60956                   | T/C  | NA                 | INTERGENIC                    | NA                               |
| Kabuli_wild_60957  | 1399944286                          | Ca_kabuli_scaffold | 60957                   | T/C  | NA                 | INTERGENIC                    | NA                               |
| Kabuli_wild_60959  | 1399944287                          | Ca_kabuli_scaffold | 60959                   | T/C  | NA                 | INTERGENIC                    | NA                               |
| Kabuli_wild_60960  | 1399944288                          | Ca_kabuli_scaffold | 60960                   | T/C  | NA                 | INTERGENIC                    | NA                               |
| Kabuli_wild_60962  | 1399944289                          | Ca_kabuli_scaffold | 60962                   | T/G  | NA                 | INTERGENIC                    | NA                               |
| Kabuli_wild_60963  | 1399944290                          | Ca_kabuli_scaffold | 60963                   | T/G  | NA                 | INTERGENIC                    | NA                               |
| Kabuli_wild_135964 | 1399944291                          | Ca_kabuli_scaffold | 135964                  | G/A  | Gene_Ca_26029      | SYNONYMOUS_CODING             | Peptidase C48, SUMO/Sentrin/Ubl1 |
| Kabuli_wild_135969 | 1399944292                          | Ca_kabuli_scaffold | 135969                  | C/T  | Gene_Ca_26029      | NON_SYNONYMOUS_CODING         | Peptidase C48, SUMO/Sentrin/Ubl1 |
| Kabuli_wild_135976 | 1399944293                          | Ca_kabuli_scaffold | 135976                  | C/T  | Gene_Ca_26029      | SYNONYMOUS_CODING             | Peptidase C48, SUMO/Sentrin/Ubl1 |
| Kabuli_wild_135999 | 1399944294                          | Ca_kabuli_scaffold | 135999                  | G/A  | Gene_Ca_26029      | NON_SYNONYMOUS_CODING         | Peptidase C48, SUMO/Sentrin/Ubl1 |
| Kabuli_wild_136004 | 1399944295                          | Ca_kabuli_scaffold | 136004                  | C/T  | Gene_Ca_26029      | NON_SYNONYMOUS_CODING         | Peptidase C48, SUMO/Sentrin/Ubl1 |
| Kabuli_wild_136017 | 1399944296                          | Ca_kabuli_scaffold | 136017                  | C/G  | Gene_Ca_26029      | NON_SYNONYMOUS_CODING         | Peptidase C48, SUMO/Sentrin/Ubl1 |
| Kabuli_wild_136030 | 1399944297                          | Ca_kabuli_scaffold | 136030                  | G/A  | Gene_Ca_26029      | SYNONYMOUS_CODING             | Peptidase C48, SUMO/Sentrin/Ubl1 |
| Kabuli_wild_136034 | 1399944298                          | Ca_kabuli_scaffold | 136034                  | G/A  | Gene_Ca_26029      | NON_SYNONYMOUS_CODING         | Peptidase C48, SUMO/Sentrin/Ubl1 |
| Kabuli_wild_136050 | 1399944299                          | Ca_kabuli_scaffold | 136050                  | G/A  | Gene_Ca_26029      | SYNONYMOUS_CODING             | Peptidase C48, SUMO/Sentrin/Ubl1 |

| SNP IDs            | NCBI dbSNP accession IDs (NCBI_SS#) | Chromosomes        | Physical positions (bp) | SNPs | Gene accession IDs | Sequence components of genome | Putative functions                   |
|--------------------|-------------------------------------|--------------------|-------------------------|------|--------------------|-------------------------------|--------------------------------------|
| Kabuli_wild_136051 | 1399944300                          | Ca_kabuli_scaffold | 136051                  | T/A  | Gene_Ca_26029      | NON_SYNONYMOUS_CODING         | Peptidase C48, SUMO/Sentrin/Ubl1     |
| Kabuli_wild_136073 | 1399944301                          | Ca_kabuli_scaffold | 136073                  | G/A  | Gene_Ca_26029      | NON_SYNONYMOUS_CODING         | Peptidase C48, SUMO/Sentrin/Ubl1     |
| Kabuli_wild_136076 | 1399944302                          | Ca_kabuli_scaffold | 136076                  | G/C  | Gene_Ca_26029      | NON_SYNONYMOUS_CODING         | Peptidase C48, SUMO/Sentrin/Ubl1     |
| Kabuli_wild_136077 | 1399944303                          | Ca_kabuli_scaffold | 136077                  | C/G  | Gene_Ca_26029      | NON_SYNONYMOUS_CODING         | Peptidase C48, SUMO/Sentrin/Ubl1     |
| Kabuli_wild_136090 | 1399944304                          | Ca_kabuli_scaffold | 136090                  | C/G  | Gene_Ca_26029      | SYNONYMOUS_CODING             | Peptidase C48, SUMO/Sentrin/Ubl1     |
| Kabuli_wild_136091 | 1399944305                          | Ca_kabuli_scaffold | 136091                  | G/A  | Gene_Ca_26029      | NON_SYNONYMOUS_CODING         | Peptidase C48, SUMO/Sentrin/Ubl1     |
| Kabuli_wild_136092 | 1399944306                          | Ca_kabuli_scaffold | 136092                  | A/G  | Gene_Ca_26029      | NON_SYNONYMOUS_CODING         | Peptidase C48, SUMO/Sentrin/Ubl1     |
| Kabuli_wild_136096 | 1399944307                          | Ca_kabuli_scaffold | 136096                  | T/C  | Gene_Ca_26029      | SYNONYMOUS_CODING             | Peptidase C48, SUMO/Sentrin/Ubl1     |
| Kabuli_wild_136106 | 1399944308                          | Ca_kabuli_scaffold | 136106                  | G/A  | Gene_Ca_26029      | NON_SYNONYMOUS_CODING         | Peptidase C48, SUMO/Sentrin/Ubl1     |
| Kabuli_wild_136109 | 1399944309                          | Ca_kabuli_scaffold | 136109                  | G/T  | Gene_Ca_26029      | NON_SYNONYMOUS_CODING         | Peptidase C48, SUMO/Sentrin/Ubl1     |
| Kabuli_wild_136129 | 1399944310                          | Ca_kabuli_scaffold | 136129                  | T/C  | Gene_Ca_26029      | SYNONYMOUS_CODING             | Peptidase C48, SUMO/Sentrin/Ubl1     |
| Kabuli_wild_468863 | 1399944311                          | Ca_kabuli_scaffold | 468863                  | T/A  | Gene_Ca_21282      | NON_SYNONYMOUS_CODING         | Protein kinase,catalytic domain      |
| Kabuli_wild_563293 | 1399944312                          | Ca_kabuli_scaffold | 563293                  | A/G  | Gene_Ca_21286      | DOWNSTREAM                    | NA                                   |
| Kabuli_wild_563319 | 1399944313                          | Ca_kabuli_scaffold | 563319                  | C/G  | Gene_Ca_21286      | DOWNSTREAM                    | NA                                   |
| Kabuli_wild_563363 | 1399944314                          | Ca_kabuli_scaffold | 563363                  | C/T  | Gene_Ca_21286      | DOWNSTREAM                    | NA                                   |
| Kabuli_wild_618427 | 1399944315                          | Ca_kabuli_scaffold | 618427                  | T/C  | Gene_Ca_21291      | SYNONYMOUS_CODING             | ABC transporter,transmembrane domain |
| Kabuli_wild_637556 | 1399944316                          | Ca_kabuli_scaffold | 637556                  | T/C  | NA                 | INTERGENIC                    | NA                                   |
| Kabuli_wild_771130 | 1399944317                          | Ca_kabuli_scaffold | 771130                  | C/T  | Gene_Ca_21296      | NON_SYNONYMOUS_CODING         | Peptidase C48, SUMO/Sentrin/Ubl1     |
| Kabuli_wild_771163 | 1399944318                          | Ca_kabuli_scaffold | 771163                  | G/A  | Gene_Ca_21296      | NON_SYNONYMOUS_CODING         | Peptidase C48, SUMO/Sentrin/Ubl1     |
| Kabuli_wild_771169 | 1399944319                          | Ca_kabuli_scaffold | 771169                  | C/T  | Gene_Ca_21296      | NON_SYNONYMOUS_CODING         | Peptidase C48, SUMO/Sentrin/Ubl1     |
| Kabuli_wild_771170 | 1399944320                          | Ca_kabuli_scaffold | 771170                  | G/A  | Gene_Ca_21296      | SYNONYMOUS_CODING             | Peptidase C48, SUMO/Sentrin/Ubl1     |
| Kabuli_wild_800641 | 1399944321                          | Ca_kabuli_scaffold | 800641                  | C/T  | NA                 | INTERGENIC                    | NA                                   |
| Kabuli_wild_800650 | 1399944322                          | Ca_kabuli_scaffold | 800650                  | C/T  | NA                 | INTERGENIC                    | NA                                   |
| Kabuli_wild_800669 | 1399944323                          | Ca_kabuli_scaffold | 800669                  | A/G  | NA                 | INTERGENIC                    | NA                                   |
| Kabuli_wild_37627  | 1399944324                          | Ca_kabuli_scaffold | 37627                   | C/G  | NA                 | INTERGENIC                    | NA                                   |
| Kabuli_wild_172869 | 1399944325                          | Ca_kabuli_scaffold | 172869                  | T/G  | NA                 | INTERGENIC                    | NA                                   |
| Kabuli_wild_182445 | 1399944326                          | Ca_kabuli_scaffold | 182445                  | T/C  | NA                 | INTERGENIC                    | NA                                   |
| Kabuli_wild_310000 | 1399944327                          | Ca_kabuli_scaffold | 310000                  | A/T  | NA                 | INTERGENIC                    | NA                                   |
| Kabuli_wild_310014 | 1399944328                          | Ca_kabuli_scaffold | 310014                  | G/A  | NA                 | INTERGENIC                    | NA                                   |
| Kabuli_wild_98240  | 1399944329                          | Ca_kabuli_scaffold | 98240                   | A/G  | Gene_Ca_27458      | NON_SYNONYMOUS_CODING         | Glycosidehydrolase,family17          |
| Kabuli_wild_41774  | 1399944330                          | Ca_kabuli_scaffold | 41774                   | G/A  | Gene_Ca_24719      | INTRON                        | Ionotropicglutamate receptor         |
| Kabuli_wild_311350 | 1399944331                          | Ca_kabuli_scaffold | 311350                  | C/T  | NA                 | INTERGENIC                    | NA                                   |
| Kabuli_wild_311394 | 1399944332                          | Ca_kabuli_scaffold | 311394                  | A/C  | NA                 | INTERGENIC                    | NA                                   |
| Kabuli_wild_311411 | 1399944333                          | Ca_kabuli_scaffold | 311411                  | G/A  | NA                 | INTERGENIC                    | NA                                   |
| Kabuli_wild_359376 | 1399944334                          | Ca_kabuli_scaffold | 359376                  | A/C  | Gene_Ca_24729      | INTRON                        | NA                                   |
| Kabuli_wild_51381  | 1399944335                          | Ca_kabuli_scaffold | 51381                   | A/T  | NA                 | INTERGENIC                    | NA                                   |
| Kabuli_wild_51396  | 1399944336                          | Ca_kabuli_scaffold | 51396                   | G/A  | NA                 | INTERGENIC                    | NA                                   |
| Kabuli_wild_51414  | 1399944337                          | Ca_kabuli_scaffold | 51414                   | C/T  | NA                 | INTERGENIC                    | NA                                   |
| Kabuli_wild_51435  | 1399944338                          | Ca_kabuli_scaffold | 51435                   | C/T  | NA                 | INTERGENIC                    | NA                                   |
| Kabuli_wild_51446  | 1399944339                          | Ca_kabuli_scaffold | 51446                   | G/A  | NA                 | INTERGENIC                    | NA                                   |
| Kabuli_wild_51494  | 1399944340                          | Ca_kabuli_scaffold | 51494                   | C/G  | NA                 | INTERGENIC                    | NA                                   |
| Kabuli_wild_51498  | 1399944341                          | Ca_kabuli_scaffold | 51498                   | C/T  | NA                 | INTERGENIC                    | NA                                   |
| Kabuli_wild_51518  | 1399944342                          | Ca_kabuli_scaffold | 51518                   | T/C  | NA                 | INTERGENIC                    | NA                                   |
| Kabuli_wild_51548  | 1399944343                          | Ca_kabuli_scaffold | 51548                   | T/C  | NA                 | INTERGENIC                    | NA                                   |

| SNP IDs            | NCBI dbSNP accession IDs (NCBI_SS#) | Chromosomes        | Physical positions (bp) | SNPs | Gene accession IDs | Sequence components of genome | Putative functions               |
|--------------------|-------------------------------------|--------------------|-------------------------|------|--------------------|-------------------------------|----------------------------------|
| Kabuli_wild_51605  | 1399944344                          | Ca_kabuli_scaffold | 51605                   | C/T  | NA                 | INTERGENIC                    | NA                               |
| Kabuli_wild_51617  | 1399944345                          | Ca_kabuli_scaffold | 51617                   | G/A  | NA                 | INTERGENIC                    | NA                               |
| Kabuli_wild_51624  | 1399944346                          | Ca_kabuli_scaffold | 51624                   | G/A  | NA                 | INTERGENIC                    | NA                               |
| Kabuli_wild_51637  | 1399944347                          | Ca_kabuli_scaffold | 51637                   | T/A  | NA                 | INTERGENIC                    | NA                               |
| Kabuli_wild_174039 | 1399944348                          | Ca_kabuli_scaffold | 174039                  | A/T  | NA                 | INTERGENIC                    | NA                               |
| Kabuli_wild_153995 | 1399944349                          | Ca_kabuli_scaffold | 153995                  | C/G  | NA                 | INTERGENIC                    | NA                               |
| Kabuli_wild_154023 | 1399944350                          | Ca_kabuli_scaffold | 154023                  | C/T  | NA                 | INTERGENIC                    | NA                               |
| Kabuli_wild_41848  | 1399944351                          | Ca_kabuli_scaffold | 41848                   | C/T  | Gene_Ca_27825      | NON_SYNONYMOUS_CODING         | NA                               |
| Kabuli_wild_41878  | 1399944352                          | Ca_kabuli_scaffold | 41878                   | C/T  | Gene_Ca_27825      | NON_SYNONYMOUS_CODING         | NA                               |
| Kabuli_wild_22672  | 1399944353                          | Ca_kabuli_scaffold | 22672                   | C/T  | NA                 | INTERGENIC                    | NA                               |
| Kabuli_wild_22675  | 1399944354                          | Ca_kabuli_scaffold | 22675                   | G/A  | NA                 | INTERGENIC                    | NA                               |
| Kabuli_wild_22680  | 1399944355                          | Ca_kabuli_scaffold | 22680                   | C/A  | NA                 | INTERGENIC                    | NA                               |
| Kabuli_wild_22693  | 1399944356                          | Ca_kabuli_scaffold | 22693                   | C/T  | NA                 | INTERGENIC                    | NA                               |
| Kabuli_wild_22699  | 1399944357                          | Ca_kabuli_scaffold | 22699                   | A/G  | NA                 | INTERGENIC                    | NA                               |
| Kabuli_wild_22708  | 1399944358                          | Ca_kabuli_scaffold | 22708                   | A/G  | NA                 | INTERGENIC                    | NA                               |
| Kabuli_wild_22720  | 1399944359                          | Ca_kabuli_scaffold | 22720                   | C/T  | NA                 | INTERGENIC                    | NA                               |
| Kabuli_wild_22726  | 1399944360                          | Ca_kabuli_scaffold | 22726                   | A/C  | NA                 | INTERGENIC                    | NA                               |
| Kabuli_wild_22732  | 1399944361                          | Ca_kabuli_scaffold | 22732                   | G/A  | NA                 | INTERGENIC                    | NA                               |
| Kabuli_wild_22777  | 1399944362                          | Ca_kabuli_scaffold | 22777                   | T/G  | NA                 | INTERGENIC                    | NA                               |
| Kabuli_wild_188959 | 1399944363                          | Ca_kabuli_scaffold | 188959                  | G/T  | NA                 | INTERGENIC                    | NA                               |
| Kabuli_wild_88627  | 1399944364                          | Ca_kabuli_scaffold | 88627                   | A/G  | Gene_Ca_27561      | SYNONYMOUS_CODING             | Peptidase C48, SUMO/Sentrin/Ubl1 |
| Kabuli_wild_88629  | 1399944365                          | Ca_kabuli_scaffold | 88629                   | C/T  | Gene_Ca_27561      | SYNONYMOUS_CODING             | Peptidase C48, SUMO/Sentrin/Ubl1 |
| Kabuli_wild_88669  | 1399944366                          | Ca_kabuli_scaffold | 88669                   | T/A  | Gene_Ca_27561      | NON_SYNONYMOUS_CODING         | Peptidase C48, SUMO/Sentrin/Ubl1 |
| Kabuli_wild_88670  | 1399944367                          | Ca_kabuli_scaffold | 88670                   | C/T  | Gene_Ca_27561      | SYNONYMOUS_CODING             | Peptidase C48, SUMO/Sentrin/Ubl1 |
| Kabuli_wild_88694  | 1399944368                          | Ca_kabuli_scaffold | 88694                   | G/A  | Gene_Ca_27561      | SYNONYMOUS_CODING             | Peptidase C48, SUMO/Sentrin/Ubl1 |
| Kabuli_wild_88721  | 1399944369                          | Ca_kabuli_scaffold | 88721                   | C/T  | Gene_Ca_27561      | NON_SYNONYMOUS_CODING         | Peptidase C48, SUMO/Sentrin/Ubl1 |
| Kabuli_wild_88726  | 1399944370                          | Ca_kabuli_scaffold | 88726                   | A/C  | Gene_Ca_27561      | NON_SYNONYMOUS_CODING         | Peptidase C48, SUMO/Sentrin/Ubl1 |
| Kabuli_wild_84915  | 1399944371                          | Ca_kabuli_scaffold | 84915                   | T/A  | NA                 | INTERGENIC                    | NA                               |
| Kabuli_wild_84943  | 1399944372                          | Ca_kabuli_scaffold | 84943                   | A/G  | NA                 | INTERGENIC                    | NA                               |
| Kabuli_wild_84945  | 1399944373                          | Ca_kabuli_scaffold | 84945                   | T/C  | NA                 | INTERGENIC                    | NA                               |
| Kabuli_wild_84953  | 1399944374                          | Ca_kabuli_scaffold | 84953                   | T/G  | NA                 | INTERGENIC                    | NA                               |
| Kabuli_wild_84969  | 1399944375                          | Ca_kabuli_scaffold | 84969                   | G/A  | NA                 | INTERGENIC                    | NA                               |
| Kabuli_wild_84972  | 1399944376                          | Ca_kabuli_scaffold | 84972                   | C/A  | NA                 | INTERGENIC                    | NA                               |
| Kabuli_wild_84974  | 1399944377                          | Ca_kabuli_scaffold | 84974                   | T/G  | NA                 | INTERGENIC                    | NA                               |
| Kabuli_wild_84988  | 1399944378                          | Ca_kabuli_scaffold | 84988                   | T/G  | NA                 | INTERGENIC                    | NA                               |
| Kabuli_wild_84994  | 1399944379                          | Ca_kabuli_scaffold | 84994                   | G/A  | NA                 | INTERGENIC                    | NA                               |
| Kabuli_wild_164620 | 1399944380                          | Ca_kabuli_scaffold | 164620                  | C/T  | NA                 | INTERGENIC                    | NA                               |
| Kabuli_wild_164787 | 1399944381                          | Ca_kabuli_scaffold | 164787                  | C/T  | NA                 | INTERGENIC                    | NA                               |
| Kabuli_wild_164789 | 1399944382                          | Ca_kabuli_scaffold | 164789                  | T/C  | NA                 | INTERGENIC                    | NA                               |
| Kabuli_wild_164983 | 1399944383                          | Ca_kabuli_scaffold | 164983                  | G/A  | NA                 | INTERGENIC                    | NA                               |
| Kabuli_wild_165014 | 1399944384                          | Ca_kabuli_scaffold | 165014                  | G/A  | NA                 | INTERGENIC                    | NA                               |
| Kabuli_wild_165285 | 1399944385                          | Ca_kabuli_scaffold | 165285                  | A/G  | Gene_Ca_24992      | UPSTREAM                      | NA                               |
| Kabuli_wild_165303 | 1399944386                          | Ca_kabuli_scaffold | 165303                  | G/A  | Gene_Ca_24992      | UPSTREAM                      | NA                               |
| Kabuli_wild_165312 | 1399944387                          | Ca_kabuli_scaffold | 165312                  | A/T  | Gene_Ca_24992      | UPSTREAM                      | NA                               |

| SNP IDs            | NCBI dbSNP accession IDs (NCBI_SS#) | Chromosomes        | Physical positions (bp) | SNPs | Gene accession IDs | Sequence components of genome | Putative functions            |
|--------------------|-------------------------------------|--------------------|-------------------------|------|--------------------|-------------------------------|-------------------------------|
| Kabuli_wild_165582 | 1399944388                          | Ca_kabuli_scaffold | 165582                  | G/A  | Gene_Ca_24992      | UPSTREAM                      | NA                            |
| Kabuli_wild_165583 | 1399944389                          | Ca_kabuli_scaffold | 165583                  | T/C  | Gene_Ca_24992      | UPSTREAM                      | NA                            |
| Kabuli_wild_196556 | 1399944390                          | Ca_kabuli_scaffold | 196556                  | G/A  | Gene_Ca_24993      | NON_SYNONYMOUS_CODING         | NA                            |
| Kabuli_wild_219176 | 1399944391                          | Ca_kabuli_scaffold | 219176                  | T/C  | NA                 | INTERGENIC                    | NA                            |
| Kabuli_wild_83724  | 1399944392                          | Ca_kabuli_scaffold | 83724                   | G/C  | Gene_Ca_26955      | NON_SYNONYMOUS_CODING         | Transposase,PttA/En/Spm,plant |
| Kabuli_wild_83732  | 1399944393                          | Ca_kabuli_scaffold | 83732                   | C/A  | Gene_Ca_26955      | NON_SYNONYMOUS_CODING         | Transposase,PttA/En/Spm,plant |
| Kabuli_wild_83898  | 1399944394                          | Ca_kabuli_scaffold | 83898                   | G/T  | Gene_Ca_26955      | NON_SYNONYMOUS_CODING         | Transposase,PttA/En/Spm,plant |
| Kabuli_wild_129171 | 1399944395                          | Ca_kabuli_scaffold | 129171                  | C/T  | NA                 | INTERGENIC                    | NA                            |
| Kabuli_wild_132825 | 1399944396                          | Ca_kabuli_scaffold | 132825                  | C/T  | NA                 | INTERGENIC                    | NA                            |
| Kabuli_wild_132843 | 1399944397                          | Ca_kabuli_scaffold | 132843                  | C/T  | NA                 | INTERGENIC                    | NA                            |
| Kabuli_wild_132849 | 1399944398                          | Ca_kabuli_scaffold | 132849                  | A/C  | NA                 | INTERGENIC                    | NA                            |
| Kabuli_wild_132858 | 1399944399                          | Ca_kabuli_scaffold | 132858                  | G/A  | NA                 | INTERGENIC                    | NA                            |
| Kabuli_wild_132859 | 1399944400                          | Ca_kabuli_scaffold | 132859                  | C/T  | NA                 | INTERGENIC                    | NA                            |
| Kabuli_wild_132873 | 1399944401                          | Ca_kabuli_scaffold | 132873                  | G/A  | NA                 | INTERGENIC                    | NA                            |
| Kabuli_wild_132896 | 1399944402                          | Ca_kabuli_scaffold | 132896                  | C/T  | NA                 | INTERGENIC                    | NA                            |
| Kabuli_wild_132907 | 1399944403                          | Ca_kabuli_scaffold | 132907                  | A/C  | NA                 | INTERGENIC                    | NA                            |
| Kabuli_wild_54813  | 1399944404                          | Ca_kabuli_scaffold | 54813                   | T/C  | NA                 | INTERGENIC                    | NA                            |
| Kabuli_wild_393535 | 1399944405                          | Ca_kabuli_scaffold | 393535                  | G/T  | NA                 | INTERGENIC                    | NA                            |
| Kabuli_wild_69075  | 1399944406                          | Ca_kabuli_scaffold | 69075                   | A/C  | Gene_Ca_26154      | NON_SYNONYMOUS_CODING         | PGAP1-like                    |
| Kabuli_wild_144442 | 1399944407                          | Ca_kabuli_scaffold | 144442                  | G/A  | NA                 | INTERGENIC                    | NA                            |
| Kabuli_wild_177270 | 1399944408                          | Ca_kabuli_scaffold | 177270                  | T/C  | NA                 | INTERGENIC                    | NA                            |
| Kabuli_wild_177306 | 1399944409                          | Ca_kabuli_scaffold | 177306                  | T/C  | NA                 | INTERGENIC                    | NA                            |
| Kabuli_wild_177340 | 1399944410                          | Ca_kabuli_scaffold | 177340                  | C/T  | NA                 | INTERGENIC                    | NA                            |
| Kabuli_wild_177354 | 1399944411                          | Ca_kabuli_scaffold | 177354                  | G/A  | NA                 | INTERGENIC                    | NA                            |
| Kabuli_wild_177388 | 1399944412                          | Ca_kabuli_scaffold | 177388                  | C/G  | NA                 | INTERGENIC                    | NA                            |
| Kabuli_wild_177685 | 1399944413                          | Ca_kabuli_scaffold | 177685                  | T/C  | NA                 | INTERGENIC                    | NA                            |
| Kabuli_wild_178945 | 1399944414                          | Ca_kabuli_scaffold | 178945                  | T/C  | NA                 | INTERGENIC                    | NA                            |
| Kabuli_wild_227608 | 1399944415                          | Ca_kabuli_scaffold | 227608                  | A/T  | NA                 | INTERGENIC                    | NA                            |
| Kabuli_wild_36686  | 1399944416                          | Ca_kabuli_scaffold | 36686                   | A/T  | Gene_Ca_27060      | INTRON                        | NA                            |
| Kabuli_wild_36703  | 1399944417                          | Ca_kabuli_scaffold | 36703                   | A/T  | Gene_Ca_27060      | INTRON                        | NA                            |
| Kabuli_wild_36704  | 1399944418                          | Ca_kabuli_scaffold | 36704                   | T/G  | Gene_Ca_27060      | INTRON                        | NA                            |
| Kabuli_wild_36709  | 1399944419                          | Ca_kabuli_scaffold | 36709                   | G/A  | Gene_Ca_27060      | INTRON                        | NA                            |
| Kabuli_wild_38767  | 1399944420                          | Ca_kabuli_scaffold | 38767                   | C/T  | Gene_Ca_27060      | INTRON                        | NA                            |
| Kabuli_wild_107659 | 1399944421                          | Ca_kabuli_scaffold | 107659                  | G/A  | NA                 | INTERGENIC                    | NA                            |
| Kabuli_wild_107669 | 1399944422                          | Ca_kabuli_scaffold | 107669                  | G/A  | NA                 | INTERGENIC                    | NA                            |
| Kabuli_wild_107671 | 1399944423                          | Ca_kabuli_scaffold | 107671                  | A/G  | NA                 | INTERGENIC                    | NA                            |
| Kabuli_wild_107678 | 1399944424                          | Ca_kabuli_scaffold | 107678                  | A/T  | NA                 | INTERGENIC                    | NA                            |
| Kabuli_wild_107704 | 1399944425                          | Ca_kabuli_scaffold | 107704                  | G/A  | NA                 | INTERGENIC                    | NA                            |
| Kabuli_wild_3175   | 1399944426                          | Ca_kabuli_scaffold | 3175                    | A/G  | NA                 | INTERGENIC                    | NA                            |
| Kabuli_wild_3221   | 1399944427                          | Ca_kabuli_scaffold | 3221                    | C/A  | NA                 | INTERGENIC                    | NA                            |
| Kabuli_wild_3238   | 1399944428                          | Ca_kabuli_scaffold | 3238                    | G/T  | NA                 | INTERGENIC                    | NA                            |
| Kabuli_wild_3263   | 1399944429                          | Ca_kabuli_scaffold | 3263                    | A/G  | NA                 | INTERGENIC                    | NA                            |
| Kabuli_wild_3266   | 1399944430                          | Ca_kabuli_scaffold | 3266                    | G/A  | NA                 | INTERGENIC                    | NA                            |
| Kabuli_wild_3271   | 1399944431                          | Ca_kabuli_scaffold | 3271                    | A/T  | NA                 | INTERGENIC                    | NA                            |

| SNP IDs            | NCBI dbSNP accession IDs (NCBI_SS#) | Chromosomes        | Physical positions (bp) | SNPs | Gene accession IDs | Sequence components of genome | Putative functions                 |
|--------------------|-------------------------------------|--------------------|-------------------------|------|--------------------|-------------------------------|------------------------------------|
| Kabuli_wild_3277   | 1399944432                          | Ca_kabuli_scaffold | 3277                    | A/C  | NA                 | INTERGENIC                    | NA                                 |
| Kabuli_wild_3309   | 1399944433                          | Ca_kabuli_scaffold | 3309                    | T/C  | NA                 | INTERGENIC                    | NA                                 |
| Kabuli_wild_130572 | 1399944434                          | Ca_kabuli_scaffold | 130572                  | G/A  | NA                 | INTERGENIC                    | NA                                 |
| Kabuli_wild_130580 | 1399944435                          | Ca_kabuli_scaffold | 130580                  | T/C  | NA                 | INTERGENIC                    | NA                                 |
| Kabuli_wild_130583 | 1399944436                          | Ca_kabuli_scaffold | 130583                  | C/T  | NA                 | INTERGENIC                    | NA                                 |
| Kabuli_wild_130587 | 1399944437                          | Ca_kabuli_scaffold | 130587                  | C/A  | NA                 | INTERGENIC                    | NA                                 |
| Kabuli_wild_130589 | 1399944438                          | Ca_kabuli_scaffold | 130589                  | C/A  | NA                 | INTERGENIC                    | NA                                 |
| Kabuli_wild_130611 | 1399944439                          | Ca_kabuli_scaffold | 130611                  | C/T  | NA                 | INTERGENIC                    | NA                                 |
| Kabuli_wild_130614 | 1399944440                          | Ca_kabuli_scaffold | 130614                  | A/G  | NA                 | INTERGENIC                    | NA                                 |
| Kabuli_wild_130621 | 1399944441                          | Ca_kabuli_scaffold | 130621                  | C/A  | NA                 | INTERGENIC                    | NA                                 |
| Kabuli_wild_130624 | 1399944442                          | Ca_kabuli_scaffold | 130624                  | A/G  | NA                 | INTERGENIC                    | NA                                 |
| Kabuli_wild_130635 | 1399944443                          | Ca_kabuli_scaffold | 130635                  | G/T  | NA                 | INTERGENIC                    | NA                                 |
| Kabuli_wild_130636 | 1399944444                          | Ca_kabuli_scaffold | 130636                  | G/A  | NA                 | INTERGENIC                    | NA                                 |
| Kabuli_wild_130639 | 1399944445                          | Ca_kabuli_scaffold | 130639                  | C/A  | NA                 | INTERGENIC                    | NA                                 |
| Kabuli_wild_130664 | 1399944446                          | Ca_kabuli_scaffold | 130664                  | T/C  | NA                 | INTERGENIC                    | NA                                 |
| Kabuli_wild_130671 | 1399944447                          | Ca_kabuli_scaffold | 130671                  | A/G  | NA                 | INTERGENIC                    | NA                                 |
| Kabuli_wild_139314 | 1399944448                          | Ca_kabuli_scaffold | 139314                  | G/T  | NA                 | INTERGENIC                    | NA                                 |
| Kabuli_wild_195890 | 1399944449                          | Ca_kabuli_scaffold | 195890                  | A/G  | NA                 | INTERGENIC                    | NA                                 |
| Kabuli_wild_296448 | 1399944450                          | Ca_kabuli_scaffold | 296448                  | A/C  | Gene_Ca_23551      | INTRON                        | SecYprotein                        |
| Kabuli_wild_297325 | 1399944451                          | Ca_kabuli_scaffold | 297325                  | G/C  | Gene_Ca_23551      | INTRON                        | SecYprotein                        |
| Kabuli_wild_178515 | 1399944452                          | Ca_kabuli_scaffold | 178515                  | T/C  | NA                 | INTERGENIC                    | NA                                 |
| Kabuli_wild_246920 | 1399944453                          | Ca_kabuli_scaffold | 246920                  | C/A  | Gene_Ca_22286      | NON_SYNONYMOUS_CODING         | Peptidase C48, SUMO/Sentrin/Ubl1   |
| Kabuli_wild_246922 | 1399944454                          | Ca_kabuli_scaffold | 246922                  | G/A  | Gene_Ca_22286      | NON_SYNONYMOUS_CODING         | Peptidase C48, SUMO/Sentrin/Ubl1   |
| Kabuli_wild_246987 | 1399944455                          | Ca_kabuli_scaffold | 246987                  | G/A  | Gene_Ca_22286      | SYNONYMOUS_CODING             | Peptidase C48, SUMO/Sentrin/Ubl1   |
| Kabuli_wild_246996 | 1399944456                          | Ca_kabuli_scaffold | 246996                  | G/T  | Gene_Ca_22286      | SYNONYMOUS_CODING             | Peptidase C48, SUMO/Sentrin/Ubl1   |
| Kabuli_wild_247001 | 1399944457                          | Ca_kabuli_scaffold | 247001                  | C/T  | Gene_Ca_22286      | NON_SYNONYMOUS_CODING         | Peptidase C48, SUMO/Sentrin/Ubl1   |
| Kabuli_wild_256286 | 1399944458                          | Ca_kabuli_scaffold | 256286                  | G/T  | Gene_Ca_22287      | INTRON                        | Protein of unknown function DUF620 |
| Kabuli_wild_321050 | 1399944459                          | Ca_kabuli_scaffold | 321050                  | G/A  | NA                 | INTERGENIC                    | NA                                 |
| Kabuli_wild_441570 | 1399944460                          | Ca_kabuli_scaffold | 441570                  | C/T  | NA                 | INTERGENIC                    | NA                                 |
| Kabuli_wild_441605 | 1399944461                          | Ca_kabuli_scaffold | 441605                  | C/A  | NA                 | INTERGENIC                    | NA                                 |
| Kabuli_wild_49060  | 1399944462                          | Ca_kabuli_scaffold | 49060                   | T/C  | Gene_Ca_25591      | SYNONYMOUS_CODING             | NA                                 |
| Kabuli_wild_49065  | 1399944463                          | Ca_kabuli_scaffold | 49065                   | G/A  | Gene_Ca_25591      | STOP_GAINED                   | NA                                 |
| Kabuli_wild_49076  | 1399944464                          | Ca_kabuli_scaffold | 49076                   | G/T  | Gene_Ca_25591      | NON_SYNONYMOUS_CODING         | NA                                 |
| Kabuli_wild_272574 | 1399944465                          | Ca_kabuli_scaffold | 272574                  | A/G  | NA                 | INTERGENIC                    | NA                                 |
| Kabuli_wild_273155 | 1399944466                          | Ca_kabuli_scaffold | 273155                  | A/G  | NA                 | INTERGENIC                    | NA                                 |
| Kabuli_wild_273203 | 1399944467                          | Ca_kabuli_scaffold | 273203                  | C/A  | NA                 | INTERGENIC                    | NA                                 |
| Kabuli_wild_273209 | 1399944468                          | Ca_kabuli_scaffold | 273209                  | C/A  | NA                 | INTERGENIC                    | NA                                 |
| Kabuli_wild_273220 | 1399944469                          | Ca_kabuli_scaffold | 273220                  | G/A  | NA                 | INTERGENIC                    | NA                                 |
| Kabuli_wild_273245 | 1399944470                          | Ca_kabuli_scaffold | 273245                  | C/T  | NA                 | INTERGENIC                    | NA                                 |
| Kabuli_wild_285952 | 1399944471                          | Ca_kabuli_scaffold | 285952                  | T/C  | NA                 | INTERGENIC                    | NA                                 |
| Kabuli_wild_285958 | 1399944472                          | Ca_kabuli_scaffold | 285958                  | C/G  | NA                 | INTERGENIC                    | NA                                 |
| Kabuli_wild_285999 | 1399944473                          | Ca_kabuli_scaffold | 285999                  | T/G  | NA                 | INTERGENIC                    | NA                                 |
| Kabuli_wild_355850 | 1399944474                          | Ca_kabuli_scaffold | 355850                  | G/A  | Gene_Ca_24364      | NON_SYNONYMOUS_CODING         | NA                                 |
| Kabuli_wild_355857 | 1399944475                          | Ca_kabuli_scaffold | 355857                  | C/T  | Gene_Ca_24364      | NON_SYNONYMOUS_CODING         | NA                                 |

| SNP IDs            | NCBI dbSNP accession IDs (NCBI_SS#) | Chromosomes        | Physical positions (bp) | SNPs | Gene accession IDs | Sequence components of genome | Putative functions |
|--------------------|-------------------------------------|--------------------|-------------------------|------|--------------------|-------------------------------|--------------------|
| Kabuli_wild_355859 | 1399944476                          | Ca_kabuli_scaffold | 355859                  | G/A  | Gene_Ca_24364      | NON_SYNONYMOUS_CODING         | NA                 |
| Kabuli_wild_355875 | 1399944477                          | Ca_kabuli_scaffold | 355875                  | G/T  | Gene_Ca_24364      | NON_SYNONYMOUS_CODING         | NA                 |
| Kabuli_wild_355898 | 1399944478                          | Ca_kabuli_scaffold | 355898                  | G/A  | Gene_Ca_24364      | NON_SYNONYMOUS_CODING         | NA                 |
| Kabuli_wild_355932 | 1399944479                          | Ca_kabuli_scaffold | 355932                  | C/A  | Gene_Ca_24364      | NON_SYNONYMOUS_CODING         | NA                 |
| Kabuli_wild_378363 | 1399944480                          | Ca_kabuli_scaffold | 378363                  | T/A  | Gene_Ca_24364      | INTRON                        | NA                 |
| Kabuli_wild_90740  | 1399944481                          | Ca_kabuli_scaffold | 90740                   | G/T  | Gene_Ca_25277      | UPSTREAM                      | NA                 |
| Kabuli_wild_90813  | 1399944482                          | Ca_kabuli_scaffold | 90813                   | C/T  | Gene_Ca_25277      | UPSTREAM                      | NA                 |
| Kabuli_wild_60078  | 1399944483                          | Ca_kabuli_scaffold | 60078                   | C/T  | NA                 | INTERGENIC                    | NA                 |
| Kabuli_wild_60099  | 1399944484                          | Ca_kabuli_scaffold | 60099                   | C/T  | NA                 | INTERGENIC                    | NA                 |
| Kabuli_wild_62060  | 1399944485                          | Ca_kabuli_scaffold | 62060                   | G/A  | NA                 | INTERGENIC                    | NA                 |
| Kabuli_wild_62073  | 1399944486                          | Ca_kabuli_scaffold | 62073                   | T/C  | NA                 | INTERGENIC                    | NA                 |
| Kabuli_wild_62246  | 1399944487                          | Ca_kabuli_scaffold | 62246                   | A/G  | NA                 | INTERGENIC                    | NA                 |
| Kabuli_wild_231515 | 1399944488                          | Ca_kabuli_scaffold | 231515                  | G/T  | NA                 | INTERGENIC                    | NA                 |
| Kabuli_wild_231580 | 1399944489                          | Ca_kabuli_scaffold | 231580                  | G/A  | NA                 | INTERGENIC                    | NA                 |
| Kabuli_wild_231603 | 1399944490                          | Ca_kabuli_scaffold | 231603                  | G/A  | NA                 | INTERGENIC                    | NA                 |
| Kabuli_wild_231808 | 1399944491                          | Ca_kabuli_scaffold | 231808                  | C/T  | NA                 | INTERGENIC                    | NA                 |
| Kabuli_wild_231819 | 1399944492                          | Ca_kabuli_scaffold | 231819                  | A/C  | NA                 | INTERGENIC                    | NA                 |
| Kabuli_wild_231837 | 1399944493                          | Ca_kabuli_scaffold | 231837                  | G/A  | NA                 | INTERGENIC                    | NA                 |
| Kabuli_wild_272150 | 1399944494                          | Ca_kabuli_scaffold | 272150                  | A/G  | NA                 | INTERGENIC                    | NA                 |
| Kabuli_wild_323122 | 1399944495                          | Ca_kabuli_scaffold | 323122                  | T/C  | NA                 | INTERGENIC                    | NA                 |
| Kabuli_wild_323128 | 1399944496                          | Ca_kabuli_scaffold | 323128                  | G/A  | NA                 | INTERGENIC                    | NA                 |
| Kabuli_wild_323140 | 1399944497                          | Ca_kabuli_scaffold | 323140                  | T/C  | NA                 | INTERGENIC                    | NA                 |
| Kabuli_wild_323141 | 1399944498                          | Ca_kabuli_scaffold | 323141                  | G/A  | NA                 | INTERGENIC                    | NA                 |
| Kabuli_wild_323147 | 1399944499                          | Ca_kabuli_scaffold | 323147                  | T/C  | NA                 | INTERGENIC                    | NA                 |
| Kabuli_wild_323161 | 1399944500                          | Ca_kabuli_scaffold | 323161                  | G/A  | NA                 | INTERGENIC                    | NA                 |
| Kabuli_wild_323162 | 1399944501                          | Ca_kabuli_scaffold | 323162                  | T/C  | NA                 | INTERGENIC                    | NA                 |
| Kabuli_wild_323167 | 1399944502                          | Ca_kabuli_scaffold | 323167                  | C/G  | NA                 | INTERGENIC                    | NA                 |
| Kabuli_wild_323171 | 1399944503                          | Ca_kabuli_scaffold | 323171                  | G/A  | NA                 | INTERGENIC                    | NA                 |
| Kabuli_wild_323181 | 1399944504                          | Ca_kabuli_scaffold | 323181                  | C/A  | NA                 | INTERGENIC                    | NA                 |
| Kabuli_wild_323219 | 1399944505                          | Ca_kabuli_scaffold | 323219                  | A/C  | NA                 | INTERGENIC                    | NA                 |
| Kabuli_wild_8479   | 1399944506                          | Ca_kabuli_scaffold | 8479                    | A/C  | Gene_Ca_28252      | NON_SYNONYMOUS_CODING         | NA                 |
| Kabuli_wild_6092   | 1399944507                          | Ca_kabuli_scaffold | 6092                    | C/G  | Gene_Ca_24670      | INTRON                        | PeptidaseM48       |
| Kabuli_wild_13769  | 1399944508                          | Ca_kabuli_scaffold | 13769                   | T/G  | NA                 | INTERGENIC                    | NA                 |
| Kabuli_wild_13809  | 1399944509                          | Ca_kabuli_scaffold | 13809                   | C/T  | NA                 | INTERGENIC                    | NA                 |
| Kabuli_wild_13811  | 1399944510                          | Ca_kabuli_scaffold | 13811                   | G/A  | NA                 | INTERGENIC                    | NA                 |
| Kabuli_wild_13812  | 1399944511                          | Ca_kabuli_scaffold | 13812                   | C/A  | NA                 | INTERGENIC                    | NA                 |
| Kabuli_wild_151121 | 1399944512                          | Ca_kabuli_scaffold | 151121                  | C/A  | NA                 | INTERGENIC                    | NA                 |
| Kabuli_wild_151123 | 1399944513                          | Ca_kabuli_scaffold | 151123                  | G/A  | NA                 | INTERGENIC                    | NA                 |
| Kabuli_wild_151124 | 1399944514                          | Ca_kabuli_scaffold | 151124                  | C/G  | NA                 | INTERGENIC                    | NA                 |
| Kabuli_wild_151138 | 1399944515                          | Ca_kabuli_scaffold | 151138                  | C/T  | NA                 | INTERGENIC                    | NA                 |
| Kabuli_wild_151149 | 1399944516                          | Ca_kabuli_scaffold | 151149                  | T/C  | NA                 | INTERGENIC                    | NA                 |
| Kabuli_wild_151196 | 1399944517                          | Ca_kabuli_scaffold | 151196                  | C/T  | NA                 | INTERGENIC                    | NA                 |
| Kabuli_wild_151201 | 1399944518                          | Ca_kabuli_scaffold | 151201                  | G/C  | NA                 | INTERGENIC                    | NA                 |
| Kabuli_wild_151205 | 1399944519                          | Ca_kabuli_scaffold | 151205                  | C/T  | NA                 | INTERGENIC                    | NA                 |



| SNP IDs            | NCBI dbSNP accession IDs (NCBI_SS#) | Chromosomes        | Physical positions (bp) | SNPs | Gene accession IDs | Sequence components of genome | Putative functions              |
|--------------------|-------------------------------------|--------------------|-------------------------|------|--------------------|-------------------------------|---------------------------------|
| Kabuli_wild_151219 | 1399944520                          | Ca_kabuli_scaffold | 151219                  | A/G  | NA                 | INTERGENIC                    | NA                              |
| Kabuli_wild_151256 | 1399944521                          | Ca_kabuli_scaffold | 151256                  | A/G  | NA                 | INTERGENIC                    | NA                              |
| Kabuli_wild_151273 | 1399944522                          | Ca_kabuli_scaffold | 151273                  | A/G  | NA                 | INTERGENIC                    | NA                              |
| Kabuli_wild_151278 | 1399944523                          | Ca_kabuli_scaffold | 151278                  | G/A  | NA                 | INTERGENIC                    | NA                              |
| Kabuli_wild_73537  | 1399944524                          | Ca_kabuli_scaffold | 73537                   | T/G  | Gene_Ca_26396      | UPSTREAM                      | Disease resistance protein      |
| Kabuli_wild_32546  | 1399944525                          | Ca_kabuli_scaffold | 32546                   | T/C  | Gene_Ca_22195      | INTRON                        | Zinc finger,PHD-type            |
| Kabuli_wild_34120  | 1399944526                          | Ca_kabuli_scaffold | 34120                   | C/A  | Gene_Ca_22195      | STOP_GAINED                   | Zinc finger,PHD-type            |
| Kabuli_wild_34145  | 1399944527                          | Ca_kabuli_scaffold | 34145                   | T/G  | Gene_Ca_22195      | NON_SYNONYMOUS_CODING         | Zinc finger,PHD-type            |
| Kabuli_wild_42532  | 1399944528                          | Ca_kabuli_scaffold | 42532                   | G/A  | Gene_Ca_22196      | SYNONYMOUS_CODING             | Ubiquitin                       |
| Kabuli_wild_42739  | 1399944529                          | Ca_kabuli_scaffold | 42739                   | C/T  | Gene_Ca_22196      | SYNONYMOUS_CODING             | Ubiquitin                       |
| Kabuli_wild_42811  | 1399944530                          | Ca_kabuli_scaffold | 42811                   | C/T  | Gene_Ca_22196      | SYNONYMOUS_CODING             | Ubiquitin                       |
| Kabuli_wild_42877  | 1399944531                          | Ca_kabuli_scaffold | 42877                   | T/C  | Gene_Ca_22196      | SYNONYMOUS_CODING             | Ubiquitin                       |
| Kabuli_wild_43372  | 1399944532                          | Ca_kabuli_scaffold | 43372                   | C/T  | Gene_Ca_22196      | SYNONYMOUS_CODING             | Ubiquitin                       |
| Kabuli_wild_44242  | 1399944533                          | Ca_kabuli_scaffold | 44242                   | C/T  | Gene_Ca_22196      | SYNONYMOUS_CODING             | Ubiquitin                       |
| Kabuli_wild_70995  | 1399944534                          | Ca_kabuli_scaffold | 70995                   | T/G  | NA                 | INTERGENIC                    | NA                              |
| Kabuli_wild_71020  | 1399944535                          | Ca_kabuli_scaffold | 71020                   | G/A  | NA                 | INTERGENIC                    | NA                              |
| Kabuli_wild_71048  | 1399944536                          | Ca_kabuli_scaffold | 71048                   | C/G  | NA                 | INTERGENIC                    | NA                              |
| Kabuli_wild_85267  | 1399944537                          | Ca_kabuli_scaffold | 85267                   | G/A  | NA                 | INTERGENIC                    | NA                              |
| Kabuli_wild_85327  | 1399944538                          | Ca_kabuli_scaffold | 85327                   | T/G  | NA                 | INTERGENIC                    | NA                              |
| Kabuli_wild_85344  | 1399944539                          | Ca_kabuli_scaffold | 85344                   | A/C  | NA                 | INTERGENIC                    | NA                              |
| Kabuli_wild_85351  | 1399944540                          | Ca_kabuli_scaffold | 85351                   | G/T  | NA                 | INTERGENIC                    | NA                              |
| Kabuli_wild_85352  | 1399944541                          | Ca_kabuli_scaffold | 85352                   | G/A  | NA                 | INTERGENIC                    | NA                              |
| Kabuli_wild_92756  | 1399944542                          | Ca_kabuli_scaffold | 92756                   | C/T  | NA                 | INTERGENIC                    | NA                              |
| Kabuli_wild_92759  | 1399944543                          | Ca_kabuli_scaffold | 92759                   | A/G  | NA                 | INTERGENIC                    | NA                              |
| Kabuli_wild_92784  | 1399944544                          | Ca_kabuli_scaffold | 92784                   | C/T  | NA                 | INTERGENIC                    | NA                              |
| Kabuli_wild_92813  | 1399944545                          | Ca_kabuli_scaffold | 92813                   | G/T  | NA                 | INTERGENIC                    | NA                              |
| Kabuli_wild_92837  | 1399944546                          | Ca_kabuli_scaffold | 92837                   | A/T  | NA                 | INTERGENIC                    | NA                              |
| Kabuli_wild_149744 | 1399944547                          | Ca_kabuli_scaffold | 149744                  | C/G  | Gene_Ca_22199      | INTRON                        | Protein kinase,catalytic domain |
| Kabuli_wild_235121 | 1399944548                          | Ca_kabuli_scaffold | 235121                  | T/C  | NA                 | INTERGENIC                    | NA                              |
| Kabuli_wild_242487 | 1399944549                          | Ca_kabuli_scaffold | 242487                  | A/G  | NA                 | INTERGENIC                    | NA                              |
| Kabuli_wild_242503 | 1399944550                          | Ca_kabuli_scaffold | 242503                  | C/T  | NA                 | INTERGENIC                    | NA                              |
| Kabuli_wild_242922 | 1399944551                          | Ca_kabuli_scaffold | 242922                  | A/C  | NA                 | INTERGENIC                    | NA                              |
| Kabuli_wild_254661 | 1399944552                          | Ca_kabuli_scaffold | 254661                  | T/G  | Gene_Ca_22205      | INTRON                        | Fattyacid desaturase,type 1     |
| Kabuli_wild_265077 | 1399944553                          | Ca_kabuli_scaffold | 265077                  | T/C  | NA                 | INTERGENIC                    | NA                              |
| Kabuli_wild_265085 | 1399944554                          | Ca_kabuli_scaffold | 265085                  | G/A  | NA                 | INTERGENIC                    | NA                              |
| Kabuli_wild_265101 | 1399944555                          | Ca_kabuli_scaffold | 265101                  | A/C  | NA                 | INTERGENIC                    | NA                              |
| Kabuli_wild_265105 | 1399944556                          | Ca_kabuli_scaffold | 265105                  | T/C  | NA                 | INTERGENIC                    | NA                              |
| Kabuli_wild_326938 | 1399944557                          | Ca_kabuli_scaffold | 326938                  | G/T  | NA                 | INTERGENIC                    | NA                              |
| Kabuli_wild_331058 | 1399944558                          | Ca_kabuli_scaffold | 331058                  | T/C  | NA                 | INTERGENIC                    | NA                              |
| Kabuli_wild_341184 | 1399944559                          | Ca_kabuli_scaffold | 341184                  | A/G  | Gene_Ca_22212      | INTRON                        | Glycosidehydrolase,family1      |
| Kabuli_wild_341202 | 1399944560                          | Ca_kabuli_scaffold | 341202                  | T/G  | Gene_Ca_22212      | INTRON                        | Glycosidehydrolase,family1      |
| Kabuli_wild_341206 | 1399944561                          | Ca_kabuli_scaffold | 341206                  | G/A  | Gene_Ca_22212      | INTRON                        | Glycosidehydrolase,family1      |
| Kabuli_wild_32402  | 1399944562                          | Ca_kabuli_scaffold | 32402                   | C/G  | Gene_Ca_27938      | NON_SYNONYMOUS_CODING         | RNA-binding,CRMdomain           |
| Kabuli_wild_182706 | 1399944563                          | Ca_kabuli_scaffold | 182706                  | T/C  | Gene_Ca_26242      | DOWNSTREAM                    | NA                              |

| SNP IDs            | NCBI dbSNP accession IDs (NCBI_SS#) | Chromosomes        | Physical positions (bp) | SNPs | Gene accession IDs | Sequence components of genome | Putative functions                         |
|--------------------|-------------------------------------|--------------------|-------------------------|------|--------------------|-------------------------------|--------------------------------------------|
| Kabuli_wild_1387   | 1399944564                          | Ca_kabuli_scaffold | 1387                    | G/A  | NA                 | INTERGENIC                    | NA                                         |
| Kabuli_wild_1390   | 1399944565                          | Ca_kabuli_scaffold | 1390                    | G/A  | NA                 | INTERGENIC                    | NA                                         |
| Kabuli_wild_1450   | 1399944566                          | Ca_kabuli_scaffold | 1450                    | G/A  | NA                 | INTERGENIC                    | NA                                         |
| Kabuli_wild_132402 | 1399944567                          | Ca_kabuli_scaffold | 132402                  | T/A  | Gene_Ca_23794      | NON_SYNONYMOUS_CODING         | NA                                         |
| Kabuli_wild_132427 | 1399944568                          | Ca_kabuli_scaffold | 132427                  | A/T  | Gene_Ca_23794      | SYNONYMOUS_CODING             | NA                                         |
| Kabuli_wild_197226 | 1399944569                          | Ca_kabuli_scaffold | 197226                  | G/A  | NA                 | INTERGENIC                    | NA                                         |
| Kabuli_wild_197230 | 1399944570                          | Ca_kabuli_scaffold | 197230                  | C/A  | NA                 | INTERGENIC                    | NA                                         |
| Kabuli_wild_197251 | 1399944571                          | Ca_kabuli_scaffold | 197251                  | G/C  | NA                 | INTERGENIC                    | NA                                         |
| Kabuli_wild_197261 | 1399944572                          | Ca_kabuli_scaffold | 197261                  | C/T  | NA                 | INTERGENIC                    | NA                                         |
| Kabuli_wild_197262 | 1399944573                          | Ca_kabuli_scaffold | 197262                  | T/G  | NA                 | INTERGENIC                    | NA                                         |
| Kabuli_wild_197272 | 1399944574                          | Ca_kabuli_scaffold | 197272                  | G/A  | NA                 | INTERGENIC                    | NA                                         |
| Kabuli_wild_197287 | 1399944575                          | Ca_kabuli_scaffold | 197287                  | G/A  | NA                 | INTERGENIC                    | NA                                         |
| Kabuli_wild_250303 | 1399944576                          | Ca_kabuli_scaffold | 250303                  | G/T  | NA                 | INTERGENIC                    | NA                                         |
| Kabuli_wild_73786  | 1399944577                          | Ca_kabuli_scaffold | 73786                   | T/C  | NA                 | INTERGENIC                    | NA                                         |
| Kabuli_wild_103510 | 1399944578                          | Ca_kabuli_scaffold | 103510                  | G/A  | NA                 | INTERGENIC                    | NA                                         |
| Kabuli_wild_103555 | 1399944579                          | Ca_kabuli_scaffold | 103555                  | G/C  | NA                 | INTERGENIC                    | NA                                         |
| Kabuli_wild_103596 | 1399944580                          | Ca_kabuli_scaffold | 103596                  | A/G  | NA                 | INTERGENIC                    | NA                                         |
| Kabuli_wild_1835   | 1399944581                          | Ca_kabuli_scaffold | 1835                    | C/T  | Gene_Ca_28102      | DOWNSTREAM                    | NA                                         |
| Kabuli_wild_1836   | 1399944582                          | Ca_kabuli_scaffold | 1836                    | A/G  | Gene_Ca_28102      | DOWNSTREAM                    | NA                                         |
| Kabuli_wild_1837   | 1399944583                          | Ca_kabuli_scaffold | 1837                    | A/C  | Gene_Ca_28102      | DOWNSTREAM                    | NA                                         |
| Kabuli_wild_1841   | 1399944584                          | Ca_kabuli_scaffold | 1841                    | A/G  | Gene_Ca_28102      | DOWNSTREAM                    | NA                                         |
| Kabuli_wild_1881   | 1399944585                          | Ca_kabuli_scaffold | 1881                    | A/G  | Gene_Ca_28102      | DOWNSTREAM                    | NA                                         |
| Kabuli_wild_1892   | 1399944586                          | Ca_kabuli_scaffold | 1892                    | G/A  | Gene_Ca_28102      | DOWNSTREAM                    | NA                                         |
| Kabuli_wild_43430  | 1399944587                          | Ca_kabuli_scaffold | 43430                   | C/A  | Gene_Ca_21726      | NON_SYNONYMOUS_CODING         | PeptidaseS8/S53,subtilisin/kexin/sedolisin |
| Kabuli_wild_141029 | 1399944588                          | Ca_kabuli_scaffold | 141029                  | C/T  | NA                 | INTERGENIC                    | NA                                         |
| Kabuli_wild_179369 | 1399944589                          | Ca_kabuli_scaffold | 179369                  | A/G  | Gene_Ca_21734      | INTRON                        | NA                                         |
| Kabuli_wild_303193 | 1399944590                          | Ca_kabuli_scaffold | 303193                  | T/C  | NA                 | INTERGENIC                    | NA                                         |
| Kabuli_wild_303201 | 1399944591                          | Ca_kabuli_scaffold | 303201                  | G/C  | NA                 | INTERGENIC                    | NA                                         |
| Kabuli_wild_303246 | 1399944592                          | Ca_kabuli_scaffold | 303246                  | A/G  | NA                 | INTERGENIC                    | NA                                         |
| Kabuli_wild_303248 | 1399944593                          | Ca_kabuli_scaffold | 303248                  | C/T  | NA                 | INTERGENIC                    | NA                                         |
| Kabuli_wild_303259 | 1399944594                          | Ca_kabuli_scaffold | 303259                  | C/G  | NA                 | INTERGENIC                    | NA                                         |
| Kabuli_wild_330997 | 1399944595                          | Ca_kabuli_scaffold | 330997                  | G/A  | NA                 | INTERGENIC                    | NA                                         |
| Kabuli_wild_478826 | 1399944596                          | Ca_kabuli_scaffold | 478826                  | C/A  | NA                 | INTERGENIC                    | NA                                         |
| Kabuli_wild_478875 | 1399944597                          | Ca_kabuli_scaffold | 478875                  | A/T  | NA                 | INTERGENIC                    | NA                                         |
| Kabuli_wild_20603  | 1399944598                          | Ca_kabuli_scaffold | 20603                   | C/T  | NA                 | INTERGENIC                    | NA                                         |
| Kabuli_wild_143174 | 1399944599                          | Ca_kabuli_scaffold | 143174                  | A/G  | NA                 | INTERGENIC                    | NA                                         |
| Kabuli_wild_143182 | 1399944600                          | Ca_kabuli_scaffold | 143182                  | C/T  | NA                 | INTERGENIC                    | NA                                         |
| Kabuli_wild_166729 | 1399944601                          | Ca_kabuli_scaffold | 166729                  | C/T  | Gene_Ca_25699      | INTRON                        | NA                                         |
| Kabuli_wild_166746 | 1399944602                          | Ca_kabuli_scaffold | 166746                  | A/G  | Gene_Ca_25699      | INTRON                        | NA                                         |
| Kabuli_wild_166747 | 1399944603                          | Ca_kabuli_scaffold | 166747                  | A/G  | Gene_Ca_25699      | INTRON                        | NA                                         |
| Kabuli_wild_166748 | 1399944604                          | Ca_kabuli_scaffold | 166748                  | G/T  | Gene_Ca_25699      | INTRON                        | NA                                         |
| Kabuli_wild_166756 | 1399944605                          | Ca_kabuli_scaffold | 166756                  | G/T  | Gene_Ca_25699      | INTRON                        | NA                                         |
| Kabuli_wild_166769 | 1399944606                          | Ca_kabuli_scaffold | 166769                  | A/G  | Gene_Ca_25699      | INTRON                        | NA                                         |
| Kabuli_wild_564    | 1399944607                          | Ca_kabuli_scaffold | 564                     | T/C  | NA                 | INTERGENIC                    | NA                                         |

| SNP IDs            | NCBI dbSNP accession IDs (NCBI_SS#) | Chromosomes        | Physical positions (bp) | SNPs | Gene accession IDs | Sequence components of genome | Putative functions                                           |
|--------------------|-------------------------------------|--------------------|-------------------------|------|--------------------|-------------------------------|--------------------------------------------------------------|
| Kabuli_wild_135286 | 1399944608                          | Ca_kabuli_scaffold | 135286                  | C/A  | NA                 | INTERGENIC                    | NA                                                           |
| Kabuli_wild_135290 | 1399944609                          | Ca_kabuli_scaffold | 135290                  | G/A  | NA                 | INTERGENIC                    | NA                                                           |
| Kabuli_wild_135647 | 1399944610                          | Ca_kabuli_scaffold | 135647                  | A/G  | NA                 | INTERGENIC                    | NA                                                           |
| Kabuli_wild_146831 | 1399944611                          | Ca_kabuli_scaffold | 146831                  | C/G  | NA                 | INTERGENIC                    | NA                                                           |
| Kabuli_wild_162366 | 1399944612                          | Ca_kabuli_scaffold | 162366                  | C/A  | NA                 | INTERGENIC                    | NA                                                           |
| Kabuli_wild_8270   | 1399944613                          | Ca_kabuli_scaffold | 8270                    | C/T  | NA                 | INTERGENIC                    | NA                                                           |
| Kabuli_wild_8303   | 1399944614                          | Ca_kabuli_scaffold | 8303                    | A/G  | NA                 | INTERGENIC                    | NA                                                           |
| Kabuli_wild_51898  | 1399944615                          | Ca_kabuli_scaffold | 51898                   | C/T  | NA                 | INTERGENIC                    | NA                                                           |
| Kabuli_wild_67375  | 1399944616                          | Ca_kabuli_scaffold | 67375                   | T/C  | Gene_Ca_26870      | INTRON                        | PeptidaseM24,structural domain                               |
| Kabuli_wild_202586 | 1399944617                          | Ca_kabuli_scaffold | 202586                  | T/C  | Gene_Ca_21177      | NON_SYNONYMOUS_CODING         | Cholinetransporter-like                                      |
| Kabuli_wild_202616 | 1399944618                          | Ca_kabuli_scaffold | 202616                  | C/T  | Gene_Ca_21177      | NON_SYNONYMOUS_CODING         | Cholinetransporter-like                                      |
| Kabuli_wild_209786 | 1399944619                          | Ca_kabuli_scaffold | 209786                  | A/C  | NA                 | INTERGENIC                    | NA                                                           |
| Kabuli_wild_243637 | 1399944620                          | Ca_kabuli_scaffold | 243637                  | C/T  | Gene_Ca_21179      | NON_SYNONYMOUS_CODING         | Pectatelyase/Amballergen                                     |
| Kabuli_wild_341790 | 1399944621                          | Ca_kabuli_scaffold | 341790                  | T/A  | Gene_Ca_21181      | SYNONYMOUS_CODING             | NA                                                           |
| Kabuli_wild_341837 | 1399944622                          | Ca_kabuli_scaffold | 341837                  | C/T  | Gene_Ca_21181      | NON_SYNONYMOUS_CODING         | NA                                                           |
| Kabuli_wild_341838 | 1399944623                          | Ca_kabuli_scaffold | 341838                  | A/C  | Gene_Ca_21181      | SYNONYMOUS_CODING             | NA                                                           |
| Kabuli_wild_341880 | 1399944624                          | Ca_kabuli_scaffold | 341880                  | A/C  | Gene_Ca_21181      | SYNONYMOUS_CODING             | NA                                                           |
| Kabuli_wild_457422 | 1399944625                          | Ca_kabuli_scaffold | 457422                  | C/T  | NA                 | INTERGENIC                    | NA                                                           |
| Kabuli_wild_647786 | 1399944626                          | Ca_kabuli_scaffold | 647786                  | T/C  | NA                 | INTERGENIC                    | NA                                                           |
| Kabuli_wild_647809 | 1399944627                          | Ca_kabuli_scaffold | 647809                  | A/T  | NA                 | INTERGENIC                    | NA                                                           |
| Kabuli_wild_647866 | 1399944628                          | Ca_kabuli_scaffold | 647866                  | A/G  | NA                 | INTERGENIC                    | NA                                                           |
| Kabuli_wild_647868 | 1399944629                          | Ca_kabuli_scaffold | 647868                  | C/T  | NA                 | INTERGENIC                    | NA                                                           |
| Kabuli_wild_660749 | 1399944630                          | Ca_kabuli_scaffold | 660749                  | C/G  | NA                 | INTERGENIC                    | NA                                                           |
| Kabuli_wild_7749   | 1399944631                          | Ca_kabuli_scaffold | 7749                    | C/T  | Gene_Ca_25562      | INTRON                        | NA                                                           |
| Kabuli_wild_23996  | 1399944632                          | Ca_kabuli_scaffold | 23996                   | A/T  | Gene_Ca_25563      | NON_SYNONYMOUS_CODING         | Carbamoyl-phosphatesynthase,GATase domain                    |
| Kabuli_wild_123578 | 1399944633                          | Ca_kabuli_scaffold | 123578                  | T/C  | NA                 | INTERGENIC                    | NA                                                           |
| Kabuli_wild_123598 | 1399944634                          | Ca_kabuli_scaffold | 123598                  | T/A  | NA                 | INTERGENIC                    | NA                                                           |
| Kabuli_wild_80897  | 1399944635                          | Ca_kabuli_scaffold | 80897                   | C/A  | NA                 | INTERGENIC                    | NA                                                           |
| Kabuli_wild_77906  | 1399944636                          | Ca_kabuli_scaffold | 77906                   | A/G  | NA                 | INTERGENIC                    | NA                                                           |
| Kabuli_wild_188381 | 1399944637                          | Ca_kabuli_scaffold | 188381                  | G/C  | NA                 | INTERGENIC                    | NA                                                           |
| Kabuli_wild_188406 | 1399944638                          | Ca_kabuli_scaffold | 188406                  | G/C  | NA                 | INTERGENIC                    | NA                                                           |
| Kabuli_wild_188630 | 1399944639                          | Ca_kabuli_scaffold | 188630                  | T/C  | NA                 | INTERGENIC                    | NA                                                           |
| Kabuli_wild_91185  | 1399944640                          | Ca_kabuli_scaffold | 91185                   | T/C  | Gene_Ca_26760      | NON_SYNONYMOUS_CODING         | PWWP                                                         |
| Kabuli_wild_111844 | 1399944641                          | Ca_kabuli_scaffold | 111844                  | A/C  | NA                 | INTERGENIC                    | NA                                                           |
| Kabuli_wild_111894 | 1399944642                          | Ca_kabuli_scaffold | 111894                  | A/T  | NA                 | INTERGENIC                    | NA                                                           |
| Kabuli_wild_111949 | 1399944643                          | Ca_kabuli_scaffold | 111949                  | T/C  | NA                 | INTERGENIC                    | NA                                                           |
| Kabuli_wild_128200 | 1399944644                          | Ca_kabuli_scaffold | 128200                  | A/T  | Gene_Ca_26761      | INTRON                        | Pathogenesis-related transcriptional factor/ERF, DNA-binding |
| Kabuli_wild_133155 | 1399944645                          | Ca_kabuli_scaffold | 133155                  | T/G  | NA                 | INTERGENIC                    | NA                                                           |
| Kabuli_wild_133189 | 1399944646                          | Ca_kabuli_scaffold | 133189                  | G/A  | NA                 | INTERGENIC                    | NA                                                           |
| Kabuli_wild_133190 | 1399944647                          | Ca_kabuli_scaffold | 133190                  | T/C  | NA                 | INTERGENIC                    | NA                                                           |
| Kabuli_wild_133201 | 1399944648                          | Ca_kabuli_scaffold | 133201                  | T/C  | NA                 | INTERGENIC                    | NA                                                           |
| Kabuli_wild_133208 | 1399944649                          | Ca_kabuli_scaffold | 133208                  | C/T  | NA                 | INTERGENIC                    | NA                                                           |
| Kabuli_wild_133234 | 1399944650                          | Ca_kabuli_scaffold | 133234                  | C/A  | NA                 | INTERGENIC                    | NA                                                           |
| Kabuli_wild_133235 | 1399944651                          | Ca_kabuli_scaffold | 133235                  | A/G  | NA                 | INTERGENIC                    | NA                                                           |

| SNP IDs            | NCBI dbSNP accession IDs (NCBI_SS#) | Chromosomes        | Physical positions (bp) | SNPs | Gene accession IDs | Sequence components of genome | Putative functions               |
|--------------------|-------------------------------------|--------------------|-------------------------|------|--------------------|-------------------------------|----------------------------------|
| Kabuli_wild_133397 | 1399944652                          | Ca_kabuli_scaffold | 133397                  | G/T  | NA                 | INTERGENIC                    | NA                               |
| Kabuli_wild_53652  | 1399944653                          | Ca_kabuli_scaffold | 53652                   | G/A  | NA                 | INTERGENIC                    | NA                               |
| Kabuli_wild_53657  | 1399944654                          | Ca_kabuli_scaffold | 53657                   | A/T  | NA                 | INTERGENIC                    | NA                               |
| Kabuli_wild_175426 | 1399944655                          | Ca_kabuli_scaffold | 175426                  | G/A  | Gene_Ca_27202      | NON_SYNONYMOUS_CODING         | Peptidase C48, SUMO/Sentrin/Ubl1 |
| Kabuli_wild_175427 | 1399944656                          | Ca_kabuli_scaffold | 175427                  | C/T  | Gene_Ca_27202      | NON_SYNONYMOUS_CODING         | Peptidase C48, SUMO/Sentrin/Ubl1 |
| Kabuli_wild_175430 | 1399944657                          | Ca_kabuli_scaffold | 175430                  | C/T  | Gene_Ca_27202      | NON_SYNONYMOUS_CODING         | Peptidase C48, SUMO/Sentrin/Ubl1 |
| Kabuli_wild_175433 | 1399944658                          | Ca_kabuli_scaffold | 175433                  | C/T  | Gene_Ca_27202      | NON_SYNONYMOUS_CODING         | Peptidase C48, SUMO/Sentrin/Ubl1 |
| Kabuli_wild_175435 | 1399944659                          | Ca_kabuli_scaffold | 175435                  | G/A  | Gene_Ca_27202      | NON_SYNONYMOUS_CODING         | Peptidase C48, SUMO/Sentrin/Ubl1 |
| Kabuli_wild_175478 | 1399944660                          | Ca_kabuli_scaffold | 175478                  | C/T  | Gene_Ca_27202      | NON_SYNONYMOUS_CODING         | Peptidase C48, SUMO/Sentrin/Ubl1 |
| Kabuli_wild_175493 | 1399944661                          | Ca_kabuli_scaffold | 175493                  | G/A  | Gene_Ca_27202      | SYNONYMOUS_CODING             | Peptidase C48, SUMO/Sentrin/Ubl1 |
| Kabuli_wild_175507 | 1399944662                          | Ca_kabuli_scaffold | 175507                  | G/C  | Gene_Ca_27202      | NON_SYNONYMOUS_CODING         | Peptidase C48, SUMO/Sentrin/Ubl1 |
| Kabuli_wild_175508 | 1399944663                          | Ca_kabuli_scaffold | 175508                  | C/T  | Gene_Ca_27202      | NON_SYNONYMOUS_CODING         | Peptidase C48, SUMO/Sentrin/Ubl1 |
| Kabuli_wild_175510 | 1399944664                          | Ca_kabuli_scaffold | 175510                  | G/A  | Gene_Ca_27202      | NON_SYNONYMOUS_CODING         | Peptidase C48, SUMO/Sentrin/Ubl1 |
| Kabuli_wild_175523 | 1399944665                          | Ca_kabuli_scaffold | 175523                  | C/T  | Gene_Ca_27202      | NON_SYNONYMOUS_CODING         | Peptidase C48, SUMO/Sentrin/Ubl1 |
| Kabuli_wild_45669  | 1399944666                          | Ca_kabuli_scaffold | 45669                   | C/T  | NA                 | INTERGENIC                    | NA                               |
| Kabuli_wild_12383  | 1399944667                          | Ca_kabuli_scaffold | 12383                   | T/G  | Gene_Ca_26545      | DOWNSTREAM                    | NA                               |
| Kabuli_wild_12394  | 1399944668                          | Ca_kabuli_scaffold | 12394                   | C/A  | Gene_Ca_26545      | DOWNSTREAM                    | NA                               |
| Kabuli_wild_12414  | 1399944669                          | Ca_kabuli_scaffold | 12414                   | C/T  | Gene_Ca_26545      | DOWNSTREAM                    | NA                               |
| Kabuli_wild_12417  | 1399944670                          | Ca_kabuli_scaffold | 12417                   | C/T  | Gene_Ca_26545      | DOWNSTREAM                    | NA                               |
| Kabuli_wild_10450  | 1399944671                          | Ca_kabuli_scaffold | 10450                   | T/G  | Gene_Ca_26652      | SYNONYMOUS_CODING             | NA                               |
| Kabuli_wild_10520  | 1399944672                          | Ca_kabuli_scaffold | 10520                   | G/T  | Gene_Ca_26652      | INTRON                        | NA                               |
| Kabuli_wild_7188   | 1399944673                          | Ca_kabuli_scaffold | 7188                    | A/C  | NA                 | INTERGENIC                    | NA                               |
| Kabuli_wild_143283 | 1399944674                          | Ca_kabuli_scaffold | 143283                  | C/T  | NA                 | INTERGENIC                    | NA                               |
| Kabuli_wild_143291 | 1399944675                          | Ca_kabuli_scaffold | 143291                  | G/A  | NA                 | INTERGENIC                    | NA                               |
| Kabuli_wild_143294 | 1399944676                          | Ca_kabuli_scaffold | 143294                  | G/A  | NA                 | INTERGENIC                    | NA                               |
| Kabuli_wild_143300 | 1399944677                          | Ca_kabuli_scaffold | 143300                  | G/A  | NA                 | INTERGENIC                    | NA                               |
| Kabuli_wild_143317 | 1399944678                          | Ca_kabuli_scaffold | 143317                  | T/A  | NA                 | INTERGENIC                    | NA                               |
| Kabuli_wild_143318 | 1399944679                          | Ca_kabuli_scaffold | 143318                  | T/C  | NA                 | INTERGENIC                    | NA                               |
| Kabuli_wild_143324 | 1399944680                          | Ca_kabuli_scaffold | 143324                  | G/A  | NA                 | INTERGENIC                    | NA                               |
| Kabuli_wild_143333 | 1399944681                          | Ca_kabuli_scaffold | 143333                  | A/T  | NA                 | INTERGENIC                    | NA                               |
| Kabuli_wild_143334 | 1399944682                          | Ca_kabuli_scaffold | 143334                  | G/A  | NA                 | INTERGENIC                    | NA                               |
| Kabuli_wild_143336 | 1399944683                          | Ca_kabuli_scaffold | 143336                  | T/C  | NA                 | INTERGENIC                    | NA                               |
| Kabuli_wild_143355 | 1399944684                          | Ca_kabuli_scaffold | 143355                  | C/T  | NA                 | INTERGENIC                    | NA                               |
| Kabuli_wild_143358 | 1399944685                          | Ca_kabuli_scaffold | 143358                  | G/A  | NA                 | INTERGENIC                    | NA                               |
| Kabuli_wild_143359 | 1399944686                          | Ca_kabuli_scaffold | 143359                  | C/T  | NA                 | INTERGENIC                    | NA                               |
| Kabuli_wild_143372 | 1399944687                          | Ca_kabuli_scaffold | 143372                  | G/A  | NA                 | INTERGENIC                    | NA                               |
| Kabuli_wild_143391 | 1399944688                          | Ca_kabuli_scaffold | 143391                  | A/C  | NA                 | INTERGENIC                    | NA                               |
| Kabuli_wild_76993  | 1399944689                          | Ca_kabuli_scaffold | 76993                   | T/C  | NA                 | INTERGENIC                    | NA                               |
| Kabuli_wild_136669 | 1399944690                          | Ca_kabuli_scaffold | 136669                  | C/T  | NA                 | INTERGENIC                    | NA                               |
| Kabuli_wild_136692 | 1399944691                          | Ca_kabuli_scaffold | 136692                  | G/A  | NA                 | INTERGENIC                    | NA                               |
| Kabuli_wild_101108 | 1399944692                          | Ca_kabuli_scaffold | 101108                  | T/C  | NA                 | INTERGENIC                    | NA                               |
| Kabuli_wild_247957 | 1399944693                          | Ca_kabuli_scaffold | 247957                  | T/G  | NA                 | INTERGENIC                    | NA                               |
| Kabuli_wild_247964 | 1399944694                          | Ca_kabuli_scaffold | 247964                  | G/A  | NA                 | INTERGENIC                    | NA                               |
| Kabuli_wild_247987 | 1399944695                          | Ca_kabuli_scaffold | 247987                  | C/A  | NA                 | INTERGENIC                    | NA                               |

| SNP IDs            | NCBI dbSNP accession IDs (NCBI_SS#) | Chromosomes        | Physical positions (bp) | SNPs | Gene accession IDs | Sequence components of genome | Putative functions                           |
|--------------------|-------------------------------------|--------------------|-------------------------|------|--------------------|-------------------------------|----------------------------------------------|
| Kabuli_wild_265923 | 1399944696                          | Ca_kabuli_scaffold | 265923                  | T/C  | NA                 | INTERGENIC                    | NA                                           |
| Kabuli_wild_266984 | 1399944697                          | Ca_kabuli_scaffold | 266984                  | T/G  | Gene_Ca_24532      | SYNONYMOUS_CODING             | Protein kinase,catalytic domain              |
| Kabuli_wild_2592   | 1399944698                          | Ca_kabuli_scaffold | 2592                    | G/A  | NA                 | INTERGENIC                    | NA                                           |
| Kabuli_wild_2668   | 1399944699                          | Ca_kabuli_scaffold | 2668                    | C/T  | NA                 | INTERGENIC                    | NA                                           |
| Kabuli_wild_65242  | 1399944700                          | Ca_kabuli_scaffold | 65242                   | T/G  | Gene_Ca_22392      | DOWNSTREAM                    | Transposase,MuDR,plant                       |
| Kabuli_wild_101520 | 1399944701                          | Ca_kabuli_scaffold | 101520                  | C/G  | NA                 | INTERGENIC                    | NA                                           |
| Kabuli_wild_101524 | 1399944702                          | Ca_kabuli_scaffold | 101524                  | C/T  | NA                 | INTERGENIC                    | NA                                           |
| Kabuli_wild_124019 | 1399944703                          | Ca_kabuli_scaffold | 124019                  | T/G  | NA                 | INTERGENIC                    | NA                                           |
| Kabuli_wild_144592 | 1399944704                          | Ca_kabuli_scaffold | 144592                  | T/C  | NA                 | INTERGENIC                    | NA                                           |
| Kabuli_wild_156836 | 1399944705                          | Ca_kabuli_scaffold | 156836                  | G/A  | NA                 | INTERGENIC                    | NA                                           |
| Kabuli_wild_146774 | 1399944706                          | Ca_kabuli_scaffold | 146774                  | C/T  | NA                 | INTERGENIC                    | NA                                           |
| Kabuli_wild_147198 | 1399944707                          | Ca_kabuli_scaffold | 147198                  | T/C  | Gene_Ca_23281      | SYNONYMOUS_CODING             | Pentatrico peptide repeat                    |
| Kabuli_wild_216656 | 1399944708                          | Ca_kabuli_scaffold | 216656                  | A/G  | NA                 | INTERGENIC                    | NA                                           |
| Kabuli_wild_220106 | 1399944709                          | Ca_kabuli_scaffold | 220106                  | C/T  | Gene_Ca_23287      | NON_SYNONYMOUS_CODING         | Self-like                                    |
| Kabuli_wild_20780  | 1399944710                          | Ca_kabuli_scaffold | 20780                   | T/G  | NA                 | INTERGENIC                    | NA                                           |
| Kabuli_wild_20819  | 1399944711                          | Ca_kabuli_scaffold | 20819                   | T/C  | NA                 | INTERGENIC                    | NA                                           |
| Kabuli_wild_20827  | 1399944712                          | Ca_kabuli_scaffold | 20827                   | G/T  | NA                 | INTERGENIC                    | NA                                           |
| Kabuli_wild_20980  | 1399944713                          | Ca_kabuli_scaffold | 20980                   | T/G  | NA                 | INTERGENIC                    | NA                                           |
| Kabuli_wild_143169 | 1399944714                          | Ca_kabuli_scaffold | 143169                  | C/T  | NA                 | INTERGENIC                    | NA                                           |
| Kabuli_wild_143191 | 1399944715                          | Ca_kabuli_scaffold | 143191                  | G/A  | NA                 | INTERGENIC                    | NA                                           |
| Kabuli_wild_143202 | 1399944716                          | Ca_kabuli_scaffold | 143202                  | G/T  | NA                 | INTERGENIC                    | NA                                           |
| Kabuli_wild_266729 | 1399944717                          | Ca_kabuli_scaffold | 266729                  | A/C  | NA                 | INTERGENIC                    | NA                                           |
| Kabuli_wild_266748 | 1399944718                          | Ca_kabuli_scaffold | 266748                  | A/C  | NA                 | INTERGENIC                    | NA                                           |
| Kabuli_wild_266848 | 1399944719                          | Ca_kabuli_scaffold | 266848                  | A/C  | NA                 | INTERGENIC                    | NA                                           |
| Kabuli_wild_17699  | 1399944720                          | Ca_kabuli_scaffold | 17699                   | A/C  | NA                 | INTERGENIC                    | NA                                           |
| Kabuli_wild_139118 | 1399944721                          | Ca_kabuli_scaffold | 139118                  | A/T  | Gene_Ca_23923      | SYNONYMOUS_CODING             | Zinc finger,C2H2-type                        |
| Kabuli_wild_147549 | 1399944722                          | Ca_kabuli_scaffold | 147549                  | G/A  | Gene_Ca_23924      | NON_SYNONYMOUS_CODING         | Uncharacterised protein familyUPF0503        |
| Kabuli_wild_227045 | 1399944723                          | Ca_kabuli_scaffold | 227045                  | C/T  | Gene_Ca_23926      | INTRON                        | WD40 repeat                                  |
| Kabuli_wild_17462  | 1399944724                          | Ca_kabuli_scaffold | 17462                   | G/A  | Gene_Ca_21478      | NON_SYNONYMOUS_CODING         | Peptidase C48, SUMO/Sentrin/Ubl1             |
| Kabuli_wild_17475  | 1399944725                          | Ca_kabuli_scaffold | 17475                   | C/T  | Gene_Ca_21478      | SYNONYMOUS_CODING             | Peptidase C48, SUMO/Sentrin/Ubl1             |
| Kabuli_wild_231381 | 1399944726                          | Ca_kabuli_scaffold | 231381                  | C/T  | NA                 | INTERGENIC                    | NA                                           |
| Kabuli_wild_231396 | 1399944727                          | Ca_kabuli_scaffold | 231396                  | G/A  | NA                 | INTERGENIC                    | NA                                           |
| Kabuli_wild_231411 | 1399944728                          | Ca_kabuli_scaffold | 231411                  | C/T  | NA                 | INTERGENIC                    | NA                                           |
| Kabuli_wild_231413 | 1399944729                          | Ca_kabuli_scaffold | 231413                  | G/T  | NA                 | INTERGENIC                    | NA                                           |
| Kabuli_wild_231437 | 1399944730                          | Ca_kabuli_scaffold | 231437                  | G/A  | NA                 | INTERGENIC                    | NA                                           |
| Kabuli_wild_347479 | 1399944731                          | Ca_kabuli_scaffold | 347479                  | T/A  | Gene_Ca_21493      | STOP_GAINED                   | Cyclin                                       |
| Kabuli_wild_25929  | 1399944732                          | Ca_kabuli_scaffold | 25929                   | G/A  | NA                 | INTERGENIC                    | NA                                           |
| Kabuli_wild_235362 | 1399944733                          | Ca_kabuli_scaffold | 235362                  | T/A  | Gene_Ca_19930      | INTRON                        | NA                                           |
| Kabuli_wild_252722 | 1399944734                          | Ca_kabuli_scaffold | 252722                  | T/G  | Gene_Ca_19931      | SYNONYMOUS_CODING             | Leucine-rich repeat,cysteine-containingstype |
| Kabuli_wild_310759 | 1399944735                          | Ca_kabuli_scaffold | 310759                  | T/A  | Gene_Ca_19934      | INTRON                        | NA                                           |
| Kabuli_wild_401905 | 1399944736                          | Ca_kabuli_scaffold | 401905                  | A/C  | NA                 | INTERGENIC                    | NA                                           |
| Kabuli_wild_441898 | 1399944737                          | Ca_kabuli_scaffold | 441898                  | G/A  | Gene_Ca_19938      | INTRON                        | Protein kinase,catalytic domain              |
| Kabuli_wild_794439 | 1399944738                          | Ca_kabuli_scaffold | 794439                  | G/T  | Gene_Ca_19955      | NON_SYNONYMOUS_CODING         | PeptidaseS8/S53,subtilisin/kexin/sedolisin   |
| Kabuli_wild_794441 | 1399944739                          | Ca_kabuli_scaffold | 794441                  | C/T  | Gene_Ca_19955      | NON_SYNONYMOUS_CODING         | PeptidaseS8/S53,subtilisin/kexin/sedolisin   |

| SNP IDs            | NCBI dbSNP accession IDs (NCBI_SS#) | Chromosomes        | Physical positions (bp) | SNPs | Gene accession IDs | Sequence components of genome | Putative functions                 |
|--------------------|-------------------------------------|--------------------|-------------------------|------|--------------------|-------------------------------|------------------------------------|
| Kabuli_wild_49136  | 1399944740                          | Ca_kabuli_scaffold | 49136                   | G/A  | Gene_Ca_26217      | SYNONYMOUS_CODING             | Acetyl-CoAcarboxylase,alphasubunit |
| Kabuli_wild_76829  | 1399944741                          | Ca_kabuli_scaffold | 76829                   | C/A  | NA                 | INTERGENIC                    | NA                                 |
| Kabuli_wild_76847  | 1399944742                          | Ca_kabuli_scaffold | 76847                   | G/C  | NA                 | INTERGENIC                    | NA                                 |
| Kabuli_wild_76848  | 1399944743                          | Ca_kabuli_scaffold | 76848                   | G/A  | NA                 | INTERGENIC                    | NA                                 |
| Kabuli_wild_76850  | 1399944744                          | Ca_kabuli_scaffold | 76850                   | T/C  | NA                 | INTERGENIC                    | NA                                 |
| Kabuli_wild_76857  | 1399944745                          | Ca_kabuli_scaffold | 76857                   | T/C  | NA                 | INTERGENIC                    | NA                                 |
| Kabuli_wild_76879  | 1399944746                          | Ca_kabuli_scaffold | 76879                   | T/C  | NA                 | INTERGENIC                    | NA                                 |
| Kabuli_wild_84830  | 1399944747                          | Ca_kabuli_scaffold | 84830                   | T/C  | NA                 | INTERGENIC                    | NA                                 |
| Kabuli_wild_84841  | 1399944748                          | Ca_kabuli_scaffold | 84841                   | T/C  | NA                 | INTERGENIC                    | NA                                 |
| Kabuli_wild_84905  | 1399944749                          | Ca_kabuli_scaffold | 84905                   | T/C  | NA                 | INTERGENIC                    | NA                                 |
| Kabuli_wild_221686 | 1399944750                          | Ca_kabuli_scaffold | 221686                  | C/A  | Gene_Ca_23135      | NON_SYNONYMOUS_CODING         | Peptidase C48, SUMO/Sentrin/Ubl1   |
| Kabuli_wild_221714 | 1399944751                          | Ca_kabuli_scaffold | 221714                  | C/T  | Gene_Ca_23135      | NON_SYNONYMOUS_CODING         | Peptidase C48, SUMO/Sentrin/Ubl1   |
| Kabuli_wild_221728 | 1399944752                          | Ca_kabuli_scaffold | 221728                  | C/T  | Gene_Ca_23135      | NON_SYNONYMOUS_CODING         | Peptidase C48, SUMO/Sentrin/Ubl1   |
| Kabuli_wild_221730 | 1399944753                          | Ca_kabuli_scaffold | 221730                  | C/G  | Gene_Ca_23135      | SYNONYMOUS_CODING             | Peptidase C48, SUMO/Sentrin/Ubl1   |
| Kabuli_wild_221733 | 1399944754                          | Ca_kabuli_scaffold | 221733                  | G/T  | Gene_Ca_23135      | NON_SYNONYMOUS_CODING         | Peptidase C48, SUMO/Sentrin/Ubl1   |
| Kabuli_wild_221735 | 1399944755                          | Ca_kabuli_scaffold | 221735                  | G/A  | Gene_Ca_23135      | NON_SYNONYMOUS_CODING         | Peptidase C48, SUMO/Sentrin/Ubl1   |
| Kabuli_wild_221743 | 1399944756                          | Ca_kabuli_scaffold | 221743                  | G/C  | Gene_Ca_23135      | NON_SYNONYMOUS_CODING         | Peptidase C48, SUMO/Sentrin/Ubl1   |
| Kabuli_wild_221748 | 1399944757                          | Ca_kabuli_scaffold | 221748                  | C/A  | Gene_Ca_23135      | SYNONYMOUS_CODING             | Peptidase C48, SUMO/Sentrin/Ubl1   |
| Kabuli_wild_221758 | 1399944758                          | Ca_kabuli_scaffold | 221758                  | G/A  | Gene_Ca_23135      | NON_SYNONYMOUS_CODING         | Peptidase C48, SUMO/Sentrin/Ubl1   |
| Kabuli_wild_221769 | 1399944759                          | Ca_kabuli_scaffold | 221769                  | T/A  | Gene_Ca_23135      | NON_SYNONYMOUS_CODING         | Peptidase C48, SUMO/Sentrin/Ubl1   |
| Kabuli_wild_221772 | 1399944760                          | Ca_kabuli_scaffold | 221772                  | G/A  | Gene_Ca_23135      | SYNONYMOUS_CODING             | Peptidase C48, SUMO/Sentrin/Ubl1   |
| Kabuli_wild_221778 | 1399944761                          | Ca_kabuli_scaffold | 221778                  | G/A  | Gene_Ca_23135      | SYNONYMOUS_CODING             | Peptidase C48, SUMO/Sentrin/Ubl1   |
| Kabuli_wild_221779 | 1399944762                          | Ca_kabuli_scaffold | 221779                  | G/A  | Gene_Ca_23135      | NON_SYNONYMOUS_CODING         | Peptidase C48, SUMO/Sentrin/Ubl1   |
| Kabuli_wild_221788 | 1399944763                          | Ca_kabuli_scaffold | 221788                  | G/A  | Gene_Ca_23135      | NON_SYNONYMOUS_CODING         | Peptidase C48, SUMO/Sentrin/Ubl1   |
| Kabuli_wild_221792 | 1399944764                          | Ca_kabuli_scaffold | 221792                  | C/A  | Gene_Ca_23135      | NON_SYNONYMOUS_CODING         | Peptidase C48, SUMO/Sentrin/Ubl1   |
| Kabuli_wild_221824 | 1399944765                          | Ca_kabuli_scaffold | 221824                  | C/T  | Gene_Ca_23135      | NON_SYNONYMOUS_CODING         | Peptidase C48, SUMO/Sentrin/Ubl1   |
| Kabuli_wild_221827 | 1399944766                          | Ca_kabuli_scaffold | 221827                  | C/A  | Gene_Ca_23135      | NON_SYNONYMOUS_CODING         | Peptidase C48, SUMO/Sentrin/Ubl1   |
| Kabuli_wild_221828 | 1399944767                          | Ca_kabuli_scaffold | 221828                  | T/A  | Gene_Ca_23135      | NON_SYNONYMOUS_CODING         | Peptidase C48, SUMO/Sentrin/Ubl1   |
| Kabuli_wild_221843 | 1399944768                          | Ca_kabuli_scaffold | 221843                  | C/T  | Gene_Ca_23135      | NON_SYNONYMOUS_CODING         | Peptidase C48, SUMO/Sentrin/Ubl1   |
| Kabuli_wild_255295 | 1399944769                          | Ca_kabuli_scaffold | 255295                  | G/A  | Gene_Ca_23136      | INTRON                        | NA                                 |
| Kabuli_wild_255299 | 1399944770                          | Ca_kabuli_scaffold | 255299                  | C/T  | Gene_Ca_23136      | INTRON                        | NA                                 |
| Kabuli_wild_255319 | 1399944771                          | Ca_kabuli_scaffold | 255319                  | A/T  | Gene_Ca_23136      | INTRON                        | NA                                 |
| Kabuli_wild_255333 | 1399944772                          | Ca_kabuli_scaffold | 255333                  | T/C  | Gene_Ca_23136      | INTRON                        | NA                                 |
| Kabuli_wild_255375 | 1399944773                          | Ca_kabuli_scaffold | 255375                  | G/T  | Gene_Ca_23136      | INTRON                        | NA                                 |
| Kabuli_wild_289080 | 1399944774                          | Ca_kabuli_scaffold | 289080                  | C/A  | NA                 | INTERGENIC                    | NA                                 |
| Kabuli_wild_289081 | 1399944775                          | Ca_kabuli_scaffold | 289081                  | A/G  | NA                 | INTERGENIC                    | NA                                 |
| Kabuli_wild_290071 | 1399944776                          | Ca_kabuli_scaffold | 290071                  | C/T  | Gene_Ca_23141      | INTRON                        | Protein of unknown function DUF642 |
| Kabuli_wild_55364  | 1399944777                          | Ca_kabuli_scaffold | 55364                   | G/A  | NA                 | INTERGENIC                    | NA                                 |
| Kabuli_wild_55369  | 1399944778                          | Ca_kabuli_scaffold | 55369                   | T/C  | NA                 | INTERGENIC                    | NA                                 |
| Kabuli_wild_55401  | 1399944779                          | Ca_kabuli_scaffold | 55401                   | T/A  | NA                 | INTERGENIC                    | NA                                 |
| Kabuli_wild_36238  | 1399944780                          | Ca_kabuli_scaffold | 36238                   | C/T  | Gene_Ca_27000      | INTRON                        | NA                                 |
| Kabuli_wild_45190  | 1399944781                          | Ca_kabuli_scaffold | 45190                   | C/T  | Gene_Ca_27001      | UPSTREAM                      | NA                                 |
| Kabuli_wild_45192  | 1399944782                          | Ca_kabuli_scaffold | 45192                   | C/T  | Gene_Ca_27001      | UPSTREAM                      | NA                                 |
| Kabuli_wild_45193  | 1399944783                          | Ca_kabuli_scaffold | 45193                   | G/A  | Gene_Ca_27001      | UPSTREAM                      | NA                                 |



| SNP IDs            | NCBI dbSNP accession IDs (NCBI_SS#) | Chromosomes        | Physical positions (bp) | SNPs | Gene accession IDs | Sequence components of genome | Putative functions               |
|--------------------|-------------------------------------|--------------------|-------------------------|------|--------------------|-------------------------------|----------------------------------|
| Kabuli_wild_45215  | 1399944784                          | Ca_kabuli_scaffold | 45215                   | C/A  | Gene_Ca_27001      | UPSTREAM                      | NA                               |
| Kabuli_wild_45228  | 1399944785                          | Ca_kabuli_scaffold | 45228                   | C/T  | Gene_Ca_27001      | UPSTREAM                      | NA                               |
| Kabuli_wild_45229  | 1399944786                          | Ca_kabuli_scaffold | 45229                   | A/T  | Gene_Ca_27001      | UPSTREAM                      | NA                               |
| Kabuli_wild_45231  | 1399944787                          | Ca_kabuli_scaffold | 45231                   | C/T  | Gene_Ca_27001      | UPSTREAM                      | NA                               |
| Kabuli_wild_45232  | 1399944788                          | Ca_kabuli_scaffold | 45232                   | A/T  | Gene_Ca_27001      | UPSTREAM                      | NA                               |
| Kabuli_wild_45234  | 1399944789                          | Ca_kabuli_scaffold | 45234                   | C/T  | Gene_Ca_27001      | UPSTREAM                      | NA                               |
| Kabuli_wild_45236  | 1399944790                          | Ca_kabuli_scaffold | 45236                   | G/A  | Gene_Ca_27001      | UPSTREAM                      | NA                               |
| Kabuli_wild_45237  | 1399944791                          | Ca_kabuli_scaffold | 45237                   | C/T  | Gene_Ca_27001      | UPSTREAM                      | NA                               |
| Kabuli_wild_45243  | 1399944792                          | Ca_kabuli_scaffold | 45243                   | C/T  | Gene_Ca_27001      | UPSTREAM                      | NA                               |
| Kabuli_wild_45244  | 1399944793                          | Ca_kabuli_scaffold | 45244                   | C/T  | Gene_Ca_27001      | UPSTREAM                      | NA                               |
| Kabuli_wild_45245  | 1399944794                          | Ca_kabuli_scaffold | 45245                   | G/A  | Gene_Ca_27001      | UPSTREAM                      | NA                               |
| Kabuli_wild_45246  | 1399944795                          | Ca_kabuli_scaffold | 45246                   | A/G  | Gene_Ca_27001      | UPSTREAM                      | NA                               |
| Kabuli_wild_45250  | 1399944796                          | Ca_kabuli_scaffold | 45250                   | T/C  | Gene_Ca_27001      | UPSTREAM                      | NA                               |
| Kabuli_wild_45254  | 1399944797                          | Ca_kabuli_scaffold | 45254                   | C/T  | Gene_Ca_27001      | UPSTREAM                      | NA                               |
| Kabuli_wild_45269  | 1399944798                          | Ca_kabuli_scaffold | 45269                   | G/C  | Gene_Ca_27001      | UPSTREAM                      | NA                               |
| Kabuli_wild_45279  | 1399944799                          | Ca_kabuli_scaffold | 45279                   | G/C  | Gene_Ca_27001      | UPSTREAM                      | NA                               |
| Kabuli_wild_45342  | 1399944800                          | Ca_kabuli_scaffold | 45342                   | T/G  | Gene_Ca_27001      | UPSTREAM                      | NA                               |
| Kabuli_wild_80072  | 1399944801                          | Ca_kabuli_scaffold | 80072                   | T/G  | NA                 | INTERGENIC                    | NA                               |
| Kabuli_wild_99074  | 1399944802                          | Ca_kabuli_scaffold | 99074                   | T/G  | NA                 | INTERGENIC                    | NA                               |
| Kabuli_wild_102725 | 1399944803                          | Ca_kabuli_scaffold | 102725                  | C/T  | NA                 | INTERGENIC                    | NA                               |
| Kabuli_wild_108277 | 1399944804                          | Ca_kabuli_scaffold | 108277                  | T/G  | NA                 | INTERGENIC                    | NA                               |
| Kabuli_wild_110753 | 1399944805                          | Ca_kabuli_scaffold | 110753                  | G/A  | NA                 | INTERGENIC                    | NA                               |
| Kabuli_wild_110757 | 1399944806                          | Ca_kabuli_scaffold | 110757                  | T/C  | NA                 | INTERGENIC                    | NA                               |
| Kabuli_wild_110759 | 1399944807                          | Ca_kabuli_scaffold | 110759                  | C/T  | NA                 | INTERGENIC                    | NA                               |
| Kabuli_wild_110765 | 1399944808                          | Ca_kabuli_scaffold | 110765                  | C/T  | NA                 | INTERGENIC                    | NA                               |
| Kabuli_wild_110772 | 1399944809                          | Ca_kabuli_scaffold | 110772                  | G/T  | NA                 | INTERGENIC                    | NA                               |
| Kabuli_wild_110785 | 1399944810                          | Ca_kabuli_scaffold | 110785                  | C/T  | NA                 | INTERGENIC                    | NA                               |
| Kabuli_wild_117216 | 1399944811                          | Ca_kabuli_scaffold | 117216                  | A/T  | NA                 | INTERGENIC                    | NA                               |
| Kabuli_wild_117287 | 1399944812                          | Ca_kabuli_scaffold | 117287                  | T/G  | NA                 | INTERGENIC                    | NA                               |
| Kabuli_wild_53203  | 1399944813                          | Ca_kabuli_scaffold | 53203                   | G/T  | Gene_Ca_25252      | INTRON                        | SAGA-associatedfactor29          |
| Kabuli_wild_150215 | 1399944814                          | Ca_kabuli_scaffold | 150215                  | G/A  | NA                 | INTERGENIC                    | NA                               |
| Kabuli_wild_150237 | 1399944815                          | Ca_kabuli_scaffold | 150237                  | C/T  | NA                 | INTERGENIC                    | NA                               |
| Kabuli_wild_31802  | 1399944816                          | Ca_kabuli_scaffold | 31802                   | A/G  | Gene_Ca_25554      | INTRON                        | Glycosidehydrolase.family1       |
| Kabuli_wild_68413  | 1399944817                          | Ca_kabuli_scaffold | 68413                   | C/T  | Gene_Ca_25556      | NON_SYNONYMOUS_CODING         | Peptidase C48, SUMO/Sentrin/Ubl1 |
| Kabuli_wild_68450  | 1399944818                          | Ca_kabuli_scaffold | 68450                   | A/C  | Gene_Ca_25556      | SYNONYMOUS_CODING             | Peptidase C48, SUMO/Sentrin/Ubl1 |
| Kabuli_wild_68497  | 1399944819                          | Ca_kabuli_scaffold | 68497                   | C/T  | Gene_Ca_25556      | NON_SYNONYMOUS_CODING         | Peptidase C48, SUMO/Sentrin/Ubl1 |
| Kabuli_wild_88420  | 1399944820                          | Ca_kabuli_scaffold | 88420                   | T/C  | Gene_Ca_25557      | INTRON                        | WD40 repeat                      |
| Kabuli_wild_88429  | 1399944821                          | Ca_kabuli_scaffold | 88429                   | A/T  | Gene_Ca_25557      | INTRON                        | WD40 repeat                      |
| Kabuli_wild_137196 | 1399944822                          | Ca_kabuli_scaffold | 137196                  | G/T  | Gene_Ca_21752      | SYNONYMOUS_CODING             | Patatin/PhospholipaseA2-related  |
| Kabuli_wild_161754 | 1399944823                          | Ca_kabuli_scaffold | 161754                  | T/C  | NA                 | INTERGENIC                    | NA                               |
| Kabuli_wild_161854 | 1399944824                          | Ca_kabuli_scaffold | 161854                  | C/T  | Gene_Ca_21754      | UPSTREAM                      | NA                               |
| Kabuli_wild_300825 | 1399944825                          | Ca_kabuli_scaffold | 300825                  | A/C  | Gene_Ca_21757      | NON_SYNONYMOUS_CODING         | F-boxdomain,cyclin-like          |
| Kabuli_wild_300872 | 1399944826                          | Ca_kabuli_scaffold | 300872                  | T/C  | Gene_Ca_21757      | SYNONYMOUS_CODING             | F-boxdomain,cyclin-like          |
| Kabuli_wild_300940 | 1399944827                          | Ca_kabuli_scaffold | 300940                  | C/T  | Gene_Ca_21757      | SYNONYMOUS_CODING             | F-boxdomain,cyclin-like          |



| SNP IDs            | NCBI dbSNP accession IDs (NCBI_SS#) | Chromosomes        | Physical positions (bp) | SNPs | Gene accession IDs | Sequence components of genome | Putative functions               |
|--------------------|-------------------------------------|--------------------|-------------------------|------|--------------------|-------------------------------|----------------------------------|
| Kabuli_wild_404240 | 1399944828                          | Ca_kabuli_scaffold | 404240                  | T/C  | NA                 | INTERGENIC                    | NA                               |
| Kabuli_wild_404254 | 1399944829                          | Ca_kabuli_scaffold | 404254                  | G/C  | NA                 | INTERGENIC                    | NA                               |
| Kabuli_wild_404275 | 1399944830                          | Ca_kabuli_scaffold | 404275                  | G/T  | NA                 | INTERGENIC                    | NA                               |
| Kabuli_wild_404282 | 1399944831                          | Ca_kabuli_scaffold | 404282                  | C/T  | NA                 | INTERGENIC                    | NA                               |
| Kabuli_wild_404364 | 1399944832                          | Ca_kabuli_scaffold | 404364                  | T/C  | NA                 | INTERGENIC                    | NA                               |
| Kabuli_wild_441731 | 1399944833                          | Ca_kabuli_scaffold | 441731                  | T/C  | NA                 | INTERGENIC                    | NA                               |
| Kabuli_wild_510949 | 1399944834                          | Ca_kabuli_scaffold | 510949                  | A/C  | Gene_Ca_21770      | INTRON                        | Folypolyglutamatesynthetase      |
| Kabuli_wild_294383 | 1399944835                          | Ca_kabuli_scaffold | 294383                  | C/A  | NA                 | INTERGENIC                    | NA                               |
| Kabuli_wild_294399 | 1399944836                          | Ca_kabuli_scaffold | 294399                  | G/A  | NA                 | INTERGENIC                    | NA                               |
| Kabuli_wild_294411 | 1399944837                          | Ca_kabuli_scaffold | 294411                  | T/A  | NA                 | INTERGENIC                    | NA                               |
| Kabuli_wild_294436 | 1399944838                          | Ca_kabuli_scaffold | 294436                  | C/G  | NA                 | INTERGENIC                    | NA                               |
| Kabuli_wild_294438 | 1399944839                          | Ca_kabuli_scaffold | 294438                  | G/A  | NA                 | INTERGENIC                    | NA                               |
| Kabuli_wild_294463 | 1399944840                          | Ca_kabuli_scaffold | 294463                  | G/A  | NA                 | INTERGENIC                    | NA                               |
| Kabuli_wild_294511 | 1399944841                          | Ca_kabuli_scaffold | 294511                  | C/T  | NA                 | INTERGENIC                    | NA                               |
| Kabuli_wild_294679 | 1399944842                          | Ca_kabuli_scaffold | 294679                  | C/A  | NA                 | INTERGENIC                    | NA                               |
| Kabuli_wild_303328 | 1399944843                          | Ca_kabuli_scaffold | 303328                  | C/T  | Gene_Ca_25344      | SYNONYMOUS_CODING             | Peptidase C48, SUMO/Sentrin/Ubl1 |
| Kabuli_wild_349605 | 1399944844                          | Ca_kabuli_scaffold | 349605                  | T/G  | NA                 | INTERGENIC                    | NA                               |
| Kabuli_wild_363426 | 1399944845                          | Ca_kabuli_scaffold | 363426                  | G/C  | NA                 | INTERGENIC                    | NA                               |
| Kabuli_wild_34907  | 1399944846                          | Ca_kabuli_scaffold | 34907                   | C/T  | NA                 | INTERGENIC                    | NA                               |
| Kabuli_wild_55478  | 1399944847                          | Ca_kabuli_scaffold | 55478                   | G/A  | NA                 | INTERGENIC                    | NA                               |
| Kabuli_wild_55489  | 1399944848                          | Ca_kabuli_scaffold | 55489                   | C/T  | NA                 | INTERGENIC                    | NA                               |
| Kabuli_wild_55519  | 1399944849                          | Ca_kabuli_scaffold | 55519                   | G/A  | NA                 | INTERGENIC                    | NA                               |
| Kabuli_wild_55520  | 1399944850                          | Ca_kabuli_scaffold | 55520                   | C/T  | NA                 | INTERGENIC                    | NA                               |
| Kabuli_wild_55523  | 1399944851                          | Ca_kabuli_scaffold | 55523                   | T/C  | NA                 | INTERGENIC                    | NA                               |
| Kabuli_wild_55549  | 1399944852                          | Ca_kabuli_scaffold | 55549                   | G/A  | NA                 | INTERGENIC                    | NA                               |
| Kabuli_wild_71998  | 1399944853                          | Ca_kabuli_scaffold | 71998                   | T/A  | NA                 | INTERGENIC                    | NA                               |
| Kabuli_wild_110896 | 1399944854                          | Ca_kabuli_scaffold | 110896                  | C/A  | NA                 | INTERGENIC                    | NA                               |
| Kabuli_wild_110931 | 1399944855                          | Ca_kabuli_scaffold | 110931                  | A/G  | NA                 | INTERGENIC                    | NA                               |
| Kabuli_wild_14084  | 1399944856                          | Ca_kabuli_scaffold | 14084                   | G/A  | NA                 | INTERGENIC                    | NA                               |
| Kabuli_wild_14122  | 1399944857                          | Ca_kabuli_scaffold | 14122                   | T/C  | NA                 | INTERGENIC                    | NA                               |
| Kabuli_wild_37368  | 1399944858                          | Ca_kabuli_scaffold | 37368                   | G/A  | NA                 | INTERGENIC                    | NA                               |
| Kabuli_wild_37379  | 1399944859                          | Ca_kabuli_scaffold | 37379                   | A/G  | NA                 | INTERGENIC                    | NA                               |
| Kabuli_wild_37390  | 1399944860                          | Ca_kabuli_scaffold | 37390                   | A/G  | NA                 | INTERGENIC                    | NA                               |
| Kabuli_wild_37404  | 1399944861                          | Ca_kabuli_scaffold | 37404                   | A/G  | NA                 | INTERGENIC                    | NA                               |
| Kabuli_wild_37554  | 1399944862                          | Ca_kabuli_scaffold | 37554                   | G/A  | NA                 | INTERGENIC                    | NA                               |
| Kabuli_wild_37592  | 1399944863                          | Ca_kabuli_scaffold | 37592                   | T/C  | NA                 | INTERGENIC                    | NA                               |
| Kabuli_wild_23769  | 1399944864                          | Ca_kabuli_scaffold | 23769                   | A/C  | NA                 | INTERGENIC                    | NA                               |
| Kabuli_wild_23773  | 1399944865                          | Ca_kabuli_scaffold | 23773                   | T/C  | NA                 | INTERGENIC                    | NA                               |
| Kabuli_wild_23774  | 1399944866                          | Ca_kabuli_scaffold | 23774                   | A/G  | NA                 | INTERGENIC                    | NA                               |
| Kabuli_wild_23775  | 1399944867                          | Ca_kabuli_scaffold | 23775                   | A/G  | NA                 | INTERGENIC                    | NA                               |
| Kabuli_wild_23793  | 1399944868                          | Ca_kabuli_scaffold | 23793                   | A/G  | NA                 | INTERGENIC                    | NA                               |
| Kabuli_wild_23795  | 1399944869                          | Ca_kabuli_scaffold | 23795                   | T/A  | NA                 | INTERGENIC                    | NA                               |
| Kabuli_wild_23803  | 1399944870                          | Ca_kabuli_scaffold | 23803                   | A/G  | NA                 | INTERGENIC                    | NA                               |
| Kabuli_wild_23808  | 1399944871                          | Ca_kabuli_scaffold | 23808                   | C/G  | NA                 | INTERGENIC                    | NA                               |

| SNP IDs           | NCBI dbSNP accession IDs (NCBI_SS#) | Chromosomes        | Physical positions (bp) | SNPs | Gene IDs | accession | Sequence components of genome | Putative functions |
|-------------------|-------------------------------------|--------------------|-------------------------|------|----------|-----------|-------------------------------|--------------------|
| Kabuli_wild_23811 | 1399944872                          | Ca_kabuli_scaffold | 23811                   | G/A  | NA       |           | INTERGENIC                    | NA                 |
| Kabuli_wild_23815 | 1399944873                          | Ca_kabuli_scaffold | 23815                   | A/G  | NA       |           | INTERGENIC                    | NA                 |
| Kabuli_wild_23816 | 1399944874                          | Ca_kabuli_scaffold | 23816                   | T/A  | NA       |           | INTERGENIC                    | NA                 |
| Kabuli_wild_23821 | 1399944875                          | Ca_kabuli_scaffold | 23821                   | T/C  | NA       |           | INTERGENIC                    | NA                 |
| Kabuli_wild_23824 | 1399944876                          | Ca_kabuli_scaffold | 23824                   | G/C  | NA       |           | INTERGENIC                    | NA                 |
| Kabuli_wild_23830 | 1399944877                          | Ca_kabuli_scaffold | 23830                   | T/C  | NA       |           | INTERGENIC                    | NA                 |
| Kabuli_wild_23912 | 1399944878                          | Ca_kabuli_scaffold | 23912                   | C/A  | NA       |           | INTERGENIC                    | NA                 |
| Kabuli_wild_23913 | 1399944879                          | Ca_kabuli_scaffold | 23913                   | A/G  | NA       |           | INTERGENIC                    | NA                 |
| Kabuli_wild_23914 | 1399944880                          | Ca_kabuli_scaffold | 23914                   | A/T  | NA       |           | INTERGENIC                    | NA                 |
| Kabuli_wild_23924 | 1399944881                          | Ca_kabuli_scaffold | 23924                   | T/C  | NA       |           | INTERGENIC                    | NA                 |
| Kabuli_wild_23925 | 1399944882                          | Ca_kabuli_scaffold | 23925                   | T/C  | NA       |           | INTERGENIC                    | NA                 |
| Kabuli_wild_23929 | 1399944883                          | Ca_kabuli_scaffold | 23929                   | G/A  | NA       |           | INTERGENIC                    | NA                 |
| Kabuli_wild_84761 | 1399944884                          | Ca_kabuli_scaffold | 84761                   | A/C  | NA       |           | INTERGENIC                    | NA                 |
| Kabuli_wild_84765 | 1399944885                          | Ca_kabuli_scaffold | 84765                   | T/C  | NA       |           | INTERGENIC                    | NA                 |
| Kabuli_wild_84766 | 1399944886                          | Ca_kabuli_scaffold | 84766                   | A/G  | NA       |           | INTERGENIC                    | NA                 |
| Kabuli_wild_84767 | 1399944887                          | Ca_kabuli_scaffold | 84767                   | A/G  | NA       |           | INTERGENIC                    | NA                 |
| Kabuli_wild_84785 | 1399944888                          | Ca_kabuli_scaffold | 84785                   | A/G  | NA       |           | INTERGENIC                    | NA                 |
| Kabuli_wild_84787 | 1399944889                          | Ca_kabuli_scaffold | 84787                   | T/A  | NA       |           | INTERGENIC                    | NA                 |
| Kabuli_wild_84795 | 1399944890                          | Ca_kabuli_scaffold | 84795                   | A/G  | NA       |           | INTERGENIC                    | NA                 |
| Kabuli_wild_84800 | 1399944891                          | Ca_kabuli_scaffold | 84800                   | C/G  | NA       |           | INTERGENIC                    | NA                 |
| Kabuli_wild_84803 | 1399944892                          | Ca_kabuli_scaffold | 84803                   | G/A  | NA       |           | INTERGENIC                    | NA                 |
| Kabuli_wild_84807 | 1399944893                          | Ca_kabuli_scaffold | 84807                   | A/T  | NA       |           | INTERGENIC                    | NA                 |
| Kabuli_wild_84813 | 1399944894                          | Ca_kabuli_scaffold | 84813                   | T/C  | NA       |           | INTERGENIC                    | NA                 |
| Kabuli_wild_84816 | 1399944895                          | Ca_kabuli_scaffold | 84816                   | G/C  | NA       |           | INTERGENIC                    | NA                 |
| Kabuli_wild_84822 | 1399944896                          | Ca_kabuli_scaffold | 84822                   | T/C  | NA       |           | INTERGENIC                    | NA                 |
| Kabuli_wild_84904 | 1399944897                          | Ca_kabuli_scaffold | 84904                   | C/A  | NA       |           | INTERGENIC                    | NA                 |
| Kabuli_wild_84906 | 1399944898                          | Ca_kabuli_scaffold | 84906                   | A/T  | NA       |           | INTERGENIC                    | NA                 |
| Kabuli_wild_84916 | 1399944899                          | Ca_kabuli_scaffold | 84916                   | T/C  | NA       |           | INTERGENIC                    | NA                 |
| Kabuli_wild_84917 | 1399944900                          | Ca_kabuli_scaffold | 84917                   | T/C  | NA       |           | INTERGENIC                    | NA                 |
| Kabuli_wild_84921 | 1399944901                          | Ca_kabuli_scaffold | 84921                   | G/A  | NA       |           | INTERGENIC                    | NA                 |
| Kabuli_wild_84937 | 1399944902                          | Ca_kabuli_scaffold | 84937                   | A/C  | NA       |           | INTERGENIC                    | NA                 |
| Kabuli_wild_84939 | 1399944903                          | Ca_kabuli_scaffold | 84939                   | C/T  | NA       |           | INTERGENIC                    | NA                 |
| Kabuli_wild_62540 | 1399944904                          | Ca_kabuli_scaffold | 62540                   | A/G  | NA       |           | INTERGENIC                    | NA                 |
| Kabuli_wild_15458 | 1399944905                          | Ca_kabuli_scaffold | 15458                   | A/C  | NA       |           | INTERGENIC                    | NA                 |
| Kabuli_wild_15459 | 1399944906                          | Ca_kabuli_scaffold | 15459                   | C/T  | NA       |           | INTERGENIC                    | NA                 |
| Kabuli_wild_15462 | 1399944907                          | Ca_kabuli_scaffold | 15462                   | A/G  | NA       |           | INTERGENIC                    | NA                 |
| Kabuli_wild_15471 | 1399944908                          | Ca_kabuli_scaffold | 15471                   | C/T  | NA       |           | INTERGENIC                    | NA                 |
| Kabuli_wild_15472 | 1399944909                          | Ca_kabuli_scaffold | 15472                   | C/A  | NA       |           | INTERGENIC                    | NA                 |
| Kabuli_wild_15473 | 1399944910                          | Ca_kabuli_scaffold | 15473                   | C/A  | NA       |           | INTERGENIC                    | NA                 |
| Kabuli_wild_15482 | 1399944911                          | Ca_kabuli_scaffold | 15482                   | A/G  | NA       |           | INTERGENIC                    | NA                 |
| Kabuli_wild_15487 | 1399944912                          | Ca_kabuli_scaffold | 15487                   | C/T  | NA       |           | INTERGENIC                    | NA                 |
| Kabuli_wild_15488 | 1399944913                          | Ca_kabuli_scaffold | 15488                   | A/C  | NA       |           | INTERGENIC                    | NA                 |
| Kabuli_wild_15518 | 1399944914                          | Ca_kabuli_scaffold | 15518                   | A/G  | NA       |           | INTERGENIC                    | NA                 |
| Kabuli_wild_15522 | 1399944915                          | Ca_kabuli_scaffold | 15522                   | G/A  | NA       |           | INTERGENIC                    | NA                 |

| SNP IDs            | NCBI dbSNP accession IDs (NCBI_SS#) | Chromosomes        | Physical positions (bp) | SNPs | Gene accession IDs | Sequence components of genome | Putative functions                      |
|--------------------|-------------------------------------|--------------------|-------------------------|------|--------------------|-------------------------------|-----------------------------------------|
| Kabuli_wild_254901 | 1399944916                          | Ca_kabuli_scaffold | 254901                  | C/T  | NA                 | INTERGENIC                    | NA                                      |
| Kabuli_wild_254942 | 1399944917                          | Ca_kabuli_scaffold | 254942                  | A/T  | NA                 | INTERGENIC                    | NA                                      |
| Kabuli_wild_254950 | 1399944918                          | Ca_kabuli_scaffold | 254950                  | G/A  | NA                 | INTERGENIC                    | NA                                      |
| Kabuli_wild_254959 | 1399944919                          | Ca_kabuli_scaffold | 254959                  | T/C  | NA                 | INTERGENIC                    | NA                                      |
| Kabuli_wild_254971 | 1399944920                          | Ca_kabuli_scaffold | 254971                  | G/A  | NA                 | INTERGENIC                    | NA                                      |
| Kabuli_wild_254992 | 1399944921                          | Ca_kabuli_scaffold | 254992                  | T/C  | NA                 | INTERGENIC                    | NA                                      |
| Kabuli_wild_373755 | 1399944922                          | Ca_kabuli_scaffold | 373755                  | G/T  | NA                 | INTERGENIC                    | NA                                      |
| Kabuli_wild_25241  | 1399944923                          | Ca_kabuli_scaffold | 25241                   | T/C  | NA                 | INTERGENIC                    | NA                                      |
| Kabuli_wild_31470  | 1399944924                          | Ca_kabuli_scaffold | 31470                   | T/C  | Gene_Ca_27338      | NON_SYNONYMOUS_CODING         | Oligo peptide transporterOPTsuperfamily |
| Kabuli_wild_107613 | 1399944925                          | Ca_kabuli_scaffold | 107613                  | C/G  | NA                 | INTERGENIC                    | NA                                      |
| Kabuli_wild_107635 | 1399944926                          | Ca_kabuli_scaffold | 107635                  | A/C  | NA                 | INTERGENIC                    | NA                                      |
| Kabuli_wild_107636 | 1399944927                          | Ca_kabuli_scaffold | 107636                  | T/C  | NA                 | INTERGENIC                    | NA                                      |
| Kabuli_wild_107661 | 1399944928                          | Ca_kabuli_scaffold | 107661                  | A/C  | NA                 | INTERGENIC                    | NA                                      |
| Kabuli_wild_107670 | 1399944929                          | Ca_kabuli_scaffold | 107670                  | A/C  | NA                 | INTERGENIC                    | NA                                      |
| Kabuli_wild_28716  | 1399944930                          | Ca_kabuli_scaffold | 28716                   | G/C  | NA                 | INTERGENIC                    | NA                                      |
| Kabuli_wild_29183  | 1399944931                          | Ca_kabuli_scaffold | 29183                   | G/A  | NA                 | INTERGENIC                    | NA                                      |
| Kabuli_wild_29190  | 1399944932                          | Ca_kabuli_scaffold | 29190                   | G/T  | NA                 | INTERGENIC                    | NA                                      |
| Kabuli_wild_29192  | 1399944933                          | Ca_kabuli_scaffold | 29192                   | A/C  | NA                 | INTERGENIC                    | NA                                      |
| Kabuli_wild_46559  | 1399944934                          | Ca_kabuli_scaffold | 46559                   | A/G  | Gene_Ca_19086      | INTRON                        | TetratricopeptideTPR-1                  |
| Kabuli_wild_187837 | 1399944935                          | Ca_kabuli_scaffold | 187837                  | G/A  | NA                 | INTERGENIC                    | NA                                      |
| Kabuli_wild_288904 | 1399944936                          | Ca_kabuli_scaffold | 288904                  | C/T  | NA                 | INTERGENIC                    | NA                                      |
| Kabuli_wild_91908  | 1399944937                          | Ca_kabuli_scaffold | 91908                   | C/T  | NA                 | INTERGENIC                    | NA                                      |
| Kabuli_wild_193441 | 1399944938                          | Ca_kabuli_scaffold | 193441                  | C/T  | NA                 | INTERGENIC                    | NA                                      |
| Kabuli_wild_244994 | 1399944939                          | Ca_kabuli_scaffold | 244994                  | A/T  | Gene_Ca_25158      | INTRON                        | Phospholipid/glycerolacyltransferase    |
| Kabuli_wild_245034 | 1399944940                          | Ca_kabuli_scaffold | 245034                  | C/T  | Gene_Ca_25158      | INTRON                        | Phospholipid/glycerolacyltransferase    |
| Kabuli_wild_245036 | 1399944941                          | Ca_kabuli_scaffold | 245036                  | T/A  | Gene_Ca_25158      | INTRON                        | Phospholipid/glycerolacyltransferase    |
| Kabuli_wild_145231 | 1399944942                          | Ca_kabuli_scaffold | 145231                  | A/G  | NA                 | INTERGENIC                    | NA                                      |
| Kabuli_wild_183054 | 1399944943                          | Ca_kabuli_scaffold | 183054                  | T/C  | NA                 | INTERGENIC                    | NA                                      |
| Kabuli_wild_183063 | 1399944944                          | Ca_kabuli_scaffold | 183063                  | G/A  | NA                 | INTERGENIC                    | NA                                      |
| Kabuli_wild_183069 | 1399944945                          | Ca_kabuli_scaffold | 183069                  | C/A  | NA                 | INTERGENIC                    | NA                                      |
| Kabuli_wild_183074 | 1399944946                          | Ca_kabuli_scaffold | 183074                  | C/G  | NA                 | INTERGENIC                    | NA                                      |
| Kabuli_wild_183078 | 1399944947                          | Ca_kabuli_scaffold | 183078                  | T/G  | NA                 | INTERGENIC                    | NA                                      |
| Kabuli_wild_183091 | 1399944948                          | Ca_kabuli_scaffold | 183091                  | T/C  | NA                 | INTERGENIC                    | NA                                      |
| Kabuli_wild_183112 | 1399944949                          | Ca_kabuli_scaffold | 183112                  | T/C  | NA                 | INTERGENIC                    | NA                                      |
| Kabuli_wild_183135 | 1399944950                          | Ca_kabuli_scaffold | 183135                  | T/C  | NA                 | INTERGENIC                    | NA                                      |
| Kabuli_wild_183143 | 1399944951                          | Ca_kabuli_scaffold | 183143                  | T/A  | NA                 | INTERGENIC                    | NA                                      |
| Kabuli_wild_189129 | 1399944952                          | Ca_kabuli_scaffold | 189129                  | C/T  | Gene_Ca_24313      | SYNONYMOUS_CODING             | Aminotransferase,classI/classII         |
| Kabuli_wild_191730 | 1399944953                          | Ca_kabuli_scaffold | 191730                  | A/C  | Gene_Ca_24313      | INTRON                        | Aminotransferase,classI/classII         |
| Kabuli_wild_197878 | 1399944954                          | Ca_kabuli_scaffold | 197878                  | A/T  | Gene_Ca_24313      | NON_SYNONYMOUS_CODING         | Aminotransferase,classI/classII         |
| Kabuli_wild_26813  | 1399944955                          | Ca_kabuli_scaffold | 26813                   | A/G  | NA                 | INTERGENIC                    | NA                                      |
| Kabuli_wild_26828  | 1399944956                          | Ca_kabuli_scaffold | 26828                   | A/G  | NA                 | INTERGENIC                    | NA                                      |
| Kabuli_wild_26845  | 1399944957                          | Ca_kabuli_scaffold | 26845                   | C/T  | NA                 | INTERGENIC                    | NA                                      |
| Kabuli_wild_26849  | 1399944958                          | Ca_kabuli_scaffold | 26849                   | T/A  | NA                 | INTERGENIC                    | NA                                      |
| Kabuli_wild_180302 | 1399944959                          | Ca_kabuli_scaffold | 180302                  | G/T  | Gene_Ca_23946      | NON_SYNONYMOUS_CODING         | Peptidase C48, SUMO/Sentrin/Ubl1        |

| SNP IDs            | NCBI dbSNP accession IDs (NCBI_SS#) | Chromosomes        | Physical positions (bp) | SNPs | Gene accession IDs | Sequence components of genome | Putative functions               |
|--------------------|-------------------------------------|--------------------|-------------------------|------|--------------------|-------------------------------|----------------------------------|
| Kabuli_wild_180348 | 1399944960                          | Ca_kabuli_scaffold | 180348                  | C/T  | Gene_Ca_23946      | NON_SYNONYMOUS_CODING         | Peptidase C48, SUMO/Sentrin/Ubl1 |
| Kabuli_wild_180362 | 1399944961                          | Ca_kabuli_scaffold | 180362                  | A/C  | Gene_Ca_23946      | NON_SYNONYMOUS_CODING         | Peptidase C48, SUMO/Sentrin/Ubl1 |
| Kabuli_wild_180364 | 1399944962                          | Ca_kabuli_scaffold | 180364                  | G/T  | Gene_Ca_23946      | NON_SYNONYMOUS_CODING         | Peptidase C48, SUMO/Sentrin/Ubl1 |
| Kabuli_wild_311182 | 1399944963                          | Ca_kabuli_scaffold | 311182                  | C/T  | NA                 | INTERGENIC                    | NA                               |
| Kabuli_wild_311222 | 1399944964                          | Ca_kabuli_scaffold | 311222                  | G/T  | NA                 | INTERGENIC                    | NA                               |
| Kabuli_wild_372816 | 1399944965                          | Ca_kabuli_scaffold | 372816                  | G/A  | NA                 | INTERGENIC                    | NA                               |
| Kabuli_wild_372845 | 1399944966                          | Ca_kabuli_scaffold | 372845                  | T/G  | NA                 | INTERGENIC                    | NA                               |
| Kabuli_wild_372851 | 1399944967                          | Ca_kabuli_scaffold | 372851                  | T/C  | NA                 | INTERGENIC                    | NA                               |
| Kabuli_wild_372860 | 1399944968                          | Ca_kabuli_scaffold | 372860                  | G/T  | NA                 | INTERGENIC                    | NA                               |
| Kabuli_wild_372862 | 1399944969                          | Ca_kabuli_scaffold | 372862                  | G/A  | NA                 | INTERGENIC                    | NA                               |
| Kabuli_wild_372869 | 1399944970                          | Ca_kabuli_scaffold | 372869                  | G/T  | NA                 | INTERGENIC                    | NA                               |
| Kabuli_wild_372874 | 1399944971                          | Ca_kabuli_scaffold | 372874                  | G/A  | NA                 | INTERGENIC                    | NA                               |
| Kabuli_wild_372875 | 1399944972                          | Ca_kabuli_scaffold | 372875                  | T/G  | NA                 | INTERGENIC                    | NA                               |
| Kabuli_wild_634514 | 1399944973                          | Ca_kabuli_scaffold | 634514                  | C/T  | NA                 | INTERGENIC                    | NA                               |
| Kabuli_wild_634515 | 1399944974                          | Ca_kabuli_scaffold | 634515                  | T/C  | NA                 | INTERGENIC                    | NA                               |
| Kabuli_wild_634517 | 1399944975                          | Ca_kabuli_scaffold | 634517                  | G/A  | NA                 | INTERGENIC                    | NA                               |
| Kabuli_wild_634605 | 1399944976                          | Ca_kabuli_scaffold | 634605                  | G/A  | NA                 | INTERGENIC                    | NA                               |
| Kabuli_wild_15998  | 1399944977                          | Ca_kabuli_scaffold | 15998                   | C/G  | NA                 | INTERGENIC                    | NA                               |
| Kabuli_wild_16029  | 1399944978                          | Ca_kabuli_scaffold | 16029                   | G/A  | NA                 | INTERGENIC                    | NA                               |
| Kabuli_wild_16042  | 1399944979                          | Ca_kabuli_scaffold | 16042                   | C/A  | NA                 | INTERGENIC                    | NA                               |
| Kabuli_wild_16056  | 1399944980                          | Ca_kabuli_scaffold | 16056                   | C/T  | NA                 | INTERGENIC                    | NA                               |
| Kabuli_wild_16061  | 1399944981                          | Ca_kabuli_scaffold | 16061                   | A/G  | NA                 | INTERGENIC                    | NA                               |
| Kabuli_wild_16068  | 1399944982                          | Ca_kabuli_scaffold | 16068                   | G/A  | NA                 | INTERGENIC                    | NA                               |
| Kabuli_wild_91684  | 1399944983                          | Ca_kabuli_scaffold | 91684                   | G/A  | Gene_Ca_24332      | SYNONYMOUS_CODING             | NA                               |
| Kabuli_wild_91704  | 1399944984                          | Ca_kabuli_scaffold | 91704                   | G/C  | Gene_Ca_24332      | SYNONYMOUS_CODING             | NA                               |
| Kabuli_wild_156613 | 1399944985                          | Ca_kabuli_scaffold | 156613                  | G/C  | NA                 | INTERGENIC                    | NA                               |
| Kabuli_wild_217402 | 1399944986                          | Ca_kabuli_scaffold | 217402                  | C/T  | Gene_Ca_27984      | SYNONYMOUS_CODING             | NA                               |
| Kabuli_wild_91979  | 1399944987                          | Ca_kabuli_scaffold | 91979                   | T/A  | NA                 | INTERGENIC                    | NA                               |
| Kabuli_wild_137032 | 1399944988                          | Ca_kabuli_scaffold | 137032                  | A/C  | NA                 | INTERGENIC                    | NA                               |
| Kabuli_wild_309725 | 1399944989                          | Ca_kabuli_scaffold | 309725                  | C/T  | NA                 | INTERGENIC                    | NA                               |
| Kabuli_wild_309797 | 1399944990                          | Ca_kabuli_scaffold | 309797                  | C/A  | NA                 | INTERGENIC                    | NA                               |
| Kabuli_wild_309818 | 1399944991                          | Ca_kabuli_scaffold | 309818                  | T/C  | NA                 | INTERGENIC                    | NA                               |
| Kabuli_wild_309865 | 1399944992                          | Ca_kabuli_scaffold | 309865                  | G/A  | NA                 | INTERGENIC                    | NA                               |
| Kabuli_wild_360343 | 1399944993                          | Ca_kabuli_scaffold | 360343                  | T/C  | NA                 | INTERGENIC                    | NA                               |
| Kabuli_wild_360349 | 1399944994                          | Ca_kabuli_scaffold | 360349                  | G/A  | NA                 | INTERGENIC                    | NA                               |
| Kabuli_wild_360366 | 1399944995                          | Ca_kabuli_scaffold | 360366                  | C/T  | NA                 | INTERGENIC                    | NA                               |
| Kabuli_wild_360385 | 1399944996                          | Ca_kabuli_scaffold | 360385                  | G/T  | NA                 | INTERGENIC                    | NA                               |
| Kabuli_wild_360388 | 1399944997                          | Ca_kabuli_scaffold | 360388                  | C/T  | NA                 | INTERGENIC                    | NA                               |
| Kabuli_wild_360400 | 1399944998                          | Ca_kabuli_scaffold | 360400                  | C/T  | NA                 | INTERGENIC                    | NA                               |
| Kabuli_wild_360406 | 1399944999                          | Ca_kabuli_scaffold | 360406                  | C/T  | NA                 | INTERGENIC                    | NA                               |
| Kabuli_wild_360408 | 1399945000                          | Ca_kabuli_scaffold | 360408                  | G/T  | NA                 | INTERGENIC                    | NA                               |
| Kabuli_wild_360411 | 1399945001                          | Ca_kabuli_scaffold | 360411                  | G/A  | NA                 | INTERGENIC                    | NA                               |
| Kabuli_wild_360413 | 1399945002                          | Ca_kabuli_scaffold | 360413                  | G/A  | NA                 | INTERGENIC                    | NA                               |
| Kabuli_wild_360416 | 1399945003                          | Ca_kabuli_scaffold | 360416                  | C/T  | NA                 | INTERGENIC                    | NA                               |

| SNP IDs            | NCBI dbSNP accession IDs (NCBI_SS#) | Chromosomes        | Physical positions (bp) | SNPs | Gene accession IDs | Sequence components of genome | Putative functions                                   |
|--------------------|-------------------------------------|--------------------|-------------------------|------|--------------------|-------------------------------|------------------------------------------------------|
| Kabuli_wild_360421 | 1399945004                          | Ca_kabuli_scaffold | 360421                  | G/A  | NA                 | INTERGENIC                    | NA                                                   |
| Kabuli_wild_360461 | 1399945005                          | Ca_kabuli_scaffold | 360461                  | G/A  | NA                 | INTERGENIC                    | NA                                                   |
| Kabuli_wild_608623 | 1399945006                          | Ca_kabuli_scaffold | 608623                  | T/G  | Gene_Ca_20172      | INTRON                        | Basic-leucine zipper (bZIP ) Transcription factor    |
| Kabuli_wild_652382 | 1399945007                          | Ca_kabuli_scaffold | 652382                  | G/A  | NA                 | INTERGENIC                    | NA                                                   |
| Kabuli_wild_826128 | 1399945008                          | Ca_kabuli_scaffold | 826128                  | T/A  | Gene_Ca_20181      | DOWNSTREAM                    | Cys/Metmetabolism,pyridoxalphosphate-dependentenzyme |
| Kabuli_wild_826136 | 1399945009                          | Ca_kabuli_scaffold | 826136                  | T/C  | Gene_Ca_20181      | DOWNSTREAM                    | Cys/Metmetabolism,pyridoxalphosphate-dependentenzyme |
| Kabuli_wild_826162 | 1399945010                          | Ca_kabuli_scaffold | 826162                  | A/C  | Gene_Ca_20181      | DOWNSTREAM                    | Cys/Metmetabolism,pyridoxalphosphate-dependentenzyme |
| Kabuli_wild_827749 | 1399945011                          | Ca_kabuli_scaffold | 827749                  | G/A  | NA                 | INTERGENIC                    | NA                                                   |
| Kabuli_wild_827776 | 1399945012                          | Ca_kabuli_scaffold | 827776                  | G/T  | NA                 | INTERGENIC                    | NA                                                   |
| Kabuli_wild_18543  | 1399945013                          | Ca_kabuli_scaffold | 18543                   | T/C  | NA                 | INTERGENIC                    | NA                                                   |
| Kabuli_wild_157238 | 1399945014                          | Ca_kabuli_scaffold | 157238                  | G/C  | Gene_Ca_23185      | NON_SYNONYMOUS_CODING         | Transcriptional factor B3                            |
| Kabuli_wild_161097 | 1399945015                          | Ca_kabuli_scaffold | 161097                  | A/G  | NA                 | INTERGENIC                    | NA                                                   |
| Kabuli_wild_253689 | 1399945016                          | Ca_kabuli_scaffold | 253689                  | T/C  | NA                 | INTERGENIC                    | NA                                                   |
| Kabuli_wild_253716 | 1399945017                          | Ca_kabuli_scaffold | 253716                  | T/G  | NA                 | INTERGENIC                    | NA                                                   |
| Kabuli_wild_253719 | 1399945018                          | Ca_kabuli_scaffold | 253719                  | G/A  | NA                 | INTERGENIC                    | NA                                                   |
| Kabuli_wild_253723 | 1399945019                          | Ca_kabuli_scaffold | 253723                  | C/T  | NA                 | INTERGENIC                    | NA                                                   |
| Kabuli_wild_253748 | 1399945020                          | Ca_kabuli_scaffold | 253748                  | A/G  | Gene_Ca_23190      | SYNONYMOUS_CODING             | NA                                                   |
| Kabuli_wild_542066 | 1399945021                          | Ca_kabuli_scaffold | 542066                  | T/C  | NA                 | INTERGENIC                    | NA                                                   |
| Kabuli_wild_578200 | 1399945022                          | Ca_kabuli_scaffold | 578200                  | T/G  | Gene_Ca_23199      | SYNONYMOUS_CODING             | AMP-dependentsynthetase/ligase                       |
| Kabuli_wild_78842  | 1399945023                          | Ca_kabuli_scaffold | 78842                   | G/A  | Gene_Ca_26805      | SYNONYMOUS_CODING             | NA                                                   |
| Kabuli_wild_78844  | 1399945024                          | Ca_kabuli_scaffold | 78844                   | A/G  | Gene_Ca_26805      | NON_SYNONYMOUS_CODING         | NA                                                   |
| Kabuli_wild_78864  | 1399945025                          | Ca_kabuli_scaffold | 78864                   | C/T  | Gene_Ca_26805      | STOP_GAINED                   | NA                                                   |
| Kabuli_wild_78871  | 1399945026                          | Ca_kabuli_scaffold | 78871                   | C/G  | Gene_Ca_26805      | NON_SYNONYMOUS_CODING         | NA                                                   |
| Kabuli_wild_78883  | 1399945027                          | Ca_kabuli_scaffold | 78883                   | T/G  | Gene_Ca_26805      | NON_SYNONYMOUS_CODING         | NA                                                   |
| Kabuli_wild_78893  | 1399945028                          | Ca_kabuli_scaffold | 78893                   | C/T  | Gene_Ca_26805      | SYNONYMOUS_CODING             | NA                                                   |
| Kabuli_wild_78894  | 1399945029                          | Ca_kabuli_scaffold | 78894                   | G/A  | Gene_Ca_26805      | NON_SYNONYMOUS_CODING         | NA                                                   |
| Kabuli_wild_163272 | 1399945030                          | Ca_kabuli_scaffold | 163272                  | T/G  | NA                 | INTERGENIC                    | NA                                                   |
| Kabuli_wild_206072 | 1399945031                          | Ca_kabuli_scaffold | 206072                  | T/G  | NA                 | INTERGENIC                    | NA                                                   |
| Kabuli_wild_206087 | 1399945032                          | Ca_kabuli_scaffold | 206087                  | T/G  | NA                 | INTERGENIC                    | NA                                                   |
| Kabuli_wild_206088 | 1399945033                          | Ca_kabuli_scaffold | 206088                  | A/G  | NA                 | INTERGENIC                    | NA                                                   |
| Kabuli_wild_206093 | 1399945034                          | Ca_kabuli_scaffold | 206093                  | G/A  | NA                 | INTERGENIC                    | NA                                                   |
| Kabuli_wild_257403 | 1399945035                          | Ca_kabuli_scaffold | 257403                  | C/T  | Gene_Ca_26826      | SYNONYMOUS_CODING             | NA                                                   |
| Kabuli_wild_257423 | 1399945036                          | Ca_kabuli_scaffold | 257423                  | C/A  | Gene_Ca_26826      | SYNONYMOUS_CODING             | NA                                                   |
| Kabuli_wild_257470 | 1399945037                          | Ca_kabuli_scaffold | 257470                  | C/T  | Gene_Ca_26826      | NON_SYNONYMOUS_CODING         | NA                                                   |
| Kabuli_wild_257542 | 1399945038                          | Ca_kabuli_scaffold | 257542                  | G/A  | Gene_Ca_26826      | NON_SYNONYMOUS_CODING         | NA                                                   |
| Kabuli_wild_247644 | 1399945039                          | Ca_kabuli_scaffold | 247644                  | G/C  | NA                 | INTERGENIC                    | NA                                                   |
| Kabuli_wild_2605   | 1399945040                          | Ca_kabuli_scaffold | 2605                    | C/T  | NA                 | INTERGENIC                    | NA                                                   |
| Kabuli_wild_2611   | 1399945041                          | Ca_kabuli_scaffold | 2611                    | A/C  | NA                 | INTERGENIC                    | NA                                                   |
| Kabuli_wild_2685   | 1399945042                          | Ca_kabuli_scaffold | 2685                    | T/C  | NA                 | INTERGENIC                    | NA                                                   |
| Kabuli_wild_27318  | 1399945043                          | Ca_kabuli_scaffold | 27318                   | C/A  | Gene_Ca_24287      | INTRON                        | Porin,eukaryotictype                                 |
| Kabuli_wild_27319  | 1399945044                          | Ca_kabuli_scaffold | 27319                   | G/T  | Gene_Ca_24287      | INTRON                        | Porin,eukaryotictype                                 |
| Kabuli_wild_153667 | 1399945045                          | Ca_kabuli_scaffold | 153667                  | G/A  | Gene_Ca_24295      | NON_SYNONYMOUS_CODING         | NA                                                   |
| Kabuli_wild_153674 | 1399945046                          | Ca_kabuli_scaffold | 153674                  | T/C  | Gene_Ca_24295      | NON_SYNONYMOUS_CODING         | NA                                                   |
| Kabuli_wild_153680 | 1399945047                          | Ca_kabuli_scaffold | 153680                  | C/A  | Gene_Ca_24295      | NON_SYNONYMOUS_CODING         | NA                                                   |

| SNP IDs            | NCBI dbSNP accession IDs (NCBI_SS#) | Chromosomes        | Physical positions (bp) | SNPs | Gene accession IDs | Sequence components of genome | Putative functions             |
|--------------------|-------------------------------------|--------------------|-------------------------|------|--------------------|-------------------------------|--------------------------------|
| Kabuli_wild_153694 | 1399945048                          | Ca_kabuli_scaffold | 153694                  | C/T  | Gene_Ca_24295      | NON_SYNONYMOUS_CODING         | NA                             |
| Kabuli_wild_153697 | 1399945049                          | Ca_kabuli_scaffold | 153697                  | G/A  | Gene_Ca_24295      | NON_SYNONYMOUS_CODING         | NA                             |
| Kabuli_wild_153699 | 1399945050                          | Ca_kabuli_scaffold | 153699                  | A/G  | Gene_Ca_24295      | SYNONYMOUS_CODING             | NA                             |
| Kabuli_wild_153706 | 1399945051                          | Ca_kabuli_scaffold | 153706                  | G/A  | Gene_Ca_24295      | NON_SYNONYMOUS_CODING         | NA                             |
| Kabuli_wild_90139  | 1399945052                          | Ca_kabuli_scaffold | 90139                   | T/C  | NA                 | INTERGENIC                    | NA                             |
| Kabuli_wild_212326 | 1399945053                          | Ca_kabuli_scaffold | 212326                  | G/A  | NA                 | INTERGENIC                    | NA                             |
| Kabuli_wild_212393 | 1399945054                          | Ca_kabuli_scaffold | 212393                  | G/A  | NA                 | INTERGENIC                    | NA                             |
| Kabuli_wild_212410 | 1399945055                          | Ca_kabuli_scaffold | 212410                  | G/T  | NA                 | INTERGENIC                    | NA                             |
| Kabuli_wild_269230 | 1399945056                          | Ca_kabuli_scaffold | 269230                  | A/C  | NA                 | INTERGENIC                    | NA                             |
| Kabuli_wild_269242 | 1399945057                          | Ca_kabuli_scaffold | 269242                  | A/G  | NA                 | INTERGENIC                    | NA                             |
| Kabuli_wild_269261 | 1399945058                          | Ca_kabuli_scaffold | 269261                  | T/A  | NA                 | INTERGENIC                    | NA                             |
| Kabuli_wild_269266 | 1399945059                          | Ca_kabuli_scaffold | 269266                  | G/T  | NA                 | INTERGENIC                    | NA                             |
| Kabuli_wild_269281 | 1399945060                          | Ca_kabuli_scaffold | 269281                  | T/G  | NA                 | INTERGENIC                    | NA                             |
| Kabuli_wild_269299 | 1399945061                          | Ca_kabuli_scaffold | 269299                  | T/C  | NA                 | INTERGENIC                    | NA                             |
| Kabuli_wild_269308 | 1399945062                          | Ca_kabuli_scaffold | 269308                  | T/C  | NA                 | INTERGENIC                    | NA                             |
| Kabuli_wild_269314 | 1399945063                          | Ca_kabuli_scaffold | 269314                  | G/A  | NA                 | INTERGENIC                    | NA                             |
| Kabuli_wild_269332 | 1399945064                          | Ca_kabuli_scaffold | 269332                  | C/T  | NA                 | INTERGENIC                    | NA                             |
| Kabuli_wild_269335 | 1399945065                          | Ca_kabuli_scaffold | 269335                  | G/A  | NA                 | INTERGENIC                    | NA                             |
| Kabuli_wild_295417 | 1399945066                          | Ca_kabuli_scaffold | 295417                  | C/T  | Gene_Ca_24971      | DOWNSTREAM                    | NA                             |
| Kabuli_wild_11511  | 1399945067                          | Ca_kabuli_scaffold | 11511                   | T/C  | NA                 | INTERGENIC                    | NA                             |
| Kabuli_wild_11850  | 1399945068                          | Ca_kabuli_scaffold | 11850                   | T/C  | NA                 | INTERGENIC                    | NA                             |
| Kabuli_wild_60880  | 1399945069                          | Ca_kabuli_scaffold | 60880                   | G/A  | NA                 | INTERGENIC                    | NA                             |
| Kabuli_wild_60887  | 1399945070                          | Ca_kabuli_scaffold | 60887                   | C/T  | NA                 | INTERGENIC                    | NA                             |
| Kabuli_wild_60898  | 1399945071                          | Ca_kabuli_scaffold | 60898                   | C/T  | NA                 | INTERGENIC                    | NA                             |
| Kabuli_wild_60928  | 1399945072                          | Ca_kabuli_scaffold | 60928                   | G/A  | NA                 | INTERGENIC                    | NA                             |
| Kabuli_wild_130103 | 1399945073                          | Ca_kabuli_scaffold | 130103                  | C/T  | NA                 | INTERGENIC                    | NA                             |
| Kabuli_wild_179070 | 1399945074                          | Ca_kabuli_scaffold | 179070                  | G/C  | NA                 | INTERGENIC                    | NA                             |
| Kabuli_wild_197212 | 1399945075                          | Ca_kabuli_scaffold | 197212                  | A/C  | Gene_Ca_24737      | UPSTREAM                      | NA                             |
| Kabuli_wild_370639 | 1399945076                          | Ca_kabuli_scaffold | 370639                  | T/A  | NA                 | INTERGENIC                    | NA                             |
| Kabuli_wild_370725 | 1399945077                          | Ca_kabuli_scaffold | 370725                  | G/A  | NA                 | INTERGENIC                    | NA                             |
| Kabuli_wild_25019  | 1399945078                          | Ca_kabuli_scaffold | 25019                   | G/A  | Gene_Ca_25043      | DOWNSTREAM                    | NA                             |
| Kabuli_wild_25722  | 1399945079                          | Ca_kabuli_scaffold | 25722                   | G/C  | NA                 | INTERGENIC                    | NA                             |
| Kabuli_wild_13360  | 1399945080                          | Ca_kabuli_scaffold | 13360                   | G/A  | NA                 | INTERGENIC                    | NA                             |
| Kabuli_wild_315093 | 1399945081                          | Ca_kabuli_scaffold | 315093                  | A/G  | Gene_Ca_23815      | UPSTREAM                      | Photosystemantennaprotein-like |
| Kabuli_wild_315114 | 1399945082                          | Ca_kabuli_scaffold | 315114                  | T/C  | Gene_Ca_23815      | UPSTREAM                      | Photosystemantennaprotein-like |
| Kabuli_wild_315135 | 1399945083                          | Ca_kabuli_scaffold | 315135                  | T/G  | Gene_Ca_23815      | UPSTREAM                      | Photosystemantennaprotein-like |
| Kabuli_wild_315138 | 1399945084                          | Ca_kabuli_scaffold | 315138                  | T/C  | Gene_Ca_23815      | UPSTREAM                      | Photosystemantennaprotein-like |
| Kabuli_wild_315141 | 1399945085                          | Ca_kabuli_scaffold | 315141                  | G/A  | Gene_Ca_23815      | UPSTREAM                      | Photosystemantennaprotein-like |
| Kabuli_wild_317199 | 1399945086                          | Ca_kabuli_scaffold | 317199                  | A/T  | Gene_Ca_23814      | DOWNSTREAM                    | RibosomalproteinS11            |
| Kabuli_wild_317202 | 1399945087                          | Ca_kabuli_scaffold | 317202                  | T/A  | Gene_Ca_23814      | DOWNSTREAM                    | RibosomalproteinS11            |
| Kabuli_wild_332378 | 1399945088                          | Ca_kabuli_scaffold | 332378                  | A/C  | NA                 | INTERGENIC                    | NA                             |
| Kabuli_wild_332413 | 1399945089                          | Ca_kabuli_scaffold | 332413                  | T/C  | Gene_Ca_23816      | SYNONYMOUS_CODING             | RibosomalproteinS7             |
| Kabuli_wild_332458 | 1399945090                          | Ca_kabuli_scaffold | 332458                  | A/T  | Gene_Ca_23816      | NON_SYNONYMOUS_CODING         | RibosomalproteinS7             |
| Kabuli_wild_332464 | 1399945091                          | Ca_kabuli_scaffold | 332464                  | G/T  | Gene_Ca_23816      | SYNONYMOUS_CODING             | RibosomalproteinS7             |

| SNP IDs            | NCBI dbSNP accession IDs (NCBI_SS#) | Chromosomes        | Physical positions (bp) | SNPs | Gene accession IDs | Sequence components of genome | Putative functions           |
|--------------------|-------------------------------------|--------------------|-------------------------|------|--------------------|-------------------------------|------------------------------|
| Kabuli_wild_332465 | 1399945092                          | Ca_kabuli_scaffold | 332465                  | T/A  | Gene_Ca_23816      | NON_SYNONYMOUS_CODING         | RibosomalproteinS7           |
| Kabuli_wild_332467 | 1399945093                          | Ca_kabuli_scaffold | 332467                  | G/C  | Gene_Ca_23816      | SYNONYMOUS_CODING             | RibosomalproteinS7           |
| Kabuli_wild_332497 | 1399945094                          | Ca_kabuli_scaffold | 332497                  | G/A  | Gene_Ca_23816      | SYNONYMOUS_CODING             | RibosomalproteinS7           |
| Kabuli_wild_357635 | 1399945095                          | Ca_kabuli_scaffold | 357635                  | A/T  | NA                 | INTERGENIC                    | NA                           |
| Kabuli_wild_357641 | 1399945096                          | Ca_kabuli_scaffold | 357641                  | G/T  | NA                 | INTERGENIC                    | NA                           |
| Kabuli_wild_357642 | 1399945097                          | Ca_kabuli_scaffold | 357642                  | T/A  | NA                 | INTERGENIC                    | NA                           |
| Kabuli_wild_357644 | 1399945098                          | Ca_kabuli_scaffold | 357644                  | G/C  | NA                 | INTERGENIC                    | NA                           |
| Kabuli_wild_357645 | 1399945099                          | Ca_kabuli_scaffold | 357645                  | G/T  | NA                 | INTERGENIC                    | NA                           |
| Kabuli_wild_357674 | 1399945100                          | Ca_kabuli_scaffold | 357674                  | G/A  | NA                 | INTERGENIC                    | NA                           |
| Kabuli_wild_359724 | 1399945101                          | Ca_kabuli_scaffold | 359724                  | T/C  | Gene_Ca_23817      | UPSTREAM                      | RibosomalproteinS12,bacteria |
| Kabuli_wild_362008 | 1399945102                          | Ca_kabuli_scaffold | 362008                  | A/G  | NA                 | INTERGENIC                    | NA                           |
| Kabuli_wild_362059 | 1399945103                          | Ca_kabuli_scaffold | 362059                  | G/T  | NA                 | INTERGENIC                    | NA                           |
| Kabuli_wild_362065 | 1399945104                          | Ca_kabuli_scaffold | 362065                  | C/A  | NA                 | INTERGENIC                    | NA                           |
| Kabuli_wild_362114 | 1399945105                          | Ca_kabuli_scaffold | 362114                  | A/C  | NA                 | INTERGENIC                    | NA                           |
| Kabuli_wild_362118 | 1399945106                          | Ca_kabuli_scaffold | 362118                  | C/A  | NA                 | INTERGENIC                    | NA                           |
| Kabuli_wild_362123 | 1399945107                          | Ca_kabuli_scaffold | 362123                  | G/A  | NA                 | INTERGENIC                    | NA                           |
| Kabuli_wild_362547 | 1399945108                          | Ca_kabuli_scaffold | 362547                  | A/G  | NA                 | INTERGENIC                    | NA                           |
| Kabuli_wild_362549 | 1399945109                          | Ca_kabuli_scaffold | 362549                  | T/G  | NA                 | INTERGENIC                    | NA                           |
| Kabuli_wild_362553 | 1399945110                          | Ca_kabuli_scaffold | 362553                  | T/C  | NA                 | INTERGENIC                    | NA                           |
| Kabuli_wild_362554 | 1399945111                          | Ca_kabuli_scaffold | 362554                  | T/A  | NA                 | INTERGENIC                    | NA                           |
| Kabuli_wild_362555 | 1399945112                          | Ca_kabuli_scaffold | 362555                  | T/G  | NA                 | INTERGENIC                    | NA                           |
| Kabuli_wild_362556 | 1399945113                          | Ca_kabuli_scaffold | 362556                  | C/A  | NA                 | INTERGENIC                    | NA                           |
| Kabuli_wild_362574 | 1399945114                          | Ca_kabuli_scaffold | 362574                  | T/C  | NA                 | INTERGENIC                    | NA                           |
| Kabuli_wild_362581 | 1399945115                          | Ca_kabuli_scaffold | 362581                  | A/G  | NA                 | INTERGENIC                    | NA                           |
| Kabuli_wild_362582 | 1399945116                          | Ca_kabuli_scaffold | 362582                  | T/C  | NA                 | INTERGENIC                    | NA                           |
| Kabuli_wild_362594 | 1399945117                          | Ca_kabuli_scaffold | 362594                  | G/T  | NA                 | INTERGENIC                    | NA                           |
| Kabuli_wild_362607 | 1399945118                          | Ca_kabuli_scaffold | 362607                  | G/A  | NA                 | INTERGENIC                    | NA                           |
| Kabuli_wild_362610 | 1399945119                          | Ca_kabuli_scaffold | 362610                  | C/T  | NA                 | INTERGENIC                    | NA                           |
| Kabuli_wild_362625 | 1399945120                          | Ca_kabuli_scaffold | 362625                  | G/T  | NA                 | INTERGENIC                    | NA                           |
| Kabuli_wild_362626 | 1399945121                          | Ca_kabuli_scaffold | 362626                  | C/G  | NA                 | INTERGENIC                    | NA                           |
| Kabuli_wild_362794 | 1399945122                          | Ca_kabuli_scaffold | 362794                  | C/T  | NA                 | INTERGENIC                    | NA                           |
| Kabuli_wild_362796 | 1399945123                          | Ca_kabuli_scaffold | 362796                  | C/T  | NA                 | INTERGENIC                    | NA                           |
| Kabuli_wild_362814 | 1399945124                          | Ca_kabuli_scaffold | 362814                  | C/T  | NA                 | INTERGENIC                    | NA                           |
| Kabuli_wild_372183 | 1399945125                          | Ca_kabuli_scaffold | 372183                  | C/T  | NA                 | INTERGENIC                    | NA                           |
| Kabuli_wild_372186 | 1399945126                          | Ca_kabuli_scaffold | 372186                  | A/C  | NA                 | INTERGENIC                    | NA                           |
| Kabuli_wild_372188 | 1399945127                          | Ca_kabuli_scaffold | 372188                  | C/G  | NA                 | INTERGENIC                    | NA                           |
| Kabuli_wild_372209 | 1399945128                          | Ca_kabuli_scaffold | 372209                  | G/C  | NA                 | INTERGENIC                    | NA                           |
| Kabuli_wild_372215 | 1399945129                          | Ca_kabuli_scaffold | 372215                  | A/G  | NA                 | INTERGENIC                    | NA                           |
| Kabuli_wild_372243 | 1399945130                          | Ca_kabuli_scaffold | 372243                  | A/T  | NA                 | INTERGENIC                    | NA                           |
| Kabuli_wild_372244 | 1399945131                          | Ca_kabuli_scaffold | 372244                  | C/T  | NA                 | INTERGENIC                    | NA                           |
| Kabuli_wild_372250 | 1399945132                          | Ca_kabuli_scaffold | 372250                  | G/A  | NA                 | INTERGENIC                    | NA                           |
| Kabuli_wild_372253 | 1399945133                          | Ca_kabuli_scaffold | 372253                  | G/T  | NA                 | INTERGENIC                    | NA                           |
| Kabuli_wild_372255 | 1399945134                          | Ca_kabuli_scaffold | 372255                  | G/A  | NA                 | INTERGENIC                    | NA                           |
| Kabuli_wild_372959 | 1399945135                          | Ca_kabuli_scaffold | 372959                  | A/C  | NA                 | INTERGENIC                    | NA                           |



| SNP IDs            | NCBI dbSNP accession IDs (NCBI_SS#) | Chromosomes        | Physical positions (bp) | SNPs | Gene accession IDs | Sequence components of genome | Putative functions                             |
|--------------------|-------------------------------------|--------------------|-------------------------|------|--------------------|-------------------------------|------------------------------------------------|
| Kabuli_wild_372970 | 1399945136                          | Ca_kabuli_scaffold | 372970                  | T/A  | NA                 | INTERGENIC                    | NA                                             |
| Kabuli_wild_373019 | 1399945137                          | Ca_kabuli_scaffold | 373019                  | A/T  | NA                 | INTERGENIC                    | NA                                             |
| Kabuli_wild_373022 | 1399945138                          | Ca_kabuli_scaffold | 373022                  | A/T  | NA                 | INTERGENIC                    | NA                                             |
| Kabuli_wild_6755   | 1399945139                          | Ca_kabuli_scaffold | 6755                    | G/A  | Gene_Ca_25786      | SYNONYMOUS_CODING             | NA                                             |
| Kabuli_wild_6770   | 1399945140                          | Ca_kabuli_scaffold | 6770                    | C/T  | Gene_Ca_25786      | NON_SYNONYMOUS_CODING         | NA                                             |
| Kabuli_wild_187484 | 1399945141                          | Ca_kabuli_scaffold | 187484                  | C/G  | NA                 | INTERGENIC                    | NA                                             |
| Kabuli_wild_12589  | 1399945142                          | Ca_kabuli_scaffold | 12589                   | G/A  | NA                 | INTERGENIC                    | NA                                             |
| Kabuli_wild_339689 | 1399945143                          | Ca_kabuli_scaffold | 339689                  | A/G  | NA                 | INTERGENIC                    | NA                                             |
| Kabuli_wild_339701 | 1399945144                          | Ca_kabuli_scaffold | 339701                  | A/C  | NA                 | INTERGENIC                    | NA                                             |
| Kabuli_wild_359448 | 1399945145                          | Ca_kabuli_scaffold | 359448                  | G/A  | Gene_Ca_25944      | NON_SYNONYMOUS_CODING         | NA                                             |
| Kabuli_wild_359465 | 1399945146                          | Ca_kabuli_scaffold | 359465                  | T/A  | Gene_Ca_25944      | SYNONYMOUS_CODING             | NA                                             |
| Kabuli_wild_2860   | 1399945147                          | Ca_kabuli_scaffold | 2860                    | G/T  | NA                 | INTERGENIC                    | NA                                             |
| Kabuli_wild_152249 | 1399945148                          | Ca_kabuli_scaffold | 152249                  | T/A  | NA                 | INTERGENIC                    | NA                                             |
| Kabuli_wild_152281 | 1399945149                          | Ca_kabuli_scaffold | 152281                  | C/A  | NA                 | INTERGENIC                    | NA                                             |
| Kabuli_wild_382375 | 1399945150                          | Ca_kabuli_scaffold | 382375                  | G/A  | Gene_Ca_25235      | INTRON                        | Dual specificity phosphatase, catalytic domain |
| Kabuli_wild_478695 | 1399945151                          | Ca_kabuli_scaffold | 478695                  | A/G  | Gene_Ca_25238      | INTRON                        | XerodermapigmentosumgroupGprotein              |
| Kabuli_wild_497428 | 1399945152                          | Ca_kabuli_scaffold | 497428                  | T/A  | NA                 | INTERGENIC                    | NA                                             |
| Kabuli_wild_497452 | 1399945153                          | Ca_kabuli_scaffold | 497452                  | T/A  | NA                 | INTERGENIC                    | NA                                             |
| Kabuli_wild_497454 | 1399945154                          | Ca_kabuli_scaffold | 497454                  | A/G  | NA                 | INTERGENIC                    | NA                                             |
| Kabuli_wild_7614   | 1399945155                          | Ca_kabuli_scaffold | 7614                    | G/A  | Gene_Ca_25929      | NON_SYNONYMOUS_CODING         | Zinc finger,Dof-type                           |
| Kabuli_wild_278864 | 1399945156                          | Ca_kabuli_scaffold | 278864                  | C/T  | NA                 | INTERGENIC                    | NA                                             |
| Kabuli_wild_278914 | 1399945157                          | Ca_kabuli_scaffold | 278914                  | C/G  | NA                 | INTERGENIC                    | NA                                             |
| Kabuli_wild_16480  | 1399945158                          | Ca_kabuli_scaffold | 16480                   | G/T  | NA                 | INTERGENIC                    | NA                                             |
| Kabuli_wild_201291 | 1399945159                          | Ca_kabuli_scaffold | 201291                  | T/G  | NA                 | INTERGENIC                    | NA                                             |
| Kabuli_wild_201293 | 1399945160                          | Ca_kabuli_scaffold | 201293                  | C/T  | NA                 | INTERGENIC                    | NA                                             |
| Kabuli_wild_201326 | 1399945161                          | Ca_kabuli_scaffold | 201326                  | C/T  | NA                 | INTERGENIC                    | NA                                             |
| Kabuli_wild_201365 | 1399945162                          | Ca_kabuli_scaffold | 201365                  | G/A  | NA                 | INTERGENIC                    | NA                                             |
| Kabuli_wild_85264  | 1399945163                          | Ca_kabuli_scaffold | 85264                   | A/T  | NA                 | INTERGENIC                    | NA                                             |
| Kabuli_wild_85318  | 1399945164                          | Ca_kabuli_scaffold | 85318                   | T/C  | NA                 | INTERGENIC                    | NA                                             |
| Kabuli_wild_53157  | 1399945165                          | Ca_kabuli_scaffold | 53157                   | T/C  | NA                 | INTERGENIC                    | NA                                             |
| Kabuli_wild_53192  | 1399945166                          | Ca_kabuli_scaffold | 53192                   | C/T  | NA                 | INTERGENIC                    | NA                                             |
| Kabuli_wild_53196  | 1399945167                          | Ca_kabuli_scaffold | 53196                   | C/T  | NA                 | INTERGENIC                    | NA                                             |
| Kabuli_wild_53229  | 1399945168                          | Ca_kabuli_scaffold | 53229                   | A/G  | NA                 | INTERGENIC                    | NA                                             |
| Kabuli_wild_89238  | 1399945169                          | Ca_kabuli_scaffold | 89238                   | T/C  | NA                 | INTERGENIC                    | NA                                             |
| Kabuli_wild_89239  | 1399945170                          | Ca_kabuli_scaffold | 89239                   | C/T  | NA                 | INTERGENIC                    | NA                                             |
| Kabuli_wild_89248  | 1399945171                          | Ca_kabuli_scaffold | 89248                   | C/T  | NA                 | INTERGENIC                    | NA                                             |
| Kabuli_wild_218012 | 1399945172                          | Ca_kabuli_scaffold | 218012                  | A/G  | NA                 | INTERGENIC                    | NA                                             |
| Kabuli_wild_265215 | 1399945173                          | Ca_kabuli_scaffold | 265215                  | A/C  | NA                 | INTERGENIC                    | NA                                             |
| Kabuli_wild_265226 | 1399945174                          | Ca_kabuli_scaffold | 265226                  | T/C  | NA                 | INTERGENIC                    | NA                                             |
| Kabuli_wild_265251 | 1399945175                          | Ca_kabuli_scaffold | 265251                  | C/T  | NA                 | INTERGENIC                    | NA                                             |
| Kabuli_wild_356107 | 1399945176                          | Ca_kabuli_scaffold | 356107                  | C/A  | NA                 | INTERGENIC                    | NA                                             |
| Kabuli_wild_448604 | 1399945177                          | Ca_kabuli_scaffold | 448604                  | G/A  | NA                 | INTERGENIC                    | NA                                             |
| Kabuli_wild_448743 | 1399945178                          | Ca_kabuli_scaffold | 448743                  | T/C  | NA                 | INTERGENIC                    | NA                                             |
| Kabuli_wild_57173  | 1399945179                          | Ca_kabuli_scaffold | 57173                   | C/T  | NA                 | INTERGENIC                    | NA                                             |

| SNP IDs            | NCBI dbSNP accession IDs (NCBI_SS#) | Chromosomes        | Physical positions (bp) | SNPs | Gene accession IDs | Sequence components of genome | Putative functions                  |
|--------------------|-------------------------------------|--------------------|-------------------------|------|--------------------|-------------------------------|-------------------------------------|
| Kabuli_wild_159740 | 1399945180                          | Ca_kabuli_scaffold | 159740                  | T/C  | NA                 | INTERGENIC                    | NA                                  |
| Kabuli_wild_188888 | 1399945181                          | Ca_kabuli_scaffold | 188888                  | G/A  | Gene_Ca_25442      | UPSTREAM                      | NA                                  |
| Kabuli_wild_188894 | 1399945182                          | Ca_kabuli_scaffold | 188894                  | A/G  | Gene_Ca_25442      | UPSTREAM                      | NA                                  |
| Kabuli_wild_188925 | 1399945183                          | Ca_kabuli_scaffold | 188925                  | C/T  | Gene_Ca_25442      | UPSTREAM                      | NA                                  |
| Kabuli_wild_188955 | 1399945184                          | Ca_kabuli_scaffold | 188955                  | G/A  | Gene_Ca_25442      | UPSTREAM                      | NA                                  |
| Kabuli_wild_188973 | 1399945185                          | Ca_kabuli_scaffold | 188973                  | C/T  | Gene_Ca_25442      | UPSTREAM                      | NA                                  |
| Kabuli_wild_188981 | 1399945186                          | Ca_kabuli_scaffold | 188981                  | A/T  | Gene_Ca_25442      | UPSTREAM                      | NA                                  |
| Kabuli_wild_102989 | 1399945187                          | Ca_kabuli_scaffold | 102989                  | A/G  | NA                 | INTERGENIC                    | NA                                  |
| Kabuli_wild_102998 | 1399945188                          | Ca_kabuli_scaffold | 102998                  | A/G  | NA                 | INTERGENIC                    | NA                                  |
| Kabuli_wild_103001 | 1399945189                          | Ca_kabuli_scaffold | 103001                  | A/G  | NA                 | INTERGENIC                    | NA                                  |
| Kabuli_wild_103040 | 1399945190                          | Ca_kabuli_scaffold | 103040                  | A/G  | NA                 | INTERGENIC                    | NA                                  |
| Kabuli_wild_103050 | 1399945191                          | Ca_kabuli_scaffold | 103050                  | C/T  | NA                 | INTERGENIC                    | NA                                  |
| Kabuli_wild_201617 | 1399945192                          | Ca_kabuli_scaffold | 201617                  | T/C  | NA                 | INTERGENIC                    | NA                                  |
| Kabuli_wild_244209 | 1399945193                          | Ca_kabuli_scaffold | 244209                  | T/C  | NA                 | INTERGENIC                    | NA                                  |
| Kabuli_wild_4363   | 1399945194                          | Ca_kabuli_scaffold | 4363                    | A/G  | NA                 | INTERGENIC                    | NA                                  |
| Kabuli_wild_33106  | 1399945195                          | Ca_kabuli_scaffold | 33106                   | A/T  | NA                 | INTERGENIC                    | NA                                  |
| Kabuli_wild_33108  | 1399945196                          | Ca_kabuli_scaffold | 33108                   | T/G  | NA                 | INTERGENIC                    | NA                                  |
| Kabuli_wild_336860 | 1399945197                          | Ca_kabuli_scaffold | 336860                  | C/A  | NA                 | INTERGENIC                    | NA                                  |
| Kabuli_wild_336894 | 1399945198                          | Ca_kabuli_scaffold | 336894                  | T/C  | NA                 | INTERGENIC                    | NA                                  |
| Kabuli_wild_360756 | 1399945199                          | Ca_kabuli_scaffold | 360756                  | T/C  | NA                 | INTERGENIC                    | NA                                  |
| Kabuli_wild_360762 | 1399945200                          | Ca_kabuli_scaffold | 360762                  | C/A  | NA                 | INTERGENIC                    | NA                                  |
| Kabuli_wild_366195 | 1399945201                          | Ca_kabuli_scaffold | 366195                  | T/C  | NA                 | INTERGENIC                    | NA                                  |
| Kabuli_wild_52238  | 1399945202                          | Ca_kabuli_scaffold | 52238                   | A/C  | NA                 | INTERGENIC                    | NA                                  |
| Kabuli_wild_27214  | 1399945203                          | Ca_kabuli_scaffold | 27214                   | G/A  | NA                 | INTERGENIC                    | NA                                  |
| Kabuli_wild_27274  | 1399945204                          | Ca_kabuli_scaffold | 27274                   | A/G  | NA                 | INTERGENIC                    | NA                                  |
| Kabuli_wild_27285  | 1399945205                          | Ca_kabuli_scaffold | 27285                   | T/C  | NA                 | INTERGENIC                    | NA                                  |
| Kabuli_wild_50239  | 1399945206                          | Ca_kabuli_scaffold | 50239                   | G/A  | NA                 | INTERGENIC                    | NA                                  |
| Kabuli_wild_50240  | 1399945207                          | Ca_kabuli_scaffold | 50240                   | C/A  | NA                 | INTERGENIC                    | NA                                  |
| Kabuli_wild_3930   | 1399945208                          | Ca_kabuli_scaffold | 3930                    | A/G  | Gene_Ca_27768      | DOWNSTREAM                    | Domain of unknown function DUF828   |
| Kabuli_wild_3933   | 1399945209                          | Ca_kabuli_scaffold | 3933                    | A/G  | Gene_Ca_27768      | DOWNSTREAM                    | Domain of unknown function DUF828   |
| Kabuli_wild_3955   | 1399945210                          | Ca_kabuli_scaffold | 3955                    | G/A  | Gene_Ca_27768      | DOWNSTREAM                    | Domain of unknown function DUF828   |
| Kabuli_wild_3970   | 1399945211                          | Ca_kabuli_scaffold | 3970                    | C/A  | Gene_Ca_27768      | DOWNSTREAM                    | Domain of unknown function DUF828   |
| Kabuli_wild_292    | 1399945212                          | Ca_kabuli_scaffold | 292                     | A/G  | NA                 | INTERGENIC                    | NA                                  |
| Kabuli_wild_310    | 1399945213                          | Ca_kabuli_scaffold | 310                     | A/C  | NA                 | INTERGENIC                    | NA                                  |
| Kabuli_wild_340    | 1399945214                          | Ca_kabuli_scaffold | 340                     | T/C  | NA                 | INTERGENIC                    | NA                                  |
| Kabuli_wild_67115  | 1399945215                          | Ca_kabuli_scaffold | 67115                   | C/T  | Gene_Ca_26176      | INTRON                        | PeptidaseS10,serinecarboxypeptidase |
| Kabuli_wild_16700  | 1399945216                          | Ca_kabuli_scaffold | 16700                   | A/C  | NA                 | INTERGENIC                    | NA                                  |
| Kabuli_wild_129263 | 1399945217                          | Ca_kabuli_scaffold | 129263                  | A/G  | NA                 | INTERGENIC                    | NA                                  |
| Kabuli_wild_129265 | 1399945218                          | Ca_kabuli_scaffold | 129265                  | G/T  | NA                 | INTERGENIC                    | NA                                  |
| Kabuli_wild_129350 | 1399945219                          | Ca_kabuli_scaffold | 129350                  | C/G  | NA                 | INTERGENIC                    | NA                                  |
| Kabuli_wild_48650  | 1399945220                          | Ca_kabuli_scaffold | 48650                   | C/A  | NA                 | INTERGENIC                    | NA                                  |
| Kabuli_wild_48678  | 1399945221                          | Ca_kabuli_scaffold | 48678                   | T/C  | NA                 | INTERGENIC                    | NA                                  |
| Kabuli_wild_53431  | 1399945222                          | Ca_kabuli_scaffold | 53431                   | G/A  | NA                 | INTERGENIC                    | NA                                  |
| Kabuli_wild_53443  | 1399945223                          | Ca_kabuli_scaffold | 53443                   | T/G  | NA                 | INTERGENIC                    | NA                                  |

| SNP IDs            | NCBI dbSNP accession IDs (NCBI_SS#) | Chromosomes        | Physical positions (bp) | SNPs | Gene accession IDs | Sequence components of genome | Putative functions                                 |
|--------------------|-------------------------------------|--------------------|-------------------------|------|--------------------|-------------------------------|----------------------------------------------------|
| Kabuli_wild_53444  | 1399945224                          | Ca_kabuli_scaffold | 53444                   | G/A  | NA                 | INTERGENIC                    | NA                                                 |
| Kabuli_wild_53450  | 1399945225                          | Ca_kabuli_scaffold | 53450                   | T/C  | NA                 | INTERGENIC                    | NA                                                 |
| Kabuli_wild_53464  | 1399945226                          | Ca_kabuli_scaffold | 53464                   | G/A  | NA                 | INTERGENIC                    | NA                                                 |
| Kabuli_wild_53465  | 1399945227                          | Ca_kabuli_scaffold | 53465                   | T/C  | NA                 | INTERGENIC                    | NA                                                 |
| Kabuli_wild_53470  | 1399945228                          | Ca_kabuli_scaffold | 53470                   | C/G  | NA                 | INTERGENIC                    | NA                                                 |
| Kabuli_wild_53474  | 1399945229                          | Ca_kabuli_scaffold | 53474                   | G/A  | NA                 | INTERGENIC                    | NA                                                 |
| Kabuli_wild_104946 | 1399945230                          | Ca_kabuli_scaffold | 104946                  | T/C  | Gene_Ca_26625      | INTRON                        | DNA mismatch repair protein MutS,C-terminal domain |
| Kabuli_wild_104963 | 1399945231                          | Ca_kabuli_scaffold | 104963                  | T/A  | Gene_Ca_26625      | INTRON                        | DNA mismatch repair protein MutS,C-terminal domain |
| Kabuli_wild_81373  | 1399945232                          | Ca_kabuli_scaffold | 81373                   | C/T  | NA                 | INTERGENIC                    | NA                                                 |
| Kabuli_wild_34686  | 1399945233                          | Ca_kabuli_scaffold | 34686                   | C/T  | NA                 | INTERGENIC                    | NA                                                 |
| Kabuli_wild_41667  | 1399945234                          | Ca_kabuli_scaffold | 41667                   | A/C  | NA                 | INTERGENIC                    | NA                                                 |
| Kabuli_wild_41705  | 1399945235                          | Ca_kabuli_scaffold | 41705                   | A/G  | NA                 | INTERGENIC                    | NA                                                 |
| Kabuli_wild_62134  | 1399945236                          | Ca_kabuli_scaffold | 62134                   | A/C  | Gene_Ca_23368      | INTRON                        | NA                                                 |
| Kabuli_wild_62141  | 1399945237                          | Ca_kabuli_scaffold | 62141                   | C/T  | Gene_Ca_23368      | INTRON                        | NA                                                 |
| Kabuli_wild_62148  | 1399945238                          | Ca_kabuli_scaffold | 62148                   | T/A  | Gene_Ca_23368      | INTRON                        | NA                                                 |
| Kabuli_wild_62166  | 1399945239                          | Ca_kabuli_scaffold | 62166                   | A/T  | Gene_Ca_23368      | INTRON                        | NA                                                 |
| Kabuli_wild_168592 | 1399945240                          | Ca_kabuli_scaffold | 168592                  | G/A  | Gene_Ca_23370      | INTRON                        | Zinc finger,FYVE-type                              |
| Kabuli_wild_246198 | 1399945241                          | Ca_kabuli_scaffold | 246198                  | A/C  | NA                 | INTERGENIC                    | NA                                                 |
| Kabuli_wild_246208 | 1399945242                          | Ca_kabuli_scaffold | 246208                  | A/C  | NA                 | INTERGENIC                    | NA                                                 |
| Kabuli_wild_246288 | 1399945243                          | Ca_kabuli_scaffold | 246288                  | C/T  | NA                 | INTERGENIC                    | NA                                                 |
| Kabuli_wild_246556 | 1399945244                          | Ca_kabuli_scaffold | 246556                  | T/C  | Gene_Ca_23373      | SYNONYMOUS_CODING             | NA                                                 |
| Kabuli_wild_528815 | 1399945245                          | Ca_kabuli_scaffold | 528815                  | C/G  | NA                 | INTERGENIC                    | NA                                                 |
| Kabuli_wild_29089  | 1399945246                          | Ca_kabuli_scaffold | 29089                   | C/T  | NA                 | INTERGENIC                    | NA                                                 |
| Kabuli_wild_29105  | 1399945247                          | Ca_kabuli_scaffold | 29105                   | C/T  | NA                 | INTERGENIC                    | NA                                                 |
| Kabuli_wild_29145  | 1399945248                          | Ca_kabuli_scaffold | 29145                   | C/T  | NA                 | INTERGENIC                    | NA                                                 |
| Kabuli_wild_13689  | 1399945249                          | Ca_kabuli_scaffold | 13689                   | T/A  | NA                 | INTERGENIC                    | NA                                                 |
| Kabuli_wild_13707  | 1399945250                          | Ca_kabuli_scaffold | 13707                   | G/A  | NA                 | INTERGENIC                    | NA                                                 |
| Kabuli_wild_8131   | 1399945251                          | Ca_kabuli_scaffold | 8131                    | C/T  | NA                 | INTERGENIC                    | NA                                                 |
| Kabuli_wild_13898  | 1399945252                          | Ca_kabuli_scaffold | 13898                   | T/C  | NA                 | INTERGENIC                    | NA                                                 |
| Kabuli_wild_13928  | 1399945253                          | Ca_kabuli_scaffold | 13928                   | G/T  | NA                 | INTERGENIC                    | NA                                                 |
| Kabuli_wild_13946  | 1399945254                          | Ca_kabuli_scaffold | 13946                   | T/C  | NA                 | INTERGENIC                    | NA                                                 |
| Kabuli_wild_28172  | 1399945255                          | Ca_kabuli_scaffold | 28172                   | G/T  | NA                 | INTERGENIC                    | NA                                                 |
| Kabuli_wild_44876  | 1399945256                          | Ca_kabuli_scaffold | 44876                   | G/A  | Gene_Ca_22411      | SYNONYMOUS_CODING             | Cation efflux protein                              |
| Kabuli_wild_45557  | 1399945257                          | Ca_kabuli_scaffold | 45557                   | A/G  | Gene_Ca_22411      | SYNONYMOUS_CODING             | Cation efflux protein                              |
| Kabuli_wild_71041  | 1399945258                          | Ca_kabuli_scaffold | 71041                   | A/G  | NA                 | INTERGENIC                    | NA                                                 |
| Kabuli_wild_78956  | 1399945259                          | Ca_kabuli_scaffold | 78956                   | A/G  | NA                 | INTERGENIC                    | NA                                                 |
| Kabuli_wild_129326 | 1399945260                          | Ca_kabuli_scaffold | 129326                  | C/G  | Gene_Ca_22416      | SYNONYMOUS_CODING             | Dehydrogenase,E1 component                         |
| Kabuli_wild_129370 | 1399945261                          | Ca_kabuli_scaffold | 129370                  | A/G  | Gene_Ca_22416      | SYNONYMOUS_CODING             | Dehydrogenase,E1 component                         |
| Kabuli_wild_130569 | 1399945262                          | Ca_kabuli_scaffold | 130569                  | G/C  | Gene_Ca_22416      | SYNONYMOUS_CODING             | Dehydrogenase,E1 component                         |
| Kabuli_wild_131911 | 1399945263                          | Ca_kabuli_scaffold | 131911                  | A/G  | Gene_Ca_22416      | INTRON                        | Dehydrogenase,E1 component                         |
| Kabuli_wild_136796 | 1399945264                          | Ca_kabuli_scaffold | 136796                  | A/G  | Gene_Ca_22417      | INTRON                        | Zinc finger, RING-type                             |
| Kabuli_wild_138379 | 1399945265                          | Ca_kabuli_scaffold | 138379                  | T/G  | Gene_Ca_22417      | NON_SYNONYMOUS_CODING         | Zinc finger, RING-type                             |
| Kabuli_wild_139268 | 1399945266                          | Ca_kabuli_scaffold | 139268                  | G/A  | Gene_Ca_22417      | SYNONYMOUS_CODING             | Zinc finger, RING-type                             |
| Kabuli_wild_154556 | 1399945267                          | Ca_kabuli_scaffold | 154556                  | T/C  | Gene_Ca_22418      | INTRON                        | Glycosyltransferase.group1                         |

| SNP IDs                   | NCBI dbSNP accession IDs (NCBI_SS#) | Chromosomes               | Physical positions (bp) | SNPs | Gene accession IDs | Sequence components of genome | Putative functions                         |
|---------------------------|-------------------------------------|---------------------------|-------------------------|------|--------------------|-------------------------------|--------------------------------------------|
| <i>Kabuli_wild_205934</i> | 1399945268                          | <i>Ca_kabuli_scaffold</i> | 205934                  | T/C  | Gene_Ca_22422      | SYNONYMOUS_CODING             | PeptidaseS8/S53,subtilisin/kexin/sedolisin |
| <i>Kabuli_wild_341613</i> | 1399945269                          | <i>Ca_kabuli_scaffold</i> | 341613                  | A/G  | NA                 | INTERGENIC                    | NA                                         |
| <i>Kabuli_wild_108833</i> | 1399945270                          | <i>Ca_kabuli_scaffold</i> | 108833                  | C/T  | Gene_Ca_25689      | SYNONYMOUS_CODING             | Tetra tricopeptide repeat-containing       |
| <i>Kabuli_wild_108908</i> | 1399945271                          | <i>Ca_kabuli_scaffold</i> | 108908                  | T/G  | Gene_Ca_25689      | INTRON                        | Tetra tricopeptide repeat-containing       |
| <i>Kabuli_wild_112026</i> | 1399945272                          | <i>Ca_kabuli_scaffold</i> | 112026                  | A/C  | Gene_Ca_25689      | INTRON                        | Tetra tricopeptide repeat-containing       |
| <i>Kabuli_wild_12398</i>  | 1399945273                          | <i>Ca_kabuli_scaffold</i> | 12398                   | C/A  | NA                 | INTERGENIC                    | NA                                         |
| <i>Kabuli_wild_36755</i>  | 1399945274                          | <i>Ca_kabuli_scaffold</i> | 36755                   | T/C  | NA                 | INTERGENIC                    | NA                                         |
| <i>Kabuli_wild_39934</i>  | 1399945275                          | <i>Ca_kabuli_scaffold</i> | 39934                   | T/G  | NA                 | INTERGENIC                    | NA                                         |
| <i>Kabuli_wild_39984</i>  | 1399945276                          | <i>Ca_kabuli_scaffold</i> | 39984                   | T/G  | NA                 | INTERGENIC                    | NA                                         |
| <i>Kabuli_wild_39985</i>  | 1399945277                          | <i>Ca_kabuli_scaffold</i> | 39985                   | C/T  | NA                 | INTERGENIC                    | NA                                         |
| <i>Kabuli_wild_39990</i>  | 1399945278                          | <i>Ca_kabuli_scaffold</i> | 39990                   | G/A  | NA                 | INTERGENIC                    | NA                                         |
| <i>Kabuli_wild_39994</i>  | 1399945279                          | <i>Ca_kabuli_scaffold</i> | 39994                   | C/T  | NA                 | INTERGENIC                    | NA                                         |
| <i>Kabuli_wild_158548</i> | 1399945280                          | <i>Ca_kabuli_scaffold</i> | 158548                  | T/C  | NA                 | INTERGENIC                    | NA                                         |
| <i>Kabuli_wild_158557</i> | 1399945281                          | <i>Ca_kabuli_scaffold</i> | 158557                  | G/A  | NA                 | INTERGENIC                    | NA                                         |
| <i>Kabuli_wild_158569</i> | 1399945282                          | <i>Ca_kabuli_scaffold</i> | 158569                  | C/T  | NA                 | INTERGENIC                    | NA                                         |
| <i>Kabuli_wild_158570</i> | 1399945283                          | <i>Ca_kabuli_scaffold</i> | 158570                  | A/G  | NA                 | INTERGENIC                    | NA                                         |
| <i>Kabuli_wild_158594</i> | 1399945284                          | <i>Ca_kabuli_scaffold</i> | 158594                  | A/G  | NA                 | INTERGENIC                    | NA                                         |
| <i>Kabuli_wild_158611</i> | 1399945285                          | <i>Ca_kabuli_scaffold</i> | 158611                  | C/T  | NA                 | INTERGENIC                    | NA                                         |
| <i>Kabuli_wild_158626</i> | 1399945286                          | <i>Ca_kabuli_scaffold</i> | 158626                  | G/T  | NA                 | INTERGENIC                    | NA                                         |
| <i>Kabuli_wild_158638</i> | 1399945287                          | <i>Ca_kabuli_scaffold</i> | 158638                  | G/A  | NA                 | INTERGENIC                    | NA                                         |
| <i>Kabuli_wild_166613</i> | 1399945288                          | <i>Ca_kabuli_scaffold</i> | 166613                  | T/A  | NA                 | INTERGENIC                    | NA                                         |
| <i>Kabuli_wild_166616</i> | 1399945289                          | <i>Ca_kabuli_scaffold</i> | 166616                  | C/T  | NA                 | INTERGENIC                    | NA                                         |
| <i>Kabuli_wild_166618</i> | 1399945290                          | <i>Ca_kabuli_scaffold</i> | 166618                  | C/T  | NA                 | INTERGENIC                    | NA                                         |
| <i>Kabuli_wild_166631</i> | 1399945291                          | <i>Ca_kabuli_scaffold</i> | 166631                  | G/T  | NA                 | INTERGENIC                    | NA                                         |
| <i>Kabuli_wild_172017</i> | 1399945292                          | <i>Ca_kabuli_scaffold</i> | 172017                  | A/G  | NA                 | INTERGENIC                    | NA                                         |
| <i>Kabuli_wild_172139</i> | 1399945293                          | <i>Ca_kabuli_scaffold</i> | 172139                  | T/G  | NA                 | INTERGENIC                    | NA                                         |
| <i>Kabuli_wild_172184</i> | 1399945294                          | <i>Ca_kabuli_scaffold</i> | 172184                  | T/C  | NA                 | INTERGENIC                    | NA                                         |
| <i>Kabuli_wild_5162</i>   | 1399945295                          | <i>Ca_kabuli_scaffold</i> | 5162                    | G/A  | Gene_Ca_27907      | NON_SYNONYMOUS_CODING         | Peptidase C48, SUMO/Sentrin/Ubl1           |
| <i>Kabuli_wild_5229</i>   | 1399945296                          | <i>Ca_kabuli_scaffold</i> | 5229                    | G/A  | Gene_Ca_27907      | NON_SYNONYMOUS_CODING         | Peptidase C48, SUMO/Sentrin/Ubl1           |
| <i>Kabuli_wild_5253</i>   | 1399945297                          | <i>Ca_kabuli_scaffold</i> | 5253                    | C/T  | Gene_Ca_27907      | NON_SYNONYMOUS_CODING         | Peptidase C48, SUMO/Sentrin/Ubl1           |
| <i>Kabuli_wild_6347</i>   | 1399945298                          | <i>Ca_kabuli_scaffold</i> | 6347                    | G/A  | NA                 | INTERGENIC                    | NA                                         |
| <i>Kabuli_wild_6426</i>   | 1399945299                          | <i>Ca_kabuli_scaffold</i> | 6426                    | G/A  | NA                 | INTERGENIC                    | NA                                         |
| <i>Kabuli_wild_83811</i>  | 1399945300                          | <i>Ca_kabuli_scaffold</i> | 83811                   | G/C  | NA                 | INTERGENIC                    | NA                                         |
| <i>Kabuli_wild_83850</i>  | 1399945301                          | <i>Ca_kabuli_scaffold</i> | 83850                   | G/A  | NA                 | INTERGENIC                    | NA                                         |
| <i>Kabuli_wild_27261</i>  | 1399945302                          | <i>Ca_kabuli_scaffold</i> | 27261                   | G/A  | NA                 | INTERGENIC                    | NA                                         |
| <i>Kabuli_wild_27279</i>  | 1399945303                          | <i>Ca_kabuli_scaffold</i> | 27279                   | C/T  | NA                 | INTERGENIC                    | NA                                         |
| <i>Kabuli_wild_27284</i>  | 1399945304                          | <i>Ca_kabuli_scaffold</i> | 27284                   | C/T  | NA                 | INTERGENIC                    | NA                                         |
| <i>Kabuli_wild_27308</i>  | 1399945305                          | <i>Ca_kabuli_scaffold</i> | 27308                   | T/G  | NA                 | INTERGENIC                    | NA                                         |
| <i>Kabuli_wild_27332</i>  | 1399945306                          | <i>Ca_kabuli_scaffold</i> | 27332                   | G/A  | NA                 | INTERGENIC                    | NA                                         |
| <i>Kabuli_wild_47025</i>  | 1399945307                          | <i>Ca_kabuli_scaffold</i> | 47025                   | G/A  | NA                 | INTERGENIC                    | NA                                         |
| <i>Kabuli_wild_47038</i>  | 1399945308                          | <i>Ca_kabuli_scaffold</i> | 47038                   | G/A  | NA                 | INTERGENIC                    | NA                                         |
| <i>Kabuli_wild_47048</i>  | 1399945309                          | <i>Ca_kabuli_scaffold</i> | 47048                   | T/G  | NA                 | INTERGENIC                    | NA                                         |
| <i>Kabuli_wild_47082</i>  | 1399945310                          | <i>Ca_kabuli_scaffold</i> | 47082                   | C/A  | NA                 | INTERGENIC                    | NA                                         |
| <i>Kabuli_wild_17568</i>  | 1399945311                          | <i>Ca_kabuli_scaffold</i> | 17568                   | G/A  | Gene_Ca_27998      | NON_SYNONYMOUS_CODING         | NA                                         |

| SNP IDs            | NCBI dbSNP accession IDs (NCBI_SS#) | Chromosomes        | Physical positions (bp) | SNPs | Gene accession IDs | Sequence components of genome | Putative functions                       |
|--------------------|-------------------------------------|--------------------|-------------------------|------|--------------------|-------------------------------|------------------------------------------|
| Kabuli_wild_265386 | 1399945312                          | Ca_kabuli_scaffold | 265386                  | C/T  | NA                 | INTERGENIC                    | NA                                       |
| Kabuli_wild_265391 | 1399945313                          | Ca_kabuli_scaffold | 265391                  | G/A  | NA                 | INTERGENIC                    | NA                                       |
| Kabuli_wild_265394 | 1399945314                          | Ca_kabuli_scaffold | 265394                  | C/T  | NA                 | INTERGENIC                    | NA                                       |
| Kabuli_wild_265396 | 1399945315                          | Ca_kabuli_scaffold | 265396                  | C/T  | NA                 | INTERGENIC                    | NA                                       |
| Kabuli_wild_265399 | 1399945316                          | Ca_kabuli_scaffold | 265399                  | C/A  | NA                 | INTERGENIC                    | NA                                       |
| Kabuli_wild_265433 | 1399945317                          | Ca_kabuli_scaffold | 265433                  | G/A  | NA                 | INTERGENIC                    | NA                                       |
| Kabuli_wild_265450 | 1399945318                          | Ca_kabuli_scaffold | 265450                  | A/T  | NA                 | INTERGENIC                    | NA                                       |
| Kabuli_wild_265458 | 1399945319                          | Ca_kabuli_scaffold | 265458                  | C/T  | NA                 | INTERGENIC                    | NA                                       |
| Kabuli_wild_265464 | 1399945320                          | Ca_kabuli_scaffold | 265464                  | A/G  | NA                 | INTERGENIC                    | NA                                       |
| Kabuli_wild_49179  | 1399945321                          | Ca_kabuli_scaffold | 49179                   | T/C  | Gene_Ca_26775      | DOWNSTREAM                    | UvrABCcomplex,subunitB                   |
| Kabuli_wild_51701  | 1399945322                          | Ca_kabuli_scaffold | 51701                   | T/C  | NA                 | INTERGENIC                    | NA                                       |
| Kabuli_wild_51702  | 1399945323                          | Ca_kabuli_scaffold | 51702                   | T/A  | NA                 | INTERGENIC                    | NA                                       |
| Kabuli_wild_51703  | 1399945324                          | Ca_kabuli_scaffold | 51703                   | C/G  | NA                 | INTERGENIC                    | NA                                       |
| Kabuli_wild_51704  | 1399945325                          | Ca_kabuli_scaffold | 51704                   | C/A  | NA                 | INTERGENIC                    | NA                                       |
| Kabuli_wild_62660  | 1399945326                          | Ca_kabuli_scaffold | 62660                   | C/T  | NA                 | INTERGENIC                    | NA                                       |
| Kabuli_wild_62738  | 1399945327                          | Ca_kabuli_scaffold | 62738                   | A/G  | NA                 | INTERGENIC                    | NA                                       |
| Kabuli_wild_386550 | 1399945328                          | Ca_kabuli_scaffold | 386550                  | C/G  | NA                 | INTERGENIC                    | NA                                       |
| Kabuli_wild_9813   | 1399945329                          | Ca_kabuli_scaffold | 9813                    | G/A  | Gene_Ca_28083      | NON_SYNONYMOUS_CODING         | Orotidine5'-phosphatodecarboxylasedomain |
| Kabuli_wild_9851   | 1399945330                          | Ca_kabuli_scaffold | 9851                    | C/T  | Gene_Ca_28083      | SYNONYMOUS_CODING             | Orotidine5'-phosphatodecarboxylasedomain |
| Kabuli_wild_52131  | 1399945331                          | Ca_kabuli_scaffold | 52131                   | G/A  | Gene_Ca_26594      | NON_SYNONYMOUS_CODING         | NA                                       |
| Kabuli_wild_52136  | 1399945332                          | Ca_kabuli_scaffold | 52136                   | C/A  | Gene_Ca_26594      | SYNONYMOUS_CODING             | NA                                       |
| Kabuli_wild_52157  | 1399945333                          | Ca_kabuli_scaffold | 52157                   | T/G  | Gene_Ca_26594      | SYNONYMOUS_CODING             | NA                                       |
| Kabuli_wild_52168  | 1399945334                          | Ca_kabuli_scaffold | 52168                   | C/T  | Gene_Ca_26594      | NON_SYNONYMOUS_CODING         | NA                                       |
| Kabuli_wild_52209  | 1399945335                          | Ca_kabuli_scaffold | 52209                   | G/A  | Gene_Ca_26594      | NON_SYNONYMOUS_CODING         | NA                                       |
| Kabuli_wild_52213  | 1399945336                          | Ca_kabuli_scaffold | 52213                   | C/T  | Gene_Ca_26594      | NON_SYNONYMOUS_CODING         | NA                                       |
| Kabuli_wild_117376 | 1399945337                          | Ca_kabuli_scaffold | 117376                  | G/A  | NA                 | INTERGENIC                    | NA                                       |
| Kabuli_wild_118266 | 1399945338                          | Ca_kabuli_scaffold | 118266                  | G/T  | NA                 | INTERGENIC                    | NA                                       |
| Kabuli_wild_232543 | 1399945339                          | Ca_kabuli_scaffold | 232543                  | G/T  | NA                 | INTERGENIC                    | NA                                       |
| Kabuli_wild_232545 | 1399945340                          | Ca_kabuli_scaffold | 232545                  | C/A  | NA                 | INTERGENIC                    | NA                                       |
| Kabuli_wild_232570 | 1399945341                          | Ca_kabuli_scaffold | 232570                  | T/G  | NA                 | INTERGENIC                    | NA                                       |
| Kabuli_wild_232581 | 1399945342                          | Ca_kabuli_scaffold | 232581                  | C/T  | NA                 | INTERGENIC                    | NA                                       |
| Kabuli_wild_232628 | 1399945343                          | Ca_kabuli_scaffold | 232628                  | G/A  | NA                 | INTERGENIC                    | NA                                       |
| Kabuli_wild_232629 | 1399945344                          | Ca_kabuli_scaffold | 232629                  | C/T  | NA                 | INTERGENIC                    | NA                                       |
| Kabuli_wild_358449 | 1399945345                          | Ca_kabuli_scaffold | 358449                  | T/A  | NA                 | INTERGENIC                    | NA                                       |
| Kabuli_wild_396159 | 1399945346                          | Ca_kabuli_scaffold | 396159                  | T/C  | NA                 | INTERGENIC                    | NA                                       |
| Kabuli_wild_396201 | 1399945347                          | Ca_kabuli_scaffold | 396201                  | A/G  | NA                 | INTERGENIC                    | NA                                       |
| Kabuli_wild_396212 | 1399945348                          | Ca_kabuli_scaffold | 396212                  | G/A  | NA                 | INTERGENIC                    | NA                                       |
| Kabuli_wild_396222 | 1399945349                          | Ca_kabuli_scaffold | 396222                  | A/G  | NA                 | INTERGENIC                    | NA                                       |
| Kabuli_wild_396234 | 1399945350                          | Ca_kabuli_scaffold | 396234                  | A/G  | NA                 | INTERGENIC                    | NA                                       |
| Kabuli_wild_609386 | 1399945351                          | Ca_kabuli_scaffold | 609386                  | C/T  | NA                 | INTERGENIC                    | NA                                       |
| Kabuli_wild_24311  | 1399945352                          | Ca_kabuli_scaffold | 24311                   | A/G  | Gene_Ca_27454      | INTRON                        | Sugar/inositol transporter               |
| Kabuli_wild_24316  | 1399945353                          | Ca_kabuli_scaffold | 24316                   | T/A  | Gene_Ca_27454      | INTRON                        | Sugar/inositol transporter               |
| Kabuli_wild_24317  | 1399945354                          | Ca_kabuli_scaffold | 24317                   | G/T  | Gene_Ca_27454      | INTRON                        | Sugar/inositol transporter               |
| Kabuli_wild_24323  | 1399945355                          | Ca_kabuli_scaffold | 24323                   | A/G  | Gene_Ca_27454      | INTRON                        | Sugar/inositol transporter               |

| SNP IDs            | NCBI dbSNP accession IDs (NCBI_SS#) | Chromosomes        | Physical positions (bp) | SNPs | Gene accession IDs | Sequence components of genome | Putative functions         |
|--------------------|-------------------------------------|--------------------|-------------------------|------|--------------------|-------------------------------|----------------------------|
| Kabuli_wild_24336  | 1399945356                          | Ca_kabuli_scaffold | 24336                   | G/T  | Gene_Ca_27454      | STOP_GAINED                   | Sugar/inositol transporter |
| Kabuli_wild_24349  | 1399945357                          | Ca_kabuli_scaffold | 24349                   | T/C  | Gene_Ca_27454      | NON_SYNONYMOUS_CODING         | Sugar/inositol transporter |
| Kabuli_wild_35489  | 1399945358                          | Ca_kabuli_scaffold | 35489                   | A/G  | Gene_Ca_27455      | SYNONYMOUS_CODING             | Sugar/inositol transporter |
| Kabuli_wild_35494  | 1399945359                          | Ca_kabuli_scaffold | 35494                   | T/A  | Gene_Ca_27455      | NON_SYNONYMOUS_CODING         | Sugar/inositol transporter |
| Kabuli_wild_35495  | 1399945360                          | Ca_kabuli_scaffold | 35495                   | G/T  | Gene_Ca_27455      | SYNONYMOUS_CODING             | Sugar/inositol transporter |
| Kabuli_wild_35501  | 1399945361                          | Ca_kabuli_scaffold | 35501                   | A/G  | Gene_Ca_27455      | SYNONYMOUS_CODING             | Sugar/inositol transporter |
| Kabuli_wild_35514  | 1399945362                          | Ca_kabuli_scaffold | 35514                   | G/T  | Gene_Ca_27455      | STOP_GAINED                   | Sugar/inositol transporter |
| Kabuli_wild_35527  | 1399945363                          | Ca_kabuli_scaffold | 35527                   | T/C  | Gene_Ca_27455      | NON_SYNONYMOUS_CODING         | Sugar/inositol transporter |
| Kabuli_wild_18453  | 1399945364                          | Ca_kabuli_scaffold | 18453                   | A/G  | NA                 | INTERGENIC                    | NA                         |
| Kabuli_wild_18621  | 1399945365                          | Ca_kabuli_scaffold | 18621                   | C/A  | NA                 | INTERGENIC                    | NA                         |
| Kabuli_wild_18693  | 1399945366                          | Ca_kabuli_scaffold | 18693                   | G/C  | NA                 | INTERGENIC                    | NA                         |
| Kabuli_wild_20978  | 1399945367                          | Ca_kabuli_scaffold | 20978                   | T/C  | Gene_Ca_24246      | NON_SYNONYMOUS_CODING         | Leucine-rich repeat        |
| Kabuli_wild_40849  | 1399945368                          | Ca_kabuli_scaffold | 40849                   | A/C  | NA                 | INTERGENIC                    | NA                         |
| Kabuli_wild_113895 | 1399945369                          | Ca_kabuli_scaffold | 113895                  | A/C  | NA                 | INTERGENIC                    | NA                         |
| Kabuli_wild_113932 | 1399945370                          | Ca_kabuli_scaffold | 113932                  | T/A  | NA                 | INTERGENIC                    | NA                         |
| Kabuli_wild_158250 | 1399945371                          | Ca_kabuli_scaffold | 158250                  | A/G  | NA                 | INTERGENIC                    | NA                         |
| Kabuli_wild_63458  | 1399945372                          | Ca_kabuli_scaffold | 63458                   | G/C  | NA                 | INTERGENIC                    | NA                         |
| Kabuli_wild_63460  | 1399945373                          | Ca_kabuli_scaffold | 63460                   | C/A  | NA                 | INTERGENIC                    | NA                         |
| Kabuli_wild_91817  | 1399945374                          | Ca_kabuli_scaffold | 91817                   | C/T  | Gene_Ca_26439      | INTRON                        | K Homology                 |
| Kabuli_wild_91849  | 1399945375                          | Ca_kabuli_scaffold | 91849                   | T/C  | Gene_Ca_26439      | SYNONYMOUS_CODING             | K Homology                 |
| Kabuli_wild_15785  | 1399945376                          | Ca_kabuli_scaffold | 15785                   | G/A  | NA                 | INTERGENIC                    | NA                         |
| Kabuli_wild_15786  | 1399945377                          | Ca_kabuli_scaffold | 15786                   | G/A  | NA                 | INTERGENIC                    | NA                         |
| Kabuli_wild_15799  | 1399945378                          | Ca_kabuli_scaffold | 15799                   | C/T  | NA                 | INTERGENIC                    | NA                         |
| Kabuli_wild_15810  | 1399945379                          | Ca_kabuli_scaffold | 15810                   | A/G  | NA                 | INTERGENIC                    | NA                         |
| Kabuli_wild_15811  | 1399945380                          | Ca_kabuli_scaffold | 15811                   | T/C  | NA                 | INTERGENIC                    | NA                         |
| Kabuli_wild_15813  | 1399945381                          | Ca_kabuli_scaffold | 15813                   | G/T  | NA                 | INTERGENIC                    | NA                         |
| Kabuli_wild_15816  | 1399945382                          | Ca_kabuli_scaffold | 15816                   | C/T  | NA                 | INTERGENIC                    | NA                         |
| Kabuli_wild_15818  | 1399945383                          | Ca_kabuli_scaffold | 15818                   | G/A  | NA                 | INTERGENIC                    | NA                         |
| Kabuli_wild_15819  | 1399945384                          | Ca_kabuli_scaffold | 15819                   | A/G  | NA                 | INTERGENIC                    | NA                         |
| Kabuli_wild_15822  | 1399945385                          | Ca_kabuli_scaffold | 15822                   | C/T  | NA                 | INTERGENIC                    | NA                         |
| Kabuli_wild_15834  | 1399945386                          | Ca_kabuli_scaffold | 15834                   | C/A  | NA                 | INTERGENIC                    | NA                         |
| Kabuli_wild_15836  | 1399945387                          | Ca_kabuli_scaffold | 15836                   | G/T  | NA                 | INTERGENIC                    | NA                         |
| Kabuli_wild_15841  | 1399945388                          | Ca_kabuli_scaffold | 15841                   | G/A  | NA                 | INTERGENIC                    | NA                         |
| Kabuli_wild_15842  | 1399945389                          | Ca_kabuli_scaffold | 15842                   | C/T  | NA                 | INTERGENIC                    | NA                         |
| Kabuli_wild_15845  | 1399945390                          | Ca_kabuli_scaffold | 15845                   | C/A  | NA                 | INTERGENIC                    | NA                         |
| Kabuli_wild_81301  | 1399945391                          | Ca_kabuli_scaffold | 81301                   | G/A  | NA                 | INTERGENIC                    | NA                         |
| Kabuli_wild_306129 | 1399945392                          | Ca_kabuli_scaffold | 306129                  | C/T  | NA                 | INTERGENIC                    | NA                         |
| Kabuli_wild_306135 | 1399945393                          | Ca_kabuli_scaffold | 306135                  | A/C  | NA                 | INTERGENIC                    | NA                         |
| Kabuli_wild_306164 | 1399945394                          | Ca_kabuli_scaffold | 306164                  | G/A  | NA                 | INTERGENIC                    | NA                         |
| Kabuli_wild_306169 | 1399945395                          | Ca_kabuli_scaffold | 306169                  | A/G  | NA                 | INTERGENIC                    | NA                         |
| Kabuli_wild_306180 | 1399945396                          | Ca_kabuli_scaffold | 306180                  | T/C  | NA                 | INTERGENIC                    | NA                         |
| Kabuli_wild_332494 | 1399945397                          | Ca_kabuli_scaffold | 332494                  | G/C  | Gene_Ca_23215      | NON_SYNONYMOUS_CODING         | NA                         |
| Kabuli_wild_358975 | 1399945398                          | Ca_kabuli_scaffold | 358975                  | C/T  | NA                 | INTERGENIC                    | NA                         |
| Kabuli_wild_359004 | 1399945399                          | Ca_kabuli_scaffold | 359004                  | G/T  | NA                 | INTERGENIC                    | NA                         |

| SNP IDs            | NCBI dbSNP accession IDs (NCBI_SS#) | Chromosomes        | Physical positions (bp) | SNPs | Gene accession IDs | Sequence components of genome | Putative functions                                            |
|--------------------|-------------------------------------|--------------------|-------------------------|------|--------------------|-------------------------------|---------------------------------------------------------------|
| Kabuli_wild_403513 | 1399945400                          | Ca_kabuli_scaffold | 403513                  | G/A  | NA                 | INTERGENIC                    | NA                                                            |
| Kabuli_wild_403521 | 1399945401                          | Ca_kabuli_scaffold | 403521                  | T/G  | NA                 | INTERGENIC                    | NA                                                            |
| Kabuli_wild_403531 | 1399945402                          | Ca_kabuli_scaffold | 403531                  | A/C  | NA                 | INTERGENIC                    | NA                                                            |
| Kabuli_wild_403553 | 1399945403                          | Ca_kabuli_scaffold | 403553                  | T/C  | NA                 | INTERGENIC                    | NA                                                            |
| Kabuli_wild_403572 | 1399945404                          | Ca_kabuli_scaffold | 403572                  | C/G  | NA                 | INTERGENIC                    | NA                                                            |
| Kabuli_wild_53125  | 1399945405                          | Ca_kabuli_scaffold | 53125                   | T/A  | NA                 | INTERGENIC                    | NA                                                            |
| Kabuli_wild_53132  | 1399945406                          | Ca_kabuli_scaffold | 53132                   | C/T  | NA                 | INTERGENIC                    | NA                                                            |
| Kabuli_wild_53223  | 1399945407                          | Ca_kabuli_scaffold | 53223                   | A/C  | NA                 | INTERGENIC                    | NA                                                            |
| Kabuli_wild_708    | 1399945408                          | Ca_kabuli_scaffold | 708                     | C/T  | Gene_Ca_21034      | SYNONYMOUS_CODING             | Major facilitator superfamily MFS-1                           |
| Kabuli_wild_1036   | 1399945409                          | Ca_kabuli_scaffold | 1036                    | A/G  | Gene_Ca_21034      | NON_SYNONYMOUS_CODING         | Major facilitator superfamily MFS-1                           |
| Kabuli_wild_206029 | 1399945410                          | Ca_kabuli_scaffold | 206029                  | C/A  | Gene_Ca_21044      | NON_SYNONYMOUS_CODING         | General substrate transporter                                 |
| Kabuli_wild_206030 | 1399945411                          | Ca_kabuli_scaffold | 206030                  | A/G  | Gene_Ca_21044      | SYNONYMOUS_CODING             | General substrate transporter                                 |
| Kabuli_wild_275493 | 1399945412                          | Ca_kabuli_scaffold | 275493                  | A/T  | Gene_Ca_21047      | INTRON                        | C4-dicarboxylatetransporter/malicacidtransportprotein         |
| Kabuli_wild_275497 | 1399945413                          | Ca_kabuli_scaffold | 275497                  | T/C  | Gene_Ca_21047      | INTRON                        | C4-dicarboxylatetransporter/malicacidtransportprotein         |
| Kabuli_wild_275510 | 1399945414                          | Ca_kabuli_scaffold | 275510                  | A/T  | Gene_Ca_21047      | INTRON                        | C4-dicarboxylatetransporter/malicacidtransportprotein         |
| Kabuli_wild_275512 | 1399945415                          | Ca_kabuli_scaffold | 275512                  | G/T  | Gene_Ca_21047      | INTRON                        | C4-dicarboxylatetransporter/malicacidtransportprotein         |
| Kabuli_wild_275519 | 1399945416                          | Ca_kabuli_scaffold | 275519                  | A/C  | Gene_Ca_21047      | INTRON                        | C4-dicarboxylatetransporter/malicacidtransportprotein         |
| Kabuli_wild_295864 | 1399945417                          | Ca_kabuli_scaffold | 295864                  | G/T  | NA                 | INTERGENIC                    | NA                                                            |
| Kabuli_wild_402860 | 1399945418                          | Ca_kabuli_scaffold | 402860                  | A/G  | NA                 | INTERGENIC                    | NA                                                            |
| Kabuli_wild_119274 | 1399945419                          | Ca_kabuli_scaffold | 119274                  | T/C  | Gene_Ca_22829      | INTRON                        | NA                                                            |
| Kabuli_wild_213783 | 1399945420                          | Ca_kabuli_scaffold | 213783                  | T/C  | NA                 | INTERGENIC                    | NA                                                            |
| Kabuli_wild_111921 | 1399945421                          | Ca_kabuli_scaffold | 111921                  | C/A  | Gene_Ca_27326      | INTRON                        | Protein of unknown function DUF3414                           |
| Kabuli_wild_121629 | 1399945422                          | Ca_kabuli_scaffold | 121629                  | T/C  | NA                 | INTERGENIC                    | NA                                                            |
| Kabuli_wild_183177 | 1399945423                          | Ca_kabuli_scaffold | 183177                  | T/C  | Gene_Ca_27327      | UPSTREAM                      | NA                                                            |
| Kabuli_wild_13212  | 1399945424                          | Ca_kabuli_scaffold | 13212                   | T/C  | NA                 | INTERGENIC                    | NA                                                            |
| Kabuli_wild_132087 | 1399945425                          | Ca_kabuli_scaffold | 132087                  | C/G  | NA                 | INTERGENIC                    | NA                                                            |
| Kabuli_wild_134580 | 1399945426                          | Ca_kabuli_scaffold | 134580                  | C/G  | Gene_Ca_25988      | INTRON                        | VacuolarATPaseassemblyintegralmembraneproteinVMA21-likedomain |
| Kabuli_wild_134707 | 1399945427                          | Ca_kabuli_scaffold | 134707                  | G/A  | Gene_Ca_25988      | INTRON                        | VacuolarATPaseassemblyintegralmembraneproteinVMA21-likedomain |
| Kabuli_wild_29284  | 1399945428                          | Ca_kabuli_scaffold | 29284                   | A/T  | NA                 | INTERGENIC                    | NA                                                            |
| Kabuli_wild_12188  | 1399945429                          | Ca_kabuli_scaffold | 12188                   | C/T  | NA                 | INTERGENIC                    | NA                                                            |
| Kabuli_wild_21152  | 1399945430                          | Ca_kabuli_scaffold | 21152                   | C/T  | Gene_Ca_27369      | NON_SYNONYMOUS_CODING         | AHook,DNA-bindingmotif                                        |
| Kabuli_wild_3061   | 1399945431                          | Ca_kabuli_scaffold | 3061                    | A/T  | Gene_Ca_25481      | SYNONYMOUS_CODING             | Photosystemantennaprotein-like                                |
| Kabuli_wild_42329  | 1399945432                          | Ca_kabuli_scaffold | 42329                   | T/C  | NA                 | INTERGENIC                    | NA                                                            |
| Kabuli_wild_57413  | 1399945433                          | Ca_kabuli_scaffold | 57413                   | A/T  | NA                 | INTERGENIC                    | NA                                                            |
| Kabuli_wild_21441  | 1399945434                          | Ca_kabuli_scaffold | 21441                   | C/A  | NA                 | INTERGENIC                    | NA                                                            |
| Kabuli_wild_21442  | 1399945435                          | Ca_kabuli_scaffold | 21442                   | G/C  | NA                 | INTERGENIC                    | NA                                                            |
| Kabuli_wild_21443  | 1399945436                          | Ca_kabuli_scaffold | 21443                   | A/C  | NA                 | INTERGENIC                    | NA                                                            |
| Kabuli_wild_23303  | 1399945437                          | Ca_kabuli_scaffold | 23303                   | T/G  | NA                 | INTERGENIC                    | NA                                                            |
| Kabuli_wild_27693  | 1399945438                          | Ca_kabuli_scaffold | 27693                   | T/C  | NA                 | INTERGENIC                    | NA                                                            |
| Kabuli_wild_27710  | 1399945439                          | Ca_kabuli_scaffold | 27710                   | T/G  | NA                 | INTERGENIC                    | NA                                                            |
| Kabuli_wild_28014  | 1399945440                          | Ca_kabuli_scaffold | 28014                   | T/A  | NA                 | INTERGENIC                    | NA                                                            |
| Kabuli_wild_28015  | 1399945441                          | Ca_kabuli_scaffold | 28015                   | A/C  | NA                 | INTERGENIC                    | NA                                                            |
| Kabuli_wild_28456  | 1399945442                          | Ca_kabuli_scaffold | 28456                   | A/C  | NA                 | INTERGENIC                    | NA                                                            |
| Kabuli_wild_29735  | 1399945443                          | Ca_kabuli_scaffold | 29735                   | G/C  | NA                 | INTERGENIC                    | NA                                                            |



| SNP IDs            | NCBI dbSNP accession IDs (NCBI_SS#) | Chromosomes        | Physical positions (bp) | SNPs | Gene accession IDs | Sequence components of genome | Putative functions                   |
|--------------------|-------------------------------------|--------------------|-------------------------|------|--------------------|-------------------------------|--------------------------------------|
| Kabuli_wild_29750  | 1399945444                          | Ca_kabuli_scaffold | 29750                   | G/T  | NA                 | INTERGENIC                    | NA                                   |
| Kabuli_wild_29797  | 1399945445                          | Ca_kabuli_scaffold | 29797                   | C/T  | NA                 | INTERGENIC                    | NA                                   |
| Kabuli_wild_29798  | 1399945446                          | Ca_kabuli_scaffold | 29798                   | C/A  | NA                 | INTERGENIC                    | NA                                   |
| Kabuli_wild_56111  | 1399945447                          | Ca_kabuli_scaffold | 56111                   | G/A  | Gene_Ca_27234      | NON_SYNONYMOUS_CODING         | Peptidase C48, SUMO/Sentrin/Ubl1     |
| Kabuli_wild_7155   | 1399945448                          | Ca_kabuli_scaffold | 7155                    | G/A  | NA                 | INTERGENIC                    | NA                                   |
| Kabuli_wild_7159   | 1399945449                          | Ca_kabuli_scaffold | 7159                    | T/G  | NA                 | INTERGENIC                    | NA                                   |
| Kabuli_wild_7166   | 1399945450                          | Ca_kabuli_scaffold | 7166                    | C/T  | NA                 | INTERGENIC                    | NA                                   |
| Kabuli_wild_7182   | 1399945451                          | Ca_kabuli_scaffold | 7182                    | C/T  | NA                 | INTERGENIC                    | NA                                   |
| Kabuli_wild_7196   | 1399945452                          | Ca_kabuli_scaffold | 7196                    | G/T  | NA                 | INTERGENIC                    | NA                                   |
| Kabuli_wild_40218  | 1399945453                          | Ca_kabuli_scaffold | 40218                   | G/A  | Gene_Ca_26498      | INTRON                        | Peptidase C48, SUMO/Sentrin/Ubl1     |
| Kabuli_wild_137408 | 1399945454                          | Ca_kabuli_scaffold | 137408                  | A/C  | Gene_Ca_26500      | DOWNSTREAM                    | NA                                   |
| Kabuli_wild_137416 | 1399945455                          | Ca_kabuli_scaffold | 137416                  | G/A  | Gene_Ca_26500      | DOWNSTREAM                    | NA                                   |
| Kabuli_wild_137433 | 1399945456                          | Ca_kabuli_scaffold | 137433                  | G/T  | Gene_Ca_26500      | DOWNSTREAM                    | NA                                   |
| Kabuli_wild_137455 | 1399945457                          | Ca_kabuli_scaffold | 137455                  | G/T  | Gene_Ca_26500      | DOWNSTREAM                    | NA                                   |
| Kabuli_wild_149524 | 1399945458                          | Ca_kabuli_scaffold | 149524                  | C/T  | Gene_Ca_26502      | NON_SYNONYMOUS_CODING         | NA                                   |
| Kabuli_wild_149537 | 1399945459                          | Ca_kabuli_scaffold | 149537                  | G/A  | Gene_Ca_26502      | SYNONYMOUS_CODING             | NA                                   |
| Kabuli_wild_149545 | 1399945460                          | Ca_kabuli_scaffold | 149545                  | C/T  | Gene_Ca_26502      | NON_SYNONYMOUS_CODING         | NA                                   |
| Kabuli_wild_149577 | 1399945461                          | Ca_kabuli_scaffold | 149577                  | G/T  | Gene_Ca_26502      | NON_SYNONYMOUS_CODING         | NA                                   |
| Kabuli_wild_149580 | 1399945462                          | Ca_kabuli_scaffold | 149580                  | G/A  | Gene_Ca_26502      | NON_SYNONYMOUS_CODING         | NA                                   |
| Kabuli_wild_149583 | 1399945463                          | Ca_kabuli_scaffold | 149583                  | G/A  | Gene_Ca_26502      | NON_SYNONYMOUS_CODING         | NA                                   |
| Kabuli_wild_149585 | 1399945464                          | Ca_kabuli_scaffold | 149585                  | G/A  | Gene_Ca_26502      | SYNONYMOUS_CODING             | NA                                   |
| Kabuli_wild_149589 | 1399945465                          | Ca_kabuli_scaffold | 149589                  | G/A  | Gene_Ca_26502      | NON_SYNONYMOUS_CODING         | NA                                   |
| Kabuli_wild_149613 | 1399945466                          | Ca_kabuli_scaffold | 149613                  | G/T  | Gene_Ca_26502      | NON_SYNONYMOUS_CODING         | NA                                   |
| Kabuli_wild_149620 | 1399945467                          | Ca_kabuli_scaffold | 149620                  | C/G  | Gene_Ca_26502      | NON_SYNONYMOUS_CODING         | NA                                   |
| Kabuli_wild_149628 | 1399945468                          | Ca_kabuli_scaffold | 149628                  | G/A  | Gene_Ca_26502      | NON_SYNONYMOUS_CODING         | NA                                   |
| Kabuli_wild_149631 | 1399945469                          | Ca_kabuli_scaffold | 149631                  | G/A  | Gene_Ca_26502      | NON_SYNONYMOUS_CODING         | NA                                   |
| Kabuli_wild_149645 | 1399945470                          | Ca_kabuli_scaffold | 149645                  | G/T  | Gene_Ca_26502      | SYNONYMOUS_CODING             | NA                                   |
| Kabuli_wild_149649 | 1399945471                          | Ca_kabuli_scaffold | 149649                  | C/T  | Gene_Ca_26502      | NON_SYNONYMOUS_CODING         | NA                                   |
| Kabuli_wild_149661 | 1399945472                          | Ca_kabuli_scaffold | 149661                  | G/A  | Gene_Ca_26502      | NON_SYNONYMOUS_CODING         | NA                                   |
| Kabuli_wild_149676 | 1399945473                          | Ca_kabuli_scaffold | 149676                  | T/C  | Gene_Ca_26502      | NON_SYNONYMOUS_CODING         | NA                                   |
| Kabuli_wild_149687 | 1399945474                          | Ca_kabuli_scaffold | 149687                  | A/T  | Gene_Ca_26502      | SYNONYMOUS_CODING             | NA                                   |
| Kabuli_wild_149689 | 1399945475                          | Ca_kabuli_scaffold | 149689                  | G/A  | Gene_Ca_26502      | NON_SYNONYMOUS_CODING         | NA                                   |
| Kabuli_wild_77099  | 1399945476                          | Ca_kabuli_scaffold | 77099                   | C/T  | NA                 | INTERGENIC                    | NA                                   |
| Kabuli_wild_88007  | 1399945477                          | Ca_kabuli_scaffold | 88007                   | G/T  | Gene_Ca_26915      | NON_SYNONYMOUS_CODING         | NA                                   |
| Kabuli_wild_3364   | 1399945478                          | Ca_kabuli_scaffold | 3364                    | G/T  | NA                 | INTERGENIC                    | NA                                   |
| Kabuli_wild_13634  | 1399945479                          | Ca_kabuli_scaffold | 13634                   | C/T  | NA                 | INTERGENIC                    | NA                                   |
| Kabuli_wild_13712  | 1399945480                          | Ca_kabuli_scaffold | 13712                   | A/G  | NA                 | INTERGENIC                    | NA                                   |
| Kabuli_wild_13730  | 1399945481                          | Ca_kabuli_scaffold | 13730                   | A/G  | NA                 | INTERGENIC                    | NA                                   |
| Kabuli_wild_13736  | 1399945482                          | Ca_kabuli_scaffold | 13736                   | G/A  | NA                 | INTERGENIC                    | NA                                   |
| Kabuli_wild_13745  | 1399945483                          | Ca_kabuli_scaffold | 13745                   | G/A  | NA                 | INTERGENIC                    | NA                                   |
| Kabuli_wild_82268  | 1399945484                          | Ca_kabuli_scaffold | 82268                   | T/C  | Gene_Ca_27591      | INTRON                        | Endonuclease/exonuclease/phosphatase |
| Kabuli_wild_83209  | 1399945485                          | Ca_kabuli_scaffold | 83209                   | T/A  | Gene_Ca_27591      | INTRON                        | Endonuclease/exonuclease/phosphatase |
| Kabuli_wild_83244  | 1399945486                          | Ca_kabuli_scaffold | 83244                   | T/C  | Gene_Ca_27591      | INTRON                        | Endonuclease/exonuclease/phosphatase |
| Kabuli_wild_84007  | 1399945487                          | Ca_kabuli_scaffold | 84007                   | C/G  | Gene_Ca_27591      | INTRON                        | Endonuclease/exonuclease/phosphatase |

| SNP IDs            | NCBI dbSNP accession IDs (NCBI_SS#) | Chromosomes        | Physical positions (bp) | SNPs | Gene accession IDs | Sequence components of genome | Putative functions                   |
|--------------------|-------------------------------------|--------------------|-------------------------|------|--------------------|-------------------------------|--------------------------------------|
| Kabuli_wild_84057  | 1399945488                          | Ca_kabuli_scaffold | 84057                   | A/G  | Gene_Ca_27591      | NON_SYNONYMOUS_CODING         | Endonuclease/exonuclease/phosphatase |
| Kabuli_wild_84072  | 1399945489                          | Ca_kabuli_scaffold | 84072                   | G/A  | Gene_Ca_27591      | NON_SYNONYMOUS_CODING         | Endonuclease/exonuclease/phosphatase |
| Kabuli_wild_84088  | 1399945490                          | Ca_kabuli_scaffold | 84088                   | C/G  | Gene_Ca_27591      | NON_SYNONYMOUS_CODING         | Endonuclease/exonuclease/phosphatase |
| Kabuli_wild_3006   | 1399945491                          | Ca_kabuli_scaffold | 3006                    | G/A  | NA                 | INTERGENIC                    | NA                                   |
| Kabuli_wild_77761  | 1399945492                          | Ca_kabuli_scaffold | 77761                   | A/T  | NA                 | INTERGENIC                    | NA                                   |
| Kabuli_wild_77763  | 1399945493                          | Ca_kabuli_scaffold | 77763                   | C/T  | NA                 | INTERGENIC                    | NA                                   |
| Kabuli_wild_77767  | 1399945494                          | Ca_kabuli_scaffold | 77767                   | A/T  | NA                 | INTERGENIC                    | NA                                   |
| Kabuli_wild_78440  | 1399945495                          | Ca_kabuli_scaffold | 78440                   | A/T  | Gene_Ca_28108      | NON_SYNONYMOUS_CODING         | Photosyntheticreactioncentre,L/M     |
| Kabuli_wild_78525  | 1399945496                          | Ca_kabuli_scaffold | 78525                   | T/A  | Gene_Ca_28108      | SYNONYMOUS_CODING             | Photosyntheticreactioncentre,L/M     |
| Kabuli_wild_78532  | 1399945497                          | Ca_kabuli_scaffold | 78532                   | T/G  | Gene_Ca_28108      | NON_SYNONYMOUS_CODING         | Photosyntheticreactioncentre,L/M     |
| Kabuli_wild_5619   | 1399945498                          | Ca_kabuli_scaffold | 5619                    | G/A  | NA                 | INTERGENIC                    | NA                                   |
| Kabuli_wild_10560  | 1399945499                          | Ca_kabuli_scaffold | 10560                   | G/A  | Gene_Ca_18007      | SYNONYMOUS_CODING             | Peptidase C48, SUMO/Sentrin/Ubl1     |
| Kabuli_wild_10575  | 1399945500                          | Ca_kabuli_scaffold | 10575                   | C/T  | Gene_Ca_18007      | NON_SYNONYMOUS_CODING         | Peptidase C48, SUMO/Sentrin/Ubl1     |
| Kabuli_wild_10582  | 1399945501                          | Ca_kabuli_scaffold | 10582                   | A/G  | Gene_Ca_18007      | SYNONYMOUS_CODING             | Peptidase C48, SUMO/Sentrin/Ubl1     |
| Kabuli_wild_40651  | 1399945502                          | Ca_kabuli_scaffold | 40651                   | T/A  | NA                 | INTERGENIC                    | NA                                   |
| Kabuli_wild_40681  | 1399945503                          | Ca_kabuli_scaffold | 40681                   | A/T  | NA                 | INTERGENIC                    | NA                                   |
| Kabuli_wild_382579 | 1399945504                          | Ca_kabuli_scaffold | 382579                  | C/T  | NA                 | INTERGENIC                    | NA                                   |
| Kabuli_wild_436598 | 1399945505                          | Ca_kabuli_scaffold | 436598                  | T/C  | Gene_Ca_18032      | UPSTREAM                      | Metridin-likeShKtoxin                |
| Kabuli_wild_436923 | 1399945506                          | Ca_kabuli_scaffold | 436923                  | T/C  | Gene_Ca_18032      | UPSTREAM                      | Metridin-likeShKtoxin                |
| Kabuli_wild_644893 | 1399945507                          | Ca_kabuli_scaffold | 644893                  | A/C  | Gene_Ca_18050      | NON_SYNONYMOUS_CODING         | CoA-binding                          |
| Kabuli_wild_667013 | 1399945508                          | Ca_kabuli_scaffold | 667013                  | A/T  | Gene_Ca_18053      | INTRON                        | NA                                   |
| Kabuli_wild_667017 | 1399945509                          | Ca_kabuli_scaffold | 667017                  | A/G  | Gene_Ca_18053      | INTRON                        | NA                                   |
| Kabuli_wild_667478 | 1399945510                          | Ca_kabuli_scaffold | 667478                  | T/G  | Gene_Ca_18053      | INTRON                        | NA                                   |
| Kabuli_wild_667494 | 1399945511                          | Ca_kabuli_scaffold | 667494                  | G/C  | Gene_Ca_18053      | INTRON                        | NA                                   |
| Kabuli_wild_667548 | 1399945512                          | Ca_kabuli_scaffold | 667548                  | A/G  | Gene_Ca_18053      | INTRON                        | NA                                   |
| Kabuli_wild_667620 | 1399945513                          | Ca_kabuli_scaffold | 667620                  | A/G  | Gene_Ca_18053      | INTRON                        | NA                                   |
| Kabuli_wild_667713 | 1399945514                          | Ca_kabuli_scaffold | 667713                  | G/A  | Gene_Ca_18053      | INTRON                        | NA                                   |
| Kabuli_wild_667750 | 1399945515                          | Ca_kabuli_scaffold | 667750                  | T/C  | Gene_Ca_18053      | INTRON                        | NA                                   |
| Kabuli_wild_674495 | 1399945516                          | Ca_kabuli_scaffold | 674495                  | A/G  | NA                 | INTERGENIC                    | NA                                   |
| Kabuli_wild_674823 | 1399945517                          | Ca_kabuli_scaffold | 674823                  | G/A  | NA                 | INTERGENIC                    | NA                                   |
| Kabuli_wild_674826 | 1399945518                          | Ca_kabuli_scaffold | 674826                  | C/T  | NA                 | INTERGENIC                    | NA                                   |
| Kabuli_wild_674844 | 1399945519                          | Ca_kabuli_scaffold | 674844                  | T/C  | NA                 | INTERGENIC                    | NA                                   |
| Kabuli_wild_674847 | 1399945520                          | Ca_kabuli_scaffold | 674847                  | T/G  | NA                 | INTERGENIC                    | NA                                   |
| Kabuli_wild_674862 | 1399945521                          | Ca_kabuli_scaffold | 674862                  | G/A  | NA                 | INTERGENIC                    | NA                                   |
| Kabuli_wild_674865 | 1399945522                          | Ca_kabuli_scaffold | 674865                  | T/C  | NA                 | INTERGENIC                    | NA                                   |
| Kabuli_wild_674871 | 1399945523                          | Ca_kabuli_scaffold | 674871                  | A/G  | NA                 | INTERGENIC                    | NA                                   |
| Kabuli_wild_674881 | 1399945524                          | Ca_kabuli_scaffold | 674881                  | G/A  | NA                 | INTERGENIC                    | NA                                   |
| Kabuli_wild_90092  | 1399945525                          | Ca_kabuli_scaffold | 90092                   | G/A  | NA                 | INTERGENIC                    | NA                                   |
| Kabuli_wild_48081  | 1399945526                          | Ca_kabuli_scaffold | 48081                   | T/A  | NA                 | INTERGENIC                    | NA                                   |
| Kabuli_wild_48115  | 1399945527                          | Ca_kabuli_scaffold | 48115                   | T/A  | NA                 | INTERGENIC                    | NA                                   |
| Kabuli_wild_48204  | 1399945528                          | Ca_kabuli_scaffold | 48204                   | T/C  | NA                 | INTERGENIC                    | NA                                   |
| Kabuli_wild_56045  | 1399945529                          | Ca_kabuli_scaffold | 56045                   | C/A  | NA                 | INTERGENIC                    | NA                                   |
| Kabuli_wild_56061  | 1399945530                          | Ca_kabuli_scaffold | 56061                   | A/C  | NA                 | INTERGENIC                    | NA                                   |
| Kabuli_wild_56069  | 1399945531                          | Ca_kabuli_scaffold | 56069                   | C/T  | NA                 | INTERGENIC                    | NA                                   |

| SNP IDs            | NCBI dbSNP accession IDs (NCBI_SS#) | Chromosomes        | Physical positions (bp) | SNPs | Gene accession IDs | Sequence components of genome | Putative functions                                           |
|--------------------|-------------------------------------|--------------------|-------------------------|------|--------------------|-------------------------------|--------------------------------------------------------------|
| Kabuli_wild_56074  | 1399945532                          | Ca_kabuli_scaffold | 56074                   | C/T  | NA                 | INTERGENIC                    | NA                                                           |
| Kabuli_wild_56075  | 1399945533                          | Ca_kabuli_scaffold | 56075                   | T/A  | NA                 | INTERGENIC                    | NA                                                           |
| Kabuli_wild_56114  | 1399945534                          | Ca_kabuli_scaffold | 56114                   | C/A  | NA                 | INTERGENIC                    | NA                                                           |
| Kabuli_wild_56116  | 1399945535                          | Ca_kabuli_scaffold | 56116                   | C/T  | NA                 | INTERGENIC                    | NA                                                           |
| Kabuli_wild_56140  | 1399945536                          | Ca_kabuli_scaffold | 56140                   | G/A  | NA                 | INTERGENIC                    | NA                                                           |
| Kabuli_wild_78574  | 1399945537                          | Ca_kabuli_scaffold | 78574                   | T/A  | Gene_Ca_27595      | INTRON                        | Uridinekinase                                                |
| Kabuli_wild_121205 | 1399945538                          | Ca_kabuli_scaffold | 121205                  | T/C  | NA                 | INTERGENIC                    | NA                                                           |
| Kabuli_wild_121249 | 1399945539                          | Ca_kabuli_scaffold | 121249                  | C/A  | NA                 | INTERGENIC                    | NA                                                           |
| Kabuli_wild_256612 | 1399945540                          | Ca_kabuli_scaffold | 256612                  | A/C  | Gene_Ca_25976      | UPSTREAM                      | NA                                                           |
| Kabuli_wild_73684  | 1399945541                          | Ca_kabuli_scaffold | 73684                   | G/A  | Gene_Ca_27683      | STOP_GAINED                   | NA                                                           |
| Kabuli_wild_73710  | 1399945542                          | Ca_kabuli_scaffold | 73710                   | G/A  | Gene_Ca_27683      | NON_SYNONYMOUS_CODING         | NA                                                           |
| Kabuli_wild_16310  | 1399945543                          | Ca_kabuli_scaffold | 16310                   | G/A  | NA                 | INTERGENIC                    | NA                                                           |
| Kabuli_wild_16328  | 1399945544                          | Ca_kabuli_scaffold | 16328                   | A/T  | NA                 | INTERGENIC                    | NA                                                           |
| Kabuli_wild_16333  | 1399945545                          | Ca_kabuli_scaffold | 16333                   | A/T  | NA                 | INTERGENIC                    | NA                                                           |
| Kabuli_wild_16336  | 1399945546                          | Ca_kabuli_scaffold | 16336                   | C/T  | NA                 | INTERGENIC                    | NA                                                           |
| Kabuli_wild_90003  | 1399945547                          | Ca_kabuli_scaffold | 90003                   | T/A  | NA                 | INTERGENIC                    | NA                                                           |
| Kabuli_wild_90013  | 1399945548                          | Ca_kabuli_scaffold | 90013                   | T/G  | NA                 | INTERGENIC                    | NA                                                           |
| Kabuli_wild_93921  | 1399945549                          | Ca_kabuli_scaffold | 93921                   | T/G  | Gene_Ca_17178      | SYNONYMOUS_CODING             | RNA recognition motif domain                                 |
| Kabuli_wild_93959  | 1399945550                          | Ca_kabuli_scaffold | 93959                   | C/T  | Gene_Ca_17178      | NON_SYNONYMOUS_CODING         | RNA recognition motif domain                                 |
| Kabuli_wild_235352 | 1399945551                          | Ca_kabuli_scaffold | 235352                  | T/C  | Gene_Ca_17194      | INTRON                        | Engulfment/cellmotility,ELMO                                 |
| Kabuli_wild_250462 | 1399945552                          | Ca_kabuli_scaffold | 250462                  | T/A  | Gene_Ca_17196      | NON_SYNONYMOUS_CODING         | Protein kinase,catalytic domain                              |
| Kabuli_wild_303236 | 1399945553                          | Ca_kabuli_scaffold | 303236                  | C/G  | NA                 | INTERGENIC                    | NA                                                           |
| Kabuli_wild_332839 | 1399945554                          | Ca_kabuli_scaffold | 332839                  | T/C  | Gene_Ca_17201      | NON_SYNONYMOUS_CODING         | RibosomalproteinL4/L1e                                       |
| Kabuli_wild_458152 | 1399945555                          | Ca_kabuli_scaffold | 458152                  | G/C  | Gene_Ca_17211      | NON_SYNONYMOUS_CODING         | Pathogenesis-related transcriptional factor/ERF, DNA-binding |
| Kabuli_wild_577874 | 1399945556                          | Ca_kabuli_scaffold | 577874                  | T/G  | NA                 | INTERGENIC                    | NA                                                           |
| Kabuli_wild_70280  | 1399945557                          | Ca_kabuli_scaffold | 70280                   | A/T  | NA                 | INTERGENIC                    | NA                                                           |
| Kabuli_wild_3379   | 1399945558                          | Ca_kabuli_scaffold | 3379                    | C/A  | Gene_Ca_25913      | NON_SYNONYMOUS_CODING         | Peptidase C48, SUMO/Sentrin/Ubl1                             |
| Kabuli_wild_3396   | 1399945559                          | Ca_kabuli_scaffold | 3396                    | C/T  | Gene_Ca_25913      | SYNONYMOUS_CODING             | Peptidase C48, SUMO/Sentrin/Ubl1                             |
| Kabuli_wild_3415   | 1399945560                          | Ca_kabuli_scaffold | 3415                    | C/T  | Gene_Ca_25913      | NON_SYNONYMOUS_CODING         | Peptidase C48, SUMO/Sentrin/Ubl1                             |
| Kabuli_wild_3438   | 1399945561                          | Ca_kabuli_scaffold | 3438                    | C/T  | Gene_Ca_25913      | SYNONYMOUS_CODING             | Peptidase C48, SUMO/Sentrin/Ubl1                             |
| Kabuli_wild_3463   | 1399945562                          | Ca_kabuli_scaffold | 3463                    | C/T  | Gene_Ca_25913      | NON_SYNONYMOUS_CODING         | Peptidase C48, SUMO/Sentrin/Ubl1                             |
| Kabuli_wild_3464   | 1399945563                          | Ca_kabuli_scaffold | 3464                    | T/A  | Gene_Ca_25913      | SYNONYMOUS_CODING             | Peptidase C48, SUMO/Sentrin/Ubl1                             |
| Kabuli_wild_126986 | 1399945564                          | Ca_kabuli_scaffold | 126986                  | T/G  | Gene_Ca_25916      | INTRON                        | Synaptojanin,N-terminal                                      |
| Kabuli_wild_127022 | 1399945565                          | Ca_kabuli_scaffold | 127022                  | G/A  | Gene_Ca_25916      | INTRON                        | Synaptojanin,N-terminal                                      |
| Kabuli_wild_127023 | 1399945566                          | Ca_kabuli_scaffold | 127023                  | G/T  | Gene_Ca_25916      | INTRON                        | Synaptojanin,N-terminal                                      |
| Kabuli_wild_127054 | 1399945567                          | Ca_kabuli_scaffold | 127054                  | C/T  | Gene_Ca_25916      | INTRON                        | Synaptojanin,N-terminal                                      |
| Kabuli_wild_8263   | 1399945568                          | Ca_kabuli_scaffold | 8263                    | A/C  | NA                 | INTERGENIC                    | NA                                                           |
| Kabuli_wild_8279   | 1399945569                          | Ca_kabuli_scaffold | 8279                    | G/T  | NA                 | INTERGENIC                    | NA                                                           |
| Kabuli_wild_8297   | 1399945570                          | Ca_kabuli_scaffold | 8297                    | A/G  | NA                 | INTERGENIC                    | NA                                                           |
| Kabuli_wild_271340 | 1399945571                          | Ca_kabuli_scaffold | 271340                  | C/T  | NA                 | INTERGENIC                    | NA                                                           |
| Kabuli_wild_344355 | 1399945572                          | Ca_kabuli_scaffold | 344355                  | A/C  | NA                 | INTERGENIC                    | NA                                                           |
| Kabuli_wild_344392 | 1399945573                          | Ca_kabuli_scaffold | 344392                  | G/A  | NA                 | INTERGENIC                    | NA                                                           |
| Kabuli_wild_344417 | 1399945574                          | Ca_kabuli_scaffold | 344417                  | G/T  | NA                 | INTERGENIC                    | NA                                                           |
| Kabuli_wild_344459 | 1399945575                          | Ca_kabuli_scaffold | 344459                  | G/A  | NA                 | INTERGENIC                    | NA                                                           |

| SNP IDs                   | NCBI dbSNP accession IDs (NCBI_SS#) | Chromosomes               | Physical positions (bp) | SNPs | Gene accession IDs | Sequence components of genome | Putative functions                                           |
|---------------------------|-------------------------------------|---------------------------|-------------------------|------|--------------------|-------------------------------|--------------------------------------------------------------|
| <i>Kabuli_wild_3406</i>   | 1399945576                          | <i>Ca_kabuli_scaffold</i> | 3406                    | T/C  | Gene_Ca_21773      | INTRON                        | Pathogenesis-related transcriptional factor/ERF, DNA-binding |
| <i>Kabuli_wild_114660</i> | 1399945577                          | <i>Ca_kabuli_scaffold</i> | 114660                  | C/G  | NA                 | INTERGENIC                    | NA                                                           |
| <i>Kabuli_wild_114665</i> | 1399945578                          | <i>Ca_kabuli_scaffold</i> | 114665                  | A/T  | NA                 | INTERGENIC                    | NA                                                           |
| <i>Kabuli_wild_394757</i> | 1399945579                          | <i>Ca_kabuli_scaffold</i> | 394757                  | G/T  | Gene_Ca_21793      | INTRON                        | Transposase,Ptta/En/Spm,plant                                |
| <i>Kabuli_wild_394800</i> | 1399945580                          | <i>Ca_kabuli_scaffold</i> | 394800                  | T/A  | Gene_Ca_21793      | INTRON                        | Transposase,Ptta/En/Spm,plant                                |
| <i>Kabuli_wild_394803</i> | 1399945581                          | <i>Ca_kabuli_scaffold</i> | 394803                  | C/T  | Gene_Ca_21793      | INTRON                        | Transposase,Ptta/En/Spm,plant                                |
| <i>Kabuli_wild_394805</i> | 1399945582                          | <i>Ca_kabuli_scaffold</i> | 394805                  | C/T  | Gene_Ca_21793      | INTRON                        | Transposase,Ptta/En/Spm,plant                                |
| <i>Kabuli_wild_394815</i> | 1399945583                          | <i>Ca_kabuli_scaffold</i> | 394815                  | T/C  | Gene_Ca_21793      | INTRON                        | Transposase,Ptta/En/Spm,plant                                |
| <i>Kabuli_wild_394818</i> | 1399945584                          | <i>Ca_kabuli_scaffold</i> | 394818                  | G/T  | Gene_Ca_21793      | INTRON                        | Transposase,Ptta/En/Spm,plant                                |
| <i>Kabuli_wild_394846</i> | 1399945585                          | <i>Ca_kabuli_scaffold</i> | 394846                  | T/A  | Gene_Ca_21793      | INTRON                        | Transposase,Ptta/En/Spm,plant                                |
| <i>Kabuli_wild_394867</i> | 1399945586                          | <i>Ca_kabuli_scaffold</i> | 394867                  | C/T  | Gene_Ca_21793      | INTRON                        | Transposase,Ptta/En/Spm,plant                                |
| <i>Kabuli_wild_394873</i> | 1399945587                          | <i>Ca_kabuli_scaffold</i> | 394873                  | A/G  | Gene_Ca_21793      | INTRON                        | Transposase,Ptta/En/Spm,plant                                |
| <i>Kabuli_wild_394917</i> | 1399945588                          | <i>Ca_kabuli_scaffold</i> | 394917                  | C/T  | Gene_Ca_21793      | INTRON                        | Transposase,Ptta/En/Spm,plant                                |
| <i>Kabuli_wild_394940</i> | 1399945589                          | <i>Ca_kabuli_scaffold</i> | 394940                  | G/A  | Gene_Ca_21793      | INTRON                        | Transposase,Ptta/En/Spm,plant                                |
| <i>Kabuli_wild_395017</i> | 1399945590                          | <i>Ca_kabuli_scaffold</i> | 395017                  | A/T  | Gene_Ca_21793      | INTRON                        | Transposase,Ptta/En/Spm,plant                                |
| <i>Kabuli_wild_395029</i> | 1399945591                          | <i>Ca_kabuli_scaffold</i> | 395029                  | C/T  | Gene_Ca_21793      | INTRON                        | Transposase,Ptta/En/Spm,plant                                |
| <i>Kabuli_wild_63613</i>  | 1399945592                          | <i>Ca_kabuli_scaffold</i> | 63613                   | A/G  | NA                 | INTERGENIC                    | NA                                                           |
| <i>Kabuli_wild_63620</i>  | 1399945593                          | <i>Ca_kabuli_scaffold</i> | 63620                   | C/T  | NA                 | INTERGENIC                    | NA                                                           |
| <i>Kabuli_wild_63662</i>  | 1399945594                          | <i>Ca_kabuli_scaffold</i> | 63662                   | T/G  | NA                 | INTERGENIC                    | NA                                                           |
| <i>Kabuli_wild_63669</i>  | 1399945595                          | <i>Ca_kabuli_scaffold</i> | 63669                   | C/T  | NA                 | INTERGENIC                    | NA                                                           |
| <i>Kabuli_wild_63671</i>  | 1399945596                          | <i>Ca_kabuli_scaffold</i> | 63671                   | T/C  | NA                 | INTERGENIC                    | NA                                                           |
| <i>Kabuli_wild_63703</i>  | 1399945597                          | <i>Ca_kabuli_scaffold</i> | 63703                   | T/C  | NA                 | INTERGENIC                    | NA                                                           |
| <i>Kabuli_wild_45508</i>  | 1399945598                          | <i>Ca_kabuli_scaffold</i> | 45508                   | C/A  | NA                 | INTERGENIC                    | NA                                                           |
| <i>Kabuli_wild_142678</i> | 1399945599                          | <i>Ca_kabuli_scaffold</i> | 142678                  | A/C  | NA                 | INTERGENIC                    | NA                                                           |
| <i>Kabuli_wild_251191</i> | 1399945600                          | <i>Ca_kabuli_scaffold</i> | 251191                  | C/A  | NA                 | INTERGENIC                    | NA                                                           |
| <i>Kabuli_wild_97229</i>  | 1399945601                          | <i>Ca_kabuli_scaffold</i> | 97229                   | C/T  | Gene_Ca_26771      | NON_SYNONYMOUS_CODING         | TAFII28-likeprotein                                          |
| <i>Kabuli_wild_97358</i>  | 1399945602                          | <i>Ca_kabuli_scaffold</i> | 97358                   | T/C  | Gene_Ca_26771      | NON_SYNONYMOUS_CODING         | TAFII28-likeprotein                                          |
| <i>Kabuli_wild_7825</i>   | 1399945603                          | <i>Ca_kabuli_scaffold</i> | 7825                    | G/A  | NA                 | INTERGENIC                    | NA                                                           |
| <i>Kabuli_wild_1154</i>   | 1399945604                          | <i>Ca_kabuli_scaffold</i> | 1154                    | C/A  | Gene_Ca_24272      | DOWNSTREAM                    | NA                                                           |
| <i>Kabuli_wild_1164</i>   | 1399945605                          | <i>Ca_kabuli_scaffold</i> | 1164                    | C/A  | Gene_Ca_24272      | DOWNSTREAM                    | NA                                                           |
| <i>Kabuli_wild_1222</i>   | 1399945606                          | <i>Ca_kabuli_scaffold</i> | 1222                    | G/A  | Gene_Ca_24272      | STOP_GAINED                   | NA                                                           |
| <i>Kabuli_wild_1232</i>   | 1399945607                          | <i>Ca_kabuli_scaffold</i> | 1232                    | C/T  | Gene_Ca_24272      | SYNONYMOUS_CODING             | NA                                                           |
| <i>Kabuli_wild_1234</i>   | 1399945608                          | <i>Ca_kabuli_scaffold</i> | 1234                    | G/T  | Gene_Ca_24272      | NON_SYNONYMOUS_CODING         | NA                                                           |
| <i>Kabuli_wild_1240</i>   | 1399945609                          | <i>Ca_kabuli_scaffold</i> | 1240                    | T/G  | Gene_Ca_24272      | NON_SYNONYMOUS_CODING         | NA                                                           |
| <i>Kabuli_wild_1281</i>   | 1399945610                          | <i>Ca_kabuli_scaffold</i> | 1281                    | G/A  | Gene_Ca_24272      | NON_SYNONYMOUS_CODING         | NA                                                           |
| <i>Kabuli_wild_3150</i>   | 1399945611                          | <i>Ca_kabuli_scaffold</i> | 3150                    | C/A  | NA                 | INTERGENIC                    | NA                                                           |
| <i>Kabuli_wild_3159</i>   | 1399945612                          | <i>Ca_kabuli_scaffold</i> | 3159                    | C/A  | NA                 | INTERGENIC                    | NA                                                           |
| <i>Kabuli_wild_3160</i>   | 1399945613                          | <i>Ca_kabuli_scaffold</i> | 3160                    | C/A  | NA                 | INTERGENIC                    | NA                                                           |
| <i>Kabuli_wild_3166</i>   | 1399945614                          | <i>Ca_kabuli_scaffold</i> | 3166                    | G/T  | NA                 | INTERGENIC                    | NA                                                           |
| <i>Kabuli_wild_3191</i>   | 1399945615                          | <i>Ca_kabuli_scaffold</i> | 3191                    | G/A  | NA                 | INTERGENIC                    | NA                                                           |
| <i>Kabuli_wild_3219</i>   | 1399945616                          | <i>Ca_kabuli_scaffold</i> | 3219                    | G/T  | NA                 | INTERGENIC                    | NA                                                           |
| <i>Kabuli_wild_3228</i>   | 1399945617                          | <i>Ca_kabuli_scaffold</i> | 3228                    | C/T  | NA                 | INTERGENIC                    | NA                                                           |
| <i>Kabuli_wild_3236</i>   | 1399945618                          | <i>Ca_kabuli_scaffold</i> | 3236                    | T/G  | NA                 | INTERGENIC                    | NA                                                           |
| <i>Kabuli_wild_3240</i>   | 1399945619                          | <i>Ca_kabuli_scaffold</i> | 3240                    | G/C  | NA                 | INTERGENIC                    | NA                                                           |

| SNP IDs            | NCBI dbSNP accession IDs (NCBI_SS#) | Chromosomes        | Physical positions (bp) | SNPs | Gene accession IDs | Sequence components of genome | Putative functions                       |
|--------------------|-------------------------------------|--------------------|-------------------------|------|--------------------|-------------------------------|------------------------------------------|
| Kabuli_wild_3244   | 1399945620                          | Ca_kabuli_scaffold | 3244                    | G/A  | NA                 | INTERGENIC                    | NA                                       |
| Kabuli_wild_3248   | 1399945621                          | Ca_kabuli_scaffold | 3248                    | C/T  | NA                 | INTERGENIC                    | NA                                       |
| Kabuli_wild_3249   | 1399945622                          | Ca_kabuli_scaffold | 3249                    | T/G  | NA                 | INTERGENIC                    | NA                                       |
| Kabuli_wild_3297   | 1399945623                          | Ca_kabuli_scaffold | 3297                    | C/T  | NA                 | INTERGENIC                    | NA                                       |
| Kabuli_wild_213927 | 1399945624                          | Ca_kabuli_scaffold | 213927                  | A/T  | Gene_Ca_24284      | NON_SYNONYMOUS_CODING         | Peptidase C48, SUMO/Sentrin/Ubl1         |
| Kabuli_wild_213932 | 1399945625                          | Ca_kabuli_scaffold | 213932                  | T/G  | Gene_Ca_24284      | NON_SYNONYMOUS_CODING         | Peptidase C48, SUMO/Sentrin/Ubl1         |
| Kabuli_wild_6852   | 1399945626                          | Ca_kabuli_scaffold | 6852                    | T/C  | NA                 | INTERGENIC                    | NA                                       |
| Kabuli_wild_58074  | 1399945627                          | Ca_kabuli_scaffold | 58074                   | T/C  | NA                 | INTERGENIC                    | NA                                       |
| Kabuli_wild_68233  | 1399945628                          | Ca_kabuli_scaffold | 68233                   | C/T  | NA                 | INTERGENIC                    | NA                                       |
| Kabuli_wild_68255  | 1399945629                          | Ca_kabuli_scaffold | 68255                   | G/T  | NA                 | INTERGENIC                    | NA                                       |
| Kabuli_wild_35084  | 1399945630                          | Ca_kabuli_scaffold | 35084                   | T/A  | NA                 | INTERGENIC                    | NA                                       |
| Kabuli_wild_150599 | 1399945631                          | Ca_kabuli_scaffold | 150599                  | C/T  | Gene_Ca_25534      | SYNONYMOUS_CODING             | NA                                       |
| Kabuli_wild_150600 | 1399945632                          | Ca_kabuli_scaffold | 150600                  | C/T  | Gene_Ca_25534      | NON_SYNONYMOUS_CODING         | NA                                       |
| Kabuli_wild_150670 | 1399945633                          | Ca_kabuli_scaffold | 150670                  | C/T  | Gene_Ca_25534      | NON_SYNONYMOUS_CODING         | NA                                       |
| Kabuli_wild_150672 | 1399945634                          | Ca_kabuli_scaffold | 150672                  | G/A  | Gene_Ca_25534      | NON_SYNONYMOUS_CODING         | NA                                       |
| Kabuli_wild_150676 | 1399945635                          | Ca_kabuli_scaffold | 150676                  | C/T  | Gene_Ca_25534      | NON_SYNONYMOUS_CODING         | NA                                       |
| Kabuli_wild_150720 | 1399945636                          | Ca_kabuli_scaffold | 150720                  | G/A  | Gene_Ca_25534      | NON_SYNONYMOUS_CODING         | NA                                       |
| Kabuli_wild_150752 | 1399945637                          | Ca_kabuli_scaffold | 150752                  | G/T  | Gene_Ca_25534      | SYNONYMOUS_CODING             | NA                                       |
| Kabuli_wild_150756 | 1399945638                          | Ca_kabuli_scaffold | 150756                  | G/A  | Gene_Ca_25534      | NON_SYNONYMOUS_CODING         | NA                                       |
| Kabuli_wild_150757 | 1399945639                          | Ca_kabuli_scaffold | 150757                  | C/T  | Gene_Ca_25534      | NON_SYNONYMOUS_CODING         | NA                                       |
| Kabuli_wild_637    | 1399945640                          | Ca_kabuli_scaffold | 637                     | T/C  | NA                 | INTERGENIC                    | NA                                       |
| Kabuli_wild_669    | 1399945641                          | Ca_kabuli_scaffold | 669                     | A/G  | NA                 | INTERGENIC                    | NA                                       |
| Kabuli_wild_693    | 1399945642                          | Ca_kabuli_scaffold | 693                     | T/A  | NA                 | INTERGENIC                    | NA                                       |
| Kabuli_wild_62204  | 1399945643                          | Ca_kabuli_scaffold | 62204                   | C/A  | NA                 | INTERGENIC                    | NA                                       |
| Kabuli_wild_62210  | 1399945644                          | Ca_kabuli_scaffold | 62210                   | A/G  | NA                 | INTERGENIC                    | NA                                       |
| Kabuli_wild_62252  | 1399945645                          | Ca_kabuli_scaffold | 62252                   | G/A  | NA                 | INTERGENIC                    | NA                                       |
| Kabuli_wild_62263  | 1399945646                          | Ca_kabuli_scaffold | 62263                   | G/A  | NA                 | INTERGENIC                    | NA                                       |
| Kabuli_wild_62264  | 1399945647                          | Ca_kabuli_scaffold | 62264                   | G/A  | NA                 | INTERGENIC                    | NA                                       |
| Kabuli_wild_87275  | 1399945648                          | Ca_kabuli_scaffold | 87275                   | G/A  | NA                 | INTERGENIC                    | NA                                       |
| Kabuli_wild_153319 | 1399945649                          | Ca_kabuli_scaffold | 153319                  | G/T  | NA                 | INTERGENIC                    | NA                                       |
| Kabuli_wild_153349 | 1399945650                          | Ca_kabuli_scaffold | 153349                  | T/C  | NA                 | INTERGENIC                    | NA                                       |
| Kabuli_wild_2438   | 1399945651                          | Ca_kabuli_scaffold | 2438                    | C/T  | NA                 | INTERGENIC                    | NA                                       |
| Kabuli_wild_2454   | 1399945652                          | Ca_kabuli_scaffold | 2454                    | G/A  | NA                 | INTERGENIC                    | NA                                       |
| Kabuli_wild_2457   | 1399945653                          | Ca_kabuli_scaffold | 2457                    | A/G  | NA                 | INTERGENIC                    | NA                                       |
| Kabuli_wild_2215   | 1399945654                          | Ca_kabuli_scaffold | 2215                    | C/T  | Gene_Ca_27403      | DOWNSTREAM                    | NA                                       |
| Kabuli_wild_2224   | 1399945655                          | Ca_kabuli_scaffold | 2224                    | A/T  | Gene_Ca_27403      | DOWNSTREAM                    | NA                                       |
| Kabuli_wild_2225   | 1399945656                          | Ca_kabuli_scaffold | 2225                    | C/T  | Gene_Ca_27403      | DOWNSTREAM                    | NA                                       |
| Kabuli_wild_2226   | 1399945657                          | Ca_kabuli_scaffold | 2226                    | G/T  | Gene_Ca_27403      | DOWNSTREAM                    | NA                                       |
| Kabuli_wild_2315   | 1399945658                          | Ca_kabuli_scaffold | 2315                    | T/C  | Gene_Ca_27403      | DOWNSTREAM                    | NA                                       |
| Kabuli_wild_9556   | 1399945659                          | Ca_kabuli_scaffold | 9556                    | C/T  | Gene_Ca_27404      | INTRON                        | Inositolpolyphosphate-relatedphosphatase |
| Kabuli_wild_9568   | 1399945660                          | Ca_kabuli_scaffold | 9568                    | A/G  | Gene_Ca_27404      | INTRON                        | Inositolpolyphosphate-relatedphosphatase |
| Kabuli_wild_58302  | 1399945661                          | Ca_kabuli_scaffold | 58302                   | G/A  | NA                 | INTERGENIC                    | NA                                       |
| Kabuli_wild_58316  | 1399945662                          | Ca_kabuli_scaffold | 58316                   | T/C  | NA                 | INTERGENIC                    | NA                                       |
| Kabuli_wild_94196  | 1399945663                          | Ca_kabuli_scaffold | 94196                   | T/A  | Gene_Ca_23728      | INTRON                        | ABC transporter-like                     |

| SNP IDs                   | NCBI dbSNP accession IDs (NCBI_SS#) | Chromosomes               | Physical positions (bp) | SNPs | Gene accession IDs | Sequence components of genome | Putative functions                                     |
|---------------------------|-------------------------------------|---------------------------|-------------------------|------|--------------------|-------------------------------|--------------------------------------------------------|
| <i>Kabuli_wild_94207</i>  | 1399945664                          | <i>Ca_kabuli_scaffold</i> | 94207                   | A/C  | Gene_Ca_23728      | NON_SYNONYMOUS_CODING         | ABC transporter-like                                   |
| <i>Kabuli_wild_112702</i> | 1399945665                          | <i>Ca_kabuli_scaffold</i> | 112702                  | G/A  | NA                 | INTERGENIC                    | NA                                                     |
| <i>Kabuli_wild_341416</i> | 1399945666                          | <i>Ca_kabuli_scaffold</i> | 341416                  | T/A  | NA                 | INTERGENIC                    | NA                                                     |
| <i>Kabuli_wild_360529</i> | 1399945667                          | <i>Ca_kabuli_scaffold</i> | 360529                  | A/C  | NA                 | INTERGENIC                    | NA                                                     |
| <i>Kabuli_wild_360567</i> | 1399945668                          | <i>Ca_kabuli_scaffold</i> | 360567                  | T/A  | NA                 | INTERGENIC                    | NA                                                     |
| <i>Kabuli_wild_360585</i> | 1399945669                          | <i>Ca_kabuli_scaffold</i> | 360585                  | C/A  | NA                 | INTERGENIC                    | NA                                                     |
| <i>Kabuli_wild_423553</i> | 1399945670                          | <i>Ca_kabuli_scaffold</i> | 423553                  | A/G  | Gene_Ca_23740      | DOWNSTREAM                    | Signal transduction response regulator, receiverdomain |
| <i>Kabuli_wild_26492</i>  | 1399945671                          | <i>Ca_kabuli_scaffold</i> | 26492                   | G/A  | NA                 | INTERGENIC                    | NA                                                     |
| <i>Kabuli_wild_26497</i>  | 1399945672                          | <i>Ca_kabuli_scaffold</i> | 26497                   | C/T  | NA                 | INTERGENIC                    | NA                                                     |
| <i>Kabuli_wild_26508</i>  | 1399945673                          | <i>Ca_kabuli_scaffold</i> | 26508                   | T/G  | NA                 | INTERGENIC                    | NA                                                     |
| <i>Kabuli_wild_64083</i>  | 1399945674                          | <i>Ca_kabuli_scaffold</i> | 64083                   | A/G  | NA                 | INTERGENIC                    | NA                                                     |
| <i>Kabuli_wild_61220</i>  | 1399945675                          | <i>Ca_kabuli_scaffold</i> | 61220                   | G/A  | Gene_Ca_26367      | NON_SYNONYMOUS_CODING         | Protein of unknown function DUF707                     |
| <i>Kabuli_wild_227534</i> | 1399945676                          | <i>Ca_kabuli_scaffold</i> | 227534                  | C/A  | NA                 | INTERGENIC                    | NA                                                     |
| <i>Kabuli_wild_227589</i> | 1399945677                          | <i>Ca_kabuli_scaffold</i> | 227589                  | G/A  | NA                 | INTERGENIC                    | NA                                                     |
| <i>Kabuli_wild_228276</i> | 1399945678                          | <i>Ca_kabuli_scaffold</i> | 228276                  | A/G  | NA                 | INTERGENIC                    | NA                                                     |
| <i>Kabuli_wild_228291</i> | 1399945679                          | <i>Ca_kabuli_scaffold</i> | 228291                  | C/T  | NA                 | INTERGENIC                    | NA                                                     |
| <i>Kabuli_wild_228304</i> | 1399945680                          | <i>Ca_kabuli_scaffold</i> | 228304                  | A/T  | NA                 | INTERGENIC                    | NA                                                     |
| <i>Kabuli_wild_228312</i> | 1399945681                          | <i>Ca_kabuli_scaffold</i> | 228312                  | C/G  | NA                 | INTERGENIC                    | NA                                                     |
| <i>Kabuli_wild_228332</i> | 1399945682                          | <i>Ca_kabuli_scaffold</i> | 228332                  | G/A  | NA                 | INTERGENIC                    | NA                                                     |
| <i>Kabuli_wild_228353</i> | 1399945683                          | <i>Ca_kabuli_scaffold</i> | 228353                  | C/T  | NA                 | INTERGENIC                    | NA                                                     |
| <i>Kabuli_wild_228358</i> | 1399945684                          | <i>Ca_kabuli_scaffold</i> | 228358                  | T/A  | NA                 | INTERGENIC                    | NA                                                     |
| <i>Kabuli_wild_228367</i> | 1399945685                          | <i>Ca_kabuli_scaffold</i> | 228367                  | C/T  | NA                 | INTERGENIC                    | NA                                                     |
| <i>Kabuli_wild_137100</i> | 1399945686                          | <i>Ca_kabuli_scaffold</i> | 137100                  | A/G  | Gene_Ca_26895      | NON_SYNONYMOUS_CODING         | NA                                                     |
| <i>Kabuli_wild_112348</i> | 1399945687                          | <i>Ca_kabuli_scaffold</i> | 112348                  | G/A  | NA                 | INTERGENIC                    | NA                                                     |
| <i>Kabuli_wild_114508</i> | 1399945688                          | <i>Ca_kabuli_scaffold</i> | 114508                  | C/A  | Gene_Ca_25739      | SYNONYMOUS_CODING             | Staphylococcalnuclease(SNase-like)                     |
| <i>Kabuli_wild_192327</i> | 1399945689                          | <i>Ca_kabuli_scaffold</i> | 192327                  | G/A  | NA                 | INTERGENIC                    | NA                                                     |
| <i>Kabuli_wild_209057</i> | 1399945690                          | <i>Ca_kabuli_scaffold</i> | 209057                  | G/T  | NA                 | INTERGENIC                    | NA                                                     |
| <i>Kabuli_wild_902</i>    | 1399945691                          | <i>Ca_kabuli_scaffold</i> | 902                     | C/T  | NA                 | INTERGENIC                    | NA                                                     |
| <i>Kabuli_wild_944</i>    | 1399945692                          | <i>Ca_kabuli_scaffold</i> | 944                     | G/A  | NA                 | INTERGENIC                    | NA                                                     |
| <i>Kabuli_wild_1098</i>   | 1399945693                          | <i>Ca_kabuli_scaffold</i> | 1098                    | T/C  | NA                 | INTERGENIC                    | NA                                                     |
| <i>Kabuli_wild_1110</i>   | 1399945694                          | <i>Ca_kabuli_scaffold</i> | 1110                    | G/A  | NA                 | INTERGENIC                    | NA                                                     |
| <i>Kabuli_wild_1134</i>   | 1399945695                          | <i>Ca_kabuli_scaffold</i> | 1134                    | T/A  | NA                 | INTERGENIC                    | NA                                                     |
| <i>Kabuli_wild_70490</i>  | 1399945696                          | <i>Ca_kabuli_scaffold</i> | 70490                   | T/C  | NA                 | INTERGENIC                    | NA                                                     |
| <i>Kabuli_wild_70494</i>  | 1399945697                          | <i>Ca_kabuli_scaffold</i> | 70494                   | A/G  | NA                 | INTERGENIC                    | NA                                                     |
| <i>Kabuli_wild_70496</i>  | 1399945698                          | <i>Ca_kabuli_scaffold</i> | 70496                   | G/A  | NA                 | INTERGENIC                    | NA                                                     |
| <i>Kabuli_wild_70506</i>  | 1399945699                          | <i>Ca_kabuli_scaffold</i> | 70506                   | G/A  | NA                 | INTERGENIC                    | NA                                                     |
| <i>Kabuli_wild_70526</i>  | 1399945700                          | <i>Ca_kabuli_scaffold</i> | 70526                   | T/C  | NA                 | INTERGENIC                    | NA                                                     |
| <i>Kabuli_wild_70535</i>  | 1399945701                          | <i>Ca_kabuli_scaffold</i> | 70535                   | G/A  | NA                 | INTERGENIC                    | NA                                                     |
| <i>Kabuli_wild_70544</i>  | 1399945702                          | <i>Ca_kabuli_scaffold</i> | 70544                   | T/A  | NA                 | INTERGENIC                    | NA                                                     |
| <i>Kabuli_wild_70547</i>  | 1399945703                          | <i>Ca_kabuli_scaffold</i> | 70547                   | G/C  | NA                 | INTERGENIC                    | NA                                                     |
| <i>Kabuli_wild_70549</i>  | 1399945704                          | <i>Ca_kabuli_scaffold</i> | 70549                   | G/A  | NA                 | INTERGENIC                    | NA                                                     |
| <i>Kabuli_wild_70552</i>  | 1399945705                          | <i>Ca_kabuli_scaffold</i> | 70552                   | A/C  | NA                 | INTERGENIC                    | NA                                                     |
| <i>Kabuli_wild_203004</i> | 1399945706                          | <i>Ca_kabuli_scaffold</i> | 203004                  | G/A  | Gene_Ca_26186      | NON_SYNONYMOUS_CODING         | Peptidase C48, SUMO/Sentrin/Ubl1                       |
| <i>Kabuli_wild_203005</i> | 1399945707                          | <i>Ca_kabuli_scaffold</i> | 203005                  | C/T  | Gene_Ca_26186      | NON_SYNONYMOUS_CODING         | Peptidase C48, SUMO/Sentrin/Ubl1                       |

| SNP IDs            | NCBI dbSNP accession IDs (NCBI_SS#) | Chromosomes        | Physical positions (bp) | SNPs | Gene accession IDs | Sequence components of genome | Putative functions                         |
|--------------------|-------------------------------------|--------------------|-------------------------|------|--------------------|-------------------------------|--------------------------------------------|
| Kabuli_wild_203081 | 1399945708                          | Ca_kabuli_scaffold | 203081                  | G/C  | Gene_Ca_26186      | SYNONYMOUS_CODING             | Peptidase C48, SUMO/Sentrin/Ubl1           |
| Kabuli_wild_168957 | 1399945709                          | Ca_kabuli_scaffold | 168957                  | A/G  | NA                 | INTERGENIC                    | NA                                         |
| Kabuli_wild_171308 | 1399945710                          | Ca_kabuli_scaffold | 171308                  | A/C  | NA                 | INTERGENIC                    | NA                                         |
| Kabuli_wild_344239 | 1399945711                          | Ca_kabuli_scaffold | 344239                  | A/C  | NA                 | INTERGENIC                    | NA                                         |
| Kabuli_wild_407641 | 1399945712                          | Ca_kabuli_scaffold | 407641                  | G/A  | Gene_Ca_24073      | SYNONYMOUS_CODING             | TGS                                        |
| Kabuli_wild_407658 | 1399945713                          | Ca_kabuli_scaffold | 407658                  | C/G  | Gene_Ca_24073      | STOP_GAINED                   | TGS                                        |
| Kabuli_wild_407691 | 1399945714                          | Ca_kabuli_scaffold | 407691                  | T/C  | Gene_Ca_24073      | NON_SYNONYMOUS_CODING         | TGS                                        |
| Kabuli_wild_407695 | 1399945715                          | Ca_kabuli_scaffold | 407695                  | T/C  | Gene_Ca_24073      | SYNONYMOUS_CODING             | TGS                                        |
| Kabuli_wild_447890 | 1399945716                          | Ca_kabuli_scaffold | 447890                  | C/T  | NA                 | INTERGENIC                    | NA                                         |
| Kabuli_wild_505051 | 1399945717                          | Ca_kabuli_scaffold | 505051                  | C/T  | NA                 | INTERGENIC                    | NA                                         |
| Kabuli_wild_520148 | 1399945718                          | Ca_kabuli_scaffold | 520148                  | A/T  | NA                 | INTERGENIC                    | NA                                         |
| Kabuli_wild_520153 | 1399945719                          | Ca_kabuli_scaffold | 520153                  | C/G  | NA                 | INTERGENIC                    | NA                                         |
| Kabuli_wild_520164 | 1399945720                          | Ca_kabuli_scaffold | 520164                  | T/A  | NA                 | INTERGENIC                    | NA                                         |
| Kabuli_wild_5074   | 1399945721                          | Ca_kabuli_scaffold | 5074                    | C/T  | Gene_Ca_24658      | INTRON                        | NA                                         |
| Kabuli_wild_5089   | 1399945722                          | Ca_kabuli_scaffold | 5089                    | A/G  | Gene_Ca_24658      | INTRON                        | NA                                         |
| Kabuli_wild_5103   | 1399945723                          | Ca_kabuli_scaffold | 5103                    | G/C  | Gene_Ca_24658      | NON_SYNONYMOUS_CODING         | NA                                         |
| Kabuli_wild_5106   | 1399945724                          | Ca_kabuli_scaffold | 5106                    | G/A  | Gene_Ca_24658      | NON_SYNONYMOUS_CODING         | NA                                         |
| Kabuli_wild_46904  | 1399945725                          | Ca_kabuli_scaffold | 46904                   | C/T  | Gene_Ca_24659      | INTRON                        | CDP-alcoholphosphatidyltransferase         |
| Kabuli_wild_285926 | 1399945726                          | Ca_kabuli_scaffold | 285926                  | G/A  | Gene_Ca_24669      | SYNONYMOUS_CODING             | NA                                         |
| Kabuli_wild_285941 | 1399945727                          | Ca_kabuli_scaffold | 285941                  | C/T  | Gene_Ca_24669      | NON_SYNONYMOUS_CODING         | NA                                         |
| Kabuli_wild_285943 | 1399945728                          | Ca_kabuli_scaffold | 285943                  | G/A  | Gene_Ca_24669      | NON_SYNONYMOUS_CODING         | NA                                         |
| Kabuli_wild_285956 | 1399945729                          | Ca_kabuli_scaffold | 285956                  | C/T  | Gene_Ca_24669      | NON_SYNONYMOUS_CODING         | NA                                         |
| Kabuli_wild_40741  | 1399945730                          | Ca_kabuli_scaffold | 40741                   | G/T  | Gene_Ca_28164      | SYNONYMOUS_CODING             | PeptidaseS8/S53,subtilisin/kexin/sedolisin |
| Kabuli_wild_40791  | 1399945731                          | Ca_kabuli_scaffold | 40791                   | C/T  | Gene_Ca_28164      | NON_SYNONYMOUS_CODING         | PeptidaseS8/S53,subtilisin/kexin/sedolisin |
| Kabuli_wild_40793  | 1399945732                          | Ca_kabuli_scaffold | 40793                   | A/G  | Gene_Ca_28164      | SYNONYMOUS_CODING             | PeptidaseS8/S53,subtilisin/kexin/sedolisin |
| Kabuli_wild_40797  | 1399945733                          | Ca_kabuli_scaffold | 40797                   | A/T  | Gene_Ca_28164      | NON_SYNONYMOUS_CODING         | PeptidaseS8/S53,subtilisin/kexin/sedolisin |
| Kabuli_wild_40814  | 1399945734                          | Ca_kabuli_scaffold | 40814                   | T/A  | Gene_Ca_28164      | SYNONYMOUS_CODING             | PeptidaseS8/S53,subtilisin/kexin/sedolisin |
| Kabuli_wild_40817  | 1399945735                          | Ca_kabuli_scaffold | 40817                   | A/G  | Gene_Ca_28164      | SYNONYMOUS_CODING             | PeptidaseS8/S53,subtilisin/kexin/sedolisin |
| Kabuli_wild_34789  | 1399945736                          | Ca_kabuli_scaffold | 34789                   | C/T  | NA                 | INTERGENIC                    | NA                                         |
| Kabuli_wild_34791  | 1399945737                          | Ca_kabuli_scaffold | 34791                   | G/A  | NA                 | INTERGENIC                    | NA                                         |
| Kabuli_wild_34799  | 1399945738                          | Ca_kabuli_scaffold | 34799                   | C/T  | NA                 | INTERGENIC                    | NA                                         |
| Kabuli_wild_85015  | 1399945739                          | Ca_kabuli_scaffold | 85015                   | A/C  | Gene_Ca_27099      | DOWNSTREAM                    | NA                                         |
| Kabuli_wild_7812   | 1399945740                          | Ca_kabuli_scaffold | 7812                    | G/C  | NA                 | INTERGENIC                    | NA                                         |
| Kabuli_wild_289    | 1399945741                          | Ca_kabuli_scaffold | 289                     | G/A  | NA                 | INTERGENIC                    | NA                                         |
| Kabuli_wild_330    | 1399945742                          | Ca_kabuli_scaffold | 330                     | T/C  | NA                 | INTERGENIC                    | NA                                         |
| Kabuli_wild_71428  | 1399945743                          | Ca_kabuli_scaffold | 71428                   | C/T  | NA                 | INTERGENIC                    | NA                                         |
| Kabuli_wild_71649  | 1399945744                          | Ca_kabuli_scaffold | 71649                   | C/T  | NA                 | INTERGENIC                    | NA                                         |
| Kabuli_wild_55971  | 1399945745                          | Ca_kabuli_scaffold | 55971                   | A/G  | Gene_Ca_26853      | SYNONYMOUS_CODING             | Glycosyltransferase, family20              |
| Kabuli_wild_57303  | 1399945746                          | Ca_kabuli_scaffold | 57303                   | C/A  | Gene_Ca_26853      | INTRON                        | Glycosyltransferase, family20              |
| Kabuli_wild_62709  | 1399945747                          | Ca_kabuli_scaffold | 62709                   | A/G  | Gene_Ca_26853      | INTRON                        | Glycosyltransferase, family20              |
| Kabuli_wild_62711  | 1399945748                          | Ca_kabuli_scaffold | 62711                   | C/T  | Gene_Ca_26853      | INTRON                        | Glycosyltransferase, family20              |
| Kabuli_wild_62751  | 1399945749                          | Ca_kabuli_scaffold | 62751                   | C/T  | Gene_Ca_26853      | INTRON                        | Glycosyltransferase, family20              |
| Kabuli_wild_62775  | 1399945750                          | Ca_kabuli_scaffold | 62775                   | T/C  | Gene_Ca_26853      | INTRON                        | Glycosyltransferase, family20              |
| Kabuli_wild_62778  | 1399945751                          | Ca_kabuli_scaffold | 62778                   | T/A  | Gene_Ca_26853      | INTRON                        | Glycosyltransferase, family20              |



| SNP IDs            | NCBI dbSNP accession IDs (NCBI_SS#) | Chromosomes        | Physical positions (bp) | SNPs | Gene accession IDs | Sequence components of genome | Putative functions                        |
|--------------------|-------------------------------------|--------------------|-------------------------|------|--------------------|-------------------------------|-------------------------------------------|
| Kabuli_wild_62008  | 1399945752                          | Ca_kabuli_scaffold | 62008                   | G/A  | NA                 | INTERGENIC                    | NA                                        |
| Kabuli_wild_66173  | 1399945753                          | Ca_kabuli_scaffold | 66173                   | A/T  | Gene_Ca_21507      | NON_SYNONYMOUS_CODING         | Aminotransferase-like,plant mobile domain |
| Kabuli_wild_66208  | 1399945754                          | Ca_kabuli_scaffold | 66208                   | G/C  | Gene_Ca_21507      | NON_SYNONYMOUS_CODING         | Aminotransferase-like,plant mobile domain |
| Kabuli_wild_150505 | 1399945755                          | Ca_kabuli_scaffold | 150505                  | G/A  | NA                 | INTERGENIC                    | NA                                        |
| Kabuli_wild_244153 | 1399945756                          | Ca_kabuli_scaffold | 244153                  | C/A  | Gene_Ca_21517      | NON_SYNONYMOUS_CODING         | Protein kinase,catalytic domain           |
| Kabuli_wild_316037 | 1399945757                          | Ca_kabuli_scaffold | 316037                  | A/G  | NA                 | INTERGENIC                    | NA                                        |
| Kabuli_wild_398729 | 1399945758                          | Ca_kabuli_scaffold | 398729                  | T/G  | Gene_Ca_21525      | NON_SYNONYMOUS_CODING         | Armadillo                                 |
| Kabuli_wild_463286 | 1399945759                          | Ca_kabuli_scaffold | 463286                  | C/T  | NA                 | INTERGENIC                    | NA                                        |
| Kabuli_wild_526442 | 1399945760                          | Ca_kabuli_scaffold | 526442                  | T/C  | NA                 | INTERGENIC                    | NA                                        |
| Kabuli_wild_526446 | 1399945761                          | Ca_kabuli_scaffold | 526446                  | C/T  | NA                 | INTERGENIC                    | NA                                        |
| Kabuli_wild_527008 | 1399945762                          | Ca_kabuli_scaffold | 527008                  | T/C  | NA                 | INTERGENIC                    | NA                                        |
| Kabuli_wild_527012 | 1399945763                          | Ca_kabuli_scaffold | 527012                  | C/T  | NA                 | INTERGENIC                    | NA                                        |
| Kabuli_wild_48753  | 1399945764                          | Ca_kabuli_scaffold | 48753                   | G/A  | NA                 | INTERGENIC                    | NA                                        |
| Kabuli_wild_68241  | 1399945765                          | Ca_kabuli_scaffold | 68241                   | G/C  | Gene_Ca_24805      | SYNONYMOUS_CODING             | Peptidase C48, SUMO/Sentrin/Ubl1          |
| Kabuli_wild_68258  | 1399945766                          | Ca_kabuli_scaffold | 68258                   | A/T  | Gene_Ca_24805      | NON_SYNONYMOUS_CODING         | Peptidase C48, SUMO/Sentrin/Ubl1          |
| Kabuli_wild_68264  | 1399945767                          | Ca_kabuli_scaffold | 68264                   | C/T  | Gene_Ca_24805      | SYNONYMOUS_CODING             | Peptidase C48, SUMO/Sentrin/Ubl1          |
| Kabuli_wild_68275  | 1399945768                          | Ca_kabuli_scaffold | 68275                   | T/C  | Gene_Ca_24805      | SYNONYMOUS_CODING             | Peptidase C48, SUMO/Sentrin/Ubl1          |
| Kabuli_wild_68284  | 1399945769                          | Ca_kabuli_scaffold | 68284                   | C/A  | Gene_Ca_24805      | NON_SYNONYMOUS_CODING         | Peptidase C48, SUMO/Sentrin/Ubl1          |
| Kabuli_wild_68290  | 1399945770                          | Ca_kabuli_scaffold | 68290                   | C/A  | Gene_Ca_24805      | NON_SYNONYMOUS_CODING         | Peptidase C48, SUMO/Sentrin/Ubl1          |
| Kabuli_wild_68311  | 1399945771                          | Ca_kabuli_scaffold | 68311                   | G/A  | Gene_Ca_24805      | SYNONYMOUS_CODING             | Peptidase C48, SUMO/Sentrin/Ubl1          |
| Kabuli_wild_68324  | 1399945772                          | Ca_kabuli_scaffold | 68324                   | T/C  | Gene_Ca_24805      | INTRON                        | Peptidase C48, SUMO/Sentrin/Ubl1          |
| Kabuli_wild_68327  | 1399945773                          | Ca_kabuli_scaffold | 68327                   | G/T  | Gene_Ca_24805      | INTRON                        | Peptidase C48, SUMO/Sentrin/Ubl1          |
| Kabuli_wild_68330  | 1399945774                          | Ca_kabuli_scaffold | 68330                   | G/A  | Gene_Ca_24805      | INTRON                        | Peptidase C48, SUMO/Sentrin/Ubl1          |
| Kabuli_wild_68354  | 1399945775                          | Ca_kabuli_scaffold | 68354                   | G/A  | Gene_Ca_24805      | INTRON                        | Peptidase C48, SUMO/Sentrin/Ubl1          |
| Kabuli_wild_68359  | 1399945776                          | Ca_kabuli_scaffold | 68359                   | T/C  | Gene_Ca_24805      | INTRON                        | Peptidase C48, SUMO/Sentrin/Ubl1          |
| Kabuli_wild_96310  | 1399945777                          | Ca_kabuli_scaffold | 96310                   | A/C  | NA                 | INTERGENIC                    | NA                                        |
| Kabuli_wild_96358  | 1399945778                          | Ca_kabuli_scaffold | 96358                   | T/C  | NA                 | INTERGENIC                    | NA                                        |
| Kabuli_wild_96399  | 1399945779                          | Ca_kabuli_scaffold | 96399                   | C/T  | NA                 | INTERGENIC                    | NA                                        |
| Kabuli_wild_96409  | 1399945780                          | Ca_kabuli_scaffold | 96409                   | C/T  | NA                 | INTERGENIC                    | NA                                        |
| Kabuli_wild_96411  | 1399945781                          | Ca_kabuli_scaffold | 96411                   | G/A  | NA                 | INTERGENIC                    | NA                                        |
| Kabuli_wild_96414  | 1399945782                          | Ca_kabuli_scaffold | 96414                   | C/T  | NA                 | INTERGENIC                    | NA                                        |
| Kabuli_wild_96428  | 1399945783                          | Ca_kabuli_scaffold | 96428                   | G/A  | NA                 | INTERGENIC                    | NA                                        |
| Kabuli_wild_96429  | 1399945784                          | Ca_kabuli_scaffold | 96429                   | C/T  | NA                 | INTERGENIC                    | NA                                        |
| Kabuli_wild_105504 | 1399945785                          | Ca_kabuli_scaffold | 105504                  | G/A  | NA                 | INTERGENIC                    | NA                                        |
| Kabuli_wild_105507 | 1399945786                          | Ca_kabuli_scaffold | 105507                  | A/T  | NA                 | INTERGENIC                    | NA                                        |
| Kabuli_wild_105553 | 1399945787                          | Ca_kabuli_scaffold | 105553                  | T/C  | NA                 | INTERGENIC                    | NA                                        |
| Kabuli_wild_192068 | 1399945788                          | Ca_kabuli_scaffold | 192068                  | T/G  | NA                 | INTERGENIC                    | NA                                        |
| Kabuli_wild_240723 | 1399945789                          | Ca_kabuli_scaffold | 240723                  | C/T  | Gene_Ca_24811      | INTRON                        | NA                                        |
| Kabuli_wild_240730 | 1399945790                          | Ca_kabuli_scaffold | 240730                  | T/C  | Gene_Ca_24811      | INTRON                        | NA                                        |
| Kabuli_wild_240735 | 1399945791                          | Ca_kabuli_scaffold | 240735                  | G/A  | Gene_Ca_24811      | INTRON                        | NA                                        |
| Kabuli_wild_240749 | 1399945792                          | Ca_kabuli_scaffold | 240749                  | G/T  | Gene_Ca_24811      | INTRON                        | NA                                        |
| Kabuli_wild_240762 | 1399945793                          | Ca_kabuli_scaffold | 240762                  | C/T  | Gene_Ca_24811      | INTRON                        | NA                                        |
| Kabuli_wild_44260  | 1399945794                          | Ca_kabuli_scaffold | 44260                   | A/G  | NA                 | INTERGENIC                    | NA                                        |
| Kabuli_wild_24166  | 1399945795                          | Ca_kabuli_scaffold | 24166                   | G/A  | NA                 | INTERGENIC                    | NA                                        |

| SNP IDs            | NCBI dbSNP accession IDs (NCBI_SS#) | Chromosomes        | Physical positions (bp) | SNPs | Gene accession IDs | Sequence components of genome | Putative functions               |
|--------------------|-------------------------------------|--------------------|-------------------------|------|--------------------|-------------------------------|----------------------------------|
| Kabuli_wild_49259  | 1399945796                          | Ca_kabuli_scaffold | 49259                   | G/A  | Gene_Ca_26762      | SYNONYMOUS_CODING             | Transposase,Ptta/En/Spm,plant    |
| Kabuli_wild_51835  | 1399945797                          | Ca_kabuli_scaffold | 51835                   | T/C  | Gene_Ca_26762      | DOWNSTREAM                    | Transposase,Ptta/En/Spm,plant    |
| Kabuli_wild_98343  | 1399945798                          | Ca_kabuli_scaffold | 98343                   | G/A  | NA                 | INTERGENIC                    | NA                               |
| Kabuli_wild_98399  | 1399945799                          | Ca_kabuli_scaffold | 98399                   | C/T  | NA                 | INTERGENIC                    | NA                               |
| Kabuli_wild_98400  | 1399945800                          | Ca_kabuli_scaffold | 98400                   | T/C  | NA                 | INTERGENIC                    | NA                               |
| Kabuli_wild_98402  | 1399945801                          | Ca_kabuli_scaffold | 98402                   | T/C  | NA                 | INTERGENIC                    | NA                               |
| Kabuli_wild_18173  | 1399945802                          | Ca_kabuli_scaffold | 18173                   | A/G  | Gene_Ca_25873      | INTRON                        | Homeobox                         |
| Kabuli_wild_124337 | 1399945803                          | Ca_kabuli_scaffold | 124337                  | G/C  | Gene_Ca_25878      | NON_SYNONYMOUS_CODING         | Peptidase C48, SUMO/Sentrin/Ubl1 |
| Kabuli_wild_124340 | 1399945804                          | Ca_kabuli_scaffold | 124340                  | G/A  | Gene_Ca_25878      | NON_SYNONYMOUS_CODING         | Peptidase C48, SUMO/Sentrin/Ubl1 |
| Kabuli_wild_124367 | 1399945805                          | Ca_kabuli_scaffold | 124367                  | C/T  | Gene_Ca_25878      | NON_SYNONYMOUS_CODING         | Peptidase C48, SUMO/Sentrin/Ubl1 |
| Kabuli_wild_124377 | 1399945806                          | Ca_kabuli_scaffold | 124377                  | A/T  | Gene_Ca_25878      | NON_SYNONYMOUS_CODING         | Peptidase C48, SUMO/Sentrin/Ubl1 |
| Kabuli_wild_124380 | 1399945807                          | Ca_kabuli_scaffold | 124380                  | G/A  | Gene_Ca_25878      | NON_SYNONYMOUS_CODING         | Peptidase C48, SUMO/Sentrin/Ubl1 |
| Kabuli_wild_124383 | 1399945808                          | Ca_kabuli_scaffold | 124383                  | C/A  | Gene_Ca_25878      | NON_SYNONYMOUS_CODING         | Peptidase C48, SUMO/Sentrin/Ubl1 |
| Kabuli_wild_227729 | 1399945809                          | Ca_kabuli_scaffold | 227729                  | G/A  | Gene_Ca_25880      | NON_SYNONYMOUS_CODING         | Peptidase C48, SUMO/Sentrin/Ubl1 |
| Kabuli_wild_227730 | 1399945810                          | Ca_kabuli_scaffold | 227730                  | C/T  | Gene_Ca_25880      | NON_SYNONYMOUS_CODING         | Peptidase C48, SUMO/Sentrin/Ubl1 |
| Kabuli_wild_227736 | 1399945811                          | Ca_kabuli_scaffold | 227736                  | C/T  | Gene_Ca_25880      | NON_SYNONYMOUS_CODING         | Peptidase C48, SUMO/Sentrin/Ubl1 |
| Kabuli_wild_227768 | 1399945812                          | Ca_kabuli_scaffold | 227768                  | G/A  | Gene_Ca_25880      | NON_SYNONYMOUS_CODING         | Peptidase C48, SUMO/Sentrin/Ubl1 |
| Kabuli_wild_227777 | 1399945813                          | Ca_kabuli_scaffold | 227777                  | G/A  | Gene_Ca_25880      | NON_SYNONYMOUS_CODING         | Peptidase C48, SUMO/Sentrin/Ubl1 |
| Kabuli_wild_227796 | 1399945814                          | Ca_kabuli_scaffold | 227796                  | G/A  | Gene_Ca_25880      | SYNONYMOUS_CODING             | Peptidase C48, SUMO/Sentrin/Ubl1 |
| Kabuli_wild_227797 | 1399945815                          | Ca_kabuli_scaffold | 227797                  | C/G  | Gene_Ca_25880      | NON_SYNONYMOUS_CODING         | Peptidase C48, SUMO/Sentrin/Ubl1 |
| Kabuli_wild_227811 | 1399945816                          | Ca_kabuli_scaffold | 227811                  | C/T  | Gene_Ca_25880      | NON_SYNONYMOUS_CODING         | Peptidase C48, SUMO/Sentrin/Ubl1 |
| Kabuli_wild_227813 | 1399945817                          | Ca_kabuli_scaffold | 227813                  | G/T  | Gene_Ca_25880      | NON_SYNONYMOUS_CODING         | Peptidase C48, SUMO/Sentrin/Ubl1 |
| Kabuli_wild_115446 | 1399945818                          | Ca_kabuli_scaffold | 115446                  | C/A  | NA                 | INTERGENIC                    | NA                               |
| Kabuli_wild_115471 | 1399945819                          | Ca_kabuli_scaffold | 115471                  | G/A  | NA                 | INTERGENIC                    | NA                               |
| Kabuli_wild_115508 | 1399945820                          | Ca_kabuli_scaffold | 115508                  | C/T  | NA                 | INTERGENIC                    | NA                               |
| Kabuli_wild_228151 | 1399945821                          | Ca_kabuli_scaffold | 228151                  | G/A  | Gene_Ca_19765      | SYNONYMOUS_CODING             | NA                               |
| Kabuli_wild_228159 | 1399945822                          | Ca_kabuli_scaffold | 228159                  | A/C  | Gene_Ca_19765      | NON_SYNONYMOUS_CODING         | NA                               |
| Kabuli_wild_262208 | 1399945823                          | Ca_kabuli_scaffold | 262208                  | C/G  | Gene_Ca_19766      | NON_SYNONYMOUS_CODING         | NA                               |
| Kabuli_wild_262541 | 1399945824                          | Ca_kabuli_scaffold | 262541                  | A/T  | Gene_Ca_19766      | NON_SYNONYMOUS_CODING         | NA                               |
| Kabuli_wild_541844 | 1399945825                          | Ca_kabuli_scaffold | 541844                  | G/A  | NA                 | INTERGENIC                    | NA                               |
| Kabuli_wild_24599  | 1399945826                          | Ca_kabuli_scaffold | 24599                   | C/T  | NA                 | INTERGENIC                    | NA                               |
| Kabuli_wild_42146  | 1399945827                          | Ca_kabuli_scaffold | 42146                   | C/T  | Gene_Ca_21984      | DOWNSTREAM                    | NA                               |
| Kabuli_wild_42192  | 1399945828                          | Ca_kabuli_scaffold | 42192                   | C/T  | Gene_Ca_21984      | DOWNSTREAM                    | NA                               |
| Kabuli_wild_172084 | 1399945829                          | Ca_kabuli_scaffold | 172084                  | G/C  | NA                 | INTERGENIC                    | NA                               |
| Kabuli_wild_177145 | 1399945830                          | Ca_kabuli_scaffold | 177145                  | C/G  | NA                 | INTERGENIC                    | NA                               |
| Kabuli_wild_177159 | 1399945831                          | Ca_kabuli_scaffold | 177159                  | G/A  | NA                 | INTERGENIC                    | NA                               |
| Kabuli_wild_177171 | 1399945832                          | Ca_kabuli_scaffold | 177171                  | T/G  | NA                 | INTERGENIC                    | NA                               |
| Kabuli_wild_177172 | 1399945833                          | Ca_kabuli_scaffold | 177172                  | G/A  | NA                 | INTERGENIC                    | NA                               |
| Kabuli_wild_177178 | 1399945834                          | Ca_kabuli_scaffold | 177178                  | T/C  | NA                 | INTERGENIC                    | NA                               |
| Kabuli_wild_177182 | 1399945835                          | Ca_kabuli_scaffold | 177182                  | C/T  | NA                 | INTERGENIC                    | NA                               |
| Kabuli_wild_177188 | 1399945836                          | Ca_kabuli_scaffold | 177188                  | G/T  | NA                 | INTERGENIC                    | NA                               |
| Kabuli_wild_177191 | 1399945837                          | Ca_kabuli_scaffold | 177191                  | C/T  | NA                 | INTERGENIC                    | NA                               |
| Kabuli_wild_177192 | 1399945838                          | Ca_kabuli_scaffold | 177192                  | G/A  | NA                 | INTERGENIC                    | NA                               |
| Kabuli_wild_177193 | 1399945839                          | Ca_kabuli_scaffold | 177193                  | T/C  | NA                 | INTERGENIC                    | NA                               |

| SNP IDs            | NCBI dbSNP accession IDs (NCBI_SS#) | Chromosomes        | Physical positions (bp) | SNPs | Gene accession IDs | Sequence components of genome | Putative functions                       |
|--------------------|-------------------------------------|--------------------|-------------------------|------|--------------------|-------------------------------|------------------------------------------|
| Kabuli_wild_177200 | 1399945840                          | Ca_kabuli_scaffold | 177200                  | T/G  | NA                 | INTERGENIC                    | NA                                       |
| Kabuli_wild_177210 | 1399945841                          | Ca_kabuli_scaffold | 177210                  | T/A  | NA                 | INTERGENIC                    | NA                                       |
| Kabuli_wild_177212 | 1399945842                          | Ca_kabuli_scaffold | 177212                  | C/A  | NA                 | INTERGENIC                    | NA                                       |
| Kabuli_wild_177219 | 1399945843                          | Ca_kabuli_scaffold | 177219                  | T/G  | NA                 | INTERGENIC                    | NA                                       |
| Kabuli_wild_177234 | 1399945844                          | Ca_kabuli_scaffold | 177234                  | A/C  | NA                 | INTERGENIC                    | NA                                       |
| Kabuli_wild_177235 | 1399945845                          | Ca_kabuli_scaffold | 177235                  | G/T  | NA                 | INTERGENIC                    | NA                                       |
| Kabuli_wild_177240 | 1399945846                          | Ca_kabuli_scaffold | 177240                  | C/A  | NA                 | INTERGENIC                    | NA                                       |
| Kabuli_wild_177241 | 1399945847                          | Ca_kabuli_scaffold | 177241                  | T/G  | NA                 | INTERGENIC                    | NA                                       |
| Kabuli_wild_177242 | 1399945848                          | Ca_kabuli_scaffold | 177242                  | G/A  | NA                 | INTERGENIC                    | NA                                       |
| Kabuli_wild_177247 | 1399945849                          | Ca_kabuli_scaffold | 177247                  | G/A  | NA                 | INTERGENIC                    | NA                                       |
| Kabuli_wild_177248 | 1399945850                          | Ca_kabuli_scaffold | 177248                  | G/T  | NA                 | INTERGENIC                    | NA                                       |
| Kabuli_wild_177256 | 1399945851                          | Ca_kabuli_scaffold | 177256                  | T/G  | NA                 | INTERGENIC                    | NA                                       |
| Kabuli_wild_182067 | 1399945852                          | Ca_kabuli_scaffold | 182067                  | C/G  | NA                 | INTERGENIC                    | NA                                       |
| Kabuli_wild_204656 | 1399945853                          | Ca_kabuli_scaffold | 204656                  | C/A  | Gene_Ca_21998      | DOWNSTREAM                    | RibosomalproteinS9                       |
| Kabuli_wild_204659 | 1399945854                          | Ca_kabuli_scaffold | 204659                  | C/A  | Gene_Ca_21998      | DOWNSTREAM                    | RibosomalproteinS9                       |
| Kabuli_wild_207153 | 1399945855                          | Ca_kabuli_scaffold | 207153                  | T/C  | Gene_Ca_21998      | INTRON                        | RibosomalproteinS9                       |
| Kabuli_wild_335227 | 1399945856                          | Ca_kabuli_scaffold | 335227                  | T/C  | Gene_Ca_22005      | SYNONYMOUS_CODING             | NA                                       |
| Kabuli_wild_335232 | 1399945857                          | Ca_kabuli_scaffold | 335232                  | G/T  | Gene_Ca_22005      | SYNONYMOUS_CODING             | NA                                       |
| Kabuli_wild_335239 | 1399945858                          | Ca_kabuli_scaffold | 335239                  | G/T  | Gene_Ca_22005      | NON_SYNONYMOUS_CODING         | NA                                       |
| Kabuli_wild_366828 | 1399945859                          | Ca_kabuli_scaffold | 366828                  | C/T  | Gene_Ca_22006      | INTRON                        | AldehydedehydrogenaseNAD(P)-dependent    |
| Kabuli_wild_366846 | 1399945860                          | Ca_kabuli_scaffold | 366846                  | T/C  | Gene_Ca_22006      | INTRON                        | AldehydedehydrogenaseNAD(P)-dependent    |
| Kabuli_wild_367576 | 1399945861                          | Ca_kabuli_scaffold | 367576                  | A/G  | Gene_Ca_22006      | UPSTREAM                      | AldehydedehydrogenaseNAD(P)-dependent    |
| Kabuli_wild_367578 | 1399945862                          | Ca_kabuli_scaffold | 367578                  | G/A  | Gene_Ca_22006      | UPSTREAM                      | AldehydedehydrogenaseNAD(P)-dependent    |
| Kabuli_wild_367745 | 1399945863                          | Ca_kabuli_scaffold | 367745                  | G/A  | Gene_Ca_22006      | UPSTREAM                      | AldehydedehydrogenaseNAD(P)-dependent    |
| Kabuli_wild_8115   | 1399945864                          | Ca_kabuli_scaffold | 8115                    | T/G  | NA                 | INTERGENIC                    | NA                                       |
| Kabuli_wild_8154   | 1399945865                          | Ca_kabuli_scaffold | 8154                    | T/G  | NA                 | INTERGENIC                    | NA                                       |
| Kabuli_wild_8221   | 1399945866                          | Ca_kabuli_scaffold | 8221                    | T/G  | NA                 | INTERGENIC                    | NA                                       |
| Kabuli_wild_31000  | 1399945867                          | Ca_kabuli_scaffold | 31000                   | A/G  | Gene_Ca_25520      | UPSTREAM                      | Protein of unknown function DUF617,plant |
| Kabuli_wild_31086  | 1399945868                          | Ca_kabuli_scaffold | 31086                   | A/C  | Gene_Ca_25520      | UPSTREAM                      | Protein of unknown function DUF617,plant |
| Kabuli_wild_31087  | 1399945869                          | Ca_kabuli_scaffold | 31087                   | G/A  | Gene_Ca_25520      | UPSTREAM                      | Protein of unknown function DUF617,plant |
| Kabuli_wild_210315 | 1399945870                          | Ca_kabuli_scaffold | 210315                  | C/T  | NA                 | INTERGENIC                    | NA                                       |
| Kabuli_wild_52743  | 1399945871                          | Ca_kabuli_scaffold | 52743                   | A/C  | Gene_Ca_26838      | NON_SYNONYMOUS_CODING         | Domain of unknown function DUF641,plant  |
| Kabuli_wild_62434  | 1399945872                          | Ca_kabuli_scaffold | 62434                   | G/A  | NA                 | INTERGENIC                    | NA                                       |
| Kabuli_wild_62506  | 1399945873                          | Ca_kabuli_scaffold | 62506                   | G/A  | NA                 | INTERGENIC                    | NA                                       |
| Kabuli_wild_69648  | 1399945874                          | Ca_kabuli_scaffold | 69648                   | A/C  | NA                 | INTERGENIC                    | NA                                       |
| Kabuli_wild_251505 | 1399945875                          | Ca_kabuli_scaffold | 251505                  | G/C  | NA                 | INTERGENIC                    | NA                                       |
| Kabuli_wild_251520 | 1399945876                          | Ca_kabuli_scaffold | 251520                  | C/G  | NA                 | INTERGENIC                    | NA                                       |
| Kabuli_wild_251544 | 1399945877                          | Ca_kabuli_scaffold | 251544                  | G/T  | NA                 | INTERGENIC                    | NA                                       |
| Kabuli_wild_98354  | 1399945878                          | Ca_kabuli_scaffold | 98354                   | A/G  | NA                 | INTERGENIC                    | NA                                       |
| Kabuli_wild_164    | 1399945879                          | Ca_kabuli_scaffold | 164                     | G/A  | NA                 | INTERGENIC                    | NA                                       |
| Kabuli_wild_172    | 1399945880                          | Ca_kabuli_scaffold | 172                     | T/A  | NA                 | INTERGENIC                    | NA                                       |
| Kabuli_wild_178    | 1399945881                          | Ca_kabuli_scaffold | 178                     | G/T  | NA                 | INTERGENIC                    | NA                                       |
| Kabuli_wild_198    | 1399945882                          | Ca_kabuli_scaffold | 198                     | G/A  | NA                 | INTERGENIC                    | NA                                       |
| Kabuli_wild_145885 | 1399945883                          | Ca_kabuli_scaffold | 145885                  | G/T  | NA                 | INTERGENIC                    | NA                                       |

| SNP IDs            | NCBI dbSNP accession IDs (NCBI_SS#) | Chromosomes        | Physical positions (bp) | SNPs | Gene accession IDs | Sequence components of genome | Putative functions              |
|--------------------|-------------------------------------|--------------------|-------------------------|------|--------------------|-------------------------------|---------------------------------|
| Kabuli_wild_149312 | 1399945884                          | Ca_kabuli_scaffold | 149312                  | T/A  | NA                 | INTERGENIC                    | NA                              |
| Kabuli_wild_149323 | 1399945885                          | Ca_kabuli_scaffold | 149323                  | T/A  | NA                 | INTERGENIC                    | NA                              |
| Kabuli_wild_149324 | 1399945886                          | Ca_kabuli_scaffold | 149324                  | C/A  | NA                 | INTERGENIC                    | NA                              |
| Kabuli_wild_149325 | 1399945887                          | Ca_kabuli_scaffold | 149325                  | T/C  | NA                 | INTERGENIC                    | NA                              |
| Kabuli_wild_149337 | 1399945888                          | Ca_kabuli_scaffold | 149337                  | T/A  | NA                 | INTERGENIC                    | NA                              |
| Kabuli_wild_4906   | 1399945889                          | Ca_kabuli_scaffold | 4906                    | G/A  | Gene_Ca_25454      | STOP_GAINED                   | NA                              |
| Kabuli_wild_4917   | 1399945890                          | Ca_kabuli_scaffold | 4917                    | G/T  | Gene_Ca_25454      | NON_SYNONYMOUS_CODING         | NA                              |
| Kabuli_wild_76627  | 1399945891                          | Ca_kabuli_scaffold | 76627                   | A/C  | NA                 | INTERGENIC                    | NA                              |
| Kabuli_wild_230210 | 1399945892                          | Ca_kabuli_scaffold | 230210                  | T/G  | NA                 | INTERGENIC                    | NA                              |
| Kabuli_wild_257838 | 1399945893                          | Ca_kabuli_scaffold | 257838                  | T/C  | Gene_Ca_25461      | SYNONYMOUS_CODING             | NA                              |
| Kabuli_wild_268825 | 1399945894                          | Ca_kabuli_scaffold | 268825                  | A/T  | NA                 | INTERGENIC                    | NA                              |
| Kabuli_wild_310741 | 1399945895                          | Ca_kabuli_scaffold | 310741                  | G/A  | NA                 | INTERGENIC                    | NA                              |
| Kabuli_wild_310749 | 1399945896                          | Ca_kabuli_scaffold | 310749                  | A/T  | NA                 | INTERGENIC                    | NA                              |
| Kabuli_wild_310757 | 1399945897                          | Ca_kabuli_scaffold | 310757                  | G/T  | NA                 | INTERGENIC                    | NA                              |
| Kabuli_wild_24845  | 1399945898                          | Ca_kabuli_scaffold | 24845                   | C/T  | NA                 | INTERGENIC                    | NA                              |
| Kabuli_wild_16647  | 1399945899                          | Ca_kabuli_scaffold | 16647                   | T/C  | NA                 | INTERGENIC                    | NA                              |
| Kabuli_wild_11275  | 1399945900                          | Ca_kabuli_scaffold | 11275                   | T/C  | NA                 | INTERGENIC                    | NA                              |
| Kabuli_wild_66318  | 1399945901                          | Ca_kabuli_scaffold | 66318                   | T/C  | Gene_Ca_23648      | NON_SYNONYMOUS_CODING         | NA                              |
| Kabuli_wild_142273 | 1399945902                          | Ca_kabuli_scaffold | 142273                  | A/G  | NA                 | INTERGENIC                    | NA                              |
| Kabuli_wild_242972 | 1399945903                          | Ca_kabuli_scaffold | 242972                  | A/G  | Gene_Ca_23658      | SYNONYMOUS_CODING             | NA                              |
| Kabuli_wild_47306  | 1399945904                          | Ca_kabuli_scaffold | 47306                   | A/G  | Gene_Ca_26687      | INTRON                        | Importin-beta,N-terminal        |
| Kabuli_wild_70354  | 1399945905                          | Ca_kabuli_scaffold | 70354                   | T/C  | Gene_Ca_26687      | INTRON                        | Importin-beta,N-terminal        |
| Kabuli_wild_74434  | 1399945906                          | Ca_kabuli_scaffold | 74434                   | C/T  | Gene_Ca_26687      | INTRON                        | Importin-beta,N-terminal        |
| Kabuli_wild_74436  | 1399945907                          | Ca_kabuli_scaffold | 74436                   | C/T  | Gene_Ca_26687      | INTRON                        | Importin-beta,N-terminal        |
| Kabuli_wild_74529  | 1399945908                          | Ca_kabuli_scaffold | 74529                   | C/T  | Gene_Ca_26687      | INTRON                        | Importin-beta,N-terminal        |
| Kabuli_wild_76809  | 1399945909                          | Ca_kabuli_scaffold | 76809                   | G/A  | Gene_Ca_26687      | INTRON                        | Importin-beta,N-terminal        |
| Kabuli_wild_55466  | 1399945910                          | Ca_kabuli_scaffold | 55466                   | C/T  | Gene_Ca_28129      | SYNONYMOUS_CODING             | NA                              |
| Kabuli_wild_55474  | 1399945911                          | Ca_kabuli_scaffold | 55474                   | T/G  | Gene_Ca_28129      | SYNONYMOUS_CODING             | NA                              |
| Kabuli_wild_55532  | 1399945912                          | Ca_kabuli_scaffold | 55532                   | G/A  | Gene_Ca_28129      | NON_SYNONYMOUS_CODING         | NA                              |
| Kabuli_wild_55533  | 1399945913                          | Ca_kabuli_scaffold | 55533                   | C/T  | Gene_Ca_28129      | NON_SYNONYMOUS_CODING         | NA                              |
| Kabuli_wild_3495   | 1399945914                          | Ca_kabuli_scaffold | 3495                    | C/A  | NA                 | INTERGENIC                    | NA                              |
| Kabuli_wild_3496   | 1399945915                          | Ca_kabuli_scaffold | 3496                    | A/T  | NA                 | INTERGENIC                    | NA                              |
| Kabuli_wild_3501   | 1399945916                          | Ca_kabuli_scaffold | 3501                    | C/A  | NA                 | INTERGENIC                    | NA                              |
| Kabuli_wild_3737   | 1399945917                          | Ca_kabuli_scaffold | 3737                    | C/A  | NA                 | INTERGENIC                    | NA                              |
| Kabuli_wild_1556   | 1399945918                          | Ca_kabuli_scaffold | 1556                    | G/T  | Gene_Ca_28230      | INTRON                        | Protein kinase,catalytic domain |
| Kabuli_wild_86080  | 1399945919                          | Ca_kabuli_scaffold | 86080                   | T/C  | Gene_Ca_24032      | DOWNSTREAM                    | NA                              |
| Kabuli_wild_86099  | 1399945920                          | Ca_kabuli_scaffold | 86099                   | G/C  | Gene_Ca_24032      | DOWNSTREAM                    | NA                              |
| Kabuli_wild_86112  | 1399945921                          | Ca_kabuli_scaffold | 86112                   | G/T  | Gene_Ca_24032      | DOWNSTREAM                    | NA                              |
| Kabuli_wild_86117  | 1399945922                          | Ca_kabuli_scaffold | 86117                   | G/T  | Gene_Ca_24032      | DOWNSTREAM                    | NA                              |
| Kabuli_wild_86127  | 1399945923                          | Ca_kabuli_scaffold | 86127                   | C/T  | Gene_Ca_24032      | DOWNSTREAM                    | NA                              |
| Kabuli_wild_90835  | 1399945924                          | Ca_kabuli_scaffold | 90835                   | T/A  | NA                 | INTERGENIC                    | NA                              |
| Kabuli_wild_90846  | 1399945925                          | Ca_kabuli_scaffold | 90846                   | C/A  | NA                 | INTERGENIC                    | NA                              |
| Kabuli_wild_200109 | 1399945926                          | Ca_kabuli_scaffold | 200109                  | A/C  | Gene_Ca_24038      | INTRON                        | Protein kinase,catalytic domain |
| Kabuli_wild_322130 | 1399945927                          | Ca_kabuli_scaffold | 322130                  | T/A  | NA                 | INTERGENIC                    | NA                              |

| SNP IDs            | NCBI dbSNP accession IDs (NCBI_SS#) | Chromosomes        | Physical positions (bp) | SNPs | Gene accession IDs | Sequence components of genome | Putative functions               |
|--------------------|-------------------------------------|--------------------|-------------------------|------|--------------------|-------------------------------|----------------------------------|
| Kabuli_wild_322287 | 1399945928                          | Ca_kabuli_scaffold | 322287                  | G/A  | NA                 | INTERGENIC                    | NA                               |
| Kabuli_wild_322289 | 1399945929                          | Ca_kabuli_scaffold | 322289                  | C/T  | NA                 | INTERGENIC                    | NA                               |
| Kabuli_wild_322315 | 1399945930                          | Ca_kabuli_scaffold | 322315                  | G/T  | NA                 | INTERGENIC                    | NA                               |
| Kabuli_wild_322383 | 1399945931                          | Ca_kabuli_scaffold | 322383                  | C/T  | NA                 | INTERGENIC                    | NA                               |
| Kabuli_wild_322390 | 1399945932                          | Ca_kabuli_scaffold | 322390                  | G/A  | NA                 | INTERGENIC                    | NA                               |
| Kabuli_wild_322400 | 1399945933                          | Ca_kabuli_scaffold | 322400                  | C/T  | NA                 | INTERGENIC                    | NA                               |
| Kabuli_wild_322414 | 1399945934                          | Ca_kabuli_scaffold | 322414                  | G/A  | NA                 | INTERGENIC                    | NA                               |
| Kabuli_wild_322415 | 1399945935                          | Ca_kabuli_scaffold | 322415                  | G/A  | NA                 | INTERGENIC                    | NA                               |
| Kabuli_wild_322446 | 1399945936                          | Ca_kabuli_scaffold | 322446                  | C/T  | NA                 | INTERGENIC                    | NA                               |
| Kabuli_wild_322448 | 1399945937                          | Ca_kabuli_scaffold | 322448                  | T/G  | NA                 | INTERGENIC                    | NA                               |
| Kabuli_wild_322450 | 1399945938                          | Ca_kabuli_scaffold | 322450                  | G/T  | NA                 | INTERGENIC                    | NA                               |
| Kabuli_wild_322456 | 1399945939                          | Ca_kabuli_scaffold | 322456                  | G/A  | NA                 | INTERGENIC                    | NA                               |
| Kabuli_wild_25045  | 1399945940                          | Ca_kabuli_scaffold | 25045                   | T/G  | Gene_Ca_26808      | NON_SYNONYMOUS_CODING         | NA                               |
| Kabuli_wild_205803 | 1399945941                          | Ca_kabuli_scaffold | 205803                  | C/T  | NA                 | INTERGENIC                    | NA                               |
| Kabuli_wild_205830 | 1399945942                          | Ca_kabuli_scaffold | 205830                  | G/A  | NA                 | INTERGENIC                    | NA                               |
| Kabuli_wild_205833 | 1399945943                          | Ca_kabuli_scaffold | 205833                  | G/A  | NA                 | INTERGENIC                    | NA                               |
| Kabuli_wild_205845 | 1399945944                          | Ca_kabuli_scaffold | 205845                  | A/G  | NA                 | INTERGENIC                    | NA                               |
| Kabuli_wild_205863 | 1399945945                          | Ca_kabuli_scaffold | 205863                  | G/A  | NA                 | INTERGENIC                    | NA                               |
| Kabuli_wild_206035 | 1399945946                          | Ca_kabuli_scaffold | 206035                  | T/C  | NA                 | INTERGENIC                    | NA                               |
| Kabuli_wild_206067 | 1399945947                          | Ca_kabuli_scaffold | 206067                  | T/G  | NA                 | INTERGENIC                    | NA                               |
| Kabuli_wild_206073 | 1399945948                          | Ca_kabuli_scaffold | 206073                  | G/A  | NA                 | INTERGENIC                    | NA                               |
| Kabuli_wild_206085 | 1399945949                          | Ca_kabuli_scaffold | 206085                  | T/C  | NA                 | INTERGENIC                    | NA                               |
| Kabuli_wild_206094 | 1399945950                          | Ca_kabuli_scaffold | 206094                  | T/C  | NA                 | INTERGENIC                    | NA                               |
| Kabuli_wild_206100 | 1399945951                          | Ca_kabuli_scaffold | 206100                  | G/A  | NA                 | INTERGENIC                    | NA                               |
| Kabuli_wild_206109 | 1399945952                          | Ca_kabuli_scaffold | 206109                  | G/C  | NA                 | INTERGENIC                    | NA                               |
| Kabuli_wild_206118 | 1399945953                          | Ca_kabuli_scaffold | 206118                  | C/T  | NA                 | INTERGENIC                    | NA                               |
| Kabuli_wild_206121 | 1399945954                          | Ca_kabuli_scaffold | 206121                  | G/A  | NA                 | INTERGENIC                    | NA                               |
| Kabuli_wild_4749   | 1399945955                          | Ca_kabuli_scaffold | 4749                    | C/T  | NA                 | INTERGENIC                    | NA                               |
| Kabuli_wild_4754   | 1399945956                          | Ca_kabuli_scaffold | 4754                    | C/T  | NA                 | INTERGENIC                    | NA                               |
| Kabuli_wild_4755   | 1399945957                          | Ca_kabuli_scaffold | 4755                    | T/A  | NA                 | INTERGENIC                    | NA                               |
| Kabuli_wild_4794   | 1399945958                          | Ca_kabuli_scaffold | 4794                    | C/A  | NA                 | INTERGENIC                    | NA                               |
| Kabuli_wild_4796   | 1399945959                          | Ca_kabuli_scaffold | 4796                    | C/T  | NA                 | INTERGENIC                    | NA                               |
| Kabuli_wild_4811   | 1399945960                          | Ca_kabuli_scaffold | 4811                    | A/C  | NA                 | INTERGENIC                    | NA                               |
| Kabuli_wild_4820   | 1399945961                          | Ca_kabuli_scaffold | 4820                    | G/A  | NA                 | INTERGENIC                    | NA                               |
| Kabuli_wild_4845   | 1399945962                          | Ca_kabuli_scaffold | 4845                    | A/T  | NA                 | INTERGENIC                    | NA                               |
| Kabuli_wild_4854   | 1399945963                          | Ca_kabuli_scaffold | 4854                    | C/T  | NA                 | INTERGENIC                    | NA                               |
| Kabuli_wild_56686  | 1399945964                          | Ca_kabuli_scaffold | 56686                   | A/T  | NA                 | INTERGENIC                    | NA                               |
| Kabuli_wild_70785  | 1399945965                          | Ca_kabuli_scaffold | 70785                   | C/T  | Gene_Ca_26256      | INTRON                        | Pentatric peptide repeat         |
| Kabuli_wild_81706  | 1399945966                          | Ca_kabuli_scaffold | 81706                   | C/T  | Gene_Ca_26514      | INTRON                        | Peptidase C48, SUMO/Sentrin/Ubl1 |
| Kabuli_wild_81713  | 1399945967                          | Ca_kabuli_scaffold | 81713                   | C/T  | Gene_Ca_26514      | INTRON                        | Peptidase C48, SUMO/Sentrin/Ubl1 |
| Kabuli_wild_81740  | 1399945968                          | Ca_kabuli_scaffold | 81740                   | C/T  | Gene_Ca_26514      | INTRON                        | Peptidase C48, SUMO/Sentrin/Ubl1 |
| Kabuli_wild_81784  | 1399945969                          | Ca_kabuli_scaffold | 81784                   | C/A  | Gene_Ca_26514      | INTRON                        | Peptidase C48, SUMO/Sentrin/Ubl1 |
| Kabuli_wild_81788  | 1399945970                          | Ca_kabuli_scaffold | 81788                   | A/C  | Gene_Ca_26514      | INTRON                        | Peptidase C48, SUMO/Sentrin/Ubl1 |
| Kabuli_wild_81789  | 1399945971                          | Ca_kabuli_scaffold | 81789                   | A/G  | Gene_Ca_26514      | INTRON                        | Peptidase C48, SUMO/Sentrin/Ubl1 |

| SNP IDs            | NCBI dbSNP accession IDs (NCBI_SS#) | Chromosomes        | Physical positions (bp) | SNPs | Gene accession IDs | Sequence components of genome | Putative functions                   |
|--------------------|-------------------------------------|--------------------|-------------------------|------|--------------------|-------------------------------|--------------------------------------|
| Kabuli_wild_81811  | 1399945972                          | Ca_kabuli_scaffold | 81811                   | A/G  | Gene_Ca_26514      | INTRON                        | Peptidase C48, SUMO/Sentrin/Ubl1     |
| Kabuli_wild_81851  | 1399945973                          | Ca_kabuli_scaffold | 81851                   | G/C  | Gene_Ca_26514      | INTRON                        | Peptidase C48, SUMO/Sentrin/Ubl1     |
| Kabuli_wild_81873  | 1399945974                          | Ca_kabuli_scaffold | 81873                   | C/A  | Gene_Ca_26514      | INTRON                        | Peptidase C48, SUMO/Sentrin/Ubl1     |
| Kabuli_wild_81880  | 1399945975                          | Ca_kabuli_scaffold | 81880                   | C/T  | Gene_Ca_26514      | INTRON                        | Peptidase C48, SUMO/Sentrin/Ubl1     |
| Kabuli_wild_81885  | 1399945976                          | Ca_kabuli_scaffold | 81885                   | A/G  | Gene_Ca_26514      | INTRON                        | Peptidase C48, SUMO/Sentrin/Ubl1     |
| Kabuli_wild_81889  | 1399945977                          | Ca_kabuli_scaffold | 81889                   | T/G  | Gene_Ca_26514      | INTRON                        | Peptidase C48, SUMO/Sentrin/Ubl1     |
| Kabuli_wild_289997 | 1399945978                          | Ca_kabuli_scaffold | 289997                  | G/T  | NA                 | INTERGENIC                    | NA                                   |
| Kabuli_wild_290018 | 1399945979                          | Ca_kabuli_scaffold | 290018                  | C/A  | NA                 | INTERGENIC                    | NA                                   |
| Kabuli_wild_3474   | 1399945980                          | Ca_kabuli_scaffold | 3474                    | A/C  | Gene_Ca_28063      | SYNONYMOUS_CODING             | Multiantimicrobial extrusion protein |
| Kabuli_wild_3641   | 1399945981                          | Ca_kabuli_scaffold | 3641                    | T/C  | Gene_Ca_28063      | INTRON                        | Multiantimicrobial extrusion protein |
| Kabuli_wild_3675   | 1399945982                          | Ca_kabuli_scaffold | 3675                    | G/C  | Gene_Ca_28063      | INTRON                        | Multiantimicrobial extrusion protein |
| Kabuli_wild_122915 | 1399945983                          | Ca_kabuli_scaffold | 122915                  | C/T  | Gene_Ca_24092      | INTRON                        | NA                                   |
| Kabuli_wild_160597 | 1399945984                          | Ca_kabuli_scaffold | 160597                  | C/T  | Gene_Ca_24092      | NON_SYNONYMOUS_CODING         | NA                                   |
| Kabuli_wild_160599 | 1399945985                          | Ca_kabuli_scaffold | 160599                  | T/A  | Gene_Ca_24092      | SYNONYMOUS_CODING             | NA                                   |
| Kabuli_wild_160623 | 1399945986                          | Ca_kabuli_scaffold | 160623                  | G/T  | Gene_Ca_24092      | SYNONYMOUS_CODING             | NA                                   |
| Kabuli_wild_160625 | 1399945987                          | Ca_kabuli_scaffold | 160625                  | C/T  | Gene_Ca_24092      | NON_SYNONYMOUS_CODING         | NA                                   |
| Kabuli_wild_160709 | 1399945988                          | Ca_kabuli_scaffold | 160709                  | T/C  | Gene_Ca_24092      | SYNONYMOUS_CODING             | NA                                   |
| Kabuli_wild_160749 | 1399945989                          | Ca_kabuli_scaffold | 160749                  | T/C  | Gene_Ca_24092      | SYNONYMOUS_CODING             | NA                                   |
| Kabuli_wild_189663 | 1399945990                          | Ca_kabuli_scaffold | 189663                  | G/A  | NA                 | INTERGENIC                    | NA                                   |
| Kabuli_wild_189664 | 1399945991                          | Ca_kabuli_scaffold | 189664                  | G/A  | NA                 | INTERGENIC                    | NA                                   |
| Kabuli_wild_189681 | 1399945992                          | Ca_kabuli_scaffold | 189681                  | C/T  | NA                 | INTERGENIC                    | NA                                   |
| Kabuli_wild_189699 | 1399945993                          | Ca_kabuli_scaffold | 189699                  | C/T  | NA                 | INTERGENIC                    | NA                                   |
| Kabuli_wild_189700 | 1399945994                          | Ca_kabuli_scaffold | 189700                  | A/G  | NA                 | INTERGENIC                    | NA                                   |
| Kabuli_wild_197789 | 1399945995                          | Ca_kabuli_scaffold | 197789                  | G/A  | NA                 | INTERGENIC                    | NA                                   |
| Kabuli_wild_197790 | 1399945996                          | Ca_kabuli_scaffold | 197790                  | G/A  | NA                 | INTERGENIC                    | NA                                   |
| Kabuli_wild_197807 | 1399945997                          | Ca_kabuli_scaffold | 197807                  | T/C  | NA                 | INTERGENIC                    | NA                                   |
| Kabuli_wild_197819 | 1399945998                          | Ca_kabuli_scaffold | 197819                  | T/G  | NA                 | INTERGENIC                    | NA                                   |
| Kabuli_wild_197826 | 1399945999                          | Ca_kabuli_scaffold | 197826                  | G/A  | NA                 | INTERGENIC                    | NA                                   |
| Kabuli_wild_197873 | 1399946000                          | Ca_kabuli_scaffold | 197873                  | C/G  | NA                 | INTERGENIC                    | NA                                   |
| Kabuli_wild_240677 | 1399946001                          | Ca_kabuli_scaffold | 240677                  | T/A  | NA                 | INTERGENIC                    | NA                                   |
| Kabuli_wild_240713 | 1399946002                          | Ca_kabuli_scaffold | 240713                  | T/C  | NA                 | INTERGENIC                    | NA                                   |
| Kabuli_wild_20734  | 1399946003                          | Ca_kabuli_scaffold | 20734                   | G/T  | NA                 | INTERGENIC                    | NA                                   |
| Kabuli_wild_20744  | 1399946004                          | Ca_kabuli_scaffold | 20744                   | G/T  | NA                 | INTERGENIC                    | NA                                   |
| Kabuli_wild_33136  | 1399946005                          | Ca_kabuli_scaffold | 33136                   | A/C  | Gene_Ca_28120      | NON_SYNONYMOUS_CODING         | NA                                   |
| Kabuli_wild_33297  | 1399946006                          | Ca_kabuli_scaffold | 33297                   | A/C  | Gene_Ca_28120      | SYNONYMOUS_CODING             | NA                                   |
| Kabuli_wild_34102  | 1399946007                          | Ca_kabuli_scaffold | 34102                   | A/C  | Gene_Ca_28120      | INTRON                        | NA                                   |
| Kabuli_wild_98231  | 1399946008                          | Ca_kabuli_scaffold | 98231                   | A/G  | NA                 | INTERGENIC                    | NA                                   |
| Kabuli_wild_20779  | 1399946009                          | Ca_kabuli_scaffold | 20779                   | T/C  | Gene_Ca_26979      | DOWNSTREAM                    | Protein kinase,catalytic domain      |
| Kabuli_wild_10470  | 1399946010                          | Ca_kabuli_scaffold | 10470                   | G/T  | NA                 | INTERGENIC                    | NA                                   |
| Kabuli_wild_10471  | 1399946011                          | Ca_kabuli_scaffold | 10471                   | T/C  | NA                 | INTERGENIC                    | NA                                   |
| Kabuli_wild_10510  | 1399946012                          | Ca_kabuli_scaffold | 10510                   | T/G  | NA                 | INTERGENIC                    | NA                                   |
| Kabuli_wild_26707  | 1399946013                          | Ca_kabuli_scaffold | 26707                   | G/T  | NA                 | INTERGENIC                    | NA                                   |
| Kabuli_wild_86513  | 1399946014                          | Ca_kabuli_scaffold | 86513                   | G/A  | Gene_Ca_26592      | DOWNSTREAM                    | NA                                   |
| Kabuli_wild_4159   | 1399946015                          | Ca_kabuli_scaffold | 4159                    | G/T  | NA                 | INTERGENIC                    | NA                                   |

| SNP IDs            | NCBI dbSNP accession IDs (NCBI_SS#) | Chromosomes        | Physical positions (bp) | SNPs | Gene accession IDs | Sequence components of genome | Putative functions                                         |
|--------------------|-------------------------------------|--------------------|-------------------------|------|--------------------|-------------------------------|------------------------------------------------------------|
| Kabuli_wild_4175   | 1399946016                          | Ca_kabuli_scaffold | 4175                    | T/A  | NA                 | INTERGENIC                    | NA                                                         |
| Kabuli_wild_81468  | 1399946017                          | Ca_kabuli_scaffold | 81468                   | G/C  | NA                 | INTERGENIC                    | NA                                                         |
| Kabuli_wild_111476 | 1399946018                          | Ca_kabuli_scaffold | 111476                  | G/A  | Gene_Ca_23856      | NON_SYNONYMOUS_CODING         | Phosphoenolpyruvatecarboxylase,activesite                  |
| Kabuli_wild_233787 | 1399946019                          | Ca_kabuli_scaffold | 233787                  | C/T  | Gene_Ca_23863      | INTRON                        | NA                                                         |
| Kabuli_wild_5079   | 1399946020                          | Ca_kabuli_scaffold | 5079                    | C/A  | Gene_Ca_27877      | NON_SYNONYMOUS_CODING         | Peptidase C48, SUMO/Sentrin/Ubl1                           |
| Kabuli_wild_5104   | 1399946021                          | Ca_kabuli_scaffold | 5104                    | T/G  | Gene_Ca_27877      | SYNONYMOUS_CODING             | Peptidase C48, SUMO/Sentrin/Ubl1                           |
| Kabuli_wild_5115   | 1399946022                          | Ca_kabuli_scaffold | 5115                    | C/T  | Gene_Ca_27877      | NON_SYNONYMOUS_CODING         | Peptidase C48, SUMO/Sentrin/Ubl1                           |
| Kabuli_wild_5163   | 1399946023                          | Ca_kabuli_scaffold | 5163                    | C/T  | Gene_Ca_27877      | NON_SYNONYMOUS_CODING         | Peptidase C48, SUMO/Sentrin/Ubl1                           |
| Kabuli_wild_20517  | 1399946024                          | Ca_kabuli_scaffold | 20517                   | T/C  | NA                 | INTERGENIC                    | NA                                                         |
| Kabuli_wild_20521  | 1399946025                          | Ca_kabuli_scaffold | 20521                   | G/T  | NA                 | INTERGENIC                    | NA                                                         |
| Kabuli_wild_20559  | 1399946026                          | Ca_kabuli_scaffold | 20559                   | G/A  | NA                 | INTERGENIC                    | NA                                                         |
| Kabuli_wild_41784  | 1399946027                          | Ca_kabuli_scaffold | 41784                   | T/C  | NA                 | INTERGENIC                    | NA                                                         |
| Kabuli_wild_41792  | 1399946028                          | Ca_kabuli_scaffold | 41792                   | C/T  | NA                 | INTERGENIC                    | NA                                                         |
| Kabuli_wild_41793  | 1399946029                          | Ca_kabuli_scaffold | 41793                   | T/G  | NA                 | INTERGENIC                    | NA                                                         |
| Kabuli_wild_41795  | 1399946030                          | Ca_kabuli_scaffold | 41795                   | A/C  | NA                 | INTERGENIC                    | NA                                                         |
| Kabuli_wild_41808  | 1399946031                          | Ca_kabuli_scaffold | 41808                   | T/A  | NA                 | INTERGENIC                    | NA                                                         |
| Kabuli_wild_41844  | 1399946032                          | Ca_kabuli_scaffold | 41844                   | T/C  | NA                 | INTERGENIC                    | NA                                                         |
| Kabuli_wild_41847  | 1399946033                          | Ca_kabuli_scaffold | 41847                   | T/A  | NA                 | INTERGENIC                    | NA                                                         |
| Kabuli_wild_41852  | 1399946034                          | Ca_kabuli_scaffold | 41852                   | C/T  | NA                 | INTERGENIC                    | NA                                                         |
| Kabuli_wild_41871  | 1399946035                          | Ca_kabuli_scaffold | 41871                   | G/A  | NA                 | INTERGENIC                    | NA                                                         |
| Kabuli_wild_2141   | 1399946036                          | Ca_kabuli_scaffold | 2141                    | T/C  | Gene_Ca_27017      | DOWNSTREAM                    | Peptidase C48, SUMO/Sentrin/Ubl1                           |
| Kabuli_wild_2145   | 1399946037                          | Ca_kabuli_scaffold | 2145                    | G/A  | Gene_Ca_27017      | DOWNSTREAM                    | Peptidase C48, SUMO/Sentrin/Ubl1                           |
| Kabuli_wild_2148   | 1399946038                          | Ca_kabuli_scaffold | 2148                    | G/A  | Gene_Ca_27017      | DOWNSTREAM                    | Peptidase C48, SUMO/Sentrin/Ubl1                           |
| Kabuli_wild_2163   | 1399946039                          | Ca_kabuli_scaffold | 2163                    | C/T  | Gene_Ca_27017      | DOWNSTREAM                    | Peptidase C48, SUMO/Sentrin/Ubl1                           |
| Kabuli_wild_2171   | 1399946040                          | Ca_kabuli_scaffold | 2171                    | T/G  | Gene_Ca_27017      | DOWNSTREAM                    | Peptidase C48, SUMO/Sentrin/Ubl1                           |
| Kabuli_wild_2182   | 1399946041                          | Ca_kabuli_scaffold | 2182                    | C/T  | Gene_Ca_27017      | DOWNSTREAM                    | Peptidase C48, SUMO/Sentrin/Ubl1                           |
| Kabuli_wild_2227   | 1399946042                          | Ca_kabuli_scaffold | 2227                    | C/T  | Gene_Ca_27017      | DOWNSTREAM                    | Peptidase C48, SUMO/Sentrin/Ubl1                           |
| Kabuli_wild_2230   | 1399946043                          | Ca_kabuli_scaffold | 2230                    | C/T  | Gene_Ca_27017      | DOWNSTREAM                    | Peptidase C48, SUMO/Sentrin/Ubl1                           |
| Kabuli_wild_71861  | 1399946044                          | Ca_kabuli_scaffold | 71861                   | G/T  | NA                 | INTERGENIC                    | NA                                                         |
| Kabuli_wild_58985  | 1399946045                          | Ca_kabuli_scaffold | 58985                   | T/G  | NA                 | INTERGENIC                    | NA                                                         |
| Kabuli_wild_58988  | 1399946046                          | Ca_kabuli_scaffold | 58988                   | G/A  | NA                 | INTERGENIC                    | NA                                                         |
| Kabuli_wild_59020  | 1399946047                          | Ca_kabuli_scaffold | 59020                   | C/T  | NA                 | INTERGENIC                    | NA                                                         |
| Kabuli_wild_11828  | 1399946048                          | Ca_kabuli_scaffold | 11828                   | C/G  | NA                 | INTERGENIC                    | NA                                                         |
| Kabuli_wild_11873  | 1399946049                          | Ca_kabuli_scaffold | 11873                   | C/T  | NA                 | INTERGENIC                    | NA                                                         |
| Kabuli_wild_25514  | 1399946050                          | Ca_kabuli_scaffold | 25514                   | A/G  | Gene_Ca_27084      | INTRON                        | Glycerol-3-phosphatedehydrogenase,NAD-dependent,C-terminal |
| Kabuli_wild_48917  | 1399946051                          | Ca_kabuli_scaffold | 48917                   | T/G  | Gene_Ca_27472      | INTRON                        | Protein kinase,catalytic domain                            |
| Kabuli_wild_48979  | 1399946052                          | Ca_kabuli_scaffold | 48979                   | T/C  | Gene_Ca_27472      | INTRON                        | Protein kinase,catalytic domain                            |
| Kabuli_wild_107750 | 1399946053                          | Ca_kabuli_scaffold | 107750                  | T/A  | Gene_Ca_27474      | NON_SYNONYMOUS_CODING         | Photosyntheticreactioncentre,L/M                           |
| Kabuli_wild_193075 | 1399946054                          | Ca_kabuli_scaffold | 193075                  | G/A  | Gene_Ca_27067      | NON_SYNONYMOUS_CODING         | NA                                                         |
| Kabuli_wild_193086 | 1399946055                          | Ca_kabuli_scaffold | 193086                  | C/G  | Gene_Ca_27067      | NON_SYNONYMOUS_CODING         | NA                                                         |
| Kabuli_wild_23507  | 1399946056                          | Ca_kabuli_scaffold | 23507                   | A/G  | NA                 | INTERGENIC                    | NA                                                         |
| Kabuli_wild_30981  | 1399946057                          | Ca_kabuli_scaffold | 30981                   | T/C  | Gene_Ca_26492      | UPSTREAM                      | Zinc finger,CCHC-type                                      |
| Kabuli_wild_31028  | 1399946058                          | Ca_kabuli_scaffold | 31028                   | C/T  | Gene_Ca_26492      | UPSTREAM                      | Zinc finger,CCHC-type                                      |
| Kabuli_wild_61364  | 1399946059                          | Ca_kabuli_scaffold | 61364                   | T/G  | Gene_Ca_26493      | INTRON                        | DAHPSynthetase.classII                                     |



| SNP IDs            | NCBI dbSNP accession IDs (NCBI_SS#) | Chromosomes        | Physical positions (bp) | SNPs | Gene accession IDs | Sequence components of genome | Putative functions                    |
|--------------------|-------------------------------------|--------------------|-------------------------|------|--------------------|-------------------------------|---------------------------------------|
| Kabuli_wild_143399 | 1399946060                          | Ca_kabuli_scaffold | 143399                  | T/C  | NA                 | INTERGENIC                    | NA                                    |
| Kabuli_wild_143440 | 1399946061                          | Ca_kabuli_scaffold | 143440                  | C/T  | NA                 | INTERGENIC                    | NA                                    |
| Kabuli_wild_177592 | 1399946062                          | Ca_kabuli_scaffold | 177592                  | T/G  | Gene_Ca_26483      | SYNONYMOUS_CODING             | NA                                    |
| Kabuli_wild_177623 | 1399946063                          | Ca_kabuli_scaffold | 177623                  | G/A  | Gene_Ca_26483      | NON_SYNONYMOUS_CODING         | NA                                    |
| Kabuli_wild_177650 | 1399946064                          | Ca_kabuli_scaffold | 177650                  | C/T  | Gene_Ca_26483      | NON_SYNONYMOUS_CODING         | NA                                    |
| Kabuli_wild_177701 | 1399946065                          | Ca_kabuli_scaffold | 177701                  | C/A  | Gene_Ca_26483      | NON_SYNONYMOUS_CODING         | NA                                    |
| Kabuli_wild_17107  | 1399946066                          | Ca_kabuli_scaffold | 17107                   | A/G  | Gene_Ca_26202      | NON_SYNONYMOUS_CODING         | Pleckstrinhomologydomain              |
| Kabuli_wild_146218 | 1399946067                          | Ca_kabuli_scaffold | 146218                  | G/A  | Gene_Ca_26207      | NON_SYNONYMOUS_CODING         | Peptidase C48, SUMO/Sentrin/Ubl1      |
| Kabuli_wild_83227  | 1399946068                          | Ca_kabuli_scaffold | 83227                   | G/C  | NA                 | INTERGENIC                    | NA                                    |
| Kabuli_wild_83345  | 1399946069                          | Ca_kabuli_scaffold | 83345                   | A/T  | NA                 | INTERGENIC                    | NA                                    |
| Kabuli_wild_83354  | 1399946070                          | Ca_kabuli_scaffold | 83354                   | T/A  | NA                 | INTERGENIC                    | NA                                    |
| Kabuli_wild_15688  | 1399946071                          | Ca_kabuli_scaffold | 15688                   | T/C  | NA                 | INTERGENIC                    | NA                                    |
| Kabuli_wild_26432  | 1399946072                          | Ca_kabuli_scaffold | 26432                   | G/A  | NA                 | INTERGENIC                    | NA                                    |
| Kabuli_wild_303945 | 1399946073                          | Ca_kabuli_scaffold | 303945                  | T/G  | NA                 | INTERGENIC                    | NA                                    |
| Kabuli_wild_303966 | 1399946074                          | Ca_kabuli_scaffold | 303966                  | C/A  | NA                 | INTERGENIC                    | NA                                    |
| Kabuli_wild_332100 | 1399946075                          | Ca_kabuli_scaffold | 332100                  | T/C  | NA                 | INTERGENIC                    | NA                                    |
| Kabuli_wild_70434  | 1399946076                          | Ca_kabuli_scaffold | 70434                   | A/G  | Gene_Ca_27588      | UPSTREAM                      | NA                                    |
| Kabuli_wild_90363  | 1399946077                          | Ca_kabuli_scaffold | 90363                   | G/A  | NA                 | INTERGENIC                    | NA                                    |
| Kabuli_wild_90371  | 1399946078                          | Ca_kabuli_scaffold | 90371                   | G/A  | NA                 | INTERGENIC                    | NA                                    |
| Kabuli_wild_90419  | 1399946079                          | Ca_kabuli_scaffold | 90419                   | A/C  | NA                 | INTERGENIC                    | NA                                    |
| Kabuli_wild_90430  | 1399946080                          | Ca_kabuli_scaffold | 90430                   | T/A  | NA                 | INTERGENIC                    | NA                                    |
| Kabuli_wild_94984  | 1399946081                          | Ca_kabuli_scaffold | 94984                   | A/T  | Gene_Ca_26648      | DOWNSTREAM                    | Integrase,catalyticcore               |
| Kabuli_wild_82935  | 1399946082                          | Ca_kabuli_scaffold | 82935                   | A/C  | Gene_Ca_26679      | SYNONYMOUS_CODING             | Plantlipidtransferprotein/Parallergen |
| Kabuli_wild_14513  | 1399946083                          | Ca_kabuli_scaffold | 14513                   | T/C  | NA                 | INTERGENIC                    | NA                                    |
| Kabuli_wild_27546  | 1399946084                          | Ca_kabuli_scaffold | 27546                   | T/C  | NA                 | INTERGENIC                    | NA                                    |
| Kabuli_wild_27556  | 1399946085                          | Ca_kabuli_scaffold | 27556                   | A/C  | NA                 | INTERGENIC                    | NA                                    |
| Kabuli_wild_27568  | 1399946086                          | Ca_kabuli_scaffold | 27568                   | A/G  | NA                 | INTERGENIC                    | NA                                    |
| Kabuli_wild_27575  | 1399946087                          | Ca_kabuli_scaffold | 27575                   | T/C  | NA                 | INTERGENIC                    | NA                                    |
| Kabuli_wild_27607  | 1399946088                          | Ca_kabuli_scaffold | 27607                   | T/G  | NA                 | INTERGENIC                    | NA                                    |
| Kabuli_wild_27613  | 1399946089                          | Ca_kabuli_scaffold | 27613                   | G/A  | NA                 | INTERGENIC                    | NA                                    |
| Kabuli_wild_62013  | 1399946090                          | Ca_kabuli_scaffold | 62013                   | C/T  | Gene_Ca_26048      | NON_SYNONYMOUS_CODING         | Annexin                               |
| Kabuli_wild_9837   | 1399946091                          | Ca_kabuli_scaffold | 9837                    | A/C  | NA                 | INTERGENIC                    | NA                                    |
| Kabuli_wild_241    | 1399946092                          | Ca_kabuli_scaffold | 241                     | G/A  | NA                 | INTERGENIC                    | NA                                    |
| Kabuli_wild_268    | 1399946093                          | Ca_kabuli_scaffold | 268                     | C/G  | NA                 | INTERGENIC                    | NA                                    |
| Kabuli_wild_295    | 1399946094                          | Ca_kabuli_scaffold | 295                     | G/A  | NA                 | INTERGENIC                    | NA                                    |
| Kabuli_wild_301    | 1399946095                          | Ca_kabuli_scaffold | 301                     | A/C  | NA                 | INTERGENIC                    | NA                                    |
| Kabuli_wild_302    | 1399946096                          | Ca_kabuli_scaffold | 302                     | G/A  | NA                 | INTERGENIC                    | NA                                    |
| Kabuli_wild_3794   | 1399946097                          | Ca_kabuli_scaffold | 3794                    | A/C  | NA                 | INTERGENIC                    | NA                                    |
| Kabuli_wild_3898   | 1399946098                          | Ca_kabuli_scaffold | 3898                    | G/C  | NA                 | INTERGENIC                    | NA                                    |
| Kabuli_wild_14251  | 1399946099                          | Ca_kabuli_scaffold | 14251                   | C/T  | NA                 | INTERGENIC                    | NA                                    |
| Kabuli_wild_14276  | 1399946100                          | Ca_kabuli_scaffold | 14276                   | C/A  | NA                 | INTERGENIC                    | NA                                    |
| Kabuli_wild_14288  | 1399946101                          | Ca_kabuli_scaffold | 14288                   | A/T  | NA                 | INTERGENIC                    | NA                                    |
| Kabuli_wild_19130  | 1399946102                          | Ca_kabuli_scaffold | 19130                   | T/C  | Gene_Ca_27100      | INTRON                        | Protein kinase,catalytic domain       |
| Kabuli_wild_21521  | 1399946103                          | Ca_kabuli_scaffold | 21521                   | A/G  | Gene_Ca_27100      | INTRON                        | Protein kinase,catalytic domain       |

| SNP IDs            | NCBI dbSNP accession IDs (NCBI_SS#) | Chromosomes        | Physical positions (bp) | SNPs | Gene accession IDs | Sequence components of genome | Putative functions               |
|--------------------|-------------------------------------|--------------------|-------------------------|------|--------------------|-------------------------------|----------------------------------|
| Kabuli_wild_40669  | 1399946104                          | Ca_kabuli_scaffold | 40669                   | T/C  | NA                 | INTERGENIC                    | NA                               |
| Kabuli_wild_65999  | 1399946105                          | Ca_kabuli_scaffold | 65999                   | C/A  | Gene_Ca_26630      | INTRON                        | Ribulose-phosphate3-epimerase    |
| Kabuli_wild_85902  | 1399946106                          | Ca_kabuli_scaffold | 85902                   | G/T  | Gene_Ca_26631      | DOWNSTREAM                    | NA                               |
| Kabuli_wild_133488 | 1399946107                          | Ca_kabuli_scaffold | 133488                  | C/T  | NA                 | INTERGENIC                    | NA                               |
| Kabuli_wild_133489 | 1399946108                          | Ca_kabuli_scaffold | 133489                  | A/G  | NA                 | INTERGENIC                    | NA                               |
| Kabuli_wild_135562 | 1399946109                          | Ca_kabuli_scaffold | 135562                  | A/G  | NA                 | INTERGENIC                    | NA                               |
| Kabuli_wild_135565 | 1399946110                          | Ca_kabuli_scaffold | 135565                  | T/A  | NA                 | INTERGENIC                    | NA                               |
| Kabuli_wild_135569 | 1399946111                          | Ca_kabuli_scaffold | 135569                  | G/C  | NA                 | INTERGENIC                    | NA                               |
| Kabuli_wild_135571 | 1399946112                          | Ca_kabuli_scaffold | 135571                  | A/G  | NA                 | INTERGENIC                    | NA                               |
| Kabuli_wild_135589 | 1399946113                          | Ca_kabuli_scaffold | 135589                  | C/T  | NA                 | INTERGENIC                    | NA                               |
| Kabuli_wild_135590 | 1399946114                          | Ca_kabuli_scaffold | 135590                  | G/A  | NA                 | INTERGENIC                    | NA                               |
| Kabuli_wild_135608 | 1399946115                          | Ca_kabuli_scaffold | 135608                  | A/G  | NA                 | INTERGENIC                    | NA                               |
| Kabuli_wild_195977 | 1399946116                          | Ca_kabuli_scaffold | 195977                  | C/T  | NA                 | INTERGENIC                    | NA                               |
| Kabuli_wild_22289  | 1399946117                          | Ca_kabuli_scaffold | 22289                   | T/G  | NA                 | INTERGENIC                    | NA                               |
| Kabuli_wild_22347  | 1399946118                          | Ca_kabuli_scaffold | 22347                   | G/A  | NA                 | INTERGENIC                    | NA                               |
| Kabuli_wild_22350  | 1399946119                          | Ca_kabuli_scaffold | 22350                   | T/G  | NA                 | INTERGENIC                    | NA                               |
| Kabuli_wild_22354  | 1399946120                          | Ca_kabuli_scaffold | 22354                   | C/T  | NA                 | INTERGENIC                    | NA                               |
| Kabuli_wild_22368  | 1399946121                          | Ca_kabuli_scaffold | 22368                   | T/C  | NA                 | INTERGENIC                    | NA                               |
| Kabuli_wild_33154  | 1399946122                          | Ca_kabuli_scaffold | 33154                   | A/G  | NA                 | INTERGENIC                    | NA                               |
| Kabuli_wild_33301  | 1399946123                          | Ca_kabuli_scaffold | 33301                   | C/A  | NA                 | INTERGENIC                    | NA                               |
| Kabuli_wild_99918  | 1399946124                          | Ca_kabuli_scaffold | 99918                   | A/G  | NA                 | INTERGENIC                    | NA                               |
| Kabuli_wild_9015   | 1399946125                          | Ca_kabuli_scaffold | 9015                    | C/T  | NA                 | INTERGENIC                    | NA                               |
| Kabuli_wild_15510  | 1399946126                          | Ca_kabuli_scaffold | 15510                   | C/T  | Gene_Ca_24921      | SYNONYMOUS_CODING             | UBA/THIF-typeNAD/FADbindingfold  |
| Kabuli_wild_208997 | 1399946127                          | Ca_kabuli_scaffold | 208997                  | G/A  | Gene_Ca_24928      | NON_SYNONYMOUS_CODING         | WD40 repeat                      |
| Kabuli_wild_209030 | 1399946128                          | Ca_kabuli_scaffold | 209030                  | G/A  | Gene_Ca_24928      | NON_SYNONYMOUS_CODING         | WD40 repeat                      |
| Kabuli_wild_192417 | 1399946129                          | Ca_kabuli_scaffold | 192417                  | A/C  | NA                 | INTERGENIC                    | NA                               |
| Kabuli_wild_192713 | 1399946130                          | Ca_kabuli_scaffold | 192713                  | G/T  | NA                 | INTERGENIC                    | NA                               |
| Kabuli_wild_193013 | 1399946131                          | Ca_kabuli_scaffold | 193013                  | T/G  | NA                 | INTERGENIC                    | NA                               |
| Kabuli_wild_266583 | 1399946132                          | Ca_kabuli_scaffold | 266583                  | G/A  | NA                 | INTERGENIC                    | NA                               |
| Kabuli_wild_456311 | 1399946133                          | Ca_kabuli_scaffold | 456311                  | G/A  | Gene_Ca_23937      | INTRON                        | Peptidase C48, SUMO/Sentrin/Ubl1 |
| Kabuli_wild_456342 | 1399946134                          | Ca_kabuli_scaffold | 456342                  | G/T  | Gene_Ca_23937      | INTRON                        | Peptidase C48, SUMO/Sentrin/Ubl1 |
| Kabuli_wild_456357 | 1399946135                          | Ca_kabuli_scaffold | 456357                  | G/A  | Gene_Ca_23937      | INTRON                        | Peptidase C48, SUMO/Sentrin/Ubl1 |
| Kabuli_wild_496626 | 1399946136                          | Ca_kabuli_scaffold | 496626                  | G/A  | Gene_Ca_23938      | STOP_GAINED                   | NA                               |
| Kabuli_wild_528896 | 1399946137                          | Ca_kabuli_scaffold | 528896                  | A/C  | NA                 | INTERGENIC                    | NA                               |
| Kabuli_wild_528979 | 1399946138                          | Ca_kabuli_scaffold | 528979                  | T/C  | NA                 | INTERGENIC                    | NA                               |
| Kabuli_wild_625332 | 1399946139                          | Ca_kabuli_scaffold | 625332                  | A/C  | NA                 | INTERGENIC                    | NA                               |
| Kabuli_wild_625335 | 1399946140                          | Ca_kabuli_scaffold | 625335                  | G/A  | NA                 | INTERGENIC                    | NA                               |
| Kabuli_wild_625342 | 1399946141                          | Ca_kabuli_scaffold | 625342                  | C/T  | NA                 | INTERGENIC                    | NA                               |
| Kabuli_wild_625355 | 1399946142                          | Ca_kabuli_scaffold | 625355                  | C/T  | NA                 | INTERGENIC                    | NA                               |
| Kabuli_wild_625360 | 1399946143                          | Ca_kabuli_scaffold | 625360                  | T/C  | NA                 | INTERGENIC                    | NA                               |
| Kabuli_wild_625362 | 1399946144                          | Ca_kabuli_scaffold | 625362                  | C/T  | NA                 | INTERGENIC                    | NA                               |
| Kabuli_wild_625365 | 1399946145                          | Ca_kabuli_scaffold | 625365                  | T/C  | NA                 | INTERGENIC                    | NA                               |
| Kabuli_wild_625366 | 1399946146                          | Ca_kabuli_scaffold | 625366                  | T/C  | NA                 | INTERGENIC                    | NA                               |
| Kabuli_wild_625375 | 1399946147                          | Ca_kabuli_scaffold | 625375                  | G/A  | NA                 | INTERGENIC                    | NA                               |

| SNP IDs            | NCBI dbSNP accession IDs (NCBI_SS#) | Chromosomes        | Physical positions (bp) | SNPs | Gene accession IDs | Sequence components of genome | Putative functions                        |
|--------------------|-------------------------------------|--------------------|-------------------------|------|--------------------|-------------------------------|-------------------------------------------|
| Kabuli_wild_625378 | 1399946148                          | Ca_kabuli_scaffold | 625378                  | G/A  | NA                 | INTERGENIC                    | NA                                        |
| Kabuli_wild_625383 | 1399946149                          | Ca_kabuli_scaffold | 625383                  | C/A  | NA                 | INTERGENIC                    | NA                                        |
| Kabuli_wild_625388 | 1399946150                          | Ca_kabuli_scaffold | 625388                  | C/T  | NA                 | INTERGENIC                    | NA                                        |
| Kabuli_wild_625389 | 1399946151                          | Ca_kabuli_scaffold | 625389                  | A/C  | NA                 | INTERGENIC                    | NA                                        |
| Kabuli_wild_625394 | 1399946152                          | Ca_kabuli_scaffold | 625394                  | C/T  | NA                 | INTERGENIC                    | NA                                        |
| Kabuli_wild_625395 | 1399946153                          | Ca_kabuli_scaffold | 625395                  | A/G  | NA                 | INTERGENIC                    | NA                                        |
| Kabuli_wild_625396 | 1399946154                          | Ca_kabuli_scaffold | 625396                  | G/A  | NA                 | INTERGENIC                    | NA                                        |
| Kabuli_wild_128665 | 1399946155                          | Ca_kabuli_scaffold | 128665                  | A/C  | Gene_Ca_27387      | UPSTREAM                      | NA                                        |
| Kabuli_wild_153879 | 1399946156                          | Ca_kabuli_scaffold | 153879                  | A/G  | Gene_Ca_26478      | UPSTREAM                      | NA                                        |
| Kabuli_wild_25892  | 1399946157                          | Ca_kabuli_scaffold | 25892                   | A/G  | NA                 | INTERGENIC                    | NA                                        |
| Kabuli_wild_25910  | 1399946158                          | Ca_kabuli_scaffold | 25910                   | C/T  | NA                 | INTERGENIC                    | NA                                        |
| Kabuli_wild_37261  | 1399946159                          | Ca_kabuli_scaffold | 37261                   | A/G  | NA                 | INTERGENIC                    | NA                                        |
| Kabuli_wild_37309  | 1399946160                          | Ca_kabuli_scaffold | 37309                   | G/T  | NA                 | INTERGENIC                    | NA                                        |
| Kabuli_wild_37312  | 1399946161                          | Ca_kabuli_scaffold | 37312                   | G/T  | NA                 | INTERGENIC                    | NA                                        |
| Kabuli_wild_43519  | 1399946162                          | Ca_kabuli_scaffold | 43519                   | T/A  | NA                 | INTERGENIC                    | NA                                        |
| Kabuli_wild_43523  | 1399946163                          | Ca_kabuli_scaffold | 43523                   | C/T  | NA                 | INTERGENIC                    | NA                                        |
| Kabuli_wild_43549  | 1399946164                          | Ca_kabuli_scaffold | 43549                   | C/T  | NA                 | INTERGENIC                    | NA                                        |
| Kabuli_wild_43551  | 1399946165                          | Ca_kabuli_scaffold | 43551                   | T/A  | NA                 | INTERGENIC                    | NA                                        |
| Kabuli_wild_43553  | 1399946166                          | Ca_kabuli_scaffold | 43553                   | G/C  | NA                 | INTERGENIC                    | NA                                        |
| Kabuli_wild_43555  | 1399946167                          | Ca_kabuli_scaffold | 43555                   | C/A  | NA                 | INTERGENIC                    | NA                                        |
| Kabuli_wild_43559  | 1399946168                          | Ca_kabuli_scaffold | 43559                   | C/A  | NA                 | INTERGENIC                    | NA                                        |
| Kabuli_wild_43564  | 1399946169                          | Ca_kabuli_scaffold | 43564                   | C/T  | NA                 | INTERGENIC                    | NA                                        |
| Kabuli_wild_43567  | 1399946170                          | Ca_kabuli_scaffold | 43567                   | C/G  | NA                 | INTERGENIC                    | NA                                        |
| Kabuli_wild_164730 | 1399946171                          | Ca_kabuli_scaffold | 164730                  | T/G  | NA                 | INTERGENIC                    | NA                                        |
| Kabuli_wild_169037 | 1399946172                          | Ca_kabuli_scaffold | 169037                  | G/T  | NA                 | INTERGENIC                    | NA                                        |
| Kabuli_wild_290930 | 1399946173                          | Ca_kabuli_scaffold | 290930                  | G/T  | Gene_Ca_23267      | NON_SYNONYMOUS_CODING         | Histidine phosphatase superfamily,clade-1 |
| Kabuli_wild_343173 | 1399946174                          | Ca_kabuli_scaffold | 343173                  | C/T  | NA                 | INTERGENIC                    | NA                                        |
| Kabuli_wild_343185 | 1399946175                          | Ca_kabuli_scaffold | 343185                  | G/A  | NA                 | INTERGENIC                    | NA                                        |
| Kabuli_wild_343239 | 1399946176                          | Ca_kabuli_scaffold | 343239                  | A/T  | NA                 | INTERGENIC                    | NA                                        |
| Kabuli_wild_356970 | 1399946177                          | Ca_kabuli_scaffold | 356970                  | G/A  | NA                 | INTERGENIC                    | NA                                        |
| Kabuli_wild_356986 | 1399946178                          | Ca_kabuli_scaffold | 356986                  | A/C  | NA                 | INTERGENIC                    | NA                                        |
| Kabuli_wild_356998 | 1399946179                          | Ca_kabuli_scaffold | 356998                  | C/T  | NA                 | INTERGENIC                    | NA                                        |
| Kabuli_wild_357004 | 1399946180                          | Ca_kabuli_scaffold | 357004                  | C/T  | NA                 | INTERGENIC                    | NA                                        |
| Kabuli_wild_357007 | 1399946181                          | Ca_kabuli_scaffold | 357007                  | C/G  | NA                 | INTERGENIC                    | NA                                        |
| Kabuli_wild_448166 | 1399946182                          | Ca_kabuli_scaffold | 448166                  | A/G  | Gene_Ca_23268      | DOWNSTREAM                    | Integrase,catalytic core                  |
| Kabuli_wild_448171 | 1399946183                          | Ca_kabuli_scaffold | 448171                  | T/C  | Gene_Ca_23268      | DOWNSTREAM                    | Integrase,catalytic core                  |
| Kabuli_wild_448176 | 1399946184                          | Ca_kabuli_scaffold | 448176                  | C/T  | Gene_Ca_23268      | DOWNSTREAM                    | Integrase,catalytic core                  |
| Kabuli_wild_448187 | 1399946185                          | Ca_kabuli_scaffold | 448187                  | G/T  | Gene_Ca_23268      | DOWNSTREAM                    | Integrase,catalytic core                  |
| Kabuli_wild_448194 | 1399946186                          | Ca_kabuli_scaffold | 448194                  | G/A  | Gene_Ca_23268      | DOWNSTREAM                    | Integrase,catalytic core                  |
| Kabuli_wild_448195 | 1399946187                          | Ca_kabuli_scaffold | 448195                  | C/T  | Gene_Ca_23268      | DOWNSTREAM                    | Integrase,catalytic core                  |
| Kabuli_wild_448198 | 1399946188                          | Ca_kabuli_scaffold | 448198                  | A/C  | Gene_Ca_23268      | DOWNSTREAM                    | Integrase,catalytic core                  |
| Kabuli_wild_448216 | 1399946189                          | Ca_kabuli_scaffold | 448216                  | C/T  | Gene_Ca_23268      | DOWNSTREAM                    | Integrase,catalytic core                  |
| Kabuli_wild_448230 | 1399946190                          | Ca_kabuli_scaffold | 448230                  | C/A  | Gene_Ca_23268      | DOWNSTREAM                    | Integrase,catalytic core                  |
| Kabuli_wild_448262 | 1399946191                          | Ca_kabuli_scaffold | 448262                  | G/T  | Gene_Ca_23268      | DOWNSTREAM                    | Integrase,catalytic core                  |

| SNP IDs            | NCBI dbSNP accession IDs (NCBI_SS#) | Chromosomes        | Physical positions (bp) | SNPs | Gene accession IDs | Sequence components of genome | Putative functions                   |
|--------------------|-------------------------------------|--------------------|-------------------------|------|--------------------|-------------------------------|--------------------------------------|
| Kabuli_wild_448275 | 1399946192                          | Ca_kabuli_scaffold | 448275                  | A/C  | Gene_Ca_23268      | DOWNSTREAM                    | Integrase,catalytic core             |
| Kabuli_wild_890    | 1399946193                          | Ca_kabuli_scaffold | 890                     | G/A  | NA                 | INTERGENIC                    | NA                                   |
| Kabuli_wild_957    | 1399946194                          | Ca_kabuli_scaffold | 957                     | G/A  | NA                 | INTERGENIC                    | NA                                   |
| Kabuli_wild_972    | 1399946195                          | Ca_kabuli_scaffold | 972                     | C/T  | NA                 | INTERGENIC                    | NA                                   |
| Kabuli_wild_176    | 1399946196                          | Ca_kabuli_scaffold | 176                     | G/A  | NA                 | INTERGENIC                    | NA                                   |
| Kabuli_wild_17033  | 1399946197                          | Ca_kabuli_scaffold | 17033                   | A/G  | NA                 | INTERGENIC                    | NA                                   |
| Kabuli_wild_17068  | 1399946198                          | Ca_kabuli_scaffold | 17068                   | A/G  | NA                 | INTERGENIC                    | NA                                   |
| Kabuli_wild_17111  | 1399946199                          | Ca_kabuli_scaffold | 17111                   | C/T  | NA                 | INTERGENIC                    | NA                                   |
| Kabuli_wild_17117  | 1399946200                          | Ca_kabuli_scaffold | 17117                   | T/C  | NA                 | INTERGENIC                    | NA                                   |
| Kabuli_wild_17120  | 1399946201                          | Ca_kabuli_scaffold | 17120                   | C/T  | NA                 | INTERGENIC                    | NA                                   |
| Kabuli_wild_17123  | 1399946202                          | Ca_kabuli_scaffold | 17123                   | G/T  | NA                 | INTERGENIC                    | NA                                   |
| Kabuli_wild_17132  | 1399946203                          | Ca_kabuli_scaffold | 17132                   | C/T  | NA                 | INTERGENIC                    | NA                                   |
| Kabuli_wild_17150  | 1399946204                          | Ca_kabuli_scaffold | 17150                   | T/C  | NA                 | INTERGENIC                    | NA                                   |
| Kabuli_wild_17151  | 1399946205                          | Ca_kabuli_scaffold | 17151                   | T/C  | NA                 | INTERGENIC                    | NA                                   |
| Kabuli_wild_17177  | 1399946206                          | Ca_kabuli_scaffold | 17177                   | T/A  | NA                 | INTERGENIC                    | NA                                   |
| Kabuli_wild_75173  | 1399946207                          | Ca_kabuli_scaffold | 75173                   | C/T  | Gene_Ca_26000      | DOWNSTREAM                    | Tetra tricopeptide repeat-containing |
| Kabuli_wild_84683  | 1399946208                          | Ca_kabuli_scaffold | 84683                   | C/T  | Gene_Ca_26001      | STOP_GAINED                   | TetratricopeptideTPR-1               |
| Kabuli_wild_23272  | 1399946209                          | Ca_kabuli_scaffold | 23272                   | A/C  | NA                 | INTERGENIC                    | NA                                   |
| Kabuli_wild_23281  | 1399946210                          | Ca_kabuli_scaffold | 23281                   | C/T  | NA                 | INTERGENIC                    | NA                                   |
| Kabuli_wild_44987  | 1399946211                          | Ca_kabuli_scaffold | 44987                   | G/C  | NA                 | INTERGENIC                    | NA                                   |
| Kabuli_wild_45018  | 1399946212                          | Ca_kabuli_scaffold | 45018                   | T/C  | NA                 | INTERGENIC                    | NA                                   |
| Kabuli_wild_45036  | 1399946213                          | Ca_kabuli_scaffold | 45036                   | A/C  | NA                 | INTERGENIC                    | NA                                   |
| Kabuli_wild_45041  | 1399946214                          | Ca_kabuli_scaffold | 45041                   | A/T  | NA                 | INTERGENIC                    | NA                                   |
| Kabuli_wild_54636  | 1399946215                          | Ca_kabuli_scaffold | 54636                   | A/T  | NA                 | INTERGENIC                    | NA                                   |
| Kabuli_wild_54683  | 1399946216                          | Ca_kabuli_scaffold | 54683                   | G/A  | NA                 | INTERGENIC                    | NA                                   |
| Kabuli_wild_54694  | 1399946217                          | Ca_kabuli_scaffold | 54694                   | T/G  | NA                 | INTERGENIC                    | NA                                   |
| Kabuli_wild_54702  | 1399946218                          | Ca_kabuli_scaffold | 54702                   | C/T  | NA                 | INTERGENIC                    | NA                                   |
| Kabuli_wild_54714  | 1399946219                          | Ca_kabuli_scaffold | 54714                   | G/A  | NA                 | INTERGENIC                    | NA                                   |
| Kabuli_wild_54725  | 1399946220                          | Ca_kabuli_scaffold | 54725                   | T/A  | NA                 | INTERGENIC                    | NA                                   |
| Kabuli_wild_25960  | 1399946221                          | Ca_kabuli_scaffold | 25960                   | A/G  | NA                 | INTERGENIC                    | NA                                   |
| Kabuli_wild_25983  | 1399946222                          | Ca_kabuli_scaffold | 25983                   | T/G  | NA                 | INTERGENIC                    | NA                                   |
| Kabuli_wild_9398   | 1399946223                          | Ca_kabuli_scaffold | 9398                    | C/A  | NA                 | INTERGENIC                    | NA                                   |
| Kabuli_wild_10541  | 1399946224                          | Ca_kabuli_scaffold | 10541                   | C/G  | NA                 | INTERGENIC                    | NA                                   |
| Kabuli_wild_10563  | 1399946225                          | Ca_kabuli_scaffold | 10563                   | T/C  | NA                 | INTERGENIC                    | NA                                   |
| Kabuli_wild_41899  | 1399946226                          | Ca_kabuli_scaffold | 41899                   | C/A  | NA                 | INTERGENIC                    | NA                                   |
| Kabuli_wild_88569  | 1399946227                          | Ca_kabuli_scaffold | 88569                   | C/T  | Gene_Ca_24140      | INTRON                        | Integrase,catalyticcore              |
| Kabuli_wild_8898   | 1399946228                          | Ca_kabuli_scaffold | 8898                    | T/G  | NA                 | INTERGENIC                    | NA                                   |
| Kabuli_wild_16292  | 1399946229                          | Ca_kabuli_scaffold | 16292                   | C/G  | NA                 | INTERGENIC                    | NA                                   |
| Kabuli_wild_16317  | 1399946230                          | Ca_kabuli_scaffold | 16317                   | C/G  | NA                 | INTERGENIC                    | NA                                   |
| Kabuli_wild_16331  | 1399946231                          | Ca_kabuli_scaffold | 16331                   | A/G  | NA                 | INTERGENIC                    | NA                                   |
| Kabuli_wild_29722  | 1399946232                          | Ca_kabuli_scaffold | 29722                   | G/A  | Gene_Ca_26697      | DOWNSTREAM                    | NA                                   |
| Kabuli_wild_40821  | 1399946233                          | Ca_kabuli_scaffold | 40821                   | T/G  | NA                 | INTERGENIC                    | NA                                   |
| Kabuli_wild_40833  | 1399946234                          | Ca_kabuli_scaffold | 40833                   | T/A  | NA                 | INTERGENIC                    | NA                                   |
| Kabuli_wild_40842  | 1399946235                          | Ca_kabuli_scaffold | 40842                   | T/G  | NA                 | INTERGENIC                    | NA                                   |

| SNP IDs            | NCBI dbSNP accession IDs (NCBI_SS#) | Chromosomes        | Physical positions (bp) | SNPs | Gene accession IDs | Sequence components of genome | Putative functions    |
|--------------------|-------------------------------------|--------------------|-------------------------|------|--------------------|-------------------------------|-----------------------|
| Kabuli_wild_40871  | 1399946236                          | Ca_kabuli_scaffold | 40871                   | T/A  | NA                 | INTERGENIC                    | NA                    |
| Kabuli_wild_40872  | 1399946237                          | Ca_kabuli_scaffold | 40872                   | T/G  | NA                 | INTERGENIC                    | NA                    |
| Kabuli_wild_40886  | 1399946238                          | Ca_kabuli_scaffold | 40886                   | T/A  | NA                 | INTERGENIC                    | NA                    |
| Kabuli_wild_5102   | 1399946239                          | Ca_kabuli_scaffold | 5102                    | T/C  | NA                 | INTERGENIC                    | NA                    |
| Kabuli_wild_532    | 1399946240                          | Ca_kabuli_scaffold | 532                     | G/C  | Gene_Ca_27847      | DOWNSTREAM                    | NA                    |
| Kabuli_wild_562    | 1399946241                          | Ca_kabuli_scaffold | 562                     | G/C  | Gene_Ca_27847      | DOWNSTREAM                    | NA                    |
| Kabuli_wild_565    | 1399946242                          | Ca_kabuli_scaffold | 565                     | T/C  | Gene_Ca_27847      | DOWNSTREAM                    | NA                    |
| Kabuli_wild_583    | 1399946243                          | Ca_kabuli_scaffold | 583                     | A/G  | Gene_Ca_27847      | DOWNSTREAM                    | NA                    |
| Kabuli_wild_106324 | 1399946244                          | Ca_kabuli_scaffold | 106324                  | C/T  | NA                 | INTERGENIC                    | NA                    |
| Kabuli_wild_309668 | 1399946245                          | Ca_kabuli_scaffold | 309668                  | G/A  | Gene_Ca_25357      | INTRON                        | NA                    |
| Kabuli_wild_187    | 1399946246                          | Ca_kabuli_scaffold | 187                     | A/G  | NA                 | INTERGENIC                    | NA                    |
| Kabuli_wild_191    | 1399946247                          | Ca_kabuli_scaffold | 191                     | C/A  | NA                 | INTERGENIC                    | NA                    |
| Kabuli_wild_30169  | 1399946248                          | Ca_kabuli_scaffold | 30169                   | G/A  | Gene_Ca_28131      | DOWNSTREAM                    | NA                    |
| Kabuli_wild_216180 | 1399946249                          | Ca_kabuli_scaffold | 216180                  | C/A  | NA                 | INTERGENIC                    | NA                    |
| Kabuli_wild_216231 | 1399946250                          | Ca_kabuli_scaffold | 216231                  | T/G  | NA                 | INTERGENIC                    | NA                    |
| Kabuli_wild_245929 | 1399946251                          | Ca_kabuli_scaffold | 245929                  | T/C  | Gene_Ca_24715      | SYNONYMOUS_CODING             | Trehalose-phosphatase |
| Kabuli_wild_103092 | 1399946252                          | Ca_kabuli_scaffold | 103092                  | A/G  | NA                 | INTERGENIC                    | NA                    |
| Kabuli_wild_103114 | 1399946253                          | Ca_kabuli_scaffold | 103114                  | G/A  | NA                 | INTERGENIC                    | NA                    |
| Kabuli_wild_55070  | 1399946254                          | Ca_kabuli_scaffold | 55070                   | A/T  | NA                 | INTERGENIC                    | NA                    |
| Kabuli_wild_56095  | 1399946255                          | Ca_kabuli_scaffold | 56095                   | G/C  | NA                 | INTERGENIC                    | NA                    |
| Kabuli_wild_56215  | 1399946256                          | Ca_kabuli_scaffold | 56215                   | A/G  | NA                 | INTERGENIC                    | NA                    |
| Kabuli_wild_163751 | 1399946257                          | Ca_kabuli_scaffold | 163751                  | C/T  | NA                 | INTERGENIC                    | NA                    |
| Kabuli_wild_163763 | 1399946258                          | Ca_kabuli_scaffold | 163763                  | T/G  | NA                 | INTERGENIC                    | NA                    |
| Kabuli_wild_163780 | 1399946259                          | Ca_kabuli_scaffold | 163780                  | C/T  | NA                 | INTERGENIC                    | NA                    |
| Kabuli_wild_163784 | 1399946260                          | Ca_kabuli_scaffold | 163784                  | G/A  | NA                 | INTERGENIC                    | NA                    |
| Kabuli_wild_253620 | 1399946261                          | Ca_kabuli_scaffold | 253620                  | T/C  | NA                 | INTERGENIC                    | NA                    |
| Kabuli_wild_253821 | 1399946262                          | Ca_kabuli_scaffold | 253821                  | T/G  | NA                 | INTERGENIC                    | NA                    |
| Kabuli_wild_84160  | 1399946263                          | Ca_kabuli_scaffold | 84160                   | G/A  | NA                 | INTERGENIC                    | NA                    |
| Kabuli_wild_18756  | 1399946264                          | Ca_kabuli_scaffold | 18756                   | C/T  | NA                 | INTERGENIC                    | NA                    |
| Kabuli_wild_18765  | 1399946265                          | Ca_kabuli_scaffold | 18765                   | C/T  | NA                 | INTERGENIC                    | NA                    |
| Kabuli_wild_18777  | 1399946266                          | Ca_kabuli_scaffold | 18777                   | C/T  | NA                 | INTERGENIC                    | NA                    |
| Kabuli_wild_18780  | 1399946267                          | Ca_kabuli_scaffold | 18780                   | G/A  | NA                 | INTERGENIC                    | NA                    |
| Kabuli_wild_18782  | 1399946268                          | Ca_kabuli_scaffold | 18782                   | C/A  | NA                 | INTERGENIC                    | NA                    |
| Kabuli_wild_54604  | 1399946269                          | Ca_kabuli_scaffold | 54604                   | T/C  | NA                 | INTERGENIC                    | NA                    |
| Kabuli_wild_54613  | 1399946270                          | Ca_kabuli_scaffold | 54613                   | G/A  | NA                 | INTERGENIC                    | NA                    |
| Kabuli_wild_54643  | 1399946271                          | Ca_kabuli_scaffold | 54643                   | G/A  | NA                 | INTERGENIC                    | NA                    |
| Kabuli_wild_67038  | 1399946272                          | Ca_kabuli_scaffold | 67038                   | C/T  | NA                 | INTERGENIC                    | NA                    |
| Kabuli_wild_67042  | 1399946273                          | Ca_kabuli_scaffold | 67042                   | G/A  | NA                 | INTERGENIC                    | NA                    |
| Kabuli_wild_67049  | 1399946274                          | Ca_kabuli_scaffold | 67049                   | G/C  | NA                 | INTERGENIC                    | NA                    |
| Kabuli_wild_67073  | 1399946275                          | Ca_kabuli_scaffold | 67073                   | G/A  | NA                 | INTERGENIC                    | NA                    |
| Kabuli_wild_67086  | 1399946276                          | Ca_kabuli_scaffold | 67086                   | A/C  | NA                 | INTERGENIC                    | NA                    |
| Kabuli_wild_157962 | 1399946277                          | Ca_kabuli_scaffold | 157962                  | C/A  | NA                 | INTERGENIC                    | NA                    |
| Kabuli_wild_412    | 1399946278                          | Ca_kabuli_scaffold | 412                     | T/A  | NA                 | INTERGENIC                    | NA                    |
| Kabuli_wild_490    | 1399946279                          | Ca_kabuli_scaffold | 490                     | G/A  | NA                 | INTERGENIC                    | NA                    |

| SNP IDs            | NCBI dbSNP accession IDs (NCBI_SS#) | Chromosomes        | Physical positions (bp) | SNPs | Gene accession IDs | Sequence components of genome | Putative functions               |
|--------------------|-------------------------------------|--------------------|-------------------------|------|--------------------|-------------------------------|----------------------------------|
| Kabuli_wild_517    | 1399946280                          | Ca_kabuli_scaffold | 517                     | G/A  | NA                 | INTERGENIC                    | NA                               |
| Kabuli_wild_535    | 1399946281                          | Ca_kabuli_scaffold | 535                     | T/C  | NA                 | INTERGENIC                    | NA                               |
| Kabuli_wild_536    | 1399946282                          | Ca_kabuli_scaffold | 536                     | C/T  | NA                 | INTERGENIC                    | NA                               |
| Kabuli_wild_537    | 1399946283                          | Ca_kabuli_scaffold | 537                     | T/G  | NA                 | INTERGENIC                    | NA                               |
| Kabuli_wild_545    | 1399946284                          | Ca_kabuli_scaffold | 545                     | C/T  | NA                 | INTERGENIC                    | NA                               |
| Kabuli_wild_65136  | 1399946285                          | Ca_kabuli_scaffold | 65136                   | T/G  | Gene_Ca_21252      | NON_SYNONYMOUS_CODING         | GH3auxin-responsivepromoter      |
| Kabuli_wild_241684 | 1399946286                          | Ca_kabuli_scaffold | 241684                  | G/T  | NA                 | INTERGENIC                    | NA                               |
| Kabuli_wild_265110 | 1399946287                          | Ca_kabuli_scaffold | 265110                  | A/C  | NA                 | INTERGENIC                    | NA                               |
| Kabuli_wild_265126 | 1399946288                          | Ca_kabuli_scaffold | 265126                  | G/T  | NA                 | INTERGENIC                    | NA                               |
| Kabuli_wild_265216 | 1399946289                          | Ca_kabuli_scaffold | 265216                  | A/G  | NA                 | INTERGENIC                    | NA                               |
| Kabuli_wild_269879 | 1399946290                          | Ca_kabuli_scaffold | 269879                  | A/G  | NA                 | INTERGENIC                    | NA                               |
| Kabuli_wild_339537 | 1399946291                          | Ca_kabuli_scaffold | 339537                  | G/A  | Gene_Ca_21267      | NON_SYNONYMOUS_CODING         | Pentatricopeptide repeat         |
| Kabuli_wild_339547 | 1399946292                          | Ca_kabuli_scaffold | 339547                  | C/T  | Gene_Ca_21267      | NON_SYNONYMOUS_CODING         | Pentatricopeptide repeat         |
| Kabuli_wild_339584 | 1399946293                          | Ca_kabuli_scaffold | 339584                  | A/G  | Gene_Ca_21267      | SYNONYMOUS_CODING             | Pentatricopeptide repeat         |
| Kabuli_wild_382520 | 1399946294                          | Ca_kabuli_scaffold | 382520                  | G/A  | Gene_Ca_21269      | INTRON                        | Nucleotidyltransferasedomain     |
| Kabuli_wild_382900 | 1399946295                          | Ca_kabuli_scaffold | 382900                  | C/T  | Gene_Ca_21269      | INTRON                        | Nucleotidyltransferasedomain     |
| Kabuli_wild_385683 | 1399946296                          | Ca_kabuli_scaffold | 385683                  | T/A  | Gene_Ca_21269      | SYNONYMOUS_CODING             | Nucleotidyltransferasedomain     |
| Kabuli_wild_46066  | 1399946297                          | Ca_kabuli_scaffold | 46066                   | G/T  | NA                 | INTERGENIC                    | NA                               |
| Kabuli_wild_46144  | 1399946298                          | Ca_kabuli_scaffold | 46144                   | A/T  | NA                 | INTERGENIC                    | NA                               |
| Kabuli_wild_46171  | 1399946299                          | Ca_kabuli_scaffold | 46171                   | T/A  | NA                 | INTERGENIC                    | NA                               |
| Kabuli_wild_212011 | 1399946300                          | Ca_kabuli_scaffold | 212011                  | G/A  | Gene_Ca_25764      | NON_SYNONYMOUS_CODING         | Leo1-likeprotein                 |
| Kabuli_wild_215883 | 1399946301                          | Ca_kabuli_scaffold | 215883                  | G/T  | Gene_Ca_25764      | INTRON                        | Leo1-likeprotein                 |
| Kabuli_wild_215907 | 1399946302                          | Ca_kabuli_scaffold | 215907                  | A/G  | Gene_Ca_25764      | INTRON                        | Leo1-likeprotein                 |
| Kabuli_wild_215969 | 1399946303                          | Ca_kabuli_scaffold | 215969                  | G/C  | Gene_Ca_25764      | INTRON                        | Leo1-likeprotein                 |
| Kabuli_wild_292507 | 1399946304                          | Ca_kabuli_scaffold | 292507                  | A/C  | NA                 | INTERGENIC                    | NA                               |
| Kabuli_wild_292511 | 1399946305                          | Ca_kabuli_scaffold | 292511                  | G/C  | NA                 | INTERGENIC                    | NA                               |
| Kabuli_wild_349325 | 1399946306                          | Ca_kabuli_scaffold | 349325                  | C/T  | Gene_Ca_25768      | INTRON                        | Peptidase C48, SUMO/Sentrin/Ubl1 |
| Kabuli_wild_98575  | 1399946307                          | Ca_kabuli_scaffold | 98575                   | C/A  | NA                 | INTERGENIC                    | NA                               |
| Kabuli_wild_98592  | 1399946308                          | Ca_kabuli_scaffold | 98592                   | C/T  | NA                 | INTERGENIC                    | NA                               |
| Kabuli_wild_98594  | 1399946309                          | Ca_kabuli_scaffold | 98594                   | G/A  | NA                 | INTERGENIC                    | NA                               |
| Kabuli_wild_98611  | 1399946310                          | Ca_kabuli_scaffold | 98611                   | C/T  | NA                 | INTERGENIC                    | NA                               |
| Kabuli_wild_98634  | 1399946311                          | Ca_kabuli_scaffold | 98634                   | C/T  | NA                 | INTERGENIC                    | NA                               |
| Kabuli_wild_98656  | 1399946312                          | Ca_kabuli_scaffold | 98656                   | C/T  | NA                 | INTERGENIC                    | NA                               |
| Kabuli_wild_98662  | 1399946313                          | Ca_kabuli_scaffold | 98662                   | C/A  | NA                 | INTERGENIC                    | NA                               |
| Kabuli_wild_98663  | 1399946314                          | Ca_kabuli_scaffold | 98663                   | T/A  | NA                 | INTERGENIC                    | NA                               |
| Kabuli_wild_62009  | 1399946315                          | Ca_kabuli_scaffold | 62009                   | C/A  | NA                 | INTERGENIC                    | NA                               |
| Kabuli_wild_62014  | 1399946316                          | Ca_kabuli_scaffold | 62014                   | G/A  | NA                 | INTERGENIC                    | NA                               |
| Kabuli_wild_62085  | 1399946317                          | Ca_kabuli_scaffold | 62085                   | A/C  | NA                 | INTERGENIC                    | NA                               |
| Kabuli_wild_62121  | 1399946318                          | Ca_kabuli_scaffold | 62121                   | G/A  | NA                 | INTERGENIC                    | NA                               |
| Kabuli_wild_62131  | 1399946319                          | Ca_kabuli_scaffold | 62131                   | G/A  | NA                 | INTERGENIC                    | NA                               |
| Kabuli_wild_62145  | 1399946320                          | Ca_kabuli_scaffold | 62145                   | G/C  | NA                 | INTERGENIC                    | NA                               |
| Kabuli_wild_62147  | 1399946321                          | Ca_kabuli_scaffold | 62147                   | G/A  | NA                 | INTERGENIC                    | NA                               |
| Kabuli_wild_62154  | 1399946322                          | Ca_kabuli_scaffold | 62154                   | T/A  | NA                 | INTERGENIC                    | NA                               |
| Kabuli_wild_72277  | 1399946323                          | Ca_kabuli_scaffold | 72277                   | G/A  | NA                 | INTERGENIC                    | NA                               |

| SNP IDs            | NCBI dbSNP accession IDs (NCBI_SS#) | Chromosomes        | Physical positions (bp) | SNPs | Gene accession IDs | Sequence components of genome | Putative functions |
|--------------------|-------------------------------------|--------------------|-------------------------|------|--------------------|-------------------------------|--------------------|
| Kabuli_wild_19707  | 1399946324                          | Ca_kabuli_scaffold | 19707                   | C/T  | Gene_Ca_28045      | NON_SYNONYMOUS_CODING         | NA                 |
| Kabuli_wild_19741  | 1399946325                          | Ca_kabuli_scaffold | 19741                   | G/A  | Gene_Ca_28045      | SYNONYMOUS_CODING             | NA                 |
| Kabuli_wild_111624 | 1399946326                          | Ca_kabuli_scaffold | 111624                  | C/A  | NA                 | INTERGENIC                    | NA                 |
| Kabuli_wild_111625 | 1399946327                          | Ca_kabuli_scaffold | 111625                  | G/C  | NA                 | INTERGENIC                    | NA                 |
| Kabuli_wild_141914 | 1399946328                          | Ca_kabuli_scaffold | 141914                  | C/T  | Gene_Ca_26289      | NON_SYNONYMOUS_CODING         | NA                 |
| Kabuli_wild_141927 | 1399946329                          | Ca_kabuli_scaffold | 141927                  | G/A  | Gene_Ca_26289      | NON_SYNONYMOUS_CODING         | NA                 |
| Kabuli_wild_152763 | 1399946330                          | Ca_kabuli_scaffold | 152763                  | C/A  | NA                 | INTERGENIC                    | NA                 |
| Kabuli_wild_13807  | 1399946331                          | Ca_kabuli_scaffold | 13807                   | G/A  | NA                 | INTERGENIC                    | NA                 |
| Kabuli_wild_13850  | 1399946332                          | Ca_kabuli_scaffold | 13850                   | G/C  | NA                 | INTERGENIC                    | NA                 |
| Kabuli_wild_13855  | 1399946333                          | Ca_kabuli_scaffold | 13855                   | G/A  | NA                 | INTERGENIC                    | NA                 |
| Kabuli_wild_13858  | 1399946334                          | Ca_kabuli_scaffold | 13858                   | G/T  | NA                 | INTERGENIC                    | NA                 |
| Kabuli_wild_13874  | 1399946335                          | Ca_kabuli_scaffold | 13874                   | G/A  | NA                 | INTERGENIC                    | NA                 |
| Kabuli_wild_13889  | 1399946336                          | Ca_kabuli_scaffold | 13889                   | C/T  | NA                 | INTERGENIC                    | NA                 |
| Kabuli_wild_13891  | 1399946337                          | Ca_kabuli_scaffold | 13891                   | G/T  | NA                 | INTERGENIC                    | NA                 |
| Kabuli_wild_118779 | 1399946338                          | Ca_kabuli_scaffold | 118779                  | G/T  | Gene_Ca_26141      | INTRON                        | NA                 |
| Kabuli_wild_118782 | 1399946339                          | Ca_kabuli_scaffold | 118782                  | C/T  | Gene_Ca_26141      | INTRON                        | NA                 |
| Kabuli_wild_118967 | 1399946340                          | Ca_kabuli_scaffold | 118967                  | G/C  | Gene_Ca_26141      | INTRON                        | NA                 |
| Kabuli_wild_118972 | 1399946341                          | Ca_kabuli_scaffold | 118972                  | A/G  | Gene_Ca_26141      | INTRON                        | NA                 |
| Kabuli_wild_118983 | 1399946342                          | Ca_kabuli_scaffold | 118983                  | C/A  | Gene_Ca_26141      | INTRON                        | NA                 |
| Kabuli_wild_139538 | 1399946343                          | Ca_kabuli_scaffold | 139538                  | G/A  | NA                 | INTERGENIC                    | NA                 |
| Kabuli_wild_139539 | 1399946344                          | Ca_kabuli_scaffold | 139539                  | A/G  | NA                 | INTERGENIC                    | NA                 |
| Kabuli_wild_139541 | 1399946345                          | Ca_kabuli_scaffold | 139541                  | T/C  | NA                 | INTERGENIC                    | NA                 |
| Kabuli_wild_139544 | 1399946346                          | Ca_kabuli_scaffold | 139544                  | C/T  | NA                 | INTERGENIC                    | NA                 |
| Kabuli_wild_139545 | 1399946347                          | Ca_kabuli_scaffold | 139545                  | G/A  | NA                 | INTERGENIC                    | NA                 |
| Kabuli_wild_139548 | 1399946348                          | Ca_kabuli_scaffold | 139548                  | C/T  | NA                 | INTERGENIC                    | NA                 |
| Kabuli_wild_139549 | 1399946349                          | Ca_kabuli_scaffold | 139549                  | C/T  | NA                 | INTERGENIC                    | NA                 |
| Kabuli_wild_139560 | 1399946350                          | Ca_kabuli_scaffold | 139560                  | G/T  | NA                 | INTERGENIC                    | NA                 |
| Kabuli_wild_139562 | 1399946351                          | Ca_kabuli_scaffold | 139562                  | C/T  | NA                 | INTERGENIC                    | NA                 |
| Kabuli_wild_139574 | 1399946352                          | Ca_kabuli_scaffold | 139574                  | T/A  | NA                 | INTERGENIC                    | NA                 |
| Kabuli_wild_139575 | 1399946353                          | Ca_kabuli_scaffold | 139575                  | C/T  | NA                 | INTERGENIC                    | NA                 |
| Kabuli_wild_139581 | 1399946354                          | Ca_kabuli_scaffold | 139581                  | G/A  | NA                 | INTERGENIC                    | NA                 |
| Kabuli_wild_139584 | 1399946355                          | Ca_kabuli_scaffold | 139584                  | G/A  | NA                 | INTERGENIC                    | NA                 |
| Kabuli_wild_139596 | 1399946356                          | Ca_kabuli_scaffold | 139596                  | A/G  | NA                 | INTERGENIC                    | NA                 |
| Kabuli_wild_139597 | 1399946357                          | Ca_kabuli_scaffold | 139597                  | A/G  | NA                 | INTERGENIC                    | NA                 |
| Kabuli_wild_139603 | 1399946358                          | Ca_kabuli_scaffold | 139603                  | C/T  | NA                 | INTERGENIC                    | NA                 |
| Kabuli_wild_139604 | 1399946359                          | Ca_kabuli_scaffold | 139604                  | T/C  | NA                 | INTERGENIC                    | NA                 |
| Kabuli_wild_139609 | 1399946360                          | Ca_kabuli_scaffold | 139609                  | C/T  | NA                 | INTERGENIC                    | NA                 |
| Kabuli_wild_19478  | 1399946361                          | Ca_kabuli_scaffold | 19478                   | C/T  | NA                 | INTERGENIC                    | NA                 |
| Kabuli_wild_22105  | 1399946362                          | Ca_kabuli_scaffold | 22105                   | A/G  | Gene_Ca_25400      | INTRON                        | NA                 |
| Kabuli_wild_22115  | 1399946363                          | Ca_kabuli_scaffold | 22115                   | C/T  | Gene_Ca_25400      | INTRON                        | NA                 |
| Kabuli_wild_22174  | 1399946364                          | Ca_kabuli_scaffold | 22174                   | G/A  | Gene_Ca_25400      | INTRON                        | NA                 |
| Kabuli_wild_22188  | 1399946365                          | Ca_kabuli_scaffold | 22188                   | G/A  | Gene_Ca_25400      | INTRON                        | NA                 |
| Kabuli_wild_22189  | 1399946366                          | Ca_kabuli_scaffold | 22189                   | G/A  | Gene_Ca_25400      | INTRON                        | NA                 |
| Kabuli_wild_437    | 1399946367                          | Ca_kabuli_scaffold | 437                     | C/A  | NA                 | INTERGENIC                    | NA                 |



| SNP IDs            | NCBI dbSNP accession IDs (NCBI_SS#) | Chromosomes        | Physical positions (bp) | SNPs | Gene accession IDs | Sequence components of genome | Putative functions                                     |
|--------------------|-------------------------------------|--------------------|-------------------------|------|--------------------|-------------------------------|--------------------------------------------------------|
| Kabuli_wild_6778   | 1399946368                          | Ca_kabuli_scaffold | 6778                    | C/A  | NA                 | INTERGENIC                    | NA                                                     |
| Kabuli_wild_6800   | 1399946369                          | Ca_kabuli_scaffold | 6800                    | C/T  | NA                 | INTERGENIC                    | NA                                                     |
| Kabuli_wild_6802   | 1399946370                          | Ca_kabuli_scaffold | 6802                    | G/T  | NA                 | INTERGENIC                    | NA                                                     |
| Kabuli_wild_6804   | 1399946371                          | Ca_kabuli_scaffold | 6804                    | T/C  | NA                 | INTERGENIC                    | NA                                                     |
| Kabuli_wild_6814   | 1399946372                          | Ca_kabuli_scaffold | 6814                    | G/T  | NA                 | INTERGENIC                    | NA                                                     |
| Kabuli_wild_61670  | 1399946373                          | Ca_kabuli_scaffold | 61670                   | A/G  | NA                 | INTERGENIC                    | NA                                                     |
| Kabuli_wild_61705  | 1399946374                          | Ca_kabuli_scaffold | 61705                   | C/T  | NA                 | INTERGENIC                    | NA                                                     |
| Kabuli_wild_61710  | 1399946375                          | Ca_kabuli_scaffold | 61710                   | C/T  | NA                 | INTERGENIC                    | NA                                                     |
| Kabuli_wild_61723  | 1399946376                          | Ca_kabuli_scaffold | 61723                   | A/G  | NA                 | INTERGENIC                    | NA                                                     |
| Kabuli_wild_61745  | 1399946377                          | Ca_kabuli_scaffold | 61745                   | T/G  | NA                 | INTERGENIC                    | NA                                                     |
| Kabuli_wild_61757  | 1399946378                          | Ca_kabuli_scaffold | 61757                   | T/C  | NA                 | INTERGENIC                    | NA                                                     |
| Kabuli_wild_372404 | 1399946379                          | Ca_kabuli_scaffold | 372404                  | A/T  | Gene_Ca_24482      | DOWNSTREAM                    | Signal transduction response regulator, receiverdomain |
| Kabuli_wild_36698  | 1399946380                          | Ca_kabuli_scaffold | 36698                   | T/C  | NA                 | INTERGENIC                    | NA                                                     |
| Kabuli_wild_36759  | 1399946381                          | Ca_kabuli_scaffold | 36759                   | T/G  | NA                 | INTERGENIC                    | NA                                                     |
| Kabuli_wild_36782  | 1399946382                          | Ca_kabuli_scaffold | 36782                   | C/T  | NA                 | INTERGENIC                    | NA                                                     |
| Kabuli_wild_36810  | 1399946383                          | Ca_kabuli_scaffold | 36810                   | T/C  | NA                 | INTERGENIC                    | NA                                                     |
| Kabuli_wild_36837  | 1399946384                          | Ca_kabuli_scaffold | 36837                   | G/A  | NA                 | INTERGENIC                    | NA                                                     |
| Kabuli_wild_166615 | 1399946385                          | Ca_kabuli_scaffold | 166615                  | T/C  | NA                 | INTERGENIC                    | NA                                                     |
| Kabuli_wild_166660 | 1399946386                          | Ca_kabuli_scaffold | 166660                  | C/T  | NA                 | INTERGENIC                    | NA                                                     |
| Kabuli_wild_171183 | 1399946387                          | Ca_kabuli_scaffold | 171183                  | G/T  | NA                 | INTERGENIC                    | NA                                                     |
| Kabuli_wild_171197 | 1399946388                          | Ca_kabuli_scaffold | 171197                  | A/G  | NA                 | INTERGENIC                    | NA                                                     |
| Kabuli_wild_226179 | 1399946389                          | Ca_kabuli_scaffold | 226179                  | C/A  | NA                 | INTERGENIC                    | NA                                                     |
| Kabuli_wild_226210 | 1399946390                          | Ca_kabuli_scaffold | 226210                  | G/A  | NA                 | INTERGENIC                    | NA                                                     |
| Kabuli_wild_226219 | 1399946391                          | Ca_kabuli_scaffold | 226219                  | T/C  | NA                 | INTERGENIC                    | NA                                                     |
| Kabuli_wild_226233 | 1399946392                          | Ca_kabuli_scaffold | 226233                  | G/T  | NA                 | INTERGENIC                    | NA                                                     |
| Kabuli_wild_147568 | 1399946393                          | Ca_kabuli_scaffold | 147568                  | C/T  | Gene_Ca_25015      | NON_SYNONYMOUS_CODING         | Peptidase C48, SUMO/Sentrin/Ubl1                       |
| Kabuli_wild_147583 | 1399946394                          | Ca_kabuli_scaffold | 147583                  | G/A  | Gene_Ca_25015      | NON_SYNONYMOUS_CODING         | Peptidase C48, SUMO/Sentrin/Ubl1                       |
| Kabuli_wild_228608 | 1399946395                          | Ca_kabuli_scaffold | 228608                  | G/A  | NA                 | INTERGENIC                    | NA                                                     |
| Kabuli_wild_228653 | 1399946396                          | Ca_kabuli_scaffold | 228653                  | G/C  | NA                 | INTERGENIC                    | NA                                                     |
| Kabuli_wild_4821   | 1399946397                          | Ca_kabuli_scaffold | 4821                    | A/G  | Gene_Ca_26928      | UPSTREAM                      | NA                                                     |
| Kabuli_wild_2097   | 1399946398                          | Ca_kabuli_scaffold | 2097                    | C/A  | NA                 | INTERGENIC                    | NA                                                     |
| Kabuli_wild_2100   | 1399946399                          | Ca_kabuli_scaffold | 2100                    | G/C  | NA                 | INTERGENIC                    | NA                                                     |
| Kabuli_wild_52375  | 1399946400                          | Ca_kabuli_scaffold | 52375                   | C/A  | NA                 | INTERGENIC                    | NA                                                     |
| Kabuli_wild_52435  | 1399946401                          | Ca_kabuli_scaffold | 52435                   | G/A  | NA                 | INTERGENIC                    | NA                                                     |
| Kabuli_wild_199111 | 1399946402                          | Ca_kabuli_scaffold | 199111                  | C/T  | NA                 | INTERGENIC                    | NA                                                     |
| Kabuli_wild_199119 | 1399946403                          | Ca_kabuli_scaffold | 199119                  | T/G  | NA                 | INTERGENIC                    | NA                                                     |
| Kabuli_wild_199120 | 1399946404                          | Ca_kabuli_scaffold | 199120                  | C/A  | NA                 | INTERGENIC                    | NA                                                     |
| Kabuli_wild_199145 | 1399946405                          | Ca_kabuli_scaffold | 199145                  | G/A  | NA                 | INTERGENIC                    | NA                                                     |
| Kabuli_wild_199169 | 1399946406                          | Ca_kabuli_scaffold | 199169                  | G/T  | NA                 | INTERGENIC                    | NA                                                     |
| Kabuli_wild_122741 | 1399946407                          | Ca_kabuli_scaffold | 122741                  | T/C  | NA                 | INTERGENIC                    | NA                                                     |
| Kabuli_wild_646    | 1399946408                          | Ca_kabuli_scaffold | 646                     | G/A  | NA                 | INTERGENIC                    | NA                                                     |
| Kabuli_wild_651    | 1399946409                          | Ca_kabuli_scaffold | 651                     | G/T  | NA                 | INTERGENIC                    | NA                                                     |
| Kabuli_wild_682    | 1399946410                          | Ca_kabuli_scaffold | 682                     | A/C  | NA                 | INTERGENIC                    | NA                                                     |
| Kabuli_wild_691    | 1399946411                          | Ca_kabuli_scaffold | 691                     | G/C  | NA                 | INTERGENIC                    | NA                                                     |

| SNP IDs            | NCBI dbSNP accession IDs (NCBI_SS#) | Chromosomes        | Physical positions (bp) | SNPs | Gene accession IDs | Sequence components of genome | Putative functions               |
|--------------------|-------------------------------------|--------------------|-------------------------|------|--------------------|-------------------------------|----------------------------------|
| Kabuli_wild_2002   | 1399946412                          | Ca_kabuli_scaffold | 2002                    | C/G  | NA                 | INTERGENIC                    | NA                               |
| Kabuli_wild_5520   | 1399946413                          | Ca_kabuli_scaffold | 5520                    | C/A  | NA                 | INTERGENIC                    | NA                               |
| Kabuli_wild_5538   | 1399946414                          | Ca_kabuli_scaffold | 5538                    | A/T  | NA                 | INTERGENIC                    | NA                               |
| Kabuli_wild_5562   | 1399946415                          | Ca_kabuli_scaffold | 5562                    | C/T  | NA                 | INTERGENIC                    | NA                               |
| Kabuli_wild_5570   | 1399946416                          | Ca_kabuli_scaffold | 5570                    | T/C  | NA                 | INTERGENIC                    | NA                               |
| Kabuli_wild_4436   | 1399946417                          | Ca_kabuli_scaffold | 4436                    | A/C  | NA                 | INTERGENIC                    | NA                               |
| Kabuli_wild_4446   | 1399946418                          | Ca_kabuli_scaffold | 4446                    | A/C  | NA                 | INTERGENIC                    | NA                               |
| Kabuli_wild_58959  | 1399946419                          | Ca_kabuli_scaffold | 58959                   | G/A  | Gene_Ca_27480      | SYNONYMOUS_CODING             | Peptidase C48, SUMO/Sentrin/Ubl1 |
| Kabuli_wild_58974  | 1399946420                          | Ca_kabuli_scaffold | 58974                   | C/T  | Gene_Ca_27480      | NON_SYNONYMOUS_CODING         | Peptidase C48, SUMO/Sentrin/Ubl1 |
| Kabuli_wild_58091  | 1399946421                          | Ca_kabuli_scaffold | 58091                   | A/T  | NA                 | INTERGENIC                    | NA                               |
| Kabuli_wild_123799 | 1399946422                          | Ca_kabuli_scaffold | 123799                  | A/C  | Gene_Ca_27079      | SYNONYMOUS_CODING             | RNA recognition motif domain     |
| Kabuli_wild_126013 | 1399946423                          | Ca_kabuli_scaffold | 126013                  | A/C  | Gene_Ca_27079      | SYNONYMOUS_CODING             | RNA recognition motif domain     |
| Kabuli_wild_70721  | 1399946424                          | Ca_kabuli_scaffold | 70721                   | A/G  | NA                 | INTERGENIC                    | NA                               |
| Kabuli_wild_207    | 1399946425                          | Ca_kabuli_scaffold | 207                     | C/T  | NA                 | INTERGENIC                    | NA                               |
| Kabuli_wild_840    | 1399946426                          | Ca_kabuli_scaffold | 840                     | G/A  | NA                 | INTERGENIC                    | NA                               |
| Kabuli_wild_845    | 1399946427                          | Ca_kabuli_scaffold | 845                     | G/T  | NA                 | INTERGENIC                    | NA                               |
| Kabuli_wild_876    | 1399946428                          | Ca_kabuli_scaffold | 876                     | A/C  | NA                 | INTERGENIC                    | NA                               |
| Kabuli_wild_885    | 1399946429                          | Ca_kabuli_scaffold | 885                     | G/C  | NA                 | INTERGENIC                    | NA                               |
| Kabuli_wild_895    | 1399946430                          | Ca_kabuli_scaffold | 895                     | A/T  | NA                 | INTERGENIC                    | NA                               |
| Kabuli_wild_901    | 1399946431                          | Ca_kabuli_scaffold | 901                     | A/C  | NA                 | INTERGENIC                    | NA                               |
| Kabuli_wild_50806  | 1399946432                          | Ca_kabuli_scaffold | 50806                   | A/G  | NA                 | INTERGENIC                    | NA                               |
| Kabuli_wild_65482  | 1399946433                          | Ca_kabuli_scaffold | 65482                   | T/G  | Gene_Ca_25421      | UPSTREAM                      | Protein kinase,catalytic domain  |
| Kabuli_wild_65617  | 1399946434                          | Ca_kabuli_scaffold | 65617                   | G/A  | Gene_Ca_25421      | UPSTREAM                      | Protein kinase,catalytic domain  |
| Kabuli_wild_83112  | 1399946435                          | Ca_kabuli_scaffold | 83112                   | A/G  | NA                 | INTERGENIC                    | NA                               |
| Kabuli_wild_502    | 1399946436                          | Ca_kabuli_scaffold | 502                     | A/G  | NA                 | INTERGENIC                    | NA                               |
| Kabuli_wild_222695 | 1399946437                          | Ca_kabuli_scaffold | 222695                  | C/A  | Gene_Ca_24349      | NON_SYNONYMOUS_CODING         | NA                               |
| Kabuli_wild_222734 | 1399946438                          | Ca_kabuli_scaffold | 222734                  | T/C  | Gene_Ca_24349      | NON_SYNONYMOUS_CODING         | NA                               |
| Kabuli_wild_222737 | 1399946439                          | Ca_kabuli_scaffold | 222737                  | G/A  | Gene_Ca_24349      | NON_SYNONYMOUS_CODING         | NA                               |
| Kabuli_wild_222749 | 1399946440                          | Ca_kabuli_scaffold | 222749                  | G/C  | Gene_Ca_24349      | NON_SYNONYMOUS_CODING         | NA                               |
| Kabuli_wild_222750 | 1399946441                          | Ca_kabuli_scaffold | 222750                  | T/G  | Gene_Ca_24349      | NON_SYNONYMOUS_CODING         | NA                               |
| Kabuli_wild_139149 | 1399946442                          | Ca_kabuli_scaffold | 139149                  | A/G  | NA                 | INTERGENIC                    | NA                               |
| Kabuli_wild_1920   | 1399946443                          | Ca_kabuli_scaffold | 1920                    | T/C  | NA                 | INTERGENIC                    | NA                               |
| Kabuli_wild_1923   | 1399946444                          | Ca_kabuli_scaffold | 1923                    | C/T  | NA                 | INTERGENIC                    | NA                               |
| Kabuli_wild_1929   | 1399946445                          | Ca_kabuli_scaffold | 1929                    | C/T  | NA                 | INTERGENIC                    | NA                               |
| Kabuli_wild_3718   | 1399946446                          | Ca_kabuli_scaffold | 3718                    | C/T  | NA                 | INTERGENIC                    | NA                               |
| Kabuli_wild_3793   | 1399946447                          | Ca_kabuli_scaffold | 3793                    | C/T  | NA                 | INTERGENIC                    | NA                               |
| Kabuli_wild_3811   | 1399946448                          | Ca_kabuli_scaffold | 3811                    | C/T  | NA                 | INTERGENIC                    | NA                               |
| Kabuli_wild_3812   | 1399946449                          | Ca_kabuli_scaffold | 3812                    | C/A  | NA                 | INTERGENIC                    | NA                               |
| Kabuli_wild_3815   | 1399946450                          | Ca_kabuli_scaffold | 3815                    | T/A  | NA                 | INTERGENIC                    | NA                               |
| Kabuli_wild_3858   | 1399946451                          | Ca_kabuli_scaffold | 3858                    | G/A  | NA                 | INTERGENIC                    | NA                               |
| Kabuli_wild_3862   | 1399946452                          | Ca_kabuli_scaffold | 3862                    | T/C  | NA                 | INTERGENIC                    | NA                               |
| Kabuli_wild_3871   | 1399946453                          | Ca_kabuli_scaffold | 3871                    | A/T  | NA                 | INTERGENIC                    | NA                               |
| Kabuli_wild_3923   | 1399946454                          | Ca_kabuli_scaffold | 3923                    | T/C  | NA                 | INTERGENIC                    | NA                               |
| Kabuli_wild_12916  | 1399946455                          | Ca_kabuli_scaffold | 12916                   | C/A  | NA                 | INTERGENIC                    | NA                               |

| SNP IDs            | NCBI dbSNP accession IDs (NCBI_SS#) | Chromosomes        | Physical positions (bp) | SNPs | Gene accession IDs | Sequence components of genome | Putative functions                              |
|--------------------|-------------------------------------|--------------------|-------------------------|------|--------------------|-------------------------------|-------------------------------------------------|
| Kabuli_wild_12969  | 1399946456                          | Ca_kabuli_scaffold | 12969                   | G/C  | NA                 | INTERGENIC                    | NA                                              |
| Kabuli_wild_12978  | 1399946457                          | Ca_kabuli_scaffold | 12978                   | A/T  | NA                 | INTERGENIC                    | NA                                              |
| Kabuli_wild_12981  | 1399946458                          | Ca_kabuli_scaffold | 12981                   | C/T  | NA                 | INTERGENIC                    | NA                                              |
| Kabuli_wild_62433  | 1399946459                          | Ca_kabuli_scaffold | 62433                   | A/G  | Gene_Ca_27074      | UPSTREAM                      | NA                                              |
| Kabuli_wild_62473  | 1399946460                          | Ca_kabuli_scaffold | 62473                   | G/A  | Gene_Ca_27074      | UPSTREAM                      | NA                                              |
| Kabuli_wild_62494  | 1399946461                          | Ca_kabuli_scaffold | 62494                   | A/G  | Gene_Ca_27074      | UPSTREAM                      | NA                                              |
| Kabuli_wild_62495  | 1399946462                          | Ca_kabuli_scaffold | 62495                   | C/T  | Gene_Ca_27074      | UPSTREAM                      | NA                                              |
| Kabuli_wild_62496  | 1399946463                          | Ca_kabuli_scaffold | 62496                   | G/C  | Gene_Ca_27074      | UPSTREAM                      | NA                                              |
| Kabuli_wild_62502  | 1399946464                          | Ca_kabuli_scaffold | 62502                   | T/C  | Gene_Ca_27074      | UPSTREAM                      | NA                                              |
| Kabuli_wild_62514  | 1399946465                          | Ca_kabuli_scaffold | 62514                   | C/G  | Gene_Ca_27074      | UPSTREAM                      | NA                                              |
| Kabuli_wild_62527  | 1399946466                          | Ca_kabuli_scaffold | 62527                   | A/G  | Gene_Ca_27074      | UPSTREAM                      | NA                                              |
| Kabuli_wild_62538  | 1399946467                          | Ca_kabuli_scaffold | 62538                   | C/T  | Gene_Ca_27074      | UPSTREAM                      | NA                                              |
| Kabuli_wild_62545  | 1399946468                          | Ca_kabuli_scaffold | 62545                   | G/A  | Gene_Ca_27074      | UPSTREAM                      | NA                                              |
| Kabuli_wild_127851 | 1399946469                          | Ca_kabuli_scaffold | 127851                  | C/T  | NA                 | INTERGENIC                    | NA                                              |
| Kabuli_wild_127855 | 1399946470                          | Ca_kabuli_scaffold | 127855                  | A/C  | NA                 | INTERGENIC                    | NA                                              |
| Kabuli_wild_127870 | 1399946471                          | Ca_kabuli_scaffold | 127870                  | T/G  | NA                 | INTERGENIC                    | NA                                              |
| Kabuli_wild_127884 | 1399946472                          | Ca_kabuli_scaffold | 127884                  | A/C  | NA                 | INTERGENIC                    | NA                                              |
| Kabuli_wild_127905 | 1399946473                          | Ca_kabuli_scaffold | 127905                  | C/T  | NA                 | INTERGENIC                    | NA                                              |
| Kabuli_wild_29923  | 1399946474                          | Ca_kabuli_scaffold | 29923                   | C/G  | NA                 | INTERGENIC                    | NA                                              |
| Kabuli_wild_35402  | 1399946475                          | Ca_kabuli_scaffold | 35402                   | A/C  | Gene_Ca_25129      | INTRON                        | NA                                              |
| Kabuli_wild_198120 | 1399946476                          | Ca_kabuli_scaffold | 198120                  | G/T  | NA                 | INTERGENIC                    | NA                                              |
| Kabuli_wild_297848 | 1399946477                          | Ca_kabuli_scaffold | 297848                  | T/C  | NA                 | INTERGENIC                    | NA                                              |
| Kabuli_wild_297884 | 1399946478                          | Ca_kabuli_scaffold | 297884                  | T/C  | NA                 | INTERGENIC                    | NA                                              |
| Kabuli_wild_314310 | 1399946479                          | Ca_kabuli_scaffold | 314310                  | G/A  | NA                 | INTERGENIC                    | NA                                              |
| Kabuli_wild_314322 | 1399946480                          | Ca_kabuli_scaffold | 314322                  | T/C  | NA                 | INTERGENIC                    | NA                                              |
| Kabuli_wild_314323 | 1399946481                          | Ca_kabuli_scaffold | 314323                  | G/A  | NA                 | INTERGENIC                    | NA                                              |
| Kabuli_wild_314329 | 1399946482                          | Ca_kabuli_scaffold | 314329                  | T/C  | NA                 | INTERGENIC                    | NA                                              |
| Kabuli_wild_314343 | 1399946483                          | Ca_kabuli_scaffold | 314343                  | G/A  | NA                 | INTERGENIC                    | NA                                              |
| Kabuli_wild_314344 | 1399946484                          | Ca_kabuli_scaffold | 314344                  | T/C  | NA                 | INTERGENIC                    | NA                                              |
| Kabuli_wild_314347 | 1399946485                          | Ca_kabuli_scaffold | 314347                  | C/T  | NA                 | INTERGENIC                    | NA                                              |
| Kabuli_wild_314349 | 1399946486                          | Ca_kabuli_scaffold | 314349                  | C/G  | NA                 | INTERGENIC                    | NA                                              |
| Kabuli_wild_314353 | 1399946487                          | Ca_kabuli_scaffold | 314353                  | G/A  | NA                 | INTERGENIC                    | NA                                              |
| Kabuli_wild_314361 | 1399946488                          | Ca_kabuli_scaffold | 314361                  | T/G  | NA                 | INTERGENIC                    | NA                                              |
| Kabuli_wild_314363 | 1399946489                          | Ca_kabuli_scaffold | 314363                  | C/A  | NA                 | INTERGENIC                    | NA                                              |
| Kabuli_wild_314401 | 1399946490                          | Ca_kabuli_scaffold | 314401                  | A/C  | NA                 | INTERGENIC                    | NA                                              |
| Kabuli_wild_28439  | 1399946491                          | Ca_kabuli_scaffold | 28439                   | C/T  | NA                 | INTERGENIC                    | NA                                              |
| Kabuli_wild_226    | 1399946492                          | Ca_kabuli_scaffold | 226                     | T/G  | NA                 | INTERGENIC                    | NA                                              |
| Kabuli_wild_242    | 1399946493                          | Ca_kabuli_scaffold | 242                     | C/G  | NA                 | INTERGENIC                    | NA                                              |
| Kabuli_wild_251    | 1399946494                          | Ca_kabuli_scaffold | 251                     | T/G  | NA                 | INTERGENIC                    | NA                                              |
| Kabuli_wild_282    | 1399946495                          | Ca_kabuli_scaffold | 282                     | C/A  | NA                 | INTERGENIC                    | NA                                              |
| Kabuli_wild_287    | 1399946496                          | Ca_kabuli_scaffold | 287                     | C/T  | NA                 | INTERGENIC                    | NA                                              |
| Kabuli_wild_3789   | 1399946497                          | Ca_kabuli_scaffold | 3789                    | C/T  | NA                 | INTERGENIC                    | NA                                              |
| Kabuli_wild_58947  | 1399946498                          | Ca_kabuli_scaffold | 58947                   | T/C  | Gene_Ca_26451      | SYNONYMOUS_CODING             | Domain of unknown function DUF125,transmembrane |
| Kabuli_wild_57613  | 1399946499                          | Ca_kabuli_scaffold | 57613                   | C/T  | Gene_Ca_27549      | NON_SYNONYMOUS_CODING         | NA                                              |

| SNP IDs            | NCBI dbSNP accession IDs (NCBI_SS#) | Chromosomes        | Physical positions (bp) | SNPs | Gene accession IDs | Sequence components of genome | Putative functions                |
|--------------------|-------------------------------------|--------------------|-------------------------|------|--------------------|-------------------------------|-----------------------------------|
| Kabuli_wild_57626  | 1399946500                          | Ca_kabuli_scaffold | 57626                   | G/A  | Gene_Ca_27549      | SYNONYMOUS_CODING             | NA                                |
| Kabuli_wild_57659  | 1399946501                          | Ca_kabuli_scaffold | 57659                   | C/T  | Gene_Ca_27549      | NON_SYNONYMOUS_CODING         | NA                                |
| Kabuli_wild_57709  | 1399946502                          | Ca_kabuli_scaffold | 57709                   | G/T  | Gene_Ca_27549      | NON_SYNONYMOUS_CODING         | NA                                |
| Kabuli_wild_57725  | 1399946503                          | Ca_kabuli_scaffold | 57725                   | G/A  | Gene_Ca_27549      | NON_SYNONYMOUS_CODING         | NA                                |
| Kabuli_wild_57726  | 1399946504                          | Ca_kabuli_scaffold | 57726                   | C/A  | Gene_Ca_27549      | NON_SYNONYMOUS_CODING         | NA                                |
| Kabuli_wild_57742  | 1399946505                          | Ca_kabuli_scaffold | 57742                   | T/A  | Gene_Ca_27549      | NON_SYNONYMOUS_CODING         | NA                                |
| Kabuli_wild_57762  | 1399946506                          | Ca_kabuli_scaffold | 57762                   | T/C  | Gene_Ca_27549      | SYNONYMOUS_CODING             | NA                                |
| Kabuli_wild_67792  | 1399946507                          | Ca_kabuli_scaffold | 67792                   | T/G  | NA                 | INTERGENIC                    | NA                                |
| Kabuli_wild_3107   | 1399946508                          | Ca_kabuli_scaffold | 3107                    | T/C  | NA                 | INTERGENIC                    | NA                                |
| Kabuli_wild_3149   | 1399946509                          | Ca_kabuli_scaffold | 3149                    | A/C  | NA                 | INTERGENIC                    | NA                                |
| Kabuli_wild_110378 | 1399946510                          | Ca_kabuli_scaffold | 110378                  | C/T  | Gene_Ca_26665      | NON_SYNONYMOUS_CODING         | Domain of unknown function DUF828 |
| Kabuli_wild_110414 | 1399946511                          | Ca_kabuli_scaffold | 110414                  | T/G  | Gene_Ca_26665      | NON_SYNONYMOUS_CODING         | Domain of unknown function DUF828 |
| Kabuli_wild_110437 | 1399946512                          | Ca_kabuli_scaffold | 110437                  | C/T  | NA                 | INTERGENIC                    | NA                                |
| Kabuli_wild_110441 | 1399946513                          | Ca_kabuli_scaffold | 110441                  | T/A  | NA                 | INTERGENIC                    | NA                                |
| Kabuli_wild_58152  | 1399946514                          | Ca_kabuli_scaffold | 58152                   | T/G  | Gene_Ca_26161      | SYNONYMOUS_CODING             | WD40 repeat                       |
| Kabuli_wild_195270 | 1399946515                          | Ca_kabuli_scaffold | 195270                  | C/T  | NA                 | INTERGENIC                    | NA                                |
| Kabuli_wild_195276 | 1399946516                          | Ca_kabuli_scaffold | 195276                  | A/C  | NA                 | INTERGENIC                    | NA                                |
| Kabuli_wild_195292 | 1399946517                          | Ca_kabuli_scaffold | 195292                  | G/T  | NA                 | INTERGENIC                    | NA                                |
| Kabuli_wild_195305 | 1399946518                          | Ca_kabuli_scaffold | 195305                  | G/A  | NA                 | INTERGENIC                    | NA                                |
| Kabuli_wild_467848 | 1399946519                          | Ca_kabuli_scaffold | 467848                  | C/T  | NA                 | INTERGENIC                    | NA                                |
| Kabuli_wild_25377  | 1399946520                          | Ca_kabuli_scaffold | 25377                   | G/A  | NA                 | INTERGENIC                    | NA                                |
| Kabuli_wild_1375   | 1399946521                          | Ca_kabuli_scaffold | 1375                    | G/A  | NA                 | INTERGENIC                    | NA                                |
| Kabuli_wild_145570 | 1399946522                          | Ca_kabuli_scaffold | 145570                  | T/C  | Gene_Ca_27567      | SYNONYMOUS_CODING             | NA                                |
| Kabuli_wild_30682  | 1399946523                          | Ca_kabuli_scaffold | 30682                   | C/T  | Gene_Ca_26033      | NON_SYNONYMOUS_CODING         | Peptidase C48, SUMO/Sentrin/Ubl1  |
| Kabuli_wild_30766  | 1399946524                          | Ca_kabuli_scaffold | 30766                   | C/T  | Gene_Ca_26033      | NON_SYNONYMOUS_CODING         | Peptidase C48, SUMO/Sentrin/Ubl1  |
| Kabuli_wild_177550 | 1399946525                          | Ca_kabuli_scaffold | 177550                  | G/T  | NA                 | INTERGENIC                    | NA                                |
| Kabuli_wild_177578 | 1399946526                          | Ca_kabuli_scaffold | 177578                  | T/C  | NA                 | INTERGENIC                    | NA                                |
| Kabuli_wild_177579 | 1399946527                          | Ca_kabuli_scaffold | 177579                  | T/C  | NA                 | INTERGENIC                    | NA                                |
| Kabuli_wild_24846  | 1399946528                          | Ca_kabuli_scaffold | 24846                   | G/A  | NA                 | INTERGENIC                    | NA                                |
| Kabuli_wild_45019  | 1399946529                          | Ca_kabuli_scaffold | 45019                   | C/T  | Gene_Ca_27214      | NON_SYNONYMOUS_CODING         | NA                                |
| Kabuli_wild_52397  | 1399946530                          | Ca_kabuli_scaffold | 52397                   | G/T  | NA                 | INTERGENIC                    | NA                                |
| Kabuli_wild_52416  | 1399946531                          | Ca_kabuli_scaffold | 52416                   | G/T  | NA                 | INTERGENIC                    | NA                                |
| Kabuli_wild_75489  | 1399946532                          | Ca_kabuli_scaffold | 75489                   | T/G  | Gene_Ca_27216      | NON_SYNONYMOUS_CODING         | Glycosidehydrolase, family28      |
| Kabuli_wild_75501  | 1399946533                          | Ca_kabuli_scaffold | 75501                   | C/A  | Gene_Ca_27216      | NON_SYNONYMOUS_CODING         | Glycosidehydrolase, family28      |
| Kabuli_wild_75546  | 1399946534                          | Ca_kabuli_scaffold | 75546                   | T/G  | Gene_Ca_27216      | NON_SYNONYMOUS_CODING         | Glycosidehydrolase, family28      |
| Kabuli_wild_75609  | 1399946535                          | Ca_kabuli_scaffold | 75609                   | A/G  | Gene_Ca_27216      | NON_SYNONYMOUS_CODING         | Glycosidehydrolase, family28      |
| Kabuli_wild_75616  | 1399946536                          | Ca_kabuli_scaffold | 75616                   | T/G  | Gene_Ca_27216      | NON_SYNONYMOUS_CODING         | Glycosidehydrolase, family28      |
| Kabuli_wild_418    | 1399946537                          | Ca_kabuli_scaffold | 418                     | T/A  | NA                 | INTERGENIC                    | NA                                |
| Kabuli_wild_980    | 1399946538                          | Ca_kabuli_scaffold | 980                     | A/G  | NA                 | INTERGENIC                    | NA                                |
| Kabuli_wild_1172   | 1399946539                          | Ca_kabuli_scaffold | 1172                    | C/T  | NA                 | INTERGENIC                    | NA                                |
| Kabuli_wild_1202   | 1399946540                          | Ca_kabuli_scaffold | 1202                    | A/G  | NA                 | INTERGENIC                    | NA                                |
| Kabuli_wild_1204   | 1399946541                          | Ca_kabuli_scaffold | 1204                    | G/A  | NA                 | INTERGENIC                    | NA                                |
| Kabuli_wild_1307   | 1399946542                          | Ca_kabuli_scaffold | 1307                    | G/A  | NA                 | INTERGENIC                    | NA                                |
| Kabuli_wild_4688   | 1399946543                          | Ca_kabuli_scaffold | 4688                    | A/C  | Gene_Ca_24392      | SYNONYMOUS_CODING             | Glycosidehydrolase, family9       |

| SNP IDs            | NCBI dbSNP accession IDs (NCBI_SS#) | Chromosomes        | Physical positions (bp) | SNPs | Gene accession IDs | Sequence components of genome | Putative functions         |
|--------------------|-------------------------------------|--------------------|-------------------------|------|--------------------|-------------------------------|----------------------------|
| Kabuli_wild_4706   | 1399946544                          | Ca_kabuli_scaffold | 4706                    | G/T  | Gene_Ca_24392      | NON_SYNONYMOUS_CODING         | Glycosidehydrolase.family9 |
| Kabuli_wild_4719   | 1399946545                          | Ca_kabuli_scaffold | 4719                    | G/A  | Gene_Ca_24392      | INTRON                        | Glycosidehydrolase.family9 |
| Kabuli_wild_4732   | 1399946546                          | Ca_kabuli_scaffold | 4732                    | C/G  | Gene_Ca_24392      | INTRON                        | Glycosidehydrolase.family9 |
| Kabuli_wild_4738   | 1399946547                          | Ca_kabuli_scaffold | 4738                    | C/G  | Gene_Ca_24392      | INTRON                        | Glycosidehydrolase.family9 |
| Kabuli_wild_4782   | 1399946548                          | Ca_kabuli_scaffold | 4782                    | C/T  | Gene_Ca_24392      | INTRON                        | Glycosidehydrolase.family9 |
| Kabuli_wild_25756  | 1399946549                          | Ca_kabuli_scaffold | 25756                   | T/G  | Gene_Ca_24394      | SYNONYMOUS_CODING             | NA                         |
| Kabuli_wild_25769  | 1399946550                          | Ca_kabuli_scaffold | 25769                   | A/G  | Gene_Ca_24394      | NON_SYNONYMOUS_CODING         | NA                         |
| Kabuli_wild_25771  | 1399946551                          | Ca_kabuli_scaffold | 25771                   | T/G  | Gene_Ca_24394      | NON_SYNONYMOUS_CODING         | NA                         |
| Kabuli_wild_43207  | 1399946552                          | Ca_kabuli_scaffold | 43207                   | G/A  | NA                 | INTERGENIC                    | NA                         |
| Kabuli_wild_49533  | 1399946553                          | Ca_kabuli_scaffold | 49533                   | T/A  | Gene_Ca_24396      | INTRON                        | Zinc finger, RING-type     |
| Kabuli_wild_49700  | 1399946554                          | Ca_kabuli_scaffold | 49700                   | A/G  | Gene_Ca_24396      | INTRON                        | Zinc finger, RING-type     |
| Kabuli_wild_82193  | 1399946555                          | Ca_kabuli_scaffold | 82193                   | C/A  | NA                 | INTERGENIC                    | NA                         |
| Kabuli_wild_82232  | 1399946556                          | Ca_kabuli_scaffold | 82232                   | C/T  | NA                 | INTERGENIC                    | NA                         |
| Kabuli_wild_82249  | 1399946557                          | Ca_kabuli_scaffold | 82249                   | G/A  | NA                 | INTERGENIC                    | NA                         |
| Kabuli_wild_82250  | 1399946558                          | Ca_kabuli_scaffold | 82250                   | T/C  | NA                 | INTERGENIC                    | NA                         |
| Kabuli_wild_82253  | 1399946559                          | Ca_kabuli_scaffold | 82253                   | G/C  | NA                 | INTERGENIC                    | NA                         |
| Kabuli_wild_82261  | 1399946560                          | Ca_kabuli_scaffold | 82261                   | C/G  | NA                 | INTERGENIC                    | NA                         |
| Kabuli_wild_82262  | 1399946561                          | Ca_kabuli_scaffold | 82262                   | G/C  | NA                 | INTERGENIC                    | NA                         |
| Kabuli_wild_82302  | 1399946562                          | Ca_kabuli_scaffold | 82302                   | T/A  | Gene_Ca_24399      | NON_SYNONYMOUS_CODING         | NA                         |
| Kabuli_wild_82319  | 1399946563                          | Ca_kabuli_scaffold | 82319                   | T/C  | Gene_Ca_24399      | SYNONYMOUS_CODING             | NA                         |
| Kabuli_wild_82328  | 1399946564                          | Ca_kabuli_scaffold | 82328                   | A/G  | Gene_Ca_24399      | SYNONYMOUS_CODING             | NA                         |
| Kabuli_wild_82342  | 1399946565                          | Ca_kabuli_scaffold | 82342                   | C/T  | Gene_Ca_24399      | NON_SYNONYMOUS_CODING         | NA                         |
| Kabuli_wild_82369  | 1399946566                          | Ca_kabuli_scaffold | 82369                   | G/A  | Gene_Ca_24399      | STOP_GAINED                   | NA                         |
| Kabuli_wild_82397  | 1399946567                          | Ca_kabuli_scaffold | 82397                   | T/C  | Gene_Ca_24399      | SYNONYMOUS_CODING             | NA                         |
| Kabuli_wild_82417  | 1399946568                          | Ca_kabuli_scaffold | 82417                   | C/T  | Gene_Ca_24399      | NON_SYNONYMOUS_CODING         | NA                         |
| Kabuli_wild_95823  | 1399946569                          | Ca_kabuli_scaffold | 95823                   | G/A  | NA                 | INTERGENIC                    | NA                         |
| Kabuli_wild_99364  | 1399946570                          | Ca_kabuli_scaffold | 99364                   | A/G  | NA                 | INTERGENIC                    | NA                         |
| Kabuli_wild_99368  | 1399946571                          | Ca_kabuli_scaffold | 99368                   | C/G  | NA                 | INTERGENIC                    | NA                         |
| Kabuli_wild_99477  | 1399946572                          | Ca_kabuli_scaffold | 99477                   | T/A  | Gene_Ca_24401      | DOWNSTREAM                    | NA                         |
| Kabuli_wild_99549  | 1399946573                          | Ca_kabuli_scaffold | 99549                   | C/A  | Gene_Ca_24401      | DOWNSTREAM                    | NA                         |
| Kabuli_wild_100874 | 1399946574                          | Ca_kabuli_scaffold | 100874                  | A/C  | Gene_Ca_24400      | DOWNSTREAM                    | NA                         |
| Kabuli_wild_100928 | 1399946575                          | Ca_kabuli_scaffold | 100928                  | T/A  | Gene_Ca_24400      | DOWNSTREAM                    | NA                         |
| Kabuli_wild_101084 | 1399946576                          | Ca_kabuli_scaffold | 101084                  | C/A  | Gene_Ca_24400      | DOWNSTREAM                    | NA                         |
| Kabuli_wild_101251 | 1399946577                          | Ca_kabuli_scaffold | 101251                  | A/G  | Gene_Ca_24400      | DOWNSTREAM                    | NA                         |
| Kabuli_wild_104549 | 1399946578                          | Ca_kabuli_scaffold | 104549                  | C/G  | NA                 | INTERGENIC                    | NA                         |
| Kabuli_wild_104583 | 1399946579                          | Ca_kabuli_scaffold | 104583                  | T/C  | Gene_Ca_24401      | NON_SYNONYMOUS_CODING         | NA                         |
| Kabuli_wild_106920 | 1399946580                          | Ca_kabuli_scaffold | 106920                  | C/T  | Gene_Ca_24401      | INTRON                        | NA                         |
| Kabuli_wild_106936 | 1399946581                          | Ca_kabuli_scaffold | 106936                  | A/G  | Gene_Ca_24401      | INTRON                        | NA                         |
| Kabuli_wild_106974 | 1399946582                          | Ca_kabuli_scaffold | 106974                  | C/T  | Gene_Ca_24401      | INTRON                        | NA                         |
| Kabuli_wild_107033 | 1399946583                          | Ca_kabuli_scaffold | 107033                  | A/T  | Gene_Ca_24401      | INTRON                        | NA                         |
| Kabuli_wild_107087 | 1399946584                          | Ca_kabuli_scaffold | 107087                  | G/A  | Gene_Ca_24401      | INTRON                        | NA                         |
| Kabuli_wild_107180 | 1399946585                          | Ca_kabuli_scaffold | 107180                  | C/T  | Gene_Ca_24401      | INTRON                        | NA                         |
| Kabuli_wild_107376 | 1399946586                          | Ca_kabuli_scaffold | 107376                  | C/T  | Gene_Ca_24401      | INTRON                        | NA                         |
| Kabuli_wild_107413 | 1399946587                          | Ca_kabuli_scaffold | 107413                  | A/G  | Gene_Ca_24401      | INTRON                        | NA                         |

| SNP IDs            | NCBI dbSNP accession IDs (NCBI_SS#) | Chromosomes        | Physical positions (bp) | SNPs | Gene accession IDs | Sequence components of genome | Putative functions                     |
|--------------------|-------------------------------------|--------------------|-------------------------|------|--------------------|-------------------------------|----------------------------------------|
| Kabuli_wild_107437 | 1399946588                          | Ca_kabuli_scaffold | 107437                  | T/C  | Gene_Ca_24401      | INTRON                        | NA                                     |
| Kabuli_wild_108211 | 1399946589                          | Ca_kabuli_scaffold | 108211                  | G/A  | Gene_Ca_24401      | INTRON                        | NA                                     |
| Kabuli_wild_108560 | 1399946590                          | Ca_kabuli_scaffold | 108560                  | T/G  | Gene_Ca_24401      | INTRON                        | NA                                     |
| Kabuli_wild_108599 | 1399946591                          | Ca_kabuli_scaffold | 108599                  | T/A  | Gene_Ca_24401      | INTRON                        | NA                                     |
| Kabuli_wild_108763 | 1399946592                          | Ca_kabuli_scaffold | 108763                  | T/G  | Gene_Ca_24401      | INTRON                        | NA                                     |
| Kabuli_wild_112836 | 1399946593                          | Ca_kabuli_scaffold | 112836                  | T/C  | Gene_Ca_24401      | INTRON                        | NA                                     |
| Kabuli_wild_117430 | 1399946594                          | Ca_kabuli_scaffold | 117430                  | A/C  | NA                 | INTERGENIC                    | NA                                     |
| Kabuli_wild_117440 | 1399946595                          | Ca_kabuli_scaffold | 117440                  | C/T  | NA                 | INTERGENIC                    | NA                                     |
| Kabuli_wild_125716 | 1399946596                          | Ca_kabuli_scaffold | 125716                  | T/C  | Gene_Ca_24402      | SYNONYMOUS_CODING             | NA                                     |
| Kabuli_wild_128027 | 1399946597                          | Ca_kabuli_scaffold | 128027                  | A/G  | Gene_Ca_24402      | INTRON                        | NA                                     |
| Kabuli_wild_133462 | 1399946598                          | Ca_kabuli_scaffold | 133462                  | G/A  | NA                 | INTERGENIC                    | NA                                     |
| Kabuli_wild_56702  | 1399946599                          | Ca_kabuli_scaffold | 56702                   | G/A  | NA                 | INTERGENIC                    | NA                                     |
| Kabuli_wild_89940  | 1399946600                          | Ca_kabuli_scaffold | 89940                   | C/T  | Gene_Ca_26646      | SYNONYMOUS_CODING             | Lactate/malatedehydrogenase,N-terminal |
| Kabuli_wild_25626  | 1399946601                          | Ca_kabuli_scaffold | 25626                   | C/G  | NA                 | INTERGENIC                    | NA                                     |
| Kabuli_wild_25655  | 1399946602                          | Ca_kabuli_scaffold | 25655                   | T/G  | NA                 | INTERGENIC                    | NA                                     |
| Kabuli_wild_25668  | 1399946603                          | Ca_kabuli_scaffold | 25668                   | T/G  | NA                 | INTERGENIC                    | NA                                     |
| Kabuli_wild_210    | 1399946604                          | Ca_kabuli_scaffold | 210                     | A/G  | NA                 | INTERGENIC                    | NA                                     |
| Kabuli_wild_213    | 1399946605                          | Ca_kabuli_scaffold | 213                     | C/T  | NA                 | INTERGENIC                    | NA                                     |
| Kabuli_wild_225    | 1399946606                          | Ca_kabuli_scaffold | 225                     | G/A  | NA                 | INTERGENIC                    | NA                                     |
| Kabuli_wild_227    | 1399946607                          | Ca_kabuli_scaffold | 227                     | T/G  | NA                 | INTERGENIC                    | NA                                     |
| Kabuli_wild_234    | 1399946608                          | Ca_kabuli_scaffold | 234                     | C/T  | NA                 | INTERGENIC                    | NA                                     |
| Kabuli_wild_239    | 1399946609                          | Ca_kabuli_scaffold | 239                     | C/T  | NA                 | INTERGENIC                    | NA                                     |
| Kabuli_wild_240    | 1399946610                          | Ca_kabuli_scaffold | 240                     | T/G  | NA                 | INTERGENIC                    | NA                                     |
| Kabuli_wild_243    | 1399946611                          | Ca_kabuli_scaffold | 243                     | A/G  | NA                 | INTERGENIC                    | NA                                     |
| Kabuli_wild_246    | 1399946612                          | Ca_kabuli_scaffold | 246                     | G/A  | NA                 | INTERGENIC                    | NA                                     |
| Kabuli_wild_256    | 1399946613                          | Ca_kabuli_scaffold | 256                     | T/C  | NA                 | INTERGENIC                    | NA                                     |
| Kabuli_wild_258    | 1399946614                          | Ca_kabuli_scaffold | 258                     | T/C  | NA                 | INTERGENIC                    | NA                                     |
| Kabuli_wild_276    | 1399946615                          | Ca_kabuli_scaffold | 276                     | G/C  | NA                 | INTERGENIC                    | NA                                     |
| Kabuli_wild_283    | 1399946616                          | Ca_kabuli_scaffold | 283                     | A/G  | NA                 | INTERGENIC                    | NA                                     |
| Kabuli_wild_285    | 1399946617                          | Ca_kabuli_scaffold | 285                     | T/G  | NA                 | INTERGENIC                    | NA                                     |
| Kabuli_wild_291    | 1399946618                          | Ca_kabuli_scaffold | 291                     | C/A  | NA                 | INTERGENIC                    | NA                                     |
| Kabuli_wild_2356   | 1399946619                          | Ca_kabuli_scaffold | 2356                    | C/G  | Gene_Ca_27862      | SYNONYMOUS_CODING             | Peptidase C48, SUMO/Sentrin/Ubl1       |
| Kabuli_wild_2369   | 1399946620                          | Ca_kabuli_scaffold | 2369                    | C/T  | Gene_Ca_27862      | SYNONYMOUS_CODING             | Peptidase C48, SUMO/Sentrin/Ubl1       |
| Kabuli_wild_2372   | 1399946621                          | Ca_kabuli_scaffold | 2372                    | G/A  | Gene_Ca_27862      | NON_SYNONYMOUS_CODING         | Peptidase C48, SUMO/Sentrin/Ubl1       |
| Kabuli_wild_2388   | 1399946622                          | Ca_kabuli_scaffold | 2388                    | C/T  | Gene_Ca_27862      | NON_SYNONYMOUS_CODING         | Peptidase C48, SUMO/Sentrin/Ubl1       |
| Kabuli_wild_2403   | 1399946623                          | Ca_kabuli_scaffold | 2403                    | C/A  | Gene_Ca_27862      | NON_SYNONYMOUS_CODING         | Peptidase C48, SUMO/Sentrin/Ubl1       |
| Kabuli_wild_2409   | 1399946624                          | Ca_kabuli_scaffold | 2409                    | A/G  | Gene_Ca_27862      | NON_SYNONYMOUS_CODING         | Peptidase C48, SUMO/Sentrin/Ubl1       |
| Kabuli_wild_2421   | 1399946625                          | Ca_kabuli_scaffold | 2421                    | G/A  | Gene_Ca_27862      | NON_SYNONYMOUS_CODING         | Peptidase C48, SUMO/Sentrin/Ubl1       |
| Kabuli_wild_2444   | 1399946626                          | Ca_kabuli_scaffold | 2444                    | C/A  | Gene_Ca_27862      | NON_SYNONYMOUS_CODING         | Peptidase C48, SUMO/Sentrin/Ubl1       |
| Kabuli_wild_2464   | 1399946627                          | Ca_kabuli_scaffold | 2464                    | A/G  | Gene_Ca_27862      | SYNONYMOUS_CODING             | Peptidase C48, SUMO/Sentrin/Ubl1       |
| Kabuli_wild_2469   | 1399946628                          | Ca_kabuli_scaffold | 2469                    | T/G  | Gene_Ca_27862      | NON_SYNONYMOUS_CODING         | Peptidase C48, SUMO/Sentrin/Ubl1       |
| Kabuli_wild_2489   | 1399946629                          | Ca_kabuli_scaffold | 2489                    | C/A  | Gene_Ca_27862      | NON_SYNONYMOUS_CODING         | Peptidase C48, SUMO/Sentrin/Ubl1       |
| Kabuli_wild_2517   | 1399946630                          | Ca_kabuli_scaffold | 2517                    | G/A  | Gene_Ca_27862      | NON_SYNONYMOUS_CODING         | Peptidase C48, SUMO/Sentrin/Ubl1       |
| Kabuli_wild_14852  | 1399946631                          | Ca_kabuli_scaffold | 14852                   | C/G  | Gene_Ca_28160      | INTRON                        | NA                                     |

| SNP IDs           | NCBI dbSNP accession IDs (NCBI_SS#) | Chromosomes        | Physical positions (bp) | SNPs | Gene accession IDs | Sequence components of genome | Putative functions                 |
|-------------------|-------------------------------------|--------------------|-------------------------|------|--------------------|-------------------------------|------------------------------------|
| Kabuli_wild_14916 | 1399946632                          | Ca_kabuli_scaffold | 14916                   | A/G  | Gene_Ca_28160      | INTRON                        | NA                                 |
| Kabuli_wild_14917 | 1399946633                          | Ca_kabuli_scaffold | 14917                   | G/A  | Gene_Ca_28160      | INTRON                        | NA                                 |
| Kabuli_wild_15086 | 1399946634                          | Ca_kabuli_scaffold | 15086                   | G/A  | Gene_Ca_28160      | INTRON                        | NA                                 |
| Kabuli_wild_15153 | 1399946635                          | Ca_kabuli_scaffold | 15153                   | G/A  | Gene_Ca_28160      | INTRON                        | NA                                 |
| Kabuli_wild_15166 | 1399946636                          | Ca_kabuli_scaffold | 15166                   | G/T  | Gene_Ca_28160      | INTRON                        | NA                                 |
| Kabuli_wild_15170 | 1399946637                          | Ca_kabuli_scaffold | 15170                   | G/T  | Gene_Ca_28160      | INTRON                        | NA                                 |
| Kabuli_wild_15187 | 1399946638                          | Ca_kabuli_scaffold | 15187                   | T/A  | Gene_Ca_28160      | INTRON                        | NA                                 |
| Kabuli_wild_56358 | 1399946639                          | Ca_kabuli_scaffold | 56358                   | T/G  | NA                 | INTERGENIC                    | NA                                 |
| Kabuli_wild_56451 | 1399946640                          | Ca_kabuli_scaffold | 56451                   | A/T  | NA                 | INTERGENIC                    | NA                                 |
| Kabuli_wild_50195 | 1399946641                          | Ca_kabuli_scaffold | 50195                   | G/C  | NA                 | INTERGENIC                    | NA                                 |
| Kabuli_wild_31202 | 1399946642                          | Ca_kabuli_scaffold | 31202                   | G/A  | Gene_Ca_27010      | NON_SYNONYMOUS_CODING         | NA                                 |
| Kabuli_wild_31205 | 1399946643                          | Ca_kabuli_scaffold | 31205                   | G/A  | Gene_Ca_27010      | NON_SYNONYMOUS_CODING         | NA                                 |
| Kabuli_wild_31211 | 1399946644                          | Ca_kabuli_scaffold | 31211                   | G/A  | Gene_Ca_27010      | NON_SYNONYMOUS_CODING         | NA                                 |
| Kabuli_wild_31218 | 1399946645                          | Ca_kabuli_scaffold | 31218                   | C/T  | Gene_Ca_27010      | NON_SYNONYMOUS_CODING         | NA                                 |
| Kabuli_wild_31269 | 1399946646                          | Ca_kabuli_scaffold | 31269                   | G/A  | Gene_Ca_27010      | SYNONYMOUS_CODING             | NA                                 |
| Kabuli_wild_31286 | 1399946647                          | Ca_kabuli_scaffold | 31286                   | G/T  | Gene_Ca_27010      | NON_SYNONYMOUS_CODING         | NA                                 |
| Kabuli_wild_48024 | 1399946648                          | Ca_kabuli_scaffold | 48024                   | A/G  | Gene_Ca_27011      | SYNONYMOUS_CODING             | NA                                 |
| Kabuli_wild_20485 | 1399946649                          | Ca_kabuli_scaffold | 20485                   | G/C  | NA                 | INTERGENIC                    | NA                                 |
| Kabuli_wild_20488 | 1399946650                          | Ca_kabuli_scaffold | 20488                   | T/G  | NA                 | INTERGENIC                    | NA                                 |
| Kabuli_wild_20496 | 1399946651                          | Ca_kabuli_scaffold | 20496                   | T/A  | NA                 | INTERGENIC                    | NA                                 |
| Kabuli_wild_20533 | 1399946652                          | Ca_kabuli_scaffold | 20533                   | G/A  | NA                 | INTERGENIC                    | NA                                 |
| Kabuli_wild_20552 | 1399946653                          | Ca_kabuli_scaffold | 20552                   | C/T  | NA                 | INTERGENIC                    | NA                                 |
| Kabuli_wild_4880  | 1399946654                          | Ca_kabuli_scaffold | 4880                    | C/T  | Gene_Ca_27574      | DOWNSTREAM                    | NA                                 |
| Kabuli_wild_263   | 1399946655                          | Ca_kabuli_scaffold | 263                     | C/T  | Gene_Ca_28080      | UPSTREAM                      | Peptidase C48, SUMO/Sentrin/Ubl1   |
| Kabuli_wild_269   | 1399946656                          | Ca_kabuli_scaffold | 269                     | A/C  | Gene_Ca_28080      | UPSTREAM                      | Peptidase C48, SUMO/Sentrin/Ubl1   |
| Kabuli_wild_272   | 1399946657                          | Ca_kabuli_scaffold | 272                     | C/T  | Gene_Ca_28080      | UPSTREAM                      | Peptidase C48, SUMO/Sentrin/Ubl1   |
| Kabuli_wild_32650 | 1399946658                          | Ca_kabuli_scaffold | 32650                   | C/T  | NA                 | INTERGENIC                    | NA                                 |
| Kabuli_wild_32703 | 1399946659                          | Ca_kabuli_scaffold | 32703                   | A/C  | NA                 | INTERGENIC                    | NA                                 |
| Kabuli_wild_32739 | 1399946660                          | Ca_kabuli_scaffold | 32739                   | C/A  | NA                 | INTERGENIC                    | NA                                 |
| Kabuli_wild_32776 | 1399946661                          | Ca_kabuli_scaffold | 32776                   | T/A  | NA                 | INTERGENIC                    | NA                                 |
| Kabuli_wild_33081 | 1399946662                          | Ca_kabuli_scaffold | 33081                   | A/G  | NA                 | INTERGENIC                    | NA                                 |
| Kabuli_wild_33207 | 1399946663                          | Ca_kabuli_scaffold | 33207                   | C/T  | NA                 | INTERGENIC                    | NA                                 |
| Kabuli_wild_33602 | 1399946664                          | Ca_kabuli_scaffold | 33602                   | C/A  | NA                 | INTERGENIC                    | NA                                 |
| Kabuli_wild_33631 | 1399946665                          | Ca_kabuli_scaffold | 33631                   | G/A  | NA                 | INTERGENIC                    | NA                                 |
| Kabuli_wild_33632 | 1399946666                          | Ca_kabuli_scaffold | 33632                   | T/G  | NA                 | INTERGENIC                    | NA                                 |
| Kabuli_wild_33655 | 1399946667                          | Ca_kabuli_scaffold | 33655                   | G/A  | NA                 | INTERGENIC                    | NA                                 |
| Kabuli_wild_319   | 1399946668                          | Ca_kabuli_scaffold | 319                     | T/C  | NA                 | INTERGENIC                    | NA                                 |
| Kabuli_wild_375   | 1399946669                          | Ca_kabuli_scaffold | 375                     | T/C  | NA                 | INTERGENIC                    | NA                                 |
| Kabuli_wild_7348  | 1399946670                          | Ca_kabuli_scaffold | 7348                    | G/A  | NA                 | INTERGENIC                    | NA                                 |
| Kabuli_wild_7388  | 1399946671                          | Ca_kabuli_scaffold | 7388                    | T/A  | NA                 | INTERGENIC                    | NA                                 |
| Kabuli_wild_53536 | 1399946672                          | Ca_kabuli_scaffold | 53536                   | T/G  | Gene_Ca_27261      | SYNONYMOUS_CODING             | Tetracyclineresistanceprotein,TetA |
| Kabuli_wild_32790 | 1399946673                          | Ca_kabuli_scaffold | 32790                   | C/T  | Gene_Ca_26723      | SYNONYMOUS_CODING             | NA                                 |
| Kabuli_wild_33498 | 1399946674                          | Ca_kabuli_scaffold | 33498                   | C/T  | Gene_Ca_26723      | INTRON                        | NA                                 |
| Kabuli_wild_33499 | 1399946675                          | Ca_kabuli_scaffold | 33499                   | T/A  | Gene_Ca_26723      | INTRON                        | NA                                 |



| SNP IDs           | NCBI dbSNP accession IDs (NCBI_SS#) | Chromosomes        | Physical positions (bp) | SNPs | Gene accession IDs | Sequence components of genome | Putative functions |
|-------------------|-------------------------------------|--------------------|-------------------------|------|--------------------|-------------------------------|--------------------|
| Kabuli_wild_33501 | 1399946676                          | Ca_kabuli_scaffold | 33501                   | G/A  | Gene_Ca_26723      | INTRON                        | NA                 |
| Kabuli_wild_33502 | 1399946677                          | Ca_kabuli_scaffold | 33502                   | A/C  | Gene_Ca_26723      | INTRON                        | NA                 |
| Kabuli_wild_33507 | 1399946678                          | Ca_kabuli_scaffold | 33507                   | A/T  | Gene_Ca_26723      | INTRON                        | NA                 |
| Kabuli_wild_33513 | 1399946679                          | Ca_kabuli_scaffold | 33513                   | A/T  | Gene_Ca_26723      | INTRON                        | NA                 |
| Kabuli_wild_33514 | 1399946680                          | Ca_kabuli_scaffold | 33514                   | A/G  | Gene_Ca_26723      | INTRON                        | NA                 |
| Kabuli_wild_33517 | 1399946681                          | Ca_kabuli_scaffold | 33517                   | A/T  | Gene_Ca_26723      | INTRON                        | NA                 |
| Kabuli_wild_33522 | 1399946682                          | Ca_kabuli_scaffold | 33522                   | A/T  | Gene_Ca_26723      | INTRON                        | NA                 |
| Kabuli_wild_33529 | 1399946683                          | Ca_kabuli_scaffold | 33529                   | T/C  | Gene_Ca_26723      | INTRON                        | NA                 |
| Kabuli_wild_33530 | 1399946684                          | Ca_kabuli_scaffold | 33530                   | G/T  | Gene_Ca_26723      | INTRON                        | NA                 |
| Kabuli_wild_33531 | 1399946685                          | Ca_kabuli_scaffold | 33531                   | T/A  | Gene_Ca_26723      | INTRON                        | NA                 |
| Kabuli_wild_33532 | 1399946686                          | Ca_kabuli_scaffold | 33532                   | C/A  | Gene_Ca_26723      | INTRON                        | NA                 |
| Kabuli_wild_4400  | 1399946687                          | Ca_kabuli_scaffold | 4400                    | G/A  | Gene_Ca_28109      | SYNONYMOUS_CODING             | NA                 |
| Kabuli_wild_4405  | 1399946688                          | Ca_kabuli_scaffold | 4405                    | T/C  | Gene_Ca_28109      | NON_SYNONYMOUS_CODING         | NA                 |
| Kabuli_wild_4409  | 1399946689                          | Ca_kabuli_scaffold | 4409                    | G/A  | NA                 | INTERGENIC                    | NA                 |
| Kabuli_wild_6910  | 1399946690                          | Ca_kabuli_scaffold | 6910                    | G/A  | NA                 | INTERGENIC                    | NA                 |
| Kabuli_wild_159   | 1399946691                          | Ca_kabuli_scaffold | 159                     | T/G  | NA                 | INTERGENIC                    | NA                 |
| Kabuli_wild_75639 | 1399946692                          | Ca_kabuli_scaffold | 75639                   | G/T  | NA                 | INTERGENIC                    | NA                 |
| Kabuli_wild_75945 | 1399946693                          | Ca_kabuli_scaffold | 75945                   | A/C  | NA                 | INTERGENIC                    | NA                 |
| Kabuli_wild_75977 | 1399946694                          | Ca_kabuli_scaffold | 75977                   | A/G  | NA                 | INTERGENIC                    | NA                 |
| Kabuli_wild_76005 | 1399946695                          | Ca_kabuli_scaffold | 76005                   | G/A  | NA                 | INTERGENIC                    | NA                 |
| Kabuli_wild_1355  | 1399946696                          | Ca_kabuli_scaffold | 1355                    | G/T  | NA                 | INTERGENIC                    | NA                 |
| Kabuli_wild_1396  | 1399946697                          | Ca_kabuli_scaffold | 1396                    | G/A  | NA                 | INTERGENIC                    | NA                 |
| Kabuli_wild_7438  | 1399946698                          | Ca_kabuli_scaffold | 7438                    | A/C  | NA                 | INTERGENIC                    | NA                 |
| Kabuli_wild_7442  | 1399946699                          | Ca_kabuli_scaffold | 7442                    | T/C  | NA                 | INTERGENIC                    | NA                 |
| Kabuli_wild_7443  | 1399946700                          | Ca_kabuli_scaffold | 7443                    | A/G  | NA                 | INTERGENIC                    | NA                 |
| Kabuli_wild_7444  | 1399946701                          | Ca_kabuli_scaffold | 7444                    | A/G  | NA                 | INTERGENIC                    | NA                 |
| Kabuli_wild_7462  | 1399946702                          | Ca_kabuli_scaffold | 7462                    | A/G  | NA                 | INTERGENIC                    | NA                 |
| Kabuli_wild_7464  | 1399946703                          | Ca_kabuli_scaffold | 7464                    | T/A  | NA                 | INTERGENIC                    | NA                 |
| Kabuli_wild_7472  | 1399946704                          | Ca_kabuli_scaffold | 7472                    | A/G  | NA                 | INTERGENIC                    | NA                 |
| Kabuli_wild_7477  | 1399946705                          | Ca_kabuli_scaffold | 7477                    | C/G  | NA                 | INTERGENIC                    | NA                 |
| Kabuli_wild_7480  | 1399946706                          | Ca_kabuli_scaffold | 7480                    | G/A  | NA                 | INTERGENIC                    | NA                 |
| Kabuli_wild_7485  | 1399946707                          | Ca_kabuli_scaffold | 7485                    | T/A  | NA                 | INTERGENIC                    | NA                 |
| Kabuli_wild_7490  | 1399946708                          | Ca_kabuli_scaffold | 7490                    | T/C  | NA                 | INTERGENIC                    | NA                 |
| Kabuli_wild_7493  | 1399946709                          | Ca_kabuli_scaffold | 7493                    | G/C  | NA                 | INTERGENIC                    | NA                 |
| Kabuli_wild_7499  | 1399946710                          | Ca_kabuli_scaffold | 7499                    | T/C  | NA                 | INTERGENIC                    | NA                 |
| Kabuli_wild_7581  | 1399946711                          | Ca_kabuli_scaffold | 7581                    | C/A  | NA                 | INTERGENIC                    | NA                 |
| Kabuli_wild_7582  | 1399946712                          | Ca_kabuli_scaffold | 7582                    | A/G  | NA                 | INTERGENIC                    | NA                 |
| Kabuli_wild_7583  | 1399946713                          | Ca_kabuli_scaffold | 7583                    | A/T  | NA                 | INTERGENIC                    | NA                 |
| Kabuli_wild_7593  | 1399946714                          | Ca_kabuli_scaffold | 7593                    | T/C  | NA                 | INTERGENIC                    | NA                 |
| Kabuli_wild_7594  | 1399946715                          | Ca_kabuli_scaffold | 7594                    | T/C  | NA                 | INTERGENIC                    | NA                 |
| Kabuli_wild_7598  | 1399946716                          | Ca_kabuli_scaffold | 7598                    | G/A  | NA                 | INTERGENIC                    | NA                 |
| Kabuli_wild_9404  | 1399946717                          | Ca_kabuli_scaffold | 9404                    | C/T  | Gene_Ca_27112      | NON_SYNONYMOUS_CODING         | NA                 |
| Kabuli_wild_9787  | 1399946718                          | Ca_kabuli_scaffold | 9787                    | G/A  | Gene_Ca_27112      | SYNONYMOUS_CODING             | NA                 |
| Kabuli_wild_29185 | 1399946719                          | Ca_kabuli_scaffold | 29185                   | A/G  | Gene_Ca_24175      | SYNONYMOUS_CODING             | NA                 |

| SNP IDs           | NCBI dbSNP accession IDs (NCBI_SS#) | Chromosomes        | Physical positions (bp) | SNPs | Gene accession IDs | Sequence components of genome | Putative functions                      |
|-------------------|-------------------------------------|--------------------|-------------------------|------|--------------------|-------------------------------|-----------------------------------------|
| Kabuli_wild_29191 | 1399946720                          | Ca_kabuli_scaffold | 29191                   | C/T  | Gene_Ca_24175      | SYNONYMOUS_CODING             | NA                                      |
| Kabuli_wild_29210 | 1399946721                          | Ca_kabuli_scaffold | 29210                   | G/C  | Gene_Ca_24175      | NON_SYNONYMOUS_CODING         | NA                                      |
| Kabuli_wild_29211 | 1399946722                          | Ca_kabuli_scaffold | 29211                   | C/T  | Gene_Ca_24175      | NON_SYNONYMOUS_CODING         | NA                                      |
| Kabuli_wild_23885 | 1399946723                          | Ca_kabuli_scaffold | 23885                   | C/T  | Gene_Ca_27209      | NON_SYNONYMOUS_CODING         | Isocitrate/isopropylmalatedehydrogenase |
| Kabuli_wild_8939  | 1399946724                          | Ca_kabuli_scaffold | 8939                    | T/A  | NA                 | INTERGENIC                    | NA                                      |
| Kabuli_wild_2917  | 1399946725                          | Ca_kabuli_scaffold | 2917                    | C/T  | NA                 | INTERGENIC                    | NA                                      |
| Kabuli_wild_2926  | 1399946726                          | Ca_kabuli_scaffold | 2926                    | C/T  | NA                 | INTERGENIC                    | NA                                      |
| Kabuli_wild_23138 | 1399946727                          | Ca_kabuli_scaffold | 23138                   | A/G  | NA                 | INTERGENIC                    | NA                                      |
| Kabuli_wild_23190 | 1399946728                          | Ca_kabuli_scaffold | 23190                   | G/C  | NA                 | INTERGENIC                    | NA                                      |
| Kabuli_wild_23201 | 1399946729                          | Ca_kabuli_scaffold | 23201                   | G/A  | NA                 | INTERGENIC                    | NA                                      |
| Kabuli_wild_23270 | 1399946730                          | Ca_kabuli_scaffold | 23270                   | A/C  | NA                 | INTERGENIC                    | NA                                      |
| Kabuli_wild_23315 | 1399946731                          | Ca_kabuli_scaffold | 23315                   | C/A  | NA                 | INTERGENIC                    | NA                                      |
| Kabuli_wild_91103 | 1399946732                          | Ca_kabuli_scaffold | 91103                   | C/T  | NA                 | INTERGENIC                    | NA                                      |
| Kabuli_wild_91108 | 1399946733                          | Ca_kabuli_scaffold | 91108                   | T/C  | NA                 | INTERGENIC                    | NA                                      |
| Kabuli_wild_91112 | 1399946734                          | Ca_kabuli_scaffold | 91112                   | A/C  | NA                 | INTERGENIC                    | NA                                      |
| Kabuli_wild_7136  | 1399946735                          | Ca_kabuli_scaffold | 7136                    | G/A  | NA                 | INTERGENIC                    | NA                                      |
| Kabuli_wild_7143  | 1399946736                          | Ca_kabuli_scaffold | 7143                    | C/A  | NA                 | INTERGENIC                    | NA                                      |
| Kabuli_wild_7198  | 1399946737                          | Ca_kabuli_scaffold | 7198                    | T/C  | NA                 | INTERGENIC                    | NA                                      |
| Kabuli_wild_17935 | 1399946738                          | Ca_kabuli_scaffold | 17935                   | C/A  | NA                 | INTERGENIC                    | NA                                      |
| Kabuli_wild_17948 | 1399946739                          | Ca_kabuli_scaffold | 17948                   | C/A  | Gene_Ca_28178      | NON_SYNONYMOUS_CODING         | Domain of unknown function DUF828       |
| Kabuli_wild_17956 | 1399946740                          | Ca_kabuli_scaffold | 17956                   | G/A  | Gene_Ca_28178      | NON_SYNONYMOUS_CODING         | Domain of unknown function DUF828       |
| Kabuli_wild_17959 | 1399946741                          | Ca_kabuli_scaffold | 17959                   | A/G  | Gene_Ca_28178      | NON_SYNONYMOUS_CODING         | Domain of unknown function DUF828       |
| Kabuli_wild_17963 | 1399946742                          | Ca_kabuli_scaffold | 17963                   | C/T  | Gene_Ca_28178      | NON_SYNONYMOUS_CODING         | Domain of unknown function DUF828       |
| Kabuli_wild_17999 | 1399946743                          | Ca_kabuli_scaffold | 17999                   | T/G  | Gene_Ca_28178      | NON_SYNONYMOUS_CODING         | Domain of unknown function DUF828       |
| Kabuli_wild_18022 | 1399946744                          | Ca_kabuli_scaffold | 18022                   | C/T  | Gene_Ca_28178      | DOWNSTREAM                    | Domain of unknown function DUF828       |
| Kabuli_wild_18026 | 1399946745                          | Ca_kabuli_scaffold | 18026                   | T/A  | Gene_Ca_28178      | DOWNSTREAM                    | Domain of unknown function DUF828       |
| Kabuli_wild_411   | 1399946746                          | Ca_kabuli_scaffold | 411                     | C/T  | Gene_Ca_26005      | INTRON                        | NA                                      |
| Kabuli_wild_444   | 1399946747                          | Ca_kabuli_scaffold | 444                     | G/A  | Gene_Ca_26005      | INTRON                        | NA                                      |
| Kabuli_wild_69182 | 1399946748                          | Ca_kabuli_scaffold | 69182                   | A/G  | Gene_Ca_26010      | INTRON                        | Protein kinase,catalytic domain         |
| Kabuli_wild_69878 | 1399946749                          | Ca_kabuli_scaffold | 69878                   | C/A  | Gene_Ca_26010      | INTRON                        | Protein kinase,catalytic domain         |
| Kabuli_wild_45363 | 1399946750                          | Ca_kabuli_scaffold | 45363                   | T/C  | Gene_Ca_26273      | NON_SYNONYMOUS_CODING         | WD40 repeat                             |
| Kabuli_wild_13376 | 1399946751                          | Ca_kabuli_scaffold | 13376                   | T/A  | NA                 | INTERGENIC                    | NA                                      |
| Kabuli_wild_84592 | 1399946752                          | Ca_kabuli_scaffold | 84592                   | A/T  | Gene_Ca_25601      | INTRON                        | PeptidaseM76,ATP23                      |
| Kabuli_wild_42134 | 1399946753                          | Ca_kabuli_scaffold | 42134                   | G/A  | Gene_Ca_26926      | SYNONYMOUS_CODING             | Lipase,GDSL                             |
| Kabuli_wild_42135 | 1399946754                          | Ca_kabuli_scaffold | 42135                   | G/T  | Gene_Ca_26926      | SYNONYMOUS_CODING             | Lipase,GDSL                             |
| Kabuli_wild_42156 | 1399946755                          | Ca_kabuli_scaffold | 42156                   | G/A  | Gene_Ca_26926      | SYNONYMOUS_CODING             | Lipase,GDSL                             |
| Kabuli_wild_42163 | 1399946756                          | Ca_kabuli_scaffold | 42163                   | T/C  | Gene_Ca_26926      | SYNONYMOUS_CODING             | Lipase,GDSL                             |
| Kabuli_wild_42164 | 1399946757                          | Ca_kabuli_scaffold | 42164                   | A/G  | Gene_Ca_26926      | SYNONYMOUS_CODING             | Lipase,GDSL                             |
| Kabuli_wild_42175 | 1399946758                          | Ca_kabuli_scaffold | 42175                   | G/A  | Gene_Ca_26926      | SYNONYMOUS_CODING             | Lipase,GDSL                             |
| Kabuli_wild_1431  | 1399946759                          | Ca_kabuli_scaffold | 1431                    | G/A  | NA                 | INTERGENIC                    | NA                                      |
| Kabuli_wild_1439  | 1399946760                          | Ca_kabuli_scaffold | 1439                    | G/A  | NA                 | INTERGENIC                    | NA                                      |
| Kabuli_wild_1478  | 1399946761                          | Ca_kabuli_scaffold | 1478                    | C/A  | NA                 | INTERGENIC                    | NA                                      |
| Kabuli_wild_398   | 1399946762                          | Ca_kabuli_scaffold | 398                     | T/A  | NA                 | INTERGENIC                    | NA                                      |
| Kabuli_wild_403   | 1399946763                          | Ca_kabuli_scaffold | 403                     | A/T  | NA                 | INTERGENIC                    | NA                                      |

| SNP IDs           | NCBI dbSNP accession IDs (NCBI_SS#) | Chromosomes        | Physical positions (bp) | SNPs | Gene accession IDs | Sequence components of genome | Putative functions                    |
|-------------------|-------------------------------------|--------------------|-------------------------|------|--------------------|-------------------------------|---------------------------------------|
| Kabuli_wild_425   | 1399946764                          | Ca_kabuli_scaffold | 425                     | C/A  | NA                 | INTERGENIC                    | NA                                    |
| Kabuli_wild_431   | 1399946765                          | Ca_kabuli_scaffold | 431                     | A/G  | NA                 | INTERGENIC                    | NA                                    |
| Kabuli_wild_458   | 1399946766                          | Ca_kabuli_scaffold | 458                     | G/A  | NA                 | INTERGENIC                    | NA                                    |
| Kabuli_wild_107   | 1399946767                          | Ca_kabuli_scaffold | 107                     | A/G  | NA                 | INTERGENIC                    | NA                                    |
| Kabuli_wild_120   | 1399946768                          | Ca_kabuli_scaffold | 120                     | A/G  | NA                 | INTERGENIC                    | NA                                    |
| Kabuli_wild_161   | 1399946769                          | Ca_kabuli_scaffold | 161                     | C/T  | NA                 | INTERGENIC                    | NA                                    |
| Kabuli_wild_231   | 1399946770                          | Ca_kabuli_scaffold | 231                     | A/C  | NA                 | INTERGENIC                    | NA                                    |
| Kabuli_wild_81068 | 1399946771                          | Ca_kabuli_scaffold | 81068                   | C/T  | NA                 | INTERGENIC                    | NA                                    |
| Kabuli_wild_81080 | 1399946772                          | Ca_kabuli_scaffold | 81080                   | C/A  | NA                 | INTERGENIC                    | NA                                    |
| Kabuli_wild_8836  | 1399946773                          | Ca_kabuli_scaffold | 8836                    | G/A  | Gene_Ca_27069      | DOWNSTREAM                    | NA                                    |
| Kabuli_wild_68378 | 1399946774                          | Ca_kabuli_scaffold | 68378                   | G/A  | Gene_Ca_27523      | INTRON                        | Pseudouridine-5'-phosphateglycosidase |
| Kabuli_wild_12947 | 1399946775                          | Ca_kabuli_scaffold | 12947                   | C/A  | Gene_Ca_27450      | UPSTREAM                      | NA                                    |
| Kabuli_wild_26228 | 1399946776                          | Ca_kabuli_scaffold | 26228                   | C/T  | NA                 | INTERGENIC                    | NA                                    |
| Kabuli_wild_64956 | 1399946777                          | Ca_kabuli_scaffold | 64956                   | C/A  | Gene_Ca_27663      | DOWNSTREAM                    | NA                                    |
| Kabuli_wild_65093 | 1399946778                          | Ca_kabuli_scaffold | 65093                   | T/C  | Gene_Ca_27663      | DOWNSTREAM                    | NA                                    |
| Kabuli_wild_65127 | 1399946779                          | Ca_kabuli_scaffold | 65127                   | C/A  | Gene_Ca_27663      | DOWNSTREAM                    | NA                                    |
| Kabuli_wild_65129 | 1399946780                          | Ca_kabuli_scaffold | 65129                   | T/A  | Gene_Ca_27663      | DOWNSTREAM                    | NA                                    |
| Kabuli_wild_12616 | 1399946781                          | Ca_kabuli_scaffold | 12616                   | T/A  | NA                 | INTERGENIC                    | NA                                    |
| Kabuli_wild_12620 | 1399946782                          | Ca_kabuli_scaffold | 12620                   | T/A  | NA                 | INTERGENIC                    | NA                                    |
| Kabuli_wild_12658 | 1399946783                          | Ca_kabuli_scaffold | 12658                   | C/A  | NA                 | INTERGENIC                    | NA                                    |
| Kabuli_wild_12692 | 1399946784                          | Ca_kabuli_scaffold | 12692                   | G/A  | NA                 | INTERGENIC                    | NA                                    |
| Kabuli_wild_12694 | 1399946785                          | Ca_kabuli_scaffold | 12694                   | G/A  | NA                 | INTERGENIC                    | NA                                    |
| Kabuli_wild_14581 | 1399946786                          | Ca_kabuli_scaffold | 14581                   | T/A  | NA                 | INTERGENIC                    | NA                                    |
| Kabuli_wild_14596 | 1399946787                          | Ca_kabuli_scaffold | 14596                   | C/T  | NA                 | INTERGENIC                    | NA                                    |
| Kabuli_wild_17198 | 1399946788                          | Ca_kabuli_scaffold | 17198                   | C/T  | Gene_Ca_27533      | DOWNSTREAM                    | Poly(A)polymerase,centraldomain       |
| Kabuli_wild_17199 | 1399946789                          | Ca_kabuli_scaffold | 17199                   | A/G  | Gene_Ca_27533      | DOWNSTREAM                    | Poly(A)polymerase,centraldomain       |
| Kabuli_wild_17286 | 1399946790                          | Ca_kabuli_scaffold | 17286                   | T/A  | Gene_Ca_27533      | DOWNSTREAM                    | Poly(A)polymerase,centraldomain       |
| Kabuli_wild_3367  | 1399946791                          | Ca_kabuli_scaffold | 3367                    | G/A  | Gene_Ca_26968      | INTRON                        | NA                                    |
| Kabuli_wild_3371  | 1399946792                          | Ca_kabuli_scaffold | 3371                    | G/A  | Gene_Ca_26968      | INTRON                        | NA                                    |
| Kabuli_wild_3399  | 1399946793                          | Ca_kabuli_scaffold | 3399                    | C/G  | Gene_Ca_26968      | INTRON                        | NA                                    |
| Kabuli_wild_3458  | 1399946794                          | Ca_kabuli_scaffold | 3458                    | A/G  | Gene_Ca_26968      | INTRON                        | NA                                    |
| Kabuli_wild_3461  | 1399946795                          | Ca_kabuli_scaffold | 3461                    | T/C  | Gene_Ca_26968      | INTRON                        | NA                                    |
| Kabuli_wild_3516  | 1399946796                          | Ca_kabuli_scaffold | 3516                    | C/T  | Gene_Ca_26968      | INTRON                        | NA                                    |
| Kabuli_wild_3879  | 1399946797                          | Ca_kabuli_scaffold | 3879                    | C/T  | Gene_Ca_26968      | DOWNSTREAM                    | NA                                    |
| Kabuli_wild_3880  | 1399946798                          | Ca_kabuli_scaffold | 3880                    | G/T  | Gene_Ca_26968      | DOWNSTREAM                    | NA                                    |
| Kabuli_wild_7260  | 1399946799                          | Ca_kabuli_scaffold | 7260                    | T/A  | NA                 | INTERGENIC                    | NA                                    |
| Kabuli_wild_13440 | 1399946800                          | Ca_kabuli_scaffold | 13440                   | C/T  | Gene_Ca_26970      | INTRON                        | NA                                    |
| Kabuli_wild_13468 | 1399946801                          | Ca_kabuli_scaffold | 13468                   | C/T  | Gene_Ca_26970      | INTRON                        | NA                                    |
| Kabuli_wild_13892 | 1399946802                          | Ca_kabuli_scaffold | 13892                   | C/G  | Gene_Ca_26970      | INTRON                        | NA                                    |
| Kabuli_wild_16944 | 1399946803                          | Ca_kabuli_scaffold | 16944                   | T/A  | Gene_Ca_26970      | INTRON                        | NA                                    |
| Kabuli_wild_18889 | 1399946804                          | Ca_kabuli_scaffold | 18889                   | A/G  | Gene_Ca_26970      | INTRON                        | NA                                    |
| Kabuli_wild_19359 | 1399946805                          | Ca_kabuli_scaffold | 19359                   | G/A  | Gene_Ca_26970      | INTRON                        | NA                                    |
| Kabuli_wild_19366 | 1399946806                          | Ca_kabuli_scaffold | 19366                   | G/T  | Gene_Ca_26970      | INTRON                        | NA                                    |
| Kabuli_wild_19367 | 1399946807                          | Ca_kabuli_scaffold | 19367                   | A/T  | Gene_Ca_26970      | INTRON                        | NA                                    |

| SNP IDs            | NCBI dbSNP accession IDs (NCBI_SS#) | Chromosomes        | Physical positions (bp) | SNPs | Gene accession IDs | Sequence components of genome | Putative functions                  |
|--------------------|-------------------------------------|--------------------|-------------------------|------|--------------------|-------------------------------|-------------------------------------|
| Kabuli_wild_19368  | 1399946808                          | Ca_kabuli_scaffold | 19368                   | A/C  | Gene_Ca_26970      | INTRON                        | NA                                  |
| Kabuli_wild_6296   | 1399946809                          | Ca_kabuli_scaffold | 6296                    | G/A  | Gene_Ca_27632      | SYNONYMOUS_CODING             | NA                                  |
| Kabuli_wild_21038  | 1399946810                          | Ca_kabuli_scaffold | 21038                   | C/T  | Gene_Ca_27633      | NON_SYNONYMOUS_CODING         | Peptidase C48, SUMO/Sentrin/Ubl1    |
| Kabuli_wild_21071  | 1399946811                          | Ca_kabuli_scaffold | 21071                   | C/T  | Gene_Ca_27633      | NON_SYNONYMOUS_CODING         | Peptidase C48, SUMO/Sentrin/Ubl1    |
| Kabuli_wild_21104  | 1399946812                          | Ca_kabuli_scaffold | 21104                   | A/T  | Gene_Ca_27633      | NON_SYNONYMOUS_CODING         | Peptidase C48, SUMO/Sentrin/Ubl1    |
| Kabuli_wild_1575   | 1399946813                          | Ca_kabuli_scaffold | 1575                    | A/C  | NA                 | INTERGENIC                    | NA                                  |
| Kabuli_wild_18144  | 1399946814                          | Ca_kabuli_scaffold | 18144                   | T/G  | NA                 | INTERGENIC                    | NA                                  |
| Kabuli_wild_18147  | 1399946815                          | Ca_kabuli_scaffold | 18147                   | G/A  | NA                 | INTERGENIC                    | NA                                  |
| Kabuli_wild_18155  | 1399946816                          | Ca_kabuli_scaffold | 18155                   | A/G  | NA                 | INTERGENIC                    | NA                                  |
| Kabuli_wild_96223  | 1399946817                          | Ca_kabuli_scaffold | 96223                   | G/C  | Gene_Ca_26888      | SYNONYMOUS_CODING             | Protein of unknown function DUF1296 |
| Kabuli_wild_130204 | 1399946818                          | Ca_kabuli_scaffold | 130204                  | G/A  | Gene_Ca_26890      | NON_SYNONYMOUS_CODING         | Peptidase C48, SUMO/Sentrin/Ubl1    |
| Kabuli_wild_130256 | 1399946819                          | Ca_kabuli_scaffold | 130256                  | C/T  | Gene_Ca_26890      | NON_SYNONYMOUS_CODING         | Peptidase C48, SUMO/Sentrin/Ubl1    |
| Kabuli_wild_130285 | 1399946820                          | Ca_kabuli_scaffold | 130285                  | G/C  | Gene_Ca_26890      | NON_SYNONYMOUS_CODING         | Peptidase C48, SUMO/Sentrin/Ubl1    |
| Kabuli_wild_1749   | 1399946821                          | Ca_kabuli_scaffold | 1749                    | G/T  | NA                 | INTERGENIC                    | NA                                  |
| Kabuli_wild_1751   | 1399946822                          | Ca_kabuli_scaffold | 1751                    | T/C  | NA                 | INTERGENIC                    | NA                                  |
| Kabuli_wild_1778   | 1399946823                          | Ca_kabuli_scaffold | 1778                    | G/A  | NA                 | INTERGENIC                    | NA                                  |
| Kabuli_wild_1780   | 1399946824                          | Ca_kabuli_scaffold | 1780                    | T/C  | NA                 | INTERGENIC                    | NA                                  |
| Kabuli_wild_1781   | 1399946825                          | Ca_kabuli_scaffold | 1781                    | C/T  | NA                 | INTERGENIC                    | NA                                  |
| Kabuli_wild_1782   | 1399946826                          | Ca_kabuli_scaffold | 1782                    | A/G  | NA                 | INTERGENIC                    | NA                                  |
| Kabuli_wild_1787   | 1399946827                          | Ca_kabuli_scaffold | 1787                    | G/A  | NA                 | INTERGENIC                    | NA                                  |
| Kabuli_wild_1793   | 1399946828                          | Ca_kabuli_scaffold | 1793                    | A/T  | NA                 | INTERGENIC                    | NA                                  |
| Kabuli_wild_1794   | 1399946829                          | Ca_kabuli_scaffold | 1794                    | A/C  | NA                 | INTERGENIC                    | NA                                  |
| Kabuli_wild_1799   | 1399946830                          | Ca_kabuli_scaffold | 1799                    | T/C  | NA                 | INTERGENIC                    | NA                                  |
| Kabuli_wild_1814   | 1399946831                          | Ca_kabuli_scaffold | 1814                    | G/T  | NA                 | INTERGENIC                    | NA                                  |
| Kabuli_wild_16503  | 1399946832                          | Ca_kabuli_scaffold | 16503                   | C/G  | Gene_Ca_27489      | NON_SYNONYMOUS_CODING         | PeptidaseA1                         |
| Kabuli_wild_873    | 1399946833                          | Ca_kabuli_scaffold | 873                     | G/A  | NA                 | INTERGENIC                    | NA                                  |
| Kabuli_wild_1004   | 1399946834                          | Ca_kabuli_scaffold | 1004                    | T/C  | NA                 | INTERGENIC                    | NA                                  |
| Kabuli_wild_1137   | 1399946835                          | Ca_kabuli_scaffold | 1137                    | T/C  | NA                 | INTERGENIC                    | NA                                  |
| Kabuli_wild_1160   | 1399946836                          | Ca_kabuli_scaffold | 1160                    | T/C  | NA                 | INTERGENIC                    | NA                                  |
| Kabuli_wild_1322   | 1399946837                          | Ca_kabuli_scaffold | 1322                    | T/A  | NA                 | INTERGENIC                    | NA                                  |
| Kabuli_wild_1345   | 1399946838                          | Ca_kabuli_scaffold | 1345                    | C/T  | NA                 | INTERGENIC                    | NA                                  |
| Kabuli_wild_93     | 1399946839                          | Ca_kabuli_scaffold | 93                      | T/A  | NA                 | INTERGENIC                    | NA                                  |
| Kabuli_wild_104    | 1399946840                          | Ca_kabuli_scaffold | 104                     | G/A  | NA                 | INTERGENIC                    | NA                                  |
| Kabuli_wild_114    | 1399946841                          | Ca_kabuli_scaffold | 114                     | G/T  | NA                 | INTERGENIC                    | NA                                  |
| Kabuli_wild_9968   | 1399946842                          | Ca_kabuli_scaffold | 9968                    | T/C  | NA                 | INTERGENIC                    | NA                                  |
| Kabuli_wild_10075  | 1399946843                          | Ca_kabuli_scaffold | 10075                   | A/G  | NA                 | INTERGENIC                    | NA                                  |
| Kabuli_wild_13169  | 1399946844                          | Ca_kabuli_scaffold | 13169                   | A/C  | NA                 | INTERGENIC                    | NA                                  |
| Kabuli_wild_13189  | 1399946845                          | Ca_kabuli_scaffold | 13189                   | T/G  | NA                 | INTERGENIC                    | NA                                  |
| Kabuli_wild_13207  | 1399946846                          | Ca_kabuli_scaffold | 13207                   | A/G  | NA                 | INTERGENIC                    | NA                                  |
| Kabuli_wild_53374  | 1399946847                          | Ca_kabuli_scaffold | 53374                   | T/C  | NA                 | INTERGENIC                    | NA                                  |
| Kabuli_wild_9986   | 1399946848                          | Ca_kabuli_scaffold | 9986                    | G/A  | NA                 | INTERGENIC                    | NA                                  |
| Kabuli_wild_1975   | 1399946849                          | Ca_kabuli_scaffold | 1975                    | A/T  | NA                 | INTERGENIC                    | NA                                  |
| Kabuli_wild_1980   | 1399946850                          | Ca_kabuli_scaffold | 1980                    | T/A  | NA                 | INTERGENIC                    | NA                                  |
| Kabuli_wild_1987   | 1399946851                          | Ca_kabuli_scaffold | 1987                    | G/A  | NA                 | INTERGENIC                    | NA                                  |

| SNP IDs           | NCBI dbSNP accession IDs (NCBI_SS#) | Chromosomes        | Physical positions (bp) | SNPs | Gene accession IDs | Sequence components of genome | Putative functions                        |
|-------------------|-------------------------------------|--------------------|-------------------------|------|--------------------|-------------------------------|-------------------------------------------|
| Kabuli_wild_1988  | 1399946852                          | Ca_kabuli_scaffold | 1988                    | C/T  | NA                 | INTERGENIC                    | NA                                        |
| Kabuli_wild_1991  | 1399946853                          | Ca_kabuli_scaffold | 1991                    | T/G  | NA                 | INTERGENIC                    | NA                                        |
| Kabuli_wild_2000  | 1399946854                          | Ca_kabuli_scaffold | 2000                    | A/G  | NA                 | INTERGENIC                    | NA                                        |
| Kabuli_wild_2021  | 1399946855                          | Ca_kabuli_scaffold | 2021                    | T/G  | NA                 | INTERGENIC                    | NA                                        |
| Kabuli_wild_4013  | 1399946856                          | Ca_kabuli_scaffold | 4013                    | G/A  | NA                 | INTERGENIC                    | NA                                        |
| Kabuli_wild_183   | 1399946857                          | Ca_kabuli_scaffold | 183                     | C/A  | NA                 | INTERGENIC                    | NA                                        |
| Kabuli_wild_200   | 1399946858                          | Ca_kabuli_scaffold | 200                     | C/T  | NA                 | INTERGENIC                    | NA                                        |
| Kabuli_wild_20003 | 1399946859                          | Ca_kabuli_scaffold | 20003                   | G/A  | Gene_Ca_26054      | INTRON                        | Aminotransferase-like,plant mobile domain |
| Kabuli_wild_20005 | 1399946860                          | Ca_kabuli_scaffold | 20005                   | G/A  | Gene_Ca_26054      | INTRON                        | Aminotransferase-like,plant mobile domain |
| Kabuli_wild_20010 | 1399946861                          | Ca_kabuli_scaffold | 20010                   | G/A  | Gene_Ca_26054      | INTRON                        | Aminotransferase-like,plant mobile domain |
| Kabuli_wild_20038 | 1399946862                          | Ca_kabuli_scaffold | 20038                   | A/G  | Gene_Ca_26054      | INTRON                        | Aminotransferase-like,plant mobile domain |
| Kabuli_wild_29414 | 1399946863                          | Ca_kabuli_scaffold | 29414                   | G/T  | Gene_Ca_26055      | INTRON                        | Zinc finger,PHD-type                      |
| Kabuli_wild_29421 | 1399946864                          | Ca_kabuli_scaffold | 29421                   | T/A  | Gene_Ca_26055      | INTRON                        | Zinc finger,PHD-type                      |
| Kabuli_wild_32129 | 1399946865                          | Ca_kabuli_scaffold | 32129                   | T/A  | Gene_Ca_26055      | NON_SYNONYMOUS_CODING         | Zinc finger,PHD-type                      |
| Kabuli_wild_36715 | 1399946866                          | Ca_kabuli_scaffold | 36715                   | A/T  | Gene_Ca_26055      | INTRON                        | Zinc finger,PHD-type                      |
| Kabuli_wild_69099 | 1399946867                          | Ca_kabuli_scaffold | 69099                   | T/C  | Gene_Ca_26056      | SYNONYMOUS_CODING             | NA                                        |
| Kabuli_wild_70041 | 1399946868                          | Ca_kabuli_scaffold | 70041                   | T/C  | Gene_Ca_26056      | SYNONYMOUS_CODING             | NA                                        |
| Kabuli_wild_71089 | 1399946869                          | Ca_kabuli_scaffold | 71089                   | T/C  | Gene_Ca_26056      | NON_SYNONYMOUS_CODING         | NA                                        |
| Kabuli_wild_1033  | 1399946870                          | Ca_kabuli_scaffold | 1033                    | T/C  | NA                 | INTERGENIC                    | NA                                        |
| Kabuli_wild_40007 | 1399946871                          | Ca_kabuli_scaffold | 40007                   | G/A  | Gene_Ca_28219      | NON_SYNONYMOUS_CODING         | Peptidase C48, SUMO/Sentrin/Ubl1          |
| Kabuli_wild_40008 | 1399946872                          | Ca_kabuli_scaffold | 40008                   | C/T  | Gene_Ca_28219      | NON_SYNONYMOUS_CODING         | Peptidase C48, SUMO/Sentrin/Ubl1          |
| Kabuli_wild_40014 | 1399946873                          | Ca_kabuli_scaffold | 40014                   | C/T  | Gene_Ca_28219      | NON_SYNONYMOUS_CODING         | Peptidase C48, SUMO/Sentrin/Ubl1          |
| Kabuli_wild_40063 | 1399946874                          | Ca_kabuli_scaffold | 40063                   | A/G  | Gene_Ca_28219      | SYNONYMOUS_CODING             | Peptidase C48, SUMO/Sentrin/Ubl1          |
| Kabuli_wild_40089 | 1399946875                          | Ca_kabuli_scaffold | 40089                   | C/A  | Gene_Ca_28219      | NON_SYNONYMOUS_CODING         | Peptidase C48, SUMO/Sentrin/Ubl1          |
| Kabuli_wild_40091 | 1399946876                          | Ca_kabuli_scaffold | 40091                   | G/T  | Gene_Ca_28219      | NON_SYNONYMOUS_CODING         | Peptidase C48, SUMO/Sentrin/Ubl1          |
| Kabuli_wild_893   | 1399946877                          | Ca_kabuli_scaffold | 893                     | G/A  | NA                 | INTERGENIC                    | NA                                        |
| Kabuli_wild_898   | 1399946878                          | Ca_kabuli_scaffold | 898                     | G/T  | NA                 | INTERGENIC                    | NA                                        |
| Kabuli_wild_929   | 1399946879                          | Ca_kabuli_scaffold | 929                     | A/C  | NA                 | INTERGENIC                    | NA                                        |
| Kabuli_wild_935   | 1399946880                          | Ca_kabuli_scaffold | 935                     | C/A  | NA                 | INTERGENIC                    | NA                                        |
| Kabuli_wild_938   | 1399946881                          | Ca_kabuli_scaffold | 938                     | G/C  | NA                 | INTERGENIC                    | NA                                        |
| Kabuli_wild_954   | 1399946882                          | Ca_kabuli_scaffold | 954                     | A/C  | NA                 | INTERGENIC                    | NA                                        |
| Kabuli_wild_2699  | 1399946883                          | Ca_kabuli_scaffold | 2699                    | T/C  | NA                 | INTERGENIC                    | NA                                        |
| Kabuli_wild_23442 | 1399946884                          | Ca_kabuli_scaffold | 23442                   | T/C  | NA                 | INTERGENIC                    | NA                                        |
| Kabuli_wild_511   | 1399946885                          | Ca_kabuli_scaffold | 511                     | G/A  | NA                 | INTERGENIC                    | NA                                        |
| Kabuli_wild_516   | 1399946886                          | Ca_kabuli_scaffold | 516                     | G/T  | NA                 | INTERGENIC                    | NA                                        |
| Kabuli_wild_547   | 1399946887                          | Ca_kabuli_scaffold | 547                     | A/C  | NA                 | INTERGENIC                    | NA                                        |
| Kabuli_wild_553   | 1399946888                          | Ca_kabuli_scaffold | 553                     | C/A  | NA                 | INTERGENIC                    | NA                                        |
| Kabuli_wild_556   | 1399946889                          | Ca_kabuli_scaffold | 556                     | G/C  | NA                 | INTERGENIC                    | NA                                        |
| Kabuli_wild_572   | 1399946890                          | Ca_kabuli_scaffold | 572                     | A/C  | NA                 | INTERGENIC                    | NA                                        |
| Kabuli_wild_7611  | 1399946891                          | Ca_kabuli_scaffold | 7611                    | G/C  | NA                 | INTERGENIC                    | NA                                        |
| Kabuli_wild_7613  | 1399946892                          | Ca_kabuli_scaffold | 7613                    | T/A  | NA                 | INTERGENIC                    | NA                                        |
| Kabuli_wild_7621  | 1399946893                          | Ca_kabuli_scaffold | 7621                    | T/C  | NA                 | INTERGENIC                    | NA                                        |
| Kabuli_wild_7632  | 1399946894                          | Ca_kabuli_scaffold | 7632                    | A/G  | NA                 | INTERGENIC                    | NA                                        |
| Kabuli_wild_7638  | 1399946895                          | Ca_kabuli_scaffold | 7638                    | C/T  | NA                 | INTERGENIC                    | NA                                        |

| SNP IDs            | NCBI dbSNP accession IDs (NCBI_SS#) | Chromosomes        | Physical positions (bp) | SNPs | Gene accession IDs | Sequence components of genome | Putative functions                 |
|--------------------|-------------------------------------|--------------------|-------------------------|------|--------------------|-------------------------------|------------------------------------|
| Kabuli_wild_7641   | 1399946896                          | Ca_kabuli_scaffold | 7641                    | T/C  | NA                 | INTERGENIC                    | NA                                 |
| Kabuli_wild_7651   | 1399946897                          | Ca_kabuli_scaffold | 7651                    | T/C  | NA                 | INTERGENIC                    | NA                                 |
| Kabuli_wild_7671   | 1399946898                          | Ca_kabuli_scaffold | 7671                    | C/T  | NA                 | INTERGENIC                    | NA                                 |
| Kabuli_wild_7678   | 1399946899                          | Ca_kabuli_scaffold | 7678                    | G/A  | NA                 | INTERGENIC                    | NA                                 |
| Kabuli_wild_7683   | 1399946900                          | Ca_kabuli_scaffold | 7683                    | T/C  | NA                 | INTERGENIC                    | NA                                 |
| Kabuli_wild_5685   | 1399946901                          | Ca_kabuli_scaffold | 5685                    | A/G  | Gene_Ca_28141      | DOWNSTREAM                    | NA                                 |
| Kabuli_wild_966    | 1399946902                          | Ca_kabuli_scaffold | 966                     | G/A  | NA                 | INTERGENIC                    | NA                                 |
| Kabuli_wild_969    | 1399946903                          | Ca_kabuli_scaffold | 969                     | T/C  | NA                 | INTERGENIC                    | NA                                 |
| Kabuli_wild_978    | 1399946904                          | Ca_kabuli_scaffold | 978                     | T/A  | NA                 | INTERGENIC                    | NA                                 |
| Kabuli_wild_10546  | 1399946905                          | Ca_kabuli_scaffold | 10546                   | G/T  | Gene_Ca_26707      | NON_SYNONYMOUS_CODING         | IQ motif,EF-handbinding site       |
| Kabuli_wild_16224  | 1399946906                          | Ca_kabuli_scaffold | 16224                   | A/T  | Gene_Ca_26707      | NON_SYNONYMOUS_CODING         | IQ motif,EF-handbinding site       |
| Kabuli_wild_16239  | 1399946907                          | Ca_kabuli_scaffold | 16239                   | G/T  | Gene_Ca_26707      | NON_SYNONYMOUS_CODING         | IQ motif,EF-handbinding site       |
| Kabuli_wild_55347  | 1399946908                          | Ca_kabuli_scaffold | 55347                   | G/T  | Gene_Ca_26708      | NON_SYNONYMOUS_CODING         | PWWP                               |
| Kabuli_wild_72624  | 1399946909                          | Ca_kabuli_scaffold | 72624                   | G/A  | Gene_Ca_26709      | INTRON                        | Peptidoglycan-bindingLysinsubgroup |
| Kabuli_wild_76922  | 1399946910                          | Ca_kabuli_scaffold | 76922                   | T/G  | NA                 | INTERGENIC                    | NA                                 |
| Kabuli_wild_76950  | 1399946911                          | Ca_kabuli_scaffold | 76950                   | C/A  | NA                 | INTERGENIC                    | NA                                 |
| Kabuli_wild_76961  | 1399946912                          | Ca_kabuli_scaffold | 76961                   | A/G  | NA                 | INTERGENIC                    | NA                                 |
| Kabuli_wild_76964  | 1399946913                          | Ca_kabuli_scaffold | 76964                   | G/A  | NA                 | INTERGENIC                    | NA                                 |
| Kabuli_wild_76965  | 1399946914                          | Ca_kabuli_scaffold | 76965                   | C/A  | NA                 | INTERGENIC                    | NA                                 |
| Kabuli_wild_106820 | 1399946915                          | Ca_kabuli_scaffold | 106820                  | A/G  | Gene_Ca_26711      | INTRON                        | WD40 repeat                        |
| Kabuli_wild_112193 | 1399946916                          | Ca_kabuli_scaffold | 112193                  | A/C  | Gene_Ca_26711      | INTRON                        | WD40 repeat                        |
| Kabuli_wild_974    | 1399946917                          | Ca_kabuli_scaffold | 974                     | G/A  | NA                 | INTERGENIC                    | NA                                 |
| Kabuli_wild_5839   | 1399946918                          | Ca_kabuli_scaffold | 5839                    | C/T  | Gene_Ca_28200      | NON_SYNONYMOUS_CODING         | NA                                 |
| Kabuli_wild_5849   | 1399946919                          | Ca_kabuli_scaffold | 5849                    | G/C  | Gene_Ca_28200      | SYNONYMOUS_CODING             | NA                                 |
| Kabuli_wild_5866   | 1399946920                          | Ca_kabuli_scaffold | 5866                    | T/A  | Gene_Ca_28200      | NON_SYNONYMOUS_CODING         | NA                                 |
| Kabuli_wild_5891   | 1399946921                          | Ca_kabuli_scaffold | 5891                    | A/T  | Gene_Ca_28200      | SYNONYMOUS_CODING             | NA                                 |
| Kabuli_wild_5912   | 1399946922                          | Ca_kabuli_scaffold | 5912                    | G/A  | Gene_Ca_28200      | SYNONYMOUS_CODING             | NA                                 |
| Kabuli_wild_14560  | 1399946923                          | Ca_kabuli_scaffold | 14560                   | T/C  | NA                 | INTERGENIC                    | NA                                 |
| Kabuli_wild_14591  | 1399946924                          | Ca_kabuli_scaffold | 14591                   | G/C  | NA                 | INTERGENIC                    | NA                                 |
| Kabuli_wild_6948   | 1399946925                          | Ca_kabuli_scaffold | 6948                    | C/T  | NA                 | INTERGENIC                    | NA                                 |
| Kabuli_wild_6956   | 1399946926                          | Ca_kabuli_scaffold | 6956                    | G/A  | NA                 | INTERGENIC                    | NA                                 |
| Kabuli_wild_4558   | 1399946927                          | Ca_kabuli_scaffold | 4558                    | C/T  | NA                 | INTERGENIC                    | NA                                 |
| Kabuli_wild_2301   | 1399946928                          | Ca_kabuli_scaffold | 2301                    | A/G  | NA                 | INTERGENIC                    | NA                                 |
| Kabuli_wild_20870  | 1399946929                          | Ca_kabuli_scaffold | 20870                   | A/T  | NA                 | INTERGENIC                    | NA                                 |
| Kabuli_wild_20891  | 1399946930                          | Ca_kabuli_scaffold | 20891                   | T/C  | NA                 | INTERGENIC                    | NA                                 |
| Kabuli_wild_20894  | 1399946931                          | Ca_kabuli_scaffold | 20894                   | C/A  | NA                 | INTERGENIC                    | NA                                 |
| Kabuli_wild_20895  | 1399946932                          | Ca_kabuli_scaffold | 20895                   | A/T  | NA                 | INTERGENIC                    | NA                                 |
| Kabuli_wild_1091   | 1399946933                          | Ca_kabuli_scaffold | 1091                    | G/A  | Gene_Ca_28010      | NON_SYNONYMOUS_CODING         | NA                                 |
| Kabuli_wild_1323   | 1399946934                          | Ca_kabuli_scaffold | 1323                    | G/A  | Gene_Ca_28010      | NON_SYNONYMOUS_CODING         | NA                                 |
| Kabuli_wild_2049   | 1399946935                          | Ca_kabuli_scaffold | 2049                    | C/T  | NA                 | INTERGENIC                    | NA                                 |
| Kabuli_wild_2083   | 1399946936                          | Ca_kabuli_scaffold | 2083                    | A/G  | NA                 | INTERGENIC                    | NA                                 |
| Kabuli_wild_2084   | 1399946937                          | Ca_kabuli_scaffold | 2084                    | C/T  | NA                 | INTERGENIC                    | NA                                 |
| Kabuli_wild_2090   | 1399946938                          | Ca_kabuli_scaffold | 2090                    | C/T  | NA                 | INTERGENIC                    | NA                                 |
| Kabuli_wild_40852  | 1399946939                          | Ca_kabuli_scaffold | 40852                   | G/T  | Gene_Ca_27607      | DOWNSTREAM                    | GCK                                |

| SNP IDs           | NCBI dbSNP accession IDs (NCBI_SS#) | Chromosomes        | Physical positions (bp) | SNPs | Gene IDs      | accession | Sequence components of genome | Putative functions          |
|-------------------|-------------------------------------|--------------------|-------------------------|------|---------------|-----------|-------------------------------|-----------------------------|
| Kabuli_wild_85    | 1399946940                          | Ca_kabuli_scaffold | 85                      | C/T  | NA            |           | INTERGENIC                    | NA                          |
| Kabuli_wild_117   | 1399946941                          | Ca_kabuli_scaffold | 117                     | C/T  | NA            |           | INTERGENIC                    | NA                          |
| Kabuli_wild_2561  | 1399946942                          | Ca_kabuli_scaffold | 2561                    | C/T  | NA            |           | INTERGENIC                    | NA                          |
| Kabuli_wild_3329  | 1399946943                          | Ca_kabuli_scaffold | 3329                    | C/A  | NA            |           | INTERGENIC                    | NA                          |
| Kabuli_wild_11300 | 1399946944                          | Ca_kabuli_scaffold | 11300                   | T/A  | NA            |           | INTERGENIC                    | NA                          |
| Kabuli_wild_11312 | 1399946945                          | Ca_kabuli_scaffold | 11312                   | A/T  | NA            |           | INTERGENIC                    | NA                          |
| Kabuli_wild_1353  | 1399946946                          | Ca_kabuli_scaffold | 1353                    | C/G  | NA            |           | INTERGENIC                    | NA                          |
| Kabuli_wild_353   | 1399946947                          | Ca_kabuli_scaffold | 353                     | G/A  | NA            |           | INTERGENIC                    | NA                          |
| Kabuli_wild_365   | 1399946948                          | Ca_kabuli_scaffold | 365                     | T/G  | NA            |           | INTERGENIC                    | NA                          |
| Kabuli_wild_366   | 1399946949                          | Ca_kabuli_scaffold | 366                     | G/A  | NA            |           | INTERGENIC                    | NA                          |
| Kabuli_wild_372   | 1399946950                          | Ca_kabuli_scaffold | 372                     | T/C  | NA            |           | INTERGENIC                    | NA                          |
| Kabuli_wild_386   | 1399946951                          | Ca_kabuli_scaffold | 386                     | G/A  | NA            |           | INTERGENIC                    | NA                          |
| Kabuli_wild_396   | 1399946952                          | Ca_kabuli_scaffold | 396                     | G/A  | NA            |           | INTERGENIC                    | NA                          |
| Kabuli_wild_406   | 1399946953                          | Ca_kabuli_scaffold | 406                     | C/A  | NA            |           | INTERGENIC                    | NA                          |
| Kabuli_wild_202   | 1399946954                          | Ca_kabuli_scaffold | 202                     | G/A  | NA            |           | INTERGENIC                    | NA                          |
| Kabuli_wild_238   | 1399946955                          | Ca_kabuli_scaffold | 238                     | A/C  | NA            |           | INTERGENIC                    | NA                          |
| Kabuli_wild_247   | 1399946956                          | Ca_kabuli_scaffold | 247                     | G/C  | NA            |           | INTERGENIC                    | NA                          |
| Kabuli_wild_2675  | 1399946957                          | Ca_kabuli_scaffold | 2675                    | T/C  | NA            |           | INTERGENIC                    | NA                          |
| Kabuli_wild_24952 | 1399946958                          | Ca_kabuli_scaffold | 24952                   | C/A  | NA            |           | INTERGENIC                    | NA                          |
| Kabuli_wild_1383  | 1399946959                          | Ca_kabuli_scaffold | 1383                    | T/C  | NA            |           | INTERGENIC                    | NA                          |
| Kabuli_wild_1434  | 1399946960                          | Ca_kabuli_scaffold | 1434                    | C/G  | NA            |           | INTERGENIC                    | NA                          |
| Kabuli_wild_1884  | 1399946961                          | Ca_kabuli_scaffold | 1884                    | G/A  | NA            |           | INTERGENIC                    | NA                          |
| Kabuli_wild_1887  | 1399946962                          | Ca_kabuli_scaffold | 1887                    | T/C  | NA            |           | INTERGENIC                    | NA                          |
| Kabuli_wild_1896  | 1399946963                          | Ca_kabuli_scaffold | 1896                    | A/T  | NA            |           | INTERGENIC                    | NA                          |
| Kabuli_wild_2011  | 1399946964                          | Ca_kabuli_scaffold | 2011                    | C/G  | NA            |           | INTERGENIC                    | NA                          |
| Kabuli_wild_2061  | 1399946965                          | Ca_kabuli_scaffold | 2061                    | A/G  | NA            |           | INTERGENIC                    | NA                          |
| Kabuli_wild_2076  | 1399946966                          | Ca_kabuli_scaffold | 2076                    | G/A  | NA            |           | INTERGENIC                    | NA                          |
| Kabuli_wild_2092  | 1399946967                          | Ca_kabuli_scaffold | 2092                    | C/G  | NA            |           | INTERGENIC                    | NA                          |
| Kabuli_wild_24882 | 1399946968                          | Ca_kabuli_scaffold | 24882                   | A/C  | NA            |           | INTERGENIC                    | NA                          |
| Kabuli_wild_36359 | 1399946969                          | Ca_kabuli_scaffold | 36359                   | G/C  | NA            |           | INTERGENIC                    | NA                          |
| Kabuli_wild_192   | 1399946970                          | Ca_kabuli_scaffold | 192                     | A/G  | NA            |           | INTERGENIC                    | NA                          |
| Kabuli_wild_163   | 1399946971                          | Ca_kabuli_scaffold | 163                     | A/C  | NA            |           | INTERGENIC                    | NA                          |
| Kabuli_wild_1297  | 1399946972                          | Ca_kabuli_scaffold | 1297                    | T/C  | Gene_Ca_26783 |           | DOWNSTREAM                    | NA                          |
| Kabuli_wild_65166 | 1399946973                          | Ca_kabuli_scaffold | 65166                   | A/C  | Gene_Ca_26785 |           | NON_SYNONYMOUS_CODING         | Pairedamphipathichelix      |
| Kabuli_wild_86716 | 1399946974                          | Ca_kabuli_scaffold | 86716                   | T/C  | NA            |           | INTERGENIC                    | NA                          |
| Kabuli_wild_88603 | 1399946975                          | Ca_kabuli_scaffold | 88603                   | T/G  | NA            |           | INTERGENIC                    | NA                          |
| Kabuli_wild_97407 | 1399946976                          | Ca_kabuli_scaffold | 97407                   | G/T  | Gene_Ca_26786 |           | INTRON                        | Dehydrogenase, E1 component |
| Kabuli_wild_528   | 1399946977                          | Ca_kabuli_scaffold | 528                     | C/A  | NA            |           | INTERGENIC                    | NA                          |
| Kabuli_wild_599   | 1399946978                          | Ca_kabuli_scaffold | 599                     | G/A  | NA            |           | INTERGENIC                    | NA                          |
| Kabuli_wild_604   | 1399946979                          | Ca_kabuli_scaffold | 604                     | C/T  | NA            |           | INTERGENIC                    | NA                          |
| Kabuli_wild_679   | 1399946980                          | Ca_kabuli_scaffold | 679                     | C/T  | NA            |           | INTERGENIC                    | NA                          |
| Kabuli_wild_718   | 1399946981                          | Ca_kabuli_scaffold | 718                     | C/G  | NA            |           | INTERGENIC                    | NA                          |
| Kabuli_wild_742   | 1399946982                          | Ca_kabuli_scaffold | 742                     | G/C  | NA            |           | INTERGENIC                    | NA                          |
| Kabuli_wild_1458  | 1399946983                          | Ca_kabuli_scaffold | 1458                    | A/G  | NA            |           | INTERGENIC                    | NA                          |



| SNP IDs           | NCBI dbSNP accession IDs (NCBI_SS#) | Chromosomes        | Physical positions (bp) | SNPs | Gene accession IDs | Sequence components of genome | Putative functions           |
|-------------------|-------------------------------------|--------------------|-------------------------|------|--------------------|-------------------------------|------------------------------|
| Kabuli_wild_1489  | 1399946984                          | Ca_kabuli_scaffold | 1489                    | A/G  | NA                 | INTERGENIC                    | NA                           |
| Kabuli_wild_1500  | 1399946985                          | Ca_kabuli_scaffold | 1500                    | T/C  | NA                 | INTERGENIC                    | NA                           |
| Kabuli_wild_1669  | 1399946986                          | Ca_kabuli_scaffold | 1669                    | C/T  | NA                 | INTERGENIC                    | NA                           |
| Kabuli_wild_1675  | 1399946987                          | Ca_kabuli_scaffold | 1675                    | C/A  | NA                 | INTERGENIC                    | NA                           |
| Kabuli_wild_1678  | 1399946988                          | Ca_kabuli_scaffold | 1678                    | C/T  | NA                 | INTERGENIC                    | NA                           |
| Kabuli_wild_1718  | 1399946989                          | Ca_kabuli_scaffold | 1718                    | G/A  | NA                 | INTERGENIC                    | NA                           |
| Kabuli_wild_753   | 1399946990                          | Ca_kabuli_scaffold | 753                     | T/C  | NA                 | INTERGENIC                    | NA                           |
| Kabuli_wild_777   | 1399946991                          | Ca_kabuli_scaffold | 777                     | G/A  | NA                 | INTERGENIC                    | NA                           |
| Kabuli_wild_817   | 1399946992                          | Ca_kabuli_scaffold | 817                     | C/T  | NA                 | INTERGENIC                    | NA                           |
| Kabuli_wild_1030  | 1399946993                          | Ca_kabuli_scaffold | 1030                    | T/A  | NA                 | INTERGENIC                    | NA                           |
| Kabuli_wild_1032  | 1399946994                          | Ca_kabuli_scaffold | 1032                    | G/T  | NA                 | INTERGENIC                    | NA                           |
| Kabuli_wild_2837  | 1399946995                          | Ca_kabuli_scaffold | 2837                    | A/G  | NA                 | INTERGENIC                    | NA                           |
| Kabuli_wild_2854  | 1399946996                          | Ca_kabuli_scaffold | 2854                    | A/T  | NA                 | INTERGENIC                    | NA                           |
| Kabuli_wild_461   | 1399946997                          | Ca_kabuli_scaffold | 461                     | G/A  | NA                 | INTERGENIC                    | NA                           |
| Kabuli_wild_141   | 1399946998                          | Ca_kabuli_scaffold | 141                     | G/A  | NA                 | INTERGENIC                    | NA                           |
| Kabuli_wild_190   | 1399946999                          | Ca_kabuli_scaffold | 190                     | T/G  | NA                 | INTERGENIC                    | NA                           |
| Kabuli_wild_6825  | 1399947000                          | Ca_kabuli_scaffold | 6825                    | G/T  | Gene_Ca_27012      | SYNONYMOUS_CODING             | BP28,C-terminal              |
| Kabuli_wild_10842 | 1399947001                          | Ca_kabuli_scaffold | 10842                   | T/A  | Gene_Ca_27012      | INTRON                        | BP28,C-terminal              |
| Kabuli_wild_10856 | 1399947002                          | Ca_kabuli_scaffold | 10856                   | T/G  | Gene_Ca_27012      | INTRON                        | BP28,C-terminal              |
| Kabuli_wild_13651 | 1399947003                          | Ca_kabuli_scaffold | 13651                   | G/A  | Gene_Ca_27012      | INTRON                        | BP28,C-terminal              |
| Kabuli_wild_25674 | 1399947004                          | Ca_kabuli_scaffold | 25674                   | T/C  | Gene_Ca_27013      | SYNONYMOUS_CODING             | Metallo-dependentphosphatase |
| Kabuli_wild_1553  | 1399947005                          | Ca_kabuli_scaffold | 1553                    | T/A  | Gene_Ca_27958      | SYNONYMOUS_CODING             | NA                           |
| Kabuli_wild_1791  | 1399947006                          | Ca_kabuli_scaffold | 1791                    | T/A  | Gene_Ca_28082      | NON_SYNONYMOUS_CODING         | NA                           |
| Kabuli_wild_215   | 1399947007                          | Ca_kabuli_scaffold | 215                     | G/A  | NA                 | INTERGENIC                    | NA                           |
| Kabuli_wild_217   | 1399947008                          | Ca_kabuli_scaffold | 217                     | A/G  | NA                 | INTERGENIC                    | NA                           |
| Kabuli_wild_23768 | 1399947009                          | Ca_kabuli_scaffold | 23768                   | T/G  | Gene_Ca_27572      | INTRON                        | WD40 repeat                  |
| Kabuli_wild_43714 | 1399947010                          | Ca_kabuli_scaffold | 43714                   | A/G  | Gene_Ca_27573      | SYNONYMOUS_CODING             | WD40 repeat                  |
| Kabuli_wild_1870  | 1399947011                          | Ca_kabuli_scaffold | 1870                    | C/A  | NA                 | INTERGENIC                    | NA                           |
| Kabuli_wild_1891  | 1399947012                          | Ca_kabuli_scaffold | 1891                    | A/G  | NA                 | INTERGENIC                    | NA                           |
| Kabuli_wild_1931  | 1399947013                          | Ca_kabuli_scaffold | 1931                    | C/T  | NA                 | INTERGENIC                    | NA                           |
| Kabuli_wild_1934  | 1399947014                          | Ca_kabuli_scaffold | 1934                    | T/A  | NA                 | INTERGENIC                    | NA                           |
| Kabuli_wild_1285  | 1399947015                          | Ca_kabuli_scaffold | 1285                    | G/A  | NA                 | INTERGENIC                    | NA                           |
| Kabuli_wild_1288  | 1399947016                          | Ca_kabuli_scaffold | 1288                    | G/T  | NA                 | INTERGENIC                    | NA                           |
| Kabuli_wild_1290  | 1399947017                          | Ca_kabuli_scaffold | 1290                    | T/C  | NA                 | INTERGENIC                    | NA                           |
| Kabuli_wild_1317  | 1399947018                          | Ca_kabuli_scaffold | 1317                    | C/G  | NA                 | INTERGENIC                    | NA                           |
| Kabuli_wild_3893  | 1399947019                          | Ca_kabuli_scaffold | 3893                    | A/T  | NA                 | INTERGENIC                    | NA                           |
| Kabuli_wild_307   | 1399947020                          | Ca_kabuli_scaffold | 307                     | A/G  | NA                 | INTERGENIC                    | NA                           |
| Kabuli_wild_1810  | 1399947021                          | Ca_kabuli_scaffold | 1810                    | C/A  | Gene_Ca_28207      | SYNONYMOUS_CODING             | NA                           |
| Kabuli_wild_1826  | 1399947022                          | Ca_kabuli_scaffold | 1826                    | C/T  | Gene_Ca_28207      | SYNONYMOUS_CODING             | NA                           |
| Kabuli_wild_3572  | 1399947023                          | Ca_kabuli_scaffold | 3572                    | A/G  | Gene_Ca_28031      | INTRON                        | CCTdomain                    |
| Kabuli_wild_3602  | 1399947024                          | Ca_kabuli_scaffold | 3602                    | T/C  | Gene_Ca_28031      | INTRON                        | CCTdomain                    |
| Kabuli_wild_3608  | 1399947025                          | Ca_kabuli_scaffold | 3608                    | A/G  | Gene_Ca_28031      | INTRON                        | CCTdomain                    |
| Kabuli_wild_1686  | 1399947026                          | Ca_kabuli_scaffold | 1686                    | G/C  | NA                 | INTERGENIC                    | NA                           |
| Kabuli_wild_9558  | 1399947027                          | Ca_kabuli_scaffold | 9558                    | G/A  | Gene_Ca_27577      | DOWNSTREAM                    | NA                           |

| SNP IDs           | NCBI dbSNP accession IDs (NCBI_SS#) | Chromosomes        | Physical positions (bp) | SNPs | Gene accession IDs | Sequence components of genome | Putative functions               |
|-------------------|-------------------------------------|--------------------|-------------------------|------|--------------------|-------------------------------|----------------------------------|
| Kabuli_wild_9563  | 1399947028                          | Ca_kabuli_scaffold | 9563                    | G/A  | Gene_Ca_27577      | DOWNSTREAM                    | NA                               |
| Kabuli_wild_2106  | 1399947029                          | Ca_kabuli_scaffold | 2106                    | G/C  | NA                 | INTERGENIC                    | NA                               |
| Kabuli_wild_2114  | 1399947030                          | Ca_kabuli_scaffold | 2114                    | A/G  | NA                 | INTERGENIC                    | NA                               |
| Kabuli_wild_2118  | 1399947031                          | Ca_kabuli_scaffold | 2118                    | T/C  | NA                 | INTERGENIC                    | NA                               |
| Kabuli_wild_2673  | 1399947032                          | Ca_kabuli_scaffold | 2673                    | C/A  | Gene_Ca_27808      | SYNONYMOUS_CODING             | Peptidase C48, SUMO/Sentrin/Ubl1 |
| Kabuli_wild_2753  | 1399947033                          | Ca_kabuli_scaffold | 2753                    | C/T  | Gene_Ca_27808      | NON_SYNONYMOUS_CODING         | Peptidase C48, SUMO/Sentrin/Ubl1 |
| Kabuli_wild_3434  | 1399947034                          | Ca_kabuli_scaffold | 3434                    | A/T  | Gene_Ca_27664      | SYNONYMOUS_CODING             | NA                               |
| Kabuli_wild_503   | 1399947035                          | Ca_kabuli_scaffold | 503                     | C/T  | NA                 | INTERGENIC                    | NA                               |
| Kabuli_wild_525   | 1399947036                          | Ca_kabuli_scaffold | 525                     | A/C  | NA                 | INTERGENIC                    | NA                               |
| Kabuli_wild_549   | 1399947037                          | Ca_kabuli_scaffold | 549                     | G/A  | NA                 | INTERGENIC                    | NA                               |
| Kabuli_wild_1000  | 1399947038                          | Ca_kabuli_scaffold | 1000                    | T/G  | NA                 | INTERGENIC                    | NA                               |
| Kabuli_wild_1002  | 1399947039                          | Ca_kabuli_scaffold | 1002                    | A/C  | NA                 | INTERGENIC                    | NA                               |
| Kabuli_wild_695   | 1399947040                          | Ca_kabuli_scaffold | 695                     | C/A  | NA                 | INTERGENIC                    | NA                               |
| Kabuli_wild_727   | 1399947041                          | Ca_kabuli_scaffold | 727                     | C/T  | NA                 | INTERGENIC                    | NA                               |
| Kabuli_wild_994   | 1399947042                          | Ca_kabuli_scaffold | 994                     | A/G  | NA                 | INTERGENIC                    | NA                               |
| Kabuli_wild_1024  | 1399947043                          | Ca_kabuli_scaffold | 1024                    | T/G  | NA                 | INTERGENIC                    | NA                               |
| Kabuli_wild_1042  | 1399947044                          | Ca_kabuli_scaffold | 1042                    | T/C  | NA                 | INTERGENIC                    | NA                               |
| Kabuli_wild_1049  | 1399947045                          | Ca_kabuli_scaffold | 1049                    | C/T  | NA                 | INTERGENIC                    | NA                               |
| Kabuli_wild_1075  | 1399947046                          | Ca_kabuli_scaffold | 1075                    | C/T  | NA                 | INTERGENIC                    | NA                               |
| Kabuli_wild_1078  | 1399947047                          | Ca_kabuli_scaffold | 1078                    | G/A  | NA                 | INTERGENIC                    | NA                               |
| Kabuli_wild_1147  | 1399947048                          | Ca_kabuli_scaffold | 1147                    | C/T  | NA                 | INTERGENIC                    | NA                               |
| Kabuli_wild_3326  | 1399947049                          | Ca_kabuli_scaffold | 3326                    | A/C  | NA                 | INTERGENIC                    | NA                               |
| Kabuli_wild_3351  | 1399947050                          | Ca_kabuli_scaffold | 3351                    | C/T  | NA                 | INTERGENIC                    | NA                               |
| Kabuli_wild_1090  | 1399947051                          | Ca_kabuli_scaffold | 1090                    | T/G  | NA                 | INTERGENIC                    | NA                               |
| Kabuli_wild_684   | 1399947052                          | Ca_kabuli_scaffold | 684                     | T/C  | NA                 | INTERGENIC                    | NA                               |
| Kabuli_wild_726   | 1399947053                          | Ca_kabuli_scaffold | 726                     | A/C  | NA                 | INTERGENIC                    | NA                               |
| Kabuli_wild_1358  | 1399947054                          | Ca_kabuli_scaffold | 1358                    | C/T  | NA                 | INTERGENIC                    | NA                               |
| Kabuli_wild_1451  | 1399947055                          | Ca_kabuli_scaffold | 1451                    | G/A  | NA                 | INTERGENIC                    | NA                               |
| Kabuli_wild_6552  | 1399947056                          | Ca_kabuli_scaffold | 6552                    | T/C  | NA                 | INTERGENIC                    | NA                               |
| Kabuli_wild_6564  | 1399947057                          | Ca_kabuli_scaffold | 6564                    | G/A  | NA                 | INTERGENIC                    | NA                               |
| Kabuli_wild_21572 | 1399947058                          | Ca_kabuli_scaffold | 21572                   | T/A  | NA                 | INTERGENIC                    | NA                               |
| Kabuli_wild_21590 | 1399947059                          | Ca_kabuli_scaffold | 21590                   | T/C  | NA                 | INTERGENIC                    | NA                               |
| Kabuli_wild_21592 | 1399947060                          | Ca_kabuli_scaffold | 21592                   | G/T  | NA                 | INTERGENIC                    | NA                               |
| Kabuli_wild_21624 | 1399947061                          | Ca_kabuli_scaffold | 21624                   | G/A  | NA                 | INTERGENIC                    | NA                               |
| Kabuli_wild_21649 | 1399947062                          | Ca_kabuli_scaffold | 21649                   | T/C  | NA                 | INTERGENIC                    | NA                               |
| Kabuli_wild_21653 | 1399947063                          | Ca_kabuli_scaffold | 21653                   | G/A  | NA                 | INTERGENIC                    | NA                               |
| Kabuli_wild_4415  | 1399947064                          | Ca_kabuli_scaffold | 4415                    | A/G  | NA                 | INTERGENIC                    | NA                               |
| Kabuli_wild_460   | 1399947065                          | Ca_kabuli_scaffold | 460                     | T/C  | NA                 | INTERGENIC                    | NA                               |
| Kabuli_wild_471   | 1399947066                          | Ca_kabuli_scaffold | 471                     | C/T  | NA                 | INTERGENIC                    | NA                               |
| Kabuli_wild_472   | 1399947067                          | Ca_kabuli_scaffold | 472                     | C/T  | NA                 | INTERGENIC                    | NA                               |
| Kabuli_wild_520   | 1399947068                          | Ca_kabuli_scaffold | 520                     | T/G  | NA                 | INTERGENIC                    | NA                               |
| Kabuli_wild_592   | 1399947069                          | Ca_kabuli_scaffold | 592                     | A/G  | NA                 | INTERGENIC                    | NA                               |
| Kabuli_wild_2056  | 1399947070                          | Ca_kabuli_scaffold | 2056                    | A/T  | NA                 | INTERGENIC                    | NA                               |
| Kabuli_wild_2073  | 1399947071                          | Ca_kabuli_scaffold | 2073                    | G/A  | NA                 | INTERGENIC                    | NA                               |

| SNP IDs            | NCBI dbSNP accession IDs (NCBI_SS#) | Chromosomes        | Physical positions (bp) | SNPs | Gene accession IDs | Sequence components of genome | Putative functions                   |
|--------------------|-------------------------------------|--------------------|-------------------------|------|--------------------|-------------------------------|--------------------------------------|
| Kabuli_wild_3911   | 1399947072                          | Ca_kabuli_scaffold | 3911                    | T/C  | NA                 | INTERGENIC                    | NA                                   |
| Kabuli_wild_3941   | 1399947073                          | Ca_kabuli_scaffold | 3941                    | G/A  | NA                 | INTERGENIC                    | NA                                   |
| Kabuli_wild_3946   | 1399947074                          | Ca_kabuli_scaffold | 3946                    | T/G  | NA                 | INTERGENIC                    | NA                                   |
| Kabuli_wild_3966   | 1399947075                          | Ca_kabuli_scaffold | 3966                    | A/C  | NA                 | INTERGENIC                    | NA                                   |
| Kabuli_wild_3967   | 1399947076                          | Ca_kabuli_scaffold | 3967                    | G/A  | NA                 | INTERGENIC                    | NA                                   |
| Kabuli_wild_3977   | 1399947077                          | Ca_kabuli_scaffold | 3977                    | A/G  | NA                 | INTERGENIC                    | NA                                   |
| Kabuli_wild_4007   | 1399947078                          | Ca_kabuli_scaffold | 4007                    | T/G  | NA                 | INTERGENIC                    | NA                                   |
| Kabuli_wild_4022   | 1399947079                          | Ca_kabuli_scaffold | 4022                    | C/T  | NA                 | INTERGENIC                    | NA                                   |
| Kabuli_wild_4025   | 1399947080                          | Ca_kabuli_scaffold | 4025                    | T/C  | NA                 | INTERGENIC                    | NA                                   |
| Kabuli_wild_4052   | 1399947081                          | Ca_kabuli_scaffold | 4052                    | T/G  | NA                 | INTERGENIC                    | NA                                   |
| Kabuli_wild_4057   | 1399947082                          | Ca_kabuli_scaffold | 4057                    | G/C  | NA                 | INTERGENIC                    | NA                                   |
| Kabuli_wild_747    | 1399947083                          | Ca_kabuli_scaffold | 747                     | G/T  | NA                 | INTERGENIC                    | NA                                   |
| Kabuli_wild_764    | 1399947084                          | Ca_kabuli_scaffold | 764                     | C/T  | NA                 | INTERGENIC                    | NA                                   |
| Kabuli_wild_795    | 1399947085                          | Ca_kabuli_scaffold | 795                     | A/G  | NA                 | INTERGENIC                    | NA                                   |
| Kabuli_wild_796    | 1399947086                          | Ca_kabuli_scaffold | 796                     | G/C  | NA                 | INTERGENIC                    | NA                                   |
| Kabuli_wild_805    | 1399947087                          | Ca_kabuli_scaffold | 805                     | A/T  | NA                 | INTERGENIC                    | NA                                   |
| Kabuli_wild_821    | 1399947088                          | Ca_kabuli_scaffold | 821                     | T/A  | NA                 | INTERGENIC                    | NA                                   |
| Kabuli_wild_20473  | 1399947089                          | Ca_kabuli_scaffold | 20473                   | T/A  | NA                 | INTERGENIC                    | NA                                   |
| Kabuli_wild_1167   | 1399947090                          | Ca_kabuli_scaffold | 1167                    | C/T  | NA                 | INTERGENIC                    | NA                                   |
| Kabuli_wild_1205   | 1399947091                          | Ca_kabuli_scaffold | 1205                    | A/G  | NA                 | INTERGENIC                    | NA                                   |
| Kabuli_wild_5263   | 1399947092                          | Ca_kabuli_scaffold | 5263                    | A/G  | NA                 | INTERGENIC                    | NA                                   |
| Kabuli_wild_1183   | 1399947093                          | Ca_kabuli_scaffold | 1183                    | G/A  | NA                 | INTERGENIC                    | NA                                   |
| Kabuli_wild_402    | 1399947094                          | Ca_kabuli_scaffold | 402                     | G/A  | NA                 | INTERGENIC                    | NA                                   |
| Kabuli_wild_19266  | 1399947095                          | Ca_kabuli_scaffold | 19266                   | G/A  | Gene_Ca_27631      | SYNONYMOUS_CODING             | NA                                   |
| Kabuli_wild_112    | 1399947096                          | Ca_kabuli_scaffold | 112                     | G/A  | NA                 | INTERGENIC                    | NA                                   |
| Kabuli_wild_409    | 1399947097                          | Ca_kabuli_scaffold | 409                     | T/G  | NA                 | INTERGENIC                    | NA                                   |
| Kabuli_wild_378    | 1399947098                          | Ca_kabuli_scaffold | 378                     | A/T  | Gene_Ca_28205      | UPSTREAM                      | NA                                   |
| Kabuli_wild_397    | 1399947099                          | Ca_kabuli_scaffold | 397                     | G/A  | Gene_Ca_28205      | UPSTREAM                      | NA                                   |
| Kabuli_wild_410    | 1399947100                          | Ca_kabuli_scaffold | 410                     | A/C  | Gene_Ca_28205      | UPSTREAM                      | NA                                   |
| Kabuli_wild_573    | 1399947101                          | Ca_kabuli_scaffold | 573                     | T/G  | Gene_Ca_28205      | UPSTREAM                      | NA                                   |
| Kabuli_wild_806    | 1399947102                          | Ca_kabuli_scaffold | 806                     | A/C  | NA                 | INTERGENIC                    | NA                                   |
| Kabuli_wild_807    | 1399947103                          | Ca_kabuli_scaffold | 807                     | G/A  | NA                 | INTERGENIC                    | NA                                   |
| Kabuli_wild_808    | 1399947104                          | Ca_kabuli_scaffold | 808                     | T/G  | NA                 | INTERGENIC                    | NA                                   |
| Kabuli_wild_31673  | 1399947105                          | Ca_kabuli_scaffold | 31673                   | G/A  | NA                 | INTERGENIC                    | NA                                   |
| Kabuli_wild_40193  | 1399947106                          | Ca_kabuli_scaffold | 40193                   | G/T  | NA                 | INTERGENIC                    | NA                                   |
| Kabuli_wild_156485 | 1399947107                          | Ca_kabuli_scaffold | 156485                  | C/T  | Gene_Ca_11572      | INTRON                        | MembraneboundO-acyltransferase,MBOAT |
| Kabuli_wild_328757 | 1399947108                          | Ca_kabuli_scaffold | 328757                  | C/T  | Gene_Ca_11580      | NON_SYNONYMOUS_CODING         | NA                                   |
| Kabuli_wild_385653 | 1399947109                          | Ca_kabuli_scaffold | 385653                  | C/T  | NA                 | INTERGENIC                    | NA                                   |
| Kabuli_wild_562892 | 1399947110                          | Ca_kabuli_scaffold | 562892                  | G/T  | NA                 | INTERGENIC                    | NA                                   |
| Kabuli_wild_562907 | 1399947111                          | Ca_kabuli_scaffold | 562907                  | A/C  | NA                 | INTERGENIC                    | NA                                   |
| Kabuli_wild_696869 | 1399947112                          | Ca_kabuli_scaffold | 696869                  | A/C  | Gene_Ca_11606      | INTRON                        | TetratricopeptideTPR-1               |
| Kabuli_wild_705224 | 1399947113                          | Ca_kabuli_scaffold | 705224                  | G/T  | Gene_Ca_11606      | INTRON                        | TetratricopeptideTPR-1               |
| Kabuli_wild_741607 | 1399947114                          | Ca_kabuli_scaffold | 741607                  | G/A  | Gene_Ca_11609      | SYNONYMOUS_CODING             | uDENN                                |
| Kabuli_wild_52124  | 1399947115                          | Ca_kabuli_scaffold | 52124                   | C/T  | NA                 | INTERGENIC                    | NA                                   |

| SNP IDs            | NCBI dbSNP accession IDs (NCBI_SS#) | Chromosomes        | Physical positions (bp) | SNPs | Gene accession IDs | Sequence components of genome | Putative functions                                    |
|--------------------|-------------------------------------|--------------------|-------------------------|------|--------------------|-------------------------------|-------------------------------------------------------|
| Kabuli_wild_52125  | 1399947116                          | Ca_kabuli_scaffold | 52125                   | C/T  | NA                 | INTERGENIC                    | NA                                                    |
| Kabuli_wild_52142  | 1399947117                          | Ca_kabuli_scaffold | 52142                   | G/T  | NA                 | INTERGENIC                    | NA                                                    |
| Kabuli_wild_52146  | 1399947118                          | Ca_kabuli_scaffold | 52146                   | T/C  | NA                 | INTERGENIC                    | NA                                                    |
| Kabuli_wild_330840 | 1399947119                          | Ca_kabuli_scaffold | 330840                  | C/A  | NA                 | INTERGENIC                    | NA                                                    |
| Kabuli_wild_45565  | 1399947120                          | Ca_kabuli_scaffold | 45565                   | A/C  | Gene_Ca_11165      | SYNONYMOUS_CODING             | NA                                                    |
| Kabuli_wild_45566  | 1399947121                          | Ca_kabuli_scaffold | 45566                   | G/A  | Gene_Ca_11165      | SYNONYMOUS_CODING             | NA                                                    |
| Kabuli_wild_58243  | 1399947122                          | Ca_kabuli_scaffold | 58243                   | A/G  | Gene_Ca_11166      | DOWNSTREAM                    | Methyltransferasetype11                               |
| Kabuli_wild_154342 | 1399947123                          | Ca_kabuli_scaffold | 154342                  | A/C  | Gene_Ca_11177      | UPSTREAM                      | Vacuolarsortingprotein9                               |
| Kabuli_wild_45461  | 1399947124                          | Ca_kabuli_scaffold | 45461                   | G/T  | Gene_Ca_08692      | UPSTREAM                      | YABBYprotein                                          |
| Kabuli_wild_118051 | 1399947125                          | Ca_kabuli_scaffold | 118051                  | T/C  | NA                 | INTERGENIC                    | NA                                                    |
| Kabuli_wild_122047 | 1399947126                          | Ca_kabuli_scaffold | 122047                  | T/C  | NA                 | INTERGENIC                    | NA                                                    |
| Kabuli_wild_122101 | 1399947127                          | Ca_kabuli_scaffold | 122101                  | T/C  | NA                 | INTERGENIC                    | NA                                                    |
| Kabuli_wild_134572 | 1399947128                          | Ca_kabuli_scaffold | 134572                  | G/A  | Gene_Ca_08700      | DOWNSTREAM                    | C4-dicarboxylatetransporter/malicacidtransportprotein |
| Kabuli_wild_150694 | 1399947129                          | Ca_kabuli_scaffold | 150694                  | C/G  | Gene_Ca_08702      | SYNONYMOUS_CODING             | SNARE associated Golgi protein                        |
| Kabuli_wild_151274 | 1399947130                          | Ca_kabuli_scaffold | 151274                  | A/C  | Gene_Ca_08702      | NON_SYNONYMOUS_CODING         | SNARE associated Golgi protein                        |
| Kabuli_wild_184453 | 1399947131                          | Ca_kabuli_scaffold | 184453                  | G/A  | Gene_Ca_08703      | SYNONYMOUS_CODING             | Aminoacid-bindingACT                                  |
| Kabuli_wild_251866 | 1399947132                          | Ca_kabuli_scaffold | 251866                  | A/C  | Gene_Ca_08709      | NON_SYNONYMOUS_CODING         | NA                                                    |
| Kabuli_wild_272718 | 1399947133                          | Ca_kabuli_scaffold | 272718                  | A/C  | NA                 | INTERGENIC                    | NA                                                    |
| Kabuli_wild_293051 | 1399947134                          | Ca_kabuli_scaffold | 293051                  | A/C  | NA                 | INTERGENIC                    | NA                                                    |
| Kabuli_wild_380225 | 1399947135                          | Ca_kabuli_scaffold | 380225                  | T/G  | Gene_Ca_08725      | SYNONYMOUS_CODING             | PeptidaseS8/S53,subtilisin/kexin/sedolisin            |
| Kabuli_wild_380232 | 1399947136                          | Ca_kabuli_scaffold | 380232                  | G/T  | Gene_Ca_08725      | NON_SYNONYMOUS_CODING         | PeptidaseS8/S53,subtilisin/kexin/sedolisin            |
| Kabuli_wild_452011 | 1399947137                          | Ca_kabuli_scaffold | 452011                  | G/T  | Gene_Ca_08730      | NON_SYNONYMOUS_CODING         | Glucose-methanol-cholineoxidoreductase,N-terminal     |
| Kabuli_wild_454342 | 1399947138                          | Ca_kabuli_scaffold | 454342                  | G/T  | Gene_Ca_08730      | UPSTREAM                      | Glucose-methanol-cholineoxidoreductase,N-terminal     |
| Kabuli_wild_535984 | 1399947139                          | Ca_kabuli_scaffold | 535984                  | G/T  | Gene_Ca_08741      | NON_SYNONYMOUS_CODING         | IQ motif,EF-handbinding site                          |
| Kabuli_wild_552173 | 1399947140                          | Ca_kabuli_scaffold | 552173                  | G/A  | NA                 | INTERGENIC                    | NA                                                    |
| Kabuli_wild_552185 | 1399947141                          | Ca_kabuli_scaffold | 552185                  | T/C  | NA                 | INTERGENIC                    | NA                                                    |
| Kabuli_wild_553863 | 1399947142                          | Ca_kabuli_scaffold | 553863                  | G/T  | NA                 | INTERGENIC                    | NA                                                    |
| Kabuli_wild_554134 | 1399947143                          | Ca_kabuli_scaffold | 554134                  | A/G  | NA                 | INTERGENIC                    | NA                                                    |
| Kabuli_wild_599470 | 1399947144                          | Ca_kabuli_scaffold | 599470                  | G/A  | Gene_Ca_08749      | SYNONYMOUS_CODING             | PeptidaseS8/S53,subtilisin/kexin/sedolisin            |
| Kabuli_wild_652067 | 1399947145                          | Ca_kabuli_scaffold | 652067                  | A/G  | Gene_Ca_08753      | NON_SYNONYMOUS_CODING         | PeptidaseS8/S53,subtilisin/kexin/sedolisin            |
| Kabuli_wild_667415 | 1399947146                          | Ca_kabuli_scaffold | 667415                  | T/G  | Gene_Ca_08754      | SYNONYMOUS_CODING             | PeptidaseS8/S53,subtilisin/kexin/sedolisin            |
| Kabuli_wild_667541 | 1399947147                          | Ca_kabuli_scaffold | 667541                  | A/C  | Gene_Ca_08754      | SYNONYMOUS_CODING             | PeptidaseS8/S53,subtilisin/kexin/sedolisin            |
| Kabuli_wild_730174 | 1399947148                          | Ca_kabuli_scaffold | 730174                  | A/C  | Gene_Ca_08761      | SYNONYMOUS_CODING             | Fork head-associated (FHA) domain                     |
| Kabuli_wild_732450 | 1399947149                          | Ca_kabuli_scaffold | 732450                  | A/C  | Gene_Ca_08761      | SYNONYMOUS_CODING             | Fork head-associated (FHA) domain                     |
| Kabuli_wild_732454 | 1399947150                          | Ca_kabuli_scaffold | 732454                  | T/G  | Gene_Ca_08761      | INTRON                        | Fork head-associated (FHA) domain                     |
| Kabuli_wild_732460 | 1399947151                          | Ca_kabuli_scaffold | 732460                  | T/A  | Gene_Ca_08761      | INTRON                        | Fork head-associated (FHA) domain                     |
| Kabuli_wild_732463 | 1399947152                          | Ca_kabuli_scaffold | 732463                  | G/T  | Gene_Ca_08761      | INTRON                        | Fork head-associated (FHA) domain                     |
| Kabuli_wild_732496 | 1399947153                          | Ca_kabuli_scaffold | 732496                  | G/T  | Gene_Ca_08761      | INTRON                        | Fork head-associated (FHA) domain                     |
| Kabuli_wild_750213 | 1399947154                          | Ca_kabuli_scaffold | 750213                  | C/A  | Gene_Ca_08762      | INTRON                        | COGcomplexcomponent,COG2                              |
| Kabuli_wild_771102 | 1399947155                          | Ca_kabuli_scaffold | 771102                  | C/T  | Gene_Ca_08765      | DOWNSTREAM                    | FBD                                                   |
| Kabuli_wild_909909 | 1399947156                          | Ca_kabuli_scaffold | 909909                  | A/G  | NA                 | INTERGENIC                    | NA                                                    |
| Kabuli_wild_959608 | 1399947157                          | Ca_kabuli_scaffold | 959608                  | A/C  | Gene_Ca_08787      | NON_SYNONYMOUS_CODING         | Transcription factor jumonji/aspartylbeta-hydroxylase |
| Kabuli_wild_959772 | 1399947158                          | Ca_kabuli_scaffold | 959772                  | C/T  | Gene_Ca_08787      | NON_SYNONYMOUS_CODING         | Transcription factor jumonji/aspartylbeta-hydroxylase |
| Kabuli_wild_959828 | 1399947159                          | Ca_kabuli_scaffold | 959828                  | G/A  | Gene_Ca_08787      | SYNONYMOUS_CODING             | Transcription factor jumonji/aspartylbeta-hydroxylase |

| SNP IDs             | NCBI dbSNP accession IDs (NCBI_SS#) | Chromosomes        | Physical positions (bp) | SNPs | Gene accession IDs | Sequence components of genome | Putative functions                                    |
|---------------------|-------------------------------------|--------------------|-------------------------|------|--------------------|-------------------------------|-------------------------------------------------------|
| Kabuli_wild_965884  | 1399947160                          | Ca_kabuli_scaffold | 965884                  | T/C  | Gene_Ca_08787      | INTRON                        | Transcription factor jumonji/aspartylbeta-hydroxylase |
| Kabuli_wild_965961  | 1399947161                          | Ca_kabuli_scaffold | 965961                  | A/G  | Gene_Ca_08787      | INTRON                        | Transcription factor jumonji/aspartylbeta-hydroxylase |
| Kabuli_wild_1020651 | 1399947162                          | Ca_kabuli_scaffold | 1020651                 | A/G  | NA                 | INTERGENIC                    | NA                                                    |
| Kabuli_wild_1022091 | 1399947163                          | Ca_kabuli_scaffold | 1022091                 | T/C  | NA                 | INTERGENIC                    | NA                                                    |
| Kabuli_wild_1066818 | 1399947164                          | Ca_kabuli_scaffold | 1066818                 | A/C  | Gene_Ca_08793      | INTRON                        | Peptidase,cysteine peptidase active site              |
| Kabuli_wild_1072750 | 1399947165                          | Ca_kabuli_scaffold | 1072750                 | C/T  | Gene_Ca_08794      | SYNONYMOUS_CODING             | WD40 repeat                                           |
| Kabuli_wild_1265627 | 1399947166                          | Ca_kabuli_scaffold | 1265627                 | T/C  | Gene_Ca_08816      | SYNONYMOUS_CODING             | Protein kinase,catalytic domain                       |
| Kabuli_wild_1265635 | 1399947167                          | Ca_kabuli_scaffold | 1265635                 | T/G  | Gene_Ca_08816      | NON_SYNONYMOUS_CODING         | Protein kinase,catalytic domain                       |
| Kabuli_wild_1273341 | 1399947168                          | Ca_kabuli_scaffold | 1273341                 | G/A  | Gene_Ca_08817      | DOWNSTREAM                    | NA                                                    |
| Kabuli_wild_1285241 | 1399947169                          | Ca_kabuli_scaffold | 1285241                 | G/A  | NA                 | INTERGENIC                    | NA                                                    |
| Kabuli_wild_1285272 | 1399947170                          | Ca_kabuli_scaffold | 1285272                 | T/G  | NA                 | INTERGENIC                    | NA                                                    |
| Kabuli_wild_1285320 | 1399947171                          | Ca_kabuli_scaffold | 1285320                 | T/G  | NA                 | INTERGENIC                    | NA                                                    |
| Kabuli_wild_1285324 | 1399947172                          | Ca_kabuli_scaffold | 1285324                 | T/G  | NA                 | INTERGENIC                    | NA                                                    |
| Kabuli_wild_1288448 | 1399947173                          | Ca_kabuli_scaffold | 1288448                 | A/G  | Gene_Ca_08820      | INTRON                        | RNAhelicase,ATP-dependent,DEAD-box,conservedsite      |
| Kabuli_wild_1296453 | 1399947174                          | Ca_kabuli_scaffold | 1296453                 | G/A  | NA                 | INTERGENIC                    | NA                                                    |
| Kabuli_wild_1320047 | 1399947175                          | Ca_kabuli_scaffold | 1320047                 | C/G  | NA                 | INTERGENIC                    | NA                                                    |
| Kabuli_wild_1330288 | 1399947176                          | Ca_kabuli_scaffold | 1330288                 | A/G  | NA                 | INTERGENIC                    | NA                                                    |
| Kabuli_wild_1330353 | 1399947177                          | Ca_kabuli_scaffold | 1330353                 | T/A  | NA                 | INTERGENIC                    | NA                                                    |
| Kabuli_wild_1330400 | 1399947178                          | Ca_kabuli_scaffold | 1330400                 | A/G  | NA                 | INTERGENIC                    | NA                                                    |
| Kabuli_wild_1398870 | 1399947179                          | Ca_kabuli_scaffold | 1398870                 | C/T  | Gene_Ca_08830      | DOWNSTREAM                    | Kinetochore-Ndc80complex,subunitSpc25                 |
| Kabuli_wild_1403480 | 1399947180                          | Ca_kabuli_scaffold | 1403480                 | A/G  | NA                 | INTERGENIC                    | NA                                                    |
| Kabuli_wild_143813  | 1399947181                          | Ca_kabuli_scaffold | 143813                  | C/G  | Gene_Ca_10872      | NON_SYNONYMOUS_CODING         | Nucleoporin,Nsp1-like,C-terminal                      |
| Kabuli_wild_144354  | 1399947182                          | Ca_kabuli_scaffold | 144354                  | C/T  | Gene_Ca_10872      | SYNONYMOUS_CODING             | Nucleoporin,Nsp1-like,C-terminal                      |
| Kabuli_wild_144486  | 1399947183                          | Ca_kabuli_scaffold | 144486                  | T/G  | Gene_Ca_10872      | SYNONYMOUS_CODING             | Nucleoporin,Nsp1-like,C-terminal                      |
| Kabuli_wild_152512  | 1399947184                          | Ca_kabuli_scaffold | 152512                  | T/G  | Gene_Ca_10872      | NON_SYNONYMOUS_CODING         | Nucleoporin,Nsp1-like,C-terminal                      |
| Kabuli_wild_152576  | 1399947185                          | Ca_kabuli_scaffold | 152576                  | G/T  | Gene_Ca_10872      | DOWNSTREAM                    | Nucleoporin,Nsp1-like,C-terminal                      |
| Kabuli_wild_244666  | 1399947186                          | Ca_kabuli_scaffold | 244666                  | G/A  | Gene_Ca_10878      | SYNONYMOUS_CODING             | Peptidase C48, SUMO/Sentrin/Ubl1                      |
| Kabuli_wild_266962  | 1399947187                          | Ca_kabuli_scaffold | 266962                  | T/C  | NA                 | INTERGENIC                    | NA                                                    |
| Kabuli_wild_266974  | 1399947188                          | Ca_kabuli_scaffold | 266974                  | G/T  | NA                 | INTERGENIC                    | NA                                                    |
| Kabuli_wild_266975  | 1399947189                          | Ca_kabuli_scaffold | 266975                  | G/A  | NA                 | INTERGENIC                    | NA                                                    |
| Kabuli_wild_266980  | 1399947190                          | Ca_kabuli_scaffold | 266980                  | G/A  | NA                 | INTERGENIC                    | NA                                                    |
| Kabuli_wild_266994  | 1399947191                          | Ca_kabuli_scaffold | 266994                  | A/G  | NA                 | INTERGENIC                    | NA                                                    |
| Kabuli_wild_267001  | 1399947192                          | Ca_kabuli_scaffold | 267001                  | A/T  | NA                 | INTERGENIC                    | NA                                                    |
| Kabuli_wild_267006  | 1399947193                          | Ca_kabuli_scaffold | 267006                  | T/C  | NA                 | INTERGENIC                    | NA                                                    |
| Kabuli_wild_15576   | 1399947194                          | Ca_kabuli_scaffold | 15576                   | G/A  | Gene_Ca_16296      | NON_SYNONYMOUS_CODING         | PeptidaseA1                                           |
| Kabuli_wild_15601   | 1399947195                          | Ca_kabuli_scaffold | 15601                   | T/G  | Gene_Ca_16296      | NON_SYNONYMOUS_CODING         | PeptidaseA1                                           |
| Kabuli_wild_15616   | 1399947196                          | Ca_kabuli_scaffold | 15616                   | A/G  | Gene_Ca_16296      | SYNONYMOUS_CODING             | PeptidaseA1                                           |
| Kabuli_wild_186203  | 1399947197                          | Ca_kabuli_scaffold | 186203                  | C/G  | Gene_Ca_16315      | UPSTREAM                      | Oxysterol-bindingprotein                              |
| Kabuli_wild_186218  | 1399947198                          | Ca_kabuli_scaffold | 186218                  | G/A  | Gene_Ca_16315      | UPSTREAM                      | Oxysterol-bindingprotein                              |
| Kabuli_wild_186243  | 1399947199                          | Ca_kabuli_scaffold | 186243                  | A/C  | Gene_Ca_16315      | UPSTREAM                      | Oxysterol-bindingprotein                              |
| Kabuli_wild_249521  | 1399947200                          | Ca_kabuli_scaffold | 249521                  | A/T  | Gene_Ca_16321      | SYNONYMOUS_CODING             | Transaldolase                                         |
| Kabuli_wild_82130   | 1399947201                          | Ca_kabuli_scaffold | 82130                   | A/C  | Gene_Ca_11944      | SYNONYMOUS_CODING             | Protein of unknown function DUF604                    |
| Kabuli_wild_105461  | 1399947202                          | Ca_kabuli_scaffold | 105461                  | A/G  | NA                 | INTERGENIC                    | NA                                                    |
| Kabuli_wild_105465  | 1399947203                          | Ca_kabuli_scaffold | 105465                  | C/T  | NA                 | INTERGENIC                    | NA                                                    |

| SNP IDs            | NCBI dbSNP accession IDs (NCBI_SS#) | Chromosomes        | Physical positions (bp) | SNPs | Gene accession IDs | Sequence components of genome | Putative functions                |
|--------------------|-------------------------------------|--------------------|-------------------------|------|--------------------|-------------------------------|-----------------------------------|
| Kabuli_wild_105521 | 1399947204                          | Ca_kabuli_scaffold | 105521                  | A/C  | NA                 | INTERGENIC                    | NA                                |
| Kabuli_wild_105523 | 1399947205                          | Ca_kabuli_scaffold | 105523                  | G/A  | NA                 | INTERGENIC                    | NA                                |
| Kabuli_wild_105541 | 1399947206                          | Ca_kabuli_scaffold | 105541                  | G/A  | NA                 | INTERGENIC                    | NA                                |
| Kabuli_wild_105546 | 1399947207                          | Ca_kabuli_scaffold | 105546                  | C/T  | NA                 | INTERGENIC                    | NA                                |
| Kabuli_wild_140540 | 1399947208                          | Ca_kabuli_scaffold | 140540                  | T/C  | Gene_Ca_11948      | INTRON                        | Pheromoneshutdown-related, TraB   |
| Kabuli_wild_148483 | 1399947209                          | Ca_kabuli_scaffold | 148483                  | C/A  | Gene_Ca_11948      | INTRON                        | Pheromoneshutdown-related, TraB   |
| Kabuli_wild_148486 | 1399947210                          | Ca_kabuli_scaffold | 148486                  | C/T  | Gene_Ca_11948      | INTRON                        | Pheromoneshutdown-related, TraB   |
| Kabuli_wild_148504 | 1399947211                          | Ca_kabuli_scaffold | 148504                  | G/T  | Gene_Ca_11948      | INTRON                        | Pheromoneshutdown-related, TraB   |
| Kabuli_wild_166935 | 1399947212                          | Ca_kabuli_scaffold | 166935                  | C/T  | Gene_Ca_11949      | INTRON                        | NA                                |
| Kabuli_wild_78650  | 1399947213                          | Ca_kabuli_scaffold | 78650                   | A/G  | NA                 | INTERGENIC                    | NA                                |
| Kabuli_wild_142859 | 1399947214                          | Ca_kabuli_scaffold | 142859                  | G/C  | NA                 | INTERGENIC                    | NA                                |
| Kabuli_wild_313139 | 1399947215                          | Ca_kabuli_scaffold | 313139                  | A/T  | Gene_Ca_22882      | INTRON                        | NA                                |
| Kabuli_wild_313160 | 1399947216                          | Ca_kabuli_scaffold | 313160                  | A/G  | Gene_Ca_22882      | INTRON                        | NA                                |
| Kabuli_wild_341136 | 1399947217                          | Ca_kabuli_scaffold | 341136                  | A/C  | NA                 | INTERGENIC                    | NA                                |
| Kabuli_wild_378975 | 1399947218                          | Ca_kabuli_scaffold | 378975                  | G/A  | NA                 | INTERGENIC                    | NA                                |
| Kabuli_wild_446882 | 1399947219                          | Ca_kabuli_scaffold | 446882                  | G/A  | Gene_Ca_22884      | NON_SYNONYMOUS_CODING         | Peptidase C48, SUMO/Sentrin/Ubl1  |
| Kabuli_wild_446912 | 1399947220                          | Ca_kabuli_scaffold | 446912                  | C/T  | Gene_Ca_22884      | SYNONYMOUS_CODING             | Peptidase C48, SUMO/Sentrin/Ubl1  |
| Kabuli_wild_446931 | 1399947221                          | Ca_kabuli_scaffold | 446931                  | C/T  | Gene_Ca_22884      | NON_SYNONYMOUS_CODING         | Peptidase C48, SUMO/Sentrin/Ubl1  |
| Kabuli_wild_446954 | 1399947222                          | Ca_kabuli_scaffold | 446954                  | C/A  | Gene_Ca_22884      | NON_SYNONYMOUS_CODING         | Peptidase C48, SUMO/Sentrin/Ubl1  |
| Kabuli_wild_581413 | 1399947223                          | Ca_kabuli_scaffold | 581413                  | A/G  | NA                 | INTERGENIC                    | NA                                |
| Kabuli_wild_26108  | 1399947224                          | Ca_kabuli_scaffold | 26108                   | G/T  | Gene_Ca_17229      | INTRON                        | Fork head-associated (FHA) domain |
| Kabuli_wild_26121  | 1399947225                          | Ca_kabuli_scaffold | 26121                   | A/C  | Gene_Ca_17229      | INTRON                        | Fork head-associated (FHA) domain |
| Kabuli_wild_26134  | 1399947226                          | Ca_kabuli_scaffold | 26134                   | C/A  | Gene_Ca_17229      | INTRON                        | Fork head-associated (FHA) domain |
| Kabuli_wild_144885 | 1399947227                          | Ca_kabuli_scaffold | 144885                  | T/C  | Gene_Ca_17233      | INTRON                        | RNA recognition motif domain      |
| Kabuli_wild_161190 | 1399947228                          | Ca_kabuli_scaffold | 161190                  | C/A  | Gene_Ca_17234      | INTRON                        | Cyclin                            |
| Kabuli_wild_260488 | 1399947229                          | Ca_kabuli_scaffold | 260488                  | A/C  | NA                 | INTERGENIC                    | NA                                |
| Kabuli_wild_299    | 1399947230                          | Ca_kabuli_scaffold | 299                     | A/T  | NA                 | INTERGENIC                    | NA                                |
| Kabuli_wild_306    | 1399947231                          | Ca_kabuli_scaffold | 306                     | T/C  | NA                 | INTERGENIC                    | NA                                |
| Kabuli_wild_342    | 1399947232                          | Ca_kabuli_scaffold | 342                     | C/T  | NA                 | INTERGENIC                    | NA                                |
| Kabuli_wild_349    | 1399947233                          | Ca_kabuli_scaffold | 349                     | C/T  | NA                 | INTERGENIC                    | NA                                |
| Kabuli_wild_550    | 1399947234                          | Ca_kabuli_scaffold | 550                     | T/G  | NA                 | INTERGENIC                    | NA                                |
| Kabuli_wild_593    | 1399947235                          | Ca_kabuli_scaffold | 593                     | A/G  | NA                 | INTERGENIC                    | NA                                |
| Kabuli_wild_614    | 1399947236                          | Ca_kabuli_scaffold | 614                     | C/T  | NA                 | INTERGENIC                    | NA                                |
| Kabuli_wild_616    | 1399947237                          | Ca_kabuli_scaffold | 616                     | A/G  | NA                 | INTERGENIC                    | NA                                |
| Kabuli_wild_649    | 1399947238                          | Ca_kabuli_scaffold | 649                     | T/C  | NA                 | INTERGENIC                    | NA                                |
| Kabuli_wild_654    | 1399947239                          | Ca_kabuli_scaffold | 654                     | C/A  | NA                 | INTERGENIC                    | NA                                |
| Kabuli_wild_689    | 1399947240                          | Ca_kabuli_scaffold | 689                     | G/A  | NA                 | INTERGENIC                    | NA                                |
| Kabuli_wild_323    | 1399947241                          | Ca_kabuli_scaffold | 323                     | T/G  | NA                 | INTERGENIC                    | NA                                |
| Kabuli_wild_416    | 1399947242                          | Ca_kabuli_scaffold | 416                     | G/A  | NA                 | INTERGENIC                    | NA                                |
| Kabuli_wild_925    | 1399947243                          | Ca_kabuli_scaffold | 925                     | C/T  | NA                 | INTERGENIC                    | NA                                |
| Kabuli_wild_341    | 1399947244                          | Ca_kabuli_scaffold | 341                     | G/A  | NA                 | INTERGENIC                    | NA                                |
| Kabuli_wild_381    | 1399947245                          | Ca_kabuli_scaffold | 381                     | T/A  | NA                 | INTERGENIC                    | NA                                |
| Kabuli_wild_1412   | 1399947246                          | Ca_kabuli_scaffold | 1412                    | A/T  | NA                 | INTERGENIC                    | NA                                |
| Kabuli_wild_1416   | 1399947247                          | Ca_kabuli_scaffold | 1416                    | T/A  | NA                 | INTERGENIC                    | NA                                |

| SNP IDs           | NCBI dbSNP accession IDs (NCBI_SS#) | Chromosomes        | Physical positions (bp) | SNPs | Gene accession IDs | Sequence components of genome | Putative functions                              |
|-------------------|-------------------------------------|--------------------|-------------------------|------|--------------------|-------------------------------|-------------------------------------------------|
| Kabuli_wild_1418  | 1399947248                          | Ca_kabuli_scaffold | 1418                    | A/C  | NA                 | INTERGENIC                    | NA                                              |
| Kabuli_wild_1422  | 1399947249                          | Ca_kabuli_scaffold | 1422                    | G/C  | NA                 | INTERGENIC                    | NA                                              |
| Kabuli_wild_1550  | 1399947250                          | Ca_kabuli_scaffold | 1550                    | T/G  | NA                 | INTERGENIC                    | NA                                              |
| Kabuli_wild_1568  | 1399947251                          | Ca_kabuli_scaffold | 1568                    | A/C  | NA                 | INTERGENIC                    | NA                                              |
| Kabuli_wild_656   | 1399947252                          | Ca_kabuli_scaffold | 656                     | G/A  | NA                 | INTERGENIC                    | NA                                              |
| Kabuli_wild_624   | 1399947253                          | Ca_kabuli_scaffold | 624                     | A/C  | NA                 | INTERGENIC                    | NA                                              |
| Kabuli_wild_641   | 1399947254                          | Ca_kabuli_scaffold | 641                     | A/C  | NA                 | INTERGENIC                    | NA                                              |
| Kabuli_wild_2177  | 1399947255                          | Ca_kabuli_scaffold | 2177                    | G/A  | NA                 | INTERGENIC                    | NA                                              |
| Kabuli_wild_3299  | 1399947256                          | Ca_kabuli_scaffold | 3299                    | A/C  | Gene_Ca_27871      | INTRON                        | RibosomalproteinS7                              |
| Kabuli_wild_1389  | 1399947257                          | Ca_kabuli_scaffold | 1389                    | A/T  | Gene_Ca_27926      | INTRON                        | DNA-directed RNA polymerase,subunit 2, domain 6 |
| Kabuli_wild_3004  | 1399947258                          | Ca_kabuli_scaffold | 3004                    | C/A  | Gene_Ca_28253      | INTRON                        | Domain of unknown function DUF231,plant         |
| Kabuli_wild_3028  | 1399947259                          | Ca_kabuli_scaffold | 3028                    | C/T  | Gene_Ca_28253      | INTRON                        | Domain of unknown function DUF231,plant         |
| Kabuli_wild_2344  | 1399947260                          | Ca_kabuli_scaffold | 2344                    | G/A  | NA                 | INTERGENIC                    | NA                                              |
| Kabuli_wild_2474  | 1399947261                          | Ca_kabuli_scaffold | 2474                    | T/A  | NA                 | INTERGENIC                    | NA                                              |
| Kabuli_wild_3190  | 1399947262                          | Ca_kabuli_scaffold | 3190                    | T/G  | NA                 | INTERGENIC                    | NA                                              |
| Kabuli_wild_3284  | 1399947263                          | Ca_kabuli_scaffold | 3284                    | C/G  | NA                 | INTERGENIC                    | NA                                              |
| Kabuli_wild_766   | 1399947264                          | Ca_kabuli_scaffold | 766                     | C/G  | Gene_Ca_28268      | INTRON                        | GCN5-related N-acetyltransferase (GNAT) domain  |
| Kabuli_wild_2152  | 1399947265                          | Ca_kabuli_scaffold | 2152                    | G/C  | Gene_Ca_28268      | INTRON                        | GCN5-related N-acetyltransferase (GNAT) domain  |
| Kabuli_wild_2169  | 1399947266                          | Ca_kabuli_scaffold | 2169                    | T/A  | Gene_Ca_28268      | INTRON                        | NA                                              |
| Kabuli_wild_1464  | 1399947267                          | Ca_kabuli_scaffold | 1464                    | A/T  | Gene_Ca_27806      | NON_SYNONYMOUS_CODING         | NA                                              |
| Kabuli_wild_3295  | 1399947268                          | Ca_kabuli_scaffold | 3295                    | G/A  | Gene_Ca_27806      | DOWNSTREAM                    | NA                                              |
| Kabuli_wild_3533  | 1399947269                          | Ca_kabuli_scaffold | 3533                    | G/A  | Gene_Ca_27806      | DOWNSTREAM                    | NA                                              |
| Kabuli_wild_4522  | 1399947270                          | Ca_kabuli_scaffold | 4522                    | A/G  | Gene_Ca_28216      | NON_SYNONYMOUS_CODING         | Cytochrome P450                                 |
| Kabuli_wild_6174  | 1399947271                          | Ca_kabuli_scaffold | 6174                    | G/T  | NA                 | INTERGENIC                    | NA                                              |
| Kabuli_wild_6178  | 1399947272                          | Ca_kabuli_scaffold | 6178                    | C/G  | NA                 | INTERGENIC                    | NA                                              |
| Kabuli_wild_6210  | 1399947273                          | Ca_kabuli_scaffold | 6210                    | G/A  | NA                 | INTERGENIC                    | NA                                              |
| Kabuli_wild_5784  | 1399947274                          | Ca_kabuli_scaffold | 5784                    | G/A  | Gene_Ca_28056      | NON_SYNONYMOUS_CODING         | Protein of unknown function DUF2930             |
| Kabuli_wild_148   | 1399947275                          | Ca_kabuli_scaffold | 148                     | C/T  | NA                 | INTERGENIC                    | NA                                              |
| Kabuli_wild_154   | 1399947276                          | Ca_kabuli_scaffold | 154                     | C/A  | NA                 | INTERGENIC                    | NA                                              |
| Kabuli_wild_644   | 1399947277                          | Ca_kabuli_scaffold | 644                     | A/G  | NA                 | INTERGENIC                    | NA                                              |
| Kabuli_wild_1744  | 1399947278                          | Ca_kabuli_scaffold | 1744                    | T/C  | NA                 | INTERGENIC                    | NA                                              |
| Kabuli_wild_3929  | 1399947279                          | Ca_kabuli_scaffold | 3929                    | T/G  | Gene_Ca_27727      | NON_SYNONYMOUS_CODING         | ABC transporter,trans membrane domain           |
| Kabuli_wild_3936  | 1399947280                          | Ca_kabuli_scaffold | 3936                    | G/T  | Gene_Ca_27727      | NON_SYNONYMOUS_CODING         | ABC transporter,trans membrane domain           |
| Kabuli_wild_3952  | 1399947281                          | Ca_kabuli_scaffold | 3952                    | T/C  | Gene_Ca_27727      | NON_SYNONYMOUS_CODING         | ABC transporter,trans membrane domain           |
| Kabuli_wild_2515  | 1399947282                          | Ca_kabuli_scaffold | 2515                    | T/A  | Gene_Ca_28257      | INTRON                        | U3smallnucleolarRNA-associatedprotein10         |
| Kabuli_wild_2529  | 1399947283                          | Ca_kabuli_scaffold | 2529                    | T/G  | Gene_Ca_28257      | INTRON                        | U3smallnucleolarRNA-associatedprotein10         |
| Kabuli_wild_3697  | 1399947284                          | Ca_kabuli_scaffold | 3697                    | A/T  | Gene_Ca_28257      | INTRON                        | U3smallnucleolarRNA-associatedprotein10         |
| Kabuli_wild_3808  | 1399947285                          | Ca_kabuli_scaffold | 3808                    | G/A  | Gene_Ca_28257      | SYNONYMOUS_CODING             | U3smallnucleolarRNA-associatedprotein10         |
| Kabuli_wild_5324  | 1399947286                          | Ca_kabuli_scaffold | 5324                    | G/A  | Gene_Ca_28257      | INTRON                        | U3smallnucleolarRNA-associatedprotein10         |
| Kabuli_wild_2620  | 1399947287                          | Ca_kabuli_scaffold | 2620                    | A/C  | NA                 | INTERGENIC                    | NA                                              |
| Kabuli_wild_2679  | 1399947288                          | Ca_kabuli_scaffold | 2679                    | C/T  | NA                 | INTERGENIC                    | NA                                              |
| Kabuli_wild_2696  | 1399947289                          | Ca_kabuli_scaffold | 2696                    | A/C  | NA                 | INTERGENIC                    | NA                                              |
| Kabuli_wild_2761  | 1399947290                          | Ca_kabuli_scaffold | 2761                    | T/C  | NA                 | INTERGENIC                    | NA                                              |
| Kabuli_wild_10642 | 1399947291                          | Ca_kabuli_scaffold | 10642                   | G/C  | Gene_Ca_28266      | SYNONYMOUS_CODING             | Disease resistance protein                      |



| SNP IDs                  | NCBI dbSNP accession IDs (NCBI_SS#) | Chromosomes               | Physical positions (bp) | SNPs | Gene accession IDs | Sequence components of genome | Putative functions                                   |
|--------------------------|-------------------------------------|---------------------------|-------------------------|------|--------------------|-------------------------------|------------------------------------------------------|
| <i>Kabuli_wild_12936</i> | 1399947292                          | <i>Ca_kabuli_scaffold</i> | 12936                   | T/G  | Gene_Ca_28087      | SYNONYMOUS_CODING             | DNAtopoisomerasell,eukaryotic-type                   |
| <i>Desi_wild_286</i>     | NA                                  | <i>Ca_desi_Chr01</i>      | 286                     | C/A  | NA                 | INTERGENIC                    | NA                                                   |
| <i>Desi_wild_179189</i>  | NA                                  | <i>Ca_desi_Chr01</i>      | 179189                  | A/C  | Gene_Ca_00004.1    | INTRON                        | Putative lipase YOR059C                              |
| <i>Desi_wild_382862</i>  | NA                                  | <i>Ca_desi_Chr01</i>      | 382862                  | T/C  | Gene_Ca_00011.1    | SYNONYMOUS_CODING             | Eukaryotic translation initiation factor 3 subunit C |
| <i>Desi_wild_382872</i>  | NA                                  | <i>Ca_desi_Chr01</i>      | 382872                  | G/A  | Gene_Ca_00011.1    | NON_SYNONYMOUS_CODING         | Eukaryotic translation initiation factor 3 subunit C |
| <i>Desi_wild_382898</i>  | NA                                  | <i>Ca_desi_Chr01</i>      | 382898                  | T/C  | Gene_Ca_00011.1    | SYNONYMOUS_CODING             | Eukaryotic translation initiation factor 3 subunit C |
| <i>Desi_wild_436895</i>  | NA                                  | <i>Ca_desi_Chr01</i>      | 436895                  | A/C  | Gene_Ca_00021.1    | DOWNSTREAM                    | Ribosome biogenesis protein BOP1 homolog             |
| <i>Desi_wild_461870</i>  | NA                                  | <i>Ca_desi_Chr01</i>      | 461870                  | A/G  | Gene_Ca_00023.1    | SYNONYMOUS_CODING             | Magnesium transporter NIPA2                          |
| <i>Desi_wild_462205</i>  | NA                                  | <i>Ca_desi_Chr01</i>      | 462205                  | G/A  | Gene_Ca_00023.1    | INTRON                        | Magnesium transporter NIPA2                          |
| <i>Desi_wild_477493</i>  | NA                                  | <i>Ca_desi_Chr01</i>      | 477493                  | C/G  | NA                 | INTERGENIC                    | NA                                                   |
| <i>Desi_wild_498862</i>  | NA                                  | <i>Ca_desi_Chr01</i>      | 498862                  | A/G  | NA                 | INTERGENIC                    | NA                                                   |
| <i>Desi_wild_513254</i>  | NA                                  | <i>Ca_desi_Chr01</i>      | 513254                  | G/T  | NA                 | INTERGENIC                    | NA                                                   |
| <i>Desi_wild_513710</i>  | NA                                  | <i>Ca_desi_Chr01</i>      | 513710                  | T/C  | NA                 | INTERGENIC                    | NA                                                   |
| <i>Desi_wild_517439</i>  | NA                                  | <i>Ca_desi_Chr01</i>      | 517439                  | A/G  | Gene_Ca_00030.1    | DOWNSTREAM                    | MLO-like protein 4                                   |
| <i>Desi_wild_517512</i>  | NA                                  | <i>Ca_desi_Chr01</i>      | 517512                  | T/C  | Gene_Ca_00030.1    | DOWNSTREAM                    | MLO-like protein 4                                   |
| <i>Desi_wild_527099</i>  | NA                                  | <i>Ca_desi_Chr01</i>      | 527099                  | A/G  | NA                 | INTERGENIC                    | NA                                                   |
| <i>Desi_wild_527113</i>  | NA                                  | <i>Ca_desi_Chr01</i>      | 527113                  | G/T  | NA                 | INTERGENIC                    | NA                                                   |
| <i>Desi_wild_527118</i>  | NA                                  | <i>Ca_desi_Chr01</i>      | 527118                  | T/C  | NA                 | INTERGENIC                    | NA                                                   |
| <i>Desi_wild_527135</i>  | NA                                  | <i>Ca_desi_Chr01</i>      | 527135                  | G/A  | NA                 | INTERGENIC                    | NA                                                   |
| <i>Desi_wild_527142</i>  | NA                                  | <i>Ca_desi_Chr01</i>      | 527142                  | G/T  | NA                 | INTERGENIC                    | NA                                                   |
| <i>Desi_wild_527148</i>  | NA                                  | <i>Ca_desi_Chr01</i>      | 527148                  | C/T  | NA                 | INTERGENIC                    | NA                                                   |
| <i>Desi_wild_527176</i>  | NA                                  | <i>Ca_desi_Chr01</i>      | 527176                  | T/C  | NA                 | INTERGENIC                    | NA                                                   |
| <i>Desi_wild_527181</i>  | NA                                  | <i>Ca_desi_Chr01</i>      | 527181                  | C/A  | NA                 | INTERGENIC                    | NA                                                   |
| <i>Desi_wild_533125</i>  | NA                                  | <i>Ca_desi_Chr01</i>      | 533125                  | C/T  | NA                 | INTERGENIC                    | NA                                                   |
| <i>Desi_wild_533127</i>  | NA                                  | <i>Ca_desi_Chr01</i>      | 533127                  | T/A  | NA                 | INTERGENIC                    | NA                                                   |
| <i>Desi_wild_533182</i>  | NA                                  | <i>Ca_desi_Chr01</i>      | 533182                  | T/A  | NA                 | INTERGENIC                    | NA                                                   |
| <i>Desi_wild_537785</i>  | NA                                  | <i>Ca_desi_Chr01</i>      | 537785                  | T/G  | NA                 | INTERGENIC                    | NA                                                   |
| <i>Desi_wild_537937</i>  | NA                                  | <i>Ca_desi_Chr01</i>      | 537937                  | T/C  | NA                 | INTERGENIC                    | NA                                                   |
| <i>Desi_wild_537971</i>  | NA                                  | <i>Ca_desi_Chr01</i>      | 537971                  | A/G  | NA                 | INTERGENIC                    | NA                                                   |
| <i>Desi_wild_538012</i>  | NA                                  | <i>Ca_desi_Chr01</i>      | 538012                  | C/T  | NA                 | INTERGENIC                    | NA                                                   |
| <i>Desi_wild_538086</i>  | NA                                  | <i>Ca_desi_Chr01</i>      | 538086                  | G/T  | NA                 | INTERGENIC                    | NA                                                   |
| <i>Desi_wild_541727</i>  | NA                                  | <i>Ca_desi_Chr01</i>      | 541727                  | C/T  | Gene_Ca_00035.1    | INTRON                        | ATP-dependent DNA helicase Q-like 4A                 |
| <i>Desi_wild_547907</i>  | NA                                  | <i>Ca_desi_Chr01</i>      | 547907                  | A/G  | Gene_Ca_00035.1    | DOWNSTREAM                    | ATP-dependent DNA helicase Q-like 4A                 |
| <i>Desi_wild_547914</i>  | NA                                  | <i>Ca_desi_Chr01</i>      | 547914                  | C/T  | Gene_Ca_00035.1    | DOWNSTREAM                    | ATP-dependent DNA helicase Q-like 4A                 |
| <i>Desi_wild_547961</i>  | NA                                  | <i>Ca_desi_Chr01</i>      | 547961                  | G/C  | NA                 | INTERGENIC                    | NA                                                   |
| <i>Desi_wild_548203</i>  | NA                                  | <i>Ca_desi_Chr01</i>      | 548203                  | T/C  | NA                 | INTERGENIC                    | NA                                                   |
| <i>Desi_wild_551496</i>  | NA                                  | <i>Ca_desi_Chr01</i>      | 551496                  | T/G  | NA                 | INTERGENIC                    | NA                                                   |
| <i>Desi_wild_648015</i>  | NA                                  | <i>Ca_desi_Chr01</i>      | 648015                  | G/A  | Gene_Ca_00046.2    | INTRON                        | UDP-glucose:glycoprotein glucosyltransferase         |
| <i>Desi_wild_664769</i>  | NA                                  | <i>Ca_desi_Chr01</i>      | 664769                  | A/G  | Gene_Ca_00046.2    | INTRON                        | UDP-glucose:glycoprotein glucosyltransferase         |
| <i>Desi_wild_664787</i>  | NA                                  | <i>Ca_desi_Chr01</i>      | 664787                  | T/G  | Gene_Ca_00046.2    | INTRON                        | UDP-glucose:glycoprotein glucosyltransferase         |
| <i>Desi_wild_664811</i>  | NA                                  | <i>Ca_desi_Chr01</i>      | 664811                  | T/G  | Gene_Ca_00046.2    | INTRON                        | UDP-glucose:glycoprotein glucosyltransferase         |
| <i>Desi_wild_685373</i>  | NA                                  | <i>Ca_desi_Chr01</i>      | 685373                  | T/C  | Gene_Ca_00048.1    | INTRON                        | Cell division control protein 48 homolog C           |
| <i>Desi_wild_704894</i>  | NA                                  | <i>Ca_desi_Chr01</i>      | 704894                  | T/A  | NA                 | INTERGENIC                    | NA                                                   |
| <i>Desi_wild_756744</i>  | NA                                  | <i>Ca_desi_Chr01</i>      | 756744                  | T/G  | NA                 | INTERGENIC                    | NA                                                   |

| SNP IDs           | NCBI dbSNP accession IDs (NCBI_SS#) | Chromosomes     | Physical positions (bp) | SNPs | Gene accession IDs | Sequence components of genome | Putative functions                           |
|-------------------|-------------------------------------|-----------------|-------------------------|------|--------------------|-------------------------------|----------------------------------------------|
| Desi_wild_792141  | NA                                  | Ca_desi_Chrom01 | 792141                  | C/A  | Gene_Ca_00065.2    | DOWNSTREAM                    | NA                                           |
| Desi_wild_807232  | NA                                  | Ca_desi_Chrom01 | 807232                  | T/C  | Gene_Ca_00067.1    | NON_SYNONYMOUS_CODING         | Separin                                      |
| Desi_wild_836330  | NA                                  | Ca_desi_Chrom01 | 836330                  | G/T  | NA                 | INTERGENIC                    | NA                                           |
| Desi_wild_836351  | NA                                  | Ca_desi_Chrom01 | 836351                  | C/T  | NA                 | INTERGENIC                    | NA                                           |
| Desi_wild_836842  | NA                                  | Ca_desi_Chrom01 | 836842                  | T/G  | NA                 | INTERGENIC                    | NA                                           |
| Desi_wild_836859  | NA                                  | Ca_desi_Chrom01 | 836859                  | G/A  | NA                 | INTERGENIC                    | NA                                           |
| Desi_wild_845508  | NA                                  | Ca_desi_Chrom01 | 845508                  | C/T  | NA                 | INTERGENIC                    | NA                                           |
| Desi_wild_872247  | NA                                  | Ca_desi_Chrom01 | 872247                  | G/A  | Gene_Ca_00076.1    | INTRON                        | Protein FAM135A                              |
| Desi_wild_872280  | NA                                  | Ca_desi_Chrom01 | 872280                  | C/T  | Gene_Ca_00076.1    | INTRON                        | Protein FAM135A                              |
| Desi_wild_885643  | NA                                  | Ca_desi_Chrom01 | 885643                  | C/T  | Gene_Ca_00076.1    | INTRON                        | Protein FAM135A                              |
| Desi_wild_885745  | NA                                  | Ca_desi_Chrom01 | 885745                  | G/T  | Gene_Ca_00076.1    | INTRON                        | Protein FAM135A                              |
| Desi_wild_965854  | NA                                  | Ca_desi_Chrom01 | 965854                  | T/C  | NA                 | INTERGENIC                    | NA                                           |
| Desi_wild_965884  | NA                                  | Ca_desi_Chrom01 | 965884                  | G/A  | NA                 | INTERGENIC                    | NA                                           |
| Desi_wild_965885  | NA                                  | Ca_desi_Chrom01 | 965885                  | T/C  | NA                 | INTERGENIC                    | NA                                           |
| Desi_wild_968375  | NA                                  | Ca_desi_Chrom01 | 968375                  | T/C  | Gene_Ca_00084.1    | SYNONYMOUS_CODING             | C2 domain-containing protein C31G5.15        |
| Desi_wild_978133  | NA                                  | Ca_desi_Chrom01 | 978133                  | T/A  | NA                 | INTERGENIC                    | NA                                           |
| Desi_wild_983043  | NA                                  | Ca_desi_Chrom01 | 983043                  | C/A  | NA                 | INTERGENIC                    | NA                                           |
| Desi_wild_983203  | NA                                  | Ca_desi_Chrom01 | 983203                  | G/T  | NA                 | INTERGENIC                    | NA                                           |
| Desi_wild_992174  | NA                                  | Ca_desi_Chrom01 | 992174                  | C/T  | Gene_Ca_00088.1    | INTRON                        | C2 domain-containing protein C31G5.15        |
| Desi_wild_993275  | NA                                  | Ca_desi_Chrom01 | 993275                  | G/T  | Gene_Ca_00088.1    | INTRON                        | C2 domain-containing protein C31G5.15        |
| Desi_wild_993482  | NA                                  | Ca_desi_Chrom01 | 993482                  | T/C  | Gene_Ca_00088.1    | SYNONYMOUS_CODING             | C2 domain-containing protein C31G5.15        |
| Desi_wild_999613  | NA                                  | Ca_desi_Chrom01 | 999613                  | T/C  | Gene_Ca_00089.1    | UPSTREAM                      | NAC domain-containing protein 68             |
| Desi_wild_1025329 | NA                                  | Ca_desi_Chrom01 | 1025329                 | T/C  | Gene_Ca_00092.1    | NON_SYNONYMOUS_CODING         | Uncharacterized 91 kDa protein in cob intron |
| Desi_wild_1025346 | NA                                  | Ca_desi_Chrom01 | 1025346                 | T/G  | Gene_Ca_00092.1    | SYNONYMOUS_CODING             | Uncharacterized 91 kDa protein in cob intron |
| Desi_wild_1025349 | NA                                  | Ca_desi_Chrom01 | 1025349                 | C/A  | Gene_Ca_00092.1    | NON_SYNONYMOUS_CODING         | Uncharacterized 91 kDa protein in cob intron |
| Desi_wild_1025432 | NA                                  | Ca_desi_Chrom01 | 1025432                 | T/C  | Gene_Ca_00092.1    | INTRON                        | Uncharacterized 91 kDa protein in cob intron |
| Desi_wild_1025458 | NA                                  | Ca_desi_Chrom01 | 1025458                 | C/T  | Gene_Ca_00092.1    | INTRON                        | Uncharacterized 91 kDa protein in cob intron |
| Desi_wild_1025590 | NA                                  | Ca_desi_Chrom01 | 1025590                 | A/G  | Gene_Ca_00092.1    | INTRON                        | Uncharacterized 91 kDa protein in cob intron |
| Desi_wild_1025593 | NA                                  | Ca_desi_Chrom01 | 1025593                 | C/A  | Gene_Ca_00092.1    | INTRON                        | Uncharacterized 91 kDa protein in cob intron |
| Desi_wild_1069295 | NA                                  | Ca_desi_Chrom01 | 1069295                 | A/C  | Gene_Ca_00096.1    | UPSTREAM                      | unknown protein                              |
| Desi_wild_1069378 | NA                                  | Ca_desi_Chrom01 | 1069378                 | C/T  | Gene_Ca_00096.1    | UPSTREAM                      | unknown protein                              |
| Desi_wild_1069394 | NA                                  | Ca_desi_Chrom01 | 1069394                 | A/C  | Gene_Ca_00096.1    | UPSTREAM                      | unknown protein                              |
| Desi_wild_1069403 | NA                                  | Ca_desi_Chrom01 | 1069403                 | A/G  | Gene_Ca_00096.1    | UPSTREAM                      | unknown protein                              |
| Desi_wild_1069410 | NA                                  | Ca_desi_Chrom01 | 1069410                 | A/T  | Gene_Ca_00096.1    | UPSTREAM                      | unknown protein                              |
| Desi_wild_1069425 | NA                                  | Ca_desi_Chrom01 | 1069425                 | A/C  | Gene_Ca_00096.1    | UPSTREAM                      | unknown protein                              |
| Desi_wild_1069436 | NA                                  | Ca_desi_Chrom01 | 1069436                 | G/A  | Gene_Ca_00096.1    | UPSTREAM                      | unknown protein                              |
| Desi_wild_1071218 | NA                                  | Ca_desi_Chrom01 | 1071218                 | C/T  | NA                 | INTERGENIC                    | NA                                           |
| Desi_wild_1071230 | NA                                  | Ca_desi_Chrom01 | 1071230                 | C/T  | NA                 | INTERGENIC                    | NA                                           |
| Desi_wild_1071275 | NA                                  | Ca_desi_Chrom01 | 1071275                 | T/C  | NA                 | INTERGENIC                    | NA                                           |
| Desi_wild_1071343 | NA                                  | Ca_desi_Chrom01 | 1071343                 | G/A  | NA                 | INTERGENIC                    | NA                                           |
| Desi_wild_1072468 | NA                                  | Ca_desi_Chrom01 | 1072468                 | C/T  | NA                 | INTERGENIC                    | NA                                           |
| Desi_wild_1072524 | NA                                  | Ca_desi_Chrom01 | 1072524                 | A/T  | NA                 | INTERGENIC                    | NA                                           |
| Desi_wild_1072532 | NA                                  | Ca_desi_Chrom01 | 1072532                 | C/T  | NA                 | INTERGENIC                    | NA                                           |
| Desi_wild_1072608 | NA                                  | Ca_desi_Chrom01 | 1072608                 | G/C  | NA                 | INTERGENIC                    | NA                                           |

| SNP IDs                  | NCBI dbSNP accession IDs (NCBI_SS#) | Chromosomes           | Physical positions (bp) | SNPs | Gene accession IDs              | Sequence components of genome | Putative functions                                                 |
|--------------------------|-------------------------------------|-----------------------|-------------------------|------|---------------------------------|-------------------------------|--------------------------------------------------------------------|
| <i>Desi_wild_1072623</i> | NA                                  | <i>Ca_desi_Chrom1</i> | 1072623                 | G/A  | NA                              | INTERGENIC                    | NA                                                                 |
| <i>Desi_wild_1072906</i> | NA                                  | <i>Ca_desi_Chrom1</i> | 1072906                 | T/C  | <a href="#">Gene_Ca_00097.1</a> | NON_SYNONYMOUS_CODING         | Putative PAP-specific phosphatase, mitochondrial                   |
| <i>Desi_wild_1072930</i> | NA                                  | <i>Ca_desi_Chrom1</i> | 1072930                 | G/A  | <a href="#">Gene_Ca_00097.1</a> | NON_SYNONYMOUS_CODING         | Putative PAP-specific phosphatase, mitochondrial                   |
| <i>Desi_wild_1072955</i> | NA                                  | <i>Ca_desi_Chrom1</i> | 1072955                 | A/G  | Gene_Ca_00097.1                 | SYNONYMOUS_CODING             | Putative PAP-specific phosphatase, mitochondrial                   |
| <i>Desi_wild_1072973</i> | NA                                  | <i>Ca_desi_Chrom1</i> | 1072973                 | T/C  | Gene_Ca_00097.1                 | INTRON                        | Putative PAP-specific phosphatase, mitochondrial                   |
| <i>Desi_wild_1072976</i> | NA                                  | <i>Ca_desi_Chrom1</i> | 1072976                 | G/A  | Gene_Ca_00097.1                 | INTRON                        | Putative PAP-specific phosphatase, mitochondrial                   |
| <i>Desi_wild_1073000</i> | NA                                  | <i>Ca_desi_Chrom1</i> | 1073000                 | A/T  | Gene_Ca_00097.1                 | INTRON                        | Putative PAP-specific phosphatase, mitochondrial                   |
| <i>Desi_wild_1073048</i> | NA                                  | <i>Ca_desi_Chrom1</i> | 1073048                 | G/A  | Gene_Ca_00097.1                 | INTRON                        | Putative PAP-specific phosphatase, mitochondrial                   |
| <i>Desi_wild_1073054</i> | NA                                  | <i>Ca_desi_Chrom1</i> | 1073054                 | A/G  | Gene_Ca_00097.1                 | INTRON                        | Putative PAP-specific phosphatase, mitochondrial                   |
| <i>Desi_wild_1073059</i> | NA                                  | <i>Ca_desi_Chrom1</i> | 1073059                 | G/A  | Gene_Ca_00097.1                 | INTRON                        | Putative PAP-specific phosphatase, mitochondrial                   |
| <i>Desi_wild_1105109</i> | NA                                  | <i>Ca_desi_Chrom1</i> | 1105109                 | C/T  | Gene_Ca_00100.1                 | SYNONYMOUS_CODING             | Probable JmjC domain-containing histone demethylation protein 2C   |
| <i>Desi_wild_1126922</i> | NA                                  | <i>Ca_desi_Chrom1</i> | 1126922                 | G/C  | Gene_Ca_00102.1                 | INTRON                        | Equilibrative nucleoside transporter 4                             |
| <i>Desi_wild_1140358</i> | NA                                  | <i>Ca_desi_Chrom1</i> | 1140358                 | A/G  | NA                              | INTERGENIC                    | NA                                                                 |
| <i>Desi_wild_1140404</i> | NA                                  | <i>Ca_desi_Chrom1</i> | 1140404                 | A/G  | NA                              | INTERGENIC                    | NA                                                                 |
| <i>Desi_wild_1140485</i> | NA                                  | <i>Ca_desi_Chrom1</i> | 1140485                 | A/T  | NA                              | INTERGENIC                    | NA                                                                 |
| <i>Desi_wild_1145410</i> | NA                                  | <i>Ca_desi_Chrom1</i> | 1145410                 | A/G  | NA                              | INTERGENIC                    | NA                                                                 |
| <i>Desi_wild_1145493</i> | NA                                  | <i>Ca_desi_Chrom1</i> | 1145493                 | G/T  | NA                              | INTERGENIC                    | NA                                                                 |
| <i>Desi_wild_1146027</i> | NA                                  | <i>Ca_desi_Chrom1</i> | 1146027                 | T/C  | NA                              | INTERGENIC                    | NA                                                                 |
| <i>Desi_wild_1146028</i> | NA                                  | <i>Ca_desi_Chrom1</i> | 1146028                 | G/T  | NA                              | INTERGENIC                    | NA                                                                 |
| <i>Desi_wild_1146076</i> | NA                                  | <i>Ca_desi_Chrom1</i> | 1146076                 | A/C  | NA                              | INTERGENIC                    | NA                                                                 |
| <i>Desi_wild_1146138</i> | NA                                  | <i>Ca_desi_Chrom1</i> | 1146138                 | T/G  | NA                              | INTERGENIC                    | NA                                                                 |
| <i>Desi_wild_1146141</i> | NA                                  | <i>Ca_desi_Chrom1</i> | 1146141                 | C/T  | NA                              | INTERGENIC                    | NA                                                                 |
| <i>Desi_wild_1146211</i> | NA                                  | <i>Ca_desi_Chrom1</i> | 1146211                 | C/T  | NA                              | INTERGENIC                    | NA                                                                 |
| <i>Desi_wild_1146466</i> | NA                                  | <i>Ca_desi_Chrom1</i> | 1146466                 | C/T  | NA                              | INTERGENIC                    | NA                                                                 |
| <i>Desi_wild_1146471</i> | NA                                  | <i>Ca_desi_Chrom1</i> | 1146471                 | G/A  | NA                              | INTERGENIC                    | NA                                                                 |
| <i>Desi_wild_1146489</i> | NA                                  | <i>Ca_desi_Chrom1</i> | 1146489                 | T/C  | NA                              | INTERGENIC                    | NA                                                                 |
| <i>Desi_wild_1146490</i> | NA                                  | <i>Ca_desi_Chrom1</i> | 1146490                 | G/A  | NA                              | INTERGENIC                    | NA                                                                 |
| <i>Desi_wild_1146611</i> | NA                                  | <i>Ca_desi_Chrom1</i> | 1146611                 | C/G  | NA                              | INTERGENIC                    | NA                                                                 |
| <i>Desi_wild_1146626</i> | NA                                  | <i>Ca_desi_Chrom1</i> | 1146626                 | C/A  | NA                              | INTERGENIC                    | NA                                                                 |
| <i>Desi_wild_1146659</i> | NA                                  | <i>Ca_desi_Chrom1</i> | 1146659                 | C/T  | NA                              | INTERGENIC                    | NA                                                                 |
| <i>Desi_wild_1156112</i> | NA                                  | <i>Ca_desi_Chrom1</i> | 1156112                 | A/G  | NA                              | INTERGENIC                    | NA                                                                 |
| <i>Desi_wild_1189512</i> | NA                                  | <i>Ca_desi_Chrom1</i> | 1189512                 | T/G  | Gene_Ca_00110.1                 | INTRON                        | G-type lectin S-receptor-like serine/threonine-protein kinase B120 |
| <i>Desi_wild_1189626</i> | NA                                  | <i>Ca_desi_Chrom1</i> | 1189626                 | C/G  | Gene_Ca_00110.1                 | INTRON                        | G-type lectin S-receptor-like serine/threonine-protein kinase B120 |
| <i>Desi_wild_1189627</i> | NA                                  | <i>Ca_desi_Chrom1</i> | 1189627                 | A/T  | Gene_Ca_00110.1                 | INTRON                        | G-type lectin S-receptor-like serine/threonine-protein kinase B120 |
| <i>Desi_wild_1189628</i> | NA                                  | <i>Ca_desi_Chrom1</i> | 1189628                 | A/C  | Gene_Ca_00110.1                 | INTRON                        | G-type lectin S-receptor-like serine/threonine-protein kinase B120 |
| <i>Desi_wild_1189675</i> | NA                                  | <i>Ca_desi_Chrom1</i> | 1189675                 | A/G  | Gene_Ca_00110.1                 | INTRON                        | G-type lectin S-receptor-like serine/threonine-protein kinase B120 |
| <i>Desi_wild_1189681</i> | NA                                  | <i>Ca_desi_Chrom1</i> | 1189681                 | G/C  | Gene_Ca_00110.1                 | INTRON                        | G-type lectin S-receptor-like serine/threonine-protein kinase B120 |
| <i>Desi_wild_1271491</i> | NA                                  | <i>Ca_desi_Chrom1</i> | 1271491                 | C/T  | Gene_Ca_00124.1                 | NON_SYNONYMOUS_CODING         | NA                                                                 |
| <i>Desi_wild_1271498</i> | NA                                  | <i>Ca_desi_Chrom1</i> | 1271498                 | A/T  | Gene_Ca_00124.1                 | SYNONYMOUS_CODING             | NA                                                                 |
| <i>Desi_wild_1313526</i> | NA                                  | <i>Ca_desi_Chrom1</i> | 1313526                 | C/T  | NA                              | INTERGENIC                    | NA                                                                 |
| <i>Desi_wild_1368713</i> | NA                                  | <i>Ca_desi_Chrom1</i> | 1368713                 | C/T  | NA                              | INTERGENIC                    | NA                                                                 |
| <i>Desi_wild_1375921</i> | NA                                  | <i>Ca_desi_Chrom1</i> | 1375921                 | C/G  | Gene_Ca_00138.1                 | SYNONYMOUS_CODING             | unknown protein                                                    |
| <i>Desi_wild_1389951</i> | NA                                  | <i>Ca_desi_Chrom1</i> | 1389951                 | C/T  | Gene_Ca_00140.2                 | INTRON                        | NA                                                                 |
| <i>Desi_wild_1445481</i> | NA                                  | <i>Ca_desi_Chrom1</i> | 1445481                 | T/A  | Gene_Ca_00144.1                 | DOWNSTREAM                    | unknown protein                                                    |

| SNP IDs                  | NCBI dbSNP accession IDs (NCBI_SS#) | Chromosomes          | Physical positions (bp) | SNPs | Gene accession IDs | Sequence components of genome | Putative functions                                       |
|--------------------------|-------------------------------------|----------------------|-------------------------|------|--------------------|-------------------------------|----------------------------------------------------------|
| <i>Desi_wild_1445548</i> | NA                                  | <i>Ca_desi_Chr01</i> | 1445548                 | T/C  | Gene_Ca_00144.1    | DOWNSTREAM                    | unknown protein                                          |
| <i>Desi_wild_1451002</i> | NA                                  | <i>Ca_desi_Chr01</i> | 1451002                 | A/G  | Gene_Ca_00145.1    | DOWNSTREAM                    | NA                                                       |
| <i>Desi_wild_1451028</i> | NA                                  | <i>Ca_desi_Chr01</i> | 1451028                 | A/T  | Gene_Ca_00145.1    | DOWNSTREAM                    | NA                                                       |
| <i>Desi_wild_1463203</i> | NA                                  | <i>Ca_desi_Chr01</i> | 1463203                 | T/C  | NA                 | INTERGENIC                    | NA                                                       |
| <i>Desi_wild_1463234</i> | NA                                  | <i>Ca_desi_Chr01</i> | 1463234                 | C/T  | NA                 | INTERGENIC                    | NA                                                       |
| <i>Desi_wild_1463270</i> | NA                                  | <i>Ca_desi_Chr01</i> | 1463270                 | A/C  | Gene_Ca_00146.1    | NON_SYNONYMOUS_CODING         | Octicosapeptide/Phox/Bem1p family protein                |
| <i>Desi_wild_1463335</i> | NA                                  | <i>Ca_desi_Chr01</i> | 1463335                 | C/T  | Gene_Ca_00146.1    | SYNONYMOUS_CODING             | Octicosapeptide/Phox/Bem1p family protein                |
| <i>Desi_wild_1479425</i> | NA                                  | <i>Ca_desi_Chr01</i> | 1479425                 | T/C  | Gene_Ca_00149.5    | DOWNSTREAM                    | NA                                                       |
| <i>Desi_wild_1479437</i> | NA                                  | <i>Ca_desi_Chr01</i> | 1479437                 | T/C  | Gene_Ca_00149.5    | DOWNSTREAM                    | NA                                                       |
| <i>Desi_wild_1480187</i> | NA                                  | <i>Ca_desi_Chr01</i> | 1480187                 | T/C  | Gene_Ca_00149.5    | DOWNSTREAM                    | NA                                                       |
| <i>Desi_wild_1486057</i> | NA                                  | <i>Ca_desi_Chr01</i> | 1486057                 | A/C  | Gene_Ca_00148.1    | SYNONYMOUS_CODING             | DNA polymerase V                                         |
| <i>Desi_wild_1486086</i> | NA                                  | <i>Ca_desi_Chr01</i> | 1486086                 | G/C  | Gene_Ca_00148.1    | NON_SYNONYMOUS_CODING         | DNA polymerase V                                         |
| <i>Desi_wild_1522221</i> | NA                                  | <i>Ca_desi_Chr01</i> | 1522221                 | T/C  | NA                 | INTERGENIC                    | NA                                                       |
| <i>Desi_wild_1526741</i> | NA                                  | <i>Ca_desi_Chr01</i> | 1526741                 | A/C  | NA                 | INTERGENIC                    | NA                                                       |
| <i>Desi_wild_1526742</i> | NA                                  | <i>Ca_desi_Chr01</i> | 1526742                 | G/T  | NA                 | INTERGENIC                    | NA                                                       |
| <i>Desi_wild_1553958</i> | NA                                  | <i>Ca_desi_Chr01</i> | 1553958                 | A/G  | Gene_Ca_00154.1    | INTRON                        | Probable peptide/nitrate transporter At1g59740           |
| <i>Desi_wild_1639010</i> | NA                                  | <i>Ca_desi_Chr01</i> | 1639010                 | T/A  | Gene_Ca_00163.1    | INTRON                        | Probable serine/threonine-protein kinase At1g54610       |
| <i>Desi_wild_1639034</i> | NA                                  | <i>Ca_desi_Chr01</i> | 1639034                 | C/T  | Gene_Ca_00163.1    | INTRON                        | Probable serine/threonine-protein kinase At1g54610       |
| <i>Desi_wild_1639039</i> | NA                                  | <i>Ca_desi_Chr01</i> | 1639039                 | T/G  | Gene_Ca_00163.1    | INTRON                        | Probable serine/threonine-protein kinase At1g54610       |
| <i>Desi_wild_1639044</i> | NA                                  | <i>Ca_desi_Chr01</i> | 1639044                 | T/C  | Gene_Ca_00163.1    | INTRON                        | Probable serine/threonine-protein kinase At1g54610       |
| <i>Desi_wild_1639052</i> | NA                                  | <i>Ca_desi_Chr01</i> | 1639052                 | G/T  | Gene_Ca_00163.1    | INTRON                        | Probable serine/threonine-protein kinase At1g54610       |
| <i>Desi_wild_1660822</i> | NA                                  | <i>Ca_desi_Chr01</i> | 1660822                 | T/C  | NA                 | INTERGENIC                    | NA                                                       |
| <i>Desi_wild_1727845</i> | NA                                  | <i>Ca_desi_Chr01</i> | 1727845                 | T/A  | NA                 | INTERGENIC                    | NA                                                       |
| <i>Desi_wild_1785109</i> | NA                                  | <i>Ca_desi_Chr01</i> | 1785109                 | G/C  | NA                 | INTERGENIC                    | NA                                                       |
| <i>Desi_wild_1785130</i> | NA                                  | <i>Ca_desi_Chr01</i> | 1785130                 | T/A  | NA                 | INTERGENIC                    | NA                                                       |
| <i>Desi_wild_1785134</i> | NA                                  | <i>Ca_desi_Chr01</i> | 1785134                 | C/A  | NA                 | INTERGENIC                    | NA                                                       |
| <i>Desi_wild_1785171</i> | NA                                  | <i>Ca_desi_Chr01</i> | 1785171                 | C/T  | NA                 | INTERGENIC                    | NA                                                       |
| <i>Desi_wild_1815665</i> | NA                                  | <i>Ca_desi_Chr01</i> | 1815665                 | T/C  | Gene_Ca_00187.1    | DOWNSTREAM                    | (3R)-hydroxymyristoyl-[acyl-carrier-protein] dehydratase |
| <i>Desi_wild_1828118</i> | NA                                  | <i>Ca_desi_Chr01</i> | 1828118                 | A/G  | Gene_Ca_00189.1    | DOWNSTREAM                    | Probable inactive receptor kinase At2g26730              |
| <i>Desi_wild_1828281</i> | NA                                  | <i>Ca_desi_Chr01</i> | 1828281                 | A/C  | NA                 | INTERGENIC                    | NA                                                       |
| <i>Desi_wild_1838149</i> | NA                                  | <i>Ca_desi_Chr01</i> | 1838149                 | C/G  | Gene_Ca_00191.1    | NON_SYNONYMOUS_CODING         | Putative pumilio homolog 7, chloroplastic                |
| <i>Desi_wild_1842557</i> | NA                                  | <i>Ca_desi_Chr01</i> | 1842557                 | C/T  | Gene_Ca_00192.1    | SYNONYMOUS_CODING             | CD2 antigen cytoplasmic tail-binding protein 2           |
| <i>Desi_wild_1851537</i> | NA                                  | <i>Ca_desi_Chr01</i> | 1851537                 | A/C  | NA                 | INTERGENIC                    | NA                                                       |
| <i>Desi_wild_1851564</i> | NA                                  | <i>Ca_desi_Chr01</i> | 1851564                 | G/A  | NA                 | INTERGENIC                    | NA                                                       |
| <i>Desi_wild_1851644</i> | NA                                  | <i>Ca_desi_Chr01</i> | 1851644                 | C/A  | NA                 | INTERGENIC                    | NA                                                       |
| <i>Desi_wild_1851780</i> | NA                                  | <i>Ca_desi_Chr01</i> | 1851780                 | A/T  | NA                 | INTERGENIC                    | NA                                                       |
| <i>Desi_wild_1851944</i> | NA                                  | <i>Ca_desi_Chr01</i> | 1851944                 | T/A  | NA                 | INTERGENIC                    | NA                                                       |
| <i>Desi_wild_1864433</i> | NA                                  | <i>Ca_desi_Chr01</i> | 1864433                 | G/C  | NA                 | INTERGENIC                    | NA                                                       |
| <i>Desi_wild_1864457</i> | NA                                  | <i>Ca_desi_Chr01</i> | 1864457                 | C/G  | NA                 | INTERGENIC                    | NA                                                       |
| <i>Desi_wild_1881482</i> | NA                                  | <i>Ca_desi_Chr01</i> | 1881482                 | A/G  | Gene_Ca_00195.1    | NON_SYNONYMOUS_CODING         | Calmodulin-binding transcription activator 2             |
| <i>Desi_wild_1881584</i> | NA                                  | <i>Ca_desi_Chr01</i> | 1881584                 | A/G  | Gene_Ca_00195.1    | NON_SYNONYMOUS_CODING         | Calmodulin-binding transcription activator 2             |
| <i>Desi_wild_1904458</i> | NA                                  | <i>Ca_desi_Chr01</i> | 1904458                 | G/A  | Gene_Ca_00199.1    | INTRON                        | Metacaspase-1                                            |
| <i>Desi_wild_1904473</i> | NA                                  | <i>Ca_desi_Chr01</i> | 1904473                 | C/T  | Gene_Ca_00199.1    | INTRON                        | Metacaspase-1                                            |
| <i>Desi_wild_1906298</i> | NA                                  | <i>Ca_desi_Chr01</i> | 1906298                 | A/C  | NA                 | INTERGENIC                    | NA                                                       |

| SNP IDs           | NCBI dbSNP accession IDs (NCBI_SS#) | Chromosomes     | Physical positions (bp) | SNPs | Gene accession IDs | Sequence components of genome | Putative functions                                |
|-------------------|-------------------------------------|-----------------|-------------------------|------|--------------------|-------------------------------|---------------------------------------------------|
| Desi_wild_1906300 | NA                                  | Ca_desi_Chrom01 | 1906300                 | T/G  | NA                 | INTERGENIC                    | NA                                                |
| Desi_wild_1906308 | NA                                  | Ca_desi_Chrom01 | 1906308                 | A/G  | NA                 | INTERGENIC                    | NA                                                |
| Desi_wild_1906324 | NA                                  | Ca_desi_Chrom01 | 1906324                 | A/C  | NA                 | INTERGENIC                    | NA                                                |
| Desi_wild_1906333 | NA                                  | Ca_desi_Chrom01 | 1906333                 | A/C  | NA                 | INTERGENIC                    | NA                                                |
| Desi_wild_1906363 | NA                                  | Ca_desi_Chrom01 | 1906363                 | G/A  | NA                 | INTERGENIC                    | NA                                                |
| Desi_wild_1912758 | NA                                  | Ca_desi_Chrom01 | 1912758                 | A/C  | NA                 | INTERGENIC                    | NA                                                |
| Desi_wild_1912820 | NA                                  | Ca_desi_Chrom01 | 1912820                 | C/T  | NA                 | INTERGENIC                    | NA                                                |
| Desi_wild_1912850 | NA                                  | Ca_desi_Chrom01 | 1912850                 | A/C  | NA                 | INTERGENIC                    | NA                                                |
| Desi_wild_1912864 | NA                                  | Ca_desi_Chrom01 | 1912864                 | T/A  | NA                 | INTERGENIC                    | NA                                                |
| Desi_wild_1920014 | NA                                  | Ca_desi_Chrom01 | 1920014                 | C/G  | NA                 | INTERGENIC                    | NA                                                |
| Desi_wild_1920100 | NA                                  | Ca_desi_Chrom01 | 1920100                 | A/G  | NA                 | INTERGENIC                    | NA                                                |
| Desi_wild_1936976 | NA                                  | Ca_desi_Chrom01 | 1936976                 | C/T  | NA                 | INTERGENIC                    | NA                                                |
| Desi_wild_1937351 | NA                                  | Ca_desi_Chrom01 | 1937351                 | C/T  | NA                 | INTERGENIC                    | NA                                                |
| Desi_wild_1960896 | NA                                  | Ca_desi_Chrom01 | 1960896                 | A/C  | NA                 | INTERGENIC                    | NA                                                |
| Desi_wild_1960959 | NA                                  | Ca_desi_Chrom01 | 1960959                 | A/G  | NA                 | INTERGENIC                    | NA                                                |
| Desi_wild_1960988 | NA                                  | Ca_desi_Chrom01 | 1960988                 | A/T  | NA                 | INTERGENIC                    | NA                                                |
| Desi_wild_1971575 | NA                                  | Ca_desi_Chrom01 | 1971575                 | C/T  | NA                 | INTERGENIC                    | NA                                                |
| Desi_wild_1982239 | NA                                  | Ca_desi_Chrom01 | 1982239                 | C/A  | Gene_Ca_00209.1    | NON_SYNONYMOUS_CODING         | NA                                                |
| Desi_wild_2021754 | NA                                  | Ca_desi_Chrom01 | 2021754                 | T/A  | Gene_Ca_00213.1    | INTRON                        | Chlorophyll a-b binding protein 13, chloroplastic |
| Desi_wild_2021813 | NA                                  | Ca_desi_Chrom01 | 2021813                 | A/G  | Gene_Ca_00213.1    | INTRON                        | Chlorophyll a-b binding protein 13, chloroplastic |
| Desi_wild_2036430 | NA                                  | Ca_desi_Chrom01 | 2036430                 | A/G  | Gene_Ca_00214.1    | NON_SYNONYMOUS_CODING         | Protein E6                                        |
| Desi_wild_2036583 | NA                                  | Ca_desi_Chrom01 | 2036583                 | A/G  | Gene_Ca_00214.1    | NON_SYNONYMOUS_CODING         | Protein E6                                        |
| Desi_wild_2047526 | NA                                  | Ca_desi_Chrom01 | 2047526                 | C/T  | Gene_Ca_00215.1    | DOWNSTREAM                    | Putative uncharacterized protein                  |
| Desi_wild_2067290 | NA                                  | Ca_desi_Chrom01 | 2067290                 | C/A  | Gene_Ca_00218.1    | SYNONYMOUS_CODING             | Ethylene-responsive transcription factor 4        |
| Desi_wild_2084396 | NA                                  | Ca_desi_Chrom01 | 2084396                 | T/G  | Gene_Ca_00219.1    | SYNONYMOUS_CODING             | Ethylene-responsive transcription factor 12       |
| Desi_wild_2084474 | NA                                  | Ca_desi_Chrom01 | 2084474                 | C/A  | Gene_Ca_00219.1    | NON_SYNONYMOUS_CODING         | Ethylene-responsive transcription factor 12       |
| Desi_wild_2084506 | NA                                  | Ca_desi_Chrom01 | 2084506                 | G/T  | Gene_Ca_00219.1    | SYNONYMOUS_CODING             | Ethylene-responsive transcription factor 12       |
| Desi_wild_2125865 | NA                                  | Ca_desi_Chrom01 | 2125865                 | T/C  | Gene_Ca_00223.1    | INTRON                        | Glyoxysomal processing protease, glyoxysomal      |
| Desi_wild_2125885 | NA                                  | Ca_desi_Chrom01 | 2125885                 | C/A  | Gene_Ca_00223.1    | INTRON                        | Glyoxysomal processing protease, glyoxysomal      |
| Desi_wild_2125886 | NA                                  | Ca_desi_Chrom01 | 2125886                 | G/C  | Gene_Ca_00223.1    | INTRON                        | Glyoxysomal processing protease, glyoxysomal      |
| Desi_wild_2185003 | NA                                  | Ca_desi_Chrom01 | 2185003                 | C/T  | NA                 | INTERGENIC                    | NA                                                |
| Desi_wild_2213694 | NA                                  | Ca_desi_Chrom01 | 2213694                 | C/T  | Gene_Ca_00229.1    | SYNONYMOUS_CODING             | NA                                                |
| Desi_wild_2213700 | NA                                  | Ca_desi_Chrom01 | 2213700                 | C/T  | Gene_Ca_00229.1    | SYNONYMOUS_CODING             | NA                                                |
| Desi_wild_2213762 | NA                                  | Ca_desi_Chrom01 | 2213762                 | T/C  | Gene_Ca_00229.1    | NON_SYNONYMOUS_CODING         | NA                                                |
| Desi_wild_2213817 | NA                                  | Ca_desi_Chrom01 | 2213817                 | A/G  | Gene_Ca_00229.1    | SYNONYMOUS_CODING             | NA                                                |
| Desi_wild_2214019 | NA                                  | Ca_desi_Chrom01 | 2214019                 | A/G  | Gene_Ca_00229.1    | NON_SYNONYMOUS_CODING         | NA                                                |
| Desi_wild_2214038 | NA                                  | Ca_desi_Chrom01 | 2214038                 | A/T  | Gene_Ca_00229.1    | NON_SYNONYMOUS_CODING         | NA                                                |
| Desi_wild_2214171 | NA                                  | Ca_desi_Chrom01 | 2214171                 | A/G  | Gene_Ca_00229.1    | SYNONYMOUS_CODING             | NA                                                |
| Desi_wild_2249232 | NA                                  | Ca_desi_Chrom01 | 2249232                 | A/G  | NA                 | INTERGENIC                    | NA                                                |
| Desi_wild_2263530 | NA                                  | Ca_desi_Chrom01 | 2263530                 | G/A  | Gene_Ca_00233.2    | INTRON                        | Serine/threonine-protein kinase HT1               |
| Desi_wild_2263604 | NA                                  | Ca_desi_Chrom01 | 2263604                 | C/A  | Gene_Ca_00233.2    | INTRON                        | Serine/threonine-protein kinase HT1               |
| Desi_wild_2281552 | NA                                  | Ca_desi_Chrom01 | 2281552                 | T/C  | Gene_Ca_00235.1    | UPSTREAM                      | NA                                                |
| Desi_wild_2281554 | NA                                  | Ca_desi_Chrom01 | 2281554                 | C/T  | Gene_Ca_00235.1    | UPSTREAM                      | NA                                                |
| Desi_wild_2292933 | NA                                  | Ca_desi_Chrom01 | 2292933                 | T/C  | Gene_Ca_00236.1    | UPSTREAM                      | NA                                                |

| SNP IDs                  | NCBI dbSNP accession IDs (NCBI_SS#) | Chromosomes          | Physical positions (bp) | SNPs | Gene accession IDs | Sequence components of genome | Putative functions                                                   |
|--------------------------|-------------------------------------|----------------------|-------------------------|------|--------------------|-------------------------------|----------------------------------------------------------------------|
| <i>Desi_wild_2292968</i> | NA                                  | <i>Ca_desi_Chr01</i> | 2292968                 | A/T  | Gene_Ca_00236.1    | UPSTREAM                      | NA                                                                   |
| <i>Desi_wild_2322455</i> | NA                                  | <i>Ca_desi_Chr01</i> | 2322455                 | A/C  | Gene_Ca_00238.5    | NON_SYNONYMOUS_CODING         | NA                                                                   |
| <i>Desi_wild_2345481</i> | NA                                  | <i>Ca_desi_Chr01</i> | 2345481                 | A/T  | Gene_Ca_00242.1    | DOWNSTREAM                    | Pentatricopeptide repeat-containing protein At2g29760, chloroplastic |
| <i>Desi_wild_2349214</i> | NA                                  | <i>Ca_desi_Chr01</i> | 2349214                 | C/A  | NA                 | INTERGENIC                    | NA                                                                   |
| <i>Desi_wild_2349258</i> | NA                                  | <i>Ca_desi_Chr01</i> | 2349258                 | G/A  | NA                 | INTERGENIC                    | NA                                                                   |
| <i>Desi_wild_2349306</i> | NA                                  | <i>Ca_desi_Chr01</i> | 2349306                 | C/T  | NA                 | INTERGENIC                    | NA                                                                   |
| <i>Desi_wild_2349688</i> | NA                                  | <i>Ca_desi_Chr01</i> | 2349688                 | C/A  | NA                 | INTERGENIC                    | NA                                                                   |
| <i>Desi_wild_2349888</i> | NA                                  | <i>Ca_desi_Chr01</i> | 2349888                 | A/G  | NA                 | INTERGENIC                    | NA                                                                   |
| <i>Desi_wild_2356768</i> | NA                                  | <i>Ca_desi_Chr01</i> | 2356768                 | A/G  | Gene_Ca_00245.1    | DOWNSTREAM                    | Putative uncharacterized protein                                     |
| <i>Desi_wild_2356772</i> | NA                                  | <i>Ca_desi_Chr01</i> | 2356772                 | A/T  | Gene_Ca_00245.1    | DOWNSTREAM                    | Putative uncharacterized protein                                     |
| <i>Desi_wild_2417658</i> | NA                                  | <i>Ca_desi_Chr01</i> | 2417658                 | A/G  | Gene_Ca_00256.1    | UPSTREAM                      | Pentatricopeptide repeat-containing protein At2g32230, mitochondrial |
| <i>Desi_wild_2417675</i> | NA                                  | <i>Ca_desi_Chr01</i> | 2417675                 | G/A  | Gene_Ca_00256.1    | UPSTREAM                      | Pentatricopeptide repeat-containing protein At2g32230, mitochondrial |
| <i>Desi_wild_2417711</i> | NA                                  | <i>Ca_desi_Chr01</i> | 2417711                 | C/T  | Gene_Ca_00256.1    | SYNONYMOUS_CODING             | Pentatricopeptide repeat-containing protein At2g32230, mitochondrial |
| <i>Desi_wild_2418095</i> | NA                                  | <i>Ca_desi_Chr01</i> | 2418095                 | C/T  | Gene_Ca_00256.1    | SYNONYMOUS_CODING             | Pentatricopeptide repeat-containing protein At2g32230, mitochondrial |
| <i>Desi_wild_2418149</i> | NA                                  | <i>Ca_desi_Chr01</i> | 2418149                 | C/T  | Gene_Ca_00256.1    | SYNONYMOUS_CODING             | Pentatricopeptide repeat-containing protein At2g32230, mitochondrial |
| <i>Desi_wild_2418212</i> | NA                                  | <i>Ca_desi_Chr01</i> | 2418212                 | T/A  | Gene_Ca_00256.1    | SYNONYMOUS_CODING             | Pentatricopeptide repeat-containing protein At2g32230, mitochondrial |
| <i>Desi_wild_2418647</i> | NA                                  | <i>Ca_desi_Chr01</i> | 2418647                 | A/T  | Gene_Ca_00256.1    | INTRON                        | Pentatricopeptide repeat-containing protein At2g32230, mitochondrial |
| <i>Desi_wild_2418752</i> | NA                                  | <i>Ca_desi_Chr01</i> | 2418752                 | A/T  | Gene_Ca_00256.1    | INTRON                        | Pentatricopeptide repeat-containing protein At2g32230, mitochondrial |
| <i>Desi_wild_2418782</i> | NA                                  | <i>Ca_desi_Chr01</i> | 2418782                 | A/C  | Gene_Ca_00256.1    | INTRON                        | Pentatricopeptide repeat-containing protein At2g32230, mitochondrial |
| <i>Desi_wild_2435977</i> | NA                                  | <i>Ca_desi_Chr01</i> | 2435977                 | G/T  | Gene_Ca_00257.1    | INTRON                        | sensitive to freezing 6                                              |
| <i>Desi_wild_2436035</i> | NA                                  | <i>Ca_desi_Chr01</i> | 2436035                 | T/C  | Gene_Ca_00257.1    | INTRON                        | sensitive to freezing 6                                              |
| <i>Desi_wild_2438719</i> | NA                                  | <i>Ca_desi_Chr01</i> | 2438719                 | T/A  | Gene_Ca_00257.1    | NON_SYNONYMOUS_CODING         | sensitive to freezing 6                                              |
| <i>Desi_wild_2440248</i> | NA                                  | <i>Ca_desi_Chr01</i> | 2440248                 | C/T  | Gene_Ca_00257.1    | DOWNSTREAM                    | sensitive to freezing 6                                              |
| <i>Desi_wild_2448997</i> | NA                                  | <i>Ca_desi_Chr01</i> | 2448997                 | C/T  | Gene_Ca_00259.1    | INTRON                        | Splicing factor U2af large subunit A                                 |
| <i>Desi_wild_2456844</i> | NA                                  | <i>Ca_desi_Chr01</i> | 2456844                 | T/G  | NA                 | INTERGENIC                    | NA                                                                   |
| <i>Desi_wild_2457014</i> | NA                                  | <i>Ca_desi_Chr01</i> | 2457014                 | A/C  | NA                 | INTERGENIC                    | NA                                                                   |
| <i>Desi_wild_2457030</i> | NA                                  | <i>Ca_desi_Chr01</i> | 2457030                 | A/G  | NA                 | INTERGENIC                    | NA                                                                   |
| <i>Desi_wild_2471753</i> | NA                                  | <i>Ca_desi_Chr01</i> | 2471753                 | G/A  | Gene_Ca_00262.1    | INTRON                        | RING finger protein 141                                              |
| <i>Desi_wild_2471793</i> | NA                                  | <i>Ca_desi_Chr01</i> | 2471793                 | C/T  | Gene_Ca_00262.1    | INTRON                        | RING finger protein 141                                              |
| <i>Desi_wild_2471889</i> | NA                                  | <i>Ca_desi_Chr01</i> | 2471889                 | T/C  | Gene_Ca_00262.1    | INTRON                        | RING finger protein 141                                              |
| <i>Desi_wild_2471923</i> | NA                                  | <i>Ca_desi_Chr01</i> | 2471923                 | C/A  | Gene_Ca_00262.1    | INTRON                        | RING finger protein 141                                              |
| <i>Desi_wild_2471996</i> | NA                                  | <i>Ca_desi_Chr01</i> | 2471996                 | G/A  | Gene_Ca_00262.1    | INTRON                        | RING finger protein 141                                              |
| <i>Desi_wild_2491479</i> | NA                                  | <i>Ca_desi_Chr01</i> | 2491479                 | T/C  | Gene_Ca_00264.1    | INTRON                        | Probable allantoinase 1                                              |
| <i>Desi_wild_2512165</i> | NA                                  | <i>Ca_desi_Chr01</i> | 2512165                 | T/C  | Gene_Ca_00267.1    | NON_SYNONYMOUS_CODING         | NA                                                                   |
| <i>Desi_wild_2541722</i> | NA                                  | <i>Ca_desi_Chr01</i> | 2541722                 | T/C  | Gene_Ca_00268.2    | INTRON                        | NA                                                                   |
| <i>Desi_wild_2553120</i> | NA                                  | <i>Ca_desi_Chr01</i> | 2553120                 | A/C  | Gene_Ca_00270.1    | DOWNSTREAM                    | Putative uncharacterized protein                                     |
| <i>Desi_wild_2553150</i> | NA                                  | <i>Ca_desi_Chr01</i> | 2553150                 | C/T  | Gene_Ca_00270.1    | DOWNSTREAM                    | Putative uncharacterized protein                                     |
| <i>Desi_wild_2553187</i> | NA                                  | <i>Ca_desi_Chr01</i> | 2553187                 | A/G  | Gene_Ca_00270.1    | DOWNSTREAM                    | Putative uncharacterized protein                                     |
| <i>Desi_wild_2554326</i> | NA                                  | <i>Ca_desi_Chr01</i> | 2554326                 | T/G  | Gene_Ca_00270.1    | DOWNSTREAM                    | Putative uncharacterized protein                                     |
| <i>Desi_wild_2555171</i> | NA                                  | <i>Ca_desi_Chr01</i> | 2555171                 | C/G  | Gene_Ca_00269.1    | DOWNSTREAM                    | UPF0559 protein                                                      |
| <i>Desi_wild_2573180</i> | NA                                  | <i>Ca_desi_Chr01</i> | 2573180                 | A/C  | NA                 | INTERGENIC                    | NA                                                                   |
| <i>Desi_wild_2593870</i> | NA                                  | <i>Ca_desi_Chr01</i> | 2593870                 | C/T  | Gene_Ca_00273.1    | INTRON                        | Protein STRUBBELIG-RECEPTOR FAMILY 1                                 |
| <i>Desi_wild_2637577</i> | NA                                  | <i>Ca_desi_Chr01</i> | 2637577                 | A/G  | Gene_Ca_00275.1    | INTRON                        | Protein of unknown function (DUF707)                                 |
| <i>Desi_wild_2637591</i> | NA                                  | <i>Ca_desi_Chr01</i> | 2637591                 | T/A  | Gene_Ca_00275.1    | INTRON                        | Protein of unknown function (DUF707)                                 |

| SNP IDs                  | NCBI dbSNP accession IDs (NCBI_SS#) | Chromosomes          | Physical positions (bp) | SNPs | Gene accession IDs | Sequence components of genome | Putative functions                                                   |
|--------------------------|-------------------------------------|----------------------|-------------------------|------|--------------------|-------------------------------|----------------------------------------------------------------------|
| <i>Desi_wild_2637647</i> | NA                                  | <i>Ca_desi_Chr01</i> | 2637647                 | C/G  | Gene_Ca_00275.1    | INTRON                        | Protein of unknown function (DUF707)                                 |
| <i>Desi_wild_2637849</i> | NA                                  | <i>Ca_desi_Chr01</i> | 2637849                 | C/T  | Gene_Ca_00275.1    | INTRON                        | Protein of unknown function (DUF707)                                 |
| <i>Desi_wild_2637890</i> | NA                                  | <i>Ca_desi_Chr01</i> | 2637890                 | G/C  | Gene_Ca_00275.1    | INTRON                        | Protein of unknown function (DUF707)                                 |
| <i>Desi_wild_2856666</i> | NA                                  | <i>Ca_desi_Chr01</i> | 2856666                 | T/C  | NA                 | INTERGENIC                    | NA                                                                   |
| <i>Desi_wild_2856743</i> | NA                                  | <i>Ca_desi_Chr01</i> | 2856743                 | G/A  | NA                 | INTERGENIC                    | NA                                                                   |
| <i>Desi_wild_2887261</i> | NA                                  | <i>Ca_desi_Chr01</i> | 2887261                 | C/G  | Gene_Ca_00288.2    | INTRON                        | NA                                                                   |
| <i>Desi_wild_3083079</i> | NA                                  | <i>Ca_desi_Chr01</i> | 3083079                 | C/T  | NA                 | INTERGENIC                    | NA                                                                   |
| <i>Desi_wild_3083080</i> | NA                                  | <i>Ca_desi_Chr01</i> | 3083080                 | G/T  | NA                 | INTERGENIC                    | NA                                                                   |
| <i>Desi_wild_3099404</i> | NA                                  | <i>Ca_desi_Chr01</i> | 3099404                 | G/C  | Gene_Ca_00314.1    | DOWNSTREAM                    | Nucleobase-ascorbate transporter 2                                   |
| <i>Desi_wild_3101622</i> | NA                                  | <i>Ca_desi_Chr01</i> | 3101622                 | G/C  | NA                 | INTERGENIC                    | NA                                                                   |
| <i>Desi_wild_3109883</i> | NA                                  | <i>Ca_desi_Chr01</i> | 3109883                 | A/C  | Gene_Ca_00315.1    | NON_SYNONYMOUS_CODING         | Probable LRR receptor-like serine/threonine-protein kinase At2g24230 |
| <i>Desi_wild_3151834</i> | NA                                  | <i>Ca_desi_Chr01</i> | 3151834                 | G/C  | Gene_Ca_00318.1    | UPSTREAM                      | U4/U6.U5 tri-snRNP-associated protein 2                              |
| <i>Desi_wild_3193712</i> | NA                                  | <i>Ca_desi_Chr01</i> | 3193712                 | C/T  | Gene_Ca_00323.1    | SYNONYMOUS_CODING             | Oryzain alpha chain                                                  |
| <i>Desi_wild_3328510</i> | NA                                  | <i>Ca_desi_Chr01</i> | 3328510                 | C/A  | Gene_Ca_00339.1    | NON_SYNONYMOUS_CODING         | U-box domain-containing protein 17                                   |
| <i>Desi_wild_3368165</i> | NA                                  | <i>Ca_desi_Chr01</i> | 3368165                 | A/C  | NA                 | INTERGENIC                    | NA                                                                   |
| <i>Desi_wild_3440875</i> | NA                                  | <i>Ca_desi_Chr01</i> | 3440875                 | C/A  | NA                 | INTERGENIC                    | NA                                                                   |
| <i>Desi_wild_3545305</i> | NA                                  | <i>Ca_desi_Chr01</i> | 3545305                 | T/G  | NA                 | INTERGENIC                    | NA                                                                   |
| <i>Desi_wild_3545332</i> | NA                                  | <i>Ca_desi_Chr01</i> | 3545332                 | T/G  | NA                 | INTERGENIC                    | NA                                                                   |
| <i>Desi_wild_3585538</i> | NA                                  | <i>Ca_desi_Chr01</i> | 3585538                 | T/C  | NA                 | INTERGENIC                    | NA                                                                   |
| <i>Desi_wild_3606890</i> | NA                                  | <i>Ca_desi_Chr01</i> | 3606890                 | T/C  | NA                 | INTERGENIC                    | NA                                                                   |
| <i>Desi_wild_3607045</i> | NA                                  | <i>Ca_desi_Chr01</i> | 3607045                 | C/G  | NA                 | INTERGENIC                    | NA                                                                   |
| <i>Desi_wild_3628602</i> | NA                                  | <i>Ca_desi_Chr01</i> | 3628602                 | G/T  | NA                 | INTERGENIC                    | NA                                                                   |
| <i>Desi_wild_3628719</i> | NA                                  | <i>Ca_desi_Chr01</i> | 3628719                 | G/A  | NA                 | INTERGENIC                    | NA                                                                   |
| <i>Desi_wild_3674413</i> | NA                                  | <i>Ca_desi_Chr01</i> | 3674413                 | A/C  | Gene_Ca_00372.1    | INTRON                        | NA                                                                   |
| <i>Desi_wild_3674854</i> | NA                                  | <i>Ca_desi_Chr01</i> | 3674854                 | A/C  | Gene_Ca_00372.1    | INTRON                        | NA                                                                   |
| <i>Desi_wild_3903712</i> | NA                                  | <i>Ca_desi_Chr01</i> | 3903712                 | T/A  | NA                 | INTERGENIC                    | NA                                                                   |
| <i>Desi_wild_3903779</i> | NA                                  | <i>Ca_desi_Chr01</i> | 3903779                 | T/C  | NA                 | INTERGENIC                    | NA                                                                   |
| <i>Desi_wild_3903801</i> | NA                                  | <i>Ca_desi_Chr01</i> | 3903801                 | G/A  | NA                 | INTERGENIC                    | NA                                                                   |
| <i>Desi_wild_3903835</i> | NA                                  | <i>Ca_desi_Chr01</i> | 3903835                 | G/A  | NA                 | INTERGENIC                    | NA                                                                   |
| <i>Desi_wild_3911580</i> | NA                                  | <i>Ca_desi_Chr01</i> | 3911580                 | A/G  | Gene_Ca_00394.1    | NON_SYNONYMOUS_CODING         | Proyl 4-hydroxylase subunit alpha-2                                  |
| <i>Desi_wild_3953451</i> | NA                                  | <i>Ca_desi_Chr01</i> | 3953451                 | C/T  | NA                 | INTERGENIC                    | NA                                                                   |
| <i>Desi_wild_3963327</i> | NA                                  | <i>Ca_desi_Chr01</i> | 3963327                 | T/C  | Gene_Ca_00399.1    | INTRON                        | Squamosa promoter-binding-like protein 7                             |
| <i>Desi_wild_3994131</i> | NA                                  | <i>Ca_desi_Chr01</i> | 3994131                 | G/A  | Gene_Ca_00401.2    | SYNONYMOUS_CODING             | Probable 1-deoxy-D-xylulose-5-phosphate synthase, chloroplastic      |
| <i>Desi_wild_3995579</i> | NA                                  | <i>Ca_desi_Chr01</i> | 3995579                 | C/T  | Gene_Ca_00401.2    | SYNONYMOUS_CODING             | Probable 1-deoxy-D-xylulose-5-phosphate synthase, chloroplastic      |
| <i>Desi_wild_3996356</i> | NA                                  | <i>Ca_desi_Chr01</i> | 3996356                 | C/T  | Gene_Ca_00401.1    | SYNONYMOUS_CODING             | Probable 1-deoxy-D-xylulose-5-phosphate synthase, chloroplastic      |
| <i>Desi_wild_3996916</i> | NA                                  | <i>Ca_desi_Chr01</i> | 3996916                 | C/T  | Gene_Ca_00401.1    | SYNONYMOUS_CODING             | Probable 1-deoxy-D-xylulose-5-phosphate synthase, chloroplastic      |
| <i>Desi_wild_5004852</i> | NA                                  | <i>Ca_desi_Chr01</i> | 5004852                 | G/A  | Gene_Ca_00414.2    | INTRON                        | Transcriptional adapter ADA2b                                        |
| <i>Desi_wild_5004855</i> | NA                                  | <i>Ca_desi_Chr01</i> | 5004855                 | A/C  | Gene_Ca_00414.2    | INTRON                        | Transcriptional adapter ADA2b                                        |
| <i>Desi_wild_5004857</i> | NA                                  | <i>Ca_desi_Chr01</i> | 5004857                 | G/C  | Gene_Ca_00414.2    | INTRON                        | Transcriptional adapter ADA2b                                        |
| <i>Desi_wild_5004917</i> | NA                                  | <i>Ca_desi_Chr01</i> | 5004917                 | C/A  | Gene_Ca_00414.2    | INTRON                        | Transcriptional adapter ADA2b                                        |
| <i>Desi_wild_5022262</i> | NA                                  | <i>Ca_desi_Chr01</i> | 5022262                 | G/T  | Gene_Ca_00416.1    | INTRON                        | CASP-like protein POPTRDRAFT_818956                                  |
| <i>Desi_wild_5022390</i> | NA                                  | <i>Ca_desi_Chr01</i> | 5022390                 | C/T  | Gene_Ca_00416.1    | INTRON                        | CASP-like protein POPTRDRAFT_818956                                  |
| <i>Desi_wild_5039591</i> | NA                                  | <i>Ca_desi_Chr01</i> | 5039591                 | A/G  | Gene_Ca_00419.1    | UPSTREAM                      | unknown protein                                                      |
| <i>Desi_wild_5039614</i> | NA                                  | <i>Ca_desi_Chr01</i> | 5039614                 | C/A  | Gene_Ca_00419.1    | UPSTREAM                      | unknown protein                                                      |



| SNP IDs                  | NCBI dbSNP accession IDs (NCBI_SS#) | Chromosomes          | Physical positions (bp) | SNPs | Gene accession IDs | Sequence components of genome | Putative functions                                            |
|--------------------------|-------------------------------------|----------------------|-------------------------|------|--------------------|-------------------------------|---------------------------------------------------------------|
| <i>Desi_wild_5040610</i> | NA                                  | <i>Ca_desi_Chr01</i> | 5040610                 | A/G  | NA                 | INTERGENIC                    | NA                                                            |
| <i>Desi_wild_5040663</i> | NA                                  | <i>Ca_desi_Chr01</i> | 5040663                 | A/G  | NA                 | INTERGENIC                    | NA                                                            |
| <i>Desi_wild_5050027</i> | NA                                  | <i>Ca_desi_Chr01</i> | 5050027                 | G/A  | NA                 | INTERGENIC                    | NA                                                            |
| <i>Desi_wild_5050172</i> | NA                                  | <i>Ca_desi_Chr01</i> | 5050172                 | C/T  | NA                 | INTERGENIC                    | NA                                                            |
| <i>Desi_wild_5056212</i> | NA                                  | <i>Ca_desi_Chr01</i> | 5056212                 | T/C  | NA                 | INTERGENIC                    | NA                                                            |
| <i>Desi_wild_5056260</i> | NA                                  | <i>Ca_desi_Chr01</i> | 5056260                 | A/C  | NA                 | INTERGENIC                    | NA                                                            |
| <i>Desi_wild_5056328</i> | NA                                  | <i>Ca_desi_Chr01</i> | 5056328                 | T/C  | NA                 | INTERGENIC                    | NA                                                            |
| <i>Desi_wild_5061066</i> | NA                                  | <i>Ca_desi_Chr01</i> | 5061066                 | T/A  | NA                 | INTERGENIC                    | NA                                                            |
| <i>Desi_wild_5061125</i> | NA                                  | <i>Ca_desi_Chr01</i> | 5061125                 | G/C  | NA                 | INTERGENIC                    | NA                                                            |
| <i>Desi_wild_5129092</i> | NA                                  | <i>Ca_desi_Chr01</i> | 5129092                 | C/G  | Gene_Ca_00427.1    | INTRON                        | GLABRA2 expression modulator                                  |
| <i>Desi_wild_5161857</i> | NA                                  | <i>Ca_desi_Chr01</i> | 5161857                 | C/T  | Gene_Ca_00430.1    | NON_SYNONYMOUS_CODING         | Ethylene-responsive transcription factor ESR2                 |
| <i>Desi_wild_5197254</i> | NA                                  | <i>Ca_desi_Chr01</i> | 5197254                 | A/G  | Gene_Ca_00431.1    | UPSTREAM                      | NA                                                            |
| <i>Desi_wild_5197334</i> | NA                                  | <i>Ca_desi_Chr01</i> | 5197334                 | C/G  | Gene_Ca_00431.1    | UPSTREAM                      | NA                                                            |
| <i>Desi_wild_5197370</i> | NA                                  | <i>Ca_desi_Chr01</i> | 5197370                 | G/A  | Gene_Ca_00431.1    | UPSTREAM                      | NA                                                            |
| <i>Desi_wild_5197445</i> | NA                                  | <i>Ca_desi_Chr01</i> | 5197445                 | C/A  | Gene_Ca_00431.1    | UPSTREAM                      | NA                                                            |
| <i>Desi_wild_5202057</i> | NA                                  | <i>Ca_desi_Chr01</i> | 5202057                 | A/T  | Gene_Ca_00432.1    | INTRON                        | LETM1-like protein                                            |
| <i>Desi_wild_5202066</i> | NA                                  | <i>Ca_desi_Chr01</i> | 5202066                 | T/C  | Gene_Ca_00432.1    | INTRON                        | LETM1-like protein                                            |
| <i>Desi_wild_5218664</i> | NA                                  | <i>Ca_desi_Chr01</i> | 5218664                 | T/C  | Gene_Ca_00434.1    | DOWNSTREAM                    | Cold-inducible RNA-binding protein                            |
| <i>Desi_wild_5240171</i> | NA                                  | <i>Ca_desi_Chr01</i> | 5240171                 | G/A  | Gene_Ca_00438.1    | INTRON                        | Vacuolar protein sorting-associated protein 55 homolog        |
| <i>Desi_wild_5279501</i> | NA                                  | <i>Ca_desi_Chr01</i> | 5279501                 | A/T  | Gene_Ca_00442.1    | NON_SYNONYMOUS_CODING         | 1-aminocyclopropane-1-carboxylate oxidase homolog 12          |
| <i>Desi_wild_5292810</i> | NA                                  | <i>Ca_desi_Chr01</i> | 5292810                 | A/T  | Gene_Ca_00444.1    | NON_SYNONYMOUS_CODING         | 125 kDa kinesin-related protein                               |
| <i>Desi_wild_5373612</i> | NA                                  | <i>Ca_desi_Chr01</i> | 5373612                 | C/T  | Gene_Ca_00455.1    | UPSTREAM                      | Pentatricopeptide repeat-containing protein At2g36240         |
| <i>Desi_wild_5489825</i> | NA                                  | <i>Ca_desi_Chr01</i> | 5489825                 | T/C  | Gene_Ca_00469.2    | SYNONYMOUS_CODING             | RNA (guanine-9)-methyltransferase domain-containing protein 2 |
| <i>Desi_wild_5498868</i> | NA                                  | <i>Ca_desi_Chr01</i> | 5498868                 | A/G  | Gene_Ca_00470.1    | DOWNSTREAM                    | NA                                                            |
| <i>Desi_wild_5498890</i> | NA                                  | <i>Ca_desi_Chr01</i> | 5498890                 | A/G  | Gene_Ca_00470.1    | DOWNSTREAM                    | NA                                                            |
| <i>Desi_wild_5506578</i> | NA                                  | <i>Ca_desi_Chr01</i> | 5506578                 | G/C  | Gene_Ca_00471.1    | INTRON                        | NA                                                            |
| <i>Desi_wild_5511110</i> | NA                                  | <i>Ca_desi_Chr01</i> | 5511110                 | A/T  | Gene_Ca_00471.1    | INTRON                        | NA                                                            |
| <i>Desi_wild_5511140</i> | NA                                  | <i>Ca_desi_Chr01</i> | 5511140                 | A/T  | Gene_Ca_00471.1    | INTRON                        | NA                                                            |
| <i>Desi_wild_5511149</i> | NA                                  | <i>Ca_desi_Chr01</i> | 5511149                 | T/C  | Gene_Ca_00471.1    | INTRON                        | NA                                                            |
| <i>Desi_wild_5511162</i> | NA                                  | <i>Ca_desi_Chr01</i> | 5511162                 | T/G  | Gene_Ca_00471.1    | INTRON                        | NA                                                            |
| <i>Desi_wild_5537208</i> | NA                                  | <i>Ca_desi_Chr01</i> | 5537208                 | C/T  | Gene_Ca_00474.1    | DOWNSTREAM                    | SEC14-like protein 4                                          |
| <i>Desi_wild_5537211</i> | NA                                  | <i>Ca_desi_Chr01</i> | 5537211                 | G/A  | Gene_Ca_00474.1    | DOWNSTREAM                    | SEC14-like protein 4                                          |
| <i>Desi_wild_5537394</i> | NA                                  | <i>Ca_desi_Chr01</i> | 5537394                 | A/G  | Gene_Ca_00474.1    | DOWNSTREAM                    | SEC14-like protein 4                                          |
| <i>Desi_wild_5537397</i> | NA                                  | <i>Ca_desi_Chr01</i> | 5537397                 | T/A  | Gene_Ca_00474.1    | DOWNSTREAM                    | SEC14-like protein 4                                          |
| <i>Desi_wild_5537508</i> | NA                                  | <i>Ca_desi_Chr01</i> | 5537508                 | C/T  | Gene_Ca_00474.1    | DOWNSTREAM                    | SEC14-like protein 4                                          |
| <i>Desi_wild_5555967</i> | NA                                  | <i>Ca_desi_Chr01</i> | 5555967                 | C/T  | Gene_Ca_00475.1    | DOWNSTREAM                    | U-box domain-containing protein 35                            |
| <i>Desi_wild_5556081</i> | NA                                  | <i>Ca_desi_Chr01</i> | 5556081                 | G/A  | Gene_Ca_00475.1    | DOWNSTREAM                    | U-box domain-containing protein 35                            |
| <i>Desi_wild_5566993</i> | NA                                  | <i>Ca_desi_Chr01</i> | 5566993                 | A/C  | Gene_Ca_00477.2    | DOWNSTREAM                    | NA                                                            |
| <i>Desi_wild_5566995</i> | NA                                  | <i>Ca_desi_Chr01</i> | 5566995                 | T/C  | Gene_Ca_00477.2    | DOWNSTREAM                    | NA                                                            |
| <i>Desi_wild_5567015</i> | NA                                  | <i>Ca_desi_Chr01</i> | 5567015                 | T/C  | Gene_Ca_00477.2    | DOWNSTREAM                    | NA                                                            |
| <i>Desi_wild_5567027</i> | NA                                  | <i>Ca_desi_Chr01</i> | 5567027                 | G/A  | Gene_Ca_00477.2    | DOWNSTREAM                    | NA                                                            |
| <i>Desi_wild_5568121</i> | NA                                  | <i>Ca_desi_Chr01</i> | 5568121                 | A/C  | Gene_Ca_00477.2    | INTRON                        | NA                                                            |
| <i>Desi_wild_5569043</i> | NA                                  | <i>Ca_desi_Chr01</i> | 5569043                 | A/C  | Gene_Ca_00477.2    | INTRON                        | NA                                                            |
| <i>Desi_wild_5580120</i> | NA                                  | <i>Ca_desi_Chr01</i> | 5580120                 | C/T  | Gene_Ca_00478.1    | SYNONYMOUS_CODING             | Farnesyl pyrophosphate synthase 1                             |

| SNP IDs                  | NCBI dbSNP accession IDs (NCBI_SS#) | Chromosomes          | Physical positions (bp) | SNPs | Gene accession IDs | Sequence components of genome | Putative functions                                                  |
|--------------------------|-------------------------------------|----------------------|-------------------------|------|--------------------|-------------------------------|---------------------------------------------------------------------|
| <i>Desi_wild_5605911</i> | NA                                  | <i>Ca_desi_Chr01</i> | 5605911                 | G/C  | NA                 | INTERGENIC                    | NA                                                                  |
| <i>Desi_wild_5613829</i> | NA                                  | <i>Ca_desi_Chr01</i> | 5613829                 | C/A  | NA                 | INTERGENIC                    | NA                                                                  |
| <i>Desi_wild_5644131</i> | NA                                  | <i>Ca_desi_Chr01</i> | 5644131                 | G/C  | NA                 | INTERGENIC                    | NA                                                                  |
| <i>Desi_wild_5645015</i> | NA                                  | <i>Ca_desi_Chr01</i> | 5645015                 | T/C  | NA                 | INTERGENIC                    | NA                                                                  |
| <i>Desi_wild_5667771</i> | NA                                  | <i>Ca_desi_Chr01</i> | 5667771                 | A/G  | NA                 | INTERGENIC                    | NA                                                                  |
| <i>Desi_wild_5676601</i> | NA                                  | <i>Ca_desi_Chr01</i> | 5676601                 | T/C  | Gene_Ca_00485.1    | SYNONYMOUS_CODING             | Probable exocyst complex component 4                                |
| <i>Desi_wild_5676645</i> | NA                                  | <i>Ca_desi_Chr01</i> | 5676645                 | C/A  | Gene_Ca_00485.1    | NON_SYNONYMOUS_CODING         | Probable exocyst complex component 4                                |
| <i>Desi_wild_5753424</i> | NA                                  | <i>Ca_desi_Chr01</i> | 5753424                 | G/A  | Gene_Ca_00495.1    | INTRON                        | Probable leucine-rich repeat receptor-like protein kinase At5g49770 |
| <i>Desi_wild_5753484</i> | NA                                  | <i>Ca_desi_Chr01</i> | 5753484                 | T/G  | Gene_Ca_00495.1    | NON_SYNONYMOUS_CODING         | Probable leucine-rich repeat receptor-like protein kinase At5g49770 |
| <i>Desi_wild_5776338</i> | NA                                  | <i>Ca_desi_Chr01</i> | 5776338                 | C/A  | Gene_Ca_00497.2    | NON_SYNONYMOUS_CODING         | NA                                                                  |
| <i>Desi_wild_5776339</i> | NA                                  | <i>Ca_desi_Chr01</i> | 5776339                 | A/G  | Gene_Ca_00497.2    | SYNONYMOUS_CODING             | NA                                                                  |
| <i>Desi_wild_5776369</i> | NA                                  | <i>Ca_desi_Chr01</i> | 5776369                 | T/C  | Gene_Ca_00497.2    | SYNONYMOUS_CODING             | NA                                                                  |
| <i>Desi_wild_5807567</i> | NA                                  | <i>Ca_desi_Chr01</i> | 5807567                 | C/G  | Gene_Ca_00500.2    | INTRON                        | NA                                                                  |
| <i>Desi_wild_5807642</i> | NA                                  | <i>Ca_desi_Chr01</i> | 5807642                 | G/A  | Gene_Ca_00500.2    | INTRON                        | NA                                                                  |
| <i>Desi_wild_5808519</i> | NA                                  | <i>Ca_desi_Chr01</i> | 5808519                 | T/G  | Gene_Ca_00500.2    | INTRON                        | NA                                                                  |
| <i>Desi_wild_5823260</i> | NA                                  | <i>Ca_desi_Chr01</i> | 5823260                 | C/T  | NA                 | INTERGENIC                    | NA                                                                  |
| <i>Desi_wild_5853627</i> | NA                                  | <i>Ca_desi_Chr01</i> | 5853627                 | T/A  | Gene_Ca_00504.1    | NON_SYNONYMOUS_CODING         | Aspartic proteinase nepenthesin-2                                   |
| <i>Desi_wild_5854373</i> | NA                                  | <i>Ca_desi_Chr01</i> | 5854373                 | C/T  | NA                 | INTERGENIC                    | NA                                                                  |
| <i>Desi_wild_5892893</i> | NA                                  | <i>Ca_desi_Chr01</i> | 5892893                 | G/A  | NA                 | INTERGENIC                    | NA                                                                  |
| <i>Desi_wild_6001090</i> | NA                                  | <i>Ca_desi_Chr01</i> | 6001090                 | C/G  | NA                 | INTERGENIC                    | NA                                                                  |
| <i>Desi_wild_6037738</i> | NA                                  | <i>Ca_desi_Chr01</i> | 6037738                 | T/G  | Gene_Ca_00513.1    | SYNONYMOUS_CODING             | Cleavage and polyadenylation specificity factor CPSF30              |
| <i>Desi_wild_6072205</i> | NA                                  | <i>Ca_desi_Chr01</i> | 6072205                 | A/G  | NA                 | INTERGENIC                    | NA                                                                  |
| <i>Desi_wild_6072236</i> | NA                                  | <i>Ca_desi_Chr01</i> | 6072236                 | A/G  | NA                 | INTERGENIC                    | NA                                                                  |
| <i>Desi_wild_6080870</i> | NA                                  | <i>Ca_desi_Chr01</i> | 6080870                 | T/C  | Gene_Ca_00517.1    | DOWNSTREAM                    | Protein CbbY, chromosomal                                           |
| <i>Desi_wild_6083987</i> | NA                                  | <i>Ca_desi_Chr01</i> | 6083987                 | T/G  | Gene_Ca_00518.1    | SYNONYMOUS_CODING             | Protein ROOT HAIR DEFECTIVE 3 homolog 2                             |
| <i>Desi_wild_6107673</i> | NA                                  | <i>Ca_desi_Chr01</i> | 6107673                 | A/C  | Gene_Ca_00519.2    | INTRON                        | Probable exocyst complex component 4                                |
| <i>Desi_wild_6107921</i> | NA                                  | <i>Ca_desi_Chr01</i> | 6107921                 | G/A  | Gene_Ca_00519.2    | INTRON                        | Probable exocyst complex component 4                                |
| <i>Desi_wild_6108004</i> | NA                                  | <i>Ca_desi_Chr01</i> | 6108004                 | C/A  | Gene_Ca_00519.2    | INTRON                        | Probable exocyst complex component 4                                |
| <i>Desi_wild_6108008</i> | NA                                  | <i>Ca_desi_Chr01</i> | 6108008                 | T/G  | Gene_Ca_00519.2    | INTRON                        | Probable exocyst complex component 4                                |
| <i>Desi_wild_6108016</i> | NA                                  | <i>Ca_desi_Chr01</i> | 6108016                 | C/T  | Gene_Ca_00519.2    | INTRON                        | Probable exocyst complex component 4                                |
| <i>Desi_wild_6108035</i> | NA                                  | <i>Ca_desi_Chr01</i> | 6108035                 | T/A  | Gene_Ca_00519.2    | INTRON                        | Probable exocyst complex component 4                                |
| <i>Desi_wild_6108094</i> | NA                                  | <i>Ca_desi_Chr01</i> | 6108094                 | C/T  | Gene_Ca_00519.2    | INTRON                        | Probable exocyst complex component 4                                |
| <i>Desi_wild_6108140</i> | NA                                  | <i>Ca_desi_Chr01</i> | 6108140                 | A/G  | Gene_Ca_00519.2    | INTRON                        | Probable exocyst complex component 4                                |
| <i>Desi_wild_6111677</i> | NA                                  | <i>Ca_desi_Chr01</i> | 6111677                 | A/G  | Gene_Ca_00519.2    | SYNONYMOUS_CODING             | Probable exocyst complex component 4                                |
| <i>Desi_wild_6111732</i> | NA                                  | <i>Ca_desi_Chr01</i> | 6111732                 | T/G  | Gene_Ca_00519.2    | INTRON                        | Probable exocyst complex component 4                                |
| <i>Desi_wild_6112419</i> | NA                                  | <i>Ca_desi_Chr01</i> | 6112419                 | T/G  | Gene_Ca_00519.2    | NON_SYNONYMOUS_CODING         | Probable exocyst complex component 4                                |
| <i>Desi_wild_6112443</i> | NA                                  | <i>Ca_desi_Chr01</i> | 6112443                 | G/A  | Gene_Ca_00519.2    | SYNONYMOUS_CODING             | Probable exocyst complex component 4                                |
| <i>Desi_wild_6112451</i> | NA                                  | <i>Ca_desi_Chr01</i> | 6112451                 | G/A  | Gene_Ca_00519.2    | SYNONYMOUS_CODING             | Probable exocyst complex component 4                                |
| <i>Desi_wild_6112461</i> | NA                                  | <i>Ca_desi_Chr01</i> | 6112461                 | G/A  | Gene_Ca_00519.2    | SYNONYMOUS_CODING             | Probable exocyst complex component 4                                |
| <i>Desi_wild_6112462</i> | NA                                  | <i>Ca_desi_Chr01</i> | 6112462                 | G/A  | Gene_Ca_00519.2    | SYNONYMOUS_CODING             | Probable exocyst complex component 4                                |
| <i>Desi_wild_6112469</i> | NA                                  | <i>Ca_desi_Chr01</i> | 6112469                 | T/C  | Gene_Ca_00519.2    | SYNONYMOUS_CODING             | Probable exocyst complex component 4                                |
| <i>Desi_wild_6113445</i> | NA                                  | <i>Ca_desi_Chr01</i> | 6113445                 | T/C  | Gene_Ca_00519.2    | INTRON                        | Probable exocyst complex component 4                                |
| <i>Desi_wild_6135902</i> | NA                                  | <i>Ca_desi_Chr01</i> | 6135902                 | A/G  | Gene_Ca_00523.1    | INTRON                        | maternal effect embryo arrest 22                                    |
| <i>Desi_wild_6135970</i> | NA                                  | <i>Ca_desi_Chr01</i> | 6135970                 | A/G  | Gene_Ca_00523.1    | INTRON                        | maternal effect embryo arrest 22                                    |

| SNP IDs                  | NCBI dbSNP accession IDs (NCBI_SS#) | Chromosomes          | Physical positions (bp) | SNPs | Gene accession IDs              | Sequence components of genome | Putative functions                                                   |
|--------------------------|-------------------------------------|----------------------|-------------------------|------|---------------------------------|-------------------------------|----------------------------------------------------------------------|
| <i>Desi_wild_6141126</i> | NA                                  | <i>Ca_desi_Chr01</i> | 6141126                 | A/C  | <a href="#">Gene_Ca_00523.1</a> | NON_SYNONYMOUS_CODING         | maternal effect embryo arrest 22                                     |
| <i>Desi_wild_6141133</i> | NA                                  | <i>Ca_desi_Chr01</i> | 6141133                 | A/C  | <a href="#">Gene_Ca_00523.1</a> | NON_SYNONYMOUS_CODING         | maternal effect embryo arrest 22                                     |
| <i>Desi_wild_6149357</i> | NA                                  | <i>Ca_desi_Chr01</i> | 6149357                 | C/A  | <a href="#">Gene_Ca_00524.1</a> | NON_SYNONYMOUS_CODING         | NA                                                                   |
| <i>Desi_wild_6262893</i> | NA                                  | <i>Ca_desi_Chr01</i> | 6262893                 | T/A  | NA                              | INTERGENIC                    | NA                                                                   |
| <i>Desi_wild_6262953</i> | NA                                  | <i>Ca_desi_Chr01</i> | 6262953                 | A/C  | NA                              | INTERGENIC                    | NA                                                                   |
| <i>Desi_wild_6268192</i> | NA                                  | <i>Ca_desi_Chr01</i> | 6268192                 | C/A  | NA                              | INTERGENIC                    | NA                                                                   |
| <i>Desi_wild_6268200</i> | NA                                  | <i>Ca_desi_Chr01</i> | 6268200                 | C/T  | NA                              | INTERGENIC                    | NA                                                                   |
| <i>Desi_wild_6268215</i> | NA                                  | <i>Ca_desi_Chr01</i> | 6268215                 | A/G  | NA                              | INTERGENIC                    | NA                                                                   |
| <i>Desi_wild_6270528</i> | NA                                  | <i>Ca_desi_Chr01</i> | 6270528                 | T/C  | NA                              | INTERGENIC                    | NA                                                                   |
| <i>Desi_wild_6270529</i> | NA                                  | <i>Ca_desi_Chr01</i> | 6270529                 | C/T  | NA                              | INTERGENIC                    | NA                                                                   |
| <i>Desi_wild_6270568</i> | NA                                  | <i>Ca_desi_Chr01</i> | 6270568                 | T/C  | NA                              | INTERGENIC                    | NA                                                                   |
| <i>Desi_wild_6270721</i> | NA                                  | <i>Ca_desi_Chr01</i> | 6270721                 | G/C  | NA                              | INTERGENIC                    | NA                                                                   |
| <i>Desi_wild_6303938</i> | NA                                  | <i>Ca_desi_Chr01</i> | 6303938                 | A/G  | NA                              | INTERGENIC                    | NA                                                                   |
| <i>Desi_wild_6303965</i> | NA                                  | <i>Ca_desi_Chr01</i> | 6303965                 | T/G  | NA                              | INTERGENIC                    | NA                                                                   |
| <i>Desi_wild_6304514</i> | NA                                  | <i>Ca_desi_Chr01</i> | 6304514                 | T/G  | NA                              | INTERGENIC                    | NA                                                                   |
| <i>Desi_wild_6304541</i> | NA                                  | <i>Ca_desi_Chr01</i> | 6304541                 | A/G  | NA                              | INTERGENIC                    | NA                                                                   |
| <i>Desi_wild_6313759</i> | NA                                  | <i>Ca_desi_Chr01</i> | 6313759                 | T/A  | <a href="#">Gene_Ca_00540.1</a> | INTRON                        | Protein KRI1 homolog                                                 |
| <i>Desi_wild_6318808</i> | NA                                  | <i>Ca_desi_Chr01</i> | 6318808                 | C/T  | NA                              | INTERGENIC                    | NA                                                                   |
| <i>Desi_wild_6319012</i> | NA                                  | <i>Ca_desi_Chr01</i> | 6319012                 | A/G  | NA                              | INTERGENIC                    | NA                                                                   |
| <i>Desi_wild_6319042</i> | NA                                  | <i>Ca_desi_Chr01</i> | 6319042                 | A/C  | NA                              | INTERGENIC                    | NA                                                                   |
| <i>Desi_wild_6322174</i> | NA                                  | <i>Ca_desi_Chr01</i> | 6322174                 | A/G  | <a href="#">Gene_Ca_00541.2</a> | UPSTREAM                      | Probable LRR receptor-like serine/threonine-protein kinase At4g20940 |
| <i>Desi_wild_6322202</i> | NA                                  | <i>Ca_desi_Chr01</i> | 6322202                 | G/T  | <a href="#">Gene_Ca_00541.2</a> | UPSTREAM                      | Probable LRR receptor-like serine/threonine-protein kinase At4g20940 |
| <i>Desi_wild_6333238</i> | NA                                  | <i>Ca_desi_Chr01</i> | 6333238                 | C/T  | NA                              | INTERGENIC                    | NA                                                                   |
| <i>Desi_wild_6333247</i> | NA                                  | <i>Ca_desi_Chr01</i> | 6333247                 | A/G  | NA                              | INTERGENIC                    | NA                                                                   |
| <i>Desi_wild_6333372</i> | NA                                  | <i>Ca_desi_Chr01</i> | 6333372                 | A/C  | NA                              | INTERGENIC                    | NA                                                                   |
| <i>Desi_wild_6333418</i> | NA                                  | <i>Ca_desi_Chr01</i> | 6333418                 | G/A  | NA                              | INTERGENIC                    | NA                                                                   |
| <i>Desi_wild_6341138</i> | NA                                  | <i>Ca_desi_Chr01</i> | 6341138                 | G/A  | <a href="#">Gene_Ca_00544.1</a> | SYNONYMOUS_CODING             | WPP domain-associated protein (Fragment)                             |
| <i>Desi_wild_6341213</i> | NA                                  | <i>Ca_desi_Chr01</i> | 6341213                 | A/C  | <a href="#">Gene_Ca_00544.1</a> | NON_SYNONYMOUS_CODING         | WPP domain-associated protein (Fragment)                             |
| <i>Desi_wild_6341237</i> | NA                                  | <i>Ca_desi_Chr01</i> | 6341237                 | C/T  | <a href="#">Gene_Ca_00544.1</a> | SYNONYMOUS_CODING             | WPP domain-associated protein (Fragment)                             |
| <i>Desi_wild_6351975</i> | NA                                  | <i>Ca_desi_Chr01</i> | 6351975                 | T/C  | <a href="#">Gene_Ca_00545.1</a> | INTRON                        | NA                                                                   |
| <i>Desi_wild_6379945</i> | NA                                  | <i>Ca_desi_Chr01</i> | 6379945                 | G/A  | <a href="#">Gene_Ca_00549.1</a> | NON_SYNONYMOUS_CODING         | Nuclear transcription factor Y subunit A-7                           |
| <i>Desi_wild_6399709</i> | NA                                  | <i>Ca_desi_Chr01</i> | 6399709                 | T/C  | <a href="#">Gene_Ca_00550.2</a> | SYNONYMOUS_CODING             | NA                                                                   |
| <i>Desi_wild_6399918</i> | NA                                  | <i>Ca_desi_Chr01</i> | 6399918                 | C/T  | <a href="#">Gene_Ca_00550.1</a> | INTRON                        | Homeobox-leucine zipper protein ATHB-14                              |
| <i>Desi_wild_6747781</i> | NA                                  | <i>Ca_desi_Chr01</i> | 6747781                 | C/T  | <a href="#">Gene_Ca_00553.1</a> | DOWNSTREAM                    | unknown protein                                                      |
| <i>Desi_wild_6858906</i> | NA                                  | <i>Ca_desi_Chr01</i> | 6858906                 | T/A  | <a href="#">Gene_Ca_00561.1</a> | SYNONYMOUS_CODING             | Subtilisin-like protease                                             |
| <i>Desi_wild_6858922</i> | NA                                  | <i>Ca_desi_Chr01</i> | 6858922                 | C/T  | <a href="#">Gene_Ca_00561.1</a> | SYNONYMOUS_CODING             | Subtilisin-like protease                                             |
| <i>Desi_wild_6858925</i> | NA                                  | <i>Ca_desi_Chr01</i> | 6858925                 | C/T  | <a href="#">Gene_Ca_00561.1</a> | SYNONYMOUS_CODING             | Subtilisin-like protease                                             |
| <i>Desi_wild_6858952</i> | NA                                  | <i>Ca_desi_Chr01</i> | 6858952                 | A/C  | <a href="#">Gene_Ca_00561.1</a> | SYNONYMOUS_CODING             | Subtilisin-like protease                                             |
| <i>Desi_wild_6858964</i> | NA                                  | <i>Ca_desi_Chr01</i> | 6858964                 | A/C  | <a href="#">Gene_Ca_00561.1</a> | SYNONYMOUS_CODING             | Subtilisin-like protease                                             |
| <i>Desi_wild_6859408</i> | NA                                  | <i>Ca_desi_Chr01</i> | 6859408                 | C/A  | <a href="#">Gene_Ca_00561.1</a> | INTRON                        | Subtilisin-like protease                                             |
| <i>Desi_wild_6859622</i> | NA                                  | <i>Ca_desi_Chr01</i> | 6859622                 | A/G  | <a href="#">Gene_Ca_00561.1</a> | SYNONYMOUS_CODING             | Subtilisin-like protease                                             |
| <i>Desi_wild_6859628</i> | NA                                  | <i>Ca_desi_Chr01</i> | 6859628                 | G/A  | <a href="#">Gene_Ca_00561.1</a> | SYNONYMOUS_CODING             | Subtilisin-like protease                                             |
| <i>Desi_wild_6859634</i> | NA                                  | <i>Ca_desi_Chr01</i> | 6859634                 | T/C  | <a href="#">Gene_Ca_00561.1</a> | SYNONYMOUS_CODING             | Subtilisin-like protease                                             |
| <i>Desi_wild_6859661</i> | NA                                  | <i>Ca_desi_Chr01</i> | 6859661                 | C/A  | <a href="#">Gene_Ca_00561.1</a> | SYNONYMOUS_CODING             | Subtilisin-like protease                                             |

| SNP IDs           | NCBI dbSNP accession IDs (NCBI_SS#) | Chromosomes    | Physical positions (bp) | SNPs | Gene accession IDs | Sequence components of genome | Putative functions       |
|-------------------|-------------------------------------|----------------|-------------------------|------|--------------------|-------------------------------|--------------------------|
| Desi_wild_6862834 | NA                                  | Ca_desi_Chrom1 | 6862834                 | C/A  | Gene_Ca_00561.1    | NON_SYNONYMOUS_CODING         | Subtilisin-like protease |
| Desi_wild_6862836 | NA                                  | Ca_desi_Chrom1 | 6862836                 | T/G  | Gene_Ca_00561.1    | SYNONYMOUS_CODING             | Subtilisin-like protease |
| Desi_wild_6862866 | NA                                  | Ca_desi_Chrom1 | 6862866                 | A/G  | Gene_Ca_00561.1    | SYNONYMOUS_CODING             | Subtilisin-like protease |
| Desi_wild_6862869 | NA                                  | Ca_desi_Chrom1 | 6862869                 | C/T  | Gene_Ca_00561.1    | SYNONYMOUS_CODING             | Subtilisin-like protease |
| Desi_wild_6862872 | NA                                  | Ca_desi_Chrom1 | 6862872                 | A/T  | Gene_Ca_00561.1    | SYNONYMOUS_CODING             | Subtilisin-like protease |
| Desi_wild_6862873 | NA                                  | Ca_desi_Chrom1 | 6862873                 | A/C  | Gene_Ca_00561.1    | NON_SYNONYMOUS_CODING         | Subtilisin-like protease |
| Desi_wild_6862881 | NA                                  | Ca_desi_Chrom1 | 6862881                 | A/C  | Gene_Ca_00561.1    | SYNONYMOUS_CODING             | Subtilisin-like protease |
| Desi_wild_6862888 | NA                                  | Ca_desi_Chrom1 | 6862888                 | T/A  | Gene_Ca_00561.1    | NON_SYNONYMOUS_CODING         | Subtilisin-like protease |
| Desi_wild_6862889 | NA                                  | Ca_desi_Chrom1 | 6862889                 | A/C  | Gene_Ca_00561.1    | NON_SYNONYMOUS_CODING         | Subtilisin-like protease |
| Desi_wild_6862893 | NA                                  | Ca_desi_Chrom1 | 6862893                 | T/C  | Gene_Ca_00561.1    | SYNONYMOUS_CODING             | Subtilisin-like protease |
| Desi_wild_6918743 | NA                                  | Ca_desi_Chrom1 | 6918743                 | T/G  | NA                 | INTERGENIC                    | NA                       |
| Desi_wild_6918766 | NA                                  | Ca_desi_Chrom1 | 6918766                 | T/A  | NA                 | INTERGENIC                    | NA                       |
| Desi_wild_6918782 | NA                                  | Ca_desi_Chrom1 | 6918782                 | T/G  | NA                 | INTERGENIC                    | NA                       |
| Desi_wild_6918819 | NA                                  | Ca_desi_Chrom1 | 6918819                 | T/A  | NA                 | INTERGENIC                    | NA                       |
| Desi_wild_7274246 | NA                                  | Ca_desi_Chrom1 | 7274246                 | C/T  | Gene_Ca_00579.1    | NON_SYNONYMOUS_CODING         | unknown protein          |
| Desi_wild_7279097 | NA                                  | Ca_desi_Chrom1 | 7279097                 | G/A  | Gene_Ca_00579.1    | INTRON                        | unknown protein          |
| Desi_wild_7279106 | NA                                  | Ca_desi_Chrom1 | 7279106                 | G/T  | Gene_Ca_00579.1    | INTRON                        | unknown protein          |
| Desi_wild_7279115 | NA                                  | Ca_desi_Chrom1 | 7279115                 | T/C  | Gene_Ca_00579.1    | INTRON                        | unknown protein          |
| Desi_wild_7279116 | NA                                  | Ca_desi_Chrom1 | 7279116                 | G/A  | Gene_Ca_00579.1    | INTRON                        | unknown protein          |
| Desi_wild_7279147 | NA                                  | Ca_desi_Chrom1 | 7279147                 | G/A  | Gene_Ca_00579.1    | SYNONYMOUS_CODING             | unknown protein          |
| Desi_wild_7279148 | NA                                  | Ca_desi_Chrom1 | 7279148                 | G/A  | Gene_Ca_00579.1    | SYNONYMOUS_CODING             | unknown protein          |
| Desi_wild_7331987 | NA                                  | Ca_desi_Chrom1 | 7331987                 | C/T  | NA                 | INTERGENIC                    | NA                       |
| Desi_wild_7383196 | NA                                  | Ca_desi_Chrom1 | 7383196                 | A/C  | Gene_Ca_00587.1    | NON_SYNONYMOUS_CODING         | unknown protein          |
| Desi_wild_7383206 | NA                                  | Ca_desi_Chrom1 | 7383206                 | A/G  | Gene_Ca_00587.1    | NON_SYNONYMOUS_CODING         | unknown protein          |
| Desi_wild_7383207 | NA                                  | Ca_desi_Chrom1 | 7383207                 | G/A  | Gene_Ca_00587.1    | NON_SYNONYMOUS_CODING         | unknown protein          |
| Desi_wild_7383208 | NA                                  | Ca_desi_Chrom1 | 7383208                 | T/A  | Gene_Ca_00587.1    | NON_SYNONYMOUS_CODING         | unknown protein          |
| Desi_wild_7383224 | NA                                  | Ca_desi_Chrom1 | 7383224                 | A/G  | Gene_Ca_00587.1    | NON_SYNONYMOUS_CODING         | unknown protein          |
| Desi_wild_7383225 | NA                                  | Ca_desi_Chrom1 | 7383225                 | G/A  | Gene_Ca_00587.1    | NON_SYNONYMOUS_CODING         | unknown protein          |
| Desi_wild_7383226 | NA                                  | Ca_desi_Chrom1 | 7383226                 | C/A  | Gene_Ca_00587.1    | NON_SYNONYMOUS_CODING         | unknown protein          |
| Desi_wild_7383229 | NA                                  | Ca_desi_Chrom1 | 7383229                 | G/A  | Gene_Ca_00587.1    | SYNONYMOUS_CODING             | unknown protein          |
| Desi_wild_7383232 | NA                                  | Ca_desi_Chrom1 | 7383232                 | G/A  | Gene_Ca_00587.1    | SYNONYMOUS_CODING             | unknown protein          |
| Desi_wild_7383255 | NA                                  | Ca_desi_Chrom1 | 7383255                 | A/G  | Gene_Ca_00587.1    | NON_SYNONYMOUS_CODING         | unknown protein          |
| Desi_wild_7383256 | NA                                  | Ca_desi_Chrom1 | 7383256                 | G/A  | Gene_Ca_00587.1    | SYNONYMOUS_CODING             | unknown protein          |
| Desi_wild_7383259 | NA                                  | Ca_desi_Chrom1 | 7383259                 | G/A  | Gene_Ca_00587.1    | SYNONYMOUS_CODING             | unknown protein          |
| Desi_wild_7383265 | NA                                  | Ca_desi_Chrom1 | 7383265                 | T/G  | Gene_Ca_00587.1    | SYNONYMOUS_CODING             | unknown protein          |
| Desi_wild_7383271 | NA                                  | Ca_desi_Chrom1 | 7383271                 | A/G  | Gene_Ca_00587.1    | SYNONYMOUS_CODING             | unknown protein          |
| Desi_wild_7383274 | NA                                  | Ca_desi_Chrom1 | 7383274                 | C/T  | Gene_Ca_00587.1    | SYNONYMOUS_CODING             | unknown protein          |
| Desi_wild_7383281 | NA                                  | Ca_desi_Chrom1 | 7383281                 | G/A  | Gene_Ca_00587.1    | NON_SYNONYMOUS_CODING         | unknown protein          |
| Desi_wild_7383287 | NA                                  | Ca_desi_Chrom1 | 7383287                 | A/G  | Gene_Ca_00587.1    | NON_SYNONYMOUS_CODING         | unknown protein          |
| Desi_wild_7383289 | NA                                  | Ca_desi_Chrom1 | 7383289                 | C/T  | Gene_Ca_00587.1    | SYNONYMOUS_CODING             | unknown protein          |
| Desi_wild_7383406 | NA                                  | Ca_desi_Chrom1 | 7383406                 | C/T  | Gene_Ca_00587.1    | SYNONYMOUS_CODING             | unknown protein          |
| Desi_wild_7383433 | NA                                  | Ca_desi_Chrom1 | 7383433                 | T/A  | Gene_Ca_00587.1    | SYNONYMOUS_CODING             | unknown protein          |
| Desi_wild_7383436 | NA                                  | Ca_desi_Chrom1 | 7383436                 | G/A  | Gene_Ca_00587.1    | SYNONYMOUS_CODING             | unknown protein          |
| Desi_wild_7383437 | NA                                  | Ca_desi_Chrom1 | 7383437                 | T/C  | Gene_Ca_00587.1    | SYNONYMOUS_CODING             | unknown protein          |

| SNP IDs                   | NCBI dbSNP accession IDs (NCBI_SS#) | Chromosomes          | Physical positions (bp) | SNPs | Gene accession IDs | Sequence components of genome | Putative functions                                             |
|---------------------------|-------------------------------------|----------------------|-------------------------|------|--------------------|-------------------------------|----------------------------------------------------------------|
| <i>Desi_wild_7489447</i>  | NA                                  | <i>Ca_desi_Chr01</i> | 7489447                 | C/A  | Gene_Ca_00593.1    | SYNONYMOUS_CODING             | Eukaryotic initiation factor 4A-15                             |
| <i>Desi_wild_7489451</i>  | NA                                  | <i>Ca_desi_Chr01</i> | 7489451                 | A/T  | Gene_Ca_00593.1    | SYNONYMOUS_CODING             | Eukaryotic initiation factor 4A-15                             |
| <i>Desi_wild_7489452</i>  | NA                                  | <i>Ca_desi_Chr01</i> | 7489452                 | T/G  | Gene_Ca_00593.1    | SYNONYMOUS_CODING             | Eukaryotic initiation factor 4A-15                             |
| <i>Desi_wild_7489471</i>  | NA                                  | <i>Ca_desi_Chr01</i> | 7489471                 | T/A  | Gene_Ca_00593.1    | SYNONYMOUS_CODING             | Eukaryotic initiation factor 4A-15                             |
| <i>Desi_wild_7489492</i>  | NA                                  | <i>Ca_desi_Chr01</i> | 7489492                 | T/A  | Gene_Ca_00593.1    | SYNONYMOUS_CODING             | Eukaryotic initiation factor 4A-15                             |
| <i>Desi_wild_7489519</i>  | NA                                  | <i>Ca_desi_Chr01</i> | 7489519                 | T/A  | Gene_Ca_00593.1    | SYNONYMOUS_CODING             | Eukaryotic initiation factor 4A-15                             |
| <i>Desi_wild_7606885</i>  | NA                                  | <i>Ca_desi_Chr01</i> | 7606885                 | C/G  | Gene_Ca_00598.1    | SYNONYMOUS_CODING             | Protein of unknown function (DUF620)                           |
| <i>Desi_wild_7606933</i>  | NA                                  | <i>Ca_desi_Chr01</i> | 7606933                 | C/T  | Gene_Ca_00598.1    | SYNONYMOUS_CODING             | Protein of unknown function (DUF620)                           |
| <i>Desi_wild_7632307</i>  | NA                                  | <i>Ca_desi_Chr01</i> | 7632307                 | A/G  | Gene_Ca_00599.1    | INTRON                        | Myb family transcription factor APL                            |
| <i>Desi_wild_7632356</i>  | NA                                  | <i>Ca_desi_Chr01</i> | 7632356                 | C/T  | Gene_Ca_00599.1    | INTRON                        | Myb family transcription factor APL                            |
| <i>Desi_wild_7680457</i>  | NA                                  | <i>Ca_desi_Chr01</i> | 7680457                 | C/T  | Gene_Ca_00602.1    | UPSTREAM                      | ALA-interacting subunit 3                                      |
| <i>Desi_wild_7680543</i>  | NA                                  | <i>Ca_desi_Chr01</i> | 7680543                 | C/T  | Gene_Ca_00602.1    | UPSTREAM                      | ALA-interacting subunit 3                                      |
| <i>Desi_wild_7712983</i>  | NA                                  | <i>Ca_desi_Chr01</i> | 7712983                 | T/A  | NA                 | INTERGENIC                    | NA                                                             |
| <i>Desi_wild_7956977</i>  | NA                                  | <i>Ca_desi_Chr01</i> | 7956977                 | T/G  | Gene_Ca_00610.1    | SYNONYMOUS_CODING             | AT-rich interactive domain-containing protein 4                |
| <i>Desi_wild_8163297</i>  | NA                                  | <i>Ca_desi_Chr01</i> | 8163297                 | C/A  | Gene_Ca_00616.1    | INTRON                        | Nuclear pore complex protein Nup205                            |
| <i>Desi_wild_8173005</i>  | NA                                  | <i>Ca_desi_Chr01</i> | 8173005                 | T/C  | Gene_Ca_00616.1    | UPSTREAM                      | Nuclear pore complex protein Nup205                            |
| <i>Desi_wild_8219717</i>  | NA                                  | <i>Ca_desi_Chr01</i> | 8219717                 | A/G  | Gene_Ca_00619.1    | NON_SYNONYMOUS_CODING         | proton pump interactor 1                                       |
| <i>Desi_wild_8280837</i>  | NA                                  | <i>Ca_desi_Chr01</i> | 8280837                 | C/A  | Gene_Ca_00622.1    | UPSTREAM                      | Probable serine/threonine-protein kinase At1g54610             |
| <i>Desi_wild_8280838</i>  | NA                                  | <i>Ca_desi_Chr01</i> | 8280838                 | C/G  | Gene_Ca_00622.1    | UPSTREAM                      | Probable serine/threonine-protein kinase At1g54610             |
| <i>Desi_wild_8871945</i>  | NA                                  | <i>Ca_desi_Chr01</i> | 8871945                 | C/T  | NA                 | INTERGENIC                    | NA                                                             |
| <i>Desi_wild_8902120</i>  | NA                                  | <i>Ca_desi_Chr01</i> | 8902120                 | C/A  | Gene_Ca_00670.1    | INTRON                        | Uncharacterized basic helix-loop-helix protein At1g06150       |
| <i>Desi_wild_8902125</i>  | NA                                  | <i>Ca_desi_Chr01</i> | 8902125                 | C/A  | Gene_Ca_00670.1    | INTRON                        | Uncharacterized basic helix-loop-helix protein At1g06150       |
| <i>Desi_wild_8902212</i>  | NA                                  | <i>Ca_desi_Chr01</i> | 8902212                 | A/C  | Gene_Ca_00670.1    | INTRON                        | Uncharacterized basic helix-loop-helix protein At1g06150       |
| <i>Desi_wild_8952943</i>  | NA                                  | <i>Ca_desi_Chr01</i> | 8952943                 | A/G  | NA                 | INTERGENIC                    | NA                                                             |
| <i>Desi_wild_9014610</i>  | NA                                  | <i>Ca_desi_Chr01</i> | 9014610                 | C/A  | NA                 | INTERGENIC                    | NA                                                             |
| <i>Desi_wild_9023130</i>  | NA                                  | <i>Ca_desi_Chr01</i> | 9023130                 | C/T  | NA                 | INTERGENIC                    | NA                                                             |
| <i>Desi_wild_9217272</i>  | NA                                  | <i>Ca_desi_Chr01</i> | 9217272                 | A/C  | Gene_Ca_00694.1    | INTRON                        | Nucleolar GTP-binding protein 1                                |
| <i>Desi_wild_9217460</i>  | NA                                  | <i>Ca_desi_Chr01</i> | 9217460                 | C/T  | Gene_Ca_00694.1    | INTRON                        | Nucleolar GTP-binding protein 1                                |
| <i>Desi_wild_9218827</i>  | NA                                  | <i>Ca_desi_Chr01</i> | 9218827                 | T/G  | Gene_Ca_00694.1    | INTRON                        | Nucleolar GTP-binding protein 1                                |
| <i>Desi_wild_9218890</i>  | NA                                  | <i>Ca_desi_Chr01</i> | 9218890                 | C/A  | Gene_Ca_00694.1    | UPSTREAM                      | Nucleolar GTP-binding protein 1                                |
| <i>Desi_wild_9298244</i>  | NA                                  | <i>Ca_desi_Chr01</i> | 9298244                 | C/T  | Gene_Ca_00699.1    | STOP_GAINED                   | NA                                                             |
| <i>Desi_wild_9306517</i>  | NA                                  | <i>Ca_desi_Chr01</i> | 9306517                 | A/C  | Gene_Ca_00700.1    | INTRON                        | Ubiquitin-conjugating enzyme E2 35                             |
| <i>Desi_wild_9354387</i>  | NA                                  | <i>Ca_desi_Chr01</i> | 9354387                 | A/G  | Gene_Ca_00703.1    | INTRON                        | Dol-P-Man:Man(6)GlcNAc(2)-PP-Dol alpha-1,2-mannosyltransferase |
| <i>Desi_wild_9354410</i>  | NA                                  | <i>Ca_desi_Chr01</i> | 9354410                 | A/G  | Gene_Ca_00703.1    | INTRON                        | Dol-P-Man:Man(6)GlcNAc(2)-PP-Dol alpha-1,2-mannosyltransferase |
| <i>Desi_wild_9354518</i>  | NA                                  | <i>Ca_desi_Chr01</i> | 9354518                 | T/G  | Gene_Ca_00703.1    | INTRON                        | Dol-P-Man:Man(6)GlcNAc(2)-PP-Dol alpha-1,2-mannosyltransferase |
| <i>Desi_wild_9354522</i>  | NA                                  | <i>Ca_desi_Chr01</i> | 9354522                 | G/A  | Gene_Ca_00703.1    | INTRON                        | Dol-P-Man:Man(6)GlcNAc(2)-PP-Dol alpha-1,2-mannosyltransferase |
| <i>Desi_wild_9361145</i>  | NA                                  | <i>Ca_desi_Chr01</i> | 9361145                 | G/T  | Gene_Ca_00704.1    | SYNONYMOUS_CODING             | Phosphoenolpyruvate carboxylase                                |
| <i>Desi_wild_9361148</i>  | NA                                  | <i>Ca_desi_Chr01</i> | 9361148                 | A/T  | Gene_Ca_00704.1    | NON_SYNONYMOUS_CODING         | Phosphoenolpyruvate carboxylase                                |
| <i>Desi_wild_10002060</i> | NA                                  | <i>Ca_desi_Chr01</i> | 10002060                | A/C  | Gene_Ca_00736.1    | INTRON                        | Ras-related protein Rab11D                                     |
| <i>Desi_wild_10083825</i> | NA                                  | <i>Ca_desi_Chr01</i> | 10083825                | A/G  | NA                 | INTERGENIC                    | NA                                                             |
| <i>Desi_wild_10106781</i> | NA                                  | <i>Ca_desi_Chr01</i> | 10106781                | G/C  | Gene_Ca_00746.1    | DOWNSTREAM                    | NA                                                             |
| <i>Desi_wild_10150102</i> | NA                                  | <i>Ca_desi_Chr01</i> | 10150102                | G/C  | Gene_Ca_00751.1    | INTRON                        | Family of unknown function (DUF662)                            |
| <i>Desi_wild_10326430</i> | NA                                  | <i>Ca_desi_Chr01</i> | 10326430                | T/G  | Gene_Ca_00766.1    | INTRON                        | Nucleosome-remodeling factor subunit BPTF                      |
| <i>Desi_wild_10334689</i> | NA                                  | <i>Ca_desi_Chr01</i> | 10334689                | A/C  | Gene_Ca_00767.1    | INTRON                        | AP-2 complex subunit alpha-2                                   |

| SNP IDs            | NCBI dbSNP accession IDs (NCBI_SS#) | Chromosomes   | Physical positions (bp) | SNPs | Gene accession IDs | Sequence components of genome | Putative functions                                                   |
|--------------------|-------------------------------------|---------------|-------------------------|------|--------------------|-------------------------------|----------------------------------------------------------------------|
| Desi_wild_10366604 | NA                                  | Ca_desi_Chr01 | 10366604                | G/T  | Gene_Ca_00769.1    | SYNONYMOUS_CODING             | Calcium-dependent protein kinase 2                                   |
| Desi_wild_10366618 | NA                                  | Ca_desi_Chr01 | 10366618                | T/G  | Gene_Ca_00769.1    | NON_SYNONYMOUS_CODING         | Calcium-dependent protein kinase 2                                   |
| Desi_wild_10371032 | NA                                  | Ca_desi_Chr01 | 10371032                | A/G  | NA                 | INTERGENIC                    | NA                                                                   |
| Desi_wild_10441561 | NA                                  | Ca_desi_Chr01 | 10441561                | T/A  | Gene_Ca_00776.3    | NON_SYNONYMOUS_CODING         | unknown protein                                                      |
| Desi_wild_10441567 | NA                                  | Ca_desi_Chr01 | 10441567                | C/T  | Gene_Ca_00776.3    | SYNONYMOUS_CODING             | unknown protein                                                      |
| Desi_wild_10441576 | NA                                  | Ca_desi_Chr01 | 10441576                | C/T  | Gene_Ca_00776.3    | SYNONYMOUS_CODING             | unknown protein                                                      |
| Desi_wild_10441613 | NA                                  | Ca_desi_Chr01 | 10441613                | G/A  | Gene_Ca_00776.3    | SYNONYMOUS_CODING             | unknown protein                                                      |
| Desi_wild_10441697 | NA                                  | Ca_desi_Chr01 | 10441697                | A/C  | Gene_Ca_00776.3    | NON_SYNONYMOUS_CODING         | unknown protein                                                      |
| Desi_wild_10441699 | NA                                  | Ca_desi_Chr01 | 10441699                | G/A  | Gene_Ca_00776.3    | SYNONYMOUS_CODING             | unknown protein                                                      |
| Desi_wild_10441719 | NA                                  | Ca_desi_Chr01 | 10441719                | A/G  | Gene_Ca_00776.3    | NON_SYNONYMOUS_CODING         | unknown protein                                                      |
| Desi_wild_10441800 | NA                                  | Ca_desi_Chr01 | 10441800                | C/A  | Gene_Ca_00776.3    | NON_SYNONYMOUS_CODING         | unknown protein                                                      |
| Desi_wild_10441806 | NA                                  | Ca_desi_Chr01 | 10441806                | C/A  | Gene_Ca_00776.3    | NON_SYNONYMOUS_CODING         | unknown protein                                                      |
| Desi_wild_10441837 | NA                                  | Ca_desi_Chr01 | 10441837                | G/A  | Gene_Ca_00776.3    | SYNONYMOUS_CODING             | unknown protein                                                      |
| Desi_wild_10530999 | NA                                  | Ca_desi_Chr01 | 10530999                | T/C  | Gene_Ca_00784.1    | NON_SYNONYMOUS_CODING         | OTU domain-containing protein 5                                      |
| Desi_wild_10531022 | NA                                  | Ca_desi_Chr01 | 10531022                | T/A  | Gene_Ca_00784.1    | NON_SYNONYMOUS_CODING         | OTU domain-containing protein 5                                      |
| Desi_wild_10608421 | NA                                  | Ca_desi_Chr01 | 10608421                | G/C  | Gene_Ca_00795.1    | INTRON                        | Glucan endo-1,3-beta-glucosidase 14                                  |
| Desi_wild_10608428 | NA                                  | Ca_desi_Chr01 | 10608428                | T/A  | Gene_Ca_00795.1    | INTRON                        | Glucan endo-1,3-beta-glucosidase 14                                  |
| Desi_wild_10720003 | NA                                  | Ca_desi_Chr01 | 10720003                | A/T  | Gene_Ca_00807.2    | INTRON                        | NA                                                                   |
| Desi_wild_10885416 | NA                                  | Ca_desi_Chr01 | 10885416                | A/G  | Gene_Ca_00823.1    | SYNONYMOUS_CODING             | Serine/threonine-protein phosphatase BSL3                            |
| Desi_wild_10972556 | NA                                  | Ca_desi_Chr01 | 10972556                | G/A  | Gene_Ca_00832.1    | DOWNSTREAM                    | Pentatricopeptide repeat-containing protein At1g06140, mitochondrial |
| Desi_wild_10972557 | NA                                  | Ca_desi_Chr01 | 10972557                | C/T  | Gene_Ca_00832.1    | DOWNSTREAM                    | Pentatricopeptide repeat-containing protein At1g06140, mitochondrial |
| Desi_wild_10991264 | NA                                  | Ca_desi_Chr01 | 10991264                | T/A  | Gene_Ca_00833.1    | INTRON                        | Serine/threonine-protein kinase Nek5                                 |
| Desi_wild_10991266 | NA                                  | Ca_desi_Chr01 | 10991266                | T/A  | Gene_Ca_00833.1    | INTRON                        | Serine/threonine-protein kinase Nek5                                 |
| Desi_wild_10991270 | NA                                  | Ca_desi_Chr01 | 10991270                | A/C  | Gene_Ca_00833.1    | INTRON                        | Serine/threonine-protein kinase Nek5                                 |
| Desi_wild_11070581 | NA                                  | Ca_desi_Chr01 | 11070581                | T/G  | Gene_Ca_00844.1    | UPSTREAM                      | NA                                                                   |
| Desi_wild_11104954 | NA                                  | Ca_desi_Chr01 | 11104954                | A/G  | Gene_Ca_00847.2    | INTRON                        | NA                                                                   |
| Desi_wild_11302818 | NA                                  | Ca_desi_Chr01 | 11302818                | G/A  | Gene_Ca_00872.1    | INTRON                        | NA                                                                   |
| Desi_wild_11302861 | NA                                  | Ca_desi_Chr01 | 11302861                | G/A  | Gene_Ca_00872.1    | INTRON                        | NA                                                                   |
| Desi_wild_11302870 | NA                                  | Ca_desi_Chr01 | 11302870                | A/G  | Gene_Ca_00872.1    | INTRON                        | NA                                                                   |
| Desi_wild_11302920 | NA                                  | Ca_desi_Chr01 | 11302920                | G/A  | Gene_Ca_00872.1    | INTRON                        | NA                                                                   |
| Desi_wild_11302923 | NA                                  | Ca_desi_Chr01 | 11302923                | C/T  | Gene_Ca_00872.1    | INTRON                        | NA                                                                   |
| Desi_wild_11302952 | NA                                  | Ca_desi_Chr01 | 11302952                | G/C  | Gene_Ca_00872.1    | INTRON                        | NA                                                                   |
| Desi_wild_11305587 | NA                                  | Ca_desi_Chr01 | 11305587                | T/G  | Gene_Ca_00872.1    | INTRON                        | NA                                                                   |
| Desi_wild_11305593 | NA                                  | Ca_desi_Chr01 | 11305593                | T/G  | Gene_Ca_00872.1    | INTRON                        | NA                                                                   |
| Desi_wild_11305633 | NA                                  | Ca_desi_Chr01 | 11305633                | T/G  | Gene_Ca_00872.1    | INTRON                        | NA                                                                   |
| Desi_wild_11470235 | NA                                  | Ca_desi_Chr01 | 11470235                | A/G  | Gene_Ca_00886.1    | INTRON                        | Serine/threonine-protein kinase CTR1                                 |
| Desi_wild_11555285 | NA                                  | Ca_desi_Chr01 | 11555285                | G/T  | NA                 | INTERGENIC                    | NA                                                                   |
| Desi_wild_11569811 | NA                                  | Ca_desi_Chr01 | 11569811                | A/C  | NA                 | INTERGENIC                    | NA                                                                   |
| Desi_wild_11901538 | NA                                  | Ca_desi_Chr01 | 11901538                | G/T  | Gene_Ca_00906.1    | INTRON                        | Protein SAND                                                         |
| Desi_wild_11909644 | NA                                  | Ca_desi_Chr01 | 11909644                | A/C  | Gene_Ca_00907.1    | SYNONYMOUS_CODING             | Double-stranded RNA-binding protein 2                                |
| Desi_wild_11929981 | NA                                  | Ca_desi_Chr01 | 11929981                | C/T  | Gene_Ca_00908.1    | INTRON                        | Homeobox-leucine zipper protein REVOLUTA                             |
| Desi_wild_12082676 | NA                                  | Ca_desi_Chr01 | 12082676                | A/G  | Gene_Ca_00923.1    | INTRON                        | Helicase protein MOM1                                                |
| Desi_wild_12155983 | NA                                  | Ca_desi_Chr01 | 12155983                | T/G  | NA                 | INTERGENIC                    | NA                                                                   |
| Desi_wild_12159674 | NA                                  | Ca_desi_Chr01 | 12159674                | A/C  | Gene_Ca_00931.1    | DOWNSTREAM                    | Ankyrin repeat-containing protein At5g02620                          |

| SNP IDs            | NCBI dbSNP accession IDs (NCBI_SS#) | Chromosomes   | Physical positions (bp) | SNPs | Gene accession IDs | Sequence components of genome | Putative functions                                                      |
|--------------------|-------------------------------------|---------------|-------------------------|------|--------------------|-------------------------------|-------------------------------------------------------------------------|
| Desi_wild_12159861 | NA                                  | Ca_desi_Chr01 | 12159861                | T/G  | NA                 | INTERGENIC                    | NA                                                                      |
| Desi_wild_12159867 | NA                                  | Ca_desi_Chr01 | 12159867                | T/A  | NA                 | INTERGENIC                    | NA                                                                      |
| Desi_wild_12163294 | NA                                  | Ca_desi_Chr01 | 12163294                | C/A  | Gene_Ca_00932.1    | UPSTREAM                      | NA                                                                      |
| Desi_wild_12171484 | NA                                  | Ca_desi_Chr01 | 12171484                | A/G  | Gene_Ca_00933.1    | SYNONYMOUS_CODING             | Receptor-like protein kinase HERK 1                                     |
| Desi_wild_12171505 | NA                                  | Ca_desi_Chr01 | 12171505                | T/C  | Gene_Ca_00933.1    | SYNONYMOUS_CODING             | Receptor-like protein kinase HERK 1                                     |
| Desi_wild_12171580 | NA                                  | Ca_desi_Chr01 | 12171580                | C/T  | Gene_Ca_00933.1    | INTRON                        | Receptor-like protein kinase HERK 1                                     |
| Desi_wild_13652120 | NA                                  | Ca_desi_Chr01 | 13652120                | C/A  | Gene_Ca_00974.1    | INTRON                        | Protein disulfide isomerase-like 1-6                                    |
| Desi_wild_13652121 | NA                                  | Ca_desi_Chr01 | 13652121                | G/T  | Gene_Ca_00974.1    | INTRON                        | Protein disulfide isomerase-like 1-6                                    |
| Desi_wild_13661871 | NA                                  | Ca_desi_Chr01 | 13661871                | T/G  | NA                 | INTERGENIC                    | NA                                                                      |
| Desi_wild_13737053 | NA                                  | Ca_desi_Chr01 | 13737053                | G/A  | Gene_Ca_00986.1    | DOWNSTREAM                    | Pentatricopeptide repeat-containing protein At3g16010                   |
| Desi_wild_13766314 | NA                                  | Ca_desi_Chr01 | 13766314                | G/A  | Gene_Ca_00989.1    | SYNONYMOUS_CODING             | Probable sulfate transporter 3.4                                        |
| Desi_wild_13798808 | NA                                  | Ca_desi_Chr01 | 13798808                | A/T  | Gene_Ca_00991.1    | SYNONYMOUS_CODING             | NA                                                                      |
| Desi_wild_13856006 | NA                                  | Ca_desi_Chr01 | 13856006                | T/C  | Gene_Ca_00998.1    | DOWNSTREAM                    | NA                                                                      |
| Desi_wild_14011049 | NA                                  | Ca_desi_Chr01 | 14011049                | C/G  | NA                 | INTERGENIC                    | NA                                                                      |
| Desi_wild_14024254 | NA                                  | Ca_desi_Chr01 | 14024254                | C/T  | NA                 | INTERGENIC                    | NA                                                                      |
| Desi_wild_14093206 | NA                                  | Ca_desi_Chr01 | 14093206                | T/A  | NA                 | INTERGENIC                    | NA                                                                      |
| Desi_wild_14113485 | NA                                  | Ca_desi_Chr01 | 14113485                | A/G  | NA                 | INTERGENIC                    | NA                                                                      |
| Desi_wild_14114903 | NA                                  | Ca_desi_Chr01 | 14114903                | A/C  | Gene_Ca_01019.1    | UPSTREAM                      | Probable LRR receptor-like serine/threonine-protein kinase At4g31250    |
| Desi_wild_14128182 | NA                                  | Ca_desi_Chr01 | 14128182                | T/C  | Gene_Ca_01019.1    | SYNONYMOUS_CODING             | Probable LRR receptor-like serine/threonine-protein kinase At4g31250    |
| Desi_wild_14128326 | NA                                  | Ca_desi_Chr01 | 14128326                | T/G  | Gene_Ca_01019.1    | NON_SYNONYMOUS_CODING         | Probable LRR receptor-like serine/threonine-protein kinase At4g31250    |
| Desi_wild_14161553 | NA                                  | Ca_desi_Chr01 | 14161553                | G/T  | Gene_Ca_01022.1    | INTRON                        | NA                                                                      |
| Desi_wild_14190420 | NA                                  | Ca_desi_Chr01 | 14190420                | G/A  | Gene_Ca_01024.1    | INTRON                        | Mitochondrial transcription termination factor family protein           |
| Desi_wild_16503    | NA                                  | Ca_desi_Chr02 | 16503                   | A/C  | NA                 | INTERGENIC                    | NA                                                                      |
| Desi_wild_16504    | NA                                  | Ca_desi_Chr02 | 16504                   | G/A  | NA                 | INTERGENIC                    | NA                                                                      |
| Desi_wild_161983   | NA                                  | Ca_desi_Chr02 | 161983                  | A/G  | Gene_Ca_01037.1    | INTRON                        | NA                                                                      |
| Desi_wild_161987   | NA                                  | Ca_desi_Chr02 | 161987                  | G/C  | Gene_Ca_01037.1    | INTRON                        | NA                                                                      |
| Desi_wild_179173   | NA                                  | Ca_desi_Chr02 | 179173                  | G/T  | Gene_Ca_01039.2    | SYNONYMOUS_CODING             | NA                                                                      |
| Desi_wild_179194   | NA                                  | Ca_desi_Chr02 | 179194                  | C/G  | Gene_Ca_01039.2    | SYNONYMOUS_CODING             | NA                                                                      |
| Desi_wild_179260   | NA                                  | Ca_desi_Chr02 | 179260                  | T/A  | Gene_Ca_01039.2    | SYNONYMOUS_CODING             | NA                                                                      |
| Desi_wild_201869   | NA                                  | Ca_desi_Chr02 | 201869                  | T/C  | Gene_Ca_01041.1    | SYNONYMOUS_CODING             | 7-dehydrocholesterol reductase                                          |
| Desi_wild_205528   | NA                                  | Ca_desi_Chr02 | 205528                  | T/C  | NA                 | INTERGENIC                    | NA                                                                      |
| Desi_wild_205617   | NA                                  | Ca_desi_Chr02 | 205617                  | C/T  | NA                 | INTERGENIC                    | NA                                                                      |
| Desi_wild_278031   | NA                                  | Ca_desi_Chr02 | 278031                  | T/C  | Gene_Ca_01047.1    | DOWNSTREAM                    | Cyclic nucleotide-gated ion channel 1                                   |
| Desi_wild_278283   | NA                                  | Ca_desi_Chr02 | 278283                  | A/T  | Gene_Ca_01047.1    | DOWNSTREAM                    | Cyclic nucleotide-gated ion channel 1                                   |
| Desi_wild_281905   | NA                                  | Ca_desi_Chr02 | 281905                  | T/C  | NA                 | INTERGENIC                    | NA                                                                      |
| Desi_wild_303118   | NA                                  | Ca_desi_Chr02 | 303118                  | C/G  | NA                 | INTERGENIC                    | NA                                                                      |
| Desi_wild_303138   | NA                                  | Ca_desi_Chr02 | 303138                  | A/G  | NA                 | INTERGENIC                    | NA                                                                      |
| Desi_wild_318397   | NA                                  | Ca_desi_Chr02 | 318397                  | A/C  | Gene_Ca_01050.1    | INTRON                        | ATP-dependent zinc metalloprotease FTSH 11, chloroplastic/mitochondrial |
| Desi_wild_318414   | NA                                  | Ca_desi_Chr02 | 318414                  | A/G  | Gene_Ca_01050.1    | INTRON                        | ATP-dependent zinc metalloprotease FTSH 11, chloroplastic/mitochondrial |
| Desi_wild_326926   | NA                                  | Ca_desi_Chr02 | 326926                  | G/T  | Gene_Ca_01051.1    | INTRON                        | Polypyrimidine tract-binding protein homolog 2                          |
| Desi_wild_327691   | NA                                  | Ca_desi_Chr02 | 327691                  | C/G  | Gene_Ca_01051.1    | INTRON                        | Polypyrimidine tract-binding protein homolog 2                          |
| Desi_wild_327712   | NA                                  | Ca_desi_Chr02 | 327712                  | T/C  | Gene_Ca_01051.1    | INTRON                        | Polypyrimidine tract-binding protein homolog 2                          |
| Desi_wild_328513   | NA                                  | Ca_desi_Chr02 | 328513                  | T/A  | Gene_Ca_01051.1    | INTRON                        | Polypyrimidine tract-binding protein homolog 2                          |
| Desi_wild_328681   | NA                                  | Ca_desi_Chr02 | 328681                  | A/C  | Gene_Ca_01051.1    | SYNONYMOUS_CODING             | Polypyrimidine tract-binding protein homolog 2                          |



| SNP IDs                 | NCBI dbSNP accession IDs (NCBI_SS#) | Chromosomes          | Physical positions (bp) | SNPs | Gene accession IDs | Sequence components of genome | Putative functions                              |
|-------------------------|-------------------------------------|----------------------|-------------------------|------|--------------------|-------------------------------|-------------------------------------------------|
| <i>Desi_wild_328828</i> | NA                                  | <i>Ca_desi_Chr02</i> | 328828                  | C/T  | Gene_Ca_01051.1    | SYNONYMOUS_CODING             | Polypyrimidine tract-binding protein homolog 2  |
| <i>Desi_wild_328850</i> | NA                                  | <i>Ca_desi_Chr02</i> | 328850                  | G/A  | Gene_Ca_01051.1    | NON_SYNONYMOUS_CODING         | Polypyrimidine tract-binding protein homolog 2  |
| <i>Desi_wild_398016</i> | NA                                  | <i>Ca_desi_Chr02</i> | 398016                  | C/T  | NA                 | INTERGENIC                    | NA                                              |
| <i>Desi_wild_429417</i> | NA                                  | <i>Ca_desi_Chr02</i> | 429417                  | T/C  | Gene_Ca_01057.2    | SYNONYMOUS_CODING             | NA                                              |
| <i>Desi_wild_437394</i> | NA                                  | <i>Ca_desi_Chr02</i> | 437394                  | T/A  | NA                 | INTERGENIC                    | NA                                              |
| <i>Desi_wild_437401</i> | NA                                  | <i>Ca_desi_Chr02</i> | 437401                  | C/T  | NA                 | INTERGENIC                    | NA                                              |
| <i>Desi_wild_437438</i> | NA                                  | <i>Ca_desi_Chr02</i> | 437438                  | T/C  | NA                 | INTERGENIC                    | NA                                              |
| <i>Desi_wild_437445</i> | NA                                  | <i>Ca_desi_Chr02</i> | 437445                  | T/C  | NA                 | INTERGENIC                    | NA                                              |
| <i>Desi_wild_437488</i> | NA                                  | <i>Ca_desi_Chr02</i> | 437488                  | T/C  | NA                 | INTERGENIC                    | NA                                              |
| <i>Desi_wild_437492</i> | NA                                  | <i>Ca_desi_Chr02</i> | 437492                  | T/A  | NA                 | INTERGENIC                    | NA                                              |
| <i>Desi_wild_437533</i> | NA                                  | <i>Ca_desi_Chr02</i> | 437533                  | A/T  | NA                 | INTERGENIC                    | NA                                              |
| <i>Desi_wild_437625</i> | NA                                  | <i>Ca_desi_Chr02</i> | 437625                  | T/C  | NA                 | INTERGENIC                    | NA                                              |
| <i>Desi_wild_437689</i> | NA                                  | <i>Ca_desi_Chr02</i> | 437689                  | A/G  | NA                 | INTERGENIC                    | NA                                              |
| <i>Desi_wild_437745</i> | NA                                  | <i>Ca_desi_Chr02</i> | 437745                  | T/C  | NA                 | INTERGENIC                    | NA                                              |
| <i>Desi_wild_437750</i> | NA                                  | <i>Ca_desi_Chr02</i> | 437750                  | C/A  | NA                 | INTERGENIC                    | NA                                              |
| <i>Desi_wild_437785</i> | NA                                  | <i>Ca_desi_Chr02</i> | 437785                  | G/A  | NA                 | INTERGENIC                    | NA                                              |
| <i>Desi_wild_440424</i> | NA                                  | <i>Ca_desi_Chr02</i> | 440424                  | T/G  | NA                 | INTERGENIC                    | NA                                              |
| <i>Desi_wild_440499</i> | NA                                  | <i>Ca_desi_Chr02</i> | 440499                  | C/G  | NA                 | INTERGENIC                    | NA                                              |
| <i>Desi_wild_440520</i> | NA                                  | <i>Ca_desi_Chr02</i> | 440520                  | G/A  | NA                 | INTERGENIC                    | NA                                              |
| <i>Desi_wild_440592</i> | NA                                  | <i>Ca_desi_Chr02</i> | 440592                  | A/T  | NA                 | INTERGENIC                    | NA                                              |
| <i>Desi_wild_440595</i> | NA                                  | <i>Ca_desi_Chr02</i> | 440595                  | T/C  | NA                 | INTERGENIC                    | NA                                              |
| <i>Desi_wild_440600</i> | NA                                  | <i>Ca_desi_Chr02</i> | 440600                  | T/A  | NA                 | INTERGENIC                    | NA                                              |
| <i>Desi_wild_440607</i> | NA                                  | <i>Ca_desi_Chr02</i> | 440607                  | A/G  | NA                 | INTERGENIC                    | NA                                              |
| <i>Desi_wild_440718</i> | NA                                  | <i>Ca_desi_Chr02</i> | 440718                  | G/T  | NA                 | INTERGENIC                    | NA                                              |
| <i>Desi_wild_440724</i> | NA                                  | <i>Ca_desi_Chr02</i> | 440724                  | C/T  | NA                 | INTERGENIC                    | NA                                              |
| <i>Desi_wild_440752</i> | NA                                  | <i>Ca_desi_Chr02</i> | 440752                  | A/G  | NA                 | INTERGENIC                    | NA                                              |
| <i>Desi_wild_440754</i> | NA                                  | <i>Ca_desi_Chr02</i> | 440754                  | T/A  | NA                 | INTERGENIC                    | NA                                              |
| <i>Desi_wild_445863</i> | NA                                  | <i>Ca_desi_Chr02</i> | 445863                  | C/T  | Gene_Ca_01058.1    | UPSTREAM                      | Arabinogalactan peptide 16                      |
| <i>Desi_wild_445878</i> | NA                                  | <i>Ca_desi_Chr02</i> | 445878                  | C/T  | Gene_Ca_01058.1    | UPSTREAM                      | Arabinogalactan peptide 16                      |
| <i>Desi_wild_445884</i> | NA                                  | <i>Ca_desi_Chr02</i> | 445884                  | C/T  | Gene_Ca_01058.1    | UPSTREAM                      | Arabinogalactan peptide 16                      |
| <i>Desi_wild_445887</i> | NA                                  | <i>Ca_desi_Chr02</i> | 445887                  | A/G  | Gene_Ca_01058.1    | UPSTREAM                      | Arabinogalactan peptide 16                      |
| <i>Desi_wild_445893</i> | NA                                  | <i>Ca_desi_Chr02</i> | 445893                  | A/G  | Gene_Ca_01058.1    | UPSTREAM                      | Arabinogalactan peptide 16                      |
| <i>Desi_wild_445911</i> | NA                                  | <i>Ca_desi_Chr02</i> | 445911                  | A/C  | Gene_Ca_01058.1    | UPSTREAM                      | Arabinogalactan peptide 16                      |
| <i>Desi_wild_445920</i> | NA                                  | <i>Ca_desi_Chr02</i> | 445920                  | A/G  | Gene_Ca_01058.1    | UPSTREAM                      | Arabinogalactan peptide 16                      |
| <i>Desi_wild_445923</i> | NA                                  | <i>Ca_desi_Chr02</i> | 445923                  | A/T  | Gene_Ca_01058.1    | UPSTREAM                      | Arabinogalactan peptide 16                      |
| <i>Desi_wild_445947</i> | NA                                  | <i>Ca_desi_Chr02</i> | 445947                  | A/G  | Gene_Ca_01058.1    | UPSTREAM                      | Arabinogalactan peptide 16                      |
| <i>Desi_wild_445950</i> | NA                                  | <i>Ca_desi_Chr02</i> | 445950                  | A/T  | Gene_Ca_01058.1    | UPSTREAM                      | Arabinogalactan peptide 16                      |
| <i>Desi_wild_527633</i> | NA                                  | <i>Ca_desi_Chr02</i> | 527633                  | T/A  | Gene_Ca_01062.1    | SYNONYMOUS_CODING             | unknown protein                                 |
| <i>Desi_wild_527634</i> | NA                                  | <i>Ca_desi_Chr02</i> | 527634                  | C/A  | Gene_Ca_01062.1    | NON_SYNONYMOUS_CODING         | unknown protein                                 |
| <i>Desi_wild_527635</i> | NA                                  | <i>Ca_desi_Chr02</i> | 527635                  | C/A  | Gene_Ca_01062.1    | NON_SYNONYMOUS_CODING         | unknown protein                                 |
| <i>Desi_wild_575518</i> | NA                                  | <i>Ca_desi_Chr02</i> | 575518                  | A/G  | Gene_Ca_01064.1    | NON_SYNONYMOUS_CODING         | CCR4-NOT transcription complex subunit 4        |
| <i>Desi_wild_593520</i> | NA                                  | <i>Ca_desi_Chr02</i> | 593520                  | T/G  | Gene_Ca_01065.1    | SYNONYMOUS_CODING             | Ethylene-responsive transcription factor RAP2-7 |
| <i>Desi_wild_593523</i> | NA                                  | <i>Ca_desi_Chr02</i> | 593523                  | T/G  | Gene_Ca_01065.1    | SYNONYMOUS_CODING             | Ethylene-responsive transcription factor RAP2-7 |
| <i>Desi_wild_595819</i> | NA                                  | <i>Ca_desi_Chr02</i> | 595819                  | G/A  | Gene_Ca_01065.1    | INTRON                        | Ethylene-responsive transcription factor RAP2-7 |

| SNP IDs                  | NCBI dbSNP accession IDs (NCBI_SS#) | Chromosomes          | Physical positions (bp) | SNPs | Gene accession IDs | Sequence components of genome | Putative functions                                    |
|--------------------------|-------------------------------------|----------------------|-------------------------|------|--------------------|-------------------------------|-------------------------------------------------------|
| <i>Desi_wild_595821</i>  | NA                                  | <i>Ca_desi_Chr02</i> | 595821                  | T/A  | Gene_Ca_01065.1    | INTRON                        | Ethylene-responsive transcription factor RAP2-7       |
| <i>Desi_wild_595836</i>  | NA                                  | <i>Ca_desi_Chr02</i> | 595836                  | T/A  | Gene_Ca_01065.1    | INTRON                        | Ethylene-responsive transcription factor RAP2-7       |
| <i>Desi_wild_595837</i>  | NA                                  | <i>Ca_desi_Chr02</i> | 595837                  | C/A  | Gene_Ca_01065.1    | INTRON                        | Ethylene-responsive transcription factor RAP2-7       |
| <i>Desi_wild_595842</i>  | NA                                  | <i>Ca_desi_Chr02</i> | 595842                  | T/A  | Gene_Ca_01065.1    | INTRON                        | Ethylene-responsive transcription factor RAP2-7       |
| <i>Desi_wild_595845</i>  | NA                                  | <i>Ca_desi_Chr02</i> | 595845                  | G/A  | Gene_Ca_01065.1    | INTRON                        | Ethylene-responsive transcription factor RAP2-7       |
| <i>Desi_wild_595850</i>  | NA                                  | <i>Ca_desi_Chr02</i> | 595850                  | A/T  | Gene_Ca_01065.1    | INTRON                        | Ethylene-responsive transcription factor RAP2-7       |
| <i>Desi_wild_595851</i>  | NA                                  | <i>Ca_desi_Chr02</i> | 595851                  | T/A  | Gene_Ca_01065.1    | INTRON                        | Ethylene-responsive transcription factor RAP2-7       |
| <i>Desi_wild_595853</i>  | NA                                  | <i>Ca_desi_Chr02</i> | 595853                  | C/A  | Gene_Ca_01065.1    | INTRON                        | Ethylene-responsive transcription factor RAP2-7       |
| <i>Desi_wild_595862</i>  | NA                                  | <i>Ca_desi_Chr02</i> | 595862                  | T/A  | Gene_Ca_01065.1    | INTRON                        | Ethylene-responsive transcription factor RAP2-7       |
| <i>Desi_wild_595863</i>  | NA                                  | <i>Ca_desi_Chr02</i> | 595863                  | G/A  | Gene_Ca_01065.1    | INTRON                        | Ethylene-responsive transcription factor RAP2-7       |
| <i>Desi_wild_595868</i>  | NA                                  | <i>Ca_desi_Chr02</i> | 595868                  | T/A  | Gene_Ca_01065.1    | INTRON                        | Ethylene-responsive transcription factor RAP2-7       |
| <i>Desi_wild_692584</i>  | NA                                  | <i>Ca_desi_Chr02</i> | 692584                  | G/A  | Gene_Ca_01066.1    | INTRON                        | Uncharacterized protein At5g03900, chloroplastic      |
| <i>Desi_wild_694620</i>  | NA                                  | <i>Ca_desi_Chr02</i> | 694620                  | A/C  | Gene_Ca_01066.1    | SYNONYMOUS_CODING             | Cell division cycle protein 27 homolog B              |
| <i>Desi_wild_727262</i>  | NA                                  | <i>Ca_desi_Chr02</i> | 727262                  | G/C  | NA                 | INTERGENIC                    | NA                                                    |
| <i>Desi_wild_749831</i>  | NA                                  | <i>Ca_desi_Chr02</i> | 749831                  | C/G  | NA                 | INTERGENIC                    | NA                                                    |
| <i>Desi_wild_750042</i>  | NA                                  | <i>Ca_desi_Chr02</i> | 750042                  | A/T  | NA                 | INTERGENIC                    | NA                                                    |
| <i>Desi_wild_760148</i>  | NA                                  | <i>Ca_desi_Chr02</i> | 760148                  | C/T  | Gene_Ca_01073.1    | NON_SYNONYMOUS_CODING         | NA                                                    |
| <i>Desi_wild_775943</i>  | NA                                  | <i>Ca_desi_Chr02</i> | 775943                  | A/G  | Gene_Ca_01074.2    | DOWNSTREAM                    | NA                                                    |
| <i>Desi_wild_842908</i>  | NA                                  | <i>Ca_desi_Chr02</i> | 842908                  | T/C  | Gene_Ca_01077.1    | INTRON                        | DUF246 domain-containing protein At1g04910            |
| <i>Desi_wild_842935</i>  | NA                                  | <i>Ca_desi_Chr02</i> | 842935                  | T/C  | Gene_Ca_01077.1    | INTRON                        | DUF246 domain-containing protein At1g04910            |
| <i>Desi_wild_842943</i>  | NA                                  | <i>Ca_desi_Chr02</i> | 842943                  | T/C  | Gene_Ca_01077.1    | INTRON                        | DUF246 domain-containing protein At1g04910            |
| <i>Desi_wild_930040</i>  | NA                                  | <i>Ca_desi_Chr02</i> | 930040                  | T/C  | Gene_Ca_01083.1    | NON_SYNONYMOUS_CODING         | ATP-dependent zinc metalloprotease FtsH               |
| <i>Desi_wild_941630</i>  | NA                                  | <i>Ca_desi_Chr02</i> | 941630                  | A/T  | Gene_Ca_01084.1    | DOWNSTREAM                    | EVI5-like protein                                     |
| <i>Desi_wild_972909</i>  | NA                                  | <i>Ca_desi_Chr02</i> | 972909                  | A/T  | Gene_Ca_01087.1    | INTRON                        | Calcium-transporting ATPase 12, plasma membrane-type  |
| <i>Desi_wild_972918</i>  | NA                                  | <i>Ca_desi_Chr02</i> | 972918                  | C/A  | Gene_Ca_01087.1    | INTRON                        | Calcium-transporting ATPase 12, plasma membrane-type  |
| <i>Desi_wild_972921</i>  | NA                                  | <i>Ca_desi_Chr02</i> | 972921                  | T/C  | Gene_Ca_01087.1    | INTRON                        | Calcium-transporting ATPase 12, plasma membrane-type  |
| <i>Desi_wild_972930</i>  | NA                                  | <i>Ca_desi_Chr02</i> | 972930                  | G/A  | Gene_Ca_01087.1    | INTRON                        | Calcium-transporting ATPase 12, plasma membrane-type  |
| <i>Desi_wild_972933</i>  | NA                                  | <i>Ca_desi_Chr02</i> | 972933                  | A/G  | Gene_Ca_01087.1    | INTRON                        | Calcium-transporting ATPase 12, plasma membrane-type  |
| <i>Desi_wild_1019692</i> | NA                                  | <i>Ca_desi_Chr02</i> | 1019692                 | G/T  | NA                 | INTERGENIC                    | NA                                                    |
| <i>Desi_wild_1019708</i> | NA                                  | <i>Ca_desi_Chr02</i> | 1019708                 | A/T  | NA                 | INTERGENIC                    | NA                                                    |
| <i>Desi_wild_1019748</i> | NA                                  | <i>Ca_desi_Chr02</i> | 1019748                 | G/A  | NA                 | INTERGENIC                    | NA                                                    |
| <i>Desi_wild_1019793</i> | NA                                  | <i>Ca_desi_Chr02</i> | 1019793                 | C/T  | NA                 | INTERGENIC                    | NA                                                    |
| <i>Desi_wild_1048657</i> | NA                                  | <i>Ca_desi_Chr02</i> | 1048657                 | G/A  | Gene_Ca_01094.1    | INTRON                        | TRICHOME BIREFRINGENCE-LIKE 13                        |
| <i>Desi_wild_1048681</i> | NA                                  | <i>Ca_desi_Chr02</i> | 1048681                 | G/T  | Gene_Ca_01094.1    | INTRON                        | Protein furry homolog-like                            |
| <i>Desi_wild_1066639</i> | NA                                  | <i>Ca_desi_Chr02</i> | 1066639                 | A/C  | NA                 | INTERGENIC                    | NA                                                    |
| <i>Desi_wild_1066672</i> | NA                                  | <i>Ca_desi_Chr02</i> | 1066672                 | T/A  | NA                 | INTERGENIC                    | NA                                                    |
| <i>Desi_wild_1081581</i> | NA                                  | <i>Ca_desi_Chr02</i> | 1081581                 | T/C  | Gene_Ca_01095.1    | NON_SYNONYMOUS_CODING         | Pentatricopeptide repeat-containing protein At3g58590 |
| <i>Desi_wild_1151458</i> | NA                                  | <i>Ca_desi_Chr02</i> | 1151458                 | G/T  | Gene_Ca_01099.1    | DOWNSTREAM                    | gamete-expressed 3                                    |
| <i>Desi_wild_1185330</i> | NA                                  | <i>Ca_desi_Chr02</i> | 1185330                 | A/G  | Gene_Ca_01101.1    | INTRON                        | Putative syntaxin-131                                 |
| <i>Desi_wild_1205892</i> | NA                                  | <i>Ca_desi_Chr02</i> | 1205892                 | A/C  | NA                 | INTERGENIC                    | NA                                                    |
| <i>Desi_wild_1220559</i> | NA                                  | <i>Ca_desi_Chr02</i> | 1220559                 | G/A  | NA                 | INTERGENIC                    | NA                                                    |
| <i>Desi_wild_1220563</i> | NA                                  | <i>Ca_desi_Chr02</i> | 1220563                 | G/C  | NA                 | INTERGENIC                    | NA                                                    |
| <i>Desi_wild_1367073</i> | NA                                  | <i>Ca_desi_Chr02</i> | 1367073                 | C/A  | Gene_Ca_01118.1    | INTRON                        | unknown protein                                       |
| <i>Desi_wild_1521957</i> | NA                                  | <i>Ca_desi_Chr02</i> | 1521957                 | A/C  | Gene_Ca_01127.1    | SYNONYMOUS_CODING             | Probable ubiquitin conjugation factor E4              |

| SNP IDs                  | NCBI dbSNP accession IDs (NCBI_SS#) | Chromosomes          | Physical positions (bp) | SNPs | Gene accession IDs | Sequence components of genome | Putative functions                                                             |
|--------------------------|-------------------------------------|----------------------|-------------------------|------|--------------------|-------------------------------|--------------------------------------------------------------------------------|
| <i>Desi_wild_1621762</i> | NA                                  | <i>Ca_desi_Chr02</i> | 1621762                 | C/A  | Gene_Ca_01137.1    | SYNONYMOUS_CODING             | NA                                                                             |
| <i>Desi_wild_1823564</i> | NA                                  | <i>Ca_desi_Chr02</i> | 1823564                 | A/G  | NA                 | INTERGENIC                    | NA                                                                             |
| <i>Desi_wild_1857277</i> | NA                                  | <i>Ca_desi_Chr02</i> | 1857277                 | C/A  | NA                 | INTERGENIC                    | NA                                                                             |
| <i>Desi_wild_1868803</i> | NA                                  | <i>Ca_desi_Chr02</i> | 1868803                 | A/C  | Gene_Ca_01162.1    | SYNONYMOUS_CODING             | NA                                                                             |
| <i>Desi_wild_1894083</i> | NA                                  | <i>Ca_desi_Chr02</i> | 1894083                 | A/T  | NA                 | INTERGENIC                    | NA                                                                             |
| <i>Desi_wild_1954750</i> | NA                                  | <i>Ca_desi_Chr02</i> | 1954750                 | A/C  | NA                 | INTERGENIC                    | NA                                                                             |
| <i>Desi_wild_1996699</i> | NA                                  | <i>Ca_desi_Chr02</i> | 1996699                 | G/A  | Gene_Ca_01174.1    | DOWNSTREAM                    | longifolia1                                                                    |
| <i>Desi_wild_2257900</i> | NA                                  | <i>Ca_desi_Chr02</i> | 2257900                 | A/C  | Gene_Ca_01195.1    | SYNONYMOUS_CODING             | Protein FLOWERING LOCUS T                                                      |
| <i>Desi_wild_2344280</i> | NA                                  | <i>Ca_desi_Chr02</i> | 2344280                 | G/A  | Gene_Ca_01201.1    | INTRON                        | Polypyrimidine tract-binding protein homolog 3                                 |
| <i>Desi_wild_2373768</i> | NA                                  | <i>Ca_desi_Chr02</i> | 2373768                 | T/G  | Gene_Ca_01203.1    | INTRON                        | Uncharacterized aarF domain-containing protein kinase At1g71810, chloroplastic |
| <i>Desi_wild_2379602</i> | NA                                  | <i>Ca_desi_Chr02</i> | 2379602                 | A/T  | NA                 | INTERGENIC                    | NA                                                                             |
| <i>Desi_wild_2406652</i> | NA                                  | <i>Ca_desi_Chr02</i> | 2406652                 | A/G  | Gene_Ca_01205.1    | INTRON                        | Uncharacterized aarF domain-containing protein kinase At1g71810, chloroplastic |
| <i>Desi_wild_2588707</i> | NA                                  | <i>Ca_desi_Chr02</i> | 2588707                 | T/A  | NA                 | INTERGENIC                    | NA                                                                             |
| <i>Desi_wild_2600740</i> | NA                                  | <i>Ca_desi_Chr02</i> | 2600740                 | G/T  | Gene_Ca_01224.1    | UPSTREAM                      | Nuclear receptor corepressor 1                                                 |
| <i>Desi_wild_2600744</i> | NA                                  | <i>Ca_desi_Chr02</i> | 2600744                 | G/T  | Gene_Ca_01224.1    | UPSTREAM                      | Nuclear receptor corepressor 1                                                 |
| <i>Desi_wild_2600751</i> | NA                                  | <i>Ca_desi_Chr02</i> | 2600751                 | C/T  | Gene_Ca_01224.1    | UPSTREAM                      | Nuclear receptor corepressor 1                                                 |
| <i>Desi_wild_2607737</i> | NA                                  | <i>Ca_desi_Chr02</i> | 2607737                 | T/A  | Gene_Ca_01224.1    | INTRON                        | Nuclear receptor corepressor 1                                                 |
| <i>Desi_wild_2607993</i> | NA                                  | <i>Ca_desi_Chr02</i> | 2607993                 | A/T  | Gene_Ca_01224.1    | INTRON                        | Nuclear receptor corepressor 1                                                 |
| <i>Desi_wild_2611144</i> | NA                                  | <i>Ca_desi_Chr02</i> | 2611144                 | A/C  | Gene_Ca_01224.1    | DOWNSTREAM                    | Nuclear receptor corepressor 1                                                 |
| <i>Desi_wild_2886290</i> | NA                                  | <i>Ca_desi_Chr02</i> | 2886290                 | C/T  | Gene_Ca_01243.1    | INTRON                        | AP-1 complex subunit gamma-2                                                   |
| <i>Desi_wild_2938023</i> | NA                                  | <i>Ca_desi_Chr02</i> | 2938023                 | T/C  | NA                 | INTERGENIC                    | NA                                                                             |
| <i>Desi_wild_2938087</i> | NA                                  | <i>Ca_desi_Chr02</i> | 2938087                 | G/T  | NA                 | INTERGENIC                    | NA                                                                             |
| <i>Desi_wild_2955638</i> | NA                                  | <i>Ca_desi_Chr02</i> | 2955638                 | T/C  | NA                 | INTERGENIC                    | NA                                                                             |
| <i>Desi_wild_3069887</i> | NA                                  | <i>Ca_desi_Chr02</i> | 3069887                 | A/G  | Gene_Ca_01253.1    | UPSTREAM                      | NA                                                                             |
| <i>Desi_wild_3069889</i> | NA                                  | <i>Ca_desi_Chr02</i> | 3069889                 | T/A  | Gene_Ca_01253.1    | UPSTREAM                      | NA                                                                             |
| <i>Desi_wild_3266533</i> | NA                                  | <i>Ca_desi_Chr02</i> | 3266533                 | T/C  | NA                 | INTERGENIC                    | NA                                                                             |
| <i>Desi_wild_3571882</i> | NA                                  | <i>Ca_desi_Chr02</i> | 3571882                 | G/A  | NA                 | INTERGENIC                    | NA                                                                             |
| <i>Desi_wild_3571919</i> | NA                                  | <i>Ca_desi_Chr02</i> | 3571919                 | G/A  | NA                 | INTERGENIC                    | NA                                                                             |
| <i>Desi_wild_3604220</i> | NA                                  | <i>Ca_desi_Chr02</i> | 3604220                 | C/A  | Gene_Ca_01296.1    | STOP_GAINED                   | CASP-like protein 10                                                           |
| <i>Desi_wild_3620996</i> | NA                                  | <i>Ca_desi_Chr02</i> | 3620996                 | T/A  | Gene_Ca_01297.1    | DOWNSTREAM                    | unknown protein                                                                |
| <i>Desi_wild_3722112</i> | NA                                  | <i>Ca_desi_Chr02</i> | 3722112                 | T/C  | NA                 | INTERGENIC                    | NA                                                                             |
| <i>Desi_wild_3722146</i> | NA                                  | <i>Ca_desi_Chr02</i> | 3722146                 | A/G  | NA                 | INTERGENIC                    | NA                                                                             |
| <i>Desi_wild_3722164</i> | NA                                  | <i>Ca_desi_Chr02</i> | 3722164                 | T/A  | NA                 | INTERGENIC                    | NA                                                                             |
| <i>Desi_wild_3750227</i> | NA                                  | <i>Ca_desi_Chr02</i> | 3750227                 | C/A  | Gene_Ca_01307.1    | DOWNSTREAM                    | Lachrymatory-factor synthase                                                   |
| <i>Desi_wild_3750295</i> | NA                                  | <i>Ca_desi_Chr02</i> | 3750295                 | T/C  | Gene_Ca_01307.1    | DOWNSTREAM                    | Lachrymatory-factor synthase                                                   |
| <i>Desi_wild_3750312</i> | NA                                  | <i>Ca_desi_Chr02</i> | 3750312                 | A/G  | Gene_Ca_01307.1    | DOWNSTREAM                    | Lachrymatory-factor synthase                                                   |
| <i>Desi_wild_3750343</i> | NA                                  | <i>Ca_desi_Chr02</i> | 3750343                 | T/A  | Gene_Ca_01307.1    | DOWNSTREAM                    | Lachrymatory-factor synthase                                                   |
| <i>Desi_wild_3756414</i> | NA                                  | <i>Ca_desi_Chr02</i> | 3756414                 | G/T  | NA                 | INTERGENIC                    | NA                                                                             |
| <i>Desi_wild_3756677</i> | NA                                  | <i>Ca_desi_Chr02</i> | 3756677                 | T/C  | NA                 | INTERGENIC                    | NA                                                                             |
| <i>Desi_wild_3773654</i> | NA                                  | <i>Ca_desi_Chr02</i> | 3773654                 | A/G  | Gene_Ca_01311.1    | DOWNSTREAM                    | Coronatine-insensitive protein 1                                               |
| <i>Desi_wild_3775127</i> | NA                                  | <i>Ca_desi_Chr02</i> | 3775127                 | A/C  | Gene_Ca_01311.1    | SYNONYMOUS_CODING             | Coronatine-insensitive protein 1                                               |
| <i>Desi_wild_3775385</i> | NA                                  | <i>Ca_desi_Chr02</i> | 3775385                 | C/T  | Gene_Ca_01311.1    | SYNONYMOUS_CODING             | Coronatine-insensitive protein 1                                               |
| <i>Desi_wild_3854173</i> | NA                                  | <i>Ca_desi_Chr02</i> | 3854173                 | A/T  | Gene_Ca_01319.1    | INTRON                        | Eukaryotic translation initiation factor 3 subunit F                           |
| <i>Desi_wild_3930203</i> | NA                                  | <i>Ca_desi_Chr02</i> | 3930203                 | C/G  | Gene_Ca_01322.1    | INTRON                        | Calcium-dependent protein kinase 13                                            |

| SNP IDs           | NCBI dbSNP accession IDs (NCBI_SS#) | Chromosomes    | Physical positions (bp) | SNPs | Gene accession IDs | Sequence components of genome | Putative functions               |
|-------------------|-------------------------------------|----------------|-------------------------|------|--------------------|-------------------------------|----------------------------------|
| Desi_wild_4058389 | NA                                  | Ca_desi_Chrom2 | 4058389                 | G/A  | Gene_Ca_01329.1    | INTRON                        | Cytosolic purine 5'-nucleotidase |
| Desi_wild_4185142 | NA                                  | Ca_desi_Chrom2 | 4185142                 | A/G  | Gene_Ca_01337.1    | INTRON                        | 60S acidic ribosomal protein P0  |
| Desi_wild_4185394 | NA                                  | Ca_desi_Chrom2 | 4185394                 | A/T  | Gene_Ca_01337.1    | INTRON                        | 60S acidic ribosomal protein P0  |
| Desi_wild_4185408 | NA                                  | Ca_desi_Chrom2 | 4185408                 | A/G  | Gene_Ca_01337.1    | INTRON                        | 60S acidic ribosomal protein P0  |
| Desi_wild_4185422 | NA                                  | Ca_desi_Chrom2 | 4185422                 | T/C  | Gene_Ca_01337.1    | INTRON                        | 60S acidic ribosomal protein P0  |
| Desi_wild_4185428 | NA                                  | Ca_desi_Chrom2 | 4185428                 | T/A  | Gene_Ca_01337.1    | INTRON                        | 60S acidic ribosomal protein P0  |
| Desi_wild_4190767 | NA                                  | Ca_desi_Chrom2 | 4190767                 | T/A  | Gene_Ca_01337.1    | INTRON                        | 60S acidic ribosomal protein P0  |
| Desi_wild_4190802 | NA                                  | Ca_desi_Chrom2 | 4190802                 | A/C  | Gene_Ca_01337.1    | INTRON                        | 60S acidic ribosomal protein P0  |
| Desi_wild_4199884 | NA                                  | Ca_desi_Chrom2 | 4199884                 | C/T  | NA                 | INTERGENIC                    | NA                               |
| Desi_wild_4212810 | NA                                  | Ca_desi_Chrom2 | 4212810                 | A/G  | Gene_Ca_01340.1    | DOWNSTREAM                    | NA                               |
| Desi_wild_4552112 | NA                                  | Ca_desi_Chrom2 | 4552112                 | C/T  | NA                 | INTERGENIC                    | NA                               |
| Desi_wild_4800793 | NA                                  | Ca_desi_Chrom2 | 4800793                 | T/A  | NA                 | INTERGENIC                    | NA                               |
| Desi_wild_5027322 | NA                                  | Ca_desi_Chrom2 | 5027322                 | G/T  | Gene_Ca_01382.1    | INTRON                        | Transcription factor bHLH135     |
| Desi_wild_5027330 | NA                                  | Ca_desi_Chrom2 | 5027330                 | T/A  | Gene_Ca_01382.1    | INTRON                        | Transcription factor bHLH135     |
| Desi_wild_5027332 | NA                                  | Ca_desi_Chrom2 | 5027332                 | T/A  | Gene_Ca_01382.1    | INTRON                        | Transcription factor bHLH135     |
| Desi_wild_5116790 | NA                                  | Ca_desi_Chrom2 | 5116790                 | C/T  | Gene_Ca_01384.1    | NON_SYNONYMOUS_CODING         | YTH domain family protein 2      |
| Desi_wild_5168628 | NA                                  | Ca_desi_Chrom2 | 5168628                 | T/A  | NA                 | INTERGENIC                    | NA                               |
| Desi_wild_5168644 | NA                                  | Ca_desi_Chrom2 | 5168644                 | A/C  | NA                 | INTERGENIC                    | NA                               |
| Desi_wild_5168645 | NA                                  | Ca_desi_Chrom2 | 5168645                 | C/A  | NA                 | INTERGENIC                    | NA                               |
| Desi_wild_5213222 | NA                                  | Ca_desi_Chrom2 | 5213222                 | G/A  | NA                 | INTERGENIC                    | NA                               |
| Desi_wild_5213365 | NA                                  | Ca_desi_Chrom2 | 5213365                 | A/T  | NA                 | INTERGENIC                    | NA                               |
| Desi_wild_5400364 | NA                                  | Ca_desi_Chrom2 | 5400364                 | C/T  | Gene_Ca_01400.1    | STOP_GAINED                   | Selinene synthase                |
| Desi_wild_5466959 | NA                                  | Ca_desi_Chrom2 | 5466959                 | C/T  | NA                 | INTERGENIC                    | NA                               |
| Desi_wild_5466961 | NA                                  | Ca_desi_Chrom2 | 5466961                 | A/G  | NA                 | INTERGENIC                    | NA                               |
| Desi_wild_5466969 | NA                                  | Ca_desi_Chrom2 | 5466969                 | T/A  | NA                 | INTERGENIC                    | NA                               |
| Desi_wild_5466993 | NA                                  | Ca_desi_Chrom2 | 5466993                 | C/T  | NA                 | INTERGENIC                    | NA                               |
| Desi_wild_5467020 | NA                                  | Ca_desi_Chrom2 | 5467020                 | G/A  | NA                 | INTERGENIC                    | NA                               |
| Desi_wild_5472802 | NA                                  | Ca_desi_Chrom2 | 5472802                 | T/C  | Gene_Ca_01409.1    | INTRON                        | NA                               |
| Desi_wild_5472879 | NA                                  | Ca_desi_Chrom2 | 5472879                 | C/A  | Gene_Ca_01409.1    | NON_SYNONYMOUS_CODING         | NA                               |
| Desi_wild_5503486 | NA                                  | Ca_desi_Chrom2 | 5503486                 | G/A  | NA                 | INTERGENIC                    | NA                               |
| Desi_wild_5503490 | NA                                  | Ca_desi_Chrom2 | 5503490                 | T/G  | NA                 | INTERGENIC                    | NA                               |
| Desi_wild_5503492 | NA                                  | Ca_desi_Chrom2 | 5503492                 | G/A  | NA                 | INTERGENIC                    | NA                               |
| Desi_wild_5503507 | NA                                  | Ca_desi_Chrom2 | 5503507                 | C/A  | NA                 | INTERGENIC                    | NA                               |
| Desi_wild_5503509 | NA                                  | Ca_desi_Chrom2 | 5503509                 | A/G  | NA                 | INTERGENIC                    | NA                               |
| Desi_wild_5503511 | NA                                  | Ca_desi_Chrom2 | 5503511                 | G/T  | NA                 | INTERGENIC                    | NA                               |
| Desi_wild_5503519 | NA                                  | Ca_desi_Chrom2 | 5503519                 | G/A  | NA                 | INTERGENIC                    | NA                               |
| Desi_wild_5503637 | NA                                  | Ca_desi_Chrom2 | 5503637                 | C/G  | NA                 | INTERGENIC                    | NA                               |
| Desi_wild_5503727 | NA                                  | Ca_desi_Chrom2 | 5503727                 | T/G  | NA                 | INTERGENIC                    | NA                               |
| Desi_wild_5503732 | NA                                  | Ca_desi_Chrom2 | 5503732                 | G/C  | NA                 | INTERGENIC                    | NA                               |
| Desi_wild_5508906 | NA                                  | Ca_desi_Chrom2 | 5508906                 | A/T  | NA                 | INTERGENIC                    | NA                               |
| Desi_wild_5513682 | NA                                  | Ca_desi_Chrom2 | 5513682                 | T/G  | NA                 | INTERGENIC                    | NA                               |
| Desi_wild_5537769 | NA                                  | Ca_desi_Chrom2 | 5537769                 | A/T  | Gene_Ca_01418.1    | NON_SYNONYMOUS_CODING         | Protein TIC 62, chloroplastic    |
| Desi_wild_5548807 | NA                                  | Ca_desi_Chrom2 | 5548807                 | C/G  | NA                 | INTERGENIC                    | NA                               |
| Desi_wild_5548819 | NA                                  | Ca_desi_Chrom2 | 5548819                 | G/A  | NA                 | INTERGENIC                    | NA                               |

| SNP IDs                  | NCBI dbSNP accession IDs (NCBI_SS#) | Chromosomes          | Physical positions (bp) | SNPs | Gene accession IDs | Sequence components of genome | Putative functions                   |
|--------------------------|-------------------------------------|----------------------|-------------------------|------|--------------------|-------------------------------|--------------------------------------|
| <i>Desi_wild_5549092</i> | NA                                  | <i>Ca_desi_Chr02</i> | 5549092                 | G/A  | NA                 | INTERGENIC                    | NA                                   |
| <i>Desi_wild_5549150</i> | NA                                  | <i>Ca_desi_Chr02</i> | 5549150                 | A/C  | NA                 | INTERGENIC                    | NA                                   |
| <i>Desi_wild_5549156</i> | NA                                  | <i>Ca_desi_Chr02</i> | 5549156                 | A/T  | NA                 | INTERGENIC                    | NA                                   |
| <i>Desi_wild_5549164</i> | NA                                  | <i>Ca_desi_Chr02</i> | 5549164                 | T/C  | NA                 | INTERGENIC                    | NA                                   |
| <i>Desi_wild_5549174</i> | NA                                  | <i>Ca_desi_Chr02</i> | 5549174                 | G/A  | NA                 | INTERGENIC                    | NA                                   |
| <i>Desi_wild_5549966</i> | NA                                  | <i>Ca_desi_Chr02</i> | 5549966                 | A/T  | NA                 | INTERGENIC                    | NA                                   |
| <i>Desi_wild_5550007</i> | NA                                  | <i>Ca_desi_Chr02</i> | 5550007                 | G/A  | NA                 | INTERGENIC                    | NA                                   |
| <i>Desi_wild_5550009</i> | NA                                  | <i>Ca_desi_Chr02</i> | 5550009                 | A/C  | NA                 | INTERGENIC                    | NA                                   |
| <i>Desi_wild_5565953</i> | NA                                  | <i>Ca_desi_Chr02</i> | 5565953                 | G/A  | Gene_Ca_01421.2    | INTRON                        | NA                                   |
| <i>Desi_wild_5565956</i> | NA                                  | <i>Ca_desi_Chr02</i> | 5565956                 | G/A  | Gene_Ca_01421.2    | INTRON                        | NA                                   |
| <i>Desi_wild_5577178</i> | NA                                  | <i>Ca_desi_Chr02</i> | 5577178                 | A/T  | Gene_Ca_01421.2    | UPSTREAM                      | NA                                   |
| <i>Desi_wild_5632367</i> | NA                                  | <i>Ca_desi_Chr02</i> | 5632367                 | C/T  | Gene_Ca_01428.1    | INTRON                        | Adenylyl cyclase-associated protein  |
| <i>Desi_wild_5634614</i> | NA                                  | <i>Ca_desi_Chr02</i> | 5634614                 | T/A  | Gene_Ca_01428.1    | INTRON                        | Adenylyl cyclase-associated protein  |
| <i>Desi_wild_5634619</i> | NA                                  | <i>Ca_desi_Chr02</i> | 5634619                 | G/T  | Gene_Ca_01428.1    | INTRON                        | Adenylyl cyclase-associated protein  |
| <i>Desi_wild_5635080</i> | NA                                  | <i>Ca_desi_Chr02</i> | 5635080                 | T/C  | Gene_Ca_01428.1    | SYNONYMOUS_CODING             | Adenylyl cyclase-associated protein  |
| <i>Desi_wild_5635215</i> | NA                                  | <i>Ca_desi_Chr02</i> | 5635215                 | A/C  | Gene_Ca_01428.1    | INTRON                        | Adenylyl cyclase-associated protein  |
| <i>Desi_wild_5648515</i> | NA                                  | <i>Ca_desi_Chr02</i> | 5648515                 | T/G  | Gene_Ca_01429.1    | INTRON                        | Glucan endo-1,3-beta-glucosidase 7   |
| <i>Desi_wild_5648550</i> | NA                                  | <i>Ca_desi_Chr02</i> | 5648550                 | A/G  | Gene_Ca_01429.1    | INTRON                        | Glucan endo-1,3-beta-glucosidase 7   |
| <i>Desi_wild_5657507</i> | NA                                  | <i>Ca_desi_Chr02</i> | 5657507                 | A/T  | Gene_Ca_01430.2    | DOWNSTREAM                    | Coatomer subunit gamma-2             |
| <i>Desi_wild_5661404</i> | NA                                  | <i>Ca_desi_Chr02</i> | 5661404                 | C/T  | Gene_Ca_01430.2    | SYNONYMOUS_CODING             | Coatomer subunit gamma-2             |
| <i>Desi_wild_5661407</i> | NA                                  | <i>Ca_desi_Chr02</i> | 5661407                 | A/G  | Gene_Ca_01430.2    | SYNONYMOUS_CODING             | Coatomer subunit gamma-2             |
| <i>Desi_wild_5661416</i> | NA                                  | <i>Ca_desi_Chr02</i> | 5661416                 | A/G  | Gene_Ca_01430.2    | SYNONYMOUS_CODING             | Coatomer subunit gamma-2             |
| <i>Desi_wild_5661427</i> | NA                                  | <i>Ca_desi_Chr02</i> | 5661427                 | A/G  | Gene_Ca_01430.2    | SYNONYMOUS_CODING             | Coatomer subunit gamma-2             |
| <i>Desi_wild_5661431</i> | NA                                  | <i>Ca_desi_Chr02</i> | 5661431                 | G/T  | Gene_Ca_01430.2    | SYNONYMOUS_CODING             | Coatomer subunit gamma-2             |
| <i>Desi_wild_5661464</i> | NA                                  | <i>Ca_desi_Chr02</i> | 5661464                 | A/T  | Gene_Ca_01430.2    | SYNONYMOUS_CODING             | Coatomer subunit gamma-2             |
| <i>Desi_wild_5661470</i> | NA                                  | <i>Ca_desi_Chr02</i> | 5661470                 | A/T  | Gene_Ca_01430.2    | SYNONYMOUS_CODING             | Coatomer subunit gamma-2             |
| <i>Desi_wild_5661482</i> | NA                                  | <i>Ca_desi_Chr02</i> | 5661482                 | A/G  | Gene_Ca_01430.2    | SYNONYMOUS_CODING             | Coatomer subunit gamma-2             |
| <i>Desi_wild_5661485</i> | NA                                  | <i>Ca_desi_Chr02</i> | 5661485                 | G/C  | Gene_Ca_01430.2    | NON_SYNONYMOUS_CODING         | Coatomer subunit gamma-2             |
| <i>Desi_wild_5661494</i> | NA                                  | <i>Ca_desi_Chr02</i> | 5661494                 | T/A  | Gene_Ca_01430.2    | SYNONYMOUS_CODING             | Coatomer subunit gamma-2             |
| <i>Desi_wild_5661498</i> | NA                                  | <i>Ca_desi_Chr02</i> | 5661498                 | T/C  | Gene_Ca_01430.2    | NON_SYNONYMOUS_CODING         | Coatomer subunit gamma-2             |
| <i>Desi_wild_5661500</i> | NA                                  | <i>Ca_desi_Chr02</i> | 5661500                 | A/G  | Gene_Ca_01430.2    | SYNONYMOUS_CODING             | Coatomer subunit gamma-2             |
| <i>Desi_wild_5663278</i> | NA                                  | <i>Ca_desi_Chr02</i> | 5663278                 | A/G  | Gene_Ca_01430.2    | SYNONYMOUS_CODING             | Coatomer subunit gamma-2             |
| <i>Desi_wild_5694118</i> | NA                                  | <i>Ca_desi_Chr02</i> | 5694118                 | T/C  | NA                 | INTERGENIC                    | NA                                   |
| <i>Desi_wild_5694127</i> | NA                                  | <i>Ca_desi_Chr02</i> | 5694127                 | C/T  | NA                 | INTERGENIC                    | NA                                   |
| <i>Desi_wild_5694128</i> | NA                                  | <i>Ca_desi_Chr02</i> | 5694128                 | G/T  | NA                 | INTERGENIC                    | NA                                   |
| <i>Desi_wild_5698170</i> | NA                                  | <i>Ca_desi_Chr02</i> | 5698170                 | T/A  | Gene_Ca_01432.1    | DOWNSTREAM                    | cold-regulated 413-plasma membrane 2 |
| <i>Desi_wild_5698197</i> | NA                                  | <i>Ca_desi_Chr02</i> | 5698197                 | G/A  | Gene_Ca_01432.1    | DOWNSTREAM                    | cold-regulated 413-plasma membrane 2 |
| <i>Desi_wild_5698209</i> | NA                                  | <i>Ca_desi_Chr02</i> | 5698209                 | G/A  | Gene_Ca_01432.1    | DOWNSTREAM                    | cold-regulated 413-plasma membrane 2 |
| <i>Desi_wild_5698976</i> | NA                                  | <i>Ca_desi_Chr02</i> | 5698976                 | C/T  | NA                 | INTERGENIC                    | NA                                   |
| <i>Desi_wild_5698994</i> | NA                                  | <i>Ca_desi_Chr02</i> | 5698994                 | G/C  | NA                 | INTERGENIC                    | NA                                   |
| <i>Desi_wild_5699101</i> | NA                                  | <i>Ca_desi_Chr02</i> | 5699101                 | G/A  | NA                 | INTERGENIC                    | NA                                   |
| <i>Desi_wild_5699314</i> | NA                                  | <i>Ca_desi_Chr02</i> | 5699314                 | A/G  | NA                 | INTERGENIC                    | NA                                   |
| <i>Desi_wild_5699317</i> | NA                                  | <i>Ca_desi_Chr02</i> | 5699317                 | T/A  | NA                 | INTERGENIC                    | NA                                   |
| <i>Desi_wild_5699361</i> | NA                                  | <i>Ca_desi_Chr02</i> | 5699361                 | G/A  | NA                 | INTERGENIC                    | NA                                   |

| SNP IDs                  | NCBI dbSNP accession IDs (NCBI_SS#) | Chromosomes          | Physical positions (bp) | SNPs | Gene accession IDs | Sequence components of genome | Putative functions                                    |
|--------------------------|-------------------------------------|----------------------|-------------------------|------|--------------------|-------------------------------|-------------------------------------------------------|
| <i>Desi_wild_5699391</i> | NA                                  | <i>Ca_desi_Chr02</i> | 5699391                 | T/A  | NA                 | INTERGENIC                    | NA                                                    |
| <i>Desi_wild_5699393</i> | NA                                  | <i>Ca_desi_Chr02</i> | 5699393                 | G/A  | NA                 | INTERGENIC                    | NA                                                    |
| <i>Desi_wild_5702641</i> | NA                                  | <i>Ca_desi_Chr02</i> | 5702641                 | T/C  | Gene_Ca_01433.1    | UPSTREAM                      | Long chain acyl-CoA synthetase 2                      |
| <i>Desi_wild_5716475</i> | NA                                  | <i>Ca_desi_Chr02</i> | 5716475                 | C/T  | Gene_Ca_01434.1    | SYNONYMOUS_CODING             | Mitogen-activated protein kinase kinase kinase A      |
| <i>Desi_wild_5733756</i> | NA                                  | <i>Ca_desi_Chr02</i> | 5733756                 | C/A  | NA                 | INTERGENIC                    | NA                                                    |
| <i>Desi_wild_5740309</i> | NA                                  | <i>Ca_desi_Chr02</i> | 5740309                 | C/A  | Gene_Ca_01436.1    | DOWNSTREAM                    | Pentatricopeptide repeat-containing protein At2g15980 |
| <i>Desi_wild_5745292</i> | NA                                  | <i>Ca_desi_Chr02</i> | 5745292                 | C/T  | NA                 | INTERGENIC                    | NA                                                    |
| <i>Desi_wild_5745551</i> | NA                                  | <i>Ca_desi_Chr02</i> | 5745551                 | G/T  | NA                 | INTERGENIC                    | NA                                                    |
| <i>Desi_wild_5787352</i> | NA                                  | <i>Ca_desi_Chr02</i> | 5787352                 | T/C  | NA                 | INTERGENIC                    | NA                                                    |
| <i>Desi_wild_5872756</i> | NA                                  | <i>Ca_desi_Chr02</i> | 5872756                 | G/C  | NA                 | INTERGENIC                    | NA                                                    |
| <i>Desi_wild_5872782</i> | NA                                  | <i>Ca_desi_Chr02</i> | 5872782                 | T/C  | NA                 | INTERGENIC                    | NA                                                    |
| <i>Desi_wild_5872784</i> | NA                                  | <i>Ca_desi_Chr02</i> | 5872784                 | G/A  | NA                 | INTERGENIC                    | NA                                                    |
| <i>Desi_wild_5872804</i> | NA                                  | <i>Ca_desi_Chr02</i> | 5872804                 | C/G  | NA                 | INTERGENIC                    | NA                                                    |
| <i>Desi_wild_5872805</i> | NA                                  | <i>Ca_desi_Chr02</i> | 5872805                 | T/C  | NA                 | INTERGENIC                    | NA                                                    |
| <i>Desi_wild_5917902</i> | NA                                  | <i>Ca_desi_Chr02</i> | 5917902                 | G/A  | Gene_Ca_01443.1    | UPSTREAM                      | Protein FAR1-RELATED SEQUENCE 5                       |
| <i>Desi_wild_5965391</i> | NA                                  | <i>Ca_desi_Chr02</i> | 5965391                 | C/T  | Gene_Ca_01451.1    | SYNONYMOUS_CODING             | Flowering time control protein FPA                    |
| <i>Desi_wild_5965393</i> | NA                                  | <i>Ca_desi_Chr02</i> | 5965393                 | G/T  | Gene_Ca_01451.1    | SYNONYMOUS_CODING             | Flowering time control protein FPA                    |
| <i>Desi_wild_5988875</i> | NA                                  | <i>Ca_desi_Chr02</i> | 5988875                 | T/A  | Gene_Ca_01452.3    | INTRON                        | NA                                                    |
| <i>Desi_wild_6010840</i> | NA                                  | <i>Ca_desi_Chr02</i> | 6010840                 | G/A  | Gene_Ca_01454.1    | INTRON                        | Calreticulin-3                                        |
| <i>Desi_wild_6011026</i> | NA                                  | <i>Ca_desi_Chr02</i> | 6011026                 | G/A  | Gene_Ca_01454.1    | SYNONYMOUS_CODING             | Calreticulin-3                                        |
| <i>Desi_wild_6018033</i> | NA                                  | <i>Ca_desi_Chr02</i> | 6018033                 | C/T  | NA                 | INTERGENIC                    | NA                                                    |
| <i>Desi_wild_6018131</i> | NA                                  | <i>Ca_desi_Chr02</i> | 6018131                 | T/C  | NA                 | INTERGENIC                    | NA                                                    |
| <i>Desi_wild_6018355</i> | NA                                  | <i>Ca_desi_Chr02</i> | 6018355                 | C/T  | Gene_Ca_01455.1    | SYNONYMOUS_CODING             | Plant protein of unknown function (DUF936)            |
| <i>Desi_wild_6018361</i> | NA                                  | <i>Ca_desi_Chr02</i> | 6018361                 | C/T  | Gene_Ca_01455.1    | SYNONYMOUS_CODING             | Plant protein of unknown function (DUF936)            |
| <i>Desi_wild_6018371</i> | NA                                  | <i>Ca_desi_Chr02</i> | 6018371                 | A/G  | Gene_Ca_01455.1    | SYNONYMOUS_CODING             | Plant protein of unknown function (DUF936)            |
| <i>Desi_wild_6018376</i> | NA                                  | <i>Ca_desi_Chr02</i> | 6018376                 | A/T  | Gene_Ca_01455.1    | SYNONYMOUS_CODING             | Plant protein of unknown function (DUF936)            |
| <i>Desi_wild_6018381</i> | NA                                  | <i>Ca_desi_Chr02</i> | 6018381                 | G/T  | Gene_Ca_01455.1    | SYNONYMOUS_CODING             | Plant protein of unknown function (DUF936)            |
| <i>Desi_wild_6018382</i> | NA                                  | <i>Ca_desi_Chr02</i> | 6018382                 | C/T  | Gene_Ca_01455.1    | SYNONYMOUS_CODING             | Plant protein of unknown function (DUF936)            |
| <i>Desi_wild_6018388</i> | NA                                  | <i>Ca_desi_Chr02</i> | 6018388                 | A/T  | Gene_Ca_01455.1    | SYNONYMOUS_CODING             | Plant protein of unknown function (DUF936)            |
| <i>Desi_wild_6019934</i> | NA                                  | <i>Ca_desi_Chr02</i> | 6019934                 | G/T  | Gene_Ca_01455.1    | NON_SYNONYMOUS_CODING         | Plant protein of unknown function (DUF936)            |
| <i>Desi_wild_6020224</i> | NA                                  | <i>Ca_desi_Chr02</i> | 6020224                 | G/A  | Gene_Ca_01455.1    | SYNONYMOUS_CODING             | Plant protein of unknown function (DUF936)            |
| <i>Desi_wild_6022619</i> | NA                                  | <i>Ca_desi_Chr02</i> | 6022619                 | C/T  | NA                 | INTERGENIC                    | NA                                                    |
| <i>Desi_wild_6022627</i> | NA                                  | <i>Ca_desi_Chr02</i> | 6022627                 | T/G  | NA                 | INTERGENIC                    | NA                                                    |
| <i>Desi_wild_6022635</i> | NA                                  | <i>Ca_desi_Chr02</i> | 6022635                 | G/A  | NA                 | INTERGENIC                    | NA                                                    |
| <i>Desi_wild_6053043</i> | NA                                  | <i>Ca_desi_Chr02</i> | 6053043                 | A/T  | NA                 | INTERGENIC                    | NA                                                    |
| <i>Desi_wild_6088304</i> | NA                                  | <i>Ca_desi_Chr02</i> | 6088304                 | C/T  | NA                 | INTERGENIC                    | NA                                                    |
| <i>Desi_wild_6089048</i> | NA                                  | <i>Ca_desi_Chr02</i> | 6089048                 | T/C  | NA                 | INTERGENIC                    | NA                                                    |
| <i>Desi_wild_6089240</i> | NA                                  | <i>Ca_desi_Chr02</i> | 6089240                 | A/G  | NA                 | INTERGENIC                    | NA                                                    |
| <i>Desi_wild_6089257</i> | NA                                  | <i>Ca_desi_Chr02</i> | 6089257                 | G/A  | NA                 | INTERGENIC                    | NA                                                    |
| <i>Desi_wild_6091962</i> | NA                                  | <i>Ca_desi_Chr02</i> | 6091962                 | C/T  | Gene_Ca_01465.1    | DOWNSTREAM                    | Arginine decarboxylase                                |
| <i>Desi_wild_6091970</i> | NA                                  | <i>Ca_desi_Chr02</i> | 6091970                 | A/C  | Gene_Ca_01465.1    | DOWNSTREAM                    | Arginine decarboxylase                                |
| <i>Desi_wild_6091973</i> | NA                                  | <i>Ca_desi_Chr02</i> | 6091973                 | T/G  | Gene_Ca_01465.1    | DOWNSTREAM                    | Arginine decarboxylase                                |
| <i>Desi_wild_6092092</i> | NA                                  | <i>Ca_desi_Chr02</i> | 6092092                 | G/A  | NA                 | INTERGENIC                    | NA                                                    |
| <i>Desi_wild_6092094</i> | NA                                  | <i>Ca_desi_Chr02</i> | 6092094                 | A/G  | NA                 | INTERGENIC                    | NA                                                    |

| SNP IDs           | NCBI dbSNP accession IDs (NCBI_SS#) | Chromosomes   | Physical positions (bp) | SNPs | Gene accession IDs | Sequence components of genome | Putative functions                          |
|-------------------|-------------------------------------|---------------|-------------------------|------|--------------------|-------------------------------|---------------------------------------------|
| Desi_wild_6092158 | NA                                  | Ca_desi_Chr02 | 6092158                 | G/C  | NA                 | INTERGENIC                    | NA                                          |
| Desi_wild_6092265 | NA                                  | Ca_desi_Chr02 | 6092265                 | A/G  | NA                 | INTERGENIC                    | NA                                          |
| Desi_wild_6092347 | NA                                  | Ca_desi_Chr02 | 6092347                 | T/G  | NA                 | INTERGENIC                    | NA                                          |
| Desi_wild_6092376 | NA                                  | Ca_desi_Chr02 | 6092376                 | T/C  | NA                 | INTERGENIC                    | NA                                          |
| Desi_wild_6092444 | NA                                  | Ca_desi_Chr02 | 6092444                 | C/T  | NA                 | INTERGENIC                    | NA                                          |
| Desi_wild_6094379 | NA                                  | Ca_desi_Chr02 | 6094379                 | C/G  | NA                 | INTERGENIC                    | NA                                          |
| Desi_wild_6103617 | NA                                  | Ca_desi_Chr02 | 6103617                 | A/T  | NA                 | INTERGENIC                    | NA                                          |
| Desi_wild_6103902 | NA                                  | Ca_desi_Chr02 | 6103902                 | T/C  | NA                 | INTERGENIC                    | NA                                          |
| Desi_wild_6107432 | NA                                  | Ca_desi_Chr02 | 6107432                 | G/T  | NA                 | INTERGENIC                    | NA                                          |
| Desi_wild_6131587 | NA                                  | Ca_desi_Chr02 | 6131587                 | T/C  | NA                 | INTERGENIC                    | NA                                          |
| Desi_wild_6131704 | NA                                  | Ca_desi_Chr02 | 6131704                 | C/T  | NA                 | INTERGENIC                    | NA                                          |
| Desi_wild_6134669 | NA                                  | Ca_desi_Chr02 | 6134669                 | A/G  | Gene_Ca_01473.1    | NON_SYNONYMOUS_CODING         | Serine/threonine-protein kinase SMG1        |
| Desi_wild_6135210 | NA                                  | Ca_desi_Chr02 | 6135210                 | G/A  | Gene_Ca_01473.1    | INTRON                        | Serine/threonine-protein kinase SMG1        |
| Desi_wild_6138861 | NA                                  | Ca_desi_Chr02 | 6138861                 | C/T  | Gene_Ca_01473.1    | INTRON                        | Serine/threonine-protein kinase SMG1        |
| Desi_wild_6138901 | NA                                  | Ca_desi_Chr02 | 6138901                 | G/C  | Gene_Ca_01473.1    | NON_SYNONYMOUS_CODING         | Serine/threonine-protein kinase SMG1        |
| Desi_wild_6138912 | NA                                  | Ca_desi_Chr02 | 6138912                 | C/T  | Gene_Ca_01473.1    | SYNONYMOUS_CODING             | Serine/threonine-protein kinase SMG1        |
| Desi_wild_6139045 | NA                                  | Ca_desi_Chr02 | 6139045                 | A/G  | Gene_Ca_01473.1    | INTRON                        | Serine/threonine-protein kinase SMG1        |
| Desi_wild_6140423 | NA                                  | Ca_desi_Chr02 | 6140423                 | G/A  | Gene_Ca_01473.1    | NON_SYNONYMOUS_CODING         | Serine/threonine-protein kinase SMG1        |
| Desi_wild_6145109 | NA                                  | Ca_desi_Chr02 | 6145109                 | C/T  | Gene_Ca_01473.1    | DOWNSTREAM                    | Serine/threonine-protein kinase SMG1        |
| Desi_wild_6145235 | NA                                  | Ca_desi_Chr02 | 6145235                 | C/T  | NA                 | INTERGENIC                    | NA                                          |
| Desi_wild_6145253 | NA                                  | Ca_desi_Chr02 | 6145253                 | G/A  | NA                 | INTERGENIC                    | NA                                          |
| Desi_wild_6145263 | NA                                  | Ca_desi_Chr02 | 6145263                 | G/A  | NA                 | INTERGENIC                    | NA                                          |
| Desi_wild_6179369 | NA                                  | Ca_desi_Chr02 | 6179369                 | A/C  | Gene_Ca_01476.2    | INTRON                        | Proteasome assembly chaperone 2             |
| Desi_wild_6255732 | NA                                  | Ca_desi_Chr02 | 6255732                 | T/C  | Gene_Ca_01480.1    | NON_SYNONYMOUS_CODING         | Proteasome-associated protein ECM29 homolog |
| Desi_wild_6270305 | NA                                  | Ca_desi_Chr02 | 6270305                 | A/C  | Gene_Ca_01480.1    | INTRON                        | Proteasome-associated protein ECM29 homolog |
| Desi_wild_6270306 | NA                                  | Ca_desi_Chr02 | 6270306                 | G/C  | Gene_Ca_01480.1    | INTRON                        | Proteasome-associated protein ECM29 homolog |
| Desi_wild_6436332 | NA                                  | Ca_desi_Chr02 | 6436332                 | T/A  | Gene_Ca_01492.2    | INTRON                        | NA                                          |
| Desi_wild_6436365 | NA                                  | Ca_desi_Chr02 | 6436365                 | A/C  | Gene_Ca_01492.2    | INTRON                        | NA                                          |
| Desi_wild_6436396 | NA                                  | Ca_desi_Chr02 | 6436396                 | G/T  | Gene_Ca_01492.2    | INTRON                        | NA                                          |
| Desi_wild_6436967 | NA                                  | Ca_desi_Chr02 | 6436967                 | T/C  | Gene_Ca_01492.2    | SYNONYMOUS_CODING             | NA                                          |
| Desi_wild_6437062 | NA                                  | Ca_desi_Chr02 | 6437062                 | A/T  | Gene_Ca_01492.2    | INTRON                        | NA                                          |
| Desi_wild_6437084 | NA                                  | Ca_desi_Chr02 | 6437084                 | A/C  | Gene_Ca_01492.2    | INTRON                        | NA                                          |
| Desi_wild_6437145 | NA                                  | Ca_desi_Chr02 | 6437145                 | T/C  | Gene_Ca_01492.2    | INTRON                        | NA                                          |
| Desi_wild_6440098 | NA                                  | Ca_desi_Chr02 | 6440098                 | T/C  | Gene_Ca_01492.1    | DOWNSTREAM                    | Lycopene beta/epsilon cyclase protein       |
| Desi_wild_6440116 | NA                                  | Ca_desi_Chr02 | 6440116                 | G/A  | Gene_Ca_01492.1    | DOWNSTREAM                    | NA                                          |
| Desi_wild_6440256 | NA                                  | Ca_desi_Chr02 | 6440256                 | T/C  | Gene_Ca_01492.1    | DOWNSTREAM                    | NA                                          |
| Desi_wild_6440265 | NA                                  | Ca_desi_Chr02 | 6440265                 | C/A  | Gene_Ca_01492.1    | DOWNSTREAM                    | NA                                          |
| Desi_wild_6440268 | NA                                  | Ca_desi_Chr02 | 6440268                 | T/A  | Gene_Ca_01492.1    | DOWNSTREAM                    | NA                                          |
| Desi_wild_6440301 | NA                                  | Ca_desi_Chr02 | 6440301                 | T/C  | Gene_Ca_01492.1    | DOWNSTREAM                    | NA                                          |
| Desi_wild_6440323 | NA                                  | Ca_desi_Chr02 | 6440323                 | C/T  | Gene_Ca_01492.1    | DOWNSTREAM                    | NA                                          |
| Desi_wild_6440324 | NA                                  | Ca_desi_Chr02 | 6440324                 | A/G  | Gene_Ca_01492.1    | DOWNSTREAM                    | NA                                          |
| Desi_wild_6440325 | NA                                  | Ca_desi_Chr02 | 6440325                 | T/C  | Gene_Ca_01492.1    | DOWNSTREAM                    | NA                                          |
| Desi_wild_6532962 | NA                                  | Ca_desi_Chr02 | 6532962                 | C/T  | NA                 | INTERGENIC                    | NA                                          |
| Desi_wild_6532976 | NA                                  | Ca_desi_Chr02 | 6532976                 | G/T  | NA                 | INTERGENIC                    | NA                                          |



| SNP IDs                  | NCBI dbSNP accession IDs (NCBI_SS#) | Chromosomes          | Physical positions (bp) | SNPs | Gene accession IDs | Sequence components of genome | Putative functions                                              |
|--------------------------|-------------------------------------|----------------------|-------------------------|------|--------------------|-------------------------------|-----------------------------------------------------------------|
| <i>Desi_wild_6533732</i> | NA                                  | <i>Ca_desi_Chr02</i> | 6533732                 | T/C  | Gene_Ca_01500.1    | INTRON                        | Uncharacterized membrane protein C2G11.09                       |
| <i>Desi_wild_6539279</i> | NA                                  | <i>Ca_desi_Chr02</i> | 6539279                 | A/C  | Gene_Ca_01500.1    | DOWNSTREAM                    | Uncharacterized membrane protein C2G11.09                       |
| <i>Desi_wild_6560145</i> | NA                                  | <i>Ca_desi_Chr02</i> | 6560145                 | A/G  | Gene_Ca_01502.1    | INTRON                        | Ubiquitin carboxyl-terminal hydrolase 13                        |
| <i>Desi_wild_6589542</i> | NA                                  | <i>Ca_desi_Chr02</i> | 6589542                 | A/G  | Gene_Ca_01503.2    | SYNONYMOUS_CODING             | DNA-binding protein HEXBP                                       |
| <i>Desi_wild_6608684</i> | NA                                  | <i>Ca_desi_Chr02</i> | 6608684                 | T/C  | NA                 | INTERGENIC                    | NA                                                              |
| <i>Desi_wild_6608737</i> | NA                                  | <i>Ca_desi_Chr02</i> | 6608737                 | G/A  | NA                 | INTERGENIC                    | NA                                                              |
| <i>Desi_wild_6608836</i> | NA                                  | <i>Ca_desi_Chr02</i> | 6608836                 | G/A  | NA                 | INTERGENIC                    | NA                                                              |
| <i>Desi_wild_6608958</i> | NA                                  | <i>Ca_desi_Chr02</i> | 6608958                 | C/T  | NA                 | INTERGENIC                    | NA                                                              |
| <i>Desi_wild_6609027</i> | NA                                  | <i>Ca_desi_Chr02</i> | 6609027                 | G/T  | NA                 | INTERGENIC                    | NA                                                              |
| <i>Desi_wild_6609053</i> | NA                                  | <i>Ca_desi_Chr02</i> | 6609053                 | A/T  | NA                 | INTERGENIC                    | NA                                                              |
| <i>Desi_wild_6614650</i> | NA                                  | <i>Ca_desi_Chr02</i> | 6614650                 | G/A  | Gene_Ca_01505.1    | INTRON                        | Structural maintenance of chromosomes protein 3                 |
| <i>Desi_wild_6614685</i> | NA                                  | <i>Ca_desi_Chr02</i> | 6614685                 | G/A  | Gene_Ca_01505.1    | INTRON                        | Structural maintenance of chromosomes protein 3                 |
| <i>Desi_wild_6614760</i> | NA                                  | <i>Ca_desi_Chr02</i> | 6614760                 | G/C  | Gene_Ca_01505.1    | INTRON                        | Structural maintenance of chromosomes protein 3                 |
| <i>Desi_wild_6622292</i> | NA                                  | <i>Ca_desi_Chr02</i> | 6622292                 | G/T  | Gene_Ca_01505.1    | INTRON                        | Structural maintenance of chromosomes protein 3                 |
| <i>Desi_wild_6624856</i> | NA                                  | <i>Ca_desi_Chr02</i> | 6624856                 | T/C  | Gene_Ca_01505.1    | SYNONYMOUS_CODING             | Structural maintenance of chromosomes protein 3                 |
| <i>Desi_wild_6624907</i> | NA                                  | <i>Ca_desi_Chr02</i> | 6624907                 | C/G  | Gene_Ca_01505.1    | INTRON                        | Structural maintenance of chromosomes protein 3                 |
| <i>Desi_wild_6653879</i> | NA                                  | <i>Ca_desi_Chr02</i> | 6653879                 | G/T  | Gene_Ca_01507.1    | NON_SYNONYMOUS_CODING         | Abscisic-aldehyde oxidase                                       |
| <i>Desi_wild_6653902</i> | NA                                  | <i>Ca_desi_Chr02</i> | 6653902                 | C/T  | Gene_Ca_01507.1    | SYNONYMOUS_CODING             | Abscisic-aldehyde oxidase                                       |
| <i>Desi_wild_6701332</i> | NA                                  | <i>Ca_desi_Chr02</i> | 6701332                 | G/T  | NA                 | INTERGENIC                    | NA                                                              |
| <i>Desi_wild_6711829</i> | NA                                  | <i>Ca_desi_Chr02</i> | 6711829                 | T/G  | Gene_Ca_01516.1    | NON_SYNONYMOUS_CODING         | BTB/POZ and MATH domain-containing protein 4                    |
| <i>Desi_wild_6916947</i> | NA                                  | <i>Ca_desi_Chr02</i> | 6916947                 | A/T  | NA                 | INTERGENIC                    | NA                                                              |
| <i>Desi_wild_6968291</i> | NA                                  | <i>Ca_desi_Chr02</i> | 6968291                 | C/T  | NA                 | INTERGENIC                    | NA                                                              |
| <i>Desi_wild_6968294</i> | NA                                  | <i>Ca_desi_Chr02</i> | 6968294                 | T/G  | NA                 | INTERGENIC                    | NA                                                              |
| <i>Desi_wild_7062059</i> | NA                                  | <i>Ca_desi_Chr02</i> | 7062059                 | G/A  | Gene_Ca_01544.1    | NON_SYNONYMOUS_CODING         | NA                                                              |
| <i>Desi_wild_7082948</i> | NA                                  | <i>Ca_desi_Chr02</i> | 7082948                 | C/G  | Gene_Ca_01546.1    | DOWNSTREAM                    | ABSCISIC ACID-INSENSITIVE 5-like protein 2                      |
| <i>Desi_wild_7083062</i> | NA                                  | <i>Ca_desi_Chr02</i> | 7083062                 | T/G  | Gene_Ca_01546.1    | DOWNSTREAM                    | ABSCISIC ACID-INSENSITIVE 5-like protein 2                      |
| <i>Desi_wild_7084976</i> | NA                                  | <i>Ca_desi_Chr02</i> | 7084976                 | A/C  | Gene_Ca_01546.1    | DOWNSTREAM                    | ABSCISIC ACID-INSENSITIVE 5-like protein 2                      |
| <i>Desi_wild_7084987</i> | NA                                  | <i>Ca_desi_Chr02</i> | 7084987                 | C/T  | Gene_Ca_01546.1    | DOWNSTREAM                    | ABSCISIC ACID-INSENSITIVE 5-like protein 2                      |
| <i>Desi_wild_7085006</i> | NA                                  | <i>Ca_desi_Chr02</i> | 7085006                 | A/G  | Gene_Ca_01546.1    | DOWNSTREAM                    | ABSCISIC ACID-INSENSITIVE 5-like protein 2                      |
| <i>Desi_wild_7113358</i> | NA                                  | <i>Ca_desi_Chr02</i> | 7113358                 | G/T  | Gene_Ca_01548.1    | DOWNSTREAM                    | Phosphatidylinositol glycan anchor biosynthesis class U protein |
| <i>Desi_wild_7242124</i> | NA                                  | <i>Ca_desi_Chr02</i> | 7242124                 | G/A  | NA                 | INTERGENIC                    | NA                                                              |
| <i>Desi_wild_7316884</i> | NA                                  | <i>Ca_desi_Chr02</i> | 7316884                 | A/T  | Gene_Ca_01569.1    | DOWNSTREAM                    | Pentatricopeptide repeat-containing protein At5g01110           |
| <i>Desi_wild_7317845</i> | NA                                  | <i>Ca_desi_Chr02</i> | 7317845                 | A/G  | Gene_Ca_01569.1    | DOWNSTREAM                    | Pentatricopeptide repeat-containing protein At5g01110           |
| <i>Desi_wild_7317863</i> | NA                                  | <i>Ca_desi_Chr02</i> | 7317863                 | G/A  | Gene_Ca_01569.1    | SYNONYMOUS_CODING             | Pentatricopeptide repeat-containing protein At5g01110           |
| <i>Desi_wild_7327612</i> | NA                                  | <i>Ca_desi_Chr02</i> | 7327612                 | C/T  | Gene_Ca_01570.2    | SYNONYMOUS_CODING             | Brain-specific homeobox protein                                 |
| <i>Desi_wild_7389166</i> | NA                                  | <i>Ca_desi_Chr02</i> | 7389166                 | G/A  | NA                 | INTERGENIC                    | NA                                                              |
| <i>Desi_wild_7455910</i> | NA                                  | <i>Ca_desi_Chr02</i> | 7455910                 | T/C  | NA                 | INTERGENIC                    | NA                                                              |
| <i>Desi_wild_7459382</i> | NA                                  | <i>Ca_desi_Chr02</i> | 7459382                 | G/A  | Gene_Ca_01583.1    | DOWNSTREAM                    | Protein TRANSPARENT TESTA 12                                    |
| <i>Desi_wild_7462051</i> | NA                                  | <i>Ca_desi_Chr02</i> | 7462051                 | A/C  | NA                 | INTERGENIC                    | NA                                                              |
| <i>Desi_wild_7488810</i> | NA                                  | <i>Ca_desi_Chr02</i> | 7488810                 | C/T  | NA                 | INTERGENIC                    | NA                                                              |
| <i>Desi_wild_7598887</i> | NA                                  | <i>Ca_desi_Chr02</i> | 7598887                 | T/G  | NA                 | INTERGENIC                    | NA                                                              |
| <i>Desi_wild_7630508</i> | NA                                  | <i>Ca_desi_Chr02</i> | 7630508                 | T/C  | Gene_Ca_01602.1    | NON_SYNONYMOUS_CODING         | Conserved oligomeric Golgi complex subunit 5                    |
| <i>Desi_wild_7659426</i> | NA                                  | <i>Ca_desi_Chr02</i> | 7659426                 | C/T  | NA                 | INTERGENIC                    | NA                                                              |
| <i>Desi_wild_7675908</i> | NA                                  | <i>Ca_desi_Chr02</i> | 7675908                 | T/G  | Gene_Ca_01606.1    | SYNONYMOUS_CODING             | Probable receptor-like protein kinase At2g42960                 |

| SNP IDs                  | NCBI dbSNP accession IDs (NCBI_SS#) | Chromosomes          | Physical positions (bp) | SNPs | Gene accession IDs | Sequence components of genome | Putative functions                                     |
|--------------------------|-------------------------------------|----------------------|-------------------------|------|--------------------|-------------------------------|--------------------------------------------------------|
| <i>Desi_wild_7697803</i> | NA                                  | <i>Ca_desi_Chr02</i> | 7697803                 | G/C  | NA                 | INTERGENIC                    | NA                                                     |
| <i>Desi_wild_7708760</i> | NA                                  | <i>Ca_desi_Chr02</i> | 7708760                 | A/C  | NA                 | INTERGENIC                    | NA                                                     |
| <i>Desi_wild_7708765</i> | NA                                  | <i>Ca_desi_Chr02</i> | 7708765                 | A/C  | NA                 | INTERGENIC                    | NA                                                     |
| <i>Desi_wild_7728470</i> | NA                                  | <i>Ca_desi_Chr02</i> | 7728470                 | C/G  | NA                 | INTERGENIC                    | NA                                                     |
| <i>Desi_wild_7728474</i> | NA                                  | <i>Ca_desi_Chr02</i> | 7728474                 | A/G  | NA                 | INTERGENIC                    | NA                                                     |
| <i>Desi_wild_7869084</i> | NA                                  | <i>Ca_desi_Chr02</i> | 7869084                 | A/C  | Gene_Ca_01629.1    | DOWNSTREAM                    | unknown protein                                        |
| <i>Desi_wild_7875419</i> | NA                                  | <i>Ca_desi_Chr02</i> | 7875419                 | A/G  | Gene_Ca_01631.1    | NON_SYNONYMOUS_CODING         | Taxadiene 5-alpha hydroxylase                          |
| <i>Desi_wild_7897881</i> | NA                                  | <i>Ca_desi_Chr02</i> | 7897881                 | C/A  | NA                 | INTERGENIC                    | NA                                                     |
| <i>Desi_wild_7944911</i> | NA                                  | <i>Ca_desi_Chr02</i> | 7944911                 | T/C  | Gene_Ca_01638.2    | NON_SYNONYMOUS_CODING         | NA                                                     |
| <i>Desi_wild_7956635</i> | NA                                  | <i>Ca_desi_Chr02</i> | 7956635                 | G/A  | Gene_Ca_01639.1    | NON_SYNONYMOUS_CODING         | ATPase family AAA domain-containing protein At1g05910  |
| <i>Desi_wild_7956738</i> | NA                                  | <i>Ca_desi_Chr02</i> | 7956738                 | T/C  | Gene_Ca_01639.1    | SYNONYMOUS_CODING             | ATPase family AAA domain-containing protein At1g05910  |
| <i>Desi_wild_7958321</i> | NA                                  | <i>Ca_desi_Chr02</i> | 7958321                 | A/C  | Gene_Ca_01639.1    | NON_SYNONYMOUS_CODING         | ATPase family AAA domain-containing protein At1g05910  |
| <i>Desi_wild_8013247</i> | NA                                  | <i>Ca_desi_Chr02</i> | 8013247                 | C/T  | Gene_Ca_01644.1    | NON_SYNONYMOUS_CODING         | Probable E3 ubiquitin-protein ligase ARI7              |
| <i>Desi_wild_8065988</i> | NA                                  | <i>Ca_desi_Chr02</i> | 8065988                 | C/A  | NA                 | INTERGENIC                    | NA                                                     |
| <i>Desi_wild_8073314</i> | NA                                  | <i>Ca_desi_Chr02</i> | 8073314                 | G/A  | NA                 | INTERGENIC                    | NA                                                     |
| <i>Desi_wild_8113708</i> | NA                                  | <i>Ca_desi_Chr02</i> | 8113708                 | T/G  | Gene_Ca_01652.1    | INTRON                        | CASP-like protein At2g28370                            |
| <i>Desi_wild_8113723</i> | NA                                  | <i>Ca_desi_Chr02</i> | 8113723                 | C/T  | Gene_Ca_01652.1    | INTRON                        | CASP-like protein At2g28370                            |
| <i>Desi_wild_8113738</i> | NA                                  | <i>Ca_desi_Chr02</i> | 8113738                 | C/T  | Gene_Ca_01652.1    | INTRON                        | CASP-like protein At2g28370                            |
| <i>Desi_wild_8127741</i> | NA                                  | <i>Ca_desi_Chr02</i> | 8127741                 | C/A  | NA                 | INTERGENIC                    | NA                                                     |
| <i>Desi_wild_8149881</i> | NA                                  | <i>Ca_desi_Chr02</i> | 8149881                 | T/G  | Gene_Ca_01654.1    | DOWNSTREAM                    | Zinc transporter ZTP29                                 |
| <i>Desi_wild_8160645</i> | NA                                  | <i>Ca_desi_Chr02</i> | 8160645                 | C/A  | Gene_Ca_01655.1    | DOWNSTREAM                    | Cytochrome c-type biogenesis protein CcmE              |
| <i>Desi_wild_8160733</i> | NA                                  | <i>Ca_desi_Chr02</i> | 8160733                 | C/T  | Gene_Ca_01655.1    | DOWNSTREAM                    | Cytochrome c-type biogenesis protein CcmE              |
| <i>Desi_wild_8160737</i> | NA                                  | <i>Ca_desi_Chr02</i> | 8160737                 | A/C  | Gene_Ca_01655.1    | DOWNSTREAM                    | Cytochrome c-type biogenesis protein CcmE              |
| <i>Desi_wild_8160750</i> | NA                                  | <i>Ca_desi_Chr02</i> | 8160750                 | G/A  | Gene_Ca_01655.1    | DOWNSTREAM                    | Cytochrome c-type biogenesis protein CcmE              |
| <i>Desi_wild_8167177</i> | NA                                  | <i>Ca_desi_Chr02</i> | 8167177                 | A/C  | Gene_Ca_01656.1    | INTRON                        | NA                                                     |
| <i>Desi_wild_8167702</i> | NA                                  | <i>Ca_desi_Chr02</i> | 8167702                 | T/C  | Gene_Ca_01656.1    | SYNONYMOUS_CODING             | NA                                                     |
| <i>Desi_wild_8167708</i> | NA                                  | <i>Ca_desi_Chr02</i> | 8167708                 | C/T  | Gene_Ca_01656.1    | SYNONYMOUS_CODING             | NA                                                     |
| <i>Desi_wild_8167709</i> | NA                                  | <i>Ca_desi_Chr02</i> | 8167709                 | C/T  | Gene_Ca_01656.1    | NON_SYNONYMOUS_CODING         | NA                                                     |
| <i>Desi_wild_8167714</i> | NA                                  | <i>Ca_desi_Chr02</i> | 8167714                 | A/G  | Gene_Ca_01656.1    | SYNONYMOUS_CODING             | NA                                                     |
| <i>Desi_wild_8167719</i> | NA                                  | <i>Ca_desi_Chr02</i> | 8167719                 | T/C  | Gene_Ca_01656.1    | NON_SYNONYMOUS_CODING         | NA                                                     |
| <i>Desi_wild_8167720</i> | NA                                  | <i>Ca_desi_Chr02</i> | 8167720                 | G/A  | Gene_Ca_01656.1    | NON_SYNONYMOUS_CODING         | NA                                                     |
| <i>Desi_wild_8167721</i> | NA                                  | <i>Ca_desi_Chr02</i> | 8167721                 | A/C  | Gene_Ca_01656.1    | NON_SYNONYMOUS_CODING         | NA                                                     |
| <i>Desi_wild_8167724</i> | NA                                  | <i>Ca_desi_Chr02</i> | 8167724                 | C/T  | Gene_Ca_01656.1    | SYNONYMOUS_CODING             | NA                                                     |
| <i>Desi_wild_8167729</i> | NA                                  | <i>Ca_desi_Chr02</i> | 8167729                 | A/G  | Gene_Ca_01656.1    | SYNONYMOUS_CODING             | NA                                                     |
| <i>Desi_wild_8167735</i> | NA                                  | <i>Ca_desi_Chr02</i> | 8167735                 | G/A  | Gene_Ca_01656.1    | SYNONYMOUS_CODING             | NA                                                     |
| <i>Desi_wild_8167740</i> | NA                                  | <i>Ca_desi_Chr02</i> | 8167740                 | C/A  | Gene_Ca_01656.1    | NON_SYNONYMOUS_CODING         | NA                                                     |
| <i>Desi_wild_8167744</i> | NA                                  | <i>Ca_desi_Chr02</i> | 8167744                 | G/A  | Gene_Ca_01656.1    | SYNONYMOUS_CODING             | NA                                                     |
| <i>Desi_wild_8167753</i> | NA                                  | <i>Ca_desi_Chr02</i> | 8167753                 | G/A  | Gene_Ca_01656.1    | SYNONYMOUS_CODING             | NA                                                     |
| <i>Desi_wild_8167754</i> | NA                                  | <i>Ca_desi_Chr02</i> | 8167754                 | A/T  | Gene_Ca_01656.1    | SYNONYMOUS_CODING             | NA                                                     |
| <i>Desi_wild_8167759</i> | NA                                  | <i>Ca_desi_Chr02</i> | 8167759                 | C/G  | Gene_Ca_01656.1    | SYNONYMOUS_CODING             | NA                                                     |
| <i>Desi_wild_8167760</i> | NA                                  | <i>Ca_desi_Chr02</i> | 8167760                 | C/G  | Gene_Ca_01656.1    | NON_SYNONYMOUS_CODING         | NA                                                     |
| <i>Desi_wild_8167764</i> | NA                                  | <i>Ca_desi_Chr02</i> | 8167764                 | G/A  | Gene_Ca_01656.1    | NON_SYNONYMOUS_CODING         | NA                                                     |
| <i>Desi_wild_8174448</i> | NA                                  | <i>Ca_desi_Chr02</i> | 8174448                 | G/A  | Gene_Ca_01657.1    | NON_SYNONYMOUS_CODING         | AP2-like ethylene-responsive transcription factor PLT2 |
| <i>Desi_wild_8234099</i> | NA                                  | <i>Ca_desi_Chr02</i> | 8234099                 | A/C  | NA                 | INTERGENIC                    | NA                                                     |

| SNP IDs                   | NCBI dbSNP accession IDs (NCBI_SS#) | Chromosomes          | Physical positions (bp) | SNPs | Gene accession IDs | Sequence components of genome | Putative functions                              |
|---------------------------|-------------------------------------|----------------------|-------------------------|------|--------------------|-------------------------------|-------------------------------------------------|
| <i>Desi_wild_8294576</i>  | NA                                  | <i>Ca_desi_Chr02</i> | 8294576                 | C/T  | Gene_Ca_01662.1    | INTRON                        | Transducin/WD40 repeat-like superfamily protein |
| <i>Desi_wild_8294583</i>  | NA                                  | <i>Ca_desi_Chr02</i> | 8294583                 | T/C  | Gene_Ca_01662.1    | INTRON                        | Transducin/WD40 repeat-like superfamily protein |
| <i>Desi_wild_8294610</i>  | NA                                  | <i>Ca_desi_Chr02</i> | 8294610                 | T/A  | Gene_Ca_01662.1    | INTRON                        | Transducin/WD40 repeat-like superfamily protein |
| <i>Desi_wild_8294706</i>  | NA                                  | <i>Ca_desi_Chr02</i> | 8294706                 | C/T  | Gene_Ca_01662.1    | INTRON                        | Transducin/WD40 repeat-like superfamily protein |
| <i>Desi_wild_8294715</i>  | NA                                  | <i>Ca_desi_Chr02</i> | 8294715                 | C/T  | Gene_Ca_01662.1    | INTRON                        | Transducin/WD40 repeat-like superfamily protein |
| <i>Desi_wild_8294721</i>  | NA                                  | <i>Ca_desi_Chr02</i> | 8294721                 | C/A  | Gene_Ca_01662.1    | INTRON                        | Transducin/WD40 repeat-like superfamily protein |
| <i>Desi_wild_8303613</i>  | NA                                  | <i>Ca_desi_Chr02</i> | 8303613                 | G/A  | Gene_Ca_01663.1    | NON_SYNONYMOUS_CODING         | unknown protein                                 |
| <i>Desi_wild_8322723</i>  | NA                                  | <i>Ca_desi_Chr02</i> | 8322723                 | A/G  | Gene_Ca_01664.1    | NON_SYNONYMOUS_CODING         | Uncharacterized ribonuclease sll1290            |
| <i>Desi_wild_8322740</i>  | NA                                  | <i>Ca_desi_Chr02</i> | 8322740                 | G/A  | Gene_Ca_01664.1    | SYNONYMOUS_CODING             | Uncharacterized ribonuclease sll1290            |
| <i>Desi_wild_8322763</i>  | NA                                  | <i>Ca_desi_Chr02</i> | 8322763                 | A/G  | Gene_Ca_01664.1    | NON_SYNONYMOUS_CODING         | Uncharacterized ribonuclease sll1290            |
| <i>Desi_wild_8495235</i>  | NA                                  | <i>Ca_desi_Chr02</i> | 8495235                 | T/G  | Gene_Ca_01673.1    | INTRON                        | DNA-directed RNA polymerase III subunit RPC1    |
| <i>Desi_wild_9840097</i>  | NA                                  | <i>Ca_desi_Chr02</i> | 9840097                 | G/A  | NA                 | INTERGENIC                    | NA                                              |
| <i>Desi_wild_9840141</i>  | NA                                  | <i>Ca_desi_Chr02</i> | 9840141                 | C/T  | NA                 | INTERGENIC                    | NA                                              |
| <i>Desi_wild_9844942</i>  | NA                                  | <i>Ca_desi_Chr02</i> | 9844942                 | G/T  | NA                 | INTERGENIC                    | NA                                              |
| <i>Desi_wild_9845051</i>  | NA                                  | <i>Ca_desi_Chr02</i> | 9845051                 | A/C  | NA                 | INTERGENIC                    | NA                                              |
| <i>Desi_wild_9864788</i>  | NA                                  | <i>Ca_desi_Chr02</i> | 9864788                 | G/T  | Gene_Ca_01705.1    | DOWNSTREAM                    | unknown protein                                 |
| <i>Desi_wild_9873103</i>  | NA                                  | <i>Ca_desi_Chr02</i> | 9873103                 | A/C  | Gene_Ca_01706.1    | SYNONYMOUS_CODING             | Protein TOC75, chloroplastic                    |
| <i>Desi_wild_9877131</i>  | NA                                  | <i>Ca_desi_Chr02</i> | 9877131                 | A/G  | Gene_Ca_01707.1    | DOWNSTREAM                    | Two-component response regulator ARR1           |
| <i>Desi_wild_9886040</i>  | NA                                  | <i>Ca_desi_Chr02</i> | 9886040                 | C/T  | Gene_Ca_01708.2    | NON_SYNONYMOUS_CODING         | NA                                              |
| <i>Desi_wild_9886081</i>  | NA                                  | <i>Ca_desi_Chr02</i> | 9886081                 | G/A  | Gene_Ca_01708.2    | NON_SYNONYMOUS_CODING         | NA                                              |
| <i>Desi_wild_10091173</i> | NA                                  | <i>Ca_desi_Chr02</i> | 10091173                | T/C  | NA                 | INTERGENIC                    | NA                                              |
| <i>Desi_wild_10439843</i> | NA                                  | <i>Ca_desi_Chr02</i> | 10439843                | G/A  | Gene_Ca_01736.2    | SYNONYMOUS_CODING             | NA                                              |
| <i>Desi_wild_10864591</i> | NA                                  | <i>Ca_desi_Chr02</i> | 10864591                | G/A  | NA                 | INTERGENIC                    | NA                                              |
| <i>Desi_wild_10864593</i> | NA                                  | <i>Ca_desi_Chr02</i> | 10864593                | A/T  | NA                 | INTERGENIC                    | NA                                              |
| <i>Desi_wild_10864609</i> | NA                                  | <i>Ca_desi_Chr02</i> | 10864609                | G/A  | NA                 | INTERGENIC                    | NA                                              |
| <i>Desi_wild_10864621</i> | NA                                  | <i>Ca_desi_Chr02</i> | 10864621                | T/A  | NA                 | INTERGENIC                    | NA                                              |
| <i>Desi_wild_10864624</i> | NA                                  | <i>Ca_desi_Chr02</i> | 10864624                | C/T  | NA                 | INTERGENIC                    | NA                                              |
| <i>Desi_wild_10864631</i> | NA                                  | <i>Ca_desi_Chr02</i> | 10864631                | C/T  | NA                 | INTERGENIC                    | NA                                              |
| <i>Desi_wild_10864664</i> | NA                                  | <i>Ca_desi_Chr02</i> | 10864664                | A/G  | NA                 | INTERGENIC                    | NA                                              |
| <i>Desi_wild_10864698</i> | NA                                  | <i>Ca_desi_Chr02</i> | 10864698                | G/A  | NA                 | INTERGENIC                    | NA                                              |
| <i>Desi_wild_10864699</i> | NA                                  | <i>Ca_desi_Chr02</i> | 10864699                | G/A  | NA                 | INTERGENIC                    | NA                                              |
| <i>Desi_wild_10864722</i> | NA                                  | <i>Ca_desi_Chr02</i> | 10864722                | T/C  | NA                 | INTERGENIC                    | NA                                              |
| <i>Desi_wild_10864728</i> | NA                                  | <i>Ca_desi_Chr02</i> | 10864728                | C/A  | NA                 | INTERGENIC                    | NA                                              |
| <i>Desi_wild_11084614</i> | NA                                  | <i>Ca_desi_Chr02</i> | 11084614                | A/C  | NA                 | INTERGENIC                    | NA                                              |
| <i>Desi_wild_11084623</i> | NA                                  | <i>Ca_desi_Chr02</i> | 11084623                | C/T  | NA                 | INTERGENIC                    | NA                                              |
| <i>Desi_wild_11276069</i> | NA                                  | <i>Ca_desi_Chr02</i> | 11276069                | G/A  | Gene_Ca_01763.1    | NON_SYNONYMOUS_CODING         | Fructokinase-2                                  |
| <i>Desi_wild_11393816</i> | NA                                  | <i>Ca_desi_Chr02</i> | 11393816                | G/A  | Gene_Ca_01765.1    | NON_SYNONYMOUS_CODING         | Uncharacterized lipoprotein syc1174_c           |
| <i>Desi_wild_11393824</i> | NA                                  | <i>Ca_desi_Chr02</i> | 11393824                | C/T  | Gene_Ca_01765.1    | INTRON                        | Uncharacterized lipoprotein syc1174_c           |
| <i>Desi_wild_11393858</i> | NA                                  | <i>Ca_desi_Chr02</i> | 11393858                | A/G  | Gene_Ca_01765.1    | INTRON                        | Uncharacterized lipoprotein syc1174_c           |
| <i>Desi_wild_11393861</i> | NA                                  | <i>Ca_desi_Chr02</i> | 11393861                | A/T  | Gene_Ca_01765.1    | INTRON                        | Uncharacterized lipoprotein syc1174_c           |
| <i>Desi_wild_11393862</i> | NA                                  | <i>Ca_desi_Chr02</i> | 11393862                | C/G  | Gene_Ca_01765.1    | INTRON                        | Uncharacterized lipoprotein syc1174_c           |
| <i>Desi_wild_11393872</i> | NA                                  | <i>Ca_desi_Chr02</i> | 11393872                | G/A  | Gene_Ca_01765.1    | INTRON                        | Uncharacterized lipoprotein syc1174_c           |
| <i>Desi_wild_11394024</i> | NA                                  | <i>Ca_desi_Chr02</i> | 11394024                | A/G  | Gene_Ca_01765.1    | INTRON                        | Uncharacterized lipoprotein syc1174_c           |
| <i>Desi_wild_11394036</i> | NA                                  | <i>Ca_desi_Chr02</i> | 11394036                | T/C  | Gene_Ca_01765.1    | INTRON                        | Uncharacterized lipoprotein syc1174_c           |

| SNP IDs            | NCBI dbSNP accession IDs (NCBI_SS#) | Chromosomes   | Physical positions (bp) | SNPs | Gene accession IDs | Sequence components of genome | Putative functions                                               |
|--------------------|-------------------------------------|---------------|-------------------------|------|--------------------|-------------------------------|------------------------------------------------------------------|
| Desi_wild_11394066 | NA                                  | Ca_desi_Chr02 | 11394066                | G/A  | Gene_Ca_01765.1    | INTRON                        | Uncharacterized lipoprotein syc1174_c                            |
| Desi_wild_11394075 | NA                                  | Ca_desi_Chr02 | 11394075                | G/A  | Gene_Ca_01765.1    | INTRON                        | Uncharacterized lipoprotein syc1174_c                            |
| Desi_wild_11394153 | NA                                  | Ca_desi_Chr02 | 11394153                | T/C  | Gene_Ca_01765.1    | INTRON                        | Uncharacterized lipoprotein syc1174_c                            |
| Desi_wild_11394247 | NA                                  | Ca_desi_Chr02 | 11394247                | G/A  | Gene_Ca_01765.1    | NON_SYNONYMOUS_CODING         | Uncharacterized lipoprotein syc1174_c                            |
| Desi_wild_11403656 | NA                                  | Ca_desi_Chr02 | 11403656                | C/T  | Gene_Ca_01766.1    | INTRON                        | T-complex protein 1 subunit theta                                |
| Desi_wild_11403678 | NA                                  | Ca_desi_Chr02 | 11403678                | T/C  | Gene_Ca_01766.1    | INTRON                        | T-complex protein 1 subunit theta                                |
| Desi_wild_11403821 | NA                                  | Ca_desi_Chr02 | 11403821                | T/A  | Gene_Ca_01766.1    | INTRON                        | T-complex protein 1 subunit theta                                |
| Desi_wild_11403828 | NA                                  | Ca_desi_Chr02 | 11403828                | C/T  | Gene_Ca_01766.1    | SYNONYMOUS_CODING             | T-complex protein 1 subunit theta                                |
| Desi_wild_11403900 | NA                                  | Ca_desi_Chr02 | 11403900                | C/A  | Gene_Ca_01766.1    | SYNONYMOUS_CODING             | T-complex protein 1 subunit theta                                |
| Desi_wild_11403959 | NA                                  | Ca_desi_Chr02 | 11403959                | C/T  | Gene_Ca_01766.1    | INTRON                        | T-complex protein 1 subunit theta                                |
| Desi_wild_11422984 | NA                                  | Ca_desi_Chr02 | 11422984                | G/A  | Gene_Ca_01768.1    | INTRON                        | Probable nicotinate-nucleotide pyrophosphorylase [carboxylating] |
| Desi_wild_11423000 | NA                                  | Ca_desi_Chr02 | 11423000                | C/A  | Gene_Ca_01768.1    | INTRON                        | Probable nicotinate-nucleotide pyrophosphorylase [carboxylating] |
| Desi_wild_11423014 | NA                                  | Ca_desi_Chr02 | 11423014                | G/A  | Gene_Ca_01768.1    | INTRON                        | Probable nicotinate-nucleotide pyrophosphorylase [carboxylating] |
| Desi_wild_11423022 | NA                                  | Ca_desi_Chr02 | 11423022                | T/C  | Gene_Ca_01768.1    | INTRON                        | Probable nicotinate-nucleotide pyrophosphorylase [carboxylating] |
| Desi_wild_11423023 | NA                                  | Ca_desi_Chr02 | 11423023                | C/T  | Gene_Ca_01768.1    | INTRON                        | Probable nicotinate-nucleotide pyrophosphorylase [carboxylating] |
| Desi_wild_11423041 | NA                                  | Ca_desi_Chr02 | 11423041                | T/G  | Gene_Ca_01768.1    | INTRON                        | Probable nicotinate-nucleotide pyrophosphorylase [carboxylating] |
| Desi_wild_11423053 | NA                                  | Ca_desi_Chr02 | 11423053                | T/C  | Gene_Ca_01768.1    | INTRON                        | Probable nicotinate-nucleotide pyrophosphorylase [carboxylating] |
| Desi_wild_11423145 | NA                                  | Ca_desi_Chr02 | 11423145                | A/G  | Gene_Ca_01768.1    | INTRON                        | Probable nicotinate-nucleotide pyrophosphorylase [carboxylating] |
| Desi_wild_11423165 | NA                                  | Ca_desi_Chr02 | 11423165                | A/T  | Gene_Ca_01768.1    | INTRON                        | Probable nicotinate-nucleotide pyrophosphorylase [carboxylating] |
| Desi_wild_11957838 | NA                                  | Ca_desi_Chr02 | 11957838                | G/A  | NA                 | INTERGENIC                    | NA                                                               |
| Desi_wild_12072110 | NA                                  | Ca_desi_Chr02 | 12072110                | A/C  | Gene_Ca_01793.1    | SYNONYMOUS_CODING             | ADP,ATP carrier protein 1, chloroplasic                          |
| Desi_wild_12490080 | NA                                  | Ca_desi_Chr02 | 12490080                | A/G  | Gene_Ca_01818.1    | DOWNSTREAM                    | Putative cyclic nucleotide-gated ion channel 8                   |
| Desi_wild_12490110 | NA                                  | Ca_desi_Chr02 | 12490110                | G/C  | Gene_Ca_01818.1    | DOWNSTREAM                    | Putative cyclic nucleotide-gated ion channel 8                   |
| Desi_wild_12518521 | NA                                  | Ca_desi_Chr02 | 12518521                | G/T  | Gene_Ca_01820.1    | NON_SYNONYMOUS_CODING         | 3-oxoacyl-[acyl-carrier-protein] synthase 3 A, chloroplasic      |
| Desi_wild_12726887 | NA                                  | Ca_desi_Chr02 | 12726887                | A/G  | Gene_Ca_01830.2    | NON_SYNONYMOUS_CODING         | NA                                                               |
| Desi_wild_12728196 | NA                                  | Ca_desi_Chr02 | 12728196                | G/T  | NA                 | INTERGENIC                    | NA                                                               |
| Desi_wild_12729502 | NA                                  | Ca_desi_Chr02 | 12729502                | C/T  | NA                 | INTERGENIC                    | NA                                                               |
| Desi_wild_12729843 | NA                                  | Ca_desi_Chr02 | 12729843                | C/A  | NA                 | INTERGENIC                    | NA                                                               |
| Desi_wild_12729845 | NA                                  | Ca_desi_Chr02 | 12729845                | T/G  | NA                 | INTERGENIC                    | NA                                                               |
| Desi_wild_12729852 | NA                                  | Ca_desi_Chr02 | 12729852                | C/A  | NA                 | INTERGENIC                    | NA                                                               |
| Desi_wild_12729864 | NA                                  | Ca_desi_Chr02 | 12729864                | A/G  | NA                 | INTERGENIC                    | NA                                                               |
| Desi_wild_12729870 | NA                                  | Ca_desi_Chr02 | 12729870                | T/A  | NA                 | INTERGENIC                    | NA                                                               |
| Desi_wild_12729884 | NA                                  | Ca_desi_Chr02 | 12729884                | G/A  | NA                 | INTERGENIC                    | NA                                                               |
| Desi_wild_12729885 | NA                                  | Ca_desi_Chr02 | 12729885                | T/A  | NA                 | INTERGENIC                    | NA                                                               |
| Desi_wild_12737222 | NA                                  | Ca_desi_Chr02 | 12737222                | G/T  | NA                 | INTERGENIC                    | NA                                                               |
| Desi_wild_12796796 | NA                                  | Ca_desi_Chr02 | 12796796                | T/A  | NA                 | INTERGENIC                    | NA                                                               |
| Desi_wild_12796811 | NA                                  | Ca_desi_Chr02 | 12796811                | T/A  | NA                 | INTERGENIC                    | NA                                                               |
| Desi_wild_12835228 | NA                                  | Ca_desi_Chr02 | 12835228                | C/G  | Gene_Ca_01837.1    | NON_SYNONYMOUS_CODING         | NA                                                               |
| Desi_wild_12844224 | NA                                  | Ca_desi_Chr02 | 12844224                | A/G  | Gene_Ca_01837.1    | INTRON                        | NA                                                               |
| Desi_wild_12985136 | NA                                  | Ca_desi_Chr02 | 12985136                | G/A  | NA                 | INTERGENIC                    | NA                                                               |
| Desi_wild_13100484 | NA                                  | Ca_desi_Chr02 | 13100484                | A/C  | NA                 | INTERGENIC                    | NA                                                               |
| Desi_wild_13122853 | NA                                  | Ca_desi_Chr02 | 13122853                | T/G  | Gene_Ca_01853.1    | SYNONYMOUS_CODING             | Nucleosome-remodeling factor subunit NURF301                     |
| Desi_wild_13260498 | NA                                  | Ca_desi_Chr02 | 13260498                | G/A  | Gene_Ca_01862.2    | DOWNSTREAM                    | NA                                                               |
| Desi_wild_13260576 | NA                                  | Ca_desi_Chr02 | 13260576                | A/C  | Gene_Ca_01862.2    | DOWNSTREAM                    | NA                                                               |

| SNP IDs                   | NCBI dbSNP accession IDs (NCBI_SS#) | Chromosomes          | Physical positions (bp) | SNPs | Gene accession IDs | Sequence components of genome | Putative functions                                                   |
|---------------------------|-------------------------------------|----------------------|-------------------------|------|--------------------|-------------------------------|----------------------------------------------------------------------|
| <i>Desi_wild_13316277</i> | NA                                  | <i>Ca_desi_Chr02</i> | 13316277                | A/G  | NA                 | INTERGENIC                    | NA                                                                   |
| <i>Desi_wild_13379964</i> | NA                                  | <i>Ca_desi_Chr02</i> | 13379964                | A/T  | NA                 | INTERGENIC                    | NA                                                                   |
| <i>Desi_wild_13421370</i> | NA                                  | <i>Ca_desi_Chr02</i> | 13421370                | C/T  | Gene_Ca_01872.1    | START_LOST                    | 60S ribosomal protein L37-3                                          |
| <i>Desi_wild_13840468</i> | NA                                  | <i>Ca_desi_Chr02</i> | 13840468                | T/G  | Gene_Ca_01896.1    | UPSTREAM                      | 40S ribosomal protein S28                                            |
| <i>Desi_wild_13924598</i> | NA                                  | <i>Ca_desi_Chr02</i> | 13924598                | A/C  | Gene_Ca_01903.1    | DOWNSTREAM                    | Protein disulfide-isomerase 5-4                                      |
| <i>Desi_wild_14163542</i> | NA                                  | <i>Ca_desi_Chr02</i> | 14163542                | A/C  | Gene_Ca_01922.1    | SYNONYMOUS_CODING             | Lysine-specific histone demethylase 1 homolog 3                      |
| <i>Desi_wild_14163647</i> | NA                                  | <i>Ca_desi_Chr02</i> | 14163647                | T/C  | Gene_Ca_01922.1    | SYNONYMOUS_CODING             | Lysine-specific histone demethylase 1 homolog 3                      |
| <i>Desi_wild_14212018</i> | NA                                  | <i>Ca_desi_Chr02</i> | 14212018                | G/A  | Gene_Ca_01927.1    | INTRON                        | Expansin-A16                                                         |
| <i>Desi_wild_14215466</i> | NA                                  | <i>Ca_desi_Chr02</i> | 14215466                | T/C  | Gene_Ca_01927.1    | INTRON                        | Expansin-A16                                                         |
| <i>Desi_wild_14289755</i> | NA                                  | <i>Ca_desi_Chr02</i> | 14289755                | A/G  | Gene_Ca_01932.1    | SYNONYMOUS_CODING             | Pentatricopeptide repeat-containing protein At2g20710, mitochondrial |
| <i>Desi_wild_14290179</i> | NA                                  | <i>Ca_desi_Chr02</i> | 14290179                | G/A  | Gene_Ca_01932.1    | DOWNSTREAM                    | Pentatricopeptide repeat-containing protein At2g20710, mitochondrial |
| <i>Desi_wild_14321272</i> | NA                                  | <i>Ca_desi_Chr02</i> | 14321272                | C/T  | NA                 | INTERGENIC                    | NA                                                                   |
| <i>Desi_wild_14321317</i> | NA                                  | <i>Ca_desi_Chr02</i> | 14321317                | A/C  | NA                 | INTERGENIC                    | NA                                                                   |
| <i>Desi_wild_14463390</i> | NA                                  | <i>Ca_desi_Chr02</i> | 14463390                | T/A  | Gene_Ca_01946.1    | INTRON                        | Peroxisome biogenesis protein 1                                      |
| <i>Desi_wild_14577597</i> | NA                                  | <i>Ca_desi_Chr02</i> | 14577597                | A/G  | Gene_Ca_01958.1    | INTRON                        | Asparagine synthetase domain-containing protein 1                    |
| <i>Desi_wild_14766612</i> | NA                                  | <i>Ca_desi_Chr02</i> | 14766612                | T/G  | Gene_Ca_01972.1    | SYNONYMOUS_CODING             | Dual specificity protein kinase sPlA                                 |
| <i>Desi_wild_14766747</i> | NA                                  | <i>Ca_desi_Chr02</i> | 14766747                | G/A  | Gene_Ca_01972.1    | UPSTREAM                      | Dual specificity protein kinase sPlA                                 |
| <i>Desi_wild_14784243</i> | NA                                  | <i>Ca_desi_Chr02</i> | 14784243                | A/G  | NA                 | INTERGENIC                    | NA                                                                   |
| <i>Desi_wild_14811203</i> | NA                                  | <i>Ca_desi_Chr02</i> | 14811203                | A/G  | NA                 | INTERGENIC                    | NA                                                                   |
| <i>Desi_wild_14861116</i> | NA                                  | <i>Ca_desi_Chr02</i> | 14861116                | A/C  | Gene_Ca_01982.2    | INTRON                        | Glycoprotein 3-alpha-L-fucosyltransferase A                          |
| <i>Desi_wild_14861159</i> | NA                                  | <i>Ca_desi_Chr02</i> | 14861159                | T/G  | Gene_Ca_01982.2    | INTRON                        | Glycoprotein 3-alpha-L-fucosyltransferase A                          |
| <i>Desi_wild_15006255</i> | NA                                  | <i>Ca_desi_Chr02</i> | 15006255                | C/A  | Gene_Ca_01994.1    | INTRON                        | Autophagy-related protein 2                                          |
| <i>Desi_wild_15006256</i> | NA                                  | <i>Ca_desi_Chr02</i> | 15006256                | G/T  | Gene_Ca_01994.1    | INTRON                        | Autophagy-related protein 2                                          |
| <i>Desi_wild_15121078</i> | NA                                  | <i>Ca_desi_Chr02</i> | 15121078                | A/C  | Gene_Ca_02003.1    | NON_SYNONYMOUS_CODING         | Polyadenylate-binding protein RBP47B                                 |
| <i>Desi_wild_15222856</i> | NA                                  | <i>Ca_desi_Chr02</i> | 15222856                | C/T  | Gene_Ca_02013.3    | DOWNSTREAM                    | NA                                                                   |
| <i>Desi_wild_15284031</i> | NA                                  | <i>Ca_desi_Chr02</i> | 15284031                | T/A  | Gene_Ca_02018.1    | UPSTREAM                      | Glycine cleavage system H protein, mitochondrial                     |
| <i>Desi_wild_15299783</i> | NA                                  | <i>Ca_desi_Chr02</i> | 15299783                | T/C  | Gene_Ca_02020.1    | SYNONYMOUS_CODING             | Protein NAP1                                                         |
| <i>Desi_wild_15318170</i> | NA                                  | <i>Ca_desi_Chr02</i> | 15318170                | C/T  | Gene_Ca_02021.2    | DOWNSTREAM                    | Uridine-cytidine kinase C                                            |
| <i>Desi_wild_15438733</i> | NA                                  | <i>Ca_desi_Chr02</i> | 15438733                | A/C  | NA                 | INTERGENIC                    | NA                                                                   |
| <i>Desi_wild_15510678</i> | NA                                  | <i>Ca_desi_Chr02</i> | 15510678                | T/G  | Gene_Ca_02041.1    | INTRON                        | Auxin efflux carrier component 3                                     |
| <i>Desi_wild_15574616</i> | NA                                  | <i>Ca_desi_Chr02</i> | 15574616                | C/T  | Gene_Ca_02047.1    | SYNONYMOUS_CODING             | NA                                                                   |
| <i>Desi_wild_15627632</i> | NA                                  | <i>Ca_desi_Chr02</i> | 15627632                | A/C  | Gene_Ca_02051.1    | INTRON                        | Chaperone protein DnaJ 1                                             |
| <i>Desi_wild_15630004</i> | NA                                  | <i>Ca_desi_Chr02</i> | 15630004                | A/G  | Gene_Ca_02051.1    | UPSTREAM                      | Chaperone protein DnaJ 1                                             |
| <i>Desi_wild_15671585</i> | NA                                  | <i>Ca_desi_Chr02</i> | 15671585                | T/A  | Gene_Ca_02054.1    | SYNONYMOUS_CODING             | Pentatricopeptide repeat-containing protein At1g11290                |
| <i>Desi_wild_15772470</i> | NA                                  | <i>Ca_desi_Chr02</i> | 15772470                | T/C  | Gene_Ca_02063.3    | DOWNSTREAM                    | NA                                                                   |
| <i>Desi_wild_15878465</i> | NA                                  | <i>Ca_desi_Chr02</i> | 15878465                | G/A  | NA                 | INTERGENIC                    | NA                                                                   |
| <i>Desi_wild_15878469</i> | NA                                  | <i>Ca_desi_Chr02</i> | 15878469                | C/A  | NA                 | INTERGENIC                    | NA                                                                   |
| <i>Desi_wild_15878470</i> | NA                                  | <i>Ca_desi_Chr02</i> | 15878470                | A/G  | NA                 | INTERGENIC                    | NA                                                                   |
| <i>Desi_wild_15878472</i> | NA                                  | <i>Ca_desi_Chr02</i> | 15878472                | A/T  | NA                 | INTERGENIC                    | NA                                                                   |
| <i>Desi_wild_16113340</i> | NA                                  | <i>Ca_desi_Chr02</i> | 16113340                | C/A  | Gene_Ca_02094.1    | NON_SYNONYMOUS_CODING         | DNA replication licensing factor MCM6                                |
| <i>Desi_wild_16113341</i> | NA                                  | <i>Ca_desi_Chr02</i> | 16113341                | G/T  | Gene_Ca_02094.1    | NON_SYNONYMOUS_CODING         | DNA replication licensing factor MCM6                                |
| <i>Desi_wild_16116122</i> | NA                                  | <i>Ca_desi_Chr02</i> | 16116122                | C/G  | Gene_Ca_02094.1    | NON_SYNONYMOUS_CODING         | DNA replication licensing factor MCM6                                |
| <i>Desi_wild_16130330</i> | NA                                  | <i>Ca_desi_Chr02</i> | 16130330                | A/G  | Gene_Ca_02096.1    | INTRON                        | Polyadenylate-binding protein 2                                      |
| <i>Desi_wild_16138943</i> | NA                                  | <i>Ca_desi_Chr02</i> | 16138943                | A/C  | Gene_Ca_02097.1    | DOWNSTREAM                    | Ras-related protein Rab11A                                           |

| SNP IDs                   | NCBI dbSNP accession IDs (NCBI_SS#) | Chromosomes          | Physical positions (bp) | SNPs | Gene accession IDs | Sequence components of genome | Putative functions                                                     |
|---------------------------|-------------------------------------|----------------------|-------------------------|------|--------------------|-------------------------------|------------------------------------------------------------------------|
| <i>Desi_wild_16310713</i> | NA                                  | <i>Ca_desi_Chr02</i> | 16310713                | C/G  | Gene_Ca_02107.1    | NON_SYNONYMOUS_CODING         | NA                                                                     |
| <i>Desi_wild_16623323</i> | NA                                  | <i>Ca_desi_Chr02</i> | 16623323                | A/G  | Gene_Ca_02113.1    | INTRON                        | Glucose-1-phosphate adenylyltransferase small subunit 1, chloroplastic |
| <i>Desi_wild_16637277</i> | NA                                  | <i>Ca_desi_Chr02</i> | 16637277                | T/G  | NA                 | INTERGENIC                    | NA                                                                     |
| <i>Desi_wild_16684792</i> | NA                                  | <i>Ca_desi_Chr02</i> | 16684792                | T/C  | Gene_Ca_02119.1    | DOWNSTREAM                    | Cc-nbs-Irr resistance protein                                          |
| <i>Desi_wild_16684794</i> | NA                                  | <i>Ca_desi_Chr02</i> | 16684794                | T/C  | Gene_Ca_02119.1    | DOWNSTREAM                    | Cc-nbs-Irr resistance protein                                          |
| <i>Desi_wild_16684843</i> | NA                                  | <i>Ca_desi_Chr02</i> | 16684843                | A/C  | Gene_Ca_02119.1    | DOWNSTREAM                    | Cc-nbs-Irr resistance protein                                          |
| <i>Desi_wild_16690097</i> | NA                                  | <i>Ca_desi_Chr02</i> | 16690097                | G/A  | Gene_Ca_02119.1    | SYNONYMOUS_CODING             | Cc-nbs-Irr resistance protein                                          |
| <i>Desi_wild_16712209</i> | NA                                  | <i>Ca_desi_Chr02</i> | 16712209                | A/G  | Gene_Ca_02121.1    | INTRON                        | Nucleoporin, Nup133/Nup155-like                                        |
| <i>Desi_wild_16715210</i> | NA                                  | <i>Ca_desi_Chr02</i> | 16715210                | C/T  | Gene_Ca_02121.1    | INTRON                        | Nucleoporin, Nup133/Nup155-like                                        |
| <i>Desi_wild_16741238</i> | NA                                  | <i>Ca_desi_Chr02</i> | 16741238                | G/T  | NA                 | INTERGENIC                    | NA                                                                     |
| <i>Desi_wild_16741302</i> | NA                                  | <i>Ca_desi_Chr02</i> | 16741302                | C/T  | NA                 | INTERGENIC                    | NA                                                                     |
| <i>Desi_wild_16748554</i> | NA                                  | <i>Ca_desi_Chr02</i> | 16748554                | G/T  | NA                 | INTERGENIC                    | NA                                                                     |
| <i>Desi_wild_16748556</i> | NA                                  | <i>Ca_desi_Chr02</i> | 16748556                | T/G  | NA                 | INTERGENIC                    | NA                                                                     |
| <i>Desi_wild_16748679</i> | NA                                  | <i>Ca_desi_Chr02</i> | 16748679                | T/A  | NA                 | INTERGENIC                    | NA                                                                     |
| <i>Desi_wild_16748700</i> | NA                                  | <i>Ca_desi_Chr02</i> | 16748700                | G/A  | NA                 | INTERGENIC                    | NA                                                                     |
| <i>Desi_wild_16748726</i> | NA                                  | <i>Ca_desi_Chr02</i> | 16748726                | T/A  | NA                 | INTERGENIC                    | NA                                                                     |
| <i>Desi_wild_16748779</i> | NA                                  | <i>Ca_desi_Chr02</i> | 16748779                | T/A  | NA                 | INTERGENIC                    | NA                                                                     |
| <i>Desi_wild_16753135</i> | NA                                  | <i>Ca_desi_Chr02</i> | 16753135                | T/G  | Gene_Ca_02127.1    | SYNONYMOUS_CODING             | Endoplasmic homolog                                                    |
| <i>Desi_wild_16756914</i> | NA                                  | <i>Ca_desi_Chr02</i> | 16756914                | G/T  | NA                 | INTERGENIC                    | NA                                                                     |
| <i>Desi_wild_16759376</i> | NA                                  | <i>Ca_desi_Chr02</i> | 16759376                | A/G  | Gene_Ca_02128.1    | DOWNSTREAM                    | OBERON-like protein (Fragment)                                         |
| <i>Desi_wild_16838366</i> | NA                                  | <i>Ca_desi_Chr02</i> | 16838366                | C/T  | Gene_Ca_02140.2    | STOP_GAINED                   | F-box protein At2g16365                                                |
| <i>Desi_wild_16838445</i> | NA                                  | <i>Ca_desi_Chr02</i> | 16838445                | C/G  | Gene_Ca_02140.2    | NON_SYNONYMOUS_CODING         | F-box protein At2g16365                                                |
| <i>Desi_wild_16856357</i> | NA                                  | <i>Ca_desi_Chr02</i> | 16856357                | A/C  | NA                 | INTERGENIC                    | NA                                                                     |
| <i>Desi_wild_16872653</i> | NA                                  | <i>Ca_desi_Chr02</i> | 16872653                | C/T  | Gene_Ca_02143.1    | SYNONYMOUS_CODING             | Glucose-1-phosphate adenylyltransferase large subunit 1 (Fragment)     |
| <i>Desi_wild_16872657</i> | NA                                  | <i>Ca_desi_Chr02</i> | 16872657                | C/T  | Gene_Ca_02143.1    | NON_SYNONYMOUS_CODING         | Glucose-1-phosphate adenylyltransferase large subunit 1 (Fragment)     |
| <i>Desi_wild_16872659</i> | NA                                  | <i>Ca_desi_Chr02</i> | 16872659                | T/C  | Gene_Ca_02143.1    | SYNONYMOUS_CODING             | Glucose-1-phosphate adenylyltransferase large subunit 1 (Fragment)     |
| <i>Desi_wild_16872665</i> | NA                                  | <i>Ca_desi_Chr02</i> | 16872665                | T/A  | Gene_Ca_02143.1    | NON_SYNONYMOUS_CODING         | Glucose-1-phosphate adenylyltransferase large subunit 1 (Fragment)     |
| <i>Desi_wild_16872671</i> | NA                                  | <i>Ca_desi_Chr02</i> | 16872671                | A/G  | Gene_Ca_02143.1    | SYNONYMOUS_CODING             | Glucose-1-phosphate adenylyltransferase large subunit 1 (Fragment)     |
| <i>Desi_wild_16872674</i> | NA                                  | <i>Ca_desi_Chr02</i> | 16872674                | T/C  | Gene_Ca_02143.1    | SYNONYMOUS_CODING             | Glucose-1-phosphate adenylyltransferase large subunit 1 (Fragment)     |
| <i>Desi_wild_16872680</i> | NA                                  | <i>Ca_desi_Chr02</i> | 16872680                | T/A  | Gene_Ca_02143.1    | SYNONYMOUS_CODING             | Glucose-1-phosphate adenylyltransferase large subunit 1 (Fragment)     |
| <i>Desi_wild_16872684</i> | NA                                  | <i>Ca_desi_Chr02</i> | 16872684                | A/T  | Gene_Ca_02143.1    | NON_SYNONYMOUS_CODING         | Glucose-1-phosphate adenylyltransferase large subunit 1 (Fragment)     |
| <i>Desi_wild_16872685</i> | NA                                  | <i>Ca_desi_Chr02</i> | 16872685                | A/G  | Gene_Ca_02143.1    | NON_SYNONYMOUS_CODING         | Glucose-1-phosphate adenylyltransferase large subunit 1 (Fragment)     |
| <i>Desi_wild_16872691</i> | NA                                  | <i>Ca_desi_Chr02</i> | 16872691                | A/T  | Gene_Ca_02143.1    | NON_SYNONYMOUS_CODING         | Glucose-1-phosphate adenylyltransferase large subunit 1 (Fragment)     |
| <i>Desi_wild_16872692</i> | NA                                  | <i>Ca_desi_Chr02</i> | 16872692                | T/G  | Gene_Ca_02143.1    | SYNONYMOUS_CODING             | Glucose-1-phosphate adenylyltransferase large subunit 1 (Fragment)     |
| <i>Desi_wild_16954914</i> | NA                                  | <i>Ca_desi_Chr02</i> | 16954914                | G/A  | Gene_Ca_02145.3    | INTRON                        | NA                                                                     |
| <i>Desi_wild_17048254</i> | NA                                  | <i>Ca_desi_Chr02</i> | 17048254                | T/G  | NA                 | INTERGENIC                    | NA                                                                     |
| <i>Desi_wild_17048349</i> | NA                                  | <i>Ca_desi_Chr02</i> | 17048349                | C/A  | NA                 | INTERGENIC                    | NA                                                                     |
| <i>Desi_wild_17246319</i> | NA                                  | <i>Ca_desi_Chr02</i> | 17246319                | G/A  | Gene_Ca_02164.1    | INTRON                        | Probable polygalacturonase At3g15720                                   |
| <i>Desi_wild_79981</i>    | NA                                  | <i>Ca_desi_Chr03</i> | 79981                   | T/C  | Gene_Ca_02172.1    | SYNONYMOUS_CODING             | Aconitate hydratase 1                                                  |
| <i>Desi_wild_126485</i>   | NA                                  | <i>Ca_desi_Chr03</i> | 126485                  | T/G  | NA                 | INTERGENIC                    | NA                                                                     |
| <i>Desi_wild_126619</i>   | NA                                  | <i>Ca_desi_Chr03</i> | 126619                  | G/A  | NA                 | INTERGENIC                    | NA                                                                     |
| <i>Desi_wild_246112</i>   | NA                                  | <i>Ca_desi_Chr03</i> | 246112                  | T/C  | NA                 | INTERGENIC                    | NA                                                                     |
| <i>Desi_wild_246148</i>   | NA                                  | <i>Ca_desi_Chr03</i> | 246148                  | G/A  | NA                 | INTERGENIC                    | NA                                                                     |
| <i>Desi_wild_335668</i>   | NA                                  | <i>Ca_desi_Chr03</i> | 335668                  | T/C  | Gene_Ca_02191.1    | INTRON                        | UPF0176 protein pc0378                                                 |

| SNP IDs                  | NCBI dbSNP accession IDs (NCBI_SS#) | Chromosomes          | Physical positions (bp) | SNPs | Gene accession IDs | Sequence components of genome | Putative functions                                                               |
|--------------------------|-------------------------------------|----------------------|-------------------------|------|--------------------|-------------------------------|----------------------------------------------------------------------------------|
| <i>Desi_wild_347865</i>  | NA                                  | <i>Ca_desi_Chr03</i> | 347865                  | C/A  | Gene_Ca_02191.1    | INTRON                        | UPF0176 protein pc0378                                                           |
| <i>Desi_wild_645020</i>  | NA                                  | <i>Ca_desi_Chr03</i> | 645020                  | A/C  | Gene_Ca_02197.1    | INTRON                        | ATPase 10, plasma membrane-type                                                  |
| <i>Desi_wild_645024</i>  | NA                                  | <i>Ca_desi_Chr03</i> | 645024                  | A/C  | Gene_Ca_02197.1    | INTRON                        | ATPase 10, plasma membrane-type                                                  |
| <i>Desi_wild_645045</i>  | NA                                  | <i>Ca_desi_Chr03</i> | 645045                  | A/G  | Gene_Ca_02197.1    | INTRON                        | ATPase 10, plasma membrane-type                                                  |
| <i>Desi_wild_669270</i>  | NA                                  | <i>Ca_desi_Chr03</i> | 669270                  | C/T  | Gene_Ca_02199.2    | SYNONYMOUS_CODING             | NA                                                                               |
| <i>Desi_wild_684601</i>  | NA                                  | <i>Ca_desi_Chr03</i> | 684601                  | T/C  | Gene_Ca_02200.1    | INTRON                        | Endoribonuclease Dicer homolog 1                                                 |
| <i>Desi_wild_695494</i>  | NA                                  | <i>Ca_desi_Chr03</i> | 695494                  | T/A  | Gene_Ca_02202.1    | DOWNSTREAM                    | Protein LHY                                                                      |
| <i>Desi_wild_695497</i>  | NA                                  | <i>Ca_desi_Chr03</i> | 695497                  | C/T  | Gene_Ca_02202.1    | DOWNSTREAM                    | Protein LHY                                                                      |
| <i>Desi_wild_698170</i>  | NA                                  | <i>Ca_desi_Chr03</i> | 698170                  | T/G  | Gene_Ca_02202.4    | SYNONYMOUS_CODING             | Protein LHY                                                                      |
| <i>Desi_wild_762935</i>  | NA                                  | <i>Ca_desi_Chr03</i> | 762935                  | G/A  | NA                 | INTERGENIC                    | NA                                                                               |
| <i>Desi_wild_768323</i>  | NA                                  | <i>Ca_desi_Chr03</i> | 768323                  | A/T  | NA                 | INTERGENIC                    | NA                                                                               |
| <i>Desi_wild_768325</i>  | NA                                  | <i>Ca_desi_Chr03</i> | 768325                  | C/A  | NA                 | INTERGENIC                    | NA                                                                               |
| <i>Desi_wild_768344</i>  | NA                                  | <i>Ca_desi_Chr03</i> | 768344                  | A/G  | NA                 | INTERGENIC                    | NA                                                                               |
| <i>Desi_wild_768374</i>  | NA                                  | <i>Ca_desi_Chr03</i> | 768374                  | A/C  | NA                 | INTERGENIC                    | NA                                                                               |
| <i>Desi_wild_854698</i>  | NA                                  | <i>Ca_desi_Chr03</i> | 854698                  | C/T  | Gene_Ca_02225.1    | DOWNSTREAM                    | Cytochrome b5 isoform 1                                                          |
| <i>Desi_wild_954899</i>  | NA                                  | <i>Ca_desi_Chr03</i> | 954899                  | T/C  | Gene_Ca_02236.1    | NON_SYNONYMOUS_CODING         | Phytochrome A                                                                    |
| <i>Desi_wild_1000520</i> | NA                                  | <i>Ca_desi_Chr03</i> | 1000520                 | T/G  | Gene_Ca_02242.1    | INTRON                        | Transducin/WD40 repeat-like superfamily protein                                  |
| <i>Desi_wild_1006231</i> | NA                                  | <i>Ca_desi_Chr03</i> | 1006231                 | A/T  | Gene_Ca_02242.1    | SYNONYMOUS_CODING             | Transducin/WD40 repeat-like superfamily protein                                  |
| <i>Desi_wild_1006408</i> | NA                                  | <i>Ca_desi_Chr03</i> | 1006408                 | C/T  | Gene_Ca_02242.1    | NON_SYNONYMOUS_CODING         | Transducin/WD40 repeat-like superfamily protein                                  |
| <i>Desi_wild_1119938</i> | NA                                  | <i>Ca_desi_Chr03</i> | 1119938                 | T/A  | Gene_Ca_02255.1    | NON_SYNONYMOUS_CODING         | NA                                                                               |
| <i>Desi_wild_1120026</i> | NA                                  | <i>Ca_desi_Chr03</i> | 1120026                 | C/T  | Gene_Ca_02255.1    | SYNONYMOUS_CODING             | NA                                                                               |
| <i>Desi_wild_1142176</i> | NA                                  | <i>Ca_desi_Chr03</i> | 1142176                 | T/C  | Gene_Ca_02258.3    | SYNONYMOUS_CODING             | NA                                                                               |
| <i>Desi_wild_1142293</i> | NA                                  | <i>Ca_desi_Chr03</i> | 1142293                 | C/A  | Gene_Ca_02258.3    | SYNONYMOUS_CODING             | NA                                                                               |
| <i>Desi_wild_1146163</i> | NA                                  | <i>Ca_desi_Chr03</i> | 1146163                 | T/C  | NA                 | INTERGENIC                    | NA                                                                               |
| <i>Desi_wild_1147189</i> | NA                                  | <i>Ca_desi_Chr03</i> | 1147189                 | C/T  | NA                 | INTERGENIC                    | NA                                                                               |
| <i>Desi_wild_1148176</i> | NA                                  | <i>Ca_desi_Chr03</i> | 1148176                 | T/G  | Gene_Ca_02260.1    | DOWNSTREAM                    | 10-deacetylbaccatin III 10-O-acetyltransferase                                   |
| <i>Desi_wild_1148257</i> | NA                                  | <i>Ca_desi_Chr03</i> | 1148257                 | A/G  | Gene_Ca_02260.1    | DOWNSTREAM                    | 10-deacetylbaccatin III 10-O-acetyltransferase                                   |
| <i>Desi_wild_1148353</i> | NA                                  | <i>Ca_desi_Chr03</i> | 1148353                 | A/C  | Gene_Ca_02260.1    | DOWNSTREAM                    | 10-deacetylbaccatin III 10-O-acetyltransferase                                   |
| <i>Desi_wild_1156273</i> | NA                                  | <i>Ca_desi_Chr03</i> | 1156273                 | T/C  | Gene_Ca_02261.1    | SYNONYMOUS_CODING             | Probable calcium-activated outward-rectifying potassium channel 5, chloroplastic |
| <i>Desi_wild_1156347</i> | NA                                  | <i>Ca_desi_Chr03</i> | 1156347                 | G/C  | Gene_Ca_02261.1    | NON_SYNONYMOUS_CODING         | Probable calcium-activated outward-rectifying potassium channel 5, chloroplastic |
| <i>Desi_wild_1198705</i> | NA                                  | <i>Ca_desi_Chr03</i> | 1198705                 | A/C  | Gene_Ca_02267.1    | NON_SYNONYMOUS_CODING         | Squamosa promoter-binding-like protein 1                                         |
| <i>Desi_wild_1198729</i> | NA                                  | <i>Ca_desi_Chr03</i> | 1198729                 | T/C  | Gene_Ca_02267.1    | SYNONYMOUS_CODING             | Squamosa promoter-binding-like protein 1                                         |
| <i>Desi_wild_1198799</i> | NA                                  | <i>Ca_desi_Chr03</i> | 1198799                 | T/A  | Gene_Ca_02267.1    | NON_SYNONYMOUS_CODING         | Squamosa promoter-binding-like protein 1                                         |
| <i>Desi_wild_1199241</i> | NA                                  | <i>Ca_desi_Chr03</i> | 1199241                 | C/A  | Gene_Ca_02267.1    | INTRON                        | Squamosa promoter-binding-like protein 1                                         |
| <i>Desi_wild_1202867</i> | NA                                  | <i>Ca_desi_Chr03</i> | 1202867                 | T/C  | Gene_Ca_02267.1    | INTRON                        | Squamosa promoter-binding-like protein 1                                         |
| <i>Desi_wild_1205789</i> | NA                                  | <i>Ca_desi_Chr03</i> | 1205789                 | A/C  | Gene_Ca_02267.1    | NON_SYNONYMOUS_CODING         | Squamosa promoter-binding-like protein 1                                         |
| <i>Desi_wild_1205811</i> | NA                                  | <i>Ca_desi_Chr03</i> | 1205811                 | T/A  | Gene_Ca_02267.1    | SYNONYMOUS_CODING             | Squamosa promoter-binding-like protein 1                                         |
| <i>Desi_wild_1205824</i> | NA                                  | <i>Ca_desi_Chr03</i> | 1205824                 | T/A  | Gene_Ca_02267.1    | NON_SYNONYMOUS_CODING         | Squamosa promoter-binding-like protein 1                                         |
| <i>Desi_wild_1205826</i> | NA                                  | <i>Ca_desi_Chr03</i> | 1205826                 | T/G  | Gene_Ca_02267.1    | NON_SYNONYMOUS_CODING         | Squamosa promoter-binding-like protein 1                                         |
| <i>Desi_wild_1205847</i> | NA                                  | <i>Ca_desi_Chr03</i> | 1205847                 | G/C  | Gene_Ca_02267.1    | SYNONYMOUS_CODING             | Squamosa promoter-binding-like protein 1                                         |
| <i>Desi_wild_1205850</i> | NA                                  | <i>Ca_desi_Chr03</i> | 1205850                 | A/T  | Gene_Ca_02267.1    | SYNONYMOUS_CODING             | Squamosa promoter-binding-like protein 1                                         |
| <i>Desi_wild_1206176</i> | NA                                  | <i>Ca_desi_Chr03</i> | 1206176                 | C/A  | Gene_Ca_02267.1    | DOWNSTREAM                    | Squamosa promoter-binding-like protein 1                                         |
| <i>Desi_wild_1208905</i> | NA                                  | <i>Ca_desi_Chr03</i> | 1208905                 | A/G  | NA                 | INTERGENIC                    | NA                                                                               |
| <i>Desi_wild_1223295</i> | NA                                  | <i>Ca_desi_Chr03</i> | 1223295                 | A/T  | Gene_Ca_02269.1    | INTRON                        | WD repeat-containing protein 6                                                   |



| SNP IDs           | NCBI dbSNP accession IDs (NCBI_SS#) | Chromosomes  | Physical positions (bp) | SNPs | Gene accession IDs | Sequence components of genome | Putative functions                          |
|-------------------|-------------------------------------|--------------|-------------------------|------|--------------------|-------------------------------|---------------------------------------------|
| Desi_wild_1228195 | NA                                  | Ca_desi_Ch03 | 1228195                 | A/G  | Gene_Ca_02269.1    | INTRON                        | WD repeat-containing protein 6              |
| Desi_wild_1233409 | NA                                  | Ca_desi_Ch03 | 1233409                 | A/C  | Gene_Ca_02270.1    | SYNONYMOUS_CODING             | LIM domain and RING finger protein C1223.01 |
| Desi_wild_1286463 | NA                                  | Ca_desi_Ch03 | 1286463                 | T/C  | NA                 | INTERGENIC                    | NA                                          |
| Desi_wild_1286513 | NA                                  | Ca_desi_Ch03 | 1286513                 | G/A  | NA                 | INTERGENIC                    | NA                                          |
| Desi_wild_1298429 | NA                                  | Ca_desi_Ch03 | 1298429                 | G/T  | Gene_Ca_02274.1    | INTRON                        | ADP-ribosylation factor 2                   |
| Desi_wild_1298488 | NA                                  | Ca_desi_Ch03 | 1298488                 | A/G  | Gene_Ca_02274.1    | SYNONYMOUS_CODING             | ADP-ribosylation factor 2                   |
| Desi_wild_1298497 | NA                                  | Ca_desi_Ch03 | 1298497                 | C/T  | Gene_Ca_02274.1    | SYNONYMOUS_CODING             | ADP-ribosylation factor 2                   |
| Desi_wild_1298524 | NA                                  | Ca_desi_Ch03 | 1298524                 | G/A  | Gene_Ca_02274.1    | SYNONYMOUS_CODING             | ADP-ribosylation factor 2                   |
| Desi_wild_1322785 | NA                                  | Ca_desi_Ch03 | 1322785                 | G/C  | NA                 | INTERGENIC                    | NA                                          |
| Desi_wild_1348788 | NA                                  | Ca_desi_Ch03 | 1348788                 | C/G  | Gene_Ca_02282.1    | INTRON                        | Flowering time control protein FCA          |
| Desi_wild_1348911 | NA                                  | Ca_desi_Ch03 | 1348911                 | T/C  | Gene_Ca_02282.1    | INTRON                        | Flowering time control protein FCA          |
| Desi_wild_1392395 | NA                                  | Ca_desi_Ch03 | 1392395                 | A/G  | Gene_Ca_02286.1    | INTRON                        | Nodal modulator 1                           |
| Desi_wild_1404434 | NA                                  | Ca_desi_Ch03 | 1404434                 | T/A  | NA                 | INTERGENIC                    | NA                                          |
| Desi_wild_1404499 | NA                                  | Ca_desi_Ch03 | 1404499                 | A/G  | NA                 | INTERGENIC                    | NA                                          |
| Desi_wild_1414358 | NA                                  | Ca_desi_Ch03 | 1414358                 | G/A  | Gene_Ca_02288.1    | NON_SYNONYMOUS_CODING         | NA                                          |
| Desi_wild_1416895 | NA                                  | Ca_desi_Ch03 | 1416895                 | A/T  | Gene_Ca_02288.1    | SYNONYMOUS_CODING             | NA                                          |
| Desi_wild_1416904 | NA                                  | Ca_desi_Ch03 | 1416904                 | T/A  | Gene_Ca_02288.1    | SYNONYMOUS_CODING             | NA                                          |
| Desi_wild_1416925 | NA                                  | Ca_desi_Ch03 | 1416925                 | C/T  | Gene_Ca_02288.1    | SYNONYMOUS_CODING             | NA                                          |
| Desi_wild_1421985 | NA                                  | Ca_desi_Ch03 | 1421985                 | C/T  | NA                 | INTERGENIC                    | NA                                          |
| Desi_wild_1427742 | NA                                  | Ca_desi_Ch03 | 1427742                 | C/T  | NA                 | INTERGENIC                    | NA                                          |
| Desi_wild_1427752 | NA                                  | Ca_desi_Ch03 | 1427752                 | C/T  | NA                 | INTERGENIC                    | NA                                          |
| Desi_wild_1427760 | NA                                  | Ca_desi_Ch03 | 1427760                 | A/G  | NA                 | INTERGENIC                    | NA                                          |
| Desi_wild_1427788 | NA                                  | Ca_desi_Ch03 | 1427788                 | C/T  | NA                 | INTERGENIC                    | NA                                          |
| Desi_wild_1427793 | NA                                  | Ca_desi_Ch03 | 1427793                 | G/A  | NA                 | INTERGENIC                    | NA                                          |
| Desi_wild_1427796 | NA                                  | Ca_desi_Ch03 | 1427796                 | A/G  | NA                 | INTERGENIC                    | NA                                          |
| Desi_wild_1427799 | NA                                  | Ca_desi_Ch03 | 1427799                 | T/C  | NA                 | INTERGENIC                    | NA                                          |
| Desi_wild_1427811 | NA                                  | Ca_desi_Ch03 | 1427811                 | A/T  | NA                 | INTERGENIC                    | NA                                          |
| Desi_wild_1427822 | NA                                  | Ca_desi_Ch03 | 1427822                 | A/T  | NA                 | INTERGENIC                    | NA                                          |
| Desi_wild_1427826 | NA                                  | Ca_desi_Ch03 | 1427826                 | C/T  | NA                 | INTERGENIC                    | NA                                          |
| Desi_wild_1427850 | NA                                  | Ca_desi_Ch03 | 1427850                 | A/G  | NA                 | INTERGENIC                    | NA                                          |
| Desi_wild_1427862 | NA                                  | Ca_desi_Ch03 | 1427862                 | T/A  | NA                 | INTERGENIC                    | NA                                          |
| Desi_wild_1427865 | NA                                  | Ca_desi_Ch03 | 1427865                 | T/C  | NA                 | INTERGENIC                    | NA                                          |
| Desi_wild_1427874 | NA                                  | Ca_desi_Ch03 | 1427874                 | T/C  | NA                 | INTERGENIC                    | NA                                          |
| Desi_wild_1427892 | NA                                  | Ca_desi_Ch03 | 1427892                 | A/T  | NA                 | INTERGENIC                    | NA                                          |
| Desi_wild_1427901 | NA                                  | Ca_desi_Ch03 | 1427901                 | A/T  | NA                 | INTERGENIC                    | NA                                          |
| Desi_wild_1427904 | NA                                  | Ca_desi_Ch03 | 1427904                 | A/G  | NA                 | INTERGENIC                    | NA                                          |
| Desi_wild_1427905 | NA                                  | Ca_desi_Ch03 | 1427905                 | T/C  | NA                 | INTERGENIC                    | NA                                          |
| Desi_wild_1503173 | NA                                  | Ca_desi_Ch03 | 1503173                 | A/T  | Gene_Ca_02301.1    | INTRON                        | DNA mismatch repair protein Msh6-1          |
| Desi_wild_1516617 | NA                                  | Ca_desi_Ch03 | 1516617                 | C/T  | NA                 | INTERGENIC                    | NA                                          |
| Desi_wild_1536663 | NA                                  | Ca_desi_Ch03 | 1536663                 | G/T  | Gene_Ca_02305.1    | NON_SYNONYMOUS_CODING         | Probable beta-D-xylosidase 2                |
| Desi_wild_1536708 | NA                                  | Ca_desi_Ch03 | 1536708                 | A/G  | Gene_Ca_02305.1    | SYNONYMOUS_CODING             | Probable beta-D-xylosidase 2                |
| Desi_wild_1536748 | NA                                  | Ca_desi_Ch03 | 1536748                 | A/G  | Gene_Ca_02305.1    | NON_SYNONYMOUS_CODING         | Probable beta-D-xylosidase 2                |
| Desi_wild_1536750 | NA                                  | Ca_desi_Ch03 | 1536750                 | A/G  | Gene_Ca_02305.1    | NON_SYNONYMOUS_CODING         | Probable beta-D-xylosidase 2                |
| Desi_wild_1536753 | NA                                  | Ca_desi_Ch03 | 1536753                 | C/T  | Gene_Ca_02305.1    | SYNONYMOUS_CODING             | Probable beta-D-xylosidase 2                |

| SNP IDs                  | NCBI dbSNP accession IDs (NCBI_SS#) | Chromosomes          | Physical positions (bp) | SNPs | Gene accession IDs | Sequence components of genome | Putative functions                                      |
|--------------------------|-------------------------------------|----------------------|-------------------------|------|--------------------|-------------------------------|---------------------------------------------------------|
| <i>Desi_wild_1536804</i> | NA                                  | <i>Ca_desi_Chr03</i> | 1536804                 | A/T  | Gene_Ca_02305.1    | SYNONYMOUS_CODING             | Probable beta-D-xylosidase 2                            |
| <i>Desi_wild_1554464</i> | NA                                  | <i>Ca_desi_Chr03</i> | 1554464                 | T/C  | Gene_Ca_02306.1    | SYNONYMOUS_CODING             | Tetratricopeptide repeat (TPR)-like superfamily protein |
| <i>Desi_wild_1566396</i> | NA                                  | <i>Ca_desi_Chr03</i> | 1566396                 | G/A  | Gene_Ca_02307.1    | INTRON                        | alpha/beta-Hydrolases superfamily protein               |
| <i>Desi_wild_1618914</i> | NA                                  | <i>Ca_desi_Chr03</i> | 1618914                 | T/A  | Gene_Ca_02315.1    | DOWNSTREAM                    | Probable galacturonosyltransferase-like 7               |
| <i>Desi_wild_1619028</i> | NA                                  | <i>Ca_desi_Chr03</i> | 1619028                 | T/A  | Gene_Ca_02315.1    | DOWNSTREAM                    | Probable galacturonosyltransferase-like 7               |
| <i>Desi_wild_1633031</i> | NA                                  | <i>Ca_desi_Chr03</i> | 1633031                 | T/A  | NA                 | INTERGENIC                    | NA                                                      |
| <i>Desi_wild_1659975</i> | NA                                  | <i>Ca_desi_Chr03</i> | 1659975                 | A/G  | NA                 | INTERGENIC                    | NA                                                      |
| <i>Desi_wild_1667821</i> | NA                                  | <i>Ca_desi_Chr03</i> | 1667821                 | C/T  | Gene_Ca_02322.1    | DOWNSTREAM                    | NA                                                      |
| <i>Desi_wild_1686934</i> | NA                                  | <i>Ca_desi_Chr03</i> | 1686934                 | G/C  | Gene_Ca_02324.1    | DOWNSTREAM                    | NA                                                      |
| <i>Desi_wild_1686974</i> | NA                                  | <i>Ca_desi_Chr03</i> | 1686974                 | G/A  | Gene_Ca_02324.1    | DOWNSTREAM                    | NA                                                      |
| <i>Desi_wild_1904567</i> | NA                                  | <i>Ca_desi_Chr03</i> | 1904567                 | G/T  | Gene_Ca_02333.1    | INTRON                        | Protein of unknown function (DUF620)                    |
| <i>Desi_wild_2660782</i> | NA                                  | <i>Ca_desi_Chr03</i> | 2660782                 | C/T  | NA                 | INTERGENIC                    | NA                                                      |
| <i>Desi_wild_2660820</i> | NA                                  | <i>Ca_desi_Chr03</i> | 2660820                 | G/A  | NA                 | INTERGENIC                    | NA                                                      |
| <i>Desi_wild_2674302</i> | NA                                  | <i>Ca_desi_Chr03</i> | 2674302                 | A/G  | Gene_Ca_02355.1    | DOWNSTREAM                    | NA                                                      |
| <i>Desi_wild_2674439</i> | NA                                  | <i>Ca_desi_Chr03</i> | 2674439                 | A/C  | Gene_Ca_02355.1    | DOWNSTREAM                    | NA                                                      |
| <i>Desi_wild_2683690</i> | NA                                  | <i>Ca_desi_Chr03</i> | 2683690                 | C/T  | Gene_Ca_02355.1    | SYNONYMOUS_CODING             | NA                                                      |
| <i>Desi_wild_2713248</i> | NA                                  | <i>Ca_desi_Chr03</i> | 2713248                 | A/C  | Gene_Ca_02359.1    | INTRON                        | Ankyrin-1                                               |
| <i>Desi_wild_2718128</i> | NA                                  | <i>Ca_desi_Chr03</i> | 2718128                 | G/C  | Gene_Ca_02359.1    | SYNONYMOUS_CODING             | Ankyrin-1                                               |
| <i>Desi_wild_2718129</i> | NA                                  | <i>Ca_desi_Chr03</i> | 2718129                 | G/A  | Gene_Ca_02359.1    | NON_SYNONYMOUS_CODING         | Ankyrin-1                                               |
| <i>Desi_wild_2725723</i> | NA                                  | <i>Ca_desi_Chr03</i> | 2725723                 | T/G  | Gene_Ca_02361.1    | DOWNSTREAM                    | FAD/NAD(P)-binding oxidoreductase family protein        |
| <i>Desi_wild_2729400</i> | NA                                  | <i>Ca_desi_Chr03</i> | 2729400                 | A/G  | NA                 | INTERGENIC                    | NA                                                      |
| <i>Desi_wild_2737288</i> | NA                                  | <i>Ca_desi_Chr03</i> | 2737288                 | T/C  | Gene_Ca_02362.1    | NON_SYNONYMOUS_CODING         | TPX2 (targeting protein for Xklp2) protein family       |
| <i>Desi_wild_2754157</i> | NA                                  | <i>Ca_desi_Chr03</i> | 2754157                 | T/C  | Gene_Ca_02363.2    | NON_SYNONYMOUS_CODING         | NA                                                      |
| <i>Desi_wild_2754159</i> | NA                                  | <i>Ca_desi_Chr03</i> | 2754159                 | C/T  | Gene_Ca_02363.2    | SYNONYMOUS_CODING             | NA                                                      |
| <i>Desi_wild_2754162</i> | NA                                  | <i>Ca_desi_Chr03</i> | 2754162                 | C/G  | Gene_Ca_02363.2    | SYNONYMOUS_CODING             | NA                                                      |
| <i>Desi_wild_2758003</i> | NA                                  | <i>Ca_desi_Chr03</i> | 2758003                 | A/C  | NA                 | INTERGENIC                    | NA                                                      |
| <i>Desi_wild_2758011</i> | NA                                  | <i>Ca_desi_Chr03</i> | 2758011                 | G/T  | NA                 | INTERGENIC                    | NA                                                      |
| <i>Desi_wild_2787458</i> | NA                                  | <i>Ca_desi_Chr03</i> | 2787458                 | A/G  | Gene_Ca_02367.1    | UPSTREAM                      | Myosin-J heavy chain                                    |
| <i>Desi_wild_2798619</i> | NA                                  | <i>Ca_desi_Chr03</i> | 2798619                 | G/T  | Gene_Ca_02367.1    | NON_SYNONYMOUS_CODING         | Myosin-J heavy chain                                    |
| <i>Desi_wild_2873563</i> | NA                                  | <i>Ca_desi_Chr03</i> | 2873563                 | G/T  | Gene_Ca_02376.1    | UPSTREAM                      | Multisubstrate pseudouridine synthase 7                 |
| <i>Desi_wild_2874250</i> | NA                                  | <i>Ca_desi_Chr03</i> | 2874250                 | C/T  | NA                 | INTERGENIC                    | NA                                                      |
| <i>Desi_wild_2915510</i> | NA                                  | <i>Ca_desi_Chr03</i> | 2915510                 | T/C  | NA                 | INTERGENIC                    | NA                                                      |
| <i>Desi_wild_2991036</i> | NA                                  | <i>Ca_desi_Chr03</i> | 2991036                 | A/C  | Gene_Ca_02392.2    | INTRON                        | NA                                                      |
| <i>Desi_wild_3002455</i> | NA                                  | <i>Ca_desi_Chr03</i> | 3002455                 | A/C  | Gene_Ca_02393.1    | NON_SYNONYMOUS_CODING         | Acyltransferase-like protein At1g54570, chloroplastic   |
| <i>Desi_wild_3015816</i> | NA                                  | <i>Ca_desi_Chr03</i> | 3015816                 | A/G  | NA                 | INTERGENIC                    | NA                                                      |
| <i>Desi_wild_3048193</i> | NA                                  | <i>Ca_desi_Chr03</i> | 3048193                 | C/T  | Gene_Ca_02397.1    | SYNONYMOUS_CODING             | Transcription factor RF2b                               |
| <i>Desi_wild_3130784</i> | NA                                  | <i>Ca_desi_Chr03</i> | 3130784                 | G/T  | Gene_Ca_02402.1    | NON_SYNONYMOUS_CODING         | Probable E3 ubiquitin-protein ligase HERC1              |
| <i>Desi_wild_3133083</i> | NA                                  | <i>Ca_desi_Chr03</i> | 3133083                 | A/G  | Gene_Ca_02402.1    | SYNONYMOUS_CODING             | Probable E3 ubiquitin-protein ligase HERC1              |
| <i>Desi_wild_3133089</i> | NA                                  | <i>Ca_desi_Chr03</i> | 3133089                 | A/G  | Gene_Ca_02402.1    | SYNONYMOUS_CODING             | Probable E3 ubiquitin-protein ligase HERC1              |
| <i>Desi_wild_3179253</i> | NA                                  | <i>Ca_desi_Chr03</i> | 3179253                 | C/T  | Gene_Ca_02403.1    | NON_SYNONYMOUS_CODING         | nitroreductase family protein                           |
| <i>Desi_wild_3187918</i> | NA                                  | <i>Ca_desi_Chr03</i> | 3187918                 | A/T  | Gene_Ca_02404.1    | INTRON                        | Sugar transport protein 10                              |
| <i>Desi_wild_3267987</i> | NA                                  | <i>Ca_desi_Chr03</i> | 3267987                 | T/G  | Gene_Ca_02412.1    | NON_SYNONYMOUS_CODING         | Uncharacterized J domain-containing protein C17A3.05c   |
| <i>Desi_wild_3333129</i> | NA                                  | <i>Ca_desi_Chr03</i> | 3333129                 | A/G  | Gene_Ca_02420.1    | NON_SYNONYMOUS_CODING         | Piezo-type mechanosensitive ion channel component 2     |
| <i>Desi_wild_3478951</i> | NA                                  | <i>Ca_desi_Chr03</i> | 3478951                 | T/C  | Gene_Ca_02439.1    | INTRON                        | NA                                                      |

| SNP IDs                  | NCBI dbSNP accession IDs (NCBI_SS#) | Chromosomes          | Physical positions (bp) | SNPs | Gene accession IDs | Sequence components of genome | Putative functions                             |
|--------------------------|-------------------------------------|----------------------|-------------------------|------|--------------------|-------------------------------|------------------------------------------------|
| <i>Desi_wild_3478973</i> | NA                                  | <i>Ca_desi_Chr03</i> | 3478973                 | T/C  | Gene_Ca_02439.1    | INTRON                        | NA                                             |
| <i>Desi_wild_3479232</i> | NA                                  | <i>Ca_desi_Chr03</i> | 3479232                 | C/T  | Gene_Ca_02439.1    | INTRON                        | NA                                             |
| <i>Desi_wild_3488455</i> | NA                                  | <i>Ca_desi_Chr03</i> | 3488455                 | C/A  | NA                 | INTERGENIC                    | NA                                             |
| <i>Desi_wild_3493823</i> | NA                                  | <i>Ca_desi_Chr03</i> | 3493823                 | T/G  | NA                 | INTERGENIC                    | NA                                             |
| <i>Desi_wild_3493826</i> | NA                                  | <i>Ca_desi_Chr03</i> | 3493826                 | C/T  | NA                 | INTERGENIC                    | NA                                             |
| <i>Desi_wild_3493840</i> | NA                                  | <i>Ca_desi_Chr03</i> | 3493840                 | G/C  | NA                 | INTERGENIC                    | NA                                             |
| <i>Desi_wild_3495509</i> | NA                                  | <i>Ca_desi_Chr03</i> | 3495509                 | T/C  | Gene_Ca_02442.1    | SYNONYMOUS_CODING             | Kinesin-4                                      |
| <i>Desi_wild_3495557</i> | NA                                  | <i>Ca_desi_Chr03</i> | 3495557                 | A/G  | Gene_Ca_02442.1    | SYNONYMOUS_CODING             | Kinesin-4                                      |
| <i>Desi_wild_3509568</i> | NA                                  | <i>Ca_desi_Chr03</i> | 3509568                 | T/C  | NA                 | INTERGENIC                    | NA                                             |
| <i>Desi_wild_3509590</i> | NA                                  | <i>Ca_desi_Chr03</i> | 3509590                 | C/G  | NA                 | INTERGENIC                    | NA                                             |
| <i>Desi_wild_3509602</i> | NA                                  | <i>Ca_desi_Chr03</i> | 3509602                 | G/T  | NA                 | INTERGENIC                    | NA                                             |
| <i>Desi_wild_3509612</i> | NA                                  | <i>Ca_desi_Chr03</i> | 3509612                 | T/A  | NA                 | INTERGENIC                    | NA                                             |
| <i>Desi_wild_3509623</i> | NA                                  | <i>Ca_desi_Chr03</i> | 3509623                 | T/C  | NA                 | INTERGENIC                    | NA                                             |
| <i>Desi_wild_3512869</i> | NA                                  | <i>Ca_desi_Chr03</i> | 3512869                 | A/G  | Gene_Ca_02444.1    | INTRON                        | Probable Xaa-Pro aminopeptidase P              |
| <i>Desi_wild_3513535</i> | NA                                  | <i>Ca_desi_Chr03</i> | 3513535                 | C/T  | Gene_Ca_02444.1    | NON_SYNONYMOUS_CODING         | Probable Xaa-Pro aminopeptidase P              |
| <i>Desi_wild_3513623</i> | NA                                  | <i>Ca_desi_Chr03</i> | 3513623                 | C/T  | Gene_Ca_02444.1    | INTRON                        | Probable Xaa-Pro aminopeptidase P              |
| <i>Desi_wild_3514424</i> | NA                                  | <i>Ca_desi_Chr03</i> | 3514424                 | A/G  | Gene_Ca_02444.1    | NON_SYNONYMOUS_CODING         | Probable Xaa-Pro aminopeptidase P              |
| <i>Desi_wild_3515808</i> | NA                                  | <i>Ca_desi_Chr03</i> | 3515808                 | T/A  | NA                 | INTERGENIC                    | NA                                             |
| <i>Desi_wild_3523403</i> | NA                                  | <i>Ca_desi_Chr03</i> | 3523403                 | T/C  | NA                 | INTERGENIC                    | NA                                             |
| <i>Desi_wild_3523411</i> | NA                                  | <i>Ca_desi_Chr03</i> | 3523411                 | T/A  | NA                 | INTERGENIC                    | NA                                             |
| <i>Desi_wild_3524842</i> | NA                                  | <i>Ca_desi_Chr03</i> | 3524842                 | C/T  | NA                 | INTERGENIC                    | NA                                             |
| <i>Desi_wild_3524855</i> | NA                                  | <i>Ca_desi_Chr03</i> | 3524855                 | T/C  | NA                 | INTERGENIC                    | NA                                             |
| <i>Desi_wild_3524914</i> | NA                                  | <i>Ca_desi_Chr03</i> | 3524914                 | A/G  | NA                 | INTERGENIC                    | NA                                             |
| <i>Desi_wild_3538547</i> | NA                                  | <i>Ca_desi_Chr03</i> | 3538547                 | C/A  | Gene_Ca_02448.1    | INTRON                        | Cell cycle checkpoint control protein RAD9A    |
| <i>Desi_wild_3567295</i> | NA                                  | <i>Ca_desi_Chr03</i> | 3567295                 | T/C  | Gene_Ca_02451.1    | INTRON                        | Putative protease Do-like 14                   |
| <i>Desi_wild_3567298</i> | NA                                  | <i>Ca_desi_Chr03</i> | 3567298                 | C/T  | Gene_Ca_02451.1    | INTRON                        | Putative protease Do-like 14                   |
| <i>Desi_wild_3567305</i> | NA                                  | <i>Ca_desi_Chr03</i> | 3567305                 | C/T  | Gene_Ca_02451.1    | INTRON                        | Putative protease Do-like 14                   |
| <i>Desi_wild_3567444</i> | NA                                  | <i>Ca_desi_Chr03</i> | 3567444                 | C/T  | Gene_Ca_02451.1    | SYNONYMOUS_CODING             | Putative protease Do-like 14                   |
| <i>Desi_wild_3576516</i> | NA                                  | <i>Ca_desi_Chr03</i> | 3576516                 | C/T  | NA                 | INTERGENIC                    | NA                                             |
| <i>Desi_wild_3576517</i> | NA                                  | <i>Ca_desi_Chr03</i> | 3576517                 | T/C  | NA                 | INTERGENIC                    | NA                                             |
| <i>Desi_wild_3576686</i> | NA                                  | <i>Ca_desi_Chr03</i> | 3576686                 | A/G  | NA                 | INTERGENIC                    | NA                                             |
| <i>Desi_wild_3580883</i> | NA                                  | <i>Ca_desi_Chr03</i> | 3580883                 | C/T  | Gene_Ca_02453.2    | INTRON                        | NA                                             |
| <i>Desi_wild_3593776</i> | NA                                  | <i>Ca_desi_Chr03</i> | 3593776                 | A/G  | Gene_Ca_02454.1    | DOWNSTREAM                    | unknown protein                                |
| <i>Desi_wild_3609473</i> | NA                                  | <i>Ca_desi_Chr03</i> | 3609473                 | T/G  | Gene_Ca_02455.1    | NON_SYNONYMOUS_CODING         | Sucrose nonfermenting 4-like protein           |
| <i>Desi_wild_3609578</i> | NA                                  | <i>Ca_desi_Chr03</i> | 3609578                 | C/T  | Gene_Ca_02455.1    | SYNONYMOUS_CODING             | Sucrose nonfermenting 4-like protein           |
| <i>Desi_wild_3631276</i> | NA                                  | <i>Ca_desi_Chr03</i> | 3631276                 | C/T  | Gene_Ca_02457.1    | SYNONYMOUS_CODING             | DNA polymerase zeta catalytic subunit          |
| <i>Desi_wild_3633582</i> | NA                                  | <i>Ca_desi_Chr03</i> | 3633582                 | G/A  | Gene_Ca_02457.1    | INTRON                        | DNA polymerase zeta catalytic subunit          |
| <i>Desi_wild_3633583</i> | NA                                  | <i>Ca_desi_Chr03</i> | 3633583                 | G/T  | Gene_Ca_02457.1    | INTRON                        | DNA polymerase zeta catalytic subunit          |
| <i>Desi_wild_3633638</i> | NA                                  | <i>Ca_desi_Chr03</i> | 3633638                 | A/G  | Gene_Ca_02457.1    | INTRON                        | DNA polymerase zeta catalytic subunit          |
| <i>Desi_wild_3635915</i> | NA                                  | <i>Ca_desi_Chr03</i> | 3635915                 | G/A  | Gene_Ca_02457.1    | SYNONYMOUS_CODING             | DNA polymerase zeta catalytic subunit          |
| <i>Desi_wild_3713712</i> | NA                                  | <i>Ca_desi_Chr03</i> | 3713712                 | C/G  | NA                 | INTERGENIC                    | NA                                             |
| <i>Desi_wild_3730777</i> | NA                                  | <i>Ca_desi_Chr03</i> | 3730777                 | T/C  | Gene_Ca_02465.1    | INTRON                        | Trafficking protein particle complex subunit 8 |
| <i>Desi_wild_3773865</i> | NA                                  | <i>Ca_desi_Chr03</i> | 3773865                 | T/C  | Gene_Ca_02470.1    | NON_SYNONYMOUS_CODING         | unknown protein                                |
| <i>Desi_wild_3774007</i> | NA                                  | <i>Ca_desi_Chr03</i> | 3774007                 | A/T  | Gene_Ca_02470.1    | SYNONYMOUS_CODING             | unknown protein                                |

| SNP IDs                  | NCBI dbSNP accession IDs (NCBI_SS#) | Chromosomes          | Physical positions (bp) | SNPs | Gene accession IDs | Sequence components of genome | Putative functions                                               |
|--------------------------|-------------------------------------|----------------------|-------------------------|------|--------------------|-------------------------------|------------------------------------------------------------------|
| <i>Desi_wild_3794394</i> | NA                                  | <i>Ca_desi_Chr03</i> | 3794394                 | T/C  | Gene_Ca_02472.1    | UPSTREAM                      | Dihydroneopterin aldolase                                        |
| <i>Desi_wild_3794446</i> | NA                                  | <i>Ca_desi_Chr03</i> | 3794446                 | T/C  | Gene_Ca_02472.1    | UPSTREAM                      | Dihydroneopterin aldolase                                        |
| <i>Desi_wild_3794458</i> | NA                                  | <i>Ca_desi_Chr03</i> | 3794458                 | A/G  | Gene_Ca_02472.1    | UPSTREAM                      | Dihydroneopterin aldolase                                        |
| <i>Desi_wild_3840423</i> | NA                                  | <i>Ca_desi_Chr03</i> | 3840423                 | T/A  | NA                 | INTERGENIC                    | NA                                                               |
| <i>Desi_wild_3840434</i> | NA                                  | <i>Ca_desi_Chr03</i> | 3840434                 | A/G  | NA                 | INTERGENIC                    | NA                                                               |
| <i>Desi_wild_3860691</i> | NA                                  | <i>Ca_desi_Chr03</i> | 3860691                 | C/A  | NA                 | INTERGENIC                    | NA                                                               |
| <i>Desi_wild_3884489</i> | NA                                  | <i>Ca_desi_Chr03</i> | 3884489                 | A/C  | Gene_Ca_02485.1    | INTRON                        | Protein downstream neighbor of Son                               |
| <i>Desi_wild_3913855</i> | NA                                  | <i>Ca_desi_Chr03</i> | 3913855                 | G/A  | Gene_Ca_02489.2    | DOWNSTREAM                    | NA                                                               |
| <i>Desi_wild_3946342</i> | NA                                  | <i>Ca_desi_Chr03</i> | 3946342                 | G/A  | Gene_Ca_02491.1    | INTRON                        | D-lactate dehydrogenase [cytochrome], mitochondrial              |
| <i>Desi_wild_3946457</i> | NA                                  | <i>Ca_desi_Chr03</i> | 3946457                 | G/T  | Gene_Ca_02491.1    | SYNONYMOUS_CODING             | D-lactate dehydrogenase [cytochrome], mitochondrial              |
| <i>Desi_wild_3954659</i> | NA                                  | <i>Ca_desi_Chr03</i> | 3954659                 | A/G  | Gene_Ca_02492.1    | SYNONYMOUS_CODING             | Sterile alpha motif (SAM) domain-containing protein              |
| <i>Desi_wild_3967371</i> | NA                                  | <i>Ca_desi_Chr03</i> | 3967371                 | G/T  | Gene_Ca_02494.1    | INTRON                        | Probable glutamate carboxypeptidase 2                            |
| <i>Desi_wild_3967388</i> | NA                                  | <i>Ca_desi_Chr03</i> | 3967388                 | G/A  | Gene_Ca_02494.1    | INTRON                        | Probable glutamate carboxypeptidase 2                            |
| <i>Desi_wild_3973381</i> | NA                                  | <i>Ca_desi_Chr03</i> | 3973381                 | G/A  | Gene_Ca_02494.1    | INTRON                        | Probable glutamate carboxypeptidase 2                            |
| <i>Desi_wild_3979158</i> | NA                                  | <i>Ca_desi_Chr03</i> | 3979158                 | T/C  | Gene_Ca_02495.1    | DOWNSTREAM                    | Ubiquitin carboxyl-terminal hydrolase 12                         |
| <i>Desi_wild_4003568</i> | NA                                  | <i>Ca_desi_Chr03</i> | 4003568                 | A/C  | Gene_Ca_02498.2    | INTRON                        | Uncharacterized protein At3g58460                                |
| <i>Desi_wild_4016158</i> | NA                                  | <i>Ca_desi_Chr03</i> | 4016158                 | C/T  | Gene_Ca_02499.1    | SYNONYMOUS_CODING             | Calcium homeostasis endoplasmic reticulum protein                |
| <i>Desi_wild_4016176</i> | NA                                  | <i>Ca_desi_Chr03</i> | 4016176                 | A/C  | Gene_Ca_02499.1    | SYNONYMOUS_CODING             | Calcium homeostasis endoplasmic reticulum protein                |
| <i>Desi_wild_4019445</i> | NA                                  | <i>Ca_desi_Chr03</i> | 4019445                 | T/G  | Gene_Ca_02499.1    | SYNONYMOUS_CODING             | Calcium homeostasis endoplasmic reticulum protein                |
| <i>Desi_wild_4019505</i> | NA                                  | <i>Ca_desi_Chr03</i> | 4019505                 | T/C  | Gene_Ca_02499.1    | SYNONYMOUS_CODING             | Calcium homeostasis endoplasmic reticulum protein                |
| <i>Desi_wild_4039042</i> | NA                                  | <i>Ca_desi_Chr03</i> | 4039042                 | G/A  | Gene_Ca_02500.1    | DOWNSTREAM                    | Pre-mRNA-splicing factor rse1                                    |
| <i>Desi_wild_4053024</i> | NA                                  | <i>Ca_desi_Chr03</i> | 4053024                 | G/A  | NA                 | INTERGENIC                    | NA                                                               |
| <i>Desi_wild_4085844</i> | NA                                  | <i>Ca_desi_Chr03</i> | 4085844                 | A/G  | Gene_Ca_02506.2    | SYNONYMOUS_CODING             | NA                                                               |
| <i>Desi_wild_4086057</i> | NA                                  | <i>Ca_desi_Chr03</i> | 4086057                 | T/C  | Gene_Ca_02506.2    | INTRON                        | NA                                                               |
| <i>Desi_wild_4086443</i> | NA                                  | <i>Ca_desi_Chr03</i> | 4086443                 | T/C  | Gene_Ca_02506.2    | INTRON                        | NA                                                               |
| <i>Desi_wild_4086479</i> | NA                                  | <i>Ca_desi_Chr03</i> | 4086479                 | C/T  | Gene_Ca_02506.2    | INTRON                        | NA                                                               |
| <i>Desi_wild_4087924</i> | NA                                  | <i>Ca_desi_Chr03</i> | 4087924                 | T/C  | Gene_Ca_02506.2    | NON_SYNONYMOUS_CODING         | NA                                                               |
| <i>Desi_wild_4087934</i> | NA                                  | <i>Ca_desi_Chr03</i> | 4087934                 | C/A  | Gene_Ca_02506.2    | NON_SYNONYMOUS_CODING         | NA                                                               |
| <i>Desi_wild_4098735</i> | NA                                  | <i>Ca_desi_Chr03</i> | 4098735                 | T/A  | Gene_Ca_02507.1    | DOWNSTREAM                    | NPL4-like protein 1                                              |
| <i>Desi_wild_4098784</i> | NA                                  | <i>Ca_desi_Chr03</i> | 4098784                 | C/A  | Gene_Ca_02507.1    | DOWNSTREAM                    | NPL4-like protein 1                                              |
| <i>Desi_wild_4100572</i> | NA                                  | <i>Ca_desi_Chr03</i> | 4100572                 | C/T  | NA                 | INTERGENIC                    | NA                                                               |
| <i>Desi_wild_4100608</i> | NA                                  | <i>Ca_desi_Chr03</i> | 4100608                 | C/T  | NA                 | INTERGENIC                    | NA                                                               |
| <i>Desi_wild_4100611</i> | NA                                  | <i>Ca_desi_Chr03</i> | 4100611                 | T/C  | NA                 | INTERGENIC                    | NA                                                               |
| <i>Desi_wild_4100651</i> | NA                                  | <i>Ca_desi_Chr03</i> | 4100651                 | C/T  | NA                 | INTERGENIC                    | NA                                                               |
| <i>Desi_wild_4100710</i> | NA                                  | <i>Ca_desi_Chr03</i> | 4100710                 | C/T  | NA                 | INTERGENIC                    | NA                                                               |
| <i>Desi_wild_4100725</i> | NA                                  | <i>Ca_desi_Chr03</i> | 4100725                 | A/T  | NA                 | INTERGENIC                    | NA                                                               |
| <i>Desi_wild_4100741</i> | NA                                  | <i>Ca_desi_Chr03</i> | 4100741                 | G/A  | NA                 | INTERGENIC                    | NA                                                               |
| <i>Desi_wild_4100757</i> | NA                                  | <i>Ca_desi_Chr03</i> | 4100757                 | T/G  | NA                 | INTERGENIC                    | NA                                                               |
| <i>Desi_wild_4118883</i> | NA                                  | <i>Ca_desi_Chr03</i> | 4118883                 | T/C  | NA                 | INTERGENIC                    | NA                                                               |
| <i>Desi_wild_4118888</i> | NA                                  | <i>Ca_desi_Chr03</i> | 4118888                 | G/A  | NA                 | INTERGENIC                    | NA                                                               |
| <i>Desi_wild_4133239</i> | NA                                  | <i>Ca_desi_Chr03</i> | 4133239                 | A/G  | NA                 | INTERGENIC                    | NA                                                               |
| <i>Desi_wild_4135452</i> | NA                                  | <i>Ca_desi_Chr03</i> | 4135452                 | G/T  | Gene_Ca_02512.1    | DOWNSTREAM                    | U1 small nuclear ribonucleoprotein C-2                           |
| <i>Desi_wild_4145509</i> | NA                                  | <i>Ca_desi_Chr03</i> | 4145509                 | T/C  | Gene_Ca_02514.1    | DOWNSTREAM                    | Sex determination protein tasselseed-2                           |
| <i>Desi_wild_4174824</i> | NA                                  | <i>Ca_desi_Chr03</i> | 4174824                 | T/G  | Gene_Ca_02518.1    | DOWNSTREAM                    | CONTAINS InterPro DOMAIN/s: rRNA processing (InterPro:IPR013730) |

| SNP IDs                  | NCBI dbSNP accession IDs (NCBI_SS#) | Chromosomes          | Physical positions (bp) | SNPs | Gene accession IDs | Sequence components of genome | Putative functions                                               |
|--------------------------|-------------------------------------|----------------------|-------------------------|------|--------------------|-------------------------------|------------------------------------------------------------------|
| <i>Desi_wild_4174837</i> | NA                                  | <i>Ca_desi_Chr03</i> | 4174837                 | A/G  | Gene_Ca_02518.1    | DOWNSTREAM                    | CONTAINS InterPro DOMAIN/s: rRNA processing (InterPro:IPR013730) |
| <i>Desi_wild_4174863</i> | NA                                  | <i>Ca_desi_Chr03</i> | 4174863                 | A/G  | Gene_Ca_02518.1    | DOWNSTREAM                    | CONTAINS InterPro DOMAIN/s: rRNA processing (InterPro:IPR013730) |
| <i>Desi_wild_4175066</i> | NA                                  | <i>Ca_desi_Chr03</i> | 4175066                 | T/C  | Gene_Ca_02518.1    | DOWNSTREAM                    | CONTAINS InterPro DOMAIN/s: rRNA processing (InterPro:IPR013730) |
| <i>Desi_wild_4175622</i> | NA                                  | <i>Ca_desi_Chr03</i> | 4175622                 | A/C  | Gene_Ca_02518.1    | INTRON                        | CONTAINS InterPro DOMAIN/s: rRNA processing (InterPro:IPR013730) |
| <i>Desi_wild_4175736</i> | NA                                  | <i>Ca_desi_Chr03</i> | 4175736                 | A/C  | Gene_Ca_02518.1    | INTRON                        | CONTAINS InterPro DOMAIN/s: rRNA processing (InterPro:IPR013730) |
| <i>Desi_wild_4182322</i> | NA                                  | <i>Ca_desi_Chr03</i> | 4182322                 | G/A  | NA                 | INTERGENIC                    | NA                                                               |
| <i>Desi_wild_4182356</i> | NA                                  | <i>Ca_desi_Chr03</i> | 4182356                 | T/A  | NA                 | INTERGENIC                    | NA                                                               |
| <i>Desi_wild_4187139</i> | NA                                  | <i>Ca_desi_Chr03</i> | 4187139                 | G/A  | NA                 | INTERGENIC                    | NA                                                               |
| <i>Desi_wild_4197006</i> | NA                                  | <i>Ca_desi_Chr03</i> | 4197006                 | G/T  | NA                 | INTERGENIC                    | NA                                                               |
| <i>Desi_wild_4197023</i> | NA                                  | <i>Ca_desi_Chr03</i> | 4197023                 | T/A  | NA                 | INTERGENIC                    | NA                                                               |
| <i>Desi_wild_4197024</i> | NA                                  | <i>Ca_desi_Chr03</i> | 4197024                 | T/A  | NA                 | INTERGENIC                    | NA                                                               |
| <i>Desi_wild_4197306</i> | NA                                  | <i>Ca_desi_Chr03</i> | 4197306                 | A/G  | NA                 | INTERGENIC                    | NA                                                               |
| <i>Desi_wild_4197390</i> | NA                                  | <i>Ca_desi_Chr03</i> | 4197390                 | T/G  | NA                 | INTERGENIC                    | NA                                                               |
| <i>Desi_wild_4197482</i> | NA                                  | <i>Ca_desi_Chr03</i> | 4197482                 | T/A  | NA                 | INTERGENIC                    | NA                                                               |
| <i>Desi_wild_4197503</i> | NA                                  | <i>Ca_desi_Chr03</i> | 4197503                 | A/G  | NA                 | INTERGENIC                    | NA                                                               |
| <i>Desi_wild_4204321</i> | NA                                  | <i>Ca_desi_Chr03</i> | 4204321                 | T/A  | NA                 | INTERGENIC                    | NA                                                               |
| <i>Desi_wild_4211431</i> | NA                                  | <i>Ca_desi_Chr03</i> | 4211431                 | G/C  | NA                 | INTERGENIC                    | NA                                                               |
| <i>Desi_wild_4211441</i> | NA                                  | <i>Ca_desi_Chr03</i> | 4211441                 | G/T  | NA                 | INTERGENIC                    | NA                                                               |
| <i>Desi_wild_4211455</i> | NA                                  | <i>Ca_desi_Chr03</i> | 4211455                 | C/T  | NA                 | INTERGENIC                    | NA                                                               |
| <i>Desi_wild_4216738</i> | NA                                  | <i>Ca_desi_Chr03</i> | 4216738                 | T/C  | Gene_Ca_02526.1    | UPSTREAM                      | Monothiol glutaredoxin-S6                                        |
| <i>Desi_wild_4229802</i> | NA                                  | <i>Ca_desi_Chr03</i> | 4229802                 | C/A  | Gene_Ca_02529.1    | SYNONYMOUS_CODING             | BTB/POZ domain-containing protein At1g03010                      |
| <i>Desi_wild_4250045</i> | NA                                  | <i>Ca_desi_Chr03</i> | 4250045                 | T/G  | Gene_Ca_02531.1    | NON_SYNONYMOUS_CODING         | Spermatogenesis-associated protein 20                            |
| <i>Desi_wild_4261374</i> | NA                                  | <i>Ca_desi_Chr03</i> | 4261374                 | A/G  | Gene_Ca_02532.2    | SYNONYMOUS_CODING             | NA                                                               |
| <i>Desi_wild_4261410</i> | NA                                  | <i>Ca_desi_Chr03</i> | 4261410                 | C/T  | Gene_Ca_02532.2    | SYNONYMOUS_CODING             | NA                                                               |
| <i>Desi_wild_4261422</i> | NA                                  | <i>Ca_desi_Chr03</i> | 4261422                 | C/T  | Gene_Ca_02532.2    | SYNONYMOUS_CODING             | NA                                                               |
| <i>Desi_wild_4265965</i> | NA                                  | <i>Ca_desi_Chr03</i> | 4265965                 | G/A  | Gene_Ca_02532.2    | NON_SYNONYMOUS_CODING         | NA                                                               |
| <i>Desi_wild_4265985</i> | NA                                  | <i>Ca_desi_Chr03</i> | 4265985                 | T/G  | Gene_Ca_02532.2    | INTRON                        | NA                                                               |
| <i>Desi_wild_4266057</i> | NA                                  | <i>Ca_desi_Chr03</i> | 4266057                 | A/G  | Gene_Ca_02532.2    | INTRON                        | NA                                                               |
| <i>Desi_wild_4300046</i> | NA                                  | <i>Ca_desi_Chr03</i> | 4300046                 | A/G  | Gene_Ca_02535.2    | SYNONYMOUS_CODING             | NA                                                               |
| <i>Desi_wild_4300111</i> | NA                                  | <i>Ca_desi_Chr03</i> | 4300111                 | T/C  | Gene_Ca_02535.2    | SYNONYMOUS_CODING             | NA                                                               |
| <i>Desi_wild_4303840</i> | NA                                  | <i>Ca_desi_Chr03</i> | 4303840                 | G/C  | Gene_Ca_02535.2    | INTRON                        | NA                                                               |
| <i>Desi_wild_4303857</i> | NA                                  | <i>Ca_desi_Chr03</i> | 4303857                 | G/A  | Gene_Ca_02535.2    | INTRON                        | NA                                                               |
| <i>Desi_wild_4303858</i> | NA                                  | <i>Ca_desi_Chr03</i> | 4303858                 | C/T  | Gene_Ca_02535.2    | INTRON                        | NA                                                               |
| <i>Desi_wild_4303915</i> | NA                                  | <i>Ca_desi_Chr03</i> | 4303915                 | G/A  | Gene_Ca_02535.2    | INTRON                        | NA                                                               |
| <i>Desi_wild_4314473</i> | NA                                  | <i>Ca_desi_Chr03</i> | 4314473                 | T/C  | Gene_Ca_02536.1    | SYNONYMOUS_CODING             | Zinc finger protein MAGPIE                                       |
| <i>Desi_wild_4327039</i> | NA                                  | <i>Ca_desi_Chr03</i> | 4327039                 | A/G  | Gene_Ca_02537.1    | NON_SYNONYMOUS_CODING         | unknown protein                                                  |
| <i>Desi_wild_4330756</i> | NA                                  | <i>Ca_desi_Chr03</i> | 4330756                 | C/T  | Gene_Ca_02537.1    | INTRON                        | unknown protein                                                  |
| <i>Desi_wild_4347515</i> | NA                                  | <i>Ca_desi_Chr03</i> | 4347515                 | G/T  | Gene_Ca_02539.1    | SYNONYMOUS_CODING             | Wee1-like protein kinase                                         |
| <i>Desi_wild_4347520</i> | NA                                  | <i>Ca_desi_Chr03</i> | 4347520                 | C/G  | Gene_Ca_02539.1    | INTRON                        | Wee1-like protein kinase                                         |
| <i>Desi_wild_4347579</i> | NA                                  | <i>Ca_desi_Chr03</i> | 4347579                 | G/A  | Gene_Ca_02539.1    | INTRON                        | Wee1-like protein kinase                                         |
| <i>Desi_wild_4356878</i> | NA                                  | <i>Ca_desi_Chr03</i> | 4356878                 | A/T  | NA                 | INTERGENIC                    | NA                                                               |
| <i>Desi_wild_4356981</i> | NA                                  | <i>Ca_desi_Chr03</i> | 4356981                 | C/T  | NA                 | INTERGENIC                    | NA                                                               |
| <i>Desi_wild_4356995</i> | NA                                  | <i>Ca_desi_Chr03</i> | 4356995                 | G/A  | NA                 | INTERGENIC                    | NA                                                               |
| <i>Desi_wild_4365790</i> | NA                                  | <i>Ca_desi_Chr03</i> | 4365790                 | C/A  | NA                 | INTERGENIC                    | NA                                                               |

| SNP IDs                  | NCBI dbSNP accession IDs (NCBI_SS#) | Chromosomes          | Physical positions (bp) | SNPs | Gene accession IDs | Sequence components of genome | Putative functions                                |
|--------------------------|-------------------------------------|----------------------|-------------------------|------|--------------------|-------------------------------|---------------------------------------------------|
| <i>Desi_wild_4365835</i> | NA                                  | <i>Ca_desi_Chr03</i> | 4365835                 | T/A  | NA                 | INTERGENIC                    | NA                                                |
| <i>Desi_wild_4386997</i> | NA                                  | <i>Ca_desi_Chr03</i> | 4386997                 | A/G  | Gene_Ca_02548.2    | SYNONYMOUS_CODING             | NA                                                |
| <i>Desi_wild_4387022</i> | NA                                  | <i>Ca_desi_Chr03</i> | 4387022                 | G/A  | Gene_Ca_02548.2    | SYNONYMOUS_CODING             | NA                                                |
| <i>Desi_wild_4401074</i> | NA                                  | <i>Ca_desi_Chr03</i> | 4401074                 | G/A  | Gene_Ca_02550.1    | SYNONYMOUS_CODING             | NA                                                |
| <i>Desi_wild_4409758</i> | NA                                  | <i>Ca_desi_Chr03</i> | 4409758                 | G/A  | Gene_Ca_02551.1    | DOWNSTREAM                    | Probable U6 snRNA-associated Sm-like protein LSm4 |
| <i>Desi_wild_4409776</i> | NA                                  | <i>Ca_desi_Chr03</i> | 4409776                 | T/A  | Gene_Ca_02551.1    | DOWNSTREAM                    | Probable U6 snRNA-associated Sm-like protein LSm4 |
| <i>Desi_wild_4409777</i> | NA                                  | <i>Ca_desi_Chr03</i> | 4409777                 | G/A  | Gene_Ca_02551.1    | DOWNSTREAM                    | Probable U6 snRNA-associated Sm-like protein LSm4 |
| <i>Desi_wild_4409778</i> | NA                                  | <i>Ca_desi_Chr03</i> | 4409778                 | T/C  | Gene_Ca_02551.1    | DOWNSTREAM                    | Probable U6 snRNA-associated Sm-like protein LSm4 |
| <i>Desi_wild_4410160</i> | NA                                  | <i>Ca_desi_Chr03</i> | 4410160                 | T/C  | NA                 | INTERGENIC                    | NA                                                |
| <i>Desi_wild_4415458</i> | NA                                  | <i>Ca_desi_Chr03</i> | 4415458                 | G/A  | NA                 | INTERGENIC                    | NA                                                |
| <i>Desi_wild_4415548</i> | NA                                  | <i>Ca_desi_Chr03</i> | 4415548                 | T/A  | NA                 | INTERGENIC                    | NA                                                |
| <i>Desi_wild_4415704</i> | NA                                  | <i>Ca_desi_Chr03</i> | 4415704                 | T/A  | NA                 | INTERGENIC                    | NA                                                |
| <i>Desi_wild_4415709</i> | NA                                  | <i>Ca_desi_Chr03</i> | 4415709                 | C/T  | NA                 | INTERGENIC                    | NA                                                |
| <i>Desi_wild_4415789</i> | NA                                  | <i>Ca_desi_Chr03</i> | 4415789                 | C/T  | NA                 | INTERGENIC                    | NA                                                |
| <i>Desi_wild_4415806</i> | NA                                  | <i>Ca_desi_Chr03</i> | 4415806                 | C/A  | NA                 | INTERGENIC                    | NA                                                |
| <i>Desi_wild_4415850</i> | NA                                  | <i>Ca_desi_Chr03</i> | 4415850                 | A/T  | NA                 | INTERGENIC                    | NA                                                |
| <i>Desi_wild_4431101</i> | NA                                  | <i>Ca_desi_Chr03</i> | 4431101                 | C/T  | Gene_Ca_02555.1    | DOWNSTREAM                    | Universal stress protein MJ0531                   |
| <i>Desi_wild_4431103</i> | NA                                  | <i>Ca_desi_Chr03</i> | 4431103                 | T/C  | Gene_Ca_02555.1    | DOWNSTREAM                    | Universal stress protein MJ0531                   |
| <i>Desi_wild_4451536</i> | NA                                  | <i>Ca_desi_Chr03</i> | 4451536                 | A/C  | NA                 | INTERGENIC                    | NA                                                |
| <i>Desi_wild_4573221</i> | NA                                  | <i>Ca_desi_Chr03</i> | 4573221                 | A/T  | Gene_Ca_02569.1    | SYNONYMOUS_CODING             | E3 ubiquitin-protein ligase Hakai                 |
| <i>Desi_wild_4581060</i> | NA                                  | <i>Ca_desi_Chr03</i> | 4581060                 | G/A  | Gene_Ca_02570.1    | NON_SYNONYMOUS_CODING         | UPF0503 protein At3g09070, chloroplastic          |
| <i>Desi_wild_4581079</i> | NA                                  | <i>Ca_desi_Chr03</i> | 4581079                 | T/G  | Gene_Ca_02570.1    | NON_SYNONYMOUS_CODING         | UPF0503 protein At3g09070, chloroplastic          |
| <i>Desi_wild_4664737</i> | NA                                  | <i>Ca_desi_Chr03</i> | 4664737                 | C/T  | Gene_Ca_02571.1    | INTRON                        | WD repeat-containing protein 62                   |
| <i>Desi_wild_4741284</i> | NA                                  | <i>Ca_desi_Chr03</i> | 4741284                 | C/T  | NA                 | INTERGENIC                    | NA                                                |
| <i>Desi_wild_4741395</i> | NA                                  | <i>Ca_desi_Chr03</i> | 4741395                 | G/C  | NA                 | INTERGENIC                    | NA                                                |
| <i>Desi_wild_4787269</i> | NA                                  | <i>Ca_desi_Chr03</i> | 4787269                 | G/T  | NA                 | INTERGENIC                    | NA                                                |
| <i>Desi_wild_4787368</i> | NA                                  | <i>Ca_desi_Chr03</i> | 4787368                 | A/T  | NA                 | INTERGENIC                    | NA                                                |
| <i>Desi_wild_4801073</i> | NA                                  | <i>Ca_desi_Chr03</i> | 4801073                 | A/C  | Gene_Ca_02585.1    | INTRON                        | Serine/threonine-protein kinase KIPK              |
| <i>Desi_wild_4801104</i> | NA                                  | <i>Ca_desi_Chr03</i> | 4801104                 | T/C  | Gene_Ca_02585.1    | INTRON                        | Serine/threonine-protein kinase KIPK              |
| <i>Desi_wild_5804745</i> | NA                                  | <i>Ca_desi_Chr03</i> | 5804745                 | G/C  | Gene_Ca_02600.2    | NON_SYNONYMOUS_CODING         | NA                                                |
| <i>Desi_wild_5851070</i> | NA                                  | <i>Ca_desi_Chr03</i> | 5851070                 | C/T  | Gene_Ca_02604.1    | NON_SYNONYMOUS_CODING         | HEAT repeat-containing protein 7A homolog         |
| <i>Desi_wild_5851142</i> | NA                                  | <i>Ca_desi_Chr03</i> | 5851142                 | A/G  | Gene_Ca_02604.1    | NON_SYNONYMOUS_CODING         | HEAT repeat-containing protein 7A homolog         |
| <i>Desi_wild_5944499</i> | NA                                  | <i>Ca_desi_Chr03</i> | 5944499                 | G/T  | Gene_Ca_02612.1    | NON_SYNONYMOUS_CODING         | Ras-related protein RABE1c                        |
| <i>Desi_wild_5955064</i> | NA                                  | <i>Ca_desi_Chr03</i> | 5955064                 | A/G  | NA                 | INTERGENIC                    | NA                                                |
| <i>Desi_wild_6078557</i> | NA                                  | <i>Ca_desi_Chr03</i> | 6078557                 | A/C  | Gene_Ca_02628.5    | NON_SYNONYMOUS_CODING         | NA                                                |
| <i>Desi_wild_6157638</i> | NA                                  | <i>Ca_desi_Chr03</i> | 6157638                 | C/T  | NA                 | INTERGENIC                    | NA                                                |
| <i>Desi_wild_6172170</i> | NA                                  | <i>Ca_desi_Chr03</i> | 6172170                 | G/A  | NA                 | INTERGENIC                    | NA                                                |
| <i>Desi_wild_6172174</i> | NA                                  | <i>Ca_desi_Chr03</i> | 6172174                 | A/T  | NA                 | INTERGENIC                    | NA                                                |
| <i>Desi_wild_6172185</i> | NA                                  | <i>Ca_desi_Chr03</i> | 6172185                 | A/G  | NA                 | INTERGENIC                    | NA                                                |
| <i>Desi_wild_6172225</i> | NA                                  | <i>Ca_desi_Chr03</i> | 6172225                 | T/A  | NA                 | INTERGENIC                    | NA                                                |
| <i>Desi_wild_6172249</i> | NA                                  | <i>Ca_desi_Chr03</i> | 6172249                 | T/G  | NA                 | INTERGENIC                    | NA                                                |
| <i>Desi_wild_6195805</i> | NA                                  | <i>Ca_desi_Chr03</i> | 6195805                 | T/G  | Gene_Ca_02645.1    | NON_SYNONYMOUS_CODING         | NA                                                |
| <i>Desi_wild_6262005</i> | NA                                  | <i>Ca_desi_Chr03</i> | 6262005                 | C/T  | Gene_Ca_02650.2    | INTRON                        | DEAD-box ATP-dependent RNA helicase 8             |
| <i>Desi_wild_6323958</i> | NA                                  | <i>Ca_desi_Chr03</i> | 6323958                 | T/C  | NA                 | INTERGENIC                    | NA                                                |

| SNP IDs                  | NCBI dbSNP accession IDs (NCBI_SS#) | Chromosomes           | Physical positions (bp) | SNPs | Gene accession IDs | Sequence components of genome | Putative functions                |
|--------------------------|-------------------------------------|-----------------------|-------------------------|------|--------------------|-------------------------------|-----------------------------------|
| <i>Desi_wild_6330548</i> | NA                                  | <i>Ca_desi_Chrom3</i> | 6330548                 | C/A  | NA                 | INTERGENIC                    | NA                                |
| <i>Desi_wild_6330673</i> | NA                                  | <i>Ca_desi_Chrom3</i> | 6330673                 | A/G  | NA                 | INTERGENIC                    | NA                                |
| <i>Desi_wild_6390835</i> | NA                                  | <i>Ca_desi_Chrom3</i> | 6390835                 | C/T  | NA                 | INTERGENIC                    | NA                                |
| <i>Desi_wild_6390861</i> | NA                                  | <i>Ca_desi_Chrom3</i> | 6390861                 | A/G  | NA                 | INTERGENIC                    | NA                                |
| <i>Desi_wild_6431297</i> | NA                                  | <i>Ca_desi_Chrom3</i> | 6431297                 | C/T  | Gene_Ca_02668.3    | INTRON                        | NA                                |
| <i>Desi_wild_6434644</i> | NA                                  | <i>Ca_desi_Chrom3</i> | 6434644                 | T/C  | Gene_Ca_02669.1    | INTRON                        | Putative G3BP-like protein        |
| <i>Desi_wild_6434961</i> | NA                                  | <i>Ca_desi_Chrom3</i> | 6434961                 | T/A  | Gene_Ca_02669.1    | INTRON                        | Putative G3BP-like protein        |
| <i>Desi_wild_6435914</i> | NA                                  | <i>Ca_desi_Chrom3</i> | 6435914                 | A/C  | Gene_Ca_02669.1    | SYNONYMOUS_CODING             | Putative G3BP-like protein        |
| <i>Desi_wild_6435997</i> | NA                                  | <i>Ca_desi_Chrom3</i> | 6435997                 | A/G  | Gene_Ca_02669.1    | SYNONYMOUS_CODING             | Putative G3BP-like protein        |
| <i>Desi_wild_6436024</i> | NA                                  | <i>Ca_desi_Chrom3</i> | 6436024                 | G/A  | Gene_Ca_02669.1    | SYNONYMOUS_CODING             | Putative G3BP-like protein        |
| <i>Desi_wild_6436085</i> | NA                                  | <i>Ca_desi_Chrom3</i> | 6436085                 | G/A  | Gene_Ca_02669.1    | INTRON                        | Putative G3BP-like protein        |
| <i>Desi_wild_6436108</i> | NA                                  | <i>Ca_desi_Chrom3</i> | 6436108                 | A/C  | Gene_Ca_02669.1    | INTRON                        | Putative G3BP-like protein        |
| <i>Desi_wild_6449881</i> | NA                                  | <i>Ca_desi_Chrom3</i> | 6449881                 | G/A  | Gene_Ca_02673.1    | UPSTREAM                      | unknown protein                   |
| <i>Desi_wild_6485692</i> | NA                                  | <i>Ca_desi_Chrom3</i> | 6485692                 | A/G  | NA                 | INTERGENIC                    | NA                                |
| <i>Desi_wild_6490909</i> | NA                                  | <i>Ca_desi_Chrom3</i> | 6490909                 | C/T  | NA                 | INTERGENIC                    | NA                                |
| <i>Desi_wild_6499799</i> | NA                                  | <i>Ca_desi_Chrom3</i> | 6499799                 | A/C  | Gene_Ca_02679.1    | INTRON                        | NA                                |
| <i>Desi_wild_6499971</i> | NA                                  | <i>Ca_desi_Chrom3</i> | 6499971                 | A/T  | Gene_Ca_02679.1    | SYNONYMOUS_CODING             | NA                                |
| <i>Desi_wild_6499977</i> | NA                                  | <i>Ca_desi_Chrom3</i> | 6499977                 | A/G  | Gene_Ca_02679.1    | SYNONYMOUS_CODING             | NA                                |
| <i>Desi_wild_6499989</i> | NA                                  | <i>Ca_desi_Chrom3</i> | 6499989                 | T/A  | Gene_Ca_02679.1    | SYNONYMOUS_CODING             | NA                                |
| <i>Desi_wild_6499995</i> | NA                                  | <i>Ca_desi_Chrom3</i> | 6499995                 | G/A  | Gene_Ca_02679.1    | SYNONYMOUS_CODING             | NA                                |
| <i>Desi_wild_6500010</i> | NA                                  | <i>Ca_desi_Chrom3</i> | 6500010                 | G/A  | Gene_Ca_02679.1    | SYNONYMOUS_CODING             | NA                                |
| <i>Desi_wild_6500013</i> | NA                                  | <i>Ca_desi_Chrom3</i> | 6500013                 | C/A  | Gene_Ca_02679.1    | NON_SYNONYMOUS_CODING         | NA                                |
| <i>Desi_wild_6500019</i> | NA                                  | <i>Ca_desi_Chrom3</i> | 6500019                 | A/G  | Gene_Ca_02679.1    | SYNONYMOUS_CODING             | NA                                |
| <i>Desi_wild_6500028</i> | NA                                  | <i>Ca_desi_Chrom3</i> | 6500028                 | A/G  | Gene_Ca_02679.1    | SYNONYMOUS_CODING             | NA                                |
| <i>Desi_wild_6501197</i> | NA                                  | <i>Ca_desi_Chrom3</i> | 6501197                 | A/T  | Gene_Ca_02679.1    | SYNONYMOUS_CODING             | NA                                |
| <i>Desi_wild_6501233</i> | NA                                  | <i>Ca_desi_Chrom3</i> | 6501233                 | T/A  | Gene_Ca_02679.1    | SYNONYMOUS_CODING             | NA                                |
| <i>Desi_wild_6501239</i> | NA                                  | <i>Ca_desi_Chrom3</i> | 6501239                 | G/A  | Gene_Ca_02679.1    | SYNONYMOUS_CODING             | NA                                |
| <i>Desi_wild_6501241</i> | NA                                  | <i>Ca_desi_Chrom3</i> | 6501241                 | T/C  | Gene_Ca_02679.1    | NON_SYNONYMOUS_CODING         | NA                                |
| <i>Desi_wild_6501247</i> | NA                                  | <i>Ca_desi_Chrom3</i> | 6501247                 | G/A  | Gene_Ca_02679.1    | SYNONYMOUS_CODING             | NA                                |
| <i>Desi_wild_6501251</i> | NA                                  | <i>Ca_desi_Chrom3</i> | 6501251                 | C/T  | Gene_Ca_02679.1    | SYNONYMOUS_CODING             | NA                                |
| <i>Desi_wild_6501259</i> | NA                                  | <i>Ca_desi_Chrom3</i> | 6501259                 | T/C  | Gene_Ca_02679.1    | NON_SYNONYMOUS_CODING         | NA                                |
| <i>Desi_wild_6501274</i> | NA                                  | <i>Ca_desi_Chrom3</i> | 6501274                 | C/A  | Gene_Ca_02679.1    | INTRON                        | NA                                |
| <i>Desi_wild_6501368</i> | NA                                  | <i>Ca_desi_Chrom3</i> | 6501368                 | T/G  | Gene_Ca_02679.1    | INTRON                        | NA                                |
| <i>Desi_wild_6501371</i> | NA                                  | <i>Ca_desi_Chrom3</i> | 6501371                 | G/A  | Gene_Ca_02679.1    | INTRON                        | NA                                |
| <i>Desi_wild_6501376</i> | NA                                  | <i>Ca_desi_Chrom3</i> | 6501376                 | C/G  | Gene_Ca_02679.1    | INTRON                        | NA                                |
| <i>Desi_wild_6501383</i> | NA                                  | <i>Ca_desi_Chrom3</i> | 6501383                 | G/A  | Gene_Ca_02679.1    | INTRON                        | NA                                |
| <i>Desi_wild_6501410</i> | NA                                  | <i>Ca_desi_Chrom3</i> | 6501410                 | A/G  | Gene_Ca_02679.1    | INTRON                        | NA                                |
| <i>Desi_wild_6501428</i> | NA                                  | <i>Ca_desi_Chrom3</i> | 6501428                 | C/T  | Gene_Ca_02679.1    | INTRON                        | NA                                |
| <i>Desi_wild_6501431</i> | NA                                  | <i>Ca_desi_Chrom3</i> | 6501431                 | G/T  | Gene_Ca_02679.1    | INTRON                        | NA                                |
| <i>Desi_wild_6501440</i> | NA                                  | <i>Ca_desi_Chrom3</i> | 6501440                 | T/A  | Gene_Ca_02679.1    | INTRON                        | NA                                |
| <i>Desi_wild_6501442</i> | NA                                  | <i>Ca_desi_Chrom3</i> | 6501442                 | C/T  | Gene_Ca_02679.1    | INTRON                        | ABC transporter C family member 5 |
| <i>Desi_wild_6543089</i> | NA                                  | <i>Ca_desi_Chrom3</i> | 6543089                 | A/T  | Gene_Ca_02681.1    | DOWNSTREAM                    | Peptide transporter PTR3-A        |
| <i>Desi_wild_6543102</i> | NA                                  | <i>Ca_desi_Chrom3</i> | 6543102                 | A/G  | Gene_Ca_02681.1    | DOWNSTREAM                    | Peptide transporter PTR3-A        |
| <i>Desi_wild_6544021</i> | NA                                  | <i>Ca_desi_Chrom3</i> | 6544021                 | T/A  | NA                 | INTERGENIC                    | NA                                |



| SNP IDs                  | NCBI dbSNP accession IDs (NCBI_SS#) | Chromosomes          | Physical positions (bp) | SNPs | Gene accession IDs | Sequence components of genome | Putative functions                                      |
|--------------------------|-------------------------------------|----------------------|-------------------------|------|--------------------|-------------------------------|---------------------------------------------------------|
| <i>Desi_wild_6544048</i> | NA                                  | <i>Ca_desi_Chr03</i> | 6544048                 | C/T  | NA                 | INTERGENIC                    | NA                                                      |
| <i>Desi_wild_6544056</i> | NA                                  | <i>Ca_desi_Chr03</i> | 6544056                 | A/G  | NA                 | INTERGENIC                    | NA                                                      |
| <i>Desi_wild_6544127</i> | NA                                  | <i>Ca_desi_Chr03</i> | 6544127                 | G/A  | NA                 | INTERGENIC                    | NA                                                      |
| <i>Desi_wild_6544365</i> | NA                                  | <i>Ca_desi_Chr03</i> | 6544365                 | G/A  | NA                 | INTERGENIC                    | NA                                                      |
| <i>Desi_wild_6547078</i> | NA                                  | <i>Ca_desi_Chr03</i> | 6547078                 | C/T  | NA                 | INTERGENIC                    | NA                                                      |
| <i>Desi_wild_6547143</i> | NA                                  | <i>Ca_desi_Chr03</i> | 6547143                 | T/C  | NA                 | INTERGENIC                    | NA                                                      |
| <i>Desi_wild_6547513</i> | NA                                  | <i>Ca_desi_Chr03</i> | 6547513                 | A/G  | NA                 | INTERGENIC                    | NA                                                      |
| <i>Desi_wild_6547617</i> | NA                                  | <i>Ca_desi_Chr03</i> | 6547617                 | C/A  | NA                 | INTERGENIC                    | NA                                                      |
| <i>Desi_wild_6592195</i> | NA                                  | <i>Ca_desi_Chr03</i> | 6592195                 | A/G  | NA                 | INTERGENIC                    | NA                                                      |
| <i>Desi_wild_6593914</i> | NA                                  | <i>Ca_desi_Chr03</i> | 6593914                 | G/A  | NA                 | INTERGENIC                    | NA                                                      |
| <i>Desi_wild_6593992</i> | NA                                  | <i>Ca_desi_Chr03</i> | 6593992                 | A/G  | NA                 | INTERGENIC                    | NA                                                      |
| <i>Desi_wild_6616912</i> | NA                                  | <i>Ca_desi_Chr03</i> | 6616912                 | G/A  | NA                 | INTERGENIC                    | NA                                                      |
| <i>Desi_wild_6636057</i> | NA                                  | <i>Ca_desi_Chr03</i> | 6636057                 | C/T  | Gene_Ca_02691.1    | DOWNSTREAM                    | Vacuolar protein sorting-associated protein 2 homolog 3 |
| <i>Desi_wild_6641242</i> | NA                                  | <i>Ca_desi_Chr03</i> | 6641242                 | G/A  | Gene_Ca_02692.1    | INTRON                        | Casein kinase I isoform delta-like                      |
| <i>Desi_wild_6641323</i> | NA                                  | <i>Ca_desi_Chr03</i> | 6641323                 | G/A  | Gene_Ca_02692.1    | INTRON                        | Casein kinase I isoform delta-like                      |
| <i>Desi_wild_6720703</i> | NA                                  | <i>Ca_desi_Chr03</i> | 6720703                 | C/A  | Gene_Ca_02697.1    | SYNONYMOUS_CODING             | Probable lysine-specific demethylase JMJ14              |
| <i>Desi_wild_6720816</i> | NA                                  | <i>Ca_desi_Chr03</i> | 6720816                 | G/A  | Gene_Ca_02697.1    | SYNONYMOUS_CODING             | Probable lysine-specific demethylase JMJ14              |
| <i>Desi_wild_6721041</i> | NA                                  | <i>Ca_desi_Chr03</i> | 6721041                 | A/G  | Gene_Ca_02697.1    | SYNONYMOUS_CODING             | Probable lysine-specific demethylase JMJ14              |
| <i>Desi_wild_6723814</i> | NA                                  | <i>Ca_desi_Chr03</i> | 6723814                 | G/A  | NA                 | INTERGENIC                    | NA                                                      |
| <i>Desi_wild_6723839</i> | NA                                  | <i>Ca_desi_Chr03</i> | 6723839                 | A/G  | NA                 | INTERGENIC                    | NA                                                      |
| <i>Desi_wild_6723852</i> | NA                                  | <i>Ca_desi_Chr03</i> | 6723852                 | G/C  | NA                 | INTERGENIC                    | NA                                                      |
| <i>Desi_wild_6738215</i> | NA                                  | <i>Ca_desi_Chr03</i> | 6738215                 | A/T  | Gene_Ca_02699.1    | DOWNSTREAM                    | Protein of unknown function (DUF640)                    |
| <i>Desi_wild_6738992</i> | NA                                  | <i>Ca_desi_Chr03</i> | 6738992                 | G/A  | Gene_Ca_02699.1    | SYNONYMOUS_CODING             | Protein of unknown function (DUF640)                    |
| <i>Desi_wild_6758389</i> | NA                                  | <i>Ca_desi_Chr03</i> | 6758389                 | T/C  | Gene_Ca_02701.1    | SYNONYMOUS_CODING             | Vacuolar protein sorting-associated protein 27          |
| <i>Desi_wild_6758461</i> | NA                                  | <i>Ca_desi_Chr03</i> | 6758461                 | T/C  | Gene_Ca_02701.1    | SYNONYMOUS_CODING             | Vacuolar protein sorting-associated protein 27          |
| <i>Desi_wild_6758514</i> | NA                                  | <i>Ca_desi_Chr03</i> | 6758514                 | T/C  | Gene_Ca_02701.1    | SYNONYMOUS_CODING             | Vacuolar protein sorting-associated protein 27          |
| <i>Desi_wild_6776192</i> | NA                                  | <i>Ca_desi_Chr03</i> | 6776192                 | A/G  | NA                 | INTERGENIC                    | NA                                                      |
| <i>Desi_wild_6776469</i> | NA                                  | <i>Ca_desi_Chr03</i> | 6776469                 | T/C  | NA                 | INTERGENIC                    | NA                                                      |
| <i>Desi_wild_6790376</i> | NA                                  | <i>Ca_desi_Chr03</i> | 6790376                 | A/C  | NA                 | INTERGENIC                    | NA                                                      |
| <i>Desi_wild_6790441</i> | NA                                  | <i>Ca_desi_Chr03</i> | 6790441                 | T/G  | NA                 | INTERGENIC                    | NA                                                      |
| <i>Desi_wild_6790700</i> | NA                                  | <i>Ca_desi_Chr03</i> | 6790700                 | G/A  | NA                 | INTERGENIC                    | NA                                                      |
| <i>Desi_wild_6799092</i> | NA                                  | <i>Ca_desi_Chr03</i> | 6799092                 | A/T  | Gene_Ca_02707.1    | INTRON                        | UPF0420 protein C16orf58 homolog                        |
| <i>Desi_wild_6799102</i> | NA                                  | <i>Ca_desi_Chr03</i> | 6799102                 | C/T  | Gene_Ca_02707.1    | INTRON                        | UPF0420 protein C16orf58 homolog                        |
| <i>Desi_wild_6799103</i> | NA                                  | <i>Ca_desi_Chr03</i> | 6799103                 | C/T  | Gene_Ca_02707.1    | INTRON                        | UPF0420 protein C16orf58 homolog                        |
| <i>Desi_wild_6809193</i> | NA                                  | <i>Ca_desi_Chr03</i> | 6809193                 | A/G  | Gene_Ca_02708.1    | DOWNSTREAM                    | NA                                                      |
| <i>Desi_wild_6812085</i> | NA                                  | <i>Ca_desi_Chr03</i> | 6812085                 | G/A  | NA                 | INTERGENIC                    | NA                                                      |
| <i>Desi_wild_6812089</i> | NA                                  | <i>Ca_desi_Chr03</i> | 6812089                 | G/T  | NA                 | INTERGENIC                    | NA                                                      |
| <i>Desi_wild_6812090</i> | NA                                  | <i>Ca_desi_Chr03</i> | 6812090                 | T/C  | NA                 | INTERGENIC                    | NA                                                      |
| <i>Desi_wild_6812091</i> | NA                                  | <i>Ca_desi_Chr03</i> | 6812091                 | G/A  | NA                 | INTERGENIC                    | NA                                                      |
| <i>Desi_wild_6812104</i> | NA                                  | <i>Ca_desi_Chr03</i> | 6812104                 | C/G  | NA                 | INTERGENIC                    | NA                                                      |
| <i>Desi_wild_6812111</i> | NA                                  | <i>Ca_desi_Chr03</i> | 6812111                 | A/G  | NA                 | INTERGENIC                    | NA                                                      |
| <i>Desi_wild_6812125</i> | NA                                  | <i>Ca_desi_Chr03</i> | 6812125                 | C/T  | NA                 | INTERGENIC                    | NA                                                      |
| <i>Desi_wild_6812138</i> | NA                                  | <i>Ca_desi_Chr03</i> | 6812138                 | C/A  | NA                 | INTERGENIC                    | NA                                                      |
| <i>Desi_wild_6812141</i> | NA                                  | <i>Ca_desi_Chr03</i> | 6812141                 | C/T  | NA                 | INTERGENIC                    | NA                                                      |

| SNP IDs                   | NCBI dbSNP accession IDs (NCBI_SS#) | Chromosomes          | Physical positions (bp) | SNPs | Gene accession IDs              | Sequence components of genome | Putative functions                                                |
|---------------------------|-------------------------------------|----------------------|-------------------------|------|---------------------------------|-------------------------------|-------------------------------------------------------------------|
| <i>Desi_wild_6812195</i>  | NA                                  | <i>Ca_desi_Chr03</i> | 6812195                 | C/T  | NA                              | INTERGENIC                    | NA                                                                |
| <i>Desi_wild_6812249</i>  | NA                                  | <i>Ca_desi_Chr03</i> | 6812249                 | G/A  | NA                              | INTERGENIC                    | NA                                                                |
| <i>Desi_wild_6812306</i>  | NA                                  | <i>Ca_desi_Chr03</i> | 6812306                 | A/C  | NA                              | INTERGENIC                    | NA                                                                |
| <i>Desi_wild_6833787</i>  | NA                                  | <i>Ca_desi_Chr03</i> | 6833787                 | G/A  | <a href="#">Gene_Ca_02709.1</a> | NON_SYNONYMOUS_CODING         | Pto-interacting protein 1                                         |
| <i>Desi_wild_6833812</i>  | NA                                  | <i>Ca_desi_Chr03</i> | 6833812                 | C/A  | <a href="#">Gene_Ca_02709.1</a> | NON_SYNONYMOUS_CODING         | Pto-interacting protein 1                                         |
| <i>Desi_wild_6833831</i>  | NA                                  | <i>Ca_desi_Chr03</i> | 6833831                 | G/A  | <a href="#">Gene_Ca_02709.1</a> | SYNONYMOUS_CODING             | Pto-interacting protein 1                                         |
| <i>Desi_wild_6833840</i>  | NA                                  | <i>Ca_desi_Chr03</i> | 6833840                 | G/T  | <a href="#">Gene_Ca_02709.1</a> | SYNONYMOUS_CODING             | Pto-interacting protein 1                                         |
| <i>Desi_wild_6833868</i>  | NA                                  | <i>Ca_desi_Chr03</i> | 6833868                 | T/C  | <a href="#">Gene_Ca_02709.1</a> | NON_SYNONYMOUS_CODING         | Pto-interacting protein 1                                         |
| <i>Desi_wild_6833869</i>  | NA                                  | <i>Ca_desi_Chr03</i> | 6833869                 | G/C  | <a href="#">Gene_Ca_02709.1</a> | NON_SYNONYMOUS_CODING         | Pto-interacting protein 1                                         |
| <i>Desi_wild_7059071</i>  | NA                                  | <i>Ca_desi_Chr03</i> | 7059071                 | G/A  | NA                              | INTERGENIC                    | NA                                                                |
| <i>Desi_wild_7059090</i>  | NA                                  | <i>Ca_desi_Chr03</i> | 7059090                 | A/G  | NA                              | INTERGENIC                    | NA                                                                |
| <i>Desi_wild_7218359</i>  | NA                                  | <i>Ca_desi_Chr03</i> | 7218359                 | A/C  | <a href="#">Gene_Ca_02748.3</a> | DOWNSTREAM                    | NA                                                                |
| <i>Desi_wild_8455273</i>  | NA                                  | <i>Ca_desi_Chr03</i> | 8455273                 | A/T  | <a href="#">Gene_Ca_02763.1</a> | UPSTREAM                      | unknown protein                                                   |
| <i>Desi_wild_8455298</i>  | NA                                  | <i>Ca_desi_Chr03</i> | 8455298                 | C/T  | <a href="#">Gene_Ca_02763.1</a> | UPSTREAM                      | unknown protein                                                   |
| <i>Desi_wild_8456386</i>  | NA                                  | <i>Ca_desi_Chr03</i> | 8456386                 | C/A  | <a href="#">Gene_Ca_02764.1</a> | DOWNSTREAM                    | Uncharacterized transporter sll0355                               |
| <i>Desi_wild_8456396</i>  | NA                                  | <i>Ca_desi_Chr03</i> | 8456396                 | A/G  | <a href="#">Gene_Ca_02764.1</a> | DOWNSTREAM                    | Uncharacterized transporter sll0355                               |
| <i>Desi_wild_8456397</i>  | NA                                  | <i>Ca_desi_Chr03</i> | 8456397                 | C/G  | <a href="#">Gene_Ca_02764.1</a> | DOWNSTREAM                    | Uncharacterized transporter sll0355                               |
| <i>Desi_wild_8459651</i>  | NA                                  | <i>Ca_desi_Chr03</i> | 8459651                 | C/A  | <a href="#">Gene_Ca_02763.1</a> | DOWNSTREAM                    | unknown protein                                                   |
| <i>Desi_wild_8556841</i>  | NA                                  | <i>Ca_desi_Chr03</i> | 8556841                 | T/G  | <a href="#">Gene_Ca_02777.1</a> | DOWNSTREAM                    | UDP-sulfoquinovose synthase, chloroplastic                        |
| <i>Desi_wild_8556886</i>  | NA                                  | <i>Ca_desi_Chr03</i> | 8556886                 | G/T  | <a href="#">Gene_Ca_02777.1</a> | DOWNSTREAM                    | UDP-sulfoquinovose synthase, chloroplastic                        |
| <i>Desi_wild_8556931</i>  | NA                                  | <i>Ca_desi_Chr03</i> | 8556931                 | G/T  | <a href="#">Gene_Ca_02777.1</a> | DOWNSTREAM                    | UDP-sulfoquinovose synthase, chloroplastic                        |
| <i>Desi_wild_8576796</i>  | NA                                  | <i>Ca_desi_Chr03</i> | 8576796                 | A/C  | <a href="#">Gene_Ca_02781.1</a> | SYNONYMOUS_CODING             | Phosphatidylinositol N-acetylglucosaminyltransferase subunit Q    |
| <i>Desi_wild_8815663</i>  | NA                                  | <i>Ca_desi_Chr03</i> | 8815663                 | C/T  | <a href="#">Gene_Ca_02785.1</a> | NON_SYNONYMOUS_CODING         | Nascent polypeptide-associated complex subunit alpha-like protein |
| <i>Desi_wild_8824939</i>  | NA                                  | <i>Ca_desi_Chr03</i> | 8824939                 | C/T  | <a href="#">Gene_Ca_02786.1</a> | DOWNSTREAM                    | NA                                                                |
| <i>Desi_wild_8826641</i>  | NA                                  | <i>Ca_desi_Chr03</i> | 8826641                 | A/G  | <a href="#">Gene_Ca_02786.1</a> | NON_SYNONYMOUS_CODING         | NA                                                                |
| <i>Desi_wild_8828335</i>  | NA                                  | <i>Ca_desi_Chr03</i> | 8828335                 | A/G  | <a href="#">Gene_Ca_02786.1</a> | SYNONYMOUS_CODING             | NA                                                                |
| <i>Desi_wild_8828383</i>  | NA                                  | <i>Ca_desi_Chr03</i> | 8828383                 | C/T  | <a href="#">Gene_Ca_02786.1</a> | SYNONYMOUS_CODING             | NA                                                                |
| <i>Desi_wild_8844220</i>  | NA                                  | <i>Ca_desi_Chr03</i> | 8844220                 | A/C  | <a href="#">Gene_Ca_02787.1</a> | NON_SYNONYMOUS_CODING         | hydroxyproline-rich glycoprotein family protein                   |
| <i>Desi_wild_8907661</i>  | NA                                  | <i>Ca_desi_Chr03</i> | 8907661                 | C/T  | <a href="#">Gene_Ca_02794.1</a> | NON_SYNONYMOUS_CODING         | Zinc finger protein 7                                             |
| <i>Desi_wild_9852607</i>  | NA                                  | <i>Ca_desi_Chr03</i> | 9852607                 | T/A  | <a href="#">Gene_Ca_02812.1</a> | NON_SYNONYMOUS_CODING         | Nucleolar MIF4G domain-containing protein 1                       |
| <i>Desi_wild_9854256</i>  | NA                                  | <i>Ca_desi_Chr03</i> | 9854256                 | C/T  | <a href="#">Gene_Ca_02812.1</a> | INTRON                        | Nucleolar MIF4G domain-containing protein 1                       |
| <i>Desi_wild_9854373</i>  | NA                                  | <i>Ca_desi_Chr03</i> | 9854373                 | C/T  | <a href="#">Gene_Ca_02812.1</a> | INTRON                        | Nucleolar MIF4G domain-containing protein 1                       |
| <i>Desi_wild_9934613</i>  | NA                                  | <i>Ca_desi_Chr03</i> | 9934613                 | A/G  | <a href="#">Gene_Ca_02817.1</a> | NON_SYNONYMOUS_CODING         | Transportin-3                                                     |
| <i>Desi_wild_9938011</i>  | NA                                  | <i>Ca_desi_Chr03</i> | 9938011                 | A/T  | <a href="#">Gene_Ca_02817.1</a> | SYNONYMOUS_CODING             | Transportin-4                                                     |
| <i>Desi_wild_9941532</i>  | NA                                  | <i>Ca_desi_Chr03</i> | 9941532                 | C/A  | <a href="#">Gene_Ca_02817.1</a> | NON_SYNONYMOUS_CODING         | Transportin-5                                                     |
| <i>Desi_wild_10075249</i> | NA                                  | <i>Ca_desi_Chr03</i> | 10075249                | G/A  | <a href="#">Gene_Ca_02827.1</a> | NON_SYNONYMOUS_CODING         | NA                                                                |
| <i>Desi_wild_10078325</i> | NA                                  | <i>Ca_desi_Chr03</i> | 10078325                | A/C  | NA                              | INTERGENIC                    | NA                                                                |
| <i>Desi_wild_10308815</i> | NA                                  | <i>Ca_desi_Chr03</i> | 10308815                | A/G  | <a href="#">Gene_Ca_02843.2</a> | NON_SYNONYMOUS_CODING         | Glycerophosphodiester phosphodiesterase GDE1                      |
| <i>Desi_wild_10308956</i> | NA                                  | <i>Ca_desi_Chr03</i> | 10308956                | A/C  | <a href="#">Gene_Ca_02843.2</a> | NON_SYNONYMOUS_CODING         | Glycerophosphodiester phosphodiesterase GDE1                      |
| <i>Desi_wild_10349421</i> | NA                                  | <i>Ca_desi_Chr03</i> | 10349421                | A/G  | <a href="#">Gene_Ca_02845.1</a> | DOWNSTREAM                    | Zinc finger protein CONSTANS-LIKE 14                              |
| <i>Desi_wild_10349456</i> | NA                                  | <i>Ca_desi_Chr03</i> | 10349456                | G/A  | <a href="#">Gene_Ca_02845.1</a> | DOWNSTREAM                    | Zinc finger protein CONSTANS-LIKE 14                              |
| <i>Desi_wild_10389534</i> | NA                                  | <i>Ca_desi_Chr03</i> | 10389534                | T/G  | NA                              | INTERGENIC                    | NA                                                                |
| <i>Desi_wild_10396779</i> | NA                                  | <i>Ca_desi_Chr03</i> | 10396779                | G/A  | <a href="#">Gene_Ca_02850.1</a> | SYNONYMOUS_CODING             | NA                                                                |
| <i>Desi_wild_10452121</i> | NA                                  | <i>Ca_desi_Chr03</i> | 10452121                | T/C  | NA                              | INTERGENIC                    | NA                                                                |

| SNP IDs                   | NCBI dbSNP accession IDs (NCBI_SS#) | Chromosomes          | Physical positions (bp) | SNPs | Gene accession IDs | Sequence components of genome | Putative functions                                                   |
|---------------------------|-------------------------------------|----------------------|-------------------------|------|--------------------|-------------------------------|----------------------------------------------------------------------|
| <i>Desi_wild_10452170</i> | NA                                  | <i>Ca_desi_Chr03</i> | 10452170                | T/A  | NA                 | INTERGENIC                    | NA                                                                   |
| <i>Desi_wild_10463013</i> | NA                                  | <i>Ca_desi_Chr03</i> | 10463013                | C/T  | Gene_Ca_02858.1    | NON_SYNONYMOUS_CODING         | NA                                                                   |
| <i>Desi_wild_10509908</i> | NA                                  | <i>Ca_desi_Chr03</i> | 10509908                | T/G  | Gene_Ca_02862.1    | SYNONYMOUS_CODING             | Formin-like protein 1                                                |
| <i>Desi_wild_10509917</i> | NA                                  | <i>Ca_desi_Chr03</i> | 10509917                | T/G  | Gene_Ca_02862.1    | SYNONYMOUS_CODING             | Formin-like protein 1                                                |
| <i>Desi_wild_10641927</i> | NA                                  | <i>Ca_desi_Chr03</i> | 10641927                | G/A  | Gene_Ca_02871.1    | NON_SYNONYMOUS_CODING         | Calcium-binding mitochondrial carrier protein ScaMC-1                |
| <i>Desi_wild_10832501</i> | NA                                  | <i>Ca_desi_Chr03</i> | 10832501                | T/G  | Gene_Ca_02884.1    | SYNONYMOUS_CODING             | Auxin efflux carrier component 1                                     |
| <i>Desi_wild_10869140</i> | NA                                  | <i>Ca_desi_Chr03</i> | 10869140                | G/A  | NA                 | INTERGENIC                    | NA                                                                   |
| <i>Desi_wild_10943669</i> | NA                                  | <i>Ca_desi_Chr03</i> | 10943669                | A/C  | NA                 | INTERGENIC                    | NA                                                                   |
| <i>Desi_wild_11019014</i> | NA                                  | <i>Ca_desi_Chr03</i> | 11019014                | A/C  | Gene_Ca_02899.1    | SYNONYMOUS_CODING             | unknown protein                                                      |
| <i>Desi_wild_11100296</i> | NA                                  | <i>Ca_desi_Chr03</i> | 11100296                | A/T  | NA                 | INTERGENIC                    | NA                                                                   |
| <i>Desi_wild_11115658</i> | NA                                  | <i>Ca_desi_Chr03</i> | 11115658                | G/A  | Gene_Ca_02909.1    | INTRON                        | NA                                                                   |
| <i>Desi_wild_11146436</i> | NA                                  | <i>Ca_desi_Chr03</i> | 11146436                | A/C  | Gene_Ca_02911.1    | DOWNSTREAM                    | Basic leucine zipper and W2 domain-containing protein 2              |
| <i>Desi_wild_11146438</i> | NA                                  | <i>Ca_desi_Chr03</i> | 11146438                | T/C  | Gene_Ca_02911.1    | DOWNSTREAM                    | Basic leucine zipper and W2 domain-containing protein 2              |
| <i>Desi_wild_11146442</i> | NA                                  | <i>Ca_desi_Chr03</i> | 11146442                | A/C  | Gene_Ca_02911.1    | DOWNSTREAM                    | Basic leucine zipper and W2 domain-containing protein 2              |
| <i>Desi_wild_11224376</i> | NA                                  | <i>Ca_desi_Chr03</i> | 11224376                | A/T  | NA                 | INTERGENIC                    | NA                                                                   |
| <i>Desi_wild_11260751</i> | NA                                  | <i>Ca_desi_Chr03</i> | 11260751                | A/G  | Gene_Ca_02927.1    | STOP_LOST                     | Dehydrogenase/reductase SDR family member 7                          |
| <i>Desi_wild_11295473</i> | NA                                  | <i>Ca_desi_Chr03</i> | 11295473                | T/C  | Gene_Ca_02929.1    | NON_SYNONYMOUS_CODING         | Phospholipase A(1) LCAT3                                             |
| <i>Desi_wild_11330443</i> | NA                                  | <i>Ca_desi_Chr03</i> | 11330443                | T/G  | Gene_Ca_02932.1    | DOWNSTREAM                    | Heat shock-related 70 kDa protein 2 (Fragments)                      |
| <i>Desi_wild_11391267</i> | NA                                  | <i>Ca_desi_Chr03</i> | 11391267                | T/G  | Gene_Ca_02936.1    | INTRON                        | Transmembrane protein 8B                                             |
| <i>Desi_wild_11392037</i> | NA                                  | <i>Ca_desi_Chr03</i> | 11392037                | T/C  | Gene_Ca_02936.1    | INTRON                        | Transmembrane protein 8B                                             |
| <i>Desi_wild_11392045</i> | NA                                  | <i>Ca_desi_Chr03</i> | 11392045                | T/A  | Gene_Ca_02936.1    | INTRON                        | Transmembrane protein 8B                                             |
| <i>Desi_wild_11392049</i> | NA                                  | <i>Ca_desi_Chr03</i> | 11392049                | A/G  | Gene_Ca_02936.1    | INTRON                        | Transmembrane protein 8B                                             |
| <i>Desi_wild_11392056</i> | NA                                  | <i>Ca_desi_Chr03</i> | 11392056                | G/A  | Gene_Ca_02936.1    | INTRON                        | Transmembrane protein 8B                                             |
| <i>Desi_wild_11392059</i> | NA                                  | <i>Ca_desi_Chr03</i> | 11392059                | G/A  | Gene_Ca_02936.1    | INTRON                        | Transmembrane protein 8B                                             |
| <i>Desi_wild_11418699</i> | NA                                  | <i>Ca_desi_Chr03</i> | 11418699                | C/T  | NA                 | INTERGENIC                    | NA                                                                   |
| <i>Desi_wild_11418707</i> | NA                                  | <i>Ca_desi_Chr03</i> | 11418707                | T/A  | NA                 | INTERGENIC                    | NA                                                                   |
| <i>Desi_wild_11418710</i> | NA                                  | <i>Ca_desi_Chr03</i> | 11418710                | C/A  | NA                 | INTERGENIC                    | NA                                                                   |
| <i>Desi_wild_11418716</i> | NA                                  | <i>Ca_desi_Chr03</i> | 11418716                | T/C  | NA                 | INTERGENIC                    | NA                                                                   |
| <i>Desi_wild_11418718</i> | NA                                  | <i>Ca_desi_Chr03</i> | 11418718                | G/A  | NA                 | INTERGENIC                    | NA                                                                   |
| <i>Desi_wild_11432450</i> | NA                                  | <i>Ca_desi_Chr03</i> | 11432450                | G/A  | NA                 | INTERGENIC                    | NA                                                                   |
| <i>Desi_wild_11444564</i> | NA                                  | <i>Ca_desi_Chr03</i> | 11444564                | A/C  | Gene_Ca_02940.1    | NON_SYNONYMOUS_CODING         | Putative mediator of RNA polymerase II transcription subunit 12      |
| <i>Desi_wild_11457652</i> | NA                                  | <i>Ca_desi_Chr03</i> | 11457652                | A/C  | NA                 | INTERGENIC                    | NA                                                                   |
| <i>Desi_wild_11490712</i> | NA                                  | <i>Ca_desi_Chr03</i> | 11490712                | C/G  | Gene_Ca_02943.1    | NON_SYNONYMOUS_CODING         | Small subunit processome component 20 homolog                        |
| <i>Desi_wild_11588066</i> | NA                                  | <i>Ca_desi_Chr03</i> | 11588066                | T/G  | Gene_Ca_02952.1    | NON_SYNONYMOUS_CODING         | SUMO-conjugating enzyme UBC9                                         |
| <i>Desi_wild_11599239</i> | NA                                  | <i>Ca_desi_Chr03</i> | 11599239                | G/A  | Gene_Ca_02953.1    | DOWNSTREAM                    | Mitochondrial ATP synthase D chain-related protein                   |
| <i>Desi_wild_11599240</i> | NA                                  | <i>Ca_desi_Chr03</i> | 11599240                | A/T  | Gene_Ca_02953.1    | DOWNSTREAM                    | Mitochondrial ATP synthase D chain-related protein                   |
| <i>Desi_wild_11656919</i> | NA                                  | <i>Ca_desi_Chr03</i> | 11656919                | G/A  | Gene_Ca_02959.1    | UPSTREAM                      | Pentatricopeptide repeat-containing protein At1g56690, mitochondrial |
| <i>Desi_wild_11656922</i> | NA                                  | <i>Ca_desi_Chr03</i> | 11656922                | T/G  | Gene_Ca_02959.1    | UPSTREAM                      | Pentatricopeptide repeat-containing protein At1g56690, mitochondrial |
| <i>Desi_wild_11783328</i> | NA                                  | <i>Ca_desi_Chr03</i> | 11783328                | C/T  | Gene_Ca_02974.1    | NON_SYNONYMOUS_CODING         | REF4-related 1                                                       |
| <i>Desi_wild_11783331</i> | NA                                  | <i>Ca_desi_Chr03</i> | 11783331                | C/T  | Gene_Ca_02974.1    | SYNONYMOUS_CODING             | REF4-related 1                                                       |
| <i>Desi_wild_11783334</i> | NA                                  | <i>Ca_desi_Chr03</i> | 11783334                | T/C  | Gene_Ca_02974.1    | NON_SYNONYMOUS_CODING         | REF4-related 1                                                       |
| <i>Desi_wild_11783335</i> | NA                                  | <i>Ca_desi_Chr03</i> | 11783335                | G/A  | Gene_Ca_02974.1    | NON_SYNONYMOUS_CODING         | REF4-related 1                                                       |
| <i>Desi_wild_11783336</i> | NA                                  | <i>Ca_desi_Chr03</i> | 11783336                | C/A  | Gene_Ca_02974.1    | STOP_GAINED                   | REF4-related 1                                                       |
| <i>Desi_wild_11783341</i> | NA                                  | <i>Ca_desi_Chr03</i> | 11783341                | C/A  | Gene_Ca_02974.1    | NON_SYNONYMOUS_CODING         | REF4-related 1                                                       |

| SNP IDs            | NCBI dbSNP accession IDs (NCBI_SS#) | Chromosomes   | Physical positions (bp) | SNPs | Gene accession IDs | Sequence components of genome | Putative functions                                          |
|--------------------|-------------------------------------|---------------|-------------------------|------|--------------------|-------------------------------|-------------------------------------------------------------|
| Desi_wild_11828812 | NA                                  | Ca_desi_Chr03 | 11828812                | C/T  | Gene_Ca_02978.1    | INTRON                        | Ethanolamine-phosphate cytidyltransferase                   |
| Desi_wild_11831867 | NA                                  | Ca_desi_Chr03 | 11831867                | T/G  | Gene_Ca_02978.1    | INTRON                        | Ethanolamine-phosphate cytidyltransferase                   |
| Desi_wild_11900882 | NA                                  | Ca_desi_Chr03 | 11900882                | T/G  | NA                 | INTERGENIC                    | NA                                                          |
| Desi_wild_11900887 | NA                                  | Ca_desi_Chr03 | 11900887                | T/C  | NA                 | INTERGENIC                    | NA                                                          |
| Desi_wild_11900930 | NA                                  | Ca_desi_Chr03 | 11900930                | T/A  | NA                 | INTERGENIC                    | NA                                                          |
| Desi_wild_11935986 | NA                                  | Ca_desi_Chr03 | 11935986                | A/G  | NA                 | INTERGENIC                    | NA                                                          |
| Desi_wild_11936234 | NA                                  | Ca_desi_Chr03 | 11936234                | A/G  | NA                 | INTERGENIC                    | NA                                                          |
| Desi_wild_12095970 | NA                                  | Ca_desi_Chr03 | 12095970                | G/T  | NA                 | INTERGENIC                    | NA                                                          |
| Desi_wild_12277447 | NA                                  | Ca_desi_Chr03 | 12277447                | C/G  | Gene_Ca_03008.3    | INTRON                        | NA                                                          |
| Desi_wild_12353499 | NA                                  | Ca_desi_Chr03 | 12353499                | A/G  | Gene_Ca_03016.1    | INTRON                        | Armadillo repeat-containing kinesin-like protein 2          |
| Desi_wild_12387560 | NA                                  | Ca_desi_Chr03 | 12387560                | T/G  | Gene_Ca_03019.1    | INTRON                        | SMAD/FHA domain-containing protein                          |
| Desi_wild_12387606 | NA                                  | Ca_desi_Chr03 | 12387606                | A/T  | Gene_Ca_03019.1    | INTRON                        | SMAD/FHA domain-containing protein                          |
| Desi_wild_12388434 | NA                                  | Ca_desi_Chr03 | 12388434                | C/T  | Gene_Ca_03019.1    | INTRON                        | SMAD/FHA domain-containing protein                          |
| Desi_wild_12472115 | NA                                  | Ca_desi_Chr03 | 12472115                | A/C  | NA                 | INTERGENIC                    | NA                                                          |
| Desi_wild_12543791 | NA                                  | Ca_desi_Chr03 | 12543791                | G/A  | Gene_Ca_03032.1    | NON_SYNONYMOUS_CODING         | NAD-dependent malic enzyme 59 kDa isoform, mitochondrial    |
| Desi_wild_12543837 | NA                                  | Ca_desi_Chr03 | 12543837                | A/C  | Gene_Ca_03032.1    | SYNONYMOUS_CODING             | NAD-dependent malic enzyme 59 kDa isoform, mitochondrial    |
| Desi_wild_12547098 | NA                                  | Ca_desi_Chr03 | 12547098                | T/G  | Gene_Ca_03032.1    | SYNONYMOUS_CODING             | NAD-dependent malic enzyme 59 kDa isoform, mitochondrial    |
| Desi_wild_12547374 | NA                                  | Ca_desi_Chr03 | 12547374                | A/G  | Gene_Ca_03032.1    | NON_SYNONYMOUS_CODING         | NAD-dependent malic enzyme 59 kDa isoform, mitochondrial    |
| Desi_wild_12640333 | NA                                  | Ca_desi_Chr03 | 12640333                | G/T  | Gene_Ca_03034.1    | DOWNSTREAM                    | NA                                                          |
| Desi_wild_12640346 | NA                                  | Ca_desi_Chr03 | 12640346                | G/A  | Gene_Ca_03034.1    | DOWNSTREAM                    | NA                                                          |
| Desi_wild_12863760 | NA                                  | Ca_desi_Chr03 | 12863760                | G/A  | NA                 | INTERGENIC                    | NA                                                          |
| Desi_wild_12863764 | NA                                  | Ca_desi_Chr03 | 12863764                | C/T  | NA                 | INTERGENIC                    | NA                                                          |
| Desi_wild_12863779 | NA                                  | Ca_desi_Chr03 | 12863779                | T/C  | NA                 | INTERGENIC                    | NA                                                          |
| Desi_wild_12863789 | NA                                  | Ca_desi_Chr03 | 12863789                | C/A  | NA                 | INTERGENIC                    | NA                                                          |
| Desi_wild_12863810 | NA                                  | Ca_desi_Chr03 | 12863810                | C/T  | NA                 | INTERGENIC                    | NA                                                          |
| Desi_wild_12863812 | NA                                  | Ca_desi_Chr03 | 12863812                | C/T  | NA                 | INTERGENIC                    | NA                                                          |
| Desi_wild_12903865 | NA                                  | Ca_desi_Chr03 | 12903865                | T/C  | Gene_Ca_03050.1    | NON_SYNONYMOUS_CODING         | ATP-dependent helicase BRM                                  |
| Desi_wild_12927637 | NA                                  | Ca_desi_Chr03 | 12927637                | A/G  | NA                 | INTERGENIC                    | NA                                                          |
| Desi_wild_12960713 | NA                                  | Ca_desi_Chr03 | 12960713                | T/C  | Gene_Ca_03055.1    | INTRON                        | 60S ribosomal protein L32-1                                 |
| Desi_wild_12979551 | NA                                  | Ca_desi_Chr03 | 12979551                | C/A  | Gene_Ca_03057.1    | INTRON                        | Beta-glucosidase 12                                         |
| Desi_wild_13365172 | NA                                  | Ca_desi_Chr03 | 13365172                | G/T  | Gene_Ca_03075.1    | NON_SYNONYMOUS_CODING         | Uncharacterized phosphoglycerate mutase family protein R708 |
| Desi_wild_13396008 | NA                                  | Ca_desi_Chr03 | 13396008                | G/C  | NA                 | INTERGENIC                    | NA                                                          |
| Desi_wild_13517775 | NA                                  | Ca_desi_Chr03 | 13517775                | T/C  | NA                 | INTERGENIC                    | NA                                                          |
| Desi_wild_13517940 | NA                                  | Ca_desi_Chr03 | 13517940                | T/C  | NA                 | INTERGENIC                    | NA                                                          |
| Desi_wild_13538576 | NA                                  | Ca_desi_Chr03 | 13538576                | A/C  | Gene_Ca_03086.1    | SYNONYMOUS_CODING             | NA                                                          |
| Desi_wild_13664202 | NA                                  | Ca_desi_Chr03 | 13664202                | T/G  | NA                 | INTERGENIC                    | NA                                                          |
| Desi_wild_13825261 | NA                                  | Ca_desi_Chr03 | 13825261                | G/A  | NA                 | INTERGENIC                    | NA                                                          |
| Desi_wild_13839597 | NA                                  | Ca_desi_Chr03 | 13839597                | C/T  | Gene_Ca_03096.1    | INTRON                        | AMP deaminase                                               |
| Desi_wild_13841817 | NA                                  | Ca_desi_Chr03 | 13841817                | T/C  | Gene_Ca_03096.1    | SYNONYMOUS_CODING             | AMP deaminase                                               |
| Desi_wild_13841895 | NA                                  | Ca_desi_Chr03 | 13841895                | A/C  | Gene_Ca_03096.1    | SYNONYMOUS_CODING             | AMP deaminase                                               |
| Desi_wild_13866595 | NA                                  | Ca_desi_Chr03 | 13866595                | G/T  | Gene_Ca_03097.1    | UPSTREAM                      | TMV resistance protein N                                    |
| Desi_wild_13894638 | NA                                  | Ca_desi_Chr03 | 13894638                | T/A  | Gene_Ca_03099.2    | INTRON                        | Proliferation-associated protein 2G4                        |
| Desi_wild_13909204 | NA                                  | Ca_desi_Chr03 | 13909204                | C/T  | Gene_Ca_03101.1    | INTRON                        | NA                                                          |
| Desi_wild_13909208 | NA                                  | Ca_desi_Chr03 | 13909208                | A/C  | Gene_Ca_03101.1    | INTRON                        | Beta-glucosidase 11                                         |

| SNP IDs            | NCBI dbSNP accession IDs (NCBI_SS#) | Chromosomes   | Physical positions (bp) | SNPs | Gene accession IDs | Sequence components of genome | Putative functions                                             |
|--------------------|-------------------------------------|---------------|-------------------------|------|--------------------|-------------------------------|----------------------------------------------------------------|
| Desi_wild_13909226 | NA                                  | Ca_desi_Chr03 | 13909226                | T/C  | Gene_Ca_03101.1    | INTRON                        | Beta-glucosidase 11                                            |
| Desi_wild_13994137 | NA                                  | Ca_desi_Chr03 | 13994137                | A/C  | Gene_Ca_03107.2    | INTRON                        | NA                                                             |
| Desi_wild_14005265 | NA                                  | Ca_desi_Chr03 | 14005265                | C/T  | NA                 | INTERGENIC                    | NA                                                             |
| Desi_wild_14005497 | NA                                  | Ca_desi_Chr03 | 14005497                | C/T  | NA                 | INTERGENIC                    | NA                                                             |
| Desi_wild_14005543 | NA                                  | Ca_desi_Chr03 | 14005543                | G/C  | NA                 | INTERGENIC                    | NA                                                             |
| Desi_wild_14006814 | NA                                  | Ca_desi_Chr03 | 14006814                | T/G  | NA                 | INTERGENIC                    | NA                                                             |
| Desi_wild_14006868 | NA                                  | Ca_desi_Chr03 | 14006868                | G/A  | NA                 | INTERGENIC                    | NA                                                             |
| Desi_wild_14172702 | NA                                  | Ca_desi_Chr03 | 14172702                | G/A  | Gene_Ca_03117.2    | INTRON                        | NA                                                             |
| Desi_wild_14209137 | NA                                  | Ca_desi_Chr03 | 14209137                | C/T  | NA                 | INTERGENIC                    | NA                                                             |
| Desi_wild_14209140 | NA                                  | Ca_desi_Chr03 | 14209140                | C/G  | NA                 | INTERGENIC                    | NA                                                             |
| Desi_wild_14209154 | NA                                  | Ca_desi_Chr03 | 14209154                | T/C  | NA                 | INTERGENIC                    | NA                                                             |
| Desi_wild_14209169 | NA                                  | Ca_desi_Chr03 | 14209169                | G/A  | NA                 | INTERGENIC                    | NA                                                             |
| Desi_wild_14469745 | NA                                  | Ca_desi_Chr03 | 14469745                | A/T  | NA                 | INTERGENIC                    | NA                                                             |
| Desi_wild_14469761 | NA                                  | Ca_desi_Chr03 | 14469761                | G/A  | NA                 | INTERGENIC                    | NA                                                             |
| Desi_wild_14469790 | NA                                  | Ca_desi_Chr03 | 14469790                | C/A  | NA                 | INTERGENIC                    | NA                                                             |
| Desi_wild_14469801 | NA                                  | Ca_desi_Chr03 | 14469801                | G/A  | NA                 | INTERGENIC                    | NA                                                             |
| Desi_wild_14469806 | NA                                  | Ca_desi_Chr03 | 14469806                | A/G  | NA                 | INTERGENIC                    | NA                                                             |
| Desi_wild_14469811 | NA                                  | Ca_desi_Chr03 | 14469811                | T/C  | NA                 | INTERGENIC                    | NA                                                             |
| Desi_wild_14469822 | NA                                  | Ca_desi_Chr03 | 14469822                | G/A  | NA                 | INTERGENIC                    | NA                                                             |
| Desi_wild_14490501 | NA                                  | Ca_desi_Chr03 | 14490501                | A/C  | Gene_Ca_03121.1    | DOWNSTREAM                    | NA                                                             |
| Desi_wild_14672189 | NA                                  | Ca_desi_Chr03 | 14672189                | C/A  | NA                 | INTERGENIC                    | NA                                                             |
| Desi_wild_14672190 | NA                                  | Ca_desi_Chr03 | 14672190                | A/G  | NA                 | INTERGENIC                    | NA                                                             |
| Desi_wild_14694727 | NA                                  | Ca_desi_Chr03 | 14694727                | A/G  | NA                 | INTERGENIC                    | NA                                                             |
| Desi_wild_14817852 | NA                                  | Ca_desi_Chr03 | 14817852                | G/A  | NA                 | INTERGENIC                    | NA                                                             |
| Desi_wild_14902064 | NA                                  | Ca_desi_Chr03 | 14902064                | G/T  | NA                 | INTERGENIC                    | NA                                                             |
| Desi_wild_15070698 | NA                                  | Ca_desi_Chr03 | 15070698                | A/T  | Gene_Ca_03167.2    | SYNONYMOUS_CODING             | NA                                                             |
| Desi_wild_15101360 | NA                                  | Ca_desi_Chr03 | 15101360                | G/A  | Gene_Ca_03170.1    | SYNONYMOUS_CODING             | NA                                                             |
| Desi_wild_15101362 | NA                                  | Ca_desi_Chr03 | 15101362                | G/T  | Gene_Ca_03170.1    | NON_SYNONYMOUS_CODING         | Putative pentatricopeptide repeat-containing protein At5g47460 |
| Desi_wild_15101368 | NA                                  | Ca_desi_Chr03 | 15101368                | A/G  | Gene_Ca_03170.1    | NON_SYNONYMOUS_CODING         | Putative pentatricopeptide repeat-containing protein At5g47460 |
| Desi_wild_15101369 | NA                                  | Ca_desi_Chr03 | 15101369                | G/C  | Gene_Ca_03170.1    | NON_SYNONYMOUS_CODING         | Putative pentatricopeptide repeat-containing protein At5g47460 |
| Desi_wild_15101397 | NA                                  | Ca_desi_Chr03 | 15101397                | G/A  | Gene_Ca_03170.1    | NON_SYNONYMOUS_CODING         | Putative pentatricopeptide repeat-containing protein At5g47460 |
| Desi_wild_15103555 | NA                                  | Ca_desi_Chr03 | 15103555                | T/C  | Gene_Ca_03170.1    | SYNONYMOUS_CODING             | Putative pentatricopeptide repeat-containing protein At5g47460 |
| Desi_wild_15103567 | NA                                  | Ca_desi_Chr03 | 15103567                | A/G  | Gene_Ca_03170.1    | SYNONYMOUS_CODING             | Putative pentatricopeptide repeat-containing protein At5g47460 |
| Desi_wild_15103581 | NA                                  | Ca_desi_Chr03 | 15103581                | C/T  | Gene_Ca_03170.1    | NON_SYNONYMOUS_CODING         | Putative pentatricopeptide repeat-containing protein At5g47460 |
| Desi_wild_15103585 | NA                                  | Ca_desi_Chr03 | 15103585                | T/G  | Gene_Ca_03170.1    | NON_SYNONYMOUS_CODING         | Putative pentatricopeptide repeat-containing protein At5g47460 |
| Desi_wild_15103603 | NA                                  | Ca_desi_Chr03 | 15103603                | C/T  | Gene_Ca_03170.1    | SYNONYMOUS_CODING             | Putative pentatricopeptide repeat-containing protein At5g47460 |
| Desi_wild_15103607 | NA                                  | Ca_desi_Chr03 | 15103607                | C/T  | Gene_Ca_03170.1    | NON_SYNONYMOUS_CODING         | Putative pentatricopeptide repeat-containing protein At5g47460 |
| Desi_wild_15103615 | NA                                  | Ca_desi_Chr03 | 15103615                | A/T  | Gene_Ca_03170.1    | SYNONYMOUS_CODING             | Putative pentatricopeptide repeat-containing protein At5g47460 |
| Desi_wild_15103618 | NA                                  | Ca_desi_Chr03 | 15103618                | T/C  | Gene_Ca_03170.1    | SYNONYMOUS_CODING             | Putative pentatricopeptide repeat-containing protein At5g47460 |
| Desi_wild_15103621 | NA                                  | Ca_desi_Chr03 | 15103621                | C/A  | Gene_Ca_03170.1    | SYNONYMOUS_CODING             | Putative pentatricopeptide repeat-containing protein At5g47460 |
| Desi_wild_15114988 | NA                                  | Ca_desi_Chr03 | 15114988                | T/C  | Gene_Ca_03171.3    | SYNONYMOUS_CODING             | G2484-1 protein                                                |
| Desi_wild_15114993 | NA                                  | Ca_desi_Chr03 | 15114993                | T/C  | Gene_Ca_03171.3    | SYNONYMOUS_CODING             | G2484-1 protein                                                |
| Desi_wild_15114997 | NA                                  | Ca_desi_Chr03 | 15114997                | A/G  | Gene_Ca_03171.3    | SYNONYMOUS_CODING             | G2484-1 protein                                                |
| Desi_wild_15115024 | NA                                  | Ca_desi_Chr03 | 15115024                | A/T  | Gene_Ca_03171.3    | SYNONYMOUS_CODING             | G2484-1 protein                                                |

| SNP IDs                   | NCBI dbSNP accession IDs (NCBI_SS#) | Chromosomes          | Physical positions (bp) | SNPs | Gene accession IDs | Sequence components of genome | Putative functions                   |
|---------------------------|-------------------------------------|----------------------|-------------------------|------|--------------------|-------------------------------|--------------------------------------|
| <i>Desi_wild_15115027</i> | NA                                  | <i>Ca_desi_Chr03</i> | 15115027                | T/A  | Gene_Ca_03171.3    | SYNONYMOUS_CODING             | G2484-1 protein                      |
| <i>Desi_wild_15115033</i> | NA                                  | <i>Ca_desi_Chr03</i> | 15115033                | A/T  | Gene_Ca_03171.3    | SYNONYMOUS_CODING             | G2484-1 protein                      |
| <i>Desi_wild_15115042</i> | NA                                  | <i>Ca_desi_Chr03</i> | 15115042                | T/C  | Gene_Ca_03171.3    | SYNONYMOUS_CODING             | G2484-1 protein                      |
| <i>Desi_wild_15115055</i> | NA                                  | <i>Ca_desi_Chr03</i> | 15115055                | G/T  | Gene_Ca_03171.3    | SYNONYMOUS_CODING             | G2484-1 protein                      |
| <i>Desi_wild_15115056</i> | NA                                  | <i>Ca_desi_Chr03</i> | 15115056                | A/T  | Gene_Ca_03171.3    | SYNONYMOUS_CODING             | G2484-1 protein                      |
| <i>Desi_wild_15115057</i> | NA                                  | <i>Ca_desi_Chr03</i> | 15115057                | A/G  | Gene_Ca_03171.3    | SYNONYMOUS_CODING             | G2484-1 protein                      |
| <i>Desi_wild_15115080</i> | NA                                  | <i>Ca_desi_Chr03</i> | 15115080                | A/G  | Gene_Ca_03171.3    | SYNONYMOUS_CODING             | G2484-1 protein                      |
| <i>Desi_wild_15115083</i> | NA                                  | <i>Ca_desi_Chr03</i> | 15115083                | T/C  | Gene_Ca_03171.3    | NON_SYNONYMOUS_CODING         | G2484-1 protein                      |
| <i>Desi_wild_15115094</i> | NA                                  | <i>Ca_desi_Chr03</i> | 15115094                | T/C  | Gene_Ca_03171.3    | SYNONYMOUS_CODING             | G2484-1 protein                      |
| <i>Desi_wild_15115099</i> | NA                                  | <i>Ca_desi_Chr03</i> | 15115099                | T/A  | Gene_Ca_03171.3    | SYNONYMOUS_CODING             | G2484-1 protein                      |
| <i>Desi_wild_15115111</i> | NA                                  | <i>Ca_desi_Chr03</i> | 15115111                | T/C  | Gene_Ca_03171.3    | SYNONYMOUS_CODING             | G2484-1 protein                      |
| <i>Desi_wild_15115114</i> | NA                                  | <i>Ca_desi_Chr03</i> | 15115114                | T/A  | Gene_Ca_03171.3    | SYNONYMOUS_CODING             | G2484-1 protein                      |
| <i>Desi_wild_15115115</i> | NA                                  | <i>Ca_desi_Chr03</i> | 15115115                | T/C  | Gene_Ca_03171.3    | SYNONYMOUS_CODING             | G2484-1 protein                      |
| <i>Desi_wild_15115122</i> | NA                                  | <i>Ca_desi_Chr03</i> | 15115122                | T/A  | Gene_Ca_03171.3    | SYNONYMOUS_CODING             | G2484-1 protein                      |
| <i>Desi_wild_15115126</i> | NA                                  | <i>Ca_desi_Chr03</i> | 15115126                | T/C  | Gene_Ca_03171.3    | SYNONYMOUS_CODING             | G2484-1 protein                      |
| <i>Desi_wild_15115128</i> | NA                                  | <i>Ca_desi_Chr03</i> | 15115128                | T/G  | Gene_Ca_03171.3    | SYNONYMOUS_CODING             | G2484-1 protein                      |
| <i>Desi_wild_15115141</i> | NA                                  | <i>Ca_desi_Chr03</i> | 15115141                | T/A  | Gene_Ca_03171.3    | SYNONYMOUS_CODING             | G2484-1 protein                      |
| <i>Desi_wild_15120462</i> | NA                                  | <i>Ca_desi_Chr03</i> | 15120462                | T/C  | Gene_Ca_03171.3    | SYNONYMOUS_CODING             | G2484-1 protein                      |
| <i>Desi_wild_15120475</i> | NA                                  | <i>Ca_desi_Chr03</i> | 15120475                | C/T  | Gene_Ca_03171.3    | SYNONYMOUS_CODING             | G2484-1 protein                      |
| <i>Desi_wild_15120481</i> | NA                                  | <i>Ca_desi_Chr03</i> | 15120481                | T/C  | Gene_Ca_03171.3    | SYNONYMOUS_CODING             | G2484-1 protein                      |
| <i>Desi_wild_15120488</i> | NA                                  | <i>Ca_desi_Chr03</i> | 15120488                | G/A  | Gene_Ca_03171.3    | SYNONYMOUS_CODING             | G2484-1 protein                      |
| <i>Desi_wild_15120492</i> | NA                                  | <i>Ca_desi_Chr03</i> | 15120492                | T/A  | Gene_Ca_03171.3    | SYNONYMOUS_CODING             | G2484-1 protein                      |
| <i>Desi_wild_15120509</i> | NA                                  | <i>Ca_desi_Chr03</i> | 15120509                | A/G  | Gene_Ca_03171.3    | SYNONYMOUS_CODING             | G2484-1 protein                      |
| <i>Desi_wild_15120536</i> | NA                                  | <i>Ca_desi_Chr03</i> | 15120536                | G/A  | Gene_Ca_03171.3    | SYNONYMOUS_CODING             | G2484-1 protein                      |
| <i>Desi_wild_15134512</i> | NA                                  | <i>Ca_desi_Chr03</i> | 15134512                | A/G  | NA                 | INTERGENIC                    | NA                                   |
| <i>Desi_wild_15281781</i> | NA                                  | <i>Ca_desi_Chr03</i> | 15281781                | C/T  | NA                 | INTERGENIC                    | NA                                   |
| <i>Desi_wild_15331624</i> | NA                                  | <i>Ca_desi_Chr03</i> | 15331624                | G/A  | NA                 | INTERGENIC                    | NA                                   |
| <i>Desi_wild_15332029</i> | NA                                  | <i>Ca_desi_Chr03</i> | 15332029                | A/T  | Gene_Ca_03191.1    | UPSTREAM                      | NA                                   |
| <i>Desi_wild_15332067</i> | NA                                  | <i>Ca_desi_Chr03</i> | 15332067                | A/C  | Gene_Ca_03191.1    | UPSTREAM                      | NA                                   |
| <i>Desi_wild_15332140</i> | NA                                  | <i>Ca_desi_Chr03</i> | 15332140                | A/G  | Gene_Ca_03191.1    | UPSTREAM                      | NA                                   |
| <i>Desi_wild_15332475</i> | NA                                  | <i>Ca_desi_Chr03</i> | 15332475                | C/G  | Gene_Ca_03191.1    | UPSTREAM                      | NA                                   |
| <i>Desi_wild_15332490</i> | NA                                  | <i>Ca_desi_Chr03</i> | 15332490                | C/G  | Gene_Ca_03191.1    | UPSTREAM                      | NA                                   |
| <i>Desi_wild_15332493</i> | NA                                  | <i>Ca_desi_Chr03</i> | 15332493                | A/C  | Gene_Ca_03191.1    | UPSTREAM                      | NA                                   |
| <i>Desi_wild_15332497</i> | NA                                  | <i>Ca_desi_Chr03</i> | 15332497                | C/T  | Gene_Ca_03191.1    | UPSTREAM                      | NA                                   |
| <i>Desi_wild_15332539</i> | NA                                  | <i>Ca_desi_Chr03</i> | 15332539                | G/A  | Gene_Ca_03191.1    | UPSTREAM                      | NA                                   |
| <i>Desi_wild_15376304</i> | NA                                  | <i>Ca_desi_Chr03</i> | 15376304                | G/C  | Gene_Ca_03195.1    | DOWNSTREAM                    | 60S ribosomal protein L18a           |
| <i>Desi_wild_15385992</i> | NA                                  | <i>Ca_desi_Chr03</i> | 15385992                | G/C  | NA                 | INTERGENIC                    | NA                                   |
| <i>Desi_wild_15386074</i> | NA                                  | <i>Ca_desi_Chr03</i> | 15386074                | T/C  | NA                 | INTERGENIC                    | NA                                   |
| <i>Desi_wild_15386093</i> | NA                                  | <i>Ca_desi_Chr03</i> | 15386093                | A/C  | NA                 | INTERGENIC                    | NA                                   |
| <i>Desi_wild_15411640</i> | NA                                  | <i>Ca_desi_Chr03</i> | 15411640                | A/T  | Gene_Ca_03200.1    | INTRON                        | Anaphase-promoting complex subunit 7 |
| <i>Desi_wild_15411677</i> | NA                                  | <i>Ca_desi_Chr03</i> | 15411677                | A/G  | Gene_Ca_03200.1    | INTRON                        | Anaphase-promoting complex subunit 7 |
| <i>Desi_wild_15448921</i> | NA                                  | <i>Ca_desi_Chr03</i> | 15448921                | G/C  | Gene_Ca_03204.3    | INTRON                        | NA                                   |
| <i>Desi_wild_15449309</i> | NA                                  | <i>Ca_desi_Chr03</i> | 15449309                | T/C  | Gene_Ca_03204.3    | SYNONYMOUS_CODING             | NA                                   |
| <i>Desi_wild_15459709</i> | NA                                  | <i>Ca_desi_Chr03</i> | 15459709                | T/C  | Gene_Ca_03205.1    | INTRON                        | NA                                   |

| SNP IDs                   | NCBI dbSNP accession IDs (NCBI_SS#) | Chromosomes          | Physical positions (bp) | SNPs | Gene accession IDs | Sequence components of genome | Putative functions                                        |
|---------------------------|-------------------------------------|----------------------|-------------------------|------|--------------------|-------------------------------|-----------------------------------------------------------|
| <i>Desi_wild_15459712</i> | NA                                  | <i>Ca_desi_Chr03</i> | 15459712                | T/G  | Gene_Ca_03205.1    | INTRON                        | NA                                                        |
| <i>Desi_wild_15466277</i> | NA                                  | <i>Ca_desi_Chr03</i> | 15466277                | A/G  | Gene_Ca_03206.1    | INTRON                        | Lipase                                                    |
| <i>Desi_wild_15487859</i> | NA                                  | <i>Ca_desi_Chr03</i> | 15487859                | A/T  | NA                 | INTERGENIC                    | NA                                                        |
| <i>Desi_wild_15502488</i> | NA                                  | <i>Ca_desi_Chr03</i> | 15502488                | C/T  | Gene_Ca_03209.1    | INTRON                        | DNA-directed RNA polymerase I subunit rpa2                |
| <i>Desi_wild_15835304</i> | NA                                  | <i>Ca_desi_Chr03</i> | 15835304                | T/C  | Gene_Ca_03216.3    | INTRON                        | Adiponectin receptor protein 2                            |
| <i>Desi_wild_15877087</i> | NA                                  | <i>Ca_desi_Chr03</i> | 15877087                | A/G  | Gene_Ca_03220.1    | DOWNSTREAM                    | BSD domain-containing protein                             |
| <i>Desi_wild_15991589</i> | NA                                  | <i>Ca_desi_Chr03</i> | 15991589                | T/C  | Gene_Ca_03229.2    | INTRON                        | Putative vacuolar protein sorting-associated protein 13A  |
| <i>Desi_wild_16001126</i> | NA                                  | <i>Ca_desi_Chr03</i> | 16001126                | T/A  | Gene_Ca_03229.2    | INTRON                        | Putative vacuolar protein sorting-associated protein 13A  |
| <i>Desi_wild_16050465</i> | NA                                  | <i>Ca_desi_Chr03</i> | 16050465                | G/T  | Gene_Ca_03231.1    | SYNONYMOUS_CODING             | NA                                                        |
| <i>Desi_wild_16104825</i> | NA                                  | <i>Ca_desi_Chr03</i> | 16104825                | G/T  | NA                 | INTERGENIC                    | NA                                                        |
| <i>Desi_wild_16209416</i> | NA                                  | <i>Ca_desi_Chr03</i> | 16209416                | G/A  | Gene_Ca_03249.1    | INTRON                        | rRNA biogenesis protein RRP36                             |
| <i>Desi_wild_16209498</i> | NA                                  | <i>Ca_desi_Chr03</i> | 16209498                | A/G  | Gene_Ca_03249.1    | INTRON                        | rRNA biogenesis protein RRP36                             |
| <i>Desi_wild_16218534</i> | NA                                  | <i>Ca_desi_Chr03</i> | 16218534                | T/C  | NA                 | INTERGENIC                    | NA                                                        |
| <i>Desi_wild_16337251</i> | NA                                  | <i>Ca_desi_Chr03</i> | 16337251                | C/T  | NA                 | INTERGENIC                    | NA                                                        |
| <i>Desi_wild_16410820</i> | NA                                  | <i>Ca_desi_Chr03</i> | 16410820                | C/T  | NA                 | INTERGENIC                    | NA                                                        |
| <i>Desi_wild_16410847</i> | NA                                  | <i>Ca_desi_Chr03</i> | 16410847                | G/T  | NA                 | INTERGENIC                    | NA                                                        |
| <i>Desi_wild_16429257</i> | NA                                  | <i>Ca_desi_Chr03</i> | 16429257                | A/C  | Gene_Ca_03271.1    | SYNONYMOUS_CODING             | Homeobox-leucine zipper protein HAT22                     |
| <i>Desi_wild_16429260</i> | NA                                  | <i>Ca_desi_Chr03</i> | 16429260                | A/C  | Gene_Ca_03271.1    | SYNONYMOUS_CODING             | Homeobox-leucine zipper protein HAT22                     |
| <i>Desi_wild_16457210</i> | NA                                  | <i>Ca_desi_Chr03</i> | 16457210                | T/C  | Gene_Ca_03273.1    | NON_SYNONYMOUS_CODING         | Transcription factor RAX3                                 |
| <i>Desi_wild_16545207</i> | NA                                  | <i>Ca_desi_Chr03</i> | 16545207                | G/A  | Gene_Ca_03277.1    | INTRON                        | ADP-ribosylation factor-like protein 8A                   |
| <i>Desi_wild_16588500</i> | NA                                  | <i>Ca_desi_Chr03</i> | 16588500                | A/G  | Gene_Ca_03282.1    | INTRON                        | Adenylyl-sulfate kinase, chloroplastic                    |
| <i>Desi_wild_16588555</i> | NA                                  | <i>Ca_desi_Chr03</i> | 16588555                | T/C  | Gene_Ca_03282.1    | INTRON                        | Adenylyl-sulfate kinase, chloroplastic                    |
| <i>Desi_wild_16617659</i> | NA                                  | <i>Ca_desi_Chr03</i> | 16617659                | C/T  | Gene_Ca_03286.1    | NON_SYNONYMOUS_CODING         | Condensin-2 complex subunit G2                            |
| <i>Desi_wild_16786527</i> | NA                                  | <i>Ca_desi_Chr03</i> | 16786527                | A/C  | Gene_Ca_03299.1    | DOWNSTREAM                    | Major facilitator superfamily domain-containing protein 5 |
| <i>Desi_wild_16894455</i> | NA                                  | <i>Ca_desi_Chr03</i> | 16894455                | G/C  | NA                 | INTERGENIC                    | NA                                                        |
| <i>Desi_wild_16894470</i> | NA                                  | <i>Ca_desi_Chr03</i> | 16894470                | G/T  | NA                 | INTERGENIC                    | NA                                                        |
| <i>Desi_wild_17011107</i> | NA                                  | <i>Ca_desi_Chr03</i> | 17011107                | C/A  | NA                 | INTERGENIC                    | NA                                                        |
| <i>Desi_wild_17011108</i> | NA                                  | <i>Ca_desi_Chr03</i> | 17011108                | A/G  | NA                 | INTERGENIC                    | NA                                                        |
| <i>Desi_wild_17014220</i> | NA                                  | <i>Ca_desi_Chr03</i> | 17014220                | A/T  | NA                 | INTERGENIC                    | NA                                                        |
| <i>Desi_wild_17014223</i> | NA                                  | <i>Ca_desi_Chr03</i> | 17014223                | G/A  | NA                 | INTERGENIC                    | NA                                                        |
| <i>Desi_wild_17014225</i> | NA                                  | <i>Ca_desi_Chr03</i> | 17014225                | A/G  | NA                 | INTERGENIC                    | NA                                                        |
| <i>Desi_wild_17014229</i> | NA                                  | <i>Ca_desi_Chr03</i> | 17014229                | T/A  | NA                 | INTERGENIC                    | NA                                                        |
| <i>Desi_wild_17014230</i> | NA                                  | <i>Ca_desi_Chr03</i> | 17014230                | T/A  | NA                 | INTERGENIC                    | NA                                                        |
| <i>Desi_wild_17014232</i> | NA                                  | <i>Ca_desi_Chr03</i> | 17014232                | A/C  | NA                 | INTERGENIC                    | NA                                                        |
| <i>Desi_wild_17088351</i> | NA                                  | <i>Ca_desi_Chr03</i> | 17088351                | A/C  | Gene_Ca_03332.1    | SYNONYMOUS_CODING             | Protein of unknown function, DUF593                       |
| <i>Desi_wild_17096881</i> | NA                                  | <i>Ca_desi_Chr03</i> | 17096881                | T/G  | NA                 | INTERGENIC                    | NA                                                        |
| <i>Desi_wild_17117877</i> | NA                                  | <i>Ca_desi_Chr03</i> | 17117877                | T/G  | Gene_Ca_03336.1    | INTRON                        | 40S ribosomal protein S5 (Fragment)                       |
| <i>Desi_wild_17135055</i> | NA                                  | <i>Ca_desi_Chr03</i> | 17135055                | A/C  | Gene_Ca_03339.1    | DOWNSTREAM                    | KH domain-containing protein At4g18375                    |
| <i>Desi_wild_17151326</i> | NA                                  | <i>Ca_desi_Chr03</i> | 17151326                | A/T  | Gene_Ca_03340.1    | DOWNSTREAM                    | FUNCTIONS IN: molecular_function unknown                  |
| <i>Desi_wild_17151439</i> | NA                                  | <i>Ca_desi_Chr03</i> | 17151439                | C/A  | Gene_Ca_03340.1    | DOWNSTREAM                    | FUNCTIONS IN: molecular_function unknown                  |
| <i>Desi_wild_17151469</i> | NA                                  | <i>Ca_desi_Chr03</i> | 17151469                | C/A  | Gene_Ca_03340.1    | DOWNSTREAM                    | FUNCTIONS IN: molecular_function unknown                  |
| <i>Desi_wild_17160394</i> | NA                                  | <i>Ca_desi_Chr03</i> | 17160394                | G/T  | Gene_Ca_03343.2    | NON_SYNONYMOUS_CODING         | Probable ubiquitin-like-specific protease 2B              |
| <i>Desi_wild_17177431</i> | NA                                  | <i>Ca_desi_Chr03</i> | 17177431                | C/T  | Gene_Ca_03344.1    | INTRON                        | Carbonic anhydrase, chloroplastic                         |
| <i>Desi_wild_17296622</i> | NA                                  | <i>Ca_desi_Chr03</i> | 17296622                | A/T  | NA                 | INTERGENIC                    | NA                                                        |



| SNP IDs                   | NCBI dbSNP accession IDs (NCBI_SS#) | Chromosomes          | Physical positions (bp) | SNPs | Gene accession IDs | Sequence components of genome | Putative functions                                                   |
|---------------------------|-------------------------------------|----------------------|-------------------------|------|--------------------|-------------------------------|----------------------------------------------------------------------|
| <i>Desi_wild_17296649</i> | NA                                  | <i>Ca_desi_Chr03</i> | 17296649                | G/A  | NA                 | INTERGENIC                    | NA                                                                   |
| <i>Desi_wild_17296670</i> | NA                                  | <i>Ca_desi_Chr03</i> | 17296670                | A/T  | NA                 | INTERGENIC                    | NA                                                                   |
| <i>Desi_wild_17296688</i> | NA                                  | <i>Ca_desi_Chr03</i> | 17296688                | T/C  | NA                 | INTERGENIC                    | NA                                                                   |
| <i>Desi_wild_17622547</i> | NA                                  | <i>Ca_desi_Chr03</i> | 17622547                | T/C  | Gene_Ca_03360.2    | DOWNSTREAM                    | NA                                                                   |
| <i>Desi_wild_17664187</i> | NA                                  | <i>Ca_desi_Chr03</i> | 17664187                | C/A  | Gene_Ca_03367.1    | DOWNSTREAM                    | NAC domain-containing protein 7                                      |
| <i>Desi_wild_17681301</i> | NA                                  | <i>Ca_desi_Chr03</i> | 17681301                | T/G  | Gene_Ca_03368.1    | UPSTREAM                      | NA                                                                   |
| <i>Desi_wild_17737216</i> | NA                                  | <i>Ca_desi_Chr03</i> | 17737216                | G/A  | Gene_Ca_03379.1    | INTRON                        | SNARE-interacting protein KEULE                                      |
| <i>Desi_wild_17833336</i> | NA                                  | <i>Ca_desi_Chr03</i> | 17833336                | T/C  | Gene_Ca_03392.1    | NON_SYNONYMOUS_CODING         | Probable LRR receptor-like serine/threonine-protein kinase At1g12460 |
| <i>Desi_wild_17836274</i> | NA                                  | <i>Ca_desi_Chr03</i> | 17836274                | A/C  | NA                 | INTERGENIC                    | NA                                                                   |
| <i>Desi_wild_17838091</i> | NA                                  | <i>Ca_desi_Chr03</i> | 17838091                | T/C  | Gene_Ca_03393.1    | UPSTREAM                      | Cell cycle regulated microtubule associated protein                  |
| <i>Desi_wild_17840051</i> | NA                                  | <i>Ca_desi_Chr03</i> | 17840051                | A/C  | Gene_Ca_03393.1    | NON_SYNONYMOUS_CODING         | Cell cycle regulated microtubule associated protein                  |
| <i>Desi_wild_17896412</i> | NA                                  | <i>Ca_desi_Chr03</i> | 17896412                | C/A  | Gene_Ca_03401.1    | INTRON                        | Protein FAM63A                                                       |
| <i>Desi_wild_17966654</i> | NA                                  | <i>Ca_desi_Chr03</i> | 17966654                | A/C  | NA                 | INTERGENIC                    | NA                                                                   |
| <i>Desi_wild_17975893</i> | NA                                  | <i>Ca_desi_Chr03</i> | 17975893                | A/G  | Gene_Ca_03412.1    | DOWNSTREAM                    | Thioredoxin-like protein HCF164, chloroplastic                       |
| <i>Desi_wild_17982263</i> | NA                                  | <i>Ca_desi_Chr03</i> | 17982263                | A/C  | NA                 | INTERGENIC                    | NA                                                                   |
| <i>Desi_wild_17982264</i> | NA                                  | <i>Ca_desi_Chr03</i> | 17982264                | G/T  | NA                 | INTERGENIC                    | NA                                                                   |
| <i>Desi_wild_18017326</i> | NA                                  | <i>Ca_desi_Chr03</i> | 18017326                | A/G  | Gene_Ca_03420.2    | DOWNSTREAM                    | NA                                                                   |
| <i>Desi_wild_18045434</i> | NA                                  | <i>Ca_desi_Chr03</i> | 18045434                | A/T  | Gene_Ca_03425.1    | INTRON                        | Protein DA1-related 1                                                |
| <i>Desi_wild_18101891</i> | NA                                  | <i>Ca_desi_Chr03</i> | 18101891                | C/T  | Gene_Ca_03430.1    | NON_SYNONYMOUS_CODING         | LOB domain-containing protein 36                                     |
| <i>Desi_wild_18121229</i> | NA                                  | <i>Ca_desi_Chr03</i> | 18121229                | A/G  | Gene_Ca_03431.1    | NON_SYNONYMOUS_CODING         | Floral homeotic protein APETALA 2                                    |
| <i>Desi_wild_18121286</i> | NA                                  | <i>Ca_desi_Chr03</i> | 18121286                | G/A  | Gene_Ca_03431.1    | NON_SYNONYMOUS_CODING         | Floral homeotic protein APETALA 2                                    |
| <i>Desi_wild_18140360</i> | NA                                  | <i>Ca_desi_Chr03</i> | 18140360                | A/C  | Gene_Ca_03432.1    | SYNONYMOUS_CODING             | Filament-like plant protein 7                                        |
| <i>Desi_wild_18140618</i> | NA                                  | <i>Ca_desi_Chr03</i> | 18140618                | G/A  | Gene_Ca_03432.1    | NON_SYNONYMOUS_CODING         | Filament-like plant protein 7                                        |
| <i>Desi_wild_18171597</i> | NA                                  | <i>Ca_desi_Chr03</i> | 18171597                | C/T  | Gene_Ca_03436.1    | NON_SYNONYMOUS_CODING         | E3 ubiquitin ligase BIG BROTHER                                      |
| <i>Desi_wild_18171672</i> | NA                                  | <i>Ca_desi_Chr03</i> | 18171672                | A/G  | Gene_Ca_03436.1    | NON_SYNONYMOUS_CODING         | E3 ubiquitin ligase BIG BROTHER                                      |
| <i>Desi_wild_18193187</i> | NA                                  | <i>Ca_desi_Chr03</i> | 18193187                | T/G  | Gene_Ca_03438.1    | DOWNSTREAM                    | Nicotinate phosphoribosyltransferase                                 |
| <i>Desi_wild_18198496</i> | NA                                  | <i>Ca_desi_Chr03</i> | 18198496                | C/T  | Gene_Ca_03439.1    | NON_SYNONYMOUS_CODING         | DNA polymerase alpha catalytic subunit                               |
| <i>Desi_wild_18207408</i> | NA                                  | <i>Ca_desi_Chr03</i> | 18207408                | C/T  | NA                 | INTERGENIC                    | NA                                                                   |
| <i>Desi_wild_18273102</i> | NA                                  | <i>Ca_desi_Chr03</i> | 18273102                | G/C  | Gene_Ca_03448.1    | SYNONYMOUS_CODING             | Zeaxanthin epoxidase, chloroplastic                                  |
| <i>Desi_wild_18273114</i> | NA                                  | <i>Ca_desi_Chr03</i> | 18273114                | T/C  | Gene_Ca_03448.1    | SYNONYMOUS_CODING             | Zeaxanthin epoxidase, chloroplastic                                  |
| <i>Desi_wild_18299725</i> | NA                                  | <i>Ca_desi_Chr03</i> | 18299725                | A/C  | Gene_Ca_03450.1    | NON_SYNONYMOUS_CODING         | FUNCTIONS IN: molecular_function unknown                             |
| <i>Desi_wild_18437879</i> | NA                                  | <i>Ca_desi_Chr03</i> | 18437879                | C/A  | Gene_Ca_03465.1    | NON_SYNONYMOUS_CODING         | Transducin/WD40 repeat-like superfamily protein                      |
| <i>Desi_wild_18440169</i> | NA                                  | <i>Ca_desi_Chr03</i> | 18440169                | A/G  | Gene_Ca_03465.1    | SYNONYMOUS_CODING             | Transducin/WD40 repeat-like superfamily protein                      |
| <i>Desi_wild_18440793</i> | NA                                  | <i>Ca_desi_Chr03</i> | 18440793                | G/T  | Gene_Ca_03465.1    | SYNONYMOUS_CODING             | Transducin/WD40 repeat-like superfamily protein                      |
| <i>Desi_wild_18440955</i> | NA                                  | <i>Ca_desi_Chr03</i> | 18440955                | A/C  | Gene_Ca_03465.1    | SYNONYMOUS_CODING             | Transducin/WD40 repeat-like superfamily protein                      |
| <i>Desi_wild_18444954</i> | NA                                  | <i>Ca_desi_Chr03</i> | 18444954                | G/A  | Gene_Ca_03465.1    | INTRON                        | Transducin/WD40 repeat-like superfamily protein                      |
| <i>Desi_wild_18444970</i> | NA                                  | <i>Ca_desi_Chr03</i> | 18444970                | G/A  | Gene_Ca_03465.1    | INTRON                        | Transducin/WD40 repeat-like superfamily protein                      |
| <i>Desi_wild_18444987</i> | NA                                  | <i>Ca_desi_Chr03</i> | 18444987                | C/T  | Gene_Ca_03465.1    | INTRON                        | Transducin/WD40 repeat-like superfamily protein                      |
| <i>Desi_wild_18445034</i> | NA                                  | <i>Ca_desi_Chr03</i> | 18445034                | G/A  | Gene_Ca_03465.1    | INTRON                        | Transducin/WD40 repeat-like superfamily protein                      |
| <i>Desi_wild_18445055</i> | NA                                  | <i>Ca_desi_Chr03</i> | 18445055                | C/T  | Gene_Ca_03465.1    | INTRON                        | Transducin/WD40 repeat-like superfamily protein                      |
| <i>Desi_wild_18445067</i> | NA                                  | <i>Ca_desi_Chr03</i> | 18445067                | G/A  | Gene_Ca_03465.1    | INTRON                        | Transducin/WD40 repeat-like superfamily protein                      |
| <i>Desi_wild_18445082</i> | NA                                  | <i>Ca_desi_Chr03</i> | 18445082                | G/A  | Gene_Ca_03465.1    | INTRON                        | Transducin/WD40 repeat-like superfamily protein                      |
| <i>Desi_wild_18445098</i> | NA                                  | <i>Ca_desi_Chr03</i> | 18445098                | G/A  | Gene_Ca_03465.1    | INTRON                        | Transducin/WD40 repeat-like superfamily protein                      |
| <i>Desi_wild_18500277</i> | NA                                  | <i>Ca_desi_Chr03</i> | 18500277                | C/G  | Gene_Ca_03470.1    | SYNONYMOUS_CODING             | LOB domain-containing protein 36                                     |

| SNP IDs                   | NCBI dbSNP accession IDs (NCBI_SS#) | Chromosomes          | Physical positions (bp) | SNPs | Gene accession IDs | Sequence components of genome | Putative functions                              |
|---------------------------|-------------------------------------|----------------------|-------------------------|------|--------------------|-------------------------------|-------------------------------------------------|
| <i>Desi_wild_18543440</i> | NA                                  | <i>Ca_desi_Chr03</i> | 18543440                | G/A  | NA                 | INTERGENIC                    | NA                                              |
| <i>Desi_wild_18543445</i> | NA                                  | <i>Ca_desi_Chr03</i> | 18543445                | C/A  | NA                 | INTERGENIC                    | NA                                              |
| <i>Desi_wild_18543482</i> | NA                                  | <i>Ca_desi_Chr03</i> | 18543482                | C/T  | NA                 | INTERGENIC                    | NA                                              |
| <i>Desi_wild_18543500</i> | NA                                  | <i>Ca_desi_Chr03</i> | 18543500                | G/T  | NA                 | INTERGENIC                    | NA                                              |
| <i>Desi_wild_18594797</i> | NA                                  | <i>Ca_desi_Chr03</i> | 18594797                | T/G  | NA                 | INTERGENIC                    | NA                                              |
| <i>Desi_wild_18594804</i> | NA                                  | <i>Ca_desi_Chr03</i> | 18594804                | G/A  | NA                 | INTERGENIC                    | NA                                              |
| <i>Desi_wild_18594827</i> | NA                                  | <i>Ca_desi_Chr03</i> | 18594827                | C/A  | NA                 | INTERGENIC                    | NA                                              |
| <i>Desi_wild_18612076</i> | NA                                  | <i>Ca_desi_Chr03</i> | 18612076                | T/C  | NA                 | INTERGENIC                    | NA                                              |
| <i>Desi_wild_18613137</i> | NA                                  | <i>Ca_desi_Chr03</i> | 18613137                | T/G  | Gene_Ca_03476.1    | SYNONYMOUS_CODING             | Proline-rich receptor-like protein kinase PERK8 |
| <i>Desi_wild_18644074</i> | NA                                  | <i>Ca_desi_Chr03</i> | 18644074                | G/A  | NA                 | INTERGENIC                    | NA                                              |
| <i>Desi_wild_18652004</i> | NA                                  | <i>Ca_desi_Chr03</i> | 18652004                | A/G  | Gene_Ca_03480.1    | DOWNSTREAM                    | Remorin                                         |
| <i>Desi_wild_18682135</i> | NA                                  | <i>Ca_desi_Chr03</i> | 18682135                | A/G  | NA                 | INTERGENIC                    | NA                                              |
| <i>Desi_wild_18682250</i> | NA                                  | <i>Ca_desi_Chr03</i> | 18682250                | A/G  | NA                 | INTERGENIC                    | NA                                              |
| <i>Desi_wild_18703005</i> | NA                                  | <i>Ca_desi_Chr03</i> | 18703005                | G/A  | Gene_Ca_03484.1    | SYNONYMOUS_CODING             | Putative copper-transporting ATPase 3           |
| <i>Desi_wild_18703008</i> | NA                                  | <i>Ca_desi_Chr03</i> | 18703008                | C/A  | Gene_Ca_03484.1    | SYNONYMOUS_CODING             | Putative copper-transporting ATPase 3           |
| <i>Desi_wild_18703009</i> | NA                                  | <i>Ca_desi_Chr03</i> | 18703009                | G/T  | Gene_Ca_03484.1    | NON_SYNONYMOUS_CODING         | Putative copper-transporting ATPase 3           |
| <i>Desi_wild_18715729</i> | NA                                  | <i>Ca_desi_Chr03</i> | 18715729                | G/C  | NA                 | INTERGENIC                    | NA                                              |
| <i>Desi_wild_18818967</i> | NA                                  | <i>Ca_desi_Chr03</i> | 18818967                | T/C  | NA                 | INTERGENIC                    | NA                                              |
| <i>Desi_wild_18972809</i> | NA                                  | <i>Ca_desi_Chr03</i> | 18972809                | T/C  | NA                 | INTERGENIC                    | NA                                              |
| <i>Desi_wild_18976309</i> | NA                                  | <i>Ca_desi_Chr03</i> | 18976309                | C/A  | NA                 | INTERGENIC                    | NA                                              |
| <i>Desi_wild_18976346</i> | NA                                  | <i>Ca_desi_Chr03</i> | 18976346                | A/C  | NA                 | INTERGENIC                    | NA                                              |
| <i>Desi_wild_18989078</i> | NA                                  | <i>Ca_desi_Chr03</i> | 18989078                | G/C  | Gene_Ca_03523.1    | NON_SYNONYMOUS_CODING         | Sugar transporter ERD6-like 6                   |
| <i>Desi_wild_19113403</i> | NA                                  | <i>Ca_desi_Chr03</i> | 19113403                | T/C  | Gene_Ca_03534.1    | NON_SYNONYMOUS_CODING         | armadillo repeat only 2                         |
| <i>Desi_wild_19172991</i> | NA                                  | <i>Ca_desi_Chr03</i> | 19172991                | A/C  | NA                 | INTERGENIC                    | NA                                              |
| <i>Desi_wild_19562374</i> | NA                                  | <i>Ca_desi_Chr03</i> | 19562374                | A/G  | Gene_Ca_03566.3    | INTRON                        | Chloride channel protein CLC-d                  |
| <i>Desi_wild_19567059</i> | NA                                  | <i>Ca_desi_Chr03</i> | 19567059                | A/G  | Gene_Ca_03566.2    | DOWNSTREAM                    | Chloride channel protein CLC-d                  |
| <i>Desi_wild_19612103</i> | NA                                  | <i>Ca_desi_Chr03</i> | 19612103                | G/A  | NA                 | INTERGENIC                    | NA                                              |
| <i>Desi_wild_19612106</i> | NA                                  | <i>Ca_desi_Chr03</i> | 19612106                | T/C  | NA                 | INTERGENIC                    | NA                                              |
| <i>Desi_wild_19617260</i> | NA                                  | <i>Ca_desi_Chr03</i> | 19617260                | A/C  | Gene_Ca_03575.1    | DOWNSTREAM                    | Ferredoxin-3, chloroplastic                     |
| <i>Desi_wild_19617421</i> | NA                                  | <i>Ca_desi_Chr03</i> | 19617421                | T/C  | Gene_Ca_03575.1    | DOWNSTREAM                    | Ferredoxin-3, chloroplastic                     |
| <i>Desi_wild_19634559</i> | NA                                  | <i>Ca_desi_Chr03</i> | 19634559                | C/T  | NA                 | INTERGENIC                    | NA                                              |
| <i>Desi_wild_19649177</i> | NA                                  | <i>Ca_desi_Chr03</i> | 19649177                | A/C  | NA                 | INTERGENIC                    | NA                                              |
| <i>Desi_wild_19660296</i> | NA                                  | <i>Ca_desi_Chr03</i> | 19660296                | T/G  | Gene_Ca_03583.1    | INTRON                        | unknown protein                                 |
| <i>Desi_wild_19665487</i> | NA                                  | <i>Ca_desi_Chr03</i> | 19665487                | C/T  | NA                 | INTERGENIC                    | NA                                              |
| <i>Desi_wild_19665546</i> | NA                                  | <i>Ca_desi_Chr03</i> | 19665546                | G/T  | NA                 | INTERGENIC                    | NA                                              |
| <i>Desi_wild_19665565</i> | NA                                  | <i>Ca_desi_Chr03</i> | 19665565                | T/C  | NA                 | INTERGENIC                    | NA                                              |
| <i>Desi_wild_19666229</i> | NA                                  | <i>Ca_desi_Chr03</i> | 19666229                | T/G  | Gene_Ca_03585.1    | DOWNSTREAM                    | Uncharacterized N-acetyltransferase p20         |
| <i>Desi_wild_19666239</i> | NA                                  | <i>Ca_desi_Chr03</i> | 19666239                | T/A  | Gene_Ca_03585.1    | DOWNSTREAM                    | Uncharacterized N-acetyltransferase p20         |
| <i>Desi_wild_19666243</i> | NA                                  | <i>Ca_desi_Chr03</i> | 19666243                | A/T  | Gene_Ca_03585.1    | DOWNSTREAM                    | Uncharacterized N-acetyltransferase p20         |
| <i>Desi_wild_19666249</i> | NA                                  | <i>Ca_desi_Chr03</i> | 19666249                | G/A  | Gene_Ca_03585.1    | DOWNSTREAM                    | Uncharacterized N-acetyltransferase p20         |
| <i>Desi_wild_19673774</i> | NA                                  | <i>Ca_desi_Chr03</i> | 19673774                | A/G  | NA                 | INTERGENIC                    | NA                                              |
| <i>Desi_wild_19673847</i> | NA                                  | <i>Ca_desi_Chr03</i> | 19673847                | A/C  | NA                 | INTERGENIC                    | NA                                              |
| <i>Desi_wild_19702745</i> | NA                                  | <i>Ca_desi_Chr03</i> | 19702745                | C/T  | NA                 | INTERGENIC                    | NA                                              |
| <i>Desi_wild_19702753</i> | NA                                  | <i>Ca_desi_Chr03</i> | 19702753                | T/G  | NA                 | INTERGENIC                    | NA                                              |

| SNP IDs            | NCBI dbSNP accession IDs (NCBI_SS#) | Chromosomes   | Physical positions (bp) | SNPs | Gene accession IDs | Sequence components of genome | Putative functions                                                   |
|--------------------|-------------------------------------|---------------|-------------------------|------|--------------------|-------------------------------|----------------------------------------------------------------------|
| Desi_wild_19702779 | NA                                  | Ca_desi_Chr03 | 19702779                | G/A  | NA                 | INTERGENIC                    | NA                                                                   |
| Desi_wild_19707424 | NA                                  | Ca_desi_Chr03 | 19707424                | G/C  | NA                 | INTERGENIC                    | NA                                                                   |
| Desi_wild_19707456 | NA                                  | Ca_desi_Chr03 | 19707456                | T/C  | NA                 | INTERGENIC                    | NA                                                                   |
| Desi_wild_19707497 | NA                                  | Ca_desi_Chr03 | 19707497                | G/A  | NA                 | INTERGENIC                    | NA                                                                   |
| Desi_wild_19707556 | NA                                  | Ca_desi_Chr03 | 19707556                | C/T  | NA                 | INTERGENIC                    | NA                                                                   |
| Desi_wild_19707735 | NA                                  | Ca_desi_Chr03 | 19707735                | A/G  | NA                 | INTERGENIC                    | NA                                                                   |
| Desi_wild_19707742 | NA                                  | Ca_desi_Chr03 | 19707742                | G/A  | NA                 | INTERGENIC                    | NA                                                                   |
| Desi_wild_19708337 | NA                                  | Ca_desi_Chr03 | 19708337                | A/G  | NA                 | INTERGENIC                    | NA                                                                   |
| Desi_wild_19710005 | NA                                  | Ca_desi_Chr03 | 19710005                | T/C  | Gene_Ca_03591.1    | DOWNSTREAM                    | Pentatricopeptide repeat-containing protein At3g22690                |
| Desi_wild_19710036 | NA                                  | Ca_desi_Chr03 | 19710036                | T/C  | Gene_Ca_03591.1    | DOWNSTREAM                    | Pentatricopeptide repeat-containing protein At3g22690                |
| Desi_wild_19710066 | NA                                  | Ca_desi_Chr03 | 19710066                | A/T  | Gene_Ca_03591.1    | DOWNSTREAM                    | Pentatricopeptide repeat-containing protein At3g22690                |
| Desi_wild_19715908 | NA                                  | Ca_desi_Chr03 | 19715908                | A/G  | NA                 | INTERGENIC                    | NA                                                                   |
| Desi_wild_19715915 | NA                                  | Ca_desi_Chr03 | 19715915                | G/A  | NA                 | INTERGENIC                    | NA                                                                   |
| Desi_wild_19826899 | NA                                  | Ca_desi_Chr03 | 19826899                | A/G  | Gene_Ca_03610.1    | DOWNSTREAM                    | NA                                                                   |
| Desi_wild_19844377 | NA                                  | Ca_desi_Chr03 | 19844377                | C/T  | Gene_Ca_03613.1    | DOWNSTREAM                    | Pentatricopeptide repeat-containing protein At1g06710, mitochondrial |
| Desi_wild_19877477 | NA                                  | Ca_desi_Chr03 | 19877477                | T/G  | Gene_Ca_03617.1    | INTRON                        | NA                                                                   |
| Desi_wild_19895631 | NA                                  | Ca_desi_Chr03 | 19895631                | C/A  | NA                 | INTERGENIC                    | NA                                                                   |
| Desi_wild_19899161 | NA                                  | Ca_desi_Chr03 | 19899161                | A/G  | NA                 | INTERGENIC                    | NA                                                                   |
| Desi_wild_19899536 | NA                                  | Ca_desi_Chr03 | 19899536                | C/T  | NA                 | INTERGENIC                    | NA                                                                   |
| Desi_wild_19925928 | NA                                  | Ca_desi_Chr03 | 19925928                | A/G  | NA                 | INTERGENIC                    | NA                                                                   |
| Desi_wild_20002666 | NA                                  | Ca_desi_Chr03 | 20002666                | G/T  | Gene_Ca_03634.1    | NON_SYNONYMOUS_CODING         | Probable GTP pyrophosphokinase                                       |
| Desi_wild_20023572 | NA                                  | Ca_desi_Chr03 | 20023572                | T/C  | NA                 | INTERGENIC                    | NA                                                                   |
| Desi_wild_20023586 | NA                                  | Ca_desi_Chr03 | 20023586                | G/T  | NA                 | INTERGENIC                    | NA                                                                   |
| Desi_wild_20023592 | NA                                  | Ca_desi_Chr03 | 20023592                | A/G  | NA                 | INTERGENIC                    | NA                                                                   |
| Desi_wild_20023597 | NA                                  | Ca_desi_Chr03 | 20023597                | C/T  | NA                 | INTERGENIC                    | NA                                                                   |
| Desi_wild_20023598 | NA                                  | Ca_desi_Chr03 | 20023598                | A/G  | NA                 | INTERGENIC                    | NA                                                                   |
| Desi_wild_20023606 | NA                                  | Ca_desi_Chr03 | 20023606                | G/T  | NA                 | INTERGENIC                    | NA                                                                   |
| Desi_wild_20023610 | NA                                  | Ca_desi_Chr03 | 20023610                | T/C  | NA                 | INTERGENIC                    | NA                                                                   |
| Desi_wild_20023632 | NA                                  | Ca_desi_Chr03 | 20023632                | T/A  | NA                 | INTERGENIC                    | NA                                                                   |
| Desi_wild_20040496 | NA                                  | Ca_desi_Chr03 | 20040496                | C/T  | Gene_Ca_03639.1    | DOWNSTREAM                    | Cyclin-B1-2                                                          |
| Desi_wild_20040675 | NA                                  | Ca_desi_Chr03 | 20040675                | A/G  | Gene_Ca_03639.1    | DOWNSTREAM                    | Cyclin-B1-2                                                          |
| Desi_wild_20040729 | NA                                  | Ca_desi_Chr03 | 20040729                | T/A  | Gene_Ca_03639.1    | DOWNSTREAM                    | Cyclin-B1-2                                                          |
| Desi_wild_20096319 | NA                                  | Ca_desi_Chr03 | 20096319                | C/A  | Gene_Ca_03650.1    | NON_SYNONYMOUS_CODING         | Far upstream element-binding protein 2                               |
| Desi_wild_20161445 | NA                                  | Ca_desi_Chr03 | 20161445                | G/A  | Gene_Ca_03656.2    | INTRON                        | NA                                                                   |
| Desi_wild_20289583 | NA                                  | Ca_desi_Chr03 | 20289583                | G/A  | Gene_Ca_03671.1    | INTRON                        | V-type proton ATPase subunit E1                                      |
| Desi_wild_20293230 | NA                                  | Ca_desi_Chr03 | 20293230                | A/C  | NA                 | INTERGENIC                    | NA                                                                   |
| Desi_wild_20299535 | NA                                  | Ca_desi_Chr03 | 20299535                | A/G  | Gene_Ca_03672.1    | UPSTREAM                      | Lactoylglutathione lyase / glyoxalase I family protein               |
| Desi_wild_20303278 | NA                                  | Ca_desi_Chr03 | 20303278                | C/T  | NA                 | INTERGENIC                    | NA                                                                   |
| Desi_wild_20335521 | NA                                  | Ca_desi_Chr03 | 20335521                | G/T  | Gene_Ca_03677.1    | INTRON                        | ATPase family AAA domain-containing protein 1                        |
| Desi_wild_20375742 | NA                                  | Ca_desi_Chr03 | 20375742                | G/A  | NA                 | INTERGENIC                    | NA                                                                   |
| Desi_wild_20404693 | NA                                  | Ca_desi_Chr03 | 20404693                | T/C  | Gene_Ca_03683.1    | INTRON                        | G2/mitotic-specific cyclin-1                                         |
| Desi_wild_20419095 | NA                                  | Ca_desi_Chr03 | 20419095                | A/C  | Gene_Ca_03684.1    | STOP_GAINED                   | Probable poly(A) polymerase                                          |
| Desi_wild_20419223 | NA                                  | Ca_desi_Chr03 | 20419223                | A/G  | Gene_Ca_03684.1    | NON_SYNONYMOUS_CODING         | Probable poly(A) polymerase                                          |
| Desi_wild_20614613 | NA                                  | Ca_desi_Chr03 | 20614613                | T/G  | NA                 | INTERGENIC                    | NA                                                                   |

| SNP IDs                   | NCBI dbSNP accession IDs (NCBI_SS#) | Chromosomes          | Physical positions (bp) | SNPs | Gene accession IDs | Sequence components of genome | Putative functions                         |
|---------------------------|-------------------------------------|----------------------|-------------------------|------|--------------------|-------------------------------|--------------------------------------------|
| <i>Desi_wild_21029534</i> | NA                                  | <i>Ca_desi_Chr03</i> | 21029534                | G/A  | Gene_Ca_03702.1    | NON_SYNONYMOUS_CODING         | NA                                         |
| <i>Desi_wild_21058243</i> | NA                                  | <i>Ca_desi_Chr03</i> | 21058243                | A/C  | NA                 | INTERGENIC                    | NA                                         |
| <i>Desi_wild_21180741</i> | NA                                  | <i>Ca_desi_Chr03</i> | 21180741                | T/G  | NA                 | INTERGENIC                    | NA                                         |
| <i>Desi_wild_21191983</i> | NA                                  | <i>Ca_desi_Chr03</i> | 21191983                | C/T  | Gene_Ca_03717.1    | SYNONYMOUS_CODING             | F-box protein SKIP31                       |
| <i>Desi_wild_21193003</i> | NA                                  | <i>Ca_desi_Chr03</i> | 21193003                | A/C  | Gene_Ca_03717.1    | INTRON                        | F-box protein SKIP31                       |
| <i>Desi_wild_21552465</i> | NA                                  | <i>Ca_desi_Chr03</i> | 21552465                | T/A  | NA                 | INTERGENIC                    | NA                                         |
| <i>Desi_wild_21588139</i> | NA                                  | <i>Ca_desi_Chr03</i> | 21588139                | G/A  | NA                 | INTERGENIC                    | NA                                         |
| <i>Desi_wild_21588162</i> | NA                                  | <i>Ca_desi_Chr03</i> | 21588162                | C/A  | NA                 | INTERGENIC                    | NA                                         |
| <i>Desi_wild_21588165</i> | NA                                  | <i>Ca_desi_Chr03</i> | 21588165                | A/T  | NA                 | INTERGENIC                    | NA                                         |
| <i>Desi_wild_21588236</i> | NA                                  | <i>Ca_desi_Chr03</i> | 21588236                | T/G  | NA                 | INTERGENIC                    | NA                                         |
| <i>Desi_wild_21592427</i> | NA                                  | <i>Ca_desi_Chr03</i> | 21592427                | T/C  | Gene_Ca_03750.2    | UPSTREAM                      | unknown protein                            |
| <i>Desi_wild_21624396</i> | NA                                  | <i>Ca_desi_Chr03</i> | 21624396                | T/A  | Gene_Ca_03756.1    | DOWNSTREAM                    | Putative ankyrin repeat protein RF_0381    |
| <i>Desi_wild_21628777</i> | NA                                  | <i>Ca_desi_Chr03</i> | 21628777                | C/A  | Gene_Ca_03756.1    | UPSTREAM                      | Putative ankyrin repeat protein RF_0381    |
| <i>Desi_wild_21658322</i> | NA                                  | <i>Ca_desi_Chr03</i> | 21658322                | A/G  | Gene_Ca_03761.2    | DOWNSTREAM                    | Ribonuclease P protein subunit P38-related |
| <i>Desi_wild_21748221</i> | NA                                  | <i>Ca_desi_Chr03</i> | 21748221                | A/C  | NA                 | INTERGENIC                    | NA                                         |
| <i>Desi_wild_21761580</i> | NA                                  | <i>Ca_desi_Chr03</i> | 21761580                | T/A  | NA                 | INTERGENIC                    | NA                                         |
| <i>Desi_wild_21762576</i> | NA                                  | <i>Ca_desi_Chr03</i> | 21762576                | A/G  | Gene_Ca_03768.1    | INTRON                        | IST1-like protein                          |
| <i>Desi_wild_21762671</i> | NA                                  | <i>Ca_desi_Chr03</i> | 21762671                | C/A  | Gene_Ca_03768.1    | INTRON                        | IST1-like protein                          |
| <i>Desi_wild_21762677</i> | NA                                  | <i>Ca_desi_Chr03</i> | 21762677                | T/A  | Gene_Ca_03768.1    | INTRON                        | IST1-like protein                          |
| <i>Desi_wild_21762686</i> | NA                                  | <i>Ca_desi_Chr03</i> | 21762686                | A/C  | Gene_Ca_03768.1    | INTRON                        | IST1-like protein                          |
| <i>Desi_wild_21762712</i> | NA                                  | <i>Ca_desi_Chr03</i> | 21762712                | C/G  | Gene_Ca_03768.1    | NON_SYNONYMOUS_CODING         | IST1-like protein                          |
| <i>Desi_wild_21867155</i> | NA                                  | <i>Ca_desi_Chr03</i> | 21867155                | G/T  | NA                 | INTERGENIC                    | NA                                         |
| <i>Desi_wild_21881134</i> | NA                                  | <i>Ca_desi_Chr03</i> | 21881134                | T/C  | NA                 | INTERGENIC                    | NA                                         |
| <i>Desi_wild_21886035</i> | NA                                  | <i>Ca_desi_Chr03</i> | 21886035                | C/T  | NA                 | INTERGENIC                    | NA                                         |
| <i>Desi_wild_21886036</i> | NA                                  | <i>Ca_desi_Chr03</i> | 21886036                | A/G  | NA                 | INTERGENIC                    | NA                                         |
| <i>Desi_wild_21886097</i> | NA                                  | <i>Ca_desi_Chr03</i> | 21886097                | A/G  | NA                 | INTERGENIC                    | NA                                         |
| <i>Desi_wild_21886113</i> | NA                                  | <i>Ca_desi_Chr03</i> | 21886113                | G/C  | NA                 | INTERGENIC                    | NA                                         |
| <i>Desi_wild_21886833</i> | NA                                  | <i>Ca_desi_Chr03</i> | 21886833                | T/A  | NA                 | INTERGENIC                    | NA                                         |
| <i>Desi_wild_21886834</i> | NA                                  | <i>Ca_desi_Chr03</i> | 21886834                | G/T  | NA                 | INTERGENIC                    | NA                                         |
| <i>Desi_wild_22003711</i> | NA                                  | <i>Ca_desi_Chr03</i> | 22003711                | A/G  | Gene_Ca_03800.1    | INTRON                        | unknown protein                            |
| <i>Desi_wild_22023174</i> | NA                                  | <i>Ca_desi_Chr03</i> | 22023174                | T/G  | Gene_Ca_03800.1    | INTRON                        | unknown protein                            |
| <i>Desi_wild_22571666</i> | NA                                  | <i>Ca_desi_Chr03</i> | 22571666                | T/C  | Gene_Ca_03809.1    | NON_SYNONYMOUS_CODING         | Probable pectinesterase 53                 |
| <i>Desi_wild_22571728</i> | NA                                  | <i>Ca_desi_Chr03</i> | 22571728                | T/G  | Gene_Ca_03809.1    | SYNONYMOUS_CODING             | Probable pectinesterase 53                 |
| <i>Desi_wild_22571755</i> | NA                                  | <i>Ca_desi_Chr03</i> | 22571755                | T/C  | Gene_Ca_03809.1    | SYNONYMOUS_CODING             | Probable pectinesterase 53                 |
| <i>Desi_wild_22573101</i> | NA                                  | <i>Ca_desi_Chr03</i> | 22573101                | A/G  | Gene_Ca_03809.1    | INTRON                        | Probable pectinesterase 53                 |
| <i>Desi_wild_22669967</i> | NA                                  | <i>Ca_desi_Chr03</i> | 22669967                | T/C  | Gene_Ca_03817.1    | DOWNSTREAM                    | Profilin-1                                 |
| <i>Desi_wild_22670433</i> | NA                                  | <i>Ca_desi_Chr03</i> | 22670433                | G/C  | Gene_Ca_03817.1    | DOWNSTREAM                    | Profilin-2                                 |
| <i>Desi_wild_22670503</i> | NA                                  | <i>Ca_desi_Chr03</i> | 22670503                | C/T  | Gene_Ca_03817.1    | DOWNSTREAM                    | Profilin-3                                 |
| <i>Desi_wild_22670535</i> | NA                                  | <i>Ca_desi_Chr03</i> | 22670535                | A/G  | Gene_Ca_03817.1    | DOWNSTREAM                    | Profilin-4                                 |
| <i>Desi_wild_22685623</i> | NA                                  | <i>Ca_desi_Chr03</i> | 22685623                | C/A  | NA                 | INTERGENIC                    | NA                                         |
| <i>Desi_wild_22685641</i> | NA                                  | <i>Ca_desi_Chr03</i> | 22685641                | C/A  | NA                 | INTERGENIC                    | NA                                         |
| <i>Desi_wild_22685662</i> | NA                                  | <i>Ca_desi_Chr03</i> | 22685662                | T/G  | NA                 | INTERGENIC                    | NA                                         |
| <i>Desi_wild_22685708</i> | NA                                  | <i>Ca_desi_Chr03</i> | 22685708                | G/T  | NA                 | INTERGENIC                    | NA                                         |
| <i>Desi_wild_22687678</i> | NA                                  | <i>Ca_desi_Chr03</i> | 22687678                | G/A  | NA                 | INTERGENIC                    | NA                                         |

| SNP IDs                   | NCBI dbSNP accession IDs (NCBI_SS#) | Chromosomes          | Physical positions (bp) | SNPs | Gene accession IDs | Sequence components of genome | Putative functions                                    |
|---------------------------|-------------------------------------|----------------------|-------------------------|------|--------------------|-------------------------------|-------------------------------------------------------|
| <i>Desi_wild_22687823</i> | NA                                  | <i>Ca_desi_Chr03</i> | 22687823                | C/T  | NA                 | INTERGENIC                    | NA                                                    |
| <i>Desi_wild_22693336</i> | NA                                  | <i>Ca_desi_Chr03</i> | 22693336                | A/T  | NA                 | INTERGENIC                    | NA                                                    |
| <i>Desi_wild_22693402</i> | NA                                  | <i>Ca_desi_Chr03</i> | 22693402                | A/G  | NA                 | INTERGENIC                    | NA                                                    |
| <i>Desi_wild_22693424</i> | NA                                  | <i>Ca_desi_Chr03</i> | 22693424                | G/A  | NA                 | INTERGENIC                    | NA                                                    |
| <i>Desi_wild_22693426</i> | NA                                  | <i>Ca_desi_Chr03</i> | 22693426                | G/T  | NA                 | INTERGENIC                    | NA                                                    |
| <i>Desi_wild_22737981</i> | NA                                  | <i>Ca_desi_Chr03</i> | 22737981                | G/A  | Gene_Ca_03824.1    | SYNONYMOUS_CODING             | Sugar transport protein 14                            |
| <i>Desi_wild_22830261</i> | NA                                  | <i>Ca_desi_Chr03</i> | 22830261                | G/A  | Gene_Ca_03831.1    | INTRON                        | Probable RNA-dependent RNA polymerase 5               |
| <i>Desi_wild_22837572</i> | NA                                  | <i>Ca_desi_Chr03</i> | 22837572                | T/C  | Gene_Ca_03831.1    | INTRON                        | Probable RNA-dependent RNA polymerase 6               |
| <i>Desi_wild_22903664</i> | NA                                  | <i>Ca_desi_Chr03</i> | 22903664                | G/A  | Gene_Ca_03840.1    | SYNONYMOUS_CODING             | DNA (cytosine-5)-methyltransferase CMT3               |
| <i>Desi_wild_22973066</i> | NA                                  | <i>Ca_desi_Chr03</i> | 22973066                | T/C  | Gene_Ca_03843.1    | INTRON                        | Nucleobase-ascorbate transporter 11                   |
| <i>Desi_wild_22973073</i> | NA                                  | <i>Ca_desi_Chr03</i> | 22973073                | T/C  | Gene_Ca_03843.1    | INTRON                        | Nucleobase-ascorbate transporter 12                   |
| <i>Desi_wild_22980522</i> | NA                                  | <i>Ca_desi_Chr03</i> | 22980522                | G/A  | Gene_Ca_03844.1    | SYNONYMOUS_CODING             | Protein SGT1 homolog At5g65490                        |
| <i>Desi_wild_22980534</i> | NA                                  | <i>Ca_desi_Chr03</i> | 22980534                | C/G  | Gene_Ca_03844.1    | SYNONYMOUS_CODING             | Protein SGT1 homolog At5g65491                        |
| <i>Desi_wild_22980578</i> | NA                                  | <i>Ca_desi_Chr03</i> | 22980578                | A/G  | Gene_Ca_03844.1    | NON_SYNONYMOUS_CODING         | Protein SGT1 homolog At5g65492                        |
| <i>Desi_wild_22984947</i> | NA                                  | <i>Ca_desi_Chr03</i> | 22984947                | G/C  | Gene_Ca_03844.1    | DOWNSTREAM                    | Protein SGT1 homolog At5g65493                        |
| <i>Desi_wild_22985057</i> | NA                                  | <i>Ca_desi_Chr03</i> | 22985057                | C/T  | Gene_Ca_03844.1    | DOWNSTREAM                    | Protein SGT1 homolog At5g65494                        |
| <i>Desi_wild_22988901</i> | NA                                  | <i>Ca_desi_Chr03</i> | 22988901                | G/A  | NA                 | INTERGENIC                    | NA                                                    |
| <i>Desi_wild_22992410</i> | NA                                  | <i>Ca_desi_Chr03</i> | 22992410                | G/A  | Gene_Ca_03845.1    | SYNONYMOUS_CODING             | Kinase interacting (KIP1-like) family protein         |
| <i>Desi_wild_22992503</i> | NA                                  | <i>Ca_desi_Chr03</i> | 22992503                | G/A  | Gene_Ca_03845.1    | SYNONYMOUS_CODING             | Kinase interacting (KIP1-like) family protein         |
| <i>Desi_wild_22992745</i> | NA                                  | <i>Ca_desi_Chr03</i> | 22992745                | G/A  | Gene_Ca_03845.1    | NON_SYNONYMOUS_CODING         | Kinase interacting (KIP1-like) family protein         |
| <i>Desi_wild_22992748</i> | NA                                  | <i>Ca_desi_Chr03</i> | 22992748                | C/T  | Gene_Ca_03845.1    | NON_SYNONYMOUS_CODING         | Kinase interacting (KIP1-like) family protein         |
| <i>Desi_wild_22992776</i> | NA                                  | <i>Ca_desi_Chr03</i> | 22992776                | A/G  | Gene_Ca_03845.1    | SYNONYMOUS_CODING             | Kinase interacting (KIP1-like) family protein         |
| <i>Desi_wild_23024242</i> | NA                                  | <i>Ca_desi_Chr03</i> | 23024242                | T/G  | Gene_Ca_03848.2    | INTRON                        | Mechanosensitive ion channel protein 2, chloroplastic |
| <i>Desi_wild_23024245</i> | NA                                  | <i>Ca_desi_Chr03</i> | 23024245                | G/A  | Gene_Ca_03848.2    | INTRON                        | Mechanosensitive ion channel protein 2, chloroplastic |
| <i>Desi_wild_23024445</i> | NA                                  | <i>Ca_desi_Chr03</i> | 23024445                | C/A  | Gene_Ca_03848.2    | INTRON                        | Mechanosensitive ion channel protein 2, chloroplastic |
| <i>Desi_wild_23024451</i> | NA                                  | <i>Ca_desi_Chr03</i> | 23024451                | C/A  | Gene_Ca_03848.2    | INTRON                        | Mechanosensitive ion channel protein 2, chloroplastic |
| <i>Desi_wild_23024457</i> | NA                                  | <i>Ca_desi_Chr03</i> | 23024457                | T/A  | Gene_Ca_03848.2    | INTRON                        | Mechanosensitive ion channel protein 2, chloroplastic |
| <i>Desi_wild_23024463</i> | NA                                  | <i>Ca_desi_Chr03</i> | 23024463                | G/A  | Gene_Ca_03848.2    | INTRON                        | Mechanosensitive ion channel protein 2, chloroplastic |
| <i>Desi_wild_23024466</i> | NA                                  | <i>Ca_desi_Chr03</i> | 23024466                | C/T  | Gene_Ca_03848.2    | INTRON                        | Mechanosensitive ion channel protein 2, chloroplastic |
| <i>Desi_wild_23024469</i> | NA                                  | <i>Ca_desi_Chr03</i> | 23024469                | A/T  | Gene_Ca_03848.2    | INTRON                        | Mechanosensitive ion channel protein 2, chloroplastic |
| <i>Desi_wild_23024477</i> | NA                                  | <i>Ca_desi_Chr03</i> | 23024477                | C/A  | Gene_Ca_03848.2    | INTRON                        | Mechanosensitive ion channel protein 2, chloroplastic |
| <i>Desi_wild_23024478</i> | NA                                  | <i>Ca_desi_Chr03</i> | 23024478                | A/T  | Gene_Ca_03848.2    | INTRON                        | Mechanosensitive ion channel protein 2, chloroplastic |
| <i>Desi_wild_23024481</i> | NA                                  | <i>Ca_desi_Chr03</i> | 23024481                | T/A  | Gene_Ca_03848.2    | INTRON                        | Mechanosensitive ion channel protein 2, chloroplastic |
| <i>Desi_wild_23024484</i> | NA                                  | <i>Ca_desi_Chr03</i> | 23024484                | A/T  | Gene_Ca_03848.2    | INTRON                        | Mechanosensitive ion channel protein 2, chloroplastic |
| <i>Desi_wild_23024486</i> | NA                                  | <i>Ca_desi_Chr03</i> | 23024486                | G/A  | Gene_Ca_03848.2    | INTRON                        | Mechanosensitive ion channel protein 2, chloroplastic |
| <i>Desi_wild_23025239</i> | NA                                  | <i>Ca_desi_Chr03</i> | 23025239                | A/C  | Gene_Ca_03848.2    | INTRON                        | Mechanosensitive ion channel protein 2, chloroplastic |
| <i>Desi_wild_23029544</i> | NA                                  | <i>Ca_desi_Chr03</i> | 23029544                | A/C  | Gene_Ca_03849.1    | DOWNSTREAM                    | NA                                                    |
| <i>Desi_wild_23029548</i> | NA                                  | <i>Ca_desi_Chr03</i> | 23029548                | T/G  | Gene_Ca_03849.1    | DOWNSTREAM                    | NA                                                    |
| <i>Desi_wild_23032363</i> | NA                                  | <i>Ca_desi_Chr03</i> | 23032363                | A/G  | NA                 | INTERGENIC                    | NA                                                    |
| <i>Desi_wild_23032475</i> | NA                                  | <i>Ca_desi_Chr03</i> | 23032475                | T/A  | NA                 | INTERGENIC                    | NA                                                    |
| <i>Desi_wild_23032534</i> | NA                                  | <i>Ca_desi_Chr03</i> | 23032534                | C/T  | NA                 | INTERGENIC                    | NA                                                    |
| <i>Desi_wild_23052123</i> | NA                                  | <i>Ca_desi_Chr03</i> | 23052123                | C/T  | Gene_Ca_03852.1    | DOWNSTREAM                    | Translation initiation factor IF-2                    |
| <i>Desi_wild_23052262</i> | NA                                  | <i>Ca_desi_Chr03</i> | 23052262                | A/G  | Gene_Ca_03852.1    | DOWNSTREAM                    | Translation initiation factor IF-3                    |
| <i>Desi_wild_23056374</i> | NA                                  | <i>Ca_desi_Chr03</i> | 23056374                | G/A  | Gene_Ca_03852.2    | SYNONYMOUS_CODING             | Translation initiation factor IF-4                    |

| SNP IDs                   | NCBI dbSNP accession IDs (NCBI_SS#) | Chromosomes          | Physical positions (bp) | SNPs | Gene accession IDs | Sequence components of genome | Putative functions                                                    |
|---------------------------|-------------------------------------|----------------------|-------------------------|------|--------------------|-------------------------------|-----------------------------------------------------------------------|
| <i>Desi_wild_23096471</i> | NA                                  | <i>Ca_desi_Chr03</i> | 23096471                | A/G  | Gene_Ca_03857.1    | NON_SYNONYMOUS_CODING         | Transcription factor MYC2                                             |
| <i>Desi_wild_23097931</i> | NA                                  | <i>Ca_desi_Chr03</i> | 23097931                | T/C  | Gene_Ca_03857.1    | DOWNSTREAM                    | Transcription factor MYC3                                             |
| <i>Desi_wild_23108909</i> | NA                                  | <i>Ca_desi_Chr03</i> | 23108909                | G/A  | Gene_Ca_03859.1    | DOWNSTREAM                    | Putative uncharacterized protein                                      |
| <i>Desi_wild_23108971</i> | NA                                  | <i>Ca_desi_Chr03</i> | 23108971                | A/G  | Gene_Ca_03859.1    | DOWNSTREAM                    | Putative uncharacterized protein                                      |
| <i>Desi_wild_23111353</i> | NA                                  | <i>Ca_desi_Chr03</i> | 23111353                | C/T  | NA                 | INTERGENIC                    | NA                                                                    |
| <i>Desi_wild_23111354</i> | NA                                  | <i>Ca_desi_Chr03</i> | 23111354                | C/T  | NA                 | INTERGENIC                    | NA                                                                    |
| <i>Desi_wild_23111450</i> | NA                                  | <i>Ca_desi_Chr03</i> | 23111450                | G/A  | NA                 | INTERGENIC                    | NA                                                                    |
| <i>Desi_wild_23111457</i> | NA                                  | <i>Ca_desi_Chr03</i> | 23111457                | A/G  | NA                 | INTERGENIC                    | NA                                                                    |
| <i>Desi_wild_23119386</i> | NA                                  | <i>Ca_desi_Chr03</i> | 23119386                | C/T  | Gene_Ca_03860.1    | SYNONYMOUS_CODING             | VQ motif-containing protein                                           |
| <i>Desi_wild_23119464</i> | NA                                  | <i>Ca_desi_Chr03</i> | 23119464                | G/A  | Gene_Ca_03860.1    | SYNONYMOUS_CODING             | VQ motif-containing protein                                           |
| <i>Desi_wild_23144183</i> | NA                                  | <i>Ca_desi_Chr03</i> | 23144183                | A/G  | NA                 | INTERGENIC                    | NA                                                                    |
| <i>Desi_wild_23144185</i> | NA                                  | <i>Ca_desi_Chr03</i> | 23144185                | G/T  | NA                 | INTERGENIC                    | NA                                                                    |
| <i>Desi_wild_23144197</i> | NA                                  | <i>Ca_desi_Chr03</i> | 23144197                | T/C  | NA                 | INTERGENIC                    | NA                                                                    |
| <i>Desi_wild_23144247</i> | NA                                  | <i>Ca_desi_Chr03</i> | 23144247                | A/C  | NA                 | INTERGENIC                    | NA                                                                    |
| <i>Desi_wild_23144313</i> | NA                                  | <i>Ca_desi_Chr03</i> | 23144313                | T/C  | NA                 | INTERGENIC                    | NA                                                                    |
| <i>Desi_wild_23156348</i> | NA                                  | <i>Ca_desi_Chr03</i> | 23156348                | T/C  | Gene_Ca_03865.1    | INTRON                        | Probable sphingolipid transporter spinster homolog 3                  |
| <i>Desi_wild_23157641</i> | NA                                  | <i>Ca_desi_Chr03</i> | 23157641                | C/A  | Gene_Ca_03865.1    | INTRON                        | Probable sphingolipid transporter spinster homolog 3                  |
| <i>Desi_wild_23157661</i> | NA                                  | <i>Ca_desi_Chr03</i> | 23157661                | A/G  | Gene_Ca_03865.1    | INTRON                        | Probable sphingolipid transporter spinster homolog 3                  |
| <i>Desi_wild_23164288</i> | NA                                  | <i>Ca_desi_Chr03</i> | 23164288                | G/A  | Gene_Ca_03866.1    | INTRON                        | Glycogen synthase                                                     |
| <i>Desi_wild_23164356</i> | NA                                  | <i>Ca_desi_Chr03</i> | 23164356                | T/C  | Gene_Ca_03866.1    | INTRON                        | Glycogen synthase                                                     |
| <i>Desi_wild_23164362</i> | NA                                  | <i>Ca_desi_Chr03</i> | 23164362                | G/C  | Gene_Ca_03866.1    | INTRON                        | Glycogen synthase                                                     |
| <i>Desi_wild_23164363</i> | NA                                  | <i>Ca_desi_Chr03</i> | 23164363                | T/C  | Gene_Ca_03866.1    | INTRON                        | Glycogen synthase                                                     |
| <i>Desi_wild_23164365</i> | NA                                  | <i>Ca_desi_Chr03</i> | 23164365                | A/T  | Gene_Ca_03866.1    | INTRON                        | Glycogen synthase                                                     |
| <i>Desi_wild_23164372</i> | NA                                  | <i>Ca_desi_Chr03</i> | 23164372                | A/C  | Gene_Ca_03866.1    | INTRON                        | Glycogen synthase                                                     |
| <i>Desi_wild_23164373</i> | NA                                  | <i>Ca_desi_Chr03</i> | 23164373                | G/T  | Gene_Ca_03866.1    | INTRON                        | Glycogen synthase                                                     |
| <i>Desi_wild_23164374</i> | NA                                  | <i>Ca_desi_Chr03</i> | 23164374                | G/T  | Gene_Ca_03866.1    | INTRON                        | Glycogen synthase                                                     |
| <i>Desi_wild_23164375</i> | NA                                  | <i>Ca_desi_Chr03</i> | 23164375                | T/G  | Gene_Ca_03866.1    | INTRON                        | Glycogen synthase                                                     |
| <i>Desi_wild_23164380</i> | NA                                  | <i>Ca_desi_Chr03</i> | 23164380                | G/A  | Gene_Ca_03866.1    | INTRON                        | Glycogen synthase                                                     |
| <i>Desi_wild_23164474</i> | NA                                  | <i>Ca_desi_Chr03</i> | 23164474                | A/G  | Gene_Ca_03866.1    | INTRON                        | Glycogen synthase                                                     |
| <i>Desi_wild_23164486</i> | NA                                  | <i>Ca_desi_Chr03</i> | 23164486                | A/G  | Gene_Ca_03866.1    | INTRON                        | Glycogen synthase                                                     |
| <i>Desi_wild_23164499</i> | NA                                  | <i>Ca_desi_Chr03</i> | 23164499                | T/C  | Gene_Ca_03866.1    | INTRON                        | Glycogen synthase                                                     |
| <i>Desi_wild_23164625</i> | NA                                  | <i>Ca_desi_Chr03</i> | 23164625                | A/G  | Gene_Ca_03866.1    | INTRON                        | Glycogen synthase                                                     |
| <i>Desi_wild_23164637</i> | NA                                  | <i>Ca_desi_Chr03</i> | 23164637                | G/A  | Gene_Ca_03866.1    | INTRON                        | Glycogen synthase                                                     |
| <i>Desi_wild_23167177</i> | NA                                  | <i>Ca_desi_Chr03</i> | 23167177                | A/C  | Gene_Ca_03866.1    | INTRON                        | Glycogen synthase                                                     |
| <i>Desi_wild_23185363</i> | NA                                  | <i>Ca_desi_Chr03</i> | 23185363                | A/C  | Gene_Ca_03868.1    | INTRON                        | Phosphoenolpyruvate carboxykinase [ATP]                               |
| <i>Desi_wild_23325891</i> | NA                                  | <i>Ca_desi_Chr03</i> | 23325891                | C/A  | NA                 | INTERGENIC                    | NA                                                                    |
| <i>Desi_wild_23330342</i> | NA                                  | <i>Ca_desi_Chr03</i> | 23330342                | G/A  | Gene_Ca_03872.1    | NON_SYNONYMOUS_CODING         | NA                                                                    |
| <i>Desi_wild_36309</i>    | NA                                  | <i>Ca_desi_Chr04</i> | 36309                   | T/C  | NA                 | INTERGENIC                    | NA                                                                    |
| <i>Desi_wild_112061</i>   | NA                                  | <i>Ca_desi_Chr04</i> | 112061                  | G/A  | NA                 | INTERGENIC                    | NA                                                                    |
| <i>Desi_wild_112110</i>   | NA                                  | <i>Ca_desi_Chr04</i> | 112110                  | C/A  | NA                 | INTERGENIC                    | NA                                                                    |
| <i>Desi_wild_122917</i>   | NA                                  | <i>Ca_desi_Chr04</i> | 122917                  | C/T  | Gene_Ca_03887.2    | NON_SYNONYMOUS_CODING         | Protein ACCUMULATION AND REPLICATION OF CHLOROPLASTS 6, chloroplastic |
| <i>Desi_wild_123046</i>   | NA                                  | <i>Ca_desi_Chr04</i> | 123046                  | A/G  | Gene_Ca_03887.2    | INTRON                        | Protein ACCUMULATION AND REPLICATION OF CHLOROPLASTS 6, chloroplastic |
| <i>Desi_wild_145927</i>   | NA                                  | <i>Ca_desi_Chr04</i> | 145927                  | G/A  | Gene_Ca_03890.1    | SYNONYMOUS_CODING             | DNA-directed RNA polymerase II subunit RPB2                           |
| <i>Desi_wild_151462</i>   | NA                                  | <i>Ca_desi_Chr04</i> | 151462                  | G/C  | NA                 | INTERGENIC                    | NA                                                                    |

| SNP IDs          | NCBI dbSNP accession IDs (NCBI_SS#) | Chromosomes  | Physical positions (bp) | SNPs | Gene accession IDs | Sequence components of genome | Putative functions                                                   |
|------------------|-------------------------------------|--------------|-------------------------|------|--------------------|-------------------------------|----------------------------------------------------------------------|
| Desi_wild_156944 | NA                                  | Ca_desi_Ch04 | 156944                  | C/T  | Gene_Ca_03891.1    | SYNONYMOUS_CODING             | NA                                                                   |
| Desi_wild_181954 | NA                                  | Ca_desi_Ch04 | 181954                  | C/G  | NA                 | INTERGENIC                    | NA                                                                   |
| Desi_wild_198665 | NA                                  | Ca_desi_Ch04 | 198665                  | C/T  | Gene_Ca_03895.1    | SYNONYMOUS_CODING             | NA                                                                   |
| Desi_wild_198670 | NA                                  | Ca_desi_Ch04 | 198670                  | C/T  | Gene_Ca_03895.1    | SYNONYMOUS_CODING             | NA                                                                   |
| Desi_wild_208481 | NA                                  | Ca_desi_Ch04 | 208481                  | C/A  | Gene_Ca_03897.1    | INTRON                        | 60S ribosomal protein L13a-4                                         |
| Desi_wild_223008 | NA                                  | Ca_desi_Ch04 | 223008                  | A/G  | Gene_Ca_03898.1    | INTRON                        | Small RNA degrading nuclease 3                                       |
| Desi_wild_223012 | NA                                  | Ca_desi_Ch04 | 223012                  | G/T  | Gene_Ca_03898.1    | INTRON                        | Small RNA degrading nuclease 3                                       |
| Desi_wild_223059 | NA                                  | Ca_desi_Ch04 | 223059                  | A/C  | Gene_Ca_03898.1    | INTRON                        | Small RNA degrading nuclease 3                                       |
| Desi_wild_232316 | NA                                  | Ca_desi_Ch04 | 232316                  | A/T  | Gene_Ca_03898.1    | INTRON                        | Small RNA degrading nuclease 3                                       |
| Desi_wild_232426 | NA                                  | Ca_desi_Ch04 | 232426                  | G/T  | Gene_Ca_03898.1    | INTRON                        | Small RNA degrading nuclease 3                                       |
| Desi_wild_241125 | NA                                  | Ca_desi_Ch04 | 241125                  | G/A  | Gene_Ca_03899.1    | INTRON                        | Probable pre-mRNA-splicing factor ATP-dependent RNA helicase         |
| Desi_wild_242163 | NA                                  | Ca_desi_Ch04 | 242163                  | C/A  | Gene_Ca_03899.1    | DOWNSTREAM                    | Probable pre-mRNA-splicing factor ATP-dependent RNA helicase         |
| Desi_wild_242343 | NA                                  | Ca_desi_Ch04 | 242343                  | A/G  | Gene_Ca_03899.1    | DOWNSTREAM                    | Probable pre-mRNA-splicing factor ATP-dependent RNA helicase         |
| Desi_wild_256346 | NA                                  | Ca_desi_Ch04 | 256346                  | C/G  | Gene_Ca_03901.1    | NON_SYNONYMOUS_CODING         | Auxin response factor 5                                              |
| Desi_wild_325947 | NA                                  | Ca_desi_Ch04 | 325947                  | T/G  | Gene_Ca_03903.1    | NON_SYNONYMOUS_CODING         | Filament-like plant protein 4                                        |
| Desi_wild_328232 | NA                                  | Ca_desi_Ch04 | 328232                  | C/T  | Gene_Ca_03903.1    | INTRON                        | Filament-like plant protein 4                                        |
| Desi_wild_328299 | NA                                  | Ca_desi_Ch04 | 328299                  | C/T  | Gene_Ca_03903.1    | INTRON                        | Filament-like plant protein 4                                        |
| Desi_wild_334848 | NA                                  | Ca_desi_Ch04 | 334848                  | T/C  | Gene_Ca_03904.1    | NON_SYNONYMOUS_CODING         | 5'-3' exoribonuclease 3                                              |
| Desi_wild_338006 | NA                                  | Ca_desi_Ch04 | 338006                  | G/A  | Gene_Ca_03904.1    | NON_SYNONYMOUS_CODING         | 5'-3' exoribonuclease 3                                              |
| Desi_wild_340829 | NA                                  | Ca_desi_Ch04 | 340829                  | A/G  | Gene_Ca_03904.1    | INTRON                        | 5'-3' exoribonuclease 3                                              |
| Desi_wild_345799 | NA                                  | Ca_desi_Ch04 | 345799                  | T/C  | Gene_Ca_03904.1    | DOWNSTREAM                    | 5'-3' exoribonuclease 3                                              |
| Desi_wild_345813 | NA                                  | Ca_desi_Ch04 | 345813                  | G/A  | Gene_Ca_03904.1    | DOWNSTREAM                    | 5'-3' exoribonuclease 3                                              |
| Desi_wild_348344 | NA                                  | Ca_desi_Ch04 | 348344                  | G/A  | NA                 | INTERGENIC                    | NA                                                                   |
| Desi_wild_348384 | NA                                  | Ca_desi_Ch04 | 348384                  | C/T  | NA                 | INTERGENIC                    | NA                                                                   |
| Desi_wild_348629 | NA                                  | Ca_desi_Ch04 | 348629                  | G/A  | NA                 | INTERGENIC                    | NA                                                                   |
| Desi_wild_348685 | NA                                  | Ca_desi_Ch04 | 348685                  | T/A  | NA                 | INTERGENIC                    | NA                                                                   |
| Desi_wild_348850 | NA                                  | Ca_desi_Ch04 | 348850                  | C/T  | NA                 | INTERGENIC                    | NA                                                                   |
| Desi_wild_354150 | NA                                  | Ca_desi_Ch04 | 354150                  | A/T  | Gene_Ca_03906.1    | UPSTREAM                      | unknown protein                                                      |
| Desi_wild_367818 | NA                                  | Ca_desi_Ch04 | 367818                  | A/G  | NA                 | INTERGENIC                    | NA                                                                   |
| Desi_wild_367829 | NA                                  | Ca_desi_Ch04 | 367829                  | A/C  | NA                 | INTERGENIC                    | NA                                                                   |
| Desi_wild_367835 | NA                                  | Ca_desi_Ch04 | 367835                  | A/C  | NA                 | INTERGENIC                    | NA                                                                   |
| Desi_wild_367860 | NA                                  | Ca_desi_Ch04 | 367860                  | A/G  | NA                 | INTERGENIC                    | NA                                                                   |
| Desi_wild_367869 | NA                                  | Ca_desi_Ch04 | 367869                  | G/A  | NA                 | INTERGENIC                    | NA                                                                   |
| Desi_wild_367943 | NA                                  | Ca_desi_Ch04 | 367943                  | G/A  | Gene_Ca_03909.1    | DOWNSTREAM                    | tRNA (adenine(58)-N(1))-methyltransferase non-catalytic subunit trm6 |
| Desi_wild_368030 | NA                                  | Ca_desi_Ch04 | 368030                  | T/A  | Gene_Ca_03909.1    | DOWNSTREAM                    | tRNA (adenine(58)-N(1))-methyltransferase non-catalytic subunit trm6 |
| Desi_wild_368038 | NA                                  | Ca_desi_Ch04 | 368038                  | T/C  | Gene_Ca_03909.1    | DOWNSTREAM                    | tRNA (adenine(58)-N(1))-methyltransferase non-catalytic subunit trm6 |
| Desi_wild_368237 | NA                                  | Ca_desi_Ch04 | 368237                  | C/T  | Gene_Ca_03909.1    | DOWNSTREAM                    | tRNA (adenine(58)-N(1))-methyltransferase non-catalytic subunit trm6 |
| Desi_wild_368270 | NA                                  | Ca_desi_Ch04 | 368270                  | A/G  | Gene_Ca_03909.1    | DOWNSTREAM                    | tRNA (adenine(58)-N(1))-methyltransferase non-catalytic subunit trm6 |
| Desi_wild_368285 | NA                                  | Ca_desi_Ch04 | 368285                  | G/C  | Gene_Ca_03909.1    | DOWNSTREAM                    | tRNA (adenine(58)-N(1))-methyltransferase non-catalytic subunit trm6 |
| Desi_wild_368416 | NA                                  | Ca_desi_Ch04 | 368416                  | T/C  | Gene_Ca_03909.1    | DOWNSTREAM                    | tRNA (adenine(58)-N(1))-methyltransferase non-catalytic subunit trm6 |
| Desi_wild_368435 | NA                                  | Ca_desi_Ch04 | 368435                  | T/A  | Gene_Ca_03909.1    | DOWNSTREAM                    | tRNA (adenine(58)-N(1))-methyltransferase non-catalytic subunit trm6 |
| Desi_wild_368438 | NA                                  | Ca_desi_Ch04 | 368438                  | T/G  | Gene_Ca_03909.1    | DOWNSTREAM                    | tRNA (adenine(58)-N(1))-methyltransferase non-catalytic subunit trm6 |
| Desi_wild_368472 | NA                                  | Ca_desi_Ch04 | 368472                  | C/T  | Gene_Ca_03909.1    | DOWNSTREAM                    | tRNA (adenine(58)-N(1))-methyltransferase non-catalytic subunit trm6 |
| Desi_wild_371754 | NA                                  | Ca_desi_Ch04 | 371754                  | A/T  | NA                 | INTERGENIC                    | NA                                                                   |



| SNP IDs                  | NCBI dbSNP accession IDs (NCBI_SS#) | Chromosomes          | Physical positions (bp) | SNPs | Gene accession IDs | Sequence components of genome | Putative functions                                |
|--------------------------|-------------------------------------|----------------------|-------------------------|------|--------------------|-------------------------------|---------------------------------------------------|
| <i>Desi_wild_372646</i>  | NA                                  | <i>Ca_desi_Chr04</i> | 372646                  | T/G  | NA                 | INTERGENIC                    | NA                                                |
| <i>Desi_wild_372779</i>  | NA                                  | <i>Ca_desi_Chr04</i> | 372779                  | G/A  | NA                 | INTERGENIC                    | NA                                                |
| <i>Desi_wild_372806</i>  | NA                                  | <i>Ca_desi_Chr04</i> | 372806                  | T/C  | NA                 | INTERGENIC                    | NA                                                |
| <i>Desi_wild_372810</i>  | NA                                  | <i>Ca_desi_Chr04</i> | 372810                  | G/C  | NA                 | INTERGENIC                    | NA                                                |
| <i>Desi_wild_705227</i>  | NA                                  | <i>Ca_desi_Chr04</i> | 705227                  | G/A  | Gene_Ca_03931.1    | INTRON                        | Lysophosphatidylcholine acyltransferase 1         |
| <i>Desi_wild_705276</i>  | NA                                  | <i>Ca_desi_Chr04</i> | 705276                  | T/G  | Gene_Ca_03931.1    | INTRON                        | Lysophosphatidylcholine acyltransferase 1         |
| <i>Desi_wild_708922</i>  | NA                                  | <i>Ca_desi_Chr04</i> | 708922                  | C/T  | Gene_Ca_03931.1    | INTRON                        | Lysophosphatidylcholine acyltransferase 1         |
| <i>Desi_wild_719505</i>  | NA                                  | <i>Ca_desi_Chr04</i> | 719505                  | G/A  | NA                 | INTERGENIC                    | NA                                                |
| <i>Desi_wild_719545</i>  | NA                                  | <i>Ca_desi_Chr04</i> | 719545                  | A/C  | NA                 | INTERGENIC                    | NA                                                |
| <i>Desi_wild_725822</i>  | NA                                  | <i>Ca_desi_Chr04</i> | 725822                  | G/A  | NA                 | INTERGENIC                    | NA                                                |
| <i>Desi_wild_725870</i>  | NA                                  | <i>Ca_desi_Chr04</i> | 725870                  | C/T  | NA                 | INTERGENIC                    | NA                                                |
| <i>Desi_wild_745631</i>  | NA                                  | <i>Ca_desi_Chr04</i> | 745631                  | G/A  | Gene_Ca_03934.1    | DOWNSTREAM                    | GYF domain-containing protein mpd2                |
| <i>Desi_wild_745785</i>  | NA                                  | <i>Ca_desi_Chr04</i> | 745785                  | T/C  | Gene_Ca_03934.1    | NON_SYNONYMOUS_CODING         | GYF domain-containing protein mpd2                |
| <i>Desi_wild_748395</i>  | NA                                  | <i>Ca_desi_Chr04</i> | 748395                  | A/C  | Gene_Ca_03934.1    | SYNONYMOUS_CODING             | GYF domain-containing protein mpd2                |
| <i>Desi_wild_748617</i>  | NA                                  | <i>Ca_desi_Chr04</i> | 748617                  | T/A  | Gene_Ca_03934.1    | SYNONYMOUS_CODING             | GYF domain-containing protein mpd2                |
| <i>Desi_wild_789720</i>  | NA                                  | <i>Ca_desi_Chr04</i> | 789720                  | T/C  | Gene_Ca_03937.1    | STOP_LOST                     | 60S ribosomal protein L13-1                       |
| <i>Desi_wild_856351</i>  | NA                                  | <i>Ca_desi_Chr04</i> | 856351                  | C/T  | Gene_Ca_03942.1    | SYNONYMOUS_CODING             | Probable beta-1,3-galactosyltransferase 10        |
| <i>Desi_wild_856412</i>  | NA                                  | <i>Ca_desi_Chr04</i> | 856412                  | C/T  | Gene_Ca_03942.1    | INTRON                        | Probable beta-1,3-galactosyltransferase 10        |
| <i>Desi_wild_889499</i>  | NA                                  | <i>Ca_desi_Chr04</i> | 889499                  | C/T  | NA                 | INTERGENIC                    | NA                                                |
| <i>Desi_wild_937980</i>  | NA                                  | <i>Ca_desi_Chr04</i> | 937980                  | A/T  | NA                 | INTERGENIC                    | NA                                                |
| <i>Desi_wild_1022009</i> | NA                                  | <i>Ca_desi_Chr04</i> | 1022009                 | A/G  | NA                 | INTERGENIC                    | NA                                                |
| <i>Desi_wild_1104683</i> | NA                                  | <i>Ca_desi_Chr04</i> | 1104683                 | A/C  | Gene_Ca_03963.1    | SYNONYMOUS_CODING             | Nucleobase-ascorbate transporter 3                |
| <i>Desi_wild_1104716</i> | NA                                  | <i>Ca_desi_Chr04</i> | 1104716                 | C/T  | Gene_Ca_03963.1    | SYNONYMOUS_CODING             | Nucleobase-ascorbate transporter 3                |
| <i>Desi_wild_1105304</i> | NA                                  | <i>Ca_desi_Chr04</i> | 1105304                 | T/C  | Gene_Ca_03963.1    | INTRON                        | Nucleobase-ascorbate transporter 3                |
| <i>Desi_wild_1105335</i> | NA                                  | <i>Ca_desi_Chr04</i> | 1105335                 | A/G  | Gene_Ca_03963.1    | INTRON                        | Nucleobase-ascorbate transporter 3                |
| <i>Desi_wild_1139987</i> | NA                                  | <i>Ca_desi_Chr04</i> | 1139987                 | G/T  | NA                 | INTERGENIC                    | NA                                                |
| <i>Desi_wild_1139996</i> | NA                                  | <i>Ca_desi_Chr04</i> | 1139996                 | C/T  | NA                 | INTERGENIC                    | NA                                                |
| <i>Desi_wild_1140000</i> | NA                                  | <i>Ca_desi_Chr04</i> | 1140000                 | A/G  | NA                 | INTERGENIC                    | NA                                                |
| <i>Desi_wild_1140009</i> | NA                                  | <i>Ca_desi_Chr04</i> | 1140009                 | A/G  | NA                 | INTERGENIC                    | NA                                                |
| <i>Desi_wild_1140012</i> | NA                                  | <i>Ca_desi_Chr04</i> | 1140012                 | A/T  | NA                 | INTERGENIC                    | NA                                                |
| <i>Desi_wild_1140048</i> | NA                                  | <i>Ca_desi_Chr04</i> | 1140048                 | T/C  | NA                 | INTERGENIC                    | NA                                                |
| <i>Desi_wild_1140049</i> | NA                                  | <i>Ca_desi_Chr04</i> | 1140049                 | G/A  | NA                 | INTERGENIC                    | NA                                                |
| <i>Desi_wild_1153292</i> | NA                                  | <i>Ca_desi_Chr04</i> | 1153292                 | G/A  | Gene_Ca_03967.1    | INTRON                        | Protein of unknown function, DUF547               |
| <i>Desi_wild_1153330</i> | NA                                  | <i>Ca_desi_Chr04</i> | 1153330                 | A/T  | Gene_Ca_03967.1    | INTRON                        | Protein of unknown function, DUF547               |
| <i>Desi_wild_1153352</i> | NA                                  | <i>Ca_desi_Chr04</i> | 1153352                 | C/T  | Gene_Ca_03967.1    | INTRON                        | Protein of unknown function, DUF547               |
| <i>Desi_wild_1153521</i> | NA                                  | <i>Ca_desi_Chr04</i> | 1153521                 | A/G  | Gene_Ca_03967.1    | NON_SYNONYMOUS_CODING         | Protein of unknown function, DUF547               |
| <i>Desi_wild_1183700</i> | NA                                  | <i>Ca_desi_Chr04</i> | 1183700                 | A/G  | NA                 | INTERGENIC                    | NA                                                |
| <i>Desi_wild_1183727</i> | NA                                  | <i>Ca_desi_Chr04</i> | 1183727                 | T/G  | NA                 | INTERGENIC                    | NA                                                |
| <i>Desi_wild_1183783</i> | NA                                  | <i>Ca_desi_Chr04</i> | 1183783                 | T/A  | NA                 | INTERGENIC                    | NA                                                |
| <i>Desi_wild_1183831</i> | NA                                  | <i>Ca_desi_Chr04</i> | 1183831                 | G/T  | NA                 | INTERGENIC                    | NA                                                |
| <i>Desi_wild_1183972</i> | NA                                  | <i>Ca_desi_Chr04</i> | 1183972                 | G/A  | NA                 | INTERGENIC                    | NA                                                |
| <i>Desi_wild_1183987</i> | NA                                  | <i>Ca_desi_Chr04</i> | 1183987                 | G/A  | NA                 | INTERGENIC                    | NA                                                |
| <i>Desi_wild_1213556</i> | NA                                  | <i>Ca_desi_Chr04</i> | 1213556                 | T/C  | Gene_Ca_03972.1    | SYNONYMOUS_CODING             | Probable inactive heme oxygenase 2, chloroplastic |
| <i>Desi_wild_1224856</i> | NA                                  | <i>Ca_desi_Chr04</i> | 1224856                 | C/T  | Gene_Ca_03974.1    | INTRON                        | Protein SERAC1                                    |

| SNP IDs           | NCBI dbSNP accession IDs (NCBI_SS#) | Chromosomes  | Physical positions (bp) | SNPs | Gene accession IDs | Sequence components of genome | Putative functions                                  |
|-------------------|-------------------------------------|--------------|-------------------------|------|--------------------|-------------------------------|-----------------------------------------------------|
| Desi_wild_1225164 | NA                                  | Ca_desi_Ch04 | 1225164                 | G/A  | Gene_Ca_03974.1    | INTRON                        | Protein SERAC1                                      |
| Desi_wild_1225211 | NA                                  | Ca_desi_Ch04 | 1225211                 | G/A  | Gene_Ca_03974.1    | INTRON                        | Protein SERAC1                                      |
| Desi_wild_1227014 | NA                                  | Ca_desi_Ch04 | 1227014                 | A/G  | Gene_Ca_03974.1    | SYNONYMOUS_CODING             | Protein SERAC1                                      |
| Desi_wild_1228391 | NA                                  | Ca_desi_Ch04 | 1228391                 | G/A  | Gene_Ca_03974.1    | NON_SYNONYMOUS_CODING         | Protein SERAC1                                      |
| Desi_wild_1248441 | NA                                  | Ca_desi_Ch04 | 1248441                 | T/G  | NA                 | INTERGENIC                    | NA                                                  |
| Desi_wild_1248476 | NA                                  | Ca_desi_Ch04 | 1248476                 | A/G  | NA                 | INTERGENIC                    | NA                                                  |
| Desi_wild_1248565 | NA                                  | Ca_desi_Ch04 | 1248565                 | A/T  | Gene_Ca_03977.1    | DOWNSTREAM                    | Putative uncharacterized protein                    |
| Desi_wild_1274763 | NA                                  | Ca_desi_Ch04 | 1274763                 | A/G  | Gene_Ca_03979.2    | NON_SYNONYMOUS_CODING         | NA                                                  |
| Desi_wild_1323302 | NA                                  | Ca_desi_Ch04 | 1323302                 | A/C  | NA                 | INTERGENIC                    | NA                                                  |
| Desi_wild_1324126 | NA                                  | Ca_desi_Ch04 | 1324126                 | G/A  | NA                 | INTERGENIC                    | NA                                                  |
| Desi_wild_1770493 | NA                                  | Ca_desi_Ch04 | 1770493                 | T/G  | Gene_Ca_03999.1    | NON_SYNONYMOUS_CODING         | DNA topoisomerase 6 subunit A                       |
| Desi_wild_1988478 | NA                                  | Ca_desi_Ch04 | 1988478                 | T/C  | NA                 | INTERGENIC                    | NA                                                  |
| Desi_wild_2040839 | NA                                  | Ca_desi_Ch04 | 2040839                 | A/G  | Gene_Ca_04016.1    | INTRON                        | Mitochondrial ubiquitin ligase activator of NFKB 1  |
| Desi_wild_2042496 | NA                                  | Ca_desi_Ch04 | 2042496                 | T/C  | Gene_Ca_04016.1    | INTRON                        | Mitochondrial ubiquitin ligase activator of NFKB 1  |
| Desi_wild_2042524 | NA                                  | Ca_desi_Ch04 | 2042524                 | T/A  | Gene_Ca_04016.1    | INTRON                        | Mitochondrial ubiquitin ligase activator of NFKB 1  |
| Desi_wild_2099278 | NA                                  | Ca_desi_Ch04 | 2099278                 | A/T  | Gene_Ca_04021.2    | UPSTREAM                      | NA                                                  |
| Desi_wild_2391174 | NA                                  | Ca_desi_Ch04 | 2391174                 | A/G  | NA                 | INTERGENIC                    | NA                                                  |
| Desi_wild_2391276 | NA                                  | Ca_desi_Ch04 | 2391276                 | A/G  | NA                 | INTERGENIC                    | NA                                                  |
| Desi_wild_2391280 | NA                                  | Ca_desi_Ch04 | 2391280                 | C/T  | NA                 | INTERGENIC                    | NA                                                  |
| Desi_wild_2391342 | NA                                  | Ca_desi_Ch04 | 2391342                 | C/G  | NA                 | INTERGENIC                    | NA                                                  |
| Desi_wild_2396211 | NA                                  | Ca_desi_Ch04 | 2396211                 | A/G  | Gene_Ca_04041.1    | NON_SYNONYMOUS_CODING         | Far upstream element-binding protein 1              |
| Desi_wild_2397043 | NA                                  | Ca_desi_Ch04 | 2397043                 | C/A  | Gene_Ca_04041.1    | SYNONYMOUS_CODING             | Far upstream element-binding protein 1              |
| Desi_wild_2410917 | NA                                  | Ca_desi_Ch04 | 2410917                 | C/G  | Gene_Ca_04042.1    | UPSTREAM                      | 26S proteasome non-ATPase regulatory subunit RPN12A |
| Desi_wild_2412911 | NA                                  | Ca_desi_Ch04 | 2412911                 | C/T  | Gene_Ca_04042.1    | UPSTREAM                      | 26S proteasome non-ATPase regulatory subunit RPN12A |
| Desi_wild_2413091 | NA                                  | Ca_desi_Ch04 | 2413091                 | T/C  | NA                 | INTERGENIC                    | NA                                                  |
| Desi_wild_2451209 | NA                                  | Ca_desi_Ch04 | 2451209                 | A/G  | NA                 | INTERGENIC                    | NA                                                  |
| Desi_wild_2451219 | NA                                  | Ca_desi_Ch04 | 2451219                 | C/G  | NA                 | INTERGENIC                    | NA                                                  |
| Desi_wild_2451258 | NA                                  | Ca_desi_Ch04 | 2451258                 | A/G  | NA                 | INTERGENIC                    | NA                                                  |
| Desi_wild_2474475 | NA                                  | Ca_desi_Ch04 | 2474475                 | T/G  | Gene_Ca_04049.1    | INTRON                        | Calcineurin B-like protein 10                       |
| Desi_wild_2511841 | NA                                  | Ca_desi_Ch04 | 2511841                 | G/T  | NA                 | INTERGENIC                    | NA                                                  |
| Desi_wild_2511853 | NA                                  | Ca_desi_Ch04 | 2511853                 | C/T  | NA                 | INTERGENIC                    | NA                                                  |
| Desi_wild_2527581 | NA                                  | Ca_desi_Ch04 | 2527581                 | A/G  | Gene_Ca_04056.2    | DOWNSTREAM                    | NA                                                  |
| Desi_wild_2620933 | NA                                  | Ca_desi_Ch04 | 2620933                 | T/A  | Gene_Ca_04062.1    | NON_SYNONYMOUS_CODING         | Protein of unknown function (DUF1350)               |
| Desi_wild_2620974 | NA                                  | Ca_desi_Ch04 | 2620974                 | A/G  | Gene_Ca_04062.1    | NON_SYNONYMOUS_CODING         | Protein of unknown function (DUF1350)               |
| Desi_wild_2750818 | NA                                  | Ca_desi_Ch04 | 2750818                 | T/C  | Gene_Ca_04069.1    | INTRON                        | Serine/threonine-protein kinase At5g01020           |
| Desi_wild_2750844 | NA                                  | Ca_desi_Ch04 | 2750844                 | G/A  | Gene_Ca_04069.1    | INTRON                        | Serine/threonine-protein kinase At5g01020           |
| Desi_wild_2750863 | NA                                  | Ca_desi_Ch04 | 2750863                 | A/C  | Gene_Ca_04069.1    | INTRON                        | Serine/threonine-protein kinase At5g01020           |
| Desi_wild_2751571 | NA                                  | Ca_desi_Ch04 | 2751571                 | G/T  | Gene_Ca_04069.1    | INTRON                        | Serine/threonine-protein kinase At5g01020           |
| Desi_wild_2761588 | NA                                  | Ca_desi_Ch04 | 2761588                 | C/T  | Gene_Ca_04069.1    | INTRON                        | Serine/threonine-protein kinase At5g01020           |
| Desi_wild_2761592 | NA                                  | Ca_desi_Ch04 | 2761592                 | G/A  | Gene_Ca_04069.1    | INTRON                        | Serine/threonine-protein kinase At5g01020           |
| Desi_wild_2761640 | NA                                  | Ca_desi_Ch04 | 2761640                 | A/G  | Gene_Ca_04069.1    | INTRON                        | Serine/threonine-protein kinase At5g01020           |
| Desi_wild_2761644 | NA                                  | Ca_desi_Ch04 | 2761644                 | A/C  | Gene_Ca_04069.1    | INTRON                        | Serine/threonine-protein kinase At5g01020           |
| Desi_wild_2761654 | NA                                  | Ca_desi_Ch04 | 2761654                 | G/C  | Gene_Ca_04069.1    | INTRON                        | Serine/threonine-protein kinase At5g01020           |
| Desi_wild_2873185 | NA                                  | Ca_desi_Ch04 | 2873185                 | C/T  | Gene_Ca_04080.2    | NON_SYNONYMOUS_CODING         | Two-component response regulator ARR12              |

| SNP IDs                  | NCBI dbSNP accession IDs (NCBI_SS#) | Chromosomes          | Physical positions (bp) | SNPs | Gene accession IDs | Sequence components of genome | Putative functions                       |
|--------------------------|-------------------------------------|----------------------|-------------------------|------|--------------------|-------------------------------|------------------------------------------|
| <i>Desi_wild_2906536</i> | NA                                  | <i>Ca_desi_Chr04</i> | 2906536                 | A/T  | Gene_Ca_04083.1    | INTRON                        | U-box domain-containing protein 6        |
| <i>Desi_wild_2921310</i> | NA                                  | <i>Ca_desi_Chr04</i> | 2921310                 | T/G  | NA                 | INTERGENIC                    | NA                                       |
| <i>Desi_wild_2977367</i> | NA                                  | <i>Ca_desi_Chr04</i> | 2977367                 | G/A  | Gene_Ca_04086.1    | INTRON                        | Transmembrane protein 85                 |
| <i>Desi_wild_2977378</i> | NA                                  | <i>Ca_desi_Chr04</i> | 2977378                 | C/T  | Gene_Ca_04086.1    | INTRON                        | Transmembrane protein 85                 |
| <i>Desi_wild_2999779</i> | NA                                  | <i>Ca_desi_Chr04</i> | 2999779                 | T/C  | Gene_Ca_04089.1    | SYNONYMOUS_CODING             | unknown protein                          |
| <i>Desi_wild_2999797</i> | NA                                  | <i>Ca_desi_Chr04</i> | 2999797                 | T/C  | Gene_Ca_04089.1    | SYNONYMOUS_CODING             | unknown protein                          |
| <i>Desi_wild_2999849</i> | NA                                  | <i>Ca_desi_Chr04</i> | 2999849                 | T/C  | Gene_Ca_04089.1    | INTRON                        | unknown protein                          |
| <i>Desi_wild_3006532</i> | NA                                  | <i>Ca_desi_Chr04</i> | 3006532                 | A/G  | NA                 | INTERGENIC                    | NA                                       |
| <i>Desi_wild_3006619</i> | NA                                  | <i>Ca_desi_Chr04</i> | 3006619                 | A/G  | NA                 | INTERGENIC                    | NA                                       |
| <i>Desi_wild_3006631</i> | NA                                  | <i>Ca_desi_Chr04</i> | 3006631                 | C/A  | NA                 | INTERGENIC                    | NA                                       |
| <i>Desi_wild_3006687</i> | NA                                  | <i>Ca_desi_Chr04</i> | 3006687                 | C/G  | NA                 | INTERGENIC                    | NA                                       |
| <i>Desi_wild_3006693</i> | NA                                  | <i>Ca_desi_Chr04</i> | 3006693                 | C/T  | NA                 | INTERGENIC                    | NA                                       |
| <i>Desi_wild_3010593</i> | NA                                  | <i>Ca_desi_Chr04</i> | 3010593                 | A/G  | Gene_Ca_04090.1    | SYNONYMOUS_CODING             | Probable protein phosphatase 2C 59       |
| <i>Desi_wild_3010670</i> | NA                                  | <i>Ca_desi_Chr04</i> | 3010670                 | T/A  | Gene_Ca_04090.1    | INTRON                        | Probable protein phosphatase 2C 59       |
| <i>Desi_wild_3010706</i> | NA                                  | <i>Ca_desi_Chr04</i> | 3010706                 | C/T  | Gene_Ca_04090.1    | INTRON                        | Probable protein phosphatase 2C 59       |
| <i>Desi_wild_3012464</i> | NA                                  | <i>Ca_desi_Chr04</i> | 3012464                 | G/C  | Gene_Ca_04090.1    | SYNONYMOUS_CODING             | Probable protein phosphatase 2C 59       |
| <i>Desi_wild_3012467</i> | NA                                  | <i>Ca_desi_Chr04</i> | 3012467                 | C/T  | Gene_Ca_04090.1    | SYNONYMOUS_CODING             | Probable protein phosphatase 2C 59       |
| <i>Desi_wild_3012744</i> | NA                                  | <i>Ca_desi_Chr04</i> | 3012744                 | C/G  | Gene_Ca_04090.1    | DOWNSTREAM                    | Probable protein phosphatase 2C 59       |
| <i>Desi_wild_3055686</i> | NA                                  | <i>Ca_desi_Chr04</i> | 3055686                 | A/C  | Gene_Ca_04094.1    | INTRON                        | Ubiquitin carboxyl-terminal hydrolase 19 |
| <i>Desi_wild_3063851</i> | NA                                  | <i>Ca_desi_Chr04</i> | 3063851                 | G/T  | NA                 | INTERGENIC                    | NA                                       |
| <i>Desi_wild_3063854</i> | NA                                  | <i>Ca_desi_Chr04</i> | 3063854                 | G/A  | NA                 | INTERGENIC                    | NA                                       |
| <i>Desi_wild_3063862</i> | NA                                  | <i>Ca_desi_Chr04</i> | 3063862                 | C/A  | NA                 | INTERGENIC                    | NA                                       |
| <i>Desi_wild_3070824</i> | NA                                  | <i>Ca_desi_Chr04</i> | 3070824                 | G/A  | NA                 | INTERGENIC                    | NA                                       |
| <i>Desi_wild_3070859</i> | NA                                  | <i>Ca_desi_Chr04</i> | 3070859                 | T/G  | NA                 | INTERGENIC                    | NA                                       |
| <i>Desi_wild_3070931</i> | NA                                  | <i>Ca_desi_Chr04</i> | 3070931                 | G/A  | NA                 | INTERGENIC                    | NA                                       |
| <i>Desi_wild_3137877</i> | NA                                  | <i>Ca_desi_Chr04</i> | 3137877                 | T/C  | Gene_Ca_04102.1    | INTRON                        | Probable histone H2A variant 3           |
| <i>Desi_wild_3163309</i> | NA                                  | <i>Ca_desi_Chr04</i> | 3163309                 | A/G  | NA                 | INTERGENIC                    | NA                                       |
| <i>Desi_wild_3163344</i> | NA                                  | <i>Ca_desi_Chr04</i> | 3163344                 | G/C  | NA                 | INTERGENIC                    | NA                                       |
| <i>Desi_wild_3248590</i> | NA                                  | <i>Ca_desi_Chr04</i> | 3248590                 | C/T  | Gene_Ca_04110.2    | INTRON                        | NA                                       |
| <i>Desi_wild_3248691</i> | NA                                  | <i>Ca_desi_Chr04</i> | 3248691                 | A/C  | Gene_Ca_04110.2    | INTRON                        | NA                                       |
| <i>Desi_wild_3248697</i> | NA                                  | <i>Ca_desi_Chr04</i> | 3248697                 | G/A  | Gene_Ca_04110.2    | INTRON                        | NA                                       |
| <i>Desi_wild_3248703</i> | NA                                  | <i>Ca_desi_Chr04</i> | 3248703                 | G/A  | Gene_Ca_04110.2    | INTRON                        | NA                                       |
| <i>Desi_wild_3248706</i> | NA                                  | <i>Ca_desi_Chr04</i> | 3248706                 | G/T  | Gene_Ca_04110.2    | INTRON                        | NA                                       |
| <i>Desi_wild_3248712</i> | NA                                  | <i>Ca_desi_Chr04</i> | 3248712                 | G/A  | Gene_Ca_04110.2    | INTRON                        | NA                                       |
| <i>Desi_wild_3248718</i> | NA                                  | <i>Ca_desi_Chr04</i> | 3248718                 | C/A  | Gene_Ca_04110.2    | INTRON                        | NA                                       |
| <i>Desi_wild_3248721</i> | NA                                  | <i>Ca_desi_Chr04</i> | 3248721                 | A/G  | Gene_Ca_04110.2    | INTRON                        | NA                                       |
| <i>Desi_wild_3248724</i> | NA                                  | <i>Ca_desi_Chr04</i> | 3248724                 | A/G  | Gene_Ca_04110.2    | INTRON                        | NA                                       |
| <i>Desi_wild_3248730</i> | NA                                  | <i>Ca_desi_Chr04</i> | 3248730                 | G/A  | Gene_Ca_04110.2    | INTRON                        | NA                                       |
| <i>Desi_wild_3248742</i> | NA                                  | <i>Ca_desi_Chr04</i> | 3248742                 | A/G  | Gene_Ca_04110.2    | INTRON                        | NA                                       |
| <i>Desi_wild_3248802</i> | NA                                  | <i>Ca_desi_Chr04</i> | 3248802                 | T/A  | Gene_Ca_04110.2    | INTRON                        | NA                                       |
| <i>Desi_wild_3248872</i> | NA                                  | <i>Ca_desi_Chr04</i> | 3248872                 | G/C  | Gene_Ca_04110.2    | NON_SYNONYMOUS_CODING         | NA                                       |
| <i>Desi_wild_3248892</i> | NA                                  | <i>Ca_desi_Chr04</i> | 3248892                 | C/T  | Gene_Ca_04110.2    | SYNONYMOUS_CODING             | NA                                       |
| <i>Desi_wild_3342245</i> | NA                                  | <i>Ca_desi_Chr04</i> | 3342245                 | T/C  | Gene_Ca_04115.1    | INTRON                        | Cyclin-A2-2                              |
| <i>Desi_wild_3343721</i> | NA                                  | <i>Ca_desi_Chr04</i> | 3343721                 | A/T  | Gene_Ca_04115.1    | DOWNSTREAM                    | Cyclin-A2-2                              |

| SNP IDs                  | NCBI dbSNP accession IDs (NCBI_SS#) | Chromosomes          | Physical positions (bp) | SNPs | Gene accession IDs | Sequence components of genome | Putative functions                                     |
|--------------------------|-------------------------------------|----------------------|-------------------------|------|--------------------|-------------------------------|--------------------------------------------------------|
| <i>Desi_wild_3343723</i> | NA                                  | <i>Ca_desi_Chr04</i> | 3343723                 | A/G  | Gene_Ca_04115.1    | DOWNSTREAM                    | Cyclin-A2-2                                            |
| <i>Desi_wild_3343827</i> | NA                                  | <i>Ca_desi_Chr04</i> | 3343827                 | G/A  | Gene_Ca_04115.1    | DOWNSTREAM                    | Cyclin-A2-2                                            |
| <i>Desi_wild_3379061</i> | NA                                  | <i>Ca_desi_Chr04</i> | 3379061                 | G/A  | Gene_Ca_04119.1    | INTRON                        | embryo defective 2410                                  |
| <i>Desi_wild_3379084</i> | NA                                  | <i>Ca_desi_Chr04</i> | 3379084                 | T/C  | Gene_Ca_04119.1    | INTRON                        | embryo defective 2410                                  |
| <i>Desi_wild_3379088</i> | NA                                  | <i>Ca_desi_Chr04</i> | 3379088                 | T/C  | Gene_Ca_04119.1    | INTRON                        | embryo defective 2410                                  |
| <i>Desi_wild_3379091</i> | NA                                  | <i>Ca_desi_Chr04</i> | 3379091                 | T/A  | Gene_Ca_04119.1    | INTRON                        | embryo defective 2410                                  |
| <i>Desi_wild_3379100</i> | NA                                  | <i>Ca_desi_Chr04</i> | 3379100                 | C/T  | Gene_Ca_04119.1    | INTRON                        | embryo defective 2410                                  |
| <i>Desi_wild_3379109</i> | NA                                  | <i>Ca_desi_Chr04</i> | 3379109                 | T/C  | Gene_Ca_04119.1    | INTRON                        | embryo defective 2410                                  |
| <i>Desi_wild_3379259</i> | NA                                  | <i>Ca_desi_Chr04</i> | 3379259                 | C/T  | Gene_Ca_04119.1    | INTRON                        | embryo defective 2410                                  |
| <i>Desi_wild_3392791</i> | NA                                  | <i>Ca_desi_Chr04</i> | 3392791                 | G/A  | Gene_Ca_04119.1    | SYNONYMOUS_CODING             | embryo defective 2410                                  |
| <i>Desi_wild_3392815</i> | NA                                  | <i>Ca_desi_Chr04</i> | 3392815                 | C/T  | Gene_Ca_04119.1    | SYNONYMOUS_CODING             | embryo defective 2410                                  |
| <i>Desi_wild_3393909</i> | NA                                  | <i>Ca_desi_Chr04</i> | 3393909                 | C/T  | Gene_Ca_04119.1    | UPSTREAM                      | embryo defective 2410                                  |
| <i>Desi_wild_3394011</i> | NA                                  | <i>Ca_desi_Chr04</i> | 3394011                 | C/T  | Gene_Ca_04119.1    | UPSTREAM                      | embryo defective 2410                                  |
| <i>Desi_wild_3417271</i> | NA                                  | <i>Ca_desi_Chr04</i> | 3417271                 | T/C  | Gene_Ca_04120.1    | DOWNSTREAM                    | Enhancer of polycomb-like transcription factor protein |
| <i>Desi_wild_3417366</i> | NA                                  | <i>Ca_desi_Chr04</i> | 3417366                 | T/C  | Gene_Ca_04120.1    | DOWNSTREAM                    | Enhancer of polycomb-like transcription factor protein |
| <i>Desi_wild_3475260</i> | NA                                  | <i>Ca_desi_Chr04</i> | 3475260                 | A/T  | NA                 | INTERGENIC                    | NA                                                     |
| <i>Desi_wild_3505903</i> | NA                                  | <i>Ca_desi_Chr04</i> | 3505903                 | T/G  | Gene_Ca_04127.1    | UPSTREAM                      | Glucan endo-1,3-beta-glucosidase 5                     |
| <i>Desi_wild_3530355</i> | NA                                  | <i>Ca_desi_Chr04</i> | 3530355                 | C/T  | Gene_Ca_04128.1    | INTRON                        | Protein arginine N-methyltransferase 1.5               |
| <i>Desi_wild_3584126</i> | NA                                  | <i>Ca_desi_Chr04</i> | 3584126                 | C/T  | Gene_Ca_04131.1    | INTRON                        | Protein arginine N-methyltransferase 1.5               |
| <i>Desi_wild_3638653</i> | NA                                  | <i>Ca_desi_Chr04</i> | 3638653                 | A/G  | Gene_Ca_04135.2    | INTRON                        | L-arabinokinase                                        |
| <i>Desi_wild_3638662</i> | NA                                  | <i>Ca_desi_Chr04</i> | 3638662                 | G/T  | Gene_Ca_04135.2    | INTRON                        | L-arabinokinase                                        |
| <i>Desi_wild_3638688</i> | NA                                  | <i>Ca_desi_Chr04</i> | 3638688                 | T/C  | Gene_Ca_04135.2    | INTRON                        | L-arabinokinase                                        |
| <i>Desi_wild_3764973</i> | NA                                  | <i>Ca_desi_Chr04</i> | 3764973                 | T/C  | Gene_Ca_04140.2    | UPSTREAM                      | CCT motif family protein                               |
| <i>Desi_wild_3764979</i> | NA                                  | <i>Ca_desi_Chr04</i> | 3764979                 | A/G  | Gene_Ca_04140.2    | UPSTREAM                      | CCT motif family protein                               |
| <i>Desi_wild_3765009</i> | NA                                  | <i>Ca_desi_Chr04</i> | 3765009                 | T/C  | Gene_Ca_04140.2    | UPSTREAM                      | CCT motif family protein                               |
| <i>Desi_wild_3789531</i> | NA                                  | <i>Ca_desi_Chr04</i> | 3789531                 | C/G  | NA                 | INTERGENIC                    | NA                                                     |
| <i>Desi_wild_3789535</i> | NA                                  | <i>Ca_desi_Chr04</i> | 3789535                 | G/A  | NA                 | INTERGENIC                    | NA                                                     |
| <i>Desi_wild_3798421</i> | NA                                  | <i>Ca_desi_Chr04</i> | 3798421                 | T/G  | Gene_Ca_04143.1    | INTRON                        | rhomboid-like protein 11                               |
| <i>Desi_wild_3798614</i> | NA                                  | <i>Ca_desi_Chr04</i> | 3798614                 | G/A  | Gene_Ca_04143.1    | SYNONYMOUS_CODING             | rhomboid-like protein 11                               |
| <i>Desi_wild_3802820</i> | NA                                  | <i>Ca_desi_Chr04</i> | 3802820                 | C/T  | Gene_Ca_04144.2    | NON_SYNONYMOUS_CODING         | NA                                                     |
| <i>Desi_wild_3859366</i> | NA                                  | <i>Ca_desi_Chr04</i> | 3859366                 | G/A  | Gene_Ca_04149.1    | DOWNSTREAM                    | Dehydration-responsive protein RD22                    |
| <i>Desi_wild_3859391</i> | NA                                  | <i>Ca_desi_Chr04</i> | 3859391                 | C/G  | Gene_Ca_04149.1    | DOWNSTREAM                    | Dehydration-responsive protein RD22                    |
| <i>Desi_wild_3869957</i> | NA                                  | <i>Ca_desi_Chr04</i> | 3869957                 | A/G  | Gene_Ca_04150.1    | SYNONYMOUS_CODING             | DNA polymerase theta                                   |
| <i>Desi_wild_3870983</i> | NA                                  | <i>Ca_desi_Chr04</i> | 3870983                 | T/C  | Gene_Ca_04150.1    | SYNONYMOUS_CODING             | DNA polymerase theta                                   |
| <i>Desi_wild_3870990</i> | NA                                  | <i>Ca_desi_Chr04</i> | 3870990                 | T/C  | Gene_Ca_04150.1    | NON_SYNONYMOUS_CODING         | DNA polymerase theta                                   |
| <i>Desi_wild_3870991</i> | NA                                  | <i>Ca_desi_Chr04</i> | 3870991                 | C/G  | Gene_Ca_04150.1    | NON_SYNONYMOUS_CODING         | DNA polymerase theta                                   |
| <i>Desi_wild_3875100</i> | NA                                  | <i>Ca_desi_Chr04</i> | 3875100                 | C/A  | Gene_Ca_04150.1    | SYNONYMOUS_CODING             | DNA polymerase theta                                   |
| <i>Desi_wild_3875312</i> | NA                                  | <i>Ca_desi_Chr04</i> | 3875312                 | A/C  | Gene_Ca_04150.1    | NON_SYNONYMOUS_CODING         | DNA polymerase theta                                   |
| <i>Desi_wild_3876355</i> | NA                                  | <i>Ca_desi_Chr04</i> | 3876355                 | C/T  | Gene_Ca_04150.1    | NON_SYNONYMOUS_CODING         | DNA polymerase theta                                   |
| <i>Desi_wild_3876413</i> | NA                                  | <i>Ca_desi_Chr04</i> | 3876413                 | G/T  | Gene_Ca_04150.1    | SYNONYMOUS_CODING             | DNA polymerase theta                                   |
| <i>Desi_wild_3904138</i> | NA                                  | <i>Ca_desi_Chr04</i> | 3904138                 | G/A  | Gene_Ca_04152.1    | DOWNSTREAM                    | tracheary element differentiation-related 7            |
| <i>Desi_wild_3904156</i> | NA                                  | <i>Ca_desi_Chr04</i> | 3904156                 | G/A  | Gene_Ca_04152.1    | DOWNSTREAM                    | tracheary element differentiation-related 7            |
| <i>Desi_wild_3920146</i> | NA                                  | <i>Ca_desi_Chr04</i> | 3920146                 | C/A  | Gene_Ca_04153.1    | SYNONYMOUS_CODING             | Group 2 truncated hemoglobin yjbl                      |
| <i>Desi_wild_3920233</i> | NA                                  | <i>Ca_desi_Chr04</i> | 3920233                 | A/G  | Gene_Ca_04153.1    | INTRON                        | Group 2 truncated hemoglobin yjbl                      |

| SNP IDs                  | NCBI dbSNP accession IDs (NCBI_SS#) | Chromosomes          | Physical positions (bp) | SNPs | Gene accession IDs | Sequence components of genome | Putative functions                                                   |
|--------------------------|-------------------------------------|----------------------|-------------------------|------|--------------------|-------------------------------|----------------------------------------------------------------------|
| <i>Desi_wild_3920243</i> | NA                                  | <i>Ca_desi_Chr04</i> | 3920243                 | T/C  | Gene_Ca_04153.1    | INTRON                        | Group 2 truncated hemoglobin yjbl                                    |
| <i>Desi_wild_3954836</i> | NA                                  | <i>Ca_desi_Chr04</i> | 3954836                 | G/A  | NA                 | INTERGENIC                    | NA                                                                   |
| <i>Desi_wild_3954869</i> | NA                                  | <i>Ca_desi_Chr04</i> | 3954869                 | C/T  | Gene_Ca_04157.1    | DOWNSTREAM                    | Uncharacterized membrane protein At1g06890                           |
| <i>Desi_wild_3973039</i> | NA                                  | <i>Ca_desi_Chr04</i> | 3973039                 | A/G  | NA                 | INTERGENIC                    | NA                                                                   |
| <i>Desi_wild_3973090</i> | NA                                  | <i>Ca_desi_Chr04</i> | 3973090                 | G/A  | NA                 | INTERGENIC                    | NA                                                                   |
| <i>Desi_wild_3973125</i> | NA                                  | <i>Ca_desi_Chr04</i> | 3973125                 | G/T  | NA                 | INTERGENIC                    | NA                                                                   |
| <i>Desi_wild_3973199</i> | NA                                  | <i>Ca_desi_Chr04</i> | 3973199                 | A/G  | NA                 | INTERGENIC                    | NA                                                                   |
| <i>Desi_wild_3973201</i> | NA                                  | <i>Ca_desi_Chr04</i> | 3973201                 | G/A  | NA                 | INTERGENIC                    | NA                                                                   |
| <i>Desi_wild_3973216</i> | NA                                  | <i>Ca_desi_Chr04</i> | 3973216                 | T/C  | NA                 | INTERGENIC                    | NA                                                                   |
| <i>Desi_wild_3973220</i> | NA                                  | <i>Ca_desi_Chr04</i> | 3973220                 | T/C  | NA                 | INTERGENIC                    | NA                                                                   |
| <i>Desi_wild_3973229</i> | NA                                  | <i>Ca_desi_Chr04</i> | 3973229                 | A/G  | NA                 | INTERGENIC                    | NA                                                                   |
| <i>Desi_wild_3973244</i> | NA                                  | <i>Ca_desi_Chr04</i> | 3973244                 | C/A  | NA                 | INTERGENIC                    | NA                                                                   |
| <i>Desi_wild_3989841</i> | NA                                  | <i>Ca_desi_Chr04</i> | 3989841                 | C/T  | NA                 | INTERGENIC                    | NA                                                                   |
| <i>Desi_wild_3989878</i> | NA                                  | <i>Ca_desi_Chr04</i> | 3989878                 | T/C  | NA                 | INTERGENIC                    | NA                                                                   |
| <i>Desi_wild_3989880</i> | NA                                  | <i>Ca_desi_Chr04</i> | 3989880                 | C/G  | NA                 | INTERGENIC                    | NA                                                                   |
| <i>Desi_wild_3989893</i> | NA                                  | <i>Ca_desi_Chr04</i> | 3989893                 | G/A  | NA                 | INTERGENIC                    | NA                                                                   |
| <i>Desi_wild_3989903</i> | NA                                  | <i>Ca_desi_Chr04</i> | 3989903                 | C/A  | NA                 | INTERGENIC                    | NA                                                                   |
| <i>Desi_wild_3989919</i> | NA                                  | <i>Ca_desi_Chr04</i> | 3989919                 | T/C  | NA                 | INTERGENIC                    | NA                                                                   |
| <i>Desi_wild_4013371</i> | NA                                  | <i>Ca_desi_Chr04</i> | 4013371                 | T/C  | Gene_Ca_04163.1    | INTRON                        | Probable LRR receptor-like serine/threonine-protein kinase At4g26540 |
| <i>Desi_wild_4013380</i> | NA                                  | <i>Ca_desi_Chr04</i> | 4013380                 | A/G  | Gene_Ca_04163.1    | INTRON                        | Probable LRR receptor-like serine/threonine-protein kinase At4g26540 |
| <i>Desi_wild_4013434</i> | NA                                  | <i>Ca_desi_Chr04</i> | 4013434                 | A/G  | Gene_Ca_04163.1    | INTRON                        | Probable LRR receptor-like serine/threonine-protein kinase At4g26540 |
| <i>Desi_wild_4013436</i> | NA                                  | <i>Ca_desi_Chr04</i> | 4013436                 | A/G  | Gene_Ca_04163.1    | INTRON                        | Probable LRR receptor-like serine/threonine-protein kinase At4g26540 |
| <i>Desi_wild_4013641</i> | NA                                  | <i>Ca_desi_Chr04</i> | 4013641                 | C/T  | Gene_Ca_04163.1    | INTRON                        | Probable LRR receptor-like serine/threonine-protein kinase At4g26540 |
| <i>Desi_wild_4013701</i> | NA                                  | <i>Ca_desi_Chr04</i> | 4013701                 | G/T  | Gene_Ca_04163.1    | INTRON                        | Probable LRR receptor-like serine/threonine-protein kinase At4g26540 |
| <i>Desi_wild_4013740</i> | NA                                  | <i>Ca_desi_Chr04</i> | 4013740                 | C/T  | Gene_Ca_04163.1    | INTRON                        | Probable LRR receptor-like serine/threonine-protein kinase At4g26540 |
| <i>Desi_wild_4013761</i> | NA                                  | <i>Ca_desi_Chr04</i> | 4013761                 | T/A  | Gene_Ca_04163.1    | INTRON                        | Probable LRR receptor-like serine/threonine-protein kinase At4g26540 |
| <i>Desi_wild_4013763</i> | NA                                  | <i>Ca_desi_Chr04</i> | 4013763                 | T/A  | Gene_Ca_04163.1    | INTRON                        | Probable LRR receptor-like serine/threonine-protein kinase At4g26540 |
| <i>Desi_wild_4013765</i> | NA                                  | <i>Ca_desi_Chr04</i> | 4013765                 | A/G  | Gene_Ca_04163.1    | INTRON                        | Probable LRR receptor-like serine/threonine-protein kinase At4g26540 |
| <i>Desi_wild_4013840</i> | NA                                  | <i>Ca_desi_Chr04</i> | 4013840                 | G/C  | Gene_Ca_04163.1    | INTRON                        | Probable LRR receptor-like serine/threonine-protein kinase At4g26540 |
| <i>Desi_wild_4013888</i> | NA                                  | <i>Ca_desi_Chr04</i> | 4013888                 | G/C  | Gene_Ca_04163.1    | INTRON                        | Probable LRR receptor-like serine/threonine-protein kinase At4g26540 |
| <i>Desi_wild_4018698</i> | NA                                  | <i>Ca_desi_Chr04</i> | 4018698                 | A/T  | Gene_Ca_04163.1    | INTRON                        | Probable LRR receptor-like serine/threonine-protein kinase At4g26540 |
| <i>Desi_wild_4018706</i> | NA                                  | <i>Ca_desi_Chr04</i> | 4018706                 | T/C  | Gene_Ca_04163.1    | INTRON                        | Probable LRR receptor-like serine/threonine-protein kinase At4g26540 |
| <i>Desi_wild_4018747</i> | NA                                  | <i>Ca_desi_Chr04</i> | 4018747                 | G/A  | Gene_Ca_04163.1    | INTRON                        | Probable LRR receptor-like serine/threonine-protein kinase At4g26540 |
| <i>Desi_wild_4018828</i> | NA                                  | <i>Ca_desi_Chr04</i> | 4018828                 | G/C  | Gene_Ca_04163.1    | INTRON                        | Probable LRR receptor-like serine/threonine-protein kinase At4g26540 |
| <i>Desi_wild_4018839</i> | NA                                  | <i>Ca_desi_Chr04</i> | 4018839                 | A/T  | Gene_Ca_04163.1    | INTRON                        | Probable LRR receptor-like serine/threonine-protein kinase At4g26540 |
| <i>Desi_wild_4018921</i> | NA                                  | <i>Ca_desi_Chr04</i> | 4018921                 | G/A  | Gene_Ca_04163.1    | INTRON                        | Probable LRR receptor-like serine/threonine-protein kinase At4g26540 |
| <i>Desi_wild_4018936</i> | NA                                  | <i>Ca_desi_Chr04</i> | 4018936                 | A/G  | Gene_Ca_04163.1    | INTRON                        | Probable LRR receptor-like serine/threonine-protein kinase At4g26540 |
| <i>Desi_wild_4053248</i> | NA                                  | <i>Ca_desi_Chr04</i> | 4053248                 | T/G  | Gene_Ca_04167.1    | INTRON                        | Subtilisin-like protease                                             |
| <i>Desi_wild_4053260</i> | NA                                  | <i>Ca_desi_Chr04</i> | 4053260                 | A/G  | Gene_Ca_04167.1    | INTRON                        | Subtilisin-like protease                                             |
| <i>Desi_wild_4053359</i> | NA                                  | <i>Ca_desi_Chr04</i> | 4053359                 | G/A  | Gene_Ca_04167.1    | INTRON                        | Subtilisin-like protease                                             |
| <i>Desi_wild_4053361</i> | NA                                  | <i>Ca_desi_Chr04</i> | 4053361                 | G/T  | Gene_Ca_04167.1    | INTRON                        | Subtilisin-like protease                                             |
| <i>Desi_wild_4053386</i> | NA                                  | <i>Ca_desi_Chr04</i> | 4053386                 | T/C  | Gene_Ca_04167.1    | INTRON                        | Subtilisin-like protease                                             |
| <i>Desi_wild_4087291</i> | NA                                  | <i>Ca_desi_Chr04</i> | 4087291                 | T/G  | Gene_Ca_04170.1    | UPSTREAM                      | NA                                                                   |
| <i>Desi_wild_4087309</i> | NA                                  | <i>Ca_desi_Chr04</i> | 4087309                 | A/C  | Gene_Ca_04170.1    | UPSTREAM                      | NA                                                                   |

| SNP IDs           | NCBI dbSNP accession IDs (NCBI_SS#) | Chromosomes   | Physical positions (bp) | SNPs | Gene accession IDs | Sequence components of genome | Putative functions                               |
|-------------------|-------------------------------------|---------------|-------------------------|------|--------------------|-------------------------------|--------------------------------------------------|
| Desi_wild_4087332 | NA                                  | Ca_desi_Chr04 | 4087332                 | T/C  | Gene_Ca_04170.1    | UPSTREAM                      | NA                                               |
| Desi_wild_4087351 | NA                                  | Ca_desi_Chr04 | 4087351                 | A/G  | Gene_Ca_04170.1    | UPSTREAM                      | NA                                               |
| Desi_wild_4087353 | NA                                  | Ca_desi_Chr04 | 4087353                 | A/T  | Gene_Ca_04170.1    | UPSTREAM                      | NA                                               |
| Desi_wild_4092883 | NA                                  | Ca_desi_Chr04 | 4092883                 | A/C  | NA                 | INTERGENIC                    | NA                                               |
| Desi_wild_4092885 | NA                                  | Ca_desi_Chr04 | 4092885                 | C/T  | NA                 | INTERGENIC                    | NA                                               |
| Desi_wild_4100626 | NA                                  | Ca_desi_Chr04 | 4100626                 | C/T  | NA                 | INTERGENIC                    | NA                                               |
| Desi_wild_4102649 | NA                                  | Ca_desi_Chr04 | 4102649                 | C/G  | NA                 | INTERGENIC                    | NA                                               |
| Desi_wild_4102650 | NA                                  | Ca_desi_Chr04 | 4102650                 | T/A  | NA                 | INTERGENIC                    | NA                                               |
| Desi_wild_4102656 | NA                                  | Ca_desi_Chr04 | 4102656                 | T/C  | NA                 | INTERGENIC                    | NA                                               |
| Desi_wild_4102698 | NA                                  | Ca_desi_Chr04 | 4102698                 | T/C  | NA                 | INTERGENIC                    | NA                                               |
| Desi_wild_4102704 | NA                                  | Ca_desi_Chr04 | 4102704                 | C/T  | NA                 | INTERGENIC                    | NA                                               |
| Desi_wild_4102802 | NA                                  | Ca_desi_Chr04 | 4102802                 | T/C  | NA                 | INTERGENIC                    | NA                                               |
| Desi_wild_4102808 | NA                                  | Ca_desi_Chr04 | 4102808                 | T/A  | NA                 | INTERGENIC                    | NA                                               |
| Desi_wild_4102814 | NA                                  | Ca_desi_Chr04 | 4102814                 | C/T  | NA                 | INTERGENIC                    | NA                                               |
| Desi_wild_4102817 | NA                                  | Ca_desi_Chr04 | 4102817                 | T/A  | NA                 | INTERGENIC                    | NA                                               |
| Desi_wild_4102845 | NA                                  | Ca_desi_Chr04 | 4102845                 | G/A  | NA                 | INTERGENIC                    | NA                                               |
| Desi_wild_4102847 | NA                                  | Ca_desi_Chr04 | 4102847                 | G/T  | NA                 | INTERGENIC                    | NA                                               |
| Desi_wild_4120091 | NA                                  | Ca_desi_Chr04 | 4120091                 | T/G  | Gene_Ca_04176.2    | INTRON                        | NA                                               |
| Desi_wild_4120104 | NA                                  | Ca_desi_Chr04 | 4120104                 | C/A  | Gene_Ca_04176.2    | INTRON                        | NA                                               |
| Desi_wild_4177588 | NA                                  | Ca_desi_Chr04 | 4177588                 | T/C  | Gene_Ca_04180.1    | SYNONYMOUS_CODING             | Probable glycosyltransferase At5g03795           |
| Desi_wild_4218981 | NA                                  | Ca_desi_Chr04 | 4218981                 | A/C  | Gene_Ca_04182.1    | NON_SYNONYMOUS_CODING         | Dehydration-responsive element-binding protein 3 |
| Desi_wild_4219027 | NA                                  | Ca_desi_Chr04 | 4219027                 | A/C  | Gene_Ca_04182.1    | NON_SYNONYMOUS_CODING         | Dehydration-responsive element-binding protein 3 |
| Desi_wild_4219039 | NA                                  | Ca_desi_Chr04 | 4219039                 | G/A  | Gene_Ca_04182.1    | SYNONYMOUS_CODING             | Dehydration-responsive element-binding protein 3 |
| Desi_wild_4219063 | NA                                  | Ca_desi_Chr04 | 4219063                 | A/G  | Gene_Ca_04182.1    | SYNONYMOUS_CODING             | Dehydration-responsive element-binding protein 3 |
| Desi_wild_4272034 | NA                                  | Ca_desi_Chr04 | 4272034                 | G/T  | Gene_Ca_04184.1    | SYNONYMOUS_CODING             | Nuclear pore complex protein Nup85               |
| Desi_wild_4273166 | NA                                  | Ca_desi_Chr04 | 4273166                 | T/C  | Gene_Ca_04184.1    | INTRON                        | Nuclear pore complex protein Nup85               |
| Desi_wild_4273233 | NA                                  | Ca_desi_Chr04 | 4273233                 | A/C  | Gene_Ca_04184.1    | INTRON                        | Nuclear pore complex protein Nup85               |
| Desi_wild_4277475 | NA                                  | Ca_desi_Chr04 | 4277475                 | T/A  | Gene_Ca_04184.1    | INTRON                        | Nuclear pore complex protein Nup85               |
| Desi_wild_4412929 | NA                                  | Ca_desi_Chr04 | 4412929                 | C/G  | Gene_Ca_04188.1    | DOWNSTREAM                    | Protein FAM135B                                  |
| Desi_wild_4412994 | NA                                  | Ca_desi_Chr04 | 4412994                 | C/A  | Gene_Ca_04188.1    | DOWNSTREAM                    | Protein FAM135B                                  |
| Desi_wild_4424788 | NA                                  | Ca_desi_Chr04 | 4424788                 | C/T  | NA                 | INTERGENIC                    | NA                                               |
| Desi_wild_4424794 | NA                                  | Ca_desi_Chr04 | 4424794                 | C/A  | NA                 | INTERGENIC                    | NA                                               |
| Desi_wild_4468697 | NA                                  | Ca_desi_Chr04 | 4468697                 | A/G  | Gene_Ca_04191.1    | INTRON                        | Exosome complex component RRP43                  |
| Desi_wild_4468755 | NA                                  | Ca_desi_Chr04 | 4468755                 | T/C  | Gene_Ca_04191.1    | INTRON                        | Exosome complex component RRP43                  |
| Desi_wild_4482370 | NA                                  | Ca_desi_Chr04 | 4482370                 | G/C  | Gene_Ca_04192.1    | INTRON                        | Thioredoxin-related transmembrane protein 2      |
| Desi_wild_4494863 | NA                                  | Ca_desi_Chr04 | 4494863                 | T/C  | NA                 | INTERGENIC                    | NA                                               |
| Desi_wild_4547865 | NA                                  | Ca_desi_Chr04 | 4547865                 | C/T  | NA                 | INTERGENIC                    | NA                                               |
| Desi_wild_4556180 | NA                                  | Ca_desi_Chr04 | 4556180                 | C/T  | Gene_Ca_04198.1    | INTRON                        | Ras-related protein RABC1                        |
| Desi_wild_4556221 | NA                                  | Ca_desi_Chr04 | 4556221                 | A/T  | Gene_Ca_04198.1    | INTRON                        | Ras-related protein RABC1                        |
| Desi_wild_4592602 | NA                                  | Ca_desi_Chr04 | 4592602                 | G/A  | NA                 | INTERGENIC                    | NA                                               |
| Desi_wild_4592738 | NA                                  | Ca_desi_Chr04 | 4592738                 | T/A  | NA                 | INTERGENIC                    | NA                                               |
| Desi_wild_4592785 | NA                                  | Ca_desi_Chr04 | 4592785                 | T/C  | NA                 | INTERGENIC                    | NA                                               |
| Desi_wild_4613329 | NA                                  | Ca_desi_Chr04 | 4613329                 | A/G  | Gene_Ca_04202.2    | SYNONYMOUS_CODING             | NA                                               |
| Desi_wild_4613716 | NA                                  | Ca_desi_Chr04 | 4613716                 | G/A  | Gene_Ca_04202.2    | STOP_GAINED                   | NA                                               |

| SNP IDs           | NCBI dbSNP accession IDs (NCBI_SS#) | Chromosomes   | Physical positions (bp) | SNPs | Gene accession IDs | Sequence components of genome | Putative functions                                      |
|-------------------|-------------------------------------|---------------|-------------------------|------|--------------------|-------------------------------|---------------------------------------------------------|
| Desi_wild_4652983 | NA                                  | Ca_desi_Chr04 | 4652983                 | A/G  | Gene_Ca_04204.1    | INTRON                        | Probable glucuronosyltransferase GUT1                   |
| Desi_wild_4652989 | NA                                  | Ca_desi_Chr04 | 4652989                 | A/G  | Gene_Ca_04204.1    | INTRON                        | Probable glucuronosyltransferase GUT1                   |
| Desi_wild_4653036 | NA                                  | Ca_desi_Chr04 | 4653036                 | A/C  | Gene_Ca_04204.1    | INTRON                        | Probable glucuronosyltransferase GUT1                   |
| Desi_wild_4687385 | NA                                  | Ca_desi_Chr04 | 4687385                 | C/T  | Gene_Ca_04205.1    | NON_SYNONYMOUS_CODING         | Probable auxin efflux carrier component 6               |
| Desi_wild_4687388 | NA                                  | Ca_desi_Chr04 | 4687388                 | C/G  | Gene_Ca_04205.1    | SYNONYMOUS_CODING             | Probable auxin efflux carrier component 6               |
| Desi_wild_4690525 | NA                                  | Ca_desi_Chr04 | 4690525                 | A/C  | Gene_Ca_04205.1    | INTRON                        | Probable auxin efflux carrier component 6               |
| Desi_wild_4701443 | NA                                  | Ca_desi_Chr04 | 4701443                 | T/A  | Gene_Ca_04206.1    | SYNONYMOUS_CODING             | Acyl-[acyl-carrier-protein] desaturase 6, chloroplastic |
| Desi_wild_4701465 | NA                                  | Ca_desi_Chr04 | 4701465                 | G/C  | Gene_Ca_04206.1    | NON_SYNONYMOUS_CODING         | Acyl-[acyl-carrier-protein] desaturase 6, chloroplastic |
| Desi_wild_4701545 | NA                                  | Ca_desi_Chr04 | 4701545                 | C/G  | Gene_Ca_04206.1    | SYNONYMOUS_CODING             | Acyl-[acyl-carrier-protein] desaturase 6, chloroplastic |
| Desi_wild_4701605 | NA                                  | Ca_desi_Chr04 | 4701605                 | G/A  | Gene_Ca_04206.1    | SYNONYMOUS_CODING             | Acyl-[acyl-carrier-protein] desaturase 6, chloroplastic |
| Desi_wild_4701677 | NA                                  | Ca_desi_Chr04 | 4701677                 | G/A  | Gene_Ca_04206.1    | SYNONYMOUS_CODING             | Acyl-[acyl-carrier-protein] desaturase 6, chloroplastic |
| Desi_wild_4701701 | NA                                  | Ca_desi_Chr04 | 4701701                 | G/A  | Gene_Ca_04206.1    | SYNONYMOUS_CODING             | Acyl-[acyl-carrier-protein] desaturase 6, chloroplastic |
| Desi_wild_4714703 | NA                                  | Ca_desi_Chr04 | 4714703                 | G/A  | Gene_Ca_04208.1    | NON_SYNONYMOUS_CODING         | Glycogenin-1                                            |
| Desi_wild_4765057 | NA                                  | Ca_desi_Chr04 | 4765057                 | T/G  | NA                 | INTERGENIC                    | NA                                                      |
| Desi_wild_4766538 | NA                                  | Ca_desi_Chr04 | 4766538                 | C/T  | Gene_Ca_04211.1    | DOWNSTREAM                    | Uncharacterized protein C57A10.07                       |
| Desi_wild_4768373 | NA                                  | Ca_desi_Chr04 | 4768373                 | C/T  | Gene_Ca_04210.1    | DOWNSTREAM                    | Ribosomal RNA small subunit methyltransferase NEP1      |
| Desi_wild_4768397 | NA                                  | Ca_desi_Chr04 | 4768397                 | C/A  | Gene_Ca_04210.1    | DOWNSTREAM                    | Ribosomal RNA small subunit methyltransferase NEP1      |
| Desi_wild_4768426 | NA                                  | Ca_desi_Chr04 | 4768426                 | A/C  | Gene_Ca_04210.1    | DOWNSTREAM                    | Ribosomal RNA small subunit methyltransferase NEP1      |
| Desi_wild_4768614 | NA                                  | Ca_desi_Chr04 | 4768614                 | G/A  | Gene_Ca_04210.1    | DOWNSTREAM                    | Ribosomal RNA small subunit methyltransferase NEP1      |
| Desi_wild_4768618 | NA                                  | Ca_desi_Chr04 | 4768618                 | A/C  | Gene_Ca_04210.1    | DOWNSTREAM                    | Ribosomal RNA small subunit methyltransferase NEP1      |
| Desi_wild_4768628 | NA                                  | Ca_desi_Chr04 | 4768628                 | A/G  | Gene_Ca_04210.1    | DOWNSTREAM                    | Ribosomal RNA small subunit methyltransferase NEP1      |
| Desi_wild_4768871 | NA                                  | Ca_desi_Chr04 | 4768871                 | T/C  | Gene_Ca_04210.1    | DOWNSTREAM                    | Ribosomal RNA small subunit methyltransferase NEP1      |
| Desi_wild_4768872 | NA                                  | Ca_desi_Chr04 | 4768872                 | T/A  | Gene_Ca_04210.1    | DOWNSTREAM                    | Ribosomal RNA small subunit methyltransferase NEP1      |
| Desi_wild_4768903 | NA                                  | Ca_desi_Chr04 | 4768903                 | A/G  | NA                 | INTERGENIC                    | NA                                                      |
| Desi_wild_4768936 | NA                                  | Ca_desi_Chr04 | 4768936                 | A/T  | NA                 | INTERGENIC                    | NA                                                      |
| Desi_wild_4768952 | NA                                  | Ca_desi_Chr04 | 4768952                 | C/G  | NA                 | INTERGENIC                    | NA                                                      |
| Desi_wild_4769476 | NA                                  | Ca_desi_Chr04 | 4769476                 | G/A  | NA                 | INTERGENIC                    | NA                                                      |
| Desi_wild_4769498 | NA                                  | Ca_desi_Chr04 | 4769498                 | G/A  | NA                 | INTERGENIC                    | NA                                                      |
| Desi_wild_4769516 | NA                                  | Ca_desi_Chr04 | 4769516                 | G/C  | NA                 | INTERGENIC                    | NA                                                      |
| Desi_wild_4769524 | NA                                  | Ca_desi_Chr04 | 4769524                 | G/A  | NA                 | INTERGENIC                    | NA                                                      |
| Desi_wild_4769567 | NA                                  | Ca_desi_Chr04 | 4769567                 | G/A  | NA                 | INTERGENIC                    | NA                                                      |
| Desi_wild_4769570 | NA                                  | Ca_desi_Chr04 | 4769570                 | A/G  | NA                 | INTERGENIC                    | NA                                                      |
| Desi_wild_4771448 | NA                                  | Ca_desi_Chr04 | 4771448                 | T/C  | NA                 | INTERGENIC                    | NA                                                      |
| Desi_wild_4771473 | NA                                  | Ca_desi_Chr04 | 4771473                 | T/A  | NA                 | INTERGENIC                    | NA                                                      |
| Desi_wild_4771490 | NA                                  | Ca_desi_Chr04 | 4771490                 | C/T  | NA                 | INTERGENIC                    | NA                                                      |
| Desi_wild_4771528 | NA                                  | Ca_desi_Chr04 | 4771528                 | G/T  | NA                 | INTERGENIC                    | NA                                                      |
| Desi_wild_4771548 | NA                                  | Ca_desi_Chr04 | 4771548                 | T/C  | NA                 | INTERGENIC                    | NA                                                      |
| Desi_wild_4771577 | NA                                  | Ca_desi_Chr04 | 4771577                 | A/G  | NA                 | INTERGENIC                    | NA                                                      |
| Desi_wild_4771738 | NA                                  | Ca_desi_Chr04 | 4771738                 | C/T  | NA                 | INTERGENIC                    | NA                                                      |
| Desi_wild_4817421 | NA                                  | Ca_desi_Chr04 | 4817421                 | C/T  | Gene_Ca_04213.1    | INTRON                        | NA                                                      |
| Desi_wild_4817433 | NA                                  | Ca_desi_Chr04 | 4817433                 | G/C  | Gene_Ca_04213.1    | INTRON                        | NA                                                      |
| Desi_wild_4817665 | NA                                  | Ca_desi_Chr04 | 4817665                 | C/T  | Gene_Ca_04213.1    | INTRON                        | NA                                                      |
| Desi_wild_4837373 | NA                                  | Ca_desi_Chr04 | 4837373                 | G/T  | Gene_Ca_04215.1    | NON_SYNONYMOUS_CODING         | Filament-like plant protein (Fragment)                  |
| Desi_wild_4837427 | NA                                  | Ca_desi_Chr04 | 4837427                 | C/G  | Gene_Ca_04215.1    | SYNONYMOUS_CODING             | Filament-like plant protein (Fragment)                  |



| SNP IDs           | NCBI dbSNP accession IDs (NCBI_SS#) | Chromosomes   | Physical positions (bp) | SNPs | Gene accession IDs | Sequence components of genome | Putative functions                                                       |
|-------------------|-------------------------------------|---------------|-------------------------|------|--------------------|-------------------------------|--------------------------------------------------------------------------|
| Desi_wild_4837547 | NA                                  | Ca_desi_Chr04 | 4837547                 | T/A  | Gene_Ca_04215.1    | SYNONYMOUS_CODING             | Filament-like plant protein (Fragment)                                   |
| Desi_wild_4837602 | NA                                  | Ca_desi_Chr04 | 4837602                 | G/A  | Gene_Ca_04215.1    | NON_SYNONYMOUS_CODING         | Filament-like plant protein (Fragment)                                   |
| Desi_wild_4837616 | NA                                  | Ca_desi_Chr04 | 4837616                 | G/A  | Gene_Ca_04215.1    | SYNONYMOUS_CODING             | Filament-like plant protein (Fragment)                                   |
| Desi_wild_4878370 | NA                                  | Ca_desi_Chr04 | 4878370                 | A/T  | Gene_Ca_04220.1    | DOWNSTREAM                    | Pyridine nucleotide-disulfide oxidoreductase domain-containing protein 2 |
| Desi_wild_4878419 | NA                                  | Ca_desi_Chr04 | 4878419                 | T/C  | Gene_Ca_04220.1    | DOWNSTREAM                    | Pyridine nucleotide-disulfide oxidoreductase domain-containing protein 2 |
| Desi_wild_4882504 | NA                                  | Ca_desi_Chr04 | 4882504                 | A/G  | Gene_Ca_04220.1    | INTRON                        | Pyridine nucleotide-disulfide oxidoreductase domain-containing protein 2 |
| Desi_wild_4905849 | NA                                  | Ca_desi_Chr04 | 4905849                 | A/G  | Gene_Ca_04222.1    | INTRON                        | Cell division control protein 48 homolog C                               |
| Desi_wild_4905870 | NA                                  | Ca_desi_Chr04 | 4905870                 | G/A  | Gene_Ca_04222.1    | INTRON                        | Cell division control protein 48 homolog C                               |
| Desi_wild_4909312 | NA                                  | Ca_desi_Chr04 | 4909312                 | C/A  | Gene_Ca_04222.1    | INTRON                        | Cell division control protein 48 homolog C                               |
| Desi_wild_4936836 | NA                                  | Ca_desi_Chr04 | 4936836                 | G/A  | NA                 | INTERGENIC                    | NA                                                                       |
| Desi_wild_4939744 | NA                                  | Ca_desi_Chr04 | 4939744                 | A/T  | NA                 | INTERGENIC                    | NA                                                                       |
| Desi_wild_4939806 | NA                                  | Ca_desi_Chr04 | 4939806                 | A/C  | NA                 | INTERGENIC                    | NA                                                                       |
| Desi_wild_4939952 | NA                                  | Ca_desi_Chr04 | 4939952                 | C/T  | NA                 | INTERGENIC                    | NA                                                                       |
| Desi_wild_4939984 | NA                                  | Ca_desi_Chr04 | 4939984                 | C/T  | NA                 | INTERGENIC                    | NA                                                                       |
| Desi_wild_4939986 | NA                                  | Ca_desi_Chr04 | 4939986                 | C/G  | NA                 | INTERGENIC                    | NA                                                                       |
| Desi_wild_5028157 | NA                                  | Ca_desi_Chr04 | 5028157                 | C/T  | Gene_Ca_04230.1    | SYNONYMOUS_CODING             | NA                                                                       |
| Desi_wild_5028184 | NA                                  | Ca_desi_Chr04 | 5028184                 | T/C  | Gene_Ca_04230.1    | SYNONYMOUS_CODING             | Two-component response regulator ARR2                                    |
| Desi_wild_5032143 | NA                                  | Ca_desi_Chr04 | 5032143                 | A/G  | Gene_Ca_04230.1    | DOWNSTREAM                    | Two-component response regulator ARR2                                    |
| Desi_wild_5032208 | NA                                  | Ca_desi_Chr04 | 5032208                 | C/T  | Gene_Ca_04230.1    | DOWNSTREAM                    | Two-component response regulator ARR2                                    |
| Desi_wild_5075688 | NA                                  | Ca_desi_Chr04 | 5075688                 | A/T  | Gene_Ca_04232.1    | INTRON                        | RNA-dependent RNA polymerase 1                                           |
| Desi_wild_5075689 | NA                                  | Ca_desi_Chr04 | 5075689                 | A/T  | Gene_Ca_04232.1    | INTRON                        | RNA-dependent RNA polymerase 1                                           |
| Desi_wild_5075690 | NA                                  | Ca_desi_Chr04 | 5075690                 | A/T  | Gene_Ca_04232.1    | INTRON                        | RNA-dependent RNA polymerase 1                                           |
| Desi_wild_5077401 | NA                                  | Ca_desi_Chr04 | 5077401                 | T/A  | Gene_Ca_04232.1    | SYNONYMOUS_CODING             | RNA-dependent RNA polymerase 1                                           |
| Desi_wild_5097092 | NA                                  | Ca_desi_Chr04 | 5097092                 | A/G  | Gene_Ca_04232.1    | INTRON                        | RNA-dependent RNA polymerase 1                                           |
| Desi_wild_5097123 | NA                                  | Ca_desi_Chr04 | 5097123                 | C/G  | Gene_Ca_04232.1    | INTRON                        | RNA-dependent RNA polymerase 1                                           |
| Desi_wild_5097133 | NA                                  | Ca_desi_Chr04 | 5097133                 | C/T  | Gene_Ca_04232.1    | INTRON                        | RNA-dependent RNA polymerase 1                                           |
| Desi_wild_5097206 | NA                                  | Ca_desi_Chr04 | 5097206                 | C/A  | Gene_Ca_04232.1    | SYNONYMOUS_CODING             | RNA-dependent RNA polymerase 1                                           |
| Desi_wild_5097212 | NA                                  | Ca_desi_Chr04 | 5097212                 | A/C  | Gene_Ca_04232.1    | NON_SYNONYMOUS_CODING         | RNA-dependent RNA polymerase 1                                           |
| Desi_wild_5097230 | NA                                  | Ca_desi_Chr04 | 5097230                 | G/C  | Gene_Ca_04232.1    | NON_SYNONYMOUS_CODING         | RNA-dependent RNA polymerase 1                                           |
| Desi_wild_5174844 | NA                                  | Ca_desi_Chr04 | 5174844                 | A/T  | Gene_Ca_04236.1    | INTRON                        | Mitochondrial inner membrane protease ATP23                              |
| Desi_wild_5408655 | NA                                  | Ca_desi_Chr04 | 5408655                 | T/C  | Gene_Ca_04241.1    | INTRON                        | Cyclin-J18-like                                                          |
| Desi_wild_5408846 | NA                                  | Ca_desi_Chr04 | 5408846                 | A/T  | Gene_Ca_04241.1    | INTRON                        | Cyclin-J18-like                                                          |
| Desi_wild_5408962 | NA                                  | Ca_desi_Chr04 | 5408962                 | C/T  | Gene_Ca_04241.1    | SYNONYMOUS_CODING             | Cyclin-J18-like                                                          |
| Desi_wild_5409102 | NA                                  | Ca_desi_Chr04 | 5409102                 | G/A  | Gene_Ca_04241.1    | INTRON                        | Cyclin-J18-like                                                          |
| Desi_wild_5410884 | NA                                  | Ca_desi_Chr04 | 5410884                 | C/T  | Gene_Ca_04241.1    | DOWNSTREAM                    | Cyclin-J18-like                                                          |
| Desi_wild_5450691 | NA                                  | Ca_desi_Chr04 | 5450691                 | C/A  | Gene_Ca_04242.1    | SYNONYMOUS_CODING             | Phenylalanine ammonia-lyase class 2                                      |
| Desi_wild_5533572 | NA                                  | Ca_desi_Chr04 | 5533572                 | A/C  | Gene_Ca_04247.1    | NON_SYNONYMOUS_CODING         | Putative white-brown complex homolog protein 30                          |
| Desi_wild_5610412 | NA                                  | Ca_desi_Chr04 | 5610412                 | C/T  | Gene_Ca_04253.1    | SYNONYMOUS_CODING             | Cell division cycle protein 48 homolog                                   |
| Desi_wild_5610421 | NA                                  | Ca_desi_Chr04 | 5610421                 | A/G  | Gene_Ca_04253.1    | SYNONYMOUS_CODING             | Cell division cycle protein 48 homolog                                   |
| Desi_wild_5610427 | NA                                  | Ca_desi_Chr04 | 5610427                 | T/C  | Gene_Ca_04253.1    | SYNONYMOUS_CODING             | Cell division cycle protein 48 homolog                                   |
| Desi_wild_5610430 | NA                                  | Ca_desi_Chr04 | 5610430                 | C/T  | Gene_Ca_04253.1    | SYNONYMOUS_CODING             | Cell division cycle protein 48 homolog                                   |
| Desi_wild_5610436 | NA                                  | Ca_desi_Chr04 | 5610436                 | T/C  | Gene_Ca_04253.1    | SYNONYMOUS_CODING             | Cell division cycle protein 48 homolog                                   |
| Desi_wild_5610468 | NA                                  | Ca_desi_Chr04 | 5610468                 | G/T  | Gene_Ca_04253.1    | SYNONYMOUS_CODING             | Cell division cycle protein 48 homolog                                   |
| Desi_wild_5610487 | NA                                  | Ca_desi_Chr04 | 5610487                 | C/T  | Gene_Ca_04253.1    | SYNONYMOUS_CODING             | Cell division cycle protein 48 homolog                                   |

| SNP IDs           | NCBI dbSNP accession IDs (NCBI_SS#) | Chromosomes   | Physical positions (bp) | SNPs | Gene accession IDs | Sequence components of genome | Putative functions                       |
|-------------------|-------------------------------------|---------------|-------------------------|------|--------------------|-------------------------------|------------------------------------------|
| Desi_wild_5610496 | NA                                  | Ca_desi_Chr04 | 5610496                 | A/G  | Gene_Ca_04253.1    | SYNONYMOUS_CODING             | Cell division cycle protein 48 homolog   |
| Desi_wild_5678590 | NA                                  | Ca_desi_Chr04 | 5678590                 | G/A  | Gene_Ca_04260.1    | DOWNSTREAM                    | HR-like lesion-inducing protein-related  |
| Desi_wild_5678705 | NA                                  | Ca_desi_Chr04 | 5678705                 | T/A  | Gene_Ca_04260.1    | DOWNSTREAM                    | HR-like lesion-inducing protein-related  |
| Desi_wild_5678706 | NA                                  | Ca_desi_Chr04 | 5678706                 | T/G  | Gene_Ca_04260.1    | DOWNSTREAM                    | HR-like lesion-inducing protein-related  |
| Desi_wild_5678708 | NA                                  | Ca_desi_Chr04 | 5678708                 | T/A  | Gene_Ca_04260.1    | DOWNSTREAM                    | HR-like lesion-inducing protein-related  |
| Desi_wild_5949721 | NA                                  | Ca_desi_Chr04 | 5949721                 | G/A  | Gene_Ca_04270.1    | INTRON                        | NA                                       |
| Desi_wild_5949743 | NA                                  | Ca_desi_Chr04 | 5949743                 | T/G  | Gene_Ca_04270.1    | INTRON                        | NA                                       |
| Desi_wild_5951756 | NA                                  | Ca_desi_Chr04 | 5951756                 | A/G  | Gene_Ca_04270.1    | INTRON                        | NA                                       |
| Desi_wild_5951768 | NA                                  | Ca_desi_Chr04 | 5951768                 | T/C  | Gene_Ca_04270.1    | INTRON                        | NA                                       |
| Desi_wild_6008524 | NA                                  | Ca_desi_Chr04 | 6008524                 | C/G  | Gene_Ca_04270.1    | INTRON                        | NA                                       |
| Desi_wild_6008718 | NA                                  | Ca_desi_Chr04 | 6008718                 | C/G  | Gene_Ca_04270.1    | INTRON                        | NA                                       |
| Desi_wild_6017153 | NA                                  | Ca_desi_Chr04 | 6017153                 | T/G  | Gene_Ca_04270.1    | INTRON                        | NA                                       |
| Desi_wild_6110371 | NA                                  | Ca_desi_Chr04 | 6110371                 | A/G  | NA                 | INTERGENIC                    | NA                                       |
| Desi_wild_6278573 | NA                                  | Ca_desi_Chr04 | 6278573                 | C/A  | NA                 | INTERGENIC                    | NA                                       |
| Desi_wild_6325277 | NA                                  | Ca_desi_Chr04 | 6325277                 | T/G  | NA                 | INTERGENIC                    | NA                                       |
| Desi_wild_6512019 | NA                                  | Ca_desi_Chr04 | 6512019                 | G/A  | Gene_Ca_04287.1    | INTRON                        | Ubiquitin carboxyl-terminal hydrolase 13 |
| Desi_wild_6512987 | NA                                  | Ca_desi_Chr04 | 6512987                 | A/C  | Gene_Ca_04287.1    | INTRON                        | Ubiquitin carboxyl-terminal hydrolase 13 |
| Desi_wild_6522272 | NA                                  | Ca_desi_Chr04 | 6522272                 | T/A  | Gene_Ca_04287.1    | SYNONYMOUS_CODING             | Ubiquitin carboxyl-terminal hydrolase 13 |
| Desi_wild_6723138 | NA                                  | Ca_desi_Chr04 | 6723138                 | T/G  | Gene_Ca_04294.1    | INTRON                        | Folylpolyglutamate synthase              |
| Desi_wild_6761736 | NA                                  | Ca_desi_Chr04 | 6761736                 | C/T  | NA                 | INTERGENIC                    | NA                                       |
| Desi_wild_6849588 | NA                                  | Ca_desi_Chr04 | 6849588                 | T/C  | NA                 | INTERGENIC                    | NA                                       |
| Desi_wild_6849789 | NA                                  | Ca_desi_Chr04 | 6849789                 | T/G  | NA                 | INTERGENIC                    | NA                                       |
| Desi_wild_7034202 | NA                                  | Ca_desi_Chr04 | 7034202                 | C/T  | Gene_Ca_04308.1    | INTRON                        | DNA helicase INO80                       |
| Desi_wild_7035560 | NA                                  | Ca_desi_Chr04 | 7035560                 | C/A  | Gene_Ca_04308.1    | SYNONYMOUS_CODING             | DNA helicase INO80                       |
| Desi_wild_7035565 | NA                                  | Ca_desi_Chr04 | 7035565                 | A/G  | Gene_Ca_04308.1    | SYNONYMOUS_CODING             | DNA helicase INO80                       |
| Desi_wild_7035566 | NA                                  | Ca_desi_Chr04 | 7035566                 | C/T  | Gene_Ca_04308.1    | SYNONYMOUS_CODING             | DNA helicase INO80                       |
| Desi_wild_7069146 | NA                                  | Ca_desi_Chr04 | 7069146                 | T/C  | NA                 | INTERGENIC                    | NA                                       |
| Desi_wild_7069188 | NA                                  | Ca_desi_Chr04 | 7069188                 | G/T  | NA                 | INTERGENIC                    | NA                                       |
| Desi_wild_7175365 | NA                                  | Ca_desi_Chr04 | 7175365                 | A/T  | Gene_Ca_04316.1    | INTRON                        | Casein kinase I homolog 2                |
| Desi_wild_7176085 | NA                                  | Ca_desi_Chr04 | 7176085                 | T/G  | Gene_Ca_04316.1    | NON_SYNONYMOUS_CODING         | Casein kinase I homolog 2                |
| Desi_wild_7262099 | NA                                  | Ca_desi_Chr04 | 7262099                 | A/G  | Gene_Ca_04324.1    | SYNONYMOUS_CODING             | Callose synthase 3                       |
| Desi_wild_7267132 | NA                                  | Ca_desi_Chr04 | 7267132                 | G/A  | Gene_Ca_04324.1    | INTRON                        | Callose synthase 3                       |
| Desi_wild_7267139 | NA                                  | Ca_desi_Chr04 | 7267139                 | C/T  | Gene_Ca_04324.1    | INTRON                        | Callose synthase 3                       |
| Desi_wild_7344455 | NA                                  | Ca_desi_Chr04 | 7344455                 | T/G  | Gene_Ca_04327.1    | SYNONYMOUS_CODING             | Plasma membrane ATPase                   |
| Desi_wild_7344458 | NA                                  | Ca_desi_Chr04 | 7344458                 | A/T  | Gene_Ca_04327.1    | SYNONYMOUS_CODING             | Plasma membrane ATPase                   |
| Desi_wild_7344465 | NA                                  | Ca_desi_Chr04 | 7344465                 | G/A  | Gene_Ca_04327.1    | NON_SYNONYMOUS_CODING         | Plasma membrane ATPase                   |
| Desi_wild_7344467 | NA                                  | Ca_desi_Chr04 | 7344467                 | T/C  | Gene_Ca_04327.1    | SYNONYMOUS_CODING             | Plasma membrane ATPase                   |
| Desi_wild_7344476 | NA                                  | Ca_desi_Chr04 | 7344476                 | T/C  | Gene_Ca_04327.1    | SYNONYMOUS_CODING             | Plasma membrane ATPase                   |
| Desi_wild_7344485 | NA                                  | Ca_desi_Chr04 | 7344485                 | C/A  | Gene_Ca_04327.1    | SYNONYMOUS_CODING             | Plasma membrane ATPase                   |
| Desi_wild_7344488 | NA                                  | Ca_desi_Chr04 | 7344488                 | A/T  | Gene_Ca_04327.1    | SYNONYMOUS_CODING             | Plasma membrane ATPase                   |
| Desi_wild_7344503 | NA                                  | Ca_desi_Chr04 | 7344503                 | A/G  | Gene_Ca_04327.1    | SYNONYMOUS_CODING             | Plasma membrane ATPase                   |
| Desi_wild_7344506 | NA                                  | Ca_desi_Chr04 | 7344506                 | A/G  | Gene_Ca_04327.1    | SYNONYMOUS_CODING             | Plasma membrane ATPase                   |
| Desi_wild_7359134 | NA                                  | Ca_desi_Chr04 | 7359134                 | T/C  | Gene_Ca_04329.1    | NON_SYNONYMOUS_CODING         | Plasma membrane ATPase 4                 |
| Desi_wild_7359771 | NA                                  | Ca_desi_Chr04 | 7359771                 | T/C  | Gene_Ca_04329.1    | SYNONYMOUS_CODING             | Plasma membrane ATPase 4                 |

| SNP IDs           | NCBI dbSNP accession IDs (NCBI_SS#) | Chromosomes     | Physical positions (bp) | SNPs | Gene accession IDs | Sequence components of genome | Putative functions                                    |
|-------------------|-------------------------------------|-----------------|-------------------------|------|--------------------|-------------------------------|-------------------------------------------------------|
| Desi_wild_7359774 | NA                                  | Ca_desi_Chrom04 | 7359774                 | T/C  | Gene_Ca_04329.1    | SYNONYMOUS_CODING             | Plasma membrane ATPase 4                              |
| Desi_wild_7359789 | NA                                  | Ca_desi_Chrom04 | 7359789                 | T/A  | Gene_Ca_04329.1    | SYNONYMOUS_CODING             | Plasma membrane ATPase 4                              |
| Desi_wild_7359792 | NA                                  | Ca_desi_Chrom04 | 7359792                 | G/T  | Gene_Ca_04329.1    | SYNONYMOUS_CODING             | Plasma membrane ATPase 4                              |
| Desi_wild_7359801 | NA                                  | Ca_desi_Chrom04 | 7359801                 | A/G  | Gene_Ca_04329.1    | SYNONYMOUS_CODING             | Plasma membrane ATPase 4                              |
| Desi_wild_7359810 | NA                                  | Ca_desi_Chrom04 | 7359810                 | A/G  | Gene_Ca_04329.1    | SYNONYMOUS_CODING             | Plasma membrane ATPase 4                              |
| Desi_wild_7359812 | NA                                  | Ca_desi_Chrom04 | 7359812                 | C/T  | Gene_Ca_04329.1    | NON_SYNONYMOUS_CODING         | Plasma membrane ATPase 4                              |
| Desi_wild_7359819 | NA                                  | Ca_desi_Chrom04 | 7359819                 | T/A  | Gene_Ca_04329.1    | SYNONYMOUS_CODING             | Plasma membrane ATPase 4                              |
| Desi_wild_7359822 | NA                                  | Ca_desi_Chrom04 | 7359822                 | A/C  | Gene_Ca_04329.1    | SYNONYMOUS_CODING             | Plasma membrane ATPase 4                              |
| Desi_wild_7359852 | NA                                  | Ca_desi_Chrom04 | 7359852                 | A/C  | Gene_Ca_04329.1    | NON_SYNONYMOUS_CODING         | Plasma membrane ATPase 4                              |
| Desi_wild_7491358 | NA                                  | Ca_desi_Chrom04 | 7491358                 | C/A  | Gene_Ca_04343.1    | UPSTREAM                      | Pentatricopeptide repeat-containing protein At5g24830 |
| Desi_wild_7509507 | NA                                  | Ca_desi_Chrom04 | 7509507                 | A/G  | Gene_Ca_04345.1    | NON_SYNONYMOUS_CODING         | Ubiquitin carboxyl-terminal hydrolase 26              |
| Desi_wild_7509523 | NA                                  | Ca_desi_Chrom04 | 7509523                 | A/T  | Gene_Ca_04345.1    | INTRON                        | Ubiquitin carboxyl-terminal hydrolase 26              |
| Desi_wild_7601238 | NA                                  | Ca_desi_Chrom04 | 7601238                 | A/G  | NA                 | INTERGENIC                    | NA                                                    |
| Desi_wild_7601504 | NA                                  | Ca_desi_Chrom04 | 7601504                 | G/T  | NA                 | INTERGENIC                    | NA                                                    |
| Desi_wild_7601698 | NA                                  | Ca_desi_Chrom04 | 7601698                 | A/C  | NA                 | INTERGENIC                    | NA                                                    |
| Desi_wild_7632892 | NA                                  | Ca_desi_Chrom04 | 7632892                 | T/G  | Gene_Ca_04363.1    | DOWNSTREAM                    | Lysine-specific demethylase 3B                        |
| Desi_wild_7643273 | NA                                  | Ca_desi_Chrom04 | 7643273                 | C/T  | Gene_Ca_04363.1    | INTRON                        | Lysine-specific demethylase 3B                        |
| Desi_wild_7643413 | NA                                  | Ca_desi_Chrom04 | 7643413                 | C/T  | Gene_Ca_04363.1    | INTRON                        | Lysine-specific demethylase 3B                        |
| Desi_wild_7644571 | NA                                  | Ca_desi_Chrom04 | 7644571                 | C/G  | Gene_Ca_04363.1    | INTRON                        | Lysine-specific demethylase 3B                        |
| Desi_wild_7644646 | NA                                  | Ca_desi_Chrom04 | 7644646                 | C/A  | Gene_Ca_04363.1    | INTRON                        | Lysine-specific demethylase 3B                        |
| Desi_wild_7647357 | NA                                  | Ca_desi_Chrom04 | 7647357                 | C/T  | Gene_Ca_04363.1    | NON_SYNONYMOUS_CODING         | Lysine-specific demethylase 3B                        |
| Desi_wild_7647362 | NA                                  | Ca_desi_Chrom04 | 7647362                 | T/C  | Gene_Ca_04363.1    | SYNONYMOUS_CODING             | Lysine-specific demethylase 3B                        |
| Desi_wild_7647369 | NA                                  | Ca_desi_Chrom04 | 7647369                 | T/C  | Gene_Ca_04363.1    | NON_SYNONYMOUS_CODING         | Lysine-specific demethylase 3B                        |
| Desi_wild_7647405 | NA                                  | Ca_desi_Chrom04 | 7647405                 | C/G  | Gene_Ca_04363.1    | NON_SYNONYMOUS_CODING         | Lysine-specific demethylase 3B                        |
| Desi_wild_7647636 | NA                                  | Ca_desi_Chrom04 | 7647636                 | A/G  | Gene_Ca_04363.1    | NON_SYNONYMOUS_CODING         | Lysine-specific demethylase 3B                        |
| Desi_wild_7647647 | NA                                  | Ca_desi_Chrom04 | 7647647                 | T/A  | Gene_Ca_04363.1    | NON_SYNONYMOUS_CODING         | Lysine-specific demethylase 3B                        |
| Desi_wild_7647648 | NA                                  | Ca_desi_Chrom04 | 7647648                 | T/A  | Gene_Ca_04363.1    | NON_SYNONYMOUS_CODING         | Lysine-specific demethylase 3B                        |
| Desi_wild_7680251 | NA                                  | Ca_desi_Chrom04 | 7680251                 | A/C  | NA                 | INTERGENIC                    | NA                                                    |
| Desi_wild_7680254 | NA                                  | Ca_desi_Chrom04 | 7680254                 | A/C  | NA                 | INTERGENIC                    | NA                                                    |
| Desi_wild_7680278 | NA                                  | Ca_desi_Chrom04 | 7680278                 | T/C  | NA                 | INTERGENIC                    | NA                                                    |
| Desi_wild_7734129 | NA                                  | Ca_desi_Chrom04 | 7734129                 | G/A  | NA                 | INTERGENIC                    | NA                                                    |
| Desi_wild_7744960 | NA                                  | Ca_desi_Chrom04 | 7744960                 | C/T  | Gene_Ca_04371.1    | SYNONYMOUS_CODING             | Putative rRNA 2'-O-methyltransferase fibrillar in 3   |
| Desi_wild_7744977 | NA                                  | Ca_desi_Chrom04 | 7744977                 | G/T  | Gene_Ca_04371.1    | INTRON                        | Putative rRNA 2'-O-methyltransferase fibrillar in 3   |
| Desi_wild_7745024 | NA                                  | Ca_desi_Chrom04 | 7745024                 | C/A  | Gene_Ca_04371.1    | INTRON                        | Putative rRNA 2'-O-methyltransferase fibrillar in 3   |
| Desi_wild_7778312 | NA                                  | Ca_desi_Chrom04 | 7778312                 | T/G  | Gene_Ca_04373.1    | NON_SYNONYMOUS_CODING         | Serine/threonine-protein kinase ATR                   |
| Desi_wild_7789296 | NA                                  | Ca_desi_Chrom04 | 7789296                 | C/T  | Gene_Ca_04373.1    | DOWNSTREAM                    | Serine/threonine-protein kinase ATR                   |
| Desi_wild_7789300 | NA                                  | Ca_desi_Chrom04 | 7789300                 | T/C  | Gene_Ca_04373.1    | DOWNSTREAM                    | Serine/threonine-protein kinase ATR                   |
| Desi_wild_7789365 | NA                                  | Ca_desi_Chrom04 | 7789365                 | C/A  | Gene_Ca_04373.1    | DOWNSTREAM                    | Serine/threonine-protein kinase ATR                   |
| Desi_wild_7797154 | NA                                  | Ca_desi_Chrom04 | 7797154                 | C/G  | Gene_Ca_04374.1    | INTRON                        | Ankyrin repeat and KH domain-containing protein 1     |
| Desi_wild_7804240 | NA                                  | Ca_desi_Chrom04 | 7804240                 | C/G  | NA                 | INTERGENIC                    | NA                                                    |
| Desi_wild_7804249 | NA                                  | Ca_desi_Chrom04 | 7804249                 | C/A  | NA                 | INTERGENIC                    | NA                                                    |
| Desi_wild_7804437 | NA                                  | Ca_desi_Chrom04 | 7804437                 | C/G  | NA                 | INTERGENIC                    | NA                                                    |
| Desi_wild_7804466 | NA                                  | Ca_desi_Chrom04 | 7804466                 | A/G  | NA                 | INTERGENIC                    | NA                                                    |
| Desi_wild_7805196 | NA                                  | Ca_desi_Chrom04 | 7805196                 | C/T  | NA                 | INTERGENIC                    | NA                                                    |

| SNP IDs                  | NCBI dbSNP accession IDs (NCBI_SS#) | Chromosomes          | Physical positions (bp) | SNPs | Gene accession IDs | Sequence components of genome | Putative functions                                                                |
|--------------------------|-------------------------------------|----------------------|-------------------------|------|--------------------|-------------------------------|-----------------------------------------------------------------------------------|
| <i>Desi_wild_7812561</i> | NA                                  | <i>Ca_desi_Chr04</i> | 7812561                 | T/C  | NA                 | INTERGENIC                    | NA                                                                                |
| <i>Desi_wild_7812668</i> | NA                                  | <i>Ca_desi_Chr04</i> | 7812668                 | G/A  | NA                 | INTERGENIC                    | NA                                                                                |
| <i>Desi_wild_7814764</i> | NA                                  | <i>Ca_desi_Chr04</i> | 7814764                 | A/G  | NA                 | INTERGENIC                    | NA                                                                                |
| <i>Desi_wild_7823585</i> | NA                                  | <i>Ca_desi_Chr04</i> | 7823585                 | G/A  | NA                 | INTERGENIC                    | NA                                                                                |
| <i>Desi_wild_7823601</i> | NA                                  | <i>Ca_desi_Chr04</i> | 7823601                 | G/C  | NA                 | INTERGENIC                    | NA                                                                                |
| <i>Desi_wild_7823630</i> | NA                                  | <i>Ca_desi_Chr04</i> | 7823630                 | C/T  | NA                 | INTERGENIC                    | NA                                                                                |
| <i>Desi_wild_7823970</i> | NA                                  | <i>Ca_desi_Chr04</i> | 7823970                 | G/T  | NA                 | INTERGENIC                    | NA                                                                                |
| <i>Desi_wild_7852474</i> | NA                                  | <i>Ca_desi_Chr04</i> | 7852474                 | C/T  | Gene_Ca_04380.1    | DOWNSTREAM                    | Serine/threonine protein phosphatase 2A 59 kDa regulatory subunit B' eta isoform  |
| <i>Desi_wild_7864254</i> | NA                                  | <i>Ca_desi_Chr04</i> | 7864254                 | C/T  | Gene_Ca_04381.2    | SYNONYMOUS_CODING             | Transportin-1                                                                     |
| <i>Desi_wild_7864256</i> | NA                                  | <i>Ca_desi_Chr04</i> | 7864256                 | G/T  | Gene_Ca_04381.2    | NON_SYNONYMOUS_CODING         | Transportin-1                                                                     |
| <i>Desi_wild_7886492</i> | NA                                  | <i>Ca_desi_Chr04</i> | 7886492                 | T/C  | NA                 | INTERGENIC                    | NA                                                                                |
| <i>Desi_wild_7889706</i> | NA                                  | <i>Ca_desi_Chr04</i> | 7889706                 | T/C  | NA                 | INTERGENIC                    | NA                                                                                |
| <i>Desi_wild_7889802</i> | NA                                  | <i>Ca_desi_Chr04</i> | 7889802                 | C/T  | NA                 | INTERGENIC                    | NA                                                                                |
| <i>Desi_wild_7889963</i> | NA                                  | <i>Ca_desi_Chr04</i> | 7889963                 | A/G  | NA                 | INTERGENIC                    | NA                                                                                |
| <i>Desi_wild_7897697</i> | NA                                  | <i>Ca_desi_Chr04</i> | 7897697                 | A/T  | Gene_Ca_04386.1    | SYNONYMOUS_CODING             | Probable protein phosphatase 2C 64                                                |
| <i>Desi_wild_7901647</i> | NA                                  | <i>Ca_desi_Chr04</i> | 7901647                 | G/C  | NA                 | INTERGENIC                    | NA                                                                                |
| <i>Desi_wild_7934938</i> | NA                                  | <i>Ca_desi_Chr04</i> | 7934938                 | A/G  | Gene_Ca_04388.1    | DOWNSTREAM                    | RNA-binding protein 39                                                            |
| <i>Desi_wild_7934989</i> | NA                                  | <i>Ca_desi_Chr04</i> | 7934989                 | G/A  | Gene_Ca_04388.1    | DOWNSTREAM                    | RNA-binding protein 39                                                            |
| <i>Desi_wild_7964304</i> | NA                                  | <i>Ca_desi_Chr04</i> | 7964304                 | T/C  | NA                 | INTERGENIC                    | NA                                                                                |
| <i>Desi_wild_7964351</i> | NA                                  | <i>Ca_desi_Chr04</i> | 7964351                 | T/C  | NA                 | INTERGENIC                    | NA                                                                                |
| <i>Desi_wild_7969472</i> | NA                                  | <i>Ca_desi_Chr04</i> | 7969472                 | A/G  | NA                 | INTERGENIC                    | NA                                                                                |
| <i>Desi_wild_7979277</i> | NA                                  | <i>Ca_desi_Chr04</i> | 7979277                 | A/T  | Gene_Ca_04392.1    | DOWNSTREAM                    | Probable LRR receptor-like serine/threonine-protein kinase At4g08850              |
| <i>Desi_wild_7979802</i> | NA                                  | <i>Ca_desi_Chr04</i> | 7979802                 | G/A  | Gene_Ca_04392.1    | DOWNSTREAM                    | Probable LRR receptor-like serine/threonine-protein kinase At4g08850              |
| <i>Desi_wild_7983120</i> | NA                                  | <i>Ca_desi_Chr04</i> | 7983120                 | C/T  | NA                 | INTERGENIC                    | NA                                                                                |
| <i>Desi_wild_7991845</i> | NA                                  | <i>Ca_desi_Chr04</i> | 7991845                 | G/A  | Gene_Ca_04393.3    | INTRON                        | NA                                                                                |
| <i>Desi_wild_7991933</i> | NA                                  | <i>Ca_desi_Chr04</i> | 7991933                 | G/A  | Gene_Ca_04393.3    | INTRON                        | NA                                                                                |
| <i>Desi_wild_7992015</i> | NA                                  | <i>Ca_desi_Chr04</i> | 7992015                 | A/G  | Gene_Ca_04393.3    | INTRON                        | NA                                                                                |
| <i>Desi_wild_7992027</i> | NA                                  | <i>Ca_desi_Chr04</i> | 7992027                 | T/G  | Gene_Ca_04393.3    | INTRON                        | NA                                                                                |
| <i>Desi_wild_8009916</i> | NA                                  | <i>Ca_desi_Chr04</i> | 8009916                 | C/G  | Gene_Ca_04395.1    | NON_SYNONYMOUS_CODING         | D111/G-patch domain-containing protein                                            |
| <i>Desi_wild_8027509</i> | NA                                  | <i>Ca_desi_Chr04</i> | 8027509                 | T/A  | Gene_Ca_04396.1    | INTRON                        | Plant protein of unknown function (DUF639)                                        |
| <i>Desi_wild_8036676</i> | NA                                  | <i>Ca_desi_Chr04</i> | 8036676                 | T/C  | Gene_Ca_04397.1    | NON_SYNONYMOUS_CODING         | BEST Arabidopsis thaliana protein match is: copper ion binding (TAIR:AT4G32610.1) |
| <i>Desi_wild_8066452</i> | NA                                  | <i>Ca_desi_Chr04</i> | 8066452                 | A/C  | Gene_Ca_04401.1    | NON_SYNONYMOUS_CODING         | PHD finger protein 3                                                              |
| <i>Desi_wild_8104148</i> | NA                                  | <i>Ca_desi_Chr04</i> | 8104148                 | T/G  | Gene_Ca_04404.1    | SYNONYMOUS_CODING             | Probable galacturonosyltransferase 3                                              |
| <i>Desi_wild_8150669</i> | NA                                  | <i>Ca_desi_Chr04</i> | 8150669                 | A/G  | NA                 | INTERGENIC                    | NA                                                                                |
| <i>Desi_wild_8155204</i> | NA                                  | <i>Ca_desi_Chr04</i> | 8155204                 | T/C  | Gene_Ca_04409.1    | NON_SYNONYMOUS_CODING         | Pleiotropic drug resistance protein 1                                             |
| <i>Desi_wild_8155339</i> | NA                                  | <i>Ca_desi_Chr04</i> | 8155339                 | G/T  | Gene_Ca_04409.1    | UPSTREAM                      | Pleiotropic drug resistance protein 1                                             |
| <i>Desi_wild_8223619</i> | NA                                  | <i>Ca_desi_Chr04</i> | 8223619                 | A/C  | Gene_Ca_04417.1    | INTRON                        | GTP-binding nuclear protein Ran-3                                                 |
| <i>Desi_wild_8269713</i> | NA                                  | <i>Ca_desi_Chr04</i> | 8269713                 | A/G  | Gene_Ca_04421.1    | UPSTREAM                      | Acyl-protein thioesterase 1 homolog 1                                             |
| <i>Desi_wild_8413892</i> | NA                                  | <i>Ca_desi_Chr04</i> | 8413892                 | A/T  | Gene_Ca_04434.1    | DOWNSTREAM                    | TIP41-like protein                                                                |
| <i>Desi_wild_8417080</i> | NA                                  | <i>Ca_desi_Chr04</i> | 8417080                 | T/C  | NA                 | INTERGENIC                    | NA                                                                                |
| <i>Desi_wild_8450676</i> | NA                                  | <i>Ca_desi_Chr04</i> | 8450676                 | G/A  | Gene_Ca_04439.1    | SYNONYMOUS_CODING             | NA                                                                                |
| <i>Desi_wild_8450693</i> | NA                                  | <i>Ca_desi_Chr04</i> | 8450693                 | T/G  | Gene_Ca_04439.1    | NON_SYNONYMOUS_CODING         | NA                                                                                |
| <i>Desi_wild_8848071</i> | NA                                  | <i>Ca_desi_Chr04</i> | 8848071                 | C/T  | NA                 | INTERGENIC                    | NA                                                                                |
| <i>Desi_wild_8848274</i> | NA                                  | <i>Ca_desi_Chr04</i> | 8848274                 | T/C  | NA                 | INTERGENIC                    | NA                                                                                |

| SNP IDs                  | NCBI dbSNP accession IDs (NCBI_SS#) | Chromosomes          | Physical positions (bp) | SNPs | Gene accession IDs | Sequence components of genome | Putative functions                                       |
|--------------------------|-------------------------------------|----------------------|-------------------------|------|--------------------|-------------------------------|----------------------------------------------------------|
| <i>Desi_wild_8848382</i> | NA                                  | <i>Ca_desi_Chr04</i> | 8848382                 | T/C  | NA                 | INTERGENIC                    | NA                                                       |
| <i>Desi_wild_8864119</i> | NA                                  | <i>Ca_desi_Chr04</i> | 8864119                 | T/C  | Gene_Ca_04463.1    | DOWNSTREAM                    | Probable receptor-like protein kinase At1g67000          |
| <i>Desi_wild_8875920</i> | NA                                  | <i>Ca_desi_Chr04</i> | 8875920                 | T/G  | Gene_Ca_04467.3    | DOWNSTREAM                    | NA                                                       |
| <i>Desi_wild_8876149</i> | NA                                  | <i>Ca_desi_Chr04</i> | 8876149                 | A/G  | Gene_Ca_04467.2    | DOWNSTREAM                    | NA                                                       |
| <i>Desi_wild_8884501</i> | NA                                  | <i>Ca_desi_Chr04</i> | 8884501                 | A/T  | Gene_Ca_04467.2    | INTRON                        | NA                                                       |
| <i>Desi_wild_8884795</i> | NA                                  | <i>Ca_desi_Chr04</i> | 8884795                 | T/G  | Gene_Ca_04467.2    | NON_SYNONYMOUS_CODING         | NA                                                       |
| <i>Desi_wild_8892078</i> | NA                                  | <i>Ca_desi_Chr04</i> | 8892078                 | C/T  | Gene_Ca_04468.1    | INTRON                        | Chaperone protein dnaJ 15                                |
| <i>Desi_wild_8892257</i> | NA                                  | <i>Ca_desi_Chr04</i> | 8892257                 | C/T  | Gene_Ca_04468.1    | INTRON                        | Chaperone protein dnaJ 15                                |
| <i>Desi_wild_8908491</i> | NA                                  | <i>Ca_desi_Chr04</i> | 8908491                 | T/A  | Gene_Ca_04469.1    | DOWNSTREAM                    | Zinc finger protein 6                                    |
| <i>Desi_wild_9098866</i> | NA                                  | <i>Ca_desi_Chr04</i> | 9098866                 | A/G  | Gene_Ca_04480.1    | SYNONYMOUS_CODING             | Zinc finger CCCH domain-containing protein 15            |
| <i>Desi_wild_9109135</i> | NA                                  | <i>Ca_desi_Chr04</i> | 9109135                 | C/T  | NA                 | INTERGENIC                    | NA                                                       |
| <i>Desi_wild_9152979</i> | NA                                  | <i>Ca_desi_Chr04</i> | 9152979                 | T/C  | Gene_Ca_04485.1    | SYNONYMOUS_CODING             | Reticulon-like protein B9                                |
| <i>Desi_wild_9158307</i> | NA                                  | <i>Ca_desi_Chr04</i> | 9158307                 | A/C  | NA                 | INTERGENIC                    | NA                                                       |
| <i>Desi_wild_9158316</i> | NA                                  | <i>Ca_desi_Chr04</i> | 9158316                 | C/A  | NA                 | INTERGENIC                    | NA                                                       |
| <i>Desi_wild_9158321</i> | NA                                  | <i>Ca_desi_Chr04</i> | 9158321                 | C/T  | NA                 | INTERGENIC                    | NA                                                       |
| <i>Desi_wild_9158337</i> | NA                                  | <i>Ca_desi_Chr04</i> | 9158337                 | A/C  | NA                 | INTERGENIC                    | NA                                                       |
| <i>Desi_wild_9158341</i> | NA                                  | <i>Ca_desi_Chr04</i> | 9158341                 | A/T  | NA                 | INTERGENIC                    | NA                                                       |
| <i>Desi_wild_9158346</i> | NA                                  | <i>Ca_desi_Chr04</i> | 9158346                 | C/A  | NA                 | INTERGENIC                    | NA                                                       |
| <i>Desi_wild_9172047</i> | NA                                  | <i>Ca_desi_Chr04</i> | 9172047                 | C/G  | Gene_Ca_04487.1    | NON_SYNONYMOUS_CODING         | Alpha,alpha-trehalose-phosphate synthase [UDP-forming] 5 |
| <i>Desi_wild_9187876</i> | NA                                  | <i>Ca_desi_Chr04</i> | 9187876                 | A/C  | Gene_Ca_04488.1    | INTRON                        | Nucleotidyl transferase superfamily protein              |
| <i>Desi_wild_9222554</i> | NA                                  | <i>Ca_desi_Chr04</i> | 9222554                 | T/A  | NA                 | INTERGENIC                    | NA                                                       |
| <i>Desi_wild_9224339</i> | NA                                  | <i>Ca_desi_Chr04</i> | 9224339                 | A/G  | Gene_Ca_04492.1    | DOWNSTREAM                    | Octicosapeptide/Phox/Bem1p family protein                |
| <i>Desi_wild_9224369</i> | NA                                  | <i>Ca_desi_Chr04</i> | 9224369                 | A/G  | Gene_Ca_04492.1    | DOWNSTREAM                    | Octicosapeptide/Phox/Bem1p family protein                |
| <i>Desi_wild_9224381</i> | NA                                  | <i>Ca_desi_Chr04</i> | 9224381                 | G/A  | Gene_Ca_04492.1    | DOWNSTREAM                    | Octicosapeptide/Phox/Bem1p family protein                |
| <i>Desi_wild_9224405</i> | NA                                  | <i>Ca_desi_Chr04</i> | 9224405                 | C/G  | Gene_Ca_04492.1    | DOWNSTREAM                    | Octicosapeptide/Phox/Bem1p family protein                |
| <i>Desi_wild_9224520</i> | NA                                  | <i>Ca_desi_Chr04</i> | 9224520                 | A/G  | Gene_Ca_04492.1    | DOWNSTREAM                    | Octicosapeptide/Phox/Bem1p family protein                |
| <i>Desi_wild_9224592</i> | NA                                  | <i>Ca_desi_Chr04</i> | 9224592                 | T/G  | NA                 | INTERGENIC                    | NA                                                       |
| <i>Desi_wild_9224613</i> | NA                                  | <i>Ca_desi_Chr04</i> | 9224613                 | C/A  | NA                 | INTERGENIC                    | NA                                                       |
| <i>Desi_wild_9224646</i> | NA                                  | <i>Ca_desi_Chr04</i> | 9224646                 | C/T  | NA                 | INTERGENIC                    | NA                                                       |
| <i>Desi_wild_9225333</i> | NA                                  | <i>Ca_desi_Chr04</i> | 9225333                 | C/T  | NA                 | INTERGENIC                    | NA                                                       |
| <i>Desi_wild_9225522</i> | NA                                  | <i>Ca_desi_Chr04</i> | 9225522                 | C/A  | NA                 | INTERGENIC                    | NA                                                       |
| <i>Desi_wild_9225697</i> | NA                                  | <i>Ca_desi_Chr04</i> | 9225697                 | T/C  | NA                 | INTERGENIC                    | NA                                                       |
| <i>Desi_wild_9296293</i> | NA                                  | <i>Ca_desi_Chr04</i> | 9296293                 | T/G  | Gene_Ca_04495.1    | SYNONYMOUS_CODING             | Protein of unknown function (DUF620)                     |
| <i>Desi_wild_9385964</i> | NA                                  | <i>Ca_desi_Chr04</i> | 9385964                 | G/A  | Gene_Ca_04506.1    | INTRON                        | Family of unknown function (DUF566)                      |
| <i>Desi_wild_9494492</i> | NA                                  | <i>Ca_desi_Chr04</i> | 9494492                 | T/G  | Gene_Ca_04516.1    | SYNONYMOUS_CODING             | Cysteine-rich receptor-like protein kinase 25            |
| <i>Desi_wild_9504450</i> | NA                                  | <i>Ca_desi_Chr04</i> | 9504450                 | T/G  | NA                 | INTERGENIC                    | NA                                                       |
| <i>Desi_wild_9513671</i> | NA                                  | <i>Ca_desi_Chr04</i> | 9513671                 | T/G  | NA                 | INTERGENIC                    | NA                                                       |
| <i>Desi_wild_9532230</i> | NA                                  | <i>Ca_desi_Chr04</i> | 9532230                 | A/G  | Gene_Ca_04519.1    | NON_SYNONYMOUS_CODING         | Cysteine-rich receptor-like protein kinase 25            |
| <i>Desi_wild_9540199</i> | NA                                  | <i>Ca_desi_Chr04</i> | 9540199                 | G/A  | Gene_Ca_04520.1    | SYNONYMOUS_CODING             | Cysteine-rich receptor-like protein kinase 25            |
| <i>Desi_wild_9540235</i> | NA                                  | <i>Ca_desi_Chr04</i> | 9540235                 | T/C  | Gene_Ca_04520.1    | SYNONYMOUS_CODING             | Cysteine-rich receptor-like protein kinase 25            |
| <i>Desi_wild_9540794</i> | NA                                  | <i>Ca_desi_Chr04</i> | 9540794                 | G/A  | Gene_Ca_04520.1    | NON_SYNONYMOUS_CODING         | Cysteine-rich receptor-like protein kinase 25            |
| <i>Desi_wild_9546623</i> | NA                                  | <i>Ca_desi_Chr04</i> | 9546623                 | C/T  | Gene_Ca_04521.1    | NON_SYNONYMOUS_CODING         | Cysteine-rich receptor-like protein kinase 25            |
| <i>Desi_wild_9546624</i> | NA                                  | <i>Ca_desi_Chr04</i> | 9546624                 | T/C  | Gene_Ca_04521.1    | NON_SYNONYMOUS_CODING         | Cysteine-rich receptor-like protein kinase 25            |
| <i>Desi_wild_9546855</i> | NA                                  | <i>Ca_desi_Chr04</i> | 9546855                 | C/T  | Gene_Ca_04521.1    | NON_SYNONYMOUS_CODING         | Cysteine-rich receptor-like protein kinase 25            |

| SNP IDs                  | NCBI dbSNP accession IDs (NCBI_SS#) | Chromosomes          | Physical positions (bp) | SNPs | Gene accession IDs | Sequence components of genome | Putative functions                                                                   |
|--------------------------|-------------------------------------|----------------------|-------------------------|------|--------------------|-------------------------------|--------------------------------------------------------------------------------------|
| <i>Desi_wild_9561732</i> | NA                                  | <i>Ca_desi_Chr04</i> | 9561732                 | T/G  | NA                 | INTERGENIC                    | NA                                                                                   |
| <i>Desi_wild_9561737</i> | NA                                  | <i>Ca_desi_Chr04</i> | 9561737                 | T/A  | NA                 | INTERGENIC                    | NA                                                                                   |
| <i>Desi_wild_9561751</i> | NA                                  | <i>Ca_desi_Chr04</i> | 9561751                 | T/G  | NA                 | INTERGENIC                    | NA                                                                                   |
| <i>Desi_wild_9561759</i> | NA                                  | <i>Ca_desi_Chr04</i> | 9561759                 | A/T  | NA                 | INTERGENIC                    | NA                                                                                   |
| <i>Desi_wild_9561762</i> | NA                                  | <i>Ca_desi_Chr04</i> | 9561762                 | T/A  | NA                 | INTERGENIC                    | NA                                                                                   |
| <i>Desi_wild_9561764</i> | NA                                  | <i>Ca_desi_Chr04</i> | 9561764                 | C/A  | NA                 | INTERGENIC                    | NA                                                                                   |
| <i>Desi_wild_9561777</i> | NA                                  | <i>Ca_desi_Chr04</i> | 9561777                 | A/C  | NA                 | INTERGENIC                    | NA                                                                                   |
| <i>Desi_wild_9561778</i> | NA                                  | <i>Ca_desi_Chr04</i> | 9561778                 | C/G  | NA                 | INTERGENIC                    | NA                                                                                   |
| <i>Desi_wild_9561782</i> | NA                                  | <i>Ca_desi_Chr04</i> | 9561782                 | A/T  | NA                 | INTERGENIC                    | NA                                                                                   |
| <i>Desi_wild_9561787</i> | NA                                  | <i>Ca_desi_Chr04</i> | 9561787                 | T/C  | NA                 | INTERGENIC                    | NA                                                                                   |
| <i>Desi_wild_9561792</i> | NA                                  | <i>Ca_desi_Chr04</i> | 9561792                 | T/G  | NA                 | INTERGENIC                    | NA                                                                                   |
| <i>Desi_wild_9561794</i> | NA                                  | <i>Ca_desi_Chr04</i> | 9561794                 | C/T  | NA                 | INTERGENIC                    | NA                                                                                   |
| <i>Desi_wild_9561796</i> | NA                                  | <i>Ca_desi_Chr04</i> | 9561796                 | T/A  | NA                 | INTERGENIC                    | NA                                                                                   |
| <i>Desi_wild_9561800</i> | NA                                  | <i>Ca_desi_Chr04</i> | 9561800                 | T/C  | NA                 | INTERGENIC                    | NA                                                                                   |
| <i>Desi_wild_9561806</i> | NA                                  | <i>Ca_desi_Chr04</i> | 9561806                 | A/T  | NA                 | INTERGENIC                    | NA                                                                                   |
| <i>Desi_wild_9561834</i> | NA                                  | <i>Ca_desi_Chr04</i> | 9561834                 | A/C  | NA                 | INTERGENIC                    | NA                                                                                   |
| <i>Desi_wild_9561852</i> | NA                                  | <i>Ca_desi_Chr04</i> | 9561852                 | T/G  | NA                 | INTERGENIC                    | NA                                                                                   |
| <i>Desi_wild_9584878</i> | NA                                  | <i>Ca_desi_Chr04</i> | 9584878                 | C/G  | Gene_Ca_04524.1    | DOWNSTREAM                    | DnaJ homolog subfamily C member 25                                                   |
| <i>Desi_wild_9585248</i> | NA                                  | <i>Ca_desi_Chr04</i> | 9585248                 | G/T  | Gene_Ca_04525.1    | DOWNSTREAM                    | NA                                                                                   |
| <i>Desi_wild_9594060</i> | NA                                  | <i>Ca_desi_Chr04</i> | 9594060                 | T/G  | Gene_Ca_04527.1    | DOWNSTREAM                    | Ubiquitin-like superfamily protein                                                   |
| <i>Desi_wild_9621755</i> | NA                                  | <i>Ca_desi_Chr04</i> | 9621755                 | G/A  | Gene_Ca_04529.1    | INTRON                        | Probable xyloglucan endotransglucosylase/hydrolase protein 8                         |
| <i>Desi_wild_9621758</i> | NA                                  | <i>Ca_desi_Chr04</i> | 9621758                 | G/A  | Gene_Ca_04529.1    | INTRON                        | Probable xyloglucan endotransglucosylase/hydrolase protein 8                         |
| <i>Desi_wild_9621769</i> | NA                                  | <i>Ca_desi_Chr04</i> | 9621769                 | C/T  | Gene_Ca_04529.1    | INTRON                        | Probable xyloglucan endotransglucosylase/hydrolase protein 8                         |
| <i>Desi_wild_9621770</i> | NA                                  | <i>Ca_desi_Chr04</i> | 9621770                 | G/A  | Gene_Ca_04529.1    | INTRON                        | Probable xyloglucan endotransglucosylase/hydrolase protein 8                         |
| <i>Desi_wild_9621810</i> | NA                                  | <i>Ca_desi_Chr04</i> | 9621810                 | G/T  | Gene_Ca_04529.1    | INTRON                        | Probable xyloglucan endotransglucosylase/hydrolase protein 8                         |
| <i>Desi_wild_9637332</i> | NA                                  | <i>Ca_desi_Chr04</i> | 9637332                 | T/C  | Gene_Ca_04532.1    | DOWNSTREAM                    | RING/U-box superfamily protein                                                       |
| <i>Desi_wild_9662593</i> | NA                                  | <i>Ca_desi_Chr04</i> | 9662593                 | T/C  | NA                 | INTERGENIC                    | NA                                                                                   |
| <i>Desi_wild_9711749</i> | NA                                  | <i>Ca_desi_Chr04</i> | 9711749                 | T/C  | Gene_Ca_04539.1    | INTRON                        | Uncharacterized protein C9orf114 homolog                                             |
| <i>Desi_wild_9713866</i> | NA                                  | <i>Ca_desi_Chr04</i> | 9713866                 | C/T  | Gene_Ca_04539.1    | SYNONYMOUS_CODING             | Uncharacterized protein C9orf114 homolog                                             |
| <i>Desi_wild_9742719</i> | NA                                  | <i>Ca_desi_Chr04</i> | 9742719                 | C/T  | NA                 | INTERGENIC                    | NA                                                                                   |
| <i>Desi_wild_9747972</i> | NA                                  | <i>Ca_desi_Chr04</i> | 9747972                 | G/C  | Gene_Ca_04545.1    | UPSTREAM                      | Alpha-1,3/1,6-mannosyltransferase ALG2                                               |
| <i>Desi_wild_9748039</i> | NA                                  | <i>Ca_desi_Chr04</i> | 9748039                 | T/G  | Gene_Ca_04545.1    | UPSTREAM                      | Alpha-1,3/1,6-mannosyltransferase ALG2                                               |
| <i>Desi_wild_9773834</i> | NA                                  | <i>Ca_desi_Chr04</i> | 9773834                 | A/T  | Gene_Ca_04547.1    | INTRON                        | Putative leucine-rich repeat receptor-like serine/threonine-protein kinase At2g14440 |
| <i>Desi_wild_9774030</i> | NA                                  | <i>Ca_desi_Chr04</i> | 9774030                 | A/T  | Gene_Ca_04547.1    | INTRON                        | Putative leucine-rich repeat receptor-like serine/threonine-protein kinase At2g14440 |
| <i>Desi_wild_9793407</i> | NA                                  | <i>Ca_desi_Chr04</i> | 9793407                 | T/C  | NA                 | INTERGENIC                    | NA                                                                                   |
| <i>Desi_wild_9793409</i> | NA                                  | <i>Ca_desi_Chr04</i> | 9793409                 | C/A  | NA                 | INTERGENIC                    | NA                                                                                   |
| <i>Desi_wild_9793410</i> | NA                                  | <i>Ca_desi_Chr04</i> | 9793410                 | T/G  | NA                 | INTERGENIC                    | NA                                                                                   |
| <i>Desi_wild_9793430</i> | NA                                  | <i>Ca_desi_Chr04</i> | 9793430                 | A/G  | NA                 | INTERGENIC                    | NA                                                                                   |
| <i>Desi_wild_9795832</i> | NA                                  | <i>Ca_desi_Chr04</i> | 9795832                 | G/A  | NA                 | INTERGENIC                    | NA                                                                                   |
| <i>Desi_wild_9834884</i> | NA                                  | <i>Ca_desi_Chr04</i> | 9834884                 | T/C  | Gene_Ca_04551.1    | SYNONYMOUS_CODING             | NA                                                                                   |
| <i>Desi_wild_9835055</i> | NA                                  | <i>Ca_desi_Chr04</i> | 9835055                 | T/G  | Gene_Ca_04551.1    | INTRON                        | Sugar transport protein 13                                                           |
| <i>Desi_wild_9835057</i> | NA                                  | <i>Ca_desi_Chr04</i> | 9835057                 | G/A  | Gene_Ca_04551.1    | INTRON                        | Sugar transport protein 13                                                           |
| <i>Desi_wild_9851330</i> | NA                                  | <i>Ca_desi_Chr04</i> | 9851330                 | A/T  | NA                 | INTERGENIC                    | NA                                                                                   |
| <i>Desi_wild_9851366</i> | NA                                  | <i>Ca_desi_Chr04</i> | 9851366                 | T/G  | NA                 | INTERGENIC                    | NA                                                                                   |

| SNP IDs            | NCBI dbSNP accession IDs (NCBI_SS#) | Chromosomes   | Physical positions (bp) | SNPs | Gene accession IDs | Sequence components of genome | Putative functions                                    |
|--------------------|-------------------------------------|---------------|-------------------------|------|--------------------|-------------------------------|-------------------------------------------------------|
| Desi_wild_9851424  | NA                                  | Ca_desi_Chr04 | 9851424                 | T/A  | NA                 | INTERGENIC                    | NA                                                    |
| Desi_wild_9855664  | NA                                  | Ca_desi_Chr04 | 9855664                 | C/A  | Gene_Ca_04552.4    | NON_SYNONYMOUS_CODING         | NA                                                    |
| Desi_wild_9856520  | NA                                  | Ca_desi_Chr04 | 9856520                 | A/G  | Gene_Ca_04552.4    | SYNONYMOUS_CODING             | NA                                                    |
| Desi_wild_9856753  | NA                                  | Ca_desi_Chr04 | 9856753                 | C/T  | Gene_Ca_04552.4    | SYNONYMOUS_CODING             | NA                                                    |
| Desi_wild_9856777  | NA                                  | Ca_desi_Chr04 | 9856777                 | G/T  | Gene_Ca_04552.4    | SYNONYMOUS_CODING             | NA                                                    |
| Desi_wild_9856813  | NA                                  | Ca_desi_Chr04 | 9856813                 | A/T  | Gene_Ca_04552.4    | SYNONYMOUS_CODING             | NA                                                    |
| Desi_wild_9857647  | NA                                  | Ca_desi_Chr04 | 9857647                 | A/G  | Gene_Ca_04552.4    | SYNONYMOUS_CODING             | NA                                                    |
| Desi_wild_9857710  | NA                                  | Ca_desi_Chr04 | 9857710                 | T/C  | Gene_Ca_04552.4    | SYNONYMOUS_CODING             | NA                                                    |
| Desi_wild_9857716  | NA                                  | Ca_desi_Chr04 | 9857716                 | C/T  | Gene_Ca_04552.4    | SYNONYMOUS_CODING             | NA                                                    |
| Desi_wild_9858208  | NA                                  | Ca_desi_Chr04 | 9858208                 | T/C  | Gene_Ca_04552.4    | SYNONYMOUS_CODING             | NA                                                    |
| Desi_wild_9858298  | NA                                  | Ca_desi_Chr04 | 9858298                 | C/G  | Gene_Ca_04552.4    | SYNONYMOUS_CODING             | NA                                                    |
| Desi_wild_9873358  | NA                                  | Ca_desi_Chr04 | 9873358                 | T/C  | NA                 | INTERGENIC                    | NA                                                    |
| Desi_wild_10237167 | NA                                  | Ca_desi_Chr04 | 10237167                | T/G  | Gene_Ca_04584.1    | INTRON                        | NA                                                    |
| Desi_wild_10246663 | NA                                  | Ca_desi_Chr04 | 10246663                | A/C  | Gene_Ca_04586.1    | UPSTREAM                      | Major facilitator superfamily protein                 |
| Desi_wild_10249225 | NA                                  | Ca_desi_Chr04 | 10249225                | T/C  | Gene_Ca_04586.1    | INTRON                        | Major facilitator superfamily protein                 |
| Desi_wild_10249253 | NA                                  | Ca_desi_Chr04 | 10249253                | C/T  | Gene_Ca_04586.1    | SYNONYMOUS_CODING             | Major facilitator superfamily protein                 |
| Desi_wild_10297495 | NA                                  | Ca_desi_Chr04 | 10297495                | T/A  | NA                 | INTERGENIC                    | NA                                                    |
| Desi_wild_10311544 | NA                                  | Ca_desi_Chr04 | 10311544                | G/A  | Gene_Ca_04592.1    | NON_SYNONYMOUS_CODING         | Pentatricopeptide repeat-containing protein At4g14850 |
| Desi_wild_10339397 | NA                                  | Ca_desi_Chr04 | 10339397                | G/A  | Gene_Ca_04596.1    | INTRON                        | Protein FRIGIDA                                       |
| Desi_wild_10339511 | NA                                  | Ca_desi_Chr04 | 10339511                | G/C  | Gene_Ca_04596.1    | INTRON                        | Protein FRIGIDA                                       |
| Desi_wild_10339519 | NA                                  | Ca_desi_Chr04 | 10339519                | G/A  | Gene_Ca_04596.1    | INTRON                        | Protein FRIGIDA                                       |
| Desi_wild_10339669 | NA                                  | Ca_desi_Chr04 | 10339669                | C/T  | Gene_Ca_04596.1    | INTRON                        | Protein FRIGIDA                                       |
| Desi_wild_10350235 | NA                                  | Ca_desi_Chr04 | 10350235                | T/C  | NA                 | INTERGENIC                    | NA                                                    |
| Desi_wild_10350256 | NA                                  | Ca_desi_Chr04 | 10350256                | T/A  | NA                 | INTERGENIC                    | NA                                                    |
| Desi_wild_10351636 | NA                                  | Ca_desi_Chr04 | 10351636                | G/A  | NA                 | INTERGENIC                    | NA                                                    |
| Desi_wild_10354585 | NA                                  | Ca_desi_Chr04 | 10354585                | G/A  | Gene_Ca_04598.1    | INTRON                        | Thiamine thiazole synthase 2, chloroplastic           |
| Desi_wild_10365308 | NA                                  | Ca_desi_Chr04 | 10365308                | G/C  | NA                 | INTERGENIC                    | NA                                                    |
| Desi_wild_10365321 | NA                                  | Ca_desi_Chr04 | 10365321                | G/T  | NA                 | INTERGENIC                    | NA                                                    |
| Desi_wild_10376604 | NA                                  | Ca_desi_Chr04 | 10376604                | G/C  | Gene_Ca_04601.1    | NON_SYNONYMOUS_CODING         | NA                                                    |
| Desi_wild_10613175 | NA                                  | Ca_desi_Chr04 | 10613175                | G/A  | NA                 | INTERGENIC                    | NA                                                    |
| Desi_wild_10613246 | NA                                  | Ca_desi_Chr04 | 10613246                | T/G  | NA                 | INTERGENIC                    | NA                                                    |
| Desi_wild_10675074 | NA                                  | Ca_desi_Chr04 | 10675074                | T/A  | NA                 | INTERGENIC                    | NA                                                    |
| Desi_wild_10675101 | NA                                  | Ca_desi_Chr04 | 10675101                | G/A  | NA                 | INTERGENIC                    | NA                                                    |
| Desi_wild_10675113 | NA                                  | Ca_desi_Chr04 | 10675113                | G/A  | NA                 | INTERGENIC                    | NA                                                    |
| Desi_wild_10675148 | NA                                  | Ca_desi_Chr04 | 10675148                | G/A  | NA                 | INTERGENIC                    | NA                                                    |
| Desi_wild_10675150 | NA                                  | Ca_desi_Chr04 | 10675150                | C/T  | NA                 | INTERGENIC                    | NA                                                    |
| Desi_wild_10675154 | NA                                  | Ca_desi_Chr04 | 10675154                | C/G  | NA                 | INTERGENIC                    | NA                                                    |
| Desi_wild_10675156 | NA                                  | Ca_desi_Chr04 | 10675156                | T/C  | NA                 | INTERGENIC                    | NA                                                    |
| Desi_wild_10685092 | NA                                  | Ca_desi_Chr04 | 10685092                | C/A  | NA                 | INTERGENIC                    | NA                                                    |
| Desi_wild_10685098 | NA                                  | Ca_desi_Chr04 | 10685098                | C/G  | NA                 | INTERGENIC                    | NA                                                    |
| Desi_wild_10685108 | NA                                  | Ca_desi_Chr04 | 10685108                | A/G  | NA                 | INTERGENIC                    | NA                                                    |
| Desi_wild_10685122 | NA                                  | Ca_desi_Chr04 | 10685122                | G/A  | NA                 | INTERGENIC                    | NA                                                    |
| Desi_wild_10685150 | NA                                  | Ca_desi_Chr04 | 10685150                | C/A  | NA                 | INTERGENIC                    | NA                                                    |
| Desi_wild_10685154 | NA                                  | Ca_desi_Chr04 | 10685154                | G/C  | NA                 | INTERGENIC                    | NA                                                    |



| SNP IDs                   | NCBI dbSNP accession IDs (NCBI_SS#) | Chromosomes          | Physical positions (bp) | SNPs | Gene accession IDs | Sequence components of genome | Putative functions                                                       |
|---------------------------|-------------------------------------|----------------------|-------------------------|------|--------------------|-------------------------------|--------------------------------------------------------------------------|
| <i>Desi_wild_10685162</i> | NA                                  | <i>Ca_desi_Chr04</i> | 10685162                | G/A  | NA                 | INTERGENIC                    | NA                                                                       |
| <i>Desi_wild_10685167</i> | NA                                  | <i>Ca_desi_Chr04</i> | 10685167                | G/A  | NA                 | INTERGENIC                    | NA                                                                       |
| <i>Desi_wild_10685174</i> | NA                                  | <i>Ca_desi_Chr04</i> | 10685174                | G/A  | NA                 | INTERGENIC                    | NA                                                                       |
| <i>Desi_wild_10685259</i> | NA                                  | <i>Ca_desi_Chr04</i> | 10685259                | C/A  | NA                 | INTERGENIC                    | NA                                                                       |
| <i>Desi_wild_10735618</i> | NA                                  | <i>Ca_desi_Chr04</i> | 10735618                | C/T  | NA                 | INTERGENIC                    | NA                                                                       |
| <i>Desi_wild_10840349</i> | NA                                  | <i>Ca_desi_Chr04</i> | 10840349                | C/A  | Gene_Ca_04628.1    | NON_SYNONYMOUS_CODING         | DUF246 domain-containing protein At1g04910                               |
| <i>Desi_wild_10848826</i> | NA                                  | <i>Ca_desi_Chr04</i> | 10848826                | G/A  | Gene_Ca_04629.1    | INTRON                        | Phosphoglucomutase, chloroplastic                                        |
| <i>Desi_wild_10941401</i> | NA                                  | <i>Ca_desi_Chr04</i> | 10941401                | C/T  | NA                 | INTERGENIC                    | NA                                                                       |
| <i>Desi_wild_10946315</i> | NA                                  | <i>Ca_desi_Chr04</i> | 10946315                | C/G  | NA                 | INTERGENIC                    | NA                                                                       |
| <i>Desi_wild_11013040</i> | NA                                  | <i>Ca_desi_Chr04</i> | 11013040                | G/C  | Gene_Ca_04646.1    | DOWNSTREAM                    | Fidgetin-like protein 1                                                  |
| <i>Desi_wild_11019388</i> | NA                                  | <i>Ca_desi_Chr04</i> | 11019388                | T/G  | Gene_Ca_04647.1    | INTRON                        | P-loop containing nucleoside triphosphate hydrolases superfamily protein |
| <i>Desi_wild_11089813</i> | NA                                  | <i>Ca_desi_Chr04</i> | 11089813                | A/T  | NA                 | INTERGENIC                    | NA                                                                       |
| <i>Desi_wild_11089936</i> | NA                                  | <i>Ca_desi_Chr04</i> | 11089936                | A/C  | NA                 | INTERGENIC                    | NA                                                                       |
| <i>Desi_wild_11089940</i> | NA                                  | <i>Ca_desi_Chr04</i> | 11089940                | C/T  | NA                 | INTERGENIC                    | NA                                                                       |
| <i>Desi_wild_11151839</i> | NA                                  | <i>Ca_desi_Chr04</i> | 11151839                | G/A  | NA                 | INTERGENIC                    | NA                                                                       |
| <i>Desi_wild_11176828</i> | NA                                  | <i>Ca_desi_Chr04</i> | 11176828                | A/G  | Gene_Ca_04660.1    | SYNONYMOUS_CODING             | Exocyst complex component SEC3A                                          |
| <i>Desi_wild_11176874</i> | NA                                  | <i>Ca_desi_Chr04</i> | 11176874                | C/T  | Gene_Ca_04660.1    | INTRON                        | Exocyst complex component SEC3A                                          |
| <i>Desi_wild_11228947</i> | NA                                  | <i>Ca_desi_Chr04</i> | 11228947                | T/C  | NA                 | INTERGENIC                    | NA                                                                       |
| <i>Desi_wild_11229015</i> | NA                                  | <i>Ca_desi_Chr04</i> | 11229015                | T/G  | NA                 | INTERGENIC                    | NA                                                                       |
| <i>Desi_wild_11334142</i> | NA                                  | <i>Ca_desi_Chr04</i> | 11334142                | C/T  | NA                 | INTERGENIC                    | NA                                                                       |
| <i>Desi_wild_11387866</i> | NA                                  | <i>Ca_desi_Chr04</i> | 11387866                | C/T  | NA                 | INTERGENIC                    | NA                                                                       |
| <i>Desi_wild_11399103</i> | NA                                  | <i>Ca_desi_Chr04</i> | 11399103                | C/T  | Gene_Ca_04679.3    | NON_SYNONYMOUS_CODING         | NAC domain-containing protein 78                                         |
| <i>Desi_wild_11407181</i> | NA                                  | <i>Ca_desi_Chr04</i> | 11407181                | T/G  | NA                 | INTERGENIC                    | NA                                                                       |
| <i>Desi_wild_11407191</i> | NA                                  | <i>Ca_desi_Chr04</i> | 11407191                | T/G  | NA                 | INTERGENIC                    | NA                                                                       |
| <i>Desi_wild_11440052</i> | NA                                  | <i>Ca_desi_Chr04</i> | 11440052                | T/A  | NA                 | INTERGENIC                    | NA                                                                       |
| <i>Desi_wild_11444591</i> | NA                                  | <i>Ca_desi_Chr04</i> | 11444591                | A/G  | Gene_Ca_04685.1    | INTRON                        | Polyadenylate-binding protein 3                                          |
| <i>Desi_wild_11444656</i> | NA                                  | <i>Ca_desi_Chr04</i> | 11444656                | G/A  | Gene_Ca_04685.1    | INTRON                        | Polyadenylate-binding protein 3                                          |
| <i>Desi_wild_11459017</i> | NA                                  | <i>Ca_desi_Chr04</i> | 11459017                | A/C  | Gene_Ca_04685.1    | SYNONYMOUS_CODING             | Polyadenylate-binding protein 3                                          |
| <i>Desi_wild_11491003</i> | NA                                  | <i>Ca_desi_Chr04</i> | 11491003                | A/G  | NA                 | INTERGENIC                    | NA                                                                       |
| <i>Desi_wild_11491028</i> | NA                                  | <i>Ca_desi_Chr04</i> | 11491028                | C/T  | NA                 | INTERGENIC                    | NA                                                                       |
| <i>Desi_wild_11538965</i> | NA                                  | <i>Ca_desi_Chr04</i> | 11538965                | C/G  | Gene_Ca_04694.1    | NON_SYNONYMOUS_CODING         | NA                                                                       |
| <i>Desi_wild_11539242</i> | NA                                  | <i>Ca_desi_Chr04</i> | 11539242                | C/T  | Gene_Ca_04694.1    | SYNONYMOUS_CODING             | NA                                                                       |
| <i>Desi_wild_11539358</i> | NA                                  | <i>Ca_desi_Chr04</i> | 11539358                | C/A  | Gene_Ca_04694.1    | NON_SYNONYMOUS_CODING         | NA                                                                       |
| <i>Desi_wild_11539401</i> | NA                                  | <i>Ca_desi_Chr04</i> | 11539401                | T/C  | Gene_Ca_04694.1    | SYNONYMOUS_CODING             | NA                                                                       |
| <i>Desi_wild_11540055</i> | NA                                  | <i>Ca_desi_Chr04</i> | 11540055                | A/G  | Gene_Ca_04694.1    | SYNONYMOUS_CODING             | NA                                                                       |
| <i>Desi_wild_11540126</i> | NA                                  | <i>Ca_desi_Chr04</i> | 11540126                | C/G  | Gene_Ca_04694.1    | INTRON                        | NA                                                                       |
| <i>Desi_wild_11540314</i> | NA                                  | <i>Ca_desi_Chr04</i> | 11540314                | G/A  | Gene_Ca_04694.1    | SYNONYMOUS_CODING             | NA                                                                       |
| <i>Desi_wild_11541368</i> | NA                                  | <i>Ca_desi_Chr04</i> | 11541368                | A/G  | Gene_Ca_04694.1    | SYNONYMOUS_CODING             | NA                                                                       |
| <i>Desi_wild_11542258</i> | NA                                  | <i>Ca_desi_Chr04</i> | 11542258                | A/G  | Gene_Ca_04694.1    | SYNONYMOUS_CODING             | NA                                                                       |
| <i>Desi_wild_11543134</i> | NA                                  | <i>Ca_desi_Chr04</i> | 11543134                | T/A  | Gene_Ca_04694.1    | INTRON                        | NA                                                                       |
| <i>Desi_wild_11543211</i> | NA                                  | <i>Ca_desi_Chr04</i> | 11543211                | G/A  | Gene_Ca_04694.1    | INTRON                        | NA                                                                       |
| <i>Desi_wild_11567921</i> | NA                                  | <i>Ca_desi_Chr04</i> | 11567921                | T/A  | NA                 | INTERGENIC                    | NA                                                                       |
| <i>Desi_wild_11570353</i> | NA                                  | <i>Ca_desi_Chr04</i> | 11570353                | G/A  | Gene_Ca_04696.1    | INTRON                        | Uncharacterized mitochondrial carrier C12B10.09                          |
| <i>Desi_wild_11570362</i> | NA                                  | <i>Ca_desi_Chr04</i> | 11570362                | C/T  | Gene_Ca_04696.1    | INTRON                        | Uncharacterized mitochondrial carrier C12B10.09                          |

| SNP IDs                   | NCBI dbSNP accession IDs (NCBI_SS#) | Chromosomes          | Physical positions (bp) | SNPs | Gene accession IDs | Sequence components of genome | Putative functions                              |
|---------------------------|-------------------------------------|----------------------|-------------------------|------|--------------------|-------------------------------|-------------------------------------------------|
| <i>Desi_wild_11570433</i> | NA                                  | <i>Ca_desi_Chr04</i> | 11570433                | C/T  | Gene_Ca_04696.1    | INTRON                        | Uncharacterized mitochondrial carrier C12B10.09 |
| <i>Desi_wild_11572131</i> | NA                                  | <i>Ca_desi_Chr04</i> | 11572131                | C/A  | Gene_Ca_04696.1    | INTRON                        | Uncharacterized mitochondrial carrier C12B10.09 |
| <i>Desi_wild_11572192</i> | NA                                  | <i>Ca_desi_Chr04</i> | 11572192                | A/C  | Gene_Ca_04696.1    | INTRON                        | Uncharacterized mitochondrial carrier C12B10.09 |
| <i>Desi_wild_11582029</i> | NA                                  | <i>Ca_desi_Chr04</i> | 11582029                | T/C  | NA                 | INTERGENIC                    | NA                                              |
| <i>Desi_wild_11582050</i> | NA                                  | <i>Ca_desi_Chr04</i> | 11582050                | C/T  | NA                 | INTERGENIC                    | NA                                              |
| <i>Desi_wild_11582317</i> | NA                                  | <i>Ca_desi_Chr04</i> | 11582317                | T/C  | NA                 | INTERGENIC                    | NA                                              |
| <i>Desi_wild_11585305</i> | NA                                  | <i>Ca_desi_Chr04</i> | 11585305                | T/C  | Gene_Ca_04698.1    | DOWNSTREAM                    | Choline/ethanolamine kinase                     |
| <i>Desi_wild_11585310</i> | NA                                  | <i>Ca_desi_Chr04</i> | 11585310                | T/C  | Gene_Ca_04698.1    | DOWNSTREAM                    | Choline/ethanolamine kinase                     |
| <i>Desi_wild_11585312</i> | NA                                  | <i>Ca_desi_Chr04</i> | 11585312                | G/A  | Gene_Ca_04698.1    | DOWNSTREAM                    | Choline/ethanolamine kinase                     |
| <i>Desi_wild_11586043</i> | NA                                  | <i>Ca_desi_Chr04</i> | 11586043                | A/C  | Gene_Ca_04698.1    | DOWNSTREAM                    | Choline/ethanolamine kinase                     |
| <i>Desi_wild_11586046</i> | NA                                  | <i>Ca_desi_Chr04</i> | 11586046                | T/A  | Gene_Ca_04698.1    | DOWNSTREAM                    | Choline/ethanolamine kinase                     |
| <i>Desi_wild_11586049</i> | NA                                  | <i>Ca_desi_Chr04</i> | 11586049                | G/C  | Gene_Ca_04698.1    | DOWNSTREAM                    | Choline/ethanolamine kinase                     |
| <i>Desi_wild_11655818</i> | NA                                  | <i>Ca_desi_Chr04</i> | 11655818                | G/A  | Gene_Ca_04705.1    | UPSTREAM                      | NA                                              |
| <i>Desi_wild_11662177</i> | NA                                  | <i>Ca_desi_Chr04</i> | 11662177                | T/G  | Gene_Ca_04705.1    | SYNONYMOUS_CODING             | NA                                              |
| <i>Desi_wild_11666148</i> | NA                                  | <i>Ca_desi_Chr04</i> | 11666148                | A/T  | Gene_Ca_04705.1    | DOWNSTREAM                    | NA                                              |
| <i>Desi_wild_11666475</i> | NA                                  | <i>Ca_desi_Chr04</i> | 11666475                | C/A  | Gene_Ca_04705.1    | DOWNSTREAM                    | NA                                              |
| <i>Desi_wild_11674576</i> | NA                                  | <i>Ca_desi_Chr04</i> | 11674576                | A/T  | NA                 | INTERGENIC                    | NA                                              |
| <i>Desi_wild_11674590</i> | NA                                  | <i>Ca_desi_Chr04</i> | 11674590                | T/C  | NA                 | INTERGENIC                    | NA                                              |
| <i>Desi_wild_11674597</i> | NA                                  | <i>Ca_desi_Chr04</i> | 11674597                | A/C  | NA                 | INTERGENIC                    | NA                                              |
| <i>Desi_wild_11674605</i> | NA                                  | <i>Ca_desi_Chr04</i> | 11674605                | G/A  | NA                 | INTERGENIC                    | NA                                              |
| <i>Desi_wild_11674615</i> | NA                                  | <i>Ca_desi_Chr04</i> | 11674615                | C/A  | NA                 | INTERGENIC                    | NA                                              |
| <i>Desi_wild_11674619</i> | NA                                  | <i>Ca_desi_Chr04</i> | 11674619                | A/C  | NA                 | INTERGENIC                    | NA                                              |
| <i>Desi_wild_11674624</i> | NA                                  | <i>Ca_desi_Chr04</i> | 11674624                | A/C  | NA                 | INTERGENIC                    | NA                                              |
| <i>Desi_wild_11704367</i> | NA                                  | <i>Ca_desi_Chr04</i> | 11704367                | T/G  | NA                 | INTERGENIC                    | NA                                              |
| <i>Desi_wild_11704768</i> | NA                                  | <i>Ca_desi_Chr04</i> | 11704768                | T/C  | NA                 | INTERGENIC                    | NA                                              |
| <i>Desi_wild_11705421</i> | NA                                  | <i>Ca_desi_Chr04</i> | 11705421                | A/C  | NA                 | INTERGENIC                    | NA                                              |
| <i>Desi_wild_11705422</i> | NA                                  | <i>Ca_desi_Chr04</i> | 11705422                | G/T  | NA                 | INTERGENIC                    | NA                                              |
| <i>Desi_wild_11705425</i> | NA                                  | <i>Ca_desi_Chr04</i> | 11705425                | C/G  | NA                 | INTERGENIC                    | NA                                              |
| <i>Desi_wild_11995878</i> | NA                                  | <i>Ca_desi_Chr04</i> | 11995878                | T/C  | Gene_Ca_04731.1    | INTRON                        | Para-aminobenzoate synthase                     |
| <i>Desi_wild_12006851</i> | NA                                  | <i>Ca_desi_Chr04</i> | 12006851                | A/T  | Gene_Ca_04732.1    | DOWNSTREAM                    | Chorismate synthase 1, chloroplastic            |
| <i>Desi_wild_12098589</i> | NA                                  | <i>Ca_desi_Chr04</i> | 12098589                | C/T  | NA                 | INTERGENIC                    | NA                                              |
| <i>Desi_wild_12098592</i> | NA                                  | <i>Ca_desi_Chr04</i> | 12098592                | C/T  | NA                 | INTERGENIC                    | NA                                              |
| <i>Desi_wild_12098595</i> | NA                                  | <i>Ca_desi_Chr04</i> | 12098595                | C/T  | NA                 | INTERGENIC                    | NA                                              |
| <i>Desi_wild_12098598</i> | NA                                  | <i>Ca_desi_Chr04</i> | 12098598                | C/T  | NA                 | INTERGENIC                    | NA                                              |
| <i>Desi_wild_12098606</i> | NA                                  | <i>Ca_desi_Chr04</i> | 12098606                | C/T  | NA                 | INTERGENIC                    | NA                                              |
| <i>Desi_wild_12119441</i> | NA                                  | <i>Ca_desi_Chr04</i> | 12119441                | T/A  | NA                 | INTERGENIC                    | NA                                              |
| <i>Desi_wild_12119463</i> | NA                                  | <i>Ca_desi_Chr04</i> | 12119463                | A/G  | NA                 | INTERGENIC                    | NA                                              |
| <i>Desi_wild_12119500</i> | NA                                  | <i>Ca_desi_Chr04</i> | 12119500                | T/C  | NA                 | INTERGENIC                    | NA                                              |
| <i>Desi_wild_12119513</i> | NA                                  | <i>Ca_desi_Chr04</i> | 12119513                | T/A  | NA                 | INTERGENIC                    | NA                                              |
| <i>Desi_wild_12130950</i> | NA                                  | <i>Ca_desi_Chr04</i> | 12130950                | G/T  | Gene_Ca_04743.1    | INTRON                        | Protein MOR1                                    |
| <i>Desi_wild_12298911</i> | NA                                  | <i>Ca_desi_Chr04</i> | 12298911                | A/G  | Gene_Ca_04755.1    | NON_SYNONYMOUS_CODING         | ABC transporter G family member 28              |
| <i>Desi_wild_12331166</i> | NA                                  | <i>Ca_desi_Chr04</i> | 12331166                | C/T  | Gene_Ca_04760.1    | SYNONYMOUS_CODING             | Phenylalanine ammonia-lyase 2                   |
| <i>Desi_wild_12331172</i> | NA                                  | <i>Ca_desi_Chr04</i> | 12331172                | C/A  | Gene_Ca_04760.1    | SYNONYMOUS_CODING             | Phenylalanine ammonia-lyase 2                   |
| <i>Desi_wild_12331187</i> | NA                                  | <i>Ca_desi_Chr04</i> | 12331187                | G/A  | Gene_Ca_04760.1    | SYNONYMOUS_CODING             | Phenylalanine ammonia-lyase 2                   |

| SNP IDs                   | NCBI dbSNP accession IDs (NCBI_SS#) | Chromosomes          | Physical positions (bp) | SNPs | Gene accession IDs | Sequence components of genome | Putative functions                                                      |
|---------------------------|-------------------------------------|----------------------|-------------------------|------|--------------------|-------------------------------|-------------------------------------------------------------------------|
| <i>Desi_wild_12331190</i> | NA                                  | <i>Ca_desi_Chr04</i> | 12331190                | C/T  | Gene_Ca_04760.1    | SYNONYMOUS_CODING             | Phenylalanine ammonia-lyase 2                                           |
| <i>Desi_wild_12331193</i> | NA                                  | <i>Ca_desi_Chr04</i> | 12331193                | G/A  | Gene_Ca_04760.1    | SYNONYMOUS_CODING             | Phenylalanine ammonia-lyase 2                                           |
| <i>Desi_wild_12331217</i> | NA                                  | <i>Ca_desi_Chr04</i> | 12331217                | A/G  | Gene_Ca_04760.1    | SYNONYMOUS_CODING             | Phenylalanine ammonia-lyase 2                                           |
| <i>Desi_wild_12413541</i> | NA                                  | <i>Ca_desi_Chr04</i> | 12413541                | A/T  | Gene_Ca_04768.3    | NON_SYNONYMOUS_CODING         | Conserved oligomeric Golgi complex subunit 1                            |
| <i>Desi_wild_12415544</i> | NA                                  | <i>Ca_desi_Chr04</i> | 12415544                | A/C  | Gene_Ca_04768.3    | SYNONYMOUS_CODING             | Conserved oligomeric Golgi complex subunit 1                            |
| <i>Desi_wild_12415630</i> | NA                                  | <i>Ca_desi_Chr04</i> | 12415630                | C/G  | Gene_Ca_04768.3    | NON_SYNONYMOUS_CODING         | Conserved oligomeric Golgi complex subunit 1                            |
| <i>Desi_wild_12528593</i> | NA                                  | <i>Ca_desi_Chr04</i> | 12528593                | A/C  | NA                 | INTERGENIC                    | NA                                                                      |
| <i>Desi_wild_12663614</i> | NA                                  | <i>Ca_desi_Chr04</i> | 12663614                | T/A  | Gene_Ca_04783.2    | DOWNSTREAM                    | NA                                                                      |
| <i>Desi_wild_12663616</i> | NA                                  | <i>Ca_desi_Chr04</i> | 12663616                | A/G  | Gene_Ca_04783.2    | DOWNSTREAM                    | NA                                                                      |
| <i>Desi_wild_12671646</i> | NA                                  | <i>Ca_desi_Chr04</i> | 12671646                | A/G  | NA                 | INTERGENIC                    | NA                                                                      |
| <i>Desi_wild_12752913</i> | NA                                  | <i>Ca_desi_Chr04</i> | 12752913                | T/A  | Gene_Ca_04789.1    | INTRON                        | Receptor-like protein kinase At3g21340                                  |
| <i>Desi_wild_12772184</i> | NA                                  | <i>Ca_desi_Chr04</i> | 12772184                | G/C  | Gene_Ca_04790.1    | NON_SYNONYMOUS_CODING         | AP2/ERF and B3 domain-containing transcription repressor TEM1           |
| <i>Desi_wild_12791217</i> | NA                                  | <i>Ca_desi_Chr04</i> | 12791217                | A/T  | NA                 | INTERGENIC                    | NA                                                                      |
| <i>Desi_wild_12791262</i> | NA                                  | <i>Ca_desi_Chr04</i> | 12791262                | A/C  | NA                 | INTERGENIC                    | NA                                                                      |
| <i>Desi_wild_12792127</i> | NA                                  | <i>Ca_desi_Chr04</i> | 12792127                | A/G  | Gene_Ca_04792.1    | NON_SYNONYMOUS_CODING         | Two-component response regulator ARR12                                  |
| <i>Desi_wild_12820783</i> | NA                                  | <i>Ca_desi_Chr04</i> | 12820783                | A/G  | Gene_Ca_04794.1    | NON_SYNONYMOUS_CODING         | Aspartyl aminopeptidase                                                 |
| <i>Desi_wild_12915127</i> | NA                                  | <i>Ca_desi_Chr04</i> | 12915127                | G/A  | Gene_Ca_04800.1    | INTRON                        | ABC transporter G family member 39                                      |
| <i>Desi_wild_12991328</i> | NA                                  | <i>Ca_desi_Chr04</i> | 12991328                | C/T  | NA                 | INTERGENIC                    | NA                                                                      |
| <i>Desi_wild_15802546</i> | NA                                  | <i>Ca_desi_Chr04</i> | 15802546                | A/C  | Gene_Ca_04839.1    | INTRON                        | RING/U-box superfamily protein                                          |
| <i>Desi_wild_15867143</i> | NA                                  | <i>Ca_desi_Chr04</i> | 15867143                | C/T  | NA                 | INTERGENIC                    | NA                                                                      |
| <i>Desi_wild_15867148</i> | NA                                  | <i>Ca_desi_Chr04</i> | 15867148                | C/T  | NA                 | INTERGENIC                    | NA                                                                      |
| <i>Desi_wild_15875005</i> | NA                                  | <i>Ca_desi_Chr04</i> | 15875005                | T/C  | Gene_Ca_04847.1    | UPSTREAM                      | Putative uncharacterized protein                                        |
| <i>Desi_wild_15957923</i> | NA                                  | <i>Ca_desi_Chr04</i> | 15957923                | C/A  | NA                 | INTERGENIC                    | NA                                                                      |
| <i>Desi_wild_15957928</i> | NA                                  | <i>Ca_desi_Chr04</i> | 15957928                | G/A  | NA                 | INTERGENIC                    | NA                                                                      |
| <i>Desi_wild_15957930</i> | NA                                  | <i>Ca_desi_Chr04</i> | 15957930                | C/A  | NA                 | INTERGENIC                    | NA                                                                      |
| <i>Desi_wild_15957956</i> | NA                                  | <i>Ca_desi_Chr04</i> | 15957956                | T/G  | NA                 | INTERGENIC                    | NA                                                                      |
| <i>Desi_wild_16094730</i> | NA                                  | <i>Ca_desi_Chr04</i> | 16094730                | T/C  | Gene_Ca_04874.1    | SYNONYMOUS_CODING             | Heavy metal transport/detoxification superfamily protein                |
| <i>Desi_wild_16135420</i> | NA                                  | <i>Ca_desi_Chr04</i> | 16135420                | G/A  | NA                 | INTERGENIC                    | NA                                                                      |
| <i>Desi_wild_16219684</i> | NA                                  | <i>Ca_desi_Chr04</i> | 16219684                | G/A  | NA                 | INTERGENIC                    | NA                                                                      |
| <i>Desi_wild_16303827</i> | NA                                  | <i>Ca_desi_Chr04</i> | 16303827                | C/T  | Gene_Ca_04900.1    | UPSTREAM                      | Branched-chain-amino-acid aminotransferase-like protein 1               |
| <i>Desi_wild_16318794</i> | NA                                  | <i>Ca_desi_Chr04</i> | 16318794                | C/T  | NA                 | INTERGENIC                    | NA                                                                      |
| <i>Desi_wild_16318820</i> | NA                                  | <i>Ca_desi_Chr04</i> | 16318820                | G/A  | NA                 | INTERGENIC                    | NA                                                                      |
| <i>Desi_wild_16362421</i> | NA                                  | <i>Ca_desi_Chr04</i> | 16362421                | T/G  | Gene_Ca_04902.1    | SYNONYMOUS_CODING             | E3 ubiquitin-protein ligase ATL6                                        |
| <i>Desi_wild_16362424</i> | NA                                  | <i>Ca_desi_Chr04</i> | 16362424                | T/G  | Gene_Ca_04902.1    | SYNONYMOUS_CODING             | E3 ubiquitin-protein ligase ATL6                                        |
| <i>Desi_wild_16362472</i> | NA                                  | <i>Ca_desi_Chr04</i> | 16362472                | T/G  | Gene_Ca_04902.1    | SYNONYMOUS_CODING             | E3 ubiquitin-protein ligase ATL6                                        |
| <i>Desi_wild_16410331</i> | NA                                  | <i>Ca_desi_Chr04</i> | 16410331                | A/T  | Gene_Ca_04908.1    | INTRON                        | Exocyst complex component 2                                             |
| <i>Desi_wild_16541771</i> | NA                                  | <i>Ca_desi_Chr04</i> | 16541771                | T/C  | Gene_Ca_04915.1    | UPSTREAM                      | Protein of unknown function (DUF668)                                    |
| <i>Desi_wild_16557315</i> | NA                                  | <i>Ca_desi_Chr04</i> | 16557315                | C/G  | NA                 | INTERGENIC                    | NA                                                                      |
| <i>Desi_wild_16565082</i> | NA                                  | <i>Ca_desi_Chr04</i> | 16565082                | G/A  | Gene_Ca_04918.1    | SYNONYMOUS_CODING             | gamete expressed 2                                                      |
| <i>Desi_wild_16568555</i> | NA                                  | <i>Ca_desi_Chr04</i> | 16568555                | T/C  | Gene_Ca_04918.1    | INTRON                        | gamete expressed 2                                                      |
| <i>Desi_wild_16571476</i> | NA                                  | <i>Ca_desi_Chr04</i> | 16571476                | A/G  | Gene_Ca_04919.1    | SYNONYMOUS_CODING             | G-type lectin S-receptor-like serine/threonine-protein kinase At1g34300 |
| <i>Desi_wild_16571500</i> | NA                                  | <i>Ca_desi_Chr04</i> | 16571500                | C/T  | Gene_Ca_04919.1    | SYNONYMOUS_CODING             | G-type lectin S-receptor-like serine/threonine-protein kinase At1g34300 |
| <i>Desi_wild_16571809</i> | NA                                  | <i>Ca_desi_Chr04</i> | 16571809                | A/G  | Gene_Ca_04919.1    | SYNONYMOUS_CODING             | G-type lectin S-receptor-like serine/threonine-protein kinase At1g34300 |
| <i>Desi_wild_16723081</i> | NA                                  | <i>Ca_desi_Chr04</i> | 16723081                | T/C  | Gene_Ca_04930.1    | INTRON                        | HIV Tat-specific factor 1 homolog                                       |

| SNP IDs                   | NCBI dbSNP accession IDs (NCBI_SS#) | Chromosomes          | Physical positions (bp) | SNPs | Gene accession IDs | Sequence components of genome | Putative functions                                                                        |
|---------------------------|-------------------------------------|----------------------|-------------------------|------|--------------------|-------------------------------|-------------------------------------------------------------------------------------------|
| <i>Desi_wild_16744606</i> | NA                                  | <i>Ca_desi_Chr04</i> | 16744606                | T/G  | Gene_Ca_04932.2    | SYNONYMOUS_CODING             | NA                                                                                        |
| <i>Desi_wild_16744701</i> | NA                                  | <i>Ca_desi_Chr04</i> | 16744701                | A/C  | Gene_Ca_04932.2    | SYNONYMOUS_CODING             | NA                                                                                        |
| <i>Desi_wild_16795445</i> | NA                                  | <i>Ca_desi_Chr04</i> | 16795445                | C/A  | Gene_Ca_04935.1    | SYNONYMOUS_CODING             | Nuclear pore complex protein Nup98-Nup96                                                  |
| <i>Desi_wild_16894642</i> | NA                                  | <i>Ca_desi_Chr04</i> | 16894642                | C/A  | Gene_Ca_04944.1    | UPSTREAM                      | Protein BCCIP homolog                                                                     |
| <i>Desi_wild_16900160</i> | NA                                  | <i>Ca_desi_Chr04</i> | 16900160                | T/C  | Gene_Ca_04945.1    | INTRON                        | Tetratricopeptide repeat (TPR)-like superfamily protein                                   |
| <i>Desi_wild_16900349</i> | NA                                  | <i>Ca_desi_Chr04</i> | 16900349                | A/G  | Gene_Ca_04945.1    | SYNONYMOUS_CODING             | Tetratricopeptide repeat (TPR)-like superfamily protein                                   |
| <i>Desi_wild_16903791</i> | NA                                  | <i>Ca_desi_Chr04</i> | 16903791                | T/C  | Gene_Ca_04945.1    | INTRON                        | Tetratricopeptide repeat (TPR)-like superfamily protein                                   |
| <i>Desi_wild_16950056</i> | NA                                  | <i>Ca_desi_Chr04</i> | 16950056                | C/T  | NA                 | INTERGENIC                    | NA                                                                                        |
| <i>Desi_wild_16950110</i> | NA                                  | <i>Ca_desi_Chr04</i> | 16950110                | A/G  | NA                 | INTERGENIC                    | NA                                                                                        |
| <i>Desi_wild_17026028</i> | NA                                  | <i>Ca_desi_Chr04</i> | 17026028                | T/G  | Gene_Ca_04952.1    | NON_SYNONYMOUS_CODING         | Dof zinc finger protein DOF4.6                                                            |
| <i>Desi_wild_17026071</i> | NA                                  | <i>Ca_desi_Chr04</i> | 17026071                | T/A  | Gene_Ca_04952.1    | SYNONYMOUS_CODING             | Dof zinc finger protein DOF4.6                                                            |
| <i>Desi_wild_17945271</i> | NA                                  | <i>Ca_desi_Chr04</i> | 17945271                | C/T  | Gene_Ca_04966.1    | INTRON                        | Actin-related protein 9                                                                   |
| <i>Desi_wild_17996121</i> | NA                                  | <i>Ca_desi_Chr04</i> | 17996121                | G/A  | Gene_Ca_04970.1    | SYNONYMOUS_CODING             | NA                                                                                        |
| <i>Desi_wild_18043871</i> | NA                                  | <i>Ca_desi_Chr04</i> | 18043871                | T/C  | NA                 | INTERGENIC                    | NA                                                                                        |
| <i>Desi_wild_18043884</i> | NA                                  | <i>Ca_desi_Chr04</i> | 18043884                | A/C  | NA                 | INTERGENIC                    | NA                                                                                        |
| <i>Desi_wild_18064741</i> | NA                                  | <i>Ca_desi_Chr04</i> | 18064741                | G/A  | NA                 | INTERGENIC                    | NA                                                                                        |
| <i>Desi_wild_18064820</i> | NA                                  | <i>Ca_desi_Chr04</i> | 18064820                | C/A  | NA                 | INTERGENIC                    | NA                                                                                        |
| <i>Desi_wild_18240713</i> | NA                                  | <i>Ca_desi_Chr04</i> | 18240713                | G/A  | Gene_Ca_04997.1    | NON_SYNONYMOUS_CODING         | unknown protein                                                                           |
| <i>Desi_wild_18280066</i> | NA                                  | <i>Ca_desi_Chr04</i> | 18280066                | C/G  | NA                 | INTERGENIC                    | NA                                                                                        |
| <i>Desi_wild_18280119</i> | NA                                  | <i>Ca_desi_Chr04</i> | 18280119                | C/T  | NA                 | INTERGENIC                    | NA                                                                                        |
| <i>Desi_wild_18280131</i> | NA                                  | <i>Ca_desi_Chr04</i> | 18280131                | C/G  | NA                 | INTERGENIC                    | NA                                                                                        |
| <i>Desi_wild_18289691</i> | NA                                  | <i>Ca_desi_Chr04</i> | 18289691                | T/C  | Gene_Ca_05001.1    | SYNONYMOUS_CODING             | Probable protein phosphatase 2C 51                                                        |
| <i>Desi_wild_18291914</i> | NA                                  | <i>Ca_desi_Chr04</i> | 18291914                | G/C  | Gene_Ca_05001.1    | INTRON                        | Probable protein phosphatase 2C 51                                                        |
| <i>Desi_wild_18311058</i> | NA                                  | <i>Ca_desi_Chr04</i> | 18311058                | T/G  | Gene_Ca_05001.1    | INTRON                        | Probable protein phosphatase 2C 51                                                        |
| <i>Desi_wild_18311118</i> | NA                                  | <i>Ca_desi_Chr04</i> | 18311118                | G/A  | Gene_Ca_05001.1    | INTRON                        | Probable protein phosphatase 2C 51                                                        |
| <i>Desi_wild_18312575</i> | NA                                  | <i>Ca_desi_Chr04</i> | 18312575                | T/G  | Gene_Ca_05001.1    | INTRON                        | Probable protein phosphatase 2C 51                                                        |
| <i>Desi_wild_18312635</i> | NA                                  | <i>Ca_desi_Chr04</i> | 18312635                | G/A  | Gene_Ca_05001.1    | INTRON                        | Probable protein phosphatase 2C 51                                                        |
| <i>Desi_wild_18312819</i> | NA                                  | <i>Ca_desi_Chr04</i> | 18312819                | C/A  | Gene_Ca_05001.1    | INTRON                        | Probable protein phosphatase 2C 51                                                        |
| <i>Desi_wild_18313138</i> | NA                                  | <i>Ca_desi_Chr04</i> | 18313138                | T/C  | Gene_Ca_05001.1    | INTRON                        | Probable protein phosphatase 2C 51                                                        |
| <i>Desi_wild_18313486</i> | NA                                  | <i>Ca_desi_Chr04</i> | 18313486                | T/C  | Gene_Ca_05001.1    | INTRON                        | Probable protein phosphatase 2C 51                                                        |
| <i>Desi_wild_18339940</i> | NA                                  | <i>Ca_desi_Chr04</i> | 18339940                | C/T  | NA                 | INTERGENIC                    | NA                                                                                        |
| <i>Desi_wild_18340087</i> | NA                                  | <i>Ca_desi_Chr04</i> | 18340087                | A/C  | NA                 | INTERGENIC                    | NA                                                                                        |
| <i>Desi_wild_18348298</i> | NA                                  | <i>Ca_desi_Chr04</i> | 18348298                | C/T  | NA                 | INTERGENIC                    | NA                                                                                        |
| <i>Desi_wild_18351604</i> | NA                                  | <i>Ca_desi_Chr04</i> | 18351604                | G/C  | NA                 | INTERGENIC                    | NA                                                                                        |
| <i>Desi_wild_18366659</i> | NA                                  | <i>Ca_desi_Chr04</i> | 18366659                | G/A  | Gene_Ca_05008.1    | DOWNSTREAM                    | kinase interacting (KIP1-like) family protein                                             |
| <i>Desi_wild_18368255</i> | NA                                  | <i>Ca_desi_Chr04</i> | 18368255                | C/T  | Gene_Ca_05007.1    | DOWNSTREAM                    | Sulfate transporter 3.1                                                                   |
| <i>Desi_wild_18368995</i> | NA                                  | <i>Ca_desi_Chr04</i> | 18368995                | T/C  | NA                 | INTERGENIC                    | NA                                                                                        |
| <i>Desi_wild_18369011</i> | NA                                  | <i>Ca_desi_Chr04</i> | 18369011                | A/G  | NA                 | INTERGENIC                    | NA                                                                                        |
| <i>Desi_wild_18369344</i> | NA                                  | <i>Ca_desi_Chr04</i> | 18369344                | G/C  | NA                 | INTERGENIC                    | NA                                                                                        |
| <i>Desi_wild_18369480</i> | NA                                  | <i>Ca_desi_Chr04</i> | 18369480                | C/T  | NA                 | INTERGENIC                    | NA                                                                                        |
| <i>Desi_wild_18369484</i> | NA                                  | <i>Ca_desi_Chr04</i> | 18369484                | C/A  | NA                 | INTERGENIC                    | NA                                                                                        |
| <i>Desi_wild_18372411</i> | NA                                  | <i>Ca_desi_Chr04</i> | 18372411                | T/C  | Gene_Ca_05008.1    | NON_SYNONYMOUS_CODING         | kinase interacting (KIP1-like) family protein                                             |
| <i>Desi_wild_18372436</i> | NA                                  | <i>Ca_desi_Chr04</i> | 18372436                | A/G  | Gene_Ca_05008.1    | SYNONYMOUS_CODING             | kinase interacting (KIP1-like) family protein                                             |
| <i>Desi_wild_18445893</i> | NA                                  | <i>Ca_desi_Chr04</i> | 18445893                | C/T  | Gene_Ca_05013.1    | DOWNSTREAM                    | Bifunctional inhibitor/lipid-transfer protein/seed storage 2S albumin superfamily protein |

| SNP IDs                   | NCBI dbSNP accession IDs (NCBI_SS#) | Chromosomes          | Physical positions (bp) | SNPs | Gene accession IDs | Sequence components of genome | Putative functions                                                          |
|---------------------------|-------------------------------------|----------------------|-------------------------|------|--------------------|-------------------------------|-----------------------------------------------------------------------------|
| <i>Desi_wild_18506530</i> | NA                                  | <i>Ca_desi_Chr04</i> | 18506530                | A/C  | Gene_Ca_05020.1    | INTRON                        | Acyl-CoA N-acyltransferase with RING/FYVE/PHD-type zinc finger protein      |
| <i>Desi_wild_18687591</i> | NA                                  | <i>Ca_desi_Chr04</i> | 18687591                | C/T  | NA                 | INTERGENIC                    | NA                                                                          |
| <i>Desi_wild_18777558</i> | NA                                  | <i>Ca_desi_Chr04</i> | 18777558                | A/G  | NA                 | INTERGENIC                    | NA                                                                          |
| <i>Desi_wild_18777560</i> | NA                                  | <i>Ca_desi_Chr04</i> | 18777560                | T/C  | NA                 | INTERGENIC                    | NA                                                                          |
| <i>Desi_wild_18777569</i> | NA                                  | <i>Ca_desi_Chr04</i> | 18777569                | A/G  | NA                 | INTERGENIC                    | NA                                                                          |
| <i>Desi_wild_18777571</i> | NA                                  | <i>Ca_desi_Chr04</i> | 18777571                | G/A  | NA                 | INTERGENIC                    | NA                                                                          |
| <i>Desi_wild_18778220</i> | NA                                  | <i>Ca_desi_Chr04</i> | 18778220                | C/T  | NA                 | INTERGENIC                    | NA                                                                          |
| <i>Desi_wild_18790760</i> | NA                                  | <i>Ca_desi_Chr04</i> | 18790760                | G/A  | Gene_Ca_05044.1    | UPSTREAM                      | Uncharacterized protein in xynA 3'region (Fragment)                         |
| <i>Desi_wild_20339221</i> | NA                                  | <i>Ca_desi_Chr04</i> | 20339221                | T/C  | Gene_Ca_05088.1    | SYNONYMOUS_CODING             | Putative uncharacterized protein                                            |
| <i>Desi_wild_20360977</i> | NA                                  | <i>Ca_desi_Chr04</i> | 20360977                | C/T  | NA                 | INTERGENIC                    | NA                                                                          |
| <i>Desi_wild_20361114</i> | NA                                  | <i>Ca_desi_Chr04</i> | 20361114                | A/C  | NA                 | INTERGENIC                    | NA                                                                          |
| <i>Desi_wild_20386231</i> | NA                                  | <i>Ca_desi_Chr04</i> | 20386231                | T/A  | Gene_Ca_05095.1    | DOWNSTREAM                    | Probable leucine-rich repeat receptor-like protein kinase At5g63930         |
| <i>Desi_wild_20386593</i> | NA                                  | <i>Ca_desi_Chr04</i> | 20386593                | C/G  | Gene_Ca_05095.1    | DOWNSTREAM                    | Probable leucine-rich repeat receptor-like protein kinase At5g63930         |
| <i>Desi_wild_20388518</i> | NA                                  | <i>Ca_desi_Chr04</i> | 20388518                | A/C  | Gene_Ca_05095.1    | SYNONYMOUS_CODING             | Probable leucine-rich repeat receptor-like protein kinase At5g63930         |
| <i>Desi_wild_20388677</i> | NA                                  | <i>Ca_desi_Chr04</i> | 20388677                | A/G  | Gene_Ca_05095.1    | SYNONYMOUS_CODING             | Probable leucine-rich repeat receptor-like protein kinase At5g63930         |
| <i>Desi_wild_20388750</i> | NA                                  | <i>Ca_desi_Chr04</i> | 20388750                | C/T  | Gene_Ca_05095.1    | INTRON                        | Probable leucine-rich repeat receptor-like protein kinase At5g63930         |
| <i>Desi_wild_20388822</i> | NA                                  | <i>Ca_desi_Chr04</i> | 20388822                | C/T  | Gene_Ca_05095.1    | INTRON                        | Probable leucine-rich repeat receptor-like protein kinase At5g63930         |
| <i>Desi_wild_20396629</i> | NA                                  | <i>Ca_desi_Chr04</i> | 20396629                | G/C  | Gene_Ca_05095.1    | INTRON                        | Probable leucine-rich repeat receptor-like protein kinase At5g63930         |
| <i>Desi_wild_20405127</i> | NA                                  | <i>Ca_desi_Chr04</i> | 20405127                | C/T  | Gene_Ca_05095.1    | INTRON                        | Probable leucine-rich repeat receptor-like protein kinase At5g63930         |
| <i>Desi_wild_20517887</i> | NA                                  | <i>Ca_desi_Chr04</i> | 20517887                | G/T  | NA                 | INTERGENIC                    | NA                                                                          |
| <i>Desi_wild_20517898</i> | NA                                  | <i>Ca_desi_Chr04</i> | 20517898                | C/A  | NA                 | INTERGENIC                    | NA                                                                          |
| <i>Desi_wild_20518130</i> | NA                                  | <i>Ca_desi_Chr04</i> | 20518130                | C/T  | NA                 | INTERGENIC                    | NA                                                                          |
| <i>Desi_wild_20518452</i> | NA                                  | <i>Ca_desi_Chr04</i> | 20518452                | A/G  | NA                 | INTERGENIC                    | NA                                                                          |
| <i>Desi_wild_20518706</i> | NA                                  | <i>Ca_desi_Chr04</i> | 20518706                | C/T  | NA                 | INTERGENIC                    | NA                                                                          |
| <i>Desi_wild_20519193</i> | NA                                  | <i>Ca_desi_Chr04</i> | 20519193                | T/C  | NA                 | INTERGENIC                    | NA                                                                          |
| <i>Desi_wild_20557265</i> | NA                                  | <i>Ca_desi_Chr04</i> | 20557265                | A/C  | NA                 | INTERGENIC                    | NA                                                                          |
| <i>Desi_wild_20580218</i> | NA                                  | <i>Ca_desi_Chr04</i> | 20580218                | G/A  | Gene_Ca_05107.1    | UPSTREAM                      | Pentatricopeptide repeat-containing protein At1g30610, chloroplastic        |
| <i>Desi_wild_20580225</i> | NA                                  | <i>Ca_desi_Chr04</i> | 20580225                | T/C  | Gene_Ca_05107.1    | UPSTREAM                      | Pentatricopeptide repeat-containing protein At1g30610, chloroplastic        |
| <i>Desi_wild_20582382</i> | NA                                  | <i>Ca_desi_Chr04</i> | 20582382                | G/A  | NA                 | INTERGENIC                    | NA                                                                          |
| <i>Desi_wild_20585887</i> | NA                                  | <i>Ca_desi_Chr04</i> | 20585887                | T/G  | Gene_Ca_05108.1    | UPSTREAM                      | Activating signal cointegrator 1                                            |
| <i>Desi_wild_20586515</i> | NA                                  | <i>Ca_desi_Chr04</i> | 20586515                | A/T  | NA                 | INTERGENIC                    | NA                                                                          |
| <i>Desi_wild_20586632</i> | NA                                  | <i>Ca_desi_Chr04</i> | 20586632                | G/A  | NA                 | INTERGENIC                    | NA                                                                          |
| <i>Desi_wild_20586790</i> | NA                                  | <i>Ca_desi_Chr04</i> | 20586790                | C/T  | NA                 | INTERGENIC                    | NA                                                                          |
| <i>Desi_wild_20625667</i> | NA                                  | <i>Ca_desi_Chr04</i> | 20625667                | A/G  | Gene_Ca_05113.1    | INTRON                        | Serine/threonine-protein phosphatase 2A regulatory subunit B" subunit alpha |
| <i>Desi_wild_20633467</i> | NA                                  | <i>Ca_desi_Chr04</i> | 20633467                | A/G  | Gene_Ca_05114.1    | SYNONYMOUS_CODING             | Serine/threonine-protein phosphatase 2A regulatory subunit B" subunit alpha |
| <i>Desi_wild_20635127</i> | NA                                  | <i>Ca_desi_Chr04</i> | 20635127                | A/G  | Gene_Ca_05114.1    | UPSTREAM                      | Serine/threonine-protein phosphatase 2A regulatory subunit B" subunit alpha |
| <i>Desi_wild_20700663</i> | NA                                  | <i>Ca_desi_Chr04</i> | 20700663                | T/C  | Gene_Ca_05122.4    | SYNONYMOUS_CODING             | Myb family transcription factor APL                                         |
| <i>Desi_wild_20753163</i> | NA                                  | <i>Ca_desi_Chr04</i> | 20753163                | C/T  | Gene_Ca_05127.1    | NON_SYNONYMOUS_CODING         | Helicase ARIP4                                                              |
| <i>Desi_wild_20753169</i> | NA                                  | <i>Ca_desi_Chr04</i> | 20753169                | C/T  | Gene_Ca_05127.1    | NON_SYNONYMOUS_CODING         | Helicase ARIP4                                                              |
| <i>Desi_wild_20753193</i> | NA                                  | <i>Ca_desi_Chr04</i> | 20753193                | C/T  | Gene_Ca_05127.1    | NON_SYNONYMOUS_CODING         | Helicase ARIP4                                                              |
| <i>Desi_wild_20782463</i> | NA                                  | <i>Ca_desi_Chr04</i> | 20782463                | T/A  | NA                 | INTERGENIC                    | NA                                                                          |
| <i>Desi_wild_20839296</i> | NA                                  | <i>Ca_desi_Chr04</i> | 20839296                | A/T  | NA                 | INTERGENIC                    | NA                                                                          |
| <i>Desi_wild_20852160</i> | NA                                  | <i>Ca_desi_Chr04</i> | 20852160                | G/A  | NA                 | INTERGENIC                    | NA                                                                          |
| <i>Desi_wild_20855255</i> | NA                                  | <i>Ca_desi_Chr04</i> | 20855255                | T/C  | Gene_Ca_05134.1    | INTRON                        | Phosphoribosylaminoimidazole carboxylase, chloroplastic (Fragment)          |

| SNP IDs                   | NCBI dbSNP accession IDs (NCBI_SS#) | Chromosomes          | Physical positions (bp) | SNPs | Gene accession IDs              | Sequence components of genome | Putative functions                                                 |
|---------------------------|-------------------------------------|----------------------|-------------------------|------|---------------------------------|-------------------------------|--------------------------------------------------------------------|
| <i>Desi_wild_20855302</i> | NA                                  | <i>Ca_desi_Chr04</i> | 20855302                | T/C  | Gene_Ca_05134.1                 | INTRON                        | Phosphoribosylaminoimidazole carboxylase, chloroplastic (Fragment) |
| <i>Desi_wild_20855381</i> | NA                                  | <i>Ca_desi_Chr04</i> | 20855381                | A/G  | Gene_Ca_05134.1                 | SYNONYMOUS_CODING             | Phosphoribosylaminoimidazole carboxylase, chloroplastic (Fragment) |
| <i>Desi_wild_20855389</i> | NA                                  | <i>Ca_desi_Chr04</i> | 20855389                | A/C  | Gene_Ca_05134.1                 | SYNONYMOUS_CODING             | Phosphoribosylaminoimidazole carboxylase, chloroplastic (Fragment) |
| <i>Desi_wild_20870761</i> | NA                                  | <i>Ca_desi_Chr04</i> | 20870761                | T/C  | <a href="#">Gene_Ca_05135.1</a> | NON_SYNONYMOUS_CODING         | NA                                                                 |
| <i>Desi_wild_20870767</i> | NA                                  | <i>Ca_desi_Chr04</i> | 20870767                | A/T  | <a href="#">Gene_Ca_05135.1</a> | NON_SYNONYMOUS_CODING         | NA                                                                 |
| <i>Desi_wild_20870774</i> | NA                                  | <i>Ca_desi_Chr04</i> | 20870774                | A/G  | <a href="#">Gene_Ca_05135.1</a> | NON_SYNONYMOUS_CODING         | NA                                                                 |
| <i>Desi_wild_20872465</i> | NA                                  | <i>Ca_desi_Chr04</i> | 20872465                | A/C  | Gene_Ca_05135.1                 | INTRON                        | NA                                                                 |
| <i>Desi_wild_20879043</i> | NA                                  | <i>Ca_desi_Chr04</i> | 20879043                | T/C  | Gene_Ca_05135.1                 | NON_SYNONYMOUS_CODING         | NA                                                                 |
| <i>Desi_wild_20879169</i> | NA                                  | <i>Ca_desi_Chr04</i> | 20879169                | A/G  | Gene_Ca_05135.1                 | NON_SYNONYMOUS_CODING         | NA                                                                 |
| <i>Desi_wild_20907979</i> | NA                                  | <i>Ca_desi_Chr04</i> | 20907979                | C/A  | Gene_Ca_05137.1                 | DOWNSTREAM                    | TPX2 (targeting protein for Xklp2) protein family                  |
| <i>Desi_wild_20996839</i> | NA                                  | <i>Ca_desi_Chr04</i> | 20996839                | G/C  | NA                              | INTERGENIC                    | NA                                                                 |
| <i>Desi_wild_21009108</i> | NA                                  | <i>Ca_desi_Chr04</i> | 21009108                | T/C  | Gene_Ca_05150.1                 | INTRON                        | CONTAINS InterPro DOMAIN/s: EGF-like (InterPro:IPR006210)          |
| <i>Desi_wild_21144276</i> | NA                                  | <i>Ca_desi_Chr04</i> | 21144276                | A/G  | Gene_Ca_05166.2                 | NON_SYNONYMOUS_CODING         | NA                                                                 |
| <i>Desi_wild_21161645</i> | NA                                  | <i>Ca_desi_Chr04</i> | 21161645                | G/A  | Gene_Ca_05167.1                 | INTRON                        | Protein MON2 homolog                                               |
| <i>Desi_wild_21161676</i> | NA                                  | <i>Ca_desi_Chr04</i> | 21161676                | A/G  | Gene_Ca_05167.1                 | INTRON                        | Protein MON2 homolog                                               |
| <i>Desi_wild_21181685</i> | NA                                  | <i>Ca_desi_Chr04</i> | 21181685                | A/G  | Gene_Ca_05167.1                 | INTRON                        | Protein MON2 homolog                                               |
| <i>Desi_wild_21181712</i> | NA                                  | <i>Ca_desi_Chr04</i> | 21181712                | C/T  | Gene_Ca_05167.1                 | INTRON                        | Protein MON2 homolog                                               |
| <i>Desi_wild_21181929</i> | NA                                  | <i>Ca_desi_Chr04</i> | 21181929                | A/G  | Gene_Ca_05167.1                 | INTRON                        | Protein MON2 homolog                                               |
| <i>Desi_wild_21181961</i> | NA                                  | <i>Ca_desi_Chr04</i> | 21181961                | G/A  | Gene_Ca_05167.1                 | INTRON                        | Protein MON2 homolog                                               |
| <i>Desi_wild_21182067</i> | NA                                  | <i>Ca_desi_Chr04</i> | 21182067                | A/C  | Gene_Ca_05167.1                 | INTRON                        | Protein MON2 homolog                                               |
| <i>Desi_wild_21191223</i> | NA                                  | <i>Ca_desi_Chr04</i> | 21191223                | T/C  | Gene_Ca_05167.2                 | DOWNSTREAM                    | Protein MON2 homolog                                               |
| <i>Desi_wild_21216434</i> | NA                                  | <i>Ca_desi_Chr04</i> | 21216434                | T/A  | Gene_Ca_05170.1                 | INTRON                        | WD repeat-containing protein 48                                    |
| <i>Desi_wild_21216437</i> | NA                                  | <i>Ca_desi_Chr04</i> | 21216437                | C/A  | Gene_Ca_05170.1                 | INTRON                        | WD repeat-containing protein 48                                    |
| <i>Desi_wild_21216441</i> | NA                                  | <i>Ca_desi_Chr04</i> | 21216441                | C/A  | Gene_Ca_05170.1                 | INTRON                        | WD repeat-containing protein 48                                    |
| <i>Desi_wild_21221287</i> | NA                                  | <i>Ca_desi_Chr04</i> | 21221287                | A/G  | Gene_Ca_05170.1                 | INTRON                        | WD repeat-containing protein 48                                    |
| <i>Desi_wild_21227078</i> | NA                                  | <i>Ca_desi_Chr04</i> | 21227078                | A/C  | Gene_Ca_05170.1                 | INTRON                        | WD repeat-containing protein 48                                    |
| <i>Desi_wild_21238854</i> | NA                                  | <i>Ca_desi_Chr04</i> | 21238854                | T/C  | Gene_Ca_05170.1                 | INTRON                        | WD repeat-containing protein 48                                    |
| <i>Desi_wild_21380024</i> | NA                                  | <i>Ca_desi_Chr04</i> | 21380024                | A/G  | <a href="#">Gene_Ca_05180.1</a> | NON_SYNONYMOUS_CODING         | E3 ubiquitin-protein ligase UPL1                                   |
| <i>Desi_wild_21382115</i> | NA                                  | <i>Ca_desi_Chr04</i> | 21382115                | A/G  | <a href="#">Gene_Ca_05180.1</a> | NON_SYNONYMOUS_CODING         | E3 ubiquitin-protein ligase UPL1                                   |
| <i>Desi_wild_21643529</i> | NA                                  | <i>Ca_desi_Chr04</i> | 21643529                | A/G  | Gene_Ca_05190.1                 | NON_SYNONYMOUS_CODING         | Glycerate dehydrogenase                                            |
| <i>Desi_wild_21643859</i> | NA                                  | <i>Ca_desi_Chr04</i> | 21643859                | G/C  | Gene_Ca_05190.1                 | INTRON                        | Glycerate dehydrogenase                                            |
| <i>Desi_wild_21650184</i> | NA                                  | <i>Ca_desi_Chr04</i> | 21650184                | A/G  | NA                              | INTERGENIC                    | NA                                                                 |
| <i>Desi_wild_21650187</i> | NA                                  | <i>Ca_desi_Chr04</i> | 21650187                | G/A  | NA                              | INTERGENIC                    | NA                                                                 |
| <i>Desi_wild_21654463</i> | NA                                  | <i>Ca_desi_Chr04</i> | 21654463                | C/T  | NA                              | INTERGENIC                    | NA                                                                 |
| <i>Desi_wild_21707320</i> | NA                                  | <i>Ca_desi_Chr04</i> | 21707320                | T/C  | NA                              | INTERGENIC                    | NA                                                                 |
| <i>Desi_wild_21752147</i> | NA                                  | <i>Ca_desi_Chr04</i> | 21752147                | T/A  | Gene_Ca_05200.1                 | NON_SYNONYMOUS_CODING         | Zinc finger protein JACKDAW                                        |
| <i>Desi_wild_21887317</i> | NA                                  | <i>Ca_desi_Chr04</i> | 21887317                | C/T  | NA                              | INTERGENIC                    | NA                                                                 |
| <i>Desi_wild_21928532</i> | NA                                  | <i>Ca_desi_Chr04</i> | 21928532                | C/T  | NA                              | INTERGENIC                    | NA                                                                 |
| <i>Desi_wild_21928536</i> | NA                                  | <i>Ca_desi_Chr04</i> | 21928536                | C/T  | NA                              | INTERGENIC                    | NA                                                                 |
| <i>Desi_wild_21928587</i> | NA                                  | <i>Ca_desi_Chr04</i> | 21928587                | A/G  | NA                              | INTERGENIC                    | NA                                                                 |
| <i>Desi_wild_21928665</i> | NA                                  | <i>Ca_desi_Chr04</i> | 21928665                | C/T  | NA                              | INTERGENIC                    | NA                                                                 |
| <i>Desi_wild_21928678</i> | NA                                  | <i>Ca_desi_Chr04</i> | 21928678                | A/T  | NA                              | INTERGENIC                    | NA                                                                 |
| <i>Desi_wild_22037221</i> | NA                                  | <i>Ca_desi_Chr04</i> | 22037221                | C/A  | Gene_Ca_05237.1                 | UPSTREAM                      | Protein FAR1-RELATED SEQUENCE 11                                   |
| <i>Desi_wild_37035</i>    | NA                                  | <i>Ca_desi_Chr05</i> | 37035                   | T/A  | Gene_Ca_05242.1                 | SYNONYMOUS_CODING             | Ankyrin repeat-containing protein At5g02620                        |

| SNP IDs                  | NCBI dbSNP accession IDs (NCBI_SS#) | Chromosomes          | Physical positions (bp) | SNPs | Gene accession IDs | Sequence components of genome | Putative functions                                                     |
|--------------------------|-------------------------------------|----------------------|-------------------------|------|--------------------|-------------------------------|------------------------------------------------------------------------|
| <i>Desi_wild_42449</i>   | NA                                  | <i>Ca_desi_Chr05</i> | 42449                   | A/G  | Gene_Ca_05242.1    | NON_SYNONYMOUS_CODING         | Ankyrin repeat-containing protein At5g02620                            |
| <i>Desi_wild_69431</i>   | NA                                  | <i>Ca_desi_Chr05</i> | 69431                   | G/C  | NA                 | INTERGENIC                    | NA                                                                     |
| <i>Desi_wild_82995</i>   | NA                                  | <i>Ca_desi_Chr05</i> | 82995                   | A/G  | Gene_Ca_05246.1    | INTRON                        | 3-ketoacyl-CoA thiolase 2, peroxisomal                                 |
| <i>Desi_wild_96304</i>   | NA                                  | <i>Ca_desi_Chr05</i> | 96304                   | C/A  | Gene_Ca_05247.2    | UPSTREAM                      | NA                                                                     |
| <i>Desi_wild_100313</i>  | NA                                  | <i>Ca_desi_Chr05</i> | 100313                  | G/A  | Gene_Ca_05247.1    | DOWNSTREAM                    | NA                                                                     |
| <i>Desi_wild_258865</i>  | NA                                  | <i>Ca_desi_Chr05</i> | 258865                  | G/T  | Gene_Ca_05252.1    | NON_SYNONYMOUS_CODING         | Nucleolar pre-ribosomal-associated protein 1                           |
| <i>Desi_wild_258877</i>  | NA                                  | <i>Ca_desi_Chr05</i> | 258877                  | C/T  | Gene_Ca_05252.1    | NON_SYNONYMOUS_CODING         | Nucleolar pre-ribosomal-associated protein 1                           |
| <i>Desi_wild_492472</i>  | NA                                  | <i>Ca_desi_Chr05</i> | 492472                  | G/T  | Gene_Ca_05263.1    | NON_SYNONYMOUS_CODING         | unknown protein                                                        |
| <i>Desi_wild_604114</i>  | NA                                  | <i>Ca_desi_Chr05</i> | 604114                  | T/G  | NA                 | INTERGENIC                    | NA                                                                     |
| <i>Desi_wild_634143</i>  | NA                                  | <i>Ca_desi_Chr05</i> | 634143                  | C/T  | Gene_Ca_05277.1    | INTRON                        | Transmembrane protein 184C                                             |
| <i>Desi_wild_634300</i>  | NA                                  | <i>Ca_desi_Chr05</i> | 634300                  | T/C  | Gene_Ca_05277.1    | INTRON                        | Transmembrane protein 184C                                             |
| <i>Desi_wild_638974</i>  | NA                                  | <i>Ca_desi_Chr05</i> | 638974                  | T/G  | Gene_Ca_05277.1    | NON_SYNONYMOUS_CODING         | Transmembrane protein 184C                                             |
| <i>Desi_wild_659816</i>  | NA                                  | <i>Ca_desi_Chr05</i> | 659816                  | G/A  | Gene_Ca_05278.1    | INTRON                        | Alpha-1,3-mannosyl-glycoprotein 2-beta-N-acetylglucosaminyltransferase |
| <i>Desi_wild_659875</i>  | NA                                  | <i>Ca_desi_Chr05</i> | 659875                  | T/G  | Gene_Ca_05278.1    | INTRON                        | Alpha-1,3-mannosyl-glycoprotein 2-beta-N-acetylglucosaminyltransferase |
| <i>Desi_wild_659877</i>  | NA                                  | <i>Ca_desi_Chr05</i> | 659877                  | C/T  | Gene_Ca_05278.1    | INTRON                        | Alpha-1,3-mannosyl-glycoprotein 2-beta-N-acetylglucosaminyltransferase |
| <i>Desi_wild_665311</i>  | NA                                  | <i>Ca_desi_Chr05</i> | 665311                  | G/A  | Gene_Ca_05278.1    | INTRON                        | Alpha-1,3-mannosyl-glycoprotein 2-beta-N-acetylglucosaminyltransferase |
| <i>Desi_wild_671955</i>  | NA                                  | <i>Ca_desi_Chr05</i> | 671955                  | C/T  | NA                 | INTERGENIC                    | NA                                                                     |
| <i>Desi_wild_671956</i>  | NA                                  | <i>Ca_desi_Chr05</i> | 671956                  | A/G  | NA                 | INTERGENIC                    | NA                                                                     |
| <i>Desi_wild_671959</i>  | NA                                  | <i>Ca_desi_Chr05</i> | 671959                  | G/A  | NA                 | INTERGENIC                    | NA                                                                     |
| <i>Desi_wild_671961</i>  | NA                                  | <i>Ca_desi_Chr05</i> | 671961                  | A/C  | NA                 | INTERGENIC                    | NA                                                                     |
| <i>Desi_wild_671963</i>  | NA                                  | <i>Ca_desi_Chr05</i> | 671963                  | G/A  | NA                 | INTERGENIC                    | NA                                                                     |
| <i>Desi_wild_671968</i>  | NA                                  | <i>Ca_desi_Chr05</i> | 671968                  | A/G  | NA                 | INTERGENIC                    | NA                                                                     |
| <i>Desi_wild_671979</i>  | NA                                  | <i>Ca_desi_Chr05</i> | 671979                  | T/C  | NA                 | INTERGENIC                    | NA                                                                     |
| <i>Desi_wild_671982</i>  | NA                                  | <i>Ca_desi_Chr05</i> | 671982                  | G/A  | NA                 | INTERGENIC                    | NA                                                                     |
| <i>Desi_wild_676205</i>  | NA                                  | <i>Ca_desi_Chr05</i> | 676205                  | C/T  | NA                 | INTERGENIC                    | NA                                                                     |
| <i>Desi_wild_689741</i>  | NA                                  | <i>Ca_desi_Chr05</i> | 689741                  | T/A  | Gene_Ca_05280.3    | SYNONYMOUS_CODING             | Monosaccharide-sensing protein 2                                       |
| <i>Desi_wild_689772</i>  | NA                                  | <i>Ca_desi_Chr05</i> | 689772                  | A/T  | Gene_Ca_05280.3    | STOP_GAINED                   | Monosaccharide-sensing protein 2                                       |
| <i>Desi_wild_1302892</i> | NA                                  | <i>Ca_desi_Chr05</i> | 1302892                 | C/A  | Gene_Ca_05292.1    | INTRON                        | NA                                                                     |
| <i>Desi_wild_1398701</i> | NA                                  | <i>Ca_desi_Chr05</i> | 1398701                 | G/C  | Gene_Ca_05302.1    | UPSTREAM                      | NA                                                                     |
| <i>Desi_wild_1398738</i> | NA                                  | <i>Ca_desi_Chr05</i> | 1398738                 | C/T  | NA                 | INTERGENIC                    | NA                                                                     |
| <i>Desi_wild_1411899</i> | NA                                  | <i>Ca_desi_Chr05</i> | 1411899                 | C/A  | Gene_Ca_05305.1    | INTRON                        | Probable S-acyltransferase At2g33640                                   |
| <i>Desi_wild_1429149</i> | NA                                  | <i>Ca_desi_Chr05</i> | 1429149                 | C/T  | NA                 | INTERGENIC                    | NA                                                                     |
| <i>Desi_wild_1434852</i> | NA                                  | <i>Ca_desi_Chr05</i> | 1434852                 | T/C  | NA                 | INTERGENIC                    | NA                                                                     |
| <i>Desi_wild_1435590</i> | NA                                  | <i>Ca_desi_Chr05</i> | 1435590                 | A/T  | NA                 | INTERGENIC                    | NA                                                                     |
| <i>Desi_wild_1444175</i> | NA                                  | <i>Ca_desi_Chr05</i> | 1444175                 | A/C  | NA                 | INTERGENIC                    | NA                                                                     |
| <i>Desi_wild_1464189</i> | NA                                  | <i>Ca_desi_Chr05</i> | 1464189                 | A/G  | Gene_Ca_05311.3    | SYNONYMOUS_CODING             | NA                                                                     |
| <i>Desi_wild_1464549</i> | NA                                  | <i>Ca_desi_Chr05</i> | 1464549                 | C/T  | Gene_Ca_05311.3    | SYNONYMOUS_CODING             | NA                                                                     |
| <i>Desi_wild_1469121</i> | NA                                  | <i>Ca_desi_Chr05</i> | 1469121                 | G/A  | NA                 | INTERGENIC                    | NA                                                                     |
| <i>Desi_wild_1470975</i> | NA                                  | <i>Ca_desi_Chr05</i> | 1470975                 | G/C  | Gene_Ca_05312.1    | INTRON                        | U-box domain-containing protein 43                                     |
| <i>Desi_wild_1471127</i> | NA                                  | <i>Ca_desi_Chr05</i> | 1471127                 | T/C  | Gene_Ca_05312.1    | SYNONYMOUS_CODING             | U-box domain-containing protein 43                                     |
| <i>Desi_wild_1471590</i> | NA                                  | <i>Ca_desi_Chr05</i> | 1471590                 | A/C  | Gene_Ca_05312.1    | NON_SYNONYMOUS_CODING         | U-box domain-containing protein 43                                     |
| <i>Desi_wild_1471621</i> | NA                                  | <i>Ca_desi_Chr05</i> | 1471621                 | A/C  | Gene_Ca_05312.1    | NON_SYNONYMOUS_CODING         | U-box domain-containing protein 43                                     |
| <i>Desi_wild_1471623</i> | NA                                  | <i>Ca_desi_Chr05</i> | 1471623                 | T/C  | Gene_Ca_05312.1    | NON_SYNONYMOUS_CODING         | U-box domain-containing protein 43                                     |
| <i>Desi_wild_1471627</i> | NA                                  | <i>Ca_desi_Chr05</i> | 1471627                 | T/C  | Gene_Ca_05312.1    | SYNONYMOUS_CODING             | U-box domain-containing protein 43                                     |



| SNP IDs                  | NCBI dbSNP accession IDs (NCBI_SS#) | Chromosomes          | Physical positions (bp) | SNPs | Gene accession IDs | Sequence components of genome  | Putative functions                                    |
|--------------------------|-------------------------------------|----------------------|-------------------------|------|--------------------|--------------------------------|-------------------------------------------------------|
| <i>Desi_wild_1471636</i> | NA                                  | <i>Ca_desi_Chr05</i> | 1471636                 | T/C  | Gene_Ca_05312.1    | SYNONYMOUS_CODING              | U-box domain-containing protein 43                    |
| <i>Desi_wild_1471645</i> | NA                                  | <i>Ca_desi_Chr05</i> | 1471645                 | A/G  | Gene_Ca_05312.1    | SYNONYMOUS_CODING              | U-box domain-containing protein 43                    |
| <i>Desi_wild_1483432</i> | NA                                  | <i>Ca_desi_Chr05</i> | 1483432                 | G/A  | Gene_Ca_05314.1    | INTRON                         | NA                                                    |
| <i>Desi_wild_1501472</i> | NA                                  | <i>Ca_desi_Chr05</i> | 1501472                 | T/C  | Gene_Ca_05316.1    | NON_SYNONYMOUS_CODING          | HMG1/2-like protein                                   |
| <i>Desi_wild_1520333</i> | NA                                  | <i>Ca_desi_Chr05</i> | 1520333                 | C/T  | NA                 | INTERGENIC                     | NA                                                    |
| <i>Desi_wild_1615818</i> | NA                                  | <i>Ca_desi_Chr05</i> | 1615818                 | T/C  | Gene_Ca_05325.1    | NON_SYNONYMOUS_CODING          | NA                                                    |
| <i>Desi_wild_1615972</i> | NA                                  | <i>Ca_desi_Chr05</i> | 1615972                 | A/C  | Gene_Ca_05325.1    | SYNONYMOUS_CODING              | NA                                                    |
| <i>Desi_wild_1616016</i> | NA                                  | <i>Ca_desi_Chr05</i> | 1616016                 | A/C  | Gene_Ca_05325.1    | SYNONYMOUS_CODING              | NA                                                    |
| <i>Desi_wild_1631232</i> | NA                                  | <i>Ca_desi_Chr05</i> | 1631232                 | C/A  | Gene_Ca_05326.5    | INTRON                         | NA                                                    |
| <i>Desi_wild_1689122</i> | NA                                  | <i>Ca_desi_Chr05</i> | 1689122                 | C/T  | NA                 | INTERGENIC                     | NA                                                    |
| <i>Desi_wild_1980736</i> | NA                                  | <i>Ca_desi_Chr05</i> | 1980736                 | A/C  | Gene_Ca_05363.2    | NON_SYNONYMOUS_CODING          | NA                                                    |
| <i>Desi_wild_2007018</i> | NA                                  | <i>Ca_desi_Chr05</i> | 2007018                 | C/A  | Gene_Ca_05364.1    | UPSTREAM                       | Pentatricopeptide repeat-containing protein At3g12770 |
| <i>Desi_wild_2007025</i> | NA                                  | <i>Ca_desi_Chr05</i> | 2007025                 | C/T  | Gene_Ca_05364.1    | UPSTREAM                       | Pentatricopeptide repeat-containing protein At3g12770 |
| <i>Desi_wild_2007048</i> | NA                                  | <i>Ca_desi_Chr05</i> | 2007048                 | A/T  | Gene_Ca_05364.1    | START_GAINED: ATG, UTR_5_PRIME | Pentatricopeptide repeat-containing protein At3g12770 |
| <i>Desi_wild_2007070</i> | NA                                  | <i>Ca_desi_Chr05</i> | 2007070                 | G/A  | Gene_Ca_05364.1    | UPSTREAM                       | Pentatricopeptide repeat-containing protein At3g12770 |
| <i>Desi_wild_2030387</i> | NA                                  | <i>Ca_desi_Chr05</i> | 2030387                 | A/G  | Gene_Ca_05366.1    | INTRON                         | Prostaglandin E synthase 2                            |
| <i>Desi_wild_2314518</i> | NA                                  | <i>Ca_desi_Chr05</i> | 2314518                 | G/A  | NA                 | INTERGENIC                     | NA                                                    |
| <i>Desi_wild_2325492</i> | NA                                  | <i>Ca_desi_Chr05</i> | 2325492                 | G/C  | NA                 | INTERGENIC                     | NA                                                    |
| <i>Desi_wild_2340842</i> | NA                                  | <i>Ca_desi_Chr05</i> | 2340842                 | T/C  | NA                 | INTERGENIC                     | NA                                                    |
| <i>Desi_wild_2340843</i> | NA                                  | <i>Ca_desi_Chr05</i> | 2340843                 | G/A  | NA                 | INTERGENIC                     | NA                                                    |
| <i>Desi_wild_2357849</i> | NA                                  | <i>Ca_desi_Chr05</i> | 2357849                 | T/A  | Gene_Ca_05388.1    | NON_SYNONYMOUS_CODING          | Ornithine carbamoyltransferase, chloroplastic         |
| <i>Desi_wild_2484112</i> | NA                                  | <i>Ca_desi_Chr05</i> | 2484112                 | T/A  | Gene_Ca_05408.1    | INTRON                         | unknown protein                                       |
| <i>Desi_wild_2491971</i> | NA                                  | <i>Ca_desi_Chr05</i> | 2491971                 | T/C  | Gene_Ca_05409.1    | INTRON                         | unknown protein                                       |
| <i>Desi_wild_2562520</i> | NA                                  | <i>Ca_desi_Chr05</i> | 2562520                 | C/A  | Gene_Ca_05415.1    | DOWNSTREAM                     | Leishmanolysin-like peptidase                         |
| <i>Desi_wild_2562580</i> | NA                                  | <i>Ca_desi_Chr05</i> | 2562580                 | C/A  | Gene_Ca_05415.1    | DOWNSTREAM                     | Leishmanolysin-like peptidase                         |
| <i>Desi_wild_2720909</i> | NA                                  | <i>Ca_desi_Chr05</i> | 2720909                 | G/T  | NA                 | INTERGENIC                     | NA                                                    |
| <i>Desi_wild_2745052</i> | NA                                  | <i>Ca_desi_Chr05</i> | 2745052                 | T/C  | Gene_Ca_05434.1    | NON_SYNONYMOUS_CODING          | Glutamyl-tRNA reductase 1, chloroplastic              |
| <i>Desi_wild_2745071</i> | NA                                  | <i>Ca_desi_Chr05</i> | 2745071                 | T/G  | Gene_Ca_05434.1    | NON_SYNONYMOUS_CODING          | Glutamyl-tRNA reductase 1, chloroplastic              |
| <i>Desi_wild_2763828</i> | NA                                  | <i>Ca_desi_Chr05</i> | 2763828                 | T/G  | Gene_Ca_05436.1    | INTRON                         | Symplekin                                             |
| <i>Desi_wild_2763839</i> | NA                                  | <i>Ca_desi_Chr05</i> | 2763839                 | T/G  | Gene_Ca_05436.1    | INTRON                         | Symplekin                                             |
| <i>Desi_wild_2764411</i> | NA                                  | <i>Ca_desi_Chr05</i> | 2764411                 | C/T  | Gene_Ca_05436.1    | INTRON                         | Symplekin                                             |
| <i>Desi_wild_2885352</i> | NA                                  | <i>Ca_desi_Chr05</i> | 2885352                 | A/T  | Gene_Ca_05443.1    | DOWNSTREAM                     | Cation/H(+) antiporter 2                              |
| <i>Desi_wild_2923609</i> | NA                                  | <i>Ca_desi_Chr05</i> | 2923609                 | A/C  | NA                 | INTERGENIC                     | NA                                                    |
| <i>Desi_wild_2958647</i> | NA                                  | <i>Ca_desi_Chr05</i> | 2958647                 | C/G  | NA                 | INTERGENIC                     | NA                                                    |
| <i>Desi_wild_3001255</i> | NA                                  | <i>Ca_desi_Chr05</i> | 3001255                 | A/T  | NA                 | INTERGENIC                     | NA                                                    |
| <i>Desi_wild_3001278</i> | NA                                  | <i>Ca_desi_Chr05</i> | 3001278                 | A/T  | NA                 | INTERGENIC                     | NA                                                    |
| <i>Desi_wild_3027281</i> | NA                                  | <i>Ca_desi_Chr05</i> | 3027281                 | C/T  | Gene_Ca_05456.1    | NON_SYNONYMOUS_CODING          | NA                                                    |
| <i>Desi_wild_3046631</i> | NA                                  | <i>Ca_desi_Chr05</i> | 3046631                 | T/G  | NA                 | INTERGENIC                     | NA                                                    |
| <i>Desi_wild_3136174</i> | NA                                  | <i>Ca_desi_Chr05</i> | 3136174                 | T/A  | Gene_Ca_05468.1    | SYNONYMOUS_CODING              | Homeobox-leucine zipper protein ATHB-8                |
| <i>Desi_wild_3164617</i> | NA                                  | <i>Ca_desi_Chr05</i> | 3164617                 | A/T  | NA                 | INTERGENIC                     | NA                                                    |
| <i>Desi_wild_3164963</i> | NA                                  | <i>Ca_desi_Chr05</i> | 3164963                 | A/G  | NA                 | INTERGENIC                     | NA                                                    |
| <i>Desi_wild_3177374</i> | NA                                  | <i>Ca_desi_Chr05</i> | 3177374                 | T/G  | Gene_Ca_05472.2    | NON_SYNONYMOUS_CODING          | NA                                                    |
| <i>Desi_wild_3218941</i> | NA                                  | <i>Ca_desi_Chr05</i> | 3218941                 | A/G  | Gene_Ca_05475.1    | INTRON                         | DDB1- and CUL4-associated factor homolog 1            |
| <i>Desi_wild_3307381</i> | NA                                  | <i>Ca_desi_Chr05</i> | 3307381                 | A/G  | NA                 | INTERGENIC                     | NA                                                    |

| SNP IDs           | NCBI dbSNP accession IDs (NCBI_SS#) | Chromosomes    | Physical positions (bp) | SNPs | Gene accession IDs | Sequence components of genome | Putative functions                 |
|-------------------|-------------------------------------|----------------|-------------------------|------|--------------------|-------------------------------|------------------------------------|
| Desi_wild_3383253 | NA                                  | Ca_desi_Chrom5 | 3383253                 | G/C  | Gene_Ca_05490.1    | DOWNSTREAM                    | chaperone protein dnaJ-related     |
| Desi_wild_3405715 | NA                                  | Ca_desi_Chrom5 | 3405715                 | C/A  | Gene_Ca_05493.1    | SYNONYMOUS_CODING             | U-box domain-containing protein 52 |
| Desi_wild_3459994 | NA                                  | Ca_desi_Chrom5 | 3459994                 | A/C  | NA                 | INTERGENIC                    | NA                                 |
| Desi_wild_3543833 | NA                                  | Ca_desi_Chrom5 | 3543833                 | G/C  | Gene_Ca_05509.2    | SYNONYMOUS_CODING             | Plasma membrane ATPase 4           |
| Desi_wild_3543861 | NA                                  | Ca_desi_Chrom5 | 3543861                 | A/C  | Gene_Ca_05509.2    | SYNONYMOUS_CODING             | Plasma membrane ATPase 4           |
| Desi_wild_3543864 | NA                                  | Ca_desi_Chrom5 | 3543864                 | G/A  | Gene_Ca_05509.2    | SYNONYMOUS_CODING             | Plasma membrane ATPase 4           |
| Desi_wild_3543866 | NA                                  | Ca_desi_Chrom5 | 3543866                 | T/C  | Gene_Ca_05509.2    | NON_SYNONYMOUS_CODING         | Plasma membrane ATPase 4           |
| Desi_wild_3543867 | NA                                  | Ca_desi_Chrom5 | 3543867                 | G/A  | Gene_Ca_05509.2    | SYNONYMOUS_CODING             | Plasma membrane ATPase 4           |
| Desi_wild_3543873 | NA                                  | Ca_desi_Chrom5 | 3543873                 | T/A  | Gene_Ca_05509.2    | SYNONYMOUS_CODING             | Plasma membrane ATPase 4           |
| Desi_wild_3543878 | NA                                  | Ca_desi_Chrom5 | 3543878                 | A/G  | Gene_Ca_05509.2    | SYNONYMOUS_CODING             | Plasma membrane ATPase 4           |
| Desi_wild_3543882 | NA                                  | Ca_desi_Chrom5 | 3543882                 | A/G  | Gene_Ca_05509.2    | SYNONYMOUS_CODING             | Plasma membrane ATPase 4           |
| Desi_wild_3543888 | NA                                  | Ca_desi_Chrom5 | 3543888                 | G/T  | Gene_Ca_05509.2    | SYNONYMOUS_CODING             | Plasma membrane ATPase 4           |
| Desi_wild_3543891 | NA                                  | Ca_desi_Chrom5 | 3543891                 | T/G  | Gene_Ca_05509.2    | SYNONYMOUS_CODING             | Plasma membrane ATPase 4           |
| Desi_wild_3543894 | NA                                  | Ca_desi_Chrom5 | 3543894                 | A/G  | Gene_Ca_05509.2    | SYNONYMOUS_CODING             | Plasma membrane ATPase 4           |
| Desi_wild_3543897 | NA                                  | Ca_desi_Chrom5 | 3543897                 | A/T  | Gene_Ca_05509.2    | SYNONYMOUS_CODING             | Plasma membrane ATPase 4           |
| Desi_wild_3543900 | NA                                  | Ca_desi_Chrom5 | 3543900                 | T/A  | Gene_Ca_05509.2    | SYNONYMOUS_CODING             | Plasma membrane ATPase 4           |
| Desi_wild_3543903 | NA                                  | Ca_desi_Chrom5 | 3543903                 | A/G  | Gene_Ca_05509.2    | SYNONYMOUS_CODING             | Plasma membrane ATPase 4           |
| Desi_wild_3543906 | NA                                  | Ca_desi_Chrom5 | 3543906                 | C/T  | Gene_Ca_05509.2    | SYNONYMOUS_CODING             | Plasma membrane ATPase 4           |
| Desi_wild_3543908 | NA                                  | Ca_desi_Chrom5 | 3543908                 | A/G  | Gene_Ca_05509.2    | SYNONYMOUS_CODING             | Plasma membrane ATPase 4           |
| Desi_wild_3545278 | NA                                  | Ca_desi_Chrom5 | 3545278                 | A/G  | Gene_Ca_05509.2    | NON_SYNONYMOUS_CODING         | Plasma membrane ATPase 4           |
| Desi_wild_3545322 | NA                                  | Ca_desi_Chrom5 | 3545322                 | A/C  | Gene_Ca_05509.2    | INTRON                        | Plasma membrane ATPase 4           |
| Desi_wild_4413238 | NA                                  | Ca_desi_Chrom5 | 4413238                 | A/G  | NA                 | INTERGENIC                    | NA                                 |
| Desi_wild_4413259 | NA                                  | Ca_desi_Chrom5 | 4413259                 | A/T  | NA                 | INTERGENIC                    | NA                                 |
| Desi_wild_4413279 | NA                                  | Ca_desi_Chrom5 | 4413279                 | C/G  | NA                 | INTERGENIC                    | NA                                 |
| Desi_wild_4413292 | NA                                  | Ca_desi_Chrom5 | 4413292                 | C/A  | NA                 | INTERGENIC                    | NA                                 |
| Desi_wild_4413294 | NA                                  | Ca_desi_Chrom5 | 4413294                 | G/A  | NA                 | INTERGENIC                    | NA                                 |
| Desi_wild_4526053 | NA                                  | Ca_desi_Chrom5 | 4526053                 | A/C  | NA                 | INTERGENIC                    | NA                                 |
| Desi_wild_4535896 | NA                                  | Ca_desi_Chrom5 | 4535896                 | G/A  | Gene_Ca_05542.1    | UPSTREAM                      | Histidine kinase 5                 |
| Desi_wild_4640703 | NA                                  | Ca_desi_Chrom5 | 4640703                 | G/A  | Gene_Ca_05554.1    | DOWNSTREAM                    | NA                                 |
| Desi_wild_4640715 | NA                                  | Ca_desi_Chrom5 | 4640715                 | A/T  | Gene_Ca_05554.1    | DOWNSTREAM                    | NA                                 |
| Desi_wild_4640734 | NA                                  | Ca_desi_Chrom5 | 4640734                 | T/A  | Gene_Ca_05554.1    | DOWNSTREAM                    | NA                                 |
| Desi_wild_4684072 | NA                                  | Ca_desi_Chrom5 | 4684072                 | A/C  | NA                 | INTERGENIC                    | NA                                 |
| Desi_wild_4713174 | NA                                  | Ca_desi_Chrom5 | 4713174                 | C/T  | NA                 | INTERGENIC                    | NA                                 |
| Desi_wild_4713183 | NA                                  | Ca_desi_Chrom5 | 4713183                 | G/T  | NA                 | INTERGENIC                    | NA                                 |
| Desi_wild_4713184 | NA                                  | Ca_desi_Chrom5 | 4713184                 | T/G  | NA                 | INTERGENIC                    | NA                                 |
| Desi_wild_4713186 | NA                                  | Ca_desi_Chrom5 | 4713186                 | G/A  | NA                 | INTERGENIC                    | NA                                 |
| Desi_wild_4713219 | NA                                  | Ca_desi_Chrom5 | 4713219                 | T/A  | NA                 | INTERGENIC                    | NA                                 |
| Desi_wild_4713225 | NA                                  | Ca_desi_Chrom5 | 4713225                 | C/T  | NA                 | INTERGENIC                    | NA                                 |
| Desi_wild_4713228 | NA                                  | Ca_desi_Chrom5 | 4713228                 | T/A  | NA                 | INTERGENIC                    | NA                                 |
| Desi_wild_4713229 | NA                                  | Ca_desi_Chrom5 | 4713229                 | A/G  | NA                 | INTERGENIC                    | NA                                 |
| Desi_wild_4713231 | NA                                  | Ca_desi_Chrom5 | 4713231                 | C/T  | NA                 | INTERGENIC                    | NA                                 |
| Desi_wild_4713237 | NA                                  | Ca_desi_Chrom5 | 4713237                 | A/T  | NA                 | INTERGENIC                    | NA                                 |
| Desi_wild_4713248 | NA                                  | Ca_desi_Chrom5 | 4713248                 | G/T  | NA                 | INTERGENIC                    | NA                                 |
| Desi_wild_4755279 | NA                                  | Ca_desi_Chrom5 | 4755279                 | G/A  | NA                 | INTERGENIC                    | NA                                 |

| SNP IDs                  | NCBI dbSNP accession IDs (NCBI_SS#) | Chromosomes          | Physical positions (bp) | SNPs | Gene accession IDs | Sequence components of genome | Putative functions                                        |
|--------------------------|-------------------------------------|----------------------|-------------------------|------|--------------------|-------------------------------|-----------------------------------------------------------|
| <i>Desi_wild_4779888</i> | NA                                  | <i>Ca_desi_Chr05</i> | 4779888                 | T/C  | NA                 | INTERGENIC                    | NA                                                        |
| <i>Desi_wild_4779911</i> | NA                                  | <i>Ca_desi_Chr05</i> | 4779911                 | A/C  | NA                 | INTERGENIC                    | NA                                                        |
| <i>Desi_wild_4837598</i> | NA                                  | <i>Ca_desi_Chr05</i> | 4837598                 | A/G  | NA                 | INTERGENIC                    | NA                                                        |
| <i>Desi_wild_4853779</i> | NA                                  | <i>Ca_desi_Chr05</i> | 4853779                 | T/A  | Gene_Ca_05585.2    | INTRON                        | Probable serine/threonine-protein kinase ndrB             |
| <i>Desi_wild_4903474</i> | NA                                  | <i>Ca_desi_Chr05</i> | 4903474                 | G/A  | NA                 | INTERGENIC                    | NA                                                        |
| <i>Desi_wild_4908534</i> | NA                                  | <i>Ca_desi_Chr05</i> | 4908534                 | G/T  | NA                 | INTERGENIC                    | NA                                                        |
| <i>Desi_wild_4939754</i> | NA                                  | <i>Ca_desi_Chr05</i> | 4939754                 | T/C  | Gene_Ca_05596.1    | SYNONYMOUS_CODING             | Probable ADP,ATP carrier protein At5g56450                |
| <i>Desi_wild_5093171</i> | NA                                  | <i>Ca_desi_Chr05</i> | 5093171                 | T/G  | Gene_Ca_05613.1    | INTRON                        | Calcium-transporting ATPase 3, endoplasmic reticulum-type |
| <i>Desi_wild_5102926</i> | NA                                  | <i>Ca_desi_Chr05</i> | 5102926                 | C/T  | Gene_Ca_05613.1    | INTRON                        | Calcium-transporting ATPase 3, endoplasmic reticulum-type |
| <i>Desi_wild_5102929</i> | NA                                  | <i>Ca_desi_Chr05</i> | 5102929                 | C/A  | Gene_Ca_05613.1    | INTRON                        | Calcium-transporting ATPase 3, endoplasmic reticulum-type |
| <i>Desi_wild_5173673</i> | NA                                  | <i>Ca_desi_Chr05</i> | 5173673                 | T/C  | Gene_Ca_05619.2    | SYNONYMOUS_CODING             | Double-stranded RNA-binding protein 1                     |
| <i>Desi_wild_5207790</i> | NA                                  | <i>Ca_desi_Chr05</i> | 5207790                 | C/A  | Gene_Ca_05622.1    | NON_SYNONYMOUS_CODING         | BEACH domain-containing protein lvsC                      |
| <i>Desi_wild_5207791</i> | NA                                  | <i>Ca_desi_Chr05</i> | 5207791                 | A/G  | Gene_Ca_05622.1    | NON_SYNONYMOUS_CODING         | BEACH domain-containing protein lvsC                      |
| <i>Desi_wild_5219599</i> | NA                                  | <i>Ca_desi_Chr05</i> | 5219599                 | A/G  | Gene_Ca_05622.1    | INTRON                        | BEACH domain-containing protein lvsC                      |
| <i>Desi_wild_5232897</i> | NA                                  | <i>Ca_desi_Chr05</i> | 5232897                 | C/G  | Gene_Ca_05623.1    | SYNONYMOUS_CODING             | GATA transcription factor 25                              |
| <i>Desi_wild_5232900</i> | NA                                  | <i>Ca_desi_Chr05</i> | 5232900                 | A/G  | Gene_Ca_05623.1    | SYNONYMOUS_CODING             | GATA transcription factor 25                              |
| <i>Desi_wild_5232903</i> | NA                                  | <i>Ca_desi_Chr05</i> | 5232903                 | A/G  | Gene_Ca_05623.1    | SYNONYMOUS_CODING             | GATA transcription factor 25                              |
| <i>Desi_wild_5232912</i> | NA                                  | <i>Ca_desi_Chr05</i> | 5232912                 | C/T  | Gene_Ca_05623.1    | SYNONYMOUS_CODING             | GATA transcription factor 25                              |
| <i>Desi_wild_5232915</i> | NA                                  | <i>Ca_desi_Chr05</i> | 5232915                 | G/T  | Gene_Ca_05623.1    | SYNONYMOUS_CODING             | GATA transcription factor 25                              |
| <i>Desi_wild_5232930</i> | NA                                  | <i>Ca_desi_Chr05</i> | 5232930                 | A/G  | Gene_Ca_05623.1    | SYNONYMOUS_CODING             | GATA transcription factor 25                              |
| <i>Desi_wild_5232931</i> | NA                                  | <i>Ca_desi_Chr05</i> | 5232931                 | A/C  | Gene_Ca_05623.1    | SYNONYMOUS_CODING             | GATA transcription factor 25                              |
| <i>Desi_wild_5232934</i> | NA                                  | <i>Ca_desi_Chr05</i> | 5232934                 | T/A  | Gene_Ca_05623.1    | SYNONYMOUS_CODING             | GATA transcription factor 25                              |
| <i>Desi_wild_5232935</i> | NA                                  | <i>Ca_desi_Chr05</i> | 5232935                 | G/A  | Gene_Ca_05623.1    | SYNONYMOUS_CODING             | GATA transcription factor 25                              |
| <i>Desi_wild_5232942</i> | NA                                  | <i>Ca_desi_Chr05</i> | 5232942                 | A/T  | Gene_Ca_05623.1    | SYNONYMOUS_CODING             | GATA transcription factor 25                              |
| <i>Desi_wild_5232963</i> | NA                                  | <i>Ca_desi_Chr05</i> | 5232963                 | A/G  | Gene_Ca_05623.1    | SYNONYMOUS_CODING             | GATA transcription factor 25                              |
| <i>Desi_wild_5232978</i> | NA                                  | <i>Ca_desi_Chr05</i> | 5232978                 | A/T  | Gene_Ca_05623.1    | SYNONYMOUS_CODING             | GATA transcription factor 25                              |
| <i>Desi_wild_5232981</i> | NA                                  | <i>Ca_desi_Chr05</i> | 5232981                 | C/A  | Gene_Ca_05623.1    | SYNONYMOUS_CODING             | GATA transcription factor 25                              |
| <i>Desi_wild_5307468</i> | NA                                  | <i>Ca_desi_Chr05</i> | 5307468                 | T/A  | Gene_Ca_05628.1    | INTRON                        | UPF0378 protein KIAA0100                                  |
| <i>Desi_wild_5307499</i> | NA                                  | <i>Ca_desi_Chr05</i> | 5307499                 | A/G  | Gene_Ca_05628.1    | INTRON                        | UPF0378 protein KIAA0100                                  |
| <i>Desi_wild_5385490</i> | NA                                  | <i>Ca_desi_Chr05</i> | 5385490                 | A/C  | Gene_Ca_05636.1    | DOWNSTREAM                    | Mechanosensitive ion channel protein 3, chloroplastic     |
| <i>Desi_wild_5422841</i> | NA                                  | <i>Ca_desi_Chr05</i> | 5422841                 | T/A  | NA                 | INTERGENIC                    | NA                                                        |
| <i>Desi_wild_5422843</i> | NA                                  | <i>Ca_desi_Chr05</i> | 5422843                 | T/C  | NA                 | INTERGENIC                    | NA                                                        |
| <i>Desi_wild_5422848</i> | NA                                  | <i>Ca_desi_Chr05</i> | 5422848                 | G/A  | NA                 | INTERGENIC                    | NA                                                        |
| <i>Desi_wild_5437648</i> | NA                                  | <i>Ca_desi_Chr05</i> | 5437648                 | A/G  | Gene_Ca_05640.1    | INTRON                        | MADS-box protein SVP                                      |
| <i>Desi_wild_5495919</i> | NA                                  | <i>Ca_desi_Chr05</i> | 5495919                 | C/A  | Gene_Ca_05645.1    | NON_SYNONYMOUS_CODING         | Ubiquitin carboxyl-terminal hydrolase 16                  |
| <i>Desi_wild_5506513</i> | NA                                  | <i>Ca_desi_Chr05</i> | 5506513                 | A/C  | Gene_Ca_05646.1    | SYNONYMOUS_CODING             | Aspartic proteinase nepenthesin-1                         |
| <i>Desi_wild_5508857</i> | NA                                  | <i>Ca_desi_Chr05</i> | 5508857                 | A/C  | NA                 | INTERGENIC                    | NA                                                        |
| <i>Desi_wild_5528798</i> | NA                                  | <i>Ca_desi_Chr05</i> | 5528798                 | A/G  | Gene_Ca_05648.1    | SYNONYMOUS_CODING             | Rho GTPase-activating protein 15                          |
| <i>Desi_wild_5624268</i> | NA                                  | <i>Ca_desi_Chr05</i> | 5624268                 | A/T  | Gene_Ca_05655.1    | NON_SYNONYMOUS_CODING         | Transcription factor HEC1                                 |
| <i>Desi_wild_5650365</i> | NA                                  | <i>Ca_desi_Chr05</i> | 5650365                 | C/T  | Gene_Ca_05656.1    | DOWNSTREAM                    | THO complex subunit 5 homolog                             |
| <i>Desi_wild_5650591</i> | NA                                  | <i>Ca_desi_Chr05</i> | 5650591                 | T/A  | Gene_Ca_05656.1    | DOWNSTREAM                    | THO complex subunit 5 homolog                             |
| <i>Desi_wild_5656147</i> | NA                                  | <i>Ca_desi_Chr05</i> | 5656147                 | G/A  | NA                 | INTERGENIC                    | NA                                                        |
| <i>Desi_wild_5697411</i> | NA                                  | <i>Ca_desi_Chr05</i> | 5697411                 | G/T  | Gene_Ca_05663.1    | DOWNSTREAM                    | Protein WEAK CHLOROPLAST MOVEMENT UNDER BLUE LIGHT 1      |
| <i>Desi_wild_5700363</i> | NA                                  | <i>Ca_desi_Chr05</i> | 5700363                 | G/A  | Gene_Ca_05663.1    | STOP_GAINED                   | Protein WEAK CHLOROPLAST MOVEMENT UNDER BLUE LIGHT 1      |

| SNP IDs                  | NCBI dbSNP accession IDs (NCBI_SS#) | Chromosomes          | Physical positions (bp) | SNPs | Gene accession IDs | Sequence components of genome | Putative functions                                                 |
|--------------------------|-------------------------------------|----------------------|-------------------------|------|--------------------|-------------------------------|--------------------------------------------------------------------|
| <i>Desi_wild_5775498</i> | NA                                  | <i>Ca_desi_Chr05</i> | 5775498                 | G/A  | NA                 | INTERGENIC                    | NA                                                                 |
| <i>Desi_wild_5775556</i> | NA                                  | <i>Ca_desi_Chr05</i> | 5775556                 | G/A  | NA                 | INTERGENIC                    | NA                                                                 |
| <i>Desi_wild_5775559</i> | NA                                  | <i>Ca_desi_Chr05</i> | 5775559                 | G/A  | NA                 | INTERGENIC                    | NA                                                                 |
| <i>Desi_wild_5775606</i> | NA                                  | <i>Ca_desi_Chr05</i> | 5775606                 | A/T  | NA                 | INTERGENIC                    | NA                                                                 |
| <i>Desi_wild_5775685</i> | NA                                  | <i>Ca_desi_Chr05</i> | 5775685                 | C/T  | NA                 | INTERGENIC                    | NA                                                                 |
| <i>Desi_wild_5797285</i> | NA                                  | <i>Ca_desi_Chr05</i> | 5797285                 | G/A  | NA                 | INTERGENIC                    | NA                                                                 |
| <i>Desi_wild_5797408</i> | NA                                  | <i>Ca_desi_Chr05</i> | 5797408                 | T/C  | NA                 | INTERGENIC                    | NA                                                                 |
| <i>Desi_wild_5816480</i> | NA                                  | <i>Ca_desi_Chr05</i> | 5816480                 | C/T  | NA                 | INTERGENIC                    | NA                                                                 |
| <i>Desi_wild_5821471</i> | NA                                  | <i>Ca_desi_Chr05</i> | 5821471                 | G/A  | NA                 | INTERGENIC                    | NA                                                                 |
| <i>Desi_wild_5864377</i> | NA                                  | <i>Ca_desi_Chr05</i> | 5864377                 | G/A  | Gene_Ca_05681.1    | DOWNSTREAM                    | RNA pseudourine synthase 7                                         |
| <i>Desi_wild_5864394</i> | NA                                  | <i>Ca_desi_Chr05</i> | 5864394                 | C/G  | Gene_Ca_05681.1    | DOWNSTREAM                    | RNA pseudourine synthase 7                                         |
| <i>Desi_wild_5864400</i> | NA                                  | <i>Ca_desi_Chr05</i> | 5864400                 | T/A  | Gene_Ca_05681.1    | DOWNSTREAM                    | RNA pseudourine synthase 7                                         |
| <i>Desi_wild_5901359</i> | NA                                  | <i>Ca_desi_Chr05</i> | 5901359                 | C/A  | Gene_Ca_05685.2    | NON_SYNONYMOUS_CODING         | RNA pseudourine synthase 7                                         |
| <i>Desi_wild_5901360</i> | NA                                  | <i>Ca_desi_Chr05</i> | 5901360                 | A/G  | Gene_Ca_05685.2    | SYNONYMOUS_CODING             | RNA pseudourine synthase 7                                         |
| <i>Desi_wild_5973536</i> | NA                                  | <i>Ca_desi_Chr05</i> | 5973536                 | C/T  | Gene_Ca_05695.1    | UPSTREAM                      | NA                                                                 |
| <i>Desi_wild_5973537</i> | NA                                  | <i>Ca_desi_Chr05</i> | 5973537                 | G/T  | Gene_Ca_05695.1    | UPSTREAM                      | NA                                                                 |
| <i>Desi_wild_5973542</i> | NA                                  | <i>Ca_desi_Chr05</i> | 5973542                 | T/G  | Gene_Ca_05695.1    | UPSTREAM                      | NA                                                                 |
| <i>Desi_wild_5973564</i> | NA                                  | <i>Ca_desi_Chr05</i> | 5973564                 | A/G  | Gene_Ca_05695.1    | UPSTREAM                      | NA                                                                 |
| <i>Desi_wild_5973566</i> | NA                                  | <i>Ca_desi_Chr05</i> | 5973566                 | A/G  | Gene_Ca_05695.1    | UPSTREAM                      | NA                                                                 |
| <i>Desi_wild_5973587</i> | NA                                  | <i>Ca_desi_Chr05</i> | 5973587                 | G/A  | Gene_Ca_05695.1    | UPSTREAM                      | NA                                                                 |
| <i>Desi_wild_5973605</i> | NA                                  | <i>Ca_desi_Chr05</i> | 5973605                 | A/T  | Gene_Ca_05695.1    | UPSTREAM                      | NA                                                                 |
| <i>Desi_wild_5973615</i> | NA                                  | <i>Ca_desi_Chr05</i> | 5973615                 | C/T  | Gene_Ca_05695.1    | UPSTREAM                      | NA                                                                 |
| <i>Desi_wild_5973618</i> | NA                                  | <i>Ca_desi_Chr05</i> | 5973618                 | C/T  | Gene_Ca_05695.1    | UPSTREAM                      | NA                                                                 |
| <i>Desi_wild_5973619</i> | NA                                  | <i>Ca_desi_Chr05</i> | 5973619                 | C/T  | Gene_Ca_05695.1    | UPSTREAM                      | NA                                                                 |
| <i>Desi_wild_5973628</i> | NA                                  | <i>Ca_desi_Chr05</i> | 5973628                 | C/A  | Gene_Ca_05695.1    | UPSTREAM                      | NA                                                                 |
| <i>Desi_wild_5976567</i> | NA                                  | <i>Ca_desi_Chr05</i> | 5976567                 | A/C  | NA                 | INTERGENIC                    | NA                                                                 |
| <i>Desi_wild_5986154</i> | NA                                  | <i>Ca_desi_Chr05</i> | 5986154                 | T/G  | NA                 | INTERGENIC                    | NA                                                                 |
| <i>Desi_wild_5986239</i> | NA                                  | <i>Ca_desi_Chr05</i> | 5986239                 | A/G  | NA                 | INTERGENIC                    | NA                                                                 |
| <i>Desi_wild_5999535</i> | NA                                  | <i>Ca_desi_Chr05</i> | 5999535                 | A/C  | Gene_Ca_05699.1    | DOWNSTREAM                    | Molybdenum cofactor sulfurase                                      |
| <i>Desi_wild_5999539</i> | NA                                  | <i>Ca_desi_Chr05</i> | 5999539                 | G/C  | Gene_Ca_05699.1    | DOWNSTREAM                    | Molybdenum cofactor sulfurase                                      |
| <i>Desi_wild_6011223</i> | NA                                  | <i>Ca_desi_Chr05</i> | 6011223                 | T/G  | Gene_Ca_05700.1    | INTRON                        | NA                                                                 |
| <i>Desi_wild_6201948</i> | NA                                  | <i>Ca_desi_Chr05</i> | 6201948                 | A/T  | Gene_Ca_05717.1    | INTRON                        | unknown protein                                                    |
| <i>Desi_wild_6268417</i> | NA                                  | <i>Ca_desi_Chr05</i> | 6268417                 | A/C  | NA                 | INTERGENIC                    | NA                                                                 |
| <i>Desi_wild_6270240</i> | NA                                  | <i>Ca_desi_Chr05</i> | 6270240                 | C/T  | NA                 | INTERGENIC                    | NA                                                                 |
| <i>Desi_wild_6376546</i> | NA                                  | <i>Ca_desi_Chr05</i> | 6376546                 | A/T  | Gene_Ca_05728.2    | INTRON                        | NA                                                                 |
| <i>Desi_wild_6376547</i> | NA                                  | <i>Ca_desi_Chr05</i> | 6376547                 | T/C  | Gene_Ca_05728.2    | INTRON                        | NA                                                                 |
| <i>Desi_wild_6383655</i> | NA                                  | <i>Ca_desi_Chr05</i> | 6383655                 | T/G  | NA                 | INTERGENIC                    | NA                                                                 |
| <i>Desi_wild_6435202</i> | NA                                  | <i>Ca_desi_Chr05</i> | 6435202                 | G/A  | Gene_Ca_05736.1    | SYNONYMOUS_CODING             | Betaine aldehyde dehydrogenase 1, chloroplastic                    |
| <i>Desi_wild_6435244</i> | NA                                  | <i>Ca_desi_Chr05</i> | 6435244                 | C/A  | Gene_Ca_05736.1    | SYNONYMOUS_CODING             | Betaine aldehyde dehydrogenase 1, chloroplastic                    |
| <i>Desi_wild_6458466</i> | NA                                  | <i>Ca_desi_Chr05</i> | 6458466                 | G/A  | NA                 | INTERGENIC                    | NA                                                                 |
| <i>Desi_wild_6458489</i> | NA                                  | <i>Ca_desi_Chr05</i> | 6458489                 | A/G  | NA                 | INTERGENIC                    | NA                                                                 |
| <i>Desi_wild_6547189</i> | NA                                  | <i>Ca_desi_Chr05</i> | 6547189                 | G/A  | Gene_Ca_05745.2    | SYNONYMOUS_CODING             | NA                                                                 |
| <i>Desi_wild_6585021</i> | NA                                  | <i>Ca_desi_Chr05</i> | 6585021                 | A/T  | Gene_Ca_05750.1    | SYNONYMOUS_CODING             | Probable alpha, alpha-trehalose-phosphate synthase [UDP-forming] 9 |
| <i>Desi_wild_6657909</i> | NA                                  | <i>Ca_desi_Chr05</i> | 6657909                 | A/T  | NA                 | INTERGENIC                    | NA                                                                 |

| SNP IDs                  | NCBI dbSNP accession IDs (NCBI_SS#) | Chromosomes          | Physical positions (bp) | SNPs | Gene accession IDs | Sequence components of genome | Putative functions                                 |
|--------------------------|-------------------------------------|----------------------|-------------------------|------|--------------------|-------------------------------|----------------------------------------------------|
| <i>Desi_wild_6885320</i> | NA                                  | <i>Ca_desi_Chr05</i> | 6885320                 | A/T  | Gene_Ca_05776.1    | INTRON                        | Poly(A) RNA polymerase GLD2                        |
| <i>Desi_wild_6902546</i> | NA                                  | <i>Ca_desi_Chr05</i> | 6902546                 | G/A  | Gene_Ca_05777.1    | DOWNSTREAM                    | Probable E3 ubiquitin-protein ligase HERC4         |
| <i>Desi_wild_6942511</i> | NA                                  | <i>Ca_desi_Chr05</i> | 6942511                 | A/C  | NA                 | INTERGENIC                    | NA                                                 |
| <i>Desi_wild_6950669</i> | NA                                  | <i>Ca_desi_Chr05</i> | 6950669                 | T/G  | Gene_Ca_05784.2    | INTRON                        | NA                                                 |
| <i>Desi_wild_6950706</i> | NA                                  | <i>Ca_desi_Chr05</i> | 6950706                 | A/T  | Gene_Ca_05784.2    | INTRON                        | NA                                                 |
| <i>Desi_wild_6991209</i> | NA                                  | <i>Ca_desi_Chr05</i> | 6991209                 | T/C  | NA                 | INTERGENIC                    | NA                                                 |
| <i>Desi_wild_7035127</i> | NA                                  | <i>Ca_desi_Chr05</i> | 7035127                 | C/T  | Gene_Ca_05794.1    | NON_SYNONYMOUS_CODING         | Amino acid permease 2                              |
| <i>Desi_wild_7052493</i> | NA                                  | <i>Ca_desi_Chr05</i> | 7052493                 | C/A  | NA                 | INTERGENIC                    | NA                                                 |
| <i>Desi_wild_7062009</i> | NA                                  | <i>Ca_desi_Chr05</i> | 7062009                 | C/A  | Gene_Ca_05795.1    | INTRON                        | Auxilin-related protein 1                          |
| <i>Desi_wild_7064373</i> | NA                                  | <i>Ca_desi_Chr05</i> | 7064373                 | A/G  | Gene_Ca_05795.1    | SYNONYMOUS_CODING             | Auxilin-related protein 1                          |
| <i>Desi_wild_7064434</i> | NA                                  | <i>Ca_desi_Chr05</i> | 7064434                 | T/C  | Gene_Ca_05795.1    | NON_SYNONYMOUS_CODING         | Auxilin-related protein 1                          |
| <i>Desi_wild_7064543</i> | NA                                  | <i>Ca_desi_Chr05</i> | 7064543                 | G/A  | Gene_Ca_05795.1    | NON_SYNONYMOUS_CODING         | Auxilin-related protein 1                          |
| <i>Desi_wild_7064622</i> | NA                                  | <i>Ca_desi_Chr05</i> | 7064622                 | C/G  | Gene_Ca_05795.1    | SYNONYMOUS_CODING             | Auxilin-related protein 1                          |
| <i>Desi_wild_7070169</i> | NA                                  | <i>Ca_desi_Chr05</i> | 7070169                 | T/C  | NA                 | INTERGENIC                    | NA                                                 |
| <i>Desi_wild_7077382</i> | NA                                  | <i>Ca_desi_Chr05</i> | 7077382                 | A/G  | Gene_Ca_05796.2    | INTRON                        | NA                                                 |
| <i>Desi_wild_7170635</i> | NA                                  | <i>Ca_desi_Chr05</i> | 7170635                 | C/A  | Gene_Ca_05806.1    | NON_SYNONYMOUS_CODING         | Probable serine/threonine-protein kinase At1g01540 |
| <i>Desi_wild_7193616</i> | NA                                  | <i>Ca_desi_Chr05</i> | 7193616                 | C/G  | Gene_Ca_05808.1    | UPSTREAM                      | E3 ubiquitin-protein ligase RGLG1                  |
| <i>Desi_wild_7266594</i> | NA                                  | <i>Ca_desi_Chr05</i> | 7266594                 | T/G  | Gene_Ca_05815.1    | NON_SYNONYMOUS_CODING         | Callose synthase 5                                 |
| <i>Desi_wild_7268172</i> | NA                                  | <i>Ca_desi_Chr05</i> | 7268172                 | G/A  | Gene_Ca_05815.1    | SYNONYMOUS_CODING             | Callose synthase 5                                 |
| <i>Desi_wild_7268186</i> | NA                                  | <i>Ca_desi_Chr05</i> | 7268186                 | G/A  | Gene_Ca_05815.1    | SYNONYMOUS_CODING             | Callose synthase 5                                 |
| <i>Desi_wild_7268196</i> | NA                                  | <i>Ca_desi_Chr05</i> | 7268196                 | G/A  | Gene_Ca_05815.1    | SYNONYMOUS_CODING             | Callose synthase 5                                 |
| <i>Desi_wild_7268209</i> | NA                                  | <i>Ca_desi_Chr05</i> | 7268209                 | A/T  | Gene_Ca_05815.1    | SYNONYMOUS_CODING             | Callose synthase 5                                 |
| <i>Desi_wild_7268212</i> | NA                                  | <i>Ca_desi_Chr05</i> | 7268212                 | A/T  | Gene_Ca_05815.1    | SYNONYMOUS_CODING             | Callose synthase 5                                 |
| <i>Desi_wild_7268218</i> | NA                                  | <i>Ca_desi_Chr05</i> | 7268218                 | A/G  | Gene_Ca_05815.1    | SYNONYMOUS_CODING             | Callose synthase 5                                 |
| <i>Desi_wild_7268224</i> | NA                                  | <i>Ca_desi_Chr05</i> | 7268224                 | G/T  | Gene_Ca_05815.1    | SYNONYMOUS_CODING             | Callose synthase 5                                 |
| <i>Desi_wild_7268227</i> | NA                                  | <i>Ca_desi_Chr05</i> | 7268227                 | T/C  | Gene_Ca_05815.1    | SYNONYMOUS_CODING             | Callose synthase 5                                 |
| <i>Desi_wild_7268230</i> | NA                                  | <i>Ca_desi_Chr05</i> | 7268230                 | C/T  | Gene_Ca_05815.1    | SYNONYMOUS_CODING             | Callose synthase 5                                 |
| <i>Desi_wild_7268236</i> | NA                                  | <i>Ca_desi_Chr05</i> | 7268236                 | C/A  | Gene_Ca_05815.1    | SYNONYMOUS_CODING             | Callose synthase 5                                 |
| <i>Desi_wild_7298869</i> | NA                                  | <i>Ca_desi_Chr05</i> | 7298869                 | T/G  | NA                 | INTERGENIC                    | NA                                                 |
| <i>Desi_wild_7370731</i> | NA                                  | <i>Ca_desi_Chr05</i> | 7370731                 | A/G  | NA                 | INTERGENIC                    | NA                                                 |
| <i>Desi_wild_7370963</i> | NA                                  | <i>Ca_desi_Chr05</i> | 7370963                 | T/A  | NA                 | INTERGENIC                    | NA                                                 |
| <i>Desi_wild_7521948</i> | NA                                  | <i>Ca_desi_Chr05</i> | 7521948                 | C/T  | Gene_Ca_05840.1    | INTRON                        | Nuclear pore complex protein Nup54                 |
| <i>Desi_wild_7628965</i> | NA                                  | <i>Ca_desi_Chr05</i> | 7628965                 | C/T  | NA                 | INTERGENIC                    | NA                                                 |
| <i>Desi_wild_7629004</i> | NA                                  | <i>Ca_desi_Chr05</i> | 7629004                 | G/T  | NA                 | INTERGENIC                    | NA                                                 |
| <i>Desi_wild_7648641</i> | NA                                  | <i>Ca_desi_Chr05</i> | 7648641                 | T/C  | NA                 | INTERGENIC                    | NA                                                 |
| <i>Desi_wild_7681731</i> | NA                                  | <i>Ca_desi_Chr05</i> | 7681731                 | A/G  | NA                 | INTERGENIC                    | NA                                                 |
| <i>Desi_wild_7694930</i> | NA                                  | <i>Ca_desi_Chr05</i> | 7694930                 | G/A  | Gene_Ca_05857.1    | DOWNSTREAM                    | Trihelix transcription factor GT-1                 |
| <i>Desi_wild_7699256</i> | NA                                  | <i>Ca_desi_Chr05</i> | 7699256                 | T/G  | Gene_Ca_05857.1    | SYNONYMOUS_CODING             | Trihelix transcription factor GT-1                 |
| <i>Desi_wild_7699265</i> | NA                                  | <i>Ca_desi_Chr05</i> | 7699265                 | T/G  | Gene_Ca_05857.1    | SYNONYMOUS_CODING             | Trihelix transcription factor GT-1                 |
| <i>Desi_wild_7699357</i> | NA                                  | <i>Ca_desi_Chr05</i> | 7699357                 | A/C  | Gene_Ca_05857.1    | UPSTREAM                      | Trihelix transcription factor GT-1                 |
| <i>Desi_wild_7746447</i> | NA                                  | <i>Ca_desi_Chr05</i> | 7746447                 | C/A  | NA                 | INTERGENIC                    | NA                                                 |
| <i>Desi_wild_7781390</i> | NA                                  | <i>Ca_desi_Chr05</i> | 7781390                 | A/C  | NA                 | INTERGENIC                    | NA                                                 |
| <i>Desi_wild_7806843</i> | NA                                  | <i>Ca_desi_Chr05</i> | 7806843                 | G/A  | Gene_Ca_05869.1    | NON_SYNONYMOUS_CODING         | G-protein coupled receptors                        |
| <i>Desi_wild_7823764</i> | NA                                  | <i>Ca_desi_Chr05</i> | 7823764                 | G/T  | Gene_Ca_05872.1    | NON_SYNONYMOUS_CODING         | COP1-interacting protein 4                         |

| SNP IDs                  | NCBI dbSNP accession IDs (NCBI_SS#) | Chromosomes          | Physical positions (bp) | SNPs | Gene accession IDs | Sequence components of genome | Putative functions                            |
|--------------------------|-------------------------------------|----------------------|-------------------------|------|--------------------|-------------------------------|-----------------------------------------------|
| <i>Desi_wild_7835498</i> | NA                                  | <i>Ca_desi_Chr05</i> | 7835498                 | A/C  | Gene_Ca_05874.1    | SYNONYMOUS_CODING             | ALBINO3-like protein 1, chloroplastic         |
| <i>Desi_wild_7910330</i> | NA                                  | <i>Ca_desi_Chr05</i> | 7910330                 | C/T  | Gene_Ca_05878.1    | DOWNSTREAM                    | Oxysterol-binding protein-related protein 1D  |
| <i>Desi_wild_7972155</i> | NA                                  | <i>Ca_desi_Chr05</i> | 7972155                 | T/C  | NA                 | INTERGENIC                    | NA                                            |
| <i>Desi_wild_8017612</i> | NA                                  | <i>Ca_desi_Chr05</i> | 8017612                 | T/C  | Gene_Ca_05890.1    | DOWNSTREAM                    | Alpha-galactosidase A                         |
| <i>Desi_wild_8153697</i> | NA                                  | <i>Ca_desi_Chr05</i> | 8153697                 | A/G  | NA                 | INTERGENIC                    | NA                                            |
| <i>Desi_wild_8153702</i> | NA                                  | <i>Ca_desi_Chr05</i> | 8153702                 | A/G  | NA                 | INTERGENIC                    | NA                                            |
| <i>Desi_wild_8153714</i> | NA                                  | <i>Ca_desi_Chr05</i> | 8153714                 | C/A  | NA                 | INTERGENIC                    | NA                                            |
| <i>Desi_wild_8153718</i> | NA                                  | <i>Ca_desi_Chr05</i> | 8153718                 | G/A  | NA                 | INTERGENIC                    | NA                                            |
| <i>Desi_wild_8153723</i> | NA                                  | <i>Ca_desi_Chr05</i> | 8153723                 | T/C  | NA                 | INTERGENIC                    | NA                                            |
| <i>Desi_wild_8153754</i> | NA                                  | <i>Ca_desi_Chr05</i> | 8153754                 | T/A  | NA                 | INTERGENIC                    | NA                                            |
| <i>Desi_wild_8153755</i> | NA                                  | <i>Ca_desi_Chr05</i> | 8153755                 | G/A  | NA                 | INTERGENIC                    | NA                                            |
| <i>Desi_wild_8153763</i> | NA                                  | <i>Ca_desi_Chr05</i> | 8153763                 | T/A  | NA                 | INTERGENIC                    | NA                                            |
| <i>Desi_wild_8153769</i> | NA                                  | <i>Ca_desi_Chr05</i> | 8153769                 | G/A  | NA                 | INTERGENIC                    | NA                                            |
| <i>Desi_wild_8153773</i> | NA                                  | <i>Ca_desi_Chr05</i> | 8153773                 | T/G  | NA                 | INTERGENIC                    | NA                                            |
| <i>Desi_wild_8153778</i> | NA                                  | <i>Ca_desi_Chr05</i> | 8153778                 | T/C  | NA                 | INTERGENIC                    | NA                                            |
| <i>Desi_wild_8466711</i> | NA                                  | <i>Ca_desi_Chr05</i> | 8466711                 | T/G  | Gene_Ca_05933.1    | DOWNSTREAM                    | Early nodulin-70                              |
| <i>Desi_wild_8466714</i> | NA                                  | <i>Ca_desi_Chr05</i> | 8466714                 | A/T  | Gene_Ca_05933.1    | DOWNSTREAM                    | Early nodulin-70                              |
| <i>Desi_wild_8466718</i> | NA                                  | <i>Ca_desi_Chr05</i> | 8466718                 | G/T  | Gene_Ca_05933.1    | DOWNSTREAM                    | Early nodulin-70                              |
| <i>Desi_wild_8466724</i> | NA                                  | <i>Ca_desi_Chr05</i> | 8466724                 | A/T  | Gene_Ca_05933.1    | DOWNSTREAM                    | Early nodulin-70                              |
| <i>Desi_wild_8466743</i> | NA                                  | <i>Ca_desi_Chr05</i> | 8466743                 | A/G  | Gene_Ca_05933.1    | DOWNSTREAM                    | Early nodulin-70                              |
| <i>Desi_wild_8498887</i> | NA                                  | <i>Ca_desi_Chr05</i> | 8498887                 | C/T  | Gene_Ca_05937.2    | INTRON                        | Aspartic proteinase-like protein 1            |
| <i>Desi_wild_8498895</i> | NA                                  | <i>Ca_desi_Chr05</i> | 8498895                 | G/A  | Gene_Ca_05937.2    | INTRON                        | Aspartic proteinase-like protein 1            |
| <i>Desi_wild_8515496</i> | NA                                  | <i>Ca_desi_Chr05</i> | 8515496                 | A/C  | Gene_Ca_05938.2    | NON_SYNONYMOUS_CODING         | NA                                            |
| <i>Desi_wild_8542117</i> | NA                                  | <i>Ca_desi_Chr05</i> | 8542117                 | T/C  | NA                 | INTERGENIC                    | NA                                            |
| <i>Desi_wild_8545228</i> | NA                                  | <i>Ca_desi_Chr05</i> | 8545228                 | G/T  | NA                 | INTERGENIC                    | NA                                            |
| <i>Desi_wild_8580671</i> | NA                                  | <i>Ca_desi_Chr05</i> | 8580671                 | T/G  | Gene_Ca_05945.1    | UPSTREAM                      | unknown protein                               |
| <i>Desi_wild_8627423</i> | NA                                  | <i>Ca_desi_Chr05</i> | 8627423                 | C/T  | NA                 | INTERGENIC                    | NA                                            |
| <i>Desi_wild_8660635</i> | NA                                  | <i>Ca_desi_Chr05</i> | 8660635                 | A/C  | NA                 | INTERGENIC                    | NA                                            |
| <i>Desi_wild_8680925</i> | NA                                  | <i>Ca_desi_Chr05</i> | 8680925                 | T/A  | Gene_Ca_05955.1    | INTRON                        | NA                                            |
| <i>Desi_wild_8681026</i> | NA                                  | <i>Ca_desi_Chr05</i> | 8681026                 | G/A  | Gene_Ca_05955.1    | NON_SYNONYMOUS_CODING         | NA                                            |
| <i>Desi_wild_8739003</i> | NA                                  | <i>Ca_desi_Chr05</i> | 8739003                 | A/C  | Gene_Ca_05960.1    | SYNONYMOUS_CODING             | unknown protein                               |
| <i>Desi_wild_8764877</i> | NA                                  | <i>Ca_desi_Chr05</i> | 8764877                 | A/C  | NA                 | INTERGENIC                    | NA                                            |
| <i>Desi_wild_8785100</i> | NA                                  | <i>Ca_desi_Chr05</i> | 8785100                 | G/A  | NA                 | INTERGENIC                    | NA                                            |
| <i>Desi_wild_8805768</i> | NA                                  | <i>Ca_desi_Chr05</i> | 8805768                 | T/G  | Gene_Ca_05970.1    | INTRON                        | Stomatin-like protein 2                       |
| <i>Desi_wild_8842551</i> | NA                                  | <i>Ca_desi_Chr05</i> | 8842551                 | A/G  | Gene_Ca_05975.2    | SYNONYMOUS_CODING             | FUNCTIONS IN: molecular_function unknown      |
| <i>Desi_wild_8868701</i> | NA                                  | <i>Ca_desi_Chr05</i> | 8868701                 | A/G  | Gene_Ca_05980.1    | DOWNSTREAM                    | NA                                            |
| <i>Desi_wild_8868969</i> | NA                                  | <i>Ca_desi_Chr05</i> | 8868969                 | T/C  | Gene_Ca_05980.1    | DOWNSTREAM                    | Uncharacterized hydrolase yugF                |
| <i>Desi_wild_8963858</i> | NA                                  | <i>Ca_desi_Chr05</i> | 8963858                 | A/T  | NA                 | INTERGENIC                    | NA                                            |
| <i>Desi_wild_9065241</i> | NA                                  | <i>Ca_desi_Chr05</i> | 9065241                 | A/C  | NA                 | INTERGENIC                    | NA                                            |
| <i>Desi_wild_9075629</i> | NA                                  | <i>Ca_desi_Chr05</i> | 9075629                 | T/C  | NA                 | INTERGENIC                    | NA                                            |
| <i>Desi_wild_9243631</i> | NA                                  | <i>Ca_desi_Chr05</i> | 9243631                 | G/A  | Gene_Ca_06016.1    | INTRON                        | NA                                            |
| <i>Desi_wild_9252419</i> | NA                                  | <i>Ca_desi_Chr05</i> | 9252419                 | A/C  | Gene_Ca_06016.1    | SYNONYMOUS_CODING             | NA                                            |
| <i>Desi_wild_9252420</i> | NA                                  | <i>Ca_desi_Chr05</i> | 9252420                 | G/T  | Gene_Ca_06016.1    | NON_SYNONYMOUS_CODING         | NA                                            |
| <i>Desi_wild_9404602</i> | NA                                  | <i>Ca_desi_Chr05</i> | 9404602                 | T/G  | Gene_Ca_06032.1    | SYNONYMOUS_CODING             | ATPase family AAA domain-containing protein 1 |

| SNP IDs                   | NCBI dbSNP accession IDs (NCBI_SS#) | Chromosomes          | Physical positions (bp) | SNPs | Gene accession IDs | Sequence components of genome | Putative functions                                  |
|---------------------------|-------------------------------------|----------------------|-------------------------|------|--------------------|-------------------------------|-----------------------------------------------------|
| <i>Desi_wild_9414352</i>  | NA                                  | <i>Ca_desi_Chr05</i> | 9414352                 | C/T  | Gene_Ca_06033.1    | SYNONYMOUS_CODING             | ATPase family AAA domain-containing protein 1-A     |
| <i>Desi_wild_9414353</i>  | NA                                  | <i>Ca_desi_Chr05</i> | 9414353                 | G/T  | Gene_Ca_06033.1    | NON_SYNONYMOUS_CODING         | ATPase family AAA domain-containing protein 1-A     |
| <i>Desi_wild_9414444</i>  | NA                                  | <i>Ca_desi_Chr05</i> | 9414444                 | C/A  | Gene_Ca_06033.1    | NON_SYNONYMOUS_CODING         | ATPase family AAA domain-containing protein 1-A     |
| <i>Desi_wild_9438727</i>  | NA                                  | <i>Ca_desi_Chr05</i> | 9438727                 | A/C  | NA                 | INTERGENIC                    | NA                                                  |
| <i>Desi_wild_9550387</i>  | NA                                  | <i>Ca_desi_Chr05</i> | 9550387                 | A/G  | Gene_Ca_06043.1    | INTRON                        | unknown protein                                     |
| <i>Desi_wild_9559908</i>  | NA                                  | <i>Ca_desi_Chr05</i> | 9559908                 | A/C  | NA                 | INTERGENIC                    | NA                                                  |
| <i>Desi_wild_9562549</i>  | NA                                  | <i>Ca_desi_Chr05</i> | 9562549                 | A/C  | Gene_Ca_06044.1    | UPSTREAM                      | SS18-like protein 2                                 |
| <i>Desi_wild_9724592</i>  | NA                                  | <i>Ca_desi_Chr05</i> | 9724592                 | T/G  | Gene_Ca_06057.1    | NON_SYNONYMOUS_CODING         | NA                                                  |
| <i>Desi_wild_9806433</i>  | NA                                  | <i>Ca_desi_Chr05</i> | 9806433                 | C/T  | Gene_Ca_06064.1    | SYNONYMOUS_CODING             | Probable pectinesterase/pectinesterase inhibitor 34 |
| <i>Desi_wild_9872975</i>  | NA                                  | <i>Ca_desi_Chr05</i> | 9872975                 | A/C  | Gene_Ca_06071.1    | UPSTREAM                      | defective in meristem silencing 3                   |
| <i>Desi_wild_9946953</i>  | NA                                  | <i>Ca_desi_Chr05</i> | 9946953                 | T/G  | Gene_Ca_06080.1    | DOWNSTREAM                    | Protein ABIL2                                       |
| <i>Desi_wild_9967382</i>  | NA                                  | <i>Ca_desi_Chr05</i> | 9967382                 | C/T  | Gene_Ca_06083.1    | UPSTREAM                      | KH domain-containing protein At4g18375              |
| <i>Desi_wild_9973465</i>  | NA                                  | <i>Ca_desi_Chr05</i> | 9973465                 | A/G  | NA                 | INTERGENIC                    | NA                                                  |
| <i>Desi_wild_10109468</i> | NA                                  | <i>Ca_desi_Chr05</i> | 10109468                | C/A  | Gene_Ca_06095.1    | NON_SYNONYMOUS_CODING         | NA                                                  |
| <i>Desi_wild_10544279</i> | NA                                  | <i>Ca_desi_Chr05</i> | 10544279                | G/A  | NA                 | INTERGENIC                    | NA                                                  |
| <i>Desi_wild_10625149</i> | NA                                  | <i>Ca_desi_Chr05</i> | 10625149                | G/T  | Gene_Ca_06115.1    | UPSTREAM                      | Elongation factor P                                 |
| <i>Desi_wild_10647914</i> | NA                                  | <i>Ca_desi_Chr05</i> | 10647914                | C/A  | Gene_Ca_06118.1    | DOWNSTREAM                    | calmodulin-binding family protein                   |
| <i>Desi_wild_10647921</i> | NA                                  | <i>Ca_desi_Chr05</i> | 10647921                | C/A  | Gene_Ca_06118.1    | DOWNSTREAM                    | calmodulin-binding family protein                   |
| <i>Desi_wild_10664414</i> | NA                                  | <i>Ca_desi_Chr05</i> | 10664414                | G/A  | Gene_Ca_06119.1    | NON_SYNONYMOUS_CODING         | Ubiquitin carboxyl-terminal hydrolase 2             |
| <i>Desi_wild_10700576</i> | NA                                  | <i>Ca_desi_Chr05</i> | 10700576                | A/C  | Gene_Ca_06125.1    | SYNONYMOUS_CODING             | Transmembrane 9 superfamily member 4                |
| <i>Desi_wild_10700586</i> | NA                                  | <i>Ca_desi_Chr05</i> | 10700586                | T/C  | Gene_Ca_06125.1    | SYNONYMOUS_CODING             | Transmembrane 9 superfamily member 4                |
| <i>Desi_wild_10700591</i> | NA                                  | <i>Ca_desi_Chr05</i> | 10700591                | A/T  | Gene_Ca_06125.1    | SYNONYMOUS_CODING             | Transmembrane 9 superfamily member 4                |
| <i>Desi_wild_10700592</i> | NA                                  | <i>Ca_desi_Chr05</i> | 10700592                | T/A  | Gene_Ca_06125.1    | SYNONYMOUS_CODING             | Transmembrane 9 superfamily member 4                |
| <i>Desi_wild_10700603</i> | NA                                  | <i>Ca_desi_Chr05</i> | 10700603                | G/T  | Gene_Ca_06125.1    | SYNONYMOUS_CODING             | Transmembrane 9 superfamily member 4                |
| <i>Desi_wild_10700604</i> | NA                                  | <i>Ca_desi_Chr05</i> | 10700604                | T/G  | Gene_Ca_06125.1    | SYNONYMOUS_CODING             | Transmembrane 9 superfamily member 4                |
| <i>Desi_wild_10700610</i> | NA                                  | <i>Ca_desi_Chr05</i> | 10700610                | C/T  | Gene_Ca_06125.1    | SYNONYMOUS_CODING             | Transmembrane 9 superfamily member 4                |
| <i>Desi_wild_10700619</i> | NA                                  | <i>Ca_desi_Chr05</i> | 10700619                | T/C  | Gene_Ca_06125.1    | SYNONYMOUS_CODING             | Transmembrane 9 superfamily member 4                |
| <i>Desi_wild_10700640</i> | NA                                  | <i>Ca_desi_Chr05</i> | 10700640                | T/A  | Gene_Ca_06125.1    | SYNONYMOUS_CODING             | Transmembrane 9 superfamily member 4                |
| <i>Desi_wild_10700652</i> | NA                                  | <i>Ca_desi_Chr05</i> | 10700652                | T/A  | Gene_Ca_06125.1    | SYNONYMOUS_CODING             | Transmembrane 9 superfamily member 4                |
| <i>Desi_wild_10700655</i> | NA                                  | <i>Ca_desi_Chr05</i> | 10700655                | G/T  | Gene_Ca_06125.1    | SYNONYMOUS_CODING             | Transmembrane 9 superfamily member 4                |
| <i>Desi_wild_10744244</i> | NA                                  | <i>Ca_desi_Chr05</i> | 10744244                | C/A  | Gene_Ca_06130.1    | NON_SYNONYMOUS_CODING         | Serine/threonine-protein kinase ATM                 |
| <i>Desi_wild_10898342</i> | NA                                  | <i>Ca_desi_Chr05</i> | 10898342                | A/G  | Gene_Ca_06144.2    | INTRON                        | NA                                                  |
| <i>Desi_wild_10960813</i> | NA                                  | <i>Ca_desi_Chr05</i> | 10960813                | C/T  | Gene_Ca_06149.2    | INTRON                        | Protein FAM91A1                                     |
| <i>Desi_wild_11028698</i> | NA                                  | <i>Ca_desi_Chr05</i> | 11028698                | C/A  | NA                 | INTERGENIC                    | NA                                                  |
| <i>Desi_wild_11061936</i> | NA                                  | <i>Ca_desi_Chr05</i> | 11061936                | T/C  | Gene_Ca_06164.1    | INTRON                        | embryo defective 1381                               |
| <i>Desi_wild_11063910</i> | NA                                  | <i>Ca_desi_Chr05</i> | 11063910                | C/G  | Gene_Ca_06164.1    | INTRON                        | embryo defective 1381                               |
| <i>Desi_wild_11160671</i> | NA                                  | <i>Ca_desi_Chr05</i> | 11160671                | A/C  | NA                 | INTERGENIC                    | NA                                                  |
| <i>Desi_wild_11160672</i> | NA                                  | <i>Ca_desi_Chr05</i> | 11160672                | G/C  | NA                 | INTERGENIC                    | NA                                                  |
| <i>Desi_wild_11174148</i> | NA                                  | <i>Ca_desi_Chr05</i> | 11174148                | C/T  | Gene_Ca_06173.1    | DOWNSTREAM                    | Putative uncharacterized protein                    |
| <i>Desi_wild_11184304</i> | NA                                  | <i>Ca_desi_Chr05</i> | 11184304                | C/T  | NA                 | INTERGENIC                    | NA                                                  |
| <i>Desi_wild_11184311</i> | NA                                  | <i>Ca_desi_Chr05</i> | 11184311                | A/G  | NA                 | INTERGENIC                    | NA                                                  |
| <i>Desi_wild_11184403</i> | NA                                  | <i>Ca_desi_Chr05</i> | 11184403                | G/A  | NA                 | INTERGENIC                    | NA                                                  |
| <i>Desi_wild_11214463</i> | NA                                  | <i>Ca_desi_Chr05</i> | 11214463                | C/A  | NA                 | INTERGENIC                    | NA                                                  |
| <i>Desi_wild_11288976</i> | NA                                  | <i>Ca_desi_Chr05</i> | 11288976                | G/A  | NA                 | INTERGENIC                    | NA                                                  |



| SNP IDs                   | NCBI dbSNP accession IDs (NCBI_SS#) | Chromosomes          | Physical positions (bp) | SNPs | Gene accession IDs | Sequence components of genome | Putative functions                                                     |
|---------------------------|-------------------------------------|----------------------|-------------------------|------|--------------------|-------------------------------|------------------------------------------------------------------------|
| <i>Desi_wild_11418304</i> | NA                                  | <i>Ca_desi_Chr05</i> | 11418304                | C/T  | NA                 | INTERGENIC                    | NA                                                                     |
| <i>Desi_wild_11418355</i> | NA                                  | <i>Ca_desi_Chr05</i> | 11418355                | A/G  | NA                 | INTERGENIC                    | NA                                                                     |
| <i>Desi_wild_11447693</i> | NA                                  | <i>Ca_desi_Chr05</i> | 11447693                | C/T  | NA                 | INTERGENIC                    | NA                                                                     |
| <i>Desi_wild_11586160</i> | NA                                  | <i>Ca_desi_Chr05</i> | 11586160                | C/T  | Gene_Ca_06203.1    | INTRON                        | Serine/threonine-protein kinase ATM                                    |
| <i>Desi_wild_11604665</i> | NA                                  | <i>Ca_desi_Chr05</i> | 11604665                | G/A  | Gene_Ca_06203.1    | INTRON                        | Serine/threonine-protein kinase ATM                                    |
| <i>Desi_wild_11609603</i> | NA                                  | <i>Ca_desi_Chr05</i> | 11609603                | C/A  | Gene_Ca_06203.1    | INTRON                        | Serine/threonine-protein kinase ATM                                    |
| <i>Desi_wild_11609771</i> | NA                                  | <i>Ca_desi_Chr05</i> | 11609771                | C/A  | Gene_Ca_06203.1    | INTRON                        | Serine/threonine-protein kinase ATM                                    |
| <i>Desi_wild_11609776</i> | NA                                  | <i>Ca_desi_Chr05</i> | 11609776                | G/A  | Gene_Ca_06203.1    | INTRON                        | Serine/threonine-protein kinase ATM                                    |
| <i>Desi_wild_11609808</i> | NA                                  | <i>Ca_desi_Chr05</i> | 11609808                | A/G  | Gene_Ca_06203.1    | INTRON                        | Serine/threonine-protein kinase ATM                                    |
| <i>Desi_wild_11655865</i> | NA                                  | <i>Ca_desi_Chr05</i> | 11655865                | C/T  | Gene_Ca_06208.1    | INTRON                        | unknown protein                                                        |
| <i>Desi_wild_11959531</i> | NA                                  | <i>Ca_desi_Chr05</i> | 11959531                | A/C  | NA                 | INTERGENIC                    | NA                                                                     |
| <i>Desi_wild_12037308</i> | NA                                  | <i>Ca_desi_Chr05</i> | 12037308                | A/T  | Gene_Ca_06243.1    | INTRON                        | Dynamain-related protein 12A                                           |
| <i>Desi_wild_12112846</i> | NA                                  | <i>Ca_desi_Chr05</i> | 12112846                | A/G  | Gene_Ca_06252.1    | NON_SYNONYMOUS_CODING         | Protein TAPT1 homolog                                                  |
| <i>Desi_wild_12319535</i> | NA                                  | <i>Ca_desi_Chr05</i> | 12319535                | T/C  | NA                 | INTERGENIC                    | NA                                                                     |
| <i>Desi_wild_12406367</i> | NA                                  | <i>Ca_desi_Chr05</i> | 12406367                | T/C  | Gene_Ca_06280.1    | INTRON                        | Callose synthase 10                                                    |
| <i>Desi_wild_12434400</i> | NA                                  | <i>Ca_desi_Chr05</i> | 12434400                | T/G  | Gene_Ca_06281.1    | INTRON                        | B3 domain-containing protein Os01g0905400                              |
| <i>Desi_wild_12461772</i> | NA                                  | <i>Ca_desi_Chr05</i> | 12461772                | C/A  | Gene_Ca_06284.1    | DOWNSTREAM                    | Oxygen-independent coproporphyrinogen-III oxidase-like protein sll1917 |
| <i>Desi_wild_12487728</i> | NA                                  | <i>Ca_desi_Chr05</i> | 12487728                | T/G  | Gene_Ca_06286.2    | SYNONYMOUS_CODING             | Telomere length regulation protein TEL2 homolog                        |
| <i>Desi_wild_12526927</i> | NA                                  | <i>Ca_desi_Chr05</i> | 12526927                | T/C  | Gene_Ca_06289.1    | DOWNSTREAM                    | DEP domain-containing mTOR-interacting protein                         |
| <i>Desi_wild_12602204</i> | NA                                  | <i>Ca_desi_Chr05</i> | 12602204                | A/C  | Gene_Ca_06296.1    | UPSTREAM                      | Vacuolar protein sorting-associated protein 9A                         |
| <i>Desi_wild_12759669</i> | NA                                  | <i>Ca_desi_Chr05</i> | 12759669                | C/T  | NA                 | INTERGENIC                    | NA                                                                     |
| <i>Desi_wild_12794350</i> | NA                                  | <i>Ca_desi_Chr05</i> | 12794350                | A/T  | Gene_Ca_06313.1    | DOWNSTREAM                    | NA                                                                     |
| <i>Desi_wild_12893610</i> | NA                                  | <i>Ca_desi_Chr05</i> | 12893610                | T/G  | Gene_Ca_06318.1    | SYNONYMOUS_CODING             | UDP-sugar pyrophosphorylase                                            |
| <i>Desi_wild_12893638</i> | NA                                  | <i>Ca_desi_Chr05</i> | 12893638                | T/C  | Gene_Ca_06318.1    | NON_SYNONYMOUS_CODING         | UDP-sugar pyrophosphorylase                                            |
| <i>Desi_wild_12898940</i> | NA                                  | <i>Ca_desi_Chr05</i> | 12898940                | T/A  | Gene_Ca_06319.1    | INTRON                        | Sorting and assembly machinery component 50 homolog                    |
| <i>Desi_wild_12898943</i> | NA                                  | <i>Ca_desi_Chr05</i> | 12898943                | A/T  | Gene_Ca_06319.1    | INTRON                        | Sorting and assembly machinery component 50 homolog                    |
| <i>Desi_wild_12899200</i> | NA                                  | <i>Ca_desi_Chr05</i> | 12899200                | G/C  | Gene_Ca_06319.1    | INTRON                        | Sorting and assembly machinery component 50 homolog                    |
| <i>Desi_wild_12899294</i> | NA                                  | <i>Ca_desi_Chr05</i> | 12899294                | C/T  | Gene_Ca_06319.1    | INTRON                        | Sorting and assembly machinery component 50 homolog                    |
| <i>Desi_wild_12899304</i> | NA                                  | <i>Ca_desi_Chr05</i> | 12899304                | G/A  | Gene_Ca_06319.1    | INTRON                        | Sorting and assembly machinery component 50 homolog                    |
| <i>Desi_wild_12899329</i> | NA                                  | <i>Ca_desi_Chr05</i> | 12899329                | G/C  | Gene_Ca_06319.1    | INTRON                        | Sorting and assembly machinery component 50 homolog                    |
| <i>Desi_wild_12948678</i> | NA                                  | <i>Ca_desi_Chr05</i> | 12948678                | T/G  | NA                 | INTERGENIC                    | NA                                                                     |
| <i>Desi_wild_12948702</i> | NA                                  | <i>Ca_desi_Chr05</i> | 12948702                | T/C  | NA                 | INTERGENIC                    | NA                                                                     |
| <i>Desi_wild_12948714</i> | NA                                  | <i>Ca_desi_Chr05</i> | 12948714                | G/A  | NA                 | INTERGENIC                    | NA                                                                     |
| <i>Desi_wild_12948716</i> | NA                                  | <i>Ca_desi_Chr05</i> | 12948716                | T/C  | NA                 | INTERGENIC                    | NA                                                                     |
| <i>Desi_wild_12948729</i> | NA                                  | <i>Ca_desi_Chr05</i> | 12948729                | G/A  | NA                 | INTERGENIC                    | NA                                                                     |
| <i>Desi_wild_12955254</i> | NA                                  | <i>Ca_desi_Chr05</i> | 12955254                | A/C  | Gene_Ca_06324.3    | SYNONYMOUS_CODING             | Multiple inositol polyphosphate phosphatase 1                          |
| <i>Desi_wild_12966290</i> | NA                                  | <i>Ca_desi_Chr05</i> | 12966290                | C/T  | Gene_Ca_06325.1    | SYNONYMOUS_CODING             | LOB domain-containing protein 12                                       |
| <i>Desi_wild_12978686</i> | NA                                  | <i>Ca_desi_Chr05</i> | 12978686                | G/A  | Gene_Ca_06326.1    | UPSTREAM                      | Cytosolic endo-beta-N-acetylglucosaminidase                            |
| <i>Desi_wild_12979161</i> | NA                                  | <i>Ca_desi_Chr05</i> | 12979161                | C/T  | Gene_Ca_06326.1    | UPSTREAM                      | Cytosolic endo-beta-N-acetylglucosaminidase                            |
| <i>Desi_wild_12979164</i> | NA                                  | <i>Ca_desi_Chr05</i> | 12979164                | C/T  | Gene_Ca_06326.1    | UPSTREAM                      | Cytosolic endo-beta-N-acetylglucosaminidase                            |
| <i>Desi_wild_12979254</i> | NA                                  | <i>Ca_desi_Chr05</i> | 12979254                | A/G  | Gene_Ca_06326.1    | UPSTREAM                      | Cytosolic endo-beta-N-acetylglucosaminidase                            |
| <i>Desi_wild_12999192</i> | NA                                  | <i>Ca_desi_Chr05</i> | 12999192                | G/T  | Gene_Ca_06328.1    | INTRON                        | FUNCTIONS IN: molecular_function unknown                               |
| <i>Desi_wild_13173580</i> | NA                                  | <i>Ca_desi_Chr05</i> | 13173580                | G/A  | Gene_Ca_06336.3    | NON_SYNONYMOUS_CODING         | Protein of unknown function (DUF399 and DUF3411)                       |
| <i>Desi_wild_13190974</i> | NA                                  | <i>Ca_desi_Chr05</i> | 13190974                | A/G  | Gene_Ca_06340.1    | INTRON                        | unknown protein                                                        |

| SNP IDs                   | NCBI dbSNP accession IDs (NCBI_SS#) | Chromosomes          | Physical positions (bp) | SNPs | Gene accession IDs | Sequence components of genome | Putative functions                                            |
|---------------------------|-------------------------------------|----------------------|-------------------------|------|--------------------|-------------------------------|---------------------------------------------------------------|
| <i>Desi_wild_13190975</i> | NA                                  | <i>Ca_desi_Chr05</i> | 13190975                | C/G  | Gene_Ca_06340.1    | INTRON                        | unknown protein                                               |
| <i>Desi_wild_13190987</i> | NA                                  | <i>Ca_desi_Chr05</i> | 13190987                | T/C  | Gene_Ca_06340.1    | INTRON                        | unknown protein                                               |
| <i>Desi_wild_13191026</i> | NA                                  | <i>Ca_desi_Chr05</i> | 13191026                | T/C  | Gene_Ca_06340.1    | INTRON                        | unknown protein                                               |
| <i>Desi_wild_13191685</i> | NA                                  | <i>Ca_desi_Chr05</i> | 13191685                | C/T  | Gene_Ca_06340.1    | INTRON                        | unknown protein                                               |
| <i>Desi_wild_13191923</i> | NA                                  | <i>Ca_desi_Chr05</i> | 13191923                | A/G  | Gene_Ca_06340.1    | INTRON                        | unknown protein                                               |
| <i>Desi_wild_13191966</i> | NA                                  | <i>Ca_desi_Chr05</i> | 13191966                | T/C  | Gene_Ca_06340.1    | INTRON                        | unknown protein                                               |
| <i>Desi_wild_13192535</i> | NA                                  | <i>Ca_desi_Chr05</i> | 13192535                | C/G  | Gene_Ca_06340.1    | INTRON                        | unknown protein                                               |
| <i>Desi_wild_13192562</i> | NA                                  | <i>Ca_desi_Chr05</i> | 13192562                | G/A  | Gene_Ca_06340.1    | INTRON                        | unknown protein                                               |
| <i>Desi_wild_13926641</i> | NA                                  | <i>Ca_desi_Chr05</i> | 13926641                | G/A  | Gene_Ca_06370.1    | NON_SYNONYMOUS_CODING         | Rab3 GTPase-activating protein catalytic subunit              |
| <i>Desi_wild_13929175</i> | NA                                  | <i>Ca_desi_Chr05</i> | 13929175                | T/C  | Gene_Ca_06370.1    | INTRON                        | Rab3 GTPase-activating protein catalytic subunit              |
| <i>Desi_wild_14056450</i> | NA                                  | <i>Ca_desi_Chr05</i> | 14056450                | G/A  | Gene_Ca_06377.1    | INTRON                        | Dihydroflavonol-4-reductase                                   |
| <i>Desi_wild_14152662</i> | NA                                  | <i>Ca_desi_Chr05</i> | 14152662                | T/G  | Gene_Ca_06382.1    | SYNONYMOUS_CODING             | Zinc finger CCCH domain-containing protein 66                 |
| <i>Desi_wild_14152990</i> | NA                                  | <i>Ca_desi_Chr05</i> | 14152990                | C/A  | Gene_Ca_06382.1    | NON_SYNONYMOUS_CODING         | Zinc finger CCCH domain-containing protein 66                 |
| <i>Desi_wild_14220315</i> | NA                                  | <i>Ca_desi_Chr05</i> | 14220315                | T/G  | NA                 | INTERGENIC                    | NA                                                            |
| <i>Desi_wild_14220330</i> | NA                                  | <i>Ca_desi_Chr05</i> | 14220330                | A/G  | NA                 | INTERGENIC                    | NA                                                            |
| <i>Desi_wild_14220338</i> | NA                                  | <i>Ca_desi_Chr05</i> | 14220338                | G/T  | NA                 | INTERGENIC                    | NA                                                            |
| <i>Desi_wild_14220339</i> | NA                                  | <i>Ca_desi_Chr05</i> | 14220339                | G/A  | NA                 | INTERGENIC                    | NA                                                            |
| <i>Desi_wild_14220343</i> | NA                                  | <i>Ca_desi_Chr05</i> | 14220343                | A/G  | NA                 | INTERGENIC                    | NA                                                            |
| <i>Desi_wild_14220346</i> | NA                                  | <i>Ca_desi_Chr05</i> | 14220346                | G/C  | NA                 | INTERGENIC                    | NA                                                            |
| <i>Desi_wild_14341243</i> | NA                                  | <i>Ca_desi_Chr05</i> | 14341243                | A/G  | Gene_Ca_06389.1    | INTRON                        | Vacuolar protein sorting-associated protein 16 homolog        |
| <i>Desi_wild_14341251</i> | NA                                  | <i>Ca_desi_Chr05</i> | 14341251                | C/T  | Gene_Ca_06389.1    | INTRON                        | Vacuolar protein sorting-associated protein 16 homolog        |
| <i>Desi_wild_14431391</i> | NA                                  | <i>Ca_desi_Chr05</i> | 14431391                | T/G  | NA                 | INTERGENIC                    | NA                                                            |
| <i>Desi_wild_14760972</i> | NA                                  | <i>Ca_desi_Chr05</i> | 14760972                | A/C  | NA                 | INTERGENIC                    | NA                                                            |
| <i>Desi_wild_14761061</i> | NA                                  | <i>Ca_desi_Chr05</i> | 14761061                | T/C  | NA                 | INTERGENIC                    | NA                                                            |
| <i>Desi_wild_14761071</i> | NA                                  | <i>Ca_desi_Chr05</i> | 14761071                | C/T  | NA                 | INTERGENIC                    | NA                                                            |
| <i>Desi_wild_14802489</i> | NA                                  | <i>Ca_desi_Chr05</i> | 14802489                | A/C  | NA                 | INTERGENIC                    | NA                                                            |
| <i>Desi_wild_14856249</i> | NA                                  | <i>Ca_desi_Chr05</i> | 14856249                | C/A  | Gene_Ca_06408.1    | DOWNSTREAM                    | NA                                                            |
| <i>Desi_wild_15197106</i> | NA                                  | <i>Ca_desi_Chr05</i> | 15197106                | G/C  | Gene_Ca_06424.1    | NON_SYNONYMOUS_CODING         | Kinase-related protein of unknown function (DUF1296)          |
| <i>Desi_wild_15239781</i> | NA                                  | <i>Ca_desi_Chr05</i> | 15239781                | G/C  | Gene_Ca_06428.1    | INTRON                        | tRNA-dihydrouridine synthase A                                |
| <i>Desi_wild_15239787</i> | NA                                  | <i>Ca_desi_Chr05</i> | 15239787                | T/C  | Gene_Ca_06428.1    | INTRON                        | tRNA-dihydrouridine synthase A                                |
| <i>Desi_wild_15239824</i> | NA                                  | <i>Ca_desi_Chr05</i> | 15239824                | A/T  | Gene_Ca_06428.1    | INTRON                        | tRNA-dihydrouridine synthase A                                |
| <i>Desi_wild_15239827</i> | NA                                  | <i>Ca_desi_Chr05</i> | 15239827                | A/T  | Gene_Ca_06428.1    | INTRON                        | tRNA-dihydrouridine synthase A                                |
| <i>Desi_wild_15284589</i> | NA                                  | <i>Ca_desi_Chr05</i> | 15284589                | A/C  | Gene_Ca_06431.3    | SYNONYMOUS_CODING             | Ankyrin repeat domain-containing protein 2                    |
| <i>Desi_wild_15284798</i> | NA                                  | <i>Ca_desi_Chr05</i> | 15284798                | A/G  | Gene_Ca_06431.3    | INTRON                        | Ankyrin repeat domain-containing protein 2                    |
| <i>Desi_wild_15418577</i> | NA                                  | <i>Ca_desi_Chr05</i> | 15418577                | T/C  | NA                 | INTERGENIC                    | NA                                                            |
| <i>Desi_wild_15497565</i> | NA                                  | <i>Ca_desi_Chr05</i> | 15497565                | T/G  | NA                 | INTERGENIC                    | NA                                                            |
| <i>Desi_wild_15504785</i> | NA                                  | <i>Ca_desi_Chr05</i> | 15504785                | T/A  | NA                 | INTERGENIC                    | NA                                                            |
| <i>Desi_wild_15609067</i> | NA                                  | <i>Ca_desi_Chr05</i> | 15609067                | G/A  | Gene_Ca_06445.1    | INTRON                        | Serine/threonine-protein phosphatase 6 regulatory subunit 3-B |
| <i>Desi_wild_15620327</i> | NA                                  | <i>Ca_desi_Chr05</i> | 15620327                | C/G  | Gene_Ca_06445.1    | INTRON                        | Serine/threonine-protein phosphatase 6 regulatory subunit 3-B |
| <i>Desi_wild_15620350</i> | NA                                  | <i>Ca_desi_Chr05</i> | 15620350                | C/T  | Gene_Ca_06445.1    | INTRON                        | Serine/threonine-protein phosphatase 6 regulatory subunit 3-B |
| <i>Desi_wild_15620403</i> | NA                                  | <i>Ca_desi_Chr05</i> | 15620403                | A/G  | Gene_Ca_06445.1    | INTRON                        | Serine/threonine-protein phosphatase 6 regulatory subunit 3-B |
| <i>Desi_wild_15713637</i> | NA                                  | <i>Ca_desi_Chr05</i> | 15713637                | C/T  | Gene_Ca_06451.1    | INTRON                        | Probable protein arginine N-methyltransferase 3               |
| <i>Desi_wild_15713697</i> | NA                                  | <i>Ca_desi_Chr05</i> | 15713697                | G/A  | Gene_Ca_06451.1    | INTRON                        | Probable protein arginine N-methyltransferase 3               |
| <i>Desi_wild_15713700</i> | NA                                  | <i>Ca_desi_Chr05</i> | 15713700                | C/T  | Gene_Ca_06451.1    | INTRON                        | Probable protein arginine N-methyltransferase 3               |

| SNP IDs            | NCBI dbSNP accession IDs (NCBI_SS#) | Chromosomes    | Physical positions (bp) | SNPs | Gene accession IDs | Sequence components of genome | Putative functions                                                   |
|--------------------|-------------------------------------|----------------|-------------------------|------|--------------------|-------------------------------|----------------------------------------------------------------------|
| Desi_wild_15990336 | NA                                  | Ca_desi_Chrom5 | 15990336                | G/A  | Gene_Ca_06458.1    | INTRON                        | Nudix hydrolase 3                                                    |
| Desi_wild_15990337 | NA                                  | Ca_desi_Chrom5 | 15990337                | C/T  | Gene_Ca_06458.1    | INTRON                        | Nudix hydrolase 3                                                    |
| Desi_wild_15990348 | NA                                  | Ca_desi_Chrom5 | 15990348                | A/T  | Gene_Ca_06458.1    | INTRON                        | Nudix hydrolase 3                                                    |
| Desi_wild_15990356 | NA                                  | Ca_desi_Chrom5 | 15990356                | A/G  | Gene_Ca_06458.1    | INTRON                        | Nudix hydrolase 3                                                    |
| Desi_wild_15990380 | NA                                  | Ca_desi_Chrom5 | 15990380                | T/C  | Gene_Ca_06458.1    | INTRON                        | Nudix hydrolase 3                                                    |
| Desi_wild_16137748 | NA                                  | Ca_desi_Chrom5 | 16137748                | A/T  | Gene_Ca_06466.1    | INTRON                        | Heat shock 70 kDa protein 2                                          |
| Desi_wild_16137753 | NA                                  | Ca_desi_Chrom5 | 16137753                | G/A  | Gene_Ca_06466.1    | INTRON                        | Heat shock 70 kDa protein 2                                          |
| Desi_wild_16137774 | NA                                  | Ca_desi_Chrom5 | 16137774                | C/G  | Gene_Ca_06466.1    | INTRON                        | Heat shock 70 kDa protein 2                                          |
| Desi_wild_16137828 | NA                                  | Ca_desi_Chrom5 | 16137828                | C/T  | Gene_Ca_06466.1    | INTRON                        | Heat shock 70 kDa protein 2                                          |
| Desi_wild_16170903 | NA                                  | Ca_desi_Chrom5 | 16170903                | A/C  | NA                 | INTERGENIC                    | NA                                                                   |
| Desi_wild_16170918 | NA                                  | Ca_desi_Chrom5 | 16170918                | G/T  | NA                 | INTERGENIC                    | NA                                                                   |
| Desi_wild_16170950 | NA                                  | Ca_desi_Chrom5 | 16170950                | G/C  | NA                 | INTERGENIC                    | NA                                                                   |
| Desi_wild_698732   | NA                                  | Ca_desi_Chrom6 | 698732                  | T/A  | NA                 | INTERGENIC                    | NA                                                                   |
| Desi_wild_710250   | NA                                  | Ca_desi_Chrom6 | 710250                  | G/A  | Gene_Ca_06487.1    | NON_SYNONYMOUS_CODING         | FRIGIDA like 1                                                       |
| Desi_wild_711778   | NA                                  | Ca_desi_Chrom6 | 711778                  | A/G  | Gene_Ca_06487.1    | NON_SYNONYMOUS_CODING         | FRIGIDA like 1                                                       |
| Desi_wild_760600   | NA                                  | Ca_desi_Chrom6 | 760600                  | C/A  | Gene_Ca_06491.3    | INTRON                        | NA                                                                   |
| Desi_wild_760601   | NA                                  | Ca_desi_Chrom6 | 760601                  | C/G  | Gene_Ca_06491.3    | INTRON                        | NA                                                                   |
| Desi_wild_760602   | NA                                  | Ca_desi_Chrom6 | 760602                  | A/C  | Gene_Ca_06491.3    | INTRON                        | NA                                                                   |
| Desi_wild_760604   | NA                                  | Ca_desi_Chrom6 | 760604                  | C/T  | Gene_Ca_06491.3    | INTRON                        | NA                                                                   |
| Desi_wild_766012   | NA                                  | Ca_desi_Chrom6 | 766012                  | A/C  | NA                 | INTERGENIC                    | NA                                                                   |
| Desi_wild_784235   | NA                                  | Ca_desi_Chrom6 | 784235                  | G/A  | Gene_Ca_06494.1    | UPSTREAM                      | Putative BPI/LBP family protein At1g04970                            |
| Desi_wild_785583   | NA                                  | Ca_desi_Chrom6 | 785583                  | C/G  | NA                 | INTERGENIC                    | NA                                                                   |
| Desi_wild_816771   | NA                                  | Ca_desi_Chrom6 | 816771                  | G/A  | Gene_Ca_06502.1    | DOWNSTREAM                    | Pentatricopeptide repeat-containing protein At4g39952, mitochondrial |
| Desi_wild_816797   | NA                                  | Ca_desi_Chrom6 | 816797                  | C/A  | Gene_Ca_06502.1    | DOWNSTREAM                    | Pentatricopeptide repeat-containing protein At4g39952, mitochondrial |
| Desi_wild_834868   | NA                                  | Ca_desi_Chrom6 | 834868                  | T/G  | NA                 | INTERGENIC                    | NA                                                                   |
| Desi_wild_837890   | NA                                  | Ca_desi_Chrom6 | 837890                  | G/A  | NA                 | INTERGENIC                    | NA                                                                   |
| Desi_wild_837921   | NA                                  | Ca_desi_Chrom6 | 837921                  | G/A  | NA                 | INTERGENIC                    | NA                                                                   |
| Desi_wild_837937   | NA                                  | Ca_desi_Chrom6 | 837937                  | T/G  | NA                 | INTERGENIC                    | NA                                                                   |
| Desi_wild_837941   | NA                                  | Ca_desi_Chrom6 | 837941                  | G/A  | NA                 | INTERGENIC                    | NA                                                                   |
| Desi_wild_837943   | NA                                  | Ca_desi_Chrom6 | 837943                  | C/T  | NA                 | INTERGENIC                    | NA                                                                   |
| Desi_wild_837945   | NA                                  | Ca_desi_Chrom6 | 837945                  | A/G  | NA                 | INTERGENIC                    | NA                                                                   |
| Desi_wild_837954   | NA                                  | Ca_desi_Chrom6 | 837954                  | T/C  | NA                 | INTERGENIC                    | NA                                                                   |
| Desi_wild_852455   | NA                                  | Ca_desi_Chrom6 | 852455                  | C/T  | NA                 | INTERGENIC                    | NA                                                                   |
| Desi_wild_852734   | NA                                  | Ca_desi_Chrom6 | 852734                  | T/A  | NA                 | INTERGENIC                    | NA                                                                   |
| Desi_wild_872274   | NA                                  | Ca_desi_Chrom6 | 872274                  | C/T  | Gene_Ca_06508.1    | NON_SYNONYMOUS_CODING         | Calcium-dependent lipid-binding (CaLB domain) family protein         |
| Desi_wild_1400882  | NA                                  | Ca_desi_Chrom6 | 1400882                 | A/G  | Gene_Ca_06528.1    | SYNONYMOUS_CODING             | NA                                                                   |
| Desi_wild_1428933  | NA                                  | Ca_desi_Chrom6 | 1428933                 | T/C  | Gene_Ca_06531.1    | INTRON                        | FH protein interacting protein FIP2                                  |
| Desi_wild_1447426  | NA                                  | Ca_desi_Chrom6 | 1447426                 | A/C  | Gene_Ca_06533.1    | INTRON                        | Exosome component 10                                                 |
| Desi_wild_1498125  | NA                                  | Ca_desi_Chrom6 | 1498125                 | C/A  | NA                 | INTERGENIC                    | NA                                                                   |
| Desi_wild_1498286  | NA                                  | Ca_desi_Chrom6 | 1498286                 | A/C  | NA                 | INTERGENIC                    | NA                                                                   |
| Desi_wild_1720438  | NA                                  | Ca_desi_Chrom6 | 1720438                 | C/T  | Gene_Ca_06553.1    | NON_SYNONYMOUS_CODING         | Probable E3 ubiquitin-protein ligase HERC2                           |
| Desi_wild_1768057  | NA                                  | Ca_desi_Chrom6 | 1768057                 | T/G  | Gene_Ca_06558.1    | SYNONYMOUS_CODING             | Glutamate decarboxylase 1                                            |
| Desi_wild_1778613  | NA                                  | Ca_desi_Chrom6 | 1778613                 | A/G  | NA                 | INTERGENIC                    | NA                                                                   |
| Desi_wild_1778652  | NA                                  | Ca_desi_Chrom6 | 1778652                 | G/A  | NA                 | INTERGENIC                    | NA                                                                   |

| SNP IDs                  | NCBI dbSNP accession IDs (NCBI_SS#) | Chromosomes          | Physical positions (bp) | SNPs | Gene accession IDs | Sequence components of genome | Putative functions                   |
|--------------------------|-------------------------------------|----------------------|-------------------------|------|--------------------|-------------------------------|--------------------------------------|
| <i>Desi_wild_1878318</i> | NA                                  | <i>Ca_desi_Chr06</i> | 1878318                 | C/A  | NA                 | INTERGENIC                    | NA                                   |
| <i>Desi_wild_1909507</i> | NA                                  | <i>Ca_desi_Chr06</i> | 1909507                 | T/C  | NA                 | INTERGENIC                    | NA                                   |
| <i>Desi_wild_1952238</i> | NA                                  | <i>Ca_desi_Chr06</i> | 1952238                 | T/G  | Gene_Ca_06573.1    | NON_SYNONYMOUS_CODING         | Nicastrin                            |
| <i>Desi_wild_1982038</i> | NA                                  | <i>Ca_desi_Chr06</i> | 1982038                 | G/C  | Gene_Ca_06576.1    | DOWNSTREAM                    | Aspartic proteinase nepenthesin-1    |
| <i>Desi_wild_2055044</i> | NA                                  | <i>Ca_desi_Chr06</i> | 2055044                 | A/C  | Gene_Ca_06580.1    | SYNONYMOUS_CODING             | Condensin complex subunit 3          |
| <i>Desi_wild_2268766</i> | NA                                  | <i>Ca_desi_Chr06</i> | 2268766                 | T/A  | NA                 | INTERGENIC                    | NA                                   |
| <i>Desi_wild_2304885</i> | NA                                  | <i>Ca_desi_Chr06</i> | 2304885                 | C/T  | NA                 | INTERGENIC                    | NA                                   |
| <i>Desi_wild_2304901</i> | NA                                  | <i>Ca_desi_Chr06</i> | 2304901                 | A/T  | NA                 | INTERGENIC                    | NA                                   |
| <i>Desi_wild_2304913</i> | NA                                  | <i>Ca_desi_Chr06</i> | 2304913                 | A/T  | NA                 | INTERGENIC                    | NA                                   |
| <i>Desi_wild_2304915</i> | NA                                  | <i>Ca_desi_Chr06</i> | 2304915                 | G/T  | NA                 | INTERGENIC                    | NA                                   |
| <i>Desi_wild_2323466</i> | NA                                  | <i>Ca_desi_Chr06</i> | 2323466                 | G/T  | NA                 | INTERGENIC                    | NA                                   |
| <i>Desi_wild_2341430</i> | NA                                  | <i>Ca_desi_Chr06</i> | 2341430                 | A/G  | NA                 | INTERGENIC                    | NA                                   |
| <i>Desi_wild_2341500</i> | NA                                  | <i>Ca_desi_Chr06</i> | 2341500                 | G/A  | NA                 | INTERGENIC                    | NA                                   |
| <i>Desi_wild_2354150</i> | NA                                  | <i>Ca_desi_Chr06</i> | 2354150                 | T/C  | NA                 | INTERGENIC                    | NA                                   |
| <i>Desi_wild_2354154</i> | NA                                  | <i>Ca_desi_Chr06</i> | 2354154                 | T/G  | NA                 | INTERGENIC                    | NA                                   |
| <i>Desi_wild_2354157</i> | NA                                  | <i>Ca_desi_Chr06</i> | 2354157                 | A/G  | NA                 | INTERGENIC                    | NA                                   |
| <i>Desi_wild_2354172</i> | NA                                  | <i>Ca_desi_Chr06</i> | 2354172                 | A/G  | NA                 | INTERGENIC                    | NA                                   |
| <i>Desi_wild_2354173</i> | NA                                  | <i>Ca_desi_Chr06</i> | 2354173                 | C/T  | NA                 | INTERGENIC                    | NA                                   |
| <i>Desi_wild_2354179</i> | NA                                  | <i>Ca_desi_Chr06</i> | 2354179                 | T/G  | NA                 | INTERGENIC                    | NA                                   |
| <i>Desi_wild_2354180</i> | NA                                  | <i>Ca_desi_Chr06</i> | 2354180                 | C/T  | NA                 | INTERGENIC                    | NA                                   |
| <i>Desi_wild_2354184</i> | NA                                  | <i>Ca_desi_Chr06</i> | 2354184                 | T/A  | NA                 | INTERGENIC                    | NA                                   |
| <i>Desi_wild_2354190</i> | NA                                  | <i>Ca_desi_Chr06</i> | 2354190                 | T/C  | NA                 | INTERGENIC                    | NA                                   |
| <i>Desi_wild_2354211</i> | NA                                  | <i>Ca_desi_Chr06</i> | 2354211                 | G/A  | NA                 | INTERGENIC                    | NA                                   |
| <i>Desi_wild_2354214</i> | NA                                  | <i>Ca_desi_Chr06</i> | 2354214                 | T/C  | NA                 | INTERGENIC                    | NA                                   |
| <i>Desi_wild_2354357</i> | NA                                  | <i>Ca_desi_Chr06</i> | 2354357                 | T/C  | NA                 | INTERGENIC                    | NA                                   |
| <i>Desi_wild_2609808</i> | NA                                  | <i>Ca_desi_Chr06</i> | 2609808                 | A/C  | NA                 | INTERGENIC                    | NA                                   |
| <i>Desi_wild_2609813</i> | NA                                  | <i>Ca_desi_Chr06</i> | 2609813                 | T/C  | NA                 | INTERGENIC                    | NA                                   |
| <i>Desi_wild_2615011</i> | NA                                  | <i>Ca_desi_Chr06</i> | 2615011                 | A/C  | Gene_Ca_06623.1    | NON_SYNONYMOUS_CODING         | Glucan endo-1,3-beta-glucosidase 2   |
| <i>Desi_wild_2615019</i> | NA                                  | <i>Ca_desi_Chr06</i> | 2615019                 | A/T  | Gene_Ca_06623.1    | NON_SYNONYMOUS_CODING         | Glucan endo-1,3-beta-glucosidase 2   |
| <i>Desi_wild_2697953</i> | NA                                  | <i>Ca_desi_Chr06</i> | 2697953                 | A/G  | Gene_Ca_06628.1    | NON_SYNONYMOUS_CODING         | Golgin candidate 2                   |
| <i>Desi_wild_2697972</i> | NA                                  | <i>Ca_desi_Chr06</i> | 2697972                 | G/A  | Gene_Ca_06628.1    | SYNONYMOUS_CODING             | Golgin candidate 2                   |
| <i>Desi_wild_2698001</i> | NA                                  | <i>Ca_desi_Chr06</i> | 2698001                 | A/G  | Gene_Ca_06628.1    | NON_SYNONYMOUS_CODING         | Golgin candidate 2                   |
| <i>Desi_wild_2698272</i> | NA                                  | <i>Ca_desi_Chr06</i> | 2698272                 | C/T  | Gene_Ca_06628.1    | SYNONYMOUS_CODING             | Golgin candidate 2                   |
| <i>Desi_wild_2698273</i> | NA                                  | <i>Ca_desi_Chr06</i> | 2698273                 | T/A  | Gene_Ca_06628.1    | NON_SYNONYMOUS_CODING         | Golgin candidate 2                   |
| <i>Desi_wild_2703180</i> | NA                                  | <i>Ca_desi_Chr06</i> | 2703180                 | T/A  | Gene_Ca_06628.1    | INTRON                        | Golgin candidate 2                   |
| <i>Desi_wild_2703198</i> | NA                                  | <i>Ca_desi_Chr06</i> | 2703198                 | A/G  | Gene_Ca_06628.1    | INTRON                        | Golgin candidate 2                   |
| <i>Desi_wild_2708661</i> | NA                                  | <i>Ca_desi_Chr06</i> | 2708661                 | C/G  | NA                 | INTERGENIC                    | NA                                   |
| <i>Desi_wild_2708683</i> | NA                                  | <i>Ca_desi_Chr06</i> | 2708683                 | C/T  | NA                 | INTERGENIC                    | NA                                   |
| <i>Desi_wild_2716533</i> | NA                                  | <i>Ca_desi_Chr06</i> | 2716533                 | T/G  | Gene_Ca_06631.1    | DOWNSTREAM                    | Serine/threonine-protein kinase CTR1 |
| <i>Desi_wild_2721201</i> | NA                                  | <i>Ca_desi_Chr06</i> | 2721201                 | A/C  | NA                 | INTERGENIC                    | NA                                   |
| <i>Desi_wild_2721202</i> | NA                                  | <i>Ca_desi_Chr06</i> | 2721202                 | G/T  | NA                 | INTERGENIC                    | NA                                   |
| <i>Desi_wild_2721205</i> | NA                                  | <i>Ca_desi_Chr06</i> | 2721205                 | A/C  | NA                 | INTERGENIC                    | NA                                   |
| <i>Desi_wild_2721210</i> | NA                                  | <i>Ca_desi_Chr06</i> | 2721210                 | G/T  | NA                 | INTERGENIC                    | NA                                   |
| <i>Desi_wild_2721217</i> | NA                                  | <i>Ca_desi_Chr06</i> | 2721217                 | A/G  | NA                 | INTERGENIC                    | NA                                   |

| SNP IDs                  | NCBI dbSNP accession IDs (NCBI_SS#) | Chromosomes           | Physical positions (bp) | SNPs | Gene accession IDs | Sequence components of genome | Putative functions                                        |
|--------------------------|-------------------------------------|-----------------------|-------------------------|------|--------------------|-------------------------------|-----------------------------------------------------------|
| <i>Desi_wild_2721220</i> | NA                                  | <i>Ca_desi_Chrom6</i> | 2721220                 | T/G  | NA                 | INTERGENIC                    | NA                                                        |
| <i>Desi_wild_2721229</i> | NA                                  | <i>Ca_desi_Chrom6</i> | 2721229                 | G/A  | NA                 | INTERGENIC                    | NA                                                        |
| <i>Desi_wild_2721236</i> | NA                                  | <i>Ca_desi_Chrom6</i> | 2721236                 | T/C  | NA                 | INTERGENIC                    | NA                                                        |
| <i>Desi_wild_2721244</i> | NA                                  | <i>Ca_desi_Chrom6</i> | 2721244                 | A/T  | NA                 | INTERGENIC                    | NA                                                        |
| <i>Desi_wild_2724389</i> | NA                                  | <i>Ca_desi_Chrom6</i> | 2724389                 | T/G  | Gene_Ca_06631.2    | INTRON                        | Serine/threonine-protein kinase CTR1                      |
| <i>Desi_wild_2734949</i> | NA                                  | <i>Ca_desi_Chrom6</i> | 2734949                 | A/C  | Gene_Ca_06632.1    | NON_SYNONYMOUS_CODING         | HMG-Y-related protein A                                   |
| <i>Desi_wild_2734976</i> | NA                                  | <i>Ca_desi_Chrom6</i> | 2734976                 | T/G  | Gene_Ca_06632.1    | SYNONYMOUS_CODING             | HMG-Y-related protein A                                   |
| <i>Desi_wild_2735094</i> | NA                                  | <i>Ca_desi_Chrom6</i> | 2735094                 | G/A  | Gene_Ca_06632.1    | NON_SYNONYMOUS_CODING         | HMG-Y-related protein A                                   |
| <i>Desi_wild_2735295</i> | NA                                  | <i>Ca_desi_Chrom6</i> | 2735295                 | T/C  | Gene_Ca_06632.1    | NON_SYNONYMOUS_CODING         | HMG-Y-related protein A                                   |
| <i>Desi_wild_2771447</i> | NA                                  | <i>Ca_desi_Chrom6</i> | 2771447                 | T/C  | Gene_Ca_06634.1    | UPSTREAM                      | Tyrosine-rich hydroxyproline-rich glycoprotein (Fragment) |
| <i>Desi_wild_2771505</i> | NA                                  | <i>Ca_desi_Chrom6</i> | 2771505                 | T/A  | Gene_Ca_06634.1    | UPSTREAM                      | Tyrosine-rich hydroxyproline-rich glycoprotein (Fragment) |
| <i>Desi_wild_2771663</i> | NA                                  | <i>Ca_desi_Chrom6</i> | 2771663                 | T/C  | Gene_Ca_06634.1    | SYNONYMOUS_CODING             | Tyrosine-rich hydroxyproline-rich glycoprotein (Fragment) |
| <i>Desi_wild_2963977</i> | NA                                  | <i>Ca_desi_Chrom6</i> | 2963977                 | A/G  | Gene_Ca_06652.1    | UPSTREAM                      | Phospholipase A2 homolog 3                                |
| <i>Desi_wild_3004623</i> | NA                                  | <i>Ca_desi_Chrom6</i> | 3004623                 | G/A  | NA                 | INTERGENIC                    | NA                                                        |
| <i>Desi_wild_3289141</i> | NA                                  | <i>Ca_desi_Chrom6</i> | 3289141                 | T/C  | Gene_Ca_06673.1    | SYNONYMOUS_CODING             | SH3 domain-containing protein                             |
| <i>Desi_wild_3295359</i> | NA                                  | <i>Ca_desi_Chrom6</i> | 3295359                 | A/T  | Gene_Ca_06673.1    | NON_SYNONYMOUS_CODING         | SH3 domain-containing protein                             |
| <i>Desi_wild_3295404</i> | NA                                  | <i>Ca_desi_Chrom6</i> | 3295404                 | A/C  | Gene_Ca_06673.1    | NON_SYNONYMOUS_CODING         | SH3 domain-containing protein                             |
| <i>Desi_wild_3295420</i> | NA                                  | <i>Ca_desi_Chrom6</i> | 3295420                 | A/C  | Gene_Ca_06673.1    | SYNONYMOUS_CODING             | SH3 domain-containing protein                             |
| <i>Desi_wild_3295426</i> | NA                                  | <i>Ca_desi_Chrom6</i> | 3295426                 | A/C  | Gene_Ca_06673.1    | SYNONYMOUS_CODING             | SH3 domain-containing protein                             |
| <i>Desi_wild_3357558</i> | NA                                  | <i>Ca_desi_Chrom6</i> | 3357558                 | T/C  | Gene_Ca_06678.2    | UPSTREAM                      | NA                                                        |
| <i>Desi_wild_3385816</i> | NA                                  | <i>Ca_desi_Chrom6</i> | 3385816                 | G/A  | NA                 | INTERGENIC                    | NA                                                        |
| <i>Desi_wild_3422528</i> | NA                                  | <i>Ca_desi_Chrom6</i> | 3422528                 | C/A  | Gene_Ca_06684.1    | INTRON                        | NA                                                        |
| <i>Desi_wild_3515971</i> | NA                                  | <i>Ca_desi_Chrom6</i> | 3515971                 | T/G  | Gene_Ca_06697.1    | NON_SYNONYMOUS_CODING         | Polyribonucleotide nucleotidyltransferase                 |
| <i>Desi_wild_3629257</i> | NA                                  | <i>Ca_desi_Chrom6</i> | 3629257                 | G/T  | Gene_Ca_06710.1    | INTRON                        | ATPase family AAA domain-containing protein 3-B           |
| <i>Desi_wild_3629260</i> | NA                                  | <i>Ca_desi_Chrom6</i> | 3629260                 | A/T  | Gene_Ca_06710.1    | INTRON                        | ATPase family AAA domain-containing protein 3-B           |
| <i>Desi_wild_3629275</i> | NA                                  | <i>Ca_desi_Chrom6</i> | 3629275                 | C/T  | Gene_Ca_06710.1    | INTRON                        | ATPase family AAA domain-containing protein 3-B           |
| <i>Desi_wild_3629293</i> | NA                                  | <i>Ca_desi_Chrom6</i> | 3629293                 | A/T  | Gene_Ca_06710.1    | INTRON                        | ATPase family AAA domain-containing protein 3-B           |
| <i>Desi_wild_3629296</i> | NA                                  | <i>Ca_desi_Chrom6</i> | 3629296                 | T/A  | Gene_Ca_06710.1    | INTRON                        | ATPase family AAA domain-containing protein 3-B           |
| <i>Desi_wild_3748457</i> | NA                                  | <i>Ca_desi_Chrom6</i> | 3748457                 | A/C  | NA                 | INTERGENIC                    | NA                                                        |
| <i>Desi_wild_3748459</i> | NA                                  | <i>Ca_desi_Chrom6</i> | 3748459                 | C/T  | NA                 | INTERGENIC                    | NA                                                        |
| <i>Desi_wild_3748465</i> | NA                                  | <i>Ca_desi_Chrom6</i> | 3748465                 | A/C  | NA                 | INTERGENIC                    | NA                                                        |
| <i>Desi_wild_3748466</i> | NA                                  | <i>Ca_desi_Chrom6</i> | 3748466                 | T/A  | NA                 | INTERGENIC                    | NA                                                        |
| <i>Desi_wild_3748468</i> | NA                                  | <i>Ca_desi_Chrom6</i> | 3748468                 | C/T  | NA                 | INTERGENIC                    | NA                                                        |
| <i>Desi_wild_3748470</i> | NA                                  | <i>Ca_desi_Chrom6</i> | 3748470                 | A/C  | NA                 | INTERGENIC                    | NA                                                        |
| <i>Desi_wild_3780628</i> | NA                                  | <i>Ca_desi_Chrom6</i> | 3780628                 | T/C  | NA                 | INTERGENIC                    | NA                                                        |
| <i>Desi_wild_3912452</i> | NA                                  | <i>Ca_desi_Chrom6</i> | 3912452                 | T/G  | Gene_Ca_06732.1    | INTRON                        | Phosphoglucomutase, cytoplasmic                           |
| <i>Desi_wild_3913889</i> | NA                                  | <i>Ca_desi_Chrom6</i> | 3913889                 | G/A  | Gene_Ca_06732.1    | INTRON                        | Phosphoglucomutase, cytoplasmic                           |
| <i>Desi_wild_3913907</i> | NA                                  | <i>Ca_desi_Chrom6</i> | 3913907                 | A/G  | Gene_Ca_06732.1    | INTRON                        | Phosphoglucomutase, cytoplasmic                           |
| <i>Desi_wild_3953946</i> | NA                                  | <i>Ca_desi_Chrom6</i> | 3953946                 | A/C  | NA                 | INTERGENIC                    | NA                                                        |
| <i>Desi_wild_3953957</i> | NA                                  | <i>Ca_desi_Chrom6</i> | 3953957                 | T/G  | NA                 | INTERGENIC                    | NA                                                        |
| <i>Desi_wild_3953982</i> | NA                                  | <i>Ca_desi_Chrom6</i> | 3953982                 | G/T  | NA                 | INTERGENIC                    | NA                                                        |
| <i>Desi_wild_3954074</i> | NA                                  | <i>Ca_desi_Chrom6</i> | 3954074                 | C/T  | NA                 | INTERGENIC                    | NA                                                        |
| <i>Desi_wild_3955621</i> | NA                                  | <i>Ca_desi_Chrom6</i> | 3955621                 | A/G  | NA                 | INTERGENIC                    | NA                                                        |
| <i>Desi_wild_3955666</i> | NA                                  | <i>Ca_desi_Chrom6</i> | 3955666                 | G/A  | NA                 | INTERGENIC                    | NA                                                        |

| SNP IDs                  | NCBI dbSNP accession IDs (NCBI_SS#) | Chromosomes           | Physical positions (bp) | SNPs | Gene accession IDs | Sequence components of genome | Putative functions                                                            |
|--------------------------|-------------------------------------|-----------------------|-------------------------|------|--------------------|-------------------------------|-------------------------------------------------------------------------------|
| <i>Desi_wild_3958738</i> | NA                                  | <i>Ca_desi_Chrom6</i> | 3958738                 | A/G  | NA                 | INTERGENIC                    | NA                                                                            |
| <i>Desi_wild_3958739</i> | NA                                  | <i>Ca_desi_Chrom6</i> | 3958739                 | G/C  | NA                 | INTERGENIC                    | NA                                                                            |
| <i>Desi_wild_3958854</i> | NA                                  | <i>Ca_desi_Chrom6</i> | 3958854                 | C/T  | NA                 | INTERGENIC                    | NA                                                                            |
| <i>Desi_wild_3960118</i> | NA                                  | <i>Ca_desi_Chrom6</i> | 3960118                 | A/G  | NA                 | INTERGENIC                    | NA                                                                            |
| <i>Desi_wild_3960216</i> | NA                                  | <i>Ca_desi_Chrom6</i> | 3960216                 | T/C  | NA                 | INTERGENIC                    | NA                                                                            |
| <i>Desi_wild_3966763</i> | NA                                  | <i>Ca_desi_Chrom6</i> | 3966763                 | T/G  | Gene_Ca_06740.1    | INTRON                        | UBX domain-containing protein 6                                               |
| <i>Desi_wild_4001706</i> | NA                                  | <i>Ca_desi_Chrom6</i> | 4001706                 | A/G  | Gene_Ca_06743.1    | UPSTREAM                      | NA                                                                            |
| <i>Desi_wild_4001710</i> | NA                                  | <i>Ca_desi_Chrom6</i> | 4001710                 | A/C  | Gene_Ca_06743.1    | UPSTREAM                      | NA                                                                            |
| <i>Desi_wild_4022210</i> | NA                                  | <i>Ca_desi_Chrom6</i> | 4022210                 | C/T  | NA                 | INTERGENIC                    | NA                                                                            |
| <i>Desi_wild_4063699</i> | NA                                  | <i>Ca_desi_Chrom6</i> | 4063699                 | C/A  | Gene_Ca_06751.1    | INTRON                        | Protein VAC14 homolog                                                         |
| <i>Desi_wild_4072292</i> | NA                                  | <i>Ca_desi_Chrom6</i> | 4072292                 | C/T  | Gene_Ca_06752.2    | SYNONYMOUS_CODING             | NA                                                                            |
| <i>Desi_wild_4072418</i> | NA                                  | <i>Ca_desi_Chrom6</i> | 4072418                 | C/G  | Gene_Ca_06752.2    | SYNONYMOUS_CODING             | NA                                                                            |
| <i>Desi_wild_4072742</i> | NA                                  | <i>Ca_desi_Chrom6</i> | 4072742                 | T/G  | Gene_Ca_06752.2    | SYNONYMOUS_CODING             | NA                                                                            |
| <i>Desi_wild_4072817</i> | NA                                  | <i>Ca_desi_Chrom6</i> | 4072817                 | C/T  | Gene_Ca_06752.2    | SYNONYMOUS_CODING             | NA                                                                            |
| <i>Desi_wild_4072826</i> | NA                                  | <i>Ca_desi_Chrom6</i> | 4072826                 | A/T  | Gene_Ca_06752.2    | SYNONYMOUS_CODING             | NA                                                                            |
| <i>Desi_wild_4074191</i> | NA                                  | <i>Ca_desi_Chrom6</i> | 4074191                 | T/C  | Gene_Ca_06752.2    | NON_SYNONYMOUS_CODING         | NA                                                                            |
| <i>Desi_wild_4082237</i> | NA                                  | <i>Ca_desi_Chrom6</i> | 4082237                 | G/T  | Gene_Ca_06753.1    | SYNONYMOUS_CODING             | E3 ubiquitin protein ligase RIE1                                              |
| <i>Desi_wild_4088391</i> | NA                                  | <i>Ca_desi_Chrom6</i> | 4088391                 | A/C  | Gene_Ca_06753.1    | SYNONYMOUS_CODING             | E3 ubiquitin protein ligase RIE1                                              |
| <i>Desi_wild_4095349</i> | NA                                  | <i>Ca_desi_Chrom6</i> | 4095349                 | T/C  | Gene_Ca_06754.1    | INTRON                        | Microtubule-associated protein 70-2                                           |
| <i>Desi_wild_4142658</i> | NA                                  | <i>Ca_desi_Chrom6</i> | 4142658                 | A/G  | NA                 | INTERGENIC                    | NA                                                                            |
| <i>Desi_wild_4142677</i> | NA                                  | <i>Ca_desi_Chrom6</i> | 4142677                 | T/C  | NA                 | INTERGENIC                    | NA                                                                            |
| <i>Desi_wild_4231750</i> | NA                                  | <i>Ca_desi_Chrom6</i> | 4231750                 | A/G  | Gene_Ca_06768.1    | UPSTREAM                      | Uncharacterized CRM domain-containing protein At3g25440, chloroplastic        |
| <i>Desi_wild_4240774</i> | NA                                  | <i>Ca_desi_Chrom6</i> | 4240774                 | C/A  | NA                 | INTERGENIC                    | NA                                                                            |
| <i>Desi_wild_4273801</i> | NA                                  | <i>Ca_desi_Chrom6</i> | 4273801                 | A/G  | NA                 | INTERGENIC                    | NA                                                                            |
| <i>Desi_wild_4276964</i> | NA                                  | <i>Ca_desi_Chrom6</i> | 4276964                 | T/C  | Gene_Ca_06775.1    | SYNONYMOUS_CODING             | LisH domain and HEAT repeat-containing protein KIAA1468 homolog               |
| <i>Desi_wild_4310476</i> | NA                                  | <i>Ca_desi_Chrom6</i> | 4310476                 | C/T  | Gene_Ca_06779.1    | NON_SYNONYMOUS_CODING         | Protein vip1                                                                  |
| <i>Desi_wild_4358705</i> | NA                                  | <i>Ca_desi_Chrom6</i> | 4358705                 | C/A  | Gene_Ca_06785.1    | NON_SYNONYMOUS_CODING         | Sphingoid long-chain bases kinase 1                                           |
| <i>Desi_wild_4539002</i> | NA                                  | <i>Ca_desi_Chrom6</i> | 4539002                 | A/G  | Gene_Ca_06797.2    | SYNONYMOUS_CODING             | Magnesium transporter MRS2-F                                                  |
| <i>Desi_wild_4553439</i> | NA                                  | <i>Ca_desi_Chrom6</i> | 4553439                 | G/C  | Gene_Ca_06800.3    | NON_SYNONYMOUS_CODING         | NA                                                                            |
| <i>Desi_wild_4576595</i> | NA                                  | <i>Ca_desi_Chrom6</i> | 4576595                 | C/A  | NA                 | INTERGENIC                    | NA                                                                            |
| <i>Desi_wild_4576598</i> | NA                                  | <i>Ca_desi_Chrom6</i> | 4576598                 | T/C  | NA                 | INTERGENIC                    | NA                                                                            |
| <i>Desi_wild_4576604</i> | NA                                  | <i>Ca_desi_Chrom6</i> | 4576604                 | T/A  | NA                 | INTERGENIC                    | NA                                                                            |
| <i>Desi_wild_4587162</i> | NA                                  | <i>Ca_desi_Chrom6</i> | 4587162                 | T/C  | NA                 | INTERGENIC                    | NA                                                                            |
| <i>Desi_wild_4646376</i> | NA                                  | <i>Ca_desi_Chrom6</i> | 4646376                 | G/A  | Gene_Ca_06808.2    | NON_SYNONYMOUS_CODING         | Aminopeptidase N                                                              |
| <i>Desi_wild_4646384</i> | NA                                  | <i>Ca_desi_Chrom6</i> | 4646384                 | A/C  | Gene_Ca_06808.2    | INTRON                        | Aminopeptidase N                                                              |
| <i>Desi_wild_4646391</i> | NA                                  | <i>Ca_desi_Chrom6</i> | 4646391                 | A/C  | Gene_Ca_06808.2    | INTRON                        | Aminopeptidase N                                                              |
| <i>Desi_wild_4646393</i> | NA                                  | <i>Ca_desi_Chrom6</i> | 4646393                 | A/C  | Gene_Ca_06808.2    | INTRON                        | Aminopeptidase N                                                              |
| <i>Desi_wild_4651094</i> | NA                                  | <i>Ca_desi_Chrom6</i> | 4651094                 | A/G  | Gene_Ca_06808.2    | SYNONYMOUS_CODING             | Aminopeptidase N                                                              |
| <i>Desi_wild_4672187</i> | NA                                  | <i>Ca_desi_Chrom6</i> | 4672187                 | A/G  | Gene_Ca_06810.1    | NON_SYNONYMOUS_CODING         | Disease resistance protein (TIR-NBS class)                                    |
| <i>Desi_wild_4672233</i> | NA                                  | <i>Ca_desi_Chrom6</i> | 4672233                 | A/T  | Gene_Ca_06810.1    | SYNONYMOUS_CODING             | Disease resistance protein (TIR-NBS class)                                    |
| <i>Desi_wild_4733447</i> | NA                                  | <i>Ca_desi_Chrom6</i> | 4733447                 | G/A  | Gene_Ca_06818.1    | SYNONYMOUS_CODING             | GMP synthase [glutamine-hydrolyzing]                                          |
| <i>Desi_wild_4764070</i> | NA                                  | <i>Ca_desi_Chrom6</i> | 4764070                 | C/T  | NA                 | INTERGENIC                    | NA                                                                            |
| <i>Desi_wild_4764426</i> | NA                                  | <i>Ca_desi_Chrom6</i> | 4764426                 | A/G  | NA                 | INTERGENIC                    | NA                                                                            |
| <i>Desi_wild_4790128</i> | NA                                  | <i>Ca_desi_Chrom6</i> | 4790128                 | T/C  | Gene_Ca_06824.1    | UPSTREAM                      | Bifunctional aspartokinase/homoserine dehydrogenase, chloroplastic (Fragment) |

| SNP IDs                  | NCBI dbSNP accession IDs (NCBI_SS#) | Chromosomes           | Physical positions (bp) | SNPs | Gene accession IDs | Sequence components of genome | Putative functions                                                            |
|--------------------------|-------------------------------------|-----------------------|-------------------------|------|--------------------|-------------------------------|-------------------------------------------------------------------------------|
| <i>Desi_wild_4790136</i> | NA                                  | <i>Ca_desi_Chrom6</i> | 4790136                 | T/C  | Gene_Ca_06824.1    | UPSTREAM                      | Bifunctional aspartokinase/homoserine dehydrogenase, chloroplastic (Fragment) |
| <i>Desi_wild_4792759</i> | NA                                  | <i>Ca_desi_Chrom6</i> | 4792759                 | G/A  | Gene_Ca_06824.1    | INTRON                        | Bifunctional aspartokinase/homoserine dehydrogenase, chloroplastic (Fragment) |
| <i>Desi_wild_4792800</i> | NA                                  | <i>Ca_desi_Chrom6</i> | 4792800                 | G/A  | Gene_Ca_06824.1    | INTRON                        | Bifunctional aspartokinase/homoserine dehydrogenase, chloroplastic (Fragment) |
| <i>Desi_wild_4792873</i> | NA                                  | <i>Ca_desi_Chrom6</i> | 4792873                 | C/T  | Gene_Ca_06824.1    | INTRON                        | Bifunctional aspartokinase/homoserine dehydrogenase, chloroplastic (Fragment) |
| <i>Desi_wild_4792973</i> | NA                                  | <i>Ca_desi_Chrom6</i> | 4792973                 | G/A  | Gene_Ca_06824.1    | INTRON                        | Bifunctional aspartokinase/homoserine dehydrogenase, chloroplastic (Fragment) |
| <i>Desi_wild_4793085</i> | NA                                  | <i>Ca_desi_Chrom6</i> | 4793085                 | G/A  | Gene_Ca_06824.1    | INTRON                        | Bifunctional aspartokinase/homoserine dehydrogenase, chloroplastic (Fragment) |
| <i>Desi_wild_4793164</i> | NA                                  | <i>Ca_desi_Chrom6</i> | 4793164                 | A/C  | Gene_Ca_06824.1    | INTRON                        | Bifunctional aspartokinase/homoserine dehydrogenase, chloroplastic (Fragment) |
| <i>Desi_wild_4793350</i> | NA                                  | <i>Ca_desi_Chrom6</i> | 4793350                 | T/C  | Gene_Ca_06824.1    | INTRON                        | Bifunctional aspartokinase/homoserine dehydrogenase, chloroplastic (Fragment) |
| <i>Desi_wild_4793838</i> | NA                                  | <i>Ca_desi_Chrom6</i> | 4793838                 | A/C  | Gene_Ca_06824.1    | INTRON                        | Bifunctional aspartokinase/homoserine dehydrogenase, chloroplastic (Fragment) |
| <i>Desi_wild_4793852</i> | NA                                  | <i>Ca_desi_Chrom6</i> | 4793852                 | T/C  | Gene_Ca_06824.1    | INTRON                        | Bifunctional aspartokinase/homoserine dehydrogenase, chloroplastic (Fragment) |
| <i>Desi_wild_4794865</i> | NA                                  | <i>Ca_desi_Chrom6</i> | 4794865                 | C/T  | Gene_Ca_06824.1    | INTRON                        | Bifunctional aspartokinase/homoserine dehydrogenase, chloroplastic (Fragment) |
| <i>Desi_wild_4799873</i> | NA                                  | <i>Ca_desi_Chrom6</i> | 4799873                 | A/G  | Gene_Ca_06824.1    | INTRON                        | Bifunctional aspartokinase/homoserine dehydrogenase, chloroplastic (Fragment) |
| <i>Desi_wild_4799905</i> | NA                                  | <i>Ca_desi_Chrom6</i> | 4799905                 | C/T  | Gene_Ca_06824.1    | NON_SYNONYMOUS_CODING         | Bifunctional aspartokinase/homoserine dehydrogenase, chloroplastic (Fragment) |
| <i>Desi_wild_4804535</i> | NA                                  | <i>Ca_desi_Chrom6</i> | 4804535                 | C/G  | Gene_Ca_06824.1    | DOWNSTREAM                    | Bifunctional aspartokinase/homoserine dehydrogenase, chloroplastic (Fragment) |
| <i>Desi_wild_4804555</i> | NA                                  | <i>Ca_desi_Chrom6</i> | 4804555                 | G/T  | Gene_Ca_06824.1    | DOWNSTREAM                    | Bifunctional aspartokinase/homoserine dehydrogenase, chloroplastic (Fragment) |
| <i>Desi_wild_4805527</i> | NA                                  | <i>Ca_desi_Chrom6</i> | 4805527                 | C/T  | NA                 | INTERGENIC                    | NA                                                                            |
| <i>Desi_wild_4806376</i> | NA                                  | <i>Ca_desi_Chrom6</i> | 4806376                 | T/C  | NA                 | INTERGENIC                    | NA                                                                            |
| <i>Desi_wild_4818656</i> | NA                                  | <i>Ca_desi_Chrom6</i> | 4818656                 | A/T  | NA                 | INTERGENIC                    | NA                                                                            |
| <i>Desi_wild_4818660</i> | NA                                  | <i>Ca_desi_Chrom6</i> | 4818660                 | T/C  | NA                 | INTERGENIC                    | NA                                                                            |
| <i>Desi_wild_4818734</i> | NA                                  | <i>Ca_desi_Chrom6</i> | 4818734                 | T/A  | NA                 | INTERGENIC                    | NA                                                                            |
| <i>Desi_wild_4836596</i> | NA                                  | <i>Ca_desi_Chrom6</i> | 4836596                 | T/G  | Gene_Ca_06829.1    | UPSTREAM                      | unknown protein                                                               |
| <i>Desi_wild_4836631</i> | NA                                  | <i>Ca_desi_Chrom6</i> | 4836631                 | G/A  | Gene_Ca_06829.1    | SYNONYMOUS_CODING             | unknown protein                                                               |
| <i>Desi_wild_4836649</i> | NA                                  | <i>Ca_desi_Chrom6</i> | 4836649                 | G/A  | Gene_Ca_06829.1    | SYNONYMOUS_CODING             | unknown protein                                                               |
| <i>Desi_wild_4838433</i> | NA                                  | <i>Ca_desi_Chrom6</i> | 4838433                 | G/A  | Gene_Ca_06829.1    | SYNONYMOUS_CODING             | unknown protein                                                               |
| <i>Desi_wild_4854023</i> | NA                                  | <i>Ca_desi_Chrom6</i> | 4854023                 | A/G  | Gene_Ca_06831.1    | INTRON                        | Protein TIC 22-like, chloroplastic                                            |
| <i>Desi_wild_4863652</i> | NA                                  | <i>Ca_desi_Chrom6</i> | 4863652                 | A/T  | NA                 | INTERGENIC                    | NA                                                                            |
| <i>Desi_wild_4863685</i> | NA                                  | <i>Ca_desi_Chrom6</i> | 4863685                 | C/A  | NA                 | INTERGENIC                    | NA                                                                            |
| <i>Desi_wild_4868363</i> | NA                                  | <i>Ca_desi_Chrom6</i> | 4868363                 | C/A  | Gene_Ca_06832.2    | NON_SYNONYMOUS_CODING         | Pentatricopeptide repeat (PPR) superfamily protein                            |
| <i>Desi_wild_4908409</i> | NA                                  | <i>Ca_desi_Chrom6</i> | 4908409                 | G/A  | Gene_Ca_06836.1    | INTRON                        | Kinesin-like protein KIF15-B                                                  |
| <i>Desi_wild_4909421</i> | NA                                  | <i>Ca_desi_Chrom6</i> | 4909421                 | C/G  | Gene_Ca_06836.1    | SYNONYMOUS_CODING             | Kinesin-like protein KIF15-B                                                  |
| <i>Desi_wild_4909445</i> | NA                                  | <i>Ca_desi_Chrom6</i> | 4909445                 | T/C  | Gene_Ca_06836.1    | SYNONYMOUS_CODING             | Kinesin-like protein KIF15-B                                                  |
| <i>Desi_wild_4909446</i> | NA                                  | <i>Ca_desi_Chrom6</i> | 4909446                 | A/G  | Gene_Ca_06836.1    | SYNONYMOUS_CODING             | Kinesin-like protein KIF15-B                                                  |
| <i>Desi_wild_4909457</i> | NA                                  | <i>Ca_desi_Chrom6</i> | 4909457                 | A/T  | Gene_Ca_06836.1    | SYNONYMOUS_CODING             | Kinesin-like protein KIF15-B                                                  |
| <i>Desi_wild_4909506</i> | NA                                  | <i>Ca_desi_Chrom6</i> | 4909506                 | C/A  | Gene_Ca_06836.1    | NON_SYNONYMOUS_CODING         | Kinesin-like protein KIF15-B                                                  |
| <i>Desi_wild_4910031</i> | NA                                  | <i>Ca_desi_Chrom6</i> | 4910031                 | G/A  | Gene_Ca_06836.1    | NON_SYNONYMOUS_CODING         | Kinesin-like protein KIF15-B                                                  |
| <i>Desi_wild_4910422</i> | NA                                  | <i>Ca_desi_Chrom6</i> | 4910422                 | C/T  | Gene_Ca_06836.1    | INTRON                        | Kinesin-like protein KIF15-B                                                  |
| <i>Desi_wild_4910434</i> | NA                                  | <i>Ca_desi_Chrom6</i> | 4910434                 | T/C  | Gene_Ca_06836.1    | INTRON                        | Kinesin-like protein KIF15-B                                                  |
| <i>Desi_wild_4911716</i> | NA                                  | <i>Ca_desi_Chrom6</i> | 4911716                 | G/T  | Gene_Ca_06836.1    | INTRON                        | Kinesin-like protein KIF15-B                                                  |
| <i>Desi_wild_4915673</i> | NA                                  | <i>Ca_desi_Chrom6</i> | 4915673                 | T/G  | NA                 | INTERGENIC                    | NA                                                                            |
| <i>Desi_wild_4999533</i> | NA                                  | <i>Ca_desi_Chrom6</i> | 4999533                 | T/G  | Gene_Ca_06844.1    | NON_SYNONYMOUS_CODING         | Calmodulin-binding transcription activator 4                                  |
| <i>Desi_wild_4999880</i> | NA                                  | <i>Ca_desi_Chrom6</i> | 4999880                 | A/G  | Gene_Ca_06844.1    | SYNONYMOUS_CODING             | Calmodulin-binding transcription activator 4                                  |
| <i>Desi_wild_5002016</i> | NA                                  | <i>Ca_desi_Chrom6</i> | 5002016                 | G/A  | Gene_Ca_06845.1    | DOWNSTREAM                    | Nuclear transport factor 2                                                    |
| <i>Desi_wild_5009335</i> | NA                                  | <i>Ca_desi_Chrom6</i> | 5009335                 | C/T  | Gene_Ca_06846.1    | INTRON                        | Histidine kinase 3                                                            |
| <i>Desi_wild_5009363</i> | NA                                  | <i>Ca_desi_Chrom6</i> | 5009363                 | T/G  | Gene_Ca_06846.1    | INTRON                        | Histidine kinase 3                                                            |



| SNP IDs                  | NCBI dbSNP accession IDs (NCBI_SS#) | Chromosomes          | Physical positions (bp) | SNPs | Gene accession IDs | Sequence components of genome | Putative functions                              |
|--------------------------|-------------------------------------|----------------------|-------------------------|------|--------------------|-------------------------------|-------------------------------------------------|
| <i>Desi_wild_5009506</i> | NA                                  | <i>Ca_desi_Chr06</i> | 5009506                 | G/T  | Gene_Ca_06846.1    | INTRON                        | Histidine kinase 3                              |
| <i>Desi_wild_5009529</i> | NA                                  | <i>Ca_desi_Chr06</i> | 5009529                 | C/T  | Gene_Ca_06846.1    | INTRON                        | Histidine kinase 3                              |
| <i>Desi_wild_5009546</i> | NA                                  | <i>Ca_desi_Chr06</i> | 5009546                 | A/G  | Gene_Ca_06846.1    | INTRON                        | Histidine kinase 3                              |
| <i>Desi_wild_5027743</i> | NA                                  | <i>Ca_desi_Chr06</i> | 5027743                 | A/G  | Gene_Ca_06848.1    | INTRON                        | Glutamate-rich WD repeat-containing protein 1   |
| <i>Desi_wild_5027775</i> | NA                                  | <i>Ca_desi_Chr06</i> | 5027775                 | T/C  | Gene_Ca_06848.1    | INTRON                        | Glutamate-rich WD repeat-containing protein 1   |
| <i>Desi_wild_5028228</i> | NA                                  | <i>Ca_desi_Chr06</i> | 5028228                 | G/T  | Gene_Ca_06848.1    | INTRON                        | Glutamate-rich WD repeat-containing protein 1   |
| <i>Desi_wild_5565183</i> | NA                                  | <i>Ca_desi_Chr06</i> | 5565183                 | G/C  | Gene_Ca_06863.1    | INTRON                        | NA                                              |
| <i>Desi_wild_5573898</i> | NA                                  | <i>Ca_desi_Chr06</i> | 5573898                 | C/T  | Gene_Ca_06866.1    | DOWNSTREAM                    | UPF0202 protein At1g10490                       |
| <i>Desi_wild_5574018</i> | NA                                  | <i>Ca_desi_Chr06</i> | 5574018                 | A/C  | Gene_Ca_06866.1    | DOWNSTREAM                    | UPF0202 protein At1g10490                       |
| <i>Desi_wild_5574091</i> | NA                                  | <i>Ca_desi_Chr06</i> | 5574091                 | C/T  | Gene_Ca_06866.1    | DOWNSTREAM                    | UPF0202 protein At1g10490                       |
| <i>Desi_wild_5582291</i> | NA                                  | <i>Ca_desi_Chr06</i> | 5582291                 | C/T  | Gene_Ca_06866.1    | INTRON                        | UPF0202 protein At1g10490                       |
| <i>Desi_wild_5600377</i> | NA                                  | <i>Ca_desi_Chr06</i> | 5600377                 | C/A  | Gene_Ca_06868.1    | INTRON                        | Uncharacterized mitochondrial carrier C12B10.09 |
| <i>Desi_wild_5601147</i> | NA                                  | <i>Ca_desi_Chr06</i> | 5601147                 | G/C  | Gene_Ca_06868.1    | INTRON                        | Uncharacterized mitochondrial carrier C12B10.09 |
| <i>Desi_wild_5601304</i> | NA                                  | <i>Ca_desi_Chr06</i> | 5601304                 | A/G  | Gene_Ca_06868.1    | INTRON                        | Uncharacterized mitochondrial carrier C12B10.09 |
| <i>Desi_wild_5608001</i> | NA                                  | <i>Ca_desi_Chr06</i> | 5608001                 | T/A  | Gene_Ca_06869.1    | NON_SYNONYMOUS_CODING         | Protein DDB_G0268328                            |
| <i>Desi_wild_5611153</i> | NA                                  | <i>Ca_desi_Chr06</i> | 5611153                 | A/G  | Gene_Ca_06869.1    | NON_SYNONYMOUS_CODING         | Protein DDB_G0268328                            |
| <i>Desi_wild_5616261</i> | NA                                  | <i>Ca_desi_Chr06</i> | 5616261                 | C/T  | Gene_Ca_06869.1    | SYNONYMOUS_CODING             | Protein DDB_G0268328                            |
| <i>Desi_wild_5765527</i> | NA                                  | <i>Ca_desi_Chr06</i> | 5765527                 | T/G  | Gene_Ca_06881.2    | SYNONYMOUS_CODING             | NA                                              |
| <i>Desi_wild_5765551</i> | NA                                  | <i>Ca_desi_Chr06</i> | 5765551                 | G/A  | Gene_Ca_06881.2    | SYNONYMOUS_CODING             | NA                                              |
| <i>Desi_wild_5793661</i> | NA                                  | <i>Ca_desi_Chr06</i> | 5793661                 | T/C  | NA                 | INTERGENIC                    | NA                                              |
| <i>Desi_wild_5793689</i> | NA                                  | <i>Ca_desi_Chr06</i> | 5793689                 | A/C  | NA                 | INTERGENIC                    | NA                                              |
| <i>Desi_wild_5793709</i> | NA                                  | <i>Ca_desi_Chr06</i> | 5793709                 | G/T  | NA                 | INTERGENIC                    | NA                                              |
| <i>Desi_wild_5805248</i> | NA                                  | <i>Ca_desi_Chr06</i> | 5805248                 | T/C  | NA                 | INTERGENIC                    | NA                                              |
| <i>Desi_wild_5814969</i> | NA                                  | <i>Ca_desi_Chr06</i> | 5814969                 | G/A  | NA                 | INTERGENIC                    | NA                                              |
| <i>Desi_wild_5815797</i> | NA                                  | <i>Ca_desi_Chr06</i> | 5815797                 | G/A  | Gene_Ca_06887.1    | DOWNSTREAM                    | stress enhanced protein 2                       |
| <i>Desi_wild_5830280</i> | NA                                  | <i>Ca_desi_Chr06</i> | 5830280                 | C/A  | NA                 | INTERGENIC                    | NA                                              |
| <i>Desi_wild_5830309</i> | NA                                  | <i>Ca_desi_Chr06</i> | 5830309                 | C/T  | NA                 | INTERGENIC                    | NA                                              |
| <i>Desi_wild_5830337</i> | NA                                  | <i>Ca_desi_Chr06</i> | 5830337                 | G/T  | NA                 | INTERGENIC                    | NA                                              |
| <i>Desi_wild_5830357</i> | NA                                  | <i>Ca_desi_Chr06</i> | 5830357                 | T/C  | NA                 | INTERGENIC                    | NA                                              |
| <i>Desi_wild_5855179</i> | NA                                  | <i>Ca_desi_Chr06</i> | 5855179                 | A/G  | Gene_Ca_06892.5    | INTRON                        | NA                                              |
| <i>Desi_wild_5856090</i> | NA                                  | <i>Ca_desi_Chr06</i> | 5856090                 | A/G  | Gene_Ca_06892.5    | INTRON                        | NA                                              |
| <i>Desi_wild_5857703</i> | NA                                  | <i>Ca_desi_Chr06</i> | 5857703                 | G/A  | Gene_Ca_06892.5    | SYNONYMOUS_CODING             | NA                                              |
| <i>Desi_wild_5881201</i> | NA                                  | <i>Ca_desi_Chr06</i> | 5881201                 | C/T  | NA                 | INTERGENIC                    | NA                                              |
| <i>Desi_wild_5935304</i> | NA                                  | <i>Ca_desi_Chr06</i> | 5935304                 | C/A  | Gene_Ca_06901.1    | NON_SYNONYMOUS_CODING         | Formation of crista junctions protein 1         |
| <i>Desi_wild_5942121</i> | NA                                  | <i>Ca_desi_Chr06</i> | 5942121                 | G/A  | NA                 | INTERGENIC                    | NA                                              |
| <i>Desi_wild_5942263</i> | NA                                  | <i>Ca_desi_Chr06</i> | 5942263                 | T/G  | NA                 | INTERGENIC                    | NA                                              |
| <i>Desi_wild_5943369</i> | NA                                  | <i>Ca_desi_Chr06</i> | 5943369                 | C/T  | Gene_Ca_06902.2    | SYNONYMOUS_CODING             | NA                                              |
| <i>Desi_wild_5943564</i> | NA                                  | <i>Ca_desi_Chr06</i> | 5943564                 | C/T  | Gene_Ca_06902.2    | SYNONYMOUS_CODING             | NA                                              |
| <i>Desi_wild_5944029</i> | NA                                  | <i>Ca_desi_Chr06</i> | 5944029                 | A/G  | Gene_Ca_06902.2    | SYNONYMOUS_CODING             | NA                                              |
| <i>Desi_wild_5944054</i> | NA                                  | <i>Ca_desi_Chr06</i> | 5944054                 | G/A  | Gene_Ca_06902.2    | NON_SYNONYMOUS_CODING         | NA                                              |
| <i>Desi_wild_5944178</i> | NA                                  | <i>Ca_desi_Chr06</i> | 5944178                 | C/T  | Gene_Ca_06902.2    | NON_SYNONYMOUS_CODING         | NA                                              |
| <i>Desi_wild_5944184</i> | NA                                  | <i>Ca_desi_Chr06</i> | 5944184                 | C/T  | Gene_Ca_06902.2    | NON_SYNONYMOUS_CODING         | NA                                              |
| <i>Desi_wild_5946749</i> | NA                                  | <i>Ca_desi_Chr06</i> | 5946749                 | C/T  | Gene_Ca_06902.2    | SYNONYMOUS_CODING             | NA                                              |
| <i>Desi_wild_5947049</i> | NA                                  | <i>Ca_desi_Chr06</i> | 5947049                 | G/T  | Gene_Ca_06902.2    | SYNONYMOUS_CODING             | NA                                              |

| SNP IDs                  | NCBI dbSNP accession IDs (NCBI_SS#) | Chromosomes          | Physical positions (bp) | SNPs | Gene accession IDs | Sequence components of genome | Putative functions                     |
|--------------------------|-------------------------------------|----------------------|-------------------------|------|--------------------|-------------------------------|----------------------------------------|
| <i>Desi_wild_5947076</i> | NA                                  | <i>Ca_desi_Chr06</i> | 5947076                 | G/A  | Gene_Ca_06902.2    | SYNONYMOUS_CODING             | NA                                     |
| <i>Desi_wild_5947130</i> | NA                                  | <i>Ca_desi_Chr06</i> | 5947130                 | G/A  | Gene_Ca_06902.2    | SYNONYMOUS_CODING             | NA                                     |
| <i>Desi_wild_5947178</i> | NA                                  | <i>Ca_desi_Chr06</i> | 5947178                 | T/A  | Gene_Ca_06902.2    | SYNONYMOUS_CODING             | NA                                     |
| <i>Desi_wild_5947581</i> | NA                                  | <i>Ca_desi_Chr06</i> | 5947581                 | G/A  | Gene_Ca_06902.2    | NON_SYNONYMOUS_CODING         | NA                                     |
| <i>Desi_wild_5947664</i> | NA                                  | <i>Ca_desi_Chr06</i> | 5947664                 | A/G  | Gene_Ca_06902.2    | SYNONYMOUS_CODING             | NA                                     |
| <i>Desi_wild_5947892</i> | NA                                  | <i>Ca_desi_Chr06</i> | 5947892                 | C/T  | Gene_Ca_06902.2    | SYNONYMOUS_CODING             | NA                                     |
| <i>Desi_wild_5948138</i> | NA                                  | <i>Ca_desi_Chr06</i> | 5948138                 | T/A  | Gene_Ca_06902.2    | NON_SYNONYMOUS_CODING         | NA                                     |
| <i>Desi_wild_5967285</i> | NA                                  | <i>Ca_desi_Chr06</i> | 5967285                 | G/C  | NA                 | INTERGENIC                    | NA                                     |
| <i>Desi_wild_5968751</i> | NA                                  | <i>Ca_desi_Chr06</i> | 5968751                 | T/C  | Gene_Ca_06906.1    | DOWNSTREAM                    | NA                                     |
| <i>Desi_wild_5968766</i> | NA                                  | <i>Ca_desi_Chr06</i> | 5968766                 | G/A  | Gene_Ca_06906.1    | DOWNSTREAM                    | NA                                     |
| <i>Desi_wild_5992325</i> | NA                                  | <i>Ca_desi_Chr06</i> | 5992325                 | A/C  | Gene_Ca_06907.3    | DOWNSTREAM                    | NA                                     |
| <i>Desi_wild_6045978</i> | NA                                  | <i>Ca_desi_Chr06</i> | 6045978                 | C/A  | Gene_Ca_06916.1    | DOWNSTREAM                    | NA                                     |
| <i>Desi_wild_6048824</i> | NA                                  | <i>Ca_desi_Chr06</i> | 6048824                 | C/T  | NA                 | INTERGENIC                    | NA                                     |
| <i>Desi_wild_6048899</i> | NA                                  | <i>Ca_desi_Chr06</i> | 6048899                 | T/C  | NA                 | INTERGENIC                    | NA                                     |
| <i>Desi_wild_6048900</i> | NA                                  | <i>Ca_desi_Chr06</i> | 6048900                 | G/A  | NA                 | INTERGENIC                    | NA                                     |
| <i>Desi_wild_6048909</i> | NA                                  | <i>Ca_desi_Chr06</i> | 6048909                 | C/T  | NA                 | INTERGENIC                    | NA                                     |
| <i>Desi_wild_6048945</i> | NA                                  | <i>Ca_desi_Chr06</i> | 6048945                 | T/C  | NA                 | INTERGENIC                    | NA                                     |
| <i>Desi_wild_6049168</i> | NA                                  | <i>Ca_desi_Chr06</i> | 6049168                 | A/C  | NA                 | INTERGENIC                    | NA                                     |
| <i>Desi_wild_6049189</i> | NA                                  | <i>Ca_desi_Chr06</i> | 6049189                 | C/T  | NA                 | INTERGENIC                    | NA                                     |
| <i>Desi_wild_6049208</i> | NA                                  | <i>Ca_desi_Chr06</i> | 6049208                 | A/C  | NA                 | INTERGENIC                    | NA                                     |
| <i>Desi_wild_6058595</i> | NA                                  | <i>Ca_desi_Chr06</i> | 6058595                 | T/G  | Gene_Ca_06917.1    | NON_SYNONYMOUS_CODING         | NA                                     |
| <i>Desi_wild_6058659</i> | NA                                  | <i>Ca_desi_Chr06</i> | 6058659                 | T/G  | Gene_Ca_06917.1    | NON_SYNONYMOUS_CODING         | NA                                     |
| <i>Desi_wild_6058779</i> | NA                                  | <i>Ca_desi_Chr06</i> | 6058779                 | A/G  | Gene_Ca_06917.1    | INTRON                        | NA                                     |
| <i>Desi_wild_6103720</i> | NA                                  | <i>Ca_desi_Chr06</i> | 6103720                 | G/T  | NA                 | INTERGENIC                    | NA                                     |
| <i>Desi_wild_6115728</i> | NA                                  | <i>Ca_desi_Chr06</i> | 6115728                 | C/A  | Gene_Ca_06923.1    | UPSTREAM                      | Protein spinster                       |
| <i>Desi_wild_6115729</i> | NA                                  | <i>Ca_desi_Chr06</i> | 6115729                 | G/T  | Gene_Ca_06923.1    | UPSTREAM                      | Protein spinster                       |
| <i>Desi_wild_6119010</i> | NA                                  | <i>Ca_desi_Chr06</i> | 6119010                 | C/T  | NA                 | INTERGENIC                    | NA                                     |
| <i>Desi_wild_6119060</i> | NA                                  | <i>Ca_desi_Chr06</i> | 6119060                 | G/A  | NA                 | INTERGENIC                    | NA                                     |
| <i>Desi_wild_6121161</i> | NA                                  | <i>Ca_desi_Chr06</i> | 6121161                 | G/T  | Gene_Ca_06923.1    | DOWNSTREAM                    | Protein spinster                       |
| <i>Desi_wild_6334146</i> | NA                                  | <i>Ca_desi_Chr06</i> | 6334146                 | C/T  | Gene_Ca_06941.1    | DOWNSTREAM                    | vascular plant one zinc finger protein |
| <i>Desi_wild_6334167</i> | NA                                  | <i>Ca_desi_Chr06</i> | 6334167                 | T/C  | Gene_Ca_06941.1    | DOWNSTREAM                    | vascular plant one zinc finger protein |
| <i>Desi_wild_6334215</i> | NA                                  | <i>Ca_desi_Chr06</i> | 6334215                 | T/C  | Gene_Ca_06941.1    | DOWNSTREAM                    | vascular plant one zinc finger protein |
| <i>Desi_wild_6334224</i> | NA                                  | <i>Ca_desi_Chr06</i> | 6334224                 | G/A  | Gene_Ca_06941.1    | DOWNSTREAM                    | vascular plant one zinc finger protein |
| <i>Desi_wild_6334238</i> | NA                                  | <i>Ca_desi_Chr06</i> | 6334238                 | T/C  | Gene_Ca_06941.1    | DOWNSTREAM                    | vascular plant one zinc finger protein |
| <i>Desi_wild_6335461</i> | NA                                  | <i>Ca_desi_Chr06</i> | 6335461                 | A/C  | Gene_Ca_06941.1    | DOWNSTREAM                    | vascular plant one zinc finger protein |
| <i>Desi_wild_6335472</i> | NA                                  | <i>Ca_desi_Chr06</i> | 6335472                 | T/C  | Gene_Ca_06941.1    | DOWNSTREAM                    | vascular plant one zinc finger protein |
| <i>Desi_wild_6335557</i> | NA                                  | <i>Ca_desi_Chr06</i> | 6335557                 | G/T  | Gene_Ca_06941.1    | DOWNSTREAM                    | vascular plant one zinc finger protein |
| <i>Desi_wild_6335576</i> | NA                                  | <i>Ca_desi_Chr06</i> | 6335576                 | A/G  | Gene_Ca_06941.1    | DOWNSTREAM                    | vascular plant one zinc finger protein |
| <i>Desi_wild_6336378</i> | NA                                  | <i>Ca_desi_Chr06</i> | 6336378                 | C/G  | Gene_Ca_06941.1    | SYNONYMOUS_CODING             | vascular plant one zinc finger protein |
| <i>Desi_wild_6338657</i> | NA                                  | <i>Ca_desi_Chr06</i> | 6338657                 | C/T  | Gene_Ca_06941.1    | SYNONYMOUS_CODING             | vascular plant one zinc finger protein |
| <i>Desi_wild_6339136</i> | NA                                  | <i>Ca_desi_Chr06</i> | 6339136                 | T/C  | Gene_Ca_06941.1    | SYNONYMOUS_CODING             | vascular plant one zinc finger protein |
| <i>Desi_wild_6354681</i> | NA                                  | <i>Ca_desi_Chr06</i> | 6354681                 | G/T  | NA                 | INTERGENIC                    | NA                                     |
| <i>Desi_wild_6354711</i> | NA                                  | <i>Ca_desi_Chr06</i> | 6354711                 | C/T  | NA                 | INTERGENIC                    | NA                                     |
| <i>Desi_wild_6354731</i> | NA                                  | <i>Ca_desi_Chr06</i> | 6354731                 | C/T  | NA                 | INTERGENIC                    | NA                                     |

| SNP IDs                  | NCBI dbSNP accession IDs (NCBI_SS#) | Chromosomes          | Physical positions (bp) | SNPs | Gene accession IDs | Sequence components of genome | Putative functions                                                   |
|--------------------------|-------------------------------------|----------------------|-------------------------|------|--------------------|-------------------------------|----------------------------------------------------------------------|
| <i>Desi_wild_6354735</i> | NA                                  | <i>Ca_desi_Chr06</i> | 6354735                 | A/C  | NA                 | INTERGENIC                    | NA                                                                   |
| <i>Desi_wild_6370183</i> | NA                                  | <i>Ca_desi_Chr06</i> | 6370183                 | A/C  | Gene_Ca_06945.1    | UPSTREAM                      | 2-hydroxyisoflavanone synthase                                       |
| <i>Desi_wild_6420034</i> | NA                                  | <i>Ca_desi_Chr06</i> | 6420034                 | T/C  | Gene_Ca_06948.1    | NON_SYNONYMOUS_CODING         | 6a-hydroxymaackiain methyltransferase 1                              |
| <i>Desi_wild_6772814</i> | NA                                  | <i>Ca_desi_Chr06</i> | 6772814                 | G/T  | Gene_Ca_06976.1    | INTRON                        | Mitochondrial import inner membrane translocase subunit TIM16        |
| <i>Desi_wild_6792312</i> | NA                                  | <i>Ca_desi_Chr06</i> | 6792312                 | C/T  | Gene_Ca_06979.1    | INTRON                        | WD repeat-containing protein 53                                      |
| <i>Desi_wild_6792418</i> | NA                                  | <i>Ca_desi_Chr06</i> | 6792418                 | A/T  | Gene_Ca_06979.1    | INTRON                        | WD repeat-containing protein 53                                      |
| <i>Desi_wild_6792770</i> | NA                                  | <i>Ca_desi_Chr06</i> | 6792770                 | C/T  | Gene_Ca_06979.1    | NON_SYNONYMOUS_CODING         | WD repeat-containing protein 53                                      |
| <i>Desi_wild_6792771</i> | NA                                  | <i>Ca_desi_Chr06</i> | 6792771                 | A/T  | Gene_Ca_06979.1    | SYNONYMOUS_CODING             | WD repeat-containing protein 53                                      |
| <i>Desi_wild_6792774</i> | NA                                  | <i>Ca_desi_Chr06</i> | 6792774                 | A/T  | Gene_Ca_06979.1    | NON_SYNONYMOUS_CODING         | WD repeat-containing protein 53                                      |
| <i>Desi_wild_6792785</i> | NA                                  | <i>Ca_desi_Chr06</i> | 6792785                 | C/A  | Gene_Ca_06979.1    | NON_SYNONYMOUS_CODING         | WD repeat-containing protein 53                                      |
| <i>Desi_wild_6792786</i> | NA                                  | <i>Ca_desi_Chr06</i> | 6792786                 | T/C  | Gene_Ca_06979.1    | SYNONYMOUS_CODING             | WD repeat-containing protein 53                                      |
| <i>Desi_wild_6800422</i> | NA                                  | <i>Ca_desi_Chr06</i> | 6800422                 | G/A  | NA                 | INTERGENIC                    | NA                                                                   |
| <i>Desi_wild_6871168</i> | NA                                  | <i>Ca_desi_Chr06</i> | 6871168                 | A/G  | NA                 | INTERGENIC                    | NA                                                                   |
| <i>Desi_wild_6874212</i> | NA                                  | <i>Ca_desi_Chr06</i> | 6874212                 | A/G  | Gene_Ca_06988.1    | INTRON                        | calmodulin-binding family protein                                    |
| <i>Desi_wild_6874240</i> | NA                                  | <i>Ca_desi_Chr06</i> | 6874240                 | T/G  | Gene_Ca_06988.1    | INTRON                        | calmodulin-binding family protein                                    |
| <i>Desi_wild_6888687</i> | NA                                  | <i>Ca_desi_Chr06</i> | 6888687                 | A/G  | Gene_Ca_06989.1    | INTRON                        | Protein of unknown function (DUF616)                                 |
| <i>Desi_wild_6897510</i> | NA                                  | <i>Ca_desi_Chr06</i> | 6897510                 | C/A  | Gene_Ca_06990.1    | NON_SYNONYMOUS_CODING         | Protochlorophyllide-dependent translocon component 52, chloroplastic |
| <i>Desi_wild_6897740</i> | NA                                  | <i>Ca_desi_Chr06</i> | 6897740                 | T/C  | Gene_Ca_06990.1    | INTRON                        | Protochlorophyllide-dependent translocon component 52, chloroplastic |
| <i>Desi_wild_6924931</i> | NA                                  | <i>Ca_desi_Chr06</i> | 6924931                 | G/T  | Gene_Ca_06996.1    | UPSTREAM                      | Probable acyl-activating enzyme 18, peroxisomal                      |
| <i>Desi_wild_6926284</i> | NA                                  | <i>Ca_desi_Chr06</i> | 6926284                 | T/G  | Gene_Ca_06995.1    | DOWNSTREAM                    | NA                                                                   |
| <i>Desi_wild_6928510</i> | NA                                  | <i>Ca_desi_Chr06</i> | 6928510                 | A/G  | NA                 | INTERGENIC                    | NA                                                                   |
| <i>Desi_wild_6928512</i> | NA                                  | <i>Ca_desi_Chr06</i> | 6928512                 | C/T  | NA                 | INTERGENIC                    | NA                                                                   |
| <i>Desi_wild_6928742</i> | NA                                  | <i>Ca_desi_Chr06</i> | 6928742                 | A/G  | NA                 | INTERGENIC                    | NA                                                                   |
| <i>Desi_wild_6928791</i> | NA                                  | <i>Ca_desi_Chr06</i> | 6928791                 | G/T  | NA                 | INTERGENIC                    | NA                                                                   |
| <i>Desi_wild_6952716</i> | NA                                  | <i>Ca_desi_Chr06</i> | 6952716                 | T/G  | Gene_Ca_06998.1    | DOWNSTREAM                    | Translation initiation factor eIF-2B subunit gamma                   |
| <i>Desi_wild_6967837</i> | NA                                  | <i>Ca_desi_Chr06</i> | 6967837                 | C/T  | Gene_Ca_07001.1    | INTRON                        | NA                                                                   |
| <i>Desi_wild_6967943</i> | NA                                  | <i>Ca_desi_Chr06</i> | 6967943                 | G/A  | Gene_Ca_07001.1    | INTRON                        | NA                                                                   |
| <i>Desi_wild_6967945</i> | NA                                  | <i>Ca_desi_Chr06</i> | 6967945                 | A/C  | Gene_Ca_07001.1    | INTRON                        | NA                                                                   |
| <i>Desi_wild_6968625</i> | NA                                  | <i>Ca_desi_Chr06</i> | 6968625                 | T/G  | Gene_Ca_07001.1    | INTRON                        | NA                                                                   |
| <i>Desi_wild_6968628</i> | NA                                  | <i>Ca_desi_Chr06</i> | 6968628                 | G/T  | Gene_Ca_07001.1    | INTRON                        | NA                                                                   |
| <i>Desi_wild_6971767</i> | NA                                  | <i>Ca_desi_Chr06</i> | 6971767                 | A/G  | Gene_Ca_07001.1    | INTRON                        | NA                                                                   |
| <i>Desi_wild_6995748</i> | NA                                  | <i>Ca_desi_Chr06</i> | 6995748                 | C/T  | Gene_Ca_07001.1    | INTRON                        | NA                                                                   |
| <i>Desi_wild_6996408</i> | NA                                  | <i>Ca_desi_Chr06</i> | 6996408                 | C/T  | Gene_Ca_07001.1    | INTRON                        | NA                                                                   |
| <i>Desi_wild_7112715</i> | NA                                  | <i>Ca_desi_Chr06</i> | 7112715                 | T/G  | Gene_Ca_07011.1    | SYNONYMOUS_CODING             | tRNA-dihydrouridine(16/17) synthase [NAD(P)(+)]-like                 |
| <i>Desi_wild_7231216</i> | NA                                  | <i>Ca_desi_Chr06</i> | 7231216                 | G/C  | Gene_Ca_07020.1    | NON_SYNONYMOUS_CODING         | Probable inositol transporter 2                                      |
| <i>Desi_wild_7241176</i> | NA                                  | <i>Ca_desi_Chr06</i> | 7241176                 | T/A  | NA                 | INTERGENIC                    | NA                                                                   |
| <i>Desi_wild_7285530</i> | NA                                  | <i>Ca_desi_Chr06</i> | 7285530                 | G/T  | Gene_Ca_07023.2    | NON_SYNONYMOUS_CODING         | NA                                                                   |
| <i>Desi_wild_7337514</i> | NA                                  | <i>Ca_desi_Chr06</i> | 7337514                 | T/G  | Gene_Ca_07027.1    | SYNONYMOUS_CODING             | Auxin response factor 6                                              |
| <i>Desi_wild_7337525</i> | NA                                  | <i>Ca_desi_Chr06</i> | 7337525                 | G/A  | Gene_Ca_07027.1    | STOP_GAINED                   | Auxin response factor 6                                              |
| <i>Desi_wild_7337556</i> | NA                                  | <i>Ca_desi_Chr06</i> | 7337556                 | C/T  | Gene_Ca_07027.1    | SYNONYMOUS_CODING             | Auxin response factor 6                                              |
| <i>Desi_wild_7337558</i> | NA                                  | <i>Ca_desi_Chr06</i> | 7337558                 | G/C  | Gene_Ca_07027.1    | NON_SYNONYMOUS_CODING         | Auxin response factor 6                                              |
| <i>Desi_wild_7337559</i> | NA                                  | <i>Ca_desi_Chr06</i> | 7337559                 | T/C  | Gene_Ca_07027.1    | SYNONYMOUS_CODING             | Auxin response factor 6                                              |
| <i>Desi_wild_7337560</i> | NA                                  | <i>Ca_desi_Chr06</i> | 7337560                 | T/G  | Gene_Ca_07027.1    | NON_SYNONYMOUS_CODING         | Auxin response factor 6                                              |
| <i>Desi_wild_7337569</i> | NA                                  | <i>Ca_desi_Chr06</i> | 7337569                 | T/A  | Gene_Ca_07027.1    | NON_SYNONYMOUS_CODING         | Auxin response factor 6                                              |

| SNP IDs           | NCBI dbSNP accession IDs (NCBI_SS#) | Chromosomes    | Physical positions (bp) | SNPs | Gene accession IDs | Sequence components of genome | Putative functions                                 |
|-------------------|-------------------------------------|----------------|-------------------------|------|--------------------|-------------------------------|----------------------------------------------------|
| Desi_wild_7414777 | NA                                  | Ca_desi_Chrom6 | 7414777                 | C/G  | NA                 | INTERGENIC                    | NA                                                 |
| Desi_wild_7457018 | NA                                  | Ca_desi_Chrom6 | 7457018                 | T/C  | NA                 | INTERGENIC                    | NA                                                 |
| Desi_wild_7539901 | NA                                  | Ca_desi_Chrom6 | 7539901                 | T/A  | Gene_Ca_07041.1    | INTRON                        | Mannosyl-oligosaccharide glucosidase               |
| Desi_wild_7540355 | NA                                  | Ca_desi_Chrom6 | 7540355                 | G/A  | Gene_Ca_07041.1    | INTRON                        | Mannosyl-oligosaccharide glucosidase               |
| Desi_wild_7597654 | NA                                  | Ca_desi_Chrom6 | 7597654                 | G/A  | Gene_Ca_07047.1    | DOWNSTREAM                    | Cyclin-dependent kinase G-2                        |
| Desi_wild_7597902 | NA                                  | Ca_desi_Chrom6 | 7597902                 | A/G  | Gene_Ca_07047.1    | DOWNSTREAM                    | Cyclin-dependent kinase G-2                        |
| Desi_wild_7628458 | NA                                  | Ca_desi_Chrom6 | 7628458                 | A/C  | Gene_Ca_07050.1    | INTRON                        | Polynucleotide 5'-hydroxyl-kinase NOL9             |
| Desi_wild_7707069 | NA                                  | Ca_desi_Chrom6 | 7707069                 | A/C  | Gene_Ca_07057.1    | SYNONYMOUS_CODING             | Signal recognition particle 72 kDa protein         |
| Desi_wild_7708553 | NA                                  | Ca_desi_Chrom6 | 7708553                 | T/C  | Gene_Ca_07057.1    | NON_SYNONYMOUS_CODING         | Signal recognition particle 72 kDa protein         |
| Desi_wild_7708557 | NA                                  | Ca_desi_Chrom6 | 7708557                 | A/C  | Gene_Ca_07057.1    | NON_SYNONYMOUS_CODING         | Signal recognition particle 72 kDa protein         |
| Desi_wild_7793284 | NA                                  | Ca_desi_Chrom6 | 7793284                 | T/G  | NA                 | INTERGENIC                    | NA                                                 |
| Desi_wild_7881884 | NA                                  | Ca_desi_Chrom6 | 7881884                 | C/A  | Gene_Ca_07073.1    | INTRON                        | Protein of unknown function (DUF789)               |
| Desi_wild_7881974 | NA                                  | Ca_desi_Chrom6 | 7881974                 | C/T  | Gene_Ca_07073.1    | INTRON                        | Protein of unknown function (DUF789)               |
| Desi_wild_7890667 | NA                                  | Ca_desi_Chrom6 | 7890667                 | G/A  | Gene_Ca_07074.1    | NON_SYNONYMOUS_CODING         | Probable serine/threonine-protein kinase At1g18390 |
| Desi_wild_7890668 | NA                                  | Ca_desi_Chrom6 | 7890668                 | T/A  | Gene_Ca_07074.1    | NON_SYNONYMOUS_CODING         | Probable serine/threonine-protein kinase At1g18390 |
| Desi_wild_7891823 | NA                                  | Ca_desi_Chrom6 | 7891823                 | G/A  | Gene_Ca_07074.1    | INTRON                        | Probable serine/threonine-protein kinase At1g18390 |
| Desi_wild_7891893 | NA                                  | Ca_desi_Chrom6 | 7891893                 | G/A  | Gene_Ca_07074.1    | INTRON                        | Probable serine/threonine-protein kinase At1g18390 |
| Desi_wild_7891904 | NA                                  | Ca_desi_Chrom6 | 7891904                 | T/C  | Gene_Ca_07074.1    | INTRON                        | Probable serine/threonine-protein kinase At1g18390 |
| Desi_wild_7956395 | NA                                  | Ca_desi_Chrom6 | 7956395                 | A/G  | Gene_Ca_07079.1    | DOWNSTREAM                    | Prolyl 3-hydroxylase 1                             |
| Desi_wild_7959189 | NA                                  | Ca_desi_Chrom6 | 7959189                 | A/T  | NA                 | INTERGENIC                    | NA                                                 |
| Desi_wild_7959193 | NA                                  | Ca_desi_Chrom6 | 7959193                 | C/G  | NA                 | INTERGENIC                    | NA                                                 |
| Desi_wild_7959207 | NA                                  | Ca_desi_Chrom6 | 7959207                 | T/A  | NA                 | INTERGENIC                    | NA                                                 |
| Desi_wild_7959236 | NA                                  | Ca_desi_Chrom6 | 7959236                 | A/T  | NA                 | INTERGENIC                    | NA                                                 |
| Desi_wild_7959244 | NA                                  | Ca_desi_Chrom6 | 7959244                 | T/C  | NA                 | INTERGENIC                    | NA                                                 |
| Desi_wild_7959263 | NA                                  | Ca_desi_Chrom6 | 7959263                 | A/G  | NA                 | INTERGENIC                    | NA                                                 |
| Desi_wild_7959327 | NA                                  | Ca_desi_Chrom6 | 7959327                 | A/T  | NA                 | INTERGENIC                    | NA                                                 |
| Desi_wild_7959367 | NA                                  | Ca_desi_Chrom6 | 7959367                 | G/A  | NA                 | INTERGENIC                    | NA                                                 |
| Desi_wild_7959943 | NA                                  | Ca_desi_Chrom6 | 7959943                 | A/G  | NA                 | INTERGENIC                    | NA                                                 |
| Desi_wild_7960007 | NA                                  | Ca_desi_Chrom6 | 7960007                 | A/G  | NA                 | INTERGENIC                    | NA                                                 |
| Desi_wild_7960015 | NA                                  | Ca_desi_Chrom6 | 7960015                 | T/G  | NA                 | INTERGENIC                    | NA                                                 |
| Desi_wild_7968788 | NA                                  | Ca_desi_Chrom6 | 7968788                 | A/C  | NA                 | INTERGENIC                    | NA                                                 |
| Desi_wild_7968800 | NA                                  | Ca_desi_Chrom6 | 7968800                 | C/G  | NA                 | INTERGENIC                    | NA                                                 |
| Desi_wild_7968802 | NA                                  | Ca_desi_Chrom6 | 7968802                 | C/T  | NA                 | INTERGENIC                    | NA                                                 |
| Desi_wild_7969668 | NA                                  | Ca_desi_Chrom6 | 7969668                 | A/G  | NA                 | INTERGENIC                    | NA                                                 |
| Desi_wild_7969725 | NA                                  | Ca_desi_Chrom6 | 7969725                 | A/C  | NA                 | INTERGENIC                    | NA                                                 |
| Desi_wild_8009576 | NA                                  | Ca_desi_Chrom6 | 8009576                 | C/G  | Gene_Ca_07086.1    | SYNONYMOUS_CODING             | NA                                                 |
| Desi_wild_8009582 | NA                                  | Ca_desi_Chrom6 | 8009582                 | C/T  | Gene_Ca_07086.1    | SYNONYMOUS_CODING             | NA                                                 |
| Desi_wild_8009585 | NA                                  | Ca_desi_Chrom6 | 8009585                 | T/C  | Gene_Ca_07086.1    | SYNONYMOUS_CODING             | NA                                                 |
| Desi_wild_8009591 | NA                                  | Ca_desi_Chrom6 | 8009591                 | G/A  | Gene_Ca_07086.1    | SYNONYMOUS_CODING             | NA                                                 |
| Desi_wild_8009597 | NA                                  | Ca_desi_Chrom6 | 8009597                 | T/C  | Gene_Ca_07086.1    | SYNONYMOUS_CODING             | NA                                                 |
| Desi_wild_8009600 | NA                                  | Ca_desi_Chrom6 | 8009600                 | T/C  | Gene_Ca_07086.1    | SYNONYMOUS_CODING             | NA                                                 |
| Desi_wild_8009604 | NA                                  | Ca_desi_Chrom6 | 8009604                 | T/C  | Gene_Ca_07086.1    | NON_SYNONYMOUS_CODING         | NA                                                 |
| Desi_wild_8009612 | NA                                  | Ca_desi_Chrom6 | 8009612                 | C/T  | Gene_Ca_07086.1    | SYNONYMOUS_CODING             | NA                                                 |
| Desi_wild_8009613 | NA                                  | Ca_desi_Chrom6 | 8009613                 | C/T  | Gene_Ca_07086.1    | NON_SYNONYMOUS_CODING         | NA                                                 |

| SNP IDs                  | NCBI dbSNP accession IDs (NCBI_SS#) | Chromosomes          | Physical positions (bp) | SNPs | Gene accession IDs | Sequence components of genome | Putative functions                                     |
|--------------------------|-------------------------------------|----------------------|-------------------------|------|--------------------|-------------------------------|--------------------------------------------------------|
| <i>Desi_wild_8009615</i> | NA                                  | <i>Ca_desi_Chr06</i> | 8009615                 | T/G  | Gene_Ca_07086.1    | SYNONYMOUS_CODING             | NA                                                     |
| <i>Desi_wild_8009624</i> | NA                                  | <i>Ca_desi_Chr06</i> | 8009624                 | T/C  | Gene_Ca_07086.1    | SYNONYMOUS_CODING             | NA                                                     |
| <i>Desi_wild_8009648</i> | NA                                  | <i>Ca_desi_Chr06</i> | 8009648                 | G/A  | Gene_Ca_07086.1    | SYNONYMOUS_CODING             | NA                                                     |
| <i>Desi_wild_8009656</i> | NA                                  | <i>Ca_desi_Chr06</i> | 8009656                 | T/C  | Gene_Ca_07086.1    | NON_SYNONYMOUS_CODING         | NA                                                     |
| <i>Desi_wild_8009901</i> | NA                                  | <i>Ca_desi_Chr06</i> | 8009901                 | C/T  | Gene_Ca_07086.1    | SYNONYMOUS_CODING             | NA                                                     |
| <i>Desi_wild_8009934</i> | NA                                  | <i>Ca_desi_Chr06</i> | 8009934                 | G/A  | Gene_Ca_07086.1    | NON_SYNONYMOUS_CODING         | NA                                                     |
| <i>Desi_wild_8009936</i> | NA                                  | <i>Ca_desi_Chr06</i> | 8009936                 | T/C  | Gene_Ca_07086.1    | SYNONYMOUS_CODING             | NA                                                     |
| <i>Desi_wild_8009941</i> | NA                                  | <i>Ca_desi_Chr06</i> | 8009941                 | G/C  | Gene_Ca_07086.1    | NON_SYNONYMOUS_CODING         | NA                                                     |
| <i>Desi_wild_8009947</i> | NA                                  | <i>Ca_desi_Chr06</i> | 8009947                 | C/T  | Gene_Ca_07086.1    | NON_SYNONYMOUS_CODING         | NA                                                     |
| <i>Desi_wild_8018615</i> | NA                                  | <i>Ca_desi_Chr06</i> | 8018615                 | C/T  | Gene_Ca_07087.1    | SYNONYMOUS_CODING             | NA                                                     |
| <i>Desi_wild_8018630</i> | NA                                  | <i>Ca_desi_Chr06</i> | 8018630                 | C/T  | Gene_Ca_07087.1    | SYNONYMOUS_CODING             | NA                                                     |
| <i>Desi_wild_8018633</i> | NA                                  | <i>Ca_desi_Chr06</i> | 8018633                 | C/G  | Gene_Ca_07087.1    | SYNONYMOUS_CODING             | NA                                                     |
| <i>Desi_wild_8018634</i> | NA                                  | <i>Ca_desi_Chr06</i> | 8018634                 | A/G  | Gene_Ca_07087.1    | SYNONYMOUS_CODING             | NA                                                     |
| <i>Desi_wild_8018636</i> | NA                                  | <i>Ca_desi_Chr06</i> | 8018636                 | C/T  | Gene_Ca_07087.1    | SYNONYMOUS_CODING             | NA                                                     |
| <i>Desi_wild_8018649</i> | NA                                  | <i>Ca_desi_Chr06</i> | 8018649                 | A/G  | Gene_Ca_07087.1    | SYNONYMOUS_CODING             | NA                                                     |
| <i>Desi_wild_8018654</i> | NA                                  | <i>Ca_desi_Chr06</i> | 8018654                 | C/T  | Gene_Ca_07087.1    | SYNONYMOUS_CODING             | NA                                                     |
| <i>Desi_wild_8018656</i> | NA                                  | <i>Ca_desi_Chr06</i> | 8018656                 | G/T  | Gene_Ca_07087.1    | NON_SYNONYMOUS_CODING         | NA                                                     |
| <i>Desi_wild_8018669</i> | NA                                  | <i>Ca_desi_Chr06</i> | 8018669                 | A/G  | Gene_Ca_07087.1    | SYNONYMOUS_CODING             | NA                                                     |
| <i>Desi_wild_8018679</i> | NA                                  | <i>Ca_desi_Chr06</i> | 8018679                 | G/T  | Gene_Ca_07087.1    | NON_SYNONYMOUS_CODING         | NA                                                     |
| <i>Desi_wild_8018681</i> | NA                                  | <i>Ca_desi_Chr06</i> | 8018681                 | A/T  | Gene_Ca_07087.1    | SYNONYMOUS_CODING             | NA                                                     |
| <i>Desi_wild_8018684</i> | NA                                  | <i>Ca_desi_Chr06</i> | 8018684                 | C/G  | Gene_Ca_07087.1    | SYNONYMOUS_CODING             | NA                                                     |
| <i>Desi_wild_8018765</i> | NA                                  | <i>Ca_desi_Chr06</i> | 8018765                 | C/A  | Gene_Ca_07087.1    | NON_SYNONYMOUS_CODING         | NA                                                     |
| <i>Desi_wild_8022636</i> | NA                                  | <i>Ca_desi_Chr06</i> | 8022636                 | T/G  | NA                 | INTERGENIC                    | NA                                                     |
| <i>Desi_wild_8443103</i> | NA                                  | <i>Ca_desi_Chr06</i> | 8443103                 | G/A  | Gene_Ca_07113.1    | INTRON                        | Protein of unknown function (DUF707)                   |
| <i>Desi_wild_8585668</i> | NA                                  | <i>Ca_desi_Chr06</i> | 8585668                 | C/G  | Gene_Ca_07122.2    | INTRON                        | 6,7-dimethyl-8-ribityllumazine synthase, chloroplastic |
| <i>Desi_wild_8585671</i> | NA                                  | <i>Ca_desi_Chr06</i> | 8585671                 | G/A  | Gene_Ca_07122.2    | INTRON                        | 6,7-dimethyl-8-ribityllumazine synthase, chloroplastic |
| <i>Desi_wild_8585672</i> | NA                                  | <i>Ca_desi_Chr06</i> | 8585672                 | A/T  | Gene_Ca_07122.2    | INTRON                        | 6,7-dimethyl-8-ribityllumazine synthase, chloroplastic |
| <i>Desi_wild_8585678</i> | NA                                  | <i>Ca_desi_Chr06</i> | 8585678                 | T/C  | Gene_Ca_07122.2    | INTRON                        | 6,7-dimethyl-8-ribityllumazine synthase, chloroplastic |
| <i>Desi_wild_8585702</i> | NA                                  | <i>Ca_desi_Chr06</i> | 8585702                 | C/T  | Gene_Ca_07122.2    | INTRON                        | 6,7-dimethyl-8-ribityllumazine synthase, chloroplastic |
| <i>Desi_wild_8585714</i> | NA                                  | <i>Ca_desi_Chr06</i> | 8585714                 | C/G  | Gene_Ca_07122.2    | INTRON                        | 6,7-dimethyl-8-ribityllumazine synthase, chloroplastic |
| <i>Desi_wild_8585725</i> | NA                                  | <i>Ca_desi_Chr06</i> | 8585725                 | T/C  | Gene_Ca_07122.2    | INTRON                        | 6,7-dimethyl-8-ribityllumazine synthase, chloroplastic |
| <i>Desi_wild_8585804</i> | NA                                  | <i>Ca_desi_Chr06</i> | 8585804                 | A/T  | Gene_Ca_07122.2    | INTRON                        | 6,7-dimethyl-8-ribityllumazine synthase, chloroplastic |
| <i>Desi_wild_8628430</i> | NA                                  | <i>Ca_desi_Chr06</i> | 8628430                 | T/C  | Gene_Ca_07125.1    | NON_SYNONYMOUS_CODING         | E3 ubiquitin-protein ligase UPL1                       |
| <i>Desi_wild_8631880</i> | NA                                  | <i>Ca_desi_Chr06</i> | 8631880                 | T/C  | Gene_Ca_07125.1    | SYNONYMOUS_CODING             | E3 ubiquitin-protein ligase UPL1                       |
| <i>Desi_wild_8631889</i> | NA                                  | <i>Ca_desi_Chr06</i> | 8631889                 | G/A  | Gene_Ca_07125.1    | SYNONYMOUS_CODING             | E3 ubiquitin-protein ligase UPL1                       |
| <i>Desi_wild_8654685</i> | NA                                  | <i>Ca_desi_Chr06</i> | 8654685                 | T/G  | Gene_Ca_07128.1    | DOWNSTREAM                    | DNA polymerase eta                                     |
| <i>Desi_wild_8731110</i> | NA                                  | <i>Ca_desi_Chr06</i> | 8731110                 | C/T  | Gene_Ca_07137.1    | NON_SYNONYMOUS_CODING         | E3 ubiquitin-protein ligase UPL1                       |
| <i>Desi_wild_8731127</i> | NA                                  | <i>Ca_desi_Chr06</i> | 8731127                 | C/T  | Gene_Ca_07137.1    | NON_SYNONYMOUS_CODING         | E3 ubiquitin-protein ligase UPL1                       |
| <i>Desi_wild_8731132</i> | NA                                  | <i>Ca_desi_Chr06</i> | 8731132                 | T/G  | Gene_Ca_07137.1    | SYNONYMOUS_CODING             | E3 ubiquitin-protein ligase UPL1                       |
| <i>Desi_wild_8731161</i> | NA                                  | <i>Ca_desi_Chr06</i> | 8731161                 | C/T  | Gene_Ca_07137.1    | NON_SYNONYMOUS_CODING         | E3 ubiquitin-protein ligase UPL1                       |
| <i>Desi_wild_8731230</i> | NA                                  | <i>Ca_desi_Chr06</i> | 8731230                 | A/G  | Gene_Ca_07137.1    | NON_SYNONYMOUS_CODING         | E3 ubiquitin-protein ligase UPL1                       |
| <i>Desi_wild_8731256</i> | NA                                  | <i>Ca_desi_Chr06</i> | 8731256                 | A/C  | Gene_Ca_07137.1    | NON_SYNONYMOUS_CODING         | E3 ubiquitin-protein ligase UPL1                       |
| <i>Desi_wild_8731271</i> | NA                                  | <i>Ca_desi_Chr06</i> | 8731271                 | A/G  | Gene_Ca_07137.1    | NON_SYNONYMOUS_CODING         | E3 ubiquitin-protein ligase UPL1                       |
| <i>Desi_wild_8737776</i> | NA                                  | <i>Ca_desi_Chr06</i> | 8737776                 | A/C  | Gene_Ca_07137.1    | SYNONYMOUS_CODING             | E3 ubiquitin-protein ligase UPL1                       |

| SNP IDs                   | NCBI dbSNP accession IDs (NCBI_SS#) | Chromosomes          | Physical positions (bp) | SNPs | Gene accession IDs | Sequence components of genome | Putative functions                                                                   |
|---------------------------|-------------------------------------|----------------------|-------------------------|------|--------------------|-------------------------------|--------------------------------------------------------------------------------------|
| <i>Desi_wild_8737791</i>  | NA                                  | <i>Ca_desi_Chr06</i> | 8737791                 | A/T  | Gene_Ca_07137.1    | SYNONYMOUS_CODING             | E3 ubiquitin-protein ligase UPL1                                                     |
| <i>Desi_wild_8751255</i>  | NA                                  | <i>Ca_desi_Chr06</i> | 8751255                 | T/C  | NA                 | INTERGENIC                    | NA                                                                                   |
| <i>Desi_wild_9128802</i>  | NA                                  | <i>Ca_desi_Chr06</i> | 9128802                 | T/A  | NA                 | INTERGENIC                    | NA                                                                                   |
| <i>Desi_wild_9143479</i>  | NA                                  | <i>Ca_desi_Chr06</i> | 9143479                 | A/T  | NA                 | INTERGENIC                    | NA                                                                                   |
| <i>Desi_wild_9154535</i>  | NA                                  | <i>Ca_desi_Chr06</i> | 9154535                 | A/T  | NA                 | INTERGENIC                    | NA                                                                                   |
| <i>Desi_wild_9172261</i>  | NA                                  | <i>Ca_desi_Chr06</i> | 9172261                 | A/G  | Gene_Ca_07152.2    | DOWNSTREAM                    | NA                                                                                   |
| <i>Desi_wild_9216495</i>  | NA                                  | <i>Ca_desi_Chr06</i> | 9216495                 | T/G  | Gene_Ca_07155.1    | DOWNSTREAM                    | NA                                                                                   |
| <i>Desi_wild_9216541</i>  | NA                                  | <i>Ca_desi_Chr06</i> | 9216541                 | C/A  | Gene_Ca_07155.1    | DOWNSTREAM                    | NA                                                                                   |
| <i>Desi_wild_9223232</i>  | NA                                  | <i>Ca_desi_Chr06</i> | 9223232                 | T/G  | Gene_Ca_07156.1    | INTRON                        | CONTAINS InterPro DOMAIN/s: Protein of unknown function DUF1084 (InterPro:IPR009457) |
| <i>Desi_wild_9227036</i>  | NA                                  | <i>Ca_desi_Chr06</i> | 9227036                 | T/C  | Gene_Ca_07156.1    | DOWNSTREAM                    | CONTAINS InterPro DOMAIN/s: Protein of unknown function DUF1084 (InterPro:IPR009457) |
| <i>Desi_wild_9245317</i>  | NA                                  | <i>Ca_desi_Chr06</i> | 9245317                 | T/G  | NA                 | INTERGENIC                    | NA                                                                                   |
| <i>Desi_wild_9253759</i>  | NA                                  | <i>Ca_desi_Chr06</i> | 9253759                 | T/C  | NA                 | INTERGENIC                    | NA                                                                                   |
| <i>Desi_wild_9268767</i>  | NA                                  | <i>Ca_desi_Chr06</i> | 9268767                 | A/G  | Gene_Ca_07163.1    | DOWNSTREAM                    | Cytochrome b561/ferric reductase transmembrane protein family                        |
| <i>Desi_wild_9268782</i>  | NA                                  | <i>Ca_desi_Chr06</i> | 9268782                 | C/G  | Gene_Ca_07163.1    | DOWNSTREAM                    | Cytochrome b561/ferric reductase transmembrane protein family                        |
| <i>Desi_wild_9339744</i>  | NA                                  | <i>Ca_desi_Chr06</i> | 9339744                 | G/A  | Gene_Ca_07168.1    | SYNONYMOUS_CODING             | Aspartate carbamoyltransferase 3, chloroplastic                                      |
| <i>Desi_wild_9339776</i>  | NA                                  | <i>Ca_desi_Chr06</i> | 9339776                 | G/C  | Gene_Ca_07168.1    | INTRON                        | Aspartate carbamoyltransferase 3, chloroplastic                                      |
| <i>Desi_wild_9347443</i>  | NA                                  | <i>Ca_desi_Chr06</i> | 9347443                 | G/A  | NA                 | INTERGENIC                    | NA                                                                                   |
| <i>Desi_wild_9367131</i>  | NA                                  | <i>Ca_desi_Chr06</i> | 9367131                 | A/C  | Gene_Ca_07172.1    | UPSTREAM                      | Octicosapeptide/Phox/Bem1p family protein                                            |
| <i>Desi_wild_9371663</i>  | NA                                  | <i>Ca_desi_Chr06</i> | 9371663                 | A/C  | Gene_Ca_07173.1    | INTRON                        | Glutamyl-tRNA reductase 1, chloroplastic                                             |
| <i>Desi_wild_9371665</i>  | NA                                  | <i>Ca_desi_Chr06</i> | 9371665                 | C/T  | Gene_Ca_07173.1    | INTRON                        | Glutamyl-tRNA reductase 1, chloroplastic                                             |
| <i>Desi_wild_9371666</i>  | NA                                  | <i>Ca_desi_Chr06</i> | 9371666                 | T/G  | Gene_Ca_07173.1    | INTRON                        | Glutamyl-tRNA reductase 1, chloroplastic                                             |
| <i>Desi_wild_9379256</i>  | NA                                  | <i>Ca_desi_Chr06</i> | 9379256                 | C/T  | Gene_Ca_07173.1    | SYNONYMOUS_CODING             | Glutamyl-tRNA reductase 1, chloroplastic                                             |
| <i>Desi_wild_9391599</i>  | NA                                  | <i>Ca_desi_Chr06</i> | 9391599                 | G/T  | Gene_Ca_07176.1    | NON_SYNONYMOUS_CODING         | K(+) efflux antiporter 3, chloroplastic                                              |
| <i>Desi_wild_9507932</i>  | NA                                  | <i>Ca_desi_Chr06</i> | 9507932                 | T/G  | Gene_Ca_07189.1    | SYNONYMOUS_CODING             | Negative regulator of genetic competence ClpC/MecB                                   |
| <i>Desi_wild_9522664</i>  | NA                                  | <i>Ca_desi_Chr06</i> | 9522664                 | T/C  | Gene_Ca_07190.1    | NON_SYNONYMOUS_CODING         | Zinc finger CCCH domain-containing protein 66                                        |
| <i>Desi_wild_9522738</i>  | NA                                  | <i>Ca_desi_Chr06</i> | 9522738                 | A/G  | Gene_Ca_07190.1    | NON_SYNONYMOUS_CODING         | Zinc finger CCCH domain-containing protein 66                                        |
| <i>Desi_wild_9628944</i>  | NA                                  | <i>Ca_desi_Chr06</i> | 9628944                 | G/A  | Gene_Ca_07198.2    | INTRON                        | NA                                                                                   |
| <i>Desi_wild_9691343</i>  | NA                                  | <i>Ca_desi_Chr06</i> | 9691343                 | C/T  | Gene_Ca_07204.1    | INTRON                        | Protein EXECUTER 1, chloroplastic                                                    |
| <i>Desi_wild_9701965</i>  | NA                                  | <i>Ca_desi_Chr06</i> | 9701965                 | A/G  | NA                 | INTERGENIC                    | NA                                                                                   |
| <i>Desi_wild_9769838</i>  | NA                                  | <i>Ca_desi_Chr06</i> | 9769838                 | G/A  | Gene_Ca_07217.1    | SYNONYMOUS_CODING             | Root phototropism protein 3                                                          |
| <i>Desi_wild_9841378</i>  | NA                                  | <i>Ca_desi_Chr06</i> | 9841378                 | T/C  | Gene_Ca_07226.1    | SYNONYMOUS_CODING             | ABC transporter G family member 11                                                   |
| <i>Desi_wild_9867699</i>  | NA                                  | <i>Ca_desi_Chr06</i> | 9867699                 | A/C  | NA                 | INTERGENIC                    | NA                                                                                   |
| <i>Desi_wild_9899142</i>  | NA                                  | <i>Ca_desi_Chr06</i> | 9899142                 | G/C  | Gene_Ca_07231.1    | NON_SYNONYMOUS_CODING         | Vacuolar protein sorting-associated protein 27                                       |
| <i>Desi_wild_9899144</i>  | NA                                  | <i>Ca_desi_Chr06</i> | 9899144                 | A/C  | Gene_Ca_07231.1    | NON_SYNONYMOUS_CODING         | Vacuolar protein sorting-associated protein 27                                       |
| <i>Desi_wild_9899151</i>  | NA                                  | <i>Ca_desi_Chr06</i> | 9899151                 | C/T  | Gene_Ca_07231.1    | NON_SYNONYMOUS_CODING         | Vacuolar protein sorting-associated protein 27                                       |
| <i>Desi_wild_9904529</i>  | NA                                  | <i>Ca_desi_Chr06</i> | 9904529                 | T/G  | NA                 | INTERGENIC                    | NA                                                                                   |
| <i>Desi_wild_9944483</i>  | NA                                  | <i>Ca_desi_Chr06</i> | 9944483                 | G/A  | NA                 | INTERGENIC                    | NA                                                                                   |
| <i>Desi_wild_9955279</i>  | NA                                  | <i>Ca_desi_Chr06</i> | 9955279                 | C/T  | Gene_Ca_07240.1    | INTRON                        | Kinesin-3                                                                            |
| <i>Desi_wild_9980951</i>  | NA                                  | <i>Ca_desi_Chr06</i> | 9980951                 | T/C  | NA                 | INTERGENIC                    | NA                                                                                   |
| <i>Desi_wild_10095855</i> | NA                                  | <i>Ca_desi_Chr06</i> | 10095855                | A/T  | Gene_Ca_07252.1    | DOWNSTREAM                    | Vacuolar iron transporter homolog 1                                                  |
| <i>Desi_wild_10125293</i> | NA                                  | <i>Ca_desi_Chr06</i> | 10125293                | T/C  | Gene_Ca_07255.4    | INTRON                        | Proteasome subunit alpha type-6                                                      |
| <i>Desi_wild_10167738</i> | NA                                  | <i>Ca_desi_Chr06</i> | 10167738                | C/T  | Gene_Ca_07258.2    | SYNONYMOUS_CODING             | NA                                                                                   |
| <i>Desi_wild_10168581</i> | NA                                  | <i>Ca_desi_Chr06</i> | 10168581                | G/A  | Gene_Ca_07258.2    | SYNONYMOUS_CODING             | NA                                                                                   |
| <i>Desi_wild_10171978</i> | NA                                  | <i>Ca_desi_Chr06</i> | 10171978                | A/C  | Gene_Ca_07258.2    | NON_SYNONYMOUS_CODING         | NA                                                                                   |

| SNP IDs                   | NCBI dbSNP accession IDs (NCBI_SS#) | Chromosomes           | Physical positions (bp) | SNPs | Gene accession IDs | Sequence components of genome | Putative functions                                     |
|---------------------------|-------------------------------------|-----------------------|-------------------------|------|--------------------|-------------------------------|--------------------------------------------------------|
| <i>Desi_wild_10255106</i> | NA                                  | <i>Ca_desi_Chrom6</i> | 10255106                | C/T  | Gene_Ca_07265.1    | INTRON                        | RNA polymerase II C-terminal domain phosphatase-like 1 |
| <i>Desi_wild_10266755</i> | NA                                  | <i>Ca_desi_Chrom6</i> | 10266755                | T/G  | NA                 | INTERGENIC                    | NA                                                     |
| <i>Desi_wild_10286901</i> | NA                                  | <i>Ca_desi_Chrom6</i> | 10286901                | C/T  | Gene_Ca_07269.1    | INTRON                        | sensitive to freezing 6                                |
| <i>Desi_wild_10338805</i> | NA                                  | <i>Ca_desi_Chrom6</i> | 10338805                | C/A  | Gene_Ca_07275.3    | DOWNSTREAM                    | NA                                                     |
| <i>Desi_wild_10338806</i> | NA                                  | <i>Ca_desi_Chrom6</i> | 10338806                | T/G  | Gene_Ca_07275.3    | DOWNSTREAM                    | NA                                                     |
| <i>Desi_wild_10359955</i> | NA                                  | <i>Ca_desi_Chrom6</i> | 10359955                | T/C  | Gene_Ca_07279.1    | INTRON                        | Vesicle-fusing ATPase                                  |
| <i>Desi_wild_10461698</i> | NA                                  | <i>Ca_desi_Chrom6</i> | 10461698                | C/G  | Gene_Ca_07291.1    | DOWNSTREAM                    | Protein of unknown function (DUF1118)                  |
| <i>Desi_wild_10461701</i> | NA                                  | <i>Ca_desi_Chrom6</i> | 10461701                | T/C  | Gene_Ca_07291.1    | DOWNSTREAM                    | Protein of unknown function (DUF1118)                  |
| <i>Desi_wild_10577165</i> | NA                                  | <i>Ca_desi_Chrom6</i> | 10577165                | T/G  | Gene_Ca_07299.1    | SYNONYMOUS_CODING             | Beta-xylosidase/alpha-L-arabinofuranosidase 2          |
| <i>Desi_wild_10577166</i> | NA                                  | <i>Ca_desi_Chrom6</i> | 10577166                | A/G  | Gene_Ca_07299.1    | NON_SYNONYMOUS_CODING         | Beta-xylosidase/alpha-L-arabinofuranosidase 2          |
| <i>Desi_wild_10577168</i> | NA                                  | <i>Ca_desi_Chrom6</i> | 10577168                | T/A  | Gene_Ca_07299.1    | SYNONYMOUS_CODING             | Beta-xylosidase/alpha-L-arabinofuranosidase 2          |
| <i>Desi_wild_10596504</i> | NA                                  | <i>Ca_desi_Chrom6</i> | 10596504                | T/G  | Gene_Ca_07301.1    | UPSTREAM                      | Tristetraprolin                                        |
| <i>Desi_wild_10614025</i> | NA                                  | <i>Ca_desi_Chrom6</i> | 10614025                | C/T  | Gene_Ca_07303.1    | INTRON                        | Dynamin-like protein ARC5                              |
| <i>Desi_wild_10614096</i> | NA                                  | <i>Ca_desi_Chrom6</i> | 10614096                | A/G  | Gene_Ca_07303.1    | SYNONYMOUS_CODING             | Dynamin-like protein ARC5                              |
| <i>Desi_wild_10614162</i> | NA                                  | <i>Ca_desi_Chrom6</i> | 10614162                | A/C  | Gene_Ca_07303.1    | SYNONYMOUS_CODING             | Dynamin-like protein ARC5                              |
| <i>Desi_wild_10614225</i> | NA                                  | <i>Ca_desi_Chrom6</i> | 10614225                | G/A  | Gene_Ca_07303.1    | INTRON                        | Dynamin-like protein ARC5                              |
| <i>Desi_wild_10614449</i> | NA                                  | <i>Ca_desi_Chrom6</i> | 10614449                | C/G  | NA                 | INTERGENIC                    | NA                                                     |
| <i>Desi_wild_10614489</i> | NA                                  | <i>Ca_desi_Chrom6</i> | 10614489                | A/G  | NA                 | INTERGENIC                    | NA                                                     |
| <i>Desi_wild_10703187</i> | NA                                  | <i>Ca_desi_Chrom6</i> | 10703187                | A/G  | Gene_Ca_07316.1    | NON_SYNONYMOUS_CODING         | Potassium transporter 7                                |
| <i>Desi_wild_10712288</i> | NA                                  | <i>Ca_desi_Chrom6</i> | 10712288                | T/G  | Gene_Ca_07317.1    | INTRON                        | Putative copper-transporting ATPase PAA1               |
| <i>Desi_wild_10714402</i> | NA                                  | <i>Ca_desi_Chrom6</i> | 10714402                | G/A  | Gene_Ca_07317.1    | INTRON                        | Putative copper-transporting ATPase PAA1               |
| <i>Desi_wild_10726489</i> | NA                                  | <i>Ca_desi_Chrom6</i> | 10726489                | T/G  | Gene_Ca_07317.1    | UPSTREAM                      | Putative copper-transporting ATPase PAA1               |
| <i>Desi_wild_10802209</i> | NA                                  | <i>Ca_desi_Chrom6</i> | 10802209                | T/A  | NA                 | INTERGENIC                    | NA                                                     |
| <i>Desi_wild_10863945</i> | NA                                  | <i>Ca_desi_Chrom6</i> | 10863945                | C/G  | Gene_Ca_07332.1    | STOP_GAINED                   | Signal recognition particle 68 kDa protein             |
| <i>Desi_wild_10949246</i> | NA                                  | <i>Ca_desi_Chrom6</i> | 10949246                | A/G  | Gene_Ca_07336.1    | NON_SYNONYMOUS_CODING         | Serine carboxypeptidase-like 45                        |
| <i>Desi_wild_11175957</i> | NA                                  | <i>Ca_desi_Chrom6</i> | 11175957                | G/T  | Gene_Ca_07352.1    | SYNONYMOUS_CODING             | RecQ-mediated genome instability protein 1             |
| <i>Desi_wild_11175961</i> | NA                                  | <i>Ca_desi_Chrom6</i> | 11175961                | G/A  | Gene_Ca_07352.1    | SYNONYMOUS_CODING             | RecQ-mediated genome instability protein 1             |
| <i>Desi_wild_11175980</i> | NA                                  | <i>Ca_desi_Chrom6</i> | 11175980                | A/G  | Gene_Ca_07352.1    | SYNONYMOUS_CODING             | RecQ-mediated genome instability protein 1             |
| <i>Desi_wild_11175981</i> | NA                                  | <i>Ca_desi_Chrom6</i> | 11175981                | T/C  | Gene_Ca_07352.1    | SYNONYMOUS_CODING             | RecQ-mediated genome instability protein 1             |
| <i>Desi_wild_11175993</i> | NA                                  | <i>Ca_desi_Chrom6</i> | 11175993                | C/A  | Gene_Ca_07352.1    | SYNONYMOUS_CODING             | RecQ-mediated genome instability protein 1             |
| <i>Desi_wild_11176003</i> | NA                                  | <i>Ca_desi_Chrom6</i> | 11176003                | C/G  | Gene_Ca_07352.1    | SYNONYMOUS_CODING             | RecQ-mediated genome instability protein 1             |
| <i>Desi_wild_11176031</i> | NA                                  | <i>Ca_desi_Chrom6</i> | 11176031                | A/G  | Gene_Ca_07352.1    | INTRON                        | RecQ-mediated genome instability protein 1             |
| <i>Desi_wild_11176037</i> | NA                                  | <i>Ca_desi_Chrom6</i> | 11176037                | T/A  | Gene_Ca_07352.1    | INTRON                        | RecQ-mediated genome instability protein 1             |
| <i>Desi_wild_11176039</i> | NA                                  | <i>Ca_desi_Chrom6</i> | 11176039                | T/C  | Gene_Ca_07352.1    | INTRON                        | RecQ-mediated genome instability protein 1             |
| <i>Desi_wild_11176040</i> | NA                                  | <i>Ca_desi_Chrom6</i> | 11176040                | G/A  | Gene_Ca_07352.1    | INTRON                        | RecQ-mediated genome instability protein 1             |
| <i>Desi_wild_11176042</i> | NA                                  | <i>Ca_desi_Chrom6</i> | 11176042                | G/A  | Gene_Ca_07352.1    | INTRON                        | RecQ-mediated genome instability protein 1             |
| <i>Desi_wild_11299967</i> | NA                                  | <i>Ca_desi_Chrom6</i> | 11299967                | C/A  | NA                 | INTERGENIC                    | NA                                                     |
| <i>Desi_wild_11337880</i> | NA                                  | <i>Ca_desi_Chrom6</i> | 11337880                | G/A  | NA                 | INTERGENIC                    | NA                                                     |
| <i>Desi_wild_11339684</i> | NA                                  | <i>Ca_desi_Chrom6</i> | 11339684                | A/G  | NA                 | INTERGENIC                    | NA                                                     |
| <i>Desi_wild_11350128</i> | NA                                  | <i>Ca_desi_Chrom6</i> | 11350128                | A/C  | Gene_Ca_07371.1    | INTRON                        | 40S ribosomal protein S1                               |
| <i>Desi_wild_11414655</i> | NA                                  | <i>Ca_desi_Chrom6</i> | 11414655                | A/C  | NA                 | INTERGENIC                    | NA                                                     |
| <i>Desi_wild_11453287</i> | NA                                  | <i>Ca_desi_Chrom6</i> | 11453287                | C/T  | Gene_Ca_07385.2    | INTRON                        | NA                                                     |
| <i>Desi_wild_11453381</i> | NA                                  | <i>Ca_desi_Chrom6</i> | 11453381                | A/G  | Gene_Ca_07385.2    | NON_SYNONYMOUS_CODING         | NA                                                     |
| <i>Desi_wild_11453999</i> | NA                                  | <i>Ca_desi_Chrom6</i> | 11453999                | A/G  | Gene_Ca_07385.1    | DOWNSTREAM                    | Probable serine/threonine-protein kinase At5g41260     |



| SNP IDs                   | NCBI dbSNP accession IDs (NCBI_SS#) | Chromosomes           | Physical positions (bp) | SNPs | Gene accession IDs | Sequence components of genome | Putative functions                                                |
|---------------------------|-------------------------------------|-----------------------|-------------------------|------|--------------------|-------------------------------|-------------------------------------------------------------------|
| <i>Desi_wild_11476793</i> | NA                                  | <i>Ca_desi_Chrom6</i> | 11476793                | T/C  | NA                 | INTERGENIC                    | NA                                                                |
| <i>Desi_wild_2259</i>     | NA                                  | <i>Ca_desi_Chrom7</i> | 2259                    | G/A  | Gene_Ca_07389.1    | NON_SYNONYMOUS_CODING         | VQ motif-containing protein                                       |
| <i>Desi_wild_59612</i>    | NA                                  | <i>Ca_desi_Chrom7</i> | 59612                   | A/T  | Gene_Ca_07392.1    | INTRON                        | Embryonic polyadenylate-binding protein 2                         |
| <i>Desi_wild_165727</i>   | NA                                  | <i>Ca_desi_Chrom7</i> | 165727                  | T/G  | Gene_Ca_07395.1    | INTRON                        | Callose synthase 9                                                |
| <i>Desi_wild_174201</i>   | NA                                  | <i>Ca_desi_Chrom7</i> | 174201                  | A/G  | Gene_Ca_07396.1    | SYNONYMOUS_CODING             | NA                                                                |
| <i>Desi_wild_231104</i>   | NA                                  | <i>Ca_desi_Chrom7</i> | 231104                  | A/C  | Gene_Ca_07398.1    | INTRON                        | Callose synthase 9                                                |
| <i>Desi_wild_282539</i>   | NA                                  | <i>Ca_desi_Chrom7</i> | 282539                  | T/C  | NA                 | INTERGENIC                    | NA                                                                |
| <i>Desi_wild_391213</i>   | NA                                  | <i>Ca_desi_Chrom7</i> | 391213                  | G/A  | NA                 | INTERGENIC                    | NA                                                                |
| <i>Desi_wild_398327</i>   | NA                                  | <i>Ca_desi_Chrom7</i> | 398327                  | G/T  | Gene_Ca_07409.1    | INTRON                        | CMP-sialic acid transporter 3                                     |
| <i>Desi_wild_585356</i>   | NA                                  | <i>Ca_desi_Chrom7</i> | 585356                  | G/A  | Gene_Ca_07427.3    | INTRON                        | Phosphatidylinositol-4-phosphate 5-kinase 7                       |
| <i>Desi_wild_640796</i>   | NA                                  | <i>Ca_desi_Chrom7</i> | 640796                  | T/C  | Gene_Ca_07432.1    | INTRON                        | Alpha N-terminal protein methyltransferase 1                      |
| <i>Desi_wild_684350</i>   | NA                                  | <i>Ca_desi_Chrom7</i> | 684350                  | C/A  | NA                 | INTERGENIC                    | NA                                                                |
| <i>Desi_wild_691183</i>   | NA                                  | <i>Ca_desi_Chrom7</i> | 691183                  | C/T  | NA                 | INTERGENIC                    | NA                                                                |
| <i>Desi_wild_691252</i>   | NA                                  | <i>Ca_desi_Chrom7</i> | 691252                  | A/G  | NA                 | INTERGENIC                    | NA                                                                |
| <i>Desi_wild_694650</i>   | NA                                  | <i>Ca_desi_Chrom7</i> | 694650                  | A/G  | NA                 | INTERGENIC                    | NA                                                                |
| <i>Desi_wild_694654</i>   | NA                                  | <i>Ca_desi_Chrom7</i> | 694654                  | C/T  | NA                 | INTERGENIC                    | NA                                                                |
| <i>Desi_wild_725831</i>   | NA                                  | <i>Ca_desi_Chrom7</i> | 725831                  | G/C  | NA                 | INTERGENIC                    | NA                                                                |
| <i>Desi_wild_725860</i>   | NA                                  | <i>Ca_desi_Chrom7</i> | 725860                  | T/C  | NA                 | INTERGENIC                    | NA                                                                |
| <i>Desi_wild_725884</i>   | NA                                  | <i>Ca_desi_Chrom7</i> | 725884                  | T/C  | NA                 | INTERGENIC                    | NA                                                                |
| <i>Desi_wild_734914</i>   | NA                                  | <i>Ca_desi_Chrom7</i> | 734914                  | T/C  | Gene_Ca_07441.1    | INTRON                        | Probable N-acetylglucosaminyl-phosphatidylinositol de-N-acetylase |
| <i>Desi_wild_734971</i>   | NA                                  | <i>Ca_desi_Chrom7</i> | 734971                  | C/G  | Gene_Ca_07441.1    | INTRON                        | Probable N-acetylglucosaminyl-phosphatidylinositol de-N-acetylase |
| <i>Desi_wild_735723</i>   | NA                                  | <i>Ca_desi_Chrom7</i> | 735723                  | T/C  | Gene_Ca_07441.1    | INTRON                        | Probable N-acetylglucosaminyl-phosphatidylinositol de-N-acetylase |
| <i>Desi_wild_740393</i>   | NA                                  | <i>Ca_desi_Chrom7</i> | 740393                  | A/G  | Gene_Ca_07441.1    | INTRON                        | Probable N-acetylglucosaminyl-phosphatidylinositol de-N-acetylase |
| <i>Desi_wild_740412</i>   | NA                                  | <i>Ca_desi_Chrom7</i> | 740412                  | T/G  | Gene_Ca_07441.1    | INTRON                        | Probable N-acetylglucosaminyl-phosphatidylinositol de-N-acetylase |
| <i>Desi_wild_740512</i>   | NA                                  | <i>Ca_desi_Chrom7</i> | 740512                  | G/A  | Gene_Ca_07441.1    | INTRON                        | Probable N-acetylglucosaminyl-phosphatidylinositol de-N-acetylase |
| <i>Desi_wild_747281</i>   | NA                                  | <i>Ca_desi_Chrom7</i> | 747281                  | T/C  | NA                 | INTERGENIC                    | NA                                                                |
| <i>Desi_wild_784246</i>   | NA                                  | <i>Ca_desi_Chrom7</i> | 784246                  | T/C  | NA                 | INTERGENIC                    | NA                                                                |
| <i>Desi_wild_830276</i>   | NA                                  | <i>Ca_desi_Chrom7</i> | 830276                  | G/A  | NA                 | INTERGENIC                    | NA                                                                |
| <i>Desi_wild_830290</i>   | NA                                  | <i>Ca_desi_Chrom7</i> | 830290                  | G/T  | NA                 | INTERGENIC                    | NA                                                                |
| <i>Desi_wild_843832</i>   | NA                                  | <i>Ca_desi_Chrom7</i> | 843832                  | T/C  | Gene_Ca_07450.1    | DOWNSTREAM                    | CAS1 domain-containing protein 1                                  |
| <i>Desi_wild_843865</i>   | NA                                  | <i>Ca_desi_Chrom7</i> | 843865                  | A/T  | Gene_Ca_07450.1    | DOWNSTREAM                    | CAS1 domain-containing protein 1                                  |
| <i>Desi_wild_1024728</i>  | NA                                  | <i>Ca_desi_Chrom7</i> | 1024728                 | T/G  | Gene_Ca_07466.1    | INTRON                        | Midasin                                                           |
| <i>Desi_wild_1029983</i>  | NA                                  | <i>Ca_desi_Chrom7</i> | 1029983                 | G/C  | Gene_Ca_07466.1    | NON_SYNONYMOUS_CODING         | Midasin                                                           |
| <i>Desi_wild_1050517</i>  | NA                                  | <i>Ca_desi_Chrom7</i> | 1050517                 | T/G  | Gene_Ca_07466.1    | INTRON                        | Midasin                                                           |
| <i>Desi_wild_1050521</i>  | NA                                  | <i>Ca_desi_Chrom7</i> | 1050521                 | C/G  | Gene_Ca_07466.1    | INTRON                        | Midasin                                                           |
| <i>Desi_wild_1050522</i>  | NA                                  | <i>Ca_desi_Chrom7</i> | 1050522                 | C/T  | Gene_Ca_07466.1    | INTRON                        | Midasin                                                           |
| <i>Desi_wild_1050542</i>  | NA                                  | <i>Ca_desi_Chrom7</i> | 1050542                 | A/T  | Gene_Ca_07466.1    | INTRON                        | Midasin                                                           |
| <i>Desi_wild_1050556</i>  | NA                                  | <i>Ca_desi_Chrom7</i> | 1050556                 | G/T  | Gene_Ca_07466.1    | INTRON                        | Midasin                                                           |
| <i>Desi_wild_1050560</i>  | NA                                  | <i>Ca_desi_Chrom7</i> | 1050560                 | C/T  | Gene_Ca_07466.1    | INTRON                        | Midasin                                                           |
| <i>Desi_wild_1050574</i>  | NA                                  | <i>Ca_desi_Chrom7</i> | 1050574                 | C/T  | Gene_Ca_07466.1    | INTRON                        | Midasin                                                           |
| <i>Desi_wild_1051053</i>  | NA                                  | <i>Ca_desi_Chrom7</i> | 1051053                 | T/G  | Gene_Ca_07466.1    | NON_SYNONYMOUS_CODING         | Midasin                                                           |
| <i>Desi_wild_1414396</i>  | NA                                  | <i>Ca_desi_Chrom7</i> | 1414396                 | T/G  | Gene_Ca_07474.1    | SYNONYMOUS_CODING             | Uncharacterized ATP-dependent helicase C29A10.10c                 |
| <i>Desi_wild_1415377</i>  | NA                                  | <i>Ca_desi_Chrom7</i> | 1415377                 | A/C  | Gene_Ca_07474.1    | SYNONYMOUS_CODING             | Uncharacterized ATP-dependent helicase C29A10.10c                 |
| <i>Desi_wild_1415378</i>  | NA                                  | <i>Ca_desi_Chrom7</i> | 1415378                 | G/T  | Gene_Ca_07474.1    | NON_SYNONYMOUS_CODING         | Uncharacterized ATP-dependent helicase C29A10.10c                 |

| SNP IDs                  | NCBI dbSNP accession IDs (NCBI_SS#) | Chromosomes          | Physical positions (bp) | SNPs | Gene accession IDs              | Sequence components of genome | Putative functions                                     |
|--------------------------|-------------------------------------|----------------------|-------------------------|------|---------------------------------|-------------------------------|--------------------------------------------------------|
| <i>Desi_wild_1415425</i> | NA                                  | <i>Ca_desi_Chr07</i> | 1415425                 | G/T  | Gene_Ca_07474.1                 | NON_SYNONYMOUS_CODING         | Uncharacterized ATP-dependent helicase C29A10.10c      |
| <i>Desi_wild_1441778</i> | NA                                  | <i>Ca_desi_Chr07</i> | 1441778                 | A/G  | Gene_Ca_07476.2                 | SYNONYMOUS_CODING             | NA                                                     |
| <i>Desi_wild_1443833</i> | NA                                  | <i>Ca_desi_Chr07</i> | 1443833                 | C/A  | Gene_Ca_07476.2                 | NON_SYNONYMOUS_CODING         | NA                                                     |
| <i>Desi_wild_1443859</i> | NA                                  | <i>Ca_desi_Chr07</i> | 1443859                 | T/G  | Gene_Ca_07476.2                 | SYNONYMOUS_CODING             | NA                                                     |
| <i>Desi_wild_1444385</i> | NA                                  | <i>Ca_desi_Chr07</i> | 1444385                 | A/G  | Gene_Ca_07476.2                 | INTRON                        | NA                                                     |
| <i>Desi_wild_1444388</i> | NA                                  | <i>Ca_desi_Chr07</i> | 1444388                 | T/C  | Gene_Ca_07476.2                 | INTRON                        | NA                                                     |
| <i>Desi_wild_1457985</i> | NA                                  | <i>Ca_desi_Chr07</i> | 1457985                 | A/G  | Gene_Ca_07478.1                 | INTRON                        | Ubiquitin-like protein ATG12                           |
| <i>Desi_wild_1467358</i> | NA                                  | <i>Ca_desi_Chr07</i> | 1467358                 | T/A  | Gene_Ca_07479.1                 | SYNONYMOUS_CODING             | AP2-like ethylene-responsive transcription factor AIL1 |
| <i>Desi_wild_1467400</i> | NA                                  | <i>Ca_desi_Chr07</i> | 1467400                 | A/G  | Gene_Ca_07479.1                 | INTRON                        | AP2-like ethylene-responsive transcription factor AIL1 |
| <i>Desi_wild_1483346</i> | NA                                  | <i>Ca_desi_Chr07</i> | 1483346                 | T/A  | NA                              | INTERGENIC                    | NA                                                     |
| <i>Desi_wild_1530448</i> | NA                                  | <i>Ca_desi_Chr07</i> | 1530448                 | C/T  | Gene_Ca_07483.1                 | NON_SYNONYMOUS_CODING         | NA                                                     |
| <i>Desi_wild_1530460</i> | NA                                  | <i>Ca_desi_Chr07</i> | 1530460                 | A/C  | Gene_Ca_07483.1                 | NON_SYNONYMOUS_CODING         | NA                                                     |
| <i>Desi_wild_1530495</i> | NA                                  | <i>Ca_desi_Chr07</i> | 1530495                 | A/C  | Gene_Ca_07483.1                 | SYNONYMOUS_CODING             | NA                                                     |
| <i>Desi_wild_1541580</i> | NA                                  | <i>Ca_desi_Chr07</i> | 1541580                 | A/T  | <a href="#">Gene_Ca_07484.2</a> | NON_SYNONYMOUS_CODING         | NA                                                     |
| <i>Desi_wild_1541646</i> | NA                                  | <i>Ca_desi_Chr07</i> | 1541646                 | C/G  | <a href="#">Gene_Ca_07484.2</a> | NON_SYNONYMOUS_CODING         | NA                                                     |
| <i>Desi_wild_1558720</i> | NA                                  | <i>Ca_desi_Chr07</i> | 1558720                 | T/G  | <a href="#">Gene_Ca_07485.1</a> | NON_SYNONYMOUS_CODING         | Protein TRANSPARENT TESTA 12                           |
| <i>Desi_wild_1558730</i> | NA                                  | <i>Ca_desi_Chr07</i> | 1558730                 | T/G  | <a href="#">Gene_Ca_07485.1</a> | NON_SYNONYMOUS_CODING         | Protein TRANSPARENT TESTA 12                           |
| <i>Desi_wild_1558761</i> | NA                                  | <i>Ca_desi_Chr07</i> | 1558761                 | T/G  | Gene_Ca_07485.1                 | SYNONYMOUS_CODING             | Protein TRANSPARENT TESTA 12                           |
| <i>Desi_wild_1558780</i> | NA                                  | <i>Ca_desi_Chr07</i> | 1558780                 | A/G  | <a href="#">Gene_Ca_07485.1</a> | NON_SYNONYMOUS_CODING         | Protein TRANSPARENT TESTA 12                           |
| <i>Desi_wild_1559999</i> | NA                                  | <i>Ca_desi_Chr07</i> | 1559999                 | A/T  | Gene_Ca_07485.1                 | INTRON                        | Protein TRANSPARENT TESTA 12                           |
| <i>Desi_wild_1560036</i> | NA                                  | <i>Ca_desi_Chr07</i> | 1560036                 | G/T  | Gene_Ca_07485.1                 | INTRON                        | Protein TRANSPARENT TESTA 12                           |
| <i>Desi_wild_1560051</i> | NA                                  | <i>Ca_desi_Chr07</i> | 1560051                 | T/C  | <a href="#">Gene_Ca_07485.1</a> | NON_SYNONYMOUS_CODING         | Protein TRANSPARENT TESTA 12                           |
| <i>Desi_wild_1566076</i> | NA                                  | <i>Ca_desi_Chr07</i> | 1566076                 | T/G  | NA                              | INTERGENIC                    | NA                                                     |
| <i>Desi_wild_1566133</i> | NA                                  | <i>Ca_desi_Chr07</i> | 1566133                 | T/C  | NA                              | INTERGENIC                    | NA                                                     |
| <i>Desi_wild_1566167</i> | NA                                  | <i>Ca_desi_Chr07</i> | 1566167                 | C/A  | NA                              | INTERGENIC                    | NA                                                     |
| <i>Desi_wild_1566197</i> | NA                                  | <i>Ca_desi_Chr07</i> | 1566197                 | G/A  | NA                              | INTERGENIC                    | NA                                                     |
| <i>Desi_wild_1566200</i> | NA                                  | <i>Ca_desi_Chr07</i> | 1566200                 | T/C  | NA                              | INTERGENIC                    | NA                                                     |
| <i>Desi_wild_1566206</i> | NA                                  | <i>Ca_desi_Chr07</i> | 1566206                 | G/T  | NA                              | INTERGENIC                    | NA                                                     |
| <i>Desi_wild_1566215</i> | NA                                  | <i>Ca_desi_Chr07</i> | 1566215                 | C/T  | NA                              | INTERGENIC                    | NA                                                     |
| <i>Desi_wild_1573752</i> | NA                                  | <i>Ca_desi_Chr07</i> | 1573752                 | T/G  | Gene_Ca_07486.1                 | NON_SYNONYMOUS_CODING         | hydroxyproline-rich glycoprotein family protein        |
| <i>Desi_wild_1577711</i> | NA                                  | <i>Ca_desi_Chr07</i> | 1577711                 | T/C  | Gene_Ca_07486.1                 | SYNONYMOUS_CODING             | hydroxyproline-rich glycoprotein family protein        |
| <i>Desi_wild_1583863</i> | NA                                  | <i>Ca_desi_Chr07</i> | 1583863                 | C/G  | Gene_Ca_07487.1                 | SYNONYMOUS_CODING             | hydroxyproline-rich glycoprotein family protein        |
| <i>Desi_wild_1583899</i> | NA                                  | <i>Ca_desi_Chr07</i> | 1583899                 | A/G  | Gene_Ca_07487.1                 | SYNONYMOUS_CODING             | hydroxyproline-rich glycoprotein family protein        |
| <i>Desi_wild_1594736</i> | NA                                  | <i>Ca_desi_Chr07</i> | 1594736                 | C/T  | NA                              | INTERGENIC                    | NA                                                     |
| <i>Desi_wild_1594746</i> | NA                                  | <i>Ca_desi_Chr07</i> | 1594746                 | C/T  | NA                              | INTERGENIC                    | NA                                                     |
| <i>Desi_wild_1594757</i> | NA                                  | <i>Ca_desi_Chr07</i> | 1594757                 | C/T  | NA                              | INTERGENIC                    | NA                                                     |
| <i>Desi_wild_1594765</i> | NA                                  | <i>Ca_desi_Chr07</i> | 1594765                 | T/A  | NA                              | INTERGENIC                    | NA                                                     |
| <i>Desi_wild_1594798</i> | NA                                  | <i>Ca_desi_Chr07</i> | 1594798                 | G/A  | NA                              | INTERGENIC                    | NA                                                     |
| <i>Desi_wild_1608938</i> | NA                                  | <i>Ca_desi_Chr07</i> | 1608938                 | C/A  | NA                              | INTERGENIC                    | NA                                                     |
| <i>Desi_wild_1608974</i> | NA                                  | <i>Ca_desi_Chr07</i> | 1608974                 | T/A  | NA                              | INTERGENIC                    | NA                                                     |
| <i>Desi_wild_1619971</i> | NA                                  | <i>Ca_desi_Chr07</i> | 1619971                 | T/C  | Gene_Ca_07490.1                 | SYNONYMOUS_CODING             | Annexin D5                                             |
| <i>Desi_wild_1619986</i> | NA                                  | <i>Ca_desi_Chr07</i> | 1619986                 | A/T  | Gene_Ca_07490.1                 | SYNONYMOUS_CODING             | Annexin D5                                             |
| <i>Desi_wild_1621693</i> | NA                                  | <i>Ca_desi_Chr07</i> | 1621693                 | A/C  | Gene_Ca_07490.1                 | SYNONYMOUS_CODING             | Annexin D5                                             |
| <i>Desi_wild_1621759</i> | NA                                  | <i>Ca_desi_Chr07</i> | 1621759                 | A/C  | Gene_Ca_07490.1                 | NON_SYNONYMOUS_CODING         | Annexin D5                                             |

| SNP IDs                  | NCBI dbSNP accession IDs (NCBI_SS#) | Chromosomes          | Physical positions (bp) | SNPs | Gene accession IDs              | Sequence components of genome | Putative functions                                                  |
|--------------------------|-------------------------------------|----------------------|-------------------------|------|---------------------------------|-------------------------------|---------------------------------------------------------------------|
| <i>Desi_wild_1631320</i> | NA                                  | <i>Ca_desi_Chr07</i> | 1631320                 | G/A  | Gene_Ca_07491.1                 | INTRON                        | NA                                                                  |
| <i>Desi_wild_1631890</i> | NA                                  | <i>Ca_desi_Chr07</i> | 1631890                 | C/T  | Gene_Ca_07491.1                 | INTRON                        | NA                                                                  |
| <i>Desi_wild_1631901</i> | NA                                  | <i>Ca_desi_Chr07</i> | 1631901                 | G/C  | Gene_Ca_07491.1                 | INTRON                        | NA                                                                  |
| <i>Desi_wild_1634405</i> | NA                                  | <i>Ca_desi_Chr07</i> | 1634405                 | T/C  | Gene_Ca_07491.1                 | INTRON                        | NA                                                                  |
| <i>Desi_wild_1634790</i> | NA                                  | <i>Ca_desi_Chr07</i> | 1634790                 | G/A  | Gene_Ca_07491.1                 | INTRON                        | NA                                                                  |
| <i>Desi_wild_1635022</i> | NA                                  | <i>Ca_desi_Chr07</i> | 1635022                 | G/A  | Gene_Ca_07491.1                 | INTRON                        | NA                                                                  |
| <i>Desi_wild_1635038</i> | NA                                  | <i>Ca_desi_Chr07</i> | 1635038                 | C/A  | Gene_Ca_07491.1                 | INTRON                        | NA                                                                  |
| <i>Desi_wild_1635039</i> | NA                                  | <i>Ca_desi_Chr07</i> | 1635039                 | G/T  | Gene_Ca_07491.1                 | INTRON                        | NA                                                                  |
| <i>Desi_wild_1635054</i> | NA                                  | <i>Ca_desi_Chr07</i> | 1635054                 | G/A  | Gene_Ca_07491.1                 | INTRON                        | NA                                                                  |
| <i>Desi_wild_1635068</i> | NA                                  | <i>Ca_desi_Chr07</i> | 1635068                 | T/C  | Gene_Ca_07491.1                 | INTRON                        | NA                                                                  |
| <i>Desi_wild_1635223</i> | NA                                  | <i>Ca_desi_Chr07</i> | 1635223                 | G/C  | Gene_Ca_07491.1                 | INTRON                        | NA                                                                  |
| <i>Desi_wild_1637398</i> | NA                                  | <i>Ca_desi_Chr07</i> | 1637398                 | G/A  | Gene_Ca_07491.1                 | SYNONYMOUS_CODING             | NA                                                                  |
| <i>Desi_wild_1637442</i> | NA                                  | <i>Ca_desi_Chr07</i> | 1637442                 | G/A  | Gene_Ca_07491.1                 | SYNONYMOUS_CODING             | NA                                                                  |
| <i>Desi_wild_1666773</i> | NA                                  | <i>Ca_desi_Chr07</i> | 1666773                 | G/A  | Gene_Ca_07493.1                 | INTRON                        | tobamovirus multiplication protein 3                                |
| <i>Desi_wild_1666807</i> | NA                                  | <i>Ca_desi_Chr07</i> | 1666807                 | C/T  | Gene_Ca_07493.1                 | INTRON                        | tobamovirus multiplication protein 3                                |
| <i>Desi_wild_1740436</i> | NA                                  | <i>Ca_desi_Chr07</i> | 1740436                 | G/A  | Gene_Ca_07500.1                 | SYNONYMOUS_CODING             | Armadillo repeat-containing protein 6                               |
| <i>Desi_wild_1740458</i> | NA                                  | <i>Ca_desi_Chr07</i> | 1740458                 | A/G  | Gene_Ca_07500.1                 | NON_SYNONYMOUS_CODING         | Armadillo repeat-containing protein 6                               |
| <i>Desi_wild_1744177</i> | NA                                  | <i>Ca_desi_Chr07</i> | 1744177                 | C/T  | Gene_Ca_07500.1                 | INTRON                        | Armadillo repeat-containing protein 6                               |
| <i>Desi_wild_1756978</i> | NA                                  | <i>Ca_desi_Chr07</i> | 1756978                 | A/G  | NA                              | INTERGENIC                    | NA                                                                  |
| <i>Desi_wild_1761375</i> | NA                                  | <i>Ca_desi_Chr07</i> | 1761375                 | G/A  | Gene_Ca_07503.1                 | SYNONYMOUS_CODING             | Probable N-acetyl-gamma-glutamyl-phosphate reductase, chloroplastic |
| <i>Desi_wild_1761414</i> | NA                                  | <i>Ca_desi_Chr07</i> | 1761414                 | A/G  | Gene_Ca_07503.1                 | INTRON                        | Probable N-acetyl-gamma-glutamyl-phosphate reductase, chloroplastic |
| <i>Desi_wild_1763110</i> | NA                                  | <i>Ca_desi_Chr07</i> | 1763110                 | C/T  | Gene_Ca_07503.1                 | INTRON                        | Probable N-acetyl-gamma-glutamyl-phosphate reductase, chloroplastic |
| <i>Desi_wild_1763125</i> | NA                                  | <i>Ca_desi_Chr07</i> | 1763125                 | A/G  | Gene_Ca_07503.1                 | INTRON                        | Probable N-acetyl-gamma-glutamyl-phosphate reductase, chloroplastic |
| <i>Desi_wild_1763146</i> | NA                                  | <i>Ca_desi_Chr07</i> | 1763146                 | G/A  | Gene_Ca_07503.1                 | INTRON                        | Probable N-acetyl-gamma-glutamyl-phosphate reductase, chloroplastic |
| <i>Desi_wild_1763149</i> | NA                                  | <i>Ca_desi_Chr07</i> | 1763149                 | T/C  | Gene_Ca_07503.1                 | INTRON                        | Probable N-acetyl-gamma-glutamyl-phosphate reductase, chloroplastic |
| <i>Desi_wild_1763162</i> | NA                                  | <i>Ca_desi_Chr07</i> | 1763162                 | C/A  | Gene_Ca_07503.1                 | INTRON                        | Probable N-acetyl-gamma-glutamyl-phosphate reductase, chloroplastic |
| <i>Desi_wild_1763170</i> | NA                                  | <i>Ca_desi_Chr07</i> | 1763170                 | C/T  | Gene_Ca_07503.1                 | INTRON                        | Probable N-acetyl-gamma-glutamyl-phosphate reductase, chloroplastic |
| <i>Desi_wild_1763172</i> | NA                                  | <i>Ca_desi_Chr07</i> | 1763172                 | T/G  | Gene_Ca_07503.1                 | INTRON                        | Probable N-acetyl-gamma-glutamyl-phosphate reductase, chloroplastic |
| <i>Desi_wild_1763185</i> | NA                                  | <i>Ca_desi_Chr07</i> | 1763185                 | T/A  | Gene_Ca_07503.1                 | INTRON                        | Probable N-acetyl-gamma-glutamyl-phosphate reductase, chloroplastic |
| <i>Desi_wild_1763235</i> | NA                                  | <i>Ca_desi_Chr07</i> | 1763235                 | A/G  | Gene_Ca_07503.1                 | INTRON                        | Probable N-acetyl-gamma-glutamyl-phosphate reductase, chloroplastic |
| <i>Desi_wild_1828924</i> | NA                                  | <i>Ca_desi_Chr07</i> | 1828924                 | C/T  | Gene_Ca_07506.1                 | SYNONYMOUS_CODING             | B3 domain-containing transcription factor VRN1                      |
| <i>Desi_wild_1828930</i> | NA                                  | <i>Ca_desi_Chr07</i> | 1828930                 | C/T  | Gene_Ca_07506.1                 | SYNONYMOUS_CODING             | B3 domain-containing transcription factor VRN1                      |
| <i>Desi_wild_1828951</i> | NA                                  | <i>Ca_desi_Chr07</i> | 1828951                 | T/C  | Gene_Ca_07506.1                 | SYNONYMOUS_CODING             | B3 domain-containing transcription factor VRN1                      |
| <i>Desi_wild_1828976</i> | NA                                  | <i>Ca_desi_Chr07</i> | 1828976                 | C/T  | Gene_Ca_07506.1                 | NON_SYNONYMOUS_CODING         | B3 domain-containing transcription factor VRN1                      |
| <i>Desi_wild_1832824</i> | NA                                  | <i>Ca_desi_Chr07</i> | 1832824                 | G/A  | NA                              | INTERGENIC                    | NA                                                                  |
| <i>Desi_wild_1832832</i> | NA                                  | <i>Ca_desi_Chr07</i> | 1832832                 | A/C  | NA                              | INTERGENIC                    | NA                                                                  |
| <i>Desi_wild_1832836</i> | NA                                  | <i>Ca_desi_Chr07</i> | 1832836                 | T/C  | NA                              | INTERGENIC                    | NA                                                                  |
| <i>Desi_wild_1832837</i> | NA                                  | <i>Ca_desi_Chr07</i> | 1832837                 | G/T  | NA                              | INTERGENIC                    | NA                                                                  |
| <i>Desi_wild_1875145</i> | NA                                  | <i>Ca_desi_Chr07</i> | 1875145                 | A/G  | Gene_Ca_07510.1                 | SYNONYMOUS_CODING             | MATE efflux family protein 4, chloroplastic                         |
| <i>Desi_wild_1875215</i> | NA                                  | <i>Ca_desi_Chr07</i> | 1875215                 | T/C  | Gene_Ca_07510.1                 | INTRON                        | MATE efflux family protein 4, chloroplastic                         |
| <i>Desi_wild_1875262</i> | NA                                  | <i>Ca_desi_Chr07</i> | 1875262                 | A/G  | Gene_Ca_07510.1                 | SYNONYMOUS_CODING             | MATE efflux family protein 4, chloroplastic                         |
| <i>Desi_wild_1875372</i> | NA                                  | <i>Ca_desi_Chr07</i> | 1875372                 | C/T  | Gene_Ca_07510.1                 | NON_SYNONYMOUS_CODING         | MATE efflux family protein 4, chloroplastic                         |
| <i>Desi_wild_1891663</i> | NA                                  | <i>Ca_desi_Chr07</i> | 1891663                 | G/A  | NA                              | INTERGENIC                    | NA                                                                  |
| <i>Desi_wild_1908411</i> | NA                                  | <i>Ca_desi_Chr07</i> | 1908411                 | T/C  | <a href="#">Gene_Ca_07512.1</a> | NON_SYNONYMOUS_CODING         | Nostrin                                                             |

| SNP IDs                  | NCBI dbSNP accession IDs (NCBI_SS#) | Chromosomes          | Physical positions (bp) | SNPs | Gene accession IDs              | Sequence components of genome | Putative functions                                  |
|--------------------------|-------------------------------------|----------------------|-------------------------|------|---------------------------------|-------------------------------|-----------------------------------------------------|
| <i>Desi_wild_1908420</i> | NA                                  | <i>Ca_desi_Chr07</i> | 1908420                 | T/A  | <a href="#">Gene_Ca_07512.1</a> | NON_SYNONYMOUS_CODING         | Nostrin                                             |
| <i>Desi_wild_1908424</i> | NA                                  | <i>Ca_desi_Chr07</i> | 1908424                 | C/T  | <a href="#">Gene_Ca_07512.1</a> | SYNONYMOUS_CODING             | Nostrin                                             |
| <i>Desi_wild_1908445</i> | NA                                  | <i>Ca_desi_Chr07</i> | 1908445                 | T/A  | <a href="#">Gene_Ca_07512.1</a> | SYNONYMOUS_CODING             | Nostrin                                             |
| <i>Desi_wild_1909090</i> | NA                                  | <i>Ca_desi_Chr07</i> | 1909090                 | A/G  | <a href="#">Gene_Ca_07512.1</a> | INTRON                        | Nostrin                                             |
| <i>Desi_wild_1909135</i> | NA                                  | <i>Ca_desi_Chr07</i> | 1909135                 | T/G  | <a href="#">Gene_Ca_07512.1</a> | SYNONYMOUS_CODING             | Nostrin                                             |
| <i>Desi_wild_2018132</i> | NA                                  | <i>Ca_desi_Chr07</i> | 2018132                 | C/G  | <a href="#">Gene_Ca_07517.1</a> | SYNONYMOUS_CODING             | Arginine decarboxylase                              |
| <i>Desi_wild_2019098</i> | NA                                  | <i>Ca_desi_Chr07</i> | 2019098                 | T/C  | <a href="#">Gene_Ca_07517.1</a> | SYNONYMOUS_CODING             | Arginine decarboxylase                              |
| <i>Desi_wild_2042866</i> | NA                                  | <i>Ca_desi_Chr07</i> | 2042866                 | G/A  | <a href="#">Gene_Ca_07520.1</a> | INTRON                        | NADP-dependent D-sorbitol-6-phosphate dehydrogenase |
| <i>Desi_wild_2042901</i> | NA                                  | <i>Ca_desi_Chr07</i> | 2042901                 | G/A  | <a href="#">Gene_Ca_07520.1</a> | INTRON                        | NADP-dependent D-sorbitol-6-phosphate dehydrogenase |
| <i>Desi_wild_2042915</i> | NA                                  | <i>Ca_desi_Chr07</i> | 2042915                 | A/G  | <a href="#">Gene_Ca_07520.1</a> | INTRON                        | NADP-dependent D-sorbitol-6-phosphate dehydrogenase |
| <i>Desi_wild_2042936</i> | NA                                  | <i>Ca_desi_Chr07</i> | 2042936                 | T/G  | <a href="#">Gene_Ca_07520.1</a> | INTRON                        | NADP-dependent D-sorbitol-6-phosphate dehydrogenase |
| <i>Desi_wild_2043017</i> | NA                                  | <i>Ca_desi_Chr07</i> | 2043017                 | G/C  | <a href="#">Gene_Ca_07520.1</a> | INTRON                        | NADP-dependent D-sorbitol-6-phosphate dehydrogenase |
| <i>Desi_wild_2043058</i> | NA                                  | <i>Ca_desi_Chr07</i> | 2043058                 | G/A  | <a href="#">Gene_Ca_07520.1</a> | INTRON                        | NADP-dependent D-sorbitol-6-phosphate dehydrogenase |
| <i>Desi_wild_2046837</i> | NA                                  | <i>Ca_desi_Chr07</i> | 2046837                 | C/A  | <a href="#">Gene_Ca_07520.1</a> | SYNONYMOUS_CODING             | NADP-dependent D-sorbitol-6-phosphate dehydrogenase |
| <i>Desi_wild_2047063</i> | NA                                  | <i>Ca_desi_Chr07</i> | 2047063                 | T/C  | <a href="#">Gene_Ca_07520.1</a> | INTRON                        | NADP-dependent D-sorbitol-6-phosphate dehydrogenase |
| <i>Desi_wild_2047125</i> | NA                                  | <i>Ca_desi_Chr07</i> | 2047125                 | A/G  | <a href="#">Gene_Ca_07520.1</a> | INTRON                        | NADP-dependent D-sorbitol-6-phosphate dehydrogenase |
| <i>Desi_wild_2047543</i> | NA                                  | <i>Ca_desi_Chr07</i> | 2047543                 | G/A  | <a href="#">Gene_Ca_07520.1</a> | SYNONYMOUS_CODING             | NADP-dependent D-sorbitol-6-phosphate dehydrogenase |
| <i>Desi_wild_2047588</i> | NA                                  | <i>Ca_desi_Chr07</i> | 2047588                 | G/A  | <a href="#">Gene_Ca_07520.1</a> | SYNONYMOUS_CODING             | NADP-dependent D-sorbitol-6-phosphate dehydrogenase |
| <i>Desi_wild_2069733</i> | NA                                  | <i>Ca_desi_Chr07</i> | 2069733                 | T/G  | <a href="#">Gene_Ca_07522.2</a> | SYNONYMOUS_CODING             | NA                                                  |
| <i>Desi_wild_2069964</i> | NA                                  | <i>Ca_desi_Chr07</i> | 2069964                 | A/G  | <a href="#">Gene_Ca_07522.2</a> | SYNONYMOUS_CODING             | NA                                                  |
| <i>Desi_wild_2070133</i> | NA                                  | <i>Ca_desi_Chr07</i> | 2070133                 | G/T  | <a href="#">Gene_Ca_07522.2</a> | INTRON                        | NA                                                  |
| <i>Desi_wild_2070162</i> | NA                                  | <i>Ca_desi_Chr07</i> | 2070162                 | G/C  | <a href="#">Gene_Ca_07522.2</a> | INTRON                        | NA                                                  |
| <i>Desi_wild_2127213</i> | NA                                  | <i>Ca_desi_Chr07</i> | 2127213                 | T/G  | NA                              | INTERGENIC                    | NA                                                  |
| <i>Desi_wild_2127236</i> | NA                                  | <i>Ca_desi_Chr07</i> | 2127236                 | C/T  | NA                              | INTERGENIC                    | NA                                                  |
| <i>Desi_wild_2127247</i> | NA                                  | <i>Ca_desi_Chr07</i> | 2127247                 | G/T  | NA                              | INTERGENIC                    | NA                                                  |
| <i>Desi_wild_2127268</i> | NA                                  | <i>Ca_desi_Chr07</i> | 2127268                 | G/A  | NA                              | INTERGENIC                    | NA                                                  |
| <i>Desi_wild_2195729</i> | NA                                  | <i>Ca_desi_Chr07</i> | 2195729                 | A/G  | <a href="#">Gene_Ca_07527.2</a> | INTRON                        | Phospholipid-transporting ATPase 3                  |
| <i>Desi_wild_2195792</i> | NA                                  | <i>Ca_desi_Chr07</i> | 2195792                 | A/G  | <a href="#">Gene_Ca_07527.2</a> | INTRON                        | Phospholipid-transporting ATPase 3                  |
| <i>Desi_wild_2196338</i> | NA                                  | <i>Ca_desi_Chr07</i> | 2196338                 | T/C  | <a href="#">Gene_Ca_07527.2</a> | INTRON                        | Phospholipid-transporting ATPase 3                  |
| <i>Desi_wild_2196374</i> | NA                                  | <i>Ca_desi_Chr07</i> | 2196374                 | G/A  | <a href="#">Gene_Ca_07527.2</a> | INTRON                        | Phospholipid-transporting ATPase 3                  |
| <i>Desi_wild_2196461</i> | NA                                  | <i>Ca_desi_Chr07</i> | 2196461                 | C/A  | <a href="#">Gene_Ca_07527.2</a> | INTRON                        | Phospholipid-transporting ATPase 3                  |
| <i>Desi_wild_2196469</i> | NA                                  | <i>Ca_desi_Chr07</i> | 2196469                 | G/A  | <a href="#">Gene_Ca_07527.2</a> | INTRON                        | Phospholipid-transporting ATPase 3                  |
| <i>Desi_wild_2196668</i> | NA                                  | <i>Ca_desi_Chr07</i> | 2196668                 | G/C  | <a href="#">Gene_Ca_07527.2</a> | INTRON                        | Phospholipid-transporting ATPase 3                  |
| <i>Desi_wild_2196689</i> | NA                                  | <i>Ca_desi_Chr07</i> | 2196689                 | G/C  | <a href="#">Gene_Ca_07527.2</a> | INTRON                        | Phospholipid-transporting ATPase 3                  |
| <i>Desi_wild_2212439</i> | NA                                  | <i>Ca_desi_Chr07</i> | 2212439                 | C/G  | <a href="#">Gene_Ca_07527.2</a> | NON_SYNONYMOUS_CODING         | Phospholipid-transporting ATPase 3                  |
| <i>Desi_wild_2302441</i> | NA                                  | <i>Ca_desi_Chr07</i> | 2302441                 | T/G  | <a href="#">Gene_Ca_07534.1</a> | INTRON                        | unknown protein                                     |
| <i>Desi_wild_2374502</i> | NA                                  | <i>Ca_desi_Chr07</i> | 2374502                 | G/A  | <a href="#">Gene_Ca_07541.1</a> | NON_SYNONYMOUS_CODING         | Putative uncharacterized protein                    |
| <i>Desi_wild_2391764</i> | NA                                  | <i>Ca_desi_Chr07</i> | 2391764                 | T/C  | <a href="#">Gene_Ca_07543.1</a> | UPSTREAM                      | Probable serine/threonine-protein kinase WNK3       |
| <i>Desi_wild_2391778</i> | NA                                  | <i>Ca_desi_Chr07</i> | 2391778                 | T/G  | <a href="#">Gene_Ca_07543.1</a> | UPSTREAM                      | Probable serine/threonine-protein kinase WNK3       |
| <i>Desi_wild_2391824</i> | NA                                  | <i>Ca_desi_Chr07</i> | 2391824                 | A/C  | <a href="#">Gene_Ca_07543.1</a> | UPSTREAM                      | Probable serine/threonine-protein kinase WNK3       |
| <i>Desi_wild_2417406</i> | NA                                  | <i>Ca_desi_Chr07</i> | 2417406                 | C/G  | <a href="#">Gene_Ca_07544.1</a> | NON_SYNONYMOUS_CODING         | Malate dehydrogenase, mitochondrial                 |
| <i>Desi_wild_2541403</i> | NA                                  | <i>Ca_desi_Chr07</i> | 2541403                 | A/G  | NA                              | INTERGENIC                    | NA                                                  |
| <i>Desi_wild_2541486</i> | NA                                  | <i>Ca_desi_Chr07</i> | 2541486                 | T/G  | NA                              | INTERGENIC                    | NA                                                  |
| <i>Desi_wild_2642039</i> | NA                                  | <i>Ca_desi_Chr07</i> | 2642039                 | T/C  | NA                              | INTERGENIC                    | NA                                                  |

| SNP IDs                  | NCBI dbSNP accession IDs (NCBI_SS#) | Chromosomes          | Physical positions (bp) | SNPs | Gene accession IDs | Sequence components of genome | Putative functions                                              |
|--------------------------|-------------------------------------|----------------------|-------------------------|------|--------------------|-------------------------------|-----------------------------------------------------------------|
| <i>Desi_wild_2642086</i> | NA                                  | <i>Ca_desi_Chr07</i> | 2642086                 | A/T  | NA                 | INTERGENIC                    | NA                                                              |
| <i>Desi_wild_2642151</i> | NA                                  | <i>Ca_desi_Chr07</i> | 2642151                 | T/C  | NA                 | INTERGENIC                    | NA                                                              |
| <i>Desi_wild_2675261</i> | NA                                  | <i>Ca_desi_Chr07</i> | 2675261                 | C/T  | NA                 | INTERGENIC                    | NA                                                              |
| <i>Desi_wild_2683264</i> | NA                                  | <i>Ca_desi_Chr07</i> | 2683264                 | T/C  | Gene_Ca_07554.3    | DOWNSTREAM                    | NA                                                              |
| <i>Desi_wild_2686388</i> | NA                                  | <i>Ca_desi_Chr07</i> | 2686388                 | A/C  | Gene_Ca_07554.3    | NON_SYNONYMOUS_CODING         | NA                                                              |
| <i>Desi_wild_2686392</i> | NA                                  | <i>Ca_desi_Chr07</i> | 2686392                 | A/C  | Gene_Ca_07554.3    | SYNONYMOUS_CODING             | NA                                                              |
| <i>Desi_wild_2686440</i> | NA                                  | <i>Ca_desi_Chr07</i> | 2686440                 | A/C  | Gene_Ca_07554.3    | SYNONYMOUS_CODING             | NA                                                              |
| <i>Desi_wild_2686471</i> | NA                                  | <i>Ca_desi_Chr07</i> | 2686471                 | C/T  | Gene_Ca_07554.3    | NON_SYNONYMOUS_CODING         | NA                                                              |
| <i>Desi_wild_2697838</i> | NA                                  | <i>Ca_desi_Chr07</i> | 2697838                 | C/T  | Gene_Ca_07557.1    | DOWNSTREAM                    | L-type lectin-domain containing receptor kinase S.1             |
| <i>Desi_wild_2705542</i> | NA                                  | <i>Ca_desi_Chr07</i> | 2705542                 | A/C  | NA                 | INTERGENIC                    | NA                                                              |
| <i>Desi_wild_2705550</i> | NA                                  | <i>Ca_desi_Chr07</i> | 2705550                 | A/G  | NA                 | INTERGENIC                    | NA                                                              |
| <i>Desi_wild_2889767</i> | NA                                  | <i>Ca_desi_Chr07</i> | 2889767                 | G/A  | Gene_Ca_07580.1    | SYNONYMOUS_CODING             | Protein tipD                                                    |
| <i>Desi_wild_2895697</i> | NA                                  | <i>Ca_desi_Chr07</i> | 2895697                 | T/G  | Gene_Ca_07581.1    | INTRON                        | Vignain                                                         |
| <i>Desi_wild_2939959</i> | NA                                  | <i>Ca_desi_Chr07</i> | 2939959                 | A/G  | Gene_Ca_07585.1    | INTRON                        | Tropinone reductase homolog                                     |
| <i>Desi_wild_2952135</i> | NA                                  | <i>Ca_desi_Chr07</i> | 2952135                 | G/C  | NA                 | INTERGENIC                    | NA                                                              |
| <i>Desi_wild_3021483</i> | NA                                  | <i>Ca_desi_Chr07</i> | 3021483                 | C/G  | Gene_Ca_07590.1    | INTRON                        | Probable E3 ubiquitin-protein ligase HERC1                      |
| <i>Desi_wild_3046607</i> | NA                                  | <i>Ca_desi_Chr07</i> | 3046607                 | G/C  | Gene_Ca_07594.1    | INTRON                        | Delta-1-pyrroline-5-carboxylate synthase                        |
| <i>Desi_wild_3123543</i> | NA                                  | <i>Ca_desi_Chr07</i> | 3123543                 | G/A  | Gene_Ca_07599.1    | INTRON                        | Probable helicase DDB_G0274399                                  |
| <i>Desi_wild_3123849</i> | NA                                  | <i>Ca_desi_Chr07</i> | 3123849                 | C/A  | Gene_Ca_07599.1    | INTRON                        | Probable helicase DDB_G0274399                                  |
| <i>Desi_wild_3123863</i> | NA                                  | <i>Ca_desi_Chr07</i> | 3123863                 | A/G  | Gene_Ca_07599.1    | INTRON                        | Probable helicase DDB_G0274399                                  |
| <i>Desi_wild_3123866</i> | NA                                  | <i>Ca_desi_Chr07</i> | 3123866                 | A/G  | Gene_Ca_07599.1    | INTRON                        | Probable helicase DDB_G0274399                                  |
| <i>Desi_wild_3123872</i> | NA                                  | <i>Ca_desi_Chr07</i> | 3123872                 | A/T  | Gene_Ca_07599.1    | INTRON                        | Probable helicase DDB_G0274399                                  |
| <i>Desi_wild_3123894</i> | NA                                  | <i>Ca_desi_Chr07</i> | 3123894                 | A/G  | Gene_Ca_07599.1    | INTRON                        | Probable helicase DDB_G0274399                                  |
| <i>Desi_wild_3123902</i> | NA                                  | <i>Ca_desi_Chr07</i> | 3123902                 | C/T  | Gene_Ca_07599.1    | INTRON                        | Probable helicase DDB_G0274399                                  |
| <i>Desi_wild_3123903</i> | NA                                  | <i>Ca_desi_Chr07</i> | 3123903                 | A/G  | Gene_Ca_07599.1    | INTRON                        | Probable helicase DDB_G0274399                                  |
| <i>Desi_wild_3123911</i> | NA                                  | <i>Ca_desi_Chr07</i> | 3123911                 | C/T  | Gene_Ca_07599.1    | INTRON                        | Probable helicase DDB_G0274399                                  |
| <i>Desi_wild_3123914</i> | NA                                  | <i>Ca_desi_Chr07</i> | 3123914                 | T/C  | Gene_Ca_07599.1    | INTRON                        | Probable helicase DDB_G0274399                                  |
| <i>Desi_wild_3136837</i> | NA                                  | <i>Ca_desi_Chr07</i> | 3136837                 | T/G  | NA                 | INTERGENIC                    | NA                                                              |
| <i>Desi_wild_3167846</i> | NA                                  | <i>Ca_desi_Chr07</i> | 3167846                 | C/T  | Gene_Ca_07607.1    | UPSTREAM                      | 7-ethoxycoumarin O-deethylase                                   |
| <i>Desi_wild_3452752</i> | NA                                  | <i>Ca_desi_Chr07</i> | 3452752                 | A/C  | Gene_Ca_07623.1    | UPSTREAM                      | Gibberellin 3-beta-dioxygenase 4                                |
| <i>Desi_wild_3479869</i> | NA                                  | <i>Ca_desi_Chr07</i> | 3479869                 | A/G  | Gene_Ca_07627.1    | SYNONYMOUS_CODING             | Putative mediator of RNA polymerase II transcription subunit 12 |
| <i>Desi_wild_3484976</i> | NA                                  | <i>Ca_desi_Chr07</i> | 3484976                 | A/C  | Gene_Ca_07627.1    | NON_SYNONYMOUS_CODING         | Putative mediator of RNA polymerase II transcription subunit 12 |
| <i>Desi_wild_3675434</i> | NA                                  | <i>Ca_desi_Chr07</i> | 3675434                 | G/C  | Gene_Ca_07634.1    | DOWNSTREAM                    | SOUL heme-binding family protein                                |
| <i>Desi_wild_3826701</i> | NA                                  | <i>Ca_desi_Chr07</i> | 3826701                 | C/G  | Gene_Ca_07641.1    | NON_SYNONYMOUS_CODING         | CTP synthase 2                                                  |
| <i>Desi_wild_3837049</i> | NA                                  | <i>Ca_desi_Chr07</i> | 3837049                 | T/G  | Gene_Ca_07642.1    | NON_SYNONYMOUS_CODING         | Zinc finger CCCH domain-containing protein 37                   |
| <i>Desi_wild_4075143</i> | NA                                  | <i>Ca_desi_Chr07</i> | 4075143                 | A/C  | Gene_Ca_07648.1    | SYNONYMOUS_CODING             | Ethylene-responsive transcription factor WRI1                   |
| <i>Desi_wild_4142638</i> | NA                                  | <i>Ca_desi_Chr07</i> | 4142638                 | T/G  | Gene_Ca_07651.1    | NON_SYNONYMOUS_CODING         | Serrate RNA effector molecule                                   |
| <i>Desi_wild_4237004</i> | NA                                  | <i>Ca_desi_Chr07</i> | 4237004                 | G/A  | Gene_Ca_07656.1    | SYNONYMOUS_CODING             | unknown protein                                                 |
| <i>Desi_wild_4255423</i> | NA                                  | <i>Ca_desi_Chr07</i> | 4255423                 | C/A  | Gene_Ca_07657.1    | NON_SYNONYMOUS_CODING         | Type I inositol-1,4,5-trisphosphate 5-phosphatase CVP2          |
| <i>Desi_wild_4468472</i> | NA                                  | <i>Ca_desi_Chr07</i> | 4468472                 | T/C  | Gene_Ca_07665.1    | INTRON                        | Protein strawberry notch homolog 1                              |
| <i>Desi_wild_4468480</i> | NA                                  | <i>Ca_desi_Chr07</i> | 4468480                 | T/G  | Gene_Ca_07665.1    | INTRON                        | Protein strawberry notch homolog 1                              |
| <i>Desi_wild_4729300</i> | NA                                  | <i>Ca_desi_Chr07</i> | 4729300                 | T/G  | Gene_Ca_07677.1    | NON_SYNONYMOUS_CODING         | Putative uncharacterized protein                                |
| <i>Desi_wild_4734309</i> | NA                                  | <i>Ca_desi_Chr07</i> | 4734309                 | A/G  | NA                 | INTERGENIC                    | NA                                                              |
| <i>Desi_wild_4997828</i> | NA                                  | <i>Ca_desi_Chr07</i> | 4997828                 | C/A  | Gene_Ca_07691.1    | NON_SYNONYMOUS_CODING         | Floral homeotic protein APETALA 1                               |

| SNP IDs                  | NCBI dbSNP accession IDs (NCBI_SS#) | Chromosomes          | Physical positions (bp) | SNPs | Gene accession IDs | Sequence components of genome | Putative functions                                              |
|--------------------------|-------------------------------------|----------------------|-------------------------|------|--------------------|-------------------------------|-----------------------------------------------------------------|
| <i>Desi_wild_4997829</i> | NA                                  | <i>Ca_desi_Chr07</i> | 4997829                 | A/G  | Gene_Ca_07691.1    | SYNONYMOUS_CODING             | Floral homeotic protein APETALA 1                               |
| <i>Desi_wild_5032989</i> | NA                                  | <i>Ca_desi_Chr07</i> | 5032989                 | A/G  | Gene_Ca_07693.1    | DOWNSTREAM                    | Transcription factor bHLH90                                     |
| <i>Desi_wild_5032991</i> | NA                                  | <i>Ca_desi_Chr07</i> | 5032991                 | C/A  | Gene_Ca_07693.1    | DOWNSTREAM                    | Transcription factor bHLH90                                     |
| <i>Desi_wild_5032992</i> | NA                                  | <i>Ca_desi_Chr07</i> | 5032992                 | T/G  | Gene_Ca_07693.1    | DOWNSTREAM                    | Transcription factor bHLH90                                     |
| <i>Desi_wild_5032996</i> | NA                                  | <i>Ca_desi_Chr07</i> | 5032996                 | A/G  | Gene_Ca_07693.1    | DOWNSTREAM                    | Transcription factor bHLH90                                     |
| <i>Desi_wild_5097674</i> | NA                                  | <i>Ca_desi_Chr07</i> | 5097674                 | T/C  | NA                 | INTERGENIC                    | NA                                                              |
| <i>Desi_wild_5123940</i> | NA                                  | <i>Ca_desi_Chr07</i> | 5123940                 | A/G  | NA                 | INTERGENIC                    | NA                                                              |
| <i>Desi_wild_5137821</i> | NA                                  | <i>Ca_desi_Chr07</i> | 5137821                 | C/T  | Gene_Ca_07701.1    | NON_SYNONYMOUS_CODING         | Probable phosphatidylinositol 4-kinase type 2-beta At1g26270    |
| <i>Desi_wild_5138627</i> | NA                                  | <i>Ca_desi_Chr07</i> | 5138627                 | G/A  | Gene_Ca_07701.1    | NON_SYNONYMOUS_CODING         | Probable phosphatidylinositol 4-kinase type 2-beta At1g26270    |
| <i>Desi_wild_5298156</i> | NA                                  | <i>Ca_desi_Chr07</i> | 5298156                 | A/G  | Gene_Ca_07712.1    | INTRON                        | Auxin-induced protein 5NG4                                      |
| <i>Desi_wild_5332139</i> | NA                                  | <i>Ca_desi_Chr07</i> | 5332139                 | C/A  | Gene_Ca_07715.1    | DOWNSTREAM                    | Ectonucleoside triphosphate diphosphohydrolase 1                |
| <i>Desi_wild_5583992</i> | NA                                  | <i>Ca_desi_Chr07</i> | 5583992                 | A/G  | Gene_Ca_07730.1    | INTRON                        | Probable 1-deoxy-D-xylulose-5-phosphate synthase, chloroplastic |
| <i>Desi_wild_5593899</i> | NA                                  | <i>Ca_desi_Chr07</i> | 5593899                 | A/G  | Gene_Ca_07731.1    | NON_SYNONYMOUS_CODING         | WD repeat-containing protein 82-B                               |
| <i>Desi_wild_5617695</i> | NA                                  | <i>Ca_desi_Chr07</i> | 5617695                 | T/G  | Gene_Ca_07734.1    | NON_SYNONYMOUS_CODING         | AP2-like ethylene-responsive transcription factor AIL6          |
| <i>Desi_wild_5639929</i> | NA                                  | <i>Ca_desi_Chr07</i> | 5639929                 | T/G  | Gene_Ca_07736.2    | NON_SYNONYMOUS_CODING         | NA                                                              |
| <i>Desi_wild_5787542</i> | NA                                  | <i>Ca_desi_Chr07</i> | 5787542                 | C/T  | NA                 | INTERGENIC                    | NA                                                              |
| <i>Desi_wild_5826572</i> | NA                                  | <i>Ca_desi_Chr07</i> | 5826572                 | A/C  | Gene_Ca_07753.1    | SYNONYMOUS_CODING             | PCTP-like protein                                               |
| <i>Desi_wild_5830528</i> | NA                                  | <i>Ca_desi_Chr07</i> | 5830528                 | C/T  | NA                 | INTERGENIC                    | NA                                                              |
| <i>Desi_wild_5885449</i> | NA                                  | <i>Ca_desi_Chr07</i> | 5885449                 | C/T  | Gene_Ca_07756.1    | SYNONYMOUS_CODING             | Exosome complex exonuclease RRP44                               |
| <i>Desi_wild_6149704</i> | NA                                  | <i>Ca_desi_Chr07</i> | 6149704                 | G/T  | NA                 | INTERGENIC                    | NA                                                              |
| <i>Desi_wild_6179151</i> | NA                                  | <i>Ca_desi_Chr07</i> | 6179151                 | C/A  | Gene_Ca_07779.1    | INTRON                        | U1 small nuclear ribonucleoprotein 70 kDa                       |
| <i>Desi_wild_6252936</i> | NA                                  | <i>Ca_desi_Chr07</i> | 6252936                 | T/C  | Gene_Ca_07787.1    | DOWNSTREAM                    | zinc finger (Ran-binding) family protein                        |
| <i>Desi_wild_6252943</i> | NA                                  | <i>Ca_desi_Chr07</i> | 6252943                 | G/A  | Gene_Ca_07787.1    | DOWNSTREAM                    | zinc finger (Ran-binding) family protein                        |
| <i>Desi_wild_6252949</i> | NA                                  | <i>Ca_desi_Chr07</i> | 6252949                 | C/G  | Gene_Ca_07787.1    | DOWNSTREAM                    | zinc finger (Ran-binding) family protein                        |
| <i>Desi_wild_6440597</i> | NA                                  | <i>Ca_desi_Chr07</i> | 6440597                 | C/G  | NA                 | INTERGENIC                    | NA                                                              |
| <i>Desi_wild_6441044</i> | NA                                  | <i>Ca_desi_Chr07</i> | 6441044                 | A/C  | NA                 | INTERGENIC                    | NA                                                              |
| <i>Desi_wild_6444942</i> | NA                                  | <i>Ca_desi_Chr07</i> | 6444942                 | C/G  | NA                 | INTERGENIC                    | NA                                                              |
| <i>Desi_wild_6450758</i> | NA                                  | <i>Ca_desi_Chr07</i> | 6450758                 | T/C  | Gene_Ca_07806.1    | DOWNSTREAM                    | Putative uncharacterized protein                                |
| <i>Desi_wild_6475915</i> | NA                                  | <i>Ca_desi_Chr07</i> | 6475915                 | C/A  | Gene_Ca_07809.1    | DOWNSTREAM                    | Late embryogenesis abundant protein, group 6                    |
| <i>Desi_wild_6537139</i> | NA                                  | <i>Ca_desi_Chr07</i> | 6537139                 | T/C  | Gene_Ca_07814.1    | NON_SYNONYMOUS_CODING         | BTB/POZ domain-containing protein At5g67385                     |
| <i>Desi_wild_6589064</i> | NA                                  | <i>Ca_desi_Chr07</i> | 6589064                 | A/T  | NA                 | INTERGENIC                    | NA                                                              |
| <i>Desi_wild_6605172</i> | NA                                  | <i>Ca_desi_Chr07</i> | 6605172                 | T/C  | Gene_Ca_07820.1    | NON_SYNONYMOUS_CODING         | LOB domain-containing protein 39                                |
| <i>Desi_wild_6730310</i> | NA                                  | <i>Ca_desi_Chr07</i> | 6730310                 | C/A  | NA                 | INTERGENIC                    | NA                                                              |
| <i>Desi_wild_6753515</i> | NA                                  | <i>Ca_desi_Chr07</i> | 6753515                 | T/C  | NA                 | INTERGENIC                    | NA                                                              |
| <i>Desi_wild_6803780</i> | NA                                  | <i>Ca_desi_Chr07</i> | 6803780                 | C/A  | NA                 | INTERGENIC                    | NA                                                              |
| <i>Desi_wild_6861317</i> | NA                                  | <i>Ca_desi_Chr07</i> | 6861317                 | C/G  | Gene_Ca_07843.1    | NON_SYNONYMOUS_CODING         | Probable hexokinase-like 2 protein                              |
| <i>Desi_wild_6940972</i> | NA                                  | <i>Ca_desi_Chr07</i> | 6940972                 | G/A  | Gene_Ca_07848.1    | NON_SYNONYMOUS_CODING         | NA                                                              |
| <i>Desi_wild_6950285</i> | NA                                  | <i>Ca_desi_Chr07</i> | 6950285                 | A/C  | Gene_Ca_07849.1    | SYNONYMOUS_CODING             | NA                                                              |
| <i>Desi_wild_7017825</i> | NA                                  | <i>Ca_desi_Chr07</i> | 7017825                 | G/A  | NA                 | INTERGENIC                    | NA                                                              |
| <i>Desi_wild_7072321</i> | NA                                  | <i>Ca_desi_Chr07</i> | 7072321                 | T/C  | Gene_Ca_07859.1    | SYNONYMOUS_CODING             | Probable hexokinase-like 2 protein                              |
| <i>Desi_wild_7176113</i> | NA                                  | <i>Ca_desi_Chr07</i> | 7176113                 | G/A  | Gene_Ca_07863.1    | SYNONYMOUS_CODING             | Phosphatidylinositol-4-phosphate 5-kinase 5                     |
| <i>Desi_wild_7182593</i> | NA                                  | <i>Ca_desi_Chr07</i> | 7182593                 | A/G  | Gene_Ca_07864.1    | SYNONYMOUS_CODING             | NA                                                              |
| <i>Desi_wild_7182620</i> | NA                                  | <i>Ca_desi_Chr07</i> | 7182620                 | C/T  | Gene_Ca_07864.1    | SYNONYMOUS_CODING             | NA                                                              |
| <i>Desi_wild_7182623</i> | NA                                  | <i>Ca_desi_Chr07</i> | 7182623                 | A/G  | Gene_Ca_07864.1    | SYNONYMOUS_CODING             | NA                                                              |



| SNP IDs           | NCBI dbSNP accession IDs (NCBI_SS#) | Chromosomes  | Physical positions (bp) | SNPs | Gene accession IDs | Sequence components of genome | Putative functions                                  |
|-------------------|-------------------------------------|--------------|-------------------------|------|--------------------|-------------------------------|-----------------------------------------------------|
| Desi_wild_7182626 | NA                                  | Ca_desi_Ch07 | 7182626                 | C/T  | Gene_Ca_07864.1    | SYNONYMOUS_CODING             | NA                                                  |
| Desi_wild_7182630 | NA                                  | Ca_desi_Ch07 | 7182630                 | C/T  | Gene_Ca_07864.1    | SYNONYMOUS_CODING             | NA                                                  |
| Desi_wild_7182635 | NA                                  | Ca_desi_Ch07 | 7182635                 | A/C  | Gene_Ca_07864.1    | SYNONYMOUS_CODING             | NA                                                  |
| Desi_wild_7182637 | NA                                  | Ca_desi_Ch07 | 7182637                 | C/G  | Gene_Ca_07864.1    | NON_SYNONYMOUS_CODING         | NA                                                  |
| Desi_wild_7182652 | NA                                  | Ca_desi_Ch07 | 7182652                 | C/A  | Gene_Ca_07864.1    | NON_SYNONYMOUS_CODING         | NA                                                  |
| Desi_wild_7232934 | NA                                  | Ca_desi_Ch07 | 7232934                 | T/G  | Gene_Ca_07872.1    | INTRON                        | unknown protein                                     |
| Desi_wild_7233251 | NA                                  | Ca_desi_Ch07 | 7233251                 | G/A  | Gene_Ca_07872.1    | INTRON                        | unknown protein                                     |
| Desi_wild_7234448 | NA                                  | Ca_desi_Ch07 | 7234448                 | C/G  | Gene_Ca_07872.1    | NON_SYNONYMOUS_CODING         | unknown protein                                     |
| Desi_wild_7266216 | NA                                  | Ca_desi_Ch07 | 7266216                 | C/A  | Gene_Ca_07873.1    | NON_SYNONYMOUS_CODING         | SBP (S-ribonuclease binding protein) family protein |
| Desi_wild_7423464 | NA                                  | Ca_desi_Ch07 | 7423464                 | A/C  | Gene_Ca_07879.1    | SYNONYMOUS_CODING             | Tetratricopeptide repeat protein 7A                 |
| Desi_wild_7427278 | NA                                  | Ca_desi_Ch07 | 7427278                 | A/G  | Gene_Ca_07879.1    | NON_SYNONYMOUS_CODING         | Tetratricopeptide repeat protein 7A                 |
| Desi_wild_7497869 | NA                                  | Ca_desi_Ch07 | 7497869                 | G/A  | NA                 | INTERGENIC                    | NA                                                  |
| Desi_wild_7687649 | NA                                  | Ca_desi_Ch07 | 7687649                 | C/T  | NA                 | INTERGENIC                    | NA                                                  |
| Desi_wild_7687656 | NA                                  | Ca_desi_Ch07 | 7687656                 | C/T  | NA                 | INTERGENIC                    | NA                                                  |
| Desi_wild_7688659 | NA                                  | Ca_desi_Ch07 | 7688659                 | T/A  | Gene_Ca_07894.1    | NON_SYNONYMOUS_CODING         | Germin-like protein subfamily 3 member 1            |
| Desi_wild_7743843 | NA                                  | Ca_desi_Ch07 | 7743843                 | T/G  | NA                 | INTERGENIC                    | NA                                                  |
| Desi_wild_7743896 | NA                                  | Ca_desi_Ch07 | 7743896                 | T/A  | NA                 | INTERGENIC                    | NA                                                  |
| Desi_wild_7750092 | NA                                  | Ca_desi_Ch07 | 7750092                 | G/A  | NA                 | INTERGENIC                    | NA                                                  |
| Desi_wild_7750219 | NA                                  | Ca_desi_Ch07 | 7750219                 | G/A  | NA                 | INTERGENIC                    | NA                                                  |
| Desi_wild_7750971 | NA                                  | Ca_desi_Ch07 | 7750971                 | T/G  | Gene_Ca_07901.1    | DOWNSTREAM                    | NA                                                  |
| Desi_wild_7755898 | NA                                  | Ca_desi_Ch07 | 7755898                 | A/C  | NA                 | INTERGENIC                    | NA                                                  |
| Desi_wild_7755930 | NA                                  | Ca_desi_Ch07 | 7755930                 | G/A  | NA                 | INTERGENIC                    | NA                                                  |
| Desi_wild_7755973 | NA                                  | Ca_desi_Ch07 | 7755973                 | T/G  | NA                 | INTERGENIC                    | NA                                                  |
| Desi_wild_7796833 | NA                                  | Ca_desi_Ch07 | 7796833                 | T/A  | Gene_Ca_07904.1    | SYNONYMOUS_CODING             | Putative receptor-like protein kinase At1g72540     |
| Desi_wild_7796875 | NA                                  | Ca_desi_Ch07 | 7796875                 | C/T  | Gene_Ca_07904.1    | SYNONYMOUS_CODING             | Putative receptor-like protein kinase At1g72540     |
| Desi_wild_7796939 | NA                                  | Ca_desi_Ch07 | 7796939                 | C/A  | Gene_Ca_07904.1    | INTRON                        | Putative receptor-like protein kinase At1g72540     |
| Desi_wild_7796940 | NA                                  | Ca_desi_Ch07 | 7796940                 | A/G  | Gene_Ca_07904.1    | INTRON                        | Putative receptor-like protein kinase At1g72540     |
| Desi_wild_7829057 | NA                                  | Ca_desi_Ch07 | 7829057                 | G/T  | Gene_Ca_07906.1    | INTRON                        | Linoleate 13S-lipoxygenase 3-1, chloroplastic       |
| Desi_wild_7829116 | NA                                  | Ca_desi_Ch07 | 7829116                 | T/G  | Gene_Ca_07906.1    | INTRON                        | Linoleate 13S-lipoxygenase 3-1, chloroplastic       |
| Desi_wild_7869802 | NA                                  | Ca_desi_Ch07 | 7869802                 | G/T  | NA                 | INTERGENIC                    | NA                                                  |
| Desi_wild_7888933 | NA                                  | Ca_desi_Ch07 | 7888933                 | C/G  | Gene_Ca_07908.1    | SYNONYMOUS_CODING             | Microtubule-associated protein 70-1                 |
| Desi_wild_7895094 | NA                                  | Ca_desi_Ch07 | 7895094                 | C/A  | NA                 | INTERGENIC                    | NA                                                  |
| Desi_wild_7895128 | NA                                  | Ca_desi_Ch07 | 7895128                 | G/C  | NA                 | INTERGENIC                    | NA                                                  |
| Desi_wild_7895789 | NA                                  | Ca_desi_Ch07 | 7895789                 | A/C  | NA                 | INTERGENIC                    | NA                                                  |
| Desi_wild_7912216 | NA                                  | Ca_desi_Ch07 | 7912216                 | A/T  | Gene_Ca_07910.1    | UPSTREAM                      | FUNCTIONS IN: molecular_function unknown            |
| Desi_wild_7945573 | NA                                  | Ca_desi_Ch07 | 7945573                 | G/A  | Gene_Ca_07913.2    | SYNONYMOUS_CODING             | Sn1-specific diacylglycerol lipase alpha            |
| Desi_wild_8007369 | NA                                  | Ca_desi_Ch07 | 8007369                 | A/G  | NA                 | INTERGENIC                    | NA                                                  |
| Desi_wild_8015487 | NA                                  | Ca_desi_Ch07 | 8015487                 | C/G  | NA                 | INTERGENIC                    | NA                                                  |
| Desi_wild_8021380 | NA                                  | Ca_desi_Ch07 | 8021380                 | T/C  | NA                 | INTERGENIC                    | NA                                                  |
| Desi_wild_8021391 | NA                                  | Ca_desi_Ch07 | 8021391                 | T/A  | NA                 | INTERGENIC                    | NA                                                  |
| Desi_wild_8097449 | NA                                  | Ca_desi_Ch07 | 8097449                 | C/A  | NA                 | INTERGENIC                    | NA                                                  |
| Desi_wild_8097508 | NA                                  | Ca_desi_Ch07 | 8097508                 | A/G  | NA                 | INTERGENIC                    | NA                                                  |
| Desi_wild_8097703 | NA                                  | Ca_desi_Ch07 | 8097703                 | A/C  | NA                 | INTERGENIC                    | NA                                                  |
| Desi_wild_8180365 | NA                                  | Ca_desi_Ch07 | 8180365                 | G/A  | Gene_Ca_07931.1    | DOWNSTREAM                    | F-box/LRR-repeat protein At4g29420                  |



| SNP IDs                  | NCBI dbSNP accession IDs (NCBI_SS#) | Chromosomes          | Physical positions (bp) | SNPs | Gene accession IDs | Sequence components of genome | Putative functions                                                       |
|--------------------------|-------------------------------------|----------------------|-------------------------|------|--------------------|-------------------------------|--------------------------------------------------------------------------|
| <i>Desi_wild_8187265</i> | NA                                  | <i>Ca_desi_Chr07</i> | 8187265                 | C/T  | Gene_Ca_07932.1    | INTRON                        | Probable zinc protease pqqL                                              |
| <i>Desi_wild_8209334</i> | NA                                  | <i>Ca_desi_Chr07</i> | 8209334                 | G/T  | Gene_Ca_07936.1    | DOWNSTREAM                    | NA                                                                       |
| <i>Desi_wild_8387061</i> | NA                                  | <i>Ca_desi_Chr07</i> | 8387061                 | G/T  | Gene_Ca_07953.2    | NON_SYNONYMOUS_CODING         | NA                                                                       |
| <i>Desi_wild_8387457</i> | NA                                  | <i>Ca_desi_Chr07</i> | 8387457                 | T/C  | Gene_Ca_07953.2    | DOWNSTREAM                    | Hexokinase-1                                                             |
| <i>Desi_wild_8445796</i> | NA                                  | <i>Ca_desi_Chr07</i> | 8445796                 | A/G  | Gene_Ca_07961.1    | INTRON                        | NADP-dependent malic enzyme                                              |
| <i>Desi_wild_8454842</i> | NA                                  | <i>Ca_desi_Chr07</i> | 8454842                 | C/A  | Gene_Ca_07962.1    | SYNONYMOUS_CODING             | Pentatricopeptide repeat-containing protein At1g10270                    |
| <i>Desi_wild_59016</i>   | NA                                  | <i>Ca_desi_Chr08</i> | 59016                   | T/G  | Gene_Ca_07972.1    | NON_SYNONYMOUS_CODING         | NEDD8-activating enzyme E1 catalytic subunit                             |
| <i>Desi_wild_69332</i>   | NA                                  | <i>Ca_desi_Chr08</i> | 69332                   | A/G  | NA                 | INTERGENIC                    | NA                                                                       |
| <i>Desi_wild_115646</i>  | NA                                  | <i>Ca_desi_Chr08</i> | 115646                  | C/A  | Gene_Ca_07980.1    | INTRON                        | NA                                                                       |
| <i>Desi_wild_115647</i>  | NA                                  | <i>Ca_desi_Chr08</i> | 115647                  | G/T  | Gene_Ca_07980.1    | INTRON                        | NA                                                                       |
| <i>Desi_wild_146954</i>  | NA                                  | <i>Ca_desi_Chr08</i> | 146954                  | A/G  | Gene_Ca_07983.1    | NON_SYNONYMOUS_CODING         | Abnormal spindle-like microcephaly-associated protein homolog (Fragment) |
| <i>Desi_wild_147015</i>  | NA                                  | <i>Ca_desi_Chr08</i> | 147015                  | G/A  | Gene_Ca_07983.1    | SYNONYMOUS_CODING             | Abnormal spindle-like microcephaly-associated protein homolog (Fragment) |
| <i>Desi_wild_201411</i>  | NA                                  | <i>Ca_desi_Chr08</i> | 201411                  | A/C  | Gene_Ca_07989.1    | INTRON                        | Uncharacterized protein yqkD                                             |
| <i>Desi_wild_201422</i>  | NA                                  | <i>Ca_desi_Chr08</i> | 201422                  | T/C  | Gene_Ca_07989.1    | INTRON                        | Uncharacterized protein yqkD                                             |
| <i>Desi_wild_201850</i>  | NA                                  | <i>Ca_desi_Chr08</i> | 201850                  | G/C  | Gene_Ca_07989.1    | INTRON                        | Uncharacterized protein yqkD                                             |
| <i>Desi_wild_201989</i>  | NA                                  | <i>Ca_desi_Chr08</i> | 201989                  | G/A  | Gene_Ca_07989.1    | INTRON                        | Uncharacterized protein yqkD                                             |
| <i>Desi_wild_202026</i>  | NA                                  | <i>Ca_desi_Chr08</i> | 202026                  | C/G  | Gene_Ca_07989.1    | INTRON                        | Uncharacterized protein yqkD                                             |
| <i>Desi_wild_202036</i>  | NA                                  | <i>Ca_desi_Chr08</i> | 202036                  | T/G  | Gene_Ca_07989.1    | INTRON                        | Uncharacterized protein yqkD                                             |
| <i>Desi_wild_229536</i>  | NA                                  | <i>Ca_desi_Chr08</i> | 229536                  | G/A  | Gene_Ca_07992.1    | DOWNSTREAM                    | Histone H2B.4                                                            |
| <i>Desi_wild_229992</i>  | NA                                  | <i>Ca_desi_Chr08</i> | 229992                  | T/A  | Gene_Ca_07992.1    | DOWNSTREAM                    | Histone H2B.4                                                            |
| <i>Desi_wild_230236</i>  | NA                                  | <i>Ca_desi_Chr08</i> | 230236                  | C/G  | NA                 | INTERGENIC                    | NA                                                                       |
| <i>Desi_wild_252774</i>  | NA                                  | <i>Ca_desi_Chr08</i> | 252774                  | A/C  | Gene_Ca_07996.1    | DOWNSTREAM                    | F-box protein At5g49610                                                  |
| <i>Desi_wild_276987</i>  | NA                                  | <i>Ca_desi_Chr08</i> | 276987                  | T/G  | NA                 | INTERGENIC                    | NA                                                                       |
| <i>Desi_wild_276998</i>  | NA                                  | <i>Ca_desi_Chr08</i> | 276998                  | C/G  | NA                 | INTERGENIC                    | NA                                                                       |
| <i>Desi_wild_277000</i>  | NA                                  | <i>Ca_desi_Chr08</i> | 277000                  | A/T  | NA                 | INTERGENIC                    | NA                                                                       |
| <i>Desi_wild_277031</i>  | NA                                  | <i>Ca_desi_Chr08</i> | 277031                  | G/T  | NA                 | INTERGENIC                    | NA                                                                       |
| <i>Desi_wild_277065</i>  | NA                                  | <i>Ca_desi_Chr08</i> | 277065                  | C/T  | NA                 | INTERGENIC                    | NA                                                                       |
| <i>Desi_wild_289088</i>  | NA                                  | <i>Ca_desi_Chr08</i> | 289088                  | A/T  | Gene_Ca_07999.1    | NON_SYNONYMOUS_CODING         | Putative NAC domain-containing protein 94                                |
| <i>Desi_wild_289090</i>  | NA                                  | <i>Ca_desi_Chr08</i> | 289090                  | G/T  | Gene_Ca_07999.1    | SYNONYMOUS_CODING             | Putative NAC domain-containing protein 94                                |
| <i>Desi_wild_289170</i>  | NA                                  | <i>Ca_desi_Chr08</i> | 289170                  | C/A  | Gene_Ca_07999.1    | NON_SYNONYMOUS_CODING         | Putative NAC domain-containing protein 94                                |
| <i>Desi_wild_289210</i>  | NA                                  | <i>Ca_desi_Chr08</i> | 289210                  | A/G  | Gene_Ca_07999.1    | SYNONYMOUS_CODING             | Putative NAC domain-containing protein 94                                |
| <i>Desi_wild_332316</i>  | NA                                  | <i>Ca_desi_Chr08</i> | 332316                  | C/A  | Gene_Ca_08005.1    | DOWNSTREAM                    | F-box protein At3g07870                                                  |
| <i>Desi_wild_344217</i>  | NA                                  | <i>Ca_desi_Chr08</i> | 344217                  | C/T  | NA                 | INTERGENIC                    | NA                                                                       |
| <i>Desi_wild_344221</i>  | NA                                  | <i>Ca_desi_Chr08</i> | 344221                  | C/T  | NA                 | INTERGENIC                    | NA                                                                       |
| <i>Desi_wild_344231</i>  | NA                                  | <i>Ca_desi_Chr08</i> | 344231                  | A/C  | NA                 | INTERGENIC                    | NA                                                                       |
| <i>Desi_wild_344233</i>  | NA                                  | <i>Ca_desi_Chr08</i> | 344233                  | A/C  | NA                 | INTERGENIC                    | NA                                                                       |
| <i>Desi_wild_344237</i>  | NA                                  | <i>Ca_desi_Chr08</i> | 344237                  | G/A  | NA                 | INTERGENIC                    | NA                                                                       |
| <i>Desi_wild_344964</i>  | NA                                  | <i>Ca_desi_Chr08</i> | 344964                  | C/G  | Gene_Ca_08006.1    | SYNONYMOUS_CODING             | ZF-HD homeobox protein At4g24660                                         |
| <i>Desi_wild_355826</i>  | NA                                  | <i>Ca_desi_Chr08</i> | 355826                  | T/C  | Gene_Ca_08007.1    | INTRON                        | UPF0420 protein C16orf58 homolog                                         |
| <i>Desi_wild_355881</i>  | NA                                  | <i>Ca_desi_Chr08</i> | 355881                  | T/A  | Gene_Ca_08007.1    | INTRON                        | UPF0420 protein C16orf58 homolog                                         |
| <i>Desi_wild_355882</i>  | NA                                  | <i>Ca_desi_Chr08</i> | 355882                  | C/A  | Gene_Ca_08007.1    | INTRON                        | UPF0420 protein C16orf58 homolog                                         |
| <i>Desi_wild_355884</i>  | NA                                  | <i>Ca_desi_Chr08</i> | 355884                  | T/A  | Gene_Ca_08007.1    | INTRON                        | UPF0420 protein C16orf58 homolog                                         |
| <i>Desi_wild_355890</i>  | NA                                  | <i>Ca_desi_Chr08</i> | 355890                  | T/A  | Gene_Ca_08007.1    | INTRON                        | UPF0420 protein C16orf58 homolog                                         |
| <i>Desi_wild_355898</i>  | NA                                  | <i>Ca_desi_Chr08</i> | 355898                  | T/A  | Gene_Ca_08007.1    | INTRON                        | UPF0420 protein C16orf58 homolog                                         |

| SNP IDs                  | NCBI dbSNP accession IDs (NCBI_SS#) | Chromosomes           | Physical positions (bp) | SNPs | Gene accession IDs | Sequence components of genome | Putative functions                                     |
|--------------------------|-------------------------------------|-----------------------|-------------------------|------|--------------------|-------------------------------|--------------------------------------------------------|
| <i>Desi_wild_355902</i>  | NA                                  | <i>Ca_desi_Chrom8</i> | 355902                  | T/A  | Gene_Ca_08007.1    | INTRON                        | UPF0420 protein C16orf58 homolog                       |
| <i>Desi_wild_355989</i>  | NA                                  | <i>Ca_desi_Chrom8</i> | 355989                  | A/C  | Gene_Ca_08007.1    | NON_SYNONYMOUS_CODING         | UPF0420 protein C16orf58 homolog                       |
| <i>Desi_wild_357336</i>  | NA                                  | <i>Ca_desi_Chrom8</i> | 357336                  | T/G  | Gene_Ca_08007.1    | SYNONYMOUS_CODING             | UPF0420 protein C16orf58 homolog                       |
| <i>Desi_wild_357429</i>  | NA                                  | <i>Ca_desi_Chrom8</i> | 357429                  | A/C  | Gene_Ca_08007.1    | SYNONYMOUS_CODING             | UPF0420 protein C16orf58 homolog                       |
| <i>Desi_wild_371615</i>  | NA                                  | <i>Ca_desi_Chrom8</i> | 371615                  | T/G  | Gene_Ca_08008.1    | INTRON                        | Cullin-associated NEDD8-dissociated protein 1          |
| <i>Desi_wild_371628</i>  | NA                                  | <i>Ca_desi_Chrom8</i> | 371628                  | A/T  | Gene_Ca_08008.1    | INTRON                        | Cullin-associated NEDD8-dissociated protein 1          |
| <i>Desi_wild_371661</i>  | NA                                  | <i>Ca_desi_Chrom8</i> | 371661                  | A/T  | Gene_Ca_08008.1    | INTRON                        | Cullin-associated NEDD8-dissociated protein 1          |
| <i>Desi_wild_372231</i>  | NA                                  | <i>Ca_desi_Chrom8</i> | 372231                  | A/T  | Gene_Ca_08008.1    | INTRON                        | Cullin-associated NEDD8-dissociated protein 1          |
| <i>Desi_wild_397389</i>  | NA                                  | <i>Ca_desi_Chrom8</i> | 397389                  | C/T  | Gene_Ca_08010.1    | INTRON                        | Type I inositol-1,4,5-trisphosphate 5-phosphatase 12   |
| <i>Desi_wild_422127</i>  | NA                                  | <i>Ca_desi_Chrom8</i> | 422127                  | T/A  | NA                 | INTERGENIC                    | NA                                                     |
| <i>Desi_wild_427213</i>  | NA                                  | <i>Ca_desi_Chrom8</i> | 427213                  | G/T  | NA                 | INTERGENIC                    | NA                                                     |
| <i>Desi_wild_427216</i>  | NA                                  | <i>Ca_desi_Chrom8</i> | 427216                  | G/T  | NA                 | INTERGENIC                    | NA                                                     |
| <i>Desi_wild_427219</i>  | NA                                  | <i>Ca_desi_Chrom8</i> | 427219                  | A/G  | NA                 | INTERGENIC                    | NA                                                     |
| <i>Desi_wild_546487</i>  | NA                                  | <i>Ca_desi_Chrom8</i> | 546487                  | C/G  | Gene_Ca_08019.1    | NON_SYNONYMOUS_CODING         | Dynamin-2A                                             |
| <i>Desi_wild_574899</i>  | NA                                  | <i>Ca_desi_Chrom8</i> | 574899                  | A/G  | NA                 | INTERGENIC                    | NA                                                     |
| <i>Desi_wild_598329</i>  | NA                                  | <i>Ca_desi_Chrom8</i> | 598329                  | C/T  | Gene_Ca_08026.1    | SYNONYMOUS_CODING             | Probable acetyl-CoA acetyltransferase, cytosolic 2     |
| <i>Desi_wild_598338</i>  | NA                                  | <i>Ca_desi_Chrom8</i> | 598338                  | A/G  | Gene_Ca_08026.1    | SYNONYMOUS_CODING             | Probable acetyl-CoA acetyltransferase, cytosolic 2     |
| <i>Desi_wild_598341</i>  | NA                                  | <i>Ca_desi_Chrom8</i> | 598341                  | A/T  | Gene_Ca_08026.1    | SYNONYMOUS_CODING             | Probable acetyl-CoA acetyltransferase, cytosolic 2     |
| <i>Desi_wild_598344</i>  | NA                                  | <i>Ca_desi_Chrom8</i> | 598344                  | C/T  | Gene_Ca_08026.1    | SYNONYMOUS_CODING             | Probable acetyl-CoA acetyltransferase, cytosolic 2     |
| <i>Desi_wild_598350</i>  | NA                                  | <i>Ca_desi_Chrom8</i> | 598350                  | T/C  | Gene_Ca_08026.1    | SYNONYMOUS_CODING             | Probable acetyl-CoA acetyltransferase, cytosolic 2     |
| <i>Desi_wild_598356</i>  | NA                                  | <i>Ca_desi_Chrom8</i> | 598356                  | T/A  | Gene_Ca_08026.1    | SYNONYMOUS_CODING             | Probable acetyl-CoA acetyltransferase, cytosolic 2     |
| <i>Desi_wild_598365</i>  | NA                                  | <i>Ca_desi_Chrom8</i> | 598365                  | G/A  | Gene_Ca_08026.1    | SYNONYMOUS_CODING             | Probable acetyl-CoA acetyltransferase, cytosolic 2     |
| <i>Desi_wild_598371</i>  | NA                                  | <i>Ca_desi_Chrom8</i> | 598371                  | T/C  | Gene_Ca_08026.1    | SYNONYMOUS_CODING             | Probable acetyl-CoA acetyltransferase, cytosolic 2     |
| <i>Desi_wild_598377</i>  | NA                                  | <i>Ca_desi_Chrom8</i> | 598377                  | G/A  | Gene_Ca_08026.1    | SYNONYMOUS_CODING             | Probable acetyl-CoA acetyltransferase, cytosolic 2     |
| <i>Desi_wild_598378</i>  | NA                                  | <i>Ca_desi_Chrom8</i> | 598378                  | A/T  | Gene_Ca_08026.1    | NON_SYNONYMOUS_CODING         | Probable acetyl-CoA acetyltransferase, cytosolic 2     |
| <i>Desi_wild_598380</i>  | NA                                  | <i>Ca_desi_Chrom8</i> | 598380                  | C/T  | Gene_Ca_08026.1    | SYNONYMOUS_CODING             | Probable acetyl-CoA acetyltransferase, cytosolic 2     |
| <i>Desi_wild_598383</i>  | NA                                  | <i>Ca_desi_Chrom8</i> | 598383                  | C/T  | Gene_Ca_08026.1    | SYNONYMOUS_CODING             | Probable acetyl-CoA acetyltransferase, cytosolic 2     |
| <i>Desi_wild_598386</i>  | NA                                  | <i>Ca_desi_Chrom8</i> | 598386                  | T/C  | Gene_Ca_08026.1    | SYNONYMOUS_CODING             | Probable acetyl-CoA acetyltransferase, cytosolic 2     |
| <i>Desi_wild_598388</i>  | NA                                  | <i>Ca_desi_Chrom8</i> | 598388                  | G/C  | Gene_Ca_08026.1    | NON_SYNONYMOUS_CODING         | Probable acetyl-CoA acetyltransferase, cytosolic 2     |
| <i>Desi_wild_598389</i>  | NA                                  | <i>Ca_desi_Chrom8</i> | 598389                  | C/A  | Gene_Ca_08026.1    | SYNONYMOUS_CODING             | Probable acetyl-CoA acetyltransferase, cytosolic 2     |
| <i>Desi_wild_598413</i>  | NA                                  | <i>Ca_desi_Chrom8</i> | 598413                  | T/C  | Gene_Ca_08026.1    | SYNONYMOUS_CODING             | Probable acetyl-CoA acetyltransferase, cytosolic 2     |
| <i>Desi_wild_598416</i>  | NA                                  | <i>Ca_desi_Chrom8</i> | 598416                  | T/C  | Gene_Ca_08026.1    | SYNONYMOUS_CODING             | Probable acetyl-CoA acetyltransferase, cytosolic 2     |
| <i>Desi_wild_598419</i>  | NA                                  | <i>Ca_desi_Chrom8</i> | 598419                  | G/A  | Gene_Ca_08026.1    | SYNONYMOUS_CODING             | Probable acetyl-CoA acetyltransferase, cytosolic 2     |
| <i>Desi_wild_678765</i>  | NA                                  | <i>Ca_desi_Chrom8</i> | 678765                  | T/G  | Gene_Ca_08036.1    | SYNONYMOUS_CODING             | Microtubule-associated protein 70-5                    |
| <i>Desi_wild_758784</i>  | NA                                  | <i>Ca_desi_Chrom8</i> | 758784                  | A/G  | Gene_Ca_08052.1    | DOWNSTREAM                    | E3 ubiquitin-protein ligase UPL5                       |
| <i>Desi_wild_758788</i>  | NA                                  | <i>Ca_desi_Chrom8</i> | 758788                  | C/T  | Gene_Ca_08052.1    | DOWNSTREAM                    | E3 ubiquitin-protein ligase UPL5                       |
| <i>Desi_wild_758789</i>  | NA                                  | <i>Ca_desi_Chrom8</i> | 758789                  | C/A  | Gene_Ca_08052.1    | DOWNSTREAM                    | E3 ubiquitin-protein ligase UPL5                       |
| <i>Desi_wild_760783</i>  | NA                                  | <i>Ca_desi_Chrom8</i> | 760783                  | T/A  | Gene_Ca_08051.1    | DOWNSTREAM                    | NA                                                     |
| <i>Desi_wild_863536</i>  | NA                                  | <i>Ca_desi_Chrom8</i> | 863536                  | A/G  | Gene_Ca_08058.1    | DOWNSTREAM                    | Translation initiation factor IF-3                     |
| <i>Desi_wild_868822</i>  | NA                                  | <i>Ca_desi_Chrom8</i> | 868822                  | C/T  | Gene_Ca_08059.2    | INTRON                        | Cellulose synthase A catalytic subunit 7 [UDP-forming] |
| <i>Desi_wild_914590</i>  | NA                                  | <i>Ca_desi_Chrom8</i> | 914590                  | G/T  | Gene_Ca_08065.3    | UPSTREAM                      | Probable cyclic nucleotide-gated ion channel 5         |
| <i>Desi_wild_914656</i>  | NA                                  | <i>Ca_desi_Chrom8</i> | 914656                  | A/C  | Gene_Ca_08065.3    | UPSTREAM                      | Probable cyclic nucleotide-gated ion channel 5         |
| <i>Desi_wild_985172</i>  | NA                                  | <i>Ca_desi_Chrom8</i> | 985172                  | G/A  | Gene_Ca_08072.1    | NON_SYNONYMOUS_CODING         | Ubiquitin carboxyl-terminal hydrolase 23               |
| <i>Desi_wild_1041386</i> | NA                                  | <i>Ca_desi_Chrom8</i> | 1041386                 | G/C  | Gene_Ca_08077.1    | SYNONYMOUS_CODING             | CBL-interacting serine/threonine-protein kinase 6      |

| SNP IDs                  | NCBI dbSNP accession IDs (NCBI_SS#) | Chromosomes          | Physical positions (bp) | SNPs | Gene accession IDs | Sequence components of genome | Putative functions                                  |
|--------------------------|-------------------------------------|----------------------|-------------------------|------|--------------------|-------------------------------|-----------------------------------------------------|
| <i>Desi_wild_1352205</i> | NA                                  | <i>Ca_desi_Chr08</i> | 1352205                 | G/A  | NA                 | INTERGENIC                    | NA                                                  |
| <i>Desi_wild_1365903</i> | NA                                  | <i>Ca_desi_Chr08</i> | 1365903                 | A/G  | NA                 | INTERGENIC                    | NA                                                  |
| <i>Desi_wild_1391494</i> | NA                                  | <i>Ca_desi_Chr08</i> | 1391494                 | T/C  | Gene_Ca_08096.1    | INTRON                        | NA                                                  |
| <i>Desi_wild_1399603</i> | NA                                  | <i>Ca_desi_Chr08</i> | 1399603                 | C/A  | Gene_Ca_08097.1    | NON_SYNONYMOUS_CODING         | unknown protein                                     |
| <i>Desi_wild_1417204</i> | NA                                  | <i>Ca_desi_Chr08</i> | 1417204                 | T/A  | Gene_Ca_08098.1    | DOWNSTREAM                    | Cucumisin                                           |
| <i>Desi_wild_1428402</i> | NA                                  | <i>Ca_desi_Chr08</i> | 1428402                 | T/C  | Gene_Ca_08100.2    | INTRON                        | NA                                                  |
| <i>Desi_wild_1450255</i> | NA                                  | <i>Ca_desi_Chr08</i> | 1450255                 | A/C  | Gene_Ca_08102.1    | INTRON                        | NA                                                  |
| <i>Desi_wild_1458009</i> | NA                                  | <i>Ca_desi_Chr08</i> | 1458009                 | A/C  | NA                 | INTERGENIC                    | NA                                                  |
| <i>Desi_wild_1475095</i> | NA                                  | <i>Ca_desi_Chr08</i> | 1475095                 | A/C  | Gene_Ca_08106.1    | SYNONYMOUS_CODING             | WRKY transcription factor 6                         |
| <i>Desi_wild_1557073</i> | NA                                  | <i>Ca_desi_Chr08</i> | 1557073                 | T/A  | Gene_Ca_08115.1    | UPSTREAM                      | NA                                                  |
| <i>Desi_wild_3444127</i> | NA                                  | <i>Ca_desi_Chr08</i> | 3444127                 | C/T  | Gene_Ca_08143.1    | SYNONYMOUS_CODING             | TRICHOME BIREFRINGENCE-LIKE 16                      |
| <i>Desi_wild_3461595</i> | NA                                  | <i>Ca_desi_Chr08</i> | 3461595                 | A/G  | NA                 | INTERGENIC                    | NA                                                  |
| <i>Desi_wild_3500770</i> | NA                                  | <i>Ca_desi_Chr08</i> | 3500770                 | G/A  | NA                 | INTERGENIC                    | NA                                                  |
| <i>Desi_wild_3501823</i> | NA                                  | <i>Ca_desi_Chr08</i> | 3501823                 | G/A  | NA                 | INTERGENIC                    | NA                                                  |
| <i>Desi_wild_3643104</i> | NA                                  | <i>Ca_desi_Chr08</i> | 3643104                 | G/A  | Gene_Ca_08164.1    | INTRON                        | Kinesin-related protein 4                           |
| <i>Desi_wild_3643216</i> | NA                                  | <i>Ca_desi_Chr08</i> | 3643216                 | A/C  | Gene_Ca_08164.1    | UPSTREAM                      | Kinesin-related protein 4                           |
| <i>Desi_wild_3656251</i> | NA                                  | <i>Ca_desi_Chr08</i> | 3656251                 | G/A  | NA                 | INTERGENIC                    | NA                                                  |
| <i>Desi_wild_3657713</i> | NA                                  | <i>Ca_desi_Chr08</i> | 3657713                 | A/G  | NA                 | INTERGENIC                    | NA                                                  |
| <i>Desi_wild_3657904</i> | NA                                  | <i>Ca_desi_Chr08</i> | 3657904                 | A/C  | NA                 | INTERGENIC                    | NA                                                  |
| <i>Desi_wild_3658961</i> | NA                                  | <i>Ca_desi_Chr08</i> | 3658961                 | C/T  | Gene_Ca_08166.1    | INTRON                        | Polyphosphoinositide phosphatase                    |
| <i>Desi_wild_3659352</i> | NA                                  | <i>Ca_desi_Chr08</i> | 3659352                 | A/G  | Gene_Ca_08166.1    | INTRON                        | Polyphosphoinositide phosphatase                    |
| <i>Desi_wild_3659369</i> | NA                                  | <i>Ca_desi_Chr08</i> | 3659369                 | C/G  | Gene_Ca_08166.1    | INTRON                        | Polyphosphoinositide phosphatase                    |
| <i>Desi_wild_3659394</i> | NA                                  | <i>Ca_desi_Chr08</i> | 3659394                 | C/A  | Gene_Ca_08166.1    | INTRON                        | Polyphosphoinositide phosphatase                    |
| <i>Desi_wild_3659459</i> | NA                                  | <i>Ca_desi_Chr08</i> | 3659459                 | G/A  | Gene_Ca_08166.1    | INTRON                        | Polyphosphoinositide phosphatase                    |
| <i>Desi_wild_3672982</i> | NA                                  | <i>Ca_desi_Chr08</i> | 3672982                 | C/T  | NA                 | INTERGENIC                    | NA                                                  |
| <i>Desi_wild_3673021</i> | NA                                  | <i>Ca_desi_Chr08</i> | 3673021                 | T/C  | NA                 | INTERGENIC                    | NA                                                  |
| <i>Desi_wild_3680541</i> | NA                                  | <i>Ca_desi_Chr08</i> | 3680541                 | A/G  | NA                 | INTERGENIC                    | NA                                                  |
| <i>Desi_wild_3680544</i> | NA                                  | <i>Ca_desi_Chr08</i> | 3680544                 | T/C  | NA                 | INTERGENIC                    | NA                                                  |
| <i>Desi_wild_3695139</i> | NA                                  | <i>Ca_desi_Chr08</i> | 3695139                 | C/T  | Gene_Ca_08169.2    | INTRON                        | NA                                                  |
| <i>Desi_wild_3697176</i> | NA                                  | <i>Ca_desi_Chr08</i> | 3697176                 | G/A  | Gene_Ca_08169.2    | NON_SYNONYMOUS_CODING         | NA                                                  |
| <i>Desi_wild_3709956</i> | NA                                  | <i>Ca_desi_Chr08</i> | 3709956                 | T/C  | Gene_Ca_08170.1    | INTRON                        | Conserved oligomeric Golgi complex subunit 3        |
| <i>Desi_wild_3718115</i> | NA                                  | <i>Ca_desi_Chr08</i> | 3718115                 | G/A  | Gene_Ca_08170.1    | INTRON                        | Conserved oligomeric Golgi complex subunit 3        |
| <i>Desi_wild_3741971</i> | NA                                  | <i>Ca_desi_Chr08</i> | 3741971                 | C/T  | Gene_Ca_08173.1    | UPSTREAM                      | Putative pectinesterase/pectinesterase inhibitor 45 |
| <i>Desi_wild_3741978</i> | NA                                  | <i>Ca_desi_Chr08</i> | 3741978                 | T/G  | Gene_Ca_08173.1    | UPSTREAM                      | Putative pectinesterase/pectinesterase inhibitor 45 |
| <i>Desi_wild_3742011</i> | NA                                  | <i>Ca_desi_Chr08</i> | 3742011                 | T/C  | Gene_Ca_08173.1    | UPSTREAM                      | Putative pectinesterase/pectinesterase inhibitor 45 |
| <i>Desi_wild_3742012</i> | NA                                  | <i>Ca_desi_Chr08</i> | 3742012                 | C/T  | Gene_Ca_08173.1    | UPSTREAM                      | Putative pectinesterase/pectinesterase inhibitor 45 |
| <i>Desi_wild_3742132</i> | NA                                  | <i>Ca_desi_Chr08</i> | 3742132                 | A/C  | Gene_Ca_08173.1    | UPSTREAM                      | Putative pectinesterase/pectinesterase inhibitor 45 |
| <i>Desi_wild_3769184</i> | NA                                  | <i>Ca_desi_Chr08</i> | 3769184                 | G/A  | Gene_Ca_08176.4    | INTRON                        | Alpha-aminoadipic semialdehyde synthase             |
| <i>Desi_wild_3775133</i> | NA                                  | <i>Ca_desi_Chr08</i> | 3775133                 | C/T  | Gene_Ca_08176.4    | INTRON                        | Alpha-aminoadipic semialdehyde synthase             |
| <i>Desi_wild_3775148</i> | NA                                  | <i>Ca_desi_Chr08</i> | 3775148                 | C/T  | Gene_Ca_08176.4    | INTRON                        | Alpha-aminoadipic semialdehyde synthase             |
| <i>Desi_wild_3775523</i> | NA                                  | <i>Ca_desi_Chr08</i> | 3775523                 | G/C  | Gene_Ca_08176.4    | SYNONYMOUS_CODING             | Alpha-aminoadipic semialdehyde synthase             |
| <i>Desi_wild_3775526</i> | NA                                  | <i>Ca_desi_Chr08</i> | 3775526                 | A/T  | Gene_Ca_08176.4    | NON_SYNONYMOUS_CODING         | Alpha-aminoadipic semialdehyde synthase             |
| <i>Desi_wild_3775555</i> | NA                                  | <i>Ca_desi_Chr08</i> | 3775555                 | T/C  | Gene_Ca_08176.4    | NON_SYNONYMOUS_CODING         | Alpha-aminoadipic semialdehyde synthase             |
| <i>Desi_wild_3775574</i> | NA                                  | <i>Ca_desi_Chr08</i> | 3775574                 | A/G  | Gene_Ca_08176.4    | SYNONYMOUS_CODING             | Alpha-aminoadipic semialdehyde synthase             |

| SNP IDs                  | NCBI dbSNP accession IDs (NCBI_SS#) | Chromosomes          | Physical positions (bp) | SNPs | Gene accession IDs              | Sequence components of genome | Putative functions                                                                          |
|--------------------------|-------------------------------------|----------------------|-------------------------|------|---------------------------------|-------------------------------|---------------------------------------------------------------------------------------------|
| <i>Desi_wild_3775593</i> | NA                                  | <i>Ca_desi_Chr08</i> | 3775593                 | A/G  | <a href="#">Gene_Ca_08176.4</a> | NON_SYNONYMOUS_CODING         | Alpha-aminoacidic semialdehyde synthase                                                     |
| <i>Desi_wild_3788881</i> | NA                                  | <i>Ca_desi_Chr08</i> | 3788881                 | T/A  | Gene_Ca_08178.1                 | INTRON                        | NA                                                                                          |
| <i>Desi_wild_3789039</i> | NA                                  | <i>Ca_desi_Chr08</i> | 3789039                 | T/C  | Gene_Ca_08178.1                 | INTRON                        | NA                                                                                          |
| <i>Desi_wild_3804401</i> | NA                                  | <i>Ca_desi_Chr08</i> | 3804401                 | G/C  | Gene_Ca_08178.1                 | SYNONYMOUS_CODING             | NA                                                                                          |
| <i>Desi_wild_3810941</i> | NA                                  | <i>Ca_desi_Chr08</i> | 3810941                 | T/C  | Gene_Ca_08179.1                 | UPSTREAM                      | E3 ubiquitin-protein ligase ATL4                                                            |
| <i>Desi_wild_3810985</i> | NA                                  | <i>Ca_desi_Chr08</i> | 3810985                 | G/A  | NA                              | INTERGENIC                    | NA                                                                                          |
| <i>Desi_wild_3940090</i> | NA                                  | <i>Ca_desi_Chr08</i> | 3940090                 | A/G  | Gene_Ca_08198.1                 | DOWNSTREAM                    | SWI/SNF-related matrix-associated actin-dependent regulator of chromatin subfamily A-like c |
| <i>Desi_wild_3945088</i> | NA                                  | <i>Ca_desi_Chr08</i> | 3945088                 | T/A  | NA                              | INTERGENIC                    | NA                                                                                          |
| <i>Desi_wild_3960575</i> | NA                                  | <i>Ca_desi_Chr08</i> | 3960575                 | T/G  | NA                              | INTERGENIC                    | NA                                                                                          |
| <i>Desi_wild_3960582</i> | NA                                  | <i>Ca_desi_Chr08</i> | 3960582                 | G/T  | NA                              | INTERGENIC                    | NA                                                                                          |
| <i>Desi_wild_3960598</i> | NA                                  | <i>Ca_desi_Chr08</i> | 3960598                 | T/C  | NA                              | INTERGENIC                    | NA                                                                                          |
| <i>Desi_wild_4010426</i> | NA                                  | <i>Ca_desi_Chr08</i> | 4010426                 | A/G  | <a href="#">Gene_Ca_08207.1</a> | NON_SYNONYMOUS_CODING         | Late embryogenesis abundant protein D-29                                                    |
| <i>Desi_wild_4010449</i> | NA                                  | <i>Ca_desi_Chr08</i> | 4010449                 | A/T  | Gene_Ca_08207.1                 | SYNONYMOUS_CODING             | Late embryogenesis abundant protein D-29                                                    |
| <i>Desi_wild_4010455</i> | NA                                  | <i>Ca_desi_Chr08</i> | 4010455                 | T/C  | Gene_Ca_08207.1                 | SYNONYMOUS_CODING             | Late embryogenesis abundant protein D-29                                                    |
| <i>Desi_wild_4010553</i> | NA                                  | <i>Ca_desi_Chr08</i> | 4010553                 | A/G  | <a href="#">Gene_Ca_08207.1</a> | NON_SYNONYMOUS_CODING         | Late embryogenesis abundant protein D-29                                                    |
| <i>Desi_wild_4026934</i> | NA                                  | <i>Ca_desi_Chr08</i> | 4026934                 | C/T  | NA                              | INTERGENIC                    | NA                                                                                          |
| <i>Desi_wild_4060900</i> | NA                                  | <i>Ca_desi_Chr08</i> | 4060900                 | A/C  | Gene_Ca_08215.1                 | DOWNSTREAM                    | Pleiotropic drug resistance protein 3                                                       |
| <i>Desi_wild_4126353</i> | NA                                  | <i>Ca_desi_Chr08</i> | 4126353                 | T/C  | Gene_Ca_08221.1                 | INTRON                        | Vacuolar protein sorting-associated protein 13A                                             |
| <i>Desi_wild_4126411</i> | NA                                  | <i>Ca_desi_Chr08</i> | 4126411                 | T/G  | Gene_Ca_08221.1                 | INTRON                        | Vacuolar protein sorting-associated protein 13A                                             |
| <i>Desi_wild_4126424</i> | NA                                  | <i>Ca_desi_Chr08</i> | 4126424                 | T/C  | Gene_Ca_08221.1                 | INTRON                        | Vacuolar protein sorting-associated protein 13A                                             |
| <i>Desi_wild_4126493</i> | NA                                  | <i>Ca_desi_Chr08</i> | 4126493                 | A/C  | Gene_Ca_08221.1                 | INTRON                        | Vacuolar protein sorting-associated protein 13A                                             |
| <i>Desi_wild_4137858</i> | NA                                  | <i>Ca_desi_Chr08</i> | 4137858                 | T/C  | Gene_Ca_08221.1                 | INTRON                        | Vacuolar protein sorting-associated protein 13A                                             |
| <i>Desi_wild_4197700</i> | NA                                  | <i>Ca_desi_Chr08</i> | 4197700                 | A/G  | Gene_Ca_08223.1                 | NON_SYNONYMOUS_CODING         | Probable beta-1,3-galactosyltransferase 16                                                  |
| <i>Desi_wild_4208135</i> | NA                                  | <i>Ca_desi_Chr08</i> | 4208135                 | G/C  | Gene_Ca_08224.1                 | NON_SYNONYMOUS_CODING         | Probable protein phosphatase 2C 13                                                          |
| <i>Desi_wild_4208155</i> | NA                                  | <i>Ca_desi_Chr08</i> | 4208155                 | G/A  | Gene_Ca_08224.1                 | SYNONYMOUS_CODING             | Probable protein phosphatase 2C 13                                                          |
| <i>Desi_wild_4208157</i> | NA                                  | <i>Ca_desi_Chr08</i> | 4208157                 | A/G  | Gene_Ca_08224.1                 | SYNONYMOUS_CODING             | Probable protein phosphatase 2C 13                                                          |
| <i>Desi_wild_4208163</i> | NA                                  | <i>Ca_desi_Chr08</i> | 4208163                 | T/A  | Gene_Ca_08224.1                 | SYNONYMOUS_CODING             | Probable protein phosphatase 2C 13                                                          |
| <i>Desi_wild_4208169</i> | NA                                  | <i>Ca_desi_Chr08</i> | 4208169                 | T/G  | Gene_Ca_08224.1                 | SYNONYMOUS_CODING             | Probable protein phosphatase 2C 13                                                          |
| <i>Desi_wild_4208175</i> | NA                                  | <i>Ca_desi_Chr08</i> | 4208175                 | T/G  | Gene_Ca_08224.1                 | SYNONYMOUS_CODING             | Probable protein phosphatase 2C 13                                                          |
| <i>Desi_wild_4284768</i> | NA                                  | <i>Ca_desi_Chr08</i> | 4284768                 | G/A  | Gene_Ca_08233.1                 | INTRON                        | Probable O-acetyltransferase CAS1                                                           |
| <i>Desi_wild_4300014</i> | NA                                  | <i>Ca_desi_Chr08</i> | 4300014                 | A/C  | Gene_Ca_08234.1                 | UPSTREAM                      | NA                                                                                          |
| <i>Desi_wild_4310627</i> | NA                                  | <i>Ca_desi_Chr08</i> | 4310627                 | C/T  | NA                              | INTERGENIC                    | NA                                                                                          |
| <i>Desi_wild_4310667</i> | NA                                  | <i>Ca_desi_Chr08</i> | 4310667                 | A/C  | NA                              | INTERGENIC                    | NA                                                                                          |
| <i>Desi_wild_4409441</i> | NA                                  | <i>Ca_desi_Chr08</i> | 4409441                 | T/G  | NA                              | INTERGENIC                    | NA                                                                                          |
| <i>Desi_wild_4535097</i> | NA                                  | <i>Ca_desi_Chr08</i> | 4535097                 | A/G  | Gene_Ca_08260.1                 | NON_SYNONYMOUS_CODING         | Pre-mRNA polyadenylation factor fip1                                                        |
| <i>Desi_wild_4566000</i> | NA                                  | <i>Ca_desi_Chr08</i> | 4566000                 | A/C  | Gene_Ca_08263.1                 | DOWNSTREAM                    | Nucleic acid-binding proteins superfamily                                                   |
| <i>Desi_wild_4601576</i> | NA                                  | <i>Ca_desi_Chr08</i> | 4601576                 | G/A  | Gene_Ca_08273.2                 | INTRON                        | NA                                                                                          |
| <i>Desi_wild_4623068</i> | NA                                  | <i>Ca_desi_Chr08</i> | 4623068                 | C/A  | Gene_Ca_08274.1                 | NON_SYNONYMOUS_CODING         | Dihydropolyl dehydrogenase                                                                  |
| <i>Desi_wild_4650662</i> | NA                                  | <i>Ca_desi_Chr08</i> | 4650662                 | T/C  | Gene_Ca_08277.1                 | NON_SYNONYMOUS_CODING         | NA                                                                                          |
| <i>Desi_wild_4670708</i> | NA                                  | <i>Ca_desi_Chr08</i> | 4670708                 | G/A  | NA                              | INTERGENIC                    | NA                                                                                          |
| <i>Desi_wild_4722955</i> | NA                                  | <i>Ca_desi_Chr08</i> | 4722955                 | C/T  | Gene_Ca_08285.2                 | SYNONYMOUS_CODING             | NA                                                                                          |
| <i>Desi_wild_4749051</i> | NA                                  | <i>Ca_desi_Chr08</i> | 4749051                 | G/A  | Gene_Ca_08286.1                 | INTRON                        | Protein of unknown function (DUF789)                                                        |
| <i>Desi_wild_4803966</i> | NA                                  | <i>Ca_desi_Chr08</i> | 4803966                 | T/G  | NA                              | INTERGENIC                    | NA                                                                                          |
| <i>Desi_wild_4845385</i> | NA                                  | <i>Ca_desi_Chr08</i> | 4845385                 | T/G  | NA                              | INTERGENIC                    | NA                                                                                          |

| SNP IDs                  | NCBI dbSNP accession IDs (NCBI_SS#) | Chromosomes          | Physical positions (bp) | SNPs | Gene accession IDs | Sequence components of genome | Putative functions                                                    |
|--------------------------|-------------------------------------|----------------------|-------------------------|------|--------------------|-------------------------------|-----------------------------------------------------------------------|
| <i>Desi_wild_4930541</i> | NA                                  | <i>Ca_desi_Chr08</i> | 4930541                 | G/T  | Gene_Ca_08311.1    | UPSTREAM                      | Late embryogenesis abundant protein Lea5                              |
| <i>Desi_wild_4982805</i> | NA                                  | <i>Ca_desi_Chr08</i> | 4982805                 | A/C  | NA                 | INTERGENIC                    | NA                                                                    |
| <i>Desi_wild_5152006</i> | NA                                  | <i>Ca_desi_Chr08</i> | 5152006                 | T/C  | Gene_Ca_08333.1    | INTRON                        | Axial regulator YABBY 5                                               |
| <i>Desi_wild_5174508</i> | NA                                  | <i>Ca_desi_Chr08</i> | 5174508                 | A/C  | NA                 | INTERGENIC                    | NA                                                                    |
| <i>Desi_wild_5271323</i> | NA                                  | <i>Ca_desi_Chr08</i> | 5271323                 | C/A  | Gene_Ca_08341.1    | NON_SYNONYMOUS_CODING         | NA                                                                    |
| <i>Desi_wild_5275234</i> | NA                                  | <i>Ca_desi_Chr08</i> | 5275234                 | T/C  | Gene_Ca_08341.1    | INTRON                        | Topless-related protein 4                                             |
| <i>Desi_wild_5292675</i> | NA                                  | <i>Ca_desi_Chr08</i> | 5292675                 | C/A  | NA                 | INTERGENIC                    | NA                                                                    |
| <i>Desi_wild_5292676</i> | NA                                  | <i>Ca_desi_Chr08</i> | 5292676                 | T/C  | NA                 | INTERGENIC                    | NA                                                                    |
| <i>Desi_wild_5292677</i> | NA                                  | <i>Ca_desi_Chr08</i> | 5292677                 | C/A  | NA                 | INTERGENIC                    | NA                                                                    |
| <i>Desi_wild_5292682</i> | NA                                  | <i>Ca_desi_Chr08</i> | 5292682                 | A/G  | NA                 | INTERGENIC                    | NA                                                                    |
| <i>Desi_wild_5292691</i> | NA                                  | <i>Ca_desi_Chr08</i> | 5292691                 | A/T  | NA                 | INTERGENIC                    | NA                                                                    |
| <i>Desi_wild_5292694</i> | NA                                  | <i>Ca_desi_Chr08</i> | 5292694                 | C/T  | NA                 | INTERGENIC                    | NA                                                                    |
| <i>Desi_wild_5294154</i> | NA                                  | <i>Ca_desi_Chr08</i> | 5294154                 | G/C  | Gene_Ca_08342.1    | NON_SYNONYMOUS_CODING         | Beta-1,4-mannosyl-glycoprotein 4-beta-N-acetylglucosaminyltransferase |
| <i>Desi_wild_5294157</i> | NA                                  | <i>Ca_desi_Chr08</i> | 5294157                 | A/C  | Gene_Ca_08342.1    | NON_SYNONYMOUS_CODING         | Beta-1,4-mannosyl-glycoprotein 4-beta-N-acetylglucosaminyltransferase |
| <i>Desi_wild_5329358</i> | NA                                  | <i>Ca_desi_Chr08</i> | 5329358                 | A/C  | NA                 | INTERGENIC                    | NA                                                                    |
| <i>Desi_wild_5400715</i> | NA                                  | <i>Ca_desi_Chr08</i> | 5400715                 | C/A  | NA                 | INTERGENIC                    | NA                                                                    |
| <i>Desi_wild_5400774</i> | NA                                  | <i>Ca_desi_Chr08</i> | 5400774                 | C/T  | NA                 | INTERGENIC                    | NA                                                                    |
| <i>Desi_wild_5406439</i> | NA                                  | <i>Ca_desi_Chr08</i> | 5406439                 | A/G  | Gene_Ca_08347.2    | NON_SYNONYMOUS_CODING         | Putative AC transposase                                               |
| <i>Desi_wild_5406498</i> | NA                                  | <i>Ca_desi_Chr08</i> | 5406498                 | T/C  | Gene_Ca_08347.2    | SYNONYMOUS_CODING             | Putative AC transposase                                               |
| <i>Desi_wild_5417922</i> | NA                                  | <i>Ca_desi_Chr08</i> | 5417922                 | T/A  | Gene_Ca_08348.1    | DOWNSTREAM                    | Small nuclear RNA activating complex (SNAPc), subunit SNAP43 protein  |
| <i>Desi_wild_5430497</i> | NA                                  | <i>Ca_desi_Chr08</i> | 5430497                 | T/C  | Gene_Ca_08350.1    | INTRON                        | Telomere-associated protein RIF1                                      |
| <i>Desi_wild_5430519</i> | NA                                  | <i>Ca_desi_Chr08</i> | 5430519                 | C/T  | Gene_Ca_08350.1    | INTRON                        | Telomere-associated protein RIF1                                      |
| <i>Desi_wild_5430520</i> | NA                                  | <i>Ca_desi_Chr08</i> | 5430520                 | C/G  | Gene_Ca_08350.1    | INTRON                        | Telomere-associated protein RIF1                                      |
| <i>Desi_wild_5503559</i> | NA                                  | <i>Ca_desi_Chr08</i> | 5503559                 | G/A  | Gene_Ca_08355.1    | SYNONYMOUS_CODING             | N-alpha-acetyltransferase 35, NatC auxiliary subunit                  |
| <i>Desi_wild_5577326</i> | NA                                  | <i>Ca_desi_Chr08</i> | 5577326                 | C/T  | NA                 | INTERGENIC                    | NA                                                                    |
| <i>Desi_wild_5662248</i> | NA                                  | <i>Ca_desi_Chr08</i> | 5662248                 | T/C  | Gene_Ca_08376.2    | INTRON                        | NA                                                                    |
| <i>Desi_wild_5676674</i> | NA                                  | <i>Ca_desi_Chr08</i> | 5676674                 | C/G  | NA                 | INTERGENIC                    | NA                                                                    |
| <i>Desi_wild_5676675</i> | NA                                  | <i>Ca_desi_Chr08</i> | 5676675                 | C/T  | NA                 | INTERGENIC                    | NA                                                                    |
| <i>Desi_wild_5741859</i> | NA                                  | <i>Ca_desi_Chr08</i> | 5741859                 | A/G  | Gene_Ca_08384.2    | SYNONYMOUS_CODING             | NA                                                                    |
| <i>Desi_wild_5839054</i> | NA                                  | <i>Ca_desi_Chr08</i> | 5839054                 | C/T  | Gene_Ca_08394.1    | INTRON                        | Large proline-rich protein BAG6                                       |
| <i>Desi_wild_5859673</i> | NA                                  | <i>Ca_desi_Chr08</i> | 5859673                 | A/G  | NA                 | INTERGENIC                    | NA                                                                    |
| <i>Desi_wild_5861157</i> | NA                                  | <i>Ca_desi_Chr08</i> | 5861157                 | C/A  | Gene_Ca_08397.1    | UPSTREAM                      | NA                                                                    |
| <i>Desi_wild_5873045</i> | NA                                  | <i>Ca_desi_Chr08</i> | 5873045                 | G/T  | Gene_Ca_08399.1    | DOWNSTREAM                    | E3 ubiquitin-protein ligase RNF13                                     |
| <i>Desi_wild_5893623</i> | NA                                  | <i>Ca_desi_Chr08</i> | 5893623                 | G/C  | Gene_Ca_08402.1    | START_LOST                    | Serine/threonine-protein kinase CTR1                                  |
| <i>Desi_wild_5893717</i> | NA                                  | <i>Ca_desi_Chr08</i> | 5893717                 | A/C  | Gene_Ca_08402.1    | NON_SYNONYMOUS_CODING         | Serine/threonine-protein kinase CTR1                                  |
| <i>Desi_wild_5894433</i> | NA                                  | <i>Ca_desi_Chr08</i> | 5894433                 | A/T  | Gene_Ca_08402.1    | SYNONYMOUS_CODING             | Serine/threonine-protein kinase CTR1                                  |
| <i>Desi_wild_5894563</i> | NA                                  | <i>Ca_desi_Chr08</i> | 5894563                 | C/T  | Gene_Ca_08402.1    | STOP_GAINED                   | Serine/threonine-protein kinase CTR1                                  |
| <i>Desi_wild_5896049</i> | NA                                  | <i>Ca_desi_Chr08</i> | 5896049                 | A/C  | Gene_Ca_08402.1    | NON_SYNONYMOUS_CODING         | Serine/threonine-protein kinase CTR1                                  |
| <i>Desi_wild_5898863</i> | NA                                  | <i>Ca_desi_Chr08</i> | 5898863                 | A/G  | Gene_Ca_08402.1    | INTRON                        | Serine/threonine-protein kinase CTR1                                  |
| <i>Desi_wild_5902520</i> | NA                                  | <i>Ca_desi_Chr08</i> | 5902520                 | C/T  | Gene_Ca_08403.1    | UPSTREAM                      | unknown protein                                                       |
| <i>Desi_wild_5937874</i> | NA                                  | <i>Ca_desi_Chr08</i> | 5937874                 | G/C  | NA                 | INTERGENIC                    | NA                                                                    |
| <i>Desi_wild_5943956</i> | NA                                  | <i>Ca_desi_Chr08</i> | 5943956                 | C/T  | NA                 | INTERGENIC                    | NA                                                                    |
| <i>Desi_wild_5955260</i> | NA                                  | <i>Ca_desi_Chr08</i> | 5955260                 | T/G  | Gene_Ca_08408.1    | INTRON                        | Sugar transport protein 7                                             |
| <i>Desi_wild_5955310</i> | NA                                  | <i>Ca_desi_Chr08</i> | 5955310                 | T/G  | Gene_Ca_08408.1    | SYNONYMOUS_CODING             | Sugar transport protein 7                                             |



| SNP IDs                  | NCBI dbSNP accession IDs (NCBI_SS#) | Chromosomes          | Physical positions (bp) | SNPs | Gene accession IDs | Sequence components of genome  | Putative functions                                               |
|--------------------------|-------------------------------------|----------------------|-------------------------|------|--------------------|--------------------------------|------------------------------------------------------------------|
| <i>Desi_wild_5955508</i> | NA                                  | <i>Ca_desi_Chr08</i> | 5955508                 | A/T  | Gene_Ca_08408.1    | INTRON                         | Sugar transport protein 7                                        |
| <i>Desi_wild_5955782</i> | NA                                  | <i>Ca_desi_Chr08</i> | 5955782                 | A/G  | Gene_Ca_08408.1    | NON_SYNONYMOUS_CODING          | Sugar transport protein 7                                        |
| <i>Desi_wild_5997392</i> | NA                                  | <i>Ca_desi_Chr08</i> | 5997392                 | G/C  | Gene_Ca_08411.1    | INTRON                         | Dicer-like protein 4                                             |
| <i>Desi_wild_6011053</i> | NA                                  | <i>Ca_desi_Chr08</i> | 6011053                 | A/G  | Gene_Ca_08411.1    | INTRON                         | Dicer-like protein 4                                             |
| <i>Desi_wild_6018260</i> | NA                                  | <i>Ca_desi_Chr08</i> | 6018260                 | A/G  | NA                 | INTERGENIC                     | NA                                                               |
| <i>Desi_wild_6018400</i> | NA                                  | <i>Ca_desi_Chr08</i> | 6018400                 | A/T  | NA                 | INTERGENIC                     | NA                                                               |
| <i>Desi_wild_6019979</i> | NA                                  | <i>Ca_desi_Chr08</i> | 6019979                 | T/C  | NA                 | INTERGENIC                     | NA                                                               |
| <i>Desi_wild_6021387</i> | NA                                  | <i>Ca_desi_Chr08</i> | 6021387                 | C/G  | Gene_Ca_08412.1    | INTRON                         | DNA replication licensing factor mcm5-A                          |
| <i>Desi_wild_6021810</i> | NA                                  | <i>Ca_desi_Chr08</i> | 6021810                 | C/T  | Gene_Ca_08412.1    | NON_SYNONYMOUS_CODING          | DNA replication licensing factor mcm5-A                          |
| <i>Desi_wild_6039116</i> | NA                                  | <i>Ca_desi_Chr08</i> | 6039116                 | C/G  | Gene_Ca_08414.1    | INTRON                         | ATPase 8, plasma membrane-type                                   |
| <i>Desi_wild_6039146</i> | NA                                  | <i>Ca_desi_Chr08</i> | 6039146                 | A/C  | Gene_Ca_08414.1    | INTRON                         | ATPase 8, plasma membrane-type                                   |
| <i>Desi_wild_6042338</i> | NA                                  | <i>Ca_desi_Chr08</i> | 6042338                 | A/G  | NA                 | INTERGENIC                     | NA                                                               |
| <i>Desi_wild_6121913</i> | NA                                  | <i>Ca_desi_Chr08</i> | 6121913                 | A/G  | NA                 | INTERGENIC                     | NA                                                               |
| <i>Desi_wild_6122035</i> | NA                                  | <i>Ca_desi_Chr08</i> | 6122035                 | G/A  | NA                 | INTERGENIC                     | NA                                                               |
| <i>Desi_wild_6122066</i> | NA                                  | <i>Ca_desi_Chr08</i> | 6122066                 | A/C  | NA                 | INTERGENIC                     | NA                                                               |
| <i>Desi_wild_6122067</i> | NA                                  | <i>Ca_desi_Chr08</i> | 6122067                 | G/T  | NA                 | INTERGENIC                     | NA                                                               |
| <i>Desi_wild_6125494</i> | NA                                  | <i>Ca_desi_Chr08</i> | 6125494                 | T/C  | Gene_Ca_08422.2    | INTRON                         | TVP38/TMEM64 family membrane protein slr0305                     |
| <i>Desi_wild_6135840</i> | NA                                  | <i>Ca_desi_Chr08</i> | 6135840                 | T/A  | NA                 | INTERGENIC                     | NA                                                               |
| <i>Desi_wild_6212381</i> | NA                                  | <i>Ca_desi_Chr08</i> | 6212381                 | G/A  | Gene_Ca_08430.1    | NON_SYNONYMOUS_CODING          | NA                                                               |
| <i>Desi_wild_6213165</i> | NA                                  | <i>Ca_desi_Chr08</i> | 6213165                 | G/A  | Gene_Ca_08430.1    | NON_SYNONYMOUS_CODING          | NA                                                               |
| <i>Desi_wild_6217067</i> | NA                                  | <i>Ca_desi_Chr08</i> | 6217067                 | T/C  | Gene_Ca_08430.1    | NON_SYNONYMOUS_CODING          | NA                                                               |
| <i>Desi_wild_6221173</i> | NA                                  | <i>Ca_desi_Chr08</i> | 6221173                 | T/G  | Gene_Ca_08430.1    | NON_SYNONYMOUS_CODING          | NA                                                               |
| <i>Desi_wild_6322354</i> | NA                                  | <i>Ca_desi_Chr08</i> | 6322354                 | A/G  | NA                 | INTERGENIC                     | NA                                                               |
| <i>Desi_wild_6380668</i> | NA                                  | <i>Ca_desi_Chr08</i> | 6380668                 | A/T  | Gene_Ca_08444.1    | SYNONYMOUS_CODING              | Zinc finger protein ZAT4                                         |
| <i>Desi_wild_6392071</i> | NA                                  | <i>Ca_desi_Chr08</i> | 6392071                 | C/A  | Gene_Ca_08446.1    | DOWNSTREAM                     | NADP-dependent alkenal double bond reductase P2                  |
| <i>Desi_wild_6413401</i> | NA                                  | <i>Ca_desi_Chr08</i> | 6413401                 | T/G  | Gene_Ca_08449.1    | NON_SYNONYMOUS_CODING          | S phase cyclin A-associated protein in the endoplasmic reticulum |
| <i>Desi_wild_6504881</i> | NA                                  | <i>Ca_desi_Chr08</i> | 6504881                 | A/G  | Gene_Ca_08458.1    | DOWNSTREAM                     | Formin-like protein 20                                           |
| <i>Desi_wild_6521878</i> | NA                                  | <i>Ca_desi_Chr08</i> | 6521878                 | T/A  | NA                 | INTERGENIC                     | NA                                                               |
| <i>Desi_wild_6550853</i> | NA                                  | <i>Ca_desi_Chr08</i> | 6550853                 | C/A  | NA                 | INTERGENIC                     | NA                                                               |
| <i>Desi_wild_6606641</i> | NA                                  | <i>Ca_desi_Chr08</i> | 6606641                 | A/C  | Gene_Ca_08469.1    | DOWNSTREAM                     | HNH endonuclease                                                 |
| <i>Desi_wild_6693743</i> | NA                                  | <i>Ca_desi_Chr08</i> | 6693743                 | C/T  | Gene_Ca_08481.1    | NON_SYNONYMOUS_CODING          | ABC transporter B family member 25                               |
| <i>Desi_wild_6890396</i> | NA                                  | <i>Ca_desi_Chr08</i> | 6890396                 | T/C  | NA                 | INTERGENIC                     | NA                                                               |
| <i>Desi_wild_6890398</i> | NA                                  | <i>Ca_desi_Chr08</i> | 6890398                 | G/A  | NA                 | INTERGENIC                     | NA                                                               |
| <i>Desi_wild_6929295</i> | NA                                  | <i>Ca_desi_Chr08</i> | 6929295                 | T/C  | Gene_Ca_08499.2    | UPSTREAM                       | NA                                                               |
| <i>Desi_wild_6929305</i> | NA                                  | <i>Ca_desi_Chr08</i> | 6929305                 | T/G  | Gene_Ca_08499.2    | UPSTREAM                       | NA                                                               |
| <i>Desi_wild_6929347</i> | NA                                  | <i>Ca_desi_Chr08</i> | 6929347                 | C/T  | Gene_Ca_08499.2    | UPSTREAM                       | NA                                                               |
| <i>Desi_wild_6929663</i> | NA                                  | <i>Ca_desi_Chr08</i> | 6929663                 | C/A  | Gene_Ca_08499.1    | START_GAINED: ATG, UTR_5_PRIME | Ribosome production factor 1                                     |
| <i>Desi_wild_6932494</i> | NA                                  | <i>Ca_desi_Chr08</i> | 6932494                 | C/A  | NA                 | INTERGENIC                     | NA                                                               |
| <i>Desi_wild_6932498</i> | NA                                  | <i>Ca_desi_Chr08</i> | 6932498                 | T/C  | NA                 | INTERGENIC                     | NA                                                               |
| <i>Desi_wild_6932543</i> | NA                                  | <i>Ca_desi_Chr08</i> | 6932543                 | A/G  | NA                 | INTERGENIC                     | NA                                                               |
| <i>Desi_wild_6949072</i> | NA                                  | <i>Ca_desi_Chr08</i> | 6949072                 | T/C  | Gene_Ca_08502.1    | DOWNSTREAM                     | Probable inactive purple acid phosphatase 29                     |
| <i>Desi_wild_6985350</i> | NA                                  | <i>Ca_desi_Chr08</i> | 6985350                 | C/T  | Gene_Ca_08507.1    | SYNONYMOUS_CODING              | Putative uncharacterized protein                                 |
| <i>Desi_wild_6985708</i> | NA                                  | <i>Ca_desi_Chr08</i> | 6985708                 | T/C  | Gene_Ca_08507.1    | SYNONYMOUS_CODING              | Putative uncharacterized protein                                 |
| <i>Desi_wild_7060761</i> | NA                                  | <i>Ca_desi_Chr08</i> | 7060761                 | C/A  | Gene_Ca_08515.1    | INTRON                         | DNA-directed RNA polymerase III subunit RPC2                     |

| SNP IDs                  | NCBI dbSNP accession IDs (NCBI_SS#) | Chromosomes          | Physical positions (bp) | SNPs | Gene accession IDs | Sequence components of genome | Putative functions                                                   |
|--------------------------|-------------------------------------|----------------------|-------------------------|------|--------------------|-------------------------------|----------------------------------------------------------------------|
| <i>Desi_wild_7061357</i> | NA                                  | <i>Ca_desi_Chr08</i> | 7061357                 | C/G  | Gene_Ca_08515.1    | NON_SYNONYMOUS_CODING         | DNA-directed RNA polymerase III subunit RPC2                         |
| <i>Desi_wild_7680841</i> | NA                                  | <i>Ca_desi_Chr08</i> | 7680841                 | T/C  | Gene_Ca_08528.1    | SYNONYMOUS_CODING             | Probable alpha-mannosidase I MNS5                                    |
| <i>Desi_wild_7684726</i> | NA                                  | <i>Ca_desi_Chr08</i> | 7684726                 | C/G  | Gene_Ca_08528.1    | INTRON                        | Probable alpha-mannosidase I MNS5                                    |
| <i>Desi_wild_7684806</i> | NA                                  | <i>Ca_desi_Chr08</i> | 7684806                 | G/A  | Gene_Ca_08528.1    | NON_SYNONYMOUS_CODING         | Probable alpha-mannosidase I MNS5                                    |
| <i>Desi_wild_7809130</i> | NA                                  | <i>Ca_desi_Chr08</i> | 7809130                 | T/G  | NA                 | INTERGENIC                    | NA                                                                   |
| <i>Desi_wild_7856284</i> | NA                                  | <i>Ca_desi_Chr08</i> | 7856284                 | C/T  | NA                 | INTERGENIC                    | NA                                                                   |
| <i>Desi_wild_7860455</i> | NA                                  | <i>Ca_desi_Chr08</i> | 7860455                 | G/C  | NA                 | INTERGENIC                    | NA                                                                   |
| <i>Desi_wild_7921680</i> | NA                                  | <i>Ca_desi_Chr08</i> | 7921680                 | G/T  | NA                 | INTERGENIC                    | NA                                                                   |
| <i>Desi_wild_8039844</i> | NA                                  | <i>Ca_desi_Chr08</i> | 8039844                 | T/C  | Gene_Ca_08568.1    | UPSTREAM                      | Heme-binding protein 2                                               |
| <i>Desi_wild_8065243</i> | NA                                  | <i>Ca_desi_Chr08</i> | 8065243                 | A/G  | NA                 | INTERGENIC                    | NA                                                                   |
| <i>Desi_wild_8124369</i> | NA                                  | <i>Ca_desi_Chr08</i> | 8124369                 | T/G  | NA                 | INTERGENIC                    | NA                                                                   |
| <i>Desi_wild_8174457</i> | NA                                  | <i>Ca_desi_Chr08</i> | 8174457                 | A/G  | NA                 | INTERGENIC                    | NA                                                                   |
| <i>Desi_wild_8224144</i> | NA                                  | <i>Ca_desi_Chr08</i> | 8224144                 | A/C  | Gene_Ca_08593.1    | INTRON                        | Lysine-specific demethylase REF6                                     |
| <i>Desi_wild_8226513</i> | NA                                  | <i>Ca_desi_Chr08</i> | 8226513                 | G/T  | Gene_Ca_08593.1    | INTRON                        | Lysine-specific demethylase REF6                                     |
| <i>Desi_wild_8226559</i> | NA                                  | <i>Ca_desi_Chr08</i> | 8226559                 | C/T  | Gene_Ca_08593.1    | NON_SYNONYMOUS_CODING         | Lysine-specific demethylase REF6                                     |
| <i>Desi_wild_8226615</i> | NA                                  | <i>Ca_desi_Chr08</i> | 8226615                 | G/A  | Gene_Ca_08593.1    | SYNONYMOUS_CODING             | Lysine-specific demethylase REF6                                     |
| <i>Desi_wild_8231924</i> | NA                                  | <i>Ca_desi_Chr08</i> | 8231924                 | T/C  | Gene_Ca_08593.1    | UPSTREAM                      | Lysine-specific demethylase REF6                                     |
| <i>Desi_wild_8232001</i> | NA                                  | <i>Ca_desi_Chr08</i> | 8232001                 | A/G  | Gene_Ca_08593.1    | UPSTREAM                      | Lysine-specific demethylase REF6                                     |
| <i>Desi_wild_8394370</i> | NA                                  | <i>Ca_desi_Chr08</i> | 8394370                 | G/A  | Gene_Ca_08605.1    | NON_SYNONYMOUS_CODING         | Argininosuccinate synthase, chloroplastic                            |
| <i>Desi_wild_8432922</i> | NA                                  | <i>Ca_desi_Chr08</i> | 8432922                 | C/A  | Gene_Ca_08610.1    | INTRON                        | Protein MSP1                                                         |
| <i>Desi_wild_8432955</i> | NA                                  | <i>Ca_desi_Chr08</i> | 8432955                 | C/A  | Gene_Ca_08610.1    | INTRON                        | Protein MSP1                                                         |
| <i>Desi_wild_8432958</i> | NA                                  | <i>Ca_desi_Chr08</i> | 8432958                 | A/T  | Gene_Ca_08610.1    | INTRON                        | Protein MSP1                                                         |
| <i>Desi_wild_8432964</i> | NA                                  | <i>Ca_desi_Chr08</i> | 8432964                 | A/C  | Gene_Ca_08610.1    | INTRON                        | Protein MSP1                                                         |
| <i>Desi_wild_8432968</i> | NA                                  | <i>Ca_desi_Chr08</i> | 8432968                 | T/G  | Gene_Ca_08610.1    | SYNONYMOUS_CODING             | Protein MSP1                                                         |
| <i>Desi_wild_8435244</i> | NA                                  | <i>Ca_desi_Chr08</i> | 8435244                 | G/T  | Gene_Ca_08610.1    | SYNONYMOUS_CODING             | Protein MSP1                                                         |
| <i>Desi_wild_8488170</i> | NA                                  | <i>Ca_desi_Chr08</i> | 8488170                 | C/T  | Gene_Ca_08616.1    | SYNONYMOUS_CODING             | Cucumisin                                                            |
| <i>Desi_wild_8527697</i> | NA                                  | <i>Ca_desi_Chr08</i> | 8527697                 | T/C  | Gene_Ca_08620.1    | DOWNSTREAM                    | Pyridoxal phosphate (PLP)-dependent transferases superfamily protein |
| <i>Desi_wild_8527968</i> | NA                                  | <i>Ca_desi_Chr08</i> | 8527968                 | C/A  | NA                 | INTERGENIC                    | NA                                                                   |
| <i>Desi_wild_8530154</i> | NA                                  | <i>Ca_desi_Chr08</i> | 8530154                 | A/G  | NA                 | INTERGENIC                    | NA                                                                   |
| <i>Desi_wild_8530166</i> | NA                                  | <i>Ca_desi_Chr08</i> | 8530166                 | C/T  | NA                 | INTERGENIC                    | NA                                                                   |
| <i>Desi_wild_8547790</i> | NA                                  | <i>Ca_desi_Chr08</i> | 8547790                 | C/A  | Gene_Ca_08623.1    | NON_SYNONYMOUS_CODING         | IQ-domain 22                                                         |
| <i>Desi_wild_8581166</i> | NA                                  | <i>Ca_desi_Chr08</i> | 8581166                 | T/G  | Gene_Ca_08624.1    | UPSTREAM                      | Phosphatidylinositol glycan anchor biosynthesis class U protein      |
| <i>Desi_wild_8581939</i> | NA                                  | <i>Ca_desi_Chr08</i> | 8581939                 | C/A  | Gene_Ca_08624.1    | UPSTREAM                      | Phosphatidylinositol glycan anchor biosynthesis class U protein      |
| <i>Desi_wild_8714984</i> | NA                                  | <i>Ca_desi_Chr08</i> | 8714984                 | C/A  | Gene_Ca_08637.1    | NON_SYNONYMOUS_CODING         | Subtilisin-like protease SDD1                                        |
| <i>Desi_wild_8714991</i> | NA                                  | <i>Ca_desi_Chr08</i> | 8714991                 | A/C  | Gene_Ca_08637.1    | SYNONYMOUS_CODING             | Subtilisin-like protease SDD1                                        |
| <i>Desi_wild_8809599</i> | NA                                  | <i>Ca_desi_Chr08</i> | 8809599                 | T/G  | NA                 | INTERGENIC                    | NA                                                                   |
| <i>Desi_wild_8830488</i> | NA                                  | <i>Ca_desi_Chr08</i> | 8830488                 | T/G  | Gene_Ca_08649.1    | SYNONYMOUS_CODING             | NA                                                                   |
| <i>Desi_wild_8851339</i> | NA                                  | <i>Ca_desi_Chr08</i> | 8851339                 | T/G  | Gene_Ca_08650.1    | NON_SYNONYMOUS_CODING         | unknown protein                                                      |
| <i>Desi_wild_8918435</i> | NA                                  | <i>Ca_desi_Chr08</i> | 8918435                 | C/T  | Gene_Ca_08656.1    | SYNONYMOUS_CODING             | [Protein-P1I] uridylyltransferase                                    |
| <i>Desi_wild_8962439</i> | NA                                  | <i>Ca_desi_Chr08</i> | 8962439                 | T/G  | Gene_Ca_08658.1    | NON_SYNONYMOUS_CODING         | NA                                                                   |
| <i>Desi_wild_8963019</i> | NA                                  | <i>Ca_desi_Chr08</i> | 8963019                 | G/C  | Gene_Ca_08658.1    | SYNONYMOUS_CODING             | NA                                                                   |
| <i>Desi_wild_8980494</i> | NA                                  | <i>Ca_desi_Chr08</i> | 8980494                 | C/T  | Gene_Ca_08659.1    | DOWNSTREAM                    | Cell cycle regulated microtubule associated protein                  |
| <i>Desi_wild_8990940</i> | NA                                  | <i>Ca_desi_Chr08</i> | 8990940                 | A/G  | Gene_Ca_08661.1    | SYNONYMOUS_CODING             | Probable sugar phosphate/phosphate translocator At1g12500            |
| <i>Desi_wild_8990994</i> | NA                                  | <i>Ca_desi_Chr08</i> | 8990994                 | A/G  | Gene_Ca_08661.1    | SYNONYMOUS_CODING             | Probable sugar phosphate/phosphate translocator At1g12500            |



| SNP IDs            | NCBI dbSNP accession IDs (NCBI_SS#) | Chromosomes   | Physical positions (bp) | SNPs | Gene accession IDs | Sequence components of genome | Putative functions                                   |
|--------------------|-------------------------------------|---------------|-------------------------|------|--------------------|-------------------------------|------------------------------------------------------|
| Desi_wild_9066626  | NA                                  | Ca_desi_Chr08 | 9066626                 | A/C  | NA                 | INTERGENIC                    | NA                                                   |
| Desi_wild_10010315 | NA                                  | Ca_desi_Chr08 | 10010315                | G/C  | NA                 | INTERGENIC                    | NA                                                   |
| Desi_wild_10010317 | NA                                  | Ca_desi_Chr08 | 10010317                | A/T  | NA                 | INTERGENIC                    | NA                                                   |
| Desi_wild_10010422 | NA                                  | Ca_desi_Chr08 | 10010422                | G/T  | NA                 | INTERGENIC                    | NA                                                   |
| Desi_wild_10010446 | NA                                  | Ca_desi_Chr08 | 10010446                | T/G  | NA                 | INTERGENIC                    | NA                                                   |
| Desi_wild_10010518 | NA                                  | Ca_desi_Chr08 | 10010518                | G/A  | NA                 | INTERGENIC                    | NA                                                   |
| Desi_wild_10011198 | NA                                  | Ca_desi_Chr08 | 10011198                | G/C  | NA                 | INTERGENIC                    | NA                                                   |
| Desi_wild_10033171 | NA                                  | Ca_desi_Chr08 | 10033171                | T/G  | NA                 | INTERGENIC                    | NA                                                   |
| Desi_wild_10047928 | NA                                  | Ca_desi_Chr08 | 10047928                | A/C  | NA                 | INTERGENIC                    | NA                                                   |
| Desi_wild_10047942 | NA                                  | Ca_desi_Chr08 | 10047942                | A/T  | NA                 | INTERGENIC                    | NA                                                   |
| Desi_wild_10089008 | NA                                  | Ca_desi_Chr08 | 10089008                | G/A  | Gene_Ca_08708.1    | DOWNSTREAM                    | unknown protein                                      |
| Desi_wild_10089756 | NA                                  | Ca_desi_Chr08 | 10089756                | G/A  | Gene_Ca_08708.1    | DOWNSTREAM                    | unknown protein                                      |
| Desi_wild_10089757 | NA                                  | Ca_desi_Chr08 | 10089757                | A/G  | Gene_Ca_08708.1    | DOWNSTREAM                    | unknown protein                                      |
| Desi_wild_10092099 | NA                                  | Ca_desi_Chr08 | 10092099                | T/A  | NA                 | INTERGENIC                    | NA                                                   |
| Desi_wild_10092448 | NA                                  | Ca_desi_Chr08 | 10092448                | G/A  | NA                 | INTERGENIC                    | NA                                                   |
| Desi_wild_10092547 | NA                                  | Ca_desi_Chr08 | 10092547                | G/C  | NA                 | INTERGENIC                    | NA                                                   |
| Desi_wild_10099055 | NA                                  | Ca_desi_Chr08 | 10099055                | C/T  | NA                 | INTERGENIC                    | NA                                                   |
| Desi_wild_10118091 | NA                                  | Ca_desi_Chr08 | 10118091                | A/G  | Gene_Ca_08711.1    | INTRON                        | Chromatin structure-remodeling complex subunit snf21 |
| Desi_wild_10122343 | NA                                  | Ca_desi_Chr08 | 10122343                | T/C  | Gene_Ca_08711.1    | INTRON                        | Chromatin structure-remodeling complex subunit snf21 |
| Desi_wild_10126050 | NA                                  | Ca_desi_Chr08 | 10126050                | A/C  | Gene_Ca_08711.1    | SYNONYMOUS_CODING             | Chromatin structure-remodeling complex subunit snf21 |
| Desi_wild_10127600 | NA                                  | Ca_desi_Chr08 | 10127600                | T/G  | Gene_Ca_08711.1    | NON_SYNONYMOUS_CODING         | Chromatin structure-remodeling complex subunit snf21 |
| Desi_wild_10138245 | NA                                  | Ca_desi_Chr08 | 10138245                | T/G  | Gene_Ca_08713.1    | UPSTREAM                      | DNAJ heat shock N-terminal domain-containing protein |
| Desi_wild_10138459 | NA                                  | Ca_desi_Chr08 | 10138459                | T/C  | NA                 | INTERGENIC                    | NA                                                   |
| Desi_wild_10139121 | NA                                  | Ca_desi_Chr08 | 10139121                | T/C  | NA                 | INTERGENIC                    | NA                                                   |
| Desi_wild_10139184 | NA                                  | Ca_desi_Chr08 | 10139184                | G/T  | NA                 | INTERGENIC                    | NA                                                   |
| Desi_wild_10146318 | NA                                  | Ca_desi_Chr08 | 10146318                | A/G  | NA                 | INTERGENIC                    | NA                                                   |
| Desi_wild_10146781 | NA                                  | Ca_desi_Chr08 | 10146781                | C/G  | NA                 | INTERGENIC                    | NA                                                   |
| Desi_wild_10146785 | NA                                  | Ca_desi_Chr08 | 10146785                | T/G  | NA                 | INTERGENIC                    | NA                                                   |
| Desi_wild_10146937 | NA                                  | Ca_desi_Chr08 | 10146937                | A/G  | NA                 | INTERGENIC                    | NA                                                   |
| Desi_wild_10147052 | NA                                  | Ca_desi_Chr08 | 10147052                | C/A  | NA                 | INTERGENIC                    | NA                                                   |
| Desi_wild_10147096 | NA                                  | Ca_desi_Chr08 | 10147096                | A/G  | NA                 | INTERGENIC                    | NA                                                   |
| Desi_wild_10156188 | NA                                  | Ca_desi_Chr08 | 10156188                | G/C  | Gene_Ca_08716.1    | INTRON                        | NA                                                   |
| Desi_wild_10156217 | NA                                  | Ca_desi_Chr08 | 10156217                | G/T  | Gene_Ca_08716.1    | INTRON                        | NA                                                   |
| Desi_wild_10161149 | NA                                  | Ca_desi_Chr08 | 10161149                | A/C  | Gene_Ca_08717.1    | NON_SYNONYMOUS_CODING         | Sugar transporter ERD6-like 16                       |
| Desi_wild_10179564 | NA                                  | Ca_desi_Chr08 | 10179564                | G/T  | Gene_Ca_08719.1    | NON_SYNONYMOUS_CODING         | Pyrimidine-specific ribonucleoside hydrolase rihA    |
| Desi_wild_10186069 | NA                                  | Ca_desi_Chr08 | 10186069                | C/A  | Gene_Ca_08720.1    | UPSTREAM                      | Prolyl 4-hydroxylase subunit alpha-1                 |
| Desi_wild_10194656 | NA                                  | Ca_desi_Chr08 | 10194656                | T/G  | Gene_Ca_08722.1    | UPSTREAM                      | Putative uncharacterized protein                     |
| Desi_wild_10194709 | NA                                  | Ca_desi_Chr08 | 10194709                | T/C  | Gene_Ca_08722.1    | SYNONYMOUS_CODING             | Putative uncharacterized protein                     |
| Desi_wild_10194719 | NA                                  | Ca_desi_Chr08 | 10194719                | C/A  | Gene_Ca_08722.1    | NON_SYNONYMOUS_CODING         | Putative uncharacterized protein                     |
| Desi_wild_10194837 | NA                                  | Ca_desi_Chr08 | 10194837                | A/G  | Gene_Ca_08722.1    | NON_SYNONYMOUS_CODING         | Putative uncharacterized protein                     |
| Desi_wild_10194865 | NA                                  | Ca_desi_Chr08 | 10194865                | G/T  | Gene_Ca_08722.1    | SYNONYMOUS_CODING             | Putative uncharacterized protein                     |
| Desi_wild_10199366 | NA                                  | Ca_desi_Chr08 | 10199366                | G/C  | NA                 | INTERGENIC                    | NA                                                   |
| Desi_wild_10366740 | NA                                  | Ca_desi_Chr08 | 10366740                | A/G  | Gene_Ca_08730.1    | SYNONYMOUS_CODING             | NA                                                   |
| Desi_wild_10366745 | NA                                  | Ca_desi_Chr08 | 10366745                | T/C  | Gene_Ca_08730.1    | NON_SYNONYMOUS_CODING         | NA                                                   |

| SNP IDs                   | NCBI dbSNP accession IDs (NCBI_SS#) | Chromosomes             | Physical positions (bp) | SNPs | Gene accession IDs | Sequence components of genome  | Putative functions                                                   |
|---------------------------|-------------------------------------|-------------------------|-------------------------|------|--------------------|--------------------------------|----------------------------------------------------------------------|
| <i>Desi_wild_10366757</i> | NA                                  | <i>Ca_desi_Chr08</i>    | 10366757                | A/G  | Gene_Ca_08730.1    | NON_SYNONYMOUS_CODING          | NA                                                                   |
| <i>Desi_wild_10366770</i> | NA                                  | <i>Ca_desi_Chr08</i>    | 10366770                | G/T  | Gene_Ca_08730.1    | NON_SYNONYMOUS_CODING          | NA                                                                   |
| <i>Desi_wild_10403641</i> | NA                                  | <i>Ca_desi_Chr08</i>    | 10403641                | A/G  | NA                 | INTERGENIC                     | NA                                                                   |
| <i>Desi_wild_10405082</i> | NA                                  | <i>Ca_desi_Chr08</i>    | 10405082                | T/C  | Gene_Ca_08734.1    | SYNONYMOUS_CODING              | Probable serine/threonine-protein kinase DDB_G0272282                |
| <i>Desi_wild_10411463</i> | NA                                  | <i>Ca_desi_Chr08</i>    | 10411463                | A/C  | Gene_Ca_08734.1    | INTRON                         | Probable serine/threonine-protein kinase DDB_G0272282                |
| <i>Desi_wild_10411483</i> | NA                                  | <i>Ca_desi_Chr08</i>    | 10411483                | C/T  | Gene_Ca_08734.1    | INTRON                         | Probable serine/threonine-protein kinase DDB_G0272282                |
| <i>Desi_wild_10430251</i> | NA                                  | <i>Ca_desi_Chr08</i>    | 10430251                | G/T  | Gene_Ca_08735.1    | INTRON                         | Probable inactive receptor kinase At5g58300                          |
| <i>Desi_wild_10443585</i> | NA                                  | <i>Ca_desi_Chr08</i>    | 10443585                | A/C  | Gene_Ca_08737.1    | SYNONYMOUS_CODING              | Chaperone protein DnaJ                                               |
| <i>Desi_wild_10468040</i> | NA                                  | <i>Ca_desi_Chr08</i>    | 10468040                | G/C  | Gene_Ca_08740.2    | INTRON                         | Nudix hydrolase 4                                                    |
| <i>Desi_wild_30276</i>    | NA                                  | <i>Ca_desi_scaffold</i> | 30276                   | G/C  | NA                 | INTERGENIC                     | NA                                                                   |
| <i>Desi_wild_30326</i>    | NA                                  | <i>Ca_desi_scaffold</i> | 30326                   | C/G  | NA                 | INTERGENIC                     | NA                                                                   |
| <i>Desi_wild_80699</i>    | NA                                  | <i>Ca_desi_scaffold</i> | 80699                   | T/G  | Gene_Ca_10605.1    | SYNONYMOUS_CODING              | Laminin subunit alpha-2                                              |
| <i>Desi_wild_80728</i>    | NA                                  | <i>Ca_desi_scaffold</i> | 80728                   | G/C  | Gene_Ca_10605.1    | SYNONYMOUS_CODING              | Laminin subunit alpha-2                                              |
| <i>Desi_wild_81218</i>    | NA                                  | <i>Ca_desi_scaffold</i> | 81218                   | T/G  | Gene_Ca_10605.1    | SYNONYMOUS_CODING              | Laminin subunit alpha-2                                              |
| <i>Desi_wild_81534</i>    | NA                                  | <i>Ca_desi_scaffold</i> | 81534                   | T/C  | Gene_Ca_10605.1    | NON_SYNONYMOUS_CODING          | Laminin subunit alpha-2                                              |
| <i>Desi_wild_210202</i>   | NA                                  | <i>Ca_desi_scaffold</i> | 210202                  | G/T  | NA                 | INTERGENIC                     | NA                                                                   |
| <i>Desi_wild_223998</i>   | NA                                  | <i>Ca_desi_scaffold</i> | 223998                  | T/A  | Gene_Ca_10620.1    | NON_SYNONYMOUS_CODING          | Potassium transporter 3                                              |
| <i>Desi_wild_414217</i>   | NA                                  | <i>Ca_desi_scaffold</i> | 414217                  | A/G  | NA                 | INTERGENIC                     | NA                                                                   |
| <i>Desi_wild_78419</i>    | NA                                  | <i>Ca_desi_scaffold</i> | 78419                   | G/A  | Gene_Ca_08748.1    | INTRON                         | Pentatricopeptide repeat-containing protein At5g57250, mitochondrial |
| <i>Desi_wild_280957</i>   | NA                                  | <i>Ca_desi_scaffold</i> | 280957                  | C/T  | NA                 | INTERGENIC                     | NA                                                                   |
| <i>Desi_wild_325565</i>   | NA                                  | <i>Ca_desi_scaffold</i> | 325565                  | A/G  | Gene_Ca_08764.1    | DOWNSTREAM                     | YbaK/aminoacyl-tRNA synthetase-associated domain                     |
| <i>Desi_wild_325566</i>   | NA                                  | <i>Ca_desi_scaffold</i> | 325566                  | A/G  | Gene_Ca_08764.1    | DOWNSTREAM                     | YbaK/aminoacyl-tRNA synthetase-associated domain                     |
| <i>Desi_wild_325568</i>   | NA                                  | <i>Ca_desi_scaffold</i> | 325568                  | A/G  | Gene_Ca_08764.1    | DOWNSTREAM                     | YbaK/aminoacyl-tRNA synthetase-associated domain                     |
| <i>Desi_wild_386292</i>   | NA                                  | <i>Ca_desi_scaffold</i> | 386292                  | G/A  | Gene_Ca_08767.1    | INTRON                         | Putative vacuolar protein sorting-associated protein 13C             |
| <i>Desi_wild_421228</i>   | NA                                  | <i>Ca_desi_scaffold</i> | 421228                  | C/A  | Gene_Ca_08769.1    | NON_SYNONYMOUS_CODING          | BTB/POZ domain-containing protein At5g66560                          |
| <i>Desi_wild_421230</i>   | NA                                  | <i>Ca_desi_scaffold</i> | 421230                  | C/A  | Gene_Ca_08769.1    | NON_SYNONYMOUS_CODING          | BTB/POZ domain-containing protein At5g66560                          |
| <i>Desi_wild_421370</i>   | NA                                  | <i>Ca_desi_scaffold</i> | 421370                  | G/A  | Gene_Ca_08769.1    | SYNONYMOUS_CODING              | BTB/POZ domain-containing protein At5g66560                          |
| <i>Desi_wild_431042</i>   | NA                                  | <i>Ca_desi_scaffold</i> | 431042                  | C/A  | Gene_Ca_08770.1    | NON_SYNONYMOUS_CODING          | cold-regulated 413-plasma membrane 2                                 |
| <i>Desi_wild_9429</i>     | NA                                  | <i>Ca_desi_scaffold</i> | 9429                    | T/C  | NA                 | INTERGENIC                     | NA                                                                   |
| <i>Desi_wild_41146</i>    | NA                                  | <i>Ca_desi_scaffold</i> | 41146                   | A/C  | Gene_Ca_08781.1    | UPSTREAM                       | Pentatricopeptide repeat-containing protein At4g38010                |
| <i>Desi_wild_41149</i>    | NA                                  | <i>Ca_desi_scaffold</i> | 41149                   | T/G  | Gene_Ca_08781.1    | UPSTREAM                       | Pentatricopeptide repeat-containing protein At4g38010                |
| <i>Desi_wild_41151</i>    | NA                                  | <i>Ca_desi_scaffold</i> | 41151                   | G/A  | Gene_Ca_08781.1    | START_GAINED: CTG, UTR_5_PRIME | Pentatricopeptide repeat-containing protein At4g38010                |
| <i>Desi_wild_41154</i>    | NA                                  | <i>Ca_desi_scaffold</i> | 41154                   | A/C  | Gene_Ca_08781.1    | UPSTREAM                       | Pentatricopeptide repeat-containing protein At4g38010                |
| <i>Desi_wild_41160</i>    | NA                                  | <i>Ca_desi_scaffold</i> | 41160                   | A/G  | Gene_Ca_08781.1    | UPSTREAM                       | Pentatricopeptide repeat-containing protein At4g38010                |
| <i>Desi_wild_229714</i>   | NA                                  | <i>Ca_desi_scaffold</i> | 229714                  | A/G  | NA                 | INTERGENIC                     | NA                                                                   |
| <i>Desi_wild_275942</i>   | NA                                  | <i>Ca_desi_scaffold</i> | 275942                  | T/G  | NA                 | INTERGENIC                     | NA                                                                   |
| <i>Desi_wild_317976</i>   | NA                                  | <i>Ca_desi_scaffold</i> | 317976                  | A/C  | NA                 | INTERGENIC                     | NA                                                                   |
| <i>Desi_wild_318019</i>   | NA                                  | <i>Ca_desi_scaffold</i> | 318019                  | T/C  | NA                 | INTERGENIC                     | NA                                                                   |
| <i>Desi_wild_379842</i>   | NA                                  | <i>Ca_desi_scaffold</i> | 379842                  | G/T  | NA                 | INTERGENIC                     | NA                                                                   |
| <i>Desi_wild_85672</i>    | NA                                  | <i>Ca_desi_scaffold</i> | 85672                   | T/G  | NA                 | INTERGENIC                     | NA                                                                   |
| <i>Desi_wild_220100</i>   | NA                                  | <i>Ca_desi_scaffold</i> | 220100                  | G/A  | Gene_Ca_10666.1    | INTRON                         | Histone-lysine N-methyltransferase ASHH2                             |
| <i>Desi_wild_257738</i>   | NA                                  | <i>Ca_desi_scaffold</i> | 257738                  | G/T  | Gene_Ca_10670.1    | INTRON                         | wound-responsive family protein                                      |
| <i>Desi_wild_261947</i>   | NA                                  | <i>Ca_desi_scaffold</i> | 261947                  | C/A  | Gene_Ca_10670.1    | NON_SYNONYMOUS_CODING          | wound-responsive family protein                                      |
| <i>Desi_wild_16931</i>    | NA                                  | <i>Ca_desi_scaffold</i> | 16931                   | T/C  | Gene_Ca_10685.1    | INTRON                         | Kinesin-related protein 11                                           |

| SNP IDs          | NCBI dbSNP accession IDs (NCBI_SS#) | Chromosomes      | Physical positions (bp) | SNPs | Gene accession IDs | Sequence components of genome | Putative functions                                   |
|------------------|-------------------------------------|------------------|-------------------------|------|--------------------|-------------------------------|------------------------------------------------------|
| Desi_wild_132345 | NA                                  | Ca_desi_scaffold | 132345                  | A/C  | Gene_Ca_10696.1    | UPSTREAM                      | resistance to phytophthora 1                         |
| Desi_wild_132386 | NA                                  | Ca_desi_scaffold | 132386                  | C/T  | Gene_Ca_10696.1    | UPSTREAM                      | resistance to phytophthora 1                         |
| Desi_wild_132519 | NA                                  | Ca_desi_scaffold | 132519                  | A/G  | Gene_Ca_10696.1    | UPSTREAM                      | resistance to phytophthora 1                         |
| Desi_wild_141979 | NA                                  | Ca_desi_scaffold | 141979                  | C/G  | Gene_Ca_10696.1    | DOWNSTREAM                    | resistance to phytophthora 1                         |
| Desi_wild_192469 | NA                                  | Ca_desi_scaffold | 192469                  | G/A  | Gene_Ca_10703.1    | SYNONYMOUS_CODING             | Short-chain type dehydrogenase/reductase             |
| Desi_wild_199681 | NA                                  | Ca_desi_scaffold | 199681                  | C/T  | Gene_Ca_10704.1    | SYNONYMOUS_CODING             | REF4-related 1                                       |
| Desi_wild_201300 | NA                                  | Ca_desi_scaffold | 201300                  | T/A  | Gene_Ca_10704.1    | INTRON                        | REF4-related 1                                       |
| Desi_wild_213502 | NA                                  | Ca_desi_scaffold | 213502                  | A/G  | Gene_Ca_10705.1    | INTRON                        | reduced epidermal fluorescence 4                     |
| Desi_wild_325187 | NA                                  | Ca_desi_scaffold | 325187                  | C/T  | Gene_Ca_10715.1    | UPSTREAM                      | unknown protein                                      |
| Desi_wild_340066 | NA                                  | Ca_desi_scaffold | 340066                  | A/C  | NA                 | INTERGENIC                    | NA                                                   |
| Desi_wild_124344 | NA                                  | Ca_desi_scaffold | 124344                  | G/C  | NA                 | INTERGENIC                    | NA                                                   |
| Desi_wild_260820 | NA                                  | Ca_desi_scaffold | 260820                  | C/A  | Gene_Ca_10731.1    | SYNONYMOUS_CODING             | ZF-HD homeobox protein At4g24660                     |
| Desi_wild_362179 | NA                                  | Ca_desi_scaffold | 362179                  | A/T  | NA                 | INTERGENIC                    | NA                                                   |
| Desi_wild_44741  | NA                                  | Ca_desi_scaffold | 44741                   | T/C  | NA                 | INTERGENIC                    | NA                                                   |
| Desi_wild_240819 | NA                                  | Ca_desi_scaffold | 240819                  | G/A  | Gene_Ca_10754.2    | NON_SYNONYMOUS_CODING         | unknown protein                                      |
| Desi_wild_241954 | NA                                  | Ca_desi_scaffold | 241954                  | C/G  | Gene_Ca_10754.2    | SYNONYMOUS_CODING             | unknown protein                                      |
| Desi_wild_327964 | NA                                  | Ca_desi_scaffold | 327964                  | A/G  | Gene_Ca_10762.1    | INTRON                        | Protein transport protein SEC24                      |
| Desi_wild_328116 | NA                                  | Ca_desi_scaffold | 328116                  | A/C  | Gene_Ca_10762.1    | NON_SYNONYMOUS_CODING         | Protein transport protein SEC24                      |
| Desi_wild_328145 | NA                                  | Ca_desi_scaffold | 328145                  | A/C  | Gene_Ca_10762.1    | SYNONYMOUS_CODING             | Protein transport protein SEC24                      |
| Desi_wild_352507 | NA                                  | Ca_desi_scaffold | 352507                  | T/C  | NA                 | INTERGENIC                    | NA                                                   |
| Desi_wild_352573 | NA                                  | Ca_desi_scaffold | 352573                  | A/C  | NA                 | INTERGENIC                    | NA                                                   |
| Desi_wild_363044 | NA                                  | Ca_desi_scaffold | 363044                  | C/T  | NA                 | INTERGENIC                    | NA                                                   |
| Desi_wild_104031 | NA                                  | Ca_desi_scaffold | 104031                  | A/G  | Gene_Ca_10775.1    | INTRON                        | Digalactosyldiacylglycerol synthase 1, chloroplastic |
| Desi_wild_125368 | NA                                  | Ca_desi_scaffold | 125368                  | A/C  | NA                 | INTERGENIC                    | NA                                                   |
| Desi_wild_147452 | NA                                  | Ca_desi_scaffold | 147452                  | T/C  | Gene_Ca_10778.1    | DOWNSTREAM                    | NA                                                   |
| Desi_wild_147486 | NA                                  | Ca_desi_scaffold | 147486                  | G/T  | Gene_Ca_10778.1    | DOWNSTREAM                    | NA                                                   |
| Desi_wild_147496 | NA                                  | Ca_desi_scaffold | 147496                  | G/C  | Gene_Ca_10778.1    | DOWNSTREAM                    | NA                                                   |
| Desi_wild_235945 | NA                                  | Ca_desi_scaffold | 235945                  | G/A  | NA                 | INTERGENIC                    | NA                                                   |
| Desi_wild_289315 | NA                                  | Ca_desi_scaffold | 289315                  | T/C  | Gene_Ca_10792.1    | NON_SYNONYMOUS_CODING         | Programmed cell death protein 2                      |
| Desi_wild_289355 | NA                                  | Ca_desi_scaffold | 289355                  | G/A  | Gene_Ca_10792.1    | SYNONYMOUS_CODING             | Programmed cell death protein 2                      |
| Desi_wild_291709 | NA                                  | Ca_desi_scaffold | 291709                  | A/G  | Gene_Ca_10792.1    | INTRON                        | Programmed cell death protein 2                      |
| Desi_wild_292570 | NA                                  | Ca_desi_scaffold | 292570                  | A/G  | Gene_Ca_10792.1    | INTRON                        | Programmed cell death protein 2                      |
| Desi_wild_296272 | NA                                  | Ca_desi_scaffold | 296272                  | C/G  | Gene_Ca_10792.1    | INTRON                        | Programmed cell death protein 2                      |
| Desi_wild_296346 | NA                                  | Ca_desi_scaffold | 296346                  | A/G  | Gene_Ca_10792.1    | INTRON                        | Programmed cell death protein 2                      |
| Desi_wild_296374 | NA                                  | Ca_desi_scaffold | 296374                  | A/G  | Gene_Ca_10792.1    | INTRON                        | Programmed cell death protein 2                      |
| Desi_wild_34934  | NA                                  | Ca_desi_scaffold | 34934                   | A/T  | Gene_Ca_10801.1    | DOWNSTREAM                    | E3 ubiquitin-protein ligase MARCH1                   |
| Desi_wild_157340 | NA                                  | Ca_desi_scaffold | 157340                  | G/C  | Gene_Ca_10810.1    | UPSTREAM                      | NA                                                   |
| Desi_wild_184630 | NA                                  | Ca_desi_scaffold | 184630                  | G/C  | Gene_Ca_10814.1    | NON_SYNONYMOUS_CODING         | Early nodulin-93                                     |
| Desi_wild_245817 | NA                                  | Ca_desi_scaffold | 245817                  | A/C  | Gene_Ca_10821.1    | NON_SYNONYMOUS_CODING         | RNA polymerase II transcription mediators            |
| Desi_wild_283066 | NA                                  | Ca_desi_scaffold | 283066                  | A/G  | NA                 | INTERGENIC                    | NA                                                   |
| Desi_wild_337559 | NA                                  | Ca_desi_scaffold | 337559                  | A/G  | NA                 | INTERGENIC                    | NA                                                   |
| Desi_wild_25166  | NA                                  | Ca_desi_scaffold | 25166                   | T/A  | NA                 | INTERGENIC                    | NA                                                   |
| Desi_wild_109359 | NA                                  | Ca_desi_scaffold | 109359                  | T/C  | Gene_Ca_10846.1    | NON_SYNONYMOUS_CODING         | Monosaccharide-sensing protein 3                     |
| Desi_wild_141575 | NA                                  | Ca_desi_scaffold | 141575                  | T/G  | Gene_Ca_10849.1    | NON_SYNONYMOUS_CODING         | MORC family CW-type zinc finger protein 3            |

| SNP IDs                 | NCBI dbSNP accession IDs (NCBI_SS#) | Chromosomes             | Physical positions (bp) | SNPs | Gene accession IDs | Sequence components of genome | Putative functions                               |
|-------------------------|-------------------------------------|-------------------------|-------------------------|------|--------------------|-------------------------------|--------------------------------------------------|
| <i>Desi_wild_205937</i> | NA                                  | <i>Ca_desi_scaffold</i> | 205937                  | T/G  | NA                 | INTERGENIC                    | NA                                               |
| <i>Desi_wild_205959</i> | NA                                  | <i>Ca_desi_scaffold</i> | 205959                  | G/C  | NA                 | INTERGENIC                    | NA                                               |
| <i>Desi_wild_206038</i> | NA                                  | <i>Ca_desi_scaffold</i> | 206038                  | T/C  | NA                 | INTERGENIC                    | NA                                               |
| <i>Desi_wild_274026</i> | NA                                  | <i>Ca_desi_scaffold</i> | 274026                  | G/T  | Gene_Ca_10854.1    | INTRON                        | NA                                               |
| <i>Desi_wild_316430</i> | NA                                  | <i>Ca_desi_scaffold</i> | 316430                  | G/T  | Gene_Ca_10858.1    | INTRON                        | Cucumisin                                        |
| <i>Desi_wild_316436</i> | NA                                  | <i>Ca_desi_scaffold</i> | 316436                  | A/C  | Gene_Ca_10858.1    | INTRON                        | Cucumisin                                        |
| <i>Desi_wild_210897</i> | NA                                  | <i>Ca_desi_scaffold</i> | 210897                  | A/G  | Gene_Ca_10879.1    | INTRON                        | Mitogen-activated protein kinase kinase kinase 2 |
| <i>Desi_wild_226003</i> | NA                                  | <i>Ca_desi_scaffold</i> | 226003                  | T/G  | Gene_Ca_10882.1    | DOWNSTREAM                    | Methyltransferase-like protein 1                 |
| <i>Desi_wild_282223</i> | NA                                  | <i>Ca_desi_scaffold</i> | 282223                  | C/T  | Gene_Ca_10887.1    | NON_SYNONYMOUS_CODING         | Ferric reduction oxidase 2                       |
| <i>Desi_wild_282463</i> | NA                                  | <i>Ca_desi_scaffold</i> | 282463                  | T/C  | Gene_Ca_10887.1    | INTRON                        | Ferric reduction oxidase 2                       |
| <i>Desi_wild_284076</i> | NA                                  | <i>Ca_desi_scaffold</i> | 284076                  | T/C  | Gene_Ca_10887.1    | INTRON                        | Ferric reduction oxidase 2                       |
| <i>Desi_wild_65093</i>  | NA                                  | <i>Ca_desi_scaffold</i> | 65093                   | T/G  | NA                 | INTERGENIC                    | NA                                               |
| <i>Desi_wild_85123</i>  | NA                                  | <i>Ca_desi_scaffold</i> | 85123                   | A/G  | NA                 | INTERGENIC                    | NA                                               |
| <i>Desi_wild_112847</i> | NA                                  | <i>Ca_desi_scaffold</i> | 112847                  | G/A  | Gene_Ca_10896.1    | SYNONYMOUS_CODING             | General transcription factor IIH subunit 3       |
| <i>Desi_wild_123973</i> | NA                                  | <i>Ca_desi_scaffold</i> | 123973                  | A/G  | Gene_Ca_10897.1    | SYNONYMOUS_CODING             | LysM domain-containing GPI-anchored protein 1    |
| <i>Desi_wild_124068</i> | NA                                  | <i>Ca_desi_scaffold</i> | 124068                  | T/C  | Gene_Ca_10897.1    | SYNONYMOUS_CODING             | LysM domain-containing GPI-anchored protein 1    |
| <i>Desi_wild_140380</i> | NA                                  | <i>Ca_desi_scaffold</i> | 140380                  | T/C  | NA                 | INTERGENIC                    | NA                                               |
| <i>Desi_wild_154538</i> | NA                                  | <i>Ca_desi_scaffold</i> | 154538                  | T/C  | Gene_Ca_10900.1    | DOWNSTREAM                    | UDP-galactose transporter 1                      |
| <i>Desi_wild_204925</i> | NA                                  | <i>Ca_desi_scaffold</i> | 204925                  | T/C  | Gene_Ca_10902.1    | INTRON                        | WEB family protein At2g40480                     |
| <i>Desi_wild_206141</i> | NA                                  | <i>Ca_desi_scaffold</i> | 206141                  | T/A  | Gene_Ca_10902.1    | DOWNSTREAM                    | WEB family protein At2g40480                     |
| <i>Desi_wild_206163</i> | NA                                  | <i>Ca_desi_scaffold</i> | 206163                  | T/G  | Gene_Ca_10902.1    | DOWNSTREAM                    | WEB family protein At2g40480                     |
| <i>Desi_wild_206181</i> | NA                                  | <i>Ca_desi_scaffold</i> | 206181                  | T/A  | Gene_Ca_10902.1    | DOWNSTREAM                    | WEB family protein At2g40480                     |
| <i>Desi_wild_230221</i> | NA                                  | <i>Ca_desi_scaffold</i> | 230221                  | T/C  | Gene_Ca_10903.2    | NON_SYNONYMOUS_CODING         | NA                                               |
| <i>Desi_wild_254983</i> | NA                                  | <i>Ca_desi_scaffold</i> | 254983                  | A/G  | NA                 | INTERGENIC                    | NA                                               |
| <i>Desi_wild_254986</i> | NA                                  | <i>Ca_desi_scaffold</i> | 254986                  | T/G  | NA                 | INTERGENIC                    | NA                                               |
| <i>Desi_wild_255132</i> | NA                                  | <i>Ca_desi_scaffold</i> | 255132                  | T/C  | NA                 | INTERGENIC                    | NA                                               |
| <i>Desi_wild_255133</i> | NA                                  | <i>Ca_desi_scaffold</i> | 255133                  | G/A  | NA                 | INTERGENIC                    | NA                                               |
| <i>Desi_wild_257906</i> | NA                                  | <i>Ca_desi_scaffold</i> | 257906                  | G/A  | Gene_Ca_10905.1    | INTRON                        | Probable peptide/nitrate transporter At2g40460   |
| <i>Desi_wild_257928</i> | NA                                  | <i>Ca_desi_scaffold</i> | 257928                  | G/A  | Gene_Ca_10905.1    | INTRON                        | Probable peptide/nitrate transporter At2g40460   |
| <i>Desi_wild_292224</i> | NA                                  | <i>Ca_desi_scaffold</i> | 292224                  | C/T  | NA                 | INTERGENIC                    | NA                                               |
| <i>Desi_wild_80789</i>  | NA                                  | <i>Ca_desi_scaffold</i> | 80789                   | C/A  | NA                 | INTERGENIC                    | NA                                               |
| <i>Desi_wild_190298</i> | NA                                  | <i>Ca_desi_scaffold</i> | 190298                  | A/T  | NA                 | INTERGENIC                    | NA                                               |
| <i>Desi_wild_196127</i> | NA                                  | <i>Ca_desi_scaffold</i> | 196127                  | C/T  | Gene_Ca_10933.1    | UPSTREAM                      | AMSH-like ubiquitin thioesterase 1               |
| <i>Desi_wild_196221</i> | NA                                  | <i>Ca_desi_scaffold</i> | 196221                  | G/A  | Gene_Ca_10933.1    | SYNONYMOUS_CODING             | AMSH-like ubiquitin thioesterase 1               |
| <i>Desi_wild_196235</i> | NA                                  | <i>Ca_desi_scaffold</i> | 196235                  | A/C  | Gene_Ca_10933.1    | SYNONYMOUS_CODING             | AMSH-like ubiquitin thioesterase 1               |
| <i>Desi_wild_197002</i> | NA                                  | <i>Ca_desi_scaffold</i> | 197002                  | C/A  | Gene_Ca_10933.1    | INTRON                        | AMSH-like ubiquitin thioesterase 1               |
| <i>Desi_wild_217811</i> | NA                                  | <i>Ca_desi_scaffold</i> | 217811                  | T/C  | NA                 | INTERGENIC                    | NA                                               |
| <i>Desi_wild_217841</i> | NA                                  | <i>Ca_desi_scaffold</i> | 217841                  | A/G  | NA                 | INTERGENIC                    | NA                                               |
| <i>Desi_wild_250378</i> | NA                                  | <i>Ca_desi_scaffold</i> | 250378                  | A/G  | Gene_Ca_10937.1    | INTRON                        | Plant protein of unknown function (DUF639)       |
| <i>Desi_wild_250406</i> | NA                                  | <i>Ca_desi_scaffold</i> | 250406                  | C/A  | Gene_Ca_10937.1    | NON_SYNONYMOUS_CODING         | Plant protein of unknown function (DUF639)       |
| <i>Desi_wild_281265</i> | NA                                  | <i>Ca_desi_scaffold</i> | 281265                  | C/G  | NA                 | INTERGENIC                    | NA                                               |
| <i>Desi_wild_143484</i> | NA                                  | <i>Ca_desi_scaffold</i> | 143484                  | T/G  | NA                 | INTERGENIC                    | NA                                               |
| <i>Desi_wild_143569</i> | NA                                  | <i>Ca_desi_scaffold</i> | 143569                  | C/A  | NA                 | INTERGENIC                    | NA                                               |
| <i>Desi_wild_161470</i> | NA                                  | <i>Ca_desi_scaffold</i> | 161470                  | T/C  | Gene_Ca_10960.1    | INTRON                        | NADPH:adrenodoxin oxidoreductase, mitochondrial  |

| SNP IDs                 | NCBI dbSNP accession IDs (NCBI_SS#) | Chromosomes             | Physical positions (bp) | SNPs | Gene accession IDs | Sequence components of genome | Putative functions                              |
|-------------------------|-------------------------------------|-------------------------|-------------------------|------|--------------------|-------------------------------|-------------------------------------------------|
| <i>Desi_wild_161513</i> | NA                                  | <i>Ca_desi_scaffold</i> | 161513                  | A/G  | Gene_Ca_10960.1    | INTRON                        | NADPH:adrenodoxin oxidoreductase, mitochondrial |
| <i>Desi_wild_185852</i> | NA                                  | <i>Ca_desi_scaffold</i> | 185852                  | G/T  | Gene_Ca_10962.1    | NON_SYNONYMOUS_CODING         | Putative E3 ubiquitin-protein ligase LIN        |
| <i>Desi_wild_209055</i> | NA                                  | <i>Ca_desi_scaffold</i> | 209055                  | T/C  | NA                 | INTERGENIC                    | NA                                              |
| <i>Desi_wild_291866</i> | NA                                  | <i>Ca_desi_scaffold</i> | 291866                  | T/C  | Gene_Ca_10976.1    | UPSTREAM                      | NA                                              |
| <i>Desi_wild_291870</i> | NA                                  | <i>Ca_desi_scaffold</i> | 291870                  | C/T  | Gene_Ca_10976.1    | UPSTREAM                      | NA                                              |
| <i>Desi_wild_291887</i> | NA                                  | <i>Ca_desi_scaffold</i> | 291887                  | G/C  | Gene_Ca_10976.1    | UPSTREAM                      | NA                                              |
| <i>Desi_wild_291891</i> | NA                                  | <i>Ca_desi_scaffold</i> | 291891                  | C/A  | Gene_Ca_10976.1    | UPSTREAM                      | NA                                              |
| <i>Desi_wild_291914</i> | NA                                  | <i>Ca_desi_scaffold</i> | 291914                  | C/T  | Gene_Ca_10976.1    | UPSTREAM                      | NA                                              |
| <i>Desi_wild_291917</i> | NA                                  | <i>Ca_desi_scaffold</i> | 291917                  | A/G  | Gene_Ca_10976.1    | UPSTREAM                      | NA                                              |
| <i>Desi_wild_291919</i> | NA                                  | <i>Ca_desi_scaffold</i> | 291919                  | A/G  | Gene_Ca_10976.1    | UPSTREAM                      | NA                                              |
| <i>Desi_wild_291929</i> | NA                                  | <i>Ca_desi_scaffold</i> | 291929                  | A/G  | Gene_Ca_10976.1    | UPSTREAM                      | NA                                              |
| <i>Desi_wild_291934</i> | NA                                  | <i>Ca_desi_scaffold</i> | 291934                  | A/T  | Gene_Ca_10976.1    | UPSTREAM                      | NA                                              |
| <i>Desi_wild_291942</i> | NA                                  | <i>Ca_desi_scaffold</i> | 291942                  | C/A  | Gene_Ca_10976.1    | UPSTREAM                      | NA                                              |
| <i>Desi_wild_291943</i> | NA                                  | <i>Ca_desi_scaffold</i> | 291943                  | C/A  | Gene_Ca_10976.1    | UPSTREAM                      | NA                                              |
| <i>Desi_wild_294611</i> | NA                                  | <i>Ca_desi_scaffold</i> | 294611                  | T/C  | Gene_Ca_10976.2    | DOWNSTREAM                    | IST1-like protein                               |
| <i>Desi_wild_311469</i> | NA                                  | <i>Ca_desi_scaffold</i> | 311469                  | C/T  | NA                 | INTERGENIC                    | NA                                              |
| <i>Desi_wild_26211</i>  | NA                                  | <i>Ca_desi_scaffold</i> | 26211                   | C/T  | Gene_Ca_10978.1    | DOWNSTREAM                    | U-box domain-containing protein 7               |
| <i>Desi_wild_26232</i>  | NA                                  | <i>Ca_desi_scaffold</i> | 26232                   | A/G  | Gene_Ca_10978.1    | DOWNSTREAM                    | U-box domain-containing protein 7               |
| <i>Desi_wild_26254</i>  | NA                                  | <i>Ca_desi_scaffold</i> | 26254                   | G/C  | Gene_Ca_10978.1    | DOWNSTREAM                    | U-box domain-containing protein 7               |
| <i>Desi_wild_31938</i>  | NA                                  | <i>Ca_desi_scaffold</i> | 31938                   | C/T  | Gene_Ca_10979.1    | INTRON                        | Uncharacterized protein YNL011C                 |
| <i>Desi_wild_36012</i>  | NA                                  | <i>Ca_desi_scaffold</i> | 36012                   | A/G  | Gene_Ca_10979.1    | DOWNSTREAM                    | Uncharacterized protein YNL011C                 |
| <i>Desi_wild_36190</i>  | NA                                  | <i>Ca_desi_scaffold</i> | 36190                   | A/C  | NA                 | INTERGENIC                    | NA                                              |
| <i>Desi_wild_90665</i>  | NA                                  | <i>Ca_desi_scaffold</i> | 90665                   | C/T  | Gene_Ca_10984.1    | SYNONYMOUS_CODING             | GDLSL esterase/lipase At2g27360                 |
| <i>Desi_wild_90991</i>  | NA                                  | <i>Ca_desi_scaffold</i> | 90991                   | C/T  | Gene_Ca_10984.1    | INTRON                        | GDLSL esterase/lipase At2g27360                 |
| <i>Desi_wild_91000</i>  | NA                                  | <i>Ca_desi_scaffold</i> | 91000                   | T/C  | Gene_Ca_10984.1    | INTRON                        | GDLSL esterase/lipase At2g27360                 |
| <i>Desi_wild_91007</i>  | NA                                  | <i>Ca_desi_scaffold</i> | 91007                   | T/C  | Gene_Ca_10984.1    | INTRON                        | GDLSL esterase/lipase At2g27360                 |
| <i>Desi_wild_91043</i>  | NA                                  | <i>Ca_desi_scaffold</i> | 91043                   | T/G  | Gene_Ca_10984.1    | INTRON                        | GDLSL esterase/lipase At2g27360                 |
| <i>Desi_wild_91094</i>  | NA                                  | <i>Ca_desi_scaffold</i> | 91094                   | A/C  | Gene_Ca_10984.1    | INTRON                        | GDLSL esterase/lipase At2g27360                 |
| <i>Desi_wild_91095</i>  | NA                                  | <i>Ca_desi_scaffold</i> | 91095                   | G/T  | Gene_Ca_10984.1    | INTRON                        | GDLSL esterase/lipase At2g27360                 |
| <i>Desi_wild_120868</i> | NA                                  | <i>Ca_desi_scaffold</i> | 120868                  | A/T  | NA                 | INTERGENIC                    | NA                                              |
| <i>Desi_wild_120869</i> | NA                                  | <i>Ca_desi_scaffold</i> | 120869                  | A/C  | NA                 | INTERGENIC                    | NA                                              |
| <i>Desi_wild_125333</i> | NA                                  | <i>Ca_desi_scaffold</i> | 125333                  | C/T  | Gene_Ca_10988.1    | INTRON                        | GDLSL esterase/lipase At5g45920                 |
| <i>Desi_wild_142393</i> | NA                                  | <i>Ca_desi_scaffold</i> | 142393                  | G/T  | NA                 | INTERGENIC                    | NA                                              |
| <i>Desi_wild_172116</i> | NA                                  | <i>Ca_desi_scaffold</i> | 172116                  | C/T  | NA                 | INTERGENIC                    | NA                                              |
| <i>Desi_wild_172254</i> | NA                                  | <i>Ca_desi_scaffold</i> | 172254                  | T/A  | NA                 | INTERGENIC                    | NA                                              |
| <i>Desi_wild_172255</i> | NA                                  | <i>Ca_desi_scaffold</i> | 172255                  | C/A  | NA                 | INTERGENIC                    | NA                                              |
| <i>Desi_wild_183069</i> | NA                                  | <i>Ca_desi_scaffold</i> | 183069                  | C/T  | NA                 | INTERGENIC                    | NA                                              |
| <i>Desi_wild_224726</i> | NA                                  | <i>Ca_desi_scaffold</i> | 224726                  | C/T  | NA                 | INTERGENIC                    | NA                                              |
| <i>Desi_wild_224729</i> | NA                                  | <i>Ca_desi_scaffold</i> | 224729                  | G/A  | NA                 | INTERGENIC                    | NA                                              |
| <i>Desi_wild_224732</i> | NA                                  | <i>Ca_desi_scaffold</i> | 224732                  | A/T  | NA                 | INTERGENIC                    | NA                                              |
| <i>Desi_wild_224735</i> | NA                                  | <i>Ca_desi_scaffold</i> | 224735                  | A/T  | NA                 | INTERGENIC                    | NA                                              |
| <i>Desi_wild_224737</i> | NA                                  | <i>Ca_desi_scaffold</i> | 224737                  | C/G  | NA                 | INTERGENIC                    | NA                                              |
| <i>Desi_wild_224738</i> | NA                                  | <i>Ca_desi_scaffold</i> | 224738                  | A/G  | NA                 | INTERGENIC                    | NA                                              |
| <i>Desi_wild_224762</i> | NA                                  | <i>Ca_desi_scaffold</i> | 224762                  | T/C  | NA                 | INTERGENIC                    | NA                                              |

| SNP IDs                 | NCBI dbSNP accession IDs (NCBI_SS#) | Chromosomes             | Physical positions (bp) | SNPs | Gene accession IDs | Sequence components of genome | Putative functions                          |
|-------------------------|-------------------------------------|-------------------------|-------------------------|------|--------------------|-------------------------------|---------------------------------------------|
| <i>Desi_wild_224765</i> | NA                                  | <i>Ca_desi_scaffold</i> | 224765                  | A/T  | NA                 | INTERGENIC                    | NA                                          |
| <i>Desi_wild_224767</i> | NA                                  | <i>Ca_desi_scaffold</i> | 224767                  | G/T  | NA                 | INTERGENIC                    | NA                                          |
| <i>Desi_wild_224770</i> | NA                                  | <i>Ca_desi_scaffold</i> | 224770                  | G/T  | NA                 | INTERGENIC                    | NA                                          |
| <i>Desi_wild_224771</i> | NA                                  | <i>Ca_desi_scaffold</i> | 224771                  | A/T  | NA                 | INTERGENIC                    | NA                                          |
| <i>Desi_wild_224773</i> | NA                                  | <i>Ca_desi_scaffold</i> | 224773                  | C/T  | NA                 | INTERGENIC                    | NA                                          |
| <i>Desi_wild_224774</i> | NA                                  | <i>Ca_desi_scaffold</i> | 224774                  | C/T  | NA                 | INTERGENIC                    | NA                                          |
| <i>Desi_wild_224776</i> | NA                                  | <i>Ca_desi_scaffold</i> | 224776                  | A/G  | NA                 | INTERGENIC                    | NA                                          |
| <i>Desi_wild_224780</i> | NA                                  | <i>Ca_desi_scaffold</i> | 224780                  | A/G  | NA                 | INTERGENIC                    | NA                                          |
| <i>Desi_wild_224789</i> | NA                                  | <i>Ca_desi_scaffold</i> | 224789                  | G/T  | NA                 | INTERGENIC                    | NA                                          |
| <i>Desi_wild_224794</i> | NA                                  | <i>Ca_desi_scaffold</i> | 224794                  | C/A  | NA                 | INTERGENIC                    | NA                                          |
| <i>Desi_wild_281754</i> | NA                                  | <i>Ca_desi_scaffold</i> | 281754                  | T/C  | Gene_Ca_11003.1    | INTRON                        | 28 kDa heat- and acid-stable phosphoprotein |
| <i>Desi_wild_281774</i> | NA                                  | <i>Ca_desi_scaffold</i> | 281774                  | C/T  | Gene_Ca_11003.1    | INTRON                        | 28 kDa heat- and acid-stable phosphoprotein |
| <i>Desi_wild_281782</i> | NA                                  | <i>Ca_desi_scaffold</i> | 281782                  | C/T  | Gene_Ca_11003.1    | INTRON                        | 28 kDa heat- and acid-stable phosphoprotein |
| <i>Desi_wild_281791</i> | NA                                  | <i>Ca_desi_scaffold</i> | 281791                  | G/C  | Gene_Ca_11003.1    | INTRON                        | 28 kDa heat- and acid-stable phosphoprotein |
| <i>Desi_wild_281792</i> | NA                                  | <i>Ca_desi_scaffold</i> | 281792                  | A/T  | Gene_Ca_11003.1    | INTRON                        | 28 kDa heat- and acid-stable phosphoprotein |
| <i>Desi_wild_281824</i> | NA                                  | <i>Ca_desi_scaffold</i> | 281824                  | G/A  | Gene_Ca_11003.1    | INTRON                        | 28 kDa heat- and acid-stable phosphoprotein |
| <i>Desi_wild_281856</i> | NA                                  | <i>Ca_desi_scaffold</i> | 281856                  | G/C  | Gene_Ca_11003.1    | INTRON                        | 28 kDa heat- and acid-stable phosphoprotein |
| <i>Desi_wild_281887</i> | NA                                  | <i>Ca_desi_scaffold</i> | 281887                  | A/T  | Gene_Ca_11003.1    | INTRON                        | 28 kDa heat- and acid-stable phosphoprotein |
| <i>Desi_wild_282106</i> | NA                                  | <i>Ca_desi_scaffold</i> | 282106                  | C/G  | Gene_Ca_11003.1    | INTRON                        | 28 kDa heat- and acid-stable phosphoprotein |
| <i>Desi_wild_282153</i> | NA                                  | <i>Ca_desi_scaffold</i> | 282153                  | T/C  | Gene_Ca_11003.1    | INTRON                        | 28 kDa heat- and acid-stable phosphoprotein |
| <i>Desi_wild_282199</i> | NA                                  | <i>Ca_desi_scaffold</i> | 282199                  | T/C  | Gene_Ca_11003.1    | INTRON                        | 28 kDa heat- and acid-stable phosphoprotein |
| <i>Desi_wild_282248</i> | NA                                  | <i>Ca_desi_scaffold</i> | 282248                  | G/A  | Gene_Ca_11003.1    | INTRON                        | 28 kDa heat- and acid-stable phosphoprotein |
| <i>Desi_wild_282254</i> | NA                                  | <i>Ca_desi_scaffold</i> | 282254                  | A/G  | Gene_Ca_11003.1    | INTRON                        | 28 kDa heat- and acid-stable phosphoprotein |
| <i>Desi_wild_282271</i> | NA                                  | <i>Ca_desi_scaffold</i> | 282271                  | A/G  | Gene_Ca_11003.1    | INTRON                        | 28 kDa heat- and acid-stable phosphoprotein |
| <i>Desi_wild_284041</i> | NA                                  | <i>Ca_desi_scaffold</i> | 284041                  | A/T  | Gene_Ca_11003.1    | INTRON                        | 28 kDa heat- and acid-stable phosphoprotein |
| <i>Desi_wild_284044</i> | NA                                  | <i>Ca_desi_scaffold</i> | 284044                  | T/C  | Gene_Ca_11003.1    | INTRON                        | 28 kDa heat- and acid-stable phosphoprotein |
| <i>Desi_wild_284053</i> | NA                                  | <i>Ca_desi_scaffold</i> | 284053                  | C/T  | Gene_Ca_11003.1    | INTRON                        | 28 kDa heat- and acid-stable phosphoprotein |
| <i>Desi_wild_284062</i> | NA                                  | <i>Ca_desi_scaffold</i> | 284062                  | T/G  | Gene_Ca_11003.1    | INTRON                        | 28 kDa heat- and acid-stable phosphoprotein |
| <i>Desi_wild_284063</i> | NA                                  | <i>Ca_desi_scaffold</i> | 284063                  | G/T  | Gene_Ca_11003.1    | INTRON                        | 28 kDa heat- and acid-stable phosphoprotein |
| <i>Desi_wild_284071</i> | NA                                  | <i>Ca_desi_scaffold</i> | 284071                  | A/C  | Gene_Ca_11003.1    | INTRON                        | 28 kDa heat- and acid-stable phosphoprotein |
| <i>Desi_wild_284095</i> | NA                                  | <i>Ca_desi_scaffold</i> | 284095                  | C/A  | Gene_Ca_11003.1    | INTRON                        | 28 kDa heat- and acid-stable phosphoprotein |
| <i>Desi_wild_284113</i> | NA                                  | <i>Ca_desi_scaffold</i> | 284113                  | C/T  | Gene_Ca_11003.1    | INTRON                        | 28 kDa heat- and acid-stable phosphoprotein |
| <i>Desi_wild_284119</i> | NA                                  | <i>Ca_desi_scaffold</i> | 284119                  | G/T  | Gene_Ca_11003.1    | INTRON                        | 28 kDa heat- and acid-stable phosphoprotein |
| <i>Desi_wild_284144</i> | NA                                  | <i>Ca_desi_scaffold</i> | 284144                  | T/C  | Gene_Ca_11003.1    | INTRON                        | 28 kDa heat- and acid-stable phosphoprotein |
| <i>Desi_wild_284145</i> | NA                                  | <i>Ca_desi_scaffold</i> | 284145                  | A/T  | Gene_Ca_11003.1    | INTRON                        | 28 kDa heat- and acid-stable phosphoprotein |
| <i>Desi_wild_284154</i> | NA                                  | <i>Ca_desi_scaffold</i> | 284154                  | A/T  | Gene_Ca_11003.1    | INTRON                        | 28 kDa heat- and acid-stable phosphoprotein |
| <i>Desi_wild_284521</i> | NA                                  | <i>Ca_desi_scaffold</i> | 284521                  | C/G  | Gene_Ca_11003.1    | INTRON                        | 28 kDa heat- and acid-stable phosphoprotein |
| <i>Desi_wild_284526</i> | NA                                  | <i>Ca_desi_scaffold</i> | 284526                  | T/G  | Gene_Ca_11003.1    | INTRON                        | 28 kDa heat- and acid-stable phosphoprotein |
| <i>Desi_wild_284532</i> | NA                                  | <i>Ca_desi_scaffold</i> | 284532                  | C/G  | Gene_Ca_11003.1    | INTRON                        | 28 kDa heat- and acid-stable phosphoprotein |
| <i>Desi_wild_284538</i> | NA                                  | <i>Ca_desi_scaffold</i> | 284538                  | A/G  | Gene_Ca_11003.1    | INTRON                        | 28 kDa heat- and acid-stable phosphoprotein |
| <i>Desi_wild_284579</i> | NA                                  | <i>Ca_desi_scaffold</i> | 284579                  | A/T  | Gene_Ca_11003.1    | INTRON                        | 28 kDa heat- and acid-stable phosphoprotein |
| <i>Desi_wild_284590</i> | NA                                  | <i>Ca_desi_scaffold</i> | 284590                  | G/C  | Gene_Ca_11003.1    | INTRON                        | 28 kDa heat- and acid-stable phosphoprotein |
| <i>Desi_wild_300818</i> | NA                                  | <i>Ca_desi_scaffold</i> | 300818                  | C/T  | Gene_Ca_11003.1    | INTRON                        | 28 kDa heat- and acid-stable phosphoprotein |
| <i>Desi_wild_45758</i>  | NA                                  | <i>Ca_desi_scaffold</i> | 45758                   | T/C  | NA                 | INTERGENIC                    | NA                                          |

| SNP IDs                 | NCBI dbSNP accession IDs (NCBI_SS#) | Chromosomes             | Physical positions (bp) | SNPs | Gene accession IDs | Sequence components of genome | Putative functions                                           |
|-------------------------|-------------------------------------|-------------------------|-------------------------|------|--------------------|-------------------------------|--------------------------------------------------------------|
| <i>Desi_wild_45763</i>  | NA                                  | <i>Ca_desi_scaffold</i> | 45763                   | C/A  | NA                 | INTERGENIC                    | NA                                                           |
| <i>Desi_wild_45768</i>  | NA                                  | <i>Ca_desi_scaffold</i> | 45768                   | G/A  | NA                 | INTERGENIC                    | NA                                                           |
| <i>Desi_wild_123133</i> | NA                                  | <i>Ca_desi_scaffold</i> | 123133                  | C/T  | NA                 | INTERGENIC                    | NA                                                           |
| <i>Desi_wild_130642</i> | NA                                  | <i>Ca_desi_scaffold</i> | 130642                  | G/A  | NA                 | INTERGENIC                    | NA                                                           |
| <i>Desi_wild_167080</i> | NA                                  | <i>Ca_desi_scaffold</i> | 167080                  | G/T  | Gene_Ca_11012.1    | UPSTREAM                      | Probable glucan endo-1,3-beta-glucosidase A6                 |
| <i>Desi_wild_194084</i> | NA                                  | <i>Ca_desi_scaffold</i> | 194084                  | T/G  | Gene_Ca_11016.1    | UPSTREAM                      | EC protein homolog 2                                         |
| <i>Desi_wild_208021</i> | NA                                  | <i>Ca_desi_scaffold</i> | 208021                  | A/C  | Gene_Ca_11017.1    | INTRON                        | Probable xyloglucan glycosyltransferase 6                    |
| <i>Desi_wild_208043</i> | NA                                  | <i>Ca_desi_scaffold</i> | 208043                  | G/A  | Gene_Ca_11017.1    | INTRON                        | Probable xyloglucan glycosyltransferase 6                    |
| <i>Desi_wild_229479</i> | NA                                  | <i>Ca_desi_scaffold</i> | 229479                  | T/G  | NA                 | INTERGENIC                    | NA                                                           |
| <i>Desi_wild_229646</i> | NA                                  | <i>Ca_desi_scaffold</i> | 229646                  | A/G  | NA                 | INTERGENIC                    | NA                                                           |
| <i>Desi_wild_276187</i> | NA                                  | <i>Ca_desi_scaffold</i> | 276187                  | A/C  | Gene_Ca_11032.1    | SYNONYMOUS_CODING             | Heat shock 70 kDa protein 15                                 |
| <i>Desi_wild_55197</i>  | NA                                  | <i>Ca_desi_scaffold</i> | 55197                   | T/C  | Gene_Ca_11038.1    | SYNONYMOUS_CODING             | Protein transport protein Sec61 subunit beta                 |
| <i>Desi_wild_95930</i>  | NA                                  | <i>Ca_desi_scaffold</i> | 95930                   | C/T  | NA                 | INTERGENIC                    | NA                                                           |
| <i>Desi_wild_103426</i> | NA                                  | <i>Ca_desi_scaffold</i> | 103426                  | C/G  | Gene_Ca_11041.2    | UPSTREAM                      | Putative lipase YOR059C                                      |
| <i>Desi_wild_103436</i> | NA                                  | <i>Ca_desi_scaffold</i> | 103436                  | A/G  | Gene_Ca_11041.2    | UPSTREAM                      | Putative lipase YOR059C                                      |
| <i>Desi_wild_103687</i> | NA                                  | <i>Ca_desi_scaffold</i> | 103687                  | G/C  | Gene_Ca_11041.2    | UPSTREAM                      | Putative lipase YOR059C                                      |
| <i>Desi_wild_103713</i> | NA                                  | <i>Ca_desi_scaffold</i> | 103713                  | C/G  | Gene_Ca_11041.2    | UPSTREAM                      | Putative lipase YOR059C                                      |
| <i>Desi_wild_103724</i> | NA                                  | <i>Ca_desi_scaffold</i> | 103724                  | A/T  | Gene_Ca_11041.2    | UPSTREAM                      | Putative lipase YOR059C                                      |
| <i>Desi_wild_103740</i> | NA                                  | <i>Ca_desi_scaffold</i> | 103740                  | A/G  | Gene_Ca_11041.2    | UPSTREAM                      | Putative lipase YOR059C                                      |
| <i>Desi_wild_108963</i> | NA                                  | <i>Ca_desi_scaffold</i> | 108963                  | C/G  | NA                 | INTERGENIC                    | NA                                                           |
| <i>Desi_wild_108965</i> | NA                                  | <i>Ca_desi_scaffold</i> | 108965                  | A/C  | NA                 | INTERGENIC                    | NA                                                           |
| <i>Desi_wild_112334</i> | NA                                  | <i>Ca_desi_scaffold</i> | 112334                  | A/G  | Gene_Ca_11043.2    | DOWNSTREAM                    | Putative mitochondrial 2-oxoglutarate/malate carrier protein |
| <i>Desi_wild_112338</i> | NA                                  | <i>Ca_desi_scaffold</i> | 112338                  | G/C  | Gene_Ca_11043.2    | DOWNSTREAM                    | Putative mitochondrial 2-oxoglutarate/malate carrier protein |
| <i>Desi_wild_153639</i> | NA                                  | <i>Ca_desi_scaffold</i> | 153639                  | A/G  | NA                 | INTERGENIC                    | NA                                                           |
| <i>Desi_wild_165481</i> | NA                                  | <i>Ca_desi_scaffold</i> | 165481                  | C/G  | Gene_Ca_11049.1    | INTRON                        | Importin-5                                                   |
| <i>Desi_wild_176973</i> | NA                                  | <i>Ca_desi_scaffold</i> | 176973                  | C/G  | Gene_Ca_11050.1    | INTRON                        | Peptidyl-tRNA hydrolase, mitochondrial                       |
| <i>Desi_wild_177005</i> | NA                                  | <i>Ca_desi_scaffold</i> | 177005                  | G/C  | Gene_Ca_11050.1    | INTRON                        | Peptidyl-tRNA hydrolase, mitochondrial                       |
| <i>Desi_wild_177355</i> | NA                                  | <i>Ca_desi_scaffold</i> | 177355                  | A/G  | Gene_Ca_11050.1    | INTRON                        | Peptidyl-tRNA hydrolase, mitochondrial                       |
| <i>Desi_wild_177412</i> | NA                                  | <i>Ca_desi_scaffold</i> | 177412                  | G/T  | Gene_Ca_11050.1    | INTRON                        | Peptidyl-tRNA hydrolase, mitochondrial                       |
| <i>Desi_wild_181918</i> | NA                                  | <i>Ca_desi_scaffold</i> | 181918                  | T/A  | Gene_Ca_11050.1    | INTRON                        | Peptidyl-tRNA hydrolase, mitochondrial                       |
| <i>Desi_wild_181989</i> | NA                                  | <i>Ca_desi_scaffold</i> | 181989                  | A/C  | Gene_Ca_11050.1    | INTRON                        | Peptidyl-tRNA hydrolase, mitochondrial                       |
| <i>Desi_wild_182122</i> | NA                                  | <i>Ca_desi_scaffold</i> | 182122                  | G/T  | Gene_Ca_11050.1    | INTRON                        | Peptidyl-tRNA hydrolase, mitochondrial                       |
| <i>Desi_wild_182161</i> | NA                                  | <i>Ca_desi_scaffold</i> | 182161                  | C/T  | Gene_Ca_11050.1    | INTRON                        | Peptidyl-tRNA hydrolase, mitochondrial                       |
| <i>Desi_wild_185896</i> | NA                                  | <i>Ca_desi_scaffold</i> | 185896                  | C/G  | Gene_Ca_11050.1    | NON_SYNONYMOUS_CODING         | Peptidyl-tRNA hydrolase, mitochondrial                       |
| <i>Desi_wild_276548</i> | NA                                  | <i>Ca_desi_scaffold</i> | 276548                  | A/C  | NA                 | INTERGENIC                    | NA                                                           |
| <i>Desi_wild_12730</i>  | NA                                  | <i>Ca_desi_scaffold</i> | 12730                   | C/A  | Gene_Ca_11063.1    | DOWNSTREAM                    | Protein ssh4                                                 |
| <i>Desi_wild_28845</i>  | NA                                  | <i>Ca_desi_scaffold</i> | 28845                   | G/C  | Gene_Ca_11064.1    | SYNONYMOUS_CODING             | Chromosome-associated kinesin KIF4B                          |
| <i>Desi_wild_28868</i>  | NA                                  | <i>Ca_desi_scaffold</i> | 28868                   | T/G  | Gene_Ca_11064.1    | SYNONYMOUS_CODING             | Chromosome-associated kinesin KIF4B                          |
| <i>Desi_wild_28871</i>  | NA                                  | <i>Ca_desi_scaffold</i> | 28871                   | T/A  | Gene_Ca_11064.1    | SYNONYMOUS_CODING             | Chromosome-associated kinesin KIF4B                          |
| <i>Desi_wild_28873</i>  | NA                                  | <i>Ca_desi_scaffold</i> | 28873                   | T/C  | Gene_Ca_11064.1    | SYNONYMOUS_CODING             | Chromosome-associated kinesin KIF4B                          |
| <i>Desi_wild_28876</i>  | NA                                  | <i>Ca_desi_scaffold</i> | 28876                   | G/A  | Gene_Ca_11064.1    | SYNONYMOUS_CODING             | Chromosome-associated kinesin KIF4B                          |
| <i>Desi_wild_28882</i>  | NA                                  | <i>Ca_desi_scaffold</i> | 28882                   | A/C  | Gene_Ca_11064.1    | SYNONYMOUS_CODING             | Chromosome-associated kinesin KIF4B                          |
| <i>Desi_wild_34623</i>  | NA                                  | <i>Ca_desi_scaffold</i> | 34623                   | T/A  | Gene_Ca_11064.1    | NON_SYNONYMOUS_CODING         | Chromosome-associated kinesin KIF4B                          |
| <i>Desi_wild_36658</i>  | NA                                  | <i>Ca_desi_scaffold</i> | 36658                   | T/C  | Gene_Ca_11064.1    | INTRON                        | Chromosome-associated kinesin KIF4B                          |



| SNP IDs                 | NCBI dbSNP accession IDs (NCBI_SS#) | Chromosomes             | Physical positions (bp) | SNPs | Gene accession IDs | Sequence components of genome | Putative functions                          |
|-------------------------|-------------------------------------|-------------------------|-------------------------|------|--------------------|-------------------------------|---------------------------------------------|
| <i>Desi_wild_42887</i>  | NA                                  | <i>Ca_desi_scaffold</i> | 42887                   | A/C  | Gene_Ca_11065.1    | NON_SYNONYMOUS_CODING         | Probable inactive receptor kinase At5g67200 |
| <i>Desi_wild_121471</i> | NA                                  | <i>Ca_desi_scaffold</i> | 121471                  | G/A  | Gene_Ca_11071.1    | INTRON                        | Chromatin modification-related protein EAF3 |
| <i>Desi_wild_121478</i> | NA                                  | <i>Ca_desi_scaffold</i> | 121478                  | C/G  | Gene_Ca_11071.1    | INTRON                        | Chromatin modification-related protein EAF3 |
| <i>Desi_wild_253869</i> | NA                                  | <i>Ca_desi_scaffold</i> | 253869                  | C/T  | NA                 | INTERGENIC                    | NA                                          |
| <i>Desi_wild_34335</i>  | NA                                  | <i>Ca_desi_scaffold</i> | 34335                   | G/A  | NA                 | INTERGENIC                    | NA                                          |
| <i>Desi_wild_90259</i>  | NA                                  | <i>Ca_desi_scaffold</i> | 90259                   | C/T  | Gene_Ca_11097.1    | SYNONYMOUS_CODING             | Kinesin-4                                   |
| <i>Desi_wild_90267</i>  | NA                                  | <i>Ca_desi_scaffold</i> | 90267                   | C/A  | Gene_Ca_11097.1    | SYNONYMOUS_CODING             | Kinesin-4                                   |
| <i>Desi_wild_90270</i>  | NA                                  | <i>Ca_desi_scaffold</i> | 90270                   | A/G  | Gene_Ca_11097.1    | SYNONYMOUS_CODING             | Kinesin-4                                   |
| <i>Desi_wild_90277</i>  | NA                                  | <i>Ca_desi_scaffold</i> | 90277                   | A/G  | Gene_Ca_11097.1    | SYNONYMOUS_CODING             | Kinesin-4                                   |
| <i>Desi_wild_90278</i>  | NA                                  | <i>Ca_desi_scaffold</i> | 90278                   | A/T  | Gene_Ca_11097.1    | SYNONYMOUS_CODING             | Kinesin-4                                   |
| <i>Desi_wild_90288</i>  | NA                                  | <i>Ca_desi_scaffold</i> | 90288                   | A/G  | Gene_Ca_11097.1    | SYNONYMOUS_CODING             | Kinesin-4                                   |
| <i>Desi_wild_90294</i>  | NA                                  | <i>Ca_desi_scaffold</i> | 90294                   | C/T  | Gene_Ca_11097.1    | SYNONYMOUS_CODING             | Kinesin-4                                   |
| <i>Desi_wild_90295</i>  | NA                                  | <i>Ca_desi_scaffold</i> | 90295                   | A/T  | Gene_Ca_11097.1    | SYNONYMOUS_CODING             | Kinesin-4                                   |
| <i>Desi_wild_90297</i>  | NA                                  | <i>Ca_desi_scaffold</i> | 90297                   | G/A  | Gene_Ca_11097.1    | SYNONYMOUS_CODING             | Kinesin-4                                   |
| <i>Desi_wild_90298</i>  | NA                                  | <i>Ca_desi_scaffold</i> | 90298                   | T/C  | Gene_Ca_11097.1    | SYNONYMOUS_CODING             | Kinesin-4                                   |
| <i>Desi_wild_90299</i>  | NA                                  | <i>Ca_desi_scaffold</i> | 90299                   | T/C  | Gene_Ca_11097.1    | SYNONYMOUS_CODING             | Kinesin-4                                   |
| <i>Desi_wild_90324</i>  | NA                                  | <i>Ca_desi_scaffold</i> | 90324                   | T/C  | Gene_Ca_11097.1    | SYNONYMOUS_CODING             | Kinesin-4                                   |
| <i>Desi_wild_90327</i>  | NA                                  | <i>Ca_desi_scaffold</i> | 90327                   | G/A  | Gene_Ca_11097.1    | SYNONYMOUS_CODING             | Kinesin-4                                   |
| <i>Desi_wild_90332</i>  | NA                                  | <i>Ca_desi_scaffold</i> | 90332                   | C/G  | Gene_Ca_11097.1    | SYNONYMOUS_CODING             | Kinesin-4                                   |
| <i>Desi_wild_90333</i>  | NA                                  | <i>Ca_desi_scaffold</i> | 90333                   | A/T  | Gene_Ca_11097.1    | SYNONYMOUS_CODING             | Kinesin-4                                   |
| <i>Desi_wild_143377</i> | NA                                  | <i>Ca_desi_scaffold</i> | 143377                  | A/G  | Gene_Ca_11100.1    | UPSTREAM                      | Topless-related protein 3                   |
| <i>Desi_wild_164166</i> | NA                                  | <i>Ca_desi_scaffold</i> | 164166                  | A/G  | Gene_Ca_11102.1    | INTRON                        | unknown protein                             |
| <i>Desi_wild_174073</i> | NA                                  | <i>Ca_desi_scaffold</i> | 174073                  | A/G  | NA                 | INTERGENIC                    | NA                                          |
| <i>Desi_wild_185925</i> | NA                                  | <i>Ca_desi_scaffold</i> | 185925                  | C/A  | NA                 | INTERGENIC                    | NA                                          |
| <i>Desi_wild_185926</i> | NA                                  | <i>Ca_desi_scaffold</i> | 185926                  | C/G  | NA                 | INTERGENIC                    | NA                                          |
| <i>Desi_wild_186208</i> | NA                                  | <i>Ca_desi_scaffold</i> | 186208                  | T/C  | NA                 | INTERGENIC                    | NA                                          |
| <i>Desi_wild_186383</i> | NA                                  | <i>Ca_desi_scaffold</i> | 186383                  | A/C  | NA                 | INTERGENIC                    | NA                                          |
| <i>Desi_wild_188770</i> | NA                                  | <i>Ca_desi_scaffold</i> | 188770                  | A/G  | NA                 | INTERGENIC                    | NA                                          |
| <i>Desi_wild_220494</i> | NA                                  | <i>Ca_desi_scaffold</i> | 220494                  | A/G  | Gene_Ca_11109.1    | NON_SYNONYMOUS_CODING         | Epoxide hydrolase 2                         |
| <i>Desi_wild_220649</i> | NA                                  | <i>Ca_desi_scaffold</i> | 220649                  | T/C  | Gene_Ca_11109.1    | SYNONYMOUS_CODING             | Epoxide hydrolase 2                         |
| <i>Desi_wild_227059</i> | NA                                  | <i>Ca_desi_scaffold</i> | 227059                  | A/G  | NA                 | INTERGENIC                    | NA                                          |
| <i>Desi_wild_263751</i> | NA                                  | <i>Ca_desi_scaffold</i> | 263751                  | T/A  | NA                 | INTERGENIC                    | NA                                          |
| <i>Desi_wild_263922</i> | NA                                  | <i>Ca_desi_scaffold</i> | 263922                  | A/T  | NA                 | INTERGENIC                    | NA                                          |
| <i>Desi_wild_263952</i> | NA                                  | <i>Ca_desi_scaffold</i> | 263952                  | A/G  | NA                 | INTERGENIC                    | NA                                          |
| <i>Desi_wild_271503</i> | NA                                  | <i>Ca_desi_scaffold</i> | 271503                  | G/C  | Gene_Ca_11114.3    | DOWNSTREAM                    | Dormancy/auxin associated family protein    |
| <i>Desi_wild_44052</i>  | NA                                  | <i>Ca_desi_scaffold</i> | 44052                   | C/T  | Gene_Ca_11118.1    | NON_SYNONYMOUS_CODING         | E3 ubiquitin-protein ligase RGLG2           |
| <i>Desi_wild_126128</i> | NA                                  | <i>Ca_desi_scaffold</i> | 126128                  | A/G  | Gene_Ca_11125.1    | DOWNSTREAM                    | Glycerol-3-phosphate dehydrogenase [NAD(+)] |
| <i>Desi_wild_207670</i> | NA                                  | <i>Ca_desi_scaffold</i> | 207670                  | A/C  | Gene_Ca_11133.1    | DOWNSTREAM                    | Cytosine homolog                            |
| <i>Desi_wild_207671</i> | NA                                  | <i>Ca_desi_scaffold</i> | 207671                  | G/T  | Gene_Ca_11133.1    | DOWNSTREAM                    | Cytosine homolog                            |
| <i>Desi_wild_219360</i> | NA                                  | <i>Ca_desi_scaffold</i> | 219360                  | T/C  | NA                 | INTERGENIC                    | NA                                          |
| <i>Desi_wild_7852</i>   | NA                                  | <i>Ca_desi_scaffold</i> | 7852                    | A/C  | Gene_Ca_11144.1    | UPSTREAM                      | Protein NSP-INTERACTING KINASE 3            |
| <i>Desi_wild_149845</i> | NA                                  | <i>Ca_desi_scaffold</i> | 149845                  | C/T  | Gene_Ca_11154.1    | INTRON                        | Phosphatidylinositol 3-kinase, root isoform |
| <i>Desi_wild_274127</i> | NA                                  | <i>Ca_desi_scaffold</i> | 274127                  | A/C  | NA                 | INTERGENIC                    | NA                                          |
| <i>Desi_wild_11747</i>  | NA                                  | <i>Ca_desi_scaffold</i> | 11747                   | A/C  | Gene_Ca_11164.1    | INTRON                        | Sulfite reductase [ferredoxin]              |

| SNP IDs                 | NCBI dbSNP accession IDs (NCBI_SS#) | Chromosomes             | Physical positions (bp) | SNPs | Gene accession IDs | Sequence components of genome | Putative functions                                                      |
|-------------------------|-------------------------------------|-------------------------|-------------------------|------|--------------------|-------------------------------|-------------------------------------------------------------------------|
| <i>Desi_wild_85356</i>  | NA                                  | <i>Ca_desi_scaffold</i> | 85356                   | A/G  | Gene_Ca_11171.1    | INTRON                        | NAD(H) kinase 1                                                         |
| <i>Desi_wild_228438</i> | NA                                  | <i>Ca_desi_scaffold</i> | 228438                  | A/C  | Gene_Ca_11181.1    | SYNONYMOUS_CODING             | NA                                                                      |
| <i>Desi_wild_59243</i>  | NA                                  | <i>Ca_desi_scaffold</i> | 59243                   | C/T  | NA                 | INTERGENIC                    | NA                                                                      |
| <i>Desi_wild_65142</i>  | NA                                  | <i>Ca_desi_scaffold</i> | 65142                   | C/T  | NA                 | INTERGENIC                    | NA                                                                      |
| <i>Desi_wild_103043</i> | NA                                  | <i>Ca_desi_scaffold</i> | 103043                  | T/G  | Gene_Ca_08855.1    | NON_SYNONYMOUS_CODING         | Flowering time control protein FY                                       |
| <i>Desi_wild_129102</i> | NA                                  | <i>Ca_desi_scaffold</i> | 129102                  | A/G  | Gene_Ca_08857.1    | INTRON                        | Alpha-1,4-galacturonosyltransferase 1                                   |
| <i>Desi_wild_178938</i> | NA                                  | <i>Ca_desi_scaffold</i> | 178938                  | A/C  | Gene_Ca_08862.1    | NON_SYNONYMOUS_CODING         | BEACH domain-containing protein lvsC                                    |
| <i>Desi_wild_178989</i> | NA                                  | <i>Ca_desi_scaffold</i> | 178989                  | T/G  | Gene_Ca_08862.1    | SYNONYMOUS_CODING             | BEACH domain-containing protein lvsC                                    |
| <i>Desi_wild_180496</i> | NA                                  | <i>Ca_desi_scaffold</i> | 180496                  | A/G  | Gene_Ca_08862.1    | SYNONYMOUS_CODING             | BEACH domain-containing protein lvsC                                    |
| <i>Desi_wild_191432</i> | NA                                  | <i>Ca_desi_scaffold</i> | 191432                  | G/A  | Gene_Ca_08862.1    | SYNONYMOUS_CODING             | BEACH domain-containing protein lvsC                                    |
| <i>Desi_wild_297692</i> | NA                                  | <i>Ca_desi_scaffold</i> | 297692                  | A/G  | Gene_Ca_08866.1    | INTRON                        | Uridine 5'-monophosphate synthase (Fragment)                            |
| <i>Desi_wild_29360</i>  | NA                                  | <i>Ca_desi_scaffold</i> | 29360                   | A/G  | NA                 | INTERGENIC                    | NA                                                                      |
| <i>Desi_wild_29368</i>  | NA                                  | <i>Ca_desi_scaffold</i> | 29368                   | G/A  | NA                 | INTERGENIC                    | NA                                                                      |
| <i>Desi_wild_29380</i>  | NA                                  | <i>Ca_desi_scaffold</i> | 29380                   | A/C  | NA                 | INTERGENIC                    | NA                                                                      |
| <i>Desi_wild_29432</i>  | NA                                  | <i>Ca_desi_scaffold</i> | 29432                   | G/A  | NA                 | INTERGENIC                    | NA                                                                      |
| <i>Desi_wild_29516</i>  | NA                                  | <i>Ca_desi_scaffold</i> | 29516                   | G/T  | NA                 | INTERGENIC                    | NA                                                                      |
| <i>Desi_wild_89915</i>  | NA                                  | <i>Ca_desi_scaffold</i> | 89915                   | T/G  | NA                 | INTERGENIC                    | NA                                                                      |
| <i>Desi_wild_122654</i> | NA                                  | <i>Ca_desi_scaffold</i> | 122654                  | G/T  | Gene_Ca_11190.1    | SYNONYMOUS_CODING             | G-type lectin S-receptor-like serine/threonine-protein kinase At2g19130 |
| <i>Desi_wild_122928</i> | NA                                  | <i>Ca_desi_scaffold</i> | 122928                  | G/A  | Gene_Ca_11190.1    | NON_SYNONYMOUS_CODING         | G-type lectin S-receptor-like serine/threonine-protein kinase At2g19130 |
| <i>Desi_wild_122954</i> | NA                                  | <i>Ca_desi_scaffold</i> | 122954                  | C/G  | Gene_Ca_11190.1    | NON_SYNONYMOUS_CODING         | G-type lectin S-receptor-like serine/threonine-protein kinase At2g19130 |
| <i>Desi_wild_128690</i> | NA                                  | <i>Ca_desi_scaffold</i> | 128690                  | G/T  | Gene_Ca_11190.1    | SYNONYMOUS_CODING             | G-type lectin S-receptor-like serine/threonine-protein kinase At2g19130 |
| <i>Desi_wild_128807</i> | NA                                  | <i>Ca_desi_scaffold</i> | 128807                  | T/A  | Gene_Ca_11190.1    | NON_SYNONYMOUS_CODING         | G-type lectin S-receptor-like serine/threonine-protein kinase At2g19130 |
| <i>Desi_wild_128818</i> | NA                                  | <i>Ca_desi_scaffold</i> | 128818                  | A/G  | Gene_Ca_11190.1    | NON_SYNONYMOUS_CODING         | G-type lectin S-receptor-like serine/threonine-protein kinase At2g19130 |
| <i>Desi_wild_128869</i> | NA                                  | <i>Ca_desi_scaffold</i> | 128869                  | T/C  | Gene_Ca_11190.1    | NON_SYNONYMOUS_CODING         | G-type lectin S-receptor-like serine/threonine-protein kinase At2g19130 |
| <i>Desi_wild_128872</i> | NA                                  | <i>Ca_desi_scaffold</i> | 128872                  | A/G  | Gene_Ca_11190.1    | NON_SYNONYMOUS_CODING         | G-type lectin S-receptor-like serine/threonine-protein kinase At2g19130 |
| <i>Desi_wild_128900</i> | NA                                  | <i>Ca_desi_scaffold</i> | 128900                  | C/T  | Gene_Ca_11190.1    | SYNONYMOUS_CODING             | G-type lectin S-receptor-like serine/threonine-protein kinase At2g19130 |
| <i>Desi_wild_128910</i> | NA                                  | <i>Ca_desi_scaffold</i> | 128910                  | C/T  | Gene_Ca_11190.1    | NON_SYNONYMOUS_CODING         | G-type lectin S-receptor-like serine/threonine-protein kinase At2g19130 |
| <i>Desi_wild_128938</i> | NA                                  | <i>Ca_desi_scaffold</i> | 128938                  | T/A  | Gene_Ca_11190.1    | NON_SYNONYMOUS_CODING         | G-type lectin S-receptor-like serine/threonine-protein kinase At2g19130 |
| <i>Desi_wild_139419</i> | NA                                  | <i>Ca_desi_scaffold</i> | 139419                  | G/A  | Gene_Ca_11191.1    | SYNONYMOUS_CODING             | G-type lectin S-receptor-like serine/threonine-protein kinase At2g19130 |
| <i>Desi_wild_139764</i> | NA                                  | <i>Ca_desi_scaffold</i> | 139764                  | A/C  | Gene_Ca_11191.1    | SYNONYMOUS_CODING             | G-type lectin S-receptor-like serine/threonine-protein kinase At2g19130 |
| <i>Desi_wild_167015</i> | NA                                  | <i>Ca_desi_scaffold</i> | 167015                  | T/C  | Gene_Ca_11194.1    | SYNONYMOUS_CODING             | Nucleolar complex protein 4 homolog                                     |
| <i>Desi_wild_170178</i> | NA                                  | <i>Ca_desi_scaffold</i> | 170178                  | T/C  | Gene_Ca_11194.1    | INTRON                        | Nucleolar complex protein 4 homolog                                     |
| <i>Desi_wild_170636</i> | NA                                  | <i>Ca_desi_scaffold</i> | 170636                  | G/A  | Gene_Ca_11194.1    | INTRON                        | Nucleolar complex protein 4 homolog                                     |
| <i>Desi_wild_170856</i> | NA                                  | <i>Ca_desi_scaffold</i> | 170856                  | G/A  | Gene_Ca_11194.1    | SYNONYMOUS_CODING             | Nucleolar complex protein 4 homolog                                     |
| <i>Desi_wild_17893</i>  | NA                                  | <i>Ca_desi_scaffold</i> | 17893                   | T/C  | Gene_Ca_11197.1    | INTRON                        | Casein kinase I isoform delta-like                                      |
| <i>Desi_wild_17894</i>  | NA                                  | <i>Ca_desi_scaffold</i> | 17894                   | T/G  | Gene_Ca_11197.1    | INTRON                        | Casein kinase I isoform delta-like                                      |
| <i>Desi_wild_17901</i>  | NA                                  | <i>Ca_desi_scaffold</i> | 17901                   | C/G  | Gene_Ca_11197.1    | INTRON                        | Casein kinase I isoform delta-like                                      |
| <i>Desi_wild_17903</i>  | NA                                  | <i>Ca_desi_scaffold</i> | 17903                   | A/T  | Gene_Ca_11197.1    | INTRON                        | Casein kinase I isoform delta-like                                      |
| <i>Desi_wild_17904</i>  | NA                                  | <i>Ca_desi_scaffold</i> | 17904                   | A/T  | Gene_Ca_11197.1    | INTRON                        | Casein kinase I isoform delta-like                                      |
| <i>Desi_wild_17905</i>  | NA                                  | <i>Ca_desi_scaffold</i> | 17905                   | C/G  | Gene_Ca_11197.1    | INTRON                        | Casein kinase I isoform delta-like                                      |
| <i>Desi_wild_17908</i>  | NA                                  | <i>Ca_desi_scaffold</i> | 17908                   | C/A  | Gene_Ca_11197.1    | INTRON                        | Casein kinase I isoform delta-like                                      |
| <i>Desi_wild_104894</i> | NA                                  | <i>Ca_desi_scaffold</i> | 104894                  | C/T  | NA                 | INTERGENIC                    | NA                                                                      |
| <i>Desi_wild_219826</i> | NA                                  | <i>Ca_desi_scaffold</i> | 219826                  | A/T  | Gene_Ca_11208.1    | DOWNSTREAM                    | RuvB-like 1                                                             |
| <i>Desi_wild_259527</i> | NA                                  | <i>Ca_desi_scaffold</i> | 259527                  | A/G  | Gene_Ca_11209.1    | INTRON                        | Vacuolar-processing enzyme alpha-isozyme                                |

| SNP IDs                 | NCBI dbSNP accession IDs (NCBI_SS#) | Chromosomes             | Physical positions (bp) | SNPs | Gene accession IDs | Sequence components of genome  | Putative functions                                                       |
|-------------------------|-------------------------------------|-------------------------|-------------------------|------|--------------------|--------------------------------|--------------------------------------------------------------------------|
| <i>Desi_wild_3684</i>   | NA                                  | <i>Ca_desi_scaffold</i> | 3684                    | C/G  | Gene_Ca_11210.1    | NON_SYNONYMOUS_CODING          | S-adenosyl-L-methionine-dependent methyltransferases superfamily protein |
| <i>Desi_wild_67958</i>  | NA                                  | <i>Ca_desi_scaffold</i> | 67958                   | G/A  | Gene_Ca_11216.1    | INTRON                         | UV radiation resistance-associated gene protein                          |
| <i>Desi_wild_68490</i>  | NA                                  | <i>Ca_desi_scaffold</i> | 68490                   | T/G  | Gene_Ca_11216.1    | INTRON                         | UV radiation resistance-associated gene protein                          |
| <i>Desi_wild_68571</i>  | NA                                  | <i>Ca_desi_scaffold</i> | 68571                   | T/A  | Gene_Ca_11216.1    | INTRON                         | UV radiation resistance-associated gene protein                          |
| <i>Desi_wild_68594</i>  | NA                                  | <i>Ca_desi_scaffold</i> | 68594                   | T/C  | Gene_Ca_11216.1    | INTRON                         | UV radiation resistance-associated gene protein                          |
| <i>Desi_wild_68626</i>  | NA                                  | <i>Ca_desi_scaffold</i> | 68626                   | G/A  | Gene_Ca_11216.1    | INTRON                         | UV radiation resistance-associated gene protein                          |
| <i>Desi_wild_115493</i> | NA                                  | <i>Ca_desi_scaffold</i> | 115493                  | A/C  | Gene_Ca_11221.1    | NON_SYNONYMOUS_CODING          | Histidine kinase-, DNA gyrase B-, and HSP90-like ATPase family protein   |
| <i>Desi_wild_115905</i> | NA                                  | <i>Ca_desi_scaffold</i> | 115905                  | A/C  | Gene_Ca_11221.1    | SYNONYMOUS_CODING              | Histidine kinase-, DNA gyrase B-, and HSP90-like ATPase family protein   |
| <i>Desi_wild_118940</i> | NA                                  | <i>Ca_desi_scaffold</i> | 118940                  | C/T  | Gene_Ca_11221.1    | INTRON                         | Histidine kinase-, DNA gyrase B-, and HSP90-like ATPase family protein   |
| <i>Desi_wild_119029</i> | NA                                  | <i>Ca_desi_scaffold</i> | 119029                  | G/A  | Gene_Ca_11221.1    | INTRON                         | Histidine kinase-, DNA gyrase B-, and HSP90-like ATPase family protein   |
| <i>Desi_wild_130520</i> | NA                                  | <i>Ca_desi_scaffold</i> | 130520                  | A/G  | Gene_Ca_11221.1    | NON_SYNONYMOUS_CODING          | Histidine kinase-, DNA gyrase B-, and HSP90-like ATPase family protein   |
| <i>Desi_wild_130600</i> | NA                                  | <i>Ca_desi_scaffold</i> | 130600                  | G/T  | Gene_Ca_11221.1    | SYNONYMOUS_CODING              | Histidine kinase-, DNA gyrase B-, and HSP90-like ATPase family protein   |
| <i>Desi_wild_167155</i> | NA                                  | <i>Ca_desi_scaffold</i> | 167155                  | T/A  | Gene_Ca_11225.1    | INTRON                         | Beta-galactosidase 9                                                     |
| <i>Desi_wild_167157</i> | NA                                  | <i>Ca_desi_scaffold</i> | 167157                  | C/A  | Gene_Ca_11225.1    | INTRON                         | Beta-galactosidase 9                                                     |
| <i>Desi_wild_167233</i> | NA                                  | <i>Ca_desi_scaffold</i> | 167233                  | C/T  | Gene_Ca_11225.1    | INTRON                         | Beta-galactosidase 9                                                     |
| <i>Desi_wild_168795</i> | NA                                  | <i>Ca_desi_scaffold</i> | 168795                  | G/T  | Gene_Ca_11225.1    | INTRON                         | Beta-galactosidase 9                                                     |
| <i>Desi_wild_184074</i> | NA                                  | <i>Ca_desi_scaffold</i> | 184074                  | T/C  | Gene_Ca_11227.1    | NON_SYNONYMOUS_CODING          | Magnesium transporter NIPA2                                              |
| <i>Desi_wild_193648</i> | NA                                  | <i>Ca_desi_scaffold</i> | 193648                  | C/T  | Gene_Ca_11228.7    | INTRON                         | RNA recognition motif (RRM)-containing protein                           |
| <i>Desi_wild_194430</i> | NA                                  | <i>Ca_desi_scaffold</i> | 194430                  | A/T  | Gene_Ca_11228.7    | NON_SYNONYMOUS_CODING          | RNA recognition motif (RRM)-containing protein                           |
| <i>Desi_wild_195026</i> | NA                                  | <i>Ca_desi_scaffold</i> | 195026                  | A/G  | Gene_Ca_11228.7    | SYNONYMOUS_CODING              | RNA recognition motif (RRM)-containing protein                           |
| <i>Desi_wild_230009</i> | NA                                  | <i>Ca_desi_scaffold</i> | 230009                  | A/G  | NA                 | INTERGENIC                     | NA                                                                       |
| <i>Desi_wild_236702</i> | NA                                  | <i>Ca_desi_scaffold</i> | 236702                  | T/C  | Gene_Ca_11231.2    | START_GAINED: TTG, UTR_5_PRIME | NA                                                                       |
| <i>Desi_wild_250092</i> | NA                                  | <i>Ca_desi_scaffold</i> | 250092                  | C/T  | Gene_Ca_11234.1    | DOWNSTREAM                     | Serine hydroxymethyltransferase 1                                        |
| <i>Desi_wild_32107</i>  | NA                                  | <i>Ca_desi_scaffold</i> | 32107                   | G/T  | NA                 | INTERGENIC                     | NA                                                                       |
| <i>Desi_wild_107454</i> | NA                                  | <i>Ca_desi_scaffold</i> | 107454                  | A/C  | Gene_Ca_11238.1    | INTRON                         | Probable ethanolamine kinase                                             |
| <i>Desi_wild_102</i>    | NA                                  | <i>Ca_desi_scaffold</i> | 102                     | C/A  | NA                 | INTERGENIC                     | NA                                                                       |
| <i>Desi_wild_44774</i>  | NA                                  | <i>Ca_desi_scaffold</i> | 44774                   | T/C  | Gene_Ca_11245.1    | SYNONYMOUS_CODING              | Putative DNA-binding protein ESCAROLA                                    |
| <i>Desi_wild_38274</i>  | NA                                  | <i>Ca_desi_scaffold</i> | 38274                   | C/A  | NA                 | INTERGENIC                     | NA                                                                       |
| <i>Desi_wild_56857</i>  | NA                                  | <i>Ca_desi_scaffold</i> | 56857                   | T/A  | NA                 | INTERGENIC                     | NA                                                                       |
| <i>Desi_wild_56866</i>  | NA                                  | <i>Ca_desi_scaffold</i> | 56866                   | T/G  | NA                 | INTERGENIC                     | NA                                                                       |
| <i>Desi_wild_56873</i>  | NA                                  | <i>Ca_desi_scaffold</i> | 56873                   | C/A  | NA                 | INTERGENIC                     | NA                                                                       |
| <i>Desi_wild_56874</i>  | NA                                  | <i>Ca_desi_scaffold</i> | 56874                   | T/C  | NA                 | INTERGENIC                     | NA                                                                       |
| <i>Desi_wild_56896</i>  | NA                                  | <i>Ca_desi_scaffold</i> | 56896                   | G/C  | NA                 | INTERGENIC                     | NA                                                                       |
| <i>Desi_wild_56899</i>  | NA                                  | <i>Ca_desi_scaffold</i> | 56899                   | G/A  | NA                 | INTERGENIC                     | NA                                                                       |
| <i>Desi_wild_56902</i>  | NA                                  | <i>Ca_desi_scaffold</i> | 56902                   | T/A  | NA                 | INTERGENIC                     | NA                                                                       |
| <i>Desi_wild_56905</i>  | NA                                  | <i>Ca_desi_scaffold</i> | 56905                   | T/C  | NA                 | INTERGENIC                     | NA                                                                       |
| <i>Desi_wild_56914</i>  | NA                                  | <i>Ca_desi_scaffold</i> | 56914                   | G/A  | NA                 | INTERGENIC                     | NA                                                                       |
| <i>Desi_wild_56917</i>  | NA                                  | <i>Ca_desi_scaffold</i> | 56917                   | G/A  | NA                 | INTERGENIC                     | NA                                                                       |
| <i>Desi_wild_56923</i>  | NA                                  | <i>Ca_desi_scaffold</i> | 56923                   | G/A  | NA                 | INTERGENIC                     | NA                                                                       |
| <i>Desi_wild_56926</i>  | NA                                  | <i>Ca_desi_scaffold</i> | 56926                   | G/A  | NA                 | INTERGENIC                     | NA                                                                       |
| <i>Desi_wild_56929</i>  | NA                                  | <i>Ca_desi_scaffold</i> | 56929                   | T/A  | NA                 | INTERGENIC                     | NA                                                                       |
| <i>Desi_wild_56936</i>  | NA                                  | <i>Ca_desi_scaffold</i> | 56936                   | T/C  | NA                 | INTERGENIC                     | NA                                                                       |
| <i>Desi_wild_56938</i>  | NA                                  | <i>Ca_desi_scaffold</i> | 56938                   | T/C  | NA                 | INTERGENIC                     | NA                                                                       |
| <i>Desi_wild_81694</i>  | NA                                  | <i>Ca_desi_scaffold</i> | 81694                   | T/A  | Gene_Ca_11261.1    | SYNONYMOUS_CODING              | Activating molecule in BECN1-regulated autophagy protein 1               |

| SNP IDs                 | NCBI dbSNP accession IDs (NCBI_SS#) | Chromosomes             | Physical positions (bp) | SNPs | Gene accession IDs | Sequence components of genome | Putative functions                                 |
|-------------------------|-------------------------------------|-------------------------|-------------------------|------|--------------------|-------------------------------|----------------------------------------------------|
| <i>Desi_wild_92912</i>  | NA                                  | <i>Ca_desi_scaffold</i> | 92912                   | A/T  | Gene_Ca_11262.1    | SYNONYMOUS_CODING             | Receptor-like serine/threonine-protein kinase ALE2 |
| <i>Desi_wild_92917</i>  | NA                                  | <i>Ca_desi_scaffold</i> | 92917                   | G/A  | Gene_Ca_11262.1    | SYNONYMOUS_CODING             | Receptor-like serine/threonine-protein kinase ALE2 |
| <i>Desi_wild_92923</i>  | NA                                  | <i>Ca_desi_scaffold</i> | 92923                   | G/T  | Gene_Ca_11262.1    | SYNONYMOUS_CODING             | Receptor-like serine/threonine-protein kinase ALE2 |
| <i>Desi_wild_92924</i>  | NA                                  | <i>Ca_desi_scaffold</i> | 92924                   | C/A  | Gene_Ca_11262.1    | SYNONYMOUS_CODING             | Receptor-like serine/threonine-protein kinase ALE2 |
| <i>Desi_wild_92929</i>  | NA                                  | <i>Ca_desi_scaffold</i> | 92929                   | A/C  | Gene_Ca_11262.1    | SYNONYMOUS_CODING             | Receptor-like serine/threonine-protein kinase ALE2 |
| <i>Desi_wild_92930</i>  | NA                                  | <i>Ca_desi_scaffold</i> | 92930                   | G/T  | Gene_Ca_11262.1    | SYNONYMOUS_CODING             | Receptor-like serine/threonine-protein kinase ALE2 |
| <i>Desi_wild_92997</i>  | NA                                  | <i>Ca_desi_scaffold</i> | 92997                   | T/A  | Gene_Ca_11262.1    | SYNONYMOUS_CODING             | Receptor-like serine/threonine-protein kinase ALE2 |
| <i>Desi_wild_92998</i>  | NA                                  | <i>Ca_desi_scaffold</i> | 92998                   | T/C  | Gene_Ca_11262.1    | SYNONYMOUS_CODING             | Receptor-like serine/threonine-protein kinase ALE2 |
| <i>Desi_wild_127152</i> | NA                                  | <i>Ca_desi_scaffold</i> | 127152                  | C/T  | Gene_Ca_11264.1    | SYNONYMOUS_CODING             | Myosin-J heavy chain                               |
| <i>Desi_wild_127185</i> | NA                                  | <i>Ca_desi_scaffold</i> | 127185                  | A/G  | Gene_Ca_11264.1    | SYNONYMOUS_CODING             | Myosin-J heavy chain                               |
| <i>Desi_wild_127203</i> | NA                                  | <i>Ca_desi_scaffold</i> | 127203                  | C/T  | Gene_Ca_11264.1    | SYNONYMOUS_CODING             | Myosin-J heavy chain                               |
| <i>Desi_wild_127212</i> | NA                                  | <i>Ca_desi_scaffold</i> | 127212                  | A/T  | Gene_Ca_11264.1    | SYNONYMOUS_CODING             | Myosin-J heavy chain                               |
| <i>Desi_wild_127215</i> | NA                                  | <i>Ca_desi_scaffold</i> | 127215                  | T/A  | Gene_Ca_11264.1    | SYNONYMOUS_CODING             | Myosin-J heavy chain                               |
| <i>Desi_wild_127216</i> | NA                                  | <i>Ca_desi_scaffold</i> | 127216                  | A/G  | Gene_Ca_11264.1    | NON_SYNONYMOUS_CODING         | Myosin-J heavy chain                               |
| <i>Desi_wild_127217</i> | NA                                  | <i>Ca_desi_scaffold</i> | 127217                  | C/T  | Gene_Ca_11264.1    | NON_SYNONYMOUS_CODING         | Myosin-J heavy chain                               |
| <i>Desi_wild_127224</i> | NA                                  | <i>Ca_desi_scaffold</i> | 127224                  | G/C  | Gene_Ca_11264.1    | NON_SYNONYMOUS_CODING         | Myosin-J heavy chain                               |
| <i>Desi_wild_127225</i> | NA                                  | <i>Ca_desi_scaffold</i> | 127225                  | T/C  | Gene_Ca_11264.1    | SYNONYMOUS_CODING             | Myosin-J heavy chain                               |
| <i>Desi_wild_127227</i> | NA                                  | <i>Ca_desi_scaffold</i> | 127227                  | G/A  | Gene_Ca_11264.1    | SYNONYMOUS_CODING             | Myosin-J heavy chain                               |
| <i>Desi_wild_127237</i> | NA                                  | <i>Ca_desi_scaffold</i> | 127237                  | T/G  | Gene_Ca_11264.1    | NON_SYNONYMOUS_CODING         | Myosin-J heavy chain                               |
| <i>Desi_wild_129228</i> | NA                                  | <i>Ca_desi_scaffold</i> | 129228                  | T/C  | Gene_Ca_11264.1    | SYNONYMOUS_CODING             | Myosin-J heavy chain                               |
| <i>Desi_wild_129230</i> | NA                                  | <i>Ca_desi_scaffold</i> | 129230                  | G/A  | Gene_Ca_11264.1    | SYNONYMOUS_CODING             | Myosin-J heavy chain                               |
| <i>Desi_wild_129234</i> | NA                                  | <i>Ca_desi_scaffold</i> | 129234                  | T/G  | Gene_Ca_11264.1    | NON_SYNONYMOUS_CODING         | Myosin-J heavy chain                               |
| <i>Desi_wild_129236</i> | NA                                  | <i>Ca_desi_scaffold</i> | 129236                  | T/A  | Gene_Ca_11264.1    | SYNONYMOUS_CODING             | Myosin-J heavy chain                               |
| <i>Desi_wild_129237</i> | NA                                  | <i>Ca_desi_scaffold</i> | 129237                  | T/C  | Gene_Ca_11264.1    | SYNONYMOUS_CODING             | Myosin-J heavy chain                               |
| <i>Desi_wild_129247</i> | NA                                  | <i>Ca_desi_scaffold</i> | 129247                  | C/T  | Gene_Ca_11264.1    | NON_SYNONYMOUS_CODING         | Myosin-J heavy chain                               |
| <i>Desi_wild_129249</i> | NA                                  | <i>Ca_desi_scaffold</i> | 129249                  | T/C  | Gene_Ca_11264.1    | SYNONYMOUS_CODING             | Myosin-J heavy chain                               |
| <i>Desi_wild_129251</i> | NA                                  | <i>Ca_desi_scaffold</i> | 129251                  | A/C  | Gene_Ca_11264.1    | NON_SYNONYMOUS_CODING         | Myosin-J heavy chain                               |
| <i>Desi_wild_129275</i> | NA                                  | <i>Ca_desi_scaffold</i> | 129275                  | C/T  | Gene_Ca_11264.1    | SYNONYMOUS_CODING             | Myosin-J heavy chain                               |
| <i>Desi_wild_129278</i> | NA                                  | <i>Ca_desi_scaffold</i> | 129278                  | A/T  | Gene_Ca_11264.1    | SYNONYMOUS_CODING             | Myosin-J heavy chain                               |
| <i>Desi_wild_129284</i> | NA                                  | <i>Ca_desi_scaffold</i> | 129284                  | G/T  | Gene_Ca_11264.1    | SYNONYMOUS_CODING             | Myosin-J heavy chain                               |
| <i>Desi_wild_129287</i> | NA                                  | <i>Ca_desi_scaffold</i> | 129287                  | A/G  | Gene_Ca_11264.1    | SYNONYMOUS_CODING             | Myosin-J heavy chain                               |
| <i>Desi_wild_129302</i> | NA                                  | <i>Ca_desi_scaffold</i> | 129302                  | C/T  | Gene_Ca_11264.1    | SYNONYMOUS_CODING             | Myosin-J heavy chain                               |
| <i>Desi_wild_129305</i> | NA                                  | <i>Ca_desi_scaffold</i> | 129305                  | A/G  | Gene_Ca_11264.1    | SYNONYMOUS_CODING             | Myosin-J heavy chain                               |
| <i>Desi_wild_129311</i> | NA                                  | <i>Ca_desi_scaffold</i> | 129311                  | T/A  | Gene_Ca_11264.1    | SYNONYMOUS_CODING             | Myosin-J heavy chain                               |
| <i>Desi_wild_129317</i> | NA                                  | <i>Ca_desi_scaffold</i> | 129317                  | T/C  | Gene_Ca_11264.1    | SYNONYMOUS_CODING             | Myosin-J heavy chain                               |
| <i>Desi_wild_129321</i> | NA                                  | <i>Ca_desi_scaffold</i> | 129321                  | C/A  | Gene_Ca_11264.1    | SYNONYMOUS_CODING             | Myosin-J heavy chain                               |
| <i>Desi_wild_129323</i> | NA                                  | <i>Ca_desi_scaffold</i> | 129323                  | T/C  | Gene_Ca_11264.1    | SYNONYMOUS_CODING             | Myosin-J heavy chain                               |
| <i>Desi_wild_198739</i> | NA                                  | <i>Ca_desi_scaffold</i> | 198739                  | A/C  | Gene_Ca_11268.1    | SYNONYMOUS_CODING             | RNI-like superfamily protein                       |
| <i>Desi_wild_221315</i> | NA                                  | <i>Ca_desi_scaffold</i> | 221315                  | G/A  | Gene_Ca_11269.1    | INTRON                        | CLIP-associating protein 2                         |
| <i>Desi_wild_221615</i> | NA                                  | <i>Ca_desi_scaffold</i> | 221615                  | C/T  | Gene_Ca_11269.1    | SYNONYMOUS_CODING             | CLIP-associating protein 2                         |
| <i>Desi_wild_221621</i> | NA                                  | <i>Ca_desi_scaffold</i> | 221621                  | C/A  | Gene_Ca_11269.1    | SYNONYMOUS_CODING             | CLIP-associating protein 2                         |
| <i>Desi_wild_221624</i> | NA                                  | <i>Ca_desi_scaffold</i> | 221624                  | A/G  | Gene_Ca_11269.1    | SYNONYMOUS_CODING             | CLIP-associating protein 2                         |
| <i>Desi_wild_221630</i> | NA                                  | <i>Ca_desi_scaffold</i> | 221630                  | A/G  | Gene_Ca_11269.1    | SYNONYMOUS_CODING             | CLIP-associating protein 2                         |
| <i>Desi_wild_221637</i> | NA                                  | <i>Ca_desi_scaffold</i> | 221637                  | T/G  | Gene_Ca_11269.1    | SYNONYMOUS_CODING             | CLIP-associating protein 2                         |

| SNP IDs          | NCBI dbSNP accession IDs (NCBI_SS#) | Chromosomes      | Physical positions (bp) | SNPs | Gene accession IDs | Sequence components of genome | Putative functions                                                      |
|------------------|-------------------------------------|------------------|-------------------------|------|--------------------|-------------------------------|-------------------------------------------------------------------------|
| Desi_wild_221639 | NA                                  | Ca_desi_scaffold | 221639                  | C/T  | Gene_Ca_11269.1    | SYNONYMOUS_CODING             | CLIP-associating protein 2                                              |
| Desi_wild_221646 | NA                                  | Ca_desi_scaffold | 221646                  | G/A  | Gene_Ca_11269.1    | SYNONYMOUS_CODING             | CLIP-associating protein 2                                              |
| Desi_wild_221647 | NA                                  | Ca_desi_scaffold | 221647                  | C/A  | Gene_Ca_11269.1    | NON_SYNONYMOUS_CODING         | CLIP-associating protein 2                                              |
| Desi_wild_221651 | NA                                  | Ca_desi_scaffold | 221651                  | A/T  | Gene_Ca_11269.1    | SYNONYMOUS_CODING             | CLIP-associating protein 2                                              |
| Desi_wild_221654 | NA                                  | Ca_desi_scaffold | 221654                  | T/G  | Gene_Ca_11269.1    | SYNONYMOUS_CODING             | CLIP-associating protein 2                                              |
| Desi_wild_221657 | NA                                  | Ca_desi_scaffold | 221657                  | C/T  | Gene_Ca_11269.1    | SYNONYMOUS_CODING             | CLIP-associating protein 2                                              |
| Desi_wild_221660 | NA                                  | Ca_desi_scaffold | 221660                  | C/T  | Gene_Ca_11269.1    | SYNONYMOUS_CODING             | CLIP-associating protein 2                                              |
| Desi_wild_221663 | NA                                  | Ca_desi_scaffold | 221663                  | T/C  | Gene_Ca_11269.1    | SYNONYMOUS_CODING             | CLIP-associating protein 2                                              |
| Desi_wild_221669 | NA                                  | Ca_desi_scaffold | 221669                  | T/A  | Gene_Ca_11269.1    | NON_SYNONYMOUS_CODING         | CLIP-associating protein 2                                              |
| Desi_wild_221675 | NA                                  | Ca_desi_scaffold | 221675                  | G/A  | Gene_Ca_11269.1    | SYNONYMOUS_CODING             | CLIP-associating protein 2                                              |
| Desi_wild_221682 | NA                                  | Ca_desi_scaffold | 221682                  | G/A  | Gene_Ca_11269.1    | NON_SYNONYMOUS_CODING         | CLIP-associating protein 2                                              |
| Desi_wild_221685 | NA                                  | Ca_desi_scaffold | 221685                  | G/A  | Gene_Ca_11269.1    | NON_SYNONYMOUS_CODING         | CLIP-associating protein 2                                              |
| Desi_wild_222787 | NA                                  | Ca_desi_scaffold | 222787                  | G/A  | Gene_Ca_11269.1    | INTRON                        | CLIP-associating protein 2                                              |
| Desi_wild_222838 | NA                                  | Ca_desi_scaffold | 222838                  | A/G  | Gene_Ca_11269.1    | INTRON                        | CLIP-associating protein 2                                              |
| Desi_wild_48334  | NA                                  | Ca_desi_scaffold | 48334                   | G/A  | Gene_Ca_11280.3    | SYNONYMOUS_CODING             | Myb family transcription factor APL                                     |
| Desi_wild_55142  | NA                                  | Ca_desi_scaffold | 55142                   | G/T  | NA                 | INTERGENIC                    | NA                                                                      |
| Desi_wild_55143  | NA                                  | Ca_desi_scaffold | 55143                   | G/A  | NA                 | INTERGENIC                    | NA                                                                      |
| Desi_wild_55161  | NA                                  | Ca_desi_scaffold | 55161                   | C/T  | NA                 | INTERGENIC                    | NA                                                                      |
| Desi_wild_55164  | NA                                  | Ca_desi_scaffold | 55164                   | C/T  | NA                 | INTERGENIC                    | NA                                                                      |
| Desi_wild_71030  | NA                                  | Ca_desi_scaffold | 71030                   | A/C  | Gene_Ca_11282.1    | SYNONYMOUS_CODING             | Heterogeneous nuclear ribonucleoprotein D0                              |
| Desi_wild_86456  | NA                                  | Ca_desi_scaffold | 86456                   | A/T  | NA                 | INTERGENIC                    | NA                                                                      |
| Desi_wild_86491  | NA                                  | Ca_desi_scaffold | 86491                   | T/C  | NA                 | INTERGENIC                    | NA                                                                      |
| Desi_wild_86504  | NA                                  | Ca_desi_scaffold | 86504                   | A/T  | NA                 | INTERGENIC                    | NA                                                                      |
| Desi_wild_91208  | NA                                  | Ca_desi_scaffold | 91208                   | C/A  | Gene_Ca_11285.1    | NON_SYNONYMOUS_CODING         | Protein PHYTOCHROME KINASE SUBSTRATE 4                                  |
| Desi_wild_133459 | NA                                  | Ca_desi_scaffold | 133459                  | T/C  | Gene_Ca_11290.1    | DOWNSTREAM                    | Probable S-acyltransferase At3g56930                                    |
| Desi_wild_133497 | NA                                  | Ca_desi_scaffold | 133497                  | C/T  | Gene_Ca_11290.1    | DOWNSTREAM                    | Probable S-acyltransferase At3g56930                                    |
| Desi_wild_217142 | NA                                  | Ca_desi_scaffold | 217142                  | T/C  | Gene_Ca_11317.1    | DOWNSTREAM                    | Pollen-specific protein SF3                                             |
| Desi_wild_217175 | NA                                  | Ca_desi_scaffold | 217175                  | G/A  | Gene_Ca_11317.1    | DOWNSTREAM                    | Pollen-specific protein SF3                                             |
| Desi_wild_219495 | NA                                  | Ca_desi_scaffold | 219495                  | C/T  | Gene_Ca_11317.2    | INTRON                        | NA                                                                      |
| Desi_wild_219498 | NA                                  | Ca_desi_scaffold | 219498                  | A/T  | Gene_Ca_11317.2    | INTRON                        | NA                                                                      |
| Desi_wild_219503 | NA                                  | Ca_desi_scaffold | 219503                  | T/C  | Gene_Ca_11317.2    | INTRON                        | NA                                                                      |
| Desi_wild_219512 | NA                                  | Ca_desi_scaffold | 219512                  | G/C  | Gene_Ca_11317.2    | INTRON                        | NA                                                                      |
| Desi_wild_220101 | NA                                  | Ca_desi_scaffold | 220101                  | T/G  | Gene_Ca_11317.2    | INTRON                        | NA                                                                      |
| Desi_wild_220121 | NA                                  | Ca_desi_scaffold | 220121                  | A/G  | Gene_Ca_11317.2    | INTRON                        | NA                                                                      |
| Desi_wild_220130 | NA                                  | Ca_desi_scaffold | 220130                  | C/T  | Gene_Ca_11317.2    | INTRON                        | NA                                                                      |
| Desi_wild_86217  | NA                                  | Ca_desi_scaffold | 86217                   | G/T  | Gene_Ca_11327.1    | NON_SYNONYMOUS_CODING         | Ubiquitin carboxyl-terminal hydrolase 14                                |
| Desi_wild_89202  | NA                                  | Ca_desi_scaffold | 89202                   | A/G  | Gene_Ca_11327.1    | INTRON                        | Ubiquitin carboxyl-terminal hydrolase 14                                |
| Desi_wild_89221  | NA                                  | Ca_desi_scaffold | 89221                   | C/T  | Gene_Ca_11327.1    | INTRON                        | Ubiquitin carboxyl-terminal hydrolase 14                                |
| Desi_wild_95881  | NA                                  | Ca_desi_scaffold | 95881                   | A/G  | Gene_Ca_11329.1    | DOWNSTREAM                    | Cyclin-D1-1                                                             |
| Desi_wild_192777 | NA                                  | Ca_desi_scaffold | 192777                  | A/G  | Gene_Ca_11337.1    | INTRON                        | NA                                                                      |
| Desi_wild_214041 | NA                                  | Ca_desi_scaffold | 214041                  | A/G  | Gene_Ca_11339.1    | SYNONYMOUS_CODING             | Rhomboid protease gluP                                                  |
| Desi_wild_112820 | NA                                  | Ca_desi_scaffold | 112820                  | C/A  | Gene_Ca_11348.1    | INTRON                        | Glucan endo-1,3-beta-glucosidase                                        |
| Desi_wild_133708 | NA                                  | Ca_desi_scaffold | 133708                  | C/T  | NA                 | INTERGENIC                    | NA                                                                      |
| Desi_wild_19252  | NA                                  | Ca_desi_scaffold | 19252                   | G/C  | Gene_Ca_11357.1    | NON_SYNONYMOUS_CODING         | Chloroplastic group IIA intron splicing facilitator CRS1, chloroplastic |

| SNP IDs                 | NCBI dbSNP accession IDs (NCBI_SS#) | Chromosomes             | Physical positions (bp) | SNPs | Gene accession IDs | Sequence components of genome | Putative functions                                         |
|-------------------------|-------------------------------------|-------------------------|-------------------------|------|--------------------|-------------------------------|------------------------------------------------------------|
| <i>Desi_wild_30365</i>  | NA                                  | <i>Ca_desi_scaffold</i> | 30365                   | G/C  | NA                 | INTERGENIC                    | NA                                                         |
| <i>Desi_wild_101457</i> | NA                                  | <i>Ca_desi_scaffold</i> | 101457                  | G/A  | NA                 | INTERGENIC                    | NA                                                         |
| <i>Desi_wild_164041</i> | NA                                  | <i>Ca_desi_scaffold</i> | 164041                  | T/C  | Gene_Ca_11370.1    | INTRON                        | Glucose-6-phosphate isomerase, cytosolic 1                 |
| <i>Desi_wild_164148</i> | NA                                  | <i>Ca_desi_scaffold</i> | 164148                  | C/A  | Gene_Ca_11370.1    | NON_SYNONYMOUS_CODING         | Glucose-6-phosphate isomerase, cytosolic 1                 |
| <i>Desi_wild_166744</i> | NA                                  | <i>Ca_desi_scaffold</i> | 166744                  | A/G  | Gene_Ca_11370.1    | INTRON                        | Glucose-6-phosphate isomerase, cytosolic 1                 |
| <i>Desi_wild_41310</i>  | NA                                  | <i>Ca_desi_scaffold</i> | 41310                   | A/C  | NA                 | INTERGENIC                    | NA                                                         |
| <i>Desi_wild_41312</i>  | NA                                  | <i>Ca_desi_scaffold</i> | 41312                   | T/A  | NA                 | INTERGENIC                    | NA                                                         |
| <i>Desi_wild_63521</i>  | NA                                  | <i>Ca_desi_scaffold</i> | 63521                   | T/C  | NA                 | INTERGENIC                    | NA                                                         |
| <i>Desi_wild_78487</i>  | NA                                  | <i>Ca_desi_scaffold</i> | 78487                   | G/C  | Gene_Ca_11378.1    | NON_SYNONYMOUS_CODING         | Putative disease resistance RPP13-like protein 1           |
| <i>Desi_wild_111132</i> | NA                                  | <i>Ca_desi_scaffold</i> | 111132                  | G/C  | Gene_Ca_11379.1    | INTRON                        | Chromosome transmission fidelity protein 18 homolog        |
| <i>Desi_wild_111144</i> | NA                                  | <i>Ca_desi_scaffold</i> | 111144                  | C/G  | Gene_Ca_11379.1    | INTRON                        | Chromosome transmission fidelity protein 18 homolog        |
| <i>Desi_wild_111146</i> | NA                                  | <i>Ca_desi_scaffold</i> | 111146                  | A/G  | Gene_Ca_11379.1    | INTRON                        | Chromosome transmission fidelity protein 18 homolog        |
| <i>Desi_wild_111181</i> | NA                                  | <i>Ca_desi_scaffold</i> | 111181                  | C/G  | Gene_Ca_11379.1    | INTRON                        | Chromosome transmission fidelity protein 18 homolog        |
| <i>Desi_wild_53908</i>  | NA                                  | <i>Ca_desi_scaffold</i> | 53908                   | T/A  | Gene_Ca_11384.1    | DOWNSTREAM                    | Vacuolar cation/proton exchanger 3                         |
| <i>Desi_wild_55379</i>  | NA                                  | <i>Ca_desi_scaffold</i> | 55379                   | T/C  | NA                 | INTERGENIC                    | NA                                                         |
| <i>Desi_wild_205282</i> | NA                                  | <i>Ca_desi_scaffold</i> | 205282                  | G/C  | Gene_Ca_11397.1    | INTRON                        | Lysosomal beta glucosidase                                 |
| <i>Desi_wild_205429</i> | NA                                  | <i>Ca_desi_scaffold</i> | 205429                  | A/G  | Gene_Ca_11397.1    | INTRON                        | Lysosomal beta glucosidase                                 |
| <i>Desi_wild_205439</i> | NA                                  | <i>Ca_desi_scaffold</i> | 205439                  | C/A  | Gene_Ca_11397.1    | INTRON                        | Lysosomal beta glucosidase                                 |
| <i>Desi_wild_205473</i> | NA                                  | <i>Ca_desi_scaffold</i> | 205473                  | A/G  | Gene_Ca_11397.1    | INTRON                        | Lysosomal beta glucosidase                                 |
| <i>Desi_wild_205495</i> | NA                                  | <i>Ca_desi_scaffold</i> | 205495                  | A/G  | Gene_Ca_11397.1    | INTRON                        | Lysosomal beta glucosidase                                 |
| <i>Desi_wild_205498</i> | NA                                  | <i>Ca_desi_scaffold</i> | 205498                  | G/A  | Gene_Ca_11397.1    | INTRON                        | Lysosomal beta glucosidase                                 |
| <i>Desi_wild_205501</i> | NA                                  | <i>Ca_desi_scaffold</i> | 205501                  | C/T  | Gene_Ca_11397.1    | INTRON                        | Lysosomal beta glucosidase                                 |
| <i>Desi_wild_205505</i> | NA                                  | <i>Ca_desi_scaffold</i> | 205505                  | T/C  | Gene_Ca_11397.1    | INTRON                        | Lysosomal beta glucosidase                                 |
| <i>Desi_wild_735</i>    | NA                                  | <i>Ca_desi_scaffold</i> | 735                     | G/A  | NA                 | INTERGENIC                    | NA                                                         |
| <i>Desi_wild_793</i>    | NA                                  | <i>Ca_desi_scaffold</i> | 793                     | C/A  | NA                 | INTERGENIC                    | NA                                                         |
| <i>Desi_wild_60878</i>  | NA                                  | <i>Ca_desi_scaffold</i> | 60878                   | C/T  | Gene_Ca_08872.1    | DOWNSTREAM                    | DNA-directed RNA polymerase 2, chloroplastic/mitochondrial |
| <i>Desi_wild_247384</i> | NA                                  | <i>Ca_desi_scaffold</i> | 247384                  | C/A  | NA                 | INTERGENIC                    | NA                                                         |
| <i>Desi_wild_247394</i> | NA                                  | <i>Ca_desi_scaffold</i> | 247394                  | C/A  | NA                 | INTERGENIC                    | NA                                                         |
| <i>Desi_wild_247405</i> | NA                                  | <i>Ca_desi_scaffold</i> | 247405                  | C/T  | NA                 | INTERGENIC                    | NA                                                         |
| <i>Desi_wild_247406</i> | NA                                  | <i>Ca_desi_scaffold</i> | 247406                  | C/T  | NA                 | INTERGENIC                    | NA                                                         |
| <i>Desi_wild_247418</i> | NA                                  | <i>Ca_desi_scaffold</i> | 247418                  | G/A  | NA                 | INTERGENIC                    | NA                                                         |
| <i>Desi_wild_247419</i> | NA                                  | <i>Ca_desi_scaffold</i> | 247419                  | C/T  | NA                 | INTERGENIC                    | NA                                                         |
| <i>Desi_wild_247429</i> | NA                                  | <i>Ca_desi_scaffold</i> | 247429                  | C/G  | NA                 | INTERGENIC                    | NA                                                         |
| <i>Desi_wild_247430</i> | NA                                  | <i>Ca_desi_scaffold</i> | 247430                  | G/A  | NA                 | INTERGENIC                    | NA                                                         |
| <i>Desi_wild_247446</i> | NA                                  | <i>Ca_desi_scaffold</i> | 247446                  | A/G  | NA                 | INTERGENIC                    | NA                                                         |
| <i>Desi_wild_247464</i> | NA                                  | <i>Ca_desi_scaffold</i> | 247464                  | C/T  | NA                 | INTERGENIC                    | NA                                                         |
| <i>Desi_wild_74392</i>  | NA                                  | <i>Ca_desi_scaffold</i> | 74392                   | G/A  | NA                 | INTERGENIC                    | NA                                                         |
| <i>Desi_wild_167009</i> | NA                                  | <i>Ca_desi_scaffold</i> | 167009                  | C/G  | Gene_Ca_08885.1    | INTRON                        | E3 ubiquitin-protein ligase RBBP6                          |
| <i>Desi_wild_167016</i> | NA                                  | <i>Ca_desi_scaffold</i> | 167016                  | G/A  | Gene_Ca_08885.1    | INTRON                        | E3 ubiquitin-protein ligase RBBP6                          |
| <i>Desi_wild_167034</i> | NA                                  | <i>Ca_desi_scaffold</i> | 167034                  | G/A  | Gene_Ca_08885.1    | INTRON                        | E3 ubiquitin-protein ligase RBBP6                          |
| <i>Desi_wild_167058</i> | NA                                  | <i>Ca_desi_scaffold</i> | 167058                  | C/G  | Gene_Ca_08885.1    | INTRON                        | E3 ubiquitin-protein ligase RBBP6                          |
| <i>Desi_wild_167059</i> | NA                                  | <i>Ca_desi_scaffold</i> | 167059                  | T/C  | Gene_Ca_08885.1    | INTRON                        | E3 ubiquitin-protein ligase RBBP6                          |
| <i>Desi_wild_167067</i> | NA                                  | <i>Ca_desi_scaffold</i> | 167067                  | A/G  | Gene_Ca_08885.1    | INTRON                        | E3 ubiquitin-protein ligase RBBP6                          |
| <i>Desi_wild_167073</i> | NA                                  | <i>Ca_desi_scaffold</i> | 167073                  | T/C  | Gene_Ca_08885.1    | INTRON                        | E3 ubiquitin-protein ligase RBBP6                          |

| SNP IDs                 | NCBI dbSNP accession IDs (NCBI_SS#) | Chromosomes             | Physical positions (bp) | SNPs | Gene accession IDs | Sequence components of genome | Putative functions                       |
|-------------------------|-------------------------------------|-------------------------|-------------------------|------|--------------------|-------------------------------|------------------------------------------|
| <i>Desi_wild_167074</i> | NA                                  | <i>Ca_desi_scaffold</i> | 167074                  | A/C  | Gene_Ca_08885.1    | INTRON                        | E3 ubiquitin-protein ligase RBBP6        |
| <i>Desi_wild_167075</i> | NA                                  | <i>Ca_desi_scaffold</i> | 167075                  | A/C  | Gene_Ca_08885.1    | INTRON                        | E3 ubiquitin-protein ligase RBBP6        |
| <i>Desi_wild_167076</i> | NA                                  | <i>Ca_desi_scaffold</i> | 167076                  | A/T  | Gene_Ca_08885.1    | INTRON                        | E3 ubiquitin-protein ligase RBBP6        |
| <i>Desi_wild_167077</i> | NA                                  | <i>Ca_desi_scaffold</i> | 167077                  | C/G  | Gene_Ca_08885.1    | INTRON                        | E3 ubiquitin-protein ligase RBBP6        |
| <i>Desi_wild_167085</i> | NA                                  | <i>Ca_desi_scaffold</i> | 167085                  | A/G  | Gene_Ca_08885.1    | INTRON                        | E3 ubiquitin-protein ligase RBBP6        |
| <i>Desi_wild_235174</i> | NA                                  | <i>Ca_desi_scaffold</i> | 235174                  | G/T  | Gene_Ca_08889.1    | INTRON                        | pectin-related                           |
| <i>Desi_wild_235220</i> | NA                                  | <i>Ca_desi_scaffold</i> | 235220                  | T/C  | Gene_Ca_08889.1    | INTRON                        | pectin-related                           |
| <i>Desi_wild_209752</i> | NA                                  | <i>Ca_desi_scaffold</i> | 209752                  | A/G  | NA                 | INTERGENIC                    | NA                                       |
| <i>Desi_wild_12050</i>  | NA                                  | <i>Ca_desi_scaffold</i> | 12050                   | A/T  | Gene_Ca_08904.1    | INTRON                        | Fanconi anemia group J protein homolog   |
| <i>Desi_wild_12126</i>  | NA                                  | <i>Ca_desi_scaffold</i> | 12126                   | A/T  | Gene_Ca_08904.1    | INTRON                        | Fanconi anemia group J protein homolog   |
| <i>Desi_wild_12128</i>  | NA                                  | <i>Ca_desi_scaffold</i> | 12128                   | A/C  | Gene_Ca_08904.1    | INTRON                        | Fanconi anemia group J protein homolog   |
| <i>Desi_wild_12255</i>  | NA                                  | <i>Ca_desi_scaffold</i> | 12255                   | G/A  | Gene_Ca_08904.1    | INTRON                        | Fanconi anemia group J protein homolog   |
| <i>Desi_wild_12257</i>  | NA                                  | <i>Ca_desi_scaffold</i> | 12257                   | T/G  | Gene_Ca_08904.1    | INTRON                        | Fanconi anemia group J protein homolog   |
| <i>Desi_wild_12262</i>  | NA                                  | <i>Ca_desi_scaffold</i> | 12262                   | C/A  | Gene_Ca_08904.1    | INTRON                        | Fanconi anemia group J protein homolog   |
| <i>Desi_wild_34304</i>  | NA                                  | <i>Ca_desi_scaffold</i> | 34304                   | A/C  | Gene_Ca_08905.1    | DOWNSTREAM                    | 12-oxophytodienoate reductase 1          |
| <i>Desi_wild_143780</i> | NA                                  | <i>Ca_desi_scaffold</i> | 143780                  | T/G  | Gene_Ca_08913.3    | SYNONYMOUS_CODING             | PHD finger protein At1g33420             |
| <i>Desi_wild_145017</i> | NA                                  | <i>Ca_desi_scaffold</i> | 145017                  | G/T  | Gene_Ca_08913.3    | NON_SYNONYMOUS_CODING         | PHD finger protein At1g33420             |
| <i>Desi_wild_698</i>    | NA                                  | <i>Ca_desi_scaffold</i> | 698                     | G/T  | NA                 | INTERGENIC                    | NA                                       |
| <i>Desi_wild_8931</i>   | NA                                  | <i>Ca_desi_scaffold</i> | 8931                    | A/C  | Gene_Ca_11400.1    | INTRON                        | Clathrin heavy chain 1                   |
| <i>Desi_wild_19808</i>  | NA                                  | <i>Ca_desi_scaffold</i> | 19808                   | C/G  | Gene_Ca_11401.1    | NON_SYNONYMOUS_CODING         | Ribosomal protein S21 family protein     |
| <i>Desi_wild_142982</i> | NA                                  | <i>Ca_desi_scaffold</i> | 142982                  | C/T  | Gene_Ca_11410.1    | INTRON                        | Anaphase-promoting complex subunit 1     |
| <i>Desi_wild_143614</i> | NA                                  | <i>Ca_desi_scaffold</i> | 143614                  | C/A  | Gene_Ca_11410.1    | NON_SYNONYMOUS_CODING         | Anaphase-promoting complex subunit 1     |
| <i>Desi_wild_144186</i> | NA                                  | <i>Ca_desi_scaffold</i> | 144186                  | T/A  | Gene_Ca_11410.1    | INTRON                        | Anaphase-promoting complex subunit 1     |
| <i>Desi_wild_144335</i> | NA                                  | <i>Ca_desi_scaffold</i> | 144335                  | C/A  | Gene_Ca_11410.1    | INTRON                        | Anaphase-promoting complex subunit 1     |
| <i>Desi_wild_144336</i> | NA                                  | <i>Ca_desi_scaffold</i> | 144336                  | T/C  | Gene_Ca_11410.1    | INTRON                        | Anaphase-promoting complex subunit 1     |
| <i>Desi_wild_144428</i> | NA                                  | <i>Ca_desi_scaffold</i> | 144428                  | A/C  | Gene_Ca_11410.1    | INTRON                        | Anaphase-promoting complex subunit 1     |
| <i>Desi_wild_144434</i> | NA                                  | <i>Ca_desi_scaffold</i> | 144434                  | G/A  | Gene_Ca_11410.1    | INTRON                        | Anaphase-promoting complex subunit 1     |
| <i>Desi_wild_144569</i> | NA                                  | <i>Ca_desi_scaffold</i> | 144569                  | C/T  | Gene_Ca_11410.1    | INTRON                        | Anaphase-promoting complex subunit 1     |
| <i>Desi_wild_148249</i> | NA                                  | <i>Ca_desi_scaffold</i> | 148249                  | T/A  | Gene_Ca_11410.1    | INTRON                        | Anaphase-promoting complex subunit 1     |
| <i>Desi_wild_148278</i> | NA                                  | <i>Ca_desi_scaffold</i> | 148278                  | C/T  | Gene_Ca_11410.1    | INTRON                        | Anaphase-promoting complex subunit 1     |
| <i>Desi_wild_173201</i> | NA                                  | <i>Ca_desi_scaffold</i> | 173201                  | T/A  | Gene_Ca_11411.3    | SYNONYMOUS_CODING             | Clathrin heavy chain 1                   |
| <i>Desi_wild_175786</i> | NA                                  | <i>Ca_desi_scaffold</i> | 175786                  | T/G  | Gene_Ca_11411.3    | INTRON                        | Clathrin heavy chain 1                   |
| <i>Desi_wild_175798</i> | NA                                  | <i>Ca_desi_scaffold</i> | 175798                  | G/A  | Gene_Ca_11411.3    | INTRON                        | Clathrin heavy chain 1                   |
| <i>Desi_wild_192488</i> | NA                                  | <i>Ca_desi_scaffold</i> | 192488                  | A/T  | NA                 | INTERGENIC                    | NA                                       |
| <i>Desi_wild_192502</i> | NA                                  | <i>Ca_desi_scaffold</i> | 192502                  | A/T  | NA                 | INTERGENIC                    | NA                                       |
| <i>Desi_wild_192508</i> | NA                                  | <i>Ca_desi_scaffold</i> | 192508                  | C/T  | NA                 | INTERGENIC                    | NA                                       |
| <i>Desi_wild_192552</i> | NA                                  | <i>Ca_desi_scaffold</i> | 192552                  | A/G  | NA                 | INTERGENIC                    | NA                                       |
| <i>Desi_wild_212410</i> | NA                                  | <i>Ca_desi_scaffold</i> | 212410                  | T/A  | Gene_Ca_11413.1    | NON_SYNONYMOUS_CODING         | Ethylene-responsive transcription factor |
| <i>Desi_wild_212421</i> | NA                                  | <i>Ca_desi_scaffold</i> | 212421                  | A/C  | Gene_Ca_11413.1    | NON_SYNONYMOUS_CODING         | Ethylene-responsive transcription factor |
| <i>Desi_wild_212425</i> | NA                                  | <i>Ca_desi_scaffold</i> | 212425                  | T/A  | Gene_Ca_11413.1    | STOP_GAINED                   | Ethylene-responsive transcription factor |
| <i>Desi_wild_222125</i> | NA                                  | <i>Ca_desi_scaffold</i> | 222125                  | G/T  | NA                 | INTERGENIC                    | NA                                       |
| <i>Desi_wild_222300</i> | NA                                  | <i>Ca_desi_scaffold</i> | 222300                  | C/T  | NA                 | INTERGENIC                    | NA                                       |
| <i>Desi_wild_222302</i> | NA                                  | <i>Ca_desi_scaffold</i> | 222302                  | T/G  | NA                 | INTERGENIC                    | NA                                       |
| <i>Desi_wild_230800</i> | NA                                  | <i>Ca_desi_scaffold</i> | 230800                  | C/T  | NA                 | INTERGENIC                    | NA                                       |



| SNP IDs                 | NCBI dbSNP accession IDs (NCBI_SS#) | Chromosomes             | Physical positions (bp) | SNPs | Gene accession IDs | Sequence components of genome | Putative functions                                           |
|-------------------------|-------------------------------------|-------------------------|-------------------------|------|--------------------|-------------------------------|--------------------------------------------------------------|
| <i>Desi_wild_232416</i> | NA                                  | <i>Ca_desi_scaffold</i> | 232416                  | G/A  | NA                 | INTERGENIC                    | NA                                                           |
| <i>Desi_wild_232425</i> | NA                                  | <i>Ca_desi_scaffold</i> | 232425                  | A/G  | NA                 | INTERGENIC                    | NA                                                           |
| <i>Desi_wild_92920</i>  | NA                                  | <i>Ca_desi_scaffold</i> | 92920                   | C/T  | NA                 | INTERGENIC                    | NA                                                           |
| <i>Desi_wild_99670</i>  | NA                                  | <i>Ca_desi_scaffold</i> | 99670                   | A/T  | Gene_Ca_11426.1    | NON_SYNONYMOUS_CODING         | Protein SUPPRESSOR OF GENE SILENCING 3                       |
| <i>Desi_wild_168229</i> | NA                                  | <i>Ca_desi_scaffold</i> | 168229                  | T/G  | Gene_Ca_11435.1    | INTRON                        | Probable cation-transporting ATPase                          |
| <i>Desi_wild_198472</i> | NA                                  | <i>Ca_desi_scaffold</i> | 198472                  | C/T  | Gene_Ca_11437.1    | INTRON                        | Protein kinase superfamily protein                           |
| <i>Desi_wild_64322</i>  | NA                                  | <i>Ca_desi_scaffold</i> | 64322                   | G/A  | Gene_Ca_11445.2    | NON_SYNONYMOUS_CODING         | NA                                                           |
| <i>Desi_wild_129430</i> | NA                                  | <i>Ca_desi_scaffold</i> | 129430                  | G/T  | Gene_Ca_11450.1    | NON_SYNONYMOUS_CODING         | ABC transporter G family member 26                           |
| <i>Desi_wild_184099</i> | NA                                  | <i>Ca_desi_scaffold</i> | 184099                  | C/T  | Gene_Ca_11456.1    | NON_SYNONYMOUS_CODING         | Probable pre-mRNA-splicing factor ATP-dependent RNA helicase |
| <i>Desi_wild_13383</i>  | NA                                  | <i>Ca_desi_scaffold</i> | 13383                   | A/G  | Gene_Ca_11459.2    | NON_SYNONYMOUS_CODING         | MATE efflux family protein 6                                 |
| <i>Desi_wild_56185</i>  | NA                                  | <i>Ca_desi_scaffold</i> | 56185                   | T/C  | Gene_Ca_11462.1    | NON_SYNONYMOUS_CODING         | Homeobox-leucine zipper protein HDG8                         |
| <i>Desi_wild_100326</i> | NA                                  | <i>Ca_desi_scaffold</i> | 100326                  | A/G  | NA                 | INTERGENIC                    | NA                                                           |
| <i>Desi_wild_100390</i> | NA                                  | <i>Ca_desi_scaffold</i> | 100390                  | G/C  | NA                 | INTERGENIC                    | NA                                                           |
| <i>Desi_wild_136282</i> | NA                                  | <i>Ca_desi_scaffold</i> | 136282                  | A/G  | Gene_Ca_11464.1    | NON_SYNONYMOUS_CODING         | WD repeat-containing protein 18                              |
| <i>Desi_wild_31579</i>  | NA                                  | <i>Ca_desi_scaffold</i> | 31579                   | A/C  | Gene_Ca_11469.1    | INTRON                        | Probable beta-1,3-galactosyltransferase 11                   |
| <i>Desi_wild_36291</i>  | NA                                  | <i>Ca_desi_scaffold</i> | 36291                   | T/G  | NA                 | INTERGENIC                    | NA                                                           |
| <i>Desi_wild_149083</i> | NA                                  | <i>Ca_desi_scaffold</i> | 149083                  | C/A  | Gene_Ca_11478.1    | INTRON                        | Bidirectional sugar transporter SWEET3                       |
| <i>Desi_wild_149089</i> | NA                                  | <i>Ca_desi_scaffold</i> | 149089                  | C/G  | Gene_Ca_11478.1    | INTRON                        | Bidirectional sugar transporter SWEET3                       |
| <i>Desi_wild_149099</i> | NA                                  | <i>Ca_desi_scaffold</i> | 149099                  | G/A  | Gene_Ca_11478.1    | INTRON                        | Bidirectional sugar transporter SWEET3                       |
| <i>Desi_wild_149113</i> | NA                                  | <i>Ca_desi_scaffold</i> | 149113                  | G/A  | Gene_Ca_11478.1    | INTRON                        | Bidirectional sugar transporter SWEET3                       |
| <i>Desi_wild_149141</i> | NA                                  | <i>Ca_desi_scaffold</i> | 149141                  | A/C  | Gene_Ca_11478.1    | INTRON                        | Bidirectional sugar transporter SWEET3                       |
| <i>Desi_wild_149158</i> | NA                                  | <i>Ca_desi_scaffold</i> | 149158                  | G/A  | Gene_Ca_11478.1    | INTRON                        | Bidirectional sugar transporter SWEET3                       |
| <i>Desi_wild_149166</i> | NA                                  | <i>Ca_desi_scaffold</i> | 149166                  | C/T  | Gene_Ca_11478.1    | INTRON                        | Bidirectional sugar transporter SWEET3                       |
| <i>Desi_wild_149183</i> | NA                                  | <i>Ca_desi_scaffold</i> | 149183                  | T/A  | Gene_Ca_11478.1    | INTRON                        | Bidirectional sugar transporter SWEET3                       |
| <i>Desi_wild_149205</i> | NA                                  | <i>Ca_desi_scaffold</i> | 149205                  | A/C  | Gene_Ca_11478.1    | INTRON                        | Bidirectional sugar transporter SWEET3                       |
| <i>Desi_wild_149231</i> | NA                                  | <i>Ca_desi_scaffold</i> | 149231                  | T/A  | Gene_Ca_11478.1    | INTRON                        | Bidirectional sugar transporter SWEET3                       |
| <i>Desi_wild_232212</i> | NA                                  | <i>Ca_desi_scaffold</i> | 232212                  | A/C  | Gene_Ca_11482.2    | INTRON                        | Probable protein phosphatase 2C 76                           |
| <i>Desi_wild_232703</i> | NA                                  | <i>Ca_desi_scaffold</i> | 232703                  | C/T  | Gene_Ca_11482.2    | INTRON                        | Probable protein phosphatase 2C 76                           |
| <i>Desi_wild_232733</i> | NA                                  | <i>Ca_desi_scaffold</i> | 232733                  | C/T  | Gene_Ca_11482.2    | INTRON                        | Probable protein phosphatase 2C 76                           |
| <i>Desi_wild_232741</i> | NA                                  | <i>Ca_desi_scaffold</i> | 232741                  | A/G  | Gene_Ca_11482.2    | INTRON                        | Probable protein phosphatase 2C 76                           |
| <i>Desi_wild_232775</i> | NA                                  | <i>Ca_desi_scaffold</i> | 232775                  | G/T  | Gene_Ca_11482.2    | INTRON                        | Probable protein phosphatase 2C 76                           |
| <i>Desi_wild_4334</i>   | NA                                  | <i>Ca_desi_scaffold</i> | 4334                    | T/G  | Gene_Ca_08976.1    | SYNONYMOUS_CODING             | Transcription activator GLK1                                 |
| <i>Desi_wild_4551</i>   | NA                                  | <i>Ca_desi_scaffold</i> | 4551                    | C/A  | Gene_Ca_08976.1    | NON_SYNONYMOUS_CODING         | Transcription activator GLK1                                 |
| <i>Desi_wild_49981</i>  | NA                                  | <i>Ca_desi_scaffold</i> | 49981                   | C/A  | Gene_Ca_08978.1    | SYNONYMOUS_CODING             | Homeodomain-like transcriptional regulator                   |
| <i>Desi_wild_66209</i>  | NA                                  | <i>Ca_desi_scaffold</i> | 66209                   | T/C  | Gene_Ca_08981.1    | NON_SYNONYMOUS_CODING         | Zinc finger protein NUTCRACKER                               |
| <i>Desi_wild_233082</i> | NA                                  | <i>Ca_desi_scaffold</i> | 233082                  | A/C  | Gene_Ca_08997.1    | SYNONYMOUS_CODING             | unknown protein                                              |
| <i>Desi_wild_688</i>    | NA                                  | <i>Ca_desi_scaffold</i> | 688                     | T/G  | NA                 | INTERGENIC                    | NA                                                           |
| <i>Desi_wild_8220</i>   | NA                                  | <i>Ca_desi_scaffold</i> | 8220                    | C/T  | NA                 | INTERGENIC                    | NA                                                           |
| <i>Desi_wild_101391</i> | NA                                  | <i>Ca_desi_scaffold</i> | 101391                  | G/C  | Gene_Ca_11495.1    | SYNONYMOUS_CODING             | ABC transporter B family member 6                            |
| <i>Desi_wild_101394</i> | NA                                  | <i>Ca_desi_scaffold</i> | 101394                  | A/C  | Gene_Ca_11495.1    | SYNONYMOUS_CODING             | ABC transporter B family member 6                            |
| <i>Desi_wild_108276</i> | NA                                  | <i>Ca_desi_scaffold</i> | 108276                  | T/G  | NA                 | INTERGENIC                    | NA                                                           |
| <i>Desi_wild_108281</i> | NA                                  | <i>Ca_desi_scaffold</i> | 108281                  | C/T  | NA                 | INTERGENIC                    | NA                                                           |
| <i>Desi_wild_108288</i> | NA                                  | <i>Ca_desi_scaffold</i> | 108288                  | C/G  | NA                 | INTERGENIC                    | NA                                                           |
| <i>Desi_wild_108309</i> | NA                                  | <i>Ca_desi_scaffold</i> | 108309                  | G/A  | NA                 | INTERGENIC                    | NA                                                           |

| SNP IDs                 | NCBI dbSNP accession IDs (NCBI_SS#) | Chromosomes             | Physical positions (bp) | SNPs | Gene accession IDs | Sequence components of genome | Putative functions                                           |
|-------------------------|-------------------------------------|-------------------------|-------------------------|------|--------------------|-------------------------------|--------------------------------------------------------------|
| <i>Desi_wild_108325</i> | NA                                  | <i>Ca_desi_scaffold</i> | 108325                  | G/T  | NA                 | INTERGENIC                    | NA                                                           |
| <i>Desi_wild_149619</i> | NA                                  | <i>Ca_desi_scaffold</i> | 149619                  | T/C  | NA                 | INTERGENIC                    | NA                                                           |
| <i>Desi_wild_149623</i> | NA                                  | <i>Ca_desi_scaffold</i> | 149623                  | A/T  | NA                 | INTERGENIC                    | NA                                                           |
| <i>Desi_wild_149710</i> | NA                                  | <i>Ca_desi_scaffold</i> | 149710                  | T/G  | NA                 | INTERGENIC                    | NA                                                           |
| <i>Desi_wild_149734</i> | NA                                  | <i>Ca_desi_scaffold</i> | 149734                  | A/G  | NA                 | INTERGENIC                    | NA                                                           |
| <i>Desi_wild_149775</i> | NA                                  | <i>Ca_desi_scaffold</i> | 149775                  | A/G  | NA                 | INTERGENIC                    | NA                                                           |
| <i>Desi_wild_163118</i> | NA                                  | <i>Ca_desi_scaffold</i> | 163118                  | G/A  | NA                 | INTERGENIC                    | NA                                                           |
| <i>Desi_wild_163185</i> | NA                                  | <i>Ca_desi_scaffold</i> | 163185                  | G/T  | NA                 | INTERGENIC                    | NA                                                           |
| <i>Desi_wild_163192</i> | NA                                  | <i>Ca_desi_scaffold</i> | 163192                  | T/A  | NA                 | INTERGENIC                    | NA                                                           |
| <i>Desi_wild_163199</i> | NA                                  | <i>Ca_desi_scaffold</i> | 163199                  | G/A  | NA                 | INTERGENIC                    | NA                                                           |
| <i>Desi_wild_163200</i> | NA                                  | <i>Ca_desi_scaffold</i> | 163200                  | C/G  | NA                 | INTERGENIC                    | NA                                                           |
| <i>Desi_wild_163201</i> | NA                                  | <i>Ca_desi_scaffold</i> | 163201                  | T/A  | NA                 | INTERGENIC                    | NA                                                           |
| <i>Desi_wild_163204</i> | NA                                  | <i>Ca_desi_scaffold</i> | 163204                  | T/G  | NA                 | INTERGENIC                    | NA                                                           |
| <i>Desi_wild_163209</i> | NA                                  | <i>Ca_desi_scaffold</i> | 163209                  | C/T  | NA                 | INTERGENIC                    | NA                                                           |
| <i>Desi_wild_163211</i> | NA                                  | <i>Ca_desi_scaffold</i> | 163211                  | G/A  | NA                 | INTERGENIC                    | NA                                                           |
| <i>Desi_wild_163222</i> | NA                                  | <i>Ca_desi_scaffold</i> | 163222                  | A/C  | NA                 | INTERGENIC                    | NA                                                           |
| <i>Desi_wild_163591</i> | NA                                  | <i>Ca_desi_scaffold</i> | 163591                  | G/A  | NA                 | INTERGENIC                    | NA                                                           |
| <i>Desi_wild_165010</i> | NA                                  | <i>Ca_desi_scaffold</i> | 165010                  | T/C  | Gene_Ca_11503.1    | SYNONYMOUS_CODING             | Putative elongator complex protein 1                         |
| <i>Desi_wild_165033</i> | NA                                  | <i>Ca_desi_scaffold</i> | 165033                  | A/C  | Gene_Ca_11503.1    | NON_SYNONYMOUS_CODING         | Putative elongator complex protein 1                         |
| <i>Desi_wild_165037</i> | NA                                  | <i>Ca_desi_scaffold</i> | 165037                  | A/G  | Gene_Ca_11503.1    | SYNONYMOUS_CODING             | Putative elongator complex protein 1                         |
| <i>Desi_wild_173149</i> | NA                                  | <i>Ca_desi_scaffold</i> | 173149                  | C/T  | NA                 | INTERGENIC                    | NA                                                           |
| <i>Desi_wild_173159</i> | NA                                  | <i>Ca_desi_scaffold</i> | 173159                  | G/A  | NA                 | INTERGENIC                    | NA                                                           |
| <i>Desi_wild_173224</i> | NA                                  | <i>Ca_desi_scaffold</i> | 173224                  | A/G  | NA                 | INTERGENIC                    | NA                                                           |
| <i>Desi_wild_182240</i> | NA                                  | <i>Ca_desi_scaffold</i> | 182240                  | C/T  | Gene_Ca_11505.1    | DOWNSTREAM                    | NA                                                           |
| <i>Desi_wild_190969</i> | NA                                  | <i>Ca_desi_scaffold</i> | 190969                  | A/G  | NA                 | INTERGENIC                    | NA                                                           |
| <i>Desi_wild_190990</i> | NA                                  | <i>Ca_desi_scaffold</i> | 190990                  | G/C  | NA                 | INTERGENIC                    | NA                                                           |
| <i>Desi_wild_191027</i> | NA                                  | <i>Ca_desi_scaffold</i> | 191027                  | A/G  | NA                 | INTERGENIC                    | NA                                                           |
| <i>Desi_wild_191037</i> | NA                                  | <i>Ca_desi_scaffold</i> | 191037                  | G/A  | NA                 | INTERGENIC                    | NA                                                           |
| <i>Desi_wild_191042</i> | NA                                  | <i>Ca_desi_scaffold</i> | 191042                  | T/G  | NA                 | INTERGENIC                    | NA                                                           |
| <i>Desi_wild_191101</i> | NA                                  | <i>Ca_desi_scaffold</i> | 191101                  | C/T  | NA                 | INTERGENIC                    | NA                                                           |
| <i>Desi_wild_124315</i> | NA                                  | <i>Ca_desi_scaffold</i> | 124315                  | G/A  | Gene_Ca_11513.1    | DOWNSTREAM                    | Polygalacturonase QRT3                                       |
| <i>Desi_wild_26750</i>  | NA                                  | <i>Ca_desi_scaffold</i> | 26750                   | T/C  | NA                 | INTERGENIC                    | NA                                                           |
| <i>Desi_wild_116599</i> | NA                                  | <i>Ca_desi_scaffold</i> | 116599                  | T/C  | NA                 | INTERGENIC                    | NA                                                           |
| <i>Desi_wild_116743</i> | NA                                  | <i>Ca_desi_scaffold</i> | 116743                  | T/C  | NA                 | INTERGENIC                    | NA                                                           |
| <i>Desi_wild_154579</i> | NA                                  | <i>Ca_desi_scaffold</i> | 154579                  | T/C  | Gene_Ca_11532.1    | DOWNSTREAM                    | NA                                                           |
| <i>Desi_wild_188378</i> | NA                                  | <i>Ca_desi_scaffold</i> | 188378                  | T/C  | Gene_Ca_11534.1    | DOWNSTREAM                    | Ubiquitin carboxyl-terminal hydrolase family protein         |
| <i>Desi_wild_204003</i> | NA                                  | <i>Ca_desi_scaffold</i> | 204003                  | A/C  | Gene_Ca_11535.1    | INTRON                        | NA                                                           |
| <i>Desi_wild_197679</i> | NA                                  | <i>Ca_desi_scaffold</i> | 197679                  | G/C  | Gene_Ca_11542.1    | DOWNSTREAM                    | Enoyl-[acyl-carrier-protein] reductase [NADH], chloroplastic |
| <i>Desi_wild_228747</i> | NA                                  | <i>Ca_desi_scaffold</i> | 228747                  | C/T  | Gene_Ca_11543.1    | SYNONYMOUS_CODING             | U-box domain-containing protein 9                            |
| <i>Desi_wild_20456</i>  | NA                                  | <i>Ca_desi_scaffold</i> | 20456                   | T/A  | NA                 | INTERGENIC                    | NA                                                           |
| <i>Desi_wild_20458</i>  | NA                                  | <i>Ca_desi_scaffold</i> | 20458                   | G/A  | NA                 | INTERGENIC                    | NA                                                           |
| <i>Desi_wild_27017</i>  | NA                                  | <i>Ca_desi_scaffold</i> | 27017                   | G/A  | NA                 | INTERGENIC                    | NA                                                           |
| <i>Desi_wild_41046</i>  | NA                                  | <i>Ca_desi_scaffold</i> | 41046                   | T/C  | Gene_Ca_11556.1    | NON_SYNONYMOUS_CODING         | RING-H2 finger protein ATL33                                 |
| <i>Desi_wild_102012</i> | NA                                  | <i>Ca_desi_scaffold</i> | 102012                  | G/T  | NA                 | INTERGENIC                    | NA                                                           |

| SNP IDs                 | NCBI dbSNP accession IDs (NCBI_SS#) | Chromosomes             | Physical positions (bp) | SNPs | Gene accession IDs | Sequence components of genome  | Putative functions                                    |
|-------------------------|-------------------------------------|-------------------------|-------------------------|------|--------------------|--------------------------------|-------------------------------------------------------|
| <i>Desi_wild_28286</i>  | NA                                  | <i>Ca_desi_scaffold</i> | 28286                   | A/G  | Gene_Ca_11566.1    | SYNONYMOUS_CODING              | NA                                                    |
| <i>Desi_wild_28287</i>  | NA                                  | <i>Ca_desi_scaffold</i> | 28287                   | C/T  | Gene_Ca_11566.1    | NON_SYNONYMOUS_CODING          | Transcription factor bHLH13                           |
| <i>Desi_wild_28312</i>  | NA                                  | <i>Ca_desi_scaffold</i> | 28312                   | C/G  | Gene_Ca_11566.1    | NON_SYNONYMOUS_CODING          | Transcription factor bHLH13                           |
| <i>Desi_wild_28328</i>  | NA                                  | <i>Ca_desi_scaffold</i> | 28328                   | A/C  | Gene_Ca_11566.1    | NON_SYNONYMOUS_CODING          | Transcription factor bHLH13                           |
| <i>Desi_wild_28433</i>  | NA                                  | <i>Ca_desi_scaffold</i> | 28433                   | T/A  | Gene_Ca_11566.1    | NON_SYNONYMOUS_CODING          | Transcription factor bHLH13                           |
| <i>Desi_wild_74545</i>  | NA                                  | <i>Ca_desi_scaffold</i> | 74545                   | A/G  | Gene_Ca_11567.1    | SYNONYMOUS_CODING              | Ethylene-responsive transcription factor ERF023       |
| <i>Desi_wild_74568</i>  | NA                                  | <i>Ca_desi_scaffold</i> | 74568                   | C/A  | Gene_Ca_11567.1    | NON_SYNONYMOUS_CODING          | Ethylene-responsive transcription factor ERF023       |
| <i>Desi_wild_74584</i>  | NA                                  | <i>Ca_desi_scaffold</i> | 74584                   | T/G  | Gene_Ca_11567.1    | SYNONYMOUS_CODING              | Ethylene-responsive transcription factor ERF023       |
| <i>Desi_wild_74592</i>  | NA                                  | <i>Ca_desi_scaffold</i> | 74592                   | T/G  | Gene_Ca_11567.1    | NON_SYNONYMOUS_CODING          | Ethylene-responsive transcription factor ERF023       |
| <i>Desi_wild_74599</i>  | NA                                  | <i>Ca_desi_scaffold</i> | 74599                   | T/G  | Gene_Ca_11567.1    | NON_SYNONYMOUS_CODING          | Ethylene-responsive transcription factor ERF023       |
| <i>Desi_wild_95215</i>  | NA                                  | <i>Ca_desi_scaffold</i> | 95215                   | G/A  | Gene_Ca_11568.1    | NON_SYNONYMOUS_CODING          | Exportin-2                                            |
| <i>Desi_wild_96479</i>  | NA                                  | <i>Ca_desi_scaffold</i> | 96479                   | A/G  | Gene_Ca_11568.1    | SYNONYMOUS_CODING              | Exportin-2                                            |
| <i>Desi_wild_190590</i> | NA                                  | <i>Ca_desi_scaffold</i> | 190590                  | C/G  | Gene_Ca_11577.1    | DOWNSTREAM                     | Pyridoxamine 5'-phosphate oxidase family protein      |
| <i>Desi_wild_53147</i>  | NA                                  | <i>Ca_desi_scaffold</i> | 53147                   | T/C  | NA                 | INTERGENIC                     | NA                                                    |
| <i>Desi_wild_100146</i> | NA                                  | <i>Ca_desi_scaffold</i> | 100146                  | G/T  | NA                 | INTERGENIC                     | NA                                                    |
| <i>Desi_wild_100170</i> | NA                                  | <i>Ca_desi_scaffold</i> | 100170                  | T/G  | NA                 | INTERGENIC                     | NA                                                    |
| <i>Desi_wild_158193</i> | NA                                  | <i>Ca_desi_scaffold</i> | 158193                  | T/C  | Gene_Ca_11594.1    | SYNONYMOUS_CODING              | Tryptophan aminotransferase-related protein 1         |
| <i>Desi_wild_174582</i> | NA                                  | <i>Ca_desi_scaffold</i> | 174582                  | C/A  | Gene_Ca_11595.1    | INTRON                         | Lipase                                                |
| <i>Desi_wild_221035</i> | NA                                  | <i>Ca_desi_scaffold</i> | 221035                  | G/A  | NA                 | INTERGENIC                     | NA                                                    |
| <i>Desi_wild_40090</i>  | NA                                  | <i>Ca_desi_scaffold</i> | 40090                   | T/G  | Gene_Ca_11600.1    | INTRON                         | nucleic acid binding                                  |
| <i>Desi_wild_56957</i>  | NA                                  | <i>Ca_desi_scaffold</i> | 56957                   | T/G  | Gene_Ca_11603.1    | DOWNSTREAM                     | Beta-galactosidase                                    |
| <i>Desi_wild_56958</i>  | NA                                  | <i>Ca_desi_scaffold</i> | 56958                   | A/G  | Gene_Ca_11603.1    | DOWNSTREAM                     | Beta-galactosidase                                    |
| <i>Desi_wild_124760</i> | NA                                  | <i>Ca_desi_scaffold</i> | 124760                  | A/G  | NA                 | INTERGENIC                     | NA                                                    |
| <i>Desi_wild_116113</i> | NA                                  | <i>Ca_desi_scaffold</i> | 116113                  | C/A  | Gene_Ca_11624.1    | INTRON                         | Rab GDP dissociation inhibitor alpha                  |
| <i>Desi_wild_82093</i>  | NA                                  | <i>Ca_desi_scaffold</i> | 82093                   | C/T  | Gene_Ca_11642.1    | INTRON                         | C2 and GRAM domain-containing protein At1g03370       |
| <i>Desi_wild_149961</i> | NA                                  | <i>Ca_desi_scaffold</i> | 149961                  | T/C  | Gene_Ca_11646.1    | DOWNSTREAM                     | Acyl-[acyl-carrier-protein] desaturase, chloroplastic |
| <i>Desi_wild_175648</i> | NA                                  | <i>Ca_desi_scaffold</i> | 175648                  | C/T  | Gene_Ca_11649.1    | SYNONYMOUS_CODING              | Uncharacterized protein C1093.03                      |
| <i>Desi_wild_186150</i> | NA                                  | <i>Ca_desi_scaffold</i> | 186150                  | C/A  | Gene_Ca_11649.2    | DOWNSTREAM                     | Uncharacterized protein C1093.03                      |
| <i>Desi_wild_186152</i> | NA                                  | <i>Ca_desi_scaffold</i> | 186152                  | T/A  | Gene_Ca_11649.2    | DOWNSTREAM                     | Uncharacterized protein C1093.03                      |
| <i>Desi_wild_189970</i> | NA                                  | <i>Ca_desi_scaffold</i> | 189970                  | T/G  | NA                 | INTERGENIC                     | NA                                                    |
| <i>Desi_wild_26991</i>  | NA                                  | <i>Ca_desi_scaffold</i> | 26991                   | T/C  | Gene_Ca_11656.2    | INTRON                         | NA                                                    |
| <i>Desi_wild_72658</i>  | NA                                  | <i>Ca_desi_scaffold</i> | 72658                   | T/C  | Gene_Ca_11666.1    | NON_SYNONYMOUS_CODING          | Ribosomal N-lysine methyltransferase 3                |
| <i>Desi_wild_78788</i>  | NA                                  | <i>Ca_desi_scaffold</i> | 78788                   | T/G  | Gene_Ca_11667.1    | INTRON                         | FUNCTIONS IN: molecular_function unknown              |
| <i>Desi_wild_78805</i>  | NA                                  | <i>Ca_desi_scaffold</i> | 78805                   | T/G  | Gene_Ca_11667.1    | INTRON                         | FUNCTIONS IN: molecular_function unknown              |
| <i>Desi_wild_98625</i>  | NA                                  | <i>Ca_desi_scaffold</i> | 98625                   | T/G  | NA                 | INTERGENIC                     | NA                                                    |
| <i>Desi_wild_100448</i> | NA                                  | <i>Ca_desi_scaffold</i> | 100448                  | T/G  | NA                 | INTERGENIC                     | NA                                                    |
| <i>Desi_wild_160119</i> | NA                                  | <i>Ca_desi_scaffold</i> | 160119                  | A/G  | NA                 | INTERGENIC                     | NA                                                    |
| <i>Desi_wild_160262</i> | NA                                  | <i>Ca_desi_scaffold</i> | 160262                  | C/T  | Gene_Ca_11672.1    | START_GAINED: TTG, UTR_5_PRIME | NA                                                    |
| <i>Desi_wild_160463</i> | NA                                  | <i>Ca_desi_scaffold</i> | 160463                  | T/G  | Gene_Ca_11672.1    | NON_SYNONYMOUS_CODING          | NA                                                    |
| <i>Desi_wild_160469</i> | NA                                  | <i>Ca_desi_scaffold</i> | 160469                  | T/G  | Gene_Ca_11672.1    | NON_SYNONYMOUS_CODING          | NA                                                    |
| <i>Desi_wild_13867</i>  | NA                                  | <i>Ca_desi_scaffold</i> | 13867                   | A/T  | Gene_Ca_11676.1    | INTRON                         | Cell division cycle 7-related protein kinase          |
| <i>Desi_wild_28070</i>  | NA                                  | <i>Ca_desi_scaffold</i> | 28070                   | A/G  | Gene_Ca_11678.2    | INTRON                         | ELMO domain-containing protein A                      |
| <i>Desi_wild_160526</i> | NA                                  | <i>Ca_desi_scaffold</i> | 160526                  | G/A  | Gene_Ca_11690.2    | NON_SYNONYMOUS_CODING          | ELMO domain-containing protein A                      |
| <i>Desi_wild_160564</i> | NA                                  | <i>Ca_desi_scaffold</i> | 160564                  | A/C  | Gene_Ca_11690.2    | SYNONYMOUS_CODING              | ELMO domain-containing protein A                      |

| SNP IDs                 | NCBI dbSNP accession IDs (NCBI_SS#) | Chromosomes             | Physical positions (bp) | SNPs | Gene accession IDs | Sequence components of genome | Putative functions                                              |
|-------------------------|-------------------------------------|-------------------------|-------------------------|------|--------------------|-------------------------------|-----------------------------------------------------------------|
| <i>Desi_wild_134135</i> | NA                                  | <i>Ca_desi_scaffold</i> | 134135                  | A/C  | Gene_Ca_11702.1    | NON_SYNONYMOUS_CODING         | U-box domain-containing protein 25                              |
| <i>Desi_wild_66755</i>  | NA                                  | <i>Ca_desi_scaffold</i> | 66755                   | A/G  | Gene_Ca_11715.1    | SYNONYMOUS_CODING             | LisH domain and HEAT repeat-containing protein KIAA1468 homolog |
| <i>Desi_wild_147761</i> | NA                                  | <i>Ca_desi_scaffold</i> | 147761                  | C/T  | Gene_Ca_11724.1    | INTRON                        | Probable receptor protein kinase TMK1                           |
| <i>Desi_wild_6101</i>   | NA                                  | <i>Ca_desi_scaffold</i> | 6101                    | G/A  | NA                 | INTERGENIC                    | NA                                                              |
| <i>Desi_wild_6166</i>   | NA                                  | <i>Ca_desi_scaffold</i> | 6166                    | G/T  | NA                 | INTERGENIC                    | NA                                                              |
| <i>Desi_wild_32066</i>  | NA                                  | <i>Ca_desi_scaffold</i> | 32066                   | T/G  | Gene_Ca_11735.1    | UPSTREAM                      | NA                                                              |
| <i>Desi_wild_33434</i>  | NA                                  | <i>Ca_desi_scaffold</i> | 33434                   | C/T  | Gene_Ca_11735.1    | SYNONYMOUS_CODING             | NA                                                              |
| <i>Desi_wild_33776</i>  | NA                                  | <i>Ca_desi_scaffold</i> | 33776                   | T/A  | Gene_Ca_11735.1    | SYNONYMOUS_CODING             | NA                                                              |
| <i>Desi_wild_33805</i>  | NA                                  | <i>Ca_desi_scaffold</i> | 33805                   | C/A  | Gene_Ca_11735.1    | SYNONYMOUS_CODING             | NA                                                              |
| <i>Desi_wild_33830</i>  | NA                                  | <i>Ca_desi_scaffold</i> | 33830                   | G/A  | Gene_Ca_11735.1    | SYNONYMOUS_CODING             | NA                                                              |
| <i>Desi_wild_58809</i>  | NA                                  | <i>Ca_desi_scaffold</i> | 58809                   | G/A  | NA                 | INTERGENIC                    | NA                                                              |
| <i>Desi_wild_58847</i>  | NA                                  | <i>Ca_desi_scaffold</i> | 58847                   | A/G  | NA                 | INTERGENIC                    | NA                                                              |
| <i>Desi_wild_58865</i>  | NA                                  | <i>Ca_desi_scaffold</i> | 58865                   | G/C  | NA                 | INTERGENIC                    | NA                                                              |
| <i>Desi_wild_78972</i>  | NA                                  | <i>Ca_desi_scaffold</i> | 78972                   | G/A  | NA                 | INTERGENIC                    | NA                                                              |
| <i>Desi_wild_79298</i>  | NA                                  | <i>Ca_desi_scaffold</i> | 79298                   | C/A  | Gene_Ca_11740.1    | DOWNSTREAM                    | Thioredoxin Y, chloroplastic                                    |
| <i>Desi_wild_79360</i>  | NA                                  | <i>Ca_desi_scaffold</i> | 79360                   | C/T  | Gene_Ca_11740.1    | DOWNSTREAM                    | Thioredoxin Y, chloroplastic                                    |
| <i>Desi_wild_79429</i>  | NA                                  | <i>Ca_desi_scaffold</i> | 79429                   | A/T  | Gene_Ca_11740.1    | DOWNSTREAM                    | Thioredoxin Y, chloroplastic                                    |
| <i>Desi_wild_85381</i>  | NA                                  | <i>Ca_desi_scaffold</i> | 85381                   | T/C  | Gene_Ca_11740.1    | UPSTREAM                      | Thioredoxin Y, chloroplastic                                    |
| <i>Desi_wild_85652</i>  | NA                                  | <i>Ca_desi_scaffold</i> | 85652                   | G/A  | Gene_Ca_11740.1    | UPSTREAM                      | Thioredoxin Y, chloroplastic                                    |
| <i>Desi_wild_120137</i> | NA                                  | <i>Ca_desi_scaffold</i> | 120137                  | T/C  | NA                 | INTERGENIC                    | NA                                                              |
| <i>Desi_wild_120327</i> | NA                                  | <i>Ca_desi_scaffold</i> | 120327                  | T/C  | NA                 | INTERGENIC                    | NA                                                              |
| <i>Desi_wild_120344</i> | NA                                  | <i>Ca_desi_scaffold</i> | 120344                  | C/T  | NA                 | INTERGENIC                    | NA                                                              |
| <i>Desi_wild_138974</i> | NA                                  | <i>Ca_desi_scaffold</i> | 138974                  | A/G  | Gene_Ca_11748.1    | UPSTREAM                      | unknown protein                                                 |
| <i>Desi_wild_174994</i> | NA                                  | <i>Ca_desi_scaffold</i> | 174994                  | A/G  | Gene_Ca_11750.1    | INTRON                        | Probable S-acyltransferase At4g24630                            |
| <i>Desi_wild_175021</i> | NA                                  | <i>Ca_desi_scaffold</i> | 175021                  | C/G  | Gene_Ca_11750.1    | INTRON                        | Probable S-acyltransferase At4g24630                            |
| <i>Desi_wild_183902</i> | NA                                  | <i>Ca_desi_scaffold</i> | 183902                  | T/C  | Gene_Ca_11751.1    | INTRON                        | Histone-lysine N-methyltransferase ASHH1                        |
| <i>Desi_wild_183909</i> | NA                                  | <i>Ca_desi_scaffold</i> | 183909                  | T/A  | Gene_Ca_11751.1    | INTRON                        | Histone-lysine N-methyltransferase ASHH1                        |
| <i>Desi_wild_190023</i> | NA                                  | <i>Ca_desi_scaffold</i> | 190023                  | A/C  | Gene_Ca_11752.1    | DOWNSTREAM                    | Phytosulfokine receptor 2                                       |
| <i>Desi_wild_190056</i> | NA                                  | <i>Ca_desi_scaffold</i> | 190056                  | T/G  | Gene_Ca_11752.1    | DOWNSTREAM                    | Phytosulfokine receptor 2                                       |
| <i>Desi_wild_190059</i> | NA                                  | <i>Ca_desi_scaffold</i> | 190059                  | A/G  | Gene_Ca_11752.1    | DOWNSTREAM                    | Phytosulfokine receptor 2                                       |
| <i>Desi_wild_212502</i> | NA                                  | <i>Ca_desi_scaffold</i> | 212502                  | C/A  | NA                 | INTERGENIC                    | NA                                                              |
| <i>Desi_wild_44289</i>  | NA                                  | <i>Ca_desi_scaffold</i> | 44289                   | C/T  | NA                 | INTERGENIC                    | NA                                                              |
| <i>Desi_wild_44304</i>  | NA                                  | <i>Ca_desi_scaffold</i> | 44304                   | C/T  | NA                 | INTERGENIC                    | NA                                                              |
| <i>Desi_wild_44311</i>  | NA                                  | <i>Ca_desi_scaffold</i> | 44311                   | G/T  | NA                 | INTERGENIC                    | NA                                                              |
| <i>Desi_wild_44317</i>  | NA                                  | <i>Ca_desi_scaffold</i> | 44317                   | G/A  | NA                 | INTERGENIC                    | NA                                                              |
| <i>Desi_wild_44322</i>  | NA                                  | <i>Ca_desi_scaffold</i> | 44322                   | A/G  | NA                 | INTERGENIC                    | NA                                                              |
| <i>Desi_wild_44329</i>  | NA                                  | <i>Ca_desi_scaffold</i> | 44329                   | A/T  | NA                 | INTERGENIC                    | NA                                                              |
| <i>Desi_wild_44336</i>  | NA                                  | <i>Ca_desi_scaffold</i> | 44336                   | A/T  | NA                 | INTERGENIC                    | NA                                                              |
| <i>Desi_wild_44339</i>  | NA                                  | <i>Ca_desi_scaffold</i> | 44339                   | A/T  | NA                 | INTERGENIC                    | NA                                                              |
| <i>Desi_wild_48797</i>  | NA                                  | <i>Ca_desi_scaffold</i> | 48797                   | T/C  | Gene_Ca_11761.1    | DOWNSTREAM                    | ABC transporter B family member 25, mitochondrial               |
| <i>Desi_wild_114414</i> | NA                                  | <i>Ca_desi_scaffold</i> | 114414                  | T/G  | Gene_Ca_11767.1    | SYNONYMOUS_CODING             | Metal tolerance protein 4                                       |
| <i>Desi_wild_114425</i> | NA                                  | <i>Ca_desi_scaffold</i> | 114425                  | G/T  | Gene_Ca_11767.1    | NON_SYNONYMOUS_CODING         | Metal tolerance protein 4                                       |
| <i>Desi_wild_114458</i> | NA                                  | <i>Ca_desi_scaffold</i> | 114458                  | A/T  | Gene_Ca_11767.1    | NON_SYNONYMOUS_CODING         | Metal tolerance protein 4                                       |
| <i>Desi_wild_154874</i> | NA                                  | <i>Ca_desi_scaffold</i> | 154874                  | C/A  | Gene_Ca_11770.1    | INTRON                        | Root phototropism protein 2                                     |

| SNP IDs                 | NCBI dbSNP accession IDs (NCBI_SS#) | Chromosomes             | Physical positions (bp) | SNPs | Gene accession IDs | Sequence components of genome | Putative functions                              |
|-------------------------|-------------------------------------|-------------------------|-------------------------|------|--------------------|-------------------------------|-------------------------------------------------|
| <i>Desi_wild_176245</i> | NA                                  | <i>Ca_desi_scaffold</i> | 176245                  | T/G  | Gene_Ca_11772.1    | SYNONYMOUS_CODING             | Ubiquitin-conjugating enzyme E2 8               |
| <i>Desi_wild_15144</i>  | NA                                  | <i>Ca_desi_scaffold</i> | 15144                   | A/G  | NA                 | INTERGENIC                    | NA                                              |
| <i>Desi_wild_187347</i> | NA                                  | <i>Ca_desi_scaffold</i> | 187347                  | C/T  | Gene_Ca_11792.1    | NON_SYNONYMOUS_CODING         | Protein Mpv17                                   |
| <i>Desi_wild_190100</i> | NA                                  | <i>Ca_desi_scaffold</i> | 190100                  | T/G  | Gene_Ca_11792.1    | INTRON                        | Protein Mpv17                                   |
| <i>Desi_wild_190103</i> | NA                                  | <i>Ca_desi_scaffold</i> | 190103                  | T/C  | Gene_Ca_11792.1    | INTRON                        | Protein Mpv17                                   |
| <i>Desi_wild_190105</i> | NA                                  | <i>Ca_desi_scaffold</i> | 190105                  | A/C  | Gene_Ca_11792.1    | INTRON                        | Protein Mpv17                                   |
| <i>Desi_wild_190164</i> | NA                                  | <i>Ca_desi_scaffold</i> | 190164                  | G/A  | Gene_Ca_11792.1    | INTRON                        | Protein Mpv17                                   |
| <i>Desi_wild_21398</i>  | NA                                  | <i>Ca_desi_scaffold</i> | 21398                   | T/A  | Gene_Ca_09010.1    | UPSTREAM                      | Disease resistance protein RPM1                 |
| <i>Desi_wild_79052</i>  | NA                                  | <i>Ca_desi_scaffold</i> | 79052                   | A/G  | NA                 | INTERGENIC                    | NA                                              |
| <i>Desi_wild_121122</i> | NA                                  | <i>Ca_desi_scaffold</i> | 121122                  | C/G  | NA                 | INTERGENIC                    | NA                                              |
| <i>Desi_wild_121277</i> | NA                                  | <i>Ca_desi_scaffold</i> | 121277                  | T/A  | NA                 | INTERGENIC                    | NA                                              |
| <i>Desi_wild_259595</i> | NA                                  | <i>Ca_desi_scaffold</i> | 259595                  | T/C  | Gene_Ca_09019.1    | INTRON                        | Peptidyl-prolyl cis-trans isomerase FKBP43      |
| <i>Desi_wild_61608</i>  | NA                                  | <i>Ca_desi_scaffold</i> | 61608                   | G/T  | Gene_Ca_11796.1    | SYNONYMOUS_CODING             | Telomerase Cajal body protein 1                 |
| <i>Desi_wild_61609</i>  | NA                                  | <i>Ca_desi_scaffold</i> | 61609                   | A/T  | Gene_Ca_11796.1    | NON_SYNONYMOUS_CODING         | Telomerase Cajal body protein 1                 |
| <i>Desi_wild_61610</i>  | NA                                  | <i>Ca_desi_scaffold</i> | 61610                   | T/C  | Gene_Ca_11796.1    | NON_SYNONYMOUS_CODING         | Telomerase Cajal body protein 1                 |
| <i>Desi_wild_97267</i>  | NA                                  | <i>Ca_desi_scaffold</i> | 97267                   | A/C  | Gene_Ca_11799.1    | INTRON                        | Calmodulin-binding protein                      |
| <i>Desi_wild_137687</i> | NA                                  | <i>Ca_desi_scaffold</i> | 137687                  | A/C  | NA                 | INTERGENIC                    | NA                                              |
| <i>Desi_wild_137688</i> | NA                                  | <i>Ca_desi_scaffold</i> | 137688                  | G/T  | NA                 | INTERGENIC                    | NA                                              |
| <i>Desi_wild_144573</i> | NA                                  | <i>Ca_desi_scaffold</i> | 144573                  | G/C  | Gene_Ca_11806.1    | SYNONYMOUS_CODING             | Sugar carrier protein C                         |
| <i>Desi_wild_9870</i>   | NA                                  | <i>Ca_desi_scaffold</i> | 9870                    | A/G  | NA                 | INTERGENIC                    | NA                                              |
| <i>Desi_wild_10463</i>  | NA                                  | <i>Ca_desi_scaffold</i> | 10463                   | G/A  | NA                 | INTERGENIC                    | NA                                              |
| <i>Desi_wild_11298</i>  | NA                                  | <i>Ca_desi_scaffold</i> | 11298                   | T/C  | NA                 | INTERGENIC                    | NA                                              |
| <i>Desi_wild_56934</i>  | NA                                  | <i>Ca_desi_scaffold</i> | 56934                   | C/T  | Gene_Ca_11814.1    | NON_SYNONYMOUS_CODING         | Ubiquitin-like-specific protease ESD4           |
| <i>Desi_wild_57026</i>  | NA                                  | <i>Ca_desi_scaffold</i> | 57026                   | G/A  | Gene_Ca_11814.1    | SYNONYMOUS_CODING             | Ubiquitin-like-specific protease ESD4           |
| <i>Desi_wild_57243</i>  | NA                                  | <i>Ca_desi_scaffold</i> | 57243                   | T/C  | Gene_Ca_11814.1    | INTRON                        | Ubiquitin-like-specific protease ESD4           |
| <i>Desi_wild_60130</i>  | NA                                  | <i>Ca_desi_scaffold</i> | 60130                   | T/C  | Gene_Ca_11814.1    | NON_SYNONYMOUS_CODING         | Ubiquitin-like-specific protease ESD4           |
| <i>Desi_wild_84666</i>  | NA                                  | <i>Ca_desi_scaffold</i> | 84666                   | T/G  | Gene_Ca_11814.1    | INTRON                        | Ubiquitin-like-specific protease ESD4           |
| <i>Desi_wild_125674</i> | NA                                  | <i>Ca_desi_scaffold</i> | 125674                  | T/G  | NA                 | INTERGENIC                    | NA                                              |
| <i>Desi_wild_144329</i> | NA                                  | <i>Ca_desi_scaffold</i> | 144329                  | G/A  | NA                 | INTERGENIC                    | NA                                              |
| <i>Desi_wild_147990</i> | NA                                  | <i>Ca_desi_scaffold</i> | 147990                  | A/G  | Gene_Ca_11820.1    | UPSTREAM                      | Probable histone-arginine methyltransferase 1.4 |
| <i>Desi_wild_164112</i> | NA                                  | <i>Ca_desi_scaffold</i> | 164112                  | G/T  | NA                 | INTERGENIC                    | NA                                              |
| <i>Desi_wild_187422</i> | NA                                  | <i>Ca_desi_scaffold</i> | 187422                  | C/T  | Gene_Ca_11824.1    | INTRON                        | unknown protein                                 |
| <i>Desi_wild_68733</i>  | NA                                  | <i>Ca_desi_scaffold</i> | 68733                   | C/A  | Gene_Ca_11831.2    | DOWNSTREAM                    | NA                                              |
| <i>Desi_wild_134211</i> | NA                                  | <i>Ca_desi_scaffold</i> | 134211                  | A/G  | Gene_Ca_11839.1    | NON_SYNONYMOUS_CODING         | Xylem serine proteinase 1                       |
| <i>Desi_wild_193024</i> | NA                                  | <i>Ca_desi_scaffold</i> | 193024                  | C/A  | NA                 | INTERGENIC                    | NA                                              |
| <i>Desi_wild_66004</i>  | NA                                  | <i>Ca_desi_scaffold</i> | 66004                   | T/G  | Gene_Ca_11845.1    | INTRON                        | TRICHOME BIREFRINGENCE-LIKE 34                  |
| <i>Desi_wild_134646</i> | NA                                  | <i>Ca_desi_scaffold</i> | 134646                  | G/A  | NA                 | INTERGENIC                    | NA                                              |
| <i>Desi_wild_134684</i> | NA                                  | <i>Ca_desi_scaffold</i> | 134684                  | T/C  | NA                 | INTERGENIC                    | NA                                              |
| <i>Desi_wild_134694</i> | NA                                  | <i>Ca_desi_scaffold</i> | 134694                  | A/G  | NA                 | INTERGENIC                    | NA                                              |
| <i>Desi_wild_134705</i> | NA                                  | <i>Ca_desi_scaffold</i> | 134705                  | G/A  | NA                 | INTERGENIC                    | NA                                              |
| <i>Desi_wild_134711</i> | NA                                  | <i>Ca_desi_scaffold</i> | 134711                  | C/G  | NA                 | INTERGENIC                    | NA                                              |
| <i>Desi_wild_134771</i> | NA                                  | <i>Ca_desi_scaffold</i> | 134771                  | A/G  | NA                 | INTERGENIC                    | NA                                              |
| <i>Desi_wild_134774</i> | NA                                  | <i>Ca_desi_scaffold</i> | 134774                  | T/C  | NA                 | INTERGENIC                    | NA                                              |
| <i>Desi_wild_150531</i> | NA                                  | <i>Ca_desi_scaffold</i> | 150531                  | A/G  | NA                 | INTERGENIC                    | NA                                              |

| SNP IDs                 | NCBI dbSNP accession IDs (NCBI_SS#) | Chromosomes             | Physical positions (bp) | SNPs | Gene accession IDs | Sequence components of genome | Putative functions                                               |
|-------------------------|-------------------------------------|-------------------------|-------------------------|------|--------------------|-------------------------------|------------------------------------------------------------------|
| <i>Desi_wild_150537</i> | NA                                  | <i>Ca_desi_scaffold</i> | 150537                  | G/A  | NA                 | INTERGENIC                    | NA                                                               |
| <i>Desi_wild_150541</i> | NA                                  | <i>Ca_desi_scaffold</i> | 150541                  | C/T  | NA                 | INTERGENIC                    | NA                                                               |
| <i>Desi_wild_150542</i> | NA                                  | <i>Ca_desi_scaffold</i> | 150542                  | A/G  | NA                 | INTERGENIC                    | NA                                                               |
| <i>Desi_wild_150550</i> | NA                                  | <i>Ca_desi_scaffold</i> | 150550                  | G/T  | NA                 | INTERGENIC                    | NA                                                               |
| <i>Desi_wild_150566</i> | NA                                  | <i>Ca_desi_scaffold</i> | 150566                  | G/T  | NA                 | INTERGENIC                    | NA                                                               |
| <i>Desi_wild_150585</i> | NA                                  | <i>Ca_desi_scaffold</i> | 150585                  | A/G  | NA                 | INTERGENIC                    | NA                                                               |
| <i>Desi_wild_150586</i> | NA                                  | <i>Ca_desi_scaffold</i> | 150586                  | C/T  | NA                 | INTERGENIC                    | NA                                                               |
| <i>Desi_wild_150645</i> | NA                                  | <i>Ca_desi_scaffold</i> | 150645                  | T/G  | NA                 | INTERGENIC                    | NA                                                               |
| <i>Desi_wild_150659</i> | NA                                  | <i>Ca_desi_scaffold</i> | 150659                  | C/T  | NA                 | INTERGENIC                    | NA                                                               |
| <i>Desi_wild_150662</i> | NA                                  | <i>Ca_desi_scaffold</i> | 150662                  | A/G  | NA                 | INTERGENIC                    | NA                                                               |
| <i>Desi_wild_67803</i>  | NA                                  | <i>Ca_desi_scaffold</i> | 67803                   | C/T  | NA                 | INTERGENIC                    | NA                                                               |
| <i>Desi_wild_67853</i>  | NA                                  | <i>Ca_desi_scaffold</i> | 67853                   | A/C  | NA                 | INTERGENIC                    | NA                                                               |
| <i>Desi_wild_114595</i> | NA                                  | <i>Ca_desi_scaffold</i> | 114595                  | T/C  | Gene_Ca_11859.1    | INTRON                        | 60S ribosomal protein L51, mitochondrial                         |
| <i>Desi_wild_116297</i> | NA                                  | <i>Ca_desi_scaffold</i> | 116297                  | G/C  | NA                 | INTERGENIC                    | NA                                                               |
| <i>Desi_wild_121197</i> | NA                                  | <i>Ca_desi_scaffold</i> | 121197                  | A/G  | Gene_Ca_11860.1    | INTRON                        | GDSL esterase/lipase 5                                           |
| <i>Desi_wild_121204</i> | NA                                  | <i>Ca_desi_scaffold</i> | 121204                  | A/G  | Gene_Ca_11860.1    | INTRON                        | GDSL esterase/lipase 5                                           |
| <i>Desi_wild_121236</i> | NA                                  | <i>Ca_desi_scaffold</i> | 121236                  | G/T  | Gene_Ca_11860.1    | INTRON                        | GDSL esterase/lipase 5                                           |
| <i>Desi_wild_121256</i> | NA                                  | <i>Ca_desi_scaffold</i> | 121256                  | C/T  | Gene_Ca_11860.1    | INTRON                        | GDSL esterase/lipase 5                                           |
| <i>Desi_wild_121278</i> | NA                                  | <i>Ca_desi_scaffold</i> | 121278                  | A/G  | Gene_Ca_11860.1    | INTRON                        | GDSL esterase/lipase 5                                           |
| <i>Desi_wild_141764</i> | NA                                  | <i>Ca_desi_scaffold</i> | 141764                  | G/T  | Gene_Ca_11861.1    | SYNONYMOUS_CODING             | Ethylene-responsive transcription factor RAP2-12                 |
| <i>Desi_wild_141847</i> | NA                                  | <i>Ca_desi_scaffold</i> | 141847                  | A/T  | Gene_Ca_11861.1    | INTRON                        | Ethylene-responsive transcription factor RAP2-12                 |
| <i>Desi_wild_171714</i> | NA                                  | <i>Ca_desi_scaffold</i> | 171714                  | T/C  | Gene_Ca_11862.1    | SYNONYMOUS_CODING             | Subtilisin-like protease                                         |
| <i>Desi_wild_11808</i>  | NA                                  | <i>Ca_desi_scaffold</i> | 11808                   | A/T  | Gene_Ca_11865.1    | NON_SYNONYMOUS_CODING         | Probable ADP-ribosylation factor GTPase-activating protein AGD14 |
| <i>Desi_wild_23800</i>  | NA                                  | <i>Ca_desi_scaffold</i> | 23800                   | A/C  | Gene_Ca_11866.1    | UPSTREAM                      | Probable serine incorporator                                     |
| <i>Desi_wild_46659</i>  | NA                                  | <i>Ca_desi_scaffold</i> | 46659                   | T/G  | Gene_Ca_11869.1    | SYNONYMOUS_CODING             | hydroxyproline-rich glycoprotein family protein                  |
| <i>Desi_wild_130743</i> | NA                                  | <i>Ca_desi_scaffold</i> | 130743                  | T/C  | NA                 | INTERGENIC                    | NA                                                               |
| <i>Desi_wild_205488</i> | NA                                  | <i>Ca_desi_scaffold</i> | 205488                  | T/G  | Gene_Ca_11890.1    | INTRON                        | 60S acidic ribosomal protein P2B                                 |
| <i>Desi_wild_4879</i>   | NA                                  | <i>Ca_desi_scaffold</i> | 4879                    | A/G  | Gene_Ca_11900.1    | INTRON                        | Uncharacterized protein At1g18480                                |
| <i>Desi_wild_9265</i>   | NA                                  | <i>Ca_desi_scaffold</i> | 9265                    | C/G  | Gene_Ca_11900.1    | NON_SYNONYMOUS_CODING         | Uncharacterized protein At1g18480                                |
| <i>Desi_wild_108492</i> | NA                                  | <i>Ca_desi_scaffold</i> | 108492                  | T/G  | Gene_Ca_11905.1    | NON_SYNONYMOUS_CODING         | Laccase-3                                                        |
| <i>Desi_wild_69384</i>  | NA                                  | <i>Ca_desi_scaffold</i> | 69384                   | C/T  | Gene_Ca_11918.1    | INTRON                        | NA                                                               |
| <i>Desi_wild_112094</i> | NA                                  | <i>Ca_desi_scaffold</i> | 112094                  | T/A  | Gene_Ca_11932.1    | INTRON                        | BSD domain-containing protein                                    |
| <i>Desi_wild_112102</i> | NA                                  | <i>Ca_desi_scaffold</i> | 112102                  | T/A  | Gene_Ca_11932.1    | INTRON                        | BSD domain-containing protein                                    |
| <i>Desi_wild_112104</i> | NA                                  | <i>Ca_desi_scaffold</i> | 112104                  | G/A  | Gene_Ca_11932.1    | INTRON                        | BSD domain-containing protein                                    |
| <i>Desi_wild_112106</i> | NA                                  | <i>Ca_desi_scaffold</i> | 112106                  | T/A  | Gene_Ca_11932.1    | INTRON                        | BSD domain-containing protein                                    |
| <i>Desi_wild_1297</i>   | NA                                  | <i>Ca_desi_scaffold</i> | 1297                    | T/G  | NA                 | INTERGENIC                    | NA                                                               |
| <i>Desi_wild_36564</i>  | NA                                  | <i>Ca_desi_scaffold</i> | 36564                   | C/A  | Gene_Ca_11938.1    | NON_SYNONYMOUS_CODING         | Protein IQ-DOMAIN 1                                              |
| <i>Desi_wild_37297</i>  | NA                                  | <i>Ca_desi_scaffold</i> | 37297                   | T/G  | Gene_Ca_11938.1    | SYNONYMOUS_CODING             | Protein IQ-DOMAIN 1                                              |
| <i>Desi_wild_37298</i>  | NA                                  | <i>Ca_desi_scaffold</i> | 37298                   | A/C  | Gene_Ca_11938.1    | SYNONYMOUS_CODING             | Protein IQ-DOMAIN 1                                              |
| <i>Desi_wild_119202</i> | NA                                  | <i>Ca_desi_scaffold</i> | 119202                  | C/A  | Gene_Ca_11948.1    | DOWNSTREAM                    | Chaperonin CPN60-like 2, mitochondrial                           |
| <i>Desi_wild_139907</i> | NA                                  | <i>Ca_desi_scaffold</i> | 139907                  | A/T  | Gene_Ca_11949.1    | NON_SYNONYMOUS_CODING         | Mixed-amyryn synthase                                            |
| <i>Desi_wild_148995</i> | NA                                  | <i>Ca_desi_scaffold</i> | 148995                  | A/G  | NA                 | INTERGENIC                    | NA                                                               |
| <i>Desi_wild_149031</i> | NA                                  | <i>Ca_desi_scaffold</i> | 149031                  | C/T  | NA                 | INTERGENIC                    | NA                                                               |
| <i>Desi_wild_149053</i> | NA                                  | <i>Ca_desi_scaffold</i> | 149053                  | C/T  | NA                 | INTERGENIC                    | NA                                                               |

| SNP IDs                 | NCBI dbSNP accession IDs (NCBI_SS#) | Chromosomes             | Physical positions (bp) | SNPs | Gene accession IDs | Sequence components of genome | Putative functions                                           |
|-------------------------|-------------------------------------|-------------------------|-------------------------|------|--------------------|-------------------------------|--------------------------------------------------------------|
| <i>Desi_wild_149067</i> | NA                                  | <i>Ca_desi_scaffold</i> | 149067                  | C/T  | NA                 | INTERGENIC                    | NA                                                           |
| <i>Desi_wild_160707</i> | NA                                  | <i>Ca_desi_scaffold</i> | 160707                  | T/C  | Gene_Ca_11951.1    | UPSTREAM                      | Receptor-like serine/threonine-protein kinase ALE2           |
| <i>Desi_wild_36382</i>  | NA                                  | <i>Ca_desi_scaffold</i> | 36382                   | A/G  | Gene_Ca_11973.1    | INTRON                        | OTU domain-containing protein 3                              |
| <i>Desi_wild_76544</i>  | NA                                  | <i>Ca_desi_scaffold</i> | 76544                   | G/A  | Gene_Ca_11977.1    | DOWNSTREAM                    | PI-PLC X domain-containing protein At5g67130                 |
| <i>Desi_wild_84543</i>  | NA                                  | <i>Ca_desi_scaffold</i> | 84543                   | G/A  | NA                 | INTERGENIC                    | NA                                                           |
| <i>Desi_wild_132738</i> | NA                                  | <i>Ca_desi_scaffold</i> | 132738                  | G/A  | Gene_Ca_11981.2    | INTRON                        | Nicotinate phosphoribosyltransferase                         |
| <i>Desi_wild_28675</i>  | NA                                  | <i>Ca_desi_scaffold</i> | 28675                   | G/A  | NA                 | INTERGENIC                    | NA                                                           |
| <i>Desi_wild_75840</i>  | NA                                  | <i>Ca_desi_scaffold</i> | 75840                   | T/A  | NA                 | INTERGENIC                    | NA                                                           |
| <i>Desi_wild_12750</i>  | NA                                  | <i>Ca_desi_scaffold</i> | 12750                   | A/C  | NA                 | INTERGENIC                    | NA                                                           |
| <i>Desi_wild_12767</i>  | NA                                  | <i>Ca_desi_scaffold</i> | 12767                   | A/C  | NA                 | INTERGENIC                    | NA                                                           |
| <i>Desi_wild_115704</i> | NA                                  | <i>Ca_desi_scaffold</i> | 115704                  | C/T  | Gene_Ca_12012.1    | INTRON                        | Chaperone protein dnaJ 3                                     |
| <i>Desi_wild_118000</i> | NA                                  | <i>Ca_desi_scaffold</i> | 118000                  | T/C  | Gene_Ca_12012.1    | UPSTREAM                      | Chaperone protein dnaJ 3                                     |
| <i>Desi_wild_12407</i>  | NA                                  | <i>Ca_desi_scaffold</i> | 12407                   | A/G  | Gene_Ca_12020.1    | INTRON                        | Protein NSP-INTERACTING KINASE 1                             |
| <i>Desi_wild_12479</i>  | NA                                  | <i>Ca_desi_scaffold</i> | 12479                   | C/T  | Gene_Ca_12020.1    | INTRON                        | Protein NSP-INTERACTING KINASE 1                             |
| <i>Desi_wild_12488</i>  | NA                                  | <i>Ca_desi_scaffold</i> | 12488                   | T/C  | Gene_Ca_12020.1    | INTRON                        | Protein NSP-INTERACTING KINASE 1                             |
| <i>Desi_wild_12491</i>  | NA                                  | <i>Ca_desi_scaffold</i> | 12491                   | G/A  | Gene_Ca_12020.1    | INTRON                        | Protein NSP-INTERACTING KINASE 1                             |
| <i>Desi_wild_12494</i>  | NA                                  | <i>Ca_desi_scaffold</i> | 12494                   | T/A  | Gene_Ca_12020.1    | INTRON                        | Protein NSP-INTERACTING KINASE 1                             |
| <i>Desi_wild_12503</i>  | NA                                  | <i>Ca_desi_scaffold</i> | 12503                   | A/T  | Gene_Ca_12020.1    | INTRON                        | Protein NSP-INTERACTING KINASE 1                             |
| <i>Desi_wild_12524</i>  | NA                                  | <i>Ca_desi_scaffold</i> | 12524                   | G/A  | Gene_Ca_12020.1    | INTRON                        | Protein NSP-INTERACTING KINASE 1                             |
| <i>Desi_wild_34488</i>  | NA                                  | <i>Ca_desi_scaffold</i> | 34488                   | T/A  | NA                 | INTERGENIC                    | NA                                                           |
| <i>Desi_wild_143277</i> | NA                                  | <i>Ca_desi_scaffold</i> | 143277                  | T/A  | Gene_Ca_12028.1    | INTRON                        | Cell division cycle protein 27 homolog B                     |
| <i>Desi_wild_143279</i> | NA                                  | <i>Ca_desi_scaffold</i> | 143279                  | A/T  | Gene_Ca_12028.1    | INTRON                        | Cell division cycle protein 27 homolog B                     |
| <i>Desi_wild_167142</i> | NA                                  | <i>Ca_desi_scaffold</i> | 167142                  | A/G  | NA                 | INTERGENIC                    | NA                                                           |
| <i>Desi_wild_172704</i> | NA                                  | <i>Ca_desi_scaffold</i> | 172704                  | T/C  | Gene_Ca_12029.1    | SYNONYMOUS_CODING             | unknown protein                                              |
| <i>Desi_wild_196251</i> | NA                                  | <i>Ca_desi_scaffold</i> | 196251                  | A/G  | NA                 | INTERGENIC                    | NA                                                           |
| <i>Desi_wild_93665</i>  | NA                                  | <i>Ca_desi_scaffold</i> | 93665                   | G/A  | NA                 | INTERGENIC                    | NA                                                           |
| <i>Desi_wild_36340</i>  | NA                                  | <i>Ca_desi_scaffold</i> | 36340                   | T/C  | NA                 | INTERGENIC                    | NA                                                           |
| <i>Desi_wild_40920</i>  | NA                                  | <i>Ca_desi_scaffold</i> | 40920                   | A/C  | NA                 | INTERGENIC                    | NA                                                           |
| <i>Desi_wild_40954</i>  | NA                                  | <i>Ca_desi_scaffold</i> | 40954                   | A/C  | NA                 | INTERGENIC                    | NA                                                           |
| <i>Desi_wild_40957</i>  | NA                                  | <i>Ca_desi_scaffold</i> | 40957                   | C/G  | NA                 | INTERGENIC                    | NA                                                           |
| <i>Desi_wild_42581</i>  | NA                                  | <i>Ca_desi_scaffold</i> | 42581                   | A/G  | NA                 | INTERGENIC                    | NA                                                           |
| <i>Desi_wild_75729</i>  | NA                                  | <i>Ca_desi_scaffold</i> | 75729                   | A/C  | Gene_Ca_12058.1    | NON_SYNONYMOUS_CODING         | NA                                                           |
| <i>Desi_wild_103495</i> | NA                                  | <i>Ca_desi_scaffold</i> | 103495                  | T/C  | Gene_Ca_12062.1    | SYNONYMOUS_CODING             | Putative uncharacterized protein                             |
| <i>Desi_wild_106782</i> | NA                                  | <i>Ca_desi_scaffold</i> | 106782                  | A/G  | Gene_Ca_12062.1    | SYNONYMOUS_CODING             | Putative uncharacterized protein                             |
| <i>Desi_wild_109849</i> | NA                                  | <i>Ca_desi_scaffold</i> | 109849                  | T/G  | Gene_Ca_12062.1    | INTRON                        | Putative uncharacterized protein                             |
| <i>Desi_wild_112305</i> | NA                                  | <i>Ca_desi_scaffold</i> | 112305                  | G/A  | Gene_Ca_12062.1    | NON_SYNONYMOUS_CODING         | Putative uncharacterized protein                             |
| <i>Desi_wild_3079</i>   | NA                                  | <i>Ca_desi_scaffold</i> | 3079                    | G/T  | NA                 | INTERGENIC                    | NA                                                           |
| <i>Desi_wild_3128</i>   | NA                                  | <i>Ca_desi_scaffold</i> | 3128                    | A/G  | NA                 | INTERGENIC                    | NA                                                           |
| <i>Desi_wild_3148</i>   | NA                                  | <i>Ca_desi_scaffold</i> | 3148                    | A/G  | NA                 | INTERGENIC                    | NA                                                           |
| <i>Desi_wild_174311</i> | NA                                  | <i>Ca_desi_scaffold</i> | 174311                  | T/A  | NA                 | INTERGENIC                    | NA                                                           |
| <i>Desi_wild_19296</i>  | NA                                  | <i>Ca_desi_scaffold</i> | 19296                   | A/T  | Gene_Ca_12084.1    | INTRON                        | Dynamamin-related protein 1C                                 |
| <i>Desi_wild_19436</i>  | NA                                  | <i>Ca_desi_scaffold</i> | 19436                   | T/A  | Gene_Ca_12084.1    | INTRON                        | Dynamamin-related protein 1C                                 |
| <i>Desi_wild_19468</i>  | NA                                  | <i>Ca_desi_scaffold</i> | 19468                   | A/G  | Gene_Ca_12084.1    | SYNONYMOUS_CODING             | Dynamamin-related protein 1C                                 |
| <i>Desi_wild_47775</i>  | NA                                  | <i>Ca_desi_scaffold</i> | 47775                   | T/A  | Gene_Ca_12085.1    | INTRON                        | Cleavage and polyadenylation specificity factor subunit 3-II |



| SNP IDs                 | NCBI dbSNP accession IDs (NCBI_SS#) | Chromosomes             | Physical positions (bp) | SNPs | Gene accession IDs | Sequence components of genome | Putative functions                                           |
|-------------------------|-------------------------------------|-------------------------|-------------------------|------|--------------------|-------------------------------|--------------------------------------------------------------|
| <i>Desi_wild_47809</i>  | NA                                  | <i>Ca_desi_scaffold</i> | 47809                   | C/A  | Gene_Ca_12085.1    | INTRON                        | Cleavage and polyadenylation specificity factor subunit 3-II |
| <i>Desi_wild_47816</i>  | NA                                  | <i>Ca_desi_scaffold</i> | 47816                   | G/A  | Gene_Ca_12085.1    | INTRON                        | Cleavage and polyadenylation specificity factor subunit 3-II |
| <i>Desi_wild_47847</i>  | NA                                  | <i>Ca_desi_scaffold</i> | 47847                   | A/G  | Gene_Ca_12085.1    | INTRON                        | Cleavage and polyadenylation specificity factor subunit 3-II |
| <i>Desi_wild_52221</i>  | NA                                  | <i>Ca_desi_scaffold</i> | 52221                   | G/A  | Gene_Ca_12085.1    | INTRON                        | Cleavage and polyadenylation specificity factor subunit 3-II |
| <i>Desi_wild_52238</i>  | NA                                  | <i>Ca_desi_scaffold</i> | 52238                   | C/A  | Gene_Ca_12085.1    | INTRON                        | Cleavage and polyadenylation specificity factor subunit 3-II |
| <i>Desi_wild_52242</i>  | NA                                  | <i>Ca_desi_scaffold</i> | 52242                   | A/T  | Gene_Ca_12085.1    | INTRON                        | Cleavage and polyadenylation specificity factor subunit 3-II |
| <i>Desi_wild_52249</i>  | NA                                  | <i>Ca_desi_scaffold</i> | 52249                   | T/A  | Gene_Ca_12085.1    | INTRON                        | Cleavage and polyadenylation specificity factor subunit 3-II |
| <i>Desi_wild_52294</i>  | NA                                  | <i>Ca_desi_scaffold</i> | 52294                   | C/G  | Gene_Ca_12085.1    | INTRON                        | Cleavage and polyadenylation specificity factor subunit 3-II |
| <i>Desi_wild_53189</i>  | NA                                  | <i>Ca_desi_scaffold</i> | 53189                   | A/G  | Gene_Ca_12085.1    | INTRON                        | Cleavage and polyadenylation specificity factor subunit 3-II |
| <i>Desi_wild_97218</i>  | NA                                  | <i>Ca_desi_scaffold</i> | 97218                   | T/C  | Gene_Ca_12089.1    | INTRON                        | tRNA guanosine-2'-O-methyltransferase TRM13 homolog          |
| <i>Desi_wild_97359</i>  | NA                                  | <i>Ca_desi_scaffold</i> | 97359                   | A/C  | Gene_Ca_12089.1    | NON_SYNONYMOUS_CODING         | tRNA guanosine-2'-O-methyltransferase TRM13 homolog          |
| <i>Desi_wild_97386</i>  | NA                                  | <i>Ca_desi_scaffold</i> | 97386                   | C/G  | Gene_Ca_12089.1    | INTRON                        | tRNA guanosine-2'-O-methyltransferase TRM13 homolog          |
| <i>Desi_wild_97451</i>  | NA                                  | <i>Ca_desi_scaffold</i> | 97451                   | T/C  | Gene_Ca_12089.1    | INTRON                        | tRNA guanosine-2'-O-methyltransferase TRM13 homolog          |
| <i>Desi_wild_97468</i>  | NA                                  | <i>Ca_desi_scaffold</i> | 97468                   | T/C  | Gene_Ca_12089.1    | INTRON                        | tRNA guanosine-2'-O-methyltransferase TRM13 homolog          |
| <i>Desi_wild_97478</i>  | NA                                  | <i>Ca_desi_scaffold</i> | 97478                   | C/T  | Gene_Ca_12089.1    | INTRON                        | tRNA guanosine-2'-O-methyltransferase TRM13 homolog          |
| <i>Desi_wild_108675</i> | NA                                  | <i>Ca_desi_scaffold</i> | 108675                  | C/A  | Gene_Ca_12090.1    | SYNONYMOUS_CODING             | NA                                                           |
| <i>Desi_wild_108699</i> | NA                                  | <i>Ca_desi_scaffold</i> | 108699                  | C/T  | Gene_Ca_12090.1    | INTRON                        | NA                                                           |
| <i>Desi_wild_108727</i> | NA                                  | <i>Ca_desi_scaffold</i> | 108727                  | A/T  | Gene_Ca_12090.1    | INTRON                        | NA                                                           |
| <i>Desi_wild_108758</i> | NA                                  | <i>Ca_desi_scaffold</i> | 108758                  | C/T  | Gene_Ca_12090.1    | INTRON                        | NA                                                           |
| <i>Desi_wild_108916</i> | NA                                  | <i>Ca_desi_scaffold</i> | 108916                  | T/C  | Gene_Ca_12090.1    | INTRON                        | NA                                                           |
| <i>Desi_wild_114379</i> | NA                                  | <i>Ca_desi_scaffold</i> | 114379                  | A/C  | Gene_Ca_12090.1    | NON_SYNONYMOUS_CODING         | NA                                                           |
| <i>Desi_wild_114392</i> | NA                                  | <i>Ca_desi_scaffold</i> | 114392                  | G/A  | Gene_Ca_12090.1    | SYNONYMOUS_CODING             | NA                                                           |
| <i>Desi_wild_114433</i> | NA                                  | <i>Ca_desi_scaffold</i> | 114433                  | G/A  | Gene_Ca_12090.1    | INTRON                        | NA                                                           |
| <i>Desi_wild_116816</i> | NA                                  | <i>Ca_desi_scaffold</i> | 116816                  | G/A  | Gene_Ca_12090.2    | SYNONYMOUS_CODING             | Protein VAC14 homolog                                        |
| <i>Desi_wild_116984</i> | NA                                  | <i>Ca_desi_scaffold</i> | 116984                  | A/G  | Gene_Ca_12090.2    | SYNONYMOUS_CODING             | Protein VAC14 homolog                                        |
| <i>Desi_wild_119774</i> | NA                                  | <i>Ca_desi_scaffold</i> | 119774                  | G/A  | Gene_Ca_12091.1    | SYNONYMOUS_CODING             | Ankyrin repeat-containing protein At2g01680                  |
| <i>Desi_wild_123132</i> | NA                                  | <i>Ca_desi_scaffold</i> | 123132                  | G/A  | Gene_Ca_12091.1    | SYNONYMOUS_CODING             | Ankyrin repeat-containing protein At2g01680                  |
| <i>Desi_wild_181554</i> | NA                                  | <i>Ca_desi_scaffold</i> | 181554                  | A/C  | Gene_Ca_12096.1    | SYNONYMOUS_CODING             | NA                                                           |
| <i>Desi_wild_181642</i> | NA                                  | <i>Ca_desi_scaffold</i> | 181642                  | T/C  | Gene_Ca_12096.1    | NON_SYNONYMOUS_CODING         | NA                                                           |
| <i>Desi_wild_181674</i> | NA                                  | <i>Ca_desi_scaffold</i> | 181674                  | A/T  | Gene_Ca_12096.1    | SYNONYMOUS_CODING             | NA                                                           |
| <i>Desi_wild_184540</i> | NA                                  | <i>Ca_desi_scaffold</i> | 184540                  | A/G  | NA                 | INTERGENIC                    | NA                                                           |
| <i>Desi_wild_184584</i> | NA                                  | <i>Ca_desi_scaffold</i> | 184584                  | C/T  | NA                 | INTERGENIC                    | NA                                                           |
| <i>Desi_wild_184588</i> | NA                                  | <i>Ca_desi_scaffold</i> | 184588                  | C/G  | NA                 | INTERGENIC                    | NA                                                           |
| <i>Desi_wild_184677</i> | NA                                  | <i>Ca_desi_scaffold</i> | 184677                  | C/A  | NA                 | INTERGENIC                    | NA                                                           |
| <i>Desi_wild_184681</i> | NA                                  | <i>Ca_desi_scaffold</i> | 184681                  | C/A  | NA                 | INTERGENIC                    | NA                                                           |
| <i>Desi_wild_185387</i> | NA                                  | <i>Ca_desi_scaffold</i> | 185387                  | A/G  | NA                 | INTERGENIC                    | NA                                                           |
| <i>Desi_wild_185465</i> | NA                                  | <i>Ca_desi_scaffold</i> | 185465                  | C/T  | NA                 | INTERGENIC                    | NA                                                           |
| <i>Desi_wild_185519</i> | NA                                  | <i>Ca_desi_scaffold</i> | 185519                  | A/C  | NA                 | INTERGENIC                    | NA                                                           |
| <i>Desi_wild_185658</i> | NA                                  | <i>Ca_desi_scaffold</i> | 185658                  | G/A  | NA                 | INTERGENIC                    | NA                                                           |
| <i>Desi_wild_185662</i> | NA                                  | <i>Ca_desi_scaffold</i> | 185662                  | T/C  | NA                 | INTERGENIC                    | NA                                                           |
| <i>Desi_wild_185684</i> | NA                                  | <i>Ca_desi_scaffold</i> | 185684                  | G/A  | NA                 | INTERGENIC                    | NA                                                           |
| <i>Desi_wild_185694</i> | NA                                  | <i>Ca_desi_scaffold</i> | 185694                  | T/C  | NA                 | INTERGENIC                    | NA                                                           |
| <i>Desi_wild_185726</i> | NA                                  | <i>Ca_desi_scaffold</i> | 185726                  | G/A  | NA                 | INTERGENIC                    | NA                                                           |
| <i>Desi_wild_9360</i>   | NA                                  | <i>Ca_desi_scaffold</i> | 9360                    | C/T  | Gene_Ca_12098.1    | INTRON                        | gamma-irradiation and mitomycin c induced 1                  |

| SNP IDs                 | NCBI dbSNP accession IDs (NCBI_SS#) | Chromosomes             | Physical positions (bp) | SNPs | Gene accession IDs | Sequence components of genome | Putative functions                             |
|-------------------------|-------------------------------------|-------------------------|-------------------------|------|--------------------|-------------------------------|------------------------------------------------|
| <i>Desi_wild_11750</i>  | NA                                  | <i>Ca_desi_scaffold</i> | 11750                   | C/T  | Gene_Ca_12098.1    | INTRON                        | gamma-irradiation and mitomycin c induced 1    |
| <i>Desi_wild_25827</i>  | NA                                  | <i>Ca_desi_scaffold</i> | 25827                   | A/G  | Gene_Ca_12098.1    | INTRON                        | gamma-irradiation and mitomycin c induced 1    |
| <i>Desi_wild_25876</i>  | NA                                  | <i>Ca_desi_scaffold</i> | 25876                   | A/G  | Gene_Ca_12098.1    | INTRON                        | gamma-irradiation and mitomycin c induced 1    |
| <i>Desi_wild_25881</i>  | NA                                  | <i>Ca_desi_scaffold</i> | 25881                   | A/C  | Gene_Ca_12098.1    | INTRON                        | gamma-irradiation and mitomycin c induced 1    |
| <i>Desi_wild_50967</i>  | NA                                  | <i>Ca_desi_scaffold</i> | 50967                   | G/A  | Gene_Ca_12099.1    | SYNONYMOUS_CODING             | Protein IQ-DOMAIN 1                            |
| <i>Desi_wild_87114</i>  | NA                                  | <i>Ca_desi_scaffold</i> | 87114                   | C/A  | Gene_Ca_12102.1    | SYNONYMOUS_CODING             | Putative non-heme bromoperoxidase BpoC         |
| <i>Desi_wild_87130</i>  | NA                                  | <i>Ca_desi_scaffold</i> | 87130                   | C/A  | Gene_Ca_12102.1    | SYNONYMOUS_CODING             | Putative non-heme bromoperoxidase BpoC         |
| <i>Desi_wild_96242</i>  | NA                                  | <i>Ca_desi_scaffold</i> | 96242                   | T/C  | Gene_Ca_12103.2    | SYNONYMOUS_CODING             | NA                                             |
| <i>Desi_wild_96927</i>  | NA                                  | <i>Ca_desi_scaffold</i> | 96927                   | C/G  | Gene_Ca_12103.2    | NON_SYNONYMOUS_CODING         | NA                                             |
| <i>Desi_wild_135120</i> | NA                                  | <i>Ca_desi_scaffold</i> | 135120                  | C/T  | NA                 | INTERGENIC                    | NA                                             |
| <i>Desi_wild_174368</i> | NA                                  | <i>Ca_desi_scaffold</i> | 174368                  | T/C  | NA                 | INTERGENIC                    | NA                                             |
| <i>Desi_wild_186649</i> | NA                                  | <i>Ca_desi_scaffold</i> | 186649                  | G/A  | Gene_Ca_12111.1    | DOWNSTREAM                    | TLC ATP/ADP transporter                        |
| <i>Desi_wild_186674</i> | NA                                  | <i>Ca_desi_scaffold</i> | 186674                  | T/C  | Gene_Ca_12111.1    | DOWNSTREAM                    | TLC ATP/ADP transporter                        |
| <i>Desi_wild_193268</i> | NA                                  | <i>Ca_desi_scaffold</i> | 193268                  | C/T  | Gene_Ca_12112.1    | NON_SYNONYMOUS_CODING         | GTPase-activating protein gyp7                 |
| <i>Desi_wild_193755</i> | NA                                  | <i>Ca_desi_scaffold</i> | 193755                  | A/G  | Gene_Ca_12112.1    | SYNONYMOUS_CODING             | GTPase-activating protein gyp7                 |
| <i>Desi_wild_113002</i> | NA                                  | <i>Ca_desi_scaffold</i> | 113002                  | C/T  | Gene_Ca_09084.1    | INTRON                        | DNA repair protein XRCC2 homolog               |
| <i>Desi_wild_113008</i> | NA                                  | <i>Ca_desi_scaffold</i> | 113008                  | A/G  | Gene_Ca_09084.1    | INTRON                        | DNA repair protein XRCC2 homolog               |
| <i>Desi_wild_113020</i> | NA                                  | <i>Ca_desi_scaffold</i> | 113020                  | T/C  | Gene_Ca_09084.1    | INTRON                        | DNA repair protein XRCC2 homolog               |
| <i>Desi_wild_113706</i> | NA                                  | <i>Ca_desi_scaffold</i> | 113706                  | G/A  | Gene_Ca_09084.1    | INTRON                        | DNA repair protein XRCC2 homolog               |
| <i>Desi_wild_127439</i> | NA                                  | <i>Ca_desi_scaffold</i> | 127439                  | A/G  | NA                 | INTERGENIC                    | NA                                             |
| <i>Desi_wild_147519</i> | NA                                  | <i>Ca_desi_scaffold</i> | 147519                  | C/T  | Gene_Ca_09088.1    | INTRON                        | TATA-binding protein-associated factor 2N      |
| <i>Desi_wild_124927</i> | NA                                  | <i>Ca_desi_scaffold</i> | 124927                  | T/C  | NA                 | INTERGENIC                    | NA                                             |
| <i>Desi_wild_43886</i>  | NA                                  | <i>Ca_desi_scaffold</i> | 43886                   | T/G  | NA                 | INTERGENIC                    | NA                                             |
| <i>Desi_wild_43943</i>  | NA                                  | <i>Ca_desi_scaffold</i> | 43943                   | T/C  | NA                 | INTERGENIC                    | NA                                             |
| <i>Desi_wild_166816</i> | NA                                  | <i>Ca_desi_scaffold</i> | 166816                  | A/G  | Gene_Ca_12142.1    | DOWNSTREAM                    | Protein of unknown function (DUF3353)          |
| <i>Desi_wild_32485</i>  | NA                                  | <i>Ca_desi_scaffold</i> | 32485                   | T/G  | Gene_Ca_12150.1    | SYNONYMOUS_CODING             | NA                                             |
| <i>Desi_wild_32644</i>  | NA                                  | <i>Ca_desi_scaffold</i> | 32644                   | A/C  | Gene_Ca_12150.1    | SYNONYMOUS_CODING             | NA                                             |
| <i>Desi_wild_78049</i>  | NA                                  | <i>Ca_desi_scaffold</i> | 78049                   | A/G  | Gene_Ca_12153.1    | DOWNSTREAM                    | unknown protein                                |
| <i>Desi_wild_184292</i> | NA                                  | <i>Ca_desi_scaffold</i> | 184292                  | A/C  | Gene_Ca_12160.1    | SYNONYMOUS_CODING             | Protein of unknown function, DUF584            |
| <i>Desi_wild_184295</i> | NA                                  | <i>Ca_desi_scaffold</i> | 184295                  | T/G  | Gene_Ca_12160.1    | SYNONYMOUS_CODING             | Protein of unknown function, DUF584            |
| <i>Desi_wild_184401</i> | NA                                  | <i>Ca_desi_scaffold</i> | 184401                  | G/A  | Gene_Ca_12160.1    | NON_SYNONYMOUS_CODING         | Protein of unknown function, DUF584            |
| <i>Desi_wild_2395</i>   | NA                                  | <i>Ca_desi_scaffold</i> | 2395                    | A/C  | NA                 | INTERGENIC                    | NA                                             |
| <i>Desi_wild_2427</i>   | NA                                  | <i>Ca_desi_scaffold</i> | 2427                    | A/G  | NA                 | INTERGENIC                    | NA                                             |
| <i>Desi_wild_2469</i>   | NA                                  | <i>Ca_desi_scaffold</i> | 2469                    | C/A  | NA                 | INTERGENIC                    | NA                                             |
| <i>Desi_wild_3590</i>   | NA                                  | <i>Ca_desi_scaffold</i> | 3590                    | C/T  | NA                 | INTERGENIC                    | NA                                             |
| <i>Desi_wild_88069</i>  | NA                                  | <i>Ca_desi_scaffold</i> | 88069                   | A/G  | Gene_Ca_12169.1    | UPSTREAM                      | Tuftelin-interacting protein 11                |
| <i>Desi_wild_91800</i>  | NA                                  | <i>Ca_desi_scaffold</i> | 91800                   | G/A  | Gene_Ca_12170.1    | SYNONYMOUS_CODING             | Putative uncharacterized protein               |
| <i>Desi_wild_163997</i> | NA                                  | <i>Ca_desi_scaffold</i> | 163997                  | T/C  | Gene_Ca_12172.1    | INTRON                        | Profilin-1                                     |
| <i>Desi_wild_50014</i>  | NA                                  | <i>Ca_desi_scaffold</i> | 50014                   | A/G  | Gene_Ca_12177.1    | SYNONYMOUS_CODING             | tRNA wybutosine-synthesizing protein 1 homolog |
| <i>Desi_wild_37960</i>  | NA                                  | <i>Ca_desi_scaffold</i> | 37960                   | C/G  | NA                 | INTERGENIC                    | NA                                             |
| <i>Desi_wild_38217</i>  | NA                                  | <i>Ca_desi_scaffold</i> | 38217                   | T/C  | NA                 | INTERGENIC                    | NA                                             |
| <i>Desi_wild_67540</i>  | NA                                  | <i>Ca_desi_scaffold</i> | 67540                   | T/C  | Gene_Ca_12208.2    | NON_SYNONYMOUS_CODING         | NA                                             |
| <i>Desi_wild_21634</i>  | NA                                  | <i>Ca_desi_scaffold</i> | 21634                   | C/A  | Gene_Ca_12219.1    | NON_SYNONYMOUS_CODING         | C-terminal binding protein AN                  |
| <i>Desi_wild_143446</i> | NA                                  | <i>Ca_desi_scaffold</i> | 143446                  | G/T  | Gene_Ca_12227.1    | NON_SYNONYMOUS_CODING         | Subtilisin-like protease                       |

| SNP IDs                 | NCBI dbSNP accession IDs (NCBI_SS#) | Chromosomes             | Physical positions (bp) | SNPs | Gene accession IDs | Sequence components of genome | Putative functions                                                   |
|-------------------------|-------------------------------------|-------------------------|-------------------------|------|--------------------|-------------------------------|----------------------------------------------------------------------|
| <i>Desi_wild_37596</i>  | NA                                  | <i>Ca_desi_scaffold</i> | 37596                   | C/T  | Gene_Ca_12234.1    | DOWNSTREAM                    | NA                                                                   |
| <i>Desi_wild_37607</i>  | NA                                  | <i>Ca_desi_scaffold</i> | 37607                   | C/T  | Gene_Ca_12234.1    | DOWNSTREAM                    | NA                                                                   |
| <i>Desi_wild_109842</i> | NA                                  | <i>Ca_desi_scaffold</i> | 109842                  | A/G  | Gene_Ca_12239.1    | NON_SYNONYMOUS_CODING         | Short-chain dehydrogenase/reductase family 42E member 1              |
| <i>Desi_wild_91743</i>  | NA                                  | <i>Ca_desi_scaffold</i> | 91743                   | G/A  | NA                 | INTERGENIC                    | NA                                                                   |
| <i>Desi_wild_91763</i>  | NA                                  | <i>Ca_desi_scaffold</i> | 91763                   | G/C  | NA                 | INTERGENIC                    | NA                                                                   |
| <i>Desi_wild_148087</i> | NA                                  | <i>Ca_desi_scaffold</i> | 148087                  | T/C  | Gene_Ca_12254.1    | DOWNSTREAM                    | Pre-mRNA-splicing factor ATP-dependent RNA helicase PRP16            |
| <i>Desi_wild_178596</i> | NA                                  | <i>Ca_desi_scaffold</i> | 178596                  | G/T  | Gene_Ca_12257.1    | INTRON                        | Uncharacterized protein YMR315W                                      |
| <i>Desi_wild_178620</i> | NA                                  | <i>Ca_desi_scaffold</i> | 178620                  | C/T  | Gene_Ca_12257.1    | INTRON                        | Uncharacterized protein YMR315W                                      |
| <i>Desi_wild_186527</i> | NA                                  | <i>Ca_desi_scaffold</i> | 186527                  | G/C  | Gene_Ca_12258.1    | INTRON                        | DNA topoisomerase 6 subunit B                                        |
| <i>Desi_wild_186533</i> | NA                                  | <i>Ca_desi_scaffold</i> | 186533                  | A/C  | Gene_Ca_12258.1    | INTRON                        | DNA topoisomerase 6 subunit B                                        |
| <i>Desi_wild_31464</i>  | NA                                  | <i>Ca_desi_scaffold</i> | 31464                   | A/T  | Gene_Ca_09112.1    | INTRON                        | BEACH domain-containing protein lvsC                                 |
| <i>Desi_wild_63952</i>  | NA                                  | <i>Ca_desi_scaffold</i> | 63952                   | C/T  | Gene_Ca_09113.1    | INTRON                        | BEACH domain-containing protein lvsC                                 |
| <i>Desi_wild_176426</i> | NA                                  | <i>Ca_desi_scaffold</i> | 176426                  | G/T  | Gene_Ca_09120.1    | NON_SYNONYMOUS_CODING         | growth-regulating factor 9                                           |
| <i>Desi_wild_176429</i> | NA                                  | <i>Ca_desi_scaffold</i> | 176429                  | G/T  | Gene_Ca_09120.1    | NON_SYNONYMOUS_CODING         | growth-regulating factor 9                                           |
| <i>Desi_wild_176430</i> | NA                                  | <i>Ca_desi_scaffold</i> | 176430                  | C/T  | Gene_Ca_09120.1    | NON_SYNONYMOUS_CODING         | growth-regulating factor 9                                           |
| <i>Desi_wild_176431</i> | NA                                  | <i>Ca_desi_scaffold</i> | 176431                  | G/T  | Gene_Ca_09120.1    | SYNONYMOUS_CODING             | growth-regulating factor 9                                           |
| <i>Desi_wild_176432</i> | NA                                  | <i>Ca_desi_scaffold</i> | 176432                  | G/C  | Gene_Ca_09120.1    | NON_SYNONYMOUS_CODING         | growth-regulating factor 9                                           |
| <i>Desi_wild_176433</i> | NA                                  | <i>Ca_desi_scaffold</i> | 176433                  | C/A  | Gene_Ca_09120.1    | NON_SYNONYMOUS_CODING         | growth-regulating factor 9                                           |
| <i>Desi_wild_176434</i> | NA                                  | <i>Ca_desi_scaffold</i> | 176434                  | C/A  | Gene_Ca_09120.1    | SYNONYMOUS_CODING             | growth-regulating factor 9                                           |
| <i>Desi_wild_176439</i> | NA                                  | <i>Ca_desi_scaffold</i> | 176439                  | G/A  | Gene_Ca_09120.1    | NON_SYNONYMOUS_CODING         | growth-regulating factor 9                                           |
| <i>Desi_wild_176440</i> | NA                                  | <i>Ca_desi_scaffold</i> | 176440                  | G/A  | Gene_Ca_09120.1    | SYNONYMOUS_CODING             | growth-regulating factor 9                                           |
| <i>Desi_wild_176441</i> | NA                                  | <i>Ca_desi_scaffold</i> | 176441                  | T/G  | Gene_Ca_09120.1    | NON_SYNONYMOUS_CODING         | growth-regulating factor 9                                           |
| <i>Desi_wild_185069</i> | NA                                  | <i>Ca_desi_scaffold</i> | 185069                  | C/T  | Gene_Ca_09121.1    | DOWNSTREAM                    | Pentatricopeptide repeat-containing protein At4g32430, mitochondrial |
| <i>Desi_wild_18274</i>  | NA                                  | <i>Ca_desi_scaffold</i> | 18274                   | A/G  | Gene_Ca_12267.1    | DOWNSTREAM                    | NA                                                                   |
| <i>Desi_wild_38357</i>  | NA                                  | <i>Ca_desi_scaffold</i> | 38357                   | A/C  | Gene_Ca_12268.1    | INTRON                        | Signal recognition particle 54 kDa protein 2                         |
| <i>Desi_wild_38359</i>  | NA                                  | <i>Ca_desi_scaffold</i> | 38359                   | A/G  | Gene_Ca_12268.1    | INTRON                        | Signal recognition particle 54 kDa protein 2                         |
| <i>Desi_wild_38363</i>  | NA                                  | <i>Ca_desi_scaffold</i> | 38363                   | G/T  | Gene_Ca_12268.1    | INTRON                        | Signal recognition particle 54 kDa protein 2                         |
| <i>Desi_wild_38364</i>  | NA                                  | <i>Ca_desi_scaffold</i> | 38364                   | T/C  | Gene_Ca_12268.1    | INTRON                        | Signal recognition particle 54 kDa protein 2                         |
| <i>Desi_wild_38366</i>  | NA                                  | <i>Ca_desi_scaffold</i> | 38366                   | A/C  | Gene_Ca_12268.1    | INTRON                        | Signal recognition particle 54 kDa protein 2                         |
| <i>Desi_wild_38377</i>  | NA                                  | <i>Ca_desi_scaffold</i> | 38377                   | C/T  | Gene_Ca_12268.1    | INTRON                        | Signal recognition particle 54 kDa protein 2                         |
| <i>Desi_wild_38378</i>  | NA                                  | <i>Ca_desi_scaffold</i> | 38378                   | C/G  | Gene_Ca_12268.1    | INTRON                        | Signal recognition particle 54 kDa protein 2                         |
| <i>Desi_wild_38384</i>  | NA                                  | <i>Ca_desi_scaffold</i> | 38384                   | G/A  | Gene_Ca_12268.1    | INTRON                        | Signal recognition particle 54 kDa protein 2                         |
| <i>Desi_wild_38385</i>  | NA                                  | <i>Ca_desi_scaffold</i> | 38385                   | C/T  | Gene_Ca_12268.1    | INTRON                        | Signal recognition particle 54 kDa protein 2                         |
| <i>Desi_wild_38411</i>  | NA                                  | <i>Ca_desi_scaffold</i> | 38411                   | A/C  | Gene_Ca_12268.1    | SYNONYMOUS_CODING             | Signal recognition particle 54 kDa protein 2                         |
| <i>Desi_wild_4155</i>   | NA                                  | <i>Ca_desi_scaffold</i> | 4155                    | C/T  | Gene_Ca_12275.1    | SYNONYMOUS_CODING             | MATE efflux family protein 4, chloroplastic                          |
| <i>Desi_wild_4179</i>   | NA                                  | <i>Ca_desi_scaffold</i> | 4179                    | A/G  | Gene_Ca_12275.1    | SYNONYMOUS_CODING             | MATE efflux family protein 4, chloroplastic                          |
| <i>Desi_wild_4206</i>   | NA                                  | <i>Ca_desi_scaffold</i> | 4206                    | C/A  | Gene_Ca_12275.1    | INTRON                        | MATE efflux family protein 4, chloroplastic                          |
| <i>Desi_wild_4207</i>   | NA                                  | <i>Ca_desi_scaffold</i> | 4207                    | G/A  | Gene_Ca_12275.1    | INTRON                        | MATE efflux family protein 4, chloroplastic                          |
| <i>Desi_wild_54060</i>  | NA                                  | <i>Ca_desi_scaffold</i> | 54060                   | C/T  | Gene_Ca_12279.1    | INTRON                        | Kinesin-related protein 11                                           |
| <i>Desi_wild_59913</i>  | NA                                  | <i>Ca_desi_scaffold</i> | 59913                   | A/G  | Gene_Ca_12279.1    | SYNONYMOUS_CODING             | Kinesin-related protein 11                                           |
| <i>Desi_wild_59916</i>  | NA                                  | <i>Ca_desi_scaffold</i> | 59916                   | A/G  | Gene_Ca_12279.1    | SYNONYMOUS_CODING             | Kinesin-related protein 11                                           |
| <i>Desi_wild_59917</i>  | NA                                  | <i>Ca_desi_scaffold</i> | 59917                   | C/T  | Gene_Ca_12279.1    | SYNONYMOUS_CODING             | Kinesin-related protein 11                                           |
| <i>Desi_wild_59919</i>  | NA                                  | <i>Ca_desi_scaffold</i> | 59919                   | A/G  | Gene_Ca_12279.1    | SYNONYMOUS_CODING             | Kinesin-related protein 11                                           |
| <i>Desi_wild_59922</i>  | NA                                  | <i>Ca_desi_scaffold</i> | 59922                   | A/G  | Gene_Ca_12279.1    | SYNONYMOUS_CODING             | Kinesin-related protein 11                                           |

| SNP IDs                 | NCBI dbSNP accession IDs (NCBI_SS#) | Chromosomes             | Physical positions (bp) | SNPs | Gene accession IDs | Sequence components of genome | Putative functions                                   |
|-------------------------|-------------------------------------|-------------------------|-------------------------|------|--------------------|-------------------------------|------------------------------------------------------|
| <i>Desi_wild_59937</i>  | NA                                  | <i>Ca_desi_scaffold</i> | 59937                   | G/A  | Gene_Ca_12279.1    | SYNONYMOUS_CODING             | Kinesin-related protein 11                           |
| <i>Desi_wild_59949</i>  | NA                                  | <i>Ca_desi_scaffold</i> | 59949                   | T/C  | Gene_Ca_12279.1    | SYNONYMOUS_CODING             | Kinesin-related protein 11                           |
| <i>Desi_wild_59961</i>  | NA                                  | <i>Ca_desi_scaffold</i> | 59961                   | T/C  | Gene_Ca_12279.1    | SYNONYMOUS_CODING             | Kinesin-related protein 11                           |
| <i>Desi_wild_59964</i>  | NA                                  | <i>Ca_desi_scaffold</i> | 59964                   | G/A  | Gene_Ca_12279.1    | SYNONYMOUS_CODING             | Kinesin-related protein 11                           |
| <i>Desi_wild_59970</i>  | NA                                  | <i>Ca_desi_scaffold</i> | 59970                   | T/G  | Gene_Ca_12279.1    | SYNONYMOUS_CODING             | Kinesin-related protein 11                           |
| <i>Desi_wild_59979</i>  | NA                                  | <i>Ca_desi_scaffold</i> | 59979                   | G/A  | Gene_Ca_12279.1    | SYNONYMOUS_CODING             | Kinesin-related protein 11                           |
| <i>Desi_wild_59982</i>  | NA                                  | <i>Ca_desi_scaffold</i> | 59982                   | G/T  | Gene_Ca_12279.1    | SYNONYMOUS_CODING             | Kinesin-related protein 11                           |
| <i>Desi_wild_59984</i>  | NA                                  | <i>Ca_desi_scaffold</i> | 59984                   | T/G  | Gene_Ca_12279.1    | SYNONYMOUS_CODING             | Kinesin-related protein 11                           |
| <i>Desi_wild_60707</i>  | NA                                  | <i>Ca_desi_scaffold</i> | 60707                   | A/G  | Gene_Ca_12279.1    | SYNONYMOUS_CODING             | Kinesin-related protein 11                           |
| <i>Desi_wild_64139</i>  | NA                                  | <i>Ca_desi_scaffold</i> | 64139                   | T/C  | NA                 | INTERGENIC                    | NA                                                   |
| <i>Desi_wild_84579</i>  | NA                                  | <i>Ca_desi_scaffold</i> | 84579                   | T/C  | Gene_Ca_12281.1    | SYNONYMOUS_CODING             | Coatomer subunit alpha-1                             |
| <i>Desi_wild_86969</i>  | NA                                  | <i>Ca_desi_scaffold</i> | 86969                   | T/C  | Gene_Ca_12281.1    | NON_SYNONYMOUS_CODING         | Coatomer subunit alpha-1                             |
| <i>Desi_wild_87001</i>  | NA                                  | <i>Ca_desi_scaffold</i> | 87001                   | T/A  | Gene_Ca_12281.1    | NON_SYNONYMOUS_CODING         | Coatomer subunit alpha-1                             |
| <i>Desi_wild_87142</i>  | NA                                  | <i>Ca_desi_scaffold</i> | 87142                   | T/G  | Gene_Ca_12281.1    | SYNONYMOUS_CODING             | Coatomer subunit alpha-1                             |
| <i>Desi_wild_87772</i>  | NA                                  | <i>Ca_desi_scaffold</i> | 87772                   | T/C  | Gene_Ca_12281.1    | SYNONYMOUS_CODING             | Coatomer subunit alpha-1                             |
| <i>Desi_wild_87781</i>  | NA                                  | <i>Ca_desi_scaffold</i> | 87781                   | C/T  | Gene_Ca_12281.1    | SYNONYMOUS_CODING             | Coatomer subunit alpha-1                             |
| <i>Desi_wild_87788</i>  | NA                                  | <i>Ca_desi_scaffold</i> | 87788                   | G/A  | Gene_Ca_12281.1    | SYNONYMOUS_CODING             | Coatomer subunit alpha-1                             |
| <i>Desi_wild_87813</i>  | NA                                  | <i>Ca_desi_scaffold</i> | 87813                   | C/T  | Gene_Ca_12281.1    | SYNONYMOUS_CODING             | Coatomer subunit alpha-1                             |
| <i>Desi_wild_87814</i>  | NA                                  | <i>Ca_desi_scaffold</i> | 87814                   | C/G  | Gene_Ca_12281.1    | SYNONYMOUS_CODING             | Coatomer subunit alpha-1                             |
| <i>Desi_wild_87825</i>  | NA                                  | <i>Ca_desi_scaffold</i> | 87825                   | G/C  | Gene_Ca_12281.1    | SYNONYMOUS_CODING             | Coatomer subunit alpha-1                             |
| <i>Desi_wild_87834</i>  | NA                                  | <i>Ca_desi_scaffold</i> | 87834                   | T/A  | Gene_Ca_12281.1    | SYNONYMOUS_CODING             | Coatomer subunit alpha-1                             |
| <i>Desi_wild_87835</i>  | NA                                  | <i>Ca_desi_scaffold</i> | 87835                   | T/C  | Gene_Ca_12281.1    | SYNONYMOUS_CODING             | Coatomer subunit alpha-1                             |
| <i>Desi_wild_87837</i>  | NA                                  | <i>Ca_desi_scaffold</i> | 87837                   | G/A  | Gene_Ca_12281.1    | SYNONYMOUS_CODING             | Coatomer subunit alpha-1                             |
| <i>Desi_wild_87838</i>  | NA                                  | <i>Ca_desi_scaffold</i> | 87838                   | G/A  | Gene_Ca_12281.1    | SYNONYMOUS_CODING             | Coatomer subunit alpha-1                             |
| <i>Desi_wild_87849</i>  | NA                                  | <i>Ca_desi_scaffold</i> | 87849                   | A/T  | Gene_Ca_12281.1    | SYNONYMOUS_CODING             | Coatomer subunit alpha-1                             |
| <i>Desi_wild_113843</i> | NA                                  | <i>Ca_desi_scaffold</i> | 113843                  | T/C  | Gene_Ca_12284.1    | INTRON                        | Vacuolar proton translocating ATPase 100 kDa subunit |
| <i>Desi_wild_113909</i> | NA                                  | <i>Ca_desi_scaffold</i> | 113909                  | G/T  | Gene_Ca_12284.1    | INTRON                        | Vacuolar proton translocating ATPase 100 kDa subunit |
| <i>Desi_wild_113959</i> | NA                                  | <i>Ca_desi_scaffold</i> | 113959                  | C/T  | Gene_Ca_12284.1    | INTRON                        | Vacuolar proton translocating ATPase 100 kDa subunit |
| <i>Desi_wild_115046</i> | NA                                  | <i>Ca_desi_scaffold</i> | 115046                  | T/A  | Gene_Ca_12284.1    | INTRON                        | Vacuolar proton translocating ATPase 100 kDa subunit |
| <i>Desi_wild_115047</i> | NA                                  | <i>Ca_desi_scaffold</i> | 115047                  | T/C  | Gene_Ca_12284.1    | INTRON                        | Vacuolar proton translocating ATPase 100 kDa subunit |
| <i>Desi_wild_119220</i> | NA                                  | <i>Ca_desi_scaffold</i> | 119220                  | A/G  | Gene_Ca_12284.1    | INTRON                        | Vacuolar proton translocating ATPase 100 kDa subunit |
| <i>Desi_wild_119513</i> | NA                                  | <i>Ca_desi_scaffold</i> | 119513                  | T/G  | Gene_Ca_12284.1    | INTRON                        | Vacuolar proton translocating ATPase 100 kDa subunit |
| <i>Desi_wild_141843</i> | NA                                  | <i>Ca_desi_scaffold</i> | 141843                  | G/T  | NA                 | INTERGENIC                    | NA                                                   |
| <i>Desi_wild_141900</i> | NA                                  | <i>Ca_desi_scaffold</i> | 141900                  | A/C  | NA                 | INTERGENIC                    | NA                                                   |
| <i>Desi_wild_166963</i> | NA                                  | <i>Ca_desi_scaffold</i> | 166963                  | A/G  | Gene_Ca_12292.1    | SYNONYMOUS_CODING             | Probable nucleolar protein 5-1                       |
| <i>Desi_wild_169047</i> | NA                                  | <i>Ca_desi_scaffold</i> | 169047                  | C/A  | Gene_Ca_12292.1    | NON_SYNONYMOUS_CODING         | Probable nucleolar protein 5-1                       |
| <i>Desi_wild_169054</i> | NA                                  | <i>Ca_desi_scaffold</i> | 169054                  | A/G  | Gene_Ca_12292.1    | SYNONYMOUS_CODING             | Probable nucleolar protein 5-1                       |
| <i>Desi_wild_8245</i>   | NA                                  | <i>Ca_desi_scaffold</i> | 8245                    | T/G  | NA                 | INTERGENIC                    | NA                                                   |
| <i>Desi_wild_77807</i>  | NA                                  | <i>Ca_desi_scaffold</i> | 77807                   | G/T  | Gene_Ca_12298.1    | STOP_GAINED                   | Probable nucleolar protein 5-1                       |
| <i>Desi_wild_170399</i> | NA                                  | <i>Ca_desi_scaffold</i> | 170399                  | A/C  | NA                 | INTERGENIC                    | NA                                                   |
| <i>Desi_wild_175256</i> | NA                                  | <i>Ca_desi_scaffold</i> | 175256                  | G/A  | NA                 | INTERGENIC                    | NA                                                   |
| <i>Desi_wild_182554</i> | NA                                  | <i>Ca_desi_scaffold</i> | 182554                  | A/C  | Gene_Ca_12307.1    | INTRON                        | Thioredoxin-like protein CXXS1                       |
| <i>Desi_wild_14323</i>  | NA                                  | <i>Ca_desi_scaffold</i> | 14323                   | T/A  | Gene_Ca_12308.1    | NON_SYNONYMOUS_CODING         | NA                                                   |
| <i>Desi_wild_15350</i>  | NA                                  | <i>Ca_desi_scaffold</i> | 15350                   | G/A  | Gene_Ca_12313.1    | NON_SYNONYMOUS_CODING         | Sulfite exporter TauE/SafE family protein            |

| SNP IDs                 | NCBI dbSNP accession IDs (NCBI_SS#) | Chromosomes             | Physical positions (bp) | SNPs | Gene accession IDs | Sequence components of genome | Putative functions                                                                        |
|-------------------------|-------------------------------------|-------------------------|-------------------------|------|--------------------|-------------------------------|-------------------------------------------------------------------------------------------|
| <i>Desi_wild_38866</i>  | NA                                  | <i>Ca_desi_scaffold</i> | 38866                   | T/C  | Gene_Ca_12314.1    | SYNONYMOUS_CODING             | Myb-related protein 3R-1                                                                  |
| <i>Desi_wild_61825</i>  | NA                                  | <i>Ca_desi_scaffold</i> | 61825                   | T/G  | Gene_Ca_12325.1    | SYNONYMOUS_CODING             | LOB domain-containing protein 41                                                          |
| <i>Desi_wild_61997</i>  | NA                                  | <i>Ca_desi_scaffold</i> | 61997                   | C/A  | Gene_Ca_12325.1    | SYNONYMOUS_CODING             | LOB domain-containing protein 41                                                          |
| <i>Desi_wild_133344</i> | NA                                  | <i>Ca_desi_scaffold</i> | 133344                  | T/C  | Gene_Ca_12333.1    | DOWNSTREAM                    | CYC1                                                                                      |
| <i>Desi_wild_34922</i>  | NA                                  | <i>Ca_desi_scaffold</i> | 34922                   | T/G  | Gene_Ca_12334.1    | NON_SYNONYMOUS_CODING         | ABC transporter B family member 1                                                         |
| <i>Desi_wild_168734</i> | NA                                  | <i>Ca_desi_scaffold</i> | 168734                  | G/T  | Gene_Ca_12351.1    | INTRON                        | Aldehyde dehydrogenase family 2 member B4, mitochondrial                                  |
| <i>Desi_wild_168776</i> | NA                                  | <i>Ca_desi_scaffold</i> | 168776                  | T/C  | Gene_Ca_12351.1    | SYNONYMOUS_CODING             | Aldehyde dehydrogenase family 2 member B4, mitochondrial                                  |
| <i>Desi_wild_169590</i> | NA                                  | <i>Ca_desi_scaffold</i> | 169590                  | G/A  | Gene_Ca_12351.1    | NON_SYNONYMOUS_CODING         | Aldehyde dehydrogenase family 2 member B4, mitochondrial                                  |
| <i>Desi_wild_11345</i>  | NA                                  | <i>Ca_desi_scaffold</i> | 11345                   | A/G  | Gene_Ca_09165.1    | SYNONYMOUS_CODING             | Trehalose-phosphate phosphatase                                                           |
| <i>Desi_wild_129442</i> | NA                                  | <i>Ca_desi_scaffold</i> | 129442                  | T/C  | NA                 | INTERGENIC                    | NA                                                                                        |
| <i>Desi_wild_54978</i>  | NA                                  | <i>Ca_desi_scaffold</i> | 54978                   | A/C  | Gene_Ca_12355.1    | SYNONYMOUS_CODING             | FUNCTIONS IN: molecular_function unknown                                                  |
| <i>Desi_wild_16995</i>  | NA                                  | <i>Ca_desi_scaffold</i> | 16995                   | A/G  | Gene_Ca_12361.1    | NON_SYNONYMOUS_CODING         | ATP sulfurylase 1, chloroplastic                                                          |
| <i>Desi_wild_96019</i>  | NA                                  | <i>Ca_desi_scaffold</i> | 96019                   | C/A  | Gene_Ca_12382.1    | INTRON                        | Probable LRR receptor-like serine/threonine-protein kinase At1g53430                      |
| <i>Desi_wild_39394</i>  | NA                                  | <i>Ca_desi_scaffold</i> | 39394                   | G/A  | Gene_Ca_12385.1    | INTRON                        | Probable LRR receptor-like serine/threonine-protein kinase At1g53430                      |
| <i>Desi_wild_39498</i>  | NA                                  | <i>Ca_desi_scaffold</i> | 39498                   | G/T  | Gene_Ca_12385.1    | INTRON                        | Probable LRR receptor-like serine/threonine-protein kinase At1g53430                      |
| <i>Desi_wild_55779</i>  | NA                                  | <i>Ca_desi_scaffold</i> | 55779                   | A/G  | Gene_Ca_12386.1    | SYNONYMOUS_STOP               | Putative G3BP-like protein                                                                |
| <i>Desi_wild_92034</i>  | NA                                  | <i>Ca_desi_scaffold</i> | 92034                   | C/G  | NA                 | INTERGENIC                    | NA                                                                                        |
| <i>Desi_wild_92036</i>  | NA                                  | <i>Ca_desi_scaffold</i> | 92036                   | T/G  | NA                 | INTERGENIC                    | NA                                                                                        |
| <i>Desi_wild_92050</i>  | NA                                  | <i>Ca_desi_scaffold</i> | 92050                   | C/T  | NA                 | INTERGENIC                    | NA                                                                                        |
| <i>Desi_wild_170998</i> | NA                                  | <i>Ca_desi_scaffold</i> | 170998                  | G/T  | Gene_Ca_12391.2    | INTRON                        | NA                                                                                        |
| <i>Desi_wild_171011</i> | NA                                  | <i>Ca_desi_scaffold</i> | 171011                  | T/G  | Gene_Ca_12391.2    | INTRON                        | NA                                                                                        |
| <i>Desi_wild_171024</i> | NA                                  | <i>Ca_desi_scaffold</i> | 171024                  | C/A  | Gene_Ca_12391.2    | INTRON                        | NA                                                                                        |
| <i>Desi_wild_53855</i>  | NA                                  | <i>Ca_desi_scaffold</i> | 53855                   | T/A  | Gene_Ca_12396.1    | SYNONYMOUS_CODING             | Plasma membrane ATPase 4                                                                  |
| <i>Desi_wild_53885</i>  | NA                                  | <i>Ca_desi_scaffold</i> | 53885                   | A/G  | Gene_Ca_12396.1    | INTRON                        | Plasma membrane ATPase 4                                                                  |
| <i>Desi_wild_53888</i>  | NA                                  | <i>Ca_desi_scaffold</i> | 53888                   | G/T  | Gene_Ca_12396.1    | INTRON                        | Plasma membrane ATPase 4                                                                  |
| <i>Desi_wild_53897</i>  | NA                                  | <i>Ca_desi_scaffold</i> | 53897                   | A/C  | Gene_Ca_12396.1    | INTRON                        | Plasma membrane ATPase 4                                                                  |
| <i>Desi_wild_53909</i>  | NA                                  | <i>Ca_desi_scaffold</i> | 53909                   | A/G  | Gene_Ca_12396.1    | INTRON                        | Plasma membrane ATPase 4                                                                  |
| <i>Desi_wild_53911</i>  | NA                                  | <i>Ca_desi_scaffold</i> | 53911                   | T/C  | Gene_Ca_12396.1    | INTRON                        | Plasma membrane ATPase 4                                                                  |
| <i>Desi_wild_53915</i>  | NA                                  | <i>Ca_desi_scaffold</i> | 53915                   | A/T  | Gene_Ca_12396.1    | INTRON                        | Plasma membrane ATPase 4                                                                  |
| <i>Desi_wild_53918</i>  | NA                                  | <i>Ca_desi_scaffold</i> | 53918                   | G/C  | Gene_Ca_12396.1    | INTRON                        | Plasma membrane ATPase 4                                                                  |
| <i>Desi_wild_53929</i>  | NA                                  | <i>Ca_desi_scaffold</i> | 53929                   | C/G  | Gene_Ca_12396.1    | INTRON                        | Plasma membrane ATPase 4                                                                  |
| <i>Desi_wild_53933</i>  | NA                                  | <i>Ca_desi_scaffold</i> | 53933                   | G/A  | Gene_Ca_12396.1    | INTRON                        | Plasma membrane ATPase 4                                                                  |
| <i>Desi_wild_53936</i>  | NA                                  | <i>Ca_desi_scaffold</i> | 53936                   | A/C  | Gene_Ca_12396.1    | INTRON                        | Plasma membrane ATPase 4                                                                  |
| <i>Desi_wild_53939</i>  | NA                                  | <i>Ca_desi_scaffold</i> | 53939                   | T/G  | Gene_Ca_12396.1    | INTRON                        | Plasma membrane ATPase 4                                                                  |
| <i>Desi_wild_54791</i>  | NA                                  | <i>Ca_desi_scaffold</i> | 54791                   | T/C  | NA                 | INTERGENIC                    | NA                                                                                        |
| <i>Desi_wild_139899</i> | NA                                  | <i>Ca_desi_scaffold</i> | 139899                  | T/A  | Gene_Ca_12416.1    | SYNONYMOUS_CODING             | Probable leucine-rich repeat receptor-like serine/threonine-protein kinase At3g14840      |
| <i>Desi_wild_139983</i> | NA                                  | <i>Ca_desi_scaffold</i> | 139983                  | G/A  | Gene_Ca_12416.1    | SYNONYMOUS_CODING             | Probable leucine-rich repeat receptor-like serine/threonine-protein kinase At3g14840      |
| <i>Desi_wild_166507</i> | NA                                  | <i>Ca_desi_scaffold</i> | 166507                  | A/G  | NA                 | INTERGENIC                    | NA                                                                                        |
| <i>Desi_wild_166548</i> | NA                                  | <i>Ca_desi_scaffold</i> | 166548                  | G/C  | NA                 | INTERGENIC                    | NA                                                                                        |
| <i>Desi_wild_166670</i> | NA                                  | <i>Ca_desi_scaffold</i> | 166670                  | T/G  | Gene_Ca_12419.1    | UPSTREAM                      | High mobility group B protein 7                                                           |
| <i>Desi_wild_166778</i> | NA                                  | <i>Ca_desi_scaffold</i> | 166778                  | G/A  | Gene_Ca_12419.1    | UPSTREAM                      | High mobility group B protein 7                                                           |
| <i>Desi_wild_166925</i> | NA                                  | <i>Ca_desi_scaffold</i> | 166925                  | T/C  | Gene_Ca_12419.1    | UPSTREAM                      | High mobility group B protein 7                                                           |
| <i>Desi_wild_167051</i> | NA                                  | <i>Ca_desi_scaffold</i> | 167051                  | T/C  | Gene_Ca_12419.1    | UPSTREAM                      | High mobility group B protein 7                                                           |
| <i>Desi_wild_9734</i>   | NA                                  | <i>Ca_desi_scaffold</i> | 9734                    | T/G  | Gene_Ca_09173.1    | INTRON                        | Putative SWI/SNF-related matrix-associated actin-dependent regulator of chromatin subfamI |

| SNP IDs                 | NCBI dbSNP accession IDs (NCBI_SS#) | Chromosomes             | Physical positions (bp) | SNPs | Gene accession IDs | Sequence components of genome | Putative functions                                                                         |
|-------------------------|-------------------------------------|-------------------------|-------------------------|------|--------------------|-------------------------------|--------------------------------------------------------------------------------------------|
| <i>Desi_wild_11260</i>  | NA                                  | <i>Ca_desi_scaffold</i> | 11260                   | C/T  | Gene_Ca_09173.1    | INTRON                        | Putative SWI/SNF-related matrix-associated actin-dependent regulator of chromatin subfamil |
| <i>Desi_wild_11282</i>  | NA                                  | <i>Ca_desi_scaffold</i> | 11282                   | A/T  | Gene_Ca_09173.1    | INTRON                        | Putative SWI/SNF-related matrix-associated actin-dependent regulator of chromatin subfamil |
| <i>Desi_wild_20736</i>  | NA                                  | <i>Ca_desi_scaffold</i> | 20736                   | G/T  | NA                 | INTERGENIC                    | NA                                                                                         |
| <i>Desi_wild_20811</i>  | NA                                  | <i>Ca_desi_scaffold</i> | 20811                   | A/C  | NA                 | INTERGENIC                    | NA                                                                                         |
| <i>Desi_wild_21193</i>  | NA                                  | <i>Ca_desi_scaffold</i> | 21193                   | G/A  | NA                 | INTERGENIC                    | NA                                                                                         |
| <i>Desi_wild_21197</i>  | NA                                  | <i>Ca_desi_scaffold</i> | 21197                   | G/T  | NA                 | INTERGENIC                    | NA                                                                                         |
| <i>Desi_wild_21239</i>  | NA                                  | <i>Ca_desi_scaffold</i> | 21239                   | G/A  | NA                 | INTERGENIC                    | NA                                                                                         |
| <i>Desi_wild_57690</i>  | NA                                  | <i>Ca_desi_scaffold</i> | 57690                   | A/C  | NA                 | INTERGENIC                    | NA                                                                                         |
| <i>Desi_wild_57691</i>  | NA                                  | <i>Ca_desi_scaffold</i> | 57691                   | G/C  | NA                 | INTERGENIC                    | NA                                                                                         |
| <i>Desi_wild_102927</i> | NA                                  | <i>Ca_desi_scaffold</i> | 102927                  | C/T  | NA                 | INTERGENIC                    | NA                                                                                         |
| <i>Desi_wild_128916</i> | NA                                  | <i>Ca_desi_scaffold</i> | 128916                  | C/T  | Gene_Ca_09184.1    | INTRON                        | Dihydroorotate dehydrogenase (quinone), mitochondrial                                      |
| <i>Desi_wild_129490</i> | NA                                  | <i>Ca_desi_scaffold</i> | 129490                  | C/A  | Gene_Ca_09184.1    | INTRON                        | Dihydroorotate dehydrogenase (quinone), mitochondrial                                      |
| <i>Desi_wild_129552</i> | NA                                  | <i>Ca_desi_scaffold</i> | 129552                  | C/A  | Gene_Ca_09184.1    | INTRON                        | Dihydroorotate dehydrogenase (quinone), mitochondrial                                      |
| <i>Desi_wild_129556</i> | NA                                  | <i>Ca_desi_scaffold</i> | 129556                  | T/A  | Gene_Ca_09184.1    | INTRON                        | Dihydroorotate dehydrogenase (quinone), mitochondrial                                      |
| <i>Desi_wild_129559</i> | NA                                  | <i>Ca_desi_scaffold</i> | 129559                  | T/C  | Gene_Ca_09184.1    | INTRON                        | Dihydroorotate dehydrogenase (quinone), mitochondrial                                      |
| <i>Desi_wild_140316</i> | NA                                  | <i>Ca_desi_scaffold</i> | 140316                  | C/T  | NA                 | INTERGENIC                    | NA                                                                                         |
| <i>Desi_wild_146178</i> | NA                                  | <i>Ca_desi_scaffold</i> | 146178                  | A/G  | NA                 | INTERGENIC                    | NA                                                                                         |
| <i>Desi_wild_156458</i> | NA                                  | <i>Ca_desi_scaffold</i> | 156458                  | C/T  | NA                 | INTERGENIC                    | NA                                                                                         |
| <i>Desi_wild_156476</i> | NA                                  | <i>Ca_desi_scaffold</i> | 156476                  | T/C  | NA                 | INTERGENIC                    | NA                                                                                         |
| <i>Desi_wild_156478</i> | NA                                  | <i>Ca_desi_scaffold</i> | 156478                  | G/A  | NA                 | INTERGENIC                    | NA                                                                                         |
| <i>Desi_wild_156506</i> | NA                                  | <i>Ca_desi_scaffold</i> | 156506                  | G/A  | NA                 | INTERGENIC                    | NA                                                                                         |
| <i>Desi_wild_170441</i> | NA                                  | <i>Ca_desi_scaffold</i> | 170441                  | A/T  | NA                 | INTERGENIC                    | NA                                                                                         |
| <i>Desi_wild_170460</i> | NA                                  | <i>Ca_desi_scaffold</i> | 170460                  | G/A  | NA                 | INTERGENIC                    | NA                                                                                         |
| <i>Desi_wild_170475</i> | NA                                  | <i>Ca_desi_scaffold</i> | 170475                  | T/G  | NA                 | INTERGENIC                    | NA                                                                                         |
| <i>Desi_wild_170485</i> | NA                                  | <i>Ca_desi_scaffold</i> | 170485                  | C/T  | NA                 | INTERGENIC                    | NA                                                                                         |
| <i>Desi_wild_11138</i>  | NA                                  | <i>Ca_desi_scaffold</i> | 11138                   | T/C  | NA                 | INTERGENIC                    | NA                                                                                         |
| <i>Desi_wild_57781</i>  | NA                                  | <i>Ca_desi_scaffold</i> | 57781                   | C/T  | NA                 | INTERGENIC                    | NA                                                                                         |
| <i>Desi_wild_63185</i>  | NA                                  | <i>Ca_desi_scaffold</i> | 63185                   | A/G  | NA                 | INTERGENIC                    | NA                                                                                         |
| <i>Desi_wild_95033</i>  | NA                                  | <i>Ca_desi_scaffold</i> | 95033                   | A/G  | NA                 | INTERGENIC                    | NA                                                                                         |
| <i>Desi_wild_128333</i> | NA                                  | <i>Ca_desi_scaffold</i> | 128333                  | A/G  | NA                 | INTERGENIC                    | NA                                                                                         |
| <i>Desi_wild_159527</i> | NA                                  | <i>Ca_desi_scaffold</i> | 159527                  | T/C  | NA                 | INTERGENIC                    | NA                                                                                         |
| <i>Desi_wild_159659</i> | NA                                  | <i>Ca_desi_scaffold</i> | 159659                  | G/C  | NA                 | INTERGENIC                    | NA                                                                                         |
| <i>Desi_wild_30814</i>  | NA                                  | <i>Ca_desi_scaffold</i> | 30814                   | T/G  | Gene_Ca_12443.1    | SYNONYMOUS_CODING             | Lamin-like protein                                                                         |
| <i>Desi_wild_65133</i>  | NA                                  | <i>Ca_desi_scaffold</i> | 65133                   | C/T  | NA                 | INTERGENIC                    | NA                                                                                         |
| <i>Desi_wild_65760</i>  | NA                                  | <i>Ca_desi_scaffold</i> | 65760                   | A/G  | NA                 | INTERGENIC                    | NA                                                                                         |
| <i>Desi_wild_59294</i>  | NA                                  | <i>Ca_desi_scaffold</i> | 59294                   | G/T  | NA                 | INTERGENIC                    | NA                                                                                         |
| <i>Desi_wild_59340</i>  | NA                                  | <i>Ca_desi_scaffold</i> | 59340                   | T/C  | NA                 | INTERGENIC                    | NA                                                                                         |
| <i>Desi_wild_171167</i> | NA                                  | <i>Ca_desi_scaffold</i> | 171167                  | C/T  | Gene_Ca_12461.1    | INTRON                        | 2-oxoglutarate/malate translocator, chloroplastic                                          |
| <i>Desi_wild_171208</i> | NA                                  | <i>Ca_desi_scaffold</i> | 171208                  | G/T  | Gene_Ca_12461.1    | INTRON                        | 2-oxoglutarate/malate translocator, chloroplastic                                          |
| <i>Desi_wild_3799</i>   | NA                                  | <i>Ca_desi_scaffold</i> | 3799                    | T/G  | Gene_Ca_12462.1    | INTRON                        | Uncharacterized protein At1g51745                                                          |
| <i>Desi_wild_26533</i>  | NA                                  | <i>Ca_desi_scaffold</i> | 26533                   | T/A  | Gene_Ca_12465.1    | SYNONYMOUS_CODING             | NA                                                                                         |
| <i>Desi_wild_26541</i>  | NA                                  | <i>Ca_desi_scaffold</i> | 26541                   | A/G  | Gene_Ca_12465.1    | SYNONYMOUS_CODING             | NA                                                                                         |
| <i>Desi_wild_26577</i>  | NA                                  | <i>Ca_desi_scaffold</i> | 26577                   | T/C  | Gene_Ca_12465.1    | SYNONYMOUS_CODING             | NA                                                                                         |
| <i>Desi_wild_26580</i>  | NA                                  | <i>Ca_desi_scaffold</i> | 26580                   | A/G  | Gene_Ca_12465.1    | SYNONYMOUS_CODING             | NA                                                                                         |

| SNP IDs                 | NCBI dbSNP accession IDs (NCBI_SS#) | Chromosomes             | Physical positions (bp) | SNPs | Gene accession IDs | Sequence components of genome | Putative functions                                            |
|-------------------------|-------------------------------------|-------------------------|-------------------------|------|--------------------|-------------------------------|---------------------------------------------------------------|
| <i>Desi_wild_26602</i>  | NA                                  | <i>Ca_desi_scaffold</i> | 26602                   | G/A  | Gene_Ca_12465.1    | SYNONYMOUS_CODING             | NA                                                            |
| <i>Desi_wild_26604</i>  | NA                                  | <i>Ca_desi_scaffold</i> | 26604                   | T/C  | Gene_Ca_12465.1    | SYNONYMOUS_CODING             | NA                                                            |
| <i>Desi_wild_26608</i>  | NA                                  | <i>Ca_desi_scaffold</i> | 26608                   | C/T  | Gene_Ca_12465.1    | SYNONYMOUS_CODING             | NA                                                            |
| <i>Desi_wild_26610</i>  | NA                                  | <i>Ca_desi_scaffold</i> | 26610                   | T/A  | Gene_Ca_12465.1    | SYNONYMOUS_CODING             | NA                                                            |
| <i>Desi_wild_45077</i>  | NA                                  | <i>Ca_desi_scaffold</i> | 45077                   | A/G  | Gene_Ca_12467.2    | SYNONYMOUS_CODING             | Protein EARLY FLOWERING 3                                     |
| <i>Desi_wild_107180</i> | NA                                  | <i>Ca_desi_scaffold</i> | 107180                  | A/G  | NA                 | INTERGENIC                    | NA                                                            |
| <i>Desi_wild_137447</i> | NA                                  | <i>Ca_desi_scaffold</i> | 137447                  | A/T  | NA                 | INTERGENIC                    | NA                                                            |
| <i>Desi_wild_153622</i> | NA                                  | <i>Ca_desi_scaffold</i> | 153622                  | A/G  | NA                 | INTERGENIC                    | NA                                                            |
| <i>Desi_wild_726</i>    | NA                                  | <i>Ca_desi_scaffold</i> | 726                     | C/T  | NA                 | INTERGENIC                    | NA                                                            |
| <i>Desi_wild_770</i>    | NA                                  | <i>Ca_desi_scaffold</i> | 770                     | G/A  | NA                 | INTERGENIC                    | NA                                                            |
| <i>Desi_wild_783</i>    | NA                                  | <i>Ca_desi_scaffold</i> | 783                     | A/C  | NA                 | INTERGENIC                    | NA                                                            |
| <i>Desi_wild_797</i>    | NA                                  | <i>Ca_desi_scaffold</i> | 797                     | G/A  | NA                 | INTERGENIC                    | NA                                                            |
| <i>Desi_wild_805</i>    | NA                                  | <i>Ca_desi_scaffold</i> | 805                     | C/T  | NA                 | INTERGENIC                    | NA                                                            |
| <i>Desi_wild_880</i>    | NA                                  | <i>Ca_desi_scaffold</i> | 880                     | T/C  | NA                 | INTERGENIC                    | NA                                                            |
| <i>Desi_wild_882</i>    | NA                                  | <i>Ca_desi_scaffold</i> | 882                     | T/C  | NA                 | INTERGENIC                    | NA                                                            |
| <i>Desi_wild_47565</i>  | NA                                  | <i>Ca_desi_scaffold</i> | 47565                   | G/C  | NA                 | INTERGENIC                    | NA                                                            |
| <i>Desi_wild_179685</i> | NA                                  | <i>Ca_desi_scaffold</i> | 179685                  | A/C  | Gene_Ca_09193.1    | INTRON                        | bZIP transcription factor 60                                  |
| <i>Desi_wild_28698</i>  | NA                                  | <i>Ca_desi_scaffold</i> | 28698                   | A/C  | Gene_Ca_12479.1    | NON_SYNONYMOUS_CODING         | Arogenate dehydratase/prephenate dehydratase 1, chloroplastic |
| <i>Desi_wild_103610</i> | NA                                  | <i>Ca_desi_scaffold</i> | 103610                  | A/G  | Gene_Ca_12484.1    | INTRON                        | Probable beta-1,3-galactosyltransferase 2                     |
| <i>Desi_wild_160115</i> | NA                                  | <i>Ca_desi_scaffold</i> | 160115                  | T/C  | Gene_Ca_12485.1    | NON_SYNONYMOUS_CODING         | Aconitate hydratase 2, mitochondrial                          |
| <i>Desi_wild_173346</i> | NA                                  | <i>Ca_desi_scaffold</i> | 173346                  | G/T  | Gene_Ca_12488.1    | SYNONYMOUS_CODING             | Protein TRANSPARENT TESTA 12                                  |
| <i>Desi_wild_64963</i>  | NA                                  | <i>Ca_desi_scaffold</i> | 64963                   | A/C  | Gene_Ca_12496.1    | INTRON                        | Protein phosphatase 2C 29                                     |
| <i>Desi_wild_84271</i>  | NA                                  | <i>Ca_desi_scaffold</i> | 84271                   | A/G  | Gene_Ca_12498.1    | INTRON                        | Probable serine/threonine-protein kinase At4g35230            |
| <i>Desi_wild_175505</i> | NA                                  | <i>Ca_desi_scaffold</i> | 175505                  | G/A  | NA                 | INTERGENIC                    | NA                                                            |
| <i>Desi_wild_92462</i>  | NA                                  | <i>Ca_desi_scaffold</i> | 92462                   | G/A  | Gene_Ca_12524.1    | STOP_GAINED                   | NA                                                            |
| <i>Desi_wild_72188</i>  | NA                                  | <i>Ca_desi_scaffold</i> | 72188                   | C/A  | NA                 | INTERGENIC                    | NA                                                            |
| <i>Desi_wild_72191</i>  | NA                                  | <i>Ca_desi_scaffold</i> | 72191                   | A/G  | NA                 | INTERGENIC                    | NA                                                            |
| <i>Desi_wild_227548</i> | NA                                  | <i>Ca_desi_scaffold</i> | 227548                  | A/T  | Gene_Ca_09203.1    | INTRON                        | S-type anion channel SLAH3                                    |
| <i>Desi_wild_227564</i> | NA                                  | <i>Ca_desi_scaffold</i> | 227564                  | A/T  | Gene_Ca_09203.1    | INTRON                        | S-type anion channel SLAH3                                    |
| <i>Desi_wild_227566</i> | NA                                  | <i>Ca_desi_scaffold</i> | 227566                  | G/T  | Gene_Ca_09203.1    | INTRON                        | S-type anion channel SLAH3                                    |
| <i>Desi_wild_227573</i> | NA                                  | <i>Ca_desi_scaffold</i> | 227573                  | A/C  | Gene_Ca_09203.1    | INTRON                        | S-type anion channel SLAH3                                    |
| <i>Desi_wild_232</i>    | NA                                  | <i>Ca_desi_scaffold</i> | 232                     | T/A  | NA                 | INTERGENIC                    | NA                                                            |
| <i>Desi_wild_238</i>    | NA                                  | <i>Ca_desi_scaffold</i> | 238                     | G/T  | NA                 | INTERGENIC                    | NA                                                            |
| <i>Desi_wild_19371</i>  | NA                                  | <i>Ca_desi_scaffold</i> | 19371                   | A/G  | NA                 | INTERGENIC                    | NA                                                            |
| <i>Desi_wild_151351</i> | NA                                  | <i>Ca_desi_scaffold</i> | 151351                  | A/C  | Gene_Ca_12552.1    | INTRON                        | unknown protein                                               |
| <i>Desi_wild_16761</i>  | NA                                  | <i>Ca_desi_scaffold</i> | 16761                   | T/C  | Gene_Ca_12562.1    | NON_SYNONYMOUS_CODING         | Pentatricopeptide repeat-containing protein At4g33170         |
| <i>Desi_wild_39990</i>  | NA                                  | <i>Ca_desi_scaffold</i> | 39990                   | T/G  | NA                 | INTERGENIC                    | NA                                                            |
| <i>Desi_wild_71346</i>  | NA                                  | <i>Ca_desi_scaffold</i> | 71346                   | A/G  | Gene_Ca_12568.1    | SYNONYMOUS_CODING             | DNA cross-link repair 1A protein                              |
| <i>Desi_wild_10777</i>  | NA                                  | <i>Ca_desi_scaffold</i> | 10777                   | G/C  | NA                 | INTERGENIC                    | NA                                                            |
| <i>Desi_wild_10800</i>  | NA                                  | <i>Ca_desi_scaffold</i> | 10800                   | A/C  | NA                 | INTERGENIC                    | NA                                                            |
| <i>Desi_wild_19876</i>  | NA                                  | <i>Ca_desi_scaffold</i> | 19876                   | G/T  | NA                 | INTERGENIC                    | NA                                                            |
| <i>Desi_wild_20804</i>  | NA                                  | <i>Ca_desi_scaffold</i> | 20804                   | T/C  | NA                 | INTERGENIC                    | NA                                                            |
| <i>Desi_wild_20833</i>  | NA                                  | <i>Ca_desi_scaffold</i> | 20833                   | A/G  | NA                 | INTERGENIC                    | NA                                                            |
| <i>Desi_wild_20834</i>  | NA                                  | <i>Ca_desi_scaffold</i> | 20834                   | G/A  | NA                 | INTERGENIC                    | NA                                                            |



| SNP IDs          | NCBI dbSNP accession IDs (NCBI_SS#) | Chromosomes      | Physical positions (bp) | SNPs | Gene accession IDs | Sequence components of genome | Putative functions                              |
|------------------|-------------------------------------|------------------|-------------------------|------|--------------------|-------------------------------|-------------------------------------------------|
| Desi_wild_23299  | NA                                  | Ca_desi_scaffold | 23299                   | A/G  | NA                 | INTERGENIC                    | NA                                              |
| Desi_wild_58218  | NA                                  | Ca_desi_scaffold | 58218                   | C/T  | Gene_Ca_12580.1    | DOWNSTREAM                    | Probable tyrosine-protein phosphatase At1g05000 |
| Desi_wild_120688 | NA                                  | Ca_desi_scaffold | 120688                  | T/A  | Gene_Ca_12583.1    | INTRON                        | Zinc finger CCCH domain-containing protein 3    |
| Desi_wild_120779 | NA                                  | Ca_desi_scaffold | 120779                  | A/G  | Gene_Ca_12583.1    | INTRON                        | Zinc finger CCCH domain-containing protein 3    |
| Desi_wild_153429 | NA                                  | Ca_desi_scaffold | 153429                  | G/A  | Gene_Ca_12585.1    | SYNONYMOUS_CODING             | E3 ubiquitin-protein ligase BRE1-like 2         |
| Desi_wild_153441 | NA                                  | Ca_desi_scaffold | 153441                  | A/T  | Gene_Ca_12585.1    | INTRON                        | E3 ubiquitin-protein ligase BRE1-like 2         |
| Desi_wild_153483 | NA                                  | Ca_desi_scaffold | 153483                  | G/A  | Gene_Ca_12585.1    | INTRON                        | E3 ubiquitin-protein ligase BRE1-like 2         |
| Desi_wild_153499 | NA                                  | Ca_desi_scaffold | 153499                  | C/T  | Gene_Ca_12585.1    | INTRON                        | E3 ubiquitin-protein ligase BRE1-like 2         |
| Desi_wild_153544 | NA                                  | Ca_desi_scaffold | 153544                  | C/T  | Gene_Ca_12585.1    | SYNONYMOUS_CODING             | E3 ubiquitin-protein ligase BRE1-like 2         |
| Desi_wild_153592 | NA                                  | Ca_desi_scaffold | 153592                  | C/T  | Gene_Ca_12585.1    | SYNONYMOUS_CODING             | E3 ubiquitin-protein ligase BRE1-like 2         |
| Desi_wild_122416 | NA                                  | Ca_desi_scaffold | 122416                  | C/T  | Gene_Ca_12590.1    | INTRON                        | Structural maintenance of chromosomes protein 5 |
| Desi_wild_122430 | NA                                  | Ca_desi_scaffold | 122430                  | C/T  | Gene_Ca_12590.1    | INTRON                        | Structural maintenance of chromosomes protein 5 |
| Desi_wild_122451 | NA                                  | Ca_desi_scaffold | 122451                  | C/T  | Gene_Ca_12590.1    | INTRON                        | Structural maintenance of chromosomes protein 5 |
| Desi_wild_122466 | NA                                  | Ca_desi_scaffold | 122466                  | T/A  | Gene_Ca_12590.1    | INTRON                        | Structural maintenance of chromosomes protein 5 |
| Desi_wild_35078  | NA                                  | Ca_desi_scaffold | 35078                   | T/C  | Gene_Ca_12594.2    | DOWNSTREAM                    | Long chain acyl-CoA synthetase 9, chloroplastic |
| Desi_wild_40819  | NA                                  | Ca_desi_scaffold | 40819                   | C/T  | Gene_Ca_12594.1    | INTRON                        | Long chain acyl-CoA synthetase 9, chloroplastic |
| Desi_wild_60386  | NA                                  | Ca_desi_scaffold | 60386                   | G/A  | Gene_Ca_12596.1    | NON_SYNONYMOUS_CODING         | UDP-galactose transporter 1                     |
| Desi_wild_60413  | NA                                  | Ca_desi_scaffold | 60413                   | A/T  | Gene_Ca_12596.1    | NON_SYNONYMOUS_CODING         | UDP-galactose transporter 1                     |
| Desi_wild_60478  | NA                                  | Ca_desi_scaffold | 60478                   | C/T  | Gene_Ca_12596.1    | SYNONYMOUS_CODING             | UDP-galactose transporter 1                     |
| Desi_wild_60781  | NA                                  | Ca_desi_scaffold | 60781                   | C/G  | Gene_Ca_12596.1    | INTRON                        | UDP-galactose transporter 1                     |
| Desi_wild_74452  | NA                                  | Ca_desi_scaffold | 74452                   | C/T  | Gene_Ca_12597.1    | SYNONYMOUS_CODING             | ATPase family AAA domain-containing protein 5   |
| Desi_wild_76116  | NA                                  | Ca_desi_scaffold | 76116                   | T/G  | Gene_Ca_12597.1    | INTRON                        | ATPase family AAA domain-containing protein 5   |
| Desi_wild_76119  | NA                                  | Ca_desi_scaffold | 76119                   | T/A  | Gene_Ca_12597.1    | INTRON                        | ATPase family AAA domain-containing protein 5   |
| Desi_wild_76126  | NA                                  | Ca_desi_scaffold | 76126                   | C/G  | Gene_Ca_12597.1    | NON_SYNONYMOUS_CODING         | ATPase family AAA domain-containing protein 5   |
| Desi_wild_76157  | NA                                  | Ca_desi_scaffold | 76157                   | T/G  | Gene_Ca_12597.1    | SYNONYMOUS_CODING             | ATPase family AAA domain-containing protein 5   |
| Desi_wild_99599  | NA                                  | Ca_desi_scaffold | 99599                   | A/T  | Gene_Ca_12599.1    | INTRON                        | Cation transport regulator-like protein         |
| Desi_wild_99668  | NA                                  | Ca_desi_scaffold | 99668                   | C/A  | Gene_Ca_12599.1    | INTRON                        | Cation transport regulator-like protein         |
| Desi_wild_99960  | NA                                  | Ca_desi_scaffold | 99960                   | T/A  | Gene_Ca_12599.1    | INTRON                        | Cation transport regulator-like protein         |
| Desi_wild_103616 | NA                                  | Ca_desi_scaffold | 103616                  | T/C  | NA                 | INTERGENIC                    | NA                                              |
| Desi_wild_103619 | NA                                  | Ca_desi_scaffold | 103619                  | A/G  | NA                 | INTERGENIC                    | NA                                              |
| Desi_wild_103678 | NA                                  | Ca_desi_scaffold | 103678                  | A/G  | NA                 | INTERGENIC                    | NA                                              |
| Desi_wild_103696 | NA                                  | Ca_desi_scaffold | 103696                  | C/A  | NA                 | INTERGENIC                    | NA                                              |
| Desi_wild_103699 | NA                                  | Ca_desi_scaffold | 103699                  | A/G  | NA                 | INTERGENIC                    | NA                                              |
| Desi_wild_103711 | NA                                  | Ca_desi_scaffold | 103711                  | G/T  | NA                 | INTERGENIC                    | NA                                              |
| Desi_wild_149603 | NA                                  | Ca_desi_scaffold | 149603                  | T/C  | NA                 | INTERGENIC                    | NA                                              |
| Desi_wild_113610 | NA                                  | Ca_desi_scaffold | 113610                  | A/C  | NA                 | INTERGENIC                    | NA                                              |
| Desi_wild_113612 | NA                                  | Ca_desi_scaffold | 113612                  | A/T  | NA                 | INTERGENIC                    | NA                                              |
| Desi_wild_114357 | NA                                  | Ca_desi_scaffold | 114357                  | C/A  | NA                 | INTERGENIC                    | NA                                              |
| Desi_wild_114363 | NA                                  | Ca_desi_scaffold | 114363                  | C/T  | NA                 | INTERGENIC                    | NA                                              |
| Desi_wild_36322  | NA                                  | Ca_desi_scaffold | 36322                   | T/G  | NA                 | INTERGENIC                    | NA                                              |
| Desi_wild_36448  | NA                                  | Ca_desi_scaffold | 36448                   | T/A  | NA                 | INTERGENIC                    | NA                                              |
| Desi_wild_93176  | NA                                  | Ca_desi_scaffold | 93176                   | G/C  | Gene_Ca_12618.1    | INTRON                        | Anthranilate phosphoribosyltransferase          |
| Desi_wild_100464 | NA                                  | Ca_desi_scaffold | 100464                  | C/T  | Gene_Ca_12618.1    | DOWNSTREAM                    | Anthranilate phosphoribosyltransferase          |
| Desi_wild_63866  | NA                                  | Ca_desi_scaffold | 63866                   | A/C  | Gene_Ca_12624.1    | SYNONYMOUS_CODING             | Ubiquilin-1                                     |

| SNP IDs                 | NCBI dbSNP accession IDs (NCBI_SS#) | Chromosomes             | Physical positions (bp) | SNPs | Gene accession IDs | Sequence components of genome | Putative functions                                    |
|-------------------------|-------------------------------------|-------------------------|-------------------------|------|--------------------|-------------------------------|-------------------------------------------------------|
| <i>Desi_wild_66260</i>  | NA                                  | <i>Ca_desi_scaffold</i> | 66260                   | G/A  | Gene_Ca_12624.1    | INTRON                        | Ubiquilin-1                                           |
| <i>Desi_wild_95740</i>  | NA                                  | <i>Ca_desi_scaffold</i> | 95740                   | C/T  | Gene_Ca_12625.1    | INTRON                        | Nuclear pore complex protein Nup160                   |
| <i>Desi_wild_96008</i>  | NA                                  | <i>Ca_desi_scaffold</i> | 96008                   | A/G  | Gene_Ca_12625.1    | INTRON                        | Nuclear pore complex protein Nup160                   |
| <i>Desi_wild_96337</i>  | NA                                  | <i>Ca_desi_scaffold</i> | 96337                   | C/T  | Gene_Ca_12625.1    | INTRON                        | Nuclear pore complex protein Nup160                   |
| <i>Desi_wild_96344</i>  | NA                                  | <i>Ca_desi_scaffold</i> | 96344                   | A/C  | Gene_Ca_12625.1    | INTRON                        | Nuclear pore complex protein Nup160                   |
| <i>Desi_wild_96354</i>  | NA                                  | <i>Ca_desi_scaffold</i> | 96354                   | C/G  | Gene_Ca_12625.1    | INTRON                        | Nuclear pore complex protein Nup160                   |
| <i>Desi_wild_96361</i>  | NA                                  | <i>Ca_desi_scaffold</i> | 96361                   | A/T  | Gene_Ca_12625.1    | INTRON                        | Nuclear pore complex protein Nup160                   |
| <i>Desi_wild_109012</i> | NA                                  | <i>Ca_desi_scaffold</i> | 109012                  | A/C  | Gene_Ca_12625.1    | SYNONYMOUS_CODING             | Nuclear pore complex protein Nup160                   |
| <i>Desi_wild_41678</i>  | NA                                  | <i>Ca_desi_scaffold</i> | 41678                   | T/A  | Gene_Ca_12630.1    | SYNONYMOUS_CODING             | Uncharacterized WD repeat-containing protein C3H5.08c |
| <i>Desi_wild_105960</i> | NA                                  | <i>Ca_desi_scaffold</i> | 105960                  | G/A  | NA                 | INTERGENIC                    | NA                                                    |
| <i>Desi_wild_116648</i> | NA                                  | <i>Ca_desi_scaffold</i> | 116648                  | T/A  | NA                 | INTERGENIC                    | NA                                                    |
| <i>Desi_wild_121597</i> | NA                                  | <i>Ca_desi_scaffold</i> | 121597                  | G/A  | NA                 | INTERGENIC                    | NA                                                    |
| <i>Desi_wild_11562</i>  | NA                                  | <i>Ca_desi_scaffold</i> | 11562                   | C/T  | Gene_Ca_12645.1    | NON_SYNONYMOUS_CODING         | AdoMet-dependent rRNA methyltransferase spb1          |
| <i>Desi_wild_11731</i>  | NA                                  | <i>Ca_desi_scaffold</i> | 11731                   | C/T  | Gene_Ca_12645.1    | SYNONYMOUS_CODING             | AdoMet-dependent rRNA methyltransferase spb1          |
| <i>Desi_wild_11758</i>  | NA                                  | <i>Ca_desi_scaffold</i> | 11758                   | A/G  | Gene_Ca_12645.1    | SYNONYMOUS_CODING             | AdoMet-dependent rRNA methyltransferase spb1          |
| <i>Desi_wild_57309</i>  | NA                                  | <i>Ca_desi_scaffold</i> | 57309                   | T/A  | NA                 | INTERGENIC                    | NA                                                    |
| <i>Desi_wild_141021</i> | NA                                  | <i>Ca_desi_scaffold</i> | 141021                  | C/T  | Gene_Ca_12652.3    | INTRON                        | mTERF domain-containing protein 3, mitochondrial      |
| <i>Desi_wild_141022</i> | NA                                  | <i>Ca_desi_scaffold</i> | 141022                  | A/G  | Gene_Ca_12652.3    | INTRON                        | mTERF domain-containing protein 3, mitochondrial      |
| <i>Desi_wild_141498</i> | NA                                  | <i>Ca_desi_scaffold</i> | 141498                  | C/T  | Gene_Ca_12652.3    | INTRON                        | mTERF domain-containing protein 3, mitochondrial      |
| <i>Desi_wild_141645</i> | NA                                  | <i>Ca_desi_scaffold</i> | 141645                  | C/T  | Gene_Ca_12652.3    | SYNONYMOUS_CODING             | mTERF domain-containing protein 3, mitochondrial      |
| <i>Desi_wild_147647</i> | NA                                  | <i>Ca_desi_scaffold</i> | 147647                  | T/A  | Gene_Ca_12653.1    | INTRON                        | Uncharacterized protein At1g01500                     |
| <i>Desi_wild_158140</i> | NA                                  | <i>Ca_desi_scaffold</i> | 158140                  | A/G  | NA                 | INTERGENIC                    | NA                                                    |
| <i>Desi_wild_161122</i> | NA                                  | <i>Ca_desi_scaffold</i> | 161122                  | C/A  | Gene_Ca_12655.1    | DOWNSTREAM                    | Uncharacterized protein At1g01500                     |
| <i>Desi_wild_99425</i>  | NA                                  | <i>Ca_desi_scaffold</i> | 99425                   | T/C  | NA                 | INTERGENIC                    | NA                                                    |
| <i>Desi_wild_99466</i>  | NA                                  | <i>Ca_desi_scaffold</i> | 99466                   | G/A  | NA                 | INTERGENIC                    | NA                                                    |
| <i>Desi_wild_126142</i> | NA                                  | <i>Ca_desi_scaffold</i> | 126142                  | T/C  | Gene_Ca_09239.1    | NON_SYNONYMOUS_CODING         | Probable ATP-dependent RNA helicase DHX37             |
| <i>Desi_wild_126154</i> | NA                                  | <i>Ca_desi_scaffold</i> | 126154                  | C/T  | Gene_Ca_09239.1    | SYNONYMOUS_CODING             | Probable ATP-dependent RNA helicase DHX37             |
| <i>Desi_wild_141636</i> | NA                                  | <i>Ca_desi_scaffold</i> | 141636                  | C/A  | NA                 | INTERGENIC                    | NA                                                    |
| <i>Desi_wild_141695</i> | NA                                  | <i>Ca_desi_scaffold</i> | 141695                  | A/C  | NA                 | INTERGENIC                    | NA                                                    |
| <i>Desi_wild_325471</i> | NA                                  | <i>Ca_desi_scaffold</i> | 325471                  | A/G  | Gene_Ca_09248.1    | SYNONYMOUS_CODING             | Synaptonemal complex protein 1                        |
| <i>Desi_wild_71827</i>  | NA                                  | <i>Ca_desi_scaffold</i> | 71827                   | A/C  | NA                 | INTERGENIC                    | NA                                                    |
| <i>Desi_wild_71838</i>  | NA                                  | <i>Ca_desi_scaffold</i> | 71838                   | G/C  | NA                 | INTERGENIC                    | NA                                                    |
| <i>Desi_wild_71880</i>  | NA                                  | <i>Ca_desi_scaffold</i> | 71880                   | G/A  | Gene_Ca_12666.1    | NON_SYNONYMOUS_CODING         | unknown protein                                       |
| <i>Desi_wild_71954</i>  | NA                                  | <i>Ca_desi_scaffold</i> | 71954                   | A/G  | Gene_Ca_12666.1    | NON_SYNONYMOUS_CODING         | unknown protein                                       |
| <i>Desi_wild_71975</i>  | NA                                  | <i>Ca_desi_scaffold</i> | 71975                   | T/C  | Gene_Ca_12666.1    | NON_SYNONYMOUS_CODING         | unknown protein                                       |
| <i>Desi_wild_71990</i>  | NA                                  | <i>Ca_desi_scaffold</i> | 71990                   | A/T  | Gene_Ca_12666.1    | NON_SYNONYMOUS_CODING         | unknown protein                                       |
| <i>Desi_wild_72008</i>  | NA                                  | <i>Ca_desi_scaffold</i> | 72008                   | C/T  | Gene_Ca_12666.1    | NON_SYNONYMOUS_CODING         | unknown protein                                       |
| <i>Desi_wild_73252</i>  | NA                                  | <i>Ca_desi_scaffold</i> | 73252                   | A/G  | Gene_Ca_12666.1    | INTRON                        | unknown protein                                       |
| <i>Desi_wild_73358</i>  | NA                                  | <i>Ca_desi_scaffold</i> | 73358                   | T/C  | Gene_Ca_12666.1    | INTRON                        | unknown protein                                       |
| <i>Desi_wild_73405</i>  | NA                                  | <i>Ca_desi_scaffold</i> | 73405                   | G/T  | Gene_Ca_12666.1    | INTRON                        | unknown protein                                       |
| <i>Desi_wild_73421</i>  | NA                                  | <i>Ca_desi_scaffold</i> | 73421                   | A/G  | Gene_Ca_12666.1    | INTRON                        | unknown protein                                       |
| <i>Desi_wild_73471</i>  | NA                                  | <i>Ca_desi_scaffold</i> | 73471                   | T/C  | Gene_Ca_12666.1    | INTRON                        | unknown protein                                       |
| <i>Desi_wild_73477</i>  | NA                                  | <i>Ca_desi_scaffold</i> | 73477                   | A/G  | Gene_Ca_12666.1    | INTRON                        | unknown protein                                       |
| <i>Desi_wild_73538</i>  | NA                                  | <i>Ca_desi_scaffold</i> | 73538                   | A/C  | Gene_Ca_12666.1    | INTRON                        | unknown protein                                       |

| SNP IDs                 | NCBI dbSNP accession IDs (NCBI_SS#) | Chromosomes             | Physical positions (bp) | SNPs | Gene accession IDs | Sequence components of genome | Putative functions                                       |
|-------------------------|-------------------------------------|-------------------------|-------------------------|------|--------------------|-------------------------------|----------------------------------------------------------|
| <i>Desi_wild_73553</i>  | NA                                  | <i>Ca_desi_scaffold</i> | 73553                   | T/A  | Gene_Ca_12666.1    | INTRON                        | unknown protein                                          |
| <i>Desi_wild_73613</i>  | NA                                  | <i>Ca_desi_scaffold</i> | 73613                   | T/A  | Gene_Ca_12666.1    | INTRON                        | unknown protein                                          |
| <i>Desi_wild_73960</i>  | NA                                  | <i>Ca_desi_scaffold</i> | 73960                   | A/C  | Gene_Ca_12666.1    | INTRON                        | unknown protein                                          |
| <i>Desi_wild_21060</i>  | NA                                  | <i>Ca_desi_scaffold</i> | 21060                   | A/T  | Gene_Ca_12673.1    | NON_SYNONYMOUS_CODING         | Uncharacterized membrane protein sll0875                 |
| <i>Desi_wild_85104</i>  | NA                                  | <i>Ca_desi_scaffold</i> | 85104                   | G/A  | Gene_Ca_12675.1    | SYNONYMOUS_CODING             | Alpha,alpha-trehalose-phosphate synthase [UDP-forming] 1 |
| <i>Desi_wild_85533</i>  | NA                                  | <i>Ca_desi_scaffold</i> | 85533                   | A/T  | Gene_Ca_12675.1    | INTRON                        | Alpha,alpha-trehalose-phosphate synthase [UDP-forming] 1 |
| <i>Desi_wild_120228</i> | NA                                  | <i>Ca_desi_scaffold</i> | 120228                  | G/A  | Gene_Ca_12677.1    | INTRON                        | Uncharacterized sodium-dependent transporter yocS        |
| <i>Desi_wild_136173</i> | NA                                  | <i>Ca_desi_scaffold</i> | 136173                  | G/A  | NA                 | INTERGENIC                    | NA                                                       |
| <i>Desi_wild_24152</i>  | NA                                  | <i>Ca_desi_scaffold</i> | 24152                   | G/T  | Gene_Ca_12679.1    | SYNONYMOUS_CODING             | Subtilisin-like protease                                 |
| <i>Desi_wild_24155</i>  | NA                                  | <i>Ca_desi_scaffold</i> | 24155                   | A/C  | Gene_Ca_12679.1    | SYNONYMOUS_CODING             | Subtilisin-like protease                                 |
| <i>Desi_wild_48005</i>  | NA                                  | <i>Ca_desi_scaffold</i> | 48005                   | T/G  | NA                 | INTERGENIC                    | NA                                                       |
| <i>Desi_wild_48037</i>  | NA                                  | <i>Ca_desi_scaffold</i> | 48037                   | G/T  | NA                 | INTERGENIC                    | NA                                                       |
| <i>Desi_wild_97011</i>  | NA                                  | <i>Ca_desi_scaffold</i> | 97011                   | G/T  | NA                 | INTERGENIC                    | NA                                                       |
| <i>Desi_wild_97070</i>  | NA                                  | <i>Ca_desi_scaffold</i> | 97070                   | T/C  | NA                 | INTERGENIC                    | NA                                                       |
| <i>Desi_wild_105442</i> | NA                                  | <i>Ca_desi_scaffold</i> | 105442                  | G/C  | Gene_Ca_12686.1    | INTRON                        | NA                                                       |
| <i>Desi_wild_42553</i>  | NA                                  | <i>Ca_desi_scaffold</i> | 42553                   | C/T  | Gene_Ca_12689.1    | SYNONYMOUS_CODING             | Transcription factor TCP7                                |
| <i>Desi_wild_42630</i>  | NA                                  | <i>Ca_desi_scaffold</i> | 42630                   | C/A  | Gene_Ca_12689.1    | NON_SYNONYMOUS_CODING         | Transcription factor TCP7                                |
| <i>Desi_wild_42691</i>  | NA                                  | <i>Ca_desi_scaffold</i> | 42691                   | C/A  | Gene_Ca_12689.1    | SYNONYMOUS_CODING             | Transcription factor TCP7                                |
| <i>Desi_wild_93887</i>  | NA                                  | <i>Ca_desi_scaffold</i> | 93887                   | C/T  | NA                 | INTERGENIC                    | NA                                                       |
| <i>Desi_wild_94223</i>  | NA                                  | <i>Ca_desi_scaffold</i> | 94223                   | G/A  | NA                 | INTERGENIC                    | NA                                                       |
| <i>Desi_wild_94237</i>  | NA                                  | <i>Ca_desi_scaffold</i> | 94237                   | T/C  | NA                 | INTERGENIC                    | NA                                                       |
| <i>Desi_wild_94265</i>  | NA                                  | <i>Ca_desi_scaffold</i> | 94265                   | A/G  | NA                 | INTERGENIC                    | NA                                                       |
| <i>Desi_wild_94358</i>  | NA                                  | <i>Ca_desi_scaffold</i> | 94358                   | C/T  | NA                 | INTERGENIC                    | NA                                                       |
| <i>Desi_wild_97990</i>  | NA                                  | <i>Ca_desi_scaffold</i> | 97990                   | C/T  | NA                 | INTERGENIC                    | NA                                                       |
| <i>Desi_wild_98008</i>  | NA                                  | <i>Ca_desi_scaffold</i> | 98008                   | C/T  | NA                 | INTERGENIC                    | NA                                                       |
| <i>Desi_wild_124388</i> | NA                                  | <i>Ca_desi_scaffold</i> | 124388                  | T/G  | Gene_Ca_12691.1    | SYNONYMOUS_CODING             | TELO2-interacting protein 1 homolog                      |
| <i>Desi_wild_128924</i> | NA                                  | <i>Ca_desi_scaffold</i> | 128924                  | C/T  | Gene_Ca_12691.1    | SYNONYMOUS_CODING             | TELO2-interacting protein 1 homolog                      |
| <i>Desi_wild_129143</i> | NA                                  | <i>Ca_desi_scaffold</i> | 129143                  | G/T  | Gene_Ca_12691.1    | SYNONYMOUS_CODING             | TELO2-interacting protein 1 homolog                      |
| <i>Desi_wild_129149</i> | NA                                  | <i>Ca_desi_scaffold</i> | 129149                  | G/A  | Gene_Ca_12691.1    | SYNONYMOUS_CODING             | TELO2-interacting protein 1 homolog                      |
| <i>Desi_wild_92323</i>  | NA                                  | <i>Ca_desi_scaffold</i> | 92323                   | A/G  | Gene_Ca_12699.3    | INTRON                        | NA                                                       |
| <i>Desi_wild_92380</i>  | NA                                  | <i>Ca_desi_scaffold</i> | 92380                   | T/C  | Gene_Ca_12699.3    | INTRON                        | NA                                                       |
| <i>Desi_wild_60668</i>  | NA                                  | <i>Ca_desi_scaffold</i> | 60668                   | C/A  | NA                 | INTERGENIC                    | NA                                                       |
| <i>Desi_wild_150322</i> | NA                                  | <i>Ca_desi_scaffold</i> | 150322                  | T/C  | Gene_Ca_12707.1    | INTRON                        | Villin-1                                                 |
| <i>Desi_wild_116206</i> | NA                                  | <i>Ca_desi_scaffold</i> | 116206                  | A/G  | NA                 | INTERGENIC                    | NA                                                       |
| <i>Desi_wild_10298</i>  | NA                                  | <i>Ca_desi_scaffold</i> | 10298                   | C/T  | Gene_Ca_12715.1    | SYNONYMOUS_CODING             | Tetratricopeptide repeat protein 1                       |
| <i>Desi_wild_10382</i>  | NA                                  | <i>Ca_desi_scaffold</i> | 10382                   | G/C  | Gene_Ca_12715.1    | SYNONYMOUS_CODING             | Tetratricopeptide repeat protein 1                       |
| <i>Desi_wild_10412</i>  | NA                                  | <i>Ca_desi_scaffold</i> | 10412                   | G/A  | Gene_Ca_12715.1    | SYNONYMOUS_CODING             | Tetratricopeptide repeat protein 1                       |
| <i>Desi_wild_34405</i>  | NA                                  | <i>Ca_desi_scaffold</i> | 34405                   | G/C  | Gene_Ca_12718.2    | INTRON                        | NA                                                       |
| <i>Desi_wild_51838</i>  | NA                                  | <i>Ca_desi_scaffold</i> | 51838                   | T/C  | NA                 | INTERGENIC                    | NA                                                       |
| <i>Desi_wild_57798</i>  | NA                                  | <i>Ca_desi_scaffold</i> | 57798                   | T/C  | NA                 | INTERGENIC                    | NA                                                       |
| <i>Desi_wild_57850</i>  | NA                                  | <i>Ca_desi_scaffold</i> | 57850                   | G/A  | NA                 | INTERGENIC                    | NA                                                       |
| <i>Desi_wild_63202</i>  | NA                                  | <i>Ca_desi_scaffold</i> | 63202                   | C/G  | NA                 | INTERGENIC                    | NA                                                       |
| <i>Desi_wild_66352</i>  | NA                                  | <i>Ca_desi_scaffold</i> | 66352                   | T/A  | Gene_Ca_12723.1    | DOWNSTREAM                    | Mitochondrial substrate carrier family protein B         |
| <i>Desi_wild_72141</i>  | NA                                  | <i>Ca_desi_scaffold</i> | 72141                   | T/A  | Gene_Ca_12724.1    | NON_SYNONYMOUS_CODING         | Calmodulin-binding transcription activator 3             |

| SNP IDs          | NCBI dbSNP accession IDs (NCBI_SS#) | Chromosomes      | Physical positions (bp) | SNPs | Gene accession IDs | Sequence components of genome | Putative functions                                            |
|------------------|-------------------------------------|------------------|-------------------------|------|--------------------|-------------------------------|---------------------------------------------------------------|
| Desi_wild_72320  | NA                                  | Ca_desi_scaffold | 72320                   | A/C  | Gene_Ca_12724.1    | NON_SYNONYMOUS_CODING         | Calmodulin-binding transcription activator 3                  |
| Desi_wild_72382  | NA                                  | Ca_desi_scaffold | 72382                   | A/G  | Gene_Ca_12724.1    | SYNONYMOUS_CODING             | Calmodulin-binding transcription activator 3                  |
| Desi_wild_72452  | NA                                  | Ca_desi_scaffold | 72452                   | A/G  | Gene_Ca_12724.1    | NON_SYNONYMOUS_CODING         | Calmodulin-binding transcription activator 3                  |
| Desi_wild_76464  | NA                                  | Ca_desi_scaffold | 76464                   | T/A  | Gene_Ca_12724.1    | DOWNSTREAM                    | Calmodulin-binding transcription activator 3                  |
| Desi_wild_77043  | NA                                  | Ca_desi_scaffold | 77043                   | C/T  | Gene_Ca_12724.1    | DOWNSTREAM                    | Calmodulin-binding transcription activator 3                  |
| Desi_wild_118443 | NA                                  | Ca_desi_scaffold | 118443                  | T/C  | Gene_Ca_12731.1    | DOWNSTREAM                    | Putative calcium-transporting ATPase 11, plasma membrane-type |
| Desi_wild_123508 | NA                                  | Ca_desi_scaffold | 123508                  | C/A  | NA                 | INTERGENIC                    | NA                                                            |
| Desi_wild_149490 | NA                                  | Ca_desi_scaffold | 149490                  | T/C  | Gene_Ca_12734.1    | UPSTREAM                      | NA                                                            |
| Desi_wild_149512 | NA                                  | Ca_desi_scaffold | 149512                  | T/C  | Gene_Ca_12734.1    | UPSTREAM                      | NA                                                            |
| Desi_wild_149608 | NA                                  | Ca_desi_scaffold | 149608                  | A/G  | Gene_Ca_12734.1    | UPSTREAM                      | NA                                                            |
| Desi_wild_149635 | NA                                  | Ca_desi_scaffold | 149635                  | A/T  | Gene_Ca_12734.1    | UPSTREAM                      | NA                                                            |
| Desi_wild_153756 | NA                                  | Ca_desi_scaffold | 153756                  | C/T  | Gene_Ca_12734.1    | INTRON                        | NA                                                            |
| Desi_wild_153806 | NA                                  | Ca_desi_scaffold | 153806                  | A/G  | Gene_Ca_12734.1    | INTRON                        | NA                                                            |
| Desi_wild_162987 | NA                                  | Ca_desi_scaffold | 162987                  | T/C  | Gene_Ca_12735.1    | INTRON                        | NA                                                            |
| Desi_wild_27049  | NA                                  | Ca_desi_scaffold | 27049                   | A/C  | NA                 | INTERGENIC                    | NA                                                            |
| Desi_wild_27220  | NA                                  | Ca_desi_scaffold | 27220                   | C/T  | NA                 | INTERGENIC                    | NA                                                            |
| Desi_wild_78286  | NA                                  | Ca_desi_scaffold | 78286                   | A/C  | Gene_Ca_12743.1    | NON_SYNONYMOUS_CODING         | NA                                                            |
| Desi_wild_128767 | NA                                  | Ca_desi_scaffold | 128767                  | G/A  | Gene_Ca_12750.1    | STOP_GAINED                   | Putative calcium-transporting ATPase 11, plasma membrane-type |
| Desi_wild_131152 | NA                                  | Ca_desi_scaffold | 131152                  | T/C  | Gene_Ca_12750.1    | SYNONYMOUS_CODING             | Putative calcium-transporting ATPase 11, plasma membrane-type |
| Desi_wild_132081 | NA                                  | Ca_desi_scaffold | 132081                  | T/C  | Gene_Ca_12750.1    | NON_SYNONYMOUS_CODING         | Putative calcium-transporting ATPase 11, plasma membrane-type |
| Desi_wild_143936 | NA                                  | Ca_desi_scaffold | 143936                  | A/G  | Gene_Ca_12751.1    | INTRON                        | Thioredoxin-like 1-1, chloroplastic                           |
| Desi_wild_148508 | NA                                  | Ca_desi_scaffold | 148508                  | G/A  | NA                 | INTERGENIC                    | NA                                                            |
| Desi_wild_148522 | NA                                  | Ca_desi_scaffold | 148522                  | T/G  | NA                 | INTERGENIC                    | NA                                                            |
| Desi_wild_148528 | NA                                  | Ca_desi_scaffold | 148528                  | A/G  | NA                 | INTERGENIC                    | NA                                                            |
| Desi_wild_148563 | NA                                  | Ca_desi_scaffold | 148563                  | T/C  | NA                 | INTERGENIC                    | NA                                                            |
| Desi_wild_148585 | NA                                  | Ca_desi_scaffold | 148585                  | T/C  | NA                 | INTERGENIC                    | NA                                                            |
| Desi_wild_16559  | NA                                  | Ca_desi_scaffold | 16559                   | A/G  | Gene_Ca_12755.1    | INTRON                        | 30S ribosomal protein S9                                      |
| Desi_wild_19056  | NA                                  | Ca_desi_scaffold | 19056                   | T/G  | Gene_Ca_12755.1    | DOWNSTREAM                    | 30S ribosomal protein S9                                      |
| Desi_wild_19057  | NA                                  | Ca_desi_scaffold | 19057                   | G/T  | Gene_Ca_12755.1    | DOWNSTREAM                    | 30S ribosomal protein S9                                      |
| Desi_wild_48012  | NA                                  | Ca_desi_scaffold | 48012                   | C/G  | NA                 | INTERGENIC                    | NA                                                            |
| Desi_wild_13637  | NA                                  | Ca_desi_scaffold | 13637                   | G/C  | Gene_Ca_12770.3    | DOWNSTREAM                    | NA                                                            |
| Desi_wild_54912  | NA                                  | Ca_desi_scaffold | 54912                   | A/C  | Gene_Ca_12774.2    | SYNONYMOUS_CODING             | IAA-amino acid hydrolase ILR1-like 6                          |
| Desi_wild_65669  | NA                                  | Ca_desi_scaffold | 65669                   | A/T  | NA                 | INTERGENIC                    | NA                                                            |
| Desi_wild_154670 | NA                                  | Ca_desi_scaffold | 154670                  | C/T  | Gene_Ca_12780.1    | INTRON                        | Aldehyde dehydrogenase family 3 member H1                     |
| Desi_wild_154678 | NA                                  | Ca_desi_scaffold | 154678                  | G/T  | Gene_Ca_12780.1    | INTRON                        | Aldehyde dehydrogenase family 3 member H1                     |
| Desi_wild_154715 | NA                                  | Ca_desi_scaffold | 154715                  | A/G  | Gene_Ca_12780.1    | INTRON                        | Aldehyde dehydrogenase family 3 member H1                     |
| Desi_wild_154718 | NA                                  | Ca_desi_scaffold | 154718                  | G/A  | Gene_Ca_12780.1    | INTRON                        | Aldehyde dehydrogenase family 3 member H1                     |
| Desi_wild_154719 | NA                                  | Ca_desi_scaffold | 154719                  | T/C  | Gene_Ca_12780.1    | INTRON                        | Aldehyde dehydrogenase family 3 member H1                     |
| Desi_wild_154723 | NA                                  | Ca_desi_scaffold | 154723                  | T/A  | Gene_Ca_12780.1    | INTRON                        | Aldehyde dehydrogenase family 3 member H1                     |
| Desi_wild_154729 | NA                                  | Ca_desi_scaffold | 154729                  | G/C  | Gene_Ca_12780.1    | INTRON                        | Aldehyde dehydrogenase family 3 member H1                     |
| Desi_wild_154730 | NA                                  | Ca_desi_scaffold | 154730                  | A/G  | Gene_Ca_12780.1    | INTRON                        | Aldehyde dehydrogenase family 3 member H1                     |
| Desi_wild_154737 | NA                                  | Ca_desi_scaffold | 154737                  | A/G  | Gene_Ca_12780.1    | INTRON                        | Aldehyde dehydrogenase family 3 member H1                     |
| Desi_wild_154744 | NA                                  | Ca_desi_scaffold | 154744                  | A/T  | Gene_Ca_12780.1    | INTRON                        | Aldehyde dehydrogenase family 3 member H1                     |
| Desi_wild_161709 | NA                                  | Ca_desi_scaffold | 161709                  | G/A  | NA                 | INTERGENIC                    | NA                                                            |

| SNP IDs                 | NCBI dbSNP accession IDs (NCBI_SS#) | Chromosomes             | Physical positions (bp) | SNPs | Gene accession IDs | Sequence components of genome | Putative functions                                  |
|-------------------------|-------------------------------------|-------------------------|-------------------------|------|--------------------|-------------------------------|-----------------------------------------------------|
| <i>Desi_wild_161760</i> | NA                                  | <i>Ca_desi_scaffold</i> | 161760                  | G/A  | NA                 | INTERGENIC                    | NA                                                  |
| <i>Desi_wild_148232</i> | NA                                  | <i>Ca_desi_scaffold</i> | 148232                  | C/T  | Gene_Ca_12803.1    | DOWNSTREAM                    | Ethylene-overproduction protein 1                   |
| <i>Desi_wild_152983</i> | NA                                  | <i>Ca_desi_scaffold</i> | 152983                  | T/A  | NA                 | INTERGENIC                    | NA                                                  |
| <i>Desi_wild_153185</i> | NA                                  | <i>Ca_desi_scaffold</i> | 153185                  | A/C  | NA                 | INTERGENIC                    | NA                                                  |
| <i>Desi_wild_153186</i> | NA                                  | <i>Ca_desi_scaffold</i> | 153186                  | T/C  | NA                 | INTERGENIC                    | NA                                                  |
| <i>Desi_wild_39708</i>  | NA                                  | <i>Ca_desi_scaffold</i> | 39708                   | T/C  | NA                 | INTERGENIC                    | NA                                                  |
| <i>Desi_wild_103625</i> | NA                                  | <i>Ca_desi_scaffold</i> | 103625                  | T/C  | NA                 | INTERGENIC                    | NA                                                  |
| <i>Desi_wild_103628</i> | NA                                  | <i>Ca_desi_scaffold</i> | 103628                  | G/T  | NA                 | INTERGENIC                    | NA                                                  |
| <i>Desi_wild_103630</i> | NA                                  | <i>Ca_desi_scaffold</i> | 103630                  | A/C  | NA                 | INTERGENIC                    | NA                                                  |
| <i>Desi_wild_103633</i> | NA                                  | <i>Ca_desi_scaffold</i> | 103633                  | C/T  | NA                 | INTERGENIC                    | NA                                                  |
| <i>Desi_wild_103651</i> | NA                                  | <i>Ca_desi_scaffold</i> | 103651                  | G/A  | NA                 | INTERGENIC                    | NA                                                  |
| <i>Desi_wild_103656</i> | NA                                  | <i>Ca_desi_scaffold</i> | 103656                  | A/G  | NA                 | INTERGENIC                    | NA                                                  |
| <i>Desi_wild_103658</i> | NA                                  | <i>Ca_desi_scaffold</i> | 103658                  | G/A  | NA                 | INTERGENIC                    | NA                                                  |
| <i>Desi_wild_103667</i> | NA                                  | <i>Ca_desi_scaffold</i> | 103667                  | G/C  | NA                 | INTERGENIC                    | NA                                                  |
| <i>Desi_wild_103677</i> | NA                                  | <i>Ca_desi_scaffold</i> | 103677                  | G/A  | NA                 | INTERGENIC                    | NA                                                  |
| <i>Desi_wild_103680</i> | NA                                  | <i>Ca_desi_scaffold</i> | 103680                  | C/T  | NA                 | INTERGENIC                    | NA                                                  |
| <i>Desi_wild_103690</i> | NA                                  | <i>Ca_desi_scaffold</i> | 103690                  | C/T  | NA                 | INTERGENIC                    | NA                                                  |
| <i>Desi_wild_103701</i> | NA                                  | <i>Ca_desi_scaffold</i> | 103701                  | T/A  | NA                 | INTERGENIC                    | NA                                                  |
| <i>Desi_wild_128413</i> | NA                                  | <i>Ca_desi_scaffold</i> | 128413                  | G/A  | NA                 | INTERGENIC                    | NA                                                  |
| <i>Desi_wild_44944</i>  | NA                                  | <i>Ca_desi_scaffold</i> | 44944                   | C/T  | Gene_Ca_12818.1    | INTRON                        | ATP-dependent DNA helicase Q-like 3                 |
| <i>Desi_wild_46877</i>  | NA                                  | <i>Ca_desi_scaffold</i> | 46877                   | A/C  | Gene_Ca_12818.1    | INTRON                        | ATP-dependent DNA helicase Q-like 3                 |
| <i>Desi_wild_63560</i>  | NA                                  | <i>Ca_desi_scaffold</i> | 63560                   | A/C  | Gene_Ca_12819.1    | SYNONYMOUS_CODING             | Methylthioribose-1-phosphate isomerase              |
| <i>Desi_wild_63877</i>  | NA                                  | <i>Ca_desi_scaffold</i> | 63877                   | A/G  | Gene_Ca_12819.1    | SYNONYMOUS_CODING             | Methylthioribose-1-phosphate isomerase              |
| <i>Desi_wild_63920</i>  | NA                                  | <i>Ca_desi_scaffold</i> | 63920                   | A/C  | Gene_Ca_12819.1    | NON_SYNONYMOUS_CODING         | Methylthioribose-1-phosphate isomerase              |
| <i>Desi_wild_7880</i>   | NA                                  | <i>Ca_desi_scaffold</i> | 7880                    | T/C  | Gene_Ca_12823.1    | NON_SYNONYMOUS_CODING         | Protein KIAA0664 homolog                            |
| <i>Desi_wild_19803</i>  | NA                                  | <i>Ca_desi_scaffold</i> | 19803                   | C/T  | Gene_Ca_12827.1    | INTRON                        | General transcription factor 3C polypeptide 3       |
| <i>Desi_wild_20559</i>  | NA                                  | <i>Ca_desi_scaffold</i> | 20559                   | C/A  | Gene_Ca_12827.1    | NON_SYNONYMOUS_CODING         | General transcription factor 3C polypeptide 3       |
| <i>Desi_wild_53563</i>  | NA                                  | <i>Ca_desi_scaffold</i> | 53563                   | C/T  | Gene_Ca_12828.1    | INTRON                        | NA                                                  |
| <i>Desi_wild_218771</i> | NA                                  | <i>Ca_desi_scaffold</i> | 218771                  | T/G  | NA                 | INTERGENIC                    | NA                                                  |
| <i>Desi_wild_232418</i> | NA                                  | <i>Ca_desi_scaffold</i> | 232418                  | G/A  | Gene_Ca_09284.1    | INTRON                        | Tyrosyl-DNA phosphodiesterase 1                     |
| <i>Desi_wild_22284</i>  | NA                                  | <i>Ca_desi_scaffold</i> | 22284                   | A/G  | Gene_Ca_09295.1    | NON_SYNONYMOUS_CODING         | Beta-fructofuranosidase, insoluble isoenzyme CWINV3 |
| <i>Desi_wild_64537</i>  | NA                                  | <i>Ca_desi_scaffold</i> | 64537                   | T/C  | NA                 | INTERGENIC                    | NA                                                  |
| <i>Desi_wild_64664</i>  | NA                                  | <i>Ca_desi_scaffold</i> | 64664                   | G/T  | NA                 | INTERGENIC                    | NA                                                  |
| <i>Desi_wild_138651</i> | NA                                  | <i>Ca_desi_scaffold</i> | 138651                  | A/G  | Gene_Ca_09306.1    | DOWNSTREAM                    | myosin, putative                                    |
| <i>Desi_wild_138674</i> | NA                                  | <i>Ca_desi_scaffold</i> | 138674                  | C/G  | Gene_Ca_09306.1    | DOWNSTREAM                    | myosin, putative                                    |
| <i>Desi_wild_146690</i> | NA                                  | <i>Ca_desi_scaffold</i> | 146690                  | A/C  | NA                 | INTERGENIC                    | NA                                                  |
| <i>Desi_wild_146692</i> | NA                                  | <i>Ca_desi_scaffold</i> | 146692                  | C/A  | NA                 | INTERGENIC                    | NA                                                  |
| <i>Desi_wild_156236</i> | NA                                  | <i>Ca_desi_scaffold</i> | 156236                  | T/C  | Gene_Ca_09307.1    | INTRON                        | Unconventional myosin-Va                            |
| <i>Desi_wild_156237</i> | NA                                  | <i>Ca_desi_scaffold</i> | 156237                  | A/G  | Gene_Ca_09307.1    | INTRON                        | Unconventional myosin-Va                            |
| <i>Desi_wild_156361</i> | NA                                  | <i>Ca_desi_scaffold</i> | 156361                  | T/C  | Gene_Ca_09307.1    | INTRON                        | Unconventional myosin-Va                            |
| <i>Desi_wild_159699</i> | NA                                  | <i>Ca_desi_scaffold</i> | 159699                  | C/T  | Gene_Ca_09307.1    | INTRON                        | Unconventional myosin-Va                            |
| <i>Desi_wild_30801</i>  | NA                                  | <i>Ca_desi_scaffold</i> | 30801                   | G/A  | Gene_Ca_12865.1    | INTRON                        | FUNCTIONS IN: molecular_function unknown            |
| <i>Desi_wild_33981</i>  | NA                                  | <i>Ca_desi_scaffold</i> | 33981                   | T/C  | Gene_Ca_12865.1    | INTRON                        | FUNCTIONS IN: molecular_function unknown            |
| <i>Desi_wild_35034</i>  | NA                                  | <i>Ca_desi_scaffold</i> | 35034                   | T/G  | Gene_Ca_12865.1    | INTRON                        | FUNCTIONS IN: molecular_function unknown            |

| SNP IDs                 | NCBI dbSNP accession IDs (NCBI_SS#) | Chromosomes             | Physical positions (bp) | SNPs | Gene accession IDs | Sequence components of genome | Putative functions                                                   |
|-------------------------|-------------------------------------|-------------------------|-------------------------|------|--------------------|-------------------------------|----------------------------------------------------------------------|
| <i>Desi_wild_35112</i>  | NA                                  | <i>Ca_desi_scaffold</i> | 35112                   | C/A  | Gene_Ca_12865.1    | INTRON                        | FUNCTIONS IN: molecular_function unknown                             |
| <i>Desi_wild_74685</i>  | NA                                  | <i>Ca_desi_scaffold</i> | 74685                   | A/C  | Gene_Ca_12866.1    | SYNONYMOUS_CODING             | Auxin efflux carrier component 3                                     |
| <i>Desi_wild_134636</i> | NA                                  | <i>Ca_desi_scaffold</i> | 134636                  | A/T  | Gene_Ca_12868.1    | INTRON                        | ATP-dependent DNA helicase recG                                      |
| <i>Desi_wild_149446</i> | NA                                  | <i>Ca_desi_scaffold</i> | 149446                  | C/G  | Gene_Ca_12868.1    | INTRON                        | ATP-dependent DNA helicase recG                                      |
| <i>Desi_wild_155230</i> | NA                                  | <i>Ca_desi_scaffold</i> | 155230                  | A/G  | NA                 | INTERGENIC                    | NA                                                                   |
| <i>Desi_wild_8659</i>   | NA                                  | <i>Ca_desi_scaffold</i> | 8659                    | A/C  | NA                 | INTERGENIC                    | NA                                                                   |
| <i>Desi_wild_18661</i>  | NA                                  | <i>Ca_desi_scaffold</i> | 18661                   | C/G  | Gene_Ca_12871.1    | DOWNSTREAM                    | Phosphomethylpyrimidine synthase, chloroplastic                      |
| <i>Desi_wild_26643</i>  | NA                                  | <i>Ca_desi_scaffold</i> | 26643                   | A/G  | NA                 | INTERGENIC                    | NA                                                                   |
| <i>Desi_wild_140187</i> | NA                                  | <i>Ca_desi_scaffold</i> | 140187                  | G/T  | NA                 | INTERGENIC                    | NA                                                                   |
| <i>Desi_wild_140253</i> | NA                                  | <i>Ca_desi_scaffold</i> | 140253                  | A/C  | NA                 | INTERGENIC                    | NA                                                                   |
| <i>Desi_wild_140260</i> | NA                                  | <i>Ca_desi_scaffold</i> | 140260                  | C/T  | NA                 | INTERGENIC                    | NA                                                                   |
| <i>Desi_wild_147590</i> | NA                                  | <i>Ca_desi_scaffold</i> | 147590                  | T/C  | Gene_Ca_12878.1    | NON_SYNONYMOUS_CODING         | Cysteine-rich receptor-like protein kinase 8                         |
| <i>Desi_wild_2983</i>   | NA                                  | <i>Ca_desi_scaffold</i> | 2983                    | T/A  | Gene_Ca_12879.1    | NON_SYNONYMOUS_CODING         | ABC transporter C family member 8                                    |
| <i>Desi_wild_29970</i>  | NA                                  | <i>Ca_desi_scaffold</i> | 29970                   | C/T  | Gene_Ca_12880.1    | STOP_GAINED                   | Probable sugar phosphate/phosphate translocator At1g06470            |
| <i>Desi_wild_55756</i>  | NA                                  | <i>Ca_desi_scaffold</i> | 55756                   | G/A  | Gene_Ca_12881.2    | SYNONYMOUS_CODING             | Inactive protein kinase SELMODRAFT_444075                            |
| <i>Desi_wild_55759</i>  | NA                                  | <i>Ca_desi_scaffold</i> | 55759                   | A/T  | Gene_Ca_12881.2    | SYNONYMOUS_CODING             | Inactive protein kinase SELMODRAFT_444075                            |
| <i>Desi_wild_55762</i>  | NA                                  | <i>Ca_desi_scaffold</i> | 55762                   | C/T  | Gene_Ca_12881.2    | SYNONYMOUS_CODING             | Inactive protein kinase SELMODRAFT_444075                            |
| <i>Desi_wild_55765</i>  | NA                                  | <i>Ca_desi_scaffold</i> | 55765                   | T/C  | Gene_Ca_12881.2    | SYNONYMOUS_CODING             | Inactive protein kinase SELMODRAFT_444075                            |
| <i>Desi_wild_55774</i>  | NA                                  | <i>Ca_desi_scaffold</i> | 55774                   | C/T  | Gene_Ca_12881.2    | SYNONYMOUS_CODING             | Inactive protein kinase SELMODRAFT_444075                            |
| <i>Desi_wild_55786</i>  | NA                                  | <i>Ca_desi_scaffold</i> | 55786                   | T/A  | Gene_Ca_12881.2    | SYNONYMOUS_CODING             | Inactive protein kinase SELMODRAFT_444075                            |
| <i>Desi_wild_55795</i>  | NA                                  | <i>Ca_desi_scaffold</i> | 55795                   | T/A  | Gene_Ca_12881.2    | SYNONYMOUS_CODING             | Inactive protein kinase SELMODRAFT_444075                            |
| <i>Desi_wild_56068</i>  | NA                                  | <i>Ca_desi_scaffold</i> | 56068                   | A/G  | Gene_Ca_12881.2    | INTRON                        | Inactive protein kinase SELMODRAFT_444075                            |
| <i>Desi_wild_56071</i>  | NA                                  | <i>Ca_desi_scaffold</i> | 56071                   | T/A  | Gene_Ca_12881.2    | INTRON                        | Inactive protein kinase SELMODRAFT_444075                            |
| <i>Desi_wild_56073</i>  | NA                                  | <i>Ca_desi_scaffold</i> | 56073                   | C/A  | Gene_Ca_12881.2    | INTRON                        | Inactive protein kinase SELMODRAFT_444075                            |
| <i>Desi_wild_56075</i>  | NA                                  | <i>Ca_desi_scaffold</i> | 56075                   | A/G  | Gene_Ca_12881.2    | INTRON                        | Inactive protein kinase SELMODRAFT_444075                            |
| <i>Desi_wild_56077</i>  | NA                                  | <i>Ca_desi_scaffold</i> | 56077                   | A/T  | Gene_Ca_12881.2    | INTRON                        | Inactive protein kinase SELMODRAFT_444075                            |
| <i>Desi_wild_56085</i>  | NA                                  | <i>Ca_desi_scaffold</i> | 56085                   | C/T  | Gene_Ca_12881.2    | SYNONYMOUS_CODING             | Inactive protein kinase SELMODRAFT_444075                            |
| <i>Desi_wild_766</i>    | NA                                  | <i>Ca_desi_scaffold</i> | 766                     | T/C  | NA                 | INTERGENIC                    | NA                                                                   |
| <i>Desi_wild_31013</i>  | NA                                  | <i>Ca_desi_scaffold</i> | 31013                   | T/C  | Gene_Ca_12889.3    | DOWNSTREAM                    | Splicing factor U2af small subunit B                                 |
| <i>Desi_wild_33513</i>  | NA                                  | <i>Ca_desi_scaffold</i> | 33513                   | C/T  | Gene_Ca_12889.2    | SYNONYMOUS_CODING             | Splicing factor U2af small subunit B                                 |
| <i>Desi_wild_65105</i>  | NA                                  | <i>Ca_desi_scaffold</i> | 65105                   | G/A  | Gene_Ca_12891.2    | NON_SYNONYMOUS_CODING         | NA                                                                   |
| <i>Desi_wild_65173</i>  | NA                                  | <i>Ca_desi_scaffold</i> | 65173                   | A/C  | Gene_Ca_12891.2    | SYNONYMOUS_CODING             | NA                                                                   |
| <i>Desi_wild_59630</i>  | NA                                  | <i>Ca_desi_scaffold</i> | 59630                   | A/T  | NA                 | INTERGENIC                    | NA                                                                   |
| <i>Desi_wild_12600</i>  | NA                                  | <i>Ca_desi_scaffold</i> | 12600                   | C/A  | Gene_Ca_09313.1    | INTRON                        | Protein RFT1 homolog                                                 |
| <i>Desi_wild_12733</i>  | NA                                  | <i>Ca_desi_scaffold</i> | 12733                   | C/T  | Gene_Ca_09313.1    | INTRON                        | Protein RFT1 homolog                                                 |
| <i>Desi_wild_48378</i>  | NA                                  | <i>Ca_desi_scaffold</i> | 48378                   | T/G  | NA                 | INTERGENIC                    | NA                                                                   |
| <i>Desi_wild_140213</i> | NA                                  | <i>Ca_desi_scaffold</i> | 140213                  | A/T  | Gene_Ca_09316.1    | INTRON                        | Structural maintenance of chromosomes protein 6                      |
| <i>Desi_wild_214953</i> | NA                                  | <i>Ca_desi_scaffold</i> | 214953                  | T/A  | Gene_Ca_09318.1    | INTRON                        | 2-phosphoglycerate kinase                                            |
| <i>Desi_wild_230262</i> | NA                                  | <i>Ca_desi_scaffold</i> | 230262                  | T/G  | Gene_Ca_09319.1    | SYNONYMOUS_CODING             | F-box protein At5g07670                                              |
| <i>Desi_wild_38580</i>  | NA                                  | <i>Ca_desi_scaffold</i> | 38580                   | T/G  | NA                 | INTERGENIC                    | NA                                                                   |
| <i>Desi_wild_38648</i>  | NA                                  | <i>Ca_desi_scaffold</i> | 38648                   | C/A  | NA                 | INTERGENIC                    | NA                                                                   |
| <i>Desi_wild_150520</i> | NA                                  | <i>Ca_desi_scaffold</i> | 150520                  | C/A  | Gene_Ca_09322.3    | NON_SYNONYMOUS_CODING         | Probable LRR receptor-like serine/threonine-protein kinase At1g14390 |
| <i>Desi_wild_150562</i> | NA                                  | <i>Ca_desi_scaffold</i> | 150562                  | A/C  | Gene_Ca_09322.3    | NON_SYNONYMOUS_CODING         | Probable LRR receptor-like serine/threonine-protein kinase At1g14390 |
| <i>Desi_wild_153800</i> | NA                                  | <i>Ca_desi_scaffold</i> | 153800                  | G/C  | NA                 | INTERGENIC                    | NA                                                                   |

| SNP IDs          | NCBI dbSNP accession IDs (NCBI_SS#) | Chromosomes      | Physical positions (bp) | SNPs | Gene accession IDs | Sequence components of genome | Putative functions                               |
|------------------|-------------------------------------|------------------|-------------------------|------|--------------------|-------------------------------|--------------------------------------------------|
| Desi_wild_153802 | NA                                  | Ca_desi_scaffold | 153802                  | T/C  | NA                 | INTERGENIC                    | NA                                               |
| Desi_wild_153811 | NA                                  | Ca_desi_scaffold | 153811                  | C/T  | NA                 | INTERGENIC                    | NA                                               |
| Desi_wild_153821 | NA                                  | Ca_desi_scaffold | 153821                  | T/C  | NA                 | INTERGENIC                    | NA                                               |
| Desi_wild_153822 | NA                                  | Ca_desi_scaffold | 153822                  | A/G  | NA                 | INTERGENIC                    | NA                                               |
| Desi_wild_153836 | NA                                  | Ca_desi_scaffold | 153836                  | A/T  | NA                 | INTERGENIC                    | NA                                               |
| Desi_wild_153838 | NA                                  | Ca_desi_scaffold | 153838                  | T/G  | NA                 | INTERGENIC                    | NA                                               |
| Desi_wild_153842 | NA                                  | Ca_desi_scaffold | 153842                  | C/A  | NA                 | INTERGENIC                    | NA                                               |
| Desi_wild_153844 | NA                                  | Ca_desi_scaffold | 153844                  | A/G  | NA                 | INTERGENIC                    | NA                                               |
| Desi_wild_153867 | NA                                  | Ca_desi_scaffold | 153867                  | G/T  | NA                 | INTERGENIC                    | NA                                               |
| Desi_wild_71414  | NA                                  | Ca_desi_scaffold | 71414                   | C/A  | Gene_Ca_12930.1    | NON_SYNONYMOUS_CODING         | Geranylgeranyl transferase type-1 subunit beta   |
| Desi_wild_89574  | NA                                  | Ca_desi_scaffold | 89574                   | C/T  | NA                 | INTERGENIC                    | NA                                               |
| Desi_wild_6040   | NA                                  | Ca_desi_scaffold | 6040                    | T/G  | NA                 | INTERGENIC                    | NA                                               |
| Desi_wild_34419  | NA                                  | Ca_desi_scaffold | 34419                   | G/T  | NA                 | INTERGENIC                    | NA                                               |
| Desi_wild_41793  | NA                                  | Ca_desi_scaffold | 41793                   | T/A  | Gene_Ca_12939.1    | SYNONYMOUS_CODING             | 1-acyl-sn-glycerol-3-phosphate acyltransferase 3 |
| Desi_wild_41794  | NA                                  | Ca_desi_scaffold | 41794                   | T/A  | Gene_Ca_12939.1    | NON_SYNONYMOUS_CODING         | 1-acyl-sn-glycerol-3-phosphate acyltransferase 3 |
| Desi_wild_41815  | NA                                  | Ca_desi_scaffold | 41815                   | C/A  | Gene_Ca_12939.1    | SYNONYMOUS_CODING             | 1-acyl-sn-glycerol-3-phosphate acyltransferase 3 |
| Desi_wild_41845  | NA                                  | Ca_desi_scaffold | 41845                   | G/T  | Gene_Ca_12939.1    | NON_SYNONYMOUS_CODING         | 1-acyl-sn-glycerol-3-phosphate acyltransferase 3 |
| Desi_wild_65085  | NA                                  | Ca_desi_scaffold | 65085                   | G/C  | NA                 | INTERGENIC                    | NA                                               |
| Desi_wild_65086  | NA                                  | Ca_desi_scaffold | 65086                   | G/T  | NA                 | INTERGENIC                    | NA                                               |
| Desi_wild_102888 | NA                                  | Ca_desi_scaffold | 102888                  | C/T  | NA                 | INTERGENIC                    | NA                                               |
| Desi_wild_12278  | NA                                  | Ca_desi_scaffold | 12278                   | C/T  | Gene_Ca_12955.1    | SYNONYMOUS_CODING             | unknown protein                                  |
| Desi_wild_12428  | NA                                  | Ca_desi_scaffold | 12428                   | T/A  | Gene_Ca_12955.1    | NON_SYNONYMOUS_CODING         | unknown protein                                  |
| Desi_wild_40912  | NA                                  | Ca_desi_scaffold | 40912                   | T/C  | NA                 | INTERGENIC                    | NA                                               |
| Desi_wild_60177  | NA                                  | Ca_desi_scaffold | 60177                   | T/C  | NA                 | INTERGENIC                    | NA                                               |
| Desi_wild_60183  | NA                                  | Ca_desi_scaffold | 60183                   | A/C  | NA                 | INTERGENIC                    | NA                                               |
| Desi_wild_19740  | NA                                  | Ca_desi_scaffold | 19740                   | T/C  | Gene_Ca_12966.1    | INTRON                        | unknown protein                                  |
| Desi_wild_49012  | NA                                  | Ca_desi_scaffold | 49012                   | A/C  | NA                 | INTERGENIC                    | NA                                               |
| Desi_wild_147694 | NA                                  | Ca_desi_scaffold | 147694                  | A/T  | Gene_Ca_12974.1    | INTRON                        | Filament-like plant protein 5                    |
| Desi_wild_147726 | NA                                  | Ca_desi_scaffold | 147726                  | A/T  | Gene_Ca_12974.1    | INTRON                        | Filament-like plant protein 5                    |
| Desi_wild_147743 | NA                                  | Ca_desi_scaffold | 147743                  | A/G  | Gene_Ca_12974.1    | INTRON                        | Filament-like plant protein 5                    |
| Desi_wild_44917  | NA                                  | Ca_desi_scaffold | 44917                   | T/C  | NA                 | INTERGENIC                    | NA                                               |
| Desi_wild_64814  | NA                                  | Ca_desi_scaffold | 64814                   | A/G  | Gene_Ca_09347.1    | NON_SYNONYMOUS_CODING         | Zinc finger CCCH domain-containing protein 12    |
| Desi_wild_65056  | NA                                  | Ca_desi_scaffold | 65056                   | C/G  | Gene_Ca_09347.1    | NON_SYNONYMOUS_CODING         | Zinc finger CCCH domain-containing protein 12    |
| Desi_wild_194417 | NA                                  | Ca_desi_scaffold | 194417                  | A/G  | Gene_Ca_09354.1    | NON_SYNONYMOUS_CODING         | Syntaxin-22                                      |
| Desi_wild_239933 | NA                                  | Ca_desi_scaffold | 239933                  | C/T  | NA                 | INTERGENIC                    | NA                                               |
| Desi_wild_239936 | NA                                  | Ca_desi_scaffold | 239936                  | A/C  | NA                 | INTERGENIC                    | NA                                               |
| Desi_wild_240679 | NA                                  | Ca_desi_scaffold | 240679                  | A/G  | NA                 | INTERGENIC                    | NA                                               |
| Desi_wild_240775 | NA                                  | Ca_desi_scaffold | 240775                  | T/C  | NA                 | INTERGENIC                    | NA                                               |
| Desi_wild_76618  | NA                                  | Ca_desi_scaffold | 76618                   | A/C  | Gene_Ca_12988.2    | SYNONYMOUS_CODING             | RNA polymerase II-associated factor 1 homolog    |
| Desi_wild_80348  | NA                                  | Ca_desi_scaffold | 80348                   | C/T  | Gene_Ca_12988.2    | SYNONYMOUS_CODING             | RNA polymerase II-associated factor 1 homolog    |
| Desi_wild_134209 | NA                                  | Ca_desi_scaffold | 134209                  | C/T  | NA                 | INTERGENIC                    | NA                                               |
| Desi_wild_134228 | NA                                  | Ca_desi_scaffold | 134228                  | T/C  | NA                 | INTERGENIC                    | NA                                               |
| Desi_wild_51818  | NA                                  | Ca_desi_scaffold | 51818                   | A/T  | NA                 | INTERGENIC                    | NA                                               |
| Desi_wild_51820  | NA                                  | Ca_desi_scaffold | 51820                   | T/A  | NA                 | INTERGENIC                    | NA                                               |



| SNP IDs          | NCBI dbSNP accession IDs (NCBI_SS#) | Chromosomes      | Physical positions (bp) | SNPs | Gene accession IDs | Sequence components of genome | Putative functions                                    |
|------------------|-------------------------------------|------------------|-------------------------|------|--------------------|-------------------------------|-------------------------------------------------------|
| Desi_wild_51835  | NA                                  | Ca_desi_scaffold | 51835                   | A/T  | NA                 | INTERGENIC                    | NA                                                    |
| Desi_wild_51837  | NA                                  | Ca_desi_scaffold | 51837                   | A/T  | NA                 | INTERGENIC                    | NA                                                    |
| Desi_wild_51840  | NA                                  | Ca_desi_scaffold | 51840                   | G/T  | NA                 | INTERGENIC                    | NA                                                    |
| Desi_wild_51841  | NA                                  | Ca_desi_scaffold | 51841                   | G/T  | NA                 | INTERGENIC                    | NA                                                    |
| Desi_wild_51846  | NA                                  | Ca_desi_scaffold | 51846                   | C/T  | NA                 | INTERGENIC                    | NA                                                    |
| Desi_wild_51848  | NA                                  | Ca_desi_scaffold | 51848                   | A/T  | NA                 | INTERGENIC                    | NA                                                    |
| Desi_wild_51851  | NA                                  | Ca_desi_scaffold | 51851                   | C/T  | NA                 | INTERGENIC                    | NA                                                    |
| Desi_wild_68923  | NA                                  | Ca_desi_scaffold | 68923                   | A/G  | Gene_Ca_13010.1    | SYNONYMOUS_CODING             | 60S ribosomal protein L24                             |
| Desi_wild_68947  | NA                                  | Ca_desi_scaffold | 68947                   | A/G  | Gene_Ca_13010.1    | SYNONYMOUS_CODING             | 60S ribosomal protein L24                             |
| Desi_wild_68974  | NA                                  | Ca_desi_scaffold | 68974                   | T/A  | Gene_Ca_13010.1    | NON_SYNONYMOUS_CODING         | 60S ribosomal protein L24                             |
| Desi_wild_68976  | NA                                  | Ca_desi_scaffold | 68976                   | T/G  | Gene_Ca_13010.1    | SYNONYMOUS_CODING             | 60S ribosomal protein L24                             |
| Desi_wild_68986  | NA                                  | Ca_desi_scaffold | 68986                   | T/C  | Gene_Ca_13010.1    | SYNONYMOUS_CODING             | 60S ribosomal protein L24                             |
| Desi_wild_68994  | NA                                  | Ca_desi_scaffold | 68994                   | T/C  | Gene_Ca_13010.1    | NON_SYNONYMOUS_CODING         | 60S ribosomal protein L24                             |
| Desi_wild_69001  | NA                                  | Ca_desi_scaffold | 69001                   | G/A  | Gene_Ca_13010.1    | SYNONYMOUS_CODING             | 60S ribosomal protein L24                             |
| Desi_wild_123806 | NA                                  | Ca_desi_scaffold | 123806                  | T/A  | Gene_Ca_13014.1    | INTRON                        | Threonine dehydratase biosynthetic, chloroplastic     |
| Desi_wild_123875 | NA                                  | Ca_desi_scaffold | 123875                  | G/A  | Gene_Ca_13014.1    | INTRON                        | Threonine dehydratase biosynthetic, chloroplastic     |
| Desi_wild_113703 | NA                                  | Ca_desi_scaffold | 113703                  | A/C  | Gene_Ca_13019.1    | DOWNSTREAM                    | Pentatricopeptide repeat-containing protein At4g20740 |
| Desi_wild_114593 | NA                                  | Ca_desi_scaffold | 114593                  | C/T  | Gene_Ca_13019.1    | DOWNSTREAM                    | Pentatricopeptide repeat-containing protein At4g20740 |
| Desi_wild_22663  | NA                                  | Ca_desi_scaffold | 22663                   | G/A  | Gene_Ca_13021.2    | SYNONYMOUS_CODING             | NA                                                    |
| Desi_wild_121826 | NA                                  | Ca_desi_scaffold | 121826                  | C/A  | Gene_Ca_13027.1    | INTRON                        | 6-phosphofructo-2-kinase/fructose-2,6-bisphosphatase  |
| Desi_wild_121863 | NA                                  | Ca_desi_scaffold | 121863                  | G/C  | Gene_Ca_13027.1    | INTRON                        | 6-phosphofructo-2-kinase/fructose-2,6-bisphosphatase  |
| Desi_wild_121868 | NA                                  | Ca_desi_scaffold | 121868                  | G/A  | Gene_Ca_13027.1    | INTRON                        | 6-phosphofructo-2-kinase/fructose-2,6-bisphosphatase  |
| Desi_wild_121871 | NA                                  | Ca_desi_scaffold | 121871                  | C/T  | Gene_Ca_13027.1    | INTRON                        | 6-phosphofructo-2-kinase/fructose-2,6-bisphosphatase  |
| Desi_wild_121892 | NA                                  | Ca_desi_scaffold | 121892                  | C/T  | Gene_Ca_13027.1    | INTRON                        | 6-phosphofructo-2-kinase/fructose-2,6-bisphosphatase  |
| Desi_wild_121900 | NA                                  | Ca_desi_scaffold | 121900                  | G/A  | Gene_Ca_13027.1    | INTRON                        | 6-phosphofructo-2-kinase/fructose-2,6-bisphosphatase  |
| Desi_wild_132521 | NA                                  | Ca_desi_scaffold | 132521                  | C/T  | Gene_Ca_13027.1    | NON_SYNONYMOUS_CODING         | 6-phosphofructo-2-kinase/fructose-2,6-bisphosphatase  |
| Desi_wild_22477  | NA                                  | Ca_desi_scaffold | 22477                   | A/C  | NA                 | INTERGENIC                    | NA                                                    |
| Desi_wild_23654  | NA                                  | Ca_desi_scaffold | 23654                   | C/T  | Gene_Ca_13029.1    | INTRON                        | FUNCTIONS IN: molecular_function unknown              |
| Desi_wild_48952  | NA                                  | Ca_desi_scaffold | 48952                   | G/T  | Gene_Ca_13030.1    | INTRON                        | Thaumatococcus-like protein 1                         |
| Desi_wild_59239  | NA                                  | Ca_desi_scaffold | 59239                   | G/A  | Gene_Ca_13030.1    | INTRON                        | Thaumatococcus-like protein 1                         |
| Desi_wild_1339   | NA                                  | Ca_desi_scaffold | 1339                    | A/T  | NA                 | INTERGENIC                    | NA                                                    |
| Desi_wild_1753   | NA                                  | Ca_desi_scaffold | 1753                    | A/C  | NA                 | INTERGENIC                    | NA                                                    |
| Desi_wild_1828   | NA                                  | Ca_desi_scaffold | 1828                    | G/A  | NA                 | INTERGENIC                    | NA                                                    |
| Desi_wild_1870   | NA                                  | Ca_desi_scaffold | 1870                    | A/G  | NA                 | INTERGENIC                    | NA                                                    |
| Desi_wild_1904   | NA                                  | Ca_desi_scaffold | 1904                    | G/A  | NA                 | INTERGENIC                    | NA                                                    |
| Desi_wild_1911   | NA                                  | Ca_desi_scaffold | 1911                    | T/C  | NA                 | INTERGENIC                    | NA                                                    |
| Desi_wild_1939   | NA                                  | Ca_desi_scaffold | 1939                    | A/C  | NA                 | INTERGENIC                    | NA                                                    |
| Desi_wild_1946   | NA                                  | Ca_desi_scaffold | 1946                    | T/A  | NA                 | INTERGENIC                    | NA                                                    |
| Desi_wild_1948   | NA                                  | Ca_desi_scaffold | 1948                    | A/C  | NA                 | INTERGENIC                    | NA                                                    |
| Desi_wild_1954   | NA                                  | Ca_desi_scaffold | 1954                    | A/C  | NA                 | INTERGENIC                    | NA                                                    |
| Desi_wild_1955   | NA                                  | Ca_desi_scaffold | 1955                    | C/A  | NA                 | INTERGENIC                    | NA                                                    |
| Desi_wild_2007   | NA                                  | Ca_desi_scaffold | 2007                    | A/C  | NA                 | INTERGENIC                    | NA                                                    |
| Desi_wild_2016   | NA                                  | Ca_desi_scaffold | 2016                    | A/C  | NA                 | INTERGENIC                    | NA                                                    |
| Desi_wild_2406   | NA                                  | Ca_desi_scaffold | 2406                    | A/G  | NA                 | INTERGENIC                    | NA                                                    |

| SNP IDs                | NCBI dbSNP accession IDs (NCBI_SS#) | Chromosomes             | Physical positions (bp) | SNPs | Gene accession IDs | Sequence components of genome | Putative functions                |
|------------------------|-------------------------------------|-------------------------|-------------------------|------|--------------------|-------------------------------|-----------------------------------|
| <i>Desi_wild_24626</i> | NA                                  | <i>Ca_desi_scaffold</i> | 24626                   | A/T  | Gene_Ca_13035.1    | INTRON                        | Auxin response factor 3           |
| <i>Desi_wild_24702</i> | NA                                  | <i>Ca_desi_scaffold</i> | 24702                   | C/T  | Gene_Ca_13035.1    | INTRON                        | Auxin response factor 3           |
| <i>Desi_wild_25522</i> | NA                                  | <i>Ca_desi_scaffold</i> | 25522                   | A/G  | Gene_Ca_13035.1    | SYNONYMOUS_CODING             | Auxin response factor 3           |
| <i>Desi_wild_25628</i> | NA                                  | <i>Ca_desi_scaffold</i> | 25628                   | A/C  | Gene_Ca_13035.1    | SYNONYMOUS_CODING             | Auxin response factor 3           |
| <i>Desi_wild_25634</i> | NA                                  | <i>Ca_desi_scaffold</i> | 25634                   | G/T  | Gene_Ca_13035.1    | NON_SYNONYMOUS_CODING         | Auxin response factor 3           |
| <i>Desi_wild_26113</i> | NA                                  | <i>Ca_desi_scaffold</i> | 26113                   | C/T  | Gene_Ca_13035.1    | SYNONYMOUS_CODING             | Auxin response factor 3           |
| <i>Desi_wild_26143</i> | NA                                  | <i>Ca_desi_scaffold</i> | 26143                   | C/A  | Gene_Ca_13035.1    | NON_SYNONYMOUS_CODING         | Auxin response factor 3           |
| <i>Desi_wild_26290</i> | NA                                  | <i>Ca_desi_scaffold</i> | 26290                   | C/T  | Gene_Ca_13035.1    | INTRON                        | Auxin response factor 3           |
| <i>Desi_wild_49205</i> | NA                                  | <i>Ca_desi_scaffold</i> | 49205                   | A/T  | Gene_Ca_13036.1    | INTRON                        | NA                                |
| <i>Desi_wild_49226</i> | NA                                  | <i>Ca_desi_scaffold</i> | 49226                   | T/G  | Gene_Ca_13036.1    | INTRON                        | NA                                |
| <i>Desi_wild_49227</i> | NA                                  | <i>Ca_desi_scaffold</i> | 49227                   | G/T  | Gene_Ca_13036.1    | INTRON                        | NA                                |
| <i>Desi_wild_49233</i> | NA                                  | <i>Ca_desi_scaffold</i> | 49233                   | T/A  | Gene_Ca_13036.1    | INTRON                        | NA                                |
| <i>Desi_wild_49236</i> | NA                                  | <i>Ca_desi_scaffold</i> | 49236                   | G/A  | Gene_Ca_13036.1    | INTRON                        | NA                                |
| <i>Desi_wild_49237</i> | NA                                  | <i>Ca_desi_scaffold</i> | 49237                   | T/G  | Gene_Ca_13036.1    | INTRON                        | NA                                |
| <i>Desi_wild_49248</i> | NA                                  | <i>Ca_desi_scaffold</i> | 49248                   | C/T  | Gene_Ca_13036.1    | INTRON                        | NA                                |
| <i>Desi_wild_49259</i> | NA                                  | <i>Ca_desi_scaffold</i> | 49259                   | A/C  | Gene_Ca_13036.1    | INTRON                        | NA                                |
| <i>Desi_wild_49279</i> | NA                                  | <i>Ca_desi_scaffold</i> | 49279                   | C/T  | Gene_Ca_13036.1    | INTRON                        | NA                                |
| <i>Desi_wild_49286</i> | NA                                  | <i>Ca_desi_scaffold</i> | 49286                   | C/T  | Gene_Ca_13036.1    | INTRON                        | NA                                |
| <i>Desi_wild_49294</i> | NA                                  | <i>Ca_desi_scaffold</i> | 49294                   | G/T  | Gene_Ca_13036.1    | INTRON                        | NA                                |
| <i>Desi_wild_49309</i> | NA                                  | <i>Ca_desi_scaffold</i> | 49309                   | T/G  | Gene_Ca_13036.1    | INTRON                        | NA                                |
| <i>Desi_wild_49334</i> | NA                                  | <i>Ca_desi_scaffold</i> | 49334                   | G/A  | Gene_Ca_13036.1    | INTRON                        | NA                                |
| <i>Desi_wild_49350</i> | NA                                  | <i>Ca_desi_scaffold</i> | 49350                   | A/C  | Gene_Ca_13036.1    | INTRON                        | NA                                |
| <i>Desi_wild_49390</i> | NA                                  | <i>Ca_desi_scaffold</i> | 49390                   | T/C  | Gene_Ca_13036.1    | INTRON                        | NA                                |
| <i>Desi_wild_49394</i> | NA                                  | <i>Ca_desi_scaffold</i> | 49394                   | G/T  | Gene_Ca_13036.1    | INTRON                        | NA                                |
| <i>Desi_wild_49410</i> | NA                                  | <i>Ca_desi_scaffold</i> | 49410                   | A/G  | Gene_Ca_13036.1    | INTRON                        | NA                                |
| <i>Desi_wild_50398</i> | NA                                  | <i>Ca_desi_scaffold</i> | 50398                   | T/G  | Gene_Ca_13036.1    | INTRON                        | NA                                |
| <i>Desi_wild_50452</i> | NA                                  | <i>Ca_desi_scaffold</i> | 50452                   | C/T  | Gene_Ca_13036.1    | INTRON                        | NA                                |
| <i>Desi_wild_50463</i> | NA                                  | <i>Ca_desi_scaffold</i> | 50463                   | C/G  | Gene_Ca_13036.1    | INTRON                        | NA                                |
| <i>Desi_wild_50464</i> | NA                                  | <i>Ca_desi_scaffold</i> | 50464                   | A/G  | Gene_Ca_13036.1    | INTRON                        | NA                                |
| <i>Desi_wild_52216</i> | NA                                  | <i>Ca_desi_scaffold</i> | 52216                   | A/G  | Gene_Ca_13036.1    | INTRON                        | NA                                |
| <i>Desi_wild_53225</i> | NA                                  | <i>Ca_desi_scaffold</i> | 53225                   | G/C  | Gene_Ca_13036.1    | INTRON                        | NA                                |
| <i>Desi_wild_53230</i> | NA                                  | <i>Ca_desi_scaffold</i> | 53230                   | T/G  | Gene_Ca_13036.1    | INTRON                        | NA                                |
| <i>Desi_wild_53234</i> | NA                                  | <i>Ca_desi_scaffold</i> | 53234                   | A/G  | Gene_Ca_13036.1    | INTRON                        | NA                                |
| <i>Desi_wild_53240</i> | NA                                  | <i>Ca_desi_scaffold</i> | 53240                   | A/G  | Gene_Ca_13036.1    | INTRON                        | NA                                |
| <i>Desi_wild_53242</i> | NA                                  | <i>Ca_desi_scaffold</i> | 53242                   | T/G  | Gene_Ca_13036.1    | INTRON                        | NA                                |
| <i>Desi_wild_53244</i> | NA                                  | <i>Ca_desi_scaffold</i> | 53244                   | T/C  | Gene_Ca_13036.1    | INTRON                        | NA                                |
| <i>Desi_wild_53246</i> | NA                                  | <i>Ca_desi_scaffold</i> | 53246                   | G/A  | Gene_Ca_13036.1    | INTRON                        | NA                                |
| <i>Desi_wild_53266</i> | NA                                  | <i>Ca_desi_scaffold</i> | 53266                   | C/G  | Gene_Ca_13036.1    | INTRON                        | NA                                |
| <i>Desi_wild_53288</i> | NA                                  | <i>Ca_desi_scaffold</i> | 53288                   | G/A  | Gene_Ca_13036.1    | INTRON                        | NA                                |
| <i>Desi_wild_53294</i> | NA                                  | <i>Ca_desi_scaffold</i> | 53294                   | G/T  | Gene_Ca_13036.1    | INTRON                        | NA                                |
| <i>Desi_wild_53405</i> | NA                                  | <i>Ca_desi_scaffold</i> | 53405                   | G/C  | Gene_Ca_13036.1    | INTRON                        | NA                                |
| <i>Desi_wild_53409</i> | NA                                  | <i>Ca_desi_scaffold</i> | 53409                   | G/C  | Gene_Ca_13036.1    | INTRON                        | NA                                |
| <i>Desi_wild_53431</i> | NA                                  | <i>Ca_desi_scaffold</i> | 53431                   | G/C  | Gene_Ca_13036.1    | INTRON                        | NA                                |
| <i>Desi_wild_73696</i> | NA                                  | <i>Ca_desi_scaffold</i> | 73696                   | T/G  | Gene_Ca_13039.1    | DOWNSTREAM                    | Receptor-like protein kinase HSL1 |

| SNP IDs                 | NCBI dbSNP accession IDs (NCBI_SS#) | Chromosomes             | Physical positions (bp) | SNPs | Gene accession IDs | Sequence components of genome | Putative functions                |
|-------------------------|-------------------------------------|-------------------------|-------------------------|------|--------------------|-------------------------------|-----------------------------------|
| <i>Desi_wild_73701</i>  | NA                                  | <i>Ca_desi_scaffold</i> | 73701                   | A/G  | Gene_Ca_13039.1    | DOWNSTREAM                    | Receptor-like protein kinase HSL1 |
| <i>Desi_wild_73714</i>  | NA                                  | <i>Ca_desi_scaffold</i> | 73714                   | T/G  | Gene_Ca_13039.1    | DOWNSTREAM                    | Receptor-like protein kinase HSL1 |
| <i>Desi_wild_73716</i>  | NA                                  | <i>Ca_desi_scaffold</i> | 73716                   | A/G  | Gene_Ca_13039.1    | DOWNSTREAM                    | Receptor-like protein kinase HSL1 |
| <i>Desi_wild_73720</i>  | NA                                  | <i>Ca_desi_scaffold</i> | 73720                   | A/T  | Gene_Ca_13039.1    | DOWNSTREAM                    | Receptor-like protein kinase HSL1 |
| <i>Desi_wild_73721</i>  | NA                                  | <i>Ca_desi_scaffold</i> | 73721                   | C/T  | Gene_Ca_13039.1    | DOWNSTREAM                    | Receptor-like protein kinase HSL1 |
| <i>Desi_wild_102118</i> | NA                                  | <i>Ca_desi_scaffold</i> | 102118                  | A/T  | NA                 | INTERGENIC                    | NA                                |
| <i>Desi_wild_102142</i> | NA                                  | <i>Ca_desi_scaffold</i> | 102142                  | A/T  | NA                 | INTERGENIC                    | NA                                |
| <i>Desi_wild_102150</i> | NA                                  | <i>Ca_desi_scaffold</i> | 102150                  | T/A  | NA                 | INTERGENIC                    | NA                                |
| <i>Desi_wild_102222</i> | NA                                  | <i>Ca_desi_scaffold</i> | 102222                  | G/C  | NA                 | INTERGENIC                    | NA                                |
| <i>Desi_wild_102227</i> | NA                                  | <i>Ca_desi_scaffold</i> | 102227                  | T/C  | NA                 | INTERGENIC                    | NA                                |
| <i>Desi_wild_102231</i> | NA                                  | <i>Ca_desi_scaffold</i> | 102231                  | C/T  | NA                 | INTERGENIC                    | NA                                |
| <i>Desi_wild_102238</i> | NA                                  | <i>Ca_desi_scaffold</i> | 102238                  | T/A  | NA                 | INTERGENIC                    | NA                                |
| <i>Desi_wild_102239</i> | NA                                  | <i>Ca_desi_scaffold</i> | 102239                  | A/C  | NA                 | INTERGENIC                    | NA                                |
| <i>Desi_wild_102246</i> | NA                                  | <i>Ca_desi_scaffold</i> | 102246                  | C/T  | NA                 | INTERGENIC                    | NA                                |
| <i>Desi_wild_103266</i> | NA                                  | <i>Ca_desi_scaffold</i> | 103266                  | A/C  | NA                 | INTERGENIC                    | NA                                |
| <i>Desi_wild_103281</i> | NA                                  | <i>Ca_desi_scaffold</i> | 103281                  | T/C  | NA                 | INTERGENIC                    | NA                                |
| <i>Desi_wild_103284</i> | NA                                  | <i>Ca_desi_scaffold</i> | 103284                  | G/A  | NA                 | INTERGENIC                    | NA                                |
| <i>Desi_wild_103291</i> | NA                                  | <i>Ca_desi_scaffold</i> | 103291                  | C/A  | NA                 | INTERGENIC                    | NA                                |
| <i>Desi_wild_103292</i> | NA                                  | <i>Ca_desi_scaffold</i> | 103292                  | G/A  | NA                 | INTERGENIC                    | NA                                |
| <i>Desi_wild_103299</i> | NA                                  | <i>Ca_desi_scaffold</i> | 103299                  | T/C  | NA                 | INTERGENIC                    | NA                                |
| <i>Desi_wild_103302</i> | NA                                  | <i>Ca_desi_scaffold</i> | 103302                  | C/T  | NA                 | INTERGENIC                    | NA                                |
| <i>Desi_wild_105144</i> | NA                                  | <i>Ca_desi_scaffold</i> | 105144                  | C/T  | NA                 | INTERGENIC                    | NA                                |
| <i>Desi_wild_105154</i> | NA                                  | <i>Ca_desi_scaffold</i> | 105154                  | A/C  | NA                 | INTERGENIC                    | NA                                |
| <i>Desi_wild_105163</i> | NA                                  | <i>Ca_desi_scaffold</i> | 105163                  | G/T  | NA                 | INTERGENIC                    | NA                                |
| <i>Desi_wild_105171</i> | NA                                  | <i>Ca_desi_scaffold</i> | 105171                  | T/G  | NA                 | INTERGENIC                    | NA                                |
| <i>Desi_wild_105172</i> | NA                                  | <i>Ca_desi_scaffold</i> | 105172                  | A/C  | NA                 | INTERGENIC                    | NA                                |
| <i>Desi_wild_105182</i> | NA                                  | <i>Ca_desi_scaffold</i> | 105182                  | A/G  | NA                 | INTERGENIC                    | NA                                |
| <i>Desi_wild_105202</i> | NA                                  | <i>Ca_desi_scaffold</i> | 105202                  | C/T  | NA                 | INTERGENIC                    | NA                                |
| <i>Desi_wild_105271</i> | NA                                  | <i>Ca_desi_scaffold</i> | 105271                  | C/T  | NA                 | INTERGENIC                    | NA                                |
| <i>Desi_wild_105273</i> | NA                                  | <i>Ca_desi_scaffold</i> | 105273                  | A/G  | NA                 | INTERGENIC                    | NA                                |
| <i>Desi_wild_105278</i> | NA                                  | <i>Ca_desi_scaffold</i> | 105278                  | C/T  | NA                 | INTERGENIC                    | NA                                |
| <i>Desi_wild_105296</i> | NA                                  | <i>Ca_desi_scaffold</i> | 105296                  | G/T  | NA                 | INTERGENIC                    | NA                                |
| <i>Desi_wild_105297</i> | NA                                  | <i>Ca_desi_scaffold</i> | 105297                  | T/A  | NA                 | INTERGENIC                    | NA                                |
| <i>Desi_wild_105301</i> | NA                                  | <i>Ca_desi_scaffold</i> | 105301                  | G/C  | NA                 | INTERGENIC                    | NA                                |
| <i>Desi_wild_105302</i> | NA                                  | <i>Ca_desi_scaffold</i> | 105302                  | A/T  | NA                 | INTERGENIC                    | NA                                |
| <i>Desi_wild_105308</i> | NA                                  | <i>Ca_desi_scaffold</i> | 105308                  | A/C  | NA                 | INTERGENIC                    | NA                                |
| <i>Desi_wild_105310</i> | NA                                  | <i>Ca_desi_scaffold</i> | 105310                  | A/G  | NA                 | INTERGENIC                    | NA                                |
| <i>Desi_wild_105312</i> | NA                                  | <i>Ca_desi_scaffold</i> | 105312                  | C/T  | NA                 | INTERGENIC                    | NA                                |
| <i>Desi_wild_105324</i> | NA                                  | <i>Ca_desi_scaffold</i> | 105324                  | A/T  | NA                 | INTERGENIC                    | NA                                |
| <i>Desi_wild_105652</i> | NA                                  | <i>Ca_desi_scaffold</i> | 105652                  | T/C  | NA                 | INTERGENIC                    | NA                                |
| <i>Desi_wild_105654</i> | NA                                  | <i>Ca_desi_scaffold</i> | 105654                  | C/T  | NA                 | INTERGENIC                    | NA                                |
| <i>Desi_wild_105677</i> | NA                                  | <i>Ca_desi_scaffold</i> | 105677                  | T/G  | NA                 | INTERGENIC                    | NA                                |
| <i>Desi_wild_105694</i> | NA                                  | <i>Ca_desi_scaffold</i> | 105694                  | C/A  | NA                 | INTERGENIC                    | NA                                |
| <i>Desi_wild_115530</i> | NA                                  | <i>Ca_desi_scaffold</i> | 115530                  | C/G  | Gene_Ca_13041.1    | UPSTREAM                      | NA                                |

| SNP IDs                 | NCBI dbSNP accession IDs (NCBI_SS#) | Chromosomes             | Physical positions (bp) | SNPs | Gene accession IDs | Sequence components of genome | Putative functions                                    |
|-------------------------|-------------------------------------|-------------------------|-------------------------|------|--------------------|-------------------------------|-------------------------------------------------------|
| <i>Desi_wild_115535</i> | NA                                  | <i>Ca_desi_scaffold</i> | 115535                  | T/G  | Gene_Ca_13041.1    | UPSTREAM                      | NA                                                    |
| <i>Desi_wild_115550</i> | NA                                  | <i>Ca_desi_scaffold</i> | 115550                  | G/T  | Gene_Ca_13041.1    | UPSTREAM                      | NA                                                    |
| <i>Desi_wild_115563</i> | NA                                  | <i>Ca_desi_scaffold</i> | 115563                  | A/G  | Gene_Ca_13041.1    | UPSTREAM                      | NA                                                    |
| <i>Desi_wild_86817</i>  | NA                                  | <i>Ca_desi_scaffold</i> | 86817                   | A/G  | Gene_Ca_13050.1    | NON_SYNONYMOUS_CODING         | Peptidyl-prolyl cis-trans isomerase FKBP20-1          |
| <i>Desi_wild_86834</i>  | NA                                  | <i>Ca_desi_scaffold</i> | 86834                   | G/A  | Gene_Ca_13050.1    | SYNONYMOUS_CODING             | Peptidyl-prolyl cis-trans isomerase FKBP20-1          |
| <i>Desi_wild_86844</i>  | NA                                  | <i>Ca_desi_scaffold</i> | 86844                   | G/A  | Gene_Ca_13050.1    | NON_SYNONYMOUS_CODING         | Peptidyl-prolyl cis-trans isomerase FKBP20-1          |
| <i>Desi_wild_43401</i>  | NA                                  | <i>Ca_desi_scaffold</i> | 43401                   | A/C  | Gene_Ca_13078.1    | NON_SYNONYMOUS_CODING         | Protein of unknown function (DUF1421)                 |
| <i>Desi_wild_22630</i>  | NA                                  | <i>Ca_desi_scaffold</i> | 22630                   | A/G  | NA                 | INTERGENIC                    | NA                                                    |
| <i>Desi_wild_22679</i>  | NA                                  | <i>Ca_desi_scaffold</i> | 22679                   | A/T  | NA                 | INTERGENIC                    | NA                                                    |
| <i>Desi_wild_22703</i>  | NA                                  | <i>Ca_desi_scaffold</i> | 22703                   | C/T  | NA                 | INTERGENIC                    | NA                                                    |
| <i>Desi_wild_62359</i>  | NA                                  | <i>Ca_desi_scaffold</i> | 62359                   | A/C  | Gene_Ca_13082.1    | INTRON                        | Preprotein translocase subunit SECY, chloroplastic    |
| <i>Desi_wild_63236</i>  | NA                                  | <i>Ca_desi_scaffold</i> | 63236                   | G/C  | Gene_Ca_13082.1    | INTRON                        | Preprotein translocase subunit SECY, chloroplastic    |
| <i>Desi_wild_5026</i>   | NA                                  | <i>Ca_desi_scaffold</i> | 5026                    | T/G  | Gene_Ca_13084.1    | INTRON                        | Uridine 5'-monophosphate synthase (Fragment)          |
| <i>Desi_wild_7881</i>   | NA                                  | <i>Ca_desi_scaffold</i> | 7881                    | C/T  | Gene_Ca_13084.1    | INTRON                        | Uridine 5'-monophosphate synthase (Fragment)          |
| <i>Desi_wild_75100</i>  | NA                                  | <i>Ca_desi_scaffold</i> | 75100                   | A/C  | Gene_Ca_13090.1    | DOWNSTREAM                    | Calcium-binding protein KIC                           |
| <i>Desi_wild_96723</i>  | NA                                  | <i>Ca_desi_scaffold</i> | 96723                   | G/A  | Gene_Ca_13094.1    | NON_SYNONYMOUS_CODING         | U-box domain-containing protein 44                    |
| <i>Desi_wild_99169</i>  | NA                                  | <i>Ca_desi_scaffold</i> | 99169                   | G/A  | Gene_Ca_13094.1    | SYNONYMOUS_CODING             | U-box domain-containing protein 44                    |
| <i>Desi_wild_99174</i>  | NA                                  | <i>Ca_desi_scaffold</i> | 99174                   | T/C  | Gene_Ca_13094.1    | SYNONYMOUS_CODING             | U-box domain-containing protein 44                    |
| <i>Desi_wild_99203</i>  | NA                                  | <i>Ca_desi_scaffold</i> | 99203                   | A/T  | Gene_Ca_13094.1    | SYNONYMOUS_CODING             | U-box domain-containing protein 44                    |
| <i>Desi_wild_99209</i>  | NA                                  | <i>Ca_desi_scaffold</i> | 99209                   | T/C  | Gene_Ca_13094.1    | SYNONYMOUS_CODING             | U-box domain-containing protein 44                    |
| <i>Desi_wild_99219</i>  | NA                                  | <i>Ca_desi_scaffold</i> | 99219                   | C/T  | Gene_Ca_13094.1    | SYNONYMOUS_CODING             | U-box domain-containing protein 44                    |
| <i>Desi_wild_99223</i>  | NA                                  | <i>Ca_desi_scaffold</i> | 99223                   | C/A  | Gene_Ca_13094.1    | SYNONYMOUS_CODING             | U-box domain-containing protein 44                    |
| <i>Desi_wild_99227</i>  | NA                                  | <i>Ca_desi_scaffold</i> | 99227                   | C/A  | Gene_Ca_13094.1    | SYNONYMOUS_CODING             | U-box domain-containing protein 44                    |
| <i>Desi_wild_99230</i>  | NA                                  | <i>Ca_desi_scaffold</i> | 99230                   | C/A  | Gene_Ca_13094.1    | SYNONYMOUS_CODING             | U-box domain-containing protein 44                    |
| <i>Desi_wild_99238</i>  | NA                                  | <i>Ca_desi_scaffold</i> | 99238                   | A/G  | Gene_Ca_13094.1    | SYNONYMOUS_CODING             | U-box domain-containing protein 44                    |
| <i>Desi_wild_99242</i>  | NA                                  | <i>Ca_desi_scaffold</i> | 99242                   | T/G  | Gene_Ca_13094.1    | SYNONYMOUS_CODING             | U-box domain-containing protein 44                    |
| <i>Desi_wild_99245</i>  | NA                                  | <i>Ca_desi_scaffold</i> | 99245                   | T/C  | Gene_Ca_13094.1    | SYNONYMOUS_CODING             | U-box domain-containing protein 44                    |
| <i>Desi_wild_99252</i>  | NA                                  | <i>Ca_desi_scaffold</i> | 99252                   | C/T  | Gene_Ca_13094.1    | NON_SYNONYMOUS_CODING         | U-box domain-containing protein 44                    |
| <i>Desi_wild_99254</i>  | NA                                  | <i>Ca_desi_scaffold</i> | 99254                   | T/A  | Gene_Ca_13094.1    | SYNONYMOUS_CODING             | U-box domain-containing protein 44                    |
| <i>Desi_wild_39144</i>  | NA                                  | <i>Ca_desi_scaffold</i> | 39144                   | T/G  | Gene_Ca_13100.1    | NON_SYNONYMOUS_CODING         | Dehydration-responsive element-binding protein 3      |
| <i>Desi_wild_39150</i>  | NA                                  | <i>Ca_desi_scaffold</i> | 39150                   | T/G  | Gene_Ca_13100.1    | NON_SYNONYMOUS_CODING         | Dehydration-responsive element-binding protein 3      |
| <i>Desi_wild_39188</i>  | NA                                  | <i>Ca_desi_scaffold</i> | 39188                   | T/G  | Gene_Ca_13100.1    | NON_SYNONYMOUS_CODING         | Dehydration-responsive element-binding protein 3      |
| <i>Desi_wild_137472</i> | NA                                  | <i>Ca_desi_scaffold</i> | 137472                  | A/G  | Gene_Ca_13102.1    | SYNONYMOUS_CODING             | Lateral root primordium (LRP) protein-related         |
| <i>Desi_wild_137693</i> | NA                                  | <i>Ca_desi_scaffold</i> | 137693                  | C/A  | Gene_Ca_13102.1    | NON_SYNONYMOUS_CODING         | Lateral root primordium (LRP) protein-related         |
| <i>Desi_wild_97535</i>  | NA                                  | <i>Ca_desi_scaffold</i> | 97535                   | G/A  | NA                 | INTERGENIC                    | NA                                                    |
| <i>Desi_wild_111286</i> | NA                                  | <i>Ca_desi_scaffold</i> | 111286                  | T/G  | Gene_Ca_13108.1    | DOWNSTREAM                    | Plant calmodulin-binding protein-related              |
| <i>Desi_wild_117425</i> | NA                                  | <i>Ca_desi_scaffold</i> | 117425                  | T/G  | Gene_Ca_13109.1    | INTRON                        | Pentatricopeptide repeat-containing protein At5g10690 |
| <i>Desi_wild_117439</i> | NA                                  | <i>Ca_desi_scaffold</i> | 117439                  | G/T  | Gene_Ca_13109.1    | INTRON                        | Pentatricopeptide repeat-containing protein At5g10690 |
| <i>Desi_wild_119780</i> | NA                                  | <i>Ca_desi_scaffold</i> | 119780                  | G/A  | Gene_Ca_13109.1    | INTRON                        | Pentatricopeptide repeat-containing protein At5g10690 |
| <i>Desi_wild_119782</i> | NA                                  | <i>Ca_desi_scaffold</i> | 119782                  | T/G  | Gene_Ca_13109.1    | INTRON                        | Pentatricopeptide repeat-containing protein At5g10690 |
| <i>Desi_wild_12232</i>  | NA                                  | <i>Ca_desi_scaffold</i> | 12232                   | C/T  | NA                 | INTERGENIC                    | NA                                                    |
| <i>Desi_wild_35154</i>  | NA                                  | <i>Ca_desi_scaffold</i> | 35154                   | C/T  | NA                 | INTERGENIC                    | NA                                                    |
| <i>Desi_wild_35170</i>  | NA                                  | <i>Ca_desi_scaffold</i> | 35170                   | A/T  | NA                 | INTERGENIC                    | NA                                                    |
| <i>Desi_wild_35221</i>  | NA                                  | <i>Ca_desi_scaffold</i> | 35221                   | C/T  | NA                 | INTERGENIC                    | NA                                                    |

| SNP IDs                 | NCBI dbSNP accession IDs (NCBI_SS#) | Chromosomes             | Physical positions (bp) | SNPs | Gene accession IDs | Sequence components of genome | Putative functions                                                   |
|-------------------------|-------------------------------------|-------------------------|-------------------------|------|--------------------|-------------------------------|----------------------------------------------------------------------|
| <i>Desi_wild_92115</i>  | NA                                  | <i>Ca_desi_scaffold</i> | 92115                   | G/A  | Gene_Ca_13122.1    | DOWNSTREAM                    | Protein DA1-related 1                                                |
| <i>Desi_wild_137630</i> | NA                                  | <i>Ca_desi_scaffold</i> | 137630                  | C/A  | Gene_Ca_13124.1    | NON_SYNONYMOUS_CODING         | Histone-lysine N-methyltransferase SUVRS5                            |
| <i>Desi_wild_141217</i> | NA                                  | <i>Ca_desi_scaffold</i> | 141217                  | G/A  | Gene_Ca_13124.1    | INTRON                        | Histone-lysine N-methyltransferase SUVRS5                            |
| <i>Desi_wild_12425</i>  | NA                                  | <i>Ca_desi_scaffold</i> | 12425                   | C/G  | Gene_Ca_13129.1    | SYNONYMOUS_CODING             | Probable LRR receptor-like serine/threonine-protein kinase At1g06840 |
| <i>Desi_wild_110953</i> | NA                                  | <i>Ca_desi_scaffold</i> | 110953                  | A/C  | Gene_Ca_13136.1    | INTRON                        | unknown protein                                                      |
| <i>Desi_wild_15632</i>  | NA                                  | <i>Ca_desi_scaffold</i> | 15632                   | T/A  | Gene_Ca_13139.1    | INTRON                        | Nitrate transporter 1.2                                              |
| <i>Desi_wild_15668</i>  | NA                                  | <i>Ca_desi_scaffold</i> | 15668                   | A/C  | Gene_Ca_13139.1    | INTRON                        | Nitrate transporter 1.2                                              |
| <i>Desi_wild_30709</i>  | NA                                  | <i>Ca_desi_scaffold</i> | 30709                   | C/G  | Gene_Ca_13140.2    | NON_SYNONYMOUS_CODING         | Mitogen-activated protein kinase kinase kinase 1                     |
| <i>Desi_wild_107552</i> | NA                                  | <i>Ca_desi_scaffold</i> | 107552                  | T/C  | Gene_Ca_13157.1    | INTRON                        | Auxilin-related protein 2                                            |
| <i>Desi_wild_139126</i> | NA                                  | <i>Ca_desi_scaffold</i> | 139126                  | A/C  | Gene_Ca_13159.2    | DOWNSTREAM                    | NA                                                                   |
| <i>Desi_wild_58364</i>  | NA                                  | <i>Ca_desi_scaffold</i> | 58364                   | T/G  | NA                 | INTERGENIC                    | NA                                                                   |
| <i>Desi_wild_135532</i> | NA                                  | <i>Ca_desi_scaffold</i> | 135532                  | G/C  | Gene_Ca_13186.1    | NON_SYNONYMOUS_CODING         | Microspherule protein 1                                              |
| <i>Desi_wild_101917</i> | NA                                  | <i>Ca_desi_scaffold</i> | 101917                  | T/G  | Gene_Ca_13192.1    | INTRON                        | Probable receptor-like protein kinase At5g15080                      |
| <i>Desi_wild_108043</i> | NA                                  | <i>Ca_desi_scaffold</i> | 108043                  | A/G  | NA                 | INTERGENIC                    | NA                                                                   |
| <i>Desi_wild_121433</i> | NA                                  | <i>Ca_desi_scaffold</i> | 121433                  | G/A  | Gene_Ca_13195.1    | INTRON                        | Putative auxin efflux carrier component 5                            |
| <i>Desi_wild_121479</i> | NA                                  | <i>Ca_desi_scaffold</i> | 121479                  | G/A  | Gene_Ca_13195.1    | INTRON                        | Putative auxin efflux carrier component 5                            |
| <i>Desi_wild_147385</i> | NA                                  | <i>Ca_desi_scaffold</i> | 147385                  | A/C  | NA                 | INTERGENIC                    | NA                                                                   |
| <i>Desi_wild_70801</i>  | NA                                  | <i>Ca_desi_scaffold</i> | 70801                   | C/T  | Gene_Ca_13203.1    | DOWNSTREAM                    | Probable methyltransferase PMT2                                      |
| <i>Desi_wild_70822</i>  | NA                                  | <i>Ca_desi_scaffold</i> | 70822                   | G/A  | Gene_Ca_13203.1    | DOWNSTREAM                    | Probable methyltransferase PMT2                                      |
| <i>Desi_wild_70836</i>  | NA                                  | <i>Ca_desi_scaffold</i> | 70836                   | C/G  | Gene_Ca_13203.1    | DOWNSTREAM                    | Probable methyltransferase PMT2                                      |
| <i>Desi_wild_70841</i>  | NA                                  | <i>Ca_desi_scaffold</i> | 70841                   | C/A  | Gene_Ca_13203.1    | DOWNSTREAM                    | Probable methyltransferase PMT2                                      |
| <i>Desi_wild_70848</i>  | NA                                  | <i>Ca_desi_scaffold</i> | 70848                   | A/G  | Gene_Ca_13203.1    | DOWNSTREAM                    | Probable methyltransferase PMT2                                      |
| <i>Desi_wild_70876</i>  | NA                                  | <i>Ca_desi_scaffold</i> | 70876                   | T/G  | Gene_Ca_13203.1    | DOWNSTREAM                    | Probable methyltransferase PMT2                                      |
| <i>Desi_wild_74856</i>  | NA                                  | <i>Ca_desi_scaffold</i> | 74856                   | C/T  | Gene_Ca_13218.1    | INTRON                        | unknown protein                                                      |
| <i>Desi_wild_75197</i>  | NA                                  | <i>Ca_desi_scaffold</i> | 75197                   | A/G  | Gene_Ca_13218.1    | SYNONYMOUS_CODING             | unknown protein                                                      |
| <i>Desi_wild_124782</i> | NA                                  | <i>Ca_desi_scaffold</i> | 124782                  | T/G  | Gene_Ca_13220.1    | DOWNSTREAM                    | Heat shock 70 kDa protein 16                                         |
| <i>Desi_wild_125818</i> | NA                                  | <i>Ca_desi_scaffold</i> | 125818                  | T/G  | NA                 | INTERGENIC                    | NA                                                                   |
| <i>Desi_wild_66779</i>  | NA                                  | <i>Ca_desi_scaffold</i> | 66779                   | T/C  | NA                 | INTERGENIC                    | NA                                                                   |
| <i>Desi_wild_66785</i>  | NA                                  | <i>Ca_desi_scaffold</i> | 66785                   | C/A  | NA                 | INTERGENIC                    | NA                                                                   |
| <i>Desi_wild_107481</i> | NA                                  | <i>Ca_desi_scaffold</i> | 107481                  | G/T  | NA                 | INTERGENIC                    | NA                                                                   |
| <i>Desi_wild_107492</i> | NA                                  | <i>Ca_desi_scaffold</i> | 107492                  | T/G  | NA                 | INTERGENIC                    | NA                                                                   |
| <i>Desi_wild_29891</i>  | NA                                  | <i>Ca_desi_scaffold</i> | 29891                   | G/A  | NA                 | INTERGENIC                    | NA                                                                   |
| <i>Desi_wild_36904</i>  | NA                                  | <i>Ca_desi_scaffold</i> | 36904                   | C/A  | Gene_Ca_13262.1    | SYNONYMOUS_CODING             | Cellulose synthase A catalytic subunit 6 [UDP-forming]               |
| <i>Desi_wild_36910</i>  | NA                                  | <i>Ca_desi_scaffold</i> | 36910                   | A/T  | Gene_Ca_13262.1    | SYNONYMOUS_CODING             | Cellulose synthase A catalytic subunit 6 [UDP-forming]               |
| <i>Desi_wild_36913</i>  | NA                                  | <i>Ca_desi_scaffold</i> | 36913                   | C/A  | Gene_Ca_13262.1    | SYNONYMOUS_CODING             | Cellulose synthase A catalytic subunit 6 [UDP-forming]               |
| <i>Desi_wild_36926</i>  | NA                                  | <i>Ca_desi_scaffold</i> | 36926                   | T/C  | Gene_Ca_13262.1    | SYNONYMOUS_CODING             | Cellulose synthase A catalytic subunit 6 [UDP-forming]               |
| <i>Desi_wild_36928</i>  | NA                                  | <i>Ca_desi_scaffold</i> | 36928                   | G/A  | Gene_Ca_13262.1    | SYNONYMOUS_CODING             | Cellulose synthase A catalytic subunit 6 [UDP-forming]               |
| <i>Desi_wild_36940</i>  | NA                                  | <i>Ca_desi_scaffold</i> | 36940                   | A/T  | Gene_Ca_13262.1    | SYNONYMOUS_CODING             | Cellulose synthase A catalytic subunit 6 [UDP-forming]               |
| <i>Desi_wild_36979</i>  | NA                                  | <i>Ca_desi_scaffold</i> | 36979                   | A/T  | Gene_Ca_13262.1    | SYNONYMOUS_CODING             | Cellulose synthase A catalytic subunit 6 [UDP-forming]               |
| <i>Desi_wild_36982</i>  | NA                                  | <i>Ca_desi_scaffold</i> | 36982                   | T/C  | Gene_Ca_13262.1    | SYNONYMOUS_CODING             | Cellulose synthase A catalytic subunit 6 [UDP-forming]               |
| <i>Desi_wild_36985</i>  | NA                                  | <i>Ca_desi_scaffold</i> | 36985                   | T/C  | Gene_Ca_13262.1    | SYNONYMOUS_CODING             | Cellulose synthase A catalytic subunit 6 [UDP-forming]               |
| <i>Desi_wild_40447</i>  | NA                                  | <i>Ca_desi_scaffold</i> | 40447                   | A/T  | Gene_Ca_13262.1    | SYNONYMOUS_CODING             | Cellulose synthase A catalytic subunit 6 [UDP-forming]               |
| <i>Desi_wild_40456</i>  | NA                                  | <i>Ca_desi_scaffold</i> | 40456                   | C/T  | Gene_Ca_13262.1    | SYNONYMOUS_CODING             | Cellulose synthase A catalytic subunit 6 [UDP-forming]               |
| <i>Desi_wild_40468</i>  | NA                                  | <i>Ca_desi_scaffold</i> | 40468                   | A/G  | Gene_Ca_13262.1    | SYNONYMOUS_CODING             | Cellulose synthase A catalytic subunit 6 [UDP-forming]               |

| SNP IDs                 | NCBI dbSNP accession IDs (NCBI_SS#) | Chromosomes             | Physical positions (bp) | SNPs | Gene accession IDs | Sequence components of genome | Putative functions                                     |
|-------------------------|-------------------------------------|-------------------------|-------------------------|------|--------------------|-------------------------------|--------------------------------------------------------|
| <i>Desi_wild_40474</i>  | NA                                  | <i>Ca_desi_scaffold</i> | 40474                   | C/T  | Gene_Ca_13262.1    | SYNONYMOUS_CODING             | Cellulose synthase A catalytic subunit 6 [UDP-forming] |
| <i>Desi_wild_40483</i>  | NA                                  | <i>Ca_desi_scaffold</i> | 40483                   | A/T  | Gene_Ca_13262.1    | SYNONYMOUS_CODING             | Cellulose synthase A catalytic subunit 6 [UDP-forming] |
| <i>Desi_wild_40519</i>  | NA                                  | <i>Ca_desi_scaffold</i> | 40519                   | T/G  | Gene_Ca_13262.1    | SYNONYMOUS_CODING             | Cellulose synthase A catalytic subunit 6 [UDP-forming] |
| <i>Desi_wild_40534</i>  | NA                                  | <i>Ca_desi_scaffold</i> | 40534                   | T/A  | Gene_Ca_13262.1    | SYNONYMOUS_CODING             | Cellulose synthase A catalytic subunit 6 [UDP-forming] |
| <i>Desi_wild_40537</i>  | NA                                  | <i>Ca_desi_scaffold</i> | 40537                   | A/G  | Gene_Ca_13262.1    | SYNONYMOUS_CODING             | Cellulose synthase A catalytic subunit 6 [UDP-forming] |
| <i>Desi_wild_25102</i>  | NA                                  | <i>Ca_desi_scaffold</i> | 25102                   | A/G  | NA                 | INTERGENIC                    | NA                                                     |
| <i>Desi_wild_7595</i>   | NA                                  | <i>Ca_desi_scaffold</i> | 7595                    | G/A  | NA                 | INTERGENIC                    | NA                                                     |
| <i>Desi_wild_7628</i>   | NA                                  | <i>Ca_desi_scaffold</i> | 7628                    | A/C  | NA                 | INTERGENIC                    | NA                                                     |
| <i>Desi_wild_7629</i>   | NA                                  | <i>Ca_desi_scaffold</i> | 7629                    | G/A  | NA                 | INTERGENIC                    | NA                                                     |
| <i>Desi_wild_7631</i>   | NA                                  | <i>Ca_desi_scaffold</i> | 7631                    | A/T  | NA                 | INTERGENIC                    | NA                                                     |
| <i>Desi_wild_7635</i>   | NA                                  | <i>Ca_desi_scaffold</i> | 7635                    | G/A  | NA                 | INTERGENIC                    | NA                                                     |
| <i>Desi_wild_7637</i>   | NA                                  | <i>Ca_desi_scaffold</i> | 7637                    | C/A  | NA                 | INTERGENIC                    | NA                                                     |
| <i>Desi_wild_7644</i>   | NA                                  | <i>Ca_desi_scaffold</i> | 7644                    | C/T  | NA                 | INTERGENIC                    | NA                                                     |
| <i>Desi_wild_7645</i>   | NA                                  | <i>Ca_desi_scaffold</i> | 7645                    | G/A  | NA                 | INTERGENIC                    | NA                                                     |
| <i>Desi_wild_7653</i>   | NA                                  | <i>Ca_desi_scaffold</i> | 7653                    | G/A  | NA                 | INTERGENIC                    | NA                                                     |
| <i>Desi_wild_7661</i>   | NA                                  | <i>Ca_desi_scaffold</i> | 7661                    | G/A  | NA                 | INTERGENIC                    | NA                                                     |
| <i>Desi_wild_39549</i>  | NA                                  | <i>Ca_desi_scaffold</i> | 39549                   | C/A  | NA                 | INTERGENIC                    | NA                                                     |
| <i>Desi_wild_139224</i> | NA                                  | <i>Ca_desi_scaffold</i> | 139224                  | A/G  | Gene_Ca_13308.1    | SYNONYMOUS_CODING             | Serine/threonine-protein kinase STN8, chloroplastic    |
| <i>Desi_wild_139231</i> | NA                                  | <i>Ca_desi_scaffold</i> | 139231                  | A/G  | Gene_Ca_13308.1    | SYNONYMOUS_CODING             | Serine/threonine-protein kinase STN8, chloroplastic    |
| <i>Desi_wild_139235</i> | NA                                  | <i>Ca_desi_scaffold</i> | 139235                  | C/T  | Gene_Ca_13308.1    | SYNONYMOUS_CODING             | Serine/threonine-protein kinase STN8, chloroplastic    |
| <i>Desi_wild_139248</i> | NA                                  | <i>Ca_desi_scaffold</i> | 139248                  | A/G  | Gene_Ca_13308.1    | SYNONYMOUS_CODING             | Serine/threonine-protein kinase STN8, chloroplastic    |
| <i>Desi_wild_139256</i> | NA                                  | <i>Ca_desi_scaffold</i> | 139256                  | C/T  | Gene_Ca_13308.1    | SYNONYMOUS_CODING             | Serine/threonine-protein kinase STN8, chloroplastic    |
| <i>Desi_wild_139257</i> | NA                                  | <i>Ca_desi_scaffold</i> | 139257                  | C/T  | Gene_Ca_13308.1    | SYNONYMOUS_CODING             | Serine/threonine-protein kinase STN8, chloroplastic    |
| <i>Desi_wild_139262</i> | NA                                  | <i>Ca_desi_scaffold</i> | 139262                  | C/T  | Gene_Ca_13308.1    | SYNONYMOUS_CODING             | Serine/threonine-protein kinase STN8, chloroplastic    |
| <i>Desi_wild_139279</i> | NA                                  | <i>Ca_desi_scaffold</i> | 139279                  | A/G  | Gene_Ca_13308.1    | NON_SYNONYMOUS_CODING         | Serine/threonine-protein kinase STN8, chloroplastic    |
| <i>Desi_wild_16074</i>  | NA                                  | <i>Ca_desi_scaffold</i> | 16074                   | A/T  | Gene_Ca_13312.1    | INTRON                        | N-alpha-acetyltransferase 40                           |
| <i>Desi_wild_16091</i>  | NA                                  | <i>Ca_desi_scaffold</i> | 16091                   | C/G  | Gene_Ca_13312.1    | INTRON                        | N-alpha-acetyltransferase 40                           |
| <i>Desi_wild_17477</i>  | NA                                  | <i>Ca_desi_scaffold</i> | 17477                   | G/C  | Gene_Ca_13312.1    | INTRON                        | N-alpha-acetyltransferase 40                           |
| <i>Desi_wild_28156</i>  | NA                                  | <i>Ca_desi_scaffold</i> | 28156                   | C/A  | Gene_Ca_13313.1    | INTRON                        | Putative 3,4-dihydroxy-2-butanone kinase               |
| <i>Desi_wild_34272</i>  | NA                                  | <i>Ca_desi_scaffold</i> | 34272                   | C/T  | Gene_Ca_13314.1    | NON_SYNONYMOUS_CODING         | ZF-HD homeobox protein At4g24660                       |
| <i>Desi_wild_30951</i>  | NA                                  | <i>Ca_desi_scaffold</i> | 30951                   | T/G  | NA                 | INTERGENIC                    | NA                                                     |
| <i>Desi_wild_136554</i> | NA                                  | <i>Ca_desi_scaffold</i> | 136554                  | A/T  | NA                 | INTERGENIC                    | NA                                                     |
| <i>Desi_wild_5841</i>   | NA                                  | <i>Ca_desi_scaffold</i> | 5841                    | G/T  | NA                 | INTERGENIC                    | NA                                                     |
| <i>Desi_wild_5842</i>   | NA                                  | <i>Ca_desi_scaffold</i> | 5842                    | T/C  | NA                 | INTERGENIC                    | NA                                                     |
| <i>Desi_wild_11225</i>  | NA                                  | <i>Ca_desi_scaffold</i> | 11225                   | G/T  | Gene_Ca_13346.2    | DOWNSTREAM                    | NA                                                     |
| <i>Desi_wild_76754</i>  | NA                                  | <i>Ca_desi_scaffold</i> | 76754                   | T/G  | Gene_Ca_13353.2    | DOWNSTREAM                    | NA                                                     |
| <i>Desi_wild_78066</i>  | NA                                  | <i>Ca_desi_scaffold</i> | 78066                   | G/T  | NA                 | INTERGENIC                    | NA                                                     |
| <i>Desi_wild_112193</i> | NA                                  | <i>Ca_desi_scaffold</i> | 112193                  | G/T  | NA                 | INTERGENIC                    | NA                                                     |
| <i>Desi_wild_6007</i>   | NA                                  | <i>Ca_desi_scaffold</i> | 6007                    | T/G  | Gene_Ca_13357.1    | INTRON                        | dual specificity protein phosphatase family protein    |
| <i>Desi_wild_6063</i>   | NA                                  | <i>Ca_desi_scaffold</i> | 6063                    | G/A  | Gene_Ca_13357.1    | INTRON                        | dual specificity protein phosphatase family protein    |
| <i>Desi_wild_46338</i>  | NA                                  | <i>Ca_desi_scaffold</i> | 46338                   | G/A  | Gene_Ca_13361.1    | SYNONYMOUS_CODING             | Lysosomal alpha-mannosidase                            |
| <i>Desi_wild_82361</i>  | NA                                  | <i>Ca_desi_scaffold</i> | 82361                   | A/C  | NA                 | INTERGENIC                    | NA                                                     |
| <i>Desi_wild_82362</i>  | NA                                  | <i>Ca_desi_scaffold</i> | 82362                   | G/T  | NA                 | INTERGENIC                    | NA                                                     |
| <i>Desi_wild_96267</i>  | NA                                  | <i>Ca_desi_scaffold</i> | 96267                   | T/C  | Gene_Ca_13365.1    | SYNONYMOUS_CODING             | DCD (Development and Cell Death) domain protein        |

| SNP IDs                 | NCBI dbSNP accession IDs (NCBI_SS#) | Chromosomes             | Physical positions (bp) | SNPs | Gene accession IDs | Sequence components of genome | Putative functions                               |
|-------------------------|-------------------------------------|-------------------------|-------------------------|------|--------------------|-------------------------------|--------------------------------------------------|
| <i>Desi_wild_96446</i>  | NA                                  | <i>Ca_desi_scaffold</i> | 96446                   | A/G  | Gene_Ca_13365.1    | NON_SYNONYMOUS_CODING         | DCD (Development and Cell Death) domain protein  |
| <i>Desi_wild_99622</i>  | NA                                  | <i>Ca_desi_scaffold</i> | 99622                   | T/G  | Gene_Ca_13375.1    | UPSTREAM                      | Lactoylglutathione lyase                         |
| <i>Desi_wild_52935</i>  | NA                                  | <i>Ca_desi_scaffold</i> | 52935                   | A/C  | Gene_Ca_13380.1    | UPSTREAM                      | E3 ubiquitin-protein ligase RNF14                |
| <i>Desi_wild_79230</i>  | NA                                  | <i>Ca_desi_scaffold</i> | 79230                   | C/T  | Gene_Ca_13383.1    | DOWNSTREAM                    | Mitogen-activated protein kinase kinase 4        |
| <i>Desi_wild_79729</i>  | NA                                  | <i>Ca_desi_scaffold</i> | 79729                   | C/A  | Gene_Ca_13383.1    | DOWNSTREAM                    | Mitogen-activated protein kinase kinase 4        |
| <i>Desi_wild_94744</i>  | NA                                  | <i>Ca_desi_scaffold</i> | 94744                   | C/A  | Gene_Ca_13385.1    | INTRON                        | Syntaxin-22                                      |
| <i>Desi_wild_104154</i> | NA                                  | <i>Ca_desi_scaffold</i> | 104154                  | C/T  | Gene_Ca_13386.1    | NON_SYNONYMOUS_CODING         | RNA-binding (RRM/RBD/RNP motifs) family protein  |
| <i>Desi_wild_52026</i>  | NA                                  | <i>Ca_desi_scaffold</i> | 52026                   | T/C  | Gene_Ca_09449.1    | NON_SYNONYMOUS_CODING         | Protein AUXIN SIGNALING F-BOX 3                  |
| <i>Desi_wild_112893</i> | NA                                  | <i>Ca_desi_scaffold</i> | 112893                  | C/T  | NA                 | INTERGENIC                    | NA                                               |
| <i>Desi_wild_82728</i>  | NA                                  | <i>Ca_desi_scaffold</i> | 82728                   | T/C  | NA                 | INTERGENIC                    | NA                                               |
| <i>Desi_wild_88028</i>  | NA                                  | <i>Ca_desi_scaffold</i> | 88028                   | T/C  | Gene_Ca_09457.1    | INTRON                        | Sister chromatid cohesion protein PDS5 homolog A |
| <i>Desi_wild_90321</i>  | NA                                  | <i>Ca_desi_scaffold</i> | 90321                   | A/G  | Gene_Ca_09457.1    | SYNONYMOUS_CODING             | Sister chromatid cohesion protein PDS5 homolog A |
| <i>Desi_wild_97307</i>  | NA                                  | <i>Ca_desi_scaffold</i> | 97307                   | A/T  | Gene_Ca_09457.1    | INTRON                        | Sister chromatid cohesion protein PDS5 homolog A |
| <i>Desi_wild_98739</i>  | NA                                  | <i>Ca_desi_scaffold</i> | 98739                   | A/T  | Gene_Ca_09457.1    | INTRON                        | Sister chromatid cohesion protein PDS5 homolog A |
| <i>Desi_wild_98741</i>  | NA                                  | <i>Ca_desi_scaffold</i> | 98741                   | G/A  | Gene_Ca_09457.1    | INTRON                        | Sister chromatid cohesion protein PDS5 homolog A |
| <i>Desi_wild_98751</i>  | NA                                  | <i>Ca_desi_scaffold</i> | 98751                   | T/G  | Gene_Ca_09457.1    | INTRON                        | Sister chromatid cohesion protein PDS5 homolog A |
| <i>Desi_wild_103362</i> | NA                                  | <i>Ca_desi_scaffold</i> | 103362                  | A/G  | Gene_Ca_09457.1    | INTRON                        | Sister chromatid cohesion protein PDS5 homolog A |
| <i>Desi_wild_107480</i> | NA                                  | <i>Ca_desi_scaffold</i> | 107480                  | A/C  | Gene_Ca_09457.1    | INTRON                        | Sister chromatid cohesion protein PDS5 homolog A |
| <i>Desi_wild_107643</i> | NA                                  | <i>Ca_desi_scaffold</i> | 107643                  | A/T  | Gene_Ca_09457.1    | INTRON                        | Sister chromatid cohesion protein PDS5 homolog A |
| <i>Desi_wild_107682</i> | NA                                  | <i>Ca_desi_scaffold</i> | 107682                  | A/C  | Gene_Ca_09457.1    | INTRON                        | Sister chromatid cohesion protein PDS5 homolog A |
| <i>Desi_wild_108030</i> | NA                                  | <i>Ca_desi_scaffold</i> | 108030                  | C/T  | Gene_Ca_09457.1    | INTRON                        | Sister chromatid cohesion protein PDS5 homolog A |
| <i>Desi_wild_108795</i> | NA                                  | <i>Ca_desi_scaffold</i> | 108795                  | C/T  | Gene_Ca_09457.1    | INTRON                        | Sister chromatid cohesion protein PDS5 homolog A |
| <i>Desi_wild_108799</i> | NA                                  | <i>Ca_desi_scaffold</i> | 108799                  | G/T  | Gene_Ca_09457.1    | INTRON                        | Sister chromatid cohesion protein PDS5 homolog A |
| <i>Desi_wild_108801</i> | NA                                  | <i>Ca_desi_scaffold</i> | 108801                  | G/C  | Gene_Ca_09457.1    | INTRON                        | Sister chromatid cohesion protein PDS5 homolog A |
| <i>Desi_wild_108803</i> | NA                                  | <i>Ca_desi_scaffold</i> | 108803                  | A/G  | Gene_Ca_09457.1    | INTRON                        | Sister chromatid cohesion protein PDS5 homolog A |
| <i>Desi_wild_108806</i> | NA                                  | <i>Ca_desi_scaffold</i> | 108806                  | T/A  | Gene_Ca_09457.1    | INTRON                        | Sister chromatid cohesion protein PDS5 homolog A |
| <i>Desi_wild_108807</i> | NA                                  | <i>Ca_desi_scaffold</i> | 108807                  | T/A  | Gene_Ca_09457.1    | INTRON                        | Sister chromatid cohesion protein PDS5 homolog A |
| <i>Desi_wild_108815</i> | NA                                  | <i>Ca_desi_scaffold</i> | 108815                  | A/G  | Gene_Ca_09457.1    | INTRON                        | Sister chromatid cohesion protein PDS5 homolog A |
| <i>Desi_wild_108817</i> | NA                                  | <i>Ca_desi_scaffold</i> | 108817                  | A/C  | Gene_Ca_09457.1    | INTRON                        | Sister chromatid cohesion protein PDS5 homolog A |
| <i>Desi_wild_108840</i> | NA                                  | <i>Ca_desi_scaffold</i> | 108840                  | G/A  | Gene_Ca_09457.1    | INTRON                        | Sister chromatid cohesion protein PDS5 homolog A |
| <i>Desi_wild_108847</i> | NA                                  | <i>Ca_desi_scaffold</i> | 108847                  | T/G  | Gene_Ca_09457.1    | INTRON                        | Sister chromatid cohesion protein PDS5 homolog A |
| <i>Desi_wild_108857</i> | NA                                  | <i>Ca_desi_scaffold</i> | 108857                  | A/G  | Gene_Ca_09457.1    | INTRON                        | Sister chromatid cohesion protein PDS5 homolog A |
| <i>Desi_wild_108859</i> | NA                                  | <i>Ca_desi_scaffold</i> | 108859                  | T/C  | Gene_Ca_09457.1    | INTRON                        | Sister chromatid cohesion protein PDS5 homolog A |
| <i>Desi_wild_108862</i> | NA                                  | <i>Ca_desi_scaffold</i> | 108862                  | T/C  | Gene_Ca_09457.1    | INTRON                        | Sister chromatid cohesion protein PDS5 homolog A |
| <i>Desi_wild_108863</i> | NA                                  | <i>Ca_desi_scaffold</i> | 108863                  | A/C  | Gene_Ca_09457.1    | INTRON                        | Sister chromatid cohesion protein PDS5 homolog A |
| <i>Desi_wild_108864</i> | NA                                  | <i>Ca_desi_scaffold</i> | 108864                  | G/A  | Gene_Ca_09457.1    | INTRON                        | Sister chromatid cohesion protein PDS5 homolog A |
| <i>Desi_wild_108869</i> | NA                                  | <i>Ca_desi_scaffold</i> | 108869                  | A/T  | Gene_Ca_09457.1    | INTRON                        | Sister chromatid cohesion protein PDS5 homolog A |
| <i>Desi_wild_108878</i> | NA                                  | <i>Ca_desi_scaffold</i> | 108878                  | T/C  | Gene_Ca_09457.1    | INTRON                        | Sister chromatid cohesion protein PDS5 homolog A |
| <i>Desi_wild_109060</i> | NA                                  | <i>Ca_desi_scaffold</i> | 109060                  | G/A  | Gene_Ca_09457.1    | INTRON                        | Sister chromatid cohesion protein PDS5 homolog A |
| <i>Desi_wild_109153</i> | NA                                  | <i>Ca_desi_scaffold</i> | 109153                  | C/T  | Gene_Ca_09457.1    | INTRON                        | Sister chromatid cohesion protein PDS5 homolog A |
| <i>Desi_wild_109207</i> | NA                                  | <i>Ca_desi_scaffold</i> | 109207                  | T/A  | Gene_Ca_09457.1    | INTRON                        | Sister chromatid cohesion protein PDS5 homolog A |
| <i>Desi_wild_109266</i> | NA                                  | <i>Ca_desi_scaffold</i> | 109266                  | G/A  | Gene_Ca_09457.1    | INTRON                        | Sister chromatid cohesion protein PDS5 homolog A |
| <i>Desi_wild_109304</i> | NA                                  | <i>Ca_desi_scaffold</i> | 109304                  | T/C  | Gene_Ca_09457.1    | INTRON                        | Sister chromatid cohesion protein PDS5 homolog A |
| <i>Desi_wild_109320</i> | NA                                  | <i>Ca_desi_scaffold</i> | 109320                  | G/A  | Gene_Ca_09457.1    | INTRON                        | Sister chromatid cohesion protein PDS5 homolog A |



| SNP IDs                 | NCBI dbSNP accession IDs (NCBI_SS#) | Chromosomes             | Physical positions (bp) | SNPs | Gene accession IDs | Sequence components of genome | Putative functions                                                          |
|-------------------------|-------------------------------------|-------------------------|-------------------------|------|--------------------|-------------------------------|-----------------------------------------------------------------------------|
| <i>Desi_wild_111657</i> | NA                                  | <i>Ca_desi_scaffold</i> | 111657                  | A/G  | Gene_Ca_09457.1    | NON_SYNONYMOUS_CODING         | Sister chromatid cohesion protein PDS5 homolog A                            |
| <i>Desi_wild_111691</i> | NA                                  | <i>Ca_desi_scaffold</i> | 111691                  | G/C  | Gene_Ca_09457.1    | SYNONYMOUS_CODING             | Sister chromatid cohesion protein PDS5 homolog A                            |
| <i>Desi_wild_114990</i> | NA                                  | <i>Ca_desi_scaffold</i> | 114990                  | T/C  | NA                 | INTERGENIC                    | NA                                                                          |
| <i>Desi_wild_115157</i> | NA                                  | <i>Ca_desi_scaffold</i> | 115157                  | G/T  | NA                 | INTERGENIC                    | NA                                                                          |
| <i>Desi_wild_115311</i> | NA                                  | <i>Ca_desi_scaffold</i> | 115311                  | A/T  | NA                 | INTERGENIC                    | NA                                                                          |
| <i>Desi_wild_115365</i> | NA                                  | <i>Ca_desi_scaffold</i> | 115365                  | T/G  | NA                 | INTERGENIC                    | NA                                                                          |
| <i>Desi_wild_116688</i> | NA                                  | <i>Ca_desi_scaffold</i> | 116688                  | G/T  | NA                 | INTERGENIC                    | NA                                                                          |
| <i>Desi_wild_116761</i> | NA                                  | <i>Ca_desi_scaffold</i> | 116761                  | A/T  | NA                 | INTERGENIC                    | NA                                                                          |
| <i>Desi_wild_116867</i> | NA                                  | <i>Ca_desi_scaffold</i> | 116867                  | G/C  | NA                 | INTERGENIC                    | NA                                                                          |
| <i>Desi_wild_116871</i> | NA                                  | <i>Ca_desi_scaffold</i> | 116871                  | T/C  | NA                 | INTERGENIC                    | NA                                                                          |
| <i>Desi_wild_120404</i> | NA                                  | <i>Ca_desi_scaffold</i> | 120404                  | C/T  | NA                 | INTERGENIC                    | NA                                                                          |
| <i>Desi_wild_7935</i>   | NA                                  | <i>Ca_desi_scaffold</i> | 7935                    | A/C  | Gene_Ca_13398.1    | NON_SYNONYMOUS_CODING         | Putative E3 ubiquitin-protein ligase XBAT31                                 |
| <i>Desi_wild_86236</i>  | NA                                  | <i>Ca_desi_scaffold</i> | 86236                   | C/A  | NA                 | INTERGENIC                    | NA                                                                          |
| <i>Desi_wild_98964</i>  | NA                                  | <i>Ca_desi_scaffold</i> | 98964                   | T/A  | Gene_Ca_13409.1    | INTRON                        | Probable histone H2A.2                                                      |
| <i>Desi_wild_106960</i> | NA                                  | <i>Ca_desi_scaffold</i> | 106960                  | C/T  | Gene_Ca_13410.1    | SYNONYMOUS_CODING             | Probable histone H2A.2                                                      |
| <i>Desi_wild_49850</i>  | NA                                  | <i>Ca_desi_scaffold</i> | 49850                   | G/T  | NA                 | INTERGENIC                    | NA                                                                          |
| <i>Desi_wild_85526</i>  | NA                                  | <i>Ca_desi_scaffold</i> | 85526                   | G/A  | NA                 | INTERGENIC                    | NA                                                                          |
| <i>Desi_wild_113754</i> | NA                                  | <i>Ca_desi_scaffold</i> | 113754                  | C/T  | Gene_Ca_09474.1    | INTRON                        | DCN1-like protein                                                           |
| <i>Desi_wild_72110</i>  | NA                                  | <i>Ca_desi_scaffold</i> | 72110                   | A/C  | NA                 | INTERGENIC                    | NA                                                                          |
| <i>Desi_wild_72156</i>  | NA                                  | <i>Ca_desi_scaffold</i> | 72156                   | G/A  | NA                 | INTERGENIC                    | NA                                                                          |
| <i>Desi_wild_100769</i> | NA                                  | <i>Ca_desi_scaffold</i> | 100769                  | C/T  | NA                 | INTERGENIC                    | NA                                                                          |
| <i>Desi_wild_113594</i> | NA                                  | <i>Ca_desi_scaffold</i> | 113594                  | T/G  | Gene_Ca_09483.1    | SYNONYMOUS_CODING             | Zinc transporter 11                                                         |
| <i>Desi_wild_30192</i>  | NA                                  | <i>Ca_desi_scaffold</i> | 30192                   | A/C  | Gene_Ca_13445.1    | INTRON                        | Auxin-responsive protein IAA29                                              |
| <i>Desi_wild_42282</i>  | NA                                  | <i>Ca_desi_scaffold</i> | 42282                   | A/C  | Gene_Ca_13446.1    | SYNONYMOUS_CODING             | Putative clathrin assembly protein At2g25430                                |
| <i>Desi_wild_42325</i>  | NA                                  | <i>Ca_desi_scaffold</i> | 42325                   | C/A  | Gene_Ca_13446.1    | NON_SYNONYMOUS_CODING         | Putative clathrin assembly protein At2g25430                                |
| <i>Desi_wild_42326</i>  | NA                                  | <i>Ca_desi_scaffold</i> | 42326                   | A/G  | Gene_Ca_13446.1    | NON_SYNONYMOUS_CODING         | Putative clathrin assembly protein At2g25430                                |
| <i>Desi_wild_71737</i>  | NA                                  | <i>Ca_desi_scaffold</i> | 71737                   | T/A  | Gene_Ca_13448.1    | DOWNSTREAM                    | G-type lectin S-receptor-like serine/threonine-protein kinase SD2-5         |
| <i>Desi_wild_87783</i>  | NA                                  | <i>Ca_desi_scaffold</i> | 87783                   | A/C  | Gene_Ca_13450.1    | DOWNSTREAM                    | EIN3-binding F-box protein 1                                                |
| <i>Desi_wild_89093</i>  | NA                                  | <i>Ca_desi_scaffold</i> | 89093                   | T/A  | Gene_Ca_13450.1    | NON_SYNONYMOUS_CODING         | EIN3-binding F-box protein 1                                                |
| <i>Desi_wild_24903</i>  | NA                                  | <i>Ca_desi_scaffold</i> | 24903                   | C/T  | Gene_Ca_13457.1    | INTRON                        | Multiple C2 and transmembrane domain-containing protein 1                   |
| <i>Desi_wild_69430</i>  | NA                                  | <i>Ca_desi_scaffold</i> | 69430                   | T/G  | Gene_Ca_13464.1    | SYNONYMOUS_CODING             | WRKY transcription factor 6                                                 |
| <i>Desi_wild_69711</i>  | NA                                  | <i>Ca_desi_scaffold</i> | 69711                   | A/G  | Gene_Ca_13464.1    | NON_SYNONYMOUS_CODING         | WRKY transcription factor 6                                                 |
| <i>Desi_wild_9231</i>   | NA                                  | <i>Ca_desi_scaffold</i> | 9231                    | T/G  | Gene_Ca_13470.1    | INTRON                        | NA                                                                          |
| <i>Desi_wild_12430</i>  | NA                                  | <i>Ca_desi_scaffold</i> | 12430                   | A/C  | Gene_Ca_13470.1    | SYNONYMOUS_CODING             | NA                                                                          |
| <i>Desi_wild_12431</i>  | NA                                  | <i>Ca_desi_scaffold</i> | 12431                   | G/T  | Gene_Ca_13470.1    | SYNONYMOUS_CODING             | NA                                                                          |
| <i>Desi_wild_43104</i>  | NA                                  | <i>Ca_desi_scaffold</i> | 43104                   | G/A  | Gene_Ca_13472.2    | NON_SYNONYMOUS_CODING         | GATA transcription factor 8                                                 |
| <i>Desi_wild_78837</i>  | NA                                  | <i>Ca_desi_scaffold</i> | 78837                   | A/C  | Gene_Ca_13473.1    | SYNONYMOUS_CODING             | Pleckstrin homology (PH) and lipid-binding START domains-containing protein |
| <i>Desi_wild_47238</i>  | NA                                  | <i>Ca_desi_scaffold</i> | 47238                   | G/T  | Gene_Ca_13480.1    | DOWNSTREAM                    | NA                                                                          |
| <i>Desi_wild_97784</i>  | NA                                  | <i>Ca_desi_scaffold</i> | 97784                   | T/C  | NA                 | INTERGENIC                    | NA                                                                          |
| <i>Desi_wild_125255</i> | NA                                  | <i>Ca_desi_scaffold</i> | 125255                  | G/A  | Gene_Ca_13489.1    | INTRON                        | Mitochondrial substrate carrier family protein S                            |
| <i>Desi_wild_125265</i> | NA                                  | <i>Ca_desi_scaffold</i> | 125265                  | G/A  | Gene_Ca_13489.1    | INTRON                        | Mitochondrial substrate carrier family protein S                            |
| <i>Desi_wild_39386</i>  | NA                                  | <i>Ca_desi_scaffold</i> | 39386                   | C/G  | NA                 | INTERGENIC                    | NA                                                                          |
| <i>Desi_wild_64519</i>  | NA                                  | <i>Ca_desi_scaffold</i> | 64519                   | A/T  | NA                 | INTERGENIC                    | NA                                                                          |
| <i>Desi_wild_71456</i>  | NA                                  | <i>Ca_desi_scaffold</i> | 71456                   | C/T  | NA                 | INTERGENIC                    | NA                                                                          |

| SNP IDs                 | NCBI dbSNP accession IDs (NCBI_SS#) | Chromosomes             | Physical positions (bp) | SNPs | Gene accession IDs | Sequence components of genome | Putative functions                                                                       |
|-------------------------|-------------------------------------|-------------------------|-------------------------|------|--------------------|-------------------------------|------------------------------------------------------------------------------------------|
| <i>Desi_wild_71459</i>  | NA                                  | <i>Ca_desi_scaffold</i> | 71459                   | G/A  | NA                 | INTERGENIC                    | NA                                                                                       |
| <i>Desi_wild_71488</i>  | NA                                  | <i>Ca_desi_scaffold</i> | 71488                   | C/T  | NA                 | INTERGENIC                    | NA                                                                                       |
| <i>Desi_wild_160303</i> | NA                                  | <i>Ca_desi_scaffold</i> | 160303                  | A/G  | Gene_Ca_09492.1    | INTRON                        | Transcription factor RF2b                                                                |
| <i>Desi_wild_189756</i> | NA                                  | <i>Ca_desi_scaffold</i> | 189756                  | A/G  | Gene_Ca_09494.1    | INTRON                        | Transcription factor RF2b                                                                |
| <i>Desi_wild_224350</i> | NA                                  | <i>Ca_desi_scaffold</i> | 224350                  | C/T  | NA                 | INTERGENIC                    | NA                                                                                       |
| <i>Desi_wild_224400</i> | NA                                  | <i>Ca_desi_scaffold</i> | 224400                  | G/A  | NA                 | INTERGENIC                    | NA                                                                                       |
| <i>Desi_wild_195134</i> | NA                                  | <i>Ca_desi_scaffold</i> | 195134                  | A/G  | NA                 | INTERGENIC                    | NA                                                                                       |
| <i>Desi_wild_38383</i>  | NA                                  | <i>Ca_desi_scaffold</i> | 38383                   | C/T  | Gene_Ca_13508.1    | NON_SYNONYMOUS_CODING         | Transmembrane E3 ubiquitin-protein ligase 1                                              |
| <i>Desi_wild_74015</i>  | NA                                  | <i>Ca_desi_scaffold</i> | 74015                   | A/C  | Gene_Ca_13511.1    | INTRON                        | Phospholipid-transporting ATPase 2                                                       |
| <i>Desi_wild_79952</i>  | NA                                  | <i>Ca_desi_scaffold</i> | 79952                   | A/C  | Gene_Ca_13511.1    | INTRON                        | Phospholipid-transporting ATPase 2                                                       |
| <i>Desi_wild_79953</i>  | NA                                  | <i>Ca_desi_scaffold</i> | 79953                   | G/T  | Gene_Ca_13511.1    | INTRON                        | Phospholipid-transporting ATPase 2                                                       |
| <i>Desi_wild_132693</i> | NA                                  | <i>Ca_desi_scaffold</i> | 132693                  | T/A  | NA                 | INTERGENIC                    | NA                                                                                       |
| <i>Desi_wild_132697</i> | NA                                  | <i>Ca_desi_scaffold</i> | 132697                  | T/A  | NA                 | INTERGENIC                    | NA                                                                                       |
| <i>Desi_wild_132731</i> | NA                                  | <i>Ca_desi_scaffold</i> | 132731                  | C/T  | NA                 | INTERGENIC                    | NA                                                                                       |
| <i>Desi_wild_132776</i> | NA                                  | <i>Ca_desi_scaffold</i> | 132776                  | C/T  | NA                 | INTERGENIC                    | NA                                                                                       |
| <i>Desi_wild_31409</i>  | NA                                  | <i>Ca_desi_scaffold</i> | 31409                   | T/C  | Gene_Ca_13521.1    | SYNONYMOUS_CODING             | Probable histone-lysine N-methyltransferase, H3 lysine-9 specific SUVH9                  |
| <i>Desi_wild_117736</i> | NA                                  | <i>Ca_desi_scaffold</i> | 117736                  | A/C  | Gene_Ca_13527.1    | SYNONYMOUS_CODING             | Phosphate transporter PHO1 homolog 1                                                     |
| <i>Desi_wild_27584</i>  | NA                                  | <i>Ca_desi_scaffold</i> | 27584                   | T/C  | Gene_Ca_08925.2    | SYNONYMOUS_CODING             | NA                                                                                       |
| <i>Desi_wild_8626</i>   | NA                                  | <i>Ca_desi_scaffold</i> | 8626                    | C/T  | NA                 | INTERGENIC                    | NA                                                                                       |
| <i>Desi_wild_10770</i>  | NA                                  | <i>Ca_desi_scaffold</i> | 10770                   | A/G  | NA                 | INTERGENIC                    | NA                                                                                       |
| <i>Desi_wild_12335</i>  | NA                                  | <i>Ca_desi_scaffold</i> | 12335                   | A/T  | Gene_Ca_13530.1    | SYNONYMOUS_CODING             | Nudix hydrolase 2                                                                        |
| <i>Desi_wild_12344</i>  | NA                                  | <i>Ca_desi_scaffold</i> | 12344                   | G/A  | Gene_Ca_13530.1    | SYNONYMOUS_CODING             | Nudix hydrolase 2                                                                        |
| <i>Desi_wild_12386</i>  | NA                                  | <i>Ca_desi_scaffold</i> | 12386                   | T/C  | Gene_Ca_13530.1    | SYNONYMOUS_CODING             | Nudix hydrolase 2                                                                        |
| <i>Desi_wild_12443</i>  | NA                                  | <i>Ca_desi_scaffold</i> | 12443                   | C/T  | Gene_Ca_13530.1    | SYNONYMOUS_CODING             | Nudix hydrolase 2                                                                        |
| <i>Desi_wild_12677</i>  | NA                                  | <i>Ca_desi_scaffold</i> | 12677                   | A/C  | Gene_Ca_13530.1    | DOWNSTREAM                    | Nudix hydrolase 2                                                                        |
| <i>Desi_wild_31772</i>  | NA                                  | <i>Ca_desi_scaffold</i> | 31772                   | A/G  | Gene_Ca_13532.3    | INTRON                        | Heavy metal transport/detoxification superfamily protein                                 |
| <i>Desi_wild_58175</i>  | NA                                  | <i>Ca_desi_scaffold</i> | 58175                   | A/G  | NA                 | INTERGENIC                    | NA                                                                                       |
| <i>Desi_wild_58310</i>  | NA                                  | <i>Ca_desi_scaffold</i> | 58310                   | A/G  | Gene_Ca_13535.1    | UPSTREAM                      | Pentatricopeptide repeat-containing protein At4g16390, chloroplastic                     |
| <i>Desi_wild_58343</i>  | NA                                  | <i>Ca_desi_scaffold</i> | 58343                   | C/T  | Gene_Ca_13535.1    | UPSTREAM                      | Pentatricopeptide repeat-containing protein At4g16390, chloroplastic                     |
| <i>Desi_wild_58417</i>  | NA                                  | <i>Ca_desi_scaffold</i> | 58417                   | T/G  | Gene_Ca_13535.1    | UPSTREAM                      | Pentatricopeptide repeat-containing protein At4g16390, chloroplastic                     |
| <i>Desi_wild_58651</i>  | NA                                  | <i>Ca_desi_scaffold</i> | 58651                   | A/T  | Gene_Ca_13535.1    | UPSTREAM                      | Pentatricopeptide repeat-containing protein At4g16390, chloroplastic                     |
| <i>Desi_wild_67997</i>  | NA                                  | <i>Ca_desi_scaffold</i> | 67997                   | A/G  | NA                 | INTERGENIC                    | NA                                                                                       |
| <i>Desi_wild_101890</i> | NA                                  | <i>Ca_desi_scaffold</i> | 101890                  | T/C  | NA                 | INTERGENIC                    | NA                                                                                       |
| <i>Desi_wild_118021</i> | NA                                  | <i>Ca_desi_scaffold</i> | 118021                  | C/T  | Gene_Ca_13542.1    | INTRON                        | agenet domain-containing protein / bromo-adjacent homology (BAH) domain-containing prote |
| <i>Desi_wild_118439</i> | NA                                  | <i>Ca_desi_scaffold</i> | 118439                  | C/T  | Gene_Ca_13542.1    | INTRON                        | agenet domain-containing protein / bromo-adjacent homology (BAH) domain-containing prote |
| <i>Desi_wild_120278</i> | NA                                  | <i>Ca_desi_scaffold</i> | 120278                  | T/C  | Gene_Ca_13542.1    | SYNONYMOUS_CODING             | agenet domain-containing protein / bromo-adjacent homology (BAH) domain-containing prote |
| <i>Desi_wild_120311</i> | NA                                  | <i>Ca_desi_scaffold</i> | 120311                  | A/T  | Gene_Ca_13542.1    | SYNONYMOUS_CODING             | agenet domain-containing protein / bromo-adjacent homology (BAH) domain-containing prote |
| <i>Desi_wild_120659</i> | NA                                  | <i>Ca_desi_scaffold</i> | 120659                  | C/T  | Gene_Ca_13542.1    | SYNONYMOUS_CODING             | agenet domain-containing protein / bromo-adjacent homology (BAH) domain-containing prote |
| <i>Desi_wild_121162</i> | NA                                  | <i>Ca_desi_scaffold</i> | 121162                  | T/C  | Gene_Ca_13542.1    | DOWNSTREAM                    | agenet domain-containing protein / bromo-adjacent homology (BAH) domain-containing prote |
| <i>Desi_wild_121168</i> | NA                                  | <i>Ca_desi_scaffold</i> | 121168                  | G/A  | Gene_Ca_13542.1    | DOWNSTREAM                    | agenet domain-containing protein / bromo-adjacent homology (BAH) domain-containing prote |
| <i>Desi_wild_121324</i> | NA                                  | <i>Ca_desi_scaffold</i> | 121324                  | A/T  | Gene_Ca_13542.1    | DOWNSTREAM                    | agenet domain-containing protein / bromo-adjacent homology (BAH) domain-containing prote |
| <i>Desi_wild_21227</i>  | NA                                  | <i>Ca_desi_scaffold</i> | 21227                   | A/C  | NA                 | INTERGENIC                    | NA                                                                                       |
| <i>Desi_wild_21228</i>  | NA                                  | <i>Ca_desi_scaffold</i> | 21228                   | G/C  | NA                 | INTERGENIC                    | NA                                                                                       |
| <i>Desi_wild_21232</i>  | NA                                  | <i>Ca_desi_scaffold</i> | 21232                   | G/C  | NA                 | INTERGENIC                    | NA                                                                                       |

| SNP IDs                 | NCBI dbSNP accession IDs (NCBI_SS#) | Chromosomes             | Physical positions (bp) | SNPs | Gene accession IDs | Sequence components of genome | Putative functions                             |
|-------------------------|-------------------------------------|-------------------------|-------------------------|------|--------------------|-------------------------------|------------------------------------------------|
| <i>Desi_wild_51092</i>  | NA                                  | <i>Ca_desi_scaffold</i> | 51092                   | T/G  | NA                 | INTERGENIC                    | NA                                             |
| <i>Desi_wild_51181</i>  | NA                                  | <i>Ca_desi_scaffold</i> | 51181                   | G/T  | NA                 | INTERGENIC                    | NA                                             |
| <i>Desi_wild_52083</i>  | NA                                  | <i>Ca_desi_scaffold</i> | 52083                   | G/T  | Gene_Ca_13547.1    | INTRON                        | Root phototropism protein 2                    |
| <i>Desi_wild_52086</i>  | NA                                  | <i>Ca_desi_scaffold</i> | 52086                   | A/G  | Gene_Ca_13547.1    | INTRON                        | Root phototropism protein 2                    |
| <i>Desi_wild_52097</i>  | NA                                  | <i>Ca_desi_scaffold</i> | 52097                   | T/G  | Gene_Ca_13547.1    | INTRON                        | Root phototropism protein 2                    |
| <i>Desi_wild_119993</i> | NA                                  | <i>Ca_desi_scaffold</i> | 119993                  | G/A  | NA                 | INTERGENIC                    | NA                                             |
| <i>Desi_wild_120018</i> | NA                                  | <i>Ca_desi_scaffold</i> | 120018                  | T/A  | NA                 | INTERGENIC                    | NA                                             |
| <i>Desi_wild_42689</i>  | NA                                  | <i>Ca_desi_scaffold</i> | 42689                   | A/G  | Gene_Ca_13553.1    | NON_SYNONYMOUS_CODING         | Thioredoxin domain-containing protein C2F3.12c |
| <i>Desi_wild_76940</i>  | NA                                  | <i>Ca_desi_scaffold</i> | 76940                   | T/C  | Gene_Ca_13558.1    | UPSTREAM                      | 50S ribosomal protein L7/L12                   |
| <i>Desi_wild_48447</i>  | NA                                  | <i>Ca_desi_scaffold</i> | 48447                   | T/C  | Gene_Ca_13575.1    | SYNONYMOUS_CODING             | Dof zinc finger protein DOF3.6                 |
| <i>Desi_wild_65117</i>  | NA                                  | <i>Ca_desi_scaffold</i> | 65117                   | G/T  | Gene_Ca_13576.1    | SYNONYMOUS_CODING             | U-box domain-containing protein 13             |
| <i>Desi_wild_67535</i>  | NA                                  | <i>Ca_desi_scaffold</i> | 67535                   | A/C  | Gene_Ca_13576.1    | INTRON                        | U-box domain-containing protein 13             |
| <i>Desi_wild_89901</i>  | NA                                  | <i>Ca_desi_scaffold</i> | 89901                   | G/C  | Gene_Ca_13577.1    | INTRON                        | Putative E3 ubiquitin-protein ligase XBAT31    |
| <i>Desi_wild_6170</i>   | NA                                  | <i>Ca_desi_scaffold</i> | 6170                    | T/G  | Gene_Ca_09511.1    | NON_SYNONYMOUS_CODING         | DNA ligase 4                                   |
| <i>Desi_wild_28369</i>  | NA                                  | <i>Ca_desi_scaffold</i> | 28369                   | G/C  | Gene_Ca_09513.1    | INTRON                        | Probable inactive purple acid phosphatase 28   |
| <i>Desi_wild_141158</i> | NA                                  | <i>Ca_desi_scaffold</i> | 141158                  | T/C  | Gene_Ca_09516.1    | INTRON                        | Poly(rC)-binding protein 3                     |
| <i>Desi_wild_141159</i> | NA                                  | <i>Ca_desi_scaffold</i> | 141159                  | G/A  | Gene_Ca_09516.1    | INTRON                        | Poly(rC)-binding protein 3                     |
| <i>Desi_wild_141160</i> | NA                                  | <i>Ca_desi_scaffold</i> | 141160                  | G/A  | Gene_Ca_09516.1    | INTRON                        | Poly(rC)-binding protein 3                     |
| <i>Desi_wild_141172</i> | NA                                  | <i>Ca_desi_scaffold</i> | 141172                  | C/T  | Gene_Ca_09516.1    | INTRON                        | Poly(rC)-binding protein 3                     |
| <i>Desi_wild_141299</i> | NA                                  | <i>Ca_desi_scaffold</i> | 141299                  | T/C  | Gene_Ca_09516.1    | INTRON                        | Poly(rC)-binding protein 3                     |
| <i>Desi_wild_141300</i> | NA                                  | <i>Ca_desi_scaffold</i> | 141300                  | T/C  | Gene_Ca_09516.1    | INTRON                        | Poly(rC)-binding protein 3                     |
| <i>Desi_wild_187950</i> | NA                                  | <i>Ca_desi_scaffold</i> | 187950                  | A/G  | Gene_Ca_09519.1    | INTRON                        | Putative clathrin assembly protein At1g14910   |
| <i>Desi_wild_60765</i>  | NA                                  | <i>Ca_desi_scaffold</i> | 60765                   | C/T  | NA                 | INTERGENIC                    | NA                                             |
| <i>Desi_wild_79699</i>  | NA                                  | <i>Ca_desi_scaffold</i> | 79699                   | T/G  | Gene_Ca_13579.1    | STOP_LOST                     | ABC transporter G family member 34             |
| <i>Desi_wild_79710</i>  | NA                                  | <i>Ca_desi_scaffold</i> | 79710                   | A/T  | Gene_Ca_13579.1    | INTRON                        | ABC transporter G family member 34             |
| <i>Desi_wild_21771</i>  | NA                                  | <i>Ca_desi_scaffold</i> | 21771                   | G/T  | Gene_Ca_13584.1    | INTRON                        | UPF0760 protein C2orf29 homolog                |
| <i>Desi_wild_22364</i>  | NA                                  | <i>Ca_desi_scaffold</i> | 22364                   | A/C  | Gene_Ca_13584.1    | UPSTREAM                      | UPF0760 protein C2orf29 homolog                |
| <i>Desi_wild_81313</i>  | NA                                  | <i>Ca_desi_scaffold</i> | 81313                   | T/G  | Gene_Ca_13585.2    | SYNONYMOUS_CODING             | NA                                             |
| <i>Desi_wild_104130</i> | NA                                  | <i>Ca_desi_scaffold</i> | 104130                  | A/G  | NA                 | INTERGENIC                    | NA                                             |
| <i>Desi_wild_109273</i> | NA                                  | <i>Ca_desi_scaffold</i> | 109273                  | G/C  | NA                 | INTERGENIC                    | NA                                             |
| <i>Desi_wild_109274</i> | NA                                  | <i>Ca_desi_scaffold</i> | 109274                  | C/G  | NA                 | INTERGENIC                    | NA                                             |
| <i>Desi_wild_109276</i> | NA                                  | <i>Ca_desi_scaffold</i> | 109276                  | T/C  | NA                 | INTERGENIC                    | NA                                             |
| <i>Desi_wild_110940</i> | NA                                  | <i>Ca_desi_scaffold</i> | 110940                  | C/T  | NA                 | INTERGENIC                    | NA                                             |
| <i>Desi_wild_110967</i> | NA                                  | <i>Ca_desi_scaffold</i> | 110967                  | G/A  | NA                 | INTERGENIC                    | NA                                             |
| <i>Desi_wild_110970</i> | NA                                  | <i>Ca_desi_scaffold</i> | 110970                  | G/T  | NA                 | INTERGENIC                    | NA                                             |
| <i>Desi_wild_110996</i> | NA                                  | <i>Ca_desi_scaffold</i> | 110996                  | T/C  | NA                 | INTERGENIC                    | NA                                             |
| <i>Desi_wild_110997</i> | NA                                  | <i>Ca_desi_scaffold</i> | 110997                  | G/A  | NA                 | INTERGENIC                    | NA                                             |
| <i>Desi_wild_111034</i> | NA                                  | <i>Ca_desi_scaffold</i> | 111034                  | C/A  | NA                 | INTERGENIC                    | NA                                             |
| <i>Desi_wild_111070</i> | NA                                  | <i>Ca_desi_scaffold</i> | 111070                  | A/C  | NA                 | INTERGENIC                    | NA                                             |
| <i>Desi_wild_32331</i>  | NA                                  | <i>Ca_desi_scaffold</i> | 32331                   | A/C  | NA                 | INTERGENIC                    | NA                                             |
| <i>Desi_wild_26187</i>  | NA                                  | <i>Ca_desi_scaffold</i> | 26187                   | A/T  | Gene_Ca_13588.1    | SYNONYMOUS_CODING             | Zinc finger protein CONSTANS-LIKE 16           |
| <i>Desi_wild_26258</i>  | NA                                  | <i>Ca_desi_scaffold</i> | 26258                   | G/A  | Gene_Ca_13588.1    | SYNONYMOUS_CODING             | Zinc finger protein CONSTANS-LIKE 16           |
| <i>Desi_wild_43706</i>  | NA                                  | <i>Ca_desi_scaffold</i> | 43706                   | G/T  | Gene_Ca_13596.3    | INTRON                        | Signal peptide peptidase-like 2B               |
| <i>Desi_wild_43921</i>  | NA                                  | <i>Ca_desi_scaffold</i> | 43921                   | C/T  | Gene_Ca_13596.3    | INTRON                        | Signal peptide peptidase-like 2B               |

| SNP IDs          | NCBI dbSNP accession IDs (NCBI_SS#) | Chromosomes      | Physical positions (bp) | SNPs | Gene accession IDs | Sequence components of genome  | Putative functions                           |
|------------------|-------------------------------------|------------------|-------------------------|------|--------------------|--------------------------------|----------------------------------------------|
| Desi_wild_55062  | NA                                  | Ca_desi_scaffold | 55062                   | A/T  | Gene_Ca_09562.1    | INTRON                         | Insulin-degrading enzyme                     |
| Desi_wild_91793  | NA                                  | Ca_desi_scaffold | 91793                   | C/T  | Gene_Ca_09565.1    | DOWNSTREAM                     | NA                                           |
| Desi_wild_60378  | NA                                  | Ca_desi_scaffold | 60378                   | T/A  | Gene_Ca_13603.1    | NON_SYNONYMOUS_CODING          | Anthranilate synthase component II           |
| Desi_wild_62124  | NA                                  | Ca_desi_scaffold | 62124                   | A/C  | Gene_Ca_13603.1    | INTRON                         | Anthranilate synthase component II           |
| Desi_wild_62167  | NA                                  | Ca_desi_scaffold | 62167                   | G/A  | Gene_Ca_13603.1    | INTRON                         | Anthranilate synthase component II           |
| Desi_wild_62328  | NA                                  | Ca_desi_scaffold | 62328                   | C/A  | Gene_Ca_13603.1    | INTRON                         | Anthranilate synthase component II           |
| Desi_wild_90972  | NA                                  | Ca_desi_scaffold | 90972                   | C/T  | Gene_Ca_13604.1    | INTRON                         | NA                                           |
| Desi_wild_92102  | NA                                  | Ca_desi_scaffold | 92102                   | T/G  | Gene_Ca_13604.1    | INTRON                         | NA                                           |
| Desi_wild_116328 | NA                                  | Ca_desi_scaffold | 116328                  | G/A  | NA                 | INTERGENIC                     | NA                                           |
| Desi_wild_117914 | NA                                  | Ca_desi_scaffold | 117914                  | G/A  | Gene_Ca_13605.1    | NON_SYNONYMOUS_CODING          | Testis-expressed sequence 10 protein         |
| Desi_wild_124038 | NA                                  | Ca_desi_scaffold | 124038                  | G/A  | Gene_Ca_13605.1    | SYNONYMOUS_CODING              | Testis-expressed sequence 10 protein         |
| Desi_wild_60374  | NA                                  | Ca_desi_scaffold | 60374                   | T/G  | Gene_Ca_13633.1    | SYNONYMOUS_CODING              | adenylate kinase family protein              |
| Desi_wild_125578 | NA                                  | Ca_desi_scaffold | 125578                  | A/G  | Gene_Ca_13637.1    | SYNONYMOUS_CODING              | WD repeat and HMG-box DNA-binding protein 1  |
| Desi_wild_25498  | NA                                  | Ca_desi_scaffold | 25498                   | T/G  | Gene_Ca_09584.1    | NON_SYNONYMOUS_CODING          | Probable serine/threonine-protein kinase NAK |
| Desi_wild_27041  | NA                                  | Ca_desi_scaffold | 27041                   | G/C  | Gene_Ca_09584.1    | INTRON                         | Probable serine/threonine-protein kinase NAK |
| Desi_wild_27045  | NA                                  | Ca_desi_scaffold | 27045                   | G/T  | Gene_Ca_09584.1    | INTRON                         | Probable serine/threonine-protein kinase NAK |
| Desi_wild_31613  | NA                                  | Ca_desi_scaffold | 31613                   | G/A  | NA                 | INTERGENIC                     | NA                                           |
| Desi_wild_31643  | NA                                  | Ca_desi_scaffold | 31643                   | A/G  | NA                 | INTERGENIC                     | NA                                           |
| Desi_wild_31654  | NA                                  | Ca_desi_scaffold | 31654                   | T/A  | NA                 | INTERGENIC                     | NA                                           |
| Desi_wild_31675  | NA                                  | Ca_desi_scaffold | 31675                   | A/G  | NA                 | INTERGENIC                     | NA                                           |
| Desi_wild_40168  | NA                                  | Ca_desi_scaffold | 40168                   | T/C  | Gene_Ca_13663.1    | SYNONYMOUS_CODING              | Probable aquaporin PIP1-2                    |
| Desi_wild_40171  | NA                                  | Ca_desi_scaffold | 40171                   | C/T  | Gene_Ca_13663.1    | SYNONYMOUS_CODING              | Probable aquaporin PIP1-2                    |
| Desi_wild_40177  | NA                                  | Ca_desi_scaffold | 40177                   | A/T  | Gene_Ca_13663.1    | SYNONYMOUS_CODING              | Probable aquaporin PIP1-2                    |
| Desi_wild_47853  | NA                                  | Ca_desi_scaffold | 47853                   | A/G  | Gene_Ca_13664.1    | SYNONYMOUS_CODING              | Disease resistance protein (TIR-NBS class)   |
| Desi_wild_127475 | NA                                  | Ca_desi_scaffold | 127475                  | A/G  | NA                 | INTERGENIC                     | NA                                           |
| Desi_wild_127477 | NA                                  | Ca_desi_scaffold | 127477                  | A/T  | NA                 | INTERGENIC                     | NA                                           |
| Desi_wild_127491 | NA                                  | Ca_desi_scaffold | 127491                  | A/G  | NA                 | INTERGENIC                     | NA                                           |
| Desi_wild_127498 | NA                                  | Ca_desi_scaffold | 127498                  | C/A  | NA                 | INTERGENIC                     | NA                                           |
| Desi_wild_127510 | NA                                  | Ca_desi_scaffold | 127510                  | T/A  | NA                 | INTERGENIC                     | NA                                           |
| Desi_wild_127529 | NA                                  | Ca_desi_scaffold | 127529                  | C/T  | NA                 | INTERGENIC                     | NA                                           |
| Desi_wild_75772  | NA                                  | Ca_desi_scaffold | 75772                   | A/G  | NA                 | INTERGENIC                     | NA                                           |
| Desi_wild_73113  | NA                                  | Ca_desi_scaffold | 73113                   | A/G  | NA                 | INTERGENIC                     | NA                                           |
| Desi_wild_101430 | NA                                  | Ca_desi_scaffold | 101430                  | C/G  | Gene_Ca_13706.1    | UPSTREAM                       | unknown protein                              |
| Desi_wild_101458 | NA                                  | Ca_desi_scaffold | 101458                  | C/G  | Gene_Ca_13706.1    | START_GAINED: CTG, UTR_5_PRIME | unknown protein                              |
| Desi_wild_119430 | NA                                  | Ca_desi_scaffold | 119430                  | G/T  | NA                 | INTERGENIC                     | NA                                           |
| Desi_wild_120250 | NA                                  | Ca_desi_scaffold | 120250                  | C/A  | NA                 | INTERGENIC                     | NA                                           |
| Desi_wild_12665  | NA                                  | Ca_desi_scaffold | 12665                   | A/C  | Gene_Ca_09608.1    | INTRON                         | Putative uncharacterized protein             |
| Desi_wild_37315  | NA                                  | Ca_desi_scaffold | 37315                   | C/A  | Gene_Ca_13719.1    | SYNONYMOUS_CODING              | S-formylglutathione hydrolase                |
| Desi_wild_80862  | NA                                  | Ca_desi_scaffold | 80862                   | A/C  | NA                 | INTERGENIC                     | NA                                           |
| Desi_wild_104936 | NA                                  | Ca_desi_scaffold | 104936                  | A/G  | Gene_Ca_13722.1    | DOWNSTREAM                     | Purple acid phosphatase 18                   |
| Desi_wild_114487 | NA                                  | Ca_desi_scaffold | 114487                  | C/A  | Gene_Ca_13723.1    | SYNONYMOUS_CODING              | Uncharacterized protein At3g06530            |
| Desi_wild_114918 | NA                                  | Ca_desi_scaffold | 114918                  | T/C  | Gene_Ca_13723.1    | INTRON                         | Uncharacterized protein At3g06530            |
| Desi_wild_114930 | NA                                  | Ca_desi_scaffold | 114930                  | C/T  | Gene_Ca_13723.1    | INTRON                         | Uncharacterized protein At3g06530            |
| Desi_wild_116446 | NA                                  | Ca_desi_scaffold | 116446                  | C/T  | Gene_Ca_13723.1    | SYNONYMOUS_CODING              | Uncharacterized protein At3g06530            |

| SNP IDs                 | NCBI dbSNP accession IDs (NCBI_SS#) | Chromosomes             | Physical positions (bp) | SNPs | Gene accession IDs | Sequence components of genome | Putative functions                                  |
|-------------------------|-------------------------------------|-------------------------|-------------------------|------|--------------------|-------------------------------|-----------------------------------------------------|
| <i>Desi_wild_116557</i> | NA                                  | <i>Ca_desi_scaffold</i> | 116557                  | T/A  | Gene_Ca_13723.1    | INTRON                        | Uncharacterized protein At3g06530                   |
| <i>Desi_wild_117725</i> | NA                                  | <i>Ca_desi_scaffold</i> | 117725                  | A/C  | Gene_Ca_13723.1    | INTRON                        | Uncharacterized protein At3g06530                   |
| <i>Desi_wild_117739</i> | NA                                  | <i>Ca_desi_scaffold</i> | 117739                  | A/T  | Gene_Ca_13723.1    | INTRON                        | Uncharacterized protein At3g06530                   |
| <i>Desi_wild_123800</i> | NA                                  | <i>Ca_desi_scaffold</i> | 123800                  | C/A  | Gene_Ca_13723.1    | SYNONYMOUS_CODING             | Uncharacterized protein At3g06530                   |
| <i>Desi_wild_34633</i>  | NA                                  | <i>Ca_desi_scaffold</i> | 34633                   | G/A  | Gene_Ca_13727.2    | SYNONYMOUS_CODING             | NA                                                  |
| <i>Desi_wild_34754</i>  | NA                                  | <i>Ca_desi_scaffold</i> | 34754                   | A/G  | Gene_Ca_13727.2    | NON_SYNONYMOUS_CODING         | NA                                                  |
| <i>Desi_wild_34829</i>  | NA                                  | <i>Ca_desi_scaffold</i> | 34829                   | G/T  | Gene_Ca_13727.2    | NON_SYNONYMOUS_CODING         | NA                                                  |
| <i>Desi_wild_40567</i>  | NA                                  | <i>Ca_desi_scaffold</i> | 40567                   | T/A  | NA                 | INTERGENIC                    | NA                                                  |
| <i>Desi_wild_95511</i>  | NA                                  | <i>Ca_desi_scaffold</i> | 95511                   | C/T  | Gene_Ca_13735.1    | DOWNSTREAM                    | TGACG-sequence-specific DNA-binding protein TGA-2.1 |
| <i>Desi_wild_108867</i> | NA                                  | <i>Ca_desi_scaffold</i> | 108867                  | G/A  | Gene_Ca_13736.1    | INTRON                        | NADH dehydrogenase C1, chloroplastic/mitochondrial  |
| <i>Desi_wild_667</i>    | NA                                  | <i>Ca_desi_scaffold</i> | 667                     | C/T  | NA                 | INTERGENIC                    | NA                                                  |
| <i>Desi_wild_670</i>    | NA                                  | <i>Ca_desi_scaffold</i> | 670                     | G/T  | NA                 | INTERGENIC                    | NA                                                  |
| <i>Desi_wild_673</i>    | NA                                  | <i>Ca_desi_scaffold</i> | 673                     | A/C  | NA                 | INTERGENIC                    | NA                                                  |
| <i>Desi_wild_704</i>    | NA                                  | <i>Ca_desi_scaffold</i> | 704                     | G/T  | NA                 | INTERGENIC                    | NA                                                  |
| <i>Desi_wild_706</i>    | NA                                  | <i>Ca_desi_scaffold</i> | 706                     | T/C  | NA                 | INTERGENIC                    | NA                                                  |
| <i>Desi_wild_725</i>    | NA                                  | <i>Ca_desi_scaffold</i> | 725                     | C/A  | NA                 | INTERGENIC                    | NA                                                  |
| <i>Desi_wild_733</i>    | NA                                  | <i>Ca_desi_scaffold</i> | 733                     | G/A  | NA                 | INTERGENIC                    | NA                                                  |
| <i>Desi_wild_736</i>    | NA                                  | <i>Ca_desi_scaffold</i> | 736                     | C/T  | NA                 | INTERGENIC                    | NA                                                  |
| <i>Desi_wild_737</i>    | NA                                  | <i>Ca_desi_scaffold</i> | 737                     | A/G  | NA                 | INTERGENIC                    | NA                                                  |
| <i>Desi_wild_742</i>    | NA                                  | <i>Ca_desi_scaffold</i> | 742                     | G/A  | NA                 | INTERGENIC                    | NA                                                  |
| <i>Desi_wild_748</i>    | NA                                  | <i>Ca_desi_scaffold</i> | 748                     | A/T  | NA                 | INTERGENIC                    | NA                                                  |
| <i>Desi_wild_749</i>    | NA                                  | <i>Ca_desi_scaffold</i> | 749                     | A/C  | NA                 | INTERGENIC                    | NA                                                  |
| <i>Desi_wild_754</i>    | NA                                  | <i>Ca_desi_scaffold</i> | 754                     | T/C  | NA                 | INTERGENIC                    | NA                                                  |
| <i>Desi_wild_53458</i>  | NA                                  | <i>Ca_desi_scaffold</i> | 53458                   | C/G  | NA                 | INTERGENIC                    | NA                                                  |
| <i>Desi_wild_53459</i>  | NA                                  | <i>Ca_desi_scaffold</i> | 53459                   | C/T  | NA                 | INTERGENIC                    | NA                                                  |
| <i>Desi_wild_53460</i>  | NA                                  | <i>Ca_desi_scaffold</i> | 53460                   | A/C  | NA                 | INTERGENIC                    | NA                                                  |
| <i>Desi_wild_53463</i>  | NA                                  | <i>Ca_desi_scaffold</i> | 53463                   | C/T  | NA                 | INTERGENIC                    | NA                                                  |
| <i>Desi_wild_53472</i>  | NA                                  | <i>Ca_desi_scaffold</i> | 53472                   | A/G  | NA                 | INTERGENIC                    | NA                                                  |
| <i>Desi_wild_53478</i>  | NA                                  | <i>Ca_desi_scaffold</i> | 53478                   | A/T  | NA                 | INTERGENIC                    | NA                                                  |
| <i>Desi_wild_53479</i>  | NA                                  | <i>Ca_desi_scaffold</i> | 53479                   | A/G  | NA                 | INTERGENIC                    | NA                                                  |
| <i>Desi_wild_54288</i>  | NA                                  | <i>Ca_desi_scaffold</i> | 54288                   | C/T  | NA                 | INTERGENIC                    | NA                                                  |
| <i>Desi_wild_54319</i>  | NA                                  | <i>Ca_desi_scaffold</i> | 54319                   | T/C  | NA                 | INTERGENIC                    | NA                                                  |
| <i>Desi_wild_54332</i>  | NA                                  | <i>Ca_desi_scaffold</i> | 54332                   | G/T  | NA                 | INTERGENIC                    | NA                                                  |
| <i>Desi_wild_96529</i>  | NA                                  | <i>Ca_desi_scaffold</i> | 96529                   | A/G  | NA                 | INTERGENIC                    | NA                                                  |
| <i>Desi_wild_96547</i>  | NA                                  | <i>Ca_desi_scaffold</i> | 96547                   | A/C  | NA                 | INTERGENIC                    | NA                                                  |
| <i>Desi_wild_98932</i>  | NA                                  | <i>Ca_desi_scaffold</i> | 98932                   | C/G  | NA                 | INTERGENIC                    | NA                                                  |
| <i>Desi_wild_98992</i>  | NA                                  | <i>Ca_desi_scaffold</i> | 98992                   | G/T  | NA                 | INTERGENIC                    | NA                                                  |
| <i>Desi_wild_2694</i>   | NA                                  | <i>Ca_desi_scaffold</i> | 2694                    | G/A  | NA                 | INTERGENIC                    | NA                                                  |
| <i>Desi_wild_56133</i>  | NA                                  | <i>Ca_desi_scaffold</i> | 56133                   | C/G  | NA                 | INTERGENIC                    | NA                                                  |
| <i>Desi_wild_56169</i>  | NA                                  | <i>Ca_desi_scaffold</i> | 56169                   | A/G  | NA                 | INTERGENIC                    | NA                                                  |
| <i>Desi_wild_11954</i>  | NA                                  | <i>Ca_desi_scaffold</i> | 11954                   | C/T  | Gene_Ca_13757.1    | INTRON                        | Chaperone protein dnaJ 1, mitochondrial             |
| <i>Desi_wild_5579</i>   | NA                                  | <i>Ca_desi_scaffold</i> | 5579                    | C/G  | NA                 | INTERGENIC                    | NA                                                  |
| <i>Desi_wild_10425</i>  | NA                                  | <i>Ca_desi_scaffold</i> | 10425                   | C/T  | Gene_Ca_13772.1    | INTRON                        | General transcription factor 3C polypeptide 2       |
| <i>Desi_wild_19389</i>  | NA                                  | <i>Ca_desi_scaffold</i> | 19389                   | C/T  | Gene_Ca_13772.1    | NON_SYNONYMOUS_CODING         | General transcription factor 3C polypeptide 2       |

| SNP IDs                 | NCBI dbSNP accession IDs (NCBI_SS#) | Chromosomes             | Physical positions (bp) | SNPs | Gene accession IDs | Sequence components of genome | Putative functions                                    |
|-------------------------|-------------------------------------|-------------------------|-------------------------|------|--------------------|-------------------------------|-------------------------------------------------------|
| <i>Desi_wild_105807</i> | NA                                  | <i>Ca_desi_scaffold</i> | 105807                  | G/T  | NA                 | INTERGENIC                    | NA                                                    |
| <i>Desi_wild_48854</i>  | NA                                  | <i>Ca_desi_scaffold</i> | 48854                   | A/G  | Gene_Ca_13776.1    | INTRON                        | Regulatory-associated protein of TOR 1                |
| <i>Desi_wild_108923</i> | NA                                  | <i>Ca_desi_scaffold</i> | 108923                  | T/G  | Gene_Ca_13784.1    | SYNONYMOUS_CODING             | Formin-like protein 8                                 |
| <i>Desi_wild_27635</i>  | NA                                  | <i>Ca_desi_scaffold</i> | 27635                   | T/A  | Gene_Ca_09626.1    | NON_SYNONYMOUS_CODING         | Kinesin-related protein 4                             |
| <i>Desi_wild_43134</i>  | NA                                  | <i>Ca_desi_scaffold</i> | 43134                   | T/C  | NA                 | INTERGENIC                    | NA                                                    |
| <i>Desi_wild_43177</i>  | NA                                  | <i>Ca_desi_scaffold</i> | 43177                   | C/T  | NA                 | INTERGENIC                    | NA                                                    |
| <i>Desi_wild_123056</i> | NA                                  | <i>Ca_desi_scaffold</i> | 123056                  | G/A  | NA                 | INTERGENIC                    | NA                                                    |
| <i>Desi_wild_123063</i> | NA                                  | <i>Ca_desi_scaffold</i> | 123063                  | C/T  | NA                 | INTERGENIC                    | NA                                                    |
| <i>Desi_wild_123097</i> | NA                                  | <i>Ca_desi_scaffold</i> | 123097                  | G/A  | NA                 | INTERGENIC                    | NA                                                    |
| <i>Desi_wild_123117</i> | NA                                  | <i>Ca_desi_scaffold</i> | 123117                  | A/T  | NA                 | INTERGENIC                    | NA                                                    |
| <i>Desi_wild_123124</i> | NA                                  | <i>Ca_desi_scaffold</i> | 123124                  | C/T  | NA                 | INTERGENIC                    | NA                                                    |
| <i>Desi_wild_13005</i>  | NA                                  | <i>Ca_desi_scaffold</i> | 13005                   | G/A  | Gene_Ca_13786.1    | SYNONYMOUS_CODING             | Polygalacturonase QRT3                                |
| <i>Desi_wild_29886</i>  | NA                                  | <i>Ca_desi_scaffold</i> | 29886                   | G/A  | NA                 | INTERGENIC                    | NA                                                    |
| <i>Desi_wild_102954</i> | NA                                  | <i>Ca_desi_scaffold</i> | 102954                  | C/T  | Gene_Ca_13797.1    | DOWNSTREAM                    | Pentatricopeptide repeat-containing protein At5g55840 |
| <i>Desi_wild_103119</i> | NA                                  | <i>Ca_desi_scaffold</i> | 103119                  | G/C  | Gene_Ca_13797.1    | DOWNSTREAM                    | Pentatricopeptide repeat-containing protein At5g55840 |
| <i>Desi_wild_105354</i> | NA                                  | <i>Ca_desi_scaffold</i> | 105354                  | T/G  | NA                 | INTERGENIC                    | NA                                                    |
| <i>Desi_wild_105410</i> | NA                                  | <i>Ca_desi_scaffold</i> | 105410                  | A/C  | NA                 | INTERGENIC                    | NA                                                    |
| <i>Desi_wild_105440</i> | NA                                  | <i>Ca_desi_scaffold</i> | 105440                  | A/G  | NA                 | INTERGENIC                    | NA                                                    |
| <i>Desi_wild_106560</i> | NA                                  | <i>Ca_desi_scaffold</i> | 106560                  | G/A  | NA                 | INTERGENIC                    | NA                                                    |
| <i>Desi_wild_106665</i> | NA                                  | <i>Ca_desi_scaffold</i> | 106665                  | T/A  | NA                 | INTERGENIC                    | NA                                                    |
| <i>Desi_wild_108452</i> | NA                                  | <i>Ca_desi_scaffold</i> | 108452                  | T/C  | Gene_Ca_13798.1    | INTRON                        | Sucrose nonfermenting 4-like protein                  |
| <i>Desi_wild_108462</i> | NA                                  | <i>Ca_desi_scaffold</i> | 108462                  | T/A  | Gene_Ca_13798.1    | INTRON                        | Sucrose nonfermenting 4-like protein                  |
| <i>Desi_wild_108527</i> | NA                                  | <i>Ca_desi_scaffold</i> | 108527                  | C/T  | Gene_Ca_13798.1    | INTRON                        | Sucrose nonfermenting 4-like protein                  |
| <i>Desi_wild_108539</i> | NA                                  | <i>Ca_desi_scaffold</i> | 108539                  | A/T  | Gene_Ca_13798.1    | INTRON                        | Sucrose nonfermenting 4-like protein                  |
| <i>Desi_wild_110304</i> | NA                                  | <i>Ca_desi_scaffold</i> | 110304                  | T/C  | Gene_Ca_13798.1    | INTRON                        | Sucrose nonfermenting 4-like protein                  |
| <i>Desi_wild_110465</i> | NA                                  | <i>Ca_desi_scaffold</i> | 110465                  | C/A  | Gene_Ca_13798.1    | INTRON                        | Sucrose nonfermenting 4-like protein                  |
| <i>Desi_wild_83949</i>  | NA                                  | <i>Ca_desi_scaffold</i> | 83949                   | G/A  | NA                 | INTERGENIC                    | NA                                                    |
| <i>Desi_wild_112436</i> | NA                                  | <i>Ca_desi_scaffold</i> | 112436                  | G/A  | Gene_Ca_13813.1    | DOWNSTREAM                    | Protein DA1                                           |
| <i>Desi_wild_15128</i>  | NA                                  | <i>Ca_desi_scaffold</i> | 15128                   | C/A  | Gene_Ca_13817.1    | SYNONYMOUS_CODING             | DNA-binding bromodomain-containing protein            |
| <i>Desi_wild_15500</i>  | NA                                  | <i>Ca_desi_scaffold</i> | 15500                   | G/A  | Gene_Ca_13817.1    | SYNONYMOUS_CODING             | DNA-binding bromodomain-containing protein            |
| <i>Desi_wild_15927</i>  | NA                                  | <i>Ca_desi_scaffold</i> | 15927                   | T/C  | Gene_Ca_13817.1    | NON_SYNONYMOUS_CODING         | DNA-binding bromodomain-containing protein            |
| <i>Desi_wild_52381</i>  | NA                                  | <i>Ca_desi_scaffold</i> | 52381                   | T/G  | Gene_Ca_13819.1    | SYNONYMOUS_CODING             | Rab3 GTPase-activating protein catalytic subunit      |
| <i>Desi_wild_52435</i>  | NA                                  | <i>Ca_desi_scaffold</i> | 52435                   | T/C  | Gene_Ca_13819.1    | SYNONYMOUS_CODING             | Rab3 GTPase-activating protein catalytic subunit      |
| <i>Desi_wild_52541</i>  | NA                                  | <i>Ca_desi_scaffold</i> | 52541                   | A/G  | Gene_Ca_13819.1    | NON_SYNONYMOUS_CODING         | Rab3 GTPase-activating protein catalytic subunit      |
| <i>Desi_wild_56727</i>  | NA                                  | <i>Ca_desi_scaffold</i> | 56727                   | T/C  | Gene_Ca_13819.1    | DOWNSTREAM                    | Rab3 GTPase-activating protein catalytic subunit      |
| <i>Desi_wild_48036</i>  | NA                                  | <i>Ca_desi_scaffold</i> | 48036                   | A/C  | Gene_Ca_13826.2    | SYNONYMOUS_CODING             | NA                                                    |
| <i>Desi_wild_63206</i>  | NA                                  | <i>Ca_desi_scaffold</i> | 63206                   | A/G  | NA                 | INTERGENIC                    | NA                                                    |
| <i>Desi_wild_63212</i>  | NA                                  | <i>Ca_desi_scaffold</i> | 63212                   | A/G  | NA                 | INTERGENIC                    | NA                                                    |
| <i>Desi_wild_43618</i>  | NA                                  | <i>Ca_desi_scaffold</i> | 43618                   | G/A  | NA                 | INTERGENIC                    | NA                                                    |
| <i>Desi_wild_3289</i>   | NA                                  | <i>Ca_desi_scaffold</i> | 3289                    | A/G  | NA                 | INTERGENIC                    | NA                                                    |
| <i>Desi_wild_3601</i>   | NA                                  | <i>Ca_desi_scaffold</i> | 3601                    | G/A  | NA                 | INTERGENIC                    | NA                                                    |
| <i>Desi_wild_3749</i>   | NA                                  | <i>Ca_desi_scaffold</i> | 3749                    | A/G  | NA                 | INTERGENIC                    | NA                                                    |
| <i>Desi_wild_3779</i>   | NA                                  | <i>Ca_desi_scaffold</i> | 3779                    | G/A  | NA                 | INTERGENIC                    | NA                                                    |
| <i>Desi_wild_3780</i>   | NA                                  | <i>Ca_desi_scaffold</i> | 3780                    | T/G  | NA                 | INTERGENIC                    | NA                                                    |

| SNP IDs                 | NCBI dbSNP accession IDs (NCBI_SS#) | Chromosomes             | Physical positions (bp) | SNPs | Gene accession IDs | Sequence components of genome | Putative functions                              |
|-------------------------|-------------------------------------|-------------------------|-------------------------|------|--------------------|-------------------------------|-------------------------------------------------|
| <i>Desi_wild_8596</i>   | NA                                  | <i>Ca_desi_scaffold</i> | 8596                    | A/G  | Gene_Ca_13836.1    | NON_SYNONYMOUS_CODING         | Protein KIAA0664 homolog                        |
| <i>Desi_wild_9088</i>   | NA                                  | <i>Ca_desi_scaffold</i> | 9088                    | A/G  | Gene_Ca_13836.1    | SYNONYMOUS_CODING             | Protein KIAA0664 homolog                        |
| <i>Desi_wild_9110</i>   | NA                                  | <i>Ca_desi_scaffold</i> | 9110                    | G/A  | Gene_Ca_13836.1    | SYNONYMOUS_CODING             | Protein KIAA0664 homolog                        |
| <i>Desi_wild_53882</i>  | NA                                  | <i>Ca_desi_scaffold</i> | 53882                   | T/C  | Gene_Ca_13838.1    | INTRON                        | Histone-lysine N-methyltransferase ATX5         |
| <i>Desi_wild_74304</i>  | NA                                  | <i>Ca_desi_scaffold</i> | 74304                   | A/G  | NA                 | INTERGENIC                    | NA                                              |
| <i>Desi_wild_32155</i>  | NA                                  | <i>Ca_desi_scaffold</i> | 32155                   | A/T  | NA                 | INTERGENIC                    | NA                                              |
| <i>Desi_wild_32158</i>  | NA                                  | <i>Ca_desi_scaffold</i> | 32158                   | A/T  | NA                 | INTERGENIC                    | NA                                              |
| <i>Desi_wild_32160</i>  | NA                                  | <i>Ca_desi_scaffold</i> | 32160                   | A/T  | NA                 | INTERGENIC                    | NA                                              |
| <i>Desi_wild_32167</i>  | NA                                  | <i>Ca_desi_scaffold</i> | 32167                   | G/T  | NA                 | INTERGENIC                    | NA                                              |
| <i>Desi_wild_32169</i>  | NA                                  | <i>Ca_desi_scaffold</i> | 32169                   | G/A  | NA                 | INTERGENIC                    | NA                                              |
| <i>Desi_wild_32172</i>  | NA                                  | <i>Ca_desi_scaffold</i> | 32172                   | C/T  | NA                 | INTERGENIC                    | NA                                              |
| <i>Desi_wild_32200</i>  | NA                                  | <i>Ca_desi_scaffold</i> | 32200                   | A/T  | NA                 | INTERGENIC                    | NA                                              |
| <i>Desi_wild_32203</i>  | NA                                  | <i>Ca_desi_scaffold</i> | 32203                   | G/T  | NA                 | INTERGENIC                    | NA                                              |
| <i>Desi_wild_32221</i>  | NA                                  | <i>Ca_desi_scaffold</i> | 32221                   | T/G  | NA                 | INTERGENIC                    | NA                                              |
| <i>Desi_wild_32226</i>  | NA                                  | <i>Ca_desi_scaffold</i> | 32226                   | C/A  | NA                 | INTERGENIC                    | NA                                              |
| <i>Desi_wild_32233</i>  | NA                                  | <i>Ca_desi_scaffold</i> | 32233                   | G/A  | NA                 | INTERGENIC                    | NA                                              |
| <i>Desi_wild_122378</i> | NA                                  | <i>Ca_desi_scaffold</i> | 122378                  | G/A  | NA                 | INTERGENIC                    | NA                                              |
| <i>Desi_wild_122403</i> | NA                                  | <i>Ca_desi_scaffold</i> | 122403                  | A/G  | NA                 | INTERGENIC                    | NA                                              |
| <i>Desi_wild_4442</i>   | NA                                  | <i>Ca_desi_scaffold</i> | 4442                    | T/C  | Gene_Ca_13852.3    | INTRON                        | MORC family CW-type zinc finger protein 4       |
| <i>Desi_wild_27081</i>  | NA                                  | <i>Ca_desi_scaffold</i> | 27081                   | T/A  | Gene_Ca_13853.1    | NON_SYNONYMOUS_CODING         | Beta-galactosidase 3                            |
| <i>Desi_wild_131188</i> | NA                                  | <i>Ca_desi_scaffold</i> | 131188                  | G/T  | Gene_Ca_09638.1    | INTRON                        | 60S ribosomal protein L11                       |
| <i>Desi_wild_131740</i> | NA                                  | <i>Ca_desi_scaffold</i> | 131740                  | A/G  | Gene_Ca_09638.1    | INTRON                        | 60S ribosomal protein L11                       |
| <i>Desi_wild_114447</i> | NA                                  | <i>Ca_desi_scaffold</i> | 114447                  | T/G  | Gene_Ca_13868.1    | INTRON                        | Dynamamin-related protein 12A                   |
| <i>Desi_wild_120129</i> | NA                                  | <i>Ca_desi_scaffold</i> | 120129                  | A/T  | Gene_Ca_13868.1    | DOWNSTREAM                    | Dynamamin-related protein 12A                   |
| <i>Desi_wild_120130</i> | NA                                  | <i>Ca_desi_scaffold</i> | 120130                  | G/T  | Gene_Ca_13868.1    | DOWNSTREAM                    | Dynamamin-related protein 12A                   |
| <i>Desi_wild_120154</i> | NA                                  | <i>Ca_desi_scaffold</i> | 120154                  | C/G  | Gene_Ca_13868.1    | DOWNSTREAM                    | Dynamamin-related protein 12A                   |
| <i>Desi_wild_120176</i> | NA                                  | <i>Ca_desi_scaffold</i> | 120176                  | A/G  | Gene_Ca_13868.1    | DOWNSTREAM                    | Dynamamin-related protein 12A                   |
| <i>Desi_wild_19244</i>  | NA                                  | <i>Ca_desi_scaffold</i> | 19244                   | T/C  | Gene_Ca_13877.1    | INTRON                        | Pre-mRNA-processing factor 39                   |
| <i>Desi_wild_39248</i>  | NA                                  | <i>Ca_desi_scaffold</i> | 39248                   | A/G  | Gene_Ca_13879.1    | NON_SYNONYMOUS_CODING         | Intersectin-1                                   |
| <i>Desi_wild_53415</i>  | NA                                  | <i>Ca_desi_scaffold</i> | 53415                   | A/T  | Gene_Ca_13881.1    | NON_SYNONYMOUS_CODING         | NA                                              |
| <i>Desi_wild_30349</i>  | NA                                  | <i>Ca_desi_scaffold</i> | 30349                   | T/A  | NA                 | INTERGENIC                    | NA                                              |
| <i>Desi_wild_30508</i>  | NA                                  | <i>Ca_desi_scaffold</i> | 30508                   | A/G  | NA                 | INTERGENIC                    | NA                                              |
| <i>Desi_wild_31363</i>  | NA                                  | <i>Ca_desi_scaffold</i> | 31363                   | A/C  | NA                 | INTERGENIC                    | NA                                              |
| <i>Desi_wild_70704</i>  | NA                                  | <i>Ca_desi_scaffold</i> | 70704                   | T/C  | Gene_Ca_13899.1    | UPSTREAM                      | unknown protein                                 |
| <i>Desi_wild_70723</i>  | NA                                  | <i>Ca_desi_scaffold</i> | 70723                   | T/C  | Gene_Ca_13899.1    | UPSTREAM                      | unknown protein                                 |
| <i>Desi_wild_72149</i>  | NA                                  | <i>Ca_desi_scaffold</i> | 72149                   | T/A  | NA                 | INTERGENIC                    | NA                                              |
| <i>Desi_wild_95858</i>  | NA                                  | <i>Ca_desi_scaffold</i> | 95858                   | G/T  | Gene_Ca_13901.1    | INTRON                        | Cyclin-SDS                                      |
| <i>Desi_wild_100704</i> | NA                                  | <i>Ca_desi_scaffold</i> | 100704                  | G/T  | Gene_Ca_13901.1    | INTRON                        | Cyclin-SDS                                      |
| <i>Desi_wild_100706</i> | NA                                  | <i>Ca_desi_scaffold</i> | 100706                  | A/G  | Gene_Ca_13901.1    | INTRON                        | Cyclin-SDS                                      |
| <i>Desi_wild_100720</i> | NA                                  | <i>Ca_desi_scaffold</i> | 100720                  | T/G  | Gene_Ca_13901.1    | INTRON                        | Cyclin-SDS                                      |
| <i>Desi_wild_37856</i>  | NA                                  | <i>Ca_desi_scaffold</i> | 37856                   | A/G  | Gene_Ca_13904.1    | SYNONYMOUS_CODING             | Cyclin-SDS                                      |
| <i>Desi_wild_42564</i>  | NA                                  | <i>Ca_desi_scaffold</i> | 42564                   | G/C  | Gene_Ca_13905.1    | DOWNSTREAM                    | RNA-binding (RRM/RBD/RNP motifs) family protein |
| <i>Desi_wild_42763</i>  | NA                                  | <i>Ca_desi_scaffold</i> | 42763                   | C/T  | Gene_Ca_13905.1    | NON_SYNONYMOUS_CODING         | RNA-binding (RRM/RBD/RNP motifs) family protein |
| <i>Desi_wild_64482</i>  | NA                                  | <i>Ca_desi_scaffold</i> | 64482                   | T/C  | NA                 | INTERGENIC                    | NA                                              |



| SNP IDs                 | NCBI dbSNP accession IDs (NCBI_SS#) | Chromosomes             | Physical positions (bp) | SNPs | Gene accession IDs | Sequence components of genome | Putative functions                                |
|-------------------------|-------------------------------------|-------------------------|-------------------------|------|--------------------|-------------------------------|---------------------------------------------------|
| <i>Desi_wild_64488</i>  | NA                                  | <i>Ca_desi_scaffold</i> | 64488                   | T/C  | NA                 | INTERGENIC                    | NA                                                |
| <i>Desi_wild_64497</i>  | NA                                  | <i>Ca_desi_scaffold</i> | 64497                   | A/C  | NA                 | INTERGENIC                    | NA                                                |
| <i>Desi_wild_64500</i>  | NA                                  | <i>Ca_desi_scaffold</i> | 64500                   | C/T  | NA                 | INTERGENIC                    | NA                                                |
| <i>Desi_wild_64504</i>  | NA                                  | <i>Ca_desi_scaffold</i> | 64504                   | G/T  | NA                 | INTERGENIC                    | NA                                                |
| <i>Desi_wild_64533</i>  | NA                                  | <i>Ca_desi_scaffold</i> | 64533                   | G/A  | NA                 | INTERGENIC                    | NA                                                |
| <i>Desi_wild_64542</i>  | NA                                  | <i>Ca_desi_scaffold</i> | 64542                   | T/A  | NA                 | INTERGENIC                    | NA                                                |
| <i>Desi_wild_64546</i>  | NA                                  | <i>Ca_desi_scaffold</i> | 64546                   | G/T  | NA                 | INTERGENIC                    | NA                                                |
| <i>Desi_wild_64559</i>  | NA                                  | <i>Ca_desi_scaffold</i> | 64559                   | T/C  | NA                 | INTERGENIC                    | NA                                                |
| <i>Desi_wild_64560</i>  | NA                                  | <i>Ca_desi_scaffold</i> | 64560                   | G/A  | NA                 | INTERGENIC                    | NA                                                |
| <i>Desi_wild_64571</i>  | NA                                  | <i>Ca_desi_scaffold</i> | 64571                   | G/C  | NA                 | INTERGENIC                    | NA                                                |
| <i>Desi_wild_114745</i> | NA                                  | <i>Ca_desi_scaffold</i> | 114745                  | G/A  | NA                 | INTERGENIC                    | NA                                                |
| <i>Desi_wild_60914</i>  | NA                                  | <i>Ca_desi_scaffold</i> | 60914                   | A/C  | NA                 | INTERGENIC                    | NA                                                |
| <i>Desi_wild_71800</i>  | NA                                  | <i>Ca_desi_scaffold</i> | 71800                   | C/T  | Gene_Ca_13934.1    | DOWNSTREAM                    | Pectinesterase/pectinesterase inhibitor PPE8B     |
| <i>Desi_wild_112079</i> | NA                                  | <i>Ca_desi_scaffold</i> | 112079                  | A/C  | NA                 | INTERGENIC                    | NA                                                |
| <i>Desi_wild_112082</i> | NA                                  | <i>Ca_desi_scaffold</i> | 112082                  | T/G  | NA                 | INTERGENIC                    | NA                                                |
| <i>Desi_wild_112134</i> | NA                                  | <i>Ca_desi_scaffold</i> | 112134                  | G/T  | NA                 | INTERGENIC                    | NA                                                |
| <i>Desi_wild_48465</i>  | NA                                  | <i>Ca_desi_scaffold</i> | 48465                   | A/C  | NA                 | INTERGENIC                    | NA                                                |
| <i>Desi_wild_120525</i> | NA                                  | <i>Ca_desi_scaffold</i> | 120525                  | A/T  | NA                 | INTERGENIC                    | NA                                                |
| <i>Desi_wild_85598</i>  | NA                                  | <i>Ca_desi_scaffold</i> | 85598                   | C/G  | NA                 | INTERGENIC                    | NA                                                |
| <i>Desi_wild_85600</i>  | NA                                  | <i>Ca_desi_scaffold</i> | 85600                   | T/G  | NA                 | INTERGENIC                    | NA                                                |
| <i>Desi_wild_85613</i>  | NA                                  | <i>Ca_desi_scaffold</i> | 85613                   | T/A  | NA                 | INTERGENIC                    | NA                                                |
| <i>Desi_wild_85623</i>  | NA                                  | <i>Ca_desi_scaffold</i> | 85623                   | C/T  | NA                 | INTERGENIC                    | NA                                                |
| <i>Desi_wild_85624</i>  | NA                                  | <i>Ca_desi_scaffold</i> | 85624                   | G/C  | NA                 | INTERGENIC                    | NA                                                |
| <i>Desi_wild_85626</i>  | NA                                  | <i>Ca_desi_scaffold</i> | 85626                   | A/G  | NA                 | INTERGENIC                    | NA                                                |
| <i>Desi_wild_85651</i>  | NA                                  | <i>Ca_desi_scaffold</i> | 85651                   | A/C  | NA                 | INTERGENIC                    | NA                                                |
| <i>Desi_wild_119411</i> | NA                                  | <i>Ca_desi_scaffold</i> | 119411                  | T/G  | NA                 | INTERGENIC                    | NA                                                |
| <i>Desi_wild_119414</i> | NA                                  | <i>Ca_desi_scaffold</i> | 119414                  | A/G  | NA                 | INTERGENIC                    | NA                                                |
| <i>Desi_wild_119425</i> | NA                                  | <i>Ca_desi_scaffold</i> | 119425                  | A/G  | NA                 | INTERGENIC                    | NA                                                |
| <i>Desi_wild_119432</i> | NA                                  | <i>Ca_desi_scaffold</i> | 119432                  | G/A  | NA                 | INTERGENIC                    | NA                                                |
| <i>Desi_wild_119433</i> | NA                                  | <i>Ca_desi_scaffold</i> | 119433                  | T/C  | NA                 | INTERGENIC                    | NA                                                |
| <i>Desi_wild_44195</i>  | NA                                  | <i>Ca_desi_scaffold</i> | 44195                   | T/C  | Gene_Ca_09678.1    | INTRON                        | NA                                                |
| <i>Desi_wild_107066</i> | NA                                  | <i>Ca_desi_scaffold</i> | 107066                  | T/A  | Gene_Ca_09681.1    | SYNONYMOUS_CODING             | Acetyl-CoA carboxylase 1                          |
| <i>Desi_wild_95271</i>  | NA                                  | <i>Ca_desi_scaffold</i> | 95271                   | T/C  | Gene_Ca_13945.1    | INTRON                        | Uncharacterized ATP-dependent helicase yprA       |
| <i>Desi_wild_14175</i>  | NA                                  | <i>Ca_desi_scaffold</i> | 14175                   | A/G  | Gene_Ca_13947.2    | INTRON                        | NA                                                |
| <i>Desi_wild_17926</i>  | NA                                  | <i>Ca_desi_scaffold</i> | 17926                   | T/A  | Gene_Ca_13947.1    | DOWNSTREAM                    | ABC transporter B family member 29, chloroplastic |
| <i>Desi_wild_17941</i>  | NA                                  | <i>Ca_desi_scaffold</i> | 17941                   | C/T  | Gene_Ca_13947.1    | DOWNSTREAM                    | ABC transporter B family member 29, chloroplastic |
| <i>Desi_wild_40798</i>  | NA                                  | <i>Ca_desi_scaffold</i> | 40798                   | G/A  | Gene_Ca_13954.2    | SYNONYMOUS_CODING             | NA                                                |
| <i>Desi_wild_74674</i>  | NA                                  | <i>Ca_desi_scaffold</i> | 74674                   | A/C  | NA                 | INTERGENIC                    | NA                                                |
| <i>Desi_wild_74704</i>  | NA                                  | <i>Ca_desi_scaffold</i> | 74704                   | T/C  | NA                 | INTERGENIC                    | NA                                                |
| <i>Desi_wild_74716</i>  | NA                                  | <i>Ca_desi_scaffold</i> | 74716                   | C/T  | NA                 | INTERGENIC                    | NA                                                |
| <i>Desi_wild_74767</i>  | NA                                  | <i>Ca_desi_scaffold</i> | 74767                   | C/T  | NA                 | INTERGENIC                    | NA                                                |
| <i>Desi_wild_74775</i>  | NA                                  | <i>Ca_desi_scaffold</i> | 74775                   | G/A  | NA                 | INTERGENIC                    | NA                                                |
| <i>Desi_wild_76262</i>  | NA                                  | <i>Ca_desi_scaffold</i> | 76262                   | T/C  | NA                 | INTERGENIC                    | NA                                                |
| <i>Desi_wild_76263</i>  | NA                                  | <i>Ca_desi_scaffold</i> | 76263                   | C/T  | NA                 | INTERGENIC                    | NA                                                |

| SNP IDs                 | NCBI dbSNP accession IDs (NCBI_SS#) | Chromosomes             | Physical positions (bp) | SNPs | Gene accession IDs | Sequence components of genome | Putative functions                                              |
|-------------------------|-------------------------------------|-------------------------|-------------------------|------|--------------------|-------------------------------|-----------------------------------------------------------------|
| <i>Desi_wild_76309</i>  | NA                                  | <i>Ca_desi_scaffold</i> | 76309                   | C/T  | NA                 | INTERGENIC                    | NA                                                              |
| <i>Desi_wild_76310</i>  | NA                                  | <i>Ca_desi_scaffold</i> | 76310                   | C/T  | NA                 | INTERGENIC                    | NA                                                              |
| <i>Desi_wild_76311</i>  | NA                                  | <i>Ca_desi_scaffold</i> | 76311                   | T/G  | NA                 | INTERGENIC                    | NA                                                              |
| <i>Desi_wild_76312</i>  | NA                                  | <i>Ca_desi_scaffold</i> | 76312                   | C/T  | NA                 | INTERGENIC                    | NA                                                              |
| <i>Desi_wild_11879</i>  | NA                                  | <i>Ca_desi_scaffold</i> | 11879                   | G/A  | Gene_Ca_13959.1    | UPSTREAM                      | NA                                                              |
| <i>Desi_wild_21736</i>  | NA                                  | <i>Ca_desi_scaffold</i> | 21736                   | C/T  | Gene_Ca_13960.1    | NON_SYNONYMOUS_CODING         | Protein RAFTIN 1A                                               |
| <i>Desi_wild_38841</i>  | NA                                  | <i>Ca_desi_scaffold</i> | 38841                   | C/A  | Gene_Ca_13961.1    | INTRON                        | ATP-dependent Clp protease proteolytic subunit 6, chloroplastic |
| <i>Desi_wild_39191</i>  | NA                                  | <i>Ca_desi_scaffold</i> | 39191                   | T/A  | Gene_Ca_13961.1    | UPSTREAM                      | ATP-dependent Clp protease proteolytic subunit 6, chloroplastic |
| <i>Desi_wild_100663</i> | NA                                  | <i>Ca_desi_scaffold</i> | 100663                  | T/C  | Gene_Ca_13965.1    | INTRON                        | SWI/SNF complex subunit SWI3D                                   |
| <i>Desi_wild_100727</i> | NA                                  | <i>Ca_desi_scaffold</i> | 100727                  | C/T  | Gene_Ca_13965.1    | INTRON                        | SWI/SNF complex subunit SWI3D                                   |
| <i>Desi_wild_89205</i>  | NA                                  | <i>Ca_desi_scaffold</i> | 89205                   | C/A  | Gene_Ca_13969.1    | INTRON                        | Callose synthase 3                                              |
| <i>Desi_wild_89206</i>  | NA                                  | <i>Ca_desi_scaffold</i> | 89206                   | A/G  | Gene_Ca_13969.1    | INTRON                        | Callose synthase 3                                              |
| <i>Desi_wild_89210</i>  | NA                                  | <i>Ca_desi_scaffold</i> | 89210                   | T/A  | Gene_Ca_13969.1    | INTRON                        | Callose synthase 3                                              |
| <i>Desi_wild_22449</i>  | NA                                  | <i>Ca_desi_scaffold</i> | 22449                   | A/G  | Gene_Ca_13980.2    | NON_SYNONYMOUS_CODING         | Protein of unknown function (DUF1997)                           |
| <i>Desi_wild_101007</i> | NA                                  | <i>Ca_desi_scaffold</i> | 101007                  | A/C  | Gene_Ca_13984.2    | SYNONYMOUS_CODING             | RNA polymerase II-associated protein 1                          |
| <i>Desi_wild_18777</i>  | NA                                  | <i>Ca_desi_scaffold</i> | 18777                   | A/G  | Gene_Ca_13993.1    | SYNONYMOUS_CODING             | Subtilisin-like protease                                        |
| <i>Desi_wild_69315</i>  | NA                                  | <i>Ca_desi_scaffold</i> | 69315                   | A/G  | Gene_Ca_13996.1    | INTRON                        | Granule-bound starch synthase 1, chloroplastic/amyloplastic     |
| <i>Desi_wild_80960</i>  | NA                                  | <i>Ca_desi_scaffold</i> | 80960                   | G/A  | Gene_Ca_13997.1    | INTRON                        | Vacuolar protein sorting-associated protein 8 homolog           |
| <i>Desi_wild_80969</i>  | NA                                  | <i>Ca_desi_scaffold</i> | 80969                   | G/A  | Gene_Ca_13997.1    | INTRON                        | Vacuolar protein sorting-associated protein 8 homolog           |
| <i>Desi_wild_87753</i>  | NA                                  | <i>Ca_desi_scaffold</i> | 87753                   | C/T  | Gene_Ca_13997.1    | SYNONYMOUS_CODING             | Vacuolar protein sorting-associated protein 8 homolog           |
| <i>Desi_wild_88643</i>  | NA                                  | <i>Ca_desi_scaffold</i> | 88643                   | A/C  | Gene_Ca_13997.1    | NON_SYNONYMOUS_CODING         | Vacuolar protein sorting-associated protein 8 homolog           |
| <i>Desi_wild_92322</i>  | NA                                  | <i>Ca_desi_scaffold</i> | 92322                   | T/C  | Gene_Ca_13997.1    | INTRON                        | Vacuolar protein sorting-associated protein 8 homolog           |
| <i>Desi_wild_97215</i>  | NA                                  | <i>Ca_desi_scaffold</i> | 97215                   | T/C  | NA                 | INTERGENIC                    | NA                                                              |
| <i>Desi_wild_98563</i>  | NA                                  | <i>Ca_desi_scaffold</i> | 98563                   | C/G  | NA                 | INTERGENIC                    | NA                                                              |
| <i>Desi_wild_99762</i>  | NA                                  | <i>Ca_desi_scaffold</i> | 99762                   | T/C  | Gene_Ca_13998.1    | SYNONYMOUS_CODING             | Pyruvate dehydrogenase E1 component subunit alpha               |
| <i>Desi_wild_99806</i>  | NA                                  | <i>Ca_desi_scaffold</i> | 99806                   | G/C  | Gene_Ca_13998.1    | SYNONYMOUS_CODING             | Pyruvate dehydrogenase E1 component subunit alpha               |
| <i>Desi_wild_10284</i>  | NA                                  | <i>Ca_desi_scaffold</i> | 10284                   | G/A  | Gene_Ca_13999.1    | NON_SYNONYMOUS_CODING         | NA                                                              |
| <i>Desi_wild_45163</i>  | NA                                  | <i>Ca_desi_scaffold</i> | 45163                   | C/A  | NA                 | INTERGENIC                    | NA                                                              |
| <i>Desi_wild_45166</i>  | NA                                  | <i>Ca_desi_scaffold</i> | 45166                   | A/C  | NA                 | INTERGENIC                    | NA                                                              |
| <i>Desi_wild_101331</i> | NA                                  | <i>Ca_desi_scaffold</i> | 101331                  | A/G  | Gene_Ca_14005.1    | INTRON                        | Polyadenylate-binding protein 2-A                               |
| <i>Desi_wild_49472</i>  | NA                                  | <i>Ca_desi_scaffold</i> | 49472                   | T/C  | NA                 | INTERGENIC                    | NA                                                              |
| <i>Desi_wild_76700</i>  | NA                                  | <i>Ca_desi_scaffold</i> | 76700                   | A/G  | Gene_Ca_14013.1    | SYNONYMOUS_CODING             | Cytochrome c1-1, heme protein, mitochondrial                    |
| <i>Desi_wild_76613</i>  | NA                                  | <i>Ca_desi_scaffold</i> | 76613                   | A/C  | NA                 | INTERGENIC                    | NA                                                              |
| <i>Desi_wild_2498</i>   | NA                                  | <i>Ca_desi_scaffold</i> | 2498                    | A/G  | NA                 | INTERGENIC                    | NA                                                              |
| <i>Desi_wild_34103</i>  | NA                                  | <i>Ca_desi_scaffold</i> | 34103                   | T/G  | Gene_Ca_14036.1    | SYNONYMOUS_CODING             | Bromodomain and PHD finger-containing protein 3                 |
| <i>Desi_wild_51225</i>  | NA                                  | <i>Ca_desi_scaffold</i> | 51225                   | T/G  | NA                 | INTERGENIC                    | NA                                                              |
| <i>Desi_wild_51231</i>  | NA                                  | <i>Ca_desi_scaffold</i> | 51231                   | C/T  | NA                 | INTERGENIC                    | NA                                                              |
| <i>Desi_wild_51233</i>  | NA                                  | <i>Ca_desi_scaffold</i> | 51233                   | T/C  | NA                 | INTERGENIC                    | NA                                                              |
| <i>Desi_wild_51234</i>  | NA                                  | <i>Ca_desi_scaffold</i> | 51234                   | C/T  | NA                 | INTERGENIC                    | NA                                                              |
| <i>Desi_wild_47271</i>  | NA                                  | <i>Ca_desi_scaffold</i> | 47271                   | T/G  | Gene_Ca_09701.1    | DOWNSTREAM                    | F-box/kelch-repeat protein At3g23880                            |
| <i>Desi_wild_65601</i>  | NA                                  | <i>Ca_desi_scaffold</i> | 65601                   | A/C  | NA                 | INTERGENIC                    | NA                                                              |
| <i>Desi_wild_65602</i>  | NA                                  | <i>Ca_desi_scaffold</i> | 65602                   | G/T  | NA                 | INTERGENIC                    | NA                                                              |
| <i>Desi_wild_38124</i>  | NA                                  | <i>Ca_desi_scaffold</i> | 38124                   | C/T  | Gene_Ca_14048.1    | SYNONYMOUS_CODING             | CONTAINS InterPro DOMAIN/s: Prefoldin (InterPro:IPR009053)      |
| <i>Desi_wild_38232</i>  | NA                                  | <i>Ca_desi_scaffold</i> | 38232                   | G/A  | Gene_Ca_14048.1    | SYNONYMOUS_CODING             | CONTAINS InterPro DOMAIN/s: Prefoldin (InterPro:IPR009053)      |

| SNP IDs                | NCBI dbSNP accession IDs (NCBI_SS#) | Chromosomes             | Physical positions (bp) | SNPs | Gene accession IDs | Sequence components of genome | Putative functions                                                           |
|------------------------|-------------------------------------|-------------------------|-------------------------|------|--------------------|-------------------------------|------------------------------------------------------------------------------|
| <i>Desi_wild_39588</i> | NA                                  | <i>Ca_desi_scaffold</i> | 39588                   | T/C  | Gene_Ca_14048.1    | NON_SYNONYMOUS_CODING         | CONTAINS InterPro DOMAIN/s: Prefoldin (InterPro:IPR009053)                   |
| <i>Desi_wild_39722</i> | NA                                  | <i>Ca_desi_scaffold</i> | 39722                   | A/T  | Gene_Ca_14048.1    | SYNONYMOUS_CODING             | CONTAINS InterPro DOMAIN/s: Prefoldin (InterPro:IPR009053)                   |
| <i>Desi_wild_40948</i> | NA                                  | <i>Ca_desi_scaffold</i> | 40948                   | A/G  | Gene_Ca_14048.1    | SYNONYMOUS_CODING             | CONTAINS InterPro DOMAIN/s: Prefoldin (InterPro:IPR009053)                   |
| <i>Desi_wild_40959</i> | NA                                  | <i>Ca_desi_scaffold</i> | 40959                   | A/G  | Gene_Ca_14048.1    | SYNONYMOUS_CODING             | CONTAINS InterPro DOMAIN/s: Prefoldin (InterPro:IPR009053)                   |
| <i>Desi_wild_42161</i> | NA                                  | <i>Ca_desi_scaffold</i> | 42161                   | C/A  | Gene_Ca_14048.1    | SYNONYMOUS_CODING             | CONTAINS InterPro DOMAIN/s: Prefoldin (InterPro:IPR009053)                   |
| <i>Desi_wild_43146</i> | NA                                  | <i>Ca_desi_scaffold</i> | 43146                   | A/G  | Gene_Ca_14048.1    | NON_SYNONYMOUS_CODING         | CONTAINS InterPro DOMAIN/s: Prefoldin (InterPro:IPR009053)                   |
| <i>Desi_wild_88557</i> | NA                                  | <i>Ca_desi_scaffold</i> | 88557                   | T/G  | NA                 | INTERGENIC                    | NA                                                                           |
| <i>Desi_wild_89029</i> | NA                                  | <i>Ca_desi_scaffold</i> | 89029                   | A/G  | NA                 | INTERGENIC                    | NA                                                                           |
| <i>Desi_wild_75574</i> | NA                                  | <i>Ca_desi_scaffold</i> | 75574                   | G/A  | Gene_Ca_14061.1    | INTRON                        | MutS2 protein                                                                |
| <i>Desi_wild_25560</i> | NA                                  | <i>Ca_desi_scaffold</i> | 25560                   | T/A  | Gene_Ca_14064.1    | UPSTREAM                      | Probable inactive leucine-rich repeat receptor-like protein kinase At3g03770 |
| <i>Desi_wild_45358</i> | NA                                  | <i>Ca_desi_scaffold</i> | 45358                   | A/G  | Gene_Ca_14065.1    | INTRON                        | Probable ATP-dependent RNA helicase DHX36                                    |
| <i>Desi_wild_11129</i> | NA                                  | <i>Ca_desi_scaffold</i> | 11129                   | G/A  | Gene_Ca_14067.1    | SYNONYMOUS_CODING             | Protein of unknown function (DUF640)                                         |
| <i>Desi_wild_11139</i> | NA                                  | <i>Ca_desi_scaffold</i> | 11139                   | G/A  | Gene_Ca_14067.1    | SYNONYMOUS_CODING             | Protein of unknown function (DUF640)                                         |
| <i>Desi_wild_11169</i> | NA                                  | <i>Ca_desi_scaffold</i> | 11169                   | A/T  | Gene_Ca_14067.1    | SYNONYMOUS_CODING             | Protein of unknown function (DUF640)                                         |
| <i>Desi_wild_11188</i> | NA                                  | <i>Ca_desi_scaffold</i> | 11188                   | G/C  | Gene_Ca_14067.1    | NON_SYNONYMOUS_CODING         | Protein of unknown function (DUF640)                                         |
| <i>Desi_wild_11199</i> | NA                                  | <i>Ca_desi_scaffold</i> | 11199                   | G/A  | Gene_Ca_14067.1    | SYNONYMOUS_CODING             | Protein of unknown function (DUF640)                                         |
| <i>Desi_wild_33165</i> | NA                                  | <i>Ca_desi_scaffold</i> | 33165                   | A/T  | Gene_Ca_14069.1    | INTRON                        | unknown protein                                                              |
| <i>Desi_wild_33172</i> | NA                                  | <i>Ca_desi_scaffold</i> | 33172                   | T/A  | Gene_Ca_14069.1    | INTRON                        | unknown protein                                                              |
| <i>Desi_wild_33187</i> | NA                                  | <i>Ca_desi_scaffold</i> | 33187                   | G/A  | Gene_Ca_14069.1    | INTRON                        | unknown protein                                                              |
| <i>Desi_wild_33188</i> | NA                                  | <i>Ca_desi_scaffold</i> | 33188                   | T/C  | Gene_Ca_14069.1    | INTRON                        | unknown protein                                                              |
| <i>Desi_wild_33485</i> | NA                                  | <i>Ca_desi_scaffold</i> | 33485                   | C/T  | Gene_Ca_14069.1    | INTRON                        | unknown protein                                                              |
| <i>Desi_wild_14940</i> | NA                                  | <i>Ca_desi_scaffold</i> | 14940                   | T/C  | NA                 | INTERGENIC                    | NA                                                                           |
| <i>Desi_wild_15272</i> | NA                                  | <i>Ca_desi_scaffold</i> | 15272                   | G/T  | NA                 | INTERGENIC                    | NA                                                                           |
| <i>Desi_wild_70892</i> | NA                                  | <i>Ca_desi_scaffold</i> | 70892                   | C/T  | Gene_Ca_14081.3    | INTRON                        | NA                                                                           |
| <i>Desi_wild_70978</i> | NA                                  | <i>Ca_desi_scaffold</i> | 70978                   | G/C  | Gene_Ca_14081.3    | INTRON                        | NA                                                                           |
| <i>Desi_wild_90453</i> | NA                                  | <i>Ca_desi_scaffold</i> | 90453                   | A/G  | NA                 | INTERGENIC                    | NA                                                                           |
| <i>Desi_wild_33133</i> | NA                                  | <i>Ca_desi_scaffold</i> | 33133                   | A/C  | Gene_Ca_14088.1    | INTRON                        | Phosphoenolpyruvate carboxykinase [ATP]                                      |
| <i>Desi_wild_52140</i> | NA                                  | <i>Ca_desi_scaffold</i> | 52140                   | A/G  | NA                 | INTERGENIC                    | NA                                                                           |
| <i>Desi_wild_97106</i> | NA                                  | <i>Ca_desi_scaffold</i> | 97106                   | A/T  | NA                 | INTERGENIC                    | NA                                                                           |
| <i>Desi_wild_26164</i> | NA                                  | <i>Ca_desi_scaffold</i> | 26164                   | A/G  | NA                 | INTERGENIC                    | NA                                                                           |
| <i>Desi_wild_38018</i> | NA                                  | <i>Ca_desi_scaffold</i> | 38018                   | C/A  | NA                 | INTERGENIC                    | NA                                                                           |
| <i>Desi_wild_2627</i>  | NA                                  | <i>Ca_desi_scaffold</i> | 2627                    | A/C  | NA                 | INTERGENIC                    | NA                                                                           |
| <i>Desi_wild_6081</i>  | NA                                  | <i>Ca_desi_scaffold</i> | 6081                    | T/G  | NA                 | INTERGENIC                    | NA                                                                           |
| <i>Desi_wild_6286</i>  | NA                                  | <i>Ca_desi_scaffold</i> | 6286                    | G/A  | NA                 | INTERGENIC                    | NA                                                                           |
| <i>Desi_wild_10575</i> | NA                                  | <i>Ca_desi_scaffold</i> | 10575                   | A/C  | Gene_Ca_14101.1    | INTRON                        | Putative G3BP-like protein                                                   |
| <i>Desi_wild_13731</i> | NA                                  | <i>Ca_desi_scaffold</i> | 13731                   | G/A  | Gene_Ca_14101.1    | INTRON                        | Putative G3BP-like protein                                                   |
| <i>Desi_wild_74226</i> | NA                                  | <i>Ca_desi_scaffold</i> | 74226                   | T/C  | NA                 | INTERGENIC                    | NA                                                                           |
| <i>Desi_wild_74341</i> | NA                                  | <i>Ca_desi_scaffold</i> | 74341                   | A/C  | NA                 | INTERGENIC                    | NA                                                                           |
| <i>Desi_wild_74354</i> | NA                                  | <i>Ca_desi_scaffold</i> | 74354                   | A/T  | NA                 | INTERGENIC                    | NA                                                                           |
| <i>Desi_wild_74436</i> | NA                                  | <i>Ca_desi_scaffold</i> | 74436                   | A/C  | NA                 | INTERGENIC                    | NA                                                                           |
| <i>Desi_wild_75310</i> | NA                                  | <i>Ca_desi_scaffold</i> | 75310                   | C/T  | NA                 | INTERGENIC                    | NA                                                                           |
| <i>Desi_wild_15332</i> | NA                                  | <i>Ca_desi_scaffold</i> | 15332                   | G/A  | Gene_Ca_14110.1    | DOWNSTREAM                    | ATP-dependent zinc metalloprotease FTSH 3, mitochondrial                     |
| <i>Desi_wild_62454</i> | NA                                  | <i>Ca_desi_scaffold</i> | 62454                   | A/T  | Gene_Ca_14114.1    | INTRON                        | Scarecrow-like protein 14                                                    |
| <i>Desi_wild_62462</i> | NA                                  | <i>Ca_desi_scaffold</i> | 62462                   | A/T  | Gene_Ca_14114.1    | INTRON                        | Scarecrow-like protein 14                                                    |

| SNP IDs                 | NCBI dbSNP accession IDs (NCBI_SS#) | Chromosomes             | Physical positions (bp) | SNPs | Gene accession IDs | Sequence components of genome | Putative functions                                                         |
|-------------------------|-------------------------------------|-------------------------|-------------------------|------|--------------------|-------------------------------|----------------------------------------------------------------------------|
| <i>Desi_wild_62463</i>  | NA                                  | <i>Ca_desi_scaffold</i> | 62463                   | G/A  | Gene_Ca_14114.1    | INTRON                        | Scarecrow-like protein 14                                                  |
| <i>Desi_wild_62479</i>  | NA                                  | <i>Ca_desi_scaffold</i> | 62479                   | A/G  | Gene_Ca_14114.1    | INTRON                        | Scarecrow-like protein 14                                                  |
| <i>Desi_wild_62480</i>  | NA                                  | <i>Ca_desi_scaffold</i> | 62480                   | T/C  | Gene_Ca_14114.1    | INTRON                        | Scarecrow-like protein 14                                                  |
| <i>Desi_wild_62486</i>  | NA                                  | <i>Ca_desi_scaffold</i> | 62486                   | T/C  | Gene_Ca_14114.1    | INTRON                        | Scarecrow-like protein 14                                                  |
| <i>Desi_wild_62488</i>  | NA                                  | <i>Ca_desi_scaffold</i> | 62488                   | C/T  | Gene_Ca_14114.1    | INTRON                        | Scarecrow-like protein 14                                                  |
| <i>Desi_wild_67314</i>  | NA                                  | <i>Ca_desi_scaffold</i> | 67314                   | C/T  | NA                 | INTERGENIC                    | NA                                                                         |
| <i>Desi_wild_67542</i>  | NA                                  | <i>Ca_desi_scaffold</i> | 67542                   | G/C  | NA                 | INTERGENIC                    | NA                                                                         |
| <i>Desi_wild_71219</i>  | NA                                  | <i>Ca_desi_scaffold</i> | 71219                   | C/G  | NA                 | INTERGENIC                    | NA                                                                         |
| <i>Desi_wild_74434</i>  | NA                                  | <i>Ca_desi_scaffold</i> | 74434                   | C/A  | Gene_Ca_14116.1    | SYNONYMOUS_CODING             | Oxysterol-binding protein-related protein 3C                               |
| <i>Desi_wild_86525</i>  | NA                                  | <i>Ca_desi_scaffold</i> | 86525                   | G/C  | NA                 | INTERGENIC                    | NA                                                                         |
| <i>Desi_wild_95130</i>  | NA                                  | <i>Ca_desi_scaffold</i> | 95130                   | C/T  | Gene_Ca_14118.1    | DOWNSTREAM                    | NA                                                                         |
| <i>Desi_wild_95148</i>  | NA                                  | <i>Ca_desi_scaffold</i> | 95148                   | A/G  | Gene_Ca_14118.1    | DOWNSTREAM                    | NA                                                                         |
| <i>Desi_wild_95154</i>  | NA                                  | <i>Ca_desi_scaffold</i> | 95154                   | C/T  | Gene_Ca_14118.1    | DOWNSTREAM                    | NA                                                                         |
| <i>Desi_wild_95182</i>  | NA                                  | <i>Ca_desi_scaffold</i> | 95182                   | G/T  | Gene_Ca_14118.1    | NON_SYNONYMOUS_CODING         | NA                                                                         |
| <i>Desi_wild_95306</i>  | NA                                  | <i>Ca_desi_scaffold</i> | 95306                   | G/A  | Gene_Ca_14118.1    | SYNONYMOUS_CODING             | NA                                                                         |
| <i>Desi_wild_95341</i>  | NA                                  | <i>Ca_desi_scaffold</i> | 95341                   | G/A  | Gene_Ca_14118.1    | INTRON                        | NA                                                                         |
| <i>Desi_wild_95344</i>  | NA                                  | <i>Ca_desi_scaffold</i> | 95344                   | C/A  | Gene_Ca_14118.1    | INTRON                        | NA                                                                         |
| <i>Desi_wild_95345</i>  | NA                                  | <i>Ca_desi_scaffold</i> | 95345                   | A/G  | Gene_Ca_14118.1    | INTRON                        | NA                                                                         |
| <i>Desi_wild_95368</i>  | NA                                  | <i>Ca_desi_scaffold</i> | 95368                   | A/G  | Gene_Ca_14118.1    | INTRON                        | NA                                                                         |
| <i>Desi_wild_105451</i> | NA                                  | <i>Ca_desi_scaffold</i> | 105451                  | C/T  | Gene_Ca_14118.1    | INTRON                        | NA                                                                         |
| <i>Desi_wild_42801</i>  | NA                                  | <i>Ca_desi_scaffold</i> | 42801                   | C/T  | NA                 | INTERGENIC                    | NA                                                                         |
| <i>Desi_wild_42841</i>  | NA                                  | <i>Ca_desi_scaffold</i> | 42841                   | G/C  | NA                 | INTERGENIC                    | NA                                                                         |
| <i>Desi_wild_42847</i>  | NA                                  | <i>Ca_desi_scaffold</i> | 42847                   | C/T  | NA                 | INTERGENIC                    | NA                                                                         |
| <i>Desi_wild_42855</i>  | NA                                  | <i>Ca_desi_scaffold</i> | 42855                   | G/A  | NA                 | INTERGENIC                    | NA                                                                         |
| <i>Desi_wild_42924</i>  | NA                                  | <i>Ca_desi_scaffold</i> | 42924                   | G/A  | NA                 | INTERGENIC                    | NA                                                                         |
| <i>Desi_wild_42971</i>  | NA                                  | <i>Ca_desi_scaffold</i> | 42971                   | C/A  | NA                 | INTERGENIC                    | NA                                                                         |
| <i>Desi_wild_88227</i>  | NA                                  | <i>Ca_desi_scaffold</i> | 88227                   | A/G  | Gene_Ca_14126.1    | INTRON                        | Sister chromatid cohesion 1 protein 1                                      |
| <i>Desi_wild_90877</i>  | NA                                  | <i>Ca_desi_scaffold</i> | 90877                   | A/G  | Gene_Ca_14126.1    | INTRON                        | Sister chromatid cohesion 1 protein 1                                      |
| <i>Desi_wild_90888</i>  | NA                                  | <i>Ca_desi_scaffold</i> | 90888                   | T/A  | Gene_Ca_14126.1    | INTRON                        | Sister chromatid cohesion 1 protein 1                                      |
| <i>Desi_wild_90903</i>  | NA                                  | <i>Ca_desi_scaffold</i> | 90903                   | C/T  | Gene_Ca_14126.1    | INTRON                        | Sister chromatid cohesion 1 protein 1                                      |
| <i>Desi_wild_91044</i>  | NA                                  | <i>Ca_desi_scaffold</i> | 91044                   | C/T  | Gene_Ca_14126.1    | INTRON                        | Sister chromatid cohesion 1 protein 1                                      |
| <i>Desi_wild_37929</i>  | NA                                  | <i>Ca_desi_scaffold</i> | 37929                   | T/G  | Gene_Ca_14131.1    | INTRON                        | N-alpha-acetyltransferase 25, NatB auxiliary subunit                       |
| <i>Desi_wild_38062</i>  | NA                                  | <i>Ca_desi_scaffold</i> | 38062                   | A/C  | Gene_Ca_14131.1    | INTRON                        | N-alpha-acetyltransferase 25, NatB auxiliary subunit                       |
| <i>Desi_wild_78334</i>  | NA                                  | <i>Ca_desi_scaffold</i> | 78334                   | G/A  | Gene_Ca_14139.1    | NON_SYNONYMOUS_CODING         | Early nodulin-like protein 2                                               |
| <i>Desi_wild_78384</i>  | NA                                  | <i>Ca_desi_scaffold</i> | 78384                   | A/G  | Gene_Ca_14139.1    | SYNONYMOUS_CODING             | Early nodulin-like protein 2                                               |
| <i>Desi_wild_78396</i>  | NA                                  | <i>Ca_desi_scaffold</i> | 78396                   | A/G  | Gene_Ca_14139.1    | SYNONYMOUS_CODING             | Early nodulin-like protein 2                                               |
| <i>Desi_wild_78402</i>  | NA                                  | <i>Ca_desi_scaffold</i> | 78402                   | T/G  | Gene_Ca_14139.1    | SYNONYMOUS_CODING             | Early nodulin-like protein 2                                               |
| <i>Desi_wild_52</i>     | NA                                  | <i>Ca_desi_scaffold</i> | 52                      | T/A  | NA                 | INTERGENIC                    | NA                                                                         |
| <i>Desi_wild_55</i>     | NA                                  | <i>Ca_desi_scaffold</i> | 55                      | T/G  | NA                 | INTERGENIC                    | NA                                                                         |
| <i>Desi_wild_60</i>     | NA                                  | <i>Ca_desi_scaffold</i> | 60                      | C/T  | NA                 | INTERGENIC                    | NA                                                                         |
| <i>Desi_wild_146</i>    | NA                                  | <i>Ca_desi_scaffold</i> | 146                     | T/C  | NA                 | INTERGENIC                    | NA                                                                         |
| <i>Desi_wild_50437</i>  | NA                                  | <i>Ca_desi_scaffold</i> | 50437                   | T/C  | Gene_Ca_14146.1    | SYNONYMOUS_CODING             | Uncharacterized protein R106                                               |
| <i>Desi_wild_50762</i>  | NA                                  | <i>Ca_desi_scaffold</i> | 50762                   | T/C  | Gene_Ca_14146.1    | INTRON                        | Uncharacterized protein R106                                               |
| <i>Desi_wild_53524</i>  | NA                                  | <i>Ca_desi_scaffold</i> | 53524                   | G/T  | Gene_Ca_14150.1    | NON_SYNONYMOUS_CODING         | Glutamyl-tRNA(Gln) amidotransferase subunit A, chloroplastic/mitochondrial |

| SNP IDs                | NCBI dbSNP accession IDs (NCBI_SS#) | Chromosomes             | Physical positions (bp) | SNPs | Gene accession IDs              | Sequence components of genome | Putative functions                                   |
|------------------------|-------------------------------------|-------------------------|-------------------------|------|---------------------------------|-------------------------------|------------------------------------------------------|
| <i>Desi_wild_38035</i> | NA                                  | <i>Ca_desi_scaffold</i> | 38035                   | T/G  | <a href="#">Gene_Ca_14161.1</a> | NON_SYNONYMOUS_CODING         | Kinase-related protein of unknown function (DUF1296) |
| <i>Desi_wild_38235</i> | NA                                  | <i>Ca_desi_scaffold</i> | 38235                   | A/G  | <a href="#">Gene_Ca_14161.1</a> | NON_SYNONYMOUS_CODING         | Kinase-related protein of unknown function (DUF1296) |
| <i>Desi_wild_38853</i> | NA                                  | <i>Ca_desi_scaffold</i> | 38853                   | T/C  | <a href="#">Gene_Ca_14161.1</a> | DOWNSTREAM                    | Kinase-related protein of unknown function (DUF1296) |
| <i>Desi_wild_59504</i> | NA                                  | <i>Ca_desi_scaffold</i> | 59504                   | A/C  | <a href="#">Gene_Ca_14172.1</a> | DOWNSTREAM                    | Vesicle-associated membrane protein 711              |
| <i>Desi_wild_59509</i> | NA                                  | <i>Ca_desi_scaffold</i> | 59509                   | G/C  | <a href="#">Gene_Ca_14172.1</a> | DOWNSTREAM                    | Vesicle-associated membrane protein 711              |
| <i>Desi_wild_59510</i> | NA                                  | <i>Ca_desi_scaffold</i> | 59510                   | T/G  | <a href="#">Gene_Ca_14172.1</a> | DOWNSTREAM                    | Vesicle-associated membrane protein 711              |
| <i>Desi_wild_59515</i> | NA                                  | <i>Ca_desi_scaffold</i> | 59515                   | G/A  | <a href="#">Gene_Ca_14172.1</a> | DOWNSTREAM                    | Vesicle-associated membrane protein 711              |
| <i>Desi_wild_81366</i> | NA                                  | <i>Ca_desi_scaffold</i> | 81366                   | A/G  | NA                              | INTERGENIC                    | NA                                                   |
| <i>Desi_wild_81721</i> | NA                                  | <i>Ca_desi_scaffold</i> | 81721                   | A/G  | <a href="#">Gene_Ca_14185.1</a> | SYNONYMOUS_CODING             | Protein RRNAD1                                       |
| <i>Desi_wild_85207</i> | NA                                  | <i>Ca_desi_scaffold</i> | 85207                   | T/A  | <a href="#">Gene_Ca_14185.1</a> | INTRON                        | Protein RRNAD1                                       |
| <i>Desi_wild_85212</i> | NA                                  | <i>Ca_desi_scaffold</i> | 85212                   | A/G  | <a href="#">Gene_Ca_14185.1</a> | INTRON                        | Protein RRNAD1                                       |
| <i>Desi_wild_89378</i> | NA                                  | <i>Ca_desi_scaffold</i> | 89378                   | A/C  | <a href="#">Gene_Ca_14185.1</a> | INTRON                        | Protein RRNAD1                                       |
| <i>Desi_wild_21894</i> | NA                                  | <i>Ca_desi_scaffold</i> | 21894                   | C/T  | <a href="#">Gene_Ca_14187.2</a> | NON_SYNONYMOUS_CODING         | Eukaryotic translation initiation factor 5B          |
| <i>Desi_wild_44043</i> | NA                                  | <i>Ca_desi_scaffold</i> | 44043                   | G/A  | NA                              | INTERGENIC                    | NA                                                   |
| <i>Desi_wild_86703</i> | NA                                  | <i>Ca_desi_scaffold</i> | 86703                   | G/A  | NA                              | INTERGENIC                    | NA                                                   |
| <i>Desi_wild_42501</i> | NA                                  | <i>Ca_desi_scaffold</i> | 42501                   | C/T  | <a href="#">Gene_Ca_14194.1</a> | INTRON                        | glutaredoxin-related                                 |
| <i>Desi_wild_44982</i> | NA                                  | <i>Ca_desi_scaffold</i> | 44982                   | A/G  | <a href="#">Gene_Ca_14194.1</a> | INTRON                        | glutaredoxin-related                                 |
| <i>Desi_wild_45017</i> | NA                                  | <i>Ca_desi_scaffold</i> | 45017                   | C/T  | <a href="#">Gene_Ca_14194.1</a> | INTRON                        | glutaredoxin-related                                 |
| <i>Desi_wild_45042</i> | NA                                  | <i>Ca_desi_scaffold</i> | 45042                   | G/A  | <a href="#">Gene_Ca_14194.1</a> | INTRON                        | glutaredoxin-related                                 |
| <i>Desi_wild_70454</i> | NA                                  | <i>Ca_desi_scaffold</i> | 70454                   | T/C  | <a href="#">Gene_Ca_14195.1</a> | INTRON                        | Protein of unknown function (DUF3755)                |
| <i>Desi_wild_70457</i> | NA                                  | <i>Ca_desi_scaffold</i> | 70457                   | T/C  | <a href="#">Gene_Ca_14195.1</a> | INTRON                        | Protein of unknown function (DUF3755)                |
| <i>Desi_wild_70484</i> | NA                                  | <i>Ca_desi_scaffold</i> | 70484                   | G/A  | <a href="#">Gene_Ca_14195.1</a> | INTRON                        | Protein of unknown function (DUF3755)                |
| <i>Desi_wild_70517</i> | NA                                  | <i>Ca_desi_scaffold</i> | 70517                   | T/C  | <a href="#">Gene_Ca_14195.1</a> | INTRON                        | Protein of unknown function (DUF3755)                |
| <i>Desi_wild_56268</i> | NA                                  | <i>Ca_desi_scaffold</i> | 56268                   | T/A  | NA                              | INTERGENIC                    | NA                                                   |
| <i>Desi_wild_70326</i> | NA                                  | <i>Ca_desi_scaffold</i> | 70326                   | G/A  | NA                              | INTERGENIC                    | NA                                                   |
| <i>Desi_wild_95399</i> | NA                                  | <i>Ca_desi_scaffold</i> | 95399                   | T/C  | <a href="#">Gene_Ca_09590.1</a> | INTRON                        | Serine/threonine-protein kinase CTR1                 |
| <i>Desi_wild_10077</i> | NA                                  | <i>Ca_desi_scaffold</i> | 10077                   | T/G  | <a href="#">Gene_Ca_09724.1</a> | SYNONYMOUS_CODING             | Uncharacterized protein At4g26450                    |
| <i>Desi_wild_10080</i> | NA                                  | <i>Ca_desi_scaffold</i> | 10080                   | T/G  | <a href="#">Gene_Ca_09724.1</a> | SYNONYMOUS_CODING             | Uncharacterized protein At4g26450                    |
| <i>Desi_wild_10101</i> | NA                                  | <i>Ca_desi_scaffold</i> | 10101                   | T/G  | <a href="#">Gene_Ca_09724.1</a> | SYNONYMOUS_CODING             | Uncharacterized protein At4g26450                    |
| <i>Desi_wild_15499</i> | NA                                  | <i>Ca_desi_scaffold</i> | 15499                   | T/C  | NA                              | INTERGENIC                    | NA                                                   |
| <i>Desi_wild_15577</i> | NA                                  | <i>Ca_desi_scaffold</i> | 15577                   | G/A  | NA                              | INTERGENIC                    | NA                                                   |
| <i>Desi_wild_26293</i> | NA                                  | <i>Ca_desi_scaffold</i> | 26293                   | G/T  | <a href="#">Gene_Ca_14218.1</a> | STOP_GAINED                   | NA                                                   |
| <i>Desi_wild_26294</i> | NA                                  | <i>Ca_desi_scaffold</i> | 26294                   | G/C  | <a href="#">Gene_Ca_14218.1</a> | NON_SYNONYMOUS_CODING         | NA                                                   |
| <i>Desi_wild_26295</i> | NA                                  | <i>Ca_desi_scaffold</i> | 26295                   | A/T  | <a href="#">Gene_Ca_14218.1</a> | SYNONYMOUS_CODING             | NA                                                   |
| <i>Desi_wild_26296</i> | NA                                  | <i>Ca_desi_scaffold</i> | 26296                   | A/G  | <a href="#">Gene_Ca_14218.1</a> | NON_SYNONYMOUS_CODING         | NA                                                   |
| <i>Desi_wild_28822</i> | NA                                  | <i>Ca_desi_scaffold</i> | 28822                   | A/G  | <a href="#">Gene_Ca_14218.3</a> | DOWNSTREAM                    | NA                                                   |
| <i>Desi_wild_84456</i> | NA                                  | <i>Ca_desi_scaffold</i> | 84456                   | G/A  | <a href="#">Gene_Ca_14221.1</a> | SYNONYMOUS_CODING             | 50S ribosomal protein L22                            |
| <i>Desi_wild_97304</i> | NA                                  | <i>Ca_desi_scaffold</i> | 97304                   | C/A  | NA                              | INTERGENIC                    | NA                                                   |
| <i>Desi_wild_97309</i> | NA                                  | <i>Ca_desi_scaffold</i> | 97309                   | G/A  | NA                              | INTERGENIC                    | NA                                                   |
| <i>Desi_wild_97364</i> | NA                                  | <i>Ca_desi_scaffold</i> | 97364                   | C/A  | NA                              | INTERGENIC                    | NA                                                   |
| <i>Desi_wild_3636</i>  | NA                                  | <i>Ca_desi_scaffold</i> | 3636                    | T/C  | NA                              | INTERGENIC                    | NA                                                   |
| <i>Desi_wild_67768</i> | NA                                  | <i>Ca_desi_scaffold</i> | 67768                   | A/G  | <a href="#">Gene_Ca_14225.2</a> | INTRON                        | 5-formyltetrahydrofolate cyclo-ligase                |
| <i>Desi_wild_11978</i> | NA                                  | <i>Ca_desi_scaffold</i> | 11978                   | C/T  | <a href="#">Gene_Ca_09737.1</a> | NON_SYNONYMOUS_CODING         | DNA polymerase epsilon catalytic subunit A           |
| <i>Desi_wild_34567</i> | NA                                  | <i>Ca_desi_scaffold</i> | 34567                   | C/A  | <a href="#">Gene_Ca_09737.1</a> | NON_SYNONYMOUS_CODING         | DNA polymerase epsilon catalytic subunit A           |

| SNP IDs                 | NCBI dbSNP accession IDs (NCBI_SS#) | Chromosomes             | Physical positions (bp) | SNPs | Gene accession IDs | Sequence components of genome | Putative functions                                                      |
|-------------------------|-------------------------------------|-------------------------|-------------------------|------|--------------------|-------------------------------|-------------------------------------------------------------------------|
| <i>Desi_wild_42197</i>  | NA                                  | <i>Ca_desi_scaffold</i> | 42197                   | T/G  | NA                 | INTERGENIC                    | NA                                                                      |
| <i>Desi_wild_100</i>    | NA                                  | <i>Ca_desi_scaffold</i> | 100                     | A/G  | NA                 | INTERGENIC                    | NA                                                                      |
| <i>Desi_wild_67346</i>  | NA                                  | <i>Ca_desi_scaffold</i> | 67346                   | T/A  | Gene_Ca_14235.1    | NON_SYNONYMOUS_CODING         | Chloroplastic group IIA intron splicing facilitator CRS1, chloroplastic |
| <i>Desi_wild_67366</i>  | NA                                  | <i>Ca_desi_scaffold</i> | 67366                   | A/C  | Gene_Ca_14235.1    | SYNONYMOUS_CODING             | Chloroplastic group IIA intron splicing facilitator CRS1, chloroplastic |
| <i>Desi_wild_92981</i>  | NA                                  | <i>Ca_desi_scaffold</i> | 92981                   | G/A  | Gene_Ca_14238.1    | SYNONYMOUS_CODING             | Probable xyloglucan glycosyltransferase 5                               |
| <i>Desi_wild_108493</i> | NA                                  | <i>Ca_desi_scaffold</i> | 108493                  | G/A  | NA                 | INTERGENIC                    | NA                                                                      |
| <i>Desi_wild_108510</i> | NA                                  | <i>Ca_desi_scaffold</i> | 108510                  | C/A  | NA                 | INTERGENIC                    | NA                                                                      |
| <i>Desi_wild_86831</i>  | NA                                  | <i>Ca_desi_scaffold</i> | 86831                   | G/A  | NA                 | INTERGENIC                    | NA                                                                      |
| <i>Desi_wild_11245</i>  | NA                                  | <i>Ca_desi_scaffold</i> | 11245                   | A/C  | NA                 | INTERGENIC                    | NA                                                                      |
| <i>Desi_wild_100250</i> | NA                                  | <i>Ca_desi_scaffold</i> | 100250                  | T/C  | NA                 | INTERGENIC                    | NA                                                                      |
| <i>Desi_wild_100268</i> | NA                                  | <i>Ca_desi_scaffold</i> | 100268                  | A/G  | NA                 | INTERGENIC                    | NA                                                                      |
| <i>Desi_wild_20284</i>  | NA                                  | <i>Ca_desi_scaffold</i> | 20284                   | T/C  | Gene_Ca_14269.1    | NON_SYNONYMOUS_CODING         | Callose synthase 12                                                     |
| <i>Desi_wild_41792</i>  | NA                                  | <i>Ca_desi_scaffold</i> | 41792                   | A/G  | Gene_Ca_14270.1    | INTRON                        | Prohibitin-2                                                            |
| <i>Desi_wild_30681</i>  | NA                                  | <i>Ca_desi_scaffold</i> | 30681                   | T/G  | NA                 | INTERGENIC                    | NA                                                                      |
| <i>Desi_wild_49540</i>  | NA                                  | <i>Ca_desi_scaffold</i> | 49540                   | T/G  | Gene_Ca_14281.1    | SYNONYMOUS_CODING             | Protein midA, mitochondrial                                             |
| <i>Desi_wild_75585</i>  | NA                                  | <i>Ca_desi_scaffold</i> | 75585                   | T/C  | Gene_Ca_14283.1    | INTRON                        | Coatomer subunit beta-1                                                 |
| <i>Desi_wild_77725</i>  | NA                                  | <i>Ca_desi_scaffold</i> | 77725                   | A/G  | Gene_Ca_14283.1    | SYNONYMOUS_CODING             | Coatomer subunit beta-1                                                 |
| <i>Desi_wild_10176</i>  | NA                                  | <i>Ca_desi_scaffold</i> | 10176                   | T/C  | NA                 | INTERGENIC                    | NA                                                                      |
| <i>Desi_wild_10310</i>  | NA                                  | <i>Ca_desi_scaffold</i> | 10310                   | G/A  | NA                 | INTERGENIC                    | NA                                                                      |
| <i>Desi_wild_10329</i>  | NA                                  | <i>Ca_desi_scaffold</i> | 10329                   | G/A  | NA                 | INTERGENIC                    | NA                                                                      |
| <i>Desi_wild_19387</i>  | NA                                  | <i>Ca_desi_scaffold</i> | 19387                   | G/A  | Gene_Ca_14289.1    | DOWNSTREAM                    | 30S ribosomal protein S9, chloroplastic                                 |
| <i>Desi_wild_19390</i>  | NA                                  | <i>Ca_desi_scaffold</i> | 19390                   | T/C  | Gene_Ca_14289.1    | DOWNSTREAM                    | 30S ribosomal protein S9, chloroplastic                                 |
| <i>Desi_wild_31617</i>  | NA                                  | <i>Ca_desi_scaffold</i> | 31617                   | A/T  | NA                 | INTERGENIC                    | NA                                                                      |
| <i>Desi_wild_80758</i>  | NA                                  | <i>Ca_desi_scaffold</i> | 80758                   | A/C  | NA                 | INTERGENIC                    | NA                                                                      |
| <i>Desi_wild_21891</i>  | NA                                  | <i>Ca_desi_scaffold</i> | 21891                   | A/G  | NA                 | INTERGENIC                    | NA                                                                      |
| <i>Desi_wild_32794</i>  | NA                                  | <i>Ca_desi_scaffold</i> | 32794                   | C/G  | Gene_Ca_14304.1    | INTRON                        | Ankyrin repeat-containing protein At5g02620                             |
| <i>Desi_wild_32809</i>  | NA                                  | <i>Ca_desi_scaffold</i> | 32809                   | G/T  | Gene_Ca_14304.1    | INTRON                        | Ankyrin repeat-containing protein At5g02620                             |
| <i>Desi_wild_32828</i>  | NA                                  | <i>Ca_desi_scaffold</i> | 32828                   | A/G  | Gene_Ca_14304.1    | INTRON                        | Ankyrin repeat-containing protein At5g02620                             |
| <i>Desi_wild_32837</i>  | NA                                  | <i>Ca_desi_scaffold</i> | 32837                   | A/G  | Gene_Ca_14304.1    | INTRON                        | Ankyrin repeat-containing protein At5g02620                             |
| <i>Desi_wild_32840</i>  | NA                                  | <i>Ca_desi_scaffold</i> | 32840                   | T/C  | Gene_Ca_14304.1    | INTRON                        | Ankyrin repeat-containing protein At5g02620                             |
| <i>Desi_wild_59914</i>  | NA                                  | <i>Ca_desi_scaffold</i> | 59914                   | A/C  | Gene_Ca_14305.1    | INTRON                        | RNA-binding protein                                                     |
| <i>Desi_wild_64234</i>  | NA                                  | <i>Ca_desi_scaffold</i> | 64234                   | T/G  | Gene_Ca_14305.1    | NON_SYNONYMOUS_CODING         | RNA-binding protein                                                     |
| <i>Desi_wild_64434</i>  | NA                                  | <i>Ca_desi_scaffold</i> | 64434                   | G/C  | NA                 | INTERGENIC                    | NA                                                                      |
| <i>Desi_wild_31749</i>  | NA                                  | <i>Ca_desi_scaffold</i> | 31749                   | G/T  | NA                 | INTERGENIC                    | NA                                                                      |
| <i>Desi_wild_76234</i>  | NA                                  | <i>Ca_desi_scaffold</i> | 76234                   | A/C  | Gene_Ca_14323.1    | SYNONYMOUS_CODING             | Putative uncharacterized protein                                        |
| <i>Desi_wild_76237</i>  | NA                                  | <i>Ca_desi_scaffold</i> | 76237                   | C/T  | Gene_Ca_14323.1    | SYNONYMOUS_CODING             | Putative uncharacterized protein                                        |
| <i>Desi_wild_4712</i>   | NA                                  | <i>Ca_desi_scaffold</i> | 4712                    | T/C  | Gene_Ca_14324.1    | NON_SYNONYMOUS_CODING         | NADP-specific glutamate dehydrogenase                                   |
| <i>Desi_wild_30858</i>  | NA                                  | <i>Ca_desi_scaffold</i> | 30858                   | C/T  | Gene_Ca_14325.1    | UPSTREAM                      | dentin sialophosphoprotein-related                                      |
| <i>Desi_wild_89893</i>  | NA                                  | <i>Ca_desi_scaffold</i> | 89893                   | A/C  | Gene_Ca_14338.1    | SYNONYMOUS_CODING             | Phosphatidate phosphatase LPIN2                                         |
| <i>Desi_wild_14893</i>  | NA                                  | <i>Ca_desi_scaffold</i> | 14893                   | A/C  | Gene_Ca_14342.1    | INTRON                        | Two-component response regulator-like APRR2                             |
| <i>Desi_wild_62407</i>  | NA                                  | <i>Ca_desi_scaffold</i> | 62407                   | G/C  | Gene_Ca_14346.1    | DOWNSTREAM                    | Expansin-like B1                                                        |
| <i>Desi_wild_92274</i>  | NA                                  | <i>Ca_desi_scaffold</i> | 92274                   | C/G  | Gene_Ca_09793.1    | NON_SYNONYMOUS_CODING         | Pentatricopeptide repeat-containing protein At4g04370                   |
| <i>Desi_wild_92333</i>  | NA                                  | <i>Ca_desi_scaffold</i> | 92333                   | A/G  | Gene_Ca_09793.1    | NON_SYNONYMOUS_CODING         | Pentatricopeptide repeat-containing protein At4g04370                   |
| <i>Desi_wild_93490</i>  | NA                                  | <i>Ca_desi_scaffold</i> | 93490                   | T/G  | Gene_Ca_09793.1    | INTRON                        | Pentatricopeptide repeat-containing protein At4g04370                   |

| SNP IDs                 | NCBI dbSNP accession IDs (NCBI_SS#) | Chromosomes             | Physical positions (bp) | SNPs | Gene accession IDs | Sequence components of genome | Putative functions                                                   |
|-------------------------|-------------------------------------|-------------------------|-------------------------|------|--------------------|-------------------------------|----------------------------------------------------------------------|
| <i>Desi_wild_93595</i>  | NA                                  | <i>Ca_desi_scaffold</i> | 93595                   | A/G  | Gene_Ca_09793.1    | INTRON                        | Pentatricopeptide repeat-containing protein At4g04370                |
| <i>Desi_wild_114395</i> | NA                                  | <i>Ca_desi_scaffold</i> | 114395                  | T/A  | NA                 | INTERGENIC                    | NA                                                                   |
| <i>Desi_wild_115771</i> | NA                                  | <i>Ca_desi_scaffold</i> | 115771                  | C/T  | NA                 | INTERGENIC                    | NA                                                                   |
| <i>Desi_wild_55922</i>  | NA                                  | <i>Ca_desi_scaffold</i> | 55922                   | T/G  | Gene_Ca_14370.1    | DOWNSTREAM                    | NA                                                                   |
| <i>Desi_wild_56104</i>  | NA                                  | <i>Ca_desi_scaffold</i> | 56104                   | A/C  | Gene_Ca_14370.1    | DOWNSTREAM                    | NA                                                                   |
| <i>Desi_wild_56132</i>  | NA                                  | <i>Ca_desi_scaffold</i> | 56132                   | A/C  | Gene_Ca_14370.1    | DOWNSTREAM                    | NA                                                                   |
| <i>Desi_wild_35493</i>  | NA                                  | <i>Ca_desi_scaffold</i> | 35493                   | T/G  | Gene_Ca_14375.1    | INTRON                        | E3 ubiquitin-protein ligase BRE1-like 1                              |
| <i>Desi_wild_35540</i>  | NA                                  | <i>Ca_desi_scaffold</i> | 35540                   | C/A  | Gene_Ca_14375.1    | INTRON                        | E3 ubiquitin-protein ligase BRE1-like 1                              |
| <i>Desi_wild_35541</i>  | NA                                  | <i>Ca_desi_scaffold</i> | 35541                   | G/A  | Gene_Ca_14375.1    | INTRON                        | E3 ubiquitin-protein ligase BRE1-like 1                              |
| <i>Desi_wild_39948</i>  | NA                                  | <i>Ca_desi_scaffold</i> | 39948                   | C/T  | Gene_Ca_14375.1    | INTRON                        | E3 ubiquitin-protein ligase BRE1-like 1                              |
| <i>Desi_wild_40024</i>  | NA                                  | <i>Ca_desi_scaffold</i> | 40024                   | C/A  | Gene_Ca_14375.1    | INTRON                        | E3 ubiquitin-protein ligase BRE1-like 1                              |
| <i>Desi_wild_40027</i>  | NA                                  | <i>Ca_desi_scaffold</i> | 40027                   | A/C  | Gene_Ca_14375.1    | INTRON                        | E3 ubiquitin-protein ligase BRE1-like 1                              |
| <i>Desi_wild_40036</i>  | NA                                  | <i>Ca_desi_scaffold</i> | 40036                   | C/A  | Gene_Ca_14375.1    | INTRON                        | E3 ubiquitin-protein ligase BRE1-like 1                              |
| <i>Desi_wild_27322</i>  | NA                                  | <i>Ca_desi_scaffold</i> | 27322                   | A/C  | Gene_Ca_09797.1    | UPSTREAM                      | Villin-3                                                             |
| <i>Desi_wild_52495</i>  | NA                                  | <i>Ca_desi_scaffold</i> | 52495                   | T/G  | NA                 | INTERGENIC                    | NA                                                                   |
| <i>Desi_wild_52517</i>  | NA                                  | <i>Ca_desi_scaffold</i> | 52517                   | G/A  | NA                 | INTERGENIC                    | NA                                                                   |
| <i>Desi_wild_53397</i>  | NA                                  | <i>Ca_desi_scaffold</i> | 53397                   | T/G  | NA                 | INTERGENIC                    | NA                                                                   |
| <i>Desi_wild_5358</i>   | NA                                  | <i>Ca_desi_scaffold</i> | 5358                    | C/G  | NA                 | INTERGENIC                    | NA                                                                   |
| <i>Desi_wild_7126</i>   | NA                                  | <i>Ca_desi_scaffold</i> | 7126                    | A/T  | NA                 | INTERGENIC                    | NA                                                                   |
| <i>Desi_wild_7180</i>   | NA                                  | <i>Ca_desi_scaffold</i> | 7180                    | A/G  | NA                 | INTERGENIC                    | NA                                                                   |
| <i>Desi_wild_7925</i>   | NA                                  | <i>Ca_desi_scaffold</i> | 7925                    | G/A  | NA                 | INTERGENIC                    | NA                                                                   |
| <i>Desi_wild_36211</i>  | NA                                  | <i>Ca_desi_scaffold</i> | 36211                   | G/A  | Gene_Ca_14385.1    | SYNONYMOUS_CODING             | NA                                                                   |
| <i>Desi_wild_36964</i>  | NA                                  | <i>Ca_desi_scaffold</i> | 36964                   | A/G  | Gene_Ca_14385.1    | INTRON                        | NA                                                                   |
| <i>Desi_wild_53215</i>  | NA                                  | <i>Ca_desi_scaffold</i> | 53215                   | G/T  | Gene_Ca_14387.2    | SYNONYMOUS_CODING             | NA                                                                   |
| <i>Desi_wild_53697</i>  | NA                                  | <i>Ca_desi_scaffold</i> | 53697                   | G/T  | Gene_Ca_14387.2    | INTRON                        | NA                                                                   |
| <i>Desi_wild_53698</i>  | NA                                  | <i>Ca_desi_scaffold</i> | 53698                   | T/G  | Gene_Ca_14387.2    | INTRON                        | NA                                                                   |
| <i>Desi_wild_83597</i>  | NA                                  | <i>Ca_desi_scaffold</i> | 83597                   | C/A  | Gene_Ca_14389.1    | NON_SYNONYMOUS_CODING         | WD and tetra-tricopeptide repeats protein 1                          |
| <i>Desi_wild_98686</i>  | NA                                  | <i>Ca_desi_scaffold</i> | 98686                   | A/G  | Gene_Ca_14390.1    | UPSTREAM                      | Serine/threonine-protein kinase-like protein At1g28390               |
| <i>Desi_wild_478</i>    | NA                                  | <i>Ca_desi_scaffold</i> | 478                     | T/C  | Gene_Ca_14399.1    | SYNONYMOUS_CODING             | Tripeptidyl-peptidase 2                                              |
| <i>Desi_wild_64832</i>  | NA                                  | <i>Ca_desi_scaffold</i> | 64832                   | T/C  | NA                 | INTERGENIC                    | NA                                                                   |
| <i>Desi_wild_79716</i>  | NA                                  | <i>Ca_desi_scaffold</i> | 79716                   | C/G  | NA                 | INTERGENIC                    | NA                                                                   |
| <i>Desi_wild_38148</i>  | NA                                  | <i>Ca_desi_scaffold</i> | 38148                   | A/G  | NA                 | INTERGENIC                    | NA                                                                   |
| <i>Desi_wild_38164</i>  | NA                                  | <i>Ca_desi_scaffold</i> | 38164                   | T/G  | NA                 | INTERGENIC                    | NA                                                                   |
| <i>Desi_wild_38237</i>  | NA                                  | <i>Ca_desi_scaffold</i> | 38237                   | C/A  | NA                 | INTERGENIC                    | NA                                                                   |
| <i>Desi_wild_86295</i>  | NA                                  | <i>Ca_desi_scaffold</i> | 86295                   | C/A  | Gene_Ca_14410.1    | INTRON                        | Histone H1                                                           |
| <i>Desi_wild_86296</i>  | NA                                  | <i>Ca_desi_scaffold</i> | 86296                   | A/G  | Gene_Ca_14410.1    | INTRON                        | Histone H1                                                           |
| <i>Desi_wild_95933</i>  | NA                                  | <i>Ca_desi_scaffold</i> | 95933                   | G/A  | Gene_Ca_14411.1    | SYNONYMOUS_CODING             | Major facilitator superfamily protein                                |
| <i>Desi_wild_96041</i>  | NA                                  | <i>Ca_desi_scaffold</i> | 96041                   | T/G  | Gene_Ca_14411.1    | SYNONYMOUS_CODING             | Major facilitator superfamily protein                                |
| <i>Desi_wild_106083</i> | NA                                  | <i>Ca_desi_scaffold</i> | 106083                  | C/T  | NA                 | INTERGENIC                    | NA                                                                   |
| <i>Desi_wild_17576</i>  | NA                                  | <i>Ca_desi_scaffold</i> | 17576                   | A/T  | Gene_Ca_14426.1    | NON_SYNONYMOUS_CODING         | LETM1 and EF-hand domain-containing protein anon-60Da, mitochondrial |
| <i>Desi_wild_26260</i>  | NA                                  | <i>Ca_desi_scaffold</i> | 26260                   | A/C  | Gene_Ca_14426.1    | SYNONYMOUS_CODING             | LETM1 and EF-hand domain-containing protein anon-60Da, mitochondrial |
| <i>Desi_wild_26322</i>  | NA                                  | <i>Ca_desi_scaffold</i> | 26322                   | C/T  | Gene_Ca_14426.1    | NON_SYNONYMOUS_CODING         | LETM1 and EF-hand domain-containing protein anon-60Da, mitochondrial |
| <i>Desi_wild_18429</i>  | NA                                  | <i>Ca_desi_scaffold</i> | 18429                   | A/T  | NA                 | INTERGENIC                    | NA                                                                   |
| <i>Desi_wild_78195</i>  | NA                                  | <i>Ca_desi_scaffold</i> | 78195                   | G/T  | NA                 | INTERGENIC                    | NA                                                                   |

| SNP IDs                 | NCBI dbSNP accession IDs (NCBI_SS#) | Chromosomes             | Physical positions (bp) | SNPs | Gene accession IDs | Sequence components of genome | Putative functions                                                                        |
|-------------------------|-------------------------------------|-------------------------|-------------------------|------|--------------------|-------------------------------|-------------------------------------------------------------------------------------------|
| <i>Desi_wild_84082</i>  | NA                                  | <i>Ca_desi_scaffold</i> | 84082                   | T/C  | Gene_Ca_14439.1    | INTRON                        | Protein BPS1, chloroplastic                                                               |
| <i>Desi_wild_84202</i>  | NA                                  | <i>Ca_desi_scaffold</i> | 84202                   | T/C  | Gene_Ca_14439.1    | INTRON                        | Protein BPS1, chloroplastic                                                               |
| <i>Desi_wild_26212</i>  | NA                                  | <i>Ca_desi_scaffold</i> | 26212                   | C/T  | NA                 | INTERGENIC                    | NA                                                                                        |
| <i>Desi_wild_27285</i>  | NA                                  | <i>Ca_desi_scaffold</i> | 27285                   | T/G  | NA                 | INTERGENIC                    | NA                                                                                        |
| <i>Desi_wild_76120</i>  | NA                                  | <i>Ca_desi_scaffold</i> | 76120                   | G/T  | NA                 | INTERGENIC                    | NA                                                                                        |
| <i>Desi_wild_87031</i>  | NA                                  | <i>Ca_desi_scaffold</i> | 87031                   | A/T  | Gene_Ca_14445.1    | INTRON                        | SWI/SNF-related matrix-associated actin-dependent regulator of chromatin subfamily A cont |
| <i>Desi_wild_87099</i>  | NA                                  | <i>Ca_desi_scaffold</i> | 87099                   | G/C  | Gene_Ca_14445.1    | INTRON                        | SWI/SNF-related matrix-associated actin-dependent regulator of chromatin subfamily A cont |
| <i>Desi_wild_91967</i>  | NA                                  | <i>Ca_desi_scaffold</i> | 91967                   | C/A  | Gene_Ca_14445.1    | INTRON                        | SWI/SNF-related matrix-associated actin-dependent regulator of chromatin subfamily A cont |
| <i>Desi_wild_92014</i>  | NA                                  | <i>Ca_desi_scaffold</i> | 92014                   | G/A  | Gene_Ca_14445.1    | INTRON                        | SWI/SNF-related matrix-associated actin-dependent regulator of chromatin subfamily A cont |
| <i>Desi_wild_98121</i>  | NA                                  | <i>Ca_desi_scaffold</i> | 98121                   | C/G  | Gene_Ca_14445.1    | INTRON                        | SWI/SNF-related matrix-associated actin-dependent regulator of chromatin subfamily A cont |
| <i>Desi_wild_98125</i>  | NA                                  | <i>Ca_desi_scaffold</i> | 98125                   | C/T  | Gene_Ca_14445.1    | INTRON                        | SWI/SNF-related matrix-associated actin-dependent regulator of chromatin subfamily A cont |
| <i>Desi_wild_98128</i>  | NA                                  | <i>Ca_desi_scaffold</i> | 98128                   | T/G  | Gene_Ca_14445.1    | INTRON                        | SWI/SNF-related matrix-associated actin-dependent regulator of chromatin subfamily A cont |
| <i>Desi_wild_98155</i>  | NA                                  | <i>Ca_desi_scaffold</i> | 98155                   | C/T  | Gene_Ca_14445.1    | INTRON                        | SWI/SNF-related matrix-associated actin-dependent regulator of chromatin subfamily A cont |
| <i>Desi_wild_98214</i>  | NA                                  | <i>Ca_desi_scaffold</i> | 98214                   | C/T  | Gene_Ca_14445.1    | INTRON                        | SWI/SNF-related matrix-associated actin-dependent regulator of chromatin subfamily A cont |
| <i>Desi_wild_98216</i>  | NA                                  | <i>Ca_desi_scaffold</i> | 98216                   | G/A  | Gene_Ca_14445.1    | INTRON                        | SWI/SNF-related matrix-associated actin-dependent regulator of chromatin subfamily A cont |
| <i>Desi_wild_98277</i>  | NA                                  | <i>Ca_desi_scaffold</i> | 98277                   | C/T  | Gene_Ca_14445.1    | INTRON                        | SWI/SNF-related matrix-associated actin-dependent regulator of chromatin subfamily A cont |
| <i>Desi_wild_98295</i>  | NA                                  | <i>Ca_desi_scaffold</i> | 98295                   | T/C  | Gene_Ca_14445.1    | INTRON                        | SWI/SNF-related matrix-associated actin-dependent regulator of chromatin subfamily A cont |
| <i>Desi_wild_98299</i>  | NA                                  | <i>Ca_desi_scaffold</i> | 98299                   | T/C  | Gene_Ca_14445.1    | INTRON                        | SWI/SNF-related matrix-associated actin-dependent regulator of chromatin subfamily A cont |
| <i>Desi_wild_98372</i>  | NA                                  | <i>Ca_desi_scaffold</i> | 98372                   | C/T  | Gene_Ca_14445.1    | INTRON                        | SWI/SNF-related matrix-associated actin-dependent regulator of chromatin subfamily A cont |
| <i>Desi_wild_98420</i>  | NA                                  | <i>Ca_desi_scaffold</i> | 98420                   | C/T  | Gene_Ca_14445.1    | INTRON                        | SWI/SNF-related matrix-associated actin-dependent regulator of chromatin subfamily A cont |
| <i>Desi_wild_98443</i>  | NA                                  | <i>Ca_desi_scaffold</i> | 98443                   | C/T  | Gene_Ca_14445.1    | INTRON                        | SWI/SNF-related matrix-associated actin-dependent regulator of chromatin subfamily A cont |
| <i>Desi_wild_100027</i> | NA                                  | <i>Ca_desi_scaffold</i> | 100027                  | T/C  | Gene_Ca_14445.1    | INTRON                        | SWI/SNF-related matrix-associated actin-dependent regulator of chromatin subfamily A cont |
| <i>Desi_wild_100047</i> | NA                                  | <i>Ca_desi_scaffold</i> | 100047                  | G/T  | Gene_Ca_14445.1    | INTRON                        | SWI/SNF-related matrix-associated actin-dependent regulator of chromatin subfamily A cont |
| <i>Desi_wild_100048</i> | NA                                  | <i>Ca_desi_scaffold</i> | 100048                  | C/T  | Gene_Ca_14445.1    | INTRON                        | SWI/SNF-related matrix-associated actin-dependent regulator of chromatin subfamily A cont |
| <i>Desi_wild_124746</i> | NA                                  | <i>Ca_desi_scaffold</i> | 124746                  | T/A  | NA                 | INTERGENIC                    | NA                                                                                        |
| <i>Desi_wild_205802</i> | NA                                  | <i>Ca_desi_scaffold</i> | 205802                  | A/C  | Gene_Ca_09676.1    | NON_SYNONYMOUS_CODING         | Chaperone protein dnaJ 10                                                                 |
| <i>Desi_wild_138176</i> | NA                                  | <i>Ca_desi_scaffold</i> | 138176                  | G/A  | NA                 | INTERGENIC                    | NA                                                                                        |
| <i>Desi_wild_158759</i> | NA                                  | <i>Ca_desi_scaffold</i> | 158759                  | G/C  | NA                 | INTERGENIC                    | NA                                                                                        |
| <i>Desi_wild_158856</i> | NA                                  | <i>Ca_desi_scaffold</i> | 158856                  | C/T  | NA                 | INTERGENIC                    | NA                                                                                        |
| <i>Desi_wild_57979</i>  | NA                                  | <i>Ca_desi_scaffold</i> | 57979                   | C/T  | NA                 | INTERGENIC                    | NA                                                                                        |
| <i>Desi_wild_58292</i>  | NA                                  | <i>Ca_desi_scaffold</i> | 58292                   | T/C  | NA                 | INTERGENIC                    | NA                                                                                        |
| <i>Desi_wild_15697</i>  | NA                                  | <i>Ca_desi_scaffold</i> | 15697                   | C/G  | Gene_Ca_09824.1    | UPSTREAM                      | Nuclear pore glycoprotein p62                                                             |
| <i>Desi_wild_16238</i>  | NA                                  | <i>Ca_desi_scaffold</i> | 16238                   | C/T  | Gene_Ca_09824.1    | UPSTREAM                      | Nuclear pore glycoprotein p62                                                             |
| <i>Desi_wild_16370</i>  | NA                                  | <i>Ca_desi_scaffold</i> | 16370                   | T/G  | Gene_Ca_09824.1    | UPSTREAM                      | Nuclear pore glycoprotein p62                                                             |
| <i>Desi_wild_24395</i>  | NA                                  | <i>Ca_desi_scaffold</i> | 24395                   | T/G  | Gene_Ca_09824.1    | INTRON                        | Nuclear pore glycoprotein p62                                                             |
| <i>Desi_wild_24459</i>  | NA                                  | <i>Ca_desi_scaffold</i> | 24459                   | G/T  | Gene_Ca_09824.1    | INTRON                        | Nuclear pore glycoprotein p62                                                             |
| <i>Desi_wild_66261</i>  | NA                                  | <i>Ca_desi_scaffold</i> | 66261                   | T/C  | NA                 | INTERGENIC                    | NA                                                                                        |
| <i>Desi_wild_66262</i>  | NA                                  | <i>Ca_desi_scaffold</i> | 66262                   | C/T  | NA                 | INTERGENIC                    | NA                                                                                        |
| <i>Desi_wild_53262</i>  | NA                                  | <i>Ca_desi_scaffold</i> | 53262                   | C/T  | Gene_Ca_14458.2    | NON_SYNONYMOUS_CODING         | NA                                                                                        |
| <i>Desi_wild_54133</i>  | NA                                  | <i>Ca_desi_scaffold</i> | 54133                   | A/G  | Gene_Ca_14458.2    | UPSTREAM                      | NA                                                                                        |
| <i>Desi_wild_82183</i>  | NA                                  | <i>Ca_desi_scaffold</i> | 82183                   | T/G  | NA                 | INTERGENIC                    | NA                                                                                        |
| <i>Desi_wild_43107</i>  | NA                                  | <i>Ca_desi_scaffold</i> | 43107                   | A/G  | Gene_Ca_14469.1    | NON_SYNONYMOUS_CODING         | Alpha-1,4-glucan-protein synthase [UDP-forming]                                           |
| <i>Desi_wild_85859</i>  | NA                                  | <i>Ca_desi_scaffold</i> | 85859                   | A/C  | Gene_Ca_14476.1    | DOWNSTREAM                    | Proteasome activator complex subunit 4                                                    |
| <i>Desi_wild_85867</i>  | NA                                  | <i>Ca_desi_scaffold</i> | 85867                   | A/C  | Gene_Ca_14476.1    | DOWNSTREAM                    | Proteasome activator complex subunit 4                                                    |



| SNP IDs                 | NCBI dbSNP accession IDs (NCBI_SS#) | Chromosomes             | Physical positions (bp) | SNPs | Gene accession IDs | Sequence components of genome | Putative functions                                            |
|-------------------------|-------------------------------------|-------------------------|-------------------------|------|--------------------|-------------------------------|---------------------------------------------------------------|
| <i>Desi_wild_85877</i>  | NA                                  | <i>Ca_desi_scaffold</i> | 85877                   | C/T  | Gene_Ca_14476.1    | DOWNSTREAM                    | Proteasome activator complex subunit 4                        |
| <i>Desi_wild_86093</i>  | NA                                  | <i>Ca_desi_scaffold</i> | 86093                   | A/C  | Gene_Ca_14476.1    | DOWNSTREAM                    | Proteasome activator complex subunit 4                        |
| <i>Desi_wild_3707</i>   | NA                                  | <i>Ca_desi_scaffold</i> | 3707                    | C/G  | Gene_Ca_14479.1    | DOWNSTREAM                    | Cation/H(+) antiporter 15                                     |
| <i>Desi_wild_84136</i>  | NA                                  | <i>Ca_desi_scaffold</i> | 84136                   | T/C  | NA                 | INTERGENIC                    | NA                                                            |
| <i>Desi_wild_11010</i>  | NA                                  | <i>Ca_desi_scaffold</i> | 11010                   | C/A  | Gene_Ca_14489.1    | SYNONYMOUS_CODING             | NA                                                            |
| <i>Desi_wild_11067</i>  | NA                                  | <i>Ca_desi_scaffold</i> | 11067                   | C/G  | Gene_Ca_14489.1    | NON_SYNONYMOUS_CODING         | NA                                                            |
| <i>Desi_wild_11068</i>  | NA                                  | <i>Ca_desi_scaffold</i> | 11068                   | C/T  | Gene_Ca_14489.1    | SYNONYMOUS_CODING             | NA                                                            |
| <i>Desi_wild_11385</i>  | NA                                  | <i>Ca_desi_scaffold</i> | 11385                   | T/G  | Gene_Ca_14489.1    | SYNONYMOUS_CODING             | NA                                                            |
| <i>Desi_wild_11386</i>  | NA                                  | <i>Ca_desi_scaffold</i> | 11386                   | G/C  | Gene_Ca_14489.1    | NON_SYNONYMOUS_CODING         | NA                                                            |
| <i>Desi_wild_11390</i>  | NA                                  | <i>Ca_desi_scaffold</i> | 11390                   | T/G  | Gene_Ca_14489.1    | NON_SYNONYMOUS_CODING         | NA                                                            |
| <i>Desi_wild_11403</i>  | NA                                  | <i>Ca_desi_scaffold</i> | 11403                   | T/C  | Gene_Ca_14489.1    | SYNONYMOUS_CODING             | NA                                                            |
| <i>Desi_wild_11432</i>  | NA                                  | <i>Ca_desi_scaffold</i> | 11432                   | G/T  | Gene_Ca_14489.1    | NON_SYNONYMOUS_CODING         | NA                                                            |
| <i>Desi_wild_11739</i>  | NA                                  | <i>Ca_desi_scaffold</i> | 11739                   | C/G  | Gene_Ca_14489.1    | NON_SYNONYMOUS_CODING         | NA                                                            |
| <i>Desi_wild_12786</i>  | NA                                  | <i>Ca_desi_scaffold</i> | 12786                   | G/T  | Gene_Ca_14489.1    | NON_SYNONYMOUS_CODING         | NA                                                            |
| <i>Desi_wild_67150</i>  | NA                                  | <i>Ca_desi_scaffold</i> | 67150                   | A/C  | Gene_Ca_14496.1    | SYNONYMOUS_CODING             | DUF246 domain-containing protein At1g04910                    |
| <i>Desi_wild_81649</i>  | NA                                  | <i>Ca_desi_scaffold</i> | 81649                   | C/A  | NA                 | INTERGENIC                    | NA                                                            |
| <i>Desi_wild_26584</i>  | NA                                  | <i>Ca_desi_scaffold</i> | 26584                   | T/C  | Gene_Ca_14499.1    | INTRON                        | wound-responsive family protein                               |
| <i>Desi_wild_27048</i>  | NA                                  | <i>Ca_desi_scaffold</i> | 27048                   | T/C  | Gene_Ca_14499.1    | INTRON                        | wound-responsive family protein                               |
| <i>Desi_wild_27063</i>  | NA                                  | <i>Ca_desi_scaffold</i> | 27063                   | A/T  | Gene_Ca_14499.1    | INTRON                        | wound-responsive family protein                               |
| <i>Desi_wild_27089</i>  | NA                                  | <i>Ca_desi_scaffold</i> | 27089                   | T/C  | Gene_Ca_14499.1    | INTRON                        | wound-responsive family protein                               |
| <i>Desi_wild_27132</i>  | NA                                  | <i>Ca_desi_scaffold</i> | 27132                   | T/C  | Gene_Ca_14499.1    | INTRON                        | wound-responsive family protein                               |
| <i>Desi_wild_27172</i>  | NA                                  | <i>Ca_desi_scaffold</i> | 27172                   | G/A  | Gene_Ca_14499.1    | INTRON                        | wound-responsive family protein                               |
| <i>Desi_wild_28401</i>  | NA                                  | <i>Ca_desi_scaffold</i> | 28401                   | C/G  | Gene_Ca_14499.1    | INTRON                        | wound-responsive family protein                               |
| <i>Desi_wild_28402</i>  | NA                                  | <i>Ca_desi_scaffold</i> | 28402                   | A/G  | Gene_Ca_14499.1    | INTRON                        | wound-responsive family protein                               |
| <i>Desi_wild_28419</i>  | NA                                  | <i>Ca_desi_scaffold</i> | 28419                   | A/G  | Gene_Ca_14499.1    | INTRON                        | wound-responsive family protein                               |
| <i>Desi_wild_28426</i>  | NA                                  | <i>Ca_desi_scaffold</i> | 28426                   | T/A  | Gene_Ca_14499.1    | INTRON                        | wound-responsive family protein                               |
| <i>Desi_wild_28494</i>  | NA                                  | <i>Ca_desi_scaffold</i> | 28494                   | G/A  | Gene_Ca_14499.1    | INTRON                        | wound-responsive family protein                               |
| <i>Desi_wild_28524</i>  | NA                                  | <i>Ca_desi_scaffold</i> | 28524                   | C/T  | Gene_Ca_14499.1    | INTRON                        | wound-responsive family protein                               |
| <i>Desi_wild_87097</i>  | NA                                  | <i>Ca_desi_scaffold</i> | 87097                   | G/A  | Gene_Ca_14503.1    | DOWNSTREAM                    | NAD kinase 2, chloroplastic                                   |
| <i>Desi_wild_87259</i>  | NA                                  | <i>Ca_desi_scaffold</i> | 87259                   | A/C  | Gene_Ca_14503.1    | DOWNSTREAM                    | NAD kinase 2, chloroplastic                                   |
| <i>Desi_wild_91514</i>  | NA                                  | <i>Ca_desi_scaffold</i> | 91514                   | C/T  | NA                 | INTERGENIC                    | NA                                                            |
| <i>Desi_wild_91560</i>  | NA                                  | <i>Ca_desi_scaffold</i> | 91560                   | G/A  | NA                 | INTERGENIC                    | NA                                                            |
| <i>Desi_wild_54981</i>  | NA                                  | <i>Ca_desi_scaffold</i> | 54981                   | C/T  | NA                 | INTERGENIC                    | NA                                                            |
| <i>Desi_wild_55002</i>  | NA                                  | <i>Ca_desi_scaffold</i> | 55002                   | C/T  | NA                 | INTERGENIC                    | NA                                                            |
| <i>Desi_wild_55008</i>  | NA                                  | <i>Ca_desi_scaffold</i> | 55008                   | G/T  | NA                 | INTERGENIC                    | NA                                                            |
| <i>Desi_wild_117770</i> | NA                                  | <i>Ca_desi_scaffold</i> | 117770                  | A/C  | Gene_Ca_09850.1    | INTRON                        | DNA topoisomerase 2                                           |
| <i>Desi_wild_14119</i>  | NA                                  | <i>Ca_desi_scaffold</i> | 14119                   | C/T  | Gene_Ca_14507.1    | INTRON                        | Mortality factor 4-like protein 1                             |
| <i>Desi_wild_44335</i>  | NA                                  | <i>Ca_desi_scaffold</i> | 44335                   | A/G  | Gene_Ca_14508.1    | INTRON                        | Probable cadmium/zinc-transporting ATPase HMA1, chloroplastic |
| <i>Desi_wild_75363</i>  | NA                                  | <i>Ca_desi_scaffold</i> | 75363                   | A/T  | Gene_Ca_14510.1    | NON_SYNONYMOUS_CODING         | Uncharacterized protein At2g41620                             |
| <i>Desi_wild_80339</i>  | NA                                  | <i>Ca_desi_scaffold</i> | 80339                   | G/A  | Gene_Ca_14510.1    | SYNONYMOUS_CODING             | Uncharacterized protein At2g41620                             |
| <i>Desi_wild_80457</i>  | NA                                  | <i>Ca_desi_scaffold</i> | 80457                   | A/C  | Gene_Ca_14510.1    | INTRON                        | Uncharacterized protein At2g41620                             |
| <i>Desi_wild_80493</i>  | NA                                  | <i>Ca_desi_scaffold</i> | 80493                   | C/A  | Gene_Ca_14510.1    | INTRON                        | Uncharacterized protein At2g41620                             |
| <i>Desi_wild_29428</i>  | NA                                  | <i>Ca_desi_scaffold</i> | 29428                   | A/G  | NA                 | INTERGENIC                    | NA                                                            |
| <i>Desi_wild_258813</i> | NA                                  | <i>Ca_desi_scaffold</i> | 258813                  | T/A  | Gene_Ca_09368.1    | NON_SYNONYMOUS_CODING         | Fasciclin-like arabinogalactan protein                        |

| SNP IDs                 | NCBI dbSNP accession IDs (NCBI_SS#) | Chromosomes             | Physical positions (bp) | SNPs | Gene accession IDs | Sequence components of genome | Putative functions                                               |
|-------------------------|-------------------------------------|-------------------------|-------------------------|------|--------------------|-------------------------------|------------------------------------------------------------------|
| <i>Desi_wild_259549</i> | NA                                  | <i>Ca_desi_scaffold</i> | 259549                  | T/G  | Gene_Ca_09368.1    | DOWNSTREAM                    | Fasciclin-like arabinogalactan protein                           |
| <i>Desi_wild_311355</i> | NA                                  | <i>Ca_desi_scaffold</i> | 311355                  | A/C  | Gene_Ca_09371.1    | NON_SYNONYMOUS_CODING         | Phospholipid-transporting ATPase 1                               |
| <i>Desi_wild_33598</i>  | NA                                  | <i>Ca_desi_scaffold</i> | 33598                   | G/A  | Gene_Ca_14515.2    | INTRON                        | NA                                                               |
| <i>Desi_wild_34654</i>  | NA                                  | <i>Ca_desi_scaffold</i> | 34654                   | T/C  | Gene_Ca_14515.2    | NON_SYNONYMOUS_CODING         | NA                                                               |
| <i>Desi_wild_67763</i>  | NA                                  | <i>Ca_desi_scaffold</i> | 67763                   | T/C  | Gene_Ca_14517.1    | INTRON                        | Nuclease S1                                                      |
| <i>Desi_wild_54679</i>  | NA                                  | <i>Ca_desi_scaffold</i> | 54679                   | G/A  | Gene_Ca_09852.1    | SYNONYMOUS_CODING             | COP1-interacting protein-related                                 |
| <i>Desi_wild_54718</i>  | NA                                  | <i>Ca_desi_scaffold</i> | 54718                   | A/G  | Gene_Ca_09852.1    | SYNONYMOUS_CODING             | COP1-interacting protein-related                                 |
| <i>Desi_wild_54733</i>  | NA                                  | <i>Ca_desi_scaffold</i> | 54733                   | T/G  | Gene_Ca_09852.1    | SYNONYMOUS_CODING             | COP1-interacting protein-related                                 |
| <i>Desi_wild_54745</i>  | NA                                  | <i>Ca_desi_scaffold</i> | 54745                   | A/C  | Gene_Ca_09852.1    | NON_SYNONYMOUS_CODING         | COP1-interacting protein-related                                 |
| <i>Desi_wild_69743</i>  | NA                                  | <i>Ca_desi_scaffold</i> | 69743                   | A/G  | NA                 | INTERGENIC                    | NA                                                               |
| <i>Desi_wild_69789</i>  | NA                                  | <i>Ca_desi_scaffold</i> | 69789                   | C/T  | NA                 | INTERGENIC                    | NA                                                               |
| <i>Desi_wild_57490</i>  | NA                                  | <i>Ca_desi_scaffold</i> | 57490                   | A/C  | Gene_Ca_14525.2    | NON_SYNONYMOUS_CODING         | Succinyl-CoA ligase [ADP-forming] subunit alpha-1, mitochondrial |
| <i>Desi_wild_89315</i>  | NA                                  | <i>Ca_desi_scaffold</i> | 89315                   | A/G  | Gene_Ca_14527.1    | DOWNSTREAM                    | DNA-binding protein RHL1                                         |
| <i>Desi_wild_89643</i>  | NA                                  | <i>Ca_desi_scaffold</i> | 89643                   | G/A  | NA                 | INTERGENIC                    | NA                                                               |
| <i>Desi_wild_89646</i>  | NA                                  | <i>Ca_desi_scaffold</i> | 89646                   | C/T  | NA                 | INTERGENIC                    | NA                                                               |
| <i>Desi_wild_89664</i>  | NA                                  | <i>Ca_desi_scaffold</i> | 89664                   | T/C  | NA                 | INTERGENIC                    | NA                                                               |
| <i>Desi_wild_89667</i>  | NA                                  | <i>Ca_desi_scaffold</i> | 89667                   | T/G  | NA                 | INTERGENIC                    | NA                                                               |
| <i>Desi_wild_89682</i>  | NA                                  | <i>Ca_desi_scaffold</i> | 89682                   | G/A  | NA                 | INTERGENIC                    | NA                                                               |
| <i>Desi_wild_89685</i>  | NA                                  | <i>Ca_desi_scaffold</i> | 89685                   | T/C  | NA                 | INTERGENIC                    | NA                                                               |
| <i>Desi_wild_89691</i>  | NA                                  | <i>Ca_desi_scaffold</i> | 89691                   | A/G  | NA                 | INTERGENIC                    | NA                                                               |
| <i>Desi_wild_89701</i>  | NA                                  | <i>Ca_desi_scaffold</i> | 89701                   | G/A  | NA                 | INTERGENIC                    | NA                                                               |
| <i>Desi_wild_4561</i>   | NA                                  | <i>Ca_desi_scaffold</i> | 4561                    | T/A  | Gene_Ca_14529.1    | NON_SYNONYMOUS_CODING         | Probable beta-D-xylosidase 6                                     |
| <i>Desi_wild_4587</i>   | NA                                  | <i>Ca_desi_scaffold</i> | 4587                    | A/C  | Gene_Ca_14529.1    | NON_SYNONYMOUS_CODING         | Probable beta-D-xylosidase 6                                     |
| <i>Desi_wild_4590</i>   | NA                                  | <i>Ca_desi_scaffold</i> | 4590                    | C/G  | Gene_Ca_14529.1    | NON_SYNONYMOUS_CODING         | Probable beta-D-xylosidase 6                                     |
| <i>Desi_wild_4875</i>   | NA                                  | <i>Ca_desi_scaffold</i> | 4875                    | A/C  | Gene_Ca_14529.1    | SYNONYMOUS_CODING             | Probable beta-D-xylosidase 6                                     |
| <i>Desi_wild_7087</i>   | NA                                  | <i>Ca_desi_scaffold</i> | 7087                    | G/T  | Gene_Ca_14529.1    | INTRON                        | Probable beta-D-xylosidase 6                                     |
| <i>Desi_wild_7400</i>   | NA                                  | <i>Ca_desi_scaffold</i> | 7400                    | C/T  | Gene_Ca_14529.1    | INTRON                        | Probable beta-D-xylosidase 6                                     |
| <i>Desi_wild_7811</i>   | NA                                  | <i>Ca_desi_scaffold</i> | 7811                    | G/A  | Gene_Ca_14529.1    | SYNONYMOUS_CODING             | Probable beta-D-xylosidase 6                                     |
| <i>Desi_wild_13449</i>  | NA                                  | <i>Ca_desi_scaffold</i> | 13449                   | A/T  | NA                 | INTERGENIC                    | NA                                                               |
| <i>Desi_wild_13459</i>  | NA                                  | <i>Ca_desi_scaffold</i> | 13459                   | T/A  | NA                 | INTERGENIC                    | NA                                                               |
| <i>Desi_wild_13460</i>  | NA                                  | <i>Ca_desi_scaffold</i> | 13460                   | T/A  | NA                 | INTERGENIC                    | NA                                                               |
| <i>Desi_wild_13461</i>  | NA                                  | <i>Ca_desi_scaffold</i> | 13461                   | A/T  | NA                 | INTERGENIC                    | NA                                                               |
| <i>Desi_wild_13473</i>  | NA                                  | <i>Ca_desi_scaffold</i> | 13473                   | C/A  | NA                 | INTERGENIC                    | NA                                                               |
| <i>Desi_wild_13477</i>  | NA                                  | <i>Ca_desi_scaffold</i> | 13477                   | T/A  | NA                 | INTERGENIC                    | NA                                                               |
| <i>Desi_wild_27874</i>  | NA                                  | <i>Ca_desi_scaffold</i> | 27874                   | A/C  | Gene_Ca_14531.2    | SYNONYMOUS_CODING             | NA                                                               |
| <i>Desi_wild_27880</i>  | NA                                  | <i>Ca_desi_scaffold</i> | 27880                   | G/A  | Gene_Ca_14531.2    | SYNONYMOUS_CODING             | NA                                                               |
| <i>Desi_wild_27883</i>  | NA                                  | <i>Ca_desi_scaffold</i> | 27883                   | A/C  | Gene_Ca_14531.2    | SYNONYMOUS_CODING             | NA                                                               |
| <i>Desi_wild_30783</i>  | NA                                  | <i>Ca_desi_scaffold</i> | 30783                   | A/G  | Gene_Ca_14531.2    | INTRON                        | NA                                                               |
| <i>Desi_wild_30823</i>  | NA                                  | <i>Ca_desi_scaffold</i> | 30823                   | T/G  | Gene_Ca_14531.2    | INTRON                        | NA                                                               |
| <i>Desi_wild_33957</i>  | NA                                  | <i>Ca_desi_scaffold</i> | 33957                   | A/C  | Gene_Ca_14531.1    | UPSTREAM                      | Protein of unknown function (duplicated DUF1399)                 |
| <i>Desi_wild_34284</i>  | NA                                  | <i>Ca_desi_scaffold</i> | 34284                   | C/T  | Gene_Ca_14531.1    | UPSTREAM                      | Protein of unknown function (duplicated DUF1399)                 |
| <i>Desi_wild_34369</i>  | NA                                  | <i>Ca_desi_scaffold</i> | 34369                   | A/G  | Gene_Ca_14531.1    | UPSTREAM                      | Protein of unknown function (duplicated DUF1399)                 |
| <i>Desi_wild_73123</i>  | NA                                  | <i>Ca_desi_scaffold</i> | 73123                   | G/T  | Gene_Ca_14535.1    | SYNONYMOUS_CODING             | Oligopeptidase A                                                 |
| <i>Desi_wild_73206</i>  | NA                                  | <i>Ca_desi_scaffold</i> | 73206                   | A/G  | Gene_Ca_14535.1    | INTRON                        | Oligopeptidase A                                                 |

| SNP IDs                | NCBI dbSNP accession IDs (NCBI_SS#) | Chromosomes             | Physical positions (bp) | SNPs | Gene accession IDs | Sequence components of genome  | Putative functions                                                            |
|------------------------|-------------------------------------|-------------------------|-------------------------|------|--------------------|--------------------------------|-------------------------------------------------------------------------------|
| <i>Desi_wild_73256</i> | NA                                  | <i>Ca_desi_scaffold</i> | 73256                   | A/T  | Gene_Ca_14535.1    | INTRON                         | Oligopeptidase A                                                              |
| <i>Desi_wild_24094</i> | NA                                  | <i>Ca_desi_scaffold</i> | 24094                   | G/A  | Gene_Ca_14539.1    | INTRON                         | Putative pentatricopeptide repeat-containing protein At1g77010, mitochondrial |
| <i>Desi_wild_34658</i> | NA                                  | <i>Ca_desi_scaffold</i> | 34658                   | C/T  | Gene_Ca_14540.2    | SYNONYMOUS_CODING              | 2-oxoisovalerate dehydrogenase subunit alpha, mitochondrial                   |
| <i>Desi_wild_88710</i> | NA                                  | <i>Ca_desi_scaffold</i> | 88710                   | T/G  | Gene_Ca_14549.1    | NON_SYNONYMOUS_CODING          | RuBisCO large subunit-binding protein subunit alpha, chloroplastic            |
| <i>Desi_wild_35514</i> | NA                                  | <i>Ca_desi_scaffold</i> | 35514                   | C/T  | Gene_Ca_14550.1    | INTRON                         | Macrophage erythroblast attacher                                              |
| <i>Desi_wild_35515</i> | NA                                  | <i>Ca_desi_scaffold</i> | 35515                   | G/T  | Gene_Ca_14550.1    | INTRON                         | Macrophage erythroblast attacher                                              |
| <i>Desi_wild_37269</i> | NA                                  | <i>Ca_desi_scaffold</i> | 37269                   | C/T  | Gene_Ca_14550.1    | UPSTREAM                       | Macrophage erythroblast attacher                                              |
| <i>Desi_wild_97452</i> | NA                                  | <i>Ca_desi_scaffold</i> | 97452                   | G/C  | Gene_Ca_14554.1    | START_GAINED: ATG, UTR_5_PRIME | Protoheme IX farnesyltransferase, mitochondrial                               |
| <i>Desi_wild_17928</i> | NA                                  | <i>Ca_desi_scaffold</i> | 17928                   | A/G  | NA                 | INTERGENIC                     | NA                                                                            |
| <i>Desi_wild_17947</i> | NA                                  | <i>Ca_desi_scaffold</i> | 17947                   | C/T  | NA                 | INTERGENIC                     | NA                                                                            |
| <i>Desi_wild_18774</i> | NA                                  | <i>Ca_desi_scaffold</i> | 18774                   | A/T  | NA                 | INTERGENIC                     | NA                                                                            |
| <i>Desi_wild_18818</i> | NA                                  | <i>Ca_desi_scaffold</i> | 18818                   | T/C  | NA                 | INTERGENIC                     | NA                                                                            |
| <i>Desi_wild_18821</i> | NA                                  | <i>Ca_desi_scaffold</i> | 18821                   | G/A  | NA                 | INTERGENIC                     | NA                                                                            |
| <i>Desi_wild_53073</i> | NA                                  | <i>Ca_desi_scaffold</i> | 53073                   | T/G  | Gene_Ca_09840.1    | NON_SYNONYMOUS_CODING          | Probable monodehydroascorbate reductase, cytoplasmic isoform 2                |
| <i>Desi_wild_68313</i> | NA                                  | <i>Ca_desi_scaffold</i> | 68313                   | G/A  | NA                 | INTERGENIC                     | NA                                                                            |
| <i>Desi_wild_88091</i> | NA                                  | <i>Ca_desi_scaffold</i> | 88091                   | C/T  | Gene_Ca_14574.1    | DOWNSTREAM                     | Protein of unknown function (DUF506)                                          |
| <i>Desi_wild_41387</i> | NA                                  | <i>Ca_desi_scaffold</i> | 41387                   | C/T  | NA                 | INTERGENIC                     | NA                                                                            |
| <i>Desi_wild_69679</i> | NA                                  | <i>Ca_desi_scaffold</i> | 69679                   | G/A  | Gene_Ca_14593.1    | INTRON                         | Polyol transporter 5                                                          |
| <i>Desi_wild_6318</i>  | NA                                  | <i>Ca_desi_scaffold</i> | 6318                    | G/A  | NA                 | INTERGENIC                     | NA                                                                            |
| <i>Desi_wild_6366</i>  | NA                                  | <i>Ca_desi_scaffold</i> | 6366                    | T/A  | NA                 | INTERGENIC                     | NA                                                                            |
| <i>Desi_wild_10407</i> | NA                                  | <i>Ca_desi_scaffold</i> | 10407                   | G/A  | Gene_Ca_14597.1    | SYNONYMOUS_CODING              | E3 ubiquitin-protein ligase KEG                                               |
| <i>Desi_wild_10573</i> | NA                                  | <i>Ca_desi_scaffold</i> | 10573                   | T/A  | Gene_Ca_14597.1    | NON_SYNONYMOUS_CODING          | E3 ubiquitin-protein ligase KEG                                               |
| <i>Desi_wild_14085</i> | NA                                  | <i>Ca_desi_scaffold</i> | 14085                   | A/G  | Gene_Ca_14597.1    | UPSTREAM                       | E3 ubiquitin-protein ligase KEG                                               |
| <i>Desi_wild_14086</i> | NA                                  | <i>Ca_desi_scaffold</i> | 14086                   | T/C  | Gene_Ca_14597.1    | START_GAINED: TTG, UTR_5_PRIME | E3 ubiquitin-protein ligase KEG                                               |
| <i>Desi_wild_60620</i> | NA                                  | <i>Ca_desi_scaffold</i> | 60620                   | A/C  | Gene_Ca_14603.1    | NON_SYNONYMOUS_CODING          | EIN3-binding F-box protein 1                                                  |
| <i>Desi_wild_61119</i> | NA                                  | <i>Ca_desi_scaffold</i> | 61119                   | A/T  | Gene_Ca_14603.1    | SYNONYMOUS_CODING              | EIN3-binding F-box protein 1                                                  |
| <i>Desi_wild_75396</i> | NA                                  | <i>Ca_desi_scaffold</i> | 75396                   | T/G  | NA                 | INTERGENIC                     | NA                                                                            |
| <i>Desi_wild_85146</i> | NA                                  | <i>Ca_desi_scaffold</i> | 85146                   | G/A  | NA                 | INTERGENIC                     | NA                                                                            |
| <i>Desi_wild_85147</i> | NA                                  | <i>Ca_desi_scaffold</i> | 85147                   | T/C  | NA                 | INTERGENIC                     | NA                                                                            |
| <i>Desi_wild_17514</i> | NA                                  | <i>Ca_desi_scaffold</i> | 17514                   | C/T  | Gene_Ca_14608.1    | INTRON                         | Alanine aminotransferase 1, mitochondrial                                     |
| <i>Desi_wild_32937</i> | NA                                  | <i>Ca_desi_scaffold</i> | 32937                   | A/G  | Gene_Ca_14609.1    | SYNONYMOUS_CODING              | Pectinesterase/pectinesterase inhibitor U1                                    |
| <i>Desi_wild_62227</i> | NA                                  | <i>Ca_desi_scaffold</i> | 62227                   | C/T  | Gene_Ca_14610.1    | INTRON                         | Exocyst complex component 5                                                   |
| <i>Desi_wild_62239</i> | NA                                  | <i>Ca_desi_scaffold</i> | 62239                   | G/A  | Gene_Ca_14610.1    | INTRON                         | Exocyst complex component 5                                                   |
| <i>Desi_wild_64098</i> | NA                                  | <i>Ca_desi_scaffold</i> | 64098                   | C/T  | Gene_Ca_14610.1    | INTRON                         | Exocyst complex component 5                                                   |
| <i>Desi_wild_64255</i> | NA                                  | <i>Ca_desi_scaffold</i> | 64255                   | T/C  | Gene_Ca_14610.1    | INTRON                         | Exocyst complex component 5                                                   |
| <i>Desi_wild_64438</i> | NA                                  | <i>Ca_desi_scaffold</i> | 64438                   | C/T  | Gene_Ca_14610.1    | INTRON                         | Exocyst complex component 5                                                   |
| <i>Desi_wild_64912</i> | NA                                  | <i>Ca_desi_scaffold</i> | 64912                   | T/C  | Gene_Ca_14610.1    | SYNONYMOUS_CODING              | Exocyst complex component 5                                                   |
| <i>Desi_wild_66131</i> | NA                                  | <i>Ca_desi_scaffold</i> | 66131                   | G/A  | Gene_Ca_14610.1    | SYNONYMOUS_CODING              | Exocyst complex component 5                                                   |
| <i>Desi_wild_75899</i> | NA                                  | <i>Ca_desi_scaffold</i> | 75899                   | T/A  | Gene_Ca_14611.1    | INTRON                         | Ubiquitin-conjugating enzyme E2 34                                            |
| <i>Desi_wild_137</i>   | NA                                  | <i>Ca_desi_scaffold</i> | 137                     | C/A  | NA                 | INTERGENIC                     | NA                                                                            |
| <i>Desi_wild_151</i>   | NA                                  | <i>Ca_desi_scaffold</i> | 151                     | C/T  | NA                 | INTERGENIC                     | NA                                                                            |
| <i>Desi_wild_8997</i>  | NA                                  | <i>Ca_desi_scaffold</i> | 8997                    | C/A  | Gene_Ca_14622.1    | UPSTREAM                       | Cyclin-U1-1                                                                   |
| <i>Desi_wild_8998</i>  | NA                                  | <i>Ca_desi_scaffold</i> | 8998                    | A/G  | Gene_Ca_14622.1    | UPSTREAM                       | Cyclin-U1-1                                                                   |
| <i>Desi_wild_35527</i> | NA                                  | <i>Ca_desi_scaffold</i> | 35527                   | T/A  | Gene_Ca_14624.1    | INTRON                         | Zinc finger protein CONSTANS-LIKE 12                                          |

| SNP IDs                 | NCBI dbSNP accession IDs (NCBI_SS#) | Chromosomes             | Physical positions (bp) | SNPs | Gene accession IDs | Sequence components of genome | Putative functions                                                   |
|-------------------------|-------------------------------------|-------------------------|-------------------------|------|--------------------|-------------------------------|----------------------------------------------------------------------|
| <i>Desi_wild_81962</i>  | NA                                  | <i>Ca_desi_scaffold</i> | 81962                   | G/A  | Gene_Ca_14631.1    | INTRON                        | Beta-amylase                                                         |
| <i>Desi_wild_82302</i>  | NA                                  | <i>Ca_desi_scaffold</i> | 82302                   | C/T  | Gene_Ca_14631.1    | NON_SYNONYMOUS_CODING         | Beta-amylase                                                         |
| <i>Desi_wild_82304</i>  | NA                                  | <i>Ca_desi_scaffold</i> | 82304                   | G/T  | Gene_Ca_14631.1    | SYNONYMOUS_CODING             | Beta-amylase                                                         |
| <i>Desi_wild_94199</i>  | NA                                  | <i>Ca_desi_scaffold</i> | 94199                   | G/A  | NA                 | INTERGENIC                    | NA                                                                   |
| <i>Desi_wild_94233</i>  | NA                                  | <i>Ca_desi_scaffold</i> | 94233                   | A/G  | NA                 | INTERGENIC                    | NA                                                                   |
| <i>Desi_wild_100824</i> | NA                                  | <i>Ca_desi_scaffold</i> | 100824                  | G/T  | Gene_Ca_14634.1    | NON_SYNONYMOUS_CODING         | Probable histone-lysine N-methyltransferase ATXR3                    |
| <i>Desi_wild_21783</i>  | NA                                  | <i>Ca_desi_scaffold</i> | 21783                   | T/G  | Gene_Ca_14635.1    | NON_SYNONYMOUS_CODING         | U-box domain-containing protein 13                                   |
| <i>Desi_wild_37651</i>  | NA                                  | <i>Ca_desi_scaffold</i> | 37651                   | C/A  | Gene_Ca_14638.2    | INTRON                        | NA                                                                   |
| <i>Desi_wild_37661</i>  | NA                                  | <i>Ca_desi_scaffold</i> | 37661                   | C/A  | Gene_Ca_14638.2    | INTRON                        | NA                                                                   |
| <i>Desi_wild_28884</i>  | NA                                  | <i>Ca_desi_scaffold</i> | 28884                   | G/C  | NA                 | INTERGENIC                    | NA                                                                   |
| <i>Desi_wild_32612</i>  | NA                                  | <i>Ca_desi_scaffold</i> | 32612                   | T/A  | Gene_Ca_09873.1    | INTRON                        | Transport inhibitor response 1-like protein                          |
| <i>Desi_wild_32647</i>  | NA                                  | <i>Ca_desi_scaffold</i> | 32647                   | G/C  | Gene_Ca_09873.1    | INTRON                        | Transport inhibitor response 1-like protein                          |
| <i>Desi_wild_13272</i>  | NA                                  | <i>Ca_desi_scaffold</i> | 13272                   | T/C  | Gene_Ca_09139.1    | INTRON                        | Probable LRR receptor-like serine/threonine-protein kinase At3g47570 |
| <i>Desi_wild_13310</i>  | NA                                  | <i>Ca_desi_scaffold</i> | 13310                   | A/G  | Gene_Ca_09139.1    | INTRON                        | Probable LRR receptor-like serine/threonine-protein kinase At3g47570 |
| <i>Desi_wild_243538</i> | NA                                  | <i>Ca_desi_scaffold</i> | 243538                  | C/T  | Gene_Ca_09162.2    | INTRON                        | Formin-like protein 14                                               |
| <i>Desi_wild_27511</i>  | NA                                  | <i>Ca_desi_scaffold</i> | 27511                   | A/T  | Gene_Ca_14658.1    | INTRON                        | Chaperone protein ClpB                                               |
| <i>Desi_wild_29348</i>  | NA                                  | <i>Ca_desi_scaffold</i> | 29348                   | A/T  | Gene_Ca_14658.1    | DOWNSTREAM                    | Chaperone protein ClpB                                               |
| <i>Desi_wild_29371</i>  | NA                                  | <i>Ca_desi_scaffold</i> | 29371                   | C/T  | Gene_Ca_14658.1    | DOWNSTREAM                    | Chaperone protein ClpB                                               |
| <i>Desi_wild_56722</i>  | NA                                  | <i>Ca_desi_scaffold</i> | 56722                   | T/C  | Gene_Ca_14660.1    | INTRON                        | N-(5'-phosphoribosyl)anthranilate isomerase                          |
| <i>Desi_wild_56757</i>  | NA                                  | <i>Ca_desi_scaffold</i> | 56757                   | T/C  | Gene_Ca_14660.1    | INTRON                        | N-(5'-phosphoribosyl)anthranilate isomerase                          |
| <i>Desi_wild_78188</i>  | NA                                  | <i>Ca_desi_scaffold</i> | 78188                   | G/C  | Gene_Ca_14663.1    | INTRON                        | Clathrin heavy chain 1                                               |
| <i>Desi_wild_79525</i>  | NA                                  | <i>Ca_desi_scaffold</i> | 79525                   | T/G  | Gene_Ca_14663.1    | INTRON                        | Clathrin heavy chain 1                                               |
| <i>Desi_wild_82113</i>  | NA                                  | <i>Ca_desi_scaffold</i> | 82113                   | A/G  | Gene_Ca_14663.1    | DOWNSTREAM                    | Clathrin heavy chain 1                                               |
| <i>Desi_wild_82678</i>  | NA                                  | <i>Ca_desi_scaffold</i> | 82678                   | T/C  | NA                 | INTERGENIC                    | NA                                                                   |
| <i>Desi_wild_88039</i>  | NA                                  | <i>Ca_desi_scaffold</i> | 88039                   | A/G  | Gene_Ca_14664.2    | NON_SYNONYMOUS_CODING         | unknown protein                                                      |
| <i>Desi_wild_27531</i>  | NA                                  | <i>Ca_desi_scaffold</i> | 27531                   | G/T  | Gene_Ca_14666.2    | NON_SYNONYMOUS_CODING         | NA                                                                   |
| <i>Desi_wild_80500</i>  | NA                                  | <i>Ca_desi_scaffold</i> | 80500                   | A/C  | NA                 | INTERGENIC                    | NA                                                                   |
| <i>Desi_wild_80507</i>  | NA                                  | <i>Ca_desi_scaffold</i> | 80507                   | T/C  | NA                 | INTERGENIC                    | NA                                                                   |
| <i>Desi_wild_80570</i>  | NA                                  | <i>Ca_desi_scaffold</i> | 80570                   | A/C  | NA                 | INTERGENIC                    | NA                                                                   |
| <i>Desi_wild_80615</i>  | NA                                  | <i>Ca_desi_scaffold</i> | 80615                   | G/T  | NA                 | INTERGENIC                    | NA                                                                   |
| <i>Desi_wild_80627</i>  | NA                                  | <i>Ca_desi_scaffold</i> | 80627                   | A/C  | NA                 | INTERGENIC                    | NA                                                                   |
| <i>Desi_wild_302</i>    | NA                                  | <i>Ca_desi_scaffold</i> | 302                     | C/T  | NA                 | INTERGENIC                    | NA                                                                   |
| <i>Desi_wild_304</i>    | NA                                  | <i>Ca_desi_scaffold</i> | 304                     | A/G  | NA                 | INTERGENIC                    | NA                                                                   |
| <i>Desi_wild_313</i>    | NA                                  | <i>Ca_desi_scaffold</i> | 313                     | C/T  | NA                 | INTERGENIC                    | NA                                                                   |
| <i>Desi_wild_321</i>    | NA                                  | <i>Ca_desi_scaffold</i> | 321                     | A/G  | NA                 | INTERGENIC                    | NA                                                                   |
| <i>Desi_wild_357</i>    | NA                                  | <i>Ca_desi_scaffold</i> | 357                     | G/C  | NA                 | INTERGENIC                    | NA                                                                   |
| <i>Desi_wild_362</i>    | NA                                  | <i>Ca_desi_scaffold</i> | 362                     | G/A  | NA                 | INTERGENIC                    | NA                                                                   |
| <i>Desi_wild_363</i>    | NA                                  | <i>Ca_desi_scaffold</i> | 363                     | C/T  | NA                 | INTERGENIC                    | NA                                                                   |
| <i>Desi_wild_408</i>    | NA                                  | <i>Ca_desi_scaffold</i> | 408                     | T/C  | NA                 | INTERGENIC                    | NA                                                                   |
| <i>Desi_wild_87657</i>  | NA                                  | <i>Ca_desi_scaffold</i> | 87657                   | C/T  | NA                 | INTERGENIC                    | NA                                                                   |
| <i>Desi_wild_45120</i>  | NA                                  | <i>Ca_desi_scaffold</i> | 45120                   | T/A  | NA                 | INTERGENIC                    | NA                                                                   |
| <i>Desi_wild_48266</i>  | NA                                  | <i>Ca_desi_scaffold</i> | 48266                   | T/C  | NA                 | INTERGENIC                    | NA                                                                   |
| <i>Desi_wild_48267</i>  | NA                                  | <i>Ca_desi_scaffold</i> | 48267                   | C/G  | NA                 | INTERGENIC                    | NA                                                                   |
| <i>Desi_wild_48288</i>  | NA                                  | <i>Ca_desi_scaffold</i> | 48288                   | G/A  | NA                 | INTERGENIC                    | NA                                                                   |

| SNP IDs                 | NCBI dbSNP accession IDs (NCBI_SS#) | Chromosomes             | Physical positions (bp) | SNPs | Gene accession IDs | Sequence components of genome | Putative functions                         |
|-------------------------|-------------------------------------|-------------------------|-------------------------|------|--------------------|-------------------------------|--------------------------------------------|
| <i>Desi_wild_124844</i> | NA                                  | <i>Ca_desi_scaffold</i> | 124844                  | T/C  | Gene_Ca_09881.1    | INTRON                        | NADPH-dependent thioredoxin reductase 3    |
| <i>Desi_wild_130166</i> | NA                                  | <i>Ca_desi_scaffold</i> | 130166                  | G/A  | Gene_Ca_09881.1    | INTRON                        | NADPH-dependent thioredoxin reductase 3    |
| <i>Desi_wild_66947</i>  | NA                                  | <i>Ca_desi_scaffold</i> | 66947                   | A/G  | Gene_Ca_14683.1    | UPSTREAM                      | E3 ubiquitin-protein ligase UPL1           |
| <i>Desi_wild_74830</i>  | NA                                  | <i>Ca_desi_scaffold</i> | 74830                   | A/T  | Gene_Ca_14683.1    | SYNONYMOUS_CODING             | E3 ubiquitin-protein ligase UPL1           |
| <i>Desi_wild_79335</i>  | NA                                  | <i>Ca_desi_scaffold</i> | 79335                   | G/A  | Gene_Ca_14683.1    | NON_SYNONYMOUS_CODING         | E3 ubiquitin-protein ligase UPL1           |
| <i>Desi_wild_90946</i>  | NA                                  | <i>Ca_desi_scaffold</i> | 90946                   | A/C  | Gene_Ca_14684.1    | INTRON                        | Crt homolog 2                              |
| <i>Desi_wild_7350</i>   | NA                                  | <i>Ca_desi_scaffold</i> | 7350                    | G/T  | Gene_Ca_09882.2    | INTRON                        | NA                                         |
| <i>Desi_wild_8860</i>   | NA                                  | <i>Ca_desi_scaffold</i> | 8860                    | G/A  | Gene_Ca_09882.2    | INTRON                        | NA                                         |
| <i>Desi_wild_58935</i>  | NA                                  | <i>Ca_desi_scaffold</i> | 58935                   | G/T  | NA                 | INTERGENIC                    | NA                                         |
| <i>Desi_wild_58999</i>  | NA                                  | <i>Ca_desi_scaffold</i> | 58999                   | G/A  | NA                 | INTERGENIC                    | NA                                         |
| <i>Desi_wild_77662</i>  | NA                                  | <i>Ca_desi_scaffold</i> | 77662                   | C/T  | NA                 | INTERGENIC                    | NA                                         |
| <i>Desi_wild_77697</i>  | NA                                  | <i>Ca_desi_scaffold</i> | 77697                   | A/C  | NA                 | INTERGENIC                    | NA                                         |
| <i>Desi_wild_77698</i>  | NA                                  | <i>Ca_desi_scaffold</i> | 77698                   | G/A  | NA                 | INTERGENIC                    | NA                                         |
| <i>Desi_wild_91564</i>  | NA                                  | <i>Ca_desi_scaffold</i> | 91564                   | A/C  | Gene_Ca_09891.1    | SYNONYMOUS_CODING             | U-box domain-containing protein 12         |
| <i>Desi_wild_91582</i>  | NA                                  | <i>Ca_desi_scaffold</i> | 91582                   | A/G  | Gene_Ca_09891.1    | SYNONYMOUS_CODING             | U-box domain-containing protein 12         |
| <i>Desi_wild_115253</i> | NA                                  | <i>Ca_desi_scaffold</i> | 115253                  | A/T  | Gene_Ca_09893.1    | INTRON                        | NA                                         |
| <i>Desi_wild_115265</i> | NA                                  | <i>Ca_desi_scaffold</i> | 115265                  | T/C  | Gene_Ca_09893.1    | INTRON                        | NA                                         |
| <i>Desi_wild_115369</i> | NA                                  | <i>Ca_desi_scaffold</i> | 115369                  | T/C  | Gene_Ca_09893.1    | INTRON                        | NA                                         |
| <i>Desi_wild_115504</i> | NA                                  | <i>Ca_desi_scaffold</i> | 115504                  | G/A  | Gene_Ca_09893.1    | INTRON                        | NA                                         |
| <i>Desi_wild_115543</i> | NA                                  | <i>Ca_desi_scaffold</i> | 115543                  | T/G  | Gene_Ca_09893.1    | INTRON                        | NA                                         |
| <i>Desi_wild_118632</i> | NA                                  | <i>Ca_desi_scaffold</i> | 118632                  | C/T  | Gene_Ca_09893.1    | INTRON                        | NA                                         |
| <i>Desi_wild_124725</i> | NA                                  | <i>Ca_desi_scaffold</i> | 124725                  | C/T  | Gene_Ca_09893.1    | INTRON                        | NA                                         |
| <i>Desi_wild_124726</i> | NA                                  | <i>Ca_desi_scaffold</i> | 124726                  | G/T  | Gene_Ca_09893.1    | INTRON                        | NA                                         |
| <i>Desi_wild_35238</i>  | NA                                  | <i>Ca_desi_scaffold</i> | 35238                   | A/G  | Gene_Ca_09895.1    | INTRON                        | unknown protein                            |
| <i>Desi_wild_225573</i> | NA                                  | <i>Ca_desi_scaffold</i> | 225573                  | C/T  | Gene_Ca_09657.1    | INTRON                        | NA                                         |
| <i>Desi_wild_225580</i> | NA                                  | <i>Ca_desi_scaffold</i> | 225580                  | A/G  | Gene_Ca_09657.1    | INTRON                        | NA                                         |
| <i>Desi_wild_225581</i> | NA                                  | <i>Ca_desi_scaffold</i> | 225581                  | A/C  | Gene_Ca_09657.1    | INTRON                        | NA                                         |
| <i>Desi_wild_225593</i> | NA                                  | <i>Ca_desi_scaffold</i> | 225593                  | C/T  | Gene_Ca_09657.1    | INTRON                        | NA                                         |
| <i>Desi_wild_225702</i> | NA                                  | <i>Ca_desi_scaffold</i> | 225702                  | G/A  | Gene_Ca_09657.1    | INTRON                        | NA                                         |
| <i>Desi_wild_225771</i> | NA                                  | <i>Ca_desi_scaffold</i> | 225771                  | T/C  | Gene_Ca_09657.1    | INTRON                        | NA                                         |
| <i>Desi_wild_225777</i> | NA                                  | <i>Ca_desi_scaffold</i> | 225777                  | G/A  | Gene_Ca_09657.1    | INTRON                        | NA                                         |
| <i>Desi_wild_225780</i> | NA                                  | <i>Ca_desi_scaffold</i> | 225780                  | A/T  | Gene_Ca_09657.1    | INTRON                        | NA                                         |
| <i>Desi_wild_243663</i> | NA                                  | <i>Ca_desi_scaffold</i> | 243663                  | G/A  | Gene_Ca_09657.1    | INTRON                        | NA                                         |
| <i>Desi_wild_248517</i> | NA                                  | <i>Ca_desi_scaffold</i> | 248517                  | A/C  | Gene_Ca_09657.1    | INTRON                        | NA                                         |
| <i>Desi_wild_253913</i> | NA                                  | <i>Ca_desi_scaffold</i> | 253913                  | A/T  | Gene_Ca_09657.1    | INTRON                        | NA                                         |
| <i>Desi_wild_88126</i>  | NA                                  | <i>Ca_desi_scaffold</i> | 88126                   | G/A  | NA                 | INTERGENIC                    | NA                                         |
| <i>Desi_wild_34784</i>  | NA                                  | <i>Ca_desi_scaffold</i> | 34784                   | A/G  | NA                 | INTERGENIC                    | NA                                         |
| <i>Desi_wild_34826</i>  | NA                                  | <i>Ca_desi_scaffold</i> | 34826                   | A/C  | NA                 | INTERGENIC                    | NA                                         |
| <i>Desi_wild_5222</i>   | NA                                  | <i>Ca_desi_scaffold</i> | 5222                    | A/G  | NA                 | INTERGENIC                    | NA                                         |
| <i>Desi_wild_86974</i>  | NA                                  | <i>Ca_desi_scaffold</i> | 86974                   | G/A  | Gene_Ca_09904.1    | NON_SYNONYMOUS_CODING         | NA                                         |
| <i>Desi_wild_97376</i>  | NA                                  | <i>Ca_desi_scaffold</i> | 97376                   | C/A  | Gene_Ca_09445.1    | INTRON                        | Sterol 3-beta-glucosyltransferase          |
| <i>Desi_wild_17285</i>  | NA                                  | <i>Ca_desi_scaffold</i> | 17285                   | G/A  | Gene_Ca_14701.1    | INTRON                        | DUF246 domain-containing protein At1g04910 |
| <i>Desi_wild_42734</i>  | NA                                  | <i>Ca_desi_scaffold</i> | 42734                   | G/C  | Gene_Ca_14703.1    | DOWNSTREAM                    | Carbonyl reductase [NADPH] 1               |
| <i>Desi_wild_42759</i>  | NA                                  | <i>Ca_desi_scaffold</i> | 42759                   | C/T  | Gene_Ca_14703.1    | DOWNSTREAM                    | Carbonyl reductase [NADPH] 1               |

| SNP IDs                | NCBI dbSNP accession IDs (NCBI_SS#) | Chromosomes             | Physical positions (bp) | SNPs | Gene accession IDs | Sequence components of genome | Putative functions                             |
|------------------------|-------------------------------------|-------------------------|-------------------------|------|--------------------|-------------------------------|------------------------------------------------|
| <i>Desi_wild_49018</i> | NA                                  | <i>Ca_desi_scaffold</i> | 49018                   | G/A  | Gene_Ca_14704.1    | NON_SYNONYMOUS_CODING         | Zinc finger protein CONSTANS-LIKE 1            |
| <i>Desi_wild_95731</i> | NA                                  | <i>Ca_desi_scaffold</i> | 95731                   | C/T  | NA                 | INTERGENIC                    | NA                                             |
| <i>Desi_wild_95736</i> | NA                                  | <i>Ca_desi_scaffold</i> | 95736                   | A/T  | NA                 | INTERGENIC                    | NA                                             |
| <i>Desi_wild_10460</i> | NA                                  | <i>Ca_desi_scaffold</i> | 10460                   | C/T  | Gene_Ca_09224.1    | SYNONYMOUS_CODING             | Myb-like protein L                             |
| <i>Desi_wild_10511</i> | NA                                  | <i>Ca_desi_scaffold</i> | 10511                   | C/T  | Gene_Ca_09224.1    | NON_SYNONYMOUS_CODING         | Myb-like protein L                             |
| <i>Desi_wild_57460</i> | NA                                  | <i>Ca_desi_scaffold</i> | 57460                   | T/C  | Gene_Ca_09227.1    | SYNONYMOUS_CODING             | Uncharacterized GPI-anchored protein At4g28100 |
| <i>Desi_wild_57564</i> | NA                                  | <i>Ca_desi_scaffold</i> | 57564                   | A/T  | Gene_Ca_09227.1    | NON_SYNONYMOUS_CODING         | Uncharacterized GPI-anchored protein At4g28100 |
| <i>Desi_wild_95248</i> | NA                                  | <i>Ca_desi_scaffold</i> | 95248                   | A/T  | NA                 | INTERGENIC                    | NA                                             |
| <i>Desi_wild_95268</i> | NA                                  | <i>Ca_desi_scaffold</i> | 95268                   | C/T  | NA                 | INTERGENIC                    | NA                                             |
| <i>Desi_wild_27367</i> | NA                                  | <i>Ca_desi_scaffold</i> | 27367                   | T/G  | Gene_Ca_14709.1    | INTRON                        | Protease 4                                     |
| <i>Desi_wild_51494</i> | NA                                  | <i>Ca_desi_scaffold</i> | 51494                   | T/C  | NA                 | INTERGENIC                    | NA                                             |
| <i>Desi_wild_62694</i> | NA                                  | <i>Ca_desi_scaffold</i> | 62694                   | C/T  | Gene_Ca_14715.1    | INTRON                        | Protein TIC110, chloroplastic                  |
| <i>Desi_wild_68856</i> | NA                                  | <i>Ca_desi_scaffold</i> | 68856                   | C/A  | Gene_Ca_14715.1    | NON_SYNONYMOUS_CODING         | Protein TIC110, chloroplastic                  |
| <i>Desi_wild_52145</i> | NA                                  | <i>Ca_desi_scaffold</i> | 52145                   | C/A  | Gene_Ca_14727.1    | DOWNSTREAM                    | U-box domain-containing protein 30             |
| <i>Desi_wild_89864</i> | NA                                  | <i>Ca_desi_scaffold</i> | 89864                   | G/A  | NA                 | INTERGENIC                    | NA                                             |
| <i>Desi_wild_89889</i> | NA                                  | <i>Ca_desi_scaffold</i> | 89889                   | G/T  | NA                 | INTERGENIC                    | NA                                             |
| <i>Desi_wild_89894</i> | NA                                  | <i>Ca_desi_scaffold</i> | 89894                   | A/T  | NA                 | INTERGENIC                    | NA                                             |
| <i>Desi_wild_90249</i> | NA                                  | <i>Ca_desi_scaffold</i> | 90249                   | C/T  | NA                 | INTERGENIC                    | NA                                             |
| <i>Desi_wild_23020</i> | NA                                  | <i>Ca_desi_scaffold</i> | 23020                   | C/A  | Gene_Ca_14730.1    | INTRON                        | Protein of unknown function (DUF1162)          |
| <i>Desi_wild_28196</i> | NA                                  | <i>Ca_desi_scaffold</i> | 28196                   | G/C  | Gene_Ca_14734.1    | NON_SYNONYMOUS_CODING         | Chaperone protein ClpB1                        |
| <i>Desi_wild_29019</i> | NA                                  | <i>Ca_desi_scaffold</i> | 29019                   | C/T  | Gene_Ca_14734.1    | SYNONYMOUS_CODING             | Chaperone protein ClpB1                        |
| <i>Desi_wild_46359</i> | NA                                  | <i>Ca_desi_scaffold</i> | 46359                   | A/G  | NA                 | INTERGENIC                    | NA                                             |
| <i>Desi_wild_46828</i> | NA                                  | <i>Ca_desi_scaffold</i> | 46828                   | T/C  | NA                 | INTERGENIC                    | NA                                             |
| <i>Desi_wild_24698</i> | NA                                  | <i>Ca_desi_scaffold</i> | 24698                   | A/C  | Gene_Ca_14743.1    | INTRON                        | Adipocyte plasma membrane-associated protein   |
| <i>Desi_wild_69129</i> | NA                                  | <i>Ca_desi_scaffold</i> | 69129                   | A/G  | Gene_Ca_14744.1    | NON_SYNONYMOUS_CODING         | Endochitinase                                  |
| <i>Desi_wild_69181</i> | NA                                  | <i>Ca_desi_scaffold</i> | 69181                   | T/G  | Gene_Ca_14744.1    | SYNONYMOUS_CODING             | Endochitinase                                  |
| <i>Desi_wild_4330</i>  | NA                                  | <i>Ca_desi_scaffold</i> | 4330                    | T/C  | NA                 | INTERGENIC                    | NA                                             |
| <i>Desi_wild_4340</i>  | NA                                  | <i>Ca_desi_scaffold</i> | 4340                    | T/C  | NA                 | INTERGENIC                    | NA                                             |
| <i>Desi_wild_4361</i>  | NA                                  | <i>Ca_desi_scaffold</i> | 4361                    | C/A  | NA                 | INTERGENIC                    | NA                                             |
| <i>Desi_wild_4364</i>  | NA                                  | <i>Ca_desi_scaffold</i> | 4364                    | T/C  | NA                 | INTERGENIC                    | NA                                             |
| <i>Desi_wild_83084</i> | NA                                  | <i>Ca_desi_scaffold</i> | 83084                   | A/C  | Gene_Ca_14761.1    | INTRON                        | GPI ethanolamine phosphate transferase 1       |
| <i>Desi_wild_84994</i> | NA                                  | <i>Ca_desi_scaffold</i> | 84994                   | T/C  | Gene_Ca_14761.1    | INTRON                        | GPI ethanolamine phosphate transferase 1       |
| <i>Desi_wild_90415</i> | NA                                  | <i>Ca_desi_scaffold</i> | 90415                   | A/G  | Gene_Ca_14761.1    | INTRON                        | GPI ethanolamine phosphate transferase 1       |
| <i>Desi_wild_56713</i> | NA                                  | <i>Ca_desi_scaffold</i> | 56713                   | T/C  | NA                 | INTERGENIC                    | NA                                             |
| <i>Desi_wild_19561</i> | NA                                  | <i>Ca_desi_scaffold</i> | 19561                   | T/C  | NA                 | INTERGENIC                    | NA                                             |
| <i>Desi_wild_68993</i> | NA                                  | <i>Ca_desi_scaffold</i> | 68993                   | T/G  | NA                 | INTERGENIC                    | NA                                             |
| <i>Desi_wild_20686</i> | NA                                  | <i>Ca_desi_scaffold</i> | 20686                   | T/G  | NA                 | INTERGENIC                    | NA                                             |
| <i>Desi_wild_25742</i> | NA                                  | <i>Ca_desi_scaffold</i> | 25742                   | C/T  | Gene_Ca_14800.1    | DOWNSTREAM                    | unknown protein                                |
| <i>Desi_wild_25777</i> | NA                                  | <i>Ca_desi_scaffold</i> | 25777                   | C/A  | Gene_Ca_14800.1    | DOWNSTREAM                    | unknown protein                                |
| <i>Desi_wild_81</i>    | NA                                  | <i>Ca_desi_scaffold</i> | 81                      | A/T  | NA                 | INTERGENIC                    | NA                                             |
| <i>Desi_wild_78431</i> | NA                                  | <i>Ca_desi_scaffold</i> | 78431                   | T/G  | NA                 | INTERGENIC                    | NA                                             |
| <i>Desi_wild_68201</i> | NA                                  | <i>Ca_desi_scaffold</i> | 68201                   | T/C  | Gene_Ca_14819.1    | NON_SYNONYMOUS_CODING         | Probable MYST-like histone acetyltransferase 1 |
| <i>Desi_wild_44938</i> | NA                                  | <i>Ca_desi_scaffold</i> | 44938                   | C/T  | NA                 | INTERGENIC                    | NA                                             |
| <i>Desi_wild_83854</i> | NA                                  | <i>Ca_desi_scaffold</i> | 83854                   | G/A  | NA                 | INTERGENIC                    | NA                                             |

| SNP IDs                 | NCBI dbSNP accession IDs (NCBI_SS#) | Chromosomes             | Physical positions (bp) | SNPs | Gene accession IDs | Sequence components of genome | Putative functions                                                   |
|-------------------------|-------------------------------------|-------------------------|-------------------------|------|--------------------|-------------------------------|----------------------------------------------------------------------|
| <i>Desi_wild_11833</i>  | NA                                  | <i>Ca_desi_scaffold</i> | 11833                   | T/A  | Gene_Ca_14837.1    | SYNONYMOUS_CODING             | Actin-related protein 3                                              |
| <i>Desi_wild_13505</i>  | NA                                  | <i>Ca_desi_scaffold</i> | 13505                   | T/A  | Gene_Ca_14837.1    | UPSTREAM                      | Actin-related protein 3                                              |
| <i>Desi_wild_65605</i>  | NA                                  | <i>Ca_desi_scaffold</i> | 65605                   | T/G  | Gene_Ca_14846.1    | DOWNSTREAM                    | Pentatricopeptide repeat-containing protein At1g13040, mitochondrial |
| <i>Desi_wild_66011</i>  | NA                                  | <i>Ca_desi_scaffold</i> | 66011                   | A/C  | Gene_Ca_14846.1    | DOWNSTREAM                    | Pentatricopeptide repeat-containing protein At1g13040, mitochondrial |
| <i>Desi_wild_9495</i>   | NA                                  | <i>Ca_desi_scaffold</i> | 9495                    | G/C  | NA                 | INTERGENIC                    | NA                                                                   |
| <i>Desi_wild_36773</i>  | NA                                  | <i>Ca_desi_scaffold</i> | 36773                   | C/T  | NA                 | INTERGENIC                    | NA                                                                   |
| <i>Desi_wild_36802</i>  | NA                                  | <i>Ca_desi_scaffold</i> | 36802                   | G/T  | NA                 | INTERGENIC                    | NA                                                                   |
| <i>Desi_wild_80740</i>  | NA                                  | <i>Ca_desi_scaffold</i> | 80740                   | G/A  | NA                 | INTERGENIC                    | NA                                                                   |
| <i>Desi_wild_80748</i>  | NA                                  | <i>Ca_desi_scaffold</i> | 80748                   | T/G  | NA                 | INTERGENIC                    | NA                                                                   |
| <i>Desi_wild_80799</i>  | NA                                  | <i>Ca_desi_scaffold</i> | 80799                   | C/T  | NA                 | INTERGENIC                    | NA                                                                   |
| <i>Desi_wild_80800</i>  | NA                                  | <i>Ca_desi_scaffold</i> | 80800                   | G/A  | NA                 | INTERGENIC                    | NA                                                                   |
| <i>Desi_wild_72524</i>  | NA                                  | <i>Ca_desi_scaffold</i> | 72524                   | C/A  | Gene_Ca_14865.1    | NON_SYNONYMOUS_CODING         | Chaperonin CPN60-2, mitochondrial                                    |
| <i>Desi_wild_159521</i> | NA                                  | <i>Ca_desi_scaffold</i> | 159521                  | C/A  | Gene_Ca_09967.1    | UPSTREAM                      | DNA-directed RNA polymerases I and III subunit RPAC1                 |
| <i>Desi_wild_85833</i>  | NA                                  | <i>Ca_desi_scaffold</i> | 85833                   | A/G  | NA                 | INTERGENIC                    | NA                                                                   |
| <i>Desi_wild_85918</i>  | NA                                  | <i>Ca_desi_scaffold</i> | 85918                   | T/C  | NA                 | INTERGENIC                    | NA                                                                   |
| <i>Desi_wild_85929</i>  | NA                                  | <i>Ca_desi_scaffold</i> | 85929                   | A/G  | NA                 | INTERGENIC                    | NA                                                                   |
| <i>Desi_wild_85980</i>  | NA                                  | <i>Ca_desi_scaffold</i> | 85980                   | G/A  | NA                 | INTERGENIC                    | NA                                                                   |
| <i>Desi_wild_20976</i>  | NA                                  | <i>Ca_desi_scaffold</i> | 20976                   | A/C  | NA                 | INTERGENIC                    | NA                                                                   |
| <i>Desi_wild_40084</i>  | NA                                  | <i>Ca_desi_scaffold</i> | 40084                   | G/A  | NA                 | INTERGENIC                    | NA                                                                   |
| <i>Desi_wild_40128</i>  | NA                                  | <i>Ca_desi_scaffold</i> | 40128                   | G/C  | NA                 | INTERGENIC                    | NA                                                                   |
| <i>Desi_wild_40154</i>  | NA                                  | <i>Ca_desi_scaffold</i> | 40154                   | T/C  | NA                 | INTERGENIC                    | NA                                                                   |
| <i>Desi_wild_40665</i>  | NA                                  | <i>Ca_desi_scaffold</i> | 40665                   | A/G  | NA                 | INTERGENIC                    | NA                                                                   |
| <i>Desi_wild_70592</i>  | NA                                  | <i>Ca_desi_scaffold</i> | 70592                   | A/G  | Gene_Ca_14873.1    | DOWNSTREAM                    | Superkiller viralicidic activity 2-like 2                            |
| <i>Desi_wild_78761</i>  | NA                                  | <i>Ca_desi_scaffold</i> | 78761                   | G/C  | Gene_Ca_14879.2    | SYNONYMOUS_CODING             | NA                                                                   |
| <i>Desi_wild_78792</i>  | NA                                  | <i>Ca_desi_scaffold</i> | 78792                   | T/C  | Gene_Ca_14879.2    | SYNONYMOUS_CODING             | NA                                                                   |
| <i>Desi_wild_79464</i>  | NA                                  | <i>Ca_desi_scaffold</i> | 79464                   | C/T  | Gene_Ca_14879.2    | SYNONYMOUS_CODING             | NA                                                                   |
| <i>Desi_wild_79478</i>  | NA                                  | <i>Ca_desi_scaffold</i> | 79478                   | G/A  | Gene_Ca_14879.2    | SYNONYMOUS_CODING             | NA                                                                   |
| <i>Desi_wild_79503</i>  | NA                                  | <i>Ca_desi_scaffold</i> | 79503                   | T/C  | Gene_Ca_14879.2    | SYNONYMOUS_CODING             | NA                                                                   |
| <i>Desi_wild_79509</i>  | NA                                  | <i>Ca_desi_scaffold</i> | 79509                   | A/T  | Gene_Ca_14879.2    | NON_SYNONYMOUS_CODING         | NA                                                                   |
| <i>Desi_wild_79521</i>  | NA                                  | <i>Ca_desi_scaffold</i> | 79521                   | A/T  | Gene_Ca_14879.2    | SYNONYMOUS_CODING             | NA                                                                   |
| <i>Desi_wild_81744</i>  | NA                                  | <i>Ca_desi_scaffold</i> | 81744                   | C/A  | Gene_Ca_14883.1    | NON_SYNONYMOUS_CODING         | Sucrose transport protein SUC5                                       |
| <i>Desi_wild_81745</i>  | NA                                  | <i>Ca_desi_scaffold</i> | 81745                   | A/G  | Gene_Ca_14883.1    | SYNONYMOUS_CODING             | Sucrose transport protein SUC5                                       |
| <i>Desi_wild_26503</i>  | NA                                  | <i>Ca_desi_scaffold</i> | 26503                   | T/C  | Gene_Ca_14886.1    | INTRON                        | Histone-lysine N-methyltransferase SETD1B                            |
| <i>Desi_wild_4180</i>   | NA                                  | <i>Ca_desi_scaffold</i> | 4180                    | C/A  | NA                 | INTERGENIC                    | NA                                                                   |
| <i>Desi_wild_84223</i>  | NA                                  | <i>Ca_desi_scaffold</i> | 84223                   | C/T  | Gene_Ca_14896.1    | NON_SYNONYMOUS_CODING         | Beta-amylase 7                                                       |
| <i>Desi_wild_27004</i>  | NA                                  | <i>Ca_desi_scaffold</i> | 27004                   | G/A  | NA                 | INTERGENIC                    | NA                                                                   |
| <i>Desi_wild_27022</i>  | NA                                  | <i>Ca_desi_scaffold</i> | 27022                   | T/A  | NA                 | INTERGENIC                    | NA                                                                   |
| <i>Desi_wild_36673</i>  | NA                                  | <i>Ca_desi_scaffold</i> | 36673                   | T/C  | Gene_Ca_14901.1    | INTRON                        | Putative GPI-anchor transamidase                                     |
| <i>Desi_wild_60476</i>  | NA                                  | <i>Ca_desi_scaffold</i> | 60476                   | A/T  | Gene_Ca_14903.1    | DOWNSTREAM                    | Polygalacturonase                                                    |
| <i>Desi_wild_60685</i>  | NA                                  | <i>Ca_desi_scaffold</i> | 60685                   | T/C  | Gene_Ca_14903.1    | DOWNSTREAM                    | Polygalacturonase                                                    |
| <i>Desi_wild_60700</i>  | NA                                  | <i>Ca_desi_scaffold</i> | 60700                   | G/A  | Gene_Ca_14903.1    | DOWNSTREAM                    | Polygalacturonase                                                    |
| <i>Desi_wild_60711</i>  | NA                                  | <i>Ca_desi_scaffold</i> | 60711                   | G/A  | Gene_Ca_14903.1    | DOWNSTREAM                    | Polygalacturonase                                                    |
| <i>Desi_wild_60712</i>  | NA                                  | <i>Ca_desi_scaffold</i> | 60712                   | T/C  | Gene_Ca_14903.1    | DOWNSTREAM                    | Polygalacturonase                                                    |
| <i>Desi_wild_18392</i>  | NA                                  | <i>Ca_desi_scaffold</i> | 18392                   | G/A  | NA                 | INTERGENIC                    | NA                                                                   |

| SNP IDs                | NCBI dbSNP accession IDs (NCBI_SS#) | Chromosomes             | Physical positions (bp) | SNPs | Gene accession IDs | Sequence components of genome | Putative functions                                                  |
|------------------------|-------------------------------------|-------------------------|-------------------------|------|--------------------|-------------------------------|---------------------------------------------------------------------|
| <i>Desi_wild_18409</i> | NA                                  | <i>Ca_desi_scaffold</i> | 18409                   | G/A  | NA                 | INTERGENIC                    | NA                                                                  |
| <i>Desi_wild_18456</i> | NA                                  | <i>Ca_desi_scaffold</i> | 18456                   | C/T  | NA                 | INTERGENIC                    | NA                                                                  |
| <i>Desi_wild_61423</i> | NA                                  | <i>Ca_desi_scaffold</i> | 61423                   | A/C  | Gene_Ca_14904.3    | NON_SYNONYMOUS_CODING         | NA                                                                  |
| <i>Desi_wild_37593</i> | NA                                  | <i>Ca_desi_scaffold</i> | 37593                   | T/C  | Gene_Ca_14910.1    | SYNONYMOUS_CODING             | 26S proteasome non-ATPase regulatory subunit 11                     |
| <i>Desi_wild_66038</i> | NA                                  | <i>Ca_desi_scaffold</i> | 66038                   | G/A  | Gene_Ca_14912.1    | INTRON                        | Probable ubiquinone biosynthesis protein UbiB                       |
| <i>Desi_wild_66068</i> | NA                                  | <i>Ca_desi_scaffold</i> | 66068                   | A/T  | Gene_Ca_14912.1    | INTRON                        | Probable ubiquinone biosynthesis protein UbiB                       |
| <i>Desi_wild_66069</i> | NA                                  | <i>Ca_desi_scaffold</i> | 66069                   | G/T  | Gene_Ca_14912.1    | INTRON                        | Probable ubiquinone biosynthesis protein UbiB                       |
| <i>Desi_wild_69994</i> | NA                                  | <i>Ca_desi_scaffold</i> | 69994                   | T/C  | Gene_Ca_14912.1    | UPSTREAM                      | Probable ubiquinone biosynthesis protein UbiB                       |
| <i>Desi_wild_70026</i> | NA                                  | <i>Ca_desi_scaffold</i> | 70026                   | C/T  | Gene_Ca_14912.1    | UPSTREAM                      | Probable ubiquinone biosynthesis protein UbiB                       |
| <i>Desi_wild_70027</i> | NA                                  | <i>Ca_desi_scaffold</i> | 70027                   | C/T  | Gene_Ca_14912.1    | UPSTREAM                      | Probable ubiquinone biosynthesis protein UbiB                       |
| <i>Desi_wild_70036</i> | NA                                  | <i>Ca_desi_scaffold</i> | 70036                   | G/A  | Gene_Ca_14912.1    | UPSTREAM                      | Probable ubiquinone biosynthesis protein UbiB                       |
| <i>Desi_wild_70041</i> | NA                                  | <i>Ca_desi_scaffold</i> | 70041                   | G/A  | Gene_Ca_14912.1    | UPSTREAM                      | Probable ubiquinone biosynthesis protein UbiB                       |
| <i>Desi_wild_70047</i> | NA                                  | <i>Ca_desi_scaffold</i> | 70047                   | G/A  | Gene_Ca_14912.1    | UPSTREAM                      | Probable ubiquinone biosynthesis protein UbiB                       |
| <i>Desi_wild_71125</i> | NA                                  | <i>Ca_desi_scaffold</i> | 71125                   | G/A  | Gene_Ca_14912.1    | UPSTREAM                      | Probable ubiquinone biosynthesis protein UbiB                       |
| <i>Desi_wild_71187</i> | NA                                  | <i>Ca_desi_scaffold</i> | 71187                   | G/A  | Gene_Ca_14912.1    | UPSTREAM                      | Probable ubiquinone biosynthesis protein UbiB                       |
| <i>Desi_wild_71195</i> | NA                                  | <i>Ca_desi_scaffold</i> | 71195                   | T/C  | Gene_Ca_14912.1    | UPSTREAM                      | Probable ubiquinone biosynthesis protein UbiB                       |
| <i>Desi_wild_71196</i> | NA                                  | <i>Ca_desi_scaffold</i> | 71196                   | C/G  | Gene_Ca_14912.1    | UPSTREAM                      | Probable ubiquinone biosynthesis protein UbiB                       |
| <i>Desi_wild_71279</i> | NA                                  | <i>Ca_desi_scaffold</i> | 71279                   | G/A  | Gene_Ca_14912.1    | UPSTREAM                      | Probable ubiquinone biosynthesis protein UbiB                       |
| <i>Desi_wild_71288</i> | NA                                  | <i>Ca_desi_scaffold</i> | 71288                   | G/T  | Gene_Ca_14912.1    | UPSTREAM                      | Probable ubiquinone biosynthesis protein UbiB                       |
| <i>Desi_wild_71305</i> | NA                                  | <i>Ca_desi_scaffold</i> | 71305                   | A/C  | Gene_Ca_14912.1    | UPSTREAM                      | Probable ubiquinone biosynthesis protein UbiB                       |
| <i>Desi_wild_71314</i> | NA                                  | <i>Ca_desi_scaffold</i> | 71314                   | A/G  | Gene_Ca_14912.1    | UPSTREAM                      | Probable ubiquinone biosynthesis protein UbiB                       |
| <i>Desi_wild_9887</i>  | NA                                  | <i>Ca_desi_scaffold</i> | 9887                    | G/A  | Gene_Ca_14914.2    | INTRON                        | NA                                                                  |
| <i>Desi_wild_12246</i> | NA                                  | <i>Ca_desi_scaffold</i> | 12246                   | A/C  | Gene_Ca_14914.2    | INTRON                        | NA                                                                  |
| <i>Desi_wild_30056</i> | NA                                  | <i>Ca_desi_scaffold</i> | 30056                   | T/C  | NA                 | INTERGENIC                    | NA                                                                  |
| <i>Desi_wild_30083</i> | NA                                  | <i>Ca_desi_scaffold</i> | 30083                   | T/A  | NA                 | INTERGENIC                    | NA                                                                  |
| <i>Desi_wild_79248</i> | NA                                  | <i>Ca_desi_scaffold</i> | 79248                   | T/G  | NA                 | INTERGENIC                    | NA                                                                  |
| <i>Desi_wild_28997</i> | NA                                  | <i>Ca_desi_scaffold</i> | 28997                   | A/G  | Gene_Ca_14936.1    | SYNONYMOUS_CODING             | LysM and putative peptidoglycan-binding domain-containing protein 2 |
| <i>Desi_wild_73401</i> | NA                                  | <i>Ca_desi_scaffold</i> | 73401                   | A/C  | Gene_Ca_14944.1    | NON_SYNONYMOUS_CODING         | Major facilitator superfamily protein                               |
| <i>Desi_wild_74659</i> | NA                                  | <i>Ca_desi_scaffold</i> | 74659                   | T/G  | Gene_Ca_14944.1    | SYNONYMOUS_CODING             | Major facilitator superfamily protein                               |
| <i>Desi_wild_20676</i> | NA                                  | <i>Ca_desi_scaffold</i> | 20676                   | C/T  | Gene_Ca_14953.1    | DOWNSTREAM                    | MADS-box protein FBP24                                              |
| <i>Desi_wild_20700</i> | NA                                  | <i>Ca_desi_scaffold</i> | 20700                   | G/C  | Gene_Ca_14953.1    | DOWNSTREAM                    | MADS-box protein FBP24                                              |
| <i>Desi_wild_44734</i> | NA                                  | <i>Ca_desi_scaffold</i> | 44734                   | G/A  | NA                 | INTERGENIC                    | NA                                                                  |
| <i>Desi_wild_44748</i> | NA                                  | <i>Ca_desi_scaffold</i> | 44748                   | A/G  | NA                 | INTERGENIC                    | NA                                                                  |
| <i>Desi_wild_44762</i> | NA                                  | <i>Ca_desi_scaffold</i> | 44762                   | T/C  | NA                 | INTERGENIC                    | NA                                                                  |
| <i>Desi_wild_44791</i> | NA                                  | <i>Ca_desi_scaffold</i> | 44791                   | C/T  | NA                 | INTERGENIC                    | NA                                                                  |
| <i>Desi_wild_44848</i> | NA                                  | <i>Ca_desi_scaffold</i> | 44848                   | C/G  | NA                 | INTERGENIC                    | NA                                                                  |
| <i>Desi_wild_50421</i> | NA                                  | <i>Ca_desi_scaffold</i> | 50421                   | C/G  | Gene_Ca_14956.1    | INTRON                        | HAUS augmin-like complex subunit 3                                  |
| <i>Desi_wild_50469</i> | NA                                  | <i>Ca_desi_scaffold</i> | 50469                   | G/A  | Gene_Ca_14956.1    | INTRON                        | HAUS augmin-like complex subunit 3                                  |
| <i>Desi_wild_50503</i> | NA                                  | <i>Ca_desi_scaffold</i> | 50503                   | C/T  | Gene_Ca_14956.1    | INTRON                        | HAUS augmin-like complex subunit 3                                  |
| <i>Desi_wild_50549</i> | NA                                  | <i>Ca_desi_scaffold</i> | 50549                   | C/T  | Gene_Ca_14956.1    | INTRON                        | HAUS augmin-like complex subunit 3                                  |
| <i>Desi_wild_50559</i> | NA                                  | <i>Ca_desi_scaffold</i> | 50559                   | G/A  | Gene_Ca_14956.1    | INTRON                        | HAUS augmin-like complex subunit 3                                  |
| <i>Desi_wild_50580</i> | NA                                  | <i>Ca_desi_scaffold</i> | 50580                   | G/A  | Gene_Ca_14956.1    | INTRON                        | HAUS augmin-like complex subunit 3                                  |
| <i>Desi_wild_50594</i> | NA                                  | <i>Ca_desi_scaffold</i> | 50594                   | A/G  | Gene_Ca_14956.1    | INTRON                        | HAUS augmin-like complex subunit 3                                  |
| <i>Desi_wild_50624</i> | NA                                  | <i>Ca_desi_scaffold</i> | 50624                   | G/A  | Gene_Ca_14956.1    | INTRON                        | HAUS augmin-like complex subunit 3                                  |



| SNP IDs         | NCBI dbSNP accession IDs (NCBI_SS#) | Chromosomes      | Physical positions (bp) | SNPs | Gene accession IDs | Sequence components of genome | Putative functions                                  |
|-----------------|-------------------------------------|------------------|-------------------------|------|--------------------|-------------------------------|-----------------------------------------------------|
| Desi_wild_50664 | NA                                  | Ca_desi_scaffold | 50664                   | T/C  | Gene_Ca_14956.1    | INTRON                        | HAUS augmin-like complex subunit 3                  |
| Desi_wild_50682 | NA                                  | Ca_desi_scaffold | 50682                   | C/A  | Gene_Ca_14956.1    | INTRON                        | HAUS augmin-like complex subunit 3                  |
| Desi_wild_50686 | NA                                  | Ca_desi_scaffold | 50686                   | T/A  | Gene_Ca_14956.1    | INTRON                        | HAUS augmin-like complex subunit 3                  |
| Desi_wild_50694 | NA                                  | Ca_desi_scaffold | 50694                   | C/T  | Gene_Ca_14956.1    | INTRON                        | HAUS augmin-like complex subunit 3                  |
| Desi_wild_50696 | NA                                  | Ca_desi_scaffold | 50696                   | G/C  | Gene_Ca_14956.1    | INTRON                        | HAUS augmin-like complex subunit 3                  |
| Desi_wild_50730 | NA                                  | Ca_desi_scaffold | 50730                   | T/C  | Gene_Ca_14956.1    | INTRON                        | HAUS augmin-like complex subunit 3                  |
| Desi_wild_32607 | NA                                  | Ca_desi_scaffold | 32607                   | G/A  | Gene_Ca_14959.1    | INTRON                        | Transcription factor HEC2                           |
| Desi_wild_33402 | NA                                  | Ca_desi_scaffold | 33402                   | A/T  | Gene_Ca_14959.1    | INTRON                        | Transcription factor HEC2                           |
| Desi_wild_56166 | NA                                  | Ca_desi_scaffold | 56166                   | T/A  | NA                 | INTERGENIC                    | NA                                                  |
| Desi_wild_9609  | NA                                  | Ca_desi_scaffold | 9609                    | G/T  | Gene_Ca_14962.1    | SYNONYMOUS_CODING             | ABC transporter B family member 1                   |
| Desi_wild_47216 | NA                                  | Ca_desi_scaffold | 47216                   | A/C  | Gene_Ca_14970.1    | NON_SYNONYMOUS_CODING         | Calcium-responsive transcription coactivator        |
| Desi_wild_48142 | NA                                  | Ca_desi_scaffold | 48142                   | G/A  | Gene_Ca_14970.1    | DOWNSTREAM                    | Calcium-responsive transcription coactivator        |
| Desi_wild_36222 | NA                                  | Ca_desi_scaffold | 36222                   | A/C  | NA                 | INTERGENIC                    | NA                                                  |
| Desi_wild_67077 | NA                                  | Ca_desi_scaffold | 67077                   | A/T  | NA                 | INTERGENIC                    | NA                                                  |
| Desi_wild_59977 | NA                                  | Ca_desi_scaffold | 59977                   | C/T  | NA                 | INTERGENIC                    | NA                                                  |
| Desi_wild_60018 | NA                                  | Ca_desi_scaffold | 60018                   | T/C  | NA                 | INTERGENIC                    | NA                                                  |
| Desi_wild_40467 | NA                                  | Ca_desi_scaffold | 40467                   | G/T  | Gene_Ca_14991.1    | NON_SYNONYMOUS_CODING         | Gamma-tubulin complex component 2                   |
| Desi_wild_45051 | NA                                  | Ca_desi_scaffold | 45051                   | A/G  | Gene_Ca_14991.1    | NON_SYNONYMOUS_CODING         | Gamma-tubulin complex component 2                   |
| Desi_wild_45057 | NA                                  | Ca_desi_scaffold | 45057                   | T/C  | Gene_Ca_14991.1    | NON_SYNONYMOUS_CODING         | Gamma-tubulin complex component 2                   |
| Desi_wild_72923 | NA                                  | Ca_desi_scaffold | 72923                   | A/C  | Gene_Ca_14994.1    | UPSTREAM                      | unknown protein                                     |
| Desi_wild_80913 | NA                                  | Ca_desi_scaffold | 80913                   | G/A  | NA                 | INTERGENIC                    | NA                                                  |
| Desi_wild_81951 | NA                                  | Ca_desi_scaffold | 81951                   | C/T  | NA                 | INTERGENIC                    | NA                                                  |
| Desi_wild_90149 | NA                                  | Ca_desi_scaffold | 90149                   | C/T  | Gene_Ca_14998.1    | UPSTREAM                      | lipase class 3 family protein                       |
| Desi_wild_90150 | NA                                  | Ca_desi_scaffold | 90150                   | C/G  | Gene_Ca_14998.1    | UPSTREAM                      | lipase class 3 family protein                       |
| Desi_wild_8413  | NA                                  | Ca_desi_scaffold | 8413                    | G/C  | Gene_Ca_14999.1    | INTRON                        | Zinc finger CCCH domain-containing protein 62       |
| Desi_wild_8582  | NA                                  | Ca_desi_scaffold | 8582                    | C/A  | Gene_Ca_14999.1    | INTRON                        | Zinc finger CCCH domain-containing protein 62       |
| Desi_wild_58155 | NA                                  | Ca_desi_scaffold | 58155                   | G/A  | Gene_Ca_15002.1    | SYNONYMOUS_CODING             | ABC transporter B family member 11                  |
| Desi_wild_58382 | NA                                  | Ca_desi_scaffold | 58382                   | A/T  | Gene_Ca_15002.1    | NON_SYNONYMOUS_CODING         | ABC transporter B family member 11                  |
| Desi_wild_58405 | NA                                  | Ca_desi_scaffold | 58405                   | A/C  | NA                 | INTERGENIC                    | NA                                                  |
| Desi_wild_62363 | NA                                  | Ca_desi_scaffold | 62363                   | C/G  | Gene_Ca_15003.1    | DOWNSTREAM                    | FUNCTIONS IN: molecular_function unknown            |
| Desi_wild_64863 | NA                                  | Ca_desi_scaffold | 64863                   | T/A  | Gene_Ca_15003.1    | NON_SYNONYMOUS_CODING         | FUNCTIONS IN: molecular_function unknown            |
| Desi_wild_64865 | NA                                  | Ca_desi_scaffold | 64865                   | C/A  | Gene_Ca_15003.1    | NON_SYNONYMOUS_CODING         | FUNCTIONS IN: molecular_function unknown            |
| Desi_wild_64868 | NA                                  | Ca_desi_scaffold | 64868                   | T/C  | Gene_Ca_15003.1    | NON_SYNONYMOUS_CODING         | FUNCTIONS IN: molecular_function unknown            |
| Desi_wild_64881 | NA                                  | Ca_desi_scaffold | 64881                   | G/A  | Gene_Ca_15003.1    | SYNONYMOUS_CODING             | FUNCTIONS IN: molecular_function unknown            |
| Desi_wild_64891 | NA                                  | Ca_desi_scaffold | 64891                   | C/A  | Gene_Ca_15003.1    | NON_SYNONYMOUS_CODING         | FUNCTIONS IN: molecular_function unknown            |
| Desi_wild_64918 | NA                                  | Ca_desi_scaffold | 64918                   | A/C  | Gene_Ca_15003.1    | SYNONYMOUS_CODING             | FUNCTIONS IN: molecular_function unknown            |
| Desi_wild_79767 | NA                                  | Ca_desi_scaffold | 79767                   | T/C  | NA                 | INTERGENIC                    | NA                                                  |
| Desi_wild_80074 | NA                                  | Ca_desi_scaffold | 80074                   | C/T  | Gene_Ca_15004.1    | SYNONYMOUS_CODING             | sequence-specific DNA binding transcription factors |
| Desi_wild_20525 | NA                                  | Ca_desi_scaffold | 20525                   | C/A  | NA                 | INTERGENIC                    | NA                                                  |
| Desi_wild_20550 | NA                                  | Ca_desi_scaffold | 20550                   | A/G  | NA                 | INTERGENIC                    | NA                                                  |
| Desi_wild_81666 | NA                                  | Ca_desi_scaffold | 81666                   | C/T  | Gene_Ca_15015.1    | NON_SYNONYMOUS_CODING         | Protein of unknown function (DUF3527)               |
| Desi_wild_81668 | NA                                  | Ca_desi_scaffold | 81668                   | C/A  | Gene_Ca_15015.1    | SYNONYMOUS_CODING             | Protein of unknown function (DUF3527)               |
| Desi_wild_81670 | NA                                  | Ca_desi_scaffold | 81670                   | G/A  | Gene_Ca_15015.1    | NON_SYNONYMOUS_CODING         | Protein of unknown function (DUF3527)               |
| Desi_wild_81676 | NA                                  | Ca_desi_scaffold | 81676                   | A/G  | Gene_Ca_15015.1    | NON_SYNONYMOUS_CODING         | Protein of unknown function (DUF3527)               |

| SNP IDs                 | NCBI dbSNP accession IDs (NCBI_SS#) | Chromosomes             | Physical positions (bp) | SNPs | Gene accession IDs | Sequence components of genome | Putative functions                                                                   |
|-------------------------|-------------------------------------|-------------------------|-------------------------|------|--------------------|-------------------------------|--------------------------------------------------------------------------------------|
| <i>Desi_wild_81677</i>  | NA                                  | <i>Ca_desi_scaffold</i> | 81677                   | C/A  | Gene_Ca_15015.1    | NON_SYNONYMOUS_CODING         | Protein of unknown function (DUF3527)                                                |
| <i>Desi_wild_81688</i>  | NA                                  | <i>Ca_desi_scaffold</i> | 81688                   | A/T  | Gene_Ca_15015.1    | NON_SYNONYMOUS_CODING         | Protein of unknown function (DUF3527)                                                |
| <i>Desi_wild_81689</i>  | NA                                  | <i>Ca_desi_scaffold</i> | 81689                   | C/G  | Gene_Ca_15015.1    | NON_SYNONYMOUS_CODING         | Protein of unknown function (DUF3527)                                                |
| <i>Desi_wild_81692</i>  | NA                                  | <i>Ca_desi_scaffold</i> | 81692                   | C/T  | Gene_Ca_15015.1    | SYNONYMOUS_CODING             | Protein of unknown function (DUF3527)                                                |
| <i>Desi_wild_81699</i>  | NA                                  | <i>Ca_desi_scaffold</i> | 81699                   | C/A  | Gene_Ca_15015.1    | NON_SYNONYMOUS_CODING         | Protein of unknown function (DUF3527)                                                |
| <i>Desi_wild_81700</i>  | NA                                  | <i>Ca_desi_scaffold</i> | 81700                   | A/T  | Gene_Ca_15015.1    | NON_SYNONYMOUS_CODING         | Protein of unknown function (DUF3527)                                                |
| <i>Desi_wild_81756</i>  | NA                                  | <i>Ca_desi_scaffold</i> | 81756                   | A/G  | Gene_Ca_15015.1    | NON_SYNONYMOUS_CODING         | Protein of unknown function (DUF3527)                                                |
| <i>Desi_wild_11283</i>  | NA                                  | <i>Ca_desi_scaffold</i> | 11283                   | C/A  | Gene_Ca_15017.1    | NON_SYNONYMOUS_CODING         | NA                                                                                   |
| <i>Desi_wild_11284</i>  | NA                                  | <i>Ca_desi_scaffold</i> | 11284                   | G/T  | Gene_Ca_15017.1    | SYNONYMOUS_CODING             | NA                                                                                   |
| <i>Desi_wild_72815</i>  | NA                                  | <i>Ca_desi_scaffold</i> | 72815                   | A/C  | Gene_Ca_15020.1    | NON_SYNONYMOUS_CODING         | NA                                                                                   |
| <i>Desi_wild_86744</i>  | NA                                  | <i>Ca_desi_scaffold</i> | 86744                   | C/T  | NA                 | INTERGENIC                    | NA                                                                                   |
| <i>Desi_wild_86749</i>  | NA                                  | <i>Ca_desi_scaffold</i> | 86749                   | C/T  | NA                 | INTERGENIC                    | NA                                                                                   |
| <i>Desi_wild_86762</i>  | NA                                  | <i>Ca_desi_scaffold</i> | 86762                   | A/G  | NA                 | INTERGENIC                    | NA                                                                                   |
| <i>Desi_wild_183340</i> | NA                                  | <i>Ca_desi_scaffold</i> | 183340                  | G/A  | Gene_Ca_09985.1    | INTRON                        | DNA-directed RNA polymerase I subunit rpa1                                           |
| <i>Desi_wild_189585</i> | NA                                  | <i>Ca_desi_scaffold</i> | 189585                  | G/A  | NA                 | INTERGENIC                    | NA                                                                                   |
| <i>Desi_wild_12471</i>  | NA                                  | <i>Ca_desi_scaffold</i> | 12471                   | T/C  | NA                 | INTERGENIC                    | NA                                                                                   |
| <i>Desi_wild_82974</i>  | NA                                  | <i>Ca_desi_scaffold</i> | 82974                   | C/T  | NA                 | INTERGENIC                    | NA                                                                                   |
| <i>Desi_wild_90549</i>  | NA                                  | <i>Ca_desi_scaffold</i> | 90549                   | G/A  | NA                 | INTERGENIC                    | NA                                                                                   |
| <i>Desi_wild_90556</i>  | NA                                  | <i>Ca_desi_scaffold</i> | 90556                   | G/T  | NA                 | INTERGENIC                    | NA                                                                                   |
| <i>Desi_wild_90573</i>  | NA                                  | <i>Ca_desi_scaffold</i> | 90573                   | T/C  | NA                 | INTERGENIC                    | NA                                                                                   |
| <i>Desi_wild_35808</i>  | NA                                  | <i>Ca_desi_scaffold</i> | 35808                   | T/C  | NA                 | INTERGENIC                    | NA                                                                                   |
| <i>Desi_wild_5464</i>   | NA                                  | <i>Ca_desi_scaffold</i> | 5464                    | T/G  | NA                 | INTERGENIC                    | NA                                                                                   |
| <i>Desi_wild_5872</i>   | NA                                  | <i>Ca_desi_scaffold</i> | 5872                    | A/C  | NA                 | INTERGENIC                    | NA                                                                                   |
| <i>Desi_wild_59295</i>  | NA                                  | <i>Ca_desi_scaffold</i> | 59295                   | A/G  | Gene_Ca_15070.1    | SYNONYMOUS_CODING             | Vacuolar iron transporter homolog 3                                                  |
| <i>Desi_wild_1432</i>   | NA                                  | <i>Ca_desi_scaffold</i> | 1432                    | T/C  | NA                 | INTERGENIC                    | NA                                                                                   |
| <i>Desi_wild_2189</i>   | NA                                  | <i>Ca_desi_scaffold</i> | 2189                    | G/C  | NA                 | INTERGENIC                    | NA                                                                                   |
| <i>Desi_wild_2194</i>   | NA                                  | <i>Ca_desi_scaffold</i> | 2194                    | A/T  | NA                 | INTERGENIC                    | NA                                                                                   |
| <i>Desi_wild_70288</i>  | NA                                  | <i>Ca_desi_scaffold</i> | 70288                   | C/A  | NA                 | INTERGENIC                    | NA                                                                                   |
| <i>Desi_wild_70628</i>  | NA                                  | <i>Ca_desi_scaffold</i> | 70628                   | C/T  | NA                 | INTERGENIC                    | NA                                                                                   |
| <i>Desi_wild_19503</i>  | NA                                  | <i>Ca_desi_scaffold</i> | 19503                   | T/C  | Gene_Ca_09333.1    | INTRON                        | Inosine triphosphate pyrophosphatase                                                 |
| <i>Desi_wild_19795</i>  | NA                                  | <i>Ca_desi_scaffold</i> | 19795                   | A/G  | Gene_Ca_09333.1    | INTRON                        | Inosine triphosphate pyrophosphatase                                                 |
| <i>Desi_wild_144862</i> | NA                                  | <i>Ca_desi_scaffold</i> | 144862                  | G/A  | NA                 | INTERGENIC                    | NA                                                                                   |
| <i>Desi_wild_224768</i> | NA                                  | <i>Ca_desi_scaffold</i> | 224768                  | C/A  | Gene_Ca_09337.1    | INTRON                        | Probable voltage-gated potassium channel subunit beta                                |
| <i>Desi_wild_224769</i> | NA                                  | <i>Ca_desi_scaffold</i> | 224769                  | C/A  | Gene_Ca_09337.1    | INTRON                        | Probable voltage-gated potassium channel subunit beta                                |
| <i>Desi_wild_231983</i> | NA                                  | <i>Ca_desi_scaffold</i> | 231983                  | G/T  | Gene_Ca_09337.1    | INTRON                        | Probable voltage-gated potassium channel subunit beta                                |
| <i>Desi_wild_234863</i> | NA                                  | <i>Ca_desi_scaffold</i> | 234863                  | G/A  | Gene_Ca_09337.1    | INTRON                        | Probable voltage-gated potassium channel subunit beta                                |
| <i>Desi_wild_234912</i> | NA                                  | <i>Ca_desi_scaffold</i> | 234912                  | A/T  | Gene_Ca_09337.1    | INTRON                        | Probable voltage-gated potassium channel subunit beta                                |
| <i>Desi_wild_234930</i> | NA                                  | <i>Ca_desi_scaffold</i> | 234930                  | T/G  | Gene_Ca_09337.1    | INTRON                        | Probable voltage-gated potassium channel subunit beta                                |
| <i>Desi_wild_234941</i> | NA                                  | <i>Ca_desi_scaffold</i> | 234941                  | G/A  | Gene_Ca_09337.1    | INTRON                        | Probable voltage-gated potassium channel subunit beta                                |
| <i>Desi_wild_234951</i> | NA                                  | <i>Ca_desi_scaffold</i> | 234951                  | G/A  | Gene_Ca_09337.1    | INTRON                        | Probable voltage-gated potassium channel subunit beta                                |
| <i>Desi_wild_67491</i>  | NA                                  | <i>Ca_desi_scaffold</i> | 67491                   | A/C  | Gene_Ca_15095.1    | NON_SYNONYMOUS_CODING         | Quinone oxidoreductase-like protein At1g23740, chloroplastic                         |
| <i>Desi_wild_22939</i>  | NA                                  | <i>Ca_desi_scaffold</i> | 22939                   | A/C  | Gene_Ca_10039.1    | INTRON                        | Probable leucine-rich repeat receptor-like serine/threonine-protein kinase At3g14840 |
| <i>Desi_wild_45699</i>  | NA                                  | <i>Ca_desi_scaffold</i> | 45699                   | G/A  | NA                 | INTERGENIC                    | NA                                                                                   |
| <i>Desi_wild_45702</i>  | NA                                  | <i>Ca_desi_scaffold</i> | 45702                   | T/A  | NA                 | INTERGENIC                    | NA                                                                                   |

| SNP IDs                | NCBI dbSNP accession IDs (NCBI_SS#) | Chromosomes             | Physical positions (bp) | SNPs | Gene accession IDs | Sequence components of genome | Putative functions                                                   |
|------------------------|-------------------------------------|-------------------------|-------------------------|------|--------------------|-------------------------------|----------------------------------------------------------------------|
| <i>Desi_wild_31992</i> | NA                                  | <i>Ca_desi_scaffold</i> | 31992                   | T/C  | Gene_Ca_10044.1    | DOWNSTREAM                    | glycine-rich protein                                                 |
| <i>Desi_wild_58357</i> | NA                                  | <i>Ca_desi_scaffold</i> | 58357                   | A/C  | Gene_Ca_10046.1    | INTRON                        | APO protein 1, chloroplastic                                         |
| <i>Desi_wild_36405</i> | NA                                  | <i>Ca_desi_scaffold</i> | 36405                   | G/A  | Gene_Ca_15113.1    | NON_SYNONYMOUS_CODING         | Coiled-coil domain-containing protein 94                             |
| <i>Desi_wild_20355</i> | NA                                  | <i>Ca_desi_scaffold</i> | 20355                   | A/T  | NA                 | INTERGENIC                    | NA                                                                   |
| <i>Desi_wild_71874</i> | NA                                  | <i>Ca_desi_scaffold</i> | 71874                   | A/C  | Gene_Ca_10048.1    | SYNONYMOUS_CODING             | RNA-binding protein 38                                               |
| <i>Desi_wild_74087</i> | NA                                  | <i>Ca_desi_scaffold</i> | 74087                   | A/C  | Gene_Ca_10048.1    | SYNONYMOUS_CODING             | RNA-binding protein 38                                               |
| <i>Desi_wild_23921</i> | NA                                  | <i>Ca_desi_scaffold</i> | 23921                   | A/T  | Gene_Ca_15117.1    | NON_SYNONYMOUS_CODING         | mediator subunit 8                                                   |
| <i>Desi_wild_34273</i> | NA                                  | <i>Ca_desi_scaffold</i> | 34273                   | C/G  | Gene_Ca_15118.1    | NON_SYNONYMOUS_CODING         | Dof zinc finger protein DOF5.2                                       |
| <i>Desi_wild_20705</i> | NA                                  | <i>Ca_desi_scaffold</i> | 20705                   | G/A  | NA                 | INTERGENIC                    | NA                                                                   |
| <i>Desi_wild_9248</i>  | NA                                  | <i>Ca_desi_scaffold</i> | 9248                    | T/C  | Gene_Ca_15128.1    | INTRON                        | Dolichol kinase                                                      |
| <i>Desi_wild_41519</i> | NA                                  | <i>Ca_desi_scaffold</i> | 41519                   | A/G  | NA                 | INTERGENIC                    | NA                                                                   |
| <i>Desi_wild_41530</i> | NA                                  | <i>Ca_desi_scaffold</i> | 41530                   | T/C  | NA                 | INTERGENIC                    | NA                                                                   |
| <i>Desi_wild_41553</i> | NA                                  | <i>Ca_desi_scaffold</i> | 41553                   | G/A  | NA                 | INTERGENIC                    | NA                                                                   |
| <i>Desi_wild_41567</i> | NA                                  | <i>Ca_desi_scaffold</i> | 41567                   | C/G  | NA                 | INTERGENIC                    | NA                                                                   |
| <i>Desi_wild_41595</i> | NA                                  | <i>Ca_desi_scaffold</i> | 41595                   | T/C  | NA                 | INTERGENIC                    | NA                                                                   |
| <i>Desi_wild_60458</i> | NA                                  | <i>Ca_desi_scaffold</i> | 60458                   | G/A  | Gene_Ca_10055.2    | INTRON                        | Pentatricopeptide repeat-containing protein At4g34830, chloroplastic |
| <i>Desi_wild_63184</i> | NA                                  | <i>Ca_desi_scaffold</i> | 63184                   | A/G  | Gene_Ca_10055.2    | INTRON                        | Pentatricopeptide repeat-containing protein At4g34830, chloroplastic |
| <i>Desi_wild_63205</i> | NA                                  | <i>Ca_desi_scaffold</i> | 63205                   | C/T  | Gene_Ca_10055.2    | INTRON                        | Pentatricopeptide repeat-containing protein At4g34830, chloroplastic |
| <i>Desi_wild_63226</i> | NA                                  | <i>Ca_desi_scaffold</i> | 63226                   | C/T  | Gene_Ca_10055.2    | INTRON                        | Pentatricopeptide repeat-containing protein At4g34830, chloroplastic |
| <i>Desi_wild_63234</i> | NA                                  | <i>Ca_desi_scaffold</i> | 63234                   | T/A  | Gene_Ca_10055.2    | INTRON                        | Pentatricopeptide repeat-containing protein At4g34830, chloroplastic |
| <i>Desi_wild_63324</i> | NA                                  | <i>Ca_desi_scaffold</i> | 63324                   | T/G  | Gene_Ca_10055.2    | INTRON                        | Pentatricopeptide repeat-containing protein At4g34830, chloroplastic |
| <i>Desi_wild_63404</i> | NA                                  | <i>Ca_desi_scaffold</i> | 63404                   | C/T  | Gene_Ca_10055.2    | INTRON                        | Pentatricopeptide repeat-containing protein At4g34830, chloroplastic |
| <i>Desi_wild_63408</i> | NA                                  | <i>Ca_desi_scaffold</i> | 63408                   | G/C  | Gene_Ca_10055.2    | INTRON                        | Pentatricopeptide repeat-containing protein At4g34830, chloroplastic |
| <i>Desi_wild_63968</i> | NA                                  | <i>Ca_desi_scaffold</i> | 63968                   | T/C  | Gene_Ca_10055.2    | INTRON                        | Pentatricopeptide repeat-containing protein At4g34830, chloroplastic |
| <i>Desi_wild_63999</i> | NA                                  | <i>Ca_desi_scaffold</i> | 63999                   | G/A  | Gene_Ca_10055.2    | INTRON                        | Pentatricopeptide repeat-containing protein At4g34830, chloroplastic |
| <i>Desi_wild_75512</i> | NA                                  | <i>Ca_desi_scaffold</i> | 75512                   | T/G  | NA                 | INTERGENIC                    | NA                                                                   |
| <i>Desi_wild_75625</i> | NA                                  | <i>Ca_desi_scaffold</i> | 75625                   | G/C  | NA                 | INTERGENIC                    | NA                                                                   |
| <i>Desi_wild_75650</i> | NA                                  | <i>Ca_desi_scaffold</i> | 75650                   | G/C  | NA                 | INTERGENIC                    | NA                                                                   |
| <i>Desi_wild_75654</i> | NA                                  | <i>Ca_desi_scaffold</i> | 75654                   | C/T  | NA                 | INTERGENIC                    | NA                                                                   |
| <i>Desi_wild_75683</i> | NA                                  | <i>Ca_desi_scaffold</i> | 75683                   | A/G  | NA                 | INTERGENIC                    | NA                                                                   |
| <i>Desi_wild_75753</i> | NA                                  | <i>Ca_desi_scaffold</i> | 75753                   | G/A  | NA                 | INTERGENIC                    | NA                                                                   |
| <i>Desi_wild_75754</i> | NA                                  | <i>Ca_desi_scaffold</i> | 75754                   | C/T  | NA                 | INTERGENIC                    | NA                                                                   |
| <i>Desi_wild_75829</i> | NA                                  | <i>Ca_desi_scaffold</i> | 75829                   | G/A  | NA                 | INTERGENIC                    | NA                                                                   |
| <i>Desi_wild_75878</i> | NA                                  | <i>Ca_desi_scaffold</i> | 75878                   | T/G  | NA                 | INTERGENIC                    | NA                                                                   |
| <i>Desi_wild_75885</i> | NA                                  | <i>Ca_desi_scaffold</i> | 75885                   | C/A  | NA                 | INTERGENIC                    | NA                                                                   |
| <i>Desi_wild_61041</i> | NA                                  | <i>Ca_desi_scaffold</i> | 61041                   | G/A  | Gene_Ca_15138.1    | INTRON                        | Protein midA homolog                                                 |
| <i>Desi_wild_6925</i>  | NA                                  | <i>Ca_desi_scaffold</i> | 6925                    | A/G  | Gene_Ca_15140.1    | INTRON                        | ADP,ATP carrier protein, mitochondrial                               |
| <i>Desi_wild_6955</i>  | NA                                  | <i>Ca_desi_scaffold</i> | 6955                    | A/G  | Gene_Ca_15140.1    | INTRON                        | ADP,ATP carrier protein, mitochondrial                               |
| <i>Desi_wild_17000</i> | NA                                  | <i>Ca_desi_scaffold</i> | 17000                   | T/G  | Gene_Ca_10061.1    | UPSTREAM                      | Putative rRNA methylase ytbB                                         |
| <i>Desi_wild_24016</i> | NA                                  | <i>Ca_desi_scaffold</i> | 24016                   | T/G  | NA                 | INTERGENIC                    | NA                                                                   |
| <i>Desi_wild_48291</i> | NA                                  | <i>Ca_desi_scaffold</i> | 48291                   | C/T  | Gene_Ca_15157.1    | NON_SYNONYMOUS_CODING         | Cyclin-T1-5                                                          |
| <i>Desi_wild_20327</i> | NA                                  | <i>Ca_desi_scaffold</i> | 20327                   | T/G  | NA                 | INTERGENIC                    | NA                                                                   |
| <i>Desi_wild_20349</i> | NA                                  | <i>Ca_desi_scaffold</i> | 20349                   | C/T  | NA                 | INTERGENIC                    | NA                                                                   |
| <i>Desi_wild_20409</i> | NA                                  | <i>Ca_desi_scaffold</i> | 20409                   | T/C  | NA                 | INTERGENIC                    | NA                                                                   |

| SNP IDs                | NCBI dbSNP accession IDs (NCBI_SS#) | Chromosomes             | Physical positions (bp) | SNPs | Gene accession IDs | Sequence components of genome | Putative functions                                                    |
|------------------------|-------------------------------------|-------------------------|-------------------------|------|--------------------|-------------------------------|-----------------------------------------------------------------------|
| <i>Desi_wild_55984</i> | NA                                  | <i>Ca_desi_scaffold</i> | 55984                   | T/C  | Gene_Ca_15169.1    | NON_SYNONYMOUS_CODING         | F-box/kelch-repeat protein At5g26960                                  |
| <i>Desi_wild_33230</i> | NA                                  | <i>Ca_desi_scaffold</i> | 33230                   | T/C  | Gene_Ca_15178.1    | SYNONYMOUS_CODING             | Subtilisin-like protease                                              |
| <i>Desi_wild_33239</i> | NA                                  | <i>Ca_desi_scaffold</i> | 33239                   | A/G  | Gene_Ca_15178.1    | SYNONYMOUS_CODING             | Subtilisin-like protease                                              |
| <i>Desi_wild_33258</i> | NA                                  | <i>Ca_desi_scaffold</i> | 33258                   | C/T  | Gene_Ca_15178.1    | SYNONYMOUS_CODING             | Subtilisin-like protease                                              |
| <i>Desi_wild_33264</i> | NA                                  | <i>Ca_desi_scaffold</i> | 33264                   | C/G  | Gene_Ca_15178.1    | SYNONYMOUS_CODING             | Subtilisin-like protease                                              |
| <i>Desi_wild_33275</i> | NA                                  | <i>Ca_desi_scaffold</i> | 33275                   | T/A  | Gene_Ca_15178.1    | SYNONYMOUS_CODING             | Subtilisin-like protease                                              |
| <i>Desi_wild_33279</i> | NA                                  | <i>Ca_desi_scaffold</i> | 33279                   | C/A  | Gene_Ca_15178.1    | SYNONYMOUS_CODING             | Subtilisin-like protease                                              |
| <i>Desi_wild_33287</i> | NA                                  | <i>Ca_desi_scaffold</i> | 33287                   | T/C  | Gene_Ca_15178.1    | SYNONYMOUS_CODING             | Subtilisin-like protease                                              |
| <i>Desi_wild_33290</i> | NA                                  | <i>Ca_desi_scaffold</i> | 33290                   | T/C  | Gene_Ca_15178.1    | SYNONYMOUS_CODING             | Subtilisin-like protease                                              |
| <i>Desi_wild_33329</i> | NA                                  | <i>Ca_desi_scaffold</i> | 33329                   | T/G  | Gene_Ca_15178.1    | SYNONYMOUS_CODING             | Subtilisin-like protease                                              |
| <i>Desi_wild_33338</i> | NA                                  | <i>Ca_desi_scaffold</i> | 33338                   | T/A  | Gene_Ca_15178.1    | INTRON                        | Subtilisin-like protease                                              |
| <i>Desi_wild_42134</i> | NA                                  | <i>Ca_desi_scaffold</i> | 42134                   | G/C  | Gene_Ca_15179.3    | INTRON                        | NA                                                                    |
| <i>Desi_wild_42204</i> | NA                                  | <i>Ca_desi_scaffold</i> | 42204                   | A/G  | Gene_Ca_15179.3    | INTRON                        | NA                                                                    |
| <i>Desi_wild_42252</i> | NA                                  | <i>Ca_desi_scaffold</i> | 42252                   | A/G  | Gene_Ca_15179.3    | INTRON                        | NA                                                                    |
| <i>Desi_wild_52214</i> | NA                                  | <i>Ca_desi_scaffold</i> | 52214                   | T/A  | Gene_Ca_15181.1    | DOWNSTREAM                    | NA                                                                    |
| <i>Desi_wild_52241</i> | NA                                  | <i>Ca_desi_scaffold</i> | 52241                   | T/A  | Gene_Ca_15181.1    | DOWNSTREAM                    | NA                                                                    |
| <i>Desi_wild_52244</i> | NA                                  | <i>Ca_desi_scaffold</i> | 52244                   | A/C  | Gene_Ca_15181.1    | DOWNSTREAM                    | NA                                                                    |
| <i>Desi_wild_52298</i> | NA                                  | <i>Ca_desi_scaffold</i> | 52298                   | A/G  | Gene_Ca_15181.1    | DOWNSTREAM                    | NA                                                                    |
| <i>Desi_wild_52304</i> | NA                                  | <i>Ca_desi_scaffold</i> | 52304                   | A/T  | Gene_Ca_15181.1    | DOWNSTREAM                    | NA                                                                    |
| <i>Desi_wild_52478</i> | NA                                  | <i>Ca_desi_scaffold</i> | 52478                   | T/A  | Gene_Ca_15181.1    | DOWNSTREAM                    | NA                                                                    |
| <i>Desi_wild_61548</i> | NA                                  | <i>Ca_desi_scaffold</i> | 61548                   | A/T  | NA                 | INTERGENIC                    | NA                                                                    |
| <i>Desi_wild_61557</i> | NA                                  | <i>Ca_desi_scaffold</i> | 61557                   | T/C  | NA                 | INTERGENIC                    | NA                                                                    |
| <i>Desi_wild_61560</i> | NA                                  | <i>Ca_desi_scaffold</i> | 61560                   | A/T  | NA                 | INTERGENIC                    | NA                                                                    |
| <i>Desi_wild_61593</i> | NA                                  | <i>Ca_desi_scaffold</i> | 61593                   | T/G  | NA                 | INTERGENIC                    | NA                                                                    |
| <i>Desi_wild_61625</i> | NA                                  | <i>Ca_desi_scaffold</i> | 61625                   | A/G  | NA                 | INTERGENIC                    | NA                                                                    |
| <i>Desi_wild_61631</i> | NA                                  | <i>Ca_desi_scaffold</i> | 61631                   | C/T  | NA                 | INTERGENIC                    | NA                                                                    |
| <i>Desi_wild_61639</i> | NA                                  | <i>Ca_desi_scaffold</i> | 61639                   | G/A  | NA                 | INTERGENIC                    | NA                                                                    |
| <i>Desi_wild_61641</i> | NA                                  | <i>Ca_desi_scaffold</i> | 61641                   | C/T  | NA                 | INTERGENIC                    | NA                                                                    |
| <i>Desi_wild_61647</i> | NA                                  | <i>Ca_desi_scaffold</i> | 61647                   | C/T  | NA                 | INTERGENIC                    | NA                                                                    |
| <i>Desi_wild_72296</i> | NA                                  | <i>Ca_desi_scaffold</i> | 72296                   | A/G  | NA                 | INTERGENIC                    | NA                                                                    |
| <i>Desi_wild_75429</i> | NA                                  | <i>Ca_desi_scaffold</i> | 75429                   | T/C  | Gene_Ca_15182.1    | DOWNSTREAM                    | TMV resistance protein N                                              |
| <i>Desi_wild_75487</i> | NA                                  | <i>Ca_desi_scaffold</i> | 75487                   | T/A  | Gene_Ca_15182.1    | DOWNSTREAM                    | TMV resistance protein N                                              |
| <i>Desi_wild_75490</i> | NA                                  | <i>Ca_desi_scaffold</i> | 75490                   | T/C  | Gene_Ca_15182.1    | DOWNSTREAM                    | TMV resistance protein N                                              |
| <i>Desi_wild_75493</i> | NA                                  | <i>Ca_desi_scaffold</i> | 75493                   | G/A  | Gene_Ca_15182.1    | DOWNSTREAM                    | TMV resistance protein N                                              |
| <i>Desi_wild_75505</i> | NA                                  | <i>Ca_desi_scaffold</i> | 75505                   | C/T  | Gene_Ca_15182.1    | DOWNSTREAM                    | TMV resistance protein N                                              |
| <i>Desi_wild_5169</i>  | NA                                  | <i>Ca_desi_scaffold</i> | 5169                    | C/T  | NA                 | INTERGENIC                    | NA                                                                    |
| <i>Desi_wild_5202</i>  | NA                                  | <i>Ca_desi_scaffold</i> | 5202                    | A/G  | NA                 | INTERGENIC                    | NA                                                                    |
| <i>Desi_wild_38023</i> | NA                                  | <i>Ca_desi_scaffold</i> | 38023                   | A/G  | Gene_Ca_10069.1    | NON_SYNONYMOUS_CODING         | LOCATED IN: vacuole                                                   |
| <i>Desi_wild_39177</i> | NA                                  | <i>Ca_desi_scaffold</i> | 39177                   | A/G  | Gene_Ca_10069.1    | SYNONYMOUS_CODING             | LOCATED IN: vacuole                                                   |
| <i>Desi_wild_71452</i> | NA                                  | <i>Ca_desi_scaffold</i> | 71452                   | T/A  | Gene_Ca_10070.1    | NON_SYNONYMOUS_CODING         | Acyl-CoA N-acyltransferase with RING/FYVE/PHD-type zinc finger domain |
| <i>Desi_wild_76040</i> | NA                                  | <i>Ca_desi_scaffold</i> | 76040                   | A/T  | NA                 | INTERGENIC                    | NA                                                                    |
| <i>Desi_wild_78489</i> | NA                                  | <i>Ca_desi_scaffold</i> | 78489                   | A/T  | NA                 | INTERGENIC                    | NA                                                                    |
| <i>Desi_wild_78496</i> | NA                                  | <i>Ca_desi_scaffold</i> | 78496                   | C/A  | NA                 | INTERGENIC                    | NA                                                                    |
| <i>Desi_wild_84930</i> | NA                                  | <i>Ca_desi_scaffold</i> | 84930                   | A/G  | NA                 | INTERGENIC                    | NA                                                                    |

| SNP IDs                | NCBI dbSNP accession IDs (NCBI_SS#) | Chromosomes             | Physical positions (bp) | SNPs | Gene accession IDs              | Sequence components of genome | Putative functions                                                   |
|------------------------|-------------------------------------|-------------------------|-------------------------|------|---------------------------------|-------------------------------|----------------------------------------------------------------------|
| <i>Desi_wild_5480</i>  | NA                                  | <i>Ca_desi_scaffold</i> | 5480                    | A/C  | Gene_Ca_15189.1                 | SYNONYMOUS_CODING             | Flavoprotein wrbA                                                    |
| <i>Desi_wild_32313</i> | NA                                  | <i>Ca_desi_scaffold</i> | 32313                   | A/G  | Gene_Ca_15198.1                 | INTRON                        | Glutathione reductase, cytosolic                                     |
| <i>Desi_wild_73336</i> | NA                                  | <i>Ca_desi_scaffold</i> | 73336                   | A/C  | Gene_Ca_15200.3                 | INTRON                        | Histidinol-phosphate aminotransferase, chloroplastic                 |
| <i>Desi_wild_81274</i> | NA                                  | <i>Ca_desi_scaffold</i> | 81274                   | A/T  | Gene_Ca_15200.3                 | NON_SYNONYMOUS_CODING         | Histidinol-phosphate aminotransferase, chloroplastic                 |
| <i>Desi_wild_11290</i> | NA                                  | <i>Ca_desi_scaffold</i> | 11290                   | A/G  | Gene_Ca_15202.2                 | DOWNSTREAM                    | SUMO-activating enzyme subunit 2                                     |
| <i>Desi_wild_39455</i> | NA                                  | <i>Ca_desi_scaffold</i> | 39455                   | A/G  | NA                              | INTERGENIC                    | NA                                                                   |
| <i>Desi_wild_39501</i> | NA                                  | <i>Ca_desi_scaffold</i> | 39501                   | C/A  | NA                              | INTERGENIC                    | NA                                                                   |
| <i>Desi_wild_39526</i> | NA                                  | <i>Ca_desi_scaffold</i> | 39526                   | C/T  | NA                              | INTERGENIC                    | NA                                                                   |
| <i>Desi_wild_82408</i> | NA                                  | <i>Ca_desi_scaffold</i> | 82408                   | A/G  | Gene_Ca_15205.1                 | INTRON                        | WD repeat-containing protein 13                                      |
| <i>Desi_wild_62262</i> | NA                                  | <i>Ca_desi_scaffold</i> | 62262                   | G/T  | NA                              | INTERGENIC                    | NA                                                                   |
| <i>Desi_wild_62312</i> | NA                                  | <i>Ca_desi_scaffold</i> | 62312                   | T/C  | NA                              | INTERGENIC                    | NA                                                                   |
| <i>Desi_wild_62361</i> | NA                                  | <i>Ca_desi_scaffold</i> | 62361                   | T/A  | NA                              | INTERGENIC                    | NA                                                                   |
| <i>Desi_wild_35359</i> | NA                                  | <i>Ca_desi_scaffold</i> | 35359                   | A/C  | NA                              | INTERGENIC                    | NA                                                                   |
| <i>Desi_wild_46725</i> | NA                                  | <i>Ca_desi_scaffold</i> | 46725                   | A/C  | Gene_Ca_10078.1                 | NON_SYNONYMOUS_CODING         | Auxin transport protein BIG                                          |
| <i>Desi_wild_48441</i> | NA                                  | <i>Ca_desi_scaffold</i> | 48441                   | T/G  | Gene_Ca_10078.1                 | INTRON                        | Auxin transport protein BIG                                          |
| <i>Desi_wild_12840</i> | NA                                  | <i>Ca_desi_scaffold</i> | 12840                   | T/C  | NA                              | INTERGENIC                    | NA                                                                   |
| <i>Desi_wild_31897</i> | NA                                  | <i>Ca_desi_scaffold</i> | 31897                   | A/C  | Gene_Ca_15227.1                 | SYNONYMOUS_CODING             | Serine/threonine-protein kinase CTR1                                 |
| <i>Desi_wild_56439</i> | NA                                  | <i>Ca_desi_scaffold</i> | 56439                   | G/A  | Gene_Ca_15228.1                 | NON_SYNONYMOUS_CODING         | Transcriptional activator DEMETER                                    |
| <i>Desi_wild_37753</i> | NA                                  | <i>Ca_desi_scaffold</i> | 37753                   | T/C  | Gene_Ca_15231.1                 | INTRON                        | Eukaryotic translation initiation factor 2D                          |
| <i>Desi_wild_47446</i> | NA                                  | <i>Ca_desi_scaffold</i> | 47446                   | G/A  | NA                              | INTERGENIC                    | NA                                                                   |
| <i>Desi_wild_47480</i> | NA                                  | <i>Ca_desi_scaffold</i> | 47480                   | T/C  | NA                              | INTERGENIC                    | NA                                                                   |
| <i>Desi_wild_47561</i> | NA                                  | <i>Ca_desi_scaffold</i> | 47561                   | G/A  | NA                              | INTERGENIC                    | NA                                                                   |
| <i>Desi_wild_47600</i> | NA                                  | <i>Ca_desi_scaffold</i> | 47600                   | A/T  | NA                              | INTERGENIC                    | NA                                                                   |
| <i>Desi_wild_49454</i> | NA                                  | <i>Ca_desi_scaffold</i> | 49454                   | A/T  | NA                              | INTERGENIC                    | NA                                                                   |
| <i>Desi_wild_49510</i> | NA                                  | <i>Ca_desi_scaffold</i> | 49510                   | C/T  | NA                              | INTERGENIC                    | NA                                                                   |
| <i>Desi_wild_49793</i> | NA                                  | <i>Ca_desi_scaffold</i> | 49793                   | G/A  | Gene_Ca_15241.1                 | DOWNSTREAM                    | Disease resistance-responsive (dirigent-like protein) family protein |
| <i>Desi_wild_49831</i> | NA                                  | <i>Ca_desi_scaffold</i> | 49831                   | G/A  | Gene_Ca_15241.1                 | DOWNSTREAM                    | Disease resistance-responsive (dirigent-like protein) family protein |
| <i>Desi_wild_62521</i> | NA                                  | <i>Ca_desi_scaffold</i> | 62521                   | T/C  | NA                              | INTERGENIC                    | NA                                                                   |
| <i>Desi_wild_34433</i> | NA                                  | <i>Ca_desi_scaffold</i> | 34433                   | C/T  | NA                              | INTERGENIC                    | NA                                                                   |
| <i>Desi_wild_59068</i> | NA                                  | <i>Ca_desi_scaffold</i> | 59068                   | A/C  | NA                              | INTERGENIC                    | NA                                                                   |
| <i>Desi_wild_525</i>   | NA                                  | <i>Ca_desi_scaffold</i> | 525                     | C/T  | NA                              | INTERGENIC                    | NA                                                                   |
| <i>Desi_wild_35473</i> | NA                                  | <i>Ca_desi_scaffold</i> | 35473                   | T/C  | Gene_Ca_15263.1                 | INTRON                        | Probable serine/threonine-protein kinase At1g18390                   |
| <i>Desi_wild_35502</i> | NA                                  | <i>Ca_desi_scaffold</i> | 35502                   | G/T  | Gene_Ca_15263.1                 | INTRON                        | Probable serine/threonine-protein kinase At1g18390                   |
| <i>Desi_wild_45419</i> | NA                                  | <i>Ca_desi_scaffold</i> | 45419                   | C/T  | Gene_Ca_15263.1                 | INTRON                        | Probable serine/threonine-protein kinase At1g18390                   |
| <i>Desi_wild_81297</i> | NA                                  | <i>Ca_desi_scaffold</i> | 81297                   | C/T  | NA                              | INTERGENIC                    | NA                                                                   |
| <i>Desi_wild_83148</i> | NA                                  | <i>Ca_desi_scaffold</i> | 83148                   | A/C  | Gene_Ca_15264.1                 | NON_SYNONYMOUS_CODING         | Pentatricopeptide repeat-containing protein At3g23020                |
| <i>Desi_wild_83176</i> | NA                                  | <i>Ca_desi_scaffold</i> | 83176                   | T/C  | Gene_Ca_15264.1                 | NON_SYNONYMOUS_CODING         | Pentatricopeptide repeat-containing protein At3g23020                |
| <i>Desi_wild_68292</i> | NA                                  | <i>Ca_desi_scaffold</i> | 68292                   | A/C  | NA                              | INTERGENIC                    | NA                                                                   |
| <i>Desi_wild_68322</i> | NA                                  | <i>Ca_desi_scaffold</i> | 68322                   | G/A  | NA                              | INTERGENIC                    | NA                                                                   |
| <i>Desi_wild_68327</i> | NA                                  | <i>Ca_desi_scaffold</i> | 68327                   | G/T  | NA                              | INTERGENIC                    | NA                                                                   |
| <i>Desi_wild_68346</i> | NA                                  | <i>Ca_desi_scaffold</i> | 68346                   | A/G  | NA                              | INTERGENIC                    | NA                                                                   |
| <i>Desi_wild_1101</i>  | NA                                  | <i>Ca_desi_scaffold</i> | 1101                    | A/G  | NA                              | INTERGENIC                    | NA                                                                   |
| <i>Desi_wild_4806</i>  | NA                                  | <i>Ca_desi_scaffold</i> | 4806                    | A/G  | Gene_Ca_15276.1                 | SYNONYMOUS_CODING             | unknown protein                                                      |
| <i>Desi_wild_4814</i>  | NA                                  | <i>Ca_desi_scaffold</i> | 4814                    | A/C  | <a href="#">Gene_Ca_15276.1</a> | NON_SYNONYMOUS_CODING         | unknown protein                                                      |

| SNP IDs          | NCBI dbSNP accession IDs (NCBI_SS#) | Chromosomes      | Physical positions (bp) | SNPs | Gene accession IDs | Sequence components of genome | Putative functions                           |
|------------------|-------------------------------------|------------------|-------------------------|------|--------------------|-------------------------------|----------------------------------------------|
| Desi_wild_4822   | NA                                  | Ca_desi_scaffold | 4822                    | A/G  | Gene_Ca_15276.1    | SYNONYMOUS_CODING             | unknown protein                              |
| Desi_wild_4823   | NA                                  | Ca_desi_scaffold | 4823                    | C/T  | Gene_Ca_15276.1    | NON_SYNONYMOUS_CODING         | unknown protein                              |
| Desi_wild_4847   | NA                                  | Ca_desi_scaffold | 4847                    | C/G  | Gene_Ca_15276.1    | NON_SYNONYMOUS_CODING         | unknown protein                              |
| Desi_wild_4848   | NA                                  | Ca_desi_scaffold | 4848                    | T/C  | Gene_Ca_15276.1    | SYNONYMOUS_CODING             | unknown protein                              |
| Desi_wild_5259   | NA                                  | Ca_desi_scaffold | 5259                    | G/A  | Gene_Ca_15276.1    | SYNONYMOUS_CODING             | unknown protein                              |
| Desi_wild_5266   | NA                                  | Ca_desi_scaffold | 5266                    | T/C  | Gene_Ca_15276.1    | NON_SYNONYMOUS_CODING         | unknown protein                              |
| Desi_wild_5268   | NA                                  | Ca_desi_scaffold | 5268                    | G/A  | Gene_Ca_15276.1    | SYNONYMOUS_CODING             | unknown protein                              |
| Desi_wild_5277   | NA                                  | Ca_desi_scaffold | 5277                    | C/A  | Gene_Ca_15276.1    | NON_SYNONYMOUS_CODING         | unknown protein                              |
| Desi_wild_5278   | NA                                  | Ca_desi_scaffold | 5278                    | A/T  | Gene_Ca_15276.1    | NON_SYNONYMOUS_CODING         | unknown protein                              |
| Desi_wild_5279   | NA                                  | Ca_desi_scaffold | 5279                    | A/C  | Gene_Ca_15276.1    | NON_SYNONYMOUS_CODING         | unknown protein                              |
| Desi_wild_5287   | NA                                  | Ca_desi_scaffold | 5287                    | A/G  | Gene_Ca_15276.1    | NON_SYNONYMOUS_CODING         | unknown protein                              |
| Desi_wild_5289   | NA                                  | Ca_desi_scaffold | 5289                    | G/A  | Gene_Ca_15276.1    | SYNONYMOUS_CODING             | unknown protein                              |
| Desi_wild_5292   | NA                                  | Ca_desi_scaffold | 5292                    | G/A  | Gene_Ca_15276.1    | SYNONYMOUS_CODING             | unknown protein                              |
| Desi_wild_5293   | NA                                  | Ca_desi_scaffold | 5293                    | A/T  | Gene_Ca_15276.1    | NON_SYNONYMOUS_CODING         | unknown protein                              |
| Desi_wild_5305   | NA                                  | Ca_desi_scaffold | 5305                    | C/T  | Gene_Ca_15276.1    | SYNONYMOUS_CODING             | unknown protein                              |
| Desi_wild_5319   | NA                                  | Ca_desi_scaffold | 5319                    | G/A  | Gene_Ca_15276.1    | SYNONYMOUS_CODING             | unknown protein                              |
| Desi_wild_5322   | NA                                  | Ca_desi_scaffold | 5322                    | G/A  | Gene_Ca_15276.1    | SYNONYMOUS_CODING             | unknown protein                              |
| Desi_wild_5325   | NA                                  | Ca_desi_scaffold | 5325                    | A/G  | Gene_Ca_15276.1    | SYNONYMOUS_CODING             | unknown protein                              |
| Desi_wild_5329   | NA                                  | Ca_desi_scaffold | 5329                    | A/C  | Gene_Ca_15276.1    | NON_SYNONYMOUS_CODING         | unknown protein                              |
| Desi_wild_10618  | NA                                  | Ca_desi_scaffold | 10618                   | A/G  | Gene_Ca_15276.1    | NON_SYNONYMOUS_CODING         | unknown protein                              |
| Desi_wild_54913  | NA                                  | Ca_desi_scaffold | 54913                   | T/C  | Gene_Ca_15278.1    | INTRON                        | Protein TOPLESS                              |
| Desi_wild_41429  | NA                                  | Ca_desi_scaffold | 41429                   | A/T  | Gene_Ca_15283.1    | INTRON                        | Cyclin-dependent kinase D-1                  |
| Desi_wild_41437  | NA                                  | Ca_desi_scaffold | 41437                   | A/C  | Gene_Ca_15283.1    | INTRON                        | Cyclin-dependent kinase D-1                  |
| Desi_wild_77077  | NA                                  | Ca_desi_scaffold | 77077                   | A/C  | NA                 | INTERGENIC                    | NA                                           |
| Desi_wild_77083  | NA                                  | Ca_desi_scaffold | 77083                   | A/G  | NA                 | INTERGENIC                    | NA                                           |
| Desi_wild_77159  | NA                                  | Ca_desi_scaffold | 77159                   | C/T  | NA                 | INTERGENIC                    | NA                                           |
| Desi_wild_77198  | NA                                  | Ca_desi_scaffold | 77198                   | A/G  | NA                 | INTERGENIC                    | NA                                           |
| Desi_wild_77445  | NA                                  | Ca_desi_scaffold | 77445                   | C/T  | NA                 | INTERGENIC                    | NA                                           |
| Desi_wild_77529  | NA                                  | Ca_desi_scaffold | 77529                   | G/A  | NA                 | INTERGENIC                    | NA                                           |
| Desi_wild_42512  | NA                                  | Ca_desi_scaffold | 42512                   | A/G  | NA                 | INTERGENIC                    | NA                                           |
| Desi_wild_42514  | NA                                  | Ca_desi_scaffold | 42514                   | T/G  | NA                 | INTERGENIC                    | NA                                           |
| Desi_wild_42528  | NA                                  | Ca_desi_scaffold | 42528                   | A/G  | NA                 | INTERGENIC                    | NA                                           |
| Desi_wild_42529  | NA                                  | Ca_desi_scaffold | 42529                   | C/A  | NA                 | INTERGENIC                    | NA                                           |
| Desi_wild_42555  | NA                                  | Ca_desi_scaffold | 42555                   | G/A  | NA                 | INTERGENIC                    | NA                                           |
| Desi_wild_19961  | NA                                  | Ca_desi_scaffold | 19961                   | A/C  | Gene_Ca_15289.2    | INTRON                        | Putative nucleosome assembly protein C364.06 |
| Desi_wild_43462  | NA                                  | Ca_desi_scaffold | 43462                   | A/C  | Gene_Ca_15289.2    | DOWNSTREAM                    | Putative nucleosome assembly protein C364.06 |
| Desi_wild_55525  | NA                                  | Ca_desi_scaffold | 55525                   | A/G  | Gene_Ca_15295.1    | INTRON                        | R3H domain-containing protein 2              |
| Desi_wild_338504 | NA                                  | Ca_desi_scaffold | 338504                  | C/T  | Gene_Ca_09051.2    | SYNONYMOUS_CODING             | BEL1-like homeodomain protein 9              |
| Desi_wild_434162 | NA                                  | Ca_desi_scaffold | 434162                  | T/G  | Gene_Ca_09053.1    | UPSTREAM                      | unknown protein                              |
| Desi_wild_441330 | NA                                  | Ca_desi_scaffold | 441330                  | G/A  | Gene_Ca_09054.1    | NON_SYNONYMOUS_CODING         | Choline transporter-like protein 2           |
| Desi_wild_441360 | NA                                  | Ca_desi_scaffold | 441360                  | A/G  | Gene_Ca_09054.1    | NON_SYNONYMOUS_CODING         | Choline transporter-like protein 2           |
| Desi_wild_532493 | NA                                  | Ca_desi_scaffold | 532493                  | A/G  | Gene_Ca_09058.1    | INTRON                        | Serine/threonine-protein kinase ATG1         |
| Desi_wild_532555 | NA                                  | Ca_desi_scaffold | 532555                  | A/C  | Gene_Ca_09058.1    | INTRON                        | Serine/threonine-protein kinase ATG1         |
| Desi_wild_577619 | NA                                  | Ca_desi_scaffold | 577619                  | A/T  | NA                 | INTERGENIC                    | NA                                           |

| SNP IDs                 | NCBI dbSNP accession IDs (NCBI_SS#) | Chromosomes             | Physical positions (bp) | SNPs | Gene accession IDs | Sequence components of genome | Putative functions                                        |
|-------------------------|-------------------------------------|-------------------------|-------------------------|------|--------------------|-------------------------------|-----------------------------------------------------------|
| <i>Desi_wild_577620</i> | NA                                  | <i>Ca_desi_scaffold</i> | 577620                  | A/G  | NA                 | INTERGENIC                    | NA                                                        |
| <i>Desi_wild_577637</i> | NA                                  | <i>Ca_desi_scaffold</i> | 577637                  | G/A  | NA                 | INTERGENIC                    | NA                                                        |
| <i>Desi_wild_577701</i> | NA                                  | <i>Ca_desi_scaffold</i> | 577701                  | A/T  | NA                 | INTERGENIC                    | NA                                                        |
| <i>Desi_wild_577704</i> | NA                                  | <i>Ca_desi_scaffold</i> | 577704                  | T/A  | NA                 | INTERGENIC                    | NA                                                        |
| <i>Desi_wild_25097</i>  | NA                                  | <i>Ca_desi_scaffold</i> | 25097                   | C/A  | NA                 | INTERGENIC                    | NA                                                        |
| <i>Desi_wild_40213</i>  | NA                                  | <i>Ca_desi_scaffold</i> | 40213                   | T/C  | NA                 | INTERGENIC                    | NA                                                        |
| <i>Desi_wild_25391</i>  | NA                                  | <i>Ca_desi_scaffold</i> | 25391                   | G/A  | Gene_Ca_15303.1    | INTRON                        | Type I inositol-1,4,5-trisphosphate 5-phosphatase 12      |
| <i>Desi_wild_30831</i>  | NA                                  | <i>Ca_desi_scaffold</i> | 30831                   | A/G  | NA                 | INTERGENIC                    | NA                                                        |
| <i>Desi_wild_30835</i>  | NA                                  | <i>Ca_desi_scaffold</i> | 30835                   | G/C  | NA                 | INTERGENIC                    | NA                                                        |
| <i>Desi_wild_30859</i>  | NA                                  | <i>Ca_desi_scaffold</i> | 30859                   | A/C  | NA                 | INTERGENIC                    | NA                                                        |
| <i>Desi_wild_30864</i>  | NA                                  | <i>Ca_desi_scaffold</i> | 30864                   | C/T  | NA                 | INTERGENIC                    | NA                                                        |
| <i>Desi_wild_8426</i>   | NA                                  | <i>Ca_desi_scaffold</i> | 8426                    | G/A  | Gene_Ca_15309.1    | INTRON                        | ABC transporter C family member 2                         |
| <i>Desi_wild_11996</i>  | NA                                  | <i>Ca_desi_scaffold</i> | 11996                   | T/A  | Gene_Ca_15309.1    | INTRON                        | ABC transporter C family member 2                         |
| <i>Desi_wild_53269</i>  | NA                                  | <i>Ca_desi_scaffold</i> | 53269                   | G/A  | NA                 | INTERGENIC                    | NA                                                        |
| <i>Desi_wild_53272</i>  | NA                                  | <i>Ca_desi_scaffold</i> | 53272                   | T/G  | NA                 | INTERGENIC                    | NA                                                        |
| <i>Desi_wild_53277</i>  | NA                                  | <i>Ca_desi_scaffold</i> | 53277                   | G/A  | NA                 | INTERGENIC                    | NA                                                        |
| <i>Desi_wild_68014</i>  | NA                                  | <i>Ca_desi_scaffold</i> | 68014                   | T/C  | Gene_Ca_15324.1    | INTRON                        | Anaphase-promoting complex subunit 5                      |
| <i>Desi_wild_70478</i>  | NA                                  | <i>Ca_desi_scaffold</i> | 70478                   | A/G  | Gene_Ca_15324.1    | INTRON                        | Anaphase-promoting complex subunit 5                      |
| <i>Desi_wild_32195</i>  | NA                                  | <i>Ca_desi_scaffold</i> | 32195                   | G/T  | Gene_Ca_15329.2    | DOWNSTREAM                    | NA                                                        |
| <i>Desi_wild_32199</i>  | NA                                  | <i>Ca_desi_scaffold</i> | 32199                   | C/A  | Gene_Ca_15329.2    | DOWNSTREAM                    | NA                                                        |
| <i>Desi_wild_61133</i>  | NA                                  | <i>Ca_desi_scaffold</i> | 61133                   | G/T  | NA                 | INTERGENIC                    | NA                                                        |
| <i>Desi_wild_52151</i>  | NA                                  | <i>Ca_desi_scaffold</i> | 52151                   | G/T  | NA                 | INTERGENIC                    | NA                                                        |
| <i>Desi_wild_105597</i> | NA                                  | <i>Ca_desi_scaffold</i> | 105597                  | C/G  | NA                 | INTERGENIC                    | NA                                                        |
| <i>Desi_wild_105606</i> | NA                                  | <i>Ca_desi_scaffold</i> | 105606                  | A/G  | NA                 | INTERGENIC                    | NA                                                        |
| <i>Desi_wild_79631</i>  | NA                                  | <i>Ca_desi_scaffold</i> | 79631                   | A/G  | Gene_Ca_15349.1    | INTRON                        | Dehydrogenase/reductase SDR family member on chromosome X |
| <i>Desi_wild_21348</i>  | NA                                  | <i>Ca_desi_scaffold</i> | 21348                   | G/C  | NA                 | INTERGENIC                    | NA                                                        |
| <i>Desi_wild_43568</i>  | NA                                  | <i>Ca_desi_scaffold</i> | 43568                   | A/C  | Gene_Ca_15353.1    | SYNONYMOUS_CODING             | Nucleolar protein 6                                       |
| <i>Desi_wild_7791</i>   | NA                                  | <i>Ca_desi_scaffold</i> | 7791                    | T/G  | Gene_Ca_15356.1    | INTRON                        | Nucleic acid-binding, OB-fold-like protein                |
| <i>Desi_wild_52914</i>  | NA                                  | <i>Ca_desi_scaffold</i> | 52914                   | C/A  | Gene_Ca_15369.2    | INTRON                        | NA                                                        |
| <i>Desi_wild_52915</i>  | NA                                  | <i>Ca_desi_scaffold</i> | 52915                   | A/G  | Gene_Ca_15369.2    | INTRON                        | NA                                                        |
| <i>Desi_wild_80299</i>  | NA                                  | <i>Ca_desi_scaffold</i> | 80299                   | C/T  | Gene_Ca_15372.1    | NON_SYNONYMOUS_CODING         | Prohibitin-1, mitochondrial                               |
| <i>Desi_wild_80684</i>  | NA                                  | <i>Ca_desi_scaffold</i> | 80684                   | A/C  | Gene_Ca_15379.1    | NON_SYNONYMOUS_CODING         | Tetratricopeptide repeat (TPR)-like superfamily protein   |
| <i>Desi_wild_34544</i>  | NA                                  | <i>Ca_desi_scaffold</i> | 34544                   | T/C  | NA                 | INTERGENIC                    | NA                                                        |
| <i>Desi_wild_34554</i>  | NA                                  | <i>Ca_desi_scaffold</i> | 34554                   | G/A  | NA                 | INTERGENIC                    | NA                                                        |
| <i>Desi_wild_34594</i>  | NA                                  | <i>Ca_desi_scaffold</i> | 34594                   | G/T  | NA                 | INTERGENIC                    | NA                                                        |
| <i>Desi_wild_34943</i>  | NA                                  | <i>Ca_desi_scaffold</i> | 34943                   | G/A  | NA                 | INTERGENIC                    | NA                                                        |
| <i>Desi_wild_53567</i>  | NA                                  | <i>Ca_desi_scaffold</i> | 53567                   | C/A  | Gene_Ca_10108.1    | NON_SYNONYMOUS_CODING         | Protein STRUBBELIG-RECEPTOR FAMILY 2                      |
| <i>Desi_wild_53659</i>  | NA                                  | <i>Ca_desi_scaffold</i> | 53659                   | C/T  | Gene_Ca_10108.1    | INTRON                        | Protein STRUBBELIG-RECEPTOR FAMILY 2                      |
| <i>Desi_wild_118715</i> | NA                                  | <i>Ca_desi_scaffold</i> | 118715                  | G/A  | Gene_Ca_09863.1    | INTRON                        | Protein EFR3 homolog B                                    |
| <i>Desi_wild_35105</i>  | NA                                  | <i>Ca_desi_scaffold</i> | 35105                   | C/T  | NA                 | INTERGENIC                    | NA                                                        |
| <i>Desi_wild_35813</i>  | NA                                  | <i>Ca_desi_scaffold</i> | 35813                   | C/T  | Gene_Ca_15390.1    | INTRON                        | Protein CHUP1, chloroplastic                              |
| <i>Desi_wild_35814</i>  | NA                                  | <i>Ca_desi_scaffold</i> | 35814                   | T/A  | Gene_Ca_15390.1    | INTRON                        | Protein CHUP1, chloroplastic                              |
| <i>Desi_wild_35816</i>  | NA                                  | <i>Ca_desi_scaffold</i> | 35816                   | G/A  | Gene_Ca_15390.1    | INTRON                        | Protein CHUP1, chloroplastic                              |
| <i>Desi_wild_35817</i>  | NA                                  | <i>Ca_desi_scaffold</i> | 35817                   | A/C  | Gene_Ca_15390.1    | INTRON                        | Protein CHUP1, chloroplastic                              |

| SNP IDs                | NCBI dbSNP accession IDs (NCBI_SS#) | Chromosomes             | Physical positions (bp) | SNPs | Gene accession IDs | Sequence components of genome | Putative functions                                        |
|------------------------|-------------------------------------|-------------------------|-------------------------|------|--------------------|-------------------------------|-----------------------------------------------------------|
| <i>Desi_wild_35822</i> | NA                                  | <i>Ca_desi_scaffold</i> | 35822                   | A/T  | Gene_Ca_15390.1    | INTRON                        | Protein CHUP1, chloroplastic                              |
| <i>Desi_wild_35828</i> | NA                                  | <i>Ca_desi_scaffold</i> | 35828                   | A/T  | Gene_Ca_15390.1    | INTRON                        | Protein CHUP1, chloroplastic                              |
| <i>Desi_wild_35829</i> | NA                                  | <i>Ca_desi_scaffold</i> | 35829                   | A/G  | Gene_Ca_15390.1    | INTRON                        | Protein CHUP1, chloroplastic                              |
| <i>Desi_wild_35832</i> | NA                                  | <i>Ca_desi_scaffold</i> | 35832                   | A/T  | Gene_Ca_15390.1    | INTRON                        | Protein CHUP1, chloroplastic                              |
| <i>Desi_wild_35837</i> | NA                                  | <i>Ca_desi_scaffold</i> | 35837                   | A/T  | Gene_Ca_15390.1    | INTRON                        | Protein CHUP1, chloroplastic                              |
| <i>Desi_wild_35844</i> | NA                                  | <i>Ca_desi_scaffold</i> | 35844                   | T/C  | Gene_Ca_15390.1    | INTRON                        | Protein CHUP1, chloroplastic                              |
| <i>Desi_wild_35845</i> | NA                                  | <i>Ca_desi_scaffold</i> | 35845                   | G/T  | Gene_Ca_15390.1    | INTRON                        | Protein CHUP1, chloroplastic                              |
| <i>Desi_wild_35846</i> | NA                                  | <i>Ca_desi_scaffold</i> | 35846                   | T/A  | Gene_Ca_15390.1    | INTRON                        | Protein CHUP1, chloroplastic                              |
| <i>Desi_wild_35847</i> | NA                                  | <i>Ca_desi_scaffold</i> | 35847                   | C/A  | Gene_Ca_15390.1    | INTRON                        | Protein CHUP1, chloroplastic                              |
| <i>Desi_wild_70402</i> | NA                                  | <i>Ca_desi_scaffold</i> | 70402                   | C/T  | NA                 | INTERGENIC                    | NA                                                        |
| <i>Desi_wild_3471</i>  | NA                                  | <i>Ca_desi_scaffold</i> | 3471                    | A/T  | NA                 | INTERGENIC                    | NA                                                        |
| <i>Desi_wild_1792</i>  | NA                                  | <i>Ca_desi_scaffold</i> | 1792                    | C/T  | NA                 | INTERGENIC                    | NA                                                        |
| <i>Desi_wild_32625</i> | NA                                  | <i>Ca_desi_scaffold</i> | 32625                   | G/C  | NA                 | INTERGENIC                    | NA                                                        |
| <i>Desi_wild_14528</i> | NA                                  | <i>Ca_desi_scaffold</i> | 14528                   | T/C  | NA                 | INTERGENIC                    | NA                                                        |
| <i>Desi_wild_14535</i> | NA                                  | <i>Ca_desi_scaffold</i> | 14535                   | C/T  | NA                 | INTERGENIC                    | NA                                                        |
| <i>Desi_wild_14573</i> | NA                                  | <i>Ca_desi_scaffold</i> | 14573                   | T/A  | NA                 | INTERGENIC                    | NA                                                        |
| <i>Desi_wild_16788</i> | NA                                  | <i>Ca_desi_scaffold</i> | 16788                   | G/A  | NA                 | INTERGENIC                    | NA                                                        |
| <i>Desi_wild_17933</i> | NA                                  | <i>Ca_desi_scaffold</i> | 17933                   | A/T  | NA                 | INTERGENIC                    | NA                                                        |
| <i>Desi_wild_7943</i>  | NA                                  | <i>Ca_desi_scaffold</i> | 7943                    | A/T  | Gene_Ca_15421.1    | UPSTREAM                      | Copper transport protein family                           |
| <i>Desi_wild_27140</i> | NA                                  | <i>Ca_desi_scaffold</i> | 27140                   | A/G  | Gene_Ca_15424.1    | UPSTREAM                      | Myosin heavy chain-related protein                        |
| <i>Desi_wild_27150</i> | NA                                  | <i>Ca_desi_scaffold</i> | 27150                   | T/A  | Gene_Ca_15424.1    | UPSTREAM                      | Myosin heavy chain-related protein                        |
| <i>Desi_wild_42343</i> | NA                                  | <i>Ca_desi_scaffold</i> | 42343                   | C/G  | Gene_Ca_15425.1    | SYNONYMOUS_CODING             | Transmembrane ascorbate ferrireductase 1                  |
| <i>Desi_wild_42358</i> | NA                                  | <i>Ca_desi_scaffold</i> | 42358                   | A/G  | Gene_Ca_15425.1    | SYNONYMOUS_CODING             | Transmembrane ascorbate ferrireductase 1                  |
| <i>Desi_wild_42593</i> | NA                                  | <i>Ca_desi_scaffold</i> | 42593                   | A/G  | Gene_Ca_15425.1    | INTRON                        | Transmembrane ascorbate ferrireductase 1                  |
| <i>Desi_wild_42669</i> | NA                                  | <i>Ca_desi_scaffold</i> | 42669                   | T/A  | Gene_Ca_15425.1    | INTRON                        | Transmembrane ascorbate ferrireductase 1                  |
| <i>Desi_wild_51956</i> | NA                                  | <i>Ca_desi_scaffold</i> | 51956                   | T/C  | Gene_Ca_15426.1    | DOWNSTREAM                    | Remorin                                                   |
| <i>Desi_wild_79148</i> | NA                                  | <i>Ca_desi_scaffold</i> | 79148                   | T/C  | Gene_Ca_15430.1    | INTRON                        | Cleavage and polyadenylation specificity factor subunit 5 |
| <i>Desi_wild_79287</i> | NA                                  | <i>Ca_desi_scaffold</i> | 79287                   | C/T  | Gene_Ca_15430.1    | INTRON                        | Cleavage and polyadenylation specificity factor subunit 5 |
| <i>Desi_wild_25520</i> | NA                                  | <i>Ca_desi_scaffold</i> | 25520                   | T/G  | Gene_Ca_15433.1    | INTRON                        | Cation/H(+) antiporter 4                                  |
| <i>Desi_wild_65766</i> | NA                                  | <i>Ca_desi_scaffold</i> | 65766                   | T/G  | Gene_Ca_15437.1    | DOWNSTREAM                    | NA                                                        |
| <i>Desi_wild_29063</i> | NA                                  | <i>Ca_desi_scaffold</i> | 29063                   | C/T  | Gene_Ca_15440.1    | DOWNSTREAM                    | unknown protein                                           |
| <i>Desi_wild_29089</i> | NA                                  | <i>Ca_desi_scaffold</i> | 29089                   | G/A  | Gene_Ca_15440.1    | DOWNSTREAM                    | unknown protein                                           |
| <i>Desi_wild_38330</i> | NA                                  | <i>Ca_desi_scaffold</i> | 38330                   | C/T  | Gene_Ca_15441.1    | INTRON                        | Probable WRKY transcription factor 9                      |
| <i>Desi_wild_38356</i> | NA                                  | <i>Ca_desi_scaffold</i> | 38356                   | G/T  | Gene_Ca_15441.1    | INTRON                        | Probable WRKY transcription factor 9                      |
| <i>Desi_wild_38370</i> | NA                                  | <i>Ca_desi_scaffold</i> | 38370                   | T/C  | Gene_Ca_15441.1    | INTRON                        | Probable WRKY transcription factor 9                      |
| <i>Desi_wild_44891</i> | NA                                  | <i>Ca_desi_scaffold</i> | 44891                   | T/C  | Gene_Ca_15442.1    | INTRON                        | Mitogen-activated protein kinase kinase kinase 1          |
| <i>Desi_wild_45277</i> | NA                                  | <i>Ca_desi_scaffold</i> | 45277                   | T/G  | NA                 | INTERGENIC                    | NA                                                        |
| <i>Desi_wild_46762</i> | NA                                  | <i>Ca_desi_scaffold</i> | 46762                   | A/G  | NA                 | INTERGENIC                    | NA                                                        |
| <i>Desi_wild_70381</i> | NA                                  | <i>Ca_desi_scaffold</i> | 70381                   | G/A  | NA                 | INTERGENIC                    | NA                                                        |
| <i>Desi_wild_1524</i>  | NA                                  | <i>Ca_desi_scaffold</i> | 1524                    | T/C  | NA                 | INTERGENIC                    | NA                                                        |
| <i>Desi_wild_9310</i>  | NA                                  | <i>Ca_desi_scaffold</i> | 9310                    | C/A  | Gene_Ca_10082.1    | INTRON                        | Delta-1-pyrroline-5-carboxylate synthase                  |
| <i>Desi_wild_12593</i> | NA                                  | <i>Ca_desi_scaffold</i> | 12593                   | A/G  | Gene_Ca_10083.1    | UPSTREAM                      | Peroxisome biogenesis protein 7                           |
| <i>Desi_wild_12626</i> | NA                                  | <i>Ca_desi_scaffold</i> | 12626                   | A/G  | Gene_Ca_10083.1    | UPSTREAM                      | Peroxisome biogenesis protein 7                           |
| <i>Desi_wild_13802</i> | NA                                  | <i>Ca_desi_scaffold</i> | 13802                   | G/A  | Gene_Ca_10083.1    | UPSTREAM                      | Peroxisome biogenesis protein 7                           |



| SNP IDs                | NCBI dbSNP accession IDs (NCBI_SS#) | Chromosomes             | Physical positions (bp) | SNPs | Gene accession IDs              | Sequence components of genome | Putative functions                                      |
|------------------------|-------------------------------------|-------------------------|-------------------------|------|---------------------------------|-------------------------------|---------------------------------------------------------|
| <i>Desi_wild_13845</i> | NA                                  | <i>Ca_desi_scaffold</i> | 13845                   | A/G  | Gene_Ca_10083.1                 | UPSTREAM                      | Peroxisome biogenesis protein 7                         |
| <i>Desi_wild_41654</i> | NA                                  | <i>Ca_desi_scaffold</i> | 41654                   | T/C  | Gene_Ca_10084.1                 | INTRON                        | Agmatine deiminase                                      |
| <i>Desi_wild_41660</i> | NA                                  | <i>Ca_desi_scaffold</i> | 41660                   | G/A  | Gene_Ca_10084.1                 | INTRON                        | Agmatine deiminase                                      |
| <i>Desi_wild_41686</i> | NA                                  | <i>Ca_desi_scaffold</i> | 41686                   | T/C  | Gene_Ca_10084.1                 | INTRON                        | Agmatine deiminase                                      |
| <i>Desi_wild_41695</i> | NA                                  | <i>Ca_desi_scaffold</i> | 41695                   | G/A  | Gene_Ca_10084.1                 | INTRON                        | Agmatine deiminase                                      |
| <i>Desi_wild_41697</i> | NA                                  | <i>Ca_desi_scaffold</i> | 41697                   | G/A  | Gene_Ca_10084.1                 | INTRON                        | Agmatine deiminase                                      |
| <i>Desi_wild_48363</i> | NA                                  | <i>Ca_desi_scaffold</i> | 48363                   | A/T  | NA                              | INTERGENIC                    | NA                                                      |
| <i>Desi_wild_48415</i> | NA                                  | <i>Ca_desi_scaffold</i> | 48415                   | G/T  | NA                              | INTERGENIC                    | NA                                                      |
| <i>Desi_wild_7239</i>  | NA                                  | <i>Ca_desi_scaffold</i> | 7239                    | C/T  | NA                              | INTERGENIC                    | NA                                                      |
| <i>Desi_wild_7244</i>  | NA                                  | <i>Ca_desi_scaffold</i> | 7244                    | A/C  | NA                              | INTERGENIC                    | NA                                                      |
| <i>Desi_wild_7248</i>  | NA                                  | <i>Ca_desi_scaffold</i> | 7248                    | C/T  | NA                              | INTERGENIC                    | NA                                                      |
| <i>Desi_wild_17371</i> | NA                                  | <i>Ca_desi_scaffold</i> | 17371                   | C/A  | Gene_Ca_15461.1                 | INTRON                        | Squamous cell carcinoma antigen recognized by T-cells 3 |
| <i>Desi_wild_46499</i> | NA                                  | <i>Ca_desi_scaffold</i> | 46499                   | A/C  | NA                              | INTERGENIC                    | NA                                                      |
| <i>Desi_wild_46114</i> | NA                                  | <i>Ca_desi_scaffold</i> | 46114                   | T/A  | NA                              | INTERGENIC                    | NA                                                      |
| <i>Desi_wild_46124</i> | NA                                  | <i>Ca_desi_scaffold</i> | 46124                   | T/A  | NA                              | INTERGENIC                    | NA                                                      |
| <i>Desi_wild_46143</i> | NA                                  | <i>Ca_desi_scaffold</i> | 46143                   | T/C  | NA                              | INTERGENIC                    | NA                                                      |
| <i>Desi_wild_32888</i> | NA                                  | <i>Ca_desi_scaffold</i> | 32888                   | C/T  | Gene_Ca_09913.1                 | INTRON                        | Serine/threonine-protein phosphatase BSL3               |
| <i>Desi_wild_38405</i> | NA                                  | <i>Ca_desi_scaffold</i> | 38405                   | G/T  | Gene_Ca_09913.1                 | INTRON                        | Serine/threonine-protein phosphatase BSL3               |
| <i>Desi_wild_38409</i> | NA                                  | <i>Ca_desi_scaffold</i> | 38409                   | T/G  | Gene_Ca_09913.1                 | INTRON                        | Serine/threonine-protein phosphatase BSL3               |
| <i>Desi_wild_38414</i> | NA                                  | <i>Ca_desi_scaffold</i> | 38414                   | A/C  | Gene_Ca_09913.1                 | INTRON                        | Serine/threonine-protein phosphatase BSL3               |
| <i>Desi_wild_39686</i> | NA                                  | <i>Ca_desi_scaffold</i> | 39686                   | A/C  | Gene_Ca_09913.1                 | SYNONYMOUS_CODING             | Serine/threonine-protein phosphatase BSL3               |
| <i>Desi_wild_63353</i> | NA                                  | <i>Ca_desi_scaffold</i> | 63353                   | A/C  | Gene_Ca_15488.1                 | INTRON                        | NA                                                      |
| <i>Desi_wild_65675</i> | NA                                  | <i>Ca_desi_scaffold</i> | 65675                   | A/G  | Gene_Ca_15488.1                 | INTRON                        | NA                                                      |
| <i>Desi_wild_67964</i> | NA                                  | <i>Ca_desi_scaffold</i> | 67964                   | T/C  | NA                              | INTERGENIC                    | NA                                                      |
| <i>Desi_wild_74520</i> | NA                                  | <i>Ca_desi_scaffold</i> | 74520                   | T/C  | NA                              | INTERGENIC                    | NA                                                      |
| <i>Desi_wild_74523</i> | NA                                  | <i>Ca_desi_scaffold</i> | 74523                   | G/A  | NA                              | INTERGENIC                    | NA                                                      |
| <i>Desi_wild_74533</i> | NA                                  | <i>Ca_desi_scaffold</i> | 74533                   | G/A  | NA                              | INTERGENIC                    | NA                                                      |
| <i>Desi_wild_74546</i> | NA                                  | <i>Ca_desi_scaffold</i> | 74546                   | T/C  | NA                              | INTERGENIC                    | NA                                                      |
| <i>Desi_wild_74583</i> | NA                                  | <i>Ca_desi_scaffold</i> | 74583                   | C/T  | NA                              | INTERGENIC                    | NA                                                      |
| <i>Desi_wild_74585</i> | NA                                  | <i>Ca_desi_scaffold</i> | 74585                   | C/T  | NA                              | INTERGENIC                    | NA                                                      |
| <i>Desi_wild_24240</i> | NA                                  | <i>Ca_desi_scaffold</i> | 24240                   | A/G  | Gene_Ca_15501.1                 | INTRON                        | Transmembrane protein 56-B                              |
| <i>Desi_wild_16359</i> | NA                                  | <i>Ca_desi_scaffold</i> | 16359                   | A/G  | Gene_Ca_15502.1                 | INTRON                        | GBF-interacting protein 1                               |
| <i>Desi_wild_18720</i> | NA                                  | <i>Ca_desi_scaffold</i> | 18720                   | T/C  | Gene_Ca_15502.3                 | INTRON                        | GBF-interacting protein 1                               |
| <i>Desi_wild_27914</i> | NA                                  | <i>Ca_desi_scaffold</i> | 27914                   | G/A  | Gene_Ca_15503.1                 | DOWNSTREAM                    | UPF0172 protein At5g55940                               |
| <i>Desi_wild_30430</i> | NA                                  | <i>Ca_desi_scaffold</i> | 30430                   | A/G  | NA                              | INTERGENIC                    | NA                                                      |
| <i>Desi_wild_67103</i> | NA                                  | <i>Ca_desi_scaffold</i> | 67103                   | C/A  | Gene_Ca_15513.1                 | UPSTREAM                      | Ubiquitin carboxyl-terminal hydrolase 17                |
| <i>Desi_wild_45975</i> | NA                                  | <i>Ca_desi_scaffold</i> | 45975                   | C/T  | Gene_Ca_15521.1                 | NON_SYNONYMOUS_CODING         | Protein of unknown function (DUF707)                    |
| <i>Desi_wild_58214</i> | NA                                  | <i>Ca_desi_scaffold</i> | 58214                   | G/A  | <a href="#">Gene_Ca_15529.1</a> | NON_SYNONYMOUS_CODING         | Protein of unknown function (DUF707)                    |
| <i>Desi_wild_58221</i> | NA                                  | <i>Ca_desi_scaffold</i> | 58221                   | G/A  | <a href="#">Gene_Ca_15529.1</a> | NON_SYNONYMOUS_CODING         | Protein of unknown function (DUF707)                    |
| <i>Desi_wild_58227</i> | NA                                  | <i>Ca_desi_scaffold</i> | 58227                   | G/A  | <a href="#">Gene_Ca_15529.1</a> | NON_SYNONYMOUS_CODING         | Protein of unknown function (DUF707)                    |
| <i>Desi_wild_58244</i> | NA                                  | <i>Ca_desi_scaffold</i> | 58244                   | A/G  | <a href="#">Gene_Ca_15529.1</a> | NON_SYNONYMOUS_CODING         | Protein of unknown function (DUF707)                    |
| <i>Desi_wild_58265</i> | NA                                  | <i>Ca_desi_scaffold</i> | 58265                   | G/A  | <a href="#">Gene_Ca_15529.1</a> | NON_SYNONYMOUS_CODING         | Protein of unknown function (DUF707)                    |
| <i>Desi_wild_58269</i> | NA                                  | <i>Ca_desi_scaffold</i> | 58269                   | A/G  | <a href="#">Gene_Ca_15529.1</a> | NON_SYNONYMOUS_CODING         | Protein of unknown function (DUF707)                    |
| <i>Desi_wild_58278</i> | NA                                  | <i>Ca_desi_scaffold</i> | 58278                   | C/T  | <a href="#">Gene_Ca_15529.1</a> | NON_SYNONYMOUS_CODING         | Protein of unknown function (DUF707)                    |

| SNP IDs                | NCBI dbSNP accession IDs (NCBI_SS#) | Chromosomes             | Physical positions (bp) | SNPs | Gene accession IDs | Sequence components of genome | Putative functions                                         |
|------------------------|-------------------------------------|-------------------------|-------------------------|------|--------------------|-------------------------------|------------------------------------------------------------|
| <i>Desi_wild_64645</i> | NA                                  | <i>Ca_desi_scaffold</i> | 64645                   | C/A  | Gene_Ca_15540.1    | INTRON                        | Protein disulfide-isomerase 5-4                            |
| <i>Desi_wild_22211</i> | NA                                  | <i>Ca_desi_scaffold</i> | 22211                   | C/T  | Gene_Ca_15542.1    | SYNONYMOUS_CODING             | NA                                                         |
| <i>Desi_wild_27881</i> | NA                                  | <i>Ca_desi_scaffold</i> | 27881                   | T/C  | NA                 | INTERGENIC                    | NA                                                         |
| <i>Desi_wild_28009</i> | NA                                  | <i>Ca_desi_scaffold</i> | 28009                   | C/A  | NA                 | INTERGENIC                    | NA                                                         |
| <i>Desi_wild_27868</i> | NA                                  | <i>Ca_desi_scaffold</i> | 27868                   | A/C  | NA                 | INTERGENIC                    | NA                                                         |
| <i>Desi_wild_12192</i> | NA                                  | <i>Ca_desi_scaffold</i> | 12192                   | T/A  | Gene_Ca_15553.1    | DOWNSTREAM                    | Monoglyceride lipase                                       |
| <i>Desi_wild_12206</i> | NA                                  | <i>Ca_desi_scaffold</i> | 12206                   | T/C  | Gene_Ca_15553.1    | DOWNSTREAM                    | Monoglyceride lipase                                       |
| <i>Desi_wild_12323</i> | NA                                  | <i>Ca_desi_scaffold</i> | 12323                   | A/G  | Gene_Ca_15553.1    | DOWNSTREAM                    | Monoglyceride lipase                                       |
| <i>Desi_wild_27371</i> | NA                                  | <i>Ca_desi_scaffold</i> | 27371                   | C/T  | Gene_Ca_15554.1    | NON_SYNONYMOUS_CODING         | Uncharacterized protein C57A7.06                           |
| <i>Desi_wild_27377</i> | NA                                  | <i>Ca_desi_scaffold</i> | 27377                   | T/C  | Gene_Ca_15554.1    | NON_SYNONYMOUS_CODING         | Uncharacterized protein C57A7.06                           |
| <i>Desi_wild_47592</i> | NA                                  | <i>Ca_desi_scaffold</i> | 47592                   | G/C  | NA                 | INTERGENIC                    | NA                                                         |
| <i>Desi_wild_47629</i> | NA                                  | <i>Ca_desi_scaffold</i> | 47629                   | A/G  | NA                 | INTERGENIC                    | NA                                                         |
| <i>Desi_wild_47653</i> | NA                                  | <i>Ca_desi_scaffold</i> | 47653                   | T/C  | NA                 | INTERGENIC                    | NA                                                         |
| <i>Desi_wild_54142</i> | NA                                  | <i>Ca_desi_scaffold</i> | 54142                   | C/A  | NA                 | INTERGENIC                    | NA                                                         |
| <i>Desi_wild_24202</i> | NA                                  | <i>Ca_desi_scaffold</i> | 24202                   | A/G  | Gene_Ca_15562.1    | NON_SYNONYMOUS_CODING         | Auxin response factor 8                                    |
| <i>Desi_wild_38572</i> | NA                                  | <i>Ca_desi_scaffold</i> | 38572                   | G/T  | Gene_Ca_10160.1    | INTRON                        | Protein STRUBBELIG-RECEPTOR FAMILY 2                       |
| <i>Desi_wild_72405</i> | NA                                  | <i>Ca_desi_scaffold</i> | 72405                   | A/G  | NA                 | INTERGENIC                    | NA                                                         |
| <i>Desi_wild_72462</i> | NA                                  | <i>Ca_desi_scaffold</i> | 72462                   | T/C  | NA                 | INTERGENIC                    | NA                                                         |
| <i>Desi_wild_72465</i> | NA                                  | <i>Ca_desi_scaffold</i> | 72465                   | T/A  | NA                 | INTERGENIC                    | NA                                                         |
| <i>Desi_wild_81710</i> | NA                                  | <i>Ca_desi_scaffold</i> | 81710                   | T/C  | NA                 | INTERGENIC                    | NA                                                         |
| <i>Desi_wild_93314</i> | NA                                  | <i>Ca_desi_scaffold</i> | 93314                   | A/T  | Gene_Ca_10175.1    | INTRON                        | Protein STRUBBELIG-RECEPTOR FAMILY 5                       |
| <i>Desi_wild_93317</i> | NA                                  | <i>Ca_desi_scaffold</i> | 93317                   | G/A  | Gene_Ca_10175.1    | INTRON                        | Protein STRUBBELIG-RECEPTOR FAMILY 5                       |
| <i>Desi_wild_15756</i> | NA                                  | <i>Ca_desi_scaffold</i> | 15756                   | G/C  | Gene_Ca_15569.1    | DOWNSTREAM                    | Protease Do-like 2, chloroplastic                          |
| <i>Desi_wild_31631</i> | NA                                  | <i>Ca_desi_scaffold</i> | 31631                   | A/G  | NA                 | INTERGENIC                    | NA                                                         |
| <i>Desi_wild_3715</i>  | NA                                  | <i>Ca_desi_scaffold</i> | 3715                    | G/T  | NA                 | INTERGENIC                    | NA                                                         |
| <i>Desi_wild_3989</i>  | NA                                  | <i>Ca_desi_scaffold</i> | 3989                    | C/A  | NA                 | INTERGENIC                    | NA                                                         |
| <i>Desi_wild_44633</i> | NA                                  | <i>Ca_desi_scaffold</i> | 44633                   | C/A  | NA                 | INTERGENIC                    | NA                                                         |
| <i>Desi_wild_11100</i> | NA                                  | <i>Ca_desi_scaffold</i> | 11100                   | A/G  | Gene_Ca_15589.1    | INTRON                        | Strictosidine synthase 3                                   |
| <i>Desi_wild_11221</i> | NA                                  | <i>Ca_desi_scaffold</i> | 11221                   | G/A  | Gene_Ca_15589.1    | DOWNSTREAM                    | Strictosidine synthase 3                                   |
| <i>Desi_wild_8558</i>  | NA                                  | <i>Ca_desi_scaffold</i> | 8558                    | A/C  | NA                 | INTERGENIC                    | NA                                                         |
| <i>Desi_wild_69013</i> | NA                                  | <i>Ca_desi_scaffold</i> | 69013                   | A/T  | NA                 | INTERGENIC                    | NA                                                         |
| <i>Desi_wild_67835</i> | NA                                  | <i>Ca_desi_scaffold</i> | 67835                   | C/T  | Gene_Ca_10197.1    | INTRON                        | Protein lin-54 homolog                                     |
| <i>Desi_wild_67839</i> | NA                                  | <i>Ca_desi_scaffold</i> | 67839                   | T/C  | Gene_Ca_10197.1    | INTRON                        | Protein lin-54 homolog                                     |
| <i>Desi_wild_67841</i> | NA                                  | <i>Ca_desi_scaffold</i> | 67841                   | A/C  | Gene_Ca_10197.1    | INTRON                        | Protein lin-54 homolog                                     |
| <i>Desi_wild_66942</i> | NA                                  | <i>Ca_desi_scaffold</i> | 66942                   | C/T  | Gene_Ca_15610.1    | INTRON                        | Putative amidohydrolase ytcJ                               |
| <i>Desi_wild_23821</i> | NA                                  | <i>Ca_desi_scaffold</i> | 23821                   | T/A  | Gene_Ca_15623.1    | DOWNSTREAM                    | Polycomb group protein FERTILIZATION-INDEPENDENT ENDOSPERM |
| <i>Desi_wild_26677</i> | NA                                  | <i>Ca_desi_scaffold</i> | 26677                   | G/A  | NA                 | INTERGENIC                    | NA                                                         |
| <i>Desi_wild_26680</i> | NA                                  | <i>Ca_desi_scaffold</i> | 26680                   | G/A  | NA                 | INTERGENIC                    | NA                                                         |
| <i>Desi_wild_26751</i> | NA                                  | <i>Ca_desi_scaffold</i> | 26751                   | A/T  | NA                 | INTERGENIC                    | NA                                                         |
| <i>Desi_wild_30012</i> | NA                                  | <i>Ca_desi_scaffold</i> | 30012                   | G/A  | Gene_Ca_15623.1    | UPSTREAM                      | Polycomb group protein FERTILIZATION-INDEPENDENT ENDOSPERM |
| <i>Desi_wild_30151</i> | NA                                  | <i>Ca_desi_scaffold</i> | 30151                   | G/C  | Gene_Ca_15623.1    | UPSTREAM                      | Polycomb group protein FERTILIZATION-INDEPENDENT ENDOSPERM |
| <i>Desi_wild_50036</i> | NA                                  | <i>Ca_desi_scaffold</i> | 50036                   | C/T  | Gene_Ca_15624.1    | DOWNSTREAM                    | Probable protein phosphatase 2C 8                          |
| <i>Desi_wild_2884</i>  | NA                                  | <i>Ca_desi_scaffold</i> | 2884                    | G/A  | NA                 | INTERGENIC                    | NA                                                         |
| <i>Desi_wild_27474</i> | NA                                  | <i>Ca_desi_scaffold</i> | 27474                   | T/C  | NA                 | INTERGENIC                    | NA                                                         |

| SNP IDs                 | NCBI dbSNP accession IDs (NCBI_SS#) | Chromosomes             | Physical positions (bp) | SNPs | Gene accession IDs | Sequence components of genome | Putative functions                                                                      |
|-------------------------|-------------------------------------|-------------------------|-------------------------|------|--------------------|-------------------------------|-----------------------------------------------------------------------------------------|
| <i>Desi_wild_27492</i>  | NA                                  | <i>Ca_desi_scaffold</i> | 27492                   | T/C  | NA                 | INTERGENIC                    | NA                                                                                      |
| <i>Desi_wild_58703</i>  | NA                                  | <i>Ca_desi_scaffold</i> | 58703                   | T/C  | Gene_Ca_15645.1    | DOWNSTREAM                    | Probable glutathione S-transferase                                                      |
| <i>Desi_wild_60199</i>  | NA                                  | <i>Ca_desi_scaffold</i> | 60199                   | C/G  | Gene_Ca_15644.1    | DOWNSTREAM                    | Probable glutathione S-transferase                                                      |
| <i>Desi_wild_51582</i>  | NA                                  | <i>Ca_desi_scaffold</i> | 51582                   | A/C  | Gene_Ca_15649.2    | INTRON                        | Cysteine-rich receptor-like protein kinase 25                                           |
| <i>Desi_wild_17026</i>  | NA                                  | <i>Ca_desi_scaffold</i> | 17026                   | T/C  | Gene_Ca_15652.1    | NON_SYNONYMOUS_CODING         | Probable metal-nicotianamine transporter YSL6                                           |
| <i>Desi_wild_36047</i>  | NA                                  | <i>Ca_desi_scaffold</i> | 36047                   | T/G  | Gene_Ca_15653.1    | NON_SYNONYMOUS_CODING         | Hydroquinone glucosyltransferase                                                        |
| <i>Desi_wild_228376</i> | NA                                  | <i>Ca_desi_scaffold</i> | 228376                  | C/A  | Gene_Ca_09024.1    | INTRON                        | Protein ETHYLENE INSENSITIVE 3                                                          |
| <i>Desi_wild_33651</i>  | NA                                  | <i>Ca_desi_scaffold</i> | 33651                   | T/C  | Gene_Ca_15672.1    | INTRON                        | Zinc finger protein 346                                                                 |
| <i>Desi_wild_33652</i>  | NA                                  | <i>Ca_desi_scaffold</i> | 33652                   | T/A  | Gene_Ca_15672.1    | INTRON                        | Zinc finger protein 346                                                                 |
| <i>Desi_wild_49117</i>  | NA                                  | <i>Ca_desi_scaffold</i> | 49117                   | T/A  | NA                 | INTERGENIC                    | NA                                                                                      |
| <i>Desi_wild_10306</i>  | NA                                  | <i>Ca_desi_scaffold</i> | 10306                   | C/T  | Gene_Ca_15676.1    | SYNONYMOUS_CODING             | UPF0496 protein At2g18630                                                               |
| <i>Desi_wild_46509</i>  | NA                                  | <i>Ca_desi_scaffold</i> | 46509                   | G/A  | Gene_Ca_15695.1    | SYNONYMOUS_CODING             | E3 ubiquitin-protein ligase At3g02290                                                   |
| <i>Desi_wild_73554</i>  | NA                                  | <i>Ca_desi_scaffold</i> | 73554                   | A/T  | NA                 | INTERGENIC                    | NA                                                                                      |
| <i>Desi_wild_73588</i>  | NA                                  | <i>Ca_desi_scaffold</i> | 73588                   | G/T  | NA                 | INTERGENIC                    | NA                                                                                      |
| <i>Desi_wild_73596</i>  | NA                                  | <i>Ca_desi_scaffold</i> | 73596                   | T/A  | NA                 | INTERGENIC                    | NA                                                                                      |
| <i>Desi_wild_73633</i>  | NA                                  | <i>Ca_desi_scaffold</i> | 73633                   | T/A  | NA                 | INTERGENIC                    | NA                                                                                      |
| <i>Desi_wild_73634</i>  | NA                                  | <i>Ca_desi_scaffold</i> | 73634                   | T/A  | NA                 | INTERGENIC                    | NA                                                                                      |
| <i>Desi_wild_73643</i>  | NA                                  | <i>Ca_desi_scaffold</i> | 73643                   | C/A  | NA                 | INTERGENIC                    | NA                                                                                      |
| <i>Desi_wild_73646</i>  | NA                                  | <i>Ca_desi_scaffold</i> | 73646                   | T/C  | NA                 | INTERGENIC                    | NA                                                                                      |
| <i>Desi_wild_42906</i>  | NA                                  | <i>Ca_desi_scaffold</i> | 42906                   | A/G  | Gene_Ca_15701.1    | INTRON                        | L-ascorbate peroxidase 3, peroxisomal                                                   |
| <i>Desi_wild_35929</i>  | NA                                  | <i>Ca_desi_scaffold</i> | 35929                   | G/A  | NA                 | INTERGENIC                    | NA                                                                                      |
| <i>Desi_wild_48213</i>  | NA                                  | <i>Ca_desi_scaffold</i> | 48213                   | A/G  | Gene_Ca_15712.2    | INTRON                        | Superoxide dismutase [Fe], chloroplastic                                                |
| <i>Desi_wild_24906</i>  | NA                                  | <i>Ca_desi_scaffold</i> | 24906                   | T/C  | NA                 | INTERGENIC                    | NA                                                                                      |
| <i>Desi_wild_49993</i>  | NA                                  | <i>Ca_desi_scaffold</i> | 49993                   | A/C  | Gene_Ca_15723.1    | SYNONYMOUS_CODING             | ADP-ribosylation factor GTPase-activating protein AGD3                                  |
| <i>Desi_wild_69589</i>  | NA                                  | <i>Ca_desi_scaffold</i> | 69589                   | C/T  | Gene_Ca_15726.1    | DOWNSTREAM                    | Peptidyl-prolyl cis-trans isomerase FKBP18, chloroplastic                               |
| <i>Desi_wild_69592</i>  | NA                                  | <i>Ca_desi_scaffold</i> | 69592                   | C/T  | Gene_Ca_15726.1    | DOWNSTREAM                    | Peptidyl-prolyl cis-trans isomerase FKBP18, chloroplastic                               |
| <i>Desi_wild_69621</i>  | NA                                  | <i>Ca_desi_scaffold</i> | 69621                   | C/T  | Gene_Ca_15726.1    | DOWNSTREAM                    | Peptidyl-prolyl cis-trans isomerase FKBP18, chloroplastic                               |
| <i>Desi_wild_69634</i>  | NA                                  | <i>Ca_desi_scaffold</i> | 69634                   | T/C  | Gene_Ca_15726.1    | DOWNSTREAM                    | Peptidyl-prolyl cis-trans isomerase FKBP18, chloroplastic                               |
| <i>Desi_wild_19800</i>  | NA                                  | <i>Ca_desi_scaffold</i> | 19800                   | A/G  | NA                 | INTERGENIC                    | NA                                                                                      |
| <i>Desi_wild_60212</i>  | NA                                  | <i>Ca_desi_scaffold</i> | 60212                   | T/C  | NA                 | INTERGENIC                    | NA                                                                                      |
| <i>Desi_wild_19506</i>  | NA                                  | <i>Ca_desi_scaffold</i> | 19506                   | T/C  | Gene_Ca_15740.1    | NON_SYNONYMOUS_CODING         | Probable bifunctional methylthioribulose-1-phosphate dehydratase/enolase-phosphatase E1 |
| <i>Desi_wild_68117</i>  | NA                                  | <i>Ca_desi_scaffold</i> | 68117                   | T/G  | Gene_Ca_15744.1    | NON_SYNONYMOUS_CODING         | Putative RNA-binding protein ylmH                                                       |
| <i>Desi_wild_68122</i>  | NA                                  | <i>Ca_desi_scaffold</i> | 68122                   | A/T  | Gene_Ca_15744.1    | NON_SYNONYMOUS_CODING         | Putative RNA-binding protein ylmH                                                       |
| <i>Desi_wild_46625</i>  | NA                                  | <i>Ca_desi_scaffold</i> | 46625                   | G/A  | Gene_Ca_15751.1    | INTRON                        | Probable histone-lysine N-methyltransferase ATXR3                                       |
| <i>Desi_wild_51584</i>  | NA                                  | <i>Ca_desi_scaffold</i> | 51584                   | A/C  | Gene_Ca_15751.1    | NON_SYNONYMOUS_CODING         | Probable histone-lysine N-methyltransferase ATXR3                                       |
| <i>Desi_wild_51587</i>  | NA                                  | <i>Ca_desi_scaffold</i> | 51587                   | C/A  | Gene_Ca_15751.1    | NON_SYNONYMOUS_CODING         | Probable histone-lysine N-methyltransferase ATXR3                                       |
| <i>Desi_wild_51591</i>  | NA                                  | <i>Ca_desi_scaffold</i> | 51591                   | A/C  | Gene_Ca_15751.1    | NON_SYNONYMOUS_CODING         | Probable histone-lysine N-methyltransferase ATXR3                                       |
| <i>Desi_wild_51607</i>  | NA                                  | <i>Ca_desi_scaffold</i> | 51607                   | A/C  | Gene_Ca_15751.1    | NON_SYNONYMOUS_CODING         | Probable histone-lysine N-methyltransferase ATXR3                                       |
| <i>Desi_wild_51636</i>  | NA                                  | <i>Ca_desi_scaffold</i> | 51636                   | A/C  | Gene_Ca_15751.1    | NON_SYNONYMOUS_CODING         | Probable histone-lysine N-methyltransferase ATXR3                                       |
| <i>Desi_wild_51699</i>  | NA                                  | <i>Ca_desi_scaffold</i> | 51699                   | A/C  | Gene_Ca_15751.1    | NON_SYNONYMOUS_CODING         | Probable histone-lysine N-methyltransferase ATXR3                                       |
| <i>Desi_wild_7486</i>   | NA                                  | <i>Ca_desi_scaffold</i> | 7486                    | G/A  | Gene_Ca_10228.1    | INTRON                        | Putative mediator of RNA polymerase II transcription subunit 23                         |
| <i>Desi_wild_7501</i>   | NA                                  | <i>Ca_desi_scaffold</i> | 7501                    | T/C  | Gene_Ca_10228.1    | INTRON                        | Putative mediator of RNA polymerase II transcription subunit 23                         |
| <i>Desi_wild_7535</i>   | NA                                  | <i>Ca_desi_scaffold</i> | 7535                    | T/C  | Gene_Ca_10228.1    | INTRON                        | Putative mediator of RNA polymerase II transcription subunit 23                         |
| <i>Desi_wild_7574</i>   | NA                                  | <i>Ca_desi_scaffold</i> | 7574                    | T/C  | Gene_Ca_10228.1    | INTRON                        | Putative mediator of RNA polymerase II transcription subunit 23                         |

| SNP IDs                | NCBI dbSNP accession IDs (NCBI_SS#) | Chromosomes             | Physical positions (bp) | SNPs | Gene accession IDs | Sequence components of genome | Putative functions                                              |
|------------------------|-------------------------------------|-------------------------|-------------------------|------|--------------------|-------------------------------|-----------------------------------------------------------------|
| <i>Desi_wild_8011</i>  | NA                                  | <i>Ca_desi_scaffold</i> | 8011                    | T/A  | Gene_Ca_10228.1    | INTRON                        | Putative mediator of RNA polymerase II transcription subunit 23 |
| <i>Desi_wild_27692</i> | NA                                  | <i>Ca_desi_scaffold</i> | 27692                   | A/G  | Gene_Ca_10229.1    | SYNONYMOUS_CODING             | Glucan endo-1,3-beta-glucosidase 3                              |
| <i>Desi_wild_37194</i> | NA                                  | <i>Ca_desi_scaffold</i> | 37194                   | A/G  | NA                 | INTERGENIC                    | NA                                                              |
| <i>Desi_wild_37235</i> | NA                                  | <i>Ca_desi_scaffold</i> | 37235                   | A/G  | NA                 | INTERGENIC                    | NA                                                              |
| <i>Desi_wild_37310</i> | NA                                  | <i>Ca_desi_scaffold</i> | 37310                   | G/C  | NA                 | INTERGENIC                    | NA                                                              |
| <i>Desi_wild_37311</i> | NA                                  | <i>Ca_desi_scaffold</i> | 37311                   | G/A  | NA                 | INTERGENIC                    | NA                                                              |
| <i>Desi_wild_37317</i> | NA                                  | <i>Ca_desi_scaffold</i> | 37317                   | A/G  | NA                 | INTERGENIC                    | NA                                                              |
| <i>Desi_wild_39598</i> | NA                                  | <i>Ca_desi_scaffold</i> | 39598                   | C/T  | Gene_Ca_10232.1    | DOWNSTREAM                    | unknown protein                                                 |
| <i>Desi_wild_39769</i> | NA                                  | <i>Ca_desi_scaffold</i> | 39769                   | C/T  | Gene_Ca_10232.1    | DOWNSTREAM                    | unknown protein                                                 |
| <i>Desi_wild_39770</i> | NA                                  | <i>Ca_desi_scaffold</i> | 39770                   | G/A  | Gene_Ca_10232.1    | DOWNSTREAM                    | unknown protein                                                 |
| <i>Desi_wild_39841</i> | NA                                  | <i>Ca_desi_scaffold</i> | 39841                   | C/T  | Gene_Ca_10232.1    | DOWNSTREAM                    | unknown protein                                                 |
| <i>Desi_wild_42014</i> | NA                                  | <i>Ca_desi_scaffold</i> | 42014                   | C/T  | NA                 | INTERGENIC                    | NA                                                              |
| <i>Desi_wild_42097</i> | NA                                  | <i>Ca_desi_scaffold</i> | 42097                   | T/A  | NA                 | INTERGENIC                    | NA                                                              |
| <i>Desi_wild_72061</i> | NA                                  | <i>Ca_desi_scaffold</i> | 72061                   | A/T  | NA                 | INTERGENIC                    | NA                                                              |
| <i>Desi_wild_73819</i> | NA                                  | <i>Ca_desi_scaffold</i> | 73819                   | G/A  | Gene_Ca_15777.1    | NON_SYNONYMOUS_CODING         | C2H2-like zinc finger protein                                   |
| <i>Desi_wild_12442</i> | NA                                  | <i>Ca_desi_scaffold</i> | 12442                   | A/G  | Gene_Ca_09940.1    | DOWNSTREAM                    | RING finger protein 141                                         |
| <i>Desi_wild_47801</i> | NA                                  | <i>Ca_desi_scaffold</i> | 47801                   | T/C  | NA                 | INTERGENIC                    | NA                                                              |
| <i>Desi_wild_47897</i> | NA                                  | <i>Ca_desi_scaffold</i> | 47897                   | C/T  | NA                 | INTERGENIC                    | NA                                                              |
| <i>Desi_wild_66935</i> | NA                                  | <i>Ca_desi_scaffold</i> | 66935                   | T/C  | NA                 | INTERGENIC                    | NA                                                              |
| <i>Desi_wild_66943</i> | NA                                  | <i>Ca_desi_scaffold</i> | 66943                   | G/C  | NA                 | INTERGENIC                    | NA                                                              |
| <i>Desi_wild_66976</i> | NA                                  | <i>Ca_desi_scaffold</i> | 66976                   | A/G  | NA                 | INTERGENIC                    | NA                                                              |
| <i>Desi_wild_66978</i> | NA                                  | <i>Ca_desi_scaffold</i> | 66978                   | T/C  | NA                 | INTERGENIC                    | NA                                                              |
| <i>Desi_wild_66981</i> | NA                                  | <i>Ca_desi_scaffold</i> | 66981                   | T/G  | NA                 | INTERGENIC                    | NA                                                              |
| <i>Desi_wild_70487</i> | NA                                  | <i>Ca_desi_scaffold</i> | 70487                   | C/A  | Gene_Ca_15804.1    | INTRON                        | Putative uncharacterized protein                                |
| <i>Desi_wild_70514</i> | NA                                  | <i>Ca_desi_scaffold</i> | 70514                   | G/A  | Gene_Ca_15804.1    | INTRON                        | Putative uncharacterized protein                                |
| <i>Desi_wild_70516</i> | NA                                  | <i>Ca_desi_scaffold</i> | 70516                   | C/A  | Gene_Ca_15804.1    | INTRON                        | Putative uncharacterized protein                                |
| <i>Desi_wild_919</i>   | NA                                  | <i>Ca_desi_scaffold</i> | 919                     | A/G  | Gene_Ca_10251.1    | DOWNSTREAM                    | C-type lectin receptor-like tyrosine-protein kinase At1g52310   |
| <i>Desi_wild_49991</i> | NA                                  | <i>Ca_desi_scaffold</i> | 49991                   | A/G  | Gene_Ca_10252.1    | NON_SYNONYMOUS_CODING         | 3-oxoacyl-[acyl-carrier-protein] synthase II, chloroplastic     |
| <i>Desi_wild_24837</i> | NA                                  | <i>Ca_desi_scaffold</i> | 24837                   | C/T  | Gene_Ca_15805.1    | SYNONYMOUS_CODING             | Peroxidase 53                                                   |
| <i>Desi_wild_27770</i> | NA                                  | <i>Ca_desi_scaffold</i> | 27770                   | T/G  | Gene_Ca_15813.1    | SYNONYMOUS_CODING             | MATH domain-containing protein At5g43560                        |
| <i>Desi_wild_27855</i> | NA                                  | <i>Ca_desi_scaffold</i> | 27855                   | A/G  | Gene_Ca_15813.1    | NON_SYNONYMOUS_CODING         | MATH domain-containing protein At5g43560                        |
| <i>Desi_wild_35960</i> | NA                                  | <i>Ca_desi_scaffold</i> | 35960                   | C/G  | Gene_Ca_15813.1    | INTRON                        | MATH domain-containing protein At5g43560                        |
| <i>Desi_wild_23865</i> | NA                                  | <i>Ca_desi_scaffold</i> | 23865                   | A/C  | Gene_Ca_15824.1    | NON_SYNONYMOUS_CODING         | Paired amphipathic helix protein Sin3-like 4                    |
| <i>Desi_wild_46188</i> | NA                                  | <i>Ca_desi_scaffold</i> | 46188                   | T/C  | Gene_Ca_15825.1    | SYNONYMOUS_CODING             | NA                                                              |
| <i>Desi_wild_47601</i> | NA                                  | <i>Ca_desi_scaffold</i> | 47601                   | T/G  | Gene_Ca_15825.1    | SYNONYMOUS_CODING             | NA                                                              |
| <i>Desi_wild_56841</i> | NA                                  | <i>Ca_desi_scaffold</i> | 56841                   | A/T  | Gene_Ca_15826.2    | INTRON                        | NA                                                              |
| <i>Desi_wild_56845</i> | NA                                  | <i>Ca_desi_scaffold</i> | 56845                   | G/T  | Gene_Ca_15826.2    | INTRON                        | NA                                                              |
| <i>Desi_wild_56846</i> | NA                                  | <i>Ca_desi_scaffold</i> | 56846                   | G/T  | Gene_Ca_15826.2    | INTRON                        | NA                                                              |
| <i>Desi_wild_22389</i> | NA                                  | <i>Ca_desi_scaffold</i> | 22389                   | T/C  | Gene_Ca_10260.2    | SYNONYMOUS_CODING             | NA                                                              |
| <i>Desi_wild_69479</i> | NA                                  | <i>Ca_desi_scaffold</i> | 69479                   | A/T  | Gene_Ca_15842.1    | UPSTREAM                      | NA                                                              |
| <i>Desi_wild_753</i>   | NA                                  | <i>Ca_desi_scaffold</i> | 753                     | G/C  | NA                 | INTERGENIC                    | NA                                                              |
| <i>Desi_wild_898</i>   | NA                                  | <i>Ca_desi_scaffold</i> | 898                     | G/A  | NA                 | INTERGENIC                    | NA                                                              |
| <i>Desi_wild_21961</i> | NA                                  | <i>Ca_desi_scaffold</i> | 21961                   | A/G  | NA                 | INTERGENIC                    | NA                                                              |
| <i>Desi_wild_22109</i> | NA                                  | <i>Ca_desi_scaffold</i> | 22109                   | T/C  | NA                 | INTERGENIC                    | NA                                                              |

| SNP IDs                 | NCBI dbSNP accession IDs (NCBI_SS#) | Chromosomes             | Physical positions (bp) | SNPs | Gene accession IDs | Sequence components of genome | Putative functions                                              |
|-------------------------|-------------------------------------|-------------------------|-------------------------|------|--------------------|-------------------------------|-----------------------------------------------------------------|
| <i>Desi_wild_72058</i>  | NA                                  | <i>Ca_desi_scaffold</i> | 72058                   | T/C  | NA                 | INTERGENIC                    | NA                                                              |
| <i>Desi_wild_72079</i>  | NA                                  | <i>Ca_desi_scaffold</i> | 72079                   | G/A  | NA                 | INTERGENIC                    | NA                                                              |
| <i>Desi_wild_72099</i>  | NA                                  | <i>Ca_desi_scaffold</i> | 72099                   | T/C  | NA                 | INTERGENIC                    | NA                                                              |
| <i>Desi_wild_72101</i>  | NA                                  | <i>Ca_desi_scaffold</i> | 72101                   | C/T  | NA                 | INTERGENIC                    | NA                                                              |
| <i>Desi_wild_46132</i>  | NA                                  | <i>Ca_desi_scaffold</i> | 46132                   | A/C  | NA                 | INTERGENIC                    | NA                                                              |
| <i>Desi_wild_46241</i>  | NA                                  | <i>Ca_desi_scaffold</i> | 46241                   | C/T  | NA                 | INTERGENIC                    | NA                                                              |
| <i>Desi_wild_54113</i>  | NA                                  | <i>Ca_desi_scaffold</i> | 54113                   | T/C  | NA                 | INTERGENIC                    | NA                                                              |
| <i>Desi_wild_63505</i>  | NA                                  | <i>Ca_desi_scaffold</i> | 63505                   | G/C  | Gene_Ca_15871.1    | INTRON                        | NA                                                              |
| <i>Desi_wild_76386</i>  | NA                                  | <i>Ca_desi_scaffold</i> | 76386                   | T/G  | Gene_Ca_10286.2    | INTRON                        | NA                                                              |
| <i>Desi_wild_83824</i>  | NA                                  | <i>Ca_desi_scaffold</i> | 83824                   | T/G  | Gene_Ca_10286.1    | SYNONYMOUS_CODING             | Probable ubiquitin-conjugating enzyme E2 26                     |
| <i>Desi_wild_83964</i>  | NA                                  | <i>Ca_desi_scaffold</i> | 83964                   | C/A  | Gene_Ca_10286.1    | NON_SYNONYMOUS_CODING         | Probable ubiquitin-conjugating enzyme E2 26                     |
| <i>Desi_wild_137109</i> | NA                                  | <i>Ca_desi_scaffold</i> | 137109                  | A/G  | NA                 | INTERGENIC                    | NA                                                              |
| <i>Desi_wild_42172</i>  | NA                                  | <i>Ca_desi_scaffold</i> | 42172                   | A/G  | NA                 | INTERGENIC                    | NA                                                              |
| <i>Desi_wild_45869</i>  | NA                                  | <i>Ca_desi_scaffold</i> | 45869                   | T/C  | Gene_Ca_15879.1    | DOWNSTREAM                    | Aldehyde dehydrogenase 22A1                                     |
| <i>Desi_wild_47264</i>  | NA                                  | <i>Ca_desi_scaffold</i> | 47264                   | C/A  | Gene_Ca_15885.1    | NON_SYNONYMOUS_CODING         | Protein suppressor of white apricot                             |
| <i>Desi_wild_53238</i>  | NA                                  | <i>Ca_desi_scaffold</i> | 53238                   | C/A  | NA                 | INTERGENIC                    | NA                                                              |
| <i>Desi_wild_58213</i>  | NA                                  | <i>Ca_desi_scaffold</i> | 58213                   | T/C  | NA                 | INTERGENIC                    | NA                                                              |
| <i>Desi_wild_58225</i>  | NA                                  | <i>Ca_desi_scaffold</i> | 58225                   | A/T  | NA                 | INTERGENIC                    | NA                                                              |
| <i>Desi_wild_58950</i>  | NA                                  | <i>Ca_desi_scaffold</i> | 58950                   | A/G  | NA                 | INTERGENIC                    | NA                                                              |
| <i>Desi_wild_58957</i>  | NA                                  | <i>Ca_desi_scaffold</i> | 58957                   | A/T  | NA                 | INTERGENIC                    | NA                                                              |
| <i>Desi_wild_59007</i>  | NA                                  | <i>Ca_desi_scaffold</i> | 59007                   | T/C  | NA                 | INTERGENIC                    | NA                                                              |
| <i>Desi_wild_59043</i>  | NA                                  | <i>Ca_desi_scaffold</i> | 59043                   | A/T  | NA                 | INTERGENIC                    | NA                                                              |
| <i>Desi_wild_59052</i>  | NA                                  | <i>Ca_desi_scaffold</i> | 59052                   | G/A  | NA                 | INTERGENIC                    | NA                                                              |
| <i>Desi_wild_63253</i>  | NA                                  | <i>Ca_desi_scaffold</i> | 63253                   | A/T  | Gene_Ca_15887.1    | UPSTREAM                      | Adenylyltransferase and sulfurtransferase MOCS3                 |
| <i>Desi_wild_63258</i>  | NA                                  | <i>Ca_desi_scaffold</i> | 63258                   | T/C  | Gene_Ca_15887.1    | UPSTREAM                      | Adenylyltransferase and sulfurtransferase MOCS3                 |
| <i>Desi_wild_64875</i>  | NA                                  | <i>Ca_desi_scaffold</i> | 64875                   | G/A  | NA                 | INTERGENIC                    | NA                                                              |
| <i>Desi_wild_36413</i>  | NA                                  | <i>Ca_desi_scaffold</i> | 36413                   | A/G  | NA                 | INTERGENIC                    | NA                                                              |
| <i>Desi_wild_25898</i>  | NA                                  | <i>Ca_desi_scaffold</i> | 25898                   | A/T  | Gene_Ca_15905.1    | UPSTREAM                      | 3-hydroxyisobutyryl-CoA hydrolase-like protein 2, mitochondrial |
| <i>Desi_wild_36455</i>  | NA                                  | <i>Ca_desi_scaffold</i> | 36455                   | C/T  | NA                 | INTERGENIC                    | NA                                                              |
| <i>Desi_wild_47454</i>  | NA                                  | <i>Ca_desi_scaffold</i> | 47454                   | C/G  | Gene_Ca_15907.1    | SYNONYMOUS_CODING             | Formin-like protein 6                                           |
| <i>Desi_wild_47540</i>  | NA                                  | <i>Ca_desi_scaffold</i> | 47540                   | A/G  | Gene_Ca_15907.1    | NON_SYNONYMOUS_CODING         | Formin-like protein 6                                           |
| <i>Desi_wild_52236</i>  | NA                                  | <i>Ca_desi_scaffold</i> | 52236                   | T/A  | Gene_Ca_15907.1    | DOWNSTREAM                    | Formin-like protein 6                                           |
| <i>Desi_wild_71868</i>  | NA                                  | <i>Ca_desi_scaffold</i> | 71868                   | G/T  | NA                 | INTERGENIC                    | NA                                                              |
| <i>Desi_wild_17915</i>  | NA                                  | <i>Ca_desi_scaffold</i> | 17915                   | G/A  | Gene_Ca_15913.1    | SYNONYMOUS_CODING             | Protein FAM135B                                                 |
| <i>Desi_wild_20749</i>  | NA                                  | <i>Ca_desi_scaffold</i> | 20749                   | T/C  | Gene_Ca_15913.1    | NON_SYNONYMOUS_CODING         | Protein FAM135B                                                 |
| <i>Desi_wild_20765</i>  | NA                                  | <i>Ca_desi_scaffold</i> | 20765                   | T/C  | Gene_Ca_15913.1    | SYNONYMOUS_CODING             | Protein FAM135B                                                 |
| <i>Desi_wild_62737</i>  | NA                                  | <i>Ca_desi_scaffold</i> | 62737                   | G/A  | NA                 | INTERGENIC                    | NA                                                              |
| <i>Desi_wild_62748</i>  | NA                                  | <i>Ca_desi_scaffold</i> | 62748                   | C/T  | NA                 | INTERGENIC                    | NA                                                              |
| <i>Desi_wild_62772</i>  | NA                                  | <i>Ca_desi_scaffold</i> | 62772                   | T/C  | NA                 | INTERGENIC                    | NA                                                              |
| <i>Desi_wild_62803</i>  | NA                                  | <i>Ca_desi_scaffold</i> | 62803                   | C/G  | NA                 | INTERGENIC                    | NA                                                              |
| <i>Desi_wild_62809</i>  | NA                                  | <i>Ca_desi_scaffold</i> | 62809                   | C/T  | NA                 | INTERGENIC                    | NA                                                              |
| <i>Desi_wild_66413</i>  | NA                                  | <i>Ca_desi_scaffold</i> | 66413                   | G/A  | Gene_Ca_15918.1    | SYNONYMOUS_CODING             | SEC1 family transport protein SLY1                              |
| <i>Desi_wild_66450</i>  | NA                                  | <i>Ca_desi_scaffold</i> | 66450                   | G/A  | Gene_Ca_15918.1    | SYNONYMOUS_CODING             | SEC1 family transport protein SLY1                              |
| <i>Desi_wild_8136</i>   | NA                                  | <i>Ca_desi_scaffold</i> | 8136                    | A/C  | Gene_Ca_15925.1    | SYNONYMOUS_CODING             | Probable inorganic phosphate transporter 1-5                    |

| SNP IDs                | NCBI dbSNP accession IDs (NCBI_SS#) | Chromosomes             | Physical positions (bp) | SNPs | Gene accession IDs | Sequence components of genome | Putative functions                                            |
|------------------------|-------------------------------------|-------------------------|-------------------------|------|--------------------|-------------------------------|---------------------------------------------------------------|
| <i>Desi_wild_8140</i>  | NA                                  | <i>Ca_desi_scaffold</i> | 8140                    | G/A  | Gene_Ca_15925.1    | SYNONYMOUS_CODING             | Probable inorganic phosphate transporter 1-5                  |
| <i>Desi_wild_8141</i>  | NA                                  | <i>Ca_desi_scaffold</i> | 8141                    | T/G  | Gene_Ca_15925.1    | SYNONYMOUS_CODING             | Probable inorganic phosphate transporter 1-5                  |
| <i>Desi_wild_8274</i>  | NA                                  | <i>Ca_desi_scaffold</i> | 8274                    | A/G  | Gene_Ca_15925.1    | SYNONYMOUS_CODING             | Probable inorganic phosphate transporter 1-5                  |
| <i>Desi_wild_8280</i>  | NA                                  | <i>Ca_desi_scaffold</i> | 8280                    | T/A  | Gene_Ca_15925.1    | SYNONYMOUS_CODING             | Probable inorganic phosphate transporter 1-5                  |
| <i>Desi_wild_8292</i>  | NA                                  | <i>Ca_desi_scaffold</i> | 8292                    | T/G  | Gene_Ca_15925.1    | SYNONYMOUS_CODING             | Probable inorganic phosphate transporter 1-5                  |
| <i>Desi_wild_8294</i>  | NA                                  | <i>Ca_desi_scaffold</i> | 8294                    | A/C  | Gene_Ca_15925.1    | SYNONYMOUS_CODING             | Probable inorganic phosphate transporter 1-5                  |
| <i>Desi_wild_8295</i>  | NA                                  | <i>Ca_desi_scaffold</i> | 8295                    | G/A  | Gene_Ca_15925.1    | SYNONYMOUS_CODING             | Probable inorganic phosphate transporter 1-5                  |
| <i>Desi_wild_8298</i>  | NA                                  | <i>Ca_desi_scaffold</i> | 8298                    | T/C  | Gene_Ca_15925.1    | SYNONYMOUS_CODING             | Probable inorganic phosphate transporter 1-5                  |
| <i>Desi_wild_8307</i>  | NA                                  | <i>Ca_desi_scaffold</i> | 8307                    | A/G  | Gene_Ca_15925.1    | SYNONYMOUS_CODING             | Probable inorganic phosphate transporter 1-5                  |
| <i>Desi_wild_8322</i>  | NA                                  | <i>Ca_desi_scaffold</i> | 8322                    | T/A  | Gene_Ca_15925.1    | SYNONYMOUS_CODING             | Probable inorganic phosphate transporter 1-5                  |
| <i>Desi_wild_8325</i>  | NA                                  | <i>Ca_desi_scaffold</i> | 8325                    | A/G  | Gene_Ca_15925.1    | SYNONYMOUS_CODING             | Probable inorganic phosphate transporter 1-5                  |
| <i>Desi_wild_8334</i>  | NA                                  | <i>Ca_desi_scaffold</i> | 8334                    | A/G  | Gene_Ca_15925.1    | SYNONYMOUS_CODING             | Probable inorganic phosphate transporter 1-5                  |
| <i>Desi_wild_8340</i>  | NA                                  | <i>Ca_desi_scaffold</i> | 8340                    | A/T  | Gene_Ca_15925.1    | SYNONYMOUS_CODING             | Probable inorganic phosphate transporter 1-5                  |
| <i>Desi_wild_8346</i>  | NA                                  | <i>Ca_desi_scaffold</i> | 8346                    | A/T  | Gene_Ca_15925.1    | SYNONYMOUS_CODING             | Probable inorganic phosphate transporter 1-5                  |
| <i>Desi_wild_10917</i> | NA                                  | <i>Ca_desi_scaffold</i> | 10917                   | G/A  | NA                 | INTERGENIC                    | NA                                                            |
| <i>Desi_wild_10981</i> | NA                                  | <i>Ca_desi_scaffold</i> | 10981                   | G/A  | Gene_Ca_15934.1    | UPSTREAM                      | Vacuolar protein sorting-associated protein 35B               |
| <i>Desi_wild_16221</i> | NA                                  | <i>Ca_desi_scaffold</i> | 16221                   | T/C  | Gene_Ca_15934.1    | INTRON                        | Vacuolar protein sorting-associated protein 35B               |
| <i>Desi_wild_16337</i> | NA                                  | <i>Ca_desi_scaffold</i> | 16337                   | C/T  | Gene_Ca_15934.1    | INTRON                        | Vacuolar protein sorting-associated protein 35B               |
| <i>Desi_wild_16402</i> | NA                                  | <i>Ca_desi_scaffold</i> | 16402                   | T/A  | Gene_Ca_15934.1    | INTRON                        | Vacuolar protein sorting-associated protein 35B               |
| <i>Desi_wild_25920</i> | NA                                  | <i>Ca_desi_scaffold</i> | 25920                   | A/G  | Gene_Ca_15935.1    | INTRON                        | NA                                                            |
| <i>Desi_wild_41589</i> | NA                                  | <i>Ca_desi_scaffold</i> | 41589                   | T/C  | Gene_Ca_15936.1    | SYNONYMOUS_CODING             | Extended synaptotagmin-2-B                                    |
| <i>Desi_wild_51436</i> | NA                                  | <i>Ca_desi_scaffold</i> | 51436                   | A/G  | Gene_Ca_15937.1    | SYNONYMOUS_CODING             | Transcription elongation factor (TFIIS) family protein        |
| <i>Desi_wild_67832</i> | NA                                  | <i>Ca_desi_scaffold</i> | 67832                   | T/A  | NA                 | INTERGENIC                    | NA                                                            |
| <i>Desi_wild_67836</i> | NA                                  | <i>Ca_desi_scaffold</i> | 67836                   | A/G  | NA                 | INTERGENIC                    | NA                                                            |
| <i>Desi_wild_67849</i> | NA                                  | <i>Ca_desi_scaffold</i> | 67849                   | A/G  | NA                 | INTERGENIC                    | NA                                                            |
| <i>Desi_wild_67856</i> | NA                                  | <i>Ca_desi_scaffold</i> | 67856                   | G/A  | NA                 | INTERGENIC                    | NA                                                            |
| <i>Desi_wild_67873</i> | NA                                  | <i>Ca_desi_scaffold</i> | 67873                   | G/A  | NA                 | INTERGENIC                    | NA                                                            |
| <i>Desi_wild_67875</i> | NA                                  | <i>Ca_desi_scaffold</i> | 67875                   | G/A  | NA                 | INTERGENIC                    | NA                                                            |
| <i>Desi_wild_36782</i> | NA                                  | <i>Ca_desi_scaffold</i> | 36782                   | A/G  | Gene_Ca_15950.1    | SYNONYMOUS_CODING             | Replication factor A protein 1                                |
| <i>Desi_wild_6117</i>  | NA                                  | <i>Ca_desi_scaffold</i> | 6117                    | A/G  | Gene_Ca_15956.1    | INTRON                        | Probable S-acyltransferase At3g26935                          |
| <i>Desi_wild_49280</i> | NA                                  | <i>Ca_desi_scaffold</i> | 49280                   | A/T  | NA                 | INTERGENIC                    | NA                                                            |
| <i>Desi_wild_49301</i> | NA                                  | <i>Ca_desi_scaffold</i> | 49301                   | T/G  | NA                 | INTERGENIC                    | NA                                                            |
| <i>Desi_wild_16321</i> | NA                                  | <i>Ca_desi_scaffold</i> | 16321                   | T/C  | Gene_Ca_15969.1    | UPSTREAM                      | Isoflavone reductase                                          |
| <i>Desi_wild_31924</i> | NA                                  | <i>Ca_desi_scaffold</i> | 31924                   | T/C  | Gene_Ca_15987.1    | SYNONYMOUS_CODING             | Myosin-J heavy chain                                          |
| <i>Desi_wild_32033</i> | NA                                  | <i>Ca_desi_scaffold</i> | 32033                   | T/C  | Gene_Ca_15987.1    | INTRON                        | Myosin-J heavy chain                                          |
| <i>Desi_wild_33812</i> | NA                                  | <i>Ca_desi_scaffold</i> | 33812                   | A/C  | Gene_Ca_15987.1    | NON_SYNONYMOUS_CODING         | Myosin-J heavy chain                                          |
| <i>Desi_wild_14736</i> | NA                                  | <i>Ca_desi_scaffold</i> | 14736                   | C/T  | Gene_Ca_16012.1    | INTRON                        | NA                                                            |
| <i>Desi_wild_17622</i> | NA                                  | <i>Ca_desi_scaffold</i> | 17622                   | C/A  | Gene_Ca_16012.1    | NON_SYNONYMOUS_CODING         | NA                                                            |
| <i>Desi_wild_40655</i> | NA                                  | <i>Ca_desi_scaffold</i> | 40655                   | T/C  | Gene_Ca_16015.1    | INTRON                        | Nuclear pore complex protein Nup107                           |
| <i>Desi_wild_46015</i> | NA                                  | <i>Ca_desi_scaffold</i> | 46015                   | C/T  | Gene_Ca_16015.1    | INTRON                        | Nuclear pore complex protein Nup107                           |
| <i>Desi_wild_46040</i> | NA                                  | <i>Ca_desi_scaffold</i> | 46040                   | G/A  | Gene_Ca_16015.1    | INTRON                        | Nuclear pore complex protein Nup107                           |
| <i>Desi_wild_60108</i> | NA                                  | <i>Ca_desi_scaffold</i> | 60108                   | C/T  | Gene_Ca_16016.1    | INTRON                        | CONTAINS InterPro DOMAIN/s: Spt20 family (InterPro:IPR021950) |
| <i>Desi_wild_71586</i> | NA                                  | <i>Ca_desi_scaffold</i> | 71586                   | G/A  | NA                 | INTERGENIC                    | NA                                                            |
| <i>Desi_wild_48203</i> | NA                                  | <i>Ca_desi_scaffold</i> | 48203                   | A/T  | Gene_Ca_16019.1    | INTRON                        | Alpha,alpha-trehalose-phosphate synthase [UDP-forming] 1      |

| SNP IDs                | NCBI dbSNP accession IDs (NCBI_SS#) | Chromosomes             | Physical positions (bp) | SNPs | Gene accession IDs | Sequence components of genome | Putative functions                                       |
|------------------------|-------------------------------------|-------------------------|-------------------------|------|--------------------|-------------------------------|----------------------------------------------------------|
| <i>Desi_wild_48206</i> | NA                                  | <i>Ca_desi_scaffold</i> | 48206                   | A/G  | Gene_Ca_16019.1    | INTRON                        | Alpha,alpha-trehalose-phosphate synthase [UDP-forming] 1 |
| <i>Desi_wild_48230</i> | NA                                  | <i>Ca_desi_scaffold</i> | 48230                   | G/A  | Gene_Ca_16019.1    | INTRON                        | Alpha,alpha-trehalose-phosphate synthase [UDP-forming] 1 |
| <i>Desi_wild_48270</i> | NA                                  | <i>Ca_desi_scaffold</i> | 48270                   | G/A  | Gene_Ca_16019.1    | INTRON                        | Alpha,alpha-trehalose-phosphate synthase [UDP-forming] 1 |
| <i>Desi_wild_48272</i> | NA                                  | <i>Ca_desi_scaffold</i> | 48272                   | T/C  | Gene_Ca_16019.1    | INTRON                        | Alpha,alpha-trehalose-phosphate synthase [UDP-forming] 1 |
| <i>Desi_wild_53525</i> | NA                                  | <i>Ca_desi_scaffold</i> | 53525                   | G/T  | Gene_Ca_16019.1    | INTRON                        | Alpha,alpha-trehalose-phosphate synthase [UDP-forming] 1 |
| <i>Desi_wild_54856</i> | NA                                  | <i>Ca_desi_scaffold</i> | 54856                   | T/C  | Gene_Ca_16019.1    | SYNONYMOUS_CODING             | Alpha,alpha-trehalose-phosphate synthase [UDP-forming] 1 |
| <i>Desi_wild_14527</i> | NA                                  | <i>Ca_desi_scaffold</i> | 14527                   | A/G  | Gene_Ca_16026.1    | INTRON                        | Exocyst complex component 3                              |
| <i>Desi_wild_25735</i> | NA                                  | <i>Ca_desi_scaffold</i> | 25735                   | A/T  | Gene_Ca_16027.1    | INTRON                        | Exocyst complex component 3                              |
| <i>Desi_wild_38097</i> | NA                                  | <i>Ca_desi_scaffold</i> | 38097                   | C/A  | Gene_Ca_16028.1    | DOWNSTREAM                    | NA                                                       |
| <i>Desi_wild_39752</i> | NA                                  | <i>Ca_desi_scaffold</i> | 39752                   | G/T  | NA                 | INTERGENIC                    | NA                                                       |
| <i>Desi_wild_33479</i> | NA                                  | <i>Ca_desi_scaffold</i> | 33479                   | C/T  | Gene_Ca_16032.1    | SYNONYMOUS_CODING             | Ubiquitin-like modifier-activating enzyme atg7           |
| <i>Desi_wild_41382</i> | NA                                  | <i>Ca_desi_scaffold</i> | 41382                   | A/C  | Gene_Ca_16034.1    | INTRON                        | NA                                                       |
| <i>Desi_wild_17701</i> | NA                                  | <i>Ca_desi_scaffold</i> | 17701                   | T/C  | NA                 | INTERGENIC                    | NA                                                       |
| <i>Desi_wild_19701</i> | NA                                  | <i>Ca_desi_scaffold</i> | 19701                   | C/T  | Gene_Ca_16036.1    | DOWNSTREAM                    | Heat stress transcription factor A-8                     |
| <i>Desi_wild_21951</i> | NA                                  | <i>Ca_desi_scaffold</i> | 21951                   | G/T  | NA                 | INTERGENIC                    | NA                                                       |
| <i>Desi_wild_41559</i> | NA                                  | <i>Ca_desi_scaffold</i> | 41559                   | A/T  | NA                 | INTERGENIC                    | NA                                                       |
| <i>Desi_wild_41560</i> | NA                                  | <i>Ca_desi_scaffold</i> | 41560                   | A/G  | NA                 | INTERGENIC                    | NA                                                       |
| <i>Desi_wild_41563</i> | NA                                  | <i>Ca_desi_scaffold</i> | 41563                   | A/G  | NA                 | INTERGENIC                    | NA                                                       |
| <i>Desi_wild_41636</i> | NA                                  | <i>Ca_desi_scaffold</i> | 41636                   | C/T  | NA                 | INTERGENIC                    | NA                                                       |
| <i>Desi_wild_41637</i> | NA                                  | <i>Ca_desi_scaffold</i> | 41637                   | G/T  | NA                 | INTERGENIC                    | NA                                                       |
| <i>Desi_wild_44894</i> | NA                                  | <i>Ca_desi_scaffold</i> | 44894                   | C/A  | Gene_Ca_16043.2    | INTRON                        | NA                                                       |
| <i>Desi_wild_44895</i> | NA                                  | <i>Ca_desi_scaffold</i> | 44895                   | G/T  | Gene_Ca_16043.2    | INTRON                        | NA                                                       |
| <i>Desi_wild_30101</i> | NA                                  | <i>Ca_desi_scaffold</i> | 30101                   | A/G  | Gene_Ca_16046.1    | DOWNSTREAM                    | CBL-interacting serine/threonine-protein kinase 10       |
| <i>Desi_wild_9742</i>  | NA                                  | <i>Ca_desi_scaffold</i> | 9742                    | G/A  | NA                 | INTERGENIC                    | NA                                                       |
| <i>Desi_wild_9745</i>  | NA                                  | <i>Ca_desi_scaffold</i> | 9745                    | C/A  | NA                 | INTERGENIC                    | NA                                                       |
| <i>Desi_wild_9787</i>  | NA                                  | <i>Ca_desi_scaffold</i> | 9787                    | G/A  | NA                 | INTERGENIC                    | NA                                                       |
| <i>Desi_wild_9793</i>  | NA                                  | <i>Ca_desi_scaffold</i> | 9793                    | G/A  | NA                 | INTERGENIC                    | NA                                                       |
| <i>Desi_wild_9800</i>  | NA                                  | <i>Ca_desi_scaffold</i> | 9800                    | G/C  | NA                 | INTERGENIC                    | NA                                                       |
| <i>Desi_wild_9802</i>  | NA                                  | <i>Ca_desi_scaffold</i> | 9802                    | G/A  | NA                 | INTERGENIC                    | NA                                                       |
| <i>Desi_wild_9811</i>  | NA                                  | <i>Ca_desi_scaffold</i> | 9811                    | A/T  | NA                 | INTERGENIC                    | NA                                                       |
| <i>Desi_wild_9829</i>  | NA                                  | <i>Ca_desi_scaffold</i> | 9829                    | A/G  | NA                 | INTERGENIC                    | NA                                                       |
| <i>Desi_wild_9836</i>  | NA                                  | <i>Ca_desi_scaffold</i> | 9836                    | C/G  | NA                 | INTERGENIC                    | NA                                                       |
| <i>Desi_wild_9838</i>  | NA                                  | <i>Ca_desi_scaffold</i> | 9838                    | A/G  | NA                 | INTERGENIC                    | NA                                                       |
| <i>Desi_wild_55101</i> | NA                                  | <i>Ca_desi_scaffold</i> | 55101                   | T/G  | Gene_Ca_16050.1    | INTRON                        | Anthranilate phosphoribosyltransferase, chloroplastic    |
| <i>Desi_wild_65803</i> | NA                                  | <i>Ca_desi_scaffold</i> | 65803                   | T/G  | Gene_Ca_16051.2    | INTRON                        | NA                                                       |
| <i>Desi_wild_57802</i> | NA                                  | <i>Ca_desi_scaffold</i> | 57802                   | T/C  | Gene_Ca_16061.1    | SYNONYMOUS_CODING             | Ethylene-responsive transcription factor 1B              |
| <i>Desi_wild_57803</i> | NA                                  | <i>Ca_desi_scaffold</i> | 57803                   | A/T  | Gene_Ca_16061.1    | SYNONYMOUS_CODING             | Ethylene-responsive transcription factor 1B              |
| <i>Desi_wild_57812</i> | NA                                  | <i>Ca_desi_scaffold</i> | 57812                   | G/A  | Gene_Ca_16061.1    | SYNONYMOUS_CODING             | Ethylene-responsive transcription factor 1B              |
| <i>Desi_wild_57813</i> | NA                                  | <i>Ca_desi_scaffold</i> | 57813                   | G/A  | Gene_Ca_16061.1    | SYNONYMOUS_CODING             | Ethylene-responsive transcription factor 1B              |
| <i>Desi_wild_57814</i> | NA                                  | <i>Ca_desi_scaffold</i> | 57814                   | A/T  | Gene_Ca_16061.1    | NON_SYNONYMOUS_CODING         | Ethylene-responsive transcription factor 1B              |
| <i>Desi_wild_57817</i> | NA                                  | <i>Ca_desi_scaffold</i> | 57817                   | A/T  | Gene_Ca_16061.1    | SYNONYMOUS_CODING             | Ethylene-responsive transcription factor 1B              |
| <i>Desi_wild_57818</i> | NA                                  | <i>Ca_desi_scaffold</i> | 57818                   | A/G  | Gene_Ca_16061.1    | SYNONYMOUS_CODING             | Ethylene-responsive transcription factor 1B              |
| <i>Desi_wild_57819</i> | NA                                  | <i>Ca_desi_scaffold</i> | 57819                   | A/T  | Gene_Ca_16061.1    | SYNONYMOUS_CODING             | Ethylene-responsive transcription factor 1B              |
| <i>Desi_wild_57820</i> | NA                                  | <i>Ca_desi_scaffold</i> | 57820                   | A/T  | Gene_Ca_16061.1    | SYNONYMOUS_CODING             | Ethylene-responsive transcription factor 1B              |

| SNP IDs                 | NCBI dbSNP accession IDs (NCBI_SS#) | Chromosomes             | Physical positions (bp) | SNPs | Gene accession IDs | Sequence components of genome | Putative functions                               |
|-------------------------|-------------------------------------|-------------------------|-------------------------|------|--------------------|-------------------------------|--------------------------------------------------|
| <i>Desi_wild_57823</i>  | NA                                  | <i>Ca_desi_scaffold</i> | 57823                   | G/A  | Gene_Ca_16061.1    | SYNONYMOUS_CODING             | Ethylene-responsive transcription factor 1B      |
| <i>Desi_wild_57826</i>  | NA                                  | <i>Ca_desi_scaffold</i> | 57826                   | T/A  | Gene_Ca_16061.1    | SYNONYMOUS_CODING             | Ethylene-responsive transcription factor 1B      |
| <i>Desi_wild_57830</i>  | NA                                  | <i>Ca_desi_scaffold</i> | 57830                   | C/A  | Gene_Ca_16061.1    | SYNONYMOUS_CODING             | Ethylene-responsive transcription factor 1B      |
| <i>Desi_wild_57835</i>  | NA                                  | <i>Ca_desi_scaffold</i> | 57835                   | A/T  | Gene_Ca_16061.1    | SYNONYMOUS_CODING             | Ethylene-responsive transcription factor 1B      |
| <i>Desi_wild_57847</i>  | NA                                  | <i>Ca_desi_scaffold</i> | 57847                   | T/A  | Gene_Ca_16061.1    | SYNONYMOUS_CODING             | Ethylene-responsive transcription factor 1B      |
| <i>Desi_wild_57849</i>  | NA                                  | <i>Ca_desi_scaffold</i> | 57849                   | A/C  | Gene_Ca_16061.1    | SYNONYMOUS_CODING             | Ethylene-responsive transcription factor 1B      |
| <i>Desi_wild_57853</i>  | NA                                  | <i>Ca_desi_scaffold</i> | 57853                   | G/A  | Gene_Ca_16061.1    | SYNONYMOUS_CODING             | Ethylene-responsive transcription factor 1B      |
| <i>Desi_wild_57855</i>  | NA                                  | <i>Ca_desi_scaffold</i> | 57855                   | A/C  | Gene_Ca_16061.1    | SYNONYMOUS_CODING             | Ethylene-responsive transcription factor 1B      |
| <i>Desi_wild_57862</i>  | NA                                  | <i>Ca_desi_scaffold</i> | 57862                   | T/C  | Gene_Ca_16061.1    | SYNONYMOUS_CODING             | Ethylene-responsive transcription factor 1B      |
| <i>Desi_wild_57863</i>  | NA                                  | <i>Ca_desi_scaffold</i> | 57863                   | T/A  | Gene_Ca_16061.1    | NON_SYNONYMOUS_CODING         | Ethylene-responsive transcription factor 1B      |
| <i>Desi_wild_46166</i>  | NA                                  | <i>Ca_desi_scaffold</i> | 46166                   | T/G  | NA                 | INTERGENIC                    | NA                                               |
| <i>Desi_wild_46184</i>  | NA                                  | <i>Ca_desi_scaffold</i> | 46184                   | A/C  | NA                 | INTERGENIC                    | NA                                               |
| <i>Desi_wild_70115</i>  | NA                                  | <i>Ca_desi_scaffold</i> | 70115                   | T/C  | NA                 | INTERGENIC                    | NA                                               |
| <i>Desi_wild_12306</i>  | NA                                  | <i>Ca_desi_scaffold</i> | 12306                   | A/G  | NA                 | INTERGENIC                    | NA                                               |
| <i>Desi_wild_154792</i> | NA                                  | <i>Ca_desi_scaffold</i> | 154792                  | G/A  | Gene_Ca_10319.1    | INTRON                        | Nitric oxide synthase 1                          |
| <i>Desi_wild_154859</i> | NA                                  | <i>Ca_desi_scaffold</i> | 154859                  | G/T  | Gene_Ca_10319.1    | INTRON                        | Nitric oxide synthase 1                          |
| <i>Desi_wild_38058</i>  | NA                                  | <i>Ca_desi_scaffold</i> | 38058                   | T/G  | NA                 | INTERGENIC                    | NA                                               |
| <i>Desi_wild_53053</i>  | NA                                  | <i>Ca_desi_scaffold</i> | 53053                   | C/T  | Gene_Ca_16075.1    | INTRON                        | 3-phosphoinositide-dependent protein kinase 1    |
| <i>Desi_wild_53054</i>  | NA                                  | <i>Ca_desi_scaffold</i> | 53054                   | T/C  | Gene_Ca_16075.1    | INTRON                        | 3-phosphoinositide-dependent protein kinase 1    |
| <i>Desi_wild_53065</i>  | NA                                  | <i>Ca_desi_scaffold</i> | 53065                   | A/T  | Gene_Ca_16075.1    | INTRON                        | 3-phosphoinositide-dependent protein kinase 1    |
| <i>Desi_wild_53070</i>  | NA                                  | <i>Ca_desi_scaffold</i> | 53070                   | A/T  | Gene_Ca_16075.1    | INTRON                        | 3-phosphoinositide-dependent protein kinase 1    |
| <i>Desi_wild_53072</i>  | NA                                  | <i>Ca_desi_scaffold</i> | 53072                   | A/T  | Gene_Ca_16075.1    | INTRON                        | 3-phosphoinositide-dependent protein kinase 1    |
| <i>Desi_wild_53078</i>  | NA                                  | <i>Ca_desi_scaffold</i> | 53078                   | C/T  | Gene_Ca_16075.1    | INTRON                        | 3-phosphoinositide-dependent protein kinase 1    |
| <i>Desi_wild_53088</i>  | NA                                  | <i>Ca_desi_scaffold</i> | 53088                   | A/T  | Gene_Ca_16075.1    | INTRON                        | 3-phosphoinositide-dependent protein kinase 1    |
| <i>Desi_wild_53094</i>  | NA                                  | <i>Ca_desi_scaffold</i> | 53094                   | A/T  | Gene_Ca_16075.1    | INTRON                        | 3-phosphoinositide-dependent protein kinase 1    |
| <i>Desi_wild_53098</i>  | NA                                  | <i>Ca_desi_scaffold</i> | 53098                   | A/T  | Gene_Ca_16075.1    | INTRON                        | 3-phosphoinositide-dependent protein kinase 1    |
| <i>Desi_wild_17502</i>  | NA                                  | <i>Ca_desi_scaffold</i> | 17502                   | C/A  | NA                 | INTERGENIC                    | NA                                               |
| <i>Desi_wild_17533</i>  | NA                                  | <i>Ca_desi_scaffold</i> | 17533                   | G/A  | NA                 | INTERGENIC                    | NA                                               |
| <i>Desi_wild_17561</i>  | NA                                  | <i>Ca_desi_scaffold</i> | 17561                   | T/C  | NA                 | INTERGENIC                    | NA                                               |
| <i>Desi_wild_64169</i>  | NA                                  | <i>Ca_desi_scaffold</i> | 64169                   | G/A  | NA                 | INTERGENIC                    | NA                                               |
| <i>Desi_wild_1401</i>   | NA                                  | <i>Ca_desi_scaffold</i> | 1401                    | A/C  | Gene_Ca_16078.1    | SYNONYMOUS_CODING             | Peroxisomal (S)-2-hydroxy-acid oxidase           |
| <i>Desi_wild_14185</i>  | NA                                  | <i>Ca_desi_scaffold</i> | 14185                   | G/A  | NA                 | INTERGENIC                    | NA                                               |
| <i>Desi_wild_14188</i>  | NA                                  | <i>Ca_desi_scaffold</i> | 14188                   | G/A  | NA                 | INTERGENIC                    | NA                                               |
| <i>Desi_wild_14202</i>  | NA                                  | <i>Ca_desi_scaffold</i> | 14202                   | A/T  | NA                 | INTERGENIC                    | NA                                               |
| <i>Desi_wild_14215</i>  | NA                                  | <i>Ca_desi_scaffold</i> | 14215                   | A/G  | NA                 | INTERGENIC                    | NA                                               |
| <i>Desi_wild_14219</i>  | NA                                  | <i>Ca_desi_scaffold</i> | 14219                   | A/C  | NA                 | INTERGENIC                    | NA                                               |
| <i>Desi_wild_14220</i>  | NA                                  | <i>Ca_desi_scaffold</i> | 14220                   | G/A  | NA                 | INTERGENIC                    | NA                                               |
| <i>Desi_wild_19385</i>  | NA                                  | <i>Ca_desi_scaffold</i> | 19385                   | A/T  | Gene_Ca_16080.1    | NON_SYNONYMOUS_CODING         | Uncharacterized protein At1g32220, chloroplastic |
| <i>Desi_wild_66269</i>  | NA                                  | <i>Ca_desi_scaffold</i> | 66269                   | C/T  | NA                 | INTERGENIC                    | NA                                               |
| <i>Desi_wild_66296</i>  | NA                                  | <i>Ca_desi_scaffold</i> | 66296                   | G/T  | NA                 | INTERGENIC                    | NA                                               |
| <i>Desi_wild_66303</i>  | NA                                  | <i>Ca_desi_scaffold</i> | 66303                   | T/C  | NA                 | INTERGENIC                    | NA                                               |
| <i>Desi_wild_66329</i>  | NA                                  | <i>Ca_desi_scaffold</i> | 66329                   | A/T  | NA                 | INTERGENIC                    | NA                                               |
| <i>Desi_wild_66335</i>  | NA                                  | <i>Ca_desi_scaffold</i> | 66335                   | G/A  | NA                 | INTERGENIC                    | NA                                               |
| <i>Desi_wild_66336</i>  | NA                                  | <i>Ca_desi_scaffold</i> | 66336                   | C/T  | NA                 | INTERGENIC                    | NA                                               |



| SNP IDs         | NCBI dbSNP accession IDs (NCBI_SS#) | Chromosomes      | Physical positions (bp) | SNPs | Gene accession IDs | Sequence components of genome | Putative functions                    |
|-----------------|-------------------------------------|------------------|-------------------------|------|--------------------|-------------------------------|---------------------------------------|
| Desi_wild_64293 | NA                                  | Ca_desi_scaffold | 64293                   | T/C  | NA                 | INTERGENIC                    | NA                                    |
| Desi_wild_64307 | NA                                  | Ca_desi_scaffold | 64307                   | A/G  | NA                 | INTERGENIC                    | NA                                    |
| Desi_wild_26575 | NA                                  | Ca_desi_scaffold | 26575                   | T/G  | Gene_Ca_16090.1    | INTRON                        | Subtilisin-like protease              |
| Desi_wild_26701 | NA                                  | Ca_desi_scaffold | 26701                   | A/C  | Gene_Ca_16090.1    | INTRON                        | Subtilisin-like protease              |
| Desi_wild_43893 | NA                                  | Ca_desi_scaffold | 43893                   | T/C  | Gene_Ca_16090.1    | NON_SYNONYMOUS_CODING         | Subtilisin-like protease              |
| Desi_wild_41503 | NA                                  | Ca_desi_scaffold | 41503                   | C/T  | NA                 | INTERGENIC                    | NA                                    |
| Desi_wild_7916  | NA                                  | Ca_desi_scaffold | 7916                    | C/T  | NA                 | INTERGENIC                    | NA                                    |
| Desi_wild_59519 | NA                                  | Ca_desi_scaffold | 59519                   | C/T  | Gene_Ca_16105.1    | INTRON                        | unknown protein                       |
| Desi_wild_22193 | NA                                  | Ca_desi_scaffold | 22193                   | C/T  | Gene_Ca_16117.1    | NON_SYNONYMOUS_CODING         | NA                                    |
| Desi_wild_53126 | NA                                  | Ca_desi_scaffold | 53126                   | T/A  | NA                 | INTERGENIC                    | NA                                    |
| Desi_wild_53237 | NA                                  | Ca_desi_scaffold | 53237                   | A/C  | NA                 | INTERGENIC                    | NA                                    |
| Desi_wild_33453 | NA                                  | Ca_desi_scaffold | 33453                   | T/C  | NA                 | INTERGENIC                    | NA                                    |
| Desi_wild_33458 | NA                                  | Ca_desi_scaffold | 33458                   | C/T  | NA                 | INTERGENIC                    | NA                                    |
| Desi_wild_33460 | NA                                  | Ca_desi_scaffold | 33460                   | G/T  | NA                 | INTERGENIC                    | NA                                    |
| Desi_wild_33464 | NA                                  | Ca_desi_scaffold | 33464                   | G/T  | NA                 | INTERGENIC                    | NA                                    |
| Desi_wild_33468 | NA                                  | Ca_desi_scaffold | 33468                   | T/A  | NA                 | INTERGENIC                    | NA                                    |
| Desi_wild_33469 | NA                                  | Ca_desi_scaffold | 33469                   | G/A  | NA                 | INTERGENIC                    | NA                                    |
| Desi_wild_10976 | NA                                  | Ca_desi_scaffold | 10976                   | T/G  | Gene_Ca_16133.1    | INTRON                        | unknown protein                       |
| Desi_wild_14590 | NA                                  | Ca_desi_scaffold | 14590                   | A/G  | Gene_Ca_16133.1    | INTRON                        | unknown protein                       |
| Desi_wild_53631 | NA                                  | Ca_desi_scaffold | 53631                   | G/A  | Gene_Ca_16142.2    | NON_SYNONYMOUS_CODING         | NA                                    |
| Desi_wild_53759 | NA                                  | Ca_desi_scaffold | 53759                   | C/T  | Gene_Ca_16142.2    | SYNONYMOUS_CODING             | NA                                    |
| Desi_wild_53764 | NA                                  | Ca_desi_scaffold | 53764                   | C/T  | Gene_Ca_16142.2    | NON_SYNONYMOUS_CODING         | NA                                    |
| Desi_wild_58215 | NA                                  | Ca_desi_scaffold | 58215                   | A/T  | NA                 | INTERGENIC                    | NA                                    |
| Desi_wild_30145 | NA                                  | Ca_desi_scaffold | 30145                   | A/C  | NA                 | INTERGENIC                    | NA                                    |
| Desi_wild_44792 | NA                                  | Ca_desi_scaffold | 44792                   | A/C  | NA                 | INTERGENIC                    | NA                                    |
| Desi_wild_7317  | NA                                  | Ca_desi_scaffold | 7317                    | G/T  | Gene_Ca_16171.1    | UPSTREAM                      | unknown protein                       |
| Desi_wild_35559 | NA                                  | Ca_desi_scaffold | 35559                   | C/T  | Gene_Ca_16174.1    | NON_SYNONYMOUS_CODING         | ZF-HD homeobox protein At4g24660      |
| Desi_wild_51475 | NA                                  | Ca_desi_scaffold | 51475                   | C/A  | Gene_Ca_16178.1    | SYNONYMOUS_CODING             | Fanconi-associated nuclease 1 homolog |
| Desi_wild_51478 | NA                                  | Ca_desi_scaffold | 51478                   | G/T  | Gene_Ca_16178.1    | NON_SYNONYMOUS_CODING         | Fanconi-associated nuclease 1 homolog |
| Desi_wild_4508  | NA                                  | Ca_desi_scaffold | 4508                    | C/T  | Gene_Ca_16199.1    | NON_SYNONYMOUS_CODING         | Protein transport protein Sec31A      |
| Desi_wild_4541  | NA                                  | Ca_desi_scaffold | 4541                    | C/T  | Gene_Ca_16199.1    | NON_SYNONYMOUS_CODING         | Protein transport protein Sec31A      |
| Desi_wild_36458 | NA                                  | Ca_desi_scaffold | 36458                   | A/T  | NA                 | INTERGENIC                    | NA                                    |
| Desi_wild_64539 | NA                                  | Ca_desi_scaffold | 64539                   | C/T  | NA                 | INTERGENIC                    | NA                                    |
| Desi_wild_64551 | NA                                  | Ca_desi_scaffold | 64551                   | G/A  | NA                 | INTERGENIC                    | NA                                    |
| Desi_wild_64555 | NA                                  | Ca_desi_scaffold | 64555                   | C/T  | NA                 | INTERGENIC                    | NA                                    |
| Desi_wild_64556 | NA                                  | Ca_desi_scaffold | 64556                   | G/T  | NA                 | INTERGENIC                    | NA                                    |
| Desi_wild_64561 | NA                                  | Ca_desi_scaffold | 64561                   | G/C  | NA                 | INTERGENIC                    | NA                                    |
| Desi_wild_64578 | NA                                  | Ca_desi_scaffold | 64578                   | G/T  | NA                 | INTERGENIC                    | NA                                    |
| Desi_wild_64581 | NA                                  | Ca_desi_scaffold | 64581                   | G/A  | NA                 | INTERGENIC                    | NA                                    |
| Desi_wild_64584 | NA                                  | Ca_desi_scaffold | 64584                   | T/A  | NA                 | INTERGENIC                    | NA                                    |
| Desi_wild_64598 | NA                                  | Ca_desi_scaffold | 64598                   | G/T  | NA                 | INTERGENIC                    | NA                                    |
| Desi_wild_64601 | NA                                  | Ca_desi_scaffold | 64601                   | G/T  | NA                 | INTERGENIC                    | NA                                    |
| Desi_wild_64605 | NA                                  | Ca_desi_scaffold | 64605                   | C/T  | NA                 | INTERGENIC                    | NA                                    |
| Desi_wild_64606 | NA                                  | Ca_desi_scaffold | 64606                   | T/C  | NA                 | INTERGENIC                    | NA                                    |

| SNP IDs                | NCBI dbSNP accession IDs (NCBI_SS#) | Chromosomes             | Physical positions (bp) | SNPs | Gene accession IDs | Sequence components of genome | Putative functions                                                                   |
|------------------------|-------------------------------------|-------------------------|-------------------------|------|--------------------|-------------------------------|--------------------------------------------------------------------------------------|
| <i>Desi_wild_64611</i> | NA                                  | <i>Ca_desi_scaffold</i> | 64611                   | T/C  | NA                 | INTERGENIC                    | NA                                                                                   |
| <i>Desi_wild_64613</i> | NA                                  | <i>Ca_desi_scaffold</i> | 64613                   | C/T  | NA                 | INTERGENIC                    | NA                                                                                   |
| <i>Desi_wild_35454</i> | NA                                  | <i>Ca_desi_scaffold</i> | 35454                   | A/T  | Gene_Ca_10333.1    | INTRON                        | Uridine kinase-like protein 1, chloroplastic                                         |
| <i>Desi_wild_57666</i> | NA                                  | <i>Ca_desi_scaffold</i> | 57666                   | A/G  | NA                 | INTERGENIC                    | NA                                                                                   |
| <i>Desi_wild_8979</i>  | NA                                  | <i>Ca_desi_scaffold</i> | 8979                    | A/T  | NA                 | INTERGENIC                    | NA                                                                                   |
| <i>Desi_wild_16629</i> | NA                                  | <i>Ca_desi_scaffold</i> | 16629                   | C/T  | NA                 | INTERGENIC                    | NA                                                                                   |
| <i>Desi_wild_46424</i> | NA                                  | <i>Ca_desi_scaffold</i> | 46424                   | G/T  | NA                 | INTERGENIC                    | NA                                                                                   |
| <i>Desi_wild_26498</i> | NA                                  | <i>Ca_desi_scaffold</i> | 26498                   | C/T  | NA                 | INTERGENIC                    | NA                                                                                   |
| <i>Desi_wild_80408</i> | NA                                  | <i>Ca_desi_scaffold</i> | 80408                   | C/T  | Gene_Ca_10341.1    | INTRON                        | UPF0202 protein At1g10490                                                            |
| <i>Desi_wild_14415</i> | NA                                  | <i>Ca_desi_scaffold</i> | 14415                   | C/T  | NA                 | INTERGENIC                    | NA                                                                                   |
| <i>Desi_wild_14482</i> | NA                                  | <i>Ca_desi_scaffold</i> | 14482                   | G/T  | NA                 | INTERGENIC                    | NA                                                                                   |
| <i>Desi_wild_14483</i> | NA                                  | <i>Ca_desi_scaffold</i> | 14483                   | C/G  | NA                 | INTERGENIC                    | NA                                                                                   |
| <i>Desi_wild_14903</i> | NA                                  | <i>Ca_desi_scaffold</i> | 14903                   | A/C  | Gene_Ca_16233.1    | INTRON                        | Phospho-2-dehydro-3-deoxyheptonate aldolase 1, chloroplastic                         |
| <i>Desi_wild_57641</i> | NA                                  | <i>Ca_desi_scaffold</i> | 57641                   | T/C  | NA                 | INTERGENIC                    | NA                                                                                   |
| <i>Desi_wild_55321</i> | NA                                  | <i>Ca_desi_scaffold</i> | 55321                   | G/C  | NA                 | INTERGENIC                    | NA                                                                                   |
| <i>Desi_wild_65227</i> | NA                                  | <i>Ca_desi_scaffold</i> | 65227                   | T/A  | NA                 | INTERGENIC                    | NA                                                                                   |
| <i>Desi_wild_65251</i> | NA                                  | <i>Ca_desi_scaffold</i> | 65251                   | G/A  | NA                 | INTERGENIC                    | NA                                                                                   |
| <i>Desi_wild_37122</i> | NA                                  | <i>Ca_desi_scaffold</i> | 37122                   | G/A  | Gene_Ca_16243.1    | INTRON                        | E3 ubiquitin-protein ligase ATL23                                                    |
| <i>Desi_wild_37287</i> | NA                                  | <i>Ca_desi_scaffold</i> | 37287                   | T/G  | Gene_Ca_16243.1    | INTRON                        | E3 ubiquitin-protein ligase ATL23                                                    |
| <i>Desi_wild_23357</i> | NA                                  | <i>Ca_desi_scaffold</i> | 23357                   | T/C  | NA                 | INTERGENIC                    | NA                                                                                   |
| <i>Desi_wild_23394</i> | NA                                  | <i>Ca_desi_scaffold</i> | 23394                   | A/C  | NA                 | INTERGENIC                    | NA                                                                                   |
| <i>Desi_wild_50936</i> | NA                                  | <i>Ca_desi_scaffold</i> | 50936                   | C/T  | NA                 | INTERGENIC                    | NA                                                                                   |
| <i>Desi_wild_33508</i> | NA                                  | <i>Ca_desi_scaffold</i> | 33508                   | T/C  | Gene_Ca_16252.3    | SYNONYMOUS_CODING             | NA                                                                                   |
| <i>Desi_wild_33602</i> | NA                                  | <i>Ca_desi_scaffold</i> | 33602                   | T/G  | Gene_Ca_16252.3    | NON_SYNONYMOUS_CODING         | NA                                                                                   |
| <i>Desi_wild_1615</i>  | NA                                  | <i>Ca_desi_scaffold</i> | 1615                    | T/C  | Gene_Ca_16255.1    | DOWNSTREAM                    | CONTAINS InterPro DOMAIN/s: Phosphorylated adapter RNA export protein, RNA-binding d |
| <i>Desi_wild_1669</i>  | NA                                  | <i>Ca_desi_scaffold</i> | 1669                    | G/T  | Gene_Ca_16255.1    | DOWNSTREAM                    | CONTAINS InterPro DOMAIN/s: Phosphorylated adapter RNA export protein, RNA-binding d |
| <i>Desi_wild_22226</i> | NA                                  | <i>Ca_desi_scaffold</i> | 22226                   | C/T  | Gene_Ca_16256.1    | DOWNSTREAM                    | Cullin-1                                                                             |
| <i>Desi_wild_16883</i> | NA                                  | <i>Ca_desi_scaffold</i> | 16883                   | T/C  | Gene_Ca_16260.1    | DOWNSTREAM                    | Salutaridine reductase                                                               |
| <i>Desi_wild_18061</i> | NA                                  | <i>Ca_desi_scaffold</i> | 18061                   | T/G  | NA                 | INTERGENIC                    | NA                                                                                   |
| <i>Desi_wild_54671</i> | NA                                  | <i>Ca_desi_scaffold</i> | 54671                   | C/A  | NA                 | INTERGENIC                    | NA                                                                                   |
| <i>Desi_wild_54672</i> | NA                                  | <i>Ca_desi_scaffold</i> | 54672                   | A/G  | NA                 | INTERGENIC                    | NA                                                                                   |
| <i>Desi_wild_54675</i> | NA                                  | <i>Ca_desi_scaffold</i> | 54675                   | T/C  | NA                 | INTERGENIC                    | NA                                                                                   |
| <i>Desi_wild_54695</i> | NA                                  | <i>Ca_desi_scaffold</i> | 54695                   | T/G  | NA                 | INTERGENIC                    | NA                                                                                   |
| <i>Desi_wild_54701</i> | NA                                  | <i>Ca_desi_scaffold</i> | 54701                   | T/G  | NA                 | INTERGENIC                    | NA                                                                                   |
| <i>Desi_wild_28645</i> | NA                                  | <i>Ca_desi_scaffold</i> | 28645                   | A/G  | Gene_Ca_16274.1    | INTRON                        | Probable proteasome inhibitor                                                        |
| <i>Desi_wild_28674</i> | NA                                  | <i>Ca_desi_scaffold</i> | 28674                   | T/C  | Gene_Ca_16274.1    | INTRON                        | Probable proteasome inhibitor                                                        |
| <i>Desi_wild_28694</i> | NA                                  | <i>Ca_desi_scaffold</i> | 28694                   | C/T  | Gene_Ca_16274.1    | INTRON                        | Probable proteasome inhibitor                                                        |
| <i>Desi_wild_28695</i> | NA                                  | <i>Ca_desi_scaffold</i> | 28695                   | A/T  | Gene_Ca_16274.1    | INTRON                        | Probable proteasome inhibitor                                                        |
| <i>Desi_wild_29117</i> | NA                                  | <i>Ca_desi_scaffold</i> | 29117                   | A/G  | Gene_Ca_16274.1    | NON_SYNONYMOUS_CODING         | Probable proteasome inhibitor                                                        |
| <i>Desi_wild_58933</i> | NA                                  | <i>Ca_desi_scaffold</i> | 58933                   | G/A  | Gene_Ca_16281.1    | SYNONYMOUS_CODING             | Late embryogenesis abundant protein 2                                                |
| <i>Desi_wild_32411</i> | NA                                  | <i>Ca_desi_scaffold</i> | 32411                   | T/C  | Gene_Ca_16282.4    | INTRON                        | NA                                                                                   |
| <i>Desi_wild_32412</i> | NA                                  | <i>Ca_desi_scaffold</i> | 32412                   | T/C  | Gene_Ca_16282.4    | INTRON                        | NA                                                                                   |
| <i>Desi_wild_32435</i> | NA                                  | <i>Ca_desi_scaffold</i> | 32435                   | G/C  | Gene_Ca_16282.4    | INTRON                        | NA                                                                                   |
| <i>Desi_wild_46663</i> | NA                                  | <i>Ca_desi_scaffold</i> | 46663                   | G/T  | Gene_Ca_16282.4    | INTRON                        | NA                                                                                   |

| SNP IDs          | NCBI dbSNP accession IDs (NCBI_SS#) | Chromosomes      | Physical positions (bp) | SNPs | Gene accession IDs | Sequence components of genome | Putative functions                                |
|------------------|-------------------------------------|------------------|-------------------------|------|--------------------|-------------------------------|---------------------------------------------------|
| Desi_wild_46671  | NA                                  | Ca_desi_scaffold | 46671                   | G/T  | Gene_Ca_16282.4    | INTRON                        | NA                                                |
| Desi_wild_46674  | NA                                  | Ca_desi_scaffold | 46674                   | G/T  | Gene_Ca_16282.4    | INTRON                        | NA                                                |
| Desi_wild_33505  | NA                                  | Ca_desi_scaffold | 33505                   | C/T  | Gene_Ca_16284.1    | NON_SYNONYMOUS_CODING         | Transcription initiation factor TFIIID subunit 11 |
| Desi_wild_33634  | NA                                  | Ca_desi_scaffold | 33634                   | T/C  | Gene_Ca_16284.1    | NON_SYNONYMOUS_CODING         | Transcription initiation factor TFIIID subunit 11 |
| Desi_wild_1437   | NA                                  | Ca_desi_scaffold | 1437                    | C/T  | NA                 | INTERGENIC                    | NA                                                |
| Desi_wild_72194  | NA                                  | Ca_desi_scaffold | 72194                   | T/G  | Gene_Ca_09743.1    | SYNONYMOUS_CODING             | Inter-alpha-trypsin inhibitor heavy chain H4      |
| Desi_wild_224015 | NA                                  | Ca_desi_scaffold | 224015                  | A/C  | NA                 | INTERGENIC                    | NA                                                |
| Desi_wild_224034 | NA                                  | Ca_desi_scaffold | 224034                  | C/T  | NA                 | INTERGENIC                    | NA                                                |
| Desi_wild_224048 | NA                                  | Ca_desi_scaffold | 224048                  | T/C  | NA                 | INTERGENIC                    | NA                                                |
| Desi_wild_46045  | NA                                  | Ca_desi_scaffold | 46045                   | A/G  | NA                 | INTERGENIC                    | NA                                                |
| Desi_wild_46061  | NA                                  | Ca_desi_scaffold | 46061                   | G/A  | NA                 | INTERGENIC                    | NA                                                |
| Desi_wild_46102  | NA                                  | Ca_desi_scaffold | 46102                   | A/G  | NA                 | INTERGENIC                    | NA                                                |
| Desi_wild_46118  | NA                                  | Ca_desi_scaffold | 46118                   | T/G  | NA                 | INTERGENIC                    | NA                                                |
| Desi_wild_46122  | NA                                  | Ca_desi_scaffold | 46122                   | G/A  | NA                 | INTERGENIC                    | NA                                                |
| Desi_wild_46123  | NA                                  | Ca_desi_scaffold | 46123                   | T/C  | NA                 | INTERGENIC                    | NA                                                |
| Desi_wild_46138  | NA                                  | Ca_desi_scaffold | 46138                   | A/G  | NA                 | INTERGENIC                    | NA                                                |
| Desi_wild_46163  | NA                                  | Ca_desi_scaffold | 46163                   | T/C  | NA                 | INTERGENIC                    | NA                                                |
| Desi_wild_58019  | NA                                  | Ca_desi_scaffold | 58019                   | C/A  | Gene_Ca_16311.1    | NON_SYNONYMOUS_CODING         | Amino acid permease 3                             |
| Desi_wild_58020  | NA                                  | Ca_desi_scaffold | 58020                   | C/G  | Gene_Ca_16311.1    | SYNONYMOUS_CODING             | Amino acid permease 3                             |
| Desi_wild_53451  | NA                                  | Ca_desi_scaffold | 53451                   | T/G  | NA                 | INTERGENIC                    | NA                                                |
| Desi_wild_53464  | NA                                  | Ca_desi_scaffold | 53464                   | A/C  | NA                 | INTERGENIC                    | NA                                                |
| Desi_wild_7761   | NA                                  | Ca_desi_scaffold | 7761                    | C/T  | Gene_Ca_16326.1    | INTRON                        | BAG family molecular chaperone regulator 4        |
| Desi_wild_7822   | NA                                  | Ca_desi_scaffold | 7822                    | G/A  | Gene_Ca_16326.1    | INTRON                        | BAG family molecular chaperone regulator 4        |
| Desi_wild_7870   | NA                                  | Ca_desi_scaffold | 7870                    | G/A  | Gene_Ca_16326.1    | INTRON                        | BAG family molecular chaperone regulator 4        |
| Desi_wild_54228  | NA                                  | Ca_desi_scaffold | 54228                   | A/G  | NA                 | INTERGENIC                    | NA                                                |
| Desi_wild_19642  | NA                                  | Ca_desi_scaffold | 19642                   | C/A  | NA                 | INTERGENIC                    | NA                                                |
| Desi_wild_19643  | NA                                  | Ca_desi_scaffold | 19643                   | G/T  | NA                 | INTERGENIC                    | NA                                                |
| Desi_wild_43672  | NA                                  | Ca_desi_scaffold | 43672                   | T/C  | NA                 | INTERGENIC                    | NA                                                |
| Desi_wild_24759  | NA                                  | Ca_desi_scaffold | 24759                   | A/G  | Gene_Ca_16338.1    | INTRON                        | Anaphase-promoting complex subunit 6              |
| Desi_wild_13662  | NA                                  | Ca_desi_scaffold | 13662                   | A/C  | Gene_Ca_16340.1    | NON_SYNONYMOUS_CODING         | calmodulin-binding family protein                 |
| Desi_wild_13664  | NA                                  | Ca_desi_scaffold | 13664                   | A/C  | Gene_Ca_16340.1    | SYNONYMOUS_CODING             | calmodulin-binding family protein                 |
| Desi_wild_13729  | NA                                  | Ca_desi_scaffold | 13729                   | A/G  | Gene_Ca_16340.1    | SYNONYMOUS_CODING             | calmodulin-binding family protein                 |
| Desi_wild_17834  | NA                                  | Ca_desi_scaffold | 17834                   | C/T  | NA                 | INTERGENIC                    | NA                                                |
| Desi_wild_18447  | NA                                  | Ca_desi_scaffold | 18447                   | A/T  | NA                 | INTERGENIC                    | NA                                                |
| Desi_wild_18567  | NA                                  | Ca_desi_scaffold | 18567                   | T/G  | NA                 | INTERGENIC                    | NA                                                |
| Desi_wild_20499  | NA                                  | Ca_desi_scaffold | 20499                   | G/C  | Gene_Ca_16345.1    | NON_SYNONYMOUS_CODING         | Translation initiation factor eIF-2B subunit beta |
| Desi_wild_12293  | NA                                  | Ca_desi_scaffold | 12293                   | G/A  | Gene_Ca_10360.1    | INTRON                        | Unconventional myosin-Va                          |
| Desi_wild_14344  | NA                                  | Ca_desi_scaffold | 14344                   | G/A  | Gene_Ca_10360.1    | INTRON                        | Unconventional myosin-Va                          |
| Desi_wild_14347  | NA                                  | Ca_desi_scaffold | 14347                   | T/C  | Gene_Ca_10360.1    | INTRON                        | Unconventional myosin-Va                          |
| Desi_wild_14388  | NA                                  | Ca_desi_scaffold | 14388                   | T/G  | Gene_Ca_10360.1    | INTRON                        | Unconventional myosin-Va                          |
| Desi_wild_14405  | NA                                  | Ca_desi_scaffold | 14405                   | A/G  | Gene_Ca_10360.1    | INTRON                        | Unconventional myosin-Va                          |
| Desi_wild_21756  | NA                                  | Ca_desi_scaffold | 21756                   | A/G  | Gene_Ca_10360.1    | SYNONYMOUS_CODING             | Unconventional myosin-Va                          |
| Desi_wild_52580  | NA                                  | Ca_desi_scaffold | 52580                   | G/T  | NA                 | INTERGENIC                    | NA                                                |
| Desi_wild_43913  | NA                                  | Ca_desi_scaffold | 43913                   | G/T  | Gene_Ca_16376.1    | NON_SYNONYMOUS_CODING         | NA                                                |

| SNP IDs                 | NCBI dbSNP accession IDs (NCBI_SS#) | Chromosomes             | Physical positions (bp) | SNPs | Gene accession IDs | Sequence components of genome | Putative functions                                   |
|-------------------------|-------------------------------------|-------------------------|-------------------------|------|--------------------|-------------------------------|------------------------------------------------------|
| <i>Desi_wild_50106</i>  | NA                                  | <i>Ca_desi_scaffold</i> | 50106                   | A/G  | Gene_Ca_16376.1    | NON_SYNONYMOUS_CODING         | NA                                                   |
| <i>Desi_wild_50347</i>  | NA                                  | <i>Ca_desi_scaffold</i> | 50347                   | T/A  | Gene_Ca_16376.1    | SYNONYMOUS_CODING             | NA                                                   |
| <i>Desi_wild_63162</i>  | NA                                  | <i>Ca_desi_scaffold</i> | 63162                   | G/T  | NA                 | INTERGENIC                    | NA                                                   |
| <i>Desi_wild_44986</i>  | NA                                  | <i>Ca_desi_scaffold</i> | 44986                   | A/T  | Gene_Ca_10373.1    | INTRON                        | Serine/threonine-protein kinase 36                   |
| <i>Desi_wild_45190</i>  | NA                                  | <i>Ca_desi_scaffold</i> | 45190                   | G/T  | Gene_Ca_10373.1    | SYNONYMOUS_CODING             | Serine/threonine-protein kinase 36                   |
| <i>Desi_wild_61435</i>  | NA                                  | <i>Ca_desi_scaffold</i> | 61435                   | C/T  | NA                 | INTERGENIC                    | NA                                                   |
| <i>Desi_wild_61444</i>  | NA                                  | <i>Ca_desi_scaffold</i> | 61444                   | G/A  | NA                 | INTERGENIC                    | NA                                                   |
| <i>Desi_wild_35499</i>  | NA                                  | <i>Ca_desi_scaffold</i> | 35499                   | A/G  | Gene_Ca_16395.1    | SYNONYMOUS_CODING             | Nuclear factor related to kappa-B-binding protein    |
| <i>Desi_wild_11408</i>  | NA                                  | <i>Ca_desi_scaffold</i> | 11408                   | T/C  | NA                 | INTERGENIC                    | NA                                                   |
| <i>Desi_wild_6729</i>   | NA                                  | <i>Ca_desi_scaffold</i> | 6729                    | C/A  | Gene_Ca_16396.1    | INTRON                        | Organic cation/carnitine transporter 4               |
| <i>Desi_wild_47207</i>  | NA                                  | <i>Ca_desi_scaffold</i> | 47207                   | C/T  | NA                 | INTERGENIC                    | NA                                                   |
| <i>Desi_wild_47208</i>  | NA                                  | <i>Ca_desi_scaffold</i> | 47208                   | A/G  | NA                 | INTERGENIC                    | NA                                                   |
| <i>Desi_wild_10327</i>  | NA                                  | <i>Ca_desi_scaffold</i> | 10327                   | C/T  | NA                 | INTERGENIC                    | NA                                                   |
| <i>Desi_wild_10380</i>  | NA                                  | <i>Ca_desi_scaffold</i> | 10380                   | T/G  | NA                 | INTERGENIC                    | NA                                                   |
| <i>Desi_wild_10393</i>  | NA                                  | <i>Ca_desi_scaffold</i> | 10393                   | A/C  | NA                 | INTERGENIC                    | NA                                                   |
| <i>Desi_wild_10398</i>  | NA                                  | <i>Ca_desi_scaffold</i> | 10398                   | G/T  | NA                 | INTERGENIC                    | NA                                                   |
| <i>Desi_wild_10413</i>  | NA                                  | <i>Ca_desi_scaffold</i> | 10413                   | C/T  | NA                 | INTERGENIC                    | NA                                                   |
| <i>Desi_wild_66951</i>  | NA                                  | <i>Ca_desi_scaffold</i> | 66951                   | T/A  | Gene_Ca_10386.1    | INTRON                        | F-box/WD-40 repeat-containing protein At3g52030      |
| <i>Desi_wild_66960</i>  | NA                                  | <i>Ca_desi_scaffold</i> | 66960                   | A/G  | Gene_Ca_10386.1    | INTRON                        | F-box/WD-40 repeat-containing protein At3g52030      |
| <i>Desi_wild_24844</i>  | NA                                  | <i>Ca_desi_scaffold</i> | 24844                   | A/C  | Gene_Ca_16409.1    | DOWNSTREAM                    | unknown protein                                      |
| <i>Desi_wild_24845</i>  | NA                                  | <i>Ca_desi_scaffold</i> | 24845                   | G/C  | Gene_Ca_16409.1    | DOWNSTREAM                    | unknown protein                                      |
| <i>Desi_wild_52269</i>  | NA                                  | <i>Ca_desi_scaffold</i> | 52269                   | C/T  | NA                 | INTERGENIC                    | NA                                                   |
| <i>Desi_wild_61845</i>  | NA                                  | <i>Ca_desi_scaffold</i> | 61845                   | C/T  | NA                 | INTERGENIC                    | NA                                                   |
| <i>Desi_wild_61846</i>  | NA                                  | <i>Ca_desi_scaffold</i> | 61846                   | A/G  | NA                 | INTERGENIC                    | NA                                                   |
| <i>Desi_wild_60182</i>  | NA                                  | <i>Ca_desi_scaffold</i> | 60182                   | T/C  | NA                 | INTERGENIC                    | NA                                                   |
| <i>Desi_wild_109525</i> | NA                                  | <i>Ca_desi_scaffold</i> | 109525                  | C/A  | Gene_Ca_10336.1    | NON_SYNONYMOUS_CODING         | Dedicator of cytokinesis protein 11                  |
| <i>Desi_wild_113397</i> | NA                                  | <i>Ca_desi_scaffold</i> | 113397                  | C/T  | Gene_Ca_10336.1    | INTRON                        | Dedicator of cytokinesis protein 11                  |
| <i>Desi_wild_113407</i> | NA                                  | <i>Ca_desi_scaffold</i> | 113407                  | A/G  | Gene_Ca_10336.1    | INTRON                        | Dedicator of cytokinesis protein 11                  |
| <i>Desi_wild_113428</i> | NA                                  | <i>Ca_desi_scaffold</i> | 113428                  | A/C  | Gene_Ca_10336.1    | INTRON                        | Dedicator of cytokinesis protein 11                  |
| <i>Desi_wild_113438</i> | NA                                  | <i>Ca_desi_scaffold</i> | 113438                  | C/T  | Gene_Ca_10336.1    | INTRON                        | Dedicator of cytokinesis protein 11                  |
| <i>Desi_wild_113443</i> | NA                                  | <i>Ca_desi_scaffold</i> | 113443                  | C/T  | Gene_Ca_10336.1    | INTRON                        | Dedicator of cytokinesis protein 11                  |
| <i>Desi_wild_113448</i> | NA                                  | <i>Ca_desi_scaffold</i> | 113448                  | C/T  | Gene_Ca_10336.1    | INTRON                        | Dedicator of cytokinesis protein 11                  |
| <i>Desi_wild_113452</i> | NA                                  | <i>Ca_desi_scaffold</i> | 113452                  | C/T  | Gene_Ca_10336.1    | INTRON                        | Dedicator of cytokinesis protein 11                  |
| <i>Desi_wild_113461</i> | NA                                  | <i>Ca_desi_scaffold</i> | 113461                  | G/T  | Gene_Ca_10336.1    | INTRON                        | Dedicator of cytokinesis protein 11                  |
| <i>Desi_wild_113467</i> | NA                                  | <i>Ca_desi_scaffold</i> | 113467                  | C/G  | Gene_Ca_10336.1    | INTRON                        | Dedicator of cytokinesis protein 11                  |
| <i>Desi_wild_113475</i> | NA                                  | <i>Ca_desi_scaffold</i> | 113475                  | C/T  | Gene_Ca_10336.1    | INTRON                        | Dedicator of cytokinesis protein 11                  |
| <i>Desi_wild_34458</i>  | NA                                  | <i>Ca_desi_scaffold</i> | 34458                   | A/C  | NA                 | INTERGENIC                    | NA                                                   |
| <i>Desi_wild_34459</i>  | NA                                  | <i>Ca_desi_scaffold</i> | 34459                   | G/C  | NA                 | INTERGENIC                    | NA                                                   |
| <i>Desi_wild_34462</i>  | NA                                  | <i>Ca_desi_scaffold</i> | 34462                   | C/G  | NA                 | INTERGENIC                    | NA                                                   |
| <i>Desi_wild_6908</i>   | NA                                  | <i>Ca_desi_scaffold</i> | 6908                    | T/C  | NA                 | INTERGENIC                    | NA                                                   |
| <i>Desi_wild_54096</i>  | NA                                  | <i>Ca_desi_scaffold</i> | 54096                   | G/A  | Gene_Ca_16447.1    | INTRON                        | NA                                                   |
| <i>Desi_wild_14900</i>  | NA                                  | <i>Ca_desi_scaffold</i> | 14900                   | C/T  | Gene_Ca_16450.1    | UPSTREAM                      | NA                                                   |
| <i>Desi_wild_14511</i>  | NA                                  | <i>Ca_desi_scaffold</i> | 14511                   | C/A  | Gene_Ca_16452.1    | INTRON                        | Uncharacterized WD repeat-containing protein C2A9.03 |
| <i>Desi_wild_30081</i>  | NA                                  | <i>Ca_desi_scaffold</i> | 30081                   | C/T  | NA                 | INTERGENIC                    | NA                                                   |

| SNP IDs                 | NCBI dbSNP accession IDs (NCBI_SS#) | Chromosomes             | Physical positions (bp) | SNPs | Gene accession IDs | Sequence components of genome | Putative functions                                              |
|-------------------------|-------------------------------------|-------------------------|-------------------------|------|--------------------|-------------------------------|-----------------------------------------------------------------|
| <i>Desi_wild_76336</i>  | NA                                  | <i>Ca_desi_scaffold</i> | 76336                   | A/G  | Gene_Ca_10396.1    | INTRON                        | Enolase 1, chloroplasic                                         |
| <i>Desi_wild_76455</i>  | NA                                  | <i>Ca_desi_scaffold</i> | 76455                   | A/C  | Gene_Ca_10396.1    | INTRON                        | Enolase 1, chloroplasic                                         |
| <i>Desi_wild_628</i>    | NA                                  | <i>Ca_desi_scaffold</i> | 628                     | G/T  | NA                 | INTERGENIC                    | NA                                                              |
| <i>Desi_wild_8566</i>   | NA                                  | <i>Ca_desi_scaffold</i> | 8566                    | A/C  | NA                 | INTERGENIC                    | NA                                                              |
| <i>Desi_wild_22015</i>  | NA                                  | <i>Ca_desi_scaffold</i> | 22015                   | C/A  | Gene_Ca_16462.1    | NON_SYNONYMOUS_CODING         | Laccase-8                                                       |
| <i>Desi_wild_1953</i>   | NA                                  | <i>Ca_desi_scaffold</i> | 1953                    | G/T  | Gene_Ca_16463.1    | NON_SYNONYMOUS_CODING         | H/ACA ribonucleoprotein complex subunit 3-like protein          |
| <i>Desi_wild_15583</i>  | NA                                  | <i>Ca_desi_scaffold</i> | 15583                   | G/A  | Gene_Ca_16467.3    | NON_SYNONYMOUS_CODING         | Metal tolerance protein 10                                      |
| <i>Desi_wild_60566</i>  | NA                                  | <i>Ca_desi_scaffold</i> | 60566                   | C/T  | NA                 | INTERGENIC                    | NA                                                              |
| <i>Desi_wild_12023</i>  | NA                                  | <i>Ca_desi_scaffold</i> | 12023                   | G/A  | Gene_Ca_16479.1    | INTRON                        | Cyclin-D2-1                                                     |
| <i>Desi_wild_26221</i>  | NA                                  | <i>Ca_desi_scaffold</i> | 26221                   | G/A  | NA                 | INTERGENIC                    | NA                                                              |
| <i>Desi_wild_37420</i>  | NA                                  | <i>Ca_desi_scaffold</i> | 37420                   | C/T  | Gene_Ca_16487.1    | NON_SYNONYMOUS_CODING         | Pentatricopeptide repeat-containing protein At1g52620           |
| <i>Desi_wild_37430</i>  | NA                                  | <i>Ca_desi_scaffold</i> | 37430                   | G/T  | Gene_Ca_16487.1    | SYNONYMOUS_CODING             | Pentatricopeptide repeat-containing protein At1g52620           |
| <i>Desi_wild_37431</i>  | NA                                  | <i>Ca_desi_scaffold</i> | 37431                   | A/G  | Gene_Ca_16487.1    | SYNONYMOUS_CODING             | Pentatricopeptide repeat-containing protein At1g52620           |
| <i>Desi_wild_37434</i>  | NA                                  | <i>Ca_desi_scaffold</i> | 37434                   | T/C  | Gene_Ca_16487.1    | SYNONYMOUS_CODING             | Pentatricopeptide repeat-containing protein At1g52620           |
| <i>Desi_wild_37464</i>  | NA                                  | <i>Ca_desi_scaffold</i> | 37464                   | C/T  | Gene_Ca_16487.1    | SYNONYMOUS_CODING             | Pentatricopeptide repeat-containing protein At1g52620           |
| <i>Desi_wild_37465</i>  | NA                                  | <i>Ca_desi_scaffold</i> | 37465                   | G/A  | Gene_Ca_16487.1    | SYNONYMOUS_CODING             | Pentatricopeptide repeat-containing protein At1g52620           |
| <i>Desi_wild_37503</i>  | NA                                  | <i>Ca_desi_scaffold</i> | 37503                   | G/C  | Gene_Ca_16487.1    | SYNONYMOUS_CODING             | Pentatricopeptide repeat-containing protein At1g52620           |
| <i>Desi_wild_37526</i>  | NA                                  | <i>Ca_desi_scaffold</i> | 37526                   | T/G  | Gene_Ca_16487.1    | SYNONYMOUS_CODING             | Pentatricopeptide repeat-containing protein At1g52620           |
| <i>Desi_wild_39525</i>  | NA                                  | <i>Ca_desi_scaffold</i> | 39525                   | T/C  | Gene_Ca_16487.1    | INTRON                        | Pentatricopeptide repeat-containing protein At1g52620           |
| <i>Desi_wild_39543</i>  | NA                                  | <i>Ca_desi_scaffold</i> | 39543                   | C/T  | Gene_Ca_16487.1    | INTRON                        | Pentatricopeptide repeat-containing protein At1g52620           |
| <i>Desi_wild_27617</i>  | NA                                  | <i>Ca_desi_scaffold</i> | 27617                   | G/C  | Gene_Ca_16492.2    | SYNONYMOUS_CODING             | NA                                                              |
| <i>Desi_wild_43438</i>  | NA                                  | <i>Ca_desi_scaffold</i> | 43438                   | A/T  | Gene_Ca_16495.1    | INTRON                        | DDB1- and CUL4-associated factor 13                             |
| <i>Desi_wild_48080</i>  | NA                                  | <i>Ca_desi_scaffold</i> | 48080                   | A/C  | Gene_Ca_16495.1    | INTRON                        | DDB1- and CUL4-associated factor 13                             |
| <i>Desi_wild_10765</i>  | NA                                  | <i>Ca_desi_scaffold</i> | 10765                   | C/T  | Gene_Ca_16497.1    | SYNONYMOUS_CODING             | DENN domain-containing protein 5B                               |
| <i>Desi_wild_47153</i>  | NA                                  | <i>Ca_desi_scaffold</i> | 47153                   | C/A  | Gene_Ca_16499.1    | INTRON                        | RNA polymerase-associated protein CTR9 homolog                  |
| <i>Desi_wild_55508</i>  | NA                                  | <i>Ca_desi_scaffold</i> | 55508                   | T/G  | Gene_Ca_16499.1    | INTRON                        | RNA polymerase-associated protein CTR9 homolog                  |
| <i>Desi_wild_142943</i> | NA                                  | <i>Ca_desi_scaffold</i> | 142943                  | C/T  | Gene_Ca_10245.1    | UPSTREAM                      | Probable NADH-ubiquinone oxidoreductase C947.15c, mitochondrial |
| <i>Desi_wild_147668</i> | NA                                  | <i>Ca_desi_scaffold</i> | 147668                  | A/C  | Gene_Ca_10246.2    | UPSTREAM                      | OTU domain-containing protein At3g57810                         |
| <i>Desi_wild_147679</i> | NA                                  | <i>Ca_desi_scaffold</i> | 147679                  | C/T  | Gene_Ca_10246.2    | UPSTREAM                      | OTU domain-containing protein At3g57810                         |
| <i>Desi_wild_147706</i> | NA                                  | <i>Ca_desi_scaffold</i> | 147706                  | A/T  | Gene_Ca_10246.2    | INTRON                        | OTU domain-containing protein At3g57810                         |
| <i>Desi_wild_150289</i> | NA                                  | <i>Ca_desi_scaffold</i> | 150289                  | A/G  | Gene_Ca_10246.2    | INTRON                        | OTU domain-containing protein At3g57810                         |
| <i>Desi_wild_19095</i>  | NA                                  | <i>Ca_desi_scaffold</i> | 19095                   | G/T  | Gene_Ca_16501.1    | SYNONYMOUS_CODING             | Pyruvate kinase, cytosolic isozyme                              |
| <i>Desi_wild_19117</i>  | NA                                  | <i>Ca_desi_scaffold</i> | 19117                   | G/T  | Gene_Ca_16501.1    | SYNONYMOUS_CODING             | Pyruvate kinase, cytosolic isozyme                              |
| <i>Desi_wild_19123</i>  | NA                                  | <i>Ca_desi_scaffold</i> | 19123                   | T/C  | Gene_Ca_16501.1    | SYNONYMOUS_CODING             | Pyruvate kinase, cytosolic isozyme                              |
| <i>Desi_wild_19126</i>  | NA                                  | <i>Ca_desi_scaffold</i> | 19126                   | G/A  | Gene_Ca_16501.1    | SYNONYMOUS_CODING             | Pyruvate kinase, cytosolic isozyme                              |
| <i>Desi_wild_19129</i>  | NA                                  | <i>Ca_desi_scaffold</i> | 19129                   | T/C  | Gene_Ca_16501.1    | SYNONYMOUS_CODING             | Pyruvate kinase, cytosolic isozyme                              |
| <i>Desi_wild_19132</i>  | NA                                  | <i>Ca_desi_scaffold</i> | 19132                   | C/A  | Gene_Ca_16501.1    | SYNONYMOUS_CODING             | Pyruvate kinase, cytosolic isozyme                              |
| <i>Desi_wild_19138</i>  | NA                                  | <i>Ca_desi_scaffold</i> | 19138                   | A/G  | Gene_Ca_16501.1    | SYNONYMOUS_CODING             | Pyruvate kinase, cytosolic isozyme                              |
| <i>Desi_wild_19141</i>  | NA                                  | <i>Ca_desi_scaffold</i> | 19141                   | G/A  | Gene_Ca_16501.1    | SYNONYMOUS_CODING             | Pyruvate kinase, cytosolic isozyme                              |
| <i>Desi_wild_42663</i>  | NA                                  | <i>Ca_desi_scaffold</i> | 42663                   | C/T  | NA                 | INTERGENIC                    | NA                                                              |
| <i>Desi_wild_47618</i>  | NA                                  | <i>Ca_desi_scaffold</i> | 47618                   | A/G  | Gene_Ca_16521.1    | SYNONYMOUS_CODING             | Limkain-b1                                                      |
| <i>Desi_wild_48872</i>  | NA                                  | <i>Ca_desi_scaffold</i> | 48872                   | G/T  | Gene_Ca_09533.1    | UPSTREAM                      | DNA repair protein RAD51 homolog 3                              |
| <i>Desi_wild_45191</i>  | NA                                  | <i>Ca_desi_scaffold</i> | 45191                   | T/C  | NA                 | INTERGENIC                    | NA                                                              |
| <i>Desi_wild_45223</i>  | NA                                  | <i>Ca_desi_scaffold</i> | 45223                   | C/G  | NA                 | INTERGENIC                    | NA                                                              |

| SNP IDs                | NCBI dbSNP accession IDs (NCBI_SS#) | Chromosomes             | Physical positions (bp) | SNPs | Gene accession IDs | Sequence components of genome | Putative functions                                                   |
|------------------------|-------------------------------------|-------------------------|-------------------------|------|--------------------|-------------------------------|----------------------------------------------------------------------|
| <i>Desi_wild_35108</i> | NA                                  | <i>Ca_desi_scaffold</i> | 35108                   | C/T  | NA                 | INTERGENIC                    | NA                                                                   |
| <i>Desi_wild_16252</i> | NA                                  | <i>Ca_desi_scaffold</i> | 16252                   | A/G  | Gene_Ca_16546.1    | SYNONYMOUS_CODING             | Laccase-5                                                            |
| <i>Desi_wild_16443</i> | NA                                  | <i>Ca_desi_scaffold</i> | 16443                   | T/C  | Gene_Ca_16546.1    | INTRON                        | Laccase-5                                                            |
| <i>Desi_wild_16450</i> | NA                                  | <i>Ca_desi_scaffold</i> | 16450                   | A/T  | Gene_Ca_16546.1    | INTRON                        | Laccase-5                                                            |
| <i>Desi_wild_29753</i> | NA                                  | <i>Ca_desi_scaffold</i> | 29753                   | T/A  | Gene_Ca_16547.1    | INTRON                        | Sorting nexin 2A                                                     |
| <i>Desi_wild_29766</i> | NA                                  | <i>Ca_desi_scaffold</i> | 29766                   | T/C  | Gene_Ca_16547.1    | INTRON                        | Sorting nexin 2A                                                     |
| <i>Desi_wild_31048</i> | NA                                  | <i>Ca_desi_scaffold</i> | 31048                   | G/A  | Gene_Ca_16547.1    | SYNONYMOUS_CODING             | Sorting nexin 2A                                                     |
| <i>Desi_wild_48596</i> | NA                                  | <i>Ca_desi_scaffold</i> | 48596                   | C/T  | NA                 | INTERGENIC                    | NA                                                                   |
| <i>Desi_wild_38718</i> | NA                                  | <i>Ca_desi_scaffold</i> | 38718                   | A/T  | NA                 | INTERGENIC                    | NA                                                                   |
| <i>Desi_wild_22099</i> | NA                                  | <i>Ca_desi_scaffold</i> | 22099                   | T/C  | Gene_Ca_10400.1    | UPSTREAM                      | TMV resistance protein N                                             |
| <i>Desi_wild_58359</i> | NA                                  | <i>Ca_desi_scaffold</i> | 58359                   | T/C  | Gene_Ca_10401.1    | NON_SYNONYMOUS_CODING         | Sucrose transport protein SUC2                                       |
| <i>Desi_wild_58687</i> | NA                                  | <i>Ca_desi_scaffold</i> | 58687                   | G/A  | Gene_Ca_10401.1    | SYNONYMOUS_CODING             | Sucrose transport protein SUC2                                       |
| <i>Desi_wild_42011</i> | NA                                  | <i>Ca_desi_scaffold</i> | 42011                   | T/C  | Gene_Ca_16588.1    | SYNONYMOUS_CODING             | NA                                                                   |
| <i>Desi_wild_6361</i>  | NA                                  | <i>Ca_desi_scaffold</i> | 6361                    | T/C  | Gene_Ca_16593.1    | UPSTREAM                      | RNA 2'-phosphotransferase, Tpt1 / KptA family                        |
| <i>Desi_wild_12740</i> | NA                                  | <i>Ca_desi_scaffold</i> | 12740                   | T/C  | Gene_Ca_16598.1    | INTRON                        | Fanconi anemia group M protein                                       |
| <i>Desi_wild_12412</i> | NA                                  | <i>Ca_desi_scaffold</i> | 12412                   | T/C  | NA                 | INTERGENIC                    | NA                                                                   |
| <i>Desi_wild_22259</i> | NA                                  | <i>Ca_desi_scaffold</i> | 22259                   | G/A  | NA                 | INTERGENIC                    | NA                                                                   |
| <i>Desi_wild_22292</i> | NA                                  | <i>Ca_desi_scaffold</i> | 22292                   | A/G  | NA                 | INTERGENIC                    | NA                                                                   |
| <i>Desi_wild_22317</i> | NA                                  | <i>Ca_desi_scaffold</i> | 22317                   | G/A  | NA                 | INTERGENIC                    | NA                                                                   |
| <i>Desi_wild_11131</i> | NA                                  | <i>Ca_desi_scaffold</i> | 11131                   | G/A  | Gene_Ca_16620.1    | NON_SYNONYMOUS_CODING         | U-box domain-containing protein 4                                    |
| <i>Desi_wild_34049</i> | NA                                  | <i>Ca_desi_scaffold</i> | 34049                   | A/C  | NA                 | INTERGENIC                    | NA                                                                   |
| <i>Desi_wild_34108</i> | NA                                  | <i>Ca_desi_scaffold</i> | 34108                   | A/C  | NA                 | INTERGENIC                    | NA                                                                   |
| <i>Desi_wild_50956</i> | NA                                  | <i>Ca_desi_scaffold</i> | 50956                   | A/G  | NA                 | INTERGENIC                    | NA                                                                   |
| <i>Desi_wild_50966</i> | NA                                  | <i>Ca_desi_scaffold</i> | 50966                   | C/T  | NA                 | INTERGENIC                    | NA                                                                   |
| <i>Desi_wild_50983</i> | NA                                  | <i>Ca_desi_scaffold</i> | 50983                   | C/T  | NA                 | INTERGENIC                    | NA                                                                   |
| <i>Desi_wild_50984</i> | NA                                  | <i>Ca_desi_scaffold</i> | 50984                   | A/G  | NA                 | INTERGENIC                    | NA                                                                   |
| <i>Desi_wild_25125</i> | NA                                  | <i>Ca_desi_scaffold</i> | 25125                   | A/G  | NA                 | INTERGENIC                    | NA                                                                   |
| <i>Desi_wild_1640</i>  | NA                                  | <i>Ca_desi_scaffold</i> | 1640                    | T/C  | NA                 | INTERGENIC                    | NA                                                                   |
| <i>Desi_wild_30227</i> | NA                                  | <i>Ca_desi_scaffold</i> | 30227                   | C/G  | Gene_Ca_16648.1    | UPSTREAM                      | Pentatricopeptide repeat-containing protein At3g61520, mitochondrial |
| <i>Desi_wild_30255</i> | NA                                  | <i>Ca_desi_scaffold</i> | 30255                   | T/C  | Gene_Ca_16648.1    | UPSTREAM                      | Pentatricopeptide repeat-containing protein At3g61520, mitochondrial |
| <i>Desi_wild_30256</i> | NA                                  | <i>Ca_desi_scaffold</i> | 30256                   | G/T  | Gene_Ca_16648.1    | UPSTREAM                      | Pentatricopeptide repeat-containing protein At3g61520, mitochondrial |
| <i>Desi_wild_30260</i> | NA                                  | <i>Ca_desi_scaffold</i> | 30260                   | C/T  | Gene_Ca_16648.1    | UPSTREAM                      | Pentatricopeptide repeat-containing protein At3g61520, mitochondrial |
| <i>Desi_wild_30273</i> | NA                                  | <i>Ca_desi_scaffold</i> | 30273                   | A/T  | Gene_Ca_16648.1    | UPSTREAM                      | Pentatricopeptide repeat-containing protein At3g61520, mitochondrial |
| <i>Desi_wild_30287</i> | NA                                  | <i>Ca_desi_scaffold</i> | 30287                   | T/C  | Gene_Ca_16648.1    | UPSTREAM                      | Pentatricopeptide repeat-containing protein At3g61520, mitochondrial |
| <i>Desi_wild_30290</i> | NA                                  | <i>Ca_desi_scaffold</i> | 30290                   | T/C  | Gene_Ca_16648.1    | UPSTREAM                      | Pentatricopeptide repeat-containing protein At3g61520, mitochondrial |
| <i>Desi_wild_46238</i> | NA                                  | <i>Ca_desi_scaffold</i> | 46238                   | T/G  | NA                 | INTERGENIC                    | NA                                                                   |
| <i>Desi_wild_46271</i> | NA                                  | <i>Ca_desi_scaffold</i> | 46271                   | A/G  | NA                 | INTERGENIC                    | NA                                                                   |
| <i>Desi_wild_46298</i> | NA                                  | <i>Ca_desi_scaffold</i> | 46298                   | T/C  | NA                 | INTERGENIC                    | NA                                                                   |
| <i>Desi_wild_46299</i> | NA                                  | <i>Ca_desi_scaffold</i> | 46299                   | G/A  | NA                 | INTERGENIC                    | NA                                                                   |
| <i>Desi_wild_46307</i> | NA                                  | <i>Ca_desi_scaffold</i> | 46307                   | T/A  | NA                 | INTERGENIC                    | NA                                                                   |
| <i>Desi_wild_46312</i> | NA                                  | <i>Ca_desi_scaffold</i> | 46312                   | G/A  | NA                 | INTERGENIC                    | NA                                                                   |
| <i>Desi_wild_46313</i> | NA                                  | <i>Ca_desi_scaffold</i> | 46313                   | T/C  | NA                 | INTERGENIC                    | NA                                                                   |
| <i>Desi_wild_35307</i> | NA                                  | <i>Ca_desi_scaffold</i> | 35307                   | G/T  | Gene_Ca_16653.1    | NON_SYNONYMOUS_CODING         | Telomerase-binding protein EST1A                                     |
| <i>Desi_wild_7773</i>  | NA                                  | <i>Ca_desi_scaffold</i> | 7773                    | T/C  | Gene_Ca_16655.1    | INTRON                        | Glycerol-3-phosphate dehydrogenase [NAD(+)]                          |

| SNP IDs                 | NCBI dbSNP accession IDs (NCBI_SS#) | Chromosomes             | Physical positions (bp) | SNPs | Gene accession IDs | Sequence components of genome | Putative functions                                              |
|-------------------------|-------------------------------------|-------------------------|-------------------------|------|--------------------|-------------------------------|-----------------------------------------------------------------|
| <i>Desi_wild_17160</i>  | NA                                  | <i>Ca_desi_scaffold</i> | 17160                   | C/T  | NA                 | INTERGENIC                    | NA                                                              |
| <i>Desi_wild_17162</i>  | NA                                  | <i>Ca_desi_scaffold</i> | 17162                   | T/C  | NA                 | INTERGENIC                    | NA                                                              |
| <i>Desi_wild_17163</i>  | NA                                  | <i>Ca_desi_scaffold</i> | 17163                   | T/C  | NA                 | INTERGENIC                    | NA                                                              |
| <i>Desi_wild_17164</i>  | NA                                  | <i>Ca_desi_scaffold</i> | 17164                   | A/T  | NA                 | INTERGENIC                    | NA                                                              |
| <i>Desi_wild_17165</i>  | NA                                  | <i>Ca_desi_scaffold</i> | 17165                   | T/A  | NA                 | INTERGENIC                    | NA                                                              |
| <i>Desi_wild_38145</i>  | NA                                  | <i>Ca_desi_scaffold</i> | 38145                   | C/T  | Gene_Ca_16666.1    | UPSTREAM                      | NA                                                              |
| <i>Desi_wild_8604</i>   | NA                                  | <i>Ca_desi_scaffold</i> | 8604                    | G/A  | NA                 | INTERGENIC                    | NA                                                              |
| <i>Desi_wild_8629</i>   | NA                                  | <i>Ca_desi_scaffold</i> | 8629                    | C/A  | NA                 | INTERGENIC                    | NA                                                              |
| <i>Desi_wild_8657</i>   | NA                                  | <i>Ca_desi_scaffold</i> | 8657                    | T/G  | NA                 | INTERGENIC                    | NA                                                              |
| <i>Desi_wild_8685</i>   | NA                                  | <i>Ca_desi_scaffold</i> | 8685                    | T/C  | NA                 | INTERGENIC                    | NA                                                              |
| <i>Desi_wild_8686</i>   | NA                                  | <i>Ca_desi_scaffold</i> | 8686                    | G/C  | NA                 | INTERGENIC                    | NA                                                              |
| <i>Desi_wild_8691</i>   | NA                                  | <i>Ca_desi_scaffold</i> | 8691                    | A/C  | NA                 | INTERGENIC                    | NA                                                              |
| <i>Desi_wild_8708</i>   | NA                                  | <i>Ca_desi_scaffold</i> | 8708                    | C/T  | NA                 | INTERGENIC                    | NA                                                              |
| <i>Desi_wild_8725</i>   | NA                                  | <i>Ca_desi_scaffold</i> | 8725                    | C/T  | NA                 | INTERGENIC                    | NA                                                              |
| <i>Desi_wild_9250</i>   | NA                                  | <i>Ca_desi_scaffold</i> | 9250                    | A/C  | NA                 | INTERGENIC                    | NA                                                              |
| <i>Desi_wild_9252</i>   | NA                                  | <i>Ca_desi_scaffold</i> | 9252                    | C/T  | NA                 | INTERGENIC                    | NA                                                              |
| <i>Desi_wild_9318</i>   | NA                                  | <i>Ca_desi_scaffold</i> | 9318                    | G/A  | NA                 | INTERGENIC                    | NA                                                              |
| <i>Desi_wild_9369</i>   | NA                                  | <i>Ca_desi_scaffold</i> | 9369                    | C/A  | NA                 | INTERGENIC                    | NA                                                              |
| <i>Desi_wild_9400</i>   | NA                                  | <i>Ca_desi_scaffold</i> | 9400                    | T/C  | NA                 | INTERGENIC                    | NA                                                              |
| <i>Desi_wild_9413</i>   | NA                                  | <i>Ca_desi_scaffold</i> | 9413                    | G/A  | NA                 | INTERGENIC                    | NA                                                              |
| <i>Desi_wild_9419</i>   | NA                                  | <i>Ca_desi_scaffold</i> | 9419                    | G/A  | NA                 | INTERGENIC                    | NA                                                              |
| <i>Desi_wild_9471</i>   | NA                                  | <i>Ca_desi_scaffold</i> | 9471                    | T/A  | NA                 | INTERGENIC                    | NA                                                              |
| <i>Desi_wild_20636</i>  | NA                                  | <i>Ca_desi_scaffold</i> | 20636                   | A/C  | NA                 | INTERGENIC                    | NA                                                              |
| <i>Desi_wild_56756</i>  | NA                                  | <i>Ca_desi_scaffold</i> | 56756                   | C/T  | NA                 | INTERGENIC                    | NA                                                              |
| <i>Desi_wild_56769</i>  | NA                                  | <i>Ca_desi_scaffold</i> | 56769                   | A/C  | NA                 | INTERGENIC                    | NA                                                              |
| <i>Desi_wild_56770</i>  | NA                                  | <i>Ca_desi_scaffold</i> | 56770                   | C/A  | NA                 | INTERGENIC                    | NA                                                              |
| <i>Desi_wild_56779</i>  | NA                                  | <i>Ca_desi_scaffold</i> | 56779                   | G/A  | NA                 | INTERGENIC                    | NA                                                              |
| <i>Desi_wild_56781</i>  | NA                                  | <i>Ca_desi_scaffold</i> | 56781                   | G/A  | NA                 | INTERGENIC                    | NA                                                              |
| <i>Desi_wild_56817</i>  | NA                                  | <i>Ca_desi_scaffold</i> | 56817                   | C/A  | NA                 | INTERGENIC                    | NA                                                              |
| <i>Desi_wild_215233</i> | NA                                  | <i>Ca_desi_scaffold</i> | 215233                  | G/A  | NA                 | INTERGENIC                    | NA                                                              |
| <i>Desi_wild_29226</i>  | NA                                  | <i>Ca_desi_scaffold</i> | 29226                   | A/G  | NA                 | INTERGENIC                    | NA                                                              |
| <i>Desi_wild_29454</i>  | NA                                  | <i>Ca_desi_scaffold</i> | 29454                   | A/G  | Gene_Ca_16675.1    | INTRON                        | Probable ADP-ribosylation factor GTPase-activating protein AGD5 |
| <i>Desi_wild_29468</i>  | NA                                  | <i>Ca_desi_scaffold</i> | 29468                   | G/A  | Gene_Ca_16675.1    | INTRON                        | Probable ADP-ribosylation factor GTPase-activating protein AGD5 |
| <i>Desi_wild_29626</i>  | NA                                  | <i>Ca_desi_scaffold</i> | 29626                   | G/T  | Gene_Ca_16675.1    | INTRON                        | Probable ADP-ribosylation factor GTPase-activating protein AGD5 |
| <i>Desi_wild_29629</i>  | NA                                  | <i>Ca_desi_scaffold</i> | 29629                   | C/T  | Gene_Ca_16675.1    | INTRON                        | Probable ADP-ribosylation factor GTPase-activating protein AGD5 |
| <i>Desi_wild_29689</i>  | NA                                  | <i>Ca_desi_scaffold</i> | 29689                   | C/T  | Gene_Ca_16675.1    | INTRON                        | Probable ADP-ribosylation factor GTPase-activating protein AGD5 |
| <i>Desi_wild_29690</i>  | NA                                  | <i>Ca_desi_scaffold</i> | 29690                   | G/A  | Gene_Ca_16675.1    | INTRON                        | Probable ADP-ribosylation factor GTPase-activating protein AGD5 |
| <i>Desi_wild_29697</i>  | NA                                  | <i>Ca_desi_scaffold</i> | 29697                   | G/A  | Gene_Ca_16675.1    | INTRON                        | Probable ADP-ribosylation factor GTPase-activating protein AGD5 |
| <i>Desi_wild_48677</i>  | NA                                  | <i>Ca_desi_scaffold</i> | 48677                   | G/A  | NA                 | INTERGENIC                    | NA                                                              |
| <i>Desi_wild_50836</i>  | NA                                  | <i>Ca_desi_scaffold</i> | 50836                   | C/A  | Gene_Ca_16678.1    | INTRON                        | Staphylococcal nuclease domain-containing protein 1             |
| <i>Desi_wild_8146</i>   | NA                                  | <i>Ca_desi_scaffold</i> | 8146                    | C/T  | Gene_Ca_16688.1    | INTRON                        | AP2-like ethylene-responsive transcription factor AIL6          |
| <i>Desi_wild_8221</i>   | NA                                  | <i>Ca_desi_scaffold</i> | 8221                    | G/A  | Gene_Ca_16688.1    | INTRON                        | AP2-like ethylene-responsive transcription factor AIL6          |
| <i>Desi_wild_8281</i>   | NA                                  | <i>Ca_desi_scaffold</i> | 8281                    | C/T  | Gene_Ca_16688.1    | INTRON                        | AP2-like ethylene-responsive transcription factor AIL6          |
| <i>Desi_wild_10395</i>  | NA                                  | <i>Ca_desi_scaffold</i> | 10395                   | T/C  | Gene_Ca_16688.1    | INTRON                        | AP2-like ethylene-responsive transcription factor AIL6          |

| SNP IDs                | NCBI dbSNP accession IDs (NCBI_SS#) | Chromosomes             | Physical positions (bp) | SNPs | Gene accession IDs | Sequence components of genome | Putative functions                                                      |
|------------------------|-------------------------------------|-------------------------|-------------------------|------|--------------------|-------------------------------|-------------------------------------------------------------------------|
| <i>Desi_wild_10469</i> | NA                                  | <i>Ca_desi_scaffold</i> | 10469                   | G/T  | Gene_Ca_16688.1    | INTRON                        | AP2-like ethylene-responsive transcription factor AIL6                  |
| <i>Desi_wild_55399</i> | NA                                  | <i>Ca_desi_scaffold</i> | 55399                   | C/T  | Gene_Ca_16689.1    | DOWNSTREAM                    | Putative U-box domain-containing protein 50                             |
| <i>Desi_wild_55410</i> | NA                                  | <i>Ca_desi_scaffold</i> | 55410                   | G/A  | Gene_Ca_16689.1    | DOWNSTREAM                    | Putative U-box domain-containing protein 50                             |
| <i>Desi_wild_38811</i> | NA                                  | <i>Ca_desi_scaffold</i> | 38811                   | T/G  | Gene_Ca_10410.1    | INTRON                        | G-type lectin S-receptor-like serine/threonine-protein kinase At4g27290 |
| <i>Desi_wild_38852</i> | NA                                  | <i>Ca_desi_scaffold</i> | 38852                   | C/T  | Gene_Ca_10410.1    | INTRON                        | G-type lectin S-receptor-like serine/threonine-protein kinase At4g27290 |
| <i>Desi_wild_30282</i> | NA                                  | <i>Ca_desi_scaffold</i> | 30282                   | G/A  | NA                 | INTERGENIC                    | NA                                                                      |
| <i>Desi_wild_39604</i> | NA                                  | <i>Ca_desi_scaffold</i> | 39604                   | G/A  | Gene_Ca_09784.1    | DOWNSTREAM                    | Putative phospholipid-transporting ATPase 4                             |
| <i>Desi_wild_39607</i> | NA                                  | <i>Ca_desi_scaffold</i> | 39607                   | T/A  | Gene_Ca_09784.1    | DOWNSTREAM                    | Putative phospholipid-transporting ATPase 4                             |
| <i>Desi_wild_39608</i> | NA                                  | <i>Ca_desi_scaffold</i> | 39608                   | C/T  | Gene_Ca_09784.1    | DOWNSTREAM                    | Putative phospholipid-transporting ATPase 4                             |
| <i>Desi_wild_39616</i> | NA                                  | <i>Ca_desi_scaffold</i> | 39616                   | G/A  | Gene_Ca_09784.1    | DOWNSTREAM                    | Putative phospholipid-transporting ATPase 4                             |
| <i>Desi_wild_68784</i> | NA                                  | <i>Ca_desi_scaffold</i> | 68784                   | T/A  | Gene_Ca_09785.1    | INTRON                        | Casein kinase I isoform delta-like                                      |
| <i>Desi_wild_33739</i> | NA                                  | <i>Ca_desi_scaffold</i> | 33739                   | G/A  | NA                 | INTERGENIC                    | NA                                                                      |
| <i>Desi_wild_33742</i> | NA                                  | <i>Ca_desi_scaffold</i> | 33742                   | G/T  | NA                 | INTERGENIC                    | NA                                                                      |
| <i>Desi_wild_33762</i> | NA                                  | <i>Ca_desi_scaffold</i> | 33762                   | G/T  | NA                 | INTERGENIC                    | NA                                                                      |
| <i>Desi_wild_33763</i> | NA                                  | <i>Ca_desi_scaffold</i> | 33763                   | A/C  | NA                 | INTERGENIC                    | NA                                                                      |
| <i>Desi_wild_33809</i> | NA                                  | <i>Ca_desi_scaffold</i> | 33809                   | T/C  | NA                 | INTERGENIC                    | NA                                                                      |
| <i>Desi_wild_12159</i> | NA                                  | <i>Ca_desi_scaffold</i> | 12159                   | G/A  | Gene_Ca_16705.1    | NON_SYNONYMOUS_CODING         | Nucleobase-ascorbate transporter 2                                      |
| <i>Desi_wild_16571</i> | NA                                  | <i>Ca_desi_scaffold</i> | 16571                   | C/T  | Gene_Ca_16707.1    | DOWNSTREAM                    | OBERON-like protein (Fragment)                                          |
| <i>Desi_wild_16576</i> | NA                                  | <i>Ca_desi_scaffold</i> | 16576                   | C/A  | Gene_Ca_16707.1    | DOWNSTREAM                    | OBERON-like protein (Fragment)                                          |
| <i>Desi_wild_16599</i> | NA                                  | <i>Ca_desi_scaffold</i> | 16599                   | G/T  | Gene_Ca_16707.1    | DOWNSTREAM                    | OBERON-like protein (Fragment)                                          |
| <i>Desi_wild_16600</i> | NA                                  | <i>Ca_desi_scaffold</i> | 16600                   | T/G  | Gene_Ca_16707.1    | DOWNSTREAM                    | OBERON-like protein (Fragment)                                          |
| <i>Desi_wild_48456</i> | NA                                  | <i>Ca_desi_scaffold</i> | 48456                   | C/T  | NA                 | INTERGENIC                    | NA                                                                      |
| <i>Desi_wild_48470</i> | NA                                  | <i>Ca_desi_scaffold</i> | 48470                   | C/T  | NA                 | INTERGENIC                    | NA                                                                      |
| <i>Desi_wild_48481</i> | NA                                  | <i>Ca_desi_scaffold</i> | 48481                   | G/T  | NA                 | INTERGENIC                    | NA                                                                      |
| <i>Desi_wild_48490</i> | NA                                  | <i>Ca_desi_scaffold</i> | 48490                   | C/T  | Gene_Ca_16712.1    | NON_SYNONYMOUS_CODING         | NA                                                                      |
| <i>Desi_wild_48493</i> | NA                                  | <i>Ca_desi_scaffold</i> | 48493                   | A/G  | Gene_Ca_16712.1    | NON_SYNONYMOUS_CODING         | NA                                                                      |
| <i>Desi_wild_48496</i> | NA                                  | <i>Ca_desi_scaffold</i> | 48496                   | A/G  | Gene_Ca_16712.1    | NON_SYNONYMOUS_CODING         | NA                                                                      |
| <i>Desi_wild_48500</i> | NA                                  | <i>Ca_desi_scaffold</i> | 48500                   | T/C  | Gene_Ca_16712.1    | SYNONYMOUS_CODING             | NA                                                                      |
| <i>Desi_wild_48518</i> | NA                                  | <i>Ca_desi_scaffold</i> | 48518                   | A/C  | Gene_Ca_16712.1    | SYNONYMOUS_CODING             | NA                                                                      |
| <i>Desi_wild_50285</i> | NA                                  | <i>Ca_desi_scaffold</i> | 50285                   | T/C  | Gene_Ca_16712.1    | DOWNSTREAM                    | NA                                                                      |
| <i>Desi_wild_52468</i> | NA                                  | <i>Ca_desi_scaffold</i> | 52468                   | C/T  | NA                 | INTERGENIC                    | NA                                                                      |
| <i>Desi_wild_52555</i> | NA                                  | <i>Ca_desi_scaffold</i> | 52555                   | T/A  | NA                 | INTERGENIC                    | NA                                                                      |
| <i>Desi_wild_55557</i> | NA                                  | <i>Ca_desi_scaffold</i> | 55557                   | A/C  | NA                 | INTERGENIC                    | NA                                                                      |
| <i>Desi_wild_55893</i> | NA                                  | <i>Ca_desi_scaffold</i> | 55893                   | A/G  | NA                 | INTERGENIC                    | NA                                                                      |
| <i>Desi_wild_55953</i> | NA                                  | <i>Ca_desi_scaffold</i> | 55953                   | G/A  | NA                 | INTERGENIC                    | NA                                                                      |
| <i>Desi_wild_55975</i> | NA                                  | <i>Ca_desi_scaffold</i> | 55975                   | A/C  | NA                 | INTERGENIC                    | NA                                                                      |
| <i>Desi_wild_9749</i>  | NA                                  | <i>Ca_desi_scaffold</i> | 9749                    | C/T  | Gene_Ca_16729.1    | INTRON                        | Probable acyl-activating enzyme 16, chloroplastic                       |
| <i>Desi_wild_3944</i>  | NA                                  | <i>Ca_desi_scaffold</i> | 3944                    | A/C  | Gene_Ca_16731.1    | NON_SYNONYMOUS_CODING         | Aspartic proteinase nepenthesin-1                                       |
| <i>Desi_wild_41021</i> | NA                                  | <i>Ca_desi_scaffold</i> | 41021                   | A/T  | Gene_Ca_16736.1    | UPSTREAM                      | 1-acyl-sn-glycerol-3-phosphate acyltransferase 1, chloroplastic         |
| <i>Desi_wild_41061</i> | NA                                  | <i>Ca_desi_scaffold</i> | 41061                   | C/T  | Gene_Ca_16736.1    | UPSTREAM                      | 1-acyl-sn-glycerol-3-phosphate acyltransferase 1, chloroplastic         |
| <i>Desi_wild_41063</i> | NA                                  | <i>Ca_desi_scaffold</i> | 41063                   | T/A  | Gene_Ca_16736.1    | UPSTREAM                      | 1-acyl-sn-glycerol-3-phosphate acyltransferase 1, chloroplastic         |
| <i>Desi_wild_16128</i> | NA                                  | <i>Ca_desi_scaffold</i> | 16128                   | A/G  | Gene_Ca_16745.1    | DOWNSTREAM                    | ADP,ATP carrier protein, mitochondrial                                  |
| <i>Desi_wild_17782</i> | NA                                  | <i>Ca_desi_scaffold</i> | 17782                   | C/T  | NA                 | INTERGENIC                    | NA                                                                      |
| <i>Desi_wild_1860</i>  | NA                                  | <i>Ca_desi_scaffold</i> | 1860                    | G/T  | NA                 | INTERGENIC                    | NA                                                                      |



| SNP IDs                | NCBI dbSNP accession IDs (NCBI_SS#) | Chromosomes             | Physical positions (bp) | SNPs | Gene accession IDs | Sequence components of genome | Putative functions                                                   |
|------------------------|-------------------------------------|-------------------------|-------------------------|------|--------------------|-------------------------------|----------------------------------------------------------------------|
| <i>Desi_wild_70744</i> | NA                                  | <i>Ca_desi_scaffold</i> | 70744                   | T/C  | Gene_Ca_10422.1    | SYNONYMOUS_CODING             | NA                                                                   |
| <i>Desi_wild_70747</i> | NA                                  | <i>Ca_desi_scaffold</i> | 70747                   | C/T  | Gene_Ca_10422.1    | SYNONYMOUS_CODING             | NA                                                                   |
| <i>Desi_wild_70754</i> | NA                                  | <i>Ca_desi_scaffold</i> | 70754                   | A/T  | Gene_Ca_10422.1    | NON_SYNONYMOUS_CODING         | NA                                                                   |
| <i>Desi_wild_70767</i> | NA                                  | <i>Ca_desi_scaffold</i> | 70767                   | C/T  | Gene_Ca_10422.1    | NON_SYNONYMOUS_CODING         | NA                                                                   |
| <i>Desi_wild_70771</i> | NA                                  | <i>Ca_desi_scaffold</i> | 70771                   | A/G  | Gene_Ca_10422.1    | SYNONYMOUS_CODING             | NA                                                                   |
| <i>Desi_wild_70777</i> | NA                                  | <i>Ca_desi_scaffold</i> | 70777                   | C/T  | Gene_Ca_10422.1    | SYNONYMOUS_CODING             | NA                                                                   |
| <i>Desi_wild_70780</i> | NA                                  | <i>Ca_desi_scaffold</i> | 70780                   | A/T  | Gene_Ca_10422.1    | SYNONYMOUS_CODING             | NA                                                                   |
| <i>Desi_wild_70786</i> | NA                                  | <i>Ca_desi_scaffold</i> | 70786                   | G/T  | Gene_Ca_10422.1    | SYNONYMOUS_CODING             | NA                                                                   |
| <i>Desi_wild_70795</i> | NA                                  | <i>Ca_desi_scaffold</i> | 70795                   | C/T  | Gene_Ca_10422.1    | SYNONYMOUS_CODING             | NA                                                                   |
| <i>Desi_wild_8869</i>  | NA                                  | <i>Ca_desi_scaffold</i> | 8869                    | A/C  | NA                 | INTERGENIC                    | NA                                                                   |
| <i>Desi_wild_15556</i> | NA                                  | <i>Ca_desi_scaffold</i> | 15556                   | T/C  | Gene_Ca_16768.2    | DOWNSTREAM                    | NA                                                                   |
| <i>Desi_wild_15560</i> | NA                                  | <i>Ca_desi_scaffold</i> | 15560                   | G/T  | Gene_Ca_16768.2    | DOWNSTREAM                    | NA                                                                   |
| <i>Desi_wild_24339</i> | NA                                  | <i>Ca_desi_scaffold</i> | 24339                   | T/A  | NA                 | INTERGENIC                    | NA                                                                   |
| <i>Desi_wild_38831</i> | NA                                  | <i>Ca_desi_scaffold</i> | 38831                   | T/C  | NA                 | INTERGENIC                    | NA                                                                   |
| <i>Desi_wild_38834</i> | NA                                  | <i>Ca_desi_scaffold</i> | 38834                   | T/G  | NA                 | INTERGENIC                    | NA                                                                   |
| <i>Desi_wild_197</i>   | NA                                  | <i>Ca_desi_scaffold</i> | 197                     | A/G  | NA                 | INTERGENIC                    | NA                                                                   |
| <i>Desi_wild_32447</i> | NA                                  | <i>Ca_desi_scaffold</i> | 32447                   | T/A  | Gene_Ca_16782.1    | UPSTREAM                      | Pescadillo homolog                                                   |
| <i>Desi_wild_43468</i> | NA                                  | <i>Ca_desi_scaffold</i> | 43468                   | C/A  | Gene_Ca_16784.1    | SYNONYMOUS_CODING             | Probable beta-1,3-galactosyltransferase 14                           |
| <i>Desi_wild_43470</i> | NA                                  | <i>Ca_desi_scaffold</i> | 43470                   | T/C  | Gene_Ca_16784.1    | NON_SYNONYMOUS_CODING         | Probable beta-1,3-galactosyltransferase 14                           |
| <i>Desi_wild_9779</i>  | NA                                  | <i>Ca_desi_scaffold</i> | 9779                    | G/C  | Gene_Ca_16787.1    | SYNONYMOUS_CODING             | hAT transposon superfamily                                           |
| <i>Desi_wild_39667</i> | NA                                  | <i>Ca_desi_scaffold</i> | 39667                   | T/C  | Gene_Ca_16798.1    | SYNONYMOUS_CODING             | DNA ligase 1                                                         |
| <i>Desi_wild_40347</i> | NA                                  | <i>Ca_desi_scaffold</i> | 40347                   | T/C  | Gene_Ca_16798.1    | INTRON                        | DNA ligase 1                                                         |
| <i>Desi_wild_6302</i>  | NA                                  | <i>Ca_desi_scaffold</i> | 6302                    | G/A  | Gene_Ca_16802.1    | INTRON                        | Nucleolar complex protein 3 homolog                                  |
| <i>Desi_wild_8846</i>  | NA                                  | <i>Ca_desi_scaffold</i> | 8846                    | A/C  | Gene_Ca_16802.1    | NON_SYNONYMOUS_CODING         | Nucleolar complex protein 3 homolog                                  |
| <i>Desi_wild_51368</i> | NA                                  | <i>Ca_desi_scaffold</i> | 51368                   | C/A  | NA                 | INTERGENIC                    | NA                                                                   |
| <i>Desi_wild_21901</i> | NA                                  | <i>Ca_desi_scaffold</i> | 21901                   | G/A  | Gene_Ca_16808.4    | SYNONYMOUS_CODING             | NA                                                                   |
| <i>Desi_wild_35206</i> | NA                                  | <i>Ca_desi_scaffold</i> | 35206                   | C/G  | NA                 | INTERGENIC                    | NA                                                                   |
| <i>Desi_wild_35246</i> | NA                                  | <i>Ca_desi_scaffold</i> | 35246                   | T/C  | NA                 | INTERGENIC                    | NA                                                                   |
| <i>Desi_wild_48996</i> | NA                                  | <i>Ca_desi_scaffold</i> | 48996                   | T/C  | Gene_Ca_16811.1    | INTRON                        | DNA ligase 1                                                         |
| <i>Desi_wild_50324</i> | NA                                  | <i>Ca_desi_scaffold</i> | 50324                   | G/A  | Gene_Ca_16811.1    | NON_SYNONYMOUS_CODING         | DNA ligase 1                                                         |
| <i>Desi_wild_34923</i> | NA                                  | <i>Ca_desi_scaffold</i> | 34923                   | T/C  | Gene_Ca_09389.1    | INTRON                        | Vacuolar protein sorting-associated protein 54                       |
| <i>Desi_wild_70659</i> | NA                                  | <i>Ca_desi_scaffold</i> | 70659                   | A/G  | NA                 | INTERGENIC                    | NA                                                                   |
| <i>Desi_wild_89268</i> | NA                                  | <i>Ca_desi_scaffold</i> | 89268                   | G/A  | Gene_Ca_09390.1    | INTRON                        | Outer arm dynein light chain 1 protein                               |
| <i>Desi_wild_89299</i> | NA                                  | <i>Ca_desi_scaffold</i> | 89299                   | G/A  | Gene_Ca_09390.1    | INTRON                        | Outer arm dynein light chain 1 protein                               |
| <i>Desi_wild_97641</i> | NA                                  | <i>Ca_desi_scaffold</i> | 97641                   | A/G  | Gene_Ca_09390.1    | UPSTREAM                      | Outer arm dynein light chain 1 protein                               |
| <i>Desi_wild_27121</i> | NA                                  | <i>Ca_desi_scaffold</i> | 27121                   | G/T  | Gene_Ca_16819.1    | UPSTREAM                      | Probable tRNA threonylcarbamoyladenosine biosynthesis protein osgep1 |
| <i>Desi_wild_27197</i> | NA                                  | <i>Ca_desi_scaffold</i> | 27197                   | C/A  | Gene_Ca_16819.1    | UPSTREAM                      | Probable tRNA threonylcarbamoyladenosine biosynthesis protein osgep1 |
| <i>Desi_wild_19358</i> | NA                                  | <i>Ca_desi_scaffold</i> | 19358                   | A/T  | NA                 | INTERGENIC                    | NA                                                                   |
| <i>Desi_wild_74459</i> | NA                                  | <i>Ca_desi_scaffold</i> | 74459                   | C/A  | NA                 | INTERGENIC                    | NA                                                                   |
| <i>Desi_wild_44396</i> | NA                                  | <i>Ca_desi_scaffold</i> | 44396                   | T/G  | Gene_Ca_16823.1    | NON_SYNONYMOUS_CODING         | unknown protein                                                      |
| <i>Desi_wild_30225</i> | NA                                  | <i>Ca_desi_scaffold</i> | 30225                   | G/A  | Gene_Ca_16824.1    | INTRON                        | Ribosomal RNA small subunit methyltransferase G                      |
| <i>Desi_wild_30281</i> | NA                                  | <i>Ca_desi_scaffold</i> | 30281                   | C/G  | Gene_Ca_16824.1    | INTRON                        | Ribosomal RNA small subunit methyltransferase G                      |
| <i>Desi_wild_48822</i> | NA                                  | <i>Ca_desi_scaffold</i> | 48822                   | A/G  | NA                 | INTERGENIC                    | NA                                                                   |
| <i>Desi_wild_48869</i> | NA                                  | <i>Ca_desi_scaffold</i> | 48869                   | C/A  | NA                 | INTERGENIC                    | NA                                                                   |

| SNP IDs                 | NCBI dbSNP accession IDs (NCBI_SS#) | Chromosomes             | Physical positions (bp) | SNPs | Gene accession IDs | Sequence components of genome | Putative functions                        |
|-------------------------|-------------------------------------|-------------------------|-------------------------|------|--------------------|-------------------------------|-------------------------------------------|
| <i>Desi_wild_13555</i>  | NA                                  | <i>Ca_desi_scaffold</i> | 13555                   | T/C  | NA                 | INTERGENIC                    | NA                                        |
| <i>Desi_wild_34984</i>  | NA                                  | <i>Ca_desi_scaffold</i> | 34984                   | C/T  | NA                 | INTERGENIC                    | NA                                        |
| <i>Desi_wild_34993</i>  | NA                                  | <i>Ca_desi_scaffold</i> | 34993                   | A/T  | NA                 | INTERGENIC                    | NA                                        |
| <i>Desi_wild_34998</i>  | NA                                  | <i>Ca_desi_scaffold</i> | 34998                   | C/T  | NA                 | INTERGENIC                    | NA                                        |
| <i>Desi_wild_42397</i>  | NA                                  | <i>Ca_desi_scaffold</i> | 42397                   | A/T  | Gene_Ca_16840.1    | NON_SYNONYMOUS_CODING         | Protein kinase PVPK-1                     |
| <i>Desi_wild_28510</i>  | NA                                  | <i>Ca_desi_scaffold</i> | 28510                   | A/T  | Gene_Ca_16846.1    | INTRON                        | unknown protein                           |
| <i>Desi_wild_622</i>    | NA                                  | <i>Ca_desi_scaffold</i> | 622                     | A/C  | Gene_Ca_16848.3    | DOWNSTREAM                    | unknown protein                           |
| <i>Desi_wild_5433</i>   | NA                                  | <i>Ca_desi_scaffold</i> | 5433                    | C/T  | Gene_Ca_16848.3    | SYNONYMOUS_CODING             | unknown protein                           |
| <i>Desi_wild_7372</i>   | NA                                  | <i>Ca_desi_scaffold</i> | 7372                    | T/C  | Gene_Ca_16848.3    | INTRON                        | unknown protein                           |
| <i>Desi_wild_16254</i>  | NA                                  | <i>Ca_desi_scaffold</i> | 16254                   | A/C  | Gene_Ca_16848.3    | INTRON                        | unknown protein                           |
| <i>Desi_wild_17822</i>  | NA                                  | <i>Ca_desi_scaffold</i> | 17822                   | A/C  | Gene_Ca_16848.3    | SYNONYMOUS_CODING             | unknown protein                           |
| <i>Desi_wild_17888</i>  | NA                                  | <i>Ca_desi_scaffold</i> | 17888                   | T/G  | Gene_Ca_16848.3    | SYNONYMOUS_CODING             | unknown protein                           |
| <i>Desi_wild_43358</i>  | NA                                  | <i>Ca_desi_scaffold</i> | 43358                   | T/G  | Gene_Ca_16849.1    | SYNONYMOUS_CODING             | Carnitiny-CoA dehydratase                 |
| <i>Desi_wild_43419</i>  | NA                                  | <i>Ca_desi_scaffold</i> | 43419                   | C/T  | Gene_Ca_16849.1    | NON_SYNONYMOUS_CODING         | Carnitiny-CoA dehydratase                 |
| <i>Desi_wild_7389</i>   | NA                                  | <i>Ca_desi_scaffold</i> | 7389                    | C/T  | Gene_Ca_16865.1    | SYNONYMOUS_CODING             | Proline dehydrogenase 2, mitochondrial    |
| <i>Desi_wild_7548</i>   | NA                                  | <i>Ca_desi_scaffold</i> | 7548                    | T/C  | Gene_Ca_16865.1    | INTRON                        | Proline dehydrogenase 2, mitochondrial    |
| <i>Desi_wild_7592</i>   | NA                                  | <i>Ca_desi_scaffold</i> | 7592                    | C/A  | Gene_Ca_16865.1    | INTRON                        | Proline dehydrogenase 2, mitochondrial    |
| <i>Desi_wild_13619</i>  | NA                                  | <i>Ca_desi_scaffold</i> | 13619                   | C/T  | NA                 | INTERGENIC                    | NA                                        |
| <i>Desi_wild_13621</i>  | NA                                  | <i>Ca_desi_scaffold</i> | 13621                   | C/T  | NA                 | INTERGENIC                    | NA                                        |
| <i>Desi_wild_13638</i>  | NA                                  | <i>Ca_desi_scaffold</i> | 13638                   | C/T  | NA                 | INTERGENIC                    | NA                                        |
| <i>Desi_wild_13656</i>  | NA                                  | <i>Ca_desi_scaffold</i> | 13656                   | A/G  | NA                 | INTERGENIC                    | NA                                        |
| <i>Desi_wild_13657</i>  | NA                                  | <i>Ca_desi_scaffold</i> | 13657                   | A/G  | NA                 | INTERGENIC                    | NA                                        |
| <i>Desi_wild_26262</i>  | NA                                  | <i>Ca_desi_scaffold</i> | 26262                   | C/A  | NA                 | INTERGENIC                    | NA                                        |
| <i>Desi_wild_3349</i>   | NA                                  | <i>Ca_desi_scaffold</i> | 3349                    | C/T  | NA                 | INTERGENIC                    | NA                                        |
| <i>Desi_wild_3386</i>   | NA                                  | <i>Ca_desi_scaffold</i> | 3386                    | C/A  | NA                 | INTERGENIC                    | NA                                        |
| <i>Desi_wild_21776</i>  | NA                                  | <i>Ca_desi_scaffold</i> | 21776                   | T/A  | Gene_Ca_16876.1    | NON_SYNONYMOUS_CODING         | Ethylene receptor 2                       |
| <i>Desi_wild_21998</i>  | NA                                  | <i>Ca_desi_scaffold</i> | 21998                   | A/C  | Gene_Ca_16876.1    | SYNONYMOUS_CODING             | Ethylene receptor 2                       |
| <i>Desi_wild_2053</i>   | NA                                  | <i>Ca_desi_scaffold</i> | 2053                    | A/T  | Gene_Ca_16886.1    | DOWNSTREAM                    | Fasciclin-like arabinogalactan protein 21 |
| <i>Desi_wild_2056</i>   | NA                                  | <i>Ca_desi_scaffold</i> | 2056                    | T/A  | Gene_Ca_16886.1    | DOWNSTREAM                    | Fasciclin-like arabinogalactan protein 21 |
| <i>Desi_wild_13214</i>  | NA                                  | <i>Ca_desi_scaffold</i> | 13214                   | T/A  | Gene_Ca_16889.1    | DOWNSTREAM                    | Fasciclin-like arabinogalactan protein 21 |
| <i>Desi_wild_24455</i>  | NA                                  | <i>Ca_desi_scaffold</i> | 24455                   | G/C  | NA                 | INTERGENIC                    | NA                                        |
| <i>Desi_wild_52405</i>  | NA                                  | <i>Ca_desi_scaffold</i> | 52405                   | C/A  | NA                 | INTERGENIC                    | NA                                        |
| <i>Desi_wild_52445</i>  | NA                                  | <i>Ca_desi_scaffold</i> | 52445                   | A/C  | NA                 | INTERGENIC                    | NA                                        |
| <i>Desi_wild_52765</i>  | NA                                  | <i>Ca_desi_scaffold</i> | 52765                   | G/A  | NA                 | INTERGENIC                    | NA                                        |
| <i>Desi_wild_52773</i>  | NA                                  | <i>Ca_desi_scaffold</i> | 52773                   | G/C  | NA                 | INTERGENIC                    | NA                                        |
| <i>Desi_wild_52776</i>  | NA                                  | <i>Ca_desi_scaffold</i> | 52776                   | A/G  | NA                 | INTERGENIC                    | NA                                        |
| <i>Desi_wild_52886</i>  | NA                                  | <i>Ca_desi_scaffold</i> | 52886                   | G/C  | NA                 | INTERGENIC                    | NA                                        |
| <i>Desi_wild_113080</i> | NA                                  | <i>Ca_desi_scaffold</i> | 113080                  | G/T  | NA                 | INTERGENIC                    | NA                                        |
| <i>Desi_wild_113082</i> | NA                                  | <i>Ca_desi_scaffold</i> | 113082                  | T/C  | NA                 | INTERGENIC                    | NA                                        |
| <i>Desi_wild_113084</i> | NA                                  | <i>Ca_desi_scaffold</i> | 113084                  | T/C  | NA                 | INTERGENIC                    | NA                                        |
| <i>Desi_wild_113089</i> | NA                                  | <i>Ca_desi_scaffold</i> | 113089                  | A/G  | NA                 | INTERGENIC                    | NA                                        |
| <i>Desi_wild_113105</i> | NA                                  | <i>Ca_desi_scaffold</i> | 113105                  | C/A  | NA                 | INTERGENIC                    | NA                                        |
| <i>Desi_wild_113133</i> | NA                                  | <i>Ca_desi_scaffold</i> | 113133                  | A/T  | NA                 | INTERGENIC                    | NA                                        |
| <i>Desi_wild_113205</i> | NA                                  | <i>Ca_desi_scaffold</i> | 113205                  | C/A  | NA                 | INTERGENIC                    | NA                                        |

| SNP IDs                 | NCBI dbSNP accession IDs (NCBI_SS#) | Chromosomes             | Physical positions (bp) | SNPs | Gene accession IDs | Sequence components of genome | Putative functions                                           |
|-------------------------|-------------------------------------|-------------------------|-------------------------|------|--------------------|-------------------------------|--------------------------------------------------------------|
| <i>Desi_wild_113282</i> | NA                                  | <i>Ca_desi_scaffold</i> | 113282                  | C/T  | NA                 | INTERGENIC                    | NA                                                           |
| <i>Desi_wild_115928</i> | NA                                  | <i>Ca_desi_scaffold</i> | 115928                  | C/A  | NA                 | INTERGENIC                    | NA                                                           |
| <i>Desi_wild_115964</i> | NA                                  | <i>Ca_desi_scaffold</i> | 115964                  | G/A  | NA                 | INTERGENIC                    | NA                                                           |
| <i>Desi_wild_115975</i> | NA                                  | <i>Ca_desi_scaffold</i> | 115975                  | C/A  | NA                 | INTERGENIC                    | NA                                                           |
| <i>Desi_wild_115987</i> | NA                                  | <i>Ca_desi_scaffold</i> | 115987                  | G/A  | NA                 | INTERGENIC                    | NA                                                           |
| <i>Desi_wild_115994</i> | NA                                  | <i>Ca_desi_scaffold</i> | 115994                  | T/C  | NA                 | INTERGENIC                    | NA                                                           |
| <i>Desi_wild_32547</i>  | NA                                  | <i>Ca_desi_scaffold</i> | 32547                   | T/G  | Gene_Ca_16910.4    | INTRON                        | NA                                                           |
| <i>Desi_wild_32550</i>  | NA                                  | <i>Ca_desi_scaffold</i> | 32550                   | A/T  | Gene_Ca_16910.4    | INTRON                        | NA                                                           |
| <i>Desi_wild_32560</i>  | NA                                  | <i>Ca_desi_scaffold</i> | 32560                   | C/A  | Gene_Ca_16910.4    | INTRON                        | NA                                                           |
| <i>Desi_wild_3452</i>   | NA                                  | <i>Ca_desi_scaffold</i> | 3452                    | T/C  | NA                 | INTERGENIC                    | NA                                                           |
| <i>Desi_wild_3967</i>   | NA                                  | <i>Ca_desi_scaffold</i> | 3967                    | A/C  | Gene_Ca_16918.1    | UPSTREAM                      | NA                                                           |
| <i>Desi_wild_4507</i>   | NA                                  | <i>Ca_desi_scaffold</i> | 4507                    | A/G  | Gene_Ca_16918.1    | UPSTREAM                      | NA                                                           |
| <i>Desi_wild_15896</i>  | NA                                  | <i>Ca_desi_scaffold</i> | 15896                   | A/G  | NA                 | INTERGENIC                    | NA                                                           |
| <i>Desi_wild_15914</i>  | NA                                  | <i>Ca_desi_scaffold</i> | 15914                   | T/G  | NA                 | INTERGENIC                    | NA                                                           |
| <i>Desi_wild_16033</i>  | NA                                  | <i>Ca_desi_scaffold</i> | 16033                   | G/T  | NA                 | INTERGENIC                    | NA                                                           |
| <i>Desi_wild_16042</i>  | NA                                  | <i>Ca_desi_scaffold</i> | 16042                   | A/G  | NA                 | INTERGENIC                    | NA                                                           |
| <i>Desi_wild_32637</i>  | NA                                  | <i>Ca_desi_scaffold</i> | 32637                   | A/C  | Gene_Ca_16932.2    | SYNONYMOUS_CODING             | NA                                                           |
| <i>Desi_wild_126201</i> | NA                                  | <i>Ca_desi_scaffold</i> | 126201                  | A/G  | Gene_Ca_10010.1    | INTRON                        | CST complex subunit CTC1                                     |
| <i>Desi_wild_133810</i> | NA                                  | <i>Ca_desi_scaffold</i> | 133810                  | A/G  | Gene_Ca_10010.1    | INTRON                        | CST complex subunit CTC1                                     |
| <i>Desi_wild_38150</i>  | NA                                  | <i>Ca_desi_scaffold</i> | 38150                   | T/G  | Gene_Ca_16942.1    | UPSTREAM                      | Small nuclear ribonucleoprotein-associated protein B'        |
| <i>Desi_wild_40465</i>  | NA                                  | <i>Ca_desi_scaffold</i> | 40465                   | T/G  | Gene_Ca_16941.1    | UPSTREAM                      | Glucose-6-phosphate/phosphate translocator 1, chloroplastic  |
| <i>Desi_wild_3064</i>   | NA                                  | <i>Ca_desi_scaffold</i> | 3064                    | T/C  | Gene_Ca_16945.1    | SYNONYMOUS_CODING             | Calcium-dependent lipid-binding (CaLB domain) family protein |
| <i>Desi_wild_25584</i>  | NA                                  | <i>Ca_desi_scaffold</i> | 25584                   | T/A  | Gene_Ca_16946.1    | SYNONYMOUS_CODING             | Ankyrin repeat-containing protein At3g12360                  |
| <i>Desi_wild_11629</i>  | NA                                  | <i>Ca_desi_scaffold</i> | 11629                   | T/C  | NA                 | INTERGENIC                    | NA                                                           |
| <i>Desi_wild_29467</i>  | NA                                  | <i>Ca_desi_scaffold</i> | 29467                   | C/A  | NA                 | INTERGENIC                    | NA                                                           |
| <i>Desi_wild_47499</i>  | NA                                  | <i>Ca_desi_scaffold</i> | 47499                   | T/A  | Gene_Ca_16949.1    | DOWNSTREAM                    | Agamous-like MADS-box protein AGL62                          |
| <i>Desi_wild_47609</i>  | NA                                  | <i>Ca_desi_scaffold</i> | 47609                   | G/T  | Gene_Ca_16949.1    | DOWNSTREAM                    | Agamous-like MADS-box protein AGL62                          |
| <i>Desi_wild_47620</i>  | NA                                  | <i>Ca_desi_scaffold</i> | 47620                   | G/T  | Gene_Ca_16949.1    | DOWNSTREAM                    | Agamous-like MADS-box protein AGL62                          |
| <i>Desi_wild_47637</i>  | NA                                  | <i>Ca_desi_scaffold</i> | 47637                   | T/A  | NA                 | INTERGENIC                    | NA                                                           |
| <i>Desi_wild_47685</i>  | NA                                  | <i>Ca_desi_scaffold</i> | 47685                   | A/G  | NA                 | INTERGENIC                    | NA                                                           |
| <i>Desi_wild_15191</i>  | NA                                  | <i>Ca_desi_scaffold</i> | 15191                   | A/G  | Gene_Ca_16952.1    | NON_SYNONYMOUS_CODING         | Zinc finger protein CONSTANS-LIKE 10                         |
| <i>Desi_wild_7453</i>   | NA                                  | <i>Ca_desi_scaffold</i> | 7453                    | A/T  | Gene_Ca_16957.1    | DOWNSTREAM                    | Werner syndrome ATP-dependent helicase                       |
| <i>Desi_wild_7479</i>   | NA                                  | <i>Ca_desi_scaffold</i> | 7479                    | T/A  | Gene_Ca_16957.1    | DOWNSTREAM                    | Werner syndrome ATP-dependent helicase                       |
| <i>Desi_wild_7497</i>   | NA                                  | <i>Ca_desi_scaffold</i> | 7497                    | C/T  | Gene_Ca_16957.1    | DOWNSTREAM                    | Werner syndrome ATP-dependent helicase                       |
| <i>Desi_wild_7511</i>   | NA                                  | <i>Ca_desi_scaffold</i> | 7511                    | G/C  | Gene_Ca_16957.1    | DOWNSTREAM                    | Werner syndrome ATP-dependent helicase                       |
| <i>Desi_wild_35411</i>  | NA                                  | <i>Ca_desi_scaffold</i> | 35411                   | A/G  | Gene_Ca_16960.1    | NON_SYNONYMOUS_CODING         | Werner syndrome ATP-dependent helicase                       |
| <i>Desi_wild_32051</i>  | NA                                  | <i>Ca_desi_scaffold</i> | 32051                   | A/G  | Gene_Ca_10448.1    | INTRON                        | NA                                                           |
| <i>Desi_wild_32643</i>  | NA                                  | <i>Ca_desi_scaffold</i> | 32643                   | A/G  | Gene_Ca_10448.1    | SYNONYMOUS_CODING             | NA                                                           |
| <i>Desi_wild_32645</i>  | NA                                  | <i>Ca_desi_scaffold</i> | 32645                   | G/T  | Gene_Ca_10448.1    | SYNONYMOUS_CODING             | NA                                                           |
| <i>Desi_wild_32654</i>  | NA                                  | <i>Ca_desi_scaffold</i> | 32654                   | G/T  | Gene_Ca_10448.1    | SYNONYMOUS_CODING             | NA                                                           |
| <i>Desi_wild_32655</i>  | NA                                  | <i>Ca_desi_scaffold</i> | 32655                   | A/G  | Gene_Ca_10448.1    | SYNONYMOUS_CODING             | NA                                                           |
| <i>Desi_wild_32658</i>  | NA                                  | <i>Ca_desi_scaffold</i> | 32658                   | A/T  | Gene_Ca_10448.1    | SYNONYMOUS_CODING             | NA                                                           |
| <i>Desi_wild_32661</i>  | NA                                  | <i>Ca_desi_scaffold</i> | 32661                   | G/A  | Gene_Ca_10448.1    | SYNONYMOUS_CODING             | NA                                                           |
| <i>Desi_wild_32667</i>  | NA                                  | <i>Ca_desi_scaffold</i> | 32667                   | A/T  | Gene_Ca_10448.1    | SYNONYMOUS_CODING             | NA                                                           |

| SNP IDs                | NCBI dbSNP accession IDs (NCBI_SS#) | Chromosomes             | Physical positions (bp) | SNPs | Gene accession IDs | Sequence components of genome | Putative functions                |
|------------------------|-------------------------------------|-------------------------|-------------------------|------|--------------------|-------------------------------|-----------------------------------|
| <i>Desi_wild_32669</i> | NA                                  | <i>Ca_desi_scaffold</i> | 32669                   | C/A  | Gene_Ca_10448.1    | SYNONYMOUS_CODING             | NA                                |
| <i>Desi_wild_32694</i> | NA                                  | <i>Ca_desi_scaffold</i> | 32694                   | T/C  | Gene_Ca_10448.1    | SYNONYMOUS_CODING             | NA                                |
| <i>Desi_wild_32700</i> | NA                                  | <i>Ca_desi_scaffold</i> | 32700                   | T/A  | Gene_Ca_10448.1    | SYNONYMOUS_CODING             | NA                                |
| <i>Desi_wild_32706</i> | NA                                  | <i>Ca_desi_scaffold</i> | 32706                   | C/T  | Gene_Ca_10448.1    | SYNONYMOUS_STOP               | NA                                |
| <i>Desi_wild_32721</i> | NA                                  | <i>Ca_desi_scaffold</i> | 32721                   | G/A  | Gene_Ca_10448.1    | NON_SYNONYMOUS_CODING         | NA                                |
| <i>Desi_wild_32724</i> | NA                                  | <i>Ca_desi_scaffold</i> | 32724                   | A/T  | Gene_Ca_10448.1    | NON_SYNONYMOUS_CODING         | NA                                |
| <i>Desi_wild_32727</i> | NA                                  | <i>Ca_desi_scaffold</i> | 32727                   | A/T  | Gene_Ca_10448.1    | NON_SYNONYMOUS_CODING         | NA                                |
| <i>Desi_wild_39268</i> | NA                                  | <i>Ca_desi_scaffold</i> | 39268                   | G/A  | Gene_Ca_16965.1    | INTRON                        | unknown protein                   |
| <i>Desi_wild_54443</i> | NA                                  | <i>Ca_desi_scaffold</i> | 54443                   | A/G  | NA                 | INTERGENIC                    | NA                                |
| <i>Desi_wild_73102</i> | NA                                  | <i>Ca_desi_scaffold</i> | 73102                   | C/G  | Gene_Ca_10202.1    | NON_SYNONYMOUS_CODING         | Putative uncharacterized protein  |
| <i>Desi_wild_30876</i> | NA                                  | <i>Ca_desi_scaffold</i> | 30876                   | A/G  | Gene_Ca_16972.1    | UPSTREAM                      | DNA topoisomerase 3-beta-1        |
| <i>Desi_wild_30880</i> | NA                                  | <i>Ca_desi_scaffold</i> | 30880                   | A/T  | Gene_Ca_16972.1    | UPSTREAM                      | DNA topoisomerase 3-beta-1        |
| <i>Desi_wild_37714</i> | NA                                  | <i>Ca_desi_scaffold</i> | 37714                   | C/A  | Gene_Ca_16976.1    | NON_SYNONYMOUS_CODING         | Reticulon-like protein B12        |
| <i>Desi_wild_18190</i> | NA                                  | <i>Ca_desi_scaffold</i> | 18190                   | G/A  | Gene_Ca_16979.1    | SYNONYMOUS_CODING             | Pre-mRNA-processing factor 6      |
| <i>Desi_wild_19060</i> | NA                                  | <i>Ca_desi_scaffold</i> | 19060                   | G/A  | Gene_Ca_16979.1    | SYNONYMOUS_CODING             | Pre-mRNA-processing factor 6      |
| <i>Desi_wild_19555</i> | NA                                  | <i>Ca_desi_scaffold</i> | 19555                   | A/G  | NA                 | INTERGENIC                    | NA                                |
| <i>Desi_wild_19621</i> | NA                                  | <i>Ca_desi_scaffold</i> | 19621                   | G/A  | NA                 | INTERGENIC                    | NA                                |
| <i>Desi_wild_19693</i> | NA                                  | <i>Ca_desi_scaffold</i> | 19693                   | G/A  | NA                 | INTERGENIC                    | NA                                |
| <i>Desi_wild_19900</i> | NA                                  | <i>Ca_desi_scaffold</i> | 19900                   | C/T  | NA                 | INTERGENIC                    | NA                                |
| <i>Desi_wild_29884</i> | NA                                  | <i>Ca_desi_scaffold</i> | 29884                   | A/G  | NA                 | INTERGENIC                    | NA                                |
| <i>Desi_wild_5680</i>  | NA                                  | <i>Ca_desi_scaffold</i> | 5680                    | C/T  | Gene_Ca_16991.6    | INTRON                        | NA                                |
| <i>Desi_wild_21724</i> | NA                                  | <i>Ca_desi_scaffold</i> | 21724                   | C/A  | Gene_Ca_16993.1    | DOWNSTREAM                    | Alcohol dehydrogenase-like 3      |
| <i>Desi_wild_49139</i> | NA                                  | <i>Ca_desi_scaffold</i> | 49139                   | T/C  | Gene_Ca_16994.1    | INTRON                        | UPF0420 protein                   |
| <i>Desi_wild_49144</i> | NA                                  | <i>Ca_desi_scaffold</i> | 49144                   | A/T  | Gene_Ca_16994.1    | INTRON                        | UPF0420 protein                   |
| <i>Desi_wild_6653</i>  | NA                                  | <i>Ca_desi_scaffold</i> | 6653                    | C/T  | Gene_Ca_16995.1    | INTRON                        | Probable methyltransferase PMT10  |
| <i>Desi_wild_6683</i>  | NA                                  | <i>Ca_desi_scaffold</i> | 6683                    | C/T  | Gene_Ca_16995.1    | INTRON                        | Probable methyltransferase PMT10  |
| <i>Desi_wild_26302</i> | NA                                  | <i>Ca_desi_scaffold</i> | 26302                   | A/C  | NA                 | INTERGENIC                    | NA                                |
| <i>Desi_wild_30162</i> | NA                                  | <i>Ca_desi_scaffold</i> | 30162                   | A/G  | Gene_Ca_16997.1    | SYNONYMOUS_CODING             | NA                                |
| <i>Desi_wild_30207</i> | NA                                  | <i>Ca_desi_scaffold</i> | 30207                   | T/A  | Gene_Ca_16997.1    | SYNONYMOUS_CODING             | NA                                |
| <i>Desi_wild_38369</i> | NA                                  | <i>Ca_desi_scaffold</i> | 38369                   | T/C  | NA                 | INTERGENIC                    | NA                                |
| <i>Desi_wild_37313</i> | NA                                  | <i>Ca_desi_scaffold</i> | 37313                   | A/G  | Gene_Ca_16999.1    | INTRON                        | HEAT repeat-containing protein 5B |
| <i>Desi_wild_27488</i> | NA                                  | <i>Ca_desi_scaffold</i> | 27488                   | C/A  | NA                 | INTERGENIC                    | NA                                |
| <i>Desi_wild_27500</i> | NA                                  | <i>Ca_desi_scaffold</i> | 27500                   | T/A  | NA                 | INTERGENIC                    | NA                                |
| <i>Desi_wild_10201</i> | NA                                  | <i>Ca_desi_scaffold</i> | 10201                   | C/A  | NA                 | INTERGENIC                    | NA                                |
| <i>Desi_wild_47501</i> | NA                                  | <i>Ca_desi_scaffold</i> | 47501                   | G/A  | NA                 | INTERGENIC                    | NA                                |
| <i>Desi_wild_33271</i> | NA                                  | <i>Ca_desi_scaffold</i> | 33271                   | A/G  | NA                 | INTERGENIC                    | NA                                |
| <i>Desi_wild_33278</i> | NA                                  | <i>Ca_desi_scaffold</i> | 33278                   | C/T  | NA                 | INTERGENIC                    | NA                                |
| <i>Desi_wild_33294</i> | NA                                  | <i>Ca_desi_scaffold</i> | 33294                   | C/T  | NA                 | INTERGENIC                    | NA                                |
| <i>Desi_wild_33295</i> | NA                                  | <i>Ca_desi_scaffold</i> | 33295                   | A/C  | NA                 | INTERGENIC                    | NA                                |
| <i>Desi_wild_33354</i> | NA                                  | <i>Ca_desi_scaffold</i> | 33354                   | T/A  | NA                 | INTERGENIC                    | NA                                |
| <i>Desi_wild_33375</i> | NA                                  | <i>Ca_desi_scaffold</i> | 33375                   | G/T  | NA                 | INTERGENIC                    | NA                                |
| <i>Desi_wild_33377</i> | NA                                  | <i>Ca_desi_scaffold</i> | 33377                   | C/T  | NA                 | INTERGENIC                    | NA                                |
| <i>Desi_wild_33381</i> | NA                                  | <i>Ca_desi_scaffold</i> | 33381                   | C/G  | NA                 | INTERGENIC                    | NA                                |
| <i>Desi_wild_33428</i> | NA                                  | <i>Ca_desi_scaffold</i> | 33428                   | T/A  | NA                 | INTERGENIC                    | NA                                |

| SNP IDs                | NCBI dbSNP accession IDs (NCBI_SS#) | Chromosomes             | Physical positions (bp) | SNPs | Gene accession IDs | Sequence components of genome | Putative functions                     |
|------------------------|-------------------------------------|-------------------------|-------------------------|------|--------------------|-------------------------------|----------------------------------------|
| <i>Desi_wild_33432</i> | NA                                  | <i>Ca_desi_scaffold</i> | 33432                   | T/A  | NA                 | INTERGENIC                    | NA                                     |
| <i>Desi_wild_33457</i> | NA                                  | <i>Ca_desi_scaffold</i> | 33457                   | C/A  | NA                 | INTERGENIC                    | NA                                     |
| <i>Desi_wild_26159</i> | NA                                  | <i>Ca_desi_scaffold</i> | 26159                   | C/T  | NA                 | INTERGENIC                    | NA                                     |
| <i>Desi_wild_27445</i> | NA                                  | <i>Ca_desi_scaffold</i> | 27445                   | C/A  | Gene_Ca_17022.1    | NON_SYNONYMOUS_CODING         | Ankyrin repeat family protein          |
| <i>Desi_wild_38722</i> | NA                                  | <i>Ca_desi_scaffold</i> | 38722                   | A/G  | NA                 | INTERGENIC                    | NA                                     |
| <i>Desi_wild_41385</i> | NA                                  | <i>Ca_desi_scaffold</i> | 41385                   | T/C  | Gene_Ca_17063.1    | INTRON                        | Neutral ceramidase                     |
| <i>Desi_wild_15037</i> | NA                                  | <i>Ca_desi_scaffold</i> | 15037                   | C/T  | Gene_Ca_17065.1    | DOWNSTREAM                    | Acid phosphatase 1                     |
| <i>Desi_wild_46788</i> | NA                                  | <i>Ca_desi_scaffold</i> | 46788                   | A/C  | NA                 | INTERGENIC                    | NA                                     |
| <i>Desi_wild_21533</i> | NA                                  | <i>Ca_desi_scaffold</i> | 21533                   | G/A  | Gene_Ca_17077.1    | INTRON                        | GDP-L-galactose phosphorylase 1        |
| <i>Desi_wild_3938</i>  | NA                                  | <i>Ca_desi_scaffold</i> | 3938                    | G/A  | NA                 | INTERGENIC                    | NA                                     |
| <i>Desi_wild_3958</i>  | NA                                  | <i>Ca_desi_scaffold</i> | 3958                    | A/G  | NA                 | INTERGENIC                    | NA                                     |
| <i>Desi_wild_3986</i>  | NA                                  | <i>Ca_desi_scaffold</i> | 3986                    | C/T  | NA                 | INTERGENIC                    | NA                                     |
| <i>Desi_wild_4013</i>  | NA                                  | <i>Ca_desi_scaffold</i> | 4013                    | G/A  | NA                 | INTERGENIC                    | NA                                     |
| <i>Desi_wild_4027</i>  | NA                                  | <i>Ca_desi_scaffold</i> | 4027                    | T/C  | NA                 | INTERGENIC                    | NA                                     |
| <i>Desi_wild_4036</i>  | NA                                  | <i>Ca_desi_scaffold</i> | 4036                    | A/G  | NA                 | INTERGENIC                    | NA                                     |
| <i>Desi_wild_4053</i>  | NA                                  | <i>Ca_desi_scaffold</i> | 4053                    | A/T  | NA                 | INTERGENIC                    | NA                                     |
| <i>Desi_wild_4110</i>  | NA                                  | <i>Ca_desi_scaffold</i> | 4110                    | C/T  | NA                 | INTERGENIC                    | NA                                     |
| <i>Desi_wild_4118</i>  | NA                                  | <i>Ca_desi_scaffold</i> | 4118                    | C/G  | NA                 | INTERGENIC                    | NA                                     |
| <i>Desi_wild_4121</i>  | NA                                  | <i>Ca_desi_scaffold</i> | 4121                    | A/G  | NA                 | INTERGENIC                    | NA                                     |
| <i>Desi_wild_4122</i>  | NA                                  | <i>Ca_desi_scaffold</i> | 4122                    | C/T  | NA                 | INTERGENIC                    | NA                                     |
| <i>Desi_wild_4139</i>  | NA                                  | <i>Ca_desi_scaffold</i> | 4139                    | G/A  | NA                 | INTERGENIC                    | NA                                     |
| <i>Desi_wild_4178</i>  | NA                                  | <i>Ca_desi_scaffold</i> | 4178                    | G/T  | NA                 | INTERGENIC                    | NA                                     |
| <i>Desi_wild_42975</i> | NA                                  | <i>Ca_desi_scaffold</i> | 42975                   | T/C  | Gene_Ca_17089.1    | INTRON                        | E3 ubiquitin-protein ligase IAP-3      |
| <i>Desi_wild_43142</i> | NA                                  | <i>Ca_desi_scaffold</i> | 43142                   | A/T  | Gene_Ca_17089.1    | INTRON                        | E3 ubiquitin-protein ligase IAP-3      |
| <i>Desi_wild_48787</i> | NA                                  | <i>Ca_desi_scaffold</i> | 48787                   | C/T  | Gene_Ca_17089.1    | NON_SYNONYMOUS_CODING         | E3 ubiquitin-protein ligase IAP-3      |
| <i>Desi_wild_15155</i> | NA                                  | <i>Ca_desi_scaffold</i> | 15155                   | C/A  | Gene_Ca_17100.1    | INTRON                        | Polyglutamine-binding protein 1        |
| <i>Desi_wild_17069</i> | NA                                  | <i>Ca_desi_scaffold</i> | 17069                   | T/C  | Gene_Ca_17100.1    | INTRON                        | Polyglutamine-binding protein 1        |
| <i>Desi_wild_37266</i> | NA                                  | <i>Ca_desi_scaffold</i> | 37266                   | G/A  | NA                 | INTERGENIC                    | NA                                     |
| <i>Desi_wild_45231</i> | NA                                  | <i>Ca_desi_scaffold</i> | 45231                   | T/C  | NA                 | INTERGENIC                    | NA                                     |
| <i>Desi_wild_45263</i> | NA                                  | <i>Ca_desi_scaffold</i> | 45263                   | G/C  | NA                 | INTERGENIC                    | NA                                     |
| <i>Desi_wild_12103</i> | NA                                  | <i>Ca_desi_scaffold</i> | 12103                   | T/C  | NA                 | INTERGENIC                    | NA                                     |
| <i>Desi_wild_42668</i> | NA                                  | <i>Ca_desi_scaffold</i> | 42668                   | T/G  | Gene_Ca_17107.1    | INTRON                        | Uncharacterized ribonuclease sl1290    |
| <i>Desi_wild_14275</i> | NA                                  | <i>Ca_desi_scaffold</i> | 14275                   | C/G  | NA                 | INTERGENIC                    | NA                                     |
| <i>Desi_wild_14279</i> | NA                                  | <i>Ca_desi_scaffold</i> | 14279                   | T/G  | NA                 | INTERGENIC                    | NA                                     |
| <i>Desi_wild_4128</i>  | NA                                  | <i>Ca_desi_scaffold</i> | 4128                    | G/A  | NA                 | INTERGENIC                    | NA                                     |
| <i>Desi_wild_4137</i>  | NA                                  | <i>Ca_desi_scaffold</i> | 4137                    | G/A  | NA                 | INTERGENIC                    | NA                                     |
| <i>Desi_wild_4152</i>  | NA                                  | <i>Ca_desi_scaffold</i> | 4152                    | G/T  | NA                 | INTERGENIC                    | NA                                     |
| <i>Desi_wild_4175</i>  | NA                                  | <i>Ca_desi_scaffold</i> | 4175                    | T/C  | NA                 | INTERGENIC                    | NA                                     |
| <i>Desi_wild_28810</i> | NA                                  | <i>Ca_desi_scaffold</i> | 28810                   | C/G  | Gene_Ca_17128.2    | INTRON                        | RNA polymerase-associated protein LEO1 |
| <i>Desi_wild_28872</i> | NA                                  | <i>Ca_desi_scaffold</i> | 28872                   | T/C  | Gene_Ca_17128.2    | INTRON                        | RNA polymerase-associated protein LEO1 |
| <i>Desi_wild_28896</i> | NA                                  | <i>Ca_desi_scaffold</i> | 28896                   | A/C  | Gene_Ca_17128.2    | INTRON                        | RNA polymerase-associated protein LEO1 |
| <i>Desi_wild_32642</i> | NA                                  | <i>Ca_desi_scaffold</i> | 32642                   | C/T  | Gene_Ca_17128.2    | INTRON                        | RNA polymerase-associated protein LEO1 |
| <i>Desi_wild_982</i>   | NA                                  | <i>Ca_desi_scaffold</i> | 982                     | T/C  | NA                 | INTERGENIC                    | NA                                     |
| <i>Desi_wild_995</i>   | NA                                  | <i>Ca_desi_scaffold</i> | 995                     | G/C  | NA                 | INTERGENIC                    | NA                                     |

| SNP IDs                | NCBI dbSNP accession IDs (NCBI_SS#) | Chromosomes             | Physical positions (bp) | SNPs | Gene accession IDs | Sequence components of genome | Putative functions                        |
|------------------------|-------------------------------------|-------------------------|-------------------------|------|--------------------|-------------------------------|-------------------------------------------|
| <i>Desi_wild_1036</i>  | NA                                  | <i>Ca_desi_scaffold</i> | 1036                    | T/C  | NA                 | INTERGENIC                    | NA                                        |
| <i>Desi_wild_20042</i> | NA                                  | <i>Ca_desi_scaffold</i> | 20042                   | A/G  | Gene_Ca_17149.1    | NON_SYNONYMOUS_CODING         | Regulator of nonsense transcripts 3A      |
| <i>Desi_wild_4617</i>  | NA                                  | <i>Ca_desi_scaffold</i> | 4617                    | A/C  | NA                 | INTERGENIC                    | NA                                        |
| <i>Desi_wild_4642</i>  | NA                                  | <i>Ca_desi_scaffold</i> | 4642                    | G/T  | NA                 | INTERGENIC                    | NA                                        |
| <i>Desi_wild_4644</i>  | NA                                  | <i>Ca_desi_scaffold</i> | 4644                    | C/T  | NA                 | INTERGENIC                    | NA                                        |
| <i>Desi_wild_4648</i>  | NA                                  | <i>Ca_desi_scaffold</i> | 4648                    | C/T  | NA                 | INTERGENIC                    | NA                                        |
| <i>Desi_wild_4679</i>  | NA                                  | <i>Ca_desi_scaffold</i> | 4679                    | A/C  | NA                 | INTERGENIC                    | NA                                        |
| <i>Desi_wild_4687</i>  | NA                                  | <i>Ca_desi_scaffold</i> | 4687                    | A/T  | NA                 | INTERGENIC                    | NA                                        |
| <i>Desi_wild_4689</i>  | NA                                  | <i>Ca_desi_scaffold</i> | 4689                    | C/T  | NA                 | INTERGENIC                    | NA                                        |
| <i>Desi_wild_4690</i>  | NA                                  | <i>Ca_desi_scaffold</i> | 4690                    | A/G  | NA                 | INTERGENIC                    | NA                                        |
| <i>Desi_wild_16608</i> | NA                                  | <i>Ca_desi_scaffold</i> | 16608                   | A/G  | Gene_Ca_17165.1    | NON_SYNONYMOUS_CODING         | NA                                        |
| <i>Desi_wild_17500</i> | NA                                  | <i>Ca_desi_scaffold</i> | 17500                   | A/G  | Gene_Ca_17165.1    | INTRON                        | NA                                        |
| <i>Desi_wild_71840</i> | NA                                  | <i>Ca_desi_scaffold</i> | 71840                   | A/C  | NA                 | INTERGENIC                    | NA                                        |
| <i>Desi_wild_71859</i> | NA                                  | <i>Ca_desi_scaffold</i> | 71859                   | A/C  | NA                 | INTERGENIC                    | NA                                        |
| <i>Desi_wild_71959</i> | NA                                  | <i>Ca_desi_scaffold</i> | 71959                   | A/C  | NA                 | INTERGENIC                    | NA                                        |
| <i>Desi_wild_27905</i> | NA                                  | <i>Ca_desi_scaffold</i> | 27905                   | T/C  | NA                 | INTERGENIC                    | NA                                        |
| <i>Desi_wild_27927</i> | NA                                  | <i>Ca_desi_scaffold</i> | 27927                   | C/T  | NA                 | INTERGENIC                    | NA                                        |
| <i>Desi_wild_27938</i> | NA                                  | <i>Ca_desi_scaffold</i> | 27938                   | T/C  | NA                 | INTERGENIC                    | NA                                        |
| <i>Desi_wild_20813</i> | NA                                  | <i>Ca_desi_scaffold</i> | 20813                   | A/T  | NA                 | INTERGENIC                    | NA                                        |
| <i>Desi_wild_20971</i> | NA                                  | <i>Ca_desi_scaffold</i> | 20971                   | T/C  | NA                 | INTERGENIC                    | NA                                        |
| <i>Desi_wild_20987</i> | NA                                  | <i>Ca_desi_scaffold</i> | 20987                   | G/A  | NA                 | INTERGENIC                    | NA                                        |
| <i>Desi_wild_21012</i> | NA                                  | <i>Ca_desi_scaffold</i> | 21012                   | G/C  | NA                 | INTERGENIC                    | NA                                        |
| <i>Desi_wild_21031</i> | NA                                  | <i>Ca_desi_scaffold</i> | 21031                   | A/G  | NA                 | INTERGENIC                    | NA                                        |
| <i>Desi_wild_21058</i> | NA                                  | <i>Ca_desi_scaffold</i> | 21058                   | T/C  | NA                 | INTERGENIC                    | NA                                        |
| <i>Desi_wild_21431</i> | NA                                  | <i>Ca_desi_scaffold</i> | 21431                   | C/G  | NA                 | INTERGENIC                    | NA                                        |
| <i>Desi_wild_21433</i> | NA                                  | <i>Ca_desi_scaffold</i> | 21433                   | C/T  | NA                 | INTERGENIC                    | NA                                        |
| <i>Desi_wild_35797</i> | NA                                  | <i>Ca_desi_scaffold</i> | 35797                   | G/T  | NA                 | INTERGENIC                    | NA                                        |
| <i>Desi_wild_35841</i> | NA                                  | <i>Ca_desi_scaffold</i> | 35841                   | A/G  | NA                 | INTERGENIC                    | NA                                        |
| <i>Desi_wild_10565</i> | NA                                  | <i>Ca_desi_scaffold</i> | 10565                   | T/G  | NA                 | INTERGENIC                    | NA                                        |
| <i>Desi_wild_10604</i> | NA                                  | <i>Ca_desi_scaffold</i> | 10604                   | T/G  | NA                 | INTERGENIC                    | NA                                        |
| <i>Desi_wild_10671</i> | NA                                  | <i>Ca_desi_scaffold</i> | 10671                   | T/G  | NA                 | INTERGENIC                    | NA                                        |
| <i>Desi_wild_32638</i> | NA                                  | <i>Ca_desi_scaffold</i> | 32638                   | A/G  | Gene_Ca_17178.1    | UPSTREAM                      | Protein of unknown function, DUF617       |
| <i>Desi_wild_32725</i> | NA                                  | <i>Ca_desi_scaffold</i> | 32725                   | G/A  | Gene_Ca_17178.1    | UPSTREAM                      | Protein of unknown function, DUF617       |
| <i>Desi_wild_28398</i> | NA                                  | <i>Ca_desi_scaffold</i> | 28398                   | T/A  | Gene_Ca_17182.1    | DOWNSTREAM                    | Transcription factor MYB86                |
| <i>Desi_wild_28518</i> | NA                                  | <i>Ca_desi_scaffold</i> | 28518                   | A/G  | Gene_Ca_17182.1    | DOWNSTREAM                    | Transcription factor MYB86                |
| <i>Desi_wild_28552</i> | NA                                  | <i>Ca_desi_scaffold</i> | 28552                   | C/T  | Gene_Ca_17182.1    | DOWNSTREAM                    | Transcription factor MYB86                |
| <i>Desi_wild_48557</i> | NA                                  | <i>Ca_desi_scaffold</i> | 48557                   | G/A  | NA                 | INTERGENIC                    | NA                                        |
| <i>Desi_wild_48591</i> | NA                                  | <i>Ca_desi_scaffold</i> | 48591                   | T/C  | NA                 | INTERGENIC                    | NA                                        |
| <i>Desi_wild_48594</i> | NA                                  | <i>Ca_desi_scaffold</i> | 48594                   | C/T  | NA                 | INTERGENIC                    | NA                                        |
| <i>Desi_wild_25393</i> | NA                                  | <i>Ca_desi_scaffold</i> | 25393                   | G/T  | Gene_Ca_17188.1    | INTRON                        | SAGA-associated factor 29 homolog         |
| <i>Desi_wild_28770</i> | NA                                  | <i>Ca_desi_scaffold</i> | 28770                   | C/A  | Gene_Ca_17190.1    | NON_SYNONYMOUS_CODING         | SAUR-like auxin-responsive protein family |
| <i>Desi_wild_3668</i>  | NA                                  | <i>Ca_desi_scaffold</i> | 3668                    | C/T  | Gene_Ca_17193.1    | INTRON                        | NA                                        |
| <i>Desi_wild_13443</i> | NA                                  | <i>Ca_desi_scaffold</i> | 13443                   | C/T  | Gene_Ca_17193.1    | INTRON                        | NA                                        |
| <i>Desi_wild_13588</i> | NA                                  | <i>Ca_desi_scaffold</i> | 13588                   | G/A  | Gene_Ca_17193.1    | INTRON                        | NA                                        |

| SNP IDs          | NCBI dbSNP accession IDs (NCBI_SS#) | Chromosomes      | Physical positions (bp) | SNPs | Gene accession IDs | Sequence components of genome | Putative functions                                                   |
|------------------|-------------------------------------|------------------|-------------------------|------|--------------------|-------------------------------|----------------------------------------------------------------------|
| Desi_wild_13653  | NA                                  | Ca_desi_scaffold | 13653                   | G/A  | Gene_Ca_17193.1    | INTRON                        | NA                                                                   |
| Desi_wild_33852  | NA                                  | Ca_desi_scaffold | 33852                   | G/T  | NA                 | INTERGENIC                    | NA                                                                   |
| Desi_wild_253697 | NA                                  | Ca_desi_scaffold | 253697                  | T/C  | Gene_Ca_09066.1    | INTRON                        | Helicase SWR1                                                        |
| Desi_wild_254365 | NA                                  | Ca_desi_scaffold | 254365                  | T/G  | Gene_Ca_09066.1    | SYNONYMOUS_CODING             | Helicase SWR1                                                        |
| Desi_wild_258172 | NA                                  | Ca_desi_scaffold | 258172                  | A/C  | Gene_Ca_09066.1    | SYNONYMOUS_CODING             | Helicase SWR1                                                        |
| Desi_wild_258241 | NA                                  | Ca_desi_scaffold | 258241                  | T/C  | Gene_Ca_09066.1    | NON_SYNONYMOUS_CODING         | Helicase SWR1                                                        |
| Desi_wild_258265 | NA                                  | Ca_desi_scaffold | 258265                  | G/A  | Gene_Ca_09066.1    | NON_SYNONYMOUS_CODING         | Helicase SWR1                                                        |
| Desi_wild_282914 | NA                                  | Ca_desi_scaffold | 282914                  | G/A  | Gene_Ca_09067.1    | SYNONYMOUS_CODING             | unknown protein                                                      |
| Desi_wild_36234  | NA                                  | Ca_desi_scaffold | 36234                   | A/C  | Gene_Ca_17215.1    | SYNONYMOUS_CODING             | WD repeat-containing protein 44                                      |
| Desi_wild_9880   | NA                                  | Ca_desi_scaffold | 9880                    | T/C  | Gene_Ca_17220.2    | SYNONYMOUS_CODING             | NA                                                                   |
| Desi_wild_21473  | NA                                  | Ca_desi_scaffold | 21473                   | A/G  | NA                 | INTERGENIC                    | NA                                                                   |
| Desi_wild_1736   | NA                                  | Ca_desi_scaffold | 1736                    | C/T  | Gene_Ca_17240.1    | INTRON                        | dual specificity protein phosphatase family protein                  |
| Desi_wild_53742  | NA                                  | Ca_desi_scaffold | 53742                   | A/G  | Gene_Ca_09874.1    | NON_SYNONYMOUS_CODING         | Probable LRR receptor-like serine/threonine-protein kinase At1g53430 |
| Desi_wild_81922  | NA                                  | Ca_desi_scaffold | 81922                   | C/T  | Gene_Ca_09875.1    | NON_SYNONYMOUS_CODING         | unknown protein                                                      |
| Desi_wild_25083  | NA                                  | Ca_desi_scaffold | 25083                   | G/A  | Gene_Ca_17242.1    | INTRON                        | Superoxide dismutase [Fe], chloroplastic                             |
| Desi_wild_25095  | NA                                  | Ca_desi_scaffold | 25095                   | A/T  | Gene_Ca_17242.1    | INTRON                        | Superoxide dismutase [Fe], chloroplastic                             |
| Desi_wild_25154  | NA                                  | Ca_desi_scaffold | 25154                   | C/G  | Gene_Ca_17242.1    | INTRON                        | Superoxide dismutase [Fe], chloroplastic                             |
| Desi_wild_25230  | NA                                  | Ca_desi_scaffold | 25230                   | G/A  | Gene_Ca_17242.1    | SYNONYMOUS_CODING             | Superoxide dismutase [Fe], chloroplastic                             |
| Desi_wild_25241  | NA                                  | Ca_desi_scaffold | 25241                   | A/T  | Gene_Ca_17242.1    | NON_SYNONYMOUS_CODING         | Superoxide dismutase [Fe], chloroplastic                             |
| Desi_wild_25686  | NA                                  | Ca_desi_scaffold | 25686                   | T/C  | Gene_Ca_17242.1    | INTRON                        | Superoxide dismutase [Fe], chloroplastic                             |
| Desi_wild_30891  | NA                                  | Ca_desi_scaffold | 30891                   | T/C  | Gene_Ca_17242.1    | NON_SYNONYMOUS_CODING         | Superoxide dismutase [Fe], chloroplastic                             |
| Desi_wild_31058  | NA                                  | Ca_desi_scaffold | 31058                   | T/A  | Gene_Ca_17242.1    | INTRON                        | Superoxide dismutase [Fe], chloroplastic                             |
| Desi_wild_12710  | NA                                  | Ca_desi_scaffold | 12710                   | A/T  | Gene_Ca_09641.1    | INTRON                        | DNA2-like helicase                                                   |
| Desi_wild_12718  | NA                                  | Ca_desi_scaffold | 12718                   | G/A  | Gene_Ca_09641.1    | INTRON                        | DNA2-like helicase                                                   |
| Desi_wild_12727  | NA                                  | Ca_desi_scaffold | 12727                   | T/C  | Gene_Ca_09641.1    | INTRON                        | DNA2-like helicase                                                   |
| Desi_wild_12729  | NA                                  | Ca_desi_scaffold | 12729                   | G/A  | Gene_Ca_09641.1    | INTRON                        | DNA2-like helicase                                                   |
| Desi_wild_12739  | NA                                  | Ca_desi_scaffold | 12739                   | G/A  | Gene_Ca_09641.1    | INTRON                        | DNA2-like helicase                                                   |
| Desi_wild_12760  | NA                                  | Ca_desi_scaffold | 12760                   | C/T  | Gene_Ca_09641.1    | INTRON                        | DNA2-like helicase                                                   |
| Desi_wild_18499  | NA                                  | Ca_desi_scaffold | 18499                   | G/T  | Gene_Ca_09641.1    | NON_SYNONYMOUS_CODING         | DNA2-like helicase                                                   |
| Desi_wild_19304  | NA                                  | Ca_desi_scaffold | 19304                   | G/T  | Gene_Ca_09641.1    | NON_SYNONYMOUS_CODING         | DNA2-like helicase                                                   |
| Desi_wild_19465  | NA                                  | Ca_desi_scaffold | 19465                   | T/G  | Gene_Ca_09641.1    | NON_SYNONYMOUS_CODING         | DNA2-like helicase                                                   |
| Desi_wild_74361  | NA                                  | Ca_desi_scaffold | 74361                   | A/G  | Gene_Ca_09643.1    | INTRON                        | SNF1-related protein kinase regulatory subunit beta-2                |
| Desi_wild_91631  | NA                                  | Ca_desi_scaffold | 91631                   | G/A  | Gene_Ca_09643.1    | INTRON                        | SNF1-related protein kinase regulatory subunit beta-2                |
| Desi_wild_417483 | NA                                  | Ca_desi_scaffold | 417483                  | G/A  | Gene_Ca_09647.1    | UPSTREAM                      | RNA-binding (RRM/RBD/RNP motifs) family protein                      |
| Desi_wild_22021  | NA                                  | Ca_desi_scaffold | 22021                   | T/G  | NA                 | INTERGENIC                    | NA                                                                   |
| Desi_wild_22036  | NA                                  | Ca_desi_scaffold | 22036                   | G/A  | NA                 | INTERGENIC                    | NA                                                                   |
| Desi_wild_22047  | NA                                  | Ca_desi_scaffold | 22047                   | A/C  | NA                 | INTERGENIC                    | NA                                                                   |
| Desi_wild_29687  | NA                                  | Ca_desi_scaffold | 29687                   | T/G  | NA                 | INTERGENIC                    | NA                                                                   |
| Desi_wild_17054  | NA                                  | Ca_desi_scaffold | 17054                   | G/A  | Gene_Ca_17249.1    | INTRON                        | Protein argonaute PNH1                                               |
| Desi_wild_21517  | NA                                  | Ca_desi_scaffold | 21517                   | A/G  | Gene_Ca_17249.1    | UPSTREAM                      | Protein argonaute PNH1                                               |
| Desi_wild_31547  | NA                                  | Ca_desi_scaffold | 31547                   | C/T  | NA                 | INTERGENIC                    | NA                                                                   |
| Desi_wild_3014   | NA                                  | Ca_desi_scaffold | 3014                    | G/A  | NA                 | INTERGENIC                    | NA                                                                   |
| Desi_wild_3052   | NA                                  | Ca_desi_scaffold | 3052                    | T/C  | Gene_Ca_17252.1    | SYNONYMOUS_CODING             | Putative uncharacterized protein                                     |
| Desi_wild_3186   | NA                                  | Ca_desi_scaffold | 3186                    | G/A  | Gene_Ca_17252.1    | NON_SYNONYMOUS_CODING         | Putative uncharacterized protein                                     |

| SNP IDs                | NCBI dbSNP accession IDs (NCBI_SS#) | Chromosomes             | Physical positions (bp) | SNPs | Gene accession IDs | Sequence components of genome | Putative functions                                      |
|------------------------|-------------------------------------|-------------------------|-------------------------|------|--------------------|-------------------------------|---------------------------------------------------------|
| <i>Desi_wild_3248</i>  | NA                                  | <i>Ca_desi_scaffold</i> | 3248                    | A/G  | Gene_Ca_17252.1    | SYNONYMOUS_CODING             | Putative uncharacterized protein                        |
| <i>Desi_wild_3257</i>  | NA                                  | <i>Ca_desi_scaffold</i> | 3257                    | T/C  | Gene_Ca_17252.1    | SYNONYMOUS_CODING             | Putative uncharacterized protein                        |
| <i>Desi_wild_3282</i>  | NA                                  | <i>Ca_desi_scaffold</i> | 3282                    | A/G  | Gene_Ca_17252.1    | SYNONYMOUS_CODING             | Putative uncharacterized protein                        |
| <i>Desi_wild_3285</i>  | NA                                  | <i>Ca_desi_scaffold</i> | 3285                    | C/T  | Gene_Ca_17252.1    | SYNONYMOUS_CODING             | Putative uncharacterized protein                        |
| <i>Desi_wild_3293</i>  | NA                                  | <i>Ca_desi_scaffold</i> | 3293                    | C/T  | Gene_Ca_17252.1    | SYNONYMOUS_CODING             | Putative uncharacterized protein                        |
| <i>Desi_wild_3300</i>  | NA                                  | <i>Ca_desi_scaffold</i> | 3300                    | A/C  | Gene_Ca_17252.1    | SYNONYMOUS_CODING             | Putative uncharacterized protein                        |
| <i>Desi_wild_40688</i> | NA                                  | <i>Ca_desi_scaffold</i> | 40688                   | G/C  | Gene_Ca_17253.1    | INTRON                        | BTB/POZ domain-containing protein At1g67900             |
| <i>Desi_wild_40694</i> | NA                                  | <i>Ca_desi_scaffold</i> | 40694                   | T/C  | Gene_Ca_17253.1    | INTRON                        | BTB/POZ domain-containing protein At1g67900             |
| <i>Desi_wild_40709</i> | NA                                  | <i>Ca_desi_scaffold</i> | 40709                   | C/T  | Gene_Ca_17253.1    | INTRON                        | BTB/POZ domain-containing protein At1g67900             |
| <i>Desi_wild_9388</i>  | NA                                  | <i>Ca_desi_scaffold</i> | 9388                    | T/C  | Gene_Ca_17260.1    | NON_SYNONYMOUS_CODING         | U4/U6 small nuclear ribonucleoprotein PRP4-like protein |
| <i>Desi_wild_9508</i>  | NA                                  | <i>Ca_desi_scaffold</i> | 9508                    | C/G  | Gene_Ca_17260.1    | INTRON                        | U4/U6 small nuclear ribonucleoprotein PRP4-like protein |
| <i>Desi_wild_32939</i> | NA                                  | <i>Ca_desi_scaffold</i> | 32939                   | G/A  | Gene_Ca_10280.1    | INTRON                        | Serine carboxypeptidase-like 49                         |
| <i>Desi_wild_54463</i> | NA                                  | <i>Ca_desi_scaffold</i> | 54463                   | A/G  | Gene_Ca_10282.1    | DOWNSTREAM                    | NA                                                      |
| <i>Desi_wild_76588</i> | NA                                  | <i>Ca_desi_scaffold</i> | 76588                   | T/C  | NA                 | INTERGENIC                    | NA                                                      |
| <i>Desi_wild_80499</i> | NA                                  | <i>Ca_desi_scaffold</i> | 80499                   | A/C  | NA                 | INTERGENIC                    | NA                                                      |
| <i>Desi_wild_37852</i> | NA                                  | <i>Ca_desi_scaffold</i> | 37852                   | G/C  | NA                 | INTERGENIC                    | NA                                                      |
| <i>Desi_wild_37854</i> | NA                                  | <i>Ca_desi_scaffold</i> | 37854                   | A/T  | NA                 | INTERGENIC                    | NA                                                      |
| <i>Desi_wild_37873</i> | NA                                  | <i>Ca_desi_scaffold</i> | 37873                   | T/A  | NA                 | INTERGENIC                    | NA                                                      |
| <i>Desi_wild_37877</i> | NA                                  | <i>Ca_desi_scaffold</i> | 37877                   | C/A  | NA                 | INTERGENIC                    | NA                                                      |
| <i>Desi_wild_37879</i> | NA                                  | <i>Ca_desi_scaffold</i> | 37879                   | A/C  | NA                 | INTERGENIC                    | NA                                                      |
| <i>Desi_wild_38008</i> | NA                                  | <i>Ca_desi_scaffold</i> | 38008                   | C/A  | NA                 | INTERGENIC                    | NA                                                      |
| <i>Desi_wild_38011</i> | NA                                  | <i>Ca_desi_scaffold</i> | 38011                   | C/T  | NA                 | INTERGENIC                    | NA                                                      |
| <i>Desi_wild_38045</i> | NA                                  | <i>Ca_desi_scaffold</i> | 38045                   | G/A  | NA                 | INTERGENIC                    | NA                                                      |
| <i>Desi_wild_42105</i> | NA                                  | <i>Ca_desi_scaffold</i> | 42105                   | A/C  | Gene_Ca_17271.2    | NON_SYNONYMOUS_CODING         | NA                                                      |
| <i>Desi_wild_42106</i> | NA                                  | <i>Ca_desi_scaffold</i> | 42106                   | G/A  | Gene_Ca_17271.2    | NON_SYNONYMOUS_CODING         | NA                                                      |
| <i>Desi_wild_42113</i> | NA                                  | <i>Ca_desi_scaffold</i> | 42113                   | T/G  | Gene_Ca_17271.2    | STOP_GAINED                   | NA                                                      |
| <i>Desi_wild_42117</i> | NA                                  | <i>Ca_desi_scaffold</i> | 42117                   | C/T  | Gene_Ca_17271.2    | NON_SYNONYMOUS_CODING         | NA                                                      |
| <i>Desi_wild_22311</i> | NA                                  | <i>Ca_desi_scaffold</i> | 22311                   | T/G  | Gene_Ca_17272.1    | INTRON                        | Putative Holliday junction resolvase                    |
| <i>Desi_wild_3076</i>  | NA                                  | <i>Ca_desi_scaffold</i> | 3076                    | T/C  | Gene_Ca_17274.1    | DOWNSTREAM                    | unknown protein                                         |
| <i>Desi_wild_4100</i>  | NA                                  | <i>Ca_desi_scaffold</i> | 4100                    | T/C  | NA                 | INTERGENIC                    | NA                                                      |
| <i>Desi_wild_4156</i>  | NA                                  | <i>Ca_desi_scaffold</i> | 4156                    | T/C  | NA                 | INTERGENIC                    | NA                                                      |
| <i>Desi_wild_7141</i>  | NA                                  | <i>Ca_desi_scaffold</i> | 7141                    | C/T  | Gene_Ca_17275.1    | INTRON                        | Tafazzin homolog                                        |
| <i>Desi_wild_7573</i>  | NA                                  | <i>Ca_desi_scaffold</i> | 7573                    | T/C  | Gene_Ca_17275.1    | NON_SYNONYMOUS_CODING         | Tafazzin homolog                                        |
| <i>Desi_wild_7585</i>  | NA                                  | <i>Ca_desi_scaffold</i> | 7585                    | A/G  | Gene_Ca_17275.1    | NON_SYNONYMOUS_CODING         | Tafazzin homolog                                        |
| <i>Desi_wild_20120</i> | NA                                  | <i>Ca_desi_scaffold</i> | 20120                   | T/C  | Gene_Ca_17278.1    | UPSTREAM                      | unknown protein                                         |
| <i>Desi_wild_24994</i> | NA                                  | <i>Ca_desi_scaffold</i> | 24994                   | C/G  | Gene_Ca_17279.1    | NON_SYNONYMOUS_CODING         | Heparan-alpha-glucosaminide N-acetyltransferase         |
| <i>Desi_wild_27348</i> | NA                                  | <i>Ca_desi_scaffold</i> | 27348                   | C/T  | Gene_Ca_17279.1    | SYNONYMOUS_CODING             | Heparan-alpha-glucosaminide N-acetyltransferase         |
| <i>Desi_wild_27534</i> | NA                                  | <i>Ca_desi_scaffold</i> | 27534                   | T/C  | Gene_Ca_17279.1    | NON_SYNONYMOUS_CODING         | Heparan-alpha-glucosaminide N-acetyltransferase         |
| <i>Desi_wild_27623</i> | NA                                  | <i>Ca_desi_scaffold</i> | 27623                   | C/T  | Gene_Ca_17279.1    | INTRON                        | Heparan-alpha-glucosaminide N-acetyltransferase         |
| <i>Desi_wild_38095</i> | NA                                  | <i>Ca_desi_scaffold</i> | 38095                   | G/C  | NA                 | INTERGENIC                    | NA                                                      |
| <i>Desi_wild_13564</i> | NA                                  | <i>Ca_desi_scaffold</i> | 13564                   | C/T  | Gene_Ca_17286.1    | DOWNSTREAM                    | ARM repeat superfamily protein                          |
| <i>Desi_wild_13566</i> | NA                                  | <i>Ca_desi_scaffold</i> | 13566                   | T/G  | Gene_Ca_17286.1    | DOWNSTREAM                    | ARM repeat superfamily protein                          |
| <i>Desi_wild_13578</i> | NA                                  | <i>Ca_desi_scaffold</i> | 13578                   | C/A  | Gene_Ca_17286.1    | DOWNSTREAM                    | ARM repeat superfamily protein                          |
| <i>Desi_wild_13603</i> | NA                                  | <i>Ca_desi_scaffold</i> | 13603                   | T/C  | Gene_Ca_17286.1    | DOWNSTREAM                    | ARM repeat superfamily protein                          |



| SNP IDs         | NCBI dbSNP accession IDs (NCBI_SS#) | Chromosomes      | Physical positions (bp) | SNPs | Gene accession IDs | Sequence components of genome | Putative functions                                   |
|-----------------|-------------------------------------|------------------|-------------------------|------|--------------------|-------------------------------|------------------------------------------------------|
| Desi_wild_13610 | NA                                  | Ca_desi_scaffold | 13610                   | T/C  | Gene_Ca_17286.1    | DOWNSTREAM                    | ARM repeat superfamily protein                       |
| Desi_wild_13613 | NA                                  | Ca_desi_scaffold | 13613                   | C/T  | Gene_Ca_17286.1    | DOWNSTREAM                    | ARM repeat superfamily protein                       |
| Desi_wild_13614 | NA                                  | Ca_desi_scaffold | 13614                   | A/G  | Gene_Ca_17286.1    | DOWNSTREAM                    | ARM repeat superfamily protein                       |
| Desi_wild_13622 | NA                                  | Ca_desi_scaffold | 13622                   | T/A  | Gene_Ca_17286.1    | DOWNSTREAM                    | ARM repeat superfamily protein                       |
| Desi_wild_7293  | NA                                  | Ca_desi_scaffold | 7293                    | T/C  | NA                 | INTERGENIC                    | NA                                                   |
| Desi_wild_15842 | NA                                  | Ca_desi_scaffold | 15842                   | A/C  | NA                 | INTERGENIC                    | NA                                                   |
| Desi_wild_33941 | NA                                  | Ca_desi_scaffold | 33941                   | C/A  | NA                 | INTERGENIC                    | NA                                                   |
| Desi_wild_19114 | NA                                  | Ca_desi_scaffold | 19114                   | C/G  | NA                 | INTERGENIC                    | NA                                                   |
| Desi_wild_19641 | NA                                  | Ca_desi_scaffold | 19641                   | C/T  | NA                 | INTERGENIC                    | NA                                                   |
| Desi_wild_19682 | NA                                  | Ca_desi_scaffold | 19682                   | A/T  | NA                 | INTERGENIC                    | NA                                                   |
| Desi_wild_19698 | NA                                  | Ca_desi_scaffold | 19698                   | C/T  | NA                 | INTERGENIC                    | NA                                                   |
| Desi_wild_2717  | NA                                  | Ca_desi_scaffold | 2717                    | C/T  | NA                 | INTERGENIC                    | NA                                                   |
| Desi_wild_8971  | NA                                  | Ca_desi_scaffold | 8971                    | C/A  | NA                 | INTERGENIC                    | NA                                                   |
| Desi_wild_41701 | NA                                  | Ca_desi_scaffold | 41701                   | T/C  | Gene_Ca_17300.1    | SYNONYMOUS_CODING             | NEP1-interacting protein 1                           |
| Desi_wild_27249 | NA                                  | Ca_desi_scaffold | 27249                   | C/T  | Gene_Ca_17312.1    | DOWNSTREAM                    | Methyltransferase-like protein 21D                   |
| Desi_wild_21699 | NA                                  | Ca_desi_scaffold | 21699                   | T/C  | Gene_Ca_17324.2    | NON_SYNONYMOUS_CODING         | Filament-like plant protein 4                        |
| Desi_wild_20314 | NA                                  | Ca_desi_scaffold | 20314                   | T/A  | Gene_Ca_17326.1    | INTRON                        | NA                                                   |
| Desi_wild_28214 | NA                                  | Ca_desi_scaffold | 28214                   | G/A  | Gene_Ca_17327.1    | SYNONYMOUS_CODING             | Nodulation-signaling pathway 2 protein               |
| Desi_wild_28218 | NA                                  | Ca_desi_scaffold | 28218                   | C/T  | Gene_Ca_17327.1    | SYNONYMOUS_CODING             | Nodulation-signaling pathway 2 protein               |
| Desi_wild_28258 | NA                                  | Ca_desi_scaffold | 28258                   | A/C  | Gene_Ca_17327.1    | NON_SYNONYMOUS_CODING         | Nodulation-signaling pathway 2 protein               |
| Desi_wild_36279 | NA                                  | Ca_desi_scaffold | 36279                   | A/G  | NA                 | INTERGENIC                    | NA                                                   |
| Desi_wild_38030 | NA                                  | Ca_desi_scaffold | 38030                   | A/G  | Gene_Ca_17328.1    | SYNONYMOUS_CODING             | Methionine aminotransferase                          |
| Desi_wild_42413 | NA                                  | Ca_desi_scaffold | 42413                   | C/T  | NA                 | INTERGENIC                    | NA                                                   |
| Desi_wild_42428 | NA                                  | Ca_desi_scaffold | 42428                   | G/A  | NA                 | INTERGENIC                    | NA                                                   |
| Desi_wild_32633 | NA                                  | Ca_desi_scaffold | 32633                   | C/T  | Gene_Ca_17339.4    | SYNONYMOUS_CODING             | NA                                                   |
| Desi_wild_42143 | NA                                  | Ca_desi_scaffold | 42143                   | C/T  | Gene_Ca_17339.3    | STOP_GAINED                   | NA                                                   |
| Desi_wild_4097  | NA                                  | Ca_desi_scaffold | 4097                    | A/G  | Gene_Ca_10490.2    | INTRON                        | NA                                                   |
| Desi_wild_4449  | NA                                  | Ca_desi_scaffold | 4449                    | A/C  | Gene_Ca_10490.2    | NON_SYNONYMOUS_CODING         | NA                                                   |
| Desi_wild_4490  | NA                                  | Ca_desi_scaffold | 4490                    | A/T  | Gene_Ca_10490.2    | SYNONYMOUS_CODING             | NA                                                   |
| Desi_wild_37771 | NA                                  | Ca_desi_scaffold | 37771                   | A/T  | Gene_Ca_10493.1    | INTRON                        | Phosphatidylinositol-4-phosphate 5-kinase 1          |
| Desi_wild_41284 | NA                                  | Ca_desi_scaffold | 41284                   | A/C  | Gene_Ca_17358.1    | SYNONYMOUS_CODING             | Uncharacterized protein At4g14450, chloroplastic     |
| Desi_wild_37900 | NA                                  | Ca_desi_scaffold | 37900                   | C/A  | Gene_Ca_17359.1    | SYNONYMOUS_CODING             | Glutamate synthase [NADH], amyloplastic              |
| Desi_wild_38041 | NA                                  | Ca_desi_scaffold | 38041                   | G/C  | Gene_Ca_17359.1    | SYNONYMOUS_CODING             | Glutamate synthase [NADH], amyloplastic              |
| Desi_wild_42559 | NA                                  | Ca_desi_scaffold | 42559                   | T/C  | Gene_Ca_17359.1    | SYNONYMOUS_CODING             | Glutamate synthase [NADH], amyloplastic              |
| Desi_wild_41572 | NA                                  | Ca_desi_scaffold | 41572                   | G/A  | NA                 | INTERGENIC                    | NA                                                   |
| Desi_wild_240   | NA                                  | Ca_desi_scaffold | 240                     | A/G  | NA                 | INTERGENIC                    | NA                                                   |
| Desi_wild_254   | NA                                  | Ca_desi_scaffold | 254                     | T/C  | NA                 | INTERGENIC                    | NA                                                   |
| Desi_wild_263   | NA                                  | Ca_desi_scaffold | 263                     | T/C  | NA                 | INTERGENIC                    | NA                                                   |
| Desi_wild_4858  | NA                                  | Ca_desi_scaffold | 4858                    | G/T  | NA                 | INTERGENIC                    | NA                                                   |
| Desi_wild_12819 | NA                                  | Ca_desi_scaffold | 12819                   | T/G  | Gene_Ca_17380.1    | NON_SYNONYMOUS_CODING         | Glutamate receptor 3.7                               |
| Desi_wild_12927 | NA                                  | Ca_desi_scaffold | 12927                   | A/G  | Gene_Ca_17380.1    | NON_SYNONYMOUS_CODING         | Glutamate receptor 3.7                               |
| Desi_wild_15890 | NA                                  | Ca_desi_scaffold | 15890                   | A/G  | NA                 | INTERGENIC                    | NA                                                   |
| Desi_wild_19861 | NA                                  | Ca_desi_scaffold | 19861                   | A/G  | Gene_Ca_17385.1    | NON_SYNONYMOUS_CODING         | UDP-galactose:fucoside alpha-3-galactosyltransferase |
| Desi_wild_36288 | NA                                  | Ca_desi_scaffold | 36288                   | C/G  | NA                 | INTERGENIC                    | NA                                                   |

| SNP IDs                | NCBI dbSNP accession IDs (NCBI_SS#) | Chromosomes             | Physical positions (bp) | SNPs | Gene accession IDs | Sequence components of genome | Putative functions                                    |
|------------------------|-------------------------------------|-------------------------|-------------------------|------|--------------------|-------------------------------|-------------------------------------------------------|
| <i>Desi_wild_4841</i>  | NA                                  | <i>Ca_desi_scaffold</i> | 4841                    | G/T  | Gene_Ca_17403.1    | INTRON                        | Probable peptide/nitrate transporter At5g62680        |
| <i>Desi_wild_4859</i>  | NA                                  | <i>Ca_desi_scaffold</i> | 4859                    | G/T  | Gene_Ca_17403.1    | INTRON                        | Probable peptide/nitrate transporter At5g62680        |
| <i>Desi_wild_4861</i>  | NA                                  | <i>Ca_desi_scaffold</i> | 4861                    | T/C  | Gene_Ca_17403.1    | INTRON                        | Probable peptide/nitrate transporter At5g62680        |
| <i>Desi_wild_4880</i>  | NA                                  | <i>Ca_desi_scaffold</i> | 4880                    | A/C  | Gene_Ca_17403.1    | INTRON                        | Probable peptide/nitrate transporter At5g62680        |
| <i>Desi_wild_4883</i>  | NA                                  | <i>Ca_desi_scaffold</i> | 4883                    | A/T  | Gene_Ca_17403.1    | INTRON                        | Probable peptide/nitrate transporter At5g62680        |
| <i>Desi_wild_4895</i>  | NA                                  | <i>Ca_desi_scaffold</i> | 4895                    | G/A  | Gene_Ca_17403.1    | INTRON                        | Probable peptide/nitrate transporter At5g62680        |
| <i>Desi_wild_4988</i>  | NA                                  | <i>Ca_desi_scaffold</i> | 4988                    | C/T  | Gene_Ca_17403.1    | INTRON                        | Probable peptide/nitrate transporter At5g62680        |
| <i>Desi_wild_5453</i>  | NA                                  | <i>Ca_desi_scaffold</i> | 5453                    | T/G  | Gene_Ca_17403.1    | SYNONYMOUS_CODING             | Probable peptide/nitrate transporter At5g62680        |
| <i>Desi_wild_5456</i>  | NA                                  | <i>Ca_desi_scaffold</i> | 5456                    | C/T  | Gene_Ca_17403.1    | SYNONYMOUS_CODING             | Probable peptide/nitrate transporter At5g62680        |
| <i>Desi_wild_5474</i>  | NA                                  | <i>Ca_desi_scaffold</i> | 5474                    | T/C  | Gene_Ca_17403.1    | SYNONYMOUS_CODING             | Probable peptide/nitrate transporter At5g62680        |
| <i>Desi_wild_6235</i>  | NA                                  | <i>Ca_desi_scaffold</i> | 6235                    | C/T  | Gene_Ca_17403.1    | INTRON                        | Probable peptide/nitrate transporter At5g62680        |
| <i>Desi_wild_4318</i>  | NA                                  | <i>Ca_desi_scaffold</i> | 4318                    | T/G  | Gene_Ca_17408.2    | SYNONYMOUS_CODING             | Probable histone-lysine N-methyltransferase ATXR3     |
| <i>Desi_wild_4358</i>  | NA                                  | <i>Ca_desi_scaffold</i> | 4358                    | G/A  | Gene_Ca_17408.2    | SYNONYMOUS_CODING             | Probable histone-lysine N-methyltransferase ATXR3     |
| <i>Desi_wild_7540</i>  | NA                                  | <i>Ca_desi_scaffold</i> | 7540                    | T/G  | Gene_Ca_17411.1    | NON_SYNONYMOUS_CODING         | Pentatricopeptide repeat-containing protein At2g30780 |
| <i>Desi_wild_23517</i> | NA                                  | <i>Ca_desi_scaffold</i> | 23517                   | G/A  | Gene_Ca_17415.1    | NON_SYNONYMOUS_CODING         | Splicing factor U2af large subunit B                  |
| <i>Desi_wild_39911</i> | NA                                  | <i>Ca_desi_scaffold</i> | 39911                   | C/G  | Gene_Ca_17422.1    | NON_SYNONYMOUS_CODING         | NA                                                    |
| <i>Desi_wild_31331</i> | NA                                  | <i>Ca_desi_scaffold</i> | 31331                   | T/A  | Gene_Ca_10499.1    | INTRON                        | Glutamate receptor 2.5                                |
| <i>Desi_wild_31342</i> | NA                                  | <i>Ca_desi_scaffold</i> | 31342                   | G/A  | Gene_Ca_10499.1    | INTRON                        | Glutamate receptor 2.5                                |
| <i>Desi_wild_61755</i> | NA                                  | <i>Ca_desi_scaffold</i> | 61755                   | G/A  | NA                 | INTERGENIC                    | NA                                                    |
| <i>Desi_wild_61769</i> | NA                                  | <i>Ca_desi_scaffold</i> | 61769                   | G/A  | NA                 | INTERGENIC                    | NA                                                    |
| <i>Desi_wild_61775</i> | NA                                  | <i>Ca_desi_scaffold</i> | 61775                   | T/G  | NA                 | INTERGENIC                    | NA                                                    |
| <i>Desi_wild_61785</i> | NA                                  | <i>Ca_desi_scaffold</i> | 61785                   | T/C  | NA                 | INTERGENIC                    | NA                                                    |
| <i>Desi_wild_61811</i> | NA                                  | <i>Ca_desi_scaffold</i> | 61811                   | G/T  | NA                 | INTERGENIC                    | NA                                                    |
| <i>Desi_wild_61827</i> | NA                                  | <i>Ca_desi_scaffold</i> | 61827                   | G/C  | NA                 | INTERGENIC                    | NA                                                    |
| <i>Desi_wild_61961</i> | NA                                  | <i>Ca_desi_scaffold</i> | 61961                   | G/A  | NA                 | INTERGENIC                    | NA                                                    |
| <i>Desi_wild_62010</i> | NA                                  | <i>Ca_desi_scaffold</i> | 62010                   | T/C  | NA                 | INTERGENIC                    | NA                                                    |
| <i>Desi_wild_62017</i> | NA                                  | <i>Ca_desi_scaffold</i> | 62017                   | C/T  | NA                 | INTERGENIC                    | NA                                                    |
| <i>Desi_wild_62037</i> | NA                                  | <i>Ca_desi_scaffold</i> | 62037                   | T/C  | NA                 | INTERGENIC                    | NA                                                    |
| <i>Desi_wild_75285</i> | NA                                  | <i>Ca_desi_scaffold</i> | 75285                   | C/A  | Gene_Ca_10501.1    | SYNONYMOUS_CODING             | 3-isopropylmalate dehydrogenase 2, chloroplastic      |
| <i>Desi_wild_17295</i> | NA                                  | <i>Ca_desi_scaffold</i> | 17295                   | A/G  | NA                 | INTERGENIC                    | NA                                                    |
| <i>Desi_wild_33186</i> | NA                                  | <i>Ca_desi_scaffold</i> | 33186                   | A/T  | Gene_Ca_17426.2    | SYNONYMOUS_CODING             | NA                                                    |
| <i>Desi_wild_4465</i>  | NA                                  | <i>Ca_desi_scaffold</i> | 4465                    | C/T  | NA                 | INTERGENIC                    | NA                                                    |
| <i>Desi_wild_10448</i> | NA                                  | <i>Ca_desi_scaffold</i> | 10448                   | A/G  | Gene_Ca_17436.1    | SYNONYMOUS_CODING             | Homoserine kinase                                     |
| <i>Desi_wild_10451</i> | NA                                  | <i>Ca_desi_scaffold</i> | 10451                   | C/T  | Gene_Ca_17436.1    | SYNONYMOUS_CODING             | Homoserine kinase                                     |
| <i>Desi_wild_10556</i> | NA                                  | <i>Ca_desi_scaffold</i> | 10556                   | A/G  | Gene_Ca_17436.1    | SYNONYMOUS_CODING             | Homoserine kinase                                     |
| <i>Desi_wild_10694</i> | NA                                  | <i>Ca_desi_scaffold</i> | 10694                   | G/T  | Gene_Ca_17436.1    | SYNONYMOUS_CODING             | Homoserine kinase                                     |
| <i>Desi_wild_10754</i> | NA                                  | <i>Ca_desi_scaffold</i> | 10754                   | G/A  | Gene_Ca_17436.1    | SYNONYMOUS_CODING             | Homoserine kinase                                     |
| <i>Desi_wild_10793</i> | NA                                  | <i>Ca_desi_scaffold</i> | 10793                   | A/G  | Gene_Ca_17436.1    | SYNONYMOUS_CODING             | Homoserine kinase                                     |
| <i>Desi_wild_10871</i> | NA                                  | <i>Ca_desi_scaffold</i> | 10871                   | A/C  | Gene_Ca_17436.1    | SYNONYMOUS_CODING             | Homoserine kinase                                     |
| <i>Desi_wild_17890</i> | NA                                  | <i>Ca_desi_scaffold</i> | 17890                   | G/A  | Gene_Ca_17437.1    | NON_SYNONYMOUS_CODING         | DNA mismatch repair protein Msh3                      |
| <i>Desi_wild_21498</i> | NA                                  | <i>Ca_desi_scaffold</i> | 21498                   | A/G  | Gene_Ca_17437.1    | SYNONYMOUS_CODING             | DNA mismatch repair protein Msh3                      |
| <i>Desi_wild_21589</i> | NA                                  | <i>Ca_desi_scaffold</i> | 21589                   | A/G  | Gene_Ca_17437.1    | INTRON                        | DNA mismatch repair protein Msh3                      |
| <i>Desi_wild_24605</i> | NA                                  | <i>Ca_desi_scaffold</i> | 24605                   | G/T  | Gene_Ca_17437.1    | NON_SYNONYMOUS_CODING         | DNA mismatch repair protein Msh3                      |
| <i>Desi_wild_31591</i> | NA                                  | <i>Ca_desi_scaffold</i> | 31591                   | T/C  | NA                 | INTERGENIC                    | NA                                                    |

| SNP IDs                | NCBI dbSNP accession IDs (NCBI_SS#) | Chromosomes             | Physical positions (bp) | SNPs | Gene accession IDs | Sequence components of genome | Putative functions                                                                         |
|------------------------|-------------------------------------|-------------------------|-------------------------|------|--------------------|-------------------------------|--------------------------------------------------------------------------------------------|
| <i>Desi_wild_11740</i> | NA                                  | <i>Ca_desi_scaffold</i> | 11740                   | T/C  | Gene_Ca_17448.1    | SYNONYMOUS_CODING             | Probable pectinesterase/pectinesterase inhibitor 61                                        |
| <i>Desi_wild_11810</i> | NA                                  | <i>Ca_desi_scaffold</i> | 11810                   | C/T  | Gene_Ca_17448.1    | NON_SYNONYMOUS_CODING         | Probable pectinesterase/pectinesterase inhibitor 61                                        |
| <i>Desi_wild_12082</i> | NA                                  | <i>Ca_desi_scaffold</i> | 12082                   | C/T  | Gene_Ca_17448.1    | SYNONYMOUS_CODING             | Probable pectinesterase/pectinesterase inhibitor 61                                        |
| <i>Desi_wild_14665</i> | NA                                  | <i>Ca_desi_scaffold</i> | 14665                   | T/G  | NA                 | INTERGENIC                    | NA                                                                                         |
| <i>Desi_wild_14690</i> | NA                                  | <i>Ca_desi_scaffold</i> | 14690                   | T/A  | NA                 | INTERGENIC                    | NA                                                                                         |
| <i>Desi_wild_14731</i> | NA                                  | <i>Ca_desi_scaffold</i> | 14731                   | C/T  | NA                 | INTERGENIC                    | NA                                                                                         |
| <i>Desi_wild_25897</i> | NA                                  | <i>Ca_desi_scaffold</i> | 25897                   | C/T  | Gene_Ca_17450.1    | SYNONYMOUS_CODING             | Lysine-specific demethylase 3B                                                             |
| <i>Desi_wild_25899</i> | NA                                  | <i>Ca_desi_scaffold</i> | 25899                   | C/T  | Gene_Ca_17450.1    | NON_SYNONYMOUS_CODING         | Lysine-specific demethylase 3B                                                             |
| <i>Desi_wild_25900</i> | NA                                  | <i>Ca_desi_scaffold</i> | 25900                   | G/T  | Gene_Ca_17450.1    | NON_SYNONYMOUS_CODING         | Lysine-specific demethylase 3B                                                             |
| <i>Desi_wild_25902</i> | NA                                  | <i>Ca_desi_scaffold</i> | 25902                   | C/T  | Gene_Ca_17450.1    | NON_SYNONYMOUS_CODING         | Lysine-specific demethylase 3B                                                             |
| <i>Desi_wild_25905</i> | NA                                  | <i>Ca_desi_scaffold</i> | 25905                   | C/A  | Gene_Ca_17450.1    | STOP_GAINED                   | Lysine-specific demethylase 3B                                                             |
| <i>Desi_wild_25910</i> | NA                                  | <i>Ca_desi_scaffold</i> | 25910                   | T/A  | Gene_Ca_17450.1    | NON_SYNONYMOUS_CODING         | Lysine-specific demethylase 3B                                                             |
| <i>Desi_wild_25911</i> | NA                                  | <i>Ca_desi_scaffold</i> | 25911                   | C/A  | Gene_Ca_17450.1    | STOP_GAINED                   | Lysine-specific demethylase 3B                                                             |
| <i>Desi_wild_37541</i> | NA                                  | <i>Ca_desi_scaffold</i> | 37541                   | C/T  | NA                 | INTERGENIC                    | NA                                                                                         |
| <i>Desi_wild_6801</i>  | NA                                  | <i>Ca_desi_scaffold</i> | 6801                    | C/A  | NA                 | INTERGENIC                    | NA                                                                                         |
| <i>Desi_wild_3864</i>  | NA                                  | <i>Ca_desi_scaffold</i> | 3864                    | A/C  | Gene_Ca_17479.1    | INTRON                        | BEST Arabidopsis thaliana protein match is: proline-rich family protein (TAIR:AT3G09000.1) |
| <i>Desi_wild_3865</i>  | NA                                  | <i>Ca_desi_scaffold</i> | 3865                    | C/G  | Gene_Ca_17479.1    | INTRON                        | BEST Arabidopsis thaliana protein match is: proline-rich family protein (TAIR:AT3G09000.1) |
| <i>Desi_wild_3867</i>  | NA                                  | <i>Ca_desi_scaffold</i> | 3867                    | G/A  | Gene_Ca_17479.1    | INTRON                        | BEST Arabidopsis thaliana protein match is: proline-rich family protein (TAIR:AT3G09000.1) |
| <i>Desi_wild_3868</i>  | NA                                  | <i>Ca_desi_scaffold</i> | 3868                    | A/G  | Gene_Ca_17479.1    | INTRON                        | BEST Arabidopsis thaliana protein match is: proline-rich family protein (TAIR:AT3G09000.1) |
| <i>Desi_wild_3869</i>  | NA                                  | <i>Ca_desi_scaffold</i> | 3869                    | G/A  | Gene_Ca_17479.1    | INTRON                        | BEST Arabidopsis thaliana protein match is: proline-rich family protein (TAIR:AT3G09000.1) |
| <i>Desi_wild_3870</i>  | NA                                  | <i>Ca_desi_scaffold</i> | 3870                    | A/C  | Gene_Ca_17479.1    | INTRON                        | BEST Arabidopsis thaliana protein match is: proline-rich family protein (TAIR:AT3G09000.1) |
| <i>Desi_wild_3872</i>  | NA                                  | <i>Ca_desi_scaffold</i> | 3872                    | G/C  | Gene_Ca_17479.1    | INTRON                        | BEST Arabidopsis thaliana protein match is: proline-rich family protein (TAIR:AT3G09000.1) |
| <i>Desi_wild_42205</i> | NA                                  | <i>Ca_desi_scaffold</i> | 42205                   | C/A  | Gene_Ca_17492.1    | NON_SYNONYMOUS_CODING         | F-box protein At1g67340                                                                    |
| <i>Desi_wild_42270</i> | NA                                  | <i>Ca_desi_scaffold</i> | 42270                   | T/A  | Gene_Ca_17492.1    | NON_SYNONYMOUS_CODING         | F-box protein At1g67340                                                                    |
| <i>Desi_wild_42290</i> | NA                                  | <i>Ca_desi_scaffold</i> | 42290                   | A/C  | Gene_Ca_17492.1    | SYNONYMOUS_CODING             | F-box protein At1g67340                                                                    |
| <i>Desi_wild_60061</i> | NA                                  | <i>Ca_desi_scaffold</i> | 60061                   | A/G  | Gene_Ca_09692.1    | DOWNSTREAM                    | Uncharacterised protein family SERF                                                        |
| <i>Desi_wild_22506</i> | NA                                  | <i>Ca_desi_scaffold</i> | 22506                   | G/A  | NA                 | INTERGENIC                    | NA                                                                                         |
| <i>Desi_wild_22887</i> | NA                                  | <i>Ca_desi_scaffold</i> | 22887                   | A/G  | NA                 | INTERGENIC                    | NA                                                                                         |
| <i>Desi_wild_35006</i> | NA                                  | <i>Ca_desi_scaffold</i> | 35006                   | C/A  | Gene_Ca_17497.1    | INTRON                        | Syntaxin-binding protein 5                                                                 |
| <i>Desi_wild_35010</i> | NA                                  | <i>Ca_desi_scaffold</i> | 35010                   | A/G  | Gene_Ca_17497.1    | INTRON                        | Syntaxin-binding protein 5                                                                 |
| <i>Desi_wild_35011</i> | NA                                  | <i>Ca_desi_scaffold</i> | 35011                   | T/A  | Gene_Ca_17497.1    | INTRON                        | Syntaxin-binding protein 5                                                                 |
| <i>Desi_wild_35018</i> | NA                                  | <i>Ca_desi_scaffold</i> | 35018                   | C/A  | Gene_Ca_17497.1    | INTRON                        | Syntaxin-binding protein 5                                                                 |
| <i>Desi_wild_35027</i> | NA                                  | <i>Ca_desi_scaffold</i> | 35027                   | T/A  | Gene_Ca_17497.1    | INTRON                        | Syntaxin-binding protein 5                                                                 |
| <i>Desi_wild_35028</i> | NA                                  | <i>Ca_desi_scaffold</i> | 35028                   | C/A  | Gene_Ca_17497.1    | INTRON                        | Syntaxin-binding protein 5                                                                 |
| <i>Desi_wild_35029</i> | NA                                  | <i>Ca_desi_scaffold</i> | 35029                   | A/G  | Gene_Ca_17497.1    | INTRON                        | Syntaxin-binding protein 5                                                                 |
| <i>Desi_wild_35030</i> | NA                                  | <i>Ca_desi_scaffold</i> | 35030                   | G/T  | Gene_Ca_17497.1    | INTRON                        | Syntaxin-binding protein 5                                                                 |
| <i>Desi_wild_35031</i> | NA                                  | <i>Ca_desi_scaffold</i> | 35031                   | C/A  | Gene_Ca_17497.1    | INTRON                        | Syntaxin-binding protein 5                                                                 |
| <i>Desi_wild_35039</i> | NA                                  | <i>Ca_desi_scaffold</i> | 35039                   | T/A  | Gene_Ca_17497.1    | INTRON                        | Syntaxin-binding protein 5                                                                 |
| <i>Desi_wild_35049</i> | NA                                  | <i>Ca_desi_scaffold</i> | 35049                   | G/A  | Gene_Ca_17497.1    | INTRON                        | Syntaxin-binding protein 5                                                                 |
| <i>Desi_wild_35124</i> | NA                                  | <i>Ca_desi_scaffold</i> | 35124                   | G/C  | Gene_Ca_17497.1    | INTRON                        | Syntaxin-binding protein 5                                                                 |
| <i>Desi_wild_35127</i> | NA                                  | <i>Ca_desi_scaffold</i> | 35127                   | G/A  | Gene_Ca_17497.1    | INTRON                        | Syntaxin-binding protein 5                                                                 |
| <i>Desi_wild_35163</i> | NA                                  | <i>Ca_desi_scaffold</i> | 35163                   | A/G  | Gene_Ca_17497.1    | INTRON                        | Syntaxin-binding protein 5                                                                 |
| <i>Desi_wild_35187</i> | NA                                  | <i>Ca_desi_scaffold</i> | 35187                   | T/C  | Gene_Ca_17497.1    | INTRON                        | Syntaxin-binding protein 5                                                                 |
| <i>Desi_wild_35188</i> | NA                                  | <i>Ca_desi_scaffold</i> | 35188                   | T/A  | Gene_Ca_17497.1    | INTRON                        | Syntaxin-binding protein 5                                                                 |

| SNP IDs                | NCBI dbSNP accession IDs (NCBI_SS#) | Chromosomes             | Physical positions (bp) | SNPs | Gene accession IDs | Sequence components of genome | Putative functions                           |
|------------------------|-------------------------------------|-------------------------|-------------------------|------|--------------------|-------------------------------|----------------------------------------------|
| <i>Desi_wild_867</i>   | NA                                  | <i>Ca_desi_scaffold</i> | 867                     | C/T  | NA                 | INTERGENIC                    | NA                                           |
| <i>Desi_wild_37185</i> | NA                                  | <i>Ca_desi_scaffold</i> | 37185                   | G/A  | Gene_Ca_17501.1    | SYNONYMOUS_STOP               | GDSL esterase/lipase APG                     |
| <i>Desi_wild_37259</i> | NA                                  | <i>Ca_desi_scaffold</i> | 37259                   | G/A  | Gene_Ca_17501.1    | DOWNSTREAM                    | GDSL esterase/lipase APG                     |
| <i>Desi_wild_37275</i> | NA                                  | <i>Ca_desi_scaffold</i> | 37275                   | G/A  | Gene_Ca_17501.1    | DOWNSTREAM                    | GDSL esterase/lipase APG                     |
| <i>Desi_wild_37295</i> | NA                                  | <i>Ca_desi_scaffold</i> | 37295                   | A/C  | Gene_Ca_17501.1    | DOWNSTREAM                    | GDSL esterase/lipase APG                     |
| <i>Desi_wild_37115</i> | NA                                  | <i>Ca_desi_scaffold</i> | 37115                   | T/C  | NA                 | INTERGENIC                    | NA                                           |
| <i>Desi_wild_6038</i>  | NA                                  | <i>Ca_desi_scaffold</i> | 6038                    | G/A  | NA                 | INTERGENIC                    | NA                                           |
| <i>Desi_wild_9042</i>  | NA                                  | <i>Ca_desi_scaffold</i> | 9042                    | T/C  | Gene_Ca_17527.1    | INTRON                        | Probable protein phosphatase 2C 12           |
| <i>Desi_wild_43119</i> | NA                                  | <i>Ca_desi_scaffold</i> | 43119                   | T/C  | NA                 | INTERGENIC                    | NA                                           |
| <i>Desi_wild_1020</i>  | NA                                  | <i>Ca_desi_scaffold</i> | 1020                    | T/C  | NA                 | INTERGENIC                    | NA                                           |
| <i>Desi_wild_1026</i>  | NA                                  | <i>Ca_desi_scaffold</i> | 1026                    | T/G  | NA                 | INTERGENIC                    | NA                                           |
| <i>Desi_wild_6393</i>  | NA                                  | <i>Ca_desi_scaffold</i> | 6393                    | T/C  | NA                 | INTERGENIC                    | NA                                           |
| <i>Desi_wild_6420</i>  | NA                                  | <i>Ca_desi_scaffold</i> | 6420                    | A/T  | NA                 | INTERGENIC                    | NA                                           |
| <i>Desi_wild_39373</i> | NA                                  | <i>Ca_desi_scaffold</i> | 39373                   | T/C  | NA                 | INTERGENIC                    | NA                                           |
| <i>Desi_wild_35771</i> | NA                                  | <i>Ca_desi_scaffold</i> | 35771                   | A/C  | Gene_Ca_17560.1    | UPSTREAM                      | rRNA-processing protein fcf2                 |
| <i>Desi_wild_8677</i>  | NA                                  | <i>Ca_desi_scaffold</i> | 8677                    | T/G  | Gene_Ca_17571.1    | INTRON                        | Phosphatidylinositol-4-phosphate 5-kinase 6  |
| <i>Desi_wild_30674</i> | NA                                  | <i>Ca_desi_scaffold</i> | 30674                   | A/G  | Gene_Ca_17574.1    | SYNONYMOUS_CODING             | S-adenosylmethionine synthase                |
| <i>Desi_wild_82252</i> | NA                                  | <i>Ca_desi_scaffold</i> | 82252                   | G/A  | Gene_Ca_10321.1    | INTRON                        | Phospholipase DDHD1                          |
| <i>Desi_wild_35978</i> | NA                                  | <i>Ca_desi_scaffold</i> | 35978                   | A/C  | NA                 | INTERGENIC                    | NA                                           |
| <i>Desi_wild_35987</i> | NA                                  | <i>Ca_desi_scaffold</i> | 35987                   | C/T  | NA                 | INTERGENIC                    | NA                                           |
| <i>Desi_wild_12713</i> | NA                                  | <i>Ca_desi_scaffold</i> | 12713                   | T/A  | NA                 | INTERGENIC                    | NA                                           |
| <i>Desi_wild_11336</i> | NA                                  | <i>Ca_desi_scaffold</i> | 11336                   | A/C  | Gene_Ca_17590.1    | DOWNSTREAM                    | Putative E3 ubiquitin-protein ligase XBAT31  |
| <i>Desi_wild_23304</i> | NA                                  | <i>Ca_desi_scaffold</i> | 23304                   | T/C  | Gene_Ca_10428.3    | INTRON                        | NA                                           |
| <i>Desi_wild_41343</i> | NA                                  | <i>Ca_desi_scaffold</i> | 41343                   | G/T  | Gene_Ca_10429.1    | NON_SYNONYMOUS_CODING         | Ankyrin repeat domain-containing protein 13B |
| <i>Desi_wild_722</i>   | NA                                  | <i>Ca_desi_scaffold</i> | 722                     | T/A  | NA                 | INTERGENIC                    | NA                                           |
| <i>Desi_wild_6650</i>  | NA                                  | <i>Ca_desi_scaffold</i> | 6650                    | T/C  | Gene_Ca_17601.1    | DOWNSTREAM                    | Nucleolar and coiled-body phosphoprotein     |
| <i>Desi_wild_6663</i>  | NA                                  | <i>Ca_desi_scaffold</i> | 6663                    | T/C  | Gene_Ca_17601.1    | DOWNSTREAM                    | Nucleolar and coiled-body phosphoprotein     |
| <i>Desi_wild_22327</i> | NA                                  | <i>Ca_desi_scaffold</i> | 22327                   | C/T  | NA                 | INTERGENIC                    | NA                                           |
| <i>Desi_wild_26406</i> | NA                                  | <i>Ca_desi_scaffold</i> | 26406                   | A/T  | Gene_Ca_17605.1    | DOWNSTREAM                    | mitotic checkpoint family protein            |
| <i>Desi_wild_26515</i> | NA                                  | <i>Ca_desi_scaffold</i> | 26515                   | T/A  | Gene_Ca_17605.1    | DOWNSTREAM                    | mitotic checkpoint family protein            |
| <i>Desi_wild_17870</i> | NA                                  | <i>Ca_desi_scaffold</i> | 17870                   | T/C  | Gene_Ca_17608.1    | INTRON                        | 50S ribosomal protein L14                    |
| <i>Desi_wild_20024</i> | NA                                  | <i>Ca_desi_scaffold</i> | 20024                   | C/T  | NA                 | INTERGENIC                    | NA                                           |
| <i>Desi_wild_20032</i> | NA                                  | <i>Ca_desi_scaffold</i> | 20032                   | G/T  | NA                 | INTERGENIC                    | NA                                           |
| <i>Desi_wild_67401</i> | NA                                  | <i>Ca_desi_scaffold</i> | 67401                   | A/T  | Gene_Ca_10519.1    | INTRON                        | Beta-fructofuranosidase, soluble isoenzyme I |
| <i>Desi_wild_778</i>   | NA                                  | <i>Ca_desi_scaffold</i> | 778                     | A/G  | NA                 | INTERGENIC                    | NA                                           |
| <i>Desi_wild_781</i>   | NA                                  | <i>Ca_desi_scaffold</i> | 781                     | G/A  | NA                 | INTERGENIC                    | NA                                           |
| <i>Desi_wild_818</i>   | NA                                  | <i>Ca_desi_scaffold</i> | 818                     | C/A  | NA                 | INTERGENIC                    | NA                                           |
| <i>Desi_wild_841</i>   | NA                                  | <i>Ca_desi_scaffold</i> | 841                     | C/T  | NA                 | INTERGENIC                    | NA                                           |
| <i>Desi_wild_842</i>   | NA                                  | <i>Ca_desi_scaffold</i> | 842                     | G/T  | NA                 | INTERGENIC                    | NA                                           |
| <i>Desi_wild_875</i>   | NA                                  | <i>Ca_desi_scaffold</i> | 875                     | C/T  | NA                 | INTERGENIC                    | NA                                           |
| <i>Desi_wild_9445</i>  | NA                                  | <i>Ca_desi_scaffold</i> | 9445                    | G/A  | NA                 | INTERGENIC                    | NA                                           |
| <i>Desi_wild_11311</i> | NA                                  | <i>Ca_desi_scaffold</i> | 11311                   | A/T  | Gene_Ca_17622.1    | INTRON                        | Peptidyl-tRNA hydrolase, chloroplastic       |
| <i>Desi_wild_8743</i>  | NA                                  | <i>Ca_desi_scaffold</i> | 8743                    | T/C  | NA                 | INTERGENIC                    | NA                                           |
| <i>Desi_wild_34850</i> | NA                                  | <i>Ca_desi_scaffold</i> | 34850                   | A/C  | NA                 | INTERGENIC                    | NA                                           |

| SNP IDs                | NCBI dbSNP accession IDs (NCBI_SS#) | Chromosomes             | Physical positions (bp) | SNPs | Gene accession IDs | Sequence components of genome | Putative functions                                                                   |
|------------------------|-------------------------------------|-------------------------|-------------------------|------|--------------------|-------------------------------|--------------------------------------------------------------------------------------|
| <i>Desi_wild_34851</i> | NA                                  | <i>Ca_desi_scaffold</i> | 34851                   | A/G  | NA                 | INTERGENIC                    | NA                                                                                   |
| <i>Desi_wild_20722</i> | NA                                  | <i>Ca_desi_scaffold</i> | 20722                   | C/T  | Gene_Ca_10025.3    | INTRON                        | cAMP-regulated phosphoprotein 19-related protein                                     |
| <i>Desi_wild_38828</i> | NA                                  | <i>Ca_desi_scaffold</i> | 38828                   | G/A  | NA                 | INTERGENIC                    | NA                                                                                   |
| <i>Desi_wild_29935</i> | NA                                  | <i>Ca_desi_scaffold</i> | 29935                   | A/G  | NA                 | INTERGENIC                    | NA                                                                                   |
| <i>Desi_wild_21527</i> | NA                                  | <i>Ca_desi_scaffold</i> | 21527                   | A/C  | NA                 | INTERGENIC                    | NA                                                                                   |
| <i>Desi_wild_7642</i>  | NA                                  | <i>Ca_desi_scaffold</i> | 7642                    | A/T  | Gene_Ca_17642.1    | NON_SYNONYMOUS_CODING         | Anthranilate synthase component II                                                   |
| <i>Desi_wild_2527</i>  | NA                                  | <i>Ca_desi_scaffold</i> | 2527                    | A/G  | Gene_Ca_17645.1    | INTRON                        | CONTAINS InterPro DOMAIN/s: Phosphorylated adapter RNA export protein, RNA-binding d |
| <i>Desi_wild_22178</i> | NA                                  | <i>Ca_desi_scaffold</i> | 22178                   | A/C  | Gene_Ca_17648.1    | UPSTREAM                      | NADH dehydrogenase [ubiquinone] iron-sulfur protein 7, mitochondrial                 |
| <i>Desi_wild_4484</i>  | NA                                  | <i>Ca_desi_scaffold</i> | 4484                    | G/A  | Gene_Ca_17653.1    | SYNONYMOUS_CODING             | Transcriptional corepressor SEUSS                                                    |
| <i>Desi_wild_4601</i>  | NA                                  | <i>Ca_desi_scaffold</i> | 4601                    | C/T  | Gene_Ca_17653.1    | SYNONYMOUS_CODING             | Transcriptional corepressor SEUSS                                                    |
| <i>Desi_wild_7304</i>  | NA                                  | <i>Ca_desi_scaffold</i> | 7304                    | A/C  | Gene_Ca_17653.1    | INTRON                        | Transcriptional corepressor SEUSS                                                    |
| <i>Desi_wild_16382</i> | NA                                  | <i>Ca_desi_scaffold</i> | 16382                   | G/A  | Gene_Ca_17655.1    | INTRON                        | Scarecrow-like protein 1                                                             |
| <i>Desi_wild_16448</i> | NA                                  | <i>Ca_desi_scaffold</i> | 16448                   | T/C  | Gene_Ca_17655.1    | INTRON                        | Scarecrow-like protein 1                                                             |
| <i>Desi_wild_598</i>   | NA                                  | <i>Ca_desi_scaffold</i> | 598                     | C/T  | NA                 | INTERGENIC                    | NA                                                                                   |
| <i>Desi_wild_23171</i> | NA                                  | <i>Ca_desi_scaffold</i> | 23171                   | G/T  | NA                 | INTERGENIC                    | NA                                                                                   |
| <i>Desi_wild_38080</i> | NA                                  | <i>Ca_desi_scaffold</i> | 38080                   | T/C  | NA                 | INTERGENIC                    | NA                                                                                   |
| <i>Desi_wild_38093</i> | NA                                  | <i>Ca_desi_scaffold</i> | 38093                   | C/A  | NA                 | INTERGENIC                    | NA                                                                                   |
| <i>Desi_wild_19264</i> | NA                                  | <i>Ca_desi_scaffold</i> | 19264                   | A/C  | Gene_Ca_17663.1    | SYNONYMOUS_CODING             | Dof zinc finger protein DOF2.4                                                       |
| <i>Desi_wild_18864</i> | NA                                  | <i>Ca_desi_scaffold</i> | 18864                   | G/T  | Gene_Ca_17666.1    | SYNONYMOUS_CODING             | Ammonium transporter 3 member 1                                                      |
| <i>Desi_wild_18894</i> | NA                                  | <i>Ca_desi_scaffold</i> | 18894                   | T/A  | Gene_Ca_17666.1    | SYNONYMOUS_CODING             | Ammonium transporter 3 member 1                                                      |
| <i>Desi_wild_19775</i> | NA                                  | <i>Ca_desi_scaffold</i> | 19775                   | G/A  | Gene_Ca_17666.1    | SYNONYMOUS_CODING             | Ammonium transporter 3 member 1                                                      |
| <i>Desi_wild_19839</i> | NA                                  | <i>Ca_desi_scaffold</i> | 19839                   | T/G  | Gene_Ca_17666.1    | NON_SYNONYMOUS_CODING         | Ammonium transporter 3 member 1                                                      |
| <i>Desi_wild_19848</i> | NA                                  | <i>Ca_desi_scaffold</i> | 19848                   | T/G  | Gene_Ca_17666.1    | NON_SYNONYMOUS_CODING         | Ammonium transporter 3 member 1                                                      |
| <i>Desi_wild_2789</i>  | NA                                  | <i>Ca_desi_scaffold</i> | 2789                    | T/C  | NA                 | INTERGENIC                    | NA                                                                                   |
| <i>Desi_wild_2811</i>  | NA                                  | <i>Ca_desi_scaffold</i> | 2811                    | A/C  | NA                 | INTERGENIC                    | NA                                                                                   |
| <i>Desi_wild_4024</i>  | NA                                  | <i>Ca_desi_scaffold</i> | 4024                    | T/A  | Gene_Ca_17667.1    | SYNONYMOUS_CODING             | PHD finger-containing protein DDB_G0268158                                           |
| <i>Desi_wild_13519</i> | NA                                  | <i>Ca_desi_scaffold</i> | 13519                   | C/A  | Gene_Ca_17667.1    | INTRON                        | PHD finger-containing protein DDB_G0268158                                           |
| <i>Desi_wild_12667</i> | NA                                  | <i>Ca_desi_scaffold</i> | 12667                   | C/G  | NA                 | INTERGENIC                    | NA                                                                                   |
| <i>Desi_wild_3288</i>  | NA                                  | <i>Ca_desi_scaffold</i> | 3288                    | G/A  | NA                 | INTERGENIC                    | NA                                                                                   |
| <i>Desi_wild_14028</i> | NA                                  | <i>Ca_desi_scaffold</i> | 14028                   | T/C  | Gene_Ca_17681.1    | INTRON                        | NADH:ubiquinone oxidoreductase, 17.2kDa subunit                                      |
| <i>Desi_wild_29998</i> | NA                                  | <i>Ca_desi_scaffold</i> | 29998                   | T/G  | NA                 | INTERGENIC                    | NA                                                                                   |
| <i>Desi_wild_30009</i> | NA                                  | <i>Ca_desi_scaffold</i> | 30009                   | C/T  | NA                 | INTERGENIC                    | NA                                                                                   |
| <i>Desi_wild_30024</i> | NA                                  | <i>Ca_desi_scaffold</i> | 30024                   | A/C  | NA                 | INTERGENIC                    | NA                                                                                   |
| <i>Desi_wild_25094</i> | NA                                  | <i>Ca_desi_scaffold</i> | 25094                   | T/C  | Gene_Ca_17691.1    | INTRON                        | Methionine aminopeptidase 1A                                                         |
| <i>Desi_wild_26626</i> | NA                                  | <i>Ca_desi_scaffold</i> | 26626                   | T/G  | Gene_Ca_17698.1    | SYNONYMOUS_CODING             | Protein SCAR2                                                                        |
| <i>Desi_wild_21680</i> | NA                                  | <i>Ca_desi_scaffold</i> | 21680                   | T/C  | Gene_Ca_17700.1    | INTRON                        | 3-ketoacyl-CoA thiolase 2, peroxisomal                                               |
| <i>Desi_wild_7334</i>  | NA                                  | <i>Ca_desi_scaffold</i> | 7334                    | A/C  | Gene_Ca_17705.1    | SYNONYMOUS_CODING             | E3 ubiquitin-protein ligase CHIP                                                     |
| <i>Desi_wild_7335</i>  | NA                                  | <i>Ca_desi_scaffold</i> | 7335                    | G/T  | Gene_Ca_17705.1    | SYNONYMOUS_CODING             | E3 ubiquitin-protein ligase CHIP                                                     |
| <i>Desi_wild_37870</i> | NA                                  | <i>Ca_desi_scaffold</i> | 37870                   | A/G  | Gene_Ca_17707.1    | INTRON                        | lipase class 3 family protein                                                        |
| <i>Desi_wild_37880</i> | NA                                  | <i>Ca_desi_scaffold</i> | 37880                   | G/A  | Gene_Ca_17707.1    | INTRON                        | lipase class 3 family protein                                                        |
| <i>Desi_wild_37888</i> | NA                                  | <i>Ca_desi_scaffold</i> | 37888                   | T/G  | Gene_Ca_17707.1    | INTRON                        | lipase class 3 family protein                                                        |
| <i>Desi_wild_37908</i> | NA                                  | <i>Ca_desi_scaffold</i> | 37908                   | A/T  | Gene_Ca_17707.1    | INTRON                        | lipase class 3 family protein                                                        |
| <i>Desi_wild_38796</i> | NA                                  | <i>Ca_desi_scaffold</i> | 38796                   | T/C  | Gene_Ca_17707.1    | SYNONYMOUS_CODING             | lipase class 3 family protein                                                        |
| <i>Desi_wild_39907</i> | NA                                  | <i>Ca_desi_scaffold</i> | 39907                   | G/A  | Gene_Ca_17707.1    | SYNONYMOUS_CODING             | lipase class 3 family protein                                                        |

| SNP IDs                | NCBI dbSNP accession IDs (NCBI_SS#) | Chromosomes             | Physical positions (bp) | SNPs | Gene accession IDs | Sequence components of genome | Putative functions                                        |
|------------------------|-------------------------------------|-------------------------|-------------------------|------|--------------------|-------------------------------|-----------------------------------------------------------|
| <i>Desi_wild_40092</i> | NA                                  | <i>Ca_desi_scaffold</i> | 40092                   | A/G  | Gene_Ca_17707.1    | INTRON                        | lipase class 3 family protein                             |
| <i>Desi_wild_30345</i> | NA                                  | <i>Ca_desi_scaffold</i> | 30345                   | A/C  | NA                 | INTERGENIC                    | NA                                                        |
| <i>Desi_wild_30357</i> | NA                                  | <i>Ca_desi_scaffold</i> | 30357                   | A/T  | NA                 | INTERGENIC                    | NA                                                        |
| <i>Desi_wild_30376</i> | NA                                  | <i>Ca_desi_scaffold</i> | 30376                   | T/C  | NA                 | INTERGENIC                    | NA                                                        |
| <i>Desi_wild_30423</i> | NA                                  | <i>Ca_desi_scaffold</i> | 30423                   | T/C  | NA                 | INTERGENIC                    | NA                                                        |
| <i>Desi_wild_17367</i> | NA                                  | <i>Ca_desi_scaffold</i> | 17367                   | A/G  | Gene_Ca_17727.1    | NON_SYNONYMOUS_CODING         | F-box/kelch-repeat protein At3g61590                      |
| <i>Desi_wild_17368</i> | NA                                  | <i>Ca_desi_scaffold</i> | 17368                   | G/A  | Gene_Ca_17727.1    | NON_SYNONYMOUS_CODING         | F-box/kelch-repeat protein At3g61590                      |
| <i>Desi_wild_17389</i> | NA                                  | <i>Ca_desi_scaffold</i> | 17389                   | T/C  | Gene_Ca_17727.1    | NON_SYNONYMOUS_CODING         | F-box/kelch-repeat protein At3g61590                      |
| <i>Desi_wild_17390</i> | NA                                  | <i>Ca_desi_scaffold</i> | 17390                   | G/T  | Gene_Ca_17727.1    | SYNONYMOUS_CODING             | F-box/kelch-repeat protein At3g61590                      |
| <i>Desi_wild_17408</i> | NA                                  | <i>Ca_desi_scaffold</i> | 17408                   | A/C  | Gene_Ca_17727.1    | SYNONYMOUS_CODING             | F-box/kelch-repeat protein At3g61590                      |
| <i>Desi_wild_17428</i> | NA                                  | <i>Ca_desi_scaffold</i> | 17428                   | A/T  | Gene_Ca_17727.1    | NON_SYNONYMOUS_CODING         | F-box/kelch-repeat protein At3g61590                      |
| <i>Desi_wild_17433</i> | NA                                  | <i>Ca_desi_scaffold</i> | 17433                   | G/A  | Gene_Ca_17727.1    | NON_SYNONYMOUS_CODING         | F-box/kelch-repeat protein At3g61590                      |
| <i>Desi_wild_17443</i> | NA                                  | <i>Ca_desi_scaffold</i> | 17443                   | T/C  | Gene_Ca_17727.1    | NON_SYNONYMOUS_CODING         | F-box/kelch-repeat protein At3g61590                      |
| <i>Desi_wild_17504</i> | NA                                  | <i>Ca_desi_scaffold</i> | 17504                   | T/A  | Gene_Ca_17727.1    | SYNONYMOUS_CODING             | F-box/kelch-repeat protein At3g61590                      |
| <i>Desi_wild_17510</i> | NA                                  | <i>Ca_desi_scaffold</i> | 17510                   | T/G  | Gene_Ca_17727.1    | NON_SYNONYMOUS_CODING         | F-box/kelch-repeat protein At3g61590                      |
| <i>Desi_wild_17512</i> | NA                                  | <i>Ca_desi_scaffold</i> | 17512                   | G/A  | Gene_Ca_17727.1    | NON_SYNONYMOUS_CODING         | F-box/kelch-repeat protein At3g61590                      |
| <i>Desi_wild_17521</i> | NA                                  | <i>Ca_desi_scaffold</i> | 17521                   | C/A  | Gene_Ca_17727.1    | STOP_GAINED                   | F-box/kelch-repeat protein At3g61590                      |
| <i>Desi_wild_17522</i> | NA                                  | <i>Ca_desi_scaffold</i> | 17522                   | A/C  | Gene_Ca_17727.1    | SYNONYMOUS_CODING             | F-box/kelch-repeat protein At3g61590                      |
| <i>Desi_wild_17525</i> | NA                                  | <i>Ca_desi_scaffold</i> | 17525                   | A/C  | Gene_Ca_17727.1    | NON_SYNONYMOUS_CODING         | F-box/kelch-repeat protein At3g61590                      |
| <i>Desi_wild_17532</i> | NA                                  | <i>Ca_desi_scaffold</i> | 17532                   | A/G  | Gene_Ca_17727.1    | NON_SYNONYMOUS_CODING         | F-box/kelch-repeat protein At3g61590                      |
| <i>Desi_wild_17538</i> | NA                                  | <i>Ca_desi_scaffold</i> | 17538                   | A/T  | Gene_Ca_17727.1    | NON_SYNONYMOUS_CODING         | F-box/kelch-repeat protein At3g61590                      |
| <i>Desi_wild_17545</i> | NA                                  | <i>Ca_desi_scaffold</i> | 17545                   | C/G  | Gene_Ca_17727.1    | NON_SYNONYMOUS_CODING         | F-box/kelch-repeat protein At3g61590                      |
| <i>Desi_wild_16936</i> | NA                                  | <i>Ca_desi_scaffold</i> | 16936                   | T/G  | Gene_Ca_17731.1    | DOWNSTREAM                    | WD repeat-containing protein 82-B                         |
| <i>Desi_wild_16983</i> | NA                                  | <i>Ca_desi_scaffold</i> | 16983                   | T/G  | Gene_Ca_17731.1    | DOWNSTREAM                    | WD repeat-containing protein 82-B                         |
| <i>Desi_wild_18816</i> | NA                                  | <i>Ca_desi_scaffold</i> | 18816                   | C/A  | Gene_Ca_17731.1    | INTRON                        | WD repeat-containing protein 82-B                         |
| <i>Desi_wild_28435</i> | NA                                  | <i>Ca_desi_scaffold</i> | 28435                   | C/T  | NA                 | INTERGENIC                    | NA                                                        |
| <i>Desi_wild_28460</i> | NA                                  | <i>Ca_desi_scaffold</i> | 28460                   | A/C  | NA                 | INTERGENIC                    | NA                                                        |
| <i>Desi_wild_28478</i> | NA                                  | <i>Ca_desi_scaffold</i> | 28478                   | T/C  | NA                 | INTERGENIC                    | NA                                                        |
| <i>Desi_wild_14365</i> | NA                                  | <i>Ca_desi_scaffold</i> | 14365                   | T/C  | NA                 | INTERGENIC                    | NA                                                        |
| <i>Desi_wild_13358</i> | NA                                  | <i>Ca_desi_scaffold</i> | 13358                   | G/A  | Gene_Ca_17739.1    | NON_SYNONYMOUS_CODING         | Tudor domain-containing protein 3                         |
| <i>Desi_wild_7273</i>  | NA                                  | <i>Ca_desi_scaffold</i> | 7273                    | G/T  | Gene_Ca_10528.1    | INTRON                        | 2,3-bisphosphoglycerate-dependent phosphoglycerate mutase |
| <i>Desi_wild_28621</i> | NA                                  | <i>Ca_desi_scaffold</i> | 28621                   | C/A  | Gene_Ca_17742.1    | NON_SYNONYMOUS_CODING         | LRR receptor-like serine/threonine-protein kinase GSO1    |
| <i>Desi_wild_12229</i> | NA                                  | <i>Ca_desi_scaffold</i> | 12229                   | G/A  | Gene_Ca_17755.1    | SYNONYMOUS_CODING             | Metal tolerance protein 1                                 |
| <i>Desi_wild_12901</i> | NA                                  | <i>Ca_desi_scaffold</i> | 12901                   | A/G  | Gene_Ca_17755.1    | SYNONYMOUS_CODING             | Metal tolerance protein 1                                 |
| <i>Desi_wild_37391</i> | NA                                  | <i>Ca_desi_scaffold</i> | 37391                   | A/G  | NA                 | INTERGENIC                    | NA                                                        |
| <i>Desi_wild_33</i>    | NA                                  | <i>Ca_desi_scaffold</i> | 33                      | T/G  | NA                 | INTERGENIC                    | NA                                                        |
| <i>Desi_wild_16297</i> | NA                                  | <i>Ca_desi_scaffold</i> | 16297                   | G/A  | NA                 | INTERGENIC                    | NA                                                        |
| <i>Desi_wild_35997</i> | NA                                  | <i>Ca_desi_scaffold</i> | 35997                   | T/C  | Gene_Ca_10532.1    | SYNONYMOUS_CODING             | Heat stress transcription factor A-5                      |
| <i>Desi_wild_36063</i> | NA                                  | <i>Ca_desi_scaffold</i> | 36063                   | T/C  | Gene_Ca_10532.1    | SYNONYMOUS_CODING             | Heat stress transcription factor A-5                      |
| <i>Desi_wild_6635</i>  | NA                                  | <i>Ca_desi_scaffold</i> | 6635                    | C/G  | Gene_Ca_17765.1    | NON_SYNONYMOUS_CODING         | Gamma-glutamyltranspeptidase 1                            |
| <i>Desi_wild_6642</i>  | NA                                  | <i>Ca_desi_scaffold</i> | 6642                    | A/G  | Gene_Ca_17765.1    | SYNONYMOUS_CODING             | Gamma-glutamyltranspeptidase 1                            |
| <i>Desi_wild_6644</i>  | NA                                  | <i>Ca_desi_scaffold</i> | 6644                    | T/C  | Gene_Ca_17765.1    | NON_SYNONYMOUS_CODING         | Gamma-glutamyltranspeptidase 1                            |
| <i>Desi_wild_34186</i> | NA                                  | <i>Ca_desi_scaffold</i> | 34186                   | G/T  | NA                 | INTERGENIC                    | NA                                                        |
| <i>Desi_wild_34219</i> | NA                                  | <i>Ca_desi_scaffold</i> | 34219                   | C/T  | NA                 | INTERGENIC                    | NA                                                        |

| SNP IDs         | NCBI dbSNP accession IDs (NCBI_SS#) | Chromosomes      | Physical positions (bp) | SNPs | Gene accession IDs | Sequence components of genome | Putative functions                                              |
|-----------------|-------------------------------------|------------------|-------------------------|------|--------------------|-------------------------------|-----------------------------------------------------------------|
| Desi_wild_65864 | NA                                  | Ca_desi_scaffold | 65864                   | A/G  | NA                 | INTERGENIC                    | NA                                                              |
| Desi_wild_68549 | NA                                  | Ca_desi_scaffold | 68549                   | A/C  | NA                 | INTERGENIC                    | NA                                                              |
| Desi_wild_17460 | NA                                  | Ca_desi_scaffold | 17460                   | C/T  | Gene_Ca_17781.2    | INTRON                        | NA                                                              |
| Desi_wild_17484 | NA                                  | Ca_desi_scaffold | 17484                   | A/C  | Gene_Ca_17781.2    | INTRON                        | NA                                                              |
| Desi_wild_17494 | NA                                  | Ca_desi_scaffold | 17494                   | A/C  | Gene_Ca_17781.2    | INTRON                        | NA                                                              |
| Desi_wild_17411 | NA                                  | Ca_desi_scaffold | 17411                   | G/T  | Gene_Ca_17782.1    | NON_SYNONYMOUS_CODING         | ABC transporter B family member 6                               |
| Desi_wild_7708  | NA                                  | Ca_desi_scaffold | 7708                    | G/A  | NA                 | INTERGENIC                    | NA                                                              |
| Desi_wild_10898 | NA                                  | Ca_desi_scaffold | 10898                   | A/T  | Gene_Ca_17784.1    | DOWNSTREAM                    | Ankyrin-2                                                       |
| Desi_wild_10930 | NA                                  | Ca_desi_scaffold | 10930                   | A/C  | Gene_Ca_17784.1    | DOWNSTREAM                    | Ankyrin-2                                                       |
| Desi_wild_13009 | NA                                  | Ca_desi_scaffold | 13009                   | T/C  | NA                 | INTERGENIC                    | NA                                                              |
| Desi_wild_18323 | NA                                  | Ca_desi_scaffold | 18323                   | G/C  | Gene_Ca_17786.1    | DOWNSTREAM                    | DnaJ homolog subfamily B member 14                              |
| Desi_wild_18324 | NA                                  | Ca_desi_scaffold | 18324                   | C/T  | Gene_Ca_17786.1    | DOWNSTREAM                    | DnaJ homolog subfamily B member 14                              |
| Desi_wild_28619 | NA                                  | Ca_desi_scaffold | 28619                   | C/T  | Gene_Ca_17787.1    | NON_SYNONYMOUS_CODING         | Serine/threonine-protein kinase ULK4                            |
| Desi_wild_28747 | NA                                  | Ca_desi_scaffold | 28747                   | G/A  | Gene_Ca_17787.1    | SYNONYMOUS_CODING             | Serine/threonine-protein kinase ULK4                            |
| Desi_wild_35052 | NA                                  | Ca_desi_scaffold | 35052                   | T/C  | Gene_Ca_17796.1    | NON_SYNONYMOUS_CODING         | Pyruvate dehydrogenase E1 component subunit beta, mitochondrial |
| Desi_wild_35067 | NA                                  | Ca_desi_scaffold | 35067                   | T/G  | Gene_Ca_17796.1    | NON_SYNONYMOUS_CODING         | Pyruvate dehydrogenase E1 component subunit beta, mitochondrial |
| Desi_wild_35092 | NA                                  | Ca_desi_scaffold | 35092                   | A/C  | Gene_Ca_17796.1    | INTRON                        | Pyruvate dehydrogenase E1 component subunit beta, mitochondrial |
| Desi_wild_35299 | NA                                  | Ca_desi_scaffold | 35299                   | C/A  | Gene_Ca_17796.1    | NON_SYNONYMOUS_CODING         | Pyruvate dehydrogenase E1 component subunit beta, mitochondrial |
| Desi_wild_31787 | NA                                  | Ca_desi_scaffold | 31787                   | A/C  | Gene_Ca_17801.1    | SYNONYMOUS_CODING             | NHL domain-containing protein                                   |
| Desi_wild_10766 | NA                                  | Ca_desi_scaffold | 10766                   | G/T  | NA                 | INTERGENIC                    | NA                                                              |
| Desi_wild_10805 | NA                                  | Ca_desi_scaffold | 10805                   | C/T  | NA                 | INTERGENIC                    | NA                                                              |
| Desi_wild_10813 | NA                                  | Ca_desi_scaffold | 10813                   | C/T  | NA                 | INTERGENIC                    | NA                                                              |
| Desi_wild_405   | NA                                  | Ca_desi_scaffold | 405                     | C/T  | NA                 | INTERGENIC                    | NA                                                              |
| Desi_wild_18484 | NA                                  | Ca_desi_scaffold | 18484                   | A/C  | Gene_Ca_17820.1    | SYNONYMOUS_CODING             | Transcription factor UNE10                                      |
| Desi_wild_37384 | NA                                  | Ca_desi_scaffold | 37384                   | A/G  | Gene_Ca_17821.1    | INTRON                        | Phosphoenolpyruvate carboxylase                                 |
| Desi_wild_37444 | NA                                  | Ca_desi_scaffold | 37444                   | T/C  | Gene_Ca_17821.1    | SYNONYMOUS_CODING             | Phosphoenolpyruvate carboxylase                                 |
| Desi_wild_30710 | NA                                  | Ca_desi_scaffold | 30710                   | C/G  | NA                 | INTERGENIC                    | NA                                                              |
| Desi_wild_30937 | NA                                  | Ca_desi_scaffold | 30937                   | G/A  | NA                 | INTERGENIC                    | NA                                                              |
| Desi_wild_34073 | NA                                  | Ca_desi_scaffold | 34073                   | T/C  | Gene_Ca_17826.1    | DOWNSTREAM                    | NA                                                              |
| Desi_wild_34080 | NA                                  | Ca_desi_scaffold | 34080                   | C/T  | Gene_Ca_17826.1    | DOWNSTREAM                    | NA                                                              |
| Desi_wild_29625 | NA                                  | Ca_desi_scaffold | 29625                   | C/T  | NA                 | INTERGENIC                    | NA                                                              |
| Desi_wild_15020 | NA                                  | Ca_desi_scaffold | 15020                   | G/A  | Gene_Ca_10533.1    | SYNONYMOUS_CODING             | NA                                                              |
| Desi_wild_15032 | NA                                  | Ca_desi_scaffold | 15032                   | A/G  | Gene_Ca_10533.1    | SYNONYMOUS_CODING             | NA                                                              |
| Desi_wild_67684 | NA                                  | Ca_desi_scaffold | 67684                   | C/A  | NA                 | INTERGENIC                    | NA                                                              |
| Desi_wild_67691 | NA                                  | Ca_desi_scaffold | 67691                   | T/A  | NA                 | INTERGENIC                    | NA                                                              |
| Desi_wild_67718 | NA                                  | Ca_desi_scaffold | 67718                   | G/A  | NA                 | INTERGENIC                    | NA                                                              |
| Desi_wild_67722 | NA                                  | Ca_desi_scaffold | 67722                   | G/A  | NA                 | INTERGENIC                    | NA                                                              |
| Desi_wild_67725 | NA                                  | Ca_desi_scaffold | 67725                   | T/C  | NA                 | INTERGENIC                    | NA                                                              |
| Desi_wild_32682 | NA                                  | Ca_desi_scaffold | 32682                   | T/G  | NA                 | INTERGENIC                    | NA                                                              |
| Desi_wild_10674 | NA                                  | Ca_desi_scaffold | 10674                   | T/C  | Gene_Ca_17833.1    | NON_SYNONYMOUS_CODING         | 60S ribosomal protein L12                                       |
| Desi_wild_38110 | NA                                  | Ca_desi_scaffold | 38110                   | T/A  | Gene_Ca_10208.1    | DOWNSTREAM                    | Putative mediator of RNA polymerase II transcription subunit 23 |
| Desi_wild_24493 | NA                                  | Ca_desi_scaffold | 24493                   | A/G  | NA                 | INTERGENIC                    | NA                                                              |
| Desi_wild_24519 | NA                                  | Ca_desi_scaffold | 24519                   | A/T  | NA                 | INTERGENIC                    | NA                                                              |
| Desi_wild_24521 | NA                                  | Ca_desi_scaffold | 24521                   | C/A  | NA                 | INTERGENIC                    | NA                                                              |



| SNP IDs                 | NCBI dbSNP accession IDs (NCBI_SS#) | Chromosomes             | Physical positions (bp) | SNPs | Gene accession IDs | Sequence components of genome | Putative functions                               |
|-------------------------|-------------------------------------|-------------------------|-------------------------|------|--------------------|-------------------------------|--------------------------------------------------|
| <i>Desi_wild_24522</i>  | NA                                  | <i>Ca_desi_scaffold</i> | 24522                   | A/T  | NA                 | INTERGENIC                    | NA                                               |
| <i>Desi_wild_19113</i>  | NA                                  | <i>Ca_desi_scaffold</i> | 19113                   | G/A  | NA                 | INTERGENIC                    | NA                                               |
| <i>Desi_wild_19188</i>  | NA                                  | <i>Ca_desi_scaffold</i> | 19188                   | T/G  | NA                 | INTERGENIC                    | NA                                               |
| <i>Desi_wild_32994</i>  | NA                                  | <i>Ca_desi_scaffold</i> | 32994                   | T/C  | NA                 | INTERGENIC                    | NA                                               |
| <i>Desi_wild_8313</i>   | NA                                  | <i>Ca_desi_scaffold</i> | 8313                    | A/T  | Gene_Ca_17865.1    | INTRON                        | FAD/NAD(P)-binding oxidoreductase family protein |
| <i>Desi_wild_8314</i>   | NA                                  | <i>Ca_desi_scaffold</i> | 8314                    | T/A  | Gene_Ca_17865.1    | INTRON                        | FAD/NAD(P)-binding oxidoreductase family protein |
| <i>Desi_wild_8319</i>   | NA                                  | <i>Ca_desi_scaffold</i> | 8319                    | G/A  | Gene_Ca_17865.1    | INTRON                        | FAD/NAD(P)-binding oxidoreductase family protein |
| <i>Desi_wild_8328</i>   | NA                                  | <i>Ca_desi_scaffold</i> | 8328                    | T/C  | Gene_Ca_17865.1    | INTRON                        | FAD/NAD(P)-binding oxidoreductase family protein |
| <i>Desi_wild_8333</i>   | NA                                  | <i>Ca_desi_scaffold</i> | 8333                    | C/T  | Gene_Ca_17865.1    | INTRON                        | FAD/NAD(P)-binding oxidoreductase family protein |
| <i>Desi_wild_18297</i>  | NA                                  | <i>Ca_desi_scaffold</i> | 18297                   | A/G  | Gene_Ca_17872.1    | INTRON                        | sequence-specific DNA binding                    |
| <i>Desi_wild_19776</i>  | NA                                  | <i>Ca_desi_scaffold</i> | 19776                   | A/G  | Gene_Ca_17872.1    | INTRON                        | sequence-specific DNA binding                    |
| <i>Desi_wild_32484</i>  | NA                                  | <i>Ca_desi_scaffold</i> | 32484                   | T/A  | Gene_Ca_17873.1    | INTRON                        | UDP-galactose/UDP-glucose transporter 5B         |
| <i>Desi_wild_32492</i>  | NA                                  | <i>Ca_desi_scaffold</i> | 32492                   | T/A  | Gene_Ca_17873.1    | INTRON                        | UDP-galactose/UDP-glucose transporter 5B         |
| <i>Desi_wild_858</i>    | NA                                  | <i>Ca_desi_scaffold</i> | 858                     | T/C  | NA                 | INTERGENIC                    | NA                                               |
| <i>Desi_wild_37872</i>  | NA                                  | <i>Ca_desi_scaffold</i> | 37872                   | G/A  | NA                 | INTERGENIC                    | NA                                               |
| <i>Desi_wild_28955</i>  | NA                                  | <i>Ca_desi_scaffold</i> | 28955                   | C/A  | NA                 | INTERGENIC                    | NA                                               |
| <i>Desi_wild_28971</i>  | NA                                  | <i>Ca_desi_scaffold</i> | 28971                   | G/A  | NA                 | INTERGENIC                    | NA                                               |
| <i>Desi_wild_43171</i>  | NA                                  | <i>Ca_desi_scaffold</i> | 43171                   | T/C  | NA                 | INTERGENIC                    | NA                                               |
| <i>Desi_wild_129036</i> | NA                                  | <i>Ca_desi_scaffold</i> | 129036                  | G/T  | Gene_Ca_09834.1    | NON_SYNONYMOUS_CODING         | Myosin-J heavy chain                             |
| <i>Desi_wild_134712</i> | NA                                  | <i>Ca_desi_scaffold</i> | 134712                  | A/T  | Gene_Ca_09834.1    | NON_SYNONYMOUS_CODING         | Myosin-J heavy chain                             |
| <i>Desi_wild_134727</i> | NA                                  | <i>Ca_desi_scaffold</i> | 134727                  | G/T  | Gene_Ca_09834.1    | NON_SYNONYMOUS_CODING         | Myosin-J heavy chain                             |
| <i>Desi_wild_207447</i> | NA                                  | <i>Ca_desi_scaffold</i> | 207447                  | A/G  | NA                 | INTERGENIC                    | NA                                               |
| <i>Desi_wild_34404</i>  | NA                                  | <i>Ca_desi_scaffold</i> | 34404                   | C/A  | Gene_Ca_17909.1    | DOWNSTREAM                    | Stem-specific protein TSJT1                      |
| <i>Desi_wild_34443</i>  | NA                                  | <i>Ca_desi_scaffold</i> | 34443                   | A/C  | Gene_Ca_17909.1    | DOWNSTREAM                    | Stem-specific protein TSJT1                      |
| <i>Desi_wild_37217</i>  | NA                                  | <i>Ca_desi_scaffold</i> | 37217                   | A/T  | NA                 | INTERGENIC                    | NA                                               |
| <i>Desi_wild_37231</i>  | NA                                  | <i>Ca_desi_scaffold</i> | 37231                   | G/A  | NA                 | INTERGENIC                    | NA                                               |
| <i>Desi_wild_4255</i>   | NA                                  | <i>Ca_desi_scaffold</i> | 4255                    | G/A  | NA                 | INTERGENIC                    | NA                                               |
| <i>Desi_wild_21044</i>  | NA                                  | <i>Ca_desi_scaffold</i> | 21044                   | G/T  | NA                 | INTERGENIC                    | NA                                               |
| <i>Desi_wild_36770</i>  | NA                                  | <i>Ca_desi_scaffold</i> | 36770                   | T/C  | NA                 | INTERGENIC                    | NA                                               |
| <i>Desi_wild_36771</i>  | NA                                  | <i>Ca_desi_scaffold</i> | 36771                   | C/T  | NA                 | INTERGENIC                    | NA                                               |
| <i>Desi_wild_36776</i>  | NA                                  | <i>Ca_desi_scaffold</i> | 36776                   | A/G  | NA                 | INTERGENIC                    | NA                                               |
| <i>Desi_wild_36791</i>  | NA                                  | <i>Ca_desi_scaffold</i> | 36791                   | T/C  | NA                 | INTERGENIC                    | NA                                               |
| <i>Desi_wild_36797</i>  | NA                                  | <i>Ca_desi_scaffold</i> | 36797                   | A/G  | NA                 | INTERGENIC                    | NA                                               |
| <i>Desi_wild_36806</i>  | NA                                  | <i>Ca_desi_scaffold</i> | 36806                   | G/A  | NA                 | INTERGENIC                    | NA                                               |
| <i>Desi_wild_36825</i>  | NA                                  | <i>Ca_desi_scaffold</i> | 36825                   | T/G  | NA                 | INTERGENIC                    | NA                                               |
| <i>Desi_wild_36831</i>  | NA                                  | <i>Ca_desi_scaffold</i> | 36831                   | G/A  | NA                 | INTERGENIC                    | NA                                               |
| <i>Desi_wild_5372</i>   | NA                                  | <i>Ca_desi_scaffold</i> | 5372                    | T/C  | Gene_Ca_17918.2    | INTRON                        | NA                                               |
| <i>Desi_wild_23689</i>  | NA                                  | <i>Ca_desi_scaffold</i> | 23689                   | T/C  | NA                 | INTERGENIC                    | NA                                               |
| <i>Desi_wild_23081</i>  | NA                                  | <i>Ca_desi_scaffold</i> | 23081                   | T/C  | Gene_Ca_17943.1    | DOWNSTREAM                    | Putative E3 ubiquitin-protein ligase RF4         |
| <i>Desi_wild_23254</i>  | NA                                  | <i>Ca_desi_scaffold</i> | 23254                   | G/T  | Gene_Ca_17943.1    | DOWNSTREAM                    | Putative E3 ubiquitin-protein ligase RF4         |
| <i>Desi_wild_23405</i>  | NA                                  | <i>Ca_desi_scaffold</i> | 23405                   | G/T  | Gene_Ca_17943.1    | DOWNSTREAM                    | Putative E3 ubiquitin-protein ligase RF4         |
| <i>Desi_wild_23453</i>  | NA                                  | <i>Ca_desi_scaffold</i> | 23453                   | C/T  | Gene_Ca_17943.1    | DOWNSTREAM                    | Putative E3 ubiquitin-protein ligase RF4         |
| <i>Desi_wild_24271</i>  | NA                                  | <i>Ca_desi_scaffold</i> | 24271                   | C/T  | Gene_Ca_17943.1    | SYNONYMOUS_CODING             | Putative E3 ubiquitin-protein ligase RF4         |
| <i>Desi_wild_24325</i>  | NA                                  | <i>Ca_desi_scaffold</i> | 24325                   | G/A  | Gene_Ca_17943.1    | SYNONYMOUS_CODING             | Putative E3 ubiquitin-protein ligase RF4         |



| SNP IDs         | NCBI dbSNP accession IDs (NCBI_SS#) | Chromosomes      | Physical positions (bp) | SNPs | Gene accession IDs | Sequence components of genome | Putative functions                                                  |
|-----------------|-------------------------------------|------------------|-------------------------|------|--------------------|-------------------------------|---------------------------------------------------------------------|
| Desi_wild_24613 | NA                                  | Ca_desi_scaffold | 24613                   | G/A  | Gene_Ca_17943.1    | SYNONYMOUS_CODING             | Putative E3 ubiquitin-protein ligase RF4                            |
| Desi_wild_29846 | NA                                  | Ca_desi_scaffold | 29846                   | G/A  | Gene_Ca_17945.1    | INTRON                        | Beta-carotene 3-hydroxylase, chloroplastic                          |
| Desi_wild_27389 | NA                                  | Ca_desi_scaffold | 27389                   | A/G  | Gene_Ca_17952.1    | INTRON                        | Intron-binding protein aquarius                                     |
| Desi_wild_27602 | NA                                  | Ca_desi_scaffold | 27602                   | G/A  | Gene_Ca_17952.1    | SYNONYMOUS_CODING             | Intron-binding protein aquarius                                     |
| Desi_wild_6960  | NA                                  | Ca_desi_scaffold | 6960                    | A/C  | Gene_Ca_17961.1    | SYNONYMOUS_CODING             | Glyoxysomal fatty acid beta-oxidation multifunctional protein MFP-a |
| Desi_wild_29051 | NA                                  | Ca_desi_scaffold | 29051                   | A/C  | Gene_Ca_17963.1    | SYNONYMOUS_CODING             | Protein of unknown function (DUF604)                                |
| Desi_wild_34051 | NA                                  | Ca_desi_scaffold | 34051                   | C/A  | NA                 | INTERGENIC                    | NA                                                                  |
| Desi_wild_34059 | NA                                  | Ca_desi_scaffold | 34059                   | A/G  | NA                 | INTERGENIC                    | NA                                                                  |
| Desi_wild_11331 | NA                                  | Ca_desi_scaffold | 11331                   | A/T  | Gene_Ca_17966.1    | INTRON                        | NA                                                                  |
| Desi_wild_11363 | NA                                  | Ca_desi_scaffold | 11363                   | A/G  | Gene_Ca_17966.1    | INTRON                        | NA                                                                  |
| Desi_wild_5066  | NA                                  | Ca_desi_scaffold | 5066                    | G/T  | NA                 | INTERGENIC                    | NA                                                                  |
| Desi_wild_5097  | NA                                  | Ca_desi_scaffold | 5097                    | C/T  | NA                 | INTERGENIC                    | NA                                                                  |
| Desi_wild_5198  | NA                                  | Ca_desi_scaffold | 5198                    | C/A  | NA                 | INTERGENIC                    | NA                                                                  |
| Desi_wild_15410 | NA                                  | Ca_desi_scaffold | 15410                   | A/G  | NA                 | INTERGENIC                    | NA                                                                  |
| Desi_wild_29066 | NA                                  | Ca_desi_scaffold | 29066                   | G/C  | Gene_Ca_17972.1    | DOWNSTREAM                    | (3S,6E)-nerolidol synthase 1                                        |
| Desi_wild_29077 | NA                                  | Ca_desi_scaffold | 29077                   | G/T  | Gene_Ca_17972.1    | DOWNSTREAM                    | (3S,6E)-nerolidol synthase 1                                        |
| Desi_wild_29084 | NA                                  | Ca_desi_scaffold | 29084                   | T/C  | Gene_Ca_17972.1    | DOWNSTREAM                    | (3S,6E)-nerolidol synthase 1                                        |
| Desi_wild_29274 | NA                                  | Ca_desi_scaffold | 29274                   | T/G  | Gene_Ca_17972.1    | DOWNSTREAM                    | (3S,6E)-nerolidol synthase 1                                        |
| Desi_wild_10517 | NA                                  | Ca_desi_scaffold | 10517                   | G/C  | NA                 | INTERGENIC                    | NA                                                                  |
| Desi_wild_120   | NA                                  | Ca_desi_scaffold | 120                     | C/A  | Gene_Ca_17997.1    | DOWNSTREAM                    | Zinc finger Ran-binding domain-containing protein 3                 |
| Desi_wild_4787  | NA                                  | Ca_desi_scaffold | 4787                    | C/T  | Gene_Ca_17998.1    | NON_SYNONYMOUS_CODING         | Pectinesterase 2                                                    |
| Desi_wild_4600  | NA                                  | Ca_desi_scaffold | 4600                    | A/C  | Gene_Ca_18001.1    | SYNONYMOUS_CODING             | Ninja-family protein mc410                                          |
| Desi_wild_35618 | NA                                  | Ca_desi_scaffold | 35618                   | C/G  | Gene_Ca_18005.1    | SYNONYMOUS_CODING             | NA                                                                  |
| Desi_wild_35652 | NA                                  | Ca_desi_scaffold | 35652                   | A/G  | Gene_Ca_18005.1    | NON_SYNONYMOUS_CODING         | NA                                                                  |
| Desi_wild_168   | NA                                  | Ca_desi_scaffold | 168                     | T/C  | NA                 | INTERGENIC                    | NA                                                                  |
| Desi_wild_1864  | NA                                  | Ca_desi_scaffold | 1864                    | G/T  | NA                 | INTERGENIC                    | NA                                                                  |
| Desi_wild_6497  | NA                                  | Ca_desi_scaffold | 6497                    | A/G  | Gene_Ca_18014.1    | STOP_LOST                     | Acidic endochitinase                                                |
| Desi_wild_6499  | NA                                  | Ca_desi_scaffold | 6499                    | T/G  | Gene_Ca_18014.1    | NON_SYNONYMOUS_CODING         | Acidic endochitinase                                                |
| Desi_wild_6502  | NA                                  | Ca_desi_scaffold | 6502                    | A/T  | Gene_Ca_18014.1    | NON_SYNONYMOUS_CODING         | Acidic endochitinase                                                |
| Desi_wild_6530  | NA                                  | Ca_desi_scaffold | 6530                    | T/G  | Gene_Ca_18014.1    | INTRON                        | Acidic endochitinase                                                |
| Desi_wild_6537  | NA                                  | Ca_desi_scaffold | 6537                    | T/G  | Gene_Ca_18014.1    | INTRON                        | Acidic endochitinase                                                |
| Desi_wild_6542  | NA                                  | Ca_desi_scaffold | 6542                    | A/G  | Gene_Ca_18014.1    | INTRON                        | Acidic endochitinase                                                |
| Desi_wild_6553  | NA                                  | Ca_desi_scaffold | 6553                    | A/T  | Gene_Ca_18014.1    | INTRON                        | Acidic endochitinase                                                |
| Desi_wild_6560  | NA                                  | Ca_desi_scaffold | 6560                    | G/A  | Gene_Ca_18014.1    | INTRON                        | Acidic endochitinase                                                |
| Desi_wild_6565  | NA                                  | Ca_desi_scaffold | 6565                    | G/A  | Gene_Ca_18014.1    | INTRON                        | Acidic endochitinase                                                |
| Desi_wild_6573  | NA                                  | Ca_desi_scaffold | 6573                    | C/A  | Gene_Ca_18014.1    | INTRON                        | Acidic endochitinase                                                |
| Desi_wild_6575  | NA                                  | Ca_desi_scaffold | 6575                    | T/C  | Gene_Ca_18014.1    | INTRON                        | Acidic endochitinase                                                |
| Desi_wild_6581  | NA                                  | Ca_desi_scaffold | 6581                    | T/A  | Gene_Ca_18014.1    | INTRON                        | Acidic endochitinase                                                |
| Desi_wild_7225  | NA                                  | Ca_desi_scaffold | 7225                    | C/A  | Gene_Ca_09706.1    | DOWNSTREAM                    | F-box/kelch-repeat protein At3g23880                                |
| Desi_wild_17014 | NA                                  | Ca_desi_scaffold | 17014                   | G/T  | NA                 | INTERGENIC                    | NA                                                                  |
| Desi_wild_17040 | NA                                  | Ca_desi_scaffold | 17040                   | G/T  | NA                 | INTERGENIC                    | NA                                                                  |
| Desi_wild_17070 | NA                                  | Ca_desi_scaffold | 17070                   | G/A  | NA                 | INTERGENIC                    | NA                                                                  |
| Desi_wild_17103 | NA                                  | Ca_desi_scaffold | 17103                   | C/T  | NA                 | INTERGENIC                    | NA                                                                  |
| Desi_wild_17104 | NA                                  | Ca_desi_scaffold | 17104                   | A/G  | NA                 | INTERGENIC                    | NA                                                                  |

| SNP IDs                 | NCBI dbSNP accession IDs (NCBI_SS#) | Chromosomes             | Physical positions (bp) | SNPs | Gene accessions | Sequence components of genome | Putative functions |
|-------------------------|-------------------------------------|-------------------------|-------------------------|------|-----------------|-------------------------------|--------------------|
| <i>Desi_wild_17110</i>  | NA                                  | <i>Ca_desi_scaffold</i> | 17110                   | C/A  | NA              | INTERGENIC                    | NA                 |
| <i>Desi_wild_17553</i>  | NA                                  | <i>Ca_desi_scaffold</i> | 17553                   | G/T  | NA              | INTERGENIC                    | NA                 |
| <i>Desi_wild_17719</i>  | NA                                  | <i>Ca_desi_scaffold</i> | 17719                   | T/C  | NA              | INTERGENIC                    | NA                 |
| <i>Desi_wild_134741</i> | NA                                  | <i>Ca_desi_scaffold</i> | 134741                  | A/G  | NA              | INTERGENIC                    | NA                 |
| <i>Desi_wild_135181</i> | NA                                  | <i>Ca_desi_scaffold</i> | 135181                  | C/T  | NA              | INTERGENIC                    | NA                 |
| <i>Desi_wild_22753</i>  | NA                                  | <i>Ca_desi_scaffold</i> | 22753                   | A/G  | NA              | INTERGENIC                    | NA                 |
| <i>Desi_wild_22777</i>  | NA                                  | <i>Ca_desi_scaffold</i> | 22777                   | T/A  | NA              | INTERGENIC                    | NA                 |
| <i>Desi_wild_22809</i>  | NA                                  | <i>Ca_desi_scaffold</i> | 22809                   | T/C  | NA              | INTERGENIC                    | NA                 |
| <i>Desi_wild_22812</i>  | NA                                  | <i>Ca_desi_scaffold</i> | 22812                   | T/G  | NA              | INTERGENIC                    | NA                 |
| <i>Desi_wild_23940</i>  | NA                                  | <i>Ca_desi_scaffold</i> | 23940                   | T/C  | NA              | INTERGENIC                    | NA                 |
| <i>Desi_wild_23943</i>  | NA                                  | <i>Ca_desi_scaffold</i> | 23943                   | G/A  | NA              | INTERGENIC                    | NA                 |
| <i>Desi_wild_23950</i>  | NA                                  | <i>Ca_desi_scaffold</i> | 23950                   | C/A  | NA              | INTERGENIC                    | NA                 |
| <i>Desi_wild_23951</i>  | NA                                  | <i>Ca_desi_scaffold</i> | 23951                   | G/A  | NA              | INTERGENIC                    | NA                 |
| <i>Desi_wild_23958</i>  | NA                                  | <i>Ca_desi_scaffold</i> | 23958                   | T/C  | NA              | INTERGENIC                    | NA                 |
| <i>Desi_wild_23961</i>  | NA                                  | <i>Ca_desi_scaffold</i> | 23961                   | C/T  | NA              | INTERGENIC                    | NA                 |
| <i>Desi_wild_24031</i>  | NA                                  | <i>Ca_desi_scaffold</i> | 24031                   | C/T  | NA              | INTERGENIC                    | NA                 |
| <i>Desi_wild_26216</i>  | NA                                  | <i>Ca_desi_scaffold</i> | 26216                   | C/A  | NA              | INTERGENIC                    | NA                 |
| <i>Desi_wild_26236</i>  | NA                                  | <i>Ca_desi_scaffold</i> | 26236                   | C/A  | NA              | INTERGENIC                    | NA                 |
| <i>Desi_wild_26239</i>  | NA                                  | <i>Ca_desi_scaffold</i> | 26239                   | T/C  | NA              | INTERGENIC                    | NA                 |
| <i>Desi_wild_26278</i>  | NA                                  | <i>Ca_desi_scaffold</i> | 26278                   | C/A  | NA              | INTERGENIC                    | NA                 |
| <i>Desi_wild_26285</i>  | NA                                  | <i>Ca_desi_scaffold</i> | 26285                   | A/G  | NA              | INTERGENIC                    | NA                 |
| <i>Desi_wild_26298</i>  | NA                                  | <i>Ca_desi_scaffold</i> | 26298                   | C/G  | NA              | INTERGENIC                    | NA                 |
| <i>Desi_wild_26334</i>  | NA                                  | <i>Ca_desi_scaffold</i> | 26334                   | G/C  | NA              | INTERGENIC                    | NA                 |
| <i>Desi_wild_26337</i>  | NA                                  | <i>Ca_desi_scaffold</i> | 26337                   | A/G  | NA              | INTERGENIC                    | NA                 |
| <i>Desi_wild_26342</i>  | NA                                  | <i>Ca_desi_scaffold</i> | 26342                   | T/C  | NA              | INTERGENIC                    | NA                 |
| <i>Desi_wild_26368</i>  | NA                                  | <i>Ca_desi_scaffold</i> | 26368                   | A/G  | NA              | INTERGENIC                    | NA                 |
| <i>Desi_wild_26380</i>  | NA                                  | <i>Ca_desi_scaffold</i> | 26380                   | T/C  | NA              | INTERGENIC                    | NA                 |
| <i>Desi_wild_26396</i>  | NA                                  | <i>Ca_desi_scaffold</i> | 26396                   | A/G  | NA              | INTERGENIC                    | NA                 |
| <i>Desi_wild_26397</i>  | NA                                  | <i>Ca_desi_scaffold</i> | 26397                   | A/C  | NA              | INTERGENIC                    | NA                 |
| <i>Desi_wild_26408</i>  | NA                                  | <i>Ca_desi_scaffold</i> | 26408                   | G/A  | NA              | INTERGENIC                    | NA                 |
| <i>Desi_wild_26411</i>  | NA                                  | <i>Ca_desi_scaffold</i> | 26411                   | T/G  | NA              | INTERGENIC                    | NA                 |
| <i>Desi_wild_26434</i>  | NA                                  | <i>Ca_desi_scaffold</i> | 26434                   | G/T  | NA              | INTERGENIC                    | NA                 |
| <i>Desi_wild_26437</i>  | NA                                  | <i>Ca_desi_scaffold</i> | 26437                   | C/G  | NA              | INTERGENIC                    | NA                 |
| <i>Desi_wild_29992</i>  | NA                                  | <i>Ca_desi_scaffold</i> | 29992                   | T/C  | NA              | INTERGENIC                    | NA                 |
| <i>Desi_wild_30010</i>  | NA                                  | <i>Ca_desi_scaffold</i> | 30010                   | A/T  | NA              | INTERGENIC                    | NA                 |
| <i>Desi_wild_30049</i>  | NA                                  | <i>Ca_desi_scaffold</i> | 30049                   | T/C  | NA              | INTERGENIC                    | NA                 |
| <i>Desi_wild_36043</i>  | NA                                  | <i>Ca_desi_scaffold</i> | 36043                   | A/T  | NA              | INTERGENIC                    | NA                 |
| <i>Desi_wild_12599</i>  | NA                                  | <i>Ca_desi_scaffold</i> | 12599                   | A/G  | NA              | INTERGENIC                    | NA                 |
| <i>Desi_wild_12629</i>  | NA                                  | <i>Ca_desi_scaffold</i> | 12629                   | C/G  | NA              | INTERGENIC                    | NA                 |
| <i>Desi_wild_12630</i>  | NA                                  | <i>Ca_desi_scaffold</i> | 12630                   | T/A  | NA              | INTERGENIC                    | NA                 |
| <i>Desi_wild_34717</i>  | NA                                  | <i>Ca_desi_scaffold</i> | 34717                   | C/T  | NA              | INTERGENIC                    | NA                 |
| <i>Desi_wild_34732</i>  | NA                                  | <i>Ca_desi_scaffold</i> | 34732                   | C/T  | NA              | INTERGENIC                    | NA                 |
| <i>Desi_wild_34766</i>  | NA                                  | <i>Ca_desi_scaffold</i> | 34766                   | G/A  | NA              | INTERGENIC                    | NA                 |
| <i>Desi_wild_34776</i>  | NA                                  | <i>Ca_desi_scaffold</i> | 34776                   | C/A  | NA              | INTERGENIC                    | NA                 |

| SNP IDs                | NCBI dbSNP accession IDs (NCBI_SS#) | Chromosomes             | Physical positions (bp) | SNPs | Gene accession IDs | Sequence components of genome | Putative functions                                          |
|------------------------|-------------------------------------|-------------------------|-------------------------|------|--------------------|-------------------------------|-------------------------------------------------------------|
| <i>Desi_wild_24593</i> | NA                                  | <i>Ca_desi_scaffold</i> | 24593                   | G/T  | Gene_Ca_18056.1    | INTRON                        | Myb family transcription factor APL                         |
| <i>Desi_wild_24646</i> | NA                                  | <i>Ca_desi_scaffold</i> | 24646                   | A/G  | Gene_Ca_18056.1    | INTRON                        | Myb family transcription factor APL                         |
| <i>Desi_wild_34058</i> | NA                                  | <i>Ca_desi_scaffold</i> | 34058                   | T/G  | NA                 | INTERGENIC                    | NA                                                          |
| <i>Desi_wild_34075</i> | NA                                  | <i>Ca_desi_scaffold</i> | 34075                   | T/C  | NA                 | INTERGENIC                    | NA                                                          |
| <i>Desi_wild_18460</i> | NA                                  | <i>Ca_desi_scaffold</i> | 18460                   | G/A  | Gene_Ca_18060.1    | INTRON                        | 29 kDa ribonucleoprotein B, chloroplastic                   |
| <i>Desi_wild_18478</i> | NA                                  | <i>Ca_desi_scaffold</i> | 18478                   | C/T  | Gene_Ca_18060.1    | INTRON                        | 29 kDa ribonucleoprotein B, chloroplastic                   |
| <i>Desi_wild_21773</i> | NA                                  | <i>Ca_desi_scaffold</i> | 21773                   | A/G  | Gene_Ca_18060.1    | SYNONYMOUS_CODING             | 29 kDa ribonucleoprotein B, chloroplastic                   |
| <i>Desi_wild_24624</i> | NA                                  | <i>Ca_desi_scaffold</i> | 24624                   | T/A  | Gene_Ca_18060.1    | INTRON                        | 29 kDa ribonucleoprotein B, chloroplastic                   |
| <i>Desi_wild_24670</i> | NA                                  | <i>Ca_desi_scaffold</i> | 24670                   | A/C  | Gene_Ca_18060.1    | INTRON                        | 29 kDa ribonucleoprotein B, chloroplastic                   |
| <i>Desi_wild_24760</i> | NA                                  | <i>Ca_desi_scaffold</i> | 24760                   | C/T  | Gene_Ca_18060.1    | SYNONYMOUS_CODING             | 29 kDa ribonucleoprotein B, chloroplastic                   |
| <i>Desi_wild_28480</i> | NA                                  | <i>Ca_desi_scaffold</i> | 28480                   | C/T  | NA                 | INTERGENIC                    | NA                                                          |
| <i>Desi_wild_28503</i> | NA                                  | <i>Ca_desi_scaffold</i> | 28503                   | G/A  | NA                 | INTERGENIC                    | NA                                                          |
| <i>Desi_wild_28509</i> | NA                                  | <i>Ca_desi_scaffold</i> | 28509                   | G/A  | NA                 | INTERGENIC                    | NA                                                          |
| <i>Desi_wild_28525</i> | NA                                  | <i>Ca_desi_scaffold</i> | 28525                   | C/A  | NA                 | INTERGENIC                    | NA                                                          |
| <i>Desi_wild_28556</i> | NA                                  | <i>Ca_desi_scaffold</i> | 28556                   | T/G  | NA                 | INTERGENIC                    | NA                                                          |
| <i>Desi_wild_28568</i> | NA                                  | <i>Ca_desi_scaffold</i> | 28568                   | C/T  | NA                 | INTERGENIC                    | NA                                                          |
| <i>Desi_wild_28571</i> | NA                                  | <i>Ca_desi_scaffold</i> | 28571                   | T/A  | NA                 | INTERGENIC                    | NA                                                          |
| <i>Desi_wild_29597</i> | NA                                  | <i>Ca_desi_scaffold</i> | 29597                   | A/C  | NA                 | INTERGENIC                    | NA                                                          |
| <i>Desi_wild_29613</i> | NA                                  | <i>Ca_desi_scaffold</i> | 29613                   | C/T  | NA                 | INTERGENIC                    | NA                                                          |
| <i>Desi_wild_29798</i> | NA                                  | <i>Ca_desi_scaffold</i> | 29798                   | G/A  | NA                 | INTERGENIC                    | NA                                                          |
| <i>Desi_wild_29840</i> | NA                                  | <i>Ca_desi_scaffold</i> | 29840                   | A/C  | NA                 | INTERGENIC                    | NA                                                          |
| <i>Desi_wild_29845</i> | NA                                  | <i>Ca_desi_scaffold</i> | 29845                   | T/C  | NA                 | INTERGENIC                    | NA                                                          |
| <i>Desi_wild_30649</i> | NA                                  | <i>Ca_desi_scaffold</i> | 30649                   | C/T  | NA                 | INTERGENIC                    | NA                                                          |
| <i>Desi_wild_34034</i> | NA                                  | <i>Ca_desi_scaffold</i> | 34034                   | T/C  | Gene_Ca_18067.1    | UPSTREAM                      | Non-structural maintenance of chromosomes element 1 homolog |
| <i>Desi_wild_28391</i> | NA                                  | <i>Ca_desi_scaffold</i> | 28391                   | G/T  | Gene_Ca_10363.1    | NON_SYNONYMOUS_CODING         | Cucumisin                                                   |
| <i>Desi_wild_28393</i> | NA                                  | <i>Ca_desi_scaffold</i> | 28393                   | C/T  | Gene_Ca_10363.1    | NON_SYNONYMOUS_CODING         | Cucumisin                                                   |
| <i>Desi_wild_31746</i> | NA                                  | <i>Ca_desi_scaffold</i> | 31746                   | A/T  | Gene_Ca_18080.1    | SYNONYMOUS_CODING             | Putative uncharacterized protein                            |
| <i>Desi_wild_31778</i> | NA                                  | <i>Ca_desi_scaffold</i> | 31778                   | G/A  | Gene_Ca_18080.1    | SYNONYMOUS_CODING             | Putative uncharacterized protein                            |
| <i>Desi_wild_12986</i> | NA                                  | <i>Ca_desi_scaffold</i> | 12986                   | A/C  | Gene_Ca_18082.1    | NON_SYNONYMOUS_CODING         | NA                                                          |
| <i>Desi_wild_12987</i> | NA                                  | <i>Ca_desi_scaffold</i> | 12987                   | G/T  | Gene_Ca_18082.1    | NON_SYNONYMOUS_CODING         | NA                                                          |
| <i>Desi_wild_29366</i> | NA                                  | <i>Ca_desi_scaffold</i> | 29366                   | T/G  | Gene_Ca_18086.1    | INTRON                        | D-3-phosphoglycerate dehydrogenase                          |
| <i>Desi_wild_17713</i> | NA                                  | <i>Ca_desi_scaffold</i> | 17713                   | G/A  | NA                 | INTERGENIC                    | NA                                                          |
| <i>Desi_wild_17727</i> | NA                                  | <i>Ca_desi_scaffold</i> | 17727                   | G/A  | NA                 | INTERGENIC                    | NA                                                          |
| <i>Desi_wild_17733</i> | NA                                  | <i>Ca_desi_scaffold</i> | 17733                   | C/G  | NA                 | INTERGENIC                    | NA                                                          |
| <i>Desi_wild_17735</i> | NA                                  | <i>Ca_desi_scaffold</i> | 17735                   | C/T  | NA                 | INTERGENIC                    | NA                                                          |
| <i>Desi_wild_17768</i> | NA                                  | <i>Ca_desi_scaffold</i> | 17768                   | G/T  | NA                 | INTERGENIC                    | NA                                                          |
| <i>Desi_wild_17772</i> | NA                                  | <i>Ca_desi_scaffold</i> | 17772                   | G/A  | NA                 | INTERGENIC                    | NA                                                          |
| <i>Desi_wild_17773</i> | NA                                  | <i>Ca_desi_scaffold</i> | 17773                   | A/G  | NA                 | INTERGENIC                    | NA                                                          |
| <i>Desi_wild_17774</i> | NA                                  | <i>Ca_desi_scaffold</i> | 17774                   | G/T  | NA                 | INTERGENIC                    | NA                                                          |
| <i>Desi_wild_17790</i> | NA                                  | <i>Ca_desi_scaffold</i> | 17790                   | G/A  | NA                 | INTERGENIC                    | NA                                                          |
| <i>Desi_wild_17801</i> | NA                                  | <i>Ca_desi_scaffold</i> | 17801                   | C/T  | NA                 | INTERGENIC                    | NA                                                          |
| <i>Desi_wild_5255</i>  | NA                                  | <i>Ca_desi_scaffold</i> | 5255                    | A/T  | Gene_Ca_18089.1    | INTRON                        | Protein of unknown function (DUF789)                        |
| <i>Desi_wild_31587</i> | NA                                  | <i>Ca_desi_scaffold</i> | 31587                   | C/T  | NA                 | INTERGENIC                    | NA                                                          |
| <i>Desi_wild_31589</i> | NA                                  | <i>Ca_desi_scaffold</i> | 31589                   | T/G  | NA                 | INTERGENIC                    | NA                                                          |

| SNP IDs                 | NCBI dbSNP accession IDs (NCBI_SS#) | Chromosomes             | Physical positions (bp) | SNPs | Gene accession IDs | Sequence components of genome | Putative functions                                        |
|-------------------------|-------------------------------------|-------------------------|-------------------------|------|--------------------|-------------------------------|-----------------------------------------------------------|
| <i>Desi_wild_31625</i>  | NA                                  | <i>Ca_desi_scaffold</i> | 31625                   | G/C  | NA                 | INTERGENIC                    | NA                                                        |
| <i>Desi_wild_31628</i>  | NA                                  | <i>Ca_desi_scaffold</i> | 31628                   | G/A  | NA                 | INTERGENIC                    | NA                                                        |
| <i>Desi_wild_31639</i>  | NA                                  | <i>Ca_desi_scaffold</i> | 31639                   | G/T  | NA                 | INTERGENIC                    | NA                                                        |
| <i>Desi_wild_31646</i>  | NA                                  | <i>Ca_desi_scaffold</i> | 31646                   | G/A  | NA                 | INTERGENIC                    | NA                                                        |
| <i>Desi_wild_28024</i>  | NA                                  | <i>Ca_desi_scaffold</i> | 28024                   | G/A  | NA                 | INTERGENIC                    | NA                                                        |
| <i>Desi_wild_10255</i>  | NA                                  | <i>Ca_desi_scaffold</i> | 10255                   | A/G  | Gene_Ca_18110.1    | NON_SYNONYMOUS_CODING         | BAG family molecular chaperone regulator 8, chloroplastic |
| <i>Desi_wild_10450</i>  | NA                                  | <i>Ca_desi_scaffold</i> | 10450                   | A/G  | Gene_Ca_18110.1    | NON_SYNONYMOUS_CODING         | BAG family molecular chaperone regulator 8, chloroplastic |
| <i>Desi_wild_10582</i>  | NA                                  | <i>Ca_desi_scaffold</i> | 10582                   | T/G  | Gene_Ca_18110.1    | NON_SYNONYMOUS_CODING         | BAG family molecular chaperone regulator 8, chloroplastic |
| <i>Desi_wild_3699</i>   | NA                                  | <i>Ca_desi_scaffold</i> | 3699                    | A/G  | Gene_Ca_18112.1    | DOWNSTREAM                    | NA                                                        |
| <i>Desi_wild_31683</i>  | NA                                  | <i>Ca_desi_scaffold</i> | 31683                   | T/C  | NA                 | INTERGENIC                    | NA                                                        |
| <i>Desi_wild_33866</i>  | NA                                  | <i>Ca_desi_scaffold</i> | 33866                   | T/C  | NA                 | INTERGENIC                    | NA                                                        |
| <i>Desi_wild_4948</i>   | NA                                  | <i>Ca_desi_scaffold</i> | 4948                    | T/G  | NA                 | INTERGENIC                    | NA                                                        |
| <i>Desi_wild_3764</i>   | NA                                  | <i>Ca_desi_scaffold</i> | 3764                    | C/T  | NA                 | INTERGENIC                    | NA                                                        |
| <i>Desi_wild_165026</i> | NA                                  | <i>Ca_desi_scaffold</i> | 165026                  | G/T  | Gene_Ca_08818.1    | INTRON                        | DNA-directed RNA polymerase E subunit 1                   |
| <i>Desi_wild_165087</i> | NA                                  | <i>Ca_desi_scaffold</i> | 165087                  | T/C  | Gene_Ca_08818.1    | NON_SYNONYMOUS_CODING         | DNA-directed RNA polymerase E subunit 1                   |
| <i>Desi_wild_333574</i> | NA                                  | <i>Ca_desi_scaffold</i> | 333574                  | T/C  | NA                 | INTERGENIC                    | NA                                                        |
| <i>Desi_wild_521777</i> | NA                                  | <i>Ca_desi_scaffold</i> | 521777                  | A/C  | NA                 | INTERGENIC                    | NA                                                        |
| <i>Desi_wild_24986</i>  | NA                                  | <i>Ca_desi_scaffold</i> | 24986                   | G/T  | Gene_Ca_18130.1    | DOWNSTREAM                    | NA                                                        |
| <i>Desi_wild_16125</i>  | NA                                  | <i>Ca_desi_scaffold</i> | 16125                   | T/G  | Gene_Ca_18131.1    | DOWNSTREAM                    | Putative disease resistance RPP13-like protein 1          |
| <i>Desi_wild_21701</i>  | NA                                  | <i>Ca_desi_scaffold</i> | 21701                   | T/C  | NA                 | INTERGENIC                    | NA                                                        |
| <i>Desi_wild_13887</i>  | NA                                  | <i>Ca_desi_scaffold</i> | 13887                   | C/A  | NA                 | INTERGENIC                    | NA                                                        |
| <i>Desi_wild_13903</i>  | NA                                  | <i>Ca_desi_scaffold</i> | 13903                   | T/G  | NA                 | INTERGENIC                    | NA                                                        |
| <i>Desi_wild_20768</i>  | NA                                  | <i>Ca_desi_scaffold</i> | 20768                   | T/G  | Gene_Ca_18143.1    | SYNONYMOUS_CODING             | Trypsin family protein                                    |
| <i>Desi_wild_23383</i>  | NA                                  | <i>Ca_desi_scaffold</i> | 23383                   | G/A  | Gene_Ca_18143.1    | NON_SYNONYMOUS_CODING         | Trypsin family protein                                    |
| <i>Desi_wild_1475</i>   | NA                                  | <i>Ca_desi_scaffold</i> | 1475                    | A/G  | NA                 | INTERGENIC                    | NA                                                        |
| <i>Desi_wild_19683</i>  | NA                                  | <i>Ca_desi_scaffold</i> | 19683                   | A/G  | Gene_Ca_18151.1    | INTRON                        | Gibberellin-regulated protein 4                           |
| <i>Desi_wild_19684</i>  | NA                                  | <i>Ca_desi_scaffold</i> | 19684                   | C/A  | Gene_Ca_18151.1    | INTRON                        | Gibberellin-regulated protein 4                           |
| <i>Desi_wild_19687</i>  | NA                                  | <i>Ca_desi_scaffold</i> | 19687                   | T/A  | Gene_Ca_18151.1    | INTRON                        | Gibberellin-regulated protein 4                           |
| <i>Desi_wild_19689</i>  | NA                                  | <i>Ca_desi_scaffold</i> | 19689                   | T/A  | Gene_Ca_18151.1    | INTRON                        | Gibberellin-regulated protein 4                           |
| <i>Desi_wild_19702</i>  | NA                                  | <i>Ca_desi_scaffold</i> | 19702                   | G/A  | Gene_Ca_18151.1    | INTRON                        | Gibberellin-regulated protein 4                           |
| <i>Desi_wild_19709</i>  | NA                                  | <i>Ca_desi_scaffold</i> | 19709                   | G/A  | Gene_Ca_18151.1    | INTRON                        | Gibberellin-regulated protein 4                           |
| <i>Desi_wild_19719</i>  | NA                                  | <i>Ca_desi_scaffold</i> | 19719                   | C/A  | Gene_Ca_18151.1    | INTRON                        | Gibberellin-regulated protein 4                           |
| <i>Desi_wild_19723</i>  | NA                                  | <i>Ca_desi_scaffold</i> | 19723                   | T/A  | Gene_Ca_18151.1    | INTRON                        | Gibberellin-regulated protein 4                           |
| <i>Desi_wild_19726</i>  | NA                                  | <i>Ca_desi_scaffold</i> | 19726                   | T/A  | Gene_Ca_18151.1    | INTRON                        | Gibberellin-regulated protein 4                           |
| <i>Desi_wild_19728</i>  | NA                                  | <i>Ca_desi_scaffold</i> | 19728                   | G/A  | Gene_Ca_18151.1    | INTRON                        | Gibberellin-regulated protein 4                           |
| <i>Desi_wild_19730</i>  | NA                                  | <i>Ca_desi_scaffold</i> | 19730                   | T/A  | Gene_Ca_18151.1    | INTRON                        | Gibberellin-regulated protein 4                           |
| <i>Desi_wild_19732</i>  | NA                                  | <i>Ca_desi_scaffold</i> | 19732                   | T/A  | Gene_Ca_18151.1    | INTRON                        | Gibberellin-regulated protein 4                           |
| <i>Desi_wild_19753</i>  | NA                                  | <i>Ca_desi_scaffold</i> | 19753                   | C/T  | Gene_Ca_18151.1    | INTRON                        | Gibberellin-regulated protein 4                           |
| <i>Desi_wild_2093</i>   | NA                                  | <i>Ca_desi_scaffold</i> | 2093                    | C/T  | Gene_Ca_18156.1    | DOWNSTREAM                    | AP-1 complex subunit gamma-1                              |
| <i>Desi_wild_2156</i>   | NA                                  | <i>Ca_desi_scaffold</i> | 2156                    | G/A  | Gene_Ca_18156.1    | DOWNSTREAM                    | AP-1 complex subunit gamma-1                              |
| <i>Desi_wild_51606</i>  | NA                                  | <i>Ca_desi_scaffold</i> | 51606                   | T/C  | Gene_Ca_09373.1    | SYNONYMOUS_CODING             | TMV resistance protein N                                  |
| <i>Desi_wild_181733</i> | NA                                  | <i>Ca_desi_scaffold</i> | 181733                  | T/G  | NA                 | INTERGENIC                    | NA                                                        |
| <i>Desi_wild_181735</i> | NA                                  | <i>Ca_desi_scaffold</i> | 181735                  | C/T  | NA                 | INTERGENIC                    | NA                                                        |
| <i>Desi_wild_59841</i>  | NA                                  | <i>Ca_desi_scaffold</i> | 59841                   | C/T  | NA                 | INTERGENIC                    | NA                                                        |

| SNP IDs                 | NCBI dbSNP accession IDs (NCBI_SS#) | Chromosomes             | Physical positions (bp) | SNPs | Gene accession IDs | Sequence components of genome | Putative functions                                   |
|-------------------------|-------------------------------------|-------------------------|-------------------------|------|--------------------|-------------------------------|------------------------------------------------------|
| <i>Desi_wild_13340</i>  | NA                                  | <i>Ca_desi_scaffold</i> | 13340                   | C/T  | Gene_Ca_18161.1    | NON_SYNONYMOUS_CODING         | NA                                                   |
| <i>Desi_wild_2559</i>   | NA                                  | <i>Ca_desi_scaffold</i> | 2559                    | G/A  | NA                 | INTERGENIC                    | NA                                                   |
| <i>Desi_wild_6966</i>   | NA                                  | <i>Ca_desi_scaffold</i> | 6966                    | A/G  | NA                 | INTERGENIC                    | NA                                                   |
| <i>Desi_wild_28178</i>  | NA                                  | <i>Ca_desi_scaffold</i> | 28178                   | A/G  | NA                 | INTERGENIC                    | NA                                                   |
| <i>Desi_wild_168443</i> | NA                                  | <i>Ca_desi_scaffold</i> | 168443                  | G/A  | NA                 | INTERGENIC                    | NA                                                   |
| <i>Desi_wild_219814</i> | NA                                  | <i>Ca_desi_scaffold</i> | 219814                  | T/C  | NA                 | INTERGENIC                    | NA                                                   |
| <i>Desi_wild_229156</i> | NA                                  | <i>Ca_desi_scaffold</i> | 229156                  | C/T  | Gene_Ca_09331.2    | NON_SYNONYMOUS_CODING         | E3 ubiquitin-protein ligase MARCH9                   |
| <i>Desi_wild_10340</i>  | NA                                  | <i>Ca_desi_scaffold</i> | 10340                   | A/G  | NA                 | INTERGENIC                    | NA                                                   |
| <i>Desi_wild_30593</i>  | NA                                  | <i>Ca_desi_scaffold</i> | 30593                   | T/G  | NA                 | INTERGENIC                    | NA                                                   |
| <i>Desi_wild_30596</i>  | NA                                  | <i>Ca_desi_scaffold</i> | 30596                   | A/G  | NA                 | INTERGENIC                    | NA                                                   |
| <i>Desi_wild_28512</i>  | NA                                  | <i>Ca_desi_scaffold</i> | 28512                   | T/C  | Gene_Ca_18190.1    | NON_SYNONYMOUS_CODING         | Two-component response regulator ARR2                |
| <i>Desi_wild_3466</i>   | NA                                  | <i>Ca_desi_scaffold</i> | 3466                    | A/G  | NA                 | INTERGENIC                    | NA                                                   |
| <i>Desi_wild_13410</i>  | NA                                  | <i>Ca_desi_scaffold</i> | 13410                   | C/T  | Gene_Ca_18198.1    | INTRON                        | Tic22-like family protein                            |
| <i>Desi_wild_657</i>    | NA                                  | <i>Ca_desi_scaffold</i> | 657                     | A/G  | NA                 | INTERGENIC                    | NA                                                   |
| <i>Desi_wild_693</i>    | NA                                  | <i>Ca_desi_scaffold</i> | 693                     | A/T  | NA                 | INTERGENIC                    | NA                                                   |
| <i>Desi_wild_14525</i>  | NA                                  | <i>Ca_desi_scaffold</i> | 14525                   | T/C  | Gene_Ca_18214.1    | DOWNSTREAM                    | Predicted protein                                    |
| <i>Desi_wild_28094</i>  | NA                                  | <i>Ca_desi_scaffold</i> | 28094                   | G/C  | NA                 | INTERGENIC                    | NA                                                   |
| <i>Desi_wild_6932</i>   | NA                                  | <i>Ca_desi_scaffold</i> | 6932                    | G/C  | Gene_Ca_18221.1    | SYNONYMOUS_CODING             | Putative peptide/nitrate transporter At2g37900       |
| <i>Desi_wild_6943</i>   | NA                                  | <i>Ca_desi_scaffold</i> | 6943                    | T/C  | Gene_Ca_18221.1    | NON_SYNONYMOUS_CODING         | Putative peptide/nitrate transporter At2g37900       |
| <i>Desi_wild_14161</i>  | NA                                  | <i>Ca_desi_scaffold</i> | 14161                   | G/T  | Gene_Ca_18228.1    | NON_SYNONYMOUS_CODING         | Endoglucanase 15                                     |
| <i>Desi_wild_14189</i>  | NA                                  | <i>Ca_desi_scaffold</i> | 14189                   | T/A  | Gene_Ca_18228.1    | SYNONYMOUS_CODING             | Endoglucanase 15                                     |
| <i>Desi_wild_1434</i>   | NA                                  | <i>Ca_desi_scaffold</i> | 1434                    | C/T  | NA                 | INTERGENIC                    | NA                                                   |
| <i>Desi_wild_1672</i>   | NA                                  | <i>Ca_desi_scaffold</i> | 1672                    | C/T  | NA                 | INTERGENIC                    | NA                                                   |
| <i>Desi_wild_3503</i>   | NA                                  | <i>Ca_desi_scaffold</i> | 3503                    | T/A  | Gene_Ca_18229.1    | SYNONYMOUS_CODING             | DNA binding                                          |
| <i>Desi_wild_19291</i>  | NA                                  | <i>Ca_desi_scaffold</i> | 19291                   | C/A  | NA                 | INTERGENIC                    | NA                                                   |
| <i>Desi_wild_25073</i>  | NA                                  | <i>Ca_desi_scaffold</i> | 25073                   | T/A  | NA                 | INTERGENIC                    | NA                                                   |
| <i>Desi_wild_25077</i>  | NA                                  | <i>Ca_desi_scaffold</i> | 25077                   | A/C  | NA                 | INTERGENIC                    | NA                                                   |
| <i>Desi_wild_25081</i>  | NA                                  | <i>Ca_desi_scaffold</i> | 25081                   | G/C  | NA                 | INTERGENIC                    | NA                                                   |
| <i>Desi_wild_25088</i>  | NA                                  | <i>Ca_desi_scaffold</i> | 25088                   | A/G  | NA                 | INTERGENIC                    | NA                                                   |
| <i>Desi_wild_25096</i>  | NA                                  | <i>Ca_desi_scaffold</i> | 25096                   | A/C  | NA                 | INTERGENIC                    | NA                                                   |
| <i>Desi_wild_25112</i>  | NA                                  | <i>Ca_desi_scaffold</i> | 25112                   | C/T  | NA                 | INTERGENIC                    | NA                                                   |
| <i>Desi_wild_25127</i>  | NA                                  | <i>Ca_desi_scaffold</i> | 25127                   | T/C  | NA                 | INTERGENIC                    | NA                                                   |
| <i>Desi_wild_2984</i>   | NA                                  | <i>Ca_desi_scaffold</i> | 2984                    | T/C  | Gene_Ca_18244.1    | INTRON                        | Putative cyclin-B3-1                                 |
| <i>Desi_wild_26775</i>  | NA                                  | <i>Ca_desi_scaffold</i> | 26775                   | G/A  | NA                 | INTERGENIC                    | NA                                                   |
| <i>Desi_wild_26776</i>  | NA                                  | <i>Ca_desi_scaffold</i> | 26776                   | C/T  | NA                 | INTERGENIC                    | NA                                                   |
| <i>Desi_wild_4390</i>   | NA                                  | <i>Ca_desi_scaffold</i> | 4390                    | G/T  | Gene_Ca_18258.1    | SYNONYMOUS_CODING             | Hepatoma-derived growth factor-related protein 2     |
| <i>Desi_wild_21328</i>  | NA                                  | <i>Ca_desi_scaffold</i> | 21328                   | G/A  | Gene_Ca_18259.1    | NON_SYNONYMOUS_CODING         | peptidoglycan-binding LysM domain-containing protein |
| <i>Desi_wild_25620</i>  | NA                                  | <i>Ca_desi_scaffold</i> | 25620                   | T/A  | NA                 | INTERGENIC                    | NA                                                   |
| <i>Desi_wild_25644</i>  | NA                                  | <i>Ca_desi_scaffold</i> | 25644                   | G/A  | NA                 | INTERGENIC                    | NA                                                   |
| <i>Desi_wild_25682</i>  | NA                                  | <i>Ca_desi_scaffold</i> | 25682                   | C/T  | NA                 | INTERGENIC                    | NA                                                   |
| <i>Desi_wild_23145</i>  | NA                                  | <i>Ca_desi_scaffold</i> | 23145                   | T/G  | NA                 | INTERGENIC                    | NA                                                   |
| <i>Desi_wild_23167</i>  | NA                                  | <i>Ca_desi_scaffold</i> | 23167                   | T/C  | NA                 | INTERGENIC                    | NA                                                   |
| <i>Desi_wild_23206</i>  | NA                                  | <i>Ca_desi_scaffold</i> | 23206                   | G/A  | NA                 | INTERGENIC                    | NA                                                   |
| <i>Desi_wild_23251</i>  | NA                                  | <i>Ca_desi_scaffold</i> | 23251                   | A/C  | NA                 | INTERGENIC                    | NA                                                   |

| SNP IDs                | NCBI dbSNP accession IDs (NCBI_SS#) | Chromosomes             | Physical positions (bp) | SNPs | Gene accession IDs | Sequence components of genome | Putative functions                        |
|------------------------|-------------------------------------|-------------------------|-------------------------|------|--------------------|-------------------------------|-------------------------------------------|
| <i>Desi_wild_23259</i> | NA                                  | <i>Ca_desi_scaffold</i> | 23259                   | C/T  | NA                 | INTERGENIC                    | NA                                        |
| <i>Desi_wild_23260</i> | NA                                  | <i>Ca_desi_scaffold</i> | 23260                   | A/G  | NA                 | INTERGENIC                    | NA                                        |
| <i>Desi_wild_14198</i> | NA                                  | <i>Ca_desi_scaffold</i> | 14198                   | C/T  | Gene_Ca_18262.1    | SYNONYMOUS_CODING             | Scarecrow-like protein 6                  |
| <i>Desi_wild_6750</i>  | NA                                  | <i>Ca_desi_scaffold</i> | 6750                    | C/T  | Gene_Ca_18263.1    | INTRON                        | Probable uridine nucleosidase 2           |
| <i>Desi_wild_6796</i>  | NA                                  | <i>Ca_desi_scaffold</i> | 6796                    | C/T  | Gene_Ca_18263.1    | INTRON                        | Probable uridine nucleosidase 2           |
| <i>Desi_wild_7758</i>  | NA                                  | <i>Ca_desi_scaffold</i> | 7758                    | G/A  | Gene_Ca_18263.1    | INTRON                        | Probable uridine nucleosidase 2           |
| <i>Desi_wild_16396</i> | NA                                  | <i>Ca_desi_scaffold</i> | 16396                   | C/T  | NA                 | INTERGENIC                    | NA                                        |
| <i>Desi_wild_11281</i> | NA                                  | <i>Ca_desi_scaffold</i> | 11281                   | T/A  | Gene_Ca_18272.1    | DOWNSTREAM                    | NA                                        |
| <i>Desi_wild_11327</i> | NA                                  | <i>Ca_desi_scaffold</i> | 11327                   | C/T  | Gene_Ca_18272.1    | DOWNSTREAM                    | NA                                        |
| <i>Desi_wild_11328</i> | NA                                  | <i>Ca_desi_scaffold</i> | 11328                   | G/A  | Gene_Ca_18272.1    | DOWNSTREAM                    | NA                                        |
| <i>Desi_wild_16062</i> | NA                                  | <i>Ca_desi_scaffold</i> | 16062                   | G/T  | NA                 | INTERGENIC                    | NA                                        |
| <i>Desi_wild_16437</i> | NA                                  | <i>Ca_desi_scaffold</i> | 16437                   | T/G  | NA                 | INTERGENIC                    | NA                                        |
| <i>Desi_wild_17296</i> | NA                                  | <i>Ca_desi_scaffold</i> | 17296                   | C/T  | NA                 | INTERGENIC                    | NA                                        |
| <i>Desi_wild_26593</i> | NA                                  | <i>Ca_desi_scaffold</i> | 26593                   | G/C  | Gene_Ca_18273.1    | NON_SYNONYMOUS_CODING         | unknown protein                           |
| <i>Desi_wild_26864</i> | NA                                  | <i>Ca_desi_scaffold</i> | 26864                   | G/A  | NA                 | INTERGENIC                    | NA                                        |
| <i>Desi_wild_9313</i>  | NA                                  | <i>Ca_desi_scaffold</i> | 9313                    | T/C  | NA                 | INTERGENIC                    | NA                                        |
| <i>Desi_wild_15965</i> | NA                                  | <i>Ca_desi_scaffold</i> | 15965                   | A/G  | Gene_Ca_18291.1    | UPSTREAM                      | Protein arginine N-methyltransferase 1.5  |
| <i>Desi_wild_19541</i> | NA                                  | <i>Ca_desi_scaffold</i> | 19541                   | T/C  | NA                 | INTERGENIC                    | NA                                        |
| <i>Desi_wild_25190</i> | NA                                  | <i>Ca_desi_scaffold</i> | 25190                   | C/G  | NA                 | INTERGENIC                    | NA                                        |
| <i>Desi_wild_21985</i> | NA                                  | <i>Ca_desi_scaffold</i> | 21985                   | G/T  | NA                 | INTERGENIC                    | NA                                        |
| <i>Desi_wild_10593</i> | NA                                  | <i>Ca_desi_scaffold</i> | 10593                   | T/A  | Gene_Ca_18304.1    | STOP_GAINED                   | Indole-3-acetic acid-induced protein ARG7 |
| <i>Desi_wild_18570</i> | NA                                  | <i>Ca_desi_scaffold</i> | 18570                   | A/C  | NA                 | INTERGENIC                    | NA                                        |
| <i>Desi_wild_14720</i> | NA                                  | <i>Ca_desi_scaffold</i> | 14720                   | T/C  | NA                 | INTERGENIC                    | NA                                        |
| <i>Desi_wild_16237</i> | NA                                  | <i>Ca_desi_scaffold</i> | 16237                   | T/G  | Gene_Ca_18309.1    | INTRON                        | Indole-3-acetic acid-induced protein ARG7 |
| <i>Desi_wild_20763</i> | NA                                  | <i>Ca_desi_scaffold</i> | 20763                   | A/G  | Gene_Ca_18313.1    | NON_SYNONYMOUS_CODING         | Exocyst complex component 7               |
| <i>Desi_wild_4909</i>  | NA                                  | <i>Ca_desi_scaffold</i> | 4909                    | T/A  | NA                 | INTERGENIC                    | NA                                        |
| <i>Desi_wild_13476</i> | NA                                  | <i>Ca_desi_scaffold</i> | 13476                   | A/C  | Gene_Ca_18317.1    | SYNONYMOUS_CODING             | NA                                        |
| <i>Desi_wild_13478</i> | NA                                  | <i>Ca_desi_scaffold</i> | 13478                   | A/G  | Gene_Ca_18317.1    | NON_SYNONYMOUS_CODING         | NA                                        |
| <i>Desi_wild_13480</i> | NA                                  | <i>Ca_desi_scaffold</i> | 13480                   | A/G  | Gene_Ca_18317.1    | NON_SYNONYMOUS_CODING         | NA                                        |
| <i>Desi_wild_13481</i> | NA                                  | <i>Ca_desi_scaffold</i> | 13481                   | A/G  | Gene_Ca_18317.1    | SYNONYMOUS_CODING             | NA                                        |
| <i>Desi_wild_13490</i> | NA                                  | <i>Ca_desi_scaffold</i> | 13490                   | C/T  | Gene_Ca_18317.1    | NON_SYNONYMOUS_CODING         | NA                                        |
| <i>Desi_wild_13493</i> | NA                                  | <i>Ca_desi_scaffold</i> | 13493                   | T/G  | Gene_Ca_18317.1    | SYNONYMOUS_CODING             | NA                                        |
| <i>Desi_wild_13506</i> | NA                                  | <i>Ca_desi_scaffold</i> | 13506                   | G/A  | Gene_Ca_18317.1    | SYNONYMOUS_CODING             | NA                                        |
| <i>Desi_wild_13511</i> | NA                                  | <i>Ca_desi_scaffold</i> | 13511                   | G/A  | Gene_Ca_18317.1    | NON_SYNONYMOUS_CODING         | NA                                        |
| <i>Desi_wild_43722</i> | NA                                  | <i>Ca_desi_scaffold</i> | 43722                   | T/C  | NA                 | INTERGENIC                    | NA                                        |
| <i>Desi_wild_29869</i> | NA                                  | <i>Ca_desi_scaffold</i> | 29869                   | A/G  | NA                 | INTERGENIC                    | NA                                        |
| <i>Desi_wild_25334</i> | NA                                  | <i>Ca_desi_scaffold</i> | 25334                   | G/T  | NA                 | INTERGENIC                    | NA                                        |
| <i>Desi_wild_25429</i> | NA                                  | <i>Ca_desi_scaffold</i> | 25429                   | C/A  | NA                 | INTERGENIC                    | NA                                        |
| <i>Desi_wild_8396</i>  | NA                                  | <i>Ca_desi_scaffold</i> | 8396                    | C/T  | NA                 | INTERGENIC                    | NA                                        |
| <i>Desi_wild_535</i>   | NA                                  | <i>Ca_desi_scaffold</i> | 535                     | C/T  | NA                 | INTERGENIC                    | NA                                        |
| <i>Desi_wild_565</i>   | NA                                  | <i>Ca_desi_scaffold</i> | 565                     | T/A  | NA                 | INTERGENIC                    | NA                                        |
| <i>Desi_wild_19953</i> | NA                                  | <i>Ca_desi_scaffold</i> | 19953                   | G/C  | NA                 | INTERGENIC                    | NA                                        |
| <i>Desi_wild_19987</i> | NA                                  | <i>Ca_desi_scaffold</i> | 19987                   | A/G  | NA                 | INTERGENIC                    | NA                                        |
| <i>Desi_wild_19991</i> | NA                                  | <i>Ca_desi_scaffold</i> | 19991                   | C/T  | NA                 | INTERGENIC                    | NA                                        |

| SNP IDs                | NCBI dbSNP accession IDs (NCBI_SS#) | Chromosomes             | Physical positions (bp) | SNPs | Gene accession IDs | Sequence components of genome | Putative functions                                    |
|------------------------|-------------------------------------|-------------------------|-------------------------|------|--------------------|-------------------------------|-------------------------------------------------------|
| <i>Desi_wild_20043</i> | NA                                  | <i>Ca_desi_scaffold</i> | 20043                   | T/A  | NA                 | INTERGENIC                    | NA                                                    |
| <i>Desi_wild_20075</i> | NA                                  | <i>Ca_desi_scaffold</i> | 20075                   | A/G  | NA                 | INTERGENIC                    | NA                                                    |
| <i>Desi_wild_20076</i> | NA                                  | <i>Ca_desi_scaffold</i> | 20076                   | T/C  | NA                 | INTERGENIC                    | NA                                                    |
| <i>Desi_wild_20077</i> | NA                                  | <i>Ca_desi_scaffold</i> | 20077                   | A/G  | NA                 | INTERGENIC                    | NA                                                    |
| <i>Desi_wild_7000</i>  | NA                                  | <i>Ca_desi_scaffold</i> | 7000                    | A/C  | Gene_Ca_18336.1    | UPSTREAM                      | Calcium-binding EF-hand family protein                |
| <i>Desi_wild_7001</i>  | NA                                  | <i>Ca_desi_scaffold</i> | 7001                    | T/G  | Gene_Ca_18336.1    | UPSTREAM                      | Calcium-binding EF-hand family protein                |
| <i>Desi_wild_7005</i>  | NA                                  | <i>Ca_desi_scaffold</i> | 7005                    | A/T  | Gene_Ca_18336.1    | UPSTREAM                      | Calcium-binding EF-hand family protein                |
| <i>Desi_wild_7006</i>  | NA                                  | <i>Ca_desi_scaffold</i> | 7006                    | A/C  | Gene_Ca_18336.1    | UPSTREAM                      | Calcium-binding EF-hand family protein                |
| <i>Desi_wild_7010</i>  | NA                                  | <i>Ca_desi_scaffold</i> | 7010                    | A/T  | Gene_Ca_18336.1    | UPSTREAM                      | Calcium-binding EF-hand family protein                |
| <i>Desi_wild_7011</i>  | NA                                  | <i>Ca_desi_scaffold</i> | 7011                    | A/T  | Gene_Ca_18336.1    | UPSTREAM                      | Calcium-binding EF-hand family protein                |
| <i>Desi_wild_7016</i>  | NA                                  | <i>Ca_desi_scaffold</i> | 7016                    | T/A  | Gene_Ca_18336.1    | UPSTREAM                      | Calcium-binding EF-hand family protein                |
| <i>Desi_wild_635</i>   | NA                                  | <i>Ca_desi_scaffold</i> | 635                     | C/T  | NA                 | INTERGENIC                    | NA                                                    |
| <i>Desi_wild_831</i>   | NA                                  | <i>Ca_desi_scaffold</i> | 831                     | T/C  | NA                 | INTERGENIC                    | NA                                                    |
| <i>Desi_wild_843</i>   | NA                                  | <i>Ca_desi_scaffold</i> | 843                     | G/A  | NA                 | INTERGENIC                    | NA                                                    |
| <i>Desi_wild_27496</i> | NA                                  | <i>Ca_desi_scaffold</i> | 27496                   | A/G  | NA                 | INTERGENIC                    | NA                                                    |
| <i>Desi_wild_15687</i> | NA                                  | <i>Ca_desi_scaffold</i> | 15687                   | T/C  | Gene_Ca_10562.1    | INTRON                        | NA                                                    |
| <i>Desi_wild_33665</i> | NA                                  | <i>Ca_desi_scaffold</i> | 33665                   | A/C  | Gene_Ca_10563.1    | NON_SYNONYMOUS_CODING         | Pentatricopeptide repeat-containing protein At3g12770 |
| <i>Desi_wild_8268</i>  | NA                                  | <i>Ca_desi_scaffold</i> | 8268                    | A/T  | Gene_Ca_18367.2    | DOWNSTREAM                    | Aspartic proteinase Asp1                              |
| <i>Desi_wild_8385</i>  | NA                                  | <i>Ca_desi_scaffold</i> | 8385                    | C/T  | Gene_Ca_18367.2    | DOWNSTREAM                    | Aspartic proteinase Asp1                              |
| <i>Desi_wild_8431</i>  | NA                                  | <i>Ca_desi_scaffold</i> | 8431                    | C/T  | Gene_Ca_18367.2    | DOWNSTREAM                    | Aspartic proteinase Asp1                              |
| <i>Desi_wild_8472</i>  | NA                                  | <i>Ca_desi_scaffold</i> | 8472                    | A/G  | NA                 | INTERGENIC                    | NA                                                    |
| <i>Desi_wild_23018</i> | NA                                  | <i>Ca_desi_scaffold</i> | 23018                   | A/G  | Gene_Ca_18368.1    | SYNONYMOUS_CODING             | U-box domain-containing protein 13                    |
| <i>Desi_wild_23349</i> | NA                                  | <i>Ca_desi_scaffold</i> | 23349                   | A/G  | Gene_Ca_18368.1    | SYNONYMOUS_CODING             | U-box domain-containing protein 13                    |
| <i>Desi_wild_23628</i> | NA                                  | <i>Ca_desi_scaffold</i> | 23628                   | G/A  | Gene_Ca_18368.1    | SYNONYMOUS_CODING             | U-box domain-containing protein 13                    |
| <i>Desi_wild_23838</i> | NA                                  | <i>Ca_desi_scaffold</i> | 23838                   | G/A  | Gene_Ca_18368.1    | SYNONYMOUS_CODING             | U-box domain-containing protein 13                    |
| <i>Desi_wild_24346</i> | NA                                  | <i>Ca_desi_scaffold</i> | 24346                   | A/C  | Gene_Ca_18368.1    | NON_SYNONYMOUS_CODING         | U-box domain-containing protein 13                    |
| <i>Desi_wild_26838</i> | NA                                  | <i>Ca_desi_scaffold</i> | 26838                   | T/A  | Gene_Ca_18368.1    | NON_SYNONYMOUS_CODING         | U-box domain-containing protein 13                    |
| <i>Desi_wild_27281</i> | NA                                  | <i>Ca_desi_scaffold</i> | 27281                   | T/C  | Gene_Ca_18368.1    | NON_SYNONYMOUS_CODING         | U-box domain-containing protein 13                    |
| <i>Desi_wild_22578</i> | NA                                  | <i>Ca_desi_scaffold</i> | 22578                   | G/T  | NA                 | INTERGENIC                    | NA                                                    |
| <i>Desi_wild_22581</i> | NA                                  | <i>Ca_desi_scaffold</i> | 22581                   | A/T  | NA                 | INTERGENIC                    | NA                                                    |
| <i>Desi_wild_22589</i> | NA                                  | <i>Ca_desi_scaffold</i> | 22589                   | C/T  | NA                 | INTERGENIC                    | NA                                                    |
| <i>Desi_wild_22591</i> | NA                                  | <i>Ca_desi_scaffold</i> | 22591                   | G/T  | NA                 | INTERGENIC                    | NA                                                    |
| <i>Desi_wild_22596</i> | NA                                  | <i>Ca_desi_scaffold</i> | 22596                   | G/A  | NA                 | INTERGENIC                    | NA                                                    |
| <i>Desi_wild_22602</i> | NA                                  | <i>Ca_desi_scaffold</i> | 22602                   | G/C  | NA                 | INTERGENIC                    | NA                                                    |
| <i>Desi_wild_22608</i> | NA                                  | <i>Ca_desi_scaffold</i> | 22608                   | A/T  | NA                 | INTERGENIC                    | NA                                                    |
| <i>Desi_wild_22614</i> | NA                                  | <i>Ca_desi_scaffold</i> | 22614                   | T/A  | NA                 | INTERGENIC                    | NA                                                    |
| <i>Desi_wild_22626</i> | NA                                  | <i>Ca_desi_scaffold</i> | 22626                   | A/T  | NA                 | INTERGENIC                    | NA                                                    |
| <i>Desi_wild_22644</i> | NA                                  | <i>Ca_desi_scaffold</i> | 22644                   | C/T  | NA                 | INTERGENIC                    | NA                                                    |
| <i>Desi_wild_22647</i> | NA                                  | <i>Ca_desi_scaffold</i> | 22647                   | C/T  | NA                 | INTERGENIC                    | NA                                                    |
| <i>Desi_wild_24876</i> | NA                                  | <i>Ca_desi_scaffold</i> | 24876                   | A/G  | Gene_Ca_18374.1    | NON_SYNONYMOUS_CODING         | Aldehyde dehydrogenase family 2 member C4             |
| <i>Desi_wild_24878</i> | NA                                  | <i>Ca_desi_scaffold</i> | 24878                   | G/T  | Gene_Ca_18374.1    | NON_SYNONYMOUS_CODING         | Aldehyde dehydrogenase family 2 member C4             |
| <i>Desi_wild_24893</i> | NA                                  | <i>Ca_desi_scaffold</i> | 24893                   | T/A  | Gene_Ca_18374.1    | SYNONYMOUS_CODING             | Aldehyde dehydrogenase family 2 member C4             |
| <i>Desi_wild_24899</i> | NA                                  | <i>Ca_desi_scaffold</i> | 24899                   | C/A  | Gene_Ca_18374.1    | SYNONYMOUS_CODING             | Aldehyde dehydrogenase family 2 member C4             |
| <i>Desi_wild_24901</i> | NA                                  | <i>Ca_desi_scaffold</i> | 24901                   | C/T  | Gene_Ca_18374.1    | NON_SYNONYMOUS_CODING         | Aldehyde dehydrogenase family 2 member C4             |

| SNP IDs                | NCBI dbSNP accession IDs (NCBI_SS#) | Chromosomes             | Physical positions (bp) | SNPs | Gene accession IDs | Sequence components of genome | Putative functions                                         |
|------------------------|-------------------------------------|-------------------------|-------------------------|------|--------------------|-------------------------------|------------------------------------------------------------|
| <i>Desi_wild_24902</i> | NA                                  | <i>Ca_desi_scaffold</i> | 24902                   | A/T  | Gene_Ca_18374.1    | SYNONYMOUS_CODING             | Aldehyde dehydrogenase family 2 member C4                  |
| <i>Desi_wild_24911</i> | NA                                  | <i>Ca_desi_scaffold</i> | 24911                   | A/C  | Gene_Ca_18374.1    | SYNONYMOUS_CODING             | Aldehyde dehydrogenase family 2 member C4                  |
| <i>Desi_wild_24917</i> | NA                                  | <i>Ca_desi_scaffold</i> | 24917                   | T/C  | Gene_Ca_18374.1    | SYNONYMOUS_CODING             | Aldehyde dehydrogenase family 2 member C4                  |
| <i>Desi_wild_24920</i> | NA                                  | <i>Ca_desi_scaffold</i> | 24920                   | T/C  | Gene_Ca_18374.1    | SYNONYMOUS_CODING             | Aldehyde dehydrogenase family 2 member C4                  |
| <i>Desi_wild_25100</i> | NA                                  | <i>Ca_desi_scaffold</i> | 25100                   | T/A  | Gene_Ca_18374.1    | DOWNSTREAM                    | Aldehyde dehydrogenase family 2 member C4                  |
| <i>Desi_wild_12583</i> | NA                                  | <i>Ca_desi_scaffold</i> | 12583                   | C/A  | NA                 | INTERGENIC                    | NA                                                         |
| <i>Desi_wild_5253</i>  | NA                                  | <i>Ca_desi_scaffold</i> | 5253                    | C/T  | NA                 | INTERGENIC                    | NA                                                         |
| <i>Desi_wild_3399</i>  | NA                                  | <i>Ca_desi_scaffold</i> | 3399                    | T/G  | Gene_Ca_10542.1    | NON_SYNONYMOUS_CODING         | NAD(P)H dehydrogenase 18                                   |
| <i>Desi_wild_10368</i> | NA                                  | <i>Ca_desi_scaffold</i> | 10368                   | G/A  | Gene_Ca_10543.1    | DOWNSTREAM                    | Acylamino-acid-releasing enzyme                            |
| <i>Desi_wild_10732</i> | NA                                  | <i>Ca_desi_scaffold</i> | 10732                   | T/G  | Gene_Ca_10543.1    | DOWNSTREAM                    | Acylamino-acid-releasing enzyme                            |
| <i>Desi_wild_10734</i> | NA                                  | <i>Ca_desi_scaffold</i> | 10734                   | T/C  | Gene_Ca_10543.1    | DOWNSTREAM                    | Acylamino-acid-releasing enzyme                            |
| <i>Desi_wild_10861</i> | NA                                  | <i>Ca_desi_scaffold</i> | 10861                   | G/C  | Gene_Ca_10543.1    | DOWNSTREAM                    | Acylamino-acid-releasing enzyme                            |
| <i>Desi_wild_10877</i> | NA                                  | <i>Ca_desi_scaffold</i> | 10877                   | T/G  | Gene_Ca_10543.1    | DOWNSTREAM                    | Acylamino-acid-releasing enzyme                            |
| <i>Desi_wild_10928</i> | NA                                  | <i>Ca_desi_scaffold</i> | 10928                   | G/A  | Gene_Ca_10543.1    | DOWNSTREAM                    | Acylamino-acid-releasing enzyme                            |
| <i>Desi_wild_10931</i> | NA                                  | <i>Ca_desi_scaffold</i> | 10931                   | T/G  | Gene_Ca_10543.1    | DOWNSTREAM                    | Acylamino-acid-releasing enzyme                            |
| <i>Desi_wild_13394</i> | NA                                  | <i>Ca_desi_scaffold</i> | 13394                   | T/G  | NA                 | INTERGENIC                    | NA                                                         |
| <i>Desi_wild_13818</i> | NA                                  | <i>Ca_desi_scaffold</i> | 13818                   | G/A  | NA                 | INTERGENIC                    | NA                                                         |
| <i>Desi_wild_13851</i> | NA                                  | <i>Ca_desi_scaffold</i> | 13851                   | C/T  | NA                 | INTERGENIC                    | NA                                                         |
| <i>Desi_wild_13866</i> | NA                                  | <i>Ca_desi_scaffold</i> | 13866                   | G/A  | NA                 | INTERGENIC                    | NA                                                         |
| <i>Desi_wild_13884</i> | NA                                  | <i>Ca_desi_scaffold</i> | 13884                   | G/A  | NA                 | INTERGENIC                    | NA                                                         |
| <i>Desi_wild_13893</i> | NA                                  | <i>Ca_desi_scaffold</i> | 13893                   | T/C  | NA                 | INTERGENIC                    | NA                                                         |
| <i>Desi_wild_13915</i> | NA                                  | <i>Ca_desi_scaffold</i> | 13915                   | T/C  | NA                 | INTERGENIC                    | NA                                                         |
| <i>Desi_wild_14049</i> | NA                                  | <i>Ca_desi_scaffold</i> | 14049                   | T/C  | NA                 | INTERGENIC                    | NA                                                         |
| <i>Desi_wild_14193</i> | NA                                  | <i>Ca_desi_scaffold</i> | 14193                   | A/G  | NA                 | INTERGENIC                    | NA                                                         |
| <i>Desi_wild_14901</i> | NA                                  | <i>Ca_desi_scaffold</i> | 14901                   | T/C  | NA                 | INTERGENIC                    | NA                                                         |
| <i>Desi_wild_24718</i> | NA                                  | <i>Ca_desi_scaffold</i> | 24718                   | A/C  | Gene_Ca_10545.1    | INTRON                        | NA                                                         |
| <i>Desi_wild_19748</i> | NA                                  | <i>Ca_desi_scaffold</i> | 19748                   | C/G  | NA                 | INTERGENIC                    | NA                                                         |
| <i>Desi_wild_27846</i> | NA                                  | <i>Ca_desi_scaffold</i> | 27846                   | C/A  | Gene_Ca_18407.1    | INTRON                        | Uncharacterized methyltransferase At2g41040, chloroplastic |
| <i>Desi_wild_27850</i> | NA                                  | <i>Ca_desi_scaffold</i> | 27850                   | C/G  | Gene_Ca_18407.1    | INTRON                        | Uncharacterized methyltransferase At2g41040, chloroplastic |
| <i>Desi_wild_7753</i>  | NA                                  | <i>Ca_desi_scaffold</i> | 7753                    | T/G  | NA                 | INTERGENIC                    | NA                                                         |
| <i>Desi_wild_23182</i> | NA                                  | <i>Ca_desi_scaffold</i> | 23182                   | A/C  | NA                 | INTERGENIC                    | NA                                                         |
| <i>Desi_wild_23245</i> | NA                                  | <i>Ca_desi_scaffold</i> | 23245                   | C/G  | NA                 | INTERGENIC                    | NA                                                         |
| <i>Desi_wild_26375</i> | NA                                  | <i>Ca_desi_scaffold</i> | 26375                   | A/T  | NA                 | INTERGENIC                    | NA                                                         |
| <i>Desi_wild_26412</i> | NA                                  | <i>Ca_desi_scaffold</i> | 26412                   | T/C  | NA                 | INTERGENIC                    | NA                                                         |
| <i>Desi_wild_26427</i> | NA                                  | <i>Ca_desi_scaffold</i> | 26427                   | C/T  | NA                 | INTERGENIC                    | NA                                                         |
| <i>Desi_wild_8953</i>  | NA                                  | <i>Ca_desi_scaffold</i> | 8953                    | A/G  | NA                 | INTERGENIC                    | NA                                                         |
| <i>Desi_wild_8960</i>  | NA                                  | <i>Ca_desi_scaffold</i> | 8960                    | T/G  | NA                 | INTERGENIC                    | NA                                                         |
| <i>Desi_wild_23607</i> | NA                                  | <i>Ca_desi_scaffold</i> | 23607                   | T/C  | NA                 | INTERGENIC                    | NA                                                         |
| <i>Desi_wild_8963</i>  | NA                                  | <i>Ca_desi_scaffold</i> | 8963                    | T/C  | NA                 | INTERGENIC                    | NA                                                         |
| <i>Desi_wild_12308</i> | NA                                  | <i>Ca_desi_scaffold</i> | 12308                   | C/T  | NA                 | INTERGENIC                    | NA                                                         |
| <i>Desi_wild_12310</i> | NA                                  | <i>Ca_desi_scaffold</i> | 12310                   | T/A  | NA                 | INTERGENIC                    | NA                                                         |
| <i>Desi_wild_12353</i> | NA                                  | <i>Ca_desi_scaffold</i> | 12353                   | T/G  | NA                 | INTERGENIC                    | NA                                                         |
| <i>Desi_wild_27857</i> | NA                                  | <i>Ca_desi_scaffold</i> | 27857                   | G/A  | NA                 | INTERGENIC                    | NA                                                         |
| <i>Desi_wild_27863</i> | NA                                  | <i>Ca_desi_scaffold</i> | 27863                   | A/T  | NA                 | INTERGENIC                    | NA                                                         |



| SNP IDs                | NCBI dbSNP accession IDs (NCBI_SS#) | Chromosomes             | Physical positions (bp) | SNPs | Gene accession IDs | Sequence components of genome | Putative functions                              |
|------------------------|-------------------------------------|-------------------------|-------------------------|------|--------------------|-------------------------------|-------------------------------------------------|
| <i>Desi_wild_156</i>   | NA                                  | <i>Ca_desi_scaffold</i> | 156                     | G/A  | NA                 | INTERGENIC                    | NA                                              |
| <i>Desi_wild_191</i>   | NA                                  | <i>Ca_desi_scaffold</i> | 191                     | A/G  | NA                 | INTERGENIC                    | NA                                              |
| <i>Desi_wild_7632</i>  | NA                                  | <i>Ca_desi_scaffold</i> | 7632                    | G/A  | Gene_Ca_18445.1    | NON_SYNONYMOUS_CODING         | NA                                              |
| <i>Desi_wild_16659</i> | NA                                  | <i>Ca_desi_scaffold</i> | 16659                   | T/G  | NA                 | INTERGENIC                    | NA                                              |
| <i>Desi_wild_15712</i> | NA                                  | <i>Ca_desi_scaffold</i> | 15712                   | C/T  | NA                 | INTERGENIC                    | NA                                              |
| <i>Desi_wild_12541</i> | NA                                  | <i>Ca_desi_scaffold</i> | 12541                   | G/T  | NA                 | INTERGENIC                    | NA                                              |
| <i>Desi_wild_21611</i> | NA                                  | <i>Ca_desi_scaffold</i> | 21611                   | C/T  | Gene_Ca_18457.1    | NON_SYNONYMOUS_CODING         | NA                                              |
| <i>Desi_wild_1235</i>  | NA                                  | <i>Ca_desi_scaffold</i> | 1235                    | G/C  | Gene_Ca_18458.1    | SYNONYMOUS_CODING             | C2H2-like zinc finger protein                   |
| <i>Desi_wild_1239</i>  | NA                                  | <i>Ca_desi_scaffold</i> | 1239                    | A/C  | Gene_Ca_18458.1    | NON_SYNONYMOUS_CODING         | C2H2-like zinc finger protein                   |
| <i>Desi_wild_1622</i>  | NA                                  | <i>Ca_desi_scaffold</i> | 1622                    | T/G  | Gene_Ca_18458.1    | SYNONYMOUS_CODING             | C2H2-like zinc finger protein                   |
| <i>Desi_wild_1625</i>  | NA                                  | <i>Ca_desi_scaffold</i> | 1625                    | T/G  | Gene_Ca_18458.1    | SYNONYMOUS_CODING             | C2H2-like zinc finger protein                   |
| <i>Desi_wild_26027</i> | NA                                  | <i>Ca_desi_scaffold</i> | 26027                   | C/A  | Gene_Ca_18459.1    | NON_SYNONYMOUS_CODING         | Scarecrow-like protein 15                       |
| <i>Desi_wild_26115</i> | NA                                  | <i>Ca_desi_scaffold</i> | 26115                   | A/G  | Gene_Ca_18459.1    | SYNONYMOUS_CODING             | Scarecrow-like protein 15                       |
| <i>Desi_wild_26118</i> | NA                                  | <i>Ca_desi_scaffold</i> | 26118                   | A/G  | Gene_Ca_18459.1    | SYNONYMOUS_CODING             | Scarecrow-like protein 15                       |
| <i>Desi_wild_560</i>   | NA                                  | <i>Ca_desi_scaffold</i> | 560                     | T/C  | NA                 | INTERGENIC                    | NA                                              |
| <i>Desi_wild_595</i>   | NA                                  | <i>Ca_desi_scaffold</i> | 595                     | C/T  | NA                 | INTERGENIC                    | NA                                              |
| <i>Desi_wild_632</i>   | NA                                  | <i>Ca_desi_scaffold</i> | 632                     | A/G  | NA                 | INTERGENIC                    | NA                                              |
| <i>Desi_wild_7813</i>  | NA                                  | <i>Ca_desi_scaffold</i> | 7813                    | T/G  | Gene_Ca_18498.1    | INTRON                        | NEDD8-activating enzyme E1 regulatory subunit   |
| <i>Desi_wild_7904</i>  | NA                                  | <i>Ca_desi_scaffold</i> | 7904                    | G/A  | Gene_Ca_18498.1    | INTRON                        | NEDD8-activating enzyme E1 regulatory subunit   |
| <i>Desi_wild_7911</i>  | NA                                  | <i>Ca_desi_scaffold</i> | 7911                    | A/T  | Gene_Ca_18498.1    | INTRON                        | NEDD8-activating enzyme E1 regulatory subunit   |
| <i>Desi_wild_22279</i> | NA                                  | <i>Ca_desi_scaffold</i> | 22279                   | C/T  | NA                 | INTERGENIC                    | NA                                              |
| <i>Desi_wild_15741</i> | NA                                  | <i>Ca_desi_scaffold</i> | 15741                   | T/G  | NA                 | INTERGENIC                    | NA                                              |
| <i>Desi_wild_15824</i> | NA                                  | <i>Ca_desi_scaffold</i> | 15824                   | G/T  | NA                 | INTERGENIC                    | NA                                              |
| <i>Desi_wild_12160</i> | NA                                  | <i>Ca_desi_scaffold</i> | 12160                   | C/A  | Gene_Ca_18505.2    | DOWNSTREAM                    | Transcription factor ASG4                       |
| <i>Desi_wild_12228</i> | NA                                  | <i>Ca_desi_scaffold</i> | 12228                   | G/A  | Gene_Ca_18505.2    | DOWNSTREAM                    | Transcription factor ASG4                       |
| <i>Desi_wild_21430</i> | NA                                  | <i>Ca_desi_scaffold</i> | 21430                   | G/T  | NA                 | INTERGENIC                    | NA                                              |
| <i>Desi_wild_21700</i> | NA                                  | <i>Ca_desi_scaffold</i> | 21700                   | G/A  | NA                 | INTERGENIC                    | NA                                              |
| <i>Desi_wild_21721</i> | NA                                  | <i>Ca_desi_scaffold</i> | 21721                   | A/T  | NA                 | INTERGENIC                    | NA                                              |
| <i>Desi_wild_26403</i> | NA                                  | <i>Ca_desi_scaffold</i> | 26403                   | A/G  | NA                 | INTERGENIC                    | NA                                              |
| <i>Desi_wild_23876</i> | NA                                  | <i>Ca_desi_scaffold</i> | 23876                   | G/A  | NA                 | INTERGENIC                    | NA                                              |
| <i>Desi_wild_23887</i> | NA                                  | <i>Ca_desi_scaffold</i> | 23887                   | C/T  | NA                 | INTERGENIC                    | NA                                              |
| <i>Desi_wild_23908</i> | NA                                  | <i>Ca_desi_scaffold</i> | 23908                   | G/A  | NA                 | INTERGENIC                    | NA                                              |
| <i>Desi_wild_23928</i> | NA                                  | <i>Ca_desi_scaffold</i> | 23928                   | G/A  | NA                 | INTERGENIC                    | NA                                              |
| <i>Desi_wild_23935</i> | NA                                  | <i>Ca_desi_scaffold</i> | 23935                   | C/T  | NA                 | INTERGENIC                    | NA                                              |
| <i>Desi_wild_23970</i> | NA                                  | <i>Ca_desi_scaffold</i> | 23970                   | T/A  | NA                 | INTERGENIC                    | NA                                              |
| <i>Desi_wild_9570</i>  | NA                                  | <i>Ca_desi_scaffold</i> | 9570                    | T/A  | Gene_Ca_18512.1    | NON_SYNONYMOUS_CODING         | ZF-HD homeobox protein At4g24660                |
| <i>Desi_wild_13100</i> | NA                                  | <i>Ca_desi_scaffold</i> | 13100                   | C/A  | Gene_Ca_18513.1    | NON_SYNONYMOUS_CODING         | Chaperone DnaJ-domain superfamily protein       |
| <i>Desi_wild_20806</i> | NA                                  | <i>Ca_desi_scaffold</i> | 20806                   | T/C  | NA                 | INTERGENIC                    | NA                                              |
| <i>Desi_wild_3853</i>  | NA                                  | <i>Ca_desi_scaffold</i> | 3853                    | G/T  | Gene_Ca_18520.1    | NON_SYNONYMOUS_CODING         | 3-oxoacyl-[acyl-carrier-protein] reductase FabG |
| <i>Desi_wild_3859</i>  | NA                                  | <i>Ca_desi_scaffold</i> | 3859                    | A/G  | Gene_Ca_18520.1    | NON_SYNONYMOUS_CODING         | 3-oxoacyl-[acyl-carrier-protein] reductase FabG |
| <i>Desi_wild_6252</i>  | NA                                  | <i>Ca_desi_scaffold</i> | 6252                    | A/G  | Gene_Ca_18528.1    | SYNONYMOUS_CODING             | BTB/POZ domain-containing protein At5g03250     |
| <i>Desi_wild_10633</i> | NA                                  | <i>Ca_desi_scaffold</i> | 10633                   | T/G  | Gene_Ca_18551.1    | SYNONYMOUS_CODING             | Saccin                                          |
| <i>Desi_wild_10646</i> | NA                                  | <i>Ca_desi_scaffold</i> | 10646                   | A/G  | Gene_Ca_18551.1    | NON_SYNONYMOUS_CODING         | Saccin                                          |
| <i>Desi_wild_10648</i> | NA                                  | <i>Ca_desi_scaffold</i> | 10648                   | T/G  | Gene_Ca_18551.1    | NON_SYNONYMOUS_CODING         | Saccin                                          |

| SNP IDs                | NCBI dbSNP accession IDs (NCBI_SS#) | Chromosomes             | Physical positions (bp) | SNPs | Gene accession IDs | Sequence components of genome | Putative functions                                                   |
|------------------------|-------------------------------------|-------------------------|-------------------------|------|--------------------|-------------------------------|----------------------------------------------------------------------|
| <i>Desi_wild_466</i>   | NA                                  | <i>Ca_desi_scaffold</i> | 466                     | G/A  | NA                 | INTERGENIC                    | NA                                                                   |
| <i>Desi_wild_500</i>   | NA                                  | <i>Ca_desi_scaffold</i> | 500                     | T/A  | NA                 | INTERGENIC                    | NA                                                                   |
| <i>Desi_wild_509</i>   | NA                                  | <i>Ca_desi_scaffold</i> | 509                     | C/A  | NA                 | INTERGENIC                    | NA                                                                   |
| <i>Desi_wild_53937</i> | NA                                  | <i>Ca_desi_scaffold</i> | 53937                   | C/A  | Gene_Ca_09570.1    | INTRON                        | Formin-like protein 20                                               |
| <i>Desi_wild_54102</i> | NA                                  | <i>Ca_desi_scaffold</i> | 54102                   | C/A  | Gene_Ca_09570.1    | INTRON                        | Formin-like protein 20                                               |
| <i>Desi_wild_70907</i> | NA                                  | <i>Ca_desi_scaffold</i> | 70907                   | C/T  | Gene_Ca_09570.1    | DOWNSTREAM                    | Formin-like protein 20                                               |
| <i>Desi_wild_23698</i> | NA                                  | <i>Ca_desi_scaffold</i> | 23698                   | G/C  | NA                 | INTERGENIC                    | NA                                                                   |
| <i>Desi_wild_23706</i> | NA                                  | <i>Ca_desi_scaffold</i> | 23706                   | C/T  | NA                 | INTERGENIC                    | NA                                                                   |
| <i>Desi_wild_23721</i> | NA                                  | <i>Ca_desi_scaffold</i> | 23721                   | C/A  | NA                 | INTERGENIC                    | NA                                                                   |
| <i>Desi_wild_23724</i> | NA                                  | <i>Ca_desi_scaffold</i> | 23724                   | T/C  | NA                 | INTERGENIC                    | NA                                                                   |
| <i>Desi_wild_23740</i> | NA                                  | <i>Ca_desi_scaffold</i> | 23740                   | C/T  | NA                 | INTERGENIC                    | NA                                                                   |
| <i>Desi_wild_23748</i> | NA                                  | <i>Ca_desi_scaffold</i> | 23748                   | A/G  | NA                 | INTERGENIC                    | NA                                                                   |
| <i>Desi_wild_23753</i> | NA                                  | <i>Ca_desi_scaffold</i> | 23753                   | C/T  | NA                 | INTERGENIC                    | NA                                                                   |
| <i>Desi_wild_23755</i> | NA                                  | <i>Ca_desi_scaffold</i> | 23755                   | G/A  | NA                 | INTERGENIC                    | NA                                                                   |
| <i>Desi_wild_13393</i> | NA                                  | <i>Ca_desi_scaffold</i> | 13393                   | A/G  | Gene_Ca_18575.1    | NON_SYNONYMOUS_CODING         | Pentatricopeptide repeat-containing protein At4g21880, mitochondrial |
| <i>Desi_wild_12208</i> | NA                                  | <i>Ca_desi_scaffold</i> | 12208                   | C/A  | NA                 | INTERGENIC                    | NA                                                                   |
| <i>Desi_wild_12266</i> | NA                                  | <i>Ca_desi_scaffold</i> | 12266                   | A/T  | NA                 | INTERGENIC                    | NA                                                                   |
| <i>Desi_wild_12291</i> | NA                                  | <i>Ca_desi_scaffold</i> | 12291                   | C/T  | NA                 | INTERGENIC                    | NA                                                                   |
| <i>Desi_wild_12296</i> | NA                                  | <i>Ca_desi_scaffold</i> | 12296                   | C/T  | NA                 | INTERGENIC                    | NA                                                                   |
| <i>Desi_wild_13835</i> | NA                                  | <i>Ca_desi_scaffold</i> | 13835                   | C/G  | NA                 | INTERGENIC                    | NA                                                                   |
| <i>Desi_wild_16306</i> | NA                                  | <i>Ca_desi_scaffold</i> | 16306                   | C/T  | Gene_Ca_18584.1    | SYNONYMOUS_CODING             | Probable WRKY transcription factor 2                                 |
| <i>Desi_wild_11128</i> | NA                                  | <i>Ca_desi_scaffold</i> | 11128                   | A/G  | NA                 | INTERGENIC                    | NA                                                                   |
| <i>Desi_wild_12179</i> | NA                                  | <i>Ca_desi_scaffold</i> | 12179                   | C/A  | Gene_Ca_18591.1    | UPSTREAM                      | Thioredoxin domain-containing protein 9 homolog                      |
| <i>Desi_wild_12711</i> | NA                                  | <i>Ca_desi_scaffold</i> | 12711                   | T/G  | NA                 | INTERGENIC                    | NA                                                                   |
| <i>Desi_wild_886</i>   | NA                                  | <i>Ca_desi_scaffold</i> | 886                     | C/T  | NA                 | INTERGENIC                    | NA                                                                   |
| <i>Desi_wild_961</i>   | NA                                  | <i>Ca_desi_scaffold</i> | 961                     | T/A  | NA                 | INTERGENIC                    | NA                                                                   |
| <i>Desi_wild_20240</i> | NA                                  | <i>Ca_desi_scaffold</i> | 20240                   | A/G  | NA                 | INTERGENIC                    | NA                                                                   |
| <i>Desi_wild_6595</i>  | NA                                  | <i>Ca_desi_scaffold</i> | 6595                    | C/T  | Gene_Ca_18605.1    | DOWNSTREAM                    | NA                                                                   |
| <i>Desi_wild_6600</i>  | NA                                  | <i>Ca_desi_scaffold</i> | 6600                    | C/T  | Gene_Ca_18605.1    | DOWNSTREAM                    | NA                                                                   |
| <i>Desi_wild_6603</i>  | NA                                  | <i>Ca_desi_scaffold</i> | 6603                    | A/C  | Gene_Ca_18605.1    | DOWNSTREAM                    | NA                                                                   |
| <i>Desi_wild_6607</i>  | NA                                  | <i>Ca_desi_scaffold</i> | 6607                    | A/G  | Gene_Ca_18605.1    | DOWNSTREAM                    | NA                                                                   |
| <i>Desi_wild_6609</i>  | NA                                  | <i>Ca_desi_scaffold</i> | 6609                    | C/T  | Gene_Ca_18605.1    | DOWNSTREAM                    | NA                                                                   |
| <i>Desi_wild_6619</i>  | NA                                  | <i>Ca_desi_scaffold</i> | 6619                    | C/T  | Gene_Ca_18605.1    | DOWNSTREAM                    | NA                                                                   |
| <i>Desi_wild_6656</i>  | NA                                  | <i>Ca_desi_scaffold</i> | 6656                    | A/T  | Gene_Ca_18605.1    | DOWNSTREAM                    | NA                                                                   |
| <i>Desi_wild_6660</i>  | NA                                  | <i>Ca_desi_scaffold</i> | 6660                    | C/T  | Gene_Ca_18605.1    | DOWNSTREAM                    | NA                                                                   |
| <i>Desi_wild_6680</i>  | NA                                  | <i>Ca_desi_scaffold</i> | 6680                    | C/T  | Gene_Ca_18605.1    | DOWNSTREAM                    | NA                                                                   |
| <i>Desi_wild_19552</i> | NA                                  | <i>Ca_desi_scaffold</i> | 19552                   | G/A  | Gene_Ca_10485.1    | DOWNSTREAM                    | Probable plastid-lipid-associated protein 13, chloroplastic          |
| <i>Desi_wild_19610</i> | NA                                  | <i>Ca_desi_scaffold</i> | 19610                   | T/C  | Gene_Ca_10485.1    | DOWNSTREAM                    | Probable plastid-lipid-associated protein 13, chloroplastic          |
| <i>Desi_wild_19667</i> | NA                                  | <i>Ca_desi_scaffold</i> | 19667                   | C/G  | Gene_Ca_10485.1    | DOWNSTREAM                    | Probable plastid-lipid-associated protein 13, chloroplastic          |
| <i>Desi_wild_10969</i> | NA                                  | <i>Ca_desi_scaffold</i> | 10969                   | G/T  | NA                 | INTERGENIC                    | NA                                                                   |
| <i>Desi_wild_11002</i> | NA                                  | <i>Ca_desi_scaffold</i> | 11002                   | G/A  | NA                 | INTERGENIC                    | NA                                                                   |
| <i>Desi_wild_11006</i> | NA                                  | <i>Ca_desi_scaffold</i> | 11006                   | C/T  | NA                 | INTERGENIC                    | NA                                                                   |
| <i>Desi_wild_1601</i>  | NA                                  | <i>Ca_desi_scaffold</i> | 1601                    | G/T  | NA                 | INTERGENIC                    | NA                                                                   |
| <i>Desi_wild_10063</i> | NA                                  | <i>Ca_desi_scaffold</i> | 10063                   | T/C  | NA                 | INTERGENIC                    | NA                                                                   |

| SNP IDs                | NCBI dbSNP accession IDs (NCBI_SS#) | Chromosomes             | Physical positions (bp) | SNPs | Gene accession IDs | Sequence components of genome | Putative functions                                  |
|------------------------|-------------------------------------|-------------------------|-------------------------|------|--------------------|-------------------------------|-----------------------------------------------------|
| <i>Desi_wild_10085</i> | NA                                  | <i>Ca_desi_scaffold</i> | 10085                   | G/A  | NA                 | INTERGENIC                    | NA                                                  |
| <i>Desi_wild_10090</i> | NA                                  | <i>Ca_desi_scaffold</i> | 10090                   | T/A  | NA                 | INTERGENIC                    | NA                                                  |
| <i>Desi_wild_10122</i> | NA                                  | <i>Ca_desi_scaffold</i> | 10122                   | G/A  | NA                 | INTERGENIC                    | NA                                                  |
| <i>Desi_wild_19259</i> | NA                                  | <i>Ca_desi_scaffold</i> | 19259                   | A/T  | Gene_Ca_18656.1    | INTRON                        | Metal tolerance protein 4                           |
| <i>Desi_wild_19294</i> | NA                                  | <i>Ca_desi_scaffold</i> | 19294                   | G/A  | Gene_Ca_18656.1    | INTRON                        | Metal tolerance protein 4                           |
| <i>Desi_wild_18690</i> | NA                                  | <i>Ca_desi_scaffold</i> | 18690                   | G/C  | NA                 | INTERGENIC                    | NA                                                  |
| <i>Desi_wild_19308</i> | NA                                  | <i>Ca_desi_scaffold</i> | 19308                   | A/C  | NA                 | INTERGENIC                    | NA                                                  |
| <i>Desi_wild_19310</i> | NA                                  | <i>Ca_desi_scaffold</i> | 19310                   | G/A  | NA                 | INTERGENIC                    | NA                                                  |
| <i>Desi_wild_19335</i> | NA                                  | <i>Ca_desi_scaffold</i> | 19335                   | C/A  | NA                 | INTERGENIC                    | NA                                                  |
| <i>Desi_wild_7841</i>  | NA                                  | <i>Ca_desi_scaffold</i> | 7841                    | C/T  | Gene_Ca_18665.1    | INTRON                        | Acyl-protein thioesterase 1 homolog 1               |
| <i>Desi_wild_8062</i>  | NA                                  | <i>Ca_desi_scaffold</i> | 8062                    | C/T  | Gene_Ca_18665.1    | INTRON                        | Acyl-protein thioesterase 1 homolog 1               |
| <i>Desi_wild_21972</i> | NA                                  | <i>Ca_desi_scaffold</i> | 21972                   | G/A  | NA                 | INTERGENIC                    | NA                                                  |
| <i>Desi_wild_2020</i>  | NA                                  | <i>Ca_desi_scaffold</i> | 2020                    | C/T  | NA                 | INTERGENIC                    | NA                                                  |
| <i>Desi_wild_2023</i>  | NA                                  | <i>Ca_desi_scaffold</i> | 2023                    | C/T  | NA                 | INTERGENIC                    | NA                                                  |
| <i>Desi_wild_2061</i>  | NA                                  | <i>Ca_desi_scaffold</i> | 2061                    | T/G  | NA                 | INTERGENIC                    | NA                                                  |
| <i>Desi_wild_4143</i>  | NA                                  | <i>Ca_desi_scaffold</i> | 4143                    | C/T  | NA                 | INTERGENIC                    | NA                                                  |
| <i>Desi_wild_4145</i>  | NA                                  | <i>Ca_desi_scaffold</i> | 4145                    | G/A  | NA                 | INTERGENIC                    | NA                                                  |
| <i>Desi_wild_4198</i>  | NA                                  | <i>Ca_desi_scaffold</i> | 4198                    | C/G  | NA                 | INTERGENIC                    | NA                                                  |
| <i>Desi_wild_1273</i>  | NA                                  | <i>Ca_desi_scaffold</i> | 1273                    | G/T  | NA                 | INTERGENIC                    | NA                                                  |
| <i>Desi_wild_1274</i>  | NA                                  | <i>Ca_desi_scaffold</i> | 1274                    | T/G  | NA                 | INTERGENIC                    | NA                                                  |
| <i>Desi_wild_23652</i> | NA                                  | <i>Ca_desi_scaffold</i> | 23652                   | A/G  | NA                 | INTERGENIC                    | NA                                                  |
| <i>Desi_wild_23750</i> | NA                                  | <i>Ca_desi_scaffold</i> | 23750                   | A/G  | NA                 | INTERGENIC                    | NA                                                  |
| <i>Desi_wild_23760</i> | NA                                  | <i>Ca_desi_scaffold</i> | 23760                   | G/A  | NA                 | INTERGENIC                    | NA                                                  |
| <i>Desi_wild_23772</i> | NA                                  | <i>Ca_desi_scaffold</i> | 23772                   | G/T  | NA                 | INTERGENIC                    | NA                                                  |
| <i>Desi_wild_20418</i> | NA                                  | <i>Ca_desi_scaffold</i> | 20418                   | T/G  | Gene_Ca_18680.1    | SYNONYMOUS_CODING             | Probable pectinesterase/pectinesterase inhibitor 13 |
| <i>Desi_wild_15377</i> | NA                                  | <i>Ca_desi_scaffold</i> | 15377                   | A/G  | NA                 | INTERGENIC                    | NA                                                  |
| <i>Desi_wild_17999</i> | NA                                  | <i>Ca_desi_scaffold</i> | 17999                   | C/A  | Gene_Ca_18691.1    | UPSTREAM                      | NA                                                  |
| <i>Desi_wild_18011</i> | NA                                  | <i>Ca_desi_scaffold</i> | 18011                   | A/T  | Gene_Ca_18691.1    | UPSTREAM                      | NA                                                  |
| <i>Desi_wild_18020</i> | NA                                  | <i>Ca_desi_scaffold</i> | 18020                   | T/A  | Gene_Ca_18691.1    | UPSTREAM                      | NA                                                  |
| <i>Desi_wild_18062</i> | NA                                  | <i>Ca_desi_scaffold</i> | 18062                   | A/C  | Gene_Ca_18691.1    | UPSTREAM                      | NA                                                  |
| <i>Desi_wild_18095</i> | NA                                  | <i>Ca_desi_scaffold</i> | 18095                   | G/T  | Gene_Ca_18691.1    | NON_SYNONYMOUS_CODING         | NA                                                  |
| <i>Desi_wild_18148</i> | NA                                  | <i>Ca_desi_scaffold</i> | 18148                   | C/T  | Gene_Ca_18691.1    | SYNONYMOUS_CODING             | NA                                                  |
| <i>Desi_wild_18193</i> | NA                                  | <i>Ca_desi_scaffold</i> | 18193                   | G/A  | Gene_Ca_18691.1    | SYNONYMOUS_CODING             | NA                                                  |
| <i>Desi_wild_18152</i> | NA                                  | <i>Ca_desi_scaffold</i> | 18152                   | A/G  | NA                 | INTERGENIC                    | NA                                                  |
| <i>Desi_wild_14916</i> | NA                                  | <i>Ca_desi_scaffold</i> | 14916                   | A/G  | Gene_Ca_18692.1    | INTRON                        | Beta-glucosidase 42                                 |
| <i>Desi_wild_618</i>   | NA                                  | <i>Ca_desi_scaffold</i> | 618                     | G/A  | NA                 | INTERGENIC                    | NA                                                  |
| <i>Desi_wild_624</i>   | NA                                  | <i>Ca_desi_scaffold</i> | 624                     | A/G  | NA                 | INTERGENIC                    | NA                                                  |
| <i>Desi_wild_661</i>   | NA                                  | <i>Ca_desi_scaffold</i> | 661                     | T/C  | NA                 | INTERGENIC                    | NA                                                  |
| <i>Desi_wild_18322</i> | NA                                  | <i>Ca_desi_scaffold</i> | 18322                   | G/T  | NA                 | INTERGENIC                    | NA                                                  |
| <i>Desi_wild_18339</i> | NA                                  | <i>Ca_desi_scaffold</i> | 18339                   | C/T  | NA                 | INTERGENIC                    | NA                                                  |
| <i>Desi_wild_18354</i> | NA                                  | <i>Ca_desi_scaffold</i> | 18354                   | G/A  | NA                 | INTERGENIC                    | NA                                                  |
| <i>Desi_wild_18365</i> | NA                                  | <i>Ca_desi_scaffold</i> | 18365                   | C/T  | NA                 | INTERGENIC                    | NA                                                  |
| <i>Desi_wild_18382</i> | NA                                  | <i>Ca_desi_scaffold</i> | 18382                   | T/C  | NA                 | INTERGENIC                    | NA                                                  |
| <i>Desi_wild_12547</i> | NA                                  | <i>Ca_desi_scaffold</i> | 12547                   | A/C  | Gene_Ca_18696.1    | NON_SYNONYMOUS_CODING         | Transcription factor IIIB 90 kDa subunit            |

| SNP IDs                | NCBI dbSNP accession IDs (NCBI_SS#) | Chromosomes             | Physical positions (bp) | SNPs | Gene accession IDs | Sequence components of genome | Putative functions                                  |
|------------------------|-------------------------------------|-------------------------|-------------------------|------|--------------------|-------------------------------|-----------------------------------------------------|
| <i>Desi_wild_4455</i>  | NA                                  | <i>Ca_desi_scaffold</i> | 4455                    | T/G  | Gene_Ca_10574.1    | INTRON                        | Protein KIAA0664 homolog                            |
| <i>Desi_wild_5437</i>  | NA                                  | <i>Ca_desi_scaffold</i> | 5437                    | C/A  | Gene_Ca_10574.1    | NON_SYNONYMOUS_CODING         | Protein KIAA0664 homolog                            |
| <i>Desi_wild_7648</i>  | NA                                  | <i>Ca_desi_scaffold</i> | 7648                    | G/A  | Gene_Ca_10574.1    | SYNONYMOUS_CODING             | Protein KIAA0664 homolog                            |
| <i>Desi_wild_832</i>   | NA                                  | <i>Ca_desi_scaffold</i> | 832                     | T/C  | NA                 | INTERGENIC                    | NA                                                  |
| <i>Desi_wild_836</i>   | NA                                  | <i>Ca_desi_scaffold</i> | 836                     | C/T  | NA                 | INTERGENIC                    | NA                                                  |
| <i>Desi_wild_837</i>   | NA                                  | <i>Ca_desi_scaffold</i> | 837                     | A/C  | NA                 | INTERGENIC                    | NA                                                  |
| <i>Desi_wild_862</i>   | NA                                  | <i>Ca_desi_scaffold</i> | 862                     | C/T  | NA                 | INTERGENIC                    | NA                                                  |
| <i>Desi_wild_896</i>   | NA                                  | <i>Ca_desi_scaffold</i> | 896                     | C/T  | NA                 | INTERGENIC                    | NA                                                  |
| <i>Desi_wild_901</i>   | NA                                  | <i>Ca_desi_scaffold</i> | 901                     | A/C  | NA                 | INTERGENIC                    | NA                                                  |
| <i>Desi_wild_922</i>   | NA                                  | <i>Ca_desi_scaffold</i> | 922                     | T/A  | NA                 | INTERGENIC                    | NA                                                  |
| <i>Desi_wild_933</i>   | NA                                  | <i>Ca_desi_scaffold</i> | 933                     | G/T  | NA                 | INTERGENIC                    | NA                                                  |
| <i>Desi_wild_14857</i> | NA                                  | <i>Ca_desi_scaffold</i> | 14857                   | T/C  | NA                 | INTERGENIC                    | NA                                                  |
| <i>Desi_wild_14858</i> | NA                                  | <i>Ca_desi_scaffold</i> | 14858                   | A/G  | NA                 | INTERGENIC                    | NA                                                  |
| <i>Desi_wild_14859</i> | NA                                  | <i>Ca_desi_scaffold</i> | 14859                   | C/T  | NA                 | INTERGENIC                    | NA                                                  |
| <i>Desi_wild_14875</i> | NA                                  | <i>Ca_desi_scaffold</i> | 14875                   | G/A  | NA                 | INTERGENIC                    | NA                                                  |
| <i>Desi_wild_14889</i> | NA                                  | <i>Ca_desi_scaffold</i> | 14889                   | G/C  | NA                 | INTERGENIC                    | NA                                                  |
| <i>Desi_wild_14898</i> | NA                                  | <i>Ca_desi_scaffold</i> | 14898                   | A/C  | NA                 | INTERGENIC                    | NA                                                  |
| <i>Desi_wild_14910</i> | NA                                  | <i>Ca_desi_scaffold</i> | 14910                   | C/T  | NA                 | INTERGENIC                    | NA                                                  |
| <i>Desi_wild_14465</i> | NA                                  | <i>Ca_desi_scaffold</i> | 14465                   | A/T  | Gene_Ca_18726.1    | INTRON                        | TGACG-sequence-specific DNA-binding protein TGA-2.1 |
| <i>Desi_wild_14849</i> | NA                                  | <i>Ca_desi_scaffold</i> | 14849                   | T/G  | Gene_Ca_18726.1    | INTRON                        | TGACG-sequence-specific DNA-binding protein TGA-2.1 |
| <i>Desi_wild_8087</i>  | NA                                  | <i>Ca_desi_scaffold</i> | 8087                    | T/C  | Gene_Ca_18737.1    | DOWNSTREAM                    | 2-aminoethanethiol dioxygenase                      |
| <i>Desi_wild_8089</i>  | NA                                  | <i>Ca_desi_scaffold</i> | 8089                    | T/A  | Gene_Ca_18737.1    | DOWNSTREAM                    | 2-aminoethanethiol dioxygenase                      |
| <i>Desi_wild_8094</i>  | NA                                  | <i>Ca_desi_scaffold</i> | 8094                    | T/A  | Gene_Ca_18737.1    | DOWNSTREAM                    | 2-aminoethanethiol dioxygenase                      |
| <i>Desi_wild_8106</i>  | NA                                  | <i>Ca_desi_scaffold</i> | 8106                    | C/T  | Gene_Ca_18737.1    | DOWNSTREAM                    | 2-aminoethanethiol dioxygenase                      |
| <i>Desi_wild_8110</i>  | NA                                  | <i>Ca_desi_scaffold</i> | 8110                    | T/A  | Gene_Ca_18737.1    | DOWNSTREAM                    | 2-aminoethanethiol dioxygenase                      |
| <i>Desi_wild_8125</i>  | NA                                  | <i>Ca_desi_scaffold</i> | 8125                    | G/T  | Gene_Ca_18737.1    | DOWNSTREAM                    | 2-aminoethanethiol dioxygenase                      |
| <i>Desi_wild_8128</i>  | NA                                  | <i>Ca_desi_scaffold</i> | 8128                    | A/C  | Gene_Ca_18737.1    | DOWNSTREAM                    | 2-aminoethanethiol dioxygenase                      |
| <i>Desi_wild_8157</i>  | NA                                  | <i>Ca_desi_scaffold</i> | 8157                    | G/A  | Gene_Ca_18737.1    | DOWNSTREAM                    | 2-aminoethanethiol dioxygenase                      |
| <i>Desi_wild_8207</i>  | NA                                  | <i>Ca_desi_scaffold</i> | 8207                    | A/G  | Gene_Ca_18737.1    | DOWNSTREAM                    | 2-aminoethanethiol dioxygenase                      |
| <i>Desi_wild_19199</i> | NA                                  | <i>Ca_desi_scaffold</i> | 19199                   | G/C  | Gene_Ca_18738.1    | NON_SYNONYMOUS_CODING         | 3-dehydroquinate synthase                           |
| <i>Desi_wild_10640</i> | NA                                  | <i>Ca_desi_scaffold</i> | 10640                   | A/G  | NA                 | INTERGENIC                    | NA                                                  |
| <i>Desi_wild_10660</i> | NA                                  | <i>Ca_desi_scaffold</i> | 10660                   | A/T  | NA                 | INTERGENIC                    | NA                                                  |
| <i>Desi_wild_10683</i> | NA                                  | <i>Ca_desi_scaffold</i> | 10683                   | T/C  | NA                 | INTERGENIC                    | NA                                                  |
| <i>Desi_wild_10699</i> | NA                                  | <i>Ca_desi_scaffold</i> | 10699                   | C/T  | NA                 | INTERGENIC                    | NA                                                  |
| <i>Desi_wild_10707</i> | NA                                  | <i>Ca_desi_scaffold</i> | 10707                   | C/T  | NA                 | INTERGENIC                    | NA                                                  |
| <i>Desi_wild_2441</i>  | NA                                  | <i>Ca_desi_scaffold</i> | 2441                    | T/C  | NA                 | INTERGENIC                    | NA                                                  |
| <i>Desi_wild_7362</i>  | NA                                  | <i>Ca_desi_scaffold</i> | 7362                    | C/T  | NA                 | INTERGENIC                    | NA                                                  |
| <i>Desi_wild_10163</i> | NA                                  | <i>Ca_desi_scaffold</i> | 10163                   | A/G  | NA                 | INTERGENIC                    | NA                                                  |
| <i>Desi_wild_10199</i> | NA                                  | <i>Ca_desi_scaffold</i> | 10199                   | C/T  | NA                 | INTERGENIC                    | NA                                                  |
| <i>Desi_wild_17628</i> | NA                                  | <i>Ca_desi_scaffold</i> | 17628                   | C/A  | Gene_Ca_18752.1    | NON_SYNONYMOUS_CODING         | Ammonium transporter 1 member 1                     |
| <i>Desi_wild_6827</i>  | NA                                  | <i>Ca_desi_scaffold</i> | 6827                    | A/C  | NA                 | INTERGENIC                    | NA                                                  |
| <i>Desi_wild_14883</i> | NA                                  | <i>Ca_desi_scaffold</i> | 14883                   | G/T  | Gene_Ca_18760.1    | NON_SYNONYMOUS_CODING         | ADP,ATP carrier protein 1, mitochondrial            |
| <i>Desi_wild_2468</i>  | NA                                  | <i>Ca_desi_scaffold</i> | 2468                    | T/A  | NA                 | INTERGENIC                    | NA                                                  |
| <i>Desi_wild_2471</i>  | NA                                  | <i>Ca_desi_scaffold</i> | 2471                    | C/T  | NA                 | INTERGENIC                    | NA                                                  |

| SNP IDs                | NCBI dbSNP accession IDs (NCBI_SS#) | Chromosomes             | Physical positions (bp) | SNPs | Gene accession IDs | Sequence components of genome | Putative functions                            |
|------------------------|-------------------------------------|-------------------------|-------------------------|------|--------------------|-------------------------------|-----------------------------------------------|
| <i>Desi_wild_2195</i>  | NA                                  | <i>Ca_desi_scaffold</i> | 2195                    | C/T  | Gene_Ca_18768.1    | NON_SYNONYMOUS_CODING         | Beta-glucosidase 12                           |
| <i>Desi_wild_1657</i>  | NA                                  | <i>Ca_desi_scaffold</i> | 1657                    | C/T  | NA                 | INTERGENIC                    | NA                                            |
| <i>Desi_wild_1686</i>  | NA                                  | <i>Ca_desi_scaffold</i> | 1686                    | C/A  | NA                 | INTERGENIC                    | NA                                            |
| <i>Desi_wild_1688</i>  | NA                                  | <i>Ca_desi_scaffold</i> | 1688                    | G/A  | NA                 | INTERGENIC                    | NA                                            |
| <i>Desi_wild_13843</i> | NA                                  | <i>Ca_desi_scaffold</i> | 13843                   | A/T  | NA                 | INTERGENIC                    | NA                                            |
| <i>Desi_wild_13846</i> | NA                                  | <i>Ca_desi_scaffold</i> | 13846                   | G/T  | NA                 | INTERGENIC                    | NA                                            |
| <i>Desi_wild_14764</i> | NA                                  | <i>Ca_desi_scaffold</i> | 14764                   | A/C  | Gene_Ca_18775.1    | INTRON                        | unknown protein                               |
| <i>Desi_wild_835</i>   | NA                                  | <i>Ca_desi_scaffold</i> | 835                     | T/C  | NA                 | INTERGENIC                    | NA                                            |
| <i>Desi_wild_2084</i>  | NA                                  | <i>Ca_desi_scaffold</i> | 2084                    | A/C  | NA                 | INTERGENIC                    | NA                                            |
| <i>Desi_wild_17078</i> | NA                                  | <i>Ca_desi_scaffold</i> | 17078                   | T/G  | NA                 | INTERGENIC                    | NA                                            |
| <i>Desi_wild_17088</i> | NA                                  | <i>Ca_desi_scaffold</i> | 17088                   | T/G  | NA                 | INTERGENIC                    | NA                                            |
| <i>Desi_wild_8514</i>  | NA                                  | <i>Ca_desi_scaffold</i> | 8514                    | G/A  | Gene_Ca_18798.1    | INTRON                        | Queuine tRNA-ribosyltransferase               |
| <i>Desi_wild_8809</i>  | NA                                  | <i>Ca_desi_scaffold</i> | 8809                    | A/C  | Gene_Ca_18798.1    | INTRON                        | Queuine tRNA-ribosyltransferase               |
| <i>Desi_wild_9047</i>  | NA                                  | <i>Ca_desi_scaffold</i> | 9047                    | T/C  | Gene_Ca_18798.1    | INTRON                        | Queuine tRNA-ribosyltransferase               |
| <i>Desi_wild_9057</i>  | NA                                  | <i>Ca_desi_scaffold</i> | 9057                    | T/A  | Gene_Ca_18798.1    | INTRON                        | Queuine tRNA-ribosyltransferase               |
| <i>Desi_wild_9122</i>  | NA                                  | <i>Ca_desi_scaffold</i> | 9122                    | C/T  | Gene_Ca_18798.1    | INTRON                        | Queuine tRNA-ribosyltransferase               |
| <i>Desi_wild_9134</i>  | NA                                  | <i>Ca_desi_scaffold</i> | 9134                    | A/T  | Gene_Ca_18798.1    | INTRON                        | Queuine tRNA-ribosyltransferase               |
| <i>Desi_wild_15488</i> | NA                                  | <i>Ca_desi_scaffold</i> | 15488                   | T/C  | Gene_Ca_18806.1    | NON_SYNONYMOUS_CODING         | Zinc finger CCCH domain-containing protein 69 |
| <i>Desi_wild_4826</i>  | NA                                  | <i>Ca_desi_scaffold</i> | 4826                    | T/C  | NA                 | INTERGENIC                    | NA                                            |
| <i>Desi_wild_4840</i>  | NA                                  | <i>Ca_desi_scaffold</i> | 4840                    | G/A  | NA                 | INTERGENIC                    | NA                                            |
| <i>Desi_wild_4872</i>  | NA                                  | <i>Ca_desi_scaffold</i> | 4872                    | C/T  | NA                 | INTERGENIC                    | NA                                            |
| <i>Desi_wild_6396</i>  | NA                                  | <i>Ca_desi_scaffold</i> | 6396                    | C/T  | Gene_Ca_18822.2    | INTRON                        | NA                                            |
| <i>Desi_wild_6398</i>  | NA                                  | <i>Ca_desi_scaffold</i> | 6398                    | C/G  | Gene_Ca_18822.2    | INTRON                        | NA                                            |
| <i>Desi_wild_7175</i>  | NA                                  | <i>Ca_desi_scaffold</i> | 7175                    | T/A  | Gene_Ca_18822.2    | INTRON                        | NA                                            |
| <i>Desi_wild_7249</i>  | NA                                  | <i>Ca_desi_scaffold</i> | 7249                    | C/T  | Gene_Ca_18822.2    | SYNONYMOUS_CODING             | NA                                            |
| <i>Desi_wild_7264</i>  | NA                                  | <i>Ca_desi_scaffold</i> | 7264                    | T/C  | Gene_Ca_18822.2    | SYNONYMOUS_CODING             | NA                                            |
| <i>Desi_wild_7339</i>  | NA                                  | <i>Ca_desi_scaffold</i> | 7339                    | A/G  | Gene_Ca_18822.2    | INTRON                        | NA                                            |
| <i>Desi_wild_7340</i>  | NA                                  | <i>Ca_desi_scaffold</i> | 7340                    | T/A  | Gene_Ca_18822.2    | INTRON                        | NA                                            |
| <i>Desi_wild_7369</i>  | NA                                  | <i>Ca_desi_scaffold</i> | 7369                    | A/G  | Gene_Ca_18822.2    | INTRON                        | NA                                            |
| <i>Desi_wild_7374</i>  | NA                                  | <i>Ca_desi_scaffold</i> | 7374                    | T/G  | Gene_Ca_18822.2    | INTRON                        | NA                                            |
| <i>Desi_wild_7390</i>  | NA                                  | <i>Ca_desi_scaffold</i> | 7390                    | T/C  | Gene_Ca_18822.2    | INTRON                        | NA                                            |
| <i>Desi_wild_7427</i>  | NA                                  | <i>Ca_desi_scaffold</i> | 7427                    | T/A  | Gene_Ca_18822.2    | INTRON                        | NA                                            |
| <i>Desi_wild_7596</i>  | NA                                  | <i>Ca_desi_scaffold</i> | 7596                    | A/G  | Gene_Ca_18822.2    | DOWNSTREAM                    | NA                                            |
| <i>Desi_wild_8034</i>  | NA                                  | <i>Ca_desi_scaffold</i> | 8034                    | T/C  | Gene_Ca_18823.1    | INTRON                        | BEL1-like homeodomain protein 9               |
| <i>Desi_wild_4011</i>  | NA                                  | <i>Ca_desi_scaffold</i> | 4011                    | C/G  | Gene_Ca_18826.1    | INTRON                        | Tripeptidyl-peptidase 2                       |
| <i>Desi_wild_4173</i>  | NA                                  | <i>Ca_desi_scaffold</i> | 4173                    | A/C  | Gene_Ca_18826.1    | INTRON                        | Tripeptidyl-peptidase 2                       |
| <i>Desi_wild_4183</i>  | NA                                  | <i>Ca_desi_scaffold</i> | 4183                    | A/C  | Gene_Ca_18826.1    | INTRON                        | Tripeptidyl-peptidase 2                       |
| <i>Desi_wild_4186</i>  | NA                                  | <i>Ca_desi_scaffold</i> | 4186                    | G/T  | Gene_Ca_18826.1    | INTRON                        | Tripeptidyl-peptidase 2                       |
| <i>Desi_wild_4189</i>  | NA                                  | <i>Ca_desi_scaffold</i> | 4189                    | C/T  | Gene_Ca_18826.1    | INTRON                        | Tripeptidyl-peptidase 2                       |
| <i>Desi_wild_3516</i>  | NA                                  | <i>Ca_desi_scaffold</i> | 3516                    | A/G  | Gene_Ca_18830.1    | NON_SYNONYMOUS_CODING         | Putative uncharacterized protein              |
| <i>Desi_wild_5636</i>  | NA                                  | <i>Ca_desi_scaffold</i> | 5636                    | G/A  | Gene_Ca_18830.1    | INTRON                        | Putative uncharacterized protein              |
| <i>Desi_wild_5703</i>  | NA                                  | <i>Ca_desi_scaffold</i> | 5703                    | T/C  | Gene_Ca_18830.1    | INTRON                        | Putative uncharacterized protein              |
| <i>Desi_wild_20563</i> | NA                                  | <i>Ca_desi_scaffold</i> | 20563                   | A/G  | Gene_Ca_18831.1    | SYNONYMOUS_CODING             | Tubby-like F-box protein 3                    |
| <i>Desi_wild_20832</i> | NA                                  | <i>Ca_desi_scaffold</i> | 20832                   | A/G  | Gene_Ca_18831.1    | SYNONYMOUS_CODING             | Tubby-like F-box protein 3                    |

| SNP IDs                | NCBI dbSNP accession IDs (NCBI_SS#) | Chromosomes             | Physical positions (bp) | SNPs | Gene accession IDs | Sequence components of genome | Putative functions                      |
|------------------------|-------------------------------------|-------------------------|-------------------------|------|--------------------|-------------------------------|-----------------------------------------|
| <i>Desi_wild_28086</i> | NA                                  | <i>Ca_desi_scaffold</i> | 28086                   | T/C  | Gene_Ca_10354.1    | INTRON                        | Nuclear-pore anchor                     |
| <i>Desi_wild_29160</i> | NA                                  | <i>Ca_desi_scaffold</i> | 29160                   | C/G  | Gene_Ca_10354.1    | INTRON                        | Nuclear-pore anchor                     |
| <i>Desi_wild_29164</i> | NA                                  | <i>Ca_desi_scaffold</i> | 29164                   | C/T  | Gene_Ca_10354.1    | INTRON                        | Nuclear-pore anchor                     |
| <i>Desi_wild_29168</i> | NA                                  | <i>Ca_desi_scaffold</i> | 29168                   | A/G  | Gene_Ca_10354.1    | INTRON                        | Nuclear-pore anchor                     |
| <i>Desi_wild_36997</i> | NA                                  | <i>Ca_desi_scaffold</i> | 36997                   | A/C  | Gene_Ca_10354.1    | INTRON                        | Nuclear-pore anchor                     |
| <i>Desi_wild_37051</i> | NA                                  | <i>Ca_desi_scaffold</i> | 37051                   | G/A  | Gene_Ca_10354.1    | INTRON                        | Nuclear-pore anchor                     |
| <i>Desi_wild_49463</i> | NA                                  | <i>Ca_desi_scaffold</i> | 49463                   | T/G  | Gene_Ca_10354.1    | INTRON                        | Nuclear-pore anchor                     |
| <i>Desi_wild_52526</i> | NA                                  | <i>Ca_desi_scaffold</i> | 52526                   | C/A  | Gene_Ca_10354.1    | INTRON                        | Nuclear-pore anchor                     |
| <i>Desi_wild_20339</i> | NA                                  | <i>Ca_desi_scaffold</i> | 20339                   | C/T  | NA                 | INTERGENIC                    | NA                                      |
| <i>Desi_wild_4819</i>  | NA                                  | <i>Ca_desi_scaffold</i> | 4819                    | G/A  | Gene_Ca_18836.1    | INTRON                        | NA                                      |
| <i>Desi_wild_11423</i> | NA                                  | <i>Ca_desi_scaffold</i> | 11423                   | T/C  | Gene_Ca_18843.1    | NON_SYNONYMOUS_CODING         | Importin-11                             |
| <i>Desi_wild_16451</i> | NA                                  | <i>Ca_desi_scaffold</i> | 16451                   | A/G  | Gene_Ca_18843.1    | INTRON                        | Importin-11                             |
| <i>Desi_wild_5836</i>  | NA                                  | <i>Ca_desi_scaffold</i> | 5836                    | A/G  | NA                 | INTERGENIC                    | NA                                      |
| <i>Desi_wild_15016</i> | NA                                  | <i>Ca_desi_scaffold</i> | 15016                   | A/G  | Gene_Ca_18851.1    | INTRON                        | Apoptosis inhibitor 5                   |
| <i>Desi_wild_14006</i> | NA                                  | <i>Ca_desi_scaffold</i> | 14006                   | T/C  | Gene_Ca_18853.1    | UPSTREAM                      | NA                                      |
| <i>Desi_wild_11774</i> | NA                                  | <i>Ca_desi_scaffold</i> | 11774                   | C/T  | NA                 | INTERGENIC                    | NA                                      |
| <i>Desi_wild_10226</i> | NA                                  | <i>Ca_desi_scaffold</i> | 10226                   | G/A  | NA                 | INTERGENIC                    | NA                                      |
| <i>Desi_wild_10248</i> | NA                                  | <i>Ca_desi_scaffold</i> | 10248                   | A/G  | NA                 | INTERGENIC                    | NA                                      |
| <i>Desi_wild_18875</i> | NA                                  | <i>Ca_desi_scaffold</i> | 18875                   | T/G  | NA                 | INTERGENIC                    | NA                                      |
| <i>Desi_wild_10832</i> | NA                                  | <i>Ca_desi_scaffold</i> | 10832                   | C/T  | Gene_Ca_18883.1    | UPSTREAM                      | BAHD acyltransferase DCR                |
| <i>Desi_wild_12635</i> | NA                                  | <i>Ca_desi_scaffold</i> | 12635                   | C/A  | NA                 | INTERGENIC                    | NA                                      |
| <i>Desi_wild_4357</i>  | NA                                  | <i>Ca_desi_scaffold</i> | 4357                    | T/G  | Gene_Ca_10582.1    | UPSTREAM                      | NA                                      |
| <i>Desi_wild_4368</i>  | NA                                  | <i>Ca_desi_scaffold</i> | 4368                    | T/A  | Gene_Ca_10582.1    | UPSTREAM                      | NA                                      |
| <i>Desi_wild_4369</i>  | NA                                  | <i>Ca_desi_scaffold</i> | 4369                    | C/T  | Gene_Ca_10582.1    | UPSTREAM                      | NA                                      |
| <i>Desi_wild_6123</i>  | NA                                  | <i>Ca_desi_scaffold</i> | 6123                    | A/C  | Gene_Ca_18886.1    | SYNONYMOUS_CODING             | unknown protein                         |
| <i>Desi_wild_9382</i>  | NA                                  | <i>Ca_desi_scaffold</i> | 9382                    | A/T  | Gene_Ca_18890.1    | SYNONYMOUS_CODING             | Wall-associated receptor kinase-like 20 |
| <i>Desi_wild_9510</i>  | NA                                  | <i>Ca_desi_scaffold</i> | 9510                    | T/A  | Gene_Ca_18890.1    | NON_SYNONYMOUS_CODING         | Wall-associated receptor kinase-like 20 |
| <i>Desi_wild_9656</i>  | NA                                  | <i>Ca_desi_scaffold</i> | 9656                    | T/A  | Gene_Ca_18890.1    | NON_SYNONYMOUS_CODING         | Wall-associated receptor kinase-like 20 |
| <i>Desi_wild_9886</i>  | NA                                  | <i>Ca_desi_scaffold</i> | 9886                    | T/G  | NA                 | INTERGENIC                    | NA                                      |
| <i>Desi_wild_1869</i>  | NA                                  | <i>Ca_desi_scaffold</i> | 1869                    | T/G  | NA                 | INTERGENIC                    | NA                                      |
| <i>Desi_wild_2544</i>  | NA                                  | <i>Ca_desi_scaffold</i> | 2544                    | G/A  | Gene_Ca_18899.1    | SYNONYMOUS_CODING             | Major facilitator superfamily protein   |
| <i>Desi_wild_2568</i>  | NA                                  | <i>Ca_desi_scaffold</i> | 2568                    | C/A  | Gene_Ca_18899.1    | NON_SYNONYMOUS_CODING         | Major facilitator superfamily protein   |
| <i>Desi_wild_10363</i> | NA                                  | <i>Ca_desi_scaffold</i> | 10363                   | G/T  | NA                 | INTERGENIC                    | NA                                      |
| <i>Desi_wild_10365</i> | NA                                  | <i>Ca_desi_scaffold</i> | 10365                   | C/T  | NA                 | INTERGENIC                    | NA                                      |
| <i>Desi_wild_10372</i> | NA                                  | <i>Ca_desi_scaffold</i> | 10372                   | A/G  | NA                 | INTERGENIC                    | NA                                      |
| <i>Desi_wild_10388</i> | NA                                  | <i>Ca_desi_scaffold</i> | 10388                   | A/C  | NA                 | INTERGENIC                    | NA                                      |
| <i>Desi_wild_10405</i> | NA                                  | <i>Ca_desi_scaffold</i> | 10405                   | C/T  | NA                 | INTERGENIC                    | NA                                      |
| <i>Desi_wild_12734</i> | NA                                  | <i>Ca_desi_scaffold</i> | 12734                   | T/C  | Gene_Ca_18904.1    | NON_SYNONYMOUS_CODING         | UDP-glucuronate 4-epimerase 2           |
| <i>Desi_wild_12736</i> | NA                                  | <i>Ca_desi_scaffold</i> | 12736                   | A/T  | Gene_Ca_18904.1    | SYNONYMOUS_CODING             | UDP-glucuronate 4-epimerase 2           |
| <i>Desi_wild_12790</i> | NA                                  | <i>Ca_desi_scaffold</i> | 12790                   | A/G  | Gene_Ca_18904.1    | SYNONYMOUS_CODING             | UDP-glucuronate 4-epimerase 2           |
| <i>Desi_wild_12838</i> | NA                                  | <i>Ca_desi_scaffold</i> | 12838                   | A/G  | Gene_Ca_18904.1    | SYNONYMOUS_CODING             | UDP-glucuronate 4-epimerase 2           |
| <i>Desi_wild_6940</i>  | NA                                  | <i>Ca_desi_scaffold</i> | 6940                    | C/T  | Gene_Ca_18906.1    | NON_SYNONYMOUS_CODING         | Annexin D1                              |
| <i>Desi_wild_1554</i>  | NA                                  | <i>Ca_desi_scaffold</i> | 1554                    | G/T  | NA                 | INTERGENIC                    | NA                                      |
| <i>Desi_wild_8861</i>  | NA                                  | <i>Ca_desi_scaffold</i> | 8861                    | C/A  | NA                 | INTERGENIC                    | NA                                      |

| SNP IDs                 | NCBI dbSNP accession IDs (NCBI_SS#) | Chromosomes             | Physical positions (bp) | SNPs | Gene accession IDs | Sequence components of genome | Putative functions                                           |
|-------------------------|-------------------------------------|-------------------------|-------------------------|------|--------------------|-------------------------------|--------------------------------------------------------------|
| <i>Desi_wild_16765</i>  | NA                                  | <i>Ca_desi_scaffold</i> | 16765                   | T/A  | Gene_Ca_18919.1    | INTRON                        | GDSDL esterase/lipase At1g29670                              |
| <i>Desi_wild_5196</i>   | NA                                  | <i>Ca_desi_scaffold</i> | 5196                    | G/A  | NA                 | INTERGENIC                    | NA                                                           |
| <i>Desi_wild_5214</i>   | NA                                  | <i>Ca_desi_scaffold</i> | 5214                    | G/A  | NA                 | INTERGENIC                    | NA                                                           |
| <i>Desi_wild_12458</i>  | NA                                  | <i>Ca_desi_scaffold</i> | 12458                   | A/G  | NA                 | INTERGENIC                    | NA                                                           |
| <i>Desi_wild_8958</i>   | NA                                  | <i>Ca_desi_scaffold</i> | 8958                    | T/A  | Gene_Ca_18932.1    | INTRON                        | DNA-directed RNA polymerase I subunit RPA2                   |
| <i>Desi_wild_11480</i>  | NA                                  | <i>Ca_desi_scaffold</i> | 11480                   | T/C  | Gene_Ca_18932.1    | INTRON                        | DNA-directed RNA polymerase I subunit RPA2                   |
| <i>Desi_wild_12406</i>  | NA                                  | <i>Ca_desi_scaffold</i> | 12406                   | C/T  | Gene_Ca_18932.1    | NON_SYNONYMOUS_CODING         | DNA-directed RNA polymerase I subunit RPA2                   |
| <i>Desi_wild_12414</i>  | NA                                  | <i>Ca_desi_scaffold</i> | 12414                   | T/G  | Gene_Ca_18932.1    | SYNONYMOUS_CODING             | DNA-directed RNA polymerase I subunit RPA2                   |
| <i>Desi_wild_12420</i>  | NA                                  | <i>Ca_desi_scaffold</i> | 12420                   | A/G  | Gene_Ca_18932.1    | NON_SYNONYMOUS_CODING         | DNA-directed RNA polymerase I subunit RPA2                   |
| <i>Desi_wild_15917</i>  | NA                                  | <i>Ca_desi_scaffold</i> | 15917                   | G/C  | NA                 | INTERGENIC                    | NA                                                           |
| <i>Desi_wild_15935</i>  | NA                                  | <i>Ca_desi_scaffold</i> | 15935                   | G/T  | NA                 | INTERGENIC                    | NA                                                           |
| <i>Desi_wild_15942</i>  | NA                                  | <i>Ca_desi_scaffold</i> | 15942                   | C/T  | NA                 | INTERGENIC                    | NA                                                           |
| <i>Desi_wild_15947</i>  | NA                                  | <i>Ca_desi_scaffold</i> | 15947                   | T/C  | NA                 | INTERGENIC                    | NA                                                           |
| <i>Desi_wild_15948</i>  | NA                                  | <i>Ca_desi_scaffold</i> | 15948                   | A/C  | NA                 | INTERGENIC                    | NA                                                           |
| <i>Desi_wild_15963</i>  | NA                                  | <i>Ca_desi_scaffold</i> | 15963                   | A/C  | NA                 | INTERGENIC                    | NA                                                           |
| <i>Desi_wild_15967</i>  | NA                                  | <i>Ca_desi_scaffold</i> | 15967                   | C/T  | NA                 | INTERGENIC                    | NA                                                           |
| <i>Desi_wild_15976</i>  | NA                                  | <i>Ca_desi_scaffold</i> | 15976                   | T/C  | NA                 | INTERGENIC                    | NA                                                           |
| <i>Desi_wild_15977</i>  | NA                                  | <i>Ca_desi_scaffold</i> | 15977                   | G/A  | NA                 | INTERGENIC                    | NA                                                           |
| <i>Desi_wild_15991</i>  | NA                                  | <i>Ca_desi_scaffold</i> | 15991                   | A/G  | NA                 | INTERGENIC                    | NA                                                           |
| <i>Desi_wild_15993</i>  | NA                                  | <i>Ca_desi_scaffold</i> | 15993                   | T/C  | NA                 | INTERGENIC                    | NA                                                           |
| <i>Desi_wild_16002</i>  | NA                                  | <i>Ca_desi_scaffold</i> | 16002                   | G/A  | NA                 | INTERGENIC                    | NA                                                           |
| <i>Desi_wild_16021</i>  | NA                                  | <i>Ca_desi_scaffold</i> | 16021                   | A/T  | NA                 | INTERGENIC                    | NA                                                           |
| <i>Desi_wild_5029</i>   | NA                                  | <i>Ca_desi_scaffold</i> | 5029                    | T/C  | Gene_Ca_18940.2    | SYNONYMOUS_CODING             | Receptor-like cytosolic serine/threonine-protein kinase RBK1 |
| <i>Desi_wild_5208</i>   | NA                                  | <i>Ca_desi_scaffold</i> | 5208                    | T/C  | Gene_Ca_18940.2    | SYNONYMOUS_CODING             | Receptor-like cytosolic serine/threonine-protein kinase RBK1 |
| <i>Desi_wild_634</i>    | NA                                  | <i>Ca_desi_scaffold</i> | 634                     | C/T  | NA                 | INTERGENIC                    | NA                                                           |
| <i>Desi_wild_682</i>    | NA                                  | <i>Ca_desi_scaffold</i> | 682                     | C/T  | NA                 | INTERGENIC                    | NA                                                           |
| <i>Desi_wild_686</i>    | NA                                  | <i>Ca_desi_scaffold</i> | 686                     | T/A  | NA                 | INTERGENIC                    | NA                                                           |
| <i>Desi_wild_758</i>    | NA                                  | <i>Ca_desi_scaffold</i> | 758                     | C/T  | NA                 | INTERGENIC                    | NA                                                           |
| <i>Desi_wild_6256</i>   | NA                                  | <i>Ca_desi_scaffold</i> | 6256                    | A/G  | Gene_Ca_18942.1    | INTRON                        | Cyclopropane-fatty-acyl-phospholipid synthase                |
| <i>Desi_wild_13953</i>  | NA                                  | <i>Ca_desi_scaffold</i> | 13953                   | T/A  | Gene_Ca_18943.1    | INTRON                        | Protein of unknown function (DUF810)                         |
| <i>Desi_wild_15163</i>  | NA                                  | <i>Ca_desi_scaffold</i> | 15163                   | G/A  | Gene_Ca_18943.1    | NON_SYNONYMOUS_CODING         | Protein of unknown function (DUF810)                         |
| <i>Desi_wild_15603</i>  | NA                                  | <i>Ca_desi_scaffold</i> | 15603                   | C/T  | Gene_Ca_18943.1    | SYNONYMOUS_CODING             | Protein of unknown function (DUF810)                         |
| <i>Desi_wild_1569</i>   | NA                                  | <i>Ca_desi_scaffold</i> | 1569                    | C/A  | NA                 | INTERGENIC                    | NA                                                           |
| <i>Desi_wild_1512</i>   | NA                                  | <i>Ca_desi_scaffold</i> | 1512                    | C/T  | NA                 | INTERGENIC                    | NA                                                           |
| <i>Desi_wild_161725</i> | NA                                  | <i>Ca_desi_scaffold</i> | 161725                  | C/A  | Gene_Ca_09134.1    | DOWNSTREAM                    | UDP-glycosyltransferase 83A1                                 |
| <i>Desi_wild_19027</i>  | NA                                  | <i>Ca_desi_scaffold</i> | 19027                   | A/C  | NA                 | INTERGENIC                    | NA                                                           |
| <i>Desi_wild_19147</i>  | NA                                  | <i>Ca_desi_scaffold</i> | 19147                   | A/G  | NA                 | INTERGENIC                    | NA                                                           |
| <i>Desi_wild_19149</i>  | NA                                  | <i>Ca_desi_scaffold</i> | 19149                   | T/A  | NA                 | INTERGENIC                    | NA                                                           |
| <i>Desi_wild_19182</i>  | NA                                  | <i>Ca_desi_scaffold</i> | 19182                   | G/A  | NA                 | INTERGENIC                    | NA                                                           |
| <i>Desi_wild_925</i>    | NA                                  | <i>Ca_desi_scaffold</i> | 925                     | C/T  | Gene_Ca_18959.1    | INTRON                        | 54S ribosomal protein L24, mitochondrial                     |
| <i>Desi_wild_15551</i>  | NA                                  | <i>Ca_desi_scaffold</i> | 15551                   | A/G  | NA                 | INTERGENIC                    | NA                                                           |
| <i>Desi_wild_15675</i>  | NA                                  | <i>Ca_desi_scaffold</i> | 15675                   | A/G  | NA                 | INTERGENIC                    | NA                                                           |
| <i>Desi_wild_18404</i>  | NA                                  | <i>Ca_desi_scaffold</i> | 18404                   | A/T  | NA                 | INTERGENIC                    | NA                                                           |
| <i>Desi_wild_18455</i>  | NA                                  | <i>Ca_desi_scaffold</i> | 18455                   | G/T  | NA                 | INTERGENIC                    | NA                                                           |

| SNP IDs                | NCBI dbSNP accession IDs (NCBI_SS#) | Chromosomes             | Physical positions (bp) | SNPs | Gene accession IDs | Sequence components of genome | Putative functions                                                                       |
|------------------------|-------------------------------------|-------------------------|-------------------------|------|--------------------|-------------------------------|------------------------------------------------------------------------------------------|
| <i>Desi_wild_9997</i>  | NA                                  | <i>Ca_desi_scaffold</i> | 9997                    | A/G  | NA                 | INTERGENIC                    | NA                                                                                       |
| <i>Desi_wild_1730</i>  | NA                                  | <i>Ca_desi_scaffold</i> | 1730                    | T/C  | NA                 | INTERGENIC                    | NA                                                                                       |
| <i>Desi_wild_12280</i> | NA                                  | <i>Ca_desi_scaffold</i> | 12280                   | T/A  | NA                 | INTERGENIC                    | NA                                                                                       |
| <i>Desi_wild_6965</i>  | NA                                  | <i>Ca_desi_scaffold</i> | 6965                    | T/C  | Gene_Ca_18993.1    | DOWNSTREAM                    | NA                                                                                       |
| <i>Desi_wild_10896</i> | NA                                  | <i>Ca_desi_scaffold</i> | 10896                   | A/C  | Gene_Ca_19002.1    | SYNONYMOUS_CODING             | Mitochondrial import inner membrane translocase subunit Tim17/Tim22/Tim23 family protein |
| <i>Desi_wild_6408</i>  | NA                                  | <i>Ca_desi_scaffold</i> | 6408                    | G/A  | NA                 | INTERGENIC                    | NA                                                                                       |
| <i>Desi_wild_6458</i>  | NA                                  | <i>Ca_desi_scaffold</i> | 6458                    | A/T  | NA                 | INTERGENIC                    | NA                                                                                       |
| <i>Desi_wild_6504</i>  | NA                                  | <i>Ca_desi_scaffold</i> | 6504                    | A/G  | NA                 | INTERGENIC                    | NA                                                                                       |
| <i>Desi_wild_6519</i>  | NA                                  | <i>Ca_desi_scaffold</i> | 6519                    | T/C  | NA                 | INTERGENIC                    | NA                                                                                       |
| <i>Desi_wild_6524</i>  | NA                                  | <i>Ca_desi_scaffold</i> | 6524                    | T/A  | NA                 | INTERGENIC                    | NA                                                                                       |
| <i>Desi_wild_6526</i>  | NA                                  | <i>Ca_desi_scaffold</i> | 6526                    | T/A  | NA                 | INTERGENIC                    | NA                                                                                       |
| <i>Desi_wild_124</i>   | NA                                  | <i>Ca_desi_scaffold</i> | 124                     | A/G  | NA                 | INTERGENIC                    | NA                                                                                       |
| <i>Desi_wild_138</i>   | NA                                  | <i>Ca_desi_scaffold</i> | 138                     | G/A  | NA                 | INTERGENIC                    | NA                                                                                       |
| <i>Desi_wild_161</i>   | NA                                  | <i>Ca_desi_scaffold</i> | 161                     | C/A  | NA                 | INTERGENIC                    | NA                                                                                       |
| <i>Desi_wild_164</i>   | NA                                  | <i>Ca_desi_scaffold</i> | 164                     | T/G  | NA                 | INTERGENIC                    | NA                                                                                       |
| <i>Desi_wild_192</i>   | NA                                  | <i>Ca_desi_scaffold</i> | 192                     | A/G  | NA                 | INTERGENIC                    | NA                                                                                       |
| <i>Desi_wild_193</i>   | NA                                  | <i>Ca_desi_scaffold</i> | 193                     | C/T  | NA                 | INTERGENIC                    | NA                                                                                       |
| <i>Desi_wild_199</i>   | NA                                  | <i>Ca_desi_scaffold</i> | 199                     | T/A  | NA                 | INTERGENIC                    | NA                                                                                       |
| <i>Desi_wild_218</i>   | NA                                  | <i>Ca_desi_scaffold</i> | 218                     | A/G  | NA                 | INTERGENIC                    | NA                                                                                       |
| <i>Desi_wild_1602</i>  | NA                                  | <i>Ca_desi_scaffold</i> | 1602                    | T/C  | Gene_Ca_19013.1    | SYNONYMOUS_CODING             | Zinc transporter 4, chloroplastic                                                        |
| <i>Desi_wild_1758</i>  | NA                                  | <i>Ca_desi_scaffold</i> | 1758                    | C/A  | Gene_Ca_19013.1    | SYNONYMOUS_CODING             | Zinc transporter 4, chloroplastic                                                        |
| <i>Desi_wild_15170</i> | NA                                  | <i>Ca_desi_scaffold</i> | 15170                   | C/G  | Gene_Ca_19014.1    | INTRON                        | Cytosolic Fe-S cluster assembly factor nubp1                                             |
| <i>Desi_wild_17937</i> | NA                                  | <i>Ca_desi_scaffold</i> | 17937                   | G/C  | Gene_Ca_19014.1    | UPSTREAM                      | Cytosolic Fe-S cluster assembly factor nubp1                                             |
| <i>Desi_wild_17956</i> | NA                                  | <i>Ca_desi_scaffold</i> | 17956                   | G/A  | Gene_Ca_19014.1    | UPSTREAM                      | Cytosolic Fe-S cluster assembly factor nubp1                                             |
| <i>Desi_wild_17979</i> | NA                                  | <i>Ca_desi_scaffold</i> | 17979                   | T/A  | Gene_Ca_19014.1    | UPSTREAM                      | Cytosolic Fe-S cluster assembly factor nubp1                                             |
| <i>Desi_wild_17980</i> | NA                                  | <i>Ca_desi_scaffold</i> | 17980                   | T/G  | Gene_Ca_19014.1    | UPSTREAM                      | Cytosolic Fe-S cluster assembly factor nubp1                                             |
| <i>Desi_wild_17982</i> | NA                                  | <i>Ca_desi_scaffold</i> | 17982                   | C/T  | Gene_Ca_19014.1    | UPSTREAM                      | Cytosolic Fe-S cluster assembly factor nubp1                                             |
| <i>Desi_wild_17990</i> | NA                                  | <i>Ca_desi_scaffold</i> | 17990                   | G/T  | Gene_Ca_19014.1    | UPSTREAM                      | Cytosolic Fe-S cluster assembly factor nubp1                                             |
| <i>Desi_wild_17997</i> | NA                                  | <i>Ca_desi_scaffold</i> | 17997                   | G/A  | Gene_Ca_19014.1    | UPSTREAM                      | Cytosolic Fe-S cluster assembly factor nubp1                                             |
| <i>Desi_wild_18026</i> | NA                                  | <i>Ca_desi_scaffold</i> | 18026                   | A/G  | Gene_Ca_19014.1    | UPSTREAM                      | Cytosolic Fe-S cluster assembly factor nubp1                                             |
| <i>Desi_wild_18040</i> | NA                                  | <i>Ca_desi_scaffold</i> | 18040                   | A/G  | Gene_Ca_19014.1    | UPSTREAM                      | Cytosolic Fe-S cluster assembly factor nubp1                                             |
| <i>Desi_wild_14138</i> | NA                                  | <i>Ca_desi_scaffold</i> | 14138                   | G/C  | Gene_Ca_19015.1    | NON_SYNONYMOUS_CODING         | Ethylene-responsive transcription factor RAP2-6                                          |
| <i>Desi_wild_14181</i> | NA                                  | <i>Ca_desi_scaffold</i> | 14181                   | G/A  | Gene_Ca_19015.1    | SYNONYMOUS_CODING             | Ethylene-responsive transcription factor RAP2-6                                          |
| <i>Desi_wild_9129</i>  | NA                                  | <i>Ca_desi_scaffold</i> | 9129                    | C/A  | Gene_Ca_19016.1    | SYNONYMOUS_CODING             | Probable acyl-activating enzyme 2                                                        |
| <i>Desi_wild_54828</i> | NA                                  | <i>Ca_desi_scaffold</i> | 54828                   | G/T  | NA                 | INTERGENIC                    | NA                                                                                       |
| <i>Desi_wild_54837</i> | NA                                  | <i>Ca_desi_scaffold</i> | 54837                   | C/T  | NA                 | INTERGENIC                    | NA                                                                                       |
| <i>Desi_wild_54852</i> | NA                                  | <i>Ca_desi_scaffold</i> | 54852                   | C/A  | NA                 | INTERGENIC                    | NA                                                                                       |
| <i>Desi_wild_54873</i> | NA                                  | <i>Ca_desi_scaffold</i> | 54873                   | C/A  | NA                 | INTERGENIC                    | NA                                                                                       |
| <i>Desi_wild_54886</i> | NA                                  | <i>Ca_desi_scaffold</i> | 54886                   | C/A  | NA                 | INTERGENIC                    | NA                                                                                       |
| <i>Desi_wild_54889</i> | NA                                  | <i>Ca_desi_scaffold</i> | 54889                   | C/T  | NA                 | INTERGENIC                    | NA                                                                                       |
| <i>Desi_wild_8695</i>  | NA                                  | <i>Ca_desi_scaffold</i> | 8695                    | T/C  | Gene_Ca_19021.1    | INTRON                        | Ataxin-3 homolog                                                                         |
| <i>Desi_wild_11873</i> | NA                                  | <i>Ca_desi_scaffold</i> | 11873                   | T/G  | Gene_Ca_19021.1    | INTRON                        | Ataxin-3 homolog                                                                         |
| <i>Desi_wild_11921</i> | NA                                  | <i>Ca_desi_scaffold</i> | 11921                   | T/G  | Gene_Ca_19021.1    | INTRON                        | Ataxin-3 homolog                                                                         |
| <i>Desi_wild_11922</i> | NA                                  | <i>Ca_desi_scaffold</i> | 11922                   | C/T  | Gene_Ca_19021.1    | INTRON                        | Ataxin-3 homolog                                                                         |



| SNP IDs         | NCBI dbSNP accession IDs (NCBI_SS#) | Chromosomes      | Physical positions (bp) | SNPs | Gene accession IDs | Sequence components of genome | Putative functions                                                              |
|-----------------|-------------------------------------|------------------|-------------------------|------|--------------------|-------------------------------|---------------------------------------------------------------------------------|
| Desi_wild_11927 | NA                                  | Ca_desi_scaffold | 11927                   | G/A  | Gene_Ca_19021.1    | INTRON                        | Ataxin-3 homolog                                                                |
| Desi_wild_11931 | NA                                  | Ca_desi_scaffold | 11931                   | C/T  | Gene_Ca_19021.1    | INTRON                        | Ataxin-3 homolog                                                                |
| Desi_wild_15999 | NA                                  | Ca_desi_scaffold | 15999                   | A/C  | NA                 | INTERGENIC                    | NA                                                                              |
| Desi_wild_12433 | NA                                  | Ca_desi_scaffold | 12433                   | A/G  | NA                 | INTERGENIC                    | NA                                                                              |
| Desi_wild_17575 | NA                                  | Ca_desi_scaffold | 17575                   | T/A  | Gene_Ca_10567.1    | NON_SYNONYMOUS_CODING         | Putative disease resistance protein At3g14460                                   |
| Desi_wild_13824 | NA                                  | Ca_desi_scaffold | 13824                   | T/C  | Gene_Ca_19036.1    | UPSTREAM                      | ubiquitin interaction motif-containing protein                                  |
| Desi_wild_3708  | NA                                  | Ca_desi_scaffold | 3708                    | G/T  | NA                 | INTERGENIC                    | NA                                                                              |
| Desi_wild_3735  | NA                                  | Ca_desi_scaffold | 3735                    | G/T  | NA                 | INTERGENIC                    | NA                                                                              |
| Desi_wild_3746  | NA                                  | Ca_desi_scaffold | 3746                    | C/G  | NA                 | INTERGENIC                    | NA                                                                              |
| Desi_wild_3778  | NA                                  | Ca_desi_scaffold | 3778                    | C/T  | NA                 | INTERGENIC                    | NA                                                                              |
| Desi_wild_3784  | NA                                  | Ca_desi_scaffold | 3784                    | T/C  | NA                 | INTERGENIC                    | NA                                                                              |
| Desi_wild_3146  | NA                                  | Ca_desi_scaffold | 3146                    | T/G  | Gene_Ca_19047.1    | INTRON                        | Serine/threonine-protein phosphatase 4 regulatory subunit 3                     |
| Desi_wild_15304 | NA                                  | Ca_desi_scaffold | 15304                   | C/G  | NA                 | INTERGENIC                    | NA                                                                              |
| Desi_wild_12940 | NA                                  | Ca_desi_scaffold | 12940                   | G/C  | Gene_Ca_19064.1    | NON_SYNONYMOUS_CODING         | F-box protein                                                                   |
| Desi_wild_6119  | NA                                  | Ca_desi_scaffold | 6119                    | T/G  | Gene_Ca_19065.1    | UPSTREAM                      | Flavonol synthase/flavanone 3-hydroxylase                                       |
| Desi_wild_7365  | NA                                  | Ca_desi_scaffold | 7365                    | T/C  | NA                 | INTERGENIC                    | NA                                                                              |
| Desi_wild_8028  | NA                                  | Ca_desi_scaffold | 8028                    | C/T  | Gene_Ca_19067.1    | INTRON                        | DNA binding                                                                     |
| Desi_wild_1913  | NA                                  | Ca_desi_scaffold | 1913                    | A/G  | Gene_Ca_19075.1    | SYNONYMOUS_CODING             | Ammonium transporter 3 member 1                                                 |
| Desi_wild_57    | NA                                  | Ca_desi_scaffold | 57                      | G/T  | NA                 | INTERGENIC                    | NA                                                                              |
| Desi_wild_79    | NA                                  | Ca_desi_scaffold | 79                      | C/G  | NA                 | INTERGENIC                    | NA                                                                              |
| Desi_wild_88    | NA                                  | Ca_desi_scaffold | 88                      | T/A  | NA                 | INTERGENIC                    | NA                                                                              |
| Desi_wild_10944 | NA                                  | Ca_desi_scaffold | 10944                   | C/A  | Gene_Ca_19076.1    | INTRON                        | Serine/threonine-protein kinase AtPK7                                           |
| Desi_wild_10945 | NA                                  | Ca_desi_scaffold | 10945                   | A/G  | Gene_Ca_19076.1    | INTRON                        | Serine/threonine-protein kinase AtPK7                                           |
| Desi_wild_10946 | NA                                  | Ca_desi_scaffold | 10946                   | T/C  | Gene_Ca_19076.1    | INTRON                        | Serine/threonine-protein kinase AtPK7                                           |
| Desi_wild_16737 | NA                                  | Ca_desi_scaffold | 16737                   | G/A  | NA                 | INTERGENIC                    | NA                                                                              |
| Desi_wild_13587 | NA                                  | Ca_desi_scaffold | 13587                   | A/G  | Gene_Ca_19081.1    | NON_SYNONYMOUS_CODING         | Transcription elongation factor SPT6                                            |
| Desi_wild_9589  | NA                                  | Ca_desi_scaffold | 9589                    | A/C  | Gene_Ca_19090.1    | SYNONYMOUS_CODING             | NA                                                                              |
| Desi_wild_10171 | NA                                  | Ca_desi_scaffold | 10171                   | T/A  | Gene_Ca_19090.1    | NON_SYNONYMOUS_CODING         | NA                                                                              |
| Desi_wild_10182 | NA                                  | Ca_desi_scaffold | 10182                   | C/A  | Gene_Ca_19090.1    | NON_SYNONYMOUS_CODING         | NA                                                                              |
| Desi_wild_10186 | NA                                  | Ca_desi_scaffold | 10186                   | A/C  | Gene_Ca_19090.1    | SYNONYMOUS_CODING             | NA                                                                              |
| Desi_wild_7679  | NA                                  | Ca_desi_scaffold | 7679                    | C/G  | NA                 | INTERGENIC                    | NA                                                                              |
| Desi_wild_7724  | NA                                  | Ca_desi_scaffold | 7724                    | G/A  | NA                 | INTERGENIC                    | NA                                                                              |
| Desi_wild_3410  | NA                                  | Ca_desi_scaffold | 3410                    | C/A  | Gene_Ca_19094.1    | NON_SYNONYMOUS_CODING         | Pentatricopeptide repeat-containing protein At1g03560, mitochondrial            |
| Desi_wild_3598  | NA                                  | Ca_desi_scaffold | 3598                    | G/T  | Gene_Ca_19095.1    | INTRON                        | CONTAINS InterPro DOMAIN/s: Kinase binding protein CGI-121 (InterPro:IPR013926) |
| Desi_wild_3736  | NA                                  | Ca_desi_scaffold | 3736                    | C/A  | Gene_Ca_19095.1    | INTRON                        | CONTAINS InterPro DOMAIN/s: Kinase binding protein CGI-121 (InterPro:IPR013926) |
| Desi_wild_3758  | NA                                  | Ca_desi_scaffold | 3758                    | T/A  | Gene_Ca_19095.1    | SYNONYMOUS_CODING             | CONTAINS InterPro DOMAIN/s: Kinase binding protein CGI-121 (InterPro:IPR013926) |
| Desi_wild_5513  | NA                                  | Ca_desi_scaffold | 5513                    | T/A  | Gene_Ca_19098.1    | INTRON                        | UPF0496 protein At3g19330                                                       |
| Desi_wild_3170  | NA                                  | Ca_desi_scaffold | 3170                    | T/C  | NA                 | INTERGENIC                    | NA                                                                              |
| Desi_wild_9058  | NA                                  | Ca_desi_scaffold | 9058                    | T/C  | NA                 | INTERGENIC                    | NA                                                                              |
| Desi_wild_9106  | NA                                  | Ca_desi_scaffold | 9106                    | T/C  | NA                 | INTERGENIC                    | NA                                                                              |
| Desi_wild_9200  | NA                                  | Ca_desi_scaffold | 9200                    | G/A  | NA                 | INTERGENIC                    | NA                                                                              |
| Desi_wild_4371  | NA                                  | Ca_desi_scaffold | 4371                    | C/T  | NA                 | INTERGENIC                    | NA                                                                              |
| Desi_wild_10249 | NA                                  | Ca_desi_scaffold | 10249                   | A/C  | NA                 | INTERGENIC                    | NA                                                                              |
| Desi_wild_10267 | NA                                  | Ca_desi_scaffold | 10267                   | C/T  | NA                 | INTERGENIC                    | NA                                                                              |

| SNP IDs         | NCBI dbSNP accession IDs (NCBI_SS#) | Chromosomes      | Physical positions (bp) | SNPs | Gene accession IDs | Sequence components of genome | Putative functions |
|-----------------|-------------------------------------|------------------|-------------------------|------|--------------------|-------------------------------|--------------------|
| Desi_wild_10302 | NA                                  | Ca_desi_scaffold | 10302                   | G/A  | NA                 | INTERGENIC                    | NA                 |
| Desi_wild_10546 | NA                                  | Ca_desi_scaffold | 10546                   | A/C  | NA                 | INTERGENIC                    | NA                 |
| Desi_wild_10585 | NA                                  | Ca_desi_scaffold | 10585                   | C/T  | NA                 | INTERGENIC                    | NA                 |
| Desi_wild_10597 | NA                                  | Ca_desi_scaffold | 10597                   | C/A  | NA                 | INTERGENIC                    | NA                 |
| Desi_wild_10601 | NA                                  | Ca_desi_scaffold | 10601                   | C/T  | NA                 | INTERGENIC                    | NA                 |
| Desi_wild_10608 | NA                                  | Ca_desi_scaffold | 10608                   | C/A  | NA                 | INTERGENIC                    | NA                 |
| Desi_wild_10609 | NA                                  | Ca_desi_scaffold | 10609                   | C/T  | NA                 | INTERGENIC                    | NA                 |
| Desi_wild_10823 | NA                                  | Ca_desi_scaffold | 10823                   | C/T  | NA                 | INTERGENIC                    | NA                 |
| Desi_wild_12896 | NA                                  | Ca_desi_scaffold | 12896                   | A/G  | NA                 | INTERGENIC                    | NA                 |
| Desi_wild_12929 | NA                                  | Ca_desi_scaffold | 12929                   | C/G  | NA                 | INTERGENIC                    | NA                 |
| Desi_wild_12932 | NA                                  | Ca_desi_scaffold | 12932                   | C/A  | NA                 | INTERGENIC                    | NA                 |
| Desi_wild_12996 | NA                                  | Ca_desi_scaffold | 12996                   | C/T  | NA                 | INTERGENIC                    | NA                 |
| Desi_wild_12997 | NA                                  | Ca_desi_scaffold | 12997                   | G/T  | NA                 | INTERGENIC                    | NA                 |
| Desi_wild_13004 | NA                                  | Ca_desi_scaffold | 13004                   | C/T  | NA                 | INTERGENIC                    | NA                 |
| Desi_wild_13007 | NA                                  | Ca_desi_scaffold | 13007                   | A/G  | NA                 | INTERGENIC                    | NA                 |
| Desi_wild_13022 | NA                                  | Ca_desi_scaffold | 13022                   | T/G  | NA                 | INTERGENIC                    | NA                 |
| Desi_wild_24568 | NA                                  | Ca_desi_scaffold | 24568                   | T/A  | NA                 | INTERGENIC                    | NA                 |
| Desi_wild_24574 | NA                                  | Ca_desi_scaffold | 24574                   | T/C  | NA                 | INTERGENIC                    | NA                 |
| Desi_wild_24577 | NA                                  | Ca_desi_scaffold | 24577                   | A/G  | NA                 | INTERGENIC                    | NA                 |
| Desi_wild_24578 | NA                                  | Ca_desi_scaffold | 24578                   | C/T  | NA                 | INTERGENIC                    | NA                 |
| Desi_wild_24598 | NA                                  | Ca_desi_scaffold | 24598                   | A/C  | NA                 | INTERGENIC                    | NA                 |
| Desi_wild_24599 | NA                                  | Ca_desi_scaffold | 24599                   | A/T  | NA                 | INTERGENIC                    | NA                 |
| Desi_wild_24601 | NA                                  | Ca_desi_scaffold | 24601                   | G/T  | NA                 | INTERGENIC                    | NA                 |
| Desi_wild_24602 | NA                                  | Ca_desi_scaffold | 24602                   | G/T  | NA                 | INTERGENIC                    | NA                 |
| Desi_wild_24617 | NA                                  | Ca_desi_scaffold | 24617                   | G/A  | NA                 | INTERGENIC                    | NA                 |
| Desi_wild_24618 | NA                                  | Ca_desi_scaffold | 24618                   | C/G  | NA                 | INTERGENIC                    | NA                 |
| Desi_wild_24619 | NA                                  | Ca_desi_scaffold | 24619                   | C/T  | NA                 | INTERGENIC                    | NA                 |
| Desi_wild_24620 | NA                                  | Ca_desi_scaffold | 24620                   | C/T  | NA                 | INTERGENIC                    | NA                 |
| Desi_wild_24622 | NA                                  | Ca_desi_scaffold | 24622                   | G/A  | NA                 | INTERGENIC                    | NA                 |
| Desi_wild_24625 | NA                                  | Ca_desi_scaffold | 24625                   | A/G  | NA                 | INTERGENIC                    | NA                 |
| Desi_wild_24638 | NA                                  | Ca_desi_scaffold | 24638                   | G/A  | NA                 | INTERGENIC                    | NA                 |
| Desi_wild_15567 | NA                                  | Ca_desi_scaffold | 15567                   | C/T  | NA                 | INTERGENIC                    | NA                 |
| Desi_wild_15572 | NA                                  | Ca_desi_scaffold | 15572                   | C/T  | NA                 | INTERGENIC                    | NA                 |
| Desi_wild_15605 | NA                                  | Ca_desi_scaffold | 15605                   | C/T  | NA                 | INTERGENIC                    | NA                 |
| Desi_wild_4835  | NA                                  | Ca_desi_scaffold | 4835                    | T/G  | Gene_Ca_19136.1    | UPSTREAM                      | unknown protein    |
| Desi_wild_10480 | NA                                  | Ca_desi_scaffold | 10480                   | G/A  | Gene_Ca_19137.1    | INTRON                        | NA                 |
| Desi_wild_10548 | NA                                  | Ca_desi_scaffold | 10548                   | C/T  | Gene_Ca_19137.1    | INTRON                        | NA                 |
| Desi_wild_12127 | NA                                  | Ca_desi_scaffold | 12127                   | A/T  | Gene_Ca_19137.1    | INTRON                        | NA                 |
| Desi_wild_12334 | NA                                  | Ca_desi_scaffold | 12334                   | A/G  | Gene_Ca_19137.1    | INTRON                        | NA                 |
| Desi_wild_12343 | NA                                  | Ca_desi_scaffold | 12343                   | C/A  | Gene_Ca_19137.1    | INTRON                        | NA                 |
| Desi_wild_12392 | NA                                  | Ca_desi_scaffold | 12392                   | A/G  | Gene_Ca_19137.1    | INTRON                        | NA                 |
| Desi_wild_13081 | NA                                  | Ca_desi_scaffold | 13081                   | G/A  | Gene_Ca_19137.1    | SYNONYMOUS_CODING             | NA                 |
| Desi_wild_6806  | NA                                  | Ca_desi_scaffold | 6806                    | T/C  | NA                 | INTERGENIC                    | NA                 |
| Desi_wild_6888  | NA                                  | Ca_desi_scaffold | 6888                    | A/T  | NA                 | INTERGENIC                    | NA                 |

| SNP IDs                | NCBI dbSNP accession IDs (NCBI_SS#) | Chromosomes             | Physical positions (bp) | SNPs | Gene accession IDs | Sequence components of genome | Putative functions           |
|------------------------|-------------------------------------|-------------------------|-------------------------|------|--------------------|-------------------------------|------------------------------|
| <i>Desi_wild_1696</i>  | NA                                  | <i>Ca_desi_scaffold</i> | 1696                    | A/C  | NA                 | INTERGENIC                    | NA                           |
| <i>Desi_wild_1699</i>  | NA                                  | <i>Ca_desi_scaffold</i> | 1699                    | A/G  | NA                 | INTERGENIC                    | NA                           |
| <i>Desi_wild_1721</i>  | NA                                  | <i>Ca_desi_scaffold</i> | 1721                    | C/T  | NA                 | INTERGENIC                    | NA                           |
| <i>Desi_wild_1727</i>  | NA                                  | <i>Ca_desi_scaffold</i> | 1727                    | G/C  | NA                 | INTERGENIC                    | NA                           |
| <i>Desi_wild_1732</i>  | NA                                  | <i>Ca_desi_scaffold</i> | 1732                    | G/T  | NA                 | INTERGENIC                    | NA                           |
| <i>Desi_wild_1829</i>  | NA                                  | <i>Ca_desi_scaffold</i> | 1829                    | A/T  | NA                 | INTERGENIC                    | NA                           |
| <i>Desi_wild_1851</i>  | NA                                  | <i>Ca_desi_scaffold</i> | 1851                    | T/C  | NA                 | INTERGENIC                    | NA                           |
| <i>Desi_wild_1933</i>  | NA                                  | <i>Ca_desi_scaffold</i> | 1933                    | A/G  | NA                 | INTERGENIC                    | NA                           |
| <i>Desi_wild_2298</i>  | NA                                  | <i>Ca_desi_scaffold</i> | 2298                    | C/T  | NA                 | INTERGENIC                    | NA                           |
| <i>Desi_wild_2389</i>  | NA                                  | <i>Ca_desi_scaffold</i> | 2389                    | T/A  | NA                 | INTERGENIC                    | NA                           |
| <i>Desi_wild_5144</i>  | NA                                  | <i>Ca_desi_scaffold</i> | 5144                    | C/A  | NA                 | INTERGENIC                    | NA                           |
| <i>Desi_wild_5155</i>  | NA                                  | <i>Ca_desi_scaffold</i> | 5155                    | G/T  | NA                 | INTERGENIC                    | NA                           |
| <i>Desi_wild_5163</i>  | NA                                  | <i>Ca_desi_scaffold</i> | 5163                    | G/T  | NA                 | INTERGENIC                    | NA                           |
| <i>Desi_wild_5170</i>  | NA                                  | <i>Ca_desi_scaffold</i> | 5170                    | T/G  | NA                 | INTERGENIC                    | NA                           |
| <i>Desi_wild_5180</i>  | NA                                  | <i>Ca_desi_scaffold</i> | 5180                    | C/A  | NA                 | INTERGENIC                    | NA                           |
| <i>Desi_wild_5200</i>  | NA                                  | <i>Ca_desi_scaffold</i> | 5200                    | T/C  | NA                 | INTERGENIC                    | NA                           |
| <i>Desi_wild_5204</i>  | NA                                  | <i>Ca_desi_scaffold</i> | 5204                    | T/G  | NA                 | INTERGENIC                    | NA                           |
| <i>Desi_wild_5224</i>  | NA                                  | <i>Ca_desi_scaffold</i> | 5224                    | G/A  | NA                 | INTERGENIC                    | NA                           |
| <i>Desi_wild_5229</i>  | NA                                  | <i>Ca_desi_scaffold</i> | 5229                    | T/C  | NA                 | INTERGENIC                    | NA                           |
| <i>Desi_wild_5232</i>  | NA                                  | <i>Ca_desi_scaffold</i> | 5232                    | C/A  | NA                 | INTERGENIC                    | NA                           |
| <i>Desi_wild_5239</i>  | NA                                  | <i>Ca_desi_scaffold</i> | 5239                    | T/A  | NA                 | INTERGENIC                    | NA                           |
| <i>Desi_wild_5244</i>  | NA                                  | <i>Ca_desi_scaffold</i> | 5244                    | G/T  | NA                 | INTERGENIC                    | NA                           |
| <i>Desi_wild_5256</i>  | NA                                  | <i>Ca_desi_scaffold</i> | 5256                    | G/A  | NA                 | INTERGENIC                    | NA                           |
| <i>Desi_wild_9338</i>  | NA                                  | <i>Ca_desi_scaffold</i> | 9338                    | G/C  | NA                 | INTERGENIC                    | NA                           |
| <i>Desi_wild_9343</i>  | NA                                  | <i>Ca_desi_scaffold</i> | 9343                    | T/G  | NA                 | INTERGENIC                    | NA                           |
| <i>Desi_wild_9347</i>  | NA                                  | <i>Ca_desi_scaffold</i> | 9347                    | A/G  | NA                 | INTERGENIC                    | NA                           |
| <i>Desi_wild_9353</i>  | NA                                  | <i>Ca_desi_scaffold</i> | 9353                    | A/G  | NA                 | INTERGENIC                    | NA                           |
| <i>Desi_wild_9355</i>  | NA                                  | <i>Ca_desi_scaffold</i> | 9355                    | T/G  | NA                 | INTERGENIC                    | NA                           |
| <i>Desi_wild_9357</i>  | NA                                  | <i>Ca_desi_scaffold</i> | 9357                    | T/C  | NA                 | INTERGENIC                    | NA                           |
| <i>Desi_wild_9359</i>  | NA                                  | <i>Ca_desi_scaffold</i> | 9359                    | G/A  | NA                 | INTERGENIC                    | NA                           |
| <i>Desi_wild_9401</i>  | NA                                  | <i>Ca_desi_scaffold</i> | 9401                    | G/A  | NA                 | INTERGENIC                    | NA                           |
| <i>Desi_wild_9407</i>  | NA                                  | <i>Ca_desi_scaffold</i> | 9407                    | G/T  | NA                 | INTERGENIC                    | NA                           |
| <i>Desi_wild_9494</i>  | NA                                  | <i>Ca_desi_scaffold</i> | 9494                    | G/A  | NA                 | INTERGENIC                    | NA                           |
| <i>Desi_wild_9501</i>  | NA                                  | <i>Ca_desi_scaffold</i> | 9501                    | T/G  | NA                 | INTERGENIC                    | NA                           |
| <i>Desi_wild_9502</i>  | NA                                  | <i>Ca_desi_scaffold</i> | 9502                    | A/T  | NA                 | INTERGENIC                    | NA                           |
| <i>Desi_wild_9509</i>  | NA                                  | <i>Ca_desi_scaffold</i> | 9509                    | G/A  | NA                 | INTERGENIC                    | NA                           |
| <i>Desi_wild_9513</i>  | NA                                  | <i>Ca_desi_scaffold</i> | 9513                    | A/G  | NA                 | INTERGENIC                    | NA                           |
| <i>Desi_wild_9518</i>  | NA                                  | <i>Ca_desi_scaffold</i> | 9518                    | C/G  | NA                 | INTERGENIC                    | NA                           |
| <i>Desi_wild_9587</i>  | NA                                  | <i>Ca_desi_scaffold</i> | 9587                    | A/C  | NA                 | INTERGENIC                    | NA                           |
| <i>Desi_wild_9590</i>  | NA                                  | <i>Ca_desi_scaffold</i> | 9590                    | A/G  | NA                 | INTERGENIC                    | NA                           |
| <i>Desi_wild_9622</i>  | NA                                  | <i>Ca_desi_scaffold</i> | 9622                    | A/T  | NA                 | INTERGENIC                    | NA                           |
| <i>Desi_wild_9646</i>  | NA                                  | <i>Ca_desi_scaffold</i> | 9646                    | T/C  | NA                 | INTERGENIC                    | NA                           |
| <i>Desi_wild_5389</i>  | NA                                  | <i>Ca_desi_scaffold</i> | 5389                    | C/G  | Gene_Ca_19160.1    | NON_SYNONYMOUS_CODING         | Dynamamin-related protein 5A |
| <i>Desi_wild_14727</i> | NA                                  | <i>Ca_desi_scaffold</i> | 14727                   | C/T  | NA                 | INTERGENIC                    | NA                           |

| SNP IDs          | NCBI dbSNP accession IDs (NCBI_SS#) | Chromosomes      | Physical positions (bp) | SNPs | Gene accession IDs | Sequence components of genome | Putative functions                                              |
|------------------|-------------------------------------|------------------|-------------------------|------|--------------------|-------------------------------|-----------------------------------------------------------------|
| Desi_wild_14734  | NA                                  | Ca_desi_scaffold | 14734                   | T/C  | NA                 | INTERGENIC                    | NA                                                              |
| Desi_wild_14770  | NA                                  | Ca_desi_scaffold | 14770                   | G/T  | NA                 | INTERGENIC                    | NA                                                              |
| Desi_wild_14834  | NA                                  | Ca_desi_scaffold | 14834                   | T/A  | NA                 | INTERGENIC                    | NA                                                              |
| Desi_wild_9271   | NA                                  | Ca_desi_scaffold | 9271                    | G/A  | NA                 | INTERGENIC                    | NA                                                              |
| Desi_wild_470    | NA                                  | Ca_desi_scaffold | 470                     | G/A  | NA                 | INTERGENIC                    | NA                                                              |
| Desi_wild_14379  | NA                                  | Ca_desi_scaffold | 14379                   | G/A  | NA                 | INTERGENIC                    | NA                                                              |
| Desi_wild_14408  | NA                                  | Ca_desi_scaffold | 14408                   | A/T  | NA                 | INTERGENIC                    | NA                                                              |
| Desi_wild_14442  | NA                                  | Ca_desi_scaffold | 14442                   | C/T  | NA                 | INTERGENIC                    | NA                                                              |
| Desi_wild_14454  | NA                                  | Ca_desi_scaffold | 14454                   | C/A  | NA                 | INTERGENIC                    | NA                                                              |
| Desi_wild_9128   | NA                                  | Ca_desi_scaffold | 9128                    | T/A  | Gene_Ca_19165.1    | NON_SYNONYMOUS_CODING         | MATE efflux family protein 9                                    |
| Desi_wild_9180   | NA                                  | Ca_desi_scaffold | 9180                    | A/G  | Gene_Ca_19165.1    | SYNONYMOUS_CODING             | MATE efflux family protein 9                                    |
| Desi_wild_9183   | NA                                  | Ca_desi_scaffold | 9183                    | A/G  | Gene_Ca_19165.1    | SYNONYMOUS_CODING             | MATE efflux family protein 9                                    |
| Desi_wild_9287   | NA                                  | Ca_desi_scaffold | 9287                    | T/C  | Gene_Ca_19165.1    | NON_SYNONYMOUS_CODING         | MATE efflux family protein 9                                    |
| Desi_wild_9307   | NA                                  | Ca_desi_scaffold | 9307                    | G/A  | Gene_Ca_19165.1    | NON_SYNONYMOUS_CODING         | MATE efflux family protein 9                                    |
| Desi_wild_2628   | NA                                  | Ca_desi_scaffold | 2628                    | A/G  | NA                 | INTERGENIC                    | NA                                                              |
| Desi_wild_10906  | NA                                  | Ca_desi_scaffold | 10906                   | A/G  | NA                 | INTERGENIC                    | NA                                                              |
| Desi_wild_11081  | NA                                  | Ca_desi_scaffold | 11081                   | G/A  | NA                 | INTERGENIC                    | NA                                                              |
| Desi_wild_11119  | NA                                  | Ca_desi_scaffold | 11119                   | T/C  | NA                 | INTERGENIC                    | NA                                                              |
| Desi_wild_11135  | NA                                  | Ca_desi_scaffold | 11135                   | C/T  | NA                 | INTERGENIC                    | NA                                                              |
| Desi_wild_6647   | NA                                  | Ca_desi_scaffold | 6647                    | C/T  | Gene_Ca_19177.1    | NON_SYNONYMOUS_CODING         | Dof zinc finger protein DOF3.3                                  |
| Desi_wild_12956  | NA                                  | Ca_desi_scaffold | 12956                   | A/G  | NA                 | INTERGENIC                    | NA                                                              |
| Desi_wild_3374   | NA                                  | Ca_desi_scaffold | 3374                    | A/G  | Gene_Ca_19187.2    | INTRON                        | Chromosome-associated kinesin KIF4B                             |
| Desi_wild_11155  | NA                                  | Ca_desi_scaffold | 11155                   | A/G  | NA                 | INTERGENIC                    | NA                                                              |
| Desi_wild_7872   | NA                                  | Ca_desi_scaffold | 7872                    | T/C  | Gene_Ca_19201.1    | DOWNSTREAM                    | ABC transporter B family member 26, chloroplastic               |
| Desi_wild_8450   | NA                                  | Ca_desi_scaffold | 8450                    | G/T  | Gene_Ca_19202.1    | NON_SYNONYMOUS_CODING         | Subtilisin-like protease                                        |
| Desi_wild_2510   | NA                                  | Ca_desi_scaffold | 2510                    | C/T  | Gene_Ca_19205.2    | NON_SYNONYMOUS_CODING         | NA                                                              |
| Desi_wild_4860   | NA                                  | Ca_desi_scaffold | 4860                    | C/T  | Gene_Ca_19206.1    | SYNONYMOUS_CODING             | molybdate transporter 1                                         |
| Desi_wild_4931   | NA                                  | Ca_desi_scaffold | 4931                    | A/G  | Gene_Ca_19206.1    | SYNONYMOUS_CODING             | molybdate transporter 1                                         |
| Desi_wild_400    | NA                                  | Ca_desi_scaffold | 400                     | C/T  | NA                 | INTERGENIC                    | NA                                                              |
| Desi_wild_3949   | NA                                  | Ca_desi_scaffold | 3949                    | A/G  | Gene_Ca_19207.1    | NON_SYNONYMOUS_CODING         | Probable cytochrome c biosynthesis protein                      |
| Desi_wild_10375  | NA                                  | Ca_desi_scaffold | 10375                   | G/T  | NA                 | INTERGENIC                    | NA                                                              |
| Desi_wild_14453  | NA                                  | Ca_desi_scaffold | 14453                   | T/A  | Gene_Ca_19208.1    | UPSTREAM                      | NA                                                              |
| Desi_wild_14455  | NA                                  | Ca_desi_scaffold | 14455                   | T/A  | Gene_Ca_19208.1    | UPSTREAM                      | NA                                                              |
| Desi_wild_14456  | NA                                  | Ca_desi_scaffold | 14456                   | G/T  | Gene_Ca_19208.1    | UPSTREAM                      | NA                                                              |
| Desi_wild_14458  | NA                                  | Ca_desi_scaffold | 14458                   | T/A  | Gene_Ca_19208.1    | UPSTREAM                      | NA                                                              |
| Desi_wild_7035   | NA                                  | Ca_desi_scaffold | 7035                    | C/T  | Gene_Ca_19211.1    | INTRON                        | Folypolyglutamate synthase                                      |
| Desi_wild_7315   | NA                                  | Ca_desi_scaffold | 7315                    | C/A  | Gene_Ca_19211.1    | INTRON                        | Folypolyglutamate synthase                                      |
| Desi_wild_8081   | NA                                  | Ca_desi_scaffold | 8081                    | T/C  | Gene_Ca_19211.1    | SYNONYMOUS_CODING             | Folypolyglutamate synthase                                      |
| Desi_wild_9676   | NA                                  | Ca_desi_scaffold | 9676                    | A/G  | Gene_Ca_19211.1    | INTRON                        | Folypolyglutamate synthase                                      |
| Desi_wild_9706   | NA                                  | Ca_desi_scaffold | 9706                    | C/A  | Gene_Ca_19211.1    | INTRON                        | Folypolyglutamate synthase                                      |
| Desi_wild_9719   | NA                                  | Ca_desi_scaffold | 9719                    | G/T  | Gene_Ca_19211.1    | INTRON                        | Folypolyglutamate synthase                                      |
| Desi_wild_2462   | NA                                  | Ca_desi_scaffold | 2462                    | T/C  | NA                 | INTERGENIC                    | NA                                                              |
| Desi_wild_57060  | NA                                  | Ca_desi_scaffold | 57060                   | A/C  | Gene_Ca_09404.1    | INTRON                        | 1,4-alpha-glucan-branching enzyme 3, chloroplastic/amyloplastic |
| Desi_wild_202720 | NA                                  | Ca_desi_scaffold | 202720                  | C/A  | Gene_Ca_09407.1    | NON_SYNONYMOUS_CODING         | Cell differentiation protein RCD1 homolog                       |

| SNP IDs                 | NCBI dbSNP accession IDs (NCBI_SS#) | Chromosomes             | Physical positions (bp) | SNPs | Gene accession IDs | Sequence components of genome | Putative functions                                          |
|-------------------------|-------------------------------------|-------------------------|-------------------------|------|--------------------|-------------------------------|-------------------------------------------------------------|
| <i>Desi_wild_202722</i> | NA                                  | <i>Ca_desi_scaffold</i> | 202722                  | A/T  | Gene_Ca_09407.1    | SYNONYMOUS_CODING             | Cell differentiation protein RCD1 homolog                   |
| <i>Desi_wild_8147</i>   | NA                                  | <i>Ca_desi_scaffold</i> | 8147                    | T/C  | NA                 | INTERGENIC                    | NA                                                          |
| <i>Desi_wild_11244</i>  | NA                                  | <i>Ca_desi_scaffold</i> | 11244                   | C/T  | NA                 | INTERGENIC                    | NA                                                          |
| <i>Desi_wild_455</i>    | NA                                  | <i>Ca_desi_scaffold</i> | 455                     | T/C  | NA                 | INTERGENIC                    | NA                                                          |
| <i>Desi_wild_3520</i>   | NA                                  | <i>Ca_desi_scaffold</i> | 3520                    | T/G  | NA                 | INTERGENIC                    | NA                                                          |
| <i>Desi_wild_8855</i>   | NA                                  | <i>Ca_desi_scaffold</i> | 8855                    | G/T  | NA                 | INTERGENIC                    | NA                                                          |
| <i>Desi_wild_5152</i>   | NA                                  | <i>Ca_desi_scaffold</i> | 5152                    | T/G  | Gene_Ca_19234.1    | SYNONYMOUS_CODING             | unknown protein                                             |
| <i>Desi_wild_5156</i>   | NA                                  | <i>Ca_desi_scaffold</i> | 5156                    | A/C  | Gene_Ca_19234.1    | SYNONYMOUS_CODING             | unknown protein                                             |
| <i>Desi_wild_5243</i>   | NA                                  | <i>Ca_desi_scaffold</i> | 5243                    | A/C  | Gene_Ca_19234.1    | SYNONYMOUS_CODING             | unknown protein                                             |
| <i>Desi_wild_11307</i>  | NA                                  | <i>Ca_desi_scaffold</i> | 11307                   | A/G  | NA                 | INTERGENIC                    | NA                                                          |
| <i>Desi_wild_12362</i>  | NA                                  | <i>Ca_desi_scaffold</i> | 12362                   | T/C  | NA                 | INTERGENIC                    | NA                                                          |
| <i>Desi_wild_13047</i>  | NA                                  | <i>Ca_desi_scaffold</i> | 13047                   | G/A  | NA                 | INTERGENIC                    | NA                                                          |
| <i>Desi_wild_13108</i>  | NA                                  | <i>Ca_desi_scaffold</i> | 13108                   | T/G  | NA                 | INTERGENIC                    | NA                                                          |
| <i>Desi_wild_13113</i>  | NA                                  | <i>Ca_desi_scaffold</i> | 13113                   | T/C  | NA                 | INTERGENIC                    | NA                                                          |
| <i>Desi_wild_10236</i>  | NA                                  | <i>Ca_desi_scaffold</i> | 10236                   | T/C  | Gene_Ca_19248.1    | UPSTREAM                      | unknown protein                                             |
| <i>Desi_wild_10297</i>  | NA                                  | <i>Ca_desi_scaffold</i> | 10297                   | A/G  | Gene_Ca_19248.1    | UPSTREAM                      | unknown protein                                             |
| <i>Desi_wild_10345</i>  | NA                                  | <i>Ca_desi_scaffold</i> | 10345                   | A/G  | Gene_Ca_19248.1    | UPSTREAM                      | unknown protein                                             |
| <i>Desi_wild_11710</i>  | NA                                  | <i>Ca_desi_scaffold</i> | 11710                   | C/T  | Gene_Ca_19268.1    | SYNONYMOUS_CODING             | Regulation of nuclear pre-mRNA domain-containing protein 1B |
| <i>Desi_wild_2522</i>   | NA                                  | <i>Ca_desi_scaffold</i> | 2522                    | C/T  | NA                 | INTERGENIC                    | NA                                                          |
| <i>Desi_wild_7505</i>   | NA                                  | <i>Ca_desi_scaffold</i> | 7505                    | T/C  | NA                 | INTERGENIC                    | NA                                                          |
| <i>Desi_wild_3890</i>   | NA                                  | <i>Ca_desi_scaffold</i> | 3890                    | G/A  | Gene_Ca_19282.1    | NON_SYNONYMOUS_CODING         | D-tagatose-1,6-bisphosphate aldolase subunit GatY           |
| <i>Desi_wild_11724</i>  | NA                                  | <i>Ca_desi_scaffold</i> | 11724                   | C/T  | NA                 | INTERGENIC                    | NA                                                          |
| <i>Desi_wild_11567</i>  | NA                                  | <i>Ca_desi_scaffold</i> | 11567                   | A/C  | NA                 | INTERGENIC                    | NA                                                          |
| <i>Desi_wild_6369</i>   | NA                                  | <i>Ca_desi_scaffold</i> | 6369                    | T/C  | Gene_Ca_19293.1    | NON_SYNONYMOUS_CODING         | NA                                                          |
| <i>Desi_wild_900</i>    | NA                                  | <i>Ca_desi_scaffold</i> | 900                     | A/T  | NA                 | INTERGENIC                    | NA                                                          |
| <i>Desi_wild_1074</i>   | NA                                  | <i>Ca_desi_scaffold</i> | 1074                    | C/A  | Gene_Ca_19300.1    | INTRON                        | Cyclin/Brf1-like TBP-binding protein                        |
| <i>Desi_wild_1092</i>   | NA                                  | <i>Ca_desi_scaffold</i> | 1092                    | T/C  | Gene_Ca_19300.1    | INTRON                        | Cyclin/Brf1-like TBP-binding protein                        |
| <i>Desi_wild_1093</i>   | NA                                  | <i>Ca_desi_scaffold</i> | 1093                    | T/G  | Gene_Ca_19300.1    | INTRON                        | Cyclin/Brf1-like TBP-binding protein                        |
| <i>Desi_wild_1103</i>   | NA                                  | <i>Ca_desi_scaffold</i> | 1103                    | C/G  | Gene_Ca_19300.1    | INTRON                        | Cyclin/Brf1-like TBP-binding protein                        |
| <i>Desi_wild_1109</i>   | NA                                  | <i>Ca_desi_scaffold</i> | 1109                    | A/G  | Gene_Ca_19300.1    | INTRON                        | Cyclin/Brf1-like TBP-binding protein                        |
| <i>Desi_wild_1111</i>   | NA                                  | <i>Ca_desi_scaffold</i> | 1111                    | A/T  | Gene_Ca_19300.1    | INTRON                        | Cyclin/Brf1-like TBP-binding protein                        |
| <i>Desi_wild_1131</i>   | NA                                  | <i>Ca_desi_scaffold</i> | 1131                    | A/G  | Gene_Ca_19300.1    | INTRON                        | Cyclin/Brf1-like TBP-binding protein                        |
| <i>Desi_wild_1291</i>   | NA                                  | <i>Ca_desi_scaffold</i> | 1291                    | T/C  | Gene_Ca_19300.1    | INTRON                        | Cyclin/Brf1-like TBP-binding protein                        |
| <i>Desi_wild_1293</i>   | NA                                  | <i>Ca_desi_scaffold</i> | 1293                    | T/C  | Gene_Ca_19300.1    | INTRON                        | Cyclin/Brf1-like TBP-binding protein                        |
| <i>Desi_wild_5356</i>   | NA                                  | <i>Ca_desi_scaffold</i> | 5356                    | A/G  | NA                 | INTERGENIC                    | NA                                                          |
| <i>Desi_wild_8144</i>   | NA                                  | <i>Ca_desi_scaffold</i> | 8144                    | C/A  | Gene_Ca_19304.1    | NON_SYNONYMOUS_CODING         | AT-rich interactive domain-containing protein 2             |
| <i>Desi_wild_8213</i>   | NA                                  | <i>Ca_desi_scaffold</i> | 8213                    | C/A  | Gene_Ca_19304.1    | NON_SYNONYMOUS_CODING         | AT-rich interactive domain-containing protein 2             |
| <i>Desi_wild_7447</i>   | NA                                  | <i>Ca_desi_scaffold</i> | 7447                    | A/T  | NA                 | INTERGENIC                    | NA                                                          |
| <i>Desi_wild_49</i>     | NA                                  | <i>Ca_desi_scaffold</i> | 49                      | T/C  | NA                 | INTERGENIC                    | NA                                                          |
| <i>Desi_wild_11193</i>  | NA                                  | <i>Ca_desi_scaffold</i> | 11193                   | C/T  | NA                 | INTERGENIC                    | NA                                                          |
| <i>Desi_wild_11356</i>  | NA                                  | <i>Ca_desi_scaffold</i> | 11356                   | A/G  | NA                 | INTERGENIC                    | NA                                                          |
| <i>Desi_wild_3339</i>   | NA                                  | <i>Ca_desi_scaffold</i> | 3339                    | A/G  | Gene_Ca_19329.1    | INTRON                        | unknown protein                                             |
| <i>Desi_wild_3342</i>   | NA                                  | <i>Ca_desi_scaffold</i> | 3342                    | C/T  | Gene_Ca_19329.1    | INTRON                        | unknown protein                                             |
| <i>Desi_wild_3390</i>   | NA                                  | <i>Ca_desi_scaffold</i> | 3390                    | C/A  | Gene_Ca_19329.1    | INTRON                        | unknown protein                                             |

| SNP IDs                | NCBI dbSNP accession IDs (NCBI_SS#) | Chromosomes             | Physical positions (bp) | SNPs | Gene accession IDs | Sequence components of genome | Putative functions                             |
|------------------------|-------------------------------------|-------------------------|-------------------------|------|--------------------|-------------------------------|------------------------------------------------|
| <i>Desi_wild_3439</i>  | NA                                  | <i>Ca_desi_scaffold</i> | 3439                    | G/A  | Gene_Ca_19329.1    | INTRON                        | unknown protein                                |
| <i>Desi_wild_5904</i>  | NA                                  | <i>Ca_desi_scaffold</i> | 5904                    | A/T  | Gene_Ca_19329.1    | UPSTREAM                      | unknown protein                                |
| <i>Desi_wild_5918</i>  | NA                                  | <i>Ca_desi_scaffold</i> | 5918                    | A/G  | Gene_Ca_19329.1    | UPSTREAM                      | unknown protein                                |
| <i>Desi_wild_5935</i>  | NA                                  | <i>Ca_desi_scaffold</i> | 5935                    | T/C  | Gene_Ca_19329.1    | UPSTREAM                      | unknown protein                                |
| <i>Desi_wild_5963</i>  | NA                                  | <i>Ca_desi_scaffold</i> | 5963                    | C/A  | Gene_Ca_19329.1    | UPSTREAM                      | unknown protein                                |
| <i>Desi_wild_5971</i>  | NA                                  | <i>Ca_desi_scaffold</i> | 5971                    | T/C  | Gene_Ca_19329.1    | UPSTREAM                      | unknown protein                                |
| <i>Desi_wild_5981</i>  | NA                                  | <i>Ca_desi_scaffold</i> | 5981                    | G/A  | Gene_Ca_19329.1    | UPSTREAM                      | unknown protein                                |
| <i>Desi_wild_6037</i>  | NA                                  | <i>Ca_desi_scaffold</i> | 6037                    | A/G  | Gene_Ca_19329.1    | UPSTREAM                      | unknown protein                                |
| <i>Desi_wild_6552</i>  | NA                                  | <i>Ca_desi_scaffold</i> | 6552                    | T/A  | Gene_Ca_19329.1    | UPSTREAM                      | unknown protein                                |
| <i>Desi_wild_4272</i>  | NA                                  | <i>Ca_desi_scaffold</i> | 4272                    | A/G  | NA                 | INTERGENIC                    | NA                                             |
| <i>Desi_wild_10594</i> | NA                                  | <i>Ca_desi_scaffold</i> | 10594                   | T/C  | NA                 | INTERGENIC                    | NA                                             |
| <i>Desi_wild_10599</i> | NA                                  | <i>Ca_desi_scaffold</i> | 10599                   | C/T  | NA                 | INTERGENIC                    | NA                                             |
| <i>Desi_wild_10613</i> | NA                                  | <i>Ca_desi_scaffold</i> | 10613                   | T/G  | NA                 | INTERGENIC                    | NA                                             |
| <i>Desi_wild_10628</i> | NA                                  | <i>Ca_desi_scaffold</i> | 10628                   | T/G  | NA                 | INTERGENIC                    | NA                                             |
| <i>Desi_wild_243</i>   | NA                                  | <i>Ca_desi_scaffold</i> | 243                     | T/G  | NA                 | INTERGENIC                    | NA                                             |
| <i>Desi_wild_3468</i>  | NA                                  | <i>Ca_desi_scaffold</i> | 3468                    | T/C  | NA                 | INTERGENIC                    | NA                                             |
| <i>Desi_wild_8078</i>  | NA                                  | <i>Ca_desi_scaffold</i> | 8078                    | G/A  | Gene_Ca_19342.1    | DOWNSTREAM                    | Kinetochore protein spc25                      |
| <i>Desi_wild_6156</i>  | NA                                  | <i>Ca_desi_scaffold</i> | 6156                    | T/G  | Gene_Ca_19350.1    | SYNONYMOUS_CODING             | Zinc finger protein ZAT9                       |
| <i>Desi_wild_6192</i>  | NA                                  | <i>Ca_desi_scaffold</i> | 6192                    | T/G  | Gene_Ca_19350.1    | SYNONYMOUS_CODING             | Zinc finger protein ZAT9                       |
| <i>Desi_wild_580</i>   | NA                                  | <i>Ca_desi_scaffold</i> | 580                     | A/T  | NA                 | INTERGENIC                    | NA                                             |
| <i>Desi_wild_7510</i>  | NA                                  | <i>Ca_desi_scaffold</i> | 7510                    | T/C  | Gene_Ca_19359.1    | SYNONYMOUS_CODING             | Proteasome activator complex subunit 4         |
| <i>Desi_wild_7608</i>  | NA                                  | <i>Ca_desi_scaffold</i> | 7608                    | G/A  | Gene_Ca_19359.1    | INTRON                        | Proteasome activator complex subunit 4         |
| <i>Desi_wild_7615</i>  | NA                                  | <i>Ca_desi_scaffold</i> | 7615                    | C/T  | Gene_Ca_19359.1    | INTRON                        | Proteasome activator complex subunit 4         |
| <i>Desi_wild_7625</i>  | NA                                  | <i>Ca_desi_scaffold</i> | 7625                    | A/C  | Gene_Ca_19359.1    | INTRON                        | Proteasome activator complex subunit 4         |
| <i>Desi_wild_9949</i>  | NA                                  | <i>Ca_desi_scaffold</i> | 9949                    | C/T  | Gene_Ca_19359.1    | INTRON                        | Proteasome activator complex subunit 4         |
| <i>Desi_wild_2477</i>  | NA                                  | <i>Ca_desi_scaffold</i> | 2477                    | T/A  | Gene_Ca_19379.1    | SYNONYMOUS_CODING             | ATP-dependent DNA helicase 2 subunit KU80      |
| <i>Desi_wild_2503</i>  | NA                                  | <i>Ca_desi_scaffold</i> | 2503                    | A/G  | Gene_Ca_19379.1    | NON_SYNONYMOUS_CODING         | ATP-dependent DNA helicase 2 subunit KU80      |
| <i>Desi_wild_2552</i>  | NA                                  | <i>Ca_desi_scaffold</i> | 2552                    | G/A  | Gene_Ca_19379.1    | SYNONYMOUS_CODING             | ATP-dependent DNA helicase 2 subunit KU80      |
| <i>Desi_wild_4342</i>  | NA                                  | <i>Ca_desi_scaffold</i> | 4342                    | G/A  | NA                 | INTERGENIC                    | NA                                             |
| <i>Desi_wild_4359</i>  | NA                                  | <i>Ca_desi_scaffold</i> | 4359                    | G/T  | NA                 | INTERGENIC                    | NA                                             |
| <i>Desi_wild_7969</i>  | NA                                  | <i>Ca_desi_scaffold</i> | 7969                    | T/C  | NA                 | INTERGENIC                    | NA                                             |
| <i>Desi_wild_2851</i>  | NA                                  | <i>Ca_desi_scaffold</i> | 2851                    | T/G  | Gene_Ca_19381.1    | INTRON                        | WPP domain-interacting tail-anchored protein 1 |
| <i>Desi_wild_3044</i>  | NA                                  | <i>Ca_desi_scaffold</i> | 3044                    | T/C  | Gene_Ca_19381.1    | INTRON                        | WPP domain-interacting tail-anchored protein 1 |
| <i>Desi_wild_4697</i>  | NA                                  | <i>Ca_desi_scaffold</i> | 4697                    | A/G  | NA                 | INTERGENIC                    | NA                                             |
| <i>Desi_wild_5191</i>  | NA                                  | <i>Ca_desi_scaffold</i> | 5191                    | G/T  | NA                 | INTERGENIC                    | NA                                             |
| <i>Desi_wild_9785</i>  | NA                                  | <i>Ca_desi_scaffold</i> | 9785                    | G/T  | NA                 | INTERGENIC                    | NA                                             |
| <i>Desi_wild_9809</i>  | NA                                  | <i>Ca_desi_scaffold</i> | 9809                    | C/G  | NA                 | INTERGENIC                    | NA                                             |
| <i>Desi_wild_9813</i>  | NA                                  | <i>Ca_desi_scaffold</i> | 9813                    | A/G  | NA                 | INTERGENIC                    | NA                                             |
| <i>Desi_wild_9819</i>  | NA                                  | <i>Ca_desi_scaffold</i> | 9819                    | C/T  | NA                 | INTERGENIC                    | NA                                             |
| <i>Desi_wild_1307</i>  | NA                                  | <i>Ca_desi_scaffold</i> | 1307                    | C/T  | NA                 | INTERGENIC                    | NA                                             |
| <i>Desi_wild_10937</i> | NA                                  | <i>Ca_desi_scaffold</i> | 10937                   | C/T  | NA                 | INTERGENIC                    | NA                                             |
| <i>Desi_wild_2511</i>  | NA                                  | <i>Ca_desi_scaffold</i> | 2511                    | A/C  | Gene_Ca_19418.1    | INTRON                        | SAM domain and HD domain-containing protein 1  |
| <i>Desi_wild_2512</i>  | NA                                  | <i>Ca_desi_scaffold</i> | 2512                    | A/C  | Gene_Ca_19418.1    | INTRON                        | SAM domain and HD domain-containing protein 1  |
| <i>Desi_wild_5139</i>  | NA                                  | <i>Ca_desi_scaffold</i> | 5139                    | G/A  | NA                 | INTERGENIC                    | NA                                             |

| SNP IDs                 | NCBI dbSNP accession IDs (NCBI_SS#) | Chromosomes             | Physical positions (bp) | SNPs | Gene accession IDs | Sequence components of genome | Putative functions                                             |
|-------------------------|-------------------------------------|-------------------------|-------------------------|------|--------------------|-------------------------------|----------------------------------------------------------------|
| <i>Desi_wild_5206</i>   | NA                                  | <i>Ca_desi_scaffold</i> | 5206                    | A/C  | NA                 | INTERGENIC                    | NA                                                             |
| <i>Desi_wild_5209</i>   | NA                                  | <i>Ca_desi_scaffold</i> | 5209                    | G/T  | NA                 | INTERGENIC                    | NA                                                             |
| <i>Desi_wild_5211</i>   | NA                                  | <i>Ca_desi_scaffold</i> | 5211                    | A/G  | NA                 | INTERGENIC                    | NA                                                             |
| <i>Desi_wild_4497</i>   | NA                                  | <i>Ca_desi_scaffold</i> | 4497                    | C/T  | NA                 | INTERGENIC                    | NA                                                             |
| <i>Desi_wild_702</i>    | NA                                  | <i>Ca_desi_scaffold</i> | 702                     | A/G  | NA                 | INTERGENIC                    | NA                                                             |
| <i>Desi_wild_710</i>    | NA                                  | <i>Ca_desi_scaffold</i> | 710                     | C/T  | NA                 | INTERGENIC                    | NA                                                             |
| <i>Desi_wild_716</i>    | NA                                  | <i>Ca_desi_scaffold</i> | 716                     | G/A  | NA                 | INTERGENIC                    | NA                                                             |
| <i>Desi_wild_717</i>    | NA                                  | <i>Ca_desi_scaffold</i> | 717                     | A/G  | NA                 | INTERGENIC                    | NA                                                             |
| <i>Desi_wild_724</i>    | NA                                  | <i>Ca_desi_scaffold</i> | 724                     | G/T  | NA                 | INTERGENIC                    | NA                                                             |
| <i>Desi_wild_734</i>    | NA                                  | <i>Ca_desi_scaffold</i> | 734                     | A/G  | NA                 | INTERGENIC                    | NA                                                             |
| <i>Desi_wild_746</i>    | NA                                  | <i>Ca_desi_scaffold</i> | 746                     | A/G  | NA                 | INTERGENIC                    | NA                                                             |
| <i>Desi_wild_750</i>    | NA                                  | <i>Ca_desi_scaffold</i> | 750                     | C/A  | NA                 | INTERGENIC                    | NA                                                             |
| <i>Desi_wild_1387</i>   | NA                                  | <i>Ca_desi_scaffold</i> | 1387                    | G/A  | Gene_Ca_19431.2    | NON_SYNONYMOUS_CODING         | NA                                                             |
| <i>Desi_wild_10028</i>  | NA                                  | <i>Ca_desi_scaffold</i> | 10028                   | C/A  | Gene_Ca_19435.2    | SYNONYMOUS_CODING             | Arabidopsis phospholipase-like protein (PEARLI 4) family       |
| <i>Desi_wild_8342</i>   | NA                                  | <i>Ca_desi_scaffold</i> | 8342                    | A/T  | Gene_Ca_19441.1    | UPSTREAM                      | Exportin-T                                                     |
| <i>Desi_wild_519</i>    | NA                                  | <i>Ca_desi_scaffold</i> | 519                     | T/A  | NA                 | INTERGENIC                    | NA                                                             |
| <i>Desi_wild_528</i>    | NA                                  | <i>Ca_desi_scaffold</i> | 528                     | G/A  | NA                 | INTERGENIC                    | NA                                                             |
| <i>Desi_wild_532</i>    | NA                                  | <i>Ca_desi_scaffold</i> | 532                     | A/G  | NA                 | INTERGENIC                    | NA                                                             |
| <i>Desi_wild_543</i>    | NA                                  | <i>Ca_desi_scaffold</i> | 543                     | A/G  | NA                 | INTERGENIC                    | NA                                                             |
| <i>Desi_wild_544</i>    | NA                                  | <i>Ca_desi_scaffold</i> | 544                     | T/G  | NA                 | INTERGENIC                    | NA                                                             |
| <i>Desi_wild_549</i>    | NA                                  | <i>Ca_desi_scaffold</i> | 549                     | T/C  | NA                 | INTERGENIC                    | NA                                                             |
| <i>Desi_wild_557</i>    | NA                                  | <i>Ca_desi_scaffold</i> | 557                     | C/T  | NA                 | INTERGENIC                    | NA                                                             |
| <i>Desi_wild_581</i>    | NA                                  | <i>Ca_desi_scaffold</i> | 581                     | A/G  | NA                 | INTERGENIC                    | NA                                                             |
| <i>Desi_wild_6630</i>   | NA                                  | <i>Ca_desi_scaffold</i> | 6630                    | T/A  | NA                 | INTERGENIC                    | NA                                                             |
| <i>Desi_wild_9617</i>   | NA                                  | <i>Ca_desi_scaffold</i> | 9617                    | G/A  | Gene_Ca_19447.1    | DOWNSTREAM                    | Calcium-binding EF-hand family protein                         |
| <i>Desi_wild_9651</i>   | NA                                  | <i>Ca_desi_scaffold</i> | 9651                    | G/C  | Gene_Ca_19447.1    | DOWNSTREAM                    | Calcium-binding EF-hand family protein                         |
| <i>Desi_wild_10266</i>  | NA                                  | <i>Ca_desi_scaffold</i> | 10266                   | C/T  | NA                 | INTERGENIC                    | NA                                                             |
| <i>Desi_wild_1857</i>   | NA                                  | <i>Ca_desi_scaffold</i> | 1857                    | T/G  | NA                 | INTERGENIC                    | NA                                                             |
| <i>Desi_wild_7752</i>   | NA                                  | <i>Ca_desi_scaffold</i> | 7752                    | A/C  | Gene_Ca_19469.1    | INTRON                        | Protein BUD31 homolog 2                                        |
| <i>Desi_wild_1135</i>   | NA                                  | <i>Ca_desi_scaffold</i> | 1135                    | T/C  | NA                 | INTERGENIC                    | NA                                                             |
| <i>Desi_wild_1170</i>   | NA                                  | <i>Ca_desi_scaffold</i> | 1170                    | C/G  | NA                 | INTERGENIC                    | NA                                                             |
| <i>Desi_wild_3057</i>   | NA                                  | <i>Ca_desi_scaffold</i> | 3057                    | T/C  | NA                 | INTERGENIC                    | NA                                                             |
| <i>Desi_wild_374</i>    | NA                                  | <i>Ca_desi_scaffold</i> | 374                     | G/A  | NA                 | INTERGENIC                    | NA                                                             |
| <i>Desi_wild_404670</i> | NA                                  | <i>Ca_desi_scaffold</i> | 404670                  | G/A  | NA                 | INTERGENIC                    | NA                                                             |
| <i>Desi_wild_408389</i> | NA                                  | <i>Ca_desi_scaffold</i> | 408389                  | T/C  | Gene_Ca_08942.1    | NON_SYNONYMOUS_CODING         | Cytochrome P450 71D11 (Fragment)                               |
| <i>Desi_wild_551933</i> | NA                                  | <i>Ca_desi_scaffold</i> | 551933                  | G/A  | Gene_Ca_08948.1    | SYNONYMOUS_CODING             | Histone-lysine N-methyltransferase, H3 lysine-9 specific SUVH4 |
| <i>Desi_wild_592493</i> | NA                                  | <i>Ca_desi_scaffold</i> | 592493                  | G/T  | Gene_Ca_08949.1    | INTRON                        | NA                                                             |
| <i>Desi_wild_592495</i> | NA                                  | <i>Ca_desi_scaffold</i> | 592495                  | A/T  | Gene_Ca_08949.1    | INTRON                        | NA                                                             |
| <i>Desi_wild_622972</i> | NA                                  | <i>Ca_desi_scaffold</i> | 622972                  | C/T  | NA                 | INTERGENIC                    | NA                                                             |
| <i>Desi_wild_683807</i> | NA                                  | <i>Ca_desi_scaffold</i> | 683807                  | A/C  | NA                 | INTERGENIC                    | NA                                                             |
| <i>Desi_wild_710209</i> | NA                                  | <i>Ca_desi_scaffold</i> | 710209                  | T/A  | Gene_Ca_08963.1    | NON_SYNONYMOUS_CODING         | Major facilitator superfamily protein                          |
| <i>Desi_wild_10129</i>  | NA                                  | <i>Ca_desi_scaffold</i> | 10129                   | T/A  | NA                 | INTERGENIC                    | NA                                                             |
| <i>Desi_wild_566</i>    | NA                                  | <i>Ca_desi_scaffold</i> | 566                     | A/T  | NA                 | INTERGENIC                    | NA                                                             |
| <i>Desi_wild_1824</i>   | NA                                  | <i>Ca_desi_scaffold</i> | 1824                    | A/T  | Gene_Ca_19494.1    | DOWNSTREAM                    | Pectinesterase 3                                               |

| SNP IDs                | NCBI dbSNP accession IDs (NCBI_SS#) | Chromosomes             | Physical positions (bp) | SNPs | Gene accession IDs | Sequence components of genome | Putative functions                              |
|------------------------|-------------------------------------|-------------------------|-------------------------|------|--------------------|-------------------------------|-------------------------------------------------|
| <i>Desi_wild_6128</i>  | NA                                  | <i>Ca_desi_scaffold</i> | 6128                    | T/G  | Gene_Ca_19502.1    | DOWNSTREAM                    | NA                                              |
| <i>Desi_wild_10415</i> | NA                                  | <i>Ca_desi_scaffold</i> | 10415                   | T/C  | NA                 | INTERGENIC                    | NA                                              |
| <i>Desi_wild_10424</i> | NA                                  | <i>Ca_desi_scaffold</i> | 10424                   | G/A  | NA                 | INTERGENIC                    | NA                                              |
| <i>Desi_wild_10431</i> | NA                                  | <i>Ca_desi_scaffold</i> | 10431                   | C/A  | NA                 | INTERGENIC                    | NA                                              |
| <i>Desi_wild_10441</i> | NA                                  | <i>Ca_desi_scaffold</i> | 10441                   | A/T  | NA                 | INTERGENIC                    | NA                                              |
| <i>Desi_wild_10488</i> | NA                                  | <i>Ca_desi_scaffold</i> | 10488                   | G/A  | NA                 | INTERGENIC                    | NA                                              |
| <i>Desi_wild_10505</i> | NA                                  | <i>Ca_desi_scaffold</i> | 10505                   | C/G  | NA                 | INTERGENIC                    | NA                                              |
| <i>Desi_wild_10539</i> | NA                                  | <i>Ca_desi_scaffold</i> | 10539                   | C/A  | NA                 | INTERGENIC                    | NA                                              |
| <i>Desi_wild_10586</i> | NA                                  | <i>Ca_desi_scaffold</i> | 10586                   | C/G  | NA                 | INTERGENIC                    | NA                                              |
| <i>Desi_wild_10589</i> | NA                                  | <i>Ca_desi_scaffold</i> | 10589                   | C/T  | NA                 | INTERGENIC                    | NA                                              |
| <i>Desi_wild_10592</i> | NA                                  | <i>Ca_desi_scaffold</i> | 10592                   | C/T  | NA                 | INTERGENIC                    | NA                                              |
| <i>Desi_wild_10617</i> | NA                                  | <i>Ca_desi_scaffold</i> | 10617                   | C/T  | NA                 | INTERGENIC                    | NA                                              |
| <i>Desi_wild_10647</i> | NA                                  | <i>Ca_desi_scaffold</i> | 10647                   | C/T  | NA                 | INTERGENIC                    | NA                                              |
| <i>Desi_wild_10654</i> | NA                                  | <i>Ca_desi_scaffold</i> | 10654                   | A/C  | NA                 | INTERGENIC                    | NA                                              |
| <i>Desi_wild_10662</i> | NA                                  | <i>Ca_desi_scaffold</i> | 10662                   | C/T  | NA                 | INTERGENIC                    | NA                                              |
| <i>Desi_wild_10663</i> | NA                                  | <i>Ca_desi_scaffold</i> | 10663                   | A/G  | NA                 | INTERGENIC                    | NA                                              |
| <i>Desi_wild_203</i>   | NA                                  | <i>Ca_desi_scaffold</i> | 203                     | C/A  | NA                 | INTERGENIC                    | NA                                              |
| <i>Desi_wild_204</i>   | NA                                  | <i>Ca_desi_scaffold</i> | 204                     | A/G  | NA                 | INTERGENIC                    | NA                                              |
| <i>Desi_wild_226</i>   | NA                                  | <i>Ca_desi_scaffold</i> | 226                     | C/A  | NA                 | INTERGENIC                    | NA                                              |
| <i>Desi_wild_250</i>   | NA                                  | <i>Ca_desi_scaffold</i> | 250                     | A/T  | NA                 | INTERGENIC                    | NA                                              |
| <i>Desi_wild_256</i>   | NA                                  | <i>Ca_desi_scaffold</i> | 256                     | C/T  | NA                 | INTERGENIC                    | NA                                              |
| <i>Desi_wild_265</i>   | NA                                  | <i>Ca_desi_scaffold</i> | 265                     | C/T  | NA                 | INTERGENIC                    | NA                                              |
| <i>Desi_wild_271</i>   | NA                                  | <i>Ca_desi_scaffold</i> | 271                     | A/C  | NA                 | INTERGENIC                    | NA                                              |
| <i>Desi_wild_482</i>   | NA                                  | <i>Ca_desi_scaffold</i> | 482                     | G/C  | NA                 | INTERGENIC                    | NA                                              |
| <i>Desi_wild_503</i>   | NA                                  | <i>Ca_desi_scaffold</i> | 503                     | C/G  | NA                 | INTERGENIC                    | NA                                              |
| <i>Desi_wild_506</i>   | NA                                  | <i>Ca_desi_scaffold</i> | 506                     | A/C  | NA                 | INTERGENIC                    | NA                                              |
| <i>Desi_wild_511</i>   | NA                                  | <i>Ca_desi_scaffold</i> | 511                     | C/T  | NA                 | INTERGENIC                    | NA                                              |
| <i>Desi_wild_2367</i>  | NA                                  | <i>Ca_desi_scaffold</i> | 2367                    | G/C  | NA                 | INTERGENIC                    | NA                                              |
| <i>Desi_wild_3604</i>  | NA                                  | <i>Ca_desi_scaffold</i> | 3604                    | A/G  | NA                 | INTERGENIC                    | NA                                              |
| <i>Desi_wild_3623</i>  | NA                                  | <i>Ca_desi_scaffold</i> | 3623                    | G/C  | NA                 | INTERGENIC                    | NA                                              |
| <i>Desi_wild_3631</i>  | NA                                  | <i>Ca_desi_scaffold</i> | 3631                    | C/A  | NA                 | INTERGENIC                    | NA                                              |
| <i>Desi_wild_3642</i>  | NA                                  | <i>Ca_desi_scaffold</i> | 3642                    | A/G  | NA                 | INTERGENIC                    | NA                                              |
| <i>Desi_wild_3647</i>  | NA                                  | <i>Ca_desi_scaffold</i> | 3647                    | C/T  | NA                 | INTERGENIC                    | NA                                              |
| <i>Desi_wild_3670</i>  | NA                                  | <i>Ca_desi_scaffold</i> | 3670                    | G/A  | NA                 | INTERGENIC                    | NA                                              |
| <i>Desi_wild_3676</i>  | NA                                  | <i>Ca_desi_scaffold</i> | 3676                    | G/A  | NA                 | INTERGENIC                    | NA                                              |
| <i>Desi_wild_3753</i>  | NA                                  | <i>Ca_desi_scaffold</i> | 3753                    | A/G  | NA                 | INTERGENIC                    | NA                                              |
| <i>Desi_wild_3756</i>  | NA                                  | <i>Ca_desi_scaffold</i> | 3756                    | A/G  | NA                 | INTERGENIC                    | NA                                              |
| <i>Desi_wild_3767</i>  | NA                                  | <i>Ca_desi_scaffold</i> | 3767                    | C/A  | NA                 | INTERGENIC                    | NA                                              |
| <i>Desi_wild_7759</i>  | NA                                  | <i>Ca_desi_scaffold</i> | 7759                    | A/G  | Gene_Ca_19521.1    | NON_SYNONYMOUS_CODING         | NA                                              |
| <i>Desi_wild_6719</i>  | NA                                  | <i>Ca_desi_scaffold</i> | 6719                    | G/T  | NA                 | INTERGENIC                    | NA                                              |
| <i>Desi_wild_6814</i>  | NA                                  | <i>Ca_desi_scaffold</i> | 6814                    | C/T  | NA                 | INTERGENIC                    | NA                                              |
| <i>Desi_wild_47205</i> | NA                                  | <i>Ca_desi_scaffold</i> | 47205                   | A/C  | NA                 | INTERGENIC                    | NA                                              |
| <i>Desi_wild_47215</i> | NA                                  | <i>Ca_desi_scaffold</i> | 47215                   | A/C  | NA                 | INTERGENIC                    | NA                                              |
| <i>Desi_wild_54468</i> | NA                                  | <i>Ca_desi_scaffold</i> | 54468                   | T/C  | Gene_Ca_09430.1    | SYNONYMOUS_CODING             | hydroxyproline-rich glycoprotein family protein |



| SNP IDs                 | NCBI dbSNP accession IDs (NCBI_SS#) | Chromosomes             | Physical positions (bp) | SNPs | Gene accession IDs | Sequence components of genome | Putative functions                                                    |
|-------------------------|-------------------------------------|-------------------------|-------------------------|------|--------------------|-------------------------------|-----------------------------------------------------------------------|
| <i>Desi_wild_159054</i> | NA                                  | <i>Ca_desi_scaffold</i> | 159054                  | A/G  | NA                 | INTERGENIC                    | NA                                                                    |
| <i>Desi_wild_184695</i> | NA                                  | <i>Ca_desi_scaffold</i> | 184695                  | C/T  | Gene_Ca_09434.1    | INTRON                        | Exportin-7-A                                                          |
| <i>Desi_wild_184697</i> | NA                                  | <i>Ca_desi_scaffold</i> | 184697                  | C/T  | Gene_Ca_09434.1    | INTRON                        | Exportin-7-A                                                          |
| <i>Desi_wild_184790</i> | NA                                  | <i>Ca_desi_scaffold</i> | 184790                  | C/T  | Gene_Ca_09434.1    | INTRON                        | Exportin-7-A                                                          |
| <i>Desi_wild_187070</i> | NA                                  | <i>Ca_desi_scaffold</i> | 187070                  | G/A  | Gene_Ca_09434.1    | INTRON                        | Exportin-7-A                                                          |
| <i>Desi_wild_1316</i>   | NA                                  | <i>Ca_desi_scaffold</i> | 1316                    | A/G  | NA                 | INTERGENIC                    | NA                                                                    |
| <i>Desi_wild_9924</i>   | NA                                  | <i>Ca_desi_scaffold</i> | 9924                    | A/G  | NA                 | INTERGENIC                    | NA                                                                    |
| <i>Desi_wild_9935</i>   | NA                                  | <i>Ca_desi_scaffold</i> | 9935                    | C/G  | NA                 | INTERGENIC                    | NA                                                                    |
| <i>Desi_wild_9937</i>   | NA                                  | <i>Ca_desi_scaffold</i> | 9937                    | G/C  | NA                 | INTERGENIC                    | NA                                                                    |
| <i>Desi_wild_9942</i>   | NA                                  | <i>Ca_desi_scaffold</i> | 9942                    | G/A  | NA                 | INTERGENIC                    | NA                                                                    |
| <i>Desi_wild_85</i>     | NA                                  | <i>Ca_desi_scaffold</i> | 85                      | G/C  | NA                 | INTERGENIC                    | NA                                                                    |
| <i>Desi_wild_5409</i>   | NA                                  | <i>Ca_desi_scaffold</i> | 5409                    | A/C  | NA                 | INTERGENIC                    | NA                                                                    |
| <i>Desi_wild_8554</i>   | NA                                  | <i>Ca_desi_scaffold</i> | 8554                    | T/G  | Gene_Ca_19555.1    | UPSTREAM                      | Serine/threonine-protein kinase HT1                                   |
| <i>Desi_wild_2735</i>   | NA                                  | <i>Ca_desi_scaffold</i> | 2735                    | A/G  | NA                 | INTERGENIC                    | NA                                                                    |
| <i>Desi_wild_2768</i>   | NA                                  | <i>Ca_desi_scaffold</i> | 2768                    | G/A  | NA                 | INTERGENIC                    | NA                                                                    |
| <i>Desi_wild_2770</i>   | NA                                  | <i>Ca_desi_scaffold</i> | 2770                    | C/T  | NA                 | INTERGENIC                    | NA                                                                    |
| <i>Desi_wild_2781</i>   | NA                                  | <i>Ca_desi_scaffold</i> | 2781                    | C/T  | NA                 | INTERGENIC                    | NA                                                                    |
| <i>Desi_wild_170</i>    | NA                                  | <i>Ca_desi_scaffold</i> | 170                     | T/A  | NA                 | INTERGENIC                    | NA                                                                    |
| <i>Desi_wild_5620</i>   | NA                                  | <i>Ca_desi_scaffold</i> | 5620                    | C/T  | Gene_Ca_19562.1    | NON_SYNONYMOUS_CODING         | Probable serine/threonine-protein kinase smg1                         |
| <i>Desi_wild_5732</i>   | NA                                  | <i>Ca_desi_scaffold</i> | 5732                    | C/T  | Gene_Ca_19562.1    | SYNONYMOUS_CODING             | Probable serine/threonine-protein kinase smg1                         |
| <i>Desi_wild_7196</i>   | NA                                  | <i>Ca_desi_scaffold</i> | 7196                    | A/G  | Gene_Ca_19562.1    | SYNONYMOUS_CODING             | Probable serine/threonine-protein kinase smg1                         |
| <i>Desi_wild_7233</i>   | NA                                  | <i>Ca_desi_scaffold</i> | 7233                    | A/T  | Gene_Ca_19562.1    | NON_SYNONYMOUS_CODING         | Probable serine/threonine-protein kinase smg1                         |
| <i>Desi_wild_5023</i>   | NA                                  | <i>Ca_desi_scaffold</i> | 5023                    | T/A  | Gene_Ca_19563.1    | INTRON                        | Floral homeotic protein APETALA 2                                     |
| <i>Desi_wild_5000</i>   | NA                                  | <i>Ca_desi_scaffold</i> | 5000                    | C/A  | NA                 | INTERGENIC                    | NA                                                                    |
| <i>Desi_wild_9224</i>   | NA                                  | <i>Ca_desi_scaffold</i> | 9224                    | T/A  | Gene_Ca_19571.1    | NON_SYNONYMOUS_CODING         | Acyl-CoA N-acyltransferase with RING/FYVE/PHD-type zinc finger domain |
| <i>Desi_wild_7308</i>   | NA                                  | <i>Ca_desi_scaffold</i> | 7308                    | A/C  | Gene_Ca_19572.1    | DOWNSTREAM                    | Protein strawberry notch                                              |
| <i>Desi_wild_7309</i>   | NA                                  | <i>Ca_desi_scaffold</i> | 7309                    | C/T  | Gene_Ca_19572.1    | DOWNSTREAM                    | Protein strawberry notch                                              |
| <i>Desi_wild_7359</i>   | NA                                  | <i>Ca_desi_scaffold</i> | 7359                    | A/T  | Gene_Ca_19572.1    | DOWNSTREAM                    | Protein strawberry notch                                              |
| <i>Desi_wild_6245</i>   | NA                                  | <i>Ca_desi_scaffold</i> | 6245                    | T/G  | Gene_Ca_19573.1    | UPSTREAM                      | unknown protein                                                       |
| <i>Desi_wild_6343</i>   | NA                                  | <i>Ca_desi_scaffold</i> | 6343                    | G/A  | Gene_Ca_19573.1    | UPSTREAM                      | unknown protein                                                       |
| <i>Desi_wild_6412</i>   | NA                                  | <i>Ca_desi_scaffold</i> | 6412                    | T/C  | Gene_Ca_19573.1    | UPSTREAM                      | unknown protein                                                       |
| <i>Desi_wild_6413</i>   | NA                                  | <i>Ca_desi_scaffold</i> | 6413                    | A/G  | Gene_Ca_19573.1    | UPSTREAM                      | unknown protein                                                       |
| <i>Desi_wild_6418</i>   | NA                                  | <i>Ca_desi_scaffold</i> | 6418                    | C/T  | Gene_Ca_19573.1    | UPSTREAM                      | unknown protein                                                       |
| <i>Desi_wild_6419</i>   | NA                                  | <i>Ca_desi_scaffold</i> | 6419                    | A/T  | Gene_Ca_19573.1    | UPSTREAM                      | unknown protein                                                       |
| <i>Desi_wild_6426</i>   | NA                                  | <i>Ca_desi_scaffold</i> | 6426                    | G/A  | Gene_Ca_19573.1    | UPSTREAM                      | unknown protein                                                       |
| <i>Desi_wild_6433</i>   | NA                                  | <i>Ca_desi_scaffold</i> | 6433                    | C/T  | Gene_Ca_19573.1    | UPSTREAM                      | unknown protein                                                       |
| <i>Desi_wild_6434</i>   | NA                                  | <i>Ca_desi_scaffold</i> | 6434                    | G/A  | Gene_Ca_19573.1    | UPSTREAM                      | unknown protein                                                       |
| <i>Desi_wild_6445</i>   | NA                                  | <i>Ca_desi_scaffold</i> | 6445                    | C/T  | Gene_Ca_19573.1    | UPSTREAM                      | unknown protein                                                       |
| <i>Desi_wild_6449</i>   | NA                                  | <i>Ca_desi_scaffold</i> | 6449                    | T/G  | Gene_Ca_19573.1    | UPSTREAM                      | unknown protein                                                       |
| <i>Desi_wild_8168</i>   | NA                                  | <i>Ca_desi_scaffold</i> | 8168                    | A/G  | NA                 | INTERGENIC                    | NA                                                                    |
| <i>Desi_wild_9211</i>   | NA                                  | <i>Ca_desi_scaffold</i> | 9211                    | A/C  | Gene_Ca_19576.1    | NON_SYNONYMOUS_CODING         | Granule-bound starch synthase 2, chloroplastic/amyloplastic           |
| <i>Desi_wild_9837</i>   | NA                                  | <i>Ca_desi_scaffold</i> | 9837                    | C/T  | Gene_Ca_19581.1    | UPSTREAM                      | TraB domain-containing protein                                        |
| <i>Desi_wild_9849</i>   | NA                                  | <i>Ca_desi_scaffold</i> | 9849                    | A/T  | Gene_Ca_19581.1    | UPSTREAM                      | TraB domain-containing protein                                        |
| <i>Desi_wild_9857</i>   | NA                                  | <i>Ca_desi_scaffold</i> | 9857                    | T/G  | Gene_Ca_19581.1    | UPSTREAM                      | TraB domain-containing protein                                        |

| SNP IDs               | NCBI dbSNP accession IDs (NCBI_SS#) | Chromosomes             | Physical positions (bp) | SNPs | Gene accession IDs | Sequence components of genome | Putative functions                                    |
|-----------------------|-------------------------------------|-------------------------|-------------------------|------|--------------------|-------------------------------|-------------------------------------------------------|
| <i>Desi_wild_9917</i> | NA                                  | <i>Ca_desi_scaffold</i> | 9917                    | T/C  | Gene_Ca_19581.1    | UPSTREAM                      | TraB domain-containing protein                        |
| <i>Desi_wild_3693</i> | NA                                  | <i>Ca_desi_scaffold</i> | 3693                    | C/T  | NA                 | INTERGENIC                    | NA                                                    |
| <i>Desi_wild_3816</i> | NA                                  | <i>Ca_desi_scaffold</i> | 3816                    | C/G  | NA                 | INTERGENIC                    | NA                                                    |
| <i>Desi_wild_4947</i> | NA                                  | <i>Ca_desi_scaffold</i> | 4947                    | A/T  | Gene_Ca_19584.1    | SYNONYMOUS_CODING             | Uncharacterized GPI-anchored protein At4g28100        |
| <i>Desi_wild_4967</i> | NA                                  | <i>Ca_desi_scaffold</i> | 4967                    | C/T  | Gene_Ca_19584.1    | NON_SYNONYMOUS_CODING         | Uncharacterized GPI-anchored protein At4g28100        |
| <i>Desi_wild_3418</i> | NA                                  | <i>Ca_desi_scaffold</i> | 3418                    | T/A  | Gene_Ca_19585.1    | INTRON                        | Pentatricopeptide repeat-containing protein At2g33680 |
| <i>Desi_wild_2240</i> | NA                                  | <i>Ca_desi_scaffold</i> | 2240                    | C/G  | NA                 | INTERGENIC                    | NA                                                    |
| <i>Desi_wild_8538</i> | NA                                  | <i>Ca_desi_scaffold</i> | 8538                    | T/G  | Gene_Ca_19588.1    | UPSTREAM                      | NA                                                    |
| <i>Desi_wild_8588</i> | NA                                  | <i>Ca_desi_scaffold</i> | 8588                    | T/C  | Gene_Ca_19588.1    | UPSTREAM                      | NA                                                    |
| <i>Desi_wild_7078</i> | NA                                  | <i>Ca_desi_scaffold</i> | 7078                    | T/G  | NA                 | INTERGENIC                    | NA                                                    |
| <i>Desi_wild_1110</i> | NA                                  | <i>Ca_desi_scaffold</i> | 1110                    | G/C  | NA                 | INTERGENIC                    | NA                                                    |
| <i>Desi_wild_4045</i> | NA                                  | <i>Ca_desi_scaffold</i> | 4045                    | G/A  | NA                 | INTERGENIC                    | NA                                                    |
| <i>Desi_wild_4094</i> | NA                                  | <i>Ca_desi_scaffold</i> | 4094                    | A/C  | NA                 | INTERGENIC                    | NA                                                    |
| <i>Desi_wild_4146</i> | NA                                  | <i>Ca_desi_scaffold</i> | 4146                    | G/A  | NA                 | INTERGENIC                    | NA                                                    |
| <i>Desi_wild_4160</i> | NA                                  | <i>Ca_desi_scaffold</i> | 4160                    | T/C  | NA                 | INTERGENIC                    | NA                                                    |
| <i>Desi_wild_4184</i> | NA                                  | <i>Ca_desi_scaffold</i> | 4184                    | T/C  | NA                 | INTERGENIC                    | NA                                                    |
| <i>Desi_wild_6208</i> | NA                                  | <i>Ca_desi_scaffold</i> | 6208                    | C/T  | NA                 | INTERGENIC                    | NA                                                    |
| <i>Desi_wild_3664</i> | NA                                  | <i>Ca_desi_scaffold</i> | 3664                    | A/C  | Gene_Ca_19611.1    | NON_SYNONYMOUS_CODING         | BTB/POZ domain-containing protein At5g48800           |
| <i>Desi_wild_2251</i> | NA                                  | <i>Ca_desi_scaffold</i> | 2251                    | A/C  | Gene_Ca_19613.1    | INTRON                        | AP-1 complex subunit gamma-2                          |
| <i>Desi_wild_2255</i> | NA                                  | <i>Ca_desi_scaffold</i> | 2255                    | T/C  | Gene_Ca_19613.1    | INTRON                        | AP-1 complex subunit gamma-2                          |
| <i>Desi_wild_2258</i> | NA                                  | <i>Ca_desi_scaffold</i> | 2258                    | A/C  | Gene_Ca_19613.1    | INTRON                        | AP-1 complex subunit gamma-2                          |
| <i>Desi_wild_2260</i> | NA                                  | <i>Ca_desi_scaffold</i> | 2260                    | T/C  | Gene_Ca_19613.1    | INTRON                        | AP-1 complex subunit gamma-2                          |
| <i>Desi_wild_6259</i> | NA                                  | <i>Ca_desi_scaffold</i> | 6259                    | A/T  | Gene_Ca_19614.1    | INTRON                        | Protein transport protein SFT2                        |
| <i>Desi_wild_6764</i> | NA                                  | <i>Ca_desi_scaffold</i> | 6764                    | T/C  | Gene_Ca_19614.1    | INTRON                        | Protein transport protein SFT2                        |
| <i>Desi_wild_5867</i> | NA                                  | <i>Ca_desi_scaffold</i> | 5867                    | G/A  | NA                 | INTERGENIC                    | NA                                                    |
| <i>Desi_wild_8009</i> | NA                                  | <i>Ca_desi_scaffold</i> | 8009                    | C/T  | NA                 | INTERGENIC                    | NA                                                    |
| <i>Desi_wild_8894</i> | NA                                  | <i>Ca_desi_scaffold</i> | 8894                    | G/A  | Gene_Ca_19621.1    | INTRON                        | Microtubule-associated protein 70-2                   |
| <i>Desi_wild_7979</i> | NA                                  | <i>Ca_desi_scaffold</i> | 7979                    | T/C  | NA                 | INTERGENIC                    | NA                                                    |
| <i>Desi_wild_8739</i> | NA                                  | <i>Ca_desi_scaffold</i> | 8739                    | G/T  | NA                 | INTERGENIC                    | NA                                                    |
| <i>Desi_wild_8970</i> | NA                                  | <i>Ca_desi_scaffold</i> | 8970                    | A/G  | NA                 | INTERGENIC                    | NA                                                    |
| <i>Desi_wild_3299</i> | NA                                  | <i>Ca_desi_scaffold</i> | 3299                    | G/A  | NA                 | INTERGENIC                    | NA                                                    |
| <i>Desi_wild_294</i>  | NA                                  | <i>Ca_desi_scaffold</i> | 294                     | G/A  | NA                 | INTERGENIC                    | NA                                                    |
| <i>Desi_wild_5413</i> | NA                                  | <i>Ca_desi_scaffold</i> | 5413                    | G/A  | Gene_Ca_19645.1    | INTRON                        | RING/FYVE/PHD zinc finger superfamily protein         |
| <i>Desi_wild_5419</i> | NA                                  | <i>Ca_desi_scaffold</i> | 5419                    | T/G  | Gene_Ca_19645.1    | INTRON                        | RING/FYVE/PHD zinc finger superfamily protein         |
| <i>Desi_wild_5432</i> | NA                                  | <i>Ca_desi_scaffold</i> | 5432                    | C/T  | Gene_Ca_19645.1    | INTRON                        | RING/FYVE/PHD zinc finger superfamily protein         |
| <i>Desi_wild_5451</i> | NA                                  | <i>Ca_desi_scaffold</i> | 5451                    | T/A  | Gene_Ca_19645.1    | INTRON                        | RING/FYVE/PHD zinc finger superfamily protein         |
| <i>Desi_wild_971</i>  | NA                                  | <i>Ca_desi_scaffold</i> | 971                     | A/C  | NA                 | INTERGENIC                    | NA                                                    |
| <i>Desi_wild_996</i>  | NA                                  | <i>Ca_desi_scaffold</i> | 996                     | C/A  | NA                 | INTERGENIC                    | NA                                                    |
| <i>Desi_wild_1010</i> | NA                                  | <i>Ca_desi_scaffold</i> | 1010                    | G/A  | NA                 | INTERGENIC                    | NA                                                    |
| <i>Desi_wild_8543</i> | NA                                  | <i>Ca_desi_scaffold</i> | 8543                    | T/C  | Gene_Ca_19647.1    | INTRON                        | Heat stress transcription factor A-3                  |
| <i>Desi_wild_2822</i> | NA                                  | <i>Ca_desi_scaffold</i> | 2822                    | A/G  | NA                 | INTERGENIC                    | NA                                                    |
| <i>Desi_wild_4555</i> | NA                                  | <i>Ca_desi_scaffold</i> | 4555                    | C/T  | NA                 | INTERGENIC                    | NA                                                    |
| <i>Desi_wild_4563</i> | NA                                  | <i>Ca_desi_scaffold</i> | 4563                    | C/T  | NA                 | INTERGENIC                    | NA                                                    |
| <i>Desi_wild_3968</i> | NA                                  | <i>Ca_desi_scaffold</i> | 3968                    | C/T  | NA                 | INTERGENIC                    | NA                                                    |

| SNP IDs               | NCBI dbSNP accession IDs (NCBI_SS#) | Chromosomes             | Physical positions (bp) | SNPs | Gene accession IDs | Sequence components of genome | Putative functions                            |
|-----------------------|-------------------------------------|-------------------------|-------------------------|------|--------------------|-------------------------------|-----------------------------------------------|
| <i>Desi_wild_6431</i> | NA                                  | <i>Ca_desi_scaffold</i> | 6431                    | G/T  | NA                 | INTERGENIC                    | NA                                            |
| <i>Desi_wild_6602</i> | NA                                  | <i>Ca_desi_scaffold</i> | 6602                    | A/G  | NA                 | INTERGENIC                    | NA                                            |
| <i>Desi_wild_502</i>  | NA                                  | <i>Ca_desi_scaffold</i> | 502                     | C/T  | NA                 | INTERGENIC                    | NA                                            |
| <i>Desi_wild_5184</i> | NA                                  | <i>Ca_desi_scaffold</i> | 5184                    | T/C  | Gene_Ca_19685.1    | DOWNSTREAM                    | WD40 repeat-containing protein SMU1           |
| <i>Desi_wild_9105</i> | NA                                  | <i>Ca_desi_scaffold</i> | 9105                    | C/T  | NA                 | INTERGENIC                    | NA                                            |
| <i>Desi_wild_9114</i> | NA                                  | <i>Ca_desi_scaffold</i> | 9114                    | T/C  | NA                 | INTERGENIC                    | NA                                            |
| <i>Desi_wild_9143</i> | NA                                  | <i>Ca_desi_scaffold</i> | 9143                    | T/C  | NA                 | INTERGENIC                    | NA                                            |
| <i>Desi_wild_8459</i> | NA                                  | <i>Ca_desi_scaffold</i> | 8459                    | A/T  | NA                 | INTERGENIC                    | NA                                            |
| <i>Desi_wild_8511</i> | NA                                  | <i>Ca_desi_scaffold</i> | 8511                    | G/T  | NA                 | INTERGENIC                    | NA                                            |
| <i>Desi_wild_8969</i> | NA                                  | <i>Ca_desi_scaffold</i> | 8969                    | A/C  | NA                 | INTERGENIC                    | NA                                            |
| <i>Desi_wild_8972</i> | NA                                  | <i>Ca_desi_scaffold</i> | 8972                    | A/T  | NA                 | INTERGENIC                    | NA                                            |
| <i>Desi_wild_4204</i> | NA                                  | <i>Ca_desi_scaffold</i> | 4204                    | G/T  | NA                 | INTERGENIC                    | NA                                            |
| <i>Desi_wild_4208</i> | NA                                  | <i>Ca_desi_scaffold</i> | 4208                    | C/T  | NA                 | INTERGENIC                    | NA                                            |
| <i>Desi_wild_4213</i> | NA                                  | <i>Ca_desi_scaffold</i> | 4213                    | C/T  | NA                 | INTERGENIC                    | NA                                            |
| <i>Desi_wild_4222</i> | NA                                  | <i>Ca_desi_scaffold</i> | 4222                    | G/C  | NA                 | INTERGENIC                    | NA                                            |
| <i>Desi_wild_4233</i> | NA                                  | <i>Ca_desi_scaffold</i> | 4233                    | T/C  | NA                 | INTERGENIC                    | NA                                            |
| <i>Desi_wild_347</i>  | NA                                  | <i>Ca_desi_scaffold</i> | 347                     | A/T  | NA                 | INTERGENIC                    | NA                                            |
| <i>Desi_wild_8023</i> | NA                                  | <i>Ca_desi_scaffold</i> | 8023                    | A/G  | NA                 | INTERGENIC                    | NA                                            |
| <i>Desi_wild_8052</i> | NA                                  | <i>Ca_desi_scaffold</i> | 8052                    | G/A  | NA                 | INTERGENIC                    | NA                                            |
| <i>Desi_wild_3618</i> | NA                                  | <i>Ca_desi_scaffold</i> | 3618                    | T/C  | Gene_Ca_19704.1    | SYNONYMOUS_CODING             | Ammonium transporter 1 member 2               |
| <i>Desi_wild_4317</i> | NA                                  | <i>Ca_desi_scaffold</i> | 4317                    | T/A  | Gene_Ca_19704.1    | SYNONYMOUS_CODING             | Ammonium transporter 1 member 2               |
| <i>Desi_wild_4409</i> | NA                                  | <i>Ca_desi_scaffold</i> | 4409                    | A/C  | Gene_Ca_19704.1    | SYNONYMOUS_CODING             | Ammonium transporter 1 member 2               |
| <i>Desi_wild_479</i>  | NA                                  | <i>Ca_desi_scaffold</i> | 479                     | T/C  | NA                 | INTERGENIC                    | NA                                            |
| <i>Desi_wild_496</i>  | NA                                  | <i>Ca_desi_scaffold</i> | 496                     | G/A  | NA                 | INTERGENIC                    | NA                                            |
| <i>Desi_wild_501</i>  | NA                                  | <i>Ca_desi_scaffold</i> | 501                     | T/C  | NA                 | INTERGENIC                    | NA                                            |
| <i>Desi_wild_7219</i> | NA                                  | <i>Ca_desi_scaffold</i> | 7219                    | G/C  | NA                 | INTERGENIC                    | NA                                            |
| <i>Desi_wild_7305</i> | NA                                  | <i>Ca_desi_scaffold</i> | 7305                    | A/G  | NA                 | INTERGENIC                    | NA                                            |
| <i>Desi_wild_7328</i> | NA                                  | <i>Ca_desi_scaffold</i> | 7328                    | A/G  | NA                 | INTERGENIC                    | NA                                            |
| <i>Desi_wild_7364</i> | NA                                  | <i>Ca_desi_scaffold</i> | 7364                    | G/A  | NA                 | INTERGENIC                    | NA                                            |
| <i>Desi_wild_7420</i> | NA                                  | <i>Ca_desi_scaffold</i> | 7420                    | C/A  | NA                 | INTERGENIC                    | NA                                            |
| <i>Desi_wild_8369</i> | NA                                  | <i>Ca_desi_scaffold</i> | 8369                    | G/A  | NA                 | INTERGENIC                    | NA                                            |
| <i>Desi_wild_2788</i> | NA                                  | <i>Ca_desi_scaffold</i> | 2788                    | C/A  | Gene_Ca_19723.1    | NON_SYNONYMOUS_CODING         | Protein misato homolog 1                      |
| <i>Desi_wild_4265</i> | NA                                  | <i>Ca_desi_scaffold</i> | 4265                    | C/T  | Gene_Ca_19729.1    | DOWNSTREAM                    | RNA 2'-phosphotransferase, Tpt1 / KptA family |
| <i>Desi_wild_4275</i> | NA                                  | <i>Ca_desi_scaffold</i> | 4275                    | A/C  | Gene_Ca_19729.1    | DOWNSTREAM                    | RNA 2'-phosphotransferase, Tpt1 / KptA family |
| <i>Desi_wild_4280</i> | NA                                  | <i>Ca_desi_scaffold</i> | 4280                    | G/A  | Gene_Ca_19729.1    | DOWNSTREAM                    | RNA 2'-phosphotransferase, Tpt1 / KptA family |
| <i>Desi_wild_4283</i> | NA                                  | <i>Ca_desi_scaffold</i> | 4283                    | G/A  | Gene_Ca_19729.1    | DOWNSTREAM                    | RNA 2'-phosphotransferase, Tpt1 / KptA family |
| <i>Desi_wild_4291</i> | NA                                  | <i>Ca_desi_scaffold</i> | 4291                    | A/G  | Gene_Ca_19729.1    | DOWNSTREAM                    | RNA 2'-phosphotransferase, Tpt1 / KptA family |
| <i>Desi_wild_4303</i> | NA                                  | <i>Ca_desi_scaffold</i> | 4303                    | C/A  | Gene_Ca_19729.1    | DOWNSTREAM                    | RNA 2'-phosphotransferase, Tpt1 / KptA family |
| <i>Desi_wild_4310</i> | NA                                  | <i>Ca_desi_scaffold</i> | 4310                    | T/A  | Gene_Ca_19729.1    | DOWNSTREAM                    | RNA 2'-phosphotransferase, Tpt1 / KptA family |
| <i>Desi_wild_4327</i> | NA                                  | <i>Ca_desi_scaffold</i> | 4327                    | C/G  | Gene_Ca_19729.1    | DOWNSTREAM                    | RNA 2'-phosphotransferase, Tpt1 / KptA family |
| <i>Desi_wild_4032</i> | NA                                  | <i>Ca_desi_scaffold</i> | 4032                    | T/G  | NA                 | INTERGENIC                    | NA                                            |
| <i>Desi_wild_4668</i> | NA                                  | <i>Ca_desi_scaffold</i> | 4668                    | A/G  | NA                 | INTERGENIC                    | NA                                            |
| <i>Desi_wild_4709</i> | NA                                  | <i>Ca_desi_scaffold</i> | 4709                    | T/A  | NA                 | INTERGENIC                    | NA                                            |
| <i>Desi_wild_6618</i> | NA                                  | <i>Ca_desi_scaffold</i> | 6618                    | G/A  | Gene_Ca_19732.1    | UPSTREAM                      | Ubiquinone biosynthesis monooxygenase COQ6    |

| SNP IDs               | NCBI dbSNP accession IDs (NCBI_SS#) | Chromosomes             | Physical positions (bp) | SNPs | Gene accession IDs | Sequence components of genome | Putative functions                                                            |
|-----------------------|-------------------------------------|-------------------------|-------------------------|------|--------------------|-------------------------------|-------------------------------------------------------------------------------|
| <i>Desi_wild_6631</i> | NA                                  | <i>Ca_desi_scaffold</i> | 6631                    | T/G  | Gene_Ca_19732.1    | UPSTREAM                      | Ubiquinone biosynthesis monoxygenase COQ6                                     |
| <i>Desi_wild_6633</i> | NA                                  | <i>Ca_desi_scaffold</i> | 6633                    | T/G  | Gene_Ca_19732.1    | UPSTREAM                      | Ubiquinone biosynthesis monoxygenase COQ6                                     |
| <i>Desi_wild_3364</i> | NA                                  | <i>Ca_desi_scaffold</i> | 3364                    | A/T  | NA                 | INTERGENIC                    | NA                                                                            |
| <i>Desi_wild_3385</i> | NA                                  | <i>Ca_desi_scaffold</i> | 3385                    | T/A  | NA                 | INTERGENIC                    | NA                                                                            |
| <i>Desi_wild_3389</i> | NA                                  | <i>Ca_desi_scaffold</i> | 3389                    | A/G  | NA                 | INTERGENIC                    | NA                                                                            |
| <i>Desi_wild_162</i>  | NA                                  | <i>Ca_desi_scaffold</i> | 162                     | G/A  | NA                 | INTERGENIC                    | NA                                                                            |
| <i>Desi_wild_1098</i> | NA                                  | <i>Ca_desi_scaffold</i> | 1098                    | G/A  | NA                 | INTERGENIC                    | NA                                                                            |
| <i>Desi_wild_1102</i> | NA                                  | <i>Ca_desi_scaffold</i> | 1102                    | G/A  | NA                 | INTERGENIC                    | NA                                                                            |
| <i>Desi_wild_1178</i> | NA                                  | <i>Ca_desi_scaffold</i> | 1178                    | G/T  | NA                 | INTERGENIC                    | NA                                                                            |
| <i>Desi_wild_4838</i> | NA                                  | <i>Ca_desi_scaffold</i> | 4838                    | C/T  | NA                 | INTERGENIC                    | NA                                                                            |
| <i>Desi_wild_4901</i> | NA                                  | <i>Ca_desi_scaffold</i> | 4901                    | T/C  | NA                 | INTERGENIC                    | NA                                                                            |
| <i>Desi_wild_5604</i> | NA                                  | <i>Ca_desi_scaffold</i> | 5604                    | A/C  | Gene_Ca_19746.1    | SYNONYMOUS_CODING             | Protein ZINC INDUCED FACILITATOR-LIKE 1                                       |
| <i>Desi_wild_4888</i> | NA                                  | <i>Ca_desi_scaffold</i> | 4888                    | T/C  | Gene_Ca_19750.1    | INTRON                        | Protein of unknown function (DUF640)                                          |
| <i>Desi_wild_7992</i> | NA                                  | <i>Ca_desi_scaffold</i> | 7992                    | T/A  | NA                 | INTERGENIC                    | NA                                                                            |
| <i>Desi_wild_4055</i> | NA                                  | <i>Ca_desi_scaffold</i> | 4055                    | C/A  | NA                 | INTERGENIC                    | NA                                                                            |
| <i>Desi_wild_8309</i> | NA                                  | <i>Ca_desi_scaffold</i> | 8309                    | A/T  | NA                 | INTERGENIC                    | NA                                                                            |
| <i>Desi_wild_8343</i> | NA                                  | <i>Ca_desi_scaffold</i> | 8343                    | T/C  | NA                 | INTERGENIC                    | NA                                                                            |
| <i>Desi_wild_8347</i> | NA                                  | <i>Ca_desi_scaffold</i> | 8347                    | C/G  | NA                 | INTERGENIC                    | NA                                                                            |
| <i>Desi_wild_8363</i> | NA                                  | <i>Ca_desi_scaffold</i> | 8363                    | C/A  | NA                 | INTERGENIC                    | NA                                                                            |
| <i>Desi_wild_6373</i> | NA                                  | <i>Ca_desi_scaffold</i> | 6373                    | G/C  | Gene_Ca_19753.1    | DOWNSTREAM                    | NA                                                                            |
| <i>Desi_wild_6432</i> | NA                                  | <i>Ca_desi_scaffold</i> | 6432                    | A/G  | Gene_Ca_19753.1    | DOWNSTREAM                    | NA                                                                            |
| <i>Desi_wild_1414</i> | NA                                  | <i>Ca_desi_scaffold</i> | 1414                    | C/A  | NA                 | INTERGENIC                    | NA                                                                            |
| <i>Desi_wild_1484</i> | NA                                  | <i>Ca_desi_scaffold</i> | 1484                    | A/C  | Gene_Ca_19755.1    | SYNONYMOUS_CODING             | Unknown protein DS12 from 2D-PAGE of leaf, chloroplastic                      |
| <i>Desi_wild_8114</i> | NA                                  | <i>Ca_desi_scaffold</i> | 8114                    | A/C  | Gene_Ca_19756.1    | NON_SYNONYMOUS_CODING         | Hydroxycinnamoyl-Coenzyme A shikimate/quinic acid hydroxycinnamoyltransferase |
| <i>Desi_wild_7906</i> | NA                                  | <i>Ca_desi_scaffold</i> | 7906                    | A/T  | NA                 | INTERGENIC                    | NA                                                                            |
| <i>Desi_wild_7982</i> | NA                                  | <i>Ca_desi_scaffold</i> | 7982                    | T/C  | NA                 | INTERGENIC                    | NA                                                                            |
| <i>Desi_wild_7985</i> | NA                                  | <i>Ca_desi_scaffold</i> | 7985                    | G/C  | NA                 | INTERGENIC                    | NA                                                                            |
| <i>Desi_wild_7987</i> | NA                                  | <i>Ca_desi_scaffold</i> | 7987                    | C/A  | NA                 | INTERGENIC                    | NA                                                                            |
| <i>Desi_wild_8037</i> | NA                                  | <i>Ca_desi_scaffold</i> | 8037                    | T/C  | NA                 | INTERGENIC                    | NA                                                                            |
| <i>Desi_wild_6714</i> | NA                                  | <i>Ca_desi_scaffold</i> | 6714                    | T/C  | NA                 | INTERGENIC                    | NA                                                                            |
| <i>Desi_wild_1471</i> | NA                                  | <i>Ca_desi_scaffold</i> | 1471                    | T/C  | NA                 | INTERGENIC                    | NA                                                                            |
| <i>Desi_wild_1706</i> | NA                                  | <i>Ca_desi_scaffold</i> | 1706                    | A/C  | NA                 | INTERGENIC                    | NA                                                                            |
| <i>Desi_wild_1711</i> | NA                                  | <i>Ca_desi_scaffold</i> | 1711                    | A/C  | NA                 | INTERGENIC                    | NA                                                                            |
| <i>Desi_wild_6487</i> | NA                                  | <i>Ca_desi_scaffold</i> | 6487                    | A/C  | NA                 | INTERGENIC                    | NA                                                                            |
| <i>Desi_wild_6488</i> | NA                                  | <i>Ca_desi_scaffold</i> | 6488                    | C/A  | NA                 | INTERGENIC                    | NA                                                                            |
| <i>Desi_wild_6842</i> | NA                                  | <i>Ca_desi_scaffold</i> | 6842                    | C/G  | NA                 | INTERGENIC                    | NA                                                                            |
| <i>Desi_wild_6849</i> | NA                                  | <i>Ca_desi_scaffold</i> | 6849                    | C/T  | NA                 | INTERGENIC                    | NA                                                                            |
| <i>Desi_wild_6863</i> | NA                                  | <i>Ca_desi_scaffold</i> | 6863                    | A/C  | NA                 | INTERGENIC                    | NA                                                                            |
| <i>Desi_wild_6879</i> | NA                                  | <i>Ca_desi_scaffold</i> | 6879                    | T/C  | NA                 | INTERGENIC                    | NA                                                                            |
| <i>Desi_wild_6893</i> | NA                                  | <i>Ca_desi_scaffold</i> | 6893                    | T/C  | NA                 | INTERGENIC                    | NA                                                                            |
| <i>Desi_wild_3650</i> | NA                                  | <i>Ca_desi_scaffold</i> | 3650                    | C/T  | Gene_Ca_19786.1    | SYNONYMOUS_CODING             | Glycogenin-1                                                                  |
| <i>Desi_wild_7387</i> | NA                                  | <i>Ca_desi_scaffold</i> | 7387                    | A/T  | NA                 | INTERGENIC                    | NA                                                                            |
| <i>Desi_wild_7396</i> | NA                                  | <i>Ca_desi_scaffold</i> | 7396                    | A/C  | NA                 | INTERGENIC                    | NA                                                                            |
| <i>Desi_wild_7496</i> | NA                                  | <i>Ca_desi_scaffold</i> | 7496                    | C/T  | NA                 | INTERGENIC                    | NA                                                                            |

| SNP IDs                 | NCBI dbSNP accession IDs (NCBI_SS#) | Chromosomes             | Physical positions (bp) | SNPs | Gene accession IDs | Sequence components of genome | Putative functions                                           |
|-------------------------|-------------------------------------|-------------------------|-------------------------|------|--------------------|-------------------------------|--------------------------------------------------------------|
| <i>Desi_wild_7531</i>   | NA                                  | <i>Ca_desi_scaffold</i> | 7531                    | C/T  | NA                 | INTERGENIC                    | NA                                                           |
| <i>Desi_wild_8323</i>   | NA                                  | <i>Ca_desi_scaffold</i> | 8323                    | A/T  | NA                 | INTERGENIC                    | NA                                                           |
| <i>Desi_wild_12845</i>  | NA                                  | <i>Ca_desi_scaffold</i> | 12845                   | A/T  | NA                 | INTERGENIC                    | NA                                                           |
| <i>Desi_wild_12849</i>  | NA                                  | <i>Ca_desi_scaffold</i> | 12849                   | T/A  | NA                 | INTERGENIC                    | NA                                                           |
| <i>Desi_wild_12851</i>  | NA                                  | <i>Ca_desi_scaffold</i> | 12851                   | A/C  | NA                 | INTERGENIC                    | NA                                                           |
| <i>Desi_wild_12855</i>  | NA                                  | <i>Ca_desi_scaffold</i> | 12855                   | G/C  | NA                 | INTERGENIC                    | NA                                                           |
| <i>Desi_wild_17234</i>  | NA                                  | <i>Ca_desi_scaffold</i> | 17234                   | G/A  | Gene_Ca_10590.1    | UPSTREAM                      | Predicted protein (Fragment)                                 |
| <i>Desi_wild_17237</i>  | NA                                  | <i>Ca_desi_scaffold</i> | 17237                   | A/C  | Gene_Ca_10590.1    | UPSTREAM                      | Predicted protein (Fragment)                                 |
| <i>Desi_wild_17238</i>  | NA                                  | <i>Ca_desi_scaffold</i> | 17238                   | G/T  | Gene_Ca_10590.1    | UPSTREAM                      | Predicted protein (Fragment)                                 |
| <i>Desi_wild_17896</i>  | NA                                  | <i>Ca_desi_scaffold</i> | 17896                   | T/A  | Gene_Ca_10590.1    | UPSTREAM                      | Predicted protein (Fragment)                                 |
| <i>Desi_wild_83621</i>  | NA                                  | <i>Ca_desi_scaffold</i> | 83621                   | A/C  | Gene_Ca_09029.1    | INTRON                        | unknown protein                                              |
| <i>Desi_wild_106267</i> | NA                                  | <i>Ca_desi_scaffold</i> | 106267                  | T/G  | Gene_Ca_09030.1    | INTRON                        | UPF0505 protein C16orf62 homolog                             |
| <i>Desi_wild_113085</i> | NA                                  | <i>Ca_desi_scaffold</i> | 113085                  | G/A  | Gene_Ca_09030.1    | INTRON                        | UPF0505 protein C16orf62 homolog                             |
| <i>Desi_wild_113086</i> | NA                                  | <i>Ca_desi_scaffold</i> | 113086                  | T/C  | Gene_Ca_09030.1    | INTRON                        | UPF0505 protein C16orf62 homolog                             |
| <i>Desi_wild_113097</i> | NA                                  | <i>Ca_desi_scaffold</i> | 113097                  | C/T  | Gene_Ca_09030.1    | INTRON                        | UPF0505 protein C16orf62 homolog                             |
| <i>Desi_wild_113139</i> | NA                                  | <i>Ca_desi_scaffold</i> | 113139                  | C/T  | Gene_Ca_09030.1    | INTRON                        | UPF0505 protein C16orf62 homolog                             |
| <i>Desi_wild_113158</i> | NA                                  | <i>Ca_desi_scaffold</i> | 113158                  | A/G  | Gene_Ca_09030.1    | INTRON                        | UPF0505 protein C16orf62 homolog                             |
| <i>Desi_wild_151688</i> | NA                                  | <i>Ca_desi_scaffold</i> | 151688                  | T/G  | Gene_Ca_09031.1    | INTRON                        | Cell differentiation protein RCD1 homolog                    |
| <i>Desi_wild_151712</i> | NA                                  | <i>Ca_desi_scaffold</i> | 151712                  | T/G  | Gene_Ca_09031.1    | INTRON                        | Cell differentiation protein RCD1 homolog                    |
| <i>Desi_wild_151718</i> | NA                                  | <i>Ca_desi_scaffold</i> | 151718                  | C/A  | Gene_Ca_09031.1    | INTRON                        | Cell differentiation protein RCD1 homolog                    |
| <i>Desi_wild_3232</i>   | NA                                  | <i>Ca_desi_scaffold</i> | 3232                    | C/A  | NA                 | INTERGENIC                    | NA                                                           |
| <i>Desi_wild_3268</i>   | NA                                  | <i>Ca_desi_scaffold</i> | 3268                    | G/A  | NA                 | INTERGENIC                    | NA                                                           |
| <i>Desi_wild_3294</i>   | NA                                  | <i>Ca_desi_scaffold</i> | 3294                    | C/A  | NA                 | INTERGENIC                    | NA                                                           |
| <i>Desi_wild_6870</i>   | NA                                  | <i>Ca_desi_scaffold</i> | 6870                    | A/C  | Gene_Ca_19796.1    | NON_SYNONYMOUS_CODING         | Sugar transport protein 5                                    |
| <i>Desi_wild_3479</i>   | NA                                  | <i>Ca_desi_scaffold</i> | 3479                    | A/G  | Gene_Ca_19800.1    | INTRON                        | Cell division cycle protein 123 homolog                      |
| <i>Desi_wild_6044</i>   | NA                                  | <i>Ca_desi_scaffold</i> | 6044                    | C/G  | NA                 | INTERGENIC                    | NA                                                           |
| <i>Desi_wild_6098</i>   | NA                                  | <i>Ca_desi_scaffold</i> | 6098                    | G/A  | NA                 | INTERGENIC                    | NA                                                           |
| <i>Desi_wild_1372</i>   | NA                                  | <i>Ca_desi_scaffold</i> | 1372                    | T/C  | Gene_Ca_19807.1    | NON_SYNONYMOUS_CODING         | Probable phosphatidylinositol 4-kinase type 2-beta At1g26270 |
| <i>Desi_wild_8048</i>   | NA                                  | <i>Ca_desi_scaffold</i> | 8048                    | G/A  | NA                 | INTERGENIC                    | NA                                                           |
| <i>Desi_wild_2083</i>   | NA                                  | <i>Ca_desi_scaffold</i> | 2083                    | G/T  | Gene_Ca_19812.1    | SYNONYMOUS_CODING             | Legumin                                                      |
| <i>Desi_wild_7605</i>   | NA                                  | <i>Ca_desi_scaffold</i> | 7605                    | T/G  | NA                 | INTERGENIC                    | NA                                                           |
| <i>Desi_wild_1480</i>   | NA                                  | <i>Ca_desi_scaffold</i> | 1480                    | A/C  | Gene_Ca_19816.1    | SYNONYMOUS_CODING             | NA                                                           |
| <i>Desi_wild_1489</i>   | NA                                  | <i>Ca_desi_scaffold</i> | 1489                    | A/C  | Gene_Ca_19816.1    | SYNONYMOUS_CODING             | NA                                                           |
| <i>Desi_wild_1498</i>   | NA                                  | <i>Ca_desi_scaffold</i> | 1498                    | A/C  | Gene_Ca_19816.1    | SYNONYMOUS_CODING             | NA                                                           |
| <i>Desi_wild_1045</i>   | NA                                  | <i>Ca_desi_scaffold</i> | 1045                    | T/C  | NA                 | INTERGENIC                    | NA                                                           |
| <i>Desi_wild_1495</i>   | NA                                  | <i>Ca_desi_scaffold</i> | 1495                    | A/T  | NA                 | INTERGENIC                    | NA                                                           |
| <i>Desi_wild_178</i>    | NA                                  | <i>Ca_desi_scaffold</i> | 178                     | T/C  | NA                 | INTERGENIC                    | NA                                                           |
| <i>Desi_wild_194</i>    | NA                                  | <i>Ca_desi_scaffold</i> | 194                     | G/A  | NA                 | INTERGENIC                    | NA                                                           |
| <i>Desi_wild_198</i>    | NA                                  | <i>Ca_desi_scaffold</i> | 198                     | G/A  | NA                 | INTERGENIC                    | NA                                                           |
| <i>Desi_wild_2551</i>   | NA                                  | <i>Ca_desi_scaffold</i> | 2551                    | T/G  | NA                 | INTERGENIC                    | NA                                                           |
| <i>Desi_wild_5369</i>   | NA                                  | <i>Ca_desi_scaffold</i> | 5369                    | A/G  | Gene_Ca_19827.1    | SYNONYMOUS_CODING             | Auxin response factor 2                                      |
| <i>Desi_wild_5153</i>   | NA                                  | <i>Ca_desi_scaffold</i> | 5153                    | G/A  | Gene_Ca_19829.2    | INTRON                        | NA                                                           |
| <i>Desi_wild_7736</i>   | NA                                  | <i>Ca_desi_scaffold</i> | 7736                    | T/G  | NA                 | INTERGENIC                    | NA                                                           |
| <i>Desi_wild_82920</i>  | NA                                  | <i>Ca_desi_scaffold</i> | 82920                   | G/T  | Gene_Ca_09755.1    | NON_SYNONYMOUS_CODING         | DNA-binding bromodomain-containing protein                   |

| SNP IDs               | NCBI dbSNP accession IDs (NCBI_SS#) | Chromosomes             | Physical positions (bp) | SNPs | Gene accession IDs | Sequence components of genome | Putative functions     |
|-----------------------|-------------------------------------|-------------------------|-------------------------|------|--------------------|-------------------------------|------------------------|
| <i>Desi_wild_3037</i> | NA                                  | <i>Ca_desi_scaffold</i> | 3037                    | G/T  | NA                 | INTERGENIC                    | NA                     |
| <i>Desi_wild_6865</i> | NA                                  | <i>Ca_desi_scaffold</i> | 6865                    | C/A  | NA                 | INTERGENIC                    | NA                     |
| <i>Desi_wild_6941</i> | NA                                  | <i>Ca_desi_scaffold</i> | 6941                    | C/T  | NA                 | INTERGENIC                    | NA                     |
| <i>Desi_wild_6952</i> | NA                                  | <i>Ca_desi_scaffold</i> | 6952                    | G/T  | NA                 | INTERGENIC                    | NA                     |
| <i>Desi_wild_6981</i> | NA                                  | <i>Ca_desi_scaffold</i> | 6981                    | A/T  | NA                 | INTERGENIC                    | NA                     |
| <i>Desi_wild_6983</i> | NA                                  | <i>Ca_desi_scaffold</i> | 6983                    | T/C  | NA                 | INTERGENIC                    | NA                     |
| <i>Desi_wild_6988</i> | NA                                  | <i>Ca_desi_scaffold</i> | 6988                    | C/T  | NA                 | INTERGENIC                    | NA                     |
| <i>Desi_wild_6993</i> | NA                                  | <i>Ca_desi_scaffold</i> | 6993                    | C/T  | NA                 | INTERGENIC                    | NA                     |
| <i>Desi_wild_4314</i> | NA                                  | <i>Ca_desi_scaffold</i> | 4314                    | A/C  | Gene_Ca_19854.1    | NON_SYNONYMOUS_CODING         | STENOFOLIA             |
| <i>Desi_wild_7204</i> | NA                                  | <i>Ca_desi_scaffold</i> | 7204                    | T/C  | NA                 | INTERGENIC                    | NA                     |
| <i>Desi_wild_1423</i> | NA                                  | <i>Ca_desi_scaffold</i> | 1423                    | C/T  | NA                 | INTERGENIC                    | NA                     |
| <i>Desi_wild_1435</i> | NA                                  | <i>Ca_desi_scaffold</i> | 1435                    | A/G  | NA                 | INTERGENIC                    | NA                     |
| <i>Desi_wild_1442</i> | NA                                  | <i>Ca_desi_scaffold</i> | 1442                    | C/T  | NA                 | INTERGENIC                    | NA                     |
| <i>Desi_wild_1463</i> | NA                                  | <i>Ca_desi_scaffold</i> | 1463                    | C/A  | NA                 | INTERGENIC                    | NA                     |
| <i>Desi_wild_1464</i> | NA                                  | <i>Ca_desi_scaffold</i> | 1464                    | C/T  | NA                 | INTERGENIC                    | NA                     |
| <i>Desi_wild_1167</i> | NA                                  | <i>Ca_desi_scaffold</i> | 1167                    | G/A  | NA                 | INTERGENIC                    | NA                     |
| <i>Desi_wild_1175</i> | NA                                  | <i>Ca_desi_scaffold</i> | 1175                    | T/A  | NA                 | INTERGENIC                    | NA                     |
| <i>Desi_wild_1182</i> | NA                                  | <i>Ca_desi_scaffold</i> | 1182                    | C/G  | NA                 | INTERGENIC                    | NA                     |
| <i>Desi_wild_1189</i> | NA                                  | <i>Ca_desi_scaffold</i> | 1189                    | T/C  | NA                 | INTERGENIC                    | NA                     |
| <i>Desi_wild_1190</i> | NA                                  | <i>Ca_desi_scaffold</i> | 1190                    | T/C  | NA                 | INTERGENIC                    | NA                     |
| <i>Desi_wild_1193</i> | NA                                  | <i>Ca_desi_scaffold</i> | 1193                    | T/G  | NA                 | INTERGENIC                    | NA                     |
| <i>Desi_wild_1196</i> | NA                                  | <i>Ca_desi_scaffold</i> | 1196                    | T/A  | NA                 | INTERGENIC                    | NA                     |
| <i>Desi_wild_1199</i> | NA                                  | <i>Ca_desi_scaffold</i> | 1199                    | G/A  | NA                 | INTERGENIC                    | NA                     |
| <i>Desi_wild_1222</i> | NA                                  | <i>Ca_desi_scaffold</i> | 1222                    | G/T  | NA                 | INTERGENIC                    | NA                     |
| <i>Desi_wild_1225</i> | NA                                  | <i>Ca_desi_scaffold</i> | 1225                    | A/T  | NA                 | INTERGENIC                    | NA                     |
| <i>Desi_wild_1234</i> | NA                                  | <i>Ca_desi_scaffold</i> | 1234                    | G/T  | NA                 | INTERGENIC                    | NA                     |
| <i>Desi_wild_1241</i> | NA                                  | <i>Ca_desi_scaffold</i> | 1241                    | A/G  | NA                 | INTERGENIC                    | NA                     |
| <i>Desi_wild_1250</i> | NA                                  | <i>Ca_desi_scaffold</i> | 1250                    | T/C  | NA                 | INTERGENIC                    | NA                     |
| <i>Desi_wild_7256</i> | NA                                  | <i>Ca_desi_scaffold</i> | 7256                    | T/C  | NA                 | INTERGENIC                    | NA                     |
| <i>Desi_wild_423</i>  | NA                                  | <i>Ca_desi_scaffold</i> | 423                     | G/A  | NA                 | INTERGENIC                    | NA                     |
| <i>Desi_wild_426</i>  | NA                                  | <i>Ca_desi_scaffold</i> | 426                     | A/T  | NA                 | INTERGENIC                    | NA                     |
| <i>Desi_wild_429</i>  | NA                                  | <i>Ca_desi_scaffold</i> | 429                     | T/C  | NA                 | INTERGENIC                    | NA                     |
| <i>Desi_wild_585</i>  | NA                                  | <i>Ca_desi_scaffold</i> | 585                     | G/A  | NA                 | INTERGENIC                    | NA                     |
| <i>Desi_wild_928</i>  | NA                                  | <i>Ca_desi_scaffold</i> | 928                     | T/C  | NA                 | INTERGENIC                    | NA                     |
| <i>Desi_wild_1085</i> | NA                                  | <i>Ca_desi_scaffold</i> | 1085                    | G/C  | NA                 | INTERGENIC                    | NA                     |
| <i>Desi_wild_4309</i> | NA                                  | <i>Ca_desi_scaffold</i> | 4309                    | G/A  | Gene_Ca_19871.1    | UPSTREAM                      | PRA1 family protein F2 |
| <i>Desi_wild_5381</i> | NA                                  | <i>Ca_desi_scaffold</i> | 5381                    | A/G  | Gene_Ca_19874.1    | NON_SYNONYMOUS_CODING         | Patatin-05             |
| <i>Desi_wild_5392</i> | NA                                  | <i>Ca_desi_scaffold</i> | 5392                    | A/T  | Gene_Ca_19874.1    | SYNONYMOUS_CODING             | Patatin-05             |
| <i>Desi_wild_5439</i> | NA                                  | <i>Ca_desi_scaffold</i> | 5439                    | A/C  | Gene_Ca_19874.1    | INTRON                        | Patatin-05             |
| <i>Desi_wild_3911</i> | NA                                  | <i>Ca_desi_scaffold</i> | 3911                    | G/T  | NA                 | INTERGENIC                    | NA                     |
| <i>Desi_wild_652</i>  | NA                                  | <i>Ca_desi_scaffold</i> | 652                     | G/A  | NA                 | INTERGENIC                    | NA                     |
| <i>Desi_wild_1644</i> | NA                                  | <i>Ca_desi_scaffold</i> | 1644                    | T/C  | NA                 | INTERGENIC                    | NA                     |
| <i>Desi_wild_1755</i> | NA                                  | <i>Ca_desi_scaffold</i> | 1755                    | C/T  | NA                 | INTERGENIC                    | NA                     |
| <i>Desi_wild_1805</i> | NA                                  | <i>Ca_desi_scaffold</i> | 1805                    | C/T  | NA                 | INTERGENIC                    | NA                     |

| SNP IDs               | NCBI dbSNP accession IDs (NCBI_SS#) | Chromosomes             | Physical positions (bp) | SNPs | Gene accession IDs | Sequence components of genome | Putative functions                              |
|-----------------------|-------------------------------------|-------------------------|-------------------------|------|--------------------|-------------------------------|-------------------------------------------------|
| <i>Desi_wild_3448</i> | NA                                  | <i>Ca_desi_scaffold</i> | 3448                    | C/G  | NA                 | INTERGENIC                    | NA                                              |
| <i>Desi_wild_829</i>  | NA                                  | <i>Ca_desi_scaffold</i> | 829                     | A/G  | NA                 | INTERGENIC                    | NA                                              |
| <i>Desi_wild_850</i>  | NA                                  | <i>Ca_desi_scaffold</i> | 850                     | G/A  | NA                 | INTERGENIC                    | NA                                              |
| <i>Desi_wild_6460</i> | NA                                  | <i>Ca_desi_scaffold</i> | 6460                    | G/A  | Gene_Ca_19886.3    | NON_SYNONYMOUS_CODING         | NA                                              |
| <i>Desi_wild_3335</i> | NA                                  | <i>Ca_desi_scaffold</i> | 3335                    | A/G  | Gene_Ca_19889.1    | NON_SYNONYMOUS_CODING         | Proline-rich receptor-like protein kinase PERK1 |
| <i>Desi_wild_3403</i> | NA                                  | <i>Ca_desi_scaffold</i> | 3403                    | C/T  | Gene_Ca_19889.1    | INTRON                        | Proline-rich receptor-like protein kinase PERK1 |
| <i>Desi_wild_3683</i> | NA                                  | <i>Ca_desi_scaffold</i> | 3683                    | G/A  | Gene_Ca_19889.1    | NON_SYNONYMOUS_CODING         | Proline-rich receptor-like protein kinase PERK1 |
| <i>Desi_wild_3692</i> | NA                                  | <i>Ca_desi_scaffold</i> | 3692                    | G/A  | Gene_Ca_19889.1    | NON_SYNONYMOUS_CODING         | Proline-rich receptor-like protein kinase PERK1 |
| <i>Desi_wild_7714</i> | NA                                  | <i>Ca_desi_scaffold</i> | 7714                    | C/A  | NA                 | INTERGENIC                    | NA                                              |
| <i>Desi_wild_7716</i> | NA                                  | <i>Ca_desi_scaffold</i> | 7716                    | T/G  | NA                 | INTERGENIC                    | NA                                              |
| <i>Desi_wild_7720</i> | NA                                  | <i>Ca_desi_scaffold</i> | 7720                    | C/A  | NA                 | INTERGENIC                    | NA                                              |
| <i>Desi_wild_7722</i> | NA                                  | <i>Ca_desi_scaffold</i> | 7722                    | A/G  | NA                 | INTERGENIC                    | NA                                              |
| <i>Desi_wild_7728</i> | NA                                  | <i>Ca_desi_scaffold</i> | 7728                    | C/A  | NA                 | INTERGENIC                    | NA                                              |
| <i>Desi_wild_2666</i> | NA                                  | <i>Ca_desi_scaffold</i> | 2666                    | C/T  | NA                 | INTERGENIC                    | NA                                              |
| <i>Desi_wild_2830</i> | NA                                  | <i>Ca_desi_scaffold</i> | 2830                    | C/T  | NA                 | INTERGENIC                    | NA                                              |
| <i>Desi_wild_3251</i> | NA                                  | <i>Ca_desi_scaffold</i> | 3251                    | T/C  | Gene_Ca_19902.1    | DOWNSTREAM                    | Eukaryotic translation initiation factor 1A     |
| <i>Desi_wild_7345</i> | NA                                  | <i>Ca_desi_scaffold</i> | 7345                    | A/G  | NA                 | INTERGENIC                    | NA                                              |
| <i>Desi_wild_7356</i> | NA                                  | <i>Ca_desi_scaffold</i> | 7356                    | A/G  | NA                 | INTERGENIC                    | NA                                              |
| <i>Desi_wild_7298</i> | NA                                  | <i>Ca_desi_scaffold</i> | 7298                    | T/C  | NA                 | INTERGENIC                    | NA                                              |
| <i>Desi_wild_51</i>   | NA                                  | <i>Ca_desi_scaffold</i> | 51                      | A/G  | NA                 | INTERGENIC                    | NA                                              |
| <i>Desi_wild_6269</i> | NA                                  | <i>Ca_desi_scaffold</i> | 6269                    | T/C  | NA                 | INTERGENIC                    | NA                                              |
| <i>Desi_wild_2948</i> | NA                                  | <i>Ca_desi_scaffold</i> | 2948                    | G/A  | NA                 | INTERGENIC                    | NA                                              |
| <i>Desi_wild_2972</i> | NA                                  | <i>Ca_desi_scaffold</i> | 2972                    | T/C  | NA                 | INTERGENIC                    | NA                                              |
| <i>Desi_wild_4158</i> | NA                                  | <i>Ca_desi_scaffold</i> | 4158                    | C/T  | Gene_Ca_19923.1    | INTRON                        | Protein of unknown function, DUF584             |
| <i>Desi_wild_4187</i> | NA                                  | <i>Ca_desi_scaffold</i> | 4187                    | C/T  | Gene_Ca_19923.1    | INTRON                        | Protein of unknown function, DUF584             |
| <i>Desi_wild_5367</i> | NA                                  | <i>Ca_desi_scaffold</i> | 5367                    | G/A  | Gene_Ca_19924.1    | UPSTREAM                      | S1 ribosomal protein                            |
| <i>Desi_wild_6813</i> | NA                                  | <i>Ca_desi_scaffold</i> | 6813                    | T/A  | NA                 | INTERGENIC                    | NA                                              |
| <i>Desi_wild_6822</i> | NA                                  | <i>Ca_desi_scaffold</i> | 6822                    | A/G  | NA                 | INTERGENIC                    | NA                                              |
| <i>Desi_wild_6829</i> | NA                                  | <i>Ca_desi_scaffold</i> | 6829                    | G/T  | NA                 | INTERGENIC                    | NA                                              |
| <i>Desi_wild_6851</i> | NA                                  | <i>Ca_desi_scaffold</i> | 6851                    | G/A  | NA                 | INTERGENIC                    | NA                                              |
| <i>Desi_wild_6357</i> | NA                                  | <i>Ca_desi_scaffold</i> | 6357                    | T/C  | NA                 | INTERGENIC                    | NA                                              |
| <i>Desi_wild_7292</i> | NA                                  | <i>Ca_desi_scaffold</i> | 7292                    | G/A  | NA                 | INTERGENIC                    | NA                                              |
| <i>Desi_wild_4344</i> | NA                                  | <i>Ca_desi_scaffold</i> | 4344                    | T/C  | NA                 | INTERGENIC                    | NA                                              |
| <i>Desi_wild_6053</i> | NA                                  | <i>Ca_desi_scaffold</i> | 6053                    | A/C  | NA                 | INTERGENIC                    | NA                                              |
| <i>Desi_wild_3844</i> | NA                                  | <i>Ca_desi_scaffold</i> | 3844                    | T/C  | Gene_Ca_19950.1    | SYNONYMOUS_CODING             | Endoglucanase 15                                |
| <i>Desi_wild_3900</i> | NA                                  | <i>Ca_desi_scaffold</i> | 3900                    | G/T  | Gene_Ca_19950.1    | NON_SYNONYMOUS_CODING         | Endoglucanase 15                                |
| <i>Desi_wild_3611</i> | NA                                  | <i>Ca_desi_scaffold</i> | 3611                    | G/T  | NA                 | INTERGENIC                    | NA                                              |
| <i>Desi_wild_3612</i> | NA                                  | <i>Ca_desi_scaffold</i> | 3612                    | G/C  | NA                 | INTERGENIC                    | NA                                              |
| <i>Desi_wild_3613</i> | NA                                  | <i>Ca_desi_scaffold</i> | 3613                    | G/T  | NA                 | INTERGENIC                    | NA                                              |
| <i>Desi_wild_4259</i> | NA                                  | <i>Ca_desi_scaffold</i> | 4259                    | C/A  | Gene_Ca_19952.1    | NON_SYNONYMOUS_CODING         | NADH-ubiquinone oxidoreductase chain 4          |
| <i>Desi_wild_4263</i> | NA                                  | <i>Ca_desi_scaffold</i> | 4263                    | C/T  | Gene_Ca_19952.1    | SYNONYMOUS_CODING             | NADH-ubiquinone oxidoreductase chain 4          |
| <i>Desi_wild_6059</i> | NA                                  | <i>Ca_desi_scaffold</i> | 6059                    | T/C  | Gene_Ca_19952.1    | DOWNSTREAM                    | NADH-ubiquinone oxidoreductase chain 4          |
| <i>Desi_wild_63</i>   | NA                                  | <i>Ca_desi_scaffold</i> | 63                      | T/C  | NA                 | INTERGENIC                    | NA                                              |
| <i>Desi_wild_4360</i> | NA                                  | <i>Ca_desi_scaffold</i> | 4360                    | T/G  | NA                 | INTERGENIC                    | NA                                              |

| SNP IDs               | NCBI dbSNP accession IDs (NCBI_SS#) | Chromosomes             | Physical positions (bp) | SNPs | Gene accession IDs | Sequence components of genome | Putative functions                      |
|-----------------------|-------------------------------------|-------------------------|-------------------------|------|--------------------|-------------------------------|-----------------------------------------|
| <i>Desi_wild_4837</i> | NA                                  | <i>Ca_desi_scaffold</i> | 4837                    | G/A  | Gene_Ca_19956.1    | UPSTREAM                      | Ribonuclease S3                         |
| <i>Desi_wild_6233</i> | NA                                  | <i>Ca_desi_scaffold</i> | 6233                    | T/C  | NA                 | INTERGENIC                    | NA                                      |
| <i>Desi_wild_6314</i> | NA                                  | <i>Ca_desi_scaffold</i> | 6314                    | T/A  | NA                 | INTERGENIC                    | NA                                      |
| <i>Desi_wild_6379</i> | NA                                  | <i>Ca_desi_scaffold</i> | 6379                    | T/G  | NA                 | INTERGENIC                    | NA                                      |
| <i>Desi_wild_3341</i> | NA                                  | <i>Ca_desi_scaffold</i> | 3341                    | A/C  | NA                 | INTERGENIC                    | NA                                      |
| <i>Desi_wild_3361</i> | NA                                  | <i>Ca_desi_scaffold</i> | 3361                    | T/C  | NA                 | INTERGENIC                    | NA                                      |
| <i>Desi_wild_4022</i> | NA                                  | <i>Ca_desi_scaffold</i> | 4022                    | T/C  | Gene_Ca_19960.1    | DOWNSTREAM                    | NA                                      |
| <i>Desi_wild_2091</i> | NA                                  | <i>Ca_desi_scaffold</i> | 2091                    | A/G  | NA                 | INTERGENIC                    | NA                                      |
| <i>Desi_wild_6507</i> | NA                                  | <i>Ca_desi_scaffold</i> | 6507                    | G/T  | NA                 | INTERGENIC                    | NA                                      |
| <i>Desi_wild_6511</i> | NA                                  | <i>Ca_desi_scaffold</i> | 6511                    | T/A  | NA                 | INTERGENIC                    | NA                                      |
| <i>Desi_wild_6521</i> | NA                                  | <i>Ca_desi_scaffold</i> | 6521                    | T/C  | NA                 | INTERGENIC                    | NA                                      |
| <i>Desi_wild_6577</i> | NA                                  | <i>Ca_desi_scaffold</i> | 6577                    | C/T  | NA                 | INTERGENIC                    | NA                                      |
| <i>Desi_wild_4182</i> | NA                                  | <i>Ca_desi_scaffold</i> | 4182                    | C/T  | Gene_Ca_19971.1    | UPSTREAM                      | NA                                      |
| <i>Desi_wild_4457</i> | NA                                  | <i>Ca_desi_scaffold</i> | 4457                    | G/A  | Gene_Ca_19971.1    | UPSTREAM                      | NA                                      |
| <i>Desi_wild_1930</i> | NA                                  | <i>Ca_desi_scaffold</i> | 1930                    | G/A  | Gene_Ca_19974.1    | DOWNSTREAM                    | glyoxal oxidase-related protein         |
| <i>Desi_wild_1968</i> | NA                                  | <i>Ca_desi_scaffold</i> | 1968                    | G/T  | Gene_Ca_19974.1    | DOWNSTREAM                    | glyoxal oxidase-related protein         |
| <i>Desi_wild_1969</i> | NA                                  | <i>Ca_desi_scaffold</i> | 1969                    | T/G  | Gene_Ca_19974.1    | DOWNSTREAM                    | glyoxal oxidase-related protein         |
| <i>Desi_wild_801</i>  | NA                                  | <i>Ca_desi_scaffold</i> | 801                     | C/A  | NA                 | INTERGENIC                    | NA                                      |
| <i>Desi_wild_1446</i> | NA                                  | <i>Ca_desi_scaffold</i> | 1446                    | T/C  | Gene_Ca_19979.1    | NON_SYNONYMOUS_CODING         | calmodulin-related                      |
| <i>Desi_wild_2239</i> | NA                                  | <i>Ca_desi_scaffold</i> | 2239                    | A/G  | NA                 | INTERGENIC                    | NA                                      |
| <i>Desi_wild_1683</i> | NA                                  | <i>Ca_desi_scaffold</i> | 1683                    | G/A  | Gene_Ca_19988.1    | INTRON                        | Naringenin,2-oxoglutarate 3-dioxygenase |
| <i>Desi_wild_2538</i> | NA                                  | <i>Ca_desi_scaffold</i> | 2538                    | G/A  | NA                 | INTERGENIC                    | NA                                      |
| <i>Desi_wild_5210</i> | NA                                  | <i>Ca_desi_scaffold</i> | 5210                    | T/C  | NA                 | INTERGENIC                    | NA                                      |
| <i>Desi_wild_5240</i> | NA                                  | <i>Ca_desi_scaffold</i> | 5240                    | G/A  | NA                 | INTERGENIC                    | NA                                      |
| <i>Desi_wild_6094</i> | NA                                  | <i>Ca_desi_scaffold</i> | 6094                    | T/C  | NA                 | INTERGENIC                    | NA                                      |
| <i>Desi_wild_2148</i> | NA                                  | <i>Ca_desi_scaffold</i> | 2148                    | A/G  | NA                 | INTERGENIC                    | NA                                      |
| <i>Desi_wild_3587</i> | NA                                  | <i>Ca_desi_scaffold</i> | 3587                    | T/C  | NA                 | INTERGENIC                    | NA                                      |
| <i>Desi_wild_1240</i> | NA                                  | <i>Ca_desi_scaffold</i> | 1240                    | T/A  | NA                 | INTERGENIC                    | NA                                      |
| <i>Desi_wild_1242</i> | NA                                  | <i>Ca_desi_scaffold</i> | 1242                    | T/G  | NA                 | INTERGENIC                    | NA                                      |
| <i>Desi_wild_1247</i> | NA                                  | <i>Ca_desi_scaffold</i> | 1247                    | G/A  | NA                 | INTERGENIC                    | NA                                      |
| <i>Desi_wild_916</i>  | NA                                  | <i>Ca_desi_scaffold</i> | 916                     | A/G  | NA                 | INTERGENIC                    | NA                                      |
| <i>Desi_wild_527</i>  | NA                                  | <i>Ca_desi_scaffold</i> | 527                     | C/T  | NA                 | INTERGENIC                    | NA                                      |
| <i>Desi_wild_588</i>  | NA                                  | <i>Ca_desi_scaffold</i> | 588                     | C/A  | NA                 | INTERGENIC                    | NA                                      |
| <i>Desi_wild_597</i>  | NA                                  | <i>Ca_desi_scaffold</i> | 597                     | G/A  | NA                 | INTERGENIC                    | NA                                      |
| <i>Desi_wild_5750</i> | NA                                  | <i>Ca_desi_scaffold</i> | 5750                    | T/C  | NA                 | INTERGENIC                    | NA                                      |
| <i>Desi_wild_513</i>  | NA                                  | <i>Ca_desi_scaffold</i> | 513                     | T/G  | NA                 | INTERGENIC                    | NA                                      |
| <i>Desi_wild_536</i>  | NA                                  | <i>Ca_desi_scaffold</i> | 536                     | A/T  | NA                 | INTERGENIC                    | NA                                      |
| <i>Desi_wild_541</i>  | NA                                  | <i>Ca_desi_scaffold</i> | 541                     | C/T  | NA                 | INTERGENIC                    | NA                                      |
| <i>Desi_wild_308</i>  | NA                                  | <i>Ca_desi_scaffold</i> | 308                     | A/C  | Gene_Ca_20007.1    | NON_SYNONYMOUS_CODING         | Peroxisomal membrane protein 13         |
| <i>Desi_wild_119</i>  | NA                                  | <i>Ca_desi_scaffold</i> | 119                     | G/A  | NA                 | INTERGENIC                    | NA                                      |
| <i>Desi_wild_6531</i> | NA                                  | <i>Ca_desi_scaffold</i> | 6531                    | A/C  | NA                 | INTERGENIC                    | NA                                      |
| <i>Desi_wild_5640</i> | NA                                  | <i>Ca_desi_scaffold</i> | 5640                    | T/C  | NA                 | INTERGENIC                    | NA                                      |
| <i>Desi_wild_1613</i> | NA                                  | <i>Ca_desi_scaffold</i> | 1613                    | A/T  | NA                 | INTERGENIC                    | NA                                      |
| <i>Desi_wild_303</i>  | NA                                  | <i>Ca_desi_scaffold</i> | 303                     | G/C  | NA                 | INTERGENIC                    | NA                                      |



| SNP IDs         | NCBI dbSNP accession IDs (NCBI_SS#) | Chromosomes      | Physical positions (bp) | SNPs | Gene accession IDs | Sequence components of genome | Putative functions                                                    |
|-----------------|-------------------------------------|------------------|-------------------------|------|--------------------|-------------------------------|-----------------------------------------------------------------------|
| Desi_wild_366   | NA                                  | Ca_desi_scaffold | 366                     | A/G  | NA                 | INTERGENIC                    | NA                                                                    |
| Desi_wild_2337  | NA                                  | Ca_desi_scaffold | 2337                    | C/A  | Gene_Ca_20017.1    | NON_SYNONYMOUS_CODING         | Histone-lysine N-methyltransferase ATX4                               |
| Desi_wild_2787  | NA                                  | Ca_desi_scaffold | 2787                    | A/C  | NA                 | INTERGENIC                    | NA                                                                    |
| Desi_wild_2846  | NA                                  | Ca_desi_scaffold | 2846                    | C/T  | NA                 | INTERGENIC                    | NA                                                                    |
| Desi_wild_2863  | NA                                  | Ca_desi_scaffold | 2863                    | A/C  | NA                 | INTERGENIC                    | NA                                                                    |
| Desi_wild_4999  | NA                                  | Ca_desi_scaffold | 4999                    | T/C  | NA                 | INTERGENIC                    | NA                                                                    |
| Desi_wild_5457  | NA                                  | Ca_desi_scaffold | 5457                    | G/A  | NA                 | INTERGENIC                    | NA                                                                    |
| Desi_wild_5964  | NA                                  | Ca_desi_scaffold | 5964                    | G/A  | NA                 | INTERGENIC                    | NA                                                                    |
| Desi_wild_62365 | NA                                  | Ca_desi_scaffold | 62365                   | C/A  | Gene_Ca_09665.1    | INTRON                        | DIS3-like exonuclease 2                                               |
| Desi_wild_64314 | NA                                  | Ca_desi_scaffold | 64314                   | A/G  | Gene_Ca_09665.1    | NON_SYNONYMOUS_CODING         | DIS3-like exonuclease 2                                               |
| Desi_wild_249   | NA                                  | Ca_desi_scaffold | 249                     | G/A  | NA                 | INTERGENIC                    | NA                                                                    |
| Desi_wild_282   | NA                                  | Ca_desi_scaffold | 282                     | C/T  | NA                 | INTERGENIC                    | NA                                                                    |
| Desi_wild_318   | NA                                  | Ca_desi_scaffold | 318                     | G/A  | NA                 | INTERGENIC                    | NA                                                                    |
| Desi_wild_329   | NA                                  | Ca_desi_scaffold | 329                     | G/A  | NA                 | INTERGENIC                    | NA                                                                    |
| Desi_wild_350   | NA                                  | Ca_desi_scaffold | 350                     | C/T  | NA                 | INTERGENIC                    | NA                                                                    |
| Desi_wild_5741  | NA                                  | Ca_desi_scaffold | 5741                    | G/A  | Gene_Ca_20029.1    | DOWNSTREAM                    | Probable cellulose synthase A catalytic subunit 8 [UDP-forming]       |
| Desi_wild_4864  | NA                                  | Ca_desi_scaffold | 4864                    | T/A  | Gene_Ca_20031.1    | INTRON                        | Predicted protein                                                     |
| Desi_wild_5497  | NA                                  | Ca_desi_scaffold | 5497                    | C/T  | NA                 | INTERGENIC                    | NA                                                                    |
| Desi_wild_5632  | NA                                  | Ca_desi_scaffold | 5632                    | G/C  | NA                 | INTERGENIC                    | NA                                                                    |
| Desi_wild_5694  | NA                                  | Ca_desi_scaffold | 5694                    | T/A  | NA                 | INTERGENIC                    | NA                                                                    |
| Desi_wild_738   | NA                                  | Ca_desi_scaffold | 738                     | G/T  | NA                 | INTERGENIC                    | NA                                                                    |
| Desi_wild_788   | NA                                  | Ca_desi_scaffold | 788                     | A/G  | NA                 | INTERGENIC                    | NA                                                                    |
| Desi_wild_792   | NA                                  | Ca_desi_scaffold | 792                     | C/T  | NA                 | INTERGENIC                    | NA                                                                    |
| Desi_wild_890   | NA                                  | Ca_desi_scaffold | 890                     | C/G  | NA                 | INTERGENIC                    | NA                                                                    |
| Desi_wild_6375  | NA                                  | Ca_desi_scaffold | 6375                    | T/A  | NA                 | INTERGENIC                    | NA                                                                    |
| Desi_wild_504   | NA                                  | Ca_desi_scaffold | 504                     | C/G  | NA                 | INTERGENIC                    | NA                                                                    |
| Desi_wild_510   | NA                                  | Ca_desi_scaffold | 510                     | A/G  | NA                 | INTERGENIC                    | NA                                                                    |
| Desi_wild_1213  | NA                                  | Ca_desi_scaffold | 1213                    | T/C  | NA                 | INTERGENIC                    | NA                                                                    |
| Desi_wild_1243  | NA                                  | Ca_desi_scaffold | 1243                    | C/A  | NA                 | INTERGENIC                    | NA                                                                    |
| Desi_wild_4710  | NA                                  | Ca_desi_scaffold | 4710                    | T/A  | NA                 | INTERGENIC                    | NA                                                                    |
| Desi_wild_4720  | NA                                  | Ca_desi_scaffold | 4720                    | G/A  | NA                 | INTERGENIC                    | NA                                                                    |
| Desi_wild_4721  | NA                                  | Ca_desi_scaffold | 4721                    | G/T  | NA                 | INTERGENIC                    | NA                                                                    |
| Desi_wild_4728  | NA                                  | Ca_desi_scaffold | 4728                    | G/T  | NA                 | INTERGENIC                    | NA                                                                    |
| Desi_wild_4731  | NA                                  | Ca_desi_scaffold | 4731                    | A/T  | NA                 | INTERGENIC                    | NA                                                                    |
| Desi_wild_4733  | NA                                  | Ca_desi_scaffold | 4733                    | C/G  | NA                 | INTERGENIC                    | NA                                                                    |
| Desi_wild_4741  | NA                                  | Ca_desi_scaffold | 4741                    | A/T  | NA                 | INTERGENIC                    | NA                                                                    |
| Desi_wild_4773  | NA                                  | Ca_desi_scaffold | 4773                    | A/G  | NA                 | INTERGENIC                    | NA                                                                    |
| Desi_wild_4779  | NA                                  | Ca_desi_scaffold | 4779                    | G/A  | NA                 | INTERGENIC                    | NA                                                                    |
| Desi_wild_606   | NA                                  | Ca_desi_scaffold | 606                     | T/C  | NA                 | INTERGENIC                    | NA                                                                    |
| Desi_wild_690   | NA                                  | Ca_desi_scaffold | 690                     | G/A  | NA                 | INTERGENIC                    | NA                                                                    |
| Desi_wild_2861  | NA                                  | Ca_desi_scaffold | 2861                    | A/G  | Gene_Ca_20070.1    | DOWNSTREAM                    | Primary amine oxidase                                                 |
| Desi_wild_4329  | NA                                  | Ca_desi_scaffold | 4329                    | C/A  | Gene_Ca_20087.1    | INTRON                        | Serine/threonine-protein kinase CTR1                                  |
| Desi_wild_2706  | NA                                  | Ca_desi_scaffold | 2706                    | A/G  | Gene_Ca_20091.1    | SYNONYMOUS_CODING             | Acyl-CoA N-acyltransferase with RING/FYVE/PHD-type zinc finger domain |
| Desi_wild_2709  | NA                                  | Ca_desi_scaffold | 2709                    | G/A  | Gene_Ca_20091.1    | SYNONYMOUS_CODING             | Acyl-CoA N-acyltransferase with RING/FYVE/PHD-type zinc finger domain |

| SNP IDs               | NCBI dbSNP accession IDs (NCBI_SS#) | Chromosomes             | Physical positions (bp) | SNPs | Gene accession IDs | Sequence components of genome | Putative functions                                                    |
|-----------------------|-------------------------------------|-------------------------|-------------------------|------|--------------------|-------------------------------|-----------------------------------------------------------------------|
| <i>Desi_wild_3447</i> | NA                                  | <i>Ca_desi_scaffold</i> | 3447                    | G/A  | Gene_Ca_20091.1    | INTRON                        | Acyl-CoA N-acyltransferase with RING/FYVE/PHD-type zinc finger domain |
| <i>Desi_wild_2031</i> | NA                                  | <i>Ca_desi_scaffold</i> | 2031                    | G/C  | Gene_Ca_20092.1    | INTRON                        | Vacuolar protein sorting-associated protein 35A                       |
| <i>Desi_wild_2035</i> | NA                                  | <i>Ca_desi_scaffold</i> | 2035                    | G/A  | Gene_Ca_20092.1    | INTRON                        | Vacuolar protein sorting-associated protein 35A                       |
| <i>Desi_wild_2041</i> | NA                                  | <i>Ca_desi_scaffold</i> | 2041                    | T/C  | Gene_Ca_20092.1    | INTRON                        | Vacuolar protein sorting-associated protein 35A                       |
| <i>Desi_wild_2968</i> | NA                                  | <i>Ca_desi_scaffold</i> | 2968                    | A/G  | Gene_Ca_20092.1    | SYNONYMOUS_CODING             | Vacuolar protein sorting-associated protein 35A                       |
| <i>Desi_wild_3008</i> | NA                                  | <i>Ca_desi_scaffold</i> | 3008                    | A/C  | Gene_Ca_20092.1    | INTRON                        | Vacuolar protein sorting-associated protein 35A                       |
| <i>Desi_wild_78</i>   | NA                                  | <i>Ca_desi_scaffold</i> | 78                      | G/A  | NA                 | INTERGENIC                    | NA                                                                    |
| <i>Desi_wild_104</i>  | NA                                  | <i>Ca_desi_scaffold</i> | 104                     | C/T  | NA                 | INTERGENIC                    | NA                                                                    |
| <i>Desi_wild_4743</i> | NA                                  | <i>Ca_desi_scaffold</i> | 4743                    | A/C  | Gene_Ca_20095.1    | SYNONYMOUS_CODING             | Pachytene checkpoint protein 2 homolog                                |
| <i>Desi_wild_1841</i> | NA                                  | <i>Ca_desi_scaffold</i> | 1841                    | T/G  | NA                 | INTERGENIC                    | NA                                                                    |
| <i>Desi_wild_1931</i> | NA                                  | <i>Ca_desi_scaffold</i> | 1931                    | T/C  | Gene_Ca_20111.1    | SYNONYMOUS_CODING             | Aspartic proteinase nepenthesin-1                                     |
| <i>Desi_wild_1971</i> | NA                                  | <i>Ca_desi_scaffold</i> | 1971                    | C/T  | Gene_Ca_20111.1    | NON_SYNONYMOUS_CODING         | Aspartic proteinase nepenthesin-1                                     |
| <i>Desi_wild_2280</i> | NA                                  | <i>Ca_desi_scaffold</i> | 2280                    | C/G  | NA                 | INTERGENIC                    | NA                                                                    |
| <i>Desi_wild_4547</i> | NA                                  | <i>Ca_desi_scaffold</i> | 4547                    | G/A  | NA                 | INTERGENIC                    | NA                                                                    |
| <i>Desi_wild_4628</i> | NA                                  | <i>Ca_desi_scaffold</i> | 4628                    | T/C  | NA                 | INTERGENIC                    | NA                                                                    |
| <i>Desi_wild_5727</i> | NA                                  | <i>Ca_desi_scaffold</i> | 5727                    | G/T  | NA                 | INTERGENIC                    | NA                                                                    |
| <i>Desi_wild_5729</i> | NA                                  | <i>Ca_desi_scaffold</i> | 5729                    | G/C  | NA                 | INTERGENIC                    | NA                                                                    |
| <i>Desi_wild_5748</i> | NA                                  | <i>Ca_desi_scaffold</i> | 5748                    | T/A  | Gene_Ca_20112.1    | SYNONYMOUS_CODING             | NA                                                                    |
| <i>Desi_wild_5754</i> | NA                                  | <i>Ca_desi_scaffold</i> | 5754                    | A/C  | Gene_Ca_20112.1    | NON_SYNONYMOUS_CODING         | NA                                                                    |
| <i>Desi_wild_5784</i> | NA                                  | <i>Ca_desi_scaffold</i> | 5784                    | C/A  | Gene_Ca_20112.1    | NON_SYNONYMOUS_CODING         | NA                                                                    |
| <i>Desi_wild_5785</i> | NA                                  | <i>Ca_desi_scaffold</i> | 5785                    | G/A  | Gene_Ca_20112.1    | SYNONYMOUS_CODING             | NA                                                                    |
| <i>Desi_wild_5795</i> | NA                                  | <i>Ca_desi_scaffold</i> | 5795                    | A/T  | Gene_Ca_20112.1    | NON_SYNONYMOUS_CODING         | NA                                                                    |
| <i>Desi_wild_5945</i> | NA                                  | <i>Ca_desi_scaffold</i> | 5945                    | C/A  | Gene_Ca_20112.1    | SYNONYMOUS_CODING             | NA                                                                    |
| <i>Desi_wild_6019</i> | NA                                  | <i>Ca_desi_scaffold</i> | 6019                    | G/A  | Gene_Ca_20112.1    | NON_SYNONYMOUS_CODING         | NA                                                                    |
| <i>Desi_wild_2545</i> | NA                                  | <i>Ca_desi_scaffold</i> | 2545                    | T/C  | NA                 | INTERGENIC                    | NA                                                                    |
| <i>Desi_wild_3119</i> | NA                                  | <i>Ca_desi_scaffold</i> | 3119                    | T/C  | NA                 | INTERGENIC                    | NA                                                                    |
| <i>Desi_wild_3408</i> | NA                                  | <i>Ca_desi_scaffold</i> | 3408                    | T/G  | NA                 | INTERGENIC                    | NA                                                                    |
| <i>Desi_wild_3478</i> | NA                                  | <i>Ca_desi_scaffold</i> | 3478                    | T/A  | NA                 | INTERGENIC                    | NA                                                                    |
| <i>Desi_wild_2495</i> | NA                                  | <i>Ca_desi_scaffold</i> | 2495                    | A/C  | Gene_Ca_20130.1    | NON_SYNONYMOUS_CODING         | Probable ATP-dependent RNA helicase DHX36                             |
| <i>Desi_wild_3316</i> | NA                                  | <i>Ca_desi_scaffold</i> | 3316                    | T/C  | Gene_Ca_20130.1    | SYNONYMOUS_CODING             | Probable ATP-dependent RNA helicase DHX36                             |
| <i>Desi_wild_498</i>  | NA                                  | <i>Ca_desi_scaffold</i> | 498                     | G/A  | NA                 | INTERGENIC                    | NA                                                                    |
| <i>Desi_wild_3969</i> | NA                                  | <i>Ca_desi_scaffold</i> | 3969                    | T/C  | Gene_Ca_20136.1    | UPSTREAM                      | Probable acyl-activating enzyme 18, peroxisomal                       |
| <i>Desi_wild_4169</i> | NA                                  | <i>Ca_desi_scaffold</i> | 4169                    | T/G  | Gene_Ca_20136.1    | NON_SYNONYMOUS_CODING         | Probable acyl-activating enzyme 18, peroxisomal                       |
| <i>Desi_wild_3100</i> | NA                                  | <i>Ca_desi_scaffold</i> | 3100                    | C/T  | NA                 | INTERGENIC                    | NA                                                                    |
| <i>Desi_wild_3110</i> | NA                                  | <i>Ca_desi_scaffold</i> | 3110                    | G/A  | NA                 | INTERGENIC                    | NA                                                                    |
| <i>Desi_wild_3113</i> | NA                                  | <i>Ca_desi_scaffold</i> | 3113                    | G/A  | NA                 | INTERGENIC                    | NA                                                                    |
| <i>Desi_wild_1466</i> | NA                                  | <i>Ca_desi_scaffold</i> | 1466                    | C/T  | NA                 | INTERGENIC                    | NA                                                                    |
| <i>Desi_wild_1499</i> | NA                                  | <i>Ca_desi_scaffold</i> | 1499                    | T/C  | NA                 | INTERGENIC                    | NA                                                                    |
| <i>Desi_wild_5791</i> | NA                                  | <i>Ca_desi_scaffold</i> | 5791                    | T/A  | NA                 | INTERGENIC                    | NA                                                                    |
| <i>Desi_wild_5793</i> | NA                                  | <i>Ca_desi_scaffold</i> | 5793                    | A/G  | NA                 | INTERGENIC                    | NA                                                                    |
| <i>Desi_wild_5815</i> | NA                                  | <i>Ca_desi_scaffold</i> | 5815                    | C/T  | NA                 | INTERGENIC                    | NA                                                                    |
| <i>Desi_wild_5831</i> | NA                                  | <i>Ca_desi_scaffold</i> | 5831                    | G/A  | NA                 | INTERGENIC                    | NA                                                                    |
| <i>Desi_wild_2032</i> | NA                                  | <i>Ca_desi_scaffold</i> | 2032                    | G/A  | NA                 | INTERGENIC                    | NA                                                                    |
| <i>Desi_wild_2457</i> | NA                                  | <i>Ca_desi_scaffold</i> | 2457                    | G/A  | Gene_Ca_20155.1    | NON_SYNONYMOUS_CODING         | Basic 7S globulin 2                                                   |

| SNP IDs         | NCBI dbSNP accession IDs (NCBI_SS#) | Chromosomes      | Physical positions (bp) | SNPs | Gene accession IDs | Sequence components of genome | Putative functions                                                                   |
|-----------------|-------------------------------------|------------------|-------------------------|------|--------------------|-------------------------------|--------------------------------------------------------------------------------------|
| Desi_wild_2481  | NA                                  | Ca_desi_scaffold | 2481                    | A/C  | Gene_Ca_20155.1    | UPSTREAM                      | Basic 7S globulin 2                                                                  |
| Desi_wild_2101  | NA                                  | Ca_desi_scaffold | 2101                    | T/C  | NA                 | INTERGENIC                    | NA                                                                                   |
| Desi_wild_4556  | NA                                  | Ca_desi_scaffold | 4556                    | T/C  | Gene_Ca_20173.1    | SYNONYMOUS_CODING             | Serine/threonine-protein kinase ATM                                                  |
| Desi_wild_2438  | NA                                  | Ca_desi_scaffold | 2438                    | A/C  | Gene_Ca_20177.1    | NON_SYNONYMOUS_CODING         | Ankyrin repeat-containing protein At5g02620                                          |
| Desi_wild_2494  | NA                                  | Ca_desi_scaffold | 2494                    | C/G  | Gene_Ca_20177.1    | SYNONYMOUS_CODING             | Ankyrin repeat-containing protein At5g02620                                          |
| Desi_wild_2738  | NA                                  | Ca_desi_scaffold | 2738                    | A/G  | Gene_Ca_20177.1    | SYNONYMOUS_CODING             | Ankyrin repeat-containing protein At5g02620                                          |
| Desi_wild_2815  | NA                                  | Ca_desi_scaffold | 2815                    | C/G  | Gene_Ca_20177.1    | NON_SYNONYMOUS_CODING         | Ankyrin repeat-containing protein At5g02620                                          |
| Desi_wild_2824  | NA                                  | Ca_desi_scaffold | 2824                    | C/T  | Gene_Ca_20177.1    | NON_SYNONYMOUS_CODING         | Ankyrin repeat-containing protein At5g02620                                          |
| Desi_wild_1647  | NA                                  | Ca_desi_scaffold | 1647                    | T/G  | NA                 | INTERGENIC                    | NA                                                                                   |
| Desi_wild_4408  | NA                                  | Ca_desi_scaffold | 4408                    | G/T  | Gene_Ca_20184.1    | NON_SYNONYMOUS_CODING         | tubulin folding cofactor E / Pflifferling (PFI)                                      |
| Desi_wild_21159 | NA                                  | Ca_desi_scaffold | 21159                   | T/C  | NA                 | INTERGENIC                    | NA                                                                                   |
| Desi_wild_21173 | NA                                  | Ca_desi_scaffold | 21173                   | G/A  | NA                 | INTERGENIC                    | NA                                                                                   |
| Desi_wild_21184 | NA                                  | Ca_desi_scaffold | 21184                   | T/C  | NA                 | INTERGENIC                    | NA                                                                                   |
| Desi_wild_21203 | NA                                  | Ca_desi_scaffold | 21203                   | C/T  | NA                 | INTERGENIC                    | NA                                                                                   |
| Desi_wild_1543  | NA                                  | Ca_desi_scaffold | 1543                    | C/G  | NA                 | INTERGENIC                    | NA                                                                                   |
| Desi_wild_1568  | NA                                  | Ca_desi_scaffold | 1568                    | C/G  | NA                 | INTERGENIC                    | NA                                                                                   |
| Desi_wild_1934  | NA                                  | Ca_desi_scaffold | 1934                    | C/T  | Gene_Ca_20204.1    | INTRON                        | CONTAINS InterPro DOMAIN/s: Uncharacterised conserved protein UCP022260 (InterPro:IF |
| Desi_wild_190   | NA                                  | Ca_desi_scaffold | 190                     | A/G  | NA                 | INTERGENIC                    | NA                                                                                   |
| Desi_wild_512   | NA                                  | Ca_desi_scaffold | 512                     | G/A  | NA                 | INTERGENIC                    | NA                                                                                   |
| Desi_wild_522   | NA                                  | Ca_desi_scaffold | 522                     | G/A  | NA                 | INTERGENIC                    | NA                                                                                   |
| Desi_wild_4239  | NA                                  | Ca_desi_scaffold | 4239                    | T/C  | NA                 | INTERGENIC                    | NA                                                                                   |
| Desi_wild_575   | NA                                  | Ca_desi_scaffold | 575                     | C/T  | NA                 | INTERGENIC                    | NA                                                                                   |
| Desi_wild_577   | NA                                  | Ca_desi_scaffold | 577                     | T/C  | NA                 | INTERGENIC                    | NA                                                                                   |
| Desi_wild_296   | NA                                  | Ca_desi_scaffold | 296                     | G/A  | NA                 | INTERGENIC                    | NA                                                                                   |
| Desi_wild_361   | NA                                  | Ca_desi_scaffold | 361                     | C/T  | NA                 | INTERGENIC                    | NA                                                                                   |
| Desi_wild_3922  | NA                                  | Ca_desi_scaffold | 3922                    | C/A  | NA                 | INTERGENIC                    | NA                                                                                   |
| Desi_wild_1599  | NA                                  | Ca_desi_scaffold | 1599                    | G/A  | NA                 | INTERGENIC                    | NA                                                                                   |
| Desi_wild_1607  | NA                                  | Ca_desi_scaffold | 1607                    | T/G  | NA                 | INTERGENIC                    | NA                                                                                   |
| Desi_wild_2660  | NA                                  | Ca_desi_scaffold | 2660                    | A/T  | NA                 | INTERGENIC                    | NA                                                                                   |
| Desi_wild_2663  | NA                                  | Ca_desi_scaffold | 2663                    | A/G  | NA                 | INTERGENIC                    | NA                                                                                   |
| Desi_wild_2665  | NA                                  | Ca_desi_scaffold | 2665                    | G/A  | NA                 | INTERGENIC                    | NA                                                                                   |
| Desi_wild_2675  | NA                                  | Ca_desi_scaffold | 2675                    | T/G  | NA                 | INTERGENIC                    | NA                                                                                   |
| Desi_wild_2676  | NA                                  | Ca_desi_scaffold | 2676                    | C/G  | NA                 | INTERGENIC                    | NA                                                                                   |
| Desi_wild_2705  | NA                                  | Ca_desi_scaffold | 2705                    | C/T  | NA                 | INTERGENIC                    | NA                                                                                   |
| Desi_wild_2727  | NA                                  | Ca_desi_scaffold | 2727                    | G/T  | NA                 | INTERGENIC                    | NA                                                                                   |
| Desi_wild_2729  | NA                                  | Ca_desi_scaffold | 2729                    | A/T  | NA                 | INTERGENIC                    | NA                                                                                   |
| Desi_wild_2731  | NA                                  | Ca_desi_scaffold | 2731                    | C/A  | NA                 | INTERGENIC                    | NA                                                                                   |
| Desi_wild_2732  | NA                                  | Ca_desi_scaffold | 2732                    | A/T  | NA                 | INTERGENIC                    | NA                                                                                   |
| Desi_wild_1941  | NA                                  | Ca_desi_scaffold | 1941                    | A/G  | NA                 | INTERGENIC                    | NA                                                                                   |
| Desi_wild_1960  | NA                                  | Ca_desi_scaffold | 1960                    | A/G  | NA                 | INTERGENIC                    | NA                                                                                   |
| Desi_wild_1976  | NA                                  | Ca_desi_scaffold | 1976                    | T/A  | NA                 | INTERGENIC                    | NA                                                                                   |
| Desi_wild_3029  | NA                                  | Ca_desi_scaffold | 3029                    | A/G  | NA                 | INTERGENIC                    | NA                                                                                   |
| Desi_wild_3036  | NA                                  | Ca_desi_scaffold | 3036                    | C/T  | NA                 | INTERGENIC                    | NA                                                                                   |
| Desi_wild_3045  | NA                                  | Ca_desi_scaffold | 3045                    | A/C  | NA                 | INTERGENIC                    | NA                                                                                   |

| SNP IDs                | NCBI dbSNP accession IDs (NCBI_SS#) | Chromosomes             | Physical positions (bp) | SNPs | Gene accession IDs | Sequence components of genome | Putative functions                                               |
|------------------------|-------------------------------------|-------------------------|-------------------------|------|--------------------|-------------------------------|------------------------------------------------------------------|
| <i>Desi_wild_3048</i>  | NA                                  | <i>Ca_desi_scaffold</i> | 3048                    | A/C  | NA                 | INTERGENIC                    | NA                                                               |
| <i>Desi_wild_3033</i>  | NA                                  | <i>Ca_desi_scaffold</i> | 3033                    | G/C  | Gene_Ca_20229.1    | INTRON                        | Cytosolic endo-beta-N-acetylglucosaminidase                      |
| <i>Desi_wild_3034</i>  | NA                                  | <i>Ca_desi_scaffold</i> | 3034                    | A/G  | Gene_Ca_20229.1    | INTRON                        | Cytosolic endo-beta-N-acetylglucosaminidase                      |
| <i>Desi_wild_1653</i>  | NA                                  | <i>Ca_desi_scaffold</i> | 1653                    | G/A  | NA                 | INTERGENIC                    | NA                                                               |
| <i>Desi_wild_1661</i>  | NA                                  | <i>Ca_desi_scaffold</i> | 1661                    | A/C  | NA                 | INTERGENIC                    | NA                                                               |
| <i>Desi_wild_934</i>   | NA                                  | <i>Ca_desi_scaffold</i> | 934                     | T/G  | NA                 | INTERGENIC                    | NA                                                               |
| <i>Desi_wild_936</i>   | NA                                  | <i>Ca_desi_scaffold</i> | 936                     | C/T  | NA                 | INTERGENIC                    | NA                                                               |
| <i>Desi_wild_937</i>   | NA                                  | <i>Ca_desi_scaffold</i> | 937                     | C/T  | NA                 | INTERGENIC                    | NA                                                               |
| <i>Desi_wild_942</i>   | NA                                  | <i>Ca_desi_scaffold</i> | 942                     | T/C  | NA                 | INTERGENIC                    | NA                                                               |
| <i>Desi_wild_959</i>   | NA                                  | <i>Ca_desi_scaffold</i> | 959                     | C/T  | NA                 | INTERGENIC                    | NA                                                               |
| <i>Desi_wild_981</i>   | NA                                  | <i>Ca_desi_scaffold</i> | 981                     | T/A  | NA                 | INTERGENIC                    | NA                                                               |
| <i>Desi_wild_986</i>   | NA                                  | <i>Ca_desi_scaffold</i> | 986                     | T/C  | NA                 | INTERGENIC                    | NA                                                               |
| <i>Desi_wild_989</i>   | NA                                  | <i>Ca_desi_scaffold</i> | 989                     | A/G  | NA                 | INTERGENIC                    | NA                                                               |
| <i>Desi_wild_1910</i>  | NA                                  | <i>Ca_desi_scaffold</i> | 1910                    | A/T  | NA                 | INTERGENIC                    | NA                                                               |
| <i>Desi_wild_17233</i> | NA                                  | <i>Ca_desi_scaffold</i> | 17233                   | A/C  | Gene_Ca_10002.1    | SYNONYMOUS_CODING             | CTP synthase                                                     |
| <i>Desi_wild_56292</i> | NA                                  | <i>Ca_desi_scaffold</i> | 56292                   | C/G  | Gene_Ca_10003.3    | INTRON                        | ABC transporter D family member 2, chloroplastic                 |
| <i>Desi_wild_422</i>   | NA                                  | <i>Ca_desi_scaffold</i> | 422                     | C/A  | NA                 | INTERGENIC                    | NA                                                               |
| <i>Desi_wild_431</i>   | NA                                  | <i>Ca_desi_scaffold</i> | 431                     | A/G  | NA                 | INTERGENIC                    | NA                                                               |
| <i>Desi_wild_433</i>   | NA                                  | <i>Ca_desi_scaffold</i> | 433                     | T/A  | NA                 | INTERGENIC                    | NA                                                               |
| <i>Desi_wild_675</i>   | NA                                  | <i>Ca_desi_scaffold</i> | 675                     | C/G  | NA                 | INTERGENIC                    | NA                                                               |
| <i>Desi_wild_701</i>   | NA                                  | <i>Ca_desi_scaffold</i> | 701                     | A/G  | NA                 | INTERGENIC                    | NA                                                               |
| <i>Desi_wild_1459</i>  | NA                                  | <i>Ca_desi_scaffold</i> | 1459                    | C/G  | Gene_Ca_20259.1    | INTRON                        | GDSL esterase/lipase At5g55050                                   |
| <i>Desi_wild_387</i>   | NA                                  | <i>Ca_desi_scaffold</i> | 387                     | C/A  | Gene_Ca_20260.1    | UPSTREAM                      | Putative cytochrome c biogenesis ccmF-like mitochondrial protein |
| <i>Desi_wild_388</i>   | NA                                  | <i>Ca_desi_scaffold</i> | 388                     | G/A  | Gene_Ca_20260.1    | UPSTREAM                      | Putative cytochrome c biogenesis ccmF-like mitochondrial protein |
| <i>Desi_wild_390</i>   | NA                                  | <i>Ca_desi_scaffold</i> | 390                     | A/C  | Gene_Ca_20260.1    | UPSTREAM                      | Putative cytochrome c biogenesis ccmF-like mitochondrial protein |
| <i>Desi_wild_3796</i>  | NA                                  | <i>Ca_desi_scaffold</i> | 3796                    | T/A  | Gene_Ca_20260.1    | INTRON                        | Putative cytochrome c biogenesis ccmF-like mitochondrial protein |
| <i>Desi_wild_1183</i>  | NA                                  | <i>Ca_desi_scaffold</i> | 1183                    | C/A  | NA                 | INTERGENIC                    | NA                                                               |
| <i>Desi_wild_1184</i>  | NA                                  | <i>Ca_desi_scaffold</i> | 1184                    | G/T  | NA                 | INTERGENIC                    | NA                                                               |
| <i>Desi_wild_3332</i>  | NA                                  | <i>Ca_desi_scaffold</i> | 3332                    | C/G  | NA                 | INTERGENIC                    | NA                                                               |
| <i>Desi_wild_3380</i>  | NA                                  | <i>Ca_desi_scaffold</i> | 3380                    | G/A  | NA                 | INTERGENIC                    | NA                                                               |
| <i>Desi_wild_3429</i>  | NA                                  | <i>Ca_desi_scaffold</i> | 3429                    | G/T  | NA                 | INTERGENIC                    | NA                                                               |
| <i>Desi_wild_3535</i>  | NA                                  | <i>Ca_desi_scaffold</i> | 3535                    | G/A  | NA                 | INTERGENIC                    | NA                                                               |
| <i>Desi_wild_3536</i>  | NA                                  | <i>Ca_desi_scaffold</i> | 3536                    | C/T  | NA                 | INTERGENIC                    | NA                                                               |
| <i>Desi_wild_3560</i>  | NA                                  | <i>Ca_desi_scaffold</i> | 3560                    | G/A  | NA                 | INTERGENIC                    | NA                                                               |
| <i>Desi_wild_3580</i>  | NA                                  | <i>Ca_desi_scaffold</i> | 3580                    | C/T  | NA                 | INTERGENIC                    | NA                                                               |
| <i>Desi_wild_3621</i>  | NA                                  | <i>Ca_desi_scaffold</i> | 3621                    | C/T  | NA                 | INTERGENIC                    | NA                                                               |
| <i>Desi_wild_3624</i>  | NA                                  | <i>Ca_desi_scaffold</i> | 3624                    | A/T  | NA                 | INTERGENIC                    | NA                                                               |
| <i>Desi_wild_3627</i>  | NA                                  | <i>Ca_desi_scaffold</i> | 3627                    | T/C  | NA                 | INTERGENIC                    | NA                                                               |
| <i>Desi_wild_3643</i>  | NA                                  | <i>Ca_desi_scaffold</i> | 3643                    | C/T  | NA                 | INTERGENIC                    | NA                                                               |
| <i>Desi_wild_3695</i>  | NA                                  | <i>Ca_desi_scaffold</i> | 3695                    | C/T  | NA                 | INTERGENIC                    | NA                                                               |
| <i>Desi_wild_3713</i>  | NA                                  | <i>Ca_desi_scaffold</i> | 3713                    | G/T  | NA                 | INTERGENIC                    | NA                                                               |
| <i>Desi_wild_3714</i>  | NA                                  | <i>Ca_desi_scaffold</i> | 3714                    | T/C  | NA                 | INTERGENIC                    | NA                                                               |
| <i>Desi_wild_3741</i>  | NA                                  | <i>Ca_desi_scaffold</i> | 3741                    | C/T  | NA                 | INTERGENIC                    | NA                                                               |
| <i>Desi_wild_3762</i>  | NA                                  | <i>Ca_desi_scaffold</i> | 3762                    | T/A  | NA                 | INTERGENIC                    | NA                                                               |

| SNP IDs               | NCBI dbSNP accession IDs (NCBI_SS#) | Chromosomes             | Physical positions (bp) | SNPs | Gene accession IDs | Sequence components of genome | Putative functions                                                   |
|-----------------------|-------------------------------------|-------------------------|-------------------------|------|--------------------|-------------------------------|----------------------------------------------------------------------|
| <i>Desi_wild_2142</i> | NA                                  | <i>Ca_desi_scaffold</i> | 2142                    | A/C  | Gene_Ca_20269.1    | INTRON                        | AP-1 complex subunit gamma-2                                         |
| <i>Desi_wild_2263</i> | NA                                  | <i>Ca_desi_scaffold</i> | 2263                    | A/C  | Gene_Ca_20269.1    | INTRON                        | AP-1 complex subunit gamma-2                                         |
| <i>Desi_wild_2266</i> | NA                                  | <i>Ca_desi_scaffold</i> | 2266                    | A/C  | Gene_Ca_20269.1    | INTRON                        | AP-1 complex subunit gamma-2                                         |
| <i>Desi_wild_2273</i> | NA                                  | <i>Ca_desi_scaffold</i> | 2273                    | A/C  | Gene_Ca_20269.1    | INTRON                        | AP-1 complex subunit gamma-2                                         |
| <i>Desi_wild_2279</i> | NA                                  | <i>Ca_desi_scaffold</i> | 2279                    | C/T  | Gene_Ca_20269.1    | INTRON                        | AP-1 complex subunit gamma-2                                         |
| <i>Desi_wild_2283</i> | NA                                  | <i>Ca_desi_scaffold</i> | 2283                    | C/T  | Gene_Ca_20269.1    | INTRON                        | AP-1 complex subunit gamma-2                                         |
| <i>Desi_wild_3720</i> | NA                                  | <i>Ca_desi_scaffold</i> | 3720                    | T/A  | NA                 | INTERGENIC                    | NA                                                                   |
| <i>Desi_wild_3774</i> | NA                                  | <i>Ca_desi_scaffold</i> | 3774                    | T/C  | NA                 | INTERGENIC                    | NA                                                                   |
| <i>Desi_wild_4934</i> | NA                                  | <i>Ca_desi_scaffold</i> | 4934                    | T/C  | NA                 | INTERGENIC                    | NA                                                                   |
| <i>Desi_wild_4938</i> | NA                                  | <i>Ca_desi_scaffold</i> | 4938                    | T/A  | NA                 | INTERGENIC                    | NA                                                                   |
| <i>Desi_wild_763</i>  | NA                                  | <i>Ca_desi_scaffold</i> | 763                     | C/T  | NA                 | INTERGENIC                    | NA                                                                   |
| <i>Desi_wild_1042</i> | NA                                  | <i>Ca_desi_scaffold</i> | 1042                    | A/G  | Gene_Ca_20274.1    | INTRON                        | ARM repeat superfamily protein                                       |
| <i>Desi_wild_1150</i> | NA                                  | <i>Ca_desi_scaffold</i> | 1150                    | A/G  | Gene_Ca_20274.1    | SYNONYMOUS_CODING             | ARM repeat superfamily protein                                       |
| <i>Desi_wild_1198</i> | NA                                  | <i>Ca_desi_scaffold</i> | 1198                    | A/T  | Gene_Ca_20274.1    | NON_SYNONYMOUS_CODING         | ARM repeat superfamily protein                                       |
| <i>Desi_wild_3878</i> | NA                                  | <i>Ca_desi_scaffold</i> | 3878                    | G/C  | NA                 | INTERGENIC                    | NA                                                                   |
| <i>Desi_wild_3918</i> | NA                                  | <i>Ca_desi_scaffold</i> | 3918                    | C/T  | NA                 | INTERGENIC                    | NA                                                                   |
| <i>Desi_wild_3926</i> | NA                                  | <i>Ca_desi_scaffold</i> | 3926                    | C/G  | NA                 | INTERGENIC                    | NA                                                                   |
| <i>Desi_wild_4115</i> | NA                                  | <i>Ca_desi_scaffold</i> | 4115                    | G/T  | NA                 | INTERGENIC                    | NA                                                                   |
| <i>Desi_wild_2417</i> | NA                                  | <i>Ca_desi_scaffold</i> | 2417                    | A/T  | NA                 | INTERGENIC                    | NA                                                                   |
| <i>Desi_wild_2460</i> | NA                                  | <i>Ca_desi_scaffold</i> | 2460                    | A/T  | NA                 | INTERGENIC                    | NA                                                                   |
| <i>Desi_wild_344</i>  | NA                                  | <i>Ca_desi_scaffold</i> | 344                     | A/T  | NA                 | INTERGENIC                    | NA                                                                   |
| <i>Desi_wild_3405</i> | NA                                  | <i>Ca_desi_scaffold</i> | 3405                    | T/A  | NA                 | INTERGENIC                    | NA                                                                   |
| <i>Desi_wild_312</i>  | NA                                  | <i>Ca_desi_scaffold</i> | 312                     | A/T  | NA                 | INTERGENIC                    | NA                                                                   |
| <i>Desi_wild_4225</i> | NA                                  | <i>Ca_desi_scaffold</i> | 4225                    | G/A  | NA                 | INTERGENIC                    | NA                                                                   |
| <i>Desi_wild_4246</i> | NA                                  | <i>Ca_desi_scaffold</i> | 4246                    | G/A  | NA                 | INTERGENIC                    | NA                                                                   |
| <i>Desi_wild_4607</i> | NA                                  | <i>Ca_desi_scaffold</i> | 4607                    | C/T  | NA                 | INTERGENIC                    | NA                                                                   |
| <i>Desi_wild_4610</i> | NA                                  | <i>Ca_desi_scaffold</i> | 4610                    | T/G  | NA                 | INTERGENIC                    | NA                                                                   |
| <i>Desi_wild_4614</i> | NA                                  | <i>Ca_desi_scaffold</i> | 4614                    | G/A  | NA                 | INTERGENIC                    | NA                                                                   |
| <i>Desi_wild_596</i>  | NA                                  | <i>Ca_desi_scaffold</i> | 596                     | T/G  | NA                 | INTERGENIC                    | NA                                                                   |
| <i>Desi_wild_646</i>  | NA                                  | <i>Ca_desi_scaffold</i> | 646                     | T/C  | NA                 | INTERGENIC                    | NA                                                                   |
| <i>Desi_wild_679</i>  | NA                                  | <i>Ca_desi_scaffold</i> | 679                     | G/A  | NA                 | INTERGENIC                    | NA                                                                   |
| <i>Desi_wild_681</i>  | NA                                  | <i>Ca_desi_scaffold</i> | 681                     | A/G  | NA                 | INTERGENIC                    | NA                                                                   |
| <i>Desi_wild_692</i>  | NA                                  | <i>Ca_desi_scaffold</i> | 692                     | G/A  | NA                 | INTERGENIC                    | NA                                                                   |
| <i>Desi_wild_721</i>  | NA                                  | <i>Ca_desi_scaffold</i> | 721                     | G/A  | NA                 | INTERGENIC                    | NA                                                                   |
| <i>Desi_wild_356</i>  | NA                                  | <i>Ca_desi_scaffold</i> | 356                     | T/C  | NA                 | INTERGENIC                    | NA                                                                   |
| <i>Desi_wild_410</i>  | NA                                  | <i>Ca_desi_scaffold</i> | 410                     | T/A  | Gene_Ca_20287.1    | DOWNSTREAM                    | Pentatricopeptide repeat-containing protein At4g35130, chloroplastic |
| <i>Desi_wild_1019</i> | NA                                  | <i>Ca_desi_scaffold</i> | 1019                    | A/T  | Gene_Ca_20287.1    | NON_SYNONYMOUS_CODING         | Pentatricopeptide repeat-containing protein At4g35130, chloroplastic |
| <i>Desi_wild_4001</i> | NA                                  | <i>Ca_desi_scaffold</i> | 4001                    | A/T  | NA                 | INTERGENIC                    | NA                                                                   |
| <i>Desi_wild_4035</i> | NA                                  | <i>Ca_desi_scaffold</i> | 4035                    | T/G  | NA                 | INTERGENIC                    | NA                                                                   |
| <i>Desi_wild_1084</i> | NA                                  | <i>Ca_desi_scaffold</i> | 1084                    | G/C  | NA                 | INTERGENIC                    | NA                                                                   |
| <i>Desi_wild_3122</i> | NA                                  | <i>Ca_desi_scaffold</i> | 3122                    | C/T  | NA                 | INTERGENIC                    | NA                                                                   |
| <i>Desi_wild_3134</i> | NA                                  | <i>Ca_desi_scaffold</i> | 3134                    | A/C  | NA                 | INTERGENIC                    | NA                                                                   |
| <i>Desi_wild_3142</i> | NA                                  | <i>Ca_desi_scaffold</i> | 3142                    | A/C  | NA                 | INTERGENIC                    | NA                                                                   |
| <i>Desi_wild_3163</i> | NA                                  | <i>Ca_desi_scaffold</i> | 3163                    | G/A  | NA                 | INTERGENIC                    | NA                                                                   |

| SNP IDs               | NCBI dbSNP accession IDs (NCBI_SS#) | Chromosomes             | Physical positions (bp) | SNPs | Gene accession IDs | Sequence components of genome | Putative functions                                  |
|-----------------------|-------------------------------------|-------------------------|-------------------------|------|--------------------|-------------------------------|-----------------------------------------------------|
| <i>Desi_wild_3496</i> | NA                                  | <i>Ca_desi_scaffold</i> | 3496                    | A/C  | NA                 | INTERGENIC                    | NA                                                  |
| <i>Desi_wild_1771</i> | NA                                  | <i>Ca_desi_scaffold</i> | 1771                    | T/C  | Gene_Ca_20302.1    | INTRON                        | Probable adenylate kinase 2, chloroplastic          |
| <i>Desi_wild_4114</i> | NA                                  | <i>Ca_desi_scaffold</i> | 4114                    | G/A  | NA                 | INTERGENIC                    | NA                                                  |
| <i>Desi_wild_4196</i> | NA                                  | <i>Ca_desi_scaffold</i> | 4196                    | G/A  | NA                 | INTERGENIC                    | NA                                                  |
| <i>Desi_wild_435</i>  | NA                                  | <i>Ca_desi_scaffold</i> | 435                     | C/T  | NA                 | INTERGENIC                    | NA                                                  |
| <i>Desi_wild_453</i>  | NA                                  | <i>Ca_desi_scaffold</i> | 453                     | G/A  | NA                 | INTERGENIC                    | NA                                                  |
| <i>Desi_wild_4468</i> | NA                                  | <i>Ca_desi_scaffold</i> | 4468                    | T/A  | Gene_Ca_20306.1    | DOWNSTREAM                    | Splicing regulatory glutamine/lysine-rich protein 1 |
| <i>Desi_wild_4197</i> | NA                                  | <i>Ca_desi_scaffold</i> | 4197                    | C/T  | NA                 | INTERGENIC                    | NA                                                  |
| <i>Desi_wild_2578</i> | NA                                  | <i>Ca_desi_scaffold</i> | 2578                    | A/G  | Gene_Ca_20308.1    | INTRON                        | Cysteine-rich PDZ-binding protein                   |
| <i>Desi_wild_2602</i> | NA                                  | <i>Ca_desi_scaffold</i> | 2602                    | C/T  | Gene_Ca_20308.1    | INTRON                        | Cysteine-rich PDZ-binding protein                   |
| <i>Desi_wild_3757</i> | NA                                  | <i>Ca_desi_scaffold</i> | 3757                    | G/T  | NA                 | INTERGENIC                    | NA                                                  |
| <i>Desi_wild_3761</i> | NA                                  | <i>Ca_desi_scaffold</i> | 3761                    | G/C  | NA                 | INTERGENIC                    | NA                                                  |
| <i>Desi_wild_3801</i> | NA                                  | <i>Ca_desi_scaffold</i> | 3801                    | G/A  | NA                 | INTERGENIC                    | NA                                                  |
| <i>Desi_wild_4525</i> | NA                                  | <i>Ca_desi_scaffold</i> | 4525                    | C/T  | NA                 | INTERGENIC                    | NA                                                  |
| <i>Desi_wild_4567</i> | NA                                  | <i>Ca_desi_scaffold</i> | 4567                    | C/T  | NA                 | INTERGENIC                    | NA                                                  |
| <i>Desi_wild_4599</i> | NA                                  | <i>Ca_desi_scaffold</i> | 4599                    | G/A  | NA                 | INTERGENIC                    | NA                                                  |
| <i>Desi_wild_3024</i> | NA                                  | <i>Ca_desi_scaffold</i> | 3024                    | G/A  | NA                 | INTERGENIC                    | NA                                                  |
| <i>Desi_wild_2271</i> | NA                                  | <i>Ca_desi_scaffold</i> | 2271                    | G/A  | NA                 | INTERGENIC                    | NA                                                  |
| <i>Desi_wild_4502</i> | NA                                  | <i>Ca_desi_scaffold</i> | 4502                    | T/C  | NA                 | INTERGENIC                    | NA                                                  |
| <i>Desi_wild_1257</i> | NA                                  | <i>Ca_desi_scaffold</i> | 1257                    | C/T  | NA                 | INTERGENIC                    | NA                                                  |
| <i>Desi_wild_376</i>  | NA                                  | <i>Ca_desi_scaffold</i> | 376                     | G/A  | NA                 | INTERGENIC                    | NA                                                  |
| <i>Desi_wild_424</i>  | NA                                  | <i>Ca_desi_scaffold</i> | 424                     | A/C  | NA                 | INTERGENIC                    | NA                                                  |
| <i>Desi_wild_432</i>  | NA                                  | <i>Ca_desi_scaffold</i> | 432                     | C/T  | NA                 | INTERGENIC                    | NA                                                  |
| <i>Desi_wild_437</i>  | NA                                  | <i>Ca_desi_scaffold</i> | 437                     | C/T  | NA                 | INTERGENIC                    | NA                                                  |
| <i>Desi_wild_438</i>  | NA                                  | <i>Ca_desi_scaffold</i> | 438                     | T/A  | NA                 | INTERGENIC                    | NA                                                  |
| <i>Desi_wild_477</i>  | NA                                  | <i>Ca_desi_scaffold</i> | 477                     | C/A  | NA                 | INTERGENIC                    | NA                                                  |
| <i>Desi_wild_1021</i> | NA                                  | <i>Ca_desi_scaffold</i> | 1021                    | G/A  | NA                 | INTERGENIC                    | NA                                                  |
| <i>Desi_wild_1024</i> | NA                                  | <i>Ca_desi_scaffold</i> | 1024                    | T/C  | NA                 | INTERGENIC                    | NA                                                  |
| <i>Desi_wild_123</i>  | NA                                  | <i>Ca_desi_scaffold</i> | 123                     | T/A  | NA                 | INTERGENIC                    | NA                                                  |
| <i>Desi_wild_140</i>  | NA                                  | <i>Ca_desi_scaffold</i> | 140                     | G/A  | NA                 | INTERGENIC                    | NA                                                  |
| <i>Desi_wild_148</i>  | NA                                  | <i>Ca_desi_scaffold</i> | 148                     | C/T  | NA                 | INTERGENIC                    | NA                                                  |
| <i>Desi_wild_187</i>  | NA                                  | <i>Ca_desi_scaffold</i> | 187                     | C/G  | NA                 | INTERGENIC                    | NA                                                  |
| <i>Desi_wild_215</i>  | NA                                  | <i>Ca_desi_scaffold</i> | 215                     | G/A  | NA                 | INTERGENIC                    | NA                                                  |
| <i>Desi_wild_2162</i> | NA                                  | <i>Ca_desi_scaffold</i> | 2162                    | T/G  | NA                 | INTERGENIC                    | NA                                                  |
| <i>Desi_wild_4172</i> | NA                                  | <i>Ca_desi_scaffold</i> | 4172                    | T/C  | NA                 | INTERGENIC                    | NA                                                  |
| <i>Desi_wild_3513</i> | NA                                  | <i>Ca_desi_scaffold</i> | 3513                    | G/A  | NA                 | INTERGENIC                    | NA                                                  |
| <i>Desi_wild_3529</i> | NA                                  | <i>Ca_desi_scaffold</i> | 3529                    | T/C  | NA                 | INTERGENIC                    | NA                                                  |
| <i>Desi_wild_3546</i> | NA                                  | <i>Ca_desi_scaffold</i> | 3546                    | G/A  | NA                 | INTERGENIC                    | NA                                                  |
| <i>Desi_wild_3548</i> | NA                                  | <i>Ca_desi_scaffold</i> | 3548                    | A/G  | NA                 | INTERGENIC                    | NA                                                  |
| <i>Desi_wild_3350</i> | NA                                  | <i>Ca_desi_scaffold</i> | 3350                    | C/A  | NA                 | INTERGENIC                    | NA                                                  |
| <i>Desi_wild_3351</i> | NA                                  | <i>Ca_desi_scaffold</i> | 3351                    | T/G  | NA                 | INTERGENIC                    | NA                                                  |
| <i>Desi_wild_3352</i> | NA                                  | <i>Ca_desi_scaffold</i> | 3352                    | A/C  | NA                 | INTERGENIC                    | NA                                                  |
| <i>Desi_wild_3353</i> | NA                                  | <i>Ca_desi_scaffold</i> | 3353                    | T/A  | NA                 | INTERGENIC                    | NA                                                  |
| <i>Desi_wild_3354</i> | NA                                  | <i>Ca_desi_scaffold</i> | 3354                    | C/T  | NA                 | INTERGENIC                    | NA                                                  |

| SNP IDs                 | NCBI dbSNP accession IDs (NCBI_SS#) | Chromosomes             | Physical positions (bp) | SNPs | Gene accession IDs | Sequence components of genome | Putative functions                            |
|-------------------------|-------------------------------------|-------------------------|-------------------------|------|--------------------|-------------------------------|-----------------------------------------------|
| <i>Desi_wild_4080</i>   | NA                                  | <i>Ca_desi_scaffold</i> | 4080                    | C/A  | NA                 | INTERGENIC                    | NA                                            |
| <i>Desi_wild_1157</i>   | NA                                  | <i>Ca_desi_scaffold</i> | 1157                    | C/A  | Gene_Ca_20341.1    | UPSTREAM                      | NA                                            |
| <i>Desi_wild_3659</i>   | NA                                  | <i>Ca_desi_scaffold</i> | 3659                    | A/C  | Gene_Ca_20341.1    | SYNONYMOUS_CODING             | NA                                            |
| <i>Desi_wild_3490</i>   | NA                                  | <i>Ca_desi_scaffold</i> | 3490                    | G/T  | NA                 | INTERGENIC                    | NA                                            |
| <i>Desi_wild_3527</i>   | NA                                  | <i>Ca_desi_scaffold</i> | 3527                    | C/A  | NA                 | INTERGENIC                    | NA                                            |
| <i>Desi_wild_3563</i>   | NA                                  | <i>Ca_desi_scaffold</i> | 3563                    | G/A  | NA                 | INTERGENIC                    | NA                                            |
| <i>Desi_wild_3569</i>   | NA                                  | <i>Ca_desi_scaffold</i> | 3569                    | G/A  | NA                 | INTERGENIC                    | NA                                            |
| <i>Desi_wild_3575</i>   | NA                                  | <i>Ca_desi_scaffold</i> | 3575                    | G/T  | NA                 | INTERGENIC                    | NA                                            |
| <i>Desi_wild_3615</i>   | NA                                  | <i>Ca_desi_scaffold</i> | 3615                    | G/C  | NA                 | INTERGENIC                    | NA                                            |
| <i>Desi_wild_3680</i>   | NA                                  | <i>Ca_desi_scaffold</i> | 3680                    | G/A  | NA                 | INTERGENIC                    | NA                                            |
| <i>Desi_wild_3777</i>   | NA                                  | <i>Ca_desi_scaffold</i> | 3777                    | G/T  | NA                 | INTERGENIC                    | NA                                            |
| <i>Desi_wild_36625</i>  | NA                                  | <i>Ca_desi_scaffold</i> | 36625                   | T/G  | Gene_Ca_09603.1    | SYNONYMOUS_CODING             | Zinc finger CCCH domain-containing protein 55 |
| <i>Desi_wild_37702</i>  | NA                                  | <i>Ca_desi_scaffold</i> | 37702                   | T/C  | Gene_Ca_09603.1    | SYNONYMOUS_CODING             | Zinc finger CCCH domain-containing protein 55 |
| <i>Desi_wild_2317</i>   | NA                                  | <i>Ca_desi_scaffold</i> | 2317                    | T/A  | NA                 | INTERGENIC                    | NA                                            |
| <i>Desi_wild_4061</i>   | NA                                  | <i>Ca_desi_scaffold</i> | 4061                    | G/A  | NA                 | INTERGENIC                    | NA                                            |
| <i>Desi_wild_4107</i>   | NA                                  | <i>Ca_desi_scaffold</i> | 4107                    | G/A  | NA                 | INTERGENIC                    | NA                                            |
| <i>Desi_wild_2182</i>   | NA                                  | <i>Ca_desi_scaffold</i> | 2182                    | C/T  | NA                 | INTERGENIC                    | NA                                            |
| <i>Desi_wild_2228</i>   | NA                                  | <i>Ca_desi_scaffold</i> | 2228                    | G/T  | NA                 | INTERGENIC                    | NA                                            |
| <i>Desi_wild_2250</i>   | NA                                  | <i>Ca_desi_scaffold</i> | 2250                    | C/T  | NA                 | INTERGENIC                    | NA                                            |
| <i>Desi_wild_101</i>    | NA                                  | <i>Ca_desi_scaffold</i> | 101                     | G/A  | NA                 | INTERGENIC                    | NA                                            |
| <i>Desi_wild_127</i>    | NA                                  | <i>Ca_desi_scaffold</i> | 127                     | G/T  | NA                 | INTERGENIC                    | NA                                            |
| <i>Desi_wild_33874</i>  | NA                                  | <i>Ca_desi_scaffold</i> | 33874                   | A/G  | Gene_Ca_09208.1    | UPSTREAM                      | Kinesin-like protein KIF15                    |
| <i>Desi_wild_57431</i>  | NA                                  | <i>Ca_desi_scaffold</i> | 57431                   | T/G  | Gene_Ca_09210.1    | INTRON                        | NA                                            |
| <i>Desi_wild_57713</i>  | NA                                  | <i>Ca_desi_scaffold</i> | 57713                   | T/A  | Gene_Ca_09210.1    | INTRON                        | NA                                            |
| <i>Desi_wild_57732</i>  | NA                                  | <i>Ca_desi_scaffold</i> | 57732                   | T/G  | Gene_Ca_09210.1    | INTRON                        | NA                                            |
| <i>Desi_wild_62819</i>  | NA                                  | <i>Ca_desi_scaffold</i> | 62819                   | C/G  | NA                 | INTERGENIC                    | NA                                            |
| <i>Desi_wild_140927</i> | NA                                  | <i>Ca_desi_scaffold</i> | 140927                  | A/T  | NA                 | INTERGENIC                    | NA                                            |
| <i>Desi_wild_3050</i>   | NA                                  | <i>Ca_desi_scaffold</i> | 3050                    | C/T  | Gene_Ca_20367.1    | DOWNSTREAM                    | Early nodulin-93                              |
| <i>Desi_wild_3085</i>   | NA                                  | <i>Ca_desi_scaffold</i> | 3085                    | C/A  | Gene_Ca_20367.1    | DOWNSTREAM                    | Early nodulin-93                              |
| <i>Desi_wild_484</i>    | NA                                  | <i>Ca_desi_scaffold</i> | 484                     | C/G  | NA                 | INTERGENIC                    | NA                                            |
| <i>Desi_wild_485</i>    | NA                                  | <i>Ca_desi_scaffold</i> | 485                     | C/T  | NA                 | INTERGENIC                    | NA                                            |
| <i>Desi_wild_515</i>    | NA                                  | <i>Ca_desi_scaffold</i> | 515                     | G/C  | NA                 | INTERGENIC                    | NA                                            |
| <i>Desi_wild_1578</i>   | NA                                  | <i>Ca_desi_scaffold</i> | 1578                    | T/G  | Gene_Ca_20373.1    | DOWNSTREAM                    | Mitochondrial protein, putative               |
| <i>Desi_wild_1633</i>   | NA                                  | <i>Ca_desi_scaffold</i> | 1633                    | T/A  | Gene_Ca_20373.1    | DOWNSTREAM                    | Mitochondrial protein, putative               |
| <i>Desi_wild_3157</i>   | NA                                  | <i>Ca_desi_scaffold</i> | 3157                    | G/T  | Gene_Ca_20373.1    | DOWNSTREAM                    | Mitochondrial protein, putative               |
| <i>Desi_wild_3159</i>   | NA                                  | <i>Ca_desi_scaffold</i> | 3159                    | T/C  | Gene_Ca_20373.1    | DOWNSTREAM                    | Mitochondrial protein, putative               |
| <i>Desi_wild_3162</i>   | NA                                  | <i>Ca_desi_scaffold</i> | 3162                    | C/T  | Gene_Ca_20373.1    | DOWNSTREAM                    | Mitochondrial protein, putative               |
| <i>Desi_wild_3250</i>   | NA                                  | <i>Ca_desi_scaffold</i> | 3250                    | C/T  | Gene_Ca_20373.1    | DOWNSTREAM                    | Mitochondrial protein, putative               |
| <i>Desi_wild_3990</i>   | NA                                  | <i>Ca_desi_scaffold</i> | 3990                    | C/T  | NA                 | INTERGENIC                    | NA                                            |
| <i>Desi_wild_4210</i>   | NA                                  | <i>Ca_desi_scaffold</i> | 4210                    | T/C  | Gene_Ca_20383.1    | UPSTREAM                      | Probable serine protease EDA2                 |
| <i>Desi_wild_4226</i>   | NA                                  | <i>Ca_desi_scaffold</i> | 4226                    | C/A  | Gene_Ca_20383.1    | UPSTREAM                      | Probable serine protease EDA2                 |
| <i>Desi_wild_4234</i>   | NA                                  | <i>Ca_desi_scaffold</i> | 4234                    | T/C  | Gene_Ca_20383.1    | UPSTREAM                      | Probable serine protease EDA2                 |
| <i>Desi_wild_929</i>    | NA                                  | <i>Ca_desi_scaffold</i> | 929                     | C/T  | NA                 | INTERGENIC                    | NA                                            |
| <i>Desi_wild_1353</i>   | NA                                  | <i>Ca_desi_scaffold</i> | 1353                    | C/G  | Gene_Ca_20387.1    | SYNONYMOUS_CODING             | NA                                            |

| SNP IDs                 | NCBI dbSNP accession IDs (NCBI_SS#) | Chromosomes             | Physical positions (bp) | SNPs | Gene accession IDs | Sequence components of genome | Putative functions                      |
|-------------------------|-------------------------------------|-------------------------|-------------------------|------|--------------------|-------------------------------|-----------------------------------------|
| <i>Desi_wild_1560</i>   | NA                                  | <i>Ca_desi_scaffold</i> | 1560                    | C/G  | Gene_Ca_20389.1    | DOWNSTREAM                    | NA                                      |
| <i>Desi_wild_1676</i>   | NA                                  | <i>Ca_desi_scaffold</i> | 1676                    | T/G  | Gene_Ca_20389.1    | DOWNSTREAM                    | NA                                      |
| <i>Desi_wild_285</i>    | NA                                  | <i>Ca_desi_scaffold</i> | 285                     | A/C  | NA                 | INTERGENIC                    | NA                                      |
| <i>Desi_wild_3555</i>   | NA                                  | <i>Ca_desi_scaffold</i> | 3555                    | A/C  | NA                 | INTERGENIC                    | NA                                      |
| <i>Desi_wild_2760</i>   | NA                                  | <i>Ca_desi_scaffold</i> | 2760                    | G/T  | NA                 | INTERGENIC                    | NA                                      |
| <i>Desi_wild_122692</i> | NA                                  | <i>Ca_desi_scaffold</i> | 122692                  | C/T  | NA                 | INTERGENIC                    | NA                                      |
| <i>Desi_wild_4031</i>   | NA                                  | <i>Ca_desi_scaffold</i> | 4031                    | A/G  | NA                 | INTERGENIC                    | NA                                      |
| <i>Desi_wild_4034</i>   | NA                                  | <i>Ca_desi_scaffold</i> | 4034                    | C/T  | NA                 | INTERGENIC                    | NA                                      |
| <i>Desi_wild_4089</i>   | NA                                  | <i>Ca_desi_scaffold</i> | 4089                    | A/G  | NA                 | INTERGENIC                    | NA                                      |
| <i>Desi_wild_2521</i>   | NA                                  | <i>Ca_desi_scaffold</i> | 2521                    | G/T  | Gene_Ca_20400.1    | INTRON                        | NA                                      |
| <i>Desi_wild_777</i>    | NA                                  | <i>Ca_desi_scaffold</i> | 777                     | T/C  | NA                 | INTERGENIC                    | NA                                      |
| <i>Desi_wild_785</i>    | NA                                  | <i>Ca_desi_scaffold</i> | 785                     | C/T  | NA                 | INTERGENIC                    | NA                                      |
| <i>Desi_wild_219</i>    | NA                                  | <i>Ca_desi_scaffold</i> | 219                     | T/C  | Gene_Ca_20404.1    | DOWNSTREAM                    | Primary amine oxidase                   |
| <i>Desi_wild_290</i>    | NA                                  | <i>Ca_desi_scaffold</i> | 290                     | G/C  | Gene_Ca_20404.1    | DOWNSTREAM                    | Primary amine oxidase                   |
| <i>Desi_wild_3851</i>   | NA                                  | <i>Ca_desi_scaffold</i> | 3851                    | T/A  | Gene_Ca_20410.1    | SYNONYMOUS_CODING             | K(+) efflux antiporter 1, chloroplastic |
| <i>Desi_wild_276</i>    | NA                                  | <i>Ca_desi_scaffold</i> | 276                     | T/C  | NA                 | INTERGENIC                    | NA                                      |
| <i>Desi_wild_277</i>    | NA                                  | <i>Ca_desi_scaffold</i> | 277                     | T/G  | NA                 | INTERGENIC                    | NA                                      |
| <i>Desi_wild_288</i>    | NA                                  | <i>Ca_desi_scaffold</i> | 288                     | T/G  | NA                 | INTERGENIC                    | NA                                      |
| <i>Desi_wild_289</i>    | NA                                  | <i>Ca_desi_scaffold</i> | 289                     | T/C  | NA                 | INTERGENIC                    | NA                                      |
| <i>Desi_wild_291</i>    | NA                                  | <i>Ca_desi_scaffold</i> | 291                     | C/G  | NA                 | INTERGENIC                    | NA                                      |
| <i>Desi_wild_3883</i>   | NA                                  | <i>Ca_desi_scaffold</i> | 3883                    | T/G  | NA                 | INTERGENIC                    | NA                                      |
| <i>Desi_wild_3891</i>   | NA                                  | <i>Ca_desi_scaffold</i> | 3891                    | C/A  | NA                 | INTERGENIC                    | NA                                      |
| <i>Desi_wild_3897</i>   | NA                                  | <i>Ca_desi_scaffold</i> | 3897                    | G/A  | NA                 | INTERGENIC                    | NA                                      |
| <i>Desi_wild_3908</i>   | NA                                  | <i>Ca_desi_scaffold</i> | 3908                    | A/G  | NA                 | INTERGENIC                    | NA                                      |
| <i>Desi_wild_3921</i>   | NA                                  | <i>Ca_desi_scaffold</i> | 3921                    | A/C  | NA                 | INTERGENIC                    | NA                                      |
| <i>Desi_wild_3952</i>   | NA                                  | <i>Ca_desi_scaffold</i> | 3952                    | C/T  | NA                 | INTERGENIC                    | NA                                      |
| <i>Desi_wild_3963</i>   | NA                                  | <i>Ca_desi_scaffold</i> | 3963                    | C/G  | NA                 | INTERGENIC                    | NA                                      |
| <i>Desi_wild_4015</i>   | NA                                  | <i>Ca_desi_scaffold</i> | 4015                    | T/C  | NA                 | INTERGENIC                    | NA                                      |
| <i>Desi_wild_2786</i>   | NA                                  | <i>Ca_desi_scaffold</i> | 2786                    | C/G  | NA                 | INTERGENIC                    | NA                                      |
| <i>Desi_wild_2924</i>   | NA                                  | <i>Ca_desi_scaffold</i> | 2924                    | G/T  | NA                 | INTERGENIC                    | NA                                      |
| <i>Desi_wild_3055</i>   | NA                                  | <i>Ca_desi_scaffold</i> | 3055                    | A/T  | NA                 | INTERGENIC                    | NA                                      |
| <i>Desi_wild_3059</i>   | NA                                  | <i>Ca_desi_scaffold</i> | 3059                    | A/T  | NA                 | INTERGENIC                    | NA                                      |
| <i>Desi_wild_3061</i>   | NA                                  | <i>Ca_desi_scaffold</i> | 3061                    | C/T  | NA                 | INTERGENIC                    | NA                                      |
| <i>Desi_wild_3091</i>   | NA                                  | <i>Ca_desi_scaffold</i> | 3091                    | A/G  | NA                 | INTERGENIC                    | NA                                      |
| <i>Desi_wild_3092</i>   | NA                                  | <i>Ca_desi_scaffold</i> | 3092                    | G/A  | NA                 | INTERGENIC                    | NA                                      |
| <i>Desi_wild_3094</i>   | NA                                  | <i>Ca_desi_scaffold</i> | 3094                    | C/A  | NA                 | INTERGENIC                    | NA                                      |
| <i>Desi_wild_3097</i>   | NA                                  | <i>Ca_desi_scaffold</i> | 3097                    | G/A  | NA                 | INTERGENIC                    | NA                                      |
| <i>Desi_wild_3114</i>   | NA                                  | <i>Ca_desi_scaffold</i> | 3114                    | A/G  | NA                 | INTERGENIC                    | NA                                      |
| <i>Desi_wild_1604</i>   | NA                                  | <i>Ca_desi_scaffold</i> | 1604                    | A/G  | NA                 | INTERGENIC                    | NA                                      |
| <i>Desi_wild_5</i>      | NA                                  | <i>Ca_desi_scaffold</i> | 5                       | A/G  | NA                 | INTERGENIC                    | NA                                      |
| <i>Desi_wild_54</i>     | NA                                  | <i>Ca_desi_scaffold</i> | 54                      | G/A  | NA                 | INTERGENIC                    | NA                                      |
| <i>Desi_wild_58</i>     | NA                                  | <i>Ca_desi_scaffold</i> | 58                      | C/T  | NA                 | INTERGENIC                    | NA                                      |
| <i>Desi_wild_65</i>     | NA                                  | <i>Ca_desi_scaffold</i> | 65                      | G/A  | NA                 | INTERGENIC                    | NA                                      |
| <i>Desi_wild_94</i>     | NA                                  | <i>Ca_desi_scaffold</i> | 94                      | C/T  | NA                 | INTERGENIC                    | NA                                      |



| SNP IDs               | NCBI dbSNP accession IDs (NCBI_SS#) | Chromosomes             | Physical positions (bp) | SNPs | Gene accession IDs | Sequence components of genome | Putative functions                               |
|-----------------------|-------------------------------------|-------------------------|-------------------------|------|--------------------|-------------------------------|--------------------------------------------------|
| <i>Desi_wild_297</i>  | NA                                  | <i>Ca_desi_scaffold</i> | 297                     | C/G  | NA                 | INTERGENIC                    | NA                                               |
| <i>Desi_wild_2622</i> | NA                                  | <i>Ca_desi_scaffold</i> | 2622                    | A/G  | Gene_Ca_20421.1    | NON_SYNONYMOUS_CODING         | 3-methyl-2-oxobutanoate hydroxymethyltransferase |
| <i>Desi_wild_3480</i> | NA                                  | <i>Ca_desi_scaffold</i> | 3480                    | A/C  | Gene_Ca_20423.1    | SYNONYMOUS_CODING             | Putative uncharacterized protein ART2            |
| <i>Desi_wild_29</i>   | NA                                  | <i>Ca_desi_scaffold</i> | 29                      | G/T  | NA                 | INTERGENIC                    | NA                                               |
| <i>Desi_wild_53</i>   | NA                                  | <i>Ca_desi_scaffold</i> | 53                      | T/C  | NA                 | INTERGENIC                    | NA                                               |
| <i>Desi_wild_64</i>   | NA                                  | <i>Ca_desi_scaffold</i> | 64                      | G/C  | NA                 | INTERGENIC                    | NA                                               |
| <i>Desi_wild_3368</i> | NA                                  | <i>Ca_desi_scaffold</i> | 3368                    | C/T  | Gene_Ca_20426.1    | SYNONYMOUS_CODING             | Ran-binding protein 17                           |
| <i>Desi_wild_3449</i> | NA                                  | <i>Ca_desi_scaffold</i> | 3449                    | A/C  | Gene_Ca_20426.1    | DOWNSTREAM                    | Ran-binding protein 17                           |
| <i>Desi_wild_1666</i> | NA                                  | <i>Ca_desi_scaffold</i> | 1666                    | C/A  | Gene_Ca_20432.1    | NON_SYNONYMOUS_CODING         | Ethylene-overproduction protein 1                |
| <i>Desi_wild_2001</i> | NA                                  | <i>Ca_desi_scaffold</i> | 2001                    | G/A  | Gene_Ca_20432.1    | SYNONYMOUS_CODING             | Ethylene-overproduction protein 1                |
| <i>Desi_wild_3537</i> | NA                                  | <i>Ca_desi_scaffold</i> | 3537                    | G/A  | Gene_Ca_20432.1    | DOWNSTREAM                    | Ethylene-overproduction protein 1                |
| <i>Desi_wild_3538</i> | NA                                  | <i>Ca_desi_scaffold</i> | 3538                    | G/A  | Gene_Ca_20432.1    | DOWNSTREAM                    | Ethylene-overproduction protein 1                |
| <i>Desi_wild_3551</i> | NA                                  | <i>Ca_desi_scaffold</i> | 3551                    | T/C  | Gene_Ca_20432.1    | DOWNSTREAM                    | Ethylene-overproduction protein 1                |
| <i>Desi_wild_3557</i> | NA                                  | <i>Ca_desi_scaffold</i> | 3557                    | A/G  | Gene_Ca_20432.1    | DOWNSTREAM                    | Ethylene-overproduction protein 1                |
| <i>Desi_wild_3568</i> | NA                                  | <i>Ca_desi_scaffold</i> | 3568                    | C/T  | Gene_Ca_20432.1    | DOWNSTREAM                    | Ethylene-overproduction protein 1                |
| <i>Desi_wild_3570</i> | NA                                  | <i>Ca_desi_scaffold</i> | 3570                    | A/G  | Gene_Ca_20432.1    | DOWNSTREAM                    | Ethylene-overproduction protein 1                |
| <i>Desi_wild_3573</i> | NA                                  | <i>Ca_desi_scaffold</i> | 3573                    | C/T  | Gene_Ca_20432.1    | DOWNSTREAM                    | Ethylene-overproduction protein 1                |
| <i>Desi_wild_3576</i> | NA                                  | <i>Ca_desi_scaffold</i> | 3576                    | A/G  | Gene_Ca_20432.1    | DOWNSTREAM                    | Ethylene-overproduction protein 1                |
| <i>Desi_wild_3578</i> | NA                                  | <i>Ca_desi_scaffold</i> | 3578                    | C/T  | Gene_Ca_20432.1    | DOWNSTREAM                    | Ethylene-overproduction protein 1                |
| <i>Desi_wild_3582</i> | NA                                  | <i>Ca_desi_scaffold</i> | 3582                    | C/T  | Gene_Ca_20432.1    | DOWNSTREAM                    | Ethylene-overproduction protein 1                |
| <i>Desi_wild_3589</i> | NA                                  | <i>Ca_desi_scaffold</i> | 3589                    | G/A  | Gene_Ca_20432.1    | DOWNSTREAM                    | Ethylene-overproduction protein 1                |
| <i>Desi_wild_3591</i> | NA                                  | <i>Ca_desi_scaffold</i> | 3591                    | G/T  | Gene_Ca_20432.1    | DOWNSTREAM                    | Ethylene-overproduction protein 1                |
| <i>Desi_wild_3603</i> | NA                                  | <i>Ca_desi_scaffold</i> | 3603                    | A/G  | Gene_Ca_20432.1    | DOWNSTREAM                    | Ethylene-overproduction protein 1                |
| <i>Desi_wild_3605</i> | NA                                  | <i>Ca_desi_scaffold</i> | 3605                    | C/T  | Gene_Ca_20432.1    | DOWNSTREAM                    | Ethylene-overproduction protein 1                |
| <i>Desi_wild_1889</i> | NA                                  | <i>Ca_desi_scaffold</i> | 1889                    | G/A  | Gene_Ca_20433.1    | INTRON                        | Villin-3                                         |
| <i>Desi_wild_2134</i> | NA                                  | <i>Ca_desi_scaffold</i> | 2134                    | T/A  | Gene_Ca_20433.1    | SYNONYMOUS_CODING             | Villin-3                                         |
| <i>Desi_wild_2140</i> | NA                                  | <i>Ca_desi_scaffold</i> | 2140                    | A/G  | Gene_Ca_20433.1    | SYNONYMOUS_CODING             | Villin-3                                         |
| <i>Desi_wild_2141</i> | NA                                  | <i>Ca_desi_scaffold</i> | 2141                    | A/T  | Gene_Ca_20433.1    | NON_SYNONYMOUS_CODING         | Villin-3                                         |
| <i>Desi_wild_2143</i> | NA                                  | <i>Ca_desi_scaffold</i> | 2143                    | G/C  | Gene_Ca_20433.1    | NON_SYNONYMOUS_CODING         | Villin-3                                         |
| <i>Desi_wild_2144</i> | NA                                  | <i>Ca_desi_scaffold</i> | 2144                    | A/T  | Gene_Ca_20433.1    | NON_SYNONYMOUS_CODING         | Villin-3                                         |
| <i>Desi_wild_2145</i> | NA                                  | <i>Ca_desi_scaffold</i> | 2145                    | C/G  | Gene_Ca_20433.1    | NON_SYNONYMOUS_CODING         | Villin-3                                         |
| <i>Desi_wild_2149</i> | NA                                  | <i>Ca_desi_scaffold</i> | 2149                    | G/T  | Gene_Ca_20433.1    | NON_SYNONYMOUS_CODING         | Villin-3                                         |
| <i>Desi_wild_2165</i> | NA                                  | <i>Ca_desi_scaffold</i> | 2165                    | C/T  | Gene_Ca_20433.1    | NON_SYNONYMOUS_CODING         | Villin-3                                         |
| <i>Desi_wild_2167</i> | NA                                  | <i>Ca_desi_scaffold</i> | 2167                    | T/A  | Gene_Ca_20433.1    | SYNONYMOUS_CODING             | Villin-3                                         |
| <i>Desi_wild_2175</i> | NA                                  | <i>Ca_desi_scaffold</i> | 2175                    | A/G  | Gene_Ca_20433.1    | NON_SYNONYMOUS_CODING         | Villin-3                                         |
| <i>Desi_wild_2188</i> | NA                                  | <i>Ca_desi_scaffold</i> | 2188                    | A/T  | Gene_Ca_20433.1    | SYNONYMOUS_CODING             | Villin-3                                         |
| <i>Desi_wild_450</i>  | NA                                  | <i>Ca_desi_scaffold</i> | 450                     | G/T  | NA                 | INTERGENIC                    | NA                                               |
| <i>Desi_wild_949</i>  | NA                                  | <i>Ca_desi_scaffold</i> | 949                     | G/A  | NA                 | INTERGENIC                    | NA                                               |
| <i>Desi_wild_993</i>  | NA                                  | <i>Ca_desi_scaffold</i> | 993                     | G/C  | NA                 | INTERGENIC                    | NA                                               |
| <i>Desi_wild_2678</i> | NA                                  | <i>Ca_desi_scaffold</i> | 2678                    | C/T  | NA                 | INTERGENIC                    | NA                                               |
| <i>Desi_wild_2683</i> | NA                                  | <i>Ca_desi_scaffold</i> | 2683                    | A/C  | NA                 | INTERGENIC                    | NA                                               |
| <i>Desi_wild_2684</i> | NA                                  | <i>Ca_desi_scaffold</i> | 2684                    | T/A  | NA                 | INTERGENIC                    | NA                                               |
| <i>Desi_wild_2701</i> | NA                                  | <i>Ca_desi_scaffold</i> | 2701                    | T/A  | NA                 | INTERGENIC                    | NA                                               |
| <i>Desi_wild_2715</i> | NA                                  | <i>Ca_desi_scaffold</i> | 2715                    | G/A  | NA                 | INTERGENIC                    | NA                                               |

| SNP IDs               | NCBI dbSNP accession IDs (NCBI_SS#) | Chromosomes             | Physical positions (bp) | SNPs | Gene accession IDs | Sequence components of genome | Putative functions                                                                    |
|-----------------------|-------------------------------------|-------------------------|-------------------------|------|--------------------|-------------------------------|---------------------------------------------------------------------------------------|
| <i>Desi_wild_3630</i> | NA                                  | <i>Ca_desi_scaffold</i> | 3630                    | G/A  | NA                 | INTERGENIC                    | NA                                                                                    |
| <i>Desi_wild_3646</i> | NA                                  | <i>Ca_desi_scaffold</i> | 3646                    | C/T  | NA                 | INTERGENIC                    | NA                                                                                    |
| <i>Desi_wild_3669</i> | NA                                  | <i>Ca_desi_scaffold</i> | 3669                    | C/A  | NA                 | INTERGENIC                    | NA                                                                                    |
| <i>Desi_wild_3679</i> | NA                                  | <i>Ca_desi_scaffold</i> | 3679                    | G/A  | NA                 | INTERGENIC                    | NA                                                                                    |
| <i>Desi_wild_3688</i> | NA                                  | <i>Ca_desi_scaffold</i> | 3688                    | T/C  | NA                 | INTERGENIC                    | NA                                                                                    |
| <i>Desi_wild_3691</i> | NA                                  | <i>Ca_desi_scaffold</i> | 3691                    | C/A  | NA                 | INTERGENIC                    | NA                                                                                    |
| <i>Desi_wild_3697</i> | NA                                  | <i>Ca_desi_scaffold</i> | 3697                    | C/T  | NA                 | INTERGENIC                    | NA                                                                                    |
| <i>Desi_wild_945</i>  | NA                                  | <i>Ca_desi_scaffold</i> | 945                     | A/G  | NA                 | INTERGENIC                    | NA                                                                                    |
| <i>Desi_wild_952</i>  | NA                                  | <i>Ca_desi_scaffold</i> | 952                     | C/A  | NA                 | INTERGENIC                    | NA                                                                                    |
| <i>Desi_wild_988</i>  | NA                                  | <i>Ca_desi_scaffold</i> | 988                     | A/G  | NA                 | INTERGENIC                    | NA                                                                                    |
| <i>Desi_wild_3483</i> | NA                                  | <i>Ca_desi_scaffold</i> | 3483                    | C/T  | NA                 | INTERGENIC                    | NA                                                                                    |
| <i>Desi_wild_2600</i> | NA                                  | <i>Ca_desi_scaffold</i> | 2600                    | C/T  | NA                 | INTERGENIC                    | NA                                                                                    |
| <i>Desi_wild_2610</i> | NA                                  | <i>Ca_desi_scaffold</i> | 2610                    | G/A  | NA                 | INTERGENIC                    | NA                                                                                    |
| <i>Desi_wild_2612</i> | NA                                  | <i>Ca_desi_scaffold</i> | 2612                    | T/C  | NA                 | INTERGENIC                    | NA                                                                                    |
| <i>Desi_wild_2617</i> | NA                                  | <i>Ca_desi_scaffold</i> | 2617                    | C/T  | NA                 | INTERGENIC                    | NA                                                                                    |
| <i>Desi_wild_2669</i> | NA                                  | <i>Ca_desi_scaffold</i> | 2669                    | T/A  | NA                 | INTERGENIC                    | NA                                                                                    |
| <i>Desi_wild_2692</i> | NA                                  | <i>Ca_desi_scaffold</i> | 2692                    | A/G  | NA                 | INTERGENIC                    | NA                                                                                    |
| <i>Desi_wild_852</i>  | NA                                  | <i>Ca_desi_scaffold</i> | 852                     | G/A  | NA                 | INTERGENIC                    | NA                                                                                    |
| <i>Desi_wild_732</i>  | NA                                  | <i>Ca_desi_scaffold</i> | 732                     | G/C  | Gene_Ca_20446.1    | INTRON                        | UPF0553 protein                                                                       |
| <i>Desi_wild_1598</i> | NA                                  | <i>Ca_desi_scaffold</i> | 1598                    | T/C  | Gene_Ca_20446.1    | INTRON                        | UPF0553 protein                                                                       |
| <i>Desi_wild_1609</i> | NA                                  | <i>Ca_desi_scaffold</i> | 1609                    | C/T  | Gene_Ca_20446.1    | INTRON                        | UPF0553 protein                                                                       |
| <i>Desi_wild_1618</i> | NA                                  | <i>Ca_desi_scaffold</i> | 1618                    | T/C  | Gene_Ca_20446.1    | INTRON                        | UPF0553 protein                                                                       |
| <i>Desi_wild_1630</i> | NA                                  | <i>Ca_desi_scaffold</i> | 1630                    | A/C  | Gene_Ca_20446.1    | INTRON                        | UPF0553 protein                                                                       |
| <i>Desi_wild_1713</i> | NA                                  | <i>Ca_desi_scaffold</i> | 1713                    | G/C  | Gene_Ca_20446.1    | INTRON                        | UPF0553 protein                                                                       |
| <i>Desi_wild_1845</i> | NA                                  | <i>Ca_desi_scaffold</i> | 1845                    | G/T  | Gene_Ca_20446.1    | NON_SYNONYMOUS_CODING         | UPF0553 protein                                                                       |
| <i>Desi_wild_2620</i> | NA                                  | <i>Ca_desi_scaffold</i> | 2620                    | C/T  | NA                 | INTERGENIC                    | NA                                                                                    |
| <i>Desi_wild_845</i>  | NA                                  | <i>Ca_desi_scaffold</i> | 845                     | A/T  | Gene_Ca_20449.1    | INTRON                        | NADH-ubiquinone oxidoreductase chain 2                                                |
| <i>Desi_wild_3400</i> | NA                                  | <i>Ca_desi_scaffold</i> | 3400                    | T/A  | NA                 | INTERGENIC                    | NA                                                                                    |
| <i>Desi_wild_419</i>  | NA                                  | <i>Ca_desi_scaffold</i> | 419                     | T/G  | NA                 | INTERGENIC                    | NA                                                                                    |
| <i>Desi_wild_860</i>  | NA                                  | <i>Ca_desi_scaffold</i> | 860                     | G/T  | Gene_Ca_20456.1    | UPSTREAM                      | Thiamine biosynthesis bifunctional protein ThiED                                      |
| <i>Desi_wild_861</i>  | NA                                  | <i>Ca_desi_scaffold</i> | 861                     | A/T  | Gene_Ca_20456.1    | UPSTREAM                      | Thiamine biosynthesis bifunctional protein ThiED                                      |
| <i>Desi_wild_947</i>  | NA                                  | <i>Ca_desi_scaffold</i> | 947                     | T/C  | Gene_Ca_20456.1    | UPSTREAM                      | Thiamine biosynthesis bifunctional protein ThiED                                      |
| <i>Desi_wild_3628</i> | NA                                  | <i>Ca_desi_scaffold</i> | 3628                    | T/G  | NA                 | INTERGENIC                    | NA                                                                                    |
| <i>Desi_wild_2482</i> | NA                                  | <i>Ca_desi_scaffold</i> | 2482                    | A/T  | NA                 | INTERGENIC                    | NA                                                                                    |
| <i>Desi_wild_3654</i> | NA                                  | <i>Ca_desi_scaffold</i> | 3654                    | C/A  | NA                 | INTERGENIC                    | NA                                                                                    |
| <i>Desi_wild_3656</i> | NA                                  | <i>Ca_desi_scaffold</i> | 3656                    | G/A  | NA                 | INTERGENIC                    | NA                                                                                    |
| <i>Desi_wild_2913</i> | NA                                  | <i>Ca_desi_scaffold</i> | 2913                    | T/G  | Gene_Ca_20459.1    | INTRON                        | Thiamine biosynthesis bifunctional protein ThiED                                      |
| <i>Desi_wild_2964</i> | NA                                  | <i>Ca_desi_scaffold</i> | 2964                    | G/A  | Gene_Ca_20459.1    | INTRON                        | Thiamine biosynthesis bifunctional protein ThiED                                      |
| <i>Desi_wild_3317</i> | NA                                  | <i>Ca_desi_scaffold</i> | 3317                    | G/C  | Gene_Ca_20459.1    | SYNONYMOUS_START              | Thiamine biosynthesis bifunctional protein ThiED                                      |
| <i>Desi_wild_3320</i> | NA                                  | <i>Ca_desi_scaffold</i> | 3320                    | C/G  | Gene_Ca_20459.1    | UPSTREAM                      | Thiamine biosynthesis bifunctional protein ThiED                                      |
| <i>Desi_wild_2270</i> | NA                                  | <i>Ca_desi_scaffold</i> | 2270                    | T/A  | NA                 | INTERGENIC                    | NA                                                                                    |
| <i>Desi_wild_2699</i> | NA                                  | <i>Ca_desi_scaffold</i> | 2699                    | T/C  | Gene_Ca_20463.1    | UPSTREAM                      | CONTAINS InterPro DOMAIN/s: Membrane protein, Tapt1/CMV receptor (InterPro:IPR008011) |
| <i>Desi_wild_14</i>   | NA                                  | <i>Ca_desi_scaffold</i> | 14                      | C/T  | NA                 | INTERGENIC                    | NA                                                                                    |
| <i>Desi_wild_40</i>   | NA                                  | <i>Ca_desi_scaffold</i> | 40                      | C/G  | NA                 | INTERGENIC                    | NA                                                                                    |

| SNP IDs               | NCBI dbSNP accession IDs (NCBI_SS#) | Chromosomes             | Physical positions (bp) | SNPs | Gene accession IDs | Sequence components of genome | Putative functions                                                            |
|-----------------------|-------------------------------------|-------------------------|-------------------------|------|--------------------|-------------------------------|-------------------------------------------------------------------------------|
| <i>Desi_wild_2474</i> | NA                                  | <i>Ca_desi_scaffold</i> | 2474                    | G/A  | NA                 | INTERGENIC                    | NA                                                                            |
| <i>Desi_wild_3467</i> | NA                                  | <i>Ca_desi_scaffold</i> | 3467                    | T/G  | Gene_Ca_20471.1    | UPSTREAM                      | DENN (AEX-3) domain-containing protein                                        |
| <i>Desi_wild_677</i>  | NA                                  | <i>Ca_desi_scaffold</i> | 677                     | C/T  | NA                 | INTERGENIC                    | NA                                                                            |
| <i>Desi_wild_696</i>  | NA                                  | <i>Ca_desi_scaffold</i> | 696                     | G/A  | NA                 | INTERGENIC                    | NA                                                                            |
| <i>Desi_wild_705</i>  | NA                                  | <i>Ca_desi_scaffold</i> | 705                     | A/G  | NA                 | INTERGENIC                    | NA                                                                            |
| <i>Desi_wild_713</i>  | NA                                  | <i>Ca_desi_scaffold</i> | 713                     | G/T  | NA                 | INTERGENIC                    | NA                                                                            |
| <i>Desi_wild_2842</i> | NA                                  | <i>Ca_desi_scaffold</i> | 2842                    | A/G  | NA                 | INTERGENIC                    | NA                                                                            |
| <i>Desi_wild_2848</i> | NA                                  | <i>Ca_desi_scaffold</i> | 2848                    | T/A  | NA                 | INTERGENIC                    | NA                                                                            |
| <i>Desi_wild_2871</i> | NA                                  | <i>Ca_desi_scaffold</i> | 2871                    | A/T  | NA                 | INTERGENIC                    | NA                                                                            |
| <i>Desi_wild_2882</i> | NA                                  | <i>Ca_desi_scaffold</i> | 2882                    | G/A  | NA                 | INTERGENIC                    | NA                                                                            |
| <i>Desi_wild_3197</i> | NA                                  | <i>Ca_desi_scaffold</i> | 3197                    | T/C  | NA                 | INTERGENIC                    | NA                                                                            |
| <i>Desi_wild_3238</i> | NA                                  | <i>Ca_desi_scaffold</i> | 3238                    | A/C  | NA                 | INTERGENIC                    | NA                                                                            |
| <i>Desi_wild_3272</i> | NA                                  | <i>Ca_desi_scaffold</i> | 3272                    | G/A  | NA                 | INTERGENIC                    | NA                                                                            |
| <i>Desi_wild_2960</i> | NA                                  | <i>Ca_desi_scaffold</i> | 2960                    | C/A  | Gene_Ca_20478.1    | SYNONYMOUS_CODING             | Cation/H(+) antiporter 20                                                     |
| <i>Desi_wild_1144</i> | NA                                  | <i>Ca_desi_scaffold</i> | 1144                    | T/G  | NA                 | INTERGENIC                    | NA                                                                            |
| <i>Desi_wild_1147</i> | NA                                  | <i>Ca_desi_scaffold</i> | 1147                    | T/G  | NA                 | INTERGENIC                    | NA                                                                            |
| <i>Desi_wild_2943</i> | NA                                  | <i>Ca_desi_scaffold</i> | 2943                    | G/A  | NA                 | INTERGENIC                    | NA                                                                            |
| <i>Desi_wild_3011</i> | NA                                  | <i>Ca_desi_scaffold</i> | 3011                    | C/T  | NA                 | INTERGENIC                    | NA                                                                            |
| <i>Desi_wild_2742</i> | NA                                  | <i>Ca_desi_scaffold</i> | 2742                    | G/C  | NA                 | INTERGENIC                    | NA                                                                            |
| <i>Desi_wild_2609</i> | NA                                  | <i>Ca_desi_scaffold</i> | 2609                    | C/T  | NA                 | INTERGENIC                    | NA                                                                            |
| <i>Desi_wild_442</i>  | NA                                  | <i>Ca_desi_scaffold</i> | 442                     | T/C  | NA                 | INTERGENIC                    | NA                                                                            |
| <i>Desi_wild_2825</i> | NA                                  | <i>Ca_desi_scaffold</i> | 2825                    | A/G  | Gene_Ca_20493.2    | NON_SYNONYMOUS_CODING         | Plant protein 1589 of unknown function                                        |
| <i>Desi_wild_1479</i> | NA                                  | <i>Ca_desi_scaffold</i> | 1479                    | A/C  | NA                 | INTERGENIC                    | NA                                                                            |
| <i>Desi_wild_2982</i> | NA                                  | <i>Ca_desi_scaffold</i> | 2982                    | T/C  | Gene_Ca_20497.1    | SYNONYMOUS_CODING             | Probable dolichyl pyrophosphate Glc1Man9GlcNAc2 alpha-1,3-glucosyltransferase |
| <i>Desi_wild_866</i>  | NA                                  | <i>Ca_desi_scaffold</i> | 866                     | A/T  | NA                 | INTERGENIC                    | NA                                                                            |
| <i>Desi_wild_475</i>  | NA                                  | <i>Ca_desi_scaffold</i> | 475                     | C/A  | NA                 | INTERGENIC                    | NA                                                                            |
| <i>Desi_wild_517</i>  | NA                                  | <i>Ca_desi_scaffold</i> | 517                     | G/A  | NA                 | INTERGENIC                    | NA                                                                            |
| <i>Desi_wild_2967</i> | NA                                  | <i>Ca_desi_scaffold</i> | 2967                    | T/C  | Gene_Ca_20501.1    | SYNONYMOUS_CODING             | Chaperone protein dnaJ 3                                                      |
| <i>Desi_wild_2985</i> | NA                                  | <i>Ca_desi_scaffold</i> | 2985                    | T/A  | Gene_Ca_20501.1    | SYNONYMOUS_CODING             | Chaperone protein dnaJ 3                                                      |
| <i>Desi_wild_2990</i> | NA                                  | <i>Ca_desi_scaffold</i> | 2990                    | A/G  | Gene_Ca_20501.1    | SYNONYMOUS_CODING             | Chaperone protein dnaJ 3                                                      |
| <i>Desi_wild_2994</i> | NA                                  | <i>Ca_desi_scaffold</i> | 2994                    | T/C  | Gene_Ca_20501.1    | SYNONYMOUS_CODING             | Chaperone protein dnaJ 3                                                      |
| <i>Desi_wild_3003</i> | NA                                  | <i>Ca_desi_scaffold</i> | 3003                    | A/C  | Gene_Ca_20501.1    | SYNONYMOUS_CODING             | Chaperone protein dnaJ 3                                                      |
| <i>Desi_wild_3007</i> | NA                                  | <i>Ca_desi_scaffold</i> | 3007                    | G/C  | Gene_Ca_20501.1    | NON_SYNONYMOUS_CODING         | Chaperone protein dnaJ 3                                                      |
| <i>Desi_wild_3009</i> | NA                                  | <i>Ca_desi_scaffold</i> | 3009                    | G/A  | Gene_Ca_20501.1    | SYNONYMOUS_CODING             | Chaperone protein dnaJ 3                                                      |
| <i>Desi_wild_3021</i> | NA                                  | <i>Ca_desi_scaffold</i> | 3021                    | T/A  | Gene_Ca_20501.1    | SYNONYMOUS_CODING             | Chaperone protein dnaJ 3                                                      |
| <i>Desi_wild_3428</i> | NA                                  | <i>Ca_desi_scaffold</i> | 3428                    | T/G  | NA                 | INTERGENIC                    | NA                                                                            |
| <i>Desi_wild_213</i>  | NA                                  | <i>Ca_desi_scaffold</i> | 213                     | T/C  | NA                 | INTERGENIC                    | NA                                                                            |
| <i>Desi_wild_3280</i> | NA                                  | <i>Ca_desi_scaffold</i> | 3280                    | G/A  | NA                 | INTERGENIC                    | NA                                                                            |
| <i>Desi_wild_3310</i> | NA                                  | <i>Ca_desi_scaffold</i> | 3310                    | G/A  | NA                 | INTERGENIC                    | NA                                                                            |
| <i>Desi_wild_3323</i> | NA                                  | <i>Ca_desi_scaffold</i> | 3323                    | G/T  | NA                 | INTERGENIC                    | NA                                                                            |
| <i>Desi_wild_779</i>  | NA                                  | <i>Ca_desi_scaffold</i> | 779                     | T/A  | NA                 | INTERGENIC                    | NA                                                                            |
| <i>Desi_wild_780</i>  | NA                                  | <i>Ca_desi_scaffold</i> | 780                     | G/A  | NA                 | INTERGENIC                    | NA                                                                            |
| <i>Desi_wild_569</i>  | NA                                  | <i>Ca_desi_scaffold</i> | 569                     | A/T  | Gene_Ca_20506.1    | INTRON                        | Nucleolar protein 6                                                           |
| <i>Desi_wild_600</i>  | NA                                  | <i>Ca_desi_scaffold</i> | 600                     | C/T  | Gene_Ca_20506.1    | INTRON                        | Nucleolar protein 6                                                           |

| SNP IDs         | NCBI dbSNP accession IDs (NCBI_SS#) | Chromosomes      | Physical positions (bp) | SNPs | Gene accession IDs | Sequence components of genome | Putative functions                              |
|-----------------|-------------------------------------|------------------|-------------------------|------|--------------------|-------------------------------|-------------------------------------------------|
| Desi_wild_1171  | NA                                  | Ca_desi_scaffold | 1171                    | T/G  | Gene_Ca_20510.1    | INTRON                        | Crooked neck-like protein 1                     |
| Desi_wild_2219  | NA                                  | Ca_desi_scaffold | 2219                    | C/T  | NA                 | INTERGENIC                    | NA                                              |
| Desi_wild_2315  | NA                                  | Ca_desi_scaffold | 2315                    | G/A  | NA                 | INTERGENIC                    | NA                                              |
| Desi_wild_3274  | NA                                  | Ca_desi_scaffold | 3274                    | C/T  | NA                 | INTERGENIC                    | NA                                              |
| Desi_wild_3325  | NA                                  | Ca_desi_scaffold | 3325                    | T/C  | NA                 | INTERGENIC                    | NA                                              |
| Desi_wild_2541  | NA                                  | Ca_desi_scaffold | 2541                    | A/G  | NA                 | INTERGENIC                    | NA                                              |
| Desi_wild_2566  | NA                                  | Ca_desi_scaffold | 2566                    | A/C  | NA                 | INTERGENIC                    | NA                                              |
| Desi_wild_1972  | NA                                  | Ca_desi_scaffold | 1972                    | G/A  | Gene_Ca_20520.1    | NON_SYNONYMOUS_CODING         | Ethylene-responsive transcription factor ERF026 |
| Desi_wild_2392  | NA                                  | Ca_desi_scaffold | 2392                    | G/A  | NA                 | INTERGENIC                    | NA                                              |
| Desi_wild_2453  | NA                                  | Ca_desi_scaffold | 2453                    | G/A  | NA                 | INTERGENIC                    | NA                                              |
| Desi_wild_1002  | NA                                  | Ca_desi_scaffold | 1002                    | A/G  | NA                 | INTERGENIC                    | NA                                              |
| Desi_wild_2539  | NA                                  | Ca_desi_scaffold | 2539                    | G/A  | NA                 | INTERGENIC                    | NA                                              |
| Desi_wild_2577  | NA                                  | Ca_desi_scaffold | 2577                    | A/G  | NA                 | INTERGENIC                    | NA                                              |
| Desi_wild_2505  | NA                                  | Ca_desi_scaffold | 2505                    | C/G  | NA                 | INTERGENIC                    | NA                                              |
| Desi_wild_2644  | NA                                  | Ca_desi_scaffold | 2644                    | C/T  | Gene_Ca_20527.1    | DOWNSTREAM                    | tRNA (guanosine(18)-2'-O)-methyltransferase     |
| Desi_wild_66258 | NA                                  | Ca_desi_scaffold | 66258                   | C/T  | Gene_Ca_09257.1    | NON_SYNONYMOUS_CODING         | unknown protein                                 |
| Desi_wild_72589 | NA                                  | Ca_desi_scaffold | 72589                   | A/G  | Gene_Ca_09257.1    | NON_SYNONYMOUS_CODING         | unknown protein                                 |
| Desi_wild_491   | NA                                  | Ca_desi_scaffold | 491                     | G/T  | NA                 | INTERGENIC                    | NA                                              |
| Desi_wild_2952  | NA                                  | Ca_desi_scaffold | 2952                    | C/T  | NA                 | INTERGENIC                    | NA                                              |
| Desi_wild_2993  | NA                                  | Ca_desi_scaffold | 2993                    | G/A  | NA                 | INTERGENIC                    | NA                                              |
| Desi_wild_3010  | NA                                  | Ca_desi_scaffold | 3010                    | A/T  | NA                 | INTERGENIC                    | NA                                              |
| Desi_wild_2911  | NA                                  | Ca_desi_scaffold | 2911                    | G/A  | NA                 | INTERGENIC                    | NA                                              |
| Desi_wild_2921  | NA                                  | Ca_desi_scaffold | 2921                    | G/T  | NA                 | INTERGENIC                    | NA                                              |
| Desi_wild_2923  | NA                                  | Ca_desi_scaffold | 2923                    | C/G  | NA                 | INTERGENIC                    | NA                                              |
| Desi_wild_2925  | NA                                  | Ca_desi_scaffold | 2925                    | C/T  | NA                 | INTERGENIC                    | NA                                              |
| Desi_wild_3093  | NA                                  | Ca_desi_scaffold | 3093                    | A/C  | NA                 | INTERGENIC                    | NA                                              |
| Desi_wild_3109  | NA                                  | Ca_desi_scaffold | 3109                    | A/G  | NA                 | INTERGENIC                    | NA                                              |
| Desi_wild_401   | NA                                  | Ca_desi_scaffold | 401                     | T/C  | NA                 | INTERGENIC                    | NA                                              |
| Desi_wild_351   | NA                                  | Ca_desi_scaffold | 351                     | T/C  | NA                 | INTERGENIC                    | NA                                              |
| Desi_wild_2359  | NA                                  | Ca_desi_scaffold | 2359                    | C/T  | NA                 | INTERGENIC                    | NA                                              |
| Desi_wild_586   | NA                                  | Ca_desi_scaffold | 586                     | G/A  | NA                 | INTERGENIC                    | NA                                              |
| Desi_wild_392   | NA                                  | Ca_desi_scaffold | 392                     | T/C  | NA                 | INTERGENIC                    | NA                                              |
| Desi_wild_394   | NA                                  | Ca_desi_scaffold | 394                     | A/C  | NA                 | INTERGENIC                    | NA                                              |
| Desi_wild_420   | NA                                  | Ca_desi_scaffold | 420                     | G/A  | NA                 | INTERGENIC                    | NA                                              |
| Desi_wild_421   | NA                                  | Ca_desi_scaffold | 421                     | A/G  | NA                 | INTERGENIC                    | NA                                              |
| Desi_wild_461   | NA                                  | Ca_desi_scaffold | 461                     | A/C  | NA                 | INTERGENIC                    | NA                                              |
| Desi_wild_462   | NA                                  | Ca_desi_scaffold | 462                     | G/T  | NA                 | INTERGENIC                    | NA                                              |
| Desi_wild_463   | NA                                  | Ca_desi_scaffold | 463                     | T/A  | NA                 | INTERGENIC                    | NA                                              |
| Desi_wild_480   | NA                                  | Ca_desi_scaffold | 480                     | T/G  | NA                 | INTERGENIC                    | NA                                              |
| Desi_wild_490   | NA                                  | Ca_desi_scaffold | 490                     | T/G  | NA                 | INTERGENIC                    | NA                                              |
| Desi_wild_495   | NA                                  | Ca_desi_scaffold | 495                     | C/A  | NA                 | INTERGENIC                    | NA                                              |
| Desi_wild_497   | NA                                  | Ca_desi_scaffold | 497                     | T/C  | NA                 | INTERGENIC                    | NA                                              |
| Desi_wild_523   | NA                                  | Ca_desi_scaffold | 523                     | C/T  | NA                 | INTERGENIC                    | NA                                              |
| Desi_wild_1431  | NA                                  | Ca_desi_scaffold | 1431                    | T/G  | NA                 | INTERGENIC                    | NA                                              |

| SNP IDs               | NCBI dbSNP accession IDs (NCBI_SS#) | Chromosomes             | Physical positions (bp) | SNPs | Gene accession IDs | Sequence components of genome | Putative functions        |
|-----------------------|-------------------------------------|-------------------------|-------------------------|------|--------------------|-------------------------------|---------------------------|
| <i>Desi_wild_3051</i> | NA                                  | <i>Ca_desi_scaffold</i> | 3051                    | C/A  | NA                 | INTERGENIC                    | NA                        |
| <i>Desi_wild_3054</i> | NA                                  | <i>Ca_desi_scaffold</i> | 3054                    | C/T  | NA                 | INTERGENIC                    | NA                        |
| <i>Desi_wild_2630</i> | NA                                  | <i>Ca_desi_scaffold</i> | 2630                    | G/T  | NA                 | INTERGENIC                    | NA                        |
| <i>Desi_wild_3040</i> | NA                                  | <i>Ca_desi_scaffold</i> | 3040                    | C/T  | NA                 | INTERGENIC                    | NA                        |
| <i>Desi_wild_3065</i> | NA                                  | <i>Ca_desi_scaffold</i> | 3065                    | G/A  | NA                 | INTERGENIC                    | NA                        |
| <i>Desi_wild_1586</i> | NA                                  | <i>Ca_desi_scaffold</i> | 1586                    | A/C  | Gene_Ca_20554.1    | SYNONYMOUS_CODING             | NA                        |
| <i>Desi_wild_2639</i> | NA                                  | <i>Ca_desi_scaffold</i> | 2639                    | A/G  | Gene_Ca_20554.1    | DOWNSTREAM                    | NA                        |
| <i>Desi_wild_343</i>  | NA                                  | <i>Ca_desi_scaffold</i> | 343                     | T/G  | NA                 | INTERGENIC                    | NA                        |
| <i>Desi_wild_385</i>  | NA                                  | <i>Ca_desi_scaffold</i> | 385                     | C/T  | NA                 | INTERGENIC                    | NA                        |
| <i>Desi_wild_773</i>  | NA                                  | <i>Ca_desi_scaffold</i> | 773                     | G/T  | NA                 | INTERGENIC                    | NA                        |
| <i>Desi_wild_892</i>  | NA                                  | <i>Ca_desi_scaffold</i> | 892                     | A/C  | NA                 | INTERGENIC                    | NA                        |
| <i>Desi_wild_656</i>  | NA                                  | <i>Ca_desi_scaffold</i> | 656                     | G/A  | Gene_Ca_20562.1    | NON_SYNONYMOUS_CODING         | Sugar transport protein 1 |
| <i>Desi_wild_2058</i> | NA                                  | <i>Ca_desi_scaffold</i> | 2058                    | T/G  | Gene_Ca_20562.1    | SYNONYMOUS_CODING             | Sugar transport protein 1 |
| <i>Desi_wild_2098</i> | NA                                  | <i>Ca_desi_scaffold</i> | 2098                    | T/A  | Gene_Ca_20562.1    | NON_SYNONYMOUS_CODING         | Sugar transport protein 1 |
| <i>Desi_wild_911</i>  | NA                                  | <i>Ca_desi_scaffold</i> | 911                     | T/G  | Gene_Ca_20567.1    | NON_SYNONYMOUS_CODING         | NA                        |
| <i>Desi_wild_538</i>  | NA                                  | <i>Ca_desi_scaffold</i> | 538                     | C/G  | NA                 | INTERGENIC                    | NA                        |
| <i>Desi_wild_327</i>  | NA                                  | <i>Ca_desi_scaffold</i> | 327                     | C/T  | NA                 | INTERGENIC                    | NA                        |
| <i>Desi_wild_353</i>  | NA                                  | <i>Ca_desi_scaffold</i> | 353                     | G/C  | NA                 | INTERGENIC                    | NA                        |
| <i>Desi_wild_369</i>  | NA                                  | <i>Ca_desi_scaffold</i> | 369                     | G/T  | NA                 | INTERGENIC                    | NA                        |
| <i>Desi_wild_375</i>  | NA                                  | <i>Ca_desi_scaffold</i> | 375                     | G/A  | NA                 | INTERGENIC                    | NA                        |
| <i>Desi_wild_409</i>  | NA                                  | <i>Ca_desi_scaffold</i> | 409                     | G/A  | NA                 | INTERGENIC                    | NA                        |
| <i>Desi_wild_1760</i> | NA                                  | <i>Ca_desi_scaffold</i> | 1760                    | C/A  | NA                 | INTERGENIC                    | NA                        |
| <i>Desi_wild_1801</i> | NA                                  | <i>Ca_desi_scaffold</i> | 1801                    | C/A  | NA                 | INTERGENIC                    | NA                        |
| <i>Desi_wild_1812</i> | NA                                  | <i>Ca_desi_scaffold</i> | 1812                    | G/A  | NA                 | INTERGENIC                    | NA                        |
| <i>Desi_wild_1825</i> | NA                                  | <i>Ca_desi_scaffold</i> | 1825                    | C/T  | NA                 | INTERGENIC                    | NA                        |
| <i>Desi_wild_1835</i> | NA                                  | <i>Ca_desi_scaffold</i> | 1835                    | G/A  | NA                 | INTERGENIC                    | NA                        |
| <i>Desi_wild_1848</i> | NA                                  | <i>Ca_desi_scaffold</i> | 1848                    | T/C  | NA                 | INTERGENIC                    | NA                        |
| <i>Desi_wild_1898</i> | NA                                  | <i>Ca_desi_scaffold</i> | 1898                    | C/T  | NA                 | INTERGENIC                    | NA                        |
| <i>Desi_wild_1915</i> | NA                                  | <i>Ca_desi_scaffold</i> | 1915                    | T/C  | NA                 | INTERGENIC                    | NA                        |
| <i>Desi_wild_2042</i> | NA                                  | <i>Ca_desi_scaffold</i> | 2042                    | G/A  | NA                 | INTERGENIC                    | NA                        |
| <i>Desi_wild_2049</i> | NA                                  | <i>Ca_desi_scaffold</i> | 2049                    | G/T  | NA                 | INTERGENIC                    | NA                        |
| <i>Desi_wild_1978</i> | NA                                  | <i>Ca_desi_scaffold</i> | 1978                    | C/T  | NA                 | INTERGENIC                    | NA                        |
| <i>Desi_wild_1879</i> | NA                                  | <i>Ca_desi_scaffold</i> | 1879                    | G/A  | NA                 | INTERGENIC                    | NA                        |
| <i>Desi_wild_1974</i> | NA                                  | <i>Ca_desi_scaffold</i> | 1974                    | T/C  | NA                 | INTERGENIC                    | NA                        |
| <i>Desi_wild_1596</i> | NA                                  | <i>Ca_desi_scaffold</i> | 1596                    | C/T  | NA                 | INTERGENIC                    | NA                        |
| <i>Desi_wild_1628</i> | NA                                  | <i>Ca_desi_scaffold</i> | 1628                    | T/C  | NA                 | INTERGENIC                    | NA                        |
| <i>Desi_wild_1682</i> | NA                                  | <i>Ca_desi_scaffold</i> | 1682                    | C/T  | NA                 | INTERGENIC                    | NA                        |
| <i>Desi_wild_1080</i> | NA                                  | <i>Ca_desi_scaffold</i> | 1080                    | T/C  | NA                 | INTERGENIC                    | NA                        |
| <i>Desi_wild_2535</i> | NA                                  | <i>Ca_desi_scaffold</i> | 2535                    | C/A  | NA                 | INTERGENIC                    | NA                        |
| <i>Desi_wild_1014</i> | NA                                  | <i>Ca_desi_scaffold</i> | 1014                    | C/T  | NA                 | INTERGENIC                    | NA                        |
| <i>Desi_wild_1611</i> | NA                                  | <i>Ca_desi_scaffold</i> | 1611                    | T/G  | NA                 | INTERGENIC                    | NA                        |
| <i>Desi_wild_2677</i> | NA                                  | <i>Ca_desi_scaffold</i> | 2677                    | G/C  | NA                 | INTERGENIC                    | NA                        |
| <i>Desi_wild_2323</i> | NA                                  | <i>Ca_desi_scaffold</i> | 2323                    | G/C  | NA                 | INTERGENIC                    | NA                        |
| <i>Desi_wild_2342</i> | NA                                  | <i>Ca_desi_scaffold</i> | 2342                    | G/A  | NA                 | INTERGENIC                    | NA                        |

| SNP IDs                 | NCBI dbSNP accession IDs (NCBI_SS#) | Chromosomes             | Physical positions (bp) | SNPs | Gene accession IDs | Sequence components of genome | Putative functions                              |
|-------------------------|-------------------------------------|-------------------------|-------------------------|------|--------------------|-------------------------------|-------------------------------------------------|
| <i>Desi_wild_2350</i>   | NA                                  | <i>Ca_desi_scaffold</i> | 2350                    | T/G  | NA                 | INTERGENIC                    | NA                                              |
| <i>Desi_wild_2354</i>   | NA                                  | <i>Ca_desi_scaffold</i> | 2354                    | G/A  | NA                 | INTERGENIC                    | NA                                              |
| <i>Desi_wild_2513</i>   | NA                                  | <i>Ca_desi_scaffold</i> | 2513                    | G/A  | NA                 | INTERGENIC                    | NA                                              |
| <i>Desi_wild_2169</i>   | NA                                  | <i>Ca_desi_scaffold</i> | 2169                    | G/T  | NA                 | INTERGENIC                    | NA                                              |
| <i>Desi_wild_2176</i>   | NA                                  | <i>Ca_desi_scaffold</i> | 2176                    | A/C  | NA                 | INTERGENIC                    | NA                                              |
| <i>Desi_wild_2215</i>   | NA                                  | <i>Ca_desi_scaffold</i> | 2215                    | A/C  | NA                 | INTERGENIC                    | NA                                              |
| <i>Desi_wild_2163</i>   | NA                                  | <i>Ca_desi_scaffold</i> | 2163                    | G/A  | NA                 | INTERGENIC                    | NA                                              |
| <i>Desi_wild_2178</i>   | NA                                  | <i>Ca_desi_scaffold</i> | 2178                    | C/T  | NA                 | INTERGENIC                    | NA                                              |
| <i>Desi_wild_2205</i>   | NA                                  | <i>Ca_desi_scaffold</i> | 2205                    | T/G  | NA                 | INTERGENIC                    | NA                                              |
| <i>Desi_wild_46709</i>  | NA                                  | <i>Ca_desi_scaffold</i> | 46709                   | G/A  | NA                 | INTERGENIC                    | NA                                              |
| <i>Desi_wild_46719</i>  | NA                                  | <i>Ca_desi_scaffold</i> | 46719                   | T/C  | NA                 | INTERGENIC                    | NA                                              |
| <i>Desi_wild_2449</i>   | NA                                  | <i>Ca_desi_scaffold</i> | 2449                    | A/G  | NA                 | INTERGENIC                    | NA                                              |
| <i>Desi_wild_2072</i>   | NA                                  | <i>Ca_desi_scaffold</i> | 2072                    | T/C  | Gene_Ca_20609.1    | UPSTREAM                      | Putative uncharacterized protein (Fragment)     |
| <i>Desi_wild_2074</i>   | NA                                  | <i>Ca_desi_scaffold</i> | 2074                    | G/T  | Gene_Ca_20609.1    | UPSTREAM                      | Putative uncharacterized protein (Fragment)     |
| <i>Desi_wild_2135</i>   | NA                                  | <i>Ca_desi_scaffold</i> | 2135                    | C/A  | Gene_Ca_20609.1    | UPSTREAM                      | Putative uncharacterized protein (Fragment)     |
| <i>Desi_wild_404</i>    | NA                                  | <i>Ca_desi_scaffold</i> | 404                     | G/A  | NA                 | INTERGENIC                    | NA                                              |
| <i>Desi_wild_448</i>    | NA                                  | <i>Ca_desi_scaffold</i> | 448                     | C/T  | NA                 | INTERGENIC                    | NA                                              |
| <i>Desi_wild_449</i>    | NA                                  | <i>Ca_desi_scaffold</i> | 449                     | A/G  | NA                 | INTERGENIC                    | NA                                              |
| <i>Desi_wild_1603</i>   | NA                                  | <i>Ca_desi_scaffold</i> | 1603                    | C/T  | NA                 | INTERGENIC                    | NA                                              |
| <i>Desi_wild_2403</i>   | NA                                  | <i>Ca_desi_scaffold</i> | 2403                    | C/T  | NA                 | INTERGENIC                    | NA                                              |
| <i>Desi_wild_41668</i>  | NA                                  | <i>Ca_desi_scaffold</i> | 41668                   | T/C  | Gene_Ca_09525.1    | SYNONYMOUS_CODING             | Putative DNA-binding protein ESCAROLA           |
| <i>Desi_wild_70220</i>  | NA                                  | <i>Ca_desi_scaffold</i> | 70220                   | G/C  | Gene_Ca_09526.1    | INTRON                        | Ubiquitin carboxyl-terminal hydrolase 16        |
| <i>Desi_wild_70248</i>  | NA                                  | <i>Ca_desi_scaffold</i> | 70248                   | T/G  | Gene_Ca_09526.1    | INTRON                        | Ubiquitin carboxyl-terminal hydrolase 16        |
| <i>Desi_wild_181003</i> | NA                                  | <i>Ca_desi_scaffold</i> | 181003                  | T/C  | Gene_Ca_09529.1    | NON_SYNONYMOUS_CODING         | Rho GTPase-activating protein 15                |
| <i>Desi_wild_853</i>    | NA                                  | <i>Ca_desi_scaffold</i> | 853                     | C/T  | NA                 | INTERGENIC                    | NA                                              |
| <i>Desi_wild_966</i>    | NA                                  | <i>Ca_desi_scaffold</i> | 966                     | A/G  | NA                 | INTERGENIC                    | NA                                              |
| <i>Desi_wild_1215</i>   | NA                                  | <i>Ca_desi_scaffold</i> | 1215                    | C/G  | NA                 | INTERGENIC                    | NA                                              |
| <i>Desi_wild_2368</i>   | NA                                  | <i>Ca_desi_scaffold</i> | 2368                    | T/A  | NA                 | INTERGENIC                    | NA                                              |
| <i>Desi_wild_1232</i>   | NA                                  | <i>Ca_desi_scaffold</i> | 1232                    | A/C  | NA                 | INTERGENIC                    | NA                                              |
| <i>Desi_wild_1784</i>   | NA                                  | <i>Ca_desi_scaffold</i> | 1784                    | C/T  | NA                 | INTERGENIC                    | NA                                              |
| <i>Desi_wild_2249</i>   | NA                                  | <i>Ca_desi_scaffold</i> | 2249                    | C/T  | NA                 | INTERGENIC                    | NA                                              |
| <i>Desi_wild_427</i>    | NA                                  | <i>Ca_desi_scaffold</i> | 427                     | C/T  | NA                 | INTERGENIC                    | NA                                              |
| <i>Desi_wild_526</i>    | NA                                  | <i>Ca_desi_scaffold</i> | 526                     | A/T  | NA                 | INTERGENIC                    | NA                                              |
| <i>Desi_wild_530</i>    | NA                                  | <i>Ca_desi_scaffold</i> | 530                     | A/G  | NA                 | INTERGENIC                    | NA                                              |
| <i>Desi_wild_579</i>    | NA                                  | <i>Ca_desi_scaffold</i> | 579                     | C/A  | NA                 | INTERGENIC                    | NA                                              |
| <i>Desi_wild_741</i>    | NA                                  | <i>Ca_desi_scaffold</i> | 741                     | C/T  | NA                 | INTERGENIC                    | NA                                              |
| <i>Desi_wild_859</i>    | NA                                  | <i>Ca_desi_scaffold</i> | 859                     | A/C  | NA                 | INTERGENIC                    | NA                                              |
| <i>Desi_wild_1445</i>   | NA                                  | <i>Ca_desi_scaffold</i> | 1445                    | T/C  | NA                 | INTERGENIC                    | NA                                              |
| <i>Desi_wild_1579</i>   | NA                                  | <i>Ca_desi_scaffold</i> | 1579                    | C/T  | NA                 | INTERGENIC                    | NA                                              |
| <i>Desi_wild_653</i>    | NA                                  | <i>Ca_desi_scaffold</i> | 653                     | C/A  | NA                 | INTERGENIC                    | NA                                              |
| <i>Desi_wild_1966</i>   | NA                                  | <i>Ca_desi_scaffold</i> | 1966                    | G/A  | NA                 | INTERGENIC                    | NA                                              |
| <i>Desi_wild_1371</i>   | NA                                  | <i>Ca_desi_scaffold</i> | 1371                    | G/A  | NA                 | INTERGENIC                    | NA                                              |
| <i>Desi_wild_1952</i>   | NA                                  | <i>Ca_desi_scaffold</i> | 1952                    | T/C  | Gene_Ca_20669.1    | SYNONYMOUS_CODING             | hydroxyproline-rich glycoprotein family protein |
| <i>Desi_wild_1993</i>   | NA                                  | <i>Ca_desi_scaffold</i> | 1993                    | C/T  | Gene_Ca_20669.1    | INTRON                        | hydroxyproline-rich glycoprotein family protein |

| SNP IDs                 | NCBI dbSNP accession IDs (NCBI_SS#) | Chromosomes             | Physical positions (bp) | SNPs | Gene accession IDs | Sequence components of genome | Putative functions                              |
|-------------------------|-------------------------------------|-------------------------|-------------------------|------|--------------------|-------------------------------|-------------------------------------------------|
| <i>Desi_wild_2008</i>   | NA                                  | <i>Ca_desi_scaffold</i> | 2008                    | G/A  | Gene_Ca_20669.1    | INTRON                        | hydroxyproline-rich glycoprotein family protein |
| <i>Desi_wild_2033</i>   | NA                                  | <i>Ca_desi_scaffold</i> | 2033                    | C/T  | Gene_Ca_20669.1    | INTRON                        | hydroxyproline-rich glycoprotein family protein |
| <i>Desi_wild_2108</i>   | NA                                  | <i>Ca_desi_scaffold</i> | 2108                    | G/A  | NA                 | INTERGENIC                    | NA                                              |
| <i>Desi_wild_413</i>    | NA                                  | <i>Ca_desi_scaffold</i> | 413                     | G/T  | NA                 | INTERGENIC                    | NA                                              |
| <i>Desi_wild_416</i>    | NA                                  | <i>Ca_desi_scaffold</i> | 416                     | C/T  | NA                 | INTERGENIC                    | NA                                              |
| <i>Desi_wild_434</i>    | NA                                  | <i>Ca_desi_scaffold</i> | 434                     | C/T  | NA                 | INTERGENIC                    | NA                                              |
| <i>Desi_wild_439</i>    | NA                                  | <i>Ca_desi_scaffold</i> | 439                     | G/A  | NA                 | INTERGENIC                    | NA                                              |
| <i>Desi_wild_456</i>    | NA                                  | <i>Ca_desi_scaffold</i> | 456                     | A/T  | NA                 | INTERGENIC                    | NA                                              |
| <i>Desi_wild_467</i>    | NA                                  | <i>Ca_desi_scaffold</i> | 467                     | C/A  | NA                 | INTERGENIC                    | NA                                              |
| <i>Desi_wild_474</i>    | NA                                  | <i>Ca_desi_scaffold</i> | 474                     | A/T  | NA                 | INTERGENIC                    | NA                                              |
| <i>Desi_wild_493</i>    | NA                                  | <i>Ca_desi_scaffold</i> | 493                     | A/G  | NA                 | INTERGENIC                    | NA                                              |
| <i>Desi_wild_540</i>    | NA                                  | <i>Ca_desi_scaffold</i> | 540                     | C/G  | NA                 | INTERGENIC                    | NA                                              |
| <i>Desi_wild_1575</i>   | NA                                  | <i>Ca_desi_scaffold</i> | 1575                    | C/G  | Gene_Ca_20672.1    | INTRON                        | Pescadillo homolog                              |
| <i>Desi_wild_53574</i>  | NA                                  | <i>Ca_desi_scaffold</i> | 53574                   | A/C  | Gene_Ca_09908.1    | NON_SYNONYMOUS_CODING         | Probable F-box protein At5g04010                |
| <i>Desi_wild_53621</i>  | NA                                  | <i>Ca_desi_scaffold</i> | 53621                   | T/C  | Gene_Ca_09908.1    | SYNONYMOUS_CODING             | Probable F-box protein At5g04010                |
| <i>Desi_wild_53689</i>  | NA                                  | <i>Ca_desi_scaffold</i> | 53689                   | C/T  | Gene_Ca_09908.1    | NON_SYNONYMOUS_CODING         | Probable F-box protein At5g04010                |
| <i>Desi_wild_138407</i> | NA                                  | <i>Ca_desi_scaffold</i> | 138407                  | G/T  | Gene_Ca_09910.1    | SYNONYMOUS_CODING             | Triacylglycerol lipase SDP1                     |
| <i>Desi_wild_153238</i> | NA                                  | <i>Ca_desi_scaffold</i> | 153238                  | T/C  | NA                 | INTERGENIC                    | NA                                              |
| <i>Desi_wild_153376</i> | NA                                  | <i>Ca_desi_scaffold</i> | 153376                  | G/T  | NA                 | INTERGENIC                    | NA                                              |
| <i>Desi_wild_629</i>    | NA                                  | <i>Ca_desi_scaffold</i> | 629                     | C/T  | Gene_Ca_20676.1    | SYNONYMOUS_CODING             | RRP1                                            |
| <i>Desi_wild_644</i>    | NA                                  | <i>Ca_desi_scaffold</i> | 644                     | A/C  | Gene_Ca_20676.1    | NON_SYNONYMOUS_CODING         | RRP1                                            |
| <i>Desi_wild_672</i>    | NA                                  | <i>Ca_desi_scaffold</i> | 672                     | G/A  | Gene_Ca_20676.1    | NON_SYNONYMOUS_CODING         | RRP1                                            |
| <i>Desi_wild_761</i>    | NA                                  | <i>Ca_desi_scaffold</i> | 761                     | C/T  | Gene_Ca_20676.1    | SYNONYMOUS_CODING             | RRP1                                            |
| <i>Desi_wild_765</i>    | NA                                  | <i>Ca_desi_scaffold</i> | 765                     | T/C  | Gene_Ca_20676.1    | INTRON                        | RRP1                                            |
| <i>Desi_wild_31556</i>  | NA                                  | <i>Ca_desi_scaffold</i> | 31556                   | C/T  | Gene_Ca_09730.1    | SYNONYMOUS_CODING             | Chitinase-like protein 2                        |
| <i>Desi_wild_62613</i>  | NA                                  | <i>Ca_desi_scaffold</i> | 62613                   | G/T  | NA                 | INTERGENIC                    | NA                                              |
| <i>Desi_wild_71338</i>  | NA                                  | <i>Ca_desi_scaffold</i> | 71338                   | A/G  | NA                 | INTERGENIC                    | NA                                              |
| <i>Desi_wild_687</i>    | NA                                  | <i>Ca_desi_scaffold</i> | 687                     | A/G  | Gene_Ca_20678.1    | SYNONYMOUS_CODING             | unknown protein                                 |
| <i>Desi_wild_879</i>    | NA                                  | <i>Ca_desi_scaffold</i> | 879                     | A/G  | Gene_Ca_20678.1    | SYNONYMOUS_CODING             | unknown protein                                 |
| <i>Desi_wild_953</i>    | NA                                  | <i>Ca_desi_scaffold</i> | 953                     | T/C  | NA                 | INTERGENIC                    | NA                                              |
| <i>Desi_wild_445</i>    | NA                                  | <i>Ca_desi_scaffold</i> | 445                     | A/G  | NA                 | INTERGENIC                    | NA                                              |
| <i>Desi_wild_663</i>    | NA                                  | <i>Ca_desi_scaffold</i> | 663                     | T/A  | NA                 | INTERGENIC                    | NA                                              |
| <i>Desi_wild_666</i>    | NA                                  | <i>Ca_desi_scaffold</i> | 666                     | C/T  | NA                 | INTERGENIC                    | NA                                              |
| <i>Desi_wild_668</i>    | NA                                  | <i>Ca_desi_scaffold</i> | 668                     | G/A  | NA                 | INTERGENIC                    | NA                                              |
| <i>Desi_wild_697</i>    | NA                                  | <i>Ca_desi_scaffold</i> | 697                     | C/T  | NA                 | INTERGENIC                    | NA                                              |
| <i>Desi_wild_1283</i>   | NA                                  | <i>Ca_desi_scaffold</i> | 1283                    | T/G  | NA                 | INTERGENIC                    | NA                                              |
| <i>Desi_wild_1288</i>   | NA                                  | <i>Ca_desi_scaffold</i> | 1288                    | G/A  | NA                 | INTERGENIC                    | NA                                              |
| <i>Desi_wild_1304</i>   | NA                                  | <i>Ca_desi_scaffold</i> | 1304                    | C/A  | NA                 | INTERGENIC                    | NA                                              |
| <i>Desi_wild_345</i>    | NA                                  | <i>Ca_desi_scaffold</i> | 345                     | G/T  | NA                 | INTERGENIC                    | NA                                              |
| <i>Desi_wild_1357</i>   | NA                                  | <i>Ca_desi_scaffold</i> | 1357                    | C/A  | NA                 | INTERGENIC                    | NA                                              |
| <i>Desi_wild_659</i>    | NA                                  | <i>Ca_desi_scaffold</i> | 659                     | G/A  | NA                 | INTERGENIC                    | NA                                              |
| <i>Desi_wild_674</i>    | NA                                  | <i>Ca_desi_scaffold</i> | 674                     | C/T  | NA                 | INTERGENIC                    | NA                                              |
| <i>Desi_wild_144930</i> | NA                                  | <i>Ca_desi_scaffold</i> | 144930                  | A/G  | Gene_Ca_09382.1    | UPSTREAM                      | Fructokinase-2                                  |
| <i>Desi_wild_201226</i> | NA                                  | <i>Ca_desi_scaffold</i> | 201226                  | C/T  | Gene_Ca_09385.1    | NON_SYNONYMOUS_CODING         | Uncharacterized protein L728                    |

| SNP IDs               | NCBI dbSNP accession IDs (NCBI_SS#) | Chromosomes             | Physical positions (bp) | SNPs | Gene accession IDs | Sequence components of genome | Putative functions                              |
|-----------------------|-------------------------------------|-------------------------|-------------------------|------|--------------------|-------------------------------|-------------------------------------------------|
| <i>Desi_wild_924</i>  | NA                                  | <i>Ca_desi_scaffold</i> | 924                     | A/G  | NA                 | INTERGENIC                    | NA                                              |
| <i>Desi_wild_1262</i> | NA                                  | <i>Ca_desi_scaffold</i> | 1262                    | A/C  | NA                 | INTERGENIC                    | NA                                              |
| <i>Desi_wild_769</i>  | NA                                  | <i>Ca_desi_scaffold</i> | 769                     | A/G  | NA                 | INTERGENIC                    | NA                                              |
| <i>Desi_wild_1776</i> | NA                                  | <i>Ca_desi_scaffold</i> | 1776                    | C/T  | NA                 | INTERGENIC                    | NA                                              |
| <i>Desi_wild_1810</i> | NA                                  | <i>Ca_desi_scaffold</i> | 1810                    | A/G  | NA                 | INTERGENIC                    | NA                                              |
| <i>Desi_wild_1076</i> | NA                                  | <i>Ca_desi_scaffold</i> | 1076                    | T/C  | NA                 | INTERGENIC                    | NA                                              |
| <i>Desi_wild_1106</i> | NA                                  | <i>Ca_desi_scaffold</i> | 1106                    | A/C  | NA                 | INTERGENIC                    | NA                                              |
| <i>Desi_wild_1997</i> | NA                                  | <i>Ca_desi_scaffold</i> | 1997                    | G/A  | Gene_Ca_20698.1    | DOWNSTREAM                    | Isopenicillin N epimerase                       |
| <i>Desi_wild_1999</i> | NA                                  | <i>Ca_desi_scaffold</i> | 1999                    | G/A  | Gene_Ca_20698.1    | DOWNSTREAM                    | Isopenicillin N epimerase                       |
| <i>Desi_wild_2004</i> | NA                                  | <i>Ca_desi_scaffold</i> | 2004                    | A/G  | Gene_Ca_20698.1    | DOWNSTREAM                    | Isopenicillin N epimerase                       |
| <i>Desi_wild_2005</i> | NA                                  | <i>Ca_desi_scaffold</i> | 2005                    | A/G  | Gene_Ca_20698.1    | DOWNSTREAM                    | Isopenicillin N epimerase                       |
| <i>Desi_wild_352</i>  | NA                                  | <i>Ca_desi_scaffold</i> | 352                     | T/G  | NA                 | INTERGENIC                    | NA                                              |
| <i>Desi_wild_1205</i> | NA                                  | <i>Ca_desi_scaffold</i> | 1205                    | G/A  | Gene_Ca_20699.1    | DOWNSTREAM                    | Uncharacterized mitochondrial protein AtMg01010 |
| <i>Desi_wild_1264</i> | NA                                  | <i>Ca_desi_scaffold</i> | 1264                    | C/T  | NA                 | INTERGENIC                    | NA                                              |
| <i>Desi_wild_1210</i> | NA                                  | <i>Ca_desi_scaffold</i> | 1210                    | G/C  | NA                 | INTERGENIC                    | NA                                              |
| <i>Desi_wild_1236</i> | NA                                  | <i>Ca_desi_scaffold</i> | 1236                    | T/C  | NA                 | INTERGENIC                    | NA                                              |
| <i>Desi_wild_1292</i> | NA                                  | <i>Ca_desi_scaffold</i> | 1292                    | T/C  | NA                 | INTERGENIC                    | NA                                              |
| <i>Desi_wild_1306</i> | NA                                  | <i>Ca_desi_scaffold</i> | 1306                    | C/T  | NA                 | INTERGENIC                    | NA                                              |
| <i>Desi_wild_1354</i> | NA                                  | <i>Ca_desi_scaffold</i> | 1354                    | A/G  | NA                 | INTERGENIC                    | NA                                              |
| <i>Desi_wild_1378</i> | NA                                  | <i>Ca_desi_scaffold</i> | 1378                    | T/C  | NA                 | INTERGENIC                    | NA                                              |
| <i>Desi_wild_1399</i> | NA                                  | <i>Ca_desi_scaffold</i> | 1399                    | G/A  | NA                 | INTERGENIC                    | NA                                              |
| <i>Desi_wild_1251</i> | NA                                  | <i>Ca_desi_scaffold</i> | 1251                    | G/A  | NA                 | INTERGENIC                    | NA                                              |
| <i>Desi_wild_1462</i> | NA                                  | <i>Ca_desi_scaffold</i> | 1462                    | C/T  | NA                 | INTERGENIC                    | NA                                              |
| <i>Desi_wild_1219</i> | NA                                  | <i>Ca_desi_scaffold</i> | 1219                    | C/T  | NA                 | INTERGENIC                    | NA                                              |
| <i>Desi_wild_1224</i> | NA                                  | <i>Ca_desi_scaffold</i> | 1224                    | T/C  | NA                 | INTERGENIC                    | NA                                              |
| <i>Desi_wild_1244</i> | NA                                  | <i>Ca_desi_scaffold</i> | 1244                    | C/T  | NA                 | INTERGENIC                    | NA                                              |
| <i>Desi_wild_1252</i> | NA                                  | <i>Ca_desi_scaffold</i> | 1252                    | G/T  | NA                 | INTERGENIC                    | NA                                              |
| <i>Desi_wild_1253</i> | NA                                  | <i>Ca_desi_scaffold</i> | 1253                    | T/G  | NA                 | INTERGENIC                    | NA                                              |
| <i>Desi_wild_1260</i> | NA                                  | <i>Ca_desi_scaffold</i> | 1260                    | A/C  | NA                 | INTERGENIC                    | NA                                              |
| <i>Desi_wild_1268</i> | NA                                  | <i>Ca_desi_scaffold</i> | 1268                    | A/G  | NA                 | INTERGENIC                    | NA                                              |
| <i>Desi_wild_1270</i> | NA                                  | <i>Ca_desi_scaffold</i> | 1270                    | T/C  | NA                 | INTERGENIC                    | NA                                              |
| <i>Desi_wild_1279</i> | NA                                  | <i>Ca_desi_scaffold</i> | 1279                    | G/A  | NA                 | INTERGENIC                    | NA                                              |
| <i>Desi_wild_468</i>  | NA                                  | <i>Ca_desi_scaffold</i> | 468                     | C/T  | Gene_Ca_20710.1    | SYNONYMOUS_CODING             | alpha/beta-Hydrolases superfamily protein       |
| <i>Desi_wild_505</i>  | NA                                  | <i>Ca_desi_scaffold</i> | 505                     | G/A  | Gene_Ca_20710.1    | SYNONYMOUS_CODING             | alpha/beta-Hydrolases superfamily protein       |
| <i>Desi_wild_1621</i> | NA                                  | <i>Ca_desi_scaffold</i> | 1621                    | G/T  | NA                 | INTERGENIC                    | NA                                              |
| <i>Desi_wild_1169</i> | NA                                  | <i>Ca_desi_scaffold</i> | 1169                    | G/A  | NA                 | INTERGENIC                    | NA                                              |
| <i>Desi_wild_1176</i> | NA                                  | <i>Ca_desi_scaffold</i> | 1176                    | G/T  | NA                 | INTERGENIC                    | NA                                              |
| <i>Desi_wild_1177</i> | NA                                  | <i>Ca_desi_scaffold</i> | 1177                    | A/T  | NA                 | INTERGENIC                    | NA                                              |
| <i>Desi_wild_1287</i> | NA                                  | <i>Ca_desi_scaffold</i> | 1287                    | C/G  | NA                 | INTERGENIC                    | NA                                              |
| <i>Desi_wild_1308</i> | NA                                  | <i>Ca_desi_scaffold</i> | 1308                    | G/A  | NA                 | INTERGENIC                    | NA                                              |
| <i>Desi_wild_1325</i> | NA                                  | <i>Ca_desi_scaffold</i> | 1325                    | C/T  | NA                 | INTERGENIC                    | NA                                              |
| <i>Desi_wild_1081</i> | NA                                  | <i>Ca_desi_scaffold</i> | 1081                    | T/C  | NA                 | INTERGENIC                    | NA                                              |
| <i>Desi_wild_1608</i> | NA                                  | <i>Ca_desi_scaffold</i> | 1608                    | G/T  | NA                 | INTERGENIC                    | NA                                              |
| <i>Desi_wild_1581</i> | NA                                  | <i>Ca_desi_scaffold</i> | 1581                    | G/A  | NA                 | INTERGENIC                    | NA                                              |



| SNP IDs               | NCBI dbSNP accession IDs (NCBI_SS#) | Chromosomes             | Physical positions (bp) | SNPs | Gene IDs | Gene accession | Sequence components of genome | Putative functions |
|-----------------------|-------------------------------------|-------------------------|-------------------------|------|----------|----------------|-------------------------------|--------------------|
| <i>Desi_wild_1593</i> | NA                                  | <i>Ca_desi_scaffold</i> | 1593                    | T/A  | NA       |                | INTERGENIC                    | NA                 |
| <i>Desi_wild_1430</i> | NA                                  | <i>Ca_desi_scaffold</i> | 1430                    | A/G  | NA       |                | INTERGENIC                    | NA                 |
| <i>Desi_wild_1452</i> | NA                                  | <i>Ca_desi_scaffold</i> | 1452                    | G/T  | NA       |                | INTERGENIC                    | NA                 |
| <i>Desi_wild_1258</i> | NA                                  | <i>Ca_desi_scaffold</i> | 1258                    | G/A  | NA       |                | INTERGENIC                    | NA                 |
| <i>Desi_wild_851</i>  | NA                                  | <i>Ca_desi_scaffold</i> | 851                     | G/T  | NA       |                | INTERGENIC                    | NA                 |
| <i>Desi_wild_938</i>  | NA                                  | <i>Ca_desi_scaffold</i> | 938                     | A/C  | NA       |                | INTERGENIC                    | NA                 |
| <i>Desi_wild_870</i>  | NA                                  | <i>Ca_desi_scaffold</i> | 870                     | G/A  | NA       |                | INTERGENIC                    | NA                 |
| <i>Desi_wild_1468</i> | NA                                  | <i>Ca_desi_scaffold</i> | 1468                    | A/T  | NA       |                | INTERGENIC                    | NA                 |
| <i>Desi_wild_1508</i> | NA                                  | <i>Ca_desi_scaffold</i> | 1508                    | T/A  | NA       |                | INTERGENIC                    | NA                 |
| <i>Desi_wild_1514</i> | NA                                  | <i>Ca_desi_scaffold</i> | 1514                    | G/T  | NA       |                | INTERGENIC                    | NA                 |
| <i>Desi_wild_1517</i> | NA                                  | <i>Ca_desi_scaffold</i> | 1517                    | C/A  | NA       |                | INTERGENIC                    | NA                 |
| <i>Desi_wild_1523</i> | NA                                  | <i>Ca_desi_scaffold</i> | 1523                    | T/A  | NA       |                | INTERGENIC                    | NA                 |
| <i>Desi_wild_1717</i> | NA                                  | <i>Ca_desi_scaffold</i> | 1717                    | C/A  | NA       |                | INTERGENIC                    | NA                 |
| <i>Desi_wild_940</i>  | NA                                  | <i>Ca_desi_scaffold</i> | 940                     | A/C  | NA       |                | INTERGENIC                    | NA                 |
| <i>Desi_wild_678</i>  | NA                                  | <i>Ca_desi_scaffold</i> | 678                     | T/G  | NA       |                | INTERGENIC                    | NA                 |
| <i>Desi_wild_1256</i> | NA                                  | <i>Ca_desi_scaffold</i> | 1256                    | G/A  | NA       |                | INTERGENIC                    | NA                 |
| <i>Desi_wild_1265</i> | NA                                  | <i>Ca_desi_scaffold</i> | 1265                    | C/A  | NA       |                | INTERGENIC                    | NA                 |
| <i>Desi_wild_1299</i> | NA                                  | <i>Ca_desi_scaffold</i> | 1299                    | C/A  | NA       |                | INTERGENIC                    | NA                 |
| <i>Desi_wild_1485</i> | NA                                  | <i>Ca_desi_scaffold</i> | 1485                    | C/G  | NA       |                | INTERGENIC                    | NA                 |
| <i>Desi_wild_1493</i> | NA                                  | <i>Ca_desi_scaffold</i> | 1493                    | G/A  | NA       |                | INTERGENIC                    | NA                 |
| <i>Desi_wild_1520</i> | NA                                  | <i>Ca_desi_scaffold</i> | 1520                    | C/T  | NA       |                | INTERGENIC                    | NA                 |
| <i>Desi_wild_1531</i> | NA                                  | <i>Ca_desi_scaffold</i> | 1531                    | C/T  | NA       |                | INTERGENIC                    | NA                 |
| <i>Desi_wild_1562</i> | NA                                  | <i>Ca_desi_scaffold</i> | 1562                    | C/T  | NA       |                | INTERGENIC                    | NA                 |
| <i>Desi_wild_954</i>  | NA                                  | <i>Ca_desi_scaffold</i> | 954                     | G/A  | NA       |                | INTERGENIC                    | NA                 |
| <i>Desi_wild_1540</i> | NA                                  | <i>Ca_desi_scaffold</i> | 1540                    | G/A  | NA       |                | INTERGENIC                    | NA                 |
| <i>Desi_wild_1444</i> | NA                                  | <i>Ca_desi_scaffold</i> | 1444                    | C/T  | NA       |                | INTERGENIC                    | NA                 |
| <i>Desi_wild_1497</i> | NA                                  | <i>Ca_desi_scaffold</i> | 1497                    | A/C  | NA       |                | INTERGENIC                    | NA                 |
| <i>Desi_wild_1533</i> | NA                                  | <i>Ca_desi_scaffold</i> | 1533                    | C/A  | NA       |                | INTERGENIC                    | NA                 |
| <i>Desi_wild_1570</i> | NA                                  | <i>Ca_desi_scaffold</i> | 1570                    | T/A  | NA       |                | INTERGENIC                    | NA                 |
| <i>Desi_wild_1136</i> | NA                                  | <i>Ca_desi_scaffold</i> | 1136                    | A/C  | NA       |                | INTERGENIC                    | NA                 |
| <i>Desi_wild_1138</i> | NA                                  | <i>Ca_desi_scaffold</i> | 1138                    | G/A  | NA       |                | INTERGENIC                    | NA                 |
| <i>Desi_wild_1162</i> | NA                                  | <i>Ca_desi_scaffold</i> | 1162                    | C/T  | NA       |                | INTERGENIC                    | NA                 |
| <i>Desi_wild_1163</i> | NA                                  | <i>Ca_desi_scaffold</i> | 1163                    | A/C  | NA       |                | INTERGENIC                    | NA                 |
| <i>Desi_wild_1187</i> | NA                                  | <i>Ca_desi_scaffold</i> | 1187                    | G/A  | NA       |                | INTERGENIC                    | NA                 |
| <i>Desi_wild_1104</i> | NA                                  | <i>Ca_desi_scaffold</i> | 1104                    | T/G  | NA       |                | INTERGENIC                    | NA                 |
| <i>Desi_wild_800</i>  | NA                                  | <i>Ca_desi_scaffold</i> | 800                     | G/T  | NA       |                | INTERGENIC                    | NA                 |
| <i>Desi_wild_1374</i> | NA                                  | <i>Ca_desi_scaffold</i> | 1374                    | A/T  | NA       |                | INTERGENIC                    | NA                 |
| <i>Desi_wild_700</i>  | NA                                  | <i>Ca_desi_scaffold</i> | 700                     | G/A  | NA       |                | INTERGENIC                    | NA                 |
| <i>Desi_wild_1166</i> | NA                                  | <i>Ca_desi_scaffold</i> | 1166                    | A/G  | NA       |                | INTERGENIC                    | NA                 |
| <i>Desi_wild_1425</i> | NA                                  | <i>Ca_desi_scaffold</i> | 1425                    | C/T  | NA       |                | INTERGENIC                    | NA                 |
| <i>Desi_wild_1426</i> | NA                                  | <i>Ca_desi_scaffold</i> | 1426                    | G/A  | NA       |                | INTERGENIC                    | NA                 |
| <i>Desi_wild_1441</i> | NA                                  | <i>Ca_desi_scaffold</i> | 1441                    | T/G  | NA       |                | INTERGENIC                    | NA                 |
| <i>Desi_wild_1448</i> | NA                                  | <i>Ca_desi_scaffold</i> | 1448                    | A/T  | NA       |                | INTERGENIC                    | NA                 |
| <i>Desi_wild_1465</i> | NA                                  | <i>Ca_desi_scaffold</i> | 1465                    | C/T  | NA       |                | INTERGENIC                    | NA                 |

| SNP IDs               | NCBI dbSNP accession IDs (NCBI_SS#) | Chromosomes             | Physical positions (bp) | SNPs | Gene accession IDs | Sequence components of genome | Putative functions                        |
|-----------------------|-------------------------------------|-------------------------|-------------------------|------|--------------------|-------------------------------|-------------------------------------------|
| <i>Desi_wild_1481</i> | NA                                  | <i>Ca_desi_scaffold</i> | 1481                    | C/G  | NA                 | INTERGENIC                    | NA                                        |
| <i>Desi_wild_1412</i> | NA                                  | <i>Ca_desi_scaffold</i> | 1412                    | G/A  | NA                 | INTERGENIC                    | NA                                        |
| <i>Desi_wild_798</i>  | NA                                  | <i>Ca_desi_scaffold</i> | 798                     | T/A  | NA                 | INTERGENIC                    | NA                                        |
| <i>Desi_wild_1315</i> | NA                                  | <i>Ca_desi_scaffold</i> | 1315                    | G/A  | NA                 | INTERGENIC                    | NA                                        |
| <i>Desi_wild_1355</i> | NA                                  | <i>Ca_desi_scaffold</i> | 1355                    | C/T  | NA                 | INTERGENIC                    | NA                                        |
| <i>Desi_wild_1436</i> | NA                                  | <i>Ca_desi_scaffold</i> | 1436                    | T/A  | NA                 | INTERGENIC                    | NA                                        |
| <i>Desi_wild_1064</i> | NA                                  | <i>Ca_desi_scaffold</i> | 1064                    | T/C  | NA                 | INTERGENIC                    | NA                                        |
| <i>Desi_wild_1149</i> | NA                                  | <i>Ca_desi_scaffold</i> | 1149                    | C/T  | NA                 | INTERGENIC                    | NA                                        |
| <i>Desi_wild_1409</i> | NA                                  | <i>Ca_desi_scaffold</i> | 1409                    | A/T  | NA                 | INTERGENIC                    | NA                                        |
| <i>Desi_wild_1427</i> | NA                                  | <i>Ca_desi_scaffold</i> | 1427                    | C/T  | NA                 | INTERGENIC                    | NA                                        |
| <i>Desi_wild_1327</i> | NA                                  | <i>Ca_desi_scaffold</i> | 1327                    | G/T  | NA                 | INTERGENIC                    | NA                                        |
| <i>Desi_wild_745</i>  | NA                                  | <i>Ca_desi_scaffold</i> | 745                     | C/A  | NA                 | INTERGENIC                    | NA                                        |
| <i>Desi_wild_1006</i> | NA                                  | <i>Ca_desi_scaffold</i> | 1006                    | G/T  | NA                 | INTERGENIC                    | NA                                        |
| <i>Desi_wild_1071</i> | NA                                  | <i>Ca_desi_scaffold</i> | 1071                    | T/G  | NA                 | INTERGENIC                    | NA                                        |
| <i>Desi_wild_1208</i> | NA                                  | <i>Ca_desi_scaffold</i> | 1208                    | C/A  | NA                 | INTERGENIC                    | NA                                        |
| <i>Desi_wild_1211</i> | NA                                  | <i>Ca_desi_scaffold</i> | 1211                    | T/C  | NA                 | INTERGENIC                    | NA                                        |
| <i>Desi_wild_1271</i> | NA                                  | <i>Ca_desi_scaffold</i> | 1271                    | T/C  | Gene_Ca_20838.1    | UPSTREAM                      | Late embryogenesis abundant protein B19.3 |
| <i>Desi_wild_1099</i> | NA                                  | <i>Ca_desi_scaffold</i> | 1099                    | G/A  | NA                 | INTERGENIC                    | NA                                        |
| <i>Desi_wild_834</i>  | NA                                  | <i>Ca_desi_scaffold</i> | 834                     | A/C  | NA                 | INTERGENIC                    | NA                                        |
| <i>Desi_wild_839</i>  | NA                                  | <i>Ca_desi_scaffold</i> | 839                     | A/G  | NA                 | INTERGENIC                    | NA                                        |
| <i>Desi_wild_1013</i> | NA                                  | <i>Ca_desi_scaffold</i> | 1013                    | A/T  | NA                 | INTERGENIC                    | NA                                        |
| <i>Desi_wild_1164</i> | NA                                  | <i>Ca_desi_scaffold</i> | 1164                    | A/T  | NA                 | INTERGENIC                    | NA                                        |
| <i>Desi_wild_1039</i> | NA                                  | <i>Ca_desi_scaffold</i> | 1039                    | A/T  | NA                 | INTERGENIC                    | NA                                        |
| <i>Desi_wild_1068</i> | NA                                  | <i>Ca_desi_scaffold</i> | 1068                    | C/T  | NA                 | INTERGENIC                    | NA                                        |
| <i>Desi_wild_1294</i> | NA                                  | <i>Ca_desi_scaffold</i> | 1294                    | A/G  | NA                 | INTERGENIC                    | NA                                        |
| <i>Desi_wild_827</i>  | NA                                  | <i>Ca_desi_scaffold</i> | 827                     | C/T  | NA                 | INTERGENIC                    | NA                                        |
| <i>Desi_wild_944</i>  | NA                                  | <i>Ca_desi_scaffold</i> | 944                     | T/C  | NA                 | INTERGENIC                    | NA                                        |
| <i>Desi_wild_1034</i> | NA                                  | <i>Ca_desi_scaffold</i> | 1034                    | C/T  | NA                 | INTERGENIC                    | NA                                        |
| <i>Desi_wild_608</i>  | NA                                  | <i>Ca_desi_scaffold</i> | 608                     | C/T  | NA                 | INTERGENIC                    | NA                                        |
| <i>Desi_wild_1079</i> | NA                                  | <i>Ca_desi_scaffold</i> | 1079                    | C/T  | NA                 | INTERGENIC                    | NA                                        |
| <i>Desi_wild_1124</i> | NA                                  | <i>Ca_desi_scaffold</i> | 1124                    | A/C  | NA                 | INTERGENIC                    | NA                                        |
| <i>Desi_wild_1160</i> | NA                                  | <i>Ca_desi_scaffold</i> | 1160                    | C/A  | NA                 | INTERGENIC                    | NA                                        |
| <i>Desi_wild_904</i>  | NA                                  | <i>Ca_desi_scaffold</i> | 904                     | C/T  | NA                 | INTERGENIC                    | NA                                        |
| <i>Desi_wild_960</i>  | NA                                  | <i>Ca_desi_scaffold</i> | 960                     | G/A  | NA                 | INTERGENIC                    | NA                                        |
| <i>Desi_wild_807</i>  | NA                                  | <i>Ca_desi_scaffold</i> | 807                     | T/C  | NA                 | INTERGENIC                    | NA                                        |
| <i>Desi_wild_869</i>  | NA                                  | <i>Ca_desi_scaffold</i> | 869                     | G/T  | NA                 | INTERGENIC                    | NA                                        |
| <i>Desi_wild_1004</i> | NA                                  | <i>Ca_desi_scaffold</i> | 1004                    | C/T  | NA                 | INTERGENIC                    | NA                                        |
| <i>Desi_wild_1025</i> | NA                                  | <i>Ca_desi_scaffold</i> | 1025                    | C/T  | NA                 | INTERGENIC                    | NA                                        |
| <i>Desi_wild_680</i>  | NA                                  | <i>Ca_desi_scaffold</i> | 680                     | C/T  | NA                 | INTERGENIC                    | NA                                        |
| <i>Desi_wild_822</i>  | NA                                  | <i>Ca_desi_scaffold</i> | 822                     | C/T  | NA                 | INTERGENIC                    | NA                                        |
| <i>Desi_wild_833</i>  | NA                                  | <i>Ca_desi_scaffold</i> | 833                     | A/G  | NA                 | INTERGENIC                    | NA                                        |
| <i>Desi_wild_539</i>  | NA                                  | <i>Ca_desi_scaffold</i> | 539                     | A/G  | Gene_Ca_21000.1    | SYNONYMOUS_CODING             | NA                                        |
| <i>Desi_wild_548</i>  | NA                                  | <i>Ca_desi_scaffold</i> | 548                     | G/A  | NA                 | INTERGENIC                    | NA                                        |
| <i>Desi_wild_689</i>  | NA                                  | <i>Ca_desi_scaffold</i> | 689                     | T/G  | NA                 | INTERGENIC                    | NA                                        |

| SNP IDs       | NCBI dbSNP accession IDs (NCBI_SS#) | Chromosomes      | Physical positions (bp) | SNPs | Gene accession IDs | Sequence components of genome | Putative functions                       |
|---------------|-------------------------------------|------------------|-------------------------|------|--------------------|-------------------------------|------------------------------------------|
| Desi_wild_815 | NA                                  | Ca_desi_scaffold | 815                     | T/G  | NA                 | INTERGENIC                    | NA                                       |
| Desi_wild_712 | NA                                  | Ca_desi_scaffold | 712                     | T/A  | NA                 | INTERGENIC                    | NA                                       |
| Desi_wild_616 | NA                                  | Ca_desi_scaffold | 616                     | A/C  | NA                 | INTERGENIC                    | NA                                       |
| Desi_wild_639 | NA                                  | Ca_desi_scaffold | 639                     | T/C  | Gene_Ca_21226.1    | SYNONYMOUS_CODING             | Carbamoyl-phosphate synthase large chain |
| Desi_wild_645 | NA                                  | Ca_desi_scaffold | 645                     | G/C  | Gene_Ca_21226.1    | SYNONYMOUS_CODING             | Carbamoyl-phosphate synthase large chain |
| Desi_wild_28  | NA                                  | Ca_desi_scaffold | 28                      | C/A  | NA                 | INTERGENIC                    | NA                                       |
| Desi_wild_35  | NA                                  | Ca_desi_scaffold | 35                      | G/A  | NA                 | INTERGENIC                    | NA                                       |
| Desi_wild_92  | NA                                  | Ca_desi_scaffold | 92                      | C/T  | NA                 | INTERGENIC                    | NA                                       |
| Desi_wild_103 | NA                                  | Ca_desi_scaffold | 103                     | A/T  | NA                 | INTERGENIC                    | NA                                       |
| Desi_wild_114 | NA                                  | Ca_desi_scaffold | 114                     | C/T  | NA                 | INTERGENIC                    | NA                                       |
| Desi_wild_139 | NA                                  | Ca_desi_scaffold | 139                     | C/T  | NA                 | INTERGENIC                    | NA                                       |
| Desi_wild_142 | NA                                  | Ca_desi_scaffold | 142                     | C/T  | NA                 | INTERGENIC                    | NA                                       |
| Desi_wild_157 | NA                                  | Ca_desi_scaffold | 157                     | G/T  | NA                 | INTERGENIC                    | NA                                       |
| Desi_wild_158 | NA                                  | Ca_desi_scaffold | 158                     | G/C  | NA                 | INTERGENIC                    | NA                                       |
| Desi_wild_185 | NA                                  | Ca_desi_scaffold | 185                     | G/C  | NA                 | INTERGENIC                    | NA                                       |
| Desi_wild_269 | NA                                  | Ca_desi_scaffold | 269                     | C/T  | NA                 | INTERGENIC                    | NA                                       |
| Desi_wild_272 | NA                                  | Ca_desi_scaffold | 272                     | G/A  | NA                 | INTERGENIC                    | NA                                       |
| Desi_wild_307 | NA                                  | Ca_desi_scaffold | 307                     | A/C  | NA                 | INTERGENIC                    | NA                                       |
| Desi_wild_323 | NA                                  | Ca_desi_scaffold | 323                     | A/C  | NA                 | INTERGENIC                    | NA                                       |
| Desi_wild_207 | NA                                  | Ca_desi_scaffold | 207                     | C/T  | NA                 | INTERGENIC                    | NA                                       |
| Desi_wild_247 | NA                                  | Ca_desi_scaffold | 247                     | T/G  | NA                 | INTERGENIC                    | NA                                       |
| Desi_wild_255 | NA                                  | Ca_desi_scaffold | 255                     | G/A  | NA                 | INTERGENIC                    | NA                                       |
| Desi_wild_258 | NA                                  | Ca_desi_scaffold | 258                     | G/A  | NA                 | INTERGENIC                    | NA                                       |
| Desi_wild_278 | NA                                  | Ca_desi_scaffold | 278                     | T/C  | NA                 | INTERGENIC                    | NA                                       |
| Desi_wild_314 | NA                                  | Ca_desi_scaffold | 314                     | A/T  | NA                 | INTERGENIC                    | NA                                       |
| Desi_wild_320 | NA                                  | Ca_desi_scaffold | 320                     | C/T  | NA                 | INTERGENIC                    | NA                                       |
| Desi_wild_253 | NA                                  | Ca_desi_scaffold | 253                     | C/T  | NA                 | INTERGENIC                    | NA                                       |
| Desi_wild_115 | NA                                  | Ca_desi_scaffold | 115                     | C/T  | NA                 | INTERGENIC                    | NA                                       |
| Desi_wild_122 | NA                                  | Ca_desi_scaffold | 122                     | G/T  | NA                 | INTERGENIC                    | NA                                       |
| Desi_wild_99  | NA                                  | Ca_desi_scaffold | 99                      | C/G  | Gene_Ca_21630.1    | SYNONYMOUS_CODING             | Elongation factor Tu                     |
| Desi_wild_108 | NA                                  | Ca_desi_scaffold | 108                     | G/A  | Gene_Ca_21630.1    | SYNONYMOUS_CODING             | Elongation factor Tu                     |
| Desi_wild_117 | NA                                  | Ca_desi_scaffold | 117                     | C/G  | Gene_Ca_21630.1    | SYNONYMOUS_CODING             | Elongation factor Tu                     |
| Desi_wild_126 | NA                                  | Ca_desi_scaffold | 126                     | A/G  | Gene_Ca_21630.1    | SYNONYMOUS_CODING             | Elongation factor Tu                     |
| Desi_wild_141 | NA                                  | Ca_desi_scaffold | 141                     | G/A  | Gene_Ca_21630.1    | SYNONYMOUS_CODING             | Elongation factor Tu                     |
| Desi_wild_145 | NA                                  | Ca_desi_scaffold | 145                     | A/T  | Gene_Ca_21630.1    | SYNONYMOUS_CODING             | Elongation factor Tu                     |
| Desi_wild_147 | NA                                  | Ca_desi_scaffold | 147                     | G/C  | Gene_Ca_21630.1    | SYNONYMOUS_CODING             | Elongation factor Tu                     |
| Desi_wild_149 | NA                                  | Ca_desi_scaffold | 149                     | C/G  | Gene_Ca_21630.1    | NON_SYNONYMOUS_CODING         | Elongation factor Tu                     |
| Desi_wild_150 | NA                                  | Ca_desi_scaffold | 150                     | C/G  | Gene_Ca_21630.1    | SYNONYMOUS_CODING             | Elongation factor Tu                     |
| Desi_wild_152 | NA                                  | Ca_desi_scaffold | 152                     | A/T  | Gene_Ca_21630.1    | SYNONYMOUS_CODING             | Elongation factor Tu                     |
| Desi_wild_153 | NA                                  | Ca_desi_scaffold | 153                     | T/C  | Gene_Ca_21630.1    | SYNONYMOUS_CODING             | Elongation factor Tu                     |
| Desi_wild_159 | NA                                  | Ca_desi_scaffold | 159                     | C/T  | Gene_Ca_21630.1    | SYNONYMOUS_CODING             | Elongation factor Tu                     |
| Desi_wild_171 | NA                                  | Ca_desi_scaffold | 171                     | G/C  | Gene_Ca_21630.1    | SYNONYMOUS_CODING             | Elongation factor Tu                     |
| Desi_wild_174 | NA                                  | Ca_desi_scaffold | 174                     | G/C  | Gene_Ca_21630.1    | NON_SYNONYMOUS_CODING         | Elongation factor Tu                     |
| Desi_wild_175 | NA                                  | Ca_desi_scaffold | 175                     | T/G  | Gene_Ca_21630.1    | NON_SYNONYMOUS_CODING         | Elongation factor Tu                     |

| SNP IDs       | NCBI dbSNP accession IDs (NCBI_SS#) | Chromosomes      | Physical positions (bp) | SNPs | Gene accession IDs | Sequence components of genome | Putative functions                         |
|---------------|-------------------------------------|------------------|-------------------------|------|--------------------|-------------------------------|--------------------------------------------|
| Desi_wild_176 | NA                                  | Ca_desi_scaffold | 176                     | T/A  | Gene_Ca_21630.1    | NON_SYNONYMOUS_CODING         | Elongation factor Tu                       |
| Desi_wild_180 | NA                                  | Ca_desi_scaffold | 180                     | G/C  | Gene_Ca_21630.1    | SYNONYMOUS_CODING             | Elongation factor Tu                       |
| Desi_wild_195 | NA                                  | Ca_desi_scaffold | 195                     | T/C  | Gene_Ca_21630.1    | SYNONYMOUS_CODING             | Elongation factor Tu                       |
| Desi_wild_228 | NA                                  | Ca_desi_scaffold | 228                     | G/C  | Gene_Ca_21630.1    | SYNONYMOUS_CODING             | Elongation factor Tu                       |
| Desi_wild_261 | NA                                  | Ca_desi_scaffold | 261                     | A/C  | Gene_Ca_21630.1    | SYNONYMOUS_CODING             | Elongation factor Tu                       |
| Desi_wild_264 | NA                                  | Ca_desi_scaffold | 264                     | G/C  | Gene_Ca_21630.1    | SYNONYMOUS_CODING             | Elongation factor Tu                       |
| Desi_wild_169 | NA                                  | Ca_desi_scaffold | 169                     | A/G  | NA                 | INTERGENIC                    | NA                                         |
| Desi_wild_206 | NA                                  | Ca_desi_scaffold | 206                     | C/A  | NA                 | INTERGENIC                    | NA                                         |
| Desi_wild_155 | NA                                  | Ca_desi_scaffold | 155                     | A/G  | NA                 | INTERGENIC                    | NA                                         |
| Desi_wild_292 | NA                                  | Ca_desi_scaffold | 292                     | C/T  | NA                 | INTERGENIC                    | NA                                         |
| Desi_wild_293 | NA                                  | Ca_desi_scaffold | 293                     | A/G  | NA                 | INTERGENIC                    | NA                                         |
| Desi_wild_298 | NA                                  | Ca_desi_scaffold | 298                     | C/T  | NA                 | INTERGENIC                    | NA                                         |
| Desi_wild_311 | NA                                  | Ca_desi_scaffold | 311                     | A/T  | NA                 | INTERGENIC                    | NA                                         |
| Desi_wild_316 | NA                                  | Ca_desi_scaffold | 316                     | A/C  | NA                 | INTERGENIC                    | NA                                         |
| Desi_wild_317 | NA                                  | Ca_desi_scaffold | 317                     | A/G  | NA                 | INTERGENIC                    | NA                                         |
| Desi_wild_328 | NA                                  | Ca_desi_scaffold | 328                     | C/T  | NA                 | INTERGENIC                    | NA                                         |
| Desi_wild_333 | NA                                  | Ca_desi_scaffold | 333                     | A/G  | NA                 | INTERGENIC                    | NA                                         |
| Desi_wild_42  | NA                                  | Ca_desi_scaffold | 42                      | T/G  | NA                 | INTERGENIC                    | NA                                         |
| Desi_wild_56  | NA                                  | Ca_desi_scaffold | 56                      | A/T  | NA                 | INTERGENIC                    | NA                                         |
| Desi_wild_93  | NA                                  | Ca_desi_scaffold | 93                      | G/T  | NA                 | INTERGENIC                    | NA                                         |
| Desi_wild_98  | NA                                  | Ca_desi_scaffold | 98                      | T/C  | NA                 | INTERGENIC                    | NA                                         |
| Desi_wild_107 | NA                                  | Ca_desi_scaffold | 107                     | C/T  | NA                 | INTERGENIC                    | NA                                         |
| Desi_wild_109 | NA                                  | Ca_desi_scaffold | 109                     | G/A  | NA                 | INTERGENIC                    | NA                                         |
| Desi_wild_111 | NA                                  | Ca_desi_scaffold | 111                     | T/A  | NA                 | INTERGENIC                    | NA                                         |
| Desi_wild_112 | NA                                  | Ca_desi_scaffold | 112                     | C/A  | NA                 | INTERGENIC                    | NA                                         |
| Desi_wild_186 | NA                                  | Ca_desi_scaffold | 186                     | C/A  | NA                 | INTERGENIC                    | NA                                         |
| Desi_wild_230 | NA                                  | Ca_desi_scaffold | 230                     | C/T  | NA                 | INTERGENIC                    | NA                                         |
| Desi_wild_239 | NA                                  | Ca_desi_scaffold | 239                     | T/G  | NA                 | INTERGENIC                    | NA                                         |
| Desi_wild_182 | NA                                  | Ca_desi_scaffold | 182                     | G/A  | NA                 | INTERGENIC                    | NA                                         |
| Desi_wild_72  | NA                                  | Ca_desi_scaffold | 72                      | C/T  | NA                 | INTERGENIC                    | NA                                         |
| Desi_wild_80  | NA                                  | Ca_desi_scaffold | 80                      | A/G  | NA                 | INTERGENIC                    | NA                                         |
| Desi_wild_91  | NA                                  | Ca_desi_scaffold | 91                      | G/A  | NA                 | INTERGENIC                    | NA                                         |
| Desi_wild_41  | NA                                  | Ca_desi_scaffold | 41                      | C/T  | NA                 | INTERGENIC                    | NA                                         |
| Desi_wild_205 | NA                                  | Ca_desi_scaffold | 205                     | T/A  | NA                 | INTERGENIC                    | NA                                         |
| Desi_wild_214 | NA                                  | Ca_desi_scaffold | 214                     | C/T  | NA                 | INTERGENIC                    | NA                                         |
| Desi_wild_335 | NA                                  | Ca_desi_scaffold | 335                     | A/G  | NA                 | INTERGENIC                    | NA                                         |
| Desi_wild_242 | NA                                  | Ca_desi_scaffold | 242                     | C/G  | Gene_Ca_21639.1    | SYNONYMOUS_CODING             | Methionine import ATP-binding protein MetN |
| Desi_wild_251 | NA                                  | Ca_desi_scaffold | 251                     | C/G  | Gene_Ca_21639.1    | SYNONYMOUS_CODING             | Methionine import ATP-binding protein MetN |
| Desi_wild_89  | NA                                  | Ca_desi_scaffold | 89                      | G/A  | NA                 | INTERGENIC                    | NA                                         |
| Desi_wild_106 | NA                                  | Ca_desi_scaffold | 106                     | T/C  | NA                 | INTERGENIC                    | NA                                         |
| Desi_wild_23  | NA                                  | Ca_desi_scaffold | 23                      | T/C  | NA                 | INTERGENIC                    | NA                                         |
| Desi_wild_24  | NA                                  | Ca_desi_scaffold | 24                      | A/C  | NA                 | INTERGENIC                    | NA                                         |
| Desi_wild_25  | NA                                  | Ca_desi_scaffold | 25                      | G/A  | NA                 | INTERGENIC                    | NA                                         |
| Desi_wild_71  | NA                                  | Ca_desi_scaffold | 71                      | T/C  | NA                 | INTERGENIC                    | NA                                         |

| SNP IDs              | NCBI dbSNP accession IDs (NCBI_SS#) | Chromosomes             | Physical positions (bp) | SNPs | Gene IDs | Sequence components of genome | Putative functions |
|----------------------|-------------------------------------|-------------------------|-------------------------|------|----------|-------------------------------|--------------------|
| <i>Desi_wild_73</i>  | NA                                  | <i>Ca_desi_scaffold</i> | 73                      | G/T  | NA       | INTERGENIC                    | NA                 |
| <i>Desi_wild_287</i> | NA                                  | <i>Ca_desi_scaffold</i> | 287                     | G/A  | NA       | INTERGENIC                    | NA                 |
| <i>Desi_wild_188</i> | NA                                  | <i>Ca_desi_scaffold</i> | 188                     | C/A  | NA       | INTERGENIC                    | NA                 |
| <i>Desi_wild_225</i> | NA                                  | <i>Ca_desi_scaffold</i> | 225                     | T/C  | NA       | INTERGENIC                    | NA                 |
| <i>Desi_wild_235</i> | NA                                  | <i>Ca_desi_scaffold</i> | 235                     | C/T  | NA       | INTERGENIC                    | NA                 |
| <i>Desi_wild_274</i> | NA                                  | <i>Ca_desi_scaffold</i> | 274                     | A/T  | NA       | INTERGENIC                    | NA                 |
| <i>Desi_wild_283</i> | NA                                  | <i>Ca_desi_scaffold</i> | 283                     | C/T  | NA       | INTERGENIC                    | NA                 |
| <i>Desi_wild_284</i> | NA                                  | <i>Ca_desi_scaffold</i> | 284                     | G/A  | NA       | INTERGENIC                    | NA                 |
| <i>Desi_wild_62</i>  | NA                                  | <i>Ca_desi_scaffold</i> | 62                      | C/T  | NA       | INTERGENIC                    | NA                 |
| <i>Desi_wild_131</i> | NA                                  | <i>Ca_desi_scaffold</i> | 131                     | G/A  | NA       | INTERGENIC                    | NA                 |
| <i>Desi_wild_259</i> | NA                                  | <i>Ca_desi_scaffold</i> | 259                     | A/C  | NA       | INTERGENIC                    | NA                 |
| <i>Desi_wild_280</i> | NA                                  | <i>Ca_desi_scaffold</i> | 280                     | G/A  | NA       | INTERGENIC                    | NA                 |
| <i>Desi_wild_229</i> | NA                                  | <i>Ca_desi_scaffold</i> | 229                     | T/C  | NA       | INTERGENIC                    | NA                 |
| <i>Desi_wild_110</i> | NA                                  | <i>Ca_desi_scaffold</i> | 110                     | G/A  | NA       | INTERGENIC                    | NA                 |
| <i>Desi_wild_275</i> | NA                                  | <i>Ca_desi_scaffold</i> | 275                     | T/A  | NA       | INTERGENIC                    | NA                 |
| <i>Desi_wild_234</i> | NA                                  | <i>Ca_desi_scaffold</i> | 234                     | G/A  | NA       | INTERGENIC                    | NA                 |
| <i>Desi_wild_132</i> | NA                                  | <i>Ca_desi_scaffold</i> | 132                     | G/T  | NA       | INTERGENIC                    | NA                 |
| <i>Desi_wild_143</i> | NA                                  | <i>Ca_desi_scaffold</i> | 143                     | C/G  | NA       | INTERGENIC                    | NA                 |
| <i>Desi_wild_163</i> | NA                                  | <i>Ca_desi_scaffold</i> | 163                     | T/C  | NA       | INTERGENIC                    | NA                 |
| <i>Desi_wild_166</i> | NA                                  | <i>Ca_desi_scaffold</i> | 166                     | C/T  | NA       | INTERGENIC                    | NA                 |
| <i>Desi_wild_208</i> | NA                                  | <i>Ca_desi_scaffold</i> | 208                     | C/G  | NA       | INTERGENIC                    | NA                 |
| <i>Desi_wild_50</i>  | NA                                  | <i>Ca_desi_scaffold</i> | 50                      | G/T  | NA       | INTERGENIC                    | NA                 |
| <i>Desi_wild_68</i>  | NA                                  | <i>Ca_desi_scaffold</i> | 68                      | C/A  | NA       | INTERGENIC                    | NA                 |
| <i>Desi_wild_82</i>  | NA                                  | <i>Ca_desi_scaffold</i> | 82                      | C/T  | NA       | INTERGENIC                    | NA                 |
| <i>Desi_wild_86</i>  | NA                                  | <i>Ca_desi_scaffold</i> | 86                      | T/A  | NA       | INTERGENIC                    | NA                 |
| <i>Desi_wild_130</i> | NA                                  | <i>Ca_desi_scaffold</i> | 130                     | C/T  | NA       | INTERGENIC                    | NA                 |
| <i>Desi_wild_244</i> | NA                                  | <i>Ca_desi_scaffold</i> | 244                     | T/C  | NA       | INTERGENIC                    | NA                 |
| <i>Desi_wild_281</i> | NA                                  | <i>Ca_desi_scaffold</i> | 281                     | T/A  | NA       | INTERGENIC                    | NA                 |
| <i>Desi_wild_144</i> | NA                                  | <i>Ca_desi_scaffold</i> | 144                     | T/C  | NA       | INTERGENIC                    | NA                 |
| <i>Desi_wild_165</i> | NA                                  | <i>Ca_desi_scaffold</i> | 165                     | C/A  | NA       | INTERGENIC                    | NA                 |
| <i>Desi_wild_167</i> | NA                                  | <i>Ca_desi_scaffold</i> | 167                     | G/A  | NA       | INTERGENIC                    | NA                 |
| <i>Desi_wild_61</i>  | NA                                  | <i>Ca_desi_scaffold</i> | 61                      | A/C  | NA       | INTERGENIC                    | NA                 |
| <i>Desi_wild_84</i>  | NA                                  | <i>Ca_desi_scaffold</i> | 84                      | C/A  | NA       | INTERGENIC                    | NA                 |
| <i>Desi_wild_134</i> | NA                                  | <i>Ca_desi_scaffold</i> | 134                     | C/T  | NA       | INTERGENIC                    | NA                 |
| <i>Desi_wild_299</i> | NA                                  | <i>Ca_desi_scaffold</i> | 299                     | G/A  | NA       | INTERGENIC                    | NA                 |
| <i>Desi_wild_67</i>  | NA                                  | <i>Ca_desi_scaffold</i> | 67                      | G/A  | NA       | INTERGENIC                    | NA                 |
| <i>Desi_wild_125</i> | NA                                  | <i>Ca_desi_scaffold</i> | 125                     | G/A  | NA       | INTERGENIC                    | NA                 |
| <i>Desi_wild_221</i> | NA                                  | <i>Ca_desi_scaffold</i> | 221                     | C/A  | NA       | INTERGENIC                    | NA                 |
| <i>Desi_wild_279</i> | NA                                  | <i>Ca_desi_scaffold</i> | 279                     | G/C  | NA       | INTERGENIC                    | NA                 |
| <i>Desi_wild_301</i> | NA                                  | <i>Ca_desi_scaffold</i> | 301                     | C/T  | NA       | INTERGENIC                    | NA                 |
| <i>Desi_wild_309</i> | NA                                  | <i>Ca_desi_scaffold</i> | 309                     | G/A  | NA       | INTERGENIC                    | NA                 |
| <i>Desi_wild_216</i> | NA                                  | <i>Ca_desi_scaffold</i> | 216                     | C/A  | NA       | INTERGENIC                    | NA                 |
| <i>Desi_wild_306</i> | NA                                  | <i>Ca_desi_scaffold</i> | 306                     | G/T  | NA       | INTERGENIC                    | NA                 |
| <i>Desi_wild_220</i> | NA                                  | <i>Ca_desi_scaffold</i> | 220                     | C/A  | NA       | INTERGENIC                    | NA                 |

| SNP IDs              | NCBI dbSNP accession IDs (NCBI_SS#) | Chromosomes             | Physical positions (bp) | SNPs | Gene accession IDs | Sequence components of genome | Putative functions                          |
|----------------------|-------------------------------------|-------------------------|-------------------------|------|--------------------|-------------------------------|---------------------------------------------|
| <i>Desi_wild_135</i> | NA                                  | <i>Ca_desi_scaffold</i> | 135                     | G/A  | NA                 | INTERGENIC                    | NA                                          |
| <i>Desi_wild_324</i> | NA                                  | <i>Ca_desi_scaffold</i> | 324                     | T/G  | NA                 | INTERGENIC                    | NA                                          |
| <i>Desi_wild_257</i> | NA                                  | <i>Ca_desi_scaffold</i> | 257                     | A/G  | NA                 | INTERGENIC                    | NA                                          |
| <i>Desi_wild_183</i> | NA                                  | <i>Ca_desi_scaffold</i> | 183                     | G/T  | NA                 | INTERGENIC                    | NA                                          |
| <i>Desi_wild_268</i> | NA                                  | <i>Ca_desi_scaffold</i> | 268                     | C/T  | NA                 | INTERGENIC                    | NA                                          |
| <i>Desi_wild_300</i> | NA                                  | <i>Ca_desi_scaffold</i> | 300                     | G/A  | NA                 | INTERGENIC                    | NA                                          |
| <i>Desi_wild_18</i>  | NA                                  | <i>Ca_desi_scaffold</i> | 18                      | G/A  | NA                 | INTERGENIC                    | NA                                          |
| <i>Desi_wild_233</i> | NA                                  | <i>Ca_desi_scaffold</i> | 233                     | C/T  | NA                 | INTERGENIC                    | NA                                          |
| <i>Desi_wild_273</i> | NA                                  | <i>Ca_desi_scaffold</i> | 273                     | G/A  | NA                 | INTERGENIC                    | NA                                          |
| <i>Desi_wild_154</i> | NA                                  | <i>Ca_desi_scaffold</i> | 154                     | C/G  | NA                 | INTERGENIC                    | NA                                          |
| <i>Desi_wild_116</i> | NA                                  | <i>Ca_desi_scaffold</i> | 116                     | C/A  | NA                 | INTERGENIC                    | NA                                          |
| <i>Desi_wild_262</i> | NA                                  | <i>Ca_desi_scaffold</i> | 262                     | C/G  | Gene_Ca_21657.1    | DOWNSTREAM                    | Electron transfer flavoprotein subunit beta |
| <i>Desi_wild_295</i> | NA                                  | <i>Ca_desi_scaffold</i> | 295                     | C/G  | Gene_Ca_21657.1    | DOWNSTREAM                    | Electron transfer flavoprotein subunit beta |
| <i>Desi_wild_133</i> | NA                                  | <i>Ca_desi_scaffold</i> | 133                     | T/C  | NA                 | INTERGENIC                    | NA                                          |
| <i>Desi_wild_43</i>  | NA                                  | <i>Ca_desi_scaffold</i> | 43                      | A/C  | NA                 | INTERGENIC                    | NA                                          |
| <i>Desi_wild_44</i>  | NA                                  | <i>Ca_desi_scaffold</i> | 44                      | T/A  | NA                 | INTERGENIC                    | NA                                          |
| <i>Desi_wild_209</i> | NA                                  | <i>Ca_desi_scaffold</i> | 209                     | G/A  | NA                 | INTERGENIC                    | NA                                          |
| <i>Desi_wild_37</i>  | NA                                  | <i>Ca_desi_scaffold</i> | 37                      | C/T  | NA                 | INTERGENIC                    | NA                                          |
| <i>Desi_wild_260</i> | NA                                  | <i>Ca_desi_scaffold</i> | 260                     | T/A  | NA                 | INTERGENIC                    | NA                                          |
| <i>Desi_wild_48</i>  | NA                                  | <i>Ca_desi_scaffold</i> | 48                      | G/A  | NA                 | INTERGENIC                    | NA                                          |
| <i>Desi_wild_59</i>  | NA                                  | <i>Ca_desi_scaffold</i> | 59                      | C/T  | NA                 | INTERGENIC                    | NA                                          |
| <i>Desi_wild_66</i>  | NA                                  | <i>Ca_desi_scaffold</i> | 66                      | C/T  | NA                 | INTERGENIC                    | NA                                          |
| <i>Desi_wild_202</i> | NA                                  | <i>Ca_desi_scaffold</i> | 202                     | G/C  | NA                 | INTERGENIC                    | NA                                          |
| <i>Desi_wild_241</i> | NA                                  | <i>Ca_desi_scaffold</i> | 241                     | G/A  | NA                 | INTERGENIC                    | NA                                          |
| <i>Desi_wild_177</i> | NA                                  | <i>Ca_desi_scaffold</i> | 177                     | T/G  | NA                 | INTERGENIC                    | NA                                          |
| <i>Desi_wild_70</i>  | NA                                  | <i>Ca_desi_scaffold</i> | 70                      | G/A  | NA                 | INTERGENIC                    | NA                                          |
| <i>Desi_wild_77</i>  | NA                                  | <i>Ca_desi_scaffold</i> | 77                      | G/A  | NA                 | INTERGENIC                    | NA                                          |
| <i>Desi_wild_227</i> | NA                                  | <i>Ca_desi_scaffold</i> | 227                     | T/C  | NA                 | INTERGENIC                    | NA                                          |
| <i>Desi_wild_184</i> | NA                                  | <i>Ca_desi_scaffold</i> | 184                     | C/T  | NA                 | INTERGENIC                    | NA                                          |
| <i>Desi_wild_118</i> | NA                                  | <i>Ca_desi_scaffold</i> | 118                     | A/T  | NA                 | INTERGENIC                    | NA                                          |
| <i>Desi_wild_179</i> | NA                                  | <i>Ca_desi_scaffold</i> | 179                     | C/A  | NA                 | INTERGENIC                    | NA                                          |
| <i>Desi_wild_181</i> | NA                                  | <i>Ca_desi_scaffold</i> | 181                     | G/A  | NA                 | INTERGENIC                    | NA                                          |
| <i>Desi_wild_189</i> | NA                                  | <i>Ca_desi_scaffold</i> | 189                     | C/T  | NA                 | INTERGENIC                    | NA                                          |
| <i>Desi_wild_217</i> | NA                                  | <i>Ca_desi_scaffold</i> | 217                     | G/A  | NA                 | INTERGENIC                    | NA                                          |
| <i>Desi_wild_121</i> | NA                                  | <i>Ca_desi_scaffold</i> | 121                     | C/T  | NA                 | INTERGENIC                    | NA                                          |
| <i>Desi_wild_196</i> | NA                                  | <i>Ca_desi_scaffold</i> | 196                     | T/C  | NA                 | INTERGENIC                    | NA                                          |
| <i>Desi_wild_105</i> | NA                                  | <i>Ca_desi_scaffold</i> | 105                     | A/C  | NA                 | INTERGENIC                    | NA                                          |
| <i>Desi_wild_248</i> | NA                                  | <i>Ca_desi_scaffold</i> | 248                     | A/C  | NA                 | INTERGENIC                    | NA                                          |
| <i>Desi_wild_90</i>  | NA                                  | <i>Ca_desi_scaffold</i> | 90                      | G/A  | NA                 | INTERGENIC                    | NA                                          |
| <i>Desi_wild_266</i> | NA                                  | <i>Ca_desi_scaffold</i> | 266                     | G/A  | NA                 | INTERGENIC                    | NA                                          |
| <i>Desi_wild_87</i>  | NA                                  | <i>Ca_desi_scaffold</i> | 87                      | G/A  | NA                 | INTERGENIC                    | NA                                          |
| <i>Desi_wild_113</i> | NA                                  | <i>Ca_desi_scaffold</i> | 113                     | G/A  | NA                 | INTERGENIC                    | NA                                          |
| <i>Desi_wild_47</i>  | NA                                  | <i>Ca_desi_scaffold</i> | 47                      | G/A  | NA                 | INTERGENIC                    | NA                                          |
| <i>Desi_wild_75</i>  | NA                                  | <i>Ca_desi_scaffold</i> | 75                      | C/T  | NA                 | INTERGENIC                    | NA                                          |

| SNP IDs              | NCBI dbSNP accession IDs (NCBI_SS#) | Chromosomes             | Physical positions (bp) | SNPs | Gene accession IDs | Sequence components of genome | Putative functions                                  |
|----------------------|-------------------------------------|-------------------------|-------------------------|------|--------------------|-------------------------------|-----------------------------------------------------|
| <i>Desi_wild_76</i>  | NA                                  | <i>Ca_desi_scaffold</i> | 76                      | G/C  | NA                 | INTERGENIC                    | NA                                                  |
| <i>Desi_wild_21</i>  | NA                                  | <i>Ca_desi_scaffold</i> | 21                      | A/C  | NA                 | INTERGENIC                    | NA                                                  |
| <i>Desi_wild_95</i>  | NA                                  | <i>Ca_desi_scaffold</i> | 95                      | C/T  | NA                 | INTERGENIC                    | NA                                                  |
| <i>Desi_wild_200</i> | NA                                  | <i>Ca_desi_scaffold</i> | 200                     | A/C  | NA                 | INTERGENIC                    | NA                                                  |
| <i>Desi_wild_16</i>  | NA                                  | <i>Ca_desi_scaffold</i> | 16                      | C/T  | NA                 | INTERGENIC                    | NA                                                  |
| <i>Desi_wild_74</i>  | NA                                  | <i>Ca_desi_scaffold</i> | 74                      | G/C  | NA                 | INTERGENIC                    | NA                                                  |
| <i>Desi_wild_172</i> | NA                                  | <i>Ca_desi_scaffold</i> | 172                     | T/A  | NA                 | INTERGENIC                    | NA                                                  |
| <i>Desi_wild_97</i>  | NA                                  | <i>Ca_desi_scaffold</i> | 97                      | C/T  | NA                 | INTERGENIC                    | NA                                                  |
| <i>Desi_wild_4</i>   | NA                                  | <i>Ca_desi_scaffold</i> | 4                       | A/G  | NA                 | INTERGENIC                    | NA                                                  |
| <i>Desi_wild_13</i>  | NA                                  | <i>Ca_desi_scaffold</i> | 13                      | G/A  | NA                 | INTERGENIC                    | NA                                                  |
| <i>Desi_wild_39</i>  | NA                                  | <i>Ca_desi_scaffold</i> | 39                      | T/C  | NA                 | INTERGENIC                    | NA                                                  |
| <i>Desi_wild_237</i> | NA                                  | <i>Ca_desi_scaffold</i> | 237                     | A/T  | NA                 | INTERGENIC                    | NA                                                  |
| <i>Desi_wild_252</i> | NA                                  | <i>Ca_desi_scaffold</i> | 252                     | C/T  | NA                 | INTERGENIC                    | NA                                                  |
| <i>Desi_wild_222</i> | NA                                  | <i>Ca_desi_scaffold</i> | 222                     | T/A  | NA                 | INTERGENIC                    | NA                                                  |
| <i>Desi_wild_83</i>  | NA                                  | <i>Ca_desi_scaffold</i> | 83                      | T/G  | NA                 | INTERGENIC                    | NA                                                  |
| <i>Desi_wild_96</i>  | NA                                  | <i>Ca_desi_scaffold</i> | 96                      | G/T  | NA                 | INTERGENIC                    | NA                                                  |
| <i>Desi_wild_129</i> | NA                                  | <i>Ca_desi_scaffold</i> | 129                     | G/C  | NA                 | INTERGENIC                    | NA                                                  |
| <i>Desi_wild_173</i> | NA                                  | <i>Ca_desi_scaffold</i> | 173                     | G/T  | NA                 | INTERGENIC                    | NA                                                  |
| <i>Desi_wild_211</i> | NA                                  | <i>Ca_desi_scaffold</i> | 211                     | G/T  | NA                 | INTERGENIC                    | NA                                                  |
| <i>Desi_wild_27</i>  | NA                                  | <i>Ca_desi_scaffold</i> | 27                      | G/T  | NA                 | INTERGENIC                    | NA                                                  |
| <i>Desi_wild_210</i> | NA                                  | <i>Ca_desi_scaffold</i> | 210                     | G/A  | NA                 | INTERGENIC                    | NA                                                  |
| <i>Desi_wild_212</i> | NA                                  | <i>Ca_desi_scaffold</i> | 212                     | G/A  | NA                 | INTERGENIC                    | NA                                                  |
| <i>Desi_wild_231</i> | NA                                  | <i>Ca_desi_scaffold</i> | 231                     | G/C  | NA                 | INTERGENIC                    | NA                                                  |
| <i>Desi_wild_128</i> | NA                                  | <i>Ca_desi_scaffold</i> | 128                     | G/C  | NA                 | INTERGENIC                    | NA                                                  |
| <i>Desi_wild_246</i> | NA                                  | <i>Ca_desi_scaffold</i> | 246                     | A/C  | NA                 | INTERGENIC                    | NA                                                  |
| <i>Desi_wild_224</i> | NA                                  | <i>Ca_desi_scaffold</i> | 224                     | T/C  | NA                 | INTERGENIC                    | NA                                                  |
| <i>Desi_wild_223</i> | NA                                  | <i>Ca_desi_scaffold</i> | 223                     | A/G  | NA                 | INTERGENIC                    | NA                                                  |
| <i>Desi_wild_19</i>  | NA                                  | <i>Ca_desi_scaffold</i> | 19                      | C/T  | NA                 | INTERGENIC                    | NA                                                  |
| <i>Desi_wild_160</i> | NA                                  | <i>Ca_desi_scaffold</i> | 160                     | G/C  | NA                 | INTERGENIC                    | NA                                                  |
| <i>Desi_wild_31</i>  | NA                                  | <i>Ca_desi_scaffold</i> | 31                      | C/T  | NA                 | INTERGENIC                    | NA                                                  |
| <i>Desi_wild_32</i>  | NA                                  | <i>Ca_desi_scaffold</i> | 32                      | G/A  | NA                 | INTERGENIC                    | NA                                                  |
| <i>Desi_wild_46</i>  | NA                                  | <i>Ca_desi_scaffold</i> | 46                      | C/T  | NA                 | INTERGENIC                    | NA                                                  |
| <i>Desi_wild_6</i>   | NA                                  | <i>Ca_desi_scaffold</i> | 6                       | C/A  | NA                 | INTERGENIC                    | NA                                                  |
| <i>Desi_wild_45</i>  | NA                                  | <i>Ca_desi_scaffold</i> | 45                      | C/A  | NA                 | INTERGENIC                    | NA                                                  |
| <i>Desi_wild_26</i>  | NA                                  | <i>Ca_desi_scaffold</i> | 26                      | T/C  | NA                 | INTERGENIC                    | NA                                                  |
| <i>Desi_wild_17</i>  | NA                                  | <i>Ca_desi_scaffold</i> | 17                      | T/A  | NA                 | INTERGENIC                    | NA                                                  |
| <i>Desi_wild_69</i>  | NA                                  | <i>Ca_desi_scaffold</i> | 69                      | C/T  | NA                 | INTERGENIC                    | NA                                                  |
| <i>Desi_wild_236</i> | NA                                  | <i>Ca_desi_scaffold</i> | 236                     | C/T  | NA                 | INTERGENIC                    | NA                                                  |
| <i>Desi_wild_136</i> | NA                                  | <i>Ca_desi_scaffold</i> | 136                     | C/A  | NA                 | INTERGENIC                    | NA                                                  |
| <i>Desi_wild_22</i>  | NA                                  | <i>Ca_desi_scaffold</i> | 22                      | G/A  | NA                 | INTERGENIC                    | NA                                                  |
| <i>Desi_wild_36</i>  | NA                                  | <i>Ca_desi_scaffold</i> | 36                      | G/A  | NA                 | INTERGENIC                    | NA                                                  |
| <i>Desi_wild_11</i>  | NA                                  | <i>Ca_desi_scaffold</i> | 11                      | G/A  | NA                 | INTERGENIC                    | NA                                                  |
| <i>Desi_wild_395</i> | NA                                  | <i>Ca_desi_scaffold</i> | 395                     | C/T  | Gene_Ca_21711.1    | UPSTREAM                      | Tyrocidine synthase 3                               |
| <i>Desi_wild_486</i> | NA                                  | <i>Ca_desi_scaffold</i> | 486                     | T/C  | Gene_Ca_21757.1    | SYNONYMOUS_CODING             | ATP-dependent Clp protease ATP-binding subunit ClpX |

| SNP IDs               | NCBI dbSNP accession IDs (NCBI_SS#) | Chromosomes             | Physical positions (bp) | SNPs | Gene accession IDs | Sequence components of genome | Putative functions                                  |
|-----------------------|-------------------------------------|-------------------------|-------------------------|------|--------------------|-------------------------------|-----------------------------------------------------|
| <i>Desi_wild_499</i>  | NA                                  | <i>Ca_desi_scaffold</i> | 499                     | G/C  | Gene_Ca_21757.1    | UPSTREAM                      | ATP-dependent Clp protease ATP-binding subunit ClpX |
| <i>Desi_wild_533</i>  | NA                                  | <i>Ca_desi_scaffold</i> | 533                     | G/T  | Gene_Ca_21757.1    | UPSTREAM                      | ATP-dependent Clp protease ATP-binding subunit ClpX |
| <i>Desi_wild_553</i>  | NA                                  | <i>Ca_desi_scaffold</i> | 553                     | T/C  | Gene_Ca_21757.1    | UPSTREAM                      | ATP-dependent Clp protease ATP-binding subunit ClpX |
| <i>Desi_wild_201</i>  | NA                                  | <i>Ca_desi_scaffold</i> | 201                     | A/G  | NA                 | INTERGENIC                    | NA                                                  |
| <i>Desi_wild_30</i>   | NA                                  | <i>Ca_desi_scaffold</i> | 30                      | A/G  | NA                 | INTERGENIC                    | NA                                                  |
| <i>Desi_wild_428</i>  | NA                                  | <i>Ca_desi_scaffold</i> | 428                     | T/C  | NA                 | INTERGENIC                    | NA                                                  |
| <i>Desi_wild_430</i>  | NA                                  | <i>Ca_desi_scaffold</i> | 430                     | G/T  | NA                 | INTERGENIC                    | NA                                                  |
| <i>Desi_wild_446</i>  | NA                                  | <i>Ca_desi_scaffold</i> | 446                     | C/A  | NA                 | INTERGENIC                    | NA                                                  |
| <i>Desi_wild_469</i>  | NA                                  | <i>Ca_desi_scaffold</i> | 469                     | G/C  | NA                 | INTERGENIC                    | NA                                                  |
| <i>Desi_wild_514</i>  | NA                                  | <i>Ca_desi_scaffold</i> | 514                     | C/G  | NA                 | INTERGENIC                    | NA                                                  |
| <i>Desi_wild_516</i>  | NA                                  | <i>Ca_desi_scaffold</i> | 516                     | C/G  | NA                 | INTERGENIC                    | NA                                                  |
| <i>Desi_wild_520</i>  | NA                                  | <i>Ca_desi_scaffold</i> | 520                     | G/C  | NA                 | INTERGENIC                    | NA                                                  |
| <i>Desi_wild_576</i>  | NA                                  | <i>Ca_desi_scaffold</i> | 576                     | A/G  | NA                 | INTERGENIC                    | NA                                                  |
| <i>Desi_wild_578</i>  | NA                                  | <i>Ca_desi_scaffold</i> | 578                     | A/C  | NA                 | INTERGENIC                    | NA                                                  |
| <i>Desi_wild_589</i>  | NA                                  | <i>Ca_desi_scaffold</i> | 589                     | C/G  | NA                 | INTERGENIC                    | NA                                                  |
| <i>Desi_wild_590</i>  | NA                                  | <i>Ca_desi_scaffold</i> | 590                     | T/A  | NA                 | INTERGENIC                    | NA                                                  |
| <i>Desi_wild_591</i>  | NA                                  | <i>Ca_desi_scaffold</i> | 591                     | T/C  | NA                 | INTERGENIC                    | NA                                                  |
| <i>Desi_wild_592</i>  | NA                                  | <i>Ca_desi_scaffold</i> | 592                     | C/G  | NA                 | INTERGENIC                    | NA                                                  |
| <i>Desi_wild_593</i>  | NA                                  | <i>Ca_desi_scaffold</i> | 593                     | G/A  | NA                 | INTERGENIC                    | NA                                                  |
| <i>Desi_wild_465</i>  | NA                                  | <i>Ca_desi_scaffold</i> | 465                     | A/G  | Gene_Ca_21896.1    | NON_SYNONYMOUS_CODING         | Probable ABC transporter permease protein y4oQ      |
| <i>Desi_wild_546</i>  | NA                                  | <i>Ca_desi_scaffold</i> | 546                     | G/A  | Gene_Ca_21896.1    | SYNONYMOUS_CODING             | Probable ABC transporter permease protein y4oQ      |
| <i>Desi_wild_547</i>  | NA                                  | <i>Ca_desi_scaffold</i> | 547                     | T/C  | Gene_Ca_21896.1    | SYNONYMOUS_CODING             | Probable ABC transporter permease protein y4oQ      |
| <i>Desi_wild_551</i>  | NA                                  | <i>Ca_desi_scaffold</i> | 551                     | T/C  | Gene_Ca_21896.1    | SYNONYMOUS_CODING             | Probable ABC transporter permease protein y4oQ      |
| <i>Desi_wild_563</i>  | NA                                  | <i>Ca_desi_scaffold</i> | 563                     | G/C  | Gene_Ca_21896.1    | SYNONYMOUS_CODING             | Probable ABC transporter permease protein y4oQ      |
| <i>Desi_wild_572</i>  | NA                                  | <i>Ca_desi_scaffold</i> | 572                     | C/G  | Gene_Ca_21896.1    | SYNONYMOUS_CODING             | Probable ABC transporter permease protein y4oQ      |
| <i>Desi_wild_676</i>  | NA                                  | <i>Ca_desi_scaffold</i> | 676                     | G/T  | Gene_Ca_21896.1    | NON_SYNONYMOUS_CODING         | Probable ABC transporter permease protein y4oQ      |
| <i>Desi_wild_684</i>  | NA                                  | <i>Ca_desi_scaffold</i> | 684                     | G/T  | Gene_Ca_21896.1    | NON_SYNONYMOUS_CODING         | Probable ABC transporter permease protein y4oQ      |
| <i>Desi_wild_695</i>  | NA                                  | <i>Ca_desi_scaffold</i> | 695                     | C/T  | Gene_Ca_21896.1    | SYNONYMOUS_CODING             | Probable ABC transporter permease protein y4oQ      |
| <i>Desi_wild_1329</i> | NA                                  | <i>Ca_desi_scaffold</i> | 1329                    | G/T  | Gene_Ca_21896.1    | SYNONYMOUS_CODING             | Probable ABC transporter permease protein y4oQ      |
| <i>Desi_wild_1338</i> | NA                                  | <i>Ca_desi_scaffold</i> | 1338                    | C/G  | Gene_Ca_21896.1    | SYNONYMOUS_CODING             | Probable ABC transporter permease protein y4oQ      |
| <i>Desi_wild_1342</i> | NA                                  | <i>Ca_desi_scaffold</i> | 1342                    | T/A  | Gene_Ca_21896.1    | NON_SYNONYMOUS_CODING         | Probable ABC transporter permease protein y4oQ      |
| <i>Desi_wild_1343</i> | NA                                  | <i>Ca_desi_scaffold</i> | 1343                    | C/G  | Gene_Ca_21896.1    | NON_SYNONYMOUS_CODING         | Probable ABC transporter permease protein y4oQ      |
| <i>Desi_wild_1344</i> | NA                                  | <i>Ca_desi_scaffold</i> | 1344                    | G/C  | Gene_Ca_21896.1    | SYNONYMOUS_CODING             | Probable ABC transporter permease protein y4oQ      |
| <i>Desi_wild_1352</i> | NA                                  | <i>Ca_desi_scaffold</i> | 1352                    | A/G  | Gene_Ca_21896.1    | NON_SYNONYMOUS_CODING         | Probable ABC transporter permease protein y4oQ      |
| <i>Desi_wild_1356</i> | NA                                  | <i>Ca_desi_scaffold</i> | 1356                    | C/T  | Gene_Ca_21896.1    | SYNONYMOUS_CODING             | Probable ABC transporter permease protein y4oQ      |
| <i>Desi_wild_1359</i> | NA                                  | <i>Ca_desi_scaffold</i> | 1359                    | C/G  | Gene_Ca_21896.1    | SYNONYMOUS_CODING             | Probable ABC transporter permease protein y4oQ      |
| <i>Desi_wild_1122</i> | NA                                  | <i>Ca_desi_scaffold</i> | 1122                    | G/C  | Gene_Ca_21932.1    | SYNONYMOUS_CODING             | Protein translocase subunit SecD                    |
| <i>Desi_wild_1209</i> | NA                                  | <i>Ca_desi_scaffold</i> | 1209                    | C/G  | Gene_Ca_21932.1    | SYNONYMOUS_CODING             | Protein translocase subunit SecD                    |
| <i>Desi_wild_332</i>  | NA                                  | <i>Ca_desi_scaffold</i> | 332                     | C/G  | Gene_Ca_21942.1    | NON_SYNONYMOUS_CODING         | Ubiquinol oxidase subunit 1                         |
| <i>Desi_wild_399</i>  | NA                                  | <i>Ca_desi_scaffold</i> | 399                     | A/T  | Gene_Ca_21942.1    | NON_SYNONYMOUS_CODING         | Ubiquinol oxidase subunit 1                         |
| <i>Desi_wild_425</i>  | NA                                  | <i>Ca_desi_scaffold</i> | 425                     | C/G  | Gene_Ca_21942.1    | NON_SYNONYMOUS_CODING         | Ubiquinol oxidase subunit 1                         |
| <i>Desi_wild_440</i>  | NA                                  | <i>Ca_desi_scaffold</i> | 440                     | C/G  | Gene_Ca_21942.1    | SYNONYMOUS_CODING             | Ubiquinol oxidase subunit 1                         |
| <i>Desi_wild_473</i>  | NA                                  | <i>Ca_desi_scaffold</i> | 473                     | G/C  | Gene_Ca_21942.1    | DOWNSTREAM                    | Ubiquinol oxidase subunit 1                         |
| <i>Desi_wild_1048</i> | NA                                  | <i>Ca_desi_scaffold</i> | 1048                    | T/C  | Gene_Ca_21949.1    | SYNONYMOUS_CODING             | Glutamine transport ATP-binding protein GlnQ        |



| SNP IDs        | NCBI dbSNP accession IDs (NCBI_SS#) | Chromosomes      | Physical positions (bp) | SNPs | Gene accession IDs | Sequence components of genome | Putative functions                                               |
|----------------|-------------------------------------|------------------|-------------------------|------|--------------------|-------------------------------|------------------------------------------------------------------|
| Desi_wild_1055 | NA                                  | Ca_desi_scaffold | 1055                    | G/C  | Gene_Ca_21949.1    | NON_SYNONYMOUS_CODING         | Glutamine transport ATP-binding protein GlnQ                     |
| Desi_wild_1056 | NA                                  | Ca_desi_scaffold | 1056                    | A/C  | Gene_Ca_21949.1    | SYNONYMOUS_CODING             | Glutamine transport ATP-binding protein GlnQ                     |
| Desi_wild_1114 | NA                                  | Ca_desi_scaffold | 1114                    | C/G  | Gene_Ca_21949.1    | NON_SYNONYMOUS_CODING         | Glutamine transport ATP-binding protein GlnQ                     |
| Desi_wild_1117 | NA                                  | Ca_desi_scaffold | 1117                    | C/G  | Gene_Ca_21949.1    | SYNONYMOUS_CODING             | Glutamine transport ATP-binding protein GlnQ                     |
| Desi_wild_1118 | NA                                  | Ca_desi_scaffold | 1118                    | A/C  | Gene_Ca_21949.1    | SYNONYMOUS_CODING             | Glutamine transport ATP-binding protein GlnQ                     |
| Desi_wild_1120 | NA                                  | Ca_desi_scaffold | 1120                    | C/G  | Gene_Ca_21949.1    | SYNONYMOUS_CODING             | Glutamine transport ATP-binding protein GlnQ                     |
| Desi_wild_1129 | NA                                  | Ca_desi_scaffold | 1129                    | C/T  | Gene_Ca_21949.1    | STOP_GAINED                   | Glutamine transport ATP-binding protein GlnQ                     |
| Desi_wild_552  | NA                                  | Ca_desi_scaffold | 552                     | C/G  | Gene_Ca_21966.1    | INTRON                        | NA                                                               |
| Desi_wild_567  | NA                                  | Ca_desi_scaffold | 567                     | G/C  | Gene_Ca_21966.1    | INTRON                        | NA                                                               |
| Desi_wild_570  | NA                                  | Ca_desi_scaffold | 570                     | C/G  | Gene_Ca_21966.1    | INTRON                        | NA                                                               |
| Desi_wild_582  | NA                                  | Ca_desi_scaffold | 582                     | G/C  | Gene_Ca_21966.1    | INTRON                        | NA                                                               |
| Desi_wild_804  | NA                                  | Ca_desi_scaffold | 804                     | G/C  | Gene_Ca_21966.1    | INTRON                        | NA                                                               |
| Desi_wild_819  | NA                                  | Ca_desi_scaffold | 819                     | G/C  | Gene_Ca_21966.1    | INTRON                        | NA                                                               |
| Desi_wild_267  | NA                                  | Ca_desi_scaffold | 267                     | A/T  | Gene_Ca_21987.1    | SYNONYMOUS_CODING             | DNA topoisomerase 4 subunit A                                    |
| Desi_wild_481  | NA                                  | Ca_desi_scaffold | 481                     | C/T  | Gene_Ca_22006.1    | SYNONYMOUS_CODING             | DNA topoisomerase 4 subunit A                                    |
| Desi_wild_492  | NA                                  | Ca_desi_scaffold | 492                     | G/T  | Gene_Ca_22006.1    | SYNONYMOUS_CODING             | DNA topoisomerase 4 subunit A                                    |
| Desi_wild_531  | NA                                  | Ca_desi_scaffold | 531                     | C/G  | Gene_Ca_22006.1    | SYNONYMOUS_CODING             | DNA topoisomerase 4 subunit A                                    |
| Desi_wild_483  | NA                                  | Ca_desi_scaffold | 483                     | T/C  | Gene_Ca_22025.1    | SYNONYMOUS_CODING             | Malate synthase G                                                |
| Desi_wild_489  | NA                                  | Ca_desi_scaffold | 489                     | C/T  | Gene_Ca_22025.1    | SYNONYMOUS_CODING             | Malate synthase G                                                |
| Desi_wild_507  | NA                                  | Ca_desi_scaffold | 507                     | A/G  | Gene_Ca_22025.1    | SYNONYMOUS_CODING             | Malate synthase G                                                |
| Desi_wild_664  | NA                                  | Ca_desi_scaffold | 664                     | C/T  | Gene_Ca_22067.1    | SYNONYMOUS_CODING             | NA                                                               |
| Desi_wild_955  | NA                                  | Ca_desi_scaffold | 955                     | C/T  | Gene_Ca_22067.1    | DOWNSTREAM                    | NA                                                               |
| Desi_wild_967  | NA                                  | Ca_desi_scaffold | 967                     | G/C  | Gene_Ca_22067.1    | DOWNSTREAM                    | NA                                                               |
| Desi_wild_976  | NA                                  | Ca_desi_scaffold | 976                     | C/G  | Gene_Ca_22067.1    | DOWNSTREAM                    | NA                                                               |
| Desi_wild_979  | NA                                  | Ca_desi_scaffold | 979                     | C/G  | Gene_Ca_22067.1    | DOWNSTREAM                    | NA                                                               |
| Desi_wild_980  | NA                                  | Ca_desi_scaffold | 980                     | C/G  | Gene_Ca_22067.1    | DOWNSTREAM                    | NA                                                               |
| Desi_wild_991  | NA                                  | Ca_desi_scaffold | 991                     | C/G  | Gene_Ca_22067.1    | DOWNSTREAM                    | NA                                                               |
| Desi_wild_992  | NA                                  | Ca_desi_scaffold | 992                     | G/A  | Gene_Ca_22067.1    | DOWNSTREAM                    | NA                                                               |
| Desi_wild_1005 | NA                                  | Ca_desi_scaffold | 1005                    | C/A  | Gene_Ca_22067.1    | DOWNSTREAM                    | NA                                                               |
| Desi_wild_397  | NA                                  | Ca_desi_scaffold | 397                     | A/G  | Gene_Ca_22081.1    | SYNONYMOUS_CODING             | Glycine betaine/L-proline transport system permease protein proW |
| Desi_wild_436  | NA                                  | Ca_desi_scaffold | 436                     | A/G  | Gene_Ca_22081.1    | NON_SYNONYMOUS_CODING         | Glycine betaine/L-proline transport system permease protein proW |
| Desi_wild_305  | NA                                  | Ca_desi_scaffold | 305                     | G/A  | NA                 | INTERGENIC                    | NA                                                               |
| Desi_wild_458  | NA                                  | Ca_desi_scaffold | 458                     | C/A  | Gene_Ca_22120.1    | STOP_GAINED                   | Phosphoenolpyruvate carboxylase                                  |
| Desi_wild_459  | NA                                  | Ca_desi_scaffold | 459                     | G/A  | Gene_Ca_22120.1    | NON_SYNONYMOUS_CODING         | Phosphoenolpyruvate carboxylase                                  |
| Desi_wild_610  | NA                                  | Ca_desi_scaffold | 610                     | T/C  | Gene_Ca_22181.1    | SYNONYMOUS_CODING             | Putative uncharacterized protein                                 |
| Desi_wild_637  | NA                                  | Ca_desi_scaffold | 637                     | G/A  | Gene_Ca_22181.1    | NON_SYNONYMOUS_CODING         | Putative uncharacterized protein                                 |
| Desi_wild_643  | NA                                  | Ca_desi_scaffold | 643                     | G/A  | Gene_Ca_22181.1    | NON_SYNONYMOUS_CODING         | Putative uncharacterized protein                                 |
| Desi_wild_649  | NA                                  | Ca_desi_scaffold | 649                     | G/C  | Gene_Ca_22181.1    | SYNONYMOUS_CODING             | Putative uncharacterized protein                                 |
| Desi_wild_655  | NA                                  | Ca_desi_scaffold | 655                     | G/A  | Gene_Ca_22181.1    | NON_SYNONYMOUS_CODING         | Putative uncharacterized protein                                 |
| Desi_wild_665  | NA                                  | Ca_desi_scaffold | 665                     | T/G  | Gene_Ca_22181.1    | NON_SYNONYMOUS_CODING         | Putative uncharacterized protein                                 |
| Desi_wild_1075 | NA                                  | Ca_desi_scaffold | 1075                    | C/G  | Gene_Ca_22210.1    | DOWNSTREAM                    | Uncharacterized protein YgeA                                     |
| Desi_wild_1087 | NA                                  | Ca_desi_scaffold | 1087                    | G/A  | Gene_Ca_22210.1    | DOWNSTREAM                    | Uncharacterized protein YgeA                                     |
| Desi_wild_1088 | NA                                  | Ca_desi_scaffold | 1088                    | G/T  | Gene_Ca_22210.1    | DOWNSTREAM                    | Uncharacterized protein YgeA                                     |
| Desi_wild_1090 | NA                                  | Ca_desi_scaffold | 1090                    | A/G  | Gene_Ca_22210.1    | DOWNSTREAM                    | Uncharacterized protein YgeA                                     |

| SNP IDs        | NCBI dbSNP accession IDs (NCBI_SS#) | Chromosomes      | Physical positions (bp) | SNPs | Gene accession IDs | Sequence components of genome | Putative functions                     |
|----------------|-------------------------------------|------------------|-------------------------|------|--------------------|-------------------------------|----------------------------------------|
| Desi_wild_1096 | NA                                  | Ca_desi_scaffold | 1096                    | A/G  | Gene_Ca_22210.1    | DOWNSTREAM                    | Uncharacterized protein YgeA           |
| Desi_wild_1112 | NA                                  | Ca_desi_scaffold | 1112                    | T/G  | Gene_Ca_22210.1    | DOWNSTREAM                    | Uncharacterized protein YgeA           |
| Desi_wild_1113 | NA                                  | Ca_desi_scaffold | 1113                    | T/A  | Gene_Ca_22210.1    | DOWNSTREAM                    | Uncharacterized protein YgeA           |
| Desi_wild_1309 | NA                                  | Ca_desi_scaffold | 1309                    | G/C  | Gene_Ca_22219.1    | NON_SYNONYMOUS_CODING         | Glutamate synthase [NADPH] large chain |
| Desi_wild_1333 | NA                                  | Ca_desi_scaffold | 1333                    | C/T  | Gene_Ca_22219.1    | NON_SYNONYMOUS_CODING         | Glutamate synthase [NADPH] large chain |
| Desi_wild_1348 | NA                                  | Ca_desi_scaffold | 1348                    | T/C  | Gene_Ca_22219.1    | NON_SYNONYMOUS_CODING         | Glutamate synthase [NADPH] large chain |
| Desi_wild_1351 | NA                                  | Ca_desi_scaffold | 1351                    | T/C  | Gene_Ca_22219.1    | NON_SYNONYMOUS_CODING         | Glutamate synthase [NADPH] large chain |
| Desi_wild_1384 | NA                                  | Ca_desi_scaffold | 1384                    | C/T  | Gene_Ca_22219.1    | NON_SYNONYMOUS_CODING         | Glutamate synthase [NADPH] large chain |
| Desi_wild_1405 | NA                                  | Ca_desi_scaffold | 1405                    | A/G  | Gene_Ca_22219.1    | UPSTREAM                      | Glutamate synthase [NADPH] large chain |
| Desi_wild_1406 | NA                                  | Ca_desi_scaffold | 1406                    | T/A  | Gene_Ca_22219.1    | UPSTREAM                      | Glutamate synthase [NADPH] large chain |
| Desi_wild_365  | NA                                  | Ca_desi_scaffold | 365                     | T/G  | Gene_Ca_22262.1    | NON_SYNONYMOUS_CODING         | NA                                     |
| Desi_wild_34   | NA                                  | Ca_desi_scaffold | 34                      | C/G  | NA                 | INTERGENIC                    | NA                                     |
| Desi_wild_364  | NA                                  | Ca_desi_scaffold | 364                     | C/G  | NA                 | INTERGENIC                    | NA                                     |
| Desi_wild_391  | NA                                  | Ca_desi_scaffold | 391                     | G/C  | NA                 | INTERGENIC                    | NA                                     |
| Desi_wild_406  | NA                                  | Ca_desi_scaffold | 406                     | C/T  | NA                 | INTERGENIC                    | NA                                     |
| Desi_wild_415  | NA                                  | Ca_desi_scaffold | 415                     | T/C  | NA                 | INTERGENIC                    | NA                                     |
| Desi_wild_370  | NA                                  | Ca_desi_scaffold | 370                     | C/T  | Gene_Ca_22278.1    | DOWNSTREAM                    | Thioesterase superfamily protein       |
| Desi_wild_373  | NA                                  | Ca_desi_scaffold | 373                     | C/T  | Gene_Ca_22278.1    | DOWNSTREAM                    | Thioesterase superfamily protein       |
| Desi_wild_382  | NA                                  | Ca_desi_scaffold | 382                     | C/T  | Gene_Ca_22278.1    | DOWNSTREAM                    | Thioesterase superfamily protein       |
| Desi_wild_412  | NA                                  | Ca_desi_scaffold | 412                     | C/T  | Gene_Ca_22278.1    | DOWNSTREAM                    | Thioesterase superfamily protein       |
| Desi_wild_451  | NA                                  | Ca_desi_scaffold | 451                     | C/T  | Gene_Ca_22278.1    | DOWNSTREAM                    | Thioesterase superfamily protein       |
| Desi_wild_730  | NA                                  | Ca_desi_scaffold | 730                     | C/G  | Gene_Ca_22284.1    | SYNONYMOUS_CODING             | C4-dicarboxylate transport protein     |
| Desi_wild_756  | NA                                  | Ca_desi_scaffold | 756                     | G/C  | Gene_Ca_22284.1    | SYNONYMOUS_CODING             | C4-dicarboxylate transport protein     |
| Desi_wild_764  | NA                                  | Ca_desi_scaffold | 764                     | T/G  | Gene_Ca_22284.1    | NON_SYNONYMOUS_CODING         | C4-dicarboxylate transport protein     |
| Desi_wild_808  | NA                                  | Ca_desi_scaffold | 808                     | G/C  | Gene_Ca_22284.1    | SYNONYMOUS_CODING             | C4-dicarboxylate transport protein     |
| Desi_wild_811  | NA                                  | Ca_desi_scaffold | 811                     | C/G  | Gene_Ca_22284.1    | SYNONYMOUS_CODING             | C4-dicarboxylate transport protein     |
| Desi_wild_812  | NA                                  | Ca_desi_scaffold | 812                     | G/A  | Gene_Ca_22284.1    | NON_SYNONYMOUS_CODING         | C4-dicarboxylate transport protein     |
| Desi_wild_814  | NA                                  | Ca_desi_scaffold | 814                     | C/T  | Gene_Ca_22284.1    | SYNONYMOUS_CODING             | C4-dicarboxylate transport protein     |
| Desi_wild_817  | NA                                  | Ca_desi_scaffold | 817                     | G/C  | Gene_Ca_22284.1    | SYNONYMOUS_CODING             | C4-dicarboxylate transport protein     |
| Desi_wild_823  | NA                                  | Ca_desi_scaffold | 823                     | C/T  | Gene_Ca_22284.1    | SYNONYMOUS_CODING             | C4-dicarboxylate transport protein     |
| Desi_wild_826  | NA                                  | Ca_desi_scaffold | 826                     | T/C  | Gene_Ca_22284.1    | SYNONYMOUS_CODING             | C4-dicarboxylate transport protein     |
| Desi_wild_838  | NA                                  | Ca_desi_scaffold | 838                     | C/G  | Gene_Ca_22284.1    | SYNONYMOUS_CODING             | C4-dicarboxylate transport protein     |
| Desi_wild_868  | NA                                  | Ca_desi_scaffold | 868                     | C/G  | Gene_Ca_22284.1    | SYNONYMOUS_CODING             | C4-dicarboxylate transport protein     |
| Desi_wild_871  | NA                                  | Ca_desi_scaffold | 871                     | G/T  | Gene_Ca_22284.1    | SYNONYMOUS_CODING             | C4-dicarboxylate transport protein     |
| Desi_wild_872  | NA                                  | Ca_desi_scaffold | 872                     | C/T  | Gene_Ca_22284.1    | DOWNSTREAM                    | C4-dicarboxylate transport protein     |
| Desi_wild_883  | NA                                  | Ca_desi_scaffold | 883                     | G/C  | Gene_Ca_22284.1    | DOWNSTREAM                    | C4-dicarboxylate transport protein     |
| Desi_wild_270  | NA                                  | Ca_desi_scaffold | 270                     | C/T  | NA                 | INTERGENIC                    | NA                                     |
| Desi_wild_964  | NA                                  | Ca_desi_scaffold | 964                     | A/G  | Gene_Ca_22290.1    | DOWNSTREAM                    | Regulatory protein TetR                |
| Desi_wild_994  | NA                                  | Ca_desi_scaffold | 994                     | G/T  | Gene_Ca_22290.1    | DOWNSTREAM                    | Regulatory protein TetR                |
| Desi_wild_997  | NA                                  | Ca_desi_scaffold | 997                     | C/T  | Gene_Ca_22290.1    | DOWNSTREAM                    | Regulatory protein TetR                |
| Desi_wild_1003 | NA                                  | Ca_desi_scaffold | 1003                    | T/C  | Gene_Ca_22290.1    | DOWNSTREAM                    | Regulatory protein TetR                |
| Desi_wild_1016 | NA                                  | Ca_desi_scaffold | 1016                    | A/C  | Gene_Ca_22290.1    | DOWNSTREAM                    | Regulatory protein TetR                |
| Desi_wild_319  | NA                                  | Ca_desi_scaffold | 319                     | G/T  | NA                 | INTERGENIC                    | NA                                     |
| Desi_wild_574  | NA                                  | Ca_desi_scaffold | 574                     | C/T  | Gene_Ca_22383.1    | DOWNSTREAM                    | NA                                     |

| SNP IDs        | NCBI dbSNP accession IDs (NCBI_SS#) | Chromosomes      | Physical positions (bp) | SNPs | Gene accession IDs | Sequence components of genome | Putative functions                                |
|----------------|-------------------------------------|------------------|-------------------------|------|--------------------|-------------------------------|---------------------------------------------------|
| Desi_wild_584  | NA                                  | Ca_desi_scaffold | 584                     | C/G  | Gene_Ca_22383.1    | DOWNSTREAM                    | NA                                                |
| Desi_wild_587  | NA                                  | Ca_desi_scaffold | 587                     | G/C  | Gene_Ca_22383.1    | DOWNSTREAM                    | NA                                                |
| Desi_wild_604  | NA                                  | Ca_desi_scaffold | 604                     | T/C  | Gene_Ca_22383.1    | DOWNSTREAM                    | NA                                                |
| Desi_wild_605  | NA                                  | Ca_desi_scaffold | 605                     | G/C  | Gene_Ca_22383.1    | DOWNSTREAM                    | NA                                                |
| Desi_wild_611  | NA                                  | Ca_desi_scaffold | 611                     | C/G  | Gene_Ca_22383.1    | DOWNSTREAM                    | NA                                                |
| Desi_wild_613  | NA                                  | Ca_desi_scaffold | 613                     | G/C  | Gene_Ca_22383.1    | DOWNSTREAM                    | NA                                                |
| Desi_wild_340  | NA                                  | Ca_desi_scaffold | 340                     | C/A  | Gene_Ca_22401.1    | DOWNSTREAM                    | NA                                                |
| Desi_wild_346  | NA                                  | Ca_desi_scaffold | 346                     | G/A  | Gene_Ca_22401.1    | DOWNSTREAM                    | NA                                                |
| Desi_wild_354  | NA                                  | Ca_desi_scaffold | 354                     | C/T  | Gene_Ca_22401.1    | DOWNSTREAM                    | NA                                                |
| Desi_wild_378  | NA                                  | Ca_desi_scaffold | 378                     | G/C  | Gene_Ca_22401.1    | DOWNSTREAM                    | NA                                                |
| Desi_wild_360  | NA                                  | Ca_desi_scaffold | 360                     | G/C  | Gene_Ca_22500.1    | SYNONYMOUS_CODING             | Holliday junction ATP-dependent DNA helicase RuvB |
| Desi_wild_441  | NA                                  | Ca_desi_scaffold | 441                     | C/T  | Gene_Ca_22500.1    | UPSTREAM                      | Holliday junction ATP-dependent DNA helicase RuvB |
| Desi_wild_443  | NA                                  | Ca_desi_scaffold | 443                     | G/T  | Gene_Ca_22500.1    | UPSTREAM                      | Holliday junction ATP-dependent DNA helicase RuvB |
| Desi_wild_444  | NA                                  | Ca_desi_scaffold | 444                     | C/T  | Gene_Ca_22500.1    | UPSTREAM                      | Holliday junction ATP-dependent DNA helicase RuvB |
| Desi_wild_447  | NA                                  | Ca_desi_scaffold | 447                     | C/G  | Gene_Ca_22500.1    | UPSTREAM                      | Holliday junction ATP-dependent DNA helicase RuvB |
| Desi_wild_460  | NA                                  | Ca_desi_scaffold | 460                     | C/G  | Gene_Ca_22500.1    | UPSTREAM                      | Holliday junction ATP-dependent DNA helicase RuvB |
| Desi_wild_325  | NA                                  | Ca_desi_scaffold | 325                     | C/G  | Gene_Ca_22510.1    | NON_SYNONYMOUS_CODING         | 3-dehydroquinate synthase                         |
| Desi_wild_331  | NA                                  | Ca_desi_scaffold | 331                     | C/T  | Gene_Ca_22510.1    | NON_SYNONYMOUS_CODING         | 3-dehydroquinate synthase                         |
| Desi_wild_1108 | NA                                  | Ca_desi_scaffold | 1108                    | C/T  | Gene_Ca_22522.1    | UPSTREAM                      | Phosphogluconate dehydratase                      |
| Desi_wild_1125 | NA                                  | Ca_desi_scaffold | 1125                    | A/T  | Gene_Ca_22522.1    | UPSTREAM                      | Phosphogluconate dehydratase                      |
| Desi_wild_1127 | NA                                  | Ca_desi_scaffold | 1127                    | G/C  | Gene_Ca_22522.1    | UPSTREAM                      | Phosphogluconate dehydratase                      |
| Desi_wild_1132 | NA                                  | Ca_desi_scaffold | 1132                    | C/T  | Gene_Ca_22522.1    | UPSTREAM                      | Phosphogluconate dehydratase                      |
| Desi_wild_396  | NA                                  | Ca_desi_scaffold | 396                     | C/A  | Gene_Ca_22542.1    | NON_SYNONYMOUS_CODING         | Transglycosylase                                  |
| Desi_wild_407  | NA                                  | Ca_desi_scaffold | 407                     | G/A  | Gene_Ca_22542.1    | SYNONYMOUS_CODING             | Transglycosylase                                  |
| Desi_wild_662  | NA                                  | Ca_desi_scaffold | 662                     | C/G  | Gene_Ca_22550.1    | UPSTREAM                      | NA                                                |
| Desi_wild_245  | NA                                  | Ca_desi_scaffold | 245                     | A/T  | Gene_Ca_22579.1    | NON_SYNONYMOUS_CODING         | Potassium-transporting ATPase B chain             |
| Desi_wild_368  | NA                                  | Ca_desi_scaffold | 368                     | G/T  | Gene_Ca_22603.1    | UPSTREAM                      | UPF0176 protein yceA                              |
| Desi_wild_379  | NA                                  | Ca_desi_scaffold | 379                     | G/T  | Gene_Ca_22603.1    | UPSTREAM                      | UPF0176 protein yceA                              |
| Desi_wild_607  | NA                                  | Ca_desi_scaffold | 607                     | T/C  | Gene_Ca_22628.1    | SYNONYMOUS_CODING             | UPF0192 protein all5100                           |
| Desi_wild_623  | NA                                  | Ca_desi_scaffold | 623                     | G/C  | Gene_Ca_22628.1    | SYNONYMOUS_CODING             | UPF0192 protein all5100                           |
| Desi_wild_386  | NA                                  | Ca_desi_scaffold | 386                     | G/C  | NA                 | INTERGENIC                    | NA                                                |
| Desi_wild_403  | NA                                  | Ca_desi_scaffold | 403                     | G/A  | NA                 | INTERGENIC                    | NA                                                |
| Desi_wild_418  | NA                                  | Ca_desi_scaffold | 418                     | G/A  | NA                 | INTERGENIC                    | NA                                                |
| Desi_wild_558  | NA                                  | Ca_desi_scaffold | 558                     | C/T  | Gene_Ca_22641.1    | NON_SYNONYMOUS_CODING         | Putative glutamate synthase [NADPH]               |
| Desi_wild_583  | NA                                  | Ca_desi_scaffold | 583                     | G/C  | Gene_Ca_22641.1    | UPSTREAM                      | Putative glutamate synthase [NADPH]               |
| Desi_wild_326  | NA                                  | Ca_desi_scaffold | 326                     | C/A  | Gene_Ca_22643.1    | SYNONYMOUS_CODING             | Putative uncharacterized protein                  |
| Desi_wild_1555 | NA                                  | Ca_desi_scaffold | 1555                    | G/C  | Gene_Ca_22648.1    | DOWNSTREAM                    | Putative uncharacterized protein (Precursor)      |
| Desi_wild_38   | NA                                  | Ca_desi_scaffold | 38                      | A/G  | Gene_Ca_22683.1    | SYNONYMOUS_CODING             | Phosphoglycolate phosphatase                      |
| Desi_wild_545  | NA                                  | Ca_desi_scaffold | 545                     | G/A  | Gene_Ca_22715.1    | NON_SYNONYMOUS_CODING         | NA                                                |
| Desi_wild_487  | NA                                  | Ca_desi_scaffold | 487                     | G/A  | Gene_Ca_22753.1    | SYNONYMOUS_CODING             | Benzoyl-CoA oxygenase component B                 |
| Desi_wild_537  | NA                                  | Ca_desi_scaffold | 537                     | T/G  | Gene_Ca_22753.1    | NON_SYNONYMOUS_START          | Benzoyl-CoA oxygenase component B                 |
| Desi_wild_556  | NA                                  | Ca_desi_scaffold | 556                     | C/G  | Gene_Ca_22753.1    | UPSTREAM                      | Benzoyl-CoA oxygenase component B                 |
| Desi_wild_864  | NA                                  | Ca_desi_scaffold | 864                     | G/A  | Gene_Ca_22820.1    | SYNONYMOUS_CODING             | Multiphosphoryl transfer protein                  |
| Desi_wild_708  | NA                                  | Ca_desi_scaffold | 708                     | A/G  | Gene_Ca_22863.1    | NON_SYNONYMOUS_CODING         | NA                                                |

| SNP IDs        | NCBI dbSNP accession IDs (NCBI_SS#) | Chromosomes      | Physical positions (bp) | SNPs | Gene accession IDs | Sequence components of genome | Putative functions                                       |
|----------------|-------------------------------------|------------------|-------------------------|------|--------------------|-------------------------------|----------------------------------------------------------|
| Desi_wild_718  | NA                                  | Ca_desi_scaffold | 718                     | A/G  | Gene_Ca_22863.1    | SYNONYMOUS_CODING             | NA                                                       |
| Desi_wild_723  | NA                                  | Ca_desi_scaffold | 723                     | A/G  | Gene_Ca_22863.1    | SYNONYMOUS_CODING             | NA                                                       |
| Desi_wild_472  | NA                                  | Ca_desi_scaffold | 472                     | T/C  | NA                 | INTERGENIC                    | NA                                                       |
| Desi_wild_349  | NA                                  | Ca_desi_scaffold | 349                     | G/T  | Gene_Ca_22917.1    | NON_SYNONYMOUS_CODING         | NADH-quinone oxidoreductase subunit N                    |
| Desi_wild_358  | NA                                  | Ca_desi_scaffold | 358                     | C/T  | Gene_Ca_22917.1    | NON_SYNONYMOUS_CODING         | NADH-quinone oxidoreductase subunit N                    |
| Desi_wild_975  | NA                                  | Ca_desi_scaffold | 975                     | G/A  | Gene_Ca_22918.1    | SYNONYMOUS_CODING             | NA                                                       |
| Desi_wild_977  | NA                                  | Ca_desi_scaffold | 977                     | G/C  | Gene_Ca_22918.1    | SYNONYMOUS_CODING             | NA                                                       |
| Desi_wild_985  | NA                                  | Ca_desi_scaffold | 985                     | T/C  | Gene_Ca_22918.1    | NON_SYNONYMOUS_CODING         | NA                                                       |
| Desi_wild_987  | NA                                  | Ca_desi_scaffold | 987                     | G/C  | Gene_Ca_22918.1    | NON_SYNONYMOUS_CODING         | NA                                                       |
| Desi_wild_1000 | NA                                  | Ca_desi_scaffold | 1000                    | G/C  | Gene_Ca_22918.1    | NON_SYNONYMOUS_CODING         | NA                                                       |
| Desi_wild_1001 | NA                                  | Ca_desi_scaffold | 1001                    | T/C  | Gene_Ca_22918.1    | SYNONYMOUS_CODING             | NA                                                       |
| Desi_wild_1028 | NA                                  | Ca_desi_scaffold | 1028                    | G/C  | Gene_Ca_22918.1    | SYNONYMOUS_CODING             | NA                                                       |
| Desi_wild_1038 | NA                                  | Ca_desi_scaffold | 1038                    | C/A  | Gene_Ca_22918.1    | DOWNSTREAM                    | NA                                                       |
| Desi_wild_452  | NA                                  | Ca_desi_scaffold | 452                     | C/G  | Gene_Ca_22963.1    | NON_SYNONYMOUS_CODING         | Adenine phosphoribosyltransferase                        |
| Desi_wild_948  | NA                                  | Ca_desi_scaffold | 948                     | G/C  | Gene_Ca_22965.1    | SYNONYMOUS_CODING             | Ferredoxin-dependent glutamate synthase 1                |
| Desi_wild_768  | NA                                  | Ca_desi_scaffold | 768                     | G/T  | Gene_Ca_22998.1    | SYNONYMOUS_CODING             | NA                                                       |
| Desi_wild_775  | NA                                  | Ca_desi_scaffold | 775                     | C/T  | Gene_Ca_22998.1    | NON_SYNONYMOUS_CODING         | NA                                                       |
| Desi_wild_784  | NA                                  | Ca_desi_scaffold | 784                     | C/G  | Gene_Ca_22998.1    | SYNONYMOUS_CODING             | NA                                                       |
| Desi_wild_791  | NA                                  | Ca_desi_scaffold | 791                     | G/A  | Gene_Ca_22998.1    | NON_SYNONYMOUS_CODING         | NA                                                       |
| Desi_wild_794  | NA                                  | Ca_desi_scaffold | 794                     | G/A  | Gene_Ca_22998.1    | SYNONYMOUS_CODING             | NA                                                       |
| Desi_wild_795  | NA                                  | Ca_desi_scaffold | 795                     | G/C  | Gene_Ca_22998.1    | NON_SYNONYMOUS_CODING         | NA                                                       |
| Desi_wild_802  | NA                                  | Ca_desi_scaffold | 802                     | A/G  | Gene_Ca_22998.1    | SYNONYMOUS_CODING             | NA                                                       |
| Desi_wild_1060 | NA                                  | Ca_desi_scaffold | 1060                    | C/G  | Gene_Ca_22998.1    | DOWNSTREAM                    | NA                                                       |
| Desi_wild_524  | NA                                  | Ca_desi_scaffold | 524                     | C/G  | Gene_Ca_23003.1    | SYNONYMOUS_CODING             | Uncharacterized protein ycgB                             |
| Desi_wild_555  | NA                                  | Ca_desi_scaffold | 555                     | C/A  | Gene_Ca_23017.1    | NON_SYNONYMOUS_CODING         | Phosphoenolpyruvate synthase                             |
| Desi_wild_559  | NA                                  | Ca_desi_scaffold | 559                     | T/A  | Gene_Ca_23017.1    | SYNONYMOUS_CODING             | Phosphoenolpyruvate synthase                             |
| Desi_wild_603  | NA                                  | Ca_desi_scaffold | 603                     | G/C  | Gene_Ca_23033.1    | SYNONYMOUS_CODING             | NA                                                       |
| Desi_wild_633  | NA                                  | Ca_desi_scaffold | 633                     | G/A  | Gene_Ca_23033.1    | SYNONYMOUS_CODING             | NA                                                       |
| Desi_wild_636  | NA                                  | Ca_desi_scaffold | 636                     | C/A  | Gene_Ca_23033.1    | STOP_GAINED                   | NA                                                       |
| Desi_wild_457  | NA                                  | Ca_desi_scaffold | 457                     | C/G  | NA                 | INTERGENIC                    | NA                                                       |
| Desi_wild_863  | NA                                  | Ca_desi_scaffold | 863                     | G/C  | Gene_Ca_23052.1    | NON_SYNONYMOUS_CODING         | Chaperone protein DnaK                                   |
| Desi_wild_877  | NA                                  | Ca_desi_scaffold | 877                     | C/G  | Gene_Ca_23052.1    | SYNONYMOUS_CODING             | Chaperone protein DnaK                                   |
| Desi_wild_908  | NA                                  | Ca_desi_scaffold | 908                     | G/T  | Gene_Ca_23052.1    | NON_SYNONYMOUS_CODING         | Chaperone protein DnaK                                   |
| Desi_wild_909  | NA                                  | Ca_desi_scaffold | 909                     | T/C  | Gene_Ca_23052.1    | NON_SYNONYMOUS_CODING         | Chaperone protein DnaK                                   |
| Desi_wild_910  | NA                                  | Ca_desi_scaffold | 910                     | C/T  | Gene_Ca_23052.1    | SYNONYMOUS_CODING             | Chaperone protein DnaK                                   |
| Desi_wild_849  | NA                                  | Ca_desi_scaffold | 849                     | G/A  | Gene_Ca_23056.1    | SYNONYMOUS_CODING             | Guanosine-3',5'-bis(diphosphate) 3'-pyrophosphohydrolase |
| Desi_wild_454  | NA                                  | Ca_desi_scaffold | 454                     | T/C  | Gene_Ca_23090.1    | SYNONYMOUS_CODING             | Methylmalonate semialdehyde dehydrogenase [acylating] 1  |
| Desi_wild_564  | NA                                  | Ca_desi_scaffold | 564                     | G/C  | Gene_Ca_23139.1    | SYNONYMOUS_CODING             | NifU-like protein                                        |
| Desi_wild_1263 | NA                                  | Ca_desi_scaffold | 1263                    | C/G  | Gene_Ca_23152.1    | SYNONYMOUS_CODING             | Peptide chain release factor 1                           |
| Desi_wild_554  | NA                                  | Ca_desi_scaffold | 554                     | C/T  | NA                 | INTERGENIC                    | NA                                                       |
| Desi_wild_393  | NA                                  | Ca_desi_scaffold | 393                     | G/C  | NA                 | INTERGENIC                    | NA                                                       |
| Desi_wild_20   | NA                                  | Ca_desi_scaffold | 20                      | T/C  | NA                 | INTERGENIC                    | NA                                                       |
| Desi_wild_8    | NA                                  | Ca_desi_scaffold | 8                       | G/C  | NA                 | INTERGENIC                    | NA                                                       |
| Desi_wild_10   | NA                                  | Ca_desi_scaffold | 10                      | G/C  | NA                 | INTERGENIC                    | NA                                                       |

| SNP IDs               | NCBI dbSNP accession IDs (NCBI_SS#) | Chromosomes             | Physical positions (bp) | SNPs | Gene accession IDs | Sequence components of genome | Putative functions                                          |
|-----------------------|-------------------------------------|-------------------------|-------------------------|------|--------------------|-------------------------------|-------------------------------------------------------------|
| <i>Desi_wild_828</i>  | NA                                  | <i>Ca_desi_scaffold</i> | 828                     | G/T  | Gene_Ca_23447.1    | NON_SYNONYMOUS_CODING         | ATP-dependent RNA helicase rhlE                             |
| <i>Desi_wild_1280</i> | NA                                  | <i>Ca_desi_scaffold</i> | 1280                    | C/G  | Gene_Ca_23479.1    | SYNONYMOUS_CODING             | Deoxyguanosinetriphosphate triphosphohydrolase-like protein |
| <i>Desi_wild_1331</i> | NA                                  | <i>Ca_desi_scaffold</i> | 1331                    | C/G  | Gene_Ca_23479.1    | DOWNSTREAM                    | Deoxyguanosinetriphosphate triphosphohydrolase-like protein |
| <i>Desi_wild_1332</i> | NA                                  | <i>Ca_desi_scaffold</i> | 1332                    | G/T  | Gene_Ca_23479.1    | DOWNSTREAM                    | Deoxyguanosinetriphosphate triphosphohydrolase-like protein |
| <i>Desi_wild_1334</i> | NA                                  | <i>Ca_desi_scaffold</i> | 1334                    | C/G  | Gene_Ca_23479.1    | DOWNSTREAM                    | Deoxyguanosinetriphosphate triphosphohydrolase-like protein |
| <i>Desi_wild_330</i>  | NA                                  | <i>Ca_desi_scaffold</i> | 330                     | T/C  | Gene_Ca_23539.1    | SYNONYMOUS_CODING             | Multidrug resistance protein MdtB                           |
| <i>Desi_wild_337</i>  | NA                                  | <i>Ca_desi_scaffold</i> | 337                     | G/T  | Gene_Ca_23539.1    | NON_SYNONYMOUS_CODING         | Multidrug resistance protein MdtB                           |
| <i>Desi_wild_338</i>  | NA                                  | <i>Ca_desi_scaffold</i> | 338                     | C/T  | Gene_Ca_23539.1    | NON_SYNONYMOUS_CODING         | Multidrug resistance protein MdtB                           |
| <i>Desi_wild_315</i>  | NA                                  | <i>Ca_desi_scaffold</i> | 315                     | A/C  | Gene_Ca_23542.1    | SYNONYMOUS_CODING             | Uncharacterized protein yjgR                                |
| <i>Desi_wild_471</i>  | NA                                  | <i>Ca_desi_scaffold</i> | 471                     | C/G  | Gene_Ca_23545.1    | SYNONYMOUS_CODING             | Aconitate hydratase 2                                       |
| <i>Desi_wild_521</i>  | NA                                  | <i>Ca_desi_scaffold</i> | 521                     | T/G  | Gene_Ca_23545.1    | SYNONYMOUS_CODING             | Aconitate hydratase 2                                       |
| <i>Desi_wild_359</i>  | NA                                  | <i>Ca_desi_scaffold</i> | 359                     | G/A  | Gene_Ca_23589.1    | UPSTREAM                      | Probable D-galactarate dehydratase                          |
| <i>Desi_wild_1062</i> | NA                                  | <i>Ca_desi_scaffold</i> | 1062                    | A/C  | Gene_Ca_23604.1    | UPSTREAM                      | NA                                                          |
| <i>Desi_wild_1095</i> | NA                                  | <i>Ca_desi_scaffold</i> | 1095                    | G/A  | Gene_Ca_23604.1    | UPSTREAM                      | NA                                                          |
| <i>Desi_wild_1107</i> | NA                                  | <i>Ca_desi_scaffold</i> | 1107                    | G/A  | Gene_Ca_23604.1    | UPSTREAM                      | NA                                                          |
| <i>Desi_wild_627</i>  | NA                                  | <i>Ca_desi_scaffold</i> | 627                     | G/A  | Gene_Ca_23627.1    | SYNONYMOUS_CODING             | ABC-type transporter, integral membrane subunit             |
| <i>Desi_wild_803</i>  | NA                                  | <i>Ca_desi_scaffold</i> | 803                     | A/G  | Gene_Ca_23664.1    | SYNONYMOUS_CODING             | NA                                                          |
| <i>Desi_wild_1008</i> | NA                                  | <i>Ca_desi_scaffold</i> | 1008                    | C/G  | Gene_Ca_23676.1    | SYNONYMOUS_CODING             | Uncharacterized ABC transporter ATP-binding protein MJ0412  |
| <i>Desi_wild_1017</i> | NA                                  | <i>Ca_desi_scaffold</i> | 1017                    | C/G  | Gene_Ca_23676.1    | SYNONYMOUS_CODING             | Uncharacterized ABC transporter ATP-binding protein MJ0412  |
| <i>Desi_wild_1027</i> | NA                                  | <i>Ca_desi_scaffold</i> | 1027                    | C/T  | Gene_Ca_23676.1    | NON_SYNONYMOUS_CODING         | Uncharacterized ABC transporter ATP-binding protein MJ0412  |
| <i>Desi_wild_1029</i> | NA                                  | <i>Ca_desi_scaffold</i> | 1029                    | G/C  | Gene_Ca_23676.1    | SYNONYMOUS_CODING             | Uncharacterized ABC transporter ATP-binding protein MJ0412  |
| <i>Desi_wild_1030</i> | NA                                  | <i>Ca_desi_scaffold</i> | 1030                    | A/C  | Gene_Ca_23676.1    | NON_SYNONYMOUS_CODING         | Uncharacterized ABC transporter ATP-binding protein MJ0412  |
| <i>Desi_wild_1032</i> | NA                                  | <i>Ca_desi_scaffold</i> | 1032                    | G/C  | Gene_Ca_23676.1    | NON_SYNONYMOUS_CODING         | Uncharacterized ABC transporter ATP-binding protein MJ0412  |
| <i>Desi_wild_1041</i> | NA                                  | <i>Ca_desi_scaffold</i> | 1041                    | C/G  | Gene_Ca_23676.1    | SYNONYMOUS_CODING             | Uncharacterized ABC transporter ATP-binding protein MJ0412  |
| <i>Desi_wild_1047</i> | NA                                  | <i>Ca_desi_scaffold</i> | 1047                    | C/T  | Gene_Ca_23676.1    | SYNONYMOUS_CODING             | Uncharacterized ABC transporter ATP-binding protein MJ0412  |
| <i>Desi_wild_1053</i> | NA                                  | <i>Ca_desi_scaffold</i> | 1053                    | C/G  | Gene_Ca_23676.1    | SYNONYMOUS_CODING             | Uncharacterized ABC transporter ATP-binding protein MJ0412  |
| <i>Desi_wild_1065</i> | NA                                  | <i>Ca_desi_scaffold</i> | 1065                    | C/G  | Gene_Ca_23676.1    | SYNONYMOUS_CODING             | Uncharacterized ABC transporter ATP-binding protein MJ0412  |
| <i>Desi_wild_341</i>  | NA                                  | <i>Ca_desi_scaffold</i> | 341                     | T/C  | Gene_Ca_23719.1    | SYNONYMOUS_CODING             | Putative uncharacterized protein                            |
| <i>Desi_wild_355</i>  | NA                                  | <i>Ca_desi_scaffold</i> | 355                     | G/C  | Gene_Ca_23719.1    | SYNONYMOUS_CODING             | Putative uncharacterized protein                            |
| <i>Desi_wild_518</i>  | NA                                  | <i>Ca_desi_scaffold</i> | 518                     | C/G  | Gene_Ca_23767.1    | SYNONYMOUS_CODING             | Acyl-CoA dehydrogenase family member 11                     |
| <i>Desi_wild_494</i>  | NA                                  | <i>Ca_desi_scaffold</i> | 494                     | C/G  | Gene_Ca_23774.1    | SYNONYMOUS_CODING             | Signal transduction histidine-protein kinase BarA           |
| <i>Desi_wild_534</i>  | NA                                  | <i>Ca_desi_scaffold</i> | 534                     | T/C  | Gene_Ca_23774.1    | SYNONYMOUS_CODING             | Signal transduction histidine-protein kinase BarA           |
| <i>Desi_wild_642</i>  | NA                                  | <i>Ca_desi_scaffold</i> | 642                     | C/G  | Gene_Ca_23780.1    | SYNONYMOUS_CODING             | NA                                                          |
| <i>Desi_wild_651</i>  | NA                                  | <i>Ca_desi_scaffold</i> | 651                     | T/C  | Gene_Ca_23851.1    | SYNONYMOUS_CODING             | NA                                                          |
| <i>Desi_wild_654</i>  | NA                                  | <i>Ca_desi_scaffold</i> | 654                     | C/G  | Gene_Ca_23851.1    | SYNONYMOUS_CODING             | NA                                                          |
| <i>Desi_wild_669</i>  | NA                                  | <i>Ca_desi_scaffold</i> | 669                     | C/G  | Gene_Ca_23851.1    | SYNONYMOUS_CODING             | NA                                                          |
| <i>Desi_wild_699</i>  | NA                                  | <i>Ca_desi_scaffold</i> | 699                     | G/T  | Gene_Ca_23851.1    | SYNONYMOUS_CODING             | NA                                                          |
| <i>Desi_wild_703</i>  | NA                                  | <i>Ca_desi_scaffold</i> | 703                     | A/G  | Gene_Ca_23851.1    | SYNONYMOUS_CODING             | NA                                                          |
| <i>Desi_wild_720</i>  | NA                                  | <i>Ca_desi_scaffold</i> | 720                     | G/C  | Gene_Ca_23851.1    | SYNONYMOUS_CODING             | NA                                                          |
| <i>Desi_wild_336</i>  | NA                                  | <i>Ca_desi_scaffold</i> | 336                     | T/C  | Gene_Ca_23859.1    | NON_SYNONYMOUS_CODING         | Potassium-transporting ATPase B chain                       |
| <i>Desi_wild_660</i>  | NA                                  | <i>Ca_desi_scaffold</i> | 660                     | C/G  | Gene_Ca_23955.1    | SYNONYMOUS_CODING             | Chemotaxis protein CheA                                     |
| <i>Desi_wild_771</i>  | NA                                  | <i>Ca_desi_scaffold</i> | 771                     | G/C  | Gene_Ca_23955.1    | SYNONYMOUS_CODING             | Chemotaxis protein CheA                                     |
| <i>Desi_wild_774</i>  | NA                                  | <i>Ca_desi_scaffold</i> | 774                     | G/A  | Gene_Ca_23955.1    | SYNONYMOUS_CODING             | Chemotaxis protein CheA                                     |
| <i>Desi_wild_810</i>  | NA                                  | <i>Ca_desi_scaffold</i> | 810                     | C/G  | Gene_Ca_23955.1    | SYNONYMOUS_CODING             | Chemotaxis protein CheA                                     |



| SNP IDs               | NCBI dbSNP accession IDs (NCBI_SS#) | Chromosomes             | Physical positions (bp) | SNPs | Gene accession IDs | Sequence components of genome | Putative functions                                          |
|-----------------------|-------------------------------------|-------------------------|-------------------------|------|--------------------|-------------------------------|-------------------------------------------------------------|
| <i>Desi_wild_411</i>  | NA                                  | <i>Ca_desi_scaffold</i> | 411                     | G/A  | Gene_Ca_23987.1    | DOWNSTREAM                    | NA                                                          |
| <i>Desi_wild_339</i>  | NA                                  | <i>Ca_desi_scaffold</i> | 339                     | C/A  | Gene_Ca_23997.1    | NON_SYNONYMOUS_CODING         | NADH-quinone oxidoreductase subunit D                       |
| <i>Desi_wild_371</i>  | NA                                  | <i>Ca_desi_scaffold</i> | 371                     | A/G  | Gene_Ca_23997.1    | SYNONYMOUS_CODING             | NADH-quinone oxidoreductase subunit D                       |
| <i>Desi_wild_380</i>  | NA                                  | <i>Ca_desi_scaffold</i> | 380                     | G/C  | Gene_Ca_23997.1    | SYNONYMOUS_CODING             | NADH-quinone oxidoreductase subunit D                       |
| <i>Desi_wild_594</i>  | NA                                  | <i>Ca_desi_scaffold</i> | 594                     | G/A  | Gene_Ca_23997.1    | NON_SYNONYMOUS_CODING         | NADH-quinone oxidoreductase subunit D                       |
| <i>Desi_wild_599</i>  | NA                                  | <i>Ca_desi_scaffold</i> | 599                     | G/A  | Gene_Ca_23997.1    | SYNONYMOUS_CODING             | NADH-quinone oxidoreductase subunit D                       |
| <i>Desi_wild_602</i>  | NA                                  | <i>Ca_desi_scaffold</i> | 602                     | G/A  | Gene_Ca_23997.1    | SYNONYMOUS_CODING             | NADH-quinone oxidoreductase subunit D                       |
| <i>Desi_wild_617</i>  | NA                                  | <i>Ca_desi_scaffold</i> | 617                     | C/T  | Gene_Ca_23997.1    | SYNONYMOUS_CODING             | NADH-quinone oxidoreductase subunit D                       |
| <i>Desi_wild_638</i>  | NA                                  | <i>Ca_desi_scaffold</i> | 638                     | G/C  | Gene_Ca_23997.1    | SYNONYMOUS_CODING             | NADH-quinone oxidoreductase subunit D                       |
| <i>Desi_wild_824</i>  | NA                                  | <i>Ca_desi_scaffold</i> | 824                     | G/C  | Gene_Ca_24032.1    | SYNONYMOUS_CODING             | Lipid A export ATP-binding/permease protein MsbA            |
| <i>Desi_wild_893</i>  | NA                                  | <i>Ca_desi_scaffold</i> | 893                     | C/G  | Gene_Ca_24032.1    | SYNONYMOUS_CODING             | Lipid A export ATP-binding/permease protein MsbA            |
| <i>Desi_wild_905</i>  | NA                                  | <i>Ca_desi_scaffold</i> | 905                     | G/T  | Gene_Ca_24032.1    | SYNONYMOUS_CODING             | Lipid A export ATP-binding/permease protein MsbA            |
| <i>Desi_wild_906</i>  | NA                                  | <i>Ca_desi_scaffold</i> | 906                     | C/T  | Gene_Ca_24032.1    | NON_SYNONYMOUS_CODING         | Lipid A export ATP-binding/permease protein MsbA            |
| <i>Desi_wild_907</i>  | NA                                  | <i>Ca_desi_scaffold</i> | 907                     | G/T  | Gene_Ca_24032.1    | NON_SYNONYMOUS_CODING         | Lipid A export ATP-binding/permease protein MsbA            |
| <i>Desi_wild_372</i>  | NA                                  | <i>Ca_desi_scaffold</i> | 372                     | C/G  | Gene_Ca_24072.1    | UPSTREAM                      | Cytochrome c oxidase subunit 1 homolog, bacteroid           |
| <i>Desi_wild_383</i>  | NA                                  | <i>Ca_desi_scaffold</i> | 383                     | T/C  | Gene_Ca_24072.1    | UPSTREAM                      | Cytochrome c oxidase subunit 1 homolog, bacteroid           |
| <i>Desi_wild_630</i>  | NA                                  | <i>Ca_desi_scaffold</i> | 630                     | T/C  | Gene_Ca_24078.1    | SYNONYMOUS_CODING             | NA                                                          |
| <i>Desi_wild_12</i>   | NA                                  | <i>Ca_desi_scaffold</i> | 12                      | G/A  | NA                 | INTERGENIC                    | NA                                                          |
| <i>Desi_wild_927</i>  | NA                                  | <i>Ca_desi_scaffold</i> | 927                     | G/C  | Gene_Ca_24128.1    | SYNONYMOUS_CODING             | Septum site-determining protein MinD                        |
| <i>Desi_wild_464</i>  | NA                                  | <i>Ca_desi_scaffold</i> | 464                     | G/A  | NA                 | INTERGENIC                    | NA                                                          |
| <i>Desi_wild_508</i>  | NA                                  | <i>Ca_desi_scaffold</i> | 508                     | G/C  | NA                 | INTERGENIC                    | NA                                                          |
| <i>Desi_wild_707</i>  | NA                                  | <i>Ca_desi_scaffold</i> | 707                     | T/C  | Gene_Ca_24190.1    | SYNONYMOUS_CODING             | Fatty acid hydroxylase                                      |
| <i>Desi_wild_714</i>  | NA                                  | <i>Ca_desi_scaffold</i> | 714                     | G/A  | Gene_Ca_24190.1    | SYNONYMOUS_CODING             | Fatty acid hydroxylase                                      |
| <i>Desi_wild_719</i>  | NA                                  | <i>Ca_desi_scaffold</i> | 719                     | G/C  | Gene_Ca_24190.1    | SYNONYMOUS_CODING             | Fatty acid hydroxylase                                      |
| <i>Desi_wild_728</i>  | NA                                  | <i>Ca_desi_scaffold</i> | 728                     | G/C  | Gene_Ca_24190.1    | SYNONYMOUS_CODING             | Fatty acid hydroxylase                                      |
| <i>Desi_wild_731</i>  | NA                                  | <i>Ca_desi_scaffold</i> | 731                     | C/G  | Gene_Ca_24190.1    | SYNONYMOUS_CODING             | Fatty acid hydroxylase                                      |
| <i>Desi_wild_755</i>  | NA                                  | <i>Ca_desi_scaffold</i> | 755                     | C/G  | Gene_Ca_24190.1    | NON_SYNONYMOUS_CODING         | Fatty acid hydroxylase                                      |
| <i>Desi_wild_762</i>  | NA                                  | <i>Ca_desi_scaffold</i> | 762                     | C/G  | Gene_Ca_24190.1    | NON_SYNONYMOUS_CODING         | Fatty acid hydroxylase                                      |
| <i>Desi_wild_310</i>  | NA                                  | <i>Ca_desi_scaffold</i> | 310                     | G/A  | Gene_Ca_24212.1    | SYNONYMOUS_CODING             | Tyrosine recombinase XerD                                   |
| <i>Desi_wild_615</i>  | NA                                  | <i>Ca_desi_scaffold</i> | 615                     | C/T  | Gene_Ca_24227.1    | SYNONYMOUS_CODING             | Oligopeptide transport system permease protein AppB         |
| <i>Desi_wild_931</i>  | NA                                  | <i>Ca_desi_scaffold</i> | 931                     | G/A  | Gene_Ca_24268.1    | UPSTREAM                      | Probable transcriptional regulatory protein Aave_3203       |
| <i>Desi_wild_974</i>  | NA                                  | <i>Ca_desi_scaffold</i> | 974                     | G/C  | Gene_Ca_24268.1    | UPSTREAM                      | Probable transcriptional regulatory protein Aave_3203       |
| <i>Desi_wild_983</i>  | NA                                  | <i>Ca_desi_scaffold</i> | 983                     | G/C  | Gene_Ca_24268.1    | UPSTREAM                      | Probable transcriptional regulatory protein Aave_3203       |
| <i>Desi_wild_476</i>  | NA                                  | <i>Ca_desi_scaffold</i> | 476                     | C/T  | Gene_Ca_24301.1    | INTRON                        | Twitching mobility protein                                  |
| <i>Desi_wild_744</i>  | NA                                  | <i>Ca_desi_scaffold</i> | 744                     | G/A  | Gene_Ca_24379.1    | SYNONYMOUS_CODING             | Phosphocarrier protein HPr                                  |
| <i>Desi_wild_619</i>  | NA                                  | <i>Ca_desi_scaffold</i> | 619                     | G/C  | Gene_Ca_24403.1    | DOWNSTREAM                    | 3-hydroxyacyl-CoA dehydrogenase NAD-binding                 |
| <i>Desi_wild_1155</i> | NA                                  | <i>Ca_desi_scaffold</i> | 1155                    | A/C  | Gene_Ca_24485.1    | SYNONYMOUS_CODING             | Uncharacterized ABC transporter ATP-binding protein HI_1051 |
| <i>Desi_wild_1165</i> | NA                                  | <i>Ca_desi_scaffold</i> | 1165                    | C/G  | Gene_Ca_24485.1    | SYNONYMOUS_CODING             | Uncharacterized signaling protein PA3311                    |
| <i>Desi_wild_1133</i> | NA                                  | <i>Ca_desi_scaffold</i> | 1133                    | C/G  | Gene_Ca_24556.1    | SYNONYMOUS_CODING             | Uncharacterized ABC transporter ATP-binding protein HI_1051 |
| <i>Desi_wild_561</i>  | NA                                  | <i>Ca_desi_scaffold</i> | 561                     | G/A  | Gene_Ca_24566.1    | SYNONYMOUS_CODING             | NADH-quinone oxidoreductase subunit L                       |
| <i>Desi_wild_609</i>  | NA                                  | <i>Ca_desi_scaffold</i> | 609                     | G/A  | Gene_Ca_24566.1    | SYNONYMOUS_CODING             | NADH-quinone oxidoreductase subunit L                       |
| <i>Desi_wild_621</i>  | NA                                  | <i>Ca_desi_scaffold</i> | 621                     | G/C  | Gene_Ca_24566.1    | SYNONYMOUS_CODING             | NADH-quinone oxidoreductase subunit L                       |
| <i>Desi_wild_813</i>  | NA                                  | <i>Ca_desi_scaffold</i> | 813                     | G/C  | Gene_Ca_24566.1    | SYNONYMOUS_CODING             | NADH-quinone oxidoreductase subunit L                       |
| <i>Desi_wild_825</i>  | NA                                  | <i>Ca_desi_scaffold</i> | 825                     | G/C  | Gene_Ca_24566.1    | SYNONYMOUS_CODING             | NADH-quinone oxidoreductase subunit L                       |

| SNP IDs               | NCBI dbSNP accession IDs (NCBI_SS#) | Chromosomes             | Physical positions (bp) | SNPs | Gene accession IDs | Sequence components of genome | Putative functions                                  |
|-----------------------|-------------------------------------|-------------------------|-------------------------|------|--------------------|-------------------------------|-----------------------------------------------------|
| <i>Desi_wild_840</i>  | NA                                  | <i>Ca_desi_scaffold</i> | 840                     | G/C  | Gene_Ca_24566.1    | SYNONYMOUS_CODING             | NADH-quinone oxidoreductase subunit L               |
| <i>Desi_wild_855</i>  | NA                                  | <i>Ca_desi_scaffold</i> | 855                     | G/C  | Gene_Ca_24566.1    | SYNONYMOUS_CODING             | NADH-quinone oxidoreductase subunit L               |
| <i>Desi_wild_857</i>  | NA                                  | <i>Ca_desi_scaffold</i> | 857                     | C/A  | Gene_Ca_24566.1    | SYNONYMOUS_CODING             | NADH-quinone oxidoreductase subunit L               |
| <i>Desi_wild_601</i>  | NA                                  | <i>Ca_desi_scaffold</i> | 601                     | C/G  | Gene_Ca_24583.1    | NON_SYNONYMOUS_CODING         | ATP-dependent RNA helicase rhIE                     |
| <i>Desi_wild_969</i>  | NA                                  | <i>Ca_desi_scaffold</i> | 969                     | C/T  | Gene_Ca_24583.1    | NON_SYNONYMOUS_CODING         | ATP-dependent RNA helicase rhIE                     |
| <i>Desi_wild_970</i>  | NA                                  | <i>Ca_desi_scaffold</i> | 970                     | G/T  | Gene_Ca_24583.1    | SYNONYMOUS_CODING             | ATP-dependent RNA helicase rhIE                     |
| <i>Desi_wild_978</i>  | NA                                  | <i>Ca_desi_scaffold</i> | 978                     | C/G  | Gene_Ca_24583.1    | SYNONYMOUS_CODING             | ATP-dependent RNA helicase rhIE                     |
| <i>Desi_wild_990</i>  | NA                                  | <i>Ca_desi_scaffold</i> | 990                     | C/T  | Gene_Ca_24583.1    | NON_SYNONYMOUS_CODING         | ATP-dependent RNA helicase rhIE                     |
| <i>Desi_wild_9</i>    | NA                                  | <i>Ca_desi_scaffold</i> | 9                       | T/C  | NA                 | INTERGENIC                    | NA                                                  |
| <i>Desi_wild_998</i>  | NA                                  | <i>Ca_desi_scaffold</i> | 998                     | T/G  | Gene_Ca_24609.1    | NON_SYNONYMOUS_CODING         | Citrate synthase                                    |
| <i>Desi_wild_1009</i> | NA                                  | <i>Ca_desi_scaffold</i> | 1009                    | C/G  | Gene_Ca_24609.1    | SYNONYMOUS_CODING             | Citrate synthase                                    |
| <i>Desi_wild_1012</i> | NA                                  | <i>Ca_desi_scaffold</i> | 1012                    | G/A  | Gene_Ca_24609.1    | SYNONYMOUS_CODING             | Citrate synthase                                    |
| <i>Desi_wild_529</i>  | NA                                  | <i>Ca_desi_scaffold</i> | 529                     | C/T  | Gene_Ca_24685.1    | DOWNSTREAM                    | ATP-dependent Clp protease ATP-binding subunit ClpA |
| <i>Desi_wild_550</i>  | NA                                  | <i>Ca_desi_scaffold</i> | 550                     | C/G  | Gene_Ca_24685.1    | DOWNSTREAM                    | ATP-dependent Clp protease ATP-binding subunit ClpA |
| <i>Desi_wild_562</i>  | NA                                  | <i>Ca_desi_scaffold</i> | 562                     | C/T  | Gene_Ca_24685.1    | DOWNSTREAM                    | ATP-dependent Clp protease ATP-binding subunit ClpA |
| <i>Desi_wild_571</i>  | NA                                  | <i>Ca_desi_scaffold</i> | 571                     | T/C  | Gene_Ca_24685.1    | DOWNSTREAM                    | ATP-dependent Clp protease ATP-binding subunit ClpA |
| <i>Desi_wild_542</i>  | NA                                  | <i>Ca_desi_scaffold</i> | 542                     | G/C  | Gene_Ca_24688.1    | NON_SYNONYMOUS_CODING         | NA                                                  |
| <i>Desi_wild_739</i>  | NA                                  | <i>Ca_desi_scaffold</i> | 739                     | C/T  | Gene_Ca_24688.1    | SYNONYMOUS_CODING             | NA                                                  |
| <i>Desi_wild_887</i>  | NA                                  | <i>Ca_desi_scaffold</i> | 887                     | T/G  | Gene_Ca_24723.1    | NON_SYNONYMOUS_CODING         | NA                                                  |
| <i>Desi_wild_912</i>  | NA                                  | <i>Ca_desi_scaffold</i> | 912                     | G/C  | Gene_Ca_24723.1    | SYNONYMOUS_CODING             | NA                                                  |
| <i>Desi_wild_691</i>  | NA                                  | <i>Ca_desi_scaffold</i> | 691                     | G/A  | Gene_Ca_24769.1    | SYNONYMOUS_CODING             | GTP-dependent nucleic acid-binding protein engD     |
| <i>Desi_wild_740</i>  | NA                                  | <i>Ca_desi_scaffold</i> | 740                     | G/C  | Gene_Ca_24769.1    | SYNONYMOUS_CODING             | GTP-dependent nucleic acid-binding protein engD     |
| <i>Desi_wild_776</i>  | NA                                  | <i>Ca_desi_scaffold</i> | 776                     | C/T  | Gene_Ca_24769.1    | SYNONYMOUS_CODING             | GTP-dependent nucleic acid-binding protein engD     |
| <i>Desi_wild_782</i>  | NA                                  | <i>Ca_desi_scaffold</i> | 782                     | G/C  | Gene_Ca_24769.1    | SYNONYMOUS_CODING             | GTP-dependent nucleic acid-binding protein engD     |
| <i>Desi_wild_809</i>  | NA                                  | <i>Ca_desi_scaffold</i> | 809                     | G/C  | Gene_Ca_24769.1    | SYNONYMOUS_CODING             | GTP-dependent nucleic acid-binding protein engD     |
| <i>Desi_wild_848</i>  | NA                                  | <i>Ca_desi_scaffold</i> | 848                     | G/A  | Gene_Ca_24769.1    | SYNONYMOUS_CODING             | GTP-dependent nucleic acid-binding protein engD     |
| <i>Desi_wild_402</i>  | NA                                  | <i>Ca_desi_scaffold</i> | 402                     | G/C  | Gene_Ca_24822.1    | DOWNSTREAM                    | NA                                                  |
| <i>Desi_wild_417</i>  | NA                                  | <i>Ca_desi_scaffold</i> | 417                     | G/A  | Gene_Ca_24822.1    | DOWNSTREAM                    | NA                                                  |
| <i>Desi_wild_15</i>   | NA                                  | <i>Ca_desi_scaffold</i> | 15                      | C/G  | NA                 | INTERGENIC                    | NA                                                  |
| <i>Desi_wild_685</i>  | NA                                  | <i>Ca_desi_scaffold</i> | 685                     | C/G  | Gene_Ca_24916.1    | DOWNSTREAM                    | Transcriptional regulatory protein rtcR             |
| <i>Desi_wild_694</i>  | NA                                  | <i>Ca_desi_scaffold</i> | 694                     | G/C  | Gene_Ca_24916.1    | DOWNSTREAM                    | Transcriptional regulatory protein rtcR             |
| <i>Desi_wild_830</i>  | NA                                  | <i>Ca_desi_scaffold</i> | 830                     | C/G  | Gene_Ca_24919.1    | UPSTREAM                      | Bifunctional protein GlmU                           |
| <i>Desi_wild_846</i>  | NA                                  | <i>Ca_desi_scaffold</i> | 846                     | T/A  | Gene_Ca_24919.1    | UPSTREAM                      | Bifunctional protein GlmU                           |
| <i>Desi_wild_847</i>  | NA                                  | <i>Ca_desi_scaffold</i> | 847                     | C/G  | Gene_Ca_24919.1    | UPSTREAM                      | Bifunctional protein GlmU                           |
| <i>Desi_wild_856</i>  | NA                                  | <i>Ca_desi_scaffold</i> | 856                     | C/G  | Gene_Ca_24919.1    | UPSTREAM                      | Bifunctional protein GlmU                           |
| <i>Desi_wild_865</i>  | NA                                  | <i>Ca_desi_scaffold</i> | 865                     | G/C  | Gene_Ca_24919.1    | UPSTREAM                      | Bifunctional protein GlmU                           |
| <i>Desi_wild_899</i>  | NA                                  | <i>Ca_desi_scaffold</i> | 899                     | G/A  | Gene_Ca_24919.1    | UPSTREAM                      | Bifunctional protein GlmU                           |
| <i>Desi_wild_914</i>  | NA                                  | <i>Ca_desi_scaffold</i> | 914                     | T/C  | Gene_Ca_24919.1    | UPSTREAM                      | Bifunctional protein GlmU                           |
| <i>Desi_wild_962</i>  | NA                                  | <i>Ca_desi_scaffold</i> | 962                     | C/T  | Gene_Ca_25035.1    | DOWNSTREAM                    | NADH-quinone oxidoreductase subunit C               |
| <i>Desi_wild_7</i>    | NA                                  | <i>Ca_desi_scaffold</i> | 7                       | C/G  | NA                 | INTERGENIC                    | NA                                                  |
| <i>Desi_wild_884</i>  | NA                                  | <i>Ca_desi_scaffold</i> | 884                     | G/T  | Gene_Ca_25173.1    | NON_SYNONYMOUS_CODING         | Transcriptional regulatory protein flbD             |
| <i>Desi_wild_891</i>  | NA                                  | <i>Ca_desi_scaffold</i> | 891                     | C/G  | Gene_Ca_25173.1    | SYNONYMOUS_CODING             | Transcriptional regulatory protein flbD             |
| <i>Desi_wild_903</i>  | NA                                  | <i>Ca_desi_scaffold</i> | 903                     | C/G  | Gene_Ca_25173.1    | SYNONYMOUS_CODING             | Transcriptional regulatory protein flbD             |
| <i>Desi_wild_1043</i> | NA                                  | <i>Ca_desi_scaffold</i> | 1043                    | C/G  | Gene_Ca_25253.1    | NON_SYNONYMOUS_CODING         | Glutathione import ATP-binding protein GsiA         |

| SNP IDs               | NCBI dbSNP accession IDs (NCBI_SS#) | Chromosomes             | Physical positions (bp) | SNPs | Gene accession IDs | Sequence components of genome | Putative functions                                              |
|-----------------------|-------------------------------------|-------------------------|-------------------------|------|--------------------|-------------------------------|-----------------------------------------------------------------|
| <i>Desi_wild_1049</i> | NA                                  | <i>Ca_desi_scaffold</i> | 1049                    | C/G  | Gene_Ca_25253.1    | NON_SYNONYMOUS_CODING         | Glutathione import ATP-binding protein GsiA                     |
| <i>Desi_wild_1050</i> | NA                                  | <i>Ca_desi_scaffold</i> | 1050                    | G/C  | Gene_Ca_25253.1    | SYNONYMOUS_CODING             | Glutathione import ATP-binding protein GsiA                     |
| <i>Desi_wild_1057</i> | NA                                  | <i>Ca_desi_scaffold</i> | 1057                    | A/C  | Gene_Ca_25253.1    | SYNONYMOUS_CODING             | Glutathione import ATP-binding protein GsiA                     |
| <i>Desi_wild_1059</i> | NA                                  | <i>Ca_desi_scaffold</i> | 1059                    | C/G  | Gene_Ca_25253.1    | SYNONYMOUS_CODING             | Glutathione import ATP-binding protein GsiA                     |
| <i>Desi_wild_1063</i> | NA                                  | <i>Ca_desi_scaffold</i> | 1063                    | C/G  | Gene_Ca_25253.1    | NON_SYNONYMOUS_CODING         | Glutathione import ATP-binding protein GsiA                     |
| <i>Desi_wild_743</i>  | NA                                  | <i>Ca_desi_scaffold</i> | 743                     | G/C  | Gene_Ca_25266.1    | SYNONYMOUS_CODING             | Thymidylate synthase                                            |
| <i>Desi_wild_671</i>  | NA                                  | <i>Ca_desi_scaffold</i> | 671                     | G/A  | Gene_Ca_25314.1    | DOWNSTREAM                    | sn-glycerol-3-phosphate transport system permease protein ugpE  |
| <i>Desi_wild_709</i>  | NA                                  | <i>Ca_desi_scaffold</i> | 709                     | A/T  | Gene_Ca_25314.1    | DOWNSTREAM                    | sn-glycerol-3-phosphate transport system permease protein ugpE  |
| <i>Desi_wild_384</i>  | NA                                  | <i>Ca_desi_scaffold</i> | 384                     | G/C  | Gene_Ca_25334.1    | SYNONYMOUS_CODING             | Uncharacterized protein in gidB 3'region                        |
| <i>Desi_wild_612</i>  | NA                                  | <i>Ca_desi_scaffold</i> | 612                     | A/G  | Gene_Ca_25400.1    | SYNONYMOUS_CODING             | Nicotinate phosphoribosyltransferase                            |
| <i>Desi_wild_787</i>  | NA                                  | <i>Ca_desi_scaffold</i> | 787                     | C/G  | Gene_Ca_25400.1    | SYNONYMOUS_CODING             | Nicotinate phosphoribosyltransferase                            |
| <i>Desi_wild_796</i>  | NA                                  | <i>Ca_desi_scaffold</i> | 796                     | C/G  | Gene_Ca_25400.1    | NON_SYNONYMOUS_CODING         | Nicotinate phosphoribosyltransferase                            |
| <i>Desi_wild_799</i>  | NA                                  | <i>Ca_desi_scaffold</i> | 799                     | C/G  | Gene_Ca_25400.1    | SYNONYMOUS_CODING             | Nicotinate phosphoribosyltransferase                            |
| <i>Desi_wild_348</i>  | NA                                  | <i>Ca_desi_scaffold</i> | 348                     | A/C  | Gene_Ca_25502.1    | NON_SYNONYMOUS_CODING         | LRR receptor-like serine/threonine-protein kinase GSO1          |
| <i>Desi_wild_377</i>  | NA                                  | <i>Ca_desi_scaffold</i> | 377                     | T/G  | Gene_Ca_25534.1    | SYNONYMOUS_CODING             | Aliphatic sulfonates import ATP-binding protein SsuB            |
| <i>Desi_wild_381</i>  | NA                                  | <i>Ca_desi_scaffold</i> | 381                     | A/C  | Gene_Ca_25534.1    | SYNONYMOUS_CODING             | Aliphatic sulfonates import ATP-binding protein SsuB            |
| <i>Desi_wild_760</i>  | NA                                  | <i>Ca_desi_scaffold</i> | 760                     | C/G  | Gene_Ca_25604.1    | NON_SYNONYMOUS_CODING         | Transaldolase                                                   |
| <i>Desi_wild_647</i>  | NA                                  | <i>Ca_desi_scaffold</i> | 647                     | A/G  | Gene_Ca_25611.1    | SYNONYMOUS_CODING             | DNA helicase II                                                 |
| <i>Desi_wild_650</i>  | NA                                  | <i>Ca_desi_scaffold</i> | 650                     | G/C  | Gene_Ca_25611.1    | SYNONYMOUS_CODING             | DNA helicase II                                                 |
| <i>Desi_wild_727</i>  | NA                                  | <i>Ca_desi_scaffold</i> | 727                     | G/C  | Gene_Ca_25614.1    | SYNONYMOUS_CODING             | Fumarate hydratase class II                                     |
| <i>Desi_wild_729</i>  | NA                                  | <i>Ca_desi_scaffold</i> | 729                     | C/A  | Gene_Ca_25614.1    | SYNONYMOUS_CODING             | Fumarate hydratase class II                                     |
| <i>Desi_wild_757</i>  | NA                                  | <i>Ca_desi_scaffold</i> | 757                     | C/G  | Gene_Ca_25614.1    | SYNONYMOUS_CODING             | Fumarate hydratase class II                                     |
| <i>Desi_wild_772</i>  | NA                                  | <i>Ca_desi_scaffold</i> | 772                     | T/C  | Gene_Ca_25614.1    | NON_SYNONYMOUS_CODING         | Fumarate hydratase class II                                     |
| <i>Desi_wild_3</i>    | NA                                  | <i>Ca_desi_scaffold</i> | 3                       | C/G  | NA                 | INTERGENIC                    | NA                                                              |
| <i>Desi_wild_751</i>  | NA                                  | <i>Ca_desi_scaffold</i> | 751                     | A/G  | Gene_Ca_25685.1    | DOWNSTREAM                    | Integration host factor subunit alpha                           |
| <i>Desi_wild_752</i>  | NA                                  | <i>Ca_desi_scaffold</i> | 752                     | C/T  | Gene_Ca_25685.1    | DOWNSTREAM                    | Integration host factor subunit alpha                           |
| <i>Desi_wild_897</i>  | NA                                  | <i>Ca_desi_scaffold</i> | 897                     | G/C  | Gene_Ca_25738.1    | SYNONYMOUS_CODING             | 1-acyl-sn-glycerol-3-phosphate acyltransferase 1, chloroplastic |
| <i>Desi_wild_917</i>  | NA                                  | <i>Ca_desi_scaffold</i> | 917                     | C/G  | Gene_Ca_25738.1    | NON_SYNONYMOUS_CODING         | 1-acyl-sn-glycerol-3-phosphate acyltransferase 1, chloroplastic |
| <i>Desi_wild_918</i>  | NA                                  | <i>Ca_desi_scaffold</i> | 918                     | A/G  | Gene_Ca_25738.1    | SYNONYMOUS_CODING             | 1-acyl-sn-glycerol-3-phosphate acyltransferase 1, chloroplastic |
| <i>Desi_wild_640</i>  | NA                                  | <i>Ca_desi_scaffold</i> | 640                     | A/G  | Gene_Ca_25796.1    | NON_SYNONYMOUS_CODING         | Nitrite reductase [NAD(P)H] large subunit                       |
| <i>Desi_wild_641</i>  | NA                                  | <i>Ca_desi_scaffold</i> | 641                     | C/T  | Gene_Ca_25796.1    | SYNONYMOUS_CODING             | Nitrite reductase [NAD(P)H] large subunit                       |
| <i>Desi_wild_389</i>  | NA                                  | <i>Ca_desi_scaffold</i> | 389                     | C/T  | Gene_Ca_25848.1    | NON_SYNONYMOUS_CODING         | NA                                                              |
| <i>Desi_wild_923</i>  | NA                                  | <i>Ca_desi_scaffold</i> | 923                     | C/G  | Gene_Ca_25848.1    | UPSTREAM                      | NA                                                              |
| <i>Desi_wild_759</i>  | NA                                  | <i>Ca_desi_scaffold</i> | 759                     | G/A  | Gene_Ca_25849.1    | SYNONYMOUS_CODING             | Uncharacterized ATP-binding protein in capB 3'region            |
| <i>Desi_wild_1116</i> | NA                                  | <i>Ca_desi_scaffold</i> | 1116                    | C/T  | Gene_Ca_25862.1    | SYNONYMOUS_CODING             | NA                                                              |
| <i>Desi_wild_1121</i> | NA                                  | <i>Ca_desi_scaffold</i> | 1121                    | C/G  | Gene_Ca_25862.1    | SYNONYMOUS_CODING             | NA                                                              |
| <i>Desi_wild_747</i>  | NA                                  | <i>Ca_desi_scaffold</i> | 747                     | C/T  | Gene_Ca_25867.1    | SYNONYMOUS_CODING             | Formate dehydrogenase, nitrate-inducible, major subunit         |
| <i>Desi_wild_968</i>  | NA                                  | <i>Ca_desi_scaffold</i> | 968                     | G/C  | Gene_Ca_25867.1    | SYNONYMOUS_CODING             | Formate dehydrogenase, nitrate-inducible, major subunit         |
| <i>Desi_wild_1007</i> | NA                                  | <i>Ca_desi_scaffold</i> | 1007                    | G/C  | Gene_Ca_25867.1    | SYNONYMOUS_CODING             | Formate dehydrogenase, nitrate-inducible, major subunit         |
| <i>Desi_wild_1015</i> | NA                                  | <i>Ca_desi_scaffold</i> | 1015                    | T/A  | Gene_Ca_25867.1    | SYNONYMOUS_CODING             | Formate dehydrogenase, nitrate-inducible, major subunit         |
| <i>Desi_wild_367</i>  | NA                                  | <i>Ca_desi_scaffold</i> | 367                     | T/C  | Gene_Ca_26109.1    | SYNONYMOUS_CODING             | 1-deoxy-D-xylulose-5-phosphate synthase                         |
| <i>Desi_wild_488</i>  | NA                                  | <i>Ca_desi_scaffold</i> | 488                     | C/G  | Gene_Ca_26109.1    | NON_SYNONYMOUS_CODING         | 1-deoxy-D-xylulose-5-phosphate synthase                         |
| <i>Desi_wild_631</i>  | NA                                  | <i>Ca_desi_scaffold</i> | 631                     | G/A  | Gene_Ca_26111.1    | SYNONYMOUS_CODING             | Organic hydroperoxide resistance transcriptional regulator      |
| <i>Desi_wild_1231</i> | NA                                  | <i>Ca_desi_scaffold</i> | 1231                    | A/G  | Gene_Ca_26152.1    | SYNONYMOUS_CODING             | Elongation factor 4                                             |



| SNP IDs               | NCBI dbSNP accession IDs (NCBI_SS#) | Chromosomes             | Physical positions (bp) | SNPs | Gene accession IDs | Sequence components of genome | Putative functions                                                         |
|-----------------------|-------------------------------------|-------------------------|-------------------------|------|--------------------|-------------------------------|----------------------------------------------------------------------------|
| <i>Desi_wild_1233</i> | NA                                  | <i>Ca_desi_scaffold</i> | 1233                    | T/A  | Gene_Ca_26152.1    | NON_SYNONYMOUS_CODING         | Elongation factor 4                                                        |
| <i>Desi_wild_1261</i> | NA                                  | <i>Ca_desi_scaffold</i> | 1261                    | G/C  | Gene_Ca_26152.1    | SYNONYMOUS_CODING             | Elongation factor 4                                                        |
| <i>Desi_wild_1276</i> | NA                                  | <i>Ca_desi_scaffold</i> | 1276                    | G/A  | Gene_Ca_26152.1    | SYNONYMOUS_CODING             | Elongation factor 4                                                        |
| <i>Desi_wild_342</i>  | NA                                  | <i>Ca_desi_scaffold</i> | 342                     | C/T  | Gene_Ca_26158.1    | SYNONYMOUS_CODING             | Nitrogen regulation protein ntrB                                           |
| <i>Desi_wild_786</i>  | NA                                  | <i>Ca_desi_scaffold</i> | 786                     | G/C  | Gene_Ca_26207.1    | UPSTREAM                      | NA                                                                         |
| <i>Desi_wild_322</i>  | NA                                  | <i>Ca_desi_scaffold</i> | 322                     | C/G  | Gene_Ca_26244.1    | NON_SYNONYMOUS_CODING         | Putative uncharacterized protein                                           |
| <i>Desi_wild_334</i>  | NA                                  | <i>Ca_desi_scaffold</i> | 334                     | T/G  | NA                 | INTERGENIC                    | NA                                                                         |
| <i>Desi_wild_414</i>  | NA                                  | <i>Ca_desi_scaffold</i> | 414                     | G/T  | NA                 | INTERGENIC                    | NA                                                                         |
| <i>Desi_wild_715</i>  | NA                                  | <i>Ca_desi_scaffold</i> | 715                     | C/G  | Gene_Ca_26365.1    | DOWNSTREAM                    | Methyl-accepting chemotaxis protein mcpC                                   |
| <i>Desi_wild_816</i>  | NA                                  | <i>Ca_desi_scaffold</i> | 816                     | G/A  | Gene_Ca_26414.1    | SYNONYMOUS_CODING             | 30S ribosomal protein S1                                                   |
| <i>Desi_wild_873</i>  | NA                                  | <i>Ca_desi_scaffold</i> | 873                     | G/C  | Gene_Ca_26414.1    | SYNONYMOUS_CODING             | 30S ribosomal protein S1                                                   |
| <i>Desi_wild_876</i>  | NA                                  | <i>Ca_desi_scaffold</i> | 876                     | G/A  | Gene_Ca_26414.1    | SYNONYMOUS_CODING             | 30S ribosomal protein S1                                                   |
| <i>Desi_wild_888</i>  | NA                                  | <i>Ca_desi_scaffold</i> | 888                     | G/A  | Gene_Ca_26414.1    | SYNONYMOUS_CODING             | 30S ribosomal protein S1                                                   |
| <i>Desi_wild_894</i>  | NA                                  | <i>Ca_desi_scaffold</i> | 894                     | G/A  | Gene_Ca_26414.1    | NON_SYNONYMOUS_CODING         | 30S ribosomal protein S1                                                   |
| <i>Desi_wild_902</i>  | NA                                  | <i>Ca_desi_scaffold</i> | 902                     | G/T  | Gene_Ca_26414.1    | SYNONYMOUS_CODING             | 30S ribosomal protein S1                                                   |
| <i>Desi_wild_913</i>  | NA                                  | <i>Ca_desi_scaffold</i> | 913                     | A/G  | Gene_Ca_26414.1    | NON_SYNONYMOUS_CODING         | 30S ribosomal protein S1                                                   |
| <i>Desi_wild_915</i>  | NA                                  | <i>Ca_desi_scaffold</i> | 915                     | G/A  | Gene_Ca_26414.1    | SYNONYMOUS_CODING             | 30S ribosomal protein S1                                                   |
| <i>Desi_wild_920</i>  | NA                                  | <i>Ca_desi_scaffold</i> | 920                     | G/T  | Gene_Ca_26414.1    | NON_SYNONYMOUS_CODING         | 30S ribosomal protein S1                                                   |
| <i>Desi_wild_921</i>  | NA                                  | <i>Ca_desi_scaffold</i> | 921                     | C/A  | Gene_Ca_26414.1    | SYNONYMOUS_CODING             | 30S ribosomal protein S1                                                   |
| <i>Desi_wild_1179</i> | NA                                  | <i>Ca_desi_scaffold</i> | 1179                    | G/C  | Gene_Ca_26455.1    | SYNONYMOUS_CODING             | Protein translocase subunit SecA                                           |
| <i>Desi_wild_1181</i> | NA                                  | <i>Ca_desi_scaffold</i> | 1181                    | C/T  | Gene_Ca_26455.1    | SYNONYMOUS_CODING             | Protein translocase subunit SecA                                           |
| <i>Desi_wild_1185</i> | NA                                  | <i>Ca_desi_scaffold</i> | 1185                    | C/G  | Gene_Ca_26455.1    | SYNONYMOUS_CODING             | Protein translocase subunit SecA                                           |
| <i>Desi_wild_1212</i> | NA                                  | <i>Ca_desi_scaffold</i> | 1212                    | G/C  | Gene_Ca_26455.1    | UPSTREAM                      | Protein translocase subunit SecA                                           |
| <i>Desi_wild_620</i>  | NA                                  | <i>Ca_desi_scaffold</i> | 620                     | C/G  | Gene_Ca_26460.1    | SYNONYMOUS_CODING             | High-affinity branched-chain amino acid transport ATP-binding protein LivF |
| <i>Desi_wild_626</i>  | NA                                  | <i>Ca_desi_scaffold</i> | 626                     | C/T  | Gene_Ca_26460.1    | SYNONYMOUS_CODING             | High-affinity branched-chain amino acid transport ATP-binding protein LivF |
| <i>Desi_wild_614</i>  | NA                                  | <i>Ca_desi_scaffold</i> | 614                     | C/G  | Gene_Ca_26473.1    | UPSTREAM                      | NA                                                                         |
| <i>Desi_wild_932</i>  | NA                                  | <i>Ca_desi_scaffold</i> | 932                     | C/G  | Gene_Ca_26473.1    | UPSTREAM                      | NA                                                                         |
| <i>Desi_wild_1022</i> | NA                                  | <i>Ca_desi_scaffold</i> | 1022                    | C/A  | Gene_Ca_26538.1    | INTRON                        | Ferric transport system permease protein fbpB                              |
| <i>Desi_wild_1035</i> | NA                                  | <i>Ca_desi_scaffold</i> | 1035                    | A/C  | Gene_Ca_26538.1    | INTRON                        | Ferric transport system permease protein fbpB                              |
| <i>Desi_wild_1203</i> | NA                                  | <i>Ca_desi_scaffold</i> | 1203                    | C/A  | Gene_Ca_26538.1    | NON_SYNONYMOUS_CODING         | Ferric transport system permease protein fbpB                              |
| <i>Desi_wild_1227</i> | NA                                  | <i>Ca_desi_scaffold</i> | 1227                    | G/A  | Gene_Ca_26538.1    | SYNONYMOUS_CODING             | Ferric transport system permease protein fbpB                              |
| <i>Desi_wild_648</i>  | NA                                  | <i>Ca_desi_scaffold</i> | 648                     | T/C  | Gene_Ca_26626.1    | UPSTREAM                      | 3-isopropylmalate dehydrogenase                                            |
| <i>Desi_wild_683</i>  | NA                                  | <i>Ca_desi_scaffold</i> | 683                     | G/C  | Gene_Ca_26626.1    | UPSTREAM                      | 3-isopropylmalate dehydrogenase                                            |
| <i>Desi_wild_625</i>  | NA                                  | <i>Ca_desi_scaffold</i> | 625                     | C/G  | NA                 | INTERGENIC                    | NA                                                                         |
| <i>Desi_wild_1044</i> | NA                                  | <i>Ca_desi_scaffold</i> | 1044                    | C/A  | Gene_Ca_26670.1    | NON_SYNONYMOUS_CODING         | Biodegradative arginine decarboxylase                                      |
| <i>Desi_wild_1046</i> | NA                                  | <i>Ca_desi_scaffold</i> | 1046                    | G/C  | Gene_Ca_26670.1    | SYNONYMOUS_CODING             | Biodegradative arginine decarboxylase                                      |
| <i>Desi_wild_1066</i> | NA                                  | <i>Ca_desi_scaffold</i> | 1066                    | T/A  | Gene_Ca_26670.1    | SYNONYMOUS_CODING             | Biodegradative arginine decarboxylase                                      |
| <i>Desi_wild_1100</i> | NA                                  | <i>Ca_desi_scaffold</i> | 1100                    | G/C  | Gene_Ca_26670.1    | SYNONYMOUS_CODING             | Biodegradative arginine decarboxylase                                      |
| <i>Desi_wild_1174</i> | NA                                  | <i>Ca_desi_scaffold</i> | 1174                    | A/G  | Gene_Ca_26706.1    | NON_SYNONYMOUS_CODING         | Putative peptide ABC transporter ATP-binding protein                       |
| <i>Desi_wild_1192</i> | NA                                  | <i>Ca_desi_scaffold</i> | 1192                    | T/C  | Gene_Ca_26706.1    | SYNONYMOUS_CODING             | Putative peptide ABC transporter ATP-binding protein                       |
| <i>Desi_wild_930</i>  | NA                                  | <i>Ca_desi_scaffold</i> | 930                     | G/C  | Gene_Ca_26772.1    | SYNONYMOUS_CODING             | DNA gyrase subunit B                                                       |
| <i>Desi_wild_972</i>  | NA                                  | <i>Ca_desi_scaffold</i> | 972                     | C/G  | Gene_Ca_26772.1    | SYNONYMOUS_CODING             | DNA gyrase subunit B                                                       |
| <i>Desi_wild_984</i>  | NA                                  | <i>Ca_desi_scaffold</i> | 984                     | C/G  | Gene_Ca_26772.1    | SYNONYMOUS_CODING             | DNA gyrase subunit B                                                       |
| <i>Desi_wild_1011</i> | NA                                  | <i>Ca_desi_scaffold</i> | 1011                    | G/A  | Gene_Ca_26772.1    | SYNONYMOUS_CODING             | DNA gyrase subunit B                                                       |

| SNP IDs                 | NCBI dbSNP accession IDs (NCBI_SS#) | Chromosomes             | Physical positions (bp) | SNPs | Gene accession IDs | Sequence components of genome | Putative functions                              |
|-------------------------|-------------------------------------|-------------------------|-------------------------|------|--------------------|-------------------------------|-------------------------------------------------|
| <i>Desi_wild_820</i>    | NA                                  | <i>Ca_desi_scaffold</i> | 820                     | G/C  | Gene_Ca_26854.1    | DOWNSTREAM                    | Macrolide-specific efflux protein macA          |
| <i>Desi_wild_821</i>    | NA                                  | <i>Ca_desi_scaffold</i> | 821                     | C/G  | Gene_Ca_26854.1    | DOWNSTREAM                    | Macrolide-specific efflux protein macA          |
| <i>Desi_wild_854</i>    | NA                                  | <i>Ca_desi_scaffold</i> | 854                     | A/T  | Gene_Ca_26854.1    | DOWNSTREAM                    | Macrolide-specific efflux protein macA          |
| <i>Desi_wild_711</i>    | NA                                  | <i>Ca_desi_scaffold</i> | 711                     | T/G  | Gene_Ca_27043.1    | INTRON                        | Cyclic di-GMP phosphodiesterase Gmr             |
| <i>Desi_wild_398</i>    | NA                                  | <i>Ca_desi_scaffold</i> | 398                     | C/T  | NA                 | INTERGENIC                    | NA                                              |
| <i>Desi_wild_878</i>    | NA                                  | <i>Ca_desi_scaffold</i> | 878                     | G/C  | Gene_Ca_27064.1    | SYNONYMOUS_CODING             | Ribosomal RNA large subunit methyltransferase N |
| <i>Desi_wild_881</i>    | NA                                  | <i>Ca_desi_scaffold</i> | 881                     | G/C  | Gene_Ca_27064.1    | SYNONYMOUS_CODING             | Ribosomal RNA large subunit methyltransferase N |
| <i>Desi_wild_889</i>    | NA                                  | <i>Ca_desi_scaffold</i> | 889                     | T/A  | Gene_Ca_27064.1    | SYNONYMOUS_CODING             | Ribosomal RNA large subunit methyltransferase N |
| <i>Desi_wild_568</i>    | NA                                  | <i>Ca_desi_scaffold</i> | 568                     | C/T  | Gene_Ca_27169.1    | NON_SYNONYMOUS_CODING         | CTP synthase                                    |
| <i>Desi_wild_573</i>    | NA                                  | <i>Ca_desi_scaffold</i> | 573                     | C/G  | Gene_Ca_27169.1    | SYNONYMOUS_CODING             | CTP synthase                                    |
| <i>Desi_wild_941</i>    | NA                                  | <i>Ca_desi_scaffold</i> | 941                     | C/T  | Gene_Ca_27186.1    | UPSTREAM                      | DNA-directed RNA polymerase subunit beta        |
| <i>Desi_wild_1255</i>   | NA                                  | <i>Ca_desi_scaffold</i> | 1255                    | G/C  | Gene_Ca_27247.1    | SYNONYMOUS_CODING             | NA                                              |
| <i>Desi_wild_1259</i>   | NA                                  | <i>Ca_desi_scaffold</i> | 1259                    | G/C  | Gene_Ca_27247.1    | SYNONYMOUS_CODING             | NA                                              |
| <i>Kabuli_wild_174</i>  | NA                                  | <i>Ca_kabuli_denovo</i> | 174                     | A/C  | NA                 | NA                            | NA                                              |
| <i>Kabuli_wild_175</i>  | NA                                  | <i>Ca_kabuli_denovo</i> | 175                     | G/A  | NA                 | NA                            | NA                                              |
| <i>Kabuli_wild_177</i>  | NA                                  | <i>Ca_kabuli_denovo</i> | 177                     | A/G  | NA                 | NA                            | NA                                              |
| <i>Kabuli_wild_179</i>  | NA                                  | <i>Ca_kabuli_denovo</i> | 179                     | T/A  | NA                 | NA                            | NA                                              |
| <i>Kabuli_wild_180</i>  | NA                                  | <i>Ca_kabuli_denovo</i> | 180                     | G/T  | NA                 | NA                            | NA                                              |
| <i>Kabuli_wild_181</i>  | NA                                  | <i>Ca_kabuli_denovo</i> | 181                     | C/G  | NA                 | NA                            | NA                                              |
| <i>Kabuli_wild_183</i>  | NA                                  | <i>Ca_kabuli_denovo</i> | 183                     | C/G  | NA                 | NA                            | NA                                              |
| <i>Kabuli_wild_184</i>  | NA                                  | <i>Ca_kabuli_denovo</i> | 184                     | G/A  | NA                 | NA                            | NA                                              |
| <i>Kabuli_wild_1078</i> | NA                                  | <i>Ca_kabuli_denovo</i> | 1078                    | T/G  | NA                 | NA                            | NA                                              |
| <i>Kabuli_wild_1095</i> | NA                                  | <i>Ca_kabuli_denovo</i> | 1095                    | T/A  | NA                 | NA                            | NA                                              |
| <i>Kabuli_wild_1118</i> | NA                                  | <i>Ca_kabuli_denovo</i> | 1118                    | G/A  | NA                 | NA                            | NA                                              |
| <i>Kabuli_wild_1203</i> | NA                                  | <i>Ca_kabuli_denovo</i> | 1203                    | T/C  | NA                 | NA                            | NA                                              |
| <i>Kabuli_wild_1216</i> | NA                                  | <i>Ca_kabuli_denovo</i> | 1216                    | T/G  | NA                 | NA                            | NA                                              |
| <i>Kabuli_wild_1229</i> | NA                                  | <i>Ca_kabuli_denovo</i> | 1229                    | G/A  | NA                 | NA                            | NA                                              |
| <i>Kabuli_wild_1627</i> | NA                                  | <i>Ca_kabuli_denovo</i> | 1627                    | A/G  | NA                 | NA                            | NA                                              |
| <i>Kabuli_wild_1628</i> | NA                                  | <i>Ca_kabuli_denovo</i> | 1628                    | G/C  | NA                 | NA                            | NA                                              |
| <i>Kabuli_wild_1629</i> | NA                                  | <i>Ca_kabuli_denovo</i> | 1629                    | C/G  | NA                 | NA                            | NA                                              |
| <i>Kabuli_wild_1631</i> | NA                                  | <i>Ca_kabuli_denovo</i> | 1631                    | T/G  | NA                 | NA                            | NA                                              |
| <i>Kabuli_wild_1633</i> | NA                                  | <i>Ca_kabuli_denovo</i> | 1633                    | C/T  | NA                 | NA                            | NA                                              |
| <i>Kabuli_wild_1911</i> | NA                                  | <i>Ca_kabuli_denovo</i> | 1911                    | T/C  | NA                 | NA                            | NA                                              |
| <i>Kabuli_wild_1912</i> | NA                                  | <i>Ca_kabuli_denovo</i> | 1912                    | T/G  | NA                 | NA                            | NA                                              |
| <i>Kabuli_wild_2010</i> | NA                                  | <i>Ca_kabuli_denovo</i> | 2010                    | G/C  | NA                 | NA                            | NA                                              |
| <i>Kabuli_wild_2109</i> | NA                                  | <i>Ca_kabuli_denovo</i> | 2109                    | T/G  | NA                 | NA                            | NA                                              |
| <i>Kabuli_wild_2113</i> | NA                                  | <i>Ca_kabuli_denovo</i> | 2113                    | G/C  | NA                 | NA                            | NA                                              |
| <i>Kabuli_wild_2689</i> | NA                                  | <i>Ca_kabuli_denovo</i> | 2689                    | A/G  | NA                 | NA                            | NA                                              |
| <i>Kabuli_wild_2690</i> | NA                                  | <i>Ca_kabuli_denovo</i> | 2690                    | G/C  | NA                 | NA                            | NA                                              |
| <i>Kabuli_wild_2691</i> | NA                                  | <i>Ca_kabuli_denovo</i> | 2691                    | A/C  | NA                 | NA                            | NA                                              |
| <i>Kabuli_wild_2692</i> | NA                                  | <i>Ca_kabuli_denovo</i> | 2692                    | G/A  | NA                 | NA                            | NA                                              |
| <i>Kabuli_wild_2694</i> | NA                                  | <i>Ca_kabuli_denovo</i> | 2694                    | A/G  | NA                 | NA                            | NA                                              |
| <i>Kabuli_wild_2696</i> | NA                                  | <i>Ca_kabuli_denovo</i> | 2696                    | T/A  | NA                 | NA                            | NA                                              |
| <i>Kabuli_wild_2697</i> | NA                                  | <i>Ca_kabuli_denovo</i> | 2697                    | G/T  | NA                 | NA                            | NA                                              |

| SNP IDs           | NCBI dbSNP accession IDs (NCBI_SS#) | Chromosomes      | Physical positions (bp) | SNPs | Gene accession IDs | Sequence components of genome | Putative functions |
|-------------------|-------------------------------------|------------------|-------------------------|------|--------------------|-------------------------------|--------------------|
| Kabuli_wild_3107  | NA                                  | Ca_kabuli_denovo | 3107                    | T/A  | NA                 | NA                            | NA                 |
| Kabuli_wild_3113  | NA                                  | Ca_kabuli_denovo | 3113                    | A/T  | NA                 | NA                            | NA                 |
| Kabuli_wild_3151  | NA                                  | Ca_kabuli_denovo | 3151                    | A/T  | NA                 | NA                            | NA                 |
| Kabuli_wild_3163  | NA                                  | Ca_kabuli_denovo | 3163                    | A/G  | NA                 | NA                            | NA                 |
| Kabuli_wild_4581  | NA                                  | Ca_kabuli_denovo | 4581                    | G/T  | NA                 | NA                            | NA                 |
| Kabuli_wild_4599  | NA                                  | Ca_kabuli_denovo | 4599                    | G/A  | NA                 | NA                            | NA                 |
| Kabuli_wild_5802  | NA                                  | Ca_kabuli_denovo | 5802                    | G/A  | NA                 | NA                            | NA                 |
| Kabuli_wild_5804  | NA                                  | Ca_kabuli_denovo | 5804                    | G/A  | NA                 | NA                            | NA                 |
| Kabuli_wild_5805  | NA                                  | Ca_kabuli_denovo | 5805                    | A/G  | NA                 | NA                            | NA                 |
| Kabuli_wild_6087  | NA                                  | Ca_kabuli_denovo | 6087                    | C/T  | NA                 | NA                            | NA                 |
| Kabuli_wild_6088  | NA                                  | Ca_kabuli_denovo | 6088                    | A/G  | NA                 | NA                            | NA                 |
| Kabuli_wild_6089  | NA                                  | Ca_kabuli_denovo | 6089                    | G/C  | NA                 | NA                            | NA                 |
| Kabuli_wild_6091  | NA                                  | Ca_kabuli_denovo | 6091                    | A/G  | NA                 | NA                            | NA                 |
| Kabuli_wild_6092  | NA                                  | Ca_kabuli_denovo | 6092                    | A/G  | NA                 | NA                            | NA                 |
| Kabuli_wild_6095  | NA                                  | Ca_kabuli_denovo | 6095                    | C/A  | NA                 | NA                            | NA                 |
| Kabuli_wild_6096  | NA                                  | Ca_kabuli_denovo | 6096                    | C/T  | NA                 | NA                            | NA                 |
| Kabuli_wild_7550  | NA                                  | Ca_kabuli_denovo | 7550                    | A/C  | NA                 | NA                            | NA                 |
| Kabuli_wild_8329  | NA                                  | Ca_kabuli_denovo | 8329                    | C/A  | NA                 | NA                            | NA                 |
| Kabuli_wild_8330  | NA                                  | Ca_kabuli_denovo | 8330                    | C/T  | NA                 | NA                            | NA                 |
| Kabuli_wild_8331  | NA                                  | Ca_kabuli_denovo | 8331                    | G/C  | NA                 | NA                            | NA                 |
| Kabuli_wild_8431  | NA                                  | Ca_kabuli_denovo | 8431                    | G/A  | NA                 | NA                            | NA                 |
| Kabuli_wild_8433  | NA                                  | Ca_kabuli_denovo | 8433                    | T/A  | NA                 | NA                            | NA                 |
| Kabuli_wild_8434  | NA                                  | Ca_kabuli_denovo | 8434                    | G/T  | NA                 | NA                            | NA                 |
| Kabuli_wild_8435  | NA                                  | Ca_kabuli_denovo | 8435                    | C/G  | NA                 | NA                            | NA                 |
| Kabuli_wild_10494 | NA                                  | Ca_kabuli_denovo | 10494                   | A/G  | NA                 | NA                            | NA                 |
| Kabuli_wild_10502 | NA                                  | Ca_kabuli_denovo | 10502                   | G/A  | NA                 | NA                            | NA                 |
| Kabuli_wild_10546 | NA                                  | Ca_kabuli_denovo | 10546                   | A/C  | NA                 | NA                            | NA                 |
| Kabuli_wild_10554 | NA                                  | Ca_kabuli_denovo | 10554                   | C/T  | NA                 | NA                            | NA                 |
| Kabuli_wild_11717 | NA                                  | Ca_kabuli_denovo | 11717                   | A/G  | NA                 | NA                            | NA                 |
| Kabuli_wild_11718 | NA                                  | Ca_kabuli_denovo | 11718                   | G/C  | NA                 | NA                            | NA                 |
| Kabuli_wild_11719 | NA                                  | Ca_kabuli_denovo | 11719                   | C/G  | NA                 | NA                            | NA                 |
| Kabuli_wild_11721 | NA                                  | Ca_kabuli_denovo | 11721                   | T/G  | NA                 | NA                            | NA                 |
| Kabuli_wild_12080 | NA                                  | Ca_kabuli_denovo | 12080                   | C/A  | NA                 | NA                            | NA                 |
| Kabuli_wild_12250 | NA                                  | Ca_kabuli_denovo | 12250                   | C/T  | NA                 | NA                            | NA                 |
| Kabuli_wild_12294 | NA                                  | Ca_kabuli_denovo | 12294                   | A/G  | NA                 | NA                            | NA                 |
| Kabuli_wild_13872 | NA                                  | Ca_kabuli_denovo | 13872                   | C/T  | NA                 | NA                            | NA                 |
| Kabuli_wild_14150 | NA                                  | Ca_kabuli_denovo | 14150                   | C/G  | NA                 | NA                            | NA                 |
| Kabuli_wild_14152 | NA                                  | Ca_kabuli_denovo | 14152                   | T/G  | NA                 | NA                            | NA                 |
| Kabuli_wild_14154 | NA                                  | Ca_kabuli_denovo | 14154                   | C/T  | NA                 | NA                            | NA                 |
| Kabuli_wild_14155 | NA                                  | Ca_kabuli_denovo | 14155                   | A/C  | NA                 | NA                            | NA                 |
| Kabuli_wild_14156 | NA                                  | Ca_kabuli_denovo | 14156                   | G/A  | NA                 | NA                            | NA                 |
| Kabuli_wild_14224 | NA                                  | Ca_kabuli_denovo | 14224                   | A/G  | NA                 | NA                            | NA                 |
| Kabuli_wild_14225 | NA                                  | Ca_kabuli_denovo | 14225                   | G/C  | NA                 | NA                            | NA                 |
| Kabuli_wild_14226 | NA                                  | Ca_kabuli_denovo | 14226                   | C/G  | NA                 | NA                            | NA                 |

| SNP IDs           | NCBI dbSNP accession IDs (NCBI_SS#) | Chromosomes      | Physical positions (bp) | SNPs | Gene accession IDs | Sequence components of genome | Putative functions |
|-------------------|-------------------------------------|------------------|-------------------------|------|--------------------|-------------------------------|--------------------|
| Kabuli_wild_14228 | NA                                  | Ca_kabuli_denovo | 14228                   | T/G  | NA                 | NA                            | NA                 |
| Kabuli_wild_14230 | NA                                  | Ca_kabuli_denovo | 14230                   | C/T  | NA                 | NA                            | NA                 |
| Kabuli_wild_14231 | NA                                  | Ca_kabuli_denovo | 14231                   | A/C  | NA                 | NA                            | NA                 |
| Kabuli_wild_14371 | NA                                  | Ca_kabuli_denovo | 14371                   | C/T  | NA                 | NA                            | NA                 |
| Kabuli_wild_14389 | NA                                  | Ca_kabuli_denovo | 14389                   | G/A  | NA                 | NA                            | NA                 |
| Kabuli_wild_14434 | NA                                  | Ca_kabuli_denovo | 14434                   | A/G  | NA                 | NA                            | NA                 |
| Kabuli_wild_14669 | NA                                  | Ca_kabuli_denovo | 14669                   | G/T  | NA                 | NA                            | NA                 |
| Kabuli_wild_14813 | NA                                  | Ca_kabuli_denovo | 14813                   | T/C  | NA                 | NA                            | NA                 |
| Kabuli_wild_14820 | NA                                  | Ca_kabuli_denovo | 14820                   | G/C  | NA                 | NA                            | NA                 |
| Kabuli_wild_14916 | NA                                  | Ca_kabuli_denovo | 14916                   | G/A  | NA                 | NA                            | NA                 |
| Kabuli_wild_14917 | NA                                  | Ca_kabuli_denovo | 14917                   | A/C  | NA                 | NA                            | NA                 |
| Kabuli_wild_15282 | NA                                  | Ca_kabuli_denovo | 15282                   | A/G  | NA                 | NA                            | NA                 |
| Kabuli_wild_15432 | NA                                  | Ca_kabuli_denovo | 15432                   | A/T  | NA                 | NA                            | NA                 |
| Kabuli_wild_15449 | NA                                  | Ca_kabuli_denovo | 15449                   | T/C  | NA                 | NA                            | NA                 |
| Kabuli_wild_16224 | NA                                  | Ca_kabuli_denovo | 16224                   | G/T  | NA                 | NA                            | NA                 |
| Kabuli_wild_16942 | NA                                  | Ca_kabuli_denovo | 16942                   | A/G  | NA                 | NA                            | NA                 |
| Kabuli_wild_16943 | NA                                  | Ca_kabuli_denovo | 16943                   | G/C  | NA                 | NA                            | NA                 |
| Kabuli_wild_16944 | NA                                  | Ca_kabuli_denovo | 16944                   | G/A  | NA                 | NA                            | NA                 |
| Kabuli_wild_16946 | NA                                  | Ca_kabuli_denovo | 16946                   | T/C  | NA                 | NA                            | NA                 |
| Kabuli_wild_17338 | NA                                  | Ca_kabuli_denovo | 17338                   | T/G  | NA                 | NA                            | NA                 |
| Kabuli_wild_17342 | NA                                  | Ca_kabuli_denovo | 17342                   | C/G  | NA                 | NA                            | NA                 |
| Kabuli_wild_17426 | NA                                  | Ca_kabuli_denovo | 17426                   | C/G  | NA                 | NA                            | NA                 |
| Kabuli_wild_17428 | NA                                  | Ca_kabuli_denovo | 17428                   | G/T  | NA                 | NA                            | NA                 |
| Kabuli_wild_17430 | NA                                  | Ca_kabuli_denovo | 17430                   | C/T  | NA                 | NA                            | NA                 |
| Kabuli_wild_17431 | NA                                  | Ca_kabuli_denovo | 17431                   | A/C  | NA                 | NA                            | NA                 |
| Kabuli_wild_17725 | NA                                  | Ca_kabuli_denovo | 17725                   | A/G  | NA                 | NA                            | NA                 |
| Kabuli_wild_18148 | NA                                  | Ca_kabuli_denovo | 18148                   | C/G  | NA                 | NA                            | NA                 |
| Kabuli_wild_18166 | NA                                  | Ca_kabuli_denovo | 18166                   | C/G  | NA                 | NA                            | NA                 |
| Kabuli_wild_18167 | NA                                  | Ca_kabuli_denovo | 18167                   | A/C  | NA                 | NA                            | NA                 |
| Kabuli_wild_18168 | NA                                  | Ca_kabuli_denovo | 18168                   | T/C  | NA                 | NA                            | NA                 |
| Kabuli_wild_18182 | NA                                  | Ca_kabuli_denovo | 18182                   | G/T  | NA                 | NA                            | NA                 |
| Kabuli_wild_18183 | NA                                  | Ca_kabuli_denovo | 18183                   | T/G  | NA                 | NA                            | NA                 |
| Kabuli_wild_18184 | NA                                  | Ca_kabuli_denovo | 18184                   | C/A  | NA                 | NA                            | NA                 |
| Kabuli_wild_18189 | NA                                  | Ca_kabuli_denovo | 18189                   | T/G  | NA                 | NA                            | NA                 |
| Kabuli_wild_18199 | NA                                  | Ca_kabuli_denovo | 18199                   | A/G  | NA                 | NA                            | NA                 |
| Kabuli_wild_18202 | NA                                  | Ca_kabuli_denovo | 18202                   | C/G  | NA                 | NA                            | NA                 |
| Kabuli_wild_18709 | NA                                  | Ca_kabuli_denovo | 18709                   | G/C  | NA                 | NA                            | NA                 |
| Kabuli_wild_18711 | NA                                  | Ca_kabuli_denovo | 18711                   | C/G  | NA                 | NA                            | NA                 |
| Kabuli_wild_18712 | NA                                  | Ca_kabuli_denovo | 18712                   | A/G  | NA                 | NA                            | NA                 |
| Kabuli_wild_18713 | NA                                  | Ca_kabuli_denovo | 18713                   | G/A  | NA                 | NA                            | NA                 |
| Kabuli_wild_18714 | NA                                  | Ca_kabuli_denovo | 18714                   | A/G  | NA                 | NA                            | NA                 |
| Kabuli_wild_18715 | NA                                  | Ca_kabuli_denovo | 18715                   | C/A  | NA                 | NA                            | NA                 |
| Kabuli_wild_19260 | NA                                  | Ca_kabuli_denovo | 19260                   | T/G  | NA                 | NA                            | NA                 |
| Kabuli_wild_19375 | NA                                  | Ca_kabuli_denovo | 19375                   | C/T  | NA                 | NA                            | NA                 |

| SNP IDs                  | NCBI dbSNP accession IDs (NCBI_SS#) | Chromosomes             | Physical positions (bp) | SNPs | Gene accession IDs | Sequence components of genome | Putative functions |
|--------------------------|-------------------------------------|-------------------------|-------------------------|------|--------------------|-------------------------------|--------------------|
| <i>Kabuli_wild_19378</i> | NA                                  | <i>Ca_kabuli_denovo</i> | 19378                   | A/G  | NA                 | NA                            | NA                 |
| <i>Kabuli_wild_19617</i> | NA                                  | <i>Ca_kabuli_denovo</i> | 19617                   | C/T  | NA                 | NA                            | NA                 |
| <i>Kabuli_wild_19618</i> | NA                                  | <i>Ca_kabuli_denovo</i> | 19618                   | A/C  | NA                 | NA                            | NA                 |
| <i>Kabuli_wild_19719</i> | NA                                  | <i>Ca_kabuli_denovo</i> | 19719                   | T/C  | NA                 | NA                            | NA                 |
| <i>Kabuli_wild_19769</i> | NA                                  | <i>Ca_kabuli_denovo</i> | 19769                   | T/C  | NA                 | NA                            | NA                 |
| <i>Kabuli_wild_21623</i> | NA                                  | <i>Ca_kabuli_denovo</i> | 21623                   | A/T  | NA                 | NA                            | NA                 |
| <i>Kabuli_wild_21626</i> | NA                                  | <i>Ca_kabuli_denovo</i> | 21626                   | C/G  | NA                 | NA                            | NA                 |
| <i>Kabuli_wild_21627</i> | NA                                  | <i>Ca_kabuli_denovo</i> | 21627                   | G/T  | NA                 | NA                            | NA                 |
| <i>Kabuli_wild_21651</i> | NA                                  | <i>Ca_kabuli_denovo</i> | 21651                   | A/C  | NA                 | NA                            | NA                 |
| <i>Kabuli_wild_22681</i> | NA                                  | <i>Ca_kabuli_denovo</i> | 22681                   | A/G  | NA                 | NA                            | NA                 |
| <i>Kabuli_wild_22682</i> | NA                                  | <i>Ca_kabuli_denovo</i> | 22682                   | G/C  | NA                 | NA                            | NA                 |
| <i>Kabuli_wild_22683</i> | NA                                  | <i>Ca_kabuli_denovo</i> | 22683                   | C/G  | NA                 | NA                            | NA                 |
| <i>Kabuli_wild_22685</i> | NA                                  | <i>Ca_kabuli_denovo</i> | 22685                   | T/G  | NA                 | NA                            | NA                 |
| <i>Kabuli_wild_22687</i> | NA                                  | <i>Ca_kabuli_denovo</i> | 22687                   | C/T  | NA                 | NA                            | NA                 |
| <i>Kabuli_wild_22688</i> | NA                                  | <i>Ca_kabuli_denovo</i> | 22688                   | A/C  | NA                 | NA                            | NA                 |
| <i>Kabuli_wild_23060</i> | NA                                  | <i>Ca_kabuli_denovo</i> | 23060                   | G/A  | NA                 | NA                            | NA                 |
| <i>Kabuli_wild_23061</i> | NA                                  | <i>Ca_kabuli_denovo</i> | 23061                   | G/A  | NA                 | NA                            | NA                 |
| <i>Kabuli_wild_23154</i> | NA                                  | <i>Ca_kabuli_denovo</i> | 23154                   | G/A  | NA                 | NA                            | NA                 |
| <i>Kabuli_wild_24140</i> | NA                                  | <i>Ca_kabuli_denovo</i> | 24140                   | C/G  | NA                 | NA                            | NA                 |
| <i>Kabuli_wild_24142</i> | NA                                  | <i>Ca_kabuli_denovo</i> | 24142                   | T/G  | NA                 | NA                            | NA                 |
| <i>Kabuli_wild_24144</i> | NA                                  | <i>Ca_kabuli_denovo</i> | 24144                   | C/T  | NA                 | NA                            | NA                 |
| <i>Kabuli_wild_24145</i> | NA                                  | <i>Ca_kabuli_denovo</i> | 24145                   | A/C  | NA                 | NA                            | NA                 |
| <i>Kabuli_wild_24605</i> | NA                                  | <i>Ca_kabuli_denovo</i> | 24605                   | G/A  | NA                 | NA                            | NA                 |
| <i>Kabuli_wild_24606</i> | NA                                  | <i>Ca_kabuli_denovo</i> | 24606                   | C/G  | NA                 | NA                            | NA                 |
| <i>Kabuli_wild_26480</i> | NA                                  | <i>Ca_kabuli_denovo</i> | 26480                   | C/T  | NA                 | NA                            | NA                 |
| <i>Kabuli_wild_26506</i> | NA                                  | <i>Ca_kabuli_denovo</i> | 26506                   | A/C  | NA                 | NA                            | NA                 |
| <i>Kabuli_wild_26922</i> | NA                                  | <i>Ca_kabuli_denovo</i> | 26922                   | C/A  | NA                 | NA                            | NA                 |
| <i>Kabuli_wild_27590</i> | NA                                  | <i>Ca_kabuli_denovo</i> | 27590                   | A/G  | NA                 | NA                            | NA                 |
| <i>Kabuli_wild_27657</i> | NA                                  | <i>Ca_kabuli_denovo</i> | 27657                   | G/A  | NA                 | NA                            | NA                 |
| <i>Kabuli_wild_27669</i> | NA                                  | <i>Ca_kabuli_denovo</i> | 27669                   | A/G  | NA                 | NA                            | NA                 |
| <i>Kabuli_wild_27694</i> | NA                                  | <i>Ca_kabuli_denovo</i> | 27694                   | G/A  | NA                 | NA                            | NA                 |
| <i>Kabuli_wild_27704</i> | NA                                  | <i>Ca_kabuli_denovo</i> | 27704                   | T/G  | NA                 | NA                            | NA                 |
| <i>Kabuli_wild_27739</i> | NA                                  | <i>Ca_kabuli_denovo</i> | 27739                   | T/G  | NA                 | NA                            | NA                 |
| <i>Kabuli_wild_29149</i> | NA                                  | <i>Ca_kabuli_denovo</i> | 29149                   | A/G  | NA                 | NA                            | NA                 |
| <i>Kabuli_wild_29701</i> | NA                                  | <i>Ca_kabuli_denovo</i> | 29701                   | G/T  | NA                 | NA                            | NA                 |
| <i>Kabuli_wild_31360</i> | NA                                  | <i>Ca_kabuli_denovo</i> | 31360                   | C/T  | NA                 | NA                            | NA                 |
| <i>Kabuli_wild_31362</i> | NA                                  | <i>Ca_kabuli_denovo</i> | 31362                   | A/C  | NA                 | NA                            | NA                 |
| <i>Kabuli_wild_31364</i> | NA                                  | <i>Ca_kabuli_denovo</i> | 31364                   | G/A  | NA                 | NA                            | NA                 |
| <i>Kabuli_wild_31517</i> | NA                                  | <i>Ca_kabuli_denovo</i> | 31517                   | A/G  | NA                 | NA                            | NA                 |
| <i>Kabuli_wild_31518</i> | NA                                  | <i>Ca_kabuli_denovo</i> | 31518                   | C/A  | NA                 | NA                            | NA                 |
| <i>Kabuli_wild_31520</i> | NA                                  | <i>Ca_kabuli_denovo</i> | 31520                   | C/A  | NA                 | NA                            | NA                 |
| <i>Kabuli_wild_31522</i> | NA                                  | <i>Ca_kabuli_denovo</i> | 31522                   | C/T  | NA                 | NA                            | NA                 |
| <i>Kabuli_wild_31523</i> | NA                                  | <i>Ca_kabuli_denovo</i> | 31523                   | G/T  | NA                 | NA                            | NA                 |
| <i>Kabuli_wild_32473</i> | NA                                  | <i>Ca_kabuli_denovo</i> | 32473                   | G/A  | NA                 | NA                            | NA                 |

| SNP IDs           | NCBI dbSNP accession IDs (NCBI_SS#) | Chromosomes      | Physical positions (bp) | SNPs | Gene accession IDs | Sequence components of genome | Putative functions |
|-------------------|-------------------------------------|------------------|-------------------------|------|--------------------|-------------------------------|--------------------|
| Kabuli_wild_32475 | NA                                  | Ca_kabuli_denovo | 32475                   | G/A  | NA                 | NA                            | NA                 |
| Kabuli_wild_32476 | NA                                  | Ca_kabuli_denovo | 32476                   | A/G  | NA                 | NA                            | NA                 |
| Kabuli_wild_33245 | NA                                  | Ca_kabuli_denovo | 33245                   | C/T  | NA                 | NA                            | NA                 |
| Kabuli_wild_33255 | NA                                  | Ca_kabuli_denovo | 33255                   | A/T  | NA                 | NA                            | NA                 |
| Kabuli_wild_33261 | NA                                  | Ca_kabuli_denovo | 33261                   | T/A  | NA                 | NA                            | NA                 |
| Kabuli_wild_34229 | NA                                  | Ca_kabuli_denovo | 34229                   | G/A  | NA                 | NA                            | NA                 |
| Kabuli_wild_34231 | NA                                  | Ca_kabuli_denovo | 34231                   | A/T  | NA                 | NA                            | NA                 |
| Kabuli_wild_34232 | NA                                  | Ca_kabuli_denovo | 34232                   | T/G  | NA                 | NA                            | NA                 |
| Kabuli_wild_34233 | NA                                  | Ca_kabuli_denovo | 34233                   | G/C  | NA                 | NA                            | NA                 |
| Kabuli_wild_34235 | NA                                  | Ca_kabuli_denovo | 34235                   | G/C  | NA                 | NA                            | NA                 |
| Kabuli_wild_34236 | NA                                  | Ca_kabuli_denovo | 34236                   | A/G  | NA                 | NA                            | NA                 |
| Kabuli_wild_34237 | NA                                  | Ca_kabuli_denovo | 34237                   | G/A  | NA                 | NA                            | NA                 |
| Kabuli_wild_34241 | NA                                  | Ca_kabuli_denovo | 34241                   | G/C  | NA                 | NA                            | NA                 |
| Kabuli_wild_34943 | NA                                  | Ca_kabuli_denovo | 34943                   | C/T  | NA                 | NA                            | NA                 |
| Kabuli_wild_34974 | NA                                  | Ca_kabuli_denovo | 34974                   | C/G  | NA                 | NA                            | NA                 |
| Kabuli_wild_35475 | NA                                  | Ca_kabuli_denovo | 35475                   | A/C  | NA                 | NA                            | NA                 |
| Kabuli_wild_35792 | NA                                  | Ca_kabuli_denovo | 35792                   | C/A  | NA                 | NA                            | NA                 |
| Kabuli_wild_35928 | NA                                  | Ca_kabuli_denovo | 35928                   | A/G  | NA                 | NA                            | NA                 |
| Kabuli_wild_35947 | NA                                  | Ca_kabuli_denovo | 35947                   | C/G  | NA                 | NA                            | NA                 |
| Kabuli_wild_35959 | NA                                  | Ca_kabuli_denovo | 35959                   | A/T  | NA                 | NA                            | NA                 |
| Kabuli_wild_36844 | NA                                  | Ca_kabuli_denovo | 36844                   | A/G  | NA                 | NA                            | NA                 |
| Kabuli_wild_36845 | NA                                  | Ca_kabuli_denovo | 36845                   | T/A  | NA                 | NA                            | NA                 |
| Kabuli_wild_36846 | NA                                  | Ca_kabuli_denovo | 36846                   | G/T  | NA                 | NA                            | NA                 |
| Kabuli_wild_38775 | NA                                  | Ca_kabuli_denovo | 38775                   | C/G  | NA                 | NA                            | NA                 |
| Kabuli_wild_38777 | NA                                  | Ca_kabuli_denovo | 38777                   | T/G  | NA                 | NA                            | NA                 |
| Kabuli_wild_38779 | NA                                  | Ca_kabuli_denovo | 38779                   | C/T  | NA                 | NA                            | NA                 |
| Kabuli_wild_38780 | NA                                  | Ca_kabuli_denovo | 38780                   | A/C  | NA                 | NA                            | NA                 |
| Kabuli_wild_38871 | NA                                  | Ca_kabuli_denovo | 38871                   | T/A  | NA                 | NA                            | NA                 |
| Kabuli_wild_38872 | NA                                  | Ca_kabuli_denovo | 38872                   | T/G  | NA                 | NA                            | NA                 |
| Kabuli_wild_38873 | NA                                  | Ca_kabuli_denovo | 38873                   | C/G  | NA                 | NA                            | NA                 |
| Kabuli_wild_38875 | NA                                  | Ca_kabuli_denovo | 38875                   | A/G  | NA                 | NA                            | NA                 |
| Kabuli_wild_38876 | NA                                  | Ca_kabuli_denovo | 38876                   | T/C  | NA                 | NA                            | NA                 |
| Kabuli_wild_39399 | NA                                  | Ca_kabuli_denovo | 39399                   | A/G  | NA                 | NA                            | NA                 |
| Kabuli_wild_39865 | NA                                  | Ca_kabuli_denovo | 39865                   | A/C  | NA                 | NA                            | NA                 |
| Kabuli_wild_39866 | NA                                  | Ca_kabuli_denovo | 39866                   | G/T  | NA                 | NA                            | NA                 |
| Kabuli_wild_40132 | NA                                  | Ca_kabuli_denovo | 40132                   | G/A  | NA                 | NA                            | NA                 |
| Kabuli_wild_40134 | NA                                  | Ca_kabuli_denovo | 40134                   | G/A  | NA                 | NA                            | NA                 |
| Kabuli_wild_40147 | NA                                  | Ca_kabuli_denovo | 40147                   | G/A  | NA                 | NA                            | NA                 |
| Kabuli_wild_40638 | NA                                  | Ca_kabuli_denovo | 40638                   | G/A  | NA                 | NA                            | NA                 |
| Kabuli_wild_40640 | NA                                  | Ca_kabuli_denovo | 40640                   | G/A  | NA                 | NA                            | NA                 |
| Kabuli_wild_40641 | NA                                  | Ca_kabuli_denovo | 40641                   | A/G  | NA                 | NA                            | NA                 |
| Kabuli_wild_40642 | NA                                  | Ca_kabuli_denovo | 40642                   | G/A  | NA                 | NA                            | NA                 |
| Kabuli_wild_40643 | NA                                  | Ca_kabuli_denovo | 40643                   | C/G  | NA                 | NA                            | NA                 |
| Kabuli_wild_40852 | NA                                  | Ca_kabuli_denovo | 40852                   | T/C  | NA                 | NA                            | NA                 |

| SNP IDs           | NCBI dbSNP accession IDs (NCBI_SS#) | Chromosomes      | Physical positions (bp) | SNPs | Gene accession IDs | Sequence components of genome | Putative functions |
|-------------------|-------------------------------------|------------------|-------------------------|------|--------------------|-------------------------------|--------------------|
| Kabuli_wild_42856 | NA                                  | Ca_kabuli_denovo | 42856                   | A/C  | NA                 | NA                            | NA                 |
| Kabuli_wild_43664 | NA                                  | Ca_kabuli_denovo | 43664                   | A/G  | NA                 | NA                            | NA                 |
| Kabuli_wild_43700 | NA                                  | Ca_kabuli_denovo | 43700                   | G/A  | NA                 | NA                            | NA                 |
| Kabuli_wild_43879 | NA                                  | Ca_kabuli_denovo | 43879                   | C/T  | NA                 | NA                            | NA                 |
| Kabuli_wild_43898 | NA                                  | Ca_kabuli_denovo | 43898                   | A/G  | NA                 | NA                            | NA                 |
| Kabuli_wild_43914 | NA                                  | Ca_kabuli_denovo | 43914                   | A/G  | NA                 | NA                            | NA                 |
| Kabuli_wild_44212 | NA                                  | Ca_kabuli_denovo | 44212                   | A/C  | NA                 | NA                            | NA                 |
| Kabuli_wild_44213 | NA                                  | Ca_kabuli_denovo | 44213                   | G/C  | NA                 | NA                            | NA                 |
| Kabuli_wild_44216 | NA                                  | Ca_kabuli_denovo | 44216                   | G/A  | NA                 | NA                            | NA                 |
| Kabuli_wild_44217 | NA                                  | Ca_kabuli_denovo | 44217                   | A/T  | NA                 | NA                            | NA                 |
| Kabuli_wild_44510 | NA                                  | Ca_kabuli_denovo | 44510                   | C/G  | NA                 | NA                            | NA                 |
| Kabuli_wild_44512 | NA                                  | Ca_kabuli_denovo | 44512                   | T/G  | NA                 | NA                            | NA                 |
| Kabuli_wild_44514 | NA                                  | Ca_kabuli_denovo | 44514                   | C/T  | NA                 | NA                            | NA                 |
| Kabuli_wild_44515 | NA                                  | Ca_kabuli_denovo | 44515                   | A/C  | NA                 | NA                            | NA                 |
| Kabuli_wild_44602 | NA                                  | Ca_kabuli_denovo | 44602                   | G/C  | NA                 | NA                            | NA                 |
| Kabuli_wild_44605 | NA                                  | Ca_kabuli_denovo | 44605                   | T/G  | NA                 | NA                            | NA                 |
| Kabuli_wild_44606 | NA                                  | Ca_kabuli_denovo | 44606                   | G/A  | NA                 | NA                            | NA                 |
| Kabuli_wild_44607 | NA                                  | Ca_kabuli_denovo | 44607                   | C/A  | NA                 | NA                            | NA                 |
| Kabuli_wild_44608 | NA                                  | Ca_kabuli_denovo | 44608                   | C/G  | NA                 | NA                            | NA                 |
| Kabuli_wild_44609 | NA                                  | Ca_kabuli_denovo | 44609                   | G/A  | NA                 | NA                            | NA                 |
| Kabuli_wild_44610 | NA                                  | Ca_kabuli_denovo | 44610                   | A/C  | NA                 | NA                            | NA                 |
| Kabuli_wild_44613 | NA                                  | Ca_kabuli_denovo | 44613                   | T/A  | NA                 | NA                            | NA                 |
| Kabuli_wild_44614 | NA                                  | Ca_kabuli_denovo | 44614                   | C/T  | NA                 | NA                            | NA                 |
| Kabuli_wild_44615 | NA                                  | Ca_kabuli_denovo | 44615                   | G/C  | NA                 | NA                            | NA                 |
| Kabuli_wild_44617 | NA                                  | Ca_kabuli_denovo | 44617                   | A/C  | NA                 | NA                            | NA                 |
| Kabuli_wild_44618 | NA                                  | Ca_kabuli_denovo | 44618                   | T/G  | NA                 | NA                            | NA                 |
| Kabuli_wild_45201 | NA                                  | Ca_kabuli_denovo | 45201                   | A/C  | NA                 | NA                            | NA                 |
| Kabuli_wild_45202 | NA                                  | Ca_kabuli_denovo | 45202                   | T/G  | NA                 | NA                            | NA                 |
| Kabuli_wild_45373 | NA                                  | Ca_kabuli_denovo | 45373                   | A/G  | NA                 | NA                            | NA                 |
| Kabuli_wild_45375 | NA                                  | Ca_kabuli_denovo | 45375                   | A/C  | NA                 | NA                            | NA                 |
| Kabuli_wild_45377 | NA                                  | Ca_kabuli_denovo | 45377                   | T/G  | NA                 | NA                            | NA                 |
| Kabuli_wild_45379 | NA                                  | Ca_kabuli_denovo | 45379                   | C/A  | NA                 | NA                            | NA                 |
| Kabuli_wild_45380 | NA                                  | Ca_kabuli_denovo | 45380                   | C/A  | NA                 | NA                            | NA                 |
| Kabuli_wild_45555 | NA                                  | Ca_kabuli_denovo | 45555                   | G/A  | NA                 | NA                            | NA                 |
| Kabuli_wild_45556 | NA                                  | Ca_kabuli_denovo | 45556                   | A/G  | NA                 | NA                            | NA                 |
| Kabuli_wild_45557 | NA                                  | Ca_kabuli_denovo | 45557                   | A/G  | NA                 | NA                            | NA                 |
| Kabuli_wild_45558 | NA                                  | Ca_kabuli_denovo | 45558                   | G/A  | NA                 | NA                            | NA                 |
| Kabuli_wild_45559 | NA                                  | Ca_kabuli_denovo | 45559                   | C/A  | NA                 | NA                            | NA                 |
| Kabuli_wild_45561 | NA                                  | Ca_kabuli_denovo | 45561                   | G/C  | NA                 | NA                            | NA                 |
| Kabuli_wild_45562 | NA                                  | Ca_kabuli_denovo | 45562                   | T/G  | NA                 | NA                            | NA                 |
| Kabuli_wild_45669 | NA                                  | Ca_kabuli_denovo | 45669                   | C/G  | NA                 | NA                            | NA                 |
| Kabuli_wild_45671 | NA                                  | Ca_kabuli_denovo | 45671                   | A/G  | NA                 | NA                            | NA                 |
| Kabuli_wild_45771 | NA                                  | Ca_kabuli_denovo | 45771                   | G/A  | NA                 | NA                            | NA                 |
| Kabuli_wild_45871 | NA                                  | Ca_kabuli_denovo | 45871                   | C/G  | NA                 | NA                            | NA                 |

| SNP IDs           | NCBI dbSNP accession IDs (NCBI_SS#) | Chromosomes      | Physical positions (bp) | SNPs | Gene accession IDs | Sequence components of genome | Putative functions |
|-------------------|-------------------------------------|------------------|-------------------------|------|--------------------|-------------------------------|--------------------|
| Kabuli_wild_45873 | NA                                  | Ca_kabuli_denovo | 45873                   | G/T  | NA                 | NA                            | NA                 |
| Kabuli_wild_45875 | NA                                  | Ca_kabuli_denovo | 45875                   | C/T  | NA                 | NA                            | NA                 |
| Kabuli_wild_45876 | NA                                  | Ca_kabuli_denovo | 45876                   | A/C  | NA                 | NA                            | NA                 |
| Kabuli_wild_45877 | NA                                  | Ca_kabuli_denovo | 45877                   | G/A  | NA                 | NA                            | NA                 |
| Kabuli_wild_45878 | NA                                  | Ca_kabuli_denovo | 45878                   | C/G  | NA                 | NA                            | NA                 |
| Kabuli_wild_45946 | NA                                  | Ca_kabuli_denovo | 45946                   | C/T  | NA                 | NA                            | NA                 |
| Kabuli_wild_45948 | NA                                  | Ca_kabuli_denovo | 45948                   | T/G  | NA                 | NA                            | NA                 |
| Kabuli_wild_45950 | NA                                  | Ca_kabuli_denovo | 45950                   | G/A  | NA                 | NA                            | NA                 |
| Kabuli_wild_46014 | NA                                  | Ca_kabuli_denovo | 46014                   | A/G  | NA                 | NA                            | NA                 |
| Kabuli_wild_46825 | NA                                  | Ca_kabuli_denovo | 46825                   | T/G  | NA                 | NA                            | NA                 |
| Kabuli_wild_46827 | NA                                  | Ca_kabuli_denovo | 46827                   | C/T  | NA                 | NA                            | NA                 |
| Kabuli_wild_46828 | NA                                  | Ca_kabuli_denovo | 46828                   | A/C  | NA                 | NA                            | NA                 |
| Kabuli_wild_46829 | NA                                  | Ca_kabuli_denovo | 46829                   | G/A  | NA                 | NA                            | NA                 |
| Kabuli_wild_46830 | NA                                  | Ca_kabuli_denovo | 46830                   | G/C  | NA                 | NA                            | NA                 |
| Kabuli_wild_46831 | NA                                  | Ca_kabuli_denovo | 46831                   | C/A  | NA                 | NA                            | NA                 |
| Kabuli_wild_46832 | NA                                  | Ca_kabuli_denovo | 46832                   | A/G  | NA                 | NA                            | NA                 |
| Kabuli_wild_47125 | NA                                  | Ca_kabuli_denovo | 47125                   | A/T  | NA                 | NA                            | NA                 |
| Kabuli_wild_47126 | NA                                  | Ca_kabuli_denovo | 47126                   | G/A  | NA                 | NA                            | NA                 |
| Kabuli_wild_47128 | NA                                  | Ca_kabuli_denovo | 47128                   | C/G  | NA                 | NA                            | NA                 |
| Kabuli_wild_47311 | NA                                  | Ca_kabuli_denovo | 47311                   | T/G  | NA                 | NA                            | NA                 |
| Kabuli_wild_47312 | NA                                  | Ca_kabuli_denovo | 47312                   | C/G  | NA                 | NA                            | NA                 |
| Kabuli_wild_47314 | NA                                  | Ca_kabuli_denovo | 47314                   | A/G  | NA                 | NA                            | NA                 |
| Kabuli_wild_47315 | NA                                  | Ca_kabuli_denovo | 47315                   | T/C  | NA                 | NA                            | NA                 |
| Kabuli_wild_48091 | NA                                  | Ca_kabuli_denovo | 48091                   | C/A  | NA                 | NA                            | NA                 |
| Kabuli_wild_48092 | NA                                  | Ca_kabuli_denovo | 48092                   | A/T  | NA                 | NA                            | NA                 |
| Kabuli_wild_48094 | NA                                  | Ca_kabuli_denovo | 48094                   | G/C  | NA                 | NA                            | NA                 |
| Kabuli_wild_48095 | NA                                  | Ca_kabuli_denovo | 48095                   | C/A  | NA                 | NA                            | NA                 |
| Kabuli_wild_48096 | NA                                  | Ca_kabuli_denovo | 48096                   | G/A  | NA                 | NA                            | NA                 |
| Kabuli_wild_48097 | NA                                  | Ca_kabuli_denovo | 48097                   | A/T  | NA                 | NA                            | NA                 |
| Kabuli_wild_48099 | NA                                  | Ca_kabuli_denovo | 48099                   | A/C  | NA                 | NA                            | NA                 |
| Kabuli_wild_48101 | NA                                  | Ca_kabuli_denovo | 48101                   | C/G  | NA                 | NA                            | NA                 |
| Kabuli_wild_48102 | NA                                  | Ca_kabuli_denovo | 48102                   | G/A  | NA                 | NA                            | NA                 |
| Kabuli_wild_48196 | NA                                  | Ca_kabuli_denovo | 48196                   | C/A  | NA                 | NA                            | NA                 |
| Kabuli_wild_48244 | NA                                  | Ca_kabuli_denovo | 48244                   | A/T  | NA                 | NA                            | NA                 |
| Kabuli_wild_48348 | NA                                  | Ca_kabuli_denovo | 48348                   | A/G  | NA                 | NA                            | NA                 |
| Kabuli_wild_48515 | NA                                  | Ca_kabuli_denovo | 48515                   | C/G  | NA                 | NA                            | NA                 |
| Kabuli_wild_48526 | NA                                  | Ca_kabuli_denovo | 48526                   | G/T  | NA                 | NA                            | NA                 |
| Kabuli_wild_48541 | NA                                  | Ca_kabuli_denovo | 48541                   | G/A  | NA                 | NA                            | NA                 |
| Kabuli_wild_48802 | NA                                  | Ca_kabuli_denovo | 48802                   | T/G  | NA                 | NA                            | NA                 |
| Kabuli_wild_48898 | NA                                  | Ca_kabuli_denovo | 48898                   | T/G  | NA                 | NA                            | NA                 |
| Kabuli_wild_48931 | NA                                  | Ca_kabuli_denovo | 48931                   | A/G  | NA                 | NA                            | NA                 |
| Kabuli_wild_48936 | NA                                  | Ca_kabuli_denovo | 48936                   | T/G  | NA                 | NA                            | NA                 |
| Kabuli_wild_48940 | NA                                  | Ca_kabuli_denovo | 48940                   | G/A  | NA                 | NA                            | NA                 |
| Kabuli_wild_49009 | NA                                  | Ca_kabuli_denovo | 49009                   | G/C  | NA                 | NA                            | NA                 |



| SNP IDs           | NCBI dbSNP accession IDs (NCBI_SS#) | Chromosomes      | Physical positions (bp) | SNPs | Gene accession IDs | Sequence components of genome | Putative functions |
|-------------------|-------------------------------------|------------------|-------------------------|------|--------------------|-------------------------------|--------------------|
| Kabuli_wild_49197 | NA                                  | Ca_kabuli_denovo | 49197                   | C/G  | NA                 | NA                            | NA                 |
| Kabuli_wild_49222 | NA                                  | Ca_kabuli_denovo | 49222                   | A/G  | NA                 | NA                            | NA                 |
| Kabuli_wild_49235 | NA                                  | Ca_kabuli_denovo | 49235                   | C/G  | NA                 | NA                            | NA                 |
| Kabuli_wild_49706 | NA                                  | Ca_kabuli_denovo | 49706                   | A/G  | NA                 | NA                            | NA                 |
| Kabuli_wild_50128 | NA                                  | Ca_kabuli_denovo | 50128                   | G/A  | NA                 | NA                            | NA                 |
| Kabuli_wild_50130 | NA                                  | Ca_kabuli_denovo | 50130                   | G/A  | NA                 | NA                            | NA                 |
| Kabuli_wild_50176 | NA                                  | Ca_kabuli_denovo | 50176                   | A/G  | NA                 | NA                            | NA                 |
| Kabuli_wild_50812 | NA                                  | Ca_kabuli_denovo | 50812                   | C/G  | NA                 | NA                            | NA                 |
| Kabuli_wild_50813 | NA                                  | Ca_kabuli_denovo | 50813                   | G/A  | NA                 | NA                            | NA                 |
| Kabuli_wild_50814 | NA                                  | Ca_kabuli_denovo | 50814                   | G/A  | NA                 | NA                            | NA                 |
| Kabuli_wild_50815 | NA                                  | Ca_kabuli_denovo | 50815                   | A/G  | NA                 | NA                            | NA                 |
| Kabuli_wild_50816 | NA                                  | Ca_kabuli_denovo | 50816                   | C/A  | NA                 | NA                            | NA                 |
| Kabuli_wild_50818 | NA                                  | Ca_kabuli_denovo | 50818                   | G/C  | NA                 | NA                            | NA                 |
| Kabuli_wild_50819 | NA                                  | Ca_kabuli_denovo | 50819                   | A/G  | NA                 | NA                            | NA                 |
| Kabuli_wild_50820 | NA                                  | Ca_kabuli_denovo | 50820                   | T/A  | NA                 | NA                            | NA                 |
| Kabuli_wild_50858 | NA                                  | Ca_kabuli_denovo | 50858                   | G/T  | NA                 | NA                            | NA                 |
| Kabuli_wild_51294 | NA                                  | Ca_kabuli_denovo | 51294                   | G/A  | NA                 | NA                            | NA                 |
| Kabuli_wild_51296 | NA                                  | Ca_kabuli_denovo | 51296                   | G/A  | NA                 | NA                            | NA                 |
| Kabuli_wild_51297 | NA                                  | Ca_kabuli_denovo | 51297                   | A/G  | NA                 | NA                            | NA                 |
| Kabuli_wild_51298 | NA                                  | Ca_kabuli_denovo | 51298                   | G/A  | NA                 | NA                            | NA                 |
| Kabuli_wild_51481 | NA                                  | Ca_kabuli_denovo | 51481                   | G/A  | NA                 | NA                            | NA                 |
| Kabuli_wild_51483 | NA                                  | Ca_kabuli_denovo | 51483                   | G/A  | NA                 | NA                            | NA                 |
| Kabuli_wild_52805 | NA                                  | Ca_kabuli_denovo | 52805                   | A/G  | NA                 | NA                            | NA                 |
| Kabuli_wild_53437 | NA                                  | Ca_kabuli_denovo | 53437                   | C/G  | NA                 | NA                            | NA                 |
| Kabuli_wild_53439 | NA                                  | Ca_kabuli_denovo | 53439                   | G/T  | NA                 | NA                            | NA                 |
| Kabuli_wild_53441 | NA                                  | Ca_kabuli_denovo | 53441                   | C/T  | NA                 | NA                            | NA                 |
| Kabuli_wild_53442 | NA                                  | Ca_kabuli_denovo | 53442                   | A/C  | NA                 | NA                            | NA                 |
| Kabuli_wild_53444 | NA                                  | Ca_kabuli_denovo | 53444                   | C/G  | NA                 | NA                            | NA                 |
| Kabuli_wild_53505 | NA                                  | Ca_kabuli_denovo | 53505                   | G/A  | NA                 | NA                            | NA                 |
| Kabuli_wild_53507 | NA                                  | Ca_kabuli_denovo | 53507                   | G/A  | NA                 | NA                            | NA                 |
| Kabuli_wild_53712 | NA                                  | Ca_kabuli_denovo | 53712                   | T/G  | NA                 | NA                            | NA                 |
| Kabuli_wild_53713 | NA                                  | Ca_kabuli_denovo | 53713                   | T/A  | NA                 | NA                            | NA                 |
| Kabuli_wild_53714 | NA                                  | Ca_kabuli_denovo | 53714                   | C/A  | NA                 | NA                            | NA                 |
| Kabuli_wild_53715 | NA                                  | Ca_kabuli_denovo | 53715                   | T/A  | NA                 | NA                            | NA                 |
| Kabuli_wild_53748 | NA                                  | Ca_kabuli_denovo | 53748                   | G/A  | NA                 | NA                            | NA                 |
| Kabuli_wild_53788 | NA                                  | Ca_kabuli_denovo | 53788                   | T/G  | NA                 | NA                            | NA                 |
| Kabuli_wild_53789 | NA                                  | Ca_kabuli_denovo | 53789                   | C/G  | NA                 | NA                            | NA                 |
| Kabuli_wild_53795 | NA                                  | Ca_kabuli_denovo | 53795                   | A/G  | NA                 | NA                            | NA                 |
| Kabuli_wild_53799 | NA                                  | Ca_kabuli_denovo | 53799                   | A/G  | NA                 | NA                            | NA                 |
| Kabuli_wild_53833 | NA                                  | Ca_kabuli_denovo | 53833                   | C/G  | NA                 | NA                            | NA                 |
| Kabuli_wild_54231 | NA                                  | Ca_kabuli_denovo | 54231                   | G/A  | NA                 | NA                            | NA                 |
| Kabuli_wild_54280 | NA                                  | Ca_kabuli_denovo | 54280                   | G/A  | NA                 | NA                            | NA                 |
| Kabuli_wild_54642 | NA                                  | Ca_kabuli_denovo | 54642                   | G/T  | NA                 | NA                            | NA                 |
| Kabuli_wild_55593 | NA                                  | Ca_kabuli_denovo | 55593                   | G/T  | NA                 | NA                            | NA                 |

| SNP IDs           | NCBI dbSNP accession IDs (NCBI_SS#) | Chromosomes      | Physical positions (bp) | SNPs | Gene accession IDs | Sequence components of genome | Putative functions |
|-------------------|-------------------------------------|------------------|-------------------------|------|--------------------|-------------------------------|--------------------|
| Kabuli_wild_55602 | NA                                  | Ca_kabuli_denovo | 55602                   | C/G  | NA                 | NA                            | NA                 |
| Kabuli_wild_55630 | NA                                  | Ca_kabuli_denovo | 55630                   | A/G  | NA                 | NA                            | NA                 |
| Kabuli_wild_55640 | NA                                  | Ca_kabuli_denovo | 55640                   | T/G  | NA                 | NA                            | NA                 |
| Kabuli_wild_55678 | NA                                  | Ca_kabuli_denovo | 55678                   | C/G  | NA                 | NA                            | NA                 |
| Kabuli_wild_55810 | NA                                  | Ca_kabuli_denovo | 55810                   | G/A  | NA                 | NA                            | NA                 |
| Kabuli_wild_55833 | NA                                  | Ca_kabuli_denovo | 55833                   | A/T  | NA                 | NA                            | NA                 |
| Kabuli_wild_55834 | NA                                  | Ca_kabuli_denovo | 55834                   | G/A  | NA                 | NA                            | NA                 |
| Kabuli_wild_56235 | NA                                  | Ca_kabuli_denovo | 56235                   | G/A  | NA                 | NA                            | NA                 |
| Kabuli_wild_56237 | NA                                  | Ca_kabuli_denovo | 56237                   | A/G  | NA                 | NA                            | NA                 |
| Kabuli_wild_56238 | NA                                  | Ca_kabuli_denovo | 56238                   | G/A  | NA                 | NA                            | NA                 |
| Kabuli_wild_56239 | NA                                  | Ca_kabuli_denovo | 56239                   | A/G  | NA                 | NA                            | NA                 |
| Kabuli_wild_56240 | NA                                  | Ca_kabuli_denovo | 56240                   | G/C  | NA                 | NA                            | NA                 |
| Kabuli_wild_56241 | NA                                  | Ca_kabuli_denovo | 56241                   | G/C  | NA                 | NA                            | NA                 |
| Kabuli_wild_56243 | NA                                  | Ca_kabuli_denovo | 56243                   | T/G  | NA                 | NA                            | NA                 |
| Kabuli_wild_56245 | NA                                  | Ca_kabuli_denovo | 56245                   | C/T  | NA                 | NA                            | NA                 |
| Kabuli_wild_56246 | NA                                  | Ca_kabuli_denovo | 56246                   | A/C  | NA                 | NA                            | NA                 |
| Kabuli_wild_56337 | NA                                  | Ca_kabuli_denovo | 56337                   | C/G  | NA                 | NA                            | NA                 |
| Kabuli_wild_56339 | NA                                  | Ca_kabuli_denovo | 56339                   | G/T  | NA                 | NA                            | NA                 |
| Kabuli_wild_56341 | NA                                  | Ca_kabuli_denovo | 56341                   | C/T  | NA                 | NA                            | NA                 |
| Kabuli_wild_56342 | NA                                  | Ca_kabuli_denovo | 56342                   | A/C  | NA                 | NA                            | NA                 |
| Kabuli_wild_56343 | NA                                  | Ca_kabuli_denovo | 56343                   | G/A  | NA                 | NA                            | NA                 |
| Kabuli_wild_57842 | NA                                  | Ca_kabuli_denovo | 57842                   | A/G  | NA                 | NA                            | NA                 |
| Kabuli_wild_58766 | NA                                  | Ca_kabuli_denovo | 58766                   | G/C  | NA                 | NA                            | NA                 |
| Kabuli_wild_58767 | NA                                  | Ca_kabuli_denovo | 58767                   | C/A  | NA                 | NA                            | NA                 |
| Kabuli_wild_58768 | NA                                  | Ca_kabuli_denovo | 58768                   | G/A  | NA                 | NA                            | NA                 |
| Kabuli_wild_58770 | NA                                  | Ca_kabuli_denovo | 58770                   | A/G  | NA                 | NA                            | NA                 |
| Kabuli_wild_58772 | NA                                  | Ca_kabuli_denovo | 58772                   | T/A  | NA                 | NA                            | NA                 |
| Kabuli_wild_58773 | NA                                  | Ca_kabuli_denovo | 58773                   | G/T  | NA                 | NA                            | NA                 |
| Kabuli_wild_58944 | NA                                  | Ca_kabuli_denovo | 58944                   | G/T  | NA                 | NA                            | NA                 |
| Kabuli_wild_58945 | NA                                  | Ca_kabuli_denovo | 58945                   | A/G  | NA                 | NA                            | NA                 |
| Kabuli_wild_59062 | NA                                  | Ca_kabuli_denovo | 59062                   | G/C  | NA                 | NA                            | NA                 |
| Kabuli_wild_59063 | NA                                  | Ca_kabuli_denovo | 59063                   | A/C  | NA                 | NA                            | NA                 |
| Kabuli_wild_59066 | NA                                  | Ca_kabuli_denovo | 59066                   | C/T  | NA                 | NA                            | NA                 |
| Kabuli_wild_59068 | NA                                  | Ca_kabuli_denovo | 59068                   | T/G  | NA                 | NA                            | NA                 |
| Kabuli_wild_59070 | NA                                  | Ca_kabuli_denovo | 59070                   | G/C  | NA                 | NA                            | NA                 |
| Kabuli_wild_59121 | NA                                  | Ca_kabuli_denovo | 59121                   | T/G  | NA                 | NA                            | NA                 |
| Kabuli_wild_59166 | NA                                  | Ca_kabuli_denovo | 59166                   | C/G  | NA                 | NA                            | NA                 |
| Kabuli_wild_60421 | NA                                  | Ca_kabuli_denovo | 60421                   | A/C  | NA                 | NA                            | NA                 |
| Kabuli_wild_60424 | NA                                  | Ca_kabuli_denovo | 60424                   | T/C  | NA                 | NA                            | NA                 |
| Kabuli_wild_60426 | NA                                  | Ca_kabuli_denovo | 60426                   | T/G  | NA                 | NA                            | NA                 |
| Kabuli_wild_60428 | NA                                  | Ca_kabuli_denovo | 60428                   | G/T  | NA                 | NA                            | NA                 |
| Kabuli_wild_60471 | NA                                  | Ca_kabuli_denovo | 60471                   | G/A  | NA                 | NA                            | NA                 |
| Kabuli_wild_61027 | NA                                  | Ca_kabuli_denovo | 61027                   | G/A  | NA                 | NA                            | NA                 |
| Kabuli_wild_61078 | NA                                  | Ca_kabuli_denovo | 61078                   | G/A  | NA                 | NA                            | NA                 |

| SNP IDs           | NCBI dbSNP accession IDs (NCBI_SS#) | Chromosomes      | Physical positions (bp) | SNPs | Gene accession IDs | Sequence components of genome | Putative functions |
|-------------------|-------------------------------------|------------------|-------------------------|------|--------------------|-------------------------------|--------------------|
| Kabuli_wild_61271 | NA                                  | Ca_kabuli_denovo | 61271                   | G/A  | NA                 | NA                            | NA                 |
| Kabuli_wild_61273 | NA                                  | Ca_kabuli_denovo | 61273                   | G/A  | NA                 | NA                            | NA                 |
| Kabuli_wild_61274 | NA                                  | Ca_kabuli_denovo | 61274                   | A/G  | NA                 | NA                            | NA                 |
| Kabuli_wild_61275 | NA                                  | Ca_kabuli_denovo | 61275                   | G/A  | NA                 | NA                            | NA                 |
| Kabuli_wild_62938 | NA                                  | Ca_kabuli_denovo | 62938                   | A/G  | NA                 | NA                            | NA                 |
| Kabuli_wild_62939 | NA                                  | Ca_kabuli_denovo | 62939                   | G/A  | NA                 | NA                            | NA                 |
| Kabuli_wild_62940 | NA                                  | Ca_kabuli_denovo | 62940                   | A/C  | NA                 | NA                            | NA                 |
| Kabuli_wild_62942 | NA                                  | Ca_kabuli_denovo | 62942                   | C/G  | NA                 | NA                            | NA                 |
| Kabuli_wild_62943 | NA                                  | Ca_kabuli_denovo | 62943                   | G/A  | NA                 | NA                            | NA                 |
| Kabuli_wild_62944 | NA                                  | Ca_kabuli_denovo | 62944                   | T/A  | NA                 | NA                            | NA                 |
| Kabuli_wild_62945 | NA                                  | Ca_kabuli_denovo | 62945                   | C/T  | NA                 | NA                            | NA                 |
| Kabuli_wild_62951 | NA                                  | Ca_kabuli_denovo | 62951                   | T/G  | NA                 | NA                            | NA                 |
| Kabuli_wild_63416 | NA                                  | Ca_kabuli_denovo | 63416                   | T/C  | NA                 | NA                            | NA                 |
| Kabuli_wild_63429 | NA                                  | Ca_kabuli_denovo | 63429                   | G/A  | NA                 | NA                            | NA                 |
| Kabuli_wild_63433 | NA                                  | Ca_kabuli_denovo | 63433                   | A/G  | NA                 | NA                            | NA                 |
| Kabuli_wild_63632 | NA                                  | Ca_kabuli_denovo | 63632                   | A/T  | NA                 | NA                            | NA                 |
| Kabuli_wild_65376 | NA                                  | Ca_kabuli_denovo | 65376                   | G/C  | NA                 | NA                            | NA                 |
| Kabuli_wild_65377 | NA                                  | Ca_kabuli_denovo | 65377                   | A/G  | NA                 | NA                            | NA                 |
| Kabuli_wild_65379 | NA                                  | Ca_kabuli_denovo | 65379                   | A/C  | NA                 | NA                            | NA                 |
| Kabuli_wild_65891 | NA                                  | Ca_kabuli_denovo | 65891                   | C/T  | NA                 | NA                            | NA                 |
| Kabuli_wild_65898 | NA                                  | Ca_kabuli_denovo | 65898                   | G/T  | NA                 | NA                            | NA                 |
| Kabuli_wild_66027 | NA                                  | Ca_kabuli_denovo | 66027                   | G/A  | NA                 | NA                            | NA                 |
| Kabuli_wild_66028 | NA                                  | Ca_kabuli_denovo | 66028                   | C/G  | NA                 | NA                            | NA                 |
| Kabuli_wild_66029 | NA                                  | Ca_kabuli_denovo | 66029                   | G/C  | NA                 | NA                            | NA                 |
| Kabuli_wild_66030 | NA                                  | Ca_kabuli_denovo | 66030                   | G/A  | NA                 | NA                            | NA                 |
| Kabuli_wild_66031 | NA                                  | Ca_kabuli_denovo | 66031                   | G/T  | NA                 | NA                            | NA                 |
| Kabuli_wild_66032 | NA                                  | Ca_kabuli_denovo | 66032                   | G/T  | NA                 | NA                            | NA                 |
| Kabuli_wild_66033 | NA                                  | Ca_kabuli_denovo | 66033                   | A/C  | NA                 | NA                            | NA                 |
| Kabuli_wild_66284 | NA                                  | Ca_kabuli_denovo | 66284                   | C/G  | NA                 | NA                            | NA                 |
| Kabuli_wild_66285 | NA                                  | Ca_kabuli_denovo | 66285                   | C/G  | NA                 | NA                            | NA                 |
| Kabuli_wild_66300 | NA                                  | Ca_kabuli_denovo | 66300                   | G/A  | NA                 | NA                            | NA                 |
| Kabuli_wild_67119 | NA                                  | Ca_kabuli_denovo | 67119                   | A/C  | NA                 | NA                            | NA                 |
| Kabuli_wild_67120 | NA                                  | Ca_kabuli_denovo | 67120                   | G/T  | NA                 | NA                            | NA                 |
| Kabuli_wild_67121 | NA                                  | Ca_kabuli_denovo | 67121                   | A/G  | NA                 | NA                            | NA                 |
| Kabuli_wild_67270 | NA                                  | Ca_kabuli_denovo | 67270                   | G/T  | NA                 | NA                            | NA                 |
| Kabuli_wild_67272 | NA                                  | Ca_kabuli_denovo | 67272                   | T/C  | NA                 | NA                            | NA                 |
| Kabuli_wild_67275 | NA                                  | Ca_kabuli_denovo | 67275                   | A/C  | NA                 | NA                            | NA                 |
| Kabuli_wild_67299 | NA                                  | Ca_kabuli_denovo | 67299                   | G/T  | NA                 | NA                            | NA                 |
| Kabuli_wild_67569 | NA                                  | Ca_kabuli_denovo | 67569                   | G/A  | NA                 | NA                            | NA                 |
| Kabuli_wild_67571 | NA                                  | Ca_kabuli_denovo | 67571                   | G/A  | NA                 | NA                            | NA                 |
| Kabuli_wild_67572 | NA                                  | Ca_kabuli_denovo | 67572                   | A/G  | NA                 | NA                            | NA                 |
| Kabuli_wild_67573 | NA                                  | Ca_kabuli_denovo | 67573                   | G/A  | NA                 | NA                            | NA                 |
| Kabuli_wild_68142 | NA                                  | Ca_kabuli_denovo | 68142                   | C/G  | NA                 | NA                            | NA                 |
| Kabuli_wild_68847 | NA                                  | Ca_kabuli_denovo | 68847                   | C/G  | NA                 | NA                            | NA                 |

| SNP IDs           | NCBI dbSNP accession IDs (NCBI_SS#) | Chromosomes      | Physical positions (bp) | SNPs | Gene accession IDs | Sequence components of genome | Putative functions |
|-------------------|-------------------------------------|------------------|-------------------------|------|--------------------|-------------------------------|--------------------|
| Kabuli_wild_68849 | NA                                  | Ca_kabuli_denovo | 68849                   | T/G  | NA                 | NA                            | NA                 |
| Kabuli_wild_68851 | NA                                  | Ca_kabuli_denovo | 68851                   | C/T  | NA                 | NA                            | NA                 |
| Kabuli_wild_69292 | NA                                  | Ca_kabuli_denovo | 69292                   | A/T  | NA                 | NA                            | NA                 |
| Kabuli_wild_69323 | NA                                  | Ca_kabuli_denovo | 69323                   | A/T  | NA                 | NA                            | NA                 |
| Kabuli_wild_69328 | NA                                  | Ca_kabuli_denovo | 69328                   | A/T  | NA                 | NA                            | NA                 |
| Kabuli_wild_70895 | NA                                  | Ca_kabuli_denovo | 70895                   | C/A  | NA                 | NA                            | NA                 |
| Kabuli_wild_70896 | NA                                  | Ca_kabuli_denovo | 70896                   | A/G  | NA                 | NA                            | NA                 |
| Kabuli_wild_70898 | NA                                  | Ca_kabuli_denovo | 70898                   | A/G  | NA                 | NA                            | NA                 |
| Kabuli_wild_70900 | NA                                  | Ca_kabuli_denovo | 70900                   | A/T  | NA                 | NA                            | NA                 |
| Kabuli_wild_70901 | NA                                  | Ca_kabuli_denovo | 70901                   | G/T  | NA                 | NA                            | NA                 |
| Kabuli_wild_71038 | NA                                  | Ca_kabuli_denovo | 71038                   | G/C  | NA                 | NA                            | NA                 |
| Kabuli_wild_71039 | NA                                  | Ca_kabuli_denovo | 71039                   | C/T  | NA                 | NA                            | NA                 |
| Kabuli_wild_71043 | NA                                  | Ca_kabuli_denovo | 71043                   | T/G  | NA                 | NA                            | NA                 |
| Kabuli_wild_71959 | NA                                  | Ca_kabuli_denovo | 71959                   | C/G  | NA                 | NA                            | NA                 |
| Kabuli_wild_71961 | NA                                  | Ca_kabuli_denovo | 71961                   | G/T  | NA                 | NA                            | NA                 |
| Kabuli_wild_71963 | NA                                  | Ca_kabuli_denovo | 71963                   | C/T  | NA                 | NA                            | NA                 |
| Kabuli_wild_71964 | NA                                  | Ca_kabuli_denovo | 71964                   | A/C  | NA                 | NA                            | NA                 |
| Kabuli_wild_71965 | NA                                  | Ca_kabuli_denovo | 71965                   | G/A  | NA                 | NA                            | NA                 |
| Kabuli_wild_71966 | NA                                  | Ca_kabuli_denovo | 71966                   | C/G  | NA                 | NA                            | NA                 |
| Kabuli_wild_72167 | NA                                  | Ca_kabuli_denovo | 72167                   | A/C  | NA                 | NA                            | NA                 |
| Kabuli_wild_72168 | NA                                  | Ca_kabuli_denovo | 72168                   | G/T  | NA                 | NA                            | NA                 |
| Kabuli_wild_72169 | NA                                  | Ca_kabuli_denovo | 72169                   | A/G  | NA                 | NA                            | NA                 |
| Kabuli_wild_72238 | NA                                  | Ca_kabuli_denovo | 72238                   | C/G  | NA                 | NA                            | NA                 |
| Kabuli_wild_72240 | NA                                  | Ca_kabuli_denovo | 72240                   | G/T  | NA                 | NA                            | NA                 |
| Kabuli_wild_72242 | NA                                  | Ca_kabuli_denovo | 72242                   | C/T  | NA                 | NA                            | NA                 |
| Kabuli_wild_72243 | NA                                  | Ca_kabuli_denovo | 72243                   | A/C  | NA                 | NA                            | NA                 |
| Kabuli_wild_73342 | NA                                  | Ca_kabuli_denovo | 73342                   | C/G  | NA                 | NA                            | NA                 |
| Kabuli_wild_73383 | NA                                  | Ca_kabuli_denovo | 73383                   | T/G  | NA                 | NA                            | NA                 |
| Kabuli_wild_73392 | NA                                  | Ca_kabuli_denovo | 73392                   | C/G  | NA                 | NA                            | NA                 |
| Kabuli_wild_73621 | NA                                  | Ca_kabuli_denovo | 73621                   | C/T  | NA                 | NA                            | NA                 |
| Kabuli_wild_73623 | NA                                  | Ca_kabuli_denovo | 73623                   | T/C  | NA                 | NA                            | NA                 |
| Kabuli_wild_74118 | NA                                  | Ca_kabuli_denovo | 74118                   | T/C  | NA                 | NA                            | NA                 |
| Kabuli_wild_74123 | NA                                  | Ca_kabuli_denovo | 74123                   | A/C  | NA                 | NA                            | NA                 |
| Kabuli_wild_74125 | NA                                  | Ca_kabuli_denovo | 74125                   | T/G  | NA                 | NA                            | NA                 |
| Kabuli_wild_74138 | NA                                  | Ca_kabuli_denovo | 74138                   | C/G  | NA                 | NA                            | NA                 |
| Kabuli_wild_74201 | NA                                  | Ca_kabuli_denovo | 74201                   | T/G  | NA                 | NA                            | NA                 |
| Kabuli_wild_74567 | NA                                  | Ca_kabuli_denovo | 74567                   | T/C  | NA                 | NA                            | NA                 |
| Kabuli_wild_74569 | NA                                  | Ca_kabuli_denovo | 74569                   | C/G  | NA                 | NA                            | NA                 |
| Kabuli_wild_74576 | NA                                  | Ca_kabuli_denovo | 74576                   | T/A  | NA                 | NA                            | NA                 |
| Kabuli_wild_74665 | NA                                  | Ca_kabuli_denovo | 74665                   | T/A  | NA                 | NA                            | NA                 |
| Kabuli_wild_74666 | NA                                  | Ca_kabuli_denovo | 74666                   | C/G  | NA                 | NA                            | NA                 |
| Kabuli_wild_74668 | NA                                  | Ca_kabuli_denovo | 74668                   | G/A  | NA                 | NA                            | NA                 |
| Kabuli_wild_74669 | NA                                  | Ca_kabuli_denovo | 74669                   | C/G  | NA                 | NA                            | NA                 |
| Kabuli_wild_74670 | NA                                  | Ca_kabuli_denovo | 74670                   | G/A  | NA                 | NA                            | NA                 |

| SNP IDs           | NCBI dbSNP accession IDs (NCBI_SS#) | Chromosomes      | Physical positions (bp) | SNPs | Gene accession IDs | Sequence components of genome | Putative functions |
|-------------------|-------------------------------------|------------------|-------------------------|------|--------------------|-------------------------------|--------------------|
| Kabuli_wild_74671 | NA                                  | Ca_kabuli_denovo | 74671                   | A/G  | NA                 | NA                            | NA                 |
| Kabuli_wild_74862 | NA                                  | Ca_kabuli_denovo | 74862                   | G/A  | NA                 | NA                            | NA                 |
| Kabuli_wild_74863 | NA                                  | Ca_kabuli_denovo | 74863                   | C/G  | NA                 | NA                            | NA                 |
| Kabuli_wild_74864 | NA                                  | Ca_kabuli_denovo | 74864                   | G/A  | NA                 | NA                            | NA                 |
| Kabuli_wild_74865 | NA                                  | Ca_kabuli_denovo | 74865                   | A/G  | NA                 | NA                            | NA                 |
| Kabuli_wild_74866 | NA                                  | Ca_kabuli_denovo | 74866                   | A/G  | NA                 | NA                            | NA                 |
| Kabuli_wild_74956 | NA                                  | Ca_kabuli_denovo | 74956                   | T/A  | NA                 | NA                            | NA                 |
| Kabuli_wild_74957 | NA                                  | Ca_kabuli_denovo | 74957                   | C/G  | NA                 | NA                            | NA                 |
| Kabuli_wild_74958 | NA                                  | Ca_kabuli_denovo | 74958                   | C/A  | NA                 | NA                            | NA                 |
| Kabuli_wild_74959 | NA                                  | Ca_kabuli_denovo | 74959                   | A/G  | NA                 | NA                            | NA                 |
| Kabuli_wild_74960 | NA                                  | Ca_kabuli_denovo | 74960                   | G/C  | NA                 | NA                            | NA                 |
| Kabuli_wild_75043 | NA                                  | Ca_kabuli_denovo | 75043                   | A/G  | NA                 | NA                            | NA                 |
| Kabuli_wild_75044 | NA                                  | Ca_kabuli_denovo | 75044                   | G/C  | NA                 | NA                            | NA                 |
| Kabuli_wild_75045 | NA                                  | Ca_kabuli_denovo | 75045                   | C/G  | NA                 | NA                            | NA                 |
| Kabuli_wild_75047 | NA                                  | Ca_kabuli_denovo | 75047                   | T/G  | NA                 | NA                            | NA                 |
| Kabuli_wild_75049 | NA                                  | Ca_kabuli_denovo | 75049                   | C/T  | NA                 | NA                            | NA                 |
| Kabuli_wild_75242 | NA                                  | Ca_kabuli_denovo | 75242                   | G/T  | NA                 | NA                            | NA                 |
| Kabuli_wild_75499 | NA                                  | Ca_kabuli_denovo | 75499                   | A/T  | NA                 | NA                            | NA                 |
| Kabuli_wild_76110 | NA                                  | Ca_kabuli_denovo | 76110                   | G/C  | NA                 | NA                            | NA                 |
| Kabuli_wild_76111 | NA                                  | Ca_kabuli_denovo | 76111                   | C/G  | NA                 | NA                            | NA                 |
| Kabuli_wild_76113 | NA                                  | Ca_kabuli_denovo | 76113                   | T/G  | NA                 | NA                            | NA                 |
| Kabuli_wild_76115 | NA                                  | Ca_kabuli_denovo | 76115                   | C/T  | NA                 | NA                            | NA                 |
| Kabuli_wild_76320 | NA                                  | Ca_kabuli_denovo | 76320                   | T/G  | NA                 | NA                            | NA                 |
| Kabuli_wild_76413 | NA                                  | Ca_kabuli_denovo | 76413                   | A/G  | NA                 | NA                            | NA                 |
| Kabuli_wild_76415 | NA                                  | Ca_kabuli_denovo | 76415                   | C/A  | NA                 | NA                            | NA                 |
| Kabuli_wild_76417 | NA                                  | Ca_kabuli_denovo | 76417                   | G/T  | NA                 | NA                            | NA                 |
| Kabuli_wild_76419 | NA                                  | Ca_kabuli_denovo | 76419                   | A/C  | NA                 | NA                            | NA                 |
| Kabuli_wild_76420 | NA                                  | Ca_kabuli_denovo | 76420                   | A/C  | NA                 | NA                            | NA                 |
| Kabuli_wild_76421 | NA                                  | Ca_kabuli_denovo | 76421                   | G/T  | NA                 | NA                            | NA                 |
| Kabuli_wild_76520 | NA                                  | Ca_kabuli_denovo | 76520                   | C/G  | NA                 | NA                            | NA                 |
| Kabuli_wild_76521 | NA                                  | Ca_kabuli_denovo | 76521                   | A/C  | NA                 | NA                            | NA                 |
| Kabuli_wild_76523 | NA                                  | Ca_kabuli_denovo | 76523                   | C/A  | NA                 | NA                            | NA                 |
| Kabuli_wild_76526 | NA                                  | Ca_kabuli_denovo | 76526                   | T/G  | NA                 | NA                            | NA                 |
| Kabuli_wild_76527 | NA                                  | Ca_kabuli_denovo | 76527                   | C/A  | NA                 | NA                            | NA                 |
| Kabuli_wild_76530 | NA                                  | Ca_kabuli_denovo | 76530                   | G/T  | NA                 | NA                            | NA                 |
| Kabuli_wild_76531 | NA                                  | Ca_kabuli_denovo | 76531                   | T/C  | NA                 | NA                            | NA                 |
| Kabuli_wild_76570 | NA                                  | Ca_kabuli_denovo | 76570                   | G/A  | NA                 | NA                            | NA                 |
| Kabuli_wild_76619 | NA                                  | Ca_kabuli_denovo | 76619                   | A/G  | NA                 | NA                            | NA                 |
| Kabuli_wild_76660 | NA                                  | Ca_kabuli_denovo | 76660                   | G/T  | NA                 | NA                            | NA                 |
| Kabuli_wild_77047 | NA                                  | Ca_kabuli_denovo | 77047                   | T/A  | NA                 | NA                            | NA                 |
| Kabuli_wild_77128 | NA                                  | Ca_kabuli_denovo | 77128                   | T/G  | NA                 | NA                            | NA                 |
| Kabuli_wild_77139 | NA                                  | Ca_kabuli_denovo | 77139                   | A/G  | NA                 | NA                            | NA                 |
| Kabuli_wild_77142 | NA                                  | Ca_kabuli_denovo | 77142                   | T/G  | NA                 | NA                            | NA                 |
| Kabuli_wild_77333 | NA                                  | Ca_kabuli_denovo | 77333                   | A/G  | NA                 | NA                            | NA                 |

| SNP IDs           | NCBI dbSNP accession IDs (NCBI_SS#) | Chromosomes      | Physical positions (bp) | SNPs | Gene accession IDs | Sequence components of genome | Putative functions |
|-------------------|-------------------------------------|------------------|-------------------------|------|--------------------|-------------------------------|--------------------|
| Kabuli_wild_77412 | NA                                  | Ca_kabuli_denovo | 77412                   | T/G  | NA                 | NA                            | NA                 |
| Kabuli_wild_77423 | NA                                  | Ca_kabuli_denovo | 77423                   | C/A  | NA                 | NA                            | NA                 |
| Kabuli_wild_77526 | NA                                  | Ca_kabuli_denovo | 77526                   | C/A  | NA                 | NA                            | NA                 |
| Kabuli_wild_77730 | NA                                  | Ca_kabuli_denovo | 77730                   | G/T  | NA                 | NA                            | NA                 |
| Kabuli_wild_77836 | NA                                  | Ca_kabuli_denovo | 77836                   | T/G  | NA                 | NA                            | NA                 |
| Kabuli_wild_77911 | NA                                  | Ca_kabuli_denovo | 77911                   | T/A  | NA                 | NA                            | NA                 |
| Kabuli_wild_77913 | NA                                  | Ca_kabuli_denovo | 77913                   | C/A  | NA                 | NA                            | NA                 |
| Kabuli_wild_77930 | NA                                  | Ca_kabuli_denovo | 77930                   | A/G  | NA                 | NA                            | NA                 |
| Kabuli_wild_77934 | NA                                  | Ca_kabuli_denovo | 77934                   | G/A  | NA                 | NA                            | NA                 |
| Kabuli_wild_78008 | NA                                  | Ca_kabuli_denovo | 78008                   | T/G  | NA                 | NA                            | NA                 |
| Kabuli_wild_78015 | NA                                  | Ca_kabuli_denovo | 78015                   | T/C  | NA                 | NA                            | NA                 |
| Kabuli_wild_78260 | NA                                  | Ca_kabuli_denovo | 78260                   | G/A  | NA                 | NA                            | NA                 |
| Kabuli_wild_78262 | NA                                  | Ca_kabuli_denovo | 78262                   | G/A  | NA                 | NA                            | NA                 |
| Kabuli_wild_78263 | NA                                  | Ca_kabuli_denovo | 78263                   | A/G  | NA                 | NA                            | NA                 |
| Kabuli_wild_78264 | NA                                  | Ca_kabuli_denovo | 78264                   | G/A  | NA                 | NA                            | NA                 |
| Kabuli_wild_78649 | NA                                  | Ca_kabuli_denovo | 78649                   | G/T  | NA                 | NA                            | NA                 |
| Kabuli_wild_78650 | NA                                  | Ca_kabuli_denovo | 78650                   | A/G  | NA                 | NA                            | NA                 |
| Kabuli_wild_78651 | NA                                  | Ca_kabuli_denovo | 78651                   | A/C  | NA                 | NA                            | NA                 |
| Kabuli_wild_78652 | NA                                  | Ca_kabuli_denovo | 78652                   | C/T  | NA                 | NA                            | NA                 |
| Kabuli_wild_78654 | NA                                  | Ca_kabuli_denovo | 78654                   | A/C  | NA                 | NA                            | NA                 |
| Kabuli_wild_78657 | NA                                  | Ca_kabuli_denovo | 78657                   | C/A  | NA                 | NA                            | NA                 |
| Kabuli_wild_78997 | NA                                  | Ca_kabuli_denovo | 78997                   | A/G  | NA                 | NA                            | NA                 |
| Kabuli_wild_79052 | NA                                  | Ca_kabuli_denovo | 79052                   | T/C  | NA                 | NA                            | NA                 |
| Kabuli_wild_79053 | NA                                  | Ca_kabuli_denovo | 79053                   | C/T  | NA                 | NA                            | NA                 |
| Kabuli_wild_79055 | NA                                  | Ca_kabuli_denovo | 79055                   | G/C  | NA                 | NA                            | NA                 |
| Kabuli_wild_79056 | NA                                  | Ca_kabuli_denovo | 79056                   | A/T  | NA                 | NA                            | NA                 |
| Kabuli_wild_79066 | NA                                  | Ca_kabuli_denovo | 79066                   | C/G  | NA                 | NA                            | NA                 |
| Kabuli_wild_79126 | NA                                  | Ca_kabuli_denovo | 79126                   | T/G  | NA                 | NA                            | NA                 |
| Kabuli_wild_79152 | NA                                  | Ca_kabuli_denovo | 79152                   | T/G  | NA                 | NA                            | NA                 |
| Kabuli_wild_79247 | NA                                  | Ca_kabuli_denovo | 79247                   | C/T  | NA                 | NA                            | NA                 |
| Kabuli_wild_79248 | NA                                  | Ca_kabuli_denovo | 79248                   | C/T  | NA                 | NA                            | NA                 |
| Kabuli_wild_79249 | NA                                  | Ca_kabuli_denovo | 79249                   | C/T  | NA                 | NA                            | NA                 |
| Kabuli_wild_79534 | NA                                  | Ca_kabuli_denovo | 79534                   | C/G  | NA                 | NA                            | NA                 |
| Kabuli_wild_79535 | NA                                  | Ca_kabuli_denovo | 79535                   | G/A  | NA                 | NA                            | NA                 |
| Kabuli_wild_79536 | NA                                  | Ca_kabuli_denovo | 79536                   | G/A  | NA                 | NA                            | NA                 |
| Kabuli_wild_79537 | NA                                  | Ca_kabuli_denovo | 79537                   | A/G  | NA                 | NA                            | NA                 |
| Kabuli_wild_79540 | NA                                  | Ca_kabuli_denovo | 79540                   | G/C  | NA                 | NA                            | NA                 |
| Kabuli_wild_79698 | NA                                  | Ca_kabuli_denovo | 79698                   | G/A  | NA                 | NA                            | NA                 |
| Kabuli_wild_79699 | NA                                  | Ca_kabuli_denovo | 79699                   | G/A  | NA                 | NA                            | NA                 |
| Kabuli_wild_79700 | NA                                  | Ca_kabuli_denovo | 79700                   | A/G  | NA                 | NA                            | NA                 |
| Kabuli_wild_79701 | NA                                  | Ca_kabuli_denovo | 79701                   | A/G  | NA                 | NA                            | NA                 |
| Kabuli_wild_79702 | NA                                  | Ca_kabuli_denovo | 79702                   | G/A  | NA                 | NA                            | NA                 |
| Kabuli_wild_79703 | NA                                  | Ca_kabuli_denovo | 79703                   | C/A  | NA                 | NA                            | NA                 |
| Kabuli_wild_79706 | NA                                  | Ca_kabuli_denovo | 79706                   | T/G  | NA                 | NA                            | NA                 |

| SNP IDs           | NCBI dbSNP accession IDs (NCBI_SS#) | Chromosomes      | Physical positions (bp) | SNPs | Gene accession IDs | Sequence components of genome | Putative functions |
|-------------------|-------------------------------------|------------------|-------------------------|------|--------------------|-------------------------------|--------------------|
| Kabuli_wild_79796 | NA                                  | Ca_kabuli_denovo | 79796                   | G/A  | NA                 | NA                            | NA                 |
| Kabuli_wild_79798 | NA                                  | Ca_kabuli_denovo | 79798                   | G/A  | NA                 | NA                            | NA                 |
| Kabuli_wild_79799 | NA                                  | Ca_kabuli_denovo | 79799                   | A/G  | NA                 | NA                            | NA                 |
| Kabuli_wild_79800 | NA                                  | Ca_kabuli_denovo | 79800                   | G/C  | NA                 | NA                            | NA                 |
| Kabuli_wild_79801 | NA                                  | Ca_kabuli_denovo | 79801                   | C/G  | NA                 | NA                            | NA                 |
| Kabuli_wild_79803 | NA                                  | Ca_kabuli_denovo | 79803                   | T/G  | NA                 | NA                            | NA                 |
| Kabuli_wild_80233 | NA                                  | Ca_kabuli_denovo | 80233                   | T/G  | NA                 | NA                            | NA                 |
| Kabuli_wild_80291 | NA                                  | Ca_kabuli_denovo | 80291                   | T/G  | NA                 | NA                            | NA                 |
| Kabuli_wild_80310 | NA                                  | Ca_kabuli_denovo | 80310                   | C/T  | NA                 | NA                            | NA                 |
| Kabuli_wild_80312 | NA                                  | Ca_kabuli_denovo | 80312                   | T/A  | NA                 | NA                            | NA                 |
| Kabuli_wild_80313 | NA                                  | Ca_kabuli_denovo | 80313                   | C/T  | NA                 | NA                            | NA                 |
| Kabuli_wild_80315 | NA                                  | Ca_kabuli_denovo | 80315                   | T/C  | NA                 | NA                            | NA                 |
| Kabuli_wild_80397 | NA                                  | Ca_kabuli_denovo | 80397                   | A/C  | NA                 | NA                            | NA                 |
| Kabuli_wild_80398 | NA                                  | Ca_kabuli_denovo | 80398                   | T/C  | NA                 | NA                            | NA                 |
| Kabuli_wild_80400 | NA                                  | Ca_kabuli_denovo | 80400                   | C/A  | NA                 | NA                            | NA                 |
| Kabuli_wild_80401 | NA                                  | Ca_kabuli_denovo | 80401                   | G/C  | NA                 | NA                            | NA                 |
| Kabuli_wild_80402 | NA                                  | Ca_kabuli_denovo | 80402                   | A/G  | NA                 | NA                            | NA                 |
| Kabuli_wild_80403 | NA                                  | Ca_kabuli_denovo | 80403                   | C/A  | NA                 | NA                            | NA                 |
| Kabuli_wild_80404 | NA                                  | Ca_kabuli_denovo | 80404                   | C/G  | NA                 | NA                            | NA                 |
| Kabuli_wild_80405 | NA                                  | Ca_kabuli_denovo | 80405                   | G/A  | NA                 | NA                            | NA                 |
| Kabuli_wild_80578 | NA                                  | Ca_kabuli_denovo | 80578                   | A/G  | NA                 | NA                            | NA                 |
| Kabuli_wild_80580 | NA                                  | Ca_kabuli_denovo | 80580                   | G/A  | NA                 | NA                            | NA                 |
| Kabuli_wild_80915 | NA                                  | Ca_kabuli_denovo | 80915                   | A/G  | NA                 | NA                            | NA                 |
| Kabuli_wild_81175 | NA                                  | Ca_kabuli_denovo | 81175                   | A/C  | NA                 | NA                            | NA                 |
| Kabuli_wild_81176 | NA                                  | Ca_kabuli_denovo | 81176                   | A/G  | NA                 | NA                            | NA                 |
| Kabuli_wild_81177 | NA                                  | Ca_kabuli_denovo | 81177                   | G/C  | NA                 | NA                            | NA                 |
| Kabuli_wild_81178 | NA                                  | Ca_kabuli_denovo | 81178                   | G/A  | NA                 | NA                            | NA                 |
| Kabuli_wild_81179 | NA                                  | Ca_kabuli_denovo | 81179                   | A/G  | NA                 | NA                            | NA                 |
| Kabuli_wild_82611 | NA                                  | Ca_kabuli_denovo | 82611                   | G/A  | NA                 | NA                            | NA                 |
| Kabuli_wild_82613 | NA                                  | Ca_kabuli_denovo | 82613                   | G/A  | NA                 | NA                            | NA                 |
| Kabuli_wild_82614 | NA                                  | Ca_kabuli_denovo | 82614                   | A/G  | NA                 | NA                            | NA                 |
| Kabuli_wild_84622 | NA                                  | Ca_kabuli_denovo | 84622                   | A/T  | NA                 | NA                            | NA                 |
| Kabuli_wild_84629 | NA                                  | Ca_kabuli_denovo | 84629                   | C/A  | NA                 | NA                            | NA                 |
| Kabuli_wild_86338 | NA                                  | Ca_kabuli_denovo | 86338                   | G/C  | NA                 | NA                            | NA                 |
| Kabuli_wild_89330 | NA                                  | Ca_kabuli_denovo | 89330                   | T/G  | NA                 | NA                            | NA                 |
| Kabuli_wild_89331 | NA                                  | Ca_kabuli_denovo | 89331                   | G/A  | NA                 | NA                            | NA                 |
| Kabuli_wild_89332 | NA                                  | Ca_kabuli_denovo | 89332                   | C/G  | NA                 | NA                            | NA                 |
| Kabuli_wild_89334 | NA                                  | Ca_kabuli_denovo | 89334                   | G/C  | NA                 | NA                            | NA                 |
| Kabuli_wild_89335 | NA                                  | Ca_kabuli_denovo | 89335                   | T/G  | NA                 | NA                            | NA                 |
| Kabuli_wild_89669 | NA                                  | Ca_kabuli_denovo | 89669                   | A/G  | NA                 | NA                            | NA                 |
| Kabuli_wild_89699 | NA                                  | Ca_kabuli_denovo | 89699                   | T/C  | NA                 | NA                            | NA                 |
| Kabuli_wild_89996 | NA                                  | Ca_kabuli_denovo | 89996                   | A/C  | NA                 | NA                            | NA                 |
| Kabuli_wild_89997 | NA                                  | Ca_kabuli_denovo | 89997                   | G/C  | NA                 | NA                            | NA                 |
| Kabuli_wild_90000 | NA                                  | Ca_kabuli_denovo | 90000                   | G/A  | NA                 | NA                            | NA                 |

| SNP IDs            | NCBI dbSNP accession IDs (NCBI_SS#) | Chromosomes      | Physical positions (bp) | SNPs | Gene accession IDs | Sequence components of genome | Putative functions |
|--------------------|-------------------------------------|------------------|-------------------------|------|--------------------|-------------------------------|--------------------|
| Kabuli_wild_90769  | NA                                  | Ca_kabuli_denovo | 90769                   | C/G  | NA                 | NA                            | NA                 |
| Kabuli_wild_90771  | NA                                  | Ca_kabuli_denovo | 90771                   | T/G  | NA                 | NA                            | NA                 |
| Kabuli_wild_90773  | NA                                  | Ca_kabuli_denovo | 90773                   | C/T  | NA                 | NA                            | NA                 |
| Kabuli_wild_91259  | NA                                  | Ca_kabuli_denovo | 91259                   | G/C  | NA                 | NA                            | NA                 |
| Kabuli_wild_91260  | NA                                  | Ca_kabuli_denovo | 91260                   | A/C  | NA                 | NA                            | NA                 |
| Kabuli_wild_91261  | NA                                  | Ca_kabuli_denovo | 91261                   | G/A  | NA                 | NA                            | NA                 |
| Kabuli_wild_91361  | NA                                  | Ca_kabuli_denovo | 91361                   | C/A  | NA                 | NA                            | NA                 |
| Kabuli_wild_91363  | NA                                  | Ca_kabuli_denovo | 91363                   | C/G  | NA                 | NA                            | NA                 |
| Kabuli_wild_91479  | NA                                  | Ca_kabuli_denovo | 91479                   | C/A  | NA                 | NA                            | NA                 |
| Kabuli_wild_91488  | NA                                  | Ca_kabuli_denovo | 91488                   | C/G  | NA                 | NA                            | NA                 |
| Kabuli_wild_91504  | NA                                  | Ca_kabuli_denovo | 91504                   | T/G  | NA                 | NA                            | NA                 |
| Kabuli_wild_91511  | NA                                  | Ca_kabuli_denovo | 91511                   | G/A  | NA                 | NA                            | NA                 |
| Kabuli_wild_91560  | NA                                  | Ca_kabuli_denovo | 91560                   | A/T  | NA                 | NA                            | NA                 |
| Kabuli_wild_91562  | NA                                  | Ca_kabuli_denovo | 91562                   | T/C  | NA                 | NA                            | NA                 |
| Kabuli_wild_91563  | NA                                  | Ca_kabuli_denovo | 91563                   | C/G  | NA                 | NA                            | NA                 |
| Kabuli_wild_91564  | NA                                  | Ca_kabuli_denovo | 91564                   | G/A  | NA                 | NA                            | NA                 |
| Kabuli_wild_91566  | NA                                  | Ca_kabuli_denovo | 91566                   | A/C  | NA                 | NA                            | NA                 |
| Kabuli_wild_91757  | NA                                  | Ca_kabuli_denovo | 91757                   | A/C  | NA                 | NA                            | NA                 |
| Kabuli_wild_92509  | NA                                  | Ca_kabuli_denovo | 92509                   | A/G  | NA                 | NA                            | NA                 |
| Kabuli_wild_92517  | NA                                  | Ca_kabuli_denovo | 92517                   | T/C  | NA                 | NA                            | NA                 |
| Kabuli_wild_93920  | NA                                  | Ca_kabuli_denovo | 93920                   | A/C  | NA                 | NA                            | NA                 |
| Kabuli_wild_94176  | NA                                  | Ca_kabuli_denovo | 94176                   | A/G  | NA                 | NA                            | NA                 |
| Kabuli_wild_94178  | NA                                  | Ca_kabuli_denovo | 94178                   | G/A  | NA                 | NA                            | NA                 |
| Kabuli_wild_94180  | NA                                  | Ca_kabuli_denovo | 94180                   | T/A  | NA                 | NA                            | NA                 |
| Kabuli_wild_94181  | NA                                  | Ca_kabuli_denovo | 94181                   | G/T  | NA                 | NA                            | NA                 |
| Kabuli_wild_94182  | NA                                  | Ca_kabuli_denovo | 94182                   | C/G  | NA                 | NA                            | NA                 |
| Kabuli_wild_95893  | NA                                  | Ca_kabuli_denovo | 95893                   | A/T  | NA                 | NA                            | NA                 |
| Kabuli_wild_95899  | NA                                  | Ca_kabuli_denovo | 95899                   | A/T  | NA                 | NA                            | NA                 |
| Kabuli_wild_96357  | NA                                  | Ca_kabuli_denovo | 96357                   | G/A  | NA                 | NA                            | NA                 |
| Kabuli_wild_99579  | NA                                  | Ca_kabuli_denovo | 99579                   | G/A  | NA                 | NA                            | NA                 |
| Kabuli_wild_99581  | NA                                  | Ca_kabuli_denovo | 99581                   | G/A  | NA                 | NA                            | NA                 |
| Kabuli_wild_99582  | NA                                  | Ca_kabuli_denovo | 99582                   | A/G  | NA                 | NA                            | NA                 |
| Kabuli_wild_99870  | NA                                  | Ca_kabuli_denovo | 99870                   | A/G  | NA                 | NA                            | NA                 |
| Kabuli_wild_100893 | NA                                  | Ca_kabuli_denovo | 100893                  | C/T  | NA                 | NA                            | NA                 |
| Kabuli_wild_101088 | NA                                  | Ca_kabuli_denovo | 101088                  | A/G  | NA                 | NA                            | NA                 |
| Kabuli_wild_101133 | NA                                  | Ca_kabuli_denovo | 101133                  | A/G  | NA                 | NA                            | NA                 |
| Kabuli_wild_101136 | NA                                  | Ca_kabuli_denovo | 101136                  | C/T  | NA                 | NA                            | NA                 |
| Kabuli_wild_101142 | NA                                  | Ca_kabuli_denovo | 101142                  | C/T  | NA                 | NA                            | NA                 |
| Kabuli_wild_101892 | NA                                  | Ca_kabuli_denovo | 101892                  | G/A  | NA                 | NA                            | NA                 |
| Kabuli_wild_102220 | NA                                  | Ca_kabuli_denovo | 102220                  | G/A  | NA                 | NA                            | NA                 |
| Kabuli_wild_102222 | NA                                  | Ca_kabuli_denovo | 102222                  | G/A  | NA                 | NA                            | NA                 |
| Kabuli_wild_102591 | NA                                  | Ca_kabuli_denovo | 102591                  | C/T  | NA                 | NA                            | NA                 |
| Kabuli_wild_102606 | NA                                  | Ca_kabuli_denovo | 102606                  | A/T  | NA                 | NA                            | NA                 |
| Kabuli_wild_102615 | NA                                  | Ca_kabuli_denovo | 102615                  | A/G  | NA                 | NA                            | NA                 |



| SNP IDs            | NCBI dbSNP accession IDs (NCBI_SS#) | Chromosomes      | Physical positions (bp) | SNPs | Gene accession IDs | Sequence components of genome | Putative functions |
|--------------------|-------------------------------------|------------------|-------------------------|------|--------------------|-------------------------------|--------------------|
| Kabuli_wild_102934 | NA                                  | Ca_kabuli_denovo | 102934                  | A/G  | NA                 | NA                            | NA                 |
| Kabuli_wild_102946 | NA                                  | Ca_kabuli_denovo | 102946                  | A/G  | NA                 | NA                            | NA                 |
| Kabuli_wild_102949 | NA                                  | Ca_kabuli_denovo | 102949                  | A/G  | NA                 | NA                            | NA                 |
| Kabuli_wild_102950 | NA                                  | Ca_kabuli_denovo | 102950                  | A/G  | NA                 | NA                            | NA                 |
| Kabuli_wild_102967 | NA                                  | Ca_kabuli_denovo | 102967                  | A/G  | NA                 | NA                            | NA                 |
| Kabuli_wild_102978 | NA                                  | Ca_kabuli_denovo | 102978                  | T/A  | NA                 | NA                            | NA                 |
| Kabuli_wild_102980 | NA                                  | Ca_kabuli_denovo | 102980                  | A/C  | NA                 | NA                            | NA                 |
| Kabuli_wild_103874 | NA                                  | Ca_kabuli_denovo | 103874                  | C/A  | NA                 | NA                            | NA                 |
| Kabuli_wild_103875 | NA                                  | Ca_kabuli_denovo | 103875                  | A/G  | NA                 | NA                            | NA                 |
| Kabuli_wild_103876 | NA                                  | Ca_kabuli_denovo | 103876                  | G/C  | NA                 | NA                            | NA                 |
| Kabuli_wild_106080 | NA                                  | Ca_kabuli_denovo | 106080                  | A/T  | NA                 | NA                            | NA                 |
| Kabuli_wild_106191 | NA                                  | Ca_kabuli_denovo | 106191                  | G/A  | NA                 | NA                            | NA                 |
| Kabuli_wild_106526 | NA                                  | Ca_kabuli_denovo | 106526                  | C/A  | NA                 | NA                            | NA                 |
| Kabuli_wild_106547 | NA                                  | Ca_kabuli_denovo | 106547                  | A/G  | NA                 | NA                            | NA                 |
| Kabuli_wild_106557 | NA                                  | Ca_kabuli_denovo | 106557                  | G/T  | NA                 | NA                            | NA                 |
| Kabuli_wild_107470 | NA                                  | Ca_kabuli_denovo | 107470                  | A/G  | NA                 | NA                            | NA                 |
| Kabuli_wild_107471 | NA                                  | Ca_kabuli_denovo | 107471                  | C/G  | NA                 | NA                            | NA                 |
| Kabuli_wild_107474 | NA                                  | Ca_kabuli_denovo | 107474                  | G/A  | NA                 | NA                            | NA                 |
| Kabuli_wild_108101 | NA                                  | Ca_kabuli_denovo | 108101                  | C/G  | NA                 | NA                            | NA                 |
| Kabuli_wild_108115 | NA                                  | Ca_kabuli_denovo | 108115                  | A/T  | NA                 | NA                            | NA                 |
| Kabuli_wild_109445 | NA                                  | Ca_kabuli_denovo | 109445                  | C/T  | NA                 | NA                            | NA                 |
| Kabuli_wild_110173 | NA                                  | Ca_kabuli_denovo | 110173                  | G/C  | NA                 | NA                            | NA                 |
| Kabuli_wild_110174 | NA                                  | Ca_kabuli_denovo | 110174                  | G/C  | NA                 | NA                            | NA                 |
| Kabuli_wild_110175 | NA                                  | Ca_kabuli_denovo | 110175                  | A/G  | NA                 | NA                            | NA                 |
| Kabuli_wild_110280 | NA                                  | Ca_kabuli_denovo | 110280                  | G/T  | NA                 | NA                            | NA                 |
| Kabuli_wild_110281 | NA                                  | Ca_kabuli_denovo | 110281                  | A/C  | NA                 | NA                            | NA                 |
| Kabuli_wild_110284 | NA                                  | Ca_kabuli_denovo | 110284                  | G/T  | NA                 | NA                            | NA                 |
| Kabuli_wild_112024 | NA                                  | Ca_kabuli_denovo | 112024                  | G/T  | NA                 | NA                            | NA                 |
| Kabuli_wild_112688 | NA                                  | Ca_kabuli_denovo | 112688                  | T/C  | NA                 | NA                            | NA                 |
| Kabuli_wild_112689 | NA                                  | Ca_kabuli_denovo | 112689                  | T/A  | NA                 | NA                            | NA                 |
| Kabuli_wild_112690 | NA                                  | Ca_kabuli_denovo | 112690                  | G/C  | NA                 | NA                            | NA                 |
| Kabuli_wild_112721 | NA                                  | Ca_kabuli_denovo | 112721                  | C/T  | NA                 | NA                            | NA                 |
| Kabuli_wild_112851 | NA                                  | Ca_kabuli_denovo | 112851                  | G/A  | NA                 | NA                            | NA                 |
| Kabuli_wild_112900 | NA                                  | Ca_kabuli_denovo | 112900                  | A/G  | NA                 | NA                            | NA                 |
| Kabuli_wild_112998 | NA                                  | Ca_kabuli_denovo | 112998                  | C/A  | NA                 | NA                            | NA                 |
| Kabuli_wild_112999 | NA                                  | Ca_kabuli_denovo | 112999                  | A/G  | NA                 | NA                            | NA                 |
| Kabuli_wild_113001 | NA                                  | Ca_kabuli_denovo | 113001                  | A/G  | NA                 | NA                            | NA                 |
| Kabuli_wild_113003 | NA                                  | Ca_kabuli_denovo | 113003                  | T/A  | NA                 | NA                            | NA                 |
| Kabuli_wild_113270 | NA                                  | Ca_kabuli_denovo | 113270                  | T/C  | NA                 | NA                            | NA                 |
| Kabuli_wild_113271 | NA                                  | Ca_kabuli_denovo | 113271                  | T/A  | NA                 | NA                            | NA                 |
| Kabuli_wild_113272 | NA                                  | Ca_kabuli_denovo | 113272                  | C/G  | NA                 | NA                            | NA                 |
| Kabuli_wild_113273 | NA                                  | Ca_kabuli_denovo | 113273                  | G/A  | NA                 | NA                            | NA                 |
| Kabuli_wild_113596 | NA                                  | Ca_kabuli_denovo | 113596                  | C/G  | NA                 | NA                            | NA                 |
| Kabuli_wild_113597 | NA                                  | Ca_kabuli_denovo | 113597                  | G/A  | NA                 | NA                            | NA                 |

| SNP IDs            | NCBI dbSNP accession IDs (NCBI_SS#) | Chromosomes      | Physical positions (bp) | SNPs | Gene accession IDs | Sequence components of genome | Putative functions |
|--------------------|-------------------------------------|------------------|-------------------------|------|--------------------|-------------------------------|--------------------|
| Kabuli_wild_113604 | NA                                  | Ca_kabuli_denovo | 113604                  | A/G  | NA                 | NA                            | NA                 |
| Kabuli_wild_113608 | NA                                  | Ca_kabuli_denovo | 113608                  | T/C  | NA                 | NA                            | NA                 |
| Kabuli_wild_114646 | NA                                  | Ca_kabuli_denovo | 114646                  | T/C  | NA                 | NA                            | NA                 |
| Kabuli_wild_114735 | NA                                  | Ca_kabuli_denovo | 114735                  | G/A  | NA                 | NA                            | NA                 |
| Kabuli_wild_114737 | NA                                  | Ca_kabuli_denovo | 114737                  | G/A  | NA                 | NA                            | NA                 |
| Kabuli_wild_114738 | NA                                  | Ca_kabuli_denovo | 114738                  | A/G  | NA                 | NA                            | NA                 |
| Kabuli_wild_115065 | NA                                  | Ca_kabuli_denovo | 115065                  | A/G  | NA                 | NA                            | NA                 |
| Kabuli_wild_115095 | NA                                  | Ca_kabuli_denovo | 115095                  | C/T  | NA                 | NA                            | NA                 |
| Kabuli_wild_115561 | NA                                  | Ca_kabuli_denovo | 115561                  | G/T  | NA                 | NA                            | NA                 |
| Kabuli_wild_116190 | NA                                  | Ca_kabuli_denovo | 116190                  | C/G  | NA                 | NA                            | NA                 |
| Kabuli_wild_116192 | NA                                  | Ca_kabuli_denovo | 116192                  | T/G  | NA                 | NA                            | NA                 |
| Kabuli_wild_116194 | NA                                  | Ca_kabuli_denovo | 116194                  | C/T  | NA                 | NA                            | NA                 |
| Kabuli_wild_116291 | NA                                  | Ca_kabuli_denovo | 116291                  | G/C  | NA                 | NA                            | NA                 |
| Kabuli_wild_116293 | NA                                  | Ca_kabuli_denovo | 116293                  | C/G  | NA                 | NA                            | NA                 |
| Kabuli_wild_116294 | NA                                  | Ca_kabuli_denovo | 116294                  | G/A  | NA                 | NA                            | NA                 |
| Kabuli_wild_116295 | NA                                  | Ca_kabuli_denovo | 116295                  | G/A  | NA                 | NA                            | NA                 |
| Kabuli_wild_116296 | NA                                  | Ca_kabuli_denovo | 116296                  | A/G  | NA                 | NA                            | NA                 |
| Kabuli_wild_117553 | NA                                  | Ca_kabuli_denovo | 117553                  | G/A  | NA                 | NA                            | NA                 |
| Kabuli_wild_117554 | NA                                  | Ca_kabuli_denovo | 117554                  | A/T  | NA                 | NA                            | NA                 |
| Kabuli_wild_117555 | NA                                  | Ca_kabuli_denovo | 117555                  | G/C  | NA                 | NA                            | NA                 |
| Kabuli_wild_117556 | NA                                  | Ca_kabuli_denovo | 117556                  | T/A  | NA                 | NA                            | NA                 |
| Kabuli_wild_118119 | NA                                  | Ca_kabuli_denovo | 118119                  | C/G  | NA                 | NA                            | NA                 |
| Kabuli_wild_118121 | NA                                  | Ca_kabuli_denovo | 118121                  | T/G  | NA                 | NA                            | NA                 |
| Kabuli_wild_118123 | NA                                  | Ca_kabuli_denovo | 118123                  | C/T  | NA                 | NA                            | NA                 |
| Kabuli_wild_118765 | NA                                  | Ca_kabuli_denovo | 118765                  | G/T  | NA                 | NA                            | NA                 |
| Kabuli_wild_118821 | NA                                  | Ca_kabuli_denovo | 118821                  | T/G  | NA                 | NA                            | NA                 |
| Kabuli_wild_118953 | NA                                  | Ca_kabuli_denovo | 118953                  | C/T  | NA                 | NA                            | NA                 |
| Kabuli_wild_119004 | NA                                  | Ca_kabuli_denovo | 119004                  | C/T  | NA                 | NA                            | NA                 |
| Kabuli_wild_119926 | NA                                  | Ca_kabuli_denovo | 119926                  | G/T  | NA                 | NA                            | NA                 |
| Kabuli_wild_119927 | NA                                  | Ca_kabuli_denovo | 119927                  | G/T  | NA                 | NA                            | NA                 |
| Kabuli_wild_119938 | NA                                  | Ca_kabuli_denovo | 119938                  | C/T  | NA                 | NA                            | NA                 |
| Kabuli_wild_120245 | NA                                  | Ca_kabuli_denovo | 120245                  | A/T  | NA                 | NA                            | NA                 |
| Kabuli_wild_120568 | NA                                  | Ca_kabuli_denovo | 120568                  | G/C  | NA                 | NA                            | NA                 |
| Kabuli_wild_120569 | NA                                  | Ca_kabuli_denovo | 120569                  | A/G  | NA                 | NA                            | NA                 |
| Kabuli_wild_120570 | NA                                  | Ca_kabuli_denovo | 120570                  | G/A  | NA                 | NA                            | NA                 |
| Kabuli_wild_121696 | NA                                  | Ca_kabuli_denovo | 121696                  | G/T  | NA                 | NA                            | NA                 |
| Kabuli_wild_122412 | NA                                  | Ca_kabuli_denovo | 122412                  | A/T  | NA                 | NA                            | NA                 |
| Kabuli_wild_122413 | NA                                  | Ca_kabuli_denovo | 122413                  | C/T  | NA                 | NA                            | NA                 |
| Kabuli_wild_122415 | NA                                  | Ca_kabuli_denovo | 122415                  | C/T  | NA                 | NA                            | NA                 |
| Kabuli_wild_122455 | NA                                  | Ca_kabuli_denovo | 122455                  | G/T  | NA                 | NA                            | NA                 |
| Kabuli_wild_122499 | NA                                  | Ca_kabuli_denovo | 122499                  | A/G  | NA                 | NA                            | NA                 |
| Kabuli_wild_122509 | NA                                  | Ca_kabuli_denovo | 122509                  | A/T  | NA                 | NA                            | NA                 |
| Kabuli_wild_122693 | NA                                  | Ca_kabuli_denovo | 122693                  | C/G  | NA                 | NA                            | NA                 |
| Kabuli_wild_122694 | NA                                  | Ca_kabuli_denovo | 122694                  | G/A  | NA                 | NA                            | NA                 |

| SNP IDs            | NCBI dbSNP accession IDs (NCBI_SS#) | Chromosomes      | Physical positions (bp) | SNPs | Gene accession IDs | Sequence components of genome | Putative functions |
|--------------------|-------------------------------------|------------------|-------------------------|------|--------------------|-------------------------------|--------------------|
| Kabuli_wild_122695 | NA                                  | Ca_kabuli_denovo | 122695                  | A/T  | NA                 | NA                            | NA                 |
| Kabuli_wild_122696 | NA                                  | Ca_kabuli_denovo | 122696                  | G/C  | NA                 | NA                            | NA                 |
| Kabuli_wild_122700 | NA                                  | Ca_kabuli_denovo | 122700                  | T/G  | NA                 | NA                            | NA                 |
| Kabuli_wild_125798 | NA                                  | Ca_kabuli_denovo | 125798                  | C/G  | NA                 | NA                            | NA                 |
| Kabuli_wild_126384 | NA                                  | Ca_kabuli_denovo | 126384                  | C/G  | NA                 | NA                            | NA                 |
| Kabuli_wild_126386 | NA                                  | Ca_kabuli_denovo | 126386                  | A/G  | NA                 | NA                            | NA                 |
| Kabuli_wild_126399 | NA                                  | Ca_kabuli_denovo | 126399                  | A/G  | NA                 | NA                            | NA                 |
| Kabuli_wild_127263 | NA                                  | Ca_kabuli_denovo | 127263                  | A/G  | NA                 | NA                            | NA                 |
| Kabuli_wild_131860 | NA                                  | Ca_kabuli_denovo | 131860                  | A/C  | NA                 | NA                            | NA                 |
| Kabuli_wild_132788 | NA                                  | Ca_kabuli_denovo | 132788                  | G/T  | NA                 | NA                            | NA                 |
| Kabuli_wild_141155 | NA                                  | Ca_kabuli_denovo | 141155                  | G/A  | NA                 | NA                            | NA                 |
| Kabuli_wild_141159 | NA                                  | Ca_kabuli_denovo | 141159                  | C/T  | NA                 | NA                            | NA                 |
| Kabuli_wild_143177 | NA                                  | Ca_kabuli_denovo | 143177                  | C/G  | NA                 | NA                            | NA                 |
| Kabuli_wild_143197 | NA                                  | Ca_kabuli_denovo | 143197                  | T/G  | NA                 | NA                            | NA                 |
| Kabuli_wild_146033 | NA                                  | Ca_kabuli_denovo | 146033                  | G/A  | NA                 | NA                            | NA                 |
| Kabuli_wild_150126 | NA                                  | Ca_kabuli_denovo | 150126                  | A/G  | NA                 | NA                            | NA                 |
| Kabuli_wild_150647 | NA                                  | Ca_kabuli_denovo | 150647                  | A/T  | NA                 | NA                            | NA                 |
| Kabuli_wild_150651 | NA                                  | Ca_kabuli_denovo | 150651                  | T/G  | NA                 | NA                            | NA                 |
| Kabuli_wild_150653 | NA                                  | Ca_kabuli_denovo | 150653                  | T/C  | NA                 | NA                            | NA                 |
| Kabuli_wild_150654 | NA                                  | Ca_kabuli_denovo | 150654                  | C/T  | NA                 | NA                            | NA                 |
| Kabuli_wild_156218 | NA                                  | Ca_kabuli_denovo | 156218                  | A/G  | NA                 | NA                            | NA                 |
| Kabuli_wild_156242 | NA                                  | Ca_kabuli_denovo | 156242                  | C/T  | NA                 | NA                            | NA                 |
| Kabuli_wild_158419 | NA                                  | Ca_kabuli_denovo | 158419                  | T/G  | NA                 | NA                            | NA                 |
| Kabuli_wild_161264 | NA                                  | Ca_kabuli_denovo | 161264                  | T/A  | NA                 | NA                            | NA                 |
| Kabuli_wild_162806 | NA                                  | Ca_kabuli_denovo | 162806                  | A/T  | NA                 | NA                            | NA                 |
| Kabuli_wild_163643 | NA                                  | Ca_kabuli_denovo | 163643                  | A/G  | NA                 | NA                            | NA                 |
| Kabuli_wild_163645 | NA                                  | Ca_kabuli_denovo | 163645                  | C/A  | NA                 | NA                            | NA                 |
| Kabuli_wild_163675 | NA                                  | Ca_kabuli_denovo | 163675                  | T/G  | NA                 | NA                            | NA                 |
| Kabuli_wild_163694 | NA                                  | Ca_kabuli_denovo | 163694                  | C/A  | NA                 | NA                            | NA                 |
| Kabuli_wild_163822 | NA                                  | Ca_kabuli_denovo | 163822                  | C/G  | NA                 | NA                            | NA                 |
| Kabuli_wild_163829 | NA                                  | Ca_kabuli_denovo | 163829                  | T/G  | NA                 | NA                            | NA                 |
| Kabuli_wild_163837 | NA                                  | Ca_kabuli_denovo | 163837                  | T/G  | NA                 | NA                            | NA                 |
| Kabuli_wild_163867 | NA                                  | Ca_kabuli_denovo | 163867                  | C/T  | NA                 | NA                            | NA                 |
| Kabuli_wild_165976 | NA                                  | Ca_kabuli_denovo | 165976                  | C/G  | NA                 | NA                            | NA                 |
| Kabuli_wild_165977 | NA                                  | Ca_kabuli_denovo | 165977                  | G/C  | NA                 | NA                            | NA                 |
| Kabuli_wild_165978 | NA                                  | Ca_kabuli_denovo | 165978                  | G/A  | NA                 | NA                            | NA                 |
| Kabuli_wild_165979 | NA                                  | Ca_kabuli_denovo | 165979                  | G/T  | NA                 | NA                            | NA                 |
| Kabuli_wild_166437 | NA                                  | Ca_kabuli_denovo | 166437                  | A/T  | NA                 | NA                            | NA                 |
| Kabuli_wild_166679 | NA                                  | Ca_kabuli_denovo | 166679                  | T/A  | NA                 | NA                            | NA                 |
| Kabuli_wild_166688 | NA                                  | Ca_kabuli_denovo | 166688                  | A/G  | NA                 | NA                            | NA                 |
| Kabuli_wild_181783 | NA                                  | Ca_kabuli_denovo | 181783                  | C/T  | NA                 | NA                            | NA                 |
| Kabuli_wild_184575 | NA                                  | Ca_kabuli_denovo | 184575                  | A/T  | NA                 | NA                            | NA                 |
| Kabuli_wild_184591 | NA                                  | Ca_kabuli_denovo | 184591                  | A/T  | NA                 | NA                            | NA                 |
| Kabuli_wild_193893 | NA                                  | Ca_kabuli_denovo | 193893                  | G/A  | NA                 | NA                            | NA                 |

| SNP IDs            | NCBI dbSNP accession IDs (NCBI_SS#) | Chromosomes      | Physical positions (bp) | SNPs | Gene accession IDs | Sequence components of genome | Putative functions |
|--------------------|-------------------------------------|------------------|-------------------------|------|--------------------|-------------------------------|--------------------|
| Kabuli_wild_194147 | NA                                  | Ca_kabuli_denovo | 194147                  | A/G  | NA                 | NA                            | NA                 |
| Kabuli_wild_194182 | NA                                  | Ca_kabuli_denovo | 194182                  | C/T  | NA                 | NA                            | NA                 |
| Kabuli_wild_196294 | NA                                  | Ca_kabuli_denovo | 196294                  | C/T  | NA                 | NA                            | NA                 |
| Kabuli_wild_196410 | NA                                  | Ca_kabuli_denovo | 196410                  | C/G  | NA                 | NA                            | NA                 |
| Kabuli_wild_197018 | NA                                  | Ca_kabuli_denovo | 197018                  | C/A  | NA                 | NA                            | NA                 |
| Kabuli_wild_197037 | NA                                  | Ca_kabuli_denovo | 197037                  | A/C  | NA                 | NA                            | NA                 |
| Kabuli_wild_201540 | NA                                  | Ca_kabuli_denovo | 201540                  | A/C  | NA                 | NA                            | NA                 |
| Kabuli_wild_201598 | NA                                  | Ca_kabuli_denovo | 201598                  | C/G  | NA                 | NA                            | NA                 |
| Kabuli_wild_201599 | NA                                  | Ca_kabuli_denovo | 201599                  | A/G  | NA                 | NA                            | NA                 |
| Kabuli_wild_203384 | NA                                  | Ca_kabuli_denovo | 203384                  | A/G  | NA                 | NA                            | NA                 |
| Kabuli_wild_203434 | NA                                  | Ca_kabuli_denovo | 203434                  | G/C  | NA                 | NA                            | NA                 |
| Kabuli_wild_203438 | NA                                  | Ca_kabuli_denovo | 203438                  | C/G  | NA                 | NA                            | NA                 |
| Kabuli_wild_204801 | NA                                  | Ca_kabuli_denovo | 204801                  | G/A  | NA                 | NA                            | NA                 |
| Kabuli_wild_204819 | NA                                  | Ca_kabuli_denovo | 204819                  | A/T  | NA                 | NA                            | NA                 |
| Kabuli_wild_205835 | NA                                  | Ca_kabuli_denovo | 205835                  | A/C  | NA                 | NA                            | NA                 |
| Kabuli_wild_209072 | NA                                  | Ca_kabuli_denovo | 209072                  | G/A  | NA                 | NA                            | NA                 |
| Kabuli_wild_211159 | NA                                  | Ca_kabuli_denovo | 211159                  | C/G  | NA                 | NA                            | NA                 |
| Kabuli_wild_214397 | NA                                  | Ca_kabuli_denovo | 214397                  | T/G  | NA                 | NA                            | NA                 |
| Kabuli_wild_214439 | NA                                  | Ca_kabuli_denovo | 214439                  | C/T  | NA                 | NA                            | NA                 |
| Kabuli_wild_214478 | NA                                  | Ca_kabuli_denovo | 214478                  | A/C  | NA                 | NA                            | NA                 |
| Kabuli_wild_214479 | NA                                  | Ca_kabuli_denovo | 214479                  | C/T  | NA                 | NA                            | NA                 |
| Kabuli_wild_214903 | NA                                  | Ca_kabuli_denovo | 214903                  | C/G  | NA                 | NA                            | NA                 |
| Kabuli_wild_214909 | NA                                  | Ca_kabuli_denovo | 214909                  | A/G  | NA                 | NA                            | NA                 |
| Kabuli_wild_217301 | NA                                  | Ca_kabuli_denovo | 217301                  | C/T  | NA                 | NA                            | NA                 |
| Kabuli_wild_218131 | NA                                  | Ca_kabuli_denovo | 218131                  | G/T  | NA                 | NA                            | NA                 |
| Kabuli_wild_225646 | NA                                  | Ca_kabuli_denovo | 225646                  | A/G  | NA                 | NA                            | NA                 |
| Kabuli_wild_226586 | NA                                  | Ca_kabuli_denovo | 226586                  | A/G  | NA                 | NA                            | NA                 |
| Kabuli_wild_231023 | NA                                  | Ca_kabuli_denovo | 231023                  | C/T  | NA                 | NA                            | NA                 |
| Kabuli_wild_232826 | NA                                  | Ca_kabuli_denovo | 232826                  | T/G  | NA                 | NA                            | NA                 |
| Kabuli_wild_232848 | NA                                  | Ca_kabuli_denovo | 232848                  | T/G  | NA                 | NA                            | NA                 |
| Kabuli_wild_232851 | NA                                  | Ca_kabuli_denovo | 232851                  | A/G  | NA                 | NA                            | NA                 |
| Kabuli_wild_232860 | NA                                  | Ca_kabuli_denovo | 232860                  | A/G  | NA                 | NA                            | NA                 |
| Kabuli_wild_232866 | NA                                  | Ca_kabuli_denovo | 232866                  | T/G  | NA                 | NA                            | NA                 |
| Kabuli_wild_232883 | NA                                  | Ca_kabuli_denovo | 232883                  | A/G  | NA                 | NA                            | NA                 |
| Kabuli_wild_232904 | NA                                  | Ca_kabuli_denovo | 232904                  | G/A  | NA                 | NA                            | NA                 |
| Kabuli_wild_236567 | NA                                  | Ca_kabuli_denovo | 236567                  | A/T  | NA                 | NA                            | NA                 |
| Kabuli_wild_237341 | NA                                  | Ca_kabuli_denovo | 237341                  | A/G  | NA                 | NA                            | NA                 |
| Kabuli_wild_237342 | NA                                  | Ca_kabuli_denovo | 237342                  | T/G  | NA                 | NA                            | NA                 |
| Kabuli_wild_237344 | NA                                  | Ca_kabuli_denovo | 237344                  | T/G  | NA                 | NA                            | NA                 |
| Kabuli_wild_237391 | NA                                  | Ca_kabuli_denovo | 237391                  | C/G  | NA                 | NA                            | NA                 |
| Kabuli_wild_237395 | NA                                  | Ca_kabuli_denovo | 237395                  | T/G  | NA                 | NA                            | NA                 |
| Kabuli_wild_237932 | NA                                  | Ca_kabuli_denovo | 237932                  | C/T  | NA                 | NA                            | NA                 |
| Kabuli_wild_237938 | NA                                  | Ca_kabuli_denovo | 237938                  | T/C  | NA                 | NA                            | NA                 |
| Kabuli_wild_238883 | NA                                  | Ca_kabuli_denovo | 238883                  | A/G  | NA                 | NA                            | NA                 |

| SNP IDs            | NCBI dbSNP accession IDs (NCBI_SS#) | Chromosomes      | Physical positions (bp) | SNPs | Gene accession IDs | Sequence components of genome | Putative functions |
|--------------------|-------------------------------------|------------------|-------------------------|------|--------------------|-------------------------------|--------------------|
| Kabuli_wild_238884 | NA                                  | Ca_kabuli_denovo | 238884                  | T/A  | NA                 | NA                            | NA                 |
| Kabuli_wild_238926 | NA                                  | Ca_kabuli_denovo | 238926                  | T/C  | NA                 | NA                            | NA                 |
| Kabuli_wild_239377 | NA                                  | Ca_kabuli_denovo | 239377                  | C/T  | NA                 | NA                            | NA                 |
| Kabuli_wild_240900 | NA                                  | Ca_kabuli_denovo | 240900                  | C/T  | NA                 | NA                            | NA                 |
| Kabuli_wild_240912 | NA                                  | Ca_kabuli_denovo | 240912                  | A/G  | NA                 | NA                            | NA                 |
| Kabuli_wild_241758 | NA                                  | Ca_kabuli_denovo | 241758                  | A/G  | NA                 | NA                            | NA                 |
| Kabuli_wild_241781 | NA                                  | Ca_kabuli_denovo | 241781                  | A/G  | NA                 | NA                            | NA                 |
| Kabuli_wild_241802 | NA                                  | Ca_kabuli_denovo | 241802                  | A/G  | NA                 | NA                            | NA                 |
| Kabuli_wild_241803 | NA                                  | Ca_kabuli_denovo | 241803                  | T/G  | NA                 | NA                            | NA                 |
| Kabuli_wild_259420 | NA                                  | Ca_kabuli_denovo | 259420                  | G/T  | NA                 | NA                            | NA                 |
| Kabuli_wild_268131 | NA                                  | Ca_kabuli_denovo | 268131                  | C/G  | NA                 | NA                            | NA                 |
| Kabuli_wild_271599 | NA                                  | Ca_kabuli_denovo | 271599                  | T/C  | NA                 | NA                            | NA                 |
| Kabuli_wild_271601 | NA                                  | Ca_kabuli_denovo | 271601                  | A/C  | NA                 | NA                            | NA                 |
| Kabuli_wild_271602 | NA                                  | Ca_kabuli_denovo | 271602                  | G/C  | NA                 | NA                            | NA                 |
| Kabuli_wild_271604 | NA                                  | Ca_kabuli_denovo | 271604                  | C/T  | NA                 | NA                            | NA                 |
| Kabuli_wild_275581 | NA                                  | Ca_kabuli_denovo | 275581                  | C/T  | NA                 | NA                            | NA                 |
| Kabuli_wild_277504 | NA                                  | Ca_kabuli_denovo | 277504                  | G/A  | NA                 | NA                            | NA                 |
| Kabuli_wild_284674 | NA                                  | Ca_kabuli_denovo | 284674                  | G/C  | NA                 | NA                            | NA                 |
| Kabuli_wild_285317 | NA                                  | Ca_kabuli_denovo | 285317                  | T/G  | NA                 | NA                            | NA                 |
| Kabuli_wild_285321 | NA                                  | Ca_kabuli_denovo | 285321                  | G/C  | NA                 | NA                            | NA                 |
| Kabuli_wild_285323 | NA                                  | Ca_kabuli_denovo | 285323                  | A/G  | NA                 | NA                            | NA                 |
| Kabuli_wild_285324 | NA                                  | Ca_kabuli_denovo | 285324                  | T/G  | NA                 | NA                            | NA                 |
| Kabuli_wild_286658 | NA                                  | Ca_kabuli_denovo | 286658                  | A/G  | NA                 | NA                            | NA                 |
| Kabuli_wild_287098 | NA                                  | Ca_kabuli_denovo | 287098                  | C/G  | NA                 | NA                            | NA                 |
| Kabuli_wild_291393 | NA                                  | Ca_kabuli_denovo | 291393                  | C/T  | NA                 | NA                            | NA                 |
| Kabuli_wild_293253 | NA                                  | Ca_kabuli_denovo | 293253                  | T/C  | NA                 | NA                            | NA                 |
| Kabuli_wild_297725 | NA                                  | Ca_kabuli_denovo | 297725                  | C/G  | NA                 | NA                            | NA                 |
| Kabuli_wild_297732 | NA                                  | Ca_kabuli_denovo | 297732                  | T/C  | NA                 | NA                            | NA                 |
| Kabuli_wild_297736 | NA                                  | Ca_kabuli_denovo | 297736                  | T/A  | NA                 | NA                            | NA                 |
| Kabuli_wild_301466 | NA                                  | Ca_kabuli_denovo | 301466                  | A/T  | NA                 | NA                            | NA                 |
| Kabuli_wild_301469 | NA                                  | Ca_kabuli_denovo | 301469                  | A/G  | NA                 | NA                            | NA                 |
| Kabuli_wild_301471 | NA                                  | Ca_kabuli_denovo | 301471                  | G/A  | NA                 | NA                            | NA                 |
| Kabuli_wild_301483 | NA                                  | Ca_kabuli_denovo | 301483                  | G/C  | NA                 | NA                            | NA                 |
| Kabuli_wild_301500 | NA                                  | Ca_kabuli_denovo | 301500                  | G/C  | NA                 | NA                            | NA                 |
| Kabuli_wild_301505 | NA                                  | Ca_kabuli_denovo | 301505                  | T/C  | NA                 | NA                            | NA                 |
| Kabuli_wild_303473 | NA                                  | Ca_kabuli_denovo | 303473                  | A/C  | NA                 | NA                            | NA                 |
| Kabuli_wild_308982 | NA                                  | Ca_kabuli_denovo | 308982                  | C/T  | NA                 | NA                            | NA                 |
| Kabuli_wild_308998 | NA                                  | Ca_kabuli_denovo | 308998                  | C/G  | NA                 | NA                            | NA                 |
| Kabuli_wild_310994 | NA                                  | Ca_kabuli_denovo | 310994                  | A/G  | NA                 | NA                            | NA                 |
| Kabuli_wild_311012 | NA                                  | Ca_kabuli_denovo | 311012                  | A/C  | NA                 | NA                            | NA                 |
| Kabuli_wild_312039 | NA                                  | Ca_kabuli_denovo | 312039                  | A/T  | NA                 | NA                            | NA                 |
| Kabuli_wild_312042 | NA                                  | Ca_kabuli_denovo | 312042                  | C/T  | NA                 | NA                            | NA                 |
| Kabuli_wild_312079 | NA                                  | Ca_kabuli_denovo | 312079                  | C/T  | NA                 | NA                            | NA                 |
| Kabuli_wild_313570 | NA                                  | Ca_kabuli_denovo | 313570                  | C/T  | NA                 | NA                            | NA                 |

| SNP IDs            | NCBI dbSNP accession IDs (NCBI_SS#) | Chromosomes      | Physical positions (bp) | SNPs | Gene accession IDs | Sequence components of genome | Putative functions |
|--------------------|-------------------------------------|------------------|-------------------------|------|--------------------|-------------------------------|--------------------|
| Kabuli_wild_313588 | NA                                  | Ca_kabuli_denovo | 313588                  | G/C  | NA                 | NA                            | NA                 |
| Kabuli_wild_313675 | NA                                  | Ca_kabuli_denovo | 313675                  | C/G  | NA                 | NA                            | NA                 |
| Kabuli_wild_313698 | NA                                  | Ca_kabuli_denovo | 313698                  | T/C  | NA                 | NA                            | NA                 |
| Kabuli_wild_324909 | NA                                  | Ca_kabuli_denovo | 324909                  | A/T  | NA                 | NA                            | NA                 |
| Kabuli_wild_328835 | NA                                  | Ca_kabuli_denovo | 328835                  | A/G  | NA                 | NA                            | NA                 |
| Kabuli_wild_330556 | NA                                  | Ca_kabuli_denovo | 330556                  | C/G  | NA                 | NA                            | NA                 |
| Kabuli_wild_330589 | NA                                  | Ca_kabuli_denovo | 330589                  | C/G  | NA                 | NA                            | NA                 |
| Kabuli_wild_337488 | NA                                  | Ca_kabuli_denovo | 337488                  | C/A  | NA                 | NA                            | NA                 |
| Kabuli_wild_338913 | NA                                  | Ca_kabuli_denovo | 338913                  | C/T  | NA                 | NA                            | NA                 |
| Kabuli_wild_338925 | NA                                  | Ca_kabuli_denovo | 338925                  | T/C  | NA                 | NA                            | NA                 |
| Kabuli_wild_340835 | NA                                  | Ca_kabuli_denovo | 340835                  | G/A  | NA                 | NA                            | NA                 |
| Kabuli_wild_340845 | NA                                  | Ca_kabuli_denovo | 340845                  | C/A  | NA                 | NA                            | NA                 |
| Kabuli_wild_340869 | NA                                  | Ca_kabuli_denovo | 340869                  | C/G  | NA                 | NA                            | NA                 |
| Kabuli_wild_341411 | NA                                  | Ca_kabuli_denovo | 341411                  | A/G  | NA                 | NA                            | NA                 |
| Kabuli_wild_342969 | NA                                  | Ca_kabuli_denovo | 342969                  | T/A  | NA                 | NA                            | NA                 |
| Kabuli_wild_348658 | NA                                  | Ca_kabuli_denovo | 348658                  | T/G  | NA                 | NA                            | NA                 |
| Kabuli_wild_348676 | NA                                  | Ca_kabuli_denovo | 348676                  | C/A  | NA                 | NA                            | NA                 |
| Kabuli_wild_349820 | NA                                  | Ca_kabuli_denovo | 349820                  | T/C  | NA                 | NA                            | NA                 |
| Kabuli_wild_351585 | NA                                  | Ca_kabuli_denovo | 351585                  | C/T  | NA                 | NA                            | NA                 |
| Kabuli_wild_357662 | NA                                  | Ca_kabuli_denovo | 357662                  | T/C  | NA                 | NA                            | NA                 |
| Kabuli_wild_362829 | NA                                  | Ca_kabuli_denovo | 362829                  | A/C  | NA                 | NA                            | NA                 |
| Kabuli_wild_362830 | NA                                  | Ca_kabuli_denovo | 362830                  | C/G  | NA                 | NA                            | NA                 |
| Kabuli_wild_362831 | NA                                  | Ca_kabuli_denovo | 362831                  | C/T  | NA                 | NA                            | NA                 |
| Kabuli_wild_362833 | NA                                  | Ca_kabuli_denovo | 362833                  | G/A  | NA                 | NA                            | NA                 |
| Kabuli_wild_362854 | NA                                  | Ca_kabuli_denovo | 362854                  | C/A  | NA                 | NA                            | NA                 |
| Kabuli_wild_370590 | NA                                  | Ca_kabuli_denovo | 370590                  | T/C  | NA                 | NA                            | NA                 |
| Kabuli_wild_370595 | NA                                  | Ca_kabuli_denovo | 370595                  | A/G  | NA                 | NA                            | NA                 |
| Kabuli_wild_370596 | NA                                  | Ca_kabuli_denovo | 370596                  | T/C  | NA                 | NA                            | NA                 |
| Kabuli_wild_370605 | NA                                  | Ca_kabuli_denovo | 370605                  | A/T  | NA                 | NA                            | NA                 |
| Kabuli_wild_370609 | NA                                  | Ca_kabuli_denovo | 370609                  | T/C  | NA                 | NA                            | NA                 |
| Kabuli_wild_370615 | NA                                  | Ca_kabuli_denovo | 370615                  | T/C  | NA                 | NA                            | NA                 |
| Kabuli_wild_370623 | NA                                  | Ca_kabuli_denovo | 370623                  | C/G  | NA                 | NA                            | NA                 |
| Kabuli_wild_370624 | NA                                  | Ca_kabuli_denovo | 370624                  | A/G  | NA                 | NA                            | NA                 |
| Kabuli_wild_370625 | NA                                  | Ca_kabuli_denovo | 370625                  | G/A  | NA                 | NA                            | NA                 |
| Kabuli_wild_375027 | NA                                  | Ca_kabuli_denovo | 375027                  | C/T  | NA                 | NA                            | NA                 |
| Kabuli_wild_376170 | NA                                  | Ca_kabuli_denovo | 376170                  | G/T  | NA                 | NA                            | NA                 |
| Kabuli_wild_379130 | NA                                  | Ca_kabuli_denovo | 379130                  | A/G  | NA                 | NA                            | NA                 |
| Kabuli_wild_379135 | NA                                  | Ca_kabuli_denovo | 379135                  | C/G  | NA                 | NA                            | NA                 |
| Kabuli_wild_379164 | NA                                  | Ca_kabuli_denovo | 379164                  | C/T  | NA                 | NA                            | NA                 |
| Kabuli_wild_379166 | NA                                  | Ca_kabuli_denovo | 379166                  | T/C  | NA                 | NA                            | NA                 |
| Kabuli_wild_379766 | NA                                  | Ca_kabuli_denovo | 379766                  | C/A  | NA                 | NA                            | NA                 |
| Kabuli_wild_380603 | NA                                  | Ca_kabuli_denovo | 380603                  | A/C  | NA                 | NA                            | NA                 |
| Kabuli_wild_380777 | NA                                  | Ca_kabuli_denovo | 380777                  | A/G  | NA                 | NA                            | NA                 |
| Kabuli_wild_380780 | NA                                  | Ca_kabuli_denovo | 380780                  | T/C  | NA                 | NA                            | NA                 |

| SNP IDs            | NCBI dbSNP accession IDs (NCBI_SS#) | Chromosomes      | Physical positions (bp) | SNPs | Gene accession IDs | Sequence components of genome | Putative functions |
|--------------------|-------------------------------------|------------------|-------------------------|------|--------------------|-------------------------------|--------------------|
| Kabuli_wild_381119 | NA                                  | Ca_kabuli_denovo | 381119                  | A/C  | NA                 | NA                            | NA                 |
| Kabuli_wild_381157 | NA                                  | Ca_kabuli_denovo | 381157                  | A/G  | NA                 | NA                            | NA                 |
| Kabuli_wild_382204 | NA                                  | Ca_kabuli_denovo | 382204                  | G/A  | NA                 | NA                            | NA                 |
| Kabuli_wild_382288 | NA                                  | Ca_kabuli_denovo | 382288                  | T/A  | NA                 | NA                            | NA                 |
| Kabuli_wild_382351 | NA                                  | Ca_kabuli_denovo | 382351                  | C/A  | NA                 | NA                            | NA                 |
| Kabuli_wild_382352 | NA                                  | Ca_kabuli_denovo | 382352                  | A/T  | NA                 | NA                            | NA                 |
| Kabuli_wild_383813 | NA                                  | Ca_kabuli_denovo | 383813                  | A/G  | NA                 | NA                            | NA                 |
| Kabuli_wild_383815 | NA                                  | Ca_kabuli_denovo | 383815                  | A/G  | NA                 | NA                            | NA                 |
| Kabuli_wild_383817 | NA                                  | Ca_kabuli_denovo | 383817                  | T/A  | NA                 | NA                            | NA                 |
| Kabuli_wild_384241 | NA                                  | Ca_kabuli_denovo | 384241                  | A/G  | NA                 | NA                            | NA                 |
| Kabuli_wild_384242 | NA                                  | Ca_kabuli_denovo | 384242                  | G/A  | NA                 | NA                            | NA                 |
| Kabuli_wild_384243 | NA                                  | Ca_kabuli_denovo | 384243                  | T/G  | NA                 | NA                            | NA                 |
| Kabuli_wild_384463 | NA                                  | Ca_kabuli_denovo | 384463                  | A/G  | NA                 | NA                            | NA                 |
| Kabuli_wild_384618 | NA                                  | Ca_kabuli_denovo | 384618                  | A/C  | NA                 | NA                            | NA                 |
| Kabuli_wild_384647 | NA                                  | Ca_kabuli_denovo | 384647                  | T/G  | NA                 | NA                            | NA                 |
| Kabuli_wild_384657 | NA                                  | Ca_kabuli_denovo | 384657                  | G/A  | NA                 | NA                            | NA                 |
| Kabuli_wild_384712 | NA                                  | Ca_kabuli_denovo | 384712                  | C/A  | NA                 | NA                            | NA                 |
| Kabuli_wild_384739 | NA                                  | Ca_kabuli_denovo | 384739                  | A/G  | NA                 | NA                            | NA                 |
| Kabuli_wild_384929 | NA                                  | Ca_kabuli_denovo | 384929                  | C/A  | NA                 | NA                            | NA                 |
| Kabuli_wild_384975 | NA                                  | Ca_kabuli_denovo | 384975                  | A/G  | NA                 | NA                            | NA                 |
| Kabuli_wild_385830 | NA                                  | Ca_kabuli_denovo | 385830                  | A/T  | NA                 | NA                            | NA                 |
| Kabuli_wild_385834 | NA                                  | Ca_kabuli_denovo | 385834                  | G/T  | NA                 | NA                            | NA                 |
| Kabuli_wild_387643 | NA                                  | Ca_kabuli_denovo | 387643                  | G/C  | NA                 | NA                            | NA                 |
| Kabuli_wild_388141 | NA                                  | Ca_kabuli_denovo | 388141                  | G/C  | NA                 | NA                            | NA                 |
| Kabuli_wild_389629 | NA                                  | Ca_kabuli_denovo | 389629                  | G/T  | NA                 | NA                            | NA                 |
| Kabuli_wild_389723 | NA                                  | Ca_kabuli_denovo | 389723                  | G/T  | NA                 | NA                            | NA                 |
| Kabuli_wild_390060 | NA                                  | Ca_kabuli_denovo | 390060                  | T/G  | NA                 | NA                            | NA                 |
| Kabuli_wild_390076 | NA                                  | Ca_kabuli_denovo | 390076                  | T/G  | NA                 | NA                            | NA                 |
| Kabuli_wild_390101 | NA                                  | Ca_kabuli_denovo | 390101                  | G/A  | NA                 | NA                            | NA                 |
| Kabuli_wild_390108 | NA                                  | Ca_kabuli_denovo | 390108                  | C/G  | NA                 | NA                            | NA                 |
| Kabuli_wild_390134 | NA                                  | Ca_kabuli_denovo | 390134                  | T/G  | NA                 | NA                            | NA                 |
| Kabuli_wild_390143 | NA                                  | Ca_kabuli_denovo | 390143                  | C/A  | NA                 | NA                            | NA                 |
| Kabuli_wild_390364 | NA                                  | Ca_kabuli_denovo | 390364                  | T/G  | NA                 | NA                            | NA                 |
| Kabuli_wild_390367 | NA                                  | Ca_kabuli_denovo | 390367                  | T/G  | NA                 | NA                            | NA                 |
| Kabuli_wild_391149 | NA                                  | Ca_kabuli_denovo | 391149                  | C/T  | NA                 | NA                            | NA                 |
| Kabuli_wild_391220 | NA                                  | Ca_kabuli_denovo | 391220                  | A/G  | NA                 | NA                            | NA                 |
| Kabuli_wild_391238 | NA                                  | Ca_kabuli_denovo | 391238                  | A/G  | NA                 | NA                            | NA                 |
| Kabuli_wild_391327 | NA                                  | Ca_kabuli_denovo | 391327                  | A/G  | NA                 | NA                            | NA                 |
| Kabuli_wild_391339 | NA                                  | Ca_kabuli_denovo | 391339                  | T/G  | NA                 | NA                            | NA                 |
| Kabuli_wild_391806 | NA                                  | Ca_kabuli_denovo | 391806                  | G/T  | NA                 | NA                            | NA                 |
| Kabuli_wild_391807 | NA                                  | Ca_kabuli_denovo | 391807                  | C/G  | NA                 | NA                            | NA                 |
| Kabuli_wild_391814 | NA                                  | Ca_kabuli_denovo | 391814                  | A/G  | NA                 | NA                            | NA                 |
| Kabuli_wild_391825 | NA                                  | Ca_kabuli_denovo | 391825                  | C/G  | NA                 | NA                            | NA                 |
| Kabuli_wild_391832 | NA                                  | Ca_kabuli_denovo | 391832                  | A/G  | NA                 | NA                            | NA                 |

| SNP IDs            | NCBI dbSNP accession IDs (NCBI_SS#) | Chromosomes      | Physical positions (bp) | SNPs | Gene accession IDs | Sequence components of genome | Putative functions |
|--------------------|-------------------------------------|------------------|-------------------------|------|--------------------|-------------------------------|--------------------|
| Kabuli_wild_391844 | NA                                  | Ca_kabuli_denovo | 391844                  | A/C  | NA                 | NA                            | NA                 |
| Kabuli_wild_391846 | NA                                  | Ca_kabuli_denovo | 391846                  | A/G  | NA                 | NA                            | NA                 |
| Kabuli_wild_391855 | NA                                  | Ca_kabuli_denovo | 391855                  | T/A  | NA                 | NA                            | NA                 |
| Kabuli_wild_391857 | NA                                  | Ca_kabuli_denovo | 391857                  | G/A  | NA                 | NA                            | NA                 |
| Kabuli_wild_391889 | NA                                  | Ca_kabuli_denovo | 391889                  | A/G  | NA                 | NA                            | NA                 |
| Kabuli_wild_392542 | NA                                  | Ca_kabuli_denovo | 392542                  | G/T  | NA                 | NA                            | NA                 |
| Kabuli_wild_392864 | NA                                  | Ca_kabuli_denovo | 392864                  | A/G  | NA                 | NA                            | NA                 |
| Kabuli_wild_392893 | NA                                  | Ca_kabuli_denovo | 392893                  | A/G  | NA                 | NA                            | NA                 |
| Kabuli_wild_392911 | NA                                  | Ca_kabuli_denovo | 392911                  | T/G  | NA                 | NA                            | NA                 |
| Kabuli_wild_392949 | NA                                  | Ca_kabuli_denovo | 392949                  | G/C  | NA                 | NA                            | NA                 |
| Kabuli_wild_393438 | NA                                  | Ca_kabuli_denovo | 393438                  | C/G  | NA                 | NA                            | NA                 |
| Kabuli_wild_393457 | NA                                  | Ca_kabuli_denovo | 393457                  | G/A  | NA                 | NA                            | NA                 |
| Kabuli_wild_393498 | NA                                  | Ca_kabuli_denovo | 393498                  | G/A  | NA                 | NA                            | NA                 |
| Kabuli_wild_393514 | NA                                  | Ca_kabuli_denovo | 393514                  | G/T  | NA                 | NA                            | NA                 |
| Kabuli_wild_393521 | NA                                  | Ca_kabuli_denovo | 393521                  | A/G  | NA                 | NA                            | NA                 |
| Kabuli_wild_393711 | NA                                  | Ca_kabuli_denovo | 393711                  | G/T  | NA                 | NA                            | NA                 |
| Kabuli_wild_393712 | NA                                  | Ca_kabuli_denovo | 393712                  | A/C  | NA                 | NA                            | NA                 |
| Kabuli_wild_393758 | NA                                  | Ca_kabuli_denovo | 393758                  | A/G  | NA                 | NA                            | NA                 |
| Kabuli_wild_393764 | NA                                  | Ca_kabuli_denovo | 393764                  | A/G  | NA                 | NA                            | NA                 |
| Kabuli_wild_393767 | NA                                  | Ca_kabuli_denovo | 393767                  | T/G  | NA                 | NA                            | NA                 |
| Kabuli_wild_393775 | NA                                  | Ca_kabuli_denovo | 393775                  | T/G  | NA                 | NA                            | NA                 |
| Kabuli_wild_393784 | NA                                  | Ca_kabuli_denovo | 393784                  | C/A  | NA                 | NA                            | NA                 |
| Kabuli_wild_394075 | NA                                  | Ca_kabuli_denovo | 394075                  | G/A  | NA                 | NA                            | NA                 |
| Kabuli_wild_394093 | NA                                  | Ca_kabuli_denovo | 394093                  | A/G  | NA                 | NA                            | NA                 |
| Kabuli_wild_394094 | NA                                  | Ca_kabuli_denovo | 394094                  | C/A  | NA                 | NA                            | NA                 |
| Kabuli_wild_394095 | NA                                  | Ca_kabuli_denovo | 394095                  | C/T  | NA                 | NA                            | NA                 |
| Kabuli_wild_394096 | NA                                  | Ca_kabuli_denovo | 394096                  | G/C  | NA                 | NA                            | NA                 |
| Kabuli_wild_394097 | NA                                  | Ca_kabuli_denovo | 394097                  | A/T  | NA                 | NA                            | NA                 |
| Kabuli_wild_394098 | NA                                  | Ca_kabuli_denovo | 394098                  | T/C  | NA                 | NA                            | NA                 |
| Kabuli_wild_394377 | NA                                  | Ca_kabuli_denovo | 394377                  | G/C  | NA                 | NA                            | NA                 |
| Kabuli_wild_394708 | NA                                  | Ca_kabuli_denovo | 394708                  | T/G  | NA                 | NA                            | NA                 |
| Kabuli_wild_394727 | NA                                  | Ca_kabuli_denovo | 394727                  | T/G  | NA                 | NA                            | NA                 |
| Kabuli_wild_394747 | NA                                  | Ca_kabuli_denovo | 394747                  | G/A  | NA                 | NA                            | NA                 |
| Kabuli_wild_394766 | NA                                  | Ca_kabuli_denovo | 394766                  | A/G  | NA                 | NA                            | NA                 |
| Kabuli_wild_394826 | NA                                  | Ca_kabuli_denovo | 394826                  | A/C  | NA                 | NA                            | NA                 |
| Kabuli_wild_394996 | NA                                  | Ca_kabuli_denovo | 394996                  | A/G  | NA                 | NA                            | NA                 |
| Kabuli_wild_395179 | NA                                  | Ca_kabuli_denovo | 395179                  | A/C  | NA                 | NA                            | NA                 |
| Kabuli_wild_395195 | NA                                  | Ca_kabuli_denovo | 395195                  | G/T  | NA                 | NA                            | NA                 |
| Kabuli_wild_395227 | NA                                  | Ca_kabuli_denovo | 395227                  | G/T  | NA                 | NA                            | NA                 |
| Kabuli_wild_395247 | NA                                  | Ca_kabuli_denovo | 395247                  | A/C  | NA                 | NA                            | NA                 |
| Kabuli_wild_395259 | NA                                  | Ca_kabuli_denovo | 395259                  | T/G  | NA                 | NA                            | NA                 |
| Kabuli_wild_395320 | NA                                  | Ca_kabuli_denovo | 395320                  | A/T  | NA                 | NA                            | NA                 |
| Kabuli_wild_395495 | NA                                  | Ca_kabuli_denovo | 395495                  | T/G  | NA                 | NA                            | NA                 |
| Kabuli_wild_395506 | NA                                  | Ca_kabuli_denovo | 395506                  | G/C  | NA                 | NA                            | NA                 |



| SNP IDs            | NCBI dbSNP accession IDs (NCBI_SS#) | Chromosomes      | Physical positions (bp) | SNPs | Gene accession IDs | Sequence components of genome | Putative functions |
|--------------------|-------------------------------------|------------------|-------------------------|------|--------------------|-------------------------------|--------------------|
| Kabuli_wild_395515 | NA                                  | Ca_kabuli_denovo | 395515                  | T/G  | NA                 | NA                            | NA                 |
| Kabuli_wild_395538 | NA                                  | Ca_kabuli_denovo | 395538                  | G/C  | NA                 | NA                            | NA                 |
| Kabuli_wild_395539 | NA                                  | Ca_kabuli_denovo | 395539                  | C/T  | NA                 | NA                            | NA                 |
| Kabuli_wild_395540 | NA                                  | Ca_kabuli_denovo | 395540                  | T/C  | NA                 | NA                            | NA                 |
| Kabuli_wild_395632 | NA                                  | Ca_kabuli_denovo | 395632                  | G/T  | NA                 | NA                            | NA                 |
| Kabuli_wild_396268 | NA                                  | Ca_kabuli_denovo | 396268                  | C/G  | NA                 | NA                            | NA                 |
| Kabuli_wild_396334 | NA                                  | Ca_kabuli_denovo | 396334                  | C/A  | NA                 | NA                            | NA                 |
| Kabuli_wild_396340 | NA                                  | Ca_kabuli_denovo | 396340                  | T/A  | NA                 | NA                            | NA                 |
| Kabuli_wild_396353 | NA                                  | Ca_kabuli_denovo | 396353                  | A/G  | NA                 | NA                            | NA                 |
| Kabuli_wild_396355 | NA                                  | Ca_kabuli_denovo | 396355                  | G/A  | NA                 | NA                            | NA                 |
| Kabuli_wild_396367 | NA                                  | Ca_kabuli_denovo | 396367                  | T/G  | NA                 | NA                            | NA                 |
| Kabuli_wild_396509 | NA                                  | Ca_kabuli_denovo | 396509                  | T/G  | NA                 | NA                            | NA                 |
| Kabuli_wild_396579 | NA                                  | Ca_kabuli_denovo | 396579                  | C/T  | NA                 | NA                            | NA                 |
| Kabuli_wild_396605 | NA                                  | Ca_kabuli_denovo | 396605                  | T/G  | NA                 | NA                            | NA                 |
| Kabuli_wild_396670 | NA                                  | Ca_kabuli_denovo | 396670                  | A/G  | NA                 | NA                            | NA                 |
| Kabuli_wild_396683 | NA                                  | Ca_kabuli_denovo | 396683                  | T/A  | NA                 | NA                            | NA                 |
| Kabuli_wild_396712 | NA                                  | Ca_kabuli_denovo | 396712                  | A/C  | NA                 | NA                            | NA                 |
| Kabuli_wild_396808 | NA                                  | Ca_kabuli_denovo | 396808                  | C/A  | NA                 | NA                            | NA                 |
| Kabuli_wild_396847 | NA                                  | Ca_kabuli_denovo | 396847                  | T/G  | NA                 | NA                            | NA                 |
| Kabuli_wild_396967 | NA                                  | Ca_kabuli_denovo | 396967                  | C/G  | NA                 | NA                            | NA                 |
| Kabuli_wild_397067 | NA                                  | Ca_kabuli_denovo | 397067                  | A/C  | NA                 | NA                            | NA                 |
| Kabuli_wild_397574 | NA                                  | Ca_kabuli_denovo | 397574                  | A/G  | NA                 | NA                            | NA                 |
| Kabuli_wild_397584 | NA                                  | Ca_kabuli_denovo | 397584                  | C/A  | NA                 | NA                            | NA                 |
| Kabuli_wild_397695 | NA                                  | Ca_kabuli_denovo | 397695                  | G/A  | NA                 | NA                            | NA                 |
| Kabuli_wild_397855 | NA                                  | Ca_kabuli_denovo | 397855                  | A/T  | NA                 | NA                            | NA                 |
| Kabuli_wild_397902 | NA                                  | Ca_kabuli_denovo | 397902                  | G/T  | NA                 | NA                            | NA                 |
| Kabuli_wild_397951 | NA                                  | Ca_kabuli_denovo | 397951                  | T/G  | NA                 | NA                            | NA                 |
| Kabuli_wild_397963 | NA                                  | Ca_kabuli_denovo | 397963                  | G/T  | NA                 | NA                            | NA                 |
| Kabuli_wild_398000 | NA                                  | Ca_kabuli_denovo | 398000                  | A/G  | NA                 | NA                            | NA                 |
| Kabuli_wild_398266 | NA                                  | Ca_kabuli_denovo | 398266                  | T/G  | NA                 | NA                            | NA                 |
| Kabuli_wild_398321 | NA                                  | Ca_kabuli_denovo | 398321                  | T/A  | NA                 | NA                            | NA                 |
| Kabuli_wild_398397 | NA                                  | Ca_kabuli_denovo | 398397                  | C/G  | NA                 | NA                            | NA                 |
| Kabuli_wild_398398 | NA                                  | Ca_kabuli_denovo | 398398                  | C/A  | NA                 | NA                            | NA                 |
| Kabuli_wild_399659 | NA                                  | Ca_kabuli_denovo | 399659                  | C/G  | NA                 | NA                            | NA                 |
| Kabuli_wild_399661 | NA                                  | Ca_kabuli_denovo | 399661                  | A/G  | NA                 | NA                            | NA                 |
| Kabuli_wild_399662 | NA                                  | Ca_kabuli_denovo | 399662                  | T/G  | NA                 | NA                            | NA                 |
| Kabuli_wild_399784 | NA                                  | Ca_kabuli_denovo | 399784                  | C/G  | NA                 | NA                            | NA                 |
| Kabuli_wild_399793 | NA                                  | Ca_kabuli_denovo | 399793                  | A/T  | NA                 | NA                            | NA                 |
| Kabuli_wild_399985 | NA                                  | Ca_kabuli_denovo | 399985                  | G/C  | NA                 | NA                            | NA                 |
| Kabuli_wild_400020 | NA                                  | Ca_kabuli_denovo | 400020                  | G/A  | NA                 | NA                            | NA                 |
| Kabuli_wild_400063 | NA                                  | Ca_kabuli_denovo | 400063                  | A/G  | NA                 | NA                            | NA                 |
| Kabuli_wild_400072 | NA                                  | Ca_kabuli_denovo | 400072                  | A/G  | NA                 | NA                            | NA                 |
| Kabuli_wild_400144 | NA                                  | Ca_kabuli_denovo | 400144                  | T/G  | NA                 | NA                            | NA                 |
| Kabuli_wild_400273 | NA                                  | Ca_kabuli_denovo | 400273                  | G/T  | NA                 | NA                            | NA                 |

| SNP IDs            | NCBI dbSNP accession IDs (NCBI_SS#) | Chromosomes      | Physical positions (bp) | SNPs | Gene accession IDs | Sequence components of genome | Putative functions |
|--------------------|-------------------------------------|------------------|-------------------------|------|--------------------|-------------------------------|--------------------|
| Kabuli_wild_400346 | NA                                  | Ca_kabuli_denovo | 400346                  | A/T  | NA                 | NA                            | NA                 |
| Kabuli_wild_400373 | NA                                  | Ca_kabuli_denovo | 400373                  | A/C  | NA                 | NA                            | NA                 |
| Kabuli_wild_400817 | NA                                  | Ca_kabuli_denovo | 400817                  | C/T  | NA                 | NA                            | NA                 |
| Kabuli_wild_400821 | NA                                  | Ca_kabuli_denovo | 400821                  | A/C  | NA                 | NA                            | NA                 |
| Kabuli_wild_400999 | NA                                  | Ca_kabuli_denovo | 400999                  | G/T  | NA                 | NA                            | NA                 |
| Kabuli_wild_401000 | NA                                  | Ca_kabuli_denovo | 401000                  | A/C  | NA                 | NA                            | NA                 |
| Kabuli_wild_401212 | NA                                  | Ca_kabuli_denovo | 401212                  | T/G  | NA                 | NA                            | NA                 |
| Kabuli_wild_401232 | NA                                  | Ca_kabuli_denovo | 401232                  | G/T  | NA                 | NA                            | NA                 |
| Kabuli_wild_401247 | NA                                  | Ca_kabuli_denovo | 401247                  | A/G  | NA                 | NA                            | NA                 |
| Kabuli_wild_401264 | NA                                  | Ca_kabuli_denovo | 401264                  | A/G  | NA                 | NA                            | NA                 |
| Kabuli_wild_401281 | NA                                  | Ca_kabuli_denovo | 401281                  | T/A  | NA                 | NA                            | NA                 |
| Kabuli_wild_401284 | NA                                  | Ca_kabuli_denovo | 401284                  | C/A  | NA                 | NA                            | NA                 |
| Kabuli_wild_401968 | NA                                  | Ca_kabuli_denovo | 401968                  | C/G  | NA                 | NA                            | NA                 |
| Kabuli_wild_401971 | NA                                  | Ca_kabuli_denovo | 401971                  | G/T  | NA                 | NA                            | NA                 |
| Kabuli_wild_401972 | NA                                  | Ca_kabuli_denovo | 401972                  | C/G  | NA                 | NA                            | NA                 |
| Kabuli_wild_402175 | NA                                  | Ca_kabuli_denovo | 402175                  | C/G  | NA                 | NA                            | NA                 |
| Kabuli_wild_402215 | NA                                  | Ca_kabuli_denovo | 402215                  | T/G  | NA                 | NA                            | NA                 |
| Kabuli_wild_402352 | NA                                  | Ca_kabuli_denovo | 402352                  | G/A  | NA                 | NA                            | NA                 |
| Kabuli_wild_402670 | NA                                  | Ca_kabuli_denovo | 402670                  | C/A  | NA                 | NA                            | NA                 |
| Kabuli_wild_402746 | NA                                  | Ca_kabuli_denovo | 402746                  | T/G  | NA                 | NA                            | NA                 |
| Kabuli_wild_402811 | NA                                  | Ca_kabuli_denovo | 402811                  | T/C  | NA                 | NA                            | NA                 |
| Kabuli_wild_402817 | NA                                  | Ca_kabuli_denovo | 402817                  | T/C  | NA                 | NA                            | NA                 |
| Kabuli_wild_403570 | NA                                  | Ca_kabuli_denovo | 403570                  | A/G  | NA                 | NA                            | NA                 |
| Kabuli_wild_403572 | NA                                  | Ca_kabuli_denovo | 403572                  | G/A  | NA                 | NA                            | NA                 |
| Kabuli_wild_403573 | NA                                  | Ca_kabuli_denovo | 403573                  | A/G  | NA                 | NA                            | NA                 |
| Kabuli_wild_403575 | NA                                  | Ca_kabuli_denovo | 403575                  | C/G  | NA                 | NA                            | NA                 |
| Kabuli_wild_403577 | NA                                  | Ca_kabuli_denovo | 403577                  | T/G  | NA                 | NA                            | NA                 |
| Kabuli_wild_404794 | NA                                  | Ca_kabuli_denovo | 404794                  | G/A  | NA                 | NA                            | NA                 |
| Kabuli_wild_404796 | NA                                  | Ca_kabuli_denovo | 404796                  | G/A  | NA                 | NA                            | NA                 |
| Kabuli_wild_405997 | NA                                  | Ca_kabuli_denovo | 405997                  | A/G  | NA                 | NA                            | NA                 |
| Kabuli_wild_406427 | NA                                  | Ca_kabuli_denovo | 406427                  | G/C  | NA                 | NA                            | NA                 |
| Kabuli_wild_406509 | NA                                  | Ca_kabuli_denovo | 406509                  | A/C  | NA                 | NA                            | NA                 |
| Kabuli_wild_406575 | NA                                  | Ca_kabuli_denovo | 406575                  | C/T  | NA                 | NA                            | NA                 |
| Kabuli_wild_406578 | NA                                  | Ca_kabuli_denovo | 406578                  | T/C  | NA                 | NA                            | NA                 |
| Kabuli_wild_406613 | NA                                  | Ca_kabuli_denovo | 406613                  | G/T  | NA                 | NA                            | NA                 |
| Kabuli_wild_406619 | NA                                  | Ca_kabuli_denovo | 406619                  | G/T  | NA                 | NA                            | NA                 |
| Kabuli_wild_406634 | NA                                  | Ca_kabuli_denovo | 406634                  | T/C  | NA                 | NA                            | NA                 |
| Kabuli_wild_406651 | NA                                  | Ca_kabuli_denovo | 406651                  | T/G  | NA                 | NA                            | NA                 |
| Kabuli_wild_406709 | NA                                  | Ca_kabuli_denovo | 406709                  | T/C  | NA                 | NA                            | NA                 |
| Kabuli_wild_406712 | NA                                  | Ca_kabuli_denovo | 406712                  | A/G  | NA                 | NA                            | NA                 |
| Kabuli_wild_406813 | NA                                  | Ca_kabuli_denovo | 406813                  | G/T  | NA                 | NA                            | NA                 |
| Kabuli_wild_407005 | NA                                  | Ca_kabuli_denovo | 407005                  | C/G  | NA                 | NA                            | NA                 |
| Kabuli_wild_407101 | NA                                  | Ca_kabuli_denovo | 407101                  | G/T  | NA                 | NA                            | NA                 |
| Kabuli_wild_407131 | NA                                  | Ca_kabuli_denovo | 407131                  | T/A  | NA                 | NA                            | NA                 |

| SNP IDs            | NCBI dbSNP accession IDs (NCBI_SS#) | Chromosomes      | Physical positions (bp) | SNPs | Gene accession IDs | Sequence components of genome | Putative functions |
|--------------------|-------------------------------------|------------------|-------------------------|------|--------------------|-------------------------------|--------------------|
| Kabuli_wild_407144 | NA                                  | Ca_kabuli_denovo | 407144                  | C/G  | NA                 | NA                            | NA                 |
| Kabuli_wild_407150 | NA                                  | Ca_kabuli_denovo | 407150                  | C/G  | NA                 | NA                            | NA                 |
| Kabuli_wild_407359 | NA                                  | Ca_kabuli_denovo | 407359                  | C/A  | NA                 | NA                            | NA                 |
| Kabuli_wild_407389 | NA                                  | Ca_kabuli_denovo | 407389                  | T/G  | NA                 | NA                            | NA                 |
| Kabuli_wild_407416 | NA                                  | Ca_kabuli_denovo | 407416                  | G/C  | NA                 | NA                            | NA                 |
| Kabuli_wild_407419 | NA                                  | Ca_kabuli_denovo | 407419                  | T/G  | NA                 | NA                            | NA                 |
| Kabuli_wild_407420 | NA                                  | Ca_kabuli_denovo | 407420                  | T/A  | NA                 | NA                            | NA                 |
| Kabuli_wild_407427 | NA                                  | Ca_kabuli_denovo | 407427                  | G/T  | NA                 | NA                            | NA                 |
| Kabuli_wild_407611 | NA                                  | Ca_kabuli_denovo | 407611                  | T/G  | NA                 | NA                            | NA                 |
| Kabuli_wild_407867 | NA                                  | Ca_kabuli_denovo | 407867                  | A/G  | NA                 | NA                            | NA                 |
| Kabuli_wild_407912 | NA                                  | Ca_kabuli_denovo | 407912                  | C/T  | NA                 | NA                            | NA                 |
| Kabuli_wild_407931 | NA                                  | Ca_kabuli_denovo | 407931                  | C/G  | NA                 | NA                            | NA                 |
| Kabuli_wild_407957 | NA                                  | Ca_kabuli_denovo | 407957                  | G/T  | NA                 | NA                            | NA                 |
| Kabuli_wild_407965 | NA                                  | Ca_kabuli_denovo | 407965                  | T/G  | NA                 | NA                            | NA                 |
| Kabuli_wild_407972 | NA                                  | Ca_kabuli_denovo | 407972                  | A/G  | NA                 | NA                            | NA                 |
| Kabuli_wild_408068 | NA                                  | Ca_kabuli_denovo | 408068                  | G/C  | NA                 | NA                            | NA                 |
| Kabuli_wild_408141 | NA                                  | Ca_kabuli_denovo | 408141                  | A/G  | NA                 | NA                            | NA                 |
| Kabuli_wild_408220 | NA                                  | Ca_kabuli_denovo | 408220                  | C/G  | NA                 | NA                            | NA                 |
| Kabuli_wild_408237 | NA                                  | Ca_kabuli_denovo | 408237                  | A/G  | NA                 | NA                            | NA                 |
| Kabuli_wild_408245 | NA                                  | Ca_kabuli_denovo | 408245                  | G/T  | NA                 | NA                            | NA                 |
| Kabuli_wild_408260 | NA                                  | Ca_kabuli_denovo | 408260                  | A/G  | NA                 | NA                            | NA                 |
| Kabuli_wild_408278 | NA                                  | Ca_kabuli_denovo | 408278                  | A/T  | NA                 | NA                            | NA                 |
| Kabuli_wild_408321 | NA                                  | Ca_kabuli_denovo | 408321                  | G/T  | NA                 | NA                            | NA                 |
| Kabuli_wild_408341 | NA                                  | Ca_kabuli_denovo | 408341                  | G/T  | NA                 | NA                            | NA                 |
| Kabuli_wild_408349 | NA                                  | Ca_kabuli_denovo | 408349                  | G/T  | NA                 | NA                            | NA                 |
| Kabuli_wild_408374 | NA                                  | Ca_kabuli_denovo | 408374                  | A/G  | NA                 | NA                            | NA                 |
| Kabuli_wild_408379 | NA                                  | Ca_kabuli_denovo | 408379                  | G/T  | NA                 | NA                            | NA                 |
| Kabuli_wild_408700 | NA                                  | Ca_kabuli_denovo | 408700                  | C/G  | NA                 | NA                            | NA                 |
| Kabuli_wild_408710 | NA                                  | Ca_kabuli_denovo | 408710                  | A/G  | NA                 | NA                            | NA                 |
| Kabuli_wild_408722 | NA                                  | Ca_kabuli_denovo | 408722                  | A/G  | NA                 | NA                            | NA                 |
| Kabuli_wild_408734 | NA                                  | Ca_kabuli_denovo | 408734                  | G/T  | NA                 | NA                            | NA                 |
| Kabuli_wild_408741 | NA                                  | Ca_kabuli_denovo | 408741                  | A/G  | NA                 | NA                            | NA                 |
| Kabuli_wild_408925 | NA                                  | Ca_kabuli_denovo | 408925                  | T/C  | NA                 | NA                            | NA                 |
| Kabuli_wild_408955 | NA                                  | Ca_kabuli_denovo | 408955                  | T/G  | NA                 | NA                            | NA                 |
| Kabuli_wild_409085 | NA                                  | Ca_kabuli_denovo | 409085                  | A/G  | NA                 | NA                            | NA                 |
| Kabuli_wild_409122 | NA                                  | Ca_kabuli_denovo | 409122                  | T/G  | NA                 | NA                            | NA                 |
| Kabuli_wild_409277 | NA                                  | Ca_kabuli_denovo | 409277                  | G/T  | NA                 | NA                            | NA                 |
| Kabuli_wild_409458 | NA                                  | Ca_kabuli_denovo | 409458                  | G/A  | NA                 | NA                            | NA                 |
| Kabuli_wild_410049 | NA                                  | Ca_kabuli_denovo | 410049                  | A/G  | NA                 | NA                            | NA                 |
| Kabuli_wild_410084 | NA                                  | Ca_kabuli_denovo | 410084                  | A/C  | NA                 | NA                            | NA                 |
| Kabuli_wild_410577 | NA                                  | Ca_kabuli_denovo | 410577                  | A/G  | NA                 | NA                            | NA                 |
| Kabuli_wild_410733 | NA                                  | Ca_kabuli_denovo | 410733                  | C/G  | NA                 | NA                            | NA                 |
| Kabuli_wild_410737 | NA                                  | Ca_kabuli_denovo | 410737                  | T/G  | NA                 | NA                            | NA                 |
| Kabuli_wild_410755 | NA                                  | Ca_kabuli_denovo | 410755                  | A/G  | NA                 | NA                            | NA                 |

| SNP IDs                   | NCBI dbSNP accession IDs (NCBI_SS#) | Chromosomes             | Physical positions (bp) | SNPs | Gene accession IDs | Sequence components of genome | Putative functions |
|---------------------------|-------------------------------------|-------------------------|-------------------------|------|--------------------|-------------------------------|--------------------|
| <i>Kabuli_wild_410829</i> | NA                                  | <i>Ca_kabuli_denovo</i> | 410829                  | C/G  | NA                 | NA                            | NA                 |
| <i>Kabuli_wild_411295</i> | NA                                  | <i>Ca_kabuli_denovo</i> | 411295                  | A/G  | NA                 | NA                            | NA                 |
| <i>Kabuli_wild_411371</i> | NA                                  | <i>Ca_kabuli_denovo</i> | 411371                  | A/C  | NA                 | NA                            | NA                 |
| <i>Kabuli_wild_411758</i> | NA                                  | <i>Ca_kabuli_denovo</i> | 411758                  | T/G  | NA                 | NA                            | NA                 |
| <i>Kabuli_wild_411871</i> | NA                                  | <i>Ca_kabuli_denovo</i> | 411871                  | T/G  | NA                 | NA                            | NA                 |
| <i>Kabuli_wild_412262</i> | NA                                  | <i>Ca_kabuli_denovo</i> | 412262                  | C/G  | NA                 | NA                            | NA                 |
| <i>Kabuli_wild_412306</i> | NA                                  | <i>Ca_kabuli_denovo</i> | 412306                  | T/G  | NA                 | NA                            | NA                 |
| <i>Kabuli_wild_412564</i> | NA                                  | <i>Ca_kabuli_denovo</i> | 412564                  | A/C  | NA                 | NA                            | NA                 |
| <i>Kabuli_wild_412619</i> | NA                                  | <i>Ca_kabuli_denovo</i> | 412619                  | A/G  | NA                 | NA                            | NA                 |
| <i>Kabuli_wild_412646</i> | NA                                  | <i>Ca_kabuli_denovo</i> | 412646                  | C/T  | NA                 | NA                            | NA                 |
| <i>Kabuli_wild_412658</i> | NA                                  | <i>Ca_kabuli_denovo</i> | 412658                  | C/G  | NA                 | NA                            | NA                 |
| <i>Kabuli_wild_412698</i> | NA                                  | <i>Ca_kabuli_denovo</i> | 412698                  | A/G  | NA                 | NA                            | NA                 |
| <i>Kabuli_wild_412702</i> | NA                                  | <i>Ca_kabuli_denovo</i> | 412702                  | A/G  | NA                 | NA                            | NA                 |
| <i>Kabuli_wild_413132</i> | NA                                  | <i>Ca_kabuli_denovo</i> | 413132                  | C/A  | NA                 | NA                            | NA                 |
| <i>Kabuli_wild_413174</i> | NA                                  | <i>Ca_kabuli_denovo</i> | 413174                  | T/G  | NA                 | NA                            | NA                 |
| <i>Kabuli_wild_413183</i> | NA                                  | <i>Ca_kabuli_denovo</i> | 413183                  | C/G  | NA                 | NA                            | NA                 |
| <i>Kabuli_wild_413872</i> | NA                                  | <i>Ca_kabuli_denovo</i> | 413872                  | A/C  | NA                 | NA                            | NA                 |
| <i>Kabuli_wild_414048</i> | NA                                  | <i>Ca_kabuli_denovo</i> | 414048                  | C/G  | NA                 | NA                            | NA                 |
| <i>Kabuli_wild_414161</i> | NA                                  | <i>Ca_kabuli_denovo</i> | 414161                  | A/C  | NA                 | NA                            | NA                 |
| <i>Kabuli_wild_414164</i> | NA                                  | <i>Ca_kabuli_denovo</i> | 414164                  | A/G  | NA                 | NA                            | NA                 |
| <i>Kabuli_wild_414175</i> | NA                                  | <i>Ca_kabuli_denovo</i> | 414175                  | A/C  | NA                 | NA                            | NA                 |
| <i>Kabuli_wild_414222</i> | NA                                  | <i>Ca_kabuli_denovo</i> | 414222                  | G/A  | NA                 | NA                            | NA                 |
| <i>Kabuli_wild_414271</i> | NA                                  | <i>Ca_kabuli_denovo</i> | 414271                  | A/C  | NA                 | NA                            | NA                 |
| <i>Kabuli_wild_414539</i> | NA                                  | <i>Ca_kabuli_denovo</i> | 414539                  | C/A  | NA                 | NA                            | NA                 |
| <i>Kabuli_wild_414541</i> | NA                                  | <i>Ca_kabuli_denovo</i> | 414541                  | C/A  | NA                 | NA                            | NA                 |
| <i>Kabuli_wild_415003</i> | NA                                  | <i>Ca_kabuli_denovo</i> | 415003                  | T/G  | NA                 | NA                            | NA                 |
| <i>Kabuli_wild_415006</i> | NA                                  | <i>Ca_kabuli_denovo</i> | 415006                  | C/A  | NA                 | NA                            | NA                 |
| <i>Kabuli_wild_416351</i> | NA                                  | <i>Ca_kabuli_denovo</i> | 416351                  | G/A  | NA                 | NA                            | NA                 |
| <i>Kabuli_wild_416353</i> | NA                                  | <i>Ca_kabuli_denovo</i> | 416353                  | A/C  | NA                 | NA                            | NA                 |
| <i>Kabuli_wild_416633</i> | NA                                  | <i>Ca_kabuli_denovo</i> | 416633                  | A/G  | NA                 | NA                            | NA                 |
| <i>Kabuli_wild_416653</i> | NA                                  | <i>Ca_kabuli_denovo</i> | 416653                  | C/G  | NA                 | NA                            | NA                 |
| <i>Kabuli_wild_416721</i> | NA                                  | <i>Ca_kabuli_denovo</i> | 416721                  | C/G  | NA                 | NA                            | NA                 |
| <i>Kabuli_wild_416747</i> | NA                                  | <i>Ca_kabuli_denovo</i> | 416747                  | T/A  | NA                 | NA                            | NA                 |
| <i>Kabuli_wild_416873</i> | NA                                  | <i>Ca_kabuli_denovo</i> | 416873                  | G/C  | NA                 | NA                            | NA                 |
| <i>Kabuli_wild_416880</i> | NA                                  | <i>Ca_kabuli_denovo</i> | 416880                  | G/C  | NA                 | NA                            | NA                 |
| <i>Kabuli_wild_417787</i> | NA                                  | <i>Ca_kabuli_denovo</i> | 417787                  | T/A  | NA                 | NA                            | NA                 |
| <i>Kabuli_wild_417789</i> | NA                                  | <i>Ca_kabuli_denovo</i> | 417789                  | G/C  | NA                 | NA                            | NA                 |
| <i>Kabuli_wild_418696</i> | NA                                  | <i>Ca_kabuli_denovo</i> | 418696                  | A/G  | NA                 | NA                            | NA                 |
| <i>Kabuli_wild_418711</i> | NA                                  | <i>Ca_kabuli_denovo</i> | 418711                  | G/A  | NA                 | NA                            | NA                 |
| <i>Kabuli_wild_418726</i> | NA                                  | <i>Ca_kabuli_denovo</i> | 418726                  | A/C  | NA                 | NA                            | NA                 |
| <i>Kabuli_wild_419556</i> | NA                                  | <i>Ca_kabuli_denovo</i> | 419556                  | A/G  | NA                 | NA                            | NA                 |
| <i>Kabuli_wild_419565</i> | NA                                  | <i>Ca_kabuli_denovo</i> | 419565                  | C/A  | NA                 | NA                            | NA                 |
| <i>Kabuli_wild_419581</i> | NA                                  | <i>Ca_kabuli_denovo</i> | 419581                  | A/G  | NA                 | NA                            | NA                 |
| <i>Kabuli_wild_419616</i> | NA                                  | <i>Ca_kabuli_denovo</i> | 419616                  | C/G  | NA                 | NA                            | NA                 |

| SNP IDs            | NCBI dbSNP accession IDs (NCBI_SS#) | Chromosomes      | Physical positions (bp) | SNPs | Gene accession IDs | Sequence components of genome | Putative functions |
|--------------------|-------------------------------------|------------------|-------------------------|------|--------------------|-------------------------------|--------------------|
| Kabuli_wild_420125 | NA                                  | Ca_kabuli_denovo | 420125                  | T/A  | NA                 | NA                            | NA                 |
| Kabuli_wild_420145 | NA                                  | Ca_kabuli_denovo | 420145                  | C/G  | NA                 | NA                            | NA                 |
| Kabuli_wild_420154 | NA                                  | Ca_kabuli_denovo | 420154                  | G/T  | NA                 | NA                            | NA                 |
| Kabuli_wild_420210 | NA                                  | Ca_kabuli_denovo | 420210                  | T/G  | NA                 | NA                            | NA                 |
| Kabuli_wild_420753 | NA                                  | Ca_kabuli_denovo | 420753                  | C/G  | NA                 | NA                            | NA                 |
| Kabuli_wild_420767 | NA                                  | Ca_kabuli_denovo | 420767                  | A/G  | NA                 | NA                            | NA                 |
| Kabuli_wild_421099 | NA                                  | Ca_kabuli_denovo | 421099                  | A/C  | NA                 | NA                            | NA                 |
| Kabuli_wild_421115 | NA                                  | Ca_kabuli_denovo | 421115                  | A/G  | NA                 | NA                            | NA                 |
| Kabuli_wild_421171 | NA                                  | Ca_kabuli_denovo | 421171                  | C/G  | NA                 | NA                            | NA                 |
| Kabuli_wild_422592 | NA                                  | Ca_kabuli_denovo | 422592                  | G/A  | NA                 | NA                            | NA                 |
| Kabuli_wild_422686 | NA                                  | Ca_kabuli_denovo | 422686                  | G/A  | NA                 | NA                            | NA                 |
| Kabuli_wild_422687 | NA                                  | Ca_kabuli_denovo | 422687                  | A/G  | NA                 | NA                            | NA                 |
| Kabuli_wild_423093 | NA                                  | Ca_kabuli_denovo | 423093                  | A/G  | NA                 | NA                            | NA                 |
| Kabuli_wild_423231 | NA                                  | Ca_kabuli_denovo | 423231                  | G/C  | NA                 | NA                            | NA                 |
| Kabuli_wild_423232 | NA                                  | Ca_kabuli_denovo | 423232                  | C/G  | NA                 | NA                            | NA                 |
| Kabuli_wild_423234 | NA                                  | Ca_kabuli_denovo | 423234                  | T/G  | NA                 | NA                            | NA                 |
| Kabuli_wild_423236 | NA                                  | Ca_kabuli_denovo | 423236                  | C/T  | NA                 | NA                            | NA                 |
| Kabuli_wild_423237 | NA                                  | Ca_kabuli_denovo | 423237                  | A/C  | NA                 | NA                            | NA                 |
| Kabuli_wild_423238 | NA                                  | Ca_kabuli_denovo | 423238                  | G/A  | NA                 | NA                            | NA                 |
| Kabuli_wild_423879 | NA                                  | Ca_kabuli_denovo | 423879                  | A/G  | NA                 | NA                            | NA                 |
| Kabuli_wild_423911 | NA                                  | Ca_kabuli_denovo | 423911                  | A/G  | NA                 | NA                            | NA                 |
| Kabuli_wild_423912 | NA                                  | Ca_kabuli_denovo | 423912                  | T/G  | NA                 | NA                            | NA                 |
| Kabuli_wild_423974 | NA                                  | Ca_kabuli_denovo | 423974                  | C/T  | NA                 | NA                            | NA                 |
| Kabuli_wild_423983 | NA                                  | Ca_kabuli_denovo | 423983                  | T/C  | NA                 | NA                            | NA                 |
| Kabuli_wild_424109 | NA                                  | Ca_kabuli_denovo | 424109                  | G/T  | NA                 | NA                            | NA                 |
| Kabuli_wild_424110 | NA                                  | Ca_kabuli_denovo | 424110                  | T/G  | NA                 | NA                            | NA                 |
| Kabuli_wild_424306 | NA                                  | Ca_kabuli_denovo | 424306                  | A/G  | NA                 | NA                            | NA                 |
| Kabuli_wild_424311 | NA                                  | Ca_kabuli_denovo | 424311                  | A/G  | NA                 | NA                            | NA                 |
| Kabuli_wild_424983 | NA                                  | Ca_kabuli_denovo | 424983                  | C/G  | NA                 | NA                            | NA                 |
| Kabuli_wild_424984 | NA                                  | Ca_kabuli_denovo | 424984                  | A/G  | NA                 | NA                            | NA                 |
| Kabuli_wild_424985 | NA                                  | Ca_kabuli_denovo | 424985                  | A/T  | NA                 | NA                            | NA                 |
| Kabuli_wild_424986 | NA                                  | Ca_kabuli_denovo | 424986                  | C/T  | NA                 | NA                            | NA                 |
| Kabuli_wild_425480 | NA                                  | Ca_kabuli_denovo | 425480                  | G/A  | NA                 | NA                            | NA                 |
| Kabuli_wild_425481 | NA                                  | Ca_kabuli_denovo | 425481                  | C/G  | NA                 | NA                            | NA                 |
| Kabuli_wild_425482 | NA                                  | Ca_kabuli_denovo | 425482                  | G/A  | NA                 | NA                            | NA                 |
| Kabuli_wild_425483 | NA                                  | Ca_kabuli_denovo | 425483                  | A/G  | NA                 | NA                            | NA                 |
| Kabuli_wild_425484 | NA                                  | Ca_kabuli_denovo | 425484                  | A/G  | NA                 | NA                            | NA                 |
| Kabuli_wild_425617 | NA                                  | Ca_kabuli_denovo | 425617                  | C/G  | NA                 | NA                            | NA                 |
| Kabuli_wild_425642 | NA                                  | Ca_kabuli_denovo | 425642                  | C/G  | NA                 | NA                            | NA                 |
| Kabuli_wild_425663 | NA                                  | Ca_kabuli_denovo | 425663                  | A/G  | NA                 | NA                            | NA                 |
| Kabuli_wild_426253 | NA                                  | Ca_kabuli_denovo | 426253                  | A/T  | NA                 | NA                            | NA                 |
| Kabuli_wild_426254 | NA                                  | Ca_kabuli_denovo | 426254                  | C/G  | NA                 | NA                            | NA                 |
| Kabuli_wild_427588 | NA                                  | Ca_kabuli_denovo | 427588                  | A/C  | NA                 | NA                            | NA                 |
| Kabuli_wild_427589 | NA                                  | Ca_kabuli_denovo | 427589                  | A/G  | NA                 | NA                            | NA                 |

| SNP IDs            | NCBI dbSNP accession IDs (NCBI_SS#) | Chromosomes      | Physical positions (bp) | SNPs | Gene accession IDs | Sequence components of genome | Putative functions |
|--------------------|-------------------------------------|------------------|-------------------------|------|--------------------|-------------------------------|--------------------|
| Kabuli_wild_427590 | NA                                  | Ca_kabuli_denovo | 427590                  | C/G  | NA                 | NA                            | NA                 |
| Kabuli_wild_427591 | NA                                  | Ca_kabuli_denovo | 427591                  | A/G  | NA                 | NA                            | NA                 |
| Kabuli_wild_427592 | NA                                  | Ca_kabuli_denovo | 427592                  | A/G  | NA                 | NA                            | NA                 |
| Kabuli_wild_427593 | NA                                  | Ca_kabuli_denovo | 427593                  | A/G  | NA                 | NA                            | NA                 |
| Kabuli_wild_427676 | NA                                  | Ca_kabuli_denovo | 427676                  | T/G  | NA                 | NA                            | NA                 |
| Kabuli_wild_427678 | NA                                  | Ca_kabuli_denovo | 427678                  | A/C  | NA                 | NA                            | NA                 |
| Kabuli_wild_427680 | NA                                  | Ca_kabuli_denovo | 427680                  | A/C  | NA                 | NA                            | NA                 |
| Kabuli_wild_427681 | NA                                  | Ca_kabuli_denovo | 427681                  | G/A  | NA                 | NA                            | NA                 |
| Kabuli_wild_427682 | NA                                  | Ca_kabuli_denovo | 427682                  | A/G  | NA                 | NA                            | NA                 |
| Kabuli_wild_427870 | NA                                  | Ca_kabuli_denovo | 427870                  | A/G  | NA                 | NA                            | NA                 |
| Kabuli_wild_428551 | NA                                  | Ca_kabuli_denovo | 428551                  | A/G  | NA                 | NA                            | NA                 |
| Kabuli_wild_428552 | NA                                  | Ca_kabuli_denovo | 428552                  | C/T  | NA                 | NA                            | NA                 |
| Kabuli_wild_428956 | NA                                  | Ca_kabuli_denovo | 428956                  | C/G  | NA                 | NA                            | NA                 |
| Kabuli_wild_429532 | NA                                  | Ca_kabuli_denovo | 429532                  | A/C  | NA                 | NA                            | NA                 |
| Kabuli_wild_429576 | NA                                  | Ca_kabuli_denovo | 429576                  | A/G  | NA                 | NA                            | NA                 |
| Kabuli_wild_429626 | NA                                  | Ca_kabuli_denovo | 429626                  | T/G  | NA                 | NA                            | NA                 |
| Kabuli_wild_429654 | NA                                  | Ca_kabuli_denovo | 429654                  | G/A  | NA                 | NA                            | NA                 |
| Kabuli_wild_429925 | NA                                  | Ca_kabuli_denovo | 429925                  | C/A  | NA                 | NA                            | NA                 |
| Kabuli_wild_429943 | NA                                  | Ca_kabuli_denovo | 429943                  | G/T  | NA                 | NA                            | NA                 |
| Kabuli_wild_429983 | NA                                  | Ca_kabuli_denovo | 429983                  | A/G  | NA                 | NA                            | NA                 |
| Kabuli_wild_430305 | NA                                  | Ca_kabuli_denovo | 430305                  | T/G  | NA                 | NA                            | NA                 |
| Kabuli_wild_430469 | NA                                  | Ca_kabuli_denovo | 430469                  | A/C  | NA                 | NA                            | NA                 |
| Kabuli_wild_430472 | NA                                  | Ca_kabuli_denovo | 430472                  | C/G  | NA                 | NA                            | NA                 |
| Kabuli_wild_430473 | NA                                  | Ca_kabuli_denovo | 430473                  | C/A  | NA                 | NA                            | NA                 |
| Kabuli_wild_430474 | NA                                  | Ca_kabuli_denovo | 430474                  | G/C  | NA                 | NA                            | NA                 |
| Kabuli_wild_430591 | NA                                  | Ca_kabuli_denovo | 430591                  | G/A  | NA                 | NA                            | NA                 |
| Kabuli_wild_430766 | NA                                  | Ca_kabuli_denovo | 430766                  | G/A  | NA                 | NA                            | NA                 |
| Kabuli_wild_430769 | NA                                  | Ca_kabuli_denovo | 430769                  | G/T  | NA                 | NA                            | NA                 |
| Kabuli_wild_430770 | NA                                  | Ca_kabuli_denovo | 430770                  | C/G  | NA                 | NA                            | NA                 |
| Kabuli_wild_431109 | NA                                  | Ca_kabuli_denovo | 431109                  | C/A  | NA                 | NA                            | NA                 |
| Kabuli_wild_431110 | NA                                  | Ca_kabuli_denovo | 431110                  | A/G  | NA                 | NA                            | NA                 |
| Kabuli_wild_432259 | NA                                  | Ca_kabuli_denovo | 432259                  | G/A  | NA                 | NA                            | NA                 |
| Kabuli_wild_434972 | NA                                  | Ca_kabuli_denovo | 434972                  | A/G  | NA                 | NA                            | NA                 |
| Kabuli_wild_435079 | NA                                  | Ca_kabuli_denovo | 435079                  | G/T  | NA                 | NA                            | NA                 |
| Kabuli_wild_436157 | NA                                  | Ca_kabuli_denovo | 436157                  | C/G  | NA                 | NA                            | NA                 |
| Kabuli_wild_438626 | NA                                  | Ca_kabuli_denovo | 438626                  | A/G  | NA                 | NA                            | NA                 |
| Kabuli_wild_440286 | NA                                  | Ca_kabuli_denovo | 440286                  | A/C  | NA                 | NA                            | NA                 |
| Kabuli_wild_440764 | NA                                  | Ca_kabuli_denovo | 440764                  | T/G  | NA                 | NA                            | NA                 |
| Kabuli_wild_440776 | NA                                  | Ca_kabuli_denovo | 440776                  | C/G  | NA                 | NA                            | NA                 |
| Kabuli_wild_441388 | NA                                  | Ca_kabuli_denovo | 441388                  | T/G  | NA                 | NA                            | NA                 |
| Kabuli_wild_441392 | NA                                  | Ca_kabuli_denovo | 441392                  | A/G  | NA                 | NA                            | NA                 |
| Kabuli_wild_442505 | NA                                  | Ca_kabuli_denovo | 442505                  | C/G  | NA                 | NA                            | NA                 |
| Kabuli_wild_442808 | NA                                  | Ca_kabuli_denovo | 442808                  | G/T  | NA                 | NA                            | NA                 |
| Kabuli_wild_442817 | NA                                  | Ca_kabuli_denovo | 442817                  | G/T  | NA                 | NA                            | NA                 |

| SNP IDs            | NCBI dbSNP accession IDs (NCBI_SS#) | Chromosomes      | Physical positions (bp) | SNPs | Gene accession IDs | Sequence components of genome | Putative functions |
|--------------------|-------------------------------------|------------------|-------------------------|------|--------------------|-------------------------------|--------------------|
| Kabuli_wild_443599 | NA                                  | Ca_kabuli_denovo | 443599                  | A/G  | NA                 | NA                            | NA                 |
| Kabuli_wild_445781 | NA                                  | Ca_kabuli_denovo | 445781                  | G/A  | NA                 | NA                            | NA                 |
| Kabuli_wild_446064 | NA                                  | Ca_kabuli_denovo | 446064                  | G/A  | NA                 | NA                            | NA                 |
| Kabuli_wild_446136 | NA                                  | Ca_kabuli_denovo | 446136                  | C/T  | NA                 | NA                            | NA                 |
| Kabuli_wild_447066 | NA                                  | Ca_kabuli_denovo | 447066                  | T/G  | NA                 | NA                            | NA                 |
| Kabuli_wild_449458 | NA                                  | Ca_kabuli_denovo | 449458                  | C/T  | NA                 | NA                            | NA                 |
| Kabuli_wild_449466 | NA                                  | Ca_kabuli_denovo | 449466                  | A/G  | NA                 | NA                            | NA                 |
| Kabuli_wild_450081 | NA                                  | Ca_kabuli_denovo | 450081                  | A/G  | NA                 | NA                            | NA                 |
| Kabuli_wild_451056 | NA                                  | Ca_kabuli_denovo | 451056                  | G/A  | NA                 | NA                            | NA                 |
| Kabuli_wild_451074 | NA                                  | Ca_kabuli_denovo | 451074                  | G/A  | NA                 | NA                            | NA                 |
| Kabuli_wild_451962 | NA                                  | Ca_kabuli_denovo | 451962                  | A/C  | NA                 | NA                            | NA                 |
| Kabuli_wild_453328 | NA                                  | Ca_kabuli_denovo | 453328                  | G/C  | NA                 | NA                            | NA                 |
| Kabuli_wild_453349 | NA                                  | Ca_kabuli_denovo | 453349                  | G/T  | NA                 | NA                            | NA                 |
| Kabuli_wild_454536 | NA                                  | Ca_kabuli_denovo | 454536                  | T/C  | NA                 | NA                            | NA                 |
| Kabuli_wild_454577 | NA                                  | Ca_kabuli_denovo | 454577                  | A/G  | NA                 | NA                            | NA                 |
| Kabuli_wild_456230 | NA                                  | Ca_kabuli_denovo | 456230                  | C/G  | NA                 | NA                            | NA                 |
| Kabuli_wild_460176 | NA                                  | Ca_kabuli_denovo | 460176                  | G/C  | NA                 | NA                            | NA                 |
| Kabuli_wild_460185 | NA                                  | Ca_kabuli_denovo | 460185                  | G/C  | NA                 | NA                            | NA                 |
| Kabuli_wild_460365 | NA                                  | Ca_kabuli_denovo | 460365                  | A/G  | NA                 | NA                            | NA                 |
| Kabuli_wild_461143 | NA                                  | Ca_kabuli_denovo | 461143                  | T/C  | NA                 | NA                            | NA                 |
| Kabuli_wild_461697 | NA                                  | Ca_kabuli_denovo | 461697                  | G/A  | NA                 | NA                            | NA                 |
| Kabuli_wild_461747 | NA                                  | Ca_kabuli_denovo | 461747                  | T/C  | NA                 | NA                            | NA                 |
| Kabuli_wild_461801 | NA                                  | Ca_kabuli_denovo | 461801                  | A/G  | NA                 | NA                            | NA                 |
| Kabuli_wild_461851 | NA                                  | Ca_kabuli_denovo | 461851                  | A/G  | NA                 | NA                            | NA                 |
| Kabuli_wild_461865 | NA                                  | Ca_kabuli_denovo | 461865                  | G/C  | NA                 | NA                            | NA                 |
| Kabuli_wild_462540 | NA                                  | Ca_kabuli_denovo | 462540                  | G/A  | NA                 | NA                            | NA                 |
| Kabuli_wild_462582 | NA                                  | Ca_kabuli_denovo | 462582                  | G/C  | NA                 | NA                            | NA                 |
| Kabuli_wild_462883 | NA                                  | Ca_kabuli_denovo | 462883                  | C/T  | NA                 | NA                            | NA                 |
| Kabuli_wild_463035 | NA                                  | Ca_kabuli_denovo | 463035                  | A/G  | NA                 | NA                            | NA                 |
| Kabuli_wild_463462 | NA                                  | Ca_kabuli_denovo | 463462                  | G/T  | NA                 | NA                            | NA                 |
| Kabuli_wild_463538 | NA                                  | Ca_kabuli_denovo | 463538                  | A/G  | NA                 | NA                            | NA                 |
| Kabuli_wild_463843 | NA                                  | Ca_kabuli_denovo | 463843                  | C/T  | NA                 | NA                            | NA                 |
| Kabuli_wild_465534 | NA                                  | Ca_kabuli_denovo | 465534                  | G/C  | NA                 | NA                            | NA                 |
| Kabuli_wild_465825 | NA                                  | Ca_kabuli_denovo | 465825                  | T/G  | NA                 | NA                            | NA                 |
| Kabuli_wild_466074 | NA                                  | Ca_kabuli_denovo | 466074                  | C/T  | NA                 | NA                            | NA                 |
| Kabuli_wild_466607 | NA                                  | Ca_kabuli_denovo | 466607                  | A/C  | NA                 | NA                            | NA                 |
| Kabuli_wild_468634 | NA                                  | Ca_kabuli_denovo | 468634                  | T/G  | NA                 | NA                            | NA                 |
| Kabuli_wild_469739 | NA                                  | Ca_kabuli_denovo | 469739                  | T/C  | NA                 | NA                            | NA                 |
| Kabuli_wild_470917 | NA                                  | Ca_kabuli_denovo | 470917                  | C/G  | NA                 | NA                            | NA                 |
| Kabuli_wild_471122 | NA                                  | Ca_kabuli_denovo | 471122                  | T/G  | NA                 | NA                            | NA                 |
| Kabuli_wild_471191 | NA                                  | Ca_kabuli_denovo | 471191                  | A/G  | NA                 | NA                            | NA                 |
| Kabuli_wild_471244 | NA                                  | Ca_kabuli_denovo | 471244                  | G/A  | NA                 | NA                            | NA                 |
| Kabuli_wild_471612 | NA                                  | Ca_kabuli_denovo | 471612                  | T/G  | NA                 | NA                            | NA                 |
| Kabuli_wild_472637 | NA                                  | Ca_kabuli_denovo | 472637                  | A/G  | NA                 | NA                            | NA                 |

| SNP IDs            | NCBI dbSNP accession IDs (NCBI_SS#) | Chromosomes      | Physical positions (bp) | SNPs | Gene accession IDs | Sequence components of genome | Putative functions |
|--------------------|-------------------------------------|------------------|-------------------------|------|--------------------|-------------------------------|--------------------|
| Kabuli_wild_473046 | NA                                  | Ca_kabuli_denovo | 473046                  | T/C  | NA                 | NA                            | NA                 |
| Kabuli_wild_473091 | NA                                  | Ca_kabuli_denovo | 473091                  | A/G  | NA                 | NA                            | NA                 |
| Kabuli_wild_474418 | NA                                  | Ca_kabuli_denovo | 474418                  | T/C  | NA                 | NA                            | NA                 |
| Kabuli_wild_474492 | NA                                  | Ca_kabuli_denovo | 474492                  | G/C  | NA                 | NA                            | NA                 |
| Kabuli_wild_474884 | NA                                  | Ca_kabuli_denovo | 474884                  | C/T  | NA                 | NA                            | NA                 |
| Kabuli_wild_475561 | NA                                  | Ca_kabuli_denovo | 475561                  | G/A  | NA                 | NA                            | NA                 |
| Kabuli_wild_476132 | NA                                  | Ca_kabuli_denovo | 476132                  | C/T  | NA                 | NA                            | NA                 |
| Kabuli_wild_476141 | NA                                  | Ca_kabuli_denovo | 476141                  | G/A  | NA                 | NA                            | NA                 |
| Kabuli_wild_476188 | NA                                  | Ca_kabuli_denovo | 476188                  | T/C  | NA                 | NA                            | NA                 |
| Kabuli_wild_477484 | NA                                  | Ca_kabuli_denovo | 477484                  | T/C  | NA                 | NA                            | NA                 |
| Kabuli_wild_477949 | NA                                  | Ca_kabuli_denovo | 477949                  | T/G  | NA                 | NA                            | NA                 |
| Kabuli_wild_478783 | NA                                  | Ca_kabuli_denovo | 478783                  | G/C  | NA                 | NA                            | NA                 |
| Kabuli_wild_478801 | NA                                  | Ca_kabuli_denovo | 478801                  | T/G  | NA                 | NA                            | NA                 |
| Kabuli_wild_479078 | NA                                  | Ca_kabuli_denovo | 479078                  | T/G  | NA                 | NA                            | NA                 |
| Kabuli_wild_479342 | NA                                  | Ca_kabuli_denovo | 479342                  | C/T  | NA                 | NA                            | NA                 |
| Kabuli_wild_479830 | NA                                  | Ca_kabuli_denovo | 479830                  | A/G  | NA                 | NA                            | NA                 |
| Kabuli_wild_480379 | NA                                  | Ca_kabuli_denovo | 480379                  | C/T  | NA                 | NA                            | NA                 |
| Kabuli_wild_481072 | NA                                  | Ca_kabuli_denovo | 481072                  | A/C  | NA                 | NA                            | NA                 |
| Kabuli_wild_482526 | NA                                  | Ca_kabuli_denovo | 482526                  | G/A  | NA                 | NA                            | NA                 |
| Kabuli_wild_482736 | NA                                  | Ca_kabuli_denovo | 482736                  | A/G  | NA                 | NA                            | NA                 |
| Kabuli_wild_484044 | NA                                  | Ca_kabuli_denovo | 484044                  | C/T  | NA                 | NA                            | NA                 |
| Kabuli_wild_485047 | NA                                  | Ca_kabuli_denovo | 485047                  | C/G  | NA                 | NA                            | NA                 |
| Kabuli_wild_485063 | NA                                  | Ca_kabuli_denovo | 485063                  | T/C  | NA                 | NA                            | NA                 |
| Kabuli_wild_485572 | NA                                  | Ca_kabuli_denovo | 485572                  | A/G  | NA                 | NA                            | NA                 |
| Kabuli_wild_485584 | NA                                  | Ca_kabuli_denovo | 485584                  | T/C  | NA                 | NA                            | NA                 |
| Kabuli_wild_486028 | NA                                  | Ca_kabuli_denovo | 486028                  | A/T  | NA                 | NA                            | NA                 |
| Kabuli_wild_486294 | NA                                  | Ca_kabuli_denovo | 486294                  | G/T  | NA                 | NA                            | NA                 |
| Kabuli_wild_487286 | NA                                  | Ca_kabuli_denovo | 487286                  | G/A  | NA                 | NA                            | NA                 |
| Kabuli_wild_487294 | NA                                  | Ca_kabuli_denovo | 487294                  | C/A  | NA                 | NA                            | NA                 |
| Kabuli_wild_487485 | NA                                  | Ca_kabuli_denovo | 487485                  | C/T  | NA                 | NA                            | NA                 |
| Kabuli_wild_487780 | NA                                  | Ca_kabuli_denovo | 487780                  | G/A  | NA                 | NA                            | NA                 |
| Kabuli_wild_487807 | NA                                  | Ca_kabuli_denovo | 487807                  | T/C  | NA                 | NA                            | NA                 |
| Kabuli_wild_488204 | NA                                  | Ca_kabuli_denovo | 488204                  | A/G  | NA                 | NA                            | NA                 |
| Kabuli_wild_489210 | NA                                  | Ca_kabuli_denovo | 489210                  | A/C  | NA                 | NA                            | NA                 |
| Kabuli_wild_489843 | NA                                  | Ca_kabuli_denovo | 489843                  | C/T  | NA                 | NA                            | NA                 |
| Kabuli_wild_491104 | NA                                  | Ca_kabuli_denovo | 491104                  | G/A  | NA                 | NA                            | NA                 |
| Kabuli_wild_491128 | NA                                  | Ca_kabuli_denovo | 491128                  | T/C  | NA                 | NA                            | NA                 |
| Kabuli_wild_491273 | NA                                  | Ca_kabuli_denovo | 491273                  | C/T  | NA                 | NA                            | NA                 |
| Kabuli_wild_491281 | NA                                  | Ca_kabuli_denovo | 491281                  | G/A  | NA                 | NA                            | NA                 |
| Kabuli_wild_491346 | NA                                  | Ca_kabuli_denovo | 491346                  | T/A  | NA                 | NA                            | NA                 |
| Kabuli_wild_491402 | NA                                  | Ca_kabuli_denovo | 491402                  | A/G  | NA                 | NA                            | NA                 |
| Kabuli_wild_491858 | NA                                  | Ca_kabuli_denovo | 491858                  | G/A  | NA                 | NA                            | NA                 |
| Kabuli_wild_492126 | NA                                  | Ca_kabuli_denovo | 492126                  | T/G  | NA                 | NA                            | NA                 |
| Kabuli_wild_492132 | NA                                  | Ca_kabuli_denovo | 492132                  | T/C  | NA                 | NA                            | NA                 |



| SNP IDs                   | NCBI dbSNP accession IDs (NCBI_SS#) | Chromosomes             | Physical positions (bp) | SNPs | Gene accession IDs | Sequence components of genome | Putative functions |
|---------------------------|-------------------------------------|-------------------------|-------------------------|------|--------------------|-------------------------------|--------------------|
| <i>Kabuli_wild_493063</i> | NA                                  | <i>Ca_kabuli_denovo</i> | 493063                  | C/A  | NA                 | NA                            | NA                 |
| <i>Kabuli_wild_493333</i> | NA                                  | <i>Ca_kabuli_denovo</i> | 493333                  | C/G  | NA                 | NA                            | NA                 |
| <i>Kabuli_wild_493357</i> | NA                                  | <i>Ca_kabuli_denovo</i> | 493357                  | T/G  | NA                 | NA                            | NA                 |
| <i>Kabuli_wild_493855</i> | NA                                  | <i>Ca_kabuli_denovo</i> | 493855                  | A/G  | NA                 | NA                            | NA                 |
| <i>Kabuli_wild_493884</i> | NA                                  | <i>Ca_kabuli_denovo</i> | 493884                  | C/T  | NA                 | NA                            | NA                 |
| <i>Kabuli_wild_493934</i> | NA                                  | <i>Ca_kabuli_denovo</i> | 493934                  | C/T  | NA                 | NA                            | NA                 |
| <i>Kabuli_wild_494146</i> | NA                                  | <i>Ca_kabuli_denovo</i> | 494146                  | G/T  | NA                 | NA                            | NA                 |
| <i>Kabuli_wild_494382</i> | NA                                  | <i>Ca_kabuli_denovo</i> | 494382                  | A/T  | NA                 | NA                            | NA                 |
| <i>Kabuli_wild_494586</i> | NA                                  | <i>Ca_kabuli_denovo</i> | 494586                  | A/G  | NA                 | NA                            | NA                 |
| <i>Kabuli_wild_495627</i> | NA                                  | <i>Ca_kabuli_denovo</i> | 495627                  | A/G  | NA                 | NA                            | NA                 |
| <i>Kabuli_wild_495672</i> | NA                                  | <i>Ca_kabuli_denovo</i> | 495672                  | C/G  | NA                 | NA                            | NA                 |
| <i>Kabuli_wild_495926</i> | NA                                  | <i>Ca_kabuli_denovo</i> | 495926                  | G/A  | NA                 | NA                            | NA                 |
| <i>Kabuli_wild_496339</i> | NA                                  | <i>Ca_kabuli_denovo</i> | 496339                  | T/C  | NA                 | NA                            | NA                 |
| <i>Kabuli_wild_496636</i> | NA                                  | <i>Ca_kabuli_denovo</i> | 496636                  | C/T  | NA                 | NA                            | NA                 |
| <i>Kabuli_wild_497008</i> | NA                                  | <i>Ca_kabuli_denovo</i> | 497008                  | T/C  | NA                 | NA                            | NA                 |
| <i>Kabuli_wild_498005</i> | NA                                  | <i>Ca_kabuli_denovo</i> | 498005                  | T/G  | NA                 | NA                            | NA                 |
| <i>Kabuli_wild_498007</i> | NA                                  | <i>Ca_kabuli_denovo</i> | 498007                  | C/G  | NA                 | NA                            | NA                 |
| <i>Kabuli_wild_498595</i> | NA                                  | <i>Ca_kabuli_denovo</i> | 498595                  | G/C  | NA                 | NA                            | NA                 |
| <i>Kabuli_wild_500001</i> | NA                                  | <i>Ca_kabuli_denovo</i> | 500001                  | A/G  | NA                 | NA                            | NA                 |
| <i>Kabuli_wild_500780</i> | NA                                  | <i>Ca_kabuli_denovo</i> | 500780                  | G/C  | NA                 | NA                            | NA                 |
| <i>Kabuli_wild_501152</i> | NA                                  | <i>Ca_kabuli_denovo</i> | 501152                  | A/T  | NA                 | NA                            | NA                 |
| <i>Kabuli_wild_501303</i> | NA                                  | <i>Ca_kabuli_denovo</i> | 501303                  | G/C  | NA                 | NA                            | NA                 |
| <i>Kabuli_wild_501330</i> | NA                                  | <i>Ca_kabuli_denovo</i> | 501330                  | A/G  | NA                 | NA                            | NA                 |
| <i>Kabuli_wild_501600</i> | NA                                  | <i>Ca_kabuli_denovo</i> | 501600                  | A/G  | NA                 | NA                            | NA                 |
| <i>Kabuli_wild_502200</i> | NA                                  | <i>Ca_kabuli_denovo</i> | 502200                  | C/A  | NA                 | NA                            | NA                 |
| <i>Kabuli_wild_502202</i> | NA                                  | <i>Ca_kabuli_denovo</i> | 502202                  | G/C  | NA                 | NA                            | NA                 |
| <i>Kabuli_wild_502203</i> | NA                                  | <i>Ca_kabuli_denovo</i> | 502203                  | A/G  | NA                 | NA                            | NA                 |
| <i>Kabuli_wild_502205</i> | NA                                  | <i>Ca_kabuli_denovo</i> | 502205                  | T/C  | NA                 | NA                            | NA                 |
| <i>Kabuli_wild_502207</i> | NA                                  | <i>Ca_kabuli_denovo</i> | 502207                  | T/G  | NA                 | NA                            | NA                 |
| <i>Kabuli_wild_502208</i> | NA                                  | <i>Ca_kabuli_denovo</i> | 502208                  | C/T  | NA                 | NA                            | NA                 |
| <i>Kabuli_wild_502654</i> | NA                                  | <i>Ca_kabuli_denovo</i> | 502654                  | C/T  | NA                 | NA                            | NA                 |
| <i>Kabuli_wild_503790</i> | NA                                  | <i>Ca_kabuli_denovo</i> | 503790                  | G/C  | NA                 | NA                            | NA                 |
| <i>Kabuli_wild_504837</i> | NA                                  | <i>Ca_kabuli_denovo</i> | 504837                  | G/C  | NA                 | NA                            | NA                 |
| <i>Kabuli_wild_505056</i> | NA                                  | <i>Ca_kabuli_denovo</i> | 505056                  | C/A  | NA                 | NA                            | NA                 |
| <i>Kabuli_wild_505602</i> | NA                                  | <i>Ca_kabuli_denovo</i> | 505602                  | G/T  | NA                 | NA                            | NA                 |
| <i>Kabuli_wild_505716</i> | NA                                  | <i>Ca_kabuli_denovo</i> | 505716                  | G/A  | NA                 | NA                            | NA                 |
| <i>Kabuli_wild_505996</i> | NA                                  | <i>Ca_kabuli_denovo</i> | 505996                  | G/A  | NA                 | NA                            | NA                 |
| <i>Kabuli_wild_506932</i> | NA                                  | <i>Ca_kabuli_denovo</i> | 506932                  | G/A  | NA                 | NA                            | NA                 |
| <i>Kabuli_wild_507754</i> | NA                                  | <i>Ca_kabuli_denovo</i> | 507754                  | C/G  | NA                 | NA                            | NA                 |
| <i>Kabuli_wild_509393</i> | NA                                  | <i>Ca_kabuli_denovo</i> | 509393                  | C/T  | NA                 | NA                            | NA                 |
| <i>Kabuli_wild_509973</i> | NA                                  | <i>Ca_kabuli_denovo</i> | 509973                  | A/G  | NA                 | NA                            | NA                 |
| <i>Kabuli_wild_510157</i> | NA                                  | <i>Ca_kabuli_denovo</i> | 510157                  | G/T  | NA                 | NA                            | NA                 |
| <i>Kabuli_wild_510573</i> | NA                                  | <i>Ca_kabuli_denovo</i> | 510573                  | G/A  | NA                 | NA                            | NA                 |
| <i>Kabuli_wild_510623</i> | NA                                  | <i>Ca_kabuli_denovo</i> | 510623                  | G/A  | NA                 | NA                            | NA                 |

| SNP IDs                   | NCBI dbSNP accession IDs (NCBI_SS#) | Chromosomes             | Physical positions (bp) | SNPs | Gene accession IDs | Sequence components of genome | Putative functions |
|---------------------------|-------------------------------------|-------------------------|-------------------------|------|--------------------|-------------------------------|--------------------|
| <i>Kabuli_wild_511099</i> | NA                                  | <i>Ca_kabuli_denovo</i> | 511099                  | T/C  | NA                 | NA                            | NA                 |
| <i>Kabuli_wild_511150</i> | NA                                  | <i>Ca_kabuli_denovo</i> | 511150                  | C/A  | NA                 | NA                            | NA                 |
| <i>Kabuli_wild_511726</i> | NA                                  | <i>Ca_kabuli_denovo</i> | 511726                  | C/G  | NA                 | NA                            | NA                 |
| <i>Kabuli_wild_511753</i> | NA                                  | <i>Ca_kabuli_denovo</i> | 511753                  | G/A  | NA                 | NA                            | NA                 |
| <i>Kabuli_wild_514147</i> | NA                                  | <i>Ca_kabuli_denovo</i> | 514147                  | A/G  | NA                 | NA                            | NA                 |
| <i>Kabuli_wild_514168</i> | NA                                  | <i>Ca_kabuli_denovo</i> | 514168                  | T/A  | NA                 | NA                            | NA                 |
| <i>Kabuli_wild_514280</i> | NA                                  | <i>Ca_kabuli_denovo</i> | 514280                  | A/G  | NA                 | NA                            | NA                 |
| <i>Kabuli_wild_514550</i> | NA                                  | <i>Ca_kabuli_denovo</i> | 514550                  | C/G  | NA                 | NA                            | NA                 |
| <i>Kabuli_wild_514597</i> | NA                                  | <i>Ca_kabuli_denovo</i> | 514597                  | C/G  | NA                 | NA                            | NA                 |
| <i>Kabuli_wild_514863</i> | NA                                  | <i>Ca_kabuli_denovo</i> | 514863                  | T/C  | NA                 | NA                            | NA                 |
| <i>Kabuli_wild_516573</i> | NA                                  | <i>Ca_kabuli_denovo</i> | 516573                  | A/G  | NA                 | NA                            | NA                 |
| <i>Kabuli_wild_516597</i> | NA                                  | <i>Ca_kabuli_denovo</i> | 516597                  | A/G  | NA                 | NA                            | NA                 |
| <i>Kabuli_wild_517864</i> | NA                                  | <i>Ca_kabuli_denovo</i> | 517864                  | G/C  | NA                 | NA                            | NA                 |
| <i>Kabuli_wild_519043</i> | NA                                  | <i>Ca_kabuli_denovo</i> | 519043                  | G/C  | NA                 | NA                            | NA                 |
| <i>Kabuli_wild_519352</i> | NA                                  | <i>Ca_kabuli_denovo</i> | 519352                  | G/A  | NA                 | NA                            | NA                 |
| <i>Kabuli_wild_519756</i> | NA                                  | <i>Ca_kabuli_denovo</i> | 519756                  | C/G  | NA                 | NA                            | NA                 |
| <i>Kabuli_wild_520571</i> | NA                                  | <i>Ca_kabuli_denovo</i> | 520571                  | C/A  | NA                 | NA                            | NA                 |
| <i>Kabuli_wild_521258</i> | NA                                  | <i>Ca_kabuli_denovo</i> | 521258                  | C/T  | NA                 | NA                            | NA                 |
| <i>Kabuli_wild_521858</i> | NA                                  | <i>Ca_kabuli_denovo</i> | 521858                  | T/G  | NA                 | NA                            | NA                 |
| <i>Kabuli_wild_521862</i> | NA                                  | <i>Ca_kabuli_denovo</i> | 521862                  | C/T  | NA                 | NA                            | NA                 |
| <i>Kabuli_wild_521879</i> | NA                                  | <i>Ca_kabuli_denovo</i> | 521879                  | G/A  | NA                 | NA                            | NA                 |
| <i>Kabuli_wild_522003</i> | NA                                  | <i>Ca_kabuli_denovo</i> | 522003                  | T/C  | NA                 | NA                            | NA                 |
| <i>Kabuli_wild_522051</i> | NA                                  | <i>Ca_kabuli_denovo</i> | 522051                  | A/G  | NA                 | NA                            | NA                 |
| <i>Kabuli_wild_523488</i> | NA                                  | <i>Ca_kabuli_denovo</i> | 523488                  | C/A  | NA                 | NA                            | NA                 |
| <i>Kabuli_wild_523497</i> | NA                                  | <i>Ca_kabuli_denovo</i> | 523497                  | C/T  | NA                 | NA                            | NA                 |
| <i>Kabuli_wild_523572</i> | NA                                  | <i>Ca_kabuli_denovo</i> | 523572                  | G/T  | NA                 | NA                            | NA                 |
| <i>Kabuli_wild_523781</i> | NA                                  | <i>Ca_kabuli_denovo</i> | 523781                  | A/G  | NA                 | NA                            | NA                 |
| <i>Kabuli_wild_524402</i> | NA                                  | <i>Ca_kabuli_denovo</i> | 524402                  | A/G  | NA                 | NA                            | NA                 |
| <i>Kabuli_wild_524434</i> | NA                                  | <i>Ca_kabuli_denovo</i> | 524434                  | T/A  | NA                 | NA                            | NA                 |
| <i>Kabuli_wild_525910</i> | NA                                  | <i>Ca_kabuli_denovo</i> | 525910                  | A/G  | NA                 | NA                            | NA                 |
| <i>Kabuli_wild_527443</i> | NA                                  | <i>Ca_kabuli_denovo</i> | 527443                  | T/C  | NA                 | NA                            | NA                 |
| <i>Kabuli_wild_527865</i> | NA                                  | <i>Ca_kabuli_denovo</i> | 527865                  | A/G  | NA                 | NA                            | NA                 |
| <i>Kabuli_wild_527969</i> | NA                                  | <i>Ca_kabuli_denovo</i> | 527969                  | C/T  | NA                 | NA                            | NA                 |
| <i>Kabuli_wild_528265</i> | NA                                  | <i>Ca_kabuli_denovo</i> | 528265                  | A/G  | NA                 | NA                            | NA                 |
| <i>Kabuli_wild_528793</i> | NA                                  | <i>Ca_kabuli_denovo</i> | 528793                  | T/C  | NA                 | NA                            | NA                 |
| <i>Kabuli_wild_529357</i> | NA                                  | <i>Ca_kabuli_denovo</i> | 529357                  | A/G  | NA                 | NA                            | NA                 |
| <i>Kabuli_wild_529358</i> | NA                                  | <i>Ca_kabuli_denovo</i> | 529358                  | T/A  | NA                 | NA                            | NA                 |
| <i>Kabuli_wild_529504</i> | NA                                  | <i>Ca_kabuli_denovo</i> | 529504                  | G/T  | NA                 | NA                            | NA                 |
| <i>Kabuli_wild_529722</i> | NA                                  | <i>Ca_kabuli_denovo</i> | 529722                  | G/A  | NA                 | NA                            | NA                 |
| <i>Kabuli_wild_530269</i> | NA                                  | <i>Ca_kabuli_denovo</i> | 530269                  | A/G  | NA                 | NA                            | NA                 |
| <i>Kabuli_wild_534285</i> | NA                                  | <i>Ca_kabuli_denovo</i> | 534285                  | C/G  | NA                 | NA                            | NA                 |
| <i>Kabuli_wild_534351</i> | NA                                  | <i>Ca_kabuli_denovo</i> | 534351                  | T/C  | NA                 | NA                            | NA                 |
| <i>Kabuli_wild_535311</i> | NA                                  | <i>Ca_kabuli_denovo</i> | 535311                  | A/G  | NA                 | NA                            | NA                 |
| <i>Kabuli_wild_535317</i> | NA                                  | <i>Ca_kabuli_denovo</i> | 535317                  | C/T  | NA                 | NA                            | NA                 |

| SNP IDs                   | NCBI dbSNP accession IDs (NCBI_SS#) | Chromosomes             | Physical positions (bp) | SNPs | Gene accession IDs | Sequence components of genome | Putative functions |
|---------------------------|-------------------------------------|-------------------------|-------------------------|------|--------------------|-------------------------------|--------------------|
| <i>Kabuli_wild_535584</i> | NA                                  | <i>Ca_kabuli_denovo</i> | 535584                  | A/C  | NA                 | NA                            | NA                 |
| <i>Kabuli_wild_535650</i> | NA                                  | <i>Ca_kabuli_denovo</i> | 535650                  | C/G  | NA                 | NA                            | NA                 |
| <i>Kabuli_wild_536366</i> | NA                                  | <i>Ca_kabuli_denovo</i> | 536366                  | C/A  | NA                 | NA                            | NA                 |
| <i>Kabuli_wild_536417</i> | NA                                  | <i>Ca_kabuli_denovo</i> | 536417                  | A/C  | NA                 | NA                            | NA                 |
| <i>Kabuli_wild_537829</i> | NA                                  | <i>Ca_kabuli_denovo</i> | 537829                  | C/T  | NA                 | NA                            | NA                 |
| <i>Kabuli_wild_538006</i> | NA                                  | <i>Ca_kabuli_denovo</i> | 538006                  | G/A  | NA                 | NA                            | NA                 |
| <i>Kabuli_wild_538021</i> | NA                                  | <i>Ca_kabuli_denovo</i> | 538021                  | A/G  | NA                 | NA                            | NA                 |
| <i>Kabuli_wild_538504</i> | NA                                  | <i>Ca_kabuli_denovo</i> | 538504                  | A/T  | NA                 | NA                            | NA                 |
| <i>Kabuli_wild_538532</i> | NA                                  | <i>Ca_kabuli_denovo</i> | 538532                  | G/C  | NA                 | NA                            | NA                 |
| <i>Kabuli_wild_539180</i> | NA                                  | <i>Ca_kabuli_denovo</i> | 539180                  | T/C  | NA                 | NA                            | NA                 |
| <i>Kabuli_wild_540553</i> | NA                                  | <i>Ca_kabuli_denovo</i> | 540553                  | C/G  | NA                 | NA                            | NA                 |
| <i>Kabuli_wild_540589</i> | NA                                  | <i>Ca_kabuli_denovo</i> | 540589                  | C/T  | NA                 | NA                            | NA                 |
| <i>Kabuli_wild_541637</i> | NA                                  | <i>Ca_kabuli_denovo</i> | 541637                  | C/A  | NA                 | NA                            | NA                 |
| <i>Kabuli_wild_541649</i> | NA                                  | <i>Ca_kabuli_denovo</i> | 541649                  | G/A  | NA                 | NA                            | NA                 |
| <i>Kabuli_wild_543464</i> | NA                                  | <i>Ca_kabuli_denovo</i> | 543464                  | G/A  | NA                 | NA                            | NA                 |
| <i>Kabuli_wild_543946</i> | NA                                  | <i>Ca_kabuli_denovo</i> | 543946                  | A/G  | NA                 | NA                            | NA                 |
| <i>Kabuli_wild_544670</i> | NA                                  | <i>Ca_kabuli_denovo</i> | 544670                  | A/G  | NA                 | NA                            | NA                 |
| <i>Kabuli_wild_544688</i> | NA                                  | <i>Ca_kabuli_denovo</i> | 544688                  | G/C  | NA                 | NA                            | NA                 |
| <i>Kabuli_wild_545966</i> | NA                                  | <i>Ca_kabuli_denovo</i> | 545966                  | C/T  | NA                 | NA                            | NA                 |
| <i>Kabuli_wild_546020</i> | NA                                  | <i>Ca_kabuli_denovo</i> | 546020                  | C/T  | NA                 | NA                            | NA                 |
| <i>Kabuli_wild_546185</i> | NA                                  | <i>Ca_kabuli_denovo</i> | 546185                  | G/A  | NA                 | NA                            | NA                 |
| <i>Kabuli_wild_546196</i> | NA                                  | <i>Ca_kabuli_denovo</i> | 546196                  | C/T  | NA                 | NA                            | NA                 |
| <i>Kabuli_wild_546653</i> | NA                                  | <i>Ca_kabuli_denovo</i> | 546653                  | A/G  | NA                 | NA                            | NA                 |
| <i>Kabuli_wild_546778</i> | NA                                  | <i>Ca_kabuli_denovo</i> | 546778                  | G/A  | NA                 | NA                            | NA                 |
| <i>Kabuli_wild_547149</i> | NA                                  | <i>Ca_kabuli_denovo</i> | 547149                  | G/T  | NA                 | NA                            | NA                 |
| <i>Kabuli_wild_548246</i> | NA                                  | <i>Ca_kabuli_denovo</i> | 548246                  | T/C  | NA                 | NA                            | NA                 |
| <i>Kabuli_wild_548281</i> | NA                                  | <i>Ca_kabuli_denovo</i> | 548281                  | A/G  | NA                 | NA                            | NA                 |
| <i>Kabuli_wild_548399</i> | NA                                  | <i>Ca_kabuli_denovo</i> | 548399                  | A/G  | NA                 | NA                            | NA                 |
| <i>Kabuli_wild_549363</i> | NA                                  | <i>Ca_kabuli_denovo</i> | 549363                  | G/A  | NA                 | NA                            | NA                 |
| <i>Kabuli_wild_549366</i> | NA                                  | <i>Ca_kabuli_denovo</i> | 549366                  | A/G  | NA                 | NA                            | NA                 |
| <i>Kabuli_wild_549390</i> | NA                                  | <i>Ca_kabuli_denovo</i> | 549390                  | T/C  | NA                 | NA                            | NA                 |
| <i>Kabuli_wild_549707</i> | NA                                  | <i>Ca_kabuli_denovo</i> | 549707                  | T/C  | NA                 | NA                            | NA                 |
| <i>Kabuli_wild_549987</i> | NA                                  | <i>Ca_kabuli_denovo</i> | 549987                  | T/G  | NA                 | NA                            | NA                 |
| <i>Kabuli_wild_551344</i> | NA                                  | <i>Ca_kabuli_denovo</i> | 551344                  | G/T  | NA                 | NA                            | NA                 |
| <i>Kabuli_wild_551442</i> | NA                                  | <i>Ca_kabuli_denovo</i> | 551442                  | A/G  | NA                 | NA                            | NA                 |
| <i>Kabuli_wild_551985</i> | NA                                  | <i>Ca_kabuli_denovo</i> | 551985                  | A/G  | NA                 | NA                            | NA                 |
| <i>Kabuli_wild_551990</i> | NA                                  | <i>Ca_kabuli_denovo</i> | 551990                  | A/C  | NA                 | NA                            | NA                 |
| <i>Kabuli_wild_553264</i> | NA                                  | <i>Ca_kabuli_denovo</i> | 553264                  | A/G  | NA                 | NA                            | NA                 |
| <i>Kabuli_wild_553291</i> | NA                                  | <i>Ca_kabuli_denovo</i> | 553291                  | T/C  | NA                 | NA                            | NA                 |
| <i>Kabuli_wild_553435</i> | NA                                  | <i>Ca_kabuli_denovo</i> | 553435                  | T/C  | NA                 | NA                            | NA                 |
| <i>Kabuli_wild_553452</i> | NA                                  | <i>Ca_kabuli_denovo</i> | 553452                  | G/C  | NA                 | NA                            | NA                 |
| <i>Kabuli_wild_554029</i> | NA                                  | <i>Ca_kabuli_denovo</i> | 554029                  | C/G  | NA                 | NA                            | NA                 |
| <i>Kabuli_wild_555486</i> | NA                                  | <i>Ca_kabuli_denovo</i> | 555486                  | C/A  | NA                 | NA                            | NA                 |
| <i>Kabuli_wild_555545</i> | NA                                  | <i>Ca_kabuli_denovo</i> | 555545                  | A/G  | NA                 | NA                            | NA                 |

| SNP IDs            | NCBI dbSNP accession IDs (NCBI_SS#) | Chromosomes      | Physical positions (bp) | SNPs | Gene accession IDs | Sequence components of genome | Putative functions |
|--------------------|-------------------------------------|------------------|-------------------------|------|--------------------|-------------------------------|--------------------|
| Kabuli_wild_555664 | NA                                  | Ca_kabuli_denovo | 555664                  | T/C  | NA                 | NA                            | NA                 |
| Kabuli_wild_559086 | NA                                  | Ca_kabuli_denovo | 559086                  | C/T  | NA                 | NA                            | NA                 |
| Kabuli_wild_559243 | NA                                  | Ca_kabuli_denovo | 559243                  | G/T  | NA                 | NA                            | NA                 |
| Kabuli_wild_559295 | NA                                  | Ca_kabuli_denovo | 559295                  | C/T  | NA                 | NA                            | NA                 |
| Kabuli_wild_559651 | NA                                  | Ca_kabuli_denovo | 559651                  | G/C  | NA                 | NA                            | NA                 |
| Kabuli_wild_559690 | NA                                  | Ca_kabuli_denovo | 559690                  | C/T  | NA                 | NA                            | NA                 |
| Kabuli_wild_560028 | NA                                  | Ca_kabuli_denovo | 560028                  | A/G  | NA                 | NA                            | NA                 |
| Kabuli_wild_560544 | NA                                  | Ca_kabuli_denovo | 560544                  | G/C  | NA                 | NA                            | NA                 |
| Kabuli_wild_560555 | NA                                  | Ca_kabuli_denovo | 560555                  | T/C  | NA                 | NA                            | NA                 |
| Kabuli_wild_561151 | NA                                  | Ca_kabuli_denovo | 561151                  | C/G  | NA                 | NA                            | NA                 |
| Kabuli_wild_561178 | NA                                  | Ca_kabuli_denovo | 561178                  | A/C  | NA                 | NA                            | NA                 |
| Kabuli_wild_563359 | NA                                  | Ca_kabuli_denovo | 563359                  | T/G  | NA                 | NA                            | NA                 |
| Kabuli_wild_563402 | NA                                  | Ca_kabuli_denovo | 563402                  | C/T  | NA                 | NA                            | NA                 |
| Kabuli_wild_564065 | NA                                  | Ca_kabuli_denovo | 564065                  | G/C  | NA                 | NA                            | NA                 |
| Kabuli_wild_564933 | NA                                  | Ca_kabuli_denovo | 564933                  | C/T  | NA                 | NA                            | NA                 |
| Kabuli_wild_565756 | NA                                  | Ca_kabuli_denovo | 565756                  | A/C  | NA                 | NA                            | NA                 |
| Kabuli_wild_565758 | NA                                  | Ca_kabuli_denovo | 565758                  | A/G  | NA                 | NA                            | NA                 |
| Kabuli_wild_567070 | NA                                  | Ca_kabuli_denovo | 567070                  | T/G  | NA                 | NA                            | NA                 |
| Kabuli_wild_567556 | NA                                  | Ca_kabuli_denovo | 567556                  | G/A  | NA                 | NA                            | NA                 |
| Kabuli_wild_568374 | NA                                  | Ca_kabuli_denovo | 568374                  | A/G  | NA                 | NA                            | NA                 |
| Kabuli_wild_569448 | NA                                  | Ca_kabuli_denovo | 569448                  | T/G  | NA                 | NA                            | NA                 |
| Kabuli_wild_569511 | NA                                  | Ca_kabuli_denovo | 569511                  | C/G  | NA                 | NA                            | NA                 |
| Kabuli_wild_570619 | NA                                  | Ca_kabuli_denovo | 570619                  | C/T  | NA                 | NA                            | NA                 |
| Kabuli_wild_570654 | NA                                  | Ca_kabuli_denovo | 570654                  | G/C  | NA                 | NA                            | NA                 |
| Kabuli_wild_571978 | NA                                  | Ca_kabuli_denovo | 571978                  | G/C  | NA                 | NA                            | NA                 |
| Kabuli_wild_572005 | NA                                  | Ca_kabuli_denovo | 572005                  | T/C  | NA                 | NA                            | NA                 |
| Kabuli_wild_572360 | NA                                  | Ca_kabuli_denovo | 572360                  | A/C  | NA                 | NA                            | NA                 |
| Kabuli_wild_572374 | NA                                  | Ca_kabuli_denovo | 572374                  | G/C  | NA                 | NA                            | NA                 |
| Kabuli_wild_572746 | NA                                  | Ca_kabuli_denovo | 572746                  | C/G  | NA                 | NA                            | NA                 |
| Kabuli_wild_573298 | NA                                  | Ca_kabuli_denovo | 573298                  | T/G  | NA                 | NA                            | NA                 |
| Kabuli_wild_573510 | NA                                  | Ca_kabuli_denovo | 573510                  | T/G  | NA                 | NA                            | NA                 |
| Kabuli_wild_574116 | NA                                  | Ca_kabuli_denovo | 574116                  | C/G  | NA                 | NA                            | NA                 |
| Kabuli_wild_574137 | NA                                  | Ca_kabuli_denovo | 574137                  | C/G  | NA                 | NA                            | NA                 |
| Kabuli_wild_574382 | NA                                  | Ca_kabuli_denovo | 574382                  | G/T  | NA                 | NA                            | NA                 |
| Kabuli_wild_574539 | NA                                  | Ca_kabuli_denovo | 574539                  | A/G  | NA                 | NA                            | NA                 |
| Kabuli_wild_576859 | NA                                  | Ca_kabuli_denovo | 576859                  | A/C  | NA                 | NA                            | NA                 |
| Kabuli_wild_576870 | NA                                  | Ca_kabuli_denovo | 576870                  | C/T  | NA                 | NA                            | NA                 |
| Kabuli_wild_577670 | NA                                  | Ca_kabuli_denovo | 577670                  | A/C  | NA                 | NA                            | NA                 |
| Kabuli_wild_577975 | NA                                  | Ca_kabuli_denovo | 577975                  | G/A  | NA                 | NA                            | NA                 |
| Kabuli_wild_578000 | NA                                  | Ca_kabuli_denovo | 578000                  | G/C  | NA                 | NA                            | NA                 |
| Kabuli_wild_578034 | NA                                  | Ca_kabuli_denovo | 578034                  | T/C  | NA                 | NA                            | NA                 |
| Kabuli_wild_578189 | NA                                  | Ca_kabuli_denovo | 578189                  | C/G  | NA                 | NA                            | NA                 |
| Kabuli_wild_578577 | NA                                  | Ca_kabuli_denovo | 578577                  | A/G  | NA                 | NA                            | NA                 |
| Kabuli_wild_578582 | NA                                  | Ca_kabuli_denovo | 578582                  | G/A  | NA                 | NA                            | NA                 |

| SNP IDs            | NCBI dbSNP accession IDs (NCBI_SS#) | Chromosomes      | Physical positions (bp) | SNPs | Gene accession IDs | Sequence components of genome | Putative functions |
|--------------------|-------------------------------------|------------------|-------------------------|------|--------------------|-------------------------------|--------------------|
| Kabuli_wild_581223 | NA                                  | Ca_kabuli_denovo | 581223                  | C/A  | NA                 | NA                            | NA                 |
| Kabuli_wild_581528 | NA                                  | Ca_kabuli_denovo | 581528                  | G/A  | NA                 | NA                            | NA                 |
| Kabuli_wild_581573 | NA                                  | Ca_kabuli_denovo | 581573                  | G/C  | NA                 | NA                            | NA                 |
| Kabuli_wild_581660 | NA                                  | Ca_kabuli_denovo | 581660                  | A/T  | NA                 | NA                            | NA                 |
| Kabuli_wild_581696 | NA                                  | Ca_kabuli_denovo | 581696                  | C/T  | NA                 | NA                            | NA                 |
| Kabuli_wild_582648 | NA                                  | Ca_kabuli_denovo | 582648                  | C/T  | NA                 | NA                            | NA                 |
| Kabuli_wild_582728 | NA                                  | Ca_kabuli_denovo | 582728                  | G/A  | NA                 | NA                            | NA                 |
| Kabuli_wild_582746 | NA                                  | Ca_kabuli_denovo | 582746                  | G/A  | NA                 | NA                            | NA                 |
| Kabuli_wild_583254 | NA                                  | Ca_kabuli_denovo | 583254                  | T/C  | NA                 | NA                            | NA                 |
| Kabuli_wild_583704 | NA                                  | Ca_kabuli_denovo | 583704                  | A/C  | NA                 | NA                            | NA                 |
| Kabuli_wild_583713 | NA                                  | Ca_kabuli_denovo | 583713                  | A/G  | NA                 | NA                            | NA                 |
| Kabuli_wild_583958 | NA                                  | Ca_kabuli_denovo | 583958                  | C/T  | NA                 | NA                            | NA                 |
| Kabuli_wild_584062 | NA                                  | Ca_kabuli_denovo | 584062                  | G/C  | NA                 | NA                            | NA                 |
| Kabuli_wild_585168 | NA                                  | Ca_kabuli_denovo | 585168                  | G/A  | NA                 | NA                            | NA                 |
| Kabuli_wild_585376 | NA                                  | Ca_kabuli_denovo | 585376                  | A/G  | NA                 | NA                            | NA                 |
| Kabuli_wild_585403 | NA                                  | Ca_kabuli_denovo | 585403                  | C/T  | NA                 | NA                            | NA                 |
| Kabuli_wild_586912 | NA                                  | Ca_kabuli_denovo | 586912                  | T/C  | NA                 | NA                            | NA                 |
| Kabuli_wild_586933 | NA                                  | Ca_kabuli_denovo | 586933                  | G/T  | NA                 | NA                            | NA                 |
| Kabuli_wild_587187 | NA                                  | Ca_kabuli_denovo | 587187                  | T/G  | NA                 | NA                            | NA                 |
| Kabuli_wild_587260 | NA                                  | Ca_kabuli_denovo | 587260                  | A/G  | NA                 | NA                            | NA                 |
| Kabuli_wild_587443 | NA                                  | Ca_kabuli_denovo | 587443                  | G/A  | NA                 | NA                            | NA                 |
| Kabuli_wild_587579 | NA                                  | Ca_kabuli_denovo | 587579                  | A/C  | NA                 | NA                            | NA                 |
| Kabuli_wild_588101 | NA                                  | Ca_kabuli_denovo | 588101                  | T/A  | NA                 | NA                            | NA                 |
| Kabuli_wild_588108 | NA                                  | Ca_kabuli_denovo | 588108                  | A/G  | NA                 | NA                            | NA                 |
| Kabuli_wild_588836 | NA                                  | Ca_kabuli_denovo | 588836                  | G/T  | NA                 | NA                            | NA                 |
| Kabuli_wild_589327 | NA                                  | Ca_kabuli_denovo | 589327                  | A/G  | NA                 | NA                            | NA                 |
| Kabuli_wild_589417 | NA                                  | Ca_kabuli_denovo | 589417                  | A/G  | NA                 | NA                            | NA                 |
| Kabuli_wild_589426 | NA                                  | Ca_kabuli_denovo | 589426                  | G/A  | NA                 | NA                            | NA                 |
| Kabuli_wild_590170 | NA                                  | Ca_kabuli_denovo | 590170                  | C/G  | NA                 | NA                            | NA                 |
| Kabuli_wild_590171 | NA                                  | Ca_kabuli_denovo | 590171                  | G/A  | NA                 | NA                            | NA                 |
| Kabuli_wild_590627 | NA                                  | Ca_kabuli_denovo | 590627                  | T/G  | NA                 | NA                            | NA                 |
| Kabuli_wild_590956 | NA                                  | Ca_kabuli_denovo | 590956                  | T/G  | NA                 | NA                            | NA                 |
| Kabuli_wild_591330 | NA                                  | Ca_kabuli_denovo | 591330                  | A/G  | NA                 | NA                            | NA                 |
| Kabuli_wild_591468 | NA                                  | Ca_kabuli_denovo | 591468                  | G/C  | NA                 | NA                            | NA                 |
| Kabuli_wild_591481 | NA                                  | Ca_kabuli_denovo | 591481                  | G/T  | NA                 | NA                            | NA                 |
| Kabuli_wild_593600 | NA                                  | Ca_kabuli_denovo | 593600                  | T/C  | NA                 | NA                            | NA                 |
| Kabuli_wild_593711 | NA                                  | Ca_kabuli_denovo | 593711                  | A/C  | NA                 | NA                            | NA                 |
| Kabuli_wild_593813 | NA                                  | Ca_kabuli_denovo | 593813                  | A/C  | NA                 | NA                            | NA                 |
| Kabuli_wild_594276 | NA                                  | Ca_kabuli_denovo | 594276                  | G/A  | NA                 | NA                            | NA                 |
| Kabuli_wild_594849 | NA                                  | Ca_kabuli_denovo | 594849                  | A/G  | NA                 | NA                            | NA                 |
| Kabuli_wild_594889 | NA                                  | Ca_kabuli_denovo | 594889                  | T/C  | NA                 | NA                            | NA                 |
| Kabuli_wild_595063 | NA                                  | Ca_kabuli_denovo | 595063                  | C/T  | NA                 | NA                            | NA                 |
| Kabuli_wild_595100 | NA                                  | Ca_kabuli_denovo | 595100                  | T/A  | NA                 | NA                            | NA                 |
| Kabuli_wild_596511 | NA                                  | Ca_kabuli_denovo | 596511                  | C/T  | NA                 | NA                            | NA                 |

| SNP IDs            | NCBI dbSNP accession IDs (NCBI_SS#) | Chromosomes      | Physical positions (bp) | SNPs | Gene accession IDs | Sequence components of genome | Putative functions |
|--------------------|-------------------------------------|------------------|-------------------------|------|--------------------|-------------------------------|--------------------|
| Kabuli_wild_596520 | NA                                  | Ca_kabuli_denovo | 596520                  | C/G  | NA                 | NA                            | NA                 |
| Kabuli_wild_598263 | NA                                  | Ca_kabuli_denovo | 598263                  | C/T  | NA                 | NA                            | NA                 |
| Kabuli_wild_598320 | NA                                  | Ca_kabuli_denovo | 598320                  | T/G  | NA                 | NA                            | NA                 |
| Kabuli_wild_598334 | NA                                  | Ca_kabuli_denovo | 598334                  | G/T  | NA                 | NA                            | NA                 |
| Kabuli_wild_599242 | NA                                  | Ca_kabuli_denovo | 599242                  | G/C  | NA                 | NA                            | NA                 |
| Kabuli_wild_600765 | NA                                  | Ca_kabuli_denovo | 600765                  | A/G  | NA                 | NA                            | NA                 |
| Kabuli_wild_600802 | NA                                  | Ca_kabuli_denovo | 600802                  | T/A  | NA                 | NA                            | NA                 |
| Kabuli_wild_601455 | NA                                  | Ca_kabuli_denovo | 601455                  | G/T  | NA                 | NA                            | NA                 |
| Kabuli_wild_601460 | NA                                  | Ca_kabuli_denovo | 601460                  | G/C  | NA                 | NA                            | NA                 |
| Kabuli_wild_601645 | NA                                  | Ca_kabuli_denovo | 601645                  | C/G  | NA                 | NA                            | NA                 |
| Kabuli_wild_602213 | NA                                  | Ca_kabuli_denovo | 602213                  | A/C  | NA                 | NA                            | NA                 |
| Kabuli_wild_602511 | NA                                  | Ca_kabuli_denovo | 602511                  | C/G  | NA                 | NA                            | NA                 |
| Kabuli_wild_602538 | NA                                  | Ca_kabuli_denovo | 602538                  | C/T  | NA                 | NA                            | NA                 |
| Kabuli_wild_602741 | NA                                  | Ca_kabuli_denovo | 602741                  | G/A  | NA                 | NA                            | NA                 |
| Kabuli_wild_602746 | NA                                  | Ca_kabuli_denovo | 602746                  | C/T  | NA                 | NA                            | NA                 |
| Kabuli_wild_603779 | NA                                  | Ca_kabuli_denovo | 603779                  | G/C  | NA                 | NA                            | NA                 |
| Kabuli_wild_603790 | NA                                  | Ca_kabuli_denovo | 603790                  | C/A  | NA                 | NA                            | NA                 |
| Kabuli_wild_603797 | NA                                  | Ca_kabuli_denovo | 603797                  | T/C  | NA                 | NA                            | NA                 |
| Kabuli_wild_603818 | NA                                  | Ca_kabuli_denovo | 603818                  | A/G  | NA                 | NA                            | NA                 |
| Kabuli_wild_604703 | NA                                  | Ca_kabuli_denovo | 604703                  | C/T  | NA                 | NA                            | NA                 |
| Kabuli_wild_604730 | NA                                  | Ca_kabuli_denovo | 604730                  | G/C  | NA                 | NA                            | NA                 |
| Kabuli_wild_605043 | NA                                  | Ca_kabuli_denovo | 605043                  | G/C  | NA                 | NA                            | NA                 |
| Kabuli_wild_605058 | NA                                  | Ca_kabuli_denovo | 605058                  | C/T  | NA                 | NA                            | NA                 |
| Kabuli_wild_605512 | NA                                  | Ca_kabuli_denovo | 605512                  | A/C  | NA                 | NA                            | NA                 |
| Kabuli_wild_605513 | NA                                  | Ca_kabuli_denovo | 605513                  | A/G  | NA                 | NA                            | NA                 |
| Kabuli_wild_605825 | NA                                  | Ca_kabuli_denovo | 605825                  | T/C  | NA                 | NA                            | NA                 |
| Kabuli_wild_605832 | NA                                  | Ca_kabuli_denovo | 605832                  | A/T  | NA                 | NA                            | NA                 |
| Kabuli_wild_606742 | NA                                  | Ca_kabuli_denovo | 606742                  | T/G  | NA                 | NA                            | NA                 |
| Kabuli_wild_606761 | NA                                  | Ca_kabuli_denovo | 606761                  | T/C  | NA                 | NA                            | NA                 |
| Kabuli_wild_608456 | NA                                  | Ca_kabuli_denovo | 608456                  | G/A  | NA                 | NA                            | NA                 |
| Kabuli_wild_608936 | NA                                  | Ca_kabuli_denovo | 608936                  | A/G  | NA                 | NA                            | NA                 |
| Kabuli_wild_609910 | NA                                  | Ca_kabuli_denovo | 609910                  | C/G  | NA                 | NA                            | NA                 |
| Kabuli_wild_610708 | NA                                  | Ca_kabuli_denovo | 610708                  | C/G  | NA                 | NA                            | NA                 |
| Kabuli_wild_612478 | NA                                  | Ca_kabuli_denovo | 612478                  | G/T  | NA                 | NA                            | NA                 |
| Kabuli_wild_612884 | NA                                  | Ca_kabuli_denovo | 612884                  | A/C  | NA                 | NA                            | NA                 |
| Kabuli_wild_614624 | NA                                  | Ca_kabuli_denovo | 614624                  | A/G  | NA                 | NA                            | NA                 |
| Kabuli_wild_614875 | NA                                  | Ca_kabuli_denovo | 614875                  | G/C  | NA                 | NA                            | NA                 |
| Kabuli_wild_615541 | NA                                  | Ca_kabuli_denovo | 615541                  | A/T  | NA                 | NA                            | NA                 |
| Kabuli_wild_615556 | NA                                  | Ca_kabuli_denovo | 615556                  | G/A  | NA                 | NA                            | NA                 |
| Kabuli_wild_616084 | NA                                  | Ca_kabuli_denovo | 616084                  | A/G  | NA                 | NA                            | NA                 |
| Kabuli_wild_616413 | NA                                  | Ca_kabuli_denovo | 616413                  | G/C  | NA                 | NA                            | NA                 |
| Kabuli_wild_616426 | NA                                  | Ca_kabuli_denovo | 616426                  | G/C  | NA                 | NA                            | NA                 |
| Kabuli_wild_616479 | NA                                  | Ca_kabuli_denovo | 616479                  | A/C  | NA                 | NA                            | NA                 |
| Kabuli_wild_616480 | NA                                  | Ca_kabuli_denovo | 616480                  | A/C  | NA                 | NA                            | NA                 |

| SNP IDs            | NCBI dbSNP accession IDs (NCBI_SS#) | Chromosomes      | Physical positions (bp) | SNPs | Gene accession IDs | Sequence components of genome | Putative functions |
|--------------------|-------------------------------------|------------------|-------------------------|------|--------------------|-------------------------------|--------------------|
| Kabuli_wild_616547 | NA                                  | Ca_kabuli_denovo | 616547                  | T/G  | NA                 | NA                            | NA                 |
| Kabuli_wild_618264 | NA                                  | Ca_kabuli_denovo | 618264                  | C/G  | NA                 | NA                            | NA                 |
| Kabuli_wild_618580 | NA                                  | Ca_kabuli_denovo | 618580                  | A/C  | NA                 | NA                            | NA                 |
| Kabuli_wild_619685 | NA                                  | Ca_kabuli_denovo | 619685                  | G/A  | NA                 | NA                            | NA                 |
| Kabuli_wild_620200 | NA                                  | Ca_kabuli_denovo | 620200                  | A/G  | NA                 | NA                            | NA                 |
| Kabuli_wild_620252 | NA                                  | Ca_kabuli_denovo | 620252                  | C/T  | NA                 | NA                            | NA                 |
| Kabuli_wild_620268 | NA                                  | Ca_kabuli_denovo | 620268                  | C/T  | NA                 | NA                            | NA                 |
| Kabuli_wild_620972 | NA                                  | Ca_kabuli_denovo | 620972                  | C/G  | NA                 | NA                            | NA                 |
| Kabuli_wild_621701 | NA                                  | Ca_kabuli_denovo | 621701                  | C/A  | NA                 | NA                            | NA                 |
| Kabuli_wild_622885 | NA                                  | Ca_kabuli_denovo | 622885                  | G/C  | NA                 | NA                            | NA                 |
| Kabuli_wild_624337 | NA                                  | Ca_kabuli_denovo | 624337                  | T/G  | NA                 | NA                            | NA                 |
| Kabuli_wild_625066 | NA                                  | Ca_kabuli_denovo | 625066                  | C/T  | NA                 | NA                            | NA                 |
| Kabuli_wild_629032 | NA                                  | Ca_kabuli_denovo | 629032                  | C/T  | NA                 | NA                            | NA                 |
| Kabuli_wild_629064 | NA                                  | Ca_kabuli_denovo | 629064                  | A/T  | NA                 | NA                            | NA                 |
| Kabuli_wild_629718 | NA                                  | Ca_kabuli_denovo | 629718                  | G/C  | NA                 | NA                            | NA                 |
| Kabuli_wild_629985 | NA                                  | Ca_kabuli_denovo | 629985                  | G/C  | NA                 | NA                            | NA                 |
| Kabuli_wild_630002 | NA                                  | Ca_kabuli_denovo | 630002                  | T/A  | NA                 | NA                            | NA                 |
| Kabuli_wild_630482 | NA                                  | Ca_kabuli_denovo | 630482                  | T/C  | NA                 | NA                            | NA                 |
| Kabuli_wild_630496 | NA                                  | Ca_kabuli_denovo | 630496                  | C/G  | NA                 | NA                            | NA                 |
| Kabuli_wild_630759 | NA                                  | Ca_kabuli_denovo | 630759                  | A/G  | NA                 | NA                            | NA                 |
| Kabuli_wild_631091 | NA                                  | Ca_kabuli_denovo | 631091                  | C/T  | NA                 | NA                            | NA                 |
| Kabuli_wild_631103 | NA                                  | Ca_kabuli_denovo | 631103                  | A/T  | NA                 | NA                            | NA                 |
| Kabuli_wild_631714 | NA                                  | Ca_kabuli_denovo | 631714                  | C/G  | NA                 | NA                            | NA                 |
| Kabuli_wild_631744 | NA                                  | Ca_kabuli_denovo | 631744                  | T/C  | NA                 | NA                            | NA                 |
| Kabuli_wild_632080 | NA                                  | Ca_kabuli_denovo | 632080                  | C/A  | NA                 | NA                            | NA                 |
| Kabuli_wild_632116 | NA                                  | Ca_kabuli_denovo | 632116                  | A/G  | NA                 | NA                            | NA                 |
| Kabuli_wild_632586 | NA                                  | Ca_kabuli_denovo | 632586                  | C/T  | NA                 | NA                            | NA                 |
| Kabuli_wild_632606 | NA                                  | Ca_kabuli_denovo | 632606                  | T/G  | NA                 | NA                            | NA                 |
| Kabuli_wild_633135 | NA                                  | Ca_kabuli_denovo | 633135                  | C/T  | NA                 | NA                            | NA                 |
| Kabuli_wild_633196 | NA                                  | Ca_kabuli_denovo | 633196                  | G/C  | NA                 | NA                            | NA                 |
| Kabuli_wild_633208 | NA                                  | Ca_kabuli_denovo | 633208                  | A/G  | NA                 | NA                            | NA                 |
| Kabuli_wild_634248 | NA                                  | Ca_kabuli_denovo | 634248                  | G/C  | NA                 | NA                            | NA                 |
| Kabuli_wild_635118 | NA                                  | Ca_kabuli_denovo | 635118                  | T/C  | NA                 | NA                            | NA                 |
| Kabuli_wild_635121 | NA                                  | Ca_kabuli_denovo | 635121                  | G/A  | NA                 | NA                            | NA                 |
| Kabuli_wild_635610 | NA                                  | Ca_kabuli_denovo | 635610                  | C/T  | NA                 | NA                            | NA                 |
| Kabuli_wild_635629 | NA                                  | Ca_kabuli_denovo | 635629                  | C/G  | NA                 | NA                            | NA                 |
| Kabuli_wild_635995 | NA                                  | Ca_kabuli_denovo | 635995                  | G/A  | NA                 | NA                            | NA                 |
| Kabuli_wild_636031 | NA                                  | Ca_kabuli_denovo | 636031                  | T/C  | NA                 | NA                            | NA                 |
| Kabuli_wild_636405 | NA                                  | Ca_kabuli_denovo | 636405                  | G/T  | NA                 | NA                            | NA                 |
| Kabuli_wild_636414 | NA                                  | Ca_kabuli_denovo | 636414                  | C/T  | NA                 | NA                            | NA                 |
| Kabuli_wild_636580 | NA                                  | Ca_kabuli_denovo | 636580                  | G/A  | NA                 | NA                            | NA                 |
| Kabuli_wild_636592 | NA                                  | Ca_kabuli_denovo | 636592                  | A/G  | NA                 | NA                            | NA                 |
| Kabuli_wild_637015 | NA                                  | Ca_kabuli_denovo | 637015                  | A/T  | NA                 | NA                            | NA                 |
| Kabuli_wild_637519 | NA                                  | Ca_kabuli_denovo | 637519                  | A/G  | NA                 | NA                            | NA                 |

| SNP IDs            | NCBI dbSNP accession IDs (NCBI_SS#) | Chromosomes      | Physical positions (bp) | SNPs | Gene accession IDs | Sequence components of genome | Putative functions |
|--------------------|-------------------------------------|------------------|-------------------------|------|--------------------|-------------------------------|--------------------|
| Kabuli_wild_637545 | NA                                  | Ca_kabuli_denovo | 637545                  | A/C  | NA                 | NA                            | NA                 |
| Kabuli_wild_637635 | NA                                  | Ca_kabuli_denovo | 637635                  | T/C  | NA                 | NA                            | NA                 |
| Kabuli_wild_637639 | NA                                  | Ca_kabuli_denovo | 637639                  | T/C  | NA                 | NA                            | NA                 |
| Kabuli_wild_637641 | NA                                  | Ca_kabuli_denovo | 637641                  | T/C  | NA                 | NA                            | NA                 |
| Kabuli_wild_638111 | NA                                  | Ca_kabuli_denovo | 638111                  | T/C  | NA                 | NA                            | NA                 |
| Kabuli_wild_638224 | NA                                  | Ca_kabuli_denovo | 638224                  | T/G  | NA                 | NA                            | NA                 |
| Kabuli_wild_638242 | NA                                  | Ca_kabuli_denovo | 638242                  | A/G  | NA                 | NA                            | NA                 |
| Kabuli_wild_638542 | NA                                  | Ca_kabuli_denovo | 638542                  | C/T  | NA                 | NA                            | NA                 |
| Kabuli_wild_638620 | NA                                  | Ca_kabuli_denovo | 638620                  | T/A  | NA                 | NA                            | NA                 |
| Kabuli_wild_640149 | NA                                  | Ca_kabuli_denovo | 640149                  | C/T  | NA                 | NA                            | NA                 |
| Kabuli_wild_640150 | NA                                  | Ca_kabuli_denovo | 640150                  | T/C  | NA                 | NA                            | NA                 |
| Kabuli_wild_641218 | NA                                  | Ca_kabuli_denovo | 641218                  | C/T  | NA                 | NA                            | NA                 |
| Kabuli_wild_641221 | NA                                  | Ca_kabuli_denovo | 641221                  | G/T  | NA                 | NA                            | NA                 |
| Kabuli_wild_641236 | NA                                  | Ca_kabuli_denovo | 641236                  | G/T  | NA                 | NA                            | NA                 |
| Kabuli_wild_641240 | NA                                  | Ca_kabuli_denovo | 641240                  | T/A  | NA                 | NA                            | NA                 |
| Kabuli_wild_641736 | NA                                  | Ca_kabuli_denovo | 641736                  | G/A  | NA                 | NA                            | NA                 |
| Kabuli_wild_642168 | NA                                  | Ca_kabuli_denovo | 642168                  | G/C  | NA                 | NA                            | NA                 |
| Kabuli_wild_643259 | NA                                  | Ca_kabuli_denovo | 643259                  | G/A  | NA                 | NA                            | NA                 |
| Kabuli_wild_643319 | NA                                  | Ca_kabuli_denovo | 643319                  | T/C  | NA                 | NA                            | NA                 |
| Kabuli_wild_643511 | NA                                  | Ca_kabuli_denovo | 643511                  | A/C  | NA                 | NA                            | NA                 |
| Kabuli_wild_643685 | NA                                  | Ca_kabuli_denovo | 643685                  | A/G  | NA                 | NA                            | NA                 |
| Kabuli_wild_643693 | NA                                  | Ca_kabuli_denovo | 643693                  | T/C  | NA                 | NA                            | NA                 |
| Kabuli_wild_645114 | NA                                  | Ca_kabuli_denovo | 645114                  | G/A  | NA                 | NA                            | NA                 |
| Kabuli_wild_645380 | NA                                  | Ca_kabuli_denovo | 645380                  | A/C  | NA                 | NA                            | NA                 |
| Kabuli_wild_646168 | NA                                  | Ca_kabuli_denovo | 646168                  | C/G  | NA                 | NA                            | NA                 |
| Kabuli_wild_646170 | NA                                  | Ca_kabuli_denovo | 646170                  | A/G  | NA                 | NA                            | NA                 |
| Kabuli_wild_647559 | NA                                  | Ca_kabuli_denovo | 647559                  | G/A  | NA                 | NA                            | NA                 |
| Kabuli_wild_650878 | NA                                  | Ca_kabuli_denovo | 650878                  | A/T  | NA                 | NA                            | NA                 |
| Kabuli_wild_651191 | NA                                  | Ca_kabuli_denovo | 651191                  | A/G  | NA                 | NA                            | NA                 |
| Kabuli_wild_652386 | NA                                  | Ca_kabuli_denovo | 652386                  | A/G  | NA                 | NA                            | NA                 |
| Kabuli_wild_652389 | NA                                  | Ca_kabuli_denovo | 652389                  | T/G  | NA                 | NA                            | NA                 |
| Kabuli_wild_654917 | NA                                  | Ca_kabuli_denovo | 654917                  | C/T  | NA                 | NA                            | NA                 |
| Kabuli_wild_654977 | NA                                  | Ca_kabuli_denovo | 654977                  | C/T  | NA                 | NA                            | NA                 |
| Kabuli_wild_655332 | NA                                  | Ca_kabuli_denovo | 655332                  | C/T  | NA                 | NA                            | NA                 |
| Kabuli_wild_655341 | NA                                  | Ca_kabuli_denovo | 655341                  | G/C  | NA                 | NA                            | NA                 |
| Kabuli_wild_656346 | NA                                  | Ca_kabuli_denovo | 656346                  | C/T  | NA                 | NA                            | NA                 |
| Kabuli_wild_656910 | NA                                  | Ca_kabuli_denovo | 656910                  | A/G  | NA                 | NA                            | NA                 |
| Kabuli_wild_657342 | NA                                  | Ca_kabuli_denovo | 657342                  | T/G  | NA                 | NA                            | NA                 |
| Kabuli_wild_657379 | NA                                  | Ca_kabuli_denovo | 657379                  | G/C  | NA                 | NA                            | NA                 |
| Kabuli_wild_657617 | NA                                  | Ca_kabuli_denovo | 657617                  | C/T  | NA                 | NA                            | NA                 |
| Kabuli_wild_658942 | NA                                  | Ca_kabuli_denovo | 658942                  | T/G  | NA                 | NA                            | NA                 |
| Kabuli_wild_660391 | NA                                  | Ca_kabuli_denovo | 660391                  | G/C  | NA                 | NA                            | NA                 |
| Kabuli_wild_660402 | NA                                  | Ca_kabuli_denovo | 660402                  | C/T  | NA                 | NA                            | NA                 |
| Kabuli_wild_660555 | NA                                  | Ca_kabuli_denovo | 660555                  | A/G  | NA                 | NA                            | NA                 |



| SNP IDs            | NCBI dbSNP accession IDs (NCBI_SS#) | Chromosomes      | Physical positions (bp) | SNPs | Gene accession IDs | Sequence components of genome | Putative functions |
|--------------------|-------------------------------------|------------------|-------------------------|------|--------------------|-------------------------------|--------------------|
| Kabuli_wild_660656 | NA                                  | Ca_kabuli_denovo | 660656                  | G/A  | NA                 | NA                            | NA                 |
| Kabuli_wild_660731 | NA                                  | Ca_kabuli_denovo | 660731                  | G/T  | NA                 | NA                            | NA                 |
| Kabuli_wild_661415 | NA                                  | Ca_kabuli_denovo | 661415                  | C/T  | NA                 | NA                            | NA                 |
| Kabuli_wild_661434 | NA                                  | Ca_kabuli_denovo | 661434                  | C/G  | NA                 | NA                            | NA                 |
| Kabuli_wild_662373 | NA                                  | Ca_kabuli_denovo | 662373                  | G/T  | NA                 | NA                            | NA                 |
| Kabuli_wild_662427 | NA                                  | Ca_kabuli_denovo | 662427                  | G/C  | NA                 | NA                            | NA                 |
| Kabuli_wild_662973 | NA                                  | Ca_kabuli_denovo | 662973                  | T/G  | NA                 | NA                            | NA                 |
| Kabuli_wild_663171 | NA                                  | Ca_kabuli_denovo | 663171                  | C/G  | NA                 | NA                            | NA                 |
| Kabuli_wild_663212 | NA                                  | Ca_kabuli_denovo | 663212                  | T/C  | NA                 | NA                            | NA                 |
| Kabuli_wild_663659 | NA                                  | Ca_kabuli_denovo | 663659                  | G/A  | NA                 | NA                            | NA                 |
| Kabuli_wild_663884 | NA                                  | Ca_kabuli_denovo | 663884                  | A/G  | NA                 | NA                            | NA                 |
| Kabuli_wild_663921 | NA                                  | Ca_kabuli_denovo | 663921                  | C/T  | NA                 | NA                            | NA                 |
| Kabuli_wild_663927 | NA                                  | Ca_kabuli_denovo | 663927                  | G/C  | NA                 | NA                            | NA                 |
| Kabuli_wild_665259 | NA                                  | Ca_kabuli_denovo | 665259                  | G/A  | NA                 | NA                            | NA                 |
| Kabuli_wild_666146 | NA                                  | Ca_kabuli_denovo | 666146                  | G/A  | NA                 | NA                            | NA                 |
| Kabuli_wild_666551 | NA                                  | Ca_kabuli_denovo | 666551                  | T/A  | NA                 | NA                            | NA                 |
| Kabuli_wild_666567 | NA                                  | Ca_kabuli_denovo | 666567                  | G/T  | NA                 | NA                            | NA                 |
| Kabuli_wild_666585 | NA                                  | Ca_kabuli_denovo | 666585                  | A/G  | NA                 | NA                            | NA                 |
| Kabuli_wild_666623 | NA                                  | Ca_kabuli_denovo | 666623                  | A/G  | NA                 | NA                            | NA                 |
| Kabuli_wild_667036 | NA                                  | Ca_kabuli_denovo | 667036                  | C/G  | NA                 | NA                            | NA                 |
| Kabuli_wild_667329 | NA                                  | Ca_kabuli_denovo | 667329                  | A/G  | NA                 | NA                            | NA                 |
| Kabuli_wild_668001 | NA                                  | Ca_kabuli_denovo | 668001                  | A/G  | NA                 | NA                            | NA                 |
| Kabuli_wild_668865 | NA                                  | Ca_kabuli_denovo | 668865                  | A/C  | NA                 | NA                            | NA                 |
| Kabuli_wild_668892 | NA                                  | Ca_kabuli_denovo | 668892                  | T/C  | NA                 | NA                            | NA                 |
| Kabuli_wild_669265 | NA                                  | Ca_kabuli_denovo | 669265                  | G/A  | NA                 | NA                            | NA                 |
| Kabuli_wild_669279 | NA                                  | Ca_kabuli_denovo | 669279                  | C/G  | NA                 | NA                            | NA                 |
| Kabuli_wild_670135 | NA                                  | Ca_kabuli_denovo | 670135                  | G/A  | NA                 | NA                            | NA                 |
| Kabuli_wild_670425 | NA                                  | Ca_kabuli_denovo | 670425                  | G/A  | NA                 | NA                            | NA                 |
| Kabuli_wild_670490 | NA                                  | Ca_kabuli_denovo | 670490                  | C/G  | NA                 | NA                            | NA                 |
| Kabuli_wild_670538 | NA                                  | Ca_kabuli_denovo | 670538                  | T/C  | NA                 | NA                            | NA                 |
| Kabuli_wild_670548 | NA                                  | Ca_kabuli_denovo | 670548                  | T/C  | NA                 | NA                            | NA                 |
| Kabuli_wild_672025 | NA                                  | Ca_kabuli_denovo | 672025                  | A/G  | NA                 | NA                            | NA                 |
| Kabuli_wild_673688 | NA                                  | Ca_kabuli_denovo | 673688                  | T/C  | NA                 | NA                            | NA                 |
| Kabuli_wild_674226 | NA                                  | Ca_kabuli_denovo | 674226                  | G/A  | NA                 | NA                            | NA                 |
| Kabuli_wild_674232 | NA                                  | Ca_kabuli_denovo | 674232                  | C/G  | NA                 | NA                            | NA                 |
| Kabuli_wild_674958 | NA                                  | Ca_kabuli_denovo | 674958                  | C/T  | NA                 | NA                            | NA                 |
| Kabuli_wild_675207 | NA                                  | Ca_kabuli_denovo | 675207                  | C/G  | NA                 | NA                            | NA                 |
| Kabuli_wild_675568 | NA                                  | Ca_kabuli_denovo | 675568                  | A/G  | NA                 | NA                            | NA                 |
| Kabuli_wild_675704 | NA                                  | Ca_kabuli_denovo | 675704                  | G/C  | NA                 | NA                            | NA                 |
| Kabuli_wild_676838 | NA                                  | Ca_kabuli_denovo | 676838                  | T/G  | NA                 | NA                            | NA                 |
| Kabuli_wild_676862 | NA                                  | Ca_kabuli_denovo | 676862                  | G/C  | NA                 | NA                            | NA                 |
| Kabuli_wild_677104 | NA                                  | Ca_kabuli_denovo | 677104                  | G/C  | NA                 | NA                            | NA                 |
| Kabuli_wild_677115 | NA                                  | Ca_kabuli_denovo | 677115                  | A/G  | NA                 | NA                            | NA                 |
| Kabuli_wild_677268 | NA                                  | Ca_kabuli_denovo | 677268                  | G/A  | NA                 | NA                            | NA                 |

| SNP IDs            | NCBI dbSNP accession IDs (NCBI_SS#) | Chromosomes      | Physical positions (bp) | SNPs | Gene accession IDs | Sequence components of genome | Putative functions |
|--------------------|-------------------------------------|------------------|-------------------------|------|--------------------|-------------------------------|--------------------|
| Kabuli_wild_677441 | NA                                  | Ca_kabuli_denovo | 677441                  | A/G  | NA                 | NA                            | NA                 |
| Kabuli_wild_677472 | NA                                  | Ca_kabuli_denovo | 677472                  | A/G  | NA                 | NA                            | NA                 |
| Kabuli_wild_677712 | NA                                  | Ca_kabuli_denovo | 677712                  | G/A  | NA                 | NA                            | NA                 |
| Kabuli_wild_677718 | NA                                  | Ca_kabuli_denovo | 677718                  | C/T  | NA                 | NA                            | NA                 |
| Kabuli_wild_678790 | NA                                  | Ca_kabuli_denovo | 678790                  | G/T  | NA                 | NA                            | NA                 |
| Kabuli_wild_679960 | NA                                  | Ca_kabuli_denovo | 679960                  | G/C  | NA                 | NA                            | NA                 |
| Kabuli_wild_680547 | NA                                  | Ca_kabuli_denovo | 680547                  | C/G  | NA                 | NA                            | NA                 |
| Kabuli_wild_680550 | NA                                  | Ca_kabuli_denovo | 680550                  | T/C  | NA                 | NA                            | NA                 |
| Kabuli_wild_681549 | NA                                  | Ca_kabuli_denovo | 681549                  | C/G  | NA                 | NA                            | NA                 |
| Kabuli_wild_681552 | NA                                  | Ca_kabuli_denovo | 681552                  | T/C  | NA                 | NA                            | NA                 |
| Kabuli_wild_682620 | NA                                  | Ca_kabuli_denovo | 682620                  | G/A  | NA                 | NA                            | NA                 |
| Kabuli_wild_682624 | NA                                  | Ca_kabuli_denovo | 682624                  | G/A  | NA                 | NA                            | NA                 |
| Kabuli_wild_683188 | NA                                  | Ca_kabuli_denovo | 683188                  | C/T  | NA                 | NA                            | NA                 |
| Kabuli_wild_683465 | NA                                  | Ca_kabuli_denovo | 683465                  | G/C  | NA                 | NA                            | NA                 |
| Kabuli_wild_684469 | NA                                  | Ca_kabuli_denovo | 684469                  | A/G  | NA                 | NA                            | NA                 |
| Kabuli_wild_685327 | NA                                  | Ca_kabuli_denovo | 685327                  | C/G  | NA                 | NA                            | NA                 |
| Kabuli_wild_685473 | NA                                  | Ca_kabuli_denovo | 685473                  | G/C  | NA                 | NA                            | NA                 |
| Kabuli_wild_685474 | NA                                  | Ca_kabuli_denovo | 685474                  | G/C  | NA                 | NA                            | NA                 |
| Kabuli_wild_685704 | NA                                  | Ca_kabuli_denovo | 685704                  | T/C  | NA                 | NA                            | NA                 |
| Kabuli_wild_685924 | NA                                  | Ca_kabuli_denovo | 685924                  | T/G  | NA                 | NA                            | NA                 |
| Kabuli_wild_686727 | NA                                  | Ca_kabuli_denovo | 686727                  | C/G  | NA                 | NA                            | NA                 |
| Kabuli_wild_686742 | NA                                  | Ca_kabuli_denovo | 686742                  | C/G  | NA                 | NA                            | NA                 |
| Kabuli_wild_687169 | NA                                  | Ca_kabuli_denovo | 687169                  | A/C  | NA                 | NA                            | NA                 |
| Kabuli_wild_687548 | NA                                  | Ca_kabuli_denovo | 687548                  | G/T  | NA                 | NA                            | NA                 |
| Kabuli_wild_688505 | NA                                  | Ca_kabuli_denovo | 688505                  | G/T  | NA                 | NA                            | NA                 |
| Kabuli_wild_688511 | NA                                  | Ca_kabuli_denovo | 688511                  | G/A  | NA                 | NA                            | NA                 |
| Kabuli_wild_689029 | NA                                  | Ca_kabuli_denovo | 689029                  | A/C  | NA                 | NA                            | NA                 |
| Kabuli_wild_689151 | NA                                  | Ca_kabuli_denovo | 689151                  | C/G  | NA                 | NA                            | NA                 |
| Kabuli_wild_689172 | NA                                  | Ca_kabuli_denovo | 689172                  | C/T  | NA                 | NA                            | NA                 |
| Kabuli_wild_689202 | NA                                  | Ca_kabuli_denovo | 689202                  | G/A  | NA                 | NA                            | NA                 |
| Kabuli_wild_689215 | NA                                  | Ca_kabuli_denovo | 689215                  | T/G  | NA                 | NA                            | NA                 |
| Kabuli_wild_689785 | NA                                  | Ca_kabuli_denovo | 689785                  | T/C  | NA                 | NA                            | NA                 |
| Kabuli_wild_690038 | NA                                  | Ca_kabuli_denovo | 690038                  | T/C  | NA                 | NA                            | NA                 |
| Kabuli_wild_690315 | NA                                  | Ca_kabuli_denovo | 690315                  | C/T  | NA                 | NA                            | NA                 |
| Kabuli_wild_690327 | NA                                  | Ca_kabuli_denovo | 690327                  | G/A  | NA                 | NA                            | NA                 |
| Kabuli_wild_690980 | NA                                  | Ca_kabuli_denovo | 690980                  | C/T  | NA                 | NA                            | NA                 |
| Kabuli_wild_690998 | NA                                  | Ca_kabuli_denovo | 690998                  | C/T  | NA                 | NA                            | NA                 |
| Kabuli_wild_691578 | NA                                  | Ca_kabuli_denovo | 691578                  | G/T  | NA                 | NA                            | NA                 |
| Kabuli_wild_691752 | NA                                  | Ca_kabuli_denovo | 691752                  | G/C  | NA                 | NA                            | NA                 |
| Kabuli_wild_692347 | NA                                  | Ca_kabuli_denovo | 692347                  | G/A  | NA                 | NA                            | NA                 |
| Kabuli_wild_692386 | NA                                  | Ca_kabuli_denovo | 692386                  | G/A  | NA                 | NA                            | NA                 |
| Kabuli_wild_694887 | NA                                  | Ca_kabuli_denovo | 694887                  | C/A  | NA                 | NA                            | NA                 |
| Kabuli_wild_695469 | NA                                  | Ca_kabuli_denovo | 695469                  | A/G  | NA                 | NA                            | NA                 |
| Kabuli_wild_695956 | NA                                  | Ca_kabuli_denovo | 695956                  | T/G  | NA                 | NA                            | NA                 |

| SNP IDs            | NCBI dbSNP accession IDs (NCBI_SS#) | Chromosomes      | Physical positions (bp) | SNPs | Gene accession IDs | Sequence components of genome | Putative functions |
|--------------------|-------------------------------------|------------------|-------------------------|------|--------------------|-------------------------------|--------------------|
| Kabuli_wild_696449 | NA                                  | Ca_kabuli_denovo | 696449                  | A/G  | NA                 | NA                            | NA                 |
| Kabuli_wild_697074 | NA                                  | Ca_kabuli_denovo | 697074                  | A/G  | NA                 | NA                            | NA                 |
| Kabuli_wild_697802 | NA                                  | Ca_kabuli_denovo | 697802                  | T/C  | NA                 | NA                            | NA                 |
| Kabuli_wild_697822 | NA                                  | Ca_kabuli_denovo | 697822                  | G/C  | NA                 | NA                            | NA                 |
| Kabuli_wild_699060 | NA                                  | Ca_kabuli_denovo | 699060                  | T/A  | NA                 | NA                            | NA                 |
| Kabuli_wild_699075 | NA                                  | Ca_kabuli_denovo | 699075                  | C/T  | NA                 | NA                            | NA                 |
| Kabuli_wild_699423 | NA                                  | Ca_kabuli_denovo | 699423                  | G/T  | NA                 | NA                            | NA                 |
| Kabuli_wild_699498 | NA                                  | Ca_kabuli_denovo | 699498                  | A/G  | NA                 | NA                            | NA                 |
| Kabuli_wild_699627 | NA                                  | Ca_kabuli_denovo | 699627                  | T/C  | NA                 | NA                            | NA                 |
| Kabuli_wild_699943 | NA                                  | Ca_kabuli_denovo | 699943                  | A/G  | NA                 | NA                            | NA                 |
| Kabuli_wild_700138 | NA                                  | Ca_kabuli_denovo | 700138                  | G/C  | NA                 | NA                            | NA                 |
| Kabuli_wild_700146 | NA                                  | Ca_kabuli_denovo | 700146                  | C/T  | NA                 | NA                            | NA                 |
| Kabuli_wild_700593 | NA                                  | Ca_kabuli_denovo | 700593                  | A/G  | NA                 | NA                            | NA                 |
| Kabuli_wild_701455 | NA                                  | Ca_kabuli_denovo | 701455                  | C/G  | NA                 | NA                            | NA                 |
| Kabuli_wild_701482 | NA                                  | Ca_kabuli_denovo | 701482                  | T/C  | NA                 | NA                            | NA                 |
| Kabuli_wild_701863 | NA                                  | Ca_kabuli_denovo | 701863                  | T/A  | NA                 | NA                            | NA                 |
| Kabuli_wild_702471 | NA                                  | Ca_kabuli_denovo | 702471                  | G/A  | NA                 | NA                            | NA                 |
| Kabuli_wild_702649 | NA                                  | Ca_kabuli_denovo | 702649                  | T/G  | NA                 | NA                            | NA                 |
| Kabuli_wild_703230 | NA                                  | Ca_kabuli_denovo | 703230                  | A/G  | NA                 | NA                            | NA                 |
| Kabuli_wild_705399 | NA                                  | Ca_kabuli_denovo | 705399                  | T/C  | NA                 | NA                            | NA                 |
| Kabuli_wild_706346 | NA                                  | Ca_kabuli_denovo | 706346                  | A/G  | NA                 | NA                            | NA                 |
| Kabuli_wild_706364 | NA                                  | Ca_kabuli_denovo | 706364                  | C/G  | NA                 | NA                            | NA                 |
| Kabuli_wild_708030 | NA                                  | Ca_kabuli_denovo | 708030                  | A/C  | NA                 | NA                            | NA                 |
| Kabuli_wild_710031 | NA                                  | Ca_kabuli_denovo | 710031                  | C/T  | NA                 | NA                            | NA                 |
| Kabuli_wild_710605 | NA                                  | Ca_kabuli_denovo | 710605                  | C/T  | NA                 | NA                            | NA                 |
| Kabuli_wild_710645 | NA                                  | Ca_kabuli_denovo | 710645                  | A/C  | NA                 | NA                            | NA                 |
| Kabuli_wild_711361 | NA                                  | Ca_kabuli_denovo | 711361                  | C/A  | NA                 | NA                            | NA                 |
| Kabuli_wild_711400 | NA                                  | Ca_kabuli_denovo | 711400                  | G/C  | NA                 | NA                            | NA                 |
| Kabuli_wild_711408 | NA                                  | Ca_kabuli_denovo | 711408                  | T/G  | NA                 | NA                            | NA                 |
| Kabuli_wild_712202 | NA                                  | Ca_kabuli_denovo | 712202                  | T/G  | NA                 | NA                            | NA                 |
| Kabuli_wild_712850 | NA                                  | Ca_kabuli_denovo | 712850                  | G/T  | NA                 | NA                            | NA                 |
| Kabuli_wild_713633 | NA                                  | Ca_kabuli_denovo | 713633                  | C/A  | NA                 | NA                            | NA                 |
| Kabuli_wild_713872 | NA                                  | Ca_kabuli_denovo | 713872                  | G/A  | NA                 | NA                            | NA                 |
| Kabuli_wild_713896 | NA                                  | Ca_kabuli_denovo | 713896                  | C/T  | NA                 | NA                            | NA                 |
| Kabuli_wild_714479 | NA                                  | Ca_kabuli_denovo | 714479                  | G/A  | NA                 | NA                            | NA                 |
| Kabuli_wild_715048 | NA                                  | Ca_kabuli_denovo | 715048                  | G/T  | NA                 | NA                            | NA                 |
| Kabuli_wild_715054 | NA                                  | Ca_kabuli_denovo | 715054                  | T/C  | NA                 | NA                            | NA                 |
| Kabuli_wild_715568 | NA                                  | Ca_kabuli_denovo | 715568                  | C/G  | NA                 | NA                            | NA                 |
| Kabuli_wild_715580 | NA                                  | Ca_kabuli_denovo | 715580                  | T/C  | NA                 | NA                            | NA                 |
| Kabuli_wild_715826 | NA                                  | Ca_kabuli_denovo | 715826                  | G/A  | NA                 | NA                            | NA                 |
| Kabuli_wild_715835 | NA                                  | Ca_kabuli_denovo | 715835                  | G/T  | NA                 | NA                            | NA                 |
| Kabuli_wild_716106 | NA                                  | Ca_kabuli_denovo | 716106                  | T/C  | NA                 | NA                            | NA                 |
| Kabuli_wild_716175 | NA                                  | Ca_kabuli_denovo | 716175                  | A/T  | NA                 | NA                            | NA                 |
| Kabuli_wild_716594 | NA                                  | Ca_kabuli_denovo | 716594                  | C/T  | NA                 | NA                            | NA                 |

| SNP IDs            | NCBI dbSNP accession IDs (NCBI_SS#) | Chromosomes      | Physical positions (bp) | SNPs | Gene accession IDs | Sequence components of genome | Putative functions |
|--------------------|-------------------------------------|------------------|-------------------------|------|--------------------|-------------------------------|--------------------|
| Kabuli_wild_717486 | NA                                  | Ca_kabuli_denovo | 717486                  | G/A  | NA                 | NA                            | NA                 |
| Kabuli_wild_717846 | NA                                  | Ca_kabuli_denovo | 717846                  | C/T  | NA                 | NA                            | NA                 |
| Kabuli_wild_717882 | NA                                  | Ca_kabuli_denovo | 717882                  | C/A  | NA                 | NA                            | NA                 |
| Kabuli_wild_718621 | NA                                  | Ca_kabuli_denovo | 718621                  | A/G  | NA                 | NA                            | NA                 |
| Kabuli_wild_719594 | NA                                  | Ca_kabuli_denovo | 719594                  | T/C  | NA                 | NA                            | NA                 |
| Kabuli_wild_719600 | NA                                  | Ca_kabuli_denovo | 719600                  | T/G  | NA                 | NA                            | NA                 |
| Kabuli_wild_720677 | NA                                  | Ca_kabuli_denovo | 720677                  | A/G  | NA                 | NA                            | NA                 |
| Kabuli_wild_720686 | NA                                  | Ca_kabuli_denovo | 720686                  | C/T  | NA                 | NA                            | NA                 |
| Kabuli_wild_720873 | NA                                  | Ca_kabuli_denovo | 720873                  | A/C  | NA                 | NA                            | NA                 |
| Kabuli_wild_720874 | NA                                  | Ca_kabuli_denovo | 720874                  | G/T  | NA                 | NA                            | NA                 |
| Kabuli_wild_720983 | NA                                  | Ca_kabuli_denovo | 720983                  | C/T  | NA                 | NA                            | NA                 |
| Kabuli_wild_721665 | NA                                  | Ca_kabuli_denovo | 721665                  | C/T  | NA                 | NA                            | NA                 |
| Kabuli_wild_721710 | NA                                  | Ca_kabuli_denovo | 721710                  | A/C  | NA                 | NA                            | NA                 |
| Kabuli_wild_721755 | NA                                  | Ca_kabuli_denovo | 721755                  | G/A  | NA                 | NA                            | NA                 |
| Kabuli_wild_722162 | NA                                  | Ca_kabuli_denovo | 722162                  | T/G  | NA                 | NA                            | NA                 |
| Kabuli_wild_724043 | NA                                  | Ca_kabuli_denovo | 724043                  | G/C  | NA                 | NA                            | NA                 |
| Kabuli_wild_724265 | NA                                  | Ca_kabuli_denovo | 724265                  | A/G  | NA                 | NA                            | NA                 |
| Kabuli_wild_724520 | NA                                  | Ca_kabuli_denovo | 724520                  | C/A  | NA                 | NA                            | NA                 |
| Kabuli_wild_724528 | NA                                  | Ca_kabuli_denovo | 724528                  | G/A  | NA                 | NA                            | NA                 |
| Kabuli_wild_724981 | NA                                  | Ca_kabuli_denovo | 724981                  | C/G  | NA                 | NA                            | NA                 |
| Kabuli_wild_725355 | NA                                  | Ca_kabuli_denovo | 725355                  | A/C  | NA                 | NA                            | NA                 |
| Kabuli_wild_725856 | NA                                  | Ca_kabuli_denovo | 725856                  | A/T  | NA                 | NA                            | NA                 |
| Kabuli_wild_725875 | NA                                  | Ca_kabuli_denovo | 725875                  | G/C  | NA                 | NA                            | NA                 |
| Kabuli_wild_725876 | NA                                  | Ca_kabuli_denovo | 725876                  | C/G  | NA                 | NA                            | NA                 |
| Kabuli_wild_725877 | NA                                  | Ca_kabuli_denovo | 725877                  | A/C  | NA                 | NA                            | NA                 |
| Kabuli_wild_725880 | NA                                  | Ca_kabuli_denovo | 725880                  | C/G  | NA                 | NA                            | NA                 |
| Kabuli_wild_725881 | NA                                  | Ca_kabuli_denovo | 725881                  | C/A  | NA                 | NA                            | NA                 |
| Kabuli_wild_725883 | NA                                  | Ca_kabuli_denovo | 725883                  | A/C  | NA                 | NA                            | NA                 |
| Kabuli_wild_725884 | NA                                  | Ca_kabuli_denovo | 725884                  | T/G  | NA                 | NA                            | NA                 |
| Kabuli_wild_725885 | NA                                  | Ca_kabuli_denovo | 725885                  | C/A  | NA                 | NA                            | NA                 |
| Kabuli_wild_725889 | NA                                  | Ca_kabuli_denovo | 725889                  | T/C  | NA                 | NA                            | NA                 |
| Kabuli_wild_726568 | NA                                  | Ca_kabuli_denovo | 726568                  | G/T  | NA                 | NA                            | NA                 |
| Kabuli_wild_727645 | NA                                  | Ca_kabuli_denovo | 727645                  | C/A  | NA                 | NA                            | NA                 |
| Kabuli_wild_727660 | NA                                  | Ca_kabuli_denovo | 727660                  | C/A  | NA                 | NA                            | NA                 |
| Kabuli_wild_728130 | NA                                  | Ca_kabuli_denovo | 728130                  | T/C  | NA                 | NA                            | NA                 |
| Kabuli_wild_728605 | NA                                  | Ca_kabuli_denovo | 728605                  | C/G  | NA                 | NA                            | NA                 |
| Kabuli_wild_729237 | NA                                  | Ca_kabuli_denovo | 729237                  | A/G  | NA                 | NA                            | NA                 |
| Kabuli_wild_729264 | NA                                  | Ca_kabuli_denovo | 729264                  | A/G  | NA                 | NA                            | NA                 |
| Kabuli_wild_731687 | NA                                  | Ca_kabuli_denovo | 731687                  | G/A  | NA                 | NA                            | NA                 |
| Kabuli_wild_731688 | NA                                  | Ca_kabuli_denovo | 731688                  | C/T  | NA                 | NA                            | NA                 |
| Kabuli_wild_731933 | NA                                  | Ca_kabuli_denovo | 731933                  | A/G  | NA                 | NA                            | NA                 |
| Kabuli_wild_732476 | NA                                  | Ca_kabuli_denovo | 732476                  | T/G  | NA                 | NA                            | NA                 |
| Kabuli_wild_732825 | NA                                  | Ca_kabuli_denovo | 732825                  | C/T  | NA                 | NA                            | NA                 |
| Kabuli_wild_733092 | NA                                  | Ca_kabuli_denovo | 733092                  | G/A  | NA                 | NA                            | NA                 |

| SNP IDs            | NCBI dbSNP accession IDs (NCBI_SS#) | Chromosomes      | Physical positions (bp) | SNPs | Gene accession IDs | Sequence components of genome | Putative functions |
|--------------------|-------------------------------------|------------------|-------------------------|------|--------------------|-------------------------------|--------------------|
| Kabuli_wild_734060 | NA                                  | Ca_kabuli_denovo | 734060                  | G/C  | NA                 | NA                            | NA                 |
| Kabuli_wild_734256 | NA                                  | Ca_kabuli_denovo | 734256                  | T/C  | NA                 | NA                            | NA                 |
| Kabuli_wild_734260 | NA                                  | Ca_kabuli_denovo | 734260                  | C/T  | NA                 | NA                            | NA                 |
| Kabuli_wild_734979 | NA                                  | Ca_kabuli_denovo | 734979                  | G/T  | NA                 | NA                            | NA                 |
| Kabuli_wild_735165 | NA                                  | Ca_kabuli_denovo | 735165                  | G/A  | NA                 | NA                            | NA                 |
| Kabuli_wild_735170 | NA                                  | Ca_kabuli_denovo | 735170                  | G/A  | NA                 | NA                            | NA                 |
| Kabuli_wild_735408 | NA                                  | Ca_kabuli_denovo | 735408                  | A/G  | NA                 | NA                            | NA                 |
| Kabuli_wild_736290 | NA                                  | Ca_kabuli_denovo | 736290                  | C/T  | NA                 | NA                            | NA                 |
| Kabuli_wild_736596 | NA                                  | Ca_kabuli_denovo | 736596                  | T/C  | NA                 | NA                            | NA                 |
| Kabuli_wild_738304 | NA                                  | Ca_kabuli_denovo | 738304                  | A/G  | NA                 | NA                            | NA                 |
| Kabuli_wild_738342 | NA                                  | Ca_kabuli_denovo | 738342                  | T/C  | NA                 | NA                            | NA                 |
| Kabuli_wild_739961 | NA                                  | Ca_kabuli_denovo | 739961                  | C/T  | NA                 | NA                            | NA                 |
| Kabuli_wild_740944 | NA                                  | Ca_kabuli_denovo | 740944                  | C/G  | NA                 | NA                            | NA                 |
| Kabuli_wild_740986 | NA                                  | Ca_kabuli_denovo | 740986                  | C/A  | NA                 | NA                            | NA                 |
| Kabuli_wild_741429 | NA                                  | Ca_kabuli_denovo | 741429                  | A/G  | NA                 | NA                            | NA                 |
| Kabuli_wild_741434 | NA                                  | Ca_kabuli_denovo | 741434                  | T/C  | NA                 | NA                            | NA                 |
| Kabuli_wild_741811 | NA                                  | Ca_kabuli_denovo | 741811                  | A/C  | NA                 | NA                            | NA                 |
| Kabuli_wild_741823 | NA                                  | Ca_kabuli_denovo | 741823                  | G/C  | NA                 | NA                            | NA                 |
| Kabuli_wild_741824 | NA                                  | Ca_kabuli_denovo | 741824                  | G/A  | NA                 | NA                            | NA                 |
| Kabuli_wild_742579 | NA                                  | Ca_kabuli_denovo | 742579                  | G/C  | NA                 | NA                            | NA                 |
| Kabuli_wild_742619 | NA                                  | Ca_kabuli_denovo | 742619                  | C/G  | NA                 | NA                            | NA                 |
| Kabuli_wild_742639 | NA                                  | Ca_kabuli_denovo | 742639                  | G/A  | NA                 | NA                            | NA                 |
| Kabuli_wild_743085 | NA                                  | Ca_kabuli_denovo | 743085                  | T/C  | NA                 | NA                            | NA                 |
| Kabuli_wild_744829 | NA                                  | Ca_kabuli_denovo | 744829                  | C/G  | NA                 | NA                            | NA                 |
| Kabuli_wild_746003 | NA                                  | Ca_kabuli_denovo | 746003                  | A/C  | NA                 | NA                            | NA                 |
| Kabuli_wild_746713 | NA                                  | Ca_kabuli_denovo | 746713                  | A/G  | NA                 | NA                            | NA                 |
| Kabuli_wild_747450 | NA                                  | Ca_kabuli_denovo | 747450                  | C/A  | NA                 | NA                            | NA                 |
| Kabuli_wild_747453 | NA                                  | Ca_kabuli_denovo | 747453                  | T/C  | NA                 | NA                            | NA                 |
| Kabuli_wild_747849 | NA                                  | Ca_kabuli_denovo | 747849                  | C/T  | NA                 | NA                            | NA                 |
| Kabuli_wild_747983 | NA                                  | Ca_kabuli_denovo | 747983                  | G/T  | NA                 | NA                            | NA                 |
| Kabuli_wild_748514 | NA                                  | Ca_kabuli_denovo | 748514                  | T/C  | NA                 | NA                            | NA                 |
| Kabuli_wild_748822 | NA                                  | Ca_kabuli_denovo | 748822                  | G/A  | NA                 | NA                            | NA                 |
| Kabuli_wild_748834 | NA                                  | Ca_kabuli_denovo | 748834                  | G/A  | NA                 | NA                            | NA                 |
| Kabuli_wild_749589 | NA                                  | Ca_kabuli_denovo | 749589                  | C/T  | NA                 | NA                            | NA                 |
| Kabuli_wild_749909 | NA                                  | Ca_kabuli_denovo | 749909                  | G/A  | NA                 | NA                            | NA                 |
| Kabuli_wild_750021 | NA                                  | Ca_kabuli_denovo | 750021                  | T/C  | NA                 | NA                            | NA                 |
| Kabuli_wild_750490 | NA                                  | Ca_kabuli_denovo | 750490                  | C/T  | NA                 | NA                            | NA                 |
| Kabuli_wild_750500 | NA                                  | Ca_kabuli_denovo | 750500                  | G/T  | NA                 | NA                            | NA                 |
| Kabuli_wild_751049 | NA                                  | Ca_kabuli_denovo | 751049                  | T/C  | NA                 | NA                            | NA                 |
| Kabuli_wild_751158 | NA                                  | Ca_kabuli_denovo | 751158                  | T/C  | NA                 | NA                            | NA                 |
| Kabuli_wild_751479 | NA                                  | Ca_kabuli_denovo | 751479                  | G/A  | NA                 | NA                            | NA                 |
| Kabuli_wild_751482 | NA                                  | Ca_kabuli_denovo | 751482                  | C/G  | NA                 | NA                            | NA                 |
| Kabuli_wild_753068 | NA                                  | Ca_kabuli_denovo | 753068                  | A/G  | NA                 | NA                            | NA                 |
| Kabuli_wild_753070 | NA                                  | Ca_kabuli_denovo | 753070                  | C/A  | NA                 | NA                            | NA                 |

| SNP IDs            | NCBI dbSNP accession IDs (NCBI_SS#) | Chromosomes      | Physical positions (bp) | SNPs | Gene accession IDs | Sequence components of genome | Putative functions |
|--------------------|-------------------------------------|------------------|-------------------------|------|--------------------|-------------------------------|--------------------|
| Kabuli_wild_754162 | NA                                  | Ca_kabuli_denovo | 754162                  | A/G  | NA                 | NA                            | NA                 |
| Kabuli_wild_754448 | NA                                  | Ca_kabuli_denovo | 754448                  | T/G  | NA                 | NA                            | NA                 |
| Kabuli_wild_754478 | NA                                  | Ca_kabuli_denovo | 754478                  | T/G  | NA                 | NA                            | NA                 |
| Kabuli_wild_754677 | NA                                  | Ca_kabuli_denovo | 754677                  | C/G  | NA                 | NA                            | NA                 |
| Kabuli_wild_754931 | NA                                  | Ca_kabuli_denovo | 754931                  | A/G  | NA                 | NA                            | NA                 |
| Kabuli_wild_755019 | NA                                  | Ca_kabuli_denovo | 755019                  | C/G  | NA                 | NA                            | NA                 |
| Kabuli_wild_755022 | NA                                  | Ca_kabuli_denovo | 755022                  | G/T  | NA                 | NA                            | NA                 |
| Kabuli_wild_755190 | NA                                  | Ca_kabuli_denovo | 755190                  | C/G  | NA                 | NA                            | NA                 |
| Kabuli_wild_755213 | NA                                  | Ca_kabuli_denovo | 755213                  | A/C  | NA                 | NA                            | NA                 |
| Kabuli_wild_755222 | NA                                  | Ca_kabuli_denovo | 755222                  | A/G  | NA                 | NA                            | NA                 |
| Kabuli_wild_755254 | NA                                  | Ca_kabuli_denovo | 755254                  | G/T  | NA                 | NA                            | NA                 |
| Kabuli_wild_756052 | NA                                  | Ca_kabuli_denovo | 756052                  | T/G  | NA                 | NA                            | NA                 |
| Kabuli_wild_757220 | NA                                  | Ca_kabuli_denovo | 757220                  | T/G  | NA                 | NA                            | NA                 |
| Kabuli_wild_757536 | NA                                  | Ca_kabuli_denovo | 757536                  | G/C  | NA                 | NA                            | NA                 |
| Kabuli_wild_757832 | NA                                  | Ca_kabuli_denovo | 757832                  | C/T  | NA                 | NA                            | NA                 |
| Kabuli_wild_757971 | NA                                  | Ca_kabuli_denovo | 757971                  | G/T  | NA                 | NA                            | NA                 |
| Kabuli_wild_758425 | NA                                  | Ca_kabuli_denovo | 758425                  | C/G  | NA                 | NA                            | NA                 |
| Kabuli_wild_758443 | NA                                  | Ca_kabuli_denovo | 758443                  | C/T  | NA                 | NA                            | NA                 |
| Kabuli_wild_758498 | NA                                  | Ca_kabuli_denovo | 758498                  | C/A  | NA                 | NA                            | NA                 |
| Kabuli_wild_758516 | NA                                  | Ca_kabuli_denovo | 758516                  | A/T  | NA                 | NA                            | NA                 |
| Kabuli_wild_758972 | NA                                  | Ca_kabuli_denovo | 758972                  | G/T  | NA                 | NA                            | NA                 |
| Kabuli_wild_758980 | NA                                  | Ca_kabuli_denovo | 758980                  | T/C  | NA                 | NA                            | NA                 |
| Kabuli_wild_758983 | NA                                  | Ca_kabuli_denovo | 758983                  | C/T  | NA                 | NA                            | NA                 |
| Kabuli_wild_759273 | NA                                  | Ca_kabuli_denovo | 759273                  | A/G  | NA                 | NA                            | NA                 |
| Kabuli_wild_759577 | NA                                  | Ca_kabuli_denovo | 759577                  | C/T  | NA                 | NA                            | NA                 |
| Kabuli_wild_759579 | NA                                  | Ca_kabuli_denovo | 759579                  | T/C  | NA                 | NA                            | NA                 |
| Kabuli_wild_759661 | NA                                  | Ca_kabuli_denovo | 759661                  | C/T  | NA                 | NA                            | NA                 |
| Kabuli_wild_759676 | NA                                  | Ca_kabuli_denovo | 759676                  | T/C  | NA                 | NA                            | NA                 |
| Kabuli_wild_759890 | NA                                  | Ca_kabuli_denovo | 759890                  | C/G  | NA                 | NA                            | NA                 |
| Kabuli_wild_759912 | NA                                  | Ca_kabuli_denovo | 759912                  | C/A  | NA                 | NA                            | NA                 |
| Kabuli_wild_760237 | NA                                  | Ca_kabuli_denovo | 760237                  | T/C  | NA                 | NA                            | NA                 |
| Kabuli_wild_760257 | NA                                  | Ca_kabuli_denovo | 760257                  | A/G  | NA                 | NA                            | NA                 |
| Kabuli_wild_760370 | NA                                  | Ca_kabuli_denovo | 760370                  | A/G  | NA                 | NA                            | NA                 |
| Kabuli_wild_760382 | NA                                  | Ca_kabuli_denovo | 760382                  | A/G  | NA                 | NA                            | NA                 |
| Kabuli_wild_761353 | NA                                  | Ca_kabuli_denovo | 761353                  | A/G  | NA                 | NA                            | NA                 |
| Kabuli_wild_761839 | NA                                  | Ca_kabuli_denovo | 761839                  | T/C  | NA                 | NA                            | NA                 |
| Kabuli_wild_764037 | NA                                  | Ca_kabuli_denovo | 764037                  | T/C  | NA                 | NA                            | NA                 |
| Kabuli_wild_764242 | NA                                  | Ca_kabuli_denovo | 764242                  | A/G  | NA                 | NA                            | NA                 |
| Kabuli_wild_764627 | NA                                  | Ca_kabuli_denovo | 764627                  | T/C  | NA                 | NA                            | NA                 |
| Kabuli_wild_764641 | NA                                  | Ca_kabuli_denovo | 764641                  | G/A  | NA                 | NA                            | NA                 |
| Kabuli_wild_765697 | NA                                  | Ca_kabuli_denovo | 765697                  | G/A  | NA                 | NA                            | NA                 |
| Kabuli_wild_766671 | NA                                  | Ca_kabuli_denovo | 766671                  | G/T  | NA                 | NA                            | NA                 |
| Kabuli_wild_766733 | NA                                  | Ca_kabuli_denovo | 766733                  | T/C  | NA                 | NA                            | NA                 |
| Kabuli_wild_767631 | NA                                  | Ca_kabuli_denovo | 767631                  | G/A  | NA                 | NA                            | NA                 |

| SNP IDs            | NCBI dbSNP accession IDs (NCBI_SS#) | Chromosomes      | Physical positions (bp) | SNPs | Gene accession IDs | Sequence components of genome | Putative functions |
|--------------------|-------------------------------------|------------------|-------------------------|------|--------------------|-------------------------------|--------------------|
| Kabuli_wild_767656 | NA                                  | Ca_kabuli_denovo | 767656                  | C/T  | NA                 | NA                            | NA                 |
| Kabuli_wild_767686 | NA                                  | Ca_kabuli_denovo | 767686                  | G/T  | NA                 | NA                            | NA                 |
| Kabuli_wild_767694 | NA                                  | Ca_kabuli_denovo | 767694                  | G/C  | NA                 | NA                            | NA                 |
| Kabuli_wild_768119 | NA                                  | Ca_kabuli_denovo | 768119                  | C/T  | NA                 | NA                            | NA                 |
| Kabuli_wild_768225 | NA                                  | Ca_kabuli_denovo | 768225                  | T/C  | NA                 | NA                            | NA                 |
| Kabuli_wild_768231 | NA                                  | Ca_kabuli_denovo | 768231                  | A/C  | NA                 | NA                            | NA                 |
| Kabuli_wild_768373 | NA                                  | Ca_kabuli_denovo | 768373                  | A/C  | NA                 | NA                            | NA                 |
| Kabuli_wild_768430 | NA                                  | Ca_kabuli_denovo | 768430                  | A/G  | NA                 | NA                            | NA                 |
| Kabuli_wild_770626 | NA                                  | Ca_kabuli_denovo | 770626                  | A/G  | NA                 | NA                            | NA                 |
| Kabuli_wild_770629 | NA                                  | Ca_kabuli_denovo | 770629                  | T/G  | NA                 | NA                            | NA                 |
| Kabuli_wild_772092 | NA                                  | Ca_kabuli_denovo | 772092                  | G/A  | NA                 | NA                            | NA                 |
| Kabuli_wild_772957 | NA                                  | Ca_kabuli_denovo | 772957                  | T/C  | NA                 | NA                            | NA                 |
| Kabuli_wild_773349 | NA                                  | Ca_kabuli_denovo | 773349                  | G/A  | NA                 | NA                            | NA                 |
| Kabuli_wild_773584 | NA                                  | Ca_kabuli_denovo | 773584                  | T/C  | NA                 | NA                            | NA                 |
| Kabuli_wild_774582 | NA                                  | Ca_kabuli_denovo | 774582                  | T/G  | NA                 | NA                            | NA                 |
| Kabuli_wild_774699 | NA                                  | Ca_kabuli_denovo | 774699                  | C/A  | NA                 | NA                            | NA                 |
| Kabuli_wild_774732 | NA                                  | Ca_kabuli_denovo | 774732                  | T/C  | NA                 | NA                            | NA                 |
| Kabuli_wild_775296 | NA                                  | Ca_kabuli_denovo | 775296                  | T/C  | NA                 | NA                            | NA                 |
| Kabuli_wild_775442 | NA                                  | Ca_kabuli_denovo | 775442                  | C/T  | NA                 | NA                            | NA                 |
| Kabuli_wild_775987 | NA                                  | Ca_kabuli_denovo | 775987                  | G/C  | NA                 | NA                            | NA                 |
| Kabuli_wild_776773 | NA                                  | Ca_kabuli_denovo | 776773                  | T/G  | NA                 | NA                            | NA                 |
| Kabuli_wild_776776 | NA                                  | Ca_kabuli_denovo | 776776                  | T/A  | NA                 | NA                            | NA                 |
| Kabuli_wild_776853 | NA                                  | Ca_kabuli_denovo | 776853                  | G/T  | NA                 | NA                            | NA                 |
| Kabuli_wild_776868 | NA                                  | Ca_kabuli_denovo | 776868                  | G/T  | NA                 | NA                            | NA                 |
| Kabuli_wild_776882 | NA                                  | Ca_kabuli_denovo | 776882                  | C/A  | NA                 | NA                            | NA                 |
| Kabuli_wild_776886 | NA                                  | Ca_kabuli_denovo | 776886                  | A/T  | NA                 | NA                            | NA                 |
| Kabuli_wild_777043 | NA                                  | Ca_kabuli_denovo | 777043                  | A/G  | NA                 | NA                            | NA                 |
| Kabuli_wild_778309 | NA                                  | Ca_kabuli_denovo | 778309                  | C/T  | NA                 | NA                            | NA                 |
| Kabuli_wild_778503 | NA                                  | Ca_kabuli_denovo | 778503                  | G/C  | NA                 | NA                            | NA                 |
| Kabuli_wild_778987 | NA                                  | Ca_kabuli_denovo | 778987                  | A/G  | NA                 | NA                            | NA                 |
| Kabuli_wild_779040 | NA                                  | Ca_kabuli_denovo | 779040                  | T/G  | NA                 | NA                            | NA                 |
| Kabuli_wild_779794 | NA                                  | Ca_kabuli_denovo | 779794                  | T/C  | NA                 | NA                            | NA                 |
| Kabuli_wild_779818 | NA                                  | Ca_kabuli_denovo | 779818                  | G/C  | NA                 | NA                            | NA                 |
| Kabuli_wild_779888 | NA                                  | Ca_kabuli_denovo | 779888                  | A/C  | NA                 | NA                            | NA                 |
| Kabuli_wild_780731 | NA                                  | Ca_kabuli_denovo | 780731                  | G/T  | NA                 | NA                            | NA                 |
| Kabuli_wild_781374 | NA                                  | Ca_kabuli_denovo | 781374                  | G/T  | NA                 | NA                            | NA                 |
| Kabuli_wild_782048 | NA                                  | Ca_kabuli_denovo | 782048                  | G/T  | NA                 | NA                            | NA                 |
| Kabuli_wild_782184 | NA                                  | Ca_kabuli_denovo | 782184                  | T/C  | NA                 | NA                            | NA                 |
| Kabuli_wild_783378 | NA                                  | Ca_kabuli_denovo | 783378                  | C/T  | NA                 | NA                            | NA                 |
| Kabuli_wild_783782 | NA                                  | Ca_kabuli_denovo | 783782                  | C/T  | NA                 | NA                            | NA                 |
| Kabuli_wild_783933 | NA                                  | Ca_kabuli_denovo | 783933                  | G/T  | NA                 | NA                            | NA                 |
| Kabuli_wild_783973 | NA                                  | Ca_kabuli_denovo | 783973                  | G/A  | NA                 | NA                            | NA                 |
| Kabuli_wild_784132 | NA                                  | Ca_kabuli_denovo | 784132                  | C/G  | NA                 | NA                            | NA                 |
| Kabuli_wild_784166 | NA                                  | Ca_kabuli_denovo | 784166                  | C/G  | NA                 | NA                            | NA                 |

| SNP IDs            | NCBI dbSNP accession IDs (NCBI_SS#) | Chromosomes      | Physical positions (bp) | SNPs | Gene accession IDs | Sequence components of genome | Putative functions |
|--------------------|-------------------------------------|------------------|-------------------------|------|--------------------|-------------------------------|--------------------|
| Kabuli_wild_784314 | NA                                  | Ca_kabuli_denovo | 784314                  | G/A  | NA                 | NA                            | NA                 |
| Kabuli_wild_784344 | NA                                  | Ca_kabuli_denovo | 784344                  | C/T  | NA                 | NA                            | NA                 |
| Kabuli_wild_785763 | NA                                  | Ca_kabuli_denovo | 785763                  | G/A  | NA                 | NA                            | NA                 |
| Kabuli_wild_785793 | NA                                  | Ca_kabuli_denovo | 785793                  | A/C  | NA                 | NA                            | NA                 |
| Kabuli_wild_786359 | NA                                  | Ca_kabuli_denovo | 786359                  | T/C  | NA                 | NA                            | NA                 |
| Kabuli_wild_786638 | NA                                  | Ca_kabuli_denovo | 786638                  | A/G  | NA                 | NA                            | NA                 |
| Kabuli_wild_786662 | NA                                  | Ca_kabuli_denovo | 786662                  | A/G  | NA                 | NA                            | NA                 |
| Kabuli_wild_786813 | NA                                  | Ca_kabuli_denovo | 786813                  | T/C  | NA                 | NA                            | NA                 |
| Kabuli_wild_787934 | NA                                  | Ca_kabuli_denovo | 787934                  | T/A  | NA                 | NA                            | NA                 |
| Kabuli_wild_788676 | NA                                  | Ca_kabuli_denovo | 788676                  | C/T  | NA                 | NA                            | NA                 |
| Kabuli_wild_788685 | NA                                  | Ca_kabuli_denovo | 788685                  | C/G  | NA                 | NA                            | NA                 |
| Kabuli_wild_789770 | NA                                  | Ca_kabuli_denovo | 789770                  | G/A  | NA                 | NA                            | NA                 |
| Kabuli_wild_790755 | NA                                  | Ca_kabuli_denovo | 790755                  | C/G  | NA                 | NA                            | NA                 |
| Kabuli_wild_791954 | NA                                  | Ca_kabuli_denovo | 791954                  | G/C  | NA                 | NA                            | NA                 |
| Kabuli_wild_791966 | NA                                  | Ca_kabuli_denovo | 791966                  | G/A  | NA                 | NA                            | NA                 |
| Kabuli_wild_792055 | NA                                  | Ca_kabuli_denovo | 792055                  | G/C  | NA                 | NA                            | NA                 |
| Kabuli_wild_792746 | NA                                  | Ca_kabuli_denovo | 792746                  | A/C  | NA                 | NA                            | NA                 |
| Kabuli_wild_793362 | NA                                  | Ca_kabuli_denovo | 793362                  | C/T  | NA                 | NA                            | NA                 |
| Kabuli_wild_794672 | NA                                  | Ca_kabuli_denovo | 794672                  | C/G  | NA                 | NA                            | NA                 |
| Kabuli_wild_794699 | NA                                  | Ca_kabuli_denovo | 794699                  | G/C  | NA                 | NA                            | NA                 |
| Kabuli_wild_794755 | NA                                  | Ca_kabuli_denovo | 794755                  | A/C  | NA                 | NA                            | NA                 |
| Kabuli_wild_795235 | NA                                  | Ca_kabuli_denovo | 795235                  | T/G  | NA                 | NA                            | NA                 |
| Kabuli_wild_797786 | NA                                  | Ca_kabuli_denovo | 797786                  | C/T  | NA                 | NA                            | NA                 |
| Kabuli_wild_797825 | NA                                  | Ca_kabuli_denovo | 797825                  | T/G  | NA                 | NA                            | NA                 |
| Kabuli_wild_798627 | NA                                  | Ca_kabuli_denovo | 798627                  | C/A  | NA                 | NA                            | NA                 |
| Kabuli_wild_798628 | NA                                  | Ca_kabuli_denovo | 798628                  | T/G  | NA                 | NA                            | NA                 |
| Kabuli_wild_798629 | NA                                  | Ca_kabuli_denovo | 798629                  | C/A  | NA                 | NA                            | NA                 |
| Kabuli_wild_798719 | NA                                  | Ca_kabuli_denovo | 798719                  | A/G  | NA                 | NA                            | NA                 |
| Kabuli_wild_798721 | NA                                  | Ca_kabuli_denovo | 798721                  | C/T  | NA                 | NA                            | NA                 |
| Kabuli_wild_798722 | NA                                  | Ca_kabuli_denovo | 798722                  | C/G  | NA                 | NA                            | NA                 |
| Kabuli_wild_800497 | NA                                  | Ca_kabuli_denovo | 800497                  | G/A  | NA                 | NA                            | NA                 |
| Kabuli_wild_800511 | NA                                  | Ca_kabuli_denovo | 800511                  | A/G  | NA                 | NA                            | NA                 |
| Kabuli_wild_800521 | NA                                  | Ca_kabuli_denovo | 800521                  | C/T  | NA                 | NA                            | NA                 |
| Kabuli_wild_800785 | NA                                  | Ca_kabuli_denovo | 800785                  | G/A  | NA                 | NA                            | NA                 |
| Kabuli_wild_802096 | NA                                  | Ca_kabuli_denovo | 802096                  | G/C  | NA                 | NA                            | NA                 |
| Kabuli_wild_802097 | NA                                  | Ca_kabuli_denovo | 802097                  | C/T  | NA                 | NA                            | NA                 |
| Kabuli_wild_802532 | NA                                  | Ca_kabuli_denovo | 802532                  | A/G  | NA                 | NA                            | NA                 |
| Kabuli_wild_802747 | NA                                  | Ca_kabuli_denovo | 802747                  | T/G  | NA                 | NA                            | NA                 |
| Kabuli_wild_802827 | NA                                  | Ca_kabuli_denovo | 802827                  | G/A  | NA                 | NA                            | NA                 |
| Kabuli_wild_802889 | NA                                  | Ca_kabuli_denovo | 802889                  | T/C  | NA                 | NA                            | NA                 |
| Kabuli_wild_802958 | NA                                  | Ca_kabuli_denovo | 802958                  | C/T  | NA                 | NA                            | NA                 |
| Kabuli_wild_802973 | NA                                  | Ca_kabuli_denovo | 802973                  | T/C  | NA                 | NA                            | NA                 |
| Kabuli_wild_803157 | NA                                  | Ca_kabuli_denovo | 803157                  | T/G  | NA                 | NA                            | NA                 |
| Kabuli_wild_804274 | NA                                  | Ca_kabuli_denovo | 804274                  | A/G  | NA                 | NA                            | NA                 |



| SNP IDs            | NCBI dbSNP accession IDs (NCBI_SS#) | Chromosomes      | Physical positions (bp) | SNPs | Gene accession IDs | Sequence components of genome | Putative functions |
|--------------------|-------------------------------------|------------------|-------------------------|------|--------------------|-------------------------------|--------------------|
| Kabuli_wild_804692 | NA                                  | Ca_kabuli_denovo | 804692                  | A/G  | NA                 | NA                            | NA                 |
| Kabuli_wild_804698 | NA                                  | Ca_kabuli_denovo | 804698                  | T/A  | NA                 | NA                            | NA                 |
| Kabuli_wild_804710 | NA                                  | Ca_kabuli_denovo | 804710                  | T/C  | NA                 | NA                            | NA                 |
| Kabuli_wild_805720 | NA                                  | Ca_kabuli_denovo | 805720                  | A/C  | NA                 | NA                            | NA                 |
| Kabuli_wild_806526 | NA                                  | Ca_kabuli_denovo | 806526                  | G/A  | NA                 | NA                            | NA                 |
| Kabuli_wild_806562 | NA                                  | Ca_kabuli_denovo | 806562                  | T/C  | NA                 | NA                            | NA                 |
| Kabuli_wild_807487 | NA                                  | Ca_kabuli_denovo | 807487                  | G/C  | NA                 | NA                            | NA                 |
| Kabuli_wild_807505 | NA                                  | Ca_kabuli_denovo | 807505                  | T/C  | NA                 | NA                            | NA                 |
| Kabuli_wild_807880 | NA                                  | Ca_kabuli_denovo | 807880                  | A/G  | NA                 | NA                            | NA                 |
| Kabuli_wild_808370 | NA                                  | Ca_kabuli_denovo | 808370                  | A/G  | NA                 | NA                            | NA                 |
| Kabuli_wild_808388 | NA                                  | Ca_kabuli_denovo | 808388                  | C/T  | NA                 | NA                            | NA                 |
| Kabuli_wild_808831 | NA                                  | Ca_kabuli_denovo | 808831                  | C/A  | NA                 | NA                            | NA                 |
| Kabuli_wild_808937 | NA                                  | Ca_kabuli_denovo | 808937                  | A/G  | NA                 | NA                            | NA                 |
| Kabuli_wild_808979 | NA                                  | Ca_kabuli_denovo | 808979                  | G/A  | NA                 | NA                            | NA                 |
| Kabuli_wild_809757 | NA                                  | Ca_kabuli_denovo | 809757                  | A/C  | NA                 | NA                            | NA                 |
| Kabuli_wild_810685 | NA                                  | Ca_kabuli_denovo | 810685                  | C/G  | NA                 | NA                            | NA                 |
| Kabuli_wild_810746 | NA                                  | Ca_kabuli_denovo | 810746                  | C/T  | NA                 | NA                            | NA                 |
| Kabuli_wild_811683 | NA                                  | Ca_kabuli_denovo | 811683                  | G/T  | NA                 | NA                            | NA                 |
| Kabuli_wild_811686 | NA                                  | Ca_kabuli_denovo | 811686                  | T/C  | NA                 | NA                            | NA                 |
| Kabuli_wild_811936 | NA                                  | Ca_kabuli_denovo | 811936                  | G/C  | NA                 | NA                            | NA                 |
| Kabuli_wild_811986 | NA                                  | Ca_kabuli_denovo | 811986                  | G/T  | NA                 | NA                            | NA                 |
| Kabuli_wild_813207 | NA                                  | Ca_kabuli_denovo | 813207                  | C/T  | NA                 | NA                            | NA                 |
| Kabuli_wild_813208 | NA                                  | Ca_kabuli_denovo | 813208                  | G/A  | NA                 | NA                            | NA                 |
| Kabuli_wild_813682 | NA                                  | Ca_kabuli_denovo | 813682                  | C/T  | NA                 | NA                            | NA                 |
| Kabuli_wild_814111 | NA                                  | Ca_kabuli_denovo | 814111                  | C/T  | NA                 | NA                            | NA                 |
| Kabuli_wild_814387 | NA                                  | Ca_kabuli_denovo | 814387                  | C/G  | NA                 | NA                            | NA                 |
| Kabuli_wild_814413 | NA                                  | Ca_kabuli_denovo | 814413                  | T/C  | NA                 | NA                            | NA                 |
| Kabuli_wild_815041 | NA                                  | Ca_kabuli_denovo | 815041                  | A/C  | NA                 | NA                            | NA                 |
| Kabuli_wild_815839 | NA                                  | Ca_kabuli_denovo | 815839                  | A/G  | NA                 | NA                            | NA                 |
| Kabuli_wild_816255 | NA                                  | Ca_kabuli_denovo | 816255                  | A/G  | NA                 | NA                            | NA                 |
| Kabuli_wild_816258 | NA                                  | Ca_kabuli_denovo | 816258                  | A/G  | NA                 | NA                            | NA                 |
| Kabuli_wild_817025 | NA                                  | Ca_kabuli_denovo | 817025                  | T/G  | NA                 | NA                            | NA                 |
| Kabuli_wild_817034 | NA                                  | Ca_kabuli_denovo | 817034                  | T/C  | NA                 | NA                            | NA                 |
| Kabuli_wild_817312 | NA                                  | Ca_kabuli_denovo | 817312                  | C/T  | NA                 | NA                            | NA                 |
| Kabuli_wild_817635 | NA                                  | Ca_kabuli_denovo | 817635                  | T/G  | NA                 | NA                            | NA                 |
| Kabuli_wild_817706 | NA                                  | Ca_kabuli_denovo | 817706                  | G/A  | NA                 | NA                            | NA                 |
| Kabuli_wild_817717 | NA                                  | Ca_kabuli_denovo | 817717                  | G/A  | NA                 | NA                            | NA                 |
| Kabuli_wild_818958 | NA                                  | Ca_kabuli_denovo | 818958                  | C/T  | NA                 | NA                            | NA                 |
| Kabuli_wild_820572 | NA                                  | Ca_kabuli_denovo | 820572                  | T/G  | NA                 | NA                            | NA                 |
| Kabuli_wild_820957 | NA                                  | Ca_kabuli_denovo | 820957                  | T/C  | NA                 | NA                            | NA                 |
| Kabuli_wild_820960 | NA                                  | Ca_kabuli_denovo | 820960                  | T/C  | NA                 | NA                            | NA                 |
| Kabuli_wild_820966 | NA                                  | Ca_kabuli_denovo | 820966                  | C/G  | NA                 | NA                            | NA                 |
| Kabuli_wild_820969 | NA                                  | Ca_kabuli_denovo | 820969                  | C/G  | NA                 | NA                            | NA                 |
| Kabuli_wild_821760 | NA                                  | Ca_kabuli_denovo | 821760                  | G/C  | NA                 | NA                            | NA                 |

| SNP IDs            | NCBI dbSNP accession IDs (NCBI_SS#) | Chromosomes      | Physical positions (bp) | SNPs | Gene accession IDs | Sequence components of genome | Putative functions |
|--------------------|-------------------------------------|------------------|-------------------------|------|--------------------|-------------------------------|--------------------|
| Kabuli_wild_821769 | NA                                  | Ca_kabuli_denovo | 821769                  | A/G  | NA                 | NA                            | NA                 |
| Kabuli_wild_822401 | NA                                  | Ca_kabuli_denovo | 822401                  | T/G  | NA                 | NA                            | NA                 |
| Kabuli_wild_823146 | NA                                  | Ca_kabuli_denovo | 823146                  | G/C  | NA                 | NA                            | NA                 |
| Kabuli_wild_823384 | NA                                  | Ca_kabuli_denovo | 823384                  | G/A  | NA                 | NA                            | NA                 |
| Kabuli_wild_824607 | NA                                  | Ca_kabuli_denovo | 824607                  | C/G  | NA                 | NA                            | NA                 |
| Kabuli_wild_825138 | NA                                  | Ca_kabuli_denovo | 825138                  | C/T  | NA                 | NA                            | NA                 |
| Kabuli_wild_825147 | NA                                  | Ca_kabuli_denovo | 825147                  | T/A  | NA                 | NA                            | NA                 |
| Kabuli_wild_825736 | NA                                  | Ca_kabuli_denovo | 825736                  | T/C  | NA                 | NA                            | NA                 |
| Kabuli_wild_825781 | NA                                  | Ca_kabuli_denovo | 825781                  | A/T  | NA                 | NA                            | NA                 |
| Kabuli_wild_825790 | NA                                  | Ca_kabuli_denovo | 825790                  | T/C  | NA                 | NA                            | NA                 |
| Kabuli_wild_825822 | NA                                  | Ca_kabuli_denovo | 825822                  | A/G  | NA                 | NA                            | NA                 |
| Kabuli_wild_825828 | NA                                  | Ca_kabuli_denovo | 825828                  | G/T  | NA                 | NA                            | NA                 |
| Kabuli_wild_826075 | NA                                  | Ca_kabuli_denovo | 826075                  | A/T  | NA                 | NA                            | NA                 |
| Kabuli_wild_826076 | NA                                  | Ca_kabuli_denovo | 826076                  | C/T  | NA                 | NA                            | NA                 |
| Kabuli_wild_826207 | NA                                  | Ca_kabuli_denovo | 826207                  | C/T  | NA                 | NA                            | NA                 |
| Kabuli_wild_826209 | NA                                  | Ca_kabuli_denovo | 826209                  | C/G  | NA                 | NA                            | NA                 |
| Kabuli_wild_826410 | NA                                  | Ca_kabuli_denovo | 826410                  | C/T  | NA                 | NA                            | NA                 |
| Kabuli_wild_826971 | NA                                  | Ca_kabuli_denovo | 826971                  | G/C  | NA                 | NA                            | NA                 |
| Kabuli_wild_826975 | NA                                  | Ca_kabuli_denovo | 826975                  | G/A  | NA                 | NA                            | NA                 |
| Kabuli_wild_828620 | NA                                  | Ca_kabuli_denovo | 828620                  | T/C  | NA                 | NA                            | NA                 |
| Kabuli_wild_828674 | NA                                  | Ca_kabuli_denovo | 828674                  | C/T  | NA                 | NA                            | NA                 |
| Kabuli_wild_828725 | NA                                  | Ca_kabuli_denovo | 828725                  | A/C  | NA                 | NA                            | NA                 |
| Kabuli_wild_829359 | NA                                  | Ca_kabuli_denovo | 829359                  | G/A  | NA                 | NA                            | NA                 |
| Kabuli_wild_830267 | NA                                  | Ca_kabuli_denovo | 830267                  | C/G  | NA                 | NA                            | NA                 |
| Kabuli_wild_830307 | NA                                  | Ca_kabuli_denovo | 830307                  | A/C  | NA                 | NA                            | NA                 |
| Kabuli_wild_832486 | NA                                  | Ca_kabuli_denovo | 832486                  | T/C  | NA                 | NA                            | NA                 |
| Kabuli_wild_832758 | NA                                  | Ca_kabuli_denovo | 832758                  | G/T  | NA                 | NA                            | NA                 |
| Kabuli_wild_833320 | NA                                  | Ca_kabuli_denovo | 833320                  | C/T  | NA                 | NA                            | NA                 |
| Kabuli_wild_833394 | NA                                  | Ca_kabuli_denovo | 833394                  | C/T  | NA                 | NA                            | NA                 |
| Kabuli_wild_833672 | NA                                  | Ca_kabuli_denovo | 833672                  | G/A  | NA                 | NA                            | NA                 |
| Kabuli_wild_833925 | NA                                  | Ca_kabuli_denovo | 833925                  | A/T  | NA                 | NA                            | NA                 |
| Kabuli_wild_834420 | NA                                  | Ca_kabuli_denovo | 834420                  | G/C  | NA                 | NA                            | NA                 |
| Kabuli_wild_834428 | NA                                  | Ca_kabuli_denovo | 834428                  | T/C  | NA                 | NA                            | NA                 |
| Kabuli_wild_834576 | NA                                  | Ca_kabuli_denovo | 834576                  | T/C  | NA                 | NA                            | NA                 |
| Kabuli_wild_834609 | NA                                  | Ca_kabuli_denovo | 834609                  | G/T  | NA                 | NA                            | NA                 |
| Kabuli_wild_834625 | NA                                  | Ca_kabuli_denovo | 834625                  | C/A  | NA                 | NA                            | NA                 |
| Kabuli_wild_836115 | NA                                  | Ca_kabuli_denovo | 836115                  | T/G  | NA                 | NA                            | NA                 |
| Kabuli_wild_839299 | NA                                  | Ca_kabuli_denovo | 839299                  | C/G  | NA                 | NA                            | NA                 |
| Kabuli_wild_839319 | NA                                  | Ca_kabuli_denovo | 839319                  | C/T  | NA                 | NA                            | NA                 |
| Kabuli_wild_839585 | NA                                  | Ca_kabuli_denovo | 839585                  | G/A  | NA                 | NA                            | NA                 |
| Kabuli_wild_839657 | NA                                  | Ca_kabuli_denovo | 839657                  | G/A  | NA                 | NA                            | NA                 |
| Kabuli_wild_840434 | NA                                  | Ca_kabuli_denovo | 840434                  | C/A  | NA                 | NA                            | NA                 |
| Kabuli_wild_841835 | NA                                  | Ca_kabuli_denovo | 841835                  | C/T  | NA                 | NA                            | NA                 |
| Kabuli_wild_841857 | NA                                  | Ca_kabuli_denovo | 841857                  | C/A  | NA                 | NA                            | NA                 |

| SNP IDs            | NCBI dbSNP accession IDs (NCBI_SS#) | Chromosomes      | Physical positions (bp) | SNPs | Gene accession IDs | Sequence components of genome | Putative functions |
|--------------------|-------------------------------------|------------------|-------------------------|------|--------------------|-------------------------------|--------------------|
| Kabuli_wild_842035 | NA                                  | Ca_kabuli_denovo | 842035                  | A/G  | NA                 | NA                            | NA                 |
| Kabuli_wild_842059 | NA                                  | Ca_kabuli_denovo | 842059                  | G/C  | NA                 | NA                            | NA                 |
| Kabuli_wild_842708 | NA                                  | Ca_kabuli_denovo | 842708                  | G/A  | NA                 | NA                            | NA                 |
| Kabuli_wild_843101 | NA                                  | Ca_kabuli_denovo | 843101                  | C/T  | NA                 | NA                            | NA                 |
| Kabuli_wild_843449 | NA                                  | Ca_kabuli_denovo | 843449                  | A/C  | NA                 | NA                            | NA                 |
| Kabuli_wild_843657 | NA                                  | Ca_kabuli_denovo | 843657                  | A/G  | NA                 | NA                            | NA                 |
| Kabuli_wild_843687 | NA                                  | Ca_kabuli_denovo | 843687                  | G/A  | NA                 | NA                            | NA                 |
| Kabuli_wild_843821 | NA                                  | Ca_kabuli_denovo | 843821                  | C/T  | NA                 | NA                            | NA                 |
| Kabuli_wild_843906 | NA                                  | Ca_kabuli_denovo | 843906                  | T/C  | NA                 | NA                            | NA                 |
| Kabuli_wild_844940 | NA                                  | Ca_kabuli_denovo | 844940                  | G/A  | NA                 | NA                            | NA                 |
| Kabuli_wild_844968 | NA                                  | Ca_kabuli_denovo | 844968                  | C/T  | NA                 | NA                            | NA                 |
| Kabuli_wild_845026 | NA                                  | Ca_kabuli_denovo | 845026                  | T/G  | NA                 | NA                            | NA                 |
| Kabuli_wild_845519 | NA                                  | Ca_kabuli_denovo | 845519                  | C/G  | NA                 | NA                            | NA                 |
| Kabuli_wild_845696 | NA                                  | Ca_kabuli_denovo | 845696                  | G/A  | NA                 | NA                            | NA                 |
| Kabuli_wild_845885 | NA                                  | Ca_kabuli_denovo | 845885                  | A/C  | NA                 | NA                            | NA                 |
| Kabuli_wild_845918 | NA                                  | Ca_kabuli_denovo | 845918                  | C/T  | NA                 | NA                            | NA                 |
| Kabuli_wild_845982 | NA                                  | Ca_kabuli_denovo | 845982                  | G/T  | NA                 | NA                            | NA                 |
| Kabuli_wild_846148 | NA                                  | Ca_kabuli_denovo | 846148                  | C/T  | NA                 | NA                            | NA                 |
| Kabuli_wild_846698 | NA                                  | Ca_kabuli_denovo | 846698                  | C/A  | NA                 | NA                            | NA                 |
| Kabuli_wild_847333 | NA                                  | Ca_kabuli_denovo | 847333                  | G/T  | NA                 | NA                            | NA                 |
| Kabuli_wild_847641 | NA                                  | Ca_kabuli_denovo | 847641                  | T/C  | NA                 | NA                            | NA                 |
| Kabuli_wild_848426 | NA                                  | Ca_kabuli_denovo | 848426                  | C/T  | NA                 | NA                            | NA                 |
| Kabuli_wild_849155 | NA                                  | Ca_kabuli_denovo | 849155                  | T/C  | NA                 | NA                            | NA                 |
| Kabuli_wild_849527 | NA                                  | Ca_kabuli_denovo | 849527                  | G/A  | NA                 | NA                            | NA                 |
| Kabuli_wild_849544 | NA                                  | Ca_kabuli_denovo | 849544                  | G/T  | NA                 | NA                            | NA                 |
| Kabuli_wild_849886 | NA                                  | Ca_kabuli_denovo | 849886                  | T/C  | NA                 | NA                            | NA                 |
| Kabuli_wild_849895 | NA                                  | Ca_kabuli_denovo | 849895                  | A/G  | NA                 | NA                            | NA                 |
| Kabuli_wild_850766 | NA                                  | Ca_kabuli_denovo | 850766                  | C/A  | NA                 | NA                            | NA                 |
| Kabuli_wild_851650 | NA                                  | Ca_kabuli_denovo | 851650                  | G/A  | NA                 | NA                            | NA                 |
| Kabuli_wild_853081 | NA                                  | Ca_kabuli_denovo | 853081                  | C/T  | NA                 | NA                            | NA                 |
| Kabuli_wild_854340 | NA                                  | Ca_kabuli_denovo | 854340                  | G/T  | NA                 | NA                            | NA                 |
| Kabuli_wild_854622 | NA                                  | Ca_kabuli_denovo | 854622                  | C/G  | NA                 | NA                            | NA                 |
| Kabuli_wild_855024 | NA                                  | Ca_kabuli_denovo | 855024                  | A/G  | NA                 | NA                            | NA                 |
| Kabuli_wild_855593 | NA                                  | Ca_kabuli_denovo | 855593                  | A/G  | NA                 | NA                            | NA                 |
| Kabuli_wild_856373 | NA                                  | Ca_kabuli_denovo | 856373                  | A/C  | NA                 | NA                            | NA                 |
| Kabuli_wild_857533 | NA                                  | Ca_kabuli_denovo | 857533                  | C/T  | NA                 | NA                            | NA                 |
| Kabuli_wild_857539 | NA                                  | Ca_kabuli_denovo | 857539                  | C/T  | NA                 | NA                            | NA                 |
| Kabuli_wild_859250 | NA                                  | Ca_kabuli_denovo | 859250                  | A/G  | NA                 | NA                            | NA                 |
| Kabuli_wild_859253 | NA                                  | Ca_kabuli_denovo | 859253                  | C/G  | NA                 | NA                            | NA                 |
| Kabuli_wild_859696 | NA                                  | Ca_kabuli_denovo | 859696                  | A/G  | NA                 | NA                            | NA                 |
| Kabuli_wild_859989 | NA                                  | Ca_kabuli_denovo | 859989                  | C/T  | NA                 | NA                            | NA                 |
| Kabuli_wild_859992 | NA                                  | Ca_kabuli_denovo | 859992                  | A/G  | NA                 | NA                            | NA                 |
| Kabuli_wild_859995 | NA                                  | Ca_kabuli_denovo | 859995                  | C/T  | NA                 | NA                            | NA                 |
| Kabuli_wild_861122 | NA                                  | Ca_kabuli_denovo | 861122                  | C/G  | NA                 | NA                            | NA                 |

| SNP IDs            | NCBI dbSNP accession IDs (NCBI_SS#) | Chromosomes      | Physical positions (bp) | SNPs | Gene accession IDs | Sequence components of genome | Putative functions |
|--------------------|-------------------------------------|------------------|-------------------------|------|--------------------|-------------------------------|--------------------|
| Kabuli_wild_861152 | NA                                  | Ca_kabuli_denovo | 861152                  | A/G  | NA                 | NA                            | NA                 |
| Kabuli_wild_861557 | NA                                  | Ca_kabuli_denovo | 861557                  | A/G  | NA                 | NA                            | NA                 |
| Kabuli_wild_861584 | NA                                  | Ca_kabuli_denovo | 861584                  | C/T  | NA                 | NA                            | NA                 |
| Kabuli_wild_862308 | NA                                  | Ca_kabuli_denovo | 862308                  | C/G  | NA                 | NA                            | NA                 |
| Kabuli_wild_863654 | NA                                  | Ca_kabuli_denovo | 863654                  | C/T  | NA                 | NA                            | NA                 |
| Kabuli_wild_864003 | NA                                  | Ca_kabuli_denovo | 864003                  | G/A  | NA                 | NA                            | NA                 |
| Kabuli_wild_864358 | NA                                  | Ca_kabuli_denovo | 864358                  | A/G  | NA                 | NA                            | NA                 |
| Kabuli_wild_864385 | NA                                  | Ca_kabuli_denovo | 864385                  | C/T  | NA                 | NA                            | NA                 |
| Kabuli_wild_864473 | NA                                  | Ca_kabuli_denovo | 864473                  | T/G  | NA                 | NA                            | NA                 |
| Kabuli_wild_864879 | NA                                  | Ca_kabuli_denovo | 864879                  | G/T  | NA                 | NA                            | NA                 |
| Kabuli_wild_867429 | NA                                  | Ca_kabuli_denovo | 867429                  | C/T  | NA                 | NA                            | NA                 |
| Kabuli_wild_867617 | NA                                  | Ca_kabuli_denovo | 867617                  | G/A  | NA                 | NA                            | NA                 |
| Kabuli_wild_867636 | NA                                  | Ca_kabuli_denovo | 867636                  | C/T  | NA                 | NA                            | NA                 |
| Kabuli_wild_868907 | NA                                  | Ca_kabuli_denovo | 868907                  | T/G  | NA                 | NA                            | NA                 |
| Kabuli_wild_868946 | NA                                  | Ca_kabuli_denovo | 868946                  | A/G  | NA                 | NA                            | NA                 |
| Kabuli_wild_868998 | NA                                  | Ca_kabuli_denovo | 868998                  | C/T  | NA                 | NA                            | NA                 |
| Kabuli_wild_869030 | NA                                  | Ca_kabuli_denovo | 869030                  | T/C  | NA                 | NA                            | NA                 |
| Kabuli_wild_869860 | NA                                  | Ca_kabuli_denovo | 869860                  | G/A  | NA                 | NA                            | NA                 |
| Kabuli_wild_870261 | NA                                  | Ca_kabuli_denovo | 870261                  | T/G  | NA                 | NA                            | NA                 |
| Kabuli_wild_870547 | NA                                  | Ca_kabuli_denovo | 870547                  | T/C  | NA                 | NA                            | NA                 |
| Kabuli_wild_870710 | NA                                  | Ca_kabuli_denovo | 870710                  | A/C  | NA                 | NA                            | NA                 |
| Kabuli_wild_870711 | NA                                  | Ca_kabuli_denovo | 870711                  | G/T  | NA                 | NA                            | NA                 |
| Kabuli_wild_871172 | NA                                  | Ca_kabuli_denovo | 871172                  | C/T  | NA                 | NA                            | NA                 |
| Kabuli_wild_871991 | NA                                  | Ca_kabuli_denovo | 871991                  | C/G  | NA                 | NA                            | NA                 |
| Kabuli_wild_873028 | NA                                  | Ca_kabuli_denovo | 873028                  | G/T  | NA                 | NA                            | NA                 |
| Kabuli_wild_873310 | NA                                  | Ca_kabuli_denovo | 873310                  | G/A  | NA                 | NA                            | NA                 |
| Kabuli_wild_874045 | NA                                  | Ca_kabuli_denovo | 874045                  | T/C  | NA                 | NA                            | NA                 |
| Kabuli_wild_874071 | NA                                  | Ca_kabuli_denovo | 874071                  | T/C  | NA                 | NA                            | NA                 |
| Kabuli_wild_875771 | NA                                  | Ca_kabuli_denovo | 875771                  | T/C  | NA                 | NA                            | NA                 |
| Kabuli_wild_877265 | NA                                  | Ca_kabuli_denovo | 877265                  | A/C  | NA                 | NA                            | NA                 |
| Kabuli_wild_877417 | NA                                  | Ca_kabuli_denovo | 877417                  | C/G  | NA                 | NA                            | NA                 |
| Kabuli_wild_877486 | NA                                  | Ca_kabuli_denovo | 877486                  | A/C  | NA                 | NA                            | NA                 |
| Kabuli_wild_877951 | NA                                  | Ca_kabuli_denovo | 877951                  | A/G  | NA                 | NA                            | NA                 |
| Kabuli_wild_877953 | NA                                  | Ca_kabuli_denovo | 877953                  | G/A  | NA                 | NA                            | NA                 |
| Kabuli_wild_877954 | NA                                  | Ca_kabuli_denovo | 877954                  | G/A  | NA                 | NA                            | NA                 |
| Kabuli_wild_877955 | NA                                  | Ca_kabuli_denovo | 877955                  | A/G  | NA                 | NA                            | NA                 |
| Kabuli_wild_877956 | NA                                  | Ca_kabuli_denovo | 877956                  | G/C  | NA                 | NA                            | NA                 |
| Kabuli_wild_878795 | NA                                  | Ca_kabuli_denovo | 878795                  | T/C  | NA                 | NA                            | NA                 |
| Kabuli_wild_881123 | NA                                  | Ca_kabuli_denovo | 881123                  | T/C  | NA                 | NA                            | NA                 |
| Kabuli_wild_881961 | NA                                  | Ca_kabuli_denovo | 881961                  | A/C  | NA                 | NA                            | NA                 |
| Kabuli_wild_881988 | NA                                  | Ca_kabuli_denovo | 881988                  | T/C  | NA                 | NA                            | NA                 |
| Kabuli_wild_882039 | NA                                  | Ca_kabuli_denovo | 882039                  | C/G  | NA                 | NA                            | NA                 |
| Kabuli_wild_883427 | NA                                  | Ca_kabuli_denovo | 883427                  | C/G  | NA                 | NA                            | NA                 |
| Kabuli_wild_883511 | NA                                  | Ca_kabuli_denovo | 883511                  | G/T  | NA                 | NA                            | NA                 |

| SNP IDs            | NCBI dbSNP accession IDs (NCBI_SS#) | Chromosomes      | Physical positions (bp) | SNPs | Gene accession IDs | Sequence components of genome | Putative functions |
|--------------------|-------------------------------------|------------------|-------------------------|------|--------------------|-------------------------------|--------------------|
| Kabuli_wild_883743 | NA                                  | Ca_kabuli_denovo | 883743                  | G/A  | NA                 | NA                            | NA                 |
| Kabuli_wild_883968 | NA                                  | Ca_kabuli_denovo | 883968                  | A/G  | NA                 | NA                            | NA                 |
| Kabuli_wild_884222 | NA                                  | Ca_kabuli_denovo | 884222                  | G/T  | NA                 | NA                            | NA                 |
| Kabuli_wild_884545 | NA                                  | Ca_kabuli_denovo | 884545                  | G/C  | NA                 | NA                            | NA                 |
| Kabuli_wild_885584 | NA                                  | Ca_kabuli_denovo | 885584                  | A/G  | NA                 | NA                            | NA                 |
| Kabuli_wild_885629 | NA                                  | Ca_kabuli_denovo | 885629                  | T/C  | NA                 | NA                            | NA                 |
| Kabuli_wild_885641 | NA                                  | Ca_kabuli_denovo | 885641                  | A/G  | NA                 | NA                            | NA                 |
| Kabuli_wild_886840 | NA                                  | Ca_kabuli_denovo | 886840                  | T/C  | NA                 | NA                            | NA                 |
| Kabuli_wild_886888 | NA                                  | Ca_kabuli_denovo | 886888                  | T/C  | NA                 | NA                            | NA                 |
| Kabuli_wild_888028 | NA                                  | Ca_kabuli_denovo | 888028                  | T/G  | NA                 | NA                            | NA                 |
| Kabuli_wild_888049 | NA                                  | Ca_kabuli_denovo | 888049                  | G/A  | NA                 | NA                            | NA                 |
| Kabuli_wild_889099 | NA                                  | Ca_kabuli_denovo | 889099                  | C/G  | NA                 | NA                            | NA                 |
| Kabuli_wild_889114 | NA                                  | Ca_kabuli_denovo | 889114                  | C/T  | NA                 | NA                            | NA                 |
| Kabuli_wild_889305 | NA                                  | Ca_kabuli_denovo | 889305                  | C/T  | NA                 | NA                            | NA                 |
| Kabuli_wild_889438 | NA                                  | Ca_kabuli_denovo | 889438                  | C/T  | NA                 | NA                            | NA                 |
| Kabuli_wild_889445 | NA                                  | Ca_kabuli_denovo | 889445                  | G/A  | NA                 | NA                            | NA                 |
| Kabuli_wild_889836 | NA                                  | Ca_kabuli_denovo | 889836                  | A/G  | NA                 | NA                            | NA                 |
| Kabuli_wild_889893 | NA                                  | Ca_kabuli_denovo | 889893                  | A/G  | NA                 | NA                            | NA                 |
| Kabuli_wild_891673 | NA                                  | Ca_kabuli_denovo | 891673                  | T/C  | NA                 | NA                            | NA                 |
| Kabuli_wild_892290 | NA                                  | Ca_kabuli_denovo | 892290                  | T/G  | NA                 | NA                            | NA                 |
| Kabuli_wild_892555 | NA                                  | Ca_kabuli_denovo | 892555                  | A/G  | NA                 | NA                            | NA                 |
| Kabuli_wild_892940 | NA                                  | Ca_kabuli_denovo | 892940                  | G/A  | NA                 | NA                            | NA                 |
| Kabuli_wild_892961 | NA                                  | Ca_kabuli_denovo | 892961                  | A/G  | NA                 | NA                            | NA                 |
| Kabuli_wild_893235 | NA                                  | Ca_kabuli_denovo | 893235                  | C/T  | NA                 | NA                            | NA                 |
| Kabuli_wild_893367 | NA                                  | Ca_kabuli_denovo | 893367                  | C/G  | NA                 | NA                            | NA                 |
| Kabuli_wild_893821 | NA                                  | Ca_kabuli_denovo | 893821                  | G/C  | NA                 | NA                            | NA                 |
| Kabuli_wild_893863 | NA                                  | Ca_kabuli_denovo | 893863                  | G/C  | NA                 | NA                            | NA                 |
| Kabuli_wild_894325 | NA                                  | Ca_kabuli_denovo | 894325                  | G/C  | NA                 | NA                            | NA                 |
| Kabuli_wild_894342 | NA                                  | Ca_kabuli_denovo | 894342                  | G/C  | NA                 | NA                            | NA                 |
| Kabuli_wild_894417 | NA                                  | Ca_kabuli_denovo | 894417                  | G/C  | NA                 | NA                            | NA                 |
| Kabuli_wild_894471 | NA                                  | Ca_kabuli_denovo | 894471                  | G/A  | NA                 | NA                            | NA                 |
| Kabuli_wild_894532 | NA                                  | Ca_kabuli_denovo | 894532                  | T/C  | NA                 | NA                            | NA                 |
| Kabuli_wild_894891 | NA                                  | Ca_kabuli_denovo | 894891                  | G/C  | NA                 | NA                            | NA                 |
| Kabuli_wild_895051 | NA                                  | Ca_kabuli_denovo | 895051                  | G/A  | NA                 | NA                            | NA                 |
| Kabuli_wild_896882 | NA                                  | Ca_kabuli_denovo | 896882                  | T/G  | NA                 | NA                            | NA                 |
| Kabuli_wild_896945 | NA                                  | Ca_kabuli_denovo | 896945                  | C/A  | NA                 | NA                            | NA                 |
| Kabuli_wild_897395 | NA                                  | Ca_kabuli_denovo | 897395                  | C/G  | NA                 | NA                            | NA                 |
| Kabuli_wild_897455 | NA                                  | Ca_kabuli_denovo | 897455                  | C/G  | NA                 | NA                            | NA                 |
| Kabuli_wild_897725 | NA                                  | Ca_kabuli_denovo | 897725                  | A/G  | NA                 | NA                            | NA                 |
| Kabuli_wild_898398 | NA                                  | Ca_kabuli_denovo | 898398                  | A/C  | NA                 | NA                            | NA                 |
| Kabuli_wild_898401 | NA                                  | Ca_kabuli_denovo | 898401                  | G/A  | NA                 | NA                            | NA                 |
| Kabuli_wild_899710 | NA                                  | Ca_kabuli_denovo | 899710                  | A/C  | NA                 | NA                            | NA                 |
| Kabuli_wild_900502 | NA                                  | Ca_kabuli_denovo | 900502                  | G/C  | NA                 | NA                            | NA                 |
| Kabuli_wild_900510 | NA                                  | Ca_kabuli_denovo | 900510                  | A/G  | NA                 | NA                            | NA                 |

| SNP IDs            | NCBI dbSNP accession IDs (NCBI_SS#) | Chromosomes      | Physical positions (bp) | SNPs | Gene accession IDs | Sequence components of genome | Putative functions |
|--------------------|-------------------------------------|------------------|-------------------------|------|--------------------|-------------------------------|--------------------|
| Kabuli_wild_900997 | NA                                  | Ca_kabuli_denovo | 900997                  | C/T  | NA                 | NA                            | NA                 |
| Kabuli_wild_901020 | NA                                  | Ca_kabuli_denovo | 901020                  | C/T  | NA                 | NA                            | NA                 |
| Kabuli_wild_901381 | NA                                  | Ca_kabuli_denovo | 901381                  | C/T  | NA                 | NA                            | NA                 |
| Kabuli_wild_901387 | NA                                  | Ca_kabuli_denovo | 901387                  | C/T  | NA                 | NA                            | NA                 |
| Kabuli_wild_902758 | NA                                  | Ca_kabuli_denovo | 902758                  | C/T  | NA                 | NA                            | NA                 |
| Kabuli_wild_902767 | NA                                  | Ca_kabuli_denovo | 902767                  | T/G  | NA                 | NA                            | NA                 |
| Kabuli_wild_902866 | NA                                  | Ca_kabuli_denovo | 902866                  | C/G  | NA                 | NA                            | NA                 |
| Kabuli_wild_902893 | NA                                  | Ca_kabuli_denovo | 902893                  | C/T  | NA                 | NA                            | NA                 |
| Kabuli_wild_903551 | NA                                  | Ca_kabuli_denovo | 903551                  | C/G  | NA                 | NA                            | NA                 |
| Kabuli_wild_903614 | NA                                  | Ca_kabuli_denovo | 903614                  | G/T  | NA                 | NA                            | NA                 |
| Kabuli_wild_903649 | NA                                  | Ca_kabuli_denovo | 903649                  | C/T  | NA                 | NA                            | NA                 |
| Kabuli_wild_904334 | NA                                  | Ca_kabuli_denovo | 904334                  | A/G  | NA                 | NA                            | NA                 |
| Kabuli_wild_905609 | NA                                  | Ca_kabuli_denovo | 905609                  | A/G  | NA                 | NA                            | NA                 |
| Kabuli_wild_905611 | NA                                  | Ca_kabuli_denovo | 905611                  | G/A  | NA                 | NA                            | NA                 |
| Kabuli_wild_905751 | NA                                  | Ca_kabuli_denovo | 905751                  | T/C  | NA                 | NA                            | NA                 |
| Kabuli_wild_906250 | NA                                  | Ca_kabuli_denovo | 906250                  | G/A  | NA                 | NA                            | NA                 |
| Kabuli_wild_906292 | NA                                  | Ca_kabuli_denovo | 906292                  | A/G  | NA                 | NA                            | NA                 |
| Kabuli_wild_907049 | NA                                  | Ca_kabuli_denovo | 907049                  | C/G  | NA                 | NA                            | NA                 |
| Kabuli_wild_907237 | NA                                  | Ca_kabuli_denovo | 907237                  | C/T  | NA                 | NA                            | NA                 |
| Kabuli_wild_908462 | NA                                  | Ca_kabuli_denovo | 908462                  | G/T  | NA                 | NA                            | NA                 |
| Kabuli_wild_908586 | NA                                  | Ca_kabuli_denovo | 908586                  | T/G  | NA                 | NA                            | NA                 |
| Kabuli_wild_908713 | NA                                  | Ca_kabuli_denovo | 908713                  | G/T  | NA                 | NA                            | NA                 |
| Kabuli_wild_908885 | NA                                  | Ca_kabuli_denovo | 908885                  | T/C  | NA                 | NA                            | NA                 |
| Kabuli_wild_909161 | NA                                  | Ca_kabuli_denovo | 909161                  | T/G  | NA                 | NA                            | NA                 |
| Kabuli_wild_909162 | NA                                  | Ca_kabuli_denovo | 909162                  | C/A  | NA                 | NA                            | NA                 |
| Kabuli_wild_909453 | NA                                  | Ca_kabuli_denovo | 909453                  | T/A  | NA                 | NA                            | NA                 |
| Kabuli_wild_909474 | NA                                  | Ca_kabuli_denovo | 909474                  | G/C  | NA                 | NA                            | NA                 |
| Kabuli_wild_909938 | NA                                  | Ca_kabuli_denovo | 909938                  | G/A  | NA                 | NA                            | NA                 |
| Kabuli_wild_911173 | NA                                  | Ca_kabuli_denovo | 911173                  | C/G  | NA                 | NA                            | NA                 |
| Kabuli_wild_911197 | NA                                  | Ca_kabuli_denovo | 911197                  | T/C  | NA                 | NA                            | NA                 |
| Kabuli_wild_911303 | NA                                  | Ca_kabuli_denovo | 911303                  | T/G  | NA                 | NA                            | NA                 |
| Kabuli_wild_911315 | NA                                  | Ca_kabuli_denovo | 911315                  | G/T  | NA                 | NA                            | NA                 |
| Kabuli_wild_912045 | NA                                  | Ca_kabuli_denovo | 912045                  | C/A  | NA                 | NA                            | NA                 |
| Kabuli_wild_912254 | NA                                  | Ca_kabuli_denovo | 912254                  | C/A  | NA                 | NA                            | NA                 |
| Kabuli_wild_913134 | NA                                  | Ca_kabuli_denovo | 913134                  | G/A  | NA                 | NA                            | NA                 |
| Kabuli_wild_913235 | NA                                  | Ca_kabuli_denovo | 913235                  | T/C  | NA                 | NA                            | NA                 |
| Kabuli_wild_913248 | NA                                  | Ca_kabuli_denovo | 913248                  | G/A  | NA                 | NA                            | NA                 |
| Kabuli_wild_913364 | NA                                  | Ca_kabuli_denovo | 913364                  | A/G  | NA                 | NA                            | NA                 |
| Kabuli_wild_913385 | NA                                  | Ca_kabuli_denovo | 913385                  | A/G  | NA                 | NA                            | NA                 |
| Kabuli_wild_915427 | NA                                  | Ca_kabuli_denovo | 915427                  | A/C  | NA                 | NA                            | NA                 |
| Kabuli_wild_915428 | NA                                  | Ca_kabuli_denovo | 915428                  | A/C  | NA                 | NA                            | NA                 |
| Kabuli_wild_915619 | NA                                  | Ca_kabuli_denovo | 915619                  | C/A  | NA                 | NA                            | NA                 |
| Kabuli_wild_915620 | NA                                  | Ca_kabuli_denovo | 915620                  | T/C  | NA                 | NA                            | NA                 |
| Kabuli_wild_915621 | NA                                  | Ca_kabuli_denovo | 915621                  | G/A  | NA                 | NA                            | NA                 |

| SNP IDs            | NCBI dbSNP accession IDs (NCBI_SS#) | Chromosomes      | Physical positions (bp) | SNPs | Gene accession IDs | Sequence components of genome | Putative functions |
|--------------------|-------------------------------------|------------------|-------------------------|------|--------------------|-------------------------------|--------------------|
| Kabuli_wild_915622 | NA                                  | Ca_kabuli_denovo | 915622                  | G/T  | NA                 | NA                            | NA                 |
| Kabuli_wild_916170 | NA                                  | Ca_kabuli_denovo | 916170                  | A/G  | NA                 | NA                            | NA                 |
| Kabuli_wild_916576 | NA                                  | Ca_kabuli_denovo | 916576                  | T/C  | NA                 | NA                            | NA                 |
| Kabuli_wild_916817 | NA                                  | Ca_kabuli_denovo | 916817                  | G/C  | NA                 | NA                            | NA                 |
| Kabuli_wild_916832 | NA                                  | Ca_kabuli_denovo | 916832                  | C/T  | NA                 | NA                            | NA                 |
| Kabuli_wild_916896 | NA                                  | Ca_kabuli_denovo | 916896                  | T/A  | NA                 | NA                            | NA                 |
| Kabuli_wild_916903 | NA                                  | Ca_kabuli_denovo | 916903                  | T/C  | NA                 | NA                            | NA                 |
| Kabuli_wild_917193 | NA                                  | Ca_kabuli_denovo | 917193                  | C/G  | NA                 | NA                            | NA                 |
| Kabuli_wild_917207 | NA                                  | Ca_kabuli_denovo | 917207                  | T/C  | NA                 | NA                            | NA                 |
| Kabuli_wild_917344 | NA                                  | Ca_kabuli_denovo | 917344                  | T/C  | NA                 | NA                            | NA                 |
| Kabuli_wild_917359 | NA                                  | Ca_kabuli_denovo | 917359                  | T/C  | NA                 | NA                            | NA                 |
| Kabuli_wild_917382 | NA                                  | Ca_kabuli_denovo | 917382                  | G/A  | NA                 | NA                            | NA                 |
| Kabuli_wild_917690 | NA                                  | Ca_kabuli_denovo | 917690                  | T/C  | NA                 | NA                            | NA                 |
| Kabuli_wild_917747 | NA                                  | Ca_kabuli_denovo | 917747                  | C/T  | NA                 | NA                            | NA                 |
| Kabuli_wild_918735 | NA                                  | Ca_kabuli_denovo | 918735                  | G/C  | NA                 | NA                            | NA                 |
| Kabuli_wild_919121 | NA                                  | Ca_kabuli_denovo | 919121                  | G/A  | NA                 | NA                            | NA                 |
| Kabuli_wild_919151 | NA                                  | Ca_kabuli_denovo | 919151                  | C/G  | NA                 | NA                            | NA                 |
| Kabuli_wild_919451 | NA                                  | Ca_kabuli_denovo | 919451                  | G/C  | NA                 | NA                            | NA                 |
| Kabuli_wild_922314 | NA                                  | Ca_kabuli_denovo | 922314                  | T/G  | NA                 | NA                            | NA                 |
| Kabuli_wild_922968 | NA                                  | Ca_kabuli_denovo | 922968                  | A/G  | NA                 | NA                            | NA                 |
| Kabuli_wild_923023 | NA                                  | Ca_kabuli_denovo | 923023                  | C/G  | NA                 | NA                            | NA                 |
| Kabuli_wild_923027 | NA                                  | Ca_kabuli_denovo | 923027                  | T/G  | NA                 | NA                            | NA                 |
| Kabuli_wild_926225 | NA                                  | Ca_kabuli_denovo | 926225                  | G/A  | NA                 | NA                            | NA                 |
| Kabuli_wild_926641 | NA                                  | Ca_kabuli_denovo | 926641                  | T/A  | NA                 | NA                            | NA                 |
| Kabuli_wild_926986 | NA                                  | Ca_kabuli_denovo | 926986                  | A/G  | NA                 | NA                            | NA                 |
| Kabuli_wild_928923 | NA                                  | Ca_kabuli_denovo | 928923                  | C/T  | NA                 | NA                            | NA                 |
| Kabuli_wild_928947 | NA                                  | Ca_kabuli_denovo | 928947                  | T/C  | NA                 | NA                            | NA                 |
| Kabuli_wild_930856 | NA                                  | Ca_kabuli_denovo | 930856                  | G/C  | NA                 | NA                            | NA                 |
| Kabuli_wild_930915 | NA                                  | Ca_kabuli_denovo | 930915                  | A/G  | NA                 | NA                            | NA                 |
| Kabuli_wild_931194 | NA                                  | Ca_kabuli_denovo | 931194                  | A/G  | NA                 | NA                            | NA                 |
| Kabuli_wild_931742 | NA                                  | Ca_kabuli_denovo | 931742                  | C/G  | NA                 | NA                            | NA                 |
| Kabuli_wild_931766 | NA                                  | Ca_kabuli_denovo | 931766                  | T/C  | NA                 | NA                            | NA                 |
| Kabuli_wild_931875 | NA                                  | Ca_kabuli_denovo | 931875                  | G/C  | NA                 | NA                            | NA                 |
| Kabuli_wild_932167 | NA                                  | Ca_kabuli_denovo | 932167                  | G/C  | NA                 | NA                            | NA                 |
| Kabuli_wild_932181 | NA                                  | Ca_kabuli_denovo | 932181                  | G/C  | NA                 | NA                            | NA                 |
| Kabuli_wild_932434 | NA                                  | Ca_kabuli_denovo | 932434                  | T/C  | NA                 | NA                            | NA                 |
| Kabuli_wild_932437 | NA                                  | Ca_kabuli_denovo | 932437                  | C/G  | NA                 | NA                            | NA                 |
| Kabuli_wild_933895 | NA                                  | Ca_kabuli_denovo | 933895                  | G/A  | NA                 | NA                            | NA                 |
| Kabuli_wild_934048 | NA                                  | Ca_kabuli_denovo | 934048                  | G/C  | NA                 | NA                            | NA                 |
| Kabuli_wild_935037 | NA                                  | Ca_kabuli_denovo | 935037                  | C/A  | NA                 | NA                            | NA                 |
| Kabuli_wild_935256 | NA                                  | Ca_kabuli_denovo | 935256                  | G/C  | NA                 | NA                            | NA                 |
| Kabuli_wild_937706 | NA                                  | Ca_kabuli_denovo | 937706                  | C/T  | NA                 | NA                            | NA                 |
| Kabuli_wild_937977 | NA                                  | Ca_kabuli_denovo | 937977                  | C/A  | NA                 | NA                            | NA                 |
| Kabuli_wild_937992 | NA                                  | Ca_kabuli_denovo | 937992                  | A/G  | NA                 | NA                            | NA                 |

| SNP IDs                   | NCBI dbSNP accession IDs (NCBI_SS#) | Chromosomes             | Physical positions (bp) | SNPs | Gene accession IDs | Sequence components of genome | Putative functions |
|---------------------------|-------------------------------------|-------------------------|-------------------------|------|--------------------|-------------------------------|--------------------|
| <i>Kabuli_wild_939399</i> | NA                                  | <i>Ca_kabuli_denovo</i> | 939399                  | G/C  | NA                 | NA                            | NA                 |
| <i>Kabuli_wild_939686</i> | NA                                  | <i>Ca_kabuli_denovo</i> | 939686                  | G/C  | NA                 | NA                            | NA                 |
| <i>Kabuli_wild_939710</i> | NA                                  | <i>Ca_kabuli_denovo</i> | 939710                  | T/C  | NA                 | NA                            | NA                 |
| <i>Kabuli_wild_941565</i> | NA                                  | <i>Ca_kabuli_denovo</i> | 941565                  | C/T  | NA                 | NA                            | NA                 |
| <i>Kabuli_wild_942155</i> | NA                                  | <i>Ca_kabuli_denovo</i> | 942155                  | A/G  | NA                 | NA                            | NA                 |
| <i>Kabuli_wild_942385</i> | NA                                  | <i>Ca_kabuli_denovo</i> | 942385                  | G/T  | NA                 | NA                            | NA                 |
| <i>Kabuli_wild_943647</i> | NA                                  | <i>Ca_kabuli_denovo</i> | 943647                  | C/T  | NA                 | NA                            | NA                 |
| <i>Kabuli_wild_943953</i> | NA                                  | <i>Ca_kabuli_denovo</i> | 943953                  | T/C  | NA                 | NA                            | NA                 |
| <i>Kabuli_wild_943968</i> | NA                                  | <i>Ca_kabuli_denovo</i> | 943968                  | C/G  | NA                 | NA                            | NA                 |
| <i>Kabuli_wild_944105</i> | NA                                  | <i>Ca_kabuli_denovo</i> | 944105                  | G/A  | NA                 | NA                            | NA                 |
| <i>Kabuli_wild_944135</i> | NA                                  | <i>Ca_kabuli_denovo</i> | 944135                  | G/A  | NA                 | NA                            | NA                 |
| <i>Kabuli_wild_944260</i> | NA                                  | <i>Ca_kabuli_denovo</i> | 944260                  | C/G  | NA                 | NA                            | NA                 |
| <i>Kabuli_wild_944298</i> | NA                                  | <i>Ca_kabuli_denovo</i> | 944298                  | T/C  | NA                 | NA                            | NA                 |
| <i>Kabuli_wild_944935</i> | NA                                  | <i>Ca_kabuli_denovo</i> | 944935                  | A/C  | NA                 | NA                            | NA                 |
| <i>Kabuli_wild_944986</i> | NA                                  | <i>Ca_kabuli_denovo</i> | 944986                  | T/C  | NA                 | NA                            | NA                 |
| <i>Kabuli_wild_945422</i> | NA                                  | <i>Ca_kabuli_denovo</i> | 945422                  | A/G  | NA                 | NA                            | NA                 |
| <i>Kabuli_wild_945423</i> | NA                                  | <i>Ca_kabuli_denovo</i> | 945423                  | C/A  | NA                 | NA                            | NA                 |
| <i>Kabuli_wild_945901</i> | NA                                  | <i>Ca_kabuli_denovo</i> | 945901                  | A/T  | NA                 | NA                            | NA                 |
| <i>Kabuli_wild_945940</i> | NA                                  | <i>Ca_kabuli_denovo</i> | 945940                  | A/G  | NA                 | NA                            | NA                 |
| <i>Kabuli_wild_946287</i> | NA                                  | <i>Ca_kabuli_denovo</i> | 946287                  | A/G  | NA                 | NA                            | NA                 |
| <i>Kabuli_wild_946290</i> | NA                                  | <i>Ca_kabuli_denovo</i> | 946290                  | G/C  | NA                 | NA                            | NA                 |
| <i>Kabuli_wild_946324</i> | NA                                  | <i>Ca_kabuli_denovo</i> | 946324                  | C/G  | NA                 | NA                            | NA                 |
| <i>Kabuli_wild_950266</i> | NA                                  | <i>Ca_kabuli_denovo</i> | 950266                  | C/A  | NA                 | NA                            | NA                 |
| <i>Kabuli_wild_950899</i> | NA                                  | <i>Ca_kabuli_denovo</i> | 950899                  | A/G  | NA                 | NA                            | NA                 |
| <i>Kabuli_wild_952767</i> | NA                                  | <i>Ca_kabuli_denovo</i> | 952767                  | C/G  | NA                 | NA                            | NA                 |
| <i>Kabuli_wild_953992</i> | NA                                  | <i>Ca_kabuli_denovo</i> | 953992                  | T/C  | NA                 | NA                            | NA                 |
| <i>Kabuli_wild_954429</i> | NA                                  | <i>Ca_kabuli_denovo</i> | 954429                  | G/A  | NA                 | NA                            | NA                 |
| <i>Kabuli_wild_954513</i> | NA                                  | <i>Ca_kabuli_denovo</i> | 954513                  | A/G  | NA                 | NA                            | NA                 |
| <i>Kabuli_wild_954545</i> | NA                                  | <i>Ca_kabuli_denovo</i> | 954545                  | T/C  | NA                 | NA                            | NA                 |
| <i>Kabuli_wild_954569</i> | NA                                  | <i>Ca_kabuli_denovo</i> | 954569                  | A/G  | NA                 | NA                            | NA                 |
| <i>Kabuli_wild_954737</i> | NA                                  | <i>Ca_kabuli_denovo</i> | 954737                  | A/C  | NA                 | NA                            | NA                 |
| <i>Kabuli_wild_954743</i> | NA                                  | <i>Ca_kabuli_denovo</i> | 954743                  | A/G  | NA                 | NA                            | NA                 |
| <i>Kabuli_wild_954877</i> | NA                                  | <i>Ca_kabuli_denovo</i> | 954877                  | C/G  | NA                 | NA                            | NA                 |
| <i>Kabuli_wild_954897</i> | NA                                  | <i>Ca_kabuli_denovo</i> | 954897                  | C/T  | NA                 | NA                            | NA                 |
| <i>Kabuli_wild_956292</i> | NA                                  | <i>Ca_kabuli_denovo</i> | 956292                  | C/T  | NA                 | NA                            | NA                 |
| <i>Kabuli_wild_957544</i> | NA                                  | <i>Ca_kabuli_denovo</i> | 957544                  | A/G  | NA                 | NA                            | NA                 |
| <i>Kabuli_wild_957618</i> | NA                                  | <i>Ca_kabuli_denovo</i> | 957618                  | G/A  | NA                 | NA                            | NA                 |
| <i>Kabuli_wild_958227</i> | NA                                  | <i>Ca_kabuli_denovo</i> | 958227                  | A/G  | NA                 | NA                            | NA                 |
| <i>Kabuli_wild_958256</i> | NA                                  | <i>Ca_kabuli_denovo</i> | 958256                  | C/T  | NA                 | NA                            | NA                 |
| <i>Kabuli_wild_959196</i> | NA                                  | <i>Ca_kabuli_denovo</i> | 959196                  | A/G  | NA                 | NA                            | NA                 |
| <i>Kabuli_wild_959443</i> | NA                                  | <i>Ca_kabuli_denovo</i> | 959443                  | T/C  | NA                 | NA                            | NA                 |
| <i>Kabuli_wild_960348</i> | NA                                  | <i>Ca_kabuli_denovo</i> | 960348                  | T/C  | NA                 | NA                            | NA                 |
| <i>Kabuli_wild_962745</i> | NA                                  | <i>Ca_kabuli_denovo</i> | 962745                  | T/C  | NA                 | NA                            | NA                 |
| <i>Kabuli_wild_965295</i> | NA                                  | <i>Ca_kabuli_denovo</i> | 965295                  | T/G  | NA                 | NA                            | NA                 |



| SNP IDs            | NCBI dbSNP accession IDs (NCBI_SS#) | Chromosomes      | Physical positions (bp) | SNPs | Gene accession IDs | Sequence components of genome | Putative functions |
|--------------------|-------------------------------------|------------------|-------------------------|------|--------------------|-------------------------------|--------------------|
| Kabuli_wild_965300 | NA                                  | Ca_kabuli_denovo | 965300                  | G/C  | NA                 | NA                            | NA                 |
| Kabuli_wild_966068 | NA                                  | Ca_kabuli_denovo | 966068                  | A/C  | NA                 | NA                            | NA                 |
| Kabuli_wild_966109 | NA                                  | Ca_kabuli_denovo | 966109                  | C/G  | NA                 | NA                            | NA                 |
| Kabuli_wild_967473 | NA                                  | Ca_kabuli_denovo | 967473                  | C/T  | NA                 | NA                            | NA                 |
| Kabuli_wild_967474 | NA                                  | Ca_kabuli_denovo | 967474                  | A/G  | NA                 | NA                            | NA                 |
| Kabuli_wild_968312 | NA                                  | Ca_kabuli_denovo | 968312                  | C/G  | NA                 | NA                            | NA                 |
| Kabuli_wild_971428 | NA                                  | Ca_kabuli_denovo | 971428                  | G/A  | NA                 | NA                            | NA                 |
| Kabuli_wild_972010 | NA                                  | Ca_kabuli_denovo | 972010                  | G/A  | NA                 | NA                            | NA                 |
| Kabuli_wild_972055 | NA                                  | Ca_kabuli_denovo | 972055                  | C/G  | NA                 | NA                            | NA                 |
| Kabuli_wild_973268 | NA                                  | Ca_kabuli_denovo | 973268                  | C/T  | NA                 | NA                            | NA                 |
| Kabuli_wild_974401 | NA                                  | Ca_kabuli_denovo | 974401                  | G/T  | NA                 | NA                            | NA                 |
| Kabuli_wild_975680 | NA                                  | Ca_kabuli_denovo | 975680                  | C/G  | NA                 | NA                            | NA                 |
| Kabuli_wild_975683 | NA                                  | Ca_kabuli_denovo | 975683                  | A/G  | NA                 | NA                            | NA                 |
| Kabuli_wild_975901 | NA                                  | Ca_kabuli_denovo | 975901                  | G/C  | NA                 | NA                            | NA                 |
| Kabuli_wild_976670 | NA                                  | Ca_kabuli_denovo | 976670                  | A/C  | NA                 | NA                            | NA                 |
| Kabuli_wild_976716 | NA                                  | Ca_kabuli_denovo | 976716                  | A/C  | NA                 | NA                            | NA                 |
| Kabuli_wild_977432 | NA                                  | Ca_kabuli_denovo | 977432                  | A/G  | NA                 | NA                            | NA                 |
| Kabuli_wild_977465 | NA                                  | Ca_kabuli_denovo | 977465                  | A/G  | NA                 | NA                            | NA                 |
| Kabuli_wild_978125 | NA                                  | Ca_kabuli_denovo | 978125                  | C/G  | NA                 | NA                            | NA                 |
| Kabuli_wild_978294 | NA                                  | Ca_kabuli_denovo | 978294                  | T/G  | NA                 | NA                            | NA                 |
| Kabuli_wild_978298 | NA                                  | Ca_kabuli_denovo | 978298                  | A/C  | NA                 | NA                            | NA                 |
| Kabuli_wild_978741 | NA                                  | Ca_kabuli_denovo | 978741                  | A/C  | NA                 | NA                            | NA                 |
| Kabuli_wild_980813 | NA                                  | Ca_kabuli_denovo | 980813                  | G/A  | NA                 | NA                            | NA                 |
| Kabuli_wild_980825 | NA                                  | Ca_kabuli_denovo | 980825                  | T/C  | NA                 | NA                            | NA                 |
| Kabuli_wild_980969 | NA                                  | Ca_kabuli_denovo | 980969                  | C/T  | NA                 | NA                            | NA                 |
| Kabuli_wild_981023 | NA                                  | Ca_kabuli_denovo | 981023                  | T/C  | NA                 | NA                            | NA                 |
| Kabuli_wild_981203 | NA                                  | Ca_kabuli_denovo | 981203                  | C/T  | NA                 | NA                            | NA                 |
| Kabuli_wild_981260 | NA                                  | Ca_kabuli_denovo | 981260                  | T/C  | NA                 | NA                            | NA                 |
| Kabuli_wild_982171 | NA                                  | Ca_kabuli_denovo | 982171                  | C/G  | NA                 | NA                            | NA                 |
| Kabuli_wild_982228 | NA                                  | Ca_kabuli_denovo | 982228                  | G/A  | NA                 | NA                            | NA                 |
| Kabuli_wild_982614 | NA                                  | Ca_kabuli_denovo | 982614                  | A/G  | NA                 | NA                            | NA                 |
| Kabuli_wild_983144 | NA                                  | Ca_kabuli_denovo | 983144                  | G/A  | NA                 | NA                            | NA                 |
| Kabuli_wild_984031 | NA                                  | Ca_kabuli_denovo | 984031                  | G/C  | NA                 | NA                            | NA                 |
| Kabuli_wild_984048 | NA                                  | Ca_kabuli_denovo | 984048                  | G/A  | NA                 | NA                            | NA                 |
| Kabuli_wild_984053 | NA                                  | Ca_kabuli_denovo | 984053                  | G/A  | NA                 | NA                            | NA                 |
| Kabuli_wild_984131 | NA                                  | Ca_kabuli_denovo | 984131                  | G/A  | NA                 | NA                            | NA                 |
| Kabuli_wild_984887 | NA                                  | Ca_kabuli_denovo | 984887                  | G/A  | NA                 | NA                            | NA                 |
| Kabuli_wild_984911 | NA                                  | Ca_kabuli_denovo | 984911                  | A/T  | NA                 | NA                            | NA                 |
| Kabuli_wild_985866 | NA                                  | Ca_kabuli_denovo | 985866                  | G/A  | NA                 | NA                            | NA                 |
| Kabuli_wild_985890 | NA                                  | Ca_kabuli_denovo | 985890                  | C/T  | NA                 | NA                            | NA                 |
| Kabuli_wild_987313 | NA                                  | Ca_kabuli_denovo | 987313                  | T/C  | NA                 | NA                            | NA                 |
| Kabuli_wild_987359 | NA                                  | Ca_kabuli_denovo | 987359                  | C/G  | NA                 | NA                            | NA                 |
| Kabuli_wild_987499 | NA                                  | Ca_kabuli_denovo | 987499                  | A/C  | NA                 | NA                            | NA                 |
| Kabuli_wild_987710 | NA                                  | Ca_kabuli_denovo | 987710                  | A/G  | NA                 | NA                            | NA                 |

| SNP IDs             | NCBI dbSNP accession IDs (NCBI_SS#) | Chromosomes      | Physical positions (bp) | SNPs | Gene accession IDs | Sequence components of genome | Putative functions |
|---------------------|-------------------------------------|------------------|-------------------------|------|--------------------|-------------------------------|--------------------|
| Kabuli_wild_987841  | NA                                  | Ca_kabuli_denovo | 987841                  | T/C  | NA                 | NA                            | NA                 |
| Kabuli_wild_988456  | NA                                  | Ca_kabuli_denovo | 988456                  | T/G  | NA                 | NA                            | NA                 |
| Kabuli_wild_988576  | NA                                  | Ca_kabuli_denovo | 988576                  | G/T  | NA                 | NA                            | NA                 |
| Kabuli_wild_989841  | NA                                  | Ca_kabuli_denovo | 989841                  | T/C  | NA                 | NA                            | NA                 |
| Kabuli_wild_989883  | NA                                  | Ca_kabuli_denovo | 989883                  | G/C  | NA                 | NA                            | NA                 |
| Kabuli_wild_990324  | NA                                  | Ca_kabuli_denovo | 990324                  | T/C  | NA                 | NA                            | NA                 |
| Kabuli_wild_991367  | NA                                  | Ca_kabuli_denovo | 991367                  | T/C  | NA                 | NA                            | NA                 |
| Kabuli_wild_991399  | NA                                  | Ca_kabuli_denovo | 991399                  | C/T  | NA                 | NA                            | NA                 |
| Kabuli_wild_991436  | NA                                  | Ca_kabuli_denovo | 991436                  | C/G  | NA                 | NA                            | NA                 |
| Kabuli_wild_991565  | NA                                  | Ca_kabuli_denovo | 991565                  | G/T  | NA                 | NA                            | NA                 |
| Kabuli_wild_991572  | NA                                  | Ca_kabuli_denovo | 991572                  | G/T  | NA                 | NA                            | NA                 |
| Kabuli_wild_991774  | NA                                  | Ca_kabuli_denovo | 991774                  | A/G  | NA                 | NA                            | NA                 |
| Kabuli_wild_991803  | NA                                  | Ca_kabuli_denovo | 991803                  | C/G  | NA                 | NA                            | NA                 |
| Kabuli_wild_992278  | NA                                  | Ca_kabuli_denovo | 992278                  | C/G  | NA                 | NA                            | NA                 |
| Kabuli_wild_994110  | NA                                  | Ca_kabuli_denovo | 994110                  | T/C  | NA                 | NA                            | NA                 |
| Kabuli_wild_994113  | NA                                  | Ca_kabuli_denovo | 994113                  | T/C  | NA                 | NA                            | NA                 |
| Kabuli_wild_994924  | NA                                  | Ca_kabuli_denovo | 994924                  | A/C  | NA                 | NA                            | NA                 |
| Kabuli_wild_994961  | NA                                  | Ca_kabuli_denovo | 994961                  | G/T  | NA                 | NA                            | NA                 |
| Kabuli_wild_995487  | NA                                  | Ca_kabuli_denovo | 995487                  | A/G  | NA                 | NA                            | NA                 |
| Kabuli_wild_995544  | NA                                  | Ca_kabuli_denovo | 995544                  | G/A  | NA                 | NA                            | NA                 |
| Kabuli_wild_995751  | NA                                  | Ca_kabuli_denovo | 995751                  | T/A  | NA                 | NA                            | NA                 |
| Kabuli_wild_995808  | NA                                  | Ca_kabuli_denovo | 995808                  | A/T  | NA                 | NA                            | NA                 |
| Kabuli_wild_997786  | NA                                  | Ca_kabuli_denovo | 997786                  | G/A  | NA                 | NA                            | NA                 |
| Kabuli_wild_999257  | NA                                  | Ca_kabuli_denovo | 999257                  | T/C  | NA                 | NA                            | NA                 |
| Kabuli_wild_1001103 | NA                                  | Ca_kabuli_denovo | 1001103                 | T/C  | NA                 | NA                            | NA                 |
| Kabuli_wild_1001112 | NA                                  | Ca_kabuli_denovo | 1001112                 | C/T  | NA                 | NA                            | NA                 |
| Kabuli_wild_1003234 | NA                                  | Ca_kabuli_denovo | 1003234                 | C/T  | NA                 | NA                            | NA                 |
| Kabuli_wild_1003279 | NA                                  | Ca_kabuli_denovo | 1003279                 | G/C  | NA                 | NA                            | NA                 |
| Kabuli_wild_1004662 | NA                                  | Ca_kabuli_denovo | 1004662                 | A/T  | NA                 | NA                            | NA                 |
| Kabuli_wild_1005303 | NA                                  | Ca_kabuli_denovo | 1005303                 | A/G  | NA                 | NA                            | NA                 |
| Kabuli_wild_1005337 | NA                                  | Ca_kabuli_denovo | 1005337                 | G/T  | NA                 | NA                            | NA                 |
| Kabuli_wild_1005468 | NA                                  | Ca_kabuli_denovo | 1005468                 | A/G  | NA                 | NA                            | NA                 |
| Kabuli_wild_1005516 | NA                                  | Ca_kabuli_denovo | 1005516                 | A/G  | NA                 | NA                            | NA                 |
| Kabuli_wild_1005598 | NA                                  | Ca_kabuli_denovo | 1005598                 | G/A  | NA                 | NA                            | NA                 |
| Kabuli_wild_1006146 | NA                                  | Ca_kabuli_denovo | 1006146                 | C/T  | NA                 | NA                            | NA                 |
| Kabuli_wild_1006330 | NA                                  | Ca_kabuli_denovo | 1006330                 | G/A  | NA                 | NA                            | NA                 |
| Kabuli_wild_1007115 | NA                                  | Ca_kabuli_denovo | 1007115                 | G/A  | NA                 | NA                            | NA                 |
| Kabuli_wild_1007508 | NA                                  | Ca_kabuli_denovo | 1007508                 | G/A  | NA                 | NA                            | NA                 |
| Kabuli_wild_1007556 | NA                                  | Ca_kabuli_denovo | 1007556                 | C/T  | NA                 | NA                            | NA                 |
| Kabuli_wild_1008220 | NA                                  | Ca_kabuli_denovo | 1008220                 | C/G  | NA                 | NA                            | NA                 |
| Kabuli_wild_1008229 | NA                                  | Ca_kabuli_denovo | 1008229                 | T/C  | NA                 | NA                            | NA                 |
| Kabuli_wild_1009114 | NA                                  | Ca_kabuli_denovo | 1009114                 | C/T  | NA                 | NA                            | NA                 |
| Kabuli_wild_1009124 | NA                                  | Ca_kabuli_denovo | 1009124                 | T/G  | NA                 | NA                            | NA                 |
| Kabuli_wild_1009369 | NA                                  | Ca_kabuli_denovo | 1009369                 | C/T  | NA                 | NA                            | NA                 |

| SNP IDs             | NCBI dbSNP accession IDs (NCBI_SS#) | Chromosomes      | Physical positions (bp) | SNPs | Gene accession IDs | Sequence components of genome | Putative functions |
|---------------------|-------------------------------------|------------------|-------------------------|------|--------------------|-------------------------------|--------------------|
| Kabuli_wild_1010305 | NA                                  | Ca_kabuli_denovo | 1010305                 | G/C  | NA                 | NA                            | NA                 |
| Kabuli_wild_1010313 | NA                                  | Ca_kabuli_denovo | 1010313                 | C/T  | NA                 | NA                            | NA                 |
| Kabuli_wild_1011933 | NA                                  | Ca_kabuli_denovo | 1011933                 | A/G  | NA                 | NA                            | NA                 |
| Kabuli_wild_1012082 | NA                                  | Ca_kabuli_denovo | 1012082                 | G/A  | NA                 | NA                            | NA                 |
| Kabuli_wild_1012213 | NA                                  | Ca_kabuli_denovo | 1012213                 | A/G  | NA                 | NA                            | NA                 |
| Kabuli_wild_1012975 | NA                                  | Ca_kabuli_denovo | 1012975                 | T/G  | NA                 | NA                            | NA                 |
| Kabuli_wild_1014349 | NA                                  | Ca_kabuli_denovo | 1014349                 | T/C  | NA                 | NA                            | NA                 |
| Kabuli_wild_1014361 | NA                                  | Ca_kabuli_denovo | 1014361                 | C/T  | NA                 | NA                            | NA                 |
| Kabuli_wild_1014587 | NA                                  | Ca_kabuli_denovo | 1014587                 | T/C  | NA                 | NA                            | NA                 |
| Kabuli_wild_1014623 | NA                                  | Ca_kabuli_denovo | 1014623                 | A/G  | NA                 | NA                            | NA                 |
| Kabuli_wild_1015136 | NA                                  | Ca_kabuli_denovo | 1015136                 | T/C  | NA                 | NA                            | NA                 |
| Kabuli_wild_1015919 | NA                                  | Ca_kabuli_denovo | 1015919                 | A/C  | NA                 | NA                            | NA                 |
| Kabuli_wild_1015920 | NA                                  | Ca_kabuli_denovo | 1015920                 | A/G  | NA                 | NA                            | NA                 |
| Kabuli_wild_1017047 | NA                                  | Ca_kabuli_denovo | 1017047                 | C/G  | NA                 | NA                            | NA                 |
| Kabuli_wild_1017322 | NA                                  | Ca_kabuli_denovo | 1017322                 | T/C  | NA                 | NA                            | NA                 |
| Kabuli_wild_1018647 | NA                                  | Ca_kabuli_denovo | 1018647                 | G/T  | NA                 | NA                            | NA                 |
| Kabuli_wild_1018709 | NA                                  | Ca_kabuli_denovo | 1018709                 | G/T  | NA                 | NA                            | NA                 |
| Kabuli_wild_1019133 | NA                                  | Ca_kabuli_denovo | 1019133                 | C/T  | NA                 | NA                            | NA                 |
| Kabuli_wild_1019187 | NA                                  | Ca_kabuli_denovo | 1019187                 | G/A  | NA                 | NA                            | NA                 |
| Kabuli_wild_1019346 | NA                                  | Ca_kabuli_denovo | 1019346                 | T/G  | NA                 | NA                            | NA                 |
| Kabuli_wild_1021083 | NA                                  | Ca_kabuli_denovo | 1021083                 | T/C  | NA                 | NA                            | NA                 |
| Kabuli_wild_1021154 | NA                                  | Ca_kabuli_denovo | 1021154                 | C/G  | NA                 | NA                            | NA                 |
| Kabuli_wild_1021358 | NA                                  | Ca_kabuli_denovo | 1021358                 | C/T  | NA                 | NA                            | NA                 |
| Kabuli_wild_1021364 | NA                                  | Ca_kabuli_denovo | 1021364                 | C/T  | NA                 | NA                            | NA                 |
| Kabuli_wild_1021630 | NA                                  | Ca_kabuli_denovo | 1021630                 | T/G  | NA                 | NA                            | NA                 |
| Kabuli_wild_1021730 | NA                                  | Ca_kabuli_denovo | 1021730                 | G/T  | NA                 | NA                            | NA                 |
| Kabuli_wild_1022968 | NA                                  | Ca_kabuli_denovo | 1022968                 | C/T  | NA                 | NA                            | NA                 |
| Kabuli_wild_1022970 | NA                                  | Ca_kabuli_denovo | 1022970                 | G/A  | NA                 | NA                            | NA                 |
| Kabuli_wild_1024602 | NA                                  | Ca_kabuli_denovo | 1024602                 | C/T  | NA                 | NA                            | NA                 |
| Kabuli_wild_1027478 | NA                                  | Ca_kabuli_denovo | 1027478                 | G/C  | NA                 | NA                            | NA                 |
| Kabuli_wild_1028455 | NA                                  | Ca_kabuli_denovo | 1028455                 | A/G  | NA                 | NA                            | NA                 |
| Kabuli_wild_1028572 | NA                                  | Ca_kabuli_denovo | 1028572                 | C/T  | NA                 | NA                            | NA                 |
| Kabuli_wild_1028584 | NA                                  | Ca_kabuli_denovo | 1028584                 | G/A  | NA                 | NA                            | NA                 |
| Kabuli_wild_1028737 | NA                                  | Ca_kabuli_denovo | 1028737                 | G/A  | NA                 | NA                            | NA                 |
| Kabuli_wild_1029073 | NA                                  | Ca_kabuli_denovo | 1029073                 | A/G  | NA                 | NA                            | NA                 |
| Kabuli_wild_1030004 | NA                                  | Ca_kabuli_denovo | 1030004                 | G/A  | NA                 | NA                            | NA                 |
| Kabuli_wild_1030049 | NA                                  | Ca_kabuli_denovo | 1030049                 | A/G  | NA                 | NA                            | NA                 |
| Kabuli_wild_1030676 | NA                                  | Ca_kabuli_denovo | 1030676                 | A/G  | NA                 | NA                            | NA                 |
| Kabuli_wild_1030691 | NA                                  | Ca_kabuli_denovo | 1030691                 | G/C  | NA                 | NA                            | NA                 |
| Kabuli_wild_1031641 | NA                                  | Ca_kabuli_denovo | 1031641                 | T/C  | NA                 | NA                            | NA                 |
| Kabuli_wild_1033718 | NA                                  | Ca_kabuli_denovo | 1033718                 | A/G  | NA                 | NA                            | NA                 |
| Kabuli_wild_1034617 | NA                                  | Ca_kabuli_denovo | 1034617                 | G/C  | NA                 | NA                            | NA                 |
| Kabuli_wild_1035733 | NA                                  | Ca_kabuli_denovo | 1035733                 | A/G  | NA                 | NA                            | NA                 |
| Kabuli_wild_1035953 | NA                                  | Ca_kabuli_denovo | 1035953                 | G/T  | NA                 | NA                            | NA                 |

| SNP IDs             | NCBI dbSNP accession IDs (NCBI_SS#) | Chromosomes      | Physical positions (bp) | SNPs | Gene accession IDs | Sequence components of genome | Putative functions |
|---------------------|-------------------------------------|------------------|-------------------------|------|--------------------|-------------------------------|--------------------|
| Kabuli_wild_1036222 | NA                                  | Ca_kabuli_denovo | 1036222                 | T/C  | NA                 | NA                            | NA                 |
| Kabuli_wild_1036348 | NA                                  | Ca_kabuli_denovo | 1036348                 | T/G  | NA                 | NA                            | NA                 |
| Kabuli_wild_1036351 | NA                                  | Ca_kabuli_denovo | 1036351                 | A/G  | NA                 | NA                            | NA                 |
| Kabuli_wild_1036693 | NA                                  | Ca_kabuli_denovo | 1036693                 | C/G  | NA                 | NA                            | NA                 |
| Kabuli_wild_1036726 | NA                                  | Ca_kabuli_denovo | 1036726                 | A/G  | NA                 | NA                            | NA                 |
| Kabuli_wild_1037076 | NA                                  | Ca_kabuli_denovo | 1037076                 | A/C  | NA                 | NA                            | NA                 |
| Kabuli_wild_1037080 | NA                                  | Ca_kabuli_denovo | 1037080                 | G/A  | NA                 | NA                            | NA                 |
| Kabuli_wild_1037169 | NA                                  | Ca_kabuli_denovo | 1037169                 | G/A  | NA                 | NA                            | NA                 |
| Kabuli_wild_1038792 | NA                                  | Ca_kabuli_denovo | 1038792                 | T/C  | NA                 | NA                            | NA                 |
| Kabuli_wild_1038924 | NA                                  | Ca_kabuli_denovo | 1038924                 | T/C  | NA                 | NA                            | NA                 |
| Kabuli_wild_1039120 | NA                                  | Ca_kabuli_denovo | 1039120                 | T/C  | NA                 | NA                            | NA                 |
| Kabuli_wild_1039180 | NA                                  | Ca_kabuli_denovo | 1039180                 | T/G  | NA                 | NA                            | NA                 |
| Kabuli_wild_1039594 | NA                                  | Ca_kabuli_denovo | 1039594                 | C/A  | NA                 | NA                            | NA                 |
| Kabuli_wild_1039663 | NA                                  | Ca_kabuli_denovo | 1039663                 | C/G  | NA                 | NA                            | NA                 |
| Kabuli_wild_1040013 | NA                                  | Ca_kabuli_denovo | 1040013                 | A/T  | NA                 | NA                            | NA                 |
| Kabuli_wild_1040579 | NA                                  | Ca_kabuli_denovo | 1040579                 | C/T  | NA                 | NA                            | NA                 |
| Kabuli_wild_1040648 | NA                                  | Ca_kabuli_denovo | 1040648                 | C/A  | NA                 | NA                            | NA                 |
| Kabuli_wild_1040785 | NA                                  | Ca_kabuli_denovo | 1040785                 | A/G  | NA                 | NA                            | NA                 |
| Kabuli_wild_1040795 | NA                                  | Ca_kabuli_denovo | 1040795                 | A/C  | NA                 | NA                            | NA                 |
| Kabuli_wild_1041269 | NA                                  | Ca_kabuli_denovo | 1041269                 | C/G  | NA                 | NA                            | NA                 |
| Kabuli_wild_1041357 | NA                                  | Ca_kabuli_denovo | 1041357                 | C/A  | NA                 | NA                            | NA                 |
| Kabuli_wild_1041361 | NA                                  | Ca_kabuli_denovo | 1041361                 | A/C  | NA                 | NA                            | NA                 |
| Kabuli_wild_1041843 | NA                                  | Ca_kabuli_denovo | 1041843                 | A/G  | NA                 | NA                            | NA                 |
| Kabuli_wild_1041876 | NA                                  | Ca_kabuli_denovo | 1041876                 | T/C  | NA                 | NA                            | NA                 |
| Kabuli_wild_1042429 | NA                                  | Ca_kabuli_denovo | 1042429                 | G/C  | NA                 | NA                            | NA                 |
| Kabuli_wild_1042979 | NA                                  | Ca_kabuli_denovo | 1042979                 | A/C  | NA                 | NA                            | NA                 |
| Kabuli_wild_1043492 | NA                                  | Ca_kabuli_denovo | 1043492                 | C/G  | NA                 | NA                            | NA                 |
| Kabuli_wild_1044492 | NA                                  | Ca_kabuli_denovo | 1044492                 | C/G  | NA                 | NA                            | NA                 |
| Kabuli_wild_1044530 | NA                                  | Ca_kabuli_denovo | 1044530                 | G/A  | NA                 | NA                            | NA                 |
| Kabuli_wild_1044756 | NA                                  | Ca_kabuli_denovo | 1044756                 | C/T  | NA                 | NA                            | NA                 |
| Kabuli_wild_1044954 | NA                                  | Ca_kabuli_denovo | 1044954                 | T/C  | NA                 | NA                            | NA                 |
| Kabuli_wild_1045146 | NA                                  | Ca_kabuli_denovo | 1045146                 | C/T  | NA                 | NA                            | NA                 |
| Kabuli_wild_1045183 | NA                                  | Ca_kabuli_denovo | 1045183                 | T/C  | NA                 | NA                            | NA                 |
| Kabuli_wild_1045417 | NA                                  | Ca_kabuli_denovo | 1045417                 | C/T  | NA                 | NA                            | NA                 |
| Kabuli_wild_1046096 | NA                                  | Ca_kabuli_denovo | 1046096                 | C/T  | NA                 | NA                            | NA                 |
| Kabuli_wild_1046115 | NA                                  | Ca_kabuli_denovo | 1046115                 | C/T  | NA                 | NA                            | NA                 |
| Kabuli_wild_1047148 | NA                                  | Ca_kabuli_denovo | 1047148                 | G/A  | NA                 | NA                            | NA                 |
| Kabuli_wild_1047898 | NA                                  | Ca_kabuli_denovo | 1047898                 | C/T  | NA                 | NA                            | NA                 |
| Kabuli_wild_1047924 | NA                                  | Ca_kabuli_denovo | 1047924                 | T/C  | NA                 | NA                            | NA                 |
| Kabuli_wild_1049140 | NA                                  | Ca_kabuli_denovo | 1049140                 | T/C  | NA                 | NA                            | NA                 |
| Kabuli_wild_1049340 | NA                                  | Ca_kabuli_denovo | 1049340                 | C/T  | NA                 | NA                            | NA                 |
| Kabuli_wild_1049891 | NA                                  | Ca_kabuli_denovo | 1049891                 | A/G  | NA                 | NA                            | NA                 |
| Kabuli_wild_1050269 | NA                                  | Ca_kabuli_denovo | 1050269                 | A/T  | NA                 | NA                            | NA                 |
| Kabuli_wild_1050274 | NA                                  | Ca_kabuli_denovo | 1050274                 | T/C  | NA                 | NA                            | NA                 |

| SNP IDs             | NCBI dbSNP accession IDs (NCBI_SS#) | Chromosomes      | Physical positions (bp) | SNPs | Gene accession IDs | Sequence components of genome | Putative functions |
|---------------------|-------------------------------------|------------------|-------------------------|------|--------------------|-------------------------------|--------------------|
| Kabuli_wild_1050282 | NA                                  | Ca_kabuli_denovo | 1050282                 | C/T  | NA                 | NA                            | NA                 |
| Kabuli_wild_1050290 | NA                                  | Ca_kabuli_denovo | 1050290                 | A/T  | NA                 | NA                            | NA                 |
| Kabuli_wild_1051074 | NA                                  | Ca_kabuli_denovo | 1051074                 | A/G  | NA                 | NA                            | NA                 |
| Kabuli_wild_1051112 | NA                                  | Ca_kabuli_denovo | 1051112                 | G/C  | NA                 | NA                            | NA                 |
| Kabuli_wild_1051554 | NA                                  | Ca_kabuli_denovo | 1051554                 | G/T  | NA                 | NA                            | NA                 |
| Kabuli_wild_1051977 | NA                                  | Ca_kabuli_denovo | 1051977                 | C/A  | NA                 | NA                            | NA                 |
| Kabuli_wild_1052076 | NA                                  | Ca_kabuli_denovo | 1052076                 | T/A  | NA                 | NA                            | NA                 |
| Kabuli_wild_1052095 | NA                                  | Ca_kabuli_denovo | 1052095                 | A/C  | NA                 | NA                            | NA                 |
| Kabuli_wild_1052112 | NA                                  | Ca_kabuli_denovo | 1052112                 | G/A  | NA                 | NA                            | NA                 |
| Kabuli_wild_1052295 | NA                                  | Ca_kabuli_denovo | 1052295                 | G/T  | NA                 | NA                            | NA                 |
| Kabuli_wild_1052424 | NA                                  | Ca_kabuli_denovo | 1052424                 | C/T  | NA                 | NA                            | NA                 |
| Kabuli_wild_1052425 | NA                                  | Ca_kabuli_denovo | 1052425                 | G/T  | NA                 | NA                            | NA                 |
| Kabuli_wild_1053101 | NA                                  | Ca_kabuli_denovo | 1053101                 | T/G  | NA                 | NA                            | NA                 |
| Kabuli_wild_1053798 | NA                                  | Ca_kabuli_denovo | 1053798                 | G/T  | NA                 | NA                            | NA                 |
| Kabuli_wild_1053870 | NA                                  | Ca_kabuli_denovo | 1053870                 | A/G  | NA                 | NA                            | NA                 |
| Kabuli_wild_1054189 | NA                                  | Ca_kabuli_denovo | 1054189                 | C/A  | NA                 | NA                            | NA                 |
| Kabuli_wild_1054266 | NA                                  | Ca_kabuli_denovo | 1054266                 | G/C  | NA                 | NA                            | NA                 |
| Kabuli_wild_1054924 | NA                                  | Ca_kabuli_denovo | 1054924                 | G/T  | NA                 | NA                            | NA                 |
| Kabuli_wild_1055933 | NA                                  | Ca_kabuli_denovo | 1055933                 | A/C  | NA                 | NA                            | NA                 |
| Kabuli_wild_1055936 | NA                                  | Ca_kabuli_denovo | 1055936                 | C/G  | NA                 | NA                            | NA                 |
| Kabuli_wild_1056909 | NA                                  | Ca_kabuli_denovo | 1056909                 | G/C  | NA                 | NA                            | NA                 |
| Kabuli_wild_1058508 | NA                                  | Ca_kabuli_denovo | 1058508                 | C/G  | NA                 | NA                            | NA                 |
| Kabuli_wild_1058742 | NA                                  | Ca_kabuli_denovo | 1058742                 | C/T  | NA                 | NA                            | NA                 |
| Kabuli_wild_1060105 | NA                                  | Ca_kabuli_denovo | 1060105                 | G/C  | NA                 | NA                            | NA                 |
| Kabuli_wild_1060196 | NA                                  | Ca_kabuli_denovo | 1060196                 | C/A  | NA                 | NA                            | NA                 |
| Kabuli_wild_1060530 | NA                                  | Ca_kabuli_denovo | 1060530                 | A/G  | NA                 | NA                            | NA                 |
| Kabuli_wild_1060573 | NA                                  | Ca_kabuli_denovo | 1060573                 | C/T  | NA                 | NA                            | NA                 |
| Kabuli_wild_1061728 | NA                                  | Ca_kabuli_denovo | 1061728                 | A/G  | NA                 | NA                            | NA                 |
| Kabuli_wild_1064173 | NA                                  | Ca_kabuli_denovo | 1064173                 | T/C  | NA                 | NA                            | NA                 |
| Kabuli_wild_1064219 | NA                                  | Ca_kabuli_denovo | 1064219                 | C/T  | NA                 | NA                            | NA                 |
| Kabuli_wild_1064620 | NA                                  | Ca_kabuli_denovo | 1064620                 | G/C  | NA                 | NA                            | NA                 |
| Kabuli_wild_1064623 | NA                                  | Ca_kabuli_denovo | 1064623                 | A/G  | NA                 | NA                            | NA                 |
| Kabuli_wild_1066602 | NA                                  | Ca_kabuli_denovo | 1066602                 | G/A  | NA                 | NA                            | NA                 |
| Kabuli_wild_1066608 | NA                                  | Ca_kabuli_denovo | 1066608                 | C/T  | NA                 | NA                            | NA                 |
| Kabuli_wild_1067088 | NA                                  | Ca_kabuli_denovo | 1067088                 | G/A  | NA                 | NA                            | NA                 |
| Kabuli_wild_1067096 | NA                                  | Ca_kabuli_denovo | 1067096                 | C/T  | NA                 | NA                            | NA                 |
| Kabuli_wild_1067639 | NA                                  | Ca_kabuli_denovo | 1067639                 | G/T  | NA                 | NA                            | NA                 |
| Kabuli_wild_1067648 | NA                                  | Ca_kabuli_denovo | 1067648                 | A/G  | NA                 | NA                            | NA                 |
| Kabuli_wild_1068666 | NA                                  | Ca_kabuli_denovo | 1068666                 | A/G  | NA                 | NA                            | NA                 |
| Kabuli_wild_1069114 | NA                                  | Ca_kabuli_denovo | 1069114                 | C/T  | NA                 | NA                            | NA                 |
| Kabuli_wild_1070635 | NA                                  | Ca_kabuli_denovo | 1070635                 | C/G  | NA                 | NA                            | NA                 |
| Kabuli_wild_1070646 | NA                                  | Ca_kabuli_denovo | 1070646                 | T/G  | NA                 | NA                            | NA                 |
| Kabuli_wild_1070665 | NA                                  | Ca_kabuli_denovo | 1070665                 | C/T  | NA                 | NA                            | NA                 |
| Kabuli_wild_1071996 | NA                                  | Ca_kabuli_denovo | 1071996                 | C/T  | NA                 | NA                            | NA                 |

| SNP IDs             | NCBI dbSNP accession IDs (NCBI_SS#) | Chromosomes      | Physical positions (bp) | SNPs | Gene accession IDs | Sequence components of genome | Putative functions |
|---------------------|-------------------------------------|------------------|-------------------------|------|--------------------|-------------------------------|--------------------|
| Kabuli_wild_1072081 | NA                                  | Ca_kabuli_denovo | 1072081                 | A/C  | NA                 | NA                            | NA                 |
| Kabuli_wild_1072082 | NA                                  | Ca_kabuli_denovo | 1072082                 | G/T  | NA                 | NA                            | NA                 |
| Kabuli_wild_1072083 | NA                                  | Ca_kabuli_denovo | 1072083                 | A/G  | NA                 | NA                            | NA                 |
| Kabuli_wild_1072717 | NA                                  | Ca_kabuli_denovo | 1072717                 | A/C  | NA                 | NA                            | NA                 |
| Kabuli_wild_1073145 | NA                                  | Ca_kabuli_denovo | 1073145                 | A/C  | NA                 | NA                            | NA                 |
| Kabuli_wild_1073221 | NA                                  | Ca_kabuli_denovo | 1073221                 | C/G  | NA                 | NA                            | NA                 |
| Kabuli_wild_1073229 | NA                                  | Ca_kabuli_denovo | 1073229                 | A/G  | NA                 | NA                            | NA                 |
| Kabuli_wild_1073234 | NA                                  | Ca_kabuli_denovo | 1073234                 | T/G  | NA                 | NA                            | NA                 |
| Kabuli_wild_1074326 | NA                                  | Ca_kabuli_denovo | 1074326                 | C/G  | NA                 | NA                            | NA                 |
| Kabuli_wild_1074353 | NA                                  | Ca_kabuli_denovo | 1074353                 | T/C  | NA                 | NA                            | NA                 |
| Kabuli_wild_1074683 | NA                                  | Ca_kabuli_denovo | 1074683                 | G/A  | NA                 | NA                            | NA                 |
| Kabuli_wild_1074809 | NA                                  | Ca_kabuli_denovo | 1074809                 | G/A  | NA                 | NA                            | NA                 |
| Kabuli_wild_1076841 | NA                                  | Ca_kabuli_denovo | 1076841                 | G/A  | NA                 | NA                            | NA                 |
| Kabuli_wild_1078864 | NA                                  | Ca_kabuli_denovo | 1078864                 | G/T  | NA                 | NA                            | NA                 |
| Kabuli_wild_1078868 | NA                                  | Ca_kabuli_denovo | 1078868                 | A/G  | NA                 | NA                            | NA                 |
| Kabuli_wild_1078953 | NA                                  | Ca_kabuli_denovo | 1078953                 | T/G  | NA                 | NA                            | NA                 |
| Kabuli_wild_1079055 | NA                                  | Ca_kabuli_denovo | 1079055                 | A/C  | NA                 | NA                            | NA                 |
| Kabuli_wild_1079959 | NA                                  | Ca_kabuli_denovo | 1079959                 | C/T  | NA                 | NA                            | NA                 |
| Kabuli_wild_1081329 | NA                                  | Ca_kabuli_denovo | 1081329                 | T/A  | NA                 | NA                            | NA                 |
| Kabuli_wild_1082008 | NA                                  | Ca_kabuli_denovo | 1082008                 | G/A  | NA                 | NA                            | NA                 |
| Kabuli_wild_1082115 | NA                                  | Ca_kabuli_denovo | 1082115                 | A/G  | NA                 | NA                            | NA                 |
| Kabuli_wild_1082139 | NA                                  | Ca_kabuli_denovo | 1082139                 | A/G  | NA                 | NA                            | NA                 |
| Kabuli_wild_1082183 | NA                                  | Ca_kabuli_denovo | 1082183                 | T/G  | NA                 | NA                            | NA                 |
| Kabuli_wild_1083936 | NA                                  | Ca_kabuli_denovo | 1083936                 | T/G  | NA                 | NA                            | NA                 |
| Kabuli_wild_1083972 | NA                                  | Ca_kabuli_denovo | 1083972                 | G/A  | NA                 | NA                            | NA                 |
| Kabuli_wild_1084430 | NA                                  | Ca_kabuli_denovo | 1084430                 | A/G  | NA                 | NA                            | NA                 |
| Kabuli_wild_1084461 | NA                                  | Ca_kabuli_denovo | 1084461                 | A/C  | NA                 | NA                            | NA                 |
| Kabuli_wild_1084521 | NA                                  | Ca_kabuli_denovo | 1084521                 | C/T  | NA                 | NA                            | NA                 |
| Kabuli_wild_1084572 | NA                                  | Ca_kabuli_denovo | 1084572                 | T/C  | NA                 | NA                            | NA                 |
| Kabuli_wild_1084691 | NA                                  | Ca_kabuli_denovo | 1084691                 | C/T  | NA                 | NA                            | NA                 |
| Kabuli_wild_1084693 | NA                                  | Ca_kabuli_denovo | 1084693                 | C/G  | NA                 | NA                            | NA                 |
| Kabuli_wild_1085934 | NA                                  | Ca_kabuli_denovo | 1085934                 | C/G  | NA                 | NA                            | NA                 |
| Kabuli_wild_1086646 | NA                                  | Ca_kabuli_denovo | 1086646                 | T/G  | NA                 | NA                            | NA                 |
| Kabuli_wild_1086787 | NA                                  | Ca_kabuli_denovo | 1086787                 | G/T  | NA                 | NA                            | NA                 |
| Kabuli_wild_1087052 | NA                                  | Ca_kabuli_denovo | 1087052                 | C/T  | NA                 | NA                            | NA                 |
| Kabuli_wild_1088306 | NA                                  | Ca_kabuli_denovo | 1088306                 | G/A  | NA                 | NA                            | NA                 |
| Kabuli_wild_1088660 | NA                                  | Ca_kabuli_denovo | 1088660                 | T/G  | NA                 | NA                            | NA                 |
| Kabuli_wild_1089185 | NA                                  | Ca_kabuli_denovo | 1089185                 | C/A  | NA                 | NA                            | NA                 |
| Kabuli_wild_1089491 | NA                                  | Ca_kabuli_denovo | 1089491                 | T/C  | NA                 | NA                            | NA                 |
| Kabuli_wild_1090534 | NA                                  | Ca_kabuli_denovo | 1090534                 | C/T  | NA                 | NA                            | NA                 |
| Kabuli_wild_1091835 | NA                                  | Ca_kabuli_denovo | 1091835                 | C/T  | NA                 | NA                            | NA                 |
| Kabuli_wild_1092615 | NA                                  | Ca_kabuli_denovo | 1092615                 | C/G  | NA                 | NA                            | NA                 |
| Kabuli_wild_1093929 | NA                                  | Ca_kabuli_denovo | 1093929                 | G/A  | NA                 | NA                            | NA                 |
| Kabuli_wild_1096281 | NA                                  | Ca_kabuli_denovo | 1096281                 | T/C  | NA                 | NA                            | NA                 |

| SNP IDs             | NCBI dbSNP accession IDs (NCBI_SS#) | Chromosomes      | Physical positions (bp) | SNPs | Gene accession IDs | Sequence components of genome | Putative functions |
|---------------------|-------------------------------------|------------------|-------------------------|------|--------------------|-------------------------------|--------------------|
| Kabuli_wild_1096410 | NA                                  | Ca_kabuli_denovo | 1096410                 | A/G  | NA                 | NA                            | NA                 |
| Kabuli_wild_1097637 | NA                                  | Ca_kabuli_denovo | 1097637                 | C/T  | NA                 | NA                            | NA                 |
| Kabuli_wild_1099223 | NA                                  | Ca_kabuli_denovo | 1099223                 | T/C  | NA                 | NA                            | NA                 |
| Kabuli_wild_1099273 | NA                                  | Ca_kabuli_denovo | 1099273                 | T/C  | NA                 | NA                            | NA                 |
| Kabuli_wild_1099352 | NA                                  | Ca_kabuli_denovo | 1099352                 | A/C  | NA                 | NA                            | NA                 |
| Kabuli_wild_1099416 | NA                                  | Ca_kabuli_denovo | 1099416                 | C/T  | NA                 | NA                            | NA                 |
| Kabuli_wild_1101073 | NA                                  | Ca_kabuli_denovo | 1101073                 | T/G  | NA                 | NA                            | NA                 |
| Kabuli_wild_1101116 | NA                                  | Ca_kabuli_denovo | 1101116                 | G/C  | NA                 | NA                            | NA                 |
| Kabuli_wild_1101637 | NA                                  | Ca_kabuli_denovo | 1101637                 | T/C  | NA                 | NA                            | NA                 |
| Kabuli_wild_1102174 | NA                                  | Ca_kabuli_denovo | 1102174                 | A/G  | NA                 | NA                            | NA                 |
| Kabuli_wild_1102879 | NA                                  | Ca_kabuli_denovo | 1102879                 | G/A  | NA                 | NA                            | NA                 |
| Kabuli_wild_1103358 | NA                                  | Ca_kabuli_denovo | 1103358                 | T/C  | NA                 | NA                            | NA                 |
| Kabuli_wild_1103406 | NA                                  | Ca_kabuli_denovo | 1103406                 | A/G  | NA                 | NA                            | NA                 |
| Kabuli_wild_1103834 | NA                                  | Ca_kabuli_denovo | 1103834                 | C/T  | NA                 | NA                            | NA                 |
| Kabuli_wild_1104245 | NA                                  | Ca_kabuli_denovo | 1104245                 | T/G  | NA                 | NA                            | NA                 |
| Kabuli_wild_1104789 | NA                                  | Ca_kabuli_denovo | 1104789                 | C/G  | NA                 | NA                            | NA                 |
| Kabuli_wild_1104843 | NA                                  | Ca_kabuli_denovo | 1104843                 | G/C  | NA                 | NA                            | NA                 |
| Kabuli_wild_1107700 | NA                                  | Ca_kabuli_denovo | 1107700                 | T/C  | NA                 | NA                            | NA                 |
| Kabuli_wild_1107709 | NA                                  | Ca_kabuli_denovo | 1107709                 | T/G  | NA                 | NA                            | NA                 |
| Kabuli_wild_1107805 | NA                                  | Ca_kabuli_denovo | 1107805                 | A/G  | NA                 | NA                            | NA                 |
| Kabuli_wild_1108874 | NA                                  | Ca_kabuli_denovo | 1108874                 | A/G  | NA                 | NA                            | NA                 |
| Kabuli_wild_1109682 | NA                                  | Ca_kabuli_denovo | 1109682                 | A/G  | NA                 | NA                            | NA                 |
| Kabuli_wild_1109709 | NA                                  | Ca_kabuli_denovo | 1109709                 | C/G  | NA                 | NA                            | NA                 |
| Kabuli_wild_1110081 | NA                                  | Ca_kabuli_denovo | 1110081                 | T/C  | NA                 | NA                            | NA                 |
| Kabuli_wild_1111709 | NA                                  | Ca_kabuli_denovo | 1111709                 | C/T  | NA                 | NA                            | NA                 |
| Kabuli_wild_1111733 | NA                                  | Ca_kabuli_denovo | 1111733                 | C/G  | NA                 | NA                            | NA                 |
| Kabuli_wild_1112933 | NA                                  | Ca_kabuli_denovo | 1112933                 | C/T  | NA                 | NA                            | NA                 |
| Kabuli_wild_1113279 | NA                                  | Ca_kabuli_denovo | 1113279                 | G/T  | NA                 | NA                            | NA                 |
| Kabuli_wild_1113280 | NA                                  | Ca_kabuli_denovo | 1113280                 | T/G  | NA                 | NA                            | NA                 |
| Kabuli_wild_1113709 | NA                                  | Ca_kabuli_denovo | 1113709                 | G/T  | NA                 | NA                            | NA                 |
| Kabuli_wild_1113711 | NA                                  | Ca_kabuli_denovo | 1113711                 | C/G  | NA                 | NA                            | NA                 |
| Kabuli_wild_1113994 | NA                                  | Ca_kabuli_denovo | 1113994                 | C/T  | NA                 | NA                            | NA                 |
| Kabuli_wild_1114700 | NA                                  | Ca_kabuli_denovo | 1114700                 | C/G  | NA                 | NA                            | NA                 |
| Kabuli_wild_1114709 | NA                                  | Ca_kabuli_denovo | 1114709                 | C/G  | NA                 | NA                            | NA                 |
| Kabuli_wild_1115616 | NA                                  | Ca_kabuli_denovo | 1115616                 | G/A  | NA                 | NA                            | NA                 |
| Kabuli_wild_1115723 | NA                                  | Ca_kabuli_denovo | 1115723                 | T/G  | NA                 | NA                            | NA                 |
| Kabuli_wild_1116527 | NA                                  | Ca_kabuli_denovo | 1116527                 | C/G  | NA                 | NA                            | NA                 |
| Kabuli_wild_1116539 | NA                                  | Ca_kabuli_denovo | 1116539                 | G/T  | NA                 | NA                            | NA                 |
| Kabuli_wild_1117962 | NA                                  | Ca_kabuli_denovo | 1117962                 | G/T  | NA                 | NA                            | NA                 |
| Kabuli_wild_1119169 | NA                                  | Ca_kabuli_denovo | 1119169                 | T/C  | NA                 | NA                            | NA                 |
| Kabuli_wild_1119178 | NA                                  | Ca_kabuli_denovo | 1119178                 | C/A  | NA                 | NA                            | NA                 |
| Kabuli_wild_1119240 | NA                                  | Ca_kabuli_denovo | 1119240                 | T/C  | NA                 | NA                            | NA                 |
| Kabuli_wild_1119252 | NA                                  | Ca_kabuli_denovo | 1119252                 | C/G  | NA                 | NA                            | NA                 |
| Kabuli_wild_1119342 | NA                                  | Ca_kabuli_denovo | 1119342                 | G/A  | NA                 | NA                            | NA                 |

| SNP IDs                    | NCBI dbSNP accession IDs (NCBI_SS#) | Chromosomes             | Physical positions (bp) | SNPs | Gene accession IDs | Sequence components of genome | Putative functions |
|----------------------------|-------------------------------------|-------------------------|-------------------------|------|--------------------|-------------------------------|--------------------|
| <i>Kabuli_wild_1119351</i> | NA                                  | <i>Ca_kabuli_denovo</i> | 1119351                 | A/C  | NA                 | NA                            | NA                 |
| <i>Kabuli_wild_1119670</i> | NA                                  | <i>Ca_kabuli_denovo</i> | 1119670                 | C/G  | NA                 | NA                            | NA                 |
| <i>Kabuli_wild_1120292</i> | NA                                  | <i>Ca_kabuli_denovo</i> | 1120292                 | G/T  | NA                 | NA                            | NA                 |
| <i>Kabuli_wild_1121190</i> | NA                                  | <i>Ca_kabuli_denovo</i> | 1121190                 | C/T  | NA                 | NA                            | NA                 |
| <i>Kabuli_wild_1123916</i> | NA                                  | <i>Ca_kabuli_denovo</i> | 1123916                 | G/A  | NA                 | NA                            | NA                 |
| <i>Kabuli_wild_1124477</i> | NA                                  | <i>Ca_kabuli_denovo</i> | 1124477                 | T/G  | NA                 | NA                            | NA                 |
| <i>Kabuli_wild_1124544</i> | NA                                  | <i>Ca_kabuli_denovo</i> | 1124544                 | T/C  | NA                 | NA                            | NA                 |
| <i>Kabuli_wild_1125458</i> | NA                                  | <i>Ca_kabuli_denovo</i> | 1125458                 | C/T  | NA                 | NA                            | NA                 |
| <i>Kabuli_wild_1125459</i> | NA                                  | <i>Ca_kabuli_denovo</i> | 1125459                 | C/T  | NA                 | NA                            | NA                 |
| <i>Kabuli_wild_1125734</i> | NA                                  | <i>Ca_kabuli_denovo</i> | 1125734                 | A/G  | NA                 | NA                            | NA                 |
| <i>Kabuli_wild_1125737</i> | NA                                  | <i>Ca_kabuli_denovo</i> | 1125737                 | G/T  | NA                 | NA                            | NA                 |
| <i>Kabuli_wild_1125911</i> | NA                                  | <i>Ca_kabuli_denovo</i> | 1125911                 | A/G  | NA                 | NA                            | NA                 |
| <i>Kabuli_wild_1126624</i> | NA                                  | <i>Ca_kabuli_denovo</i> | 1126624                 | C/A  | NA                 | NA                            | NA                 |
| <i>Kabuli_wild_1129162</i> | NA                                  | <i>Ca_kabuli_denovo</i> | 1129162                 | C/A  | NA                 | NA                            | NA                 |
| <i>Kabuli_wild_1129551</i> | NA                                  | <i>Ca_kabuli_denovo</i> | 1129551                 | C/T  | NA                 | NA                            | NA                 |
| <i>Kabuli_wild_1129582</i> | NA                                  | <i>Ca_kabuli_denovo</i> | 1129582                 | G/A  | NA                 | NA                            | NA                 |
| <i>Kabuli_wild_1130881</i> | NA                                  | <i>Ca_kabuli_denovo</i> | 1130881                 | A/G  | NA                 | NA                            | NA                 |
| <i>Kabuli_wild_1130890</i> | NA                                  | <i>Ca_kabuli_denovo</i> | 1130890                 | C/G  | NA                 | NA                            | NA                 |
| <i>Kabuli_wild_1131132</i> | NA                                  | <i>Ca_kabuli_denovo</i> | 1131132                 | T/G  | NA                 | NA                            | NA                 |
| <i>Kabuli_wild_1131152</i> | NA                                  | <i>Ca_kabuli_denovo</i> | 1131152                 | T/G  | NA                 | NA                            | NA                 |
| <i>Kabuli_wild_1131716</i> | NA                                  | <i>Ca_kabuli_denovo</i> | 1131716                 | G/A  | NA                 | NA                            | NA                 |
| <i>Kabuli_wild_1134765</i> | NA                                  | <i>Ca_kabuli_denovo</i> | 1134765                 | C/T  | NA                 | NA                            | NA                 |
| <i>Kabuli_wild_1136286</i> | NA                                  | <i>Ca_kabuli_denovo</i> | 1136286                 | T/G  | NA                 | NA                            | NA                 |
| <i>Kabuli_wild_1136502</i> | NA                                  | <i>Ca_kabuli_denovo</i> | 1136502                 | G/A  | NA                 | NA                            | NA                 |
| <i>Kabuli_wild_1138004</i> | NA                                  | <i>Ca_kabuli_denovo</i> | 1138004                 | A/G  | NA                 | NA                            | NA                 |
| <i>Kabuli_wild_1139753</i> | NA                                  | <i>Ca_kabuli_denovo</i> | 1139753                 | C/T  | NA                 | NA                            | NA                 |
| <i>Kabuli_wild_1139765</i> | NA                                  | <i>Ca_kabuli_denovo</i> | 1139765                 | A/T  | NA                 | NA                            | NA                 |
| <i>Kabuli_wild_1139920</i> | NA                                  | <i>Ca_kabuli_denovo</i> | 1139920                 | C/T  | NA                 | NA                            | NA                 |
| <i>Kabuli_wild_1139929</i> | NA                                  | <i>Ca_kabuli_denovo</i> | 1139929                 | C/G  | NA                 | NA                            | NA                 |
| <i>Kabuli_wild_1140297</i> | NA                                  | <i>Ca_kabuli_denovo</i> | 1140297                 | T/C  | NA                 | NA                            | NA                 |
| <i>Kabuli_wild_1140306</i> | NA                                  | <i>Ca_kabuli_denovo</i> | 1140306                 | C/T  | NA                 | NA                            | NA                 |
| <i>Kabuli_wild_1140428</i> | NA                                  | <i>Ca_kabuli_denovo</i> | 1140428                 | C/A  | NA                 | NA                            | NA                 |
| <i>Kabuli_wild_1140777</i> | NA                                  | <i>Ca_kabuli_denovo</i> | 1140777                 | C/T  | NA                 | NA                            | NA                 |
| <i>Kabuli_wild_1140932</i> | NA                                  | <i>Ca_kabuli_denovo</i> | 1140932                 | C/T  | NA                 | NA                            | NA                 |
| <i>Kabuli_wild_1140953</i> | NA                                  | <i>Ca_kabuli_denovo</i> | 1140953                 | A/C  | NA                 | NA                            | NA                 |
| <i>Kabuli_wild_1141544</i> | NA                                  | <i>Ca_kabuli_denovo</i> | 1141544                 | A/G  | NA                 | NA                            | NA                 |
| <i>Kabuli_wild_1141932</i> | NA                                  | <i>Ca_kabuli_denovo</i> | 1141932                 | C/T  | NA                 | NA                            | NA                 |
| <i>Kabuli_wild_1141984</i> | NA                                  | <i>Ca_kabuli_denovo</i> | 1141984                 | C/T  | NA                 | NA                            | NA                 |
| <i>Kabuli_wild_1142618</i> | NA                                  | <i>Ca_kabuli_denovo</i> | 1142618                 | G/C  | NA                 | NA                            | NA                 |
| <i>Kabuli_wild_1142688</i> | NA                                  | <i>Ca_kabuli_denovo</i> | 1142688                 | T/C  | NA                 | NA                            | NA                 |
| <i>Kabuli_wild_1145145</i> | NA                                  | <i>Ca_kabuli_denovo</i> | 1145145                 | G/C  | NA                 | NA                            | NA                 |
| <i>Kabuli_wild_1145169</i> | NA                                  | <i>Ca_kabuli_denovo</i> | 1145169                 | A/C  | NA                 | NA                            | NA                 |
| <i>Kabuli_wild_1145463</i> | NA                                  | <i>Ca_kabuli_denovo</i> | 1145463                 | T/C  | NA                 | NA                            | NA                 |
| <i>Kabuli_wild_1146493</i> | NA                                  | <i>Ca_kabuli_denovo</i> | 1146493                 | G/C  | NA                 | NA                            | NA                 |



| SNP IDs             | NCBI dbSNP accession IDs (NCBI_SS#) | Chromosomes      | Physical positions (bp) | SNPs | Gene accession IDs | Sequence components of genome | Putative functions |
|---------------------|-------------------------------------|------------------|-------------------------|------|--------------------|-------------------------------|--------------------|
| Kabuli_wild_1146702 | NA                                  | Ca_kabuli_denovo | 1146702                 | G/C  | NA                 | NA                            | NA                 |
| Kabuli_wild_1146705 | NA                                  | Ca_kabuli_denovo | 1146705                 | T/C  | NA                 | NA                            | NA                 |
| Kabuli_wild_1147097 | NA                                  | Ca_kabuli_denovo | 1147097                 | A/G  | NA                 | NA                            | NA                 |
| Kabuli_wild_1147112 | NA                                  | Ca_kabuli_denovo | 1147112                 | C/T  | NA                 | NA                            | NA                 |
| Kabuli_wild_1147282 | NA                                  | Ca_kabuli_denovo | 1147282                 | C/T  | NA                 | NA                            | NA                 |
| Kabuli_wild_1147318 | NA                                  | Ca_kabuli_denovo | 1147318                 | A/C  | NA                 | NA                            | NA                 |
| Kabuli_wild_1147681 | NA                                  | Ca_kabuli_denovo | 1147681                 | C/T  | NA                 | NA                            | NA                 |
| Kabuli_wild_1148546 | NA                                  | Ca_kabuli_denovo | 1148546                 | C/T  | NA                 | NA                            | NA                 |
| Kabuli_wild_1148598 | NA                                  | Ca_kabuli_denovo | 1148598                 | G/A  | NA                 | NA                            | NA                 |
| Kabuli_wild_1148773 | NA                                  | Ca_kabuli_denovo | 1148773                 | C/G  | NA                 | NA                            | NA                 |
| Kabuli_wild_1150019 | NA                                  | Ca_kabuli_denovo | 1150019                 | T/C  | NA                 | NA                            | NA                 |
| Kabuli_wild_1150408 | NA                                  | Ca_kabuli_denovo | 1150408                 | T/C  | NA                 | NA                            | NA                 |
| Kabuli_wild_1150468 | NA                                  | Ca_kabuli_denovo | 1150468                 | G/A  | NA                 | NA                            | NA                 |
| Kabuli_wild_1150780 | NA                                  | Ca_kabuli_denovo | 1150780                 | G/C  | NA                 | NA                            | NA                 |
| Kabuli_wild_1150836 | NA                                  | Ca_kabuli_denovo | 1150836                 | A/G  | NA                 | NA                            | NA                 |
| Kabuli_wild_1152987 | NA                                  | Ca_kabuli_denovo | 1152987                 | G/A  | NA                 | NA                            | NA                 |
| Kabuli_wild_1153000 | NA                                  | Ca_kabuli_denovo | 1153000                 | A/G  | NA                 | NA                            | NA                 |
| Kabuli_wild_1153086 | NA                                  | Ca_kabuli_denovo | 1153086                 | T/G  | NA                 | NA                            | NA                 |
| Kabuli_wild_1153198 | NA                                  | Ca_kabuli_denovo | 1153198                 | G/T  | NA                 | NA                            | NA                 |
| Kabuli_wild_1153670 | NA                                  | Ca_kabuli_denovo | 1153670                 | C/T  | NA                 | NA                            | NA                 |
| Kabuli_wild_1155231 | NA                                  | Ca_kabuli_denovo | 1155231                 | C/T  | NA                 | NA                            | NA                 |
| Kabuli_wild_1155255 | NA                                  | Ca_kabuli_denovo | 1155255                 | G/C  | NA                 | NA                            | NA                 |
| Kabuli_wild_1155640 | NA                                  | Ca_kabuli_denovo | 1155640                 | A/G  | NA                 | NA                            | NA                 |
| Kabuli_wild_1156031 | NA                                  | Ca_kabuli_denovo | 1156031                 | G/A  | NA                 | NA                            | NA                 |
| Kabuli_wild_1156127 | NA                                  | Ca_kabuli_denovo | 1156127                 | C/T  | NA                 | NA                            | NA                 |
| Kabuli_wild_1156192 | NA                                  | Ca_kabuli_denovo | 1156192                 | G/A  | NA                 | NA                            | NA                 |
| Kabuli_wild_1157573 | NA                                  | Ca_kabuli_denovo | 1157573                 | C/T  | NA                 | NA                            | NA                 |
| Kabuli_wild_1159923 | NA                                  | Ca_kabuli_denovo | 1159923                 | A/G  | NA                 | NA                            | NA                 |
| Kabuli_wild_1159950 | NA                                  | Ca_kabuli_denovo | 1159950                 | A/G  | NA                 | NA                            | NA                 |
| Kabuli_wild_1159981 | NA                                  | Ca_kabuli_denovo | 1159981                 | A/G  | NA                 | NA                            | NA                 |
| Kabuli_wild_1160574 | NA                                  | Ca_kabuli_denovo | 1160574                 | A/T  | NA                 | NA                            | NA                 |
| Kabuli_wild_1161038 | NA                                  | Ca_kabuli_denovo | 1161038                 | G/C  | NA                 | NA                            | NA                 |
| Kabuli_wild_1161041 | NA                                  | Ca_kabuli_denovo | 1161041                 | A/G  | NA                 | NA                            | NA                 |
| Kabuli_wild_1161385 | NA                                  | Ca_kabuli_denovo | 1161385                 | T/C  | NA                 | NA                            | NA                 |
| Kabuli_wild_1161406 | NA                                  | Ca_kabuli_denovo | 1161406                 | G/A  | NA                 | NA                            | NA                 |
| Kabuli_wild_1161880 | NA                                  | Ca_kabuli_denovo | 1161880                 | G/A  | NA                 | NA                            | NA                 |
| Kabuli_wild_1161901 | NA                                  | Ca_kabuli_denovo | 1161901                 | C/T  | NA                 | NA                            | NA                 |
| Kabuli_wild_1162287 | NA                                  | Ca_kabuli_denovo | 1162287                 | A/G  | NA                 | NA                            | NA                 |
| Kabuli_wild_1163088 | NA                                  | Ca_kabuli_denovo | 1163088                 | A/G  | NA                 | NA                            | NA                 |
| Kabuli_wild_1163123 | NA                                  | Ca_kabuli_denovo | 1163123                 | G/T  | NA                 | NA                            | NA                 |
| Kabuli_wild_1163427 | NA                                  | Ca_kabuli_denovo | 1163427                 | G/A  | NA                 | NA                            | NA                 |
| Kabuli_wild_1163467 | NA                                  | Ca_kabuli_denovo | 1163467                 | G/A  | NA                 | NA                            | NA                 |
| Kabuli_wild_1163484 | NA                                  | Ca_kabuli_denovo | 1163484                 | C/G  | NA                 | NA                            | NA                 |
| Kabuli_wild_1165601 | NA                                  | Ca_kabuli_denovo | 1165601                 | T/C  | NA                 | NA                            | NA                 |

| SNP IDs             | NCBI dbSNP accession IDs (NCBI_SS#) | Chromosomes      | Physical positions (bp) | SNPs | Gene accession IDs | Sequence components of genome | Putative functions |
|---------------------|-------------------------------------|------------------|-------------------------|------|--------------------|-------------------------------|--------------------|
| Kabuli_wild_1165622 | NA                                  | Ca_kabuli_denovo | 1165622                 | G/A  | NA                 | NA                            | NA                 |
| Kabuli_wild_1166036 | NA                                  | Ca_kabuli_denovo | 1166036                 | T/C  | NA                 | NA                            | NA                 |
| Kabuli_wild_1166064 | NA                                  | Ca_kabuli_denovo | 1166064                 | G/A  | NA                 | NA                            | NA                 |
| Kabuli_wild_1167171 | NA                                  | Ca_kabuli_denovo | 1167171                 | C/T  | NA                 | NA                            | NA                 |
| Kabuli_wild_1167222 | NA                                  | Ca_kabuli_denovo | 1167222                 | T/C  | NA                 | NA                            | NA                 |
| Kabuli_wild_1168413 | NA                                  | Ca_kabuli_denovo | 1168413                 | C/T  | NA                 | NA                            | NA                 |
| Kabuli_wild_1168932 | NA                                  | Ca_kabuli_denovo | 1168932                 | G/A  | NA                 | NA                            | NA                 |
| Kabuli_wild_1168940 | NA                                  | Ca_kabuli_denovo | 1168940                 | C/T  | NA                 | NA                            | NA                 |
| Kabuli_wild_1169071 | NA                                  | Ca_kabuli_denovo | 1169071                 | A/G  | NA                 | NA                            | NA                 |
| Kabuli_wild_1169073 | NA                                  | Ca_kabuli_denovo | 1169073                 | G/A  | NA                 | NA                            | NA                 |
| Kabuli_wild_1169075 | NA                                  | Ca_kabuli_denovo | 1169075                 | T/A  | NA                 | NA                            | NA                 |
| Kabuli_wild_1169076 | NA                                  | Ca_kabuli_denovo | 1169076                 | G/T  | NA                 | NA                            | NA                 |
| Kabuli_wild_1169770 | NA                                  | Ca_kabuli_denovo | 1169770                 | C/G  | NA                 | NA                            | NA                 |
| Kabuli_wild_1170817 | NA                                  | Ca_kabuli_denovo | 1170817                 | A/G  | NA                 | NA                            | NA                 |
| Kabuli_wild_1171197 | NA                                  | Ca_kabuli_denovo | 1171197                 | C/T  | NA                 | NA                            | NA                 |
| Kabuli_wild_1171796 | NA                                  | Ca_kabuli_denovo | 1171796                 | T/G  | NA                 | NA                            | NA                 |
| Kabuli_wild_1172225 | NA                                  | Ca_kabuli_denovo | 1172225                 | G/A  | NA                 | NA                            | NA                 |
| Kabuli_wild_1172362 | NA                                  | Ca_kabuli_denovo | 1172362                 | T/G  | NA                 | NA                            | NA                 |
| Kabuli_wild_1174161 | NA                                  | Ca_kabuli_denovo | 1174161                 | T/C  | NA                 | NA                            | NA                 |
| Kabuli_wild_1174746 | NA                                  | Ca_kabuli_denovo | 1174746                 | G/A  | NA                 | NA                            | NA                 |
| Kabuli_wild_1174758 | NA                                  | Ca_kabuli_denovo | 1174758                 | G/A  | NA                 | NA                            | NA                 |
| Kabuli_wild_1177926 | NA                                  | Ca_kabuli_denovo | 1177926                 | C/T  | NA                 | NA                            | NA                 |
| Kabuli_wild_1178226 | NA                                  | Ca_kabuli_denovo | 1178226                 | C/G  | NA                 | NA                            | NA                 |
| Kabuli_wild_1178250 | NA                                  | Ca_kabuli_denovo | 1178250                 | T/C  | NA                 | NA                            | NA                 |
| Kabuli_wild_1178600 | NA                                  | Ca_kabuli_denovo | 1178600                 | C/G  | NA                 | NA                            | NA                 |
| Kabuli_wild_1179388 | NA                                  | Ca_kabuli_denovo | 1179388                 | G/A  | NA                 | NA                            | NA                 |
| Kabuli_wild_1179419 | NA                                  | Ca_kabuli_denovo | 1179419                 | G/C  | NA                 | NA                            | NA                 |
| Kabuli_wild_1182314 | NA                                  | Ca_kabuli_denovo | 1182314                 | C/G  | NA                 | NA                            | NA                 |
| Kabuli_wild_1182831 | NA                                  | Ca_kabuli_denovo | 1182831                 | A/G  | NA                 | NA                            | NA                 |
| Kabuli_wild_1182835 | NA                                  | Ca_kabuli_denovo | 1182835                 | A/G  | NA                 | NA                            | NA                 |
| Kabuli_wild_1182865 | NA                                  | Ca_kabuli_denovo | 1182865                 | C/T  | NA                 | NA                            | NA                 |
| Kabuli_wild_1183261 | NA                                  | Ca_kabuli_denovo | 1183261                 | T/C  | NA                 | NA                            | NA                 |
| Kabuli_wild_1183276 | NA                                  | Ca_kabuli_denovo | 1183276                 | A/G  | NA                 | NA                            | NA                 |
| Kabuli_wild_1183468 | NA                                  | Ca_kabuli_denovo | 1183468                 | T/C  | NA                 | NA                            | NA                 |
| Kabuli_wild_1183510 | NA                                  | Ca_kabuli_denovo | 1183510                 | T/C  | NA                 | NA                            | NA                 |
| Kabuli_wild_1184436 | NA                                  | Ca_kabuli_denovo | 1184436                 | A/G  | NA                 | NA                            | NA                 |
| Kabuli_wild_1184616 | NA                                  | Ca_kabuli_denovo | 1184616                 | C/T  | NA                 | NA                            | NA                 |
| Kabuli_wild_1185730 | NA                                  | Ca_kabuli_denovo | 1185730                 | T/C  | NA                 | NA                            | NA                 |
| Kabuli_wild_1186608 | NA                                  | Ca_kabuli_denovo | 1186608                 | T/C  | NA                 | NA                            | NA                 |
| Kabuli_wild_1186786 | NA                                  | Ca_kabuli_denovo | 1186786                 | A/G  | NA                 | NA                            | NA                 |
| Kabuli_wild_1186938 | NA                                  | Ca_kabuli_denovo | 1186938                 | C/T  | NA                 | NA                            | NA                 |
| Kabuli_wild_1186952 | NA                                  | Ca_kabuli_denovo | 1186952                 | C/T  | NA                 | NA                            | NA                 |
| Kabuli_wild_1188238 | NA                                  | Ca_kabuli_denovo | 1188238                 | G/A  | NA                 | NA                            | NA                 |
| Kabuli_wild_1188241 | NA                                  | Ca_kabuli_denovo | 1188241                 | A/G  | NA                 | NA                            | NA                 |

| SNP IDs                    | NCBI dbSNP accession IDs (NCBI_SS#) | Chromosomes             | Physical positions (bp) | SNPs | Gene accession IDs | Sequence components of genome | Putative functions |
|----------------------------|-------------------------------------|-------------------------|-------------------------|------|--------------------|-------------------------------|--------------------|
| <i>Kabuli_wild_1188843</i> | NA                                  | <i>Ca_kabuli_denovo</i> | 1188843                 | A/G  | NA                 | NA                            | NA                 |
| <i>Kabuli_wild_1188844</i> | NA                                  | <i>Ca_kabuli_denovo</i> | 1188844                 | A/G  | NA                 | NA                            | NA                 |
| <i>Kabuli_wild_1189286</i> | NA                                  | <i>Ca_kabuli_denovo</i> | 1189286                 | G/A  | NA                 | NA                            | NA                 |
| <i>Kabuli_wild_1189740</i> | NA                                  | <i>Ca_kabuli_denovo</i> | 1189740                 | A/C  | NA                 | NA                            | NA                 |
| <i>Kabuli_wild_1189756</i> | NA                                  | <i>Ca_kabuli_denovo</i> | 1189756                 | C/T  | NA                 | NA                            | NA                 |
| <i>Kabuli_wild_1190250</i> | NA                                  | <i>Ca_kabuli_denovo</i> | 1190250                 | A/G  | NA                 | NA                            | NA                 |
| <i>Kabuli_wild_1190255</i> | NA                                  | <i>Ca_kabuli_denovo</i> | 1190255                 | C/A  | NA                 | NA                            | NA                 |
| <i>Kabuli_wild_1192282</i> | NA                                  | <i>Ca_kabuli_denovo</i> | 1192282                 | A/G  | NA                 | NA                            | NA                 |
| <i>Kabuli_wild_1192659</i> | NA                                  | <i>Ca_kabuli_denovo</i> | 1192659                 | G/C  | NA                 | NA                            | NA                 |
| <i>Kabuli_wild_1192867</i> | NA                                  | <i>Ca_kabuli_denovo</i> | 1192867                 | T/G  | NA                 | NA                            | NA                 |
| <i>Kabuli_wild_1192925</i> | NA                                  | <i>Ca_kabuli_denovo</i> | 1192925                 | G/C  | NA                 | NA                            | NA                 |
| <i>Kabuli_wild_1193546</i> | NA                                  | <i>Ca_kabuli_denovo</i> | 1193546                 | C/T  | NA                 | NA                            | NA                 |
| <i>Kabuli_wild_1193613</i> | NA                                  | <i>Ca_kabuli_denovo</i> | 1193613                 | G/T  | NA                 | NA                            | NA                 |
| <i>Kabuli_wild_1193825</i> | NA                                  | <i>Ca_kabuli_denovo</i> | 1193825                 | A/G  | NA                 | NA                            | NA                 |
| <i>Kabuli_wild_1194233</i> | NA                                  | <i>Ca_kabuli_denovo</i> | 1194233                 | A/G  | NA                 | NA                            | NA                 |
| <i>Kabuli_wild_1194234</i> | NA                                  | <i>Ca_kabuli_denovo</i> | 1194234                 | T/C  | NA                 | NA                            | NA                 |
| <i>Kabuli_wild_1194428</i> | NA                                  | <i>Ca_kabuli_denovo</i> | 1194428                 | A/G  | NA                 | NA                            | NA                 |
| <i>Kabuli_wild_1195492</i> | NA                                  | <i>Ca_kabuli_denovo</i> | 1195492                 | G/C  | NA                 | NA                            | NA                 |
| <i>Kabuli_wild_1195513</i> | NA                                  | <i>Ca_kabuli_denovo</i> | 1195513                 | T/C  | NA                 | NA                            | NA                 |
| <i>Kabuli_wild_1195899</i> | NA                                  | <i>Ca_kabuli_denovo</i> | 1195899                 | G/C  | NA                 | NA                            | NA                 |
| <i>Kabuli_wild_1196268</i> | NA                                  | <i>Ca_kabuli_denovo</i> | 1196268                 | G/A  | NA                 | NA                            | NA                 |
| <i>Kabuli_wild_1196511</i> | NA                                  | <i>Ca_kabuli_denovo</i> | 1196511                 | C/A  | NA                 | NA                            | NA                 |
| <i>Kabuli_wild_1196771</i> | NA                                  | <i>Ca_kabuli_denovo</i> | 1196771                 | G/A  | NA                 | NA                            | NA                 |
| <i>Kabuli_wild_1196807</i> | NA                                  | <i>Ca_kabuli_denovo</i> | 1196807                 | G/A  | NA                 | NA                            | NA                 |
| <i>Kabuli_wild_1197414</i> | NA                                  | <i>Ca_kabuli_denovo</i> | 1197414                 | C/A  | NA                 | NA                            | NA                 |
| <i>Kabuli_wild_1197464</i> | NA                                  | <i>Ca_kabuli_denovo</i> | 1197464                 | G/A  | NA                 | NA                            | NA                 |
| <i>Kabuli_wild_1197830</i> | NA                                  | <i>Ca_kabuli_denovo</i> | 1197830                 | A/G  | NA                 | NA                            | NA                 |
| <i>Kabuli_wild_1197890</i> | NA                                  | <i>Ca_kabuli_denovo</i> | 1197890                 | T/G  | NA                 | NA                            | NA                 |
| <i>Kabuli_wild_1199019</i> | NA                                  | <i>Ca_kabuli_denovo</i> | 1199019                 | C/A  | NA                 | NA                            | NA                 |
| <i>Kabuli_wild_1199234</i> | NA                                  | <i>Ca_kabuli_denovo</i> | 1199234                 | G/A  | NA                 | NA                            | NA                 |
| <i>Kabuli_wild_1199618</i> | NA                                  | <i>Ca_kabuli_denovo</i> | 1199618                 | T/G  | NA                 | NA                            | NA                 |
| <i>Kabuli_wild_1199754</i> | NA                                  | <i>Ca_kabuli_denovo</i> | 1199754                 | G/C  | NA                 | NA                            | NA                 |
| <i>Kabuli_wild_1199756</i> | NA                                  | <i>Ca_kabuli_denovo</i> | 1199756                 | T/C  | NA                 | NA                            | NA                 |
| <i>Kabuli_wild_1200934</i> | NA                                  | <i>Ca_kabuli_denovo</i> | 1200934                 | G/C  | NA                 | NA                            | NA                 |
| <i>Kabuli_wild_1201897</i> | NA                                  | <i>Ca_kabuli_denovo</i> | 1201897                 | C/A  | NA                 | NA                            | NA                 |
| <i>Kabuli_wild_1202275</i> | NA                                  | <i>Ca_kabuli_denovo</i> | 1202275                 | G/A  | NA                 | NA                            | NA                 |
| <i>Kabuli_wild_1202748</i> | NA                                  | <i>Ca_kabuli_denovo</i> | 1202748                 | G/A  | NA                 | NA                            | NA                 |
| <i>Kabuli_wild_1202778</i> | NA                                  | <i>Ca_kabuli_denovo</i> | 1202778                 | A/T  | NA                 | NA                            | NA                 |
| <i>Kabuli_wild_1203164</i> | NA                                  | <i>Ca_kabuli_denovo</i> | 1203164                 | T/C  | NA                 | NA                            | NA                 |
| <i>Kabuli_wild_1203679</i> | NA                                  | <i>Ca_kabuli_denovo</i> | 1203679                 | A/T  | NA                 | NA                            | NA                 |
| <i>Kabuli_wild_1203706</i> | NA                                  | <i>Ca_kabuli_denovo</i> | 1203706                 | A/G  | NA                 | NA                            | NA                 |
| <i>Kabuli_wild_1203852</i> | NA                                  | <i>Ca_kabuli_denovo</i> | 1203852                 | C/T  | NA                 | NA                            | NA                 |
| <i>Kabuli_wild_1204264</i> | NA                                  | <i>Ca_kabuli_denovo</i> | 1204264                 | G/T  | NA                 | NA                            | NA                 |
| <i>Kabuli_wild_1205180</i> | NA                                  | <i>Ca_kabuli_denovo</i> | 1205180                 | T/C  | NA                 | NA                            | NA                 |

| SNP IDs             | NCBI dbSNP accession IDs (NCBI_SS#) | Chromosomes      | Physical positions (bp) | SNPs | Gene accession IDs | Sequence components of genome | Putative functions |
|---------------------|-------------------------------------|------------------|-------------------------|------|--------------------|-------------------------------|--------------------|
| Kabuli_wild_1206033 | NA                                  | Ca_kabuli_denovo | 1206033                 | G/T  | NA                 | NA                            | NA                 |
| Kabuli_wild_1206232 | NA                                  | Ca_kabuli_denovo | 1206232                 | A/C  | NA                 | NA                            | NA                 |
| Kabuli_wild_1206531 | NA                                  | Ca_kabuli_denovo | 1206531                 | C/A  | NA                 | NA                            | NA                 |
| Kabuli_wild_1206565 | NA                                  | Ca_kabuli_denovo | 1206565                 | T/G  | NA                 | NA                            | NA                 |
| Kabuli_wild_1206608 | NA                                  | Ca_kabuli_denovo | 1206608                 | C/T  | NA                 | NA                            | NA                 |
| Kabuli_wild_1206617 | NA                                  | Ca_kabuli_denovo | 1206617                 | A/G  | NA                 | NA                            | NA                 |
| Kabuli_wild_1206724 | NA                                  | Ca_kabuli_denovo | 1206724                 | G/T  | NA                 | NA                            | NA                 |
| Kabuli_wild_1208374 | NA                                  | Ca_kabuli_denovo | 1208374                 | T/C  | NA                 | NA                            | NA                 |
| Kabuli_wild_1208383 | NA                                  | Ca_kabuli_denovo | 1208383                 | C/T  | NA                 | NA                            | NA                 |
| Kabuli_wild_1208671 | NA                                  | Ca_kabuli_denovo | 1208671                 | T/G  | NA                 | NA                            | NA                 |
| Kabuli_wild_1210056 | NA                                  | Ca_kabuli_denovo | 1210056                 | G/T  | NA                 | NA                            | NA                 |
| Kabuli_wild_1210084 | NA                                  | Ca_kabuli_denovo | 1210084                 | A/G  | NA                 | NA                            | NA                 |
| Kabuli_wild_1210431 | NA                                  | Ca_kabuli_denovo | 1210431                 | G/A  | NA                 | NA                            | NA                 |
| Kabuli_wild_1210965 | NA                                  | Ca_kabuli_denovo | 1210965                 | C/A  | NA                 | NA                            | NA                 |
| Kabuli_wild_1211005 | NA                                  | Ca_kabuli_denovo | 1211005                 | A/C  | NA                 | NA                            | NA                 |
| Kabuli_wild_1211494 | NA                                  | Ca_kabuli_denovo | 1211494                 | C/T  | NA                 | NA                            | NA                 |
| Kabuli_wild_1211511 | NA                                  | Ca_kabuli_denovo | 1211511                 | A/G  | NA                 | NA                            | NA                 |
| Kabuli_wild_1211567 | NA                                  | Ca_kabuli_denovo | 1211567                 | T/G  | NA                 | NA                            | NA                 |
| Kabuli_wild_1211880 | NA                                  | Ca_kabuli_denovo | 1211880                 | A/G  | NA                 | NA                            | NA                 |
| Kabuli_wild_1212441 | NA                                  | Ca_kabuli_denovo | 1212441                 | G/T  | NA                 | NA                            | NA                 |
| Kabuli_wild_1212954 | NA                                  | Ca_kabuli_denovo | 1212954                 | C/T  | NA                 | NA                            | NA                 |
| Kabuli_wild_1212967 | NA                                  | Ca_kabuli_denovo | 1212967                 | A/G  | NA                 | NA                            | NA                 |
| Kabuli_wild_1213224 | NA                                  | Ca_kabuli_denovo | 1213224                 | T/C  | NA                 | NA                            | NA                 |
| Kabuli_wild_1213286 | NA                                  | Ca_kabuli_denovo | 1213286                 | A/G  | NA                 | NA                            | NA                 |
| Kabuli_wild_1213424 | NA                                  | Ca_kabuli_denovo | 1213424                 | C/A  | NA                 | NA                            | NA                 |
| Kabuli_wild_1213813 | NA                                  | Ca_kabuli_denovo | 1213813                 | A/G  | NA                 | NA                            | NA                 |
| Kabuli_wild_1213834 | NA                                  | Ca_kabuli_denovo | 1213834                 | C/G  | NA                 | NA                            | NA                 |
| Kabuli_wild_1213902 | NA                                  | Ca_kabuli_denovo | 1213902                 | C/G  | NA                 | NA                            | NA                 |
| Kabuli_wild_1213917 | NA                                  | Ca_kabuli_denovo | 1213917                 | A/G  | NA                 | NA                            | NA                 |
| Kabuli_wild_1215310 | NA                                  | Ca_kabuli_denovo | 1215310                 | A/C  | NA                 | NA                            | NA                 |
| Kabuli_wild_1215861 | NA                                  | Ca_kabuli_denovo | 1215861                 | C/T  | NA                 | NA                            | NA                 |
| Kabuli_wild_1215876 | NA                                  | Ca_kabuli_denovo | 1215876                 | C/G  | NA                 | NA                            | NA                 |
| Kabuli_wild_1219730 | NA                                  | Ca_kabuli_denovo | 1219730                 | G/A  | NA                 | NA                            | NA                 |
| Kabuli_wild_1219736 | NA                                  | Ca_kabuli_denovo | 1219736                 | G/A  | NA                 | NA                            | NA                 |
| Kabuli_wild_1220412 | NA                                  | Ca_kabuli_denovo | 1220412                 | C/G  | NA                 | NA                            | NA                 |
| Kabuli_wild_1220445 | NA                                  | Ca_kabuli_denovo | 1220445                 | T/C  | NA                 | NA                            | NA                 |
| Kabuli_wild_1220498 | NA                                  | Ca_kabuli_denovo | 1220498                 | T/C  | NA                 | NA                            | NA                 |
| Kabuli_wild_1220513 | NA                                  | Ca_kabuli_denovo | 1220513                 | T/C  | NA                 | NA                            | NA                 |
| Kabuli_wild_1221632 | NA                                  | Ca_kabuli_denovo | 1221632                 | A/G  | NA                 | NA                            | NA                 |
| Kabuli_wild_1222876 | NA                                  | Ca_kabuli_denovo | 1222876                 | C/G  | NA                 | NA                            | NA                 |
| Kabuli_wild_1222882 | NA                                  | Ca_kabuli_denovo | 1222882                 | C/G  | NA                 | NA                            | NA                 |
| Kabuli_wild_1223266 | NA                                  | Ca_kabuli_denovo | 1223266                 | C/T  | NA                 | NA                            | NA                 |
| Kabuli_wild_1224787 | NA                                  | Ca_kabuli_denovo | 1224787                 | C/T  | NA                 | NA                            | NA                 |
| Kabuli_wild_1224790 | NA                                  | Ca_kabuli_denovo | 1224790                 | A/G  | NA                 | NA                            | NA                 |

| SNP IDs             | NCBI dbSNP accession IDs (NCBI_SS#) | Chromosomes      | Physical positions (bp) | SNPs | Gene accession IDs | Sequence components of genome | Putative functions |
|---------------------|-------------------------------------|------------------|-------------------------|------|--------------------|-------------------------------|--------------------|
| Kabuli_wild_1225096 | NA                                  | Ca_kabuli_denovo | 1225096                 | C/T  | NA                 | NA                            | NA                 |
| Kabuli_wild_1225126 | NA                                  | Ca_kabuli_denovo | 1225126                 | C/G  | NA                 | NA                            | NA                 |
| Kabuli_wild_1225670 | NA                                  | Ca_kabuli_denovo | 1225670                 | G/T  | NA                 | NA                            | NA                 |
| Kabuli_wild_1225752 | NA                                  | Ca_kabuli_denovo | 1225752                 | T/C  | NA                 | NA                            | NA                 |
| Kabuli_wild_1226406 | NA                                  | Ca_kabuli_denovo | 1226406                 | T/G  | NA                 | NA                            | NA                 |
| Kabuli_wild_1229188 | NA                                  | Ca_kabuli_denovo | 1229188                 | T/G  | NA                 | NA                            | NA                 |
| Kabuli_wild_1229191 | NA                                  | Ca_kabuli_denovo | 1229191                 | A/C  | NA                 | NA                            | NA                 |
| Kabuli_wild_1229927 | NA                                  | Ca_kabuli_denovo | 1229927                 | C/G  | NA                 | NA                            | NA                 |
| Kabuli_wild_1229930 | NA                                  | Ca_kabuli_denovo | 1229930                 | G/A  | NA                 | NA                            | NA                 |
| Kabuli_wild_1230404 | NA                                  | Ca_kabuli_denovo | 1230404                 | A/T  | NA                 | NA                            | NA                 |
| Kabuli_wild_1230783 | NA                                  | Ca_kabuli_denovo | 1230783                 | G/A  | NA                 | NA                            | NA                 |
| Kabuli_wild_1230785 | NA                                  | Ca_kabuli_denovo | 1230785                 | C/T  | NA                 | NA                            | NA                 |
| Kabuli_wild_1230802 | NA                                  | Ca_kabuli_denovo | 1230802                 | G/C  | NA                 | NA                            | NA                 |
| Kabuli_wild_1230824 | NA                                  | Ca_kabuli_denovo | 1230824                 | G/A  | NA                 | NA                            | NA                 |
| Kabuli_wild_1231569 | NA                                  | Ca_kabuli_denovo | 1231569                 | T/A  | NA                 | NA                            | NA                 |
| Kabuli_wild_1231599 | NA                                  | Ca_kabuli_denovo | 1231599                 | G/A  | NA                 | NA                            | NA                 |
| Kabuli_wild_1231733 | NA                                  | Ca_kabuli_denovo | 1231733                 | G/T  | NA                 | NA                            | NA                 |
| Kabuli_wild_1231891 | NA                                  | Ca_kabuli_denovo | 1231891                 | A/C  | NA                 | NA                            | NA                 |
| Kabuli_wild_1231897 | NA                                  | Ca_kabuli_denovo | 1231897                 | C/A  | NA                 | NA                            | NA                 |
| Kabuli_wild_1231919 | NA                                  | Ca_kabuli_denovo | 1231919                 | A/G  | NA                 | NA                            | NA                 |
| Kabuli_wild_1232103 | NA                                  | Ca_kabuli_denovo | 1232103                 | T/G  | NA                 | NA                            | NA                 |
| Kabuli_wild_1233110 | NA                                  | Ca_kabuli_denovo | 1233110                 | C/T  | NA                 | NA                            | NA                 |
| Kabuli_wild_1233134 | NA                                  | Ca_kabuli_denovo | 1233134                 | A/G  | NA                 | NA                            | NA                 |
| Kabuli_wild_1235104 | NA                                  | Ca_kabuli_denovo | 1235104                 | C/A  | NA                 | NA                            | NA                 |
| Kabuli_wild_1235105 | NA                                  | Ca_kabuli_denovo | 1235105                 | A/G  | NA                 | NA                            | NA                 |
| Kabuli_wild_1235579 | NA                                  | Ca_kabuli_denovo | 1235579                 | G/T  | NA                 | NA                            | NA                 |
| Kabuli_wild_1235584 | NA                                  | Ca_kabuli_denovo | 1235584                 | T/C  | NA                 | NA                            | NA                 |
| Kabuli_wild_1237008 | NA                                  | Ca_kabuli_denovo | 1237008                 | C/G  | NA                 | NA                            | NA                 |
| Kabuli_wild_1237011 | NA                                  | Ca_kabuli_denovo | 1237011                 | C/A  | NA                 | NA                            | NA                 |
| Kabuli_wild_1237185 | NA                                  | Ca_kabuli_denovo | 1237185                 | T/C  | NA                 | NA                            | NA                 |
| Kabuli_wild_1237255 | NA                                  | Ca_kabuli_denovo | 1237255                 | A/G  | NA                 | NA                            | NA                 |
| Kabuli_wild_1237419 | NA                                  | Ca_kabuli_denovo | 1237419                 | C/G  | NA                 | NA                            | NA                 |
| Kabuli_wild_1238641 | NA                                  | Ca_kabuli_denovo | 1238641                 | G/C  | NA                 | NA                            | NA                 |
| Kabuli_wild_1238816 | NA                                  | Ca_kabuli_denovo | 1238816                 | A/G  | NA                 | NA                            | NA                 |
| Kabuli_wild_1241234 | NA                                  | Ca_kabuli_denovo | 1241234                 | C/G  | NA                 | NA                            | NA                 |
| Kabuli_wild_1241237 | NA                                  | Ca_kabuli_denovo | 1241237                 | A/G  | NA                 | NA                            | NA                 |
| Kabuli_wild_1241243 | NA                                  | Ca_kabuli_denovo | 1241243                 | C/T  | NA                 | NA                            | NA                 |
| Kabuli_wild_1241799 | NA                                  | Ca_kabuli_denovo | 1241799                 | C/T  | NA                 | NA                            | NA                 |
| Kabuli_wild_1241921 | NA                                  | Ca_kabuli_denovo | 1241921                 | T/G  | NA                 | NA                            | NA                 |
| Kabuli_wild_1243308 | NA                                  | Ca_kabuli_denovo | 1243308                 | C/G  | NA                 | NA                            | NA                 |
| Kabuli_wild_1243368 | NA                                  | Ca_kabuli_denovo | 1243368                 | T/C  | NA                 | NA                            | NA                 |
| Kabuli_wild_1243642 | NA                                  | Ca_kabuli_denovo | 1243642                 | C/T  | NA                 | NA                            | NA                 |
| Kabuli_wild_1243647 | NA                                  | Ca_kabuli_denovo | 1243647                 | T/A  | NA                 | NA                            | NA                 |
| Kabuli_wild_1245357 | NA                                  | Ca_kabuli_denovo | 1245357                 | C/A  | NA                 | NA                            | NA                 |

| SNP IDs             | NCBI dbSNP accession IDs (NCBI_SS#) | Chromosomes      | Physical positions (bp) | SNPs | Gene accession IDs | Sequence components of genome | Putative functions |
|---------------------|-------------------------------------|------------------|-------------------------|------|--------------------|-------------------------------|--------------------|
| Kabuli_wild_1245712 | NA                                  | Ca_kabuli_denovo | 1245712                 | A/C  | NA                 | NA                            | NA                 |
| Kabuli_wild_1246997 | NA                                  | Ca_kabuli_denovo | 1246997                 | G/A  | NA                 | NA                            | NA                 |
| Kabuli_wild_1247054 | NA                                  | Ca_kabuli_denovo | 1247054                 | G/A  | NA                 | NA                            | NA                 |
| Kabuli_wild_1247858 | NA                                  | Ca_kabuli_denovo | 1247858                 | C/T  | NA                 | NA                            | NA                 |
| Kabuli_wild_1247890 | NA                                  | Ca_kabuli_denovo | 1247890                 | A/G  | NA                 | NA                            | NA                 |
| Kabuli_wild_1248338 | NA                                  | Ca_kabuli_denovo | 1248338                 | C/A  | NA                 | NA                            | NA                 |
| Kabuli_wild_1248355 | NA                                  | Ca_kabuli_denovo | 1248355                 | T/G  | NA                 | NA                            | NA                 |
| Kabuli_wild_1248962 | NA                                  | Ca_kabuli_denovo | 1248962                 | A/C  | NA                 | NA                            | NA                 |
| Kabuli_wild_1250708 | NA                                  | Ca_kabuli_denovo | 1250708                 | G/C  | NA                 | NA                            | NA                 |
| Kabuli_wild_1250863 | NA                                  | Ca_kabuli_denovo | 1250863                 | C/T  | NA                 | NA                            | NA                 |
| Kabuli_wild_1251452 | NA                                  | Ca_kabuli_denovo | 1251452                 | A/T  | NA                 | NA                            | NA                 |
| Kabuli_wild_1252813 | NA                                  | Ca_kabuli_denovo | 1252813                 | C/T  | NA                 | NA                            | NA                 |
| Kabuli_wild_1253383 | NA                                  | Ca_kabuli_denovo | 1253383                 | G/C  | NA                 | NA                            | NA                 |
| Kabuli_wild_1254712 | NA                                  | Ca_kabuli_denovo | 1254712                 | C/T  | NA                 | NA                            | NA                 |
| Kabuli_wild_1254852 | NA                                  | Ca_kabuli_denovo | 1254852                 | C/T  | NA                 | NA                            | NA                 |
| Kabuli_wild_1257495 | NA                                  | Ca_kabuli_denovo | 1257495                 | G/A  | NA                 | NA                            | NA                 |
| Kabuli_wild_1259289 | NA                                  | Ca_kabuli_denovo | 1259289                 | T/G  | NA                 | NA                            | NA                 |
| Kabuli_wild_1259309 | NA                                  | Ca_kabuli_denovo | 1259309                 | A/G  | NA                 | NA                            | NA                 |
| Kabuli_wild_1259730 | NA                                  | Ca_kabuli_denovo | 1259730                 | T/C  | NA                 | NA                            | NA                 |
| Kabuli_wild_1259833 | NA                                  | Ca_kabuli_denovo | 1259833                 | G/T  | NA                 | NA                            | NA                 |
| Kabuli_wild_1261100 | NA                                  | Ca_kabuli_denovo | 1261100                 | C/T  | NA                 | NA                            | NA                 |
| Kabuli_wild_1261255 | NA                                  | Ca_kabuli_denovo | 1261255                 | C/G  | NA                 | NA                            | NA                 |
| Kabuli_wild_1261507 | NA                                  | Ca_kabuli_denovo | 1261507                 | T/C  | NA                 | NA                            | NA                 |
| Kabuli_wild_1261650 | NA                                  | Ca_kabuli_denovo | 1261650                 | C/G  | NA                 | NA                            | NA                 |
| Kabuli_wild_1261862 | NA                                  | Ca_kabuli_denovo | 1261862                 | C/T  | NA                 | NA                            | NA                 |
| Kabuli_wild_1263595 | NA                                  | Ca_kabuli_denovo | 1263595                 | G/A  | NA                 | NA                            | NA                 |
| Kabuli_wild_1263614 | NA                                  | Ca_kabuli_denovo | 1263614                 | A/C  | NA                 | NA                            | NA                 |
| Kabuli_wild_1263625 | NA                                  | Ca_kabuli_denovo | 1263625                 | G/C  | NA                 | NA                            | NA                 |
| Kabuli_wild_1263846 | NA                                  | Ca_kabuli_denovo | 1263846                 | A/G  | NA                 | NA                            | NA                 |
| Kabuli_wild_1264228 | NA                                  | Ca_kabuli_denovo | 1264228                 | C/T  | NA                 | NA                            | NA                 |
| Kabuli_wild_1265111 | NA                                  | Ca_kabuli_denovo | 1265111                 | T/G  | NA                 | NA                            | NA                 |
| Kabuli_wild_1265655 | NA                                  | Ca_kabuli_denovo | 1265655                 | T/C  | NA                 | NA                            | NA                 |
| Kabuli_wild_1265765 | NA                                  | Ca_kabuli_denovo | 1265765                 | C/A  | NA                 | NA                            | NA                 |
| Kabuli_wild_1265811 | NA                                  | Ca_kabuli_denovo | 1265811                 | C/G  | NA                 | NA                            | NA                 |
| Kabuli_wild_1266462 | NA                                  | Ca_kabuli_denovo | 1266462                 | T/G  | NA                 | NA                            | NA                 |
| Kabuli_wild_1266914 | NA                                  | Ca_kabuli_denovo | 1266914                 | A/G  | NA                 | NA                            | NA                 |
| Kabuli_wild_1266923 | NA                                  | Ca_kabuli_denovo | 1266923                 | A/G  | NA                 | NA                            | NA                 |
| Kabuli_wild_1267939 | NA                                  | Ca_kabuli_denovo | 1267939                 | G/A  | NA                 | NA                            | NA                 |
| Kabuli_wild_1267956 | NA                                  | Ca_kabuli_denovo | 1267956                 | C/T  | NA                 | NA                            | NA                 |
| Kabuli_wild_1268051 | NA                                  | Ca_kabuli_denovo | 1268051                 | C/T  | NA                 | NA                            | NA                 |
| Kabuli_wild_1269215 | NA                                  | Ca_kabuli_denovo | 1269215                 | A/C  | NA                 | NA                            | NA                 |
| Kabuli_wild_1269230 | NA                                  | Ca_kabuli_denovo | 1269230                 | A/G  | NA                 | NA                            | NA                 |
| Kabuli_wild_1270018 | NA                                  | Ca_kabuli_denovo | 1270018                 | C/T  | NA                 | NA                            | NA                 |
| Kabuli_wild_1271565 | NA                                  | Ca_kabuli_denovo | 1271565                 | T/A  | NA                 | NA                            | NA                 |

| SNP IDs             | NCBI dbSNP accession IDs (NCBI_SS#) | Chromosomes      | Physical positions (bp) | SNPs | Gene accession IDs | Sequence components of genome | Putative functions |
|---------------------|-------------------------------------|------------------|-------------------------|------|--------------------|-------------------------------|--------------------|
| Kabuli_wild_1271595 | NA                                  | Ca_kabuli_denovo | 1271595                 | C/T  | NA                 | NA                            | NA                 |
| Kabuli_wild_1271735 | NA                                  | Ca_kabuli_denovo | 1271735                 | C/T  | NA                 | NA                            | NA                 |
| Kabuli_wild_1272327 | NA                                  | Ca_kabuli_denovo | 1272327                 | A/G  | NA                 | NA                            | NA                 |
| Kabuli_wild_1272692 | NA                                  | Ca_kabuli_denovo | 1272692                 | A/G  | NA                 | NA                            | NA                 |
| Kabuli_wild_1272704 | NA                                  | Ca_kabuli_denovo | 1272704                 | G/A  | NA                 | NA                            | NA                 |
| Kabuli_wild_1272727 | NA                                  | Ca_kabuli_denovo | 1272727                 | T/G  | NA                 | NA                            | NA                 |
| Kabuli_wild_1273407 | NA                                  | Ca_kabuli_denovo | 1273407                 | A/G  | NA                 | NA                            | NA                 |
| Kabuli_wild_1273442 | NA                                  | Ca_kabuli_denovo | 1273442                 | C/A  | NA                 | NA                            | NA                 |
| Kabuli_wild_1274535 | NA                                  | Ca_kabuli_denovo | 1274535                 | G/C  | NA                 | NA                            | NA                 |
| Kabuli_wild_1274732 | NA                                  | Ca_kabuli_denovo | 1274732                 | G/T  | NA                 | NA                            | NA                 |
| Kabuli_wild_1277003 | NA                                  | Ca_kabuli_denovo | 1277003                 | C/G  | NA                 | NA                            | NA                 |
| Kabuli_wild_1278011 | NA                                  | Ca_kabuli_denovo | 1278011                 | C/A  | NA                 | NA                            | NA                 |
| Kabuli_wild_1278055 | NA                                  | Ca_kabuli_denovo | 1278055                 | T/C  | NA                 | NA                            | NA                 |
| Kabuli_wild_1279393 | NA                                  | Ca_kabuli_denovo | 1279393                 | C/G  | NA                 | NA                            | NA                 |
| Kabuli_wild_1279787 | NA                                  | Ca_kabuli_denovo | 1279787                 | T/C  | NA                 | NA                            | NA                 |
| Kabuli_wild_1279972 | NA                                  | Ca_kabuli_denovo | 1279972                 | T/C  | NA                 | NA                            | NA                 |
| Kabuli_wild_1280074 | NA                                  | Ca_kabuli_denovo | 1280074                 | G/T  | NA                 | NA                            | NA                 |
| Kabuli_wild_1280118 | NA                                  | Ca_kabuli_denovo | 1280118                 | C/G  | NA                 | NA                            | NA                 |
| Kabuli_wild_1280937 | NA                                  | Ca_kabuli_denovo | 1280937                 | T/C  | NA                 | NA                            | NA                 |
| Kabuli_wild_1281042 | NA                                  | Ca_kabuli_denovo | 1281042                 | C/G  | NA                 | NA                            | NA                 |
| Kabuli_wild_1282013 | NA                                  | Ca_kabuli_denovo | 1282013                 | C/G  | NA                 | NA                            | NA                 |
| Kabuli_wild_1282055 | NA                                  | Ca_kabuli_denovo | 1282055                 | C/G  | NA                 | NA                            | NA                 |
| Kabuli_wild_1282955 | NA                                  | Ca_kabuli_denovo | 1282955                 | G/T  | NA                 | NA                            | NA                 |
| Kabuli_wild_1283870 | NA                                  | Ca_kabuli_denovo | 1283870                 | A/C  | NA                 | NA                            | NA                 |
| Kabuli_wild_1284207 | NA                                  | Ca_kabuli_denovo | 1284207                 | T/A  | NA                 | NA                            | NA                 |
| Kabuli_wild_1284827 | NA                                  | Ca_kabuli_denovo | 1284827                 | A/C  | NA                 | NA                            | NA                 |
| Kabuli_wild_1285438 | NA                                  | Ca_kabuli_denovo | 1285438                 | C/A  | NA                 | NA                            | NA                 |
| Kabuli_wild_1285440 | NA                                  | Ca_kabuli_denovo | 1285440                 | A/G  | NA                 | NA                            | NA                 |
| Kabuli_wild_1287152 | NA                                  | Ca_kabuli_denovo | 1287152                 | C/G  | NA                 | NA                            | NA                 |
| Kabuli_wild_1287772 | NA                                  | Ca_kabuli_denovo | 1287772                 | C/T  | NA                 | NA                            | NA                 |
| Kabuli_wild_1287829 | NA                                  | Ca_kabuli_denovo | 1287829                 | A/G  | NA                 | NA                            | NA                 |
| Kabuli_wild_1288502 | NA                                  | Ca_kabuli_denovo | 1288502                 | T/A  | NA                 | NA                            | NA                 |
| Kabuli_wild_1288519 | NA                                  | Ca_kabuli_denovo | 1288519                 | A/G  | NA                 | NA                            | NA                 |
| Kabuli_wild_1288904 | NA                                  | Ca_kabuli_denovo | 1288904                 | A/G  | NA                 | NA                            | NA                 |
| Kabuli_wild_1288923 | NA                                  | Ca_kabuli_denovo | 1288923                 | A/C  | NA                 | NA                            | NA                 |
| Kabuli_wild_1289097 | NA                                  | Ca_kabuli_denovo | 1289097                 | T/G  | NA                 | NA                            | NA                 |
| Kabuli_wild_1289191 | NA                                  | Ca_kabuli_denovo | 1289191                 | C/A  | NA                 | NA                            | NA                 |
| Kabuli_wild_1289257 | NA                                  | Ca_kabuli_denovo | 1289257                 | A/G  | NA                 | NA                            | NA                 |
| Kabuli_wild_1290481 | NA                                  | Ca_kabuli_denovo | 1290481                 | C/T  | NA                 | NA                            | NA                 |
| Kabuli_wild_1290487 | NA                                  | Ca_kabuli_denovo | 1290487                 | A/G  | NA                 | NA                            | NA                 |
| Kabuli_wild_1291355 | NA                                  | Ca_kabuli_denovo | 1291355                 | G/C  | NA                 | NA                            | NA                 |
| Kabuli_wild_1291544 | NA                                  | Ca_kabuli_denovo | 1291544                 | C/T  | NA                 | NA                            | NA                 |
| Kabuli_wild_1291614 | NA                                  | Ca_kabuli_denovo | 1291614                 | A/G  | NA                 | NA                            | NA                 |
| Kabuli_wild_1291682 | NA                                  | Ca_kabuli_denovo | 1291682                 | C/T  | NA                 | NA                            | NA                 |

| SNP IDs             | NCBI dbSNP accession IDs (NCBI_SS#) | Chromosomes      | Physical positions (bp) | SNPs | Gene accession IDs | Sequence components of genome | Putative functions |
|---------------------|-------------------------------------|------------------|-------------------------|------|--------------------|-------------------------------|--------------------|
| Kabuli_wild_1292085 | NA                                  | Ca_kabuli_denovo | 1292085                 | T/C  | NA                 | NA                            | NA                 |
| Kabuli_wild_1292165 | NA                                  | Ca_kabuli_denovo | 1292165                 | C/T  | NA                 | NA                            | NA                 |
| Kabuli_wild_1292346 | NA                                  | Ca_kabuli_denovo | 1292346                 | C/T  | NA                 | NA                            | NA                 |
| Kabuli_wild_1292694 | NA                                  | Ca_kabuli_denovo | 1292694                 | G/T  | NA                 | NA                            | NA                 |
| Kabuli_wild_1292775 | NA                                  | Ca_kabuli_denovo | 1292775                 | A/G  | NA                 | NA                            | NA                 |
| Kabuli_wild_1292778 | NA                                  | Ca_kabuli_denovo | 1292778                 | G/C  | NA                 | NA                            | NA                 |
| Kabuli_wild_1293137 | NA                                  | Ca_kabuli_denovo | 1293137                 | G/A  | NA                 | NA                            | NA                 |
| Kabuli_wild_1293346 | NA                                  | Ca_kabuli_denovo | 1293346                 | C/T  | NA                 | NA                            | NA                 |
| Kabuli_wild_1293370 | NA                                  | Ca_kabuli_denovo | 1293370                 | G/C  | NA                 | NA                            | NA                 |
| Kabuli_wild_1294100 | NA                                  | Ca_kabuli_denovo | 1294100                 | A/G  | NA                 | NA                            | NA                 |
| Kabuli_wild_1294112 | NA                                  | Ca_kabuli_denovo | 1294112                 | A/T  | NA                 | NA                            | NA                 |
| Kabuli_wild_1294132 | NA                                  | Ca_kabuli_denovo | 1294132                 | C/T  | NA                 | NA                            | NA                 |
| Kabuli_wild_1294150 | NA                                  | Ca_kabuli_denovo | 1294150                 | G/A  | NA                 | NA                            | NA                 |
| Kabuli_wild_1294607 | NA                                  | Ca_kabuli_denovo | 1294607                 | A/G  | NA                 | NA                            | NA                 |
| Kabuli_wild_1295807 | NA                                  | Ca_kabuli_denovo | 1295807                 | C/A  | NA                 | NA                            | NA                 |
| Kabuli_wild_1295816 | NA                                  | Ca_kabuli_denovo | 1295816                 | T/C  | NA                 | NA                            | NA                 |
| Kabuli_wild_1296290 | NA                                  | Ca_kabuli_denovo | 1296290                 | T/C  | NA                 | NA                            | NA                 |
| Kabuli_wild_1296306 | NA                                  | Ca_kabuli_denovo | 1296306                 | A/G  | NA                 | NA                            | NA                 |
| Kabuli_wild_1297120 | NA                                  | Ca_kabuli_denovo | 1297120                 | G/C  | NA                 | NA                            | NA                 |
| Kabuli_wild_1297121 | NA                                  | Ca_kabuli_denovo | 1297121                 | G/C  | NA                 | NA                            | NA                 |
| Kabuli_wild_1297128 | NA                                  | Ca_kabuli_denovo | 1297128                 | A/G  | NA                 | NA                            | NA                 |
| Kabuli_wild_1298021 | NA                                  | Ca_kabuli_denovo | 1298021                 | G/A  | NA                 | NA                            | NA                 |
| Kabuli_wild_1298876 | NA                                  | Ca_kabuli_denovo | 1298876                 | G/T  | NA                 | NA                            | NA                 |
| Kabuli_wild_1299071 | NA                                  | Ca_kabuli_denovo | 1299071                 | C/G  | NA                 | NA                            | NA                 |
| Kabuli_wild_1300246 | NA                                  | Ca_kabuli_denovo | 1300246                 | G/A  | NA                 | NA                            | NA                 |
| Kabuli_wild_1301499 | NA                                  | Ca_kabuli_denovo | 1301499                 | C/T  | NA                 | NA                            | NA                 |
| Kabuli_wild_1301553 | NA                                  | Ca_kabuli_denovo | 1301553                 | G/A  | NA                 | NA                            | NA                 |
| Kabuli_wild_1301978 | NA                                  | Ca_kabuli_denovo | 1301978                 | G/C  | NA                 | NA                            | NA                 |
| Kabuli_wild_1302932 | NA                                  | Ca_kabuli_denovo | 1302932                 | T/G  | NA                 | NA                            | NA                 |
| Kabuli_wild_1303340 | NA                                  | Ca_kabuli_denovo | 1303340                 | T/C  | NA                 | NA                            | NA                 |
| Kabuli_wild_1303446 | NA                                  | Ca_kabuli_denovo | 1303446                 | G/C  | NA                 | NA                            | NA                 |
| Kabuli_wild_1303637 | NA                                  | Ca_kabuli_denovo | 1303637                 | T/G  | NA                 | NA                            | NA                 |
| Kabuli_wild_1303706 | NA                                  | Ca_kabuli_denovo | 1303706                 | T/C  | NA                 | NA                            | NA                 |
| Kabuli_wild_1304356 | NA                                  | Ca_kabuli_denovo | 1304356                 | C/G  | NA                 | NA                            | NA                 |
| Kabuli_wild_1304679 | NA                                  | Ca_kabuli_denovo | 1304679                 | C/T  | NA                 | NA                            | NA                 |
| Kabuli_wild_1306464 | NA                                  | Ca_kabuli_denovo | 1306464                 | T/A  | NA                 | NA                            | NA                 |
| Kabuli_wild_1306479 | NA                                  | Ca_kabuli_denovo | 1306479                 | G/A  | NA                 | NA                            | NA                 |
| Kabuli_wild_1307034 | NA                                  | Ca_kabuli_denovo | 1307034                 | A/T  | NA                 | NA                            | NA                 |
| Kabuli_wild_1307043 | NA                                  | Ca_kabuli_denovo | 1307043                 | G/A  | NA                 | NA                            | NA                 |
| Kabuli_wild_1307193 | NA                                  | Ca_kabuli_denovo | 1307193                 | C/G  | NA                 | NA                            | NA                 |
| Kabuli_wild_1307237 | NA                                  | Ca_kabuli_denovo | 1307237                 | C/G  | NA                 | NA                            | NA                 |
| Kabuli_wild_1307285 | NA                                  | Ca_kabuli_denovo | 1307285                 | C/T  | NA                 | NA                            | NA                 |
| Kabuli_wild_1309982 | NA                                  | Ca_kabuli_denovo | 1309982                 | C/T  | NA                 | NA                            | NA                 |
| Kabuli_wild_1310298 | NA                                  | Ca_kabuli_denovo | 1310298                 | C/G  | NA                 | NA                            | NA                 |



| SNP IDs             | NCBI dbSNP accession IDs (NCBI_SS#) | Chromosomes      | Physical positions (bp) | SNPs | Gene accession IDs | Sequence components of genome | Putative functions |
|---------------------|-------------------------------------|------------------|-------------------------|------|--------------------|-------------------------------|--------------------|
| Kabuli_wild_1310619 | NA                                  | Ca_kabuli_denovo | 1310619                 | G/A  | NA                 | NA                            | NA                 |
| Kabuli_wild_1312803 | NA                                  | Ca_kabuli_denovo | 1312803                 | C/T  | NA                 | NA                            | NA                 |
| Kabuli_wild_1312821 | NA                                  | Ca_kabuli_denovo | 1312821                 | G/T  | NA                 | NA                            | NA                 |
| Kabuli_wild_1315552 | NA                                  | Ca_kabuli_denovo | 1315552                 | A/C  | NA                 | NA                            | NA                 |
| Kabuli_wild_1317244 | NA                                  | Ca_kabuli_denovo | 1317244                 | A/G  | NA                 | NA                            | NA                 |
| Kabuli_wild_1317488 | NA                                  | Ca_kabuli_denovo | 1317488                 | G/T  | NA                 | NA                            | NA                 |
| Kabuli_wild_1317991 | NA                                  | Ca_kabuli_denovo | 1317991                 | A/G  | NA                 | NA                            | NA                 |
| Kabuli_wild_1320797 | NA                                  | Ca_kabuli_denovo | 1320797                 | A/C  | NA                 | NA                            | NA                 |
| Kabuli_wild_1320800 | NA                                  | Ca_kabuli_denovo | 1320800                 | C/T  | NA                 | NA                            | NA                 |
| Kabuli_wild_1320866 | NA                                  | Ca_kabuli_denovo | 1320866                 | C/T  | NA                 | NA                            | NA                 |
| Kabuli_wild_1320881 | NA                                  | Ca_kabuli_denovo | 1320881                 | C/G  | NA                 | NA                            | NA                 |
| Kabuli_wild_1320954 | NA                                  | Ca_kabuli_denovo | 1320954                 | T/C  | NA                 | NA                            | NA                 |
| Kabuli_wild_1320981 | NA                                  | Ca_kabuli_denovo | 1320981                 | A/T  | NA                 | NA                            | NA                 |
| Kabuli_wild_1321511 | NA                                  | Ca_kabuli_denovo | 1321511                 | G/T  | NA                 | NA                            | NA                 |
| Kabuli_wild_1323465 | NA                                  | Ca_kabuli_denovo | 1323465                 | T/C  | NA                 | NA                            | NA                 |
| Kabuli_wild_1325174 | NA                                  | Ca_kabuli_denovo | 1325174                 | C/G  | NA                 | NA                            | NA                 |
| Kabuli_wild_1325177 | NA                                  | Ca_kabuli_denovo | 1325177                 | C/T  | NA                 | NA                            | NA                 |
| Kabuli_wild_1326328 | NA                                  | Ca_kabuli_denovo | 1326328                 | G/A  | NA                 | NA                            | NA                 |
| Kabuli_wild_1326720 | NA                                  | Ca_kabuli_denovo | 1326720                 | G/T  | NA                 | NA                            | NA                 |
| Kabuli_wild_1326723 | NA                                  | Ca_kabuli_denovo | 1326723                 | C/T  | NA                 | NA                            | NA                 |
| Kabuli_wild_1326741 | NA                                  | Ca_kabuli_denovo | 1326741                 | A/G  | NA                 | NA                            | NA                 |
| Kabuli_wild_1326791 | NA                                  | Ca_kabuli_denovo | 1326791                 | G/T  | NA                 | NA                            | NA                 |
| Kabuli_wild_1327911 | NA                                  | Ca_kabuli_denovo | 1327911                 | A/G  | NA                 | NA                            | NA                 |
| Kabuli_wild_1327932 | NA                                  | Ca_kabuli_denovo | 1327932                 | C/G  | NA                 | NA                            | NA                 |
| Kabuli_wild_1328370 | NA                                  | Ca_kabuli_denovo | 1328370                 | T/C  | NA                 | NA                            | NA                 |
| Kabuli_wild_1330139 | NA                                  | Ca_kabuli_denovo | 1330139                 | A/G  | NA                 | NA                            | NA                 |
| Kabuli_wild_1330149 | NA                                  | Ca_kabuli_denovo | 1330149                 | C/G  | NA                 | NA                            | NA                 |
| Kabuli_wild_1330927 | NA                                  | Ca_kabuli_denovo | 1330927                 | A/G  | NA                 | NA                            | NA                 |
| Kabuli_wild_1330998 | NA                                  | Ca_kabuli_denovo | 1330998                 | A/G  | NA                 | NA                            | NA                 |
| Kabuli_wild_1331402 | NA                                  | Ca_kabuli_denovo | 1331402                 | A/G  | NA                 | NA                            | NA                 |
| Kabuli_wild_1331450 | NA                                  | Ca_kabuli_denovo | 1331450                 | G/A  | NA                 | NA                            | NA                 |
| Kabuli_wild_1332276 | NA                                  | Ca_kabuli_denovo | 1332276                 | T/C  | NA                 | NA                            | NA                 |
| Kabuli_wild_1332313 | NA                                  | Ca_kabuli_denovo | 1332313                 | G/C  | NA                 | NA                            | NA                 |
| Kabuli_wild_1333241 | NA                                  | Ca_kabuli_denovo | 1333241                 | A/G  | NA                 | NA                            | NA                 |
| Kabuli_wild_1333268 | NA                                  | Ca_kabuli_denovo | 1333268                 | C/T  | NA                 | NA                            | NA                 |
| Kabuli_wild_1333467 | NA                                  | Ca_kabuli_denovo | 1333467                 | A/G  | NA                 | NA                            | NA                 |
| Kabuli_wild_1335122 | NA                                  | Ca_kabuli_denovo | 1335122                 | A/C  | NA                 | NA                            | NA                 |
| Kabuli_wild_1335124 | NA                                  | Ca_kabuli_denovo | 1335124                 | T/G  | NA                 | NA                            | NA                 |
| Kabuli_wild_1335765 | NA                                  | Ca_kabuli_denovo | 1335765                 | T/C  | NA                 | NA                            | NA                 |
| Kabuli_wild_1335798 | NA                                  | Ca_kabuli_denovo | 1335798                 | G/C  | NA                 | NA                            | NA                 |
| Kabuli_wild_1336248 | NA                                  | Ca_kabuli_denovo | 1336248                 | T/C  | NA                 | NA                            | NA                 |
| Kabuli_wild_1336252 | NA                                  | Ca_kabuli_denovo | 1336252                 | T/C  | NA                 | NA                            | NA                 |
| Kabuli_wild_1337013 | NA                                  | Ca_kabuli_denovo | 1337013                 | C/G  | NA                 | NA                            | NA                 |
| Kabuli_wild_1337226 | NA                                  | Ca_kabuli_denovo | 1337226                 | C/T  | NA                 | NA                            | NA                 |

| SNP IDs                    | NCBI dbSNP accession IDs (NCBI_SS#) | Chromosomes             | Physical positions (bp) | SNPs | Gene accession IDs | Sequence components of genome | Putative functions |
|----------------------------|-------------------------------------|-------------------------|-------------------------|------|--------------------|-------------------------------|--------------------|
| <i>Kabuli_wild_1337238</i> | NA                                  | <i>Ca_kabuli_denovo</i> | 1337238                 | T/G  | NA                 | NA                            | NA                 |
| <i>Kabuli_wild_1338749</i> | NA                                  | <i>Ca_kabuli_denovo</i> | 1338749                 | A/G  | NA                 | NA                            | NA                 |
| <i>Kabuli_wild_1340610</i> | NA                                  | <i>Ca_kabuli_denovo</i> | 1340610                 | T/C  | NA                 | NA                            | NA                 |
| <i>Kabuli_wild_1340622</i> | NA                                  | <i>Ca_kabuli_denovo</i> | 1340622                 | T/C  | NA                 | NA                            | NA                 |
| <i>Kabuli_wild_1340693</i> | NA                                  | <i>Ca_kabuli_denovo</i> | 1340693                 | A/G  | NA                 | NA                            | NA                 |
| <i>Kabuli_wild_1340997</i> | NA                                  | <i>Ca_kabuli_denovo</i> | 1340997                 | A/G  | NA                 | NA                            | NA                 |
| <i>Kabuli_wild_1341051</i> | NA                                  | <i>Ca_kabuli_denovo</i> | 1341051                 | A/C  | NA                 | NA                            | NA                 |
| <i>Kabuli_wild_1341565</i> | NA                                  | <i>Ca_kabuli_denovo</i> | 1341565                 | G/A  | NA                 | NA                            | NA                 |
| <i>Kabuli_wild_1341574</i> | NA                                  | <i>Ca_kabuli_denovo</i> | 1341574                 | G/A  | NA                 | NA                            | NA                 |
| <i>Kabuli_wild_1341583</i> | NA                                  | <i>Ca_kabuli_denovo</i> | 1341583                 | C/T  | NA                 | NA                            | NA                 |
| <i>Kabuli_wild_1342242</i> | NA                                  | <i>Ca_kabuli_denovo</i> | 1342242                 | C/T  | NA                 | NA                            | NA                 |
| <i>Kabuli_wild_1342284</i> | NA                                  | <i>Ca_kabuli_denovo</i> | 1342284                 | A/G  | NA                 | NA                            | NA                 |
| <i>Kabuli_wild_1343276</i> | NA                                  | <i>Ca_kabuli_denovo</i> | 1343276                 | G/A  | NA                 | NA                            | NA                 |
| <i>Kabuli_wild_1347193</i> | NA                                  | <i>Ca_kabuli_denovo</i> | 1347193                 | C/A  | NA                 | NA                            | NA                 |
| <i>Kabuli_wild_1347202</i> | NA                                  | <i>Ca_kabuli_denovo</i> | 1347202                 | A/G  | NA                 | NA                            | NA                 |
| <i>Kabuli_wild_1347903</i> | NA                                  | <i>Ca_kabuli_denovo</i> | 1347903                 | G/T  | NA                 | NA                            | NA                 |
| <i>Kabuli_wild_1347912</i> | NA                                  | <i>Ca_kabuli_denovo</i> | 1347912                 | G/C  | NA                 | NA                            | NA                 |
| <i>Kabuli_wild_1347924</i> | NA                                  | <i>Ca_kabuli_denovo</i> | 1347924                 | A/G  | NA                 | NA                            | NA                 |
| <i>Kabuli_wild_1348082</i> | NA                                  | <i>Ca_kabuli_denovo</i> | 1348082                 | A/G  | NA                 | NA                            | NA                 |
| <i>Kabuli_wild_1349335</i> | NA                                  | <i>Ca_kabuli_denovo</i> | 1349335                 | C/A  | NA                 | NA                            | NA                 |
| <i>Kabuli_wild_1349380</i> | NA                                  | <i>Ca_kabuli_denovo</i> | 1349380                 | C/G  | NA                 | NA                            | NA                 |
| <i>Kabuli_wild_1349487</i> | NA                                  | <i>Ca_kabuli_denovo</i> | 1349487                 | G/T  | NA                 | NA                            | NA                 |
| <i>Kabuli_wild_1350405</i> | NA                                  | <i>Ca_kabuli_denovo</i> | 1350405                 | A/G  | NA                 | NA                            | NA                 |
| <i>Kabuli_wild_1351006</i> | NA                                  | <i>Ca_kabuli_denovo</i> | 1351006                 | T/C  | NA                 | NA                            | NA                 |
| <i>Kabuli_wild_1351867</i> | NA                                  | <i>Ca_kabuli_denovo</i> | 1351867                 | T/C  | NA                 | NA                            | NA                 |
| <i>Kabuli_wild_1351921</i> | NA                                  | <i>Ca_kabuli_denovo</i> | 1351921                 | C/T  | NA                 | NA                            | NA                 |
| <i>Kabuli_wild_1352100</i> | NA                                  | <i>Ca_kabuli_denovo</i> | 1352100                 | C/G  | NA                 | NA                            | NA                 |
| <i>Kabuli_wild_1352112</i> | NA                                  | <i>Ca_kabuli_denovo</i> | 1352112                 | C/T  | NA                 | NA                            | NA                 |
| <i>Kabuli_wild_1352942</i> | NA                                  | <i>Ca_kabuli_denovo</i> | 1352942                 | A/G  | NA                 | NA                            | NA                 |
| <i>Kabuli_wild_1352969</i> | NA                                  | <i>Ca_kabuli_denovo</i> | 1352969                 | T/G  | NA                 | NA                            | NA                 |
| <i>Kabuli_wild_1353031</i> | NA                                  | <i>Ca_kabuli_denovo</i> | 1353031                 | G/T  | NA                 | NA                            | NA                 |
| <i>Kabuli_wild_1353668</i> | NA                                  | <i>Ca_kabuli_denovo</i> | 1353668                 | T/G  | NA                 | NA                            | NA                 |
| <i>Kabuli_wild_1353819</i> | NA                                  | <i>Ca_kabuli_denovo</i> | 1353819                 | T/C  | NA                 | NA                            | NA                 |
| <i>Kabuli_wild_1353849</i> | NA                                  | <i>Ca_kabuli_denovo</i> | 1353849                 | T/G  | NA                 | NA                            | NA                 |
| <i>Kabuli_wild_1354391</i> | NA                                  | <i>Ca_kabuli_denovo</i> | 1354391                 | T/C  | NA                 | NA                            | NA                 |
| <i>Kabuli_wild_1355727</i> | NA                                  | <i>Ca_kabuli_denovo</i> | 1355727                 | A/G  | NA                 | NA                            | NA                 |
| <i>Kabuli_wild_1356048</i> | NA                                  | <i>Ca_kabuli_denovo</i> | 1356048                 | G/T  | NA                 | NA                            | NA                 |
| <i>Kabuli_wild_1356051</i> | NA                                  | <i>Ca_kabuli_denovo</i> | 1356051                 | T/C  | NA                 | NA                            | NA                 |
| <i>Kabuli_wild_1356063</i> | NA                                  | <i>Ca_kabuli_denovo</i> | 1356063                 | T/G  | NA                 | NA                            | NA                 |
| <i>Kabuli_wild_1356421</i> | NA                                  | <i>Ca_kabuli_denovo</i> | 1356421                 | C/G  | NA                 | NA                            | NA                 |
| <i>Kabuli_wild_1356424</i> | NA                                  | <i>Ca_kabuli_denovo</i> | 1356424                 | A/G  | NA                 | NA                            | NA                 |
| <i>Kabuli_wild_1356847</i> | NA                                  | <i>Ca_kabuli_denovo</i> | 1356847                 | T/G  | NA                 | NA                            | NA                 |
| <i>Kabuli_wild_1356855</i> | NA                                  | <i>Ca_kabuli_denovo</i> | 1356855                 | T/C  | NA                 | NA                            | NA                 |
| <i>Kabuli_wild_1358359</i> | NA                                  | <i>Ca_kabuli_denovo</i> | 1358359                 | C/T  | NA                 | NA                            | NA                 |

| SNP IDs             | NCBI dbSNP accession IDs (NCBI_SS#) | Chromosomes      | Physical positions (bp) | SNPs | Gene accession IDs | Sequence components of genome | Putative functions |
|---------------------|-------------------------------------|------------------|-------------------------|------|--------------------|-------------------------------|--------------------|
| Kabuli_wild_1358364 | NA                                  | Ca_kabuli_denovo | 1358364                 | G/A  | NA                 | NA                            | NA                 |
| Kabuli_wild_1358865 | NA                                  | Ca_kabuli_denovo | 1358865                 | G/T  | NA                 | NA                            | NA                 |
| Kabuli_wild_1359043 | NA                                  | Ca_kabuli_denovo | 1359043                 | T/C  | NA                 | NA                            | NA                 |
| Kabuli_wild_1360118 | NA                                  | Ca_kabuli_denovo | 1360118                 | G/C  | NA                 | NA                            | NA                 |
| Kabuli_wild_1360586 | NA                                  | Ca_kabuli_denovo | 1360586                 | G/C  | NA                 | NA                            | NA                 |
| Kabuli_wild_1360821 | NA                                  | Ca_kabuli_denovo | 1360821                 | T/C  | NA                 | NA                            | NA                 |
| Kabuli_wild_1361343 | NA                                  | Ca_kabuli_denovo | 1361343                 | C/G  | NA                 | NA                            | NA                 |
| Kabuli_wild_1361386 | NA                                  | Ca_kabuli_denovo | 1361386                 | T/G  | NA                 | NA                            | NA                 |
| Kabuli_wild_1362247 | NA                                  | Ca_kabuli_denovo | 1362247                 | T/G  | NA                 | NA                            | NA                 |
| Kabuli_wild_1362538 | NA                                  | Ca_kabuli_denovo | 1362538                 | T/C  | NA                 | NA                            | NA                 |
| Kabuli_wild_1363287 | NA                                  | Ca_kabuli_denovo | 1363287                 | G/T  | NA                 | NA                            | NA                 |
| Kabuli_wild_1364278 | NA                                  | Ca_kabuli_denovo | 1364278                 | G/C  | NA                 | NA                            | NA                 |
| Kabuli_wild_1364300 | NA                                  | Ca_kabuli_denovo | 1364300                 | A/G  | NA                 | NA                            | NA                 |
| Kabuli_wild_1365067 | NA                                  | Ca_kabuli_denovo | 1365067                 | G/A  | NA                 | NA                            | NA                 |
| Kabuli_wild_1365070 | NA                                  | Ca_kabuli_denovo | 1365070                 | T/G  | NA                 | NA                            | NA                 |
| Kabuli_wild_1365925 | NA                                  | Ca_kabuli_denovo | 1365925                 | A/G  | NA                 | NA                            | NA                 |
| Kabuli_wild_1366629 | NA                                  | Ca_kabuli_denovo | 1366629                 | C/T  | NA                 | NA                            | NA                 |
| Kabuli_wild_1367145 | NA                                  | Ca_kabuli_denovo | 1367145                 | A/T  | NA                 | NA                            | NA                 |
| Kabuli_wild_1367372 | NA                                  | Ca_kabuli_denovo | 1367372                 | A/G  | NA                 | NA                            | NA                 |
| Kabuli_wild_1367387 | NA                                  | Ca_kabuli_denovo | 1367387                 | C/A  | NA                 | NA                            | NA                 |
| Kabuli_wild_1367766 | NA                                  | Ca_kabuli_denovo | 1367766                 | A/G  | NA                 | NA                            | NA                 |
| Kabuli_wild_1367794 | NA                                  | Ca_kabuli_denovo | 1367794                 | G/A  | NA                 | NA                            | NA                 |
| Kabuli_wild_1369679 | NA                                  | Ca_kabuli_denovo | 1369679                 | G/T  | NA                 | NA                            | NA                 |
| Kabuli_wild_1369983 | NA                                  | Ca_kabuli_denovo | 1369983                 | G/C  | NA                 | NA                            | NA                 |
| Kabuli_wild_1370017 | NA                                  | Ca_kabuli_denovo | 1370017                 | T/A  | NA                 | NA                            | NA                 |
| Kabuli_wild_1370527 | NA                                  | Ca_kabuli_denovo | 1370527                 | C/T  | NA                 | NA                            | NA                 |
| Kabuli_wild_1373649 | NA                                  | Ca_kabuli_denovo | 1373649                 | A/C  | NA                 | NA                            | NA                 |
| Kabuli_wild_1373981 | NA                                  | Ca_kabuli_denovo | 1373981                 | C/A  | NA                 | NA                            | NA                 |
| Kabuli_wild_1374783 | NA                                  | Ca_kabuli_denovo | 1374783                 | T/C  | NA                 | NA                            | NA                 |
| Kabuli_wild_1375166 | NA                                  | Ca_kabuli_denovo | 1375166                 | C/T  | NA                 | NA                            | NA                 |
| Kabuli_wild_1375610 | NA                                  | Ca_kabuli_denovo | 1375610                 | C/T  | NA                 | NA                            | NA                 |
| Kabuli_wild_1375761 | NA                                  | Ca_kabuli_denovo | 1375761                 | T/C  | NA                 | NA                            | NA                 |
| Kabuli_wild_1376115 | NA                                  | Ca_kabuli_denovo | 1376115                 | T/G  | NA                 | NA                            | NA                 |
| Kabuli_wild_1376392 | NA                                  | Ca_kabuli_denovo | 1376392                 | C/T  | NA                 | NA                            | NA                 |
| Kabuli_wild_1376876 | NA                                  | Ca_kabuli_denovo | 1376876                 | T/C  | NA                 | NA                            | NA                 |
| Kabuli_wild_1376915 | NA                                  | Ca_kabuli_denovo | 1376915                 | C/G  | NA                 | NA                            | NA                 |
| Kabuli_wild_1377024 | NA                                  | Ca_kabuli_denovo | 1377024                 | T/C  | NA                 | NA                            | NA                 |
| Kabuli_wild_1377851 | NA                                  | Ca_kabuli_denovo | 1377851                 | T/C  | NA                 | NA                            | NA                 |
| Kabuli_wild_1377944 | NA                                  | Ca_kabuli_denovo | 1377944                 | C/G  | NA                 | NA                            | NA                 |
| Kabuli_wild_1377947 | NA                                  | Ca_kabuli_denovo | 1377947                 | G/C  | NA                 | NA                            | NA                 |
| Kabuli_wild_1379819 | NA                                  | Ca_kabuli_denovo | 1379819                 | A/C  | NA                 | NA                            | NA                 |
| Kabuli_wild_1380154 | NA                                  | Ca_kabuli_denovo | 1380154                 | G/T  | NA                 | NA                            | NA                 |
| Kabuli_wild_1380185 | NA                                  | Ca_kabuli_denovo | 1380185                 | G/C  | NA                 | NA                            | NA                 |
| Kabuli_wild_1380194 | NA                                  | Ca_kabuli_denovo | 1380194                 | G/A  | NA                 | NA                            | NA                 |

| SNP IDs                    | NCBI dbSNP accession IDs (NCBI_SS#) | Chromosomes             | Physical positions (bp) | SNPs | Gene accession IDs | Sequence components of genome | Putative functions |
|----------------------------|-------------------------------------|-------------------------|-------------------------|------|--------------------|-------------------------------|--------------------|
| <i>Kabuli_wild_1381642</i> | NA                                  | <i>Ca_kabuli_denovo</i> | 1381642                 | G/C  | NA                 | NA                            | NA                 |
| <i>Kabuli_wild_1381651</i> | NA                                  | <i>Ca_kabuli_denovo</i> | 1381651                 | T/C  | NA                 | NA                            | NA                 |
| <i>Kabuli_wild_1381840</i> | NA                                  | <i>Ca_kabuli_denovo</i> | 1381840                 | C/T  | NA                 | NA                            | NA                 |
| <i>Kabuli_wild_1382015</i> | NA                                  | <i>Ca_kabuli_denovo</i> | 1382015                 | C/T  | NA                 | NA                            | NA                 |
| <i>Kabuli_wild_1382742</i> | NA                                  | <i>Ca_kabuli_denovo</i> | 1382742                 | G/A  | NA                 | NA                            | NA                 |
| <i>Kabuli_wild_1382748</i> | NA                                  | <i>Ca_kabuli_denovo</i> | 1382748                 | A/C  | NA                 | NA                            | NA                 |
| <i>Kabuli_wild_1384029</i> | NA                                  | <i>Ca_kabuli_denovo</i> | 1384029                 | T/G  | NA                 | NA                            | NA                 |
| <i>Kabuli_wild_1384726</i> | NA                                  | <i>Ca_kabuli_denovo</i> | 1384726                 | T/C  | NA                 | NA                            | NA                 |
| <i>Kabuli_wild_1385536</i> | NA                                  | <i>Ca_kabuli_denovo</i> | 1385536                 | G/C  | NA                 | NA                            | NA                 |
| <i>Kabuli_wild_1387020</i> | NA                                  | <i>Ca_kabuli_denovo</i> | 1387020                 | C/T  | NA                 | NA                            | NA                 |
| <i>Kabuli_wild_1387023</i> | NA                                  | <i>Ca_kabuli_denovo</i> | 1387023                 | C/A  | NA                 | NA                            | NA                 |
| <i>Kabuli_wild_1387643</i> | NA                                  | <i>Ca_kabuli_denovo</i> | 1387643                 | A/G  | NA                 | NA                            | NA                 |
| <i>Kabuli_wild_1387703</i> | NA                                  | <i>Ca_kabuli_denovo</i> | 1387703                 | G/A  | NA                 | NA                            | NA                 |
| <i>Kabuli_wild_1388621</i> | NA                                  | <i>Ca_kabuli_denovo</i> | 1388621                 | A/G  | NA                 | NA                            | NA                 |
| <i>Kabuli_wild_1388661</i> | NA                                  | <i>Ca_kabuli_denovo</i> | 1388661                 | G/A  | NA                 | NA                            | NA                 |
| <i>Kabuli_wild_1388967</i> | NA                                  | <i>Ca_kabuli_denovo</i> | 1388967                 | T/G  | NA                 | NA                            | NA                 |
| <i>Kabuli_wild_1390430</i> | NA                                  | <i>Ca_kabuli_denovo</i> | 1390430                 | G/T  | NA                 | NA                            | NA                 |
| <i>Kabuli_wild_1391024</i> | NA                                  | <i>Ca_kabuli_denovo</i> | 1391024                 | G/A  | NA                 | NA                            | NA                 |
| <i>Kabuli_wild_1391350</i> | NA                                  | <i>Ca_kabuli_denovo</i> | 1391350                 | G/C  | NA                 | NA                            | NA                 |
| <i>Kabuli_wild_1391392</i> | NA                                  | <i>Ca_kabuli_denovo</i> | 1391392                 | T/C  | NA                 | NA                            | NA                 |
| <i>Kabuli_wild_1391615</i> | NA                                  | <i>Ca_kabuli_denovo</i> | 1391615                 | A/T  | NA                 | NA                            | NA                 |
| <i>Kabuli_wild_1392837</i> | NA                                  | <i>Ca_kabuli_denovo</i> | 1392837                 | C/A  | NA                 | NA                            | NA                 |
| <i>Kabuli_wild_1392986</i> | NA                                  | <i>Ca_kabuli_denovo</i> | 1392986                 | G/C  | NA                 | NA                            | NA                 |
| <i>Kabuli_wild_1393248</i> | NA                                  | <i>Ca_kabuli_denovo</i> | 1393248                 | A/C  | NA                 | NA                            | NA                 |
| <i>Kabuli_wild_1393941</i> | NA                                  | <i>Ca_kabuli_denovo</i> | 1393941                 | A/G  | NA                 | NA                            | NA                 |
| <i>Kabuli_wild_1394333</i> | NA                                  | <i>Ca_kabuli_denovo</i> | 1394333                 | A/G  | NA                 | NA                            | NA                 |
| <i>Kabuli_wild_1394334</i> | NA                                  | <i>Ca_kabuli_denovo</i> | 1394334                 | T/C  | NA                 | NA                            | NA                 |
| <i>Kabuli_wild_1396139</i> | NA                                  | <i>Ca_kabuli_denovo</i> | 1396139                 | C/G  | NA                 | NA                            | NA                 |
| <i>Kabuli_wild_1396150</i> | NA                                  | <i>Ca_kabuli_denovo</i> | 1396150                 | T/G  | NA                 | NA                            | NA                 |
| <i>Kabuli_wild_1396151</i> | NA                                  | <i>Ca_kabuli_denovo</i> | 1396151                 | T/C  | NA                 | NA                            | NA                 |
| <i>Kabuli_wild_1396354</i> | NA                                  | <i>Ca_kabuli_denovo</i> | 1396354                 | C/T  | NA                 | NA                            | NA                 |
| <i>Kabuli_wild_1397109</i> | NA                                  | <i>Ca_kabuli_denovo</i> | 1397109                 | A/G  | NA                 | NA                            | NA                 |
| <i>Kabuli_wild_1397467</i> | NA                                  | <i>Ca_kabuli_denovo</i> | 1397467                 | T/G  | NA                 | NA                            | NA                 |
| <i>Kabuli_wild_1397479</i> | NA                                  | <i>Ca_kabuli_denovo</i> | 1397479                 | A/G  | NA                 | NA                            | NA                 |
| <i>Kabuli_wild_1397840</i> | NA                                  | <i>Ca_kabuli_denovo</i> | 1397840                 | C/G  | NA                 | NA                            | NA                 |
| <i>Kabuli_wild_1397858</i> | NA                                  | <i>Ca_kabuli_denovo</i> | 1397858                 | T/C  | NA                 | NA                            | NA                 |
| <i>Kabuli_wild_1400103</i> | NA                                  | <i>Ca_kabuli_denovo</i> | 1400103                 | T/C  | NA                 | NA                            | NA                 |
| <i>Kabuli_wild_1400877</i> | NA                                  | <i>Ca_kabuli_denovo</i> | 1400877                 | A/G  | NA                 | NA                            | NA                 |
| <i>Kabuli_wild_1400880</i> | NA                                  | <i>Ca_kabuli_denovo</i> | 1400880                 | A/G  | NA                 | NA                            | NA                 |
| <i>Kabuli_wild_1401714</i> | NA                                  | <i>Ca_kabuli_denovo</i> | 1401714                 | G/A  | NA                 | NA                            | NA                 |
| <i>Kabuli_wild_1401877</i> | NA                                  | <i>Ca_kabuli_denovo</i> | 1401877                 | G/A  | NA                 | NA                            | NA                 |
| <i>Kabuli_wild_1401879</i> | NA                                  | <i>Ca_kabuli_denovo</i> | 1401879                 | A/G  | NA                 | NA                            | NA                 |
| <i>Kabuli_wild_1401880</i> | NA                                  | <i>Ca_kabuli_denovo</i> | 1401880                 | A/G  | NA                 | NA                            | NA                 |
| <i>Kabuli_wild_1401881</i> | NA                                  | <i>Ca_kabuli_denovo</i> | 1401881                 | G/A  | NA                 | NA                            | NA                 |

| SNP IDs                    | NCBI dbSNP accession IDs (NCBI_SS#) | Chromosomes             | Physical positions (bp) | SNPs | Gene accession IDs | Sequence components of genome | Putative functions |
|----------------------------|-------------------------------------|-------------------------|-------------------------|------|--------------------|-------------------------------|--------------------|
| <i>Kabuli_wild_1401882</i> | NA                                  | <i>Ca_kabuli_denovo</i> | 1401882                 | C/G  | NA                 | NA                            | NA                 |
| <i>Kabuli_wild_1401931</i> | NA                                  | <i>Ca_kabuli_denovo</i> | 1401931                 | C/T  | NA                 | NA                            | NA                 |
| <i>Kabuli_wild_1402391</i> | NA                                  | <i>Ca_kabuli_denovo</i> | 1402391                 | G/A  | NA                 | NA                            | NA                 |
| <i>Kabuli_wild_1402399</i> | NA                                  | <i>Ca_kabuli_denovo</i> | 1402399                 | C/G  | NA                 | NA                            | NA                 |
| <i>Kabuli_wild_1404327</i> | NA                                  | <i>Ca_kabuli_denovo</i> | 1404327                 | G/A  | NA                 | NA                            | NA                 |
| <i>Kabuli_wild_1404459</i> | NA                                  | <i>Ca_kabuli_denovo</i> | 1404459                 | C/T  | NA                 | NA                            | NA                 |
| <i>Kabuli_wild_1405093</i> | NA                                  | <i>Ca_kabuli_denovo</i> | 1405093                 | T/C  | NA                 | NA                            | NA                 |
| <i>Kabuli_wild_1405120</i> | NA                                  | <i>Ca_kabuli_denovo</i> | 1405120                 | C/T  | NA                 | NA                            | NA                 |
| <i>Kabuli_wild_1405259</i> | NA                                  | <i>Ca_kabuli_denovo</i> | 1405259                 | A/G  | NA                 | NA                            | NA                 |
| <i>Kabuli_wild_1405344</i> | NA                                  | <i>Ca_kabuli_denovo</i> | 1405344                 | G/C  | NA                 | NA                            | NA                 |
| <i>Kabuli_wild_1405448</i> | NA                                  | <i>Ca_kabuli_denovo</i> | 1405448                 | C/T  | NA                 | NA                            | NA                 |
| <i>Kabuli_wild_1405460</i> | NA                                  | <i>Ca_kabuli_denovo</i> | 1405460                 | C/G  | NA                 | NA                            | NA                 |
| <i>Kabuli_wild_1405582</i> | NA                                  | <i>Ca_kabuli_denovo</i> | 1405582                 | C/T  | NA                 | NA                            | NA                 |
| <i>Kabuli_wild_1405591</i> | NA                                  | <i>Ca_kabuli_denovo</i> | 1405591                 | A/G  | NA                 | NA                            | NA                 |
| <i>Kabuli_wild_1408231</i> | NA                                  | <i>Ca_kabuli_denovo</i> | 1408231                 | C/T  | NA                 | NA                            | NA                 |
| <i>Kabuli_wild_1408237</i> | NA                                  | <i>Ca_kabuli_denovo</i> | 1408237                 | T/C  | NA                 | NA                            | NA                 |
| <i>Kabuli_wild_1408409</i> | NA                                  | <i>Ca_kabuli_denovo</i> | 1408409                 | G/A  | NA                 | NA                            | NA                 |
| <i>Kabuli_wild_1408575</i> | NA                                  | <i>Ca_kabuli_denovo</i> | 1408575                 | A/G  | NA                 | NA                            | NA                 |
| <i>Kabuli_wild_1410253</i> | NA                                  | <i>Ca_kabuli_denovo</i> | 1410253                 | G/A  | NA                 | NA                            | NA                 |
| <i>Kabuli_wild_1410822</i> | NA                                  | <i>Ca_kabuli_denovo</i> | 1410822                 | C/T  | NA                 | NA                            | NA                 |
| <i>Kabuli_wild_1411369</i> | NA                                  | <i>Ca_kabuli_denovo</i> | 1411369                 | T/G  | NA                 | NA                            | NA                 |
| <i>Kabuli_wild_1412760</i> | NA                                  | <i>Ca_kabuli_denovo</i> | 1412760                 | A/G  | NA                 | NA                            | NA                 |
| <i>Kabuli_wild_1412765</i> | NA                                  | <i>Ca_kabuli_denovo</i> | 1412765                 | C/G  | NA                 | NA                            | NA                 |
| <i>Kabuli_wild_1412777</i> | NA                                  | <i>Ca_kabuli_denovo</i> | 1412777                 | C/T  | NA                 | NA                            | NA                 |
| <i>Kabuli_wild_1413414</i> | NA                                  | <i>Ca_kabuli_denovo</i> | 1413414                 | C/G  | NA                 | NA                            | NA                 |
| <i>Kabuli_wild_1414232</i> | NA                                  | <i>Ca_kabuli_denovo</i> | 1414232                 | G/C  | NA                 | NA                            | NA                 |
| <i>Kabuli_wild_1414358</i> | NA                                  | <i>Ca_kabuli_denovo</i> | 1414358                 | C/G  | NA                 | NA                            | NA                 |
| <i>Kabuli_wild_1414598</i> | NA                                  | <i>Ca_kabuli_denovo</i> | 1414598                 | C/G  | NA                 | NA                            | NA                 |
| <i>Kabuli_wild_1414630</i> | NA                                  | <i>Ca_kabuli_denovo</i> | 1414630                 | T/A  | NA                 | NA                            | NA                 |
| <i>Kabuli_wild_1414708</i> | NA                                  | <i>Ca_kabuli_denovo</i> | 1414708                 | C/T  | NA                 | NA                            | NA                 |
| <i>Kabuli_wild_1414724</i> | NA                                  | <i>Ca_kabuli_denovo</i> | 1414724                 | T/A  | NA                 | NA                            | NA                 |
| <i>Kabuli_wild_1414803</i> | NA                                  | <i>Ca_kabuli_denovo</i> | 1414803                 | G/C  | NA                 | NA                            | NA                 |
| <i>Kabuli_wild_1415473</i> | NA                                  | <i>Ca_kabuli_denovo</i> | 1415473                 | C/T  | NA                 | NA                            | NA                 |
| <i>Kabuli_wild_1415762</i> | NA                                  | <i>Ca_kabuli_denovo</i> | 1415762                 | A/G  | NA                 | NA                            | NA                 |
| <i>Kabuli_wild_1415812</i> | NA                                  | <i>Ca_kabuli_denovo</i> | 1415812                 | A/T  | NA                 | NA                            | NA                 |
| <i>Kabuli_wild_1416527</i> | NA                                  | <i>Ca_kabuli_denovo</i> | 1416527                 | G/T  | NA                 | NA                            | NA                 |
| <i>Kabuli_wild_1416751</i> | NA                                  | <i>Ca_kabuli_denovo</i> | 1416751                 | G/A  | NA                 | NA                            | NA                 |
| <i>Kabuli_wild_1418155</i> | NA                                  | <i>Ca_kabuli_denovo</i> | 1418155                 | T/C  | NA                 | NA                            | NA                 |
| <i>Kabuli_wild_1420712</i> | NA                                  | <i>Ca_kabuli_denovo</i> | 1420712                 | C/T  | NA                 | NA                            | NA                 |
| <i>Kabuli_wild_1421679</i> | NA                                  | <i>Ca_kabuli_denovo</i> | 1421679                 | C/G  | NA                 | NA                            | NA                 |
| <i>Kabuli_wild_1422273</i> | NA                                  | <i>Ca_kabuli_denovo</i> | 1422273                 | C/T  | NA                 | NA                            | NA                 |
| <i>Kabuli_wild_1422543</i> | NA                                  | <i>Ca_kabuli_denovo</i> | 1422543                 | A/C  | NA                 | NA                            | NA                 |
| <i>Kabuli_wild_1422544</i> | NA                                  | <i>Ca_kabuli_denovo</i> | 1422544                 | C/G  | NA                 | NA                            | NA                 |
| <i>Kabuli_wild_1423022</i> | NA                                  | <i>Ca_kabuli_denovo</i> | 1423022                 | T/C  | NA                 | NA                            | NA                 |

| SNP IDs             | NCBI dbSNP accession IDs (NCBI_SS#) | Chromosomes      | Physical positions (bp) | SNPs | Gene accession IDs | Sequence components of genome | Putative functions |
|---------------------|-------------------------------------|------------------|-------------------------|------|--------------------|-------------------------------|--------------------|
| Kabuli_wild_1423025 | NA                                  | Ca_kabuli_denovo | 1423025                 | C/T  | NA                 | NA                            | NA                 |
| Kabuli_wild_1424191 | NA                                  | Ca_kabuli_denovo | 1424191                 | T/G  | NA                 | NA                            | NA                 |
| Kabuli_wild_1424716 | NA                                  | Ca_kabuli_denovo | 1424716                 | G/C  | NA                 | NA                            | NA                 |
| Kabuli_wild_1424751 | NA                                  | Ca_kabuli_denovo | 1424751                 | G/T  | NA                 | NA                            | NA                 |
| Kabuli_wild_1425888 | NA                                  | Ca_kabuli_denovo | 1425888                 | G/T  | NA                 | NA                            | NA                 |
| Kabuli_wild_1425906 | NA                                  | Ca_kabuli_denovo | 1425906                 | T/C  | NA                 | NA                            | NA                 |
| Kabuli_wild_1426551 | NA                                  | Ca_kabuli_denovo | 1426551                 | C/T  | NA                 | NA                            | NA                 |
| Kabuli_wild_1426560 | NA                                  | Ca_kabuli_denovo | 1426560                 | A/C  | NA                 | NA                            | NA                 |
| Kabuli_wild_1428121 | NA                                  | Ca_kabuli_denovo | 1428121                 | C/T  | NA                 | NA                            | NA                 |
| Kabuli_wild_1428157 | NA                                  | Ca_kabuli_denovo | 1428157                 | T/C  | NA                 | NA                            | NA                 |
| Kabuli_wild_1428276 | NA                                  | Ca_kabuli_denovo | 1428276                 | C/A  | NA                 | NA                            | NA                 |
| Kabuli_wild_1429227 | NA                                  | Ca_kabuli_denovo | 1429227                 | G/T  | NA                 | NA                            | NA                 |
| Kabuli_wild_1430441 | NA                                  | Ca_kabuli_denovo | 1430441                 | G/A  | NA                 | NA                            | NA                 |
| Kabuli_wild_1430528 | NA                                  | Ca_kabuli_denovo | 1430528                 | C/G  | NA                 | NA                            | NA                 |
| Kabuli_wild_1431281 | NA                                  | Ca_kabuli_denovo | 1431281                 | T/C  | NA                 | NA                            | NA                 |
| Kabuli_wild_1431299 | NA                                  | Ca_kabuli_denovo | 1431299                 | A/G  | NA                 | NA                            | NA                 |
| Kabuli_wild_1432155 | NA                                  | Ca_kabuli_denovo | 1432155                 | G/A  | NA                 | NA                            | NA                 |
| Kabuli_wild_1434318 | NA                                  | Ca_kabuli_denovo | 1434318                 | T/C  | NA                 | NA                            | NA                 |
| Kabuli_wild_1434342 | NA                                  | Ca_kabuli_denovo | 1434342                 | T/C  | NA                 | NA                            | NA                 |
| Kabuli_wild_1435177 | NA                                  | Ca_kabuli_denovo | 1435177                 | T/A  | NA                 | NA                            | NA                 |
| Kabuli_wild_1435477 | NA                                  | Ca_kabuli_denovo | 1435477                 | C/G  | NA                 | NA                            | NA                 |
| Kabuli_wild_1436555 | NA                                  | Ca_kabuli_denovo | 1436555                 | T/G  | NA                 | NA                            | NA                 |
| Kabuli_wild_1436558 | NA                                  | Ca_kabuli_denovo | 1436558                 | G/A  | NA                 | NA                            | NA                 |
| Kabuli_wild_1437006 | NA                                  | Ca_kabuli_denovo | 1437006                 | A/C  | NA                 | NA                            | NA                 |
| Kabuli_wild_1437048 | NA                                  | Ca_kabuli_denovo | 1437048                 | G/T  | NA                 | NA                            | NA                 |
| Kabuli_wild_1437551 | NA                                  | Ca_kabuli_denovo | 1437551                 | T/C  | NA                 | NA                            | NA                 |
| Kabuli_wild_1437808 | NA                                  | Ca_kabuli_denovo | 1437808                 | T/C  | NA                 | NA                            | NA                 |
| Kabuli_wild_1438168 | NA                                  | Ca_kabuli_denovo | 1438168                 | T/C  | NA                 | NA                            | NA                 |
| Kabuli_wild_1438503 | NA                                  | Ca_kabuli_denovo | 1438503                 | A/G  | NA                 | NA                            | NA                 |
| Kabuli_wild_1438597 | NA                                  | Ca_kabuli_denovo | 1438597                 | A/T  | NA                 | NA                            | NA                 |
| Kabuli_wild_1439376 | NA                                  | Ca_kabuli_denovo | 1439376                 | G/C  | NA                 | NA                            | NA                 |
| Kabuli_wild_1439622 | NA                                  | Ca_kabuli_denovo | 1439622                 | G/A  | NA                 | NA                            | NA                 |
| Kabuli_wild_1439631 | NA                                  | Ca_kabuli_denovo | 1439631                 | G/A  | NA                 | NA                            | NA                 |
| Kabuli_wild_1439751 | NA                                  | Ca_kabuli_denovo | 1439751                 | T/C  | NA                 | NA                            | NA                 |
| Kabuli_wild_1441684 | NA                                  | Ca_kabuli_denovo | 1441684                 | C/G  | NA                 | NA                            | NA                 |
| Kabuli_wild_1441702 | NA                                  | Ca_kabuli_denovo | 1441702                 | T/C  | NA                 | NA                            | NA                 |
| Kabuli_wild_1443461 | NA                                  | Ca_kabuli_denovo | 1443461                 | G/C  | NA                 | NA                            | NA                 |
| Kabuli_wild_1444208 | NA                                  | Ca_kabuli_denovo | 1444208                 | A/C  | NA                 | NA                            | NA                 |
| Kabuli_wild_1444897 | NA                                  | Ca_kabuli_denovo | 1444897                 | G/A  | NA                 | NA                            | NA                 |
| Kabuli_wild_1444927 | NA                                  | Ca_kabuli_denovo | 1444927                 | A/G  | NA                 | NA                            | NA                 |
| Kabuli_wild_1445963 | NA                                  | Ca_kabuli_denovo | 1445963                 | T/C  | NA                 | NA                            | NA                 |
| Kabuli_wild_1446658 | NA                                  | Ca_kabuli_denovo | 1446658                 | G/A  | NA                 | NA                            | NA                 |
| Kabuli_wild_1448276 | NA                                  | Ca_kabuli_denovo | 1448276                 | C/T  | NA                 | NA                            | NA                 |
| Kabuli_wild_1451198 | NA                                  | Ca_kabuli_denovo | 1451198                 | T/C  | NA                 | NA                            | NA                 |

| SNP IDs             | NCBI dbSNP accession IDs (NCBI_SS#) | Chromosomes      | Physical positions (bp) | SNPs | Gene accession IDs | Sequence components of genome | Putative functions |
|---------------------|-------------------------------------|------------------|-------------------------|------|--------------------|-------------------------------|--------------------|
| Kabuli_wild_1451254 | NA                                  | Ca_kabuli_denovo | 1451254                 | A/C  | NA                 | NA                            | NA                 |
| Kabuli_wild_1451811 | NA                                  | Ca_kabuli_denovo | 1451811                 | T/C  | NA                 | NA                            | NA                 |
| Kabuli_wild_1451972 | NA                                  | Ca_kabuli_denovo | 1451972                 | T/C  | NA                 | NA                            | NA                 |
| Kabuli_wild_1452915 | NA                                  | Ca_kabuli_denovo | 1452915                 | T/C  | NA                 | NA                            | NA                 |
| Kabuli_wild_1453274 | NA                                  | Ca_kabuli_denovo | 1453274                 | A/T  | NA                 | NA                            | NA                 |
| Kabuli_wild_1453465 | NA                                  | Ca_kabuli_denovo | 1453465                 | C/T  | NA                 | NA                            | NA                 |
| Kabuli_wild_1453594 | NA                                  | Ca_kabuli_denovo | 1453594                 | C/A  | NA                 | NA                            | NA                 |
| Kabuli_wild_1453621 | NA                                  | Ca_kabuli_denovo | 1453621                 | G/C  | NA                 | NA                            | NA                 |
| Kabuli_wild_1454476 | NA                                  | Ca_kabuli_denovo | 1454476                 | A/G  | NA                 | NA                            | NA                 |
| Kabuli_wild_1454853 | NA                                  | Ca_kabuli_denovo | 1454853                 | C/T  | NA                 | NA                            | NA                 |
| Kabuli_wild_1455700 | NA                                  | Ca_kabuli_denovo | 1455700                 | C/T  | NA                 | NA                            | NA                 |
| Kabuli_wild_1456218 | NA                                  | Ca_kabuli_denovo | 1456218                 | T/C  | NA                 | NA                            | NA                 |
| Kabuli_wild_1456221 | NA                                  | Ca_kabuli_denovo | 1456221                 | G/A  | NA                 | NA                            | NA                 |
| Kabuli_wild_1457282 | NA                                  | Ca_kabuli_denovo | 1457282                 | G/A  | NA                 | NA                            | NA                 |
| Kabuli_wild_1457360 | NA                                  | Ca_kabuli_denovo | 1457360                 | A/G  | NA                 | NA                            | NA                 |
| Kabuli_wild_1458224 | NA                                  | Ca_kabuli_denovo | 1458224                 | C/G  | NA                 | NA                            | NA                 |
| Kabuli_wild_1458574 | NA                                  | Ca_kabuli_denovo | 1458574                 | C/T  | NA                 | NA                            | NA                 |
| Kabuli_wild_1459456 | NA                                  | Ca_kabuli_denovo | 1459456                 | A/G  | NA                 | NA                            | NA                 |
| Kabuli_wild_1460880 | NA                                  | Ca_kabuli_denovo | 1460880                 | T/G  | NA                 | NA                            | NA                 |
| Kabuli_wild_1462066 | NA                                  | Ca_kabuli_denovo | 1462066                 | C/G  | NA                 | NA                            | NA                 |
| Kabuli_wild_1462111 | NA                                  | Ca_kabuli_denovo | 1462111                 | A/G  | NA                 | NA                            | NA                 |
| Kabuli_wild_1462257 | NA                                  | Ca_kabuli_denovo | 1462257                 | G/A  | NA                 | NA                            | NA                 |
| Kabuli_wild_1462869 | NA                                  | Ca_kabuli_denovo | 1462869                 | A/G  | NA                 | NA                            | NA                 |
| Kabuli_wild_1463326 | NA                                  | Ca_kabuli_denovo | 1463326                 | A/G  | NA                 | NA                            | NA                 |
| Kabuli_wild_1463365 | NA                                  | Ca_kabuli_denovo | 1463365                 | C/T  | NA                 | NA                            | NA                 |
| Kabuli_wild_1463585 | NA                                  | Ca_kabuli_denovo | 1463585                 | G/T  | NA                 | NA                            | NA                 |
| Kabuli_wild_1463591 | NA                                  | Ca_kabuli_denovo | 1463591                 | A/C  | NA                 | NA                            | NA                 |
| Kabuli_wild_1463787 | NA                                  | Ca_kabuli_denovo | 1463787                 | C/T  | NA                 | NA                            | NA                 |
| Kabuli_wild_1464415 | NA                                  | Ca_kabuli_denovo | 1464415                 | T/G  | NA                 | NA                            | NA                 |
| Kabuli_wild_1465049 | NA                                  | Ca_kabuli_denovo | 1465049                 | T/C  | NA                 | NA                            | NA                 |
| Kabuli_wild_1465058 | NA                                  | Ca_kabuli_denovo | 1465058                 | A/G  | NA                 | NA                            | NA                 |
| Kabuli_wild_1465650 | NA                                  | Ca_kabuli_denovo | 1465650                 | T/A  | NA                 | NA                            | NA                 |
| Kabuli_wild_1466460 | NA                                  | Ca_kabuli_denovo | 1466460                 | T/C  | NA                 | NA                            | NA                 |
| Kabuli_wild_1467718 | NA                                  | Ca_kabuli_denovo | 1467718                 | T/A  | NA                 | NA                            | NA                 |
| Kabuli_wild_1467761 | NA                                  | Ca_kabuli_denovo | 1467761                 | C/T  | NA                 | NA                            | NA                 |
| Kabuli_wild_1467773 | NA                                  | Ca_kabuli_denovo | 1467773                 | T/C  | NA                 | NA                            | NA                 |
| Kabuli_wild_1469319 | NA                                  | Ca_kabuli_denovo | 1469319                 | C/T  | NA                 | NA                            | NA                 |
| Kabuli_wild_1469369 | NA                                  | Ca_kabuli_denovo | 1469369                 | C/T  | NA                 | NA                            | NA                 |
| Kabuli_wild_1470875 | NA                                  | Ca_kabuli_denovo | 1470875                 | G/T  | NA                 | NA                            | NA                 |
| Kabuli_wild_1470899 | NA                                  | Ca_kabuli_denovo | 1470899                 | C/G  | NA                 | NA                            | NA                 |
| Kabuli_wild_1470969 | NA                                  | Ca_kabuli_denovo | 1470969                 | G/C  | NA                 | NA                            | NA                 |
| Kabuli_wild_1470988 | NA                                  | Ca_kabuli_denovo | 1470988                 | G/A  | NA                 | NA                            | NA                 |
| Kabuli_wild_1471454 | NA                                  | Ca_kabuli_denovo | 1471454                 | C/T  | NA                 | NA                            | NA                 |
| Kabuli_wild_1471549 | NA                                  | Ca_kabuli_denovo | 1471549                 | A/T  | NA                 | NA                            | NA                 |

| SNP IDs             | NCBI dbSNP accession IDs (NCBI_SS#) | Chromosomes      | Physical positions (bp) | SNPs | Gene accession IDs | Sequence components of genome | Putative functions |
|---------------------|-------------------------------------|------------------|-------------------------|------|--------------------|-------------------------------|--------------------|
| Kabuli_wild_1471592 | NA                                  | Ca_kabuli_denovo | 1471592                 | G/C  | NA                 | NA                            | NA                 |
| Kabuli_wild_1471829 | NA                                  | Ca_kabuli_denovo | 1471829                 | T/G  | NA                 | NA                            | NA                 |
| Kabuli_wild_1471857 | NA                                  | Ca_kabuli_denovo | 1471857                 | C/T  | NA                 | NA                            | NA                 |
| Kabuli_wild_1471997 | NA                                  | Ca_kabuli_denovo | 1471997                 | G/T  | NA                 | NA                            | NA                 |
| Kabuli_wild_1472783 | NA                                  | Ca_kabuli_denovo | 1472783                 | T/G  | NA                 | NA                            | NA                 |
| Kabuli_wild_1473720 | NA                                  | Ca_kabuli_denovo | 1473720                 | A/G  | NA                 | NA                            | NA                 |
| Kabuli_wild_1474261 | NA                                  | Ca_kabuli_denovo | 1474261                 | A/G  | NA                 | NA                            | NA                 |
| Kabuli_wild_1474543 | NA                                  | Ca_kabuli_denovo | 1474543                 | G/C  | NA                 | NA                            | NA                 |
| Kabuli_wild_1474912 | NA                                  | Ca_kabuli_denovo | 1474912                 | T/G  | NA                 | NA                            | NA                 |
| Kabuli_wild_1475445 | NA                                  | Ca_kabuli_denovo | 1475445                 | G/A  | NA                 | NA                            | NA                 |
| Kabuli_wild_1475469 | NA                                  | Ca_kabuli_denovo | 1475469                 | C/T  | NA                 | NA                            | NA                 |
| Kabuli_wild_1476614 | NA                                  | Ca_kabuli_denovo | 1476614                 | G/A  | NA                 | NA                            | NA                 |
| Kabuli_wild_1476656 | NA                                  | Ca_kabuli_denovo | 1476656                 | C/G  | NA                 | NA                            | NA                 |
| Kabuli_wild_1478625 | NA                                  | Ca_kabuli_denovo | 1478625                 | T/G  | NA                 | NA                            | NA                 |
| Kabuli_wild_1478626 | NA                                  | Ca_kabuli_denovo | 1478626                 | C/T  | NA                 | NA                            | NA                 |
| Kabuli_wild_1479407 | NA                                  | Ca_kabuli_denovo | 1479407                 | G/C  | NA                 | NA                            | NA                 |
| Kabuli_wild_1479413 | NA                                  | Ca_kabuli_denovo | 1479413                 | G/A  | NA                 | NA                            | NA                 |
| Kabuli_wild_1479417 | NA                                  | Ca_kabuli_denovo | 1479417                 | G/A  | NA                 | NA                            | NA                 |
| Kabuli_wild_1480674 | NA                                  | Ca_kabuli_denovo | 1480674                 | G/C  | NA                 | NA                            | NA                 |
| Kabuli_wild_1480677 | NA                                  | Ca_kabuli_denovo | 1480677                 | A/G  | NA                 | NA                            | NA                 |
| Kabuli_wild_1480689 | NA                                  | Ca_kabuli_denovo | 1480689                 | A/G  | NA                 | NA                            | NA                 |
| Kabuli_wild_1480716 | NA                                  | Ca_kabuli_denovo | 1480716                 | T/C  | NA                 | NA                            | NA                 |
| Kabuli_wild_1481319 | NA                                  | Ca_kabuli_denovo | 1481319                 | T/C  | NA                 | NA                            | NA                 |
| Kabuli_wild_1481438 | NA                                  | Ca_kabuli_denovo | 1481438                 | G/A  | NA                 | NA                            | NA                 |
| Kabuli_wild_1481461 | NA                                  | Ca_kabuli_denovo | 1481461                 | G/C  | NA                 | NA                            | NA                 |
| Kabuli_wild_1481723 | NA                                  | Ca_kabuli_denovo | 1481723                 | C/T  | NA                 | NA                            | NA                 |
| Kabuli_wild_1481730 | NA                                  | Ca_kabuli_denovo | 1481730                 | G/A  | NA                 | NA                            | NA                 |
| Kabuli_wild_1483056 | NA                                  | Ca_kabuli_denovo | 1483056                 | C/T  | NA                 | NA                            | NA                 |
| Kabuli_wild_1483059 | NA                                  | Ca_kabuli_denovo | 1483059                 | T/C  | NA                 | NA                            | NA                 |
| Kabuli_wild_1484147 | NA                                  | Ca_kabuli_denovo | 1484147                 | T/C  | NA                 | NA                            | NA                 |
| Kabuli_wild_1484580 | NA                                  | Ca_kabuli_denovo | 1484580                 | A/G  | NA                 | NA                            | NA                 |
| Kabuli_wild_1485049 | NA                                  | Ca_kabuli_denovo | 1485049                 | C/G  | NA                 | NA                            | NA                 |
| Kabuli_wild_1485247 | NA                                  | Ca_kabuli_denovo | 1485247                 | C/A  | NA                 | NA                            | NA                 |
| Kabuli_wild_1485628 | NA                                  | Ca_kabuli_denovo | 1485628                 | A/G  | NA                 | NA                            | NA                 |
| Kabuli_wild_1486094 | NA                                  | Ca_kabuli_denovo | 1486094                 | C/T  | NA                 | NA                            | NA                 |
| Kabuli_wild_1487134 | NA                                  | Ca_kabuli_denovo | 1487134                 | T/C  | NA                 | NA                            | NA                 |
| Kabuli_wild_1487818 | NA                                  | Ca_kabuli_denovo | 1487818                 | T/G  | NA                 | NA                            | NA                 |
| Kabuli_wild_1489201 | NA                                  | Ca_kabuli_denovo | 1489201                 | C/T  | NA                 | NA                            | NA                 |
| Kabuli_wild_1489258 | NA                                  | Ca_kabuli_denovo | 1489258                 | C/A  | NA                 | NA                            | NA                 |
| Kabuli_wild_1489429 | NA                                  | Ca_kabuli_denovo | 1489429                 | G/C  | NA                 | NA                            | NA                 |
| Kabuli_wild_1489441 | NA                                  | Ca_kabuli_denovo | 1489441                 | C/A  | NA                 | NA                            | NA                 |
| Kabuli_wild_1489563 | NA                                  | Ca_kabuli_denovo | 1489563                 | C/G  | NA                 | NA                            | NA                 |
| Kabuli_wild_1489895 | NA                                  | Ca_kabuli_denovo | 1489895                 | T/G  | NA                 | NA                            | NA                 |
| Kabuli_wild_1489920 | NA                                  | Ca_kabuli_denovo | 1489920                 | T/G  | NA                 | NA                            | NA                 |



| SNP IDs             | NCBI dbSNP accession IDs (NCBI_SS#) | Chromosomes      | Physical positions (bp) | SNPs | Gene accession IDs | Sequence components of genome | Putative functions |
|---------------------|-------------------------------------|------------------|-------------------------|------|--------------------|-------------------------------|--------------------|
| Kabuli_wild_1490037 | NA                                  | Ca_kabuli_denovo | 1490037                 | T/G  | NA                 | NA                            | NA                 |
| Kabuli_wild_1490923 | NA                                  | Ca_kabuli_denovo | 1490923                 | T/G  | NA                 | NA                            | NA                 |
| Kabuli_wild_1490927 | NA                                  | Ca_kabuli_denovo | 1490927                 | A/G  | NA                 | NA                            | NA                 |
| Kabuli_wild_1491454 | NA                                  | Ca_kabuli_denovo | 1491454                 | C/G  | NA                 | NA                            | NA                 |
| Kabuli_wild_1492397 | NA                                  | Ca_kabuli_denovo | 1492397                 | G/A  | NA                 | NA                            | NA                 |
| Kabuli_wild_1492445 | NA                                  | Ca_kabuli_denovo | 1492445                 | C/T  | NA                 | NA                            | NA                 |
| Kabuli_wild_1492612 | NA                                  | Ca_kabuli_denovo | 1492612                 | C/T  | NA                 | NA                            | NA                 |
| Kabuli_wild_1492658 | NA                                  | Ca_kabuli_denovo | 1492658                 | T/G  | NA                 | NA                            | NA                 |
| Kabuli_wild_1494348 | NA                                  | Ca_kabuli_denovo | 1494348                 | C/G  | NA                 | NA                            | NA                 |
| Kabuli_wild_1494381 | NA                                  | Ca_kabuli_denovo | 1494381                 | T/G  | NA                 | NA                            | NA                 |
| Kabuli_wild_1494705 | NA                                  | Ca_kabuli_denovo | 1494705                 | C/G  | NA                 | NA                            | NA                 |
| Kabuli_wild_1494710 | NA                                  | Ca_kabuli_denovo | 1494710                 | A/G  | NA                 | NA                            | NA                 |
| Kabuli_wild_1495727 | NA                                  | Ca_kabuli_denovo | 1495727                 | T/C  | NA                 | NA                            | NA                 |
| Kabuli_wild_1496621 | NA                                  | Ca_kabuli_denovo | 1496621                 | C/G  | NA                 | NA                            | NA                 |
| Kabuli_wild_1497339 | NA                                  | Ca_kabuli_denovo | 1497339                 | T/C  | NA                 | NA                            | NA                 |
| Kabuli_wild_1497859 | NA                                  | Ca_kabuli_denovo | 1497859                 | T/A  | NA                 | NA                            | NA                 |
| Kabuli_wild_1497861 | NA                                  | Ca_kabuli_denovo | 1497861                 | T/C  | NA                 | NA                            | NA                 |
| Kabuli_wild_1499035 | NA                                  | Ca_kabuli_denovo | 1499035                 | A/G  | NA                 | NA                            | NA                 |
| Kabuli_wild_1499083 | NA                                  | Ca_kabuli_denovo | 1499083                 | C/T  | NA                 | NA                            | NA                 |
| Kabuli_wild_1499089 | NA                                  | Ca_kabuli_denovo | 1499089                 | T/A  | NA                 | NA                            | NA                 |
| Kabuli_wild_1499397 | NA                                  | Ca_kabuli_denovo | 1499397                 | A/G  | NA                 | NA                            | NA                 |
| Kabuli_wild_1499424 | NA                                  | Ca_kabuli_denovo | 1499424                 | T/C  | NA                 | NA                            | NA                 |
| Kabuli_wild_1499486 | NA                                  | Ca_kabuli_denovo | 1499486                 | C/T  | NA                 | NA                            | NA                 |
| Kabuli_wild_1499629 | NA                                  | Ca_kabuli_denovo | 1499629                 | C/A  | NA                 | NA                            | NA                 |
| Kabuli_wild_1500257 | NA                                  | Ca_kabuli_denovo | 1500257                 | T/C  | NA                 | NA                            | NA                 |
| Kabuli_wild_1500636 | NA                                  | Ca_kabuli_denovo | 1500636                 | T/C  | NA                 | NA                            | NA                 |
| Kabuli_wild_1500639 | NA                                  | Ca_kabuli_denovo | 1500639                 | C/G  | NA                 | NA                            | NA                 |
| Kabuli_wild_1501038 | NA                                  | Ca_kabuli_denovo | 1501038                 | T/C  | NA                 | NA                            | NA                 |
| Kabuli_wild_1501047 | NA                                  | Ca_kabuli_denovo | 1501047                 | A/C  | NA                 | NA                            | NA                 |
| Kabuli_wild_1501441 | NA                                  | Ca_kabuli_denovo | 1501441                 | A/C  | NA                 | NA                            | NA                 |
| Kabuli_wild_1501459 | NA                                  | Ca_kabuli_denovo | 1501459                 | C/G  | NA                 | NA                            | NA                 |
| Kabuli_wild_1501714 | NA                                  | Ca_kabuli_denovo | 1501714                 | T/C  | NA                 | NA                            | NA                 |
| Kabuli_wild_1501717 | NA                                  | Ca_kabuli_denovo | 1501717                 | T/G  | NA                 | NA                            | NA                 |
| Kabuli_wild_1502449 | NA                                  | Ca_kabuli_denovo | 1502449                 | T/G  | NA                 | NA                            | NA                 |
| Kabuli_wild_1502996 | NA                                  | Ca_kabuli_denovo | 1502996                 | A/G  | NA                 | NA                            | NA                 |
| Kabuli_wild_1507980 | NA                                  | Ca_kabuli_denovo | 1507980                 | T/G  | NA                 | NA                            | NA                 |
| Kabuli_wild_1508475 | NA                                  | Ca_kabuli_denovo | 1508475                 | T/G  | NA                 | NA                            | NA                 |
| Kabuli_wild_1508504 | NA                                  | Ca_kabuli_denovo | 1508504                 | G/A  | NA                 | NA                            | NA                 |
| Kabuli_wild_1508540 | NA                                  | Ca_kabuli_denovo | 1508540                 | G/A  | NA                 | NA                            | NA                 |
| Kabuli_wild_1509204 | NA                                  | Ca_kabuli_denovo | 1509204                 | G/A  | NA                 | NA                            | NA                 |
| Kabuli_wild_1509258 | NA                                  | Ca_kabuli_denovo | 1509258                 | G/A  | NA                 | NA                            | NA                 |
| Kabuli_wild_1509600 | NA                                  | Ca_kabuli_denovo | 1509600                 | C/T  | NA                 | NA                            | NA                 |
| Kabuli_wild_1509671 | NA                                  | Ca_kabuli_denovo | 1509671                 | C/T  | NA                 | NA                            | NA                 |
| Kabuli_wild_1509763 | NA                                  | Ca_kabuli_denovo | 1509763                 | A/G  | NA                 | NA                            | NA                 |

| SNP IDs             | NCBI dbSNP accession IDs (NCBI_SS#) | Chromosomes      | Physical positions (bp) | SNPs | Gene accession IDs | Sequence components of genome | Putative functions |
|---------------------|-------------------------------------|------------------|-------------------------|------|--------------------|-------------------------------|--------------------|
| Kabuli_wild_1511226 | NA                                  | Ca_kabuli_denovo | 1511226                 | C/G  | NA                 | NA                            | NA                 |
| Kabuli_wild_1511295 | NA                                  | Ca_kabuli_denovo | 1511295                 | C/G  | NA                 | NA                            | NA                 |
| Kabuli_wild_1511665 | NA                                  | Ca_kabuli_denovo | 1511665                 | T/G  | NA                 | NA                            | NA                 |
| Kabuli_wild_1512517 | NA                                  | Ca_kabuli_denovo | 1512517                 | C/T  | NA                 | NA                            | NA                 |
| Kabuli_wild_1512873 | NA                                  | Ca_kabuli_denovo | 1512873                 | G/A  | NA                 | NA                            | NA                 |
| Kabuli_wild_1517039 | NA                                  | Ca_kabuli_denovo | 1517039                 | G/A  | NA                 | NA                            | NA                 |
| Kabuli_wild_1517138 | NA                                  | Ca_kabuli_denovo | 1517138                 | C/G  | NA                 | NA                            | NA                 |
| Kabuli_wild_1517177 | NA                                  | Ca_kabuli_denovo | 1517177                 | A/G  | NA                 | NA                            | NA                 |
| Kabuli_wild_1517520 | NA                                  | Ca_kabuli_denovo | 1517520                 | C/T  | NA                 | NA                            | NA                 |
| Kabuli_wild_1517535 | NA                                  | Ca_kabuli_denovo | 1517535                 | T/C  | NA                 | NA                            | NA                 |
| Kabuli_wild_1517712 | NA                                  | Ca_kabuli_denovo | 1517712                 | A/G  | NA                 | NA                            | NA                 |
| Kabuli_wild_1517769 | NA                                  | Ca_kabuli_denovo | 1517769                 | G/A  | NA                 | NA                            | NA                 |
| Kabuli_wild_1518980 | NA                                  | Ca_kabuli_denovo | 1518980                 | C/T  | NA                 | NA                            | NA                 |
| Kabuli_wild_1519281 | NA                                  | Ca_kabuli_denovo | 1519281                 | T/C  | NA                 | NA                            | NA                 |
| Kabuli_wild_1519311 | NA                                  | Ca_kabuli_denovo | 1519311                 | A/G  | NA                 | NA                            | NA                 |
| Kabuli_wild_1519329 | NA                                  | Ca_kabuli_denovo | 1519329                 | G/A  | NA                 | NA                            | NA                 |
| Kabuli_wild_1519733 | NA                                  | Ca_kabuli_denovo | 1519733                 | A/C  | NA                 | NA                            | NA                 |
| Kabuli_wild_1526364 | NA                                  | Ca_kabuli_denovo | 1526364                 | T/C  | NA                 | NA                            | NA                 |
| Kabuli_wild_1526939 | NA                                  | Ca_kabuli_denovo | 1526939                 | G/A  | NA                 | NA                            | NA                 |
| Kabuli_wild_1526952 | NA                                  | Ca_kabuli_denovo | 1526952                 | G/T  | NA                 | NA                            | NA                 |
| Kabuli_wild_1527247 | NA                                  | Ca_kabuli_denovo | 1527247                 | C/G  | NA                 | NA                            | NA                 |
| Kabuli_wild_1528528 | NA                                  | Ca_kabuli_denovo | 1528528                 | A/G  | NA                 | NA                            | NA                 |
| Kabuli_wild_1528602 | NA                                  | Ca_kabuli_denovo | 1528602                 | G/A  | NA                 | NA                            | NA                 |
| Kabuli_wild_1528652 | NA                                  | Ca_kabuli_denovo | 1528652                 | A/C  | NA                 | NA                            | NA                 |
| Kabuli_wild_1528899 | NA                                  | Ca_kabuli_denovo | 1528899                 | C/T  | NA                 | NA                            | NA                 |
| Kabuli_wild_1528920 | NA                                  | Ca_kabuli_denovo | 1528920                 | A/C  | NA                 | NA                            | NA                 |
| Kabuli_wild_1529325 | NA                                  | Ca_kabuli_denovo | 1529325                 | T/G  | NA                 | NA                            | NA                 |
| Kabuli_wild_1531106 | NA                                  | Ca_kabuli_denovo | 1531106                 | C/A  | NA                 | NA                            | NA                 |
| Kabuli_wild_1531129 | NA                                  | Ca_kabuli_denovo | 1531129                 | A/G  | NA                 | NA                            | NA                 |
| Kabuli_wild_1532344 | NA                                  | Ca_kabuli_denovo | 1532344                 | T/C  | NA                 | NA                            | NA                 |
| Kabuli_wild_1533529 | NA                                  | Ca_kabuli_denovo | 1533529                 | C/T  | NA                 | NA                            | NA                 |
| Kabuli_wild_1534148 | NA                                  | Ca_kabuli_denovo | 1534148                 | G/A  | NA                 | NA                            | NA                 |
| Kabuli_wild_1534163 | NA                                  | Ca_kabuli_denovo | 1534163                 | C/G  | NA                 | NA                            | NA                 |
| Kabuli_wild_1535091 | NA                                  | Ca_kabuli_denovo | 1535091                 | C/T  | NA                 | NA                            | NA                 |
| Kabuli_wild_1535096 | NA                                  | Ca_kabuli_denovo | 1535096                 | C/T  | NA                 | NA                            | NA                 |
| Kabuli_wild_1535190 | NA                                  | Ca_kabuli_denovo | 1535190                 | C/T  | NA                 | NA                            | NA                 |
| Kabuli_wild_1535738 | NA                                  | Ca_kabuli_denovo | 1535738                 | T/C  | NA                 | NA                            | NA                 |
| Kabuli_wild_1536528 | NA                                  | Ca_kabuli_denovo | 1536528                 | G/A  | NA                 | NA                            | NA                 |
| Kabuli_wild_1537185 | NA                                  | Ca_kabuli_denovo | 1537185                 | G/T  | NA                 | NA                            | NA                 |
| Kabuli_wild_1538025 | NA                                  | Ca_kabuli_denovo | 1538025                 | C/G  | NA                 | NA                            | NA                 |
| Kabuli_wild_1538969 | NA                                  | Ca_kabuli_denovo | 1538969                 | C/A  | NA                 | NA                            | NA                 |
| Kabuli_wild_1538995 | NA                                  | Ca_kabuli_denovo | 1538995                 | C/T  | NA                 | NA                            | NA                 |
| Kabuli_wild_1539497 | NA                                  | Ca_kabuli_denovo | 1539497                 | A/G  | NA                 | NA                            | NA                 |
| Kabuli_wild_1539538 | NA                                  | Ca_kabuli_denovo | 1539538                 | C/G  | NA                 | NA                            | NA                 |

| SNP IDs             | NCBI dbSNP accession IDs (NCBI_SS#) | Chromosomes      | Physical positions (bp) | SNPs | Gene accession IDs | Sequence components of genome | Putative functions |
|---------------------|-------------------------------------|------------------|-------------------------|------|--------------------|-------------------------------|--------------------|
| Kabuli_wild_1539565 | NA                                  | Ca_kabuli_denovo | 1539565                 | T/C  | NA                 | NA                            | NA                 |
| Kabuli_wild_1540914 | NA                                  | Ca_kabuli_denovo | 1540914                 | C/T  | NA                 | NA                            | NA                 |
| Kabuli_wild_1540956 | NA                                  | Ca_kabuli_denovo | 1540956                 | C/T  | NA                 | NA                            | NA                 |
| Kabuli_wild_1541187 | NA                                  | Ca_kabuli_denovo | 1541187                 | G/A  | NA                 | NA                            | NA                 |
| Kabuli_wild_1541193 | NA                                  | Ca_kabuli_denovo | 1541193                 | A/G  | NA                 | NA                            | NA                 |
| Kabuli_wild_1542773 | NA                                  | Ca_kabuli_denovo | 1542773                 | T/G  | NA                 | NA                            | NA                 |
| Kabuli_wild_1542938 | NA                                  | Ca_kabuli_denovo | 1542938                 | A/G  | NA                 | NA                            | NA                 |
| Kabuli_wild_1542973 | NA                                  | Ca_kabuli_denovo | 1542973                 | C/A  | NA                 | NA                            | NA                 |
| Kabuli_wild_1543648 | NA                                  | Ca_kabuli_denovo | 1543648                 | C/T  | NA                 | NA                            | NA                 |
| Kabuli_wild_1544797 | NA                                  | Ca_kabuli_denovo | 1544797                 | T/G  | NA                 | NA                            | NA                 |
| Kabuli_wild_1544809 | NA                                  | Ca_kabuli_denovo | 1544809                 | G/C  | NA                 | NA                            | NA                 |
| Kabuli_wild_1544818 | NA                                  | Ca_kabuli_denovo | 1544818                 | T/C  | NA                 | NA                            | NA                 |
| Kabuli_wild_1544824 | NA                                  | Ca_kabuli_denovo | 1544824                 | T/C  | NA                 | NA                            | NA                 |
| Kabuli_wild_1544907 | NA                                  | Ca_kabuli_denovo | 1544907                 | C/T  | NA                 | NA                            | NA                 |
| Kabuli_wild_1545288 | NA                                  | Ca_kabuli_denovo | 1545288                 | G/T  | NA                 | NA                            | NA                 |
| Kabuli_wild_1545289 | NA                                  | Ca_kabuli_denovo | 1545289                 | T/C  | NA                 | NA                            | NA                 |
| Kabuli_wild_1545360 | NA                                  | Ca_kabuli_denovo | 1545360                 | C/G  | NA                 | NA                            | NA                 |
| Kabuli_wild_1547034 | NA                                  | Ca_kabuli_denovo | 1547034                 | G/C  | NA                 | NA                            | NA                 |
| Kabuli_wild_1547205 | NA                                  | Ca_kabuli_denovo | 1547205                 | A/G  | NA                 | NA                            | NA                 |
| Kabuli_wild_1547590 | NA                                  | Ca_kabuli_denovo | 1547590                 | C/T  | NA                 | NA                            | NA                 |
| Kabuli_wild_1547620 | NA                                  | Ca_kabuli_denovo | 1547620                 | T/C  | NA                 | NA                            | NA                 |
| Kabuli_wild_1551479 | NA                                  | Ca_kabuli_denovo | 1551479                 | G/A  | NA                 | NA                            | NA                 |
| Kabuli_wild_1551550 | NA                                  | Ca_kabuli_denovo | 1551550                 | C/G  | NA                 | NA                            | NA                 |
| Kabuli_wild_1552178 | NA                                  | Ca_kabuli_denovo | 1552178                 | A/C  | NA                 | NA                            | NA                 |
| Kabuli_wild_1552558 | NA                                  | Ca_kabuli_denovo | 1552558                 | C/G  | NA                 | NA                            | NA                 |
| Kabuli_wild_1552846 | NA                                  | Ca_kabuli_denovo | 1552846                 | C/T  | NA                 | NA                            | NA                 |
| Kabuli_wild_1553933 | NA                                  | Ca_kabuli_denovo | 1553933                 | C/T  | NA                 | NA                            | NA                 |
| Kabuli_wild_1553963 | NA                                  | Ca_kabuli_denovo | 1553963                 | T/C  | NA                 | NA                            | NA                 |
| Kabuli_wild_1554772 | NA                                  | Ca_kabuli_denovo | 1554772                 | T/C  | NA                 | NA                            | NA                 |
| Kabuli_wild_1554802 | NA                                  | Ca_kabuli_denovo | 1554802                 | G/A  | NA                 | NA                            | NA                 |
| Kabuli_wild_1555639 | NA                                  | Ca_kabuli_denovo | 1555639                 | C/A  | NA                 | NA                            | NA                 |
| Kabuli_wild_1555709 | NA                                  | Ca_kabuli_denovo | 1555709                 | G/A  | NA                 | NA                            | NA                 |
| Kabuli_wild_1556244 | NA                                  | Ca_kabuli_denovo | 1556244                 | C/A  | NA                 | NA                            | NA                 |
| Kabuli_wild_1556443 | NA                                  | Ca_kabuli_denovo | 1556443                 | T/G  | NA                 | NA                            | NA                 |
| Kabuli_wild_1557481 | NA                                  | Ca_kabuli_denovo | 1557481                 | C/A  | NA                 | NA                            | NA                 |
| Kabuli_wild_1557602 | NA                                  | Ca_kabuli_denovo | 1557602                 | G/C  | NA                 | NA                            | NA                 |
| Kabuli_wild_1557629 | NA                                  | Ca_kabuli_denovo | 1557629                 | A/G  | NA                 | NA                            | NA                 |
| Kabuli_wild_1557890 | NA                                  | Ca_kabuli_denovo | 1557890                 | T/G  | NA                 | NA                            | NA                 |
| Kabuli_wild_1560171 | NA                                  | Ca_kabuli_denovo | 1560171                 | T/G  | NA                 | NA                            | NA                 |
| Kabuli_wild_1560324 | NA                                  | Ca_kabuli_denovo | 1560324                 | T/G  | NA                 | NA                            | NA                 |
| Kabuli_wild_1560601 | NA                                  | Ca_kabuli_denovo | 1560601                 | G/C  | NA                 | NA                            | NA                 |
| Kabuli_wild_1560784 | NA                                  | Ca_kabuli_denovo | 1560784                 | G/A  | NA                 | NA                            | NA                 |
| Kabuli_wild_1561090 | NA                                  | Ca_kabuli_denovo | 1561090                 | T/A  | NA                 | NA                            | NA                 |
| Kabuli_wild_1562072 | NA                                  | Ca_kabuli_denovo | 1562072                 | C/T  | NA                 | NA                            | NA                 |

| SNP IDs             | NCBI dbSNP accession IDs (NCBI_SS#) | Chromosomes      | Physical positions (bp) | SNPs | Gene accession IDs | Sequence components of genome | Putative functions |
|---------------------|-------------------------------------|------------------|-------------------------|------|--------------------|-------------------------------|--------------------|
| Kabuli_wild_1562104 | NA                                  | Ca_kabuli_denovo | 1562104                 | A/T  | NA                 | NA                            | NA                 |
| Kabuli_wild_1562231 | NA                                  | Ca_kabuli_denovo | 1562231                 | C/T  | NA                 | NA                            | NA                 |
| Kabuli_wild_1562237 | NA                                  | Ca_kabuli_denovo | 1562237                 | G/A  | NA                 | NA                            | NA                 |
| Kabuli_wild_1562625 | NA                                  | Ca_kabuli_denovo | 1562625                 | T/A  | NA                 | NA                            | NA                 |
| Kabuli_wild_1564155 | NA                                  | Ca_kabuli_denovo | 1564155                 | G/C  | NA                 | NA                            | NA                 |
| Kabuli_wild_1564213 | NA                                  | Ca_kabuli_denovo | 1564213                 | C/A  | NA                 | NA                            | NA                 |
| Kabuli_wild_1564691 | NA                                  | Ca_kabuli_denovo | 1564691                 | A/G  | NA                 | NA                            | NA                 |
| Kabuli_wild_1564866 | NA                                  | Ca_kabuli_denovo | 1564866                 | T/G  | NA                 | NA                            | NA                 |
| Kabuli_wild_1565562 | NA                                  | Ca_kabuli_denovo | 1565562                 | A/C  | NA                 | NA                            | NA                 |
| Kabuli_wild_1566217 | NA                                  | Ca_kabuli_denovo | 1566217                 | C/G  | NA                 | NA                            | NA                 |
| Kabuli_wild_1566507 | NA                                  | Ca_kabuli_denovo | 1566507                 | C/A  | NA                 | NA                            | NA                 |
| Kabuli_wild_1567695 | NA                                  | Ca_kabuli_denovo | 1567695                 | A/C  | NA                 | NA                            | NA                 |
| Kabuli_wild_1568740 | NA                                  | Ca_kabuli_denovo | 1568740                 | G/A  | NA                 | NA                            | NA                 |
| Kabuli_wild_1569524 | NA                                  | Ca_kabuli_denovo | 1569524                 | G/A  | NA                 | NA                            | NA                 |
| Kabuli_wild_1570873 | NA                                  | Ca_kabuli_denovo | 1570873                 | C/T  | NA                 | NA                            | NA                 |
| Kabuli_wild_1574017 | NA                                  | Ca_kabuli_denovo | 1574017                 | C/A  | NA                 | NA                            | NA                 |
| Kabuli_wild_1575090 | NA                                  | Ca_kabuli_denovo | 1575090                 | T/C  | NA                 | NA                            | NA                 |
| Kabuli_wild_1575144 | NA                                  | Ca_kabuli_denovo | 1575144                 | C/A  | NA                 | NA                            | NA                 |
| Kabuli_wild_1575183 | NA                                  | Ca_kabuli_denovo | 1575183                 | C/A  | NA                 | NA                            | NA                 |
| Kabuli_wild_1576163 | NA                                  | Ca_kabuli_denovo | 1576163                 | G/A  | NA                 | NA                            | NA                 |
| Kabuli_wild_1576966 | NA                                  | Ca_kabuli_denovo | 1576966                 | T/G  | NA                 | NA                            | NA                 |
| Kabuli_wild_1577385 | NA                                  | Ca_kabuli_denovo | 1577385                 | G/T  | NA                 | NA                            | NA                 |
| Kabuli_wild_1578823 | NA                                  | Ca_kabuli_denovo | 1578823                 | G/C  | NA                 | NA                            | NA                 |
| Kabuli_wild_1579024 | NA                                  | Ca_kabuli_denovo | 1579024                 | T/A  | NA                 | NA                            | NA                 |
| Kabuli_wild_1579078 | NA                                  | Ca_kabuli_denovo | 1579078                 | G/A  | NA                 | NA                            | NA                 |
| Kabuli_wild_1579522 | NA                                  | Ca_kabuli_denovo | 1579522                 | C/T  | NA                 | NA                            | NA                 |
| Kabuli_wild_1579531 | NA                                  | Ca_kabuli_denovo | 1579531                 | C/T  | NA                 | NA                            | NA                 |
| Kabuli_wild_1580376 | NA                                  | Ca_kabuli_denovo | 1580376                 | T/C  | NA                 | NA                            | NA                 |
| Kabuli_wild_1580385 | NA                                  | Ca_kabuli_denovo | 1580385                 | G/A  | NA                 | NA                            | NA                 |
| Kabuli_wild_1580406 | NA                                  | Ca_kabuli_denovo | 1580406                 | T/C  | NA                 | NA                            | NA                 |
| Kabuli_wild_1580415 | NA                                  | Ca_kabuli_denovo | 1580415                 | A/C  | NA                 | NA                            | NA                 |
| Kabuli_wild_1581054 | NA                                  | Ca_kabuli_denovo | 1581054                 | G/C  | NA                 | NA                            | NA                 |
| Kabuli_wild_1581119 | NA                                  | Ca_kabuli_denovo | 1581119                 | C/G  | NA                 | NA                            | NA                 |
| Kabuli_wild_1581913 | NA                                  | Ca_kabuli_denovo | 1581913                 | A/C  | NA                 | NA                            | NA                 |
| Kabuli_wild_1581915 | NA                                  | Ca_kabuli_denovo | 1581915                 | A/C  | NA                 | NA                            | NA                 |
| Kabuli_wild_1582606 | NA                                  | Ca_kabuli_denovo | 1582606                 | C/G  | NA                 | NA                            | NA                 |
| Kabuli_wild_1583737 | NA                                  | Ca_kabuli_denovo | 1583737                 | A/G  | NA                 | NA                            | NA                 |
| Kabuli_wild_1584186 | NA                                  | Ca_kabuli_denovo | 1584186                 | T/G  | NA                 | NA                            | NA                 |
| Kabuli_wild_1584207 | NA                                  | Ca_kabuli_denovo | 1584207                 | C/T  | NA                 | NA                            | NA                 |
| Kabuli_wild_1584582 | NA                                  | Ca_kabuli_denovo | 1584582                 | T/C  | NA                 | NA                            | NA                 |
| Kabuli_wild_1585035 | NA                                  | Ca_kabuli_denovo | 1585035                 | T/C  | NA                 | NA                            | NA                 |
| Kabuli_wild_1585068 | NA                                  | Ca_kabuli_denovo | 1585068                 | C/T  | NA                 | NA                            | NA                 |
| Kabuli_wild_1586192 | NA                                  | Ca_kabuli_denovo | 1586192                 | C/T  | NA                 | NA                            | NA                 |
| Kabuli_wild_1586219 | NA                                  | Ca_kabuli_denovo | 1586219                 | G/C  | NA                 | NA                            | NA                 |

| SNP IDs             | NCBI dbSNP accession IDs (NCBI_SS#) | Chromosomes      | Physical positions (bp) | SNPs | Gene accession IDs | Sequence components of genome | Putative functions |
|---------------------|-------------------------------------|------------------|-------------------------|------|--------------------|-------------------------------|--------------------|
| Kabuli_wild_1586340 | NA                                  | Ca_kabuli_denovo | 1586340                 | G/A  | NA                 | NA                            | NA                 |
| Kabuli_wild_1587062 | NA                                  | Ca_kabuli_denovo | 1587062                 | G/C  | NA                 | NA                            | NA                 |
| Kabuli_wild_1587265 | NA                                  | Ca_kabuli_denovo | 1587265                 | C/T  | NA                 | NA                            | NA                 |
| Kabuli_wild_1587268 | NA                                  | Ca_kabuli_denovo | 1587268                 | A/G  | NA                 | NA                            | NA                 |
| Kabuli_wild_1587283 | NA                                  | Ca_kabuli_denovo | 1587283                 | T/C  | NA                 | NA                            | NA                 |
| Kabuli_wild_1588889 | NA                                  | Ca_kabuli_denovo | 1588889                 | C/T  | NA                 | NA                            | NA                 |
| Kabuli_wild_1588957 | NA                                  | Ca_kabuli_denovo | 1588957                 | C/T  | NA                 | NA                            | NA                 |
| Kabuli_wild_1588982 | NA                                  | Ca_kabuli_denovo | 1588982                 | C/G  | NA                 | NA                            | NA                 |
| Kabuli_wild_1589418 | NA                                  | Ca_kabuli_denovo | 1589418                 | C/T  | NA                 | NA                            | NA                 |
| Kabuli_wild_1589448 | NA                                  | Ca_kabuli_denovo | 1589448                 | A/T  | NA                 | NA                            | NA                 |
| Kabuli_wild_1589517 | NA                                  | Ca_kabuli_denovo | 1589517                 | T/C  | NA                 | NA                            | NA                 |
| Kabuli_wild_1589862 | NA                                  | Ca_kabuli_denovo | 1589862                 | A/G  | NA                 | NA                            | NA                 |
| Kabuli_wild_1590925 | NA                                  | Ca_kabuli_denovo | 1590925                 | C/T  | NA                 | NA                            | NA                 |
| Kabuli_wild_1591826 | NA                                  | Ca_kabuli_denovo | 1591826                 | C/G  | NA                 | NA                            | NA                 |
| Kabuli_wild_1592282 | NA                                  | Ca_kabuli_denovo | 1592282                 | T/G  | NA                 | NA                            | NA                 |
| Kabuli_wild_1592769 | NA                                  | Ca_kabuli_denovo | 1592769                 | T/C  | NA                 | NA                            | NA                 |
| Kabuli_wild_1593106 | NA                                  | Ca_kabuli_denovo | 1593106                 | T/C  | NA                 | NA                            | NA                 |
| Kabuli_wild_1593540 | NA                                  | Ca_kabuli_denovo | 1593540                 | C/A  | NA                 | NA                            | NA                 |
| Kabuli_wild_1593543 | NA                                  | Ca_kabuli_denovo | 1593543                 | C/G  | NA                 | NA                            | NA                 |
| Kabuli_wild_1595929 | NA                                  | Ca_kabuli_denovo | 1595929                 | G/A  | NA                 | NA                            | NA                 |
| Kabuli_wild_1596276 | NA                                  | Ca_kabuli_denovo | 1596276                 | G/C  | NA                 | NA                            | NA                 |
| Kabuli_wild_1596338 | NA                                  | Ca_kabuli_denovo | 1596338                 | T/C  | NA                 | NA                            | NA                 |
| Kabuli_wild_1596583 | NA                                  | Ca_kabuli_denovo | 1596583                 | C/T  | NA                 | NA                            | NA                 |
| Kabuli_wild_1596598 | NA                                  | Ca_kabuli_denovo | 1596598                 | G/C  | NA                 | NA                            | NA                 |
| Kabuli_wild_1596603 | NA                                  | Ca_kabuli_denovo | 1596603                 | C/T  | NA                 | NA                            | NA                 |
| Kabuli_wild_1596681 | NA                                  | Ca_kabuli_denovo | 1596681                 | G/A  | NA                 | NA                            | NA                 |
| Kabuli_wild_1598814 | NA                                  | Ca_kabuli_denovo | 1598814                 | A/G  | NA                 | NA                            | NA                 |
| Kabuli_wild_1598815 | NA                                  | Ca_kabuli_denovo | 1598815                 | C/A  | NA                 | NA                            | NA                 |
| Kabuli_wild_1600970 | NA                                  | Ca_kabuli_denovo | 1600970                 | A/G  | NA                 | NA                            | NA                 |
| Kabuli_wild_1601189 | NA                                  | Ca_kabuli_denovo | 1601189                 | A/G  | NA                 | NA                            | NA                 |
| Kabuli_wild_1601334 | NA                                  | Ca_kabuli_denovo | 1601334                 | T/G  | NA                 | NA                            | NA                 |
| Kabuli_wild_1602117 | NA                                  | Ca_kabuli_denovo | 1602117                 | C/T  | NA                 | NA                            | NA                 |
| Kabuli_wild_1602176 | NA                                  | Ca_kabuli_denovo | 1602176                 | A/G  | NA                 | NA                            | NA                 |
| Kabuli_wild_1602610 | NA                                  | Ca_kabuli_denovo | 1602610                 | C/G  | NA                 | NA                            | NA                 |
| Kabuli_wild_1602846 | NA                                  | Ca_kabuli_denovo | 1602846                 | G/A  | NA                 | NA                            | NA                 |
| Kabuli_wild_1602902 | NA                                  | Ca_kabuli_denovo | 1602902                 | G/A  | NA                 | NA                            | NA                 |
| Kabuli_wild_1602908 | NA                                  | Ca_kabuli_denovo | 1602908                 | T/C  | NA                 | NA                            | NA                 |
| Kabuli_wild_1603305 | NA                                  | Ca_kabuli_denovo | 1603305                 | T/C  | NA                 | NA                            | NA                 |
| Kabuli_wild_1605313 | NA                                  | Ca_kabuli_denovo | 1605313                 | A/G  | NA                 | NA                            | NA                 |
| Kabuli_wild_1605346 | NA                                  | Ca_kabuli_denovo | 1605346                 | T/C  | NA                 | NA                            | NA                 |
| Kabuli_wild_1605411 | NA                                  | Ca_kabuli_denovo | 1605411                 | C/T  | NA                 | NA                            | NA                 |
| Kabuli_wild_1606081 | NA                                  | Ca_kabuli_denovo | 1606081                 | C/T  | NA                 | NA                            | NA                 |
| Kabuli_wild_1607387 | NA                                  | Ca_kabuli_denovo | 1607387                 | A/G  | NA                 | NA                            | NA                 |
| Kabuli_wild_1607462 | NA                                  | Ca_kabuli_denovo | 1607462                 | C/T  | NA                 | NA                            | NA                 |

| SNP IDs             | NCBI dbSNP accession IDs (NCBI_SS#) | Chromosomes      | Physical positions (bp) | SNPs | Gene accession IDs | Sequence components of genome | Putative functions |
|---------------------|-------------------------------------|------------------|-------------------------|------|--------------------|-------------------------------|--------------------|
| Kabuli_wild_1607542 | NA                                  | Ca_kabuli_denovo | 1607542                 | A/G  | NA                 | NA                            | NA                 |
| Kabuli_wild_1607665 | NA                                  | Ca_kabuli_denovo | 1607665                 | G/T  | NA                 | NA                            | NA                 |
| Kabuli_wild_1608727 | NA                                  | Ca_kabuli_denovo | 1608727                 | G/A  | NA                 | NA                            | NA                 |
| Kabuli_wild_1608938 | NA                                  | Ca_kabuli_denovo | 1608938                 | G/A  | NA                 | NA                            | NA                 |
| Kabuli_wild_1609302 | NA                                  | Ca_kabuli_denovo | 1609302                 | T/C  | NA                 | NA                            | NA                 |
| Kabuli_wild_1609693 | NA                                  | Ca_kabuli_denovo | 1609693                 | G/A  | NA                 | NA                            | NA                 |
| Kabuli_wild_1609781 | NA                                  | Ca_kabuli_denovo | 1609781                 | T/C  | NA                 | NA                            | NA                 |
| Kabuli_wild_1610496 | NA                                  | Ca_kabuli_denovo | 1610496                 | G/A  | NA                 | NA                            | NA                 |
| Kabuli_wild_1611111 | NA                                  | Ca_kabuli_denovo | 1611111                 | C/G  | NA                 | NA                            | NA                 |
| Kabuli_wild_1611131 | NA                                  | Ca_kabuli_denovo | 1611131                 | G/A  | NA                 | NA                            | NA                 |
| Kabuli_wild_1611589 | NA                                  | Ca_kabuli_denovo | 1611589                 | G/T  | NA                 | NA                            | NA                 |
| Kabuli_wild_1612887 | NA                                  | Ca_kabuli_denovo | 1612887                 | C/G  | NA                 | NA                            | NA                 |
| Kabuli_wild_1613116 | NA                                  | Ca_kabuli_denovo | 1613116                 | C/A  | NA                 | NA                            | NA                 |
| Kabuli_wild_1614552 | NA                                  | Ca_kabuli_denovo | 1614552                 | G/A  | NA                 | NA                            | NA                 |
| Kabuli_wild_1614741 | NA                                  | Ca_kabuli_denovo | 1614741                 | A/G  | NA                 | NA                            | NA                 |
| Kabuli_wild_1614938 | NA                                  | Ca_kabuli_denovo | 1614938                 | C/T  | NA                 | NA                            | NA                 |
| Kabuli_wild_1615074 | NA                                  | Ca_kabuli_denovo | 1615074                 | T/C  | NA                 | NA                            | NA                 |
| Kabuli_wild_1615320 | NA                                  | Ca_kabuli_denovo | 1615320                 | C/T  | NA                 | NA                            | NA                 |
| Kabuli_wild_1616999 | NA                                  | Ca_kabuli_denovo | 1616999                 | A/C  | NA                 | NA                            | NA                 |
| Kabuli_wild_1617114 | NA                                  | Ca_kabuli_denovo | 1617114                 | C/T  | NA                 | NA                            | NA                 |
| Kabuli_wild_1617838 | NA                                  | Ca_kabuli_denovo | 1617838                 | T/C  | NA                 | NA                            | NA                 |
| Kabuli_wild_1618473 | NA                                  | Ca_kabuli_denovo | 1618473                 | T/C  | NA                 | NA                            | NA                 |
| Kabuli_wild_1619203 | NA                                  | Ca_kabuli_denovo | 1619203                 | C/T  | NA                 | NA                            | NA                 |
| Kabuli_wild_1619230 | NA                                  | Ca_kabuli_denovo | 1619230                 | C/G  | NA                 | NA                            | NA                 |
| Kabuli_wild_1620721 | NA                                  | Ca_kabuli_denovo | 1620721                 | C/G  | NA                 | NA                            | NA                 |
| Kabuli_wild_1621111 | NA                                  | Ca_kabuli_denovo | 1621111                 | G/T  | NA                 | NA                            | NA                 |
| Kabuli_wild_1621157 | NA                                  | Ca_kabuli_denovo | 1621157                 | C/T  | NA                 | NA                            | NA                 |
| Kabuli_wild_1621422 | NA                                  | Ca_kabuli_denovo | 1621422                 | A/G  | NA                 | NA                            | NA                 |
| Kabuli_wild_1622112 | NA                                  | Ca_kabuli_denovo | 1622112                 | G/T  | NA                 | NA                            | NA                 |
| Kabuli_wild_1623476 | NA                                  | Ca_kabuli_denovo | 1623476                 | A/C  | NA                 | NA                            | NA                 |
| Kabuli_wild_1623829 | NA                                  | Ca_kabuli_denovo | 1623829                 | G/A  | NA                 | NA                            | NA                 |
| Kabuli_wild_1623831 | NA                                  | Ca_kabuli_denovo | 1623831                 | C/T  | NA                 | NA                            | NA                 |
| Kabuli_wild_1623834 | NA                                  | Ca_kabuli_denovo | 1623834                 | G/A  | NA                 | NA                            | NA                 |
| Kabuli_wild_1623871 | NA                                  | Ca_kabuli_denovo | 1623871                 | A/G  | NA                 | NA                            | NA                 |
| Kabuli_wild_1624060 | NA                                  | Ca_kabuli_denovo | 1624060                 | C/T  | NA                 | NA                            | NA                 |
| Kabuli_wild_1624319 | NA                                  | Ca_kabuli_denovo | 1624319                 | C/G  | NA                 | NA                            | NA                 |
| Kabuli_wild_1624668 | NA                                  | Ca_kabuli_denovo | 1624668                 | C/T  | NA                 | NA                            | NA                 |
| Kabuli_wild_1625200 | NA                                  | Ca_kabuli_denovo | 1625200                 | C/G  | NA                 | NA                            | NA                 |
| Kabuli_wild_1626525 | NA                                  | Ca_kabuli_denovo | 1626525                 | T/G  | NA                 | NA                            | NA                 |
| Kabuli_wild_1626945 | NA                                  | Ca_kabuli_denovo | 1626945                 | C/A  | NA                 | NA                            | NA                 |
| Kabuli_wild_1626966 | NA                                  | Ca_kabuli_denovo | 1626966                 | C/G  | NA                 | NA                            | NA                 |
| Kabuli_wild_1627915 | NA                                  | Ca_kabuli_denovo | 1627915                 | T/C  | NA                 | NA                            | NA                 |
| Kabuli_wild_1628452 | NA                                  | Ca_kabuli_denovo | 1628452                 | A/T  | NA                 | NA                            | NA                 |
| Kabuli_wild_1628455 | NA                                  | Ca_kabuli_denovo | 1628455                 | G/T  | NA                 | NA                            | NA                 |

| SNP IDs             | NCBI dbSNP accession IDs (NCBI_SS#) | Chromosomes      | Physical positions (bp) | SNPs | Gene accession IDs | Sequence components of genome | Putative functions |
|---------------------|-------------------------------------|------------------|-------------------------|------|--------------------|-------------------------------|--------------------|
| Kabuli_wild_1628458 | NA                                  | Ca_kabuli_denovo | 1628458                 | C/G  | NA                 | NA                            | NA                 |
| Kabuli_wild_1628460 | NA                                  | Ca_kabuli_denovo | 1628460                 | G/C  | NA                 | NA                            | NA                 |
| Kabuli_wild_1628463 | NA                                  | Ca_kabuli_denovo | 1628463                 | T/G  | NA                 | NA                            | NA                 |
| Kabuli_wild_1629638 | NA                                  | Ca_kabuli_denovo | 1629638                 | A/C  | NA                 | NA                            | NA                 |
| Kabuli_wild_1630457 | NA                                  | Ca_kabuli_denovo | 1630457                 | G/A  | NA                 | NA                            | NA                 |
| Kabuli_wild_1631619 | NA                                  | Ca_kabuli_denovo | 1631619                 | C/G  | NA                 | NA                            | NA                 |
| Kabuli_wild_1631704 | NA                                  | Ca_kabuli_denovo | 1631704                 | G/A  | NA                 | NA                            | NA                 |
| Kabuli_wild_1632239 | NA                                  | Ca_kabuli_denovo | 1632239                 | T/G  | NA                 | NA                            | NA                 |
| Kabuli_wild_1634443 | NA                                  | Ca_kabuli_denovo | 1634443                 | G/C  | NA                 | NA                            | NA                 |
| Kabuli_wild_1634561 | NA                                  | Ca_kabuli_denovo | 1634561                 | A/C  | NA                 | NA                            | NA                 |
| Kabuli_wild_1635387 | NA                                  | Ca_kabuli_denovo | 1635387                 | A/G  | NA                 | NA                            | NA                 |
| Kabuli_wild_1635399 | NA                                  | Ca_kabuli_denovo | 1635399                 | G/C  | NA                 | NA                            | NA                 |
| Kabuli_wild_1636184 | NA                                  | Ca_kabuli_denovo | 1636184                 | T/C  | NA                 | NA                            | NA                 |
| Kabuli_wild_1636499 | NA                                  | Ca_kabuli_denovo | 1636499                 | A/G  | NA                 | NA                            | NA                 |
| Kabuli_wild_1636538 | NA                                  | Ca_kabuli_denovo | 1636538                 | C/T  | NA                 | NA                            | NA                 |
| Kabuli_wild_1639459 | NA                                  | Ca_kabuli_denovo | 1639459                 | G/C  | NA                 | NA                            | NA                 |
| Kabuli_wild_1639498 | NA                                  | Ca_kabuli_denovo | 1639498                 | A/G  | NA                 | NA                            | NA                 |
| Kabuli_wild_1640264 | NA                                  | Ca_kabuli_denovo | 1640264                 | G/T  | NA                 | NA                            | NA                 |
| Kabuli_wild_1640391 | NA                                  | Ca_kabuli_denovo | 1640391                 | C/G  | NA                 | NA                            | NA                 |
| Kabuli_wild_1641784 | NA                                  | Ca_kabuli_denovo | 1641784                 | C/T  | NA                 | NA                            | NA                 |
| Kabuli_wild_1641990 | NA                                  | Ca_kabuli_denovo | 1641990                 | G/C  | NA                 | NA                            | NA                 |
| Kabuli_wild_1642370 | NA                                  | Ca_kabuli_denovo | 1642370                 | G/C  | NA                 | NA                            | NA                 |
| Kabuli_wild_1642391 | NA                                  | Ca_kabuli_denovo | 1642391                 | C/G  | NA                 | NA                            | NA                 |
| Kabuli_wild_1643082 | NA                                  | Ca_kabuli_denovo | 1643082                 | G/C  | NA                 | NA                            | NA                 |
| Kabuli_wild_1644035 | NA                                  | Ca_kabuli_denovo | 1644035                 | G/A  | NA                 | NA                            | NA                 |
| Kabuli_wild_1644058 | NA                                  | Ca_kabuli_denovo | 1644058                 | C/A  | NA                 | NA                            | NA                 |
| Kabuli_wild_1644379 | NA                                  | Ca_kabuli_denovo | 1644379                 | A/G  | NA                 | NA                            | NA                 |
| Kabuli_wild_1644946 | NA                                  | Ca_kabuli_denovo | 1644946                 | A/G  | NA                 | NA                            | NA                 |
| Kabuli_wild_1644958 | NA                                  | Ca_kabuli_denovo | 1644958                 | G/C  | NA                 | NA                            | NA                 |
| Kabuli_wild_1645084 | NA                                  | Ca_kabuli_denovo | 1645084                 | C/T  | NA                 | NA                            | NA                 |
| Kabuli_wild_1645098 | NA                                  | Ca_kabuli_denovo | 1645098                 | A/G  | NA                 | NA                            | NA                 |
| Kabuli_wild_1645940 | NA                                  | Ca_kabuli_denovo | 1645940                 | A/C  | NA                 | NA                            | NA                 |
| Kabuli_wild_1645997 | NA                                  | Ca_kabuli_denovo | 1645997                 | T/C  | NA                 | NA                            | NA                 |
| Kabuli_wild_1646052 | NA                                  | Ca_kabuli_denovo | 1646052                 | G/T  | NA                 | NA                            | NA                 |
| Kabuli_wild_1646087 | NA                                  | Ca_kabuli_denovo | 1646087                 | C/T  | NA                 | NA                            | NA                 |
| Kabuli_wild_1646631 | NA                                  | Ca_kabuli_denovo | 1646631                 | G/A  | NA                 | NA                            | NA                 |
| Kabuli_wild_1646710 | NA                                  | Ca_kabuli_denovo | 1646710                 | T/G  | NA                 | NA                            | NA                 |
| Kabuli_wild_1647219 | NA                                  | Ca_kabuli_denovo | 1647219                 | T/C  | NA                 | NA                            | NA                 |
| Kabuli_wild_1647360 | NA                                  | Ca_kabuli_denovo | 1647360                 | A/G  | NA                 | NA                            | NA                 |
| Kabuli_wild_1647688 | NA                                  | Ca_kabuli_denovo | 1647688                 | C/A  | NA                 | NA                            | NA                 |
| Kabuli_wild_1647791 | NA                                  | Ca_kabuli_denovo | 1647791                 | G/A  | NA                 | NA                            | NA                 |
| Kabuli_wild_1647850 | NA                                  | Ca_kabuli_denovo | 1647850                 | T/C  | NA                 | NA                            | NA                 |
| Kabuli_wild_1647894 | NA                                  | Ca_kabuli_denovo | 1647894                 | C/T  | NA                 | NA                            | NA                 |
| Kabuli_wild_1647986 | NA                                  | Ca_kabuli_denovo | 1647986                 | G/A  | NA                 | NA                            | NA                 |

| SNP IDs                    | NCBI dbSNP accession IDs (NCBI_SS#) | Chromosomes             | Physical positions (bp) | SNPs | Gene accession IDs | Sequence components of genome | Putative functions |
|----------------------------|-------------------------------------|-------------------------|-------------------------|------|--------------------|-------------------------------|--------------------|
| <i>Kabuli_wild_1648957</i> | NA                                  | <i>Ca_kabuli_denovo</i> | 1648957                 | C/G  | NA                 | NA                            | NA                 |
| <i>Kabuli_wild_1648969</i> | NA                                  | <i>Ca_kabuli_denovo</i> | 1648969                 | C/T  | NA                 | NA                            | NA                 |
| <i>Kabuli_wild_1649875</i> | NA                                  | <i>Ca_kabuli_denovo</i> | 1649875                 | A/G  | NA                 | NA                            | NA                 |
| <i>Kabuli_wild_1651148</i> | NA                                  | <i>Ca_kabuli_denovo</i> | 1651148                 | C/G  | NA                 | NA                            | NA                 |
| <i>Kabuli_wild_1651685</i> | NA                                  | <i>Ca_kabuli_denovo</i> | 1651685                 | A/C  | NA                 | NA                            | NA                 |
| <i>Kabuli_wild_1651687</i> | NA                                  | <i>Ca_kabuli_denovo</i> | 1651687                 | A/G  | NA                 | NA                            | NA                 |
| <i>Kabuli_wild_1652182</i> | NA                                  | <i>Ca_kabuli_denovo</i> | 1652182                 | G/C  | NA                 | NA                            | NA                 |
| <i>Kabuli_wild_1652189</i> | NA                                  | <i>Ca_kabuli_denovo</i> | 1652189                 | G/A  | NA                 | NA                            | NA                 |
| <i>Kabuli_wild_1652614</i> | NA                                  | <i>Ca_kabuli_denovo</i> | 1652614                 | G/A  | NA                 | NA                            | NA                 |
| <i>Kabuli_wild_1652772</i> | NA                                  | <i>Ca_kabuli_denovo</i> | 1652772                 | G/A  | NA                 | NA                            | NA                 |
| <i>Kabuli_wild_1653028</i> | NA                                  | <i>Ca_kabuli_denovo</i> | 1653028                 | T/C  | NA                 | NA                            | NA                 |
| <i>Kabuli_wild_1653049</i> | NA                                  | <i>Ca_kabuli_denovo</i> | 1653049                 | T/C  | NA                 | NA                            | NA                 |
| <i>Kabuli_wild_1653055</i> | NA                                  | <i>Ca_kabuli_denovo</i> | 1653055                 | G/A  | NA                 | NA                            | NA                 |
| <i>Kabuli_wild_1653323</i> | NA                                  | <i>Ca_kabuli_denovo</i> | 1653323                 | G/A  | NA                 | NA                            | NA                 |
| <i>Kabuli_wild_1653371</i> | NA                                  | <i>Ca_kabuli_denovo</i> | 1653371                 | T/C  | NA                 | NA                            | NA                 |
| <i>Kabuli_wild_1653857</i> | NA                                  | <i>Ca_kabuli_denovo</i> | 1653857                 | G/T  | NA                 | NA                            | NA                 |
| <i>Kabuli_wild_1654988</i> | NA                                  | <i>Ca_kabuli_denovo</i> | 1654988                 | C/T  | NA                 | NA                            | NA                 |
| <i>Kabuli_wild_1655741</i> | NA                                  | <i>Ca_kabuli_denovo</i> | 1655741                 | A/G  | NA                 | NA                            | NA                 |
| <i>Kabuli_wild_1655801</i> | NA                                  | <i>Ca_kabuli_denovo</i> | 1655801                 | C/T  | NA                 | NA                            | NA                 |
| <i>Kabuli_wild_1655994</i> | NA                                  | <i>Ca_kabuli_denovo</i> | 1655994                 | T/G  | NA                 | NA                            | NA                 |
| <i>Kabuli_wild_1657525</i> | NA                                  | <i>Ca_kabuli_denovo</i> | 1657525                 | T/C  | NA                 | NA                            | NA                 |
| <i>Kabuli_wild_1658086</i> | NA                                  | <i>Ca_kabuli_denovo</i> | 1658086                 | T/C  | NA                 | NA                            | NA                 |
| <i>Kabuli_wild_1658126</i> | NA                                  | <i>Ca_kabuli_denovo</i> | 1658126                 | G/A  | NA                 | NA                            | NA                 |
| <i>Kabuli_wild_1658928</i> | NA                                  | <i>Ca_kabuli_denovo</i> | 1658928                 | G/A  | NA                 | NA                            | NA                 |
| <i>Kabuli_wild_1659164</i> | NA                                  | <i>Ca_kabuli_denovo</i> | 1659164                 | C/T  | NA                 | NA                            | NA                 |
| <i>Kabuli_wild_1660163</i> | NA                                  | <i>Ca_kabuli_denovo</i> | 1660163                 | A/C  | NA                 | NA                            | NA                 |
| <i>Kabuli_wild_1660695</i> | NA                                  | <i>Ca_kabuli_denovo</i> | 1660695                 | G/A  | NA                 | NA                            | NA                 |
| <i>Kabuli_wild_1660737</i> | NA                                  | <i>Ca_kabuli_denovo</i> | 1660737                 | C/A  | NA                 | NA                            | NA                 |
| <i>Kabuli_wild_1661415</i> | NA                                  | <i>Ca_kabuli_denovo</i> | 1661415                 | A/G  | NA                 | NA                            | NA                 |
| <i>Kabuli_wild_1661417</i> | NA                                  | <i>Ca_kabuli_denovo</i> | 1661417                 | G/A  | NA                 | NA                            | NA                 |
| <i>Kabuli_wild_1661605</i> | NA                                  | <i>Ca_kabuli_denovo</i> | 1661605                 | C/A  | NA                 | NA                            | NA                 |
| <i>Kabuli_wild_1661614</i> | NA                                  | <i>Ca_kabuli_denovo</i> | 1661614                 | T/C  | NA                 | NA                            | NA                 |
| <i>Kabuli_wild_1661774</i> | NA                                  | <i>Ca_kabuli_denovo</i> | 1661774                 | A/G  | NA                 | NA                            | NA                 |
| <i>Kabuli_wild_1661784</i> | NA                                  | <i>Ca_kabuli_denovo</i> | 1661784                 | T/C  | NA                 | NA                            | NA                 |
| <i>Kabuli_wild_1661810</i> | NA                                  | <i>Ca_kabuli_denovo</i> | 1661810                 | A/T  | NA                 | NA                            | NA                 |
| <i>Kabuli_wild_1662163</i> | NA                                  | <i>Ca_kabuli_denovo</i> | 1662163                 | C/A  | NA                 | NA                            | NA                 |
| <i>Kabuli_wild_1662916</i> | NA                                  | <i>Ca_kabuli_denovo</i> | 1662916                 | T/C  | NA                 | NA                            | NA                 |
| <i>Kabuli_wild_1662935</i> | NA                                  | <i>Ca_kabuli_denovo</i> | 1662935                 | A/G  | NA                 | NA                            | NA                 |
| <i>Kabuli_wild_1663424</i> | NA                                  | <i>Ca_kabuli_denovo</i> | 1663424                 | G/A  | NA                 | NA                            | NA                 |
| <i>Kabuli_wild_1663660</i> | NA                                  | <i>Ca_kabuli_denovo</i> | 1663660                 | C/A  | NA                 | NA                            | NA                 |
| <i>Kabuli_wild_1664303</i> | NA                                  | <i>Ca_kabuli_denovo</i> | 1664303                 | A/G  | NA                 | NA                            | NA                 |
| <i>Kabuli_wild_1664318</i> | NA                                  | <i>Ca_kabuli_denovo</i> | 1664318                 | C/T  | NA                 | NA                            | NA                 |
| <i>Kabuli_wild_1664397</i> | NA                                  | <i>Ca_kabuli_denovo</i> | 1664397                 | C/T  | NA                 | NA                            | NA                 |
| <i>Kabuli_wild_1665094</i> | NA                                  | <i>Ca_kabuli_denovo</i> | 1665094                 | G/A  | NA                 | NA                            | NA                 |



| SNP IDs             | NCBI dbSNP accession IDs (NCBI_SS#) | Chromosomes      | Physical positions (bp) | SNPs | Gene accession IDs | Sequence components of genome | Putative functions |
|---------------------|-------------------------------------|------------------|-------------------------|------|--------------------|-------------------------------|--------------------|
| Kabuli_wild_1665164 | NA                                  | Ca_kabuli_denovo | 1665164                 | T/C  | NA                 | NA                            | NA                 |
| Kabuli_wild_1665168 | NA                                  | Ca_kabuli_denovo | 1665168                 | A/G  | NA                 | NA                            | NA                 |
| Kabuli_wild_1666053 | NA                                  | Ca_kabuli_denovo | 1666053                 | A/T  | NA                 | NA                            | NA                 |
| Kabuli_wild_1666518 | NA                                  | Ca_kabuli_denovo | 1666518                 | T/C  | NA                 | NA                            | NA                 |
| Kabuli_wild_1666936 | NA                                  | Ca_kabuli_denovo | 1666936                 | G/T  | NA                 | NA                            | NA                 |
| Kabuli_wild_1667012 | NA                                  | Ca_kabuli_denovo | 1667012                 | C/T  | NA                 | NA                            | NA                 |
| Kabuli_wild_1667481 | NA                                  | Ca_kabuli_denovo | 1667481                 | T/G  | NA                 | NA                            | NA                 |
| Kabuli_wild_1667673 | NA                                  | Ca_kabuli_denovo | 1667673                 | T/G  | NA                 | NA                            | NA                 |
| Kabuli_wild_1668173 | NA                                  | Ca_kabuli_denovo | 1668173                 | A/G  | NA                 | NA                            | NA                 |
| Kabuli_wild_1668685 | NA                                  | Ca_kabuli_denovo | 1668685                 | A/G  | NA                 | NA                            | NA                 |
| Kabuli_wild_1669138 | NA                                  | Ca_kabuli_denovo | 1669138                 | G/C  | NA                 | NA                            | NA                 |
| Kabuli_wild_1670030 | NA                                  | Ca_kabuli_denovo | 1670030                 | C/A  | NA                 | NA                            | NA                 |
| Kabuli_wild_1670036 | NA                                  | Ca_kabuli_denovo | 1670036                 | C/T  | NA                 | NA                            | NA                 |
| Kabuli_wild_1670097 | NA                                  | Ca_kabuli_denovo | 1670097                 | A/C  | NA                 | NA                            | NA                 |
| Kabuli_wild_1671045 | NA                                  | Ca_kabuli_denovo | 1671045                 | T/C  | NA                 | NA                            | NA                 |
| Kabuli_wild_1671053 | NA                                  | Ca_kabuli_denovo | 1671053                 | C/G  | NA                 | NA                            | NA                 |
| Kabuli_wild_1671750 | NA                                  | Ca_kabuli_denovo | 1671750                 | C/T  | NA                 | NA                            | NA                 |
| Kabuli_wild_1672532 | NA                                  | Ca_kabuli_denovo | 1672532                 | G/A  | NA                 | NA                            | NA                 |
| Kabuli_wild_1672580 | NA                                  | Ca_kabuli_denovo | 1672580                 | A/G  | NA                 | NA                            | NA                 |
| Kabuli_wild_1674024 | NA                                  | Ca_kabuli_denovo | 1674024                 | T/C  | NA                 | NA                            | NA                 |
| Kabuli_wild_1674199 | NA                                  | Ca_kabuli_denovo | 1674199                 | G/A  | NA                 | NA                            | NA                 |
| Kabuli_wild_1674584 | NA                                  | Ca_kabuli_denovo | 1674584                 | A/G  | NA                 | NA                            | NA                 |
| Kabuli_wild_1674778 | NA                                  | Ca_kabuli_denovo | 1674778                 | C/A  | NA                 | NA                            | NA                 |
| Kabuli_wild_1674787 | NA                                  | Ca_kabuli_denovo | 1674787                 | A/G  | NA                 | NA                            | NA                 |
| Kabuli_wild_1675513 | NA                                  | Ca_kabuli_denovo | 1675513                 | A/G  | NA                 | NA                            | NA                 |
| Kabuli_wild_1675515 | NA                                  | Ca_kabuli_denovo | 1675515                 | A/G  | NA                 | NA                            | NA                 |
| Kabuli_wild_1675517 | NA                                  | Ca_kabuli_denovo | 1675517                 | T/A  | NA                 | NA                            | NA                 |
| Kabuli_wild_1676704 | NA                                  | Ca_kabuli_denovo | 1676704                 | G/A  | NA                 | NA                            | NA                 |
| Kabuli_wild_1676734 | NA                                  | Ca_kabuli_denovo | 1676734                 | T/C  | NA                 | NA                            | NA                 |
| Kabuli_wild_1677091 | NA                                  | Ca_kabuli_denovo | 1677091                 | A/G  | NA                 | NA                            | NA                 |
| Kabuli_wild_1677118 | NA                                  | Ca_kabuli_denovo | 1677118                 | G/C  | NA                 | NA                            | NA                 |
| Kabuli_wild_1677308 | NA                                  | Ca_kabuli_denovo | 1677308                 | T/C  | NA                 | NA                            | NA                 |
| Kabuli_wild_1677885 | NA                                  | Ca_kabuli_denovo | 1677885                 | A/G  | NA                 | NA                            | NA                 |
| Kabuli_wild_1677891 | NA                                  | Ca_kabuli_denovo | 1677891                 | C/T  | NA                 | NA                            | NA                 |
| Kabuli_wild_1678447 | NA                                  | Ca_kabuli_denovo | 1678447                 | C/T  | NA                 | NA                            | NA                 |
| Kabuli_wild_1678449 | NA                                  | Ca_kabuli_denovo | 1678449                 | G/C  | NA                 | NA                            | NA                 |
| Kabuli_wild_1678770 | NA                                  | Ca_kabuli_denovo | 1678770                 | G/T  | NA                 | NA                            | NA                 |
| Kabuli_wild_1678797 | NA                                  | Ca_kabuli_denovo | 1678797                 | G/C  | NA                 | NA                            | NA                 |
| Kabuli_wild_1680004 | NA                                  | Ca_kabuli_denovo | 1680004                 | C/G  | NA                 | NA                            | NA                 |
| Kabuli_wild_1680322 | NA                                  | Ca_kabuli_denovo | 1680322                 | C/T  | NA                 | NA                            | NA                 |
| Kabuli_wild_1681003 | NA                                  | Ca_kabuli_denovo | 1681003                 | T/C  | NA                 | NA                            | NA                 |
| Kabuli_wild_1681652 | NA                                  | Ca_kabuli_denovo | 1681652                 | G/C  | NA                 | NA                            | NA                 |
| Kabuli_wild_1682614 | NA                                  | Ca_kabuli_denovo | 1682614                 | G/A  | NA                 | NA                            | NA                 |
| Kabuli_wild_1682968 | NA                                  | Ca_kabuli_denovo | 1682968                 | G/A  | NA                 | NA                            | NA                 |

| SNP IDs             | NCBI dbSNP accession IDs (NCBI_SS#) | Chromosomes      | Physical positions (bp) | SNPs | Gene accession IDs | Sequence components of genome | Putative functions |
|---------------------|-------------------------------------|------------------|-------------------------|------|--------------------|-------------------------------|--------------------|
| Kabuli_wild_1682979 | NA                                  | Ca_kabuli_denovo | 1682979                 | G/A  | NA                 | NA                            | NA                 |
| Kabuli_wild_1683294 | NA                                  | Ca_kabuli_denovo | 1683294                 | G/A  | NA                 | NA                            | NA                 |
| Kabuli_wild_1683325 | NA                                  | Ca_kabuli_denovo | 1683325                 | C/A  | NA                 | NA                            | NA                 |
| Kabuli_wild_1683745 | NA                                  | Ca_kabuli_denovo | 1683745                 | G/A  | NA                 | NA                            | NA                 |
| Kabuli_wild_1684249 | NA                                  | Ca_kabuli_denovo | 1684249                 | G/T  | NA                 | NA                            | NA                 |
| Kabuli_wild_1684323 | NA                                  | Ca_kabuli_denovo | 1684323                 | G/A  | NA                 | NA                            | NA                 |
| Kabuli_wild_1684638 | NA                                  | Ca_kabuli_denovo | 1684638                 | C/G  | NA                 | NA                            | NA                 |
| Kabuli_wild_1684905 | NA                                  | Ca_kabuli_denovo | 1684905                 | G/A  | NA                 | NA                            | NA                 |
| Kabuli_wild_1685601 | NA                                  | Ca_kabuli_denovo | 1685601                 | G/T  | NA                 | NA                            | NA                 |
| Kabuli_wild_1685830 | NA                                  | Ca_kabuli_denovo | 1685830                 | G/T  | NA                 | NA                            | NA                 |
| Kabuli_wild_1685833 | NA                                  | Ca_kabuli_denovo | 1685833                 | G/A  | NA                 | NA                            | NA                 |
| Kabuli_wild_1686157 | NA                                  | Ca_kabuli_denovo | 1686157                 | A/C  | NA                 | NA                            | NA                 |
| Kabuli_wild_1686517 | NA                                  | Ca_kabuli_denovo | 1686517                 | G/C  | NA                 | NA                            | NA                 |
| Kabuli_wild_1686559 | NA                                  | Ca_kabuli_denovo | 1686559                 | A/C  | NA                 | NA                            | NA                 |
| Kabuli_wild_1687185 | NA                                  | Ca_kabuli_denovo | 1687185                 | C/T  | NA                 | NA                            | NA                 |
| Kabuli_wild_1687227 | NA                                  | Ca_kabuli_denovo | 1687227                 | A/G  | NA                 | NA                            | NA                 |
| Kabuli_wild_1688169 | NA                                  | Ca_kabuli_denovo | 1688169                 | C/G  | NA                 | NA                            | NA                 |
| Kabuli_wild_1689009 | NA                                  | Ca_kabuli_denovo | 1689009                 | A/T  | NA                 | NA                            | NA                 |
| Kabuli_wild_1689026 | NA                                  | Ca_kabuli_denovo | 1689026                 | C/G  | NA                 | NA                            | NA                 |
| Kabuli_wild_1689197 | NA                                  | Ca_kabuli_denovo | 1689197                 | A/C  | NA                 | NA                            | NA                 |
| Kabuli_wild_1692416 | NA                                  | Ca_kabuli_denovo | 1692416                 | C/T  | NA                 | NA                            | NA                 |
| Kabuli_wild_1692449 | NA                                  | Ca_kabuli_denovo | 1692449                 | A/C  | NA                 | NA                            | NA                 |
| Kabuli_wild_1693383 | NA                                  | Ca_kabuli_denovo | 1693383                 | G/T  | NA                 | NA                            | NA                 |
| Kabuli_wild_1693421 | NA                                  | Ca_kabuli_denovo | 1693421                 | T/C  | NA                 | NA                            | NA                 |
| Kabuli_wild_1695910 | NA                                  | Ca_kabuli_denovo | 1695910                 | T/C  | NA                 | NA                            | NA                 |
| Kabuli_wild_1695962 | NA                                  | Ca_kabuli_denovo | 1695962                 | G/T  | NA                 | NA                            | NA                 |
| Kabuli_wild_1697880 | NA                                  | Ca_kabuli_denovo | 1697880                 | C/T  | NA                 | NA                            | NA                 |
| Kabuli_wild_1699585 | NA                                  | Ca_kabuli_denovo | 1699585                 | G/C  | NA                 | NA                            | NA                 |
| Kabuli_wild_1699728 | NA                                  | Ca_kabuli_denovo | 1699728                 | T/C  | NA                 | NA                            | NA                 |
| Kabuli_wild_1699737 | NA                                  | Ca_kabuli_denovo | 1699737                 | T/C  | NA                 | NA                            | NA                 |
| Kabuli_wild_1700207 | NA                                  | Ca_kabuli_denovo | 1700207                 | G/C  | NA                 | NA                            | NA                 |
| Kabuli_wild_1701037 | NA                                  | Ca_kabuli_denovo | 1701037                 | G/A  | NA                 | NA                            | NA                 |
| Kabuli_wild_1701511 | NA                                  | Ca_kabuli_denovo | 1701511                 | A/G  | NA                 | NA                            | NA                 |
| Kabuli_wild_1702168 | NA                                  | Ca_kabuli_denovo | 1702168                 | T/G  | NA                 | NA                            | NA                 |
| Kabuli_wild_1703960 | NA                                  | Ca_kabuli_denovo | 1703960                 | C/T  | NA                 | NA                            | NA                 |
| Kabuli_wild_1705757 | NA                                  | Ca_kabuli_denovo | 1705757                 | A/G  | NA                 | NA                            | NA                 |
| Kabuli_wild_1705764 | NA                                  | Ca_kabuli_denovo | 1705764                 | T/A  | NA                 | NA                            | NA                 |
| Kabuli_wild_1706091 | NA                                  | Ca_kabuli_denovo | 1706091                 | C/A  | NA                 | NA                            | NA                 |
| Kabuli_wild_1708027 | NA                                  | Ca_kabuli_denovo | 1708027                 | C/G  | NA                 | NA                            | NA                 |
| Kabuli_wild_1709192 | NA                                  | Ca_kabuli_denovo | 1709192                 | C/T  | NA                 | NA                            | NA                 |
| Kabuli_wild_1709232 | NA                                  | Ca_kabuli_denovo | 1709232                 | A/G  | NA                 | NA                            | NA                 |
| Kabuli_wild_1709692 | NA                                  | Ca_kabuli_denovo | 1709692                 | G/A  | NA                 | NA                            | NA                 |
| Kabuli_wild_1709789 | NA                                  | Ca_kabuli_denovo | 1709789                 | C/T  | NA                 | NA                            | NA                 |
| Kabuli_wild_1711214 | NA                                  | Ca_kabuli_denovo | 1711214                 | T/G  | NA                 | NA                            | NA                 |

| SNP IDs             | NCBI dbSNP accession IDs (NCBI_SS#) | Chromosomes      | Physical positions (bp) | SNPs | Gene accession IDs | Sequence components of genome | Putative functions |
|---------------------|-------------------------------------|------------------|-------------------------|------|--------------------|-------------------------------|--------------------|
| Kabuli_wild_1711346 | NA                                  | Ca_kabuli_denovo | 1711346                 | T/G  | NA                 | NA                            | NA                 |
| Kabuli_wild_1711611 | NA                                  | Ca_kabuli_denovo | 1711611                 | C/G  | NA                 | NA                            | NA                 |
| Kabuli_wild_1712123 | NA                                  | Ca_kabuli_denovo | 1712123                 | C/T  | NA                 | NA                            | NA                 |
| Kabuli_wild_1712126 | NA                                  | Ca_kabuli_denovo | 1712126                 | T/G  | NA                 | NA                            | NA                 |
| Kabuli_wild_1713912 | NA                                  | Ca_kabuli_denovo | 1713912                 | T/G  | NA                 | NA                            | NA                 |
| Kabuli_wild_1713963 | NA                                  | Ca_kabuli_denovo | 1713963                 | G/A  | NA                 | NA                            | NA                 |
| Kabuli_wild_1713971 | NA                                  | Ca_kabuli_denovo | 1713971                 | A/G  | NA                 | NA                            | NA                 |
| Kabuli_wild_1714840 | NA                                  | Ca_kabuli_denovo | 1714840                 | G/T  | NA                 | NA                            | NA                 |
| Kabuli_wild_1714863 | NA                                  | Ca_kabuli_denovo | 1714863                 | A/G  | NA                 | NA                            | NA                 |
| Kabuli_wild_1717179 | NA                                  | Ca_kabuli_denovo | 1717179                 | G/T  | NA                 | NA                            | NA                 |
| Kabuli_wild_1718543 | NA                                  | Ca_kabuli_denovo | 1718543                 | C/G  | NA                 | NA                            | NA                 |
| Kabuli_wild_1718548 | NA                                  | Ca_kabuli_denovo | 1718548                 | C/T  | NA                 | NA                            | NA                 |
| Kabuli_wild_1718761 | NA                                  | Ca_kabuli_denovo | 1718761                 | G/A  | NA                 | NA                            | NA                 |
| Kabuli_wild_1718770 | NA                                  | Ca_kabuli_denovo | 1718770                 | G/C  | NA                 | NA                            | NA                 |
| Kabuli_wild_1719388 | NA                                  | Ca_kabuli_denovo | 1719388                 | C/T  | NA                 | NA                            | NA                 |
| Kabuli_wild_1719400 | NA                                  | Ca_kabuli_denovo | 1719400                 | G/A  | NA                 | NA                            | NA                 |
| Kabuli_wild_1721046 | NA                                  | Ca_kabuli_denovo | 1721046                 | T/G  | NA                 | NA                            | NA                 |
| Kabuli_wild_1721075 | NA                                  | Ca_kabuli_denovo | 1721075                 | G/T  | NA                 | NA                            | NA                 |
| Kabuli_wild_1721109 | NA                                  | Ca_kabuli_denovo | 1721109                 | G/T  | NA                 | NA                            | NA                 |
| Kabuli_wild_1721401 | NA                                  | Ca_kabuli_denovo | 1721401                 | A/C  | NA                 | NA                            | NA                 |
| Kabuli_wild_1721521 | NA                                  | Ca_kabuli_denovo | 1721521                 | T/C  | NA                 | NA                            | NA                 |
| Kabuli_wild_1721558 | NA                                  | Ca_kabuli_denovo | 1721558                 | G/C  | NA                 | NA                            | NA                 |
| Kabuli_wild_1721979 | NA                                  | Ca_kabuli_denovo | 1721979                 | G/T  | NA                 | NA                            | NA                 |
| Kabuli_wild_1723253 | NA                                  | Ca_kabuli_denovo | 1723253                 | G/A  | NA                 | NA                            | NA                 |
| Kabuli_wild_1723432 | NA                                  | Ca_kabuli_denovo | 1723432                 | C/G  | NA                 | NA                            | NA                 |
| Kabuli_wild_1723433 | NA                                  | Ca_kabuli_denovo | 1723433                 | A/C  | NA                 | NA                            | NA                 |
| Kabuli_wild_1723434 | NA                                  | Ca_kabuli_denovo | 1723434                 | G/A  | NA                 | NA                            | NA                 |
| Kabuli_wild_1723436 | NA                                  | Ca_kabuli_denovo | 1723436                 | G/A  | NA                 | NA                            | NA                 |
| Kabuli_wild_1723653 | NA                                  | Ca_kabuli_denovo | 1723653                 | C/T  | NA                 | NA                            | NA                 |
| Kabuli_wild_1723654 | NA                                  | Ca_kabuli_denovo | 1723654                 | G/A  | NA                 | NA                            | NA                 |
| Kabuli_wild_1723833 | NA                                  | Ca_kabuli_denovo | 1723833                 | A/G  | NA                 | NA                            | NA                 |
| Kabuli_wild_1723900 | NA                                  | Ca_kabuli_denovo | 1723900                 | A/C  | NA                 | NA                            | NA                 |
| Kabuli_wild_1724803 | NA                                  | Ca_kabuli_denovo | 1724803                 | T/C  | NA                 | NA                            | NA                 |
| Kabuli_wild_1724836 | NA                                  | Ca_kabuli_denovo | 1724836                 | G/A  | NA                 | NA                            | NA                 |
| Kabuli_wild_1725135 | NA                                  | Ca_kabuli_denovo | 1725135                 | A/G  | NA                 | NA                            | NA                 |
| Kabuli_wild_1725193 | NA                                  | Ca_kabuli_denovo | 1725193                 | T/G  | NA                 | NA                            | NA                 |
| Kabuli_wild_1725223 | NA                                  | Ca_kabuli_denovo | 1725223                 | C/T  | NA                 | NA                            | NA                 |
| Kabuli_wild_1726758 | NA                                  | Ca_kabuli_denovo | 1726758                 | G/A  | NA                 | NA                            | NA                 |
| Kabuli_wild_1726769 | NA                                  | Ca_kabuli_denovo | 1726769                 | A/T  | NA                 | NA                            | NA                 |
| Kabuli_wild_1727837 | NA                                  | Ca_kabuli_denovo | 1727837                 | A/G  | NA                 | NA                            | NA                 |
| Kabuli_wild_1727859 | NA                                  | Ca_kabuli_denovo | 1727859                 | C/T  | NA                 | NA                            | NA                 |
| Kabuli_wild_1729922 | NA                                  | Ca_kabuli_denovo | 1729922                 | C/T  | NA                 | NA                            | NA                 |
| Kabuli_wild_1730825 | NA                                  | Ca_kabuli_denovo | 1730825                 | A/G  | NA                 | NA                            | NA                 |
| Kabuli_wild_1730863 | NA                                  | Ca_kabuli_denovo | 1730863                 | A/C  | NA                 | NA                            | NA                 |

| SNP IDs             | NCBI dbSNP accession IDs (NCBI_SS#) | Chromosomes      | Physical positions (bp) | SNPs | Gene accession IDs | Sequence components of genome | Putative functions |
|---------------------|-------------------------------------|------------------|-------------------------|------|--------------------|-------------------------------|--------------------|
| Kabuli_wild_1732710 | NA                                  | Ca_kabuli_denovo | 1732710                 | C/A  | NA                 | NA                            | NA                 |
| Kabuli_wild_1733590 | NA                                  | Ca_kabuli_denovo | 1733590                 | T/G  | NA                 | NA                            | NA                 |
| Kabuli_wild_1733598 | NA                                  | Ca_kabuli_denovo | 1733598                 | C/T  | NA                 | NA                            | NA                 |
| Kabuli_wild_1734488 | NA                                  | Ca_kabuli_denovo | 1734488                 | G/T  | NA                 | NA                            | NA                 |
| Kabuli_wild_1734492 | NA                                  | Ca_kabuli_denovo | 1734492                 | G/T  | NA                 | NA                            | NA                 |
| Kabuli_wild_1735556 | NA                                  | Ca_kabuli_denovo | 1735556                 | A/G  | NA                 | NA                            | NA                 |
| Kabuli_wild_1735991 | NA                                  | Ca_kabuli_denovo | 1735991                 | G/C  | NA                 | NA                            | NA                 |
| Kabuli_wild_1737299 | NA                                  | Ca_kabuli_denovo | 1737299                 | A/G  | NA                 | NA                            | NA                 |
| Kabuli_wild_1737301 | NA                                  | Ca_kabuli_denovo | 1737301                 | A/G  | NA                 | NA                            | NA                 |
| Kabuli_wild_1737303 | NA                                  | Ca_kabuli_denovo | 1737303                 | T/A  | NA                 | NA                            | NA                 |
| Kabuli_wild_1737304 | NA                                  | Ca_kabuli_denovo | 1737304                 | G/T  | NA                 | NA                            | NA                 |
| Kabuli_wild_1739930 | NA                                  | Ca_kabuli_denovo | 1739930                 | T/A  | NA                 | NA                            | NA                 |
| Kabuli_wild_1740058 | NA                                  | Ca_kabuli_denovo | 1740058                 | C/T  | NA                 | NA                            | NA                 |
| Kabuli_wild_1740555 | NA                                  | Ca_kabuli_denovo | 1740555                 | G/A  | NA                 | NA                            | NA                 |
| Kabuli_wild_1741208 | NA                                  | Ca_kabuli_denovo | 1741208                 | A/G  | NA                 | NA                            | NA                 |
| Kabuli_wild_1741226 | NA                                  | Ca_kabuli_denovo | 1741226                 | T/G  | NA                 | NA                            | NA                 |
| Kabuli_wild_1741232 | NA                                  | Ca_kabuli_denovo | 1741232                 | A/G  | NA                 | NA                            | NA                 |
| Kabuli_wild_1741836 | NA                                  | Ca_kabuli_denovo | 1741836                 | T/C  | NA                 | NA                            | NA                 |
| Kabuli_wild_1742777 | NA                                  | Ca_kabuli_denovo | 1742777                 | A/G  | NA                 | NA                            | NA                 |
| Kabuli_wild_1742856 | NA                                  | Ca_kabuli_denovo | 1742856                 | T/C  | NA                 | NA                            | NA                 |
| Kabuli_wild_1743108 | NA                                  | Ca_kabuli_denovo | 1743108                 | T/C  | NA                 | NA                            | NA                 |
| Kabuli_wild_1743730 | NA                                  | Ca_kabuli_denovo | 1743730                 | C/T  | NA                 | NA                            | NA                 |
| Kabuli_wild_1743971 | NA                                  | Ca_kabuli_denovo | 1743971                 | G/A  | NA                 | NA                            | NA                 |
| Kabuli_wild_1744318 | NA                                  | Ca_kabuli_denovo | 1744318                 | T/C  | NA                 | NA                            | NA                 |
| Kabuli_wild_1745633 | NA                                  | Ca_kabuli_denovo | 1745633                 | T/G  | NA                 | NA                            | NA                 |
| Kabuli_wild_1746344 | NA                                  | Ca_kabuli_denovo | 1746344                 | A/C  | NA                 | NA                            | NA                 |
| Kabuli_wild_1746366 | NA                                  | Ca_kabuli_denovo | 1746366                 | G/C  | NA                 | NA                            | NA                 |
| Kabuli_wild_1747819 | NA                                  | Ca_kabuli_denovo | 1747819                 | T/C  | NA                 | NA                            | NA                 |
| Kabuli_wild_1747866 | NA                                  | Ca_kabuli_denovo | 1747866                 | T/C  | NA                 | NA                            | NA                 |
| Kabuli_wild_1748949 | NA                                  | Ca_kabuli_denovo | 1748949                 | G/T  | NA                 | NA                            | NA                 |
| Kabuli_wild_1749169 | NA                                  | Ca_kabuli_denovo | 1749169                 | A/C  | NA                 | NA                            | NA                 |
| Kabuli_wild_1750051 | NA                                  | Ca_kabuli_denovo | 1750051                 | G/C  | NA                 | NA                            | NA                 |
| Kabuli_wild_1750093 | NA                                  | Ca_kabuli_denovo | 1750093                 | T/C  | NA                 | NA                            | NA                 |
| Kabuli_wild_1751196 | NA                                  | Ca_kabuli_denovo | 1751196                 | T/C  | NA                 | NA                            | NA                 |
| Kabuli_wild_1751266 | NA                                  | Ca_kabuli_denovo | 1751266                 | C/A  | NA                 | NA                            | NA                 |
| Kabuli_wild_1753915 | NA                                  | Ca_kabuli_denovo | 1753915                 | G/A  | NA                 | NA                            | NA                 |
| Kabuli_wild_1753984 | NA                                  | Ca_kabuli_denovo | 1753984                 | C/T  | NA                 | NA                            | NA                 |
| Kabuli_wild_1754202 | NA                                  | Ca_kabuli_denovo | 1754202                 | T/G  | NA                 | NA                            | NA                 |
| Kabuli_wild_1755055 | NA                                  | Ca_kabuli_denovo | 1755055                 | A/G  | NA                 | NA                            | NA                 |
| Kabuli_wild_1755309 | NA                                  | Ca_kabuli_denovo | 1755309                 | G/A  | NA                 | NA                            | NA                 |
| Kabuli_wild_1755726 | NA                                  | Ca_kabuli_denovo | 1755726                 | C/T  | NA                 | NA                            | NA                 |
| Kabuli_wild_1755732 | NA                                  | Ca_kabuli_denovo | 1755732                 | C/G  | NA                 | NA                            | NA                 |
| Kabuli_wild_1756250 | NA                                  | Ca_kabuli_denovo | 1756250                 | C/G  | NA                 | NA                            | NA                 |
| Kabuli_wild_1756254 | NA                                  | Ca_kabuli_denovo | 1756254                 | A/C  | NA                 | NA                            | NA                 |

| SNP IDs             | NCBI dbSNP accession IDs (NCBI_SS#) | Chromosomes      | Physical positions (bp) | SNPs | Gene accession IDs | Sequence components of genome | Putative functions |
|---------------------|-------------------------------------|------------------|-------------------------|------|--------------------|-------------------------------|--------------------|
| Kabuli_wild_1756628 | NA                                  | Ca_kabuli_denovo | 1756628                 | A/G  | NA                 | NA                            | NA                 |
| Kabuli_wild_1758224 | NA                                  | Ca_kabuli_denovo | 1758224                 | T/G  | NA                 | NA                            | NA                 |
| Kabuli_wild_1758248 | NA                                  | Ca_kabuli_denovo | 1758248                 | C/T  | NA                 | NA                            | NA                 |
| Kabuli_wild_1758370 | NA                                  | Ca_kabuli_denovo | 1758370                 | C/T  | NA                 | NA                            | NA                 |
| Kabuli_wild_1758394 | NA                                  | Ca_kabuli_denovo | 1758394                 | T/C  | NA                 | NA                            | NA                 |
| Kabuli_wild_1758897 | NA                                  | Ca_kabuli_denovo | 1758897                 | T/C  | NA                 | NA                            | NA                 |
| Kabuli_wild_1759129 | NA                                  | Ca_kabuli_denovo | 1759129                 | G/T  | NA                 | NA                            | NA                 |
| Kabuli_wild_1759942 | NA                                  | Ca_kabuli_denovo | 1759942                 | T/C  | NA                 | NA                            | NA                 |
| Kabuli_wild_1760033 | NA                                  | Ca_kabuli_denovo | 1760033                 | C/G  | NA                 | NA                            | NA                 |
| Kabuli_wild_1762273 | NA                                  | Ca_kabuli_denovo | 1762273                 | C/A  | NA                 | NA                            | NA                 |
| Kabuli_wild_1762757 | NA                                  | Ca_kabuli_denovo | 1762757                 | G/A  | NA                 | NA                            | NA                 |
| Kabuli_wild_1763705 | NA                                  | Ca_kabuli_denovo | 1763705                 | G/C  | NA                 | NA                            | NA                 |
| Kabuli_wild_1763708 | NA                                  | Ca_kabuli_denovo | 1763708                 | A/G  | NA                 | NA                            | NA                 |
| Kabuli_wild_1765542 | NA                                  | Ca_kabuli_denovo | 1765542                 | A/G  | NA                 | NA                            | NA                 |
| Kabuli_wild_1765672 | NA                                  | Ca_kabuli_denovo | 1765672                 | C/T  | NA                 | NA                            | NA                 |
| Kabuli_wild_1766782 | NA                                  | Ca_kabuli_denovo | 1766782                 | G/C  | NA                 | NA                            | NA                 |
| Kabuli_wild_1766900 | NA                                  | Ca_kabuli_denovo | 1766900                 | C/T  | NA                 | NA                            | NA                 |
| Kabuli_wild_1767870 | NA                                  | Ca_kabuli_denovo | 1767870                 | G/A  | NA                 | NA                            | NA                 |
| Kabuli_wild_1767875 | NA                                  | Ca_kabuli_denovo | 1767875                 | G/C  | NA                 | NA                            | NA                 |
| Kabuli_wild_1768763 | NA                                  | Ca_kabuli_denovo | 1768763                 | C/T  | NA                 | NA                            | NA                 |
| Kabuli_wild_1771962 | NA                                  | Ca_kabuli_denovo | 1771962                 | C/T  | NA                 | NA                            | NA                 |
| Kabuli_wild_1772265 | NA                                  | Ca_kabuli_denovo | 1772265                 | G/C  | NA                 | NA                            | NA                 |
| Kabuli_wild_1772274 | NA                                  | Ca_kabuli_denovo | 1772274                 | C/T  | NA                 | NA                            | NA                 |
| Kabuli_wild_1773031 | NA                                  | Ca_kabuli_denovo | 1773031                 | G/A  | NA                 | NA                            | NA                 |
| Kabuli_wild_1773422 | NA                                  | Ca_kabuli_denovo | 1773422                 | G/T  | NA                 | NA                            | NA                 |
| Kabuli_wild_1774062 | NA                                  | Ca_kabuli_denovo | 1774062                 | A/G  | NA                 | NA                            | NA                 |
| Kabuli_wild_1774420 | NA                                  | Ca_kabuli_denovo | 1774420                 | C/T  | NA                 | NA                            | NA                 |
| Kabuli_wild_1775974 | NA                                  | Ca_kabuli_denovo | 1775974                 | G/A  | NA                 | NA                            | NA                 |
| Kabuli_wild_1776217 | NA                                  | Ca_kabuli_denovo | 1776217                 | A/C  | NA                 | NA                            | NA                 |
| Kabuli_wild_1776997 | NA                                  | Ca_kabuli_denovo | 1776997                 | T/C  | NA                 | NA                            | NA                 |
| Kabuli_wild_1777188 | NA                                  | Ca_kabuli_denovo | 1777188                 | G/A  | NA                 | NA                            | NA                 |
| Kabuli_wild_1777600 | NA                                  | Ca_kabuli_denovo | 1777600                 | A/C  | NA                 | NA                            | NA                 |
| Kabuli_wild_1780535 | NA                                  | Ca_kabuli_denovo | 1780535                 | A/G  | NA                 | NA                            | NA                 |
| Kabuli_wild_1780537 | NA                                  | Ca_kabuli_denovo | 1780537                 | G/A  | NA                 | NA                            | NA                 |
| Kabuli_wild_1780822 | NA                                  | Ca_kabuli_denovo | 1780822                 | C/T  | NA                 | NA                            | NA                 |
| Kabuli_wild_1781657 | NA                                  | Ca_kabuli_denovo | 1781657                 | T/A  | NA                 | NA                            | NA                 |
| Kabuli_wild_1782161 | NA                                  | Ca_kabuli_denovo | 1782161                 | T/C  | NA                 | NA                            | NA                 |
| Kabuli_wild_1783368 | NA                                  | Ca_kabuli_denovo | 1783368                 | C/G  | NA                 | NA                            | NA                 |
| Kabuli_wild_1783411 | NA                                  | Ca_kabuli_denovo | 1783411                 | C/T  | NA                 | NA                            | NA                 |
| Kabuli_wild_1783714 | NA                                  | Ca_kabuli_denovo | 1783714                 | G/C  | NA                 | NA                            | NA                 |
| Kabuli_wild_1784603 | NA                                  | Ca_kabuli_denovo | 1784603                 | G/A  | NA                 | NA                            | NA                 |
| Kabuli_wild_1785046 | NA                                  | Ca_kabuli_denovo | 1785046                 | A/C  | NA                 | NA                            | NA                 |
| Kabuli_wild_1785615 | NA                                  | Ca_kabuli_denovo | 1785615                 | A/C  | NA                 | NA                            | NA                 |
| Kabuli_wild_1786251 | NA                                  | Ca_kabuli_denovo | 1786251                 | G/A  | NA                 | NA                            | NA                 |

| SNP IDs             | NCBI dbSNP accession IDs (NCBI_SS#) | Chromosomes      | Physical positions (bp) | SNPs | Gene accession IDs | Sequence components of genome | Putative functions |
|---------------------|-------------------------------------|------------------|-------------------------|------|--------------------|-------------------------------|--------------------|
| Kabuli_wild_1786272 | NA                                  | Ca_kabuli_denovo | 1786272                 | G/A  | NA                 | NA                            | NA                 |
| Kabuli_wild_1786886 | NA                                  | Ca_kabuli_denovo | 1786886                 | G/A  | NA                 | NA                            | NA                 |
| Kabuli_wild_1786892 | NA                                  | Ca_kabuli_denovo | 1786892                 | G/C  | NA                 | NA                            | NA                 |
| Kabuli_wild_1788156 | NA                                  | Ca_kabuli_denovo | 1788156                 | A/G  | NA                 | NA                            | NA                 |
| Kabuli_wild_1788851 | NA                                  | Ca_kabuli_denovo | 1788851                 | C/T  | NA                 | NA                            | NA                 |
| Kabuli_wild_1788907 | NA                                  | Ca_kabuli_denovo | 1788907                 | G/A  | NA                 | NA                            | NA                 |
| Kabuli_wild_1789831 | NA                                  | Ca_kabuli_denovo | 1789831                 | G/A  | NA                 | NA                            | NA                 |
| Kabuli_wild_1789868 | NA                                  | Ca_kabuli_denovo | 1789868                 | C/T  | NA                 | NA                            | NA                 |
| Kabuli_wild_1790051 | NA                                  | Ca_kabuli_denovo | 1790051                 | G/T  | NA                 | NA                            | NA                 |
| Kabuli_wild_1790061 | NA                                  | Ca_kabuli_denovo | 1790061                 | C/T  | NA                 | NA                            | NA                 |
| Kabuli_wild_1790069 | NA                                  | Ca_kabuli_denovo | 1790069                 | A/T  | NA                 | NA                            | NA                 |
| Kabuli_wild_1790075 | NA                                  | Ca_kabuli_denovo | 1790075                 | A/T  | NA                 | NA                            | NA                 |
| Kabuli_wild_1790317 | NA                                  | Ca_kabuli_denovo | 1790317                 | G/A  | NA                 | NA                            | NA                 |
| Kabuli_wild_1791776 | NA                                  | Ca_kabuli_denovo | 1791776                 | G/A  | NA                 | NA                            | NA                 |
| Kabuli_wild_1791788 | NA                                  | Ca_kabuli_denovo | 1791788                 | G/C  | NA                 | NA                            | NA                 |
| Kabuli_wild_1792017 | NA                                  | Ca_kabuli_denovo | 1792017                 | A/C  | NA                 | NA                            | NA                 |
| Kabuli_wild_1792800 | NA                                  | Ca_kabuli_denovo | 1792800                 | T/C  | NA                 | NA                            | NA                 |
| Kabuli_wild_1792827 | NA                                  | Ca_kabuli_denovo | 1792827                 | T/C  | NA                 | NA                            | NA                 |
| Kabuli_wild_1792992 | NA                                  | Ca_kabuli_denovo | 1792992                 | G/A  | NA                 | NA                            | NA                 |
| Kabuli_wild_1793005 | NA                                  | Ca_kabuli_denovo | 1793005                 | C/T  | NA                 | NA                            | NA                 |
| Kabuli_wild_1793423 | NA                                  | Ca_kabuli_denovo | 1793423                 | T/C  | NA                 | NA                            | NA                 |
| Kabuli_wild_1794432 | NA                                  | Ca_kabuli_denovo | 1794432                 | T/C  | NA                 | NA                            | NA                 |
| Kabuli_wild_1794641 | NA                                  | Ca_kabuli_denovo | 1794641                 | G/T  | NA                 | NA                            | NA                 |
| Kabuli_wild_1794685 | NA                                  | Ca_kabuli_denovo | 1794685                 | T/C  | NA                 | NA                            | NA                 |
| Kabuli_wild_1794990 | NA                                  | Ca_kabuli_denovo | 1794990                 | C/G  | NA                 | NA                            | NA                 |
| Kabuli_wild_1795349 | NA                                  | Ca_kabuli_denovo | 1795349                 | A/C  | NA                 | NA                            | NA                 |
| Kabuli_wild_1795364 | NA                                  | Ca_kabuli_denovo | 1795364                 | A/G  | NA                 | NA                            | NA                 |
| Kabuli_wild_1797120 | NA                                  | Ca_kabuli_denovo | 1797120                 | C/T  | NA                 | NA                            | NA                 |
| Kabuli_wild_1797143 | NA                                  | Ca_kabuli_denovo | 1797143                 | C/T  | NA                 | NA                            | NA                 |
| Kabuli_wild_1797954 | NA                                  | Ca_kabuli_denovo | 1797954                 | T/G  | NA                 | NA                            | NA                 |
| Kabuli_wild_1797955 | NA                                  | Ca_kabuli_denovo | 1797955                 | T/A  | NA                 | NA                            | NA                 |
| Kabuli_wild_1798059 | NA                                  | Ca_kabuli_denovo | 1798059                 | G/A  | NA                 | NA                            | NA                 |
| Kabuli_wild_1798116 | NA                                  | Ca_kabuli_denovo | 1798116                 | C/G  | NA                 | NA                            | NA                 |
| Kabuli_wild_1799027 | NA                                  | Ca_kabuli_denovo | 1799027                 | C/T  | NA                 | NA                            | NA                 |
| Kabuli_wild_1799589 | NA                                  | Ca_kabuli_denovo | 1799589                 | G/C  | NA                 | NA                            | NA                 |
| Kabuli_wild_1800013 | NA                                  | Ca_kabuli_denovo | 1800013                 | C/G  | NA                 | NA                            | NA                 |
| Kabuli_wild_1800065 | NA                                  | Ca_kabuli_denovo | 1800065                 | T/G  | NA                 | NA                            | NA                 |
| Kabuli_wild_1800087 | NA                                  | Ca_kabuli_denovo | 1800087                 | A/G  | NA                 | NA                            | NA                 |
| Kabuli_wild_1800888 | NA                                  | Ca_kabuli_denovo | 1800888                 | C/T  | NA                 | NA                            | NA                 |
| Kabuli_wild_1801726 | NA                                  | Ca_kabuli_denovo | 1801726                 | T/C  | NA                 | NA                            | NA                 |
| Kabuli_wild_1801891 | NA                                  | Ca_kabuli_denovo | 1801891                 | A/G  | NA                 | NA                            | NA                 |
| Kabuli_wild_1804003 | NA                                  | Ca_kabuli_denovo | 1804003                 | C/A  | NA                 | NA                            | NA                 |
| Kabuli_wild_1804273 | NA                                  | Ca_kabuli_denovo | 1804273                 | A/G  | NA                 | NA                            | NA                 |
| Kabuli_wild_1804276 | NA                                  | Ca_kabuli_denovo | 1804276                 | G/C  | NA                 | NA                            | NA                 |

| SNP IDs             | NCBI dbSNP accession IDs (NCBI_SS#) | Chromosomes      | Physical positions (bp) | SNPs | Gene accession IDs | Sequence components of genome | Putative functions |
|---------------------|-------------------------------------|------------------|-------------------------|------|--------------------|-------------------------------|--------------------|
| Kabuli_wild_1804546 | NA                                  | Ca_kabuli_denovo | 1804546                 | G/A  | NA                 | NA                            | NA                 |
| Kabuli_wild_1804845 | NA                                  | Ca_kabuli_denovo | 1804845                 | G/A  | NA                 | NA                            | NA                 |
| Kabuli_wild_1805636 | NA                                  | Ca_kabuli_denovo | 1805636                 | G/A  | NA                 | NA                            | NA                 |
| Kabuli_wild_1806006 | NA                                  | Ca_kabuli_denovo | 1806006                 | T/C  | NA                 | NA                            | NA                 |
| Kabuli_wild_1806017 | NA                                  | Ca_kabuli_denovo | 1806017                 | G/A  | NA                 | NA                            | NA                 |
| Kabuli_wild_1807035 | NA                                  | Ca_kabuli_denovo | 1807035                 | G/A  | NA                 | NA                            | NA                 |
| Kabuli_wild_1807115 | NA                                  | Ca_kabuli_denovo | 1807115                 | T/C  | NA                 | NA                            | NA                 |
| Kabuli_wild_1807480 | NA                                  | Ca_kabuli_denovo | 1807480                 | C/T  | NA                 | NA                            | NA                 |
| Kabuli_wild_1807767 | NA                                  | Ca_kabuli_denovo | 1807767                 | C/G  | NA                 | NA                            | NA                 |
| Kabuli_wild_1808140 | NA                                  | Ca_kabuli_denovo | 1808140                 | T/C  | NA                 | NA                            | NA                 |
| Kabuli_wild_1808345 | NA                                  | Ca_kabuli_denovo | 1808345                 | A/C  | NA                 | NA                            | NA                 |
| Kabuli_wild_1808386 | NA                                  | Ca_kabuli_denovo | 1808386                 | A/G  | NA                 | NA                            | NA                 |
| Kabuli_wild_1808713 | NA                                  | Ca_kabuli_denovo | 1808713                 | C/A  | NA                 | NA                            | NA                 |
| Kabuli_wild_1809193 | NA                                  | Ca_kabuli_denovo | 1809193                 | C/T  | NA                 | NA                            | NA                 |
| Kabuli_wild_1809253 | NA                                  | Ca_kabuli_denovo | 1809253                 | T/C  | NA                 | NA                            | NA                 |
| Kabuli_wild_1809975 | NA                                  | Ca_kabuli_denovo | 1809975                 | A/G  | NA                 | NA                            | NA                 |
| Kabuli_wild_1809987 | NA                                  | Ca_kabuli_denovo | 1809987                 | C/G  | NA                 | NA                            | NA                 |
| Kabuli_wild_1810350 | NA                                  | Ca_kabuli_denovo | 1810350                 | A/C  | NA                 | NA                            | NA                 |
| Kabuli_wild_1810984 | NA                                  | Ca_kabuli_denovo | 1810984                 | A/C  | NA                 | NA                            | NA                 |
| Kabuli_wild_1811330 | NA                                  | Ca_kabuli_denovo | 1811330                 | T/C  | NA                 | NA                            | NA                 |
| Kabuli_wild_1811399 | NA                                  | Ca_kabuli_denovo | 1811399                 | A/T  | NA                 | NA                            | NA                 |
| Kabuli_wild_1811959 | NA                                  | Ca_kabuli_denovo | 1811959                 | T/C  | NA                 | NA                            | NA                 |
| Kabuli_wild_1812129 | NA                                  | Ca_kabuli_denovo | 1812129                 | C/T  | NA                 | NA                            | NA                 |
| Kabuli_wild_1812769 | NA                                  | Ca_kabuli_denovo | 1812769                 | T/C  | NA                 | NA                            | NA                 |
| Kabuli_wild_1812770 | NA                                  | Ca_kabuli_denovo | 1812770                 | T/C  | NA                 | NA                            | NA                 |
| Kabuli_wild_1813439 | NA                                  | Ca_kabuli_denovo | 1813439                 | T/C  | NA                 | NA                            | NA                 |
| Kabuli_wild_1815650 | NA                                  | Ca_kabuli_denovo | 1815650                 | G/A  | NA                 | NA                            | NA                 |
| Kabuli_wild_1815697 | NA                                  | Ca_kabuli_denovo | 1815697                 | C/A  | NA                 | NA                            | NA                 |
| Kabuli_wild_1815754 | NA                                  | Ca_kabuli_denovo | 1815754                 | A/C  | NA                 | NA                            | NA                 |
| Kabuli_wild_1816147 | NA                                  | Ca_kabuli_denovo | 1816147                 | A/G  | NA                 | NA                            | NA                 |
| Kabuli_wild_1816858 | NA                                  | Ca_kabuli_denovo | 1816858                 | T/C  | NA                 | NA                            | NA                 |
| Kabuli_wild_1817489 | NA                                  | Ca_kabuli_denovo | 1817489                 | G/A  | NA                 | NA                            | NA                 |
| Kabuli_wild_1817630 | NA                                  | Ca_kabuli_denovo | 1817630                 | T/G  | NA                 | NA                            | NA                 |
| Kabuli_wild_1817641 | NA                                  | Ca_kabuli_denovo | 1817641                 | T/G  | NA                 | NA                            | NA                 |
| Kabuli_wild_1817645 | NA                                  | Ca_kabuli_denovo | 1817645                 | T/G  | NA                 | NA                            | NA                 |
| Kabuli_wild_1817653 | NA                                  | Ca_kabuli_denovo | 1817653                 | T/G  | NA                 | NA                            | NA                 |
| Kabuli_wild_1817685 | NA                                  | Ca_kabuli_denovo | 1817685                 | T/G  | NA                 | NA                            | NA                 |
| Kabuli_wild_1817705 | NA                                  | Ca_kabuli_denovo | 1817705                 | T/A  | NA                 | NA                            | NA                 |
| Kabuli_wild_1817709 | NA                                  | Ca_kabuli_denovo | 1817709                 | G/C  | NA                 | NA                            | NA                 |
| Kabuli_wild_1818953 | NA                                  | Ca_kabuli_denovo | 1818953                 | G/A  | NA                 | NA                            | NA                 |
| Kabuli_wild_1818968 | NA                                  | Ca_kabuli_denovo | 1818968                 | G/T  | NA                 | NA                            | NA                 |
| Kabuli_wild_1818977 | NA                                  | Ca_kabuli_denovo | 1818977                 | A/G  | NA                 | NA                            | NA                 |
| Kabuli_wild_1818990 | NA                                  | Ca_kabuli_denovo | 1818990                 | G/C  | NA                 | NA                            | NA                 |
| Kabuli_wild_1819874 | NA                                  | Ca_kabuli_denovo | 1819874                 | G/T  | NA                 | NA                            | NA                 |

| SNP IDs             | NCBI dbSNP accession IDs (NCBI_SS#) | Chromosomes      | Physical positions (bp) | SNPs | Gene accession IDs | Sequence components of genome | Putative functions |
|---------------------|-------------------------------------|------------------|-------------------------|------|--------------------|-------------------------------|--------------------|
| Kabuli_wild_1819918 | NA                                  | Ca_kabuli_denovo | 1819918                 | G/A  | NA                 | NA                            | NA                 |
| Kabuli_wild_1820533 | NA                                  | Ca_kabuli_denovo | 1820533                 | T/G  | NA                 | NA                            | NA                 |
| Kabuli_wild_1820639 | NA                                  | Ca_kabuli_denovo | 1820639                 | T/C  | NA                 | NA                            | NA                 |
| Kabuli_wild_1820786 | NA                                  | Ca_kabuli_denovo | 1820786                 | G/A  | NA                 | NA                            | NA                 |
| Kabuli_wild_1821142 | NA                                  | Ca_kabuli_denovo | 1821142                 | C/T  | NA                 | NA                            | NA                 |
| Kabuli_wild_1821835 | NA                                  | Ca_kabuli_denovo | 1821835                 | G/T  | NA                 | NA                            | NA                 |
| Kabuli_wild_1822362 | NA                                  | Ca_kabuli_denovo | 1822362                 | T/C  | NA                 | NA                            | NA                 |
| Kabuli_wild_1823502 | NA                                  | Ca_kabuli_denovo | 1823502                 | C/A  | NA                 | NA                            | NA                 |
| Kabuli_wild_1823505 | NA                                  | Ca_kabuli_denovo | 1823505                 | C/T  | NA                 | NA                            | NA                 |
| Kabuli_wild_1823848 | NA                                  | Ca_kabuli_denovo | 1823848                 | G/A  | NA                 | NA                            | NA                 |
| Kabuli_wild_1823866 | NA                                  | Ca_kabuli_denovo | 1823866                 | A/G  | NA                 | NA                            | NA                 |
| Kabuli_wild_1823881 | NA                                  | Ca_kabuli_denovo | 1823881                 | T/C  | NA                 | NA                            | NA                 |
| Kabuli_wild_1823920 | NA                                  | Ca_kabuli_denovo | 1823920                 | A/G  | NA                 | NA                            | NA                 |
| Kabuli_wild_1824141 | NA                                  | Ca_kabuli_denovo | 1824141                 | A/G  | NA                 | NA                            | NA                 |
| Kabuli_wild_1825121 | NA                                  | Ca_kabuli_denovo | 1825121                 | C/A  | NA                 | NA                            | NA                 |
| Kabuli_wild_1826660 | NA                                  | Ca_kabuli_denovo | 1826660                 | A/G  | NA                 | NA                            | NA                 |
| Kabuli_wild_1827140 | NA                                  | Ca_kabuli_denovo | 1827140                 | A/G  | NA                 | NA                            | NA                 |
| Kabuli_wild_1827170 | NA                                  | Ca_kabuli_denovo | 1827170                 | G/A  | NA                 | NA                            | NA                 |
| Kabuli_wild_1827731 | NA                                  | Ca_kabuli_denovo | 1827731                 | G/A  | NA                 | NA                            | NA                 |
| Kabuli_wild_1827735 | NA                                  | Ca_kabuli_denovo | 1827735                 | A/C  | NA                 | NA                            | NA                 |
| Kabuli_wild_1828641 | NA                                  | Ca_kabuli_denovo | 1828641                 | C/T  | NA                 | NA                            | NA                 |
| Kabuli_wild_1828925 | NA                                  | Ca_kabuli_denovo | 1828925                 | C/T  | NA                 | NA                            | NA                 |
| Kabuli_wild_1829275 | NA                                  | Ca_kabuli_denovo | 1829275                 | G/T  | NA                 | NA                            | NA                 |
| Kabuli_wild_1829961 | NA                                  | Ca_kabuli_denovo | 1829961                 | A/G  | NA                 | NA                            | NA                 |
| Kabuli_wild_1829972 | NA                                  | Ca_kabuli_denovo | 1829972                 | A/G  | NA                 | NA                            | NA                 |
| Kabuli_wild_1830398 | NA                                  | Ca_kabuli_denovo | 1830398                 | C/T  | NA                 | NA                            | NA                 |
| Kabuli_wild_1830572 | NA                                  | Ca_kabuli_denovo | 1830572                 | A/G  | NA                 | NA                            | NA                 |
| Kabuli_wild_1830635 | NA                                  | Ca_kabuli_denovo | 1830635                 | G/C  | NA                 | NA                            | NA                 |
| Kabuli_wild_1830704 | NA                                  | Ca_kabuli_denovo | 1830704                 | G/C  | NA                 | NA                            | NA                 |
| Kabuli_wild_1833984 | NA                                  | Ca_kabuli_denovo | 1833984                 | G/A  | NA                 | NA                            | NA                 |
| Kabuli_wild_1834016 | NA                                  | Ca_kabuli_denovo | 1834016                 | G/C  | NA                 | NA                            | NA                 |
| Kabuli_wild_1834087 | NA                                  | Ca_kabuli_denovo | 1834087                 | G/A  | NA                 | NA                            | NA                 |
| Kabuli_wild_1834222 | NA                                  | Ca_kabuli_denovo | 1834222                 | G/A  | NA                 | NA                            | NA                 |
| Kabuli_wild_1834229 | NA                                  | Ca_kabuli_denovo | 1834229                 | G/C  | NA                 | NA                            | NA                 |
| Kabuli_wild_1834382 | NA                                  | Ca_kabuli_denovo | 1834382                 | C/T  | NA                 | NA                            | NA                 |
| Kabuli_wild_1834384 | NA                                  | Ca_kabuli_denovo | 1834384                 | G/A  | NA                 | NA                            | NA                 |
| Kabuli_wild_1834408 | NA                                  | Ca_kabuli_denovo | 1834408                 | A/T  | NA                 | NA                            | NA                 |
| Kabuli_wild_1834429 | NA                                  | Ca_kabuli_denovo | 1834429                 | C/T  | NA                 | NA                            | NA                 |
| Kabuli_wild_1834800 | NA                                  | Ca_kabuli_denovo | 1834800                 | T/C  | NA                 | NA                            | NA                 |
| Kabuli_wild_1834850 | NA                                  | Ca_kabuli_denovo | 1834850                 | A/T  | NA                 | NA                            | NA                 |
| Kabuli_wild_1834865 | NA                                  | Ca_kabuli_denovo | 1834865                 | T/G  | NA                 | NA                            | NA                 |
| Kabuli_wild_1834878 | NA                                  | Ca_kabuli_denovo | 1834878                 | G/A  | NA                 | NA                            | NA                 |
| Kabuli_wild_1836254 | NA                                  | Ca_kabuli_denovo | 1836254                 | A/G  | NA                 | NA                            | NA                 |
| Kabuli_wild_1836909 | NA                                  | Ca_kabuli_denovo | 1836909                 | G/A  | NA                 | NA                            | NA                 |



| SNP IDs             | NCBI dbSNP accession IDs (NCBI_SS#) | Chromosomes      | Physical positions (bp) | SNPs | Gene accession IDs | Sequence components of genome | Putative functions |
|---------------------|-------------------------------------|------------------|-------------------------|------|--------------------|-------------------------------|--------------------|
| Kabuli_wild_1836923 | NA                                  | Ca_kabuli_denovo | 1836923                 | G/A  | NA                 | NA                            | NA                 |
| Kabuli_wild_1837047 | NA                                  | Ca_kabuli_denovo | 1837047                 | A/C  | NA                 | NA                            | NA                 |
| Kabuli_wild_1837060 | NA                                  | Ca_kabuli_denovo | 1837060                 | C/T  | NA                 | NA                            | NA                 |
| Kabuli_wild_1837328 | NA                                  | Ca_kabuli_denovo | 1837328                 | T/C  | NA                 | NA                            | NA                 |
| Kabuli_wild_1837425 | NA                                  | Ca_kabuli_denovo | 1837425                 | A/G  | NA                 | NA                            | NA                 |
| Kabuli_wild_1837491 | NA                                  | Ca_kabuli_denovo | 1837491                 | C/G  | NA                 | NA                            | NA                 |
| Kabuli_wild_1837734 | NA                                  | Ca_kabuli_denovo | 1837734                 | T/C  | NA                 | NA                            | NA                 |
| Kabuli_wild_1838831 | NA                                  | Ca_kabuli_denovo | 1838831                 | G/A  | NA                 | NA                            | NA                 |
| Kabuli_wild_1838845 | NA                                  | Ca_kabuli_denovo | 1838845                 | T/A  | NA                 | NA                            | NA                 |
| Kabuli_wild_1839080 | NA                                  | Ca_kabuli_denovo | 1839080                 | T/C  | NA                 | NA                            | NA                 |
| Kabuli_wild_1839348 | NA                                  | Ca_kabuli_denovo | 1839348                 | A/C  | NA                 | NA                            | NA                 |
| Kabuli_wild_1839402 | NA                                  | Ca_kabuli_denovo | 1839402                 | A/G  | NA                 | NA                            | NA                 |
| Kabuli_wild_1839473 | NA                                  | Ca_kabuli_denovo | 1839473                 | C/G  | NA                 | NA                            | NA                 |
| Kabuli_wild_1839864 | NA                                  | Ca_kabuli_denovo | 1839864                 | C/G  | NA                 | NA                            | NA                 |
| Kabuli_wild_1839867 | NA                                  | Ca_kabuli_denovo | 1839867                 | G/A  | NA                 | NA                            | NA                 |
| Kabuli_wild_1841787 | NA                                  | Ca_kabuli_denovo | 1841787                 | A/G  | NA                 | NA                            | NA                 |
| Kabuli_wild_1841811 | NA                                  | Ca_kabuli_denovo | 1841811                 | G/C  | NA                 | NA                            | NA                 |
| Kabuli_wild_1842303 | NA                                  | Ca_kabuli_denovo | 1842303                 | A/G  | NA                 | NA                            | NA                 |
| Kabuli_wild_1842392 | NA                                  | Ca_kabuli_denovo | 1842392                 | G/C  | NA                 | NA                            | NA                 |
| Kabuli_wild_1842667 | NA                                  | Ca_kabuli_denovo | 1842667                 | G/A  | NA                 | NA                            | NA                 |
| Kabuli_wild_1843103 | NA                                  | Ca_kabuli_denovo | 1843103                 | T/C  | NA                 | NA                            | NA                 |
| Kabuli_wild_1844119 | NA                                  | Ca_kabuli_denovo | 1844119                 | T/G  | NA                 | NA                            | NA                 |
| Kabuli_wild_1845300 | NA                                  | Ca_kabuli_denovo | 1845300                 | C/T  | NA                 | NA                            | NA                 |
| Kabuli_wild_1845841 | NA                                  | Ca_kabuli_denovo | 1845841                 | C/G  | NA                 | NA                            | NA                 |
| Kabuli_wild_1845847 | NA                                  | Ca_kabuli_denovo | 1845847                 | C/T  | NA                 | NA                            | NA                 |
| Kabuli_wild_1846956 | NA                                  | Ca_kabuli_denovo | 1846956                 | T/G  | NA                 | NA                            | NA                 |
| Kabuli_wild_1848902 | NA                                  | Ca_kabuli_denovo | 1848902                 | T/C  | NA                 | NA                            | NA                 |
| Kabuli_wild_1849751 | NA                                  | Ca_kabuli_denovo | 1849751                 | A/T  | NA                 | NA                            | NA                 |
| Kabuli_wild_1849823 | NA                                  | Ca_kabuli_denovo | 1849823                 | G/A  | NA                 | NA                            | NA                 |
| Kabuli_wild_1851163 | NA                                  | Ca_kabuli_denovo | 1851163                 | G/A  | NA                 | NA                            | NA                 |
| Kabuli_wild_1851484 | NA                                  | Ca_kabuli_denovo | 1851484                 | T/C  | NA                 | NA                            | NA                 |
| Kabuli_wild_1851508 | NA                                  | Ca_kabuli_denovo | 1851508                 | G/C  | NA                 | NA                            | NA                 |
| Kabuli_wild_1851864 | NA                                  | Ca_kabuli_denovo | 1851864                 | C/G  | NA                 | NA                            | NA                 |
| Kabuli_wild_1852287 | NA                                  | Ca_kabuli_denovo | 1852287                 | A/G  | NA                 | NA                            | NA                 |
| Kabuli_wild_1852290 | NA                                  | Ca_kabuli_denovo | 1852290                 | G/A  | NA                 | NA                            | NA                 |
| Kabuli_wild_1853221 | NA                                  | Ca_kabuli_denovo | 1853221                 | C/T  | NA                 | NA                            | NA                 |
| Kabuli_wild_1853244 | NA                                  | Ca_kabuli_denovo | 1853244                 | G/A  | NA                 | NA                            | NA                 |
| Kabuli_wild_1853635 | NA                                  | Ca_kabuli_denovo | 1853635                 | C/T  | NA                 | NA                            | NA                 |
| Kabuli_wild_1854213 | NA                                  | Ca_kabuli_denovo | 1854213                 | A/G  | NA                 | NA                            | NA                 |
| Kabuli_wild_1854223 | NA                                  | Ca_kabuli_denovo | 1854223                 | A/G  | NA                 | NA                            | NA                 |
| Kabuli_wild_1854886 | NA                                  | Ca_kabuli_denovo | 1854886                 | C/T  | NA                 | NA                            | NA                 |
| Kabuli_wild_1854893 | NA                                  | Ca_kabuli_denovo | 1854893                 | G/A  | NA                 | NA                            | NA                 |
| Kabuli_wild_1855277 | NA                                  | Ca_kabuli_denovo | 1855277                 | A/G  | NA                 | NA                            | NA                 |
| Kabuli_wild_1855922 | NA                                  | Ca_kabuli_denovo | 1855922                 | C/T  | NA                 | NA                            | NA                 |

| SNP IDs                    | NCBI dbSNP accession IDs (NCBI_SS#) | Chromosomes             | Physical positions (bp) | SNPs | Gene accession IDs | Sequence components of genome | Putative functions |
|----------------------------|-------------------------------------|-------------------------|-------------------------|------|--------------------|-------------------------------|--------------------|
| <i>Kabuli_wild_1856002</i> | NA                                  | <i>Ca_kabuli_denovo</i> | 1856002                 | T/C  | NA                 | NA                            | NA                 |
| <i>Kabuli_wild_1856011</i> | NA                                  | <i>Ca_kabuli_denovo</i> | 1856011                 | T/C  | NA                 | NA                            | NA                 |
| <i>Kabuli_wild_1856448</i> | NA                                  | <i>Ca_kabuli_denovo</i> | 1856448                 | C/G  | NA                 | NA                            | NA                 |
| <i>Kabuli_wild_1856565</i> | NA                                  | <i>Ca_kabuli_denovo</i> | 1856565                 | A/G  | NA                 | NA                            | NA                 |
| <i>Kabuli_wild_1857231</i> | NA                                  | <i>Ca_kabuli_denovo</i> | 1857231                 | G/A  | NA                 | NA                            | NA                 |
| <i>Kabuli_wild_1857691</i> | NA                                  | <i>Ca_kabuli_denovo</i> | 1857691                 | C/A  | NA                 | NA                            | NA                 |
| <i>Kabuli_wild_1857730</i> | NA                                  | <i>Ca_kabuli_denovo</i> | 1857730                 | T/C  | NA                 | NA                            | NA                 |
| <i>Kabuli_wild_1858277</i> | NA                                  | <i>Ca_kabuli_denovo</i> | 1858277                 | T/C  | NA                 | NA                            | NA                 |
| <i>Kabuli_wild_1858299</i> | NA                                  | <i>Ca_kabuli_denovo</i> | 1858299                 | C/A  | NA                 | NA                            | NA                 |
| <i>Kabuli_wild_1858798</i> | NA                                  | <i>Ca_kabuli_denovo</i> | 1858798                 | T/C  | NA                 | NA                            | NA                 |
| <i>Kabuli_wild_1858899</i> | NA                                  | <i>Ca_kabuli_denovo</i> | 1858899                 | T/C  | NA                 | NA                            | NA                 |
| <i>Kabuli_wild_1858905</i> | NA                                  | <i>Ca_kabuli_denovo</i> | 1858905                 | G/A  | NA                 | NA                            | NA                 |
| <i>Kabuli_wild_1859471</i> | NA                                  | <i>Ca_kabuli_denovo</i> | 1859471                 | A/G  | NA                 | NA                            | NA                 |
| <i>Kabuli_wild_1859599</i> | NA                                  | <i>Ca_kabuli_denovo</i> | 1859599                 | G/A  | NA                 | NA                            | NA                 |
| <i>Kabuli_wild_1861048</i> | NA                                  | <i>Ca_kabuli_denovo</i> | 1861048                 | T/G  | NA                 | NA                            | NA                 |
| <i>Kabuli_wild_1861324</i> | NA                                  | <i>Ca_kabuli_denovo</i> | 1861324                 | T/C  | NA                 | NA                            | NA                 |
| <i>Kabuli_wild_1861325</i> | NA                                  | <i>Ca_kabuli_denovo</i> | 1861325                 | T/G  | NA                 | NA                            | NA                 |
| <i>Kabuli_wild_1861451</i> | NA                                  | <i>Ca_kabuli_denovo</i> | 1861451                 | G/T  | NA                 | NA                            | NA                 |
| <i>Kabuli_wild_1861925</i> | NA                                  | <i>Ca_kabuli_denovo</i> | 1861925                 | T/C  | NA                 | NA                            | NA                 |
| <i>Kabuli_wild_1861935</i> | NA                                  | <i>Ca_kabuli_denovo</i> | 1861935                 | A/G  | NA                 | NA                            | NA                 |
| <i>Kabuli_wild_1861962</i> | NA                                  | <i>Ca_kabuli_denovo</i> | 1861962                 | G/A  | NA                 | NA                            | NA                 |
| <i>Kabuli_wild_1862261</i> | NA                                  | <i>Ca_kabuli_denovo</i> | 1862261                 | A/G  | NA                 | NA                            | NA                 |
| <i>Kabuli_wild_1862264</i> | NA                                  | <i>Ca_kabuli_denovo</i> | 1862264                 | A/G  | NA                 | NA                            | NA                 |
| <i>Kabuli_wild_1862280</i> | NA                                  | <i>Ca_kabuli_denovo</i> | 1862280                 | A/G  | NA                 | NA                            | NA                 |
| <i>Kabuli_wild_1862971</i> | NA                                  | <i>Ca_kabuli_denovo</i> | 1862971                 | C/G  | NA                 | NA                            | NA                 |
| <i>Kabuli_wild_1863253</i> | NA                                  | <i>Ca_kabuli_denovo</i> | 1863253                 | G/A  | NA                 | NA                            | NA                 |
| <i>Kabuli_wild_1863284</i> | NA                                  | <i>Ca_kabuli_denovo</i> | 1863284                 | T/C  | NA                 | NA                            | NA                 |
| <i>Kabuli_wild_1864625</i> | NA                                  | <i>Ca_kabuli_denovo</i> | 1864625                 | G/A  | NA                 | NA                            | NA                 |
| <i>Kabuli_wild_1864633</i> | NA                                  | <i>Ca_kabuli_denovo</i> | 1864633                 | C/T  | NA                 | NA                            | NA                 |
| <i>Kabuli_wild_1864782</i> | NA                                  | <i>Ca_kabuli_denovo</i> | 1864782                 | A/G  | NA                 | NA                            | NA                 |
| <i>Kabuli_wild_1865146</i> | NA                                  | <i>Ca_kabuli_denovo</i> | 1865146                 | C/G  | NA                 | NA                            | NA                 |
| <i>Kabuli_wild_1866070</i> | NA                                  | <i>Ca_kabuli_denovo</i> | 1866070                 | G/T  | NA                 | NA                            | NA                 |
| <i>Kabuli_wild_1866270</i> | NA                                  | <i>Ca_kabuli_denovo</i> | 1866270                 | A/G  | NA                 | NA                            | NA                 |
| <i>Kabuli_wild_1866279</i> | NA                                  | <i>Ca_kabuli_denovo</i> | 1866279                 | T/C  | NA                 | NA                            | NA                 |
| <i>Kabuli_wild_1866776</i> | NA                                  | <i>Ca_kabuli_denovo</i> | 1866776                 | A/G  | NA                 | NA                            | NA                 |
| <i>Kabuli_wild_1866785</i> | NA                                  | <i>Ca_kabuli_denovo</i> | 1866785                 | C/T  | NA                 | NA                            | NA                 |
| <i>Kabuli_wild_1868009</i> | NA                                  | <i>Ca_kabuli_denovo</i> | 1868009                 | T/C  | NA                 | NA                            | NA                 |
| <i>Kabuli_wild_1868053</i> | NA                                  | <i>Ca_kabuli_denovo</i> | 1868053                 | C/T  | NA                 | NA                            | NA                 |
| <i>Kabuli_wild_1868188</i> | NA                                  | <i>Ca_kabuli_denovo</i> | 1868188                 | T/C  | NA                 | NA                            | NA                 |
| <i>Kabuli_wild_1868769</i> | NA                                  | <i>Ca_kabuli_denovo</i> | 1868769                 | C/G  | NA                 | NA                            | NA                 |
| <i>Kabuli_wild_1868801</i> | NA                                  | <i>Ca_kabuli_denovo</i> | 1868801                 | G/A  | NA                 | NA                            | NA                 |
| <i>Kabuli_wild_1869730</i> | NA                                  | <i>Ca_kabuli_denovo</i> | 1869730                 | T/C  | NA                 | NA                            | NA                 |
| <i>Kabuli_wild_1870017</i> | NA                                  | <i>Ca_kabuli_denovo</i> | 1870017                 | A/G  | NA                 | NA                            | NA                 |
| <i>Kabuli_wild_1870047</i> | NA                                  | <i>Ca_kabuli_denovo</i> | 1870047                 | C/T  | NA                 | NA                            | NA                 |

| SNP IDs             | NCBI dbSNP accession IDs (NCBI_SS#) | Chromosomes      | Physical positions (bp) | SNPs | Gene accession IDs | Sequence components of genome | Putative functions |
|---------------------|-------------------------------------|------------------|-------------------------|------|--------------------|-------------------------------|--------------------|
| Kabuli_wild_1870893 | NA                                  | Ca_kabuli_denovo | 1870893                 | A/G  | NA                 | NA                            | NA                 |
| Kabuli_wild_1871446 | NA                                  | Ca_kabuli_denovo | 1871446                 | G/A  | NA                 | NA                            | NA                 |
| Kabuli_wild_1871449 | NA                                  | Ca_kabuli_denovo | 1871449                 | G/C  | NA                 | NA                            | NA                 |
| Kabuli_wild_1871535 | NA                                  | Ca_kabuli_denovo | 1871535                 | A/G  | NA                 | NA                            | NA                 |
| Kabuli_wild_1871600 | NA                                  | Ca_kabuli_denovo | 1871600                 | G/C  | NA                 | NA                            | NA                 |
| Kabuli_wild_1872405 | NA                                  | Ca_kabuli_denovo | 1872405                 | T/G  | NA                 | NA                            | NA                 |
| Kabuli_wild_1872461 | NA                                  | Ca_kabuli_denovo | 1872461                 | A/G  | NA                 | NA                            | NA                 |
| Kabuli_wild_1872518 | NA                                  | Ca_kabuli_denovo | 1872518                 | T/C  | NA                 | NA                            | NA                 |
| Kabuli_wild_1872631 | NA                                  | Ca_kabuli_denovo | 1872631                 | G/T  | NA                 | NA                            | NA                 |
| Kabuli_wild_1873178 | NA                                  | Ca_kabuli_denovo | 1873178                 | G/C  | NA                 | NA                            | NA                 |
| Kabuli_wild_1873202 | NA                                  | Ca_kabuli_denovo | 1873202                 | A/G  | NA                 | NA                            | NA                 |
| Kabuli_wild_1873831 | NA                                  | Ca_kabuli_denovo | 1873831                 | C/G  | NA                 | NA                            | NA                 |
| Kabuli_wild_1874625 | NA                                  | Ca_kabuli_denovo | 1874625                 | C/T  | NA                 | NA                            | NA                 |
| Kabuli_wild_1874628 | NA                                  | Ca_kabuli_denovo | 1874628                 | A/G  | NA                 | NA                            | NA                 |
| Kabuli_wild_1875559 | NA                                  | Ca_kabuli_denovo | 1875559                 | T/C  | NA                 | NA                            | NA                 |
| Kabuli_wild_1876149 | NA                                  | Ca_kabuli_denovo | 1876149                 | G/A  | NA                 | NA                            | NA                 |
| Kabuli_wild_1876771 | NA                                  | Ca_kabuli_denovo | 1876771                 | C/T  | NA                 | NA                            | NA                 |
| Kabuli_wild_1876774 | NA                                  | Ca_kabuli_denovo | 1876774                 | A/G  | NA                 | NA                            | NA                 |
| Kabuli_wild_1877640 | NA                                  | Ca_kabuli_denovo | 1877640                 | C/T  | NA                 | NA                            | NA                 |
| Kabuli_wild_1877662 | NA                                  | Ca_kabuli_denovo | 1877662                 | C/G  | NA                 | NA                            | NA                 |
| Kabuli_wild_1878257 | NA                                  | Ca_kabuli_denovo | 1878257                 | A/G  | NA                 | NA                            | NA                 |
| Kabuli_wild_1878319 | NA                                  | Ca_kabuli_denovo | 1878319                 | C/T  | NA                 | NA                            | NA                 |
| Kabuli_wild_1879336 | NA                                  | Ca_kabuli_denovo | 1879336                 | G/T  | NA                 | NA                            | NA                 |
| Kabuli_wild_1879339 | NA                                  | Ca_kabuli_denovo | 1879339                 | A/G  | NA                 | NA                            | NA                 |
| Kabuli_wild_1880225 | NA                                  | Ca_kabuli_denovo | 1880225                 | A/G  | NA                 | NA                            | NA                 |
| Kabuli_wild_1880315 | NA                                  | Ca_kabuli_denovo | 1880315                 | C/T  | NA                 | NA                            | NA                 |
| Kabuli_wild_1880318 | NA                                  | Ca_kabuli_denovo | 1880318                 | C/T  | NA                 | NA                            | NA                 |
| Kabuli_wild_1880897 | NA                                  | Ca_kabuli_denovo | 1880897                 | G/C  | NA                 | NA                            | NA                 |
| Kabuli_wild_1881408 | NA                                  | Ca_kabuli_denovo | 1881408                 | C/G  | NA                 | NA                            | NA                 |
| Kabuli_wild_1882260 | NA                                  | Ca_kabuli_denovo | 1882260                 | A/G  | NA                 | NA                            | NA                 |
| Kabuli_wild_1882263 | NA                                  | Ca_kabuli_denovo | 1882263                 | A/G  | NA                 | NA                            | NA                 |
| Kabuli_wild_1882640 | NA                                  | Ca_kabuli_denovo | 1882640                 | G/A  | NA                 | NA                            | NA                 |
| Kabuli_wild_1882708 | NA                                  | Ca_kabuli_denovo | 1882708                 | C/T  | NA                 | NA                            | NA                 |
| Kabuli_wild_1883688 | NA                                  | Ca_kabuli_denovo | 1883688                 | C/T  | NA                 | NA                            | NA                 |
| Kabuli_wild_1883721 | NA                                  | Ca_kabuli_denovo | 1883721                 | T/C  | NA                 | NA                            | NA                 |
| Kabuli_wild_1883821 | NA                                  | Ca_kabuli_denovo | 1883821                 | G/T  | NA                 | NA                            | NA                 |
| Kabuli_wild_1883842 | NA                                  | Ca_kabuli_denovo | 1883842                 | T/A  | NA                 | NA                            | NA                 |
| Kabuli_wild_1885464 | NA                                  | Ca_kabuli_denovo | 1885464                 | G/C  | NA                 | NA                            | NA                 |
| Kabuli_wild_1885474 | NA                                  | Ca_kabuli_denovo | 1885474                 | G/A  | NA                 | NA                            | NA                 |
| Kabuli_wild_1886047 | NA                                  | Ca_kabuli_denovo | 1886047                 | A/G  | NA                 | NA                            | NA                 |
| Kabuli_wild_1886064 | NA                                  | Ca_kabuli_denovo | 1886064                 | T/C  | NA                 | NA                            | NA                 |
| Kabuli_wild_1886311 | NA                                  | Ca_kabuli_denovo | 1886311                 | G/T  | NA                 | NA                            | NA                 |
| Kabuli_wild_1886356 | NA                                  | Ca_kabuli_denovo | 1886356                 | C/G  | NA                 | NA                            | NA                 |
| Kabuli_wild_1886928 | NA                                  | Ca_kabuli_denovo | 1886928                 | G/C  | NA                 | NA                            | NA                 |

| SNP IDs             | NCBI dbSNP accession IDs (NCBI_SS#) | Chromosomes      | Physical positions (bp) | SNPs | Gene accession IDs | Sequence components of genome | Putative functions |
|---------------------|-------------------------------------|------------------|-------------------------|------|--------------------|-------------------------------|--------------------|
| Kabuli_wild_1887966 | NA                                  | Ca_kabuli_denovo | 1887966                 | C/G  | NA                 | NA                            | NA                 |
| Kabuli_wild_1888531 | NA                                  | Ca_kabuli_denovo | 1888531                 | A/G  | NA                 | NA                            | NA                 |
| Kabuli_wild_1888551 | NA                                  | Ca_kabuli_denovo | 1888551                 | C/G  | NA                 | NA                            | NA                 |
| Kabuli_wild_1890223 | NA                                  | Ca_kabuli_denovo | 1890223                 | T/G  | NA                 | NA                            | NA                 |
| Kabuli_wild_1892822 | NA                                  | Ca_kabuli_denovo | 1892822                 | G/A  | NA                 | NA                            | NA                 |
| Kabuli_wild_1893359 | NA                                  | Ca_kabuli_denovo | 1893359                 | G/A  | NA                 | NA                            | NA                 |
| Kabuli_wild_1893982 | NA                                  | Ca_kabuli_denovo | 1893982                 | A/T  | NA                 | NA                            | NA                 |
| Kabuli_wild_1894013 | NA                                  | Ca_kabuli_denovo | 1894013                 | A/G  | NA                 | NA                            | NA                 |
| Kabuli_wild_1894485 | NA                                  | Ca_kabuli_denovo | 1894485                 | G/A  | NA                 | NA                            | NA                 |
| Kabuli_wild_1894553 | NA                                  | Ca_kabuli_denovo | 1894553                 | G/C  | NA                 | NA                            | NA                 |
| Kabuli_wild_1894582 | NA                                  | Ca_kabuli_denovo | 1894582                 | T/C  | NA                 | NA                            | NA                 |
| Kabuli_wild_1894953 | NA                                  | Ca_kabuli_denovo | 1894953                 | G/A  | NA                 | NA                            | NA                 |
| Kabuli_wild_1895722 | NA                                  | Ca_kabuli_denovo | 1895722                 | C/T  | NA                 | NA                            | NA                 |
| Kabuli_wild_1896119 | NA                                  | Ca_kabuli_denovo | 1896119                 | A/G  | NA                 | NA                            | NA                 |
| Kabuli_wild_1896326 | NA                                  | Ca_kabuli_denovo | 1896326                 | A/G  | NA                 | NA                            | NA                 |
| Kabuli_wild_1896453 | NA                                  | Ca_kabuli_denovo | 1896453                 | G/A  | NA                 | NA                            | NA                 |
| Kabuli_wild_1896480 | NA                                  | Ca_kabuli_denovo | 1896480                 | G/A  | NA                 | NA                            | NA                 |
| Kabuli_wild_1896915 | NA                                  | Ca_kabuli_denovo | 1896915                 | C/T  | NA                 | NA                            | NA                 |
| Kabuli_wild_1897141 | NA                                  | Ca_kabuli_denovo | 1897141                 | A/C  | NA                 | NA                            | NA                 |
| Kabuli_wild_1898751 | NA                                  | Ca_kabuli_denovo | 1898751                 | G/C  | NA                 | NA                            | NA                 |
| Kabuli_wild_1898782 | NA                                  | Ca_kabuli_denovo | 1898782                 | A/G  | NA                 | NA                            | NA                 |
| Kabuli_wild_1899065 | NA                                  | Ca_kabuli_denovo | 1899065                 | T/C  | NA                 | NA                            | NA                 |
| Kabuli_wild_1899190 | NA                                  | Ca_kabuli_denovo | 1899190                 | C/T  | NA                 | NA                            | NA                 |
| Kabuli_wild_1899198 | NA                                  | Ca_kabuli_denovo | 1899198                 | A/C  | NA                 | NA                            | NA                 |
| Kabuli_wild_1900275 | NA                                  | Ca_kabuli_denovo | 1900275                 | T/C  | NA                 | NA                            | NA                 |
| Kabuli_wild_1900325 | NA                                  | Ca_kabuli_denovo | 1900325                 | T/C  | NA                 | NA                            | NA                 |
| Kabuli_wild_1900663 | NA                                  | Ca_kabuli_denovo | 1900663                 | T/C  | NA                 | NA                            | NA                 |
| Kabuli_wild_1900963 | NA                                  | Ca_kabuli_denovo | 1900963                 | T/C  | NA                 | NA                            | NA                 |
| Kabuli_wild_1901345 | NA                                  | Ca_kabuli_denovo | 1901345                 | A/G  | NA                 | NA                            | NA                 |
| Kabuli_wild_1901933 | NA                                  | Ca_kabuli_denovo | 1901933                 | G/A  | NA                 | NA                            | NA                 |
| Kabuli_wild_1901994 | NA                                  | Ca_kabuli_denovo | 1901994                 | G/A  | NA                 | NA                            | NA                 |
| Kabuli_wild_1902886 | NA                                  | Ca_kabuli_denovo | 1902886                 | A/C  | NA                 | NA                            | NA                 |
| Kabuli_wild_1903985 | NA                                  | Ca_kabuli_denovo | 1903985                 | T/C  | NA                 | NA                            | NA                 |
| Kabuli_wild_1904520 | NA                                  | Ca_kabuli_denovo | 1904520                 | T/G  | NA                 | NA                            | NA                 |
| Kabuli_wild_1905805 | NA                                  | Ca_kabuli_denovo | 1905805                 | G/T  | NA                 | NA                            | NA                 |
| Kabuli_wild_1906004 | NA                                  | Ca_kabuli_denovo | 1906004                 | G/A  | NA                 | NA                            | NA                 |
| Kabuli_wild_1906047 | NA                                  | Ca_kabuli_denovo | 1906047                 | A/C  | NA                 | NA                            | NA                 |
| Kabuli_wild_1906325 | NA                                  | Ca_kabuli_denovo | 1906325                 | C/A  | NA                 | NA                            | NA                 |
| Kabuli_wild_1906873 | NA                                  | Ca_kabuli_denovo | 1906873                 | G/T  | NA                 | NA                            | NA                 |
| Kabuli_wild_1907053 | NA                                  | Ca_kabuli_denovo | 1907053                 | C/T  | NA                 | NA                            | NA                 |
| Kabuli_wild_1907195 | NA                                  | Ca_kabuli_denovo | 1907195                 | C/T  | NA                 | NA                            | NA                 |
| Kabuli_wild_1910781 | NA                                  | Ca_kabuli_denovo | 1910781                 | T/C  | NA                 | NA                            | NA                 |
| Kabuli_wild_1911739 | NA                                  | Ca_kabuli_denovo | 1911739                 | C/A  | NA                 | NA                            | NA                 |
| Kabuli_wild_1911745 | NA                                  | Ca_kabuli_denovo | 1911745                 | G/C  | NA                 | NA                            | NA                 |

| SNP IDs             | NCBI dbSNP accession IDs (NCBI_SS#) | Chromosomes      | Physical positions (bp) | SNPs | Gene accession IDs | Sequence components of genome | Putative functions |
|---------------------|-------------------------------------|------------------|-------------------------|------|--------------------|-------------------------------|--------------------|
| Kabuli_wild_1914370 | NA                                  | Ca_kabuli_denovo | 1914370                 | G/T  | NA                 | NA                            | NA                 |
| Kabuli_wild_1914564 | NA                                  | Ca_kabuli_denovo | 1914564                 | G/A  | NA                 | NA                            | NA                 |
| Kabuli_wild_1914638 | NA                                  | Ca_kabuli_denovo | 1914638                 | C/T  | NA                 | NA                            | NA                 |
| Kabuli_wild_1914695 | NA                                  | Ca_kabuli_denovo | 1914695                 | G/A  | NA                 | NA                            | NA                 |
| Kabuli_wild_1916041 | NA                                  | Ca_kabuli_denovo | 1916041                 | G/C  | NA                 | NA                            | NA                 |
| Kabuli_wild_1918436 | NA                                  | Ca_kabuli_denovo | 1918436                 | A/G  | NA                 | NA                            | NA                 |
| Kabuli_wild_1918757 | NA                                  | Ca_kabuli_denovo | 1918757                 | G/A  | NA                 | NA                            | NA                 |
| Kabuli_wild_1919678 | NA                                  | Ca_kabuli_denovo | 1919678                 | C/T  | NA                 | NA                            | NA                 |
| Kabuli_wild_1919748 | NA                                  | Ca_kabuli_denovo | 1919748                 | A/G  | NA                 | NA                            | NA                 |
| Kabuli_wild_1920190 | NA                                  | Ca_kabuli_denovo | 1920190                 | C/T  | NA                 | NA                            | NA                 |
| Kabuli_wild_1920210 | NA                                  | Ca_kabuli_denovo | 1920210                 | G/C  | NA                 | NA                            | NA                 |
| Kabuli_wild_1920475 | NA                                  | Ca_kabuli_denovo | 1920475                 | C/A  | NA                 | NA                            | NA                 |
| Kabuli_wild_1921332 | NA                                  | Ca_kabuli_denovo | 1921332                 | A/C  | NA                 | NA                            | NA                 |
| Kabuli_wild_1921921 | NA                                  | Ca_kabuli_denovo | 1921921                 | C/T  | NA                 | NA                            | NA                 |
| Kabuli_wild_1921990 | NA                                  | Ca_kabuli_denovo | 1921990                 | C/G  | NA                 | NA                            | NA                 |
| Kabuli_wild_1922573 | NA                                  | Ca_kabuli_denovo | 1922573                 | T/C  | NA                 | NA                            | NA                 |
| Kabuli_wild_1923095 | NA                                  | Ca_kabuli_denovo | 1923095                 | A/G  | NA                 | NA                            | NA                 |
| Kabuli_wild_1923107 | NA                                  | Ca_kabuli_denovo | 1923107                 | C/T  | NA                 | NA                            | NA                 |
| Kabuli_wild_1923671 | NA                                  | Ca_kabuli_denovo | 1923671                 | C/T  | NA                 | NA                            | NA                 |
| Kabuli_wild_1923833 | NA                                  | Ca_kabuli_denovo | 1923833                 | G/T  | NA                 | NA                            | NA                 |
| Kabuli_wild_1924402 | NA                                  | Ca_kabuli_denovo | 1924402                 | C/T  | NA                 | NA                            | NA                 |
| Kabuli_wild_1924415 | NA                                  | Ca_kabuli_denovo | 1924415                 | A/C  | NA                 | NA                            | NA                 |
| Kabuli_wild_1925373 | NA                                  | Ca_kabuli_denovo | 1925373                 | A/G  | NA                 | NA                            | NA                 |
| Kabuli_wild_1927317 | NA                                  | Ca_kabuli_denovo | 1927317                 | G/A  | NA                 | NA                            | NA                 |
| Kabuli_wild_1927930 | NA                                  | Ca_kabuli_denovo | 1927930                 | C/T  | NA                 | NA                            | NA                 |
| Kabuli_wild_1927987 | NA                                  | Ca_kabuli_denovo | 1927987                 | G/A  | NA                 | NA                            | NA                 |
| Kabuli_wild_1928484 | NA                                  | Ca_kabuli_denovo | 1928484                 | G/A  | NA                 | NA                            | NA                 |
| Kabuli_wild_1929212 | NA                                  | Ca_kabuli_denovo | 1929212                 | G/A  | NA                 | NA                            | NA                 |
| Kabuli_wild_1930973 | NA                                  | Ca_kabuli_denovo | 1930973                 | T/G  | NA                 | NA                            | NA                 |
| Kabuli_wild_1931126 | NA                                  | Ca_kabuli_denovo | 1931126                 | A/G  | NA                 | NA                            | NA                 |
| Kabuli_wild_1931471 | NA                                  | Ca_kabuli_denovo | 1931471                 | G/T  | NA                 | NA                            | NA                 |
| Kabuli_wild_1932096 | NA                                  | Ca_kabuli_denovo | 1932096                 | T/C  | NA                 | NA                            | NA                 |
| Kabuli_wild_1932099 | NA                                  | Ca_kabuli_denovo | 1932099                 | A/G  | NA                 | NA                            | NA                 |
| Kabuli_wild_1932843 | NA                                  | Ca_kabuli_denovo | 1932843                 | T/C  | NA                 | NA                            | NA                 |
| Kabuli_wild_1934730 | NA                                  | Ca_kabuli_denovo | 1934730                 | A/G  | NA                 | NA                            | NA                 |
| Kabuli_wild_1935141 | NA                                  | Ca_kabuli_denovo | 1935141                 | C/G  | NA                 | NA                            | NA                 |
| Kabuli_wild_1936128 | NA                                  | Ca_kabuli_denovo | 1936128                 | G/A  | NA                 | NA                            | NA                 |
| Kabuli_wild_1936834 | NA                                  | Ca_kabuli_denovo | 1936834                 | C/T  | NA                 | NA                            | NA                 |
| Kabuli_wild_1937167 | NA                                  | Ca_kabuli_denovo | 1937167                 | G/C  | NA                 | NA                            | NA                 |
| Kabuli_wild_1937175 | NA                                  | Ca_kabuli_denovo | 1937175                 | T/G  | NA                 | NA                            | NA                 |
| Kabuli_wild_1937214 | NA                                  | Ca_kabuli_denovo | 1937214                 | A/G  | NA                 | NA                            | NA                 |
| Kabuli_wild_1937304 | NA                                  | Ca_kabuli_denovo | 1937304                 | C/T  | NA                 | NA                            | NA                 |
| Kabuli_wild_1937513 | NA                                  | Ca_kabuli_denovo | 1937513                 | C/T  | NA                 | NA                            | NA                 |
| Kabuli_wild_1938237 | NA                                  | Ca_kabuli_denovo | 1938237                 | C/G  | NA                 | NA                            | NA                 |

| SNP IDs             | NCBI dbSNP accession IDs (NCBI_SS#) | Chromosomes      | Physical positions (bp) | SNPs | Gene accession IDs | Sequence components of genome | Putative functions |
|---------------------|-------------------------------------|------------------|-------------------------|------|--------------------|-------------------------------|--------------------|
| Kabuli_wild_1938240 | NA                                  | Ca_kabuli_denovo | 1938240                 | A/G  | NA                 | NA                            | NA                 |
| Kabuli_wild_1938637 | NA                                  | Ca_kabuli_denovo | 1938637                 | C/G  | NA                 | NA                            | NA                 |
| Kabuli_wild_1938652 | NA                                  | Ca_kabuli_denovo | 1938652                 | G/A  | NA                 | NA                            | NA                 |
| Kabuli_wild_1938857 | NA                                  | Ca_kabuli_denovo | 1938857                 | T/G  | NA                 | NA                            | NA                 |
| Kabuli_wild_1938983 | NA                                  | Ca_kabuli_denovo | 1938983                 | G/C  | NA                 | NA                            | NA                 |
| Kabuli_wild_1939012 | NA                                  | Ca_kabuli_denovo | 1939012                 | T/A  | NA                 | NA                            | NA                 |
| Kabuli_wild_1939037 | NA                                  | Ca_kabuli_denovo | 1939037                 | G/T  | NA                 | NA                            | NA                 |
| Kabuli_wild_1939057 | NA                                  | Ca_kabuli_denovo | 1939057                 | C/G  | NA                 | NA                            | NA                 |
| Kabuli_wild_1939509 | NA                                  | Ca_kabuli_denovo | 1939509                 | C/A  | NA                 | NA                            | NA                 |
| Kabuli_wild_1939539 | NA                                  | Ca_kabuli_denovo | 1939539                 | G/C  | NA                 | NA                            | NA                 |
| Kabuli_wild_1939811 | NA                                  | Ca_kabuli_denovo | 1939811                 | A/G  | NA                 | NA                            | NA                 |
| Kabuli_wild_1939828 | NA                                  | Ca_kabuli_denovo | 1939828                 | C/T  | NA                 | NA                            | NA                 |
| Kabuli_wild_1940775 | NA                                  | Ca_kabuli_denovo | 1940775                 | A/C  | NA                 | NA                            | NA                 |
| Kabuli_wild_1940805 | NA                                  | Ca_kabuli_denovo | 1940805                 | G/T  | NA                 | NA                            | NA                 |
| Kabuli_wild_1940863 | NA                                  | Ca_kabuli_denovo | 1940863                 | G/T  | NA                 | NA                            | NA                 |
| Kabuli_wild_1940865 | NA                                  | Ca_kabuli_denovo | 1940865                 | T/C  | NA                 | NA                            | NA                 |
| Kabuli_wild_1941876 | NA                                  | Ca_kabuli_denovo | 1941876                 | T/C  | NA                 | NA                            | NA                 |
| Kabuli_wild_1942164 | NA                                  | Ca_kabuli_denovo | 1942164                 | A/G  | NA                 | NA                            | NA                 |
| Kabuli_wild_1943735 | NA                                  | Ca_kabuli_denovo | 1943735                 | C/T  | NA                 | NA                            | NA                 |
| Kabuli_wild_1943738 | NA                                  | Ca_kabuli_denovo | 1943738                 | C/T  | NA                 | NA                            | NA                 |
| Kabuli_wild_1944956 | NA                                  | Ca_kabuli_denovo | 1944956                 | G/A  | NA                 | NA                            | NA                 |
| Kabuli_wild_1945139 | NA                                  | Ca_kabuli_denovo | 1945139                 | C/T  | NA                 | NA                            | NA                 |
| Kabuli_wild_1945510 | NA                                  | Ca_kabuli_denovo | 1945510                 | C/T  | NA                 | NA                            | NA                 |
| Kabuli_wild_1945537 | NA                                  | Ca_kabuli_denovo | 1945537                 | A/T  | NA                 | NA                            | NA                 |
| Kabuli_wild_1945678 | NA                                  | Ca_kabuli_denovo | 1945678                 | T/C  | NA                 | NA                            | NA                 |
| Kabuli_wild_1945708 | NA                                  | Ca_kabuli_denovo | 1945708                 | A/G  | NA                 | NA                            | NA                 |
| Kabuli_wild_1946114 | NA                                  | Ca_kabuli_denovo | 1946114                 | C/T  | NA                 | NA                            | NA                 |
| Kabuli_wild_1946238 | NA                                  | Ca_kabuli_denovo | 1946238                 | A/G  | NA                 | NA                            | NA                 |
| Kabuli_wild_1946932 | NA                                  | Ca_kabuli_denovo | 1946932                 | T/A  | NA                 | NA                            | NA                 |
| Kabuli_wild_1947358 | NA                                  | Ca_kabuli_denovo | 1947358                 | T/C  | NA                 | NA                            | NA                 |
| Kabuli_wild_1947797 | NA                                  | Ca_kabuli_denovo | 1947797                 | T/G  | NA                 | NA                            | NA                 |
| Kabuli_wild_1947838 | NA                                  | Ca_kabuli_denovo | 1947838                 | C/T  | NA                 | NA                            | NA                 |
| Kabuli_wild_1948272 | NA                                  | Ca_kabuli_denovo | 1948272                 | A/G  | NA                 | NA                            | NA                 |
| Kabuli_wild_1948421 | NA                                  | Ca_kabuli_denovo | 1948421                 | T/G  | NA                 | NA                            | NA                 |
| Kabuli_wild_1948996 | NA                                  | Ca_kabuli_denovo | 1948996                 | C/T  | NA                 | NA                            | NA                 |
| Kabuli_wild_1949017 | NA                                  | Ca_kabuli_denovo | 1949017                 | A/G  | NA                 | NA                            | NA                 |
| Kabuli_wild_1949312 | NA                                  | Ca_kabuli_denovo | 1949312                 | G/A  | NA                 | NA                            | NA                 |
| Kabuli_wild_1949667 | NA                                  | Ca_kabuli_denovo | 1949667                 | A/G  | NA                 | NA                            | NA                 |
| Kabuli_wild_1950193 | NA                                  | Ca_kabuli_denovo | 1950193                 | G/A  | NA                 | NA                            | NA                 |
| Kabuli_wild_1950928 | NA                                  | Ca_kabuli_denovo | 1950928                 | A/G  | NA                 | NA                            | NA                 |
| Kabuli_wild_1951910 | NA                                  | Ca_kabuli_denovo | 1951910                 | G/A  | NA                 | NA                            | NA                 |
| Kabuli_wild_1951915 | NA                                  | Ca_kabuli_denovo | 1951915                 | C/T  | NA                 | NA                            | NA                 |
| Kabuli_wild_1952340 | NA                                  | Ca_kabuli_denovo | 1952340                 | C/G  | NA                 | NA                            | NA                 |
| Kabuli_wild_1952341 | NA                                  | Ca_kabuli_denovo | 1952341                 | A/G  | NA                 | NA                            | NA                 |

| SNP IDs                    | NCBI dbSNP accession IDs (NCBI_SS#) | Chromosomes             | Physical positions (bp) | SNPs | Gene accession IDs | Sequence components of genome | Putative functions |
|----------------------------|-------------------------------------|-------------------------|-------------------------|------|--------------------|-------------------------------|--------------------|
| <i>Kabuli_wild_1952662</i> | NA                                  | <i>Ca_kabuli_denovo</i> | 1952662                 | G/C  | NA                 | NA                            | NA                 |
| <i>Kabuli_wild_1952889</i> | NA                                  | <i>Ca_kabuli_denovo</i> | 1952889                 | C/T  | NA                 | NA                            | NA                 |
| <i>Kabuli_wild_1953503</i> | NA                                  | <i>Ca_kabuli_denovo</i> | 1953503                 | T/C  | NA                 | NA                            | NA                 |
| <i>Kabuli_wild_1953737</i> | NA                                  | <i>Ca_kabuli_denovo</i> | 1953737                 | C/T  | NA                 | NA                            | NA                 |
| <i>Kabuli_wild_1953752</i> | NA                                  | <i>Ca_kabuli_denovo</i> | 1953752                 | G/C  | NA                 | NA                            | NA                 |
| <i>Kabuli_wild_1953840</i> | NA                                  | <i>Ca_kabuli_denovo</i> | 1953840                 | A/T  | NA                 | NA                            | NA                 |
| <i>Kabuli_wild_1954910</i> | NA                                  | <i>Ca_kabuli_denovo</i> | 1954910                 | G/C  | NA                 | NA                            | NA                 |
| <i>Kabuli_wild_1954935</i> | NA                                  | <i>Ca_kabuli_denovo</i> | 1954935                 | A/G  | NA                 | NA                            | NA                 |
| <i>Kabuli_wild_1955386</i> | NA                                  | <i>Ca_kabuli_denovo</i> | 1955386                 | T/G  | NA                 | NA                            | NA                 |
| <i>Kabuli_wild_1955402</i> | NA                                  | <i>Ca_kabuli_denovo</i> | 1955402                 | A/G  | NA                 | NA                            | NA                 |
| <i>Kabuli_wild_1956135</i> | NA                                  | <i>Ca_kabuli_denovo</i> | 1956135                 | A/T  | NA                 | NA                            | NA                 |
| <i>Kabuli_wild_1956166</i> | NA                                  | <i>Ca_kabuli_denovo</i> | 1956166                 | T/C  | NA                 | NA                            | NA                 |
| <i>Kabuli_wild_1956214</i> | NA                                  | <i>Ca_kabuli_denovo</i> | 1956214                 | A/G  | NA                 | NA                            | NA                 |
| <i>Kabuli_wild_1956243</i> | NA                                  | <i>Ca_kabuli_denovo</i> | 1956243                 | C/G  | NA                 | NA                            | NA                 |
| <i>Kabuli_wild_1956281</i> | NA                                  | <i>Ca_kabuli_denovo</i> | 1956281                 | A/G  | NA                 | NA                            | NA                 |
| <i>Kabuli_wild_1956440</i> | NA                                  | <i>Ca_kabuli_denovo</i> | 1956440                 | G/T  | NA                 | NA                            | NA                 |
| <i>Kabuli_wild_1956960</i> | NA                                  | <i>Ca_kabuli_denovo</i> | 1956960                 | A/G  | NA                 | NA                            | NA                 |
| <i>Kabuli_wild_1957003</i> | NA                                  | <i>Ca_kabuli_denovo</i> | 1957003                 | A/C  | NA                 | NA                            | NA                 |
| <i>Kabuli_wild_1957340</i> | NA                                  | <i>Ca_kabuli_denovo</i> | 1957340                 | T/C  | NA                 | NA                            | NA                 |
| <i>Kabuli_wild_1961194</i> | NA                                  | <i>Ca_kabuli_denovo</i> | 1961194                 | A/C  | NA                 | NA                            | NA                 |
| <i>Kabuli_wild_1962503</i> | NA                                  | <i>Ca_kabuli_denovo</i> | 1962503                 | A/G  | NA                 | NA                            | NA                 |
| <i>Kabuli_wild_1962524</i> | NA                                  | <i>Ca_kabuli_denovo</i> | 1962524                 | G/C  | NA                 | NA                            | NA                 |
| <i>Kabuli_wild_1963437</i> | NA                                  | <i>Ca_kabuli_denovo</i> | 1963437                 | G/C  | NA                 | NA                            | NA                 |
| <i>Kabuli_wild_1965174</i> | NA                                  | <i>Ca_kabuli_denovo</i> | 1965174                 | T/C  | NA                 | NA                            | NA                 |
| <i>Kabuli_wild_1965202</i> | NA                                  | <i>Ca_kabuli_denovo</i> | 1965202                 | G/C  | NA                 | NA                            | NA                 |
| <i>Kabuli_wild_1966172</i> | NA                                  | <i>Ca_kabuli_denovo</i> | 1966172                 | A/G  | NA                 | NA                            | NA                 |
| <i>Kabuli_wild_1968085</i> | NA                                  | <i>Ca_kabuli_denovo</i> | 1968085                 | G/A  | NA                 | NA                            | NA                 |
| <i>Kabuli_wild_1968699</i> | NA                                  | <i>Ca_kabuli_denovo</i> | 1968699                 | A/T  | NA                 | NA                            | NA                 |
| <i>Kabuli_wild_1969349</i> | NA                                  | <i>Ca_kabuli_denovo</i> | 1969349                 | A/G  | NA                 | NA                            | NA                 |
| <i>Kabuli_wild_1969907</i> | NA                                  | <i>Ca_kabuli_denovo</i> | 1969907                 | A/G  | NA                 | NA                            | NA                 |
| <i>Kabuli_wild_1969930</i> | NA                                  | <i>Ca_kabuli_denovo</i> | 1969930                 | A/G  | NA                 | NA                            | NA                 |
| <i>Kabuli_wild_1970270</i> | NA                                  | <i>Ca_kabuli_denovo</i> | 1970270                 | A/G  | NA                 | NA                            | NA                 |
| <i>Kabuli_wild_1970275</i> | NA                                  | <i>Ca_kabuli_denovo</i> | 1970275                 | C/A  | NA                 | NA                            | NA                 |
| <i>Kabuli_wild_1970931</i> | NA                                  | <i>Ca_kabuli_denovo</i> | 1970931                 | G/A  | NA                 | NA                            | NA                 |
| <i>Kabuli_wild_1970971</i> | NA                                  | <i>Ca_kabuli_denovo</i> | 1970971                 | C/G  | NA                 | NA                            | NA                 |
| <i>Kabuli_wild_1971240</i> | NA                                  | <i>Ca_kabuli_denovo</i> | 1971240                 | C/T  | NA                 | NA                            | NA                 |
| <i>Kabuli_wild_1971246</i> | NA                                  | <i>Ca_kabuli_denovo</i> | 1971246                 | C/T  | NA                 | NA                            | NA                 |
| <i>Kabuli_wild_1971766</i> | NA                                  | <i>Ca_kabuli_denovo</i> | 1971766                 | G/T  | NA                 | NA                            | NA                 |
| <i>Kabuli_wild_1971800</i> | NA                                  | <i>Ca_kabuli_denovo</i> | 1971800                 | A/G  | NA                 | NA                            | NA                 |
| <i>Kabuli_wild_1971826</i> | NA                                  | <i>Ca_kabuli_denovo</i> | 1971826                 | G/A  | NA                 | NA                            | NA                 |
| <i>Kabuli_wild_1971865</i> | NA                                  | <i>Ca_kabuli_denovo</i> | 1971865                 | A/C  | NA                 | NA                            | NA                 |
| <i>Kabuli_wild_1971922</i> | NA                                  | <i>Ca_kabuli_denovo</i> | 1971922                 | G/A  | NA                 | NA                            | NA                 |
| <i>Kabuli_wild_1973389</i> | NA                                  | <i>Ca_kabuli_denovo</i> | 1973389                 | G/T  | NA                 | NA                            | NA                 |
| <i>Kabuli_wild_1974305</i> | NA                                  | <i>Ca_kabuli_denovo</i> | 1974305                 | G/A  | NA                 | NA                            | NA                 |

| SNP IDs             | NCBI dbSNP accession IDs (NCBI_SS#) | Chromosomes      | Physical positions (bp) | SNPs | Gene accession IDs | Sequence components of genome | Putative functions |
|---------------------|-------------------------------------|------------------|-------------------------|------|--------------------|-------------------------------|--------------------|
| Kabuli_wild_1974701 | NA                                  | Ca_kabuli_denovo | 1974701                 | G/A  | NA                 | NA                            | NA                 |
| Kabuli_wild_1974706 | NA                                  | Ca_kabuli_denovo | 1974706                 | G/A  | NA                 | NA                            | NA                 |
| Kabuli_wild_1975769 | NA                                  | Ca_kabuli_denovo | 1975769                 | G/C  | NA                 | NA                            | NA                 |
| Kabuli_wild_1975777 | NA                                  | Ca_kabuli_denovo | 1975777                 | T/C  | NA                 | NA                            | NA                 |
| Kabuli_wild_1975872 | NA                                  | Ca_kabuli_denovo | 1975872                 | A/G  | NA                 | NA                            | NA                 |
| Kabuli_wild_1975896 | NA                                  | Ca_kabuli_denovo | 1975896                 | A/G  | NA                 | NA                            | NA                 |
| Kabuli_wild_1978864 | NA                                  | Ca_kabuli_denovo | 1978864                 | G/A  | NA                 | NA                            | NA                 |
| Kabuli_wild_1978878 | NA                                  | Ca_kabuli_denovo | 1978878                 | G/A  | NA                 | NA                            | NA                 |
| Kabuli_wild_1979672 | NA                                  | Ca_kabuli_denovo | 1979672                 | C/T  | NA                 | NA                            | NA                 |
| Kabuli_wild_1979836 | NA                                  | Ca_kabuli_denovo | 1979836                 | G/A  | NA                 | NA                            | NA                 |
| Kabuli_wild_1979921 | NA                                  | Ca_kabuli_denovo | 1979921                 | A/G  | NA                 | NA                            | NA                 |
| Kabuli_wild_1979924 | NA                                  | Ca_kabuli_denovo | 1979924                 | A/G  | NA                 | NA                            | NA                 |
| Kabuli_wild_1980086 | NA                                  | Ca_kabuli_denovo | 1980086                 | T/C  | NA                 | NA                            | NA                 |
| Kabuli_wild_1980533 | NA                                  | Ca_kabuli_denovo | 1980533                 | T/C  | NA                 | NA                            | NA                 |
| Kabuli_wild_1980898 | NA                                  | Ca_kabuli_denovo | 1980898                 | G/A  | NA                 | NA                            | NA                 |
| Kabuli_wild_1981761 | NA                                  | Ca_kabuli_denovo | 1981761                 | G/A  | NA                 | NA                            | NA                 |
| Kabuli_wild_1981800 | NA                                  | Ca_kabuli_denovo | 1981800                 | C/G  | NA                 | NA                            | NA                 |
| Kabuli_wild_1982643 | NA                                  | Ca_kabuli_denovo | 1982643                 | T/G  | NA                 | NA                            | NA                 |
| Kabuli_wild_1982656 | NA                                  | Ca_kabuli_denovo | 1982656                 | A/C  | NA                 | NA                            | NA                 |
| Kabuli_wild_1982728 | NA                                  | Ca_kabuli_denovo | 1982728                 | C/T  | NA                 | NA                            | NA                 |
| Kabuli_wild_1985451 | NA                                  | Ca_kabuli_denovo | 1985451                 | T/A  | NA                 | NA                            | NA                 |
| Kabuli_wild_1985474 | NA                                  | Ca_kabuli_denovo | 1985474                 | C/A  | NA                 | NA                            | NA                 |
| Kabuli_wild_1986229 | NA                                  | Ca_kabuli_denovo | 1986229                 | A/G  | NA                 | NA                            | NA                 |
| Kabuli_wild_1986230 | NA                                  | Ca_kabuli_denovo | 1986230                 | G/A  | NA                 | NA                            | NA                 |
| Kabuli_wild_1986280 | NA                                  | Ca_kabuli_denovo | 1986280                 | G/T  | NA                 | NA                            | NA                 |
| Kabuli_wild_1986292 | NA                                  | Ca_kabuli_denovo | 1986292                 | C/T  | NA                 | NA                            | NA                 |
| Kabuli_wild_1986746 | NA                                  | Ca_kabuli_denovo | 1986746                 | A/G  | NA                 | NA                            | NA                 |
| Kabuli_wild_1987030 | NA                                  | Ca_kabuli_denovo | 1987030                 | T/C  | NA                 | NA                            | NA                 |
| Kabuli_wild_1987111 | NA                                  | Ca_kabuli_denovo | 1987111                 | C/T  | NA                 | NA                            | NA                 |
| Kabuli_wild_1987126 | NA                                  | Ca_kabuli_denovo | 1987126                 | C/G  | NA                 | NA                            | NA                 |
| Kabuli_wild_1987275 | NA                                  | Ca_kabuli_denovo | 1987275                 | G/T  | NA                 | NA                            | NA                 |
| Kabuli_wild_1989848 | NA                                  | Ca_kabuli_denovo | 1989848                 | T/C  | NA                 | NA                            | NA                 |
| Kabuli_wild_1990137 | NA                                  | Ca_kabuli_denovo | 1990137                 | G/A  | NA                 | NA                            | NA                 |
| Kabuli_wild_1990404 | NA                                  | Ca_kabuli_denovo | 1990404                 | T/A  | NA                 | NA                            | NA                 |
| Kabuli_wild_1990809 | NA                                  | Ca_kabuli_denovo | 1990809                 | A/G  | NA                 | NA                            | NA                 |
| Kabuli_wild_1990845 | NA                                  | Ca_kabuli_denovo | 1990845                 | C/G  | NA                 | NA                            | NA                 |
| Kabuli_wild_1991774 | NA                                  | Ca_kabuli_denovo | 1991774                 | G/C  | NA                 | NA                            | NA                 |
| Kabuli_wild_1992064 | NA                                  | Ca_kabuli_denovo | 1992064                 | G/T  | NA                 | NA                            | NA                 |
| Kabuli_wild_1992150 | NA                                  | Ca_kabuli_denovo | 1992150                 | T/G  | NA                 | NA                            | NA                 |
| Kabuli_wild_1994465 | NA                                  | Ca_kabuli_denovo | 1994465                 | A/C  | NA                 | NA                            | NA                 |
| Kabuli_wild_1994575 | NA                                  | Ca_kabuli_denovo | 1994575                 | T/C  | NA                 | NA                            | NA                 |
| Kabuli_wild_1994594 | NA                                  | Ca_kabuli_denovo | 1994594                 | G/A  | NA                 | NA                            | NA                 |
| Kabuli_wild_1994980 | NA                                  | Ca_kabuli_denovo | 1994980                 | A/C  | NA                 | NA                            | NA                 |
| Kabuli_wild_1994985 | NA                                  | Ca_kabuli_denovo | 1994985                 | G/A  | NA                 | NA                            | NA                 |



| SNP IDs             | NCBI dbSNP accession IDs (NCBI_SS#) | Chromosomes      | Physical positions (bp) | SNPs | Gene accession IDs | Sequence components of genome | Putative functions |
|---------------------|-------------------------------------|------------------|-------------------------|------|--------------------|-------------------------------|--------------------|
| Kabuli_wild_1995098 | NA                                  | Ca_kabuli_denovo | 1995098                 | A/G  | NA                 | NA                            | NA                 |
| Kabuli_wild_1997392 | NA                                  | Ca_kabuli_denovo | 1997392                 | G/A  | NA                 | NA                            | NA                 |
| Kabuli_wild_1997490 | NA                                  | Ca_kabuli_denovo | 1997490                 | G/C  | NA                 | NA                            | NA                 |
| Kabuli_wild_1998632 | NA                                  | Ca_kabuli_denovo | 1998632                 | C/T  | NA                 | NA                            | NA                 |
| Kabuli_wild_1999931 | NA                                  | Ca_kabuli_denovo | 1999931                 | A/C  | NA                 | NA                            | NA                 |
| Kabuli_wild_1999942 | NA                                  | Ca_kabuli_denovo | 1999942                 | G/A  | NA                 | NA                            | NA                 |
| Kabuli_wild_1999959 | NA                                  | Ca_kabuli_denovo | 1999959                 | T/A  | NA                 | NA                            | NA                 |
| Kabuli_wild_2000231 | NA                                  | Ca_kabuli_denovo | 2000231                 | C/T  | NA                 | NA                            | NA                 |
| Kabuli_wild_2000264 | NA                                  | Ca_kabuli_denovo | 2000264                 | T/C  | NA                 | NA                            | NA                 |
| Kabuli_wild_2000271 | NA                                  | Ca_kabuli_denovo | 2000271                 | C/T  | NA                 | NA                            | NA                 |
| Kabuli_wild_2001980 | NA                                  | Ca_kabuli_denovo | 2001980                 | T/C  | NA                 | NA                            | NA                 |
| Kabuli_wild_2002313 | NA                                  | Ca_kabuli_denovo | 2002313                 | G/T  | NA                 | NA                            | NA                 |
| Kabuli_wild_2004111 | NA                                  | Ca_kabuli_denovo | 2004111                 | A/G  | NA                 | NA                            | NA                 |
| Kabuli_wild_2004438 | NA                                  | Ca_kabuli_denovo | 2004438                 | G/T  | NA                 | NA                            | NA                 |
| Kabuli_wild_2005415 | NA                                  | Ca_kabuli_denovo | 2005415                 | G/T  | NA                 | NA                            | NA                 |
| Kabuli_wild_2007185 | NA                                  | Ca_kabuli_denovo | 2007185                 | G/A  | NA                 | NA                            | NA                 |
| Kabuli_wild_2007217 | NA                                  | Ca_kabuli_denovo | 2007217                 | T/C  | NA                 | NA                            | NA                 |
| Kabuli_wild_2007961 | NA                                  | Ca_kabuli_denovo | 2007961                 | A/T  | NA                 | NA                            | NA                 |
| Kabuli_wild_2007969 | NA                                  | Ca_kabuli_denovo | 2007969                 | T/C  | NA                 | NA                            | NA                 |
| Kabuli_wild_2008775 | NA                                  | Ca_kabuli_denovo | 2008775                 | G/T  | NA                 | NA                            | NA                 |
| Kabuli_wild_2010400 | NA                                  | Ca_kabuli_denovo | 2010400                 | T/C  | NA                 | NA                            | NA                 |
| Kabuli_wild_2010592 | NA                                  | Ca_kabuli_denovo | 2010592                 | A/G  | NA                 | NA                            | NA                 |
| Kabuli_wild_2010629 | NA                                  | Ca_kabuli_denovo | 2010629                 | A/G  | NA                 | NA                            | NA                 |
| Kabuli_wild_2011980 | NA                                  | Ca_kabuli_denovo | 2011980                 | T/C  | NA                 | NA                            | NA                 |
| Kabuli_wild_2012007 | NA                                  | Ca_kabuli_denovo | 2012007                 | T/C  | NA                 | NA                            | NA                 |
| Kabuli_wild_2013612 | NA                                  | Ca_kabuli_denovo | 2013612                 | C/A  | NA                 | NA                            | NA                 |
| Kabuli_wild_2013632 | NA                                  | Ca_kabuli_denovo | 2013632                 | C/A  | NA                 | NA                            | NA                 |
| Kabuli_wild_2013671 | NA                                  | Ca_kabuli_denovo | 2013671                 | A/G  | NA                 | NA                            | NA                 |
| Kabuli_wild_2014071 | NA                                  | Ca_kabuli_denovo | 2014071                 | G/A  | NA                 | NA                            | NA                 |
| Kabuli_wild_2014134 | NA                                  | Ca_kabuli_denovo | 2014134                 | A/G  | NA                 | NA                            | NA                 |
| Kabuli_wild_2014186 | NA                                  | Ca_kabuli_denovo | 2014186                 | C/T  | NA                 | NA                            | NA                 |
| Kabuli_wild_2014931 | NA                                  | Ca_kabuli_denovo | 2014931                 | T/A  | NA                 | NA                            | NA                 |
| Kabuli_wild_2014980 | NA                                  | Ca_kabuli_denovo | 2014980                 | A/G  | NA                 | NA                            | NA                 |
| Kabuli_wild_2018115 | NA                                  | Ca_kabuli_denovo | 2018115                 | T/G  | NA                 | NA                            | NA                 |
| Kabuli_wild_2019258 | NA                                  | Ca_kabuli_denovo | 2019258                 | T/C  | NA                 | NA                            | NA                 |
| Kabuli_wild_2019273 | NA                                  | Ca_kabuli_denovo | 2019273                 | A/G  | NA                 | NA                            | NA                 |
| Kabuli_wild_2021924 | NA                                  | Ca_kabuli_denovo | 2021924                 | T/C  | NA                 | NA                            | NA                 |
| Kabuli_wild_2022605 | NA                                  | Ca_kabuli_denovo | 2022605                 | C/A  | NA                 | NA                            | NA                 |
| Kabuli_wild_2022653 | NA                                  | Ca_kabuli_denovo | 2022653                 | A/G  | NA                 | NA                            | NA                 |
| Kabuli_wild_2023588 | NA                                  | Ca_kabuli_denovo | 2023588                 | G/C  | NA                 | NA                            | NA                 |
| Kabuli_wild_2023600 | NA                                  | Ca_kabuli_denovo | 2023600                 | A/G  | NA                 | NA                            | NA                 |
| Kabuli_wild_2023864 | NA                                  | Ca_kabuli_denovo | 2023864                 | C/T  | NA                 | NA                            | NA                 |
| Kabuli_wild_2023866 | NA                                  | Ca_kabuli_denovo | 2023866                 | G/T  | NA                 | NA                            | NA                 |
| Kabuli_wild_2023874 | NA                                  | Ca_kabuli_denovo | 2023874                 | T/C  | NA                 | NA                            | NA                 |

| SNP IDs             | NCBI dbSNP accession IDs (NCBI_SS#) | Chromosomes      | Physical positions (bp) | SNPs | Gene accession IDs | Sequence components of genome | Putative functions |
|---------------------|-------------------------------------|------------------|-------------------------|------|--------------------|-------------------------------|--------------------|
| Kabuli_wild_2024241 | NA                                  | Ca_kabuli_denovo | 2024241                 | A/C  | NA                 | NA                            | NA                 |
| Kabuli_wild_2024284 | NA                                  | Ca_kabuli_denovo | 2024284                 | G/A  | NA                 | NA                            | NA                 |
| Kabuli_wild_2024390 | NA                                  | Ca_kabuli_denovo | 2024390                 | A/G  | NA                 | NA                            | NA                 |
| Kabuli_wild_2024783 | NA                                  | Ca_kabuli_denovo | 2024783                 | T/C  | NA                 | NA                            | NA                 |
| Kabuli_wild_2024802 | NA                                  | Ca_kabuli_denovo | 2024802                 | C/T  | NA                 | NA                            | NA                 |
| Kabuli_wild_2025250 | NA                                  | Ca_kabuli_denovo | 2025250                 | G/T  | NA                 | NA                            | NA                 |
| Kabuli_wild_2025491 | NA                                  | Ca_kabuli_denovo | 2025491                 | A/C  | NA                 | NA                            | NA                 |
| Kabuli_wild_2025621 | NA                                  | Ca_kabuli_denovo | 2025621                 | A/G  | NA                 | NA                            | NA                 |
| Kabuli_wild_2026070 | NA                                  | Ca_kabuli_denovo | 2026070                 | C/T  | NA                 | NA                            | NA                 |
| Kabuli_wild_2026073 | NA                                  | Ca_kabuli_denovo | 2026073                 | A/C  | NA                 | NA                            | NA                 |
| Kabuli_wild_2027678 | NA                                  | Ca_kabuli_denovo | 2027678                 | A/C  | NA                 | NA                            | NA                 |
| Kabuli_wild_2027897 | NA                                  | Ca_kabuli_denovo | 2027897                 | T/C  | NA                 | NA                            | NA                 |
| Kabuli_wild_2027899 | NA                                  | Ca_kabuli_denovo | 2027899                 | G/A  | NA                 | NA                            | NA                 |
| Kabuli_wild_2030944 | NA                                  | Ca_kabuli_denovo | 2030944                 | T/A  | NA                 | NA                            | NA                 |
| Kabuli_wild_2031136 | NA                                  | Ca_kabuli_denovo | 2031136                 | G/A  | NA                 | NA                            | NA                 |
| Kabuli_wild_2031155 | NA                                  | Ca_kabuli_denovo | 2031155                 | A/G  | NA                 | NA                            | NA                 |
| Kabuli_wild_2031323 | NA                                  | Ca_kabuli_denovo | 2031323                 | T/C  | NA                 | NA                            | NA                 |
| Kabuli_wild_2031746 | NA                                  | Ca_kabuli_denovo | 2031746                 | T/C  | NA                 | NA                            | NA                 |
| Kabuli_wild_2032820 | NA                                  | Ca_kabuli_denovo | 2032820                 | C/T  | NA                 | NA                            | NA                 |
| Kabuli_wild_2033462 | NA                                  | Ca_kabuli_denovo | 2033462                 | G/C  | NA                 | NA                            | NA                 |
| Kabuli_wild_2033471 | NA                                  | Ca_kabuli_denovo | 2033471                 | C/A  | NA                 | NA                            | NA                 |
| Kabuli_wild_2033480 | NA                                  | Ca_kabuli_denovo | 2033480                 | G/A  | NA                 | NA                            | NA                 |
| Kabuli_wild_2034175 | NA                                  | Ca_kabuli_denovo | 2034175                 | T/G  | NA                 | NA                            | NA                 |
| Kabuli_wild_2034256 | NA                                  | Ca_kabuli_denovo | 2034256                 | T/C  | NA                 | NA                            | NA                 |
| Kabuli_wild_2034849 | NA                                  | Ca_kabuli_denovo | 2034849                 | A/C  | NA                 | NA                            | NA                 |
| Kabuli_wild_2034885 | NA                                  | Ca_kabuli_denovo | 2034885                 | A/C  | NA                 | NA                            | NA                 |
| Kabuli_wild_2035108 | NA                                  | Ca_kabuli_denovo | 2035108                 | A/G  | NA                 | NA                            | NA                 |
| Kabuli_wild_2035686 | NA                                  | Ca_kabuli_denovo | 2035686                 | C/G  | NA                 | NA                            | NA                 |
| Kabuli_wild_2035743 | NA                                  | Ca_kabuli_denovo | 2035743                 | G/A  | NA                 | NA                            | NA                 |
| Kabuli_wild_2036546 | NA                                  | Ca_kabuli_denovo | 2036546                 | C/T  | NA                 | NA                            | NA                 |
| Kabuli_wild_2037072 | NA                                  | Ca_kabuli_denovo | 2037072                 | G/C  | NA                 | NA                            | NA                 |
| Kabuli_wild_2037366 | NA                                  | Ca_kabuli_denovo | 2037366                 | C/G  | NA                 | NA                            | NA                 |
| Kabuli_wild_2038581 | NA                                  | Ca_kabuli_denovo | 2038581                 | T/C  | NA                 | NA                            | NA                 |
| Kabuli_wild_2038589 | NA                                  | Ca_kabuli_denovo | 2038589                 | T/G  | NA                 | NA                            | NA                 |
| Kabuli_wild_2038603 | NA                                  | Ca_kabuli_denovo | 2038603                 | T/C  | NA                 | NA                            | NA                 |
| Kabuli_wild_2038826 | NA                                  | Ca_kabuli_denovo | 2038826                 | G/C  | NA                 | NA                            | NA                 |
| Kabuli_wild_2039178 | NA                                  | Ca_kabuli_denovo | 2039178                 | A/G  | NA                 | NA                            | NA                 |
| Kabuli_wild_2039214 | NA                                  | Ca_kabuli_denovo | 2039214                 | A/G  | NA                 | NA                            | NA                 |
| Kabuli_wild_2040169 | NA                                  | Ca_kabuli_denovo | 2040169                 | T/C  | NA                 | NA                            | NA                 |
| Kabuli_wild_2040199 | NA                                  | Ca_kabuli_denovo | 2040199                 | A/G  | NA                 | NA                            | NA                 |
| Kabuli_wild_2040423 | NA                                  | Ca_kabuli_denovo | 2040423                 | A/G  | NA                 | NA                            | NA                 |
| Kabuli_wild_2042257 | NA                                  | Ca_kabuli_denovo | 2042257                 | T/G  | NA                 | NA                            | NA                 |
| Kabuli_wild_2042519 | NA                                  | Ca_kabuli_denovo | 2042519                 | T/G  | NA                 | NA                            | NA                 |
| Kabuli_wild_2042671 | NA                                  | Ca_kabuli_denovo | 2042671                 | A/G  | NA                 | NA                            | NA                 |

| SNP IDs             | NCBI dbSNP accession IDs (NCBI_SS#) | Chromosomes      | Physical positions (bp) | SNPs | Gene accession IDs | Sequence components of genome | Putative functions |
|---------------------|-------------------------------------|------------------|-------------------------|------|--------------------|-------------------------------|--------------------|
| Kabuli_wild_2044338 | NA                                  | Ca_kabuli_denovo | 2044338                 | A/G  | NA                 | NA                            | NA                 |
| Kabuli_wild_2044813 | NA                                  | Ca_kabuli_denovo | 2044813                 | C/G  | NA                 | NA                            | NA                 |
| Kabuli_wild_2044977 | NA                                  | Ca_kabuli_denovo | 2044977                 | C/T  | NA                 | NA                            | NA                 |
| Kabuli_wild_2045148 | NA                                  | Ca_kabuli_denovo | 2045148                 | G/A  | NA                 | NA                            | NA                 |
| Kabuli_wild_2045207 | NA                                  | Ca_kabuli_denovo | 2045207                 | T/C  | NA                 | NA                            | NA                 |
| Kabuli_wild_2045540 | NA                                  | Ca_kabuli_denovo | 2045540                 | G/A  | NA                 | NA                            | NA                 |
| Kabuli_wild_2046090 | NA                                  | Ca_kabuli_denovo | 2046090                 | G/T  | NA                 | NA                            | NA                 |
| Kabuli_wild_2046951 | NA                                  | Ca_kabuli_denovo | 2046951                 | C/G  | NA                 | NA                            | NA                 |
| Kabuli_wild_2046978 | NA                                  | Ca_kabuli_denovo | 2046978                 | T/C  | NA                 | NA                            | NA                 |
| Kabuli_wild_2047439 | NA                                  | Ca_kabuli_denovo | 2047439                 | C/G  | NA                 | NA                            | NA                 |
| Kabuli_wild_2047486 | NA                                  | Ca_kabuli_denovo | 2047486                 | T/C  | NA                 | NA                            | NA                 |
| Kabuli_wild_2047642 | NA                                  | Ca_kabuli_denovo | 2047642                 | A/T  | NA                 | NA                            | NA                 |
| Kabuli_wild_2047899 | NA                                  | Ca_kabuli_denovo | 2047899                 | G/A  | NA                 | NA                            | NA                 |
| Kabuli_wild_2048034 | NA                                  | Ca_kabuli_denovo | 2048034                 | A/G  | NA                 | NA                            | NA                 |
| Kabuli_wild_2048976 | NA                                  | Ca_kabuli_denovo | 2048976                 | G/A  | NA                 | NA                            | NA                 |
| Kabuli_wild_2048992 | NA                                  | Ca_kabuli_denovo | 2048992                 | C/G  | NA                 | NA                            | NA                 |
| Kabuli_wild_2049091 | NA                                  | Ca_kabuli_denovo | 2049091                 | T/C  | NA                 | NA                            | NA                 |
| Kabuli_wild_2049101 | NA                                  | Ca_kabuli_denovo | 2049101                 | A/G  | NA                 | NA                            | NA                 |
| Kabuli_wild_2049310 | NA                                  | Ca_kabuli_denovo | 2049310                 | G/C  | NA                 | NA                            | NA                 |
| Kabuli_wild_2050019 | NA                                  | Ca_kabuli_denovo | 2050019                 | T/G  | NA                 | NA                            | NA                 |
| Kabuli_wild_2051448 | NA                                  | Ca_kabuli_denovo | 2051448                 | G/A  | NA                 | NA                            | NA                 |
| Kabuli_wild_2051449 | NA                                  | Ca_kabuli_denovo | 2051449                 | C/G  | NA                 | NA                            | NA                 |
| Kabuli_wild_2052275 | NA                                  | Ca_kabuli_denovo | 2052275                 | T/C  | NA                 | NA                            | NA                 |
| Kabuli_wild_2052380 | NA                                  | Ca_kabuli_denovo | 2052380                 | G/C  | NA                 | NA                            | NA                 |
| Kabuli_wild_2052455 | NA                                  | Ca_kabuli_denovo | 2052455                 | T/C  | NA                 | NA                            | NA                 |
| Kabuli_wild_2053393 | NA                                  | Ca_kabuli_denovo | 2053393                 | T/C  | NA                 | NA                            | NA                 |
| Kabuli_wild_2054116 | NA                                  | Ca_kabuli_denovo | 2054116                 | C/T  | NA                 | NA                            | NA                 |
| Kabuli_wild_2054982 | NA                                  | Ca_kabuli_denovo | 2054982                 | G/T  | NA                 | NA                            | NA                 |
| Kabuli_wild_2055308 | NA                                  | Ca_kabuli_denovo | 2055308                 | C/A  | NA                 | NA                            | NA                 |
| Kabuli_wild_2056188 | NA                                  | Ca_kabuli_denovo | 2056188                 | G/C  | NA                 | NA                            | NA                 |
| Kabuli_wild_2056642 | NA                                  | Ca_kabuli_denovo | 2056642                 | G/A  | NA                 | NA                            | NA                 |
| Kabuli_wild_2056851 | NA                                  | Ca_kabuli_denovo | 2056851                 | T/C  | NA                 | NA                            | NA                 |
| Kabuli_wild_2056872 | NA                                  | Ca_kabuli_denovo | 2056872                 | G/A  | NA                 | NA                            | NA                 |
| Kabuli_wild_2056917 | NA                                  | Ca_kabuli_denovo | 2056917                 | G/T  | NA                 | NA                            | NA                 |
| Kabuli_wild_2058327 | NA                                  | Ca_kabuli_denovo | 2058327                 | T/A  | NA                 | NA                            | NA                 |
| Kabuli_wild_2059111 | NA                                  | Ca_kabuli_denovo | 2059111                 | A/G  | NA                 | NA                            | NA                 |
| Kabuli_wild_2059773 | NA                                  | Ca_kabuli_denovo | 2059773                 | C/T  | NA                 | NA                            | NA                 |
| Kabuli_wild_2060447 | NA                                  | Ca_kabuli_denovo | 2060447                 | G/A  | NA                 | NA                            | NA                 |
| Kabuli_wild_2060649 | NA                                  | Ca_kabuli_denovo | 2060649                 | G/C  | NA                 | NA                            | NA                 |
| Kabuli_wild_2060665 | NA                                  | Ca_kabuli_denovo | 2060665                 | C/T  | NA                 | NA                            | NA                 |
| Kabuli_wild_2062628 | NA                                  | Ca_kabuli_denovo | 2062628                 | A/C  | NA                 | NA                            | NA                 |
| Kabuli_wild_2063151 | NA                                  | Ca_kabuli_denovo | 2063151                 | A/G  | NA                 | NA                            | NA                 |
| Kabuli_wild_2063178 | NA                                  | Ca_kabuli_denovo | 2063178                 | G/A  | NA                 | NA                            | NA                 |
| Kabuli_wild_2063332 | NA                                  | Ca_kabuli_denovo | 2063332                 | G/A  | NA                 | NA                            | NA                 |

| SNP IDs             | NCBI dbSNP accession IDs (NCBI_SS#) | Chromosomes      | Physical positions (bp) | SNPs | Gene accession IDs | Sequence components of genome | Putative functions |
|---------------------|-------------------------------------|------------------|-------------------------|------|--------------------|-------------------------------|--------------------|
| Kabuli_wild_2064417 | NA                                  | Ca_kabuli_denovo | 2064417                 | T/C  | NA                 | NA                            | NA                 |
| Kabuli_wild_2065678 | NA                                  | Ca_kabuli_denovo | 2065678                 | T/C  | NA                 | NA                            | NA                 |
| Kabuli_wild_2065691 | NA                                  | Ca_kabuli_denovo | 2065691                 | C/T  | NA                 | NA                            | NA                 |
| Kabuli_wild_2067386 | NA                                  | Ca_kabuli_denovo | 2067386                 | C/T  | NA                 | NA                            | NA                 |
| Kabuli_wild_2067389 | NA                                  | Ca_kabuli_denovo | 2067389                 | A/G  | NA                 | NA                            | NA                 |
| Kabuli_wild_2067439 | NA                                  | Ca_kabuli_denovo | 2067439                 | C/G  | NA                 | NA                            | NA                 |
| Kabuli_wild_2067759 | NA                                  | Ca_kabuli_denovo | 2067759                 | C/T  | NA                 | NA                            | NA                 |
| Kabuli_wild_2067762 | NA                                  | Ca_kabuli_denovo | 2067762                 | T/A  | NA                 | NA                            | NA                 |
| Kabuli_wild_2068136 | NA                                  | Ca_kabuli_denovo | 2068136                 | G/A  | NA                 | NA                            | NA                 |
| Kabuli_wild_2068436 | NA                                  | Ca_kabuli_denovo | 2068436                 | G/T  | NA                 | NA                            | NA                 |
| Kabuli_wild_2068449 | NA                                  | Ca_kabuli_denovo | 2068449                 | T/C  | NA                 | NA                            | NA                 |
| Kabuli_wild_2068831 | NA                                  | Ca_kabuli_denovo | 2068831                 | T/G  | NA                 | NA                            | NA                 |
| Kabuli_wild_2069165 | NA                                  | Ca_kabuli_denovo | 2069165                 | G/A  | NA                 | NA                            | NA                 |
| Kabuli_wild_2069791 | NA                                  | Ca_kabuli_denovo | 2069791                 | G/T  | NA                 | NA                            | NA                 |
| Kabuli_wild_2071190 | NA                                  | Ca_kabuli_denovo | 2071190                 | A/G  | NA                 | NA                            | NA                 |
| Kabuli_wild_2071205 | NA                                  | Ca_kabuli_denovo | 2071205                 | C/G  | NA                 | NA                            | NA                 |
| Kabuli_wild_2071255 | NA                                  | Ca_kabuli_denovo | 2071255                 | C/T  | NA                 | NA                            | NA                 |
| Kabuli_wild_2072557 | NA                                  | Ca_kabuli_denovo | 2072557                 | G/C  | NA                 | NA                            | NA                 |
| Kabuli_wild_2072604 | NA                                  | Ca_kabuli_denovo | 2072604                 | A/G  | NA                 | NA                            | NA                 |
| Kabuli_wild_2074186 | NA                                  | Ca_kabuli_denovo | 2074186                 | A/C  | NA                 | NA                            | NA                 |
| Kabuli_wild_2074303 | NA                                  | Ca_kabuli_denovo | 2074303                 | C/T  | NA                 | NA                            | NA                 |
| Kabuli_wild_2074321 | NA                                  | Ca_kabuli_denovo | 2074321                 | G/A  | NA                 | NA                            | NA                 |
| Kabuli_wild_2074339 | NA                                  | Ca_kabuli_denovo | 2074339                 | C/T  | NA                 | NA                            | NA                 |
| Kabuli_wild_2074614 | NA                                  | Ca_kabuli_denovo | 2074614                 | T/C  | NA                 | NA                            | NA                 |
| Kabuli_wild_2074628 | NA                                  | Ca_kabuli_denovo | 2074628                 | T/G  | NA                 | NA                            | NA                 |
| Kabuli_wild_2074641 | NA                                  | Ca_kabuli_denovo | 2074641                 | A/G  | NA                 | NA                            | NA                 |
| Kabuli_wild_2074688 | NA                                  | Ca_kabuli_denovo | 2074688                 | A/C  | NA                 | NA                            | NA                 |
| Kabuli_wild_2074739 | NA                                  | Ca_kabuli_denovo | 2074739                 | C/T  | NA                 | NA                            | NA                 |
| Kabuli_wild_2078674 | NA                                  | Ca_kabuli_denovo | 2078674                 | C/A  | NA                 | NA                            | NA                 |
| Kabuli_wild_2078707 | NA                                  | Ca_kabuli_denovo | 2078707                 | A/G  | NA                 | NA                            | NA                 |
| Kabuli_wild_2079318 | NA                                  | Ca_kabuli_denovo | 2079318                 | C/G  | NA                 | NA                            | NA                 |
| Kabuli_wild_2079321 | NA                                  | Ca_kabuli_denovo | 2079321                 | G/A  | NA                 | NA                            | NA                 |
| Kabuli_wild_2081996 | NA                                  | Ca_kabuli_denovo | 2081996                 | C/G  | NA                 | NA                            | NA                 |
| Kabuli_wild_2082105 | NA                                  | Ca_kabuli_denovo | 2082105                 | T/C  | NA                 | NA                            | NA                 |
| Kabuli_wild_2082111 | NA                                  | Ca_kabuli_denovo | 2082111                 | C/T  | NA                 | NA                            | NA                 |
| Kabuli_wild_2084567 | NA                                  | Ca_kabuli_denovo | 2084567                 | T/G  | NA                 | NA                            | NA                 |
| Kabuli_wild_2086553 | NA                                  | Ca_kabuli_denovo | 2086553                 | G/T  | NA                 | NA                            | NA                 |
| Kabuli_wild_2086596 | NA                                  | Ca_kabuli_denovo | 2086596                 | G/A  | NA                 | NA                            | NA                 |
| Kabuli_wild_2086907 | NA                                  | Ca_kabuli_denovo | 2086907                 | A/G  | NA                 | NA                            | NA                 |
| Kabuli_wild_2086915 | NA                                  | Ca_kabuli_denovo | 2086915                 | C/G  | NA                 | NA                            | NA                 |
| Kabuli_wild_2087127 | NA                                  | Ca_kabuli_denovo | 2087127                 | G/T  | NA                 | NA                            | NA                 |
| Kabuli_wild_2087818 | NA                                  | Ca_kabuli_denovo | 2087818                 | A/C  | NA                 | NA                            | NA                 |
| Kabuli_wild_2090860 | NA                                  | Ca_kabuli_denovo | 2090860                 | G/A  | NA                 | NA                            | NA                 |
| Kabuli_wild_2091179 | NA                                  | Ca_kabuli_denovo | 2091179                 | C/T  | NA                 | NA                            | NA                 |

| SNP IDs             | NCBI dbSNP accession IDs (NCBI_SS#) | Chromosomes      | Physical positions (bp) | SNPs | Gene accession IDs | Sequence components of genome | Putative functions |
|---------------------|-------------------------------------|------------------|-------------------------|------|--------------------|-------------------------------|--------------------|
| Kabuli_wild_2091247 | NA                                  | Ca_kabuli_denovo | 2091247                 | T/C  | NA                 | NA                            | NA                 |
| Kabuli_wild_2093328 | NA                                  | Ca_kabuli_denovo | 2093328                 | C/G  | NA                 | NA                            | NA                 |
| Kabuli_wild_2093895 | NA                                  | Ca_kabuli_denovo | 2093895                 | G/T  | NA                 | NA                            | NA                 |
| Kabuli_wild_2093913 | NA                                  | Ca_kabuli_denovo | 2093913                 | C/G  | NA                 | NA                            | NA                 |
| Kabuli_wild_2095164 | NA                                  | Ca_kabuli_denovo | 2095164                 | T/G  | NA                 | NA                            | NA                 |
| Kabuli_wild_2095964 | NA                                  | Ca_kabuli_denovo | 2095964                 | A/G  | NA                 | NA                            | NA                 |
| Kabuli_wild_2096145 | NA                                  | Ca_kabuli_denovo | 2096145                 | A/G  | NA                 | NA                            | NA                 |
| Kabuli_wild_2096146 | NA                                  | Ca_kabuli_denovo | 2096146                 | T/C  | NA                 | NA                            | NA                 |
| Kabuli_wild_2097418 | NA                                  | Ca_kabuli_denovo | 2097418                 | G/A  | NA                 | NA                            | NA                 |
| Kabuli_wild_2097424 | NA                                  | Ca_kabuli_denovo | 2097424                 | C/T  | NA                 | NA                            | NA                 |
| Kabuli_wild_2097585 | NA                                  | Ca_kabuli_denovo | 2097585                 | T/A  | NA                 | NA                            | NA                 |
| Kabuli_wild_2099371 | NA                                  | Ca_kabuli_denovo | 2099371                 | C/T  | NA                 | NA                            | NA                 |
| Kabuli_wild_2101067 | NA                                  | Ca_kabuli_denovo | 2101067                 | T/C  | NA                 | NA                            | NA                 |
| Kabuli_wild_2101109 | NA                                  | Ca_kabuli_denovo | 2101109                 | T/C  | NA                 | NA                            | NA                 |
| Kabuli_wild_2101259 | NA                                  | Ca_kabuli_denovo | 2101259                 | G/A  | NA                 | NA                            | NA                 |
| Kabuli_wild_2102368 | NA                                  | Ca_kabuli_denovo | 2102368                 | C/G  | NA                 | NA                            | NA                 |
| Kabuli_wild_2102382 | NA                                  | Ca_kabuli_denovo | 2102382                 | G/T  | NA                 | NA                            | NA                 |
| Kabuli_wild_2102432 | NA                                  | Ca_kabuli_denovo | 2102432                 | T/C  | NA                 | NA                            | NA                 |
| Kabuli_wild_2102462 | NA                                  | Ca_kabuli_denovo | 2102462                 | A/C  | NA                 | NA                            | NA                 |
| Kabuli_wild_2103586 | NA                                  | Ca_kabuli_denovo | 2103586                 | A/G  | NA                 | NA                            | NA                 |
| Kabuli_wild_2103597 | NA                                  | Ca_kabuli_denovo | 2103597                 | C/G  | NA                 | NA                            | NA                 |
| Kabuli_wild_2104239 | NA                                  | Ca_kabuli_denovo | 2104239                 | T/C  | NA                 | NA                            | NA                 |
| Kabuli_wild_2105244 | NA                                  | Ca_kabuli_denovo | 2105244                 | C/G  | NA                 | NA                            | NA                 |
| Kabuli_wild_2105734 | NA                                  | Ca_kabuli_denovo | 2105734                 | T/G  | NA                 | NA                            | NA                 |
| Kabuli_wild_2105855 | NA                                  | Ca_kabuli_denovo | 2105855                 | C/G  | NA                 | NA                            | NA                 |
| Kabuli_wild_2106327 | NA                                  | Ca_kabuli_denovo | 2106327                 | A/C  | NA                 | NA                            | NA                 |
| Kabuli_wild_2106633 | NA                                  | Ca_kabuli_denovo | 2106633                 | T/C  | NA                 | NA                            | NA                 |
| Kabuli_wild_2106695 | NA                                  | Ca_kabuli_denovo | 2106695                 | T/C  | NA                 | NA                            | NA                 |
| Kabuli_wild_2109246 | NA                                  | Ca_kabuli_denovo | 2109246                 | C/T  | NA                 | NA                            | NA                 |
| Kabuli_wild_2110184 | NA                                  | Ca_kabuli_denovo | 2110184                 | A/G  | NA                 | NA                            | NA                 |
| Kabuli_wild_2110186 | NA                                  | Ca_kabuli_denovo | 2110186                 | T/C  | NA                 | NA                            | NA                 |
| Kabuli_wild_2110189 | NA                                  | Ca_kabuli_denovo | 2110189                 | T/G  | NA                 | NA                            | NA                 |
| Kabuli_wild_2110289 | NA                                  | Ca_kabuli_denovo | 2110289                 | C/T  | NA                 | NA                            | NA                 |
| Kabuli_wild_2111573 | NA                                  | Ca_kabuli_denovo | 2111573                 | T/A  | NA                 | NA                            | NA                 |
| Kabuli_wild_2112535 | NA                                  | Ca_kabuli_denovo | 2112535                 | A/G  | NA                 | NA                            | NA                 |
| Kabuli_wild_2113577 | NA                                  | Ca_kabuli_denovo | 2113577                 | T/C  | NA                 | NA                            | NA                 |
| Kabuli_wild_2113657 | NA                                  | Ca_kabuli_denovo | 2113657                 | C/T  | NA                 | NA                            | NA                 |
| Kabuli_wild_2113897 | NA                                  | Ca_kabuli_denovo | 2113897                 | C/T  | NA                 | NA                            | NA                 |
| Kabuli_wild_2115120 | NA                                  | Ca_kabuli_denovo | 2115120                 | C/G  | NA                 | NA                            | NA                 |
| Kabuli_wild_2116670 | NA                                  | Ca_kabuli_denovo | 2116670                 | T/G  | NA                 | NA                            | NA                 |
| Kabuli_wild_2116744 | NA                                  | Ca_kabuli_denovo | 2116744                 | C/G  | NA                 | NA                            | NA                 |
| Kabuli_wild_2116961 | NA                                  | Ca_kabuli_denovo | 2116961                 | T/G  | NA                 | NA                            | NA                 |
| Kabuli_wild_2117088 | NA                                  | Ca_kabuli_denovo | 2117088                 | T/C  | NA                 | NA                            | NA                 |
| Kabuli_wild_2117091 | NA                                  | Ca_kabuli_denovo | 2117091                 | A/G  | NA                 | NA                            | NA                 |

| SNP IDs             | NCBI dbSNP accession IDs (NCBI_SS#) | Chromosomes      | Physical positions (bp) | SNPs | Gene accession IDs | Sequence components of genome | Putative functions |
|---------------------|-------------------------------------|------------------|-------------------------|------|--------------------|-------------------------------|--------------------|
| Kabuli_wild_2117346 | NA                                  | Ca_kabuli_denovo | 2117346                 | C/G  | NA                 | NA                            | NA                 |
| Kabuli_wild_2117348 | NA                                  | Ca_kabuli_denovo | 2117348                 | T/G  | NA                 | NA                            | NA                 |
| Kabuli_wild_2118340 | NA                                  | Ca_kabuli_denovo | 2118340                 | C/G  | NA                 | NA                            | NA                 |
| Kabuli_wild_2118749 | NA                                  | Ca_kabuli_denovo | 2118749                 | C/A  | NA                 | NA                            | NA                 |
| Kabuli_wild_2118755 | NA                                  | Ca_kabuli_denovo | 2118755                 | T/G  | NA                 | NA                            | NA                 |
| Kabuli_wild_2121163 | NA                                  | Ca_kabuli_denovo | 2121163                 | T/C  | NA                 | NA                            | NA                 |
| Kabuli_wild_2121205 | NA                                  | Ca_kabuli_denovo | 2121205                 | T/C  | NA                 | NA                            | NA                 |
| Kabuli_wild_2121279 | NA                                  | Ca_kabuli_denovo | 2121279                 | T/C  | NA                 | NA                            | NA                 |
| Kabuli_wild_2121735 | NA                                  | Ca_kabuli_denovo | 2121735                 | C/T  | NA                 | NA                            | NA                 |
| Kabuli_wild_2122426 | NA                                  | Ca_kabuli_denovo | 2122426                 | C/G  | NA                 | NA                            | NA                 |
| Kabuli_wild_2122818 | NA                                  | Ca_kabuli_denovo | 2122818                 | G/T  | NA                 | NA                            | NA                 |
| Kabuli_wild_2122925 | NA                                  | Ca_kabuli_denovo | 2122925                 | A/G  | NA                 | NA                            | NA                 |
| Kabuli_wild_2123021 | NA                                  | Ca_kabuli_denovo | 2123021                 | A/T  | NA                 | NA                            | NA                 |
| Kabuli_wild_2124156 | NA                                  | Ca_kabuli_denovo | 2124156                 | A/G  | NA                 | NA                            | NA                 |
| Kabuli_wild_2124183 | NA                                  | Ca_kabuli_denovo | 2124183                 | C/T  | NA                 | NA                            | NA                 |
| Kabuli_wild_2124195 | NA                                  | Ca_kabuli_denovo | 2124195                 | T/C  | NA                 | NA                            | NA                 |
| Kabuli_wild_2125191 | NA                                  | Ca_kabuli_denovo | 2125191                 | G/A  | NA                 | NA                            | NA                 |
| Kabuli_wild_2125817 | NA                                  | Ca_kabuli_denovo | 2125817                 | T/C  | NA                 | NA                            | NA                 |
| Kabuli_wild_2125908 | NA                                  | Ca_kabuli_denovo | 2125908                 | C/T  | NA                 | NA                            | NA                 |
| Kabuli_wild_2126134 | NA                                  | Ca_kabuli_denovo | 2126134                 | G/A  | NA                 | NA                            | NA                 |
| Kabuli_wild_2129123 | NA                                  | Ca_kabuli_denovo | 2129123                 | C/G  | NA                 | NA                            | NA                 |
| Kabuli_wild_2129998 | NA                                  | Ca_kabuli_denovo | 2129998                 | T/C  | NA                 | NA                            | NA                 |
| Kabuli_wild_2130080 | NA                                  | Ca_kabuli_denovo | 2130080                 | T/G  | NA                 | NA                            | NA                 |
| Kabuli_wild_2130150 | NA                                  | Ca_kabuli_denovo | 2130150                 | C/G  | NA                 | NA                            | NA                 |
| Kabuli_wild_2130378 | NA                                  | Ca_kabuli_denovo | 2130378                 | C/T  | NA                 | NA                            | NA                 |
| Kabuli_wild_2130606 | NA                                  | Ca_kabuli_denovo | 2130606                 | T/C  | NA                 | NA                            | NA                 |
| Kabuli_wild_2130614 | NA                                  | Ca_kabuli_denovo | 2130614                 | A/G  | NA                 | NA                            | NA                 |
| Kabuli_wild_2131242 | NA                                  | Ca_kabuli_denovo | 2131242                 | A/G  | NA                 | NA                            | NA                 |
| Kabuli_wild_2131341 | NA                                  | Ca_kabuli_denovo | 2131341                 | T/C  | NA                 | NA                            | NA                 |
| Kabuli_wild_2131374 | NA                                  | Ca_kabuli_denovo | 2131374                 | G/T  | NA                 | NA                            | NA                 |
| Kabuli_wild_2131911 | NA                                  | Ca_kabuli_denovo | 2131911                 | A/T  | NA                 | NA                            | NA                 |
| Kabuli_wild_2133642 | NA                                  | Ca_kabuli_denovo | 2133642                 | G/A  | NA                 | NA                            | NA                 |
| Kabuli_wild_2133972 | NA                                  | Ca_kabuli_denovo | 2133972                 | A/C  | NA                 | NA                            | NA                 |
| Kabuli_wild_2133993 | NA                                  | Ca_kabuli_denovo | 2133993                 | T/C  | NA                 | NA                            | NA                 |
| Kabuli_wild_2134936 | NA                                  | Ca_kabuli_denovo | 2134936                 | A/G  | NA                 | NA                            | NA                 |
| Kabuli_wild_2135005 | NA                                  | Ca_kabuli_denovo | 2135005                 | A/C  | NA                 | NA                            | NA                 |
| Kabuli_wild_2136407 | NA                                  | Ca_kabuli_denovo | 2136407                 | A/G  | NA                 | NA                            | NA                 |
| Kabuli_wild_2137079 | NA                                  | Ca_kabuli_denovo | 2137079                 | T/C  | NA                 | NA                            | NA                 |
| Kabuli_wild_2137773 | NA                                  | Ca_kabuli_denovo | 2137773                 | G/C  | NA                 | NA                            | NA                 |
| Kabuli_wild_2138182 | NA                                  | Ca_kabuli_denovo | 2138182                 | A/G  | NA                 | NA                            | NA                 |
| Kabuli_wild_2138191 | NA                                  | Ca_kabuli_denovo | 2138191                 | A/G  | NA                 | NA                            | NA                 |
| Kabuli_wild_2138735 | NA                                  | Ca_kabuli_denovo | 2138735                 | T/C  | NA                 | NA                            | NA                 |
| Kabuli_wild_2139967 | NA                                  | Ca_kabuli_denovo | 2139967                 | C/G  | NA                 | NA                            | NA                 |
| Kabuli_wild_2139976 | NA                                  | Ca_kabuli_denovo | 2139976                 | C/G  | NA                 | NA                            | NA                 |

| SNP IDs             | NCBI dbSNP accession IDs (NCBI_SS#) | Chromosomes      | Physical positions (bp) | SNPs | Gene accession IDs | Sequence components of genome | Putative functions |
|---------------------|-------------------------------------|------------------|-------------------------|------|--------------------|-------------------------------|--------------------|
| Kabuli_wild_2140775 | NA                                  | Ca_kabuli_denovo | 2140775                 | G/A  | NA                 | NA                            | NA                 |
| Kabuli_wild_2140967 | NA                                  | Ca_kabuli_denovo | 2140967                 | A/G  | NA                 | NA                            | NA                 |
| Kabuli_wild_2141032 | NA                                  | Ca_kabuli_denovo | 2141032                 | A/T  | NA                 | NA                            | NA                 |
| Kabuli_wild_2141062 | NA                                  | Ca_kabuli_denovo | 2141062                 | T/A  | NA                 | NA                            | NA                 |
| Kabuli_wild_2141136 | NA                                  | Ca_kabuli_denovo | 2141136                 | A/G  | NA                 | NA                            | NA                 |
| Kabuli_wild_2141142 | NA                                  | Ca_kabuli_denovo | 2141142                 | C/T  | NA                 | NA                            | NA                 |
| Kabuli_wild_2141248 | NA                                  | Ca_kabuli_denovo | 2141248                 | G/C  | NA                 | NA                            | NA                 |
| Kabuli_wild_2141610 | NA                                  | Ca_kabuli_denovo | 2141610                 | A/C  | NA                 | NA                            | NA                 |
| Kabuli_wild_2142082 | NA                                  | Ca_kabuli_denovo | 2142082                 | C/G  | NA                 | NA                            | NA                 |
| Kabuli_wild_2142083 | NA                                  | Ca_kabuli_denovo | 2142083                 | A/C  | NA                 | NA                            | NA                 |
| Kabuli_wild_2142222 | NA                                  | Ca_kabuli_denovo | 2142222                 | T/C  | NA                 | NA                            | NA                 |
| Kabuli_wild_2142230 | NA                                  | Ca_kabuli_denovo | 2142230                 | G/C  | NA                 | NA                            | NA                 |
| Kabuli_wild_2142697 | NA                                  | Ca_kabuli_denovo | 2142697                 | G/A  | NA                 | NA                            | NA                 |
| Kabuli_wild_2142703 | NA                                  | Ca_kabuli_denovo | 2142703                 | G/A  | NA                 | NA                            | NA                 |
| Kabuli_wild_2142786 | NA                                  | Ca_kabuli_denovo | 2142786                 | T/C  | NA                 | NA                            | NA                 |
| Kabuli_wild_2142861 | NA                                  | Ca_kabuli_denovo | 2142861                 | T/A  | NA                 | NA                            | NA                 |
| Kabuli_wild_2142975 | NA                                  | Ca_kabuli_denovo | 2142975                 | A/G  | NA                 | NA                            | NA                 |
| Kabuli_wild_2143373 | NA                                  | Ca_kabuli_denovo | 2143373                 | C/G  | NA                 | NA                            | NA                 |
| Kabuli_wild_2143377 | NA                                  | Ca_kabuli_denovo | 2143377                 | G/A  | NA                 | NA                            | NA                 |
| Kabuli_wild_2143763 | NA                                  | Ca_kabuli_denovo | 2143763                 | C/T  | NA                 | NA                            | NA                 |
| Kabuli_wild_2143820 | NA                                  | Ca_kabuli_denovo | 2143820                 | T/G  | NA                 | NA                            | NA                 |
| Kabuli_wild_2144114 | NA                                  | Ca_kabuli_denovo | 2144114                 | C/G  | NA                 | NA                            | NA                 |
| Kabuli_wild_2144327 | NA                                  | Ca_kabuli_denovo | 2144327                 | A/G  | NA                 | NA                            | NA                 |
| Kabuli_wild_2144447 | NA                                  | Ca_kabuli_denovo | 2144447                 | G/C  | NA                 | NA                            | NA                 |
| Kabuli_wild_2144716 | NA                                  | Ca_kabuli_denovo | 2144716                 | G/A  | NA                 | NA                            | NA                 |
| Kabuli_wild_2144802 | NA                                  | Ca_kabuli_denovo | 2144802                 | A/G  | NA                 | NA                            | NA                 |
| Kabuli_wild_2145506 | NA                                  | Ca_kabuli_denovo | 2145506                 | T/C  | NA                 | NA                            | NA                 |
| Kabuli_wild_2145513 | NA                                  | Ca_kabuli_denovo | 2145513                 | G/C  | NA                 | NA                            | NA                 |
| Kabuli_wild_2145783 | NA                                  | Ca_kabuli_denovo | 2145783                 | C/T  | NA                 | NA                            | NA                 |
| Kabuli_wild_2146483 | NA                                  | Ca_kabuli_denovo | 2146483                 | G/C  | NA                 | NA                            | NA                 |
| Kabuli_wild_2146736 | NA                                  | Ca_kabuli_denovo | 2146736                 | A/G  | NA                 | NA                            | NA                 |
| Kabuli_wild_2148259 | NA                                  | Ca_kabuli_denovo | 2148259                 | T/C  | NA                 | NA                            | NA                 |
| Kabuli_wild_2148292 | NA                                  | Ca_kabuli_denovo | 2148292                 | A/G  | NA                 | NA                            | NA                 |
| Kabuli_wild_2148335 | NA                                  | Ca_kabuli_denovo | 2148335                 | T/G  | NA                 | NA                            | NA                 |
| Kabuli_wild_2149100 | NA                                  | Ca_kabuli_denovo | 2149100                 | T/A  | NA                 | NA                            | NA                 |
| Kabuli_wild_2149102 | NA                                  | Ca_kabuli_denovo | 2149102                 | G/T  | NA                 | NA                            | NA                 |
| Kabuli_wild_2149349 | NA                                  | Ca_kabuli_denovo | 2149349                 | G/A  | NA                 | NA                            | NA                 |
| Kabuli_wild_2153217 | NA                                  | Ca_kabuli_denovo | 2153217                 | G/A  | NA                 | NA                            | NA                 |
| Kabuli_wild_2153954 | NA                                  | Ca_kabuli_denovo | 2153954                 | A/C  | NA                 | NA                            | NA                 |
| Kabuli_wild_2153969 | NA                                  | Ca_kabuli_denovo | 2153969                 | G/A  | NA                 | NA                            | NA                 |
| Kabuli_wild_2153971 | NA                                  | Ca_kabuli_denovo | 2153971                 | T/G  | NA                 | NA                            | NA                 |
| Kabuli_wild_2154111 | NA                                  | Ca_kabuli_denovo | 2154111                 | C/A  | NA                 | NA                            | NA                 |
| Kabuli_wild_2154859 | NA                                  | Ca_kabuli_denovo | 2154859                 | T/G  | NA                 | NA                            | NA                 |
| Kabuli_wild_2154863 | NA                                  | Ca_kabuli_denovo | 2154863                 | A/C  | NA                 | NA                            | NA                 |

| SNP IDs             | NCBI dbSNP accession IDs (NCBI_SS#) | Chromosomes      | Physical positions (bp) | SNPs | Gene accession IDs | Sequence components of genome | Putative functions |
|---------------------|-------------------------------------|------------------|-------------------------|------|--------------------|-------------------------------|--------------------|
| Kabuli_wild_2155639 | NA                                  | Ca_kabuli_denovo | 2155639                 | A/G  | NA                 | NA                            | NA                 |
| Kabuli_wild_2155679 | NA                                  | Ca_kabuli_denovo | 2155679                 | C/T  | NA                 | NA                            | NA                 |
| Kabuli_wild_2155694 | NA                                  | Ca_kabuli_denovo | 2155694                 | G/A  | NA                 | NA                            | NA                 |
| Kabuli_wild_2155739 | NA                                  | Ca_kabuli_denovo | 2155739                 | G/C  | NA                 | NA                            | NA                 |
| Kabuli_wild_2156090 | NA                                  | Ca_kabuli_denovo | 2156090                 | C/A  | NA                 | NA                            | NA                 |
| Kabuli_wild_2156136 | NA                                  | Ca_kabuli_denovo | 2156136                 | C/T  | NA                 | NA                            | NA                 |
| Kabuli_wild_2157144 | NA                                  | Ca_kabuli_denovo | 2157144                 | G/A  | NA                 | NA                            | NA                 |
| Kabuli_wild_2157978 | NA                                  | Ca_kabuli_denovo | 2157978                 | C/G  | NA                 | NA                            | NA                 |
| Kabuli_wild_2157980 | NA                                  | Ca_kabuli_denovo | 2157980                 | G/T  | NA                 | NA                            | NA                 |
| Kabuli_wild_2157982 | NA                                  | Ca_kabuli_denovo | 2157982                 | C/T  | NA                 | NA                            | NA                 |
| Kabuli_wild_2158126 | NA                                  | Ca_kabuli_denovo | 2158126                 | A/G  | NA                 | NA                            | NA                 |
| Kabuli_wild_2158795 | NA                                  | Ca_kabuli_denovo | 2158795                 | T/C  | NA                 | NA                            | NA                 |
| Kabuli_wild_2158843 | NA                                  | Ca_kabuli_denovo | 2158843                 | C/A  | NA                 | NA                            | NA                 |
| Kabuli_wild_2159115 | NA                                  | Ca_kabuli_denovo | 2159115                 | T/C  | NA                 | NA                            | NA                 |
| Kabuli_wild_2160462 | NA                                  | Ca_kabuli_denovo | 2160462                 | T/C  | NA                 | NA                            | NA                 |
| Kabuli_wild_2161721 | NA                                  | Ca_kabuli_denovo | 2161721                 | A/G  | NA                 | NA                            | NA                 |
| Kabuli_wild_2162688 | NA                                  | Ca_kabuli_denovo | 2162688                 | T/A  | NA                 | NA                            | NA                 |
| Kabuli_wild_2162792 | NA                                  | Ca_kabuli_denovo | 2162792                 | C/G  | NA                 | NA                            | NA                 |
| Kabuli_wild_2163176 | NA                                  | Ca_kabuli_denovo | 2163176                 | G/A  | NA                 | NA                            | NA                 |
| Kabuli_wild_2163933 | NA                                  | Ca_kabuli_denovo | 2163933                 | T/A  | NA                 | NA                            | NA                 |
| Kabuli_wild_2163963 | NA                                  | Ca_kabuli_denovo | 2163963                 | G/A  | NA                 | NA                            | NA                 |
| Kabuli_wild_2164440 | NA                                  | Ca_kabuli_denovo | 2164440                 | T/C  | NA                 | NA                            | NA                 |
| Kabuli_wild_2165589 | NA                                  | Ca_kabuli_denovo | 2165589                 | G/A  | NA                 | NA                            | NA                 |
| Kabuli_wild_2165652 | NA                                  | Ca_kabuli_denovo | 2165652                 | G/A  | NA                 | NA                            | NA                 |
| Kabuli_wild_2165917 | NA                                  | Ca_kabuli_denovo | 2165917                 | A/G  | NA                 | NA                            | NA                 |
| Kabuli_wild_2166251 | NA                                  | Ca_kabuli_denovo | 2166251                 | G/T  | NA                 | NA                            | NA                 |
| Kabuli_wild_2167711 | NA                                  | Ca_kabuli_denovo | 2167711                 | T/C  | NA                 | NA                            | NA                 |
| Kabuli_wild_2167909 | NA                                  | Ca_kabuli_denovo | 2167909                 | T/A  | NA                 | NA                            | NA                 |
| Kabuli_wild_2168227 | NA                                  | Ca_kabuli_denovo | 2168227                 | G/T  | NA                 | NA                            | NA                 |
| Kabuli_wild_2168265 | NA                                  | Ca_kabuli_denovo | 2168265                 | T/A  | NA                 | NA                            | NA                 |
| Kabuli_wild_2168543 | NA                                  | Ca_kabuli_denovo | 2168543                 | G/C  | NA                 | NA                            | NA                 |
| Kabuli_wild_2170703 | NA                                  | Ca_kabuli_denovo | 2170703                 | A/G  | NA                 | NA                            | NA                 |
| Kabuli_wild_2170705 | NA                                  | Ca_kabuli_denovo | 2170705                 | G/T  | NA                 | NA                            | NA                 |
| Kabuli_wild_2171671 | NA                                  | Ca_kabuli_denovo | 2171671                 | C/G  | NA                 | NA                            | NA                 |
| Kabuli_wild_2171674 | NA                                  | Ca_kabuli_denovo | 2171674                 | A/G  | NA                 | NA                            | NA                 |
| Kabuli_wild_2171906 | NA                                  | Ca_kabuli_denovo | 2171906                 | C/A  | NA                 | NA                            | NA                 |
| Kabuli_wild_2171912 | NA                                  | Ca_kabuli_denovo | 2171912                 | G/C  | NA                 | NA                            | NA                 |
| Kabuli_wild_2171992 | NA                                  | Ca_kabuli_denovo | 2171992                 | G/A  | NA                 | NA                            | NA                 |
| Kabuli_wild_2172007 | NA                                  | Ca_kabuli_denovo | 2172007                 | G/A  | NA                 | NA                            | NA                 |
| Kabuli_wild_2172564 | NA                                  | Ca_kabuli_denovo | 2172564                 | G/C  | NA                 | NA                            | NA                 |
| Kabuli_wild_2172697 | NA                                  | Ca_kabuli_denovo | 2172697                 | A/G  | NA                 | NA                            | NA                 |
| Kabuli_wild_2172727 | NA                                  | Ca_kabuli_denovo | 2172727                 | T/C  | NA                 | NA                            | NA                 |
| Kabuli_wild_2174377 | NA                                  | Ca_kabuli_denovo | 2174377                 | C/G  | NA                 | NA                            | NA                 |
| Kabuli_wild_2174378 | NA                                  | Ca_kabuli_denovo | 2174378                 | C/A  | NA                 | NA                            | NA                 |



| SNP IDs             | NCBI dbSNP accession IDs (NCBI_SS#) | Chromosomes      | Physical positions (bp) | SNPs | Gene accession IDs | Sequence components of genome | Putative functions |
|---------------------|-------------------------------------|------------------|-------------------------|------|--------------------|-------------------------------|--------------------|
| Kabuli_wild_2174381 | NA                                  | Ca_kabuli_denovo | 2174381                 | C/G  | NA                 | NA                            | NA                 |
| Kabuli_wild_2175373 | NA                                  | Ca_kabuli_denovo | 2175373                 | G/A  | NA                 | NA                            | NA                 |
| Kabuli_wild_2175382 | NA                                  | Ca_kabuli_denovo | 2175382                 | C/A  | NA                 | NA                            | NA                 |
| Kabuli_wild_2176556 | NA                                  | Ca_kabuli_denovo | 2176556                 | T/C  | NA                 | NA                            | NA                 |
| Kabuli_wild_2176578 | NA                                  | Ca_kabuli_denovo | 2176578                 | T/C  | NA                 | NA                            | NA                 |
| Kabuli_wild_2176816 | NA                                  | Ca_kabuli_denovo | 2176816                 | G/T  | NA                 | NA                            | NA                 |
| Kabuli_wild_2177196 | NA                                  | Ca_kabuli_denovo | 2177196                 | A/G  | NA                 | NA                            | NA                 |
| Kabuli_wild_2177506 | NA                                  | Ca_kabuli_denovo | 2177506                 | C/T  | NA                 | NA                            | NA                 |
| Kabuli_wild_2177540 | NA                                  | Ca_kabuli_denovo | 2177540                 | C/T  | NA                 | NA                            | NA                 |
| Kabuli_wild_2178586 | NA                                  | Ca_kabuli_denovo | 2178586                 | C/G  | NA                 | NA                            | NA                 |
| Kabuli_wild_2178611 | NA                                  | Ca_kabuli_denovo | 2178611                 | A/G  | NA                 | NA                            | NA                 |
| Kabuli_wild_2179447 | NA                                  | Ca_kabuli_denovo | 2179447                 | G/A  | NA                 | NA                            | NA                 |
| Kabuli_wild_2179448 | NA                                  | Ca_kabuli_denovo | 2179448                 | T/C  | NA                 | NA                            | NA                 |
| Kabuli_wild_2180125 | NA                                  | Ca_kabuli_denovo | 2180125                 | G/T  | NA                 | NA                            | NA                 |
| Kabuli_wild_2180127 | NA                                  | Ca_kabuli_denovo | 2180127                 | T/C  | NA                 | NA                            | NA                 |
| Kabuli_wild_2180321 | NA                                  | Ca_kabuli_denovo | 2180321                 | T/C  | NA                 | NA                            | NA                 |
| Kabuli_wild_2180325 | NA                                  | Ca_kabuli_denovo | 2180325                 | C/T  | NA                 | NA                            | NA                 |
| Kabuli_wild_2180595 | NA                                  | Ca_kabuli_denovo | 2180595                 | A/T  | NA                 | NA                            | NA                 |
| Kabuli_wild_2181288 | NA                                  | Ca_kabuli_denovo | 2181288                 | T/G  | NA                 | NA                            | NA                 |
| Kabuli_wild_2181318 | NA                                  | Ca_kabuli_denovo | 2181318                 | A/G  | NA                 | NA                            | NA                 |
| Kabuli_wild_2181993 | NA                                  | Ca_kabuli_denovo | 2181993                 | T/C  | NA                 | NA                            | NA                 |
| Kabuli_wild_2184403 | NA                                  | Ca_kabuli_denovo | 2184403                 | T/C  | NA                 | NA                            | NA                 |
| Kabuli_wild_2184779 | NA                                  | Ca_kabuli_denovo | 2184779                 | C/T  | NA                 | NA                            | NA                 |
| Kabuli_wild_2184857 | NA                                  | Ca_kabuli_denovo | 2184857                 | A/G  | NA                 | NA                            | NA                 |
| Kabuli_wild_2184999 | NA                                  | Ca_kabuli_denovo | 2184999                 | G/C  | NA                 | NA                            | NA                 |
| Kabuli_wild_2185051 | NA                                  | Ca_kabuli_denovo | 2185051                 | T/C  | NA                 | NA                            | NA                 |
| Kabuli_wild_2187207 | NA                                  | Ca_kabuli_denovo | 2187207                 | T/C  | NA                 | NA                            | NA                 |
| Kabuli_wild_2187519 | NA                                  | Ca_kabuli_denovo | 2187519                 | G/C  | NA                 | NA                            | NA                 |
| Kabuli_wild_2187534 | NA                                  | Ca_kabuli_denovo | 2187534                 | T/C  | NA                 | NA                            | NA                 |
| Kabuli_wild_2188308 | NA                                  | Ca_kabuli_denovo | 2188308                 | T/C  | NA                 | NA                            | NA                 |
| Kabuli_wild_2188675 | NA                                  | Ca_kabuli_denovo | 2188675                 | G/A  | NA                 | NA                            | NA                 |
| Kabuli_wild_2188721 | NA                                  | Ca_kabuli_denovo | 2188721                 | C/A  | NA                 | NA                            | NA                 |
| Kabuli_wild_2188790 | NA                                  | Ca_kabuli_denovo | 2188790                 | A/G  | NA                 | NA                            | NA                 |
| Kabuli_wild_2190021 | NA                                  | Ca_kabuli_denovo | 2190021                 | G/T  | NA                 | NA                            | NA                 |
| Kabuli_wild_2191330 | NA                                  | Ca_kabuli_denovo | 2191330                 | G/T  | NA                 | NA                            | NA                 |
| Kabuli_wild_2191364 | NA                                  | Ca_kabuli_denovo | 2191364                 | A/G  | NA                 | NA                            | NA                 |
| Kabuli_wild_2191388 | NA                                  | Ca_kabuli_denovo | 2191388                 | A/G  | NA                 | NA                            | NA                 |
| Kabuli_wild_2191404 | NA                                  | Ca_kabuli_denovo | 2191404                 | G/C  | NA                 | NA                            | NA                 |
| Kabuli_wild_2192867 | NA                                  | Ca_kabuli_denovo | 2192867                 | G/A  | NA                 | NA                            | NA                 |
| Kabuli_wild_2192873 | NA                                  | Ca_kabuli_denovo | 2192873                 | G/C  | NA                 | NA                            | NA                 |
| Kabuli_wild_2193136 | NA                                  | Ca_kabuli_denovo | 2193136                 | C/T  | NA                 | NA                            | NA                 |
| Kabuli_wild_2193205 | NA                                  | Ca_kabuli_denovo | 2193205                 | A/G  | NA                 | NA                            | NA                 |
| Kabuli_wild_2193913 | NA                                  | Ca_kabuli_denovo | 2193913                 | T/A  | NA                 | NA                            | NA                 |
| Kabuli_wild_2193978 | NA                                  | Ca_kabuli_denovo | 2193978                 | C/G  | NA                 | NA                            | NA                 |

| SNP IDs             | NCBI dbSNP accession IDs (NCBI_SS#) | Chromosomes      | Physical positions (bp) | SNPs | Gene accession IDs | Sequence components of genome | Putative functions |
|---------------------|-------------------------------------|------------------|-------------------------|------|--------------------|-------------------------------|--------------------|
| Kabuli_wild_2195269 | NA                                  | Ca_kabuli_denovo | 2195269                 | C/T  | NA                 | NA                            | NA                 |
| Kabuli_wild_2195292 | NA                                  | Ca_kabuli_denovo | 2195292                 | A/G  | NA                 | NA                            | NA                 |
| Kabuli_wild_2196238 | NA                                  | Ca_kabuli_denovo | 2196238                 | C/T  | NA                 | NA                            | NA                 |
| Kabuli_wild_2196961 | NA                                  | Ca_kabuli_denovo | 2196961                 | C/T  | NA                 | NA                            | NA                 |
| Kabuli_wild_2196986 | NA                                  | Ca_kabuli_denovo | 2196986                 | C/G  | NA                 | NA                            | NA                 |
| Kabuli_wild_2197137 | NA                                  | Ca_kabuli_denovo | 2197137                 | G/C  | NA                 | NA                            | NA                 |
| Kabuli_wild_2197150 | NA                                  | Ca_kabuli_denovo | 2197150                 | A/T  | NA                 | NA                            | NA                 |
| Kabuli_wild_2197640 | NA                                  | Ca_kabuli_denovo | 2197640                 | T/G  | NA                 | NA                            | NA                 |
| Kabuli_wild_2198223 | NA                                  | Ca_kabuli_denovo | 2198223                 | A/G  | NA                 | NA                            | NA                 |
| Kabuli_wild_2198481 | NA                                  | Ca_kabuli_denovo | 2198481                 | A/G  | NA                 | NA                            | NA                 |
| Kabuli_wild_2200396 | NA                                  | Ca_kabuli_denovo | 2200396                 | G/T  | NA                 | NA                            | NA                 |
| Kabuli_wild_2200431 | NA                                  | Ca_kabuli_denovo | 2200431                 | T/C  | NA                 | NA                            | NA                 |
| Kabuli_wild_2201285 | NA                                  | Ca_kabuli_denovo | 2201285                 | C/T  | NA                 | NA                            | NA                 |
| Kabuli_wild_2201861 | NA                                  | Ca_kabuli_denovo | 2201861                 | G/C  | NA                 | NA                            | NA                 |
| Kabuli_wild_2202377 | NA                                  | Ca_kabuli_denovo | 2202377                 | T/C  | NA                 | NA                            | NA                 |
| Kabuli_wild_2202728 | NA                                  | Ca_kabuli_denovo | 2202728                 | A/G  | NA                 | NA                            | NA                 |
| Kabuli_wild_2202765 | NA                                  | Ca_kabuli_denovo | 2202765                 | A/G  | NA                 | NA                            | NA                 |
| Kabuli_wild_2207477 | NA                                  | Ca_kabuli_denovo | 2207477                 | C/A  | NA                 | NA                            | NA                 |
| Kabuli_wild_2207525 | NA                                  | Ca_kabuli_denovo | 2207525                 | A/G  | NA                 | NA                            | NA                 |
| Kabuli_wild_2207591 | NA                                  | Ca_kabuli_denovo | 2207591                 | G/A  | NA                 | NA                            | NA                 |
| Kabuli_wild_2207693 | NA                                  | Ca_kabuli_denovo | 2207693                 | G/C  | NA                 | NA                            | NA                 |
| Kabuli_wild_2208162 | NA                                  | Ca_kabuli_denovo | 2208162                 | G/A  | NA                 | NA                            | NA                 |
| Kabuli_wild_2209652 | NA                                  | Ca_kabuli_denovo | 2209652                 | A/G  | NA                 | NA                            | NA                 |
| Kabuli_wild_2209659 | NA                                  | Ca_kabuli_denovo | 2209659                 | G/A  | NA                 | NA                            | NA                 |
| Kabuli_wild_2209681 | NA                                  | Ca_kabuli_denovo | 2209681                 | T/G  | NA                 | NA                            | NA                 |
| Kabuli_wild_2210032 | NA                                  | Ca_kabuli_denovo | 2210032                 | C/G  | NA                 | NA                            | NA                 |
| Kabuli_wild_2212917 | NA                                  | Ca_kabuli_denovo | 2212917                 | G/T  | NA                 | NA                            | NA                 |
| Kabuli_wild_2212935 | NA                                  | Ca_kabuli_denovo | 2212935                 | C/T  | NA                 | NA                            | NA                 |
| Kabuli_wild_2213403 | NA                                  | Ca_kabuli_denovo | 2213403                 | C/T  | NA                 | NA                            | NA                 |
| Kabuli_wild_2213684 | NA                                  | Ca_kabuli_denovo | 2213684                 | C/T  | NA                 | NA                            | NA                 |
| Kabuli_wild_2213757 | NA                                  | Ca_kabuli_denovo | 2213757                 | C/T  | NA                 | NA                            | NA                 |
| Kabuli_wild_2213893 | NA                                  | Ca_kabuli_denovo | 2213893                 | C/T  | NA                 | NA                            | NA                 |
| Kabuli_wild_2213935 | NA                                  | Ca_kabuli_denovo | 2213935                 | A/G  | NA                 | NA                            | NA                 |
| Kabuli_wild_2213993 | NA                                  | Ca_kabuli_denovo | 2213993                 | A/G  | NA                 | NA                            | NA                 |
| Kabuli_wild_2214279 | NA                                  | Ca_kabuli_denovo | 2214279                 | G/C  | NA                 | NA                            | NA                 |
| Kabuli_wild_2214306 | NA                                  | Ca_kabuli_denovo | 2214306                 | G/A  | NA                 | NA                            | NA                 |
| Kabuli_wild_2214321 | NA                                  | Ca_kabuli_denovo | 2214321                 | A/G  | NA                 | NA                            | NA                 |
| Kabuli_wild_2215404 | NA                                  | Ca_kabuli_denovo | 2215404                 | T/A  | NA                 | NA                            | NA                 |
| Kabuli_wild_2215415 | NA                                  | Ca_kabuli_denovo | 2215415                 | T/C  | NA                 | NA                            | NA                 |
| Kabuli_wild_2215495 | NA                                  | Ca_kabuli_denovo | 2215495                 | G/A  | NA                 | NA                            | NA                 |
| Kabuli_wild_2215626 | NA                                  | Ca_kabuli_denovo | 2215626                 | G/A  | NA                 | NA                            | NA                 |
| Kabuli_wild_2215632 | NA                                  | Ca_kabuli_denovo | 2215632                 | C/G  | NA                 | NA                            | NA                 |
| Kabuli_wild_2216722 | NA                                  | Ca_kabuli_denovo | 2216722                 | T/C  | NA                 | NA                            | NA                 |
| Kabuli_wild_2216744 | NA                                  | Ca_kabuli_denovo | 2216744                 | C/G  | NA                 | NA                            | NA                 |

| SNP IDs             | NCBI dbSNP accession IDs (NCBI_SS#) | Chromosomes      | Physical positions (bp) | SNPs | Gene accession IDs | Sequence components of genome | Putative functions |
|---------------------|-------------------------------------|------------------|-------------------------|------|--------------------|-------------------------------|--------------------|
| Kabuli_wild_2217534 | NA                                  | Ca_kabuli_denovo | 2217534                 | A/G  | NA                 | NA                            | NA                 |
| Kabuli_wild_2217536 | NA                                  | Ca_kabuli_denovo | 2217536                 | G/A  | NA                 | NA                            | NA                 |
| Kabuli_wild_2217537 | NA                                  | Ca_kabuli_denovo | 2217537                 | A/G  | NA                 | NA                            | NA                 |
| Kabuli_wild_2217538 | NA                                  | Ca_kabuli_denovo | 2217538                 | G/A  | NA                 | NA                            | NA                 |
| Kabuli_wild_2217923 | NA                                  | Ca_kabuli_denovo | 2217923                 | T/C  | NA                 | NA                            | NA                 |
| Kabuli_wild_2217934 | NA                                  | Ca_kabuli_denovo | 2217934                 | C/T  | NA                 | NA                            | NA                 |
| Kabuli_wild_2218553 | NA                                  | Ca_kabuli_denovo | 2218553                 | T/C  | NA                 | NA                            | NA                 |
| Kabuli_wild_2219215 | NA                                  | Ca_kabuli_denovo | 2219215                 | A/G  | NA                 | NA                            | NA                 |
| Kabuli_wild_2220905 | NA                                  | Ca_kabuli_denovo | 2220905                 | G/T  | NA                 | NA                            | NA                 |
| Kabuli_wild_2220927 | NA                                  | Ca_kabuli_denovo | 2220927                 | G/A  | NA                 | NA                            | NA                 |
| Kabuli_wild_2220965 | NA                                  | Ca_kabuli_denovo | 2220965                 | C/A  | NA                 | NA                            | NA                 |
| Kabuli_wild_2221446 | NA                                  | Ca_kabuli_denovo | 2221446                 | A/G  | NA                 | NA                            | NA                 |
| Kabuli_wild_2221492 | NA                                  | Ca_kabuli_denovo | 2221492                 | G/A  | NA                 | NA                            | NA                 |
| Kabuli_wild_2222172 | NA                                  | Ca_kabuli_denovo | 2222172                 | A/G  | NA                 | NA                            | NA                 |
| Kabuli_wild_2222350 | NA                                  | Ca_kabuli_denovo | 2222350                 | G/T  | NA                 | NA                            | NA                 |
| Kabuli_wild_2222393 | NA                                  | Ca_kabuli_denovo | 2222393                 | G/A  | NA                 | NA                            | NA                 |
| Kabuli_wild_2224399 | NA                                  | Ca_kabuli_denovo | 2224399                 | A/G  | NA                 | NA                            | NA                 |
| Kabuli_wild_2224416 | NA                                  | Ca_kabuli_denovo | 2224416                 | C/G  | NA                 | NA                            | NA                 |
| Kabuli_wild_2224636 | NA                                  | Ca_kabuli_denovo | 2224636                 | A/C  | NA                 | NA                            | NA                 |
| Kabuli_wild_2224939 | NA                                  | Ca_kabuli_denovo | 2224939                 | T/C  | NA                 | NA                            | NA                 |
| Kabuli_wild_2225401 | NA                                  | Ca_kabuli_denovo | 2225401                 | C/T  | NA                 | NA                            | NA                 |
| Kabuli_wild_2226079 | NA                                  | Ca_kabuli_denovo | 2226079                 | G/T  | NA                 | NA                            | NA                 |
| Kabuli_wild_2226547 | NA                                  | Ca_kabuli_denovo | 2226547                 | G/A  | NA                 | NA                            | NA                 |
| Kabuli_wild_2227231 | NA                                  | Ca_kabuli_denovo | 2227231                 | C/T  | NA                 | NA                            | NA                 |
| Kabuli_wild_2227237 | NA                                  | Ca_kabuli_denovo | 2227237                 | T/C  | NA                 | NA                            | NA                 |
| Kabuli_wild_2230317 | NA                                  | Ca_kabuli_denovo | 2230317                 | T/C  | NA                 | NA                            | NA                 |
| Kabuli_wild_2231058 | NA                                  | Ca_kabuli_denovo | 2231058                 | T/C  | NA                 | NA                            | NA                 |
| Kabuli_wild_2231077 | NA                                  | Ca_kabuli_denovo | 2231077                 | A/G  | NA                 | NA                            | NA                 |
| Kabuli_wild_2231563 | NA                                  | Ca_kabuli_denovo | 2231563                 | G/A  | NA                 | NA                            | NA                 |
| Kabuli_wild_2231605 | NA                                  | Ca_kabuli_denovo | 2231605                 | A/G  | NA                 | NA                            | NA                 |
| Kabuli_wild_2231821 | NA                                  | Ca_kabuli_denovo | 2231821                 | A/G  | NA                 | NA                            | NA                 |
| Kabuli_wild_2232715 | NA                                  | Ca_kabuli_denovo | 2232715                 | C/T  | NA                 | NA                            | NA                 |
| Kabuli_wild_2233487 | NA                                  | Ca_kabuli_denovo | 2233487                 | G/A  | NA                 | NA                            | NA                 |
| Kabuli_wild_2234249 | NA                                  | Ca_kabuli_denovo | 2234249                 | A/G  | NA                 | NA                            | NA                 |
| Kabuli_wild_2235764 | NA                                  | Ca_kabuli_denovo | 2235764                 | G/A  | NA                 | NA                            | NA                 |
| Kabuli_wild_2237435 | NA                                  | Ca_kabuli_denovo | 2237435                 | C/T  | NA                 | NA                            | NA                 |
| Kabuli_wild_2237602 | NA                                  | Ca_kabuli_denovo | 2237602                 | C/G  | NA                 | NA                            | NA                 |
| Kabuli_wild_2237872 | NA                                  | Ca_kabuli_denovo | 2237872                 | A/G  | NA                 | NA                            | NA                 |
| Kabuli_wild_2238708 | NA                                  | Ca_kabuli_denovo | 2238708                 | G/T  | NA                 | NA                            | NA                 |
| Kabuli_wild_2238777 | NA                                  | Ca_kabuli_denovo | 2238777                 | G/A  | NA                 | NA                            | NA                 |
| Kabuli_wild_2238971 | NA                                  | Ca_kabuli_denovo | 2238971                 | G/A  | NA                 | NA                            | NA                 |
| Kabuli_wild_2239026 | NA                                  | Ca_kabuli_denovo | 2239026                 | C/G  | NA                 | NA                            | NA                 |
| Kabuli_wild_2239086 | NA                                  | Ca_kabuli_denovo | 2239086                 | A/G  | NA                 | NA                            | NA                 |
| Kabuli_wild_2239388 | NA                                  | Ca_kabuli_denovo | 2239388                 | T/C  | NA                 | NA                            | NA                 |

| SNP IDs             | NCBI dbSNP accession IDs (NCBI_SS#) | Chromosomes      | Physical positions (bp) | SNPs | Gene accession IDs | Sequence components of genome | Putative functions |
|---------------------|-------------------------------------|------------------|-------------------------|------|--------------------|-------------------------------|--------------------|
| Kabuli_wild_2239686 | NA                                  | Ca_kabuli_denovo | 2239686                 | T/C  | NA                 | NA                            | NA                 |
| Kabuli_wild_2239743 | NA                                  | Ca_kabuli_denovo | 2239743                 | T/C  | NA                 | NA                            | NA                 |
| Kabuli_wild_2239826 | NA                                  | Ca_kabuli_denovo | 2239826                 | G/C  | NA                 | NA                            | NA                 |
| Kabuli_wild_2239853 | NA                                  | Ca_kabuli_denovo | 2239853                 | T/C  | NA                 | NA                            | NA                 |
| Kabuli_wild_2240173 | NA                                  | Ca_kabuli_denovo | 2240173                 | G/T  | NA                 | NA                            | NA                 |
| Kabuli_wild_2240176 | NA                                  | Ca_kabuli_denovo | 2240176                 | T/C  | NA                 | NA                            | NA                 |
| Kabuli_wild_2240721 | NA                                  | Ca_kabuli_denovo | 2240721                 | A/T  | NA                 | NA                            | NA                 |
| Kabuli_wild_2241456 | NA                                  | Ca_kabuli_denovo | 2241456                 | T/C  | NA                 | NA                            | NA                 |
| Kabuli_wild_2241564 | NA                                  | Ca_kabuli_denovo | 2241564                 | C/G  | NA                 | NA                            | NA                 |
| Kabuli_wild_2241567 | NA                                  | Ca_kabuli_denovo | 2241567                 | A/G  | NA                 | NA                            | NA                 |
| Kabuli_wild_2242551 | NA                                  | Ca_kabuli_denovo | 2242551                 | C/T  | NA                 | NA                            | NA                 |
| Kabuli_wild_2242568 | NA                                  | Ca_kabuli_denovo | 2242568                 | C/T  | NA                 | NA                            | NA                 |
| Kabuli_wild_2242688 | NA                                  | Ca_kabuli_denovo | 2242688                 | C/T  | NA                 | NA                            | NA                 |
| Kabuli_wild_2242689 | NA                                  | Ca_kabuli_denovo | 2242689                 | C/T  | NA                 | NA                            | NA                 |
| Kabuli_wild_2242692 | NA                                  | Ca_kabuli_denovo | 2242692                 | G/T  | NA                 | NA                            | NA                 |
| Kabuli_wild_2242709 | NA                                  | Ca_kabuli_denovo | 2242709                 | C/G  | NA                 | NA                            | NA                 |
| Kabuli_wild_2242867 | NA                                  | Ca_kabuli_denovo | 2242867                 | A/G  | NA                 | NA                            | NA                 |
| Kabuli_wild_2243049 | NA                                  | Ca_kabuli_denovo | 2243049                 | A/C  | NA                 | NA                            | NA                 |
| Kabuli_wild_2244054 | NA                                  | Ca_kabuli_denovo | 2244054                 | T/C  | NA                 | NA                            | NA                 |
| Kabuli_wild_2244073 | NA                                  | Ca_kabuli_denovo | 2244073                 | C/A  | NA                 | NA                            | NA                 |
| Kabuli_wild_2244435 | NA                                  | Ca_kabuli_denovo | 2244435                 | A/G  | NA                 | NA                            | NA                 |
| Kabuli_wild_2244513 | NA                                  | Ca_kabuli_denovo | 2244513                 | A/G  | NA                 | NA                            | NA                 |
| Kabuli_wild_2244515 | NA                                  | Ca_kabuli_denovo | 2244515                 | C/T  | NA                 | NA                            | NA                 |
| Kabuli_wild_2244516 | NA                                  | Ca_kabuli_denovo | 2244516                 | A/G  | NA                 | NA                            | NA                 |
| Kabuli_wild_2244625 | NA                                  | Ca_kabuli_denovo | 2244625                 | G/C  | NA                 | NA                            | NA                 |
| Kabuli_wild_2244627 | NA                                  | Ca_kabuli_denovo | 2244627                 | C/A  | NA                 | NA                            | NA                 |
| Kabuli_wild_2244646 | NA                                  | Ca_kabuli_denovo | 2244646                 | G/A  | NA                 | NA                            | NA                 |
| Kabuli_wild_2244824 | NA                                  | Ca_kabuli_denovo | 2244824                 | G/A  | NA                 | NA                            | NA                 |
| Kabuli_wild_2244837 | NA                                  | Ca_kabuli_denovo | 2244837                 | T/G  | NA                 | NA                            | NA                 |
| Kabuli_wild_2246751 | NA                                  | Ca_kabuli_denovo | 2246751                 | C/A  | NA                 | NA                            | NA                 |
| Kabuli_wild_2247164 | NA                                  | Ca_kabuli_denovo | 2247164                 | T/C  | NA                 | NA                            | NA                 |
| Kabuli_wild_2247165 | NA                                  | Ca_kabuli_denovo | 2247165                 | T/C  | NA                 | NA                            | NA                 |
| Kabuli_wild_2247757 | NA                                  | Ca_kabuli_denovo | 2247757                 | G/C  | NA                 | NA                            | NA                 |
| Kabuli_wild_2247763 | NA                                  | Ca_kabuli_denovo | 2247763                 | T/C  | NA                 | NA                            | NA                 |
| Kabuli_wild_2250471 | NA                                  | Ca_kabuli_denovo | 2250471                 | A/C  | NA                 | NA                            | NA                 |
| Kabuli_wild_2250743 | NA                                  | Ca_kabuli_denovo | 2250743                 | C/T  | NA                 | NA                            | NA                 |
| Kabuli_wild_2250866 | NA                                  | Ca_kabuli_denovo | 2250866                 | T/C  | NA                 | NA                            | NA                 |
| Kabuli_wild_2251945 | NA                                  | Ca_kabuli_denovo | 2251945                 | T/G  | NA                 | NA                            | NA                 |
| Kabuli_wild_2252854 | NA                                  | Ca_kabuli_denovo | 2252854                 | G/C  | NA                 | NA                            | NA                 |
| Kabuli_wild_2253864 | NA                                  | Ca_kabuli_denovo | 2253864                 | G/C  | NA                 | NA                            | NA                 |
| Kabuli_wild_2255275 | NA                                  | Ca_kabuli_denovo | 2255275                 | T/G  | NA                 | NA                            | NA                 |
| Kabuli_wild_2255444 | NA                                  | Ca_kabuli_denovo | 2255444                 | A/G  | NA                 | NA                            | NA                 |
| Kabuli_wild_2255457 | NA                                  | Ca_kabuli_denovo | 2255457                 | C/T  | NA                 | NA                            | NA                 |
| Kabuli_wild_2256475 | NA                                  | Ca_kabuli_denovo | 2256475                 | T/C  | NA                 | NA                            | NA                 |

| SNP IDs             | NCBI dbSNP accession IDs (NCBI_SS#) | Chromosomes      | Physical positions (bp) | SNPs | Gene accession IDs | Sequence components of genome | Putative functions |
|---------------------|-------------------------------------|------------------|-------------------------|------|--------------------|-------------------------------|--------------------|
| Kabuli_wild_2256803 | NA                                  | Ca_kabuli_denovo | 2256803                 | A/C  | NA                 | NA                            | NA                 |
| Kabuli_wild_2257250 | NA                                  | Ca_kabuli_denovo | 2257250                 | G/A  | NA                 | NA                            | NA                 |
| Kabuli_wild_2257316 | NA                                  | Ca_kabuli_denovo | 2257316                 | C/G  | NA                 | NA                            | NA                 |
| Kabuli_wild_2258580 | NA                                  | Ca_kabuli_denovo | 2258580                 | C/A  | NA                 | NA                            | NA                 |
| Kabuli_wild_2260169 | NA                                  | Ca_kabuli_denovo | 2260169                 | G/A  | NA                 | NA                            | NA                 |
| Kabuli_wild_2260182 | NA                                  | Ca_kabuli_denovo | 2260182                 | C/T  | NA                 | NA                            | NA                 |
| Kabuli_wild_2261325 | NA                                  | Ca_kabuli_denovo | 2261325                 | C/G  | NA                 | NA                            | NA                 |
| Kabuli_wild_2261379 | NA                                  | Ca_kabuli_denovo | 2261379                 | C/A  | NA                 | NA                            | NA                 |
| Kabuli_wild_2262678 | NA                                  | Ca_kabuli_denovo | 2262678                 | A/T  | NA                 | NA                            | NA                 |
| Kabuli_wild_2263756 | NA                                  | Ca_kabuli_denovo | 2263756                 | C/T  | NA                 | NA                            | NA                 |
| Kabuli_wild_2263783 | NA                                  | Ca_kabuli_denovo | 2263783                 | C/A  | NA                 | NA                            | NA                 |
| Kabuli_wild_2263831 | NA                                  | Ca_kabuli_denovo | 2263831                 | C/G  | NA                 | NA                            | NA                 |
| Kabuli_wild_2263858 | NA                                  | Ca_kabuli_denovo | 2263858                 | G/T  | NA                 | NA                            | NA                 |
| Kabuli_wild_2266205 | NA                                  | Ca_kabuli_denovo | 2266205                 | A/G  | NA                 | NA                            | NA                 |
| Kabuli_wild_2266244 | NA                                  | Ca_kabuli_denovo | 2266244                 | A/C  | NA                 | NA                            | NA                 |
| Kabuli_wild_2266321 | NA                                  | Ca_kabuli_denovo | 2266321                 | C/T  | NA                 | NA                            | NA                 |
| Kabuli_wild_2266369 | NA                                  | Ca_kabuli_denovo | 2266369                 | T/C  | NA                 | NA                            | NA                 |
| Kabuli_wild_2266501 | NA                                  | Ca_kabuli_denovo | 2266501                 | C/T  | NA                 | NA                            | NA                 |
| Kabuli_wild_2267638 | NA                                  | Ca_kabuli_denovo | 2267638                 | T/C  | NA                 | NA                            | NA                 |
| Kabuli_wild_2267692 | NA                                  | Ca_kabuli_denovo | 2267692                 | A/G  | NA                 | NA                            | NA                 |
| Kabuli_wild_2267911 | NA                                  | Ca_kabuli_denovo | 2267911                 | C/T  | NA                 | NA                            | NA                 |
| Kabuli_wild_2268491 | NA                                  | Ca_kabuli_denovo | 2268491                 | G/A  | NA                 | NA                            | NA                 |
| Kabuli_wild_2269858 | NA                                  | Ca_kabuli_denovo | 2269858                 | T/C  | NA                 | NA                            | NA                 |
| Kabuli_wild_2271373 | NA                                  | Ca_kabuli_denovo | 2271373                 | G/C  | NA                 | NA                            | NA                 |
| Kabuli_wild_2271990 | NA                                  | Ca_kabuli_denovo | 2271990                 | G/C  | NA                 | NA                            | NA                 |
| Kabuli_wild_2271995 | NA                                  | Ca_kabuli_denovo | 2271995                 | T/C  | NA                 | NA                            | NA                 |
| Kabuli_wild_2272091 | NA                                  | Ca_kabuli_denovo | 2272091                 | T/C  | NA                 | NA                            | NA                 |
| Kabuli_wild_2272285 | NA                                  | Ca_kabuli_denovo | 2272285                 | T/G  | NA                 | NA                            | NA                 |
| Kabuli_wild_2272392 | NA                                  | Ca_kabuli_denovo | 2272392                 | G/C  | NA                 | NA                            | NA                 |
| Kabuli_wild_2272413 | NA                                  | Ca_kabuli_denovo | 2272413                 | C/G  | NA                 | NA                            | NA                 |
| Kabuli_wild_2272533 | NA                                  | Ca_kabuli_denovo | 2272533                 | C/T  | NA                 | NA                            | NA                 |
| Kabuli_wild_2272626 | NA                                  | Ca_kabuli_denovo | 2272626                 | A/G  | NA                 | NA                            | NA                 |
| Kabuli_wild_2272706 | NA                                  | Ca_kabuli_denovo | 2272706                 | C/T  | NA                 | NA                            | NA                 |
| Kabuli_wild_2272736 | NA                                  | Ca_kabuli_denovo | 2272736                 | G/T  | NA                 | NA                            | NA                 |
| Kabuli_wild_2272856 | NA                                  | Ca_kabuli_denovo | 2272856                 | C/G  | NA                 | NA                            | NA                 |
| Kabuli_wild_2272904 | NA                                  | Ca_kabuli_denovo | 2272904                 | C/G  | NA                 | NA                            | NA                 |
| Kabuli_wild_2273312 | NA                                  | Ca_kabuli_denovo | 2273312                 | G/A  | NA                 | NA                            | NA                 |
| Kabuli_wild_2273453 | NA                                  | Ca_kabuli_denovo | 2273453                 | C/T  | NA                 | NA                            | NA                 |
| Kabuli_wild_2273653 | NA                                  | Ca_kabuli_denovo | 2273653                 | A/G  | NA                 | NA                            | NA                 |
| Kabuli_wild_2274057 | NA                                  | Ca_kabuli_denovo | 2274057                 | T/G  | NA                 | NA                            | NA                 |
| Kabuli_wild_2274085 | NA                                  | Ca_kabuli_denovo | 2274085                 | T/C  | NA                 | NA                            | NA                 |
| Kabuli_wild_2274279 | NA                                  | Ca_kabuli_denovo | 2274279                 | G/T  | NA                 | NA                            | NA                 |
| Kabuli_wild_2274597 | NA                                  | Ca_kabuli_denovo | 2274597                 | G/T  | NA                 | NA                            | NA                 |
| Kabuli_wild_2274618 | NA                                  | Ca_kabuli_denovo | 2274618                 | C/G  | NA                 | NA                            | NA                 |

| SNP IDs             | NCBI dbSNP accession IDs (NCBI_SS#) | Chromosomes      | Physical positions (bp) | SNPs | Gene accession IDs | Sequence components of genome | Putative functions |
|---------------------|-------------------------------------|------------------|-------------------------|------|--------------------|-------------------------------|--------------------|
| Kabuli_wild_2275301 | NA                                  | Ca_kabuli_denovo | 2275301                 | T/C  | NA                 | NA                            | NA                 |
| Kabuli_wild_2275310 | NA                                  | Ca_kabuli_denovo | 2275310                 | T/C  | NA                 | NA                            | NA                 |
| Kabuli_wild_2275890 | NA                                  | Ca_kabuli_denovo | 2275890                 | G/C  | NA                 | NA                            | NA                 |
| Kabuli_wild_2275904 | NA                                  | Ca_kabuli_denovo | 2275904                 | T/G  | NA                 | NA                            | NA                 |
| Kabuli_wild_2278216 | NA                                  | Ca_kabuli_denovo | 2278216                 | C/T  | NA                 | NA                            | NA                 |
| Kabuli_wild_2278872 | NA                                  | Ca_kabuli_denovo | 2278872                 | T/G  | NA                 | NA                            | NA                 |
| Kabuli_wild_2279287 | NA                                  | Ca_kabuli_denovo | 2279287                 | A/G  | NA                 | NA                            | NA                 |
| Kabuli_wild_2279299 | NA                                  | Ca_kabuli_denovo | 2279299                 | T/C  | NA                 | NA                            | NA                 |
| Kabuli_wild_2279546 | NA                                  | Ca_kabuli_denovo | 2279546                 | G/A  | NA                 | NA                            | NA                 |
| Kabuli_wild_2279581 | NA                                  | Ca_kabuli_denovo | 2279581                 | G/T  | NA                 | NA                            | NA                 |
| Kabuli_wild_2280573 | NA                                  | Ca_kabuli_denovo | 2280573                 | G/C  | NA                 | NA                            | NA                 |
| Kabuli_wild_2280579 | NA                                  | Ca_kabuli_denovo | 2280579                 | G/A  | NA                 | NA                            | NA                 |
| Kabuli_wild_2281507 | NA                                  | Ca_kabuli_denovo | 2281507                 | A/G  | NA                 | NA                            | NA                 |
| Kabuli_wild_2281532 | NA                                  | Ca_kabuli_denovo | 2281532                 | A/G  | NA                 | NA                            | NA                 |
| Kabuli_wild_2281886 | NA                                  | Ca_kabuli_denovo | 2281886                 | A/C  | NA                 | NA                            | NA                 |
| Kabuli_wild_2282144 | NA                                  | Ca_kabuli_denovo | 2282144                 | C/T  | NA                 | NA                            | NA                 |
| Kabuli_wild_2282894 | NA                                  | Ca_kabuli_denovo | 2282894                 | T/C  | NA                 | NA                            | NA                 |
| Kabuli_wild_2284066 | NA                                  | Ca_kabuli_denovo | 2284066                 | C/A  | NA                 | NA                            | NA                 |
| Kabuli_wild_2284158 | NA                                  | Ca_kabuli_denovo | 2284158                 | G/T  | NA                 | NA                            | NA                 |
| Kabuli_wild_2284721 | NA                                  | Ca_kabuli_denovo | 2284721                 | G/A  | NA                 | NA                            | NA                 |
| Kabuli_wild_2284787 | NA                                  | Ca_kabuli_denovo | 2284787                 | C/T  | NA                 | NA                            | NA                 |
| Kabuli_wild_2284794 | NA                                  | Ca_kabuli_denovo | 2284794                 | G/A  | NA                 | NA                            | NA                 |
| Kabuli_wild_2285497 | NA                                  | Ca_kabuli_denovo | 2285497                 | C/T  | NA                 | NA                            | NA                 |
| Kabuli_wild_2288090 | NA                                  | Ca_kabuli_denovo | 2288090                 | T/C  | NA                 | NA                            | NA                 |
| Kabuli_wild_2288365 | NA                                  | Ca_kabuli_denovo | 2288365                 | A/C  | NA                 | NA                            | NA                 |
| Kabuli_wild_2288869 | NA                                  | Ca_kabuli_denovo | 2288869                 | T/C  | NA                 | NA                            | NA                 |
| Kabuli_wild_2289039 | NA                                  | Ca_kabuli_denovo | 2289039                 | T/C  | NA                 | NA                            | NA                 |
| Kabuli_wild_2290737 | NA                                  | Ca_kabuli_denovo | 2290737                 | G/T  | NA                 | NA                            | NA                 |
| Kabuli_wild_2290784 | NA                                  | Ca_kabuli_denovo | 2290784                 | G/T  | NA                 | NA                            | NA                 |
| Kabuli_wild_2291094 | NA                                  | Ca_kabuli_denovo | 2291094                 | G/A  | NA                 | NA                            | NA                 |
| Kabuli_wild_2291646 | NA                                  | Ca_kabuli_denovo | 2291646                 | G/C  | NA                 | NA                            | NA                 |
| Kabuli_wild_2292192 | NA                                  | Ca_kabuli_denovo | 2292192                 | T/A  | NA                 | NA                            | NA                 |
| Kabuli_wild_2292230 | NA                                  | Ca_kabuli_denovo | 2292230                 | T/C  | NA                 | NA                            | NA                 |
| Kabuli_wild_2293522 | NA                                  | Ca_kabuli_denovo | 2293522                 | A/G  | NA                 | NA                            | NA                 |
| Kabuli_wild_2293593 | NA                                  | Ca_kabuli_denovo | 2293593                 | A/C  | NA                 | NA                            | NA                 |
| Kabuli_wild_2293941 | NA                                  | Ca_kabuli_denovo | 2293941                 | C/G  | NA                 | NA                            | NA                 |
| Kabuli_wild_2293951 | NA                                  | Ca_kabuli_denovo | 2293951                 | G/C  | NA                 | NA                            | NA                 |
| Kabuli_wild_2294204 | NA                                  | Ca_kabuli_denovo | 2294204                 | T/G  | NA                 | NA                            | NA                 |
| Kabuli_wild_2294596 | NA                                  | Ca_kabuli_denovo | 2294596                 | C/T  | NA                 | NA                            | NA                 |
| Kabuli_wild_2294647 | NA                                  | Ca_kabuli_denovo | 2294647                 | A/G  | NA                 | NA                            | NA                 |
| Kabuli_wild_2298312 | NA                                  | Ca_kabuli_denovo | 2298312                 | C/T  | NA                 | NA                            | NA                 |
| Kabuli_wild_2298321 | NA                                  | Ca_kabuli_denovo | 2298321                 | G/T  | NA                 | NA                            | NA                 |
| Kabuli_wild_2298870 | NA                                  | Ca_kabuli_denovo | 2298870                 | C/T  | NA                 | NA                            | NA                 |
| Kabuli_wild_2299335 | NA                                  | Ca_kabuli_denovo | 2299335                 | G/A  | NA                 | NA                            | NA                 |

| SNP IDs                    | NCBI dbSNP accession IDs (NCBI_SS#) | Chromosomes             | Physical positions (bp) | SNPs | Gene accession IDs | Sequence components of genome | Putative functions |
|----------------------------|-------------------------------------|-------------------------|-------------------------|------|--------------------|-------------------------------|--------------------|
| <i>Kabuli_wild_2299779</i> | NA                                  | <i>Ca_kabuli_denovo</i> | 2299779                 | G/A  | NA                 | NA                            | NA                 |
| <i>Kabuli_wild_2301204</i> | NA                                  | <i>Ca_kabuli_denovo</i> | 2301204                 | G/A  | NA                 | NA                            | NA                 |
| <i>Kabuli_wild_2301225</i> | NA                                  | <i>Ca_kabuli_denovo</i> | 2301225                 | G/A  | NA                 | NA                            | NA                 |
| <i>Kabuli_wild_2301615</i> | NA                                  | <i>Ca_kabuli_denovo</i> | 2301615                 | C/A  | NA                 | NA                            | NA                 |
| <i>Kabuli_wild_2301618</i> | NA                                  | <i>Ca_kabuli_denovo</i> | 2301618                 | G/C  | NA                 | NA                            | NA                 |
| <i>Kabuli_wild_2301975</i> | NA                                  | <i>Ca_kabuli_denovo</i> | 2301975                 | G/A  | NA                 | NA                            | NA                 |
| <i>Kabuli_wild_2301976</i> | NA                                  | <i>Ca_kabuli_denovo</i> | 2301976                 | G/A  | NA                 | NA                            | NA                 |
| <i>Kabuli_wild_2302170</i> | NA                                  | <i>Ca_kabuli_denovo</i> | 2302170                 | C/G  | NA                 | NA                            | NA                 |
| <i>Kabuli_wild_2302230</i> | NA                                  | <i>Ca_kabuli_denovo</i> | 2302230                 | G/C  | NA                 | NA                            | NA                 |
| <i>Kabuli_wild_2304334</i> | NA                                  | <i>Ca_kabuli_denovo</i> | 2304334                 | T/C  | NA                 | NA                            | NA                 |
| <i>Kabuli_wild_2305932</i> | NA                                  | <i>Ca_kabuli_denovo</i> | 2305932                 | A/G  | NA                 | NA                            | NA                 |
| <i>Kabuli_wild_2306468</i> | NA                                  | <i>Ca_kabuli_denovo</i> | 2306468                 | C/G  | NA                 | NA                            | NA                 |
| <i>Kabuli_wild_2307302</i> | NA                                  | <i>Ca_kabuli_denovo</i> | 2307302                 | A/G  | NA                 | NA                            | NA                 |
| <i>Kabuli_wild_2307332</i> | NA                                  | <i>Ca_kabuli_denovo</i> | 2307332                 | T/G  | NA                 | NA                            | NA                 |
| <i>Kabuli_wild_2308864</i> | NA                                  | <i>Ca_kabuli_denovo</i> | 2308864                 | C/T  | NA                 | NA                            | NA                 |
| <i>Kabuli_wild_2308909</i> | NA                                  | <i>Ca_kabuli_denovo</i> | 2308909                 | C/G  | NA                 | NA                            | NA                 |
| <i>Kabuli_wild_2310445</i> | NA                                  | <i>Ca_kabuli_denovo</i> | 2310445                 | C/T  | NA                 | NA                            | NA                 |
| <i>Kabuli_wild_2310469</i> | NA                                  | <i>Ca_kabuli_denovo</i> | 2310469                 | G/A  | NA                 | NA                            | NA                 |
| <i>Kabuli_wild_2310949</i> | NA                                  | <i>Ca_kabuli_denovo</i> | 2310949                 | C/T  | NA                 | NA                            | NA                 |
| <i>Kabuli_wild_2310958</i> | NA                                  | <i>Ca_kabuli_denovo</i> | 2310958                 | C/G  | NA                 | NA                            | NA                 |
| <i>Kabuli_wild_2312705</i> | NA                                  | <i>Ca_kabuli_denovo</i> | 2312705                 | A/G  | NA                 | NA                            | NA                 |
| <i>Kabuli_wild_2313515</i> | NA                                  | <i>Ca_kabuli_denovo</i> | 2313515                 | T/C  | NA                 | NA                            | NA                 |
| <i>Kabuli_wild_2314639</i> | NA                                  | <i>Ca_kabuli_denovo</i> | 2314639                 | A/G  | NA                 | NA                            | NA                 |
| <i>Kabuli_wild_2314642</i> | NA                                  | <i>Ca_kabuli_denovo</i> | 2314642                 | G/A  | NA                 | NA                            | NA                 |
| <i>Kabuli_wild_2314686</i> | NA                                  | <i>Ca_kabuli_denovo</i> | 2314686                 | A/G  | NA                 | NA                            | NA                 |
| <i>Kabuli_wild_2315075</i> | NA                                  | <i>Ca_kabuli_denovo</i> | 2315075                 | G/C  | NA                 | NA                            | NA                 |
| <i>Kabuli_wild_2315084</i> | NA                                  | <i>Ca_kabuli_denovo</i> | 2315084                 | C/G  | NA                 | NA                            | NA                 |
| <i>Kabuli_wild_2315310</i> | NA                                  | <i>Ca_kabuli_denovo</i> | 2315310                 | T/C  | NA                 | NA                            | NA                 |
| <i>Kabuli_wild_2315319</i> | NA                                  | <i>Ca_kabuli_denovo</i> | 2315319                 | G/T  | NA                 | NA                            | NA                 |
| <i>Kabuli_wild_2315833</i> | NA                                  | <i>Ca_kabuli_denovo</i> | 2315833                 | G/A  | NA                 | NA                            | NA                 |
| <i>Kabuli_wild_2315923</i> | NA                                  | <i>Ca_kabuli_denovo</i> | 2315923                 | A/G  | NA                 | NA                            | NA                 |
| <i>Kabuli_wild_2316224</i> | NA                                  | <i>Ca_kabuli_denovo</i> | 2316224                 | A/G  | NA                 | NA                            | NA                 |
| <i>Kabuli_wild_2316296</i> | NA                                  | <i>Ca_kabuli_denovo</i> | 2316296                 | C/G  | NA                 | NA                            | NA                 |
| <i>Kabuli_wild_2317638</i> | NA                                  | <i>Ca_kabuli_denovo</i> | 2317638                 | T/G  | NA                 | NA                            | NA                 |
| <i>Kabuli_wild_2317961</i> | NA                                  | <i>Ca_kabuli_denovo</i> | 2317961                 | A/G  | NA                 | NA                            | NA                 |
| <i>Kabuli_wild_2317970</i> | NA                                  | <i>Ca_kabuli_denovo</i> | 2317970                 | G/A  | NA                 | NA                            | NA                 |
| <i>Kabuli_wild_2318155</i> | NA                                  | <i>Ca_kabuli_denovo</i> | 2318155                 | G/A  | NA                 | NA                            | NA                 |
| <i>Kabuli_wild_2318560</i> | NA                                  | <i>Ca_kabuli_denovo</i> | 2318560                 | G/A  | NA                 | NA                            | NA                 |
| <i>Kabuli_wild_2318965</i> | NA                                  | <i>Ca_kabuli_denovo</i> | 2318965                 | A/T  | NA                 | NA                            | NA                 |
| <i>Kabuli_wild_2318968</i> | NA                                  | <i>Ca_kabuli_denovo</i> | 2318968                 | T/C  | NA                 | NA                            | NA                 |
| <i>Kabuli_wild_2321891</i> | NA                                  | <i>Ca_kabuli_denovo</i> | 2321891                 | G/C  | NA                 | NA                            | NA                 |
| <i>Kabuli_wild_2321894</i> | NA                                  | <i>Ca_kabuli_denovo</i> | 2321894                 | C/T  | NA                 | NA                            | NA                 |
| <i>Kabuli_wild_2323411</i> | NA                                  | <i>Ca_kabuli_denovo</i> | 2323411                 | T/C  | NA                 | NA                            | NA                 |
| <i>Kabuli_wild_2323438</i> | NA                                  | <i>Ca_kabuli_denovo</i> | 2323438                 | C/G  | NA                 | NA                            | NA                 |

| SNP IDs                    | NCBI dbSNP accession IDs (NCBI_SS#) | Chromosomes             | Physical positions (bp) | SNPs | Gene accession IDs | Sequence components of genome | Putative functions |
|----------------------------|-------------------------------------|-------------------------|-------------------------|------|--------------------|-------------------------------|--------------------|
| <i>Kabuli_wild_2323980</i> | NA                                  | <i>Ca_kabuli_denovo</i> | 2323980                 | T/C  | NA                 | NA                            | NA                 |
| <i>Kabuli_wild_2326829</i> | NA                                  | <i>Ca_kabuli_denovo</i> | 2326829                 | C/T  | NA                 | NA                            | NA                 |
| <i>Kabuli_wild_2326844</i> | NA                                  | <i>Ca_kabuli_denovo</i> | 2326844                 | T/C  | NA                 | NA                            | NA                 |
| <i>Kabuli_wild_2327576</i> | NA                                  | <i>Ca_kabuli_denovo</i> | 2327576                 | A/G  | NA                 | NA                            | NA                 |
| <i>Kabuli_wild_2327757</i> | NA                                  | <i>Ca_kabuli_denovo</i> | 2327757                 | G/A  | NA                 | NA                            | NA                 |
| <i>Kabuli_wild_2328278</i> | NA                                  | <i>Ca_kabuli_denovo</i> | 2328278                 | C/T  | NA                 | NA                            | NA                 |
| <i>Kabuli_wild_2328810</i> | NA                                  | <i>Ca_kabuli_denovo</i> | 2328810                 | A/C  | NA                 | NA                            | NA                 |
| <i>Kabuli_wild_2329215</i> | NA                                  | <i>Ca_kabuli_denovo</i> | 2329215                 | T/C  | NA                 | NA                            | NA                 |
| <i>Kabuli_wild_2329812</i> | NA                                  | <i>Ca_kabuli_denovo</i> | 2329812                 | G/A  | NA                 | NA                            | NA                 |
| <i>Kabuli_wild_2329814</i> | NA                                  | <i>Ca_kabuli_denovo</i> | 2329814                 | G/A  | NA                 | NA                            | NA                 |
| <i>Kabuli_wild_2329854</i> | NA                                  | <i>Ca_kabuli_denovo</i> | 2329854                 | T/G  | NA                 | NA                            | NA                 |
| <i>Kabuli_wild_2330215</i> | NA                                  | <i>Ca_kabuli_denovo</i> | 2330215                 | G/A  | NA                 | NA                            | NA                 |
| <i>Kabuli_wild_2330480</i> | NA                                  | <i>Ca_kabuli_denovo</i> | 2330480                 | C/A  | NA                 | NA                            | NA                 |
| <i>Kabuli_wild_2330528</i> | NA                                  | <i>Ca_kabuli_denovo</i> | 2330528                 | C/A  | NA                 | NA                            | NA                 |
| <i>Kabuli_wild_2331832</i> | NA                                  | <i>Ca_kabuli_denovo</i> | 2331832                 | T/C  | NA                 | NA                            | NA                 |
| <i>Kabuli_wild_2332400</i> | NA                                  | <i>Ca_kabuli_denovo</i> | 2332400                 | G/T  | NA                 | NA                            | NA                 |
| <i>Kabuli_wild_2332591</i> | NA                                  | <i>Ca_kabuli_denovo</i> | 2332591                 | A/C  | NA                 | NA                            | NA                 |
| <i>Kabuli_wild_2332593</i> | NA                                  | <i>Ca_kabuli_denovo</i> | 2332593                 | G/A  | NA                 | NA                            | NA                 |
| <i>Kabuli_wild_2332974</i> | NA                                  | <i>Ca_kabuli_denovo</i> | 2332974                 | A/G  | NA                 | NA                            | NA                 |
| <i>Kabuli_wild_2333684</i> | NA                                  | <i>Ca_kabuli_denovo</i> | 2333684                 | A/C  | NA                 | NA                            | NA                 |
| <i>Kabuli_wild_2333714</i> | NA                                  | <i>Ca_kabuli_denovo</i> | 2333714                 | G/C  | NA                 | NA                            | NA                 |
| <i>Kabuli_wild_2333887</i> | NA                                  | <i>Ca_kabuli_denovo</i> | 2333887                 | G/A  | NA                 | NA                            | NA                 |
| <i>Kabuli_wild_2333899</i> | NA                                  | <i>Ca_kabuli_denovo</i> | 2333899                 | A/G  | NA                 | NA                            | NA                 |
| <i>Kabuli_wild_2334647</i> | NA                                  | <i>Ca_kabuli_denovo</i> | 2334647                 | C/T  | NA                 | NA                            | NA                 |
| <i>Kabuli_wild_2334649</i> | NA                                  | <i>Ca_kabuli_denovo</i> | 2334649                 | A/G  | NA                 | NA                            | NA                 |
| <i>Kabuli_wild_2335836</i> | NA                                  | <i>Ca_kabuli_denovo</i> | 2335836                 | G/A  | NA                 | NA                            | NA                 |
| <i>Kabuli_wild_2335909</i> | NA                                  | <i>Ca_kabuli_denovo</i> | 2335909                 | T/G  | NA                 | NA                            | NA                 |
| <i>Kabuli_wild_2336997</i> | NA                                  | <i>Ca_kabuli_denovo</i> | 2336997                 | G/C  | NA                 | NA                            | NA                 |
| <i>Kabuli_wild_2338119</i> | NA                                  | <i>Ca_kabuli_denovo</i> | 2338119                 | G/T  | NA                 | NA                            | NA                 |
| <i>Kabuli_wild_2338684</i> | NA                                  | <i>Ca_kabuli_denovo</i> | 2338684                 | T/C  | NA                 | NA                            | NA                 |
| <i>Kabuli_wild_2339204</i> | NA                                  | <i>Ca_kabuli_denovo</i> | 2339204                 | G/A  | NA                 | NA                            | NA                 |
| <i>Kabuli_wild_2340670</i> | NA                                  | <i>Ca_kabuli_denovo</i> | 2340670                 | A/C  | NA                 | NA                            | NA                 |
| <i>Kabuli_wild_2340695</i> | NA                                  | <i>Ca_kabuli_denovo</i> | 2340695                 | A/C  | NA                 | NA                            | NA                 |
| <i>Kabuli_wild_2340952</i> | NA                                  | <i>Ca_kabuli_denovo</i> | 2340952                 | T/C  | NA                 | NA                            | NA                 |
| <i>Kabuli_wild_2341045</i> | NA                                  | <i>Ca_kabuli_denovo</i> | 2341045                 | G/T  | NA                 | NA                            | NA                 |
| <i>Kabuli_wild_2341838</i> | NA                                  | <i>Ca_kabuli_denovo</i> | 2341838                 | G/C  | NA                 | NA                            | NA                 |
| <i>Kabuli_wild_2341889</i> | NA                                  | <i>Ca_kabuli_denovo</i> | 2341889                 | A/G  | NA                 | NA                            | NA                 |
| <i>Kabuli_wild_2342726</i> | NA                                  | <i>Ca_kabuli_denovo</i> | 2342726                 | T/C  | NA                 | NA                            | NA                 |
| <i>Kabuli_wild_2343154</i> | NA                                  | <i>Ca_kabuli_denovo</i> | 2343154                 | A/G  | NA                 | NA                            | NA                 |
| <i>Kabuli_wild_2343155</i> | NA                                  | <i>Ca_kabuli_denovo</i> | 2343155                 | T/A  | NA                 | NA                            | NA                 |
| <i>Kabuli_wild_2343156</i> | NA                                  | <i>Ca_kabuli_denovo</i> | 2343156                 | G/T  | NA                 | NA                            | NA                 |
| <i>Kabuli_wild_2343261</i> | NA                                  | <i>Ca_kabuli_denovo</i> | 2343261                 | A/C  | NA                 | NA                            | NA                 |
| <i>Kabuli_wild_2343992</i> | NA                                  | <i>Ca_kabuli_denovo</i> | 2343992                 | C/A  | NA                 | NA                            | NA                 |
| <i>Kabuli_wild_2344209</i> | NA                                  | <i>Ca_kabuli_denovo</i> | 2344209                 | G/C  | NA                 | NA                            | NA                 |



| SNP IDs             | NCBI dbSNP accession IDs (NCBI_SS#) | Chromosomes      | Physical positions (bp) | SNPs | Gene accession IDs | Sequence components of genome | Putative functions |
|---------------------|-------------------------------------|------------------|-------------------------|------|--------------------|-------------------------------|--------------------|
| Kabuli_wild_2345493 | NA                                  | Ca_kabuli_denovo | 2345493                 | A/G  | NA                 | NA                            | NA                 |
| Kabuli_wild_2346090 | NA                                  | Ca_kabuli_denovo | 2346090                 | C/G  | NA                 | NA                            | NA                 |
| Kabuli_wild_2346150 | NA                                  | Ca_kabuli_denovo | 2346150                 | C/T  | NA                 | NA                            | NA                 |
| Kabuli_wild_2346280 | NA                                  | Ca_kabuli_denovo | 2346280                 | C/A  | NA                 | NA                            | NA                 |
| Kabuli_wild_2346406 | NA                                  | Ca_kabuli_denovo | 2346406                 | G/A  | NA                 | NA                            | NA                 |
| Kabuli_wild_2347369 | NA                                  | Ca_kabuli_denovo | 2347369                 | C/T  | NA                 | NA                            | NA                 |
| Kabuli_wild_2347535 | NA                                  | Ca_kabuli_denovo | 2347535                 | T/G  | NA                 | NA                            | NA                 |
| Kabuli_wild_2347772 | NA                                  | Ca_kabuli_denovo | 2347772                 | T/C  | NA                 | NA                            | NA                 |
| Kabuli_wild_2347923 | NA                                  | Ca_kabuli_denovo | 2347923                 | A/C  | NA                 | NA                            | NA                 |
| Kabuli_wild_2347942 | NA                                  | Ca_kabuli_denovo | 2347942                 | G/C  | NA                 | NA                            | NA                 |
| Kabuli_wild_2348488 | NA                                  | Ca_kabuli_denovo | 2348488                 | T/C  | NA                 | NA                            | NA                 |
| Kabuli_wild_2349501 | NA                                  | Ca_kabuli_denovo | 2349501                 | T/C  | NA                 | NA                            | NA                 |
| Kabuli_wild_2349528 | NA                                  | Ca_kabuli_denovo | 2349528                 | C/G  | NA                 | NA                            | NA                 |
| Kabuli_wild_2349777 | NA                                  | Ca_kabuli_denovo | 2349777                 | A/C  | NA                 | NA                            | NA                 |
| Kabuli_wild_2349797 | NA                                  | Ca_kabuli_denovo | 2349797                 | T/C  | NA                 | NA                            | NA                 |
| Kabuli_wild_2350662 | NA                                  | Ca_kabuli_denovo | 2350662                 | G/A  | NA                 | NA                            | NA                 |
| Kabuli_wild_2350677 | NA                                  | Ca_kabuli_denovo | 2350677                 | T/C  | NA                 | NA                            | NA                 |
| Kabuli_wild_2350876 | NA                                  | Ca_kabuli_denovo | 2350876                 | G/C  | NA                 | NA                            | NA                 |
| Kabuli_wild_2351359 | NA                                  | Ca_kabuli_denovo | 2351359                 | G/C  | NA                 | NA                            | NA                 |
| Kabuli_wild_2352119 | NA                                  | Ca_kabuli_denovo | 2352119                 | A/C  | NA                 | NA                            | NA                 |
| Kabuli_wild_2352135 | NA                                  | Ca_kabuli_denovo | 2352135                 | T/C  | NA                 | NA                            | NA                 |
| Kabuli_wild_2352180 | NA                                  | Ca_kabuli_denovo | 2352180                 | G/A  | NA                 | NA                            | NA                 |
| Kabuli_wild_2352181 | NA                                  | Ca_kabuli_denovo | 2352181                 | A/C  | NA                 | NA                            | NA                 |
| Kabuli_wild_2352182 | NA                                  | Ca_kabuli_denovo | 2352182                 | C/G  | NA                 | NA                            | NA                 |
| Kabuli_wild_2352183 | NA                                  | Ca_kabuli_denovo | 2352183                 | G/A  | NA                 | NA                            | NA                 |
| Kabuli_wild_2352184 | NA                                  | Ca_kabuli_denovo | 2352184                 | A/C  | NA                 | NA                            | NA                 |
| Kabuli_wild_2352185 | NA                                  | Ca_kabuli_denovo | 2352185                 | T/C  | NA                 | NA                            | NA                 |
| Kabuli_wild_2352186 | NA                                  | Ca_kabuli_denovo | 2352186                 | C/G  | NA                 | NA                            | NA                 |
| Kabuli_wild_2352187 | NA                                  | Ca_kabuli_denovo | 2352187                 | T/A  | NA                 | NA                            | NA                 |
| Kabuli_wild_2352188 | NA                                  | Ca_kabuli_denovo | 2352188                 | C/T  | NA                 | NA                            | NA                 |
| Kabuli_wild_2352189 | NA                                  | Ca_kabuli_denovo | 2352189                 | G/C  | NA                 | NA                            | NA                 |
| Kabuli_wild_2352463 | NA                                  | Ca_kabuli_denovo | 2352463                 | T/C  | NA                 | NA                            | NA                 |
| Kabuli_wild_2352819 | NA                                  | Ca_kabuli_denovo | 2352819                 | T/C  | NA                 | NA                            | NA                 |
| Kabuli_wild_2353471 | NA                                  | Ca_kabuli_denovo | 2353471                 | G/C  | NA                 | NA                            | NA                 |
| Kabuli_wild_2353962 | NA                                  | Ca_kabuli_denovo | 2353962                 | T/C  | NA                 | NA                            | NA                 |
| Kabuli_wild_2353964 | NA                                  | Ca_kabuli_denovo | 2353964                 | C/T  | NA                 | NA                            | NA                 |
| Kabuli_wild_2354921 | NA                                  | Ca_kabuli_denovo | 2354921                 | C/T  | NA                 | NA                            | NA                 |
| Kabuli_wild_2354972 | NA                                  | Ca_kabuli_denovo | 2354972                 | G/A  | NA                 | NA                            | NA                 |
| Kabuli_wild_2354987 | NA                                  | Ca_kabuli_denovo | 2354987                 | G/A  | NA                 | NA                            | NA                 |
| Kabuli_wild_2355730 | NA                                  | Ca_kabuli_denovo | 2355730                 | G/T  | NA                 | NA                            | NA                 |
| Kabuli_wild_2355737 | NA                                  | Ca_kabuli_denovo | 2355737                 | G/C  | NA                 | NA                            | NA                 |
| Kabuli_wild_2356025 | NA                                  | Ca_kabuli_denovo | 2356025                 | T/C  | NA                 | NA                            | NA                 |
| Kabuli_wild_2356030 | NA                                  | Ca_kabuli_denovo | 2356030                 | T/C  | NA                 | NA                            | NA                 |
| Kabuli_wild_2356120 | NA                                  | Ca_kabuli_denovo | 2356120                 | T/C  | NA                 | NA                            | NA                 |

| SNP IDs             | NCBI dbSNP accession IDs (NCBI_SS#) | Chromosomes      | Physical positions (bp) | SNPs | Gene accession IDs | Sequence components of genome | Putative functions |
|---------------------|-------------------------------------|------------------|-------------------------|------|--------------------|-------------------------------|--------------------|
| Kabuli_wild_2356147 | NA                                  | Ca_kabuli_denovo | 2356147                 | T/C  | NA                 | NA                            | NA                 |
| Kabuli_wild_2356684 | NA                                  | Ca_kabuli_denovo | 2356684                 | A/G  | NA                 | NA                            | NA                 |
| Kabuli_wild_2356739 | NA                                  | Ca_kabuli_denovo | 2356739                 | A/G  | NA                 | NA                            | NA                 |
| Kabuli_wild_2356846 | NA                                  | Ca_kabuli_denovo | 2356846                 | A/C  | NA                 | NA                            | NA                 |
| Kabuli_wild_2356968 | NA                                  | Ca_kabuli_denovo | 2356968                 | T/C  | NA                 | NA                            | NA                 |
| Kabuli_wild_2356979 | NA                                  | Ca_kabuli_denovo | 2356979                 | T/C  | NA                 | NA                            | NA                 |
| Kabuli_wild_2357263 | NA                                  | Ca_kabuli_denovo | 2357263                 | C/G  | NA                 | NA                            | NA                 |
| Kabuli_wild_2357296 | NA                                  | Ca_kabuli_denovo | 2357296                 | A/G  | NA                 | NA                            | NA                 |
| Kabuli_wild_2357690 | NA                                  | Ca_kabuli_denovo | 2357690                 | G/A  | NA                 | NA                            | NA                 |
| Kabuli_wild_2357691 | NA                                  | Ca_kabuli_denovo | 2357691                 | T/A  | NA                 | NA                            | NA                 |
| Kabuli_wild_2359304 | NA                                  | Ca_kabuli_denovo | 2359304                 | G/T  | NA                 | NA                            | NA                 |
| Kabuli_wild_2359457 | NA                                  | Ca_kabuli_denovo | 2359457                 | T/G  | NA                 | NA                            | NA                 |
| Kabuli_wild_2360197 | NA                                  | Ca_kabuli_denovo | 2360197                 | C/G  | NA                 | NA                            | NA                 |
| Kabuli_wild_2362389 | NA                                  | Ca_kabuli_denovo | 2362389                 | G/T  | NA                 | NA                            | NA                 |
| Kabuli_wild_2362408 | NA                                  | Ca_kabuli_denovo | 2362408                 | G/C  | NA                 | NA                            | NA                 |
| Kabuli_wild_2363352 | NA                                  | Ca_kabuli_denovo | 2363352                 | G/A  | NA                 | NA                            | NA                 |
| Kabuli_wild_2363668 | NA                                  | Ca_kabuli_denovo | 2363668                 | T/C  | NA                 | NA                            | NA                 |
| Kabuli_wild_2363755 | NA                                  | Ca_kabuli_denovo | 2363755                 | C/G  | NA                 | NA                            | NA                 |
| Kabuli_wild_2363782 | NA                                  | Ca_kabuli_denovo | 2363782                 | T/G  | NA                 | NA                            | NA                 |
| Kabuli_wild_2363871 | NA                                  | Ca_kabuli_denovo | 2363871                 | T/C  | NA                 | NA                            | NA                 |
| Kabuli_wild_2363967 | NA                                  | Ca_kabuli_denovo | 2363967                 | T/C  | NA                 | NA                            | NA                 |
| Kabuli_wild_2364033 | NA                                  | Ca_kabuli_denovo | 2364033                 | T/G  | NA                 | NA                            | NA                 |
| Kabuli_wild_2364173 | NA                                  | Ca_kabuli_denovo | 2364173                 | A/T  | NA                 | NA                            | NA                 |
| Kabuli_wild_2364919 | NA                                  | Ca_kabuli_denovo | 2364919                 | C/T  | NA                 | NA                            | NA                 |
| Kabuli_wild_2364930 | NA                                  | Ca_kabuli_denovo | 2364930                 | A/G  | NA                 | NA                            | NA                 |
| Kabuli_wild_2365132 | NA                                  | Ca_kabuli_denovo | 2365132                 | G/A  | NA                 | NA                            | NA                 |
| Kabuli_wild_2365242 | NA                                  | Ca_kabuli_denovo | 2365242                 | T/C  | NA                 | NA                            | NA                 |
| Kabuli_wild_2365635 | NA                                  | Ca_kabuli_denovo | 2365635                 | A/G  | NA                 | NA                            | NA                 |
| Kabuli_wild_2367055 | NA                                  | Ca_kabuli_denovo | 2367055                 | A/G  | NA                 | NA                            | NA                 |
| Kabuli_wild_2367827 | NA                                  | Ca_kabuli_denovo | 2367827                 | G/A  | NA                 | NA                            | NA                 |
| Kabuli_wild_2367880 | NA                                  | Ca_kabuli_denovo | 2367880                 | G/C  | NA                 | NA                            | NA                 |
| Kabuli_wild_2367921 | NA                                  | Ca_kabuli_denovo | 2367921                 | G/C  | NA                 | NA                            | NA                 |
| Kabuli_wild_2367939 | NA                                  | Ca_kabuli_denovo | 2367939                 | C/T  | NA                 | NA                            | NA                 |
| Kabuli_wild_2368168 | NA                                  | Ca_kabuli_denovo | 2368168                 | G/T  | NA                 | NA                            | NA                 |
| Kabuli_wild_2368699 | NA                                  | Ca_kabuli_denovo | 2368699                 | C/T  | NA                 | NA                            | NA                 |
| Kabuli_wild_2368999 | NA                                  | Ca_kabuli_denovo | 2368999                 | C/T  | NA                 | NA                            | NA                 |
| Kabuli_wild_2369049 | NA                                  | Ca_kabuli_denovo | 2369049                 | G/T  | NA                 | NA                            | NA                 |
| Kabuli_wild_2371704 | NA                                  | Ca_kabuli_denovo | 2371704                 | C/T  | NA                 | NA                            | NA                 |
| Kabuli_wild_2372063 | NA                                  | Ca_kabuli_denovo | 2372063                 | C/G  | NA                 | NA                            | NA                 |
| Kabuli_wild_2372072 | NA                                  | Ca_kabuli_denovo | 2372072                 | G/A  | NA                 | NA                            | NA                 |
| Kabuli_wild_2372895 | NA                                  | Ca_kabuli_denovo | 2372895                 | G/C  | NA                 | NA                            | NA                 |
| Kabuli_wild_2374455 | NA                                  | Ca_kabuli_denovo | 2374455                 | G/A  | NA                 | NA                            | NA                 |
| Kabuli_wild_2374478 | NA                                  | Ca_kabuli_denovo | 2374478                 | G/A  | NA                 | NA                            | NA                 |
| Kabuli_wild_2375015 | NA                                  | Ca_kabuli_denovo | 2375015                 | T/C  | NA                 | NA                            | NA                 |

| SNP IDs             | NCBI dbSNP accession IDs (NCBI_SS#) | Chromosomes      | Physical positions (bp) | SNPs | Gene accession IDs | Sequence components of genome | Putative functions |
|---------------------|-------------------------------------|------------------|-------------------------|------|--------------------|-------------------------------|--------------------|
| Kabuli_wild_2375090 | NA                                  | Ca_kabuli_denovo | 2375090                 | C/T  | NA                 | NA                            | NA                 |
| Kabuli_wild_2375120 | NA                                  | Ca_kabuli_denovo | 2375120                 | T/C  | NA                 | NA                            | NA                 |
| Kabuli_wild_2376397 | NA                                  | Ca_kabuli_denovo | 2376397                 | T/G  | NA                 | NA                            | NA                 |
| Kabuli_wild_2376623 | NA                                  | Ca_kabuli_denovo | 2376623                 | G/C  | NA                 | NA                            | NA                 |
| Kabuli_wild_2376882 | NA                                  | Ca_kabuli_denovo | 2376882                 | T/C  | NA                 | NA                            | NA                 |
| Kabuli_wild_2377169 | NA                                  | Ca_kabuli_denovo | 2377169                 | T/C  | NA                 | NA                            | NA                 |
| Kabuli_wild_2377226 | NA                                  | Ca_kabuli_denovo | 2377226                 | G/A  | NA                 | NA                            | NA                 |
| Kabuli_wild_2377904 | NA                                  | Ca_kabuli_denovo | 2377904                 | T/C  | NA                 | NA                            | NA                 |
| Kabuli_wild_2378403 | NA                                  | Ca_kabuli_denovo | 2378403                 | G/C  | NA                 | NA                            | NA                 |
| Kabuli_wild_2378409 | NA                                  | Ca_kabuli_denovo | 2378409                 | C/T  | NA                 | NA                            | NA                 |
| Kabuli_wild_2378982 | NA                                  | Ca_kabuli_denovo | 2378982                 | A/G  | NA                 | NA                            | NA                 |
| Kabuli_wild_2378985 | NA                                  | Ca_kabuli_denovo | 2378985                 | T/C  | NA                 | NA                            | NA                 |
| Kabuli_wild_2379325 | NA                                  | Ca_kabuli_denovo | 2379325                 | G/C  | NA                 | NA                            | NA                 |
| Kabuli_wild_2379947 | NA                                  | Ca_kabuli_denovo | 2379947                 | C/G  | NA                 | NA                            | NA                 |
| Kabuli_wild_2379958 | NA                                  | Ca_kabuli_denovo | 2379958                 | A/C  | NA                 | NA                            | NA                 |
| Kabuli_wild_2380231 | NA                                  | Ca_kabuli_denovo | 2380231                 | T/C  | NA                 | NA                            | NA                 |
| Kabuli_wild_2380529 | NA                                  | Ca_kabuli_denovo | 2380529                 | C/G  | NA                 | NA                            | NA                 |
| Kabuli_wild_2381230 | NA                                  | Ca_kabuli_denovo | 2381230                 | C/G  | NA                 | NA                            | NA                 |
| Kabuli_wild_2381234 | NA                                  | Ca_kabuli_denovo | 2381234                 | G/T  | NA                 | NA                            | NA                 |
| Kabuli_wild_2383452 | NA                                  | Ca_kabuli_denovo | 2383452                 | G/C  | NA                 | NA                            | NA                 |
| Kabuli_wild_2385787 | NA                                  | Ca_kabuli_denovo | 2385787                 | T/C  | NA                 | NA                            | NA                 |
| Kabuli_wild_2386680 | NA                                  | Ca_kabuli_denovo | 2386680                 | A/G  | NA                 | NA                            | NA                 |
| Kabuli_wild_2386703 | NA                                  | Ca_kabuli_denovo | 2386703                 | A/G  | NA                 | NA                            | NA                 |
| Kabuli_wild_2387402 | NA                                  | Ca_kabuli_denovo | 2387402                 | A/C  | NA                 | NA                            | NA                 |
| Kabuli_wild_2387790 | NA                                  | Ca_kabuli_denovo | 2387790                 | T/G  | NA                 | NA                            | NA                 |
| Kabuli_wild_2390158 | NA                                  | Ca_kabuli_denovo | 2390158                 | T/C  | NA                 | NA                            | NA                 |
| Kabuli_wild_2390426 | NA                                  | Ca_kabuli_denovo | 2390426                 | C/A  | NA                 | NA                            | NA                 |
| Kabuli_wild_2391215 | NA                                  | Ca_kabuli_denovo | 2391215                 | C/T  | NA                 | NA                            | NA                 |
| Kabuli_wild_2392012 | NA                                  | Ca_kabuli_denovo | 2392012                 | C/T  | NA                 | NA                            | NA                 |
| Kabuli_wild_2392026 | NA                                  | Ca_kabuli_denovo | 2392026                 | C/T  | NA                 | NA                            | NA                 |
| Kabuli_wild_2392903 | NA                                  | Ca_kabuli_denovo | 2392903                 | G/A  | NA                 | NA                            | NA                 |
| Kabuli_wild_2393147 | NA                                  | Ca_kabuli_denovo | 2393147                 | T/C  | NA                 | NA                            | NA                 |
| Kabuli_wild_2393177 | NA                                  | Ca_kabuli_denovo | 2393177                 | C/T  | NA                 | NA                            | NA                 |
| Kabuli_wild_2393251 | NA                                  | Ca_kabuli_denovo | 2393251                 | C/A  | NA                 | NA                            | NA                 |
| Kabuli_wild_2393629 | NA                                  | Ca_kabuli_denovo | 2393629                 | T/C  | NA                 | NA                            | NA                 |
| Kabuli_wild_2393832 | NA                                  | Ca_kabuli_denovo | 2393832                 | C/T  | NA                 | NA                            | NA                 |
| Kabuli_wild_2393875 | NA                                  | Ca_kabuli_denovo | 2393875                 | C/T  | NA                 | NA                            | NA                 |
| Kabuli_wild_2394283 | NA                                  | Ca_kabuli_denovo | 2394283                 | A/C  | NA                 | NA                            | NA                 |
| Kabuli_wild_2394794 | NA                                  | Ca_kabuli_denovo | 2394794                 | C/T  | NA                 | NA                            | NA                 |
| Kabuli_wild_2396277 | NA                                  | Ca_kabuli_denovo | 2396277                 | A/G  | NA                 | NA                            | NA                 |
| Kabuli_wild_2396289 | NA                                  | Ca_kabuli_denovo | 2396289                 | C/T  | NA                 | NA                            | NA                 |
| Kabuli_wild_2396746 | NA                                  | Ca_kabuli_denovo | 2396746                 | T/C  | NA                 | NA                            | NA                 |
| Kabuli_wild_2396854 | NA                                  | Ca_kabuli_denovo | 2396854                 | C/T  | NA                 | NA                            | NA                 |
| Kabuli_wild_2397795 | NA                                  | Ca_kabuli_denovo | 2397795                 | T/C  | NA                 | NA                            | NA                 |

| SNP IDs             | NCBI dbSNP accession IDs (NCBI_SS#) | Chromosomes      | Physical positions (bp) | SNPs | Gene accession IDs | Sequence components of genome | Putative functions |
|---------------------|-------------------------------------|------------------|-------------------------|------|--------------------|-------------------------------|--------------------|
| Kabuli_wild_2397864 | NA                                  | Ca_kabuli_denovo | 2397864                 | T/G  | NA                 | NA                            | NA                 |
| Kabuli_wild_2398369 | NA                                  | Ca_kabuli_denovo | 2398369                 | C/T  | NA                 | NA                            | NA                 |
| Kabuli_wild_2398951 | NA                                  | Ca_kabuli_denovo | 2398951                 | G/C  | NA                 | NA                            | NA                 |
| Kabuli_wild_2398966 | NA                                  | Ca_kabuli_denovo | 2398966                 | C/T  | NA                 | NA                            | NA                 |
| Kabuli_wild_2400028 | NA                                  | Ca_kabuli_denovo | 2400028                 | T/C  | NA                 | NA                            | NA                 |
| Kabuli_wild_2400801 | NA                                  | Ca_kabuli_denovo | 2400801                 | G/T  | NA                 | NA                            | NA                 |
| Kabuli_wild_2401043 | NA                                  | Ca_kabuli_denovo | 2401043                 | G/C  | NA                 | NA                            | NA                 |
| Kabuli_wild_2401045 | NA                                  | Ca_kabuli_denovo | 2401045                 | A/G  | NA                 | NA                            | NA                 |
| Kabuli_wild_2401066 | NA                                  | Ca_kabuli_denovo | 2401066                 | C/A  | NA                 | NA                            | NA                 |
| Kabuli_wild_2401345 | NA                                  | Ca_kabuli_denovo | 2401345                 | G/A  | NA                 | NA                            | NA                 |
| Kabuli_wild_2401750 | NA                                  | Ca_kabuli_denovo | 2401750                 | A/G  | NA                 | NA                            | NA                 |
| Kabuli_wild_2401751 | NA                                  | Ca_kabuli_denovo | 2401751                 | C/A  | NA                 | NA                            | NA                 |
| Kabuli_wild_2402315 | NA                                  | Ca_kabuli_denovo | 2402315                 | A/G  | NA                 | NA                            | NA                 |
| Kabuli_wild_2402417 | NA                                  | Ca_kabuli_denovo | 2402417                 | A/G  | NA                 | NA                            | NA                 |
| Kabuli_wild_2403154 | NA                                  | Ca_kabuli_denovo | 2403154                 | C/G  | NA                 | NA                            | NA                 |
| Kabuli_wild_2403511 | NA                                  | Ca_kabuli_denovo | 2403511                 | G/C  | NA                 | NA                            | NA                 |
| Kabuli_wild_2403541 | NA                                  | Ca_kabuli_denovo | 2403541                 | C/T  | NA                 | NA                            | NA                 |
| Kabuli_wild_2403733 | NA                                  | Ca_kabuli_denovo | 2403733                 | C/G  | NA                 | NA                            | NA                 |
| Kabuli_wild_2403832 | NA                                  | Ca_kabuli_denovo | 2403832                 | G/T  | NA                 | NA                            | NA                 |
| Kabuli_wild_2404034 | NA                                  | Ca_kabuli_denovo | 2404034                 | C/A  | NA                 | NA                            | NA                 |
| Kabuli_wild_2404035 | NA                                  | Ca_kabuli_denovo | 2404035                 | T/G  | NA                 | NA                            | NA                 |
| Kabuli_wild_2404289 | NA                                  | Ca_kabuli_denovo | 2404289                 | C/A  | NA                 | NA                            | NA                 |
| Kabuli_wild_2404403 | NA                                  | Ca_kabuli_denovo | 2404403                 | A/G  | NA                 | NA                            | NA                 |
| Kabuli_wild_2404482 | NA                                  | Ca_kabuli_denovo | 2404482                 | A/G  | NA                 | NA                            | NA                 |
| Kabuli_wild_2404506 | NA                                  | Ca_kabuli_denovo | 2404506                 | A/G  | NA                 | NA                            | NA                 |
| Kabuli_wild_2404509 | NA                                  | Ca_kabuli_denovo | 2404509                 | G/A  | NA                 | NA                            | NA                 |
| Kabuli_wild_2404815 | NA                                  | Ca_kabuli_denovo | 2404815                 | G/T  | NA                 | NA                            | NA                 |
| Kabuli_wild_2405109 | NA                                  | Ca_kabuli_denovo | 2405109                 | T/G  | NA                 | NA                            | NA                 |
| Kabuli_wild_2405586 | NA                                  | Ca_kabuli_denovo | 2405586                 | C/G  | NA                 | NA                            | NA                 |
| Kabuli_wild_2405676 | NA                                  | Ca_kabuli_denovo | 2405676                 | T/G  | NA                 | NA                            | NA                 |
| Kabuli_wild_2406588 | NA                                  | Ca_kabuli_denovo | 2406588                 | G/A  | NA                 | NA                            | NA                 |
| Kabuli_wild_2407085 | NA                                  | Ca_kabuli_denovo | 2407085                 | T/G  | NA                 | NA                            | NA                 |
| Kabuli_wild_2407373 | NA                                  | Ca_kabuli_denovo | 2407373                 | C/A  | NA                 | NA                            | NA                 |
| Kabuli_wild_2408081 | NA                                  | Ca_kabuli_denovo | 2408081                 | C/G  | NA                 | NA                            | NA                 |
| Kabuli_wild_2409674 | NA                                  | Ca_kabuli_denovo | 2409674                 | A/C  | NA                 | NA                            | NA                 |
| Kabuli_wild_2410321 | NA                                  | Ca_kabuli_denovo | 2410321                 | G/C  | NA                 | NA                            | NA                 |
| Kabuli_wild_2410384 | NA                                  | Ca_kabuli_denovo | 2410384                 | A/C  | NA                 | NA                            | NA                 |
| Kabuli_wild_2410599 | NA                                  | Ca_kabuli_denovo | 2410599                 | C/T  | NA                 | NA                            | NA                 |
| Kabuli_wild_2411084 | NA                                  | Ca_kabuli_denovo | 2411084                 | C/A  | NA                 | NA                            | NA                 |
| Kabuli_wild_2411095 | NA                                  | Ca_kabuli_denovo | 2411095                 | G/A  | NA                 | NA                            | NA                 |
| Kabuli_wild_2412832 | NA                                  | Ca_kabuli_denovo | 2412832                 | C/T  | NA                 | NA                            | NA                 |
| Kabuli_wild_2412845 | NA                                  | Ca_kabuli_denovo | 2412845                 | G/A  | NA                 | NA                            | NA                 |
| Kabuli_wild_2413120 | NA                                  | Ca_kabuli_denovo | 2413120                 | T/G  | NA                 | NA                            | NA                 |
| Kabuli_wild_2413129 | NA                                  | Ca_kabuli_denovo | 2413129                 | T/C  | NA                 | NA                            | NA                 |

| SNP IDs             | NCBI dbSNP accession IDs (NCBI_SS#) | Chromosomes      | Physical positions (bp) | SNPs | Gene accession IDs | Sequence components of genome | Putative functions |
|---------------------|-------------------------------------|------------------|-------------------------|------|--------------------|-------------------------------|--------------------|
| Kabuli_wild_2413505 | NA                                  | Ca_kabuli_denovo | 2413505                 | G/C  | NA                 | NA                            | NA                 |
| Kabuli_wild_2414296 | NA                                  | Ca_kabuli_denovo | 2414296                 | C/T  | NA                 | NA                            | NA                 |
| Kabuli_wild_2414326 | NA                                  | Ca_kabuli_denovo | 2414326                 | T/C  | NA                 | NA                            | NA                 |
| Kabuli_wild_2414474 | NA                                  | Ca_kabuli_denovo | 2414474                 | G/A  | NA                 | NA                            | NA                 |
| Kabuli_wild_2414510 | NA                                  | Ca_kabuli_denovo | 2414510                 | A/G  | NA                 | NA                            | NA                 |
| Kabuli_wild_2415077 | NA                                  | Ca_kabuli_denovo | 2415077                 | G/A  | NA                 | NA                            | NA                 |
| Kabuli_wild_2415101 | NA                                  | Ca_kabuli_denovo | 2415101                 | A/C  | NA                 | NA                            | NA                 |
| Kabuli_wild_2416017 | NA                                  | Ca_kabuli_denovo | 2416017                 | A/T  | NA                 | NA                            | NA                 |
| Kabuli_wild_2416052 | NA                                  | Ca_kabuli_denovo | 2416052                 | A/G  | NA                 | NA                            | NA                 |
| Kabuli_wild_2416264 | NA                                  | Ca_kabuli_denovo | 2416264                 | G/A  | NA                 | NA                            | NA                 |
| Kabuli_wild_2417610 | NA                                  | Ca_kabuli_denovo | 2417610                 | G/T  | NA                 | NA                            | NA                 |
| Kabuli_wild_2417965 | NA                                  | Ca_kabuli_denovo | 2417965                 | C/T  | NA                 | NA                            | NA                 |
| Kabuli_wild_2418182 | NA                                  | Ca_kabuli_denovo | 2418182                 | G/T  | NA                 | NA                            | NA                 |
| Kabuli_wild_2420178 | NA                                  | Ca_kabuli_denovo | 2420178                 | G/A  | NA                 | NA                            | NA                 |
| Kabuli_wild_2420745 | NA                                  | Ca_kabuli_denovo | 2420745                 | A/G  | NA                 | NA                            | NA                 |
| Kabuli_wild_2420984 | NA                                  | Ca_kabuli_denovo | 2420984                 | A/T  | NA                 | NA                            | NA                 |
| Kabuli_wild_2420987 | NA                                  | Ca_kabuli_denovo | 2420987                 | A/C  | NA                 | NA                            | NA                 |
| Kabuli_wild_2421552 | NA                                  | Ca_kabuli_denovo | 2421552                 | A/C  | NA                 | NA                            | NA                 |
| Kabuli_wild_2421577 | NA                                  | Ca_kabuli_denovo | 2421577                 | G/C  | NA                 | NA                            | NA                 |
| Kabuli_wild_2421592 | NA                                  | Ca_kabuli_denovo | 2421592                 | C/G  | NA                 | NA                            | NA                 |
| Kabuli_wild_2421594 | NA                                  | Ca_kabuli_denovo | 2421594                 | A/G  | NA                 | NA                            | NA                 |
| Kabuli_wild_2422682 | NA                                  | Ca_kabuli_denovo | 2422682                 | T/C  | NA                 | NA                            | NA                 |
| Kabuli_wild_2422703 | NA                                  | Ca_kabuli_denovo | 2422703                 | C/T  | NA                 | NA                            | NA                 |
| Kabuli_wild_2423593 | NA                                  | Ca_kabuli_denovo | 2423593                 | G/C  | NA                 | NA                            | NA                 |
| Kabuli_wild_2425057 | NA                                  | Ca_kabuli_denovo | 2425057                 | G/C  | NA                 | NA                            | NA                 |
| Kabuli_wild_2425340 | NA                                  | Ca_kabuli_denovo | 2425340                 | A/G  | NA                 | NA                            | NA                 |
| Kabuli_wild_2425627 | NA                                  | Ca_kabuli_denovo | 2425627                 | T/C  | NA                 | NA                            | NA                 |
| Kabuli_wild_2426121 | NA                                  | Ca_kabuli_denovo | 2426121                 | G/A  | NA                 | NA                            | NA                 |
| Kabuli_wild_2426157 | NA                                  | Ca_kabuli_denovo | 2426157                 | C/T  | NA                 | NA                            | NA                 |
| Kabuli_wild_2427775 | NA                                  | Ca_kabuli_denovo | 2427775                 | C/T  | NA                 | NA                            | NA                 |
| Kabuli_wild_2427871 | NA                                  | Ca_kabuli_denovo | 2427871                 | G/A  | NA                 | NA                            | NA                 |
| Kabuli_wild_2427927 | NA                                  | Ca_kabuli_denovo | 2427927                 | C/T  | NA                 | NA                            | NA                 |
| Kabuli_wild_2428447 | NA                                  | Ca_kabuli_denovo | 2428447                 | A/G  | NA                 | NA                            | NA                 |
| Kabuli_wild_2428480 | NA                                  | Ca_kabuli_denovo | 2428480                 | A/C  | NA                 | NA                            | NA                 |
| Kabuli_wild_2428644 | NA                                  | Ca_kabuli_denovo | 2428644                 | A/G  | NA                 | NA                            | NA                 |
| Kabuli_wild_2428682 | NA                                  | Ca_kabuli_denovo | 2428682                 | C/A  | NA                 | NA                            | NA                 |
| Kabuli_wild_2428837 | NA                                  | Ca_kabuli_denovo | 2428837                 | C/T  | NA                 | NA                            | NA                 |
| Kabuli_wild_2428840 | NA                                  | Ca_kabuli_denovo | 2428840                 | G/C  | NA                 | NA                            | NA                 |
| Kabuli_wild_2429385 | NA                                  | Ca_kabuli_denovo | 2429385                 | A/G  | NA                 | NA                            | NA                 |
| Kabuli_wild_2429387 | NA                                  | Ca_kabuli_denovo | 2429387                 | A/G  | NA                 | NA                            | NA                 |
| Kabuli_wild_2429389 | NA                                  | Ca_kabuli_denovo | 2429389                 | T/A  | NA                 | NA                            | NA                 |
| Kabuli_wild_2429518 | NA                                  | Ca_kabuli_denovo | 2429518                 | T/C  | NA                 | NA                            | NA                 |
| Kabuli_wild_2433241 | NA                                  | Ca_kabuli_denovo | 2433241                 | T/C  | NA                 | NA                            | NA                 |
| Kabuli_wild_2433248 | NA                                  | Ca_kabuli_denovo | 2433248                 | G/A  | NA                 | NA                            | NA                 |

| SNP IDs             | NCBI dbSNP accession IDs (NCBI_SS#) | Chromosomes      | Physical positions (bp) | SNPs | Gene accession IDs | Sequence components of genome | Putative functions |
|---------------------|-------------------------------------|------------------|-------------------------|------|--------------------|-------------------------------|--------------------|
| Kabuli_wild_2435580 | NA                                  | Ca_kabuli_denovo | 2435580                 | A/G  | NA                 | NA                            | NA                 |
| Kabuli_wild_2435581 | NA                                  | Ca_kabuli_denovo | 2435581                 | G/T  | NA                 | NA                            | NA                 |
| Kabuli_wild_2435582 | NA                                  | Ca_kabuli_denovo | 2435582                 | T/C  | NA                 | NA                            | NA                 |
| Kabuli_wild_2435583 | NA                                  | Ca_kabuli_denovo | 2435583                 | C/G  | NA                 | NA                            | NA                 |
| Kabuli_wild_2435681 | NA                                  | Ca_kabuli_denovo | 2435681                 | G/A  | NA                 | NA                            | NA                 |
| Kabuli_wild_2435683 | NA                                  | Ca_kabuli_denovo | 2435683                 | C/T  | NA                 | NA                            | NA                 |
| Kabuli_wild_2435760 | NA                                  | Ca_kabuli_denovo | 2435760                 | C/A  | NA                 | NA                            | NA                 |
| Kabuli_wild_2436251 | NA                                  | Ca_kabuli_denovo | 2436251                 | T/G  | NA                 | NA                            | NA                 |
| Kabuli_wild_2436269 | NA                                  | Ca_kabuli_denovo | 2436269                 | C/T  | NA                 | NA                            | NA                 |
| Kabuli_wild_2436372 | NA                                  | Ca_kabuli_denovo | 2436372                 | G/C  | NA                 | NA                            | NA                 |
| Kabuli_wild_2437198 | NA                                  | Ca_kabuli_denovo | 2437198                 | G/T  | NA                 | NA                            | NA                 |
| Kabuli_wild_2438060 | NA                                  | Ca_kabuli_denovo | 2438060                 | T/C  | NA                 | NA                            | NA                 |
| Kabuli_wild_2438102 | NA                                  | Ca_kabuli_denovo | 2438102                 | G/A  | NA                 | NA                            | NA                 |
| Kabuli_wild_2438348 | NA                                  | Ca_kabuli_denovo | 2438348                 | C/T  | NA                 | NA                            | NA                 |
| Kabuli_wild_2438747 | NA                                  | Ca_kabuli_denovo | 2438747                 | A/G  | NA                 | NA                            | NA                 |
| Kabuli_wild_2438899 | NA                                  | Ca_kabuli_denovo | 2438899                 | T/C  | NA                 | NA                            | NA                 |
| Kabuli_wild_2439609 | NA                                  | Ca_kabuli_denovo | 2439609                 | C/T  | NA                 | NA                            | NA                 |
| Kabuli_wild_2441124 | NA                                  | Ca_kabuli_denovo | 2441124                 | A/G  | NA                 | NA                            | NA                 |
| Kabuli_wild_2442654 | NA                                  | Ca_kabuli_denovo | 2442654                 | G/A  | NA                 | NA                            | NA                 |
| Kabuli_wild_2443822 | NA                                  | Ca_kabuli_denovo | 2443822                 | G/T  | NA                 | NA                            | NA                 |
| Kabuli_wild_2444070 | NA                                  | Ca_kabuli_denovo | 2444070                 | T/C  | NA                 | NA                            | NA                 |
| Kabuli_wild_2444757 | NA                                  | Ca_kabuli_denovo | 2444757                 | C/T  | NA                 | NA                            | NA                 |
| Kabuli_wild_2444779 | NA                                  | Ca_kabuli_denovo | 2444779                 | G/A  | NA                 | NA                            | NA                 |
| Kabuli_wild_2446416 | NA                                  | Ca_kabuli_denovo | 2446416                 | G/C  | NA                 | NA                            | NA                 |
| Kabuli_wild_2447078 | NA                                  | Ca_kabuli_denovo | 2447078                 | A/G  | NA                 | NA                            | NA                 |
| Kabuli_wild_2447111 | NA                                  | Ca_kabuli_denovo | 2447111                 | C/T  | NA                 | NA                            | NA                 |
| Kabuli_wild_2448149 | NA                                  | Ca_kabuli_denovo | 2448149                 | T/C  | NA                 | NA                            | NA                 |
| Kabuli_wild_2448985 | NA                                  | Ca_kabuli_denovo | 2448985                 | T/C  | NA                 | NA                            | NA                 |
| Kabuli_wild_2450912 | NA                                  | Ca_kabuli_denovo | 2450912                 | T/C  | NA                 | NA                            | NA                 |
| Kabuli_wild_2451265 | NA                                  | Ca_kabuli_denovo | 2451265                 | T/C  | NA                 | NA                            | NA                 |
| Kabuli_wild_2451286 | NA                                  | Ca_kabuli_denovo | 2451286                 | C/T  | NA                 | NA                            | NA                 |
| Kabuli_wild_2451472 | NA                                  | Ca_kabuli_denovo | 2451472                 | C/T  | NA                 | NA                            | NA                 |
| Kabuli_wild_2451989 | NA                                  | Ca_kabuli_denovo | 2451989                 | C/T  | NA                 | NA                            | NA                 |
| Kabuli_wild_2452001 | NA                                  | Ca_kabuli_denovo | 2452001                 | C/G  | NA                 | NA                            | NA                 |
| Kabuli_wild_2453473 | NA                                  | Ca_kabuli_denovo | 2453473                 | C/T  | NA                 | NA                            | NA                 |
| Kabuli_wild_2453781 | NA                                  | Ca_kabuli_denovo | 2453781                 | G/C  | NA                 | NA                            | NA                 |
| Kabuli_wild_2453861 | NA                                  | Ca_kabuli_denovo | 2453861                 | C/T  | NA                 | NA                            | NA                 |
| Kabuli_wild_2454369 | NA                                  | Ca_kabuli_denovo | 2454369                 | A/G  | NA                 | NA                            | NA                 |
| Kabuli_wild_2456504 | NA                                  | Ca_kabuli_denovo | 2456504                 | C/T  | NA                 | NA                            | NA                 |
| Kabuli_wild_2456516 | NA                                  | Ca_kabuli_denovo | 2456516                 | G/A  | NA                 | NA                            | NA                 |
| Kabuli_wild_2456903 | NA                                  | Ca_kabuli_denovo | 2456903                 | G/A  | NA                 | NA                            | NA                 |
| Kabuli_wild_2461438 | NA                                  | Ca_kabuli_denovo | 2461438                 | A/G  | NA                 | NA                            | NA                 |
| Kabuli_wild_2464720 | NA                                  | Ca_kabuli_denovo | 2464720                 | T/C  | NA                 | NA                            | NA                 |
| Kabuli_wild_2464751 | NA                                  | Ca_kabuli_denovo | 2464751                 | C/T  | NA                 | NA                            | NA                 |

| SNP IDs             | NCBI dbSNP accession IDs (NCBI_SS#) | Chromosomes      | Physical positions (bp) | SNPs | Gene accession IDs | Sequence components of genome | Putative functions |
|---------------------|-------------------------------------|------------------|-------------------------|------|--------------------|-------------------------------|--------------------|
| Kabuli_wild_2465130 | NA                                  | Ca_kabuli_denovo | 2465130                 | G/A  | NA                 | NA                            | NA                 |
| Kabuli_wild_2465523 | NA                                  | Ca_kabuli_denovo | 2465523                 | G/T  | NA                 | NA                            | NA                 |
| Kabuli_wild_2465563 | NA                                  | Ca_kabuli_denovo | 2465563                 | G/A  | NA                 | NA                            | NA                 |
| Kabuli_wild_2466017 | NA                                  | Ca_kabuli_denovo | 2466017                 | T/C  | NA                 | NA                            | NA                 |
| Kabuli_wild_2468040 | NA                                  | Ca_kabuli_denovo | 2468040                 | G/C  | NA                 | NA                            | NA                 |
| Kabuli_wild_2468240 | NA                                  | Ca_kabuli_denovo | 2468240                 | A/G  | NA                 | NA                            | NA                 |
| Kabuli_wild_2468643 | NA                                  | Ca_kabuli_denovo | 2468643                 | C/T  | NA                 | NA                            | NA                 |
| Kabuli_wild_2468926 | NA                                  | Ca_kabuli_denovo | 2468926                 | T/G  | NA                 | NA                            | NA                 |
| Kabuli_wild_2469181 | NA                                  | Ca_kabuli_denovo | 2469181                 | A/G  | NA                 | NA                            | NA                 |
| Kabuli_wild_2469678 | NA                                  | Ca_kabuli_denovo | 2469678                 | G/A  | NA                 | NA                            | NA                 |
| Kabuli_wild_2469900 | NA                                  | Ca_kabuli_denovo | 2469900                 | C/T  | NA                 | NA                            | NA                 |
| Kabuli_wild_2469918 | NA                                  | Ca_kabuli_denovo | 2469918                 | T/G  | NA                 | NA                            | NA                 |
| Kabuli_wild_2470463 | NA                                  | Ca_kabuli_denovo | 2470463                 | C/A  | NA                 | NA                            | NA                 |
| Kabuli_wild_2471146 | NA                                  | Ca_kabuli_denovo | 2471146                 | T/A  | NA                 | NA                            | NA                 |
| Kabuli_wild_2471459 | NA                                  | Ca_kabuli_denovo | 2471459                 | A/G  | NA                 | NA                            | NA                 |
| Kabuli_wild_2472417 | NA                                  | Ca_kabuli_denovo | 2472417                 | C/T  | NA                 | NA                            | NA                 |
| Kabuli_wild_2474837 | NA                                  | Ca_kabuli_denovo | 2474837                 | C/T  | NA                 | NA                            | NA                 |
| Kabuli_wild_2474882 | NA                                  | Ca_kabuli_denovo | 2474882                 | T/C  | NA                 | NA                            | NA                 |
| Kabuli_wild_2475563 | NA                                  | Ca_kabuli_denovo | 2475563                 | T/C  | NA                 | NA                            | NA                 |
| Kabuli_wild_2475569 | NA                                  | Ca_kabuli_denovo | 2475569                 | T/G  | NA                 | NA                            | NA                 |
| Kabuli_wild_2475792 | NA                                  | Ca_kabuli_denovo | 2475792                 | C/G  | NA                 | NA                            | NA                 |
| Kabuli_wild_2475827 | NA                                  | Ca_kabuli_denovo | 2475827                 | G/A  | NA                 | NA                            | NA                 |
| Kabuli_wild_2476327 | NA                                  | Ca_kabuli_denovo | 2476327                 | C/T  | NA                 | NA                            | NA                 |
| Kabuli_wild_2477254 | NA                                  | Ca_kabuli_denovo | 2477254                 | A/G  | NA                 | NA                            | NA                 |
| Kabuli_wild_2477262 | NA                                  | Ca_kabuli_denovo | 2477262                 | T/A  | NA                 | NA                            | NA                 |
| Kabuli_wild_2477431 | NA                                  | Ca_kabuli_denovo | 2477431                 | A/G  | NA                 | NA                            | NA                 |
| Kabuli_wild_2477448 | NA                                  | Ca_kabuli_denovo | 2477448                 | C/T  | NA                 | NA                            | NA                 |
| Kabuli_wild_2477466 | NA                                  | Ca_kabuli_denovo | 2477466                 | A/G  | NA                 | NA                            | NA                 |
| Kabuli_wild_2480577 | NA                                  | Ca_kabuli_denovo | 2480577                 | G/C  | NA                 | NA                            | NA                 |
| Kabuli_wild_2480586 | NA                                  | Ca_kabuli_denovo | 2480586                 | T/G  | NA                 | NA                            | NA                 |
| Kabuli_wild_2480653 | NA                                  | Ca_kabuli_denovo | 2480653                 | C/T  | NA                 | NA                            | NA                 |
| Kabuli_wild_2480735 | NA                                  | Ca_kabuli_denovo | 2480735                 | A/G  | NA                 | NA                            | NA                 |
| Kabuli_wild_2480738 | NA                                  | Ca_kabuli_denovo | 2480738                 | G/A  | NA                 | NA                            | NA                 |
| Kabuli_wild_2481127 | NA                                  | Ca_kabuli_denovo | 2481127                 | G/A  | NA                 | NA                            | NA                 |
| Kabuli_wild_2481814 | NA                                  | Ca_kabuli_denovo | 2481814                 | T/C  | NA                 | NA                            | NA                 |
| Kabuli_wild_2481822 | NA                                  | Ca_kabuli_denovo | 2481822                 | C/G  | NA                 | NA                            | NA                 |
| Kabuli_wild_2481824 | NA                                  | Ca_kabuli_denovo | 2481824                 | A/C  | NA                 | NA                            | NA                 |
| Kabuli_wild_2483148 | NA                                  | Ca_kabuli_denovo | 2483148                 | G/C  | NA                 | NA                            | NA                 |
| Kabuli_wild_2483444 | NA                                  | Ca_kabuli_denovo | 2483444                 | T/A  | NA                 | NA                            | NA                 |
| Kabuli_wild_2484995 | NA                                  | Ca_kabuli_denovo | 2484995                 | T/C  | NA                 | NA                            | NA                 |
| Kabuli_wild_2485031 | NA                                  | Ca_kabuli_denovo | 2485031                 | T/C  | NA                 | NA                            | NA                 |
| Kabuli_wild_2485283 | NA                                  | Ca_kabuli_denovo | 2485283                 | T/C  | NA                 | NA                            | NA                 |
| Kabuli_wild_2485286 | NA                                  | Ca_kabuli_denovo | 2485286                 | A/G  | NA                 | NA                            | NA                 |
| Kabuli_wild_2485398 | NA                                  | Ca_kabuli_denovo | 2485398                 | C/T  | NA                 | NA                            | NA                 |

| SNP IDs             | NCBI dbSNP accession IDs (NCBI_SS#) | Chromosomes      | Physical positions (bp) | SNPs | Gene accession IDs | Sequence components of genome | Putative functions |
|---------------------|-------------------------------------|------------------|-------------------------|------|--------------------|-------------------------------|--------------------|
| Kabuli_wild_2485778 | NA                                  | Ca_kabuli_denovo | 2485778                 | T/C  | NA                 | NA                            | NA                 |
| Kabuli_wild_2486748 | NA                                  | Ca_kabuli_denovo | 2486748                 | C/A  | NA                 | NA                            | NA                 |
| Kabuli_wild_2490274 | NA                                  | Ca_kabuli_denovo | 2490274                 | C/T  | NA                 | NA                            | NA                 |
| Kabuli_wild_2490336 | NA                                  | Ca_kabuli_denovo | 2490336                 | A/T  | NA                 | NA                            | NA                 |
| Kabuli_wild_2493642 | NA                                  | Ca_kabuli_denovo | 2493642                 | C/T  | NA                 | NA                            | NA                 |
| Kabuli_wild_2493699 | NA                                  | Ca_kabuli_denovo | 2493699                 | T/G  | NA                 | NA                            | NA                 |
| Kabuli_wild_2494112 | NA                                  | Ca_kabuli_denovo | 2494112                 | G/A  | NA                 | NA                            | NA                 |
| Kabuli_wild_2494151 | NA                                  | Ca_kabuli_denovo | 2494151                 | C/G  | NA                 | NA                            | NA                 |
| Kabuli_wild_2494319 | NA                                  | Ca_kabuli_denovo | 2494319                 | T/C  | NA                 | NA                            | NA                 |
| Kabuli_wild_2494625 | NA                                  | Ca_kabuli_denovo | 2494625                 | T/C  | NA                 | NA                            | NA                 |
| Kabuli_wild_2495389 | NA                                  | Ca_kabuli_denovo | 2495389                 | C/T  | NA                 | NA                            | NA                 |
| Kabuli_wild_2495434 | NA                                  | Ca_kabuli_denovo | 2495434                 | G/A  | NA                 | NA                            | NA                 |
| Kabuli_wild_2496447 | NA                                  | Ca_kabuli_denovo | 2496447                 | T/G  | NA                 | NA                            | NA                 |
| Kabuli_wild_2496855 | NA                                  | Ca_kabuli_denovo | 2496855                 | A/G  | NA                 | NA                            | NA                 |
| Kabuli_wild_2498004 | NA                                  | Ca_kabuli_denovo | 2498004                 | C/T  | NA                 | NA                            | NA                 |
| Kabuli_wild_2499131 | NA                                  | Ca_kabuli_denovo | 2499131                 | A/G  | NA                 | NA                            | NA                 |
| Kabuli_wild_2499140 | NA                                  | Ca_kabuli_denovo | 2499140                 | C/G  | NA                 | NA                            | NA                 |
| Kabuli_wild_2499601 | NA                                  | Ca_kabuli_denovo | 2499601                 | G/C  | NA                 | NA                            | NA                 |
| Kabuli_wild_2499610 | NA                                  | Ca_kabuli_denovo | 2499610                 | T/G  | NA                 | NA                            | NA                 |
| Kabuli_wild_2499747 | NA                                  | Ca_kabuli_denovo | 2499747                 | C/T  | NA                 | NA                            | NA                 |
| Kabuli_wild_2499762 | NA                                  | Ca_kabuli_denovo | 2499762                 | T/G  | NA                 | NA                            | NA                 |
| Kabuli_wild_2500274 | NA                                  | Ca_kabuli_denovo | 2500274                 | C/A  | NA                 | NA                            | NA                 |
| Kabuli_wild_2500283 | NA                                  | Ca_kabuli_denovo | 2500283                 | T/C  | NA                 | NA                            | NA                 |
| Kabuli_wild_2502029 | NA                                  | Ca_kabuli_denovo | 2502029                 | T/C  | NA                 | NA                            | NA                 |
| Kabuli_wild_2502030 | NA                                  | Ca_kabuli_denovo | 2502030                 | A/G  | NA                 | NA                            | NA                 |
| Kabuli_wild_2502364 | NA                                  | Ca_kabuli_denovo | 2502364                 | C/T  | NA                 | NA                            | NA                 |
| Kabuli_wild_2502373 | NA                                  | Ca_kabuli_denovo | 2502373                 | G/C  | NA                 | NA                            | NA                 |
| Kabuli_wild_2502414 | NA                                  | Ca_kabuli_denovo | 2502414                 | G/A  | NA                 | NA                            | NA                 |
| Kabuli_wild_2502581 | NA                                  | Ca_kabuli_denovo | 2502581                 | A/G  | NA                 | NA                            | NA                 |
| Kabuli_wild_2502588 | NA                                  | Ca_kabuli_denovo | 2502588                 | G/T  | NA                 | NA                            | NA                 |
| Kabuli_wild_2502596 | NA                                  | Ca_kabuli_denovo | 2502596                 | C/T  | NA                 | NA                            | NA                 |
| Kabuli_wild_2502960 | NA                                  | Ca_kabuli_denovo | 2502960                 | C/T  | NA                 | NA                            | NA                 |
| Kabuli_wild_2503328 | NA                                  | Ca_kabuli_denovo | 2503328                 | T/C  | NA                 | NA                            | NA                 |
| Kabuli_wild_2504222 | NA                                  | Ca_kabuli_denovo | 2504222                 | A/G  | NA                 | NA                            | NA                 |
| Kabuli_wild_2504791 | NA                                  | Ca_kabuli_denovo | 2504791                 | C/G  | NA                 | NA                            | NA                 |
| Kabuli_wild_2504809 | NA                                  | Ca_kabuli_denovo | 2504809                 | C/T  | NA                 | NA                            | NA                 |
| Kabuli_wild_2504906 | NA                                  | Ca_kabuli_denovo | 2504906                 | T/G  | NA                 | NA                            | NA                 |
| Kabuli_wild_2504931 | NA                                  | Ca_kabuli_denovo | 2504931                 | T/G  | NA                 | NA                            | NA                 |
| Kabuli_wild_2505486 | NA                                  | Ca_kabuli_denovo | 2505486                 | T/C  | NA                 | NA                            | NA                 |
| Kabuli_wild_2506458 | NA                                  | Ca_kabuli_denovo | 2506458                 | G/C  | NA                 | NA                            | NA                 |
| Kabuli_wild_2506467 | NA                                  | Ca_kabuli_denovo | 2506467                 | T/C  | NA                 | NA                            | NA                 |
| Kabuli_wild_2506613 | NA                                  | Ca_kabuli_denovo | 2506613                 | A/C  | NA                 | NA                            | NA                 |
| Kabuli_wild_2508091 | NA                                  | Ca_kabuli_denovo | 2508091                 | A/G  | NA                 | NA                            | NA                 |
| Kabuli_wild_2508372 | NA                                  | Ca_kabuli_denovo | 2508372                 | T/C  | NA                 | NA                            | NA                 |



| SNP IDs             | NCBI dbSNP accession IDs (NCBI_SS#) | Chromosomes      | Physical positions (bp) | SNPs | Gene accession IDs | Sequence components of genome | Putative functions |
|---------------------|-------------------------------------|------------------|-------------------------|------|--------------------|-------------------------------|--------------------|
| Kabuli_wild_2509538 | NA                                  | Ca_kabuli_denovo | 2509538                 | C/G  | NA                 | NA                            | NA                 |
| Kabuli_wild_2509601 | NA                                  | Ca_kabuli_denovo | 2509601                 | G/A  | NA                 | NA                            | NA                 |
| Kabuli_wild_2510339 | NA                                  | Ca_kabuli_denovo | 2510339                 | T/G  | NA                 | NA                            | NA                 |
| Kabuli_wild_2511214 | NA                                  | Ca_kabuli_denovo | 2511214                 | T/C  | NA                 | NA                            | NA                 |
| Kabuli_wild_2511257 | NA                                  | Ca_kabuli_denovo | 2511257                 | A/G  | NA                 | NA                            | NA                 |
| Kabuli_wild_2513317 | NA                                  | Ca_kabuli_denovo | 2513317                 | G/A  | NA                 | NA                            | NA                 |
| Kabuli_wild_2515222 | NA                                  | Ca_kabuli_denovo | 2515222                 | C/G  | NA                 | NA                            | NA                 |
| Kabuli_wild_2515572 | NA                                  | Ca_kabuli_denovo | 2515572                 | C/T  | NA                 | NA                            | NA                 |
| Kabuli_wild_2515611 | NA                                  | Ca_kabuli_denovo | 2515611                 | G/A  | NA                 | NA                            | NA                 |
| Kabuli_wild_2515617 | NA                                  | Ca_kabuli_denovo | 2515617                 | C/G  | NA                 | NA                            | NA                 |
| Kabuli_wild_2515935 | NA                                  | Ca_kabuli_denovo | 2515935                 | A/G  | NA                 | NA                            | NA                 |
| Kabuli_wild_2515944 | NA                                  | Ca_kabuli_denovo | 2515944                 | T/C  | NA                 | NA                            | NA                 |
| Kabuli_wild_2518469 | NA                                  | Ca_kabuli_denovo | 2518469                 | G/A  | NA                 | NA                            | NA                 |
| Kabuli_wild_2518496 | NA                                  | Ca_kabuli_denovo | 2518496                 | G/C  | NA                 | NA                            | NA                 |
| Kabuli_wild_2518669 | NA                                  | Ca_kabuli_denovo | 2518669                 | G/A  | NA                 | NA                            | NA                 |
| Kabuli_wild_2518728 | NA                                  | Ca_kabuli_denovo | 2518728                 | C/T  | NA                 | NA                            | NA                 |
| Kabuli_wild_2519065 | NA                                  | Ca_kabuli_denovo | 2519065                 | G/A  | NA                 | NA                            | NA                 |
| Kabuli_wild_2519070 | NA                                  | Ca_kabuli_denovo | 2519070                 | G/A  | NA                 | NA                            | NA                 |
| Kabuli_wild_2519533 | NA                                  | Ca_kabuli_denovo | 2519533                 | C/G  | NA                 | NA                            | NA                 |
| Kabuli_wild_2519718 | NA                                  | Ca_kabuli_denovo | 2519718                 | G/A  | NA                 | NA                            | NA                 |
| Kabuli_wild_2520219 | NA                                  | Ca_kabuli_denovo | 2520219                 | C/T  | NA                 | NA                            | NA                 |
| Kabuli_wild_2520317 | NA                                  | Ca_kabuli_denovo | 2520317                 | G/C  | NA                 | NA                            | NA                 |
| Kabuli_wild_2520804 | NA                                  | Ca_kabuli_denovo | 2520804                 | A/G  | NA                 | NA                            | NA                 |
| Kabuli_wild_2520811 | NA                                  | Ca_kabuli_denovo | 2520811                 | A/C  | NA                 | NA                            | NA                 |
| Kabuli_wild_2521054 | NA                                  | Ca_kabuli_denovo | 2521054                 | C/T  | NA                 | NA                            | NA                 |
| Kabuli_wild_2521179 | NA                                  | Ca_kabuli_denovo | 2521179                 | C/A  | NA                 | NA                            | NA                 |
| Kabuli_wild_2522011 | NA                                  | Ca_kabuli_denovo | 2522011                 | G/T  | NA                 | NA                            | NA                 |
| Kabuli_wild_2523472 | NA                                  | Ca_kabuli_denovo | 2523472                 | T/C  | NA                 | NA                            | NA                 |
| Kabuli_wild_2523556 | NA                                  | Ca_kabuli_denovo | 2523556                 | A/G  | NA                 | NA                            | NA                 |
| Kabuli_wild_2523558 | NA                                  | Ca_kabuli_denovo | 2523558                 | A/G  | NA                 | NA                            | NA                 |
| Kabuli_wild_2523559 | NA                                  | Ca_kabuli_denovo | 2523559                 | G/A  | NA                 | NA                            | NA                 |
| Kabuli_wild_2523855 | NA                                  | Ca_kabuli_denovo | 2523855                 | A/C  | NA                 | NA                            | NA                 |
| Kabuli_wild_2525449 | NA                                  | Ca_kabuli_denovo | 2525449                 | C/G  | NA                 | NA                            | NA                 |
| Kabuli_wild_2525524 | NA                                  | Ca_kabuli_denovo | 2525524                 | C/G  | NA                 | NA                            | NA                 |
| Kabuli_wild_2525675 | NA                                  | Ca_kabuli_denovo | 2525675                 | A/G  | NA                 | NA                            | NA                 |
| Kabuli_wild_2526105 | NA                                  | Ca_kabuli_denovo | 2526105                 | C/G  | NA                 | NA                            | NA                 |
| Kabuli_wild_2526108 | NA                                  | Ca_kabuli_denovo | 2526108                 | C/G  | NA                 | NA                            | NA                 |
| Kabuli_wild_2526129 | NA                                  | Ca_kabuli_denovo | 2526129                 | A/G  | NA                 | NA                            | NA                 |
| Kabuli_wild_2526518 | NA                                  | Ca_kabuli_denovo | 2526518                 | A/C  | NA                 | NA                            | NA                 |
| Kabuli_wild_2527239 | NA                                  | Ca_kabuli_denovo | 2527239                 | C/T  | NA                 | NA                            | NA                 |
| Kabuli_wild_2527271 | NA                                  | Ca_kabuli_denovo | 2527271                 | A/G  | NA                 | NA                            | NA                 |
| Kabuli_wild_2527404 | NA                                  | Ca_kabuli_denovo | 2527404                 | C/T  | NA                 | NA                            | NA                 |
| Kabuli_wild_2527417 | NA                                  | Ca_kabuli_denovo | 2527417                 | T/C  | NA                 | NA                            | NA                 |
| Kabuli_wild_2528472 | NA                                  | Ca_kabuli_denovo | 2528472                 | T/C  | NA                 | NA                            | NA                 |

| SNP IDs             | NCBI dbSNP accession IDs (NCBI_SS#) | Chromosomes      | Physical positions (bp) | SNPs | Gene accession IDs | Sequence components of genome | Putative functions |
|---------------------|-------------------------------------|------------------|-------------------------|------|--------------------|-------------------------------|--------------------|
| Kabuli_wild_2528666 | NA                                  | Ca_kabuli_denovo | 2528666                 | C/T  | NA                 | NA                            | NA                 |
| Kabuli_wild_2528726 | NA                                  | Ca_kabuli_denovo | 2528726                 | A/G  | NA                 | NA                            | NA                 |
| Kabuli_wild_2529410 | NA                                  | Ca_kabuli_denovo | 2529410                 | A/C  | NA                 | NA                            | NA                 |
| Kabuli_wild_2530393 | NA                                  | Ca_kabuli_denovo | 2530393                 | A/G  | NA                 | NA                            | NA                 |
| Kabuli_wild_2530394 | NA                                  | Ca_kabuli_denovo | 2530394                 | T/C  | NA                 | NA                            | NA                 |
| Kabuli_wild_2531172 | NA                                  | Ca_kabuli_denovo | 2531172                 | C/T  | NA                 | NA                            | NA                 |
| Kabuli_wild_2531209 | NA                                  | Ca_kabuli_denovo | 2531209                 | C/T  | NA                 | NA                            | NA                 |
| Kabuli_wild_2531323 | NA                                  | Ca_kabuli_denovo | 2531323                 | G/A  | NA                 | NA                            | NA                 |
| Kabuli_wild_2531363 | NA                                  | Ca_kabuli_denovo | 2531363                 | A/G  | NA                 | NA                            | NA                 |
| Kabuli_wild_2532828 | NA                                  | Ca_kabuli_denovo | 2532828                 | G/A  | NA                 | NA                            | NA                 |
| Kabuli_wild_2533166 | NA                                  | Ca_kabuli_denovo | 2533166                 | T/G  | NA                 | NA                            | NA                 |
| Kabuli_wild_2533199 | NA                                  | Ca_kabuli_denovo | 2533199                 | G/A  | NA                 | NA                            | NA                 |
| Kabuli_wild_2533253 | NA                                  | Ca_kabuli_denovo | 2533253                 | T/C  | NA                 | NA                            | NA                 |
| Kabuli_wild_2533703 | NA                                  | Ca_kabuli_denovo | 2533703                 | C/T  | NA                 | NA                            | NA                 |
| Kabuli_wild_2533715 | NA                                  | Ca_kabuli_denovo | 2533715                 | A/G  | NA                 | NA                            | NA                 |
| Kabuli_wild_2534174 | NA                                  | Ca_kabuli_denovo | 2534174                 | A/T  | NA                 | NA                            | NA                 |
| Kabuli_wild_2534304 | NA                                  | Ca_kabuli_denovo | 2534304                 | G/A  | NA                 | NA                            | NA                 |
| Kabuli_wild_2534606 | NA                                  | Ca_kabuli_denovo | 2534606                 | G/A  | NA                 | NA                            | NA                 |
| Kabuli_wild_2534674 | NA                                  | Ca_kabuli_denovo | 2534674                 | T/G  | NA                 | NA                            | NA                 |
| Kabuli_wild_2536232 | NA                                  | Ca_kabuli_denovo | 2536232                 | A/C  | NA                 | NA                            | NA                 |
| Kabuli_wild_2537284 | NA                                  | Ca_kabuli_denovo | 2537284                 | A/G  | NA                 | NA                            | NA                 |
| Kabuli_wild_2537478 | NA                                  | Ca_kabuli_denovo | 2537478                 | T/G  | NA                 | NA                            | NA                 |
| Kabuli_wild_2537635 | NA                                  | Ca_kabuli_denovo | 2537635                 | C/T  | NA                 | NA                            | NA                 |
| Kabuli_wild_2537998 | NA                                  | Ca_kabuli_denovo | 2537998                 | C/T  | NA                 | NA                            | NA                 |
| Kabuli_wild_2538750 | NA                                  | Ca_kabuli_denovo | 2538750                 | C/G  | NA                 | NA                            | NA                 |
| Kabuli_wild_2539550 | NA                                  | Ca_kabuli_denovo | 2539550                 | G/C  | NA                 | NA                            | NA                 |
| Kabuli_wild_2539572 | NA                                  | Ca_kabuli_denovo | 2539572                 | G/A  | NA                 | NA                            | NA                 |
| Kabuli_wild_2539731 | NA                                  | Ca_kabuli_denovo | 2539731                 | A/G  | NA                 | NA                            | NA                 |
| Kabuli_wild_2539923 | NA                                  | Ca_kabuli_denovo | 2539923                 | C/A  | NA                 | NA                            | NA                 |
| Kabuli_wild_2539994 | NA                                  | Ca_kabuli_denovo | 2539994                 | A/G  | NA                 | NA                            | NA                 |
| Kabuli_wild_2540010 | NA                                  | Ca_kabuli_denovo | 2540010                 | A/C  | NA                 | NA                            | NA                 |
| Kabuli_wild_2541129 | NA                                  | Ca_kabuli_denovo | 2541129                 | C/T  | NA                 | NA                            | NA                 |
| Kabuli_wild_2542887 | NA                                  | Ca_kabuli_denovo | 2542887                 | G/A  | NA                 | NA                            | NA                 |
| Kabuli_wild_2542923 | NA                                  | Ca_kabuli_denovo | 2542923                 | T/C  | NA                 | NA                            | NA                 |
| Kabuli_wild_2542927 | NA                                  | Ca_kabuli_denovo | 2542927                 | A/G  | NA                 | NA                            | NA                 |
| Kabuli_wild_2543317 | NA                                  | Ca_kabuli_denovo | 2543317                 | G/C  | NA                 | NA                            | NA                 |
| Kabuli_wild_2544034 | NA                                  | Ca_kabuli_denovo | 2544034                 | C/T  | NA                 | NA                            | NA                 |
| Kabuli_wild_2544037 | NA                                  | Ca_kabuli_denovo | 2544037                 | C/G  | NA                 | NA                            | NA                 |
| Kabuli_wild_2544475 | NA                                  | Ca_kabuli_denovo | 2544475                 | G/A  | NA                 | NA                            | NA                 |
| Kabuli_wild_2544487 | NA                                  | Ca_kabuli_denovo | 2544487                 | G/A  | NA                 | NA                            | NA                 |
| Kabuli_wild_2545616 | NA                                  | Ca_kabuli_denovo | 2545616                 | G/C  | NA                 | NA                            | NA                 |
| Kabuli_wild_2545640 | NA                                  | Ca_kabuli_denovo | 2545640                 | C/G  | NA                 | NA                            | NA                 |
| Kabuli_wild_2546105 | NA                                  | Ca_kabuli_denovo | 2546105                 | A/G  | NA                 | NA                            | NA                 |
| Kabuli_wild_2546111 | NA                                  | Ca_kabuli_denovo | 2546111                 | G/A  | NA                 | NA                            | NA                 |

| SNP IDs             | NCBI dbSNP accession IDs (NCBI_SS#) | Chromosomes      | Physical positions (bp) | SNPs | Gene accession IDs | Sequence components of genome | Putative functions |
|---------------------|-------------------------------------|------------------|-------------------------|------|--------------------|-------------------------------|--------------------|
| Kabuli_wild_2546810 | NA                                  | Ca_kabuli_denovo | 2546810                 | A/G  | NA                 | NA                            | NA                 |
| Kabuli_wild_2546849 | NA                                  | Ca_kabuli_denovo | 2546849                 | G/T  | NA                 | NA                            | NA                 |
| Kabuli_wild_2546890 | NA                                  | Ca_kabuli_denovo | 2546890                 | T/G  | NA                 | NA                            | NA                 |
| Kabuli_wild_2546902 | NA                                  | Ca_kabuli_denovo | 2546902                 | C/G  | NA                 | NA                            | NA                 |
| Kabuli_wild_2547873 | NA                                  | Ca_kabuli_denovo | 2547873                 | C/T  | NA                 | NA                            | NA                 |
| Kabuli_wild_2548163 | NA                                  | Ca_kabuli_denovo | 2548163                 | G/A  | NA                 | NA                            | NA                 |
| Kabuli_wild_2548867 | NA                                  | Ca_kabuli_denovo | 2548867                 | T/C  | NA                 | NA                            | NA                 |
| Kabuli_wild_2548921 | NA                                  | Ca_kabuli_denovo | 2548921                 | A/G  | NA                 | NA                            | NA                 |
| Kabuli_wild_2548975 | NA                                  | Ca_kabuli_denovo | 2548975                 | C/T  | NA                 | NA                            | NA                 |
| Kabuli_wild_2549231 | NA                                  | Ca_kabuli_denovo | 2549231                 | G/A  | NA                 | NA                            | NA                 |
| Kabuli_wild_2549511 | NA                                  | Ca_kabuli_denovo | 2549511                 | A/G  | NA                 | NA                            | NA                 |
| Kabuli_wild_2550159 | NA                                  | Ca_kabuli_denovo | 2550159                 | G/C  | NA                 | NA                            | NA                 |
| Kabuli_wild_2550298 | NA                                  | Ca_kabuli_denovo | 2550298                 | G/C  | NA                 | NA                            | NA                 |
| Kabuli_wild_2550432 | NA                                  | Ca_kabuli_denovo | 2550432                 | C/T  | NA                 | NA                            | NA                 |
| Kabuli_wild_2550773 | NA                                  | Ca_kabuli_denovo | 2550773                 | C/G  | NA                 | NA                            | NA                 |
| Kabuli_wild_2550776 | NA                                  | Ca_kabuli_denovo | 2550776                 | C/G  | NA                 | NA                            | NA                 |
| Kabuli_wild_2551003 | NA                                  | Ca_kabuli_denovo | 2551003                 | G/T  | NA                 | NA                            | NA                 |
| Kabuli_wild_2551030 | NA                                  | Ca_kabuli_denovo | 2551030                 | C/T  | NA                 | NA                            | NA                 |
| Kabuli_wild_2551272 | NA                                  | Ca_kabuli_denovo | 2551272                 | T/C  | NA                 | NA                            | NA                 |
| Kabuli_wild_2551326 | NA                                  | Ca_kabuli_denovo | 2551326                 | C/T  | NA                 | NA                            | NA                 |
| Kabuli_wild_2552870 | NA                                  | Ca_kabuli_denovo | 2552870                 | A/G  | NA                 | NA                            | NA                 |
| Kabuli_wild_2553173 | NA                                  | Ca_kabuli_denovo | 2553173                 | A/G  | NA                 | NA                            | NA                 |
| Kabuli_wild_2553301 | NA                                  | Ca_kabuli_denovo | 2553301                 | G/A  | NA                 | NA                            | NA                 |
| Kabuli_wild_2553709 | NA                                  | Ca_kabuli_denovo | 2553709                 | T/C  | NA                 | NA                            | NA                 |
| Kabuli_wild_2554097 | NA                                  | Ca_kabuli_denovo | 2554097                 | G/A  | NA                 | NA                            | NA                 |
| Kabuli_wild_2554103 | NA                                  | Ca_kabuli_denovo | 2554103                 | A/G  | NA                 | NA                            | NA                 |
| Kabuli_wild_2555024 | NA                                  | Ca_kabuli_denovo | 2555024                 | G/A  | NA                 | NA                            | NA                 |
| Kabuli_wild_2555293 | NA                                  | Ca_kabuli_denovo | 2555293                 | T/G  | NA                 | NA                            | NA                 |
| Kabuli_wild_2555522 | NA                                  | Ca_kabuli_denovo | 2555522                 | G/A  | NA                 | NA                            | NA                 |
| Kabuli_wild_2555804 | NA                                  | Ca_kabuli_denovo | 2555804                 | T/C  | NA                 | NA                            | NA                 |
| Kabuli_wild_2555831 | NA                                  | Ca_kabuli_denovo | 2555831                 | G/T  | NA                 | NA                            | NA                 |
| Kabuli_wild_2555835 | NA                                  | Ca_kabuli_denovo | 2555835                 | A/G  | NA                 | NA                            | NA                 |
| Kabuli_wild_2555883 | NA                                  | Ca_kabuli_denovo | 2555883                 | T/G  | NA                 | NA                            | NA                 |
| Kabuli_wild_2555916 | NA                                  | Ca_kabuli_denovo | 2555916                 | C/G  | NA                 | NA                            | NA                 |
| Kabuli_wild_2555982 | NA                                  | Ca_kabuli_denovo | 2555982                 | T/C  | NA                 | NA                            | NA                 |
| Kabuli_wild_2556110 | NA                                  | Ca_kabuli_denovo | 2556110                 | C/G  | NA                 | NA                            | NA                 |
| Kabuli_wild_2556135 | NA                                  | Ca_kabuli_denovo | 2556135                 | C/T  | NA                 | NA                            | NA                 |
| Kabuli_wild_2556736 | NA                                  | Ca_kabuli_denovo | 2556736                 | C/G  | NA                 | NA                            | NA                 |
| Kabuli_wild_2557235 | NA                                  | Ca_kabuli_denovo | 2557235                 | T/G  | NA                 | NA                            | NA                 |
| Kabuli_wild_2557474 | NA                                  | Ca_kabuli_denovo | 2557474                 | A/C  | NA                 | NA                            | NA                 |
| Kabuli_wild_2557480 | NA                                  | Ca_kabuli_denovo | 2557480                 | T/C  | NA                 | NA                            | NA                 |
| Kabuli_wild_2558134 | NA                                  | Ca_kabuli_denovo | 2558134                 | C/G  | NA                 | NA                            | NA                 |
| Kabuli_wild_2558615 | NA                                  | Ca_kabuli_denovo | 2558615                 | A/G  | NA                 | NA                            | NA                 |
| Kabuli_wild_2558648 | NA                                  | Ca_kabuli_denovo | 2558648                 | G/A  | NA                 | NA                            | NA                 |

| SNP IDs             | NCBI dbSNP accession IDs (NCBI_SS#) | Chromosomes      | Physical positions (bp) | SNPs | Gene accession IDs | Sequence components of genome | Putative functions |
|---------------------|-------------------------------------|------------------|-------------------------|------|--------------------|-------------------------------|--------------------|
| Kabuli_wild_2559238 | NA                                  | Ca_kabuli_denovo | 2559238                 | G/A  | NA                 | NA                            | NA                 |
| Kabuli_wild_2559981 | NA                                  | Ca_kabuli_denovo | 2559981                 | C/G  | NA                 | NA                            | NA                 |
| Kabuli_wild_2560751 | NA                                  | Ca_kabuli_denovo | 2560751                 | C/G  | NA                 | NA                            | NA                 |
| Kabuli_wild_2561469 | NA                                  | Ca_kabuli_denovo | 2561469                 | T/G  | NA                 | NA                            | NA                 |
| Kabuli_wild_2561765 | NA                                  | Ca_kabuli_denovo | 2561765                 | C/T  | NA                 | NA                            | NA                 |
| Kabuli_wild_2561800 | NA                                  | Ca_kabuli_denovo | 2561800                 | A/G  | NA                 | NA                            | NA                 |
| Kabuli_wild_2563180 | NA                                  | Ca_kabuli_denovo | 2563180                 | G/A  | NA                 | NA                            | NA                 |
| Kabuli_wild_2563697 | NA                                  | Ca_kabuli_denovo | 2563697                 | C/T  | NA                 | NA                            | NA                 |
| Kabuli_wild_2564098 | NA                                  | Ca_kabuli_denovo | 2564098                 | T/A  | NA                 | NA                            | NA                 |
| Kabuli_wild_2565795 | NA                                  | Ca_kabuli_denovo | 2565795                 | T/C  | NA                 | NA                            | NA                 |
| Kabuli_wild_2565825 | NA                                  | Ca_kabuli_denovo | 2565825                 | C/G  | NA                 | NA                            | NA                 |
| Kabuli_wild_2566875 | NA                                  | Ca_kabuli_denovo | 2566875                 | C/T  | NA                 | NA                            | NA                 |
| Kabuli_wild_2568621 | NA                                  | Ca_kabuli_denovo | 2568621                 | A/C  | NA                 | NA                            | NA                 |
| Kabuli_wild_2568622 | NA                                  | Ca_kabuli_denovo | 2568622                 | A/G  | NA                 | NA                            | NA                 |
| Kabuli_wild_2569915 | NA                                  | Ca_kabuli_denovo | 2569915                 | C/G  | NA                 | NA                            | NA                 |
| Kabuli_wild_2569918 | NA                                  | Ca_kabuli_denovo | 2569918                 | C/T  | NA                 | NA                            | NA                 |
| Kabuli_wild_2571036 | NA                                  | Ca_kabuli_denovo | 2571036                 | C/G  | NA                 | NA                            | NA                 |
| Kabuli_wild_2571324 | NA                                  | Ca_kabuli_denovo | 2571324                 | A/C  | NA                 | NA                            | NA                 |
| Kabuli_wild_2571554 | NA                                  | Ca_kabuli_denovo | 2571554                 | T/C  | NA                 | NA                            | NA                 |
| Kabuli_wild_2572209 | NA                                  | Ca_kabuli_denovo | 2572209                 | A/C  | NA                 | NA                            | NA                 |
| Kabuli_wild_2572234 | NA                                  | Ca_kabuli_denovo | 2572234                 | A/C  | NA                 | NA                            | NA                 |
| Kabuli_wild_2572456 | NA                                  | Ca_kabuli_denovo | 2572456                 | T/G  | NA                 | NA                            | NA                 |
| Kabuli_wild_2572462 | NA                                  | Ca_kabuli_denovo | 2572462                 | T/A  | NA                 | NA                            | NA                 |
| Kabuli_wild_2572800 | NA                                  | Ca_kabuli_denovo | 2572800                 | G/A  | NA                 | NA                            | NA                 |
| Kabuli_wild_2572917 | NA                                  | Ca_kabuli_denovo | 2572917                 | A/G  | NA                 | NA                            | NA                 |
| Kabuli_wild_2573349 | NA                                  | Ca_kabuli_denovo | 2573349                 | A/C  | NA                 | NA                            | NA                 |
| Kabuli_wild_2573351 | NA                                  | Ca_kabuli_denovo | 2573351                 | A/C  | NA                 | NA                            | NA                 |
| Kabuli_wild_2573352 | NA                                  | Ca_kabuli_denovo | 2573352                 | A/T  | NA                 | NA                            | NA                 |
| Kabuli_wild_2576391 | NA                                  | Ca_kabuli_denovo | 2576391                 | G/A  | NA                 | NA                            | NA                 |
| Kabuli_wild_2576789 | NA                                  | Ca_kabuli_denovo | 2576789                 | C/G  | NA                 | NA                            | NA                 |
| Kabuli_wild_2576874 | NA                                  | Ca_kabuli_denovo | 2576874                 | G/A  | NA                 | NA                            | NA                 |
| Kabuli_wild_2576932 | NA                                  | Ca_kabuli_denovo | 2576932                 | C/T  | NA                 | NA                            | NA                 |
| Kabuli_wild_2578501 | NA                                  | Ca_kabuli_denovo | 2578501                 | C/G  | NA                 | NA                            | NA                 |
| Kabuli_wild_2578536 | NA                                  | Ca_kabuli_denovo | 2578536                 | C/G  | NA                 | NA                            | NA                 |
| Kabuli_wild_2578545 | NA                                  | Ca_kabuli_denovo | 2578545                 | C/T  | NA                 | NA                            | NA                 |
| Kabuli_wild_2579149 | NA                                  | Ca_kabuli_denovo | 2579149                 | A/G  | NA                 | NA                            | NA                 |
| Kabuli_wild_2579154 | NA                                  | Ca_kabuli_denovo | 2579154                 | T/C  | NA                 | NA                            | NA                 |
| Kabuli_wild_2579300 | NA                                  | Ca_kabuli_denovo | 2579300                 | G/T  | NA                 | NA                            | NA                 |
| Kabuli_wild_2580334 | NA                                  | Ca_kabuli_denovo | 2580334                 | A/C  | NA                 | NA                            | NA                 |
| Kabuli_wild_2580335 | NA                                  | Ca_kabuli_denovo | 2580335                 | A/G  | NA                 | NA                            | NA                 |
| Kabuli_wild_2580406 | NA                                  | Ca_kabuli_denovo | 2580406                 | T/C  | NA                 | NA                            | NA                 |
| Kabuli_wild_2584955 | NA                                  | Ca_kabuli_denovo | 2584955                 | C/T  | NA                 | NA                            | NA                 |
| Kabuli_wild_2585415 | NA                                  | Ca_kabuli_denovo | 2585415                 | T/A  | NA                 | NA                            | NA                 |
| Kabuli_wild_2585773 | NA                                  | Ca_kabuli_denovo | 2585773                 | A/G  | NA                 | NA                            | NA                 |

| SNP IDs             | NCBI dbSNP accession IDs (NCBI_SS#) | Chromosomes      | Physical positions (bp) | SNPs | Gene accession IDs | Sequence components of genome | Putative functions |
|---------------------|-------------------------------------|------------------|-------------------------|------|--------------------|-------------------------------|--------------------|
| Kabuli_wild_2586343 | NA                                  | Ca_kabuli_denovo | 2586343                 | T/C  | NA                 | NA                            | NA                 |
| Kabuli_wild_2587469 | NA                                  | Ca_kabuli_denovo | 2587469                 | A/G  | NA                 | NA                            | NA                 |
| Kabuli_wild_2587936 | NA                                  | Ca_kabuli_denovo | 2587936                 | T/C  | NA                 | NA                            | NA                 |
| Kabuli_wild_2587969 | NA                                  | Ca_kabuli_denovo | 2587969                 | C/G  | NA                 | NA                            | NA                 |
| Kabuli_wild_2588112 | NA                                  | Ca_kabuli_denovo | 2588112                 | C/T  | NA                 | NA                            | NA                 |
| Kabuli_wild_2588136 | NA                                  | Ca_kabuli_denovo | 2588136                 | T/C  | NA                 | NA                            | NA                 |
| Kabuli_wild_2588811 | NA                                  | Ca_kabuli_denovo | 2588811                 | A/C  | NA                 | NA                            | NA                 |
| Kabuli_wild_2590144 | NA                                  | Ca_kabuli_denovo | 2590144                 | G/A  | NA                 | NA                            | NA                 |
| Kabuli_wild_2590261 | NA                                  | Ca_kabuli_denovo | 2590261                 | T/C  | NA                 | NA                            | NA                 |
| Kabuli_wild_2590264 | NA                                  | Ca_kabuli_denovo | 2590264                 | C/G  | NA                 | NA                            | NA                 |
| Kabuli_wild_2590806 | NA                                  | Ca_kabuli_denovo | 2590806                 | T/C  | NA                 | NA                            | NA                 |
| Kabuli_wild_2591024 | NA                                  | Ca_kabuli_denovo | 2591024                 | T/C  | NA                 | NA                            | NA                 |
| Kabuli_wild_2591066 | NA                                  | Ca_kabuli_denovo | 2591066                 | T/C  | NA                 | NA                            | NA                 |
| Kabuli_wild_2592095 | NA                                  | Ca_kabuli_denovo | 2592095                 | A/G  | NA                 | NA                            | NA                 |
| Kabuli_wild_2592166 | NA                                  | Ca_kabuli_denovo | 2592166                 | T/C  | NA                 | NA                            | NA                 |
| Kabuli_wild_2592272 | NA                                  | Ca_kabuli_denovo | 2592272                 | A/G  | NA                 | NA                            | NA                 |
| Kabuli_wild_2593173 | NA                                  | Ca_kabuli_denovo | 2593173                 | A/G  | NA                 | NA                            | NA                 |
| Kabuli_wild_2594100 | NA                                  | Ca_kabuli_denovo | 2594100                 | C/T  | NA                 | NA                            | NA                 |
| Kabuli_wild_2594605 | NA                                  | Ca_kabuli_denovo | 2594605                 | T/C  | NA                 | NA                            | NA                 |
| Kabuli_wild_2594674 | NA                                  | Ca_kabuli_denovo | 2594674                 | T/G  | NA                 | NA                            | NA                 |
| Kabuli_wild_2594950 | NA                                  | Ca_kabuli_denovo | 2594950                 | G/T  | NA                 | NA                            | NA                 |
| Kabuli_wild_2595382 | NA                                  | Ca_kabuli_denovo | 2595382                 | A/G  | NA                 | NA                            | NA                 |
| Kabuli_wild_2595507 | NA                                  | Ca_kabuli_denovo | 2595507                 | C/G  | NA                 | NA                            | NA                 |
| Kabuli_wild_2595510 | NA                                  | Ca_kabuli_denovo | 2595510                 | T/C  | NA                 | NA                            | NA                 |
| Kabuli_wild_2595540 | NA                                  | Ca_kabuli_denovo | 2595540                 | T/C  | NA                 | NA                            | NA                 |
| Kabuli_wild_2595559 | NA                                  | Ca_kabuli_denovo | 2595559                 | C/G  | NA                 | NA                            | NA                 |
| Kabuli_wild_2595731 | NA                                  | Ca_kabuli_denovo | 2595731                 | T/G  | NA                 | NA                            | NA                 |
| Kabuli_wild_2596269 | NA                                  | Ca_kabuli_denovo | 2596269                 | A/G  | NA                 | NA                            | NA                 |
| Kabuli_wild_2597040 | NA                                  | Ca_kabuli_denovo | 2597040                 | C/T  | NA                 | NA                            | NA                 |
| Kabuli_wild_2597623 | NA                                  | Ca_kabuli_denovo | 2597623                 | T/C  | NA                 | NA                            | NA                 |
| Kabuli_wild_2597813 | NA                                  | Ca_kabuli_denovo | 2597813                 | A/C  | NA                 | NA                            | NA                 |
| Kabuli_wild_2598302 | NA                                  | Ca_kabuli_denovo | 2598302                 | T/C  | NA                 | NA                            | NA                 |
| Kabuli_wild_2598876 | NA                                  | Ca_kabuli_denovo | 2598876                 | G/A  | NA                 | NA                            | NA                 |
| Kabuli_wild_2600193 | NA                                  | Ca_kabuli_denovo | 2600193                 | A/G  | NA                 | NA                            | NA                 |
| Kabuli_wild_2600317 | NA                                  | Ca_kabuli_denovo | 2600317                 | A/C  | NA                 | NA                            | NA                 |
| Kabuli_wild_2603237 | NA                                  | Ca_kabuli_denovo | 2603237                 | A/C  | NA                 | NA                            | NA                 |
| Kabuli_wild_2603261 | NA                                  | Ca_kabuli_denovo | 2603261                 | A/G  | NA                 | NA                            | NA                 |
| Kabuli_wild_2604148 | NA                                  | Ca_kabuli_denovo | 2604148                 | A/C  | NA                 | NA                            | NA                 |
| Kabuli_wild_2604694 | NA                                  | Ca_kabuli_denovo | 2604694                 | C/T  | NA                 | NA                            | NA                 |
| Kabuli_wild_2605523 | NA                                  | Ca_kabuli_denovo | 2605523                 | G/A  | NA                 | NA                            | NA                 |
| Kabuli_wild_2605734 | NA                                  | Ca_kabuli_denovo | 2605734                 | T/C  | NA                 | NA                            | NA                 |
| Kabuli_wild_2605907 | NA                                  | Ca_kabuli_denovo | 2605907                 | T/C  | NA                 | NA                            | NA                 |
| Kabuli_wild_2605934 | NA                                  | Ca_kabuli_denovo | 2605934                 | C/G  | NA                 | NA                            | NA                 |
| Kabuli_wild_2606065 | NA                                  | Ca_kabuli_denovo | 2606065                 | C/G  | NA                 | NA                            | NA                 |

| SNP IDs             | NCBI dbSNP accession IDs (NCBI_SS#) | Chromosomes      | Physical positions (bp) | SNPs | Gene accession IDs | Sequence components of genome | Putative functions |
|---------------------|-------------------------------------|------------------|-------------------------|------|--------------------|-------------------------------|--------------------|
| Kabuli_wild_2606071 | NA                                  | Ca_kabuli_denovo | 2606071                 | T/C  | NA                 | NA                            | NA                 |
| Kabuli_wild_2606074 | NA                                  | Ca_kabuli_denovo | 2606074                 | A/C  | NA                 | NA                            | NA                 |
| Kabuli_wild_2606201 | NA                                  | Ca_kabuli_denovo | 2606201                 | C/A  | NA                 | NA                            | NA                 |
| Kabuli_wild_2606207 | NA                                  | Ca_kabuli_denovo | 2606207                 | T/C  | NA                 | NA                            | NA                 |
| Kabuli_wild_2606740 | NA                                  | Ca_kabuli_denovo | 2606740                 | T/C  | NA                 | NA                            | NA                 |
| Kabuli_wild_2607711 | NA                                  | Ca_kabuli_denovo | 2607711                 | A/T  | NA                 | NA                            | NA                 |
| Kabuli_wild_2608047 | NA                                  | Ca_kabuli_denovo | 2608047                 | T/G  | NA                 | NA                            | NA                 |
| Kabuli_wild_2610057 | NA                                  | Ca_kabuli_denovo | 2610057                 | G/T  | NA                 | NA                            | NA                 |
| Kabuli_wild_2610349 | NA                                  | Ca_kabuli_denovo | 2610349                 | T/G  | NA                 | NA                            | NA                 |
| Kabuli_wild_2610730 | NA                                  | Ca_kabuli_denovo | 2610730                 | C/G  | NA                 | NA                            | NA                 |
| Kabuli_wild_2610742 | NA                                  | Ca_kabuli_denovo | 2610742                 | T/C  | NA                 | NA                            | NA                 |
| Kabuli_wild_2610826 | NA                                  | Ca_kabuli_denovo | 2610826                 | G/C  | NA                 | NA                            | NA                 |
| Kabuli_wild_2610882 | NA                                  | Ca_kabuli_denovo | 2610882                 | G/A  | NA                 | NA                            | NA                 |
| Kabuli_wild_2611263 | NA                                  | Ca_kabuli_denovo | 2611263                 | A/T  | NA                 | NA                            | NA                 |
| Kabuli_wild_2613186 | NA                                  | Ca_kabuli_denovo | 2613186                 | T/G  | NA                 | NA                            | NA                 |
| Kabuli_wild_2613187 | NA                                  | Ca_kabuli_denovo | 2613187                 | C/A  | NA                 | NA                            | NA                 |
| Kabuli_wild_2613292 | NA                                  | Ca_kabuli_denovo | 2613292                 | C/G  | NA                 | NA                            | NA                 |
| Kabuli_wild_2613739 | NA                                  | Ca_kabuli_denovo | 2613739                 | G/A  | NA                 | NA                            | NA                 |
| Kabuli_wild_2613754 | NA                                  | Ca_kabuli_denovo | 2613754                 | A/G  | NA                 | NA                            | NA                 |
| Kabuli_wild_2613943 | NA                                  | Ca_kabuli_denovo | 2613943                 | G/A  | NA                 | NA                            | NA                 |
| Kabuli_wild_2613951 | NA                                  | Ca_kabuli_denovo | 2613951                 | T/G  | NA                 | NA                            | NA                 |
| Kabuli_wild_2613963 | NA                                  | Ca_kabuli_denovo | 2613963                 | T/C  | NA                 | NA                            | NA                 |
| Kabuli_wild_2614118 | NA                                  | Ca_kabuli_denovo | 2614118                 | C/A  | NA                 | NA                            | NA                 |
| Kabuli_wild_2614670 | NA                                  | Ca_kabuli_denovo | 2614670                 | T/G  | NA                 | NA                            | NA                 |
| Kabuli_wild_2615298 | NA                                  | Ca_kabuli_denovo | 2615298                 | A/G  | NA                 | NA                            | NA                 |
| Kabuli_wild_2615483 | NA                                  | Ca_kabuli_denovo | 2615483                 | G/A  | NA                 | NA                            | NA                 |
| Kabuli_wild_2615516 | NA                                  | Ca_kabuli_denovo | 2615516                 | G/A  | NA                 | NA                            | NA                 |
| Kabuli_wild_2615767 | NA                                  | Ca_kabuli_denovo | 2615767                 | C/T  | NA                 | NA                            | NA                 |
| Kabuli_wild_2615770 | NA                                  | Ca_kabuli_denovo | 2615770                 | A/G  | NA                 | NA                            | NA                 |
| Kabuli_wild_2616235 | NA                                  | Ca_kabuli_denovo | 2616235                 | G/C  | NA                 | NA                            | NA                 |
| Kabuli_wild_2616254 | NA                                  | Ca_kabuli_denovo | 2616254                 | C/G  | NA                 | NA                            | NA                 |
| Kabuli_wild_2616348 | NA                                  | Ca_kabuli_denovo | 2616348                 | C/T  | NA                 | NA                            | NA                 |
| Kabuli_wild_2616396 | NA                                  | Ca_kabuli_denovo | 2616396                 | T/G  | NA                 | NA                            | NA                 |
| Kabuli_wild_2616814 | NA                                  | Ca_kabuli_denovo | 2616814                 | T/C  | NA                 | NA                            | NA                 |
| Kabuli_wild_2617429 | NA                                  | Ca_kabuli_denovo | 2617429                 | C/T  | NA                 | NA                            | NA                 |
| Kabuli_wild_2617602 | NA                                  | Ca_kabuli_denovo | 2617602                 | C/A  | NA                 | NA                            | NA                 |
| Kabuli_wild_2617606 | NA                                  | Ca_kabuli_denovo | 2617606                 | A/G  | NA                 | NA                            | NA                 |
| Kabuli_wild_2618302 | NA                                  | Ca_kabuli_denovo | 2618302                 | G/A  | NA                 | NA                            | NA                 |
| Kabuli_wild_2618326 | NA                                  | Ca_kabuli_denovo | 2618326                 | A/G  | NA                 | NA                            | NA                 |
| Kabuli_wild_2618961 | NA                                  | Ca_kabuli_denovo | 2618961                 | C/T  | NA                 | NA                            | NA                 |
| Kabuli_wild_2619551 | NA                                  | Ca_kabuli_denovo | 2619551                 | C/G  | NA                 | NA                            | NA                 |
| Kabuli_wild_2619578 | NA                                  | Ca_kabuli_denovo | 2619578                 | A/G  | NA                 | NA                            | NA                 |
| Kabuli_wild_2620797 | NA                                  | Ca_kabuli_denovo | 2620797                 | G/T  | NA                 | NA                            | NA                 |
| Kabuli_wild_2621183 | NA                                  | Ca_kabuli_denovo | 2621183                 | A/G  | NA                 | NA                            | NA                 |

| SNP IDs             | NCBI dbSNP accession IDs (NCBI_SS#) | Chromosomes      | Physical positions (bp) | SNPs | Gene accession IDs | Sequence components of genome | Putative functions |
|---------------------|-------------------------------------|------------------|-------------------------|------|--------------------|-------------------------------|--------------------|
| Kabuli_wild_2621227 | NA                                  | Ca_kabuli_denovo | 2621227                 | T/C  | NA                 | NA                            | NA                 |
| Kabuli_wild_2621621 | NA                                  | Ca_kabuli_denovo | 2621621                 | C/T  | NA                 | NA                            | NA                 |
| Kabuli_wild_2621642 | NA                                  | Ca_kabuli_denovo | 2621642                 | T/C  | NA                 | NA                            | NA                 |
| Kabuli_wild_2622052 | NA                                  | Ca_kabuli_denovo | 2622052                 | A/G  | NA                 | NA                            | NA                 |
| Kabuli_wild_2622300 | NA                                  | Ca_kabuli_denovo | 2622300                 | A/G  | NA                 | NA                            | NA                 |
| Kabuli_wild_2622305 | NA                                  | Ca_kabuli_denovo | 2622305                 | C/T  | NA                 | NA                            | NA                 |
| Kabuli_wild_2623217 | NA                                  | Ca_kabuli_denovo | 2623217                 | G/A  | NA                 | NA                            | NA                 |
| Kabuli_wild_2623235 | NA                                  | Ca_kabuli_denovo | 2623235                 | A/G  | NA                 | NA                            | NA                 |
| Kabuli_wild_2624130 | NA                                  | Ca_kabuli_denovo | 2624130                 | G/A  | NA                 | NA                            | NA                 |
| Kabuli_wild_2624188 | NA                                  | Ca_kabuli_denovo | 2624188                 | T/A  | NA                 | NA                            | NA                 |
| Kabuli_wild_2625486 | NA                                  | Ca_kabuli_denovo | 2625486                 | C/T  | NA                 | NA                            | NA                 |
| Kabuli_wild_2626140 | NA                                  | Ca_kabuli_denovo | 2626140                 | A/G  | NA                 | NA                            | NA                 |
| Kabuli_wild_2626191 | NA                                  | Ca_kabuli_denovo | 2626191                 | G/A  | NA                 | NA                            | NA                 |
| Kabuli_wild_2627411 | NA                                  | Ca_kabuli_denovo | 2627411                 | T/G  | NA                 | NA                            | NA                 |
| Kabuli_wild_2627431 | NA                                  | Ca_kabuli_denovo | 2627431                 | A/G  | NA                 | NA                            | NA                 |
| Kabuli_wild_2627499 | NA                                  | Ca_kabuli_denovo | 2627499                 | G/T  | NA                 | NA                            | NA                 |
| Kabuli_wild_2628271 | NA                                  | Ca_kabuli_denovo | 2628271                 | G/A  | NA                 | NA                            | NA                 |
| Kabuli_wild_2629143 | NA                                  | Ca_kabuli_denovo | 2629143                 | T/C  | NA                 | NA                            | NA                 |
| Kabuli_wild_2629180 | NA                                  | Ca_kabuli_denovo | 2629180                 | A/G  | NA                 | NA                            | NA                 |
| Kabuli_wild_2629426 | NA                                  | Ca_kabuli_denovo | 2629426                 | G/C  | NA                 | NA                            | NA                 |
| Kabuli_wild_2629436 | NA                                  | Ca_kabuli_denovo | 2629436                 | T/C  | NA                 | NA                            | NA                 |
| Kabuli_wild_2630134 | NA                                  | Ca_kabuli_denovo | 2630134                 | G/A  | NA                 | NA                            | NA                 |
| Kabuli_wild_2630749 | NA                                  | Ca_kabuli_denovo | 2630749                 | T/C  | NA                 | NA                            | NA                 |
| Kabuli_wild_2631710 | NA                                  | Ca_kabuli_denovo | 2631710                 | G/A  | NA                 | NA                            | NA                 |
| Kabuli_wild_2633019 | NA                                  | Ca_kabuli_denovo | 2633019                 | G/C  | NA                 | NA                            | NA                 |
| Kabuli_wild_2633049 | NA                                  | Ca_kabuli_denovo | 2633049                 | A/G  | NA                 | NA                            | NA                 |
| Kabuli_wild_2633133 | NA                                  | Ca_kabuli_denovo | 2633133                 | G/A  | NA                 | NA                            | NA                 |
| Kabuli_wild_2633619 | NA                                  | Ca_kabuli_denovo | 2633619                 | C/T  | NA                 | NA                            | NA                 |
| Kabuli_wild_2634966 | NA                                  | Ca_kabuli_denovo | 2634966                 | C/G  | NA                 | NA                            | NA                 |
| Kabuli_wild_2634981 | NA                                  | Ca_kabuli_denovo | 2634981                 | G/A  | NA                 | NA                            | NA                 |
| Kabuli_wild_2635277 | NA                                  | Ca_kabuli_denovo | 2635277                 | C/G  | NA                 | NA                            | NA                 |
| Kabuli_wild_2635863 | NA                                  | Ca_kabuli_denovo | 2635863                 | C/T  | NA                 | NA                            | NA                 |
| Kabuli_wild_2635924 | NA                                  | Ca_kabuli_denovo | 2635924                 | C/G  | NA                 | NA                            | NA                 |
| Kabuli_wild_2636342 | NA                                  | Ca_kabuli_denovo | 2636342                 | T/C  | NA                 | NA                            | NA                 |
| Kabuli_wild_2636945 | NA                                  | Ca_kabuli_denovo | 2636945                 | G/A  | NA                 | NA                            | NA                 |
| Kabuli_wild_2636947 | NA                                  | Ca_kabuli_denovo | 2636947                 | T/C  | NA                 | NA                            | NA                 |
| Kabuli_wild_2637554 | NA                                  | Ca_kabuli_denovo | 2637554                 | C/T  | NA                 | NA                            | NA                 |
| Kabuli_wild_2637721 | NA                                  | Ca_kabuli_denovo | 2637721                 | G/T  | NA                 | NA                            | NA                 |
| Kabuli_wild_2638921 | NA                                  | Ca_kabuli_denovo | 2638921                 | A/C  | NA                 | NA                            | NA                 |
| Kabuli_wild_2639320 | NA                                  | Ca_kabuli_denovo | 2639320                 | A/G  | NA                 | NA                            | NA                 |
| Kabuli_wild_2639479 | NA                                  | Ca_kabuli_denovo | 2639479                 | C/T  | NA                 | NA                            | NA                 |
| Kabuli_wild_2639486 | NA                                  | Ca_kabuli_denovo | 2639486                 | G/A  | NA                 | NA                            | NA                 |
| Kabuli_wild_2639981 | NA                                  | Ca_kabuli_denovo | 2639981                 | C/G  | NA                 | NA                            | NA                 |
| Kabuli_wild_2639984 | NA                                  | Ca_kabuli_denovo | 2639984                 | A/G  | NA                 | NA                            | NA                 |

| SNP IDs             | NCBI dbSNP accession IDs (NCBI_SS#) | Chromosomes      | Physical positions (bp) | SNPs | Gene accession IDs | Sequence components of genome | Putative functions |
|---------------------|-------------------------------------|------------------|-------------------------|------|--------------------|-------------------------------|--------------------|
| Kabuli_wild_2639988 | NA                                  | Ca_kabuli_denovo | 2639988                 | A/G  | NA                 | NA                            | NA                 |
| Kabuli_wild_2643628 | NA                                  | Ca_kabuli_denovo | 2643628                 | G/C  | NA                 | NA                            | NA                 |
| Kabuli_wild_2643698 | NA                                  | Ca_kabuli_denovo | 2643698                 | C/T  | NA                 | NA                            | NA                 |
| Kabuli_wild_2644419 | NA                                  | Ca_kabuli_denovo | 2644419                 | G/C  | NA                 | NA                            | NA                 |
| Kabuli_wild_2645048 | NA                                  | Ca_kabuli_denovo | 2645048                 | G/A  | NA                 | NA                            | NA                 |
| Kabuli_wild_2645062 | NA                                  | Ca_kabuli_denovo | 2645062                 | T/C  | NA                 | NA                            | NA                 |
| Kabuli_wild_2645063 | NA                                  | Ca_kabuli_denovo | 2645063                 | T/C  | NA                 | NA                            | NA                 |
| Kabuli_wild_2645309 | NA                                  | Ca_kabuli_denovo | 2645309                 | A/G  | NA                 | NA                            | NA                 |
| Kabuli_wild_2646478 | NA                                  | Ca_kabuli_denovo | 2646478                 | G/C  | NA                 | NA                            | NA                 |
| Kabuli_wild_2646484 | NA                                  | Ca_kabuli_denovo | 2646484                 | G/A  | NA                 | NA                            | NA                 |
| Kabuli_wild_2647395 | NA                                  | Ca_kabuli_denovo | 2647395                 | C/T  | NA                 | NA                            | NA                 |
| Kabuli_wild_2647667 | NA                                  | Ca_kabuli_denovo | 2647667                 | C/T  | NA                 | NA                            | NA                 |
| Kabuli_wild_2647696 | NA                                  | Ca_kabuli_denovo | 2647696                 | T/G  | NA                 | NA                            | NA                 |
| Kabuli_wild_2647757 | NA                                  | Ca_kabuli_denovo | 2647757                 | C/T  | NA                 | NA                            | NA                 |
| Kabuli_wild_2647838 | NA                                  | Ca_kabuli_denovo | 2647838                 | C/A  | NA                 | NA                            | NA                 |
| Kabuli_wild_2648057 | NA                                  | Ca_kabuli_denovo | 2648057                 | T/C  | NA                 | NA                            | NA                 |
| Kabuli_wild_2649230 | NA                                  | Ca_kabuli_denovo | 2649230                 | T/C  | NA                 | NA                            | NA                 |
| Kabuli_wild_2649316 | NA                                  | Ca_kabuli_denovo | 2649316                 | C/G  | NA                 | NA                            | NA                 |
| Kabuli_wild_2649337 | NA                                  | Ca_kabuli_denovo | 2649337                 | T/C  | NA                 | NA                            | NA                 |
| Kabuli_wild_2649536 | NA                                  | Ca_kabuli_denovo | 2649536                 | A/T  | NA                 | NA                            | NA                 |
| Kabuli_wild_2649798 | NA                                  | Ca_kabuli_denovo | 2649798                 | T/C  | NA                 | NA                            | NA                 |
| Kabuli_wild_2650413 | NA                                  | Ca_kabuli_denovo | 2650413                 | T/G  | NA                 | NA                            | NA                 |
| Kabuli_wild_2650679 | NA                                  | Ca_kabuli_denovo | 2650679                 | T/C  | NA                 | NA                            | NA                 |
| Kabuli_wild_2651564 | NA                                  | Ca_kabuli_denovo | 2651564                 | C/T  | NA                 | NA                            | NA                 |
| Kabuli_wild_2653577 | NA                                  | Ca_kabuli_denovo | 2653577                 | A/G  | NA                 | NA                            | NA                 |
| Kabuli_wild_2654592 | NA                                  | Ca_kabuli_denovo | 2654592                 | C/G  | NA                 | NA                            | NA                 |
| Kabuli_wild_2654920 | NA                                  | Ca_kabuli_denovo | 2654920                 | C/G  | NA                 | NA                            | NA                 |
| Kabuli_wild_2655630 | NA                                  | Ca_kabuli_denovo | 2655630                 | T/C  | NA                 | NA                            | NA                 |
| Kabuli_wild_2656503 | NA                                  | Ca_kabuli_denovo | 2656503                 | A/G  | NA                 | NA                            | NA                 |
| Kabuli_wild_2656505 | NA                                  | Ca_kabuli_denovo | 2656505                 | A/G  | NA                 | NA                            | NA                 |
| Kabuli_wild_2657020 | NA                                  | Ca_kabuli_denovo | 2657020                 | C/T  | NA                 | NA                            | NA                 |
| Kabuli_wild_2657308 | NA                                  | Ca_kabuli_denovo | 2657308                 | A/G  | NA                 | NA                            | NA                 |
| Kabuli_wild_2657370 | NA                                  | Ca_kabuli_denovo | 2657370                 | G/A  | NA                 | NA                            | NA                 |
| Kabuli_wild_2658438 | NA                                  | Ca_kabuli_denovo | 2658438                 | C/T  | NA                 | NA                            | NA                 |
| Kabuli_wild_2658831 | NA                                  | Ca_kabuli_denovo | 2658831                 | T/G  | NA                 | NA                            | NA                 |
| Kabuli_wild_2659026 | NA                                  | Ca_kabuli_denovo | 2659026                 | T/C  | NA                 | NA                            | NA                 |
| Kabuli_wild_2659037 | NA                                  | Ca_kabuli_denovo | 2659037                 | G/A  | NA                 | NA                            | NA                 |
| Kabuli_wild_2659177 | NA                                  | Ca_kabuli_denovo | 2659177                 | G/T  | NA                 | NA                            | NA                 |
| Kabuli_wild_2659195 | NA                                  | Ca_kabuli_denovo | 2659195                 | C/G  | NA                 | NA                            | NA                 |
| Kabuli_wild_2659804 | NA                                  | Ca_kabuli_denovo | 2659804                 | T/C  | NA                 | NA                            | NA                 |
| Kabuli_wild_2659819 | NA                                  | Ca_kabuli_denovo | 2659819                 | G/A  | NA                 | NA                            | NA                 |
| Kabuli_wild_2660289 | NA                                  | Ca_kabuli_denovo | 2660289                 | C/G  | NA                 | NA                            | NA                 |
| Kabuli_wild_2660590 | NA                                  | Ca_kabuli_denovo | 2660590                 | G/A  | NA                 | NA                            | NA                 |
| Kabuli_wild_2661085 | NA                                  | Ca_kabuli_denovo | 2661085                 | T/C  | NA                 | NA                            | NA                 |



| SNP IDs             | NCBI dbSNP accession IDs (NCBI_SS#) | Chromosomes      | Physical positions (bp) | SNPs | Gene accession IDs | Sequence components of genome | Putative functions |
|---------------------|-------------------------------------|------------------|-------------------------|------|--------------------|-------------------------------|--------------------|
| Kabuli_wild_2661097 | NA                                  | Ca_kabuli_denovo | 2661097                 | A/G  | NA                 | NA                            | NA                 |
| Kabuli_wild_2661155 | NA                                  | Ca_kabuli_denovo | 2661155                 | T/C  | NA                 | NA                            | NA                 |
| Kabuli_wild_2661163 | NA                                  | Ca_kabuli_denovo | 2661163                 | A/G  | NA                 | NA                            | NA                 |
| Kabuli_wild_2661474 | NA                                  | Ca_kabuli_denovo | 2661474                 | G/A  | NA                 | NA                            | NA                 |
| Kabuli_wild_2661879 | NA                                  | Ca_kabuli_denovo | 2661879                 | G/A  | NA                 | NA                            | NA                 |
| Kabuli_wild_2663214 | NA                                  | Ca_kabuli_denovo | 2663214                 | T/G  | NA                 | NA                            | NA                 |
| Kabuli_wild_2663608 | NA                                  | Ca_kabuli_denovo | 2663608                 | C/T  | NA                 | NA                            | NA                 |
| Kabuli_wild_2663990 | NA                                  | Ca_kabuli_denovo | 2663990                 | T/C  | NA                 | NA                            | NA                 |
| Kabuli_wild_2664938 | NA                                  | Ca_kabuli_denovo | 2664938                 | T/C  | NA                 | NA                            | NA                 |
| Kabuli_wild_2665620 | NA                                  | Ca_kabuli_denovo | 2665620                 | C/T  | NA                 | NA                            | NA                 |
| Kabuli_wild_2665686 | NA                                  | Ca_kabuli_denovo | 2665686                 | C/T  | NA                 | NA                            | NA                 |
| Kabuli_wild_2665847 | NA                                  | Ca_kabuli_denovo | 2665847                 | A/G  | NA                 | NA                            | NA                 |
| Kabuli_wild_2665858 | NA                                  | Ca_kabuli_denovo | 2665858                 | G/A  | NA                 | NA                            | NA                 |
| Kabuli_wild_2667209 | NA                                  | Ca_kabuli_denovo | 2667209                 | G/T  | NA                 | NA                            | NA                 |
| Kabuli_wild_2667465 | NA                                  | Ca_kabuli_denovo | 2667465                 | T/C  | NA                 | NA                            | NA                 |
| Kabuli_wild_2667505 | NA                                  | Ca_kabuli_denovo | 2667505                 | G/A  | NA                 | NA                            | NA                 |
| Kabuli_wild_2668482 | NA                                  | Ca_kabuli_denovo | 2668482                 | A/G  | NA                 | NA                            | NA                 |
| Kabuli_wild_2669122 | NA                                  | Ca_kabuli_denovo | 2669122                 | C/G  | NA                 | NA                            | NA                 |
| Kabuli_wild_2669936 | NA                                  | Ca_kabuli_denovo | 2669936                 | C/T  | NA                 | NA                            | NA                 |
| Kabuli_wild_2670317 | NA                                  | Ca_kabuli_denovo | 2670317                 | A/G  | NA                 | NA                            | NA                 |
| Kabuli_wild_2670318 | NA                                  | Ca_kabuli_denovo | 2670318                 | G/A  | NA                 | NA                            | NA                 |
| Kabuli_wild_2670528 | NA                                  | Ca_kabuli_denovo | 2670528                 | C/G  | NA                 | NA                            | NA                 |
| Kabuli_wild_2670658 | NA                                  | Ca_kabuli_denovo | 2670658                 | C/G  | NA                 | NA                            | NA                 |
| Kabuli_wild_2671146 | NA                                  | Ca_kabuli_denovo | 2671146                 | G/C  | NA                 | NA                            | NA                 |
| Kabuli_wild_2671548 | NA                                  | Ca_kabuli_denovo | 2671548                 | C/G  | NA                 | NA                            | NA                 |
| Kabuli_wild_2671590 | NA                                  | Ca_kabuli_denovo | 2671590                 | T/G  | NA                 | NA                            | NA                 |
| Kabuli_wild_2672065 | NA                                  | Ca_kabuli_denovo | 2672065                 | T/C  | NA                 | NA                            | NA                 |
| Kabuli_wild_2672067 | NA                                  | Ca_kabuli_denovo | 2672067                 | A/G  | NA                 | NA                            | NA                 |
| Kabuli_wild_2672316 | NA                                  | Ca_kabuli_denovo | 2672316                 | T/C  | NA                 | NA                            | NA                 |
| Kabuli_wild_2672355 | NA                                  | Ca_kabuli_denovo | 2672355                 | C/T  | NA                 | NA                            | NA                 |
| Kabuli_wild_2674105 | NA                                  | Ca_kabuli_denovo | 2674105                 | T/C  | NA                 | NA                            | NA                 |
| Kabuli_wild_2674111 | NA                                  | Ca_kabuli_denovo | 2674111                 | T/C  | NA                 | NA                            | NA                 |
| Kabuli_wild_2675248 | NA                                  | Ca_kabuli_denovo | 2675248                 | A/G  | NA                 | NA                            | NA                 |
| Kabuli_wild_2675264 | NA                                  | Ca_kabuli_denovo | 2675264                 | G/A  | NA                 | NA                            | NA                 |
| Kabuli_wild_2675724 | NA                                  | Ca_kabuli_denovo | 2675724                 | G/A  | NA                 | NA                            | NA                 |
| Kabuli_wild_2675772 | NA                                  | Ca_kabuli_denovo | 2675772                 | G/C  | NA                 | NA                            | NA                 |
| Kabuli_wild_2676863 | NA                                  | Ca_kabuli_denovo | 2676863                 | A/G  | NA                 | NA                            | NA                 |
| Kabuli_wild_2676921 | NA                                  | Ca_kabuli_denovo | 2676921                 | G/C  | NA                 | NA                            | NA                 |
| Kabuli_wild_2677173 | NA                                  | Ca_kabuli_denovo | 2677173                 | G/A  | NA                 | NA                            | NA                 |
| Kabuli_wild_2677221 | NA                                  | Ca_kabuli_denovo | 2677221                 | T/C  | NA                 | NA                            | NA                 |
| Kabuli_wild_2677880 | NA                                  | Ca_kabuli_denovo | 2677880                 | A/G  | NA                 | NA                            | NA                 |
| Kabuli_wild_2677881 | NA                                  | Ca_kabuli_denovo | 2677881                 | T/C  | NA                 | NA                            | NA                 |
| Kabuli_wild_2678514 | NA                                  | Ca_kabuli_denovo | 2678514                 | G/T  | NA                 | NA                            | NA                 |
| Kabuli_wild_2678722 | NA                                  | Ca_kabuli_denovo | 2678722                 | A/G  | NA                 | NA                            | NA                 |

| SNP IDs             | NCBI dbSNP accession IDs (NCBI_SS#) | Chromosomes      | Physical positions (bp) | SNPs | Gene accession IDs | Sequence components of genome | Putative functions |
|---------------------|-------------------------------------|------------------|-------------------------|------|--------------------|-------------------------------|--------------------|
| Kabuli_wild_2678749 | NA                                  | Ca_kabuli_denovo | 2678749                 | G/C  | NA                 | NA                            | NA                 |
| Kabuli_wild_2682194 | NA                                  | Ca_kabuli_denovo | 2682194                 | C/G  | NA                 | NA                            | NA                 |
| Kabuli_wild_2682219 | NA                                  | Ca_kabuli_denovo | 2682219                 | C/T  | NA                 | NA                            | NA                 |
| Kabuli_wild_2683077 | NA                                  | Ca_kabuli_denovo | 2683077                 | C/G  | NA                 | NA                            | NA                 |
| Kabuli_wild_2683116 | NA                                  | Ca_kabuli_denovo | 2683116                 | T/C  | NA                 | NA                            | NA                 |
| Kabuli_wild_2683577 | NA                                  | Ca_kabuli_denovo | 2683577                 | A/G  | NA                 | NA                            | NA                 |
| Kabuli_wild_2683592 | NA                                  | Ca_kabuli_denovo | 2683592                 | A/G  | NA                 | NA                            | NA                 |
| Kabuli_wild_2684566 | NA                                  | Ca_kabuli_denovo | 2684566                 | C/T  | NA                 | NA                            | NA                 |
| Kabuli_wild_2684982 | NA                                  | Ca_kabuli_denovo | 2684982                 | C/G  | NA                 | NA                            | NA                 |
| Kabuli_wild_2684986 | NA                                  | Ca_kabuli_denovo | 2684986                 | T/C  | NA                 | NA                            | NA                 |
| Kabuli_wild_2684995 | NA                                  | Ca_kabuli_denovo | 2684995                 | T/C  | NA                 | NA                            | NA                 |
| Kabuli_wild_2686488 | NA                                  | Ca_kabuli_denovo | 2686488                 | C/G  | NA                 | NA                            | NA                 |
| Kabuli_wild_2686673 | NA                                  | Ca_kabuli_denovo | 2686673                 | G/A  | NA                 | NA                            | NA                 |
| Kabuli_wild_2686848 | NA                                  | Ca_kabuli_denovo | 2686848                 | A/C  | NA                 | NA                            | NA                 |
| Kabuli_wild_2686905 | NA                                  | Ca_kabuli_denovo | 2686905                 | T/C  | NA                 | NA                            | NA                 |
| Kabuli_wild_2687775 | NA                                  | Ca_kabuli_denovo | 2687775                 | C/T  | NA                 | NA                            | NA                 |
| Kabuli_wild_2687919 | NA                                  | Ca_kabuli_denovo | 2687919                 | C/T  | NA                 | NA                            | NA                 |
| Kabuli_wild_2687934 | NA                                  | Ca_kabuli_denovo | 2687934                 | A/G  | NA                 | NA                            | NA                 |
| Kabuli_wild_2688498 | NA                                  | Ca_kabuli_denovo | 2688498                 | T/C  | NA                 | NA                            | NA                 |
| Kabuli_wild_2688522 | NA                                  | Ca_kabuli_denovo | 2688522                 | T/C  | NA                 | NA                            | NA                 |
| Kabuli_wild_2689683 | NA                                  | Ca_kabuli_denovo | 2689683                 | A/G  | NA                 | NA                            | NA                 |
| Kabuli_wild_2690276 | NA                                  | Ca_kabuli_denovo | 2690276                 | T/G  | NA                 | NA                            | NA                 |
| Kabuli_wild_2690332 | NA                                  | Ca_kabuli_denovo | 2690332                 | C/A  | NA                 | NA                            | NA                 |
| Kabuli_wild_2691363 | NA                                  | Ca_kabuli_denovo | 2691363                 | C/T  | NA                 | NA                            | NA                 |
| Kabuli_wild_2691369 | NA                                  | Ca_kabuli_denovo | 2691369                 | C/T  | NA                 | NA                            | NA                 |
| Kabuli_wild_2692165 | NA                                  | Ca_kabuli_denovo | 2692165                 | T/G  | NA                 | NA                            | NA                 |
| Kabuli_wild_2693682 | NA                                  | Ca_kabuli_denovo | 2693682                 | G/A  | NA                 | NA                            | NA                 |
| Kabuli_wild_2693711 | NA                                  | Ca_kabuli_denovo | 2693711                 | C/T  | NA                 | NA                            | NA                 |
| Kabuli_wild_2693866 | NA                                  | Ca_kabuli_denovo | 2693866                 | T/C  | NA                 | NA                            | NA                 |
| Kabuli_wild_2693873 | NA                                  | Ca_kabuli_denovo | 2693873                 | G/A  | NA                 | NA                            | NA                 |
| Kabuli_wild_2694110 | NA                                  | Ca_kabuli_denovo | 2694110                 | T/G  | NA                 | NA                            | NA                 |
| Kabuli_wild_2695138 | NA                                  | Ca_kabuli_denovo | 2695138                 | A/G  | NA                 | NA                            | NA                 |
| Kabuli_wild_2695156 | NA                                  | Ca_kabuli_denovo | 2695156                 | A/G  | NA                 | NA                            | NA                 |
| Kabuli_wild_2695180 | NA                                  | Ca_kabuli_denovo | 2695180                 | T/C  | NA                 | NA                            | NA                 |
| Kabuli_wild_2695482 | NA                                  | Ca_kabuli_denovo | 2695482                 | A/C  | NA                 | NA                            | NA                 |
| Kabuli_wild_2695550 | NA                                  | Ca_kabuli_denovo | 2695550                 | A/T  | NA                 | NA                            | NA                 |
| Kabuli_wild_2695785 | NA                                  | Ca_kabuli_denovo | 2695785                 | G/A  | NA                 | NA                            | NA                 |
| Kabuli_wild_2695821 | NA                                  | Ca_kabuli_denovo | 2695821                 | G/C  | NA                 | NA                            | NA                 |
| Kabuli_wild_2695894 | NA                                  | Ca_kabuli_denovo | 2695894                 | A/G  | NA                 | NA                            | NA                 |
| Kabuli_wild_2695895 | NA                                  | Ca_kabuli_denovo | 2695895                 | A/G  | NA                 | NA                            | NA                 |
| Kabuli_wild_2698318 | NA                                  | Ca_kabuli_denovo | 2698318                 | G/A  | NA                 | NA                            | NA                 |
| Kabuli_wild_2698336 | NA                                  | Ca_kabuli_denovo | 2698336                 | A/G  | NA                 | NA                            | NA                 |
| Kabuli_wild_2699654 | NA                                  | Ca_kabuli_denovo | 2699654                 | A/G  | NA                 | NA                            | NA                 |
| Kabuli_wild_2699885 | NA                                  | Ca_kabuli_denovo | 2699885                 | T/C  | NA                 | NA                            | NA                 |

| SNP IDs             | NCBI dbSNP accession IDs (NCBI_SS#) | Chromosomes      | Physical positions (bp) | SNPs | Gene accession IDs | Sequence components of genome | Putative functions |
|---------------------|-------------------------------------|------------------|-------------------------|------|--------------------|-------------------------------|--------------------|
| Kabuli_wild_2700208 | NA                                  | Ca_kabuli_denovo | 2700208                 | C/T  | NA                 | NA                            | NA                 |
| Kabuli_wild_2700755 | NA                                  | Ca_kabuli_denovo | 2700755                 | A/T  | NA                 | NA                            | NA                 |
| Kabuli_wild_2701136 | NA                                  | Ca_kabuli_denovo | 2701136                 | C/A  | NA                 | NA                            | NA                 |
| Kabuli_wild_2701214 | NA                                  | Ca_kabuli_denovo | 2701214                 | T/C  | NA                 | NA                            | NA                 |
| Kabuli_wild_2701500 | NA                                  | Ca_kabuli_denovo | 2701500                 | T/A  | NA                 | NA                            | NA                 |
| Kabuli_wild_2701670 | NA                                  | Ca_kabuli_denovo | 2701670                 | C/T  | NA                 | NA                            | NA                 |
| Kabuli_wild_2701887 | NA                                  | Ca_kabuli_denovo | 2701887                 | A/G  | NA                 | NA                            | NA                 |
| Kabuli_wild_2701902 | NA                                  | Ca_kabuli_denovo | 2701902                 | C/G  | NA                 | NA                            | NA                 |
| Kabuli_wild_2703844 | NA                                  | Ca_kabuli_denovo | 2703844                 | T/A  | NA                 | NA                            | NA                 |
| Kabuli_wild_2704118 | NA                                  | Ca_kabuli_denovo | 2704118                 | T/C  | NA                 | NA                            | NA                 |
| Kabuli_wild_2705121 | NA                                  | Ca_kabuli_denovo | 2705121                 | G/A  | NA                 | NA                            | NA                 |
| Kabuli_wild_2706168 | NA                                  | Ca_kabuli_denovo | 2706168                 | T/C  | NA                 | NA                            | NA                 |
| Kabuli_wild_2706172 | NA                                  | Ca_kabuli_denovo | 2706172                 | C/G  | NA                 | NA                            | NA                 |
| Kabuli_wild_2707140 | NA                                  | Ca_kabuli_denovo | 2707140                 | A/G  | NA                 | NA                            | NA                 |
| Kabuli_wild_2707167 | NA                                  | Ca_kabuli_denovo | 2707167                 | C/A  | NA                 | NA                            | NA                 |
| Kabuli_wild_2707831 | NA                                  | Ca_kabuli_denovo | 2707831                 | G/A  | NA                 | NA                            | NA                 |
| Kabuli_wild_2707870 | NA                                  | Ca_kabuli_denovo | 2707870                 | A/G  | NA                 | NA                            | NA                 |
| Kabuli_wild_2708169 | NA                                  | Ca_kabuli_denovo | 2708169                 | C/T  | NA                 | NA                            | NA                 |
| Kabuli_wild_2709301 | NA                                  | Ca_kabuli_denovo | 2709301                 | G/C  | NA                 | NA                            | NA                 |
| Kabuli_wild_2709319 | NA                                  | Ca_kabuli_denovo | 2709319                 | T/C  | NA                 | NA                            | NA                 |
| Kabuli_wild_2710250 | NA                                  | Ca_kabuli_denovo | 2710250                 | T/C  | NA                 | NA                            | NA                 |
| Kabuli_wild_2710264 | NA                                  | Ca_kabuli_denovo | 2710264                 | G/A  | NA                 | NA                            | NA                 |
| Kabuli_wild_2710815 | NA                                  | Ca_kabuli_denovo | 2710815                 | C/G  | NA                 | NA                            | NA                 |
| Kabuli_wild_2712115 | NA                                  | Ca_kabuli_denovo | 2712115                 | G/A  | NA                 | NA                            | NA                 |
| Kabuli_wild_2712180 | NA                                  | Ca_kabuli_denovo | 2712180                 | A/C  | NA                 | NA                            | NA                 |
| Kabuli_wild_2712208 | NA                                  | Ca_kabuli_denovo | 2712208                 | C/T  | NA                 | NA                            | NA                 |
| Kabuli_wild_2712327 | NA                                  | Ca_kabuli_denovo | 2712327                 | C/T  | NA                 | NA                            | NA                 |
| Kabuli_wild_2712599 | NA                                  | Ca_kabuli_denovo | 2712599                 | C/G  | NA                 | NA                            | NA                 |
| Kabuli_wild_2713039 | NA                                  | Ca_kabuli_denovo | 2713039                 | G/T  | NA                 | NA                            | NA                 |
| Kabuli_wild_2713548 | NA                                  | Ca_kabuli_denovo | 2713548                 | A/C  | NA                 | NA                            | NA                 |
| Kabuli_wild_2714625 | NA                                  | Ca_kabuli_denovo | 2714625                 | A/G  | NA                 | NA                            | NA                 |
| Kabuli_wild_2714629 | NA                                  | Ca_kabuli_denovo | 2714629                 | G/A  | NA                 | NA                            | NA                 |
| Kabuli_wild_2715095 | NA                                  | Ca_kabuli_denovo | 2715095                 | A/G  | NA                 | NA                            | NA                 |
| Kabuli_wild_2715140 | NA                                  | Ca_kabuli_denovo | 2715140                 | G/A  | NA                 | NA                            | NA                 |
| Kabuli_wild_2715588 | NA                                  | Ca_kabuli_denovo | 2715588                 | T/A  | NA                 | NA                            | NA                 |
| Kabuli_wild_2716922 | NA                                  | Ca_kabuli_denovo | 2716922                 | A/G  | NA                 | NA                            | NA                 |
| Kabuli_wild_2716943 | NA                                  | Ca_kabuli_denovo | 2716943                 | A/C  | NA                 | NA                            | NA                 |
| Kabuli_wild_2717121 | NA                                  | Ca_kabuli_denovo | 2717121                 | C/T  | NA                 | NA                            | NA                 |
| Kabuli_wild_2717136 | NA                                  | Ca_kabuli_denovo | 2717136                 | T/C  | NA                 | NA                            | NA                 |
| Kabuli_wild_2717222 | NA                                  | Ca_kabuli_denovo | 2717222                 | T/G  | NA                 | NA                            | NA                 |
| Kabuli_wild_2717320 | NA                                  | Ca_kabuli_denovo | 2717320                 | C/G  | NA                 | NA                            | NA                 |
| Kabuli_wild_2717338 | NA                                  | Ca_kabuli_denovo | 2717338                 | C/T  | NA                 | NA                            | NA                 |
| Kabuli_wild_2717879 | NA                                  | Ca_kabuli_denovo | 2717879                 | T/G  | NA                 | NA                            | NA                 |
| Kabuli_wild_2717909 | NA                                  | Ca_kabuli_denovo | 2717909                 | C/T  | NA                 | NA                            | NA                 |

| SNP IDs             | NCBI dbSNP accession IDs (NCBI_SS#) | Chromosomes      | Physical positions (bp) | SNPs | Gene accession IDs | Sequence components of genome | Putative functions |
|---------------------|-------------------------------------|------------------|-------------------------|------|--------------------|-------------------------------|--------------------|
| Kabuli_wild_2717954 | NA                                  | Ca_kabuli_denovo | 2717954                 | C/T  | NA                 | NA                            | NA                 |
| Kabuli_wild_2719104 | NA                                  | Ca_kabuli_denovo | 2719104                 | A/G  | NA                 | NA                            | NA                 |
| Kabuli_wild_2721853 | NA                                  | Ca_kabuli_denovo | 2721853                 | T/G  | NA                 | NA                            | NA                 |
| Kabuli_wild_2721955 | NA                                  | Ca_kabuli_denovo | 2721955                 | A/C  | NA                 | NA                            | NA                 |
| Kabuli_wild_2723039 | NA                                  | Ca_kabuli_denovo | 2723039                 | C/T  | NA                 | NA                            | NA                 |
| Kabuli_wild_2723068 | NA                                  | Ca_kabuli_denovo | 2723068                 | T/G  | NA                 | NA                            | NA                 |
| Kabuli_wild_2723168 | NA                                  | Ca_kabuli_denovo | 2723168                 | C/T  | NA                 | NA                            | NA                 |
| Kabuli_wild_2723547 | NA                                  | Ca_kabuli_denovo | 2723547                 | A/G  | NA                 | NA                            | NA                 |
| Kabuli_wild_2723592 | NA                                  | Ca_kabuli_denovo | 2723592                 | A/G  | NA                 | NA                            | NA                 |
| Kabuli_wild_2723750 | NA                                  | Ca_kabuli_denovo | 2723750                 | T/G  | NA                 | NA                            | NA                 |
| Kabuli_wild_2723771 | NA                                  | Ca_kabuli_denovo | 2723771                 | T/C  | NA                 | NA                            | NA                 |
| Kabuli_wild_2724515 | NA                                  | Ca_kabuli_denovo | 2724515                 | A/G  | NA                 | NA                            | NA                 |
| Kabuli_wild_2724552 | NA                                  | Ca_kabuli_denovo | 2724552                 | A/G  | NA                 | NA                            | NA                 |
| Kabuli_wild_2724892 | NA                                  | Ca_kabuli_denovo | 2724892                 | G/C  | NA                 | NA                            | NA                 |
| Kabuli_wild_2725750 | NA                                  | Ca_kabuli_denovo | 2725750                 | A/T  | NA                 | NA                            | NA                 |
| Kabuli_wild_2725857 | NA                                  | Ca_kabuli_denovo | 2725857                 | G/A  | NA                 | NA                            | NA                 |
| Kabuli_wild_2725863 | NA                                  | Ca_kabuli_denovo | 2725863                 | G/A  | NA                 | NA                            | NA                 |
| Kabuli_wild_2727263 | NA                                  | Ca_kabuli_denovo | 2727263                 | T/C  | NA                 | NA                            | NA                 |
| Kabuli_wild_2727753 | NA                                  | Ca_kabuli_denovo | 2727753                 | A/G  | NA                 | NA                            | NA                 |
| Kabuli_wild_2727992 | NA                                  | Ca_kabuli_denovo | 2727992                 | G/T  | NA                 | NA                            | NA                 |
| Kabuli_wild_2729639 | NA                                  | Ca_kabuli_denovo | 2729639                 | G/C  | NA                 | NA                            | NA                 |
| Kabuli_wild_2730902 | NA                                  | Ca_kabuli_denovo | 2730902                 | C/A  | NA                 | NA                            | NA                 |
| Kabuli_wild_2730924 | NA                                  | Ca_kabuli_denovo | 2730924                 | G/C  | NA                 | NA                            | NA                 |
| Kabuli_wild_2731296 | NA                                  | Ca_kabuli_denovo | 2731296                 | C/G  | NA                 | NA                            | NA                 |
| Kabuli_wild_2731312 | NA                                  | Ca_kabuli_denovo | 2731312                 | T/G  | NA                 | NA                            | NA                 |
| Kabuli_wild_2731315 | NA                                  | Ca_kabuli_denovo | 2731315                 | A/G  | NA                 | NA                            | NA                 |
| Kabuli_wild_2732699 | NA                                  | Ca_kabuli_denovo | 2732699                 | A/G  | NA                 | NA                            | NA                 |
| Kabuli_wild_2733505 | NA                                  | Ca_kabuli_denovo | 2733505                 | T/G  | NA                 | NA                            | NA                 |
| Kabuli_wild_2733569 | NA                                  | Ca_kabuli_denovo | 2733569                 | T/C  | NA                 | NA                            | NA                 |
| Kabuli_wild_2733774 | NA                                  | Ca_kabuli_denovo | 2733774                 | A/T  | NA                 | NA                            | NA                 |
| Kabuli_wild_2734109 | NA                                  | Ca_kabuli_denovo | 2734109                 | C/T  | NA                 | NA                            | NA                 |
| Kabuli_wild_2734124 | NA                                  | Ca_kabuli_denovo | 2734124                 | G/A  | NA                 | NA                            | NA                 |
| Kabuli_wild_2734837 | NA                                  | Ca_kabuli_denovo | 2734837                 | G/T  | NA                 | NA                            | NA                 |
| Kabuli_wild_2736628 | NA                                  | Ca_kabuli_denovo | 2736628                 | C/G  | NA                 | NA                            | NA                 |
| Kabuli_wild_2736670 | NA                                  | Ca_kabuli_denovo | 2736670                 | C/T  | NA                 | NA                            | NA                 |
| Kabuli_wild_2736812 | NA                                  | Ca_kabuli_denovo | 2736812                 | G/T  | NA                 | NA                            | NA                 |
| Kabuli_wild_2736890 | NA                                  | Ca_kabuli_denovo | 2736890                 | T/C  | NA                 | NA                            | NA                 |
| Kabuli_wild_2737348 | NA                                  | Ca_kabuli_denovo | 2737348                 | G/T  | NA                 | NA                            | NA                 |
| Kabuli_wild_2737630 | NA                                  | Ca_kabuli_denovo | 2737630                 | T/C  | NA                 | NA                            | NA                 |
| Kabuli_wild_2737680 | NA                                  | Ca_kabuli_denovo | 2737680                 | T/G  | NA                 | NA                            | NA                 |
| Kabuli_wild_2737725 | NA                                  | Ca_kabuli_denovo | 2737725                 | C/T  | NA                 | NA                            | NA                 |
| Kabuli_wild_2737808 | NA                                  | Ca_kabuli_denovo | 2737808                 | G/T  | NA                 | NA                            | NA                 |
| Kabuli_wild_2738309 | NA                                  | Ca_kabuli_denovo | 2738309                 | G/A  | NA                 | NA                            | NA                 |
| Kabuli_wild_2738817 | NA                                  | Ca_kabuli_denovo | 2738817                 | T/C  | NA                 | NA                            | NA                 |

| SNP IDs             | NCBI dbSNP accession IDs (NCBI_SS#) | Chromosomes      | Physical positions (bp) | SNPs | Gene accession IDs | Sequence components of genome | Putative functions |
|---------------------|-------------------------------------|------------------|-------------------------|------|--------------------|-------------------------------|--------------------|
| Kabuli_wild_2738824 | NA                                  | Ca_kabuli_denovo | 2738824                 | C/A  | NA                 | NA                            | NA                 |
| Kabuli_wild_2740075 | NA                                  | Ca_kabuli_denovo | 2740075                 | T/G  | NA                 | NA                            | NA                 |
| Kabuli_wild_2740204 | NA                                  | Ca_kabuli_denovo | 2740204                 | A/C  | NA                 | NA                            | NA                 |
| Kabuli_wild_2741058 | NA                                  | Ca_kabuli_denovo | 2741058                 | G/T  | NA                 | NA                            | NA                 |
| Kabuli_wild_2741239 | NA                                  | Ca_kabuli_denovo | 2741239                 | G/T  | NA                 | NA                            | NA                 |
| Kabuli_wild_2741850 | NA                                  | Ca_kabuli_denovo | 2741850                 | C/T  | NA                 | NA                            | NA                 |
| Kabuli_wild_2741919 | NA                                  | Ca_kabuli_denovo | 2741919                 | A/C  | NA                 | NA                            | NA                 |
| Kabuli_wild_2743789 | NA                                  | Ca_kabuli_denovo | 2743789                 | C/T  | NA                 | NA                            | NA                 |
| Kabuli_wild_2743825 | NA                                  | Ca_kabuli_denovo | 2743825                 | G/C  | NA                 | NA                            | NA                 |
| Kabuli_wild_2744186 | NA                                  | Ca_kabuli_denovo | 2744186                 | A/G  | NA                 | NA                            | NA                 |
| Kabuli_wild_2744231 | NA                                  | Ca_kabuli_denovo | 2744231                 | A/C  | NA                 | NA                            | NA                 |
| Kabuli_wild_2744237 | NA                                  | Ca_kabuli_denovo | 2744237                 | A/G  | NA                 | NA                            | NA                 |
| Kabuli_wild_2744276 | NA                                  | Ca_kabuli_denovo | 2744276                 | C/G  | NA                 | NA                            | NA                 |
| Kabuli_wild_2744410 | NA                                  | Ca_kabuli_denovo | 2744410                 | C/A  | NA                 | NA                            | NA                 |
| Kabuli_wild_2744530 | NA                                  | Ca_kabuli_denovo | 2744530                 | G/C  | NA                 | NA                            | NA                 |
| Kabuli_wild_2744544 | NA                                  | Ca_kabuli_denovo | 2744544                 | A/G  | NA                 | NA                            | NA                 |
| Kabuli_wild_2744581 | NA                                  | Ca_kabuli_denovo | 2744581                 | A/G  | NA                 | NA                            | NA                 |
| Kabuli_wild_2744625 | NA                                  | Ca_kabuli_denovo | 2744625                 | C/A  | NA                 | NA                            | NA                 |
| Kabuli_wild_2745793 | NA                                  | Ca_kabuli_denovo | 2745793                 | T/C  | NA                 | NA                            | NA                 |
| Kabuli_wild_2745802 | NA                                  | Ca_kabuli_denovo | 2745802                 | G/C  | NA                 | NA                            | NA                 |
| Kabuli_wild_2746334 | NA                                  | Ca_kabuli_denovo | 2746334                 | G/C  | NA                 | NA                            | NA                 |
| Kabuli_wild_2747260 | NA                                  | Ca_kabuli_denovo | 2747260                 | A/G  | NA                 | NA                            | NA                 |
| Kabuli_wild_2748087 | NA                                  | Ca_kabuli_denovo | 2748087                 | A/C  | NA                 | NA                            | NA                 |
| Kabuli_wild_2748093 | NA                                  | Ca_kabuli_denovo | 2748093                 | A/G  | NA                 | NA                            | NA                 |
| Kabuli_wild_2749243 | NA                                  | Ca_kabuli_denovo | 2749243                 | G/A  | NA                 | NA                            | NA                 |
| Kabuli_wild_2749299 | NA                                  | Ca_kabuli_denovo | 2749299                 | G/A  | NA                 | NA                            | NA                 |
| Kabuli_wild_2749427 | NA                                  | Ca_kabuli_denovo | 2749427                 | C/T  | NA                 | NA                            | NA                 |
| Kabuli_wild_2749481 | NA                                  | Ca_kabuli_denovo | 2749481                 | T/C  | NA                 | NA                            | NA                 |
| Kabuli_wild_2749737 | NA                                  | Ca_kabuli_denovo | 2749737                 | G/C  | NA                 | NA                            | NA                 |
| Kabuli_wild_2749770 | NA                                  | Ca_kabuli_denovo | 2749770                 | C/T  | NA                 | NA                            | NA                 |
| Kabuli_wild_2749908 | NA                                  | Ca_kabuli_denovo | 2749908                 | C/T  | NA                 | NA                            | NA                 |
| Kabuli_wild_2749978 | NA                                  | Ca_kabuli_denovo | 2749978                 | G/T  | NA                 | NA                            | NA                 |
| Kabuli_wild_2750384 | NA                                  | Ca_kabuli_denovo | 2750384                 | G/A  | NA                 | NA                            | NA                 |
| Kabuli_wild_2750393 | NA                                  | Ca_kabuli_denovo | 2750393                 | C/T  | NA                 | NA                            | NA                 |
| Kabuli_wild_2750411 | NA                                  | Ca_kabuli_denovo | 2750411                 | T/C  | NA                 | NA                            | NA                 |
| Kabuli_wild_2752442 | NA                                  | Ca_kabuli_denovo | 2752442                 | G/A  | NA                 | NA                            | NA                 |
| Kabuli_wild_2752645 | NA                                  | Ca_kabuli_denovo | 2752645                 | C/G  | NA                 | NA                            | NA                 |
| Kabuli_wild_2752684 | NA                                  | Ca_kabuli_denovo | 2752684                 | A/G  | NA                 | NA                            | NA                 |
| Kabuli_wild_2753353 | NA                                  | Ca_kabuli_denovo | 2753353                 | C/T  | NA                 | NA                            | NA                 |
| Kabuli_wild_2753398 | NA                                  | Ca_kabuli_denovo | 2753398                 | A/G  | NA                 | NA                            | NA                 |
| Kabuli_wild_2753507 | NA                                  | Ca_kabuli_denovo | 2753507                 | G/A  | NA                 | NA                            | NA                 |
| Kabuli_wild_2753992 | NA                                  | Ca_kabuli_denovo | 2753992                 | G/C  | NA                 | NA                            | NA                 |
| Kabuli_wild_2755818 | NA                                  | Ca_kabuli_denovo | 2755818                 | T/C  | NA                 | NA                            | NA                 |
| Kabuli_wild_2756012 | NA                                  | Ca_kabuli_denovo | 2756012                 | T/G  | NA                 | NA                            | NA                 |

| SNP IDs             | NCBI dbSNP accession IDs (NCBI_SS#) | Chromosomes      | Physical positions (bp) | SNPs | Gene accession IDs | Sequence components of genome | Putative functions |
|---------------------|-------------------------------------|------------------|-------------------------|------|--------------------|-------------------------------|--------------------|
| Kabuli_wild_2756018 | NA                                  | Ca_kabuli_denovo | 2756018                 | T/C  | NA                 | NA                            | NA                 |
| Kabuli_wild_2756269 | NA                                  | Ca_kabuli_denovo | 2756269                 | C/G  | NA                 | NA                            | NA                 |
| Kabuli_wild_2756960 | NA                                  | Ca_kabuli_denovo | 2756960                 | C/A  | NA                 | NA                            | NA                 |
| Kabuli_wild_2757425 | NA                                  | Ca_kabuli_denovo | 2757425                 | A/G  | NA                 | NA                            | NA                 |
| Kabuli_wild_2757792 | NA                                  | Ca_kabuli_denovo | 2757792                 | A/T  | NA                 | NA                            | NA                 |
| Kabuli_wild_2757799 | NA                                  | Ca_kabuli_denovo | 2757799                 | T/C  | NA                 | NA                            | NA                 |
| Kabuli_wild_2758180 | NA                                  | Ca_kabuli_denovo | 2758180                 | A/G  | NA                 | NA                            | NA                 |
| Kabuli_wild_2759986 | NA                                  | Ca_kabuli_denovo | 2759986                 | A/G  | NA                 | NA                            | NA                 |
| Kabuli_wild_2760408 | NA                                  | Ca_kabuli_denovo | 2760408                 | C/T  | NA                 | NA                            | NA                 |
| Kabuli_wild_2761386 | NA                                  | Ca_kabuli_denovo | 2761386                 | C/G  | NA                 | NA                            | NA                 |
| Kabuli_wild_2761962 | NA                                  | Ca_kabuli_denovo | 2761962                 | T/G  | NA                 | NA                            | NA                 |
| Kabuli_wild_2762124 | NA                                  | Ca_kabuli_denovo | 2762124                 | A/G  | NA                 | NA                            | NA                 |
| Kabuli_wild_2762139 | NA                                  | Ca_kabuli_denovo | 2762139                 | G/C  | NA                 | NA                            | NA                 |
| Kabuli_wild_2763412 | NA                                  | Ca_kabuli_denovo | 2763412                 | C/A  | NA                 | NA                            | NA                 |
| Kabuli_wild_2763501 | NA                                  | Ca_kabuli_denovo | 2763501                 | T/C  | NA                 | NA                            | NA                 |
| Kabuli_wild_2763985 | NA                                  | Ca_kabuli_denovo | 2763985                 | T/C  | NA                 | NA                            | NA                 |
| Kabuli_wild_2764117 | NA                                  | Ca_kabuli_denovo | 2764117                 | G/C  | NA                 | NA                            | NA                 |
| Kabuli_wild_2764357 | NA                                  | Ca_kabuli_denovo | 2764357                 | C/T  | NA                 | NA                            | NA                 |
| Kabuli_wild_2764549 | NA                                  | Ca_kabuli_denovo | 2764549                 | G/C  | NA                 | NA                            | NA                 |
| Kabuli_wild_2764567 | NA                                  | Ca_kabuli_denovo | 2764567                 | A/G  | NA                 | NA                            | NA                 |
| Kabuli_wild_2765008 | NA                                  | Ca_kabuli_denovo | 2765008                 | A/G  | NA                 | NA                            | NA                 |
| Kabuli_wild_2765013 | NA                                  | Ca_kabuli_denovo | 2765013                 | G/A  | NA                 | NA                            | NA                 |
| Kabuli_wild_2766198 | NA                                  | Ca_kabuli_denovo | 2766198                 | G/A  | NA                 | NA                            | NA                 |
| Kabuli_wild_2766257 | NA                                  | Ca_kabuli_denovo | 2766257                 | C/A  | NA                 | NA                            | NA                 |
| Kabuli_wild_2767057 | NA                                  | Ca_kabuli_denovo | 2767057                 | T/C  | NA                 | NA                            | NA                 |
| Kabuli_wild_2767992 | NA                                  | Ca_kabuli_denovo | 2767992                 | A/C  | NA                 | NA                            | NA                 |
| Kabuli_wild_2768276 | NA                                  | Ca_kabuli_denovo | 2768276                 | G/A  | NA                 | NA                            | NA                 |
| Kabuli_wild_2768279 | NA                                  | Ca_kabuli_denovo | 2768279                 | A/G  | NA                 | NA                            | NA                 |
| Kabuli_wild_2769109 | NA                                  | Ca_kabuli_denovo | 2769109                 | A/G  | NA                 | NA                            | NA                 |
| Kabuli_wild_2769136 | NA                                  | Ca_kabuli_denovo | 2769136                 | T/C  | NA                 | NA                            | NA                 |
| Kabuli_wild_2769464 | NA                                  | Ca_kabuli_denovo | 2769464                 | A/G  | NA                 | NA                            | NA                 |
| Kabuli_wild_2770068 | NA                                  | Ca_kabuli_denovo | 2770068                 | A/C  | NA                 | NA                            | NA                 |
| Kabuli_wild_2773405 | NA                                  | Ca_kabuli_denovo | 2773405                 | C/G  | NA                 | NA                            | NA                 |
| Kabuli_wild_2773587 | NA                                  | Ca_kabuli_denovo | 2773587                 | G/A  | NA                 | NA                            | NA                 |
| Kabuli_wild_2773674 | NA                                  | Ca_kabuli_denovo | 2773674                 | A/C  | NA                 | NA                            | NA                 |
| Kabuli_wild_2773684 | NA                                  | Ca_kabuli_denovo | 2773684                 | C/T  | NA                 | NA                            | NA                 |
| Kabuli_wild_2774187 | NA                                  | Ca_kabuli_denovo | 2774187                 | C/G  | NA                 | NA                            | NA                 |
| Kabuli_wild_2775233 | NA                                  | Ca_kabuli_denovo | 2775233                 | C/T  | NA                 | NA                            | NA                 |
| Kabuli_wild_2776007 | NA                                  | Ca_kabuli_denovo | 2776007                 | G/A  | NA                 | NA                            | NA                 |
| Kabuli_wild_2777485 | NA                                  | Ca_kabuli_denovo | 2777485                 | G/C  | NA                 | NA                            | NA                 |
| Kabuli_wild_2777500 | NA                                  | Ca_kabuli_denovo | 2777500                 | C/A  | NA                 | NA                            | NA                 |
| Kabuli_wild_2777603 | NA                                  | Ca_kabuli_denovo | 2777603                 | G/C  | NA                 | NA                            | NA                 |
| Kabuli_wild_2778595 | NA                                  | Ca_kabuli_denovo | 2778595                 | C/A  | NA                 | NA                            | NA                 |
| Kabuli_wild_2778596 | NA                                  | Ca_kabuli_denovo | 2778596                 | T/G  | NA                 | NA                            | NA                 |

| SNP IDs             | NCBI dbSNP accession IDs (NCBI_SS#) | Chromosomes      | Physical positions (bp) | SNPs | Gene accession IDs | Sequence components of genome | Putative functions |
|---------------------|-------------------------------------|------------------|-------------------------|------|--------------------|-------------------------------|--------------------|
| Kabuli_wild_2780423 | NA                                  | Ca_kabuli_denovo | 2780423                 | T/C  | NA                 | NA                            | NA                 |
| Kabuli_wild_2781106 | NA                                  | Ca_kabuli_denovo | 2781106                 | A/G  | NA                 | NA                            | NA                 |
| Kabuli_wild_2781423 | NA                                  | Ca_kabuli_denovo | 2781423                 | C/T  | NA                 | NA                            | NA                 |
| Kabuli_wild_2781429 | NA                                  | Ca_kabuli_denovo | 2781429                 | C/G  | NA                 | NA                            | NA                 |
| Kabuli_wild_2781453 | NA                                  | Ca_kabuli_denovo | 2781453                 | A/G  | NA                 | NA                            | NA                 |
| Kabuli_wild_2781465 | NA                                  | Ca_kabuli_denovo | 2781465                 | A/T  | NA                 | NA                            | NA                 |
| Kabuli_wild_2782657 | NA                                  | Ca_kabuli_denovo | 2782657                 | C/A  | NA                 | NA                            | NA                 |
| Kabuli_wild_2783751 | NA                                  | Ca_kabuli_denovo | 2783751                 | G/C  | NA                 | NA                            | NA                 |
| Kabuli_wild_2783790 | NA                                  | Ca_kabuli_denovo | 2783790                 | G/T  | NA                 | NA                            | NA                 |
| Kabuli_wild_2784243 | NA                                  | Ca_kabuli_denovo | 2784243                 | C/T  | NA                 | NA                            | NA                 |
| Kabuli_wild_2785996 | NA                                  | Ca_kabuli_denovo | 2785996                 | C/A  | NA                 | NA                            | NA                 |
| Kabuli_wild_2786027 | NA                                  | Ca_kabuli_denovo | 2786027                 | T/C  | NA                 | NA                            | NA                 |
| Kabuli_wild_2786088 | NA                                  | Ca_kabuli_denovo | 2786088                 | A/G  | NA                 | NA                            | NA                 |
| Kabuli_wild_2786130 | NA                                  | Ca_kabuli_denovo | 2786130                 | G/A  | NA                 | NA                            | NA                 |
| Kabuli_wild_2786145 | NA                                  | Ca_kabuli_denovo | 2786145                 | G/A  | NA                 | NA                            | NA                 |
| Kabuli_wild_2786484 | NA                                  | Ca_kabuli_denovo | 2786484                 | C/T  | NA                 | NA                            | NA                 |
| Kabuli_wild_2786516 | NA                                  | Ca_kabuli_denovo | 2786516                 | G/A  | NA                 | NA                            | NA                 |
| Kabuli_wild_2786804 | NA                                  | Ca_kabuli_denovo | 2786804                 | T/C  | NA                 | NA                            | NA                 |
| Kabuli_wild_2786974 | NA                                  | Ca_kabuli_denovo | 2786974                 | G/A  | NA                 | NA                            | NA                 |
| Kabuli_wild_2786983 | NA                                  | Ca_kabuli_denovo | 2786983                 | G/A  | NA                 | NA                            | NA                 |
| Kabuli_wild_2787098 | NA                                  | Ca_kabuli_denovo | 2787098                 | T/C  | NA                 | NA                            | NA                 |
| Kabuli_wild_2787131 | NA                                  | Ca_kabuli_denovo | 2787131                 | A/G  | NA                 | NA                            | NA                 |
| Kabuli_wild_2787456 | NA                                  | Ca_kabuli_denovo | 2787456                 | C/G  | NA                 | NA                            | NA                 |
| Kabuli_wild_2787850 | NA                                  | Ca_kabuli_denovo | 2787850                 | A/G  | NA                 | NA                            | NA                 |
| Kabuli_wild_2790544 | NA                                  | Ca_kabuli_denovo | 2790544                 | A/G  | NA                 | NA                            | NA                 |
| Kabuli_wild_2791111 | NA                                  | Ca_kabuli_denovo | 2791111                 | T/C  | NA                 | NA                            | NA                 |
| Kabuli_wild_2791113 | NA                                  | Ca_kabuli_denovo | 2791113                 | T/G  | NA                 | NA                            | NA                 |
| Kabuli_wild_2791724 | NA                                  | Ca_kabuli_denovo | 2791724                 | G/A  | NA                 | NA                            | NA                 |
| Kabuli_wild_2792313 | NA                                  | Ca_kabuli_denovo | 2792313                 | T/C  | NA                 | NA                            | NA                 |
| Kabuli_wild_2792315 | NA                                  | Ca_kabuli_denovo | 2792315                 | T/G  | NA                 | NA                            | NA                 |
| Kabuli_wild_2793244 | NA                                  | Ca_kabuli_denovo | 2793244                 | A/C  | NA                 | NA                            | NA                 |
| Kabuli_wild_2794063 | NA                                  | Ca_kabuli_denovo | 2794063                 | A/T  | NA                 | NA                            | NA                 |
| Kabuli_wild_2795357 | NA                                  | Ca_kabuli_denovo | 2795357                 | G/A  | NA                 | NA                            | NA                 |
| Kabuli_wild_2796031 | NA                                  | Ca_kabuli_denovo | 2796031                 | A/G  | NA                 | NA                            | NA                 |
| Kabuli_wild_2796154 | NA                                  | Ca_kabuli_denovo | 2796154                 | T/G  | NA                 | NA                            | NA                 |
| Kabuli_wild_2796266 | NA                                  | Ca_kabuli_denovo | 2796266                 | G/A  | NA                 | NA                            | NA                 |
| Kabuli_wild_2796510 | NA                                  | Ca_kabuli_denovo | 2796510                 | T/C  | NA                 | NA                            | NA                 |
| Kabuli_wild_2797737 | NA                                  | Ca_kabuli_denovo | 2797737                 | A/G  | NA                 | NA                            | NA                 |
| Kabuli_wild_2797766 | NA                                  | Ca_kabuli_denovo | 2797766                 | T/C  | NA                 | NA                            | NA                 |
| Kabuli_wild_2798242 | NA                                  | Ca_kabuli_denovo | 2798242                 | C/A  | NA                 | NA                            | NA                 |
| Kabuli_wild_2798256 | NA                                  | Ca_kabuli_denovo | 2798256                 | C/G  | NA                 | NA                            | NA                 |
| Kabuli_wild_2798273 | NA                                  | Ca_kabuli_denovo | 2798273                 | C/T  | NA                 | NA                            | NA                 |
| Kabuli_wild_2798726 | NA                                  | Ca_kabuli_denovo | 2798726                 | T/G  | NA                 | NA                            | NA                 |
| Kabuli_wild_2799307 | NA                                  | Ca_kabuli_denovo | 2799307                 | C/T  | NA                 | NA                            | NA                 |

| SNP IDs             | NCBI dbSNP accession IDs (NCBI_SS#) | Chromosomes      | Physical positions (bp) | SNPs | Gene accession IDs | Sequence components of genome | Putative functions |
|---------------------|-------------------------------------|------------------|-------------------------|------|--------------------|-------------------------------|--------------------|
| Kabuli_wild_2799407 | NA                                  | Ca_kabuli_denovo | 2799407                 | A/G  | NA                 | NA                            | NA                 |
| Kabuli_wild_2801099 | NA                                  | Ca_kabuli_denovo | 2801099                 | A/G  | NA                 | NA                            | NA                 |
| Kabuli_wild_2801106 | NA                                  | Ca_kabuli_denovo | 2801106                 | G/T  | NA                 | NA                            | NA                 |
| Kabuli_wild_2803590 | NA                                  | Ca_kabuli_denovo | 2803590                 | A/G  | NA                 | NA                            | NA                 |
| Kabuli_wild_2803852 | NA                                  | Ca_kabuli_denovo | 2803852                 | A/G  | NA                 | NA                            | NA                 |
| Kabuli_wild_2804729 | NA                                  | Ca_kabuli_denovo | 2804729                 | T/C  | NA                 | NA                            | NA                 |
| Kabuli_wild_2804771 | NA                                  | Ca_kabuli_denovo | 2804771                 | T/A  | NA                 | NA                            | NA                 |
| Kabuli_wild_2805399 | NA                                  | Ca_kabuli_denovo | 2805399                 | C/A  | NA                 | NA                            | NA                 |
| Kabuli_wild_2805453 | NA                                  | Ca_kabuli_denovo | 2805453                 | C/G  | NA                 | NA                            | NA                 |
| Kabuli_wild_2806362 | NA                                  | Ca_kabuli_denovo | 2806362                 | G/C  | NA                 | NA                            | NA                 |
| Kabuli_wild_2806365 | NA                                  | Ca_kabuli_denovo | 2806365                 | T/G  | NA                 | NA                            | NA                 |
| Kabuli_wild_2806797 | NA                                  | Ca_kabuli_denovo | 2806797                 | A/G  | NA                 | NA                            | NA                 |
| Kabuli_wild_2806870 | NA                                  | Ca_kabuli_denovo | 2806870                 | C/G  | NA                 | NA                            | NA                 |
| Kabuli_wild_2807798 | NA                                  | Ca_kabuli_denovo | 2807798                 | A/G  | NA                 | NA                            | NA                 |
| Kabuli_wild_2808110 | NA                                  | Ca_kabuli_denovo | 2808110                 | C/G  | NA                 | NA                            | NA                 |
| Kabuli_wild_2808116 | NA                                  | Ca_kabuli_denovo | 2808116                 | A/C  | NA                 | NA                            | NA                 |
| Kabuli_wild_2810559 | NA                                  | Ca_kabuli_denovo | 2810559                 | G/A  | NA                 | NA                            | NA                 |
| Kabuli_wild_2810604 | NA                                  | Ca_kabuli_denovo | 2810604                 | G/A  | NA                 | NA                            | NA                 |
| Kabuli_wild_2810925 | NA                                  | Ca_kabuli_denovo | 2810925                 | G/A  | NA                 | NA                            | NA                 |
| Kabuli_wild_2810943 | NA                                  | Ca_kabuli_denovo | 2810943                 | G/A  | NA                 | NA                            | NA                 |
| Kabuli_wild_2811753 | NA                                  | Ca_kabuli_denovo | 2811753                 | C/T  | NA                 | NA                            | NA                 |
| Kabuli_wild_2811813 | NA                                  | Ca_kabuli_denovo | 2811813                 | A/T  | NA                 | NA                            | NA                 |
| Kabuli_wild_2811857 | NA                                  | Ca_kabuli_denovo | 2811857                 | G/A  | NA                 | NA                            | NA                 |
| Kabuli_wild_2812174 | NA                                  | Ca_kabuli_denovo | 2812174                 | C/A  | NA                 | NA                            | NA                 |
| Kabuli_wild_2812276 | NA                                  | Ca_kabuli_denovo | 2812276                 | G/A  | NA                 | NA                            | NA                 |
| Kabuli_wild_2812588 | NA                                  | Ca_kabuli_denovo | 2812588                 | G/A  | NA                 | NA                            | NA                 |
| Kabuli_wild_2812590 | NA                                  | Ca_kabuli_denovo | 2812590                 | T/C  | NA                 | NA                            | NA                 |
| Kabuli_wild_2813158 | NA                                  | Ca_kabuli_denovo | 2813158                 | C/T  | NA                 | NA                            | NA                 |
| Kabuli_wild_2813210 | NA                                  | Ca_kabuli_denovo | 2813210                 | G/A  | NA                 | NA                            | NA                 |
| Kabuli_wild_2813881 | NA                                  | Ca_kabuli_denovo | 2813881                 | A/G  | NA                 | NA                            | NA                 |
| Kabuli_wild_2814055 | NA                                  | Ca_kabuli_denovo | 2814055                 | T/G  | NA                 | NA                            | NA                 |
| Kabuli_wild_2814424 | NA                                  | Ca_kabuli_denovo | 2814424                 | C/G  | NA                 | NA                            | NA                 |
| Kabuli_wild_2814604 | NA                                  | Ca_kabuli_denovo | 2814604                 | A/G  | NA                 | NA                            | NA                 |
| Kabuli_wild_2814794 | NA                                  | Ca_kabuli_denovo | 2814794                 | T/C  | NA                 | NA                            | NA                 |
| Kabuli_wild_2814812 | NA                                  | Ca_kabuli_denovo | 2814812                 | T/C  | NA                 | NA                            | NA                 |
| Kabuli_wild_2814827 | NA                                  | Ca_kabuli_denovo | 2814827                 | C/T  | NA                 | NA                            | NA                 |
| Kabuli_wild_2814854 | NA                                  | Ca_kabuli_denovo | 2814854                 | C/A  | NA                 | NA                            | NA                 |
| Kabuli_wild_2816200 | NA                                  | Ca_kabuli_denovo | 2816200                 | G/C  | NA                 | NA                            | NA                 |
| Kabuli_wild_2816646 | NA                                  | Ca_kabuli_denovo | 2816646                 | T/C  | NA                 | NA                            | NA                 |
| Kabuli_wild_2816652 | NA                                  | Ca_kabuli_denovo | 2816652                 | A/G  | NA                 | NA                            | NA                 |
| Kabuli_wild_2816739 | NA                                  | Ca_kabuli_denovo | 2816739                 | T/C  | NA                 | NA                            | NA                 |
| Kabuli_wild_2816953 | NA                                  | Ca_kabuli_denovo | 2816953                 | A/G  | NA                 | NA                            | NA                 |
| Kabuli_wild_2817150 | NA                                  | Ca_kabuli_denovo | 2817150                 | C/G  | NA                 | NA                            | NA                 |
| Kabuli_wild_2817697 | NA                                  | Ca_kabuli_denovo | 2817697                 | A/T  | NA                 | NA                            | NA                 |



| SNP IDs             | NCBI dbSNP accession IDs (NCBI_SS#) | Chromosomes      | Physical positions (bp) | SNPs | Gene accession IDs | Sequence components of genome | Putative functions |
|---------------------|-------------------------------------|------------------|-------------------------|------|--------------------|-------------------------------|--------------------|
| Kabuli_wild_2818109 | NA                                  | Ca_kabuli_denovo | 2818109                 | G/A  | NA                 | NA                            | NA                 |
| Kabuli_wild_2818162 | NA                                  | Ca_kabuli_denovo | 2818162                 | T/C  | NA                 | NA                            | NA                 |
| Kabuli_wild_2818589 | NA                                  | Ca_kabuli_denovo | 2818589                 | C/A  | NA                 | NA                            | NA                 |
| Kabuli_wild_2818804 | NA                                  | Ca_kabuli_denovo | 2818804                 | G/A  | NA                 | NA                            | NA                 |
| Kabuli_wild_2819398 | NA                                  | Ca_kabuli_denovo | 2819398                 | G/T  | NA                 | NA                            | NA                 |
| Kabuli_wild_2819745 | NA                                  | Ca_kabuli_denovo | 2819745                 | A/T  | NA                 | NA                            | NA                 |
| Kabuli_wild_2819766 | NA                                  | Ca_kabuli_denovo | 2819766                 | T/C  | NA                 | NA                            | NA                 |
| Kabuli_wild_2819993 | NA                                  | Ca_kabuli_denovo | 2819993                 | C/G  | NA                 | NA                            | NA                 |
| Kabuli_wild_2820769 | NA                                  | Ca_kabuli_denovo | 2820769                 | C/T  | NA                 | NA                            | NA                 |
| Kabuli_wild_2821972 | NA                                  | Ca_kabuli_denovo | 2821972                 | C/T  | NA                 | NA                            | NA                 |
| Kabuli_wild_2821992 | NA                                  | Ca_kabuli_denovo | 2821992                 | G/C  | NA                 | NA                            | NA                 |
| Kabuli_wild_2822754 | NA                                  | Ca_kabuli_denovo | 2822754                 | T/C  | NA                 | NA                            | NA                 |
| Kabuli_wild_2822763 | NA                                  | Ca_kabuli_denovo | 2822763                 | A/G  | NA                 | NA                            | NA                 |
| Kabuli_wild_2823136 | NA                                  | Ca_kabuli_denovo | 2823136                 | C/G  | NA                 | NA                            | NA                 |
| Kabuli_wild_2823142 | NA                                  | Ca_kabuli_denovo | 2823142                 | A/G  | NA                 | NA                            | NA                 |
| Kabuli_wild_2823649 | NA                                  | Ca_kabuli_denovo | 2823649                 | A/G  | NA                 | NA                            | NA                 |
| Kabuli_wild_2823660 | NA                                  | Ca_kabuli_denovo | 2823660                 | T/G  | NA                 | NA                            | NA                 |
| Kabuli_wild_2823672 | NA                                  | Ca_kabuli_denovo | 2823672                 | C/A  | NA                 | NA                            | NA                 |
| Kabuli_wild_2823702 | NA                                  | Ca_kabuli_denovo | 2823702                 | T/G  | NA                 | NA                            | NA                 |
| Kabuli_wild_2823918 | NA                                  | Ca_kabuli_denovo | 2823918                 | A/G  | NA                 | NA                            | NA                 |
| Kabuli_wild_2823919 | NA                                  | Ca_kabuli_denovo | 2823919                 | T/C  | NA                 | NA                            | NA                 |
| Kabuli_wild_2824890 | NA                                  | Ca_kabuli_denovo | 2824890                 | T/C  | NA                 | NA                            | NA                 |
| Kabuli_wild_2825033 | NA                                  | Ca_kabuli_denovo | 2825033                 | T/A  | NA                 | NA                            | NA                 |
| Kabuli_wild_2825364 | NA                                  | Ca_kabuli_denovo | 2825364                 | A/G  | NA                 | NA                            | NA                 |
| Kabuli_wild_2825380 | NA                                  | Ca_kabuli_denovo | 2825380                 | C/A  | NA                 | NA                            | NA                 |
| Kabuli_wild_2827498 | NA                                  | Ca_kabuli_denovo | 2827498                 | G/A  | NA                 | NA                            | NA                 |
| Kabuli_wild_2827986 | NA                                  | Ca_kabuli_denovo | 2827986                 | T/G  | NA                 | NA                            | NA                 |
| Kabuli_wild_2828044 | NA                                  | Ca_kabuli_denovo | 2828044                 | G/C  | NA                 | NA                            | NA                 |
| Kabuli_wild_2828387 | NA                                  | Ca_kabuli_denovo | 2828387                 | G/T  | NA                 | NA                            | NA                 |
| Kabuli_wild_2829344 | NA                                  | Ca_kabuli_denovo | 2829344                 | C/A  | NA                 | NA                            | NA                 |
| Kabuli_wild_2829374 | NA                                  | Ca_kabuli_denovo | 2829374                 | T/C  | NA                 | NA                            | NA                 |
| Kabuli_wild_2830260 | NA                                  | Ca_kabuli_denovo | 2830260                 | T/G  | NA                 | NA                            | NA                 |
| Kabuli_wild_2830939 | NA                                  | Ca_kabuli_denovo | 2830939                 | G/C  | NA                 | NA                            | NA                 |
| Kabuli_wild_2831823 | NA                                  | Ca_kabuli_denovo | 2831823                 | T/C  | NA                 | NA                            | NA                 |
| Kabuli_wild_2832371 | NA                                  | Ca_kabuli_denovo | 2832371                 | C/T  | NA                 | NA                            | NA                 |
| Kabuli_wild_2833033 | NA                                  | Ca_kabuli_denovo | 2833033                 | A/G  | NA                 | NA                            | NA                 |
| Kabuli_wild_2833059 | NA                                  | Ca_kabuli_denovo | 2833059                 | T/C  | NA                 | NA                            | NA                 |
| Kabuli_wild_2835079 | NA                                  | Ca_kabuli_denovo | 2835079                 | C/G  | NA                 | NA                            | NA                 |
| Kabuli_wild_2835086 | NA                                  | Ca_kabuli_denovo | 2835086                 | T/C  | NA                 | NA                            | NA                 |
| Kabuli_wild_2836269 | NA                                  | Ca_kabuli_denovo | 2836269                 | C/T  | NA                 | NA                            | NA                 |
| Kabuli_wild_2836274 | NA                                  | Ca_kabuli_denovo | 2836274                 | T/C  | NA                 | NA                            | NA                 |
| Kabuli_wild_2836280 | NA                                  | Ca_kabuli_denovo | 2836280                 | G/C  | NA                 | NA                            | NA                 |
| Kabuli_wild_2837555 | NA                                  | Ca_kabuli_denovo | 2837555                 | G/A  | NA                 | NA                            | NA                 |
| Kabuli_wild_2838073 | NA                                  | Ca_kabuli_denovo | 2838073                 | C/T  | NA                 | NA                            | NA                 |

| SNP IDs             | NCBI dbSNP accession IDs (NCBI_SS#) | Chromosomes      | Physical positions (bp) | SNPs | Gene accession IDs | Sequence components of genome | Putative functions |
|---------------------|-------------------------------------|------------------|-------------------------|------|--------------------|-------------------------------|--------------------|
| Kabuli_wild_2838480 | NA                                  | Ca_kabuli_denovo | 2838480                 | G/C  | NA                 | NA                            | NA                 |
| Kabuli_wild_2838483 | NA                                  | Ca_kabuli_denovo | 2838483                 | C/T  | NA                 | NA                            | NA                 |
| Kabuli_wild_2839363 | NA                                  | Ca_kabuli_denovo | 2839363                 | G/T  | NA                 | NA                            | NA                 |
| Kabuli_wild_2839678 | NA                                  | Ca_kabuli_denovo | 2839678                 | C/T  | NA                 | NA                            | NA                 |
| Kabuli_wild_2839696 | NA                                  | Ca_kabuli_denovo | 2839696                 | C/T  | NA                 | NA                            | NA                 |
| Kabuli_wild_2839788 | NA                                  | Ca_kabuli_denovo | 2839788                 | G/C  | NA                 | NA                            | NA                 |
| Kabuli_wild_2840528 | NA                                  | Ca_kabuli_denovo | 2840528                 | G/T  | NA                 | NA                            | NA                 |
| Kabuli_wild_2840632 | NA                                  | Ca_kabuli_denovo | 2840632                 | A/G  | NA                 | NA                            | NA                 |
| Kabuli_wild_2840654 | NA                                  | Ca_kabuli_denovo | 2840654                 | C/G  | NA                 | NA                            | NA                 |
| Kabuli_wild_2840796 | NA                                  | Ca_kabuli_denovo | 2840796                 | C/T  | NA                 | NA                            | NA                 |
| Kabuli_wild_2840892 | NA                                  | Ca_kabuli_denovo | 2840892                 | C/T  | NA                 | NA                            | NA                 |
| Kabuli_wild_2840895 | NA                                  | Ca_kabuli_denovo | 2840895                 | G/C  | NA                 | NA                            | NA                 |
| Kabuli_wild_2842075 | NA                                  | Ca_kabuli_denovo | 2842075                 | C/A  | NA                 | NA                            | NA                 |
| Kabuli_wild_2842321 | NA                                  | Ca_kabuli_denovo | 2842321                 | G/A  | NA                 | NA                            | NA                 |
| Kabuli_wild_2842836 | NA                                  | Ca_kabuli_denovo | 2842836                 | G/C  | NA                 | NA                            | NA                 |
| Kabuli_wild_2842946 | NA                                  | Ca_kabuli_denovo | 2842946                 | C/T  | NA                 | NA                            | NA                 |
| Kabuli_wild_2842994 | NA                                  | Ca_kabuli_denovo | 2842994                 | G/C  | NA                 | NA                            | NA                 |
| Kabuli_wild_2845056 | NA                                  | Ca_kabuli_denovo | 2845056                 | C/T  | NA                 | NA                            | NA                 |
| Kabuli_wild_2845179 | NA                                  | Ca_kabuli_denovo | 2845179                 | T/C  | NA                 | NA                            | NA                 |
| Kabuli_wild_2845188 | NA                                  | Ca_kabuli_denovo | 2845188                 | G/T  | NA                 | NA                            | NA                 |
| Kabuli_wild_2845839 | NA                                  | Ca_kabuli_denovo | 2845839                 | T/C  | NA                 | NA                            | NA                 |
| Kabuli_wild_2848781 | NA                                  | Ca_kabuli_denovo | 2848781                 | T/C  | NA                 | NA                            | NA                 |
| Kabuli_wild_2849190 | NA                                  | Ca_kabuli_denovo | 2849190                 | A/G  | NA                 | NA                            | NA                 |
| Kabuli_wild_2850029 | NA                                  | Ca_kabuli_denovo | 2850029                 | A/G  | NA                 | NA                            | NA                 |
| Kabuli_wild_2850089 | NA                                  | Ca_kabuli_denovo | 2850089                 | G/A  | NA                 | NA                            | NA                 |
| Kabuli_wild_2850782 | NA                                  | Ca_kabuli_denovo | 2850782                 | T/G  | NA                 | NA                            | NA                 |
| Kabuli_wild_2853334 | NA                                  | Ca_kabuli_denovo | 2853334                 | G/A  | NA                 | NA                            | NA                 |
| Kabuli_wild_2853499 | NA                                  | Ca_kabuli_denovo | 2853499                 | T/C  | NA                 | NA                            | NA                 |
| Kabuli_wild_2853530 | NA                                  | Ca_kabuli_denovo | 2853530                 | C/G  | NA                 | NA                            | NA                 |
| Kabuli_wild_2854054 | NA                                  | Ca_kabuli_denovo | 2854054                 | T/G  | NA                 | NA                            | NA                 |
| Kabuli_wild_2854319 | NA                                  | Ca_kabuli_denovo | 2854319                 | A/G  | NA                 | NA                            | NA                 |
| Kabuli_wild_2854583 | NA                                  | Ca_kabuli_denovo | 2854583                 | C/T  | NA                 | NA                            | NA                 |
| Kabuli_wild_2855346 | NA                                  | Ca_kabuli_denovo | 2855346                 | T/C  | NA                 | NA                            | NA                 |
| Kabuli_wild_2855364 | NA                                  | Ca_kabuli_denovo | 2855364                 | T/C  | NA                 | NA                            | NA                 |
| Kabuli_wild_2856245 | NA                                  | Ca_kabuli_denovo | 2856245                 | C/T  | NA                 | NA                            | NA                 |
| Kabuli_wild_2856263 | NA                                  | Ca_kabuli_denovo | 2856263                 | C/G  | NA                 | NA                            | NA                 |
| Kabuli_wild_2856822 | NA                                  | Ca_kabuli_denovo | 2856822                 | T/C  | NA                 | NA                            | NA                 |
| Kabuli_wild_2856831 | NA                                  | Ca_kabuli_denovo | 2856831                 | G/T  | NA                 | NA                            | NA                 |
| Kabuli_wild_2856911 | NA                                  | Ca_kabuli_denovo | 2856911                 | A/G  | NA                 | NA                            | NA                 |
| Kabuli_wild_2857957 | NA                                  | Ca_kabuli_denovo | 2857957                 | G/A  | NA                 | NA                            | NA                 |
| Kabuli_wild_2858014 | NA                                  | Ca_kabuli_denovo | 2858014                 | G/A  | NA                 | NA                            | NA                 |
| Kabuli_wild_2858284 | NA                                  | Ca_kabuli_denovo | 2858284                 | G/A  | NA                 | NA                            | NA                 |
| Kabuli_wild_2858328 | NA                                  | Ca_kabuli_denovo | 2858328                 | G/T  | NA                 | NA                            | NA                 |
| Kabuli_wild_2858475 | NA                                  | Ca_kabuli_denovo | 2858475                 | A/G  | NA                 | NA                            | NA                 |

| SNP IDs             | NCBI dbSNP accession IDs (NCBI_SS#) | Chromosomes      | Physical positions (bp) | SNPs | Gene accession IDs | Sequence components of genome | Putative functions |
|---------------------|-------------------------------------|------------------|-------------------------|------|--------------------|-------------------------------|--------------------|
| Kabuli_wild_2858481 | NA                                  | Ca_kabuli_denovo | 2858481                 | C/G  | NA                 | NA                            | NA                 |
| Kabuli_wild_2859218 | NA                                  | Ca_kabuli_denovo | 2859218                 | T/A  | NA                 | NA                            | NA                 |
| Kabuli_wild_2859245 | NA                                  | Ca_kabuli_denovo | 2859245                 | A/G  | NA                 | NA                            | NA                 |
| Kabuli_wild_2859390 | NA                                  | Ca_kabuli_denovo | 2859390                 | C/G  | NA                 | NA                            | NA                 |
| Kabuli_wild_2860310 | NA                                  | Ca_kabuli_denovo | 2860310                 | T/G  | NA                 | NA                            | NA                 |
| Kabuli_wild_2860341 | NA                                  | Ca_kabuli_denovo | 2860341                 | T/C  | NA                 | NA                            | NA                 |
| Kabuli_wild_2860677 | NA                                  | Ca_kabuli_denovo | 2860677                 | A/G  | NA                 | NA                            | NA                 |
| Kabuli_wild_2860753 | NA                                  | Ca_kabuli_denovo | 2860753                 | G/A  | NA                 | NA                            | NA                 |
| Kabuli_wild_2861122 | NA                                  | Ca_kabuli_denovo | 2861122                 | G/T  | NA                 | NA                            | NA                 |
| Kabuli_wild_2861760 | NA                                  | Ca_kabuli_denovo | 2861760                 | T/C  | NA                 | NA                            | NA                 |
| Kabuli_wild_2861766 | NA                                  | Ca_kabuli_denovo | 2861766                 | T/G  | NA                 | NA                            | NA                 |
| Kabuli_wild_2861882 | NA                                  | Ca_kabuli_denovo | 2861882                 | T/C  | NA                 | NA                            | NA                 |
| Kabuli_wild_2862324 | NA                                  | Ca_kabuli_denovo | 2862324                 | T/C  | NA                 | NA                            | NA                 |
| Kabuli_wild_2862823 | NA                                  | Ca_kabuli_denovo | 2862823                 | T/C  | NA                 | NA                            | NA                 |
| Kabuli_wild_2863207 | NA                                  | Ca_kabuli_denovo | 2863207                 | T/A  | NA                 | NA                            | NA                 |
| Kabuli_wild_2864280 | NA                                  | Ca_kabuli_denovo | 2864280                 | G/C  | NA                 | NA                            | NA                 |
| Kabuli_wild_2864328 | NA                                  | Ca_kabuli_denovo | 2864328                 | A/C  | NA                 | NA                            | NA                 |
| Kabuli_wild_2867149 | NA                                  | Ca_kabuli_denovo | 2867149                 | C/A  | NA                 | NA                            | NA                 |
| Kabuli_wild_2868057 | NA                                  | Ca_kabuli_denovo | 2868057                 | G/A  | NA                 | NA                            | NA                 |
| Kabuli_wild_2868066 | NA                                  | Ca_kabuli_denovo | 2868066                 | T/G  | NA                 | NA                            | NA                 |
| Kabuli_wild_2868355 | NA                                  | Ca_kabuli_denovo | 2868355                 | T/G  | NA                 | NA                            | NA                 |
| Kabuli_wild_2868544 | NA                                  | Ca_kabuli_denovo | 2868544                 | C/G  | NA                 | NA                            | NA                 |
| Kabuli_wild_2868571 | NA                                  | Ca_kabuli_denovo | 2868571                 | C/A  | NA                 | NA                            | NA                 |
| Kabuli_wild_2868577 | NA                                  | Ca_kabuli_denovo | 2868577                 | C/G  | NA                 | NA                            | NA                 |
| Kabuli_wild_2869039 | NA                                  | Ca_kabuli_denovo | 2869039                 | G/A  | NA                 | NA                            | NA                 |
| Kabuli_wild_2870579 | NA                                  | Ca_kabuli_denovo | 2870579                 | T/C  | NA                 | NA                            | NA                 |
| Kabuli_wild_2870624 | NA                                  | Ca_kabuli_denovo | 2870624                 | C/T  | NA                 | NA                            | NA                 |
| Kabuli_wild_2871055 | NA                                  | Ca_kabuli_denovo | 2871055                 | C/A  | NA                 | NA                            | NA                 |
| Kabuli_wild_2871123 | NA                                  | Ca_kabuli_denovo | 2871123                 | T/C  | NA                 | NA                            | NA                 |
| Kabuli_wild_2871195 | NA                                  | Ca_kabuli_denovo | 2871195                 | C/A  | NA                 | NA                            | NA                 |
| Kabuli_wild_2871270 | NA                                  | Ca_kabuli_denovo | 2871270                 | C/T  | NA                 | NA                            | NA                 |
| Kabuli_wild_2873097 | NA                                  | Ca_kabuli_denovo | 2873097                 | C/T  | NA                 | NA                            | NA                 |
| Kabuli_wild_2873118 | NA                                  | Ca_kabuli_denovo | 2873118                 | C/G  | NA                 | NA                            | NA                 |
| Kabuli_wild_2873140 | NA                                  | Ca_kabuli_denovo | 2873140                 | C/T  | NA                 | NA                            | NA                 |
| Kabuli_wild_2873188 | NA                                  | Ca_kabuli_denovo | 2873188                 | A/T  | NA                 | NA                            | NA                 |
| Kabuli_wild_2873231 | NA                                  | Ca_kabuli_denovo | 2873231                 | A/G  | NA                 | NA                            | NA                 |
| Kabuli_wild_2875232 | NA                                  | Ca_kabuli_denovo | 2875232                 | C/T  | NA                 | NA                            | NA                 |
| Kabuli_wild_2875416 | NA                                  | Ca_kabuli_denovo | 2875416                 | G/C  | NA                 | NA                            | NA                 |
| Kabuli_wild_2875876 | NA                                  | Ca_kabuli_denovo | 2875876                 | C/A  | NA                 | NA                            | NA                 |
| Kabuli_wild_2878041 | NA                                  | Ca_kabuli_denovo | 2878041                 | C/G  | NA                 | NA                            | NA                 |
| Kabuli_wild_2878045 | NA                                  | Ca_kabuli_denovo | 2878045                 | T/C  | NA                 | NA                            | NA                 |
| Kabuli_wild_2878434 | NA                                  | Ca_kabuli_denovo | 2878434                 | T/G  | NA                 | NA                            | NA                 |
| Kabuli_wild_2878494 | NA                                  | Ca_kabuli_denovo | 2878494                 | C/G  | NA                 | NA                            | NA                 |
| Kabuli_wild_2880539 | NA                                  | Ca_kabuli_denovo | 2880539                 | T/G  | NA                 | NA                            | NA                 |

| SNP IDs             | NCBI dbSNP accession IDs (NCBI_SS#) | Chromosomes      | Physical positions (bp) | SNPs | Gene accession IDs | Sequence components of genome | Putative functions |
|---------------------|-------------------------------------|------------------|-------------------------|------|--------------------|-------------------------------|--------------------|
| Kabuli_wild_2881576 | NA                                  | Ca_kabuli_denovo | 2881576                 | T/C  | NA                 | NA                            | NA                 |
| Kabuli_wild_2881600 | NA                                  | Ca_kabuli_denovo | 2881600                 | T/G  | NA                 | NA                            | NA                 |
| Kabuli_wild_2882731 | NA                                  | Ca_kabuli_denovo | 2882731                 | T/G  | NA                 | NA                            | NA                 |
| Kabuli_wild_2883292 | NA                                  | Ca_kabuli_denovo | 2883292                 | C/T  | NA                 | NA                            | NA                 |
| Kabuli_wild_2883667 | NA                                  | Ca_kabuli_denovo | 2883667                 | G/A  | NA                 | NA                            | NA                 |
| Kabuli_wild_2883919 | NA                                  | Ca_kabuli_denovo | 2883919                 | G/A  | NA                 | NA                            | NA                 |
| Kabuli_wild_2883925 | NA                                  | Ca_kabuli_denovo | 2883925                 | A/C  | NA                 | NA                            | NA                 |
| Kabuli_wild_2885673 | NA                                  | Ca_kabuli_denovo | 2885673                 | T/C  | NA                 | NA                            | NA                 |
| Kabuli_wild_2885716 | NA                                  | Ca_kabuli_denovo | 2885716                 | C/G  | NA                 | NA                            | NA                 |
| Kabuli_wild_2886184 | NA                                  | Ca_kabuli_denovo | 2886184                 | G/C  | NA                 | NA                            | NA                 |
| Kabuli_wild_2886226 | NA                                  | Ca_kabuli_denovo | 2886226                 | G/C  | NA                 | NA                            | NA                 |
| Kabuli_wild_2887255 | NA                                  | Ca_kabuli_denovo | 2887255                 | G/T  | NA                 | NA                            | NA                 |
| Kabuli_wild_2887256 | NA                                  | Ca_kabuli_denovo | 2887256                 | G/T  | NA                 | NA                            | NA                 |
| Kabuli_wild_2888044 | NA                                  | Ca_kabuli_denovo | 2888044                 | G/A  | NA                 | NA                            | NA                 |
| Kabuli_wild_2888065 | NA                                  | Ca_kabuli_denovo | 2888065                 | C/T  | NA                 | NA                            | NA                 |
| Kabuli_wild_2888348 | NA                                  | Ca_kabuli_denovo | 2888348                 | A/C  | NA                 | NA                            | NA                 |
| Kabuli_wild_2888462 | NA                                  | Ca_kabuli_denovo | 2888462                 | C/T  | NA                 | NA                            | NA                 |
| Kabuli_wild_2888495 | NA                                  | Ca_kabuli_denovo | 2888495                 | A/G  | NA                 | NA                            | NA                 |
| Kabuli_wild_2889941 | NA                                  | Ca_kabuli_denovo | 2889941                 | T/C  | NA                 | NA                            | NA                 |
| Kabuli_wild_2889954 | NA                                  | Ca_kabuli_denovo | 2889954                 | C/G  | NA                 | NA                            | NA                 |
| Kabuli_wild_2890128 | NA                                  | Ca_kabuli_denovo | 2890128                 | G/C  | NA                 | NA                            | NA                 |
| Kabuli_wild_2890624 | NA                                  | Ca_kabuli_denovo | 2890624                 | T/G  | NA                 | NA                            | NA                 |
| Kabuli_wild_2890864 | NA                                  | Ca_kabuli_denovo | 2890864                 | T/G  | NA                 | NA                            | NA                 |
| Kabuli_wild_2892159 | NA                                  | Ca_kabuli_denovo | 2892159                 | A/G  | NA                 | NA                            | NA                 |
| Kabuli_wild_2892674 | NA                                  | Ca_kabuli_denovo | 2892674                 | A/C  | NA                 | NA                            | NA                 |
| Kabuli_wild_2892767 | NA                                  | Ca_kabuli_denovo | 2892767                 | T/G  | NA                 | NA                            | NA                 |
| Kabuli_wild_2893654 | NA                                  | Ca_kabuli_denovo | 2893654                 | G/A  | NA                 | NA                            | NA                 |
| Kabuli_wild_2893674 | NA                                  | Ca_kabuli_denovo | 2893674                 | G/C  | NA                 | NA                            | NA                 |
| Kabuli_wild_2896574 | NA                                  | Ca_kabuli_denovo | 2896574                 | G/T  | NA                 | NA                            | NA                 |
| Kabuli_wild_2896579 | NA                                  | Ca_kabuli_denovo | 2896579                 | A/T  | NA                 | NA                            | NA                 |
| Kabuli_wild_2896665 | NA                                  | Ca_kabuli_denovo | 2896665                 | C/A  | NA                 | NA                            | NA                 |
| Kabuli_wild_2897835 | NA                                  | Ca_kabuli_denovo | 2897835                 | C/G  | NA                 | NA                            | NA                 |
| Kabuli_wild_2897847 | NA                                  | Ca_kabuli_denovo | 2897847                 | G/C  | NA                 | NA                            | NA                 |
| Kabuli_wild_2898592 | NA                                  | Ca_kabuli_denovo | 2898592                 | T/G  | NA                 | NA                            | NA                 |
| Kabuli_wild_2898988 | NA                                  | Ca_kabuli_denovo | 2898988                 | A/C  | NA                 | NA                            | NA                 |
| Kabuli_wild_2898990 | NA                                  | Ca_kabuli_denovo | 2898990                 | T/C  | NA                 | NA                            | NA                 |
| Kabuli_wild_2899581 | NA                                  | Ca_kabuli_denovo | 2899581                 | T/G  | NA                 | NA                            | NA                 |
| Kabuli_wild_2899591 | NA                                  | Ca_kabuli_denovo | 2899591                 | A/G  | NA                 | NA                            | NA                 |
| Kabuli_wild_2900255 | NA                                  | Ca_kabuli_denovo | 2900255                 | T/C  | NA                 | NA                            | NA                 |
| Kabuli_wild_2901339 | NA                                  | Ca_kabuli_denovo | 2901339                 | C/G  | NA                 | NA                            | NA                 |
| Kabuli_wild_2901351 | NA                                  | Ca_kabuli_denovo | 2901351                 | C/T  | NA                 | NA                            | NA                 |
| Kabuli_wild_2901522 | NA                                  | Ca_kabuli_denovo | 2901522                 | C/T  | NA                 | NA                            | NA                 |
| Kabuli_wild_2901728 | NA                                  | Ca_kabuli_denovo | 2901728                 | T/C  | NA                 | NA                            | NA                 |
| Kabuli_wild_2901736 | NA                                  | Ca_kabuli_denovo | 2901736                 | G/A  | NA                 | NA                            | NA                 |

| SNP IDs             | NCBI dbSNP accession IDs (NCBI_SS#) | Chromosomes      | Physical positions (bp) | SNPs | Gene accession IDs | Sequence components of genome | Putative functions |
|---------------------|-------------------------------------|------------------|-------------------------|------|--------------------|-------------------------------|--------------------|
| Kabuli_wild_2903400 | NA                                  | Ca_kabuli_denovo | 2903400                 | A/G  | NA                 | NA                            | NA                 |
| Kabuli_wild_2903430 | NA                                  | Ca_kabuli_denovo | 2903430                 | T/C  | NA                 | NA                            | NA                 |
| Kabuli_wild_2903848 | NA                                  | Ca_kabuli_denovo | 2903848                 | A/G  | NA                 | NA                            | NA                 |
| Kabuli_wild_2904021 | NA                                  | Ca_kabuli_denovo | 2904021                 | T/G  | NA                 | NA                            | NA                 |
| Kabuli_wild_2904426 | NA                                  | Ca_kabuli_denovo | 2904426                 | C/T  | NA                 | NA                            | NA                 |
| Kabuli_wild_2904446 | NA                                  | Ca_kabuli_denovo | 2904446                 | C/T  | NA                 | NA                            | NA                 |
| Kabuli_wild_2905014 | NA                                  | Ca_kabuli_denovo | 2905014                 | C/T  | NA                 | NA                            | NA                 |
| Kabuli_wild_2905038 | NA                                  | Ca_kabuli_denovo | 2905038                 | G/C  | NA                 | NA                            | NA                 |
| Kabuli_wild_2905668 | NA                                  | Ca_kabuli_denovo | 2905668                 | A/C  | NA                 | NA                            | NA                 |
| Kabuli_wild_2906929 | NA                                  | Ca_kabuli_denovo | 2906929                 | G/C  | NA                 | NA                            | NA                 |
| Kabuli_wild_2907761 | NA                                  | Ca_kabuli_denovo | 2907761                 | T/G  | NA                 | NA                            | NA                 |
| Kabuli_wild_2907959 | NA                                  | Ca_kabuli_denovo | 2907959                 | C/G  | NA                 | NA                            | NA                 |
| Kabuli_wild_2908885 | NA                                  | Ca_kabuli_denovo | 2908885                 | T/C  | NA                 | NA                            | NA                 |
| Kabuli_wild_2908904 | NA                                  | Ca_kabuli_denovo | 2908904                 | G/A  | NA                 | NA                            | NA                 |
| Kabuli_wild_2908979 | NA                                  | Ca_kabuli_denovo | 2908979                 | C/T  | NA                 | NA                            | NA                 |
| Kabuli_wild_2909057 | NA                                  | Ca_kabuli_denovo | 2909057                 | C/T  | NA                 | NA                            | NA                 |
| Kabuli_wild_2909576 | NA                                  | Ca_kabuli_denovo | 2909576                 | T/C  | NA                 | NA                            | NA                 |
| Kabuli_wild_2909580 | NA                                  | Ca_kabuli_denovo | 2909580                 | G/A  | NA                 | NA                            | NA                 |
| Kabuli_wild_2909771 | NA                                  | Ca_kabuli_denovo | 2909771                 | C/T  | NA                 | NA                            | NA                 |
| Kabuli_wild_2909776 | NA                                  | Ca_kabuli_denovo | 2909776                 | C/A  | NA                 | NA                            | NA                 |
| Kabuli_wild_2909968 | NA                                  | Ca_kabuli_denovo | 2909968                 | T/G  | NA                 | NA                            | NA                 |
| Kabuli_wild_2909979 | NA                                  | Ca_kabuli_denovo | 2909979                 | G/C  | NA                 | NA                            | NA                 |
| Kabuli_wild_2910080 | NA                                  | Ca_kabuli_denovo | 2910080                 | C/T  | NA                 | NA                            | NA                 |
| Kabuli_wild_2910169 | NA                                  | Ca_kabuli_denovo | 2910169                 | C/A  | NA                 | NA                            | NA                 |
| Kabuli_wild_2910215 | NA                                  | Ca_kabuli_denovo | 2910215                 | G/C  | NA                 | NA                            | NA                 |
| Kabuli_wild_2910734 | NA                                  | Ca_kabuli_denovo | 2910734                 | G/C  | NA                 | NA                            | NA                 |
| Kabuli_wild_2910860 | NA                                  | Ca_kabuli_denovo | 2910860                 | C/G  | NA                 | NA                            | NA                 |
| Kabuli_wild_2910908 | NA                                  | Ca_kabuli_denovo | 2910908                 | C/T  | NA                 | NA                            | NA                 |
| Kabuli_wild_2911312 | NA                                  | Ca_kabuli_denovo | 2911312                 | T/C  | NA                 | NA                            | NA                 |
| Kabuli_wild_2912482 | NA                                  | Ca_kabuli_denovo | 2912482                 | A/G  | NA                 | NA                            | NA                 |
| Kabuli_wild_2912501 | NA                                  | Ca_kabuli_denovo | 2912501                 | G/T  | NA                 | NA                            | NA                 |
| Kabuli_wild_2912583 | NA                                  | Ca_kabuli_denovo | 2912583                 | T/C  | NA                 | NA                            | NA                 |
| Kabuli_wild_2912585 | NA                                  | Ca_kabuli_denovo | 2912585                 | G/C  | NA                 | NA                            | NA                 |
| Kabuli_wild_2913240 | NA                                  | Ca_kabuli_denovo | 2913240                 | G/T  | NA                 | NA                            | NA                 |
| Kabuli_wild_2914052 | NA                                  | Ca_kabuli_denovo | 2914052                 | T/G  | NA                 | NA                            | NA                 |
| Kabuli_wild_2915581 | NA                                  | Ca_kabuli_denovo | 2915581                 | G/A  | NA                 | NA                            | NA                 |
| Kabuli_wild_2915590 | NA                                  | Ca_kabuli_denovo | 2915590                 | T/C  | NA                 | NA                            | NA                 |
| Kabuli_wild_2916292 | NA                                  | Ca_kabuli_denovo | 2916292                 | G/A  | NA                 | NA                            | NA                 |
| Kabuli_wild_2916295 | NA                                  | Ca_kabuli_denovo | 2916295                 | C/G  | NA                 | NA                            | NA                 |
| Kabuli_wild_2916469 | NA                                  | Ca_kabuli_denovo | 2916469                 | G/A  | NA                 | NA                            | NA                 |
| Kabuli_wild_2917228 | NA                                  | Ca_kabuli_denovo | 2917228                 | C/A  | NA                 | NA                            | NA                 |
| Kabuli_wild_2917240 | NA                                  | Ca_kabuli_denovo | 2917240                 | G/C  | NA                 | NA                            | NA                 |
| Kabuli_wild_2917439 | NA                                  | Ca_kabuli_denovo | 2917439                 | G/C  | NA                 | NA                            | NA                 |
| Kabuli_wild_2917530 | NA                                  | Ca_kabuli_denovo | 2917530                 | T/C  | NA                 | NA                            | NA                 |

| SNP IDs             | NCBI dbSNP accession IDs (NCBI_SS#) | Chromosomes      | Physical positions (bp) | SNPs | Gene accession IDs | Sequence components of genome | Putative functions |
|---------------------|-------------------------------------|------------------|-------------------------|------|--------------------|-------------------------------|--------------------|
| Kabuli_wild_2918003 | NA                                  | Ca_kabuli_denovo | 2918003                 | A/G  | NA                 | NA                            | NA                 |
| Kabuli_wild_2918065 | NA                                  | Ca_kabuli_denovo | 2918065                 | C/T  | NA                 | NA                            | NA                 |
| Kabuli_wild_2918238 | NA                                  | Ca_kabuli_denovo | 2918238                 | A/G  | NA                 | NA                            | NA                 |
| Kabuli_wild_2918494 | NA                                  | Ca_kabuli_denovo | 2918494                 | T/C  | NA                 | NA                            | NA                 |
| Kabuli_wild_2918786 | NA                                  | Ca_kabuli_denovo | 2918786                 | C/T  | NA                 | NA                            | NA                 |
| Kabuli_wild_2918789 | NA                                  | Ca_kabuli_denovo | 2918789                 | C/T  | NA                 | NA                            | NA                 |
| Kabuli_wild_2918993 | NA                                  | Ca_kabuli_denovo | 2918993                 | C/T  | NA                 | NA                            | NA                 |
| Kabuli_wild_2919023 | NA                                  | Ca_kabuli_denovo | 2919023                 | T/C  | NA                 | NA                            | NA                 |
| Kabuli_wild_2921985 | NA                                  | Ca_kabuli_denovo | 2921985                 | G/A  | NA                 | NA                            | NA                 |
| Kabuli_wild_2923896 | NA                                  | Ca_kabuli_denovo | 2923896                 | A/G  | NA                 | NA                            | NA                 |
| Kabuli_wild_2923905 | NA                                  | Ca_kabuli_denovo | 2923905                 | A/G  | NA                 | NA                            | NA                 |
| Kabuli_wild_2923953 | NA                                  | Ca_kabuli_denovo | 2923953                 | G/A  | NA                 | NA                            | NA                 |
| Kabuli_wild_2924208 | NA                                  | Ca_kabuli_denovo | 2924208                 | A/C  | NA                 | NA                            | NA                 |
| Kabuli_wild_2924822 | NA                                  | Ca_kabuli_denovo | 2924822                 | T/G  | NA                 | NA                            | NA                 |
| Kabuli_wild_2924875 | NA                                  | Ca_kabuli_denovo | 2924875                 | T/C  | NA                 | NA                            | NA                 |
| Kabuli_wild_2926067 | NA                                  | Ca_kabuli_denovo | 2926067                 | A/G  | NA                 | NA                            | NA                 |
| Kabuli_wild_2926163 | NA                                  | Ca_kabuli_denovo | 2926163                 | C/T  | NA                 | NA                            | NA                 |
| Kabuli_wild_2926270 | NA                                  | Ca_kabuli_denovo | 2926270                 | G/A  | NA                 | NA                            | NA                 |
| Kabuli_wild_2926279 | NA                                  | Ca_kabuli_denovo | 2926279                 | C/T  | NA                 | NA                            | NA                 |
| Kabuli_wild_2927037 | NA                                  | Ca_kabuli_denovo | 2927037                 | C/G  | NA                 | NA                            | NA                 |
| Kabuli_wild_2927271 | NA                                  | Ca_kabuli_denovo | 2927271                 | C/T  | NA                 | NA                            | NA                 |
| Kabuli_wild_2927391 | NA                                  | Ca_kabuli_denovo | 2927391                 | C/T  | NA                 | NA                            | NA                 |
| Kabuli_wild_2928386 | NA                                  | Ca_kabuli_denovo | 2928386                 | C/G  | NA                 | NA                            | NA                 |
| Kabuli_wild_2929655 | NA                                  | Ca_kabuli_denovo | 2929655                 | A/G  | NA                 | NA                            | NA                 |
| Kabuli_wild_2929688 | NA                                  | Ca_kabuli_denovo | 2929688                 | G/C  | NA                 | NA                            | NA                 |
| Kabuli_wild_2930562 | NA                                  | Ca_kabuli_denovo | 2930562                 | C/T  | NA                 | NA                            | NA                 |
| Kabuli_wild_2930780 | NA                                  | Ca_kabuli_denovo | 2930780                 | C/G  | NA                 | NA                            | NA                 |
| Kabuli_wild_2930781 | NA                                  | Ca_kabuli_denovo | 2930781                 | A/G  | NA                 | NA                            | NA                 |
| Kabuli_wild_2930782 | NA                                  | Ca_kabuli_denovo | 2930782                 | G/A  | NA                 | NA                            | NA                 |
| Kabuli_wild_2930941 | NA                                  | Ca_kabuli_denovo | 2930941                 | G/C  | NA                 | NA                            | NA                 |
| Kabuli_wild_2931031 | NA                                  | Ca_kabuli_denovo | 2931031                 | C/T  | NA                 | NA                            | NA                 |
| Kabuli_wild_2931378 | NA                                  | Ca_kabuli_denovo | 2931378                 | T/G  | NA                 | NA                            | NA                 |
| Kabuli_wild_2931516 | NA                                  | Ca_kabuli_denovo | 2931516                 | C/T  | NA                 | NA                            | NA                 |
| Kabuli_wild_2931566 | NA                                  | Ca_kabuli_denovo | 2931566                 | C/A  | NA                 | NA                            | NA                 |
| Kabuli_wild_2933348 | NA                                  | Ca_kabuli_denovo | 2933348                 | C/G  | NA                 | NA                            | NA                 |
| Kabuli_wild_2933412 | NA                                  | Ca_kabuli_denovo | 2933412                 | T/A  | NA                 | NA                            | NA                 |
| Kabuli_wild_2933646 | NA                                  | Ca_kabuli_denovo | 2933646                 | A/G  | NA                 | NA                            | NA                 |
| Kabuli_wild_2934232 | NA                                  | Ca_kabuli_denovo | 2934232                 | C/A  | NA                 | NA                            | NA                 |
| Kabuli_wild_2934235 | NA                                  | Ca_kabuli_denovo | 2934235                 | C/G  | NA                 | NA                            | NA                 |
| Kabuli_wild_2934711 | NA                                  | Ca_kabuli_denovo | 2934711                 | A/G  | NA                 | NA                            | NA                 |
| Kabuli_wild_2935788 | NA                                  | Ca_kabuli_denovo | 2935788                 | G/A  | NA                 | NA                            | NA                 |
| Kabuli_wild_2936417 | NA                                  | Ca_kabuli_denovo | 2936417                 | C/G  | NA                 | NA                            | NA                 |
| Kabuli_wild_2936865 | NA                                  | Ca_kabuli_denovo | 2936865                 | T/C  | NA                 | NA                            | NA                 |
| Kabuli_wild_2936895 | NA                                  | Ca_kabuli_denovo | 2936895                 | G/C  | NA                 | NA                            | NA                 |

| SNP IDs             | NCBI dbSNP accession IDs (NCBI_SS#) | Chromosomes      | Physical positions (bp) | SNPs | Gene accession IDs | Sequence components of genome | Putative functions |
|---------------------|-------------------------------------|------------------|-------------------------|------|--------------------|-------------------------------|--------------------|
| Kabuli_wild_2936934 | NA                                  | Ca_kabuli_denovo | 2936934                 | A/G  | NA                 | NA                            | NA                 |
| Kabuli_wild_2937556 | NA                                  | Ca_kabuli_denovo | 2937556                 | A/G  | NA                 | NA                            | NA                 |
| Kabuli_wild_2937580 | NA                                  | Ca_kabuli_denovo | 2937580                 | C/T  | NA                 | NA                            | NA                 |
| Kabuli_wild_2937863 | NA                                  | Ca_kabuli_denovo | 2937863                 | A/G  | NA                 | NA                            | NA                 |
| Kabuli_wild_2939162 | NA                                  | Ca_kabuli_denovo | 2939162                 | G/T  | NA                 | NA                            | NA                 |
| Kabuli_wild_2939527 | NA                                  | Ca_kabuli_denovo | 2939527                 | A/T  | NA                 | NA                            | NA                 |
| Kabuli_wild_2940334 | NA                                  | Ca_kabuli_denovo | 2940334                 | C/T  | NA                 | NA                            | NA                 |
| Kabuli_wild_2941499 | NA                                  | Ca_kabuli_denovo | 2941499                 | A/G  | NA                 | NA                            | NA                 |
| Kabuli_wild_2942455 | NA                                  | Ca_kabuli_denovo | 2942455                 | C/T  | NA                 | NA                            | NA                 |
| Kabuli_wild_2943617 | NA                                  | Ca_kabuli_denovo | 2943617                 | T/C  | NA                 | NA                            | NA                 |
| Kabuli_wild_2943677 | NA                                  | Ca_kabuli_denovo | 2943677                 | C/A  | NA                 | NA                            | NA                 |
| Kabuli_wild_2943995 | NA                                  | Ca_kabuli_denovo | 2943995                 | G/A  | NA                 | NA                            | NA                 |
| Kabuli_wild_2944394 | NA                                  | Ca_kabuli_denovo | 2944394                 | C/G  | NA                 | NA                            | NA                 |
| Kabuli_wild_2944499 | NA                                  | Ca_kabuli_denovo | 2944499                 | G/A  | NA                 | NA                            | NA                 |
| Kabuli_wild_2945901 | NA                                  | Ca_kabuli_denovo | 2945901                 | T/G  | NA                 | NA                            | NA                 |
| Kabuli_wild_2946323 | NA                                  | Ca_kabuli_denovo | 2946323                 | G/T  | NA                 | NA                            | NA                 |
| Kabuli_wild_2946681 | NA                                  | Ca_kabuli_denovo | 2946681                 | C/T  | NA                 | NA                            | NA                 |
| Kabuli_wild_2946692 | NA                                  | Ca_kabuli_denovo | 2946692                 | T/C  | NA                 | NA                            | NA                 |
| Kabuli_wild_2946914 | NA                                  | Ca_kabuli_denovo | 2946914                 | G/A  | NA                 | NA                            | NA                 |
| Kabuli_wild_2948141 | NA                                  | Ca_kabuli_denovo | 2948141                 | A/G  | NA                 | NA                            | NA                 |
| Kabuli_wild_2948652 | NA                                  | Ca_kabuli_denovo | 2948652                 | G/A  | NA                 | NA                            | NA                 |
| Kabuli_wild_2949346 | NA                                  | Ca_kabuli_denovo | 2949346                 | T/C  | NA                 | NA                            | NA                 |
| Kabuli_wild_2949374 | NA                                  | Ca_kabuli_denovo | 2949374                 | G/A  | NA                 | NA                            | NA                 |
| Kabuli_wild_2949922 | NA                                  | Ca_kabuli_denovo | 2949922                 | A/C  | NA                 | NA                            | NA                 |
| Kabuli_wild_2950152 | NA                                  | Ca_kabuli_denovo | 2950152                 | C/G  | NA                 | NA                            | NA                 |
| Kabuli_wild_2950886 | NA                                  | Ca_kabuli_denovo | 2950886                 | C/T  | NA                 | NA                            | NA                 |
| Kabuli_wild_2950989 | NA                                  | Ca_kabuli_denovo | 2950989                 | G/A  | NA                 | NA                            | NA                 |
| Kabuli_wild_2951401 | NA                                  | Ca_kabuli_denovo | 2951401                 | C/T  | NA                 | NA                            | NA                 |
| Kabuli_wild_2951861 | NA                                  | Ca_kabuli_denovo | 2951861                 | A/G  | NA                 | NA                            | NA                 |
| Kabuli_wild_2952064 | NA                                  | Ca_kabuli_denovo | 2952064                 | A/G  | NA                 | NA                            | NA                 |
| Kabuli_wild_2952748 | NA                                  | Ca_kabuli_denovo | 2952748                 | G/A  | NA                 | NA                            | NA                 |
| Kabuli_wild_2952767 | NA                                  | Ca_kabuli_denovo | 2952767                 | C/T  | NA                 | NA                            | NA                 |
| Kabuli_wild_2953470 | NA                                  | Ca_kabuli_denovo | 2953470                 | C/T  | NA                 | NA                            | NA                 |
| Kabuli_wild_2955149 | NA                                  | Ca_kabuli_denovo | 2955149                 | C/T  | NA                 | NA                            | NA                 |
| Kabuli_wild_2956351 | NA                                  | Ca_kabuli_denovo | 2956351                 | T/C  | NA                 | NA                            | NA                 |
| Kabuli_wild_2956419 | NA                                  | Ca_kabuli_denovo | 2956419                 | C/G  | NA                 | NA                            | NA                 |
| Kabuli_wild_2956451 | NA                                  | Ca_kabuli_denovo | 2956451                 | T/C  | NA                 | NA                            | NA                 |
| Kabuli_wild_2956711 | NA                                  | Ca_kabuli_denovo | 2956711                 | A/G  | NA                 | NA                            | NA                 |
| Kabuli_wild_2958283 | NA                                  | Ca_kabuli_denovo | 2958283                 | G/C  | NA                 | NA                            | NA                 |
| Kabuli_wild_2958719 | NA                                  | Ca_kabuli_denovo | 2958719                 | T/C  | NA                 | NA                            | NA                 |
| Kabuli_wild_2959062 | NA                                  | Ca_kabuli_denovo | 2959062                 | G/C  | NA                 | NA                            | NA                 |
| Kabuli_wild_2959242 | NA                                  | Ca_kabuli_denovo | 2959242                 | G/C  | NA                 | NA                            | NA                 |
| Kabuli_wild_2959311 | NA                                  | Ca_kabuli_denovo | 2959311                 | G/T  | NA                 | NA                            | NA                 |
| Kabuli_wild_2959410 | NA                                  | Ca_kabuli_denovo | 2959410                 | A/T  | NA                 | NA                            | NA                 |

| SNP IDs             | NCBI dbSNP accession IDs (NCBI_SS#) | Chromosomes      | Physical positions (bp) | SNPs | Gene accession IDs | Sequence components of genome | Putative functions |
|---------------------|-------------------------------------|------------------|-------------------------|------|--------------------|-------------------------------|--------------------|
| Kabuli_wild_2959442 | NA                                  | Ca_kabuli_denovo | 2959442                 | C/T  | NA                 | NA                            | NA                 |
| Kabuli_wild_2959498 | NA                                  | Ca_kabuli_denovo | 2959498                 | G/A  | NA                 | NA                            | NA                 |
| Kabuli_wild_2960178 | NA                                  | Ca_kabuli_denovo | 2960178                 | C/T  | NA                 | NA                            | NA                 |
| Kabuli_wild_2960549 | NA                                  | Ca_kabuli_denovo | 2960549                 | C/T  | NA                 | NA                            | NA                 |
| Kabuli_wild_2961527 | NA                                  | Ca_kabuli_denovo | 2961527                 | G/C  | NA                 | NA                            | NA                 |
| Kabuli_wild_2962232 | NA                                  | Ca_kabuli_denovo | 2962232                 | G/A  | NA                 | NA                            | NA                 |
| Kabuli_wild_2962311 | NA                                  | Ca_kabuli_denovo | 2962311                 | C/G  | NA                 | NA                            | NA                 |
| Kabuli_wild_2962986 | NA                                  | Ca_kabuli_denovo | 2962986                 | G/A  | NA                 | NA                            | NA                 |
| Kabuli_wild_2964257 | NA                                  | Ca_kabuli_denovo | 2964257                 | A/C  | NA                 | NA                            | NA                 |
| Kabuli_wild_2964258 | NA                                  | Ca_kabuli_denovo | 2964258                 | G/A  | NA                 | NA                            | NA                 |
| Kabuli_wild_2964756 | NA                                  | Ca_kabuli_denovo | 2964756                 | G/A  | NA                 | NA                            | NA                 |
| Kabuli_wild_2964762 | NA                                  | Ca_kabuli_denovo | 2964762                 | A/T  | NA                 | NA                            | NA                 |
| Kabuli_wild_2966516 | NA                                  | Ca_kabuli_denovo | 2966516                 | C/T  | NA                 | NA                            | NA                 |
| Kabuli_wild_2966795 | NA                                  | Ca_kabuli_denovo | 2966795                 | C/T  | NA                 | NA                            | NA                 |
| Kabuli_wild_2966834 | NA                                  | Ca_kabuli_denovo | 2966834                 | A/G  | NA                 | NA                            | NA                 |
| Kabuli_wild_2967233 | NA                                  | Ca_kabuli_denovo | 2967233                 | A/G  | NA                 | NA                            | NA                 |
| Kabuli_wild_2967474 | NA                                  | Ca_kabuli_denovo | 2967474                 | C/T  | NA                 | NA                            | NA                 |
| Kabuli_wild_2967492 | NA                                  | Ca_kabuli_denovo | 2967492                 | G/A  | NA                 | NA                            | NA                 |
| Kabuli_wild_2967608 | NA                                  | Ca_kabuli_denovo | 2967608                 | A/T  | NA                 | NA                            | NA                 |
| Kabuli_wild_2967780 | NA                                  | Ca_kabuli_denovo | 2967780                 | G/C  | NA                 | NA                            | NA                 |
| Kabuli_wild_2967810 | NA                                  | Ca_kabuli_denovo | 2967810                 | A/C  | NA                 | NA                            | NA                 |
| Kabuli_wild_2969807 | NA                                  | Ca_kabuli_denovo | 2969807                 | G/A  | NA                 | NA                            | NA                 |
| Kabuli_wild_2969828 | NA                                  | Ca_kabuli_denovo | 2969828                 | T/C  | NA                 | NA                            | NA                 |
| Kabuli_wild_2971189 | NA                                  | Ca_kabuli_denovo | 2971189                 | G/C  | NA                 | NA                            | NA                 |
| Kabuli_wild_2972937 | NA                                  | Ca_kabuli_denovo | 2972937                 | G/A  | NA                 | NA                            | NA                 |
| Kabuli_wild_2972946 | NA                                  | Ca_kabuli_denovo | 2972946                 | C/A  | NA                 | NA                            | NA                 |
| Kabuli_wild_2973028 | NA                                  | Ca_kabuli_denovo | 2973028                 | T/G  | NA                 | NA                            | NA                 |
| Kabuli_wild_2973071 | NA                                  | Ca_kabuli_denovo | 2973071                 | A/G  | NA                 | NA                            | NA                 |
| Kabuli_wild_2973307 | NA                                  | Ca_kabuli_denovo | 2973307                 | G/A  | NA                 | NA                            | NA                 |
| Kabuli_wild_2973388 | NA                                  | Ca_kabuli_denovo | 2973388                 | T/C  | NA                 | NA                            | NA                 |
| Kabuli_wild_2973425 | NA                                  | Ca_kabuli_denovo | 2973425                 | T/C  | NA                 | NA                            | NA                 |
| Kabuli_wild_2973534 | NA                                  | Ca_kabuli_denovo | 2973534                 | T/C  | NA                 | NA                            | NA                 |
| Kabuli_wild_2973537 | NA                                  | Ca_kabuli_denovo | 2973537                 | A/G  | NA                 | NA                            | NA                 |
| Kabuli_wild_2973999 | NA                                  | Ca_kabuli_denovo | 2973999                 | T/C  | NA                 | NA                            | NA                 |
| Kabuli_wild_2974038 | NA                                  | Ca_kabuli_denovo | 2974038                 | A/G  | NA                 | NA                            | NA                 |
| Kabuli_wild_2974217 | NA                                  | Ca_kabuli_denovo | 2974217                 | C/T  | NA                 | NA                            | NA                 |
| Kabuli_wild_2974231 | NA                                  | Ca_kabuli_denovo | 2974231                 | C/T  | NA                 | NA                            | NA                 |
| Kabuli_wild_2974379 | NA                                  | Ca_kabuli_denovo | 2974379                 | C/G  | NA                 | NA                            | NA                 |
| Kabuli_wild_2974396 | NA                                  | Ca_kabuli_denovo | 2974396                 | C/G  | NA                 | NA                            | NA                 |
| Kabuli_wild_2974890 | NA                                  | Ca_kabuli_denovo | 2974890                 | G/A  | NA                 | NA                            | NA                 |
| Kabuli_wild_2976977 | NA                                  | Ca_kabuli_denovo | 2976977                 | G/A  | NA                 | NA                            | NA                 |
| Kabuli_wild_2977010 | NA                                  | Ca_kabuli_denovo | 2977010                 | C/G  | NA                 | NA                            | NA                 |
| Kabuli_wild_2978927 | NA                                  | Ca_kabuli_denovo | 2978927                 | C/T  | NA                 | NA                            | NA                 |
| Kabuli_wild_2979618 | NA                                  | Ca_kabuli_denovo | 2979618                 | C/T  | NA                 | NA                            | NA                 |



| SNP IDs             | NCBI dbSNP accession IDs (NCBI_SS#) | Chromosomes      | Physical positions (bp) | SNPs | Gene accession IDs | Sequence components of genome | Putative functions |
|---------------------|-------------------------------------|------------------|-------------------------|------|--------------------|-------------------------------|--------------------|
| Kabuli_wild_2980774 | NA                                  | Ca_kabuli_denovo | 2980774                 | T/C  | NA                 | NA                            | NA                 |
| Kabuli_wild_2985055 | NA                                  | Ca_kabuli_denovo | 2985055                 | T/C  | NA                 | NA                            | NA                 |
| Kabuli_wild_2985242 | NA                                  | Ca_kabuli_denovo | 2985242                 | T/C  | NA                 | NA                            | NA                 |
| Kabuli_wild_2985337 | NA                                  | Ca_kabuli_denovo | 2985337                 | T/C  | NA                 | NA                            | NA                 |
| Kabuli_wild_2985355 | NA                                  | Ca_kabuli_denovo | 2985355                 | A/G  | NA                 | NA                            | NA                 |
| Kabuli_wild_2985514 | NA                                  | Ca_kabuli_denovo | 2985514                 | C/T  | NA                 | NA                            | NA                 |
| Kabuli_wild_2985517 | NA                                  | Ca_kabuli_denovo | 2985517                 | C/T  | NA                 | NA                            | NA                 |
| Kabuli_wild_2985660 | NA                                  | Ca_kabuli_denovo | 2985660                 | A/G  | NA                 | NA                            | NA                 |
| Kabuli_wild_2985672 | NA                                  | Ca_kabuli_denovo | 2985672                 | C/T  | NA                 | NA                            | NA                 |
| Kabuli_wild_2985678 | NA                                  | Ca_kabuli_denovo | 2985678                 | A/G  | NA                 | NA                            | NA                 |
| Kabuli_wild_2986096 | NA                                  | Ca_kabuli_denovo | 2986096                 | T/A  | NA                 | NA                            | NA                 |
| Kabuli_wild_2986821 | NA                                  | Ca_kabuli_denovo | 2986821                 | T/C  | NA                 | NA                            | NA                 |
| Kabuli_wild_2986845 | NA                                  | Ca_kabuli_denovo | 2986845                 | G/C  | NA                 | NA                            | NA                 |
| Kabuli_wild_2987454 | NA                                  | Ca_kabuli_denovo | 2987454                 | G/A  | NA                 | NA                            | NA                 |
| Kabuli_wild_2987510 | NA                                  | Ca_kabuli_denovo | 2987510                 | G/A  | NA                 | NA                            | NA                 |
| Kabuli_wild_2987645 | NA                                  | Ca_kabuli_denovo | 2987645                 | T/C  | NA                 | NA                            | NA                 |
| Kabuli_wild_2987987 | NA                                  | Ca_kabuli_denovo | 2987987                 | T/C  | NA                 | NA                            | NA                 |
| Kabuli_wild_2988003 | NA                                  | Ca_kabuli_denovo | 2988003                 | T/C  | NA                 | NA                            | NA                 |
| Kabuli_wild_2988429 | NA                                  | Ca_kabuli_denovo | 2988429                 | G/C  | NA                 | NA                            | NA                 |
| Kabuli_wild_2988475 | NA                                  | Ca_kabuli_denovo | 2988475                 | C/T  | NA                 | NA                            | NA                 |
| Kabuli_wild_2989973 | NA                                  | Ca_kabuli_denovo | 2989973                 | C/T  | NA                 | NA                            | NA                 |
| Kabuli_wild_2990434 | NA                                  | Ca_kabuli_denovo | 2990434                 | C/T  | NA                 | NA                            | NA                 |
| Kabuli_wild_2990444 | NA                                  | Ca_kabuli_denovo | 2990444                 | C/T  | NA                 | NA                            | NA                 |
| Kabuli_wild_2991695 | NA                                  | Ca_kabuli_denovo | 2991695                 | G/A  | NA                 | NA                            | NA                 |
| Kabuli_wild_2991802 | NA                                  | Ca_kabuli_denovo | 2991802                 | T/C  | NA                 | NA                            | NA                 |
| Kabuli_wild_2992905 | NA                                  | Ca_kabuli_denovo | 2992905                 | G/A  | NA                 | NA                            | NA                 |
| Kabuli_wild_2993065 | NA                                  | Ca_kabuli_denovo | 2993065                 | A/C  | NA                 | NA                            | NA                 |
| Kabuli_wild_2993650 | NA                                  | Ca_kabuli_denovo | 2993650                 | G/T  | NA                 | NA                            | NA                 |
| Kabuli_wild_2993772 | NA                                  | Ca_kabuli_denovo | 2993772                 | C/G  | NA                 | NA                            | NA                 |
| Kabuli_wild_2993778 | NA                                  | Ca_kabuli_denovo | 2993778                 | A/G  | NA                 | NA                            | NA                 |
| Kabuli_wild_2994144 | NA                                  | Ca_kabuli_denovo | 2994144                 | G/A  | NA                 | NA                            | NA                 |
| Kabuli_wild_2994806 | NA                                  | Ca_kabuli_denovo | 2994806                 | C/A  | NA                 | NA                            | NA                 |
| Kabuli_wild_2994830 | NA                                  | Ca_kabuli_denovo | 2994830                 | G/T  | NA                 | NA                            | NA                 |
| Kabuli_wild_2995730 | NA                                  | Ca_kabuli_denovo | 2995730                 | A/C  | NA                 | NA                            | NA                 |
| Kabuli_wild_2995738 | NA                                  | Ca_kabuli_denovo | 2995738                 | A/G  | NA                 | NA                            | NA                 |
| Kabuli_wild_2996133 | NA                                  | Ca_kabuli_denovo | 2996133                 | C/G  | NA                 | NA                            | NA                 |
| Kabuli_wild_2996139 | NA                                  | Ca_kabuli_denovo | 2996139                 | C/G  | NA                 | NA                            | NA                 |
| Kabuli_wild_2997548 | NA                                  | Ca_kabuli_denovo | 2997548                 | T/C  | NA                 | NA                            | NA                 |
| Kabuli_wild_2997733 | NA                                  | Ca_kabuli_denovo | 2997733                 | T/G  | NA                 | NA                            | NA                 |
| Kabuli_wild_2997739 | NA                                  | Ca_kabuli_denovo | 2997739                 | G/C  | NA                 | NA                            | NA                 |
| Kabuli_wild_2997947 | NA                                  | Ca_kabuli_denovo | 2997947                 | C/T  | NA                 | NA                            | NA                 |
| Kabuli_wild_2997957 | NA                                  | Ca_kabuli_denovo | 2997957                 | A/G  | NA                 | NA                            | NA                 |
| Kabuli_wild_2998525 | NA                                  | Ca_kabuli_denovo | 2998525                 | C/T  | NA                 | NA                            | NA                 |
| Kabuli_wild_2998900 | NA                                  | Ca_kabuli_denovo | 2998900                 | A/G  | NA                 | NA                            | NA                 |

| SNP IDs             | NCBI dbSNP accession IDs (NCBI_SS#) | Chromosomes      | Physical positions (bp) | SNPs | Gene accession IDs | Sequence components of genome | Putative functions |
|---------------------|-------------------------------------|------------------|-------------------------|------|--------------------|-------------------------------|--------------------|
| Kabuli_wild_2998973 | NA                                  | Ca_kabuli_denovo | 2998973                 | G/C  | NA                 | NA                            | NA                 |
| Kabuli_wild_2999133 | NA                                  | Ca_kabuli_denovo | 2999133                 | G/T  | NA                 | NA                            | NA                 |
| Kabuli_wild_2999397 | NA                                  | Ca_kabuli_denovo | 2999397                 | T/C  | NA                 | NA                            | NA                 |
| Kabuli_wild_2999427 | NA                                  | Ca_kabuli_denovo | 2999427                 | A/T  | NA                 | NA                            | NA                 |
| Kabuli_wild_2999575 | NA                                  | Ca_kabuli_denovo | 2999575                 | A/G  | NA                 | NA                            | NA                 |
| Kabuli_wild_2999608 | NA                                  | Ca_kabuli_denovo | 2999608                 | G/A  | NA                 | NA                            | NA                 |
| Kabuli_wild_3000180 | NA                                  | Ca_kabuli_denovo | 3000180                 | A/G  | NA                 | NA                            | NA                 |
| Kabuli_wild_3000417 | NA                                  | Ca_kabuli_denovo | 3000417                 | G/C  | NA                 | NA                            | NA                 |
| Kabuli_wild_3000958 | NA                                  | Ca_kabuli_denovo | 3000958                 | G/A  | NA                 | NA                            | NA                 |
| Kabuli_wild_3000985 | NA                                  | Ca_kabuli_denovo | 3000985                 | C/G  | NA                 | NA                            | NA                 |
| Kabuli_wild_3001712 | NA                                  | Ca_kabuli_denovo | 3001712                 | C/T  | NA                 | NA                            | NA                 |
| Kabuli_wild_3001914 | NA                                  | Ca_kabuli_denovo | 3001914                 | T/C  | NA                 | NA                            | NA                 |
| Kabuli_wild_3002429 | NA                                  | Ca_kabuli_denovo | 3002429                 | C/A  | NA                 | NA                            | NA                 |
| Kabuli_wild_3002474 | NA                                  | Ca_kabuli_denovo | 3002474                 | C/T  | NA                 | NA                            | NA                 |
| Kabuli_wild_3002996 | NA                                  | Ca_kabuli_denovo | 3002996                 | A/G  | NA                 | NA                            | NA                 |
| Kabuli_wild_3003023 | NA                                  | Ca_kabuli_denovo | 3003023                 | G/C  | NA                 | NA                            | NA                 |
| Kabuli_wild_3004260 | NA                                  | Ca_kabuli_denovo | 3004260                 | G/A  | NA                 | NA                            | NA                 |
| Kabuli_wild_3004426 | NA                                  | Ca_kabuli_denovo | 3004426                 | C/G  | NA                 | NA                            | NA                 |
| Kabuli_wild_3004429 | NA                                  | Ca_kabuli_denovo | 3004429                 | G/C  | NA                 | NA                            | NA                 |
| Kabuli_wild_3005641 | NA                                  | Ca_kabuli_denovo | 3005641                 | G/A  | NA                 | NA                            | NA                 |
| Kabuli_wild_3005990 | NA                                  | Ca_kabuli_denovo | 3005990                 | T/G  | NA                 | NA                            | NA                 |
| Kabuli_wild_3006021 | NA                                  | Ca_kabuli_denovo | 3006021                 | C/G  | NA                 | NA                            | NA                 |
| Kabuli_wild_3006580 | NA                                  | Ca_kabuli_denovo | 3006580                 | G/A  | NA                 | NA                            | NA                 |
| Kabuli_wild_3006643 | NA                                  | Ca_kabuli_denovo | 3006643                 | C/T  | NA                 | NA                            | NA                 |
| Kabuli_wild_3006994 | NA                                  | Ca_kabuli_denovo | 3006994                 | A/G  | NA                 | NA                            | NA                 |
| Kabuli_wild_3007006 | NA                                  | Ca_kabuli_denovo | 3007006                 | A/G  | NA                 | NA                            | NA                 |
| Kabuli_wild_3007732 | NA                                  | Ca_kabuli_denovo | 3007732                 | C/A  | NA                 | NA                            | NA                 |
| Kabuli_wild_3008947 | NA                                  | Ca_kabuli_denovo | 3008947                 | A/G  | NA                 | NA                            | NA                 |
| Kabuli_wild_3009664 | NA                                  | Ca_kabuli_denovo | 3009664                 | C/T  | NA                 | NA                            | NA                 |
| Kabuli_wild_3009682 | NA                                  | Ca_kabuli_denovo | 3009682                 | A/G  | NA                 | NA                            | NA                 |
| Kabuli_wild_3010256 | NA                                  | Ca_kabuli_denovo | 3010256                 | T/C  | NA                 | NA                            | NA                 |
| Kabuli_wild_3010264 | NA                                  | Ca_kabuli_denovo | 3010264                 | G/A  | NA                 | NA                            | NA                 |
| Kabuli_wild_3011334 | NA                                  | Ca_kabuli_denovo | 3011334                 | G/A  | NA                 | NA                            | NA                 |
| Kabuli_wild_3011361 | NA                                  | Ca_kabuli_denovo | 3011361                 | A/G  | NA                 | NA                            | NA                 |
| Kabuli_wild_3011522 | NA                                  | Ca_kabuli_denovo | 3011522                 | G/A  | NA                 | NA                            | NA                 |
| Kabuli_wild_3011546 | NA                                  | Ca_kabuli_denovo | 3011546                 | G/A  | NA                 | NA                            | NA                 |
| Kabuli_wild_3011577 | NA                                  | Ca_kabuli_denovo | 3011577                 | A/G  | NA                 | NA                            | NA                 |
| Kabuli_wild_3011578 | NA                                  | Ca_kabuli_denovo | 3011578                 | T/G  | NA                 | NA                            | NA                 |
| Kabuli_wild_3011758 | NA                                  | Ca_kabuli_denovo | 3011758                 | C/T  | NA                 | NA                            | NA                 |
| Kabuli_wild_3012587 | NA                                  | Ca_kabuli_denovo | 3012587                 | C/T  | NA                 | NA                            | NA                 |
| Kabuli_wild_3012865 | NA                                  | Ca_kabuli_denovo | 3012865                 | A/C  | NA                 | NA                            | NA                 |
| Kabuli_wild_3012912 | NA                                  | Ca_kabuli_denovo | 3012912                 | C/T  | NA                 | NA                            | NA                 |
| Kabuli_wild_3012915 | NA                                  | Ca_kabuli_denovo | 3012915                 | G/A  | NA                 | NA                            | NA                 |
| Kabuli_wild_3014245 | NA                                  | Ca_kabuli_denovo | 3014245                 | A/G  | NA                 | NA                            | NA                 |

| SNP IDs             | NCBI dbSNP accession IDs (NCBI_SS#) | Chromosomes      | Physical positions (bp) | SNPs | Gene accession IDs | Sequence components of genome | Putative functions |
|---------------------|-------------------------------------|------------------|-------------------------|------|--------------------|-------------------------------|--------------------|
| Kabuli_wild_3014248 | NA                                  | Ca_kabuli_denovo | 3014248                 | G/A  | NA                 | NA                            | NA                 |
| Kabuli_wild_3014701 | NA                                  | Ca_kabuli_denovo | 3014701                 | A/C  | NA                 | NA                            | NA                 |
| Kabuli_wild_3014988 | NA                                  | Ca_kabuli_denovo | 3014988                 | A/G  | NA                 | NA                            | NA                 |
| Kabuli_wild_3015255 | NA                                  | Ca_kabuli_denovo | 3015255                 | G/C  | NA                 | NA                            | NA                 |
| Kabuli_wild_3015393 | NA                                  | Ca_kabuli_denovo | 3015393                 | T/A  | NA                 | NA                            | NA                 |
| Kabuli_wild_3016641 | NA                                  | Ca_kabuli_denovo | 3016641                 | T/G  | NA                 | NA                            | NA                 |
| Kabuli_wild_3017342 | NA                                  | Ca_kabuli_denovo | 3017342                 | C/T  | NA                 | NA                            | NA                 |
| Kabuli_wild_3017957 | NA                                  | Ca_kabuli_denovo | 3017957                 | C/T  | NA                 | NA                            | NA                 |
| Kabuli_wild_3018596 | NA                                  | Ca_kabuli_denovo | 3018596                 | A/G  | NA                 | NA                            | NA                 |
| Kabuli_wild_3018799 | NA                                  | Ca_kabuli_denovo | 3018799                 | A/G  | NA                 | NA                            | NA                 |
| Kabuli_wild_3018955 | NA                                  | Ca_kabuli_denovo | 3018955                 | A/T  | NA                 | NA                            | NA                 |
| Kabuli_wild_3019634 | NA                                  | Ca_kabuli_denovo | 3019634                 | C/T  | NA                 | NA                            | NA                 |
| Kabuli_wild_3022001 | NA                                  | Ca_kabuli_denovo | 3022001                 | A/T  | NA                 | NA                            | NA                 |
| Kabuli_wild_3022024 | NA                                  | Ca_kabuli_denovo | 3022024                 | C/G  | NA                 | NA                            | NA                 |
| Kabuli_wild_3022102 | NA                                  | Ca_kabuli_denovo | 3022102                 | C/T  | NA                 | NA                            | NA                 |
| Kabuli_wild_3023362 | NA                                  | Ca_kabuli_denovo | 3023362                 | G/A  | NA                 | NA                            | NA                 |
| Kabuli_wild_3023553 | NA                                  | Ca_kabuli_denovo | 3023553                 | A/G  | NA                 | NA                            | NA                 |
| Kabuli_wild_3023554 | NA                                  | Ca_kabuli_denovo | 3023554                 | T/C  | NA                 | NA                            | NA                 |
| Kabuli_wild_3025244 | NA                                  | Ca_kabuli_denovo | 3025244                 | A/G  | NA                 | NA                            | NA                 |
| Kabuli_wild_3025282 | NA                                  | Ca_kabuli_denovo | 3025282                 | C/T  | NA                 | NA                            | NA                 |
| Kabuli_wild_3025292 | NA                                  | Ca_kabuli_denovo | 3025292                 | A/G  | NA                 | NA                            | NA                 |
| Kabuli_wild_3025584 | NA                                  | Ca_kabuli_denovo | 3025584                 | C/T  | NA                 | NA                            | NA                 |
| Kabuli_wild_3026233 | NA                                  | Ca_kabuli_denovo | 3026233                 | C/G  | NA                 | NA                            | NA                 |
| Kabuli_wild_3026256 | NA                                  | Ca_kabuli_denovo | 3026256                 | A/G  | NA                 | NA                            | NA                 |
| Kabuli_wild_3027907 | NA                                  | Ca_kabuli_denovo | 3027907                 | T/C  | NA                 | NA                            | NA                 |
| Kabuli_wild_3027910 | NA                                  | Ca_kabuli_denovo | 3027910                 | G/A  | NA                 | NA                            | NA                 |
| Kabuli_wild_3027997 | NA                                  | Ca_kabuli_denovo | 3027997                 | G/A  | NA                 | NA                            | NA                 |
| Kabuli_wild_3028045 | NA                                  | Ca_kabuli_denovo | 3028045                 | G/T  | NA                 | NA                            | NA                 |
| Kabuli_wild_3028225 | NA                                  | Ca_kabuli_denovo | 3028225                 | T/C  | NA                 | NA                            | NA                 |
| Kabuli_wild_3029946 | NA                                  | Ca_kabuli_denovo | 3029946                 | C/T  | NA                 | NA                            | NA                 |
| Kabuli_wild_3030033 | NA                                  | Ca_kabuli_denovo | 3030033                 | T/C  | NA                 | NA                            | NA                 |
| Kabuli_wild_3030049 | NA                                  | Ca_kabuli_denovo | 3030049                 | A/G  | NA                 | NA                            | NA                 |
| Kabuli_wild_3030134 | NA                                  | Ca_kabuli_denovo | 3030134                 | C/A  | NA                 | NA                            | NA                 |
| Kabuli_wild_3030433 | NA                                  | Ca_kabuli_denovo | 3030433                 | C/T  | NA                 | NA                            | NA                 |
| Kabuli_wild_3030822 | NA                                  | Ca_kabuli_denovo | 3030822                 | A/G  | NA                 | NA                            | NA                 |
| Kabuli_wild_3030846 | NA                                  | Ca_kabuli_denovo | 3030846                 | C/G  | NA                 | NA                            | NA                 |
| Kabuli_wild_3031601 | NA                                  | Ca_kabuli_denovo | 3031601                 | C/T  | NA                 | NA                            | NA                 |
| Kabuli_wild_3032346 | NA                                  | Ca_kabuli_denovo | 3032346                 | A/G  | NA                 | NA                            | NA                 |
| Kabuli_wild_3032352 | NA                                  | Ca_kabuli_denovo | 3032352                 | T/G  | NA                 | NA                            | NA                 |
| Kabuli_wild_3032562 | NA                                  | Ca_kabuli_denovo | 3032562                 | G/A  | NA                 | NA                            | NA                 |
| Kabuli_wild_3032727 | NA                                  | Ca_kabuli_denovo | 3032727                 | T/G  | NA                 | NA                            | NA                 |
| Kabuli_wild_3032928 | NA                                  | Ca_kabuli_denovo | 3032928                 | A/G  | NA                 | NA                            | NA                 |
| Kabuli_wild_3033066 | NA                                  | Ca_kabuli_denovo | 3033066                 | A/G  | NA                 | NA                            | NA                 |
| Kabuli_wild_3033102 | NA                                  | Ca_kabuli_denovo | 3033102                 | C/T  | NA                 | NA                            | NA                 |

| SNP IDs             | NCBI dbSNP accession IDs (NCBI_SS#) | Chromosomes      | Physical positions (bp) | SNPs | Gene accession IDs | Sequence components of genome | Putative functions |
|---------------------|-------------------------------------|------------------|-------------------------|------|--------------------|-------------------------------|--------------------|
| Kabuli_wild_3033254 | NA                                  | Ca_kabuli_denovo | 3033254                 | G/A  | NA                 | NA                            | NA                 |
| Kabuli_wild_3033416 | NA                                  | Ca_kabuli_denovo | 3033416                 | T/G  | NA                 | NA                            | NA                 |
| Kabuli_wild_3034160 | NA                                  | Ca_kabuli_denovo | 3034160                 | G/A  | NA                 | NA                            | NA                 |
| Kabuli_wild_3034175 | NA                                  | Ca_kabuli_denovo | 3034175                 | A/G  | NA                 | NA                            | NA                 |
| Kabuli_wild_3034312 | NA                                  | Ca_kabuli_denovo | 3034312                 | T/C  | NA                 | NA                            | NA                 |
| Kabuli_wild_3034320 | NA                                  | Ca_kabuli_denovo | 3034320                 | T/G  | NA                 | NA                            | NA                 |
| Kabuli_wild_3034406 | NA                                  | Ca_kabuli_denovo | 3034406                 | T/C  | NA                 | NA                            | NA                 |
| Kabuli_wild_3035117 | NA                                  | Ca_kabuli_denovo | 3035117                 | T/C  | NA                 | NA                            | NA                 |
| Kabuli_wild_3035789 | NA                                  | Ca_kabuli_denovo | 3035789                 | G/A  | NA                 | NA                            | NA                 |
| Kabuli_wild_3035839 | NA                                  | Ca_kabuli_denovo | 3035839                 | T/G  | NA                 | NA                            | NA                 |
| Kabuli_wild_3036666 | NA                                  | Ca_kabuli_denovo | 3036666                 | T/C  | NA                 | NA                            | NA                 |
| Kabuli_wild_3037994 | NA                                  | Ca_kabuli_denovo | 3037994                 | A/G  | NA                 | NA                            | NA                 |
| Kabuli_wild_3038670 | NA                                  | Ca_kabuli_denovo | 3038670                 | T/C  | NA                 | NA                            | NA                 |
| Kabuli_wild_3038706 | NA                                  | Ca_kabuli_denovo | 3038706                 | T/G  | NA                 | NA                            | NA                 |
| Kabuli_wild_3039242 | NA                                  | Ca_kabuli_denovo | 3039242                 | G/T  | NA                 | NA                            | NA                 |
| Kabuli_wild_3040066 | NA                                  | Ca_kabuli_denovo | 3040066                 | C/G  | NA                 | NA                            | NA                 |
| Kabuli_wild_3040104 | NA                                  | Ca_kabuli_denovo | 3040104                 | A/G  | NA                 | NA                            | NA                 |
| Kabuli_wild_3040804 | NA                                  | Ca_kabuli_denovo | 3040804                 | T/C  | NA                 | NA                            | NA                 |
| Kabuli_wild_3040840 | NA                                  | Ca_kabuli_denovo | 3040840                 | C/T  | NA                 | NA                            | NA                 |
| Kabuli_wild_3041038 | NA                                  | Ca_kabuli_denovo | 3041038                 | T/C  | NA                 | NA                            | NA                 |
| Kabuli_wild_3041074 | NA                                  | Ca_kabuli_denovo | 3041074                 | A/G  | NA                 | NA                            | NA                 |
| Kabuli_wild_3041297 | NA                                  | Ca_kabuli_denovo | 3041297                 | T/G  | NA                 | NA                            | NA                 |
| Kabuli_wild_3041303 | NA                                  | Ca_kabuli_denovo | 3041303                 | G/T  | NA                 | NA                            | NA                 |
| Kabuli_wild_3042089 | NA                                  | Ca_kabuli_denovo | 3042089                 | A/G  | NA                 | NA                            | NA                 |
| Kabuli_wild_3042095 | NA                                  | Ca_kabuli_denovo | 3042095                 | G/C  | NA                 | NA                            | NA                 |
| Kabuli_wild_3042381 | NA                                  | Ca_kabuli_denovo | 3042381                 | G/A  | NA                 | NA                            | NA                 |
| Kabuli_wild_3042420 | NA                                  | Ca_kabuli_denovo | 3042420                 | A/G  | NA                 | NA                            | NA                 |
| Kabuli_wild_3042575 | NA                                  | Ca_kabuli_denovo | 3042575                 | T/C  | NA                 | NA                            | NA                 |
| Kabuli_wild_3043711 | NA                                  | Ca_kabuli_denovo | 3043711                 | A/G  | NA                 | NA                            | NA                 |
| Kabuli_wild_3043731 | NA                                  | Ca_kabuli_denovo | 3043731                 | C/G  | NA                 | NA                            | NA                 |
| Kabuli_wild_3043895 | NA                                  | Ca_kabuli_denovo | 3043895                 | G/C  | NA                 | NA                            | NA                 |
| Kabuli_wild_3044021 | NA                                  | Ca_kabuli_denovo | 3044021                 | A/G  | NA                 | NA                            | NA                 |
| Kabuli_wild_3044476 | NA                                  | Ca_kabuli_denovo | 3044476                 | A/G  | NA                 | NA                            | NA                 |
| Kabuli_wild_3044523 | NA                                  | Ca_kabuli_denovo | 3044523                 | A/G  | NA                 | NA                            | NA                 |
| Kabuli_wild_3044568 | NA                                  | Ca_kabuli_denovo | 3044568                 | A/G  | NA                 | NA                            | NA                 |
| Kabuli_wild_3045157 | NA                                  | Ca_kabuli_denovo | 3045157                 | A/C  | NA                 | NA                            | NA                 |
| Kabuli_wild_3045369 | NA                                  | Ca_kabuli_denovo | 3045369                 | T/C  | NA                 | NA                            | NA                 |
| Kabuli_wild_3045492 | NA                                  | Ca_kabuli_denovo | 3045492                 | G/A  | NA                 | NA                            | NA                 |
| Kabuli_wild_3045568 | NA                                  | Ca_kabuli_denovo | 3045568                 | G/A  | NA                 | NA                            | NA                 |
| Kabuli_wild_3045592 | NA                                  | Ca_kabuli_denovo | 3045592                 | G/A  | NA                 | NA                            | NA                 |
| Kabuli_wild_3045666 | NA                                  | Ca_kabuli_denovo | 3045666                 | C/G  | NA                 | NA                            | NA                 |
| Kabuli_wild_3045740 | NA                                  | Ca_kabuli_denovo | 3045740                 | C/A  | NA                 | NA                            | NA                 |
| Kabuli_wild_3045742 | NA                                  | Ca_kabuli_denovo | 3045742                 | A/C  | NA                 | NA                            | NA                 |
| Kabuli_wild_3047322 | NA                                  | Ca_kabuli_denovo | 3047322                 | T/A  | NA                 | NA                            | NA                 |

| SNP IDs             | NCBI dbSNP accession IDs (NCBI_SS#) | Chromosomes      | Physical positions (bp) | SNPs | Gene accession IDs | Sequence components of genome | Putative functions |
|---------------------|-------------------------------------|------------------|-------------------------|------|--------------------|-------------------------------|--------------------|
| Kabuli_wild_3047592 | NA                                  | Ca_kabuli_denovo | 3047592                 | G/C  | NA                 | NA                            | NA                 |
| Kabuli_wild_3047625 | NA                                  | Ca_kabuli_denovo | 3047625                 | C/T  | NA                 | NA                            | NA                 |
| Kabuli_wild_3047816 | NA                                  | Ca_kabuli_denovo | 3047816                 | G/C  | NA                 | NA                            | NA                 |
| Kabuli_wild_3047987 | NA                                  | Ca_kabuli_denovo | 3047987                 | C/T  | NA                 | NA                            | NA                 |
| Kabuli_wild_3048028 | NA                                  | Ca_kabuli_denovo | 3048028                 | C/G  | NA                 | NA                            | NA                 |
| Kabuli_wild_3048869 | NA                                  | Ca_kabuli_denovo | 3048869                 | G/A  | NA                 | NA                            | NA                 |
| Kabuli_wild_3049453 | NA                                  | Ca_kabuli_denovo | 3049453                 | C/T  | NA                 | NA                            | NA                 |
| Kabuli_wild_3049474 | NA                                  | Ca_kabuli_denovo | 3049474                 | G/C  | NA                 | NA                            | NA                 |
| Kabuli_wild_3050766 | NA                                  | Ca_kabuli_denovo | 3050766                 | A/G  | NA                 | NA                            | NA                 |
| Kabuli_wild_3051693 | NA                                  | Ca_kabuli_denovo | 3051693                 | G/A  | NA                 | NA                            | NA                 |
| Kabuli_wild_3051993 | NA                                  | Ca_kabuli_denovo | 3051993                 | T/C  | NA                 | NA                            | NA                 |
| Kabuli_wild_3052374 | NA                                  | Ca_kabuli_denovo | 3052374                 | A/C  | NA                 | NA                            | NA                 |
| Kabuli_wild_3052386 | NA                                  | Ca_kabuli_denovo | 3052386                 | T/C  | NA                 | NA                            | NA                 |
| Kabuli_wild_3052642 | NA                                  | Ca_kabuli_denovo | 3052642                 | A/G  | NA                 | NA                            | NA                 |
| Kabuli_wild_3052645 | NA                                  | Ca_kabuli_denovo | 3052645                 | G/C  | NA                 | NA                            | NA                 |
| Kabuli_wild_3052790 | NA                                  | Ca_kabuli_denovo | 3052790                 | G/T  | NA                 | NA                            | NA                 |
| Kabuli_wild_3052807 | NA                                  | Ca_kabuli_denovo | 3052807                 | A/G  | NA                 | NA                            | NA                 |
| Kabuli_wild_3052838 | NA                                  | Ca_kabuli_denovo | 3052838                 | T/C  | NA                 | NA                            | NA                 |
| Kabuli_wild_3052953 | NA                                  | Ca_kabuli_denovo | 3052953                 | G/A  | NA                 | NA                            | NA                 |
| Kabuli_wild_3052983 | NA                                  | Ca_kabuli_denovo | 3052983                 | C/G  | NA                 | NA                            | NA                 |
| Kabuli_wild_3053163 | NA                                  | Ca_kabuli_denovo | 3053163                 | C/A  | NA                 | NA                            | NA                 |
| Kabuli_wild_3053394 | NA                                  | Ca_kabuli_denovo | 3053394                 | T/G  | NA                 | NA                            | NA                 |
| Kabuli_wild_3053727 | NA                                  | Ca_kabuli_denovo | 3053727                 | C/G  | NA                 | NA                            | NA                 |
| Kabuli_wild_3053772 | NA                                  | Ca_kabuli_denovo | 3053772                 | G/A  | NA                 | NA                            | NA                 |
| Kabuli_wild_3054458 | NA                                  | Ca_kabuli_denovo | 3054458                 | T/C  | NA                 | NA                            | NA                 |
| Kabuli_wild_3054790 | NA                                  | Ca_kabuli_denovo | 3054790                 | A/C  | NA                 | NA                            | NA                 |
| Kabuli_wild_3055197 | NA                                  | Ca_kabuli_denovo | 3055197                 | G/A  | NA                 | NA                            | NA                 |
| Kabuli_wild_3055238 | NA                                  | Ca_kabuli_denovo | 3055238                 | C/T  | NA                 | NA                            | NA                 |
| Kabuli_wild_3055369 | NA                                  | Ca_kabuli_denovo | 3055369                 | C/T  | NA                 | NA                            | NA                 |
| Kabuli_wild_3055523 | NA                                  | Ca_kabuli_denovo | 3055523                 | T/A  | NA                 | NA                            | NA                 |
| Kabuli_wild_3056385 | NA                                  | Ca_kabuli_denovo | 3056385                 | A/G  | NA                 | NA                            | NA                 |
| Kabuli_wild_3056807 | NA                                  | Ca_kabuli_denovo | 3056807                 | G/C  | NA                 | NA                            | NA                 |
| Kabuli_wild_3056879 | NA                                  | Ca_kabuli_denovo | 3056879                 | C/T  | NA                 | NA                            | NA                 |
| Kabuli_wild_3057979 | NA                                  | Ca_kabuli_denovo | 3057979                 | G/T  | NA                 | NA                            | NA                 |
| Kabuli_wild_3058371 | NA                                  | Ca_kabuli_denovo | 3058371                 | A/G  | NA                 | NA                            | NA                 |
| Kabuli_wild_3058488 | NA                                  | Ca_kabuli_denovo | 3058488                 | A/G  | NA                 | NA                            | NA                 |
| Kabuli_wild_3058673 | NA                                  | Ca_kabuli_denovo | 3058673                 | G/C  | NA                 | NA                            | NA                 |
| Kabuli_wild_3059134 | NA                                  | Ca_kabuli_denovo | 3059134                 | A/C  | NA                 | NA                            | NA                 |
| Kabuli_wild_3059232 | NA                                  | Ca_kabuli_denovo | 3059232                 | G/C  | NA                 | NA                            | NA                 |
| Kabuli_wild_3059277 | NA                                  | Ca_kabuli_denovo | 3059277                 | G/C  | NA                 | NA                            | NA                 |
| Kabuli_wild_3060104 | NA                                  | Ca_kabuli_denovo | 3060104                 | T/C  | NA                 | NA                            | NA                 |
| Kabuli_wild_3060721 | NA                                  | Ca_kabuli_denovo | 3060721                 | G/C  | NA                 | NA                            | NA                 |
| Kabuli_wild_3060978 | NA                                  | Ca_kabuli_denovo | 3060978                 | G/A  | NA                 | NA                            | NA                 |
| Kabuli_wild_3061002 | NA                                  | Ca_kabuli_denovo | 3061002                 | C/T  | NA                 | NA                            | NA                 |

| SNP IDs             | NCBI dbSNP accession IDs (NCBI_SS#) | Chromosomes      | Physical positions (bp) | SNPs | Gene accession IDs | Sequence components of genome | Putative functions |
|---------------------|-------------------------------------|------------------|-------------------------|------|--------------------|-------------------------------|--------------------|
| Kabuli_wild_3061198 | NA                                  | Ca_kabuli_denovo | 3061198                 | C/T  | NA                 | NA                            | NA                 |
| Kabuli_wild_3061973 | NA                                  | Ca_kabuli_denovo | 3061973                 | C/T  | NA                 | NA                            | NA                 |
| Kabuli_wild_3061976 | NA                                  | Ca_kabuli_denovo | 3061976                 | C/G  | NA                 | NA                            | NA                 |
| Kabuli_wild_3062084 | NA                                  | Ca_kabuli_denovo | 3062084                 | T/C  | NA                 | NA                            | NA                 |
| Kabuli_wild_3062247 | NA                                  | Ca_kabuli_denovo | 3062247                 | T/C  | NA                 | NA                            | NA                 |
| Kabuli_wild_3062278 | NA                                  | Ca_kabuli_denovo | 3062278                 | T/C  | NA                 | NA                            | NA                 |
| Kabuli_wild_3062366 | NA                                  | Ca_kabuli_denovo | 3062366                 | C/T  | NA                 | NA                            | NA                 |
| Kabuli_wild_3062372 | NA                                  | Ca_kabuli_denovo | 3062372                 | G/A  | NA                 | NA                            | NA                 |
| Kabuli_wild_3063032 | NA                                  | Ca_kabuli_denovo | 3063032                 | G/A  | NA                 | NA                            | NA                 |
| Kabuli_wild_3063311 | NA                                  | Ca_kabuli_denovo | 3063311                 | G/A  | NA                 | NA                            | NA                 |
| Kabuli_wild_3063371 | NA                                  | Ca_kabuli_denovo | 3063371                 | A/G  | NA                 | NA                            | NA                 |
| Kabuli_wild_3063743 | NA                                  | Ca_kabuli_denovo | 3063743                 | T/C  | NA                 | NA                            | NA                 |
| Kabuli_wild_3066710 | NA                                  | Ca_kabuli_denovo | 3066710                 | G/T  | NA                 | NA                            | NA                 |
| Kabuli_wild_3067029 | NA                                  | Ca_kabuli_denovo | 3067029                 | C/T  | NA                 | NA                            | NA                 |
| Kabuli_wild_3067056 | NA                                  | Ca_kabuli_denovo | 3067056                 | T/C  | NA                 | NA                            | NA                 |
| Kabuli_wild_3067207 | NA                                  | Ca_kabuli_denovo | 3067207                 | C/T  | NA                 | NA                            | NA                 |
| Kabuli_wild_3067216 | NA                                  | Ca_kabuli_denovo | 3067216                 | C/T  | NA                 | NA                            | NA                 |
| Kabuli_wild_3070994 | NA                                  | Ca_kabuli_denovo | 3070994                 | T/C  | NA                 | NA                            | NA                 |
| Kabuli_wild_3071003 | NA                                  | Ca_kabuli_denovo | 3071003                 | T/C  | NA                 | NA                            | NA                 |
| Kabuli_wild_3072259 | NA                                  | Ca_kabuli_denovo | 3072259                 | A/T  | NA                 | NA                            | NA                 |
| Kabuli_wild_3072261 | NA                                  | Ca_kabuli_denovo | 3072261                 | G/T  | NA                 | NA                            | NA                 |
| Kabuli_wild_3072272 | NA                                  | Ca_kabuli_denovo | 3072272                 | T/C  | NA                 | NA                            | NA                 |
| Kabuli_wild_3072579 | NA                                  | Ca_kabuli_denovo | 3072579                 | T/C  | NA                 | NA                            | NA                 |
| Kabuli_wild_3072671 | NA                                  | Ca_kabuli_denovo | 3072671                 | C/T  | NA                 | NA                            | NA                 |
| Kabuli_wild_3073785 | NA                                  | Ca_kabuli_denovo | 3073785                 | G/C  | NA                 | NA                            | NA                 |
| Kabuli_wild_3074284 | NA                                  | Ca_kabuli_denovo | 3074284                 | A/G  | NA                 | NA                            | NA                 |
| Kabuli_wild_3074287 | NA                                  | Ca_kabuli_denovo | 3074287                 | C/A  | NA                 | NA                            | NA                 |
| Kabuli_wild_3074459 | NA                                  | Ca_kabuli_denovo | 3074459                 | G/A  | NA                 | NA                            | NA                 |
| Kabuli_wild_3075634 | NA                                  | Ca_kabuli_denovo | 3075634                 | A/G  | NA                 | NA                            | NA                 |
| Kabuli_wild_3075670 | NA                                  | Ca_kabuli_denovo | 3075670                 | G/A  | NA                 | NA                            | NA                 |
| Kabuli_wild_3076415 | NA                                  | Ca_kabuli_denovo | 3076415                 | G/C  | NA                 | NA                            | NA                 |
| Kabuli_wild_3076613 | NA                                  | Ca_kabuli_denovo | 3076613                 | A/G  | NA                 | NA                            | NA                 |
| Kabuli_wild_3076628 | NA                                  | Ca_kabuli_denovo | 3076628                 | A/G  | NA                 | NA                            | NA                 |
| Kabuli_wild_3076921 | NA                                  | Ca_kabuli_denovo | 3076921                 | C/T  | NA                 | NA                            | NA                 |
| Kabuli_wild_3077691 | NA                                  | Ca_kabuli_denovo | 3077691                 | A/G  | NA                 | NA                            | NA                 |
| Kabuli_wild_3078441 | NA                                  | Ca_kabuli_denovo | 3078441                 | G/A  | NA                 | NA                            | NA                 |
| Kabuli_wild_3078444 | NA                                  | Ca_kabuli_denovo | 3078444                 | G/A  | NA                 | NA                            | NA                 |
| Kabuli_wild_3078592 | NA                                  | Ca_kabuli_denovo | 3078592                 | G/A  | NA                 | NA                            | NA                 |
| Kabuli_wild_3078982 | NA                                  | Ca_kabuli_denovo | 3078982                 | G/C  | NA                 | NA                            | NA                 |
| Kabuli_wild_3079000 | NA                                  | Ca_kabuli_denovo | 3079000                 | T/C  | NA                 | NA                            | NA                 |
| Kabuli_wild_3079027 | NA                                  | Ca_kabuli_denovo | 3079027                 | G/C  | NA                 | NA                            | NA                 |
| Kabuli_wild_3079144 | NA                                  | Ca_kabuli_denovo | 3079144                 | C/T  | NA                 | NA                            | NA                 |
| Kabuli_wild_3079285 | NA                                  | Ca_kabuli_denovo | 3079285                 | A/G  | NA                 | NA                            | NA                 |
| Kabuli_wild_3079290 | NA                                  | Ca_kabuli_denovo | 3079290                 | G/A  | NA                 | NA                            | NA                 |

| SNP IDs             | NCBI dbSNP accession IDs (NCBI_SS#) | Chromosomes      | Physical positions (bp) | SNPs | Gene accession IDs | Sequence components of genome | Putative functions |
|---------------------|-------------------------------------|------------------|-------------------------|------|--------------------|-------------------------------|--------------------|
| Kabuli_wild_3079395 | NA                                  | Ca_kabuli_denovo | 3079395                 | T/G  | NA                 | NA                            | NA                 |
| Kabuli_wild_3080769 | NA                                  | Ca_kabuli_denovo | 3080769                 | A/G  | NA                 | NA                            | NA                 |
| Kabuli_wild_3080780 | NA                                  | Ca_kabuli_denovo | 3080780                 | T/C  | NA                 | NA                            | NA                 |
| Kabuli_wild_3081289 | NA                                  | Ca_kabuli_denovo | 3081289                 | G/A  | NA                 | NA                            | NA                 |
| Kabuli_wild_3081548 | NA                                  | Ca_kabuli_denovo | 3081548                 | G/A  | NA                 | NA                            | NA                 |
| Kabuli_wild_3081981 | NA                                  | Ca_kabuli_denovo | 3081981                 | A/T  | NA                 | NA                            | NA                 |
| Kabuli_wild_3083624 | NA                                  | Ca_kabuli_denovo | 3083624                 | T/C  | NA                 | NA                            | NA                 |
| Kabuli_wild_3084169 | NA                                  | Ca_kabuli_denovo | 3084169                 | T/C  | NA                 | NA                            | NA                 |
| Kabuli_wild_3084220 | NA                                  | Ca_kabuli_denovo | 3084220                 | T/C  | NA                 | NA                            | NA                 |
| Kabuli_wild_3084339 | NA                                  | Ca_kabuli_denovo | 3084339                 | A/C  | NA                 | NA                            | NA                 |
| Kabuli_wild_3084549 | NA                                  | Ca_kabuli_denovo | 3084549                 | G/A  | NA                 | NA                            | NA                 |
| Kabuli_wild_3084567 | NA                                  | Ca_kabuli_denovo | 3084567                 | C/G  | NA                 | NA                            | NA                 |
| Kabuli_wild_3085062 | NA                                  | Ca_kabuli_denovo | 3085062                 | T/C  | NA                 | NA                            | NA                 |
| Kabuli_wild_3085101 | NA                                  | Ca_kabuli_denovo | 3085101                 | C/T  | NA                 | NA                            | NA                 |
| Kabuli_wild_3085316 | NA                                  | Ca_kabuli_denovo | 3085316                 | A/G  | NA                 | NA                            | NA                 |
| Kabuli_wild_3085318 | NA                                  | Ca_kabuli_denovo | 3085318                 | A/G  | NA                 | NA                            | NA                 |
| Kabuli_wild_3085509 | NA                                  | Ca_kabuli_denovo | 3085509                 | C/G  | NA                 | NA                            | NA                 |
| Kabuli_wild_3085713 | NA                                  | Ca_kabuli_denovo | 3085713                 | A/G  | NA                 | NA                            | NA                 |
| Kabuli_wild_3086008 | NA                                  | Ca_kabuli_denovo | 3086008                 | A/G  | NA                 | NA                            | NA                 |
| Kabuli_wild_3086029 | NA                                  | Ca_kabuli_denovo | 3086029                 | C/T  | NA                 | NA                            | NA                 |
| Kabuli_wild_3086548 | NA                                  | Ca_kabuli_denovo | 3086548                 | C/G  | NA                 | NA                            | NA                 |
| Kabuli_wild_3087737 | NA                                  | Ca_kabuli_denovo | 3087737                 | T/G  | NA                 | NA                            | NA                 |
| Kabuli_wild_3088453 | NA                                  | Ca_kabuli_denovo | 3088453                 | C/T  | NA                 | NA                            | NA                 |
| Kabuli_wild_3089405 | NA                                  | Ca_kabuli_denovo | 3089405                 | T/C  | NA                 | NA                            | NA                 |
| Kabuli_wild_3089450 | NA                                  | Ca_kabuli_denovo | 3089450                 | A/G  | NA                 | NA                            | NA                 |
| Kabuli_wild_3091346 | NA                                  | Ca_kabuli_denovo | 3091346                 | T/G  | NA                 | NA                            | NA                 |
| Kabuli_wild_3092527 | NA                                  | Ca_kabuli_denovo | 3092527                 | C/G  | NA                 | NA                            | NA                 |
| Kabuli_wild_3093776 | NA                                  | Ca_kabuli_denovo | 3093776                 | G/C  | NA                 | NA                            | NA                 |
| Kabuli_wild_3094764 | NA                                  | Ca_kabuli_denovo | 3094764                 | A/G  | NA                 | NA                            | NA                 |
| Kabuli_wild_3095060 | NA                                  | Ca_kabuli_denovo | 3095060                 | T/C  | NA                 | NA                            | NA                 |
| Kabuli_wild_3096104 | NA                                  | Ca_kabuli_denovo | 3096104                 | G/A  | NA                 | NA                            | NA                 |
| Kabuli_wild_3096113 | NA                                  | Ca_kabuli_denovo | 3096113                 | G/A  | NA                 | NA                            | NA                 |
| Kabuli_wild_3096211 | NA                                  | Ca_kabuli_denovo | 3096211                 | T/C  | NA                 | NA                            | NA                 |
| Kabuli_wild_3096416 | NA                                  | Ca_kabuli_denovo | 3096416                 | G/A  | NA                 | NA                            | NA                 |
| Kabuli_wild_3096428 | NA                                  | Ca_kabuli_denovo | 3096428                 | A/G  | NA                 | NA                            | NA                 |
| Kabuli_wild_3096540 | NA                                  | Ca_kabuli_denovo | 3096540                 | T/G  | NA                 | NA                            | NA                 |
| Kabuli_wild_3097377 | NA                                  | Ca_kabuli_denovo | 3097377                 | C/G  | NA                 | NA                            | NA                 |
| Kabuli_wild_3097481 | NA                                  | Ca_kabuli_denovo | 3097481                 | C/T  | NA                 | NA                            | NA                 |
| Kabuli_wild_3097980 | NA                                  | Ca_kabuli_denovo | 3097980                 | T/G  | NA                 | NA                            | NA                 |
| Kabuli_wild_3098137 | NA                                  | Ca_kabuli_denovo | 3098137                 | A/G  | NA                 | NA                            | NA                 |
| Kabuli_wild_3098163 | NA                                  | Ca_kabuli_denovo | 3098163                 | T/C  | NA                 | NA                            | NA                 |
| Kabuli_wild_3099117 | NA                                  | Ca_kabuli_denovo | 3099117                 | T/C  | NA                 | NA                            | NA                 |
| Kabuli_wild_3100012 | NA                                  | Ca_kabuli_denovo | 3100012                 | A/G  | NA                 | NA                            | NA                 |
| Kabuli_wild_3100013 | NA                                  | Ca_kabuli_denovo | 3100013                 | A/G  | NA                 | NA                            | NA                 |

| SNP IDs             | NCBI dbSNP accession IDs (NCBI_SS#) | Chromosomes      | Physical positions (bp) | SNPs | Gene accession IDs | Sequence components of genome | Putative functions |
|---------------------|-------------------------------------|------------------|-------------------------|------|--------------------|-------------------------------|--------------------|
| Kabuli_wild_3100221 | NA                                  | Ca_kabuli_denovo | 3100221                 | T/A  | NA                 | NA                            | NA                 |
| Kabuli_wild_3102235 | NA                                  | Ca_kabuli_denovo | 3102235                 | T/C  | NA                 | NA                            | NA                 |
| Kabuli_wild_3103997 | NA                                  | Ca_kabuli_denovo | 3103997                 | A/T  | NA                 | NA                            | NA                 |
| Kabuli_wild_3104149 | NA                                  | Ca_kabuli_denovo | 3104149                 | A/T  | NA                 | NA                            | NA                 |
| Kabuli_wild_3104154 | NA                                  | Ca_kabuli_denovo | 3104154                 | G/A  | NA                 | NA                            | NA                 |
| Kabuli_wild_3104632 | NA                                  | Ca_kabuli_denovo | 3104632                 | C/G  | NA                 | NA                            | NA                 |
| Kabuli_wild_3104821 | NA                                  | Ca_kabuli_denovo | 3104821                 | A/G  | NA                 | NA                            | NA                 |
| Kabuli_wild_3104859 | NA                                  | Ca_kabuli_denovo | 3104859                 | A/T  | NA                 | NA                            | NA                 |
| Kabuli_wild_3106480 | NA                                  | Ca_kabuli_denovo | 3106480                 | C/T  | NA                 | NA                            | NA                 |
| Kabuli_wild_3106483 | NA                                  | Ca_kabuli_denovo | 3106483                 | T/C  | NA                 | NA                            | NA                 |
| Kabuli_wild_3106568 | NA                                  | Ca_kabuli_denovo | 3106568                 | C/T  | NA                 | NA                            | NA                 |
| Kabuli_wild_3106583 | NA                                  | Ca_kabuli_denovo | 3106583                 | C/T  | NA                 | NA                            | NA                 |
| Kabuli_wild_3106598 | NA                                  | Ca_kabuli_denovo | 3106598                 | C/T  | NA                 | NA                            | NA                 |
| Kabuli_wild_3106649 | NA                                  | Ca_kabuli_denovo | 3106649                 | G/A  | NA                 | NA                            | NA                 |
| Kabuli_wild_3107700 | NA                                  | Ca_kabuli_denovo | 3107700                 | C/A  | NA                 | NA                            | NA                 |
| Kabuli_wild_3107776 | NA                                  | Ca_kabuli_denovo | 3107776                 | A/G  | NA                 | NA                            | NA                 |
| Kabuli_wild_3107782 | NA                                  | Ca_kabuli_denovo | 3107782                 | C/A  | NA                 | NA                            | NA                 |
| Kabuli_wild_3108034 | NA                                  | Ca_kabuli_denovo | 3108034                 | C/T  | NA                 | NA                            | NA                 |
| Kabuli_wild_3108331 | NA                                  | Ca_kabuli_denovo | 3108331                 | C/T  | NA                 | NA                            | NA                 |
| Kabuli_wild_3108373 | NA                                  | Ca_kabuli_denovo | 3108373                 | C/G  | NA                 | NA                            | NA                 |
| Kabuli_wild_3110365 | NA                                  | Ca_kabuli_denovo | 3110365                 | T/C  | NA                 | NA                            | NA                 |
| Kabuli_wild_3111007 | NA                                  | Ca_kabuli_denovo | 3111007                 | C/T  | NA                 | NA                            | NA                 |
| Kabuli_wild_3111232 | NA                                  | Ca_kabuli_denovo | 3111232                 | C/T  | NA                 | NA                            | NA                 |
| Kabuli_wild_3111323 | NA                                  | Ca_kabuli_denovo | 3111323                 | G/C  | NA                 | NA                            | NA                 |
| Kabuli_wild_3111389 | NA                                  | Ca_kabuli_denovo | 3111389                 | T/C  | NA                 | NA                            | NA                 |
| Kabuli_wild_3111627 | NA                                  | Ca_kabuli_denovo | 3111627                 | T/C  | NA                 | NA                            | NA                 |
| Kabuli_wild_3111645 | NA                                  | Ca_kabuli_denovo | 3111645                 | G/A  | NA                 | NA                            | NA                 |
| Kabuli_wild_3111648 | NA                                  | Ca_kabuli_denovo | 3111648                 | G/C  | NA                 | NA                            | NA                 |
| Kabuli_wild_3111743 | NA                                  | Ca_kabuli_denovo | 3111743                 | G/A  | NA                 | NA                            | NA                 |
| Kabuli_wild_3111787 | NA                                  | Ca_kabuli_denovo | 3111787                 | G/A  | NA                 | NA                            | NA                 |
| Kabuli_wild_3111871 | NA                                  | Ca_kabuli_denovo | 3111871                 | G/C  | NA                 | NA                            | NA                 |
| Kabuli_wild_3112485 | NA                                  | Ca_kabuli_denovo | 3112485                 | C/T  | NA                 | NA                            | NA                 |
| Kabuli_wild_3112499 | NA                                  | Ca_kabuli_denovo | 3112499                 | C/T  | NA                 | NA                            | NA                 |
| Kabuli_wild_3112639 | NA                                  | Ca_kabuli_denovo | 3112639                 | A/G  | NA                 | NA                            | NA                 |
| Kabuli_wild_3112642 | NA                                  | Ca_kabuli_denovo | 3112642                 | C/A  | NA                 | NA                            | NA                 |
| Kabuli_wild_3113439 | NA                                  | Ca_kabuli_denovo | 3113439                 | C/T  | NA                 | NA                            | NA                 |
| Kabuli_wild_3115635 | NA                                  | Ca_kabuli_denovo | 3115635                 | G/T  | NA                 | NA                            | NA                 |
| Kabuli_wild_3116754 | NA                                  | Ca_kabuli_denovo | 3116754                 | T/C  | NA                 | NA                            | NA                 |
| Kabuli_wild_3116787 | NA                                  | Ca_kabuli_denovo | 3116787                 | G/A  | NA                 | NA                            | NA                 |
| Kabuli_wild_3117400 | NA                                  | Ca_kabuli_denovo | 3117400                 | C/A  | NA                 | NA                            | NA                 |
| Kabuli_wild_3117401 | NA                                  | Ca_kabuli_denovo | 3117401                 | A/T  | NA                 | NA                            | NA                 |
| Kabuli_wild_3117404 | NA                                  | Ca_kabuli_denovo | 3117404                 | C/A  | NA                 | NA                            | NA                 |
| Kabuli_wild_3118226 | NA                                  | Ca_kabuli_denovo | 3118226                 | A/G  | NA                 | NA                            | NA                 |
| Kabuli_wild_3118235 | NA                                  | Ca_kabuli_denovo | 3118235                 | T/C  | NA                 | NA                            | NA                 |



| SNP IDs             | NCBI dbSNP accession IDs (NCBI_SS#) | Chromosomes      | Physical positions (bp) | SNPs | Gene accession IDs | Sequence components of genome | Putative functions |
|---------------------|-------------------------------------|------------------|-------------------------|------|--------------------|-------------------------------|--------------------|
| Kabuli_wild_3118241 | NA                                  | Ca_kabuli_denovo | 3118241                 | G/A  | NA                 | NA                            | NA                 |
| Kabuli_wild_3118250 | NA                                  | Ca_kabuli_denovo | 3118250                 | G/C  | NA                 | NA                            | NA                 |
| Kabuli_wild_3119062 | NA                                  | Ca_kabuli_denovo | 3119062                 | T/C  | NA                 | NA                            | NA                 |
| Kabuli_wild_3119893 | NA                                  | Ca_kabuli_denovo | 3119893                 | G/C  | NA                 | NA                            | NA                 |
| Kabuli_wild_3119915 | NA                                  | Ca_kabuli_denovo | 3119915                 | T/G  | NA                 | NA                            | NA                 |
| Kabuli_wild_3123382 | NA                                  | Ca_kabuli_denovo | 3123382                 | G/C  | NA                 | NA                            | NA                 |
| Kabuli_wild_3124146 | NA                                  | Ca_kabuli_denovo | 3124146                 | A/G  | NA                 | NA                            | NA                 |
| Kabuli_wild_3124148 | NA                                  | Ca_kabuli_denovo | 3124148                 | C/G  | NA                 | NA                            | NA                 |
| Kabuli_wild_3125725 | NA                                  | Ca_kabuli_denovo | 3125725                 | G/T  | NA                 | NA                            | NA                 |
| Kabuli_wild_3125789 | NA                                  | Ca_kabuli_denovo | 3125789                 | G/A  | NA                 | NA                            | NA                 |
| Kabuli_wild_3125816 | NA                                  | Ca_kabuli_denovo | 3125816                 | T/C  | NA                 | NA                            | NA                 |
| Kabuli_wild_3125883 | NA                                  | Ca_kabuli_denovo | 3125883                 | C/G  | NA                 | NA                            | NA                 |
| Kabuli_wild_3126180 | NA                                  | Ca_kabuli_denovo | 3126180                 | G/C  | NA                 | NA                            | NA                 |
| Kabuli_wild_3126222 | NA                                  | Ca_kabuli_denovo | 3126222                 | G/A  | NA                 | NA                            | NA                 |
| Kabuli_wild_3126687 | NA                                  | Ca_kabuli_denovo | 3126687                 | T/G  | NA                 | NA                            | NA                 |
| Kabuli_wild_3126974 | NA                                  | Ca_kabuli_denovo | 3126974                 | T/C  | NA                 | NA                            | NA                 |
| Kabuli_wild_3127056 | NA                                  | Ca_kabuli_denovo | 3127056                 | G/C  | NA                 | NA                            | NA                 |
| Kabuli_wild_3127064 | NA                                  | Ca_kabuli_denovo | 3127064                 | A/C  | NA                 | NA                            | NA                 |
| Kabuli_wild_3127090 | NA                                  | Ca_kabuli_denovo | 3127090                 | T/C  | NA                 | NA                            | NA                 |
| Kabuli_wild_3127143 | NA                                  | Ca_kabuli_denovo | 3127143                 | T/C  | NA                 | NA                            | NA                 |
| Kabuli_wild_3127502 | NA                                  | Ca_kabuli_denovo | 3127502                 | T/G  | NA                 | NA                            | NA                 |
| Kabuli_wild_3128585 | NA                                  | Ca_kabuli_denovo | 3128585                 | A/G  | NA                 | NA                            | NA                 |
| Kabuli_wild_3128616 | NA                                  | Ca_kabuli_denovo | 3128616                 | C/T  | NA                 | NA                            | NA                 |
| Kabuli_wild_3128878 | NA                                  | Ca_kabuli_denovo | 3128878                 | A/G  | NA                 | NA                            | NA                 |
| Kabuli_wild_3131344 | NA                                  | Ca_kabuli_denovo | 3131344                 | A/G  | NA                 | NA                            | NA                 |
| Kabuli_wild_3132672 | NA                                  | Ca_kabuli_denovo | 3132672                 | T/G  | NA                 | NA                            | NA                 |
| Kabuli_wild_3132741 | NA                                  | Ca_kabuli_denovo | 3132741                 | T/C  | NA                 | NA                            | NA                 |
| Kabuli_wild_3132769 | NA                                  | Ca_kabuli_denovo | 3132769                 | C/T  | NA                 | NA                            | NA                 |
| Kabuli_wild_3133639 | NA                                  | Ca_kabuli_denovo | 3133639                 | T/G  | NA                 | NA                            | NA                 |
| Kabuli_wild_3133652 | NA                                  | Ca_kabuli_denovo | 3133652                 | C/T  | NA                 | NA                            | NA                 |
| Kabuli_wild_3134319 | NA                                  | Ca_kabuli_denovo | 3134319                 | A/G  | NA                 | NA                            | NA                 |
| Kabuli_wild_3134346 | NA                                  | Ca_kabuli_denovo | 3134346                 | G/A  | NA                 | NA                            | NA                 |
| Kabuli_wild_3135025 | NA                                  | Ca_kabuli_denovo | 3135025                 | A/G  | NA                 | NA                            | NA                 |
| Kabuli_wild_3135242 | NA                                  | Ca_kabuli_denovo | 3135242                 | C/T  | NA                 | NA                            | NA                 |
| Kabuli_wild_3135392 | NA                                  | Ca_kabuli_denovo | 3135392                 | G/A  | NA                 | NA                            | NA                 |
| Kabuli_wild_3135483 | NA                                  | Ca_kabuli_denovo | 3135483                 | G/C  | NA                 | NA                            | NA                 |
| Kabuli_wild_3135516 | NA                                  | Ca_kabuli_denovo | 3135516                 | C/T  | NA                 | NA                            | NA                 |
| Kabuli_wild_3135592 | NA                                  | Ca_kabuli_denovo | 3135592                 | C/T  | NA                 | NA                            | NA                 |
| Kabuli_wild_3135660 | NA                                  | Ca_kabuli_denovo | 3135660                 | T/G  | NA                 | NA                            | NA                 |
| Kabuli_wild_3135698 | NA                                  | Ca_kabuli_denovo | 3135698                 | A/G  | NA                 | NA                            | NA                 |
| Kabuli_wild_3135731 | NA                                  | Ca_kabuli_denovo | 3135731                 | T/C  | NA                 | NA                            | NA                 |
| Kabuli_wild_3136414 | NA                                  | Ca_kabuli_denovo | 3136414                 | G/A  | NA                 | NA                            | NA                 |
| Kabuli_wild_3136646 | NA                                  | Ca_kabuli_denovo | 3136646                 | A/C  | NA                 | NA                            | NA                 |
| Kabuli_wild_3136835 | NA                                  | Ca_kabuli_denovo | 3136835                 | T/C  | NA                 | NA                            | NA                 |

| SNP IDs                    | NCBI dbSNP accession IDs (NCBI_SS#) | Chromosomes             | Physical positions (bp) | SNPs | Gene accession IDs | Sequence components of genome | Putative functions |
|----------------------------|-------------------------------------|-------------------------|-------------------------|------|--------------------|-------------------------------|--------------------|
| <i>Kabuli_wild_3138302</i> | NA                                  | <i>Ca_kabuli_denovo</i> | 3138302                 | T/C  | NA                 | NA                            | NA                 |
| <i>Kabuli_wild_3138468</i> | NA                                  | <i>Ca_kabuli_denovo</i> | 3138468                 | G/C  | NA                 | NA                            | NA                 |
| <i>Kabuli_wild_3138972</i> | NA                                  | <i>Ca_kabuli_denovo</i> | 3138972                 | G/A  | NA                 | NA                            | NA                 |
| <i>Kabuli_wild_3139045</i> | NA                                  | <i>Ca_kabuli_denovo</i> | 3139045                 | T/A  | NA                 | NA                            | NA                 |
| <i>Kabuli_wild_3139081</i> | NA                                  | <i>Ca_kabuli_denovo</i> | 3139081                 | A/G  | NA                 | NA                            | NA                 |
| <i>Kabuli_wild_3139132</i> | NA                                  | <i>Ca_kabuli_denovo</i> | 3139132                 | G/C  | NA                 | NA                            | NA                 |
| <i>Kabuli_wild_3139583</i> | NA                                  | <i>Ca_kabuli_denovo</i> | 3139583                 | C/A  | NA                 | NA                            | NA                 |
| <i>Kabuli_wild_3139681</i> | NA                                  | <i>Ca_kabuli_denovo</i> | 3139681                 | A/C  | NA                 | NA                            | NA                 |
| <i>Kabuli_wild_3140532</i> | NA                                  | <i>Ca_kabuli_denovo</i> | 3140532                 | T/C  | NA                 | NA                            | NA                 |
| <i>Kabuli_wild_3140545</i> | NA                                  | <i>Ca_kabuli_denovo</i> | 3140545                 | G/A  | NA                 | NA                            | NA                 |
| <i>Kabuli_wild_3140956</i> | NA                                  | <i>Ca_kabuli_denovo</i> | 3140956                 | C/G  | NA                 | NA                            | NA                 |
| <i>Kabuli_wild_3141594</i> | NA                                  | <i>Ca_kabuli_denovo</i> | 3141594                 | A/G  | NA                 | NA                            | NA                 |
| <i>Kabuli_wild_3142085</i> | NA                                  | <i>Ca_kabuli_denovo</i> | 3142085                 | C/T  | NA                 | NA                            | NA                 |
| <i>Kabuli_wild_3142660</i> | NA                                  | <i>Ca_kabuli_denovo</i> | 3142660                 | C/T  | NA                 | NA                            | NA                 |
| <i>Kabuli_wild_3142663</i> | NA                                  | <i>Ca_kabuli_denovo</i> | 3142663                 | A/C  | NA                 | NA                            | NA                 |
| <i>Kabuli_wild_3142834</i> | NA                                  | <i>Ca_kabuli_denovo</i> | 3142834                 | C/T  | NA                 | NA                            | NA                 |
| <i>Kabuli_wild_3144137</i> | NA                                  | <i>Ca_kabuli_denovo</i> | 3144137                 | T/C  | NA                 | NA                            | NA                 |
| <i>Kabuli_wild_3145953</i> | NA                                  | <i>Ca_kabuli_denovo</i> | 3145953                 | A/G  | NA                 | NA                            | NA                 |
| <i>Kabuli_wild_3148329</i> | NA                                  | <i>Ca_kabuli_denovo</i> | 3148329                 | A/G  | NA                 | NA                            | NA                 |
| <i>Kabuli_wild_3149246</i> | NA                                  | <i>Ca_kabuli_denovo</i> | 3149246                 | T/C  | NA                 | NA                            | NA                 |
| <i>Kabuli_wild_3149382</i> | NA                                  | <i>Ca_kabuli_denovo</i> | 3149382                 | A/G  | NA                 | NA                            | NA                 |
| <i>Kabuli_wild_3150355</i> | NA                                  | <i>Ca_kabuli_denovo</i> | 3150355                 | C/G  | NA                 | NA                            | NA                 |
| <i>Kabuli_wild_3152545</i> | NA                                  | <i>Ca_kabuli_denovo</i> | 3152545                 | G/A  | NA                 | NA                            | NA                 |
| <i>Kabuli_wild_3152599</i> | NA                                  | <i>Ca_kabuli_denovo</i> | 3152599                 | T/C  | NA                 | NA                            | NA                 |
| <i>Kabuli_wild_3152943</i> | NA                                  | <i>Ca_kabuli_denovo</i> | 3152943                 | T/C  | NA                 | NA                            | NA                 |
| <i>Kabuli_wild_3153896</i> | NA                                  | <i>Ca_kabuli_denovo</i> | 3153896                 | A/G  | NA                 | NA                            | NA                 |
| <i>Kabuli_wild_3153950</i> | NA                                  | <i>Ca_kabuli_denovo</i> | 3153950                 | G/C  | NA                 | NA                            | NA                 |
| <i>Kabuli_wild_3155168</i> | NA                                  | <i>Ca_kabuli_denovo</i> | 3155168                 | A/G  | NA                 | NA                            | NA                 |
| <i>Kabuli_wild_3155179</i> | NA                                  | <i>Ca_kabuli_denovo</i> | 3155179                 | G/T  | NA                 | NA                            | NA                 |
| <i>Kabuli_wild_3155591</i> | NA                                  | <i>Ca_kabuli_denovo</i> | 3155591                 | T/G  | NA                 | NA                            | NA                 |
| <i>Kabuli_wild_3157083</i> | NA                                  | <i>Ca_kabuli_denovo</i> | 3157083                 | C/G  | NA                 | NA                            | NA                 |
| <i>Kabuli_wild_3158605</i> | NA                                  | <i>Ca_kabuli_denovo</i> | 3158605                 | G/T  | NA                 | NA                            | NA                 |
| <i>Kabuli_wild_3158632</i> | NA                                  | <i>Ca_kabuli_denovo</i> | 3158632                 | T/C  | NA                 | NA                            | NA                 |
| <i>Kabuli_wild_3159065</i> | NA                                  | <i>Ca_kabuli_denovo</i> | 3159065                 | C/G  | NA                 | NA                            | NA                 |
| <i>Kabuli_wild_3159128</i> | NA                                  | <i>Ca_kabuli_denovo</i> | 3159128                 | C/T  | NA                 | NA                            | NA                 |
| <i>Kabuli_wild_3160718</i> | NA                                  | <i>Ca_kabuli_denovo</i> | 3160718                 | A/G  | NA                 | NA                            | NA                 |
| <i>Kabuli_wild_3160730</i> | NA                                  | <i>Ca_kabuli_denovo</i> | 3160730                 | G/A  | NA                 | NA                            | NA                 |
| <i>Kabuli_wild_3161580</i> | NA                                  | <i>Ca_kabuli_denovo</i> | 3161580                 | G/C  | NA                 | NA                            | NA                 |
| <i>Kabuli_wild_3161637</i> | NA                                  | <i>Ca_kabuli_denovo</i> | 3161637                 | G/T  | NA                 | NA                            | NA                 |
| <i>Kabuli_wild_3161859</i> | NA                                  | <i>Ca_kabuli_denovo</i> | 3161859                 | T/C  | NA                 | NA                            | NA                 |
| <i>Kabuli_wild_3161974</i> | NA                                  | <i>Ca_kabuli_denovo</i> | 3161974                 | C/A  | NA                 | NA                            | NA                 |
| <i>Kabuli_wild_3162064</i> | NA                                  | <i>Ca_kabuli_denovo</i> | 3162064                 | C/A  | NA                 | NA                            | NA                 |
| <i>Kabuli_wild_3162068</i> | NA                                  | <i>Ca_kabuli_denovo</i> | 3162068                 | G/C  | NA                 | NA                            | NA                 |
| <i>Kabuli_wild_3162258</i> | NA                                  | <i>Ca_kabuli_denovo</i> | 3162258                 | G/A  | NA                 | NA                            | NA                 |

| SNP IDs             | NCBI dbSNP accession IDs (NCBI_SS#) | Chromosomes      | Physical positions (bp) | SNPs | Gene accession IDs | Sequence components of genome | Putative functions |
|---------------------|-------------------------------------|------------------|-------------------------|------|--------------------|-------------------------------|--------------------|
| Kabuli_wild_3162327 | NA                                  | Ca_kabuli_denovo | 3162327                 | G/A  | NA                 | NA                            | NA                 |
| Kabuli_wild_3162961 | NA                                  | Ca_kabuli_denovo | 3162961                 | C/G  | NA                 | NA                            | NA                 |
| Kabuli_wild_3162997 | NA                                  | Ca_kabuli_denovo | 3162997                 | G/A  | NA                 | NA                            | NA                 |
| Kabuli_wild_3164108 | NA                                  | Ca_kabuli_denovo | 3164108                 | G/C  | NA                 | NA                            | NA                 |
| Kabuli_wild_3164700 | NA                                  | Ca_kabuli_denovo | 3164700                 | C/G  | NA                 | NA                            | NA                 |
| Kabuli_wild_3165839 | NA                                  | Ca_kabuli_denovo | 3165839                 | T/C  | NA                 | NA                            | NA                 |
| Kabuli_wild_3166239 | NA                                  | Ca_kabuli_denovo | 3166239                 | T/C  | NA                 | NA                            | NA                 |
| Kabuli_wild_3166325 | NA                                  | Ca_kabuli_denovo | 3166325                 | A/T  | NA                 | NA                            | NA                 |
| Kabuli_wild_3166541 | NA                                  | Ca_kabuli_denovo | 3166541                 | A/G  | NA                 | NA                            | NA                 |
| Kabuli_wild_3166577 | NA                                  | Ca_kabuli_denovo | 3166577                 | T/A  | NA                 | NA                            | NA                 |
| Kabuli_wild_3167213 | NA                                  | Ca_kabuli_denovo | 3167213                 | C/A  | NA                 | NA                            | NA                 |
| Kabuli_wild_3167222 | NA                                  | Ca_kabuli_denovo | 3167222                 | C/T  | NA                 | NA                            | NA                 |
| Kabuli_wild_3167607 | NA                                  | Ca_kabuli_denovo | 3167607                 | T/C  | NA                 | NA                            | NA                 |
| Kabuli_wild_3168194 | NA                                  | Ca_kabuli_denovo | 3168194                 | T/C  | NA                 | NA                            | NA                 |
| Kabuli_wild_3168239 | NA                                  | Ca_kabuli_denovo | 3168239                 | G/A  | NA                 | NA                            | NA                 |
| Kabuli_wild_3168657 | NA                                  | Ca_kabuli_denovo | 3168657                 | G/A  | NA                 | NA                            | NA                 |
| Kabuli_wild_3168669 | NA                                  | Ca_kabuli_denovo | 3168669                 | G/C  | NA                 | NA                            | NA                 |
| Kabuli_wild_3169267 | NA                                  | Ca_kabuli_denovo | 3169267                 | A/G  | NA                 | NA                            | NA                 |
| Kabuli_wild_3169279 | NA                                  | Ca_kabuli_denovo | 3169279                 | A/G  | NA                 | NA                            | NA                 |
| Kabuli_wild_3171214 | NA                                  | Ca_kabuli_denovo | 3171214                 | G/A  | NA                 | NA                            | NA                 |
| Kabuli_wild_3171770 | NA                                  | Ca_kabuli_denovo | 3171770                 | G/C  | NA                 | NA                            | NA                 |
| Kabuli_wild_3171772 | NA                                  | Ca_kabuli_denovo | 3171772                 | C/A  | NA                 | NA                            | NA                 |
| Kabuli_wild_3171849 | NA                                  | Ca_kabuli_denovo | 3171849                 | C/G  | NA                 | NA                            | NA                 |
| Kabuli_wild_3171869 | NA                                  | Ca_kabuli_denovo | 3171869                 | G/A  | NA                 | NA                            | NA                 |
| Kabuli_wild_3173400 | NA                                  | Ca_kabuli_denovo | 3173400                 | T/G  | NA                 | NA                            | NA                 |
| Kabuli_wild_3173430 | NA                                  | Ca_kabuli_denovo | 3173430                 | A/G  | NA                 | NA                            | NA                 |
| Kabuli_wild_3173697 | NA                                  | Ca_kabuli_denovo | 3173697                 | C/T  | NA                 | NA                            | NA                 |
| Kabuli_wild_3174221 | NA                                  | Ca_kabuli_denovo | 3174221                 | G/A  | NA                 | NA                            | NA                 |
| Kabuli_wild_3174988 | NA                                  | Ca_kabuli_denovo | 3174988                 | A/G  | NA                 | NA                            | NA                 |
| Kabuli_wild_3175148 | NA                                  | Ca_kabuli_denovo | 3175148                 | G/T  | NA                 | NA                            | NA                 |
| Kabuli_wild_3175473 | NA                                  | Ca_kabuli_denovo | 3175473                 | T/C  | NA                 | NA                            | NA                 |
| Kabuli_wild_3175510 | NA                                  | Ca_kabuli_denovo | 3175510                 | A/G  | NA                 | NA                            | NA                 |
| Kabuli_wild_3176074 | NA                                  | Ca_kabuli_denovo | 3176074                 | A/G  | NA                 | NA                            | NA                 |
| Kabuli_wild_3179212 | NA                                  | Ca_kabuli_denovo | 3179212                 | G/T  | NA                 | NA                            | NA                 |
| Kabuli_wild_3179421 | NA                                  | Ca_kabuli_denovo | 3179421                 | T/G  | NA                 | NA                            | NA                 |
| Kabuli_wild_3179445 | NA                                  | Ca_kabuli_denovo | 3179445                 | C/G  | NA                 | NA                            | NA                 |
| Kabuli_wild_3180201 | NA                                  | Ca_kabuli_denovo | 3180201                 | G/C  | NA                 | NA                            | NA                 |
| Kabuli_wild_3180222 | NA                                  | Ca_kabuli_denovo | 3180222                 | T/C  | NA                 | NA                            | NA                 |
| Kabuli_wild_3180929 | NA                                  | Ca_kabuli_denovo | 3180929                 | G/A  | NA                 | NA                            | NA                 |
| Kabuli_wild_3181383 | NA                                  | Ca_kabuli_denovo | 3181383                 | C/T  | NA                 | NA                            | NA                 |
| Kabuli_wild_3181810 | NA                                  | Ca_kabuli_denovo | 3181810                 | T/C  | NA                 | NA                            | NA                 |
| Kabuli_wild_3182827 | NA                                  | Ca_kabuli_denovo | 3182827                 | C/A  | NA                 | NA                            | NA                 |
| Kabuli_wild_3182851 | NA                                  | Ca_kabuli_denovo | 3182851                 | G/C  | NA                 | NA                            | NA                 |
| Kabuli_wild_3184413 | NA                                  | Ca_kabuli_denovo | 3184413                 | G/C  | NA                 | NA                            | NA                 |

| SNP IDs             | NCBI dbSNP accession IDs (NCBI_SS#) | Chromosomes      | Physical positions (bp) | SNPs | Gene accession IDs | Sequence components of genome | Putative functions |
|---------------------|-------------------------------------|------------------|-------------------------|------|--------------------|-------------------------------|--------------------|
| Kabuli_wild_3184420 | NA                                  | Ca_kabuli_denovo | 3184420                 | A/C  | NA                 | NA                            | NA                 |
| Kabuli_wild_3185076 | NA                                  | Ca_kabuli_denovo | 3185076                 | G/A  | NA                 | NA                            | NA                 |
| Kabuli_wild_3185306 | NA                                  | Ca_kabuli_denovo | 3185306                 | G/A  | NA                 | NA                            | NA                 |
| Kabuli_wild_3185950 | NA                                  | Ca_kabuli_denovo | 3185950                 | A/T  | NA                 | NA                            | NA                 |
| Kabuli_wild_3185956 | NA                                  | Ca_kabuli_denovo | 3185956                 | G/A  | NA                 | NA                            | NA                 |
| Kabuli_wild_3186344 | NA                                  | Ca_kabuli_denovo | 3186344                 | C/T  | NA                 | NA                            | NA                 |
| Kabuli_wild_3186379 | NA                                  | Ca_kabuli_denovo | 3186379                 | G/C  | NA                 | NA                            | NA                 |
| Kabuli_wild_3186437 | NA                                  | Ca_kabuli_denovo | 3186437                 | G/A  | NA                 | NA                            | NA                 |
| Kabuli_wild_3186582 | NA                                  | Ca_kabuli_denovo | 3186582                 | C/T  | NA                 | NA                            | NA                 |
| Kabuli_wild_3187501 | NA                                  | Ca_kabuli_denovo | 3187501                 | T/G  | NA                 | NA                            | NA                 |
| Kabuli_wild_3188935 | NA                                  | Ca_kabuli_denovo | 3188935                 | A/G  | NA                 | NA                            | NA                 |
| Kabuli_wild_3190091 | NA                                  | Ca_kabuli_denovo | 3190091                 | A/G  | NA                 | NA                            | NA                 |
| Kabuli_wild_3190397 | NA                                  | Ca_kabuli_denovo | 3190397                 | C/A  | NA                 | NA                            | NA                 |
| Kabuli_wild_3190432 | NA                                  | Ca_kabuli_denovo | 3190432                 | T/C  | NA                 | NA                            | NA                 |
| Kabuli_wild_3191184 | NA                                  | Ca_kabuli_denovo | 3191184                 | A/G  | NA                 | NA                            | NA                 |
| Kabuli_wild_3191235 | NA                                  | Ca_kabuli_denovo | 3191235                 | C/T  | NA                 | NA                            | NA                 |
| Kabuli_wild_3192333 | NA                                  | Ca_kabuli_denovo | 3192333                 | T/C  | NA                 | NA                            | NA                 |
| Kabuli_wild_3192366 | NA                                  | Ca_kabuli_denovo | 3192366                 | G/C  | NA                 | NA                            | NA                 |
| Kabuli_wild_3194699 | NA                                  | Ca_kabuli_denovo | 3194699                 | A/C  | NA                 | NA                            | NA                 |
| Kabuli_wild_3195783 | NA                                  | Ca_kabuli_denovo | 3195783                 | G/C  | NA                 | NA                            | NA                 |
| Kabuli_wild_3197426 | NA                                  | Ca_kabuli_denovo | 3197426                 | A/G  | NA                 | NA                            | NA                 |
| Kabuli_wild_3197427 | NA                                  | Ca_kabuli_denovo | 3197427                 | G/C  | NA                 | NA                            | NA                 |
| Kabuli_wild_3197429 | NA                                  | Ca_kabuli_denovo | 3197429                 | A/G  | NA                 | NA                            | NA                 |
| Kabuli_wild_3197430 | NA                                  | Ca_kabuli_denovo | 3197430                 | G/A  | NA                 | NA                            | NA                 |
| Kabuli_wild_3197433 | NA                                  | Ca_kabuli_denovo | 3197433                 | C/A  | NA                 | NA                            | NA                 |
| Kabuli_wild_3197434 | NA                                  | Ca_kabuli_denovo | 3197434                 | C/T  | NA                 | NA                            | NA                 |
| Kabuli_wild_3197436 | NA                                  | Ca_kabuli_denovo | 3197436                 | A/C  | NA                 | NA                            | NA                 |
| Kabuli_wild_3197960 | NA                                  | Ca_kabuli_denovo | 3197960                 | T/C  | NA                 | NA                            | NA                 |
| Kabuli_wild_3199518 | NA                                  | Ca_kabuli_denovo | 3199518                 | C/A  | NA                 | NA                            | NA                 |
| Kabuli_wild_3199533 | NA                                  | Ca_kabuli_denovo | 3199533                 | A/G  | NA                 | NA                            | NA                 |
| Kabuli_wild_3200047 | NA                                  | Ca_kabuli_denovo | 3200047                 | A/G  | NA                 | NA                            | NA                 |
| Kabuli_wild_3200529 | NA                                  | Ca_kabuli_denovo | 3200529                 | C/A  | NA                 | NA                            | NA                 |
| Kabuli_wild_3200874 | NA                                  | Ca_kabuli_denovo | 3200874                 | C/A  | NA                 | NA                            | NA                 |
| Kabuli_wild_3201921 | NA                                  | Ca_kabuli_denovo | 3201921                 | T/C  | NA                 | NA                            | NA                 |
| Kabuli_wild_3202005 | NA                                  | Ca_kabuli_denovo | 3202005                 | G/T  | NA                 | NA                            | NA                 |
| Kabuli_wild_3202634 | NA                                  | Ca_kabuli_denovo | 3202634                 | T/C  | NA                 | NA                            | NA                 |
| Kabuli_wild_3203474 | NA                                  | Ca_kabuli_denovo | 3203474                 | T/C  | NA                 | NA                            | NA                 |
| Kabuli_wild_3203719 | NA                                  | Ca_kabuli_denovo | 3203719                 | G/C  | NA                 | NA                            | NA                 |
| Kabuli_wild_3203860 | NA                                  | Ca_kabuli_denovo | 3203860                 | G/A  | NA                 | NA                            | NA                 |
| Kabuli_wild_3204967 | NA                                  | Ca_kabuli_denovo | 3204967                 | A/G  | NA                 | NA                            | NA                 |
| Kabuli_wild_3204973 | NA                                  | Ca_kabuli_denovo | 3204973                 | A/G  | NA                 | NA                            | NA                 |
| Kabuli_wild_3205946 | NA                                  | Ca_kabuli_denovo | 3205946                 | C/T  | NA                 | NA                            | NA                 |
| Kabuli_wild_3206700 | NA                                  | Ca_kabuli_denovo | 3206700                 | C/T  | NA                 | NA                            | NA                 |
| Kabuli_wild_3206701 | NA                                  | Ca_kabuli_denovo | 3206701                 | T/C  | NA                 | NA                            | NA                 |

| SNP IDs             | NCBI dbSNP accession IDs (NCBI_SS#) | Chromosomes      | Physical positions (bp) | SNPs | Gene accession IDs | Sequence components of genome | Putative functions |
|---------------------|-------------------------------------|------------------|-------------------------|------|--------------------|-------------------------------|--------------------|
| Kabuli_wild_3206996 | NA                                  | Ca_kabuli_denovo | 3206996                 | C/A  | NA                 | NA                            | NA                 |
| Kabuli_wild_3207002 | NA                                  | Ca_kabuli_denovo | 3207002                 | G/C  | NA                 | NA                            | NA                 |
| Kabuli_wild_3207894 | NA                                  | Ca_kabuli_denovo | 3207894                 | A/G  | NA                 | NA                            | NA                 |
| Kabuli_wild_3207928 | NA                                  | Ca_kabuli_denovo | 3207928                 | A/T  | NA                 | NA                            | NA                 |
| Kabuli_wild_3207931 | NA                                  | Ca_kabuli_denovo | 3207931                 | A/C  | NA                 | NA                            | NA                 |
| Kabuli_wild_3210359 | NA                                  | Ca_kabuli_denovo | 3210359                 | T/G  | NA                 | NA                            | NA                 |
| Kabuli_wild_3210369 | NA                                  | Ca_kabuli_denovo | 3210369                 | C/G  | NA                 | NA                            | NA                 |
| Kabuli_wild_3210472 | NA                                  | Ca_kabuli_denovo | 3210472                 | G/C  | NA                 | NA                            | NA                 |
| Kabuli_wild_3210494 | NA                                  | Ca_kabuli_denovo | 3210494                 | A/G  | NA                 | NA                            | NA                 |
| Kabuli_wild_3210682 | NA                                  | Ca_kabuli_denovo | 3210682                 | G/A  | NA                 | NA                            | NA                 |
| Kabuli_wild_3210756 | NA                                  | Ca_kabuli_denovo | 3210756                 | A/G  | NA                 | NA                            | NA                 |
| Kabuli_wild_3212665 | NA                                  | Ca_kabuli_denovo | 3212665                 | G/A  | NA                 | NA                            | NA                 |
| Kabuli_wild_3212782 | NA                                  | Ca_kabuli_denovo | 3212782                 | T/C  | NA                 | NA                            | NA                 |
| Kabuli_wild_3212863 | NA                                  | Ca_kabuli_denovo | 3212863                 | T/C  | NA                 | NA                            | NA                 |
| Kabuli_wild_3212923 | NA                                  | Ca_kabuli_denovo | 3212923                 | T/C  | NA                 | NA                            | NA                 |
| Kabuli_wild_3212950 | NA                                  | Ca_kabuli_denovo | 3212950                 | G/A  | NA                 | NA                            | NA                 |
| Kabuli_wild_3213912 | NA                                  | Ca_kabuli_denovo | 3213912                 | C/G  | NA                 | NA                            | NA                 |
| Kabuli_wild_3213974 | NA                                  | Ca_kabuli_denovo | 3213974                 | G/A  | NA                 | NA                            | NA                 |
| Kabuli_wild_3214153 | NA                                  | Ca_kabuli_denovo | 3214153                 | C/G  | NA                 | NA                            | NA                 |
| Kabuli_wild_3214379 | NA                                  | Ca_kabuli_denovo | 3214379                 | C/G  | NA                 | NA                            | NA                 |
| Kabuli_wild_3216790 | NA                                  | Ca_kabuli_denovo | 3216790                 | G/A  | NA                 | NA                            | NA                 |
| Kabuli_wild_3217095 | NA                                  | Ca_kabuli_denovo | 3217095                 | T/C  | NA                 | NA                            | NA                 |
| Kabuli_wild_3217374 | NA                                  | Ca_kabuli_denovo | 3217374                 | A/C  | NA                 | NA                            | NA                 |
| Kabuli_wild_3217545 | NA                                  | Ca_kabuli_denovo | 3217545                 | A/T  | NA                 | NA                            | NA                 |
| Kabuli_wild_3217569 | NA                                  | Ca_kabuli_denovo | 3217569                 | T/C  | NA                 | NA                            | NA                 |
| Kabuli_wild_3218024 | NA                                  | Ca_kabuli_denovo | 3218024                 | C/A  | NA                 | NA                            | NA                 |
| Kabuli_wild_3218819 | NA                                  | Ca_kabuli_denovo | 3218819                 | T/C  | NA                 | NA                            | NA                 |
| Kabuli_wild_3219352 | NA                                  | Ca_kabuli_denovo | 3219352                 | A/G  | NA                 | NA                            | NA                 |
| Kabuli_wild_3219948 | NA                                  | Ca_kabuli_denovo | 3219948                 | A/C  | NA                 | NA                            | NA                 |
| Kabuli_wild_3221237 | NA                                  | Ca_kabuli_denovo | 3221237                 | T/C  | NA                 | NA                            | NA                 |
| Kabuli_wild_3221286 | NA                                  | Ca_kabuli_denovo | 3221286                 | G/T  | NA                 | NA                            | NA                 |
| Kabuli_wild_3221493 | NA                                  | Ca_kabuli_denovo | 3221493                 | C/T  | NA                 | NA                            | NA                 |
| Kabuli_wild_3221713 | NA                                  | Ca_kabuli_denovo | 3221713                 | G/C  | NA                 | NA                            | NA                 |
| Kabuli_wild_3221766 | NA                                  | Ca_kabuli_denovo | 3221766                 | C/G  | NA                 | NA                            | NA                 |
| Kabuli_wild_3223179 | NA                                  | Ca_kabuli_denovo | 3223179                 | T/G  | NA                 | NA                            | NA                 |
| Kabuli_wild_3223189 | NA                                  | Ca_kabuli_denovo | 3223189                 | T/C  | NA                 | NA                            | NA                 |
| Kabuli_wild_3223482 | NA                                  | Ca_kabuli_denovo | 3223482                 | T/G  | NA                 | NA                            | NA                 |
| Kabuli_wild_3223563 | NA                                  | Ca_kabuli_denovo | 3223563                 | C/T  | NA                 | NA                            | NA                 |
| Kabuli_wild_3223792 | NA                                  | Ca_kabuli_denovo | 3223792                 | C/G  | NA                 | NA                            | NA                 |
| Kabuli_wild_3224774 | NA                                  | Ca_kabuli_denovo | 3224774                 | T/C  | NA                 | NA                            | NA                 |
| Kabuli_wild_3224792 | NA                                  | Ca_kabuli_denovo | 3224792                 | A/G  | NA                 | NA                            | NA                 |
| Kabuli_wild_3224846 | NA                                  | Ca_kabuli_denovo | 3224846                 | G/A  | NA                 | NA                            | NA                 |
| Kabuli_wild_3225129 | NA                                  | Ca_kabuli_denovo | 3225129                 | C/A  | NA                 | NA                            | NA                 |
| Kabuli_wild_3225620 | NA                                  | Ca_kabuli_denovo | 3225620                 | G/A  | NA                 | NA                            | NA                 |

| SNP IDs             | NCBI dbSNP accession IDs (NCBI_SS#) | Chromosomes      | Physical positions (bp) | SNPs | Gene accession IDs | Sequence components of genome | Putative functions |
|---------------------|-------------------------------------|------------------|-------------------------|------|--------------------|-------------------------------|--------------------|
| Kabuli_wild_3225645 | NA                                  | Ca_kabuli_denovo | 3225645                 | A/G  | NA                 | NA                            | NA                 |
| Kabuli_wild_3226218 | NA                                  | Ca_kabuli_denovo | 3226218                 | C/G  | NA                 | NA                            | NA                 |
| Kabuli_wild_3226344 | NA                                  | Ca_kabuli_denovo | 3226344                 | G/T  | NA                 | NA                            | NA                 |
| Kabuli_wild_3226345 | NA                                  | Ca_kabuli_denovo | 3226345                 | C/A  | NA                 | NA                            | NA                 |
| Kabuli_wild_3227215 | NA                                  | Ca_kabuli_denovo | 3227215                 | T/G  | NA                 | NA                            | NA                 |
| Kabuli_wild_3227284 | NA                                  | Ca_kabuli_denovo | 3227284                 | G/A  | NA                 | NA                            | NA                 |
| Kabuli_wild_3227293 | NA                                  | Ca_kabuli_denovo | 3227293                 | G/A  | NA                 | NA                            | NA                 |
| Kabuli_wild_3228712 | NA                                  | Ca_kabuli_denovo | 3228712                 | T/C  | NA                 | NA                            | NA                 |
| Kabuli_wild_3228716 | NA                                  | Ca_kabuli_denovo | 3228716                 | C/T  | NA                 | NA                            | NA                 |
| Kabuli_wild_3229494 | NA                                  | Ca_kabuli_denovo | 3229494                 | T/C  | NA                 | NA                            | NA                 |
| Kabuli_wild_3230152 | NA                                  | Ca_kabuli_denovo | 3230152                 | A/G  | NA                 | NA                            | NA                 |
| Kabuli_wild_3230435 | NA                                  | Ca_kabuli_denovo | 3230435                 | G/A  | NA                 | NA                            | NA                 |
| Kabuli_wild_3230662 | NA                                  | Ca_kabuli_denovo | 3230662                 | G/A  | NA                 | NA                            | NA                 |
| Kabuli_wild_3230692 | NA                                  | Ca_kabuli_denovo | 3230692                 | A/G  | NA                 | NA                            | NA                 |
| Kabuli_wild_3230969 | NA                                  | Ca_kabuli_denovo | 3230969                 | C/T  | NA                 | NA                            | NA                 |
| Kabuli_wild_3231281 | NA                                  | Ca_kabuli_denovo | 3231281                 | G/A  | NA                 | NA                            | NA                 |
| Kabuli_wild_3233354 | NA                                  | Ca_kabuli_denovo | 3233354                 | A/G  | NA                 | NA                            | NA                 |
| Kabuli_wild_3234135 | NA                                  | Ca_kabuli_denovo | 3234135                 | T/C  | NA                 | NA                            | NA                 |
| Kabuli_wild_3234728 | NA                                  | Ca_kabuli_denovo | 3234728                 | T/G  | NA                 | NA                            | NA                 |
| Kabuli_wild_3235308 | NA                                  | Ca_kabuli_denovo | 3235308                 | G/T  | NA                 | NA                            | NA                 |
| Kabuli_wild_3235314 | NA                                  | Ca_kabuli_denovo | 3235314                 | G/A  | NA                 | NA                            | NA                 |
| Kabuli_wild_3236558 | NA                                  | Ca_kabuli_denovo | 3236558                 | C/G  | NA                 | NA                            | NA                 |
| Kabuli_wild_3237063 | NA                                  | Ca_kabuli_denovo | 3237063                 | A/G  | NA                 | NA                            | NA                 |
| Kabuli_wild_3237171 | NA                                  | Ca_kabuli_denovo | 3237171                 | T/C  | NA                 | NA                            | NA                 |
| Kabuli_wild_3237177 | NA                                  | Ca_kabuli_denovo | 3237177                 | G/T  | NA                 | NA                            | NA                 |
| Kabuli_wild_3237180 | NA                                  | Ca_kabuli_denovo | 3237180                 | T/C  | NA                 | NA                            | NA                 |
| Kabuli_wild_3237237 | NA                                  | Ca_kabuli_denovo | 3237237                 | T/C  | NA                 | NA                            | NA                 |
| Kabuli_wild_3238585 | NA                                  | Ca_kabuli_denovo | 3238585                 | G/A  | NA                 | NA                            | NA                 |
| Kabuli_wild_3238593 | NA                                  | Ca_kabuli_denovo | 3238593                 | C/T  | NA                 | NA                            | NA                 |
| Kabuli_wild_3239635 | NA                                  | Ca_kabuli_denovo | 3239635                 | T/G  | NA                 | NA                            | NA                 |
| Kabuli_wild_3241518 | NA                                  | Ca_kabuli_denovo | 3241518                 | T/C  | NA                 | NA                            | NA                 |
| Kabuli_wild_3241623 | NA                                  | Ca_kabuli_denovo | 3241623                 | T/A  | NA                 | NA                            | NA                 |
| Kabuli_wild_3241660 | NA                                  | Ca_kabuli_denovo | 3241660                 | G/A  | NA                 | NA                            | NA                 |
| Kabuli_wild_3241688 | NA                                  | Ca_kabuli_denovo | 3241688                 | G/C  | NA                 | NA                            | NA                 |
| Kabuli_wild_3241690 | NA                                  | Ca_kabuli_denovo | 3241690                 | G/A  | NA                 | NA                            | NA                 |
| Kabuli_wild_3242091 | NA                                  | Ca_kabuli_denovo | 3242091                 | C/T  | NA                 | NA                            | NA                 |
| Kabuli_wild_3242100 | NA                                  | Ca_kabuli_denovo | 3242100                 | C/A  | NA                 | NA                            | NA                 |
| Kabuli_wild_3242503 | NA                                  | Ca_kabuli_denovo | 3242503                 | A/G  | NA                 | NA                            | NA                 |
| Kabuli_wild_3242533 | NA                                  | Ca_kabuli_denovo | 3242533                 | G/A  | NA                 | NA                            | NA                 |
| Kabuli_wild_3242617 | NA                                  | Ca_kabuli_denovo | 3242617                 | G/A  | NA                 | NA                            | NA                 |
| Kabuli_wild_3242700 | NA                                  | Ca_kabuli_denovo | 3242700                 | T/C  | NA                 | NA                            | NA                 |
| Kabuli_wild_3243056 | NA                                  | Ca_kabuli_denovo | 3243056                 | G/C  | NA                 | NA                            | NA                 |
| Kabuli_wild_3244808 | NA                                  | Ca_kabuli_denovo | 3244808                 | A/G  | NA                 | NA                            | NA                 |
| Kabuli_wild_3244842 | NA                                  | Ca_kabuli_denovo | 3244842                 | G/C  | NA                 | NA                            | NA                 |

| SNP IDs             | NCBI dbSNP accession IDs (NCBI_SS#) | Chromosomes      | Physical positions (bp) | SNPs | Gene accession IDs | Sequence components of genome | Putative functions |
|---------------------|-------------------------------------|------------------|-------------------------|------|--------------------|-------------------------------|--------------------|
| Kabuli_wild_3244928 | NA                                  | Ca_kabuli_denovo | 3244928                 | G/T  | NA                 | NA                            | NA                 |
| Kabuli_wild_3245400 | NA                                  | Ca_kabuli_denovo | 3245400                 | C/T  | NA                 | NA                            | NA                 |
| Kabuli_wild_3245546 | NA                                  | Ca_kabuli_denovo | 3245546                 | T/C  | NA                 | NA                            | NA                 |
| Kabuli_wild_3245558 | NA                                  | Ca_kabuli_denovo | 3245558                 | T/G  | NA                 | NA                            | NA                 |
| Kabuli_wild_3245844 | NA                                  | Ca_kabuli_denovo | 3245844                 | C/G  | NA                 | NA                            | NA                 |
| Kabuli_wild_3245968 | NA                                  | Ca_kabuli_denovo | 3245968                 | C/G  | NA                 | NA                            | NA                 |
| Kabuli_wild_3245975 | NA                                  | Ca_kabuli_denovo | 3245975                 | T/C  | NA                 | NA                            | NA                 |
| Kabuli_wild_3247121 | NA                                  | Ca_kabuli_denovo | 3247121                 | T/C  | NA                 | NA                            | NA                 |
| Kabuli_wild_3249351 | NA                                  | Ca_kabuli_denovo | 3249351                 | T/G  | NA                 | NA                            | NA                 |
| Kabuli_wild_3250174 | NA                                  | Ca_kabuli_denovo | 3250174                 | A/G  | NA                 | NA                            | NA                 |
| Kabuli_wild_3250187 | NA                                  | Ca_kabuli_denovo | 3250187                 | G/C  | NA                 | NA                            | NA                 |
| Kabuli_wild_3250368 | NA                                  | Ca_kabuli_denovo | 3250368                 | T/C  | NA                 | NA                            | NA                 |
| Kabuli_wild_3250782 | NA                                  | Ca_kabuli_denovo | 3250782                 | C/T  | NA                 | NA                            | NA                 |
| Kabuli_wild_3250925 | NA                                  | Ca_kabuli_denovo | 3250925                 | C/T  | NA                 | NA                            | NA                 |
| Kabuli_wild_3250935 | NA                                  | Ca_kabuli_denovo | 3250935                 | G/A  | NA                 | NA                            | NA                 |
| Kabuli_wild_3251139 | NA                                  | Ca_kabuli_denovo | 3251139                 | T/C  | NA                 | NA                            | NA                 |
| Kabuli_wild_3251157 | NA                                  | Ca_kabuli_denovo | 3251157                 | A/C  | NA                 | NA                            | NA                 |
| Kabuli_wild_3251206 | NA                                  | Ca_kabuli_denovo | 3251206                 | G/C  | NA                 | NA                            | NA                 |
| Kabuli_wild_3251230 | NA                                  | Ca_kabuli_denovo | 3251230                 | G/A  | NA                 | NA                            | NA                 |
| Kabuli_wild_3251338 | NA                                  | Ca_kabuli_denovo | 3251338                 | C/G  | NA                 | NA                            | NA                 |
| Kabuli_wild_3251341 | NA                                  | Ca_kabuli_denovo | 3251341                 | T/C  | NA                 | NA                            | NA                 |
| Kabuli_wild_3251402 | NA                                  | Ca_kabuli_denovo | 3251402                 | C/G  | NA                 | NA                            | NA                 |
| Kabuli_wild_3251420 | NA                                  | Ca_kabuli_denovo | 3251420                 | C/T  | NA                 | NA                            | NA                 |
| Kabuli_wild_3251552 | NA                                  | Ca_kabuli_denovo | 3251552                 | T/C  | NA                 | NA                            | NA                 |
| Kabuli_wild_3251570 | NA                                  | Ca_kabuli_denovo | 3251570                 | G/A  | NA                 | NA                            | NA                 |
| Kabuli_wild_3251938 | NA                                  | Ca_kabuli_denovo | 3251938                 | T/G  | NA                 | NA                            | NA                 |
| Kabuli_wild_3251959 | NA                                  | Ca_kabuli_denovo | 3251959                 | T/G  | NA                 | NA                            | NA                 |
| Kabuli_wild_3253249 | NA                                  | Ca_kabuli_denovo | 3253249                 | C/T  | NA                 | NA                            | NA                 |
| Kabuli_wild_3253277 | NA                                  | Ca_kabuli_denovo | 3253277                 | C/G  | NA                 | NA                            | NA                 |
| Kabuli_wild_3253589 | NA                                  | Ca_kabuli_denovo | 3253589                 | C/T  | NA                 | NA                            | NA                 |
| Kabuli_wild_3253598 | NA                                  | Ca_kabuli_denovo | 3253598                 | C/T  | NA                 | NA                            | NA                 |
| Kabuli_wild_3253742 | NA                                  | Ca_kabuli_denovo | 3253742                 | C/G  | NA                 | NA                            | NA                 |
| Kabuli_wild_3253939 | NA                                  | Ca_kabuli_denovo | 3253939                 | C/T  | NA                 | NA                            | NA                 |
| Kabuli_wild_3256460 | NA                                  | Ca_kabuli_denovo | 3256460                 | C/T  | NA                 | NA                            | NA                 |
| Kabuli_wild_3256932 | NA                                  | Ca_kabuli_denovo | 3256932                 | G/A  | NA                 | NA                            | NA                 |
| Kabuli_wild_3256962 | NA                                  | Ca_kabuli_denovo | 3256962                 | T/C  | NA                 | NA                            | NA                 |
| Kabuli_wild_3258574 | NA                                  | Ca_kabuli_denovo | 3258574                 | A/G  | NA                 | NA                            | NA                 |
| Kabuli_wild_3258608 | NA                                  | Ca_kabuli_denovo | 3258608                 | G/C  | NA                 | NA                            | NA                 |
| Kabuli_wild_3258973 | NA                                  | Ca_kabuli_denovo | 3258973                 | C/G  | NA                 | NA                            | NA                 |
| Kabuli_wild_3260219 | NA                                  | Ca_kabuli_denovo | 3260219                 | A/G  | NA                 | NA                            | NA                 |
| Kabuli_wild_3260288 | NA                                  | Ca_kabuli_denovo | 3260288                 | A/G  | NA                 | NA                            | NA                 |
| Kabuli_wild_3260940 | NA                                  | Ca_kabuli_denovo | 3260940                 | C/T  | NA                 | NA                            | NA                 |
| Kabuli_wild_3261172 | NA                                  | Ca_kabuli_denovo | 3261172                 | A/C  | NA                 | NA                            | NA                 |
| Kabuli_wild_3261274 | NA                                  | Ca_kabuli_denovo | 3261274                 | A/C  | NA                 | NA                            | NA                 |

| SNP IDs             | NCBI dbSNP accession IDs (NCBI_SS#) | Chromosomes      | Physical positions (bp) | SNPs | Gene accession IDs | Sequence components of genome | Putative functions |
|---------------------|-------------------------------------|------------------|-------------------------|------|--------------------|-------------------------------|--------------------|
| Kabuli_wild_3261275 | NA                                  | Ca_kabuli_denovo | 3261275                 | A/G  | NA                 | NA                            | NA                 |
| Kabuli_wild_3261883 | NA                                  | Ca_kabuli_denovo | 3261883                 | G/C  | NA                 | NA                            | NA                 |
| Kabuli_wild_3261916 | NA                                  | Ca_kabuli_denovo | 3261916                 | A/G  | NA                 | NA                            | NA                 |
| Kabuli_wild_3262280 | NA                                  | Ca_kabuli_denovo | 3262280                 | G/C  | NA                 | NA                            | NA                 |
| Kabuli_wild_3262302 | NA                                  | Ca_kabuli_denovo | 3262302                 | T/C  | NA                 | NA                            | NA                 |
| Kabuli_wild_3262770 | NA                                  | Ca_kabuli_denovo | 3262770                 | G/A  | NA                 | NA                            | NA                 |
| Kabuli_wild_3262783 | NA                                  | Ca_kabuli_denovo | 3262783                 | G/C  | NA                 | NA                            | NA                 |
| Kabuli_wild_3262789 | NA                                  | Ca_kabuli_denovo | 3262789                 | G/A  | NA                 | NA                            | NA                 |
| Kabuli_wild_3263010 | NA                                  | Ca_kabuli_denovo | 3263010                 | C/T  | NA                 | NA                            | NA                 |
| Kabuli_wild_3263612 | NA                                  | Ca_kabuli_denovo | 3263612                 | C/G  | NA                 | NA                            | NA                 |
| Kabuli_wild_3263639 | NA                                  | Ca_kabuli_denovo | 3263639                 | T/C  | NA                 | NA                            | NA                 |
| Kabuli_wild_3263756 | NA                                  | Ca_kabuli_denovo | 3263756                 | G/A  | NA                 | NA                            | NA                 |
| Kabuli_wild_3263758 | NA                                  | Ca_kabuli_denovo | 3263758                 | C/G  | NA                 | NA                            | NA                 |
| Kabuli_wild_3263760 | NA                                  | Ca_kabuli_denovo | 3263760                 | A/C  | NA                 | NA                            | NA                 |
| Kabuli_wild_3263762 | NA                                  | Ca_kabuli_denovo | 3263762                 | G/A  | NA                 | NA                            | NA                 |
| Kabuli_wild_3265857 | NA                                  | Ca_kabuli_denovo | 3265857                 | C/T  | NA                 | NA                            | NA                 |
| Kabuli_wild_3266291 | NA                                  | Ca_kabuli_denovo | 3266291                 | G/A  | NA                 | NA                            | NA                 |
| Kabuli_wild_3269085 | NA                                  | Ca_kabuli_denovo | 3269085                 | A/G  | NA                 | NA                            | NA                 |
| Kabuli_wild_3269527 | NA                                  | Ca_kabuli_denovo | 3269527                 | G/C  | NA                 | NA                            | NA                 |
| Kabuli_wild_3271679 | NA                                  | Ca_kabuli_denovo | 3271679                 | T/C  | NA                 | NA                            | NA                 |
| Kabuli_wild_3272750 | NA                                  | Ca_kabuli_denovo | 3272750                 | C/T  | NA                 | NA                            | NA                 |
| Kabuli_wild_3272928 | NA                                  | Ca_kabuli_denovo | 3272928                 | T/C  | NA                 | NA                            | NA                 |
| Kabuli_wild_3272965 | NA                                  | Ca_kabuli_denovo | 3272965                 | A/G  | NA                 | NA                            | NA                 |
| Kabuli_wild_3273066 | NA                                  | Ca_kabuli_denovo | 3273066                 | T/G  | NA                 | NA                            | NA                 |
| Kabuli_wild_3273097 | NA                                  | Ca_kabuli_denovo | 3273097                 | A/G  | NA                 | NA                            | NA                 |
| Kabuli_wild_3275162 | NA                                  | Ca_kabuli_denovo | 3275162                 | T/G  | NA                 | NA                            | NA                 |
| Kabuli_wild_3275310 | NA                                  | Ca_kabuli_denovo | 3275310                 | C/G  | NA                 | NA                            | NA                 |
| Kabuli_wild_3276148 | NA                                  | Ca_kabuli_denovo | 3276148                 | T/C  | NA                 | NA                            | NA                 |
| Kabuli_wild_3276239 | NA                                  | Ca_kabuli_denovo | 3276239                 | G/T  | NA                 | NA                            | NA                 |
| Kabuli_wild_3276248 | NA                                  | Ca_kabuli_denovo | 3276248                 | C/G  | NA                 | NA                            | NA                 |
| Kabuli_wild_3276494 | NA                                  | Ca_kabuli_denovo | 3276494                 | G/A  | NA                 | NA                            | NA                 |
| Kabuli_wild_3277303 | NA                                  | Ca_kabuli_denovo | 3277303                 | A/G  | NA                 | NA                            | NA                 |
| Kabuli_wild_3278140 | NA                                  | Ca_kabuli_denovo | 3278140                 | C/A  | NA                 | NA                            | NA                 |
| Kabuli_wild_3278362 | NA                                  | Ca_kabuli_denovo | 3278362                 | G/C  | NA                 | NA                            | NA                 |
| Kabuli_wild_3279002 | NA                                  | Ca_kabuli_denovo | 3279002                 | C/T  | NA                 | NA                            | NA                 |
| Kabuli_wild_3280408 | NA                                  | Ca_kabuli_denovo | 3280408                 | A/T  | NA                 | NA                            | NA                 |
| Kabuli_wild_3280611 | NA                                  | Ca_kabuli_denovo | 3280611                 | G/C  | NA                 | NA                            | NA                 |
| Kabuli_wild_3281171 | NA                                  | Ca_kabuli_denovo | 3281171                 | C/G  | NA                 | NA                            | NA                 |
| Kabuli_wild_3281655 | NA                                  | Ca_kabuli_denovo | 3281655                 | T/C  | NA                 | NA                            | NA                 |
| Kabuli_wild_3281698 | NA                                  | Ca_kabuli_denovo | 3281698                 | T/A  | NA                 | NA                            | NA                 |
| Kabuli_wild_3283536 | NA                                  | Ca_kabuli_denovo | 3283536                 | C/G  | NA                 | NA                            | NA                 |
| Kabuli_wild_3283598 | NA                                  | Ca_kabuli_denovo | 3283598                 | G/A  | NA                 | NA                            | NA                 |
| Kabuli_wild_3284401 | NA                                  | Ca_kabuli_denovo | 3284401                 | A/G  | NA                 | NA                            | NA                 |
| Kabuli_wild_3286800 | NA                                  | Ca_kabuli_denovo | 3286800                 | T/C  | NA                 | NA                            | NA                 |



| SNP IDs             | NCBI dbSNP accession IDs (NCBI_SS#) | Chromosomes      | Physical positions (bp) | SNPs | Gene accession IDs | Sequence components of genome | Putative functions |
|---------------------|-------------------------------------|------------------|-------------------------|------|--------------------|-------------------------------|--------------------|
| Kabuli_wild_3286812 | NA                                  | Ca_kabuli_denovo | 3286812                 | C/T  | NA                 | NA                            | NA                 |
| Kabuli_wild_3287751 | NA                                  | Ca_kabuli_denovo | 3287751                 | A/C  | NA                 | NA                            | NA                 |
| Kabuli_wild_3288043 | NA                                  | Ca_kabuli_denovo | 3288043                 | G/T  | NA                 | NA                            | NA                 |
| Kabuli_wild_3288770 | NA                                  | Ca_kabuli_denovo | 3288770                 | T/G  | NA                 | NA                            | NA                 |
| Kabuli_wild_3288858 | NA                                  | Ca_kabuli_denovo | 3288858                 | T/C  | NA                 | NA                            | NA                 |
| Kabuli_wild_3289445 | NA                                  | Ca_kabuli_denovo | 3289445                 | C/A  | NA                 | NA                            | NA                 |
| Kabuli_wild_3289760 | NA                                  | Ca_kabuli_denovo | 3289760                 | G/C  | NA                 | NA                            | NA                 |
| Kabuli_wild_3289778 | NA                                  | Ca_kabuli_denovo | 3289778                 | A/G  | NA                 | NA                            | NA                 |
| Kabuli_wild_3290014 | NA                                  | Ca_kabuli_denovo | 3290014                 | C/T  | NA                 | NA                            | NA                 |
| Kabuli_wild_3290070 | NA                                  | Ca_kabuli_denovo | 3290070                 | C/T  | NA                 | NA                            | NA                 |
| Kabuli_wild_3290215 | NA                                  | Ca_kabuli_denovo | 3290215                 | G/C  | NA                 | NA                            | NA                 |
| Kabuli_wild_3290243 | NA                                  | Ca_kabuli_denovo | 3290243                 | G/A  | NA                 | NA                            | NA                 |
| Kabuli_wild_3290258 | NA                                  | Ca_kabuli_denovo | 3290258                 | A/G  | NA                 | NA                            | NA                 |
| Kabuli_wild_3291947 | NA                                  | Ca_kabuli_denovo | 3291947                 | C/A  | NA                 | NA                            | NA                 |
| Kabuli_wild_3291958 | NA                                  | Ca_kabuli_denovo | 3291958                 | A/C  | NA                 | NA                            | NA                 |
| Kabuli_wild_3293333 | NA                                  | Ca_kabuli_denovo | 3293333                 | A/G  | NA                 | NA                            | NA                 |
| Kabuli_wild_3294147 | NA                                  | Ca_kabuli_denovo | 3294147                 | T/C  | NA                 | NA                            | NA                 |
| Kabuli_wild_3294261 | NA                                  | Ca_kabuli_denovo | 3294261                 | T/C  | NA                 | NA                            | NA                 |
| Kabuli_wild_3294303 | NA                                  | Ca_kabuli_denovo | 3294303                 | A/C  | NA                 | NA                            | NA                 |
| Kabuli_wild_3294590 | NA                                  | Ca_kabuli_denovo | 3294590                 | C/T  | NA                 | NA                            | NA                 |
| Kabuli_wild_3295890 | NA                                  | Ca_kabuli_denovo | 3295890                 | A/G  | NA                 | NA                            | NA                 |
| Kabuli_wild_3296133 | NA                                  | Ca_kabuli_denovo | 3296133                 | G/T  | NA                 | NA                            | NA                 |
| Kabuli_wild_3296866 | NA                                  | Ca_kabuli_denovo | 3296866                 | G/A  | NA                 | NA                            | NA                 |
| Kabuli_wild_3297539 | NA                                  | Ca_kabuli_denovo | 3297539                 | T/C  | NA                 | NA                            | NA                 |
| Kabuli_wild_3297549 | NA                                  | Ca_kabuli_denovo | 3297549                 | G/A  | NA                 | NA                            | NA                 |
| Kabuli_wild_3299985 | NA                                  | Ca_kabuli_denovo | 3299985                 | C/G  | NA                 | NA                            | NA                 |
| Kabuli_wild_3300204 | NA                                  | Ca_kabuli_denovo | 3300204                 | G/T  | NA                 | NA                            | NA                 |
| Kabuli_wild_3301473 | NA                                  | Ca_kabuli_denovo | 3301473                 | G/C  | NA                 | NA                            | NA                 |
| Kabuli_wild_3302023 | NA                                  | Ca_kabuli_denovo | 3302023                 | T/G  | NA                 | NA                            | NA                 |
| Kabuli_wild_3302218 | NA                                  | Ca_kabuli_denovo | 3302218                 | T/C  | NA                 | NA                            | NA                 |
| Kabuli_wild_3302219 | NA                                  | Ca_kabuli_denovo | 3302219                 | T/C  | NA                 | NA                            | NA                 |
| Kabuli_wild_3303381 | NA                                  | Ca_kabuli_denovo | 3303381                 | C/G  | NA                 | NA                            | NA                 |
| Kabuli_wild_3303758 | NA                                  | Ca_kabuli_denovo | 3303758                 | A/C  | NA                 | NA                            | NA                 |
| Kabuli_wild_3303770 | NA                                  | Ca_kabuli_denovo | 3303770                 | A/G  | NA                 | NA                            | NA                 |
| Kabuli_wild_3304963 | NA                                  | Ca_kabuli_denovo | 3304963                 | A/G  | NA                 | NA                            | NA                 |
| Kabuli_wild_3305184 | NA                                  | Ca_kabuli_denovo | 3305184                 | G/C  | NA                 | NA                            | NA                 |
| Kabuli_wild_3305191 | NA                                  | Ca_kabuli_denovo | 3305191                 | G/C  | NA                 | NA                            | NA                 |
| Kabuli_wild_3305524 | NA                                  | Ca_kabuli_denovo | 3305524                 | T/C  | NA                 | NA                            | NA                 |
| Kabuli_wild_3307960 | NA                                  | Ca_kabuli_denovo | 3307960                 | T/C  | NA                 | NA                            | NA                 |
| Kabuli_wild_3307978 | NA                                  | Ca_kabuli_denovo | 3307978                 | A/G  | NA                 | NA                            | NA                 |
| Kabuli_wild_3308048 | NA                                  | Ca_kabuli_denovo | 3308048                 | C/A  | NA                 | NA                            | NA                 |
| Kabuli_wild_3308607 | NA                                  | Ca_kabuli_denovo | 3308607                 | G/T  | NA                 | NA                            | NA                 |
| Kabuli_wild_3309401 | NA                                  | Ca_kabuli_denovo | 3309401                 | C/T  | NA                 | NA                            | NA                 |
| Kabuli_wild_3309409 | NA                                  | Ca_kabuli_denovo | 3309409                 | G/T  | NA                 | NA                            | NA                 |

| SNP IDs             | NCBI dbSNP accession IDs (NCBI_SS#) | Chromosomes      | Physical positions (bp) | SNPs | Gene accession IDs | Sequence components of genome | Putative functions |
|---------------------|-------------------------------------|------------------|-------------------------|------|--------------------|-------------------------------|--------------------|
| Kabuli_wild_3309909 | NA                                  | Ca_kabuli_denovo | 3309909                 | G/T  | NA                 | NA                            | NA                 |
| Kabuli_wild_3310140 | NA                                  | Ca_kabuli_denovo | 3310140                 | A/G  | NA                 | NA                            | NA                 |
| Kabuli_wild_3311129 | NA                                  | Ca_kabuli_denovo | 3311129                 | T/G  | NA                 | NA                            | NA                 |
| Kabuli_wild_3311984 | NA                                  | Ca_kabuli_denovo | 3311984                 | T/G  | NA                 | NA                            | NA                 |
| Kabuli_wild_3312413 | NA                                  | Ca_kabuli_denovo | 3312413                 | C/T  | NA                 | NA                            | NA                 |
| Kabuli_wild_3312913 | NA                                  | Ca_kabuli_denovo | 3312913                 | T/A  | NA                 | NA                            | NA                 |
| Kabuli_wild_3313224 | NA                                  | Ca_kabuli_denovo | 3313224                 | G/A  | NA                 | NA                            | NA                 |
| Kabuli_wild_3313227 | NA                                  | Ca_kabuli_denovo | 3313227                 | G/C  | NA                 | NA                            | NA                 |
| Kabuli_wild_3314909 | NA                                  | Ca_kabuli_denovo | 3314909                 | G/T  | NA                 | NA                            | NA                 |
| Kabuli_wild_3315896 | NA                                  | Ca_kabuli_denovo | 3315896                 | C/T  | NA                 | NA                            | NA                 |
| Kabuli_wild_3315953 | NA                                  | Ca_kabuli_denovo | 3315953                 | A/C  | NA                 | NA                            | NA                 |
| Kabuli_wild_3316411 | NA                                  | Ca_kabuli_denovo | 3316411                 | A/G  | NA                 | NA                            | NA                 |
| Kabuli_wild_3316484 | NA                                  | Ca_kabuli_denovo | 3316484                 | G/C  | NA                 | NA                            | NA                 |
| Kabuli_wild_3316520 | NA                                  | Ca_kabuli_denovo | 3316520                 | G/T  | NA                 | NA                            | NA                 |
| Kabuli_wild_3316964 | NA                                  | Ca_kabuli_denovo | 3316964                 | C/G  | NA                 | NA                            | NA                 |
| Kabuli_wild_3317373 | NA                                  | Ca_kabuli_denovo | 3317373                 | G/C  | NA                 | NA                            | NA                 |
| Kabuli_wild_3317388 | NA                                  | Ca_kabuli_denovo | 3317388                 | C/T  | NA                 | NA                            | NA                 |
| Kabuli_wild_3318176 | NA                                  | Ca_kabuli_denovo | 3318176                 | C/A  | NA                 | NA                            | NA                 |
| Kabuli_wild_3318499 | NA                                  | Ca_kabuli_denovo | 3318499                 | T/G  | NA                 | NA                            | NA                 |
| Kabuli_wild_3318954 | NA                                  | Ca_kabuli_denovo | 3318954                 | C/T  | NA                 | NA                            | NA                 |
| Kabuli_wild_3318963 | NA                                  | Ca_kabuli_denovo | 3318963                 | T/C  | NA                 | NA                            | NA                 |
| Kabuli_wild_3321056 | NA                                  | Ca_kabuli_denovo | 3321056                 | A/G  | NA                 | NA                            | NA                 |
| Kabuli_wild_3321082 | NA                                  | Ca_kabuli_denovo | 3321082                 | T/C  | NA                 | NA                            | NA                 |
| Kabuli_wild_3321565 | NA                                  | Ca_kabuli_denovo | 3321565                 | C/G  | NA                 | NA                            | NA                 |
| Kabuli_wild_3321876 | NA                                  | Ca_kabuli_denovo | 3321876                 | A/G  | NA                 | NA                            | NA                 |
| Kabuli_wild_3321878 | NA                                  | Ca_kabuli_denovo | 3321878                 | G/A  | NA                 | NA                            | NA                 |
| Kabuli_wild_3322386 | NA                                  | Ca_kabuli_denovo | 3322386                 | A/C  | NA                 | NA                            | NA                 |
| Kabuli_wild_3323958 | NA                                  | Ca_kabuli_denovo | 3323958                 | G/A  | NA                 | NA                            | NA                 |
| Kabuli_wild_3324319 | NA                                  | Ca_kabuli_denovo | 3324319                 | G/T  | NA                 | NA                            | NA                 |
| Kabuli_wild_3325345 | NA                                  | Ca_kabuli_denovo | 3325345                 | A/G  | NA                 | NA                            | NA                 |
| Kabuli_wild_3325618 | NA                                  | Ca_kabuli_denovo | 3325618                 | G/A  | NA                 | NA                            | NA                 |
| Kabuli_wild_3325650 | NA                                  | Ca_kabuli_denovo | 3325650                 | C/G  | NA                 | NA                            | NA                 |
| Kabuli_wild_3326471 | NA                                  | Ca_kabuli_denovo | 3326471                 | A/G  | NA                 | NA                            | NA                 |
| Kabuli_wild_3326532 | NA                                  | Ca_kabuli_denovo | 3326532                 | G/C  | NA                 | NA                            | NA                 |
| Kabuli_wild_3326547 | NA                                  | Ca_kabuli_denovo | 3326547                 | T/C  | NA                 | NA                            | NA                 |
| Kabuli_wild_3327148 | NA                                  | Ca_kabuli_denovo | 3327148                 | G/A  | NA                 | NA                            | NA                 |
| Kabuli_wild_3327537 | NA                                  | Ca_kabuli_denovo | 3327537                 | C/T  | NA                 | NA                            | NA                 |
| Kabuli_wild_3327545 | NA                                  | Ca_kabuli_denovo | 3327545                 | G/T  | NA                 | NA                            | NA                 |
| Kabuli_wild_3327738 | NA                                  | Ca_kabuli_denovo | 3327738                 | G/C  | NA                 | NA                            | NA                 |
| Kabuli_wild_3329321 | NA                                  | Ca_kabuli_denovo | 3329321                 | T/G  | NA                 | NA                            | NA                 |
| Kabuli_wild_3330025 | NA                                  | Ca_kabuli_denovo | 3330025                 | G/T  | NA                 | NA                            | NA                 |
| Kabuli_wild_3330847 | NA                                  | Ca_kabuli_denovo | 3330847                 | A/T  | NA                 | NA                            | NA                 |
| Kabuli_wild_3332779 | NA                                  | Ca_kabuli_denovo | 3332779                 | C/T  | NA                 | NA                            | NA                 |
| Kabuli_wild_3333547 | NA                                  | Ca_kabuli_denovo | 3333547                 | A/G  | NA                 | NA                            | NA                 |

| SNP IDs             | NCBI dbSNP accession IDs (NCBI_SS#) | Chromosomes      | Physical positions (bp) | SNPs | Gene accession IDs | Sequence components of genome | Putative functions |
|---------------------|-------------------------------------|------------------|-------------------------|------|--------------------|-------------------------------|--------------------|
| Kabuli_wild_3333963 | NA                                  | Ca_kabuli_denovo | 3333963                 | G/C  | NA                 | NA                            | NA                 |
| Kabuli_wild_3333970 | NA                                  | Ca_kabuli_denovo | 3333970                 | C/G  | NA                 | NA                            | NA                 |
| Kabuli_wild_3335806 | NA                                  | Ca_kabuli_denovo | 3335806                 | A/G  | NA                 | NA                            | NA                 |
| Kabuli_wild_3338177 | NA                                  | Ca_kabuli_denovo | 3338177                 | G/T  | NA                 | NA                            | NA                 |
| Kabuli_wild_3338468 | NA                                  | Ca_kabuli_denovo | 3338468                 | G/T  | NA                 | NA                            | NA                 |
| Kabuli_wild_3338707 | NA                                  | Ca_kabuli_denovo | 3338707                 | C/A  | NA                 | NA                            | NA                 |
| Kabuli_wild_3338795 | NA                                  | Ca_kabuli_denovo | 3338795                 | T/G  | NA                 | NA                            | NA                 |
| Kabuli_wild_3339143 | NA                                  | Ca_kabuli_denovo | 3339143                 | C/A  | NA                 | NA                            | NA                 |
| Kabuli_wild_3339396 | NA                                  | Ca_kabuli_denovo | 3339396                 | T/G  | NA                 | NA                            | NA                 |
| Kabuli_wild_3339411 | NA                                  | Ca_kabuli_denovo | 3339411                 | T/G  | NA                 | NA                            | NA                 |
| Kabuli_wild_3339535 | NA                                  | Ca_kabuli_denovo | 3339535                 | G/T  | NA                 | NA                            | NA                 |
| Kabuli_wild_3340628 | NA                                  | Ca_kabuli_denovo | 3340628                 | G/C  | NA                 | NA                            | NA                 |
| Kabuli_wild_3340631 | NA                                  | Ca_kabuli_denovo | 3340631                 | A/G  | NA                 | NA                            | NA                 |
| Kabuli_wild_3340920 | NA                                  | Ca_kabuli_denovo | 3340920                 | T/C  | NA                 | NA                            | NA                 |
| Kabuli_wild_3340926 | NA                                  | Ca_kabuli_denovo | 3340926                 | G/C  | NA                 | NA                            | NA                 |
| Kabuli_wild_3343092 | NA                                  | Ca_kabuli_denovo | 3343092                 | C/T  | NA                 | NA                            | NA                 |
| Kabuli_wild_3343118 | NA                                  | Ca_kabuli_denovo | 3343118                 | C/A  | NA                 | NA                            | NA                 |
| Kabuli_wild_3346369 | NA                                  | Ca_kabuli_denovo | 3346369                 | T/C  | NA                 | NA                            | NA                 |
| Kabuli_wild_3346458 | NA                                  | Ca_kabuli_denovo | 3346458                 | G/A  | NA                 | NA                            | NA                 |
| Kabuli_wild_3346477 | NA                                  | Ca_kabuli_denovo | 3346477                 | T/A  | NA                 | NA                            | NA                 |
| Kabuli_wild_3347298 | NA                                  | Ca_kabuli_denovo | 3347298                 | C/G  | NA                 | NA                            | NA                 |
| Kabuli_wild_3347300 | NA                                  | Ca_kabuli_denovo | 3347300                 | G/T  | NA                 | NA                            | NA                 |
| Kabuli_wild_3347302 | NA                                  | Ca_kabuli_denovo | 3347302                 | C/T  | NA                 | NA                            | NA                 |
| Kabuli_wild_3347435 | NA                                  | Ca_kabuli_denovo | 3347435                 | A/C  | NA                 | NA                            | NA                 |
| Kabuli_wild_3347509 | NA                                  | Ca_kabuli_denovo | 3347509                 | A/C  | NA                 | NA                            | NA                 |
| Kabuli_wild_3348841 | NA                                  | Ca_kabuli_denovo | 3348841                 | C/G  | NA                 | NA                            | NA                 |
| Kabuli_wild_3348903 | NA                                  | Ca_kabuli_denovo | 3348903                 | C/A  | NA                 | NA                            | NA                 |
| Kabuli_wild_3350664 | NA                                  | Ca_kabuli_denovo | 3350664                 | G/C  | NA                 | NA                            | NA                 |
| Kabuli_wild_3350703 | NA                                  | Ca_kabuli_denovo | 3350703                 | G/T  | NA                 | NA                            | NA                 |
| Kabuli_wild_3351607 | NA                                  | Ca_kabuli_denovo | 3351607                 | T/C  | NA                 | NA                            | NA                 |
| Kabuli_wild_3351670 | NA                                  | Ca_kabuli_denovo | 3351670                 | C/T  | NA                 | NA                            | NA                 |
| Kabuli_wild_3351748 | NA                                  | Ca_kabuli_denovo | 3351748                 | G/A  | NA                 | NA                            | NA                 |
| Kabuli_wild_3351766 | NA                                  | Ca_kabuli_denovo | 3351766                 | C/A  | NA                 | NA                            | NA                 |
| Kabuli_wild_3354111 | NA                                  | Ca_kabuli_denovo | 3354111                 | T/C  | NA                 | NA                            | NA                 |
| Kabuli_wild_3354314 | NA                                  | Ca_kabuli_denovo | 3354314                 | A/G  | NA                 | NA                            | NA                 |
| Kabuli_wild_3354341 | NA                                  | Ca_kabuli_denovo | 3354341                 | G/A  | NA                 | NA                            | NA                 |
| Kabuli_wild_3354408 | NA                                  | Ca_kabuli_denovo | 3354408                 | C/G  | NA                 | NA                            | NA                 |
| Kabuli_wild_3354487 | NA                                  | Ca_kabuli_denovo | 3354487                 | A/C  | NA                 | NA                            | NA                 |
| Kabuli_wild_3354488 | NA                                  | Ca_kabuli_denovo | 3354488                 | G/T  | NA                 | NA                            | NA                 |
| Kabuli_wild_3354489 | NA                                  | Ca_kabuli_denovo | 3354489                 | A/T  | NA                 | NA                            | NA                 |
| Kabuli_wild_3356408 | NA                                  | Ca_kabuli_denovo | 3356408                 | T/G  | NA                 | NA                            | NA                 |
| Kabuli_wild_3356681 | NA                                  | Ca_kabuli_denovo | 3356681                 | C/T  | NA                 | NA                            | NA                 |
| Kabuli_wild_3356745 | NA                                  | Ca_kabuli_denovo | 3356745                 | T/C  | NA                 | NA                            | NA                 |
| Kabuli_wild_3356770 | NA                                  | Ca_kabuli_denovo | 3356770                 | G/A  | NA                 | NA                            | NA                 |

| SNP IDs                    | NCBI dbSNP accession IDs (NCBI_SS#) | Chromosomes             | Physical positions (bp) | SNPs | Gene accession IDs | Sequence components of genome | Putative functions |
|----------------------------|-------------------------------------|-------------------------|-------------------------|------|--------------------|-------------------------------|--------------------|
| <i>Kabuli_wild_3357353</i> | NA                                  | <i>Ca_kabuli_denovo</i> | 3357353                 | A/G  | NA                 | NA                            | NA                 |
| <i>Kabuli_wild_3357362</i> | NA                                  | <i>Ca_kabuli_denovo</i> | 3357362                 | A/G  | NA                 | NA                            | NA                 |
| <i>Kabuli_wild_3357570</i> | NA                                  | <i>Ca_kabuli_denovo</i> | 3357570                 | G/T  | NA                 | NA                            | NA                 |
| <i>Kabuli_wild_3357893</i> | NA                                  | <i>Ca_kabuli_denovo</i> | 3357893                 | C/T  | NA                 | NA                            | NA                 |
| <i>Kabuli_wild_3357895</i> | NA                                  | <i>Ca_kabuli_denovo</i> | 3357895                 | A/G  | NA                 | NA                            | NA                 |
| <i>Kabuli_wild_3357901</i> | NA                                  | <i>Ca_kabuli_denovo</i> | 3357901                 | A/G  | NA                 | NA                            | NA                 |
| <i>Kabuli_wild_3357952</i> | NA                                  | <i>Ca_kabuli_denovo</i> | 3357952                 | A/G  | NA                 | NA                            | NA                 |
| <i>Kabuli_wild_3358011</i> | NA                                  | <i>Ca_kabuli_denovo</i> | 3358011                 | G/T  | NA                 | NA                            | NA                 |
| <i>Kabuli_wild_3358029</i> | NA                                  | <i>Ca_kabuli_denovo</i> | 3358029                 | C/T  | NA                 | NA                            | NA                 |
| <i>Kabuli_wild_3358125</i> | NA                                  | <i>Ca_kabuli_denovo</i> | 3358125                 | C/T  | NA                 | NA                            | NA                 |
| <i>Kabuli_wild_3358135</i> | NA                                  | <i>Ca_kabuli_denovo</i> | 3358135                 | A/C  | NA                 | NA                            | NA                 |
| <i>Kabuli_wild_3358793</i> | NA                                  | <i>Ca_kabuli_denovo</i> | 3358793                 | C/T  | NA                 | NA                            | NA                 |
| <i>Kabuli_wild_3358939</i> | NA                                  | <i>Ca_kabuli_denovo</i> | 3358939                 | T/A  | NA                 | NA                            | NA                 |
| <i>Kabuli_wild_3358940</i> | NA                                  | <i>Ca_kabuli_denovo</i> | 3358940                 | G/T  | NA                 | NA                            | NA                 |
| <i>Kabuli_wild_3358941</i> | NA                                  | <i>Ca_kabuli_denovo</i> | 3358941                 | C/G  | NA                 | NA                            | NA                 |
| <i>Kabuli_wild_3358943</i> | NA                                  | <i>Ca_kabuli_denovo</i> | 3358943                 | C/G  | NA                 | NA                            | NA                 |
| <i>Kabuli_wild_3358944</i> | NA                                  | <i>Ca_kabuli_denovo</i> | 3358944                 | G/A  | NA                 | NA                            | NA                 |
| <i>Kabuli_wild_3358945</i> | NA                                  | <i>Ca_kabuli_denovo</i> | 3358945                 | A/G  | NA                 | NA                            | NA                 |
| <i>Kabuli_wild_3359932</i> | NA                                  | <i>Ca_kabuli_denovo</i> | 3359932                 | G/A  | NA                 | NA                            | NA                 |
| <i>Kabuli_wild_3360672</i> | NA                                  | <i>Ca_kabuli_denovo</i> | 3360672                 | T/G  | NA                 | NA                            | NA                 |
| <i>Kabuli_wild_3362345</i> | NA                                  | <i>Ca_kabuli_denovo</i> | 3362345                 | A/G  | NA                 | NA                            | NA                 |
| <i>Kabuli_wild_3362860</i> | NA                                  | <i>Ca_kabuli_denovo</i> | 3362860                 | T/C  | NA                 | NA                            | NA                 |
| <i>Kabuli_wild_3362896</i> | NA                                  | <i>Ca_kabuli_denovo</i> | 3362896                 | A/G  | NA                 | NA                            | NA                 |
| <i>Kabuli_wild_3364898</i> | NA                                  | <i>Ca_kabuli_denovo</i> | 3364898                 | A/G  | NA                 | NA                            | NA                 |
| <i>Kabuli_wild_3365247</i> | NA                                  | <i>Ca_kabuli_denovo</i> | 3365247                 | A/C  | NA                 | NA                            | NA                 |
| <i>Kabuli_wild_3366469</i> | NA                                  | <i>Ca_kabuli_denovo</i> | 3366469                 | A/G  | NA                 | NA                            | NA                 |
| <i>Kabuli_wild_3368079</i> | NA                                  | <i>Ca_kabuli_denovo</i> | 3368079                 | C/T  | NA                 | NA                            | NA                 |
| <i>Kabuli_wild_3368085</i> | NA                                  | <i>Ca_kabuli_denovo</i> | 3368085                 | C/G  | NA                 | NA                            | NA                 |
| <i>Kabuli_wild_3369383</i> | NA                                  | <i>Ca_kabuli_denovo</i> | 3369383                 | G/C  | NA                 | NA                            | NA                 |
| <i>Kabuli_wild_3369395</i> | NA                                  | <i>Ca_kabuli_denovo</i> | 3369395                 | A/C  | NA                 | NA                            | NA                 |
| <i>Kabuli_wild_3371183</i> | NA                                  | <i>Ca_kabuli_denovo</i> | 3371183                 | G/C  | NA                 | NA                            | NA                 |
| <i>Kabuli_wild_3371195</i> | NA                                  | <i>Ca_kabuli_denovo</i> | 3371195                 | C/A  | NA                 | NA                            | NA                 |
| <i>Kabuli_wild_3372170</i> | NA                                  | <i>Ca_kabuli_denovo</i> | 3372170                 | A/G  | NA                 | NA                            | NA                 |
| <i>Kabuli_wild_3372591</i> | NA                                  | <i>Ca_kabuli_denovo</i> | 3372591                 | G/A  | NA                 | NA                            | NA                 |
| <i>Kabuli_wild_3373492</i> | NA                                  | <i>Ca_kabuli_denovo</i> | 3373492                 | G/A  | NA                 | NA                            | NA                 |
| <i>Kabuli_wild_3373575</i> | NA                                  | <i>Ca_kabuli_denovo</i> | 3373575                 | C/T  | NA                 | NA                            | NA                 |
| <i>Kabuli_wild_3373612</i> | NA                                  | <i>Ca_kabuli_denovo</i> | 3373612                 | A/G  | NA                 | NA                            | NA                 |
| <i>Kabuli_wild_3374773</i> | NA                                  | <i>Ca_kabuli_denovo</i> | 3374773                 | G/C  | NA                 | NA                            | NA                 |
| <i>Kabuli_wild_3375456</i> | NA                                  | <i>Ca_kabuli_denovo</i> | 3375456                 | G/A  | NA                 | NA                            | NA                 |
| <i>Kabuli_wild_3376267</i> | NA                                  | <i>Ca_kabuli_denovo</i> | 3376267                 | A/G  | NA                 | NA                            | NA                 |
| <i>Kabuli_wild_3376350</i> | NA                                  | <i>Ca_kabuli_denovo</i> | 3376350                 | T/C  | NA                 | NA                            | NA                 |
| <i>Kabuli_wild_3376371</i> | NA                                  | <i>Ca_kabuli_denovo</i> | 3376371                 | G/A  | NA                 | NA                            | NA                 |
| <i>Kabuli_wild_3377755</i> | NA                                  | <i>Ca_kabuli_denovo</i> | 3377755                 | A/G  | NA                 | NA                            | NA                 |
| <i>Kabuli_wild_3378965</i> | NA                                  | <i>Ca_kabuli_denovo</i> | 3378965                 | T/C  | NA                 | NA                            | NA                 |

| SNP IDs                    | NCBI dbSNP accession IDs (NCBI_SS#) | Chromosomes             | Physical positions (bp) | SNPs | Gene accession IDs | Sequence components of genome | Putative functions |
|----------------------------|-------------------------------------|-------------------------|-------------------------|------|--------------------|-------------------------------|--------------------|
| <i>Kabuli_wild_3379273</i> | NA                                  | <i>Ca_kabuli_denovo</i> | 3379273                 | T/C  | NA                 | NA                            | NA                 |
| <i>Kabuli_wild_3379732</i> | NA                                  | <i>Ca_kabuli_denovo</i> | 3379732                 | C/T  | NA                 | NA                            | NA                 |
| <i>Kabuli_wild_3379757</i> | NA                                  | <i>Ca_kabuli_denovo</i> | 3379757                 | G/T  | NA                 | NA                            | NA                 |
| <i>Kabuli_wild_3380133</i> | NA                                  | <i>Ca_kabuli_denovo</i> | 3380133                 | C/T  | NA                 | NA                            | NA                 |
| <i>Kabuli_wild_3382013</i> | NA                                  | <i>Ca_kabuli_denovo</i> | 3382013                 | C/G  | NA                 | NA                            | NA                 |
| <i>Kabuli_wild_3382053</i> | NA                                  | <i>Ca_kabuli_denovo</i> | 3382053                 | A/G  | NA                 | NA                            | NA                 |
| <i>Kabuli_wild_3382099</i> | NA                                  | <i>Ca_kabuli_denovo</i> | 3382099                 | C/G  | NA                 | NA                            | NA                 |
| <i>Kabuli_wild_3382241</i> | NA                                  | <i>Ca_kabuli_denovo</i> | 3382241                 | C/G  | NA                 | NA                            | NA                 |
| <i>Kabuli_wild_3382250</i> | NA                                  | <i>Ca_kabuli_denovo</i> | 3382250                 | C/T  | NA                 | NA                            | NA                 |
| <i>Kabuli_wild_3382256</i> | NA                                  | <i>Ca_kabuli_denovo</i> | 3382256                 | C/T  | NA                 | NA                            | NA                 |
| <i>Kabuli_wild_3382283</i> | NA                                  | <i>Ca_kabuli_denovo</i> | 3382283                 | G/C  | NA                 | NA                            | NA                 |
| <i>Kabuli_wild_3382647</i> | NA                                  | <i>Ca_kabuli_denovo</i> | 3382647                 | G/A  | NA                 | NA                            | NA                 |
| <i>Kabuli_wild_3382697</i> | NA                                  | <i>Ca_kabuli_denovo</i> | 3382697                 | G/A  | NA                 | NA                            | NA                 |
| <i>Kabuli_wild_3382714</i> | NA                                  | <i>Ca_kabuli_denovo</i> | 3382714                 | G/C  | NA                 | NA                            | NA                 |
| <i>Kabuli_wild_3383027</i> | NA                                  | <i>Ca_kabuli_denovo</i> | 3383027                 | G/A  | NA                 | NA                            | NA                 |
| <i>Kabuli_wild_3383093</i> | NA                                  | <i>Ca_kabuli_denovo</i> | 3383093                 | C/T  | NA                 | NA                            | NA                 |
| <i>Kabuli_wild_3384030</i> | NA                                  | <i>Ca_kabuli_denovo</i> | 3384030                 | A/C  | NA                 | NA                            | NA                 |
| <i>Kabuli_wild_3384048</i> | NA                                  | <i>Ca_kabuli_denovo</i> | 3384048                 | G/A  | NA                 | NA                            | NA                 |
| <i>Kabuli_wild_3384998</i> | NA                                  | <i>Ca_kabuli_denovo</i> | 3384998                 | A/G  | NA                 | NA                            | NA                 |
| <i>Kabuli_wild_3385558</i> | NA                                  | <i>Ca_kabuli_denovo</i> | 3385558                 | T/C  | NA                 | NA                            | NA                 |
| <i>Kabuli_wild_3385576</i> | NA                                  | <i>Ca_kabuli_denovo</i> | 3385576                 | G/A  | NA                 | NA                            | NA                 |
| <i>Kabuli_wild_3385877</i> | NA                                  | <i>Ca_kabuli_denovo</i> | 3385877                 | A/G  | NA                 | NA                            | NA                 |
| <i>Kabuli_wild_3385891</i> | NA                                  | <i>Ca_kabuli_denovo</i> | 3385891                 | T/C  | NA                 | NA                            | NA                 |
| <i>Kabuli_wild_3386412</i> | NA                                  | <i>Ca_kabuli_denovo</i> | 3386412                 | A/G  | NA                 | NA                            | NA                 |
| <i>Kabuli_wild_3386413</i> | NA                                  | <i>Ca_kabuli_denovo</i> | 3386413                 | A/C  | NA                 | NA                            | NA                 |
| <i>Kabuli_wild_3386452</i> | NA                                  | <i>Ca_kabuli_denovo</i> | 3386452                 | C/T  | NA                 | NA                            | NA                 |
| <i>Kabuli_wild_3386474</i> | NA                                  | <i>Ca_kabuli_denovo</i> | 3386474                 | C/A  | NA                 | NA                            | NA                 |
| <i>Kabuli_wild_3386554</i> | NA                                  | <i>Ca_kabuli_denovo</i> | 3386554                 | A/G  | NA                 | NA                            | NA                 |
| <i>Kabuli_wild_3386593</i> | NA                                  | <i>Ca_kabuli_denovo</i> | 3386593                 | C/T  | NA                 | NA                            | NA                 |
| <i>Kabuli_wild_3386718</i> | NA                                  | <i>Ca_kabuli_denovo</i> | 3386718                 | C/A  | NA                 | NA                            | NA                 |
| <i>Kabuli_wild_3388459</i> | NA                                  | <i>Ca_kabuli_denovo</i> | 3388459                 | G/C  | NA                 | NA                            | NA                 |
| <i>Kabuli_wild_3388975</i> | NA                                  | <i>Ca_kabuli_denovo</i> | 3388975                 | G/T  | NA                 | NA                            | NA                 |
| <i>Kabuli_wild_3389543</i> | NA                                  | <i>Ca_kabuli_denovo</i> | 3389543                 | A/G  | NA                 | NA                            | NA                 |
| <i>Kabuli_wild_3389747</i> | NA                                  | <i>Ca_kabuli_denovo</i> | 3389747                 | A/G  | NA                 | NA                            | NA                 |
| <i>Kabuli_wild_3390035</i> | NA                                  | <i>Ca_kabuli_denovo</i> | 3390035                 | G/A  | NA                 | NA                            | NA                 |
| <i>Kabuli_wild_3390065</i> | NA                                  | <i>Ca_kabuli_denovo</i> | 3390065                 | A/G  | NA                 | NA                            | NA                 |
| <i>Kabuli_wild_3394712</i> | NA                                  | <i>Ca_kabuli_denovo</i> | 3394712                 | G/T  | NA                 | NA                            | NA                 |
| <i>Kabuli_wild_3395212</i> | NA                                  | <i>Ca_kabuli_denovo</i> | 3395212                 | A/G  | NA                 | NA                            | NA                 |
| <i>Kabuli_wild_3397533</i> | NA                                  | <i>Ca_kabuli_denovo</i> | 3397533                 | A/G  | NA                 | NA                            | NA                 |
| <i>Kabuli_wild_3397657</i> | NA                                  | <i>Ca_kabuli_denovo</i> | 3397657                 | C/T  | NA                 | NA                            | NA                 |
| <i>Kabuli_wild_3398252</i> | NA                                  | <i>Ca_kabuli_denovo</i> | 3398252                 | C/A  | NA                 | NA                            | NA                 |
| <i>Kabuli_wild_3398258</i> | NA                                  | <i>Ca_kabuli_denovo</i> | 3398258                 | A/C  | NA                 | NA                            | NA                 |
| <i>Kabuli_wild_3398463</i> | NA                                  | <i>Ca_kabuli_denovo</i> | 3398463                 | A/G  | NA                 | NA                            | NA                 |
| <i>Kabuli_wild_3398465</i> | NA                                  | <i>Ca_kabuli_denovo</i> | 3398465                 | T/C  | NA                 | NA                            | NA                 |

| SNP IDs             | NCBI dbSNP accession IDs (NCBI_SS#) | Chromosomes      | Physical positions (bp) | SNPs | Gene accession IDs | Sequence components of genome | Putative functions |
|---------------------|-------------------------------------|------------------|-------------------------|------|--------------------|-------------------------------|--------------------|
| Kabuli_wild_3398501 | NA                                  | Ca_kabuli_denovo | 3398501                 | A/C  | NA                 | NA                            | NA                 |
| Kabuli_wild_3399027 | NA                                  | Ca_kabuli_denovo | 3399027                 | A/G  | NA                 | NA                            | NA                 |
| Kabuli_wild_3400010 | NA                                  | Ca_kabuli_denovo | 3400010                 | A/G  | NA                 | NA                            | NA                 |
| Kabuli_wild_3400020 | NA                                  | Ca_kabuli_denovo | 3400020                 | T/C  | NA                 | NA                            | NA                 |
| Kabuli_wild_3402165 | NA                                  | Ca_kabuli_denovo | 3402165                 | T/C  | NA                 | NA                            | NA                 |
| Kabuli_wild_3402193 | NA                                  | Ca_kabuli_denovo | 3402193                 | T/G  | NA                 | NA                            | NA                 |
| Kabuli_wild_3402845 | NA                                  | Ca_kabuli_denovo | 3402845                 | C/T  | NA                 | NA                            | NA                 |
| Kabuli_wild_3403636 | NA                                  | Ca_kabuli_denovo | 3403636                 | A/G  | NA                 | NA                            | NA                 |
| Kabuli_wild_3404800 | NA                                  | Ca_kabuli_denovo | 3404800                 | A/G  | NA                 | NA                            | NA                 |
| Kabuli_wild_3405040 | NA                                  | Ca_kabuli_denovo | 3405040                 | A/G  | NA                 | NA                            | NA                 |
| Kabuli_wild_3405079 | NA                                  | Ca_kabuli_denovo | 3405079                 | G/A  | NA                 | NA                            | NA                 |
| Kabuli_wild_3405182 | NA                                  | Ca_kabuli_denovo | 3405182                 | A/G  | NA                 | NA                            | NA                 |
| Kabuli_wild_3405185 | NA                                  | Ca_kabuli_denovo | 3405185                 | C/A  | NA                 | NA                            | NA                 |
| Kabuli_wild_3405447 | NA                                  | Ca_kabuli_denovo | 3405447                 | T/G  | NA                 | NA                            | NA                 |
| Kabuli_wild_3405477 | NA                                  | Ca_kabuli_denovo | 3405477                 | A/G  | NA                 | NA                            | NA                 |
| Kabuli_wild_3406244 | NA                                  | Ca_kabuli_denovo | 3406244                 | C/A  | NA                 | NA                            | NA                 |
| Kabuli_wild_3406499 | NA                                  | Ca_kabuli_denovo | 3406499                 | G/A  | NA                 | NA                            | NA                 |
| Kabuli_wild_3407471 | NA                                  | Ca_kabuli_denovo | 3407471                 | C/G  | NA                 | NA                            | NA                 |
| Kabuli_wild_3407678 | NA                                  | Ca_kabuli_denovo | 3407678                 | G/T  | NA                 | NA                            | NA                 |
| Kabuli_wild_3407762 | NA                                  | Ca_kabuli_denovo | 3407762                 | T/C  | NA                 | NA                            | NA                 |
| Kabuli_wild_3407834 | NA                                  | Ca_kabuli_denovo | 3407834                 | C/T  | NA                 | NA                            | NA                 |
| Kabuli_wild_3408846 | NA                                  | Ca_kabuli_denovo | 3408846                 | C/T  | NA                 | NA                            | NA                 |
| Kabuli_wild_3408925 | NA                                  | Ca_kabuli_denovo | 3408925                 | T/A  | NA                 | NA                            | NA                 |
| Kabuli_wild_3408994 | NA                                  | Ca_kabuli_denovo | 3408994                 | C/T  | NA                 | NA                            | NA                 |
| Kabuli_wild_3410654 | NA                                  | Ca_kabuli_denovo | 3410654                 | A/G  | NA                 | NA                            | NA                 |
| Kabuli_wild_3411247 | NA                                  | Ca_kabuli_denovo | 3411247                 | T/C  | NA                 | NA                            | NA                 |
| Kabuli_wild_3411651 | NA                                  | Ca_kabuli_denovo | 3411651                 | G/A  | NA                 | NA                            | NA                 |
| Kabuli_wild_3413612 | NA                                  | Ca_kabuli_denovo | 3413612                 | G/C  | NA                 | NA                            | NA                 |
| Kabuli_wild_3414059 | NA                                  | Ca_kabuli_denovo | 3414059                 | G/A  | NA                 | NA                            | NA                 |
| Kabuli_wild_3414067 | NA                                  | Ca_kabuli_denovo | 3414067                 | A/G  | NA                 | NA                            | NA                 |
| Kabuli_wild_3414069 | NA                                  | Ca_kabuli_denovo | 3414069                 | C/A  | NA                 | NA                            | NA                 |
| Kabuli_wild_3414127 | NA                                  | Ca_kabuli_denovo | 3414127                 | A/G  | NA                 | NA                            | NA                 |
| Kabuli_wild_3415060 | NA                                  | Ca_kabuli_denovo | 3415060                 | C/G  | NA                 | NA                            | NA                 |
| Kabuli_wild_3415114 | NA                                  | Ca_kabuli_denovo | 3415114                 | C/A  | NA                 | NA                            | NA                 |
| Kabuli_wild_3415751 | NA                                  | Ca_kabuli_denovo | 3415751                 | T/C  | NA                 | NA                            | NA                 |
| Kabuli_wild_3416654 | NA                                  | Ca_kabuli_denovo | 3416654                 | C/G  | NA                 | NA                            | NA                 |
| Kabuli_wild_3416743 | NA                                  | Ca_kabuli_denovo | 3416743                 | G/C  | NA                 | NA                            | NA                 |
| Kabuli_wild_3417703 | NA                                  | Ca_kabuli_denovo | 3417703                 | A/C  | NA                 | NA                            | NA                 |
| Kabuli_wild_3418348 | NA                                  | Ca_kabuli_denovo | 3418348                 | G/A  | NA                 | NA                            | NA                 |
| Kabuli_wild_3423013 | NA                                  | Ca_kabuli_denovo | 3423013                 | G/C  | NA                 | NA                            | NA                 |
| Kabuli_wild_3423064 | NA                                  | Ca_kabuli_denovo | 3423064                 | C/T  | NA                 | NA                            | NA                 |
| Kabuli_wild_3423191 | NA                                  | Ca_kabuli_denovo | 3423191                 | G/C  | NA                 | NA                            | NA                 |
| Kabuli_wild_3423279 | NA                                  | Ca_kabuli_denovo | 3423279                 | C/T  | NA                 | NA                            | NA                 |
| Kabuli_wild_3423485 | NA                                  | Ca_kabuli_denovo | 3423485                 | G/C  | NA                 | NA                            | NA                 |

| SNP IDs             | NCBI dbSNP accession IDs (NCBI_SS#) | Chromosomes      | Physical positions (bp) | SNPs | Gene accession IDs | Sequence components of genome | Putative functions |
|---------------------|-------------------------------------|------------------|-------------------------|------|--------------------|-------------------------------|--------------------|
| Kabuli_wild_3423688 | NA                                  | Ca_kabuli_denovo | 3423688                 | C/G  | NA                 | NA                            | NA                 |
| Kabuli_wild_3424214 | NA                                  | Ca_kabuli_denovo | 3424214                 | C/G  | NA                 | NA                            | NA                 |
| Kabuli_wild_3424232 | NA                                  | Ca_kabuli_denovo | 3424232                 | C/T  | NA                 | NA                            | NA                 |
| Kabuli_wild_3424758 | NA                                  | Ca_kabuli_denovo | 3424758                 | C/G  | NA                 | NA                            | NA                 |
| Kabuli_wild_3424773 | NA                                  | Ca_kabuli_denovo | 3424773                 | G/A  | NA                 | NA                            | NA                 |
| Kabuli_wild_3425017 | NA                                  | Ca_kabuli_denovo | 3425017                 | A/G  | NA                 | NA                            | NA                 |
| Kabuli_wild_3425248 | NA                                  | Ca_kabuli_denovo | 3425248                 | A/G  | NA                 | NA                            | NA                 |
| Kabuli_wild_3425534 | NA                                  | Ca_kabuli_denovo | 3425534                 | T/G  | NA                 | NA                            | NA                 |
| Kabuli_wild_3425537 | NA                                  | Ca_kabuli_denovo | 3425537                 | T/C  | NA                 | NA                            | NA                 |
| Kabuli_wild_3426779 | NA                                  | Ca_kabuli_denovo | 3426779                 | C/T  | NA                 | NA                            | NA                 |
| Kabuli_wild_3427131 | NA                                  | Ca_kabuli_denovo | 3427131                 | A/G  | NA                 | NA                            | NA                 |
| Kabuli_wild_3431388 | NA                                  | Ca_kabuli_denovo | 3431388                 | G/A  | NA                 | NA                            | NA                 |
| Kabuli_wild_3431390 | NA                                  | Ca_kabuli_denovo | 3431390                 | G/A  | NA                 | NA                            | NA                 |
| Kabuli_wild_3431421 | NA                                  | Ca_kabuli_denovo | 3431421                 | G/A  | NA                 | NA                            | NA                 |
| Kabuli_wild_3432669 | NA                                  | Ca_kabuli_denovo | 3432669                 | C/T  | NA                 | NA                            | NA                 |
| Kabuli_wild_3433140 | NA                                  | Ca_kabuli_denovo | 3433140                 | C/A  | NA                 | NA                            | NA                 |
| Kabuli_wild_3434371 | NA                                  | Ca_kabuli_denovo | 3434371                 | A/C  | NA                 | NA                            | NA                 |
| Kabuli_wild_3434933 | NA                                  | Ca_kabuli_denovo | 3434933                 | C/A  | NA                 | NA                            | NA                 |
| Kabuli_wild_3435208 | NA                                  | Ca_kabuli_denovo | 3435208                 | C/T  | NA                 | NA                            | NA                 |
| Kabuli_wild_3436599 | NA                                  | Ca_kabuli_denovo | 3436599                 | C/G  | NA                 | NA                            | NA                 |
| Kabuli_wild_3436683 | NA                                  | Ca_kabuli_denovo | 3436683                 | A/T  | NA                 | NA                            | NA                 |
| Kabuli_wild_3436708 | NA                                  | Ca_kabuli_denovo | 3436708                 | T/C  | NA                 | NA                            | NA                 |
| Kabuli_wild_3436797 | NA                                  | Ca_kabuli_denovo | 3436797                 | G/C  | NA                 | NA                            | NA                 |
| Kabuli_wild_3437595 | NA                                  | Ca_kabuli_denovo | 3437595                 | A/T  | NA                 | NA                            | NA                 |
| Kabuli_wild_3438514 | NA                                  | Ca_kabuli_denovo | 3438514                 | G/T  | NA                 | NA                            | NA                 |
| Kabuli_wild_3439859 | NA                                  | Ca_kabuli_denovo | 3439859                 | G/A  | NA                 | NA                            | NA                 |
| Kabuli_wild_3439886 | NA                                  | Ca_kabuli_denovo | 3439886                 | A/G  | NA                 | NA                            | NA                 |
| Kabuli_wild_3440068 | NA                                  | Ca_kabuli_denovo | 3440068                 | C/T  | NA                 | NA                            | NA                 |
| Kabuli_wild_3440854 | NA                                  | Ca_kabuli_denovo | 3440854                 | G/A  | NA                 | NA                            | NA                 |
| Kabuli_wild_3441120 | NA                                  | Ca_kabuli_denovo | 3441120                 | A/G  | NA                 | NA                            | NA                 |
| Kabuli_wild_3441332 | NA                                  | Ca_kabuli_denovo | 3441332                 | C/T  | NA                 | NA                            | NA                 |
| Kabuli_wild_3441341 | NA                                  | Ca_kabuli_denovo | 3441341                 | C/T  | NA                 | NA                            | NA                 |
| Kabuli_wild_3441509 | NA                                  | Ca_kabuli_denovo | 3441509                 | G/A  | NA                 | NA                            | NA                 |
| Kabuli_wild_3441768 | NA                                  | Ca_kabuli_denovo | 3441768                 | T/C  | NA                 | NA                            | NA                 |
| Kabuli_wild_3442427 | NA                                  | Ca_kabuli_denovo | 3442427                 | C/T  | NA                 | NA                            | NA                 |
| Kabuli_wild_3443029 | NA                                  | Ca_kabuli_denovo | 3443029                 | T/C  | NA                 | NA                            | NA                 |
| Kabuli_wild_3443032 | NA                                  | Ca_kabuli_denovo | 3443032                 | C/T  | NA                 | NA                            | NA                 |
| Kabuli_wild_3443696 | NA                                  | Ca_kabuli_denovo | 3443696                 | G/T  | NA                 | NA                            | NA                 |
| Kabuli_wild_3443716 | NA                                  | Ca_kabuli_denovo | 3443716                 | T/G  | NA                 | NA                            | NA                 |
| Kabuli_wild_3443873 | NA                                  | Ca_kabuli_denovo | 3443873                 | G/A  | NA                 | NA                            | NA                 |
| Kabuli_wild_3444032 | NA                                  | Ca_kabuli_denovo | 3444032                 | T/C  | NA                 | NA                            | NA                 |
| Kabuli_wild_3444228 | NA                                  | Ca_kabuli_denovo | 3444228                 | C/G  | NA                 | NA                            | NA                 |
| Kabuli_wild_3444330 | NA                                  | Ca_kabuli_denovo | 3444330                 | G/C  | NA                 | NA                            | NA                 |
| Kabuli_wild_3444386 | NA                                  | Ca_kabuli_denovo | 3444386                 | G/C  | NA                 | NA                            | NA                 |

| SNP IDs             | NCBI dbSNP accession IDs (NCBI_SS#) | Chromosomes      | Physical positions (bp) | SNPs | Gene accession IDs | Sequence components of genome | Putative functions |
|---------------------|-------------------------------------|------------------|-------------------------|------|--------------------|-------------------------------|--------------------|
| Kabuli_wild_3444614 | NA                                  | Ca_kabuli_denovo | 3444614                 | T/G  | NA                 | NA                            | NA                 |
| Kabuli_wild_3444650 | NA                                  | Ca_kabuli_denovo | 3444650                 | T/G  | NA                 | NA                            | NA                 |
| Kabuli_wild_3444764 | NA                                  | Ca_kabuli_denovo | 3444764                 | T/C  | NA                 | NA                            | NA                 |
| Kabuli_wild_3445307 | NA                                  | Ca_kabuli_denovo | 3445307                 | C/T  | NA                 | NA                            | NA                 |
| Kabuli_wild_3445322 | NA                                  | Ca_kabuli_denovo | 3445322                 | T/C  | NA                 | NA                            | NA                 |
| Kabuli_wild_3445349 | NA                                  | Ca_kabuli_denovo | 3445349                 | T/C  | NA                 | NA                            | NA                 |
| Kabuli_wild_3445352 | NA                                  | Ca_kabuli_denovo | 3445352                 | A/G  | NA                 | NA                            | NA                 |
| Kabuli_wild_3445781 | NA                                  | Ca_kabuli_denovo | 3445781                 | T/G  | NA                 | NA                            | NA                 |
| Kabuli_wild_3445994 | NA                                  | Ca_kabuli_denovo | 3445994                 | C/T  | NA                 | NA                            | NA                 |
| Kabuli_wild_3445997 | NA                                  | Ca_kabuli_denovo | 3445997                 | C/A  | NA                 | NA                            | NA                 |
| Kabuli_wild_3446242 | NA                                  | Ca_kabuli_denovo | 3446242                 | G/C  | NA                 | NA                            | NA                 |
| Kabuli_wild_3446286 | NA                                  | Ca_kabuli_denovo | 3446286                 | T/C  | NA                 | NA                            | NA                 |
| Kabuli_wild_3447351 | NA                                  | Ca_kabuli_denovo | 3447351                 | T/G  | NA                 | NA                            | NA                 |
| Kabuli_wild_3447426 | NA                                  | Ca_kabuli_denovo | 3447426                 | G/A  | NA                 | NA                            | NA                 |
| Kabuli_wild_3447850 | NA                                  | Ca_kabuli_denovo | 3447850                 | A/G  | NA                 | NA                            | NA                 |
| Kabuli_wild_3447893 | NA                                  | Ca_kabuli_denovo | 3447893                 | G/A  | NA                 | NA                            | NA                 |
| Kabuli_wild_3448820 | NA                                  | Ca_kabuli_denovo | 3448820                 | G/T  | NA                 | NA                            | NA                 |
| Kabuli_wild_3448829 | NA                                  | Ca_kabuli_denovo | 3448829                 | C/T  | NA                 | NA                            | NA                 |
| Kabuli_wild_3451770 | NA                                  | Ca_kabuli_denovo | 3451770                 | T/A  | NA                 | NA                            | NA                 |
| Kabuli_wild_3452002 | NA                                  | Ca_kabuli_denovo | 3452002                 | G/T  | NA                 | NA                            | NA                 |
| Kabuli_wild_3452003 | NA                                  | Ca_kabuli_denovo | 3452003                 | T/C  | NA                 | NA                            | NA                 |
| Kabuli_wild_3452261 | NA                                  | Ca_kabuli_denovo | 3452261                 | G/C  | NA                 | NA                            | NA                 |
| Kabuli_wild_3452508 | NA                                  | Ca_kabuli_denovo | 3452508                 | T/G  | NA                 | NA                            | NA                 |
| Kabuli_wild_3452717 | NA                                  | Ca_kabuli_denovo | 3452717                 | C/T  | NA                 | NA                            | NA                 |
| Kabuli_wild_3453278 | NA                                  | Ca_kabuli_denovo | 3453278                 | G/A  | NA                 | NA                            | NA                 |
| Kabuli_wild_3453287 | NA                                  | Ca_kabuli_denovo | 3453287                 | A/G  | NA                 | NA                            | NA                 |
| Kabuli_wild_3455597 | NA                                  | Ca_kabuli_denovo | 3455597                 | A/C  | NA                 | NA                            | NA                 |
| Kabuli_wild_3456349 | NA                                  | Ca_kabuli_denovo | 3456349                 | T/C  | NA                 | NA                            | NA                 |
| Kabuli_wild_3456366 | NA                                  | Ca_kabuli_denovo | 3456366                 | G/T  | NA                 | NA                            | NA                 |
| Kabuli_wild_3456406 | NA                                  | Ca_kabuli_denovo | 3456406                 | A/T  | NA                 | NA                            | NA                 |
| Kabuli_wild_3456948 | NA                                  | Ca_kabuli_denovo | 3456948                 | G/C  | NA                 | NA                            | NA                 |
| Kabuli_wild_3457256 | NA                                  | Ca_kabuli_denovo | 3457256                 | C/T  | NA                 | NA                            | NA                 |
| Kabuli_wild_3457274 | NA                                  | Ca_kabuli_denovo | 3457274                 | T/C  | NA                 | NA                            | NA                 |
| Kabuli_wild_3457485 | NA                                  | Ca_kabuli_denovo | 3457485                 | G/A  | NA                 | NA                            | NA                 |
| Kabuli_wild_3460241 | NA                                  | Ca_kabuli_denovo | 3460241                 | G/T  | NA                 | NA                            | NA                 |
| Kabuli_wild_3460295 | NA                                  | Ca_kabuli_denovo | 3460295                 | G/C  | NA                 | NA                            | NA                 |
| Kabuli_wild_3460547 | NA                                  | Ca_kabuli_denovo | 3460547                 | G/A  | NA                 | NA                            | NA                 |
| Kabuli_wild_3460941 | NA                                  | Ca_kabuli_denovo | 3460941                 | C/T  | NA                 | NA                            | NA                 |
| Kabuli_wild_3460965 | NA                                  | Ca_kabuli_denovo | 3460965                 | G/C  | NA                 | NA                            | NA                 |
| Kabuli_wild_3464018 | NA                                  | Ca_kabuli_denovo | 3464018                 | T/C  | NA                 | NA                            | NA                 |
| Kabuli_wild_3464030 | NA                                  | Ca_kabuli_denovo | 3464030                 | G/A  | NA                 | NA                            | NA                 |
| Kabuli_wild_3464066 | NA                                  | Ca_kabuli_denovo | 3464066                 | A/C  | NA                 | NA                            | NA                 |
| Kabuli_wild_3464164 | NA                                  | Ca_kabuli_denovo | 3464164                 | T/C  | NA                 | NA                            | NA                 |
| Kabuli_wild_3464514 | NA                                  | Ca_kabuli_denovo | 3464514                 | C/T  | NA                 | NA                            | NA                 |



| SNP IDs             | NCBI dbSNP accession IDs (NCBI_SS#) | Chromosomes      | Physical positions (bp) | SNPs | Gene accession IDs | Sequence components of genome | Putative functions |
|---------------------|-------------------------------------|------------------|-------------------------|------|--------------------|-------------------------------|--------------------|
| Kabuli_wild_3464517 | NA                                  | Ca_kabuli_denovo | 3464517                 | T/C  | NA                 | NA                            | NA                 |
| Kabuli_wild_3466345 | NA                                  | Ca_kabuli_denovo | 3466345                 | A/G  | NA                 | NA                            | NA                 |
| Kabuli_wild_3466363 | NA                                  | Ca_kabuli_denovo | 3466363                 | C/G  | NA                 | NA                            | NA                 |
| Kabuli_wild_3466658 | NA                                  | Ca_kabuli_denovo | 3466658                 | G/A  | NA                 | NA                            | NA                 |
| Kabuli_wild_3466673 | NA                                  | Ca_kabuli_denovo | 3466673                 | C/G  | NA                 | NA                            | NA                 |
| Kabuli_wild_3466945 | NA                                  | Ca_kabuli_denovo | 3466945                 | G/C  | NA                 | NA                            | NA                 |
| Kabuli_wild_3466965 | NA                                  | Ca_kabuli_denovo | 3466965                 | T/C  | NA                 | NA                            | NA                 |
| Kabuli_wild_3467253 | NA                                  | Ca_kabuli_denovo | 3467253                 | G/C  | NA                 | NA                            | NA                 |
| Kabuli_wild_3469271 | NA                                  | Ca_kabuli_denovo | 3469271                 | G/C  | NA                 | NA                            | NA                 |
| Kabuli_wild_3469328 | NA                                  | Ca_kabuli_denovo | 3469328                 | T/C  | NA                 | NA                            | NA                 |
| Kabuli_wild_3470103 | NA                                  | Ca_kabuli_denovo | 3470103                 | G/T  | NA                 | NA                            | NA                 |
| Kabuli_wild_3470406 | NA                                  | Ca_kabuli_denovo | 3470406                 | T/G  | NA                 | NA                            | NA                 |
| Kabuli_wild_3470635 | NA                                  | Ca_kabuli_denovo | 3470635                 | C/T  | NA                 | NA                            | NA                 |
| Kabuli_wild_3470709 | NA                                  | Ca_kabuli_denovo | 3470709                 | T/C  | NA                 | NA                            | NA                 |
| Kabuli_wild_3470732 | NA                                  | Ca_kabuli_denovo | 3470732                 | C/A  | NA                 | NA                            | NA                 |
| Kabuli_wild_3471108 | NA                                  | Ca_kabuli_denovo | 3471108                 | T/C  | NA                 | NA                            | NA                 |
| Kabuli_wild_3471138 | NA                                  | Ca_kabuli_denovo | 3471138                 | T/C  | NA                 | NA                            | NA                 |
| Kabuli_wild_3471209 | NA                                  | Ca_kabuli_denovo | 3471209                 | C/T  | NA                 | NA                            | NA                 |
| Kabuli_wild_3471224 | NA                                  | Ca_kabuli_denovo | 3471224                 | G/C  | NA                 | NA                            | NA                 |
| Kabuli_wild_3471275 | NA                                  | Ca_kabuli_denovo | 3471275                 | G/C  | NA                 | NA                            | NA                 |
| Kabuli_wild_3471884 | NA                                  | Ca_kabuli_denovo | 3471884                 | A/C  | NA                 | NA                            | NA                 |
| Kabuli_wild_3473040 | NA                                  | Ca_kabuli_denovo | 3473040                 | G/A  | NA                 | NA                            | NA                 |
| Kabuli_wild_3473238 | NA                                  | Ca_kabuli_denovo | 3473238                 | A/G  | NA                 | NA                            | NA                 |
| Kabuli_wild_3473731 | NA                                  | Ca_kabuli_denovo | 3473731                 | G/C  | NA                 | NA                            | NA                 |
| Kabuli_wild_3473826 | NA                                  | Ca_kabuli_denovo | 3473826                 | T/G  | NA                 | NA                            | NA                 |
| Kabuli_wild_3474019 | NA                                  | Ca_kabuli_denovo | 3474019                 | C/T  | NA                 | NA                            | NA                 |
| Kabuli_wild_3474029 | NA                                  | Ca_kabuli_denovo | 3474029                 | G/C  | NA                 | NA                            | NA                 |
| Kabuli_wild_3474041 | NA                                  | Ca_kabuli_denovo | 3474041                 | T/C  | NA                 | NA                            | NA                 |
| Kabuli_wild_3474539 | NA                                  | Ca_kabuli_denovo | 3474539                 | C/T  | NA                 | NA                            | NA                 |
| Kabuli_wild_3475027 | NA                                  | Ca_kabuli_denovo | 3475027                 | T/A  | NA                 | NA                            | NA                 |
| Kabuli_wild_3475436 | NA                                  | Ca_kabuli_denovo | 3475436                 | G/C  | NA                 | NA                            | NA                 |
| Kabuli_wild_3476834 | NA                                  | Ca_kabuli_denovo | 3476834                 | T/C  | NA                 | NA                            | NA                 |
| Kabuli_wild_3477019 | NA                                  | Ca_kabuli_denovo | 3477019                 | T/G  | NA                 | NA                            | NA                 |
| Kabuli_wild_3477022 | NA                                  | Ca_kabuli_denovo | 3477022                 | G/C  | NA                 | NA                            | NA                 |
| Kabuli_wild_3477852 | NA                                  | Ca_kabuli_denovo | 3477852                 | T/G  | NA                 | NA                            | NA                 |
| Kabuli_wild_3477870 | NA                                  | Ca_kabuli_denovo | 3477870                 | G/A  | NA                 | NA                            | NA                 |
| Kabuli_wild_3478093 | NA                                  | Ca_kabuli_denovo | 3478093                 | C/A  | NA                 | NA                            | NA                 |
| Kabuli_wild_3478158 | NA                                  | Ca_kabuli_denovo | 3478158                 | G/A  | NA                 | NA                            | NA                 |
| Kabuli_wild_3478507 | NA                                  | Ca_kabuli_denovo | 3478507                 | T/C  | NA                 | NA                            | NA                 |
| Kabuli_wild_3480351 | NA                                  | Ca_kabuli_denovo | 3480351                 | A/C  | NA                 | NA                            | NA                 |
| Kabuli_wild_3480354 | NA                                  | Ca_kabuli_denovo | 3480354                 | C/G  | NA                 | NA                            | NA                 |
| Kabuli_wild_3481593 | NA                                  | Ca_kabuli_denovo | 3481593                 | C/G  | NA                 | NA                            | NA                 |
| Kabuli_wild_3481633 | NA                                  | Ca_kabuli_denovo | 3481633                 | G/T  | NA                 | NA                            | NA                 |
| Kabuli_wild_3482934 | NA                                  | Ca_kabuli_denovo | 3482934                 | C/T  | NA                 | NA                            | NA                 |

| SNP IDs             | NCBI dbSNP accession IDs (NCBI_SS#) | Chromosomes      | Physical positions (bp) | SNPs | Gene accession IDs | Sequence components of genome | Putative functions |
|---------------------|-------------------------------------|------------------|-------------------------|------|--------------------|-------------------------------|--------------------|
| Kabuli_wild_3483139 | NA                                  | Ca_kabuli_denovo | 3483139                 | G/A  | NA                 | NA                            | NA                 |
| Kabuli_wild_3485159 | NA                                  | Ca_kabuli_denovo | 3485159                 | G/C  | NA                 | NA                            | NA                 |
| Kabuli_wild_3485755 | NA                                  | Ca_kabuli_denovo | 3485755                 | A/C  | NA                 | NA                            | NA                 |
| Kabuli_wild_3486186 | NA                                  | Ca_kabuli_denovo | 3486186                 | A/T  | NA                 | NA                            | NA                 |
| Kabuli_wild_3486202 | NA                                  | Ca_kabuli_denovo | 3486202                 | C/G  | NA                 | NA                            | NA                 |
| Kabuli_wild_3486297 | NA                                  | Ca_kabuli_denovo | 3486297                 | C/A  | NA                 | NA                            | NA                 |
| Kabuli_wild_3486713 | NA                                  | Ca_kabuli_denovo | 3486713                 | C/T  | NA                 | NA                            | NA                 |
| Kabuli_wild_3486794 | NA                                  | Ca_kabuli_denovo | 3486794                 | C/A  | NA                 | NA                            | NA                 |
| Kabuli_wild_3487345 | NA                                  | Ca_kabuli_denovo | 3487345                 | G/A  | NA                 | NA                            | NA                 |
| Kabuli_wild_3488678 | NA                                  | Ca_kabuli_denovo | 3488678                 | G/A  | NA                 | NA                            | NA                 |
| Kabuli_wild_3488792 | NA                                  | Ca_kabuli_denovo | 3488792                 | G/A  | NA                 | NA                            | NA                 |
| Kabuli_wild_3488844 | NA                                  | Ca_kabuli_denovo | 3488844                 | A/G  | NA                 | NA                            | NA                 |
| Kabuli_wild_3488862 | NA                                  | Ca_kabuli_denovo | 3488862                 | G/C  | NA                 | NA                            | NA                 |
| Kabuli_wild_3490600 | NA                                  | Ca_kabuli_denovo | 3490600                 | C/T  | NA                 | NA                            | NA                 |
| Kabuli_wild_3490986 | NA                                  | Ca_kabuli_denovo | 3490986                 | G/A  | NA                 | NA                            | NA                 |
| Kabuli_wild_3490992 | NA                                  | Ca_kabuli_denovo | 3490992                 | G/A  | NA                 | NA                            | NA                 |
| Kabuli_wild_3492479 | NA                                  | Ca_kabuli_denovo | 3492479                 | A/C  | NA                 | NA                            | NA                 |
| Kabuli_wild_3494183 | NA                                  | Ca_kabuli_denovo | 3494183                 | G/T  | NA                 | NA                            | NA                 |
| Kabuli_wild_3494186 | NA                                  | Ca_kabuli_denovo | 3494186                 | A/G  | NA                 | NA                            | NA                 |
| Kabuli_wild_3494221 | NA                                  | Ca_kabuli_denovo | 3494221                 | C/T  | NA                 | NA                            | NA                 |
| Kabuli_wild_3495540 | NA                                  | Ca_kabuli_denovo | 3495540                 | A/G  | NA                 | NA                            | NA                 |
| Kabuli_wild_3495564 | NA                                  | Ca_kabuli_denovo | 3495564                 | G/C  | NA                 | NA                            | NA                 |
| Kabuli_wild_3495766 | NA                                  | Ca_kabuli_denovo | 3495766                 | G/A  | NA                 | NA                            | NA                 |
| Kabuli_wild_3497772 | NA                                  | Ca_kabuli_denovo | 3497772                 | A/T  | NA                 | NA                            | NA                 |
| Kabuli_wild_3497804 | NA                                  | Ca_kabuli_denovo | 3497804                 | G/C  | NA                 | NA                            | NA                 |
| Kabuli_wild_3498058 | NA                                  | Ca_kabuli_denovo | 3498058                 | G/A  | NA                 | NA                            | NA                 |
| Kabuli_wild_3498086 | NA                                  | Ca_kabuli_denovo | 3498086                 | G/T  | NA                 | NA                            | NA                 |
| Kabuli_wild_3498696 | NA                                  | Ca_kabuli_denovo | 3498696                 | T/C  | NA                 | NA                            | NA                 |
| Kabuli_wild_3498702 | NA                                  | Ca_kabuli_denovo | 3498702                 | T/G  | NA                 | NA                            | NA                 |
| Kabuli_wild_3499188 | NA                                  | Ca_kabuli_denovo | 3499188                 | C/T  | NA                 | NA                            | NA                 |
| Kabuli_wild_3499614 | NA                                  | Ca_kabuli_denovo | 3499614                 | G/T  | NA                 | NA                            | NA                 |
| Kabuli_wild_3499620 | NA                                  | Ca_kabuli_denovo | 3499620                 | A/G  | NA                 | NA                            | NA                 |
| Kabuli_wild_3501028 | NA                                  | Ca_kabuli_denovo | 3501028                 | A/T  | NA                 | NA                            | NA                 |
| Kabuli_wild_3501405 | NA                                  | Ca_kabuli_denovo | 3501405                 | C/G  | NA                 | NA                            | NA                 |
| Kabuli_wild_3501410 | NA                                  | Ca_kabuli_denovo | 3501410                 | A/C  | NA                 | NA                            | NA                 |
| Kabuli_wild_3501669 | NA                                  | Ca_kabuli_denovo | 3501669                 | A/G  | NA                 | NA                            | NA                 |
| Kabuli_wild_3501728 | NA                                  | Ca_kabuli_denovo | 3501728                 | G/A  | NA                 | NA                            | NA                 |
| Kabuli_wild_3502328 | NA                                  | Ca_kabuli_denovo | 3502328                 | T/C  | NA                 | NA                            | NA                 |
| Kabuli_wild_3504034 | NA                                  | Ca_kabuli_denovo | 3504034                 | A/G  | NA                 | NA                            | NA                 |
| Kabuli_wild_3504297 | NA                                  | Ca_kabuli_denovo | 3504297                 | A/C  | NA                 | NA                            | NA                 |
| Kabuli_wild_3504352 | NA                                  | Ca_kabuli_denovo | 3504352                 | A/G  | NA                 | NA                            | NA                 |
| Kabuli_wild_3507584 | NA                                  | Ca_kabuli_denovo | 3507584                 | A/G  | NA                 | NA                            | NA                 |
| Kabuli_wild_3507827 | NA                                  | Ca_kabuli_denovo | 3507827                 | C/A  | NA                 | NA                            | NA                 |
| Kabuli_wild_3509098 | NA                                  | Ca_kabuli_denovo | 3509098                 | A/G  | NA                 | NA                            | NA                 |

| SNP IDs             | NCBI dbSNP accession IDs (NCBI_SS#) | Chromosomes      | Physical positions (bp) | SNPs | Gene accession IDs | Sequence components of genome | Putative functions |
|---------------------|-------------------------------------|------------------|-------------------------|------|--------------------|-------------------------------|--------------------|
| Kabuli_wild_3510462 | NA                                  | Ca_kabuli_denovo | 3510462                 | T/G  | NA                 | NA                            | NA                 |
| Kabuli_wild_3511189 | NA                                  | Ca_kabuli_denovo | 3511189                 | T/C  | NA                 | NA                            | NA                 |
| Kabuli_wild_3511216 | NA                                  | Ca_kabuli_denovo | 3511216                 | G/A  | NA                 | NA                            | NA                 |
| Kabuli_wild_3512853 | NA                                  | Ca_kabuli_denovo | 3512853                 | C/T  | NA                 | NA                            | NA                 |
| Kabuli_wild_3512856 | NA                                  | Ca_kabuli_denovo | 3512856                 | T/C  | NA                 | NA                            | NA                 |
| Kabuli_wild_3513243 | NA                                  | Ca_kabuli_denovo | 3513243                 | T/C  | NA                 | NA                            | NA                 |
| Kabuli_wild_3513388 | NA                                  | Ca_kabuli_denovo | 3513388                 | C/T  | NA                 | NA                            | NA                 |
| Kabuli_wild_3513415 | NA                                  | Ca_kabuli_denovo | 3513415                 | T/C  | NA                 | NA                            | NA                 |
| Kabuli_wild_3513896 | NA                                  | Ca_kabuli_denovo | 3513896                 | C/A  | NA                 | NA                            | NA                 |
| Kabuli_wild_3513902 | NA                                  | Ca_kabuli_denovo | 3513902                 | C/G  | NA                 | NA                            | NA                 |
| Kabuli_wild_3514091 | NA                                  | Ca_kabuli_denovo | 3514091                 | T/C  | NA                 | NA                            | NA                 |
| Kabuli_wild_3514501 | NA                                  | Ca_kabuli_denovo | 3514501                 | A/G  | NA                 | NA                            | NA                 |
| Kabuli_wild_3514503 | NA                                  | Ca_kabuli_denovo | 3514503                 | T/A  | NA                 | NA                            | NA                 |
| Kabuli_wild_3514758 | NA                                  | Ca_kabuli_denovo | 3514758                 | T/G  | NA                 | NA                            | NA                 |
| Kabuli_wild_3514761 | NA                                  | Ca_kabuli_denovo | 3514761                 | G/C  | NA                 | NA                            | NA                 |
| Kabuli_wild_3515312 | NA                                  | Ca_kabuli_denovo | 3515312                 | C/G  | NA                 | NA                            | NA                 |
| Kabuli_wild_3516496 | NA                                  | Ca_kabuli_denovo | 3516496                 | A/G  | NA                 | NA                            | NA                 |
| Kabuli_wild_3516529 | NA                                  | Ca_kabuli_denovo | 3516529                 | G/T  | NA                 | NA                            | NA                 |
| Kabuli_wild_3516661 | NA                                  | Ca_kabuli_denovo | 3516661                 | T/C  | NA                 | NA                            | NA                 |
| Kabuli_wild_3516667 | NA                                  | Ca_kabuli_denovo | 3516667                 | G/T  | NA                 | NA                            | NA                 |
| Kabuli_wild_3517086 | NA                                  | Ca_kabuli_denovo | 3517086                 | T/C  | NA                 | NA                            | NA                 |
| Kabuli_wild_3517221 | NA                                  | Ca_kabuli_denovo | 3517221                 | G/T  | NA                 | NA                            | NA                 |
| Kabuli_wild_3517227 | NA                                  | Ca_kabuli_denovo | 3517227                 | G/T  | NA                 | NA                            | NA                 |
| Kabuli_wild_3517232 | NA                                  | Ca_kabuli_denovo | 3517232                 | T/G  | NA                 | NA                            | NA                 |
| Kabuli_wild_3517249 | NA                                  | Ca_kabuli_denovo | 3517249                 | T/G  | NA                 | NA                            | NA                 |
| Kabuli_wild_3517317 | NA                                  | Ca_kabuli_denovo | 3517317                 | T/G  | NA                 | NA                            | NA                 |
| Kabuli_wild_3517570 | NA                                  | Ca_kabuli_denovo | 3517570                 | G/T  | NA                 | NA                            | NA                 |
| Kabuli_wild_3517579 | NA                                  | Ca_kabuli_denovo | 3517579                 | G/A  | NA                 | NA                            | NA                 |
| Kabuli_wild_3517696 | NA                                  | Ca_kabuli_denovo | 3517696                 | G/C  | NA                 | NA                            | NA                 |
| Kabuli_wild_3519505 | NA                                  | Ca_kabuli_denovo | 3519505                 | C/G  | NA                 | NA                            | NA                 |
| Kabuli_wild_3519550 | NA                                  | Ca_kabuli_denovo | 3519550                 | C/G  | NA                 | NA                            | NA                 |
| Kabuli_wild_3519577 | NA                                  | Ca_kabuli_denovo | 3519577                 | C/T  | NA                 | NA                            | NA                 |
| Kabuli_wild_3519580 | NA                                  | Ca_kabuli_denovo | 3519580                 | C/G  | NA                 | NA                            | NA                 |
| Kabuli_wild_3519601 | NA                                  | Ca_kabuli_denovo | 3519601                 | C/G  | NA                 | NA                            | NA                 |
| Kabuli_wild_3521090 | NA                                  | Ca_kabuli_denovo | 3521090                 | G/A  | NA                 | NA                            | NA                 |
| Kabuli_wild_3522246 | NA                                  | Ca_kabuli_denovo | 3522246                 | C/T  | NA                 | NA                            | NA                 |
| Kabuli_wild_3522994 | NA                                  | Ca_kabuli_denovo | 3522994                 | A/G  | NA                 | NA                            | NA                 |
| Kabuli_wild_3523042 | NA                                  | Ca_kabuli_denovo | 3523042                 | C/A  | NA                 | NA                            | NA                 |
| Kabuli_wild_3523054 | NA                                  | Ca_kabuli_denovo | 3523054                 | A/T  | NA                 | NA                            | NA                 |
| Kabuli_wild_3523057 | NA                                  | Ca_kabuli_denovo | 3523057                 | C/G  | NA                 | NA                            | NA                 |
| Kabuli_wild_3524738 | NA                                  | Ca_kabuli_denovo | 3524738                 | C/T  | NA                 | NA                            | NA                 |
| Kabuli_wild_3524801 | NA                                  | Ca_kabuli_denovo | 3524801                 | T/C  | NA                 | NA                            | NA                 |
| Kabuli_wild_3524932 | NA                                  | Ca_kabuli_denovo | 3524932                 | G/A  | NA                 | NA                            | NA                 |
| Kabuli_wild_3525001 | NA                                  | Ca_kabuli_denovo | 3525001                 | A/T  | NA                 | NA                            | NA                 |

| SNP IDs             | NCBI dbSNP accession IDs (NCBI_SS#) | Chromosomes      | Physical positions (bp) | SNPs | Gene accession IDs | Sequence components of genome | Putative functions |
|---------------------|-------------------------------------|------------------|-------------------------|------|--------------------|-------------------------------|--------------------|
| Kabuli_wild_3525203 | NA                                  | Ca_kabuli_denovo | 3525203                 | A/G  | NA                 | NA                            | NA                 |
| Kabuli_wild_3525204 | NA                                  | Ca_kabuli_denovo | 3525204                 | A/T  | NA                 | NA                            | NA                 |
| Kabuli_wild_3526018 | NA                                  | Ca_kabuli_denovo | 3526018                 | A/G  | NA                 | NA                            | NA                 |
| Kabuli_wild_3527327 | NA                                  | Ca_kabuli_denovo | 3527327                 | T/G  | NA                 | NA                            | NA                 |
| Kabuli_wild_3527693 | NA                                  | Ca_kabuli_denovo | 3527693                 | G/A  | NA                 | NA                            | NA                 |
| Kabuli_wild_3530277 | NA                                  | Ca_kabuli_denovo | 3530277                 | A/G  | NA                 | NA                            | NA                 |
| Kabuli_wild_3530775 | NA                                  | Ca_kabuli_denovo | 3530775                 | T/C  | NA                 | NA                            | NA                 |
| Kabuli_wild_3531052 | NA                                  | Ca_kabuli_denovo | 3531052                 | G/A  | NA                 | NA                            | NA                 |
| Kabuli_wild_3531549 | NA                                  | Ca_kabuli_denovo | 3531549                 | G/A  | NA                 | NA                            | NA                 |
| Kabuli_wild_3531567 | NA                                  | Ca_kabuli_denovo | 3531567                 | C/A  | NA                 | NA                            | NA                 |
| Kabuli_wild_3532232 | NA                                  | Ca_kabuli_denovo | 3532232                 | C/T  | NA                 | NA                            | NA                 |
| Kabuli_wild_3532292 | NA                                  | Ca_kabuli_denovo | 3532292                 | C/G  | NA                 | NA                            | NA                 |
| Kabuli_wild_3532692 | NA                                  | Ca_kabuli_denovo | 3532692                 | C/G  | NA                 | NA                            | NA                 |
| Kabuli_wild_3533304 | NA                                  | Ca_kabuli_denovo | 3533304                 | C/A  | NA                 | NA                            | NA                 |
| Kabuli_wild_3533314 | NA                                  | Ca_kabuli_denovo | 3533314                 | T/G  | NA                 | NA                            | NA                 |
| Kabuli_wild_3533399 | NA                                  | Ca_kabuli_denovo | 3533399                 | A/G  | NA                 | NA                            | NA                 |
| Kabuli_wild_3533410 | NA                                  | Ca_kabuli_denovo | 3533410                 | G/T  | NA                 | NA                            | NA                 |
| Kabuli_wild_3534244 | NA                                  | Ca_kabuli_denovo | 3534244                 | G/T  | NA                 | NA                            | NA                 |
| Kabuli_wild_3534292 | NA                                  | Ca_kabuli_denovo | 3534292                 | A/G  | NA                 | NA                            | NA                 |
| Kabuli_wild_3534462 | NA                                  | Ca_kabuli_denovo | 3534462                 | A/G  | NA                 | NA                            | NA                 |
| Kabuli_wild_3535537 | NA                                  | Ca_kabuli_denovo | 3535537                 | C/G  | NA                 | NA                            | NA                 |
| Kabuli_wild_3535588 | NA                                  | Ca_kabuli_denovo | 3535588                 | C/A  | NA                 | NA                            | NA                 |
| Kabuli_wild_3535612 | NA                                  | Ca_kabuli_denovo | 3535612                 | C/G  | NA                 | NA                            | NA                 |
| Kabuli_wild_3536835 | NA                                  | Ca_kabuli_denovo | 3536835                 | G/A  | NA                 | NA                            | NA                 |
| Kabuli_wild_3536986 | NA                                  | Ca_kabuli_denovo | 3536986                 | T/C  | NA                 | NA                            | NA                 |
| Kabuli_wild_3537007 | NA                                  | Ca_kabuli_denovo | 3537007                 | A/G  | NA                 | NA                            | NA                 |
| Kabuli_wild_3537065 | NA                                  | Ca_kabuli_denovo | 3537065                 | G/A  | NA                 | NA                            | NA                 |
| Kabuli_wild_3537068 | NA                                  | Ca_kabuli_denovo | 3537068                 | G/C  | NA                 | NA                            | NA                 |
| Kabuli_wild_3537248 | NA                                  | Ca_kabuli_denovo | 3537248                 | T/C  | NA                 | NA                            | NA                 |
| Kabuli_wild_3537290 | NA                                  | Ca_kabuli_denovo | 3537290                 | G/A  | NA                 | NA                            | NA                 |
| Kabuli_wild_3537355 | NA                                  | Ca_kabuli_denovo | 3537355                 | C/T  | NA                 | NA                            | NA                 |
| Kabuli_wild_3537650 | NA                                  | Ca_kabuli_denovo | 3537650                 | C/A  | NA                 | NA                            | NA                 |
| Kabuli_wild_3537698 | NA                                  | Ca_kabuli_denovo | 3537698                 | T/C  | NA                 | NA                            | NA                 |
| Kabuli_wild_3538636 | NA                                  | Ca_kabuli_denovo | 3538636                 | T/A  | NA                 | NA                            | NA                 |
| Kabuli_wild_3538759 | NA                                  | Ca_kabuli_denovo | 3538759                 | G/C  | NA                 | NA                            | NA                 |
| Kabuli_wild_3538789 | NA                                  | Ca_kabuli_denovo | 3538789                 | A/G  | NA                 | NA                            | NA                 |
| Kabuli_wild_3540046 | NA                                  | Ca_kabuli_denovo | 3540046                 | G/C  | NA                 | NA                            | NA                 |
| Kabuli_wild_3540391 | NA                                  | Ca_kabuli_denovo | 3540391                 | T/G  | NA                 | NA                            | NA                 |
| Kabuli_wild_3540437 | NA                                  | Ca_kabuli_denovo | 3540437                 | T/G  | NA                 | NA                            | NA                 |
| Kabuli_wild_3541052 | NA                                  | Ca_kabuli_denovo | 3541052                 | T/C  | NA                 | NA                            | NA                 |
| Kabuli_wild_3542314 | NA                                  | Ca_kabuli_denovo | 3542314                 | G/C  | NA                 | NA                            | NA                 |
| Kabuli_wild_3542333 | NA                                  | Ca_kabuli_denovo | 3542333                 | C/G  | NA                 | NA                            | NA                 |
| Kabuli_wild_3542511 | NA                                  | Ca_kabuli_denovo | 3542511                 | G/T  | NA                 | NA                            | NA                 |
| Kabuli_wild_3543093 | NA                                  | Ca_kabuli_denovo | 3543093                 | T/G  | NA                 | NA                            | NA                 |

| SNP IDs             | NCBI dbSNP accession IDs (NCBI_SS#) | Chromosomes      | Physical positions (bp) | SNPs | Gene accession IDs | Sequence components of genome | Putative functions |
|---------------------|-------------------------------------|------------------|-------------------------|------|--------------------|-------------------------------|--------------------|
| Kabuli_wild_3543099 | NA                                  | Ca_kabuli_denovo | 3543099                 | T/A  | NA                 | NA                            | NA                 |
| Kabuli_wild_3543176 | NA                                  | Ca_kabuli_denovo | 3543176                 | T/C  | NA                 | NA                            | NA                 |
| Kabuli_wild_3543426 | NA                                  | Ca_kabuli_denovo | 3543426                 | C/T  | NA                 | NA                            | NA                 |
| Kabuli_wild_3543832 | NA                                  | Ca_kabuli_denovo | 3543832                 | A/C  | NA                 | NA                            | NA                 |
| Kabuli_wild_3544353 | NA                                  | Ca_kabuli_denovo | 3544353                 | C/G  | NA                 | NA                            | NA                 |
| Kabuli_wild_3544374 | NA                                  | Ca_kabuli_denovo | 3544374                 | A/T  | NA                 | NA                            | NA                 |
| Kabuli_wild_3545695 | NA                                  | Ca_kabuli_denovo | 3545695                 | C/T  | NA                 | NA                            | NA                 |
| Kabuli_wild_3546350 | NA                                  | Ca_kabuli_denovo | 3546350                 | C/G  | NA                 | NA                            | NA                 |
| Kabuli_wild_3546358 | NA                                  | Ca_kabuli_denovo | 3546358                 | C/G  | NA                 | NA                            | NA                 |
| Kabuli_wild_3546447 | NA                                  | Ca_kabuli_denovo | 3546447                 | T/C  | NA                 | NA                            | NA                 |
| Kabuli_wild_3546448 | NA                                  | Ca_kabuli_denovo | 3546448                 | C/A  | NA                 | NA                            | NA                 |
| Kabuli_wild_3546657 | NA                                  | Ca_kabuli_denovo | 3546657                 | T/C  | NA                 | NA                            | NA                 |
| Kabuli_wild_3549663 | NA                                  | Ca_kabuli_denovo | 3549663                 | C/G  | NA                 | NA                            | NA                 |
| Kabuli_wild_3549885 | NA                                  | Ca_kabuli_denovo | 3549885                 | C/T  | NA                 | NA                            | NA                 |
| Kabuli_wild_3550448 | NA                                  | Ca_kabuli_denovo | 3550448                 | C/T  | NA                 | NA                            | NA                 |
| Kabuli_wild_3550570 | NA                                  | Ca_kabuli_denovo | 3550570                 | T/C  | NA                 | NA                            | NA                 |
| Kabuli_wild_3551030 | NA                                  | Ca_kabuli_denovo | 3551030                 | T/G  | NA                 | NA                            | NA                 |
| Kabuli_wild_3551217 | NA                                  | Ca_kabuli_denovo | 3551217                 | C/A  | NA                 | NA                            | NA                 |
| Kabuli_wild_3552524 | NA                                  | Ca_kabuli_denovo | 3552524                 | G/C  | NA                 | NA                            | NA                 |
| Kabuli_wild_3552557 | NA                                  | Ca_kabuli_denovo | 3552557                 | C/T  | NA                 | NA                            | NA                 |
| Kabuli_wild_3552679 | NA                                  | Ca_kabuli_denovo | 3552679                 | A/G  | NA                 | NA                            | NA                 |
| Kabuli_wild_3553666 | NA                                  | Ca_kabuli_denovo | 3553666                 | C/T  | NA                 | NA                            | NA                 |
| Kabuli_wild_3553712 | NA                                  | Ca_kabuli_denovo | 3553712                 | A/G  | NA                 | NA                            | NA                 |
| Kabuli_wild_3553731 | NA                                  | Ca_kabuli_denovo | 3553731                 | G/T  | NA                 | NA                            | NA                 |
| Kabuli_wild_3553748 | NA                                  | Ca_kabuli_denovo | 3553748                 | T/C  | NA                 | NA                            | NA                 |
| Kabuli_wild_3553837 | NA                                  | Ca_kabuli_denovo | 3553837                 | G/C  | NA                 | NA                            | NA                 |
| Kabuli_wild_3553867 | NA                                  | Ca_kabuli_denovo | 3553867                 | C/T  | NA                 | NA                            | NA                 |
| Kabuli_wild_3555968 | NA                                  | Ca_kabuli_denovo | 3555968                 | C/T  | NA                 | NA                            | NA                 |
| Kabuli_wild_3556071 | NA                                  | Ca_kabuli_denovo | 3556071                 | C/G  | NA                 | NA                            | NA                 |
| Kabuli_wild_3556163 | NA                                  | Ca_kabuli_denovo | 3556163                 | C/T  | NA                 | NA                            | NA                 |
| Kabuli_wild_3556178 | NA                                  | Ca_kabuli_denovo | 3556178                 | G/C  | NA                 | NA                            | NA                 |
| Kabuli_wild_3556494 | NA                                  | Ca_kabuli_denovo | 3556494                 | G/A  | NA                 | NA                            | NA                 |
| Kabuli_wild_3557093 | NA                                  | Ca_kabuli_denovo | 3557093                 | C/T  | NA                 | NA                            | NA                 |
| Kabuli_wild_3558836 | NA                                  | Ca_kabuli_denovo | 3558836                 | C/T  | NA                 | NA                            | NA                 |
| Kabuli_wild_3559753 | NA                                  | Ca_kabuli_denovo | 3559753                 | A/G  | NA                 | NA                            | NA                 |
| Kabuli_wild_3560109 | NA                                  | Ca_kabuli_denovo | 3560109                 | C/A  | NA                 | NA                            | NA                 |
| Kabuli_wild_3560121 | NA                                  | Ca_kabuli_denovo | 3560121                 | T/C  | NA                 | NA                            | NA                 |
| Kabuli_wild_3560201 | NA                                  | Ca_kabuli_denovo | 3560201                 | G/A  | NA                 | NA                            | NA                 |
| Kabuli_wild_3560335 | NA                                  | Ca_kabuli_denovo | 3560335                 | C/T  | NA                 | NA                            | NA                 |
| Kabuli_wild_3561233 | NA                                  | Ca_kabuli_denovo | 3561233                 | C/T  | NA                 | NA                            | NA                 |
| Kabuli_wild_3561349 | NA                                  | Ca_kabuli_denovo | 3561349                 | A/T  | NA                 | NA                            | NA                 |
| Kabuli_wild_3561363 | NA                                  | Ca_kabuli_denovo | 3561363                 | C/T  | NA                 | NA                            | NA                 |
| Kabuli_wild_3562737 | NA                                  | Ca_kabuli_denovo | 3562737                 | C/G  | NA                 | NA                            | NA                 |
| Kabuli_wild_3564194 | NA                                  | Ca_kabuli_denovo | 3564194                 | C/T  | NA                 | NA                            | NA                 |

| SNP IDs             | NCBI dbSNP accession IDs (NCBI_SS#) | Chromosomes      | Physical positions (bp) | SNPs | Gene accession IDs | Sequence components of genome | Putative functions |
|---------------------|-------------------------------------|------------------|-------------------------|------|--------------------|-------------------------------|--------------------|
| Kabuli_wild_3564200 | NA                                  | Ca_kabuli_denovo | 3564200                 | A/G  | NA                 | NA                            | NA                 |
| Kabuli_wild_3565098 | NA                                  | Ca_kabuli_denovo | 3565098                 | A/G  | NA                 | NA                            | NA                 |
| Kabuli_wild_3565169 | NA                                  | Ca_kabuli_denovo | 3565169                 | T/G  | NA                 | NA                            | NA                 |
| Kabuli_wild_3565545 | NA                                  | Ca_kabuli_denovo | 3565545                 | C/T  | NA                 | NA                            | NA                 |
| Kabuli_wild_3565674 | NA                                  | Ca_kabuli_denovo | 3565674                 | G/T  | NA                 | NA                            | NA                 |
| Kabuli_wild_3565693 | NA                                  | Ca_kabuli_denovo | 3565693                 | A/G  | NA                 | NA                            | NA                 |
| Kabuli_wild_3565720 | NA                                  | Ca_kabuli_denovo | 3565720                 | C/G  | NA                 | NA                            | NA                 |
| Kabuli_wild_3565723 | NA                                  | Ca_kabuli_denovo | 3565723                 | C/T  | NA                 | NA                            | NA                 |
| Kabuli_wild_3565975 | NA                                  | Ca_kabuli_denovo | 3565975                 | A/G  | NA                 | NA                            | NA                 |
| Kabuli_wild_3566210 | NA                                  | Ca_kabuli_denovo | 3566210                 | G/A  | NA                 | NA                            | NA                 |
| Kabuli_wild_3566227 | NA                                  | Ca_kabuli_denovo | 3566227                 | A/C  | NA                 | NA                            | NA                 |
| Kabuli_wild_3568330 | NA                                  | Ca_kabuli_denovo | 3568330                 | G/T  | NA                 | NA                            | NA                 |
| Kabuli_wild_3568428 | NA                                  | Ca_kabuli_denovo | 3568428                 | T/C  | NA                 | NA                            | NA                 |
| Kabuli_wild_3568430 | NA                                  | Ca_kabuli_denovo | 3568430                 | G/C  | NA                 | NA                            | NA                 |
| Kabuli_wild_3569669 | NA                                  | Ca_kabuli_denovo | 3569669                 | C/G  | NA                 | NA                            | NA                 |
| Kabuli_wild_3570072 | NA                                  | Ca_kabuli_denovo | 3570072                 | C/T  | NA                 | NA                            | NA                 |
| Kabuli_wild_3570096 | NA                                  | Ca_kabuli_denovo | 3570096                 | G/T  | NA                 | NA                            | NA                 |
| Kabuli_wild_3570906 | NA                                  | Ca_kabuli_denovo | 3570906                 | C/A  | NA                 | NA                            | NA                 |
| Kabuli_wild_3571685 | NA                                  | Ca_kabuli_denovo | 3571685                 | T/C  | NA                 | NA                            | NA                 |
| Kabuli_wild_3571720 | NA                                  | Ca_kabuli_denovo | 3571720                 | T/C  | NA                 | NA                            | NA                 |
| Kabuli_wild_3571988 | NA                                  | Ca_kabuli_denovo | 3571988                 | T/C  | NA                 | NA                            | NA                 |
| Kabuli_wild_3572274 | NA                                  | Ca_kabuli_denovo | 3572274                 | T/C  | NA                 | NA                            | NA                 |
| Kabuli_wild_3572312 | NA                                  | Ca_kabuli_denovo | 3572312                 | C/T  | NA                 | NA                            | NA                 |
| Kabuli_wild_3572390 | NA                                  | Ca_kabuli_denovo | 3572390                 | G/C  | NA                 | NA                            | NA                 |
| Kabuli_wild_3572410 | NA                                  | Ca_kabuli_denovo | 3572410                 | C/T  | NA                 | NA                            | NA                 |
| Kabuli_wild_3574311 | NA                                  | Ca_kabuli_denovo | 3574311                 | G/T  | NA                 | NA                            | NA                 |
| Kabuli_wild_3574323 | NA                                  | Ca_kabuli_denovo | 3574323                 | T/C  | NA                 | NA                            | NA                 |
| Kabuli_wild_3574345 | NA                                  | Ca_kabuli_denovo | 3574345                 | T/G  | NA                 | NA                            | NA                 |
| Kabuli_wild_3575248 | NA                                  | Ca_kabuli_denovo | 3575248                 | T/G  | NA                 | NA                            | NA                 |
| Kabuli_wild_3575250 | NA                                  | Ca_kabuli_denovo | 3575250                 | C/T  | NA                 | NA                            | NA                 |
| Kabuli_wild_3575251 | NA                                  | Ca_kabuli_denovo | 3575251                 | A/C  | NA                 | NA                            | NA                 |
| Kabuli_wild_3575771 | NA                                  | Ca_kabuli_denovo | 3575771                 | A/G  | NA                 | NA                            | NA                 |
| Kabuli_wild_3576183 | NA                                  | Ca_kabuli_denovo | 3576183                 | A/G  | NA                 | NA                            | NA                 |
| Kabuli_wild_3576214 | NA                                  | Ca_kabuli_denovo | 3576214                 | A/G  | NA                 | NA                            | NA                 |
| Kabuli_wild_3576255 | NA                                  | Ca_kabuli_denovo | 3576255                 | T/C  | NA                 | NA                            | NA                 |
| Kabuli_wild_3576310 | NA                                  | Ca_kabuli_denovo | 3576310                 | T/C  | NA                 | NA                            | NA                 |
| Kabuli_wild_3576763 | NA                                  | Ca_kabuli_denovo | 3576763                 | G/A  | NA                 | NA                            | NA                 |
| Kabuli_wild_3576769 | NA                                  | Ca_kabuli_denovo | 3576769                 | C/T  | NA                 | NA                            | NA                 |
| Kabuli_wild_3576846 | NA                                  | Ca_kabuli_denovo | 3576846                 | G/A  | NA                 | NA                            | NA                 |
| Kabuli_wild_3579320 | NA                                  | Ca_kabuli_denovo | 3579320                 | T/G  | NA                 | NA                            | NA                 |
| Kabuli_wild_3579737 | NA                                  | Ca_kabuli_denovo | 3579737                 | A/G  | NA                 | NA                            | NA                 |
| Kabuli_wild_3579740 | NA                                  | Ca_kabuli_denovo | 3579740                 | G/C  | NA                 | NA                            | NA                 |
| Kabuli_wild_3579848 | NA                                  | Ca_kabuli_denovo | 3579848                 | A/G  | NA                 | NA                            | NA                 |
| Kabuli_wild_3580429 | NA                                  | Ca_kabuli_denovo | 3580429                 | T/C  | NA                 | NA                            | NA                 |

| SNP IDs             | NCBI dbSNP accession IDs (NCBI_SS#) | Chromosomes      | Physical positions (bp) | SNPs | Gene accession IDs | Sequence components of genome | Putative functions |
|---------------------|-------------------------------------|------------------|-------------------------|------|--------------------|-------------------------------|--------------------|
| Kabuli_wild_3580434 | NA                                  | Ca_kabuli_denovo | 3580434                 | C/T  | NA                 | NA                            | NA                 |
| Kabuli_wild_3580672 | NA                                  | Ca_kabuli_denovo | 3580672                 | G/T  | NA                 | NA                            | NA                 |
| Kabuli_wild_3580684 | NA                                  | Ca_kabuli_denovo | 3580684                 | A/G  | NA                 | NA                            | NA                 |
| Kabuli_wild_3581803 | NA                                  | Ca_kabuli_denovo | 3581803                 | C/G  | NA                 | NA                            | NA                 |
| Kabuli_wild_3581809 | NA                                  | Ca_kabuli_denovo | 3581809                 | G/C  | NA                 | NA                            | NA                 |
| Kabuli_wild_3581812 | NA                                  | Ca_kabuli_denovo | 3581812                 | G/A  | NA                 | NA                            | NA                 |
| Kabuli_wild_3581900 | NA                                  | Ca_kabuli_denovo | 3581900                 | A/G  | NA                 | NA                            | NA                 |
| Kabuli_wild_3582651 | NA                                  | Ca_kabuli_denovo | 3582651                 | G/A  | NA                 | NA                            | NA                 |
| Kabuli_wild_3582678 | NA                                  | Ca_kabuli_denovo | 3582678                 | G/A  | NA                 | NA                            | NA                 |
| Kabuli_wild_3582687 | NA                                  | Ca_kabuli_denovo | 3582687                 | C/T  | NA                 | NA                            | NA                 |
| Kabuli_wild_3582876 | NA                                  | Ca_kabuli_denovo | 3582876                 | A/G  | NA                 | NA                            | NA                 |
| Kabuli_wild_3582901 | NA                                  | Ca_kabuli_denovo | 3582901                 | T/C  | NA                 | NA                            | NA                 |
| Kabuli_wild_3583649 | NA                                  | Ca_kabuli_denovo | 3583649                 | A/C  | NA                 | NA                            | NA                 |
| Kabuli_wild_3583657 | NA                                  | Ca_kabuli_denovo | 3583657                 | C/G  | NA                 | NA                            | NA                 |
| Kabuli_wild_3584229 | NA                                  | Ca_kabuli_denovo | 3584229                 | T/G  | NA                 | NA                            | NA                 |
| Kabuli_wild_3584242 | NA                                  | Ca_kabuli_denovo | 3584242                 | G/A  | NA                 | NA                            | NA                 |
| Kabuli_wild_3584396 | NA                                  | Ca_kabuli_denovo | 3584396                 | C/T  | NA                 | NA                            | NA                 |
| Kabuli_wild_3584726 | NA                                  | Ca_kabuli_denovo | 3584726                 | T/C  | NA                 | NA                            | NA                 |
| Kabuli_wild_3585195 | NA                                  | Ca_kabuli_denovo | 3585195                 | T/C  | NA                 | NA                            | NA                 |
| Kabuli_wild_3585207 | NA                                  | Ca_kabuli_denovo | 3585207                 | C/A  | NA                 | NA                            | NA                 |
| Kabuli_wild_3585383 | NA                                  | Ca_kabuli_denovo | 3585383                 | G/A  | NA                 | NA                            | NA                 |
| Kabuli_wild_3586819 | NA                                  | Ca_kabuli_denovo | 3586819                 | C/A  | NA                 | NA                            | NA                 |
| Kabuli_wild_3587011 | NA                                  | Ca_kabuli_denovo | 3587011                 | T/C  | NA                 | NA                            | NA                 |
| Kabuli_wild_3587059 | NA                                  | Ca_kabuli_denovo | 3587059                 | C/T  | NA                 | NA                            | NA                 |
| Kabuli_wild_3587204 | NA                                  | Ca_kabuli_denovo | 3587204                 | C/G  | NA                 | NA                            | NA                 |
| Kabuli_wild_3587222 | NA                                  | Ca_kabuli_denovo | 3587222                 | G/T  | NA                 | NA                            | NA                 |
| Kabuli_wild_3587610 | NA                                  | Ca_kabuli_denovo | 3587610                 | T/A  | NA                 | NA                            | NA                 |
| Kabuli_wild_3589242 | NA                                  | Ca_kabuli_denovo | 3589242                 | T/C  | NA                 | NA                            | NA                 |
| Kabuli_wild_3589279 | NA                                  | Ca_kabuli_denovo | 3589279                 | A/G  | NA                 | NA                            | NA                 |
| Kabuli_wild_3589530 | NA                                  | Ca_kabuli_denovo | 3589530                 | A/G  | NA                 | NA                            | NA                 |
| Kabuli_wild_3589632 | NA                                  | Ca_kabuli_denovo | 3589632                 | T/C  | NA                 | NA                            | NA                 |
| Kabuli_wild_3589960 | NA                                  | Ca_kabuli_denovo | 3589960                 | C/T  | NA                 | NA                            | NA                 |
| Kabuli_wild_3590027 | NA                                  | Ca_kabuli_denovo | 3590027                 | T/C  | NA                 | NA                            | NA                 |
| Kabuli_wild_3590428 | NA                                  | Ca_kabuli_denovo | 3590428                 | C/T  | NA                 | NA                            | NA                 |
| Kabuli_wild_3590461 | NA                                  | Ca_kabuli_denovo | 3590461                 | A/G  | NA                 | NA                            | NA                 |
| Kabuli_wild_3590574 | NA                                  | Ca_kabuli_denovo | 3590574                 | T/A  | NA                 | NA                            | NA                 |
| Kabuli_wild_3590921 | NA                                  | Ca_kabuli_denovo | 3590921                 | C/T  | NA                 | NA                            | NA                 |
| Kabuli_wild_3590930 | NA                                  | Ca_kabuli_denovo | 3590930                 | T/C  | NA                 | NA                            | NA                 |
| Kabuli_wild_3591685 | NA                                  | Ca_kabuli_denovo | 3591685                 | A/G  | NA                 | NA                            | NA                 |
| Kabuli_wild_3591706 | NA                                  | Ca_kabuli_denovo | 3591706                 | G/T  | NA                 | NA                            | NA                 |
| Kabuli_wild_3592605 | NA                                  | Ca_kabuli_denovo | 3592605                 | G/T  | NA                 | NA                            | NA                 |
| Kabuli_wild_3593348 | NA                                  | Ca_kabuli_denovo | 3593348                 | T/C  | NA                 | NA                            | NA                 |
| Kabuli_wild_3593363 | NA                                  | Ca_kabuli_denovo | 3593363                 | G/T  | NA                 | NA                            | NA                 |
| Kabuli_wild_3593926 | NA                                  | Ca_kabuli_denovo | 3593926                 | A/G  | NA                 | NA                            | NA                 |

| SNP IDs             | NCBI dbSNP accession IDs (NCBI_SS#) | Chromosomes      | Physical positions (bp) | SNPs | Gene accession IDs | Sequence components of genome | Putative functions |
|---------------------|-------------------------------------|------------------|-------------------------|------|--------------------|-------------------------------|--------------------|
| Kabuli_wild_3594902 | NA                                  | Ca_kabuli_denovo | 3594902                 | G/T  | NA                 | NA                            | NA                 |
| Kabuli_wild_3594987 | NA                                  | Ca_kabuli_denovo | 3594987                 | T/C  | NA                 | NA                            | NA                 |
| Kabuli_wild_3595036 | NA                                  | Ca_kabuli_denovo | 3595036                 | C/A  | NA                 | NA                            | NA                 |
| Kabuli_wild_3595460 | NA                                  | Ca_kabuli_denovo | 3595460                 | A/G  | NA                 | NA                            | NA                 |
| Kabuli_wild_3595463 | NA                                  | Ca_kabuli_denovo | 3595463                 | T/G  | NA                 | NA                            | NA                 |
| Kabuli_wild_3595478 | NA                                  | Ca_kabuli_denovo | 3595478                 | G/A  | NA                 | NA                            | NA                 |
| Kabuli_wild_3596069 | NA                                  | Ca_kabuli_denovo | 3596069                 | A/G  | NA                 | NA                            | NA                 |
| Kabuli_wild_3596506 | NA                                  | Ca_kabuli_denovo | 3596506                 | A/G  | NA                 | NA                            | NA                 |
| Kabuli_wild_3596645 | NA                                  | Ca_kabuli_denovo | 3596645                 | A/G  | NA                 | NA                            | NA                 |
| Kabuli_wild_3596651 | NA                                  | Ca_kabuli_denovo | 3596651                 | A/C  | NA                 | NA                            | NA                 |
| Kabuli_wild_3597014 | NA                                  | Ca_kabuli_denovo | 3597014                 | C/G  | NA                 | NA                            | NA                 |
| Kabuli_wild_3597227 | NA                                  | Ca_kabuli_denovo | 3597227                 | C/G  | NA                 | NA                            | NA                 |
| Kabuli_wild_3597627 | NA                                  | Ca_kabuli_denovo | 3597627                 | C/T  | NA                 | NA                            | NA                 |
| Kabuli_wild_3597656 | NA                                  | Ca_kabuli_denovo | 3597656                 | A/G  | NA                 | NA                            | NA                 |
| Kabuli_wild_3597971 | NA                                  | Ca_kabuli_denovo | 3597971                 | C/G  | NA                 | NA                            | NA                 |
| Kabuli_wild_3598481 | NA                                  | Ca_kabuli_denovo | 3598481                 | A/G  | NA                 | NA                            | NA                 |
| Kabuli_wild_3598502 | NA                                  | Ca_kabuli_denovo | 3598502                 | G/A  | NA                 | NA                            | NA                 |
| Kabuli_wild_3598517 | NA                                  | Ca_kabuli_denovo | 3598517                 | A/G  | NA                 | NA                            | NA                 |
| Kabuli_wild_3598538 | NA                                  | Ca_kabuli_denovo | 3598538                 | G/C  | NA                 | NA                            | NA                 |
| Kabuli_wild_3599669 | NA                                  | Ca_kabuli_denovo | 3599669                 | C/A  | NA                 | NA                            | NA                 |
| Kabuli_wild_3603249 | NA                                  | Ca_kabuli_denovo | 3603249                 | T/A  | NA                 | NA                            | NA                 |
| Kabuli_wild_3605346 | NA                                  | Ca_kabuli_denovo | 3605346                 | C/T  | NA                 | NA                            | NA                 |
| Kabuli_wild_3605651 | NA                                  | Ca_kabuli_denovo | 3605651                 | A/T  | NA                 | NA                            | NA                 |
| Kabuli_wild_3606044 | NA                                  | Ca_kabuli_denovo | 3606044                 | T/G  | NA                 | NA                            | NA                 |
| Kabuli_wild_3606070 | NA                                  | Ca_kabuli_denovo | 3606070                 | A/G  | NA                 | NA                            | NA                 |
| Kabuli_wild_3606409 | NA                                  | Ca_kabuli_denovo | 3606409                 | G/C  | NA                 | NA                            | NA                 |
| Kabuli_wild_3606418 | NA                                  | Ca_kabuli_denovo | 3606418                 | C/G  | NA                 | NA                            | NA                 |
| Kabuli_wild_3606896 | NA                                  | Ca_kabuli_denovo | 3606896                 | G/C  | NA                 | NA                            | NA                 |
| Kabuli_wild_3606915 | NA                                  | Ca_kabuli_denovo | 3606915                 | C/G  | NA                 | NA                            | NA                 |
| Kabuli_wild_3609759 | NA                                  | Ca_kabuli_denovo | 3609759                 | C/T  | NA                 | NA                            | NA                 |
| Kabuli_wild_3611290 | NA                                  | Ca_kabuli_denovo | 3611290                 | A/G  | NA                 | NA                            | NA                 |
| Kabuli_wild_3611676 | NA                                  | Ca_kabuli_denovo | 3611676                 | C/T  | NA                 | NA                            | NA                 |
| Kabuli_wild_3614046 | NA                                  | Ca_kabuli_denovo | 3614046                 | A/G  | NA                 | NA                            | NA                 |
| Kabuli_wild_3615003 | NA                                  | Ca_kabuli_denovo | 3615003                 | C/T  | NA                 | NA                            | NA                 |
| Kabuli_wild_3615749 | NA                                  | Ca_kabuli_denovo | 3615749                 | C/T  | NA                 | NA                            | NA                 |
| Kabuli_wild_3616149 | NA                                  | Ca_kabuli_denovo | 3616149                 | T/G  | NA                 | NA                            | NA                 |
| Kabuli_wild_3616713 | NA                                  | Ca_kabuli_denovo | 3616713                 | A/C  | NA                 | NA                            | NA                 |
| Kabuli_wild_3617114 | NA                                  | Ca_kabuli_denovo | 3617114                 | T/C  | NA                 | NA                            | NA                 |
| Kabuli_wild_3617681 | NA                                  | Ca_kabuli_denovo | 3617681                 | C/T  | NA                 | NA                            | NA                 |
| Kabuli_wild_3619069 | NA                                  | Ca_kabuli_denovo | 3619069                 | T/G  | NA                 | NA                            | NA                 |
| Kabuli_wild_3619081 | NA                                  | Ca_kabuli_denovo | 3619081                 | C/G  | NA                 | NA                            | NA                 |
| Kabuli_wild_3619316 | NA                                  | Ca_kabuli_denovo | 3619316                 | G/A  | NA                 | NA                            | NA                 |
| Kabuli_wild_3621069 | NA                                  | Ca_kabuli_denovo | 3621069                 | A/C  | NA                 | NA                            | NA                 |
| Kabuli_wild_3621559 | NA                                  | Ca_kabuli_denovo | 3621559                 | G/A  | NA                 | NA                            | NA                 |



| SNP IDs             | NCBI dbSNP accession IDs (NCBI_SS#) | Chromosomes      | Physical positions (bp) | SNPs | Gene accession IDs | Sequence components of genome | Putative functions |
|---------------------|-------------------------------------|------------------|-------------------------|------|--------------------|-------------------------------|--------------------|
| Kabuli_wild_3621943 | NA                                  | Ca_kabuli_denovo | 3621943                 | T/G  | NA                 | NA                            | NA                 |
| Kabuli_wild_3621967 | NA                                  | Ca_kabuli_denovo | 3621967                 | T/G  | NA                 | NA                            | NA                 |
| Kabuli_wild_3622059 | NA                                  | Ca_kabuli_denovo | 3622059                 | T/G  | NA                 | NA                            | NA                 |
| Kabuli_wild_3622062 | NA                                  | Ca_kabuli_denovo | 3622062                 | T/G  | NA                 | NA                            | NA                 |
| Kabuli_wild_3622530 | NA                                  | Ca_kabuli_denovo | 3622530                 | G/T  | NA                 | NA                            | NA                 |
| Kabuli_wild_3623525 | NA                                  | Ca_kabuli_denovo | 3623525                 | G/A  | NA                 | NA                            | NA                 |
| Kabuli_wild_3624266 | NA                                  | Ca_kabuli_denovo | 3624266                 | C/T  | NA                 | NA                            | NA                 |
| Kabuli_wild_3625538 | NA                                  | Ca_kabuli_denovo | 3625538                 | A/G  | NA                 | NA                            | NA                 |
| Kabuli_wild_3625616 | NA                                  | Ca_kabuli_denovo | 3625616                 | G/A  | NA                 | NA                            | NA                 |
| Kabuli_wild_3625628 | NA                                  | Ca_kabuli_denovo | 3625628                 | T/C  | NA                 | NA                            | NA                 |
| Kabuli_wild_3626411 | NA                                  | Ca_kabuli_denovo | 3626411                 | C/T  | NA                 | NA                            | NA                 |
| Kabuli_wild_3626584 | NA                                  | Ca_kabuli_denovo | 3626584                 | T/C  | NA                 | NA                            | NA                 |
| Kabuli_wild_3626605 | NA                                  | Ca_kabuli_denovo | 3626605                 | C/T  | NA                 | NA                            | NA                 |
| Kabuli_wild_3626710 | NA                                  | Ca_kabuli_denovo | 3626710                 | T/C  | NA                 | NA                            | NA                 |
| Kabuli_wild_3626719 | NA                                  | Ca_kabuli_denovo | 3626719                 | A/G  | NA                 | NA                            | NA                 |
| Kabuli_wild_3627183 | NA                                  | Ca_kabuli_denovo | 3627183                 | A/G  | NA                 | NA                            | NA                 |
| Kabuli_wild_3627234 | NA                                  | Ca_kabuli_denovo | 3627234                 | C/A  | NA                 | NA                            | NA                 |
| Kabuli_wild_3627279 | NA                                  | Ca_kabuli_denovo | 3627279                 | G/T  | NA                 | NA                            | NA                 |
| Kabuli_wild_3627295 | NA                                  | Ca_kabuli_denovo | 3627295                 | T/C  | NA                 | NA                            | NA                 |
| Kabuli_wild_3628737 | NA                                  | Ca_kabuli_denovo | 3628737                 | C/G  | NA                 | NA                            | NA                 |
| Kabuli_wild_3628748 | NA                                  | Ca_kabuli_denovo | 3628748                 | T/C  | NA                 | NA                            | NA                 |
| Kabuli_wild_3629449 | NA                                  | Ca_kabuli_denovo | 3629449                 | A/T  | NA                 | NA                            | NA                 |
| Kabuli_wild_3629875 | NA                                  | Ca_kabuli_denovo | 3629875                 | G/T  | NA                 | NA                            | NA                 |
| Kabuli_wild_3629881 | NA                                  | Ca_kabuli_denovo | 3629881                 | G/A  | NA                 | NA                            | NA                 |
| Kabuli_wild_3629938 | NA                                  | Ca_kabuli_denovo | 3629938                 | G/A  | NA                 | NA                            | NA                 |
| Kabuli_wild_3630426 | NA                                  | Ca_kabuli_denovo | 3630426                 | G/A  | NA                 | NA                            | NA                 |
| Kabuli_wild_3631467 | NA                                  | Ca_kabuli_denovo | 3631467                 | C/G  | NA                 | NA                            | NA                 |
| Kabuli_wild_3631743 | NA                                  | Ca_kabuli_denovo | 3631743                 | G/A  | NA                 | NA                            | NA                 |
| Kabuli_wild_3631755 | NA                                  | Ca_kabuli_denovo | 3631755                 | A/G  | NA                 | NA                            | NA                 |
| Kabuli_wild_3632315 | NA                                  | Ca_kabuli_denovo | 3632315                 | G/C  | NA                 | NA                            | NA                 |
| Kabuli_wild_3632362 | NA                                  | Ca_kabuli_denovo | 3632362                 | C/T  | NA                 | NA                            | NA                 |
| Kabuli_wild_3633007 | NA                                  | Ca_kabuli_denovo | 3633007                 | T/C  | NA                 | NA                            | NA                 |
| Kabuli_wild_3633279 | NA                                  | Ca_kabuli_denovo | 3633279                 | A/C  | NA                 | NA                            | NA                 |
| Kabuli_wild_3633360 | NA                                  | Ca_kabuli_denovo | 3633360                 | G/A  | NA                 | NA                            | NA                 |
| Kabuli_wild_3633576 | NA                                  | Ca_kabuli_denovo | 3633576                 | G/C  | NA                 | NA                            | NA                 |
| Kabuli_wild_3634846 | NA                                  | Ca_kabuli_denovo | 3634846                 | C/T  | NA                 | NA                            | NA                 |
| Kabuli_wild_3634848 | NA                                  | Ca_kabuli_denovo | 3634848                 | G/T  | NA                 | NA                            | NA                 |
| Kabuli_wild_3634850 | NA                                  | Ca_kabuli_denovo | 3634850                 | T/G  | NA                 | NA                            | NA                 |
| Kabuli_wild_3634883 | NA                                  | Ca_kabuli_denovo | 3634883                 | T/G  | NA                 | NA                            | NA                 |
| Kabuli_wild_3634885 | NA                                  | Ca_kabuli_denovo | 3634885                 | T/G  | NA                 | NA                            | NA                 |
| Kabuli_wild_3634900 | NA                                  | Ca_kabuli_denovo | 3634900                 | T/A  | NA                 | NA                            | NA                 |
| Kabuli_wild_3635264 | NA                                  | Ca_kabuli_denovo | 3635264                 | C/G  | NA                 | NA                            | NA                 |
| Kabuli_wild_3635568 | NA                                  | Ca_kabuli_denovo | 3635568                 | A/G  | NA                 | NA                            | NA                 |
| Kabuli_wild_3635612 | NA                                  | Ca_kabuli_denovo | 3635612                 | A/G  | NA                 | NA                            | NA                 |

| SNP IDs             | NCBI dbSNP accession IDs (NCBI_SS#) | Chromosomes      | Physical positions (bp) | SNPs | Gene accession IDs | Sequence components of genome | Putative functions |
|---------------------|-------------------------------------|------------------|-------------------------|------|--------------------|-------------------------------|--------------------|
| Kabuli_wild_3635738 | NA                                  | Ca_kabuli_denovo | 3635738                 | T/C  | NA                 | NA                            | NA                 |
| Kabuli_wild_3636402 | NA                                  | Ca_kabuli_denovo | 3636402                 | T/C  | NA                 | NA                            | NA                 |
| Kabuli_wild_3636578 | NA                                  | Ca_kabuli_denovo | 3636578                 | A/G  | NA                 | NA                            | NA                 |
| Kabuli_wild_3637894 | NA                                  | Ca_kabuli_denovo | 3637894                 | G/C  | NA                 | NA                            | NA                 |
| Kabuli_wild_3637901 | NA                                  | Ca_kabuli_denovo | 3637901                 | C/G  | NA                 | NA                            | NA                 |
| Kabuli_wild_3638806 | NA                                  | Ca_kabuli_denovo | 3638806                 | C/G  | NA                 | NA                            | NA                 |
| Kabuli_wild_3638827 | NA                                  | Ca_kabuli_denovo | 3638827                 | C/G  | NA                 | NA                            | NA                 |
| Kabuli_wild_3641523 | NA                                  | Ca_kabuli_denovo | 3641523                 | C/A  | NA                 | NA                            | NA                 |
| Kabuli_wild_3641547 | NA                                  | Ca_kabuli_denovo | 3641547                 | G/A  | NA                 | NA                            | NA                 |
| Kabuli_wild_3643517 | NA                                  | Ca_kabuli_denovo | 3643517                 | A/G  | NA                 | NA                            | NA                 |
| Kabuli_wild_3643905 | NA                                  | Ca_kabuli_denovo | 3643905                 | T/C  | NA                 | NA                            | NA                 |
| Kabuli_wild_3644758 | NA                                  | Ca_kabuli_denovo | 3644758                 | A/G  | NA                 | NA                            | NA                 |
| Kabuli_wild_3644793 | NA                                  | Ca_kabuli_denovo | 3644793                 | A/C  | NA                 | NA                            | NA                 |
| Kabuli_wild_3645499 | NA                                  | Ca_kabuli_denovo | 3645499                 | G/A  | NA                 | NA                            | NA                 |
| Kabuli_wild_3645510 | NA                                  | Ca_kabuli_denovo | 3645510                 | C/G  | NA                 | NA                            | NA                 |
| Kabuli_wild_3645595 | NA                                  | Ca_kabuli_denovo | 3645595                 | G/A  | NA                 | NA                            | NA                 |
| Kabuli_wild_3645906 | NA                                  | Ca_kabuli_denovo | 3645906                 | T/G  | NA                 | NA                            | NA                 |
| Kabuli_wild_3645910 | NA                                  | Ca_kabuli_denovo | 3645910                 | G/C  | NA                 | NA                            | NA                 |
| Kabuli_wild_3646864 | NA                                  | Ca_kabuli_denovo | 3646864                 | T/C  | NA                 | NA                            | NA                 |
| Kabuli_wild_3646873 | NA                                  | Ca_kabuli_denovo | 3646873                 | C/G  | NA                 | NA                            | NA                 |
| Kabuli_wild_3646967 | NA                                  | Ca_kabuli_denovo | 3646967                 | G/A  | NA                 | NA                            | NA                 |
| Kabuli_wild_3647021 | NA                                  | Ca_kabuli_denovo | 3647021                 | G/A  | NA                 | NA                            | NA                 |
| Kabuli_wild_3647445 | NA                                  | Ca_kabuli_denovo | 3647445                 | C/G  | NA                 | NA                            | NA                 |
| Kabuli_wild_3647454 | NA                                  | Ca_kabuli_denovo | 3647454                 | G/A  | NA                 | NA                            | NA                 |
| Kabuli_wild_3647463 | NA                                  | Ca_kabuli_denovo | 3647463                 | T/C  | NA                 | NA                            | NA                 |
| Kabuli_wild_3647490 | NA                                  | Ca_kabuli_denovo | 3647490                 | G/C  | NA                 | NA                            | NA                 |
| Kabuli_wild_3647586 | NA                                  | Ca_kabuli_denovo | 3647586                 | G/C  | NA                 | NA                            | NA                 |
| Kabuli_wild_3647599 | NA                                  | Ca_kabuli_denovo | 3647599                 | C/T  | NA                 | NA                            | NA                 |
| Kabuli_wild_3647827 | NA                                  | Ca_kabuli_denovo | 3647827                 | A/G  | NA                 | NA                            | NA                 |
| Kabuli_wild_3648056 | NA                                  | Ca_kabuli_denovo | 3648056                 | C/A  | NA                 | NA                            | NA                 |
| Kabuli_wild_3649200 | NA                                  | Ca_kabuli_denovo | 3649200                 | G/A  | NA                 | NA                            | NA                 |
| Kabuli_wild_3649248 | NA                                  | Ca_kabuli_denovo | 3649248                 | T/C  | NA                 | NA                            | NA                 |
| Kabuli_wild_3649595 | NA                                  | Ca_kabuli_denovo | 3649595                 | T/G  | NA                 | NA                            | NA                 |
| Kabuli_wild_3649991 | NA                                  | Ca_kabuli_denovo | 3649991                 | T/C  | NA                 | NA                            | NA                 |
| Kabuli_wild_3651079 | NA                                  | Ca_kabuli_denovo | 3651079                 | A/G  | NA                 | NA                            | NA                 |
| Kabuli_wild_3651080 | NA                                  | Ca_kabuli_denovo | 3651080                 | G/A  | NA                 | NA                            | NA                 |
| Kabuli_wild_3651683 | NA                                  | Ca_kabuli_denovo | 3651683                 | G/A  | NA                 | NA                            | NA                 |
| Kabuli_wild_3655054 | NA                                  | Ca_kabuli_denovo | 3655054                 | A/G  | NA                 | NA                            | NA                 |
| Kabuli_wild_3655078 | NA                                  | Ca_kabuli_denovo | 3655078                 | C/G  | NA                 | NA                            | NA                 |
| Kabuli_wild_3655265 | NA                                  | Ca_kabuli_denovo | 3655265                 | G/A  | NA                 | NA                            | NA                 |
| Kabuli_wild_3655267 | NA                                  | Ca_kabuli_denovo | 3655267                 | G/A  | NA                 | NA                            | NA                 |
| Kabuli_wild_3655268 | NA                                  | Ca_kabuli_denovo | 3655268                 | A/G  | NA                 | NA                            | NA                 |
| Kabuli_wild_3656471 | NA                                  | Ca_kabuli_denovo | 3656471                 | A/G  | NA                 | NA                            | NA                 |
| Kabuli_wild_3656519 | NA                                  | Ca_kabuli_denovo | 3656519                 | C/A  | NA                 | NA                            | NA                 |

| SNP IDs             | NCBI dbSNP accession IDs (NCBI_SS#) | Chromosomes      | Physical positions (bp) | SNPs | Gene accession IDs | Sequence components of genome | Putative functions |
|---------------------|-------------------------------------|------------------|-------------------------|------|--------------------|-------------------------------|--------------------|
| Kabuli_wild_3656570 | NA                                  | Ca_kabuli_denovo | 3656570                 | T/G  | NA                 | NA                            | NA                 |
| Kabuli_wild_3656615 | NA                                  | Ca_kabuli_denovo | 3656615                 | A/C  | NA                 | NA                            | NA                 |
| Kabuli_wild_3658115 | NA                                  | Ca_kabuli_denovo | 3658115                 | G/A  | NA                 | NA                            | NA                 |
| Kabuli_wild_3659865 | NA                                  | Ca_kabuli_denovo | 3659865                 | C/G  | NA                 | NA                            | NA                 |
| Kabuli_wild_3659886 | NA                                  | Ca_kabuli_denovo | 3659886                 | G/A  | NA                 | NA                            | NA                 |
| Kabuli_wild_3660150 | NA                                  | Ca_kabuli_denovo | 3660150                 | T/C  | NA                 | NA                            | NA                 |
| Kabuli_wild_3660262 | NA                                  | Ca_kabuli_denovo | 3660262                 | A/C  | NA                 | NA                            | NA                 |
| Kabuli_wild_3660303 | NA                                  | Ca_kabuli_denovo | 3660303                 | C/G  | NA                 | NA                            | NA                 |
| Kabuli_wild_3660433 | NA                                  | Ca_kabuli_denovo | 3660433                 | A/T  | NA                 | NA                            | NA                 |
| Kabuli_wild_3660582 | NA                                  | Ca_kabuli_denovo | 3660582                 | T/C  | NA                 | NA                            | NA                 |
| Kabuli_wild_3661272 | NA                                  | Ca_kabuli_denovo | 3661272                 | A/G  | NA                 | NA                            | NA                 |
| Kabuli_wild_3661273 | NA                                  | Ca_kabuli_denovo | 3661273                 | G/T  | NA                 | NA                            | NA                 |
| Kabuli_wild_3661274 | NA                                  | Ca_kabuli_denovo | 3661274                 | C/T  | NA                 | NA                            | NA                 |
| Kabuli_wild_3661275 | NA                                  | Ca_kabuli_denovo | 3661275                 | G/C  | NA                 | NA                            | NA                 |
| Kabuli_wild_3661276 | NA                                  | Ca_kabuli_denovo | 3661276                 | G/A  | NA                 | NA                            | NA                 |
| Kabuli_wild_3661277 | NA                                  | Ca_kabuli_denovo | 3661277                 | T/G  | NA                 | NA                            | NA                 |
| Kabuli_wild_3661278 | NA                                  | Ca_kabuli_denovo | 3661278                 | C/T  | NA                 | NA                            | NA                 |
| Kabuli_wild_3661279 | NA                                  | Ca_kabuli_denovo | 3661279                 | A/C  | NA                 | NA                            | NA                 |
| Kabuli_wild_3661280 | NA                                  | Ca_kabuli_denovo | 3661280                 | G/A  | NA                 | NA                            | NA                 |
| Kabuli_wild_3661740 | NA                                  | Ca_kabuli_denovo | 3661740                 | T/C  | NA                 | NA                            | NA                 |
| Kabuli_wild_3662515 | NA                                  | Ca_kabuli_denovo | 3662515                 | G/A  | NA                 | NA                            | NA                 |
| Kabuli_wild_3663022 | NA                                  | Ca_kabuli_denovo | 3663022                 | G/T  | NA                 | NA                            | NA                 |
| Kabuli_wild_3663306 | NA                                  | Ca_kabuli_denovo | 3663306                 | G/A  | NA                 | NA                            | NA                 |
| Kabuli_wild_3663428 | NA                                  | Ca_kabuli_denovo | 3663428                 | G/C  | NA                 | NA                            | NA                 |
| Kabuli_wild_3663429 | NA                                  | Ca_kabuli_denovo | 3663429                 | C/T  | NA                 | NA                            | NA                 |
| Kabuli_wild_3663738 | NA                                  | Ca_kabuli_denovo | 3663738                 | A/G  | NA                 | NA                            | NA                 |
| Kabuli_wild_3663812 | NA                                  | Ca_kabuli_denovo | 3663812                 | G/A  | NA                 | NA                            | NA                 |
| Kabuli_wild_3665115 | NA                                  | Ca_kabuli_denovo | 3665115                 | C/A  | NA                 | NA                            | NA                 |
| Kabuli_wild_3665193 | NA                                  | Ca_kabuli_denovo | 3665193                 | G/C  | NA                 | NA                            | NA                 |
| Kabuli_wild_3665396 | NA                                  | Ca_kabuli_denovo | 3665396                 | G/C  | NA                 | NA                            | NA                 |
| Kabuli_wild_3665465 | NA                                  | Ca_kabuli_denovo | 3665465                 | C/T  | NA                 | NA                            | NA                 |
| Kabuli_wild_3666160 | NA                                  | Ca_kabuli_denovo | 3666160                 | A/C  | NA                 | NA                            | NA                 |
| Kabuli_wild_3667526 | NA                                  | Ca_kabuli_denovo | 3667526                 | A/G  | NA                 | NA                            | NA                 |
| Kabuli_wild_3667579 | NA                                  | Ca_kabuli_denovo | 3667579                 | A/G  | NA                 | NA                            | NA                 |
| Kabuli_wild_3667948 | NA                                  | Ca_kabuli_denovo | 3667948                 | A/C  | NA                 | NA                            | NA                 |
| Kabuli_wild_3668124 | NA                                  | Ca_kabuli_denovo | 3668124                 | A/G  | NA                 | NA                            | NA                 |
| Kabuli_wild_3669627 | NA                                  | Ca_kabuli_denovo | 3669627                 | G/A  | NA                 | NA                            | NA                 |
| Kabuli_wild_3669628 | NA                                  | Ca_kabuli_denovo | 3669628                 | A/G  | NA                 | NA                            | NA                 |
| Kabuli_wild_3670531 | NA                                  | Ca_kabuli_denovo | 3670531                 | C/T  | NA                 | NA                            | NA                 |
| Kabuli_wild_3670659 | NA                                  | Ca_kabuli_denovo | 3670659                 | A/G  | NA                 | NA                            | NA                 |
| Kabuli_wild_3671302 | NA                                  | Ca_kabuli_denovo | 3671302                 | G/A  | NA                 | NA                            | NA                 |
| Kabuli_wild_3671358 | NA                                  | Ca_kabuli_denovo | 3671358                 | T/C  | NA                 | NA                            | NA                 |
| Kabuli_wild_3671421 | NA                                  | Ca_kabuli_denovo | 3671421                 | G/A  | NA                 | NA                            | NA                 |
| Kabuli_wild_3671435 | NA                                  | Ca_kabuli_denovo | 3671435                 | G/A  | NA                 | NA                            | NA                 |

| SNP IDs             | NCBI dbSNP accession IDs (NCBI_SS#) | Chromosomes      | Physical positions (bp) | SNPs | Gene accession IDs | Sequence components of genome | Putative functions |
|---------------------|-------------------------------------|------------------|-------------------------|------|--------------------|-------------------------------|--------------------|
| Kabuli_wild_3671850 | NA                                  | Ca_kabuli_denovo | 3671850                 | T/G  | NA                 | NA                            | NA                 |
| Kabuli_wild_3671871 | NA                                  | Ca_kabuli_denovo | 3671871                 | C/T  | NA                 | NA                            | NA                 |
| Kabuli_wild_3672007 | NA                                  | Ca_kabuli_denovo | 3672007                 | G/A  | NA                 | NA                            | NA                 |
| Kabuli_wild_3672683 | NA                                  | Ca_kabuli_denovo | 3672683                 | T/C  | NA                 | NA                            | NA                 |
| Kabuli_wild_3672764 | NA                                  | Ca_kabuli_denovo | 3672764                 | T/C  | NA                 | NA                            | NA                 |
| Kabuli_wild_3672772 | NA                                  | Ca_kabuli_denovo | 3672772                 | G/A  | NA                 | NA                            | NA                 |
| Kabuli_wild_3673056 | NA                                  | Ca_kabuli_denovo | 3673056                 | C/T  | NA                 | NA                            | NA                 |
| Kabuli_wild_3673089 | NA                                  | Ca_kabuli_denovo | 3673089                 | C/A  | NA                 | NA                            | NA                 |
| Kabuli_wild_3674217 | NA                                  | Ca_kabuli_denovo | 3674217                 | C/T  | NA                 | NA                            | NA                 |
| Kabuli_wild_3674863 | NA                                  | Ca_kabuli_denovo | 3674863                 | C/G  | NA                 | NA                            | NA                 |
| Kabuli_wild_3674898 | NA                                  | Ca_kabuli_denovo | 3674898                 | T/C  | NA                 | NA                            | NA                 |
| Kabuli_wild_3675096 | NA                                  | Ca_kabuli_denovo | 3675096                 | T/C  | NA                 | NA                            | NA                 |
| Kabuli_wild_3675578 | NA                                  | Ca_kabuli_denovo | 3675578                 | C/A  | NA                 | NA                            | NA                 |
| Kabuli_wild_3675606 | NA                                  | Ca_kabuli_denovo | 3675606                 | C/T  | NA                 | NA                            | NA                 |
| Kabuli_wild_3676040 | NA                                  | Ca_kabuli_denovo | 3676040                 | A/T  | NA                 | NA                            | NA                 |
| Kabuli_wild_3676135 | NA                                  | Ca_kabuli_denovo | 3676135                 | T/C  | NA                 | NA                            | NA                 |
| Kabuli_wild_3676901 | NA                                  | Ca_kabuli_denovo | 3676901                 | C/A  | NA                 | NA                            | NA                 |
| Kabuli_wild_3677856 | NA                                  | Ca_kabuli_denovo | 3677856                 | A/C  | NA                 | NA                            | NA                 |
| Kabuli_wild_3678365 | NA                                  | Ca_kabuli_denovo | 3678365                 | T/G  | NA                 | NA                            | NA                 |
| Kabuli_wild_3678579 | NA                                  | Ca_kabuli_denovo | 3678579                 | A/G  | NA                 | NA                            | NA                 |
| Kabuli_wild_3678820 | NA                                  | Ca_kabuli_denovo | 3678820                 | A/G  | NA                 | NA                            | NA                 |
| Kabuli_wild_3679564 | NA                                  | Ca_kabuli_denovo | 3679564                 | T/C  | NA                 | NA                            | NA                 |
| Kabuli_wild_3679662 | NA                                  | Ca_kabuli_denovo | 3679662                 | T/C  | NA                 | NA                            | NA                 |
| Kabuli_wild_3679684 | NA                                  | Ca_kabuli_denovo | 3679684                 | C/G  | NA                 | NA                            | NA                 |
| Kabuli_wild_3679893 | NA                                  | Ca_kabuli_denovo | 3679893                 | A/G  | NA                 | NA                            | NA                 |
| Kabuli_wild_3679895 | NA                                  | Ca_kabuli_denovo | 3679895                 | T/C  | NA                 | NA                            | NA                 |
| Kabuli_wild_3680217 | NA                                  | Ca_kabuli_denovo | 3680217                 | A/C  | NA                 | NA                            | NA                 |
| Kabuli_wild_3681026 | NA                                  | Ca_kabuli_denovo | 3681026                 | C/A  | NA                 | NA                            | NA                 |
| Kabuli_wild_3682486 | NA                                  | Ca_kabuli_denovo | 3682486                 | T/A  | NA                 | NA                            | NA                 |
| Kabuli_wild_3682980 | NA                                  | Ca_kabuli_denovo | 3682980                 | G/A  | NA                 | NA                            | NA                 |
| Kabuli_wild_3683108 | NA                                  | Ca_kabuli_denovo | 3683108                 | C/G  | NA                 | NA                            | NA                 |
| Kabuli_wild_3683670 | NA                                  | Ca_kabuli_denovo | 3683670                 | C/T  | NA                 | NA                            | NA                 |
| Kabuli_wild_3684353 | NA                                  | Ca_kabuli_denovo | 3684353                 | C/T  | NA                 | NA                            | NA                 |
| Kabuli_wild_3685304 | NA                                  | Ca_kabuli_denovo | 3685304                 | T/C  | NA                 | NA                            | NA                 |
| Kabuli_wild_3685817 | NA                                  | Ca_kabuli_denovo | 3685817                 | G/A  | NA                 | NA                            | NA                 |
| Kabuli_wild_3685818 | NA                                  | Ca_kabuli_denovo | 3685818                 | A/G  | NA                 | NA                            | NA                 |
| Kabuli_wild_3686515 | NA                                  | Ca_kabuli_denovo | 3686515                 | G/C  | NA                 | NA                            | NA                 |
| Kabuli_wild_3687771 | NA                                  | Ca_kabuli_denovo | 3687771                 | G/C  | NA                 | NA                            | NA                 |
| Kabuli_wild_3687988 | NA                                  | Ca_kabuli_denovo | 3687988                 | T/C  | NA                 | NA                            | NA                 |
| Kabuli_wild_3688018 | NA                                  | Ca_kabuli_denovo | 3688018                 | C/T  | NA                 | NA                            | NA                 |
| Kabuli_wild_3688963 | NA                                  | Ca_kabuli_denovo | 3688963                 | T/C  | NA                 | NA                            | NA                 |
| Kabuli_wild_3689073 | NA                                  | Ca_kabuli_denovo | 3689073                 | T/C  | NA                 | NA                            | NA                 |
| Kabuli_wild_3689836 | NA                                  | Ca_kabuli_denovo | 3689836                 | A/G  | NA                 | NA                            | NA                 |
| Kabuli_wild_3689967 | NA                                  | Ca_kabuli_denovo | 3689967                 | T/G  | NA                 | NA                            | NA                 |

| SNP IDs             | NCBI dbSNP accession IDs (NCBI_SS#) | Chromosomes      | Physical positions (bp) | SNPs | Gene accession IDs | Sequence components of genome | Putative functions |
|---------------------|-------------------------------------|------------------|-------------------------|------|--------------------|-------------------------------|--------------------|
| Kabuli_wild_3690012 | NA                                  | Ca_kabuli_denovo | 3690012                 | T/G  | NA                 | NA                            | NA                 |
| Kabuli_wild_3690532 | NA                                  | Ca_kabuli_denovo | 3690532                 | G/A  | NA                 | NA                            | NA                 |
| Kabuli_wild_3691770 | NA                                  | Ca_kabuli_denovo | 3691770                 | G/A  | NA                 | NA                            | NA                 |
| Kabuli_wild_3691783 | NA                                  | Ca_kabuli_denovo | 3691783                 | T/G  | NA                 | NA                            | NA                 |
| Kabuli_wild_3692271 | NA                                  | Ca_kabuli_denovo | 3692271                 | T/C  | NA                 | NA                            | NA                 |
| Kabuli_wild_3692634 | NA                                  | Ca_kabuli_denovo | 3692634                 | A/G  | NA                 | NA                            | NA                 |
| Kabuli_wild_3693056 | NA                                  | Ca_kabuli_denovo | 3693056                 | A/C  | NA                 | NA                            | NA                 |
| Kabuli_wild_3693098 | NA                                  | Ca_kabuli_denovo | 3693098                 | A/G  | NA                 | NA                            | NA                 |
| Kabuli_wild_3694623 | NA                                  | Ca_kabuli_denovo | 3694623                 | G/C  | NA                 | NA                            | NA                 |
| Kabuli_wild_3694653 | NA                                  | Ca_kabuli_denovo | 3694653                 | C/T  | NA                 | NA                            | NA                 |
| Kabuli_wild_3695081 | NA                                  | Ca_kabuli_denovo | 3695081                 | A/C  | NA                 | NA                            | NA                 |
| Kabuli_wild_3695151 | NA                                  | Ca_kabuli_denovo | 3695151                 | A/G  | NA                 | NA                            | NA                 |
| Kabuli_wild_3695219 | NA                                  | Ca_kabuli_denovo | 3695219                 | C/T  | NA                 | NA                            | NA                 |
| Kabuli_wild_3695563 | NA                                  | Ca_kabuli_denovo | 3695563                 | C/T  | NA                 | NA                            | NA                 |
| Kabuli_wild_3695631 | NA                                  | Ca_kabuli_denovo | 3695631                 | T/C  | NA                 | NA                            | NA                 |
| Kabuli_wild_3695851 | NA                                  | Ca_kabuli_denovo | 3695851                 | A/G  | NA                 | NA                            | NA                 |
| Kabuli_wild_3696022 | NA                                  | Ca_kabuli_denovo | 3696022                 | T/C  | NA                 | NA                            | NA                 |
| Kabuli_wild_3696078 | NA                                  | Ca_kabuli_denovo | 3696078                 | T/G  | NA                 | NA                            | NA                 |
| Kabuli_wild_3696100 | NA                                  | Ca_kabuli_denovo | 3696100                 | T/G  | NA                 | NA                            | NA                 |
| Kabuli_wild_3696818 | NA                                  | Ca_kabuli_denovo | 3696818                 | A/G  | NA                 | NA                            | NA                 |
| Kabuli_wild_3696842 | NA                                  | Ca_kabuli_denovo | 3696842                 | C/G  | NA                 | NA                            | NA                 |
| Kabuli_wild_3696931 | NA                                  | Ca_kabuli_denovo | 3696931                 | T/C  | NA                 | NA                            | NA                 |
| Kabuli_wild_3696933 | NA                                  | Ca_kabuli_denovo | 3696933                 | C/G  | NA                 | NA                            | NA                 |
| Kabuli_wild_3696982 | NA                                  | Ca_kabuli_denovo | 3696982                 | T/G  | NA                 | NA                            | NA                 |
| Kabuli_wild_3697281 | NA                                  | Ca_kabuli_denovo | 3697281                 | T/C  | NA                 | NA                            | NA                 |
| Kabuli_wild_3697336 | NA                                  | Ca_kabuli_denovo | 3697336                 | G/A  | NA                 | NA                            | NA                 |
| Kabuli_wild_3698464 | NA                                  | Ca_kabuli_denovo | 3698464                 | G/A  | NA                 | NA                            | NA                 |
| Kabuli_wild_3698762 | NA                                  | Ca_kabuli_denovo | 3698762                 | T/C  | NA                 | NA                            | NA                 |
| Kabuli_wild_3699183 | NA                                  | Ca_kabuli_denovo | 3699183                 | T/G  | NA                 | NA                            | NA                 |
| Kabuli_wild_3700637 | NA                                  | Ca_kabuli_denovo | 3700637                 | G/C  | NA                 | NA                            | NA                 |
| Kabuli_wild_3700823 | NA                                  | Ca_kabuli_denovo | 3700823                 | A/G  | NA                 | NA                            | NA                 |
| Kabuli_wild_3700923 | NA                                  | Ca_kabuli_denovo | 3700923                 | A/G  | NA                 | NA                            | NA                 |
| Kabuli_wild_3701179 | NA                                  | Ca_kabuli_denovo | 3701179                 | A/G  | NA                 | NA                            | NA                 |
| Kabuli_wild_3701459 | NA                                  | Ca_kabuli_denovo | 3701459                 | C/G  | NA                 | NA                            | NA                 |
| Kabuli_wild_3701460 | NA                                  | Ca_kabuli_denovo | 3701460                 | A/G  | NA                 | NA                            | NA                 |
| Kabuli_wild_3701461 | NA                                  | Ca_kabuli_denovo | 3701461                 | A/G  | NA                 | NA                            | NA                 |
| Kabuli_wild_3702368 | NA                                  | Ca_kabuli_denovo | 3702368                 | C/T  | NA                 | NA                            | NA                 |
| Kabuli_wild_3702586 | NA                                  | Ca_kabuli_denovo | 3702586                 | A/G  | NA                 | NA                            | NA                 |
| Kabuli_wild_3702602 | NA                                  | Ca_kabuli_denovo | 3702602                 | T/A  | NA                 | NA                            | NA                 |
| Kabuli_wild_3702858 | NA                                  | Ca_kabuli_denovo | 3702858                 | A/G  | NA                 | NA                            | NA                 |
| Kabuli_wild_3703604 | NA                                  | Ca_kabuli_denovo | 3703604                 | C/A  | NA                 | NA                            | NA                 |
| Kabuli_wild_3703642 | NA                                  | Ca_kabuli_denovo | 3703642                 | C/G  | NA                 | NA                            | NA                 |
| Kabuli_wild_3704235 | NA                                  | Ca_kabuli_denovo | 3704235                 | G/C  | NA                 | NA                            | NA                 |
| Kabuli_wild_3704265 | NA                                  | Ca_kabuli_denovo | 3704265                 | C/T  | NA                 | NA                            | NA                 |

| SNP IDs             | NCBI dbSNP accession IDs (NCBI_SS#) | Chromosomes      | Physical positions (bp) | SNPs | Gene accession IDs | Sequence components of genome | Putative functions |
|---------------------|-------------------------------------|------------------|-------------------------|------|--------------------|-------------------------------|--------------------|
| Kabuli_wild_3704271 | NA                                  | Ca_kabuli_denovo | 3704271                 | C/T  | NA                 | NA                            | NA                 |
| Kabuli_wild_3705206 | NA                                  | Ca_kabuli_denovo | 3705206                 | G/C  | NA                 | NA                            | NA                 |
| Kabuli_wild_3705224 | NA                                  | Ca_kabuli_denovo | 3705224                 | A/C  | NA                 | NA                            | NA                 |
| Kabuli_wild_3705652 | NA                                  | Ca_kabuli_denovo | 3705652                 | G/A  | NA                 | NA                            | NA                 |
| Kabuli_wild_3705682 | NA                                  | Ca_kabuli_denovo | 3705682                 | G/A  | NA                 | NA                            | NA                 |
| Kabuli_wild_3706515 | NA                                  | Ca_kabuli_denovo | 3706515                 | G/A  | NA                 | NA                            | NA                 |
| Kabuli_wild_3706615 | NA                                  | Ca_kabuli_denovo | 3706615                 | T/G  | NA                 | NA                            | NA                 |
| Kabuli_wild_3706821 | NA                                  | Ca_kabuli_denovo | 3706821                 | G/A  | NA                 | NA                            | NA                 |
| Kabuli_wild_3706883 | NA                                  | Ca_kabuli_denovo | 3706883                 | C/A  | NA                 | NA                            | NA                 |
| Kabuli_wild_3707682 | NA                                  | Ca_kabuli_denovo | 3707682                 | G/A  | NA                 | NA                            | NA                 |
| Kabuli_wild_3709910 | NA                                  | Ca_kabuli_denovo | 3709910                 | G/C  | NA                 | NA                            | NA                 |
| Kabuli_wild_3709929 | NA                                  | Ca_kabuli_denovo | 3709929                 | T/C  | NA                 | NA                            | NA                 |
| Kabuli_wild_3710023 | NA                                  | Ca_kabuli_denovo | 3710023                 | G/A  | NA                 | NA                            | NA                 |
| Kabuli_wild_3710069 | NA                                  | Ca_kabuli_denovo | 3710069                 | C/A  | NA                 | NA                            | NA                 |
| Kabuli_wild_3710322 | NA                                  | Ca_kabuli_denovo | 3710322                 | G/T  | NA                 | NA                            | NA                 |
| Kabuli_wild_3711739 | NA                                  | Ca_kabuli_denovo | 3711739                 | A/G  | NA                 | NA                            | NA                 |
| Kabuli_wild_3711742 | NA                                  | Ca_kabuli_denovo | 3711742                 | C/G  | NA                 | NA                            | NA                 |
| Kabuli_wild_3711768 | NA                                  | Ca_kabuli_denovo | 3711768                 | G/C  | NA                 | NA                            | NA                 |
| Kabuli_wild_3711815 | NA                                  | Ca_kabuli_denovo | 3711815                 | T/C  | NA                 | NA                            | NA                 |
| Kabuli_wild_3711986 | NA                                  | Ca_kabuli_denovo | 3711986                 | G/T  | NA                 | NA                            | NA                 |
| Kabuli_wild_3712025 | NA                                  | Ca_kabuli_denovo | 3712025                 | G/T  | NA                 | NA                            | NA                 |
| Kabuli_wild_3712045 | NA                                  | Ca_kabuli_denovo | 3712045                 | C/G  | NA                 | NA                            | NA                 |
| Kabuli_wild_3712069 | NA                                  | Ca_kabuli_denovo | 3712069                 | T/C  | NA                 | NA                            | NA                 |
| Kabuli_wild_3712345 | NA                                  | Ca_kabuli_denovo | 3712345                 | A/C  | NA                 | NA                            | NA                 |
| Kabuli_wild_3713315 | NA                                  | Ca_kabuli_denovo | 3713315                 | C/G  | NA                 | NA                            | NA                 |
| Kabuli_wild_3713318 | NA                                  | Ca_kabuli_denovo | 3713318                 | A/G  | NA                 | NA                            | NA                 |
| Kabuli_wild_3713353 | NA                                  | Ca_kabuli_denovo | 3713353                 | A/C  | NA                 | NA                            | NA                 |
| Kabuli_wild_3713719 | NA                                  | Ca_kabuli_denovo | 3713719                 | C/T  | NA                 | NA                            | NA                 |
| Kabuli_wild_3713761 | NA                                  | Ca_kabuli_denovo | 3713761                 | T/C  | NA                 | NA                            | NA                 |
| Kabuli_wild_3713930 | NA                                  | Ca_kabuli_denovo | 3713930                 | T/G  | NA                 | NA                            | NA                 |
| Kabuli_wild_3714250 | NA                                  | Ca_kabuli_denovo | 3714250                 | C/T  | NA                 | NA                            | NA                 |
| Kabuli_wild_3714259 | NA                                  | Ca_kabuli_denovo | 3714259                 | C/G  | NA                 | NA                            | NA                 |
| Kabuli_wild_3715533 | NA                                  | Ca_kabuli_denovo | 3715533                 | A/T  | NA                 | NA                            | NA                 |
| Kabuli_wild_3717392 | NA                                  | Ca_kabuli_denovo | 3717392                 | A/C  | NA                 | NA                            | NA                 |
| Kabuli_wild_3717400 | NA                                  | Ca_kabuli_denovo | 3717400                 | T/G  | NA                 | NA                            | NA                 |
| Kabuli_wild_3717574 | NA                                  | Ca_kabuli_denovo | 3717574                 | G/T  | NA                 | NA                            | NA                 |
| Kabuli_wild_3717594 | NA                                  | Ca_kabuli_denovo | 3717594                 | T/G  | NA                 | NA                            | NA                 |
| Kabuli_wild_3718397 | NA                                  | Ca_kabuli_denovo | 3718397                 | A/G  | NA                 | NA                            | NA                 |
| Kabuli_wild_3718418 | NA                                  | Ca_kabuli_denovo | 3718418                 | C/T  | NA                 | NA                            | NA                 |
| Kabuli_wild_3719160 | NA                                  | Ca_kabuli_denovo | 3719160                 | G/A  | NA                 | NA                            | NA                 |
| Kabuli_wild_3719528 | NA                                  | Ca_kabuli_denovo | 3719528                 | C/T  | NA                 | NA                            | NA                 |
| Kabuli_wild_3719672 | NA                                  | Ca_kabuli_denovo | 3719672                 | A/G  | NA                 | NA                            | NA                 |
| Kabuli_wild_3720682 | NA                                  | Ca_kabuli_denovo | 3720682                 | T/G  | NA                 | NA                            | NA                 |
| Kabuli_wild_3720711 | NA                                  | Ca_kabuli_denovo | 3720711                 | T/C  | NA                 | NA                            | NA                 |

| SNP IDs             | NCBI dbSNP accession IDs (NCBI_SS#) | Chromosomes      | Physical positions (bp) | SNPs | Gene accession IDs | Sequence components of genome | Putative functions |
|---------------------|-------------------------------------|------------------|-------------------------|------|--------------------|-------------------------------|--------------------|
| Kabuli_wild_3720780 | NA                                  | Ca_kabuli_denovo | 3720780                 | T/C  | NA                 | NA                            | NA                 |
| Kabuli_wild_3720802 | NA                                  | Ca_kabuli_denovo | 3720802                 | G/A  | NA                 | NA                            | NA                 |
| Kabuli_wild_3720819 | NA                                  | Ca_kabuli_denovo | 3720819                 | A/G  | NA                 | NA                            | NA                 |
| Kabuli_wild_3720843 | NA                                  | Ca_kabuli_denovo | 3720843                 | T/C  | NA                 | NA                            | NA                 |
| Kabuli_wild_3722239 | NA                                  | Ca_kabuli_denovo | 3722239                 | T/A  | NA                 | NA                            | NA                 |
| Kabuli_wild_3722271 | NA                                  | Ca_kabuli_denovo | 3722271                 | A/C  | NA                 | NA                            | NA                 |
| Kabuli_wild_3722354 | NA                                  | Ca_kabuli_denovo | 3722354                 | C/G  | NA                 | NA                            | NA                 |
| Kabuli_wild_3723330 | NA                                  | Ca_kabuli_denovo | 3723330                 | C/A  | NA                 | NA                            | NA                 |
| Kabuli_wild_3723440 | NA                                  | Ca_kabuli_denovo | 3723440                 | T/G  | NA                 | NA                            | NA                 |
| Kabuli_wild_3725258 | NA                                  | Ca_kabuli_denovo | 3725258                 | A/G  | NA                 | NA                            | NA                 |
| Kabuli_wild_3725499 | NA                                  | Ca_kabuli_denovo | 3725499                 | T/G  | NA                 | NA                            | NA                 |
| Kabuli_wild_3726731 | NA                                  | Ca_kabuli_denovo | 3726731                 | A/G  | NA                 | NA                            | NA                 |
| Kabuli_wild_3726770 | NA                                  | Ca_kabuli_denovo | 3726770                 | C/T  | NA                 | NA                            | NA                 |
| Kabuli_wild_3726925 | NA                                  | Ca_kabuli_denovo | 3726925                 | T/G  | NA                 | NA                            | NA                 |
| Kabuli_wild_3726968 | NA                                  | Ca_kabuli_denovo | 3726968                 | G/C  | NA                 | NA                            | NA                 |
| Kabuli_wild_3726995 | NA                                  | Ca_kabuli_denovo | 3726995                 | G/A  | NA                 | NA                            | NA                 |
| Kabuli_wild_3727010 | NA                                  | Ca_kabuli_denovo | 3727010                 | T/C  | NA                 | NA                            | NA                 |
| Kabuli_wild_3727136 | NA                                  | Ca_kabuli_denovo | 3727136                 | C/T  | NA                 | NA                            | NA                 |
| Kabuli_wild_3727253 | NA                                  | Ca_kabuli_denovo | 3727253                 | G/C  | NA                 | NA                            | NA                 |
| Kabuli_wild_3727697 | NA                                  | Ca_kabuli_denovo | 3727697                 | T/G  | NA                 | NA                            | NA                 |
| Kabuli_wild_3728475 | NA                                  | Ca_kabuli_denovo | 3728475                 | G/A  | NA                 | NA                            | NA                 |
| Kabuli_wild_3729353 | NA                                  | Ca_kabuli_denovo | 3729353                 | C/T  | NA                 | NA                            | NA                 |
| Kabuli_wild_3729649 | NA                                  | Ca_kabuli_denovo | 3729649                 | G/T  | NA                 | NA                            | NA                 |
| Kabuli_wild_3729679 | NA                                  | Ca_kabuli_denovo | 3729679                 | C/T  | NA                 | NA                            | NA                 |
| Kabuli_wild_3729680 | NA                                  | Ca_kabuli_denovo | 3729680                 | A/G  | NA                 | NA                            | NA                 |
| Kabuli_wild_3729682 | NA                                  | Ca_kabuli_denovo | 3729682                 | T/G  | NA                 | NA                            | NA                 |
| Kabuli_wild_3730188 | NA                                  | Ca_kabuli_denovo | 3730188                 | A/G  | NA                 | NA                            | NA                 |
| Kabuli_wild_3731247 | NA                                  | Ca_kabuli_denovo | 3731247                 | C/T  | NA                 | NA                            | NA                 |
| Kabuli_wild_3731252 | NA                                  | Ca_kabuli_denovo | 3731252                 | G/A  | NA                 | NA                            | NA                 |
| Kabuli_wild_3731373 | NA                                  | Ca_kabuli_denovo | 3731373                 | A/C  | NA                 | NA                            | NA                 |
| Kabuli_wild_3731409 | NA                                  | Ca_kabuli_denovo | 3731409                 | G/A  | NA                 | NA                            | NA                 |
| Kabuli_wild_3732207 | NA                                  | Ca_kabuli_denovo | 3732207                 | T/G  | NA                 | NA                            | NA                 |
| Kabuli_wild_3734001 | NA                                  | Ca_kabuli_denovo | 3734001                 | T/A  | NA                 | NA                            | NA                 |
| Kabuli_wild_3734509 | NA                                  | Ca_kabuli_denovo | 3734509                 | T/A  | NA                 | NA                            | NA                 |
| Kabuli_wild_3735870 | NA                                  | Ca_kabuli_denovo | 3735870                 | A/G  | NA                 | NA                            | NA                 |
| Kabuli_wild_3736321 | NA                                  | Ca_kabuli_denovo | 3736321                 | C/A  | NA                 | NA                            | NA                 |
| Kabuli_wild_3736387 | NA                                  | Ca_kabuli_denovo | 3736387                 | G/T  | NA                 | NA                            | NA                 |
| Kabuli_wild_3737262 | NA                                  | Ca_kabuli_denovo | 3737262                 | G/A  | NA                 | NA                            | NA                 |
| Kabuli_wild_3737279 | NA                                  | Ca_kabuli_denovo | 3737279                 | A/G  | NA                 | NA                            | NA                 |
| Kabuli_wild_3737783 | NA                                  | Ca_kabuli_denovo | 3737783                 | T/G  | NA                 | NA                            | NA                 |
| Kabuli_wild_3737939 | NA                                  | Ca_kabuli_denovo | 3737939                 | G/A  | NA                 | NA                            | NA                 |
| Kabuli_wild_3738358 | NA                                  | Ca_kabuli_denovo | 3738358                 | G/A  | NA                 | NA                            | NA                 |
| Kabuli_wild_3739688 | NA                                  | Ca_kabuli_denovo | 3739688                 | T/C  | NA                 | NA                            | NA                 |
| Kabuli_wild_3739691 | NA                                  | Ca_kabuli_denovo | 3739691                 | G/A  | NA                 | NA                            | NA                 |

| SNP IDs             | NCBI dbSNP accession IDs (NCBI_SS#) | Chromosomes      | Physical positions (bp) | SNPs | Gene accession IDs | Sequence components of genome | Putative functions |
|---------------------|-------------------------------------|------------------|-------------------------|------|--------------------|-------------------------------|--------------------|
| Kabuli_wild_3740276 | NA                                  | Ca_kabuli_denovo | 3740276                 | C/T  | NA                 | NA                            | NA                 |
| Kabuli_wild_3740295 | NA                                  | Ca_kabuli_denovo | 3740295                 | T/C  | NA                 | NA                            | NA                 |
| Kabuli_wild_3741884 | NA                                  | Ca_kabuli_denovo | 3741884                 | G/C  | NA                 | NA                            | NA                 |
| Kabuli_wild_3741944 | NA                                  | Ca_kabuli_denovo | 3741944                 | T/C  | NA                 | NA                            | NA                 |
| Kabuli_wild_3742003 | NA                                  | Ca_kabuli_denovo | 3742003                 | G/C  | NA                 | NA                            | NA                 |
| Kabuli_wild_3742357 | NA                                  | Ca_kabuli_denovo | 3742357                 | T/C  | NA                 | NA                            | NA                 |
| Kabuli_wild_3742363 | NA                                  | Ca_kabuli_denovo | 3742363                 | C/T  | NA                 | NA                            | NA                 |
| Kabuli_wild_3742923 | NA                                  | Ca_kabuli_denovo | 3742923                 | T/C  | NA                 | NA                            | NA                 |
| Kabuli_wild_3742932 | NA                                  | Ca_kabuli_denovo | 3742932                 | G/T  | NA                 | NA                            | NA                 |
| Kabuli_wild_3743516 | NA                                  | Ca_kabuli_denovo | 3743516                 | A/G  | NA                 | NA                            | NA                 |
| Kabuli_wild_3743525 | NA                                  | Ca_kabuli_denovo | 3743525                 | A/G  | NA                 | NA                            | NA                 |
| Kabuli_wild_3744244 | NA                                  | Ca_kabuli_denovo | 3744244                 | C/T  | NA                 | NA                            | NA                 |
| Kabuli_wild_3744924 | NA                                  | Ca_kabuli_denovo | 3744924                 | T/C  | NA                 | NA                            | NA                 |
| Kabuli_wild_3744938 | NA                                  | Ca_kabuli_denovo | 3744938                 | G/A  | NA                 | NA                            | NA                 |
| Kabuli_wild_3745274 | NA                                  | Ca_kabuli_denovo | 3745274                 | G/A  | NA                 | NA                            | NA                 |
| Kabuli_wild_3745276 | NA                                  | Ca_kabuli_denovo | 3745276                 | A/G  | NA                 | NA                            | NA                 |
| Kabuli_wild_3745277 | NA                                  | Ca_kabuli_denovo | 3745277                 | A/G  | NA                 | NA                            | NA                 |
| Kabuli_wild_3746842 | NA                                  | Ca_kabuli_denovo | 3746842                 | T/G  | NA                 | NA                            | NA                 |
| Kabuli_wild_3746843 | NA                                  | Ca_kabuli_denovo | 3746843                 | G/A  | NA                 | NA                            | NA                 |
| Kabuli_wild_3746844 | NA                                  | Ca_kabuli_denovo | 3746844                 | C/G  | NA                 | NA                            | NA                 |
| Kabuli_wild_3746845 | NA                                  | Ca_kabuli_denovo | 3746845                 | A/C  | NA                 | NA                            | NA                 |
| Kabuli_wild_3747961 | NA                                  | Ca_kabuli_denovo | 3747961                 | G/A  | NA                 | NA                            | NA                 |
| Kabuli_wild_3747974 | NA                                  | Ca_kabuli_denovo | 3747974                 | T/C  | NA                 | NA                            | NA                 |
| Kabuli_wild_3748631 | NA                                  | Ca_kabuli_denovo | 3748631                 | G/T  | NA                 | NA                            | NA                 |
| Kabuli_wild_3748632 | NA                                  | Ca_kabuli_denovo | 3748632                 | T/C  | NA                 | NA                            | NA                 |
| Kabuli_wild_3748798 | NA                                  | Ca_kabuli_denovo | 3748798                 | A/C  | NA                 | NA                            | NA                 |
| Kabuli_wild_3749599 | NA                                  | Ca_kabuli_denovo | 3749599                 | T/C  | NA                 | NA                            | NA                 |
| Kabuli_wild_3749611 | NA                                  | Ca_kabuli_denovo | 3749611                 | G/C  | NA                 | NA                            | NA                 |
| Kabuli_wild_3750123 | NA                                  | Ca_kabuli_denovo | 3750123                 | A/G  | NA                 | NA                            | NA                 |
| Kabuli_wild_3750854 | NA                                  | Ca_kabuli_denovo | 3750854                 | G/A  | NA                 | NA                            | NA                 |
| Kabuli_wild_3750861 | NA                                  | Ca_kabuli_denovo | 3750861                 | A/G  | NA                 | NA                            | NA                 |
| Kabuli_wild_3751102 | NA                                  | Ca_kabuli_denovo | 3751102                 | C/T  | NA                 | NA                            | NA                 |
| Kabuli_wild_3751292 | NA                                  | Ca_kabuli_denovo | 3751292                 | C/T  | NA                 | NA                            | NA                 |
| Kabuli_wild_3751344 | NA                                  | Ca_kabuli_denovo | 3751344                 | G/C  | NA                 | NA                            | NA                 |
| Kabuli_wild_3751370 | NA                                  | Ca_kabuli_denovo | 3751370                 | A/G  | NA                 | NA                            | NA                 |
| Kabuli_wild_3751412 | NA                                  | Ca_kabuli_denovo | 3751412                 | G/T  | NA                 | NA                            | NA                 |
| Kabuli_wild_3751653 | NA                                  | Ca_kabuli_denovo | 3751653                 | A/G  | NA                 | NA                            | NA                 |
| Kabuli_wild_3752129 | NA                                  | Ca_kabuli_denovo | 3752129                 | G/A  | NA                 | NA                            | NA                 |
| Kabuli_wild_3753793 | NA                                  | Ca_kabuli_denovo | 3753793                 | G/A  | NA                 | NA                            | NA                 |
| Kabuli_wild_3753823 | NA                                  | Ca_kabuli_denovo | 3753823                 | C/G  | NA                 | NA                            | NA                 |
| Kabuli_wild_3754317 | NA                                  | Ca_kabuli_denovo | 3754317                 | C/T  | NA                 | NA                            | NA                 |
| Kabuli_wild_3754320 | NA                                  | Ca_kabuli_denovo | 3754320                 | C/T  | NA                 | NA                            | NA                 |
| Kabuli_wild_3757686 | NA                                  | Ca_kabuli_denovo | 3757686                 | A/G  | NA                 | NA                            | NA                 |
| Kabuli_wild_3758183 | NA                                  | Ca_kabuli_denovo | 3758183                 | G/C  | NA                 | NA                            | NA                 |



| SNP IDs             | NCBI dbSNP accession IDs (NCBI_SS#) | Chromosomes      | Physical positions (bp) | SNPs | Gene accession IDs | Sequence components of genome | Putative functions |
|---------------------|-------------------------------------|------------------|-------------------------|------|--------------------|-------------------------------|--------------------|
| Kabuli_wild_3758317 | NA                                  | Ca_kabuli_denovo | 3758317                 | A/G  | NA                 | NA                            | NA                 |
| Kabuli_wild_3759773 | NA                                  | Ca_kabuli_denovo | 3759773                 | C/T  | NA                 | NA                            | NA                 |
| Kabuli_wild_3760050 | NA                                  | Ca_kabuli_denovo | 3760050                 | A/C  | NA                 | NA                            | NA                 |
| Kabuli_wild_3761712 | NA                                  | Ca_kabuli_denovo | 3761712                 | G/A  | NA                 | NA                            | NA                 |
| Kabuli_wild_3761926 | NA                                  | Ca_kabuli_denovo | 3761926                 | C/G  | NA                 | NA                            | NA                 |
| Kabuli_wild_3766562 | NA                                  | Ca_kabuli_denovo | 3766562                 | C/T  | NA                 | NA                            | NA                 |
| Kabuli_wild_3766575 | NA                                  | Ca_kabuli_denovo | 3766575                 | T/C  | NA                 | NA                            | NA                 |
| Kabuli_wild_3768338 | NA                                  | Ca_kabuli_denovo | 3768338                 | C/G  | NA                 | NA                            | NA                 |
| Kabuli_wild_3770465 | NA                                  | Ca_kabuli_denovo | 3770465                 | C/G  | NA                 | NA                            | NA                 |
| Kabuli_wild_3770472 | NA                                  | Ca_kabuli_denovo | 3770472                 | T/A  | NA                 | NA                            | NA                 |
| Kabuli_wild_3770536 | NA                                  | Ca_kabuli_denovo | 3770536                 | T/A  | NA                 | NA                            | NA                 |
| Kabuli_wild_3773679 | NA                                  | Ca_kabuli_denovo | 3773679                 | G/C  | NA                 | NA                            | NA                 |
| Kabuli_wild_3773680 | NA                                  | Ca_kabuli_denovo | 3773680                 | A/C  | NA                 | NA                            | NA                 |
| Kabuli_wild_3789559 | NA                                  | Ca_kabuli_denovo | 3789559                 | A/G  | NA                 | NA                            | NA                 |
| Kabuli_wild_3789593 | NA                                  | Ca_kabuli_denovo | 3789593                 | G/A  | NA                 | NA                            | NA                 |
| Kabuli_wild_3789602 | NA                                  | Ca_kabuli_denovo | 3789602                 | C/A  | NA                 | NA                            | NA                 |
| Kabuli_wild_3789604 | NA                                  | Ca_kabuli_denovo | 3789604                 | A/G  | NA                 | NA                            | NA                 |
| Kabuli_wild_3791164 | NA                                  | Ca_kabuli_denovo | 3791164                 | T/C  | NA                 | NA                            | NA                 |
| Kabuli_wild_3806076 | NA                                  | Ca_kabuli_denovo | 3806076                 | C/G  | NA                 | NA                            | NA                 |
| Kabuli_wild_3806079 | NA                                  | Ca_kabuli_denovo | 3806079                 | C/T  | NA                 | NA                            | NA                 |
| Kabuli_wild_3821537 | NA                                  | Ca_kabuli_denovo | 3821537                 | G/C  | NA                 | NA                            | NA                 |
| Kabuli_wild_3821553 | NA                                  | Ca_kabuli_denovo | 3821553                 | G/C  | NA                 | NA                            | NA                 |
| Kabuli_wild_3821641 | NA                                  | Ca_kabuli_denovo | 3821641                 | G/T  | NA                 | NA                            | NA                 |
| Kabuli_wild_3821962 | NA                                  | Ca_kabuli_denovo | 3821962                 | A/T  | NA                 | NA                            | NA                 |
| Kabuli_wild_3838200 | NA                                  | Ca_kabuli_denovo | 3838200                 | A/T  | NA                 | NA                            | NA                 |
| Kabuli_wild_3838201 | NA                                  | Ca_kabuli_denovo | 3838201                 | A/C  | NA                 | NA                            | NA                 |
| Kabuli_wild_3859634 | NA                                  | Ca_kabuli_denovo | 3859634                 | T/G  | NA                 | NA                            | NA                 |
| Kabuli_wild_3859635 | NA                                  | Ca_kabuli_denovo | 3859635                 | A/T  | NA                 | NA                            | NA                 |
| Kabuli_wild_3859714 | NA                                  | Ca_kabuli_denovo | 3859714                 | G/T  | NA                 | NA                            | NA                 |
| Kabuli_wild_3871526 | NA                                  | Ca_kabuli_denovo | 3871526                 | A/G  | NA                 | NA                            | NA                 |
| Kabuli_wild_3873848 | NA                                  | Ca_kabuli_denovo | 3873848                 | G/T  | NA                 | NA                            | NA                 |
| Kabuli_wild_3873860 | NA                                  | Ca_kabuli_denovo | 3873860                 | C/T  | NA                 | NA                            | NA                 |
| Kabuli_wild_3875258 | NA                                  | Ca_kabuli_denovo | 3875258                 | C/T  | NA                 | NA                            | NA                 |
| Kabuli_wild_3877734 | NA                                  | Ca_kabuli_denovo | 3877734                 | A/G  | NA                 | NA                            | NA                 |
| Kabuli_wild_3883949 | NA                                  | Ca_kabuli_denovo | 3883949                 | C/T  | NA                 | NA                            | NA                 |
| Kabuli_wild_3884103 | NA                                  | Ca_kabuli_denovo | 3884103                 | C/G  | NA                 | NA                            | NA                 |
| Kabuli_wild_3884105 | NA                                  | Ca_kabuli_denovo | 3884105                 | C/T  | NA                 | NA                            | NA                 |
| Kabuli_wild_3884106 | NA                                  | Ca_kabuli_denovo | 3884106                 | A/T  | NA                 | NA                            | NA                 |
| Kabuli_wild_3891496 | NA                                  | Ca_kabuli_denovo | 3891496                 | G/T  | NA                 | NA                            | NA                 |
| Kabuli_wild_3894827 | NA                                  | Ca_kabuli_denovo | 3894827                 | A/C  | NA                 | NA                            | NA                 |
| Kabuli_wild_3894828 | NA                                  | Ca_kabuli_denovo | 3894828                 | G/T  | NA                 | NA                            | NA                 |
| Kabuli_wild_3899300 | NA                                  | Ca_kabuli_denovo | 3899300                 | C/T  | NA                 | NA                            | NA                 |
| Kabuli_wild_3904526 | NA                                  | Ca_kabuli_denovo | 3904526                 | A/G  | NA                 | NA                            | NA                 |
| Kabuli_wild_3906988 | NA                                  | Ca_kabuli_denovo | 3906988                 | G/T  | NA                 | NA                            | NA                 |

| SNP IDs             | NCBI dbSNP accession IDs (NCBI_SS#) | Chromosomes      | Physical positions (bp) | SNPs | Gene accession IDs | Sequence components of genome | Putative functions |
|---------------------|-------------------------------------|------------------|-------------------------|------|--------------------|-------------------------------|--------------------|
| Kabuli_wild_3913285 | NA                                  | Ca_kabuli_denovo | 3913285                 | G/T  | NA                 | NA                            | NA                 |
| Kabuli_wild_3921967 | NA                                  | Ca_kabuli_denovo | 3921967                 | C/G  | NA                 | NA                            | NA                 |
| Kabuli_wild_3926702 | NA                                  | Ca_kabuli_denovo | 3926702                 | C/T  | NA                 | NA                            | NA                 |
| Kabuli_wild_3931858 | NA                                  | Ca_kabuli_denovo | 3931858                 | G/T  | NA                 | NA                            | NA                 |
| Kabuli_wild_3938190 | NA                                  | Ca_kabuli_denovo | 3938190                 | G/T  | NA                 | NA                            | NA                 |
| Kabuli_wild_3938307 | NA                                  | Ca_kabuli_denovo | 3938307                 | G/T  | NA                 | NA                            | NA                 |
| Kabuli_wild_3939437 | NA                                  | Ca_kabuli_denovo | 3939437                 | A/G  | NA                 | NA                            | NA                 |
| Kabuli_wild_3941702 | NA                                  | Ca_kabuli_denovo | 3941702                 | T/A  | NA                 | NA                            | NA                 |
| Kabuli_wild_3946518 | NA                                  | Ca_kabuli_denovo | 3946518                 | C/G  | NA                 | NA                            | NA                 |
| Kabuli_wild_3956305 | NA                                  | Ca_kabuli_denovo | 3956305                 | C/G  | NA                 | NA                            | NA                 |
| Kabuli_wild_3956323 | NA                                  | Ca_kabuli_denovo | 3956323                 | C/G  | NA                 | NA                            | NA                 |
| Kabuli_wild_3961817 | NA                                  | Ca_kabuli_denovo | 3961817                 | C/G  | NA                 | NA                            | NA                 |
| Kabuli_wild_3962498 | NA                                  | Ca_kabuli_denovo | 3962498                 | G/T  | NA                 | NA                            | NA                 |
| Kabuli_wild_3962514 | NA                                  | Ca_kabuli_denovo | 3962514                 | A/G  | NA                 | NA                            | NA                 |
| Kabuli_wild_3965708 | NA                                  | Ca_kabuli_denovo | 3965708                 | A/G  | NA                 | NA                            | NA                 |
| Kabuli_wild_3965717 | NA                                  | Ca_kabuli_denovo | 3965717                 | C/T  | NA                 | NA                            | NA                 |
| Kabuli_wild_3965723 | NA                                  | Ca_kabuli_denovo | 3965723                 | C/T  | NA                 | NA                            | NA                 |
| Kabuli_wild_3976642 | NA                                  | Ca_kabuli_denovo | 3976642                 | A/G  | NA                 | NA                            | NA                 |
| Kabuli_wild_3976657 | NA                                  | Ca_kabuli_denovo | 3976657                 | C/G  | NA                 | NA                            | NA                 |
| Kabuli_wild_3981658 | NA                                  | Ca_kabuli_denovo | 3981658                 | A/G  | NA                 | NA                            | NA                 |
| Kabuli_wild_3988212 | NA                                  | Ca_kabuli_denovo | 3988212                 | G/T  | NA                 | NA                            | NA                 |
| Kabuli_wild_3990150 | NA                                  | Ca_kabuli_denovo | 3990150                 | A/G  | NA                 | NA                            | NA                 |
| Kabuli_wild_3994691 | NA                                  | Ca_kabuli_denovo | 3994691                 | A/G  | NA                 | NA                            | NA                 |
| Kabuli_wild_3996687 | NA                                  | Ca_kabuli_denovo | 3996687                 | A/G  | NA                 | NA                            | NA                 |
| Kabuli_wild_3996732 | NA                                  | Ca_kabuli_denovo | 3996732                 | G/T  | NA                 | NA                            | NA                 |
| Kabuli_wild_4001617 | NA                                  | Ca_kabuli_denovo | 4001617                 | A/G  | NA                 | NA                            | NA                 |
| Kabuli_wild_4001632 | NA                                  | Ca_kabuli_denovo | 4001632                 | A/G  | NA                 | NA                            | NA                 |
| Kabuli_wild_4010460 | NA                                  | Ca_kabuli_denovo | 4010460                 | A/T  | NA                 | NA                            | NA                 |
| Kabuli_wild_4010483 | NA                                  | Ca_kabuli_denovo | 4010483                 | C/T  | NA                 | NA                            | NA                 |
| Kabuli_wild_4031922 | NA                                  | Ca_kabuli_denovo | 4031922                 | C/G  | NA                 | NA                            | NA                 |
| Kabuli_wild_4031937 | NA                                  | Ca_kabuli_denovo | 4031937                 | G/T  | NA                 | NA                            | NA                 |
| Kabuli_wild_4036298 | NA                                  | Ca_kabuli_denovo | 4036298                 | G/A  | NA                 | NA                            | NA                 |
| Kabuli_wild_4042476 | NA                                  | Ca_kabuli_denovo | 4042476                 | C/T  | NA                 | NA                            | NA                 |
| Kabuli_wild_4042484 | NA                                  | Ca_kabuli_denovo | 4042484                 | C/G  | NA                 | NA                            | NA                 |
| Kabuli_wild_4042487 | NA                                  | Ca_kabuli_denovo | 4042487                 | C/G  | NA                 | NA                            | NA                 |
| Kabuli_wild_4046491 | NA                                  | Ca_kabuli_denovo | 4046491                 | G/T  | NA                 | NA                            | NA                 |
| Kabuli_wild_4047031 | NA                                  | Ca_kabuli_denovo | 4047031                 | C/G  | NA                 | NA                            | NA                 |
| Kabuli_wild_4047034 | NA                                  | Ca_kabuli_denovo | 4047034                 | C/G  | NA                 | NA                            | NA                 |
| Kabuli_wild_4059778 | NA                                  | Ca_kabuli_denovo | 4059778                 | A/G  | NA                 | NA                            | NA                 |
| Kabuli_wild_4060832 | NA                                  | Ca_kabuli_denovo | 4060832                 | A/G  | NA                 | NA                            | NA                 |
| Kabuli_wild_4071344 | NA                                  | Ca_kabuli_denovo | 4071344                 | C/G  | NA                 | NA                            | NA                 |
| Kabuli_wild_4071396 | NA                                  | Ca_kabuli_denovo | 4071396                 | G/T  | NA                 | NA                            | NA                 |
| Kabuli_wild_4071399 | NA                                  | Ca_kabuli_denovo | 4071399                 | A/G  | NA                 | NA                            | NA                 |
| Kabuli_wild_4080774 | NA                                  | Ca_kabuli_denovo | 4080774                 | A/G  | NA                 | NA                            | NA                 |

| SNP IDs             | NCBI dbSNP accession IDs (NCBI_SS#) | Chromosomes      | Physical positions (bp) | SNPs | Gene accession IDs | Sequence components of genome | Putative functions |
|---------------------|-------------------------------------|------------------|-------------------------|------|--------------------|-------------------------------|--------------------|
| Kabuli_wild_4080780 | NA                                  | Ca_kabuli_denovo | 4080780                 | A/G  | NA                 | NA                            | NA                 |
| Kabuli_wild_4080794 | NA                                  | Ca_kabuli_denovo | 4080794                 | A/C  | NA                 | NA                            | NA                 |
| Kabuli_wild_4080801 | NA                                  | Ca_kabuli_denovo | 4080801                 | C/G  | NA                 | NA                            | NA                 |
| Kabuli_wild_4082083 | NA                                  | Ca_kabuli_denovo | 4082083                 | A/G  | NA                 | NA                            | NA                 |
| Kabuli_wild_4082122 | NA                                  | Ca_kabuli_denovo | 4082122                 | G/T  | NA                 | NA                            | NA                 |
| Kabuli_wild_4100045 | NA                                  | Ca_kabuli_denovo | 4100045                 | A/G  | NA                 | NA                            | NA                 |
| Kabuli_wild_4100060 | NA                                  | Ca_kabuli_denovo | 4100060                 | A/G  | NA                 | NA                            | NA                 |
| Kabuli_wild_4100081 | NA                                  | Ca_kabuli_denovo | 4100081                 | C/G  | NA                 | NA                            | NA                 |
| Kabuli_wild_4100093 | NA                                  | Ca_kabuli_denovo | 4100093                 | A/G  | NA                 | NA                            | NA                 |
| Kabuli_wild_4112415 | NA                                  | Ca_kabuli_denovo | 4112415                 | C/G  | NA                 | NA                            | NA                 |
| Kabuli_wild_4119999 | NA                                  | Ca_kabuli_denovo | 4119999                 | C/T  | NA                 | NA                            | NA                 |
| Kabuli_wild_4120002 | NA                                  | Ca_kabuli_denovo | 4120002                 | G/T  | NA                 | NA                            | NA                 |
| Kabuli_wild_4121145 | NA                                  | Ca_kabuli_denovo | 4121145                 | C/T  | NA                 | NA                            | NA                 |
| Kabuli_wild_4122362 | NA                                  | Ca_kabuli_denovo | 4122362                 | A/G  | NA                 | NA                            | NA                 |
| Kabuli_wild_4122395 | NA                                  | Ca_kabuli_denovo | 4122395                 | A/G  | NA                 | NA                            | NA                 |
| Kabuli_wild_4128158 | NA                                  | Ca_kabuli_denovo | 4128158                 | C/G  | NA                 | NA                            | NA                 |
| Kabuli_wild_4128179 | NA                                  | Ca_kabuli_denovo | 4128179                 | A/G  | NA                 | NA                            | NA                 |
| Kabuli_wild_4128444 | NA                                  | Ca_kabuli_denovo | 4128444                 | A/T  | NA                 | NA                            | NA                 |
| Kabuli_wild_4145368 | NA                                  | Ca_kabuli_denovo | 4145368                 | C/T  | NA                 | NA                            | NA                 |
| Kabuli_wild_4149628 | NA                                  | Ca_kabuli_denovo | 4149628                 | A/G  | NA                 | NA                            | NA                 |
| Kabuli_wild_4149637 | NA                                  | Ca_kabuli_denovo | 4149637                 | A/G  | NA                 | NA                            | NA                 |
| Kabuli_wild_4150925 | NA                                  | Ca_kabuli_denovo | 4150925                 | A/G  | NA                 | NA                            | NA                 |
| Kabuli_wild_4154692 | NA                                  | Ca_kabuli_denovo | 4154692                 | C/T  | NA                 | NA                            | NA                 |
| Kabuli_wild_4154707 | NA                                  | Ca_kabuli_denovo | 4154707                 | C/T  | NA                 | NA                            | NA                 |
| Kabuli_wild_4157605 | NA                                  | Ca_kabuli_denovo | 4157605                 | G/T  | NA                 | NA                            | NA                 |
| Kabuli_wild_4157616 | NA                                  | Ca_kabuli_denovo | 4157616                 | C/G  | NA                 | NA                            | NA                 |
| Kabuli_wild_4157629 | NA                                  | Ca_kabuli_denovo | 4157629                 | A/G  | NA                 | NA                            | NA                 |
| Kabuli_wild_4157631 | NA                                  | Ca_kabuli_denovo | 4157631                 | A/C  | NA                 | NA                            | NA                 |
| Kabuli_wild_4165114 | NA                                  | Ca_kabuli_denovo | 4165114                 | C/G  | NA                 | NA                            | NA                 |
| Kabuli_wild_4165146 | NA                                  | Ca_kabuli_denovo | 4165146                 | A/G  | NA                 | NA                            | NA                 |
| Kabuli_wild_4165149 | NA                                  | Ca_kabuli_denovo | 4165149                 | G/T  | NA                 | NA                            | NA                 |
| Kabuli_wild_4165966 | NA                                  | Ca_kabuli_denovo | 4165966                 | C/T  | NA                 | NA                            | NA                 |
| Kabuli_wild_4166020 | NA                                  | Ca_kabuli_denovo | 4166020                 | A/G  | NA                 | NA                            | NA                 |
| Kabuli_wild_4168726 | NA                                  | Ca_kabuli_denovo | 4168726                 | G/A  | NA                 | NA                            | NA                 |
| Kabuli_wild_4168732 | NA                                  | Ca_kabuli_denovo | 4168732                 | G/T  | NA                 | NA                            | NA                 |
| Kabuli_wild_4168735 | NA                                  | Ca_kabuli_denovo | 4168735                 | G/A  | NA                 | NA                            | NA                 |
| Kabuli_wild_4178918 | NA                                  | Ca_kabuli_denovo | 4178918                 | A/G  | NA                 | NA                            | NA                 |
| Kabuli_wild_4180575 | NA                                  | Ca_kabuli_denovo | 4180575                 | G/T  | NA                 | NA                            | NA                 |
| Kabuli_wild_4184466 | NA                                  | Ca_kabuli_denovo | 4184466                 | C/T  | NA                 | NA                            | NA                 |
| Kabuli_wild_4195579 | NA                                  | Ca_kabuli_denovo | 4195579                 | A/C  | NA                 | NA                            | NA                 |
| Kabuli_wild_4202268 | NA                                  | Ca_kabuli_denovo | 4202268                 | A/G  | NA                 | NA                            | NA                 |
| Kabuli_wild_4202278 | NA                                  | Ca_kabuli_denovo | 4202278                 | A/G  | NA                 | NA                            | NA                 |
| Kabuli_wild_4206916 | NA                                  | Ca_kabuli_denovo | 4206916                 | G/T  | NA                 | NA                            | NA                 |
| Kabuli_wild_4206997 | NA                                  | Ca_kabuli_denovo | 4206997                 | C/G  | NA                 | NA                            | NA                 |

| SNP IDs             | NCBI dbSNP accession IDs (NCBI_SS#) | Chromosomes      | Physical positions (bp) | SNPs | Gene accession IDs | Sequence components of genome | Putative functions |
|---------------------|-------------------------------------|------------------|-------------------------|------|--------------------|-------------------------------|--------------------|
| Kabuli_wild_4214598 | NA                                  | Ca_kabuli_denovo | 4214598                 | A/G  | NA                 | NA                            | NA                 |
| Kabuli_wild_4218793 | NA                                  | Ca_kabuli_denovo | 4218793                 | C/G  | NA                 | NA                            | NA                 |
| Kabuli_wild_4220510 | NA                                  | Ca_kabuli_denovo | 4220510                 | C/G  | NA                 | NA                            | NA                 |
| Kabuli_wild_4222094 | NA                                  | Ca_kabuli_denovo | 4222094                 | G/T  | NA                 | NA                            | NA                 |
| Kabuli_wild_4224419 | NA                                  | Ca_kabuli_denovo | 4224419                 | C/G  | NA                 | NA                            | NA                 |
| Kabuli_wild_4228858 | NA                                  | Ca_kabuli_denovo | 4228858                 | C/T  | NA                 | NA                            | NA                 |
| Kabuli_wild_4228861 | NA                                  | Ca_kabuli_denovo | 4228861                 | G/A  | NA                 | NA                            | NA                 |
| Kabuli_wild_4228876 | NA                                  | Ca_kabuli_denovo | 4228876                 | C/G  | NA                 | NA                            | NA                 |
| Kabuli_wild_4252383 | NA                                  | Ca_kabuli_denovo | 4252383                 | C/T  | NA                 | NA                            | NA                 |
| Kabuli_wild_4263323 | NA                                  | Ca_kabuli_denovo | 4263323                 | G/T  | NA                 | NA                            | NA                 |
| Kabuli_wild_4273029 | NA                                  | Ca_kabuli_denovo | 4273029                 | C/G  | NA                 | NA                            | NA                 |
| Kabuli_wild_4273054 | NA                                  | Ca_kabuli_denovo | 4273054                 | A/G  | NA                 | NA                            | NA                 |
| Kabuli_wild_4279793 | NA                                  | Ca_kabuli_denovo | 4279793                 | G/A  | NA                 | NA                            | NA                 |
| Kabuli_wild_4279817 | NA                                  | Ca_kabuli_denovo | 4279817                 | G/A  | NA                 | NA                            | NA                 |
| Kabuli_wild_4281908 | NA                                  | Ca_kabuli_denovo | 4281908                 | A/G  | NA                 | NA                            | NA                 |
| Kabuli_wild_4312170 | NA                                  | Ca_kabuli_denovo | 4312170                 | C/G  | NA                 | NA                            | NA                 |
| Kabuli_wild_4312275 | NA                                  | Ca_kabuli_denovo | 4312275                 | C/G  | NA                 | NA                            | NA                 |
| Kabuli_wild_4312285 | NA                                  | Ca_kabuli_denovo | 4312285                 | A/G  | NA                 | NA                            | NA                 |
| Kabuli_wild_4320067 | NA                                  | Ca_kabuli_denovo | 4320067                 | G/T  | NA                 | NA                            | NA                 |
| Kabuli_wild_4320118 | NA                                  | Ca_kabuli_denovo | 4320118                 | C/G  | NA                 | NA                            | NA                 |
| Kabuli_wild_4332514 | NA                                  | Ca_kabuli_denovo | 4332514                 | C/T  | NA                 | NA                            | NA                 |
| Kabuli_wild_4332523 | NA                                  | Ca_kabuli_denovo | 4332523                 | C/G  | NA                 | NA                            | NA                 |
| Kabuli_wild_4332535 | NA                                  | Ca_kabuli_denovo | 4332535                 | C/T  | NA                 | NA                            | NA                 |
| Kabuli_wild_4332539 | NA                                  | Ca_kabuli_denovo | 4332539                 | C/T  | NA                 | NA                            | NA                 |
| Kabuli_wild_4348192 | NA                                  | Ca_kabuli_denovo | 4348192                 | G/T  | NA                 | NA                            | NA                 |
| Kabuli_wild_4352165 | NA                                  | Ca_kabuli_denovo | 4352165                 | A/G  | NA                 | NA                            | NA                 |
| Kabuli_wild_4352186 | NA                                  | Ca_kabuli_denovo | 4352186                 | C/G  | NA                 | NA                            | NA                 |
| Kabuli_wild_4353624 | NA                                  | Ca_kabuli_denovo | 4353624                 | G/T  | NA                 | NA                            | NA                 |
| Kabuli_wild_4353630 | NA                                  | Ca_kabuli_denovo | 4353630                 | C/T  | NA                 | NA                            | NA                 |
| Kabuli_wild_4364100 | NA                                  | Ca_kabuli_denovo | 4364100                 | C/T  | NA                 | NA                            | NA                 |
| Kabuli_wild_4364121 | NA                                  | Ca_kabuli_denovo | 4364121                 | C/G  | NA                 | NA                            | NA                 |
| Kabuli_wild_4368315 | NA                                  | Ca_kabuli_denovo | 4368315                 | G/A  | NA                 | NA                            | NA                 |
| Kabuli_wild_4368333 | NA                                  | Ca_kabuli_denovo | 4368333                 | A/G  | NA                 | NA                            | NA                 |
| Kabuli_wild_4368343 | NA                                  | Ca_kabuli_denovo | 4368343                 | T/C  | NA                 | NA                            | NA                 |
| Kabuli_wild_4376953 | NA                                  | Ca_kabuli_denovo | 4376953                 | A/G  | NA                 | NA                            | NA                 |
| Kabuli_wild_4384387 | NA                                  | Ca_kabuli_denovo | 4384387                 | A/C  | NA                 | NA                            | NA                 |
| Kabuli_wild_4399110 | NA                                  | Ca_kabuli_denovo | 4399110                 | A/G  | NA                 | NA                            | NA                 |
| Kabuli_wild_4399117 | NA                                  | Ca_kabuli_denovo | 4399117                 | C/T  | NA                 | NA                            | NA                 |
| Kabuli_wild_4410684 | NA                                  | Ca_kabuli_denovo | 4410684                 | C/T  | NA                 | NA                            | NA                 |
| Kabuli_wild_4416016 | NA                                  | Ca_kabuli_denovo | 4416016                 | C/T  | NA                 | NA                            | NA                 |
| Kabuli_wild_4423328 | NA                                  | Ca_kabuli_denovo | 4423328                 | C/G  | NA                 | NA                            | NA                 |
| Kabuli_wild_4423334 | NA                                  | Ca_kabuli_denovo | 4423334                 | G/T  | NA                 | NA                            | NA                 |
| Kabuli_wild_4441266 | NA                                  | Ca_kabuli_denovo | 4441266                 | A/C  | NA                 | NA                            | NA                 |
| Kabuli_wild_4441267 | NA                                  | Ca_kabuli_denovo | 4441267                 | G/T  | NA                 | NA                            | NA                 |

| SNP IDs             | NCBI dbSNP accession IDs (NCBI_SS#) | Chromosomes      | Physical positions (bp) | SNPs | Gene accession IDs | Sequence components of genome | Putative functions |
|---------------------|-------------------------------------|------------------|-------------------------|------|--------------------|-------------------------------|--------------------|
| Kabuli_wild_4441268 | NA                                  | Ca_kabuli_denovo | 4441268                 | A/G  | NA                 | NA                            | NA                 |
| Kabuli_wild_4442893 | NA                                  | Ca_kabuli_denovo | 4442893                 | C/T  | NA                 | NA                            | NA                 |
| Kabuli_wild_4442900 | NA                                  | Ca_kabuli_denovo | 4442900                 | A/G  | NA                 | NA                            | NA                 |
| Kabuli_wild_4442902 | NA                                  | Ca_kabuli_denovo | 4442902                 | C/G  | NA                 | NA                            | NA                 |
| Kabuli_wild_4445758 | NA                                  | Ca_kabuli_denovo | 4445758                 | A/G  | NA                 | NA                            | NA                 |
| Kabuli_wild_4449353 | NA                                  | Ca_kabuli_denovo | 4449353                 | C/T  | NA                 | NA                            | NA                 |
| Kabuli_wild_4449356 | NA                                  | Ca_kabuli_denovo | 4449356                 | C/T  | NA                 | NA                            | NA                 |
| Kabuli_wild_4449365 | NA                                  | Ca_kabuli_denovo | 4449365                 | C/T  | NA                 | NA                            | NA                 |
| Kabuli_wild_4449368 | NA                                  | Ca_kabuli_denovo | 4449368                 | A/G  | NA                 | NA                            | NA                 |
| Kabuli_wild_4470701 | NA                                  | Ca_kabuli_denovo | 4470701                 | G/T  | NA                 | NA                            | NA                 |
| Kabuli_wild_4474663 | NA                                  | Ca_kabuli_denovo | 4474663                 | C/T  | NA                 | NA                            | NA                 |
| Kabuli_wild_4474678 | NA                                  | Ca_kabuli_denovo | 4474678                 | A/G  | NA                 | NA                            | NA                 |
| Kabuli_wild_4481789 | NA                                  | Ca_kabuli_denovo | 4481789                 | A/G  | NA                 | NA                            | NA                 |
| Kabuli_wild_4481792 | NA                                  | Ca_kabuli_denovo | 4481792                 | T/G  | NA                 | NA                            | NA                 |
| Kabuli_wild_4482611 | NA                                  | Ca_kabuli_denovo | 4482611                 | G/C  | NA                 | NA                            | NA                 |
| Kabuli_wild_4524821 | NA                                  | Ca_kabuli_denovo | 4524821                 | A/G  | NA                 | NA                            | NA                 |
| Kabuli_wild_4539455 | NA                                  | Ca_kabuli_denovo | 4539455                 | G/A  | NA                 | NA                            | NA                 |
| Kabuli_wild_4543295 | NA                                  | Ca_kabuli_denovo | 4543295                 | A/G  | NA                 | NA                            | NA                 |
| Kabuli_wild_4555939 | NA                                  | Ca_kabuli_denovo | 4555939                 | A/C  | NA                 | NA                            | NA                 |
| Kabuli_wild_4555956 | NA                                  | Ca_kabuli_denovo | 4555956                 | A/G  | NA                 | NA                            | NA                 |
| Kabuli_wild_4561654 | NA                                  | Ca_kabuli_denovo | 4561654                 | A/G  | NA                 | NA                            | NA                 |
| Kabuli_wild_4561657 | NA                                  | Ca_kabuli_denovo | 4561657                 | A/G  | NA                 | NA                            | NA                 |
| Kabuli_wild_4561681 | NA                                  | Ca_kabuli_denovo | 4561681                 | C/T  | NA                 | NA                            | NA                 |
| Kabuli_wild_4561702 | NA                                  | Ca_kabuli_denovo | 4561702                 | C/T  | NA                 | NA                            | NA                 |
| Kabuli_wild_4575616 | NA                                  | Ca_kabuli_denovo | 4575616                 | C/T  | NA                 | NA                            | NA                 |
| Kabuli_wild_4575617 | NA                                  | Ca_kabuli_denovo | 4575617                 | A/G  | NA                 | NA                            | NA                 |
| Kabuli_wild_4580925 | NA                                  | Ca_kabuli_denovo | 4580925                 | C/G  | NA                 | NA                            | NA                 |
| Kabuli_wild_4580928 | NA                                  | Ca_kabuli_denovo | 4580928                 | C/G  | NA                 | NA                            | NA                 |
| Kabuli_wild_4580946 | NA                                  | Ca_kabuli_denovo | 4580946                 | C/G  | NA                 | NA                            | NA                 |
| Kabuli_wild_4582842 | NA                                  | Ca_kabuli_denovo | 4582842                 | C/T  | NA                 | NA                            | NA                 |
| Kabuli_wild_4583119 | NA                                  | Ca_kabuli_denovo | 4583119                 | C/T  | NA                 | NA                            | NA                 |
| Kabuli_wild_4583144 | NA                                  | Ca_kabuli_denovo | 4583144                 | A/G  | NA                 | NA                            | NA                 |
| Kabuli_wild_4583145 | NA                                  | Ca_kabuli_denovo | 4583145                 | C/T  | NA                 | NA                            | NA                 |
| Kabuli_wild_4586346 | NA                                  | Ca_kabuli_denovo | 4586346                 | C/G  | NA                 | NA                            | NA                 |
| Kabuli_wild_4612891 | NA                                  | Ca_kabuli_denovo | 4612891                 | A/G  | NA                 | NA                            | NA                 |
| Kabuli_wild_4620073 | NA                                  | Ca_kabuli_denovo | 4620073                 | G/T  | NA                 | NA                            | NA                 |
| Kabuli_wild_4620077 | NA                                  | Ca_kabuli_denovo | 4620077                 | A/C  | NA                 | NA                            | NA                 |
| Kabuli_wild_4620097 | NA                                  | Ca_kabuli_denovo | 4620097                 | C/T  | NA                 | NA                            | NA                 |
| Kabuli_wild_4621786 | NA                                  | Ca_kabuli_denovo | 4621786                 | C/T  | NA                 | NA                            | NA                 |
| Kabuli_wild_4623883 | NA                                  | Ca_kabuli_denovo | 4623883                 | C/G  | NA                 | NA                            | NA                 |
| Kabuli_wild_4628653 | NA                                  | Ca_kabuli_denovo | 4628653                 | A/C  | NA                 | NA                            | NA                 |
| Kabuli_wild_4650600 | NA                                  | Ca_kabuli_denovo | 4650600                 | C/T  | NA                 | NA                            | NA                 |
| Kabuli_wild_4651824 | NA                                  | Ca_kabuli_denovo | 4651824                 | C/G  | NA                 | NA                            | NA                 |
| Kabuli_wild_4651827 | NA                                  | Ca_kabuli_denovo | 4651827                 | C/G  | NA                 | NA                            | NA                 |

| SNP IDs             | NCBI dbSNP accession IDs (NCBI_SS#) | Chromosomes      | Physical positions (bp) | SNPs | Gene accession IDs | Sequence components of genome | Putative functions |
|---------------------|-------------------------------------|------------------|-------------------------|------|--------------------|-------------------------------|--------------------|
| Kabuli_wild_4655697 | NA                                  | Ca_kabuli_denovo | 4655697                 | C/T  | NA                 | NA                            | NA                 |
| Kabuli_wild_4655730 | NA                                  | Ca_kabuli_denovo | 4655730                 | C/T  | NA                 | NA                            | NA                 |
| Kabuli_wild_4659173 | NA                                  | Ca_kabuli_denovo | 4659173                 | C/T  | NA                 | NA                            | NA                 |
| Kabuli_wild_4659434 | NA                                  | Ca_kabuli_denovo | 4659434                 | C/T  | NA                 | NA                            | NA                 |
| Kabuli_wild_4660659 | NA                                  | Ca_kabuli_denovo | 4660659                 | A/G  | NA                 | NA                            | NA                 |
| Kabuli_wild_4660843 | NA                                  | Ca_kabuli_denovo | 4660843                 | G/T  | NA                 | NA                            | NA                 |
| Kabuli_wild_4660854 | NA                                  | Ca_kabuli_denovo | 4660854                 | A/T  | NA                 | NA                            | NA                 |
| Kabuli_wild_4674423 | NA                                  | Ca_kabuli_denovo | 4674423                 | A/G  | NA                 | NA                            | NA                 |
| Kabuli_wild_4674453 | NA                                  | Ca_kabuli_denovo | 4674453                 | A/C  | NA                 | NA                            | NA                 |
| Kabuli_wild_4674455 | NA                                  | Ca_kabuli_denovo | 4674455                 | C/G  | NA                 | NA                            | NA                 |
| Kabuli_wild_4675266 | NA                                  | Ca_kabuli_denovo | 4675266                 | G/A  | NA                 | NA                            | NA                 |
| Kabuli_wild_4675269 | NA                                  | Ca_kabuli_denovo | 4675269                 | G/A  | NA                 | NA                            | NA                 |
| Kabuli_wild_4679481 | NA                                  | Ca_kabuli_denovo | 4679481                 | A/G  | NA                 | NA                            | NA                 |
| Kabuli_wild_4685343 | NA                                  | Ca_kabuli_denovo | 4685343                 | A/G  | NA                 | NA                            | NA                 |
| Kabuli_wild_4685933 | NA                                  | Ca_kabuli_denovo | 4685933                 | C/G  | NA                 | NA                            | NA                 |
| Kabuli_wild_4685945 | NA                                  | Ca_kabuli_denovo | 4685945                 | A/G  | NA                 | NA                            | NA                 |
| Kabuli_wild_4685959 | NA                                  | Ca_kabuli_denovo | 4685959                 | A/T  | NA                 | NA                            | NA                 |
| Kabuli_wild_4692454 | NA                                  | Ca_kabuli_denovo | 4692454                 | A/G  | NA                 | NA                            | NA                 |
| Kabuli_wild_4692476 | NA                                  | Ca_kabuli_denovo | 4692476                 | A/G  | NA                 | NA                            | NA                 |
| Kabuli_wild_4692482 | NA                                  | Ca_kabuli_denovo | 4692482                 | A/G  | NA                 | NA                            | NA                 |
| Kabuli_wild_4697424 | NA                                  | Ca_kabuli_denovo | 4697424                 | C/T  | NA                 | NA                            | NA                 |
| Kabuli_wild_4699401 | NA                                  | Ca_kabuli_denovo | 4699401                 | A/G  | NA                 | NA                            | NA                 |
| Kabuli_wild_4699445 | NA                                  | Ca_kabuli_denovo | 4699445                 | C/G  | NA                 | NA                            | NA                 |
| Kabuli_wild_4704590 | NA                                  | Ca_kabuli_denovo | 4704590                 | A/G  | NA                 | NA                            | NA                 |
| Kabuli_wild_4734869 | NA                                  | Ca_kabuli_denovo | 4734869                 | T/C  | NA                 | NA                            | NA                 |
| Kabuli_wild_4738456 | NA                                  | Ca_kabuli_denovo | 4738456                 | C/T  | NA                 | NA                            | NA                 |
| Kabuli_wild_4738477 | NA                                  | Ca_kabuli_denovo | 4738477                 | G/A  | NA                 | NA                            | NA                 |
| Kabuli_wild_4738495 | NA                                  | Ca_kabuli_denovo | 4738495                 | C/G  | NA                 | NA                            | NA                 |
| Kabuli_wild_4738504 | NA                                  | Ca_kabuli_denovo | 4738504                 | G/C  | NA                 | NA                            | NA                 |
| Kabuli_wild_4743233 | NA                                  | Ca_kabuli_denovo | 4743233                 | A/G  | NA                 | NA                            | NA                 |
| Kabuli_wild_4749397 | NA                                  | Ca_kabuli_denovo | 4749397                 | C/T  | NA                 | NA                            | NA                 |
| Kabuli_wild_4752975 | NA                                  | Ca_kabuli_denovo | 4752975                 | C/T  | NA                 | NA                            | NA                 |
| Kabuli_wild_4752984 | NA                                  | Ca_kabuli_denovo | 4752984                 | A/C  | NA                 | NA                            | NA                 |
| Kabuli_wild_4760307 | NA                                  | Ca_kabuli_denovo | 4760307                 | C/T  | NA                 | NA                            | NA                 |
| Kabuli_wild_4763432 | NA                                  | Ca_kabuli_denovo | 4763432                 | A/G  | NA                 | NA                            | NA                 |
| Kabuli_wild_4793394 | NA                                  | Ca_kabuli_denovo | 4793394                 | A/G  | NA                 | NA                            | NA                 |
| Kabuli_wild_4797125 | NA                                  | Ca_kabuli_denovo | 4797125                 | C/T  | NA                 | NA                            | NA                 |
| Kabuli_wild_4806277 | NA                                  | Ca_kabuli_denovo | 4806277                 | A/G  | NA                 | NA                            | NA                 |
| Kabuli_wild_4806834 | NA                                  | Ca_kabuli_denovo | 4806834                 | A/C  | NA                 | NA                            | NA                 |
| Kabuli_wild_4806869 | NA                                  | Ca_kabuli_denovo | 4806869                 | C/G  | NA                 | NA                            | NA                 |
| Kabuli_wild_4809218 | NA                                  | Ca_kabuli_denovo | 4809218                 | C/G  | NA                 | NA                            | NA                 |
| Kabuli_wild_4809233 | NA                                  | Ca_kabuli_denovo | 4809233                 | G/A  | NA                 | NA                            | NA                 |
| Kabuli_wild_4828242 | NA                                  | Ca_kabuli_denovo | 4828242                 | C/T  | NA                 | NA                            | NA                 |
| Kabuli_wild_4837148 | NA                                  | Ca_kabuli_denovo | 4837148                 | C/G  | NA                 | NA                            | NA                 |

| SNP IDs             | NCBI dbSNP accession IDs (NCBI_SS#) | Chromosomes      | Physical positions (bp) | SNPs | Gene accession IDs | Sequence components of genome | Putative functions |
|---------------------|-------------------------------------|------------------|-------------------------|------|--------------------|-------------------------------|--------------------|
| Kabuli_wild_4837149 | NA                                  | Ca_kabuli_denovo | 4837149                 | A/G  | NA                 | NA                            | NA                 |
| Kabuli_wild_4837181 | NA                                  | Ca_kabuli_denovo | 4837181                 | C/G  | NA                 | NA                            | NA                 |
| Kabuli_wild_4837196 | NA                                  | Ca_kabuli_denovo | 4837196                 | C/G  | NA                 | NA                            | NA                 |
| Kabuli_wild_4855317 | NA                                  | Ca_kabuli_denovo | 4855317                 | C/G  | NA                 | NA                            | NA                 |
| Kabuli_wild_4855481 | NA                                  | Ca_kabuli_denovo | 4855481                 | C/T  | NA                 | NA                            | NA                 |
| Kabuli_wild_4855493 | NA                                  | Ca_kabuli_denovo | 4855493                 | C/G  | NA                 | NA                            | NA                 |
| Kabuli_wild_4883151 | NA                                  | Ca_kabuli_denovo | 4883151                 | A/G  | NA                 | NA                            | NA                 |
| Kabuli_wild_4883428 | NA                                  | Ca_kabuli_denovo | 4883428                 | G/C  | NA                 | NA                            | NA                 |
| Kabuli_wild_4884376 | NA                                  | Ca_kabuli_denovo | 4884376                 | C/G  | NA                 | NA                            | NA                 |
| Kabuli_wild_4884380 | NA                                  | Ca_kabuli_denovo | 4884380                 | C/T  | NA                 | NA                            | NA                 |
| Kabuli_wild_4884456 | NA                                  | Ca_kabuli_denovo | 4884456                 | C/G  | NA                 | NA                            | NA                 |
| Kabuli_wild_4884458 | NA                                  | Ca_kabuli_denovo | 4884458                 | C/T  | NA                 | NA                            | NA                 |
| Kabuli_wild_4884465 | NA                                  | Ca_kabuli_denovo | 4884465                 | C/G  | NA                 | NA                            | NA                 |
| Kabuli_wild_4893881 | NA                                  | Ca_kabuli_denovo | 4893881                 | A/G  | NA                 | NA                            | NA                 |
| Kabuli_wild_4893896 | NA                                  | Ca_kabuli_denovo | 4893896                 | C/T  | NA                 | NA                            | NA                 |
| Kabuli_wild_4895963 | NA                                  | Ca_kabuli_denovo | 4895963                 | A/G  | NA                 | NA                            | NA                 |
| Kabuli_wild_4895969 | NA                                  | Ca_kabuli_denovo | 4895969                 | A/T  | NA                 | NA                            | NA                 |
| Kabuli_wild_4895971 | NA                                  | Ca_kabuli_denovo | 4895971                 | A/G  | NA                 | NA                            | NA                 |
| Kabuli_wild_4897761 | NA                                  | Ca_kabuli_denovo | 4897761                 | C/G  | NA                 | NA                            | NA                 |
| Kabuli_wild_4901464 | NA                                  | Ca_kabuli_denovo | 4901464                 | A/G  | NA                 | NA                            | NA                 |
| Kabuli_wild_4909721 | NA                                  | Ca_kabuli_denovo | 4909721                 | A/G  | NA                 | NA                            | NA                 |
| Kabuli_wild_4930637 | NA                                  | Ca_kabuli_denovo | 4930637                 | A/G  | NA                 | NA                            | NA                 |
| Kabuli_wild_4936619 | NA                                  | Ca_kabuli_denovo | 4936619                 | A/G  | NA                 | NA                            | NA                 |
| Kabuli_wild_4936688 | NA                                  | Ca_kabuli_denovo | 4936688                 | C/G  | NA                 | NA                            | NA                 |
| Kabuli_wild_4942531 | NA                                  | Ca_kabuli_denovo | 4942531                 | C/G  | NA                 | NA                            | NA                 |
| Kabuli_wild_4945497 | NA                                  | Ca_kabuli_denovo | 4945497                 | C/G  | NA                 | NA                            | NA                 |
| Kabuli_wild_4949043 | NA                                  | Ca_kabuli_denovo | 4949043                 | A/C  | NA                 | NA                            | NA                 |
| Kabuli_wild_4961195 | NA                                  | Ca_kabuli_denovo | 4961195                 | G/T  | NA                 | NA                            | NA                 |
| Kabuli_wild_4966047 | NA                                  | Ca_kabuli_denovo | 4966047                 | A/C  | NA                 | NA                            | NA                 |
| Kabuli_wild_4966048 | NA                                  | Ca_kabuli_denovo | 4966048                 | G/T  | NA                 | NA                            | NA                 |
| Kabuli_wild_4972432 | NA                                  | Ca_kabuli_denovo | 4972432                 | G/C  | NA                 | NA                            | NA                 |
| Kabuli_wild_4972441 | NA                                  | Ca_kabuli_denovo | 4972441                 | T/C  | NA                 | NA                            | NA                 |
| Kabuli_wild_4978056 | NA                                  | Ca_kabuli_denovo | 4978056                 | A/G  | NA                 | NA                            | NA                 |
| Kabuli_wild_4997644 | NA                                  | Ca_kabuli_denovo | 4997644                 | A/C  | NA                 | NA                            | NA                 |
| Kabuli_wild_4998666 | NA                                  | Ca_kabuli_denovo | 4998666                 | A/G  | NA                 | NA                            | NA                 |
| Kabuli_wild_5001995 | NA                                  | Ca_kabuli_denovo | 5001995                 | C/T  | NA                 | NA                            | NA                 |
| Kabuli_wild_5002004 | NA                                  | Ca_kabuli_denovo | 5002004                 | C/T  | NA                 | NA                            | NA                 |
| Kabuli_wild_5023245 | NA                                  | Ca_kabuli_denovo | 5023245                 | C/T  | NA                 | NA                            | NA                 |
| Kabuli_wild_5023280 | NA                                  | Ca_kabuli_denovo | 5023280                 | A/T  | NA                 | NA                            | NA                 |
| Kabuli_wild_5034088 | NA                                  | Ca_kabuli_denovo | 5034088                 | C/T  | NA                 | NA                            | NA                 |
| Kabuli_wild_5034091 | NA                                  | Ca_kabuli_denovo | 5034091                 | C/G  | NA                 | NA                            | NA                 |
| Kabuli_wild_5034104 | NA                                  | Ca_kabuli_denovo | 5034104                 | G/T  | NA                 | NA                            | NA                 |
| Kabuli_wild_5034460 | NA                                  | Ca_kabuli_denovo | 5034460                 | C/G  | NA                 | NA                            | NA                 |
| Kabuli_wild_5034475 | NA                                  | Ca_kabuli_denovo | 5034475                 | A/G  | NA                 | NA                            | NA                 |

| SNP IDs             | NCBI dbSNP accession IDs (NCBI_SS#) | Chromosomes      | Physical positions (bp) | SNPs | Gene accession IDs | Sequence components of genome | Putative functions |
|---------------------|-------------------------------------|------------------|-------------------------|------|--------------------|-------------------------------|--------------------|
| Kabuli_wild_5035933 | NA                                  | Ca_kabuli_denovo | 5035933                 | A/G  | NA                 | NA                            | NA                 |
| Kabuli_wild_5037026 | NA                                  | Ca_kabuli_denovo | 5037026                 | T/C  | NA                 | NA                            | NA                 |
| Kabuli_wild_5041612 | NA                                  | Ca_kabuli_denovo | 5041612                 | C/G  | NA                 | NA                            | NA                 |
| Kabuli_wild_5041632 | NA                                  | Ca_kabuli_denovo | 5041632                 | A/T  | NA                 | NA                            | NA                 |
| Kabuli_wild_5041636 | NA                                  | Ca_kabuli_denovo | 5041636                 | C/G  | NA                 | NA                            | NA                 |
| Kabuli_wild_5042729 | NA                                  | Ca_kabuli_denovo | 5042729                 | C/G  | NA                 | NA                            | NA                 |
| Kabuli_wild_5042741 | NA                                  | Ca_kabuli_denovo | 5042741                 | C/G  | NA                 | NA                            | NA                 |
| Kabuli_wild_5053835 | NA                                  | Ca_kabuli_denovo | 5053835                 | C/T  | NA                 | NA                            | NA                 |
| Kabuli_wild_5053910 | NA                                  | Ca_kabuli_denovo | 5053910                 | A/G  | NA                 | NA                            | NA                 |
| Kabuli_wild_5053919 | NA                                  | Ca_kabuli_denovo | 5053919                 | A/G  | NA                 | NA                            | NA                 |
| Kabuli_wild_5055294 | NA                                  | Ca_kabuli_denovo | 5055294                 | C/T  | NA                 | NA                            | NA                 |
| Kabuli_wild_5056902 | NA                                  | Ca_kabuli_denovo | 5056902                 | C/G  | NA                 | NA                            | NA                 |
| Kabuli_wild_5056906 | NA                                  | Ca_kabuli_denovo | 5056906                 | A/C  | NA                 | NA                            | NA                 |
| Kabuli_wild_5060215 | NA                                  | Ca_kabuli_denovo | 5060215                 | G/T  | NA                 | NA                            | NA                 |
| Kabuli_wild_5064647 | NA                                  | Ca_kabuli_denovo | 5064647                 | A/C  | NA                 | NA                            | NA                 |
| Kabuli_wild_5080960 | NA                                  | Ca_kabuli_denovo | 5080960                 | A/G  | NA                 | NA                            | NA                 |
| Kabuli_wild_5089778 | NA                                  | Ca_kabuli_denovo | 5089778                 | A/G  | NA                 | NA                            | NA                 |
| Kabuli_wild_5098242 | NA                                  | Ca_kabuli_denovo | 5098242                 | A/G  | NA                 | NA                            | NA                 |
| Kabuli_wild_5099143 | NA                                  | Ca_kabuli_denovo | 5099143                 | G/T  | NA                 | NA                            | NA                 |
| Kabuli_wild_5099441 | NA                                  | Ca_kabuli_denovo | 5099441                 | A/G  | NA                 | NA                            | NA                 |
| Kabuli_wild_5101061 | NA                                  | Ca_kabuli_denovo | 5101061                 | G/T  | NA                 | NA                            | NA                 |
| Kabuli_wild_5101062 | NA                                  | Ca_kabuli_denovo | 5101062                 | C/G  | NA                 | NA                            | NA                 |
| Kabuli_wild_5101065 | NA                                  | Ca_kabuli_denovo | 5101065                 | C/G  | NA                 | NA                            | NA                 |
| Kabuli_wild_5101178 | NA                                  | Ca_kabuli_denovo | 5101178                 | C/G  | NA                 | NA                            | NA                 |
| Kabuli_wild_5114948 | NA                                  | Ca_kabuli_denovo | 5114948                 | A/T  | NA                 | NA                            | NA                 |
| Kabuli_wild_5160366 | NA                                  | Ca_kabuli_denovo | 5160366                 | G/T  | NA                 | NA                            | NA                 |
| Kabuli_wild_5163500 | NA                                  | Ca_kabuli_denovo | 5163500                 | G/T  | NA                 | NA                            | NA                 |
| Kabuli_wild_5165385 | NA                                  | Ca_kabuli_denovo | 5165385                 | A/G  | NA                 | NA                            | NA                 |
| Kabuli_wild_5168517 | NA                                  | Ca_kabuli_denovo | 5168517                 | C/G  | NA                 | NA                            | NA                 |
| Kabuli_wild_5168565 | NA                                  | Ca_kabuli_denovo | 5168565                 | G/T  | NA                 | NA                            | NA                 |
| Kabuli_wild_5170332 | NA                                  | Ca_kabuli_denovo | 5170332                 | C/T  | NA                 | NA                            | NA                 |
| Kabuli_wild_5170349 | NA                                  | Ca_kabuli_denovo | 5170349                 | C/T  | NA                 | NA                            | NA                 |
| Kabuli_wild_5193735 | NA                                  | Ca_kabuli_denovo | 5193735                 | C/G  | NA                 | NA                            | NA                 |
| Kabuli_wild_5208902 | NA                                  | Ca_kabuli_denovo | 5208902                 | A/G  | NA                 | NA                            | NA                 |
| Kabuli_wild_5208947 | NA                                  | Ca_kabuli_denovo | 5208947                 | G/T  | NA                 | NA                            | NA                 |
| Kabuli_wild_5209967 | NA                                  | Ca_kabuli_denovo | 5209967                 | G/T  | NA                 | NA                            | NA                 |
| Kabuli_wild_5226470 | NA                                  | Ca_kabuli_denovo | 5226470                 | C/T  | NA                 | NA                            | NA                 |
| Kabuli_wild_5235195 | NA                                  | Ca_kabuli_denovo | 5235195                 | C/G  | NA                 | NA                            | NA                 |
| Kabuli_wild_5239180 | NA                                  | Ca_kabuli_denovo | 5239180                 | G/C  | NA                 | NA                            | NA                 |
| Kabuli_wild_5239189 | NA                                  | Ca_kabuli_denovo | 5239189                 | C/G  | NA                 | NA                            | NA                 |
| Kabuli_wild_5239195 | NA                                  | Ca_kabuli_denovo | 5239195                 | C/G  | NA                 | NA                            | NA                 |
| Kabuli_wild_5239207 | NA                                  | Ca_kabuli_denovo | 5239207                 | C/G  | NA                 | NA                            | NA                 |
| Kabuli_wild_5255914 | NA                                  | Ca_kabuli_denovo | 5255914                 | T/C  | NA                 | NA                            | NA                 |
| Kabuli_wild_5258093 | NA                                  | Ca_kabuli_denovo | 5258093                 | C/G  | NA                 | NA                            | NA                 |



| SNP IDs             | NCBI dbSNP accession IDs (NCBI_SS#) | Chromosomes      | Physical positions (bp) | SNPs | Gene accession IDs | Sequence components of genome | Putative functions |
|---------------------|-------------------------------------|------------------|-------------------------|------|--------------------|-------------------------------|--------------------|
| Kabuli_wild_5258108 | NA                                  | Ca_kabuli_denovo | 5258108                 | A/C  | NA                 | NA                            | NA                 |
| Kabuli_wild_5258111 | NA                                  | Ca_kabuli_denovo | 5258111                 | C/G  | NA                 | NA                            | NA                 |
| Kabuli_wild_5266732 | NA                                  | Ca_kabuli_denovo | 5266732                 | A/G  | NA                 | NA                            | NA                 |
| Kabuli_wild_5266735 | NA                                  | Ca_kabuli_denovo | 5266735                 | C/T  | NA                 | NA                            | NA                 |
| Kabuli_wild_5266741 | NA                                  | Ca_kabuli_denovo | 5266741                 | A/G  | NA                 | NA                            | NA                 |
| Kabuli_wild_5274410 | NA                                  | Ca_kabuli_denovo | 5274410                 | C/T  | NA                 | NA                            | NA                 |
| Kabuli_wild_5280289 | NA                                  | Ca_kabuli_denovo | 5280289                 | A/G  | NA                 | NA                            | NA                 |
| Kabuli_wild_5280292 | NA                                  | Ca_kabuli_denovo | 5280292                 | C/T  | NA                 | NA                            | NA                 |
| Kabuli_wild_5280294 | NA                                  | Ca_kabuli_denovo | 5280294                 | A/G  | NA                 | NA                            | NA                 |
| Kabuli_wild_5282411 | NA                                  | Ca_kabuli_denovo | 5282411                 | C/G  | NA                 | NA                            | NA                 |
| Kabuli_wild_5300474 | NA                                  | Ca_kabuli_denovo | 5300474                 | C/G  | NA                 | NA                            | NA                 |
| Kabuli_wild_5302194 | NA                                  | Ca_kabuli_denovo | 5302194                 | C/T  | NA                 | NA                            | NA                 |
| Kabuli_wild_5304811 | NA                                  | Ca_kabuli_denovo | 5304811                 | C/G  | NA                 | NA                            | NA                 |
| Kabuli_wild_5307695 | NA                                  | Ca_kabuli_denovo | 5307695                 | C/T  | NA                 | NA                            | NA                 |
| Kabuli_wild_5314521 | NA                                  | Ca_kabuli_denovo | 5314521                 | G/T  | NA                 | NA                            | NA                 |
| Kabuli_wild_5314540 | NA                                  | Ca_kabuli_denovo | 5314540                 | C/T  | NA                 | NA                            | NA                 |
| Kabuli_wild_5314541 | NA                                  | Ca_kabuli_denovo | 5314541                 | C/T  | NA                 | NA                            | NA                 |
| Kabuli_wild_5315559 | NA                                  | Ca_kabuli_denovo | 5315559                 | C/G  | NA                 | NA                            | NA                 |
| Kabuli_wild_5315568 | NA                                  | Ca_kabuli_denovo | 5315568                 | C/G  | NA                 | NA                            | NA                 |
| Kabuli_wild_5315571 | NA                                  | Ca_kabuli_denovo | 5315571                 | A/G  | NA                 | NA                            | NA                 |
| Kabuli_wild_5319962 | NA                                  | Ca_kabuli_denovo | 5319962                 | G/C  | NA                 | NA                            | NA                 |
| Kabuli_wild_5320500 | NA                                  | Ca_kabuli_denovo | 5320500                 | C/G  | NA                 | NA                            | NA                 |
| Kabuli_wild_5320521 | NA                                  | Ca_kabuli_denovo | 5320521                 | C/G  | NA                 | NA                            | NA                 |
| Kabuli_wild_5322130 | NA                                  | Ca_kabuli_denovo | 5322130                 | A/C  | NA                 | NA                            | NA                 |
| Kabuli_wild_5322608 | NA                                  | Ca_kabuli_denovo | 5322608                 | A/G  | NA                 | NA                            | NA                 |
| Kabuli_wild_5322623 | NA                                  | Ca_kabuli_denovo | 5322623                 | C/G  | NA                 | NA                            | NA                 |
| Kabuli_wild_5322628 | NA                                  | Ca_kabuli_denovo | 5322628                 | C/G  | NA                 | NA                            | NA                 |
| Kabuli_wild_5324197 | NA                                  | Ca_kabuli_denovo | 5324197                 | A/G  | NA                 | NA                            | NA                 |
| Kabuli_wild_5348903 | NA                                  | Ca_kabuli_denovo | 5348903                 | T/G  | NA                 | NA                            | NA                 |
| Kabuli_wild_5356282 | NA                                  | Ca_kabuli_denovo | 5356282                 | A/G  | NA                 | NA                            | NA                 |
| Kabuli_wild_5366964 | NA                                  | Ca_kabuli_denovo | 5366964                 | G/C  | NA                 | NA                            | NA                 |
| Kabuli_wild_5366973 | NA                                  | Ca_kabuli_denovo | 5366973                 | A/G  | NA                 | NA                            | NA                 |
| Kabuli_wild_5367363 | NA                                  | Ca_kabuli_denovo | 5367363                 | A/G  | NA                 | NA                            | NA                 |
| Kabuli_wild_5391954 | NA                                  | Ca_kabuli_denovo | 5391954                 | C/G  | NA                 | NA                            | NA                 |
| Kabuli_wild_5391957 | NA                                  | Ca_kabuli_denovo | 5391957                 | C/G  | NA                 | NA                            | NA                 |
| Kabuli_wild_5391969 | NA                                  | Ca_kabuli_denovo | 5391969                 | G/T  | NA                 | NA                            | NA                 |
| Kabuli_wild_5395276 | NA                                  | Ca_kabuli_denovo | 5395276                 | C/T  | NA                 | NA                            | NA                 |
| Kabuli_wild_5398320 | NA                                  | Ca_kabuli_denovo | 5398320                 | C/G  | NA                 | NA                            | NA                 |
| Kabuli_wild_5398338 | NA                                  | Ca_kabuli_denovo | 5398338                 | A/T  | NA                 | NA                            | NA                 |
| Kabuli_wild_5407540 | NA                                  | Ca_kabuli_denovo | 5407540                 | C/G  | NA                 | NA                            | NA                 |
| Kabuli_wild_5407567 | NA                                  | Ca_kabuli_denovo | 5407567                 | C/G  | NA                 | NA                            | NA                 |
| Kabuli_wild_5412933 | NA                                  | Ca_kabuli_denovo | 5412933                 | A/T  | NA                 | NA                            | NA                 |
| Kabuli_wild_5412944 | NA                                  | Ca_kabuli_denovo | 5412944                 | C/T  | NA                 | NA                            | NA                 |
| Kabuli_wild_5412987 | NA                                  | Ca_kabuli_denovo | 5412987                 | A/T  | NA                 | NA                            | NA                 |

| SNP IDs             | NCBI dbSNP accession IDs (NCBI_SS#) | Chromosomes      | Physical positions (bp) | SNPs | Gene accession IDs | Sequence components of genome | Putative functions |
|---------------------|-------------------------------------|------------------|-------------------------|------|--------------------|-------------------------------|--------------------|
| Kabuli_wild_5414645 | NA                                  | Ca_kabuli_denovo | 5414645                 | A/C  | NA                 | NA                            | NA                 |
| Kabuli_wild_5414654 | NA                                  | Ca_kabuli_denovo | 5414654                 | G/T  | NA                 | NA                            | NA                 |
| Kabuli_wild_5414853 | NA                                  | Ca_kabuli_denovo | 5414853                 | G/A  | NA                 | NA                            | NA                 |
| Kabuli_wild_5414858 | NA                                  | Ca_kabuli_denovo | 5414858                 | C/T  | NA                 | NA                            | NA                 |
| Kabuli_wild_5419044 | NA                                  | Ca_kabuli_denovo | 5419044                 | C/T  | NA                 | NA                            | NA                 |
| Kabuli_wild_5419050 | NA                                  | Ca_kabuli_denovo | 5419050                 | C/G  | NA                 | NA                            | NA                 |
| Kabuli_wild_5419062 | NA                                  | Ca_kabuli_denovo | 5419062                 | C/G  | NA                 | NA                            | NA                 |
| Kabuli_wild_5419063 | NA                                  | Ca_kabuli_denovo | 5419063                 | A/C  | NA                 | NA                            | NA                 |
| Kabuli_wild_5420059 | NA                                  | Ca_kabuli_denovo | 5420059                 | C/G  | NA                 | NA                            | NA                 |
| Kabuli_wild_5422397 | NA                                  | Ca_kabuli_denovo | 5422397                 | G/T  | NA                 | NA                            | NA                 |
| Kabuli_wild_5435405 | NA                                  | Ca_kabuli_denovo | 5435405                 | A/G  | NA                 | NA                            | NA                 |
| Kabuli_wild_5442773 | NA                                  | Ca_kabuli_denovo | 5442773                 | C/G  | NA                 | NA                            | NA                 |
| Kabuli_wild_5442791 | NA                                  | Ca_kabuli_denovo | 5442791                 | C/T  | NA                 | NA                            | NA                 |
| Kabuli_wild_5442806 | NA                                  | Ca_kabuli_denovo | 5442806                 | A/G  | NA                 | NA                            | NA                 |
| Kabuli_wild_5442821 | NA                                  | Ca_kabuli_denovo | 5442821                 | C/T  | NA                 | NA                            | NA                 |
| Kabuli_wild_5443069 | NA                                  | Ca_kabuli_denovo | 5443069                 | C/T  | NA                 | NA                            | NA                 |
| Kabuli_wild_5443094 | NA                                  | Ca_kabuli_denovo | 5443094                 | C/T  | NA                 | NA                            | NA                 |
| Kabuli_wild_5443580 | NA                                  | Ca_kabuli_denovo | 5443580                 | A/G  | NA                 | NA                            | NA                 |
| Kabuli_wild_5446271 | NA                                  | Ca_kabuli_denovo | 5446271                 | C/T  | NA                 | NA                            | NA                 |
| Kabuli_wild_5446572 | NA                                  | Ca_kabuli_denovo | 5446572                 | C/T  | NA                 | NA                            | NA                 |
| Kabuli_wild_5446575 | NA                                  | Ca_kabuli_denovo | 5446575                 | A/C  | NA                 | NA                            | NA                 |
| Kabuli_wild_5446590 | NA                                  | Ca_kabuli_denovo | 5446590                 | A/T  | NA                 | NA                            | NA                 |
| Kabuli_wild_5448489 | NA                                  | Ca_kabuli_denovo | 5448489                 | G/T  | NA                 | NA                            | NA                 |
| Kabuli_wild_5448497 | NA                                  | Ca_kabuli_denovo | 5448497                 | C/G  | NA                 | NA                            | NA                 |
| Kabuli_wild_5460760 | NA                                  | Ca_kabuli_denovo | 5460760                 | G/T  | NA                 | NA                            | NA                 |
| Kabuli_wild_5469548 | NA                                  | Ca_kabuli_denovo | 5469548                 | C/G  | NA                 | NA                            | NA                 |
| Kabuli_wild_5474135 | NA                                  | Ca_kabuli_denovo | 5474135                 | A/C  | NA                 | NA                            | NA                 |
| Kabuli_wild_5475279 | NA                                  | Ca_kabuli_denovo | 5475279                 | A/G  | NA                 | NA                            | NA                 |
| Kabuli_wild_5479995 | NA                                  | Ca_kabuli_denovo | 5479995                 | A/G  | NA                 | NA                            | NA                 |
| Kabuli_wild_5483056 | NA                                  | Ca_kabuli_denovo | 5483056                 | C/T  | NA                 | NA                            | NA                 |
| Kabuli_wild_5490179 | NA                                  | Ca_kabuli_denovo | 5490179                 | C/G  | NA                 | NA                            | NA                 |
| Kabuli_wild_5490194 | NA                                  | Ca_kabuli_denovo | 5490194                 | C/G  | NA                 | NA                            | NA                 |
| Kabuli_wild_5501856 | NA                                  | Ca_kabuli_denovo | 5501856                 | C/T  | NA                 | NA                            | NA                 |
| Kabuli_wild_5503319 | NA                                  | Ca_kabuli_denovo | 5503319                 | C/G  | NA                 | NA                            | NA                 |
| Kabuli_wild_5511625 | NA                                  | Ca_kabuli_denovo | 5511625                 | C/T  | NA                 | NA                            | NA                 |
| Kabuli_wild_5518129 | NA                                  | Ca_kabuli_denovo | 5518129                 | C/T  | NA                 | NA                            | NA                 |
| Kabuli_wild_5519433 | NA                                  | Ca_kabuli_denovo | 5519433                 | A/G  | NA                 | NA                            | NA                 |
| Kabuli_wild_5519454 | NA                                  | Ca_kabuli_denovo | 5519454                 | C/T  | NA                 | NA                            | NA                 |
| Kabuli_wild_5519460 | NA                                  | Ca_kabuli_denovo | 5519460                 | A/G  | NA                 | NA                            | NA                 |
| Kabuli_wild_5524350 | NA                                  | Ca_kabuli_denovo | 5524350                 | C/G  | NA                 | NA                            | NA                 |
| Kabuli_wild_5527994 | NA                                  | Ca_kabuli_denovo | 5527994                 | T/C  | NA                 | NA                            | NA                 |
| Kabuli_wild_5528033 | NA                                  | Ca_kabuli_denovo | 5528033                 | T/C  | NA                 | NA                            | NA                 |
| Kabuli_wild_5528268 | NA                                  | Ca_kabuli_denovo | 5528268                 | C/T  | NA                 | NA                            | NA                 |
| Kabuli_wild_5534390 | NA                                  | Ca_kabuli_denovo | 5534390                 | C/T  | NA                 | NA                            | NA                 |

| SNP IDs             | NCBI dbSNP accession IDs (NCBI_SS#) | Chromosomes      | Physical positions (bp) | SNPs | Gene accession IDs | Sequence components of genome | Putative functions |
|---------------------|-------------------------------------|------------------|-------------------------|------|--------------------|-------------------------------|--------------------|
| Kabuli_wild_5534424 | NA                                  | Ca_kabuli_denovo | 5534424                 | A/T  | NA                 | NA                            | NA                 |
| Kabuli_wild_5541767 | NA                                  | Ca_kabuli_denovo | 5541767                 | C/T  | NA                 | NA                            | NA                 |
| Kabuli_wild_5550591 | NA                                  | Ca_kabuli_denovo | 5550591                 | C/T  | NA                 | NA                            | NA                 |
| Kabuli_wild_5550602 | NA                                  | Ca_kabuli_denovo | 5550602                 | C/T  | NA                 | NA                            | NA                 |
| Kabuli_wild_5558645 | NA                                  | Ca_kabuli_denovo | 5558645                 | C/T  | NA                 | NA                            | NA                 |
| Kabuli_wild_5565308 | NA                                  | Ca_kabuli_denovo | 5565308                 | G/T  | NA                 | NA                            | NA                 |
| Kabuli_wild_5571040 | NA                                  | Ca_kabuli_denovo | 5571040                 | A/G  | NA                 | NA                            | NA                 |
| Kabuli_wild_5581832 | NA                                  | Ca_kabuli_denovo | 5581832                 | G/T  | NA                 | NA                            | NA                 |
| Kabuli_wild_5590211 | NA                                  | Ca_kabuli_denovo | 5590211                 | C/G  | NA                 | NA                            | NA                 |
| Kabuli_wild_5590229 | NA                                  | Ca_kabuli_denovo | 5590229                 | C/G  | NA                 | NA                            | NA                 |
| Kabuli_wild_5590241 | NA                                  | Ca_kabuli_denovo | 5590241                 | C/G  | NA                 | NA                            | NA                 |
| Kabuli_wild_5595223 | NA                                  | Ca_kabuli_denovo | 5595223                 | A/G  | NA                 | NA                            | NA                 |
| Kabuli_wild_5596017 | NA                                  | Ca_kabuli_denovo | 5596017                 | C/G  | NA                 | NA                            | NA                 |
| Kabuli_wild_5596029 | NA                                  | Ca_kabuli_denovo | 5596029                 | C/T  | NA                 | NA                            | NA                 |
| Kabuli_wild_5596044 | NA                                  | Ca_kabuli_denovo | 5596044                 | C/G  | NA                 | NA                            | NA                 |
| Kabuli_wild_5599744 | NA                                  | Ca_kabuli_denovo | 5599744                 | C/T  | NA                 | NA                            | NA                 |
| Kabuli_wild_5600016 | NA                                  | Ca_kabuli_denovo | 5600016                 | A/T  | NA                 | NA                            | NA                 |
| Kabuli_wild_5601911 | NA                                  | Ca_kabuli_denovo | 5601911                 | C/G  | NA                 | NA                            | NA                 |
| Kabuli_wild_5601914 | NA                                  | Ca_kabuli_denovo | 5601914                 | C/G  | NA                 | NA                            | NA                 |
| Kabuli_wild_5601926 | NA                                  | Ca_kabuli_denovo | 5601926                 | A/G  | NA                 | NA                            | NA                 |
| Kabuli_wild_5603048 | NA                                  | Ca_kabuli_denovo | 5603048                 | A/G  | NA                 | NA                            | NA                 |
| Kabuli_wild_5607497 | NA                                  | Ca_kabuli_denovo | 5607497                 | C/T  | NA                 | NA                            | NA                 |
| Kabuli_wild_5607530 | NA                                  | Ca_kabuli_denovo | 5607530                 | A/G  | NA                 | NA                            | NA                 |
| Kabuli_wild_5612631 | NA                                  | Ca_kabuli_denovo | 5612631                 | G/T  | NA                 | NA                            | NA                 |
| Kabuli_wild_5612636 | NA                                  | Ca_kabuli_denovo | 5612636                 | C/T  | NA                 | NA                            | NA                 |
| Kabuli_wild_5623935 | NA                                  | Ca_kabuli_denovo | 5623935                 | C/T  | NA                 | NA                            | NA                 |
| Kabuli_wild_5623961 | NA                                  | Ca_kabuli_denovo | 5623961                 | C/G  | NA                 | NA                            | NA                 |
| Kabuli_wild_5631180 | NA                                  | Ca_kabuli_denovo | 5631180                 | A/G  | NA                 | NA                            | NA                 |
| Kabuli_wild_5634317 | NA                                  | Ca_kabuli_denovo | 5634317                 | C/T  | NA                 | NA                            | NA                 |
| Kabuli_wild_5634320 | NA                                  | Ca_kabuli_denovo | 5634320                 | A/G  | NA                 | NA                            | NA                 |
| Kabuli_wild_5635155 | NA                                  | Ca_kabuli_denovo | 5635155                 | G/A  | NA                 | NA                            | NA                 |
| Kabuli_wild_5637906 | NA                                  | Ca_kabuli_denovo | 5637906                 | C/T  | NA                 | NA                            | NA                 |
| Kabuli_wild_5637948 | NA                                  | Ca_kabuli_denovo | 5637948                 | C/T  | NA                 | NA                            | NA                 |
| Kabuli_wild_5647400 | NA                                  | Ca_kabuli_denovo | 5647400                 | A/T  | NA                 | NA                            | NA                 |
| Kabuli_wild_5647422 | NA                                  | Ca_kabuli_denovo | 5647422                 | A/G  | NA                 | NA                            | NA                 |
| Kabuli_wild_5647425 | NA                                  | Ca_kabuli_denovo | 5647425                 | C/G  | NA                 | NA                            | NA                 |
| Kabuli_wild_5648943 | NA                                  | Ca_kabuli_denovo | 5648943                 | C/T  | NA                 | NA                            | NA                 |
| Kabuli_wild_5651577 | NA                                  | Ca_kabuli_denovo | 5651577                 | G/C  | NA                 | NA                            | NA                 |
| Kabuli_wild_5651580 | NA                                  | Ca_kabuli_denovo | 5651580                 | G/A  | NA                 | NA                            | NA                 |
| Kabuli_wild_5651581 | NA                                  | Ca_kabuli_denovo | 5651581                 | G/C  | NA                 | NA                            | NA                 |
| Kabuli_wild_5652062 | NA                                  | Ca_kabuli_denovo | 5652062                 | A/G  | NA                 | NA                            | NA                 |
| Kabuli_wild_5652077 | NA                                  | Ca_kabuli_denovo | 5652077                 | C/T  | NA                 | NA                            | NA                 |
| Kabuli_wild_5657664 | NA                                  | Ca_kabuli_denovo | 5657664                 | C/T  | NA                 | NA                            | NA                 |
| Kabuli_wild_5657718 | NA                                  | Ca_kabuli_denovo | 5657718                 | A/G  | NA                 | NA                            | NA                 |

| SNP IDs             | NCBI dbSNP accession IDs (NCBI_SS#) | Chromosomes      | Physical positions (bp) | SNPs | Gene accession IDs | Sequence components of genome | Putative functions |
|---------------------|-------------------------------------|------------------|-------------------------|------|--------------------|-------------------------------|--------------------|
| Kabuli_wild_5657721 | NA                                  | Ca_kabuli_denovo | 5657721                 | G/T  | NA                 | NA                            | NA                 |
| Kabuli_wild_5657724 | NA                                  | Ca_kabuli_denovo | 5657724                 | A/T  | NA                 | NA                            | NA                 |
| Kabuli_wild_5658243 | NA                                  | Ca_kabuli_denovo | 5658243                 | C/G  | NA                 | NA                            | NA                 |
| Kabuli_wild_5666211 | NA                                  | Ca_kabuli_denovo | 5666211                 | C/T  | NA                 | NA                            | NA                 |
| Kabuli_wild_5666253 | NA                                  | Ca_kabuli_denovo | 5666253                 | A/G  | NA                 | NA                            | NA                 |
| Kabuli_wild_5716737 | NA                                  | Ca_kabuli_denovo | 5716737                 | A/C  | NA                 | NA                            | NA                 |
| Kabuli_wild_5716738 | NA                                  | Ca_kabuli_denovo | 5716738                 | G/T  | NA                 | NA                            | NA                 |
| Kabuli_wild_5717166 | NA                                  | Ca_kabuli_denovo | 5717166                 | G/T  | NA                 | NA                            | NA                 |
| Kabuli_wild_5729030 | NA                                  | Ca_kabuli_denovo | 5729030                 | C/T  | NA                 | NA                            | NA                 |
| Kabuli_wild_5739859 | NA                                  | Ca_kabuli_denovo | 5739859                 | C/G  | NA                 | NA                            | NA                 |
| Kabuli_wild_5739863 | NA                                  | Ca_kabuli_denovo | 5739863                 | A/G  | NA                 | NA                            | NA                 |
| Kabuli_wild_5739874 | NA                                  | Ca_kabuli_denovo | 5739874                 | C/T  | NA                 | NA                            | NA                 |
| Kabuli_wild_5748166 | NA                                  | Ca_kabuli_denovo | 5748166                 | G/T  | NA                 | NA                            | NA                 |
| Kabuli_wild_5758452 | NA                                  | Ca_kabuli_denovo | 5758452                 | C/T  | NA                 | NA                            | NA                 |
| Kabuli_wild_5763959 | NA                                  | Ca_kabuli_denovo | 5763959                 | C/T  | NA                 | NA                            | NA                 |
| Kabuli_wild_5763995 | NA                                  | Ca_kabuli_denovo | 5763995                 | C/T  | NA                 | NA                            | NA                 |
| Kabuli_wild_5770545 | NA                                  | Ca_kabuli_denovo | 5770545                 | C/T  | NA                 | NA                            | NA                 |
| Kabuli_wild_5776892 | NA                                  | Ca_kabuli_denovo | 5776892                 | C/G  | NA                 | NA                            | NA                 |
| Kabuli_wild_5776907 | NA                                  | Ca_kabuli_denovo | 5776907                 | C/G  | NA                 | NA                            | NA                 |
| Kabuli_wild_5777068 | NA                                  | Ca_kabuli_denovo | 5777068                 | C/G  | NA                 | NA                            | NA                 |
| Kabuli_wild_5783834 | NA                                  | Ca_kabuli_denovo | 5783834                 | A/G  | NA                 | NA                            | NA                 |
| Kabuli_wild_5789804 | NA                                  | Ca_kabuli_denovo | 5789804                 | G/A  | NA                 | NA                            | NA                 |
| Kabuli_wild_5789817 | NA                                  | Ca_kabuli_denovo | 5789817                 | C/G  | NA                 | NA                            | NA                 |
| Kabuli_wild_5789828 | NA                                  | Ca_kabuli_denovo | 5789828                 | C/T  | NA                 | NA                            | NA                 |
| Kabuli_wild_5807512 | NA                                  | Ca_kabuli_denovo | 5807512                 | A/G  | NA                 | NA                            | NA                 |
| Kabuli_wild_5807748 | NA                                  | Ca_kabuli_denovo | 5807748                 | G/T  | NA                 | NA                            | NA                 |
| Kabuli_wild_5826564 | NA                                  | Ca_kabuli_denovo | 5826564                 | C/G  | NA                 | NA                            | NA                 |
| Kabuli_wild_5826584 | NA                                  | Ca_kabuli_denovo | 5826584                 | A/G  | NA                 | NA                            | NA                 |
| Kabuli_wild_5834544 | NA                                  | Ca_kabuli_denovo | 5834544                 | C/G  | NA                 | NA                            | NA                 |
| Kabuli_wild_5834550 | NA                                  | Ca_kabuli_denovo | 5834550                 | C/T  | NA                 | NA                            | NA                 |
| Kabuli_wild_5834562 | NA                                  | Ca_kabuli_denovo | 5834562                 | G/A  | NA                 | NA                            | NA                 |
| Kabuli_wild_5836473 | NA                                  | Ca_kabuli_denovo | 5836473                 | C/T  | NA                 | NA                            | NA                 |
| Kabuli_wild_5838542 | NA                                  | Ca_kabuli_denovo | 5838542                 | A/G  | NA                 | NA                            | NA                 |
| Kabuli_wild_5838553 | NA                                  | Ca_kabuli_denovo | 5838553                 | C/T  | NA                 | NA                            | NA                 |
| Kabuli_wild_5838556 | NA                                  | Ca_kabuli_denovo | 5838556                 | C/G  | NA                 | NA                            | NA                 |
| Kabuli_wild_5843902 | NA                                  | Ca_kabuli_denovo | 5843902                 | C/G  | NA                 | NA                            | NA                 |
| Kabuli_wild_5846223 | NA                                  | Ca_kabuli_denovo | 5846223                 | A/G  | NA                 | NA                            | NA                 |
| Kabuli_wild_5859765 | NA                                  | Ca_kabuli_denovo | 5859765                 | A/C  | NA                 | NA                            | NA                 |
| Kabuli_wild_5868002 | NA                                  | Ca_kabuli_denovo | 5868002                 | A/C  | NA                 | NA                            | NA                 |
| Kabuli_wild_5889687 | NA                                  | Ca_kabuli_denovo | 5889687                 | C/G  | NA                 | NA                            | NA                 |
| Kabuli_wild_5889688 | NA                                  | Ca_kabuli_denovo | 5889688                 | C/G  | NA                 | NA                            | NA                 |
| Kabuli_wild_5901519 | NA                                  | Ca_kabuli_denovo | 5901519                 | C/G  | NA                 | NA                            | NA                 |
| Kabuli_wild_5901534 | NA                                  | Ca_kabuli_denovo | 5901534                 | C/G  | NA                 | NA                            | NA                 |
| Kabuli_wild_5901540 | NA                                  | Ca_kabuli_denovo | 5901540                 | A/C  | NA                 | NA                            | NA                 |

| SNP IDs             | NCBI dbSNP accession IDs (NCBI_SS#) | Chromosomes      | Physical positions (bp) | SNPs | Gene accession IDs | Sequence components of genome | Putative functions |
|---------------------|-------------------------------------|------------------|-------------------------|------|--------------------|-------------------------------|--------------------|
| Kabuli_wild_5901543 | NA                                  | Ca_kabuli_denovo | 5901543                 | C/G  | NA                 | NA                            | NA                 |
| Kabuli_wild_5905065 | NA                                  | Ca_kabuli_denovo | 5905065                 | A/G  | NA                 | NA                            | NA                 |
| Kabuli_wild_5907117 | NA                                  | Ca_kabuli_denovo | 5907117                 | C/T  | NA                 | NA                            | NA                 |
| Kabuli_wild_5908182 | NA                                  | Ca_kabuli_denovo | 5908182                 | G/T  | NA                 | NA                            | NA                 |
| Kabuli_wild_5911684 | NA                                  | Ca_kabuli_denovo | 5911684                 | T/C  | NA                 | NA                            | NA                 |
| Kabuli_wild_5911727 | NA                                  | Ca_kabuli_denovo | 5911727                 | T/C  | NA                 | NA                            | NA                 |
| Kabuli_wild_5911735 | NA                                  | Ca_kabuli_denovo | 5911735                 | G/C  | NA                 | NA                            | NA                 |
| Kabuli_wild_5917954 | NA                                  | Ca_kabuli_denovo | 5917954                 | C/T  | NA                 | NA                            | NA                 |
| Kabuli_wild_5919968 | NA                                  | Ca_kabuli_denovo | 5919968                 | G/T  | NA                 | NA                            | NA                 |
| Kabuli_wild_5919998 | NA                                  | Ca_kabuli_denovo | 5919998                 | C/T  | NA                 | NA                            | NA                 |
| Kabuli_wild_5921667 | NA                                  | Ca_kabuli_denovo | 5921667                 | A/G  | NA                 | NA                            | NA                 |
| Kabuli_wild_5934209 | NA                                  | Ca_kabuli_denovo | 5934209                 | C/T  | NA                 | NA                            | NA                 |
| Kabuli_wild_5934307 | NA                                  | Ca_kabuli_denovo | 5934307                 | C/G  | NA                 | NA                            | NA                 |
| Kabuli_wild_5934314 | NA                                  | Ca_kabuli_denovo | 5934314                 | C/G  | NA                 | NA                            | NA                 |
| Kabuli_wild_5935387 | NA                                  | Ca_kabuli_denovo | 5935387                 | A/G  | NA                 | NA                            | NA                 |
| Kabuli_wild_5937058 | NA                                  | Ca_kabuli_denovo | 5937058                 | A/G  | NA                 | NA                            | NA                 |
| Kabuli_wild_5947126 | NA                                  | Ca_kabuli_denovo | 5947126                 | A/G  | NA                 | NA                            | NA                 |
| Kabuli_wild_5947162 | NA                                  | Ca_kabuli_denovo | 5947162                 | A/G  | NA                 | NA                            | NA                 |
| Kabuli_wild_5955937 | NA                                  | Ca_kabuli_denovo | 5955937                 | A/G  | NA                 | NA                            | NA                 |
| Kabuli_wild_5955947 | NA                                  | Ca_kabuli_denovo | 5955947                 | A/C  | NA                 | NA                            | NA                 |
| Kabuli_wild_5955948 | NA                                  | Ca_kabuli_denovo | 5955948                 | A/G  | NA                 | NA                            | NA                 |
| Kabuli_wild_5957109 | NA                                  | Ca_kabuli_denovo | 5957109                 | C/G  | NA                 | NA                            | NA                 |
| Kabuli_wild_5957112 | NA                                  | Ca_kabuli_denovo | 5957112                 | C/T  | NA                 | NA                            | NA                 |
| Kabuli_wild_5959023 | NA                                  | Ca_kabuli_denovo | 5959023                 | C/T  | NA                 | NA                            | NA                 |
| Kabuli_wild_5959025 | NA                                  | Ca_kabuli_denovo | 5959025                 | C/G  | NA                 | NA                            | NA                 |
| Kabuli_wild_5965753 | NA                                  | Ca_kabuli_denovo | 5965753                 | C/T  | NA                 | NA                            | NA                 |
| Kabuli_wild_5966628 | NA                                  | Ca_kabuli_denovo | 5966628                 | C/G  | NA                 | NA                            | NA                 |
| Kabuli_wild_5967085 | NA                                  | Ca_kabuli_denovo | 5967085                 | C/T  | NA                 | NA                            | NA                 |
| Kabuli_wild_5967089 | NA                                  | Ca_kabuli_denovo | 5967089                 | C/T  | NA                 | NA                            | NA                 |
| Kabuli_wild_5969946 | NA                                  | Ca_kabuli_denovo | 5969946                 | G/T  | NA                 | NA                            | NA                 |
| Kabuli_wild_5970802 | NA                                  | Ca_kabuli_denovo | 5970802                 | T/C  | NA                 | NA                            | NA                 |
| Kabuli_wild_5973123 | NA                                  | Ca_kabuli_denovo | 5973123                 | G/T  | NA                 | NA                            | NA                 |
| Kabuli_wild_5978189 | NA                                  | Ca_kabuli_denovo | 5978189                 | A/G  | NA                 | NA                            | NA                 |
| Kabuli_wild_5978225 | NA                                  | Ca_kabuli_denovo | 5978225                 | A/G  | NA                 | NA                            | NA                 |
| Kabuli_wild_5981620 | NA                                  | Ca_kabuli_denovo | 5981620                 | A/G  | NA                 | NA                            | NA                 |
| Kabuli_wild_5983903 | NA                                  | Ca_kabuli_denovo | 5983903                 | A/G  | NA                 | NA                            | NA                 |
| Kabuli_wild_5988837 | NA                                  | Ca_kabuli_denovo | 5988837                 | A/G  | NA                 | NA                            | NA                 |
| Kabuli_wild_6003511 | NA                                  | Ca_kabuli_denovo | 6003511                 | A/G  | NA                 | NA                            | NA                 |
| Kabuli_wild_6006890 | NA                                  | Ca_kabuli_denovo | 6006890                 | C/G  | NA                 | NA                            | NA                 |
| Kabuli_wild_6011930 | NA                                  | Ca_kabuli_denovo | 6011930                 | C/T  | NA                 | NA                            | NA                 |
| Kabuli_wild_6015547 | NA                                  | Ca_kabuli_denovo | 6015547                 | C/T  | NA                 | NA                            | NA                 |
| Kabuli_wild_6023689 | NA                                  | Ca_kabuli_denovo | 6023689                 | C/G  | NA                 | NA                            | NA                 |
| Kabuli_wild_6034261 | NA                                  | Ca_kabuli_denovo | 6034261                 | G/C  | NA                 | NA                            | NA                 |
| Kabuli_wild_6037341 | NA                                  | Ca_kabuli_denovo | 6037341                 | A/G  | NA                 | NA                            | NA                 |

| SNP IDs             | NCBI dbSNP accession IDs (NCBI_SS#) | Chromosomes      | Physical positions (bp) | SNPs | Gene accession IDs | Sequence components of genome | Putative functions |
|---------------------|-------------------------------------|------------------|-------------------------|------|--------------------|-------------------------------|--------------------|
| Kabuli_wild_6044368 | NA                                  | Ca_kabuli_denovo | 6044368                 | C/T  | NA                 | NA                            | NA                 |
| Kabuli_wild_6052473 | NA                                  | Ca_kabuli_denovo | 6052473                 | A/G  | NA                 | NA                            | NA                 |
| Kabuli_wild_6059210 | NA                                  | Ca_kabuli_denovo | 6059210                 | A/C  | NA                 | NA                            | NA                 |
| Kabuli_wild_6059211 | NA                                  | Ca_kabuli_denovo | 6059211                 | A/G  | NA                 | NA                            | NA                 |
| Kabuli_wild_6059212 | NA                                  | Ca_kabuli_denovo | 6059212                 | A/G  | NA                 | NA                            | NA                 |
| Kabuli_wild_6059213 | NA                                  | Ca_kabuli_denovo | 6059213                 | A/T  | NA                 | NA                            | NA                 |
| Kabuli_wild_6059611 | NA                                  | Ca_kabuli_denovo | 6059611                 | C/T  | NA                 | NA                            | NA                 |
| Kabuli_wild_6059638 | NA                                  | Ca_kabuli_denovo | 6059638                 | C/T  | NA                 | NA                            | NA                 |
| Kabuli_wild_6059943 | NA                                  | Ca_kabuli_denovo | 6059943                 | G/T  | NA                 | NA                            | NA                 |
| Kabuli_wild_6060558 | NA                                  | Ca_kabuli_denovo | 6060558                 | C/T  | NA                 | NA                            | NA                 |
| Kabuli_wild_6079936 | NA                                  | Ca_kabuli_denovo | 6079936                 | C/T  | NA                 | NA                            | NA                 |
| Kabuli_wild_6084407 | NA                                  | Ca_kabuli_denovo | 6084407                 | C/G  | NA                 | NA                            | NA                 |
| Kabuli_wild_6091526 | NA                                  | Ca_kabuli_denovo | 6091526                 | G/T  | NA                 | NA                            | NA                 |
| Kabuli_wild_6092868 | NA                                  | Ca_kabuli_denovo | 6092868                 | T/C  | NA                 | NA                            | NA                 |
| Kabuli_wild_6092880 | NA                                  | Ca_kabuli_denovo | 6092880                 | T/G  | NA                 | NA                            | NA                 |
| Kabuli_wild_6100852 | NA                                  | Ca_kabuli_denovo | 6100852                 | A/C  | NA                 | NA                            | NA                 |
| Kabuli_wild_6100853 | NA                                  | Ca_kabuli_denovo | 6100853                 | C/G  | NA                 | NA                            | NA                 |
| Kabuli_wild_6100895 | NA                                  | Ca_kabuli_denovo | 6100895                 | T/G  | NA                 | NA                            | NA                 |
| Kabuli_wild_6102165 | NA                                  | Ca_kabuli_denovo | 6102165                 | A/G  | NA                 | NA                            | NA                 |
| Kabuli_wild_6103680 | NA                                  | Ca_kabuli_denovo | 6103680                 | C/G  | NA                 | NA                            | NA                 |
| Kabuli_wild_6103689 | NA                                  | Ca_kabuli_denovo | 6103689                 | A/G  | NA                 | NA                            | NA                 |
| Kabuli_wild_6104580 | NA                                  | Ca_kabuli_denovo | 6104580                 | G/C  | NA                 | NA                            | NA                 |
| Kabuli_wild_6119058 | NA                                  | Ca_kabuli_denovo | 6119058                 | G/T  | NA                 | NA                            | NA                 |
| Kabuli_wild_6119240 | NA                                  | Ca_kabuli_denovo | 6119240                 | C/T  | NA                 | NA                            | NA                 |
| Kabuli_wild_6127151 | NA                                  | Ca_kabuli_denovo | 6127151                 | C/G  | NA                 | NA                            | NA                 |
| Kabuli_wild_6127175 | NA                                  | Ca_kabuli_denovo | 6127175                 | C/G  | NA                 | NA                            | NA                 |
| Kabuli_wild_6128115 | NA                                  | Ca_kabuli_denovo | 6128115                 | C/G  | NA                 | NA                            | NA                 |
| Kabuli_wild_6128120 | NA                                  | Ca_kabuli_denovo | 6128120                 | C/T  | NA                 | NA                            | NA                 |
| Kabuli_wild_6132575 | NA                                  | Ca_kabuli_denovo | 6132575                 | C/G  | NA                 | NA                            | NA                 |
| Kabuli_wild_6132584 | NA                                  | Ca_kabuli_denovo | 6132584                 | A/G  | NA                 | NA                            | NA                 |
| Kabuli_wild_6137119 | NA                                  | Ca_kabuli_denovo | 6137119                 | A/G  | NA                 | NA                            | NA                 |
| Kabuli_wild_6137132 | NA                                  | Ca_kabuli_denovo | 6137132                 | A/G  | NA                 | NA                            | NA                 |
| Kabuli_wild_6137899 | NA                                  | Ca_kabuli_denovo | 6137899                 | A/C  | NA                 | NA                            | NA                 |
| Kabuli_wild_6141984 | NA                                  | Ca_kabuli_denovo | 6141984                 | A/G  | NA                 | NA                            | NA                 |
| Kabuli_wild_6144925 | NA                                  | Ca_kabuli_denovo | 6144925                 | A/C  | NA                 | NA                            | NA                 |
| Kabuli_wild_6149282 | NA                                  | Ca_kabuli_denovo | 6149282                 | C/T  | NA                 | NA                            | NA                 |
| Kabuli_wild_6149328 | NA                                  | Ca_kabuli_denovo | 6149328                 | C/T  | NA                 | NA                            | NA                 |
| Kabuli_wild_6153591 | NA                                  | Ca_kabuli_denovo | 6153591                 | C/T  | NA                 | NA                            | NA                 |
| Kabuli_wild_6167967 | NA                                  | Ca_kabuli_denovo | 6167967                 | G/T  | NA                 | NA                            | NA                 |
| Kabuli_wild_6176933 | NA                                  | Ca_kabuli_denovo | 6176933                 | C/G  | NA                 | NA                            | NA                 |
| Kabuli_wild_6176957 | NA                                  | Ca_kabuli_denovo | 6176957                 | C/G  | NA                 | NA                            | NA                 |
| Kabuli_wild_6177620 | NA                                  | Ca_kabuli_denovo | 6177620                 | G/T  | NA                 | NA                            | NA                 |
| Kabuli_wild_6177623 | NA                                  | Ca_kabuli_denovo | 6177623                 | C/G  | NA                 | NA                            | NA                 |
| Kabuli_wild_6218737 | NA                                  | Ca_kabuli_denovo | 6218737                 | A/G  | NA                 | NA                            | NA                 |

| SNP IDs             | NCBI dbSNP accession IDs (NCBI_SS#) | Chromosomes      | Physical positions (bp) | SNPs | Gene accession IDs | Sequence components of genome | Putative functions |
|---------------------|-------------------------------------|------------------|-------------------------|------|--------------------|-------------------------------|--------------------|
| Kabuli_wild_6220925 | NA                                  | Ca_kabuli_denovo | 6220925                 | C/T  | NA                 | NA                            | NA                 |
| Kabuli_wild_6228910 | NA                                  | Ca_kabuli_denovo | 6228910                 | A/G  | NA                 | NA                            | NA                 |
| Kabuli_wild_6234062 | NA                                  | Ca_kabuli_denovo | 6234062                 | C/T  | NA                 | NA                            | NA                 |
| Kabuli_wild_6236412 | NA                                  | Ca_kabuli_denovo | 6236412                 | A/G  | NA                 | NA                            | NA                 |
| Kabuli_wild_6237747 | NA                                  | Ca_kabuli_denovo | 6237747                 | A/T  | NA                 | NA                            | NA                 |
| Kabuli_wild_6237756 | NA                                  | Ca_kabuli_denovo | 6237756                 | A/G  | NA                 | NA                            | NA                 |
| Kabuli_wild_6238219 | NA                                  | Ca_kabuli_denovo | 6238219                 | G/T  | NA                 | NA                            | NA                 |
| Kabuli_wild_6238250 | NA                                  | Ca_kabuli_denovo | 6238250                 | A/G  | NA                 | NA                            | NA                 |
| Kabuli_wild_6238440 | NA                                  | Ca_kabuli_denovo | 6238440                 | C/G  | NA                 | NA                            | NA                 |
| Kabuli_wild_6238476 | NA                                  | Ca_kabuli_denovo | 6238476                 | A/G  | NA                 | NA                            | NA                 |
| Kabuli_wild_6257709 | NA                                  | Ca_kabuli_denovo | 6257709                 | A/G  | NA                 | NA                            | NA                 |
| Kabuli_wild_6260223 | NA                                  | Ca_kabuli_denovo | 6260223                 | G/T  | NA                 | NA                            | NA                 |
| Kabuli_wild_6261479 | NA                                  | Ca_kabuli_denovo | 6261479                 | A/G  | NA                 | NA                            | NA                 |
| Kabuli_wild_6261483 | NA                                  | Ca_kabuli_denovo | 6261483                 | A/C  | NA                 | NA                            | NA                 |
| Kabuli_wild_6272348 | NA                                  | Ca_kabuli_denovo | 6272348                 | G/T  | NA                 | NA                            | NA                 |
| Kabuli_wild_6273757 | NA                                  | Ca_kabuli_denovo | 6273757                 | A/G  | NA                 | NA                            | NA                 |
| Kabuli_wild_6275536 | NA                                  | Ca_kabuli_denovo | 6275536                 | C/G  | NA                 | NA                            | NA                 |
| Kabuli_wild_6275539 | NA                                  | Ca_kabuli_denovo | 6275539                 | A/G  | NA                 | NA                            | NA                 |
| Kabuli_wild_6275554 | NA                                  | Ca_kabuli_denovo | 6275554                 | C/G  | NA                 | NA                            | NA                 |
| Kabuli_wild_6275557 | NA                                  | Ca_kabuli_denovo | 6275557                 | A/G  | NA                 | NA                            | NA                 |
| Kabuli_wild_6281899 | NA                                  | Ca_kabuli_denovo | 6281899                 | A/G  | NA                 | NA                            | NA                 |
| Kabuli_wild_6281905 | NA                                  | Ca_kabuli_denovo | 6281905                 | A/G  | NA                 | NA                            | NA                 |
| Kabuli_wild_6284626 | NA                                  | Ca_kabuli_denovo | 6284626                 | A/G  | NA                 | NA                            | NA                 |
| Kabuli_wild_6290369 | NA                                  | Ca_kabuli_denovo | 6290369                 | C/G  | NA                 | NA                            | NA                 |
| Kabuli_wild_6290426 | NA                                  | Ca_kabuli_denovo | 6290426                 | C/T  | NA                 | NA                            | NA                 |
| Kabuli_wild_6290437 | NA                                  | Ca_kabuli_denovo | 6290437                 | C/G  | NA                 | NA                            | NA                 |
| Kabuli_wild_6294762 | NA                                  | Ca_kabuli_denovo | 6294762                 | C/T  | NA                 | NA                            | NA                 |
| Kabuli_wild_6317524 | NA                                  | Ca_kabuli_denovo | 6317524                 | A/G  | NA                 | NA                            | NA                 |
| Kabuli_wild_6317550 | NA                                  | Ca_kabuli_denovo | 6317550                 | A/C  | NA                 | NA                            | NA                 |
| Kabuli_wild_6323681 | NA                                  | Ca_kabuli_denovo | 6323681                 | G/T  | NA                 | NA                            | NA                 |
| Kabuli_wild_6324864 | NA                                  | Ca_kabuli_denovo | 6324864                 | A/G  | NA                 | NA                            | NA                 |
| Kabuli_wild_6328625 | NA                                  | Ca_kabuli_denovo | 6328625                 | A/G  | NA                 | NA                            | NA                 |
| Kabuli_wild_6329122 | NA                                  | Ca_kabuli_denovo | 6329122                 | A/C  | NA                 | NA                            | NA                 |
| Kabuli_wild_6332448 | NA                                  | Ca_kabuli_denovo | 6332448                 | C/G  | NA                 | NA                            | NA                 |
| Kabuli_wild_6332449 | NA                                  | Ca_kabuli_denovo | 6332449                 | T/C  | NA                 | NA                            | NA                 |
| Kabuli_wild_6365155 | NA                                  | Ca_kabuli_denovo | 6365155                 | C/T  | NA                 | NA                            | NA                 |
| Kabuli_wild_6368737 | NA                                  | Ca_kabuli_denovo | 6368737                 | G/T  | NA                 | NA                            | NA                 |
| Kabuli_wild_6368758 | NA                                  | Ca_kabuli_denovo | 6368758                 | A/G  | NA                 | NA                            | NA                 |
| Kabuli_wild_6368761 | NA                                  | Ca_kabuli_denovo | 6368761                 | C/T  | NA                 | NA                            | NA                 |
| Kabuli_wild_6378067 | NA                                  | Ca_kabuli_denovo | 6378067                 | C/T  | NA                 | NA                            | NA                 |
| Kabuli_wild_6378068 | NA                                  | Ca_kabuli_denovo | 6378068                 | A/G  | NA                 | NA                            | NA                 |
| Kabuli_wild_6386115 | NA                                  | Ca_kabuli_denovo | 6386115                 | C/G  | NA                 | NA                            | NA                 |
| Kabuli_wild_6391624 | NA                                  | Ca_kabuli_denovo | 6391624                 | C/T  | NA                 | NA                            | NA                 |
| Kabuli_wild_6391651 | NA                                  | Ca_kabuli_denovo | 6391651                 | C/T  | NA                 | NA                            | NA                 |

| SNP IDs             | NCBI dbSNP accession IDs (NCBI_SS#) | Chromosomes      | Physical positions (bp) | SNPs | Gene accession IDs | Sequence components of genome | Putative functions |
|---------------------|-------------------------------------|------------------|-------------------------|------|--------------------|-------------------------------|--------------------|
| Kabuli_wild_6395364 | NA                                  | Ca_kabuli_denovo | 6395364                 | A/G  | NA                 | NA                            | NA                 |
| Kabuli_wild_6395369 | NA                                  | Ca_kabuli_denovo | 6395369                 | A/G  | NA                 | NA                            | NA                 |
| Kabuli_wild_6395370 | NA                                  | Ca_kabuli_denovo | 6395370                 | C/G  | NA                 | NA                            | NA                 |
| Kabuli_wild_6398482 | NA                                  | Ca_kabuli_denovo | 6398482                 | A/T  | NA                 | NA                            | NA                 |
| Kabuli_wild_6402723 | NA                                  | Ca_kabuli_denovo | 6402723                 | G/T  | NA                 | NA                            | NA                 |
| Kabuli_wild_6409909 | NA                                  | Ca_kabuli_denovo | 6409909                 | C/G  | NA                 | NA                            | NA                 |
| Kabuli_wild_6409915 | NA                                  | Ca_kabuli_denovo | 6409915                 | C/T  | NA                 | NA                            | NA                 |
| Kabuli_wild_6428012 | NA                                  | Ca_kabuli_denovo | 6428012                 | A/C  | NA                 | NA                            | NA                 |
| Kabuli_wild_6428013 | NA                                  | Ca_kabuli_denovo | 6428013                 | C/T  | NA                 | NA                            | NA                 |
| Kabuli_wild_6428021 | NA                                  | Ca_kabuli_denovo | 6428021                 | C/G  | NA                 | NA                            | NA                 |
| Kabuli_wild_6438120 | NA                                  | Ca_kabuli_denovo | 6438120                 | C/T  | NA                 | NA                            | NA                 |
| Kabuli_wild_6438154 | NA                                  | Ca_kabuli_denovo | 6438154                 | C/G  | NA                 | NA                            | NA                 |
| Kabuli_wild_6468678 | NA                                  | Ca_kabuli_denovo | 6468678                 | C/G  | NA                 | NA                            | NA                 |
| Kabuli_wild_6468687 | NA                                  | Ca_kabuli_denovo | 6468687                 | C/T  | NA                 | NA                            | NA                 |
| Kabuli_wild_6471063 | NA                                  | Ca_kabuli_denovo | 6471063                 | C/G  | NA                 | NA                            | NA                 |
| Kabuli_wild_6475526 | NA                                  | Ca_kabuli_denovo | 6475526                 | C/G  | NA                 | NA                            | NA                 |
| Kabuli_wild_6475528 | NA                                  | Ca_kabuli_denovo | 6475528                 | C/G  | NA                 | NA                            | NA                 |
| Kabuli_wild_6475531 | NA                                  | Ca_kabuli_denovo | 6475531                 | C/G  | NA                 | NA                            | NA                 |
| Kabuli_wild_6503258 | NA                                  | Ca_kabuli_denovo | 6503258                 | C/T  | NA                 | NA                            | NA                 |
| Kabuli_wild_6503264 | NA                                  | Ca_kabuli_denovo | 6503264                 | A/G  | NA                 | NA                            | NA                 |
| Kabuli_wild_6503273 | NA                                  | Ca_kabuli_denovo | 6503273                 | C/G  | NA                 | NA                            | NA                 |
| Kabuli_wild_6503291 | NA                                  | Ca_kabuli_denovo | 6503291                 | A/C  | NA                 | NA                            | NA                 |
| Kabuli_wild_6508275 | NA                                  | Ca_kabuli_denovo | 6508275                 | A/C  | NA                 | NA                            | NA                 |
| Kabuli_wild_6508276 | NA                                  | Ca_kabuli_denovo | 6508276                 | G/T  | NA                 | NA                            | NA                 |
| Kabuli_wild_6508277 | NA                                  | Ca_kabuli_denovo | 6508277                 | A/G  | NA                 | NA                            | NA                 |
| Kabuli_wild_6508278 | NA                                  | Ca_kabuli_denovo | 6508278                 | A/T  | NA                 | NA                            | NA                 |
| Kabuli_wild_6508398 | NA                                  | Ca_kabuli_denovo | 6508398                 | A/C  | NA                 | NA                            | NA                 |
| Kabuli_wild_6508711 | NA                                  | Ca_kabuli_denovo | 6508711                 | G/T  | NA                 | NA                            | NA                 |
| Kabuli_wild_6510125 | NA                                  | Ca_kabuli_denovo | 6510125                 | A/C  | NA                 | NA                            | NA                 |
| Kabuli_wild_6510760 | NA                                  | Ca_kabuli_denovo | 6510760                 | C/T  | NA                 | NA                            | NA                 |
| Kabuli_wild_6524360 | NA                                  | Ca_kabuli_denovo | 6524360                 | C/T  | NA                 | NA                            | NA                 |
| Kabuli_wild_6526060 | NA                                  | Ca_kabuli_denovo | 6526060                 | C/G  | NA                 | NA                            | NA                 |
| Kabuli_wild_6526068 | NA                                  | Ca_kabuli_denovo | 6526068                 | A/G  | NA                 | NA                            | NA                 |
| Kabuli_wild_6526069 | NA                                  | Ca_kabuli_denovo | 6526069                 | C/G  | NA                 | NA                            | NA                 |
| Kabuli_wild_6528235 | NA                                  | Ca_kabuli_denovo | 6528235                 | C/G  | NA                 | NA                            | NA                 |
| Kabuli_wild_6528237 | NA                                  | Ca_kabuli_denovo | 6528237                 | C/T  | NA                 | NA                            | NA                 |
| Kabuli_wild_6535169 | NA                                  | Ca_kabuli_denovo | 6535169                 | A/G  | NA                 | NA                            | NA                 |
| Kabuli_wild_6559967 | NA                                  | Ca_kabuli_denovo | 6559967                 | A/G  | NA                 | NA                            | NA                 |
| Kabuli_wild_6560062 | NA                                  | Ca_kabuli_denovo | 6560062                 | C/T  | NA                 | NA                            | NA                 |
| Kabuli_wild_6568049 | NA                                  | Ca_kabuli_denovo | 6568049                 | C/T  | NA                 | NA                            | NA                 |
| Kabuli_wild_6586871 | NA                                  | Ca_kabuli_denovo | 6586871                 | C/G  | NA                 | NA                            | NA                 |
| Kabuli_wild_6586877 | NA                                  | Ca_kabuli_denovo | 6586877                 | C/G  | NA                 | NA                            | NA                 |
| Kabuli_wild_6587514 | NA                                  | Ca_kabuli_denovo | 6587514                 | A/G  | NA                 | NA                            | NA                 |
| Kabuli_wild_6587526 | NA                                  | Ca_kabuli_denovo | 6587526                 | C/T  | NA                 | NA                            | NA                 |



| SNP IDs             | NCBI dbSNP accession IDs (NCBI_SS#) | Chromosomes      | Physical positions (bp) | SNPs | Gene accession IDs | Sequence components of genome | Putative functions |
|---------------------|-------------------------------------|------------------|-------------------------|------|--------------------|-------------------------------|--------------------|
| Kabuli_wild_6587550 | NA                                  | Ca_kabuli_denovo | 6587550                 | G/T  | NA                 | NA                            | NA                 |
| Kabuli_wild_6605439 | NA                                  | Ca_kabuli_denovo | 6605439                 | A/G  | NA                 | NA                            | NA                 |
| Kabuli_wild_6610081 | NA                                  | Ca_kabuli_denovo | 6610081                 | G/C  | NA                 | NA                            | NA                 |
| Kabuli_wild_6631985 | NA                                  | Ca_kabuli_denovo | 6631985                 | C/T  | NA                 | NA                            | NA                 |
| Kabuli_wild_6632008 | NA                                  | Ca_kabuli_denovo | 6632008                 | A/G  | NA                 | NA                            | NA                 |
| Kabuli_wild_6634463 | NA                                  | Ca_kabuli_denovo | 6634463                 | C/G  | NA                 | NA                            | NA                 |
| Kabuli_wild_6634472 | NA                                  | Ca_kabuli_denovo | 6634472                 | C/G  | NA                 | NA                            | NA                 |
| Kabuli_wild_6649834 | NA                                  | Ca_kabuli_denovo | 6649834                 | A/C  | NA                 | NA                            | NA                 |
| Kabuli_wild_6649879 | NA                                  | Ca_kabuli_denovo | 6649879                 | A/T  | NA                 | NA                            | NA                 |
| Kabuli_wild_6654803 | NA                                  | Ca_kabuli_denovo | 6654803                 | G/T  | NA                 | NA                            | NA                 |
| Kabuli_wild_6665922 | NA                                  | Ca_kabuli_denovo | 6665922                 | C/G  | NA                 | NA                            | NA                 |
| Kabuli_wild_6665946 | NA                                  | Ca_kabuli_denovo | 6665946                 | C/G  | NA                 | NA                            | NA                 |
| Kabuli_wild_6665949 | NA                                  | Ca_kabuli_denovo | 6665949                 | C/G  | NA                 | NA                            | NA                 |
| Kabuli_wild_6669551 | NA                                  | Ca_kabuli_denovo | 6669551                 | A/G  | NA                 | NA                            | NA                 |
| Kabuli_wild_6671979 | NA                                  | Ca_kabuli_denovo | 6671979                 | A/G  | NA                 | NA                            | NA                 |
| Kabuli_wild_6684901 | NA                                  | Ca_kabuli_denovo | 6684901                 | C/G  | NA                 | NA                            | NA                 |
| Kabuli_wild_6685958 | NA                                  | Ca_kabuli_denovo | 6685958                 | T/G  | NA                 | NA                            | NA                 |
| Kabuli_wild_6687490 | NA                                  | Ca_kabuli_denovo | 6687490                 | C/T  | NA                 | NA                            | NA                 |
| Kabuli_wild_6691636 | NA                                  | Ca_kabuli_denovo | 6691636                 | A/G  | NA                 | NA                            | NA                 |
| Kabuli_wild_6691637 | NA                                  | Ca_kabuli_denovo | 6691637                 | A/G  | NA                 | NA                            | NA                 |
| Kabuli_wild_6691643 | NA                                  | Ca_kabuli_denovo | 6691643                 | A/G  | NA                 | NA                            | NA                 |
| Kabuli_wild_6691671 | NA                                  | Ca_kabuli_denovo | 6691671                 | A/G  | NA                 | NA                            | NA                 |
| Kabuli_wild_6692717 | NA                                  | Ca_kabuli_denovo | 6692717                 | A/G  | NA                 | NA                            | NA                 |
| Kabuli_wild_6692734 | NA                                  | Ca_kabuli_denovo | 6692734                 | C/G  | NA                 | NA                            | NA                 |
| Kabuli_wild_6692871 | NA                                  | Ca_kabuli_denovo | 6692871                 | A/C  | NA                 | NA                            | NA                 |
| Kabuli_wild_6692925 | NA                                  | Ca_kabuli_denovo | 6692925                 | A/G  | NA                 | NA                            | NA                 |
| Kabuli_wild_6701263 | NA                                  | Ca_kabuli_denovo | 6701263                 | G/C  | NA                 | NA                            | NA                 |
| Kabuli_wild_6701287 | NA                                  | Ca_kabuli_denovo | 6701287                 | G/A  | NA                 | NA                            | NA                 |
| Kabuli_wild_6703536 | NA                                  | Ca_kabuli_denovo | 6703536                 | A/C  | NA                 | NA                            | NA                 |
| Kabuli_wild_6703571 | NA                                  | Ca_kabuli_denovo | 6703571                 | A/G  | NA                 | NA                            | NA                 |
| Kabuli_wild_6703575 | NA                                  | Ca_kabuli_denovo | 6703575                 | C/T  | NA                 | NA                            | NA                 |
| Kabuli_wild_6704667 | NA                                  | Ca_kabuli_denovo | 6704667                 | C/G  | NA                 | NA                            | NA                 |
| Kabuli_wild_6704674 | NA                                  | Ca_kabuli_denovo | 6704674                 | A/G  | NA                 | NA                            | NA                 |
| Kabuli_wild_6708468 | NA                                  | Ca_kabuli_denovo | 6708468                 | C/G  | NA                 | NA                            | NA                 |
| Kabuli_wild_6710446 | NA                                  | Ca_kabuli_denovo | 6710446                 | C/G  | NA                 | NA                            | NA                 |
| Kabuli_wild_6710447 | NA                                  | Ca_kabuli_denovo | 6710447                 | C/G  | NA                 | NA                            | NA                 |
| Kabuli_wild_6710646 | NA                                  | Ca_kabuli_denovo | 6710646                 | A/G  | NA                 | NA                            | NA                 |
| Kabuli_wild_6712469 | NA                                  | Ca_kabuli_denovo | 6712469                 | C/G  | NA                 | NA                            | NA                 |
| Kabuli_wild_6712475 | NA                                  | Ca_kabuli_denovo | 6712475                 | C/G  | NA                 | NA                            | NA                 |
| Kabuli_wild_6712481 | NA                                  | Ca_kabuli_denovo | 6712481                 | A/G  | NA                 | NA                            | NA                 |
| Kabuli_wild_6717388 | NA                                  | Ca_kabuli_denovo | 6717388                 | A/G  | NA                 | NA                            | NA                 |
| Kabuli_wild_6728339 | NA                                  | Ca_kabuli_denovo | 6728339                 | G/T  | NA                 | NA                            | NA                 |
| Kabuli_wild_6734977 | NA                                  | Ca_kabuli_denovo | 6734977                 | A/G  | NA                 | NA                            | NA                 |
| Kabuli_wild_6735001 | NA                                  | Ca_kabuli_denovo | 6735001                 | C/G  | NA                 | NA                            | NA                 |

| SNP IDs             | NCBI dbSNP accession IDs (NCBI_SS#) | Chromosomes      | Physical positions (bp) | SNPs | Gene accession IDs | Sequence components of genome | Putative functions |
|---------------------|-------------------------------------|------------------|-------------------------|------|--------------------|-------------------------------|--------------------|
| Kabuli_wild_6736752 | NA                                  | Ca_kabuli_denovo | 6736752                 | C/G  | NA                 | NA                            | NA                 |
| Kabuli_wild_6739627 | NA                                  | Ca_kabuli_denovo | 6739627                 | A/G  | NA                 | NA                            | NA                 |
| Kabuli_wild_6771903 | NA                                  | Ca_kabuli_denovo | 6771903                 | C/T  | NA                 | NA                            | NA                 |
| Kabuli_wild_6774706 | NA                                  | Ca_kabuli_denovo | 6774706                 | C/G  | NA                 | NA                            | NA                 |
| Kabuli_wild_6778467 | NA                                  | Ca_kabuli_denovo | 6778467                 | C/G  | NA                 | NA                            | NA                 |
| Kabuli_wild_6778757 | NA                                  | Ca_kabuli_denovo | 6778757                 | A/G  | NA                 | NA                            | NA                 |
| Kabuli_wild_6779828 | NA                                  | Ca_kabuli_denovo | 6779828                 | G/T  | NA                 | NA                            | NA                 |
| Kabuli_wild_6779858 | NA                                  | Ca_kabuli_denovo | 6779858                 | A/G  | NA                 | NA                            | NA                 |
| Kabuli_wild_6780392 | NA                                  | Ca_kabuli_denovo | 6780392                 | A/G  | NA                 | NA                            | NA                 |
| Kabuli_wild_6781051 | NA                                  | Ca_kabuli_denovo | 6781051                 | C/G  | NA                 | NA                            | NA                 |
| Kabuli_wild_6781056 | NA                                  | Ca_kabuli_denovo | 6781056                 | A/C  | NA                 | NA                            | NA                 |
| Kabuli_wild_6790119 | NA                                  | Ca_kabuli_denovo | 6790119                 | A/C  | NA                 | NA                            | NA                 |
| Kabuli_wild_6791580 | NA                                  | Ca_kabuli_denovo | 6791580                 | A/G  | NA                 | NA                            | NA                 |
| Kabuli_wild_6791589 | NA                                  | Ca_kabuli_denovo | 6791589                 | A/C  | NA                 | NA                            | NA                 |
| Kabuli_wild_6791598 | NA                                  | Ca_kabuli_denovo | 6791598                 | C/T  | NA                 | NA                            | NA                 |
| Kabuli_wild_6804481 | NA                                  | Ca_kabuli_denovo | 6804481                 | G/T  | NA                 | NA                            | NA                 |
| Kabuli_wild_6809824 | NA                                  | Ca_kabuli_denovo | 6809824                 | A/G  | NA                 | NA                            | NA                 |
| Kabuli_wild_6809833 | NA                                  | Ca_kabuli_denovo | 6809833                 | C/G  | NA                 | NA                            | NA                 |
| Kabuli_wild_6816850 | NA                                  | Ca_kabuli_denovo | 6816850                 | A/T  | NA                 | NA                            | NA                 |
| Kabuli_wild_6819345 | NA                                  | Ca_kabuli_denovo | 6819345                 | A/G  | NA                 | NA                            | NA                 |
| Kabuli_wild_6823878 | NA                                  | Ca_kabuli_denovo | 6823878                 | A/G  | NA                 | NA                            | NA                 |
| Kabuli_wild_6823894 | NA                                  | Ca_kabuli_denovo | 6823894                 | A/T  | NA                 | NA                            | NA                 |
| Kabuli_wild_6823909 | NA                                  | Ca_kabuli_denovo | 6823909                 | G/T  | NA                 | NA                            | NA                 |
| Kabuli_wild_6833247 | NA                                  | Ca_kabuli_denovo | 6833247                 | C/T  | NA                 | NA                            | NA                 |
| Kabuli_wild_6846685 | NA                                  | Ca_kabuli_denovo | 6846685                 | A/C  | NA                 | NA                            | NA                 |
| Kabuli_wild_6846688 | NA                                  | Ca_kabuli_denovo | 6846688                 | A/C  | NA                 | NA                            | NA                 |
| Kabuli_wild_6846692 | NA                                  | Ca_kabuli_denovo | 6846692                 | C/G  | NA                 | NA                            | NA                 |
| Kabuli_wild_6849736 | NA                                  | Ca_kabuli_denovo | 6849736                 | A/G  | NA                 | NA                            | NA                 |
| Kabuli_wild_6849742 | NA                                  | Ca_kabuli_denovo | 6849742                 | C/G  | NA                 | NA                            | NA                 |
| Kabuli_wild_6849748 | NA                                  | Ca_kabuli_denovo | 6849748                 | A/G  | NA                 | NA                            | NA                 |
| Kabuli_wild_6849757 | NA                                  | Ca_kabuli_denovo | 6849757                 | C/G  | NA                 | NA                            | NA                 |
| Kabuli_wild_6853682 | NA                                  | Ca_kabuli_denovo | 6853682                 | C/T  | NA                 | NA                            | NA                 |
| Kabuli_wild_6873749 | NA                                  | Ca_kabuli_denovo | 6873749                 | A/T  | NA                 | NA                            | NA                 |
| Kabuli_wild_6873768 | NA                                  | Ca_kabuli_denovo | 6873768                 | C/G  | NA                 | NA                            | NA                 |
| Kabuli_wild_6873780 | NA                                  | Ca_kabuli_denovo | 6873780                 | C/G  | NA                 | NA                            | NA                 |
| Kabuli_wild_6877187 | NA                                  | Ca_kabuli_denovo | 6877187                 | C/G  | NA                 | NA                            | NA                 |
| Kabuli_wild_6884964 | NA                                  | Ca_kabuli_denovo | 6884964                 | C/T  | NA                 | NA                            | NA                 |
| Kabuli_wild_6884979 | NA                                  | Ca_kabuli_denovo | 6884979                 | C/G  | NA                 | NA                            | NA                 |
| Kabuli_wild_6889056 | NA                                  | Ca_kabuli_denovo | 6889056                 | A/T  | NA                 | NA                            | NA                 |
| Kabuli_wild_6889259 | NA                                  | Ca_kabuli_denovo | 6889259                 | G/T  | NA                 | NA                            | NA                 |
| Kabuli_wild_6889280 | NA                                  | Ca_kabuli_denovo | 6889280                 | C/G  | NA                 | NA                            | NA                 |
| Kabuli_wild_6898002 | NA                                  | Ca_kabuli_denovo | 6898002                 | T/C  | NA                 | NA                            | NA                 |
| Kabuli_wild_6899021 | NA                                  | Ca_kabuli_denovo | 6899021                 | C/G  | NA                 | NA                            | NA                 |
| Kabuli_wild_6899060 | NA                                  | Ca_kabuli_denovo | 6899060                 | A/G  | NA                 | NA                            | NA                 |

| SNP IDs                    | NCBI dbSNP accession IDs (NCBI_SS#) | Chromosomes             | Physical positions (bp) | SNPs | Gene accession IDs | Sequence components of genome | Putative functions |
|----------------------------|-------------------------------------|-------------------------|-------------------------|------|--------------------|-------------------------------|--------------------|
| <i>Kabuli_wild_6899099</i> | NA                                  | <i>Ca_kabuli_denovo</i> | 6899099                 | C/G  | NA                 | NA                            | NA                 |
| <i>Kabuli_wild_6899987</i> | NA                                  | <i>Ca_kabuli_denovo</i> | 6899987                 | C/T  | NA                 | NA                            | NA                 |
| <i>Kabuli_wild_6906042</i> | NA                                  | <i>Ca_kabuli_denovo</i> | 6906042                 | C/G  | NA                 | NA                            | NA                 |
| <i>Kabuli_wild_6906766</i> | NA                                  | <i>Ca_kabuli_denovo</i> | 6906766                 | A/G  | NA                 | NA                            | NA                 |
| <i>Kabuli_wild_6915187</i> | NA                                  | <i>Ca_kabuli_denovo</i> | 6915187                 | G/T  | NA                 | NA                            | NA                 |
| <i>Kabuli_wild_6915189</i> | NA                                  | <i>Ca_kabuli_denovo</i> | 6915189                 | A/C  | NA                 | NA                            | NA                 |
| <i>Kabuli_wild_6917963</i> | NA                                  | <i>Ca_kabuli_denovo</i> | 6917963                 | C/G  | NA                 | NA                            | NA                 |
| <i>Kabuli_wild_6917993</i> | NA                                  | <i>Ca_kabuli_denovo</i> | 6917993                 | A/G  | NA                 | NA                            | NA                 |
| <i>Kabuli_wild_6921002</i> | NA                                  | <i>Ca_kabuli_denovo</i> | 6921002                 | C/T  | NA                 | NA                            | NA                 |
| <i>Kabuli_wild_6932780</i> | NA                                  | <i>Ca_kabuli_denovo</i> | 6932780                 | G/T  | NA                 | NA                            | NA                 |
| <i>Kabuli_wild_6937788</i> | NA                                  | <i>Ca_kabuli_denovo</i> | 6937788                 | A/G  | NA                 | NA                            | NA                 |
| <i>Kabuli_wild_6939974</i> | NA                                  | <i>Ca_kabuli_denovo</i> | 6939974                 | G/T  | NA                 | NA                            | NA                 |
| <i>Kabuli_wild_6940045</i> | NA                                  | <i>Ca_kabuli_denovo</i> | 6940045                 | A/G  | NA                 | NA                            | NA                 |
| <i>Kabuli_wild_6948296</i> | NA                                  | <i>Ca_kabuli_denovo</i> | 6948296                 | A/G  | NA                 | NA                            | NA                 |
| <i>Kabuli_wild_6961244</i> | NA                                  | <i>Ca_kabuli_denovo</i> | 6961244                 | A/G  | NA                 | NA                            | NA                 |
| <i>Kabuli_wild_6961247</i> | NA                                  | <i>Ca_kabuli_denovo</i> | 6961247                 | C/G  | NA                 | NA                            | NA                 |
| <i>Kabuli_wild_6962323</i> | NA                                  | <i>Ca_kabuli_denovo</i> | 6962323                 | C/G  | NA                 | NA                            | NA                 |
| <i>Kabuli_wild_6962334</i> | NA                                  | <i>Ca_kabuli_denovo</i> | 6962334                 | A/C  | NA                 | NA                            | NA                 |
| <i>Kabuli_wild_6964101</i> | NA                                  | <i>Ca_kabuli_denovo</i> | 6964101                 | A/G  | NA                 | NA                            | NA                 |
| <i>Kabuli_wild_6965047</i> | NA                                  | <i>Ca_kabuli_denovo</i> | 6965047                 | A/G  | NA                 | NA                            | NA                 |
| <i>Kabuli_wild_6965059</i> | NA                                  | <i>Ca_kabuli_denovo</i> | 6965059                 | A/G  | NA                 | NA                            | NA                 |
| <i>Kabuli_wild_6973070</i> | NA                                  | <i>Ca_kabuli_denovo</i> | 6973070                 | A/G  | NA                 | NA                            | NA                 |
| <i>Kabuli_wild_6973097</i> | NA                                  | <i>Ca_kabuli_denovo</i> | 6973097                 | A/C  | NA                 | NA                            | NA                 |
| <i>Kabuli_wild_6974358</i> | NA                                  | <i>Ca_kabuli_denovo</i> | 6974358                 | A/G  | NA                 | NA                            | NA                 |
| <i>Kabuli_wild_6974381</i> | NA                                  | <i>Ca_kabuli_denovo</i> | 6974381                 | C/T  | NA                 | NA                            | NA                 |
| <i>Kabuli_wild_6984958</i> | NA                                  | <i>Ca_kabuli_denovo</i> | 6984958                 | G/T  | NA                 | NA                            | NA                 |
| <i>Kabuli_wild_6985684</i> | NA                                  | <i>Ca_kabuli_denovo</i> | 6985684                 | G/T  | NA                 | NA                            | NA                 |
| <i>Kabuli_wild_6989128</i> | NA                                  | <i>Ca_kabuli_denovo</i> | 6989128                 | G/T  | NA                 | NA                            | NA                 |
| <i>Kabuli_wild_6995462</i> | NA                                  | <i>Ca_kabuli_denovo</i> | 6995462                 | A/G  | NA                 | NA                            | NA                 |
| <i>Kabuli_wild_6995609</i> | NA                                  | <i>Ca_kabuli_denovo</i> | 6995609                 | C/T  | NA                 | NA                            | NA                 |
| <i>Kabuli_wild_7017837</i> | NA                                  | <i>Ca_kabuli_denovo</i> | 7017837                 | G/T  | NA                 | NA                            | NA                 |
| <i>Kabuli_wild_7017841</i> | NA                                  | <i>Ca_kabuli_denovo</i> | 7017841                 | C/T  | NA                 | NA                            | NA                 |
| <i>Kabuli_wild_7020861</i> | NA                                  | <i>Ca_kabuli_denovo</i> | 7020861                 | C/G  | NA                 | NA                            | NA                 |
| <i>Kabuli_wild_7037502</i> | NA                                  | <i>Ca_kabuli_denovo</i> | 7037502                 | G/T  | NA                 | NA                            | NA                 |
| <i>Kabuli_wild_7040780</i> | NA                                  | <i>Ca_kabuli_denovo</i> | 7040780                 | C/T  | NA                 | NA                            | NA                 |
| <i>Kabuli_wild_7044091</i> | NA                                  | <i>Ca_kabuli_denovo</i> | 7044091                 | C/T  | NA                 | NA                            | NA                 |
| <i>Kabuli_wild_7044115</i> | NA                                  | <i>Ca_kabuli_denovo</i> | 7044115                 | C/T  | NA                 | NA                            | NA                 |
| <i>Kabuli_wild_7044116</i> | NA                                  | <i>Ca_kabuli_denovo</i> | 7044116                 | G/T  | NA                 | NA                            | NA                 |
| <i>Kabuli_wild_7048968</i> | NA                                  | <i>Ca_kabuli_denovo</i> | 7048968                 | A/G  | NA                 | NA                            | NA                 |
| <i>Kabuli_wild_7055233</i> | NA                                  | <i>Ca_kabuli_denovo</i> | 7055233                 | C/T  | NA                 | NA                            | NA                 |
| <i>Kabuli_wild_7077745</i> | NA                                  | <i>Ca_kabuli_denovo</i> | 7077745                 | C/T  | NA                 | NA                            | NA                 |
| <i>Kabuli_wild_7077763</i> | NA                                  | <i>Ca_kabuli_denovo</i> | 7077763                 | C/T  | NA                 | NA                            | NA                 |
| <i>Kabuli_wild_7083636</i> | NA                                  | <i>Ca_kabuli_denovo</i> | 7083636                 | G/T  | NA                 | NA                            | NA                 |
| <i>Kabuli_wild_7091606</i> | NA                                  | <i>Ca_kabuli_denovo</i> | 7091606                 | C/T  | NA                 | NA                            | NA                 |

| SNP IDs             | NCBI dbSNP accession IDs (NCBI_SS#) | Chromosomes      | Physical positions (bp) | SNPs | Gene accession IDs | Sequence components of genome | Putative functions |
|---------------------|-------------------------------------|------------------|-------------------------|------|--------------------|-------------------------------|--------------------|
| Kabuli_wild_7091618 | NA                                  | Ca_kabuli_denovo | 7091618                 | G/T  | NA                 | NA                            | NA                 |
| Kabuli_wild_7091645 | NA                                  | Ca_kabuli_denovo | 7091645                 | A/C  | NA                 | NA                            | NA                 |
| Kabuli_wild_7102312 | NA                                  | Ca_kabuli_denovo | 7102312                 | A/T  | NA                 | NA                            | NA                 |
| Kabuli_wild_7110018 | NA                                  | Ca_kabuli_denovo | 7110018                 | C/G  | NA                 | NA                            | NA                 |
| Kabuli_wild_7110020 | NA                                  | Ca_kabuli_denovo | 7110020                 | G/T  | NA                 | NA                            | NA                 |
| Kabuli_wild_7110024 | NA                                  | Ca_kabuli_denovo | 7110024                 | C/G  | NA                 | NA                            | NA                 |
| Kabuli_wild_7110039 | NA                                  | Ca_kabuli_denovo | 7110039                 | C/G  | NA                 | NA                            | NA                 |
| Kabuli_wild_7110774 | NA                                  | Ca_kabuli_denovo | 7110774                 | C/G  | NA                 | NA                            | NA                 |
| Kabuli_wild_7110794 | NA                                  | Ca_kabuli_denovo | 7110794                 | C/G  | NA                 | NA                            | NA                 |
| Kabuli_wild_7127200 | NA                                  | Ca_kabuli_denovo | 7127200                 | G/T  | NA                 | NA                            | NA                 |
| Kabuli_wild_7127976 | NA                                  | Ca_kabuli_denovo | 7127976                 | C/T  | NA                 | NA                            | NA                 |
| Kabuli_wild_7128000 | NA                                  | Ca_kabuli_denovo | 7128000                 | C/G  | NA                 | NA                            | NA                 |
| Kabuli_wild_7139008 | NA                                  | Ca_kabuli_denovo | 7139008                 | A/G  | NA                 | NA                            | NA                 |
| Kabuli_wild_7146574 | NA                                  | Ca_kabuli_denovo | 7146574                 | G/T  | NA                 | NA                            | NA                 |
| Kabuli_wild_7149668 | NA                                  | Ca_kabuli_denovo | 7149668                 | C/G  | NA                 | NA                            | NA                 |
| Kabuli_wild_7149670 | NA                                  | Ca_kabuli_denovo | 7149670                 | C/G  | NA                 | NA                            | NA                 |
| Kabuli_wild_7152662 | NA                                  | Ca_kabuli_denovo | 7152662                 | A/C  | NA                 | NA                            | NA                 |
| Kabuli_wild_7152663 | NA                                  | Ca_kabuli_denovo | 7152663                 | A/G  | NA                 | NA                            | NA                 |
| Kabuli_wild_7154297 | NA                                  | Ca_kabuli_denovo | 7154297                 | C/T  | NA                 | NA                            | NA                 |
| Kabuli_wild_7154345 | NA                                  | Ca_kabuli_denovo | 7154345                 | C/T  | NA                 | NA                            | NA                 |
| Kabuli_wild_7154348 | NA                                  | Ca_kabuli_denovo | 7154348                 | A/C  | NA                 | NA                            | NA                 |
| Kabuli_wild_7154351 | NA                                  | Ca_kabuli_denovo | 7154351                 | C/T  | NA                 | NA                            | NA                 |
| Kabuli_wild_7156185 | NA                                  | Ca_kabuli_denovo | 7156185                 | G/C  | NA                 | NA                            | NA                 |
| Kabuli_wild_7156191 | NA                                  | Ca_kabuli_denovo | 7156191                 | T/C  | NA                 | NA                            | NA                 |
| Kabuli_wild_7158946 | NA                                  | Ca_kabuli_denovo | 7158946                 | C/T  | NA                 | NA                            | NA                 |
| Kabuli_wild_7184459 | NA                                  | Ca_kabuli_denovo | 7184459                 | C/T  | NA                 | NA                            | NA                 |
| Kabuli_wild_7202096 | NA                                  | Ca_kabuli_denovo | 7202096                 | G/T  | NA                 | NA                            | NA                 |
| Kabuli_wild_7213430 | NA                                  | Ca_kabuli_denovo | 7213430                 | C/G  | NA                 | NA                            | NA                 |
| Kabuli_wild_7225166 | NA                                  | Ca_kabuli_denovo | 7225166                 | C/T  | NA                 | NA                            | NA                 |
| Kabuli_wild_7229350 | NA                                  | Ca_kabuli_denovo | 7229350                 | C/T  | NA                 | NA                            | NA                 |
| Kabuli_wild_7233201 | NA                                  | Ca_kabuli_denovo | 7233201                 | C/T  | NA                 | NA                            | NA                 |
| Kabuli_wild_7233704 | NA                                  | Ca_kabuli_denovo | 7233704                 | A/G  | NA                 | NA                            | NA                 |
| Kabuli_wild_7241418 | NA                                  | Ca_kabuli_denovo | 7241418                 | C/G  | NA                 | NA                            | NA                 |
| Kabuli_wild_7245146 | NA                                  | Ca_kabuli_denovo | 7245146                 | A/G  | NA                 | NA                            | NA                 |
| Kabuli_wild_7250547 | NA                                  | Ca_kabuli_denovo | 7250547                 | G/T  | NA                 | NA                            | NA                 |
| Kabuli_wild_7250559 | NA                                  | Ca_kabuli_denovo | 7250559                 | A/G  | NA                 | NA                            | NA                 |
| Kabuli_wild_7251742 | NA                                  | Ca_kabuli_denovo | 7251742                 | G/T  | NA                 | NA                            | NA                 |
| Kabuli_wild_7256247 | NA                                  | Ca_kabuli_denovo | 7256247                 | C/T  | NA                 | NA                            | NA                 |
| Kabuli_wild_7263257 | NA                                  | Ca_kabuli_denovo | 7263257                 | A/G  | NA                 | NA                            | NA                 |
| Kabuli_wild_7263269 | NA                                  | Ca_kabuli_denovo | 7263269                 | C/T  | NA                 | NA                            | NA                 |
| Kabuli_wild_7284001 | NA                                  | Ca_kabuli_denovo | 7284001                 | C/G  | NA                 | NA                            | NA                 |
| Kabuli_wild_7284005 | NA                                  | Ca_kabuli_denovo | 7284005                 | C/G  | NA                 | NA                            | NA                 |
| Kabuli_wild_7290944 | NA                                  | Ca_kabuli_denovo | 7290944                 | G/T  | NA                 | NA                            | NA                 |
| Kabuli_wild_7297474 | NA                                  | Ca_kabuli_denovo | 7297474                 | C/T  | NA                 | NA                            | NA                 |

| SNP IDs             | NCBI dbSNP accession IDs (NCBI_SS#) | Chromosomes      | Physical positions (bp) | SNPs | Gene accession IDs | Sequence components of genome | Putative functions |
|---------------------|-------------------------------------|------------------|-------------------------|------|--------------------|-------------------------------|--------------------|
| Kabuli_wild_7300994 | NA                                  | Ca_kabuli_denovo | 7300994                 | C/G  | NA                 | NA                            | NA                 |
| Kabuli_wild_7317780 | NA                                  | Ca_kabuli_denovo | 7317780                 | C/T  | NA                 | NA                            | NA                 |
| Kabuli_wild_7317783 | NA                                  | Ca_kabuli_denovo | 7317783                 | C/G  | NA                 | NA                            | NA                 |
| Kabuli_wild_7317805 | NA                                  | Ca_kabuli_denovo | 7317805                 | A/T  | NA                 | NA                            | NA                 |
| Kabuli_wild_7318581 | NA                                  | Ca_kabuli_denovo | 7318581                 | C/T  | NA                 | NA                            | NA                 |
| Kabuli_wild_7323402 | NA                                  | Ca_kabuli_denovo | 7323402                 | C/G  | NA                 | NA                            | NA                 |
| Kabuli_wild_7324633 | NA                                  | Ca_kabuli_denovo | 7324633                 | C/T  | NA                 | NA                            | NA                 |
| Kabuli_wild_7331383 | NA                                  | Ca_kabuli_denovo | 7331383                 | C/A  | NA                 | NA                            | NA                 |
| Kabuli_wild_7331398 | NA                                  | Ca_kabuli_denovo | 7331398                 | A/G  | NA                 | NA                            | NA                 |
| Kabuli_wild_7331404 | NA                                  | Ca_kabuli_denovo | 7331404                 | G/A  | NA                 | NA                            | NA                 |
| Kabuli_wild_7331608 | NA                                  | Ca_kabuli_denovo | 7331608                 | G/T  | NA                 | NA                            | NA                 |
| Kabuli_wild_7336976 | NA                                  | Ca_kabuli_denovo | 7336976                 | C/T  | NA                 | NA                            | NA                 |
| Kabuli_wild_7337054 | NA                                  | Ca_kabuli_denovo | 7337054                 | C/T  | NA                 | NA                            | NA                 |
| Kabuli_wild_7345436 | NA                                  | Ca_kabuli_denovo | 7345436                 | C/T  | NA                 | NA                            | NA                 |
| Kabuli_wild_7345466 | NA                                  | Ca_kabuli_denovo | 7345466                 | A/G  | NA                 | NA                            | NA                 |
| Kabuli_wild_7345475 | NA                                  | Ca_kabuli_denovo | 7345475                 | C/G  | NA                 | NA                            | NA                 |
| Kabuli_wild_7345511 | NA                                  | Ca_kabuli_denovo | 7345511                 | G/T  | NA                 | NA                            | NA                 |
| Kabuli_wild_7369478 | NA                                  | Ca_kabuli_denovo | 7369478                 | C/G  | NA                 | NA                            | NA                 |
| Kabuli_wild_7379539 | NA                                  | Ca_kabuli_denovo | 7379539                 | C/T  | NA                 | NA                            | NA                 |
| Kabuli_wild_7385083 | NA                                  | Ca_kabuli_denovo | 7385083                 | G/T  | NA                 | NA                            | NA                 |
| Kabuli_wild_7407068 | NA                                  | Ca_kabuli_denovo | 7407068                 | A/G  | NA                 | NA                            | NA                 |
| Kabuli_wild_7410978 | NA                                  | Ca_kabuli_denovo | 7410978                 | C/T  | NA                 | NA                            | NA                 |
| Kabuli_wild_7410984 | NA                                  | Ca_kabuli_denovo | 7410984                 | A/G  | NA                 | NA                            | NA                 |
| Kabuli_wild_7410993 | NA                                  | Ca_kabuli_denovo | 7410993                 | G/T  | NA                 | NA                            | NA                 |
| Kabuli_wild_7411023 | NA                                  | Ca_kabuli_denovo | 7411023                 | C/G  | NA                 | NA                            | NA                 |
| Kabuli_wild_7414689 | NA                                  | Ca_kabuli_denovo | 7414689                 | G/T  | NA                 | NA                            | NA                 |
| Kabuli_wild_7425662 | NA                                  | Ca_kabuli_denovo | 7425662                 | C/T  | NA                 | NA                            | NA                 |
| Kabuli_wild_7425665 | NA                                  | Ca_kabuli_denovo | 7425665                 | A/G  | NA                 | NA                            | NA                 |
| Kabuli_wild_7431592 | NA                                  | Ca_kabuli_denovo | 7431592                 | C/T  | NA                 | NA                            | NA                 |
| Kabuli_wild_7431598 | NA                                  | Ca_kabuli_denovo | 7431598                 | C/G  | NA                 | NA                            | NA                 |
| Kabuli_wild_7431607 | NA                                  | Ca_kabuli_denovo | 7431607                 | C/G  | NA                 | NA                            | NA                 |
| Kabuli_wild_7447469 | NA                                  | Ca_kabuli_denovo | 7447469                 | C/T  | NA                 | NA                            | NA                 |
| Kabuli_wild_7447473 | NA                                  | Ca_kabuli_denovo | 7447473                 | A/T  | NA                 | NA                            | NA                 |
| Kabuli_wild_7448028 | NA                                  | Ca_kabuli_denovo | 7448028                 | A/C  | NA                 | NA                            | NA                 |
| Kabuli_wild_7448051 | NA                                  | Ca_kabuli_denovo | 7448051                 | C/G  | NA                 | NA                            | NA                 |
| Kabuli_wild_7472951 | NA                                  | Ca_kabuli_denovo | 7472951                 | C/T  | NA                 | NA                            | NA                 |
| Kabuli_wild_7473683 | NA                                  | Ca_kabuli_denovo | 7473683                 | A/G  | NA                 | NA                            | NA                 |
| Kabuli_wild_7476410 | NA                                  | Ca_kabuli_denovo | 7476410                 | G/T  | NA                 | NA                            | NA                 |
| Kabuli_wild_7479862 | NA                                  | Ca_kabuli_denovo | 7479862                 | C/T  | NA                 | NA                            | NA                 |
| Kabuli_wild_7481764 | NA                                  | Ca_kabuli_denovo | 7481764                 | G/T  | NA                 | NA                            | NA                 |
| Kabuli_wild_7481770 | NA                                  | Ca_kabuli_denovo | 7481770                 | C/T  | NA                 | NA                            | NA                 |
| Kabuli_wild_7492520 | NA                                  | Ca_kabuli_denovo | 7492520                 | A/G  | NA                 | NA                            | NA                 |
| Kabuli_wild_7492873 | NA                                  | Ca_kabuli_denovo | 7492873                 | A/C  | NA                 | NA                            | NA                 |
| Kabuli_wild_7492892 | NA                                  | Ca_kabuli_denovo | 7492892                 | A/T  | NA                 | NA                            | NA                 |

| SNP IDs             | NCBI dbSNP accession IDs (NCBI_SS#) | Chromosomes      | Physical positions (bp) | SNPs | Gene accession IDs | Sequence components of genome | Putative functions |
|---------------------|-------------------------------------|------------------|-------------------------|------|--------------------|-------------------------------|--------------------|
| Kabuli_wild_7492905 | NA                                  | Ca_kabuli_denovo | 7492905                 | C/T  | NA                 | NA                            | NA                 |
| Kabuli_wild_7499706 | NA                                  | Ca_kabuli_denovo | 7499706                 | A/T  | NA                 | NA                            | NA                 |
| Kabuli_wild_7514052 | NA                                  | Ca_kabuli_denovo | 7514052                 | C/T  | NA                 | NA                            | NA                 |
| Kabuli_wild_7514100 | NA                                  | Ca_kabuli_denovo | 7514100                 | C/T  | NA                 | NA                            | NA                 |
| Kabuli_wild_7517895 | NA                                  | Ca_kabuli_denovo | 7517895                 | G/T  | NA                 | NA                            | NA                 |
| Kabuli_wild_7520804 | NA                                  | Ca_kabuli_denovo | 7520804                 | G/C  | NA                 | NA                            | NA                 |
| Kabuli_wild_7520813 | NA                                  | Ca_kabuli_denovo | 7520813                 | C/T  | NA                 | NA                            | NA                 |
| Kabuli_wild_7520816 | NA                                  | Ca_kabuli_denovo | 7520816                 | G/A  | NA                 | NA                            | NA                 |
| Kabuli_wild_7521465 | NA                                  | Ca_kabuli_denovo | 7521465                 | A/G  | NA                 | NA                            | NA                 |
| Kabuli_wild_7521518 | NA                                  | Ca_kabuli_denovo | 7521518                 | A/G  | NA                 | NA                            | NA                 |
| Kabuli_wild_7522103 | NA                                  | Ca_kabuli_denovo | 7522103                 | G/T  | NA                 | NA                            | NA                 |
| Kabuli_wild_7522200 | NA                                  | Ca_kabuli_denovo | 7522200                 | A/G  | NA                 | NA                            | NA                 |
| Kabuli_wild_7528970 | NA                                  | Ca_kabuli_denovo | 7528970                 | A/G  | NA                 | NA                            | NA                 |
| Kabuli_wild_7530115 | NA                                  | Ca_kabuli_denovo | 7530115                 | C/G  | NA                 | NA                            | NA                 |
| Kabuli_wild_7530123 | NA                                  | Ca_kabuli_denovo | 7530123                 | C/G  | NA                 | NA                            | NA                 |
| Kabuli_wild_7531428 | NA                                  | Ca_kabuli_denovo | 7531428                 | G/T  | NA                 | NA                            | NA                 |
| Kabuli_wild_7543728 | NA                                  | Ca_kabuli_denovo | 7543728                 | C/T  | NA                 | NA                            | NA                 |
| Kabuli_wild_7548160 | NA                                  | Ca_kabuli_denovo | 7548160                 | C/G  | NA                 | NA                            | NA                 |
| Kabuli_wild_7548166 | NA                                  | Ca_kabuli_denovo | 7548166                 | G/T  | NA                 | NA                            | NA                 |
| Kabuli_wild_7548177 | NA                                  | Ca_kabuli_denovo | 7548177                 | C/T  | NA                 | NA                            | NA                 |
| Kabuli_wild_7548180 | NA                                  | Ca_kabuli_denovo | 7548180                 | A/T  | NA                 | NA                            | NA                 |
| Kabuli_wild_7555955 | NA                                  | Ca_kabuli_denovo | 7555955                 | A/G  | NA                 | NA                            | NA                 |
| Kabuli_wild_7558462 | NA                                  | Ca_kabuli_denovo | 7558462                 | C/T  | NA                 | NA                            | NA                 |
| Kabuli_wild_7558496 | NA                                  | Ca_kabuli_denovo | 7558496                 | C/G  | NA                 | NA                            | NA                 |
| Kabuli_wild_7558498 | NA                                  | Ca_kabuli_denovo | 7558498                 | A/G  | NA                 | NA                            | NA                 |
| Kabuli_wild_7572899 | NA                                  | Ca_kabuli_denovo | 7572899                 | C/G  | NA                 | NA                            | NA                 |
| Kabuli_wild_7573714 | NA                                  | Ca_kabuli_denovo | 7573714                 | C/G  | NA                 | NA                            | NA                 |
| Kabuli_wild_7573716 | NA                                  | Ca_kabuli_denovo | 7573716                 | C/G  | NA                 | NA                            | NA                 |
| Kabuli_wild_7579498 | NA                                  | Ca_kabuli_denovo | 7579498                 | A/C  | NA                 | NA                            | NA                 |
| Kabuli_wild_7606591 | NA                                  | Ca_kabuli_denovo | 7606591                 | G/T  | NA                 | NA                            | NA                 |
| Kabuli_wild_7613951 | NA                                  | Ca_kabuli_denovo | 7613951                 | C/G  | NA                 | NA                            | NA                 |
| Kabuli_wild_7619168 | NA                                  | Ca_kabuli_denovo | 7619168                 | A/G  | NA                 | NA                            | NA                 |
| Kabuli_wild_7620262 | NA                                  | Ca_kabuli_denovo | 7620262                 | A/G  | NA                 | NA                            | NA                 |
| Kabuli_wild_7620277 | NA                                  | Ca_kabuli_denovo | 7620277                 | A/G  | NA                 | NA                            | NA                 |
| Kabuli_wild_7620283 | NA                                  | Ca_kabuli_denovo | 7620283                 | A/G  | NA                 | NA                            | NA                 |
| Kabuli_wild_7627644 | NA                                  | Ca_kabuli_denovo | 7627644                 | G/T  | NA                 | NA                            | NA                 |
| Kabuli_wild_7629685 | NA                                  | Ca_kabuli_denovo | 7629685                 | A/G  | NA                 | NA                            | NA                 |
| Kabuli_wild_7629694 | NA                                  | Ca_kabuli_denovo | 7629694                 | A/G  | NA                 | NA                            | NA                 |
| Kabuli_wild_7632926 | NA                                  | Ca_kabuli_denovo | 7632926                 | G/T  | NA                 | NA                            | NA                 |
| Kabuli_wild_7674703 | NA                                  | Ca_kabuli_denovo | 7674703                 | C/T  | NA                 | NA                            | NA                 |
| Kabuli_wild_7678824 | NA                                  | Ca_kabuli_denovo | 7678824                 | G/A  | NA                 | NA                            | NA                 |
| Kabuli_wild_7678825 | NA                                  | Ca_kabuli_denovo | 7678825                 | G/A  | NA                 | NA                            | NA                 |
| Kabuli_wild_7680410 | NA                                  | Ca_kabuli_denovo | 7680410                 | C/G  | NA                 | NA                            | NA                 |
| Kabuli_wild_7680411 | NA                                  | Ca_kabuli_denovo | 7680411                 | C/G  | NA                 | NA                            | NA                 |

| SNP IDs             | NCBI dbSNP accession IDs (NCBI_SS#) | Chromosomes      | Physical positions (bp) | SNPs | Gene accession IDs | Sequence components of genome | Putative functions |
|---------------------|-------------------------------------|------------------|-------------------------|------|--------------------|-------------------------------|--------------------|
| Kabuli_wild_7684053 | NA                                  | Ca_kabuli_denovo | 7684053                 | C/T  | NA                 | NA                            | NA                 |
| Kabuli_wild_7696518 | NA                                  | Ca_kabuli_denovo | 7696518                 | A/G  | NA                 | NA                            | NA                 |
| Kabuli_wild_7703700 | NA                                  | Ca_kabuli_denovo | 7703700                 | C/G  | NA                 | NA                            | NA                 |
| Kabuli_wild_7714802 | NA                                  | Ca_kabuli_denovo | 7714802                 | C/T  | NA                 | NA                            | NA                 |
| Kabuli_wild_7714823 | NA                                  | Ca_kabuli_denovo | 7714823                 | C/T  | NA                 | NA                            | NA                 |
| Kabuli_wild_7725085 | NA                                  | Ca_kabuli_denovo | 7725085                 | A/G  | NA                 | NA                            | NA                 |
| Kabuli_wild_7726874 | NA                                  | Ca_kabuli_denovo | 7726874                 | A/G  | NA                 | NA                            | NA                 |
| Kabuli_wild_7735119 | NA                                  | Ca_kabuli_denovo | 7735119                 | C/T  | NA                 | NA                            | NA                 |
| Kabuli_wild_7735146 | NA                                  | Ca_kabuli_denovo | 7735146                 | A/T  | NA                 | NA                            | NA                 |
| Kabuli_wild_7742265 | NA                                  | Ca_kabuli_denovo | 7742265                 | A/C  | NA                 | NA                            | NA                 |
| Kabuli_wild_7744322 | NA                                  | Ca_kabuli_denovo | 7744322                 | A/C  | NA                 | NA                            | NA                 |
| Kabuli_wild_7744323 | NA                                  | Ca_kabuli_denovo | 7744323                 | A/G  | NA                 | NA                            | NA                 |
| Kabuli_wild_7746169 | NA                                  | Ca_kabuli_denovo | 7746169                 | G/T  | NA                 | NA                            | NA                 |
| Kabuli_wild_7756635 | NA                                  | Ca_kabuli_denovo | 7756635                 | G/T  | NA                 | NA                            | NA                 |
| Kabuli_wild_7756638 | NA                                  | Ca_kabuli_denovo | 7756638                 | A/G  | NA                 | NA                            | NA                 |
| Kabuli_wild_7760112 | NA                                  | Ca_kabuli_denovo | 7760112                 | A/G  | NA                 | NA                            | NA                 |
| Kabuli_wild_7763363 | NA                                  | Ca_kabuli_denovo | 7763363                 | A/C  | NA                 | NA                            | NA                 |
| Kabuli_wild_7763404 | NA                                  | Ca_kabuli_denovo | 7763404                 | T/C  | NA                 | NA                            | NA                 |
| Kabuli_wild_7769909 | NA                                  | Ca_kabuli_denovo | 7769909                 | C/T  | NA                 | NA                            | NA                 |
| Kabuli_wild_7777389 | NA                                  | Ca_kabuli_denovo | 7777389                 | A/G  | NA                 | NA                            | NA                 |
| Kabuli_wild_7777420 | NA                                  | Ca_kabuli_denovo | 7777420                 | G/A  | NA                 | NA                            | NA                 |
| Kabuli_wild_7781021 | NA                                  | Ca_kabuli_denovo | 7781021                 | A/C  | NA                 | NA                            | NA                 |
| Kabuli_wild_7784833 | NA                                  | Ca_kabuli_denovo | 7784833                 | A/G  | NA                 | NA                            | NA                 |
| Kabuli_wild_7784869 | NA                                  | Ca_kabuli_denovo | 7784869                 | A/G  | NA                 | NA                            | NA                 |
| Kabuli_wild_7784887 | NA                                  | Ca_kabuli_denovo | 7784887                 | C/T  | NA                 | NA                            | NA                 |
| Kabuli_wild_7803966 | NA                                  | Ca_kabuli_denovo | 7803966                 | C/G  | NA                 | NA                            | NA                 |
| Kabuli_wild_7804666 | NA                                  | Ca_kabuli_denovo | 7804666                 | C/T  | NA                 | NA                            | NA                 |
| Kabuli_wild_7804676 | NA                                  | Ca_kabuli_denovo | 7804676                 | C/G  | NA                 | NA                            | NA                 |
| Kabuli_wild_7804699 | NA                                  | Ca_kabuli_denovo | 7804699                 | G/T  | NA                 | NA                            | NA                 |
| Kabuli_wild_7804714 | NA                                  | Ca_kabuli_denovo | 7804714                 | C/G  | NA                 | NA                            | NA                 |
| Kabuli_wild_7810116 | NA                                  | Ca_kabuli_denovo | 7810116                 | C/T  | NA                 | NA                            | NA                 |
| Kabuli_wild_7812742 | NA                                  | Ca_kabuli_denovo | 7812742                 | A/T  | NA                 | NA                            | NA                 |
| Kabuli_wild_7812755 | NA                                  | Ca_kabuli_denovo | 7812755                 | G/T  | NA                 | NA                            | NA                 |
| Kabuli_wild_7817714 | NA                                  | Ca_kabuli_denovo | 7817714                 | T/A  | NA                 | NA                            | NA                 |
| Kabuli_wild_7817726 | NA                                  | Ca_kabuli_denovo | 7817726                 | C/T  | NA                 | NA                            | NA                 |
| Kabuli_wild_7818561 | NA                                  | Ca_kabuli_denovo | 7818561                 | G/T  | NA                 | NA                            | NA                 |
| Kabuli_wild_7823091 | NA                                  | Ca_kabuli_denovo | 7823091                 | G/C  | NA                 | NA                            | NA                 |
| Kabuli_wild_7823094 | NA                                  | Ca_kabuli_denovo | 7823094                 | C/G  | NA                 | NA                            | NA                 |
| Kabuli_wild_7838372 | NA                                  | Ca_kabuli_denovo | 7838372                 | A/C  | NA                 | NA                            | NA                 |
| Kabuli_wild_7838373 | NA                                  | Ca_kabuli_denovo | 7838373                 | G/T  | NA                 | NA                            | NA                 |
| Kabuli_wild_7838570 | NA                                  | Ca_kabuli_denovo | 7838570                 | C/G  | NA                 | NA                            | NA                 |
| Kabuli_wild_7840702 | NA                                  | Ca_kabuli_denovo | 7840702                 | G/T  | NA                 | NA                            | NA                 |
| Kabuli_wild_7852533 | NA                                  | Ca_kabuli_denovo | 7852533                 | A/G  | NA                 | NA                            | NA                 |
| Kabuli_wild_7862043 | NA                                  | Ca_kabuli_denovo | 7862043                 | C/G  | NA                 | NA                            | NA                 |

| SNP IDs             | NCBI dbSNP accession IDs (NCBI_SS#) | Chromosomes      | Physical positions (bp) | SNPs | Gene accession IDs | Sequence components of genome | Putative functions |
|---------------------|-------------------------------------|------------------|-------------------------|------|--------------------|-------------------------------|--------------------|
| Kabuli_wild_7862046 | NA                                  | Ca_kabuli_denovo | 7862046                 | C/T  | NA                 | NA                            | NA                 |
| Kabuli_wild_7863072 | NA                                  | Ca_kabuli_denovo | 7863072                 | A/C  | NA                 | NA                            | NA                 |
| Kabuli_wild_7863073 | NA                                  | Ca_kabuli_denovo | 7863073                 | G/T  | NA                 | NA                            | NA                 |
| Kabuli_wild_7867069 | NA                                  | Ca_kabuli_denovo | 7867069                 | G/T  | NA                 | NA                            | NA                 |
| Kabuli_wild_7867080 | NA                                  | Ca_kabuli_denovo | 7867080                 | C/T  | NA                 | NA                            | NA                 |
| Kabuli_wild_7869014 | NA                                  | Ca_kabuli_denovo | 7869014                 | G/A  | NA                 | NA                            | NA                 |
| Kabuli_wild_7881359 | NA                                  | Ca_kabuli_denovo | 7881359                 | C/G  | NA                 | NA                            | NA                 |
| Kabuli_wild_7881380 | NA                                  | Ca_kabuli_denovo | 7881380                 | C/G  | NA                 | NA                            | NA                 |
| Kabuli_wild_7893446 | NA                                  | Ca_kabuli_denovo | 7893446                 | G/A  | NA                 | NA                            | NA                 |
| Kabuli_wild_7902804 | NA                                  | Ca_kabuli_denovo | 7902804                 | G/A  | NA                 | NA                            | NA                 |
| Kabuli_wild_7917615 | NA                                  | Ca_kabuli_denovo | 7917615                 | C/G  | NA                 | NA                            | NA                 |
| Kabuli_wild_7917635 | NA                                  | Ca_kabuli_denovo | 7917635                 | A/G  | NA                 | NA                            | NA                 |
| Kabuli_wild_7917646 | NA                                  | Ca_kabuli_denovo | 7917646                 | A/C  | NA                 | NA                            | NA                 |
| Kabuli_wild_7917989 | NA                                  | Ca_kabuli_denovo | 7917989                 | C/G  | NA                 | NA                            | NA                 |
| Kabuli_wild_7919036 | NA                                  | Ca_kabuli_denovo | 7919036                 | A/G  | NA                 | NA                            | NA                 |
| Kabuli_wild_7919114 | NA                                  | Ca_kabuli_denovo | 7919114                 | C/T  | NA                 | NA                            | NA                 |
| Kabuli_wild_7921212 | NA                                  | Ca_kabuli_denovo | 7921212                 | A/G  | NA                 | NA                            | NA                 |
| Kabuli_wild_7935411 | NA                                  | Ca_kabuli_denovo | 7935411                 | C/G  | NA                 | NA                            | NA                 |
| Kabuli_wild_7935412 | NA                                  | Ca_kabuli_denovo | 7935412                 | A/G  | NA                 | NA                            | NA                 |
| Kabuli_wild_7936916 | NA                                  | Ca_kabuli_denovo | 7936916                 | G/A  | NA                 | NA                            | NA                 |
| Kabuli_wild_7936940 | NA                                  | Ca_kabuli_denovo | 7936940                 | A/G  | NA                 | NA                            | NA                 |
| Kabuli_wild_7939472 | NA                                  | Ca_kabuli_denovo | 7939472                 | C/G  | NA                 | NA                            | NA                 |
| Kabuli_wild_7939478 | NA                                  | Ca_kabuli_denovo | 7939478                 | C/G  | NA                 | NA                            | NA                 |
| Kabuli_wild_7950388 | NA                                  | Ca_kabuli_denovo | 7950388                 | C/G  | NA                 | NA                            | NA                 |
| Kabuli_wild_7950391 | NA                                  | Ca_kabuli_denovo | 7950391                 | C/G  | NA                 | NA                            | NA                 |
| Kabuli_wild_7950393 | NA                                  | Ca_kabuli_denovo | 7950393                 | A/T  | NA                 | NA                            | NA                 |
| Kabuli_wild_7960644 | NA                                  | Ca_kabuli_denovo | 7960644                 | C/T  | NA                 | NA                            | NA                 |
| Kabuli_wild_7960647 | NA                                  | Ca_kabuli_denovo | 7960647                 | A/G  | NA                 | NA                            | NA                 |
| Kabuli_wild_7960656 | NA                                  | Ca_kabuli_denovo | 7960656                 | C/G  | NA                 | NA                            | NA                 |
| Kabuli_wild_7961785 | NA                                  | Ca_kabuli_denovo | 7961785                 | A/G  | NA                 | NA                            | NA                 |
| Kabuli_wild_7961806 | NA                                  | Ca_kabuli_denovo | 7961806                 | C/G  | NA                 | NA                            | NA                 |
| Kabuli_wild_7967130 | NA                                  | Ca_kabuli_denovo | 7967130                 | C/T  | NA                 | NA                            | NA                 |
| Kabuli_wild_7967181 | NA                                  | Ca_kabuli_denovo | 7967181                 | C/T  | NA                 | NA                            | NA                 |
| Kabuli_wild_7967193 | NA                                  | Ca_kabuli_denovo | 7967193                 | A/G  | NA                 | NA                            | NA                 |
| Kabuli_wild_7989851 | NA                                  | Ca_kabuli_denovo | 7989851                 | A/G  | NA                 | NA                            | NA                 |
| Kabuli_wild_7989882 | NA                                  | Ca_kabuli_denovo | 7989882                 | A/G  | NA                 | NA                            | NA                 |
| Kabuli_wild_7998019 | NA                                  | Ca_kabuli_denovo | 7998019                 | A/G  | NA                 | NA                            | NA                 |
| Kabuli_wild_7998020 | NA                                  | Ca_kabuli_denovo | 7998020                 | G/T  | NA                 | NA                            | NA                 |
| Kabuli_wild_8010905 | NA                                  | Ca_kabuli_denovo | 8010905                 | G/A  | NA                 | NA                            | NA                 |
| Kabuli_wild_8010923 | NA                                  | Ca_kabuli_denovo | 8010923                 | T/C  | NA                 | NA                            | NA                 |
| Kabuli_wild_8016445 | NA                                  | Ca_kabuli_denovo | 8016445                 | C/G  | NA                 | NA                            | NA                 |
| Kabuli_wild_8016457 | NA                                  | Ca_kabuli_denovo | 8016457                 | A/C  | NA                 | NA                            | NA                 |
| Kabuli_wild_8016897 | NA                                  | Ca_kabuli_denovo | 8016897                 | C/G  | NA                 | NA                            | NA                 |
| Kabuli_wild_8016903 | NA                                  | Ca_kabuli_denovo | 8016903                 | G/C  | NA                 | NA                            | NA                 |



| SNP IDs             | NCBI dbSNP accession IDs (NCBI_SS#) | Chromosomes      | Physical positions (bp) | SNPs | Gene accession IDs | Sequence components of genome | Putative functions |
|---------------------|-------------------------------------|------------------|-------------------------|------|--------------------|-------------------------------|--------------------|
| Kabuli_wild_8017184 | NA                                  | Ca_kabuli_denovo | 8017184                 | A/C  | NA                 | NA                            | NA                 |
| Kabuli_wild_8018398 | NA                                  | Ca_kabuli_denovo | 8018398                 | A/C  | NA                 | NA                            | NA                 |
| Kabuli_wild_8020591 | NA                                  | Ca_kabuli_denovo | 8020591                 | C/G  | NA                 | NA                            | NA                 |
| Kabuli_wild_8020616 | NA                                  | Ca_kabuli_denovo | 8020616                 | C/G  | NA                 | NA                            | NA                 |
| Kabuli_wild_8028657 | NA                                  | Ca_kabuli_denovo | 8028657                 | A/C  | NA                 | NA                            | NA                 |
| Kabuli_wild_8028658 | NA                                  | Ca_kabuli_denovo | 8028658                 | G/T  | NA                 | NA                            | NA                 |
| Kabuli_wild_8038643 | NA                                  | Ca_kabuli_denovo | 8038643                 | C/G  | NA                 | NA                            | NA                 |
| Kabuli_wild_8038691 | NA                                  | Ca_kabuli_denovo | 8038691                 | G/C  | NA                 | NA                            | NA                 |
| Kabuli_wild_8040203 | NA                                  | Ca_kabuli_denovo | 8040203                 | A/T  | NA                 | NA                            | NA                 |
| Kabuli_wild_8041244 | NA                                  | Ca_kabuli_denovo | 8041244                 | G/T  | NA                 | NA                            | NA                 |
| Kabuli_wild_8041263 | NA                                  | Ca_kabuli_denovo | 8041263                 | C/T  | NA                 | NA                            | NA                 |
| Kabuli_wild_8045126 | NA                                  | Ca_kabuli_denovo | 8045126                 | A/G  | NA                 | NA                            | NA                 |
| Kabuli_wild_8045129 | NA                                  | Ca_kabuli_denovo | 8045129                 | C/G  | NA                 | NA                            | NA                 |
| Kabuli_wild_8049857 | NA                                  | Ca_kabuli_denovo | 8049857                 | A/G  | NA                 | NA                            | NA                 |
| Kabuli_wild_8049867 | NA                                  | Ca_kabuli_denovo | 8049867                 | C/T  | NA                 | NA                            | NA                 |
| Kabuli_wild_8049879 | NA                                  | Ca_kabuli_denovo | 8049879                 | G/C  | NA                 | NA                            | NA                 |
| Kabuli_wild_8061153 | NA                                  | Ca_kabuli_denovo | 8061153                 | A/G  | NA                 | NA                            | NA                 |
| Kabuli_wild_8061155 | NA                                  | Ca_kabuli_denovo | 8061155                 | C/G  | NA                 | NA                            | NA                 |
| Kabuli_wild_8061180 | NA                                  | Ca_kabuli_denovo | 8061180                 | G/T  | NA                 | NA                            | NA                 |
| Kabuli_wild_8061191 | NA                                  | Ca_kabuli_denovo | 8061191                 | C/G  | NA                 | NA                            | NA                 |
| Kabuli_wild_8068527 | NA                                  | Ca_kabuli_denovo | 8068527                 | G/T  | NA                 | NA                            | NA                 |
| Kabuli_wild_8068536 | NA                                  | Ca_kabuli_denovo | 8068536                 | C/T  | NA                 | NA                            | NA                 |
| Kabuli_wild_8072680 | NA                                  | Ca_kabuli_denovo | 8072680                 | G/T  | NA                 | NA                            | NA                 |
| Kabuli_wild_8072685 | NA                                  | Ca_kabuli_denovo | 8072685                 | A/G  | NA                 | NA                            | NA                 |
| Kabuli_wild_8072906 | NA                                  | Ca_kabuli_denovo | 8072906                 | G/T  | NA                 | NA                            | NA                 |
| Kabuli_wild_8080936 | NA                                  | Ca_kabuli_denovo | 8080936                 | A/G  | NA                 | NA                            | NA                 |
| Kabuli_wild_8082596 | NA                                  | Ca_kabuli_denovo | 8082596                 | A/C  | NA                 | NA                            | NA                 |
| Kabuli_wild_8084720 | NA                                  | Ca_kabuli_denovo | 8084720                 | C/T  | NA                 | NA                            | NA                 |
| Kabuli_wild_8084768 | NA                                  | Ca_kabuli_denovo | 8084768                 | A/C  | NA                 | NA                            | NA                 |
| Kabuli_wild_8085682 | NA                                  | Ca_kabuli_denovo | 8085682                 | G/T  | NA                 | NA                            | NA                 |
| Kabuli_wild_8085687 | NA                                  | Ca_kabuli_denovo | 8085687                 | A/G  | NA                 | NA                            | NA                 |
| Kabuli_wild_8085690 | NA                                  | Ca_kabuli_denovo | 8085690                 | C/G  | NA                 | NA                            | NA                 |
| Kabuli_wild_8087025 | NA                                  | Ca_kabuli_denovo | 8087025                 | T/C  | NA                 | NA                            | NA                 |
| Kabuli_wild_8087028 | NA                                  | Ca_kabuli_denovo | 8087028                 | C/T  | NA                 | NA                            | NA                 |
| Kabuli_wild_8087763 | NA                                  | Ca_kabuli_denovo | 8087763                 | A/T  | NA                 | NA                            | NA                 |
| Kabuli_wild_8087771 | NA                                  | Ca_kabuli_denovo | 8087771                 | C/T  | NA                 | NA                            | NA                 |
| Kabuli_wild_8087772 | NA                                  | Ca_kabuli_denovo | 8087772                 | A/G  | NA                 | NA                            | NA                 |
| Kabuli_wild_8087773 | NA                                  | Ca_kabuli_denovo | 8087773                 | A/T  | NA                 | NA                            | NA                 |
| Kabuli_wild_8091409 | NA                                  | Ca_kabuli_denovo | 8091409                 | C/T  | NA                 | NA                            | NA                 |
| Kabuli_wild_8093077 | NA                                  | Ca_kabuli_denovo | 8093077                 | C/T  | NA                 | NA                            | NA                 |
| Kabuli_wild_8093080 | NA                                  | Ca_kabuli_denovo | 8093080                 | C/T  | NA                 | NA                            | NA                 |
| Kabuli_wild_8093087 | NA                                  | Ca_kabuli_denovo | 8093087                 | A/G  | NA                 | NA                            | NA                 |
| Kabuli_wild_8111276 | NA                                  | Ca_kabuli_denovo | 8111276                 | A/C  | NA                 | NA                            | NA                 |
| Kabuli_wild_8111300 | NA                                  | Ca_kabuli_denovo | 8111300                 | C/G  | NA                 | NA                            | NA                 |

| SNP IDs                    | NCBI dbSNP accession IDs (NCBI_SS#) | Chromosomes             | Physical positions (bp) | SNPs | Gene accession IDs | Sequence components of genome | Putative functions |
|----------------------------|-------------------------------------|-------------------------|-------------------------|------|--------------------|-------------------------------|--------------------|
| <i>Kabuli_wild_8112368</i> | NA                                  | <i>Ca_kabuli_denovo</i> | 8112368                 | A/G  | NA                 | NA                            | NA                 |
| <i>Kabuli_wild_8112381</i> | NA                                  | <i>Ca_kabuli_denovo</i> | 8112381                 | A/G  | NA                 | NA                            | NA                 |
| <i>Kabuli_wild_8125529</i> | NA                                  | <i>Ca_kabuli_denovo</i> | 8125529                 | C/T  | NA                 | NA                            | NA                 |
| <i>Kabuli_wild_8129105</i> | NA                                  | <i>Ca_kabuli_denovo</i> | 8129105                 | A/G  | NA                 | NA                            | NA                 |
| <i>Kabuli_wild_8139719</i> | NA                                  | <i>Ca_kabuli_denovo</i> | 8139719                 | C/G  | NA                 | NA                            | NA                 |
| <i>Kabuli_wild_8139728</i> | NA                                  | <i>Ca_kabuli_denovo</i> | 8139728                 | C/G  | NA                 | NA                            | NA                 |
| <i>Kabuli_wild_8139747</i> | NA                                  | <i>Ca_kabuli_denovo</i> | 8139747                 | A/G  | NA                 | NA                            | NA                 |
| <i>Kabuli_wild_8139748</i> | NA                                  | <i>Ca_kabuli_denovo</i> | 8139748                 | C/G  | NA                 | NA                            | NA                 |
| <i>Kabuli_wild_8139814</i> | NA                                  | <i>Ca_kabuli_denovo</i> | 8139814                 | C/G  | NA                 | NA                            | NA                 |
| <i>Kabuli_wild_8139833</i> | NA                                  | <i>Ca_kabuli_denovo</i> | 8139833                 | A/C  | NA                 | NA                            | NA                 |
| <i>Kabuli_wild_8139842</i> | NA                                  | <i>Ca_kabuli_denovo</i> | 8139842                 | A/T  | NA                 | NA                            | NA                 |
| <i>Kabuli_wild_8139843</i> | NA                                  | <i>Ca_kabuli_denovo</i> | 8139843                 | C/G  | NA                 | NA                            | NA                 |
| <i>Kabuli_wild_8140378</i> | NA                                  | <i>Ca_kabuli_denovo</i> | 8140378                 | A/G  | NA                 | NA                            | NA                 |
| <i>Kabuli_wild_8141999</i> | NA                                  | <i>Ca_kabuli_denovo</i> | 8141999                 | C/T  | NA                 | NA                            | NA                 |
| <i>Kabuli_wild_8142018</i> | NA                                  | <i>Ca_kabuli_denovo</i> | 8142018                 | A/G  | NA                 | NA                            | NA                 |
| <i>Kabuli_wild_8148775</i> | NA                                  | <i>Ca_kabuli_denovo</i> | 8148775                 | C/T  | NA                 | NA                            | NA                 |
| <i>Kabuli_wild_8148790</i> | NA                                  | <i>Ca_kabuli_denovo</i> | 8148790                 | C/G  | NA                 | NA                            | NA                 |
| <i>Kabuli_wild_8150554</i> | NA                                  | <i>Ca_kabuli_denovo</i> | 8150554                 | A/G  | NA                 | NA                            | NA                 |
| <i>Kabuli_wild_8150556</i> | NA                                  | <i>Ca_kabuli_denovo</i> | 8150556                 | A/G  | NA                 | NA                            | NA                 |
| <i>Kabuli_wild_8150564</i> | NA                                  | <i>Ca_kabuli_denovo</i> | 8150564                 | A/G  | NA                 | NA                            | NA                 |
| <i>Kabuli_wild_8161321</i> | NA                                  | <i>Ca_kabuli_denovo</i> | 8161321                 | A/G  | NA                 | NA                            | NA                 |
| <i>Kabuli_wild_8161327</i> | NA                                  | <i>Ca_kabuli_denovo</i> | 8161327                 | A/G  | NA                 | NA                            | NA                 |
| <i>Kabuli_wild_8161330</i> | NA                                  | <i>Ca_kabuli_denovo</i> | 8161330                 | A/G  | NA                 | NA                            | NA                 |
| <i>Kabuli_wild_8161333</i> | NA                                  | <i>Ca_kabuli_denovo</i> | 8161333                 | A/G  | NA                 | NA                            | NA                 |
| <i>Kabuli_wild_8174491</i> | NA                                  | <i>Ca_kabuli_denovo</i> | 8174491                 | A/T  | NA                 | NA                            | NA                 |
| <i>Kabuli_wild_8190835</i> | NA                                  | <i>Ca_kabuli_denovo</i> | 8190835                 | G/T  | NA                 | NA                            | NA                 |
| <i>Kabuli_wild_8190839</i> | NA                                  | <i>Ca_kabuli_denovo</i> | 8190839                 | C/G  | NA                 | NA                            | NA                 |
| <i>Kabuli_wild_8206915</i> | NA                                  | <i>Ca_kabuli_denovo</i> | 8206915                 | A/G  | NA                 | NA                            | NA                 |
| <i>Kabuli_wild_8209677</i> | NA                                  | <i>Ca_kabuli_denovo</i> | 8209677                 | C/T  | NA                 | NA                            | NA                 |
| <i>Kabuli_wild_8212691</i> | NA                                  | <i>Ca_kabuli_denovo</i> | 8212691                 | C/G  | NA                 | NA                            | NA                 |
| <i>Kabuli_wild_8216492</i> | NA                                  | <i>Ca_kabuli_denovo</i> | 8216492                 | C/G  | NA                 | NA                            | NA                 |
| <i>Kabuli_wild_8216493</i> | NA                                  | <i>Ca_kabuli_denovo</i> | 8216493                 | C/T  | NA                 | NA                            | NA                 |
| <i>Kabuli_wild_8216507</i> | NA                                  | <i>Ca_kabuli_denovo</i> | 8216507                 | C/T  | NA                 | NA                            | NA                 |
| <i>Kabuli_wild_8239770</i> | NA                                  | <i>Ca_kabuli_denovo</i> | 8239770                 | A/G  | NA                 | NA                            | NA                 |
| <i>Kabuli_wild_8239773</i> | NA                                  | <i>Ca_kabuli_denovo</i> | 8239773                 | A/G  | NA                 | NA                            | NA                 |
| <i>Kabuli_wild_8242020</i> | NA                                  | <i>Ca_kabuli_denovo</i> | 8242020                 | G/T  | NA                 | NA                            | NA                 |
| <i>Kabuli_wild_8242339</i> | NA                                  | <i>Ca_kabuli_denovo</i> | 8242339                 | G/T  | NA                 | NA                            | NA                 |
| <i>Kabuli_wild_8243744</i> | NA                                  | <i>Ca_kabuli_denovo</i> | 8243744                 | A/G  | NA                 | NA                            | NA                 |
| <i>Kabuli_wild_8243783</i> | NA                                  | <i>Ca_kabuli_denovo</i> | 8243783                 | A/G  | NA                 | NA                            | NA                 |
| <i>Kabuli_wild_8247103</i> | NA                                  | <i>Ca_kabuli_denovo</i> | 8247103                 | A/G  | NA                 | NA                            | NA                 |
| <i>Kabuli_wild_8247121</i> | NA                                  | <i>Ca_kabuli_denovo</i> | 8247121                 | A/G  | NA                 | NA                            | NA                 |
| <i>Kabuli_wild_8247131</i> | NA                                  | <i>Ca_kabuli_denovo</i> | 8247131                 | A/G  | NA                 | NA                            | NA                 |
| <i>Kabuli_wild_8247150</i> | NA                                  | <i>Ca_kabuli_denovo</i> | 8247150                 | G/T  | NA                 | NA                            | NA                 |
| <i>Kabuli_wild_8249040</i> | NA                                  | <i>Ca_kabuli_denovo</i> | 8249040                 | T/C  | NA                 | NA                            | NA                 |

| SNP IDs             | NCBI dbSNP accession IDs (NCBI_SS#) | Chromosomes      | Physical positions (bp) | SNPs | Gene accession IDs | Sequence components of genome | Putative functions |
|---------------------|-------------------------------------|------------------|-------------------------|------|--------------------|-------------------------------|--------------------|
| Kabuli_wild_8261511 | NA                                  | Ca_kabuli_denovo | 8261511                 | A/G  | NA                 | NA                            | NA                 |
| Kabuli_wild_8261541 | NA                                  | Ca_kabuli_denovo | 8261541                 | G/T  | NA                 | NA                            | NA                 |
| Kabuli_wild_8264773 | NA                                  | Ca_kabuli_denovo | 8264773                 | T/C  | NA                 | NA                            | NA                 |
| Kabuli_wild_8266093 | NA                                  | Ca_kabuli_denovo | 8266093                 | C/G  | NA                 | NA                            | NA                 |
| Kabuli_wild_8271986 | NA                                  | Ca_kabuli_denovo | 8271986                 | C/T  | NA                 | NA                            | NA                 |
| Kabuli_wild_8272007 | NA                                  | Ca_kabuli_denovo | 8272007                 | G/T  | NA                 | NA                            | NA                 |
| Kabuli_wild_8283279 | NA                                  | Ca_kabuli_denovo | 8283279                 | A/G  | NA                 | NA                            | NA                 |
| Kabuli_wild_8283294 | NA                                  | Ca_kabuli_denovo | 8283294                 | C/G  | NA                 | NA                            | NA                 |
| Kabuli_wild_8283295 | NA                                  | Ca_kabuli_denovo | 8283295                 | A/G  | NA                 | NA                            | NA                 |
| Kabuli_wild_8283296 | NA                                  | Ca_kabuli_denovo | 8283296                 | A/C  | NA                 | NA                            | NA                 |
| Kabuli_wild_8290756 | NA                                  | Ca_kabuli_denovo | 8290756                 | A/G  | NA                 | NA                            | NA                 |
| Kabuli_wild_8294278 | NA                                  | Ca_kabuli_denovo | 8294278                 | A/T  | NA                 | NA                            | NA                 |
| Kabuli_wild_8301225 | NA                                  | Ca_kabuli_denovo | 8301225                 | A/G  | NA                 | NA                            | NA                 |
| Kabuli_wild_8301273 | NA                                  | Ca_kabuli_denovo | 8301273                 | C/G  | NA                 | NA                            | NA                 |
| Kabuli_wild_8308547 | NA                                  | Ca_kabuli_denovo | 8308547                 | A/G  | NA                 | NA                            | NA                 |
| Kabuli_wild_8308562 | NA                                  | Ca_kabuli_denovo | 8308562                 | A/G  | NA                 | NA                            | NA                 |
| Kabuli_wild_8317755 | NA                                  | Ca_kabuli_denovo | 8317755                 | C/T  | NA                 | NA                            | NA                 |
| Kabuli_wild_8319072 | NA                                  | Ca_kabuli_denovo | 8319072                 | A/C  | NA                 | NA                            | NA                 |
| Kabuli_wild_8320163 | NA                                  | Ca_kabuli_denovo | 8320163                 | C/G  | NA                 | NA                            | NA                 |
| Kabuli_wild_8320187 | NA                                  | Ca_kabuli_denovo | 8320187                 | C/G  | NA                 | NA                            | NA                 |
| Kabuli_wild_8320188 | NA                                  | Ca_kabuli_denovo | 8320188                 | A/G  | NA                 | NA                            | NA                 |
| Kabuli_wild_8348614 | NA                                  | Ca_kabuli_denovo | 8348614                 | A/G  | NA                 | NA                            | NA                 |
| Kabuli_wild_8350653 | NA                                  | Ca_kabuli_denovo | 8350653                 | C/G  | NA                 | NA                            | NA                 |
| Kabuli_wild_8350674 | NA                                  | Ca_kabuli_denovo | 8350674                 | A/G  | NA                 | NA                            | NA                 |
| Kabuli_wild_8350836 | NA                                  | Ca_kabuli_denovo | 8350836                 | A/T  | NA                 | NA                            | NA                 |
| Kabuli_wild_8350840 | NA                                  | Ca_kabuli_denovo | 8350840                 | C/G  | NA                 | NA                            | NA                 |
| Kabuli_wild_8351898 | NA                                  | Ca_kabuli_denovo | 8351898                 | A/G  | NA                 | NA                            | NA                 |
| Kabuli_wild_8357659 | NA                                  | Ca_kabuli_denovo | 8357659                 | A/G  | NA                 | NA                            | NA                 |
| Kabuli_wild_8357686 | NA                                  | Ca_kabuli_denovo | 8357686                 | A/G  | NA                 | NA                            | NA                 |
| Kabuli_wild_8362209 | NA                                  | Ca_kabuli_denovo | 8362209                 | A/G  | NA                 | NA                            | NA                 |
| Kabuli_wild_8362231 | NA                                  | Ca_kabuli_denovo | 8362231                 | A/G  | NA                 | NA                            | NA                 |
| Kabuli_wild_8364783 | NA                                  | Ca_kabuli_denovo | 8364783                 | A/G  | NA                 | NA                            | NA                 |
| Kabuli_wild_8364798 | NA                                  | Ca_kabuli_denovo | 8364798                 | A/G  | NA                 | NA                            | NA                 |
| Kabuli_wild_8364825 | NA                                  | Ca_kabuli_denovo | 8364825                 | C/G  | NA                 | NA                            | NA                 |
| Kabuli_wild_8370782 | NA                                  | Ca_kabuli_denovo | 8370782                 | C/G  | NA                 | NA                            | NA                 |
| Kabuli_wild_8373361 | NA                                  | Ca_kabuli_denovo | 8373361                 | G/T  | NA                 | NA                            | NA                 |
| Kabuli_wild_8373362 | NA                                  | Ca_kabuli_denovo | 8373362                 | C/T  | NA                 | NA                            | NA                 |
| Kabuli_wild_8374939 | NA                                  | Ca_kabuli_denovo | 8374939                 | C/G  | NA                 | NA                            | NA                 |
| Kabuli_wild_8374963 | NA                                  | Ca_kabuli_denovo | 8374963                 | C/G  | NA                 | NA                            | NA                 |
| Kabuli_wild_8374967 | NA                                  | Ca_kabuli_denovo | 8374967                 | C/G  | NA                 | NA                            | NA                 |
| Kabuli_wild_8390491 | NA                                  | Ca_kabuli_denovo | 8390491                 | G/A  | NA                 | NA                            | NA                 |
| Kabuli_wild_8390527 | NA                                  | Ca_kabuli_denovo | 8390527                 | A/C  | NA                 | NA                            | NA                 |
| Kabuli_wild_8397031 | NA                                  | Ca_kabuli_denovo | 8397031                 | A/G  | NA                 | NA                            | NA                 |
| Kabuli_wild_8402323 | NA                                  | Ca_kabuli_denovo | 8402323                 | C/G  | NA                 | NA                            | NA                 |

| SNP IDs             | NCBI dbSNP accession IDs (NCBI_SS#) | Chromosomes      | Physical positions (bp) | SNPs | Gene accession IDs | Sequence components of genome | Putative functions |
|---------------------|-------------------------------------|------------------|-------------------------|------|--------------------|-------------------------------|--------------------|
| Kabuli_wild_8402332 | NA                                  | Ca_kabuli_denovo | 8402332                 | C/T  | NA                 | NA                            | NA                 |
| Kabuli_wild_8407339 | NA                                  | Ca_kabuli_denovo | 8407339                 | C/T  | NA                 | NA                            | NA                 |
| Kabuli_wild_8407365 | NA                                  | Ca_kabuli_denovo | 8407365                 | A/G  | NA                 | NA                            | NA                 |
| Kabuli_wild_8407815 | NA                                  | Ca_kabuli_denovo | 8407815                 | C/G  | NA                 | NA                            | NA                 |
| Kabuli_wild_8407824 | NA                                  | Ca_kabuli_denovo | 8407824                 | A/G  | NA                 | NA                            | NA                 |
| Kabuli_wild_8411366 | NA                                  | Ca_kabuli_denovo | 8411366                 | A/G  | NA                 | NA                            | NA                 |
| Kabuli_wild_8413795 | NA                                  | Ca_kabuli_denovo | 8413795                 | A/G  | NA                 | NA                            | NA                 |
| Kabuli_wild_8413810 | NA                                  | Ca_kabuli_denovo | 8413810                 | C/G  | NA                 | NA                            | NA                 |
| Kabuli_wild_8428166 | NA                                  | Ca_kabuli_denovo | 8428166                 | G/C  | NA                 | NA                            | NA                 |
| Kabuli_wild_8428169 | NA                                  | Ca_kabuli_denovo | 8428169                 | C/T  | NA                 | NA                            | NA                 |
| Kabuli_wild_8435782 | NA                                  | Ca_kabuli_denovo | 8435782                 | A/C  | NA                 | NA                            | NA                 |
| Kabuli_wild_8435803 | NA                                  | Ca_kabuli_denovo | 8435803                 | A/G  | NA                 | NA                            | NA                 |
| Kabuli_wild_8435809 | NA                                  | Ca_kabuli_denovo | 8435809                 | A/G  | NA                 | NA                            | NA                 |
| Kabuli_wild_8439634 | NA                                  | Ca_kabuli_denovo | 8439634                 | C/T  | NA                 | NA                            | NA                 |
| Kabuli_wild_8439670 | NA                                  | Ca_kabuli_denovo | 8439670                 | C/T  | NA                 | NA                            | NA                 |
| Kabuli_wild_8439676 | NA                                  | Ca_kabuli_denovo | 8439676                 | A/G  | NA                 | NA                            | NA                 |
| Kabuli_wild_8448773 | NA                                  | Ca_kabuli_denovo | 8448773                 | C/G  | NA                 | NA                            | NA                 |
| Kabuli_wild_8448800 | NA                                  | Ca_kabuli_denovo | 8448800                 | A/C  | NA                 | NA                            | NA                 |
| Kabuli_wild_8448815 | NA                                  | Ca_kabuli_denovo | 8448815                 | C/T  | NA                 | NA                            | NA                 |
| Kabuli_wild_8455793 | NA                                  | Ca_kabuli_denovo | 8455793                 | C/G  | NA                 | NA                            | NA                 |
| Kabuli_wild_8455799 | NA                                  | Ca_kabuli_denovo | 8455799                 | C/G  | NA                 | NA                            | NA                 |
| Kabuli_wild_8461676 | NA                                  | Ca_kabuli_denovo | 8461676                 | C/G  | NA                 | NA                            | NA                 |
| Kabuli_wild_8475935 | NA                                  | Ca_kabuli_denovo | 8475935                 | C/T  | NA                 | NA                            | NA                 |
| Kabuli_wild_8475971 | NA                                  | Ca_kabuli_denovo | 8475971                 | C/T  | NA                 | NA                            | NA                 |
| Kabuli_wild_8479359 | NA                                  | Ca_kabuli_denovo | 8479359                 | C/T  | NA                 | NA                            | NA                 |
| Kabuli_wild_8479392 | NA                                  | Ca_kabuli_denovo | 8479392                 | C/G  | NA                 | NA                            | NA                 |
| Kabuli_wild_8481847 | NA                                  | Ca_kabuli_denovo | 8481847                 | C/T  | NA                 | NA                            | NA                 |
| Kabuli_wild_8492901 | NA                                  | Ca_kabuli_denovo | 8492901                 | G/C  | NA                 | NA                            | NA                 |
| Kabuli_wild_8492904 | NA                                  | Ca_kabuli_denovo | 8492904                 | A/G  | NA                 | NA                            | NA                 |
| Kabuli_wild_8502160 | NA                                  | Ca_kabuli_denovo | 8502160                 | A/G  | NA                 | NA                            | NA                 |
| Kabuli_wild_8502163 | NA                                  | Ca_kabuli_denovo | 8502163                 | A/G  | NA                 | NA                            | NA                 |
| Kabuli_wild_8519262 | NA                                  | Ca_kabuli_denovo | 8519262                 | C/G  | NA                 | NA                            | NA                 |
| Kabuli_wild_8519271 | NA                                  | Ca_kabuli_denovo | 8519271                 | C/G  | NA                 | NA                            | NA                 |
| Kabuli_wild_8519616 | NA                                  | Ca_kabuli_denovo | 8519616                 | A/C  | NA                 | NA                            | NA                 |
| Kabuli_wild_8519617 | NA                                  | Ca_kabuli_denovo | 8519617                 | C/G  | NA                 | NA                            | NA                 |
| Kabuli_wild_8521095 | NA                                  | Ca_kabuli_denovo | 8521095                 | A/G  | NA                 | NA                            | NA                 |
| Kabuli_wild_8521105 | NA                                  | Ca_kabuli_denovo | 8521105                 | G/T  | NA                 | NA                            | NA                 |
| Kabuli_wild_8533210 | NA                                  | Ca_kabuli_denovo | 8533210                 | C/G  | NA                 | NA                            | NA                 |
| Kabuli_wild_8536832 | NA                                  | Ca_kabuli_denovo | 8536832                 | C/G  | NA                 | NA                            | NA                 |
| Kabuli_wild_8553166 | NA                                  | Ca_kabuli_denovo | 8553166                 | C/G  | NA                 | NA                            | NA                 |
| Kabuli_wild_8553179 | NA                                  | Ca_kabuli_denovo | 8553179                 | A/C  | NA                 | NA                            | NA                 |
| Kabuli_wild_8556138 | NA                                  | Ca_kabuli_denovo | 8556138                 | C/G  | NA                 | NA                            | NA                 |
| Kabuli_wild_8556156 | NA                                  | Ca_kabuli_denovo | 8556156                 | C/G  | NA                 | NA                            | NA                 |
| Kabuli_wild_8556177 | NA                                  | Ca_kabuli_denovo | 8556177                 | C/G  | NA                 | NA                            | NA                 |

| SNP IDs             | NCBI dbSNP accession IDs (NCBI_SS#) | Chromosomes      | Physical positions (bp) | SNPs | Gene accession IDs | Sequence components of genome | Putative functions |
|---------------------|-------------------------------------|------------------|-------------------------|------|--------------------|-------------------------------|--------------------|
| Kabuli_wild_8556180 | NA                                  | Ca_kabuli_denovo | 8556180                 | C/G  | NA                 | NA                            | NA                 |
| Kabuli_wild_8562975 | NA                                  | Ca_kabuli_denovo | 8562975                 | A/G  | NA                 | NA                            | NA                 |
| Kabuli_wild_8568176 | NA                                  | Ca_kabuli_denovo | 8568176                 | A/G  | NA                 | NA                            | NA                 |
| Kabuli_wild_8568177 | NA                                  | Ca_kabuli_denovo | 8568177                 | C/T  | NA                 | NA                            | NA                 |
| Kabuli_wild_8568178 | NA                                  | Ca_kabuli_denovo | 8568178                 | A/C  | NA                 | NA                            | NA                 |
| Kabuli_wild_8576208 | NA                                  | Ca_kabuli_denovo | 8576208                 | A/G  | NA                 | NA                            | NA                 |
| Kabuli_wild_8584723 | NA                                  | Ca_kabuli_denovo | 8584723                 | T/C  | NA                 | NA                            | NA                 |
| Kabuli_wild_8586433 | NA                                  | Ca_kabuli_denovo | 8586433                 | C/T  | NA                 | NA                            | NA                 |
| Kabuli_wild_8604238 | NA                                  | Ca_kabuli_denovo | 8604238                 | G/T  | NA                 | NA                            | NA                 |
| Kabuli_wild_8622629 | NA                                  | Ca_kabuli_denovo | 8622629                 | A/G  | NA                 | NA                            | NA                 |
| Kabuli_wild_8627295 | NA                                  | Ca_kabuli_denovo | 8627295                 | A/G  | NA                 | NA                            | NA                 |
| Kabuli_wild_8633152 | NA                                  | Ca_kabuli_denovo | 8633152                 | C/T  | NA                 | NA                            | NA                 |
| Kabuli_wild_8633164 | NA                                  | Ca_kabuli_denovo | 8633164                 | C/T  | NA                 | NA                            | NA                 |
| Kabuli_wild_8635655 | NA                                  | Ca_kabuli_denovo | 8635655                 | C/T  | NA                 | NA                            | NA                 |
| Kabuli_wild_8637360 | NA                                  | Ca_kabuli_denovo | 8637360                 | G/T  | NA                 | NA                            | NA                 |
| Kabuli_wild_8639190 | NA                                  | Ca_kabuli_denovo | 8639190                 | G/T  | NA                 | NA                            | NA                 |
| Kabuli_wild_8639976 | NA                                  | Ca_kabuli_denovo | 8639976                 | G/T  | NA                 | NA                            | NA                 |
| Kabuli_wild_8641699 | NA                                  | Ca_kabuli_denovo | 8641699                 | G/T  | NA                 | NA                            | NA                 |
| Kabuli_wild_8647878 | NA                                  | Ca_kabuli_denovo | 8647878                 | C/G  | NA                 | NA                            | NA                 |
| Kabuli_wild_8647899 | NA                                  | Ca_kabuli_denovo | 8647899                 | C/G  | NA                 | NA                            | NA                 |
| Kabuli_wild_8647902 | NA                                  | Ca_kabuli_denovo | 8647902                 | C/G  | NA                 | NA                            | NA                 |
| Kabuli_wild_8650732 | NA                                  | Ca_kabuli_denovo | 8650732                 | C/G  | NA                 | NA                            | NA                 |
| Kabuli_wild_8650735 | NA                                  | Ca_kabuli_denovo | 8650735                 | A/G  | NA                 | NA                            | NA                 |
| Kabuli_wild_8658174 | NA                                  | Ca_kabuli_denovo | 8658174                 | A/G  | NA                 | NA                            | NA                 |
| Kabuli_wild_8658186 | NA                                  | Ca_kabuli_denovo | 8658186                 | C/G  | NA                 | NA                            | NA                 |
| Kabuli_wild_8660790 | NA                                  | Ca_kabuli_denovo | 8660790                 | A/T  | NA                 | NA                            | NA                 |
| Kabuli_wild_8676764 | NA                                  | Ca_kabuli_denovo | 8676764                 | C/T  | NA                 | NA                            | NA                 |
| Kabuli_wild_8676800 | NA                                  | Ca_kabuli_denovo | 8676800                 | C/G  | NA                 | NA                            | NA                 |
| Kabuli_wild_8680643 | NA                                  | Ca_kabuli_denovo | 8680643                 | A/C  | NA                 | NA                            | NA                 |
| Kabuli_wild_8708396 | NA                                  | Ca_kabuli_denovo | 8708396                 | C/G  | NA                 | NA                            | NA                 |
| Kabuli_wild_8708408 | NA                                  | Ca_kabuli_denovo | 8708408                 | C/G  | NA                 | NA                            | NA                 |
| Kabuli_wild_8716678 | NA                                  | Ca_kabuli_denovo | 8716678                 | C/T  | NA                 | NA                            | NA                 |
| Kabuli_wild_8716680 | NA                                  | Ca_kabuli_denovo | 8716680                 | A/C  | NA                 | NA                            | NA                 |
| Kabuli_wild_8716725 | NA                                  | Ca_kabuli_denovo | 8716725                 | A/T  | NA                 | NA                            | NA                 |
| Kabuli_wild_8716727 | NA                                  | Ca_kabuli_denovo | 8716727                 | C/T  | NA                 | NA                            | NA                 |
| Kabuli_wild_8720747 | NA                                  | Ca_kabuli_denovo | 8720747                 | C/G  | NA                 | NA                            | NA                 |
| Kabuli_wild_8725327 | NA                                  | Ca_kabuli_denovo | 8725327                 | C/T  | NA                 | NA                            | NA                 |
| Kabuli_wild_8726464 | NA                                  | Ca_kabuli_denovo | 8726464                 | T/C  | NA                 | NA                            | NA                 |
| Kabuli_wild_8726473 | NA                                  | Ca_kabuli_denovo | 8726473                 | G/C  | NA                 | NA                            | NA                 |
| Kabuli_wild_8729677 | NA                                  | Ca_kabuli_denovo | 8729677                 | C/T  | NA                 | NA                            | NA                 |
| Kabuli_wild_8744208 | NA                                  | Ca_kabuli_denovo | 8744208                 | C/T  | NA                 | NA                            | NA                 |
| Kabuli_wild_8744211 | NA                                  | Ca_kabuli_denovo | 8744211                 | C/T  | NA                 | NA                            | NA                 |
| Kabuli_wild_8751062 | NA                                  | Ca_kabuli_denovo | 8751062                 | C/T  | NA                 | NA                            | NA                 |
| Kabuli_wild_8751091 | NA                                  | Ca_kabuli_denovo | 8751091                 | A/G  | NA                 | NA                            | NA                 |

| SNP IDs             | NCBI dbSNP accession IDs (NCBI_SS#) | Chromosomes      | Physical positions (bp) | SNPs | Gene accession IDs | Sequence components of genome | Putative functions |
|---------------------|-------------------------------------|------------------|-------------------------|------|--------------------|-------------------------------|--------------------|
| Kabuli_wild_8757993 | NA                                  | Ca_kabuli_denovo | 8757993                 | A/G  | NA                 | NA                            | NA                 |
| Kabuli_wild_8758784 | NA                                  | Ca_kabuli_denovo | 8758784                 | G/T  | NA                 | NA                            | NA                 |
| Kabuli_wild_8773094 | NA                                  | Ca_kabuli_denovo | 8773094                 | G/T  | NA                 | NA                            | NA                 |
| Kabuli_wild_8773399 | NA                                  | Ca_kabuli_denovo | 8773399                 | G/C  | NA                 | NA                            | NA                 |
| Kabuli_wild_8773658 | NA                                  | Ca_kabuli_denovo | 8773658                 | A/G  | NA                 | NA                            | NA                 |
| Kabuli_wild_8773715 | NA                                  | Ca_kabuli_denovo | 8773715                 | A/G  | NA                 | NA                            | NA                 |
| Kabuli_wild_8789449 | NA                                  | Ca_kabuli_denovo | 8789449                 | C/G  | NA                 | NA                            | NA                 |
| Kabuli_wild_8805500 | NA                                  | Ca_kabuli_denovo | 8805500                 | T/A  | NA                 | NA                            | NA                 |
| Kabuli_wild_8808446 | NA                                  | Ca_kabuli_denovo | 8808446                 | A/G  | NA                 | NA                            | NA                 |
| Kabuli_wild_8811877 | NA                                  | Ca_kabuli_denovo | 8811877                 | A/C  | NA                 | NA                            | NA                 |
| Kabuli_wild_8811898 | NA                                  | Ca_kabuli_denovo | 8811898                 | C/G  | NA                 | NA                            | NA                 |
| Kabuli_wild_8828273 | NA                                  | Ca_kabuli_denovo | 8828273                 | G/T  | NA                 | NA                            | NA                 |
| Kabuli_wild_8834105 | NA                                  | Ca_kabuli_denovo | 8834105                 | G/C  | NA                 | NA                            | NA                 |
| Kabuli_wild_8834108 | NA                                  | Ca_kabuli_denovo | 8834108                 | G/A  | NA                 | NA                            | NA                 |
| Kabuli_wild_8836985 | NA                                  | Ca_kabuli_denovo | 8836985                 | C/T  | NA                 | NA                            | NA                 |
| Kabuli_wild_8841865 | NA                                  | Ca_kabuli_denovo | 8841865                 | C/T  | NA                 | NA                            | NA                 |
| Kabuli_wild_8841868 | NA                                  | Ca_kabuli_denovo | 8841868                 | G/A  | NA                 | NA                            | NA                 |
| Kabuli_wild_8843792 | NA                                  | Ca_kabuli_denovo | 8843792                 | G/T  | NA                 | NA                            | NA                 |
| Kabuli_wild_8845580 | NA                                  | Ca_kabuli_denovo | 8845580                 | G/C  | NA                 | NA                            | NA                 |
| Kabuli_wild_8869422 | NA                                  | Ca_kabuli_denovo | 8869422                 | G/T  | NA                 | NA                            | NA                 |
| Kabuli_wild_8869448 | NA                                  | Ca_kabuli_denovo | 8869448                 | C/T  | NA                 | NA                            | NA                 |
| Kabuli_wild_8874863 | NA                                  | Ca_kabuli_denovo | 8874863                 | G/A  | NA                 | NA                            | NA                 |
| Kabuli_wild_8875045 | NA                                  | Ca_kabuli_denovo | 8875045                 | C/T  | NA                 | NA                            | NA                 |
| Kabuli_wild_8875590 | NA                                  | Ca_kabuli_denovo | 8875590                 | A/C  | NA                 | NA                            | NA                 |
| Kabuli_wild_8875604 | NA                                  | Ca_kabuli_denovo | 8875604                 | C/G  | NA                 | NA                            | NA                 |
| Kabuli_wild_8879780 | NA                                  | Ca_kabuli_denovo | 8879780                 | C/T  | NA                 | NA                            | NA                 |
| Kabuli_wild_8879789 | NA                                  | Ca_kabuli_denovo | 8879789                 | G/T  | NA                 | NA                            | NA                 |
| Kabuli_wild_8879810 | NA                                  | Ca_kabuli_denovo | 8879810                 | C/T  | NA                 | NA                            | NA                 |
| Kabuli_wild_8881875 | NA                                  | Ca_kabuli_denovo | 8881875                 | A/G  | NA                 | NA                            | NA                 |
| Kabuli_wild_8896204 | NA                                  | Ca_kabuli_denovo | 8896204                 | C/G  | NA                 | NA                            | NA                 |
| Kabuli_wild_8898965 | NA                                  | Ca_kabuli_denovo | 8898965                 | A/G  | NA                 | NA                            | NA                 |
| Kabuli_wild_8898967 | NA                                  | Ca_kabuli_denovo | 8898967                 | A/G  | NA                 | NA                            | NA                 |
| Kabuli_wild_8898973 | NA                                  | Ca_kabuli_denovo | 8898973                 | C/T  | NA                 | NA                            | NA                 |
| Kabuli_wild_8907797 | NA                                  | Ca_kabuli_denovo | 8907797                 | A/G  | NA                 | NA                            | NA                 |
| Kabuli_wild_8911232 | NA                                  | Ca_kabuli_denovo | 8911232                 | C/G  | NA                 | NA                            | NA                 |
| Kabuli_wild_8911235 | NA                                  | Ca_kabuli_denovo | 8911235                 | C/G  | NA                 | NA                            | NA                 |
| Kabuli_wild_8912355 | NA                                  | Ca_kabuli_denovo | 8912355                 | A/G  | NA                 | NA                            | NA                 |
| Kabuli_wild_8912373 | NA                                  | Ca_kabuli_denovo | 8912373                 | C/T  | NA                 | NA                            | NA                 |
| Kabuli_wild_8919290 | NA                                  | Ca_kabuli_denovo | 8919290                 | C/G  | NA                 | NA                            | NA                 |
| Kabuli_wild_8919338 | NA                                  | Ca_kabuli_denovo | 8919338                 | C/G  | NA                 | NA                            | NA                 |
| Kabuli_wild_8919377 | NA                                  | Ca_kabuli_denovo | 8919377                 | C/G  | NA                 | NA                            | NA                 |
| Kabuli_wild_8947605 | NA                                  | Ca_kabuli_denovo | 8947605                 | C/G  | NA                 | NA                            | NA                 |
| Kabuli_wild_8963853 | NA                                  | Ca_kabuli_denovo | 8963853                 | G/A  | NA                 | NA                            | NA                 |
| Kabuli_wild_8965977 | NA                                  | Ca_kabuli_denovo | 8965977                 | A/C  | NA                 | NA                            | NA                 |

| SNP IDs             | NCBI dbSNP accession IDs (NCBI_SS#) | Chromosomes      | Physical positions (bp) | SNPs | Gene accession IDs | Sequence components of genome | Putative functions |
|---------------------|-------------------------------------|------------------|-------------------------|------|--------------------|-------------------------------|--------------------|
| Kabuli_wild_8966623 | NA                                  | Ca_kabuli_denovo | 8966623                 | C/T  | NA                 | NA                            | NA                 |
| Kabuli_wild_8976802 | NA                                  | Ca_kabuli_denovo | 8976802                 | G/T  | NA                 | NA                            | NA                 |
| Kabuli_wild_8979006 | NA                                  | Ca_kabuli_denovo | 8979006                 | C/T  | NA                 | NA                            | NA                 |
| Kabuli_wild_8980131 | NA                                  | Ca_kabuli_denovo | 8980131                 | C/T  | NA                 | NA                            | NA                 |
| Kabuli_wild_8980163 | NA                                  | Ca_kabuli_denovo | 8980163                 | C/G  | NA                 | NA                            | NA                 |
| Kabuli_wild_8991359 | NA                                  | Ca_kabuli_denovo | 8991359                 | A/C  | NA                 | NA                            | NA                 |
| Kabuli_wild_9029385 | NA                                  | Ca_kabuli_denovo | 9029385                 | A/C  | NA                 | NA                            | NA                 |
| Kabuli_wild_9032944 | NA                                  | Ca_kabuli_denovo | 9032944                 | A/G  | NA                 | NA                            | NA                 |
| Kabuli_wild_9058153 | NA                                  | Ca_kabuli_denovo | 9058153                 | C/G  | NA                 | NA                            | NA                 |
| Kabuli_wild_9059986 | NA                                  | Ca_kabuli_denovo | 9059986                 | C/G  | NA                 | NA                            | NA                 |
| Kabuli_wild_9063232 | NA                                  | Ca_kabuli_denovo | 9063232                 | C/G  | NA                 | NA                            | NA                 |
| Kabuli_wild_9069286 | NA                                  | Ca_kabuli_denovo | 9069286                 | C/T  | NA                 | NA                            | NA                 |
| Kabuli_wild_9070740 | NA                                  | Ca_kabuli_denovo | 9070740                 | C/T  | NA                 | NA                            | NA                 |
| Kabuli_wild_9077198 | NA                                  | Ca_kabuli_denovo | 9077198                 | C/G  | NA                 | NA                            | NA                 |
| Kabuli_wild_9088496 | NA                                  | Ca_kabuli_denovo | 9088496                 | C/T  | NA                 | NA                            | NA                 |
| Kabuli_wild_9088499 | NA                                  | Ca_kabuli_denovo | 9088499                 | C/G  | NA                 | NA                            | NA                 |
| Kabuli_wild_9088506 | NA                                  | Ca_kabuli_denovo | 9088506                 | A/G  | NA                 | NA                            | NA                 |
| Kabuli_wild_9092382 | NA                                  | Ca_kabuli_denovo | 9092382                 | A/G  | NA                 | NA                            | NA                 |
| Kabuli_wild_9092385 | NA                                  | Ca_kabuli_denovo | 9092385                 | C/G  | NA                 | NA                            | NA                 |
| Kabuli_wild_9092415 | NA                                  | Ca_kabuli_denovo | 9092415                 | T/C  | NA                 | NA                            | NA                 |
| Kabuli_wild_9093616 | NA                                  | Ca_kabuli_denovo | 9093616                 | A/C  | NA                 | NA                            | NA                 |
| Kabuli_wild_9093620 | NA                                  | Ca_kabuli_denovo | 9093620                 | C/G  | NA                 | NA                            | NA                 |
| Kabuli_wild_9095710 | NA                                  | Ca_kabuli_denovo | 9095710                 | G/C  | NA                 | NA                            | NA                 |
| Kabuli_wild_9095725 | NA                                  | Ca_kabuli_denovo | 9095725                 | G/A  | NA                 | NA                            | NA                 |
| Kabuli_wild_9095898 | NA                                  | Ca_kabuli_denovo | 9095898                 | G/A  | NA                 | NA                            | NA                 |
| Kabuli_wild_9100948 | NA                                  | Ca_kabuli_denovo | 9100948                 | G/T  | NA                 | NA                            | NA                 |
| Kabuli_wild_9108458 | NA                                  | Ca_kabuli_denovo | 9108458                 | C/T  | NA                 | NA                            | NA                 |
| Kabuli_wild_9116621 | NA                                  | Ca_kabuli_denovo | 9116621                 | A/G  | NA                 | NA                            | NA                 |
| Kabuli_wild_9116622 | NA                                  | Ca_kabuli_denovo | 9116622                 | C/G  | NA                 | NA                            | NA                 |
| Kabuli_wild_9130891 | NA                                  | Ca_kabuli_denovo | 9130891                 | A/G  | NA                 | NA                            | NA                 |
| Kabuli_wild_9146111 | NA                                  | Ca_kabuli_denovo | 9146111                 | A/G  | NA                 | NA                            | NA                 |
| Kabuli_wild_9167727 | NA                                  | Ca_kabuli_denovo | 9167727                 | C/G  | NA                 | NA                            | NA                 |
| Kabuli_wild_9167748 | NA                                  | Ca_kabuli_denovo | 9167748                 | C/G  | NA                 | NA                            | NA                 |
| Kabuli_wild_9167754 | NA                                  | Ca_kabuli_denovo | 9167754                 | C/G  | NA                 | NA                            | NA                 |
| Kabuli_wild_9167760 | NA                                  | Ca_kabuli_denovo | 9167760                 | C/T  | NA                 | NA                            | NA                 |
| Kabuli_wild_9170462 | NA                                  | Ca_kabuli_denovo | 9170462                 | C/G  | NA                 | NA                            | NA                 |
| Kabuli_wild_9171173 | NA                                  | Ca_kabuli_denovo | 9171173                 | G/T  | NA                 | NA                            | NA                 |
| Kabuli_wild_9186079 | NA                                  | Ca_kabuli_denovo | 9186079                 | A/G  | NA                 | NA                            | NA                 |
| Kabuli_wild_9193367 | NA                                  | Ca_kabuli_denovo | 9193367                 | C/T  | NA                 | NA                            | NA                 |
| Kabuli_wild_9193371 | NA                                  | Ca_kabuli_denovo | 9193371                 | C/T  | NA                 | NA                            | NA                 |
| Kabuli_wild_9198693 | NA                                  | Ca_kabuli_denovo | 9198693                 | C/T  | NA                 | NA                            | NA                 |
| Kabuli_wild_9215903 | NA                                  | Ca_kabuli_denovo | 9215903                 | C/T  | NA                 | NA                            | NA                 |
| Kabuli_wild_9230609 | NA                                  | Ca_kabuli_denovo | 9230609                 | A/G  | NA                 | NA                            | NA                 |
| Kabuli_wild_9232211 | NA                                  | Ca_kabuli_denovo | 9232211                 | A/G  | NA                 | NA                            | NA                 |

| SNP IDs             | NCBI dbSNP accession IDs (NCBI_SS#) | Chromosomes      | Physical positions (bp) | SNPs | Gene accession IDs | Sequence components of genome | Putative functions |
|---------------------|-------------------------------------|------------------|-------------------------|------|--------------------|-------------------------------|--------------------|
| Kabuli_wild_9263838 | NA                                  | Ca_kabuli_denovo | 9263838                 | C/G  | NA                 | NA                            | NA                 |
| Kabuli_wild_9265480 | NA                                  | Ca_kabuli_denovo | 9265480                 | A/C  | NA                 | NA                            | NA                 |
| Kabuli_wild_9266817 | NA                                  | Ca_kabuli_denovo | 9266817                 | A/G  | NA                 | NA                            | NA                 |
| Kabuli_wild_9279055 | NA                                  | Ca_kabuli_denovo | 9279055                 | C/T  | NA                 | NA                            | NA                 |
| Kabuli_wild_9289897 | NA                                  | Ca_kabuli_denovo | 9289897                 | A/G  | NA                 | NA                            | NA                 |
| Kabuli_wild_9289900 | NA                                  | Ca_kabuli_denovo | 9289900                 | A/G  | NA                 | NA                            | NA                 |
| Kabuli_wild_9306531 | NA                                  | Ca_kabuli_denovo | 9306531                 | T/C  | NA                 | NA                            | NA                 |
| Kabuli_wild_9306537 | NA                                  | Ca_kabuli_denovo | 9306537                 | G/C  | NA                 | NA                            | NA                 |
| Kabuli_wild_9325985 | NA                                  | Ca_kabuli_denovo | 9325985                 | A/G  | NA                 | NA                            | NA                 |
| Kabuli_wild_9326018 | NA                                  | Ca_kabuli_denovo | 9326018                 | A/G  | NA                 | NA                            | NA                 |
| Kabuli_wild_9339202 | NA                                  | Ca_kabuli_denovo | 9339202                 | A/C  | NA                 | NA                            | NA                 |
| Kabuli_wild_9339227 | NA                                  | Ca_kabuli_denovo | 9339227                 | A/C  | NA                 | NA                            | NA                 |
| Kabuli_wild_9343781 | NA                                  | Ca_kabuli_denovo | 9343781                 | C/G  | NA                 | NA                            | NA                 |
| Kabuli_wild_9343798 | NA                                  | Ca_kabuli_denovo | 9343798                 | A/G  | NA                 | NA                            | NA                 |
| Kabuli_wild_9353638 | NA                                  | Ca_kabuli_denovo | 9353638                 | C/G  | NA                 | NA                            | NA                 |
| Kabuli_wild_9355351 | NA                                  | Ca_kabuli_denovo | 9355351                 | A/G  | NA                 | NA                            | NA                 |
| Kabuli_wild_9355363 | NA                                  | Ca_kabuli_denovo | 9355363                 | C/G  | NA                 | NA                            | NA                 |
| Kabuli_wild_9355421 | NA                                  | Ca_kabuli_denovo | 9355421                 | G/T  | NA                 | NA                            | NA                 |
| Kabuli_wild_9359362 | NA                                  | Ca_kabuli_denovo | 9359362                 | C/T  | NA                 | NA                            | NA                 |
| Kabuli_wild_9359375 | NA                                  | Ca_kabuli_denovo | 9359375                 | C/T  | NA                 | NA                            | NA                 |
| Kabuli_wild_9359376 | NA                                  | Ca_kabuli_denovo | 9359376                 | G/T  | NA                 | NA                            | NA                 |
| Kabuli_wild_9359383 | NA                                  | Ca_kabuli_denovo | 9359383                 | A/G  | NA                 | NA                            | NA                 |
| Kabuli_wild_9366960 | NA                                  | Ca_kabuli_denovo | 9366960                 | C/T  | NA                 | NA                            | NA                 |
| Kabuli_wild_9397553 | NA                                  | Ca_kabuli_denovo | 9397553                 | C/G  | NA                 | NA                            | NA                 |
| Kabuli_wild_9401236 | NA                                  | Ca_kabuli_denovo | 9401236                 | C/G  | NA                 | NA                            | NA                 |
| Kabuli_wild_9401248 | NA                                  | Ca_kabuli_denovo | 9401248                 | A/C  | NA                 | NA                            | NA                 |
| Kabuli_wild_9401251 | NA                                  | Ca_kabuli_denovo | 9401251                 | A/G  | NA                 | NA                            | NA                 |
| Kabuli_wild_9426495 | NA                                  | Ca_kabuli_denovo | 9426495                 | A/G  | NA                 | NA                            | NA                 |
| Kabuli_wild_9426543 | NA                                  | Ca_kabuli_denovo | 9426543                 | A/G  | NA                 | NA                            | NA                 |
| Kabuli_wild_9428777 | NA                                  | Ca_kabuli_denovo | 9428777                 | C/T  | NA                 | NA                            | NA                 |
| Kabuli_wild_9429702 | NA                                  | Ca_kabuli_denovo | 9429702                 | C/G  | NA                 | NA                            | NA                 |
| Kabuli_wild_9431725 | NA                                  | Ca_kabuli_denovo | 9431725                 | C/G  | NA                 | NA                            | NA                 |
| Kabuli_wild_9431764 | NA                                  | Ca_kabuli_denovo | 9431764                 | G/A  | NA                 | NA                            | NA                 |
| Kabuli_wild_9440232 | NA                                  | Ca_kabuli_denovo | 9440232                 | A/G  | NA                 | NA                            | NA                 |
| Kabuli_wild_9445796 | NA                                  | Ca_kabuli_denovo | 9445796                 | C/G  | NA                 | NA                            | NA                 |
| Kabuli_wild_9451393 | NA                                  | Ca_kabuli_denovo | 9451393                 | C/T  | NA                 | NA                            | NA                 |
| Kabuli_wild_9453195 | NA                                  | Ca_kabuli_denovo | 9453195                 | A/C  | NA                 | NA                            | NA                 |
| Kabuli_wild_9476151 | NA                                  | Ca_kabuli_denovo | 9476151                 | C/T  | NA                 | NA                            | NA                 |
| Kabuli_wild_9476152 | NA                                  | Ca_kabuli_denovo | 9476152                 | C/T  | NA                 | NA                            | NA                 |
| Kabuli_wild_9516070 | NA                                  | Ca_kabuli_denovo | 9516070                 | G/T  | NA                 | NA                            | NA                 |
| Kabuli_wild_9525494 | NA                                  | Ca_kabuli_denovo | 9525494                 | C/G  | NA                 | NA                            | NA                 |
| Kabuli_wild_9525524 | NA                                  | Ca_kabuli_denovo | 9525524                 | A/G  | NA                 | NA                            | NA                 |
| Kabuli_wild_9544958 | NA                                  | Ca_kabuli_denovo | 9544958                 | A/C  | NA                 | NA                            | NA                 |
| Kabuli_wild_9544964 | NA                                  | Ca_kabuli_denovo | 9544964                 | A/G  | NA                 | NA                            | NA                 |



| SNP IDs             | NCBI dbSNP accession IDs (NCBI_SS#) | Chromosomes      | Physical positions (bp) | SNPs | Gene accession IDs | Sequence components of genome | Putative functions |
|---------------------|-------------------------------------|------------------|-------------------------|------|--------------------|-------------------------------|--------------------|
| Kabuli_wild_9549329 | NA                                  | Ca_kabuli_denovo | 9549329                 | A/G  | NA                 | NA                            | NA                 |
| Kabuli_wild_9549358 | NA                                  | Ca_kabuli_denovo | 9549358                 | C/T  | NA                 | NA                            | NA                 |
| Kabuli_wild_9561804 | NA                                  | Ca_kabuli_denovo | 9561804                 | C/T  | NA                 | NA                            | NA                 |
| Kabuli_wild_9572931 | NA                                  | Ca_kabuli_denovo | 9572931                 | A/C  | NA                 | NA                            | NA                 |
| Kabuli_wild_9582495 | NA                                  | Ca_kabuli_denovo | 9582495                 | A/G  | NA                 | NA                            | NA                 |
| Kabuli_wild_9606648 | NA                                  | Ca_kabuli_denovo | 9606648                 | C/T  | NA                 | NA                            | NA                 |
| Kabuli_wild_9615030 | NA                                  | Ca_kabuli_denovo | 9615030                 | G/T  | NA                 | NA                            | NA                 |
| Kabuli_wild_9616045 | NA                                  | Ca_kabuli_denovo | 9616045                 | A/G  | NA                 | NA                            | NA                 |
| Kabuli_wild_9616048 | NA                                  | Ca_kabuli_denovo | 9616048                 | T/C  | NA                 | NA                            | NA                 |
| Kabuli_wild_9624666 | NA                                  | Ca_kabuli_denovo | 9624666                 | A/G  | NA                 | NA                            | NA                 |
| Kabuli_wild_9633696 | NA                                  | Ca_kabuli_denovo | 9633696                 | C/T  | NA                 | NA                            | NA                 |
| Kabuli_wild_9633709 | NA                                  | Ca_kabuli_denovo | 9633709                 | A/G  | NA                 | NA                            | NA                 |
| Kabuli_wild_9635366 | NA                                  | Ca_kabuli_denovo | 9635366                 | C/T  | NA                 | NA                            | NA                 |
| Kabuli_wild_9648794 | NA                                  | Ca_kabuli_denovo | 9648794                 | A/G  | NA                 | NA                            | NA                 |
| Kabuli_wild_9648798 | NA                                  | Ca_kabuli_denovo | 9648798                 | C/G  | NA                 | NA                            | NA                 |
| Kabuli_wild_9648800 | NA                                  | Ca_kabuli_denovo | 9648800                 | C/T  | NA                 | NA                            | NA                 |
| Kabuli_wild_9664945 | NA                                  | Ca_kabuli_denovo | 9664945                 | C/G  | NA                 | NA                            | NA                 |
| Kabuli_wild_9664963 | NA                                  | Ca_kabuli_denovo | 9664963                 | A/G  | NA                 | NA                            | NA                 |
| Kabuli_wild_9664984 | NA                                  | Ca_kabuli_denovo | 9664984                 | A/G  | NA                 | NA                            | NA                 |
| Kabuli_wild_9664987 | NA                                  | Ca_kabuli_denovo | 9664987                 | A/G  | NA                 | NA                            | NA                 |
| Kabuli_wild_9675032 | NA                                  | Ca_kabuli_denovo | 9675032                 | C/G  | NA                 | NA                            | NA                 |
| Kabuli_wild_9677698 | NA                                  | Ca_kabuli_denovo | 9677698                 | A/C  | NA                 | NA                            | NA                 |
| Kabuli_wild_9687450 | NA                                  | Ca_kabuli_denovo | 9687450                 | C/G  | NA                 | NA                            | NA                 |
| Kabuli_wild_9688053 | NA                                  | Ca_kabuli_denovo | 9688053                 | G/T  | NA                 | NA                            | NA                 |
| Kabuli_wild_9698621 | NA                                  | Ca_kabuli_denovo | 9698621                 | G/T  | NA                 | NA                            | NA                 |
| Kabuli_wild_9698639 | NA                                  | Ca_kabuli_denovo | 9698639                 | G/T  | NA                 | NA                            | NA                 |
| Kabuli_wild_9717792 | NA                                  | Ca_kabuli_denovo | 9717792                 | C/T  | NA                 | NA                            | NA                 |
| Kabuli_wild_9717811 | NA                                  | Ca_kabuli_denovo | 9717811                 | G/A  | NA                 | NA                            | NA                 |
| Kabuli_wild_9739939 | NA                                  | Ca_kabuli_denovo | 9739939                 | A/G  | NA                 | NA                            | NA                 |
| Kabuli_wild_9760966 | NA                                  | Ca_kabuli_denovo | 9760966                 | C/T  | NA                 | NA                            | NA                 |
| Kabuli_wild_9762597 | NA                                  | Ca_kabuli_denovo | 9762597                 | A/C  | NA                 | NA                            | NA                 |
| Kabuli_wild_9762598 | NA                                  | Ca_kabuli_denovo | 9762598                 | A/G  | NA                 | NA                            | NA                 |
| Kabuli_wild_9780469 | NA                                  | Ca_kabuli_denovo | 9780469                 | A/C  | NA                 | NA                            | NA                 |
| Kabuli_wild_9780496 | NA                                  | Ca_kabuli_denovo | 9780496                 | A/C  | NA                 | NA                            | NA                 |
| Kabuli_wild_9784740 | NA                                  | Ca_kabuli_denovo | 9784740                 | A/T  | NA                 | NA                            | NA                 |
| Kabuli_wild_9784741 | NA                                  | Ca_kabuli_denovo | 9784741                 | C/G  | NA                 | NA                            | NA                 |
| Kabuli_wild_9791747 | NA                                  | Ca_kabuli_denovo | 9791747                 | A/G  | NA                 | NA                            | NA                 |
| Kabuli_wild_9805378 | NA                                  | Ca_kabuli_denovo | 9805378                 | C/G  | NA                 | NA                            | NA                 |
| Kabuli_wild_9823317 | NA                                  | Ca_kabuli_denovo | 9823317                 | A/C  | NA                 | NA                            | NA                 |
| Kabuli_wild_9823981 | NA                                  | Ca_kabuli_denovo | 9823981                 | A/C  | NA                 | NA                            | NA                 |
| Kabuli_wild_9823999 | NA                                  | Ca_kabuli_denovo | 9823999                 | G/A  | NA                 | NA                            | NA                 |
| Kabuli_wild_9855799 | NA                                  | Ca_kabuli_denovo | 9855799                 | C/G  | NA                 | NA                            | NA                 |
| Kabuli_wild_9855832 | NA                                  | Ca_kabuli_denovo | 9855832                 | C/G  | NA                 | NA                            | NA                 |
| Kabuli_wild_9855868 | NA                                  | Ca_kabuli_denovo | 9855868                 | C/G  | NA                 | NA                            | NA                 |

| SNP IDs              | NCBI dbSNP accession IDs (NCBI_SS#) | Chromosomes      | Physical positions (bp) | SNPs | Gene accession IDs | Sequence components of genome | Putative functions |
|----------------------|-------------------------------------|------------------|-------------------------|------|--------------------|-------------------------------|--------------------|
| Kabuli_wild_9855877  | NA                                  | Ca_kabuli_denovo | 9855877                 | C/G  | NA                 | NA                            | NA                 |
| Kabuli_wild_9859140  | NA                                  | Ca_kabuli_denovo | 9859140                 | T/C  | NA                 | NA                            | NA                 |
| Kabuli_wild_9876471  | NA                                  | Ca_kabuli_denovo | 9876471                 | G/T  | NA                 | NA                            | NA                 |
| Kabuli_wild_9878571  | NA                                  | Ca_kabuli_denovo | 9878571                 | G/T  | NA                 | NA                            | NA                 |
| Kabuli_wild_9891513  | NA                                  | Ca_kabuli_denovo | 9891513                 | G/T  | NA                 | NA                            | NA                 |
| Kabuli_wild_9912655  | NA                                  | Ca_kabuli_denovo | 9912655                 | C/G  | NA                 | NA                            | NA                 |
| Kabuli_wild_9922879  | NA                                  | Ca_kabuli_denovo | 9922879                 | C/T  | NA                 | NA                            | NA                 |
| Kabuli_wild_9924308  | NA                                  | Ca_kabuli_denovo | 9924308                 | C/T  | NA                 | NA                            | NA                 |
| Kabuli_wild_9924327  | NA                                  | Ca_kabuli_denovo | 9924327                 | C/G  | NA                 | NA                            | NA                 |
| Kabuli_wild_9931352  | NA                                  | Ca_kabuli_denovo | 9931352                 | G/T  | NA                 | NA                            | NA                 |
| Kabuli_wild_9939264  | NA                                  | Ca_kabuli_denovo | 9939264                 | C/G  | NA                 | NA                            | NA                 |
| Kabuli_wild_9939297  | NA                                  | Ca_kabuli_denovo | 9939297                 | C/G  | NA                 | NA                            | NA                 |
| Kabuli_wild_9943601  | NA                                  | Ca_kabuli_denovo | 9943601                 | A/G  | NA                 | NA                            | NA                 |
| Kabuli_wild_9943634  | NA                                  | Ca_kabuli_denovo | 9943634                 | G/C  | NA                 | NA                            | NA                 |
| Kabuli_wild_9943652  | NA                                  | Ca_kabuli_denovo | 9943652                 | G/A  | NA                 | NA                            | NA                 |
| Kabuli_wild_9943658  | NA                                  | Ca_kabuli_denovo | 9943658                 | A/G  | NA                 | NA                            | NA                 |
| Kabuli_wild_9951032  | NA                                  | Ca_kabuli_denovo | 9951032                 | A/G  | NA                 | NA                            | NA                 |
| Kabuli_wild_9957173  | NA                                  | Ca_kabuli_denovo | 9957173                 | C/T  | NA                 | NA                            | NA                 |
| Kabuli_wild_9957221  | NA                                  | Ca_kabuli_denovo | 9957221                 | C/G  | NA                 | NA                            | NA                 |
| Kabuli_wild_9984879  | NA                                  | Ca_kabuli_denovo | 9984879                 | A/C  | NA                 | NA                            | NA                 |
| Kabuli_wild_10009236 | NA                                  | Ca_kabuli_denovo | 10009236                | C/T  | NA                 | NA                            | NA                 |
| Kabuli_wild_10010277 | NA                                  | Ca_kabuli_denovo | 10010277                | C/G  | NA                 | NA                            | NA                 |
| Kabuli_wild_10010278 | NA                                  | Ca_kabuli_denovo | 10010278                | C/G  | NA                 | NA                            | NA                 |
| Kabuli_wild_10010297 | NA                                  | Ca_kabuli_denovo | 10010297                | C/G  | NA                 | NA                            | NA                 |
| Kabuli_wild_10010298 | NA                                  | Ca_kabuli_denovo | 10010298                | A/C  | NA                 | NA                            | NA                 |
| Kabuli_wild_10019390 | NA                                  | Ca_kabuli_denovo | 10019390                | A/C  | NA                 | NA                            | NA                 |
| Kabuli_wild_10019396 | NA                                  | Ca_kabuli_denovo | 10019396                | C/G  | NA                 | NA                            | NA                 |
| Kabuli_wild_10028145 | NA                                  | Ca_kabuli_denovo | 10028145                | A/G  | NA                 | NA                            | NA                 |
| Kabuli_wild_10030433 | NA                                  | Ca_kabuli_denovo | 10030433                | C/G  | NA                 | NA                            | NA                 |
| Kabuli_wild_10030435 | NA                                  | Ca_kabuli_denovo | 10030435                | A/C  | NA                 | NA                            | NA                 |
| Kabuli_wild_10041460 | NA                                  | Ca_kabuli_denovo | 10041460                | A/G  | NA                 | NA                            | NA                 |
| Kabuli_wild_10045096 | NA                                  | Ca_kabuli_denovo | 10045096                | C/T  | NA                 | NA                            | NA                 |
| Kabuli_wild_10045105 | NA                                  | Ca_kabuli_denovo | 10045105                | C/T  | NA                 | NA                            | NA                 |
| Kabuli_wild_10047742 | NA                                  | Ca_kabuli_denovo | 10047742                | C/T  | NA                 | NA                            | NA                 |
| Kabuli_wild_10053339 | NA                                  | Ca_kabuli_denovo | 10053339                | C/T  | NA                 | NA                            | NA                 |
| Kabuli_wild_10055540 | NA                                  | Ca_kabuli_denovo | 10055540                | C/G  | NA                 | NA                            | NA                 |
| Kabuli_wild_10072208 | NA                                  | Ca_kabuli_denovo | 10072208                | C/G  | NA                 | NA                            | NA                 |
| Kabuli_wild_10073831 | NA                                  | Ca_kabuli_denovo | 10073831                | A/G  | NA                 | NA                            | NA                 |
| Kabuli_wild_10073844 | NA                                  | Ca_kabuli_denovo | 10073844                | A/G  | NA                 | NA                            | NA                 |
| Kabuli_wild_10073860 | NA                                  | Ca_kabuli_denovo | 10073860                | C/G  | NA                 | NA                            | NA                 |
| Kabuli_wild_10074902 | NA                                  | Ca_kabuli_denovo | 10074902                | A/C  | NA                 | NA                            | NA                 |
| Kabuli_wild_10076624 | NA                                  | Ca_kabuli_denovo | 10076624                | C/T  | NA                 | NA                            | NA                 |
| Kabuli_wild_10077136 | NA                                  | Ca_kabuli_denovo | 10077136                | T/G  | NA                 | NA                            | NA                 |
| Kabuli_wild_10077982 | NA                                  | Ca_kabuli_denovo | 10077982                | A/G  | NA                 | NA                            | NA                 |

| SNP IDs                     | NCBI dbSNP accession IDs (NCBI_SS#) | Chromosomes             | Physical positions (bp) | SNPs | Gene accession IDs | Sequence components of genome | Putative functions |
|-----------------------------|-------------------------------------|-------------------------|-------------------------|------|--------------------|-------------------------------|--------------------|
| <i>Kabuli_wild_10079620</i> | NA                                  | <i>Ca_kabuli_denovo</i> | 10079620                | A/G  | NA                 | NA                            | NA                 |
| <i>Kabuli_wild_10079626</i> | NA                                  | <i>Ca_kabuli_denovo</i> | 10079626                | A/G  | NA                 | NA                            | NA                 |
| <i>Kabuli_wild_10079665</i> | NA                                  | <i>Ca_kabuli_denovo</i> | 10079665                | A/G  | NA                 | NA                            | NA                 |
| <i>Kabuli_wild_10079689</i> | NA                                  | <i>Ca_kabuli_denovo</i> | 10079689                | C/G  | NA                 | NA                            | NA                 |
| <i>Kabuli_wild_10087972</i> | NA                                  | <i>Ca_kabuli_denovo</i> | 10087972                | A/C  | NA                 | NA                            | NA                 |
| <i>Kabuli_wild_10087973</i> | NA                                  | <i>Ca_kabuli_denovo</i> | 10087973                | G/T  | NA                 | NA                            | NA                 |
| <i>Kabuli_wild_10089869</i> | NA                                  | <i>Ca_kabuli_denovo</i> | 10089869                | C/T  | NA                 | NA                            | NA                 |
| <i>Kabuli_wild_10095986</i> | NA                                  | <i>Ca_kabuli_denovo</i> | 10095986                | T/C  | NA                 | NA                            | NA                 |
| <i>Kabuli_wild_10099309</i> | NA                                  | <i>Ca_kabuli_denovo</i> | 10099309                | C/T  | NA                 | NA                            | NA                 |
| <i>Kabuli_wild_10099330</i> | NA                                  | <i>Ca_kabuli_denovo</i> | 10099330                | G/T  | NA                 | NA                            | NA                 |
| <i>Kabuli_wild_10114911</i> | NA                                  | <i>Ca_kabuli_denovo</i> | 10114911                | A/G  | NA                 | NA                            | NA                 |
| <i>Kabuli_wild_10115821</i> | NA                                  | <i>Ca_kabuli_denovo</i> | 10115821                | A/G  | NA                 | NA                            | NA                 |
| <i>Kabuli_wild_10115836</i> | NA                                  | <i>Ca_kabuli_denovo</i> | 10115836                | A/G  | NA                 | NA                            | NA                 |
| <i>Kabuli_wild_10117248</i> | NA                                  | <i>Ca_kabuli_denovo</i> | 10117248                | C/G  | NA                 | NA                            | NA                 |
| <i>Kabuli_wild_10117257</i> | NA                                  | <i>Ca_kabuli_denovo</i> | 10117257                | A/G  | NA                 | NA                            | NA                 |
| <i>Kabuli_wild_10128847</i> | NA                                  | <i>Ca_kabuli_denovo</i> | 10128847                | C/T  | NA                 | NA                            | NA                 |
| <i>Kabuli_wild_10128856</i> | NA                                  | <i>Ca_kabuli_denovo</i> | 10128856                | C/G  | NA                 | NA                            | NA                 |
| <i>Kabuli_wild_10135732</i> | NA                                  | <i>Ca_kabuli_denovo</i> | 10135732                | T/G  | NA                 | NA                            | NA                 |
| <i>Kabuli_wild_10137678</i> | NA                                  | <i>Ca_kabuli_denovo</i> | 10137678                | T/C  | NA                 | NA                            | NA                 |
| <i>Kabuli_wild_10150386</i> | NA                                  | <i>Ca_kabuli_denovo</i> | 10150386                | A/C  | NA                 | NA                            | NA                 |
| <i>Kabuli_wild_10203032</i> | NA                                  | <i>Ca_kabuli_denovo</i> | 10203032                | C/G  | NA                 | NA                            | NA                 |
| <i>Kabuli_wild_10203897</i> | NA                                  | <i>Ca_kabuli_denovo</i> | 10203897                | A/C  | NA                 | NA                            | NA                 |
| <i>Kabuli_wild_10240187</i> | NA                                  | <i>Ca_kabuli_denovo</i> | 10240187                | A/G  | NA                 | NA                            | NA                 |
| <i>Kabuli_wild_10243165</i> | NA                                  | <i>Ca_kabuli_denovo</i> | 10243165                | C/T  | NA                 | NA                            | NA                 |
| <i>Kabuli_wild_10252401</i> | NA                                  | <i>Ca_kabuli_denovo</i> | 10252401                | C/T  | NA                 | NA                            | NA                 |
| <i>Kabuli_wild_10259536</i> | NA                                  | <i>Ca_kabuli_denovo</i> | 10259536                | A/C  | NA                 | NA                            | NA                 |
| <i>Kabuli_wild_10260469</i> | NA                                  | <i>Ca_kabuli_denovo</i> | 10260469                | C/T  | NA                 | NA                            | NA                 |
| <i>Kabuli_wild_10264882</i> | NA                                  | <i>Ca_kabuli_denovo</i> | 10264882                | A/C  | NA                 | NA                            | NA                 |
| <i>Kabuli_wild_10306961</i> | NA                                  | <i>Ca_kabuli_denovo</i> | 10306961                | A/G  | NA                 | NA                            | NA                 |
| <i>Kabuli_wild_10306997</i> | NA                                  | <i>Ca_kabuli_denovo</i> | 10306997                | A/G  | NA                 | NA                            | NA                 |
| <i>Kabuli_wild_10307005</i> | NA                                  | <i>Ca_kabuli_denovo</i> | 10307005                | C/T  | NA                 | NA                            | NA                 |
| <i>Kabuli_wild_10318505</i> | NA                                  | <i>Ca_kabuli_denovo</i> | 10318505                | C/G  | NA                 | NA                            | NA                 |
| <i>Kabuli_wild_10328054</i> | NA                                  | <i>Ca_kabuli_denovo</i> | 10328054                | C/T  | NA                 | NA                            | NA                 |
| <i>Kabuli_wild_10328056</i> | NA                                  | <i>Ca_kabuli_denovo</i> | 10328056                | A/G  | NA                 | NA                            | NA                 |
| <i>Kabuli_wild_10328057</i> | NA                                  | <i>Ca_kabuli_denovo</i> | 10328057                | A/G  | NA                 | NA                            | NA                 |
| <i>Kabuli_wild_10330541</i> | NA                                  | <i>Ca_kabuli_denovo</i> | 10330541                | C/G  | NA                 | NA                            | NA                 |
| <i>Kabuli_wild_10330586</i> | NA                                  | <i>Ca_kabuli_denovo</i> | 10330586                | G/T  | NA                 | NA                            | NA                 |
| <i>Kabuli_wild_10333281</i> | NA                                  | <i>Ca_kabuli_denovo</i> | 10333281                | C/T  | NA                 | NA                            | NA                 |
| <i>Kabuli_wild_10333298</i> | NA                                  | <i>Ca_kabuli_denovo</i> | 10333298                | A/G  | NA                 | NA                            | NA                 |
| <i>Kabuli_wild_10335367</i> | NA                                  | <i>Ca_kabuli_denovo</i> | 10335367                | C/G  | NA                 | NA                            | NA                 |
| <i>Kabuli_wild_10335376</i> | NA                                  | <i>Ca_kabuli_denovo</i> | 10335376                | G/T  | NA                 | NA                            | NA                 |
| <i>Kabuli_wild_10337259</i> | NA                                  | <i>Ca_kabuli_denovo</i> | 10337259                | C/T  | NA                 | NA                            | NA                 |
| <i>Kabuli_wild_10357516</i> | NA                                  | <i>Ca_kabuli_denovo</i> | 10357516                | C/T  | NA                 | NA                            | NA                 |
| <i>Kabuli_wild_10362522</i> | NA                                  | <i>Ca_kabuli_denovo</i> | 10362522                | A/C  | NA                 | NA                            | NA                 |

| SNP IDs              | NCBI dbSNP accession IDs (NCBI_SS#) | Chromosomes      | Physical positions (bp) | SNPs | Gene accession IDs | Sequence components of genome | Putative functions |
|----------------------|-------------------------------------|------------------|-------------------------|------|--------------------|-------------------------------|--------------------|
| Kabuli_wild_10362523 | NA                                  | Ca_kabuli_denovo | 10362523                | G/T  | NA                 | NA                            | NA                 |
| Kabuli_wild_10366681 | NA                                  | Ca_kabuli_denovo | 10366681                | A/G  | NA                 | NA                            | NA                 |
| Kabuli_wild_10367099 | NA                                  | Ca_kabuli_denovo | 10367099                | A/G  | NA                 | NA                            | NA                 |
| Kabuli_wild_10372939 | NA                                  | Ca_kabuli_denovo | 10372939                | C/T  | NA                 | NA                            | NA                 |
| Kabuli_wild_10386009 | NA                                  | Ca_kabuli_denovo | 10386009                | C/G  | NA                 | NA                            | NA                 |
| Kabuli_wild_10386011 | NA                                  | Ca_kabuli_denovo | 10386011                | C/G  | NA                 | NA                            | NA                 |
| Kabuli_wild_10389524 | NA                                  | Ca_kabuli_denovo | 10389524                | G/T  | NA                 | NA                            | NA                 |
| Kabuli_wild_10389807 | NA                                  | Ca_kabuli_denovo | 10389807                | C/G  | NA                 | NA                            | NA                 |
| Kabuli_wild_10389816 | NA                                  | Ca_kabuli_denovo | 10389816                | C/G  | NA                 | NA                            | NA                 |
| Kabuli_wild_10389827 | NA                                  | Ca_kabuli_denovo | 10389827                | A/T  | NA                 | NA                            | NA                 |
| Kabuli_wild_10397208 | NA                                  | Ca_kabuli_denovo | 10397208                | A/C  | NA                 | NA                            | NA                 |
| Kabuli_wild_10407843 | NA                                  | Ca_kabuli_denovo | 10407843                | C/G  | NA                 | NA                            | NA                 |
| Kabuli_wild_10407852 | NA                                  | Ca_kabuli_denovo | 10407852                | A/G  | NA                 | NA                            | NA                 |
| Kabuli_wild_10407870 | NA                                  | Ca_kabuli_denovo | 10407870                | C/G  | NA                 | NA                            | NA                 |
| Kabuli_wild_10409433 | NA                                  | Ca_kabuli_denovo | 10409433                | C/T  | NA                 | NA                            | NA                 |
| Kabuli_wild_10416709 | NA                                  | Ca_kabuli_denovo | 10416709                | C/T  | NA                 | NA                            | NA                 |
| Kabuli_wild_10421148 | NA                                  | Ca_kabuli_denovo | 10421148                | C/T  | NA                 | NA                            | NA                 |
| Kabuli_wild_10423472 | NA                                  | Ca_kabuli_denovo | 10423472                | G/T  | NA                 | NA                            | NA                 |
| Kabuli_wild_10426186 | NA                                  | Ca_kabuli_denovo | 10426186                | C/T  | NA                 | NA                            | NA                 |
| Kabuli_wild_10426198 | NA                                  | Ca_kabuli_denovo | 10426198                | C/G  | NA                 | NA                            | NA                 |
| Kabuli_wild_10426204 | NA                                  | Ca_kabuli_denovo | 10426204                | A/C  | NA                 | NA                            | NA                 |
| Kabuli_wild_10429893 | NA                                  | Ca_kabuli_denovo | 10429893                | C/T  | NA                 | NA                            | NA                 |
| Kabuli_wild_10429923 | NA                                  | Ca_kabuli_denovo | 10429923                | C/G  | NA                 | NA                            | NA                 |
| Kabuli_wild_10442515 | NA                                  | Ca_kabuli_denovo | 10442515                | A/T  | NA                 | NA                            | NA                 |
| Kabuli_wild_10442530 | NA                                  | Ca_kabuli_denovo | 10442530                | A/T  | NA                 | NA                            | NA                 |
| Kabuli_wild_10442587 | NA                                  | Ca_kabuli_denovo | 10442587                | A/T  | NA                 | NA                            | NA                 |
| Kabuli_wild_10448229 | NA                                  | Ca_kabuli_denovo | 10448229                | G/T  | NA                 | NA                            | NA                 |
| Kabuli_wild_10448246 | NA                                  | Ca_kabuli_denovo | 10448246                | G/T  | NA                 | NA                            | NA                 |
| Kabuli_wild_10468565 | NA                                  | Ca_kabuli_denovo | 10468565                | A/G  | NA                 | NA                            | NA                 |
| Kabuli_wild_10471809 | NA                                  | Ca_kabuli_denovo | 10471809                | C/T  | NA                 | NA                            | NA                 |
| Kabuli_wild_10493282 | NA                                  | Ca_kabuli_denovo | 10493282                | A/G  | NA                 | NA                            | NA                 |
| Kabuli_wild_10495520 | NA                                  | Ca_kabuli_denovo | 10495520                | A/C  | NA                 | NA                            | NA                 |
| Kabuli_wild_10495521 | NA                                  | Ca_kabuli_denovo | 10495521                | G/T  | NA                 | NA                            | NA                 |
| Kabuli_wild_10495522 | NA                                  | Ca_kabuli_denovo | 10495522                | A/G  | NA                 | NA                            | NA                 |
| Kabuli_wild_10495523 | NA                                  | Ca_kabuli_denovo | 10495523                | A/T  | NA                 | NA                            | NA                 |
| Kabuli_wild_10501420 | NA                                  | Ca_kabuli_denovo | 10501420                | A/G  | NA                 | NA                            | NA                 |
| Kabuli_wild_10501429 | NA                                  | Ca_kabuli_denovo | 10501429                | A/G  | NA                 | NA                            | NA                 |
| Kabuli_wild_10501456 | NA                                  | Ca_kabuli_denovo | 10501456                | A/G  | NA                 | NA                            | NA                 |
| Kabuli_wild_10503502 | NA                                  | Ca_kabuli_denovo | 10503502                | C/G  | NA                 | NA                            | NA                 |
| Kabuli_wild_10508312 | NA                                  | Ca_kabuli_denovo | 10508312                | G/T  | NA                 | NA                            | NA                 |
| Kabuli_wild_10514194 | NA                                  | Ca_kabuli_denovo | 10514194                | G/T  | NA                 | NA                            | NA                 |
| Kabuli_wild_10516620 | NA                                  | Ca_kabuli_denovo | 10516620                | A/G  | NA                 | NA                            | NA                 |
| Kabuli_wild_10516657 | NA                                  | Ca_kabuli_denovo | 10516657                | C/T  | NA                 | NA                            | NA                 |
| Kabuli_wild_10535840 | NA                                  | Ca_kabuli_denovo | 10535840                | C/T  | NA                 | NA                            | NA                 |

| SNP IDs              | NCBI dbSNP accession IDs (NCBI_SS#) | Chromosomes      | Physical positions (bp) | SNPs | Gene accession IDs | Sequence components of genome | Putative functions |
|----------------------|-------------------------------------|------------------|-------------------------|------|--------------------|-------------------------------|--------------------|
| Kabuli_wild_10536522 | NA                                  | Ca_kabuli_denovo | 10536522                | C/G  | NA                 | NA                            | NA                 |
| Kabuli_wild_10536524 | NA                                  | Ca_kabuli_denovo | 10536524                | A/T  | NA                 | NA                            | NA                 |
| Kabuli_wild_10536558 | NA                                  | Ca_kabuli_denovo | 10536558                | C/G  | NA                 | NA                            | NA                 |
| Kabuli_wild_10536705 | NA                                  | Ca_kabuli_denovo | 10536705                | G/T  | NA                 | NA                            | NA                 |
| Kabuli_wild_10542946 | NA                                  | Ca_kabuli_denovo | 10542946                | A/G  | NA                 | NA                            | NA                 |
| Kabuli_wild_10542991 | NA                                  | Ca_kabuli_denovo | 10542991                | T/C  | NA                 | NA                            | NA                 |
| Kabuli_wild_10547899 | NA                                  | Ca_kabuli_denovo | 10547899                | C/G  | NA                 | NA                            | NA                 |
| Kabuli_wild_10549320 | NA                                  | Ca_kabuli_denovo | 10549320                | C/T  | NA                 | NA                            | NA                 |
| Kabuli_wild_10557487 | NA                                  | Ca_kabuli_denovo | 10557487                | A/G  | NA                 | NA                            | NA                 |
| Kabuli_wild_10557517 | NA                                  | Ca_kabuli_denovo | 10557517                | T/C  | NA                 | NA                            | NA                 |
| Kabuli_wild_10561330 | NA                                  | Ca_kabuli_denovo | 10561330                | C/T  | NA                 | NA                            | NA                 |
| Kabuli_wild_10565277 | NA                                  | Ca_kabuli_denovo | 10565277                | T/C  | NA                 | NA                            | NA                 |
| Kabuli_wild_10565293 | NA                                  | Ca_kabuli_denovo | 10565293                | A/G  | NA                 | NA                            | NA                 |
| Kabuli_wild_10565294 | NA                                  | Ca_kabuli_denovo | 10565294                | G/C  | NA                 | NA                            | NA                 |
| Kabuli_wild_10565295 | NA                                  | Ca_kabuli_denovo | 10565295                | C/T  | NA                 | NA                            | NA                 |
| Kabuli_wild_10578716 | NA                                  | Ca_kabuli_denovo | 10578716                | G/T  | NA                 | NA                            | NA                 |
| Kabuli_wild_10593046 | NA                                  | Ca_kabuli_denovo | 10593046                | C/T  | NA                 | NA                            | NA                 |
| Kabuli_wild_10593085 | NA                                  | Ca_kabuli_denovo | 10593085                | C/T  | NA                 | NA                            | NA                 |
| Kabuli_wild_10596825 | NA                                  | Ca_kabuli_denovo | 10596825                | C/T  | NA                 | NA                            | NA                 |
| Kabuli_wild_10614096 | NA                                  | Ca_kabuli_denovo | 10614096                | A/T  | NA                 | NA                            | NA                 |
| Kabuli_wild_10614135 | NA                                  | Ca_kabuli_denovo | 10614135                | C/T  | NA                 | NA                            | NA                 |
| Kabuli_wild_10621025 | NA                                  | Ca_kabuli_denovo | 10621025                | C/G  | NA                 | NA                            | NA                 |
| Kabuli_wild_10621038 | NA                                  | Ca_kabuli_denovo | 10621038                | C/T  | NA                 | NA                            | NA                 |
| Kabuli_wild_10621112 | NA                                  | Ca_kabuli_denovo | 10621112                | A/C  | NA                 | NA                            | NA                 |
| Kabuli_wild_10621113 | NA                                  | Ca_kabuli_denovo | 10621113                | A/G  | NA                 | NA                            | NA                 |
| Kabuli_wild_10626440 | NA                                  | Ca_kabuli_denovo | 10626440                | A/G  | NA                 | NA                            | NA                 |
| Kabuli_wild_10626527 | NA                                  | Ca_kabuli_denovo | 10626527                | C/G  | NA                 | NA                            | NA                 |
| Kabuli_wild_10626528 | NA                                  | Ca_kabuli_denovo | 10626528                | C/G  | NA                 | NA                            | NA                 |
| Kabuli_wild_10628912 | NA                                  | Ca_kabuli_denovo | 10628912                | A/G  | NA                 | NA                            | NA                 |
| Kabuli_wild_10628969 | NA                                  | Ca_kabuli_denovo | 10628969                | C/T  | NA                 | NA                            | NA                 |
| Kabuli_wild_10668364 | NA                                  | Ca_kabuli_denovo | 10668364                | C/G  | NA                 | NA                            | NA                 |
| Kabuli_wild_10668367 | NA                                  | Ca_kabuli_denovo | 10668367                | T/C  | NA                 | NA                            | NA                 |
| Kabuli_wild_10673960 | NA                                  | Ca_kabuli_denovo | 10673960                | C/G  | NA                 | NA                            | NA                 |
| Kabuli_wild_10673966 | NA                                  | Ca_kabuli_denovo | 10673966                | C/T  | NA                 | NA                            | NA                 |
| Kabuli_wild_10673985 | NA                                  | Ca_kabuli_denovo | 10673985                | C/G  | NA                 | NA                            | NA                 |
| Kabuli_wild_10688489 | NA                                  | Ca_kabuli_denovo | 10688489                | C/T  | NA                 | NA                            | NA                 |
| Kabuli_wild_10690648 | NA                                  | Ca_kabuli_denovo | 10690648                | A/C  | NA                 | NA                            | NA                 |
| Kabuli_wild_10690651 | NA                                  | Ca_kabuli_denovo | 10690651                | C/T  | NA                 | NA                            | NA                 |
| Kabuli_wild_10690652 | NA                                  | Ca_kabuli_denovo | 10690652                | C/G  | NA                 | NA                            | NA                 |
| Kabuli_wild_10690653 | NA                                  | Ca_kabuli_denovo | 10690653                | A/G  | NA                 | NA                            | NA                 |
| Kabuli_wild_10697803 | NA                                  | Ca_kabuli_denovo | 10697803                | A/G  | NA                 | NA                            | NA                 |
| Kabuli_wild_10697837 | NA                                  | Ca_kabuli_denovo | 10697837                | A/G  | NA                 | NA                            | NA                 |
| Kabuli_wild_10704541 | NA                                  | Ca_kabuli_denovo | 10704541                | C/T  | NA                 | NA                            | NA                 |
| Kabuli_wild_10704547 | NA                                  | Ca_kabuli_denovo | 10704547                | C/T  | NA                 | NA                            | NA                 |

| SNP IDs              | NCBI dbSNP accession IDs (NCBI_SS#) | Chromosomes      | Physical positions (bp) | SNPs | Gene accession IDs | Sequence components of genome | Putative functions |
|----------------------|-------------------------------------|------------------|-------------------------|------|--------------------|-------------------------------|--------------------|
| Kabuli_wild_10704586 | NA                                  | Ca_kabuli_denovo | 10704586                | G/T  | NA                 | NA                            | NA                 |
| Kabuli_wild_10704589 | NA                                  | Ca_kabuli_denovo | 10704589                | C/T  | NA                 | NA                            | NA                 |
| Kabuli_wild_10708171 | NA                                  | Ca_kabuli_denovo | 10708171                | A/C  | NA                 | NA                            | NA                 |
| Kabuli_wild_10708184 | NA                                  | Ca_kabuli_denovo | 10708184                | G/T  | NA                 | NA                            | NA                 |
| Kabuli_wild_10713024 | NA                                  | Ca_kabuli_denovo | 10713024                | A/G  | NA                 | NA                            | NA                 |
| Kabuli_wild_10713027 | NA                                  | Ca_kabuli_denovo | 10713027                | C/G  | NA                 | NA                            | NA                 |
| Kabuli_wild_10713029 | NA                                  | Ca_kabuli_denovo | 10713029                | A/G  | NA                 | NA                            | NA                 |
| Kabuli_wild_10719883 | NA                                  | Ca_kabuli_denovo | 10719883                | G/T  | NA                 | NA                            | NA                 |
| Kabuli_wild_10724493 | NA                                  | Ca_kabuli_denovo | 10724493                | C/T  | NA                 | NA                            | NA                 |
| Kabuli_wild_10724496 | NA                                  | Ca_kabuli_denovo | 10724496                | C/T  | NA                 | NA                            | NA                 |
| Kabuli_wild_10724642 | NA                                  | Ca_kabuli_denovo | 10724642                | A/G  | NA                 | NA                            | NA                 |
| Kabuli_wild_10743863 | NA                                  | Ca_kabuli_denovo | 10743863                | A/G  | NA                 | NA                            | NA                 |
| Kabuli_wild_10743866 | NA                                  | Ca_kabuli_denovo | 10743866                | A/G  | NA                 | NA                            | NA                 |
| Kabuli_wild_10743887 | NA                                  | Ca_kabuli_denovo | 10743887                | G/T  | NA                 | NA                            | NA                 |
| Kabuli_wild_10746817 | NA                                  | Ca_kabuli_denovo | 10746817                | C/T  | NA                 | NA                            | NA                 |
| Kabuli_wild_10746853 | NA                                  | Ca_kabuli_denovo | 10746853                | A/G  | NA                 | NA                            | NA                 |
| Kabuli_wild_10747137 | NA                                  | Ca_kabuli_denovo | 10747137                | C/G  | NA                 | NA                            | NA                 |
| Kabuli_wild_10747140 | NA                                  | Ca_kabuli_denovo | 10747140                | T/C  | NA                 | NA                            | NA                 |
| Kabuli_wild_10747143 | NA                                  | Ca_kabuli_denovo | 10747143                | C/T  | NA                 | NA                            | NA                 |
| Kabuli_wild_10747155 | NA                                  | Ca_kabuli_denovo | 10747155                | C/G  | NA                 | NA                            | NA                 |
| Kabuli_wild_10750224 | NA                                  | Ca_kabuli_denovo | 10750224                | C/G  | NA                 | NA                            | NA                 |
| Kabuli_wild_10750239 | NA                                  | Ca_kabuli_denovo | 10750239                | A/G  | NA                 | NA                            | NA                 |
| Kabuli_wild_10768373 | NA                                  | Ca_kabuli_denovo | 10768373                | C/T  | NA                 | NA                            | NA                 |
| Kabuli_wild_10776097 | NA                                  | Ca_kabuli_denovo | 10776097                | G/T  | NA                 | NA                            | NA                 |
| Kabuli_wild_10780443 | NA                                  | Ca_kabuli_denovo | 10780443                | C/T  | NA                 | NA                            | NA                 |
| Kabuli_wild_10789463 | NA                                  | Ca_kabuli_denovo | 10789463                | A/G  | NA                 | NA                            | NA                 |
| Kabuli_wild_10789469 | NA                                  | Ca_kabuli_denovo | 10789469                | C/T  | NA                 | NA                            | NA                 |
| Kabuli_wild_10789472 | NA                                  | Ca_kabuli_denovo | 10789472                | C/G  | NA                 | NA                            | NA                 |
| Kabuli_wild_10790244 | NA                                  | Ca_kabuli_denovo | 10790244                | A/G  | NA                 | NA                            | NA                 |
| Kabuli_wild_10809175 | NA                                  | Ca_kabuli_denovo | 10809175                | C/T  | NA                 | NA                            | NA                 |
| Kabuli_wild_10824222 | NA                                  | Ca_kabuli_denovo | 10824222                | A/C  | NA                 | NA                            | NA                 |
| Kabuli_wild_10824223 | NA                                  | Ca_kabuli_denovo | 10824223                | G/T  | NA                 | NA                            | NA                 |
| Kabuli_wild_10826195 | NA                                  | Ca_kabuli_denovo | 10826195                | A/G  | NA                 | NA                            | NA                 |
| Kabuli_wild_10826794 | NA                                  | Ca_kabuli_denovo | 10826794                | A/G  | NA                 | NA                            | NA                 |
| Kabuli_wild_10826797 | NA                                  | Ca_kabuli_denovo | 10826797                | C/G  | NA                 | NA                            | NA                 |
| Kabuli_wild_10841709 | NA                                  | Ca_kabuli_denovo | 10841709                | C/T  | NA                 | NA                            | NA                 |
| Kabuli_wild_10850609 | NA                                  | Ca_kabuli_denovo | 10850609                | A/G  | NA                 | NA                            | NA                 |
| Kabuli_wild_10856913 | NA                                  | Ca_kabuli_denovo | 10856913                | A/C  | NA                 | NA                            | NA                 |
| Kabuli_wild_10856934 | NA                                  | Ca_kabuli_denovo | 10856934                | C/G  | NA                 | NA                            | NA                 |
| Kabuli_wild_10856943 | NA                                  | Ca_kabuli_denovo | 10856943                | C/G  | NA                 | NA                            | NA                 |
| Kabuli_wild_10856946 | NA                                  | Ca_kabuli_denovo | 10856946                | A/G  | NA                 | NA                            | NA                 |
| Kabuli_wild_10862521 | NA                                  | Ca_kabuli_denovo | 10862521                | C/T  | NA                 | NA                            | NA                 |
| Kabuli_wild_10862524 | NA                                  | Ca_kabuli_denovo | 10862524                | C/T  | NA                 | NA                            | NA                 |
| Kabuli_wild_10878188 | NA                                  | Ca_kabuli_denovo | 10878188                | A/G  | NA                 | NA                            | NA                 |

| SNP IDs              | NCBI dbSNP accession IDs (NCBI_SS#) | Chromosomes      | Physical positions (bp) | SNPs | Gene accession IDs | Sequence components of genome | Putative functions |
|----------------------|-------------------------------------|------------------|-------------------------|------|--------------------|-------------------------------|--------------------|
| Kabuli_wild_10882278 | NA                                  | Ca_kabuli_denovo | 10882278                | G/C  | NA                 | NA                            | NA                 |
| Kabuli_wild_10890920 | NA                                  | Ca_kabuli_denovo | 10890920                | A/G  | NA                 | NA                            | NA                 |
| Kabuli_wild_10900102 | NA                                  | Ca_kabuli_denovo | 10900102                | C/T  | NA                 | NA                            | NA                 |
| Kabuli_wild_10900105 | NA                                  | Ca_kabuli_denovo | 10900105                | C/G  | NA                 | NA                            | NA                 |
| Kabuli_wild_10910774 | NA                                  | Ca_kabuli_denovo | 10910774                | C/G  | NA                 | NA                            | NA                 |
| Kabuli_wild_10910801 | NA                                  | Ca_kabuli_denovo | 10910801                | C/G  | NA                 | NA                            | NA                 |
| Kabuli_wild_10910813 | NA                                  | Ca_kabuli_denovo | 10910813                | C/G  | NA                 | NA                            | NA                 |
| Kabuli_wild_10910819 | NA                                  | Ca_kabuli_denovo | 10910819                | A/G  | NA                 | NA                            | NA                 |
| Kabuli_wild_10940248 | NA                                  | Ca_kabuli_denovo | 10940248                | A/G  | NA                 | NA                            | NA                 |
| Kabuli_wild_10940259 | NA                                  | Ca_kabuli_denovo | 10940259                | A/T  | NA                 | NA                            | NA                 |
| Kabuli_wild_10940334 | NA                                  | Ca_kabuli_denovo | 10940334                | C/T  | NA                 | NA                            | NA                 |
| Kabuli_wild_10940358 | NA                                  | Ca_kabuli_denovo | 10940358                | C/T  | NA                 | NA                            | NA                 |
| Kabuli_wild_10953068 | NA                                  | Ca_kabuli_denovo | 10953068                | A/G  | NA                 | NA                            | NA                 |
| Kabuli_wild_10961836 | NA                                  | Ca_kabuli_denovo | 10961836                | G/T  | NA                 | NA                            | NA                 |
| Kabuli_wild_10981586 | NA                                  | Ca_kabuli_denovo | 10981586                | C/T  | NA                 | NA                            | NA                 |
| Kabuli_wild_10983086 | NA                                  | Ca_kabuli_denovo | 10983086                | C/G  | NA                 | NA                            | NA                 |
| Kabuli_wild_10990617 | NA                                  | Ca_kabuli_denovo | 10990617                | C/T  | NA                 | NA                            | NA                 |
| Kabuli_wild_10993069 | NA                                  | Ca_kabuli_denovo | 10993069                | A/C  | NA                 | NA                            | NA                 |
| Kabuli_wild_10997227 | NA                                  | Ca_kabuli_denovo | 10997227                | C/T  | NA                 | NA                            | NA                 |
| Kabuli_wild_10997252 | NA                                  | Ca_kabuli_denovo | 10997252                | A/C  | NA                 | NA                            | NA                 |
| Kabuli_wild_10997260 | NA                                  | Ca_kabuli_denovo | 10997260                | C/T  | NA                 | NA                            | NA                 |
| Kabuli_wild_10997635 | NA                                  | Ca_kabuli_denovo | 10997635                | T/C  | NA                 | NA                            | NA                 |
| Kabuli_wild_10998934 | NA                                  | Ca_kabuli_denovo | 10998934                | A/T  | NA                 | NA                            | NA                 |
| Kabuli_wild_10998940 | NA                                  | Ca_kabuli_denovo | 10998940                | A/C  | NA                 | NA                            | NA                 |
| Kabuli_wild_11008807 | NA                                  | Ca_kabuli_denovo | 11008807                | A/C  | NA                 | NA                            | NA                 |
| Kabuli_wild_11008808 | NA                                  | Ca_kabuli_denovo | 11008808                | C/G  | NA                 | NA                            | NA                 |
| Kabuli_wild_11010991 | NA                                  | Ca_kabuli_denovo | 11010991                | A/C  | NA                 | NA                            | NA                 |
| Kabuli_wild_11010992 | NA                                  | Ca_kabuli_denovo | 11010992                | A/G  | NA                 | NA                            | NA                 |
| Kabuli_wild_11015322 | NA                                  | Ca_kabuli_denovo | 11015322                | A/G  | NA                 | NA                            | NA                 |
| Kabuli_wild_11020802 | NA                                  | Ca_kabuli_denovo | 11020802                | C/T  | NA                 | NA                            | NA                 |
| Kabuli_wild_11028901 | NA                                  | Ca_kabuli_denovo | 11028901                | C/T  | NA                 | NA                            | NA                 |
| Kabuli_wild_11038963 | NA                                  | Ca_kabuli_denovo | 11038963                | G/C  | NA                 | NA                            | NA                 |
| Kabuli_wild_11052999 | NA                                  | Ca_kabuli_denovo | 11052999                | C/G  | NA                 | NA                            | NA                 |
| Kabuli_wild_11053002 | NA                                  | Ca_kabuli_denovo | 11053002                | C/G  | NA                 | NA                            | NA                 |
| Kabuli_wild_11053010 | NA                                  | Ca_kabuli_denovo | 11053010                | A/C  | NA                 | NA                            | NA                 |
| Kabuli_wild_11053026 | NA                                  | Ca_kabuli_denovo | 11053026                | C/G  | NA                 | NA                            | NA                 |
| Kabuli_wild_11058919 | NA                                  | Ca_kabuli_denovo | 11058919                | C/G  | NA                 | NA                            | NA                 |
| Kabuli_wild_11058921 | NA                                  | Ca_kabuli_denovo | 11058921                | G/A  | NA                 | NA                            | NA                 |
| Kabuli_wild_11058974 | NA                                  | Ca_kabuli_denovo | 11058974                | C/G  | NA                 | NA                            | NA                 |
| Kabuli_wild_11058977 | NA                                  | Ca_kabuli_denovo | 11058977                | A/G  | NA                 | NA                            | NA                 |
| Kabuli_wild_11058989 | NA                                  | Ca_kabuli_denovo | 11058989                | C/G  | NA                 | NA                            | NA                 |
| Kabuli_wild_11062302 | NA                                  | Ca_kabuli_denovo | 11062302                | C/G  | NA                 | NA                            | NA                 |
| Kabuli_wild_11062308 | NA                                  | Ca_kabuli_denovo | 11062308                | C/G  | NA                 | NA                            | NA                 |
| Kabuli_wild_11062318 | NA                                  | Ca_kabuli_denovo | 11062318                | A/G  | NA                 | NA                            | NA                 |

| SNP IDs              | NCBI dbSNP accession IDs (NCBI_SS#) | Chromosomes      | Physical positions (bp) | SNPs | Gene accession IDs | Sequence components of genome | Putative functions |
|----------------------|-------------------------------------|------------------|-------------------------|------|--------------------|-------------------------------|--------------------|
| Kabuli_wild_11074937 | NA                                  | Ca_kabuli_denovo | 11074937                | C/T  | NA                 | NA                            | NA                 |
| Kabuli_wild_11074973 | NA                                  | Ca_kabuli_denovo | 11074973                | A/G  | NA                 | NA                            | NA                 |
| Kabuli_wild_11081606 | NA                                  | Ca_kabuli_denovo | 11081606                | C/T  | NA                 | NA                            | NA                 |
| Kabuli_wild_11083125 | NA                                  | Ca_kabuli_denovo | 11083125                | C/T  | NA                 | NA                            | NA                 |
| Kabuli_wild_11083131 | NA                                  | Ca_kabuli_denovo | 11083131                | A/G  | NA                 | NA                            | NA                 |
| Kabuli_wild_11083134 | NA                                  | Ca_kabuli_denovo | 11083134                | A/C  | NA                 | NA                            | NA                 |
| Kabuli_wild_11087795 | NA                                  | Ca_kabuli_denovo | 11087795                | G/T  | NA                 | NA                            | NA                 |
| Kabuli_wild_11104480 | NA                                  | Ca_kabuli_denovo | 11104480                | C/G  | NA                 | NA                            | NA                 |
| Kabuli_wild_11104498 | NA                                  | Ca_kabuli_denovo | 11104498                | G/T  | NA                 | NA                            | NA                 |
| Kabuli_wild_11104501 | NA                                  | Ca_kabuli_denovo | 11104501                | C/G  | NA                 | NA                            | NA                 |
| Kabuli_wild_11107805 | NA                                  | Ca_kabuli_denovo | 11107805                | A/C  | NA                 | NA                            | NA                 |
| Kabuli_wild_11107817 | NA                                  | Ca_kabuli_denovo | 11107817                | C/G  | NA                 | NA                            | NA                 |
| Kabuli_wild_11107826 | NA                                  | Ca_kabuli_denovo | 11107826                | C/G  | NA                 | NA                            | NA                 |
| Kabuli_wild_11117990 | NA                                  | Ca_kabuli_denovo | 11117990                | T/C  | NA                 | NA                            | NA                 |
| Kabuli_wild_11118570 | NA                                  | Ca_kabuli_denovo | 11118570                | A/G  | NA                 | NA                            | NA                 |
| Kabuli_wild_11118573 | NA                                  | Ca_kabuli_denovo | 11118573                | A/G  | NA                 | NA                            | NA                 |
| Kabuli_wild_11118855 | NA                                  | Ca_kabuli_denovo | 11118855                | C/G  | NA                 | NA                            | NA                 |
| Kabuli_wild_11118861 | NA                                  | Ca_kabuli_denovo | 11118861                | C/G  | NA                 | NA                            | NA                 |
| Kabuli_wild_11144668 | NA                                  | Ca_kabuli_denovo | 11144668                | C/G  | NA                 | NA                            | NA                 |
| Kabuli_wild_11144671 | NA                                  | Ca_kabuli_denovo | 11144671                | C/G  | NA                 | NA                            | NA                 |
| Kabuli_wild_11163940 | NA                                  | Ca_kabuli_denovo | 11163940                | A/T  | NA                 | NA                            | NA                 |
| Kabuli_wild_11163941 | NA                                  | Ca_kabuli_denovo | 11163941                | G/T  | NA                 | NA                            | NA                 |
| Kabuli_wild_11163942 | NA                                  | Ca_kabuli_denovo | 11163942                | C/G  | NA                 | NA                            | NA                 |
| Kabuli_wild_11170497 | NA                                  | Ca_kabuli_denovo | 11170497                | C/T  | NA                 | NA                            | NA                 |
| Kabuli_wild_11197204 | NA                                  | Ca_kabuli_denovo | 11197204                | C/T  | NA                 | NA                            | NA                 |
| Kabuli_wild_11199206 | NA                                  | Ca_kabuli_denovo | 11199206                | C/G  | NA                 | NA                            | NA                 |
| Kabuli_wild_11199207 | NA                                  | Ca_kabuli_denovo | 11199207                | A/G  | NA                 | NA                            | NA                 |
| Kabuli_wild_11203446 | NA                                  | Ca_kabuli_denovo | 11203446                | C/T  | NA                 | NA                            | NA                 |
| Kabuli_wild_11224207 | NA                                  | Ca_kabuli_denovo | 11224207                | A/C  | NA                 | NA                            | NA                 |
| Kabuli_wild_11224224 | NA                                  | Ca_kabuli_denovo | 11224224                | A/G  | NA                 | NA                            | NA                 |
| Kabuli_wild_11249021 | NA                                  | Ca_kabuli_denovo | 11249021                | G/T  | NA                 | NA                            | NA                 |
| Kabuli_wild_11255915 | NA                                  | Ca_kabuli_denovo | 11255915                | C/G  | NA                 | NA                            | NA                 |
| Kabuli_wild_11255918 | NA                                  | Ca_kabuli_denovo | 11255918                | G/T  | NA                 | NA                            | NA                 |
| Kabuli_wild_11255981 | NA                                  | Ca_kabuli_denovo | 11255981                | C/T  | NA                 | NA                            | NA                 |
| Kabuli_wild_11262471 | NA                                  | Ca_kabuli_denovo | 11262471                | C/G  | NA                 | NA                            | NA                 |
| Kabuli_wild_11262504 | NA                                  | Ca_kabuli_denovo | 11262504                | A/G  | NA                 | NA                            | NA                 |
| Kabuli_wild_11280161 | NA                                  | Ca_kabuli_denovo | 11280161                | C/T  | NA                 | NA                            | NA                 |
| Kabuli_wild_11282326 | NA                                  | Ca_kabuli_denovo | 11282326                | C/G  | NA                 | NA                            | NA                 |
| Kabuli_wild_11282353 | NA                                  | Ca_kabuli_denovo | 11282353                | C/T  | NA                 | NA                            | NA                 |
| Kabuli_wild_11286685 | NA                                  | Ca_kabuli_denovo | 11286685                | A/T  | NA                 | NA                            | NA                 |
| Kabuli_wild_11291555 | NA                                  | Ca_kabuli_denovo | 11291555                | C/T  | NA                 | NA                            | NA                 |
| Kabuli_wild_11291558 | NA                                  | Ca_kabuli_denovo | 11291558                | C/T  | NA                 | NA                            | NA                 |
| Kabuli_wild_11291567 | NA                                  | Ca_kabuli_denovo | 11291567                | C/T  | NA                 | NA                            | NA                 |
| Kabuli_wild_11293437 | NA                                  | Ca_kabuli_denovo | 11293437                | C/G  | NA                 | NA                            | NA                 |



| SNP IDs              | NCBI dbSNP accession IDs (NCBI_SS#) | Chromosomes      | Physical positions (bp) | SNPs | Gene accession IDs | Sequence components of genome | Putative functions |
|----------------------|-------------------------------------|------------------|-------------------------|------|--------------------|-------------------------------|--------------------|
| Kabuli_wild_11303945 | NA                                  | Ca_kabuli_denovo | 11303945                | A/G  | NA                 | NA                            | NA                 |
| Kabuli_wild_11309868 | NA                                  | Ca_kabuli_denovo | 11309868                | G/A  | NA                 | NA                            | NA                 |
| Kabuli_wild_11309869 | NA                                  | Ca_kabuli_denovo | 11309869                | C/T  | NA                 | NA                            | NA                 |
| Kabuli_wild_11310379 | NA                                  | Ca_kabuli_denovo | 11310379                | G/T  | NA                 | NA                            | NA                 |
| Kabuli_wild_11321303 | NA                                  | Ca_kabuli_denovo | 11321303                | G/T  | NA                 | NA                            | NA                 |
| Kabuli_wild_11321380 | NA                                  | Ca_kabuli_denovo | 11321380                | C/G  | NA                 | NA                            | NA                 |
| Kabuli_wild_11321383 | NA                                  | Ca_kabuli_denovo | 11321383                | A/G  | NA                 | NA                            | NA                 |
| Kabuli_wild_11323172 | NA                                  | Ca_kabuli_denovo | 11323172                | C/T  | NA                 | NA                            | NA                 |
| Kabuli_wild_11323178 | NA                                  | Ca_kabuli_denovo | 11323178                | C/T  | NA                 | NA                            | NA                 |
| Kabuli_wild_11328137 | NA                                  | Ca_kabuli_denovo | 11328137                | C/G  | NA                 | NA                            | NA                 |
| Kabuli_wild_11335871 | NA                                  | Ca_kabuli_denovo | 11335871                | G/T  | NA                 | NA                            | NA                 |
| Kabuli_wild_11372695 | NA                                  | Ca_kabuli_denovo | 11372695                | C/G  | NA                 | NA                            | NA                 |
| Kabuli_wild_11375547 | NA                                  | Ca_kabuli_denovo | 11375547                | C/T  | NA                 | NA                            | NA                 |
| Kabuli_wild_11377999 | NA                                  | Ca_kabuli_denovo | 11377999                | C/G  | NA                 | NA                            | NA                 |
| Kabuli_wild_11378005 | NA                                  | Ca_kabuli_denovo | 11378005                | A/G  | NA                 | NA                            | NA                 |
| Kabuli_wild_11378012 | NA                                  | Ca_kabuli_denovo | 11378012                | C/G  | NA                 | NA                            | NA                 |
| Kabuli_wild_11392423 | NA                                  | Ca_kabuli_denovo | 11392423                | A/G  | NA                 | NA                            | NA                 |
| Kabuli_wild_11392424 | NA                                  | Ca_kabuli_denovo | 11392424                | C/G  | NA                 | NA                            | NA                 |
| Kabuli_wild_11394360 | NA                                  | Ca_kabuli_denovo | 11394360                | G/T  | NA                 | NA                            | NA                 |
| Kabuli_wild_11394901 | NA                                  | Ca_kabuli_denovo | 11394901                | C/G  | NA                 | NA                            | NA                 |
| Kabuli_wild_11394907 | NA                                  | Ca_kabuli_denovo | 11394907                | C/G  | NA                 | NA                            | NA                 |
| Kabuli_wild_11394913 | NA                                  | Ca_kabuli_denovo | 11394913                | C/T  | NA                 | NA                            | NA                 |
| Kabuli_wild_11394928 | NA                                  | Ca_kabuli_denovo | 11394928                | C/G  | NA                 | NA                            | NA                 |
| Kabuli_wild_11400065 | NA                                  | Ca_kabuli_denovo | 11400065                | A/G  | NA                 | NA                            | NA                 |
| Kabuli_wild_11402708 | NA                                  | Ca_kabuli_denovo | 11402708                | G/T  | NA                 | NA                            | NA                 |
| Kabuli_wild_11431570 | NA                                  | Ca_kabuli_denovo | 11431570                | G/C  | NA                 | NA                            | NA                 |
| Kabuli_wild_11431603 | NA                                  | Ca_kabuli_denovo | 11431603                | C/A  | NA                 | NA                            | NA                 |
| Kabuli_wild_11438695 | NA                                  | Ca_kabuli_denovo | 11438695                | A/G  | NA                 | NA                            | NA                 |
| Kabuli_wild_11438734 | NA                                  | Ca_kabuli_denovo | 11438734                | C/G  | NA                 | NA                            | NA                 |
| Kabuli_wild_11441860 | NA                                  | Ca_kabuli_denovo | 11441860                | G/T  | NA                 | NA                            | NA                 |
| Kabuli_wild_11456941 | NA                                  | Ca_kabuli_denovo | 11456941                | C/G  | NA                 | NA                            | NA                 |
| Kabuli_wild_11456964 | NA                                  | Ca_kabuli_denovo | 11456964                | C/G  | NA                 | NA                            | NA                 |
| Kabuli_wild_11456965 | NA                                  | Ca_kabuli_denovo | 11456965                | C/G  | NA                 | NA                            | NA                 |
| Kabuli_wild_11470425 | NA                                  | Ca_kabuli_denovo | 11470425                | A/G  | NA                 | NA                            | NA                 |
| Kabuli_wild_11470473 | NA                                  | Ca_kabuli_denovo | 11470473                | G/T  | NA                 | NA                            | NA                 |
| Kabuli_wild_11470474 | NA                                  | Ca_kabuli_denovo | 11470474                | A/G  | NA                 | NA                            | NA                 |
| Kabuli_wild_11475743 | NA                                  | Ca_kabuli_denovo | 11475743                | C/T  | NA                 | NA                            | NA                 |
| Kabuli_wild_11475744 | NA                                  | Ca_kabuli_denovo | 11475744                | C/T  | NA                 | NA                            | NA                 |
| Kabuli_wild_11475811 | NA                                  | Ca_kabuli_denovo | 11475811                | C/T  | NA                 | NA                            | NA                 |
| Kabuli_wild_11477949 | NA                                  | Ca_kabuli_denovo | 11477949                | C/T  | NA                 | NA                            | NA                 |
| Kabuli_wild_11488831 | NA                                  | Ca_kabuli_denovo | 11488831                | G/T  | NA                 | NA                            | NA                 |
| Kabuli_wild_11491706 | NA                                  | Ca_kabuli_denovo | 11491706                | A/C  | NA                 | NA                            | NA                 |
| Kabuli_wild_11502711 | NA                                  | Ca_kabuli_denovo | 11502711                | A/C  | NA                 | NA                            | NA                 |
| Kabuli_wild_11502712 | NA                                  | Ca_kabuli_denovo | 11502712                | G/T  | NA                 | NA                            | NA                 |

| SNP IDs              | NCBI dbSNP accession IDs (NCBI_SS#) | Chromosomes      | Physical positions (bp) | SNPs | Gene accession IDs | Sequence components of genome | Putative functions |
|----------------------|-------------------------------------|------------------|-------------------------|------|--------------------|-------------------------------|--------------------|
| Kabuli_wild_11503255 | NA                                  | Ca_kabuli_denovo | 11503255                | A/G  | NA                 | NA                            | NA                 |
| Kabuli_wild_11510129 | NA                                  | Ca_kabuli_denovo | 11510129                | C/G  | NA                 | NA                            | NA                 |
| Kabuli_wild_11510141 | NA                                  | Ca_kabuli_denovo | 11510141                | C/G  | NA                 | NA                            | NA                 |
| Kabuli_wild_11516630 | NA                                  | Ca_kabuli_denovo | 11516630                | A/G  | NA                 | NA                            | NA                 |
| Kabuli_wild_11516636 | NA                                  | Ca_kabuli_denovo | 11516636                | C/G  | NA                 | NA                            | NA                 |
| Kabuli_wild_11521724 | NA                                  | Ca_kabuli_denovo | 11521724                | A/G  | NA                 | NA                            | NA                 |
| Kabuli_wild_11521751 | NA                                  | Ca_kabuli_denovo | 11521751                | C/G  | NA                 | NA                            | NA                 |
| Kabuli_wild_11523744 | NA                                  | Ca_kabuli_denovo | 11523744                | C/T  | NA                 | NA                            | NA                 |
| Kabuli_wild_11525828 | NA                                  | Ca_kabuli_denovo | 11525828                | C/T  | NA                 | NA                            | NA                 |
| Kabuli_wild_11526486 | NA                                  | Ca_kabuli_denovo | 11526486                | C/T  | NA                 | NA                            | NA                 |
| Kabuli_wild_11526497 | NA                                  | Ca_kabuli_denovo | 11526497                | C/G  | NA                 | NA                            | NA                 |
| Kabuli_wild_11532191 | NA                                  | Ca_kabuli_denovo | 11532191                | A/T  | NA                 | NA                            | NA                 |
| Kabuli_wild_11532200 | NA                                  | Ca_kabuli_denovo | 11532200                | G/T  | NA                 | NA                            | NA                 |
| Kabuli_wild_11554939 | NA                                  | Ca_kabuli_denovo | 11554939                | C/T  | NA                 | NA                            | NA                 |
| Kabuli_wild_11561993 | NA                                  | Ca_kabuli_denovo | 11561993                | G/T  | NA                 | NA                            | NA                 |
| Kabuli_wild_11565677 | NA                                  | Ca_kabuli_denovo | 11565677                | G/T  | NA                 | NA                            | NA                 |
| Kabuli_wild_11570301 | NA                                  | Ca_kabuli_denovo | 11570301                | T/C  | NA                 | NA                            | NA                 |
| Kabuli_wild_11572561 | NA                                  | Ca_kabuli_denovo | 11572561                | C/T  | NA                 | NA                            | NA                 |
| Kabuli_wild_11572562 | NA                                  | Ca_kabuli_denovo | 11572562                | A/G  | NA                 | NA                            | NA                 |
| Kabuli_wild_11609698 | NA                                  | Ca_kabuli_denovo | 11609698                | C/G  | NA                 | NA                            | NA                 |
| Kabuli_wild_11609721 | NA                                  | Ca_kabuli_denovo | 11609721                | G/T  | NA                 | NA                            | NA                 |
| Kabuli_wild_11610362 | NA                                  | Ca_kabuli_denovo | 11610362                | A/C  | NA                 | NA                            | NA                 |
| Kabuli_wild_11610364 | NA                                  | Ca_kabuli_denovo | 11610364                | C/T  | NA                 | NA                            | NA                 |
| Kabuli_wild_11620045 | NA                                  | Ca_kabuli_denovo | 11620045                | C/G  | NA                 | NA                            | NA                 |
| Kabuli_wild_11628032 | NA                                  | Ca_kabuli_denovo | 11628032                | A/T  | NA                 | NA                            | NA                 |
| Kabuli_wild_11628062 | NA                                  | Ca_kabuli_denovo | 11628062                | A/G  | NA                 | NA                            | NA                 |
| Kabuli_wild_11651401 | NA                                  | Ca_kabuli_denovo | 11651401                | C/T  | NA                 | NA                            | NA                 |
| Kabuli_wild_11651416 | NA                                  | Ca_kabuli_denovo | 11651416                | A/G  | NA                 | NA                            | NA                 |
| Kabuli_wild_11659368 | NA                                  | Ca_kabuli_denovo | 11659368                | G/T  | NA                 | NA                            | NA                 |
| Kabuli_wild_11661615 | NA                                  | Ca_kabuli_denovo | 11661615                | C/T  | NA                 | NA                            | NA                 |
| Kabuli_wild_11665475 | NA                                  | Ca_kabuli_denovo | 11665475                | C/T  | NA                 | NA                            | NA                 |
| Kabuli_wild_11665484 | NA                                  | Ca_kabuli_denovo | 11665484                | C/G  | NA                 | NA                            | NA                 |
| Kabuli_wild_11674494 | NA                                  | Ca_kabuli_denovo | 11674494                | C/T  | NA                 | NA                            | NA                 |
| Kabuli_wild_11674498 | NA                                  | Ca_kabuli_denovo | 11674498                | A/C  | NA                 | NA                            | NA                 |
| Kabuli_wild_11679868 | NA                                  | Ca_kabuli_denovo | 11679868                | G/T  | NA                 | NA                            | NA                 |
| Kabuli_wild_11681936 | NA                                  | Ca_kabuli_denovo | 11681936                | A/C  | NA                 | NA                            | NA                 |
| Kabuli_wild_11686570 | NA                                  | Ca_kabuli_denovo | 11686570                | C/T  | NA                 | NA                            | NA                 |
| Kabuli_wild_11687702 | NA                                  | Ca_kabuli_denovo | 11687702                | G/A  | NA                 | NA                            | NA                 |
| Kabuli_wild_11687715 | NA                                  | Ca_kabuli_denovo | 11687715                | G/A  | NA                 | NA                            | NA                 |
| Kabuli_wild_11694297 | NA                                  | Ca_kabuli_denovo | 11694297                | T/C  | NA                 | NA                            | NA                 |
| Kabuli_wild_11699181 | NA                                  | Ca_kabuli_denovo | 11699181                | C/T  | NA                 | NA                            | NA                 |
| Kabuli_wild_11705587 | NA                                  | Ca_kabuli_denovo | 11705587                | C/T  | NA                 | NA                            | NA                 |
| Kabuli_wild_11741759 | NA                                  | Ca_kabuli_denovo | 11741759                | C/T  | NA                 | NA                            | NA                 |
| Kabuli_wild_11741760 | NA                                  | Ca_kabuli_denovo | 11741760                | G/T  | NA                 | NA                            | NA                 |

| SNP IDs              | NCBI dbSNP accession IDs (NCBI_SS#) | Chromosomes      | Physical positions (bp) | SNPs | Gene accession IDs | Sequence components of genome | Putative functions |
|----------------------|-------------------------------------|------------------|-------------------------|------|--------------------|-------------------------------|--------------------|
| Kabuli_wild_11741845 | NA                                  | Ca_kabuli_denovo | 11741845                | A/G  | NA                 | NA                            | NA                 |
| Kabuli_wild_11744230 | NA                                  | Ca_kabuli_denovo | 11744230                | G/A  | NA                 | NA                            | NA                 |
| Kabuli_wild_11744231 | NA                                  | Ca_kabuli_denovo | 11744231                | T/C  | NA                 | NA                            | NA                 |
| Kabuli_wild_11748128 | NA                                  | Ca_kabuli_denovo | 11748128                | C/T  | NA                 | NA                            | NA                 |
| Kabuli_wild_11757188 | NA                                  | Ca_kabuli_denovo | 11757188                | C/T  | NA                 | NA                            | NA                 |
| Kabuli_wild_11763419 | NA                                  | Ca_kabuli_denovo | 11763419                | A/G  | NA                 | NA                            | NA                 |
| Kabuli_wild_11763437 | NA                                  | Ca_kabuli_denovo | 11763437                | C/T  | NA                 | NA                            | NA                 |
| Kabuli_wild_11774441 | NA                                  | Ca_kabuli_denovo | 11774441                | C/T  | NA                 | NA                            | NA                 |
| Kabuli_wild_11775954 | NA                                  | Ca_kabuli_denovo | 11775954                | A/G  | NA                 | NA                            | NA                 |
| Kabuli_wild_11779570 | NA                                  | Ca_kabuli_denovo | 11779570                | C/G  | NA                 | NA                            | NA                 |
| Kabuli_wild_11779585 | NA                                  | Ca_kabuli_denovo | 11779585                | C/G  | NA                 | NA                            | NA                 |
| Kabuli_wild_11793619 | NA                                  | Ca_kabuli_denovo | 11793619                | C/T  | NA                 | NA                            | NA                 |
| Kabuli_wild_11793634 | NA                                  | Ca_kabuli_denovo | 11793634                | C/G  | NA                 | NA                            | NA                 |
| Kabuli_wild_11802039 | NA                                  | Ca_kabuli_denovo | 11802039                | G/T  | NA                 | NA                            | NA                 |
| Kabuli_wild_11810359 | NA                                  | Ca_kabuli_denovo | 11810359                | C/T  | NA                 | NA                            | NA                 |
| Kabuli_wild_11825449 | NA                                  | Ca_kabuli_denovo | 11825449                | C/G  | NA                 | NA                            | NA                 |
| Kabuli_wild_11825467 | NA                                  | Ca_kabuli_denovo | 11825467                | C/G  | NA                 | NA                            | NA                 |
| Kabuli_wild_11830698 | NA                                  | Ca_kabuli_denovo | 11830698                | A/G  | NA                 | NA                            | NA                 |
| Kabuli_wild_11832376 | NA                                  | Ca_kabuli_denovo | 11832376                | C/T  | NA                 | NA                            | NA                 |
| Kabuli_wild_11832382 | NA                                  | Ca_kabuli_denovo | 11832382                | C/T  | NA                 | NA                            | NA                 |
| Kabuli_wild_11844842 | NA                                  | Ca_kabuli_denovo | 11844842                | C/T  | NA                 | NA                            | NA                 |
| Kabuli_wild_11848773 | NA                                  | Ca_kabuli_denovo | 11848773                | G/A  | NA                 | NA                            | NA                 |
| Kabuli_wild_11848785 | NA                                  | Ca_kabuli_denovo | 11848785                | G/A  | NA                 | NA                            | NA                 |
| Kabuli_wild_11851158 | NA                                  | Ca_kabuli_denovo | 11851158                | G/T  | NA                 | NA                            | NA                 |
| Kabuli_wild_11851955 | NA                                  | Ca_kabuli_denovo | 11851955                | G/C  | NA                 | NA                            | NA                 |
| Kabuli_wild_11851964 | NA                                  | Ca_kabuli_denovo | 11851964                | T/C  | NA                 | NA                            | NA                 |
| Kabuli_wild_11854433 | NA                                  | Ca_kabuli_denovo | 11854433                | C/G  | NA                 | NA                            | NA                 |
| Kabuli_wild_11854453 | NA                                  | Ca_kabuli_denovo | 11854453                | A/C  | NA                 | NA                            | NA                 |
| Kabuli_wild_11865718 | NA                                  | Ca_kabuli_denovo | 11865718                | C/G  | NA                 | NA                            | NA                 |
| Kabuli_wild_11865721 | NA                                  | Ca_kabuli_denovo | 11865721                | A/G  | NA                 | NA                            | NA                 |
| Kabuli_wild_11865733 | NA                                  | Ca_kabuli_denovo | 11865733                | C/G  | NA                 | NA                            | NA                 |
| Kabuli_wild_11872788 | NA                                  | Ca_kabuli_denovo | 11872788                | C/T  | NA                 | NA                            | NA                 |
| Kabuli_wild_11883485 | NA                                  | Ca_kabuli_denovo | 11883485                | A/G  | NA                 | NA                            | NA                 |
| Kabuli_wild_11884068 | NA                                  | Ca_kabuli_denovo | 11884068                | A/G  | NA                 | NA                            | NA                 |
| Kabuli_wild_11891728 | NA                                  | Ca_kabuli_denovo | 11891728                | G/T  | NA                 | NA                            | NA                 |
| Kabuli_wild_11906289 | NA                                  | Ca_kabuli_denovo | 11906289                | A/G  | NA                 | NA                            | NA                 |
| Kabuli_wild_11906295 | NA                                  | Ca_kabuli_denovo | 11906295                | C/T  | NA                 | NA                            | NA                 |
| Kabuli_wild_11927052 | NA                                  | Ca_kabuli_denovo | 11927052                | G/T  | NA                 | NA                            | NA                 |
| Kabuli_wild_11930441 | NA                                  | Ca_kabuli_denovo | 11930441                | G/T  | NA                 | NA                            | NA                 |
| Kabuli_wild_11938173 | NA                                  | Ca_kabuli_denovo | 11938173                | A/G  | NA                 | NA                            | NA                 |
| Kabuli_wild_11939178 | NA                                  | Ca_kabuli_denovo | 11939178                | T/C  | NA                 | NA                            | NA                 |
| Kabuli_wild_11940758 | NA                                  | Ca_kabuli_denovo | 11940758                | A/T  | NA                 | NA                            | NA                 |
| Kabuli_wild_11942657 | NA                                  | Ca_kabuli_denovo | 11942657                | G/T  | NA                 | NA                            | NA                 |
| Kabuli_wild_11943360 | NA                                  | Ca_kabuli_denovo | 11943360                | C/G  | NA                 | NA                            | NA                 |

| SNP IDs              | NCBI dbSNP accession IDs (NCBI_SS#) | Chromosomes      | Physical positions (bp) | SNPs | Gene accession IDs | Sequence components of genome | Putative functions |
|----------------------|-------------------------------------|------------------|-------------------------|------|--------------------|-------------------------------|--------------------|
| Kabuli_wild_11945447 | NA                                  | Ca_kabuli_denovo | 11945447                | C/G  | NA                 | NA                            | NA                 |
| Kabuli_wild_11945449 | NA                                  | Ca_kabuli_denovo | 11945449                | A/T  | NA                 | NA                            | NA                 |
| Kabuli_wild_11945450 | NA                                  | Ca_kabuli_denovo | 11945450                | C/G  | NA                 | NA                            | NA                 |
| Kabuli_wild_11945468 | NA                                  | Ca_kabuli_denovo | 11945468                | C/G  | NA                 | NA                            | NA                 |
| Kabuli_wild_11950505 | NA                                  | Ca_kabuli_denovo | 11950505                | C/T  | NA                 | NA                            | NA                 |
| Kabuli_wild_11951421 | NA                                  | Ca_kabuli_denovo | 11951421                | G/T  | NA                 | NA                            | NA                 |
| Kabuli_wild_11961584 | NA                                  | Ca_kabuli_denovo | 11961584                | C/G  | NA                 | NA                            | NA                 |
| Kabuli_wild_11963937 | NA                                  | Ca_kabuli_denovo | 11963937                | A/C  | NA                 | NA                            | NA                 |
| Kabuli_wild_11963938 | NA                                  | Ca_kabuli_denovo | 11963938                | G/T  | NA                 | NA                            | NA                 |
| Kabuli_wild_11967941 | NA                                  | Ca_kabuli_denovo | 11967941                | A/G  | NA                 | NA                            | NA                 |
| Kabuli_wild_11991997 | NA                                  | Ca_kabuli_denovo | 11991997                | G/A  | NA                 | NA                            | NA                 |
| Kabuli_wild_11992968 | NA                                  | Ca_kabuli_denovo | 11992968                | C/T  | NA                 | NA                            | NA                 |
| Kabuli_wild_11999189 | NA                                  | Ca_kabuli_denovo | 11999189                | C/G  | NA                 | NA                            | NA                 |
| Kabuli_wild_11999225 | NA                                  | Ca_kabuli_denovo | 11999225                | C/T  | NA                 | NA                            | NA                 |
| Kabuli_wild_11999226 | NA                                  | Ca_kabuli_denovo | 11999226                | A/C  | NA                 | NA                            | NA                 |
| Kabuli_wild_11999227 | NA                                  | Ca_kabuli_denovo | 11999227                | A/C  | NA                 | NA                            | NA                 |
| Kabuli_wild_12002533 | NA                                  | Ca_kabuli_denovo | 12002533                | A/G  | NA                 | NA                            | NA                 |
| Kabuli_wild_12002590 | NA                                  | Ca_kabuli_denovo | 12002590                | G/A  | NA                 | NA                            | NA                 |
| Kabuli_wild_12006504 | NA                                  | Ca_kabuli_denovo | 12006504                | G/T  | NA                 | NA                            | NA                 |
| Kabuli_wild_12014864 | NA                                  | Ca_kabuli_denovo | 12014864                | C/T  | NA                 | NA                            | NA                 |
| Kabuli_wild_12014872 | NA                                  | Ca_kabuli_denovo | 12014872                | A/G  | NA                 | NA                            | NA                 |
| Kabuli_wild_12047132 | NA                                  | Ca_kabuli_denovo | 12047132                | C/T  | NA                 | NA                            | NA                 |
| Kabuli_wild_12050557 | NA                                  | Ca_kabuli_denovo | 12050557                | C/T  | NA                 | NA                            | NA                 |
| Kabuli_wild_12058588 | NA                                  | Ca_kabuli_denovo | 12058588                | C/T  | NA                 | NA                            | NA                 |
| Kabuli_wild_12064855 | NA                                  | Ca_kabuli_denovo | 12064855                | C/T  | NA                 | NA                            | NA                 |
| Kabuli_wild_12071412 | NA                                  | Ca_kabuli_denovo | 12071412                | T/C  | NA                 | NA                            | NA                 |
| Kabuli_wild_12074318 | NA                                  | Ca_kabuli_denovo | 12074318                | C/G  | NA                 | NA                            | NA                 |
| Kabuli_wild_12075663 | NA                                  | Ca_kabuli_denovo | 12075663                | G/C  | NA                 | NA                            | NA                 |
| Kabuli_wild_12086832 | NA                                  | Ca_kabuli_denovo | 12086832                | C/T  | NA                 | NA                            | NA                 |
| Kabuli_wild_12088696 | NA                                  | Ca_kabuli_denovo | 12088696                | A/G  | NA                 | NA                            | NA                 |
| Kabuli_wild_12089249 | NA                                  | Ca_kabuli_denovo | 12089249                | A/G  | NA                 | NA                            | NA                 |
| Kabuli_wild_12104357 | NA                                  | Ca_kabuli_denovo | 12104357                | A/G  | NA                 | NA                            | NA                 |
| Kabuli_wild_12104381 | NA                                  | Ca_kabuli_denovo | 12104381                | C/T  | NA                 | NA                            | NA                 |
| Kabuli_wild_12111121 | NA                                  | Ca_kabuli_denovo | 12111121                | A/G  | NA                 | NA                            | NA                 |
| Kabuli_wild_12111510 | NA                                  | Ca_kabuli_denovo | 12111510                | A/T  | NA                 | NA                            | NA                 |
| Kabuli_wild_12111605 | NA                                  | Ca_kabuli_denovo | 12111605                | A/T  | NA                 | NA                            | NA                 |
| Kabuli_wild_12111607 | NA                                  | Ca_kabuli_denovo | 12111607                | C/G  | NA                 | NA                            | NA                 |
| Kabuli_wild_12123156 | NA                                  | Ca_kabuli_denovo | 12123156                | A/G  | NA                 | NA                            | NA                 |
| Kabuli_wild_12128552 | NA                                  | Ca_kabuli_denovo | 12128552                | A/C  | NA                 | NA                            | NA                 |
| Kabuli_wild_12128904 | NA                                  | Ca_kabuli_denovo | 12128904                | C/G  | NA                 | NA                            | NA                 |
| Kabuli_wild_12128905 | NA                                  | Ca_kabuli_denovo | 12128905                | G/A  | NA                 | NA                            | NA                 |
| Kabuli_wild_12132080 | NA                                  | Ca_kabuli_denovo | 12132080                | G/T  | NA                 | NA                            | NA                 |
| Kabuli_wild_12139602 | NA                                  | Ca_kabuli_denovo | 12139602                | C/G  | NA                 | NA                            | NA                 |
| Kabuli_wild_12139623 | NA                                  | Ca_kabuli_denovo | 12139623                | C/G  | NA                 | NA                            | NA                 |

| SNP IDs              | NCBI dbSNP accession IDs (NCBI_SS#) | Chromosomes      | Physical positions (bp) | SNPs | Gene accession IDs | Sequence components of genome | Putative functions |
|----------------------|-------------------------------------|------------------|-------------------------|------|--------------------|-------------------------------|--------------------|
| Kabuli_wild_12149031 | NA                                  | Ca_kabuli_denovo | 12149031                | C/G  | NA                 | NA                            | NA                 |
| Kabuli_wild_12151760 | NA                                  | Ca_kabuli_denovo | 12151760                | A/G  | NA                 | NA                            | NA                 |
| Kabuli_wild_12169868 | NA                                  | Ca_kabuli_denovo | 12169868                | G/T  | NA                 | NA                            | NA                 |
| Kabuli_wild_12173429 | NA                                  | Ca_kabuli_denovo | 12173429                | C/T  | NA                 | NA                            | NA                 |
| Kabuli_wild_12173483 | NA                                  | Ca_kabuli_denovo | 12173483                | A/G  | NA                 | NA                            | NA                 |
| Kabuli_wild_12173495 | NA                                  | Ca_kabuli_denovo | 12173495                | A/C  | NA                 | NA                            | NA                 |
| Kabuli_wild_12173498 | NA                                  | Ca_kabuli_denovo | 12173498                | C/T  | NA                 | NA                            | NA                 |
| Kabuli_wild_12174681 | NA                                  | Ca_kabuli_denovo | 12174681                | C/T  | NA                 | NA                            | NA                 |
| Kabuli_wild_12175142 | NA                                  | Ca_kabuli_denovo | 12175142                | C/G  | NA                 | NA                            | NA                 |
| Kabuli_wild_12185863 | NA                                  | Ca_kabuli_denovo | 12185863                | A/G  | NA                 | NA                            | NA                 |
| Kabuli_wild_12185883 | NA                                  | Ca_kabuli_denovo | 12185883                | G/T  | NA                 | NA                            | NA                 |
| Kabuli_wild_12194017 | NA                                  | Ca_kabuli_denovo | 12194017                | A/G  | NA                 | NA                            | NA                 |
| Kabuli_wild_12208217 | NA                                  | Ca_kabuli_denovo | 12208217                | C/G  | NA                 | NA                            | NA                 |
| Kabuli_wild_12208247 | NA                                  | Ca_kabuli_denovo | 12208247                | G/C  | NA                 | NA                            | NA                 |
| Kabuli_wild_12211469 | NA                                  | Ca_kabuli_denovo | 12211469                | A/G  | NA                 | NA                            | NA                 |
| Kabuli_wild_12234223 | NA                                  | Ca_kabuli_denovo | 12234223                | A/C  | NA                 | NA                            | NA                 |
| Kabuli_wild_12236411 | NA                                  | Ca_kabuli_denovo | 12236411                | A/T  | NA                 | NA                            | NA                 |
| Kabuli_wild_12239471 | NA                                  | Ca_kabuli_denovo | 12239471                | C/G  | NA                 | NA                            | NA                 |
| Kabuli_wild_12239492 | NA                                  | Ca_kabuli_denovo | 12239492                | C/G  | NA                 | NA                            | NA                 |
| Kabuli_wild_12239515 | NA                                  | Ca_kabuli_denovo | 12239515                | G/T  | NA                 | NA                            | NA                 |
| Kabuli_wild_12244955 | NA                                  | Ca_kabuli_denovo | 12244955                | C/G  | NA                 | NA                            | NA                 |
| Kabuli_wild_12244979 | NA                                  | Ca_kabuli_denovo | 12244979                | A/G  | NA                 | NA                            | NA                 |
| Kabuli_wild_12249890 | NA                                  | Ca_kabuli_denovo | 12249890                | A/T  | NA                 | NA                            | NA                 |
| Kabuli_wild_12249905 | NA                                  | Ca_kabuli_denovo | 12249905                | A/G  | NA                 | NA                            | NA                 |
| Kabuli_wild_12249930 | NA                                  | Ca_kabuli_denovo | 12249930                | C/G  | NA                 | NA                            | NA                 |
| Kabuli_wild_12260639 | NA                                  | Ca_kabuli_denovo | 12260639                | C/G  | NA                 | NA                            | NA                 |
| Kabuli_wild_12265035 | NA                                  | Ca_kabuli_denovo | 12265035                | A/T  | NA                 | NA                            | NA                 |
| Kabuli_wild_12268723 | NA                                  | Ca_kabuli_denovo | 12268723                | A/C  | NA                 | NA                            | NA                 |
| Kabuli_wild_12277005 | NA                                  | Ca_kabuli_denovo | 12277005                | C/G  | NA                 | NA                            | NA                 |
| Kabuli_wild_12279304 | NA                                  | Ca_kabuli_denovo | 12279304                | A/G  | NA                 | NA                            | NA                 |
| Kabuli_wild_12290452 | NA                                  | Ca_kabuli_denovo | 12290452                | A/C  | NA                 | NA                            | NA                 |
| Kabuli_wild_12290453 | NA                                  | Ca_kabuli_denovo | 12290453                | A/G  | NA                 | NA                            | NA                 |
| Kabuli_wild_12293230 | NA                                  | Ca_kabuli_denovo | 12293230                | C/G  | NA                 | NA                            | NA                 |
| Kabuli_wild_12294394 | NA                                  | Ca_kabuli_denovo | 12294394                | C/G  | NA                 | NA                            | NA                 |
| Kabuli_wild_12295424 | NA                                  | Ca_kabuli_denovo | 12295424                | C/T  | NA                 | NA                            | NA                 |
| Kabuli_wild_12295444 | NA                                  | Ca_kabuli_denovo | 12295444                | C/T  | NA                 | NA                            | NA                 |
| Kabuli_wild_12321551 | NA                                  | Ca_kabuli_denovo | 12321551                | G/T  | NA                 | NA                            | NA                 |
| Kabuli_wild_12335985 | NA                                  | Ca_kabuli_denovo | 12335985                | C/T  | NA                 | NA                            | NA                 |
| Kabuli_wild_12336021 | NA                                  | Ca_kabuli_denovo | 12336021                | C/T  | NA                 | NA                            | NA                 |
| Kabuli_wild_12336024 | NA                                  | Ca_kabuli_denovo | 12336024                | C/G  | NA                 | NA                            | NA                 |
| Kabuli_wild_12337714 | NA                                  | Ca_kabuli_denovo | 12337714                | A/G  | NA                 | NA                            | NA                 |
| Kabuli_wild_12347380 | NA                                  | Ca_kabuli_denovo | 12347380                | C/G  | NA                 | NA                            | NA                 |
| Kabuli_wild_12355686 | NA                                  | Ca_kabuli_denovo | 12355686                | C/T  | NA                 | NA                            | NA                 |
| Kabuli_wild_12362859 | NA                                  | Ca_kabuli_denovo | 12362859                | A/T  | NA                 | NA                            | NA                 |

| SNP IDs              | NCBI dbSNP accession IDs (NCBI_SS#) | Chromosomes      | Physical positions (bp) | SNPs | Gene accession IDs | Sequence components of genome | Putative functions |
|----------------------|-------------------------------------|------------------|-------------------------|------|--------------------|-------------------------------|--------------------|
| Kabuli_wild_12373870 | NA                                  | Ca_kabuli_denovo | 12373870                | A/T  | NA                 | NA                            | NA                 |
| Kabuli_wild_12373902 | NA                                  | Ca_kabuli_denovo | 12373902                | A/T  | NA                 | NA                            | NA                 |
| Kabuli_wild_12373903 | NA                                  | Ca_kabuli_denovo | 12373903                | G/T  | NA                 | NA                            | NA                 |
| Kabuli_wild_12381459 | NA                                  | Ca_kabuli_denovo | 12381459                | A/C  | NA                 | NA                            | NA                 |
| Kabuli_wild_12386504 | NA                                  | Ca_kabuli_denovo | 12386504                | A/G  | NA                 | NA                            | NA                 |
| Kabuli_wild_12391938 | NA                                  | Ca_kabuli_denovo | 12391938                | A/G  | NA                 | NA                            | NA                 |
| Kabuli_wild_12402757 | NA                                  | Ca_kabuli_denovo | 12402757                | C/G  | NA                 | NA                            | NA                 |
| Kabuli_wild_12402760 | NA                                  | Ca_kabuli_denovo | 12402760                | C/T  | NA                 | NA                            | NA                 |
| Kabuli_wild_12406263 | NA                                  | Ca_kabuli_denovo | 12406263                | C/T  | NA                 | NA                            | NA                 |
| Kabuli_wild_12406265 | NA                                  | Ca_kabuli_denovo | 12406265                | A/C  | NA                 | NA                            | NA                 |
| Kabuli_wild_12431750 | NA                                  | Ca_kabuli_denovo | 12431750                | C/T  | NA                 | NA                            | NA                 |
| Kabuli_wild_12435383 | NA                                  | Ca_kabuli_denovo | 12435383                | C/T  | NA                 | NA                            | NA                 |
| Kabuli_wild_12437534 | NA                                  | Ca_kabuli_denovo | 12437534                | T/C  | NA                 | NA                            | NA                 |
| Kabuli_wild_12437591 | NA                                  | Ca_kabuli_denovo | 12437591                | C/T  | NA                 | NA                            | NA                 |
| Kabuli_wild_12450539 | NA                                  | Ca_kabuli_denovo | 12450539                | A/T  | NA                 | NA                            | NA                 |
| Kabuli_wild_12450545 | NA                                  | Ca_kabuli_denovo | 12450545                | C/G  | NA                 | NA                            | NA                 |
| Kabuli_wild_12450551 | NA                                  | Ca_kabuli_denovo | 12450551                | C/G  | NA                 | NA                            | NA                 |
| Kabuli_wild_12450552 | NA                                  | Ca_kabuli_denovo | 12450552                | C/A  | NA                 | NA                            | NA                 |
| Kabuli_wild_12453007 | NA                                  | Ca_kabuli_denovo | 12453007                | G/T  | NA                 | NA                            | NA                 |
| Kabuli_wild_12453022 | NA                                  | Ca_kabuli_denovo | 12453022                | A/C  | NA                 | NA                            | NA                 |
| Kabuli_wild_12461092 | NA                                  | Ca_kabuli_denovo | 12461092                | C/T  | NA                 | NA                            | NA                 |
| Kabuli_wild_12469832 | NA                                  | Ca_kabuli_denovo | 12469832                | C/G  | NA                 | NA                            | NA                 |
| Kabuli_wild_12473249 | NA                                  | Ca_kabuli_denovo | 12473249                | C/T  | NA                 | NA                            | NA                 |
| Kabuli_wild_12474400 | NA                                  | Ca_kabuli_denovo | 12474400                | C/T  | NA                 | NA                            | NA                 |
| Kabuli_wild_12478122 | NA                                  | Ca_kabuli_denovo | 12478122                | G/T  | NA                 | NA                            | NA                 |
| Kabuli_wild_12482363 | NA                                  | Ca_kabuli_denovo | 12482363                | C/T  | NA                 | NA                            | NA                 |
| Kabuli_wild_12482364 | NA                                  | Ca_kabuli_denovo | 12482364                | C/G  | NA                 | NA                            | NA                 |
| Kabuli_wild_12493010 | NA                                  | Ca_kabuli_denovo | 12493010                | C/T  | NA                 | NA                            | NA                 |
| Kabuli_wild_12493013 | NA                                  | Ca_kabuli_denovo | 12493013                | C/T  | NA                 | NA                            | NA                 |
| Kabuli_wild_12494418 | NA                                  | Ca_kabuli_denovo | 12494418                | A/C  | NA                 | NA                            | NA                 |
| Kabuli_wild_12505074 | NA                                  | Ca_kabuli_denovo | 12505074                | C/G  | NA                 | NA                            | NA                 |
| Kabuli_wild_12513758 | NA                                  | Ca_kabuli_denovo | 12513758                | A/G  | NA                 | NA                            | NA                 |
| Kabuli_wild_12515920 | NA                                  | Ca_kabuli_denovo | 12515920                | G/T  | NA                 | NA                            | NA                 |
| Kabuli_wild_12516663 | NA                                  | Ca_kabuli_denovo | 12516663                | A/G  | NA                 | NA                            | NA                 |
| Kabuli_wild_12516670 | NA                                  | Ca_kabuli_denovo | 12516670                | C/T  | NA                 | NA                            | NA                 |
| Kabuli_wild_12517108 | NA                                  | Ca_kabuli_denovo | 12517108                | A/G  | NA                 | NA                            | NA                 |
| Kabuli_wild_12523212 | NA                                  | Ca_kabuli_denovo | 12523212                | C/G  | NA                 | NA                            | NA                 |
| Kabuli_wild_12526205 | NA                                  | Ca_kabuli_denovo | 12526205                | G/A  | NA                 | NA                            | NA                 |
| Kabuli_wild_12527843 | NA                                  | Ca_kabuli_denovo | 12527843                | G/T  | NA                 | NA                            | NA                 |
| Kabuli_wild_12535486 | NA                                  | Ca_kabuli_denovo | 12535486                | A/G  | NA                 | NA                            | NA                 |
| Kabuli_wild_12535495 | NA                                  | Ca_kabuli_denovo | 12535495                | A/G  | NA                 | NA                            | NA                 |
| Kabuli_wild_12537261 | NA                                  | Ca_kabuli_denovo | 12537261                | C/T  | NA                 | NA                            | NA                 |
| Kabuli_wild_12538933 | NA                                  | Ca_kabuli_denovo | 12538933                | C/G  | NA                 | NA                            | NA                 |
| Kabuli_wild_12546301 | NA                                  | Ca_kabuli_denovo | 12546301                | G/T  | NA                 | NA                            | NA                 |

| SNP IDs              | NCBI dbSNP accession IDs (NCBI_SS#) | Chromosomes      | Physical positions (bp) | SNPs | Gene accession IDs | Sequence components of genome | Putative functions |
|----------------------|-------------------------------------|------------------|-------------------------|------|--------------------|-------------------------------|--------------------|
| Kabuli_wild_12546364 | NA                                  | Ca_kabuli_denovo | 12546364                | C/T  | NA                 | NA                            | NA                 |
| Kabuli_wild_12555429 | NA                                  | Ca_kabuli_denovo | 12555429                | G/A  | NA                 | NA                            | NA                 |
| Kabuli_wild_12555439 | NA                                  | Ca_kabuli_denovo | 12555439                | C/G  | NA                 | NA                            | NA                 |
| Kabuli_wild_12562664 | NA                                  | Ca_kabuli_denovo | 12562664                | A/G  | NA                 | NA                            | NA                 |
| Kabuli_wild_12571196 | NA                                  | Ca_kabuli_denovo | 12571196                | C/G  | NA                 | NA                            | NA                 |
| Kabuli_wild_12574136 | NA                                  | Ca_kabuli_denovo | 12574136                | G/A  | NA                 | NA                            | NA                 |
| Kabuli_wild_12574160 | NA                                  | Ca_kabuli_denovo | 12574160                | G/C  | NA                 | NA                            | NA                 |
| Kabuli_wild_12581766 | NA                                  | Ca_kabuli_denovo | 12581766                | A/G  | NA                 | NA                            | NA                 |
| Kabuli_wild_12590031 | NA                                  | Ca_kabuli_denovo | 12590031                | C/T  | NA                 | NA                            | NA                 |
| Kabuli_wild_12590036 | NA                                  | Ca_kabuli_denovo | 12590036                | C/T  | NA                 | NA                            | NA                 |
| Kabuli_wild_12590230 | NA                                  | Ca_kabuli_denovo | 12590230                | C/T  | NA                 | NA                            | NA                 |
| Kabuli_wild_12590399 | NA                                  | Ca_kabuli_denovo | 12590399                | A/G  | NA                 | NA                            | NA                 |
| Kabuli_wild_12602417 | NA                                  | Ca_kabuli_denovo | 12602417                | A/G  | NA                 | NA                            | NA                 |
| Kabuli_wild_12602425 | NA                                  | Ca_kabuli_denovo | 12602425                | G/T  | NA                 | NA                            | NA                 |
| Kabuli_wild_12605100 | NA                                  | Ca_kabuli_denovo | 12605100                | A/C  | NA                 | NA                            | NA                 |
| Kabuli_wild_12605103 | NA                                  | Ca_kabuli_denovo | 12605103                | A/G  | NA                 | NA                            | NA                 |
| Kabuli_wild_12605154 | NA                                  | Ca_kabuli_denovo | 12605154                | A/G  | NA                 | NA                            | NA                 |
| Kabuli_wild_12636535 | NA                                  | Ca_kabuli_denovo | 12636535                | C/G  | NA                 | NA                            | NA                 |
| Kabuli_wild_12656845 | NA                                  | Ca_kabuli_denovo | 12656845                | A/G  | NA                 | NA                            | NA                 |
| Kabuli_wild_12672911 | NA                                  | Ca_kabuli_denovo | 12672911                | C/G  | NA                 | NA                            | NA                 |
| Kabuli_wild_12680456 | NA                                  | Ca_kabuli_denovo | 12680456                | C/T  | NA                 | NA                            | NA                 |
| Kabuli_wild_12680461 | NA                                  | Ca_kabuli_denovo | 12680461                | A/G  | NA                 | NA                            | NA                 |
| Kabuli_wild_12694331 | NA                                  | Ca_kabuli_denovo | 12694331                | C/G  | NA                 | NA                            | NA                 |
| Kabuli_wild_12694334 | NA                                  | Ca_kabuli_denovo | 12694334                | A/G  | NA                 | NA                            | NA                 |
| Kabuli_wild_12694341 | NA                                  | Ca_kabuli_denovo | 12694341                | C/T  | NA                 | NA                            | NA                 |
| Kabuli_wild_12697555 | NA                                  | Ca_kabuli_denovo | 12697555                | C/T  | NA                 | NA                            | NA                 |
| Kabuli_wild_12705999 | NA                                  | Ca_kabuli_denovo | 12705999                | A/G  | NA                 | NA                            | NA                 |
| Kabuli_wild_12706026 | NA                                  | Ca_kabuli_denovo | 12706026                | A/G  | NA                 | NA                            | NA                 |
| Kabuli_wild_12710377 | NA                                  | Ca_kabuli_denovo | 12710377                | G/A  | NA                 | NA                            | NA                 |
| Kabuli_wild_12710380 | NA                                  | Ca_kabuli_denovo | 12710380                | C/T  | NA                 | NA                            | NA                 |
| Kabuli_wild_12719237 | NA                                  | Ca_kabuli_denovo | 12719237                | G/A  | NA                 | NA                            | NA                 |
| Kabuli_wild_12732398 | NA                                  | Ca_kabuli_denovo | 12732398                | G/T  | NA                 | NA                            | NA                 |
| Kabuli_wild_12732415 | NA                                  | Ca_kabuli_denovo | 12732415                | C/G  | NA                 | NA                            | NA                 |
| Kabuli_wild_12732430 | NA                                  | Ca_kabuli_denovo | 12732430                | C/G  | NA                 | NA                            | NA                 |
| Kabuli_wild_12768123 | NA                                  | Ca_kabuli_denovo | 12768123                | A/G  | NA                 | NA                            | NA                 |
| Kabuli_wild_12770252 | NA                                  | Ca_kabuli_denovo | 12770252                | C/G  | NA                 | NA                            | NA                 |
| Kabuli_wild_12774015 | NA                                  | Ca_kabuli_denovo | 12774015                | C/T  | NA                 | NA                            | NA                 |
| Kabuli_wild_12774024 | NA                                  | Ca_kabuli_denovo | 12774024                | C/G  | NA                 | NA                            | NA                 |
| Kabuli_wild_12777752 | NA                                  | Ca_kabuli_denovo | 12777752                | A/G  | NA                 | NA                            | NA                 |
| Kabuli_wild_12783947 | NA                                  | Ca_kabuli_denovo | 12783947                | C/G  | NA                 | NA                            | NA                 |
| Kabuli_wild_12785383 | NA                                  | Ca_kabuli_denovo | 12785383                | A/G  | NA                 | NA                            | NA                 |
| Kabuli_wild_12790339 | NA                                  | Ca_kabuli_denovo | 12790339                | G/T  | NA                 | NA                            | NA                 |
| Kabuli_wild_12801749 | NA                                  | Ca_kabuli_denovo | 12801749                | C/T  | NA                 | NA                            | NA                 |
| Kabuli_wild_12801752 | NA                                  | Ca_kabuli_denovo | 12801752                | C/T  | NA                 | NA                            | NA                 |

| SNP IDs              | NCBI dbSNP accession IDs (NCBI_SS#) | Chromosomes      | Physical positions (bp) | SNPs | Gene accession IDs | Sequence components of genome | Putative functions |
|----------------------|-------------------------------------|------------------|-------------------------|------|--------------------|-------------------------------|--------------------|
| Kabuli_wild_12801755 | NA                                  | Ca_kabuli_denovo | 12801755                | C/T  | NA                 | NA                            | NA                 |
| Kabuli_wild_12801761 | NA                                  | Ca_kabuli_denovo | 12801761                | C/T  | NA                 | NA                            | NA                 |
| Kabuli_wild_12807105 | NA                                  | Ca_kabuli_denovo | 12807105                | G/T  | NA                 | NA                            | NA                 |
| Kabuli_wild_12812773 | NA                                  | Ca_kabuli_denovo | 12812773                | C/G  | NA                 | NA                            | NA                 |
| Kabuli_wild_12815406 | NA                                  | Ca_kabuli_denovo | 12815406                | G/T  | NA                 | NA                            | NA                 |
| Kabuli_wild_12834915 | NA                                  | Ca_kabuli_denovo | 12834915                | G/T  | NA                 | NA                            | NA                 |
| Kabuli_wild_12834949 | NA                                  | Ca_kabuli_denovo | 12834949                | C/G  | NA                 | NA                            | NA                 |
| Kabuli_wild_12834955 | NA                                  | Ca_kabuli_denovo | 12834955                | C/G  | NA                 | NA                            | NA                 |
| Kabuli_wild_12834958 | NA                                  | Ca_kabuli_denovo | 12834958                | C/G  | NA                 | NA                            | NA                 |
| Kabuli_wild_12846405 | NA                                  | Ca_kabuli_denovo | 12846405                | C/G  | NA                 | NA                            | NA                 |
| Kabuli_wild_12846408 | NA                                  | Ca_kabuli_denovo | 12846408                | C/G  | NA                 | NA                            | NA                 |
| Kabuli_wild_12846429 | NA                                  | Ca_kabuli_denovo | 12846429                | G/T  | NA                 | NA                            | NA                 |
| Kabuli_wild_12860956 | NA                                  | Ca_kabuli_denovo | 12860956                | C/G  | NA                 | NA                            | NA                 |
| Kabuli_wild_12865064 | NA                                  | Ca_kabuli_denovo | 12865064                | C/G  | NA                 | NA                            | NA                 |
| Kabuli_wild_12875849 | NA                                  | Ca_kabuli_denovo | 12875849                | A/G  | NA                 | NA                            | NA                 |
| Kabuli_wild_12875850 | NA                                  | Ca_kabuli_denovo | 12875850                | A/G  | NA                 | NA                            | NA                 |
| Kabuli_wild_12875900 | NA                                  | Ca_kabuli_denovo | 12875900                | A/G  | NA                 | NA                            | NA                 |
| Kabuli_wild_12883498 | NA                                  | Ca_kabuli_denovo | 12883498                | C/T  | NA                 | NA                            | NA                 |
| Kabuli_wild_12899591 | NA                                  | Ca_kabuli_denovo | 12899591                | A/G  | NA                 | NA                            | NA                 |
| Kabuli_wild_12903033 | NA                                  | Ca_kabuli_denovo | 12903033                | C/T  | NA                 | NA                            | NA                 |
| Kabuli_wild_12903057 | NA                                  | Ca_kabuli_denovo | 12903057                | C/T  | NA                 | NA                            | NA                 |
| Kabuli_wild_12903333 | NA                                  | Ca_kabuli_denovo | 12903333                | C/T  | NA                 | NA                            | NA                 |
| Kabuli_wild_12908047 | NA                                  | Ca_kabuli_denovo | 12908047                | A/C  | NA                 | NA                            | NA                 |
| Kabuli_wild_12922106 | NA                                  | Ca_kabuli_denovo | 12922106                | C/G  | NA                 | NA                            | NA                 |
| Kabuli_wild_12922108 | NA                                  | Ca_kabuli_denovo | 12922108                | A/G  | NA                 | NA                            | NA                 |
| Kabuli_wild_12957680 | NA                                  | Ca_kabuli_denovo | 12957680                | C/G  | NA                 | NA                            | NA                 |
| Kabuli_wild_12960138 | NA                                  | Ca_kabuli_denovo | 12960138                | C/G  | NA                 | NA                            | NA                 |
| Kabuli_wild_12960150 | NA                                  | Ca_kabuli_denovo | 12960150                | A/G  | NA                 | NA                            | NA                 |
| Kabuli_wild_12971681 | NA                                  | Ca_kabuli_denovo | 12971681                | C/T  | NA                 | NA                            | NA                 |
| Kabuli_wild_12975056 | NA                                  | Ca_kabuli_denovo | 12975056                | C/T  | NA                 | NA                            | NA                 |
| Kabuli_wild_13012005 | NA                                  | Ca_kabuli_denovo | 13012005                | C/G  | NA                 | NA                            | NA                 |
| Kabuli_wild_13013252 | NA                                  | Ca_kabuli_denovo | 13013252                | T/C  | NA                 | NA                            | NA                 |
| Kabuli_wild_13013258 | NA                                  | Ca_kabuli_denovo | 13013258                | C/G  | NA                 | NA                            | NA                 |
| Kabuli_wild_13013291 | NA                                  | Ca_kabuli_denovo | 13013291                | G/C  | NA                 | NA                            | NA                 |
| Kabuli_wild_13035545 | NA                                  | Ca_kabuli_denovo | 13035545                | C/T  | NA                 | NA                            | NA                 |
| Kabuli_wild_13035563 | NA                                  | Ca_kabuli_denovo | 13035563                | A/G  | NA                 | NA                            | NA                 |
| Kabuli_wild_13048742 | NA                                  | Ca_kabuli_denovo | 13048742                | A/C  | NA                 | NA                            | NA                 |
| Kabuli_wild_13052157 | NA                                  | Ca_kabuli_denovo | 13052157                | G/T  | NA                 | NA                            | NA                 |
| Kabuli_wild_13058592 | NA                                  | Ca_kabuli_denovo | 13058592                | G/A  | NA                 | NA                            | NA                 |
| Kabuli_wild_13058595 | NA                                  | Ca_kabuli_denovo | 13058595                | C/G  | NA                 | NA                            | NA                 |
| Kabuli_wild_13059871 | NA                                  | Ca_kabuli_denovo | 13059871                | C/G  | NA                 | NA                            | NA                 |
| Kabuli_wild_13095015 | NA                                  | Ca_kabuli_denovo | 13095015                | C/G  | NA                 | NA                            | NA                 |
| Kabuli_wild_13095039 | NA                                  | Ca_kabuli_denovo | 13095039                | G/A  | NA                 | NA                            | NA                 |
| Kabuli_wild_13095046 | NA                                  | Ca_kabuli_denovo | 13095046                | C/T  | NA                 | NA                            | NA                 |



| SNP IDs                     | NCBI dbSNP accession IDs (NCBI_SS#) | Chromosomes             | Physical positions (bp) | SNPs | Gene accession IDs | Sequence components of genome | Putative functions |
|-----------------------------|-------------------------------------|-------------------------|-------------------------|------|--------------------|-------------------------------|--------------------|
| <i>Kabuli_wild_13103279</i> | NA                                  | <i>Ca_kabuli_denovo</i> | 13103279                | C/T  | NA                 | NA                            | NA                 |
| <i>Kabuli_wild_13103285</i> | NA                                  | <i>Ca_kabuli_denovo</i> | 13103285                | A/G  | NA                 | NA                            | NA                 |
| <i>Kabuli_wild_13103295</i> | NA                                  | <i>Ca_kabuli_denovo</i> | 13103295                | C/T  | NA                 | NA                            | NA                 |
| <i>Kabuli_wild_13103325</i> | NA                                  | <i>Ca_kabuli_denovo</i> | 13103325                | A/C  | NA                 | NA                            | NA                 |
| <i>Kabuli_wild_13111968</i> | NA                                  | <i>Ca_kabuli_denovo</i> | 13111968                | T/G  | NA                 | NA                            | NA                 |
| <i>Kabuli_wild_13118117</i> | NA                                  | <i>Ca_kabuli_denovo</i> | 13118117                | G/T  | NA                 | NA                            | NA                 |
| <i>Kabuli_wild_13118126</i> | NA                                  | <i>Ca_kabuli_denovo</i> | 13118126                | C/T  | NA                 | NA                            | NA                 |
| <i>Kabuli_wild_13118150</i> | NA                                  | <i>Ca_kabuli_denovo</i> | 13118150                | C/T  | NA                 | NA                            | NA                 |
| <i>Kabuli_wild_13134653</i> | NA                                  | <i>Ca_kabuli_denovo</i> | 13134653                | C/G  | NA                 | NA                            | NA                 |
| <i>Kabuli_wild_13141699</i> | NA                                  | <i>Ca_kabuli_denovo</i> | 13141699                | C/T  | NA                 | NA                            | NA                 |
| <i>Kabuli_wild_13144406</i> | NA                                  | <i>Ca_kabuli_denovo</i> | 13144406                | G/T  | NA                 | NA                            | NA                 |
| <i>Kabuli_wild_13150035</i> | NA                                  | <i>Ca_kabuli_denovo</i> | 13150035                | G/C  | NA                 | NA                            | NA                 |
| <i>Kabuli_wild_13150050</i> | NA                                  | <i>Ca_kabuli_denovo</i> | 13150050                | G/C  | NA                 | NA                            | NA                 |
| <i>Kabuli_wild_13165624</i> | NA                                  | <i>Ca_kabuli_denovo</i> | 13165624                | C/G  | NA                 | NA                            | NA                 |
| <i>Kabuli_wild_13165627</i> | NA                                  | <i>Ca_kabuli_denovo</i> | 13165627                | C/G  | NA                 | NA                            | NA                 |
| <i>Kabuli_wild_13165633</i> | NA                                  | <i>Ca_kabuli_denovo</i> | 13165633                | C/G  | NA                 | NA                            | NA                 |
| <i>Kabuli_wild_13184613</i> | NA                                  | <i>Ca_kabuli_denovo</i> | 13184613                | C/T  | NA                 | NA                            | NA                 |
| <i>Kabuli_wild_13189058</i> | NA                                  | <i>Ca_kabuli_denovo</i> | 13189058                | A/G  | NA                 | NA                            | NA                 |
| <i>Kabuli_wild_13192800</i> | NA                                  | <i>Ca_kabuli_denovo</i> | 13192800                | C/T  | NA                 | NA                            | NA                 |
| <i>Kabuli_wild_13193155</i> | NA                                  | <i>Ca_kabuli_denovo</i> | 13193155                | G/T  | NA                 | NA                            | NA                 |
| <i>Kabuli_wild_13193175</i> | NA                                  | <i>Ca_kabuli_denovo</i> | 13193175                | A/G  | NA                 | NA                            | NA                 |
| <i>Kabuli_wild_13193176</i> | NA                                  | <i>Ca_kabuli_denovo</i> | 13193176                | C/G  | NA                 | NA                            | NA                 |
| <i>Kabuli_wild_13200392</i> | NA                                  | <i>Ca_kabuli_denovo</i> | 13200392                | C/T  | NA                 | NA                            | NA                 |
| <i>Kabuli_wild_13204365</i> | NA                                  | <i>Ca_kabuli_denovo</i> | 13204365                | C/A  | NA                 | NA                            | NA                 |
| <i>Kabuli_wild_13204368</i> | NA                                  | <i>Ca_kabuli_denovo</i> | 13204368                | C/T  | NA                 | NA                            | NA                 |
| <i>Kabuli_wild_13206195</i> | NA                                  | <i>Ca_kabuli_denovo</i> | 13206195                | C/G  | NA                 | NA                            | NA                 |
| <i>Kabuli_wild_13217200</i> | NA                                  | <i>Ca_kabuli_denovo</i> | 13217200                | C/G  | NA                 | NA                            | NA                 |
| <i>Kabuli_wild_13217203</i> | NA                                  | <i>Ca_kabuli_denovo</i> | 13217203                | C/T  | NA                 | NA                            | NA                 |
| <i>Kabuli_wild_13217210</i> | NA                                  | <i>Ca_kabuli_denovo</i> | 13217210                | A/C  | NA                 | NA                            | NA                 |
| <i>Kabuli_wild_13218667</i> | NA                                  | <i>Ca_kabuli_denovo</i> | 13218667                | A/G  | NA                 | NA                            | NA                 |
| <i>Kabuli_wild_13218681</i> | NA                                  | <i>Ca_kabuli_denovo</i> | 13218681                | C/T  | NA                 | NA                            | NA                 |
| <i>Kabuli_wild_13219420</i> | NA                                  | <i>Ca_kabuli_denovo</i> | 13219420                | C/T  | NA                 | NA                            | NA                 |
| <i>Kabuli_wild_13219426</i> | NA                                  | <i>Ca_kabuli_denovo</i> | 13219426                | C/G  | NA                 | NA                            | NA                 |
| <i>Kabuli_wild_13221499</i> | NA                                  | <i>Ca_kabuli_denovo</i> | 13221499                | A/G  | NA                 | NA                            | NA                 |
| <i>Kabuli_wild_13230487</i> | NA                                  | <i>Ca_kabuli_denovo</i> | 13230487                | C/T  | NA                 | NA                            | NA                 |
| <i>Kabuli_wild_13230517</i> | NA                                  | <i>Ca_kabuli_denovo</i> | 13230517                | C/T  | NA                 | NA                            | NA                 |
| <i>Kabuli_wild_13230521</i> | NA                                  | <i>Ca_kabuli_denovo</i> | 13230521                | A/C  | NA                 | NA                            | NA                 |
| <i>Kabuli_wild_13231283</i> | NA                                  | <i>Ca_kabuli_denovo</i> | 13231283                | C/T  | NA                 | NA                            | NA                 |
| <i>Kabuli_wild_13231287</i> | NA                                  | <i>Ca_kabuli_denovo</i> | 13231287                | G/T  | NA                 | NA                            | NA                 |
| <i>Kabuli_wild_13231296</i> | NA                                  | <i>Ca_kabuli_denovo</i> | 13231296                | C/G  | NA                 | NA                            | NA                 |
| <i>Kabuli_wild_13231298</i> | NA                                  | <i>Ca_kabuli_denovo</i> | 13231298                | C/G  | NA                 | NA                            | NA                 |
| <i>Kabuli_wild_13234669</i> | NA                                  | <i>Ca_kabuli_denovo</i> | 13234669                | A/T  | NA                 | NA                            | NA                 |
| <i>Kabuli_wild_13234670</i> | NA                                  | <i>Ca_kabuli_denovo</i> | 13234670                | C/G  | NA                 | NA                            | NA                 |
| <i>Kabuli_wild_13234682</i> | NA                                  | <i>Ca_kabuli_denovo</i> | 13234682                | C/G  | NA                 | NA                            | NA                 |

| SNP IDs              | NCBI dbSNP accession IDs (NCBI_SS#) | Chromosomes      | Physical positions (bp) | SNPs | Gene accession IDs | Sequence components of genome | Putative functions |
|----------------------|-------------------------------------|------------------|-------------------------|------|--------------------|-------------------------------|--------------------|
| Kabuli_wild_13240937 | NA                                  | Ca_kabuli_denovo | 13240937                | C/G  | NA                 | NA                            | NA                 |
| Kabuli_wild_13253608 | NA                                  | Ca_kabuli_denovo | 13253608                | A/G  | NA                 | NA                            | NA                 |
| Kabuli_wild_13253611 | NA                                  | Ca_kabuli_denovo | 13253611                | T/C  | NA                 | NA                            | NA                 |
| Kabuli_wild_13253626 | NA                                  | Ca_kabuli_denovo | 13253626                | A/G  | NA                 | NA                            | NA                 |
| Kabuli_wild_13258233 | NA                                  | Ca_kabuli_denovo | 13258233                | A/G  | NA                 | NA                            | NA                 |
| Kabuli_wild_13258242 | NA                                  | Ca_kabuli_denovo | 13258242                | A/C  | NA                 | NA                            | NA                 |
| Kabuli_wild_13264338 | NA                                  | Ca_kabuli_denovo | 13264338                | C/G  | NA                 | NA                            | NA                 |
| Kabuli_wild_13273086 | NA                                  | Ca_kabuli_denovo | 13273086                | C/T  | NA                 | NA                            | NA                 |
| Kabuli_wild_13273089 | NA                                  | Ca_kabuli_denovo | 13273089                | C/T  | NA                 | NA                            | NA                 |
| Kabuli_wild_13273104 | NA                                  | Ca_kabuli_denovo | 13273104                | C/T  | NA                 | NA                            | NA                 |
| Kabuli_wild_13284451 | NA                                  | Ca_kabuli_denovo | 13284451                | A/G  | NA                 | NA                            | NA                 |
| Kabuli_wild_13284494 | NA                                  | Ca_kabuli_denovo | 13284494                | C/T  | NA                 | NA                            | NA                 |
| Kabuli_wild_13284511 | NA                                  | Ca_kabuli_denovo | 13284511                | C/T  | NA                 | NA                            | NA                 |
| Kabuli_wild_13289436 | NA                                  | Ca_kabuli_denovo | 13289436                | C/A  | NA                 | NA                            | NA                 |
| Kabuli_wild_13291882 | NA                                  | Ca_kabuli_denovo | 13291882                | C/T  | NA                 | NA                            | NA                 |
| Kabuli_wild_13291885 | NA                                  | Ca_kabuli_denovo | 13291885                | C/G  | NA                 | NA                            | NA                 |
| Kabuli_wild_13292633 | NA                                  | Ca_kabuli_denovo | 13292633                | C/T  | NA                 | NA                            | NA                 |
| Kabuli_wild_13313527 | NA                                  | Ca_kabuli_denovo | 13313527                | A/G  | NA                 | NA                            | NA                 |
| Kabuli_wild_13314316 | NA                                  | Ca_kabuli_denovo | 13314316                | C/T  | NA                 | NA                            | NA                 |
| Kabuli_wild_13329193 | NA                                  | Ca_kabuli_denovo | 13329193                | C/G  | NA                 | NA                            | NA                 |
| Kabuli_wild_13336829 | NA                                  | Ca_kabuli_denovo | 13336829                | A/G  | NA                 | NA                            | NA                 |
| Kabuli_wild_13337505 | NA                                  | Ca_kabuli_denovo | 13337505                | C/T  | NA                 | NA                            | NA                 |
| Kabuli_wild_13340022 | NA                                  | Ca_kabuli_denovo | 13340022                | C/G  | NA                 | NA                            | NA                 |
| Kabuli_wild_13340023 | NA                                  | Ca_kabuli_denovo | 13340023                | C/T  | NA                 | NA                            | NA                 |
| Kabuli_wild_13361874 | NA                                  | Ca_kabuli_denovo | 13361874                | A/G  | NA                 | NA                            | NA                 |
| Kabuli_wild_13361875 | NA                                  | Ca_kabuli_denovo | 13361875                | C/G  | NA                 | NA                            | NA                 |
| Kabuli_wild_13361890 | NA                                  | Ca_kabuli_denovo | 13361890                | C/G  | NA                 | NA                            | NA                 |
| Kabuli_wild_13361894 | NA                                  | Ca_kabuli_denovo | 13361894                | A/T  | NA                 | NA                            | NA                 |
| Kabuli_wild_13362975 | NA                                  | Ca_kabuli_denovo | 13362975                | G/A  | NA                 | NA                            | NA                 |
| Kabuli_wild_13365460 | NA                                  | Ca_kabuli_denovo | 13365460                | C/T  | NA                 | NA                            | NA                 |
| Kabuli_wild_13371188 | NA                                  | Ca_kabuli_denovo | 13371188                | C/T  | NA                 | NA                            | NA                 |
| Kabuli_wild_13373179 | NA                                  | Ca_kabuli_denovo | 13373179                | C/T  | NA                 | NA                            | NA                 |
| Kabuli_wild_13373191 | NA                                  | Ca_kabuli_denovo | 13373191                | C/T  | NA                 | NA                            | NA                 |
| Kabuli_wild_13373196 | NA                                  | Ca_kabuli_denovo | 13373196                | C/G  | NA                 | NA                            | NA                 |
| Kabuli_wild_13373257 | NA                                  | Ca_kabuli_denovo | 13373257                | C/T  | NA                 | NA                            | NA                 |
| Kabuli_wild_13380894 | NA                                  | Ca_kabuli_denovo | 13380894                | C/G  | NA                 | NA                            | NA                 |
| Kabuli_wild_13385634 | NA                                  | Ca_kabuli_denovo | 13385634                | T/C  | NA                 | NA                            | NA                 |
| Kabuli_wild_13385655 | NA                                  | Ca_kabuli_denovo | 13385655                | C/T  | NA                 | NA                            | NA                 |
| Kabuli_wild_13398861 | NA                                  | Ca_kabuli_denovo | 13398861                | A/G  | NA                 | NA                            | NA                 |
| Kabuli_wild_13398864 | NA                                  | Ca_kabuli_denovo | 13398864                | C/T  | NA                 | NA                            | NA                 |
| Kabuli_wild_13408066 | NA                                  | Ca_kabuli_denovo | 13408066                | G/T  | NA                 | NA                            | NA                 |
| Kabuli_wild_13422877 | NA                                  | Ca_kabuli_denovo | 13422877                | C/G  | NA                 | NA                            | NA                 |
| Kabuli_wild_13443436 | NA                                  | Ca_kabuli_denovo | 13443436                | G/T  | NA                 | NA                            | NA                 |
| Kabuli_wild_13451352 | NA                                  | Ca_kabuli_denovo | 13451352                | G/T  | NA                 | NA                            | NA                 |

| SNP IDs              | NCBI dbSNP accession IDs (NCBI_SS#) | Chromosomes      | Physical positions (bp) | SNPs | Gene accession IDs | Sequence components of genome | Putative functions |
|----------------------|-------------------------------------|------------------|-------------------------|------|--------------------|-------------------------------|--------------------|
| Kabuli_wild_13455596 | NA                                  | Ca_kabuli_denovo | 13455596                | C/T  | NA                 | NA                            | NA                 |
| Kabuli_wild_13459355 | NA                                  | Ca_kabuli_denovo | 13459355                | C/T  | NA                 | NA                            | NA                 |
| Kabuli_wild_13463983 | NA                                  | Ca_kabuli_denovo | 13463983                | A/C  | NA                 | NA                            | NA                 |
| Kabuli_wild_13467117 | NA                                  | Ca_kabuli_denovo | 13467117                | C/G  | NA                 | NA                            | NA                 |
| Kabuli_wild_13477114 | NA                                  | Ca_kabuli_denovo | 13477114                | G/T  | NA                 | NA                            | NA                 |
| Kabuli_wild_13477120 | NA                                  | Ca_kabuli_denovo | 13477120                | G/T  | NA                 | NA                            | NA                 |
| Kabuli_wild_13477126 | NA                                  | Ca_kabuli_denovo | 13477126                | A/G  | NA                 | NA                            | NA                 |
| Kabuli_wild_13479489 | NA                                  | Ca_kabuli_denovo | 13479489                | G/T  | NA                 | NA                            | NA                 |
| Kabuli_wild_13479510 | NA                                  | Ca_kabuli_denovo | 13479510                | G/A  | NA                 | NA                            | NA                 |
| Kabuli_wild_13481633 | NA                                  | Ca_kabuli_denovo | 13481633                | G/T  | NA                 | NA                            | NA                 |
| Kabuli_wild_13482304 | NA                                  | Ca_kabuli_denovo | 13482304                | C/T  | NA                 | NA                            | NA                 |
| Kabuli_wild_13493552 | NA                                  | Ca_kabuli_denovo | 13493552                | G/T  | NA                 | NA                            | NA                 |
| Kabuli_wild_13504856 | NA                                  | Ca_kabuli_denovo | 13504856                | C/T  | NA                 | NA                            | NA                 |
| Kabuli_wild_13504932 | NA                                  | Ca_kabuli_denovo | 13504932                | A/G  | NA                 | NA                            | NA                 |
| Kabuli_wild_13520031 | NA                                  | Ca_kabuli_denovo | 13520031                | C/G  | NA                 | NA                            | NA                 |
| Kabuli_wild_13525667 | NA                                  | Ca_kabuli_denovo | 13525667                | G/T  | NA                 | NA                            | NA                 |
| Kabuli_wild_13528788 | NA                                  | Ca_kabuli_denovo | 13528788                | C/T  | NA                 | NA                            | NA                 |
| Kabuli_wild_13528793 | NA                                  | Ca_kabuli_denovo | 13528793                | C/G  | NA                 | NA                            | NA                 |
| Kabuli_wild_13534815 | NA                                  | Ca_kabuli_denovo | 13534815                | A/G  | NA                 | NA                            | NA                 |
| Kabuli_wild_13537835 | NA                                  | Ca_kabuli_denovo | 13537835                | C/T  | NA                 | NA                            | NA                 |
| Kabuli_wild_13540671 | NA                                  | Ca_kabuli_denovo | 13540671                | C/G  | NA                 | NA                            | NA                 |
| Kabuli_wild_13546074 | NA                                  | Ca_kabuli_denovo | 13546074                | C/G  | NA                 | NA                            | NA                 |
| Kabuli_wild_13546110 | NA                                  | Ca_kabuli_denovo | 13546110                | C/T  | NA                 | NA                            | NA                 |
| Kabuli_wild_13560918 | NA                                  | Ca_kabuli_denovo | 13560918                | C/G  | NA                 | NA                            | NA                 |
| Kabuli_wild_13562228 | NA                                  | Ca_kabuli_denovo | 13562228                | C/T  | NA                 | NA                            | NA                 |
| Kabuli_wild_13562234 | NA                                  | Ca_kabuli_denovo | 13562234                | A/G  | NA                 | NA                            | NA                 |
| Kabuli_wild_13576290 | NA                                  | Ca_kabuli_denovo | 13576290                | A/G  | NA                 | NA                            | NA                 |
| Kabuli_wild_13581046 | NA                                  | Ca_kabuli_denovo | 13581046                | C/G  | NA                 | NA                            | NA                 |
| Kabuli_wild_13581058 | NA                                  | Ca_kabuli_denovo | 13581058                | C/G  | NA                 | NA                            | NA                 |
| Kabuli_wild_13586473 | NA                                  | Ca_kabuli_denovo | 13586473                | C/G  | NA                 | NA                            | NA                 |
| Kabuli_wild_13595482 | NA                                  | Ca_kabuli_denovo | 13595482                | A/G  | NA                 | NA                            | NA                 |
| Kabuli_wild_13595485 | NA                                  | Ca_kabuli_denovo | 13595485                | T/C  | NA                 | NA                            | NA                 |
| Kabuli_wild_13596766 | NA                                  | Ca_kabuli_denovo | 13596766                | C/G  | NA                 | NA                            | NA                 |
| Kabuli_wild_13596769 | NA                                  | Ca_kabuli_denovo | 13596769                | C/T  | NA                 | NA                            | NA                 |
| Kabuli_wild_13616196 | NA                                  | Ca_kabuli_denovo | 13616196                | A/G  | NA                 | NA                            | NA                 |
| Kabuli_wild_13616229 | NA                                  | Ca_kabuli_denovo | 13616229                | A/G  | NA                 | NA                            | NA                 |
| Kabuli_wild_13616232 | NA                                  | Ca_kabuli_denovo | 13616232                | A/G  | NA                 | NA                            | NA                 |
| Kabuli_wild_13618380 | NA                                  | Ca_kabuli_denovo | 13618380                | A/G  | NA                 | NA                            | NA                 |
| Kabuli_wild_13618383 | NA                                  | Ca_kabuli_denovo | 13618383                | A/T  | NA                 | NA                            | NA                 |
| Kabuli_wild_13618385 | NA                                  | Ca_kabuli_denovo | 13618385                | A/G  | NA                 | NA                            | NA                 |
| Kabuli_wild_13620750 | NA                                  | Ca_kabuli_denovo | 13620750                | A/G  | NA                 | NA                            | NA                 |
| Kabuli_wild_13630719 | NA                                  | Ca_kabuli_denovo | 13630719                | C/T  | NA                 | NA                            | NA                 |
| Kabuli_wild_13630722 | NA                                  | Ca_kabuli_denovo | 13630722                | C/T  | NA                 | NA                            | NA                 |
| Kabuli_wild_13630731 | NA                                  | Ca_kabuli_denovo | 13630731                | C/T  | NA                 | NA                            | NA                 |

| SNP IDs              | NCBI dbSNP accession IDs (NCBI_SS#) | Chromosomes      | Physical positions (bp) | SNPs | Gene accession IDs | Sequence components of genome | Putative functions |
|----------------------|-------------------------------------|------------------|-------------------------|------|--------------------|-------------------------------|--------------------|
| Kabuli_wild_13639857 | NA                                  | Ca_kabuli_denovo | 13639857                | A/C  | NA                 | NA                            | NA                 |
| Kabuli_wild_13639858 | NA                                  | Ca_kabuli_denovo | 13639858                | C/G  | NA                 | NA                            | NA                 |
| Kabuli_wild_13639879 | NA                                  | Ca_kabuli_denovo | 13639879                | C/G  | NA                 | NA                            | NA                 |
| Kabuli_wild_13653743 | NA                                  | Ca_kabuli_denovo | 13653743                | C/T  | NA                 | NA                            | NA                 |
| Kabuli_wild_13657325 | NA                                  | Ca_kabuli_denovo | 13657325                | C/G  | NA                 | NA                            | NA                 |
| Kabuli_wild_13672433 | NA                                  | Ca_kabuli_denovo | 13672433                | A/G  | NA                 | NA                            | NA                 |
| Kabuli_wild_13672466 | NA                                  | Ca_kabuli_denovo | 13672466                | A/G  | NA                 | NA                            | NA                 |
| Kabuli_wild_13678983 | NA                                  | Ca_kabuli_denovo | 13678983                | A/G  | NA                 | NA                            | NA                 |
| Kabuli_wild_13682461 | NA                                  | Ca_kabuli_denovo | 13682461                | A/G  | NA                 | NA                            | NA                 |
| Kabuli_wild_13686061 | NA                                  | Ca_kabuli_denovo | 13686061                | C/G  | NA                 | NA                            | NA                 |
| Kabuli_wild_13693342 | NA                                  | Ca_kabuli_denovo | 13693342                | A/G  | NA                 | NA                            | NA                 |
| Kabuli_wild_13708110 | NA                                  | Ca_kabuli_denovo | 13708110                | C/G  | NA                 | NA                            | NA                 |
| Kabuli_wild_13708134 | NA                                  | Ca_kabuli_denovo | 13708134                | C/G  | NA                 | NA                            | NA                 |
| Kabuli_wild_13711488 | NA                                  | Ca_kabuli_denovo | 13711488                | C/G  | NA                 | NA                            | NA                 |
| Kabuli_wild_13750142 | NA                                  | Ca_kabuli_denovo | 13750142                | A/C  | NA                 | NA                            | NA                 |
| Kabuli_wild_13752454 | NA                                  | Ca_kabuli_denovo | 13752454                | C/G  | NA                 | NA                            | NA                 |
| Kabuli_wild_13752457 | NA                                  | Ca_kabuli_denovo | 13752457                | C/G  | NA                 | NA                            | NA                 |
| Kabuli_wild_13758330 | NA                                  | Ca_kabuli_denovo | 13758330                | A/T  | NA                 | NA                            | NA                 |
| Kabuli_wild_13758332 | NA                                  | Ca_kabuli_denovo | 13758332                | C/G  | NA                 | NA                            | NA                 |
| Kabuli_wild_13772682 | NA                                  | Ca_kabuli_denovo | 13772682                | A/G  | NA                 | NA                            | NA                 |
| Kabuli_wild_13803168 | NA                                  | Ca_kabuli_denovo | 13803168                | C/G  | NA                 | NA                            | NA                 |
| Kabuli_wild_13813040 | NA                                  | Ca_kabuli_denovo | 13813040                | A/G  | NA                 | NA                            | NA                 |
| Kabuli_wild_13813049 | NA                                  | Ca_kabuli_denovo | 13813049                | G/T  | NA                 | NA                            | NA                 |
| Kabuli_wild_13818540 | NA                                  | Ca_kabuli_denovo | 13818540                | G/A  | NA                 | NA                            | NA                 |
| Kabuli_wild_13823872 | NA                                  | Ca_kabuli_denovo | 13823872                | G/T  | NA                 | NA                            | NA                 |
| Kabuli_wild_13829031 | NA                                  | Ca_kabuli_denovo | 13829031                | G/T  | NA                 | NA                            | NA                 |
| Kabuli_wild_13833753 | NA                                  | Ca_kabuli_denovo | 13833753                | C/T  | NA                 | NA                            | NA                 |
| Kabuli_wild_13833762 | NA                                  | Ca_kabuli_denovo | 13833762                | A/G  | NA                 | NA                            | NA                 |
| Kabuli_wild_13833768 | NA                                  | Ca_kabuli_denovo | 13833768                | C/T  | NA                 | NA                            | NA                 |
| Kabuli_wild_13882673 | NA                                  | Ca_kabuli_denovo | 13882673                | A/G  | NA                 | NA                            | NA                 |
| Kabuli_wild_13884856 | NA                                  | Ca_kabuli_denovo | 13884856                | C/T  | NA                 | NA                            | NA                 |
| Kabuli_wild_13891624 | NA                                  | Ca_kabuli_denovo | 13891624                | A/G  | NA                 | NA                            | NA                 |
| Kabuli_wild_13897130 | NA                                  | Ca_kabuli_denovo | 13897130                | A/G  | NA                 | NA                            | NA                 |
| Kabuli_wild_13902259 | NA                                  | Ca_kabuli_denovo | 13902259                | C/T  | NA                 | NA                            | NA                 |
| Kabuli_wild_13902271 | NA                                  | Ca_kabuli_denovo | 13902271                | C/T  | NA                 | NA                            | NA                 |
| Kabuli_wild_13922729 | NA                                  | Ca_kabuli_denovo | 13922729                | G/T  | NA                 | NA                            | NA                 |
| Kabuli_wild_13924331 | NA                                  | Ca_kabuli_denovo | 13924331                | C/T  | NA                 | NA                            | NA                 |
| Kabuli_wild_13924358 | NA                                  | Ca_kabuli_denovo | 13924358                | A/G  | NA                 | NA                            | NA                 |
| Kabuli_wild_13930206 | NA                                  | Ca_kabuli_denovo | 13930206                | G/T  | NA                 | NA                            | NA                 |
| Kabuli_wild_13932472 | NA                                  | Ca_kabuli_denovo | 13932472                | G/C  | NA                 | NA                            | NA                 |
| Kabuli_wild_13939008 | NA                                  | Ca_kabuli_denovo | 13939008                | A/T  | NA                 | NA                            | NA                 |
| Kabuli_wild_13939025 | NA                                  | Ca_kabuli_denovo | 13939025                | C/T  | NA                 | NA                            | NA                 |
| Kabuli_wild_13944710 | NA                                  | Ca_kabuli_denovo | 13944710                | A/G  | NA                 | NA                            | NA                 |
| Kabuli_wild_13944731 | NA                                  | Ca_kabuli_denovo | 13944731                | A/G  | NA                 | NA                            | NA                 |

| SNP IDs              | NCBI dbSNP accession IDs (NCBI_SS#) | Chromosomes      | Physical positions (bp) | SNPs | Gene accession IDs | Sequence components of genome | Putative functions |
|----------------------|-------------------------------------|------------------|-------------------------|------|--------------------|-------------------------------|--------------------|
| Kabuli_wild_13950008 | NA                                  | Ca_kabuli_denovo | 13950008                | A/C  | NA                 | NA                            | NA                 |
| Kabuli_wild_13973200 | NA                                  | Ca_kabuli_denovo | 13973200                | A/C  | NA                 | NA                            | NA                 |
| Kabuli_wild_13973204 | NA                                  | Ca_kabuli_denovo | 13973204                | C/G  | NA                 | NA                            | NA                 |
| Kabuli_wild_13973225 | NA                                  | Ca_kabuli_denovo | 13973225                | C/G  | NA                 | NA                            | NA                 |
| Kabuli_wild_13976727 | NA                                  | Ca_kabuli_denovo | 13976727                | G/A  | NA                 | NA                            | NA                 |
| Kabuli_wild_13991939 | NA                                  | Ca_kabuli_denovo | 13991939                | A/G  | NA                 | NA                            | NA                 |
| Kabuli_wild_13991957 | NA                                  | Ca_kabuli_denovo | 13991957                | C/G  | NA                 | NA                            | NA                 |
| Kabuli_wild_13991975 | NA                                  | Ca_kabuli_denovo | 13991975                | C/G  | NA                 | NA                            | NA                 |
| Kabuli_wild_13991981 | NA                                  | Ca_kabuli_denovo | 13991981                | C/T  | NA                 | NA                            | NA                 |
| Kabuli_wild_13994863 | NA                                  | Ca_kabuli_denovo | 13994863                | C/G  | NA                 | NA                            | NA                 |
| Kabuli_wild_13994866 | NA                                  | Ca_kabuli_denovo | 13994866                | A/C  | NA                 | NA                            | NA                 |
| Kabuli_wild_13999449 | NA                                  | Ca_kabuli_denovo | 13999449                | G/T  | NA                 | NA                            | NA                 |
| Kabuli_wild_13999455 | NA                                  | Ca_kabuli_denovo | 13999455                | A/G  | NA                 | NA                            | NA                 |
| Kabuli_wild_13999718 | NA                                  | Ca_kabuli_denovo | 13999718                | A/C  | NA                 | NA                            | NA                 |
| Kabuli_wild_13999724 | NA                                  | Ca_kabuli_denovo | 13999724                | C/G  | NA                 | NA                            | NA                 |
| Kabuli_wild_13999772 | NA                                  | Ca_kabuli_denovo | 13999772                | C/T  | NA                 | NA                            | NA                 |
| Kabuli_wild_14058158 | NA                                  | Ca_kabuli_denovo | 14058158                | A/G  | NA                 | NA                            | NA                 |
| Kabuli_wild_14058169 | NA                                  | Ca_kabuli_denovo | 14058169                | A/G  | NA                 | NA                            | NA                 |
| Kabuli_wild_14072681 | NA                                  | Ca_kabuli_denovo | 14072681                | C/G  | NA                 | NA                            | NA                 |
| Kabuli_wild_14081885 | NA                                  | Ca_kabuli_denovo | 14081885                | C/G  | NA                 | NA                            | NA                 |
| Kabuli_wild_14081888 | NA                                  | Ca_kabuli_denovo | 14081888                | A/C  | NA                 | NA                            | NA                 |
| Kabuli_wild_14083626 | NA                                  | Ca_kabuli_denovo | 14083626                | C/T  | NA                 | NA                            | NA                 |
| Kabuli_wild_14084776 | NA                                  | Ca_kabuli_denovo | 14084776                | A/G  | NA                 | NA                            | NA                 |
| Kabuli_wild_14095089 | NA                                  | Ca_kabuli_denovo | 14095089                | G/T  | NA                 | NA                            | NA                 |
| Kabuli_wild_14095098 | NA                                  | Ca_kabuli_denovo | 14095098                | C/T  | NA                 | NA                            | NA                 |
| Kabuli_wild_14096222 | NA                                  | Ca_kabuli_denovo | 14096222                | C/T  | NA                 | NA                            | NA                 |
| Kabuli_wild_14096256 | NA                                  | Ca_kabuli_denovo | 14096256                | A/C  | NA                 | NA                            | NA                 |
| Kabuli_wild_14096262 | NA                                  | Ca_kabuli_denovo | 14096262                | A/C  | NA                 | NA                            | NA                 |
| Kabuli_wild_14098426 | NA                                  | Ca_kabuli_denovo | 14098426                | C/T  | NA                 | NA                            | NA                 |
| Kabuli_wild_14098429 | NA                                  | Ca_kabuli_denovo | 14098429                | C/T  | NA                 | NA                            | NA                 |
| Kabuli_wild_14098435 | NA                                  | Ca_kabuli_denovo | 14098435                | G/A  | NA                 | NA                            | NA                 |
| Kabuli_wild_14110375 | NA                                  | Ca_kabuli_denovo | 14110375                | C/T  | NA                 | NA                            | NA                 |
| Kabuli_wild_14116583 | NA                                  | Ca_kabuli_denovo | 14116583                | C/T  | NA                 | NA                            | NA                 |
| Kabuli_wild_14121423 | NA                                  | Ca_kabuli_denovo | 14121423                | C/T  | NA                 | NA                            | NA                 |
| Kabuli_wild_14126816 | NA                                  | Ca_kabuli_denovo | 14126816                | C/G  | NA                 | NA                            | NA                 |
| Kabuli_wild_14126819 | NA                                  | Ca_kabuli_denovo | 14126819                | A/C  | NA                 | NA                            | NA                 |
| Kabuli_wild_14126834 | NA                                  | Ca_kabuli_denovo | 14126834                | A/G  | NA                 | NA                            | NA                 |
| Kabuli_wild_14126843 | NA                                  | Ca_kabuli_denovo | 14126843                | A/G  | NA                 | NA                            | NA                 |
| Kabuli_wild_14129852 | NA                                  | Ca_kabuli_denovo | 14129852                | C/T  | NA                 | NA                            | NA                 |
| Kabuli_wild_14129862 | NA                                  | Ca_kabuli_denovo | 14129862                | C/G  | NA                 | NA                            | NA                 |
| Kabuli_wild_14129882 | NA                                  | Ca_kabuli_denovo | 14129882                | C/T  | NA                 | NA                            | NA                 |
| Kabuli_wild_14129896 | NA                                  | Ca_kabuli_denovo | 14129896                | A/G  | NA                 | NA                            | NA                 |
| Kabuli_wild_14150590 | NA                                  | Ca_kabuli_denovo | 14150590                | A/G  | NA                 | NA                            | NA                 |
| Kabuli_wild_14157597 | NA                                  | Ca_kabuli_denovo | 14157597                | A/G  | NA                 | NA                            | NA                 |

| SNP IDs              | NCBI dbSNP accession IDs (NCBI_SS#) | Chromosomes      | Physical positions (bp) | SNPs | Gene accession IDs | Sequence components of genome | Putative functions |
|----------------------|-------------------------------------|------------------|-------------------------|------|--------------------|-------------------------------|--------------------|
| Kabuli_wild_14157598 | NA                                  | Ca_kabuli_denovo | 14157598                | C/G  | NA                 | NA                            | NA                 |
| Kabuli_wild_14157599 | NA                                  | Ca_kabuli_denovo | 14157599                | C/G  | NA                 | NA                            | NA                 |
| Kabuli_wild_14157617 | NA                                  | Ca_kabuli_denovo | 14157617                | C/G  | NA                 | NA                            | NA                 |
| Kabuli_wild_14164438 | NA                                  | Ca_kabuli_denovo | 14164438                | C/G  | NA                 | NA                            | NA                 |
| Kabuli_wild_14164475 | NA                                  | Ca_kabuli_denovo | 14164475                | C/G  | NA                 | NA                            | NA                 |
| Kabuli_wild_14164478 | NA                                  | Ca_kabuli_denovo | 14164478                | C/G  | NA                 | NA                            | NA                 |
| Kabuli_wild_14164498 | NA                                  | Ca_kabuli_denovo | 14164498                | C/T  | NA                 | NA                            | NA                 |
| Kabuli_wild_14171283 | NA                                  | Ca_kabuli_denovo | 14171283                | G/T  | NA                 | NA                            | NA                 |
| Kabuli_wild_14184380 | NA                                  | Ca_kabuli_denovo | 14184380                | A/G  | NA                 | NA                            | NA                 |
| Kabuli_wild_14197237 | NA                                  | Ca_kabuli_denovo | 14197237                | C/T  | NA                 | NA                            | NA                 |
| Kabuli_wild_14197243 | NA                                  | Ca_kabuli_denovo | 14197243                | C/T  | NA                 | NA                            | NA                 |
| Kabuli_wild_14197246 | NA                                  | Ca_kabuli_denovo | 14197246                | A/G  | NA                 | NA                            | NA                 |
| Kabuli_wild_14198043 | NA                                  | Ca_kabuli_denovo | 14198043                | G/T  | NA                 | NA                            | NA                 |
| Kabuli_wild_14207584 | NA                                  | Ca_kabuli_denovo | 14207584                | C/G  | NA                 | NA                            | NA                 |
| Kabuli_wild_14207586 | NA                                  | Ca_kabuli_denovo | 14207586                | C/G  | NA                 | NA                            | NA                 |
| Kabuli_wild_14207601 | NA                                  | Ca_kabuli_denovo | 14207601                | C/G  | NA                 | NA                            | NA                 |
| Kabuli_wild_14207613 | NA                                  | Ca_kabuli_denovo | 14207613                | C/G  | NA                 | NA                            | NA                 |
| Kabuli_wild_14217344 | NA                                  | Ca_kabuli_denovo | 14217344                | A/G  | NA                 | NA                            | NA                 |
| Kabuli_wild_14217398 | NA                                  | Ca_kabuli_denovo | 14217398                | A/G  | NA                 | NA                            | NA                 |
| Kabuli_wild_14217404 | NA                                  | Ca_kabuli_denovo | 14217404                | A/G  | NA                 | NA                            | NA                 |
| Kabuli_wild_14218398 | NA                                  | Ca_kabuli_denovo | 14218398                | C/T  | NA                 | NA                            | NA                 |
| Kabuli_wild_14220782 | NA                                  | Ca_kabuli_denovo | 14220782                | C/G  | NA                 | NA                            | NA                 |
| Kabuli_wild_14228983 | NA                                  | Ca_kabuli_denovo | 14228983                | A/G  | NA                 | NA                            | NA                 |
| Kabuli_wild_14241961 | NA                                  | Ca_kabuli_denovo | 14241961                | C/G  | NA                 | NA                            | NA                 |
| Kabuli_wild_14241967 | NA                                  | Ca_kabuli_denovo | 14241967                | T/C  | NA                 | NA                            | NA                 |
| Kabuli_wild_14241970 | NA                                  | Ca_kabuli_denovo | 14241970                | A/C  | NA                 | NA                            | NA                 |
| Kabuli_wild_14241976 | NA                                  | Ca_kabuli_denovo | 14241976                | A/G  | NA                 | NA                            | NA                 |
| Kabuli_wild_14250787 | NA                                  | Ca_kabuli_denovo | 14250787                | C/G  | NA                 | NA                            | NA                 |
| Kabuli_wild_14250793 | NA                                  | Ca_kabuli_denovo | 14250793                | C/G  | NA                 | NA                            | NA                 |
| Kabuli_wild_14255509 | NA                                  | Ca_kabuli_denovo | 14255509                | G/T  | NA                 | NA                            | NA                 |
| Kabuli_wild_14259841 | NA                                  | Ca_kabuli_denovo | 14259841                | A/G  | NA                 | NA                            | NA                 |
| Kabuli_wild_14268549 | NA                                  | Ca_kabuli_denovo | 14268549                | G/T  | NA                 | NA                            | NA                 |
| Kabuli_wild_14271276 | NA                                  | Ca_kabuli_denovo | 14271276                | C/G  | NA                 | NA                            | NA                 |
| Kabuli_wild_14274356 | NA                                  | Ca_kabuli_denovo | 14274356                | G/T  | NA                 | NA                            | NA                 |
| Kabuli_wild_14276708 | NA                                  | Ca_kabuli_denovo | 14276708                | C/T  | NA                 | NA                            | NA                 |
| Kabuli_wild_14286170 | NA                                  | Ca_kabuli_denovo | 14286170                | G/A  | NA                 | NA                            | NA                 |
| Kabuli_wild_14302942 | NA                                  | Ca_kabuli_denovo | 14302942                | G/T  | NA                 | NA                            | NA                 |
| Kabuli_wild_14306102 | NA                                  | Ca_kabuli_denovo | 14306102                | A/G  | NA                 | NA                            | NA                 |
| Kabuli_wild_14317950 | NA                                  | Ca_kabuli_denovo | 14317950                | T/C  | NA                 | NA                            | NA                 |
| Kabuli_wild_14317968 | NA                                  | Ca_kabuli_denovo | 14317968                | C/G  | NA                 | NA                            | NA                 |
| Kabuli_wild_14317983 | NA                                  | Ca_kabuli_denovo | 14317983                | T/C  | NA                 | NA                            | NA                 |
| Kabuli_wild_14317984 | NA                                  | Ca_kabuli_denovo | 14317984                | T/C  | NA                 | NA                            | NA                 |
| Kabuli_wild_14319278 | NA                                  | Ca_kabuli_denovo | 14319278                | G/A  | NA                 | NA                            | NA                 |
| Kabuli_wild_14319289 | NA                                  | Ca_kabuli_denovo | 14319289                | T/C  | NA                 | NA                            | NA                 |

| SNP IDs              | NCBI dbSNP accession IDs (NCBI_SS#) | Chromosomes      | Physical positions (bp) | SNPs | Gene accession IDs | Sequence components of genome | Putative functions |
|----------------------|-------------------------------------|------------------|-------------------------|------|--------------------|-------------------------------|--------------------|
| Kabuli_wild_14319294 | NA                                  | Ca_kabuli_denovo | 14319294                | T/C  | NA                 | NA                            | NA                 |
| Kabuli_wild_14319391 | NA                                  | Ca_kabuli_denovo | 14319391                | A/G  | NA                 | NA                            | NA                 |
| Kabuli_wild_14319401 | NA                                  | Ca_kabuli_denovo | 14319401                | C/T  | NA                 | NA                            | NA                 |
| Kabuli_wild_14321988 | NA                                  | Ca_kabuli_denovo | 14321988                | C/A  | NA                 | NA                            | NA                 |
| Kabuli_wild_14337715 | NA                                  | Ca_kabuli_denovo | 14337715                | C/G  | NA                 | NA                            | NA                 |
| Kabuli_wild_14337727 | NA                                  | Ca_kabuli_denovo | 14337727                | C/T  | NA                 | NA                            | NA                 |
| Kabuli_wild_14340384 | NA                                  | Ca_kabuli_denovo | 14340384                | T/C  | NA                 | NA                            | NA                 |
| Kabuli_wild_14343640 | NA                                  | Ca_kabuli_denovo | 14343640                | G/T  | NA                 | NA                            | NA                 |
| Kabuli_wild_14363739 | NA                                  | Ca_kabuli_denovo | 14363739                | C/T  | NA                 | NA                            | NA                 |
| Kabuli_wild_14363763 | NA                                  | Ca_kabuli_denovo | 14363763                | G/A  | NA                 | NA                            | NA                 |
| Kabuli_wild_14373149 | NA                                  | Ca_kabuli_denovo | 14373149                | G/A  | NA                 | NA                            | NA                 |
| Kabuli_wild_14373166 | NA                                  | Ca_kabuli_denovo | 14373166                | C/T  | NA                 | NA                            | NA                 |
| Kabuli_wild_14387532 | NA                                  | Ca_kabuli_denovo | 14387532                | A/C  | NA                 | NA                            | NA                 |
| Kabuli_wild_14387538 | NA                                  | Ca_kabuli_denovo | 14387538                | C/T  | NA                 | NA                            | NA                 |
| Kabuli_wild_14402613 | NA                                  | Ca_kabuli_denovo | 14402613                | C/T  | NA                 | NA                            | NA                 |
| Kabuli_wild_14402622 | NA                                  | Ca_kabuli_denovo | 14402622                | A/G  | NA                 | NA                            | NA                 |
| Kabuli_wild_14402628 | NA                                  | Ca_kabuli_denovo | 14402628                | C/G  | NA                 | NA                            | NA                 |
| Kabuli_wild_14407448 | NA                                  | Ca_kabuli_denovo | 14407448                | G/A  | NA                 | NA                            | NA                 |
| Kabuli_wild_14407485 | NA                                  | Ca_kabuli_denovo | 14407485                | G/C  | NA                 | NA                            | NA                 |
| Kabuli_wild_14411554 | NA                                  | Ca_kabuli_denovo | 14411554                | A/C  | NA                 | NA                            | NA                 |
| Kabuli_wild_14414555 | NA                                  | Ca_kabuli_denovo | 14414555                | A/C  | NA                 | NA                            | NA                 |
| Kabuli_wild_14428380 | NA                                  | Ca_kabuli_denovo | 14428380                | C/G  | NA                 | NA                            | NA                 |
| Kabuli_wild_14429994 | NA                                  | Ca_kabuli_denovo | 14429994                | T/A  | NA                 | NA                            | NA                 |
| Kabuli_wild_14434805 | NA                                  | Ca_kabuli_denovo | 14434805                | T/C  | NA                 | NA                            | NA                 |
| Kabuli_wild_14434850 | NA                                  | Ca_kabuli_denovo | 14434850                | G/C  | NA                 | NA                            | NA                 |
| Kabuli_wild_14437657 | NA                                  | Ca_kabuli_denovo | 14437657                | C/T  | NA                 | NA                            | NA                 |
| Kabuli_wild_14439181 | NA                                  | Ca_kabuli_denovo | 14439181                | T/C  | NA                 | NA                            | NA                 |
| Kabuli_wild_14439190 | NA                                  | Ca_kabuli_denovo | 14439190                | C/G  | NA                 | NA                            | NA                 |
| Kabuli_wild_14439193 | NA                                  | Ca_kabuli_denovo | 14439193                | C/G  | NA                 | NA                            | NA                 |
| Kabuli_wild_14447850 | NA                                  | Ca_kabuli_denovo | 14447850                | T/C  | NA                 | NA                            | NA                 |
| Kabuli_wild_14447853 | NA                                  | Ca_kabuli_denovo | 14447853                | C/G  | NA                 | NA                            | NA                 |
| Kabuli_wild_14447868 | NA                                  | Ca_kabuli_denovo | 14447868                | C/G  | NA                 | NA                            | NA                 |
| Kabuli_wild_14448124 | NA                                  | Ca_kabuli_denovo | 14448124                | C/A  | NA                 | NA                            | NA                 |
| Kabuli_wild_14450887 | NA                                  | Ca_kabuli_denovo | 14450887                | G/T  | NA                 | NA                            | NA                 |
| Kabuli_wild_14453989 | NA                                  | Ca_kabuli_denovo | 14453989                | C/T  | NA                 | NA                            | NA                 |
| Kabuli_wild_14454001 | NA                                  | Ca_kabuli_denovo | 14454001                | C/T  | NA                 | NA                            | NA                 |
| Kabuli_wild_14454025 | NA                                  | Ca_kabuli_denovo | 14454025                | A/G  | NA                 | NA                            | NA                 |
| Kabuli_wild_14456555 | NA                                  | Ca_kabuli_denovo | 14456555                | C/G  | NA                 | NA                            | NA                 |
| Kabuli_wild_14456558 | NA                                  | Ca_kabuli_denovo | 14456558                | C/G  | NA                 | NA                            | NA                 |
| Kabuli_wild_14456561 | NA                                  | Ca_kabuli_denovo | 14456561                | A/T  | NA                 | NA                            | NA                 |
| Kabuli_wild_14456579 | NA                                  | Ca_kabuli_denovo | 14456579                | C/G  | NA                 | NA                            | NA                 |
| Kabuli_wild_14484122 | NA                                  | Ca_kabuli_denovo | 14484122                | C/G  | NA                 | NA                            | NA                 |
| Kabuli_wild_14484126 | NA                                  | Ca_kabuli_denovo | 14484126                | A/G  | NA                 | NA                            | NA                 |
| Kabuli_wild_14504473 | NA                                  | Ca_kabuli_denovo | 14504473                | C/T  | NA                 | NA                            | NA                 |

| SNP IDs              | NCBI dbSNP accession IDs (NCBI_SS#) | Chromosomes      | Physical positions (bp) | SNPs | Gene accession IDs | Sequence components of genome | Putative functions |
|----------------------|-------------------------------------|------------------|-------------------------|------|--------------------|-------------------------------|--------------------|
| Kabuli_wild_14509203 | NA                                  | Ca_kabuli_denovo | 14509203                | A/G  | NA                 | NA                            | NA                 |
| Kabuli_wild_14519188 | NA                                  | Ca_kabuli_denovo | 14519188                | T/C  | NA                 | NA                            | NA                 |
| Kabuli_wild_14523362 | NA                                  | Ca_kabuli_denovo | 14523362                | A/C  | NA                 | NA                            | NA                 |
| Kabuli_wild_14525544 | NA                                  | Ca_kabuli_denovo | 14525544                | C/T  | NA                 | NA                            | NA                 |
| Kabuli_wild_14525913 | NA                                  | Ca_kabuli_denovo | 14525913                | C/G  | NA                 | NA                            | NA                 |
| Kabuli_wild_14525919 | NA                                  | Ca_kabuli_denovo | 14525919                | A/C  | NA                 | NA                            | NA                 |
| Kabuli_wild_14534292 | NA                                  | Ca_kabuli_denovo | 14534292                | C/T  | NA                 | NA                            | NA                 |
| Kabuli_wild_14534295 | NA                                  | Ca_kabuli_denovo | 14534295                | G/C  | NA                 | NA                            | NA                 |
| Kabuli_wild_14542881 | NA                                  | Ca_kabuli_denovo | 14542881                | G/A  | NA                 | NA                            | NA                 |
| Kabuli_wild_14545196 | NA                                  | Ca_kabuli_denovo | 14545196                | A/C  | NA                 | NA                            | NA                 |
| Kabuli_wild_14545202 | NA                                  | Ca_kabuli_denovo | 14545202                | C/G  | NA                 | NA                            | NA                 |
| Kabuli_wild_14545208 | NA                                  | Ca_kabuli_denovo | 14545208                | C/G  | NA                 | NA                            | NA                 |
| Kabuli_wild_14545217 | NA                                  | Ca_kabuli_denovo | 14545217                | C/G  | NA                 | NA                            | NA                 |
| Kabuli_wild_14545380 | NA                                  | Ca_kabuli_denovo | 14545380                | A/G  | NA                 | NA                            | NA                 |
| Kabuli_wild_14545395 | NA                                  | Ca_kabuli_denovo | 14545395                | C/G  | NA                 | NA                            | NA                 |
| Kabuli_wild_14545401 | NA                                  | Ca_kabuli_denovo | 14545401                | C/T  | NA                 | NA                            | NA                 |
| Kabuli_wild_14545955 | NA                                  | Ca_kabuli_denovo | 14545955                | C/G  | NA                 | NA                            | NA                 |
| Kabuli_wild_14545959 | NA                                  | Ca_kabuli_denovo | 14545959                | A/G  | NA                 | NA                            | NA                 |
| Kabuli_wild_14545961 | NA                                  | Ca_kabuli_denovo | 14545961                | C/G  | NA                 | NA                            | NA                 |
| Kabuli_wild_14550015 | NA                                  | Ca_kabuli_denovo | 14550015                | A/G  | NA                 | NA                            | NA                 |
| Kabuli_wild_14551602 | NA                                  | Ca_kabuli_denovo | 14551602                | C/T  | NA                 | NA                            | NA                 |
| Kabuli_wild_14553977 | NA                                  | Ca_kabuli_denovo | 14553977                | G/T  | NA                 | NA                            | NA                 |
| Kabuli_wild_14556307 | NA                                  | Ca_kabuli_denovo | 14556307                | G/T  | NA                 | NA                            | NA                 |
| Kabuli_wild_14559873 | NA                                  | Ca_kabuli_denovo | 14559873                | A/G  | NA                 | NA                            | NA                 |
| Kabuli_wild_14559891 | NA                                  | Ca_kabuli_denovo | 14559891                | A/C  | NA                 | NA                            | NA                 |
| Kabuli_wild_14570024 | NA                                  | Ca_kabuli_denovo | 14570024                | C/G  | NA                 | NA                            | NA                 |
| Kabuli_wild_14579057 | NA                                  | Ca_kabuli_denovo | 14579057                | C/T  | NA                 | NA                            | NA                 |
| Kabuli_wild_14598704 | NA                                  | Ca_kabuli_denovo | 14598704                | C/T  | NA                 | NA                            | NA                 |
| Kabuli_wild_14598743 | NA                                  | Ca_kabuli_denovo | 14598743                | A/G  | NA                 | NA                            | NA                 |
| Kabuli_wild_14601243 | NA                                  | Ca_kabuli_denovo | 14601243                | C/G  | NA                 | NA                            | NA                 |
| Kabuli_wild_14606458 | NA                                  | Ca_kabuli_denovo | 14606458                | C/T  | NA                 | NA                            | NA                 |
| Kabuli_wild_14614161 | NA                                  | Ca_kabuli_denovo | 14614161                | C/G  | NA                 | NA                            | NA                 |
| Kabuli_wild_14619782 | NA                                  | Ca_kabuli_denovo | 14619782                | C/T  | NA                 | NA                            | NA                 |
| Kabuli_wild_14622367 | NA                                  | Ca_kabuli_denovo | 14622367                | A/G  | NA                 | NA                            | NA                 |
| Kabuli_wild_14627846 | NA                                  | Ca_kabuli_denovo | 14627846                | C/G  | NA                 | NA                            | NA                 |
| Kabuli_wild_14627855 | NA                                  | Ca_kabuli_denovo | 14627855                | C/T  | NA                 | NA                            | NA                 |
| Kabuli_wild_14627865 | NA                                  | Ca_kabuli_denovo | 14627865                | G/T  | NA                 | NA                            | NA                 |
| Kabuli_wild_14631483 | NA                                  | Ca_kabuli_denovo | 14631483                | C/G  | NA                 | NA                            | NA                 |
| Kabuli_wild_14631485 | NA                                  | Ca_kabuli_denovo | 14631485                | C/T  | NA                 | NA                            | NA                 |
| Kabuli_wild_14636761 | NA                                  | Ca_kabuli_denovo | 14636761                | A/C  | NA                 | NA                            | NA                 |
| Kabuli_wild_14636762 | NA                                  | Ca_kabuli_denovo | 14636762                | G/T  | NA                 | NA                            | NA                 |
| Kabuli_wild_14636763 | NA                                  | Ca_kabuli_denovo | 14636763                | A/G  | NA                 | NA                            | NA                 |
| Kabuli_wild_14640024 | NA                                  | Ca_kabuli_denovo | 14640024                | G/T  | NA                 | NA                            | NA                 |
| Kabuli_wild_14640045 | NA                                  | Ca_kabuli_denovo | 14640045                | A/T  | NA                 | NA                            | NA                 |



| SNP IDs              | NCBI dbSNP accession IDs (NCBI_SS#) | Chromosomes      | Physical positions (bp) | SNPs | Gene accession IDs | Sequence components of genome | Putative functions |
|----------------------|-------------------------------------|------------------|-------------------------|------|--------------------|-------------------------------|--------------------|
| Kabuli_wild_14645753 | NA                                  | Ca_kabuli_denovo | 14645753                | G/T  | NA                 | NA                            | NA                 |
| Kabuli_wild_14647237 | NA                                  | Ca_kabuli_denovo | 14647237                | A/G  | NA                 | NA                            | NA                 |
| Kabuli_wild_14648650 | NA                                  | Ca_kabuli_denovo | 14648650                | C/G  | NA                 | NA                            | NA                 |
| Kabuli_wild_14648677 | NA                                  | Ca_kabuli_denovo | 14648677                | C/T  | NA                 | NA                            | NA                 |
| Kabuli_wild_14655484 | NA                                  | Ca_kabuli_denovo | 14655484                | C/G  | NA                 | NA                            | NA                 |
| Kabuli_wild_14655493 | NA                                  | Ca_kabuli_denovo | 14655493                | C/G  | NA                 | NA                            | NA                 |
| Kabuli_wild_14669777 | NA                                  | Ca_kabuli_denovo | 14669777                | C/T  | NA                 | NA                            | NA                 |
| Kabuli_wild_14670786 | NA                                  | Ca_kabuli_denovo | 14670786                | A/G  | NA                 | NA                            | NA                 |
| Kabuli_wild_14670801 | NA                                  | Ca_kabuli_denovo | 14670801                | A/G  | NA                 | NA                            | NA                 |
| Kabuli_wild_14670810 | NA                                  | Ca_kabuli_denovo | 14670810                | A/G  | NA                 | NA                            | NA                 |
| Kabuli_wild_14678107 | NA                                  | Ca_kabuli_denovo | 14678107                | C/T  | NA                 | NA                            | NA                 |
| Kabuli_wild_14678113 | NA                                  | Ca_kabuli_denovo | 14678113                | C/G  | NA                 | NA                            | NA                 |
| Kabuli_wild_14678146 | NA                                  | Ca_kabuli_denovo | 14678146                | C/T  | NA                 | NA                            | NA                 |
| Kabuli_wild_14678149 | NA                                  | Ca_kabuli_denovo | 14678149                | A/G  | NA                 | NA                            | NA                 |
| Kabuli_wild_14685688 | NA                                  | Ca_kabuli_denovo | 14685688                | A/C  | NA                 | NA                            | NA                 |
| Kabuli_wild_14715742 | NA                                  | Ca_kabuli_denovo | 14715742                | C/A  | NA                 | NA                            | NA                 |
| Kabuli_wild_14715897 | NA                                  | Ca_kabuli_denovo | 14715897                | A/C  | NA                 | NA                            | NA                 |
| Kabuli_wild_14715898 | NA                                  | Ca_kabuli_denovo | 14715898                | G/T  | NA                 | NA                            | NA                 |
| Kabuli_wild_14734460 | NA                                  | Ca_kabuli_denovo | 14734460                | C/T  | NA                 | NA                            | NA                 |
| Kabuli_wild_14738429 | NA                                  | Ca_kabuli_denovo | 14738429                | C/T  | NA                 | NA                            | NA                 |
| Kabuli_wild_14742885 | NA                                  | Ca_kabuli_denovo | 14742885                | C/T  | NA                 | NA                            | NA                 |
| Kabuli_wild_14748615 | NA                                  | Ca_kabuli_denovo | 14748615                | A/G  | NA                 | NA                            | NA                 |
| Kabuli_wild_14748618 | NA                                  | Ca_kabuli_denovo | 14748618                | A/G  | NA                 | NA                            | NA                 |
| Kabuli_wild_14750799 | NA                                  | Ca_kabuli_denovo | 14750799                | A/C  | NA                 | NA                            | NA                 |
| Kabuli_wild_14750874 | NA                                  | Ca_kabuli_denovo | 14750874                | A/G  | NA                 | NA                            | NA                 |
| Kabuli_wild_14752103 | NA                                  | Ca_kabuli_denovo | 14752103                | A/G  | NA                 | NA                            | NA                 |
| Kabuli_wild_14752104 | NA                                  | Ca_kabuli_denovo | 14752104                | C/G  | NA                 | NA                            | NA                 |
| Kabuli_wild_14752113 | NA                                  | Ca_kabuli_denovo | 14752113                | C/G  | NA                 | NA                            | NA                 |
| Kabuli_wild_14752117 | NA                                  | Ca_kabuli_denovo | 14752117                | C/G  | NA                 | NA                            | NA                 |
| Kabuli_wild_14756242 | NA                                  | Ca_kabuli_denovo | 14756242                | G/T  | NA                 | NA                            | NA                 |
| Kabuli_wild_14760161 | NA                                  | Ca_kabuli_denovo | 14760161                | C/T  | NA                 | NA                            | NA                 |
| Kabuli_wild_14763880 | NA                                  | Ca_kabuli_denovo | 14763880                | C/G  | NA                 | NA                            | NA                 |
| Kabuli_wild_14763883 | NA                                  | Ca_kabuli_denovo | 14763883                | C/T  | NA                 | NA                            | NA                 |
| Kabuli_wild_14763891 | NA                                  | Ca_kabuli_denovo | 14763891                | C/G  | NA                 | NA                            | NA                 |
| Kabuli_wild_14773293 | NA                                  | Ca_kabuli_denovo | 14773293                | A/G  | NA                 | NA                            | NA                 |
| Kabuli_wild_14779769 | NA                                  | Ca_kabuli_denovo | 14779769                | T/C  | NA                 | NA                            | NA                 |
| Kabuli_wild_14781330 | NA                                  | Ca_kabuli_denovo | 14781330                | A/G  | NA                 | NA                            | NA                 |
| Kabuli_wild_14781342 | NA                                  | Ca_kabuli_denovo | 14781342                | A/G  | NA                 | NA                            | NA                 |
| Kabuli_wild_14781345 | NA                                  | Ca_kabuli_denovo | 14781345                | C/T  | NA                 | NA                            | NA                 |
| Kabuli_wild_14781944 | NA                                  | Ca_kabuli_denovo | 14781944                | T/C  | NA                 | NA                            | NA                 |
| Kabuli_wild_14781947 | NA                                  | Ca_kabuli_denovo | 14781947                | C/T  | NA                 | NA                            | NA                 |
| Kabuli_wild_14781950 | NA                                  | Ca_kabuli_denovo | 14781950                | C/G  | NA                 | NA                            | NA                 |
| Kabuli_wild_14785539 | NA                                  | Ca_kabuli_denovo | 14785539                | C/T  | NA                 | NA                            | NA                 |
| Kabuli_wild_14787088 | NA                                  | Ca_kabuli_denovo | 14787088                | G/T  | NA                 | NA                            | NA                 |

| SNP IDs                     | NCBI dbSNP accession IDs (NCBI_SS#) | Chromosomes             | Physical positions (bp) | SNPs | Gene accession IDs | Sequence components of genome | Putative functions |
|-----------------------------|-------------------------------------|-------------------------|-------------------------|------|--------------------|-------------------------------|--------------------|
| <i>Kabuli_wild_14787125</i> | NA                                  | <i>Ca_kabuli_denovo</i> | 14787125                | C/T  | NA                 | NA                            | NA                 |
| <i>Kabuli_wild_14801886</i> | NA                                  | <i>Ca_kabuli_denovo</i> | 14801886                | G/A  | NA                 | NA                            | NA                 |
| <i>Kabuli_wild_14807978</i> | NA                                  | <i>Ca_kabuli_denovo</i> | 14807978                | C/T  | NA                 | NA                            | NA                 |
| <i>Kabuli_wild_14812109</i> | NA                                  | <i>Ca_kabuli_denovo</i> | 14812109                | T/C  | NA                 | NA                            | NA                 |
| <i>Kabuli_wild_14812115</i> | NA                                  | <i>Ca_kabuli_denovo</i> | 14812115                | T/G  | NA                 | NA                            | NA                 |
| <i>Kabuli_wild_14825063</i> | NA                                  | <i>Ca_kabuli_denovo</i> | 14825063                | A/G  | NA                 | NA                            | NA                 |
| <i>Kabuli_wild_14825072</i> | NA                                  | <i>Ca_kabuli_denovo</i> | 14825072                | C/G  | NA                 | NA                            | NA                 |
| <i>Kabuli_wild_14834658</i> | NA                                  | <i>Ca_kabuli_denovo</i> | 14834658                | G/C  | NA                 | NA                            | NA                 |
| <i>Kabuli_wild_14834664</i> | NA                                  | <i>Ca_kabuli_denovo</i> | 14834664                | G/A  | NA                 | NA                            | NA                 |
| <i>Kabuli_wild_14834691</i> | NA                                  | <i>Ca_kabuli_denovo</i> | 14834691                | G/A  | NA                 | NA                            | NA                 |
| <i>Kabuli_wild_14840184</i> | NA                                  | <i>Ca_kabuli_denovo</i> | 14840184                | A/T  | NA                 | NA                            | NA                 |
| <i>Kabuli_wild_14840188</i> | NA                                  | <i>Ca_kabuli_denovo</i> | 14840188                | C/G  | NA                 | NA                            | NA                 |
| <i>Kabuli_wild_14840192</i> | NA                                  | <i>Ca_kabuli_denovo</i> | 14840192                | C/T  | NA                 | NA                            | NA                 |
| <i>Kabuli_wild_14845699</i> | NA                                  | <i>Ca_kabuli_denovo</i> | 14845699                | C/T  | NA                 | NA                            | NA                 |
| <i>Kabuli_wild_14856894</i> | NA                                  | <i>Ca_kabuli_denovo</i> | 14856894                | C/T  | NA                 | NA                            | NA                 |
| <i>Kabuli_wild_14858536</i> | NA                                  | <i>Ca_kabuli_denovo</i> | 14858536                | C/G  | NA                 | NA                            | NA                 |
| <i>Kabuli_wild_14858537</i> | NA                                  | <i>Ca_kabuli_denovo</i> | 14858537                | G/T  | NA                 | NA                            | NA                 |
| <i>Kabuli_wild_14865362</i> | NA                                  | <i>Ca_kabuli_denovo</i> | 14865362                | A/G  | NA                 | NA                            | NA                 |
| <i>Kabuli_wild_14873604</i> | NA                                  | <i>Ca_kabuli_denovo</i> | 14873604                | C/G  | NA                 | NA                            | NA                 |
| <i>Kabuli_wild_14873628</i> | NA                                  | <i>Ca_kabuli_denovo</i> | 14873628                | C/G  | NA                 | NA                            | NA                 |
| <i>Kabuli_wild_14873634</i> | NA                                  | <i>Ca_kabuli_denovo</i> | 14873634                | A/G  | NA                 | NA                            | NA                 |
| <i>Kabuli_wild_14873635</i> | NA                                  | <i>Ca_kabuli_denovo</i> | 14873635                | G/T  | NA                 | NA                            | NA                 |
| <i>Kabuli_wild_14879104</i> | NA                                  | <i>Ca_kabuli_denovo</i> | 14879104                | A/C  | NA                 | NA                            | NA                 |
| <i>Kabuli_wild_14879105</i> | NA                                  | <i>Ca_kabuli_denovo</i> | 14879105                | G/T  | NA                 | NA                            | NA                 |
| <i>Kabuli_wild_14879106</i> | NA                                  | <i>Ca_kabuli_denovo</i> | 14879106                | A/T  | NA                 | NA                            | NA                 |
| <i>Kabuli_wild_14892135</i> | NA                                  | <i>Ca_kabuli_denovo</i> | 14892135                | T/G  | NA                 | NA                            | NA                 |
| <i>Kabuli_wild_14892695</i> | NA                                  | <i>Ca_kabuli_denovo</i> | 14892695                | A/T  | NA                 | NA                            | NA                 |
| <i>Kabuli_wild_14892730</i> | NA                                  | <i>Ca_kabuli_denovo</i> | 14892730                | A/G  | NA                 | NA                            | NA                 |
| <i>Kabuli_wild_14892731</i> | NA                                  | <i>Ca_kabuli_denovo</i> | 14892731                | C/G  | NA                 | NA                            | NA                 |
| <i>Kabuli_wild_14892739</i> | NA                                  | <i>Ca_kabuli_denovo</i> | 14892739                | A/G  | NA                 | NA                            | NA                 |
| <i>Kabuli_wild_14900816</i> | NA                                  | <i>Ca_kabuli_denovo</i> | 14900816                | C/T  | NA                 | NA                            | NA                 |
| <i>Kabuli_wild_14901519</i> | NA                                  | <i>Ca_kabuli_denovo</i> | 14901519                | A/G  | NA                 | NA                            | NA                 |
| <i>Kabuli_wild_14901520</i> | NA                                  | <i>Ca_kabuli_denovo</i> | 14901520                | C/G  | NA                 | NA                            | NA                 |
| <i>Kabuli_wild_14901521</i> | NA                                  | <i>Ca_kabuli_denovo</i> | 14901521                | C/G  | NA                 | NA                            | NA                 |
| <i>Kabuli_wild_14904880</i> | NA                                  | <i>Ca_kabuli_denovo</i> | 14904880                | C/G  | NA                 | NA                            | NA                 |
| <i>Kabuli_wild_14904892</i> | NA                                  | <i>Ca_kabuli_denovo</i> | 14904892                | C/T  | NA                 | NA                            | NA                 |
| <i>Kabuli_wild_14904897</i> | NA                                  | <i>Ca_kabuli_denovo</i> | 14904897                | C/G  | NA                 | NA                            | NA                 |
| <i>Kabuli_wild_14907289</i> | NA                                  | <i>Ca_kabuli_denovo</i> | 14907289                | C/G  | NA                 | NA                            | NA                 |
| <i>Kabuli_wild_14927041</i> | NA                                  | <i>Ca_kabuli_denovo</i> | 14927041                | C/G  | NA                 | NA                            | NA                 |
| <i>Kabuli_wild_14932996</i> | NA                                  | <i>Ca_kabuli_denovo</i> | 14932996                | C/G  | NA                 | NA                            | NA                 |
| <i>Kabuli_wild_14932998</i> | NA                                  | <i>Ca_kabuli_denovo</i> | 14932998                | A/G  | NA                 | NA                            | NA                 |
| <i>Kabuli_wild_14933046</i> | NA                                  | <i>Ca_kabuli_denovo</i> | 14933046                | C/G  | NA                 | NA                            | NA                 |
| <i>Kabuli_wild_14933053</i> | NA                                  | <i>Ca_kabuli_denovo</i> | 14933053                | A/C  | NA                 | NA                            | NA                 |
| <i>Kabuli_wild_14943088</i> | NA                                  | <i>Ca_kabuli_denovo</i> | 14943088                | G/T  | NA                 | NA                            | NA                 |

| SNP IDs              | NCBI dbSNP accession IDs (NCBI_SS#) | Chromosomes      | Physical positions (bp) | SNPs | Gene accession IDs | Sequence components of genome | Putative functions |
|----------------------|-------------------------------------|------------------|-------------------------|------|--------------------|-------------------------------|--------------------|
| Kabuli_wild_14949041 | NA                                  | Ca_kabuli_denovo | 14949041                | C/G  | NA                 | NA                            | NA                 |
| Kabuli_wild_14949059 | NA                                  | Ca_kabuli_denovo | 14949059                | G/C  | NA                 | NA                            | NA                 |
| Kabuli_wild_14949065 | NA                                  | Ca_kabuli_denovo | 14949065                | G/A  | NA                 | NA                            | NA                 |
| Kabuli_wild_14960085 | NA                                  | Ca_kabuli_denovo | 14960085                | A/G  | NA                 | NA                            | NA                 |
| Kabuli_wild_14960088 | NA                                  | Ca_kabuli_denovo | 14960088                | G/T  | NA                 | NA                            | NA                 |
| Kabuli_wild_14982481 | NA                                  | Ca_kabuli_denovo | 14982481                | C/G  | NA                 | NA                            | NA                 |
| Kabuli_wild_14982490 | NA                                  | Ca_kabuli_denovo | 14982490                | C/G  | NA                 | NA                            | NA                 |
| Kabuli_wild_14982822 | NA                                  | Ca_kabuli_denovo | 14982822                | C/T  | NA                 | NA                            | NA                 |
| Kabuli_wild_14982831 | NA                                  | Ca_kabuli_denovo | 14982831                | C/G  | NA                 | NA                            | NA                 |
| Kabuli_wild_15003866 | NA                                  | Ca_kabuli_denovo | 15003866                | C/T  | NA                 | NA                            | NA                 |
| Kabuli_wild_15003871 | NA                                  | Ca_kabuli_denovo | 15003871                | A/G  | NA                 | NA                            | NA                 |
| Kabuli_wild_15004646 | NA                                  | Ca_kabuli_denovo | 15004646                | C/T  | NA                 | NA                            | NA                 |
| Kabuli_wild_15017149 | NA                                  | Ca_kabuli_denovo | 15017149                | C/T  | NA                 | NA                            | NA                 |
| Kabuli_wild_15017188 | NA                                  | Ca_kabuli_denovo | 15017188                | A/G  | NA                 | NA                            | NA                 |
| Kabuli_wild_15031889 | NA                                  | Ca_kabuli_denovo | 15031889                | C/T  | NA                 | NA                            | NA                 |
| Kabuli_wild_15031907 | NA                                  | Ca_kabuli_denovo | 15031907                | C/G  | NA                 | NA                            | NA                 |
| Kabuli_wild_15045692 | NA                                  | Ca_kabuli_denovo | 15045692                | A/G  | NA                 | NA                            | NA                 |
| Kabuli_wild_15056731 | NA                                  | Ca_kabuli_denovo | 15056731                | C/T  | NA                 | NA                            | NA                 |
| Kabuli_wild_15059074 | NA                                  | Ca_kabuli_denovo | 15059074                | G/T  | NA                 | NA                            | NA                 |
| Kabuli_wild_15061058 | NA                                  | Ca_kabuli_denovo | 15061058                | C/T  | NA                 | NA                            | NA                 |
| Kabuli_wild_15061085 | NA                                  | Ca_kabuli_denovo | 15061085                | T/C  | NA                 | NA                            | NA                 |
| Kabuli_wild_15061091 | NA                                  | Ca_kabuli_denovo | 15061091                | C/T  | NA                 | NA                            | NA                 |
| Kabuli_wild_15065410 | NA                                  | Ca_kabuli_denovo | 15065410                | C/G  | NA                 | NA                            | NA                 |
| Kabuli_wild_15065412 | NA                                  | Ca_kabuli_denovo | 15065412                | G/T  | NA                 | NA                            | NA                 |
| Kabuli_wild_15065416 | NA                                  | Ca_kabuli_denovo | 15065416                | A/G  | NA                 | NA                            | NA                 |
| Kabuli_wild_15067931 | NA                                  | Ca_kabuli_denovo | 15067931                | C/G  | NA                 | NA                            | NA                 |
| Kabuli_wild_15067949 | NA                                  | Ca_kabuli_denovo | 15067949                | A/G  | NA                 | NA                            | NA                 |
| Kabuli_wild_15073206 | NA                                  | Ca_kabuli_denovo | 15073206                | C/T  | NA                 | NA                            | NA                 |
| Kabuli_wild_15073216 | NA                                  | Ca_kabuli_denovo | 15073216                | A/C  | NA                 | NA                            | NA                 |
| Kabuli_wild_15073219 | NA                                  | Ca_kabuli_denovo | 15073219                | C/G  | NA                 | NA                            | NA                 |
| Kabuli_wild_15073224 | NA                                  | Ca_kabuli_denovo | 15073224                | C/T  | NA                 | NA                            | NA                 |
| Kabuli_wild_15074106 | NA                                  | Ca_kabuli_denovo | 15074106                | A/G  | NA                 | NA                            | NA                 |
| Kabuli_wild_15076842 | NA                                  | Ca_kabuli_denovo | 15076842                | A/C  | NA                 | NA                            | NA                 |
| Kabuli_wild_15110749 | NA                                  | Ca_kabuli_denovo | 15110749                | C/G  | NA                 | NA                            | NA                 |
| Kabuli_wild_15118707 | NA                                  | Ca_kabuli_denovo | 15118707                | C/G  | NA                 | NA                            | NA                 |
| Kabuli_wild_15118708 | NA                                  | Ca_kabuli_denovo | 15118708                | G/T  | NA                 | NA                            | NA                 |
| Kabuli_wild_15119247 | NA                                  | Ca_kabuli_denovo | 15119247                | C/T  | NA                 | NA                            | NA                 |
| Kabuli_wild_15121668 | NA                                  | Ca_kabuli_denovo | 15121668                | G/T  | NA                 | NA                            | NA                 |
| Kabuli_wild_15122219 | NA                                  | Ca_kabuli_denovo | 15122219                | C/G  | NA                 | NA                            | NA                 |
| Kabuli_wild_15123295 | NA                                  | Ca_kabuli_denovo | 15123295                | A/G  | NA                 | NA                            | NA                 |
| Kabuli_wild_15123313 | NA                                  | Ca_kabuli_denovo | 15123313                | A/G  | NA                 | NA                            | NA                 |
| Kabuli_wild_15125936 | NA                                  | Ca_kabuli_denovo | 15125936                | T/C  | NA                 | NA                            | NA                 |
| Kabuli_wild_15126209 | NA                                  | Ca_kabuli_denovo | 15126209                | A/C  | NA                 | NA                            | NA                 |
| Kabuli_wild_15139700 | NA                                  | Ca_kabuli_denovo | 15139700                | C/G  | NA                 | NA                            | NA                 |

| SNP IDs              | NCBI dbSNP accession IDs (NCBI_SS#) | Chromosomes      | Physical positions (bp) | SNPs | Gene accession IDs | Sequence components of genome | Putative functions |
|----------------------|-------------------------------------|------------------|-------------------------|------|--------------------|-------------------------------|--------------------|
| Kabuli_wild_15139718 | NA                                  | Ca_kabuli_denovo | 15139718                | C/G  | NA                 | NA                            | NA                 |
| Kabuli_wild_15139721 | NA                                  | Ca_kabuli_denovo | 15139721                | A/G  | NA                 | NA                            | NA                 |
| Kabuli_wild_15139727 | NA                                  | Ca_kabuli_denovo | 15139727                | C/T  | NA                 | NA                            | NA                 |
| Kabuli_wild_15149600 | NA                                  | Ca_kabuli_denovo | 15149600                | C/G  | NA                 | NA                            | NA                 |
| Kabuli_wild_15179175 | NA                                  | Ca_kabuli_denovo | 15179175                | C/G  | NA                 | NA                            | NA                 |
| Kabuli_wild_15186667 | NA                                  | Ca_kabuli_denovo | 15186667                | G/T  | NA                 | NA                            | NA                 |
| Kabuli_wild_15190170 | NA                                  | Ca_kabuli_denovo | 15190170                | G/T  | NA                 | NA                            | NA                 |
| Kabuli_wild_15198249 | NA                                  | Ca_kabuli_denovo | 15198249                | A/C  | NA                 | NA                            | NA                 |
| Kabuli_wild_15198261 | NA                                  | Ca_kabuli_denovo | 15198261                | C/T  | NA                 | NA                            | NA                 |
| Kabuli_wild_15198315 | NA                                  | Ca_kabuli_denovo | 15198315                | A/G  | NA                 | NA                            | NA                 |
| Kabuli_wild_15198331 | NA                                  | Ca_kabuli_denovo | 15198331                | A/G  | NA                 | NA                            | NA                 |
| Kabuli_wild_15198357 | NA                                  | Ca_kabuli_denovo | 15198357                | C/G  | NA                 | NA                            | NA                 |
| Kabuli_wild_15203189 | NA                                  | Ca_kabuli_denovo | 15203189                | C/G  | NA                 | NA                            | NA                 |
| Kabuli_wild_15211436 | NA                                  | Ca_kabuli_denovo | 15211436                | A/C  | NA                 | NA                            | NA                 |
| Kabuli_wild_15224890 | NA                                  | Ca_kabuli_denovo | 15224890                | G/T  | NA                 | NA                            | NA                 |
| Kabuli_wild_15237755 | NA                                  | Ca_kabuli_denovo | 15237755                | C/G  | NA                 | NA                            | NA                 |
| Kabuli_wild_15240123 | NA                                  | Ca_kabuli_denovo | 15240123                | C/G  | NA                 | NA                            | NA                 |
| Kabuli_wild_15240126 | NA                                  | Ca_kabuli_denovo | 15240126                | C/G  | NA                 | NA                            | NA                 |
| Kabuli_wild_15240128 | NA                                  | Ca_kabuli_denovo | 15240128                | A/C  | NA                 | NA                            | NA                 |
| Kabuli_wild_15257411 | NA                                  | Ca_kabuli_denovo | 15257411                | C/G  | NA                 | NA                            | NA                 |
| Kabuli_wild_15257444 | NA                                  | Ca_kabuli_denovo | 15257444                | C/G  | NA                 | NA                            | NA                 |
| Kabuli_wild_15259106 | NA                                  | Ca_kabuli_denovo | 15259106                | A/G  | NA                 | NA                            | NA                 |
| Kabuli_wild_15275862 | NA                                  | Ca_kabuli_denovo | 15275862                | G/C  | NA                 | NA                            | NA                 |
| Kabuli_wild_15275864 | NA                                  | Ca_kabuli_denovo | 15275864                | G/C  | NA                 | NA                            | NA                 |
| Kabuli_wild_15275870 | NA                                  | Ca_kabuli_denovo | 15275870                | T/C  | NA                 | NA                            | NA                 |
| Kabuli_wild_15290334 | NA                                  | Ca_kabuli_denovo | 15290334                | G/T  | NA                 | NA                            | NA                 |
| Kabuli_wild_15298642 | NA                                  | Ca_kabuli_denovo | 15298642                | A/G  | NA                 | NA                            | NA                 |
| Kabuli_wild_15298646 | NA                                  | Ca_kabuli_denovo | 15298646                | A/C  | NA                 | NA                            | NA                 |
| Kabuli_wild_15298647 | NA                                  | Ca_kabuli_denovo | 15298647                | C/T  | NA                 | NA                            | NA                 |
| Kabuli_wild_15298679 | NA                                  | Ca_kabuli_denovo | 15298679                | C/T  | NA                 | NA                            | NA                 |
| Kabuli_wild_15302070 | NA                                  | Ca_kabuli_denovo | 15302070                | C/T  | NA                 | NA                            | NA                 |
| Kabuli_wild_15302272 | NA                                  | Ca_kabuli_denovo | 15302272                | C/T  | NA                 | NA                            | NA                 |
| Kabuli_wild_15312402 | NA                                  | Ca_kabuli_denovo | 15312402                | A/C  | NA                 | NA                            | NA                 |
| Kabuli_wild_15312403 | NA                                  | Ca_kabuli_denovo | 15312403                | C/G  | NA                 | NA                            | NA                 |
| Kabuli_wild_15316045 | NA                                  | Ca_kabuli_denovo | 15316045                | A/G  | NA                 | NA                            | NA                 |
| Kabuli_wild_15316876 | NA                                  | Ca_kabuli_denovo | 15316876                | C/G  | NA                 | NA                            | NA                 |
| Kabuli_wild_15341818 | NA                                  | Ca_kabuli_denovo | 15341818                | C/T  | NA                 | NA                            | NA                 |
| Kabuli_wild_15349246 | NA                                  | Ca_kabuli_denovo | 15349246                | G/T  | NA                 | NA                            | NA                 |
| Kabuli_wild_15372890 | NA                                  | Ca_kabuli_denovo | 15372890                | G/T  | NA                 | NA                            | NA                 |
| Kabuli_wild_15382015 | NA                                  | Ca_kabuli_denovo | 15382015                | C/T  | NA                 | NA                            | NA                 |
| Kabuli_wild_15383184 | NA                                  | Ca_kabuli_denovo | 15383184                | A/C  | NA                 | NA                            | NA                 |
| Kabuli_wild_15383193 | NA                                  | Ca_kabuli_denovo | 15383193                | C/T  | NA                 | NA                            | NA                 |
| Kabuli_wild_15386738 | NA                                  | Ca_kabuli_denovo | 15386738                | C/G  | NA                 | NA                            | NA                 |
| Kabuli_wild_15387811 | NA                                  | Ca_kabuli_denovo | 15387811                | A/G  | NA                 | NA                            | NA                 |

| SNP IDs              | NCBI dbSNP accession IDs (NCBI_SS#) | Chromosomes      | Physical positions (bp) | SNPs | Gene accession IDs | Sequence components of genome | Putative functions |
|----------------------|-------------------------------------|------------------|-------------------------|------|--------------------|-------------------------------|--------------------|
| Kabuli_wild_15387820 | NA                                  | Ca_kabuli_denovo | 15387820                | A/G  | NA                 | NA                            | NA                 |
| Kabuli_wild_15401948 | NA                                  | Ca_kabuli_denovo | 15401948                | C/T  | NA                 | NA                            | NA                 |
| Kabuli_wild_15401951 | NA                                  | Ca_kabuli_denovo | 15401951                | A/G  | NA                 | NA                            | NA                 |
| Kabuli_wild_15408207 | NA                                  | Ca_kabuli_denovo | 15408207                | G/T  | NA                 | NA                            | NA                 |
| Kabuli_wild_15412401 | NA                                  | Ca_kabuli_denovo | 15412401                | A/G  | NA                 | NA                            | NA                 |
| Kabuli_wild_15412404 | NA                                  | Ca_kabuli_denovo | 15412404                | T/C  | NA                 | NA                            | NA                 |
| Kabuli_wild_15417507 | NA                                  | Ca_kabuli_denovo | 15417507                | A/G  | NA                 | NA                            | NA                 |
| Kabuli_wild_15436485 | NA                                  | Ca_kabuli_denovo | 15436485                | C/G  | NA                 | NA                            | NA                 |
| Kabuli_wild_15436518 | NA                                  | Ca_kabuli_denovo | 15436518                | A/G  | NA                 | NA                            | NA                 |
| Kabuli_wild_15438294 | NA                                  | Ca_kabuli_denovo | 15438294                | C/G  | NA                 | NA                            | NA                 |
| Kabuli_wild_15438315 | NA                                  | Ca_kabuli_denovo | 15438315                | C/T  | NA                 | NA                            | NA                 |
| Kabuli_wild_15448677 | NA                                  | Ca_kabuli_denovo | 15448677                | G/T  | NA                 | NA                            | NA                 |
| Kabuli_wild_15460239 | NA                                  | Ca_kabuli_denovo | 15460239                | T/C  | NA                 | NA                            | NA                 |
| Kabuli_wild_15460257 | NA                                  | Ca_kabuli_denovo | 15460257                | T/C  | NA                 | NA                            | NA                 |
| Kabuli_wild_15461606 | NA                                  | Ca_kabuli_denovo | 15461606                | C/T  | NA                 | NA                            | NA                 |
| Kabuli_wild_15461639 | NA                                  | Ca_kabuli_denovo | 15461639                | A/G  | NA                 | NA                            | NA                 |
| Kabuli_wild_15481910 | NA                                  | Ca_kabuli_denovo | 15481910                | A/G  | NA                 | NA                            | NA                 |
| Kabuli_wild_15481920 | NA                                  | Ca_kabuli_denovo | 15481920                | C/T  | NA                 | NA                            | NA                 |
| Kabuli_wild_15482121 | NA                                  | Ca_kabuli_denovo | 15482121                | C/G  | NA                 | NA                            | NA                 |
| Kabuli_wild_15487230 | NA                                  | Ca_kabuli_denovo | 15487230                | C/T  | NA                 | NA                            | NA                 |
| Kabuli_wild_15487233 | NA                                  | Ca_kabuli_denovo | 15487233                | C/G  | NA                 | NA                            | NA                 |
| Kabuli_wild_15488013 | NA                                  | Ca_kabuli_denovo | 15488013                | A/G  | NA                 | NA                            | NA                 |
| Kabuli_wild_15499863 | NA                                  | Ca_kabuli_denovo | 15499863                | C/G  | NA                 | NA                            | NA                 |
| Kabuli_wild_15501281 | NA                                  | Ca_kabuli_denovo | 15501281                | C/T  | NA                 | NA                            | NA                 |
| Kabuli_wild_15515510 | NA                                  | Ca_kabuli_denovo | 15515510                | T/C  | NA                 | NA                            | NA                 |
| Kabuli_wild_15557754 | NA                                  | Ca_kabuli_denovo | 15557754                | A/G  | NA                 | NA                            | NA                 |
| Kabuli_wild_15562059 | NA                                  | Ca_kabuli_denovo | 15562059                | A/G  | NA                 | NA                            | NA                 |
| Kabuli_wild_15563904 | NA                                  | Ca_kabuli_denovo | 15563904                | C/T  | NA                 | NA                            | NA                 |
| Kabuli_wild_15577098 | NA                                  | Ca_kabuli_denovo | 15577098                | C/G  | NA                 | NA                            | NA                 |
| Kabuli_wild_15603303 | NA                                  | Ca_kabuli_denovo | 15603303                | C/G  | NA                 | NA                            | NA                 |
| Kabuli_wild_15607604 | NA                                  | Ca_kabuli_denovo | 15607604                | A/G  | NA                 | NA                            | NA                 |
| Kabuli_wild_15607617 | NA                                  | Ca_kabuli_denovo | 15607617                | A/G  | NA                 | NA                            | NA                 |
| Kabuli_wild_15607621 | NA                                  | Ca_kabuli_denovo | 15607621                | T/G  | NA                 | NA                            | NA                 |
| Kabuli_wild_15607623 | NA                                  | Ca_kabuli_denovo | 15607623                | C/G  | NA                 | NA                            | NA                 |
| Kabuli_wild_15609590 | NA                                  | Ca_kabuli_denovo | 15609590                | A/G  | NA                 | NA                            | NA                 |
| Kabuli_wild_15609594 | NA                                  | Ca_kabuli_denovo | 15609594                | C/G  | NA                 | NA                            | NA                 |
| Kabuli_wild_15610143 | NA                                  | Ca_kabuli_denovo | 15610143                | C/G  | NA                 | NA                            | NA                 |
| Kabuli_wild_15610149 | NA                                  | Ca_kabuli_denovo | 15610149                | A/G  | NA                 | NA                            | NA                 |
| Kabuli_wild_15613189 | NA                                  | Ca_kabuli_denovo | 15613189                | C/G  | NA                 | NA                            | NA                 |
| Kabuli_wild_15613222 | NA                                  | Ca_kabuli_denovo | 15613222                | A/G  | NA                 | NA                            | NA                 |
| Kabuli_wild_15632097 | NA                                  | Ca_kabuli_denovo | 15632097                | C/G  | NA                 | NA                            | NA                 |
| Kabuli_wild_15634347 | NA                                  | Ca_kabuli_denovo | 15634347                | A/G  | NA                 | NA                            | NA                 |
| Kabuli_wild_15652346 | NA                                  | Ca_kabuli_denovo | 15652346                | C/G  | NA                 | NA                            | NA                 |
| Kabuli_wild_15665833 | NA                                  | Ca_kabuli_denovo | 15665833                | C/G  | NA                 | NA                            | NA                 |

| SNP IDs              | NCBI dbSNP accession IDs (NCBI_SS#) | Chromosomes      | Physical positions (bp) | SNPs | Gene accession IDs | Sequence components of genome | Putative functions |
|----------------------|-------------------------------------|------------------|-------------------------|------|--------------------|-------------------------------|--------------------|
| Kabuli_wild_15665839 | NA                                  | Ca_kabuli_denovo | 15665839                | G/T  | NA                 | NA                            | NA                 |
| Kabuli_wild_15665841 | NA                                  | Ca_kabuli_denovo | 15665841                | C/G  | NA                 | NA                            | NA                 |
| Kabuli_wild_15665854 | NA                                  | Ca_kabuli_denovo | 15665854                | G/T  | NA                 | NA                            | NA                 |
| Kabuli_wild_15669383 | NA                                  | Ca_kabuli_denovo | 15669383                | T/G  | NA                 | NA                            | NA                 |
| Kabuli_wild_15672984 | NA                                  | Ca_kabuli_denovo | 15672984                | C/G  | NA                 | NA                            | NA                 |
| Kabuli_wild_15674074 | NA                                  | Ca_kabuli_denovo | 15674074                | A/G  | NA                 | NA                            | NA                 |
| Kabuli_wild_15674125 | NA                                  | Ca_kabuli_denovo | 15674125                | A/C  | NA                 | NA                            | NA                 |
| Kabuli_wild_15674137 | NA                                  | Ca_kabuli_denovo | 15674137                | A/C  | NA                 | NA                            | NA                 |
| Kabuli_wild_15674161 | NA                                  | Ca_kabuli_denovo | 15674161                | C/G  | NA                 | NA                            | NA                 |
| Kabuli_wild_15676103 | NA                                  | Ca_kabuli_denovo | 15676103                | A/G  | NA                 | NA                            | NA                 |
| Kabuli_wild_15676153 | NA                                  | Ca_kabuli_denovo | 15676153                | A/G  | NA                 | NA                            | NA                 |
| Kabuli_wild_15678111 | NA                                  | Ca_kabuli_denovo | 15678111                | T/C  | NA                 | NA                            | NA                 |
| Kabuli_wild_15707612 | NA                                  | Ca_kabuli_denovo | 15707612                | C/T  | NA                 | NA                            | NA                 |
| Kabuli_wild_15708305 | NA                                  | Ca_kabuli_denovo | 15708305                | A/G  | NA                 | NA                            | NA                 |
| Kabuli_wild_15716564 | NA                                  | Ca_kabuli_denovo | 15716564                | A/G  | NA                 | NA                            | NA                 |
| Kabuli_wild_15716660 | NA                                  | Ca_kabuli_denovo | 15716660                | G/T  | NA                 | NA                            | NA                 |
| Kabuli_wild_15732984 | NA                                  | Ca_kabuli_denovo | 15732984                | A/G  | NA                 | NA                            | NA                 |
| Kabuli_wild_15733020 | NA                                  | Ca_kabuli_denovo | 15733020                | A/G  | NA                 | NA                            | NA                 |
| Kabuli_wild_15735283 | NA                                  | Ca_kabuli_denovo | 15735283                | C/G  | NA                 | NA                            | NA                 |
| Kabuli_wild_15735285 | NA                                  | Ca_kabuli_denovo | 15735285                | A/T  | NA                 | NA                            | NA                 |
| Kabuli_wild_15736015 | NA                                  | Ca_kabuli_denovo | 15736015                | A/T  | NA                 | NA                            | NA                 |
| Kabuli_wild_15736024 | NA                                  | Ca_kabuli_denovo | 15736024                | G/T  | NA                 | NA                            | NA                 |
| Kabuli_wild_15736037 | NA                                  | Ca_kabuli_denovo | 15736037                | C/T  | NA                 | NA                            | NA                 |
| Kabuli_wild_15745810 | NA                                  | Ca_kabuli_denovo | 15745810                | C/T  | NA                 | NA                            | NA                 |
| Kabuli_wild_15759681 | NA                                  | Ca_kabuli_denovo | 15759681                | C/T  | NA                 | NA                            | NA                 |
| Kabuli_wild_15759711 | NA                                  | Ca_kabuli_denovo | 15759711                | C/G  | NA                 | NA                            | NA                 |
| Kabuli_wild_15759717 | NA                                  | Ca_kabuli_denovo | 15759717                | G/T  | NA                 | NA                            | NA                 |
| Kabuli_wild_15759750 | NA                                  | Ca_kabuli_denovo | 15759750                | C/G  | NA                 | NA                            | NA                 |
| Kabuli_wild_15770105 | NA                                  | Ca_kabuli_denovo | 15770105                | C/T  | NA                 | NA                            | NA                 |
| Kabuli_wild_15775413 | NA                                  | Ca_kabuli_denovo | 15775413                | A/G  | NA                 | NA                            | NA                 |
| Kabuli_wild_15780570 | NA                                  | Ca_kabuli_denovo | 15780570                | C/T  | NA                 | NA                            | NA                 |
| Kabuli_wild_15780582 | NA                                  | Ca_kabuli_denovo | 15780582                | C/G  | NA                 | NA                            | NA                 |
| Kabuli_wild_15780594 | NA                                  | Ca_kabuli_denovo | 15780594                | A/G  | NA                 | NA                            | NA                 |
| Kabuli_wild_15783802 | NA                                  | Ca_kabuli_denovo | 15783802                | C/T  | NA                 | NA                            | NA                 |
| Kabuli_wild_15783808 | NA                                  | Ca_kabuli_denovo | 15783808                | A/G  | NA                 | NA                            | NA                 |
| Kabuli_wild_15783813 | NA                                  | Ca_kabuli_denovo | 15783813                | C/T  | NA                 | NA                            | NA                 |
| Kabuli_wild_15783815 | NA                                  | Ca_kabuli_denovo | 15783815                | A/C  | NA                 | NA                            | NA                 |
| Kabuli_wild_15785649 | NA                                  | Ca_kabuli_denovo | 15785649                | G/T  | NA                 | NA                            | NA                 |
| Kabuli_wild_15789182 | NA                                  | Ca_kabuli_denovo | 15789182                | C/G  | NA                 | NA                            | NA                 |
| Kabuli_wild_15797871 | NA                                  | Ca_kabuli_denovo | 15797871                | C/T  | NA                 | NA                            | NA                 |
| Kabuli_wild_15797883 | NA                                  | Ca_kabuli_denovo | 15797883                | C/T  | NA                 | NA                            | NA                 |
| Kabuli_wild_15801891 | NA                                  | Ca_kabuli_denovo | 15801891                | C/T  | NA                 | NA                            | NA                 |
| Kabuli_wild_15806709 | NA                                  | Ca_kabuli_denovo | 15806709                | C/T  | NA                 | NA                            | NA                 |
| Kabuli_wild_15807543 | NA                                  | Ca_kabuli_denovo | 15807543                | G/T  | NA                 | NA                            | NA                 |

| SNP IDs              | NCBI dbSNP accession IDs (NCBI_SS#) | Chromosomes      | Physical positions (bp) | SNPs | Gene accession IDs | Sequence components of genome | Putative functions |
|----------------------|-------------------------------------|------------------|-------------------------|------|--------------------|-------------------------------|--------------------|
| Kabuli_wild_15813563 | NA                                  | Ca_kabuli_denovo | 15813563                | C/G  | NA                 | NA                            | NA                 |
| Kabuli_wild_15813568 | NA                                  | Ca_kabuli_denovo | 15813568                | A/C  | NA                 | NA                            | NA                 |
| Kabuli_wild_15816990 | NA                                  | Ca_kabuli_denovo | 15816990                | G/T  | NA                 | NA                            | NA                 |
| Kabuli_wild_15816996 | NA                                  | Ca_kabuli_denovo | 15816996                | A/C  | NA                 | NA                            | NA                 |
| Kabuli_wild_15817029 | NA                                  | Ca_kabuli_denovo | 15817029                | C/T  | NA                 | NA                            | NA                 |
| Kabuli_wild_15817127 | NA                                  | Ca_kabuli_denovo | 15817127                | G/T  | NA                 | NA                            | NA                 |
| Kabuli_wild_15818016 | NA                                  | Ca_kabuli_denovo | 15818016                | C/T  | NA                 | NA                            | NA                 |
| Kabuli_wild_15823345 | NA                                  | Ca_kabuli_denovo | 15823345                | A/G  | NA                 | NA                            | NA                 |
| Kabuli_wild_15823366 | NA                                  | Ca_kabuli_denovo | 15823366                | C/G  | NA                 | NA                            | NA                 |
| Kabuli_wild_15823393 | NA                                  | Ca_kabuli_denovo | 15823393                | A/G  | NA                 | NA                            | NA                 |
| Kabuli_wild_15825688 | NA                                  | Ca_kabuli_denovo | 15825688                | G/T  | NA                 | NA                            | NA                 |
| Kabuli_wild_15839769 | NA                                  | Ca_kabuli_denovo | 15839769                | G/A  | NA                 | NA                            | NA                 |
| Kabuli_wild_15847392 | NA                                  | Ca_kabuli_denovo | 15847392                | G/T  | NA                 | NA                            | NA                 |
| Kabuli_wild_15847401 | NA                                  | Ca_kabuli_denovo | 15847401                | G/T  | NA                 | NA                            | NA                 |
| Kabuli_wild_15861267 | NA                                  | Ca_kabuli_denovo | 15861267                | C/T  | NA                 | NA                            | NA                 |
| Kabuli_wild_15863048 | NA                                  | Ca_kabuli_denovo | 15863048                | A/G  | NA                 | NA                            | NA                 |
| Kabuli_wild_15866735 | NA                                  | Ca_kabuli_denovo | 15866735                | C/T  | NA                 | NA                            | NA                 |
| Kabuli_wild_15869493 | NA                                  | Ca_kabuli_denovo | 15869493                | C/T  | NA                 | NA                            | NA                 |
| Kabuli_wild_15869499 | NA                                  | Ca_kabuli_denovo | 15869499                | C/G  | NA                 | NA                            | NA                 |
| Kabuli_wild_15869501 | NA                                  | Ca_kabuli_denovo | 15869501                | A/G  | NA                 | NA                            | NA                 |
| Kabuli_wild_15869511 | NA                                  | Ca_kabuli_denovo | 15869511                | C/T  | NA                 | NA                            | NA                 |
| Kabuli_wild_15869637 | NA                                  | Ca_kabuli_denovo | 15869637                | G/T  | NA                 | NA                            | NA                 |
| Kabuli_wild_15871027 | NA                                  | Ca_kabuli_denovo | 15871027                | G/A  | NA                 | NA                            | NA                 |
| Kabuli_wild_15879098 | NA                                  | Ca_kabuli_denovo | 15879098                | A/G  | NA                 | NA                            | NA                 |
| Kabuli_wild_15882357 | NA                                  | Ca_kabuli_denovo | 15882357                | A/C  | NA                 | NA                            | NA                 |
| Kabuli_wild_15882363 | NA                                  | Ca_kabuli_denovo | 15882363                | C/T  | NA                 | NA                            | NA                 |
| Kabuli_wild_15882387 | NA                                  | Ca_kabuli_denovo | 15882387                | A/G  | NA                 | NA                            | NA                 |
| Kabuli_wild_15882396 | NA                                  | Ca_kabuli_denovo | 15882396                | G/T  | NA                 | NA                            | NA                 |
| Kabuli_wild_15886401 | NA                                  | Ca_kabuli_denovo | 15886401                | C/T  | NA                 | NA                            | NA                 |
| Kabuli_wild_15886417 | NA                                  | Ca_kabuli_denovo | 15886417                | C/G  | NA                 | NA                            | NA                 |
| Kabuli_wild_15888101 | NA                                  | Ca_kabuli_denovo | 15888101                | G/T  | NA                 | NA                            | NA                 |
| Kabuli_wild_15890768 | NA                                  | Ca_kabuli_denovo | 15890768                | G/A  | NA                 | NA                            | NA                 |
| Kabuli_wild_15897485 | NA                                  | Ca_kabuli_denovo | 15897485                | G/T  | NA                 | NA                            | NA                 |
| Kabuli_wild_15902107 | NA                                  | Ca_kabuli_denovo | 15902107                | A/G  | NA                 | NA                            | NA                 |
| Kabuli_wild_15902140 | NA                                  | Ca_kabuli_denovo | 15902140                | G/A  | NA                 | NA                            | NA                 |
| Kabuli_wild_15918913 | NA                                  | Ca_kabuli_denovo | 15918913                | C/T  | NA                 | NA                            | NA                 |
| Kabuli_wild_15942871 | NA                                  | Ca_kabuli_denovo | 15942871                | C/G  | NA                 | NA                            | NA                 |
| Kabuli_wild_15945055 | NA                                  | Ca_kabuli_denovo | 15945055                | G/T  | NA                 | NA                            | NA                 |
| Kabuli_wild_15961355 | NA                                  | Ca_kabuli_denovo | 15961355                | C/G  | NA                 | NA                            | NA                 |
| Kabuli_wild_15969097 | NA                                  | Ca_kabuli_denovo | 15969097                | C/G  | NA                 | NA                            | NA                 |
| Kabuli_wild_15969634 | NA                                  | Ca_kabuli_denovo | 15969634                | C/G  | NA                 | NA                            | NA                 |
| Kabuli_wild_15969637 | NA                                  | Ca_kabuli_denovo | 15969637                | C/T  | NA                 | NA                            | NA                 |
| Kabuli_wild_15969640 | NA                                  | Ca_kabuli_denovo | 15969640                | C/G  | NA                 | NA                            | NA                 |
| Kabuli_wild_15970060 | NA                                  | Ca_kabuli_denovo | 15970060                | G/T  | NA                 | NA                            | NA                 |

| SNP IDs              | NCBI dbSNP accession IDs (NCBI_SS#) | Chromosomes      | Physical positions (bp) | SNPs | Gene accession IDs | Sequence components of genome | Putative functions |
|----------------------|-------------------------------------|------------------|-------------------------|------|--------------------|-------------------------------|--------------------|
| Kabuli_wild_15970388 | NA                                  | Ca_kabuli_denovo | 15970388                | G/T  | NA                 | NA                            | NA                 |
| Kabuli_wild_15970391 | NA                                  | Ca_kabuli_denovo | 15970391                | C/G  | NA                 | NA                            | NA                 |
| Kabuli_wild_15971077 | NA                                  | Ca_kabuli_denovo | 15971077                | G/T  | NA                 | NA                            | NA                 |
| Kabuli_wild_15977339 | NA                                  | Ca_kabuli_denovo | 15977339                | C/T  | NA                 | NA                            | NA                 |
| Kabuli_wild_15987609 | NA                                  | Ca_kabuli_denovo | 15987609                | A/G  | NA                 | NA                            | NA                 |
| Kabuli_wild_15990330 | NA                                  | Ca_kabuli_denovo | 15990330                | A/G  | NA                 | NA                            | NA                 |
| Kabuli_wild_15996035 | NA                                  | Ca_kabuli_denovo | 15996035                | A/C  | NA                 | NA                            | NA                 |
| Kabuli_wild_15996074 | NA                                  | Ca_kabuli_denovo | 15996074                | C/T  | NA                 | NA                            | NA                 |
| Kabuli_wild_15997941 | NA                                  | Ca_kabuli_denovo | 15997941                | A/G  | NA                 | NA                            | NA                 |
| Kabuli_wild_15997959 | NA                                  | Ca_kabuli_denovo | 15997959                | A/G  | NA                 | NA                            | NA                 |
| Kabuli_wild_16010868 | NA                                  | Ca_kabuli_denovo | 16010868                | A/G  | NA                 | NA                            | NA                 |
| Kabuli_wild_16010880 | NA                                  | Ca_kabuli_denovo | 16010880                | C/T  | NA                 | NA                            | NA                 |
| Kabuli_wild_16010883 | NA                                  | Ca_kabuli_denovo | 16010883                | C/G  | NA                 | NA                            | NA                 |
| Kabuli_wild_16014875 | NA                                  | Ca_kabuli_denovo | 16014875                | A/G  | NA                 | NA                            | NA                 |
| Kabuli_wild_16021795 | NA                                  | Ca_kabuli_denovo | 16021795                | C/G  | NA                 | NA                            | NA                 |
| Kabuli_wild_16023199 | NA                                  | Ca_kabuli_denovo | 16023199                | G/T  | NA                 | NA                            | NA                 |
| Kabuli_wild_16023220 | NA                                  | Ca_kabuli_denovo | 16023220                | A/G  | NA                 | NA                            | NA                 |
| Kabuli_wild_16029568 | NA                                  | Ca_kabuli_denovo | 16029568                | C/G  | NA                 | NA                            | NA                 |
| Kabuli_wild_16029574 | NA                                  | Ca_kabuli_denovo | 16029574                | C/G  | NA                 | NA                            | NA                 |
| Kabuli_wild_16029576 | NA                                  | Ca_kabuli_denovo | 16029576                | G/T  | NA                 | NA                            | NA                 |
| Kabuli_wild_16029580 | NA                                  | Ca_kabuli_denovo | 16029580                | C/G  | NA                 | NA                            | NA                 |
| Kabuli_wild_16045636 | NA                                  | Ca_kabuli_denovo | 16045636                | C/T  | NA                 | NA                            | NA                 |
| Kabuli_wild_16045641 | NA                                  | Ca_kabuli_denovo | 16045641                | G/T  | NA                 | NA                            | NA                 |
| Kabuli_wild_16045681 | NA                                  | Ca_kabuli_denovo | 16045681                | G/T  | NA                 | NA                            | NA                 |
| Kabuli_wild_16048093 | NA                                  | Ca_kabuli_denovo | 16048093                | A/T  | NA                 | NA                            | NA                 |
| Kabuli_wild_16048099 | NA                                  | Ca_kabuli_denovo | 16048099                | C/G  | NA                 | NA                            | NA                 |
| Kabuli_wild_16048105 | NA                                  | Ca_kabuli_denovo | 16048105                | A/C  | NA                 | NA                            | NA                 |
| Kabuli_wild_16048114 | NA                                  | Ca_kabuli_denovo | 16048114                | A/G  | NA                 | NA                            | NA                 |
| Kabuli_wild_16050579 | NA                                  | Ca_kabuli_denovo | 16050579                | A/G  | NA                 | NA                            | NA                 |
| Kabuli_wild_16051107 | NA                                  | Ca_kabuli_denovo | 16051107                | A/G  | NA                 | NA                            | NA                 |
| Kabuli_wild_16051121 | NA                                  | Ca_kabuli_denovo | 16051121                | A/C  | NA                 | NA                            | NA                 |
| Kabuli_wild_16051122 | NA                                  | Ca_kabuli_denovo | 16051122                | G/T  | NA                 | NA                            | NA                 |
| Kabuli_wild_16051123 | NA                                  | Ca_kabuli_denovo | 16051123                | A/G  | NA                 | NA                            | NA                 |
| Kabuli_wild_16052296 | NA                                  | Ca_kabuli_denovo | 16052296                | G/A  | NA                 | NA                            | NA                 |
| Kabuli_wild_16052299 | NA                                  | Ca_kabuli_denovo | 16052299                | G/A  | NA                 | NA                            | NA                 |
| Kabuli_wild_16052302 | NA                                  | Ca_kabuli_denovo | 16052302                | C/T  | NA                 | NA                            | NA                 |
| Kabuli_wild_16064913 | NA                                  | Ca_kabuli_denovo | 16064913                | C/G  | NA                 | NA                            | NA                 |
| Kabuli_wild_16065066 | NA                                  | Ca_kabuli_denovo | 16065066                | C/T  | NA                 | NA                            | NA                 |
| Kabuli_wild_16067777 | NA                                  | Ca_kabuli_denovo | 16067777                | C/T  | NA                 | NA                            | NA                 |
| Kabuli_wild_16070795 | NA                                  | Ca_kabuli_denovo | 16070795                | C/T  | NA                 | NA                            | NA                 |
| Kabuli_wild_16070807 | NA                                  | Ca_kabuli_denovo | 16070807                | C/T  | NA                 | NA                            | NA                 |
| Kabuli_wild_16070823 | NA                                  | Ca_kabuli_denovo | 16070823                | A/G  | NA                 | NA                            | NA                 |
| Kabuli_wild_16077937 | NA                                  | Ca_kabuli_denovo | 16077937                | G/T  | NA                 | NA                            | NA                 |
| Kabuli_wild_16077962 | NA                                  | Ca_kabuli_denovo | 16077962                | A/G  | NA                 | NA                            | NA                 |



| SNP IDs              | NCBI dbSNP accession IDs (NCBI_SS#) | Chromosomes      | Physical positions (bp) | SNPs | Gene accession IDs | Sequence components of genome | Putative functions |
|----------------------|-------------------------------------|------------------|-------------------------|------|--------------------|-------------------------------|--------------------|
| Kabuli_wild_16092730 | NA                                  | Ca_kabuli_denovo | 16092730                | G/T  | NA                 | NA                            | NA                 |
| Kabuli_wild_16093902 | NA                                  | Ca_kabuli_denovo | 16093902                | C/T  | NA                 | NA                            | NA                 |
| Kabuli_wild_16095822 | NA                                  | Ca_kabuli_denovo | 16095822                | C/T  | NA                 | NA                            | NA                 |
| Kabuli_wild_16097220 | NA                                  | Ca_kabuli_denovo | 16097220                | G/T  | NA                 | NA                            | NA                 |
| Kabuli_wild_16097228 | NA                                  | Ca_kabuli_denovo | 16097228                | C/G  | NA                 | NA                            | NA                 |
| Kabuli_wild_16097237 | NA                                  | Ca_kabuli_denovo | 16097237                | C/T  | NA                 | NA                            | NA                 |
| Kabuli_wild_16097243 | NA                                  | Ca_kabuli_denovo | 16097243                | C/T  | NA                 | NA                            | NA                 |
| Kabuli_wild_16107189 | NA                                  | Ca_kabuli_denovo | 16107189                | G/T  | NA                 | NA                            | NA                 |
| Kabuli_wild_16107195 | NA                                  | Ca_kabuli_denovo | 16107195                | C/G  | NA                 | NA                            | NA                 |
| Kabuli_wild_16107207 | NA                                  | Ca_kabuli_denovo | 16107207                | A/G  | NA                 | NA                            | NA                 |
| Kabuli_wild_16107491 | NA                                  | Ca_kabuli_denovo | 16107491                | C/G  | NA                 | NA                            | NA                 |
| Kabuli_wild_16107503 | NA                                  | Ca_kabuli_denovo | 16107503                | C/T  | NA                 | NA                            | NA                 |
| Kabuli_wild_16107578 | NA                                  | Ca_kabuli_denovo | 16107578                | A/T  | NA                 | NA                            | NA                 |
| Kabuli_wild_16113485 | NA                                  | Ca_kabuli_denovo | 16113485                | A/G  | NA                 | NA                            | NA                 |
| Kabuli_wild_16122150 | NA                                  | Ca_kabuli_denovo | 16122150                | A/C  | NA                 | NA                            | NA                 |
| Kabuli_wild_16130285 | NA                                  | Ca_kabuli_denovo | 16130285                | A/G  | NA                 | NA                            | NA                 |
| Kabuli_wild_16133317 | NA                                  | Ca_kabuli_denovo | 16133317                | C/G  | NA                 | NA                            | NA                 |
| Kabuli_wild_16133326 | NA                                  | Ca_kabuli_denovo | 16133326                | C/G  | NA                 | NA                            | NA                 |
| Kabuli_wild_16133329 | NA                                  | Ca_kabuli_denovo | 16133329                | C/G  | NA                 | NA                            | NA                 |
| Kabuli_wild_16133340 | NA                                  | Ca_kabuli_denovo | 16133340                | G/T  | NA                 | NA                            | NA                 |
| Kabuli_wild_16144027 | NA                                  | Ca_kabuli_denovo | 16144027                | G/T  | NA                 | NA                            | NA                 |
| Kabuli_wild_16147654 | NA                                  | Ca_kabuli_denovo | 16147654                | A/G  | NA                 | NA                            | NA                 |
| Kabuli_wild_16165454 | NA                                  | Ca_kabuli_denovo | 16165454                | A/G  | NA                 | NA                            | NA                 |
| Kabuli_wild_16165470 | NA                                  | Ca_kabuli_denovo | 16165470                | A/G  | NA                 | NA                            | NA                 |
| Kabuli_wild_16178112 | NA                                  | Ca_kabuli_denovo | 16178112                | G/A  | NA                 | NA                            | NA                 |
| Kabuli_wild_16190325 | NA                                  | Ca_kabuli_denovo | 16190325                | C/G  | NA                 | NA                            | NA                 |
| Kabuli_wild_16190328 | NA                                  | Ca_kabuli_denovo | 16190328                | A/G  | NA                 | NA                            | NA                 |
| Kabuli_wild_16191289 | NA                                  | Ca_kabuli_denovo | 16191289                | C/T  | NA                 | NA                            | NA                 |
| Kabuli_wild_16194688 | NA                                  | Ca_kabuli_denovo | 16194688                | A/C  | NA                 | NA                            | NA                 |
| Kabuli_wild_16196886 | NA                                  | Ca_kabuli_denovo | 16196886                | C/G  | NA                 | NA                            | NA                 |
| Kabuli_wild_16197757 | NA                                  | Ca_kabuli_denovo | 16197757                | C/T  | NA                 | NA                            | NA                 |
| Kabuli_wild_16199428 | NA                                  | Ca_kabuli_denovo | 16199428                | A/G  | NA                 | NA                            | NA                 |
| Kabuli_wild_16199440 | NA                                  | Ca_kabuli_denovo | 16199440                | A/G  | NA                 | NA                            | NA                 |
| Kabuli_wild_16199441 | NA                                  | Ca_kabuli_denovo | 16199441                | C/T  | NA                 | NA                            | NA                 |
| Kabuli_wild_16199455 | NA                                  | Ca_kabuli_denovo | 16199455                | C/G  | NA                 | NA                            | NA                 |
| Kabuli_wild_16201032 | NA                                  | Ca_kabuli_denovo | 16201032                | A/C  | NA                 | NA                            | NA                 |
| Kabuli_wild_16201033 | NA                                  | Ca_kabuli_denovo | 16201033                | A/G  | NA                 | NA                            | NA                 |
| Kabuli_wild_16205532 | NA                                  | Ca_kabuli_denovo | 16205532                | C/T  | NA                 | NA                            | NA                 |
| Kabuli_wild_16207788 | NA                                  | Ca_kabuli_denovo | 16207788                | G/A  | NA                 | NA                            | NA                 |
| Kabuli_wild_16207845 | NA                                  | Ca_kabuli_denovo | 16207845                | G/A  | NA                 | NA                            | NA                 |
| Kabuli_wild_16227468 | NA                                  | Ca_kabuli_denovo | 16227468                | A/G  | NA                 | NA                            | NA                 |
| Kabuli_wild_16227501 | NA                                  | Ca_kabuli_denovo | 16227501                | C/G  | NA                 | NA                            | NA                 |
| Kabuli_wild_16227504 | NA                                  | Ca_kabuli_denovo | 16227504                | A/C  | NA                 | NA                            | NA                 |
| Kabuli_wild_16235781 | NA                                  | Ca_kabuli_denovo | 16235781                | G/T  | NA                 | NA                            | NA                 |

| SNP IDs              | NCBI dbSNP accession IDs (NCBI_SS#) | Chromosomes      | Physical positions (bp) | SNPs | Gene accession IDs | Sequence components of genome | Putative functions |
|----------------------|-------------------------------------|------------------|-------------------------|------|--------------------|-------------------------------|--------------------|
| Kabuli_wild_16249347 | NA                                  | Ca_kabuli_denovo | 16249347                | G/A  | NA                 | NA                            | NA                 |
| Kabuli_wild_16253515 | NA                                  | Ca_kabuli_denovo | 16253515                | G/T  | NA                 | NA                            | NA                 |
| Kabuli_wild_16282950 | NA                                  | Ca_kabuli_denovo | 16282950                | C/T  | NA                 | NA                            | NA                 |
| Kabuli_wild_16282968 | NA                                  | Ca_kabuli_denovo | 16282968                | A/G  | NA                 | NA                            | NA                 |
| Kabuli_wild_16283005 | NA                                  | Ca_kabuli_denovo | 16283005                | A/G  | NA                 | NA                            | NA                 |
| Kabuli_wild_16285798 | NA                                  | Ca_kabuli_denovo | 16285798                | A/G  | NA                 | NA                            | NA                 |
| Kabuli_wild_16293199 | NA                                  | Ca_kabuli_denovo | 16293199                | C/T  | NA                 | NA                            | NA                 |
| Kabuli_wild_16301506 | NA                                  | Ca_kabuli_denovo | 16301506                | A/G  | NA                 | NA                            | NA                 |
| Kabuli_wild_16308966 | NA                                  | Ca_kabuli_denovo | 16308966                | C/T  | NA                 | NA                            | NA                 |
| Kabuli_wild_16308972 | NA                                  | Ca_kabuli_denovo | 16308972                | C/T  | NA                 | NA                            | NA                 |
| Kabuli_wild_16314776 | NA                                  | Ca_kabuli_denovo | 16314776                | A/G  | NA                 | NA                            | NA                 |
| Kabuli_wild_16314785 | NA                                  | Ca_kabuli_denovo | 16314785                | C/T  | NA                 | NA                            | NA                 |
| Kabuli_wild_16322372 | NA                                  | Ca_kabuli_denovo | 16322372                | A/G  | NA                 | NA                            | NA                 |
| Kabuli_wild_16322388 | NA                                  | Ca_kabuli_denovo | 16322388                | C/T  | NA                 | NA                            | NA                 |
| Kabuli_wild_16322391 | NA                                  | Ca_kabuli_denovo | 16322391                | C/T  | NA                 | NA                            | NA                 |
| Kabuli_wild_16342007 | NA                                  | Ca_kabuli_denovo | 16342007                | G/T  | NA                 | NA                            | NA                 |
| Kabuli_wild_16353708 | NA                                  | Ca_kabuli_denovo | 16353708                | C/G  | NA                 | NA                            | NA                 |
| Kabuli_wild_16353727 | NA                                  | Ca_kabuli_denovo | 16353727                | A/T  | NA                 | NA                            | NA                 |
| Kabuli_wild_16359509 | NA                                  | Ca_kabuli_denovo | 16359509                | C/G  | NA                 | NA                            | NA                 |
| Kabuli_wild_16359524 | NA                                  | Ca_kabuli_denovo | 16359524                | C/G  | NA                 | NA                            | NA                 |
| Kabuli_wild_16361127 | NA                                  | Ca_kabuli_denovo | 16361127                | G/A  | NA                 | NA                            | NA                 |
| Kabuli_wild_16361169 | NA                                  | Ca_kabuli_denovo | 16361169                | G/C  | NA                 | NA                            | NA                 |
| Kabuli_wild_16372828 | NA                                  | Ca_kabuli_denovo | 16372828                | G/T  | NA                 | NA                            | NA                 |
| Kabuli_wild_16394883 | NA                                  | Ca_kabuli_denovo | 16394883                | C/T  | NA                 | NA                            | NA                 |
| Kabuli_wild_16394901 | NA                                  | Ca_kabuli_denovo | 16394901                | G/T  | NA                 | NA                            | NA                 |
| Kabuli_wild_16394921 | NA                                  | Ca_kabuli_denovo | 16394921                | C/T  | NA                 | NA                            | NA                 |
| Kabuli_wild_16403325 | NA                                  | Ca_kabuli_denovo | 16403325                | C/G  | NA                 | NA                            | NA                 |
| Kabuli_wild_16403331 | NA                                  | Ca_kabuli_denovo | 16403331                | C/G  | NA                 | NA                            | NA                 |
| Kabuli_wild_16409848 | NA                                  | Ca_kabuli_denovo | 16409848                | A/G  | NA                 | NA                            | NA                 |
| Kabuli_wild_16409971 | NA                                  | Ca_kabuli_denovo | 16409971                | C/T  | NA                 | NA                            | NA                 |
| Kabuli_wild_16423940 | NA                                  | Ca_kabuli_denovo | 16423940                | C/G  | NA                 | NA                            | NA                 |
| Kabuli_wild_16423967 | NA                                  | Ca_kabuli_denovo | 16423967                | A/G  | NA                 | NA                            | NA                 |
| Kabuli_wild_16426560 | NA                                  | Ca_kabuli_denovo | 16426560                | A/C  | NA                 | NA                            | NA                 |
| Kabuli_wild_16426561 | NA                                  | Ca_kabuli_denovo | 16426561                | C/G  | NA                 | NA                            | NA                 |
| Kabuli_wild_16426563 | NA                                  | Ca_kabuli_denovo | 16426563                | G/T  | NA                 | NA                            | NA                 |
| Kabuli_wild_16429064 | NA                                  | Ca_kabuli_denovo | 16429064                | A/G  | NA                 | NA                            | NA                 |
| Kabuli_wild_16433045 | NA                                  | Ca_kabuli_denovo | 16433045                | A/G  | NA                 | NA                            | NA                 |
| Kabuli_wild_16433051 | NA                                  | Ca_kabuli_denovo | 16433051                | A/G  | NA                 | NA                            | NA                 |
| Kabuli_wild_16451881 | NA                                  | Ca_kabuli_denovo | 16451881                | G/T  | NA                 | NA                            | NA                 |
| Kabuli_wild_16458610 | NA                                  | Ca_kabuli_denovo | 16458610                | C/T  | NA                 | NA                            | NA                 |
| Kabuli_wild_16458611 | NA                                  | Ca_kabuli_denovo | 16458611                | G/T  | NA                 | NA                            | NA                 |
| Kabuli_wild_16471246 | NA                                  | Ca_kabuli_denovo | 16471246                | C/G  | NA                 | NA                            | NA                 |
| Kabuli_wild_16471251 | NA                                  | Ca_kabuli_denovo | 16471251                | G/T  | NA                 | NA                            | NA                 |
| Kabuli_wild_16472188 | NA                                  | Ca_kabuli_denovo | 16472188                | A/C  | NA                 | NA                            | NA                 |

| SNP IDs              | NCBI dbSNP accession IDs (NCBI_SS#) | Chromosomes      | Physical positions (bp) | SNPs | Gene accession IDs | Sequence components of genome | Putative functions |
|----------------------|-------------------------------------|------------------|-------------------------|------|--------------------|-------------------------------|--------------------|
| Kabuli_wild_16472201 | NA                                  | Ca_kabuli_denovo | 16472201                | A/T  | NA                 | NA                            | NA                 |
| Kabuli_wild_16486812 | NA                                  | Ca_kabuli_denovo | 16486812                | T/C  | NA                 | NA                            | NA                 |
| Kabuli_wild_16486815 | NA                                  | Ca_kabuli_denovo | 16486815                | G/T  | NA                 | NA                            | NA                 |
| Kabuli_wild_16489032 | NA                                  | Ca_kabuli_denovo | 16489032                | C/T  | NA                 | NA                            | NA                 |
| Kabuli_wild_16489035 | NA                                  | Ca_kabuli_denovo | 16489035                | C/G  | NA                 | NA                            | NA                 |
| Kabuli_wild_16489038 | NA                                  | Ca_kabuli_denovo | 16489038                | G/T  | NA                 | NA                            | NA                 |
| Kabuli_wild_16496993 | NA                                  | Ca_kabuli_denovo | 16496993                | A/C  | NA                 | NA                            | NA                 |
| Kabuli_wild_16496996 | NA                                  | Ca_kabuli_denovo | 16496996                | C/T  | NA                 | NA                            | NA                 |
| Kabuli_wild_16497002 | NA                                  | Ca_kabuli_denovo | 16497002                | A/C  | NA                 | NA                            | NA                 |
| Kabuli_wild_16502190 | NA                                  | Ca_kabuli_denovo | 16502190                | A/G  | NA                 | NA                            | NA                 |
| Kabuli_wild_16502268 | NA                                  | Ca_kabuli_denovo | 16502268                | A/C  | NA                 | NA                            | NA                 |
| Kabuli_wild_16502277 | NA                                  | Ca_kabuli_denovo | 16502277                | C/G  | NA                 | NA                            | NA                 |
| Kabuli_wild_16515695 | NA                                  | Ca_kabuli_denovo | 16515695                | C/G  | NA                 | NA                            | NA                 |
| Kabuli_wild_16515698 | NA                                  | Ca_kabuli_denovo | 16515698                | C/T  | NA                 | NA                            | NA                 |
| Kabuli_wild_16520474 | NA                                  | Ca_kabuli_denovo | 16520474                | C/T  | NA                 | NA                            | NA                 |
| Kabuli_wild_16525581 | NA                                  | Ca_kabuli_denovo | 16525581                | C/G  | NA                 | NA                            | NA                 |
| Kabuli_wild_16535263 | NA                                  | Ca_kabuli_denovo | 16535263                | C/T  | NA                 | NA                            | NA                 |
| Kabuli_wild_16535305 | NA                                  | Ca_kabuli_denovo | 16535305                | C/G  | NA                 | NA                            | NA                 |
| Kabuli_wild_16535314 | NA                                  | Ca_kabuli_denovo | 16535314                | C/T  | NA                 | NA                            | NA                 |
| Kabuli_wild_16538495 | NA                                  | Ca_kabuli_denovo | 16538495                | C/G  | NA                 | NA                            | NA                 |
| Kabuli_wild_16544689 | NA                                  | Ca_kabuli_denovo | 16544689                | G/T  | NA                 | NA                            | NA                 |
| Kabuli_wild_16552767 | NA                                  | Ca_kabuli_denovo | 16552767                | G/T  | NA                 | NA                            | NA                 |
| Kabuli_wild_16554387 | NA                                  | Ca_kabuli_denovo | 16554387                | A/G  | NA                 | NA                            | NA                 |
| Kabuli_wild_16558116 | NA                                  | Ca_kabuli_denovo | 16558116                | G/T  | NA                 | NA                            | NA                 |
| Kabuli_wild_16559561 | NA                                  | Ca_kabuli_denovo | 16559561                | A/C  | NA                 | NA                            | NA                 |
| Kabuli_wild_16559563 | NA                                  | Ca_kabuli_denovo | 16559563                | A/C  | NA                 | NA                            | NA                 |
| Kabuli_wild_16581419 | NA                                  | Ca_kabuli_denovo | 16581419                | C/T  | NA                 | NA                            | NA                 |
| Kabuli_wild_16581426 | NA                                  | Ca_kabuli_denovo | 16581426                | C/T  | NA                 | NA                            | NA                 |
| Kabuli_wild_16581498 | NA                                  | Ca_kabuli_denovo | 16581498                | G/A  | NA                 | NA                            | NA                 |
| Kabuli_wild_16589134 | NA                                  | Ca_kabuli_denovo | 16589134                | C/G  | NA                 | NA                            | NA                 |
| Kabuli_wild_16593633 | NA                                  | Ca_kabuli_denovo | 16593633                | A/G  | NA                 | NA                            | NA                 |
| Kabuli_wild_16605864 | NA                                  | Ca_kabuli_denovo | 16605864                | A/G  | NA                 | NA                            | NA                 |
| Kabuli_wild_16619532 | NA                                  | Ca_kabuli_denovo | 16619532                | A/C  | NA                 | NA                            | NA                 |
| Kabuli_wild_16624328 | NA                                  | Ca_kabuli_denovo | 16624328                | C/G  | NA                 | NA                            | NA                 |
| Kabuli_wild_16628653 | NA                                  | Ca_kabuli_denovo | 16628653                | C/T  | NA                 | NA                            | NA                 |
| Kabuli_wild_16628656 | NA                                  | Ca_kabuli_denovo | 16628656                | C/G  | NA                 | NA                            | NA                 |
| Kabuli_wild_16637327 | NA                                  | Ca_kabuli_denovo | 16637327                | A/G  | NA                 | NA                            | NA                 |
| Kabuli_wild_16637355 | NA                                  | Ca_kabuli_denovo | 16637355                | C/T  | NA                 | NA                            | NA                 |
| Kabuli_wild_16637573 | NA                                  | Ca_kabuli_denovo | 16637573                | C/T  | NA                 | NA                            | NA                 |
| Kabuli_wild_16643966 | NA                                  | Ca_kabuli_denovo | 16643966                | G/A  | NA                 | NA                            | NA                 |
| Kabuli_wild_16646327 | NA                                  | Ca_kabuli_denovo | 16646327                | T/C  | NA                 | NA                            | NA                 |
| Kabuli_wild_16646535 | NA                                  | Ca_kabuli_denovo | 16646535                | G/T  | NA                 | NA                            | NA                 |
| Kabuli_wild_16658379 | NA                                  | Ca_kabuli_denovo | 16658379                | G/T  | NA                 | NA                            | NA                 |
| Kabuli_wild_16665044 | NA                                  | Ca_kabuli_denovo | 16665044                | C/G  | NA                 | NA                            | NA                 |

| SNP IDs              | NCBI dbSNP accession IDs (NCBI_SS#) | Chromosomes      | Physical positions (bp) | SNPs | Gene accession IDs | Sequence components of genome | Putative functions |
|----------------------|-------------------------------------|------------------|-------------------------|------|--------------------|-------------------------------|--------------------|
| Kabuli_wild_16665053 | NA                                  | Ca_kabuli_denovo | 16665053                | C/G  | NA                 | NA                            | NA                 |
| Kabuli_wild_16665987 | NA                                  | Ca_kabuli_denovo | 16665987                | C/G  | NA                 | NA                            | NA                 |
| Kabuli_wild_16666003 | NA                                  | Ca_kabuli_denovo | 16666003                | A/G  | NA                 | NA                            | NA                 |
| Kabuli_wild_16673326 | NA                                  | Ca_kabuli_denovo | 16673326                | C/T  | NA                 | NA                            | NA                 |
| Kabuli_wild_16673349 | NA                                  | Ca_kabuli_denovo | 16673349                | A/T  | NA                 | NA                            | NA                 |
| Kabuli_wild_16673350 | NA                                  | Ca_kabuli_denovo | 16673350                | A/T  | NA                 | NA                            | NA                 |
| Kabuli_wild_16674813 | NA                                  | Ca_kabuli_denovo | 16674813                | G/T  | NA                 | NA                            | NA                 |
| Kabuli_wild_16674826 | NA                                  | Ca_kabuli_denovo | 16674826                | C/G  | NA                 | NA                            | NA                 |
| Kabuli_wild_16675968 | NA                                  | Ca_kabuli_denovo | 16675968                | A/T  | NA                 | NA                            | NA                 |
| Kabuli_wild_16675990 | NA                                  | Ca_kabuli_denovo | 16675990                | C/G  | NA                 | NA                            | NA                 |
| Kabuli_wild_16680770 | NA                                  | Ca_kabuli_denovo | 16680770                | A/G  | NA                 | NA                            | NA                 |
| Kabuli_wild_16689083 | NA                                  | Ca_kabuli_denovo | 16689083                | C/G  | NA                 | NA                            | NA                 |
| Kabuli_wild_16700500 | NA                                  | Ca_kabuli_denovo | 16700500                | A/G  | NA                 | NA                            | NA                 |
| Kabuli_wild_16703782 | NA                                  | Ca_kabuli_denovo | 16703782                | C/G  | NA                 | NA                            | NA                 |
| Kabuli_wild_16703839 | NA                                  | Ca_kabuli_denovo | 16703839                | A/G  | NA                 | NA                            | NA                 |
| Kabuli_wild_16707022 | NA                                  | Ca_kabuli_denovo | 16707022                | C/G  | NA                 | NA                            | NA                 |
| Kabuli_wild_16707033 | NA                                  | Ca_kabuli_denovo | 16707033                | C/G  | NA                 | NA                            | NA                 |
| Kabuli_wild_16707037 | NA                                  | Ca_kabuli_denovo | 16707037                | C/G  | NA                 | NA                            | NA                 |
| Kabuli_wild_16707044 | NA                                  | Ca_kabuli_denovo | 16707044                | C/G  | NA                 | NA                            | NA                 |
| Kabuli_wild_16712330 | NA                                  | Ca_kabuli_denovo | 16712330                | A/G  | NA                 | NA                            | NA                 |
| Kabuli_wild_16723310 | NA                                  | Ca_kabuli_denovo | 16723310                | G/T  | NA                 | NA                            | NA                 |
| Kabuli_wild_16723745 | NA                                  | Ca_kabuli_denovo | 16723745                | C/G  | NA                 | NA                            | NA                 |
| Kabuli_wild_16723749 | NA                                  | Ca_kabuli_denovo | 16723749                | A/G  | NA                 | NA                            | NA                 |
| Kabuli_wild_16723764 | NA                                  | Ca_kabuli_denovo | 16723764                | C/T  | NA                 | NA                            | NA                 |
| Kabuli_wild_16723768 | NA                                  | Ca_kabuli_denovo | 16723768                | C/G  | NA                 | NA                            | NA                 |
| Kabuli_wild_16724708 | NA                                  | Ca_kabuli_denovo | 16724708                | C/T  | NA                 | NA                            | NA                 |
| Kabuli_wild_16731750 | NA                                  | Ca_kabuli_denovo | 16731750                | A/G  | NA                 | NA                            | NA                 |
| Kabuli_wild_16732878 | NA                                  | Ca_kabuli_denovo | 16732878                | C/T  | NA                 | NA                            | NA                 |
| Kabuli_wild_16735820 | NA                                  | Ca_kabuli_denovo | 16735820                | C/T  | NA                 | NA                            | NA                 |
| Kabuli_wild_16735838 | NA                                  | Ca_kabuli_denovo | 16735838                | C/T  | NA                 | NA                            | NA                 |
| Kabuli_wild_16735841 | NA                                  | Ca_kabuli_denovo | 16735841                | A/G  | NA                 | NA                            | NA                 |
| Kabuli_wild_16742354 | NA                                  | Ca_kabuli_denovo | 16742354                | G/C  | NA                 | NA                            | NA                 |
| Kabuli_wild_16742365 | NA                                  | Ca_kabuli_denovo | 16742365                | A/C  | NA                 | NA                            | NA                 |
| Kabuli_wild_16742367 | NA                                  | Ca_kabuli_denovo | 16742367                | C/G  | NA                 | NA                            | NA                 |
| Kabuli_wild_16760412 | NA                                  | Ca_kabuli_denovo | 16760412                | C/T  | NA                 | NA                            | NA                 |
| Kabuli_wild_16760415 | NA                                  | Ca_kabuli_denovo | 16760415                | G/T  | NA                 | NA                            | NA                 |
| Kabuli_wild_16760451 | NA                                  | Ca_kabuli_denovo | 16760451                | A/G  | NA                 | NA                            | NA                 |
| Kabuli_wild_16764255 | NA                                  | Ca_kabuli_denovo | 16764255                | C/T  | NA                 | NA                            | NA                 |
| Kabuli_wild_16776287 | NA                                  | Ca_kabuli_denovo | 16776287                | C/T  | NA                 | NA                            | NA                 |
| Kabuli_wild_16776317 | NA                                  | Ca_kabuli_denovo | 16776317                | C/T  | NA                 | NA                            | NA                 |
| Kabuli_wild_16776401 | NA                                  | Ca_kabuli_denovo | 16776401                | A/G  | NA                 | NA                            | NA                 |
| Kabuli_wild_16783441 | NA                                  | Ca_kabuli_denovo | 16783441                | A/T  | NA                 | NA                            | NA                 |
| Kabuli_wild_16785391 | NA                                  | Ca_kabuli_denovo | 16785391                | A/G  | NA                 | NA                            | NA                 |
| Kabuli_wild_16793180 | NA                                  | Ca_kabuli_denovo | 16793180                | C/T  | NA                 | NA                            | NA                 |

| SNP IDs              | NCBI dbSNP accession IDs (NCBI_SS#) | Chromosomes      | Physical positions (bp) | SNPs | Gene accession IDs | Sequence components of genome | Putative functions |
|----------------------|-------------------------------------|------------------|-------------------------|------|--------------------|-------------------------------|--------------------|
| Kabuli_wild_16793712 | NA                                  | Ca_kabuli_denovo | 16793712                | G/T  | NA                 | NA                            | NA                 |
| Kabuli_wild_16793717 | NA                                  | Ca_kabuli_denovo | 16793717                | A/G  | NA                 | NA                            | NA                 |
| Kabuli_wild_16796962 | NA                                  | Ca_kabuli_denovo | 16796962                | G/C  | NA                 | NA                            | NA                 |
| Kabuli_wild_16796964 | NA                                  | Ca_kabuli_denovo | 16796964                | A/G  | NA                 | NA                            | NA                 |
| Kabuli_wild_16796966 | NA                                  | Ca_kabuli_denovo | 16796966                | G/A  | NA                 | NA                            | NA                 |
| Kabuli_wild_16800018 | NA                                  | Ca_kabuli_denovo | 16800018                | A/G  | NA                 | NA                            | NA                 |
| Kabuli_wild_16800024 | NA                                  | Ca_kabuli_denovo | 16800024                | C/G  | NA                 | NA                            | NA                 |
| Kabuli_wild_16801009 | NA                                  | Ca_kabuli_denovo | 16801009                | C/T  | NA                 | NA                            | NA                 |
| Kabuli_wild_16802139 | NA                                  | Ca_kabuli_denovo | 16802139                | T/C  | NA                 | NA                            | NA                 |
| Kabuli_wild_16807536 | NA                                  | Ca_kabuli_denovo | 16807536                | C/G  | NA                 | NA                            | NA                 |
| Kabuli_wild_16807554 | NA                                  | Ca_kabuli_denovo | 16807554                | C/G  | NA                 | NA                            | NA                 |
| Kabuli_wild_16808760 | NA                                  | Ca_kabuli_denovo | 16808760                | A/G  | NA                 | NA                            | NA                 |
| Kabuli_wild_16808778 | NA                                  | Ca_kabuli_denovo | 16808778                | G/C  | NA                 | NA                            | NA                 |
| Kabuli_wild_16810853 | NA                                  | Ca_kabuli_denovo | 16810853                | C/T  | NA                 | NA                            | NA                 |
| Kabuli_wild_16810877 | NA                                  | Ca_kabuli_denovo | 16810877                | C/T  | NA                 | NA                            | NA                 |
| Kabuli_wild_16814643 | NA                                  | Ca_kabuli_denovo | 16814643                | G/T  | NA                 | NA                            | NA                 |
| Kabuli_wild_16835640 | NA                                  | Ca_kabuli_denovo | 16835640                | T/C  | NA                 | NA                            | NA                 |
| Kabuli_wild_16835648 | NA                                  | Ca_kabuli_denovo | 16835648                | T/C  | NA                 | NA                            | NA                 |
| Kabuli_wild_16841739 | NA                                  | Ca_kabuli_denovo | 16841739                | C/T  | NA                 | NA                            | NA                 |
| Kabuli_wild_16844202 | NA                                  | Ca_kabuli_denovo | 16844202                | G/T  | NA                 | NA                            | NA                 |
| Kabuli_wild_16846070 | NA                                  | Ca_kabuli_denovo | 16846070                | G/T  | NA                 | NA                            | NA                 |
| Kabuli_wild_16848390 | NA                                  | Ca_kabuli_denovo | 16848390                | C/T  | NA                 | NA                            | NA                 |
| Kabuli_wild_16848399 | NA                                  | Ca_kabuli_denovo | 16848399                | C/T  | NA                 | NA                            | NA                 |
| Kabuli_wild_16850368 | NA                                  | Ca_kabuli_denovo | 16850368                | C/T  | NA                 | NA                            | NA                 |
| Kabuli_wild_16854746 | NA                                  | Ca_kabuli_denovo | 16854746                | C/T  | NA                 | NA                            | NA                 |
| Kabuli_wild_16863167 | NA                                  | Ca_kabuli_denovo | 16863167                | C/T  | NA                 | NA                            | NA                 |
| Kabuli_wild_16876417 | NA                                  | Ca_kabuli_denovo | 16876417                | G/T  | NA                 | NA                            | NA                 |
| Kabuli_wild_16879873 | NA                                  | Ca_kabuli_denovo | 16879873                | C/T  | NA                 | NA                            | NA                 |
| Kabuli_wild_16902425 | NA                                  | Ca_kabuli_denovo | 16902425                | C/G  | NA                 | NA                            | NA                 |
| Kabuli_wild_16902436 | NA                                  | Ca_kabuli_denovo | 16902436                | C/G  | NA                 | NA                            | NA                 |
| Kabuli_wild_16902440 | NA                                  | Ca_kabuli_denovo | 16902440                | C/G  | NA                 | NA                            | NA                 |
| Kabuli_wild_16911068 | NA                                  | Ca_kabuli_denovo | 16911068                | C/T  | NA                 | NA                            | NA                 |
| Kabuli_wild_16911073 | NA                                  | Ca_kabuli_denovo | 16911073                | C/G  | NA                 | NA                            | NA                 |
| Kabuli_wild_16918577 | NA                                  | Ca_kabuli_denovo | 16918577                | G/T  | NA                 | NA                            | NA                 |
| Kabuli_wild_16918607 | NA                                  | Ca_kabuli_denovo | 16918607                | C/G  | NA                 | NA                            | NA                 |
| Kabuli_wild_16926662 | NA                                  | Ca_kabuli_denovo | 16926662                | A/T  | NA                 | NA                            | NA                 |
| Kabuli_wild_16928131 | NA                                  | Ca_kabuli_denovo | 16928131                | C/G  | NA                 | NA                            | NA                 |
| Kabuli_wild_16930456 | NA                                  | Ca_kabuli_denovo | 16930456                | A/T  | NA                 | NA                            | NA                 |
| Kabuli_wild_16930488 | NA                                  | Ca_kabuli_denovo | 16930488                | C/G  | NA                 | NA                            | NA                 |
| Kabuli_wild_16932436 | NA                                  | Ca_kabuli_denovo | 16932436                | A/C  | NA                 | NA                            | NA                 |
| Kabuli_wild_16932437 | NA                                  | Ca_kabuli_denovo | 16932437                | A/G  | NA                 | NA                            | NA                 |
| Kabuli_wild_16932438 | NA                                  | Ca_kabuli_denovo | 16932438                | A/G  | NA                 | NA                            | NA                 |
| Kabuli_wild_16936389 | NA                                  | Ca_kabuli_denovo | 16936389                | C/G  | NA                 | NA                            | NA                 |
| Kabuli_wild_16944499 | NA                                  | Ca_kabuli_denovo | 16944499                | G/T  | NA                 | NA                            | NA                 |

| SNP IDs                     | NCBI dbSNP accession IDs (NCBI_SS#) | Chromosomes             | Physical positions (bp) | SNPs | Gene accession IDs | Sequence components of genome | Putative functions |
|-----------------------------|-------------------------------------|-------------------------|-------------------------|------|--------------------|-------------------------------|--------------------|
| <i>Kabuli_wild_16952879</i> | NA                                  | <i>Ca_kabuli_denovo</i> | 16952879                | C/T  | NA                 | NA                            | NA                 |
| <i>Kabuli_wild_16952919</i> | NA                                  | <i>Ca_kabuli_denovo</i> | 16952919                | T/C  | NA                 | NA                            | NA                 |
| <i>Kabuli_wild_16955005</i> | NA                                  | <i>Ca_kabuli_denovo</i> | 16955005                | C/T  | NA                 | NA                            | NA                 |
| <i>Kabuli_wild_16955011</i> | NA                                  | <i>Ca_kabuli_denovo</i> | 16955011                | C/G  | NA                 | NA                            | NA                 |
| <i>Kabuli_wild_16971016</i> | NA                                  | <i>Ca_kabuli_denovo</i> | 16971016                | A/T  | NA                 | NA                            | NA                 |
| <i>Kabuli_wild_16971017</i> | NA                                  | <i>Ca_kabuli_denovo</i> | 16971017                | C/G  | NA                 | NA                            | NA                 |
| <i>Kabuli_wild_16971018</i> | NA                                  | <i>Ca_kabuli_denovo</i> | 16971018                | C/G  | NA                 | NA                            | NA                 |
| <i>Kabuli_wild_16971048</i> | NA                                  | <i>Ca_kabuli_denovo</i> | 16971048                | C/G  | NA                 | NA                            | NA                 |
| <i>Kabuli_wild_16979416</i> | NA                                  | <i>Ca_kabuli_denovo</i> | 16979416                | A/G  | NA                 | NA                            | NA                 |
| <i>Kabuli_wild_16981687</i> | NA                                  | <i>Ca_kabuli_denovo</i> | 16981687                | T/C  | NA                 | NA                            | NA                 |
| <i>Kabuli_wild_16985110</i> | NA                                  | <i>Ca_kabuli_denovo</i> | 16985110                | C/G  | NA                 | NA                            | NA                 |
| <i>Kabuli_wild_16986207</i> | NA                                  | <i>Ca_kabuli_denovo</i> | 16986207                | A/C  | NA                 | NA                            | NA                 |
| <i>Kabuli_wild_16986208</i> | NA                                  | <i>Ca_kabuli_denovo</i> | 16986208                | G/T  | NA                 | NA                            | NA                 |
| <i>Kabuli_wild_16993709</i> | NA                                  | <i>Ca_kabuli_denovo</i> | 16993709                | G/T  | NA                 | NA                            | NA                 |
| <i>Kabuli_wild_16996945</i> | NA                                  | <i>Ca_kabuli_denovo</i> | 16996945                | A/T  | NA                 | NA                            | NA                 |
| <i>Kabuli_wild_16996948</i> | NA                                  | <i>Ca_kabuli_denovo</i> | 16996948                | C/G  | NA                 | NA                            | NA                 |
| <i>Kabuli_wild_16997021</i> | NA                                  | <i>Ca_kabuli_denovo</i> | 16997021                | A/C  | NA                 | NA                            | NA                 |
| <i>Kabuli_wild_17003565</i> | NA                                  | <i>Ca_kabuli_denovo</i> | 17003565                | G/T  | NA                 | NA                            | NA                 |
| <i>Kabuli_wild_17005316</i> | NA                                  | <i>Ca_kabuli_denovo</i> | 17005316                | C/T  | NA                 | NA                            | NA                 |
| <i>Kabuli_wild_17020299</i> | NA                                  | <i>Ca_kabuli_denovo</i> | 17020299                | C/G  | NA                 | NA                            | NA                 |
| <i>Kabuli_wild_17020308</i> | NA                                  | <i>Ca_kabuli_denovo</i> | 17020308                | A/T  | NA                 | NA                            | NA                 |
| <i>Kabuli_wild_17031483</i> | NA                                  | <i>Ca_kabuli_denovo</i> | 17031483                | G/A  | NA                 | NA                            | NA                 |
| <i>Kabuli_wild_17041532</i> | NA                                  | <i>Ca_kabuli_denovo</i> | 17041532                | A/G  | NA                 | NA                            | NA                 |
| <i>Kabuli_wild_17041552</i> | NA                                  | <i>Ca_kabuli_denovo</i> | 17041552                | A/G  | NA                 | NA                            | NA                 |
| <i>Kabuli_wild_17041699</i> | NA                                  | <i>Ca_kabuli_denovo</i> | 17041699                | C/T  | NA                 | NA                            | NA                 |
| <i>Kabuli_wild_17043685</i> | NA                                  | <i>Ca_kabuli_denovo</i> | 17043685                | A/T  | NA                 | NA                            | NA                 |
| <i>Kabuli_wild_17043691</i> | NA                                  | <i>Ca_kabuli_denovo</i> | 17043691                | A/G  | NA                 | NA                            | NA                 |
| <i>Kabuli_wild_17043703</i> | NA                                  | <i>Ca_kabuli_denovo</i> | 17043703                | C/T  | NA                 | NA                            | NA                 |
| <i>Kabuli_wild_17045955</i> | NA                                  | <i>Ca_kabuli_denovo</i> | 17045955                | G/T  | NA                 | NA                            | NA                 |
| <i>Kabuli_wild_17060964</i> | NA                                  | <i>Ca_kabuli_denovo</i> | 17060964                | G/T  | NA                 | NA                            | NA                 |
| <i>Kabuli_wild_17074129</i> | NA                                  | <i>Ca_kabuli_denovo</i> | 17074129                | A/G  | NA                 | NA                            | NA                 |
| <i>Kabuli_wild_17084944</i> | NA                                  | <i>Ca_kabuli_denovo</i> | 17084944                | C/G  | NA                 | NA                            | NA                 |
| <i>Kabuli_wild_17094325</i> | NA                                  | <i>Ca_kabuli_denovo</i> | 17094325                | C/T  | NA                 | NA                            | NA                 |
| <i>Kabuli_wild_17101441</i> | NA                                  | <i>Ca_kabuli_denovo</i> | 17101441                | A/G  | NA                 | NA                            | NA                 |
| <i>Kabuli_wild_17110152</i> | NA                                  | <i>Ca_kabuli_denovo</i> | 17110152                | A/G  | NA                 | NA                            | NA                 |
| <i>Kabuli_wild_17110155</i> | NA                                  | <i>Ca_kabuli_denovo</i> | 17110155                | G/A  | NA                 | NA                            | NA                 |
| <i>Kabuli_wild_17116298</i> | NA                                  | <i>Ca_kabuli_denovo</i> | 17116298                | G/T  | NA                 | NA                            | NA                 |
| <i>Kabuli_wild_17127999</i> | NA                                  | <i>Ca_kabuli_denovo</i> | 17127999                | C/G  | NA                 | NA                            | NA                 |
| <i>Kabuli_wild_17128020</i> | NA                                  | <i>Ca_kabuli_denovo</i> | 17128020                | C/G  | NA                 | NA                            | NA                 |
| <i>Kabuli_wild_17128192</i> | NA                                  | <i>Ca_kabuli_denovo</i> | 17128192                | A/G  | NA                 | NA                            | NA                 |
| <i>Kabuli_wild_17128198</i> | NA                                  | <i>Ca_kabuli_denovo</i> | 17128198                | C/G  | NA                 | NA                            | NA                 |
| <i>Kabuli_wild_17128721</i> | NA                                  | <i>Ca_kabuli_denovo</i> | 17128721                | G/C  | NA                 | NA                            | NA                 |
| <i>Kabuli_wild_17128727</i> | NA                                  | <i>Ca_kabuli_denovo</i> | 17128727                | A/G  | NA                 | NA                            | NA                 |
| <i>Kabuli_wild_17128736</i> | NA                                  | <i>Ca_kabuli_denovo</i> | 17128736                | C/T  | NA                 | NA                            | NA                 |

| SNP IDs              | NCBI dbSNP accession IDs (NCBI_SS#) | Chromosomes      | Physical positions (bp) | SNPs | Gene accession IDs | Sequence components of genome | Putative functions |
|----------------------|-------------------------------------|------------------|-------------------------|------|--------------------|-------------------------------|--------------------|
| Kabuli_wild_17131186 | NA                                  | Ca_kabuli_denovo | 17131186                | A/G  | NA                 | NA                            | NA                 |
| Kabuli_wild_17144314 | NA                                  | Ca_kabuli_denovo | 17144314                | A/G  | NA                 | NA                            | NA                 |
| Kabuli_wild_17149502 | NA                                  | Ca_kabuli_denovo | 17149502                | C/G  | NA                 | NA                            | NA                 |
| Kabuli_wild_17162172 | NA                                  | Ca_kabuli_denovo | 17162172                | G/A  | NA                 | NA                            | NA                 |
| Kabuli_wild_17172225 | NA                                  | Ca_kabuli_denovo | 17172225                | C/G  | NA                 | NA                            | NA                 |
| Kabuli_wild_17178875 | NA                                  | Ca_kabuli_denovo | 17178875                | A/C  | NA                 | NA                            | NA                 |
| Kabuli_wild_17178911 | NA                                  | Ca_kabuli_denovo | 17178911                | A/G  | NA                 | NA                            | NA                 |
| Kabuli_wild_17183075 | NA                                  | Ca_kabuli_denovo | 17183075                | C/G  | NA                 | NA                            | NA                 |
| Kabuli_wild_17183076 | NA                                  | Ca_kabuli_denovo | 17183076                | G/T  | NA                 | NA                            | NA                 |
| Kabuli_wild_17183078 | NA                                  | Ca_kabuli_denovo | 17183078                | A/G  | NA                 | NA                            | NA                 |
| Kabuli_wild_17183096 | NA                                  | Ca_kabuli_denovo | 17183096                | A/G  | NA                 | NA                            | NA                 |
| Kabuli_wild_17197218 | NA                                  | Ca_kabuli_denovo | 17197218                | A/G  | NA                 | NA                            | NA                 |
| Kabuli_wild_17200318 | NA                                  | Ca_kabuli_denovo | 17200318                | C/G  | NA                 | NA                            | NA                 |
| Kabuli_wild_17200319 | NA                                  | Ca_kabuli_denovo | 17200319                | C/T  | NA                 | NA                            | NA                 |
| Kabuli_wild_17216556 | NA                                  | Ca_kabuli_denovo | 17216556                | C/T  | NA                 | NA                            | NA                 |
| Kabuli_wild_17236000 | NA                                  | Ca_kabuli_denovo | 17236000                | C/G  | NA                 | NA                            | NA                 |
| Kabuli_wild_17256795 | NA                                  | Ca_kabuli_denovo | 17256795                | C/T  | NA                 | NA                            | NA                 |
| Kabuli_wild_17277991 | NA                                  | Ca_kabuli_denovo | 17277991                | A/G  | NA                 | NA                            | NA                 |
| Kabuli_wild_17289084 | NA                                  | Ca_kabuli_denovo | 17289084                | A/G  | NA                 | NA                            | NA                 |
| Kabuli_wild_17289099 | NA                                  | Ca_kabuli_denovo | 17289099                | C/G  | NA                 | NA                            | NA                 |
| Kabuli_wild_17289108 | NA                                  | Ca_kabuli_denovo | 17289108                | C/G  | NA                 | NA                            | NA                 |
| Kabuli_wild_17302511 | NA                                  | Ca_kabuli_denovo | 17302511                | A/G  | NA                 | NA                            | NA                 |
| Kabuli_wild_17308024 | NA                                  | Ca_kabuli_denovo | 17308024                | C/G  | NA                 | NA                            | NA                 |
| Kabuli_wild_17309503 | NA                                  | Ca_kabuli_denovo | 17309503                | C/G  | NA                 | NA                            | NA                 |
| Kabuli_wild_17309515 | NA                                  | Ca_kabuli_denovo | 17309515                | C/G  | NA                 | NA                            | NA                 |
| Kabuli_wild_17309518 | NA                                  | Ca_kabuli_denovo | 17309518                | C/G  | NA                 | NA                            | NA                 |
| Kabuli_wild_17315235 | NA                                  | Ca_kabuli_denovo | 17315235                | T/C  | NA                 | NA                            | NA                 |
| Kabuli_wild_17316916 | NA                                  | Ca_kabuli_denovo | 17316916                | C/G  | NA                 | NA                            | NA                 |
| Kabuli_wild_17320132 | NA                                  | Ca_kabuli_denovo | 17320132                | A/C  | NA                 | NA                            | NA                 |
| Kabuli_wild_17320133 | NA                                  | Ca_kabuli_denovo | 17320133                | A/G  | NA                 | NA                            | NA                 |
| Kabuli_wild_17320798 | NA                                  | Ca_kabuli_denovo | 17320798                | A/G  | NA                 | NA                            | NA                 |
| Kabuli_wild_17332315 | NA                                  | Ca_kabuli_denovo | 17332315                | C/T  | NA                 | NA                            | NA                 |
| Kabuli_wild_17335862 | NA                                  | Ca_kabuli_denovo | 17335862                | T/C  | NA                 | NA                            | NA                 |
| Kabuli_wild_17336296 | NA                                  | Ca_kabuli_denovo | 17336296                | A/G  | NA                 | NA                            | NA                 |
| Kabuli_wild_17336363 | NA                                  | Ca_kabuli_denovo | 17336363                | C/T  | NA                 | NA                            | NA                 |
| Kabuli_wild_17346920 | NA                                  | Ca_kabuli_denovo | 17346920                | C/T  | NA                 | NA                            | NA                 |
| Kabuli_wild_17364338 | NA                                  | Ca_kabuli_denovo | 17364338                | G/T  | NA                 | NA                            | NA                 |
| Kabuli_wild_17364347 | NA                                  | Ca_kabuli_denovo | 17364347                | C/T  | NA                 | NA                            | NA                 |
| Kabuli_wild_17373910 | NA                                  | Ca_kabuli_denovo | 17373910                | C/G  | NA                 | NA                            | NA                 |
| Kabuli_wild_17373914 | NA                                  | Ca_kabuli_denovo | 17373914                | A/T  | NA                 | NA                            | NA                 |
| Kabuli_wild_17373925 | NA                                  | Ca_kabuli_denovo | 17373925                | C/G  | NA                 | NA                            | NA                 |
| Kabuli_wild_17373952 | NA                                  | Ca_kabuli_denovo | 17373952                | C/G  | NA                 | NA                            | NA                 |
| Kabuli_wild_17379608 | NA                                  | Ca_kabuli_denovo | 17379608                | G/C  | NA                 | NA                            | NA                 |
| Kabuli_wild_17384453 | NA                                  | Ca_kabuli_denovo | 17384453                | G/A  | NA                 | NA                            | NA                 |

| SNP IDs              | NCBI dbSNP accession IDs (NCBI_SS#) | Chromosomes      | Physical positions (bp) | SNPs | Gene accession IDs | Sequence components of genome | Putative functions |
|----------------------|-------------------------------------|------------------|-------------------------|------|--------------------|-------------------------------|--------------------|
| Kabuli_wild_17384471 | NA                                  | Ca_kabuli_denovo | 17384471                | G/A  | NA                 | NA                            | NA                 |
| Kabuli_wild_17384474 | NA                                  | Ca_kabuli_denovo | 17384474                | A/G  | NA                 | NA                            | NA                 |
| Kabuli_wild_17394056 | NA                                  | Ca_kabuli_denovo | 17394056                | C/G  | NA                 | NA                            | NA                 |
| Kabuli_wild_17394077 | NA                                  | Ca_kabuli_denovo | 17394077                | C/G  | NA                 | NA                            | NA                 |
| Kabuli_wild_17395965 | NA                                  | Ca_kabuli_denovo | 17395965                | A/G  | NA                 | NA                            | NA                 |
| Kabuli_wild_17400513 | NA                                  | Ca_kabuli_denovo | 17400513                | C/T  | NA                 | NA                            | NA                 |
| Kabuli_wild_17406406 | NA                                  | Ca_kabuli_denovo | 17406406                | A/G  | NA                 | NA                            | NA                 |
| Kabuli_wild_17410024 | NA                                  | Ca_kabuli_denovo | 17410024                | C/T  | NA                 | NA                            | NA                 |
| Kabuli_wild_17410033 | NA                                  | Ca_kabuli_denovo | 17410033                | A/G  | NA                 | NA                            | NA                 |
| Kabuli_wild_17415371 | NA                                  | Ca_kabuli_denovo | 17415371                | A/G  | NA                 | NA                            | NA                 |
| Kabuli_wild_17418778 | NA                                  | Ca_kabuli_denovo | 17418778                | A/G  | NA                 | NA                            | NA                 |
| Kabuli_wild_17421326 | NA                                  | Ca_kabuli_denovo | 17421326                | C/T  | NA                 | NA                            | NA                 |
| Kabuli_wild_17424170 | NA                                  | Ca_kabuli_denovo | 17424170                | C/G  | NA                 | NA                            | NA                 |
| Kabuli_wild_17424173 | NA                                  | Ca_kabuli_denovo | 17424173                | C/G  | NA                 | NA                            | NA                 |
| Kabuli_wild_17424194 | NA                                  | Ca_kabuli_denovo | 17424194                | C/G  | NA                 | NA                            | NA                 |
| Kabuli_wild_17432949 | NA                                  | Ca_kabuli_denovo | 17432949                | A/G  | NA                 | NA                            | NA                 |
| Kabuli_wild_17432982 | NA                                  | Ca_kabuli_denovo | 17432982                | C/G  | NA                 | NA                            | NA                 |
| Kabuli_wild_17432985 | NA                                  | Ca_kabuli_denovo | 17432985                | C/G  | NA                 | NA                            | NA                 |
| Kabuli_wild_17432988 | NA                                  | Ca_kabuli_denovo | 17432988                | C/T  | NA                 | NA                            | NA                 |
| Kabuli_wild_17447284 | NA                                  | Ca_kabuli_denovo | 17447284                | G/T  | NA                 | NA                            | NA                 |
| Kabuli_wild_17450495 | NA                                  | Ca_kabuli_denovo | 17450495                | A/G  | NA                 | NA                            | NA                 |
| Kabuli_wild_17450506 | NA                                  | Ca_kabuli_denovo | 17450506                | C/T  | NA                 | NA                            | NA                 |
| Kabuli_wild_17452043 | NA                                  | Ca_kabuli_denovo | 17452043                | G/T  | NA                 | NA                            | NA                 |
| Kabuli_wild_17452058 | NA                                  | Ca_kabuli_denovo | 17452058                | A/C  | NA                 | NA                            | NA                 |
| Kabuli_wild_17452908 | NA                                  | Ca_kabuli_denovo | 17452908                | A/G  | NA                 | NA                            | NA                 |
| Kabuli_wild_17452926 | NA                                  | Ca_kabuli_denovo | 17452926                | C/G  | NA                 | NA                            | NA                 |
| Kabuli_wild_17457130 | NA                                  | Ca_kabuli_denovo | 17457130                | C/G  | NA                 | NA                            | NA                 |
| Kabuli_wild_17458424 | NA                                  | Ca_kabuli_denovo | 17458424                | C/G  | NA                 | NA                            | NA                 |
| Kabuli_wild_17471573 | NA                                  | Ca_kabuli_denovo | 17471573                | A/G  | NA                 | NA                            | NA                 |
| Kabuli_wild_17471576 | NA                                  | Ca_kabuli_denovo | 17471576                | G/A  | NA                 | NA                            | NA                 |
| Kabuli_wild_17482857 | NA                                  | Ca_kabuli_denovo | 17482857                | C/T  | NA                 | NA                            | NA                 |
| Kabuli_wild_17491466 | NA                                  | Ca_kabuli_denovo | 17491466                | C/T  | NA                 | NA                            | NA                 |
| Kabuli_wild_17495407 | NA                                  | Ca_kabuli_denovo | 17495407                | A/C  | NA                 | NA                            | NA                 |
| Kabuli_wild_17495408 | NA                                  | Ca_kabuli_denovo | 17495408                | G/T  | NA                 | NA                            | NA                 |
| Kabuli_wild_17499320 | NA                                  | Ca_kabuli_denovo | 17499320                | C/G  | NA                 | NA                            | NA                 |
| Kabuli_wild_17500477 | NA                                  | Ca_kabuli_denovo | 17500477                | C/T  | NA                 | NA                            | NA                 |
| Kabuli_wild_17500522 | NA                                  | Ca_kabuli_denovo | 17500522                | G/T  | NA                 | NA                            | NA                 |
| Kabuli_wild_17516032 | NA                                  | Ca_kabuli_denovo | 17516032                | A/C  | NA                 | NA                            | NA                 |
| Kabuli_wild_17516050 | NA                                  | Ca_kabuli_denovo | 17516050                | A/G  | NA                 | NA                            | NA                 |
| Kabuli_wild_17521071 | NA                                  | Ca_kabuli_denovo | 17521071                | C/A  | NA                 | NA                            | NA                 |
| Kabuli_wild_17521074 | NA                                  | Ca_kabuli_denovo | 17521074                | A/C  | NA                 | NA                            | NA                 |
| Kabuli_wild_17521101 | NA                                  | Ca_kabuli_denovo | 17521101                | C/A  | NA                 | NA                            | NA                 |
| Kabuli_wild_17521102 | NA                                  | Ca_kabuli_denovo | 17521102                | C/T  | NA                 | NA                            | NA                 |
| Kabuli_wild_17522860 | NA                                  | Ca_kabuli_denovo | 17522860                | A/C  | NA                 | NA                            | NA                 |



| SNP IDs                     | NCBI dbSNP accession IDs (NCBI_SS#) | Chromosomes             | Physical positions (bp) | SNPs | Gene accession IDs | Sequence components of genome | Putative functions |
|-----------------------------|-------------------------------------|-------------------------|-------------------------|------|--------------------|-------------------------------|--------------------|
| <i>Kabuli_wild_17531486</i> | NA                                  | <i>Ca_kabuli_denovo</i> | 17531486                | A/G  | NA                 | NA                            | NA                 |
| <i>Kabuli_wild_17531498</i> | NA                                  | <i>Ca_kabuli_denovo</i> | 17531498                | A/G  | NA                 | NA                            | NA                 |
| <i>Kabuli_wild_17534553</i> | NA                                  | <i>Ca_kabuli_denovo</i> | 17534553                | G/C  | NA                 | NA                            | NA                 |
| <i>Kabuli_wild_17534574</i> | NA                                  | <i>Ca_kabuli_denovo</i> | 17534574                | T/G  | NA                 | NA                            | NA                 |
| <i>Kabuli_wild_17534586</i> | NA                                  | <i>Ca_kabuli_denovo</i> | 17534586                | T/C  | NA                 | NA                            | NA                 |
| <i>Kabuli_wild_17534595</i> | NA                                  | <i>Ca_kabuli_denovo</i> | 17534595                | T/A  | NA                 | NA                            | NA                 |
| <i>Kabuli_wild_17538172</i> | NA                                  | <i>Ca_kabuli_denovo</i> | 17538172                | A/G  | NA                 | NA                            | NA                 |
| <i>Kabuli_wild_17538875</i> | NA                                  | <i>Ca_kabuli_denovo</i> | 17538875                | A/C  | NA                 | NA                            | NA                 |
| <i>Kabuli_wild_17556523</i> | NA                                  | <i>Ca_kabuli_denovo</i> | 17556523                | C/G  | NA                 | NA                            | NA                 |
| <i>Kabuli_wild_17556995</i> | NA                                  | <i>Ca_kabuli_denovo</i> | 17556995                | A/C  | NA                 | NA                            | NA                 |
| <i>Kabuli_wild_17558056</i> | NA                                  | <i>Ca_kabuli_denovo</i> | 17558056                | G/T  | NA                 | NA                            | NA                 |
| <i>Kabuli_wild_17559751</i> | NA                                  | <i>Ca_kabuli_denovo</i> | 17559751                | C/T  | NA                 | NA                            | NA                 |
| <i>Kabuli_wild_17560805</i> | NA                                  | <i>Ca_kabuli_denovo</i> | 17560805                | C/G  | NA                 | NA                            | NA                 |
| <i>Kabuli_wild_17560808</i> | NA                                  | <i>Ca_kabuli_denovo</i> | 17560808                | C/G  | NA                 | NA                            | NA                 |
| <i>Kabuli_wild_17560811</i> | NA                                  | <i>Ca_kabuli_denovo</i> | 17560811                | C/T  | NA                 | NA                            | NA                 |
| <i>Kabuli_wild_17565905</i> | NA                                  | <i>Ca_kabuli_denovo</i> | 17565905                | C/T  | NA                 | NA                            | NA                 |
| <i>Kabuli_wild_17565908</i> | NA                                  | <i>Ca_kabuli_denovo</i> | 17565908                | C/G  | NA                 | NA                            | NA                 |
| <i>Kabuli_wild_17565910</i> | NA                                  | <i>Ca_kabuli_denovo</i> | 17565910                | A/G  | NA                 | NA                            | NA                 |
| <i>Kabuli_wild_17565953</i> | NA                                  | <i>Ca_kabuli_denovo</i> | 17565953                | A/G  | NA                 | NA                            | NA                 |
| <i>Kabuli_wild_17567546</i> | NA                                  | <i>Ca_kabuli_denovo</i> | 17567546                | C/T  | NA                 | NA                            | NA                 |
| <i>Kabuli_wild_17585000</i> | NA                                  | <i>Ca_kabuli_denovo</i> | 17585000                | C/T  | NA                 | NA                            | NA                 |
| <i>Kabuli_wild_17591887</i> | NA                                  | <i>Ca_kabuli_denovo</i> | 17591887                | A/G  | NA                 | NA                            | NA                 |
| <i>Kabuli_wild_17596910</i> | NA                                  | <i>Ca_kabuli_denovo</i> | 17596910                | G/T  | NA                 | NA                            | NA                 |
| <i>Kabuli_wild_17596940</i> | NA                                  | <i>Ca_kabuli_denovo</i> | 17596940                | A/G  | NA                 | NA                            | NA                 |
| <i>Kabuli_wild_17596944</i> | NA                                  | <i>Ca_kabuli_denovo</i> | 17596944                | C/T  | NA                 | NA                            | NA                 |
| <i>Kabuli_wild_17596958</i> | NA                                  | <i>Ca_kabuli_denovo</i> | 17596958                | A/G  | NA                 | NA                            | NA                 |
| <i>Kabuli_wild_17596972</i> | NA                                  | <i>Ca_kabuli_denovo</i> | 17596972                | A/G  | NA                 | NA                            | NA                 |
| <i>Kabuli_wild_17596999</i> | NA                                  | <i>Ca_kabuli_denovo</i> | 17596999                | C/G  | NA                 | NA                            | NA                 |
| <i>Kabuli_wild_17597014</i> | NA                                  | <i>Ca_kabuli_denovo</i> | 17597014                | C/G  | NA                 | NA                            | NA                 |
| <i>Kabuli_wild_17597541</i> | NA                                  | <i>Ca_kabuli_denovo</i> | 17597541                | C/T  | NA                 | NA                            | NA                 |
| <i>Kabuli_wild_17597558</i> | NA                                  | <i>Ca_kabuli_denovo</i> | 17597558                | A/G  | NA                 | NA                            | NA                 |
| <i>Kabuli_wild_17597588</i> | NA                                  | <i>Ca_kabuli_denovo</i> | 17597588                | C/T  | NA                 | NA                            | NA                 |
| <i>Kabuli_wild_17597612</i> | NA                                  | <i>Ca_kabuli_denovo</i> | 17597612                | C/G  | NA                 | NA                            | NA                 |
| <i>Kabuli_wild_17598594</i> | NA                                  | <i>Ca_kabuli_denovo</i> | 17598594                | A/G  | NA                 | NA                            | NA                 |
| <i>Kabuli_wild_17598612</i> | NA                                  | <i>Ca_kabuli_denovo</i> | 17598612                | C/G  | NA                 | NA                            | NA                 |
| <i>Kabuli_wild_17602217</i> | NA                                  | <i>Ca_kabuli_denovo</i> | 17602217                | C/T  | NA                 | NA                            | NA                 |
| <i>Kabuli_wild_17602218</i> | NA                                  | <i>Ca_kabuli_denovo</i> | 17602218                | C/T  | NA                 | NA                            | NA                 |
| <i>Kabuli_wild_17605512</i> | NA                                  | <i>Ca_kabuli_denovo</i> | 17605512                | A/C  | NA                 | NA                            | NA                 |
| <i>Kabuli_wild_17605513</i> | NA                                  | <i>Ca_kabuli_denovo</i> | 17605513                | A/G  | NA                 | NA                            | NA                 |
| <i>Kabuli_wild_17613693</i> | NA                                  | <i>Ca_kabuli_denovo</i> | 17613693                | A/G  | NA                 | NA                            | NA                 |
| <i>Kabuli_wild_17617621</i> | NA                                  | <i>Ca_kabuli_denovo</i> | 17617621                | C/G  | NA                 | NA                            | NA                 |
| <i>Kabuli_wild_17623345</i> | NA                                  | <i>Ca_kabuli_denovo</i> | 17623345                | G/T  | NA                 | NA                            | NA                 |
| <i>Kabuli_wild_17634304</i> | NA                                  | <i>Ca_kabuli_denovo</i> | 17634304                | C/T  | NA                 | NA                            | NA                 |
| <i>Kabuli_wild_17634316</i> | NA                                  | <i>Ca_kabuli_denovo</i> | 17634316                | C/T  | NA                 | NA                            | NA                 |

| SNP IDs              | NCBI dbSNP accession IDs (NCBI_SS#) | Chromosomes      | Physical positions (bp) | SNPs | Gene accession IDs | Sequence components of genome | Putative functions |
|----------------------|-------------------------------------|------------------|-------------------------|------|--------------------|-------------------------------|--------------------|
| Kabuli_wild_17634317 | NA                                  | Ca_kabuli_denovo | 17634317                | A/G  | NA                 | NA                            | NA                 |
| Kabuli_wild_17640622 | NA                                  | Ca_kabuli_denovo | 17640622                | C/G  | NA                 | NA                            | NA                 |
| Kabuli_wild_17644857 | NA                                  | Ca_kabuli_denovo | 17644857                | C/T  | NA                 | NA                            | NA                 |
| Kabuli_wild_17649034 | NA                                  | Ca_kabuli_denovo | 17649034                | C/T  | NA                 | NA                            | NA                 |
| Kabuli_wild_17649045 | NA                                  | Ca_kabuli_denovo | 17649045                | A/G  | NA                 | NA                            | NA                 |
| Kabuli_wild_17649055 | NA                                  | Ca_kabuli_denovo | 17649055                | A/G  | NA                 | NA                            | NA                 |
| Kabuli_wild_17649058 | NA                                  | Ca_kabuli_denovo | 17649058                | A/G  | NA                 | NA                            | NA                 |
| Kabuli_wild_17659036 | NA                                  | Ca_kabuli_denovo | 17659036                | A/C  | NA                 | NA                            | NA                 |
| Kabuli_wild_17659140 | NA                                  | Ca_kabuli_denovo | 17659140                | C/T  | NA                 | NA                            | NA                 |
| Kabuli_wild_17659765 | NA                                  | Ca_kabuli_denovo | 17659765                | A/C  | NA                 | NA                            | NA                 |
| Kabuli_wild_17659798 | NA                                  | Ca_kabuli_denovo | 17659798                | C/T  | NA                 | NA                            | NA                 |
| Kabuli_wild_17659810 | NA                                  | Ca_kabuli_denovo | 17659810                | G/T  | NA                 | NA                            | NA                 |
| Kabuli_wild_17661651 | NA                                  | Ca_kabuli_denovo | 17661651                | A/C  | NA                 | NA                            | NA                 |
| Kabuli_wild_17686192 | NA                                  | Ca_kabuli_denovo | 17686192                | C/G  | NA                 | NA                            | NA                 |
| Kabuli_wild_17689612 | NA                                  | Ca_kabuli_denovo | 17689612                | C/T  | NA                 | NA                            | NA                 |
| Kabuli_wild_17694929 | NA                                  | Ca_kabuli_denovo | 17694929                | C/G  | NA                 | NA                            | NA                 |
| Kabuli_wild_17695785 | NA                                  | Ca_kabuli_denovo | 17695785                | A/G  | NA                 | NA                            | NA                 |
| Kabuli_wild_17695791 | NA                                  | Ca_kabuli_denovo | 17695791                | C/G  | NA                 | NA                            | NA                 |
| Kabuli_wild_17715655 | NA                                  | Ca_kabuli_denovo | 17715655                | A/G  | NA                 | NA                            | NA                 |
| Kabuli_wild_17728389 | NA                                  | Ca_kabuli_denovo | 17728389                | C/T  | NA                 | NA                            | NA                 |
| Kabuli_wild_17734557 | NA                                  | Ca_kabuli_denovo | 17734557                | A/G  | NA                 | NA                            | NA                 |
| Kabuli_wild_17740121 | NA                                  | Ca_kabuli_denovo | 17740121                | A/G  | NA                 | NA                            | NA                 |
| Kabuli_wild_17763720 | NA                                  | Ca_kabuli_denovo | 17763720                | A/G  | NA                 | NA                            | NA                 |
| Kabuli_wild_17767313 | NA                                  | Ca_kabuli_denovo | 17767313                | C/T  | NA                 | NA                            | NA                 |
| Kabuli_wild_17767329 | NA                                  | Ca_kabuli_denovo | 17767329                | C/T  | NA                 | NA                            | NA                 |
| Kabuli_wild_17767343 | NA                                  | Ca_kabuli_denovo | 17767343                | C/T  | NA                 | NA                            | NA                 |
| Kabuli_wild_17776712 | NA                                  | Ca_kabuli_denovo | 17776712                | A/G  | NA                 | NA                            | NA                 |
| Kabuli_wild_17776722 | NA                                  | Ca_kabuli_denovo | 17776722                | G/A  | NA                 | NA                            | NA                 |
| Kabuli_wild_17778900 | NA                                  | Ca_kabuli_denovo | 17778900                | A/G  | NA                 | NA                            | NA                 |
| Kabuli_wild_17792989 | NA                                  | Ca_kabuli_denovo | 17792989                | G/T  | NA                 | NA                            | NA                 |
| Kabuli_wild_17793938 | NA                                  | Ca_kabuli_denovo | 17793938                | C/T  | NA                 | NA                            | NA                 |
| Kabuli_wild_17794383 | NA                                  | Ca_kabuli_denovo | 17794383                | T/C  | NA                 | NA                            | NA                 |
| Kabuli_wild_17794395 | NA                                  | Ca_kabuli_denovo | 17794395                | T/C  | NA                 | NA                            | NA                 |
| Kabuli_wild_17794413 | NA                                  | Ca_kabuli_denovo | 17794413                | C/G  | NA                 | NA                            | NA                 |
| Kabuli_wild_17794904 | NA                                  | Ca_kabuli_denovo | 17794904                | G/T  | NA                 | NA                            | NA                 |
| Kabuli_wild_17806175 | NA                                  | Ca_kabuli_denovo | 17806175                | C/G  | NA                 | NA                            | NA                 |
| Kabuli_wild_17806190 | NA                                  | Ca_kabuli_denovo | 17806190                | C/G  | NA                 | NA                            | NA                 |
| Kabuli_wild_17810363 | NA                                  | Ca_kabuli_denovo | 17810363                | G/A  | NA                 | NA                            | NA                 |
| Kabuli_wild_17825452 | NA                                  | Ca_kabuli_denovo | 17825452                | C/T  | NA                 | NA                            | NA                 |
| Kabuli_wild_17825497 | NA                                  | Ca_kabuli_denovo | 17825497                | A/C  | NA                 | NA                            | NA                 |
| Kabuli_wild_17826976 | NA                                  | Ca_kabuli_denovo | 17826976                | A/G  | NA                 | NA                            | NA                 |
| Kabuli_wild_17826985 | NA                                  | Ca_kabuli_denovo | 17826985                | C/T  | NA                 | NA                            | NA                 |
| Kabuli_wild_17842569 | NA                                  | Ca_kabuli_denovo | 17842569                | A/G  | NA                 | NA                            | NA                 |
| Kabuli_wild_17856843 | NA                                  | Ca_kabuli_denovo | 17856843                | A/G  | NA                 | NA                            | NA                 |

| SNP IDs              | NCBI dbSNP accession IDs (NCBI_SS#) | Chromosomes      | Physical positions (bp) | SNPs | Gene accession IDs | Sequence components of genome | Putative functions |
|----------------------|-------------------------------------|------------------|-------------------------|------|--------------------|-------------------------------|--------------------|
| Kabuli_wild_17865132 | NA                                  | Ca_kabuli_denovo | 17865132                | G/T  | NA                 | NA                            | NA                 |
| Kabuli_wild_17867459 | NA                                  | Ca_kabuli_denovo | 17867459                | C/G  | NA                 | NA                            | NA                 |
| Kabuli_wild_17885322 | NA                                  | Ca_kabuli_denovo | 17885322                | G/A  | NA                 | NA                            | NA                 |
| Kabuli_wild_17888350 | NA                                  | Ca_kabuli_denovo | 17888350                | C/G  | NA                 | NA                            | NA                 |
| Kabuli_wild_17889969 | NA                                  | Ca_kabuli_denovo | 17889969                | A/C  | NA                 | NA                            | NA                 |
| Kabuli_wild_17900190 | NA                                  | Ca_kabuli_denovo | 17900190                | G/T  | NA                 | NA                            | NA                 |
| Kabuli_wild_17914022 | NA                                  | Ca_kabuli_denovo | 17914022                | A/G  | NA                 | NA                            | NA                 |
| Kabuli_wild_17919928 | NA                                  | Ca_kabuli_denovo | 17919928                | A/G  | NA                 | NA                            | NA                 |
| Kabuli_wild_17921786 | NA                                  | Ca_kabuli_denovo | 17921786                | G/A  | NA                 | NA                            | NA                 |
| Kabuli_wild_17921809 | NA                                  | Ca_kabuli_denovo | 17921809                | G/A  | NA                 | NA                            | NA                 |
| Kabuli_wild_17936120 | NA                                  | Ca_kabuli_denovo | 17936120                | C/T  | NA                 | NA                            | NA                 |
| Kabuli_wild_17938409 | NA                                  | Ca_kabuli_denovo | 17938409                | A/G  | NA                 | NA                            | NA                 |
| Kabuli_wild_17938410 | NA                                  | Ca_kabuli_denovo | 17938410                | A/G  | NA                 | NA                            | NA                 |
| Kabuli_wild_17938411 | NA                                  | Ca_kabuli_denovo | 17938411                | C/G  | NA                 | NA                            | NA                 |
| Kabuli_wild_17938414 | NA                                  | Ca_kabuli_denovo | 17938414                | A/G  | NA                 | NA                            | NA                 |
| Kabuli_wild_17941963 | NA                                  | Ca_kabuli_denovo | 17941963                | C/G  | NA                 | NA                            | NA                 |
| Kabuli_wild_17945708 | NA                                  | Ca_kabuli_denovo | 17945708                | G/T  | NA                 | NA                            | NA                 |
| Kabuli_wild_17950113 | NA                                  | Ca_kabuli_denovo | 17950113                | G/T  | NA                 | NA                            | NA                 |
| Kabuli_wild_17953946 | NA                                  | Ca_kabuli_denovo | 17953946                | G/T  | NA                 | NA                            | NA                 |
| Kabuli_wild_17954435 | NA                                  | Ca_kabuli_denovo | 17954435                | G/A  | NA                 | NA                            | NA                 |
| Kabuli_wild_17967601 | NA                                  | Ca_kabuli_denovo | 17967601                | G/T  | NA                 | NA                            | NA                 |
| Kabuli_wild_17970261 | NA                                  | Ca_kabuli_denovo | 17970261                | C/T  | NA                 | NA                            | NA                 |
| Kabuli_wild_17970273 | NA                                  | Ca_kabuli_denovo | 17970273                | C/T  | NA                 | NA                            | NA                 |
| Kabuli_wild_17971156 | NA                                  | Ca_kabuli_denovo | 17971156                | G/T  | NA                 | NA                            | NA                 |
| Kabuli_wild_18000829 | NA                                  | Ca_kabuli_denovo | 18000829                | T/C  | NA                 | NA                            | NA                 |
| Kabuli_wild_18003861 | NA                                  | Ca_kabuli_denovo | 18003861                | A/G  | NA                 | NA                            | NA                 |
| Kabuli_wild_18003864 | NA                                  | Ca_kabuli_denovo | 18003864                | A/G  | NA                 | NA                            | NA                 |
| Kabuli_wild_18003870 | NA                                  | Ca_kabuli_denovo | 18003870                | A/G  | NA                 | NA                            | NA                 |
| Kabuli_wild_18003879 | NA                                  | Ca_kabuli_denovo | 18003879                | C/G  | NA                 | NA                            | NA                 |
| Kabuli_wild_18009139 | NA                                  | Ca_kabuli_denovo | 18009139                | C/T  | NA                 | NA                            | NA                 |
| Kabuli_wild_18009151 | NA                                  | Ca_kabuli_denovo | 18009151                | A/G  | NA                 | NA                            | NA                 |
| Kabuli_wild_18009157 | NA                                  | Ca_kabuli_denovo | 18009157                | T/C  | NA                 | NA                            | NA                 |
| Kabuli_wild_18012599 | NA                                  | Ca_kabuli_denovo | 18012599                | C/G  | NA                 | NA                            | NA                 |
| Kabuli_wild_18012625 | NA                                  | Ca_kabuli_denovo | 18012625                | C/G  | NA                 | NA                            | NA                 |
| Kabuli_wild_18012637 | NA                                  | Ca_kabuli_denovo | 18012637                | A/G  | NA                 | NA                            | NA                 |
| Kabuli_wild_18014503 | NA                                  | Ca_kabuli_denovo | 18014503                | A/C  | NA                 | NA                            | NA                 |
| Kabuli_wild_18014507 | NA                                  | Ca_kabuli_denovo | 18014507                | C/G  | NA                 | NA                            | NA                 |
| Kabuli_wild_18014515 | NA                                  | Ca_kabuli_denovo | 18014515                | C/T  | NA                 | NA                            | NA                 |
| Kabuli_wild_18027812 | NA                                  | Ca_kabuli_denovo | 18027812                | C/G  | NA                 | NA                            | NA                 |
| Kabuli_wild_18048166 | NA                                  | Ca_kabuli_denovo | 18048166                | C/G  | NA                 | NA                            | NA                 |
| Kabuli_wild_18051556 | NA                                  | Ca_kabuli_denovo | 18051556                | C/G  | NA                 | NA                            | NA                 |
| Kabuli_wild_18051565 | NA                                  | Ca_kabuli_denovo | 18051565                | A/G  | NA                 | NA                            | NA                 |
| Kabuli_wild_18051640 | NA                                  | Ca_kabuli_denovo | 18051640                | C/G  | NA                 | NA                            | NA                 |
| Kabuli_wild_18051643 | NA                                  | Ca_kabuli_denovo | 18051643                | C/G  | NA                 | NA                            | NA                 |

| SNP IDs              | NCBI dbSNP accession IDs (NCBI_SS#) | Chromosomes      | Physical positions (bp) | SNPs | Gene accession IDs | Sequence components of genome | Putative functions |
|----------------------|-------------------------------------|------------------|-------------------------|------|--------------------|-------------------------------|--------------------|
| Kabuli_wild_18051650 | NA                                  | Ca_kabuli_denovo | 18051650                | A/C  | NA                 | NA                            | NA                 |
| Kabuli_wild_18053713 | NA                                  | Ca_kabuli_denovo | 18053713                | G/T  | NA                 | NA                            | NA                 |
| Kabuli_wild_18067972 | NA                                  | Ca_kabuli_denovo | 18067972                | A/C  | NA                 | NA                            | NA                 |
| Kabuli_wild_18067973 | NA                                  | Ca_kabuli_denovo | 18067973                | G/T  | NA                 | NA                            | NA                 |
| Kabuli_wild_18069091 | NA                                  | Ca_kabuli_denovo | 18069091                | G/T  | NA                 | NA                            | NA                 |
| Kabuli_wild_18104419 | NA                                  | Ca_kabuli_denovo | 18104419                | G/T  | NA                 | NA                            | NA                 |
| Kabuli_wild_18105688 | NA                                  | Ca_kabuli_denovo | 18105688                | A/C  | NA                 | NA                            | NA                 |
| Kabuli_wild_18112281 | NA                                  | Ca_kabuli_denovo | 18112281                | C/G  | NA                 | NA                            | NA                 |
| Kabuli_wild_18112738 | NA                                  | Ca_kabuli_denovo | 18112738                | G/T  | NA                 | NA                            | NA                 |
| Kabuli_wild_18112969 | NA                                  | Ca_kabuli_denovo | 18112969                | G/C  | NA                 | NA                            | NA                 |
| Kabuli_wild_18113051 | NA                                  | Ca_kabuli_denovo | 18113051                | G/C  | NA                 | NA                            | NA                 |
| Kabuli_wild_18113072 | NA                                  | Ca_kabuli_denovo | 18113072                | A/G  | NA                 | NA                            | NA                 |
| Kabuli_wild_18114032 | NA                                  | Ca_kabuli_denovo | 18114032                | G/A  | NA                 | NA                            | NA                 |
| Kabuli_wild_18114219 | NA                                  | Ca_kabuli_denovo | 18114219                | A/C  | NA                 | NA                            | NA                 |
| Kabuli_wild_18114444 | NA                                  | Ca_kabuli_denovo | 18114444                | G/A  | NA                 | NA                            | NA                 |
| Kabuli_wild_18115024 | NA                                  | Ca_kabuli_denovo | 18115024                | A/G  | NA                 | NA                            | NA                 |
| Kabuli_wild_18115025 | NA                                  | Ca_kabuli_denovo | 18115025                | C/T  | NA                 | NA                            | NA                 |
| Kabuli_wild_18115620 | NA                                  | Ca_kabuli_denovo | 18115620                | T/G  | NA                 | NA                            | NA                 |
| Kabuli_wild_18115645 | NA                                  | Ca_kabuli_denovo | 18115645                | T/G  | NA                 | NA                            | NA                 |
| Kabuli_wild_18115951 | NA                                  | Ca_kabuli_denovo | 18115951                | G/T  | NA                 | NA                            | NA                 |
| Kabuli_wild_18116003 | NA                                  | Ca_kabuli_denovo | 18116003                | A/G  | NA                 | NA                            | NA                 |
| Kabuli_wild_18116303 | NA                                  | Ca_kabuli_denovo | 18116303                | A/G  | NA                 | NA                            | NA                 |
| Kabuli_wild_18117816 | NA                                  | Ca_kabuli_denovo | 18117816                | A/G  | NA                 | NA                            | NA                 |
| Kabuli_wild_18118350 | NA                                  | Ca_kabuli_denovo | 18118350                | A/G  | NA                 | NA                            | NA                 |
| Kabuli_wild_18118430 | NA                                  | Ca_kabuli_denovo | 18118430                | C/G  | NA                 | NA                            | NA                 |
| Kabuli_wild_18118529 | NA                                  | Ca_kabuli_denovo | 18118529                | T/G  | NA                 | NA                            | NA                 |
| Kabuli_wild_18118543 | NA                                  | Ca_kabuli_denovo | 18118543                | G/T  | NA                 | NA                            | NA                 |
| Kabuli_wild_18118615 | NA                                  | Ca_kabuli_denovo | 18118615                | A/T  | NA                 | NA                            | NA                 |
| Kabuli_wild_18120127 | NA                                  | Ca_kabuli_denovo | 18120127                | A/G  | NA                 | NA                            | NA                 |
| Kabuli_wild_18120258 | NA                                  | Ca_kabuli_denovo | 18120258                | A/G  | NA                 | NA                            | NA                 |
| Kabuli_wild_18120276 | NA                                  | Ca_kabuli_denovo | 18120276                | A/C  | NA                 | NA                            | NA                 |
| Kabuli_wild_18120285 | NA                                  | Ca_kabuli_denovo | 18120285                | A/G  | NA                 | NA                            | NA                 |
| Kabuli_wild_18120785 | NA                                  | Ca_kabuli_denovo | 18120785                | C/A  | NA                 | NA                            | NA                 |
| Kabuli_wild_18120793 | NA                                  | Ca_kabuli_denovo | 18120793                | A/G  | NA                 | NA                            | NA                 |
| Kabuli_wild_18120800 | NA                                  | Ca_kabuli_denovo | 18120800                | G/A  | NA                 | NA                            | NA                 |
| Kabuli_wild_18120801 | NA                                  | Ca_kabuli_denovo | 18120801                | T/G  | NA                 | NA                            | NA                 |
| Kabuli_wild_18120822 | NA                                  | Ca_kabuli_denovo | 18120822                | A/T  | NA                 | NA                            | NA                 |
| Kabuli_wild_18120826 | NA                                  | Ca_kabuli_denovo | 18120826                | G/C  | NA                 | NA                            | NA                 |
| Kabuli_wild_18120836 | NA                                  | Ca_kabuli_denovo | 18120836                | A/T  | NA                 | NA                            | NA                 |
| Kabuli_wild_18120894 | NA                                  | Ca_kabuli_denovo | 18120894                | A/G  | NA                 | NA                            | NA                 |
| Kabuli_wild_18123197 | NA                                  | Ca_kabuli_denovo | 18123197                | A/G  | NA                 | NA                            | NA                 |
| Kabuli_wild_18125025 | NA                                  | Ca_kabuli_denovo | 18125025                | G/T  | NA                 | NA                            | NA                 |
| Kabuli_wild_18125198 | NA                                  | Ca_kabuli_denovo | 18125198                | A/G  | NA                 | NA                            | NA                 |
| Kabuli_wild_18125230 | NA                                  | Ca_kabuli_denovo | 18125230                | G/T  | NA                 | NA                            | NA                 |

| SNP IDs                     | NCBI dbSNP accession IDs (NCBI_SS#) | Chromosomes             | Physical positions (bp) | SNPs | Gene accession IDs | Sequence components of genome | Putative functions |
|-----------------------------|-------------------------------------|-------------------------|-------------------------|------|--------------------|-------------------------------|--------------------|
| <i>Kabuli_wild_18125471</i> | NA                                  | <i>Ca_kabuli_denovo</i> | 18125471                | G/T  | NA                 | NA                            | NA                 |
| <i>Kabuli_wild_18125483</i> | NA                                  | <i>Ca_kabuli_denovo</i> | 18125483                | G/C  | NA                 | NA                            | NA                 |
| <i>Kabuli_wild_18126223</i> | NA                                  | <i>Ca_kabuli_denovo</i> | 18126223                | G/T  | NA                 | NA                            | NA                 |
| <i>Kabuli_wild_18126787</i> | NA                                  | <i>Ca_kabuli_denovo</i> | 18126787                | A/T  | NA                 | NA                            | NA                 |
| <i>Kabuli_wild_18126796</i> | NA                                  | <i>Ca_kabuli_denovo</i> | 18126796                | A/T  | NA                 | NA                            | NA                 |
| <i>Kabuli_wild_18127838</i> | NA                                  | <i>Ca_kabuli_denovo</i> | 18127838                | C/A  | NA                 | NA                            | NA                 |
| <i>Kabuli_wild_18127851</i> | NA                                  | <i>Ca_kabuli_denovo</i> | 18127851                | G/T  | NA                 | NA                            | NA                 |
| <i>Kabuli_wild_18127853</i> | NA                                  | <i>Ca_kabuli_denovo</i> | 18127853                | A/G  | NA                 | NA                            | NA                 |
| <i>Kabuli_wild_18127857</i> | NA                                  | <i>Ca_kabuli_denovo</i> | 18127857                | A/G  | NA                 | NA                            | NA                 |
| <i>Kabuli_wild_18127863</i> | NA                                  | <i>Ca_kabuli_denovo</i> | 18127863                | T/A  | NA                 | NA                            | NA                 |
| <i>Kabuli_wild_18127883</i> | NA                                  | <i>Ca_kabuli_denovo</i> | 18127883                | T/C  | NA                 | NA                            | NA                 |
| <i>Kabuli_wild_18127907</i> | NA                                  | <i>Ca_kabuli_denovo</i> | 18127907                | G/C  | NA                 | NA                            | NA                 |
| <i>Kabuli_wild_18128048</i> | NA                                  | <i>Ca_kabuli_denovo</i> | 18128048                | A/C  | NA                 | NA                            | NA                 |
| <i>Kabuli_wild_18128051</i> | NA                                  | <i>Ca_kabuli_denovo</i> | 18128051                | A/T  | NA                 | NA                            | NA                 |
| <i>Kabuli_wild_18128073</i> | NA                                  | <i>Ca_kabuli_denovo</i> | 18128073                | C/G  | NA                 | NA                            | NA                 |
| <i>Kabuli_wild_18128570</i> | NA                                  | <i>Ca_kabuli_denovo</i> | 18128570                | A/G  | NA                 | NA                            | NA                 |
| <i>Kabuli_wild_18128573</i> | NA                                  | <i>Ca_kabuli_denovo</i> | 18128573                | C/G  | NA                 | NA                            | NA                 |
| <i>Kabuli_wild_18128667</i> | NA                                  | <i>Ca_kabuli_denovo</i> | 18128667                | G/T  | NA                 | NA                            | NA                 |
| <i>Kabuli_wild_18131403</i> | NA                                  | <i>Ca_kabuli_denovo</i> | 18131403                | A/C  | NA                 | NA                            | NA                 |
| <i>Kabuli_wild_18131424</i> | NA                                  | <i>Ca_kabuli_denovo</i> | 18131424                | G/A  | NA                 | NA                            | NA                 |
| <i>Kabuli_wild_18131445</i> | NA                                  | <i>Ca_kabuli_denovo</i> | 18131445                | G/A  | NA                 | NA                            | NA                 |
| <i>Kabuli_wild_18133115</i> | NA                                  | <i>Ca_kabuli_denovo</i> | 18133115                | G/T  | NA                 | NA                            | NA                 |
| <i>Kabuli_wild_18133193</i> | NA                                  | <i>Ca_kabuli_denovo</i> | 18133193                | A/T  | NA                 | NA                            | NA                 |
| <i>Kabuli_wild_18133222</i> | NA                                  | <i>Ca_kabuli_denovo</i> | 18133222                | T/G  | NA                 | NA                            | NA                 |
| <i>Kabuli_wild_18133338</i> | NA                                  | <i>Ca_kabuli_denovo</i> | 18133338                | A/C  | NA                 | NA                            | NA                 |
| <i>Kabuli_wild_18133414</i> | NA                                  | <i>Ca_kabuli_denovo</i> | 18133414                | G/T  | NA                 | NA                            | NA                 |
| <i>Kabuli_wild_18133572</i> | NA                                  | <i>Ca_kabuli_denovo</i> | 18133572                | T/G  | NA                 | NA                            | NA                 |
| <i>Kabuli_wild_18134530</i> | NA                                  | <i>Ca_kabuli_denovo</i> | 18134530                | A/G  | NA                 | NA                            | NA                 |
| <i>Kabuli_wild_18135386</i> | NA                                  | <i>Ca_kabuli_denovo</i> | 18135386                | A/G  | NA                 | NA                            | NA                 |
| <i>Kabuli_wild_18135396</i> | NA                                  | <i>Ca_kabuli_denovo</i> | 18135396                | A/C  | NA                 | NA                            | NA                 |
| <i>Kabuli_wild_18137416</i> | NA                                  | <i>Ca_kabuli_denovo</i> | 18137416                | A/C  | NA                 | NA                            | NA                 |
| <i>Kabuli_wild_18138092</i> | NA                                  | <i>Ca_kabuli_denovo</i> | 18138092                | G/T  | NA                 | NA                            | NA                 |
| <i>Kabuli_wild_18138199</i> | NA                                  | <i>Ca_kabuli_denovo</i> | 18138199                | G/T  | NA                 | NA                            | NA                 |
| <i>Kabuli_wild_18138687</i> | NA                                  | <i>Ca_kabuli_denovo</i> | 18138687                | A/T  | NA                 | NA                            | NA                 |
| <i>Kabuli_wild_18138911</i> | NA                                  | <i>Ca_kabuli_denovo</i> | 18138911                | A/G  | NA                 | NA                            | NA                 |
| <i>Kabuli_wild_18138914</i> | NA                                  | <i>Ca_kabuli_denovo</i> | 18138914                | T/G  | NA                 | NA                            | NA                 |
| <i>Kabuli_wild_18138962</i> | NA                                  | <i>Ca_kabuli_denovo</i> | 18138962                | C/G  | NA                 | NA                            | NA                 |
| <i>Kabuli_wild_18139101</i> | NA                                  | <i>Ca_kabuli_denovo</i> | 18139101                | A/G  | NA                 | NA                            | NA                 |
| <i>Kabuli_wild_18139570</i> | NA                                  | <i>Ca_kabuli_denovo</i> | 18139570                | T/A  | NA                 | NA                            | NA                 |
| <i>Kabuli_wild_18139621</i> | NA                                  | <i>Ca_kabuli_denovo</i> | 18139621                | C/G  | NA                 | NA                            | NA                 |
| <i>Kabuli_wild_18139646</i> | NA                                  | <i>Ca_kabuli_denovo</i> | 18139646                | T/G  | NA                 | NA                            | NA                 |
| <i>Kabuli_wild_18139686</i> | NA                                  | <i>Ca_kabuli_denovo</i> | 18139686                | G/T  | NA                 | NA                            | NA                 |
| <i>Kabuli_wild_18139781</i> | NA                                  | <i>Ca_kabuli_denovo</i> | 18139781                | C/G  | NA                 | NA                            | NA                 |
| <i>Kabuli_wild_18139860</i> | NA                                  | <i>Ca_kabuli_denovo</i> | 18139860                | G/T  | NA                 | NA                            | NA                 |

| SNP IDs              | NCBI dbSNP accession IDs (NCBI_SS#) | Chromosomes      | Physical positions (bp) | SNPs | Gene accession IDs | Sequence components of genome | Putative functions |
|----------------------|-------------------------------------|------------------|-------------------------|------|--------------------|-------------------------------|--------------------|
| Kabuli_wild_18139872 | NA                                  | Ca_kabuli_denovo | 18139872                | G/T  | NA                 | NA                            | NA                 |
| Kabuli_wild_18139875 | NA                                  | Ca_kabuli_denovo | 18139875                | C/G  | NA                 | NA                            | NA                 |
| Kabuli_wild_18139890 | NA                                  | Ca_kabuli_denovo | 18139890                | T/G  | NA                 | NA                            | NA                 |
| Kabuli_wild_18140364 | NA                                  | Ca_kabuli_denovo | 18140364                | A/G  | NA                 | NA                            | NA                 |
| Kabuli_wild_18140930 | NA                                  | Ca_kabuli_denovo | 18140930                | C/A  | NA                 | NA                            | NA                 |
| Kabuli_wild_18140931 | NA                                  | Ca_kabuli_denovo | 18140931                | A/G  | NA                 | NA                            | NA                 |
| Kabuli_wild_18140933 | NA                                  | Ca_kabuli_denovo | 18140933                | A/G  | NA                 | NA                            | NA                 |
| Kabuli_wild_18140935 | NA                                  | Ca_kabuli_denovo | 18140935                | A/T  | NA                 | NA                            | NA                 |
| Kabuli_wild_18141247 | NA                                  | Ca_kabuli_denovo | 18141247                | A/T  | NA                 | NA                            | NA                 |
| Kabuli_wild_18142077 | NA                                  | Ca_kabuli_denovo | 18142077                | G/T  | NA                 | NA                            | NA                 |
| Kabuli_wild_18142609 | NA                                  | Ca_kabuli_denovo | 18142609                | A/G  | NA                 | NA                            | NA                 |
| Kabuli_wild_18143820 | NA                                  | Ca_kabuli_denovo | 18143820                | G/A  | NA                 | NA                            | NA                 |
| Kabuli_wild_18143826 | NA                                  | Ca_kabuli_denovo | 18143826                | G/T  | NA                 | NA                            | NA                 |
| Kabuli_wild_18145794 | NA                                  | Ca_kabuli_denovo | 18145794                | A/C  | NA                 | NA                            | NA                 |
| Kabuli_wild_18145803 | NA                                  | Ca_kabuli_denovo | 18145803                | A/G  | NA                 | NA                            | NA                 |
| Kabuli_wild_18145805 | NA                                  | Ca_kabuli_denovo | 18145805                | A/T  | NA                 | NA                            | NA                 |
| Kabuli_wild_18145860 | NA                                  | Ca_kabuli_denovo | 18145860                | A/G  | NA                 | NA                            | NA                 |
| Kabuli_wild_18146635 | NA                                  | Ca_kabuli_denovo | 18146635                | A/G  | NA                 | NA                            | NA                 |
| Kabuli_wild_18147249 | NA                                  | Ca_kabuli_denovo | 18147249                | A/G  | NA                 | NA                            | NA                 |
| Kabuli_wild_18148526 | NA                                  | Ca_kabuli_denovo | 18148526                | G/T  | NA                 | NA                            | NA                 |
| Kabuli_wild_18148559 | NA                                  | Ca_kabuli_denovo | 18148559                | G/T  | NA                 | NA                            | NA                 |
| Kabuli_wild_18149782 | NA                                  | Ca_kabuli_denovo | 18149782                | A/G  | NA                 | NA                            | NA                 |
| Kabuli_wild_18155032 | NA                                  | Ca_kabuli_denovo | 18155032                | C/A  | NA                 | NA                            | NA                 |
| Kabuli_wild_18155033 | NA                                  | Ca_kabuli_denovo | 18155033                | A/G  | NA                 | NA                            | NA                 |
| Kabuli_wild_18155035 | NA                                  | Ca_kabuli_denovo | 18155035                | A/G  | NA                 | NA                            | NA                 |
| Kabuli_wild_18155037 | NA                                  | Ca_kabuli_denovo | 18155037                | T/A  | NA                 | NA                            | NA                 |
| Kabuli_wild_18155876 | NA                                  | Ca_kabuli_denovo | 18155876                | T/G  | NA                 | NA                            | NA                 |
| Kabuli_wild_18157721 | NA                                  | Ca_kabuli_denovo | 18157721                | G/T  | NA                 | NA                            | NA                 |
| Kabuli_wild_18159210 | NA                                  | Ca_kabuli_denovo | 18159210                | C/G  | NA                 | NA                            | NA                 |
| Kabuli_wild_18159212 | NA                                  | Ca_kabuli_denovo | 18159212                | C/G  | NA                 | NA                            | NA                 |
| Kabuli_wild_18159213 | NA                                  | Ca_kabuli_denovo | 18159213                | A/G  | NA                 | NA                            | NA                 |
| Kabuli_wild_18159498 | NA                                  | Ca_kabuli_denovo | 18159498                | A/G  | NA                 | NA                            | NA                 |
| Kabuli_wild_18160762 | NA                                  | Ca_kabuli_denovo | 18160762                | G/A  | NA                 | NA                            | NA                 |
| Kabuli_wild_18160893 | NA                                  | Ca_kabuli_denovo | 18160893                | A/G  | NA                 | NA                            | NA                 |
| Kabuli_wild_18160919 | NA                                  | Ca_kabuli_denovo | 18160919                | A/G  | NA                 | NA                            | NA                 |
| Kabuli_wild_18160920 | NA                                  | Ca_kabuli_denovo | 18160920                | A/G  | NA                 | NA                            | NA                 |
| Kabuli_wild_18161375 | NA                                  | Ca_kabuli_denovo | 18161375                | T/G  | NA                 | NA                            | NA                 |
| Kabuli_wild_18161389 | NA                                  | Ca_kabuli_denovo | 18161389                | G/C  | NA                 | NA                            | NA                 |
| Kabuli_wild_18161426 | NA                                  | Ca_kabuli_denovo | 18161426                | C/G  | NA                 | NA                            | NA                 |
| Kabuli_wild_18161447 | NA                                  | Ca_kabuli_denovo | 18161447                | T/A  | NA                 | NA                            | NA                 |
| Kabuli_wild_18166693 | NA                                  | Ca_kabuli_denovo | 18166693                | G/T  | NA                 | NA                            | NA                 |
| Kabuli_wild_18166697 | NA                                  | Ca_kabuli_denovo | 18166697                | G/T  | NA                 | NA                            | NA                 |
| Kabuli_wild_18166698 | NA                                  | Ca_kabuli_denovo | 18166698                | A/G  | NA                 | NA                            | NA                 |
| Kabuli_wild_18168733 | NA                                  | Ca_kabuli_denovo | 18168733                | G/A  | NA                 | NA                            | NA                 |

| SNP IDs              | NCBI dbSNP accession IDs (NCBI_SS#) | Chromosomes      | Physical positions (bp) | SNPs | Gene accession IDs | Sequence components of genome | Putative functions |
|----------------------|-------------------------------------|------------------|-------------------------|------|--------------------|-------------------------------|--------------------|
| Kabuli_wild_18168734 | NA                                  | Ca_kabuli_denovo | 18168734                | A/G  | NA                 | NA                            | NA                 |
| Kabuli_wild_18168735 | NA                                  | Ca_kabuli_denovo | 18168735                | A/G  | NA                 | NA                            | NA                 |
| Kabuli_wild_18168736 | NA                                  | Ca_kabuli_denovo | 18168736                | A/C  | NA                 | NA                            | NA                 |
| Kabuli_wild_18177935 | NA                                  | Ca_kabuli_denovo | 18177935                | G/C  | NA                 | NA                            | NA                 |
| Kabuli_wild_18179542 | NA                                  | Ca_kabuli_denovo | 18179542                | G/T  | NA                 | NA                            | NA                 |
| Kabuli_wild_18179564 | NA                                  | Ca_kabuli_denovo | 18179564                | A/G  | NA                 | NA                            | NA                 |
| Kabuli_wild_18185719 | NA                                  | Ca_kabuli_denovo | 18185719                | T/G  | NA                 | NA                            | NA                 |
| Kabuli_wild_18185722 | NA                                  | Ca_kabuli_denovo | 18185722                | G/T  | NA                 | NA                            | NA                 |
| Kabuli_wild_18185734 | NA                                  | Ca_kabuli_denovo | 18185734                | A/G  | NA                 | NA                            | NA                 |
| Kabuli_wild_18185753 | NA                                  | Ca_kabuli_denovo | 18185753                | C/G  | NA                 | NA                            | NA                 |
| Kabuli_wild_18185896 | NA                                  | Ca_kabuli_denovo | 18185896                | C/A  | NA                 | NA                            | NA                 |
| Kabuli_wild_18185897 | NA                                  | Ca_kabuli_denovo | 18185897                | A/G  | NA                 | NA                            | NA                 |
| Kabuli_wild_18185899 | NA                                  | Ca_kabuli_denovo | 18185899                | A/G  | NA                 | NA                            | NA                 |
| Kabuli_wild_18185901 | NA                                  | Ca_kabuli_denovo | 18185901                | T/A  | NA                 | NA                            | NA                 |
| Kabuli_wild_18185902 | NA                                  | Ca_kabuli_denovo | 18185902                | G/T  | NA                 | NA                            | NA                 |
| Kabuli_wild_18185903 | NA                                  | Ca_kabuli_denovo | 18185903                | C/G  | NA                 | NA                            | NA                 |
| Kabuli_wild_18188774 | NA                                  | Ca_kabuli_denovo | 18188774                | C/G  | NA                 | NA                            | NA                 |
| Kabuli_wild_18189465 | NA                                  | Ca_kabuli_denovo | 18189465                | G/A  | NA                 | NA                            | NA                 |
| Kabuli_wild_18193564 | NA                                  | Ca_kabuli_denovo | 18193564                | G/T  | NA                 | NA                            | NA                 |
| Kabuli_wild_18193565 | NA                                  | Ca_kabuli_denovo | 18193565                | A/C  | NA                 | NA                            | NA                 |
| Kabuli_wild_18193870 | NA                                  | Ca_kabuli_denovo | 18193870                | G/C  | NA                 | NA                            | NA                 |
| Kabuli_wild_18193877 | NA                                  | Ca_kabuli_denovo | 18193877                | A/C  | NA                 | NA                            | NA                 |
| Kabuli_wild_18193978 | NA                                  | Ca_kabuli_denovo | 18193978                | C/A  | NA                 | NA                            | NA                 |
| Kabuli_wild_18194133 | NA                                  | Ca_kabuli_denovo | 18194133                | A/C  | NA                 | NA                            | NA                 |
| Kabuli_wild_18194134 | NA                                  | Ca_kabuli_denovo | 18194134                | G/T  | NA                 | NA                            | NA                 |
| Kabuli_wild_18194135 | NA                                  | Ca_kabuli_denovo | 18194135                | G/A  | NA                 | NA                            | NA                 |
| Kabuli_wild_18194136 | NA                                  | Ca_kabuli_denovo | 18194136                | C/T  | NA                 | NA                            | NA                 |
| Kabuli_wild_18200141 | NA                                  | Ca_kabuli_denovo | 18200141                | A/C  | NA                 | NA                            | NA                 |
| Kabuli_wild_18204245 | NA                                  | Ca_kabuli_denovo | 18204245                | A/G  | NA                 | NA                            | NA                 |
| Kabuli_wild_18205965 | NA                                  | Ca_kabuli_denovo | 18205965                | G/A  | NA                 | NA                            | NA                 |
| Kabuli_wild_18205967 | NA                                  | Ca_kabuli_denovo | 18205967                | G/A  | NA                 | NA                            | NA                 |
| Kabuli_wild_18205968 | NA                                  | Ca_kabuli_denovo | 18205968                | C/T  | NA                 | NA                            | NA                 |
| Kabuli_wild_18207542 | NA                                  | Ca_kabuli_denovo | 18207542                | C/G  | NA                 | NA                            | NA                 |
| Kabuli_wild_18207565 | NA                                  | Ca_kabuli_denovo | 18207565                | C/G  | NA                 | NA                            | NA                 |
| Kabuli_wild_18207614 | NA                                  | Ca_kabuli_denovo | 18207614                | A/G  | NA                 | NA                            | NA                 |
| Kabuli_wild_18207623 | NA                                  | Ca_kabuli_denovo | 18207623                | A/G  | NA                 | NA                            | NA                 |
| Kabuli_wild_18210347 | NA                                  | Ca_kabuli_denovo | 18210347                | A/C  | NA                 | NA                            | NA                 |
| Kabuli_wild_18210420 | NA                                  | Ca_kabuli_denovo | 18210420                | T/G  | NA                 | NA                            | NA                 |
| Kabuli_wild_18210424 | NA                                  | Ca_kabuli_denovo | 18210424                | C/G  | NA                 | NA                            | NA                 |
| Kabuli_wild_18210426 | NA                                  | Ca_kabuli_denovo | 18210426                | G/A  | NA                 | NA                            | NA                 |
| Kabuli_wild_18210427 | NA                                  | Ca_kabuli_denovo | 18210427                | G/T  | NA                 | NA                            | NA                 |
| Kabuli_wild_18210428 | NA                                  | Ca_kabuli_denovo | 18210428                | A/G  | NA                 | NA                            | NA                 |
| Kabuli_wild_18210429 | NA                                  | Ca_kabuli_denovo | 18210429                | A/C  | NA                 | NA                            | NA                 |
| Kabuli_wild_18210430 | NA                                  | Ca_kabuli_denovo | 18210430                | T/C  | NA                 | NA                            | NA                 |

| SNP IDs              | NCBI dbSNP accession IDs (NCBI_SS#) | Chromosomes      | Physical positions (bp) | SNPs | Gene accession IDs | Sequence components of genome | Putative functions |
|----------------------|-------------------------------------|------------------|-------------------------|------|--------------------|-------------------------------|--------------------|
| Kabuli_wild_18210432 | NA                                  | Ca_kabuli_denovo | 18210432                | C/A  | NA                 | NA                            | NA                 |
| Kabuli_wild_18210433 | NA                                  | Ca_kabuli_denovo | 18210433                | C/G  | NA                 | NA                            | NA                 |
| Kabuli_wild_18210434 | NA                                  | Ca_kabuli_denovo | 18210434                | G/A  | NA                 | NA                            | NA                 |
| Kabuli_wild_18210435 | NA                                  | Ca_kabuli_denovo | 18210435                | A/C  | NA                 | NA                            | NA                 |
| Kabuli_wild_18210436 | NA                                  | Ca_kabuli_denovo | 18210436                | G/C  | NA                 | NA                            | NA                 |
| Kabuli_wild_18210437 | NA                                  | Ca_kabuli_denovo | 18210437                | A/G  | NA                 | NA                            | NA                 |
| Kabuli_wild_18210438 | NA                                  | Ca_kabuli_denovo | 18210438                | C/A  | NA                 | NA                            | NA                 |
| Kabuli_wild_18210440 | NA                                  | Ca_kabuli_denovo | 18210440                | G/C  | NA                 | NA                            | NA                 |
| Kabuli_wild_18210443 | NA                                  | Ca_kabuli_denovo | 18210443                | G/T  | NA                 | NA                            | NA                 |
| Kabuli_wild_18210444 | NA                                  | Ca_kabuli_denovo | 18210444                | T/C  | NA                 | NA                            | NA                 |
| Kabuli_wild_18210445 | NA                                  | Ca_kabuli_denovo | 18210445                | A/G  | NA                 | NA                            | NA                 |
| Kabuli_wild_18211494 | NA                                  | Ca_kabuli_denovo | 18211494                | T/C  | NA                 | NA                            | NA                 |
| Kabuli_wild_18211495 | NA                                  | Ca_kabuli_denovo | 18211495                | T/G  | NA                 | NA                            | NA                 |
| Kabuli_wild_18211498 | NA                                  | Ca_kabuli_denovo | 18211498                | A/G  | NA                 | NA                            | NA                 |
| Kabuli_wild_18211500 | NA                                  | Ca_kabuli_denovo | 18211500                | A/G  | NA                 | NA                            | NA                 |
| Kabuli_wild_18213830 | NA                                  | Ca_kabuli_denovo | 18213830                | A/G  | NA                 | NA                            | NA                 |
| Kabuli_wild_18213832 | NA                                  | Ca_kabuli_denovo | 18213832                | G/A  | NA                 | NA                            | NA                 |
| Kabuli_wild_18213834 | NA                                  | Ca_kabuli_denovo | 18213834                | A/T  | NA                 | NA                            | NA                 |
| Kabuli_wild_18213835 | NA                                  | Ca_kabuli_denovo | 18213835                | G/T  | NA                 | NA                            | NA                 |
| Kabuli_wild_18214247 | NA                                  | Ca_kabuli_denovo | 18214247                | A/G  | NA                 | NA                            | NA                 |
| Kabuli_wild_18214262 | NA                                  | Ca_kabuli_denovo | 18214262                | A/C  | NA                 | NA                            | NA                 |
| Kabuli_wild_18214277 | NA                                  | Ca_kabuli_denovo | 18214277                | A/G  | NA                 | NA                            | NA                 |
| Kabuli_wild_18214307 | NA                                  | Ca_kabuli_denovo | 18214307                | G/A  | NA                 | NA                            | NA                 |
| Kabuli_wild_18214431 | NA                                  | Ca_kabuli_denovo | 18214431                | A/G  | NA                 | NA                            | NA                 |
| Kabuli_wild_18214465 | NA                                  | Ca_kabuli_denovo | 18214465                | A/G  | NA                 | NA                            | NA                 |
| Kabuli_wild_18214492 | NA                                  | Ca_kabuli_denovo | 18214492                | A/G  | NA                 | NA                            | NA                 |
| Kabuli_wild_18214501 | NA                                  | Ca_kabuli_denovo | 18214501                | G/A  | NA                 | NA                            | NA                 |
| Kabuli_wild_18214591 | NA                                  | Ca_kabuli_denovo | 18214591                | A/G  | NA                 | NA                            | NA                 |
| Kabuli_wild_18214593 | NA                                  | Ca_kabuli_denovo | 18214593                | A/G  | NA                 | NA                            | NA                 |
| Kabuli_wild_18216737 | NA                                  | Ca_kabuli_denovo | 18216737                | A/C  | NA                 | NA                            | NA                 |
| Kabuli_wild_18217113 | NA                                  | Ca_kabuli_denovo | 18217113                | A/C  | NA                 | NA                            | NA                 |
| Kabuli_wild_18218247 | NA                                  | Ca_kabuli_denovo | 18218247                | T/G  | NA                 | NA                            | NA                 |
| Kabuli_wild_18218255 | NA                                  | Ca_kabuli_denovo | 18218255                | G/T  | NA                 | NA                            | NA                 |
| Kabuli_wild_18218285 | NA                                  | Ca_kabuli_denovo | 18218285                | T/G  | NA                 | NA                            | NA                 |
| Kabuli_wild_18219079 | NA                                  | Ca_kabuli_denovo | 18219079                | T/G  | NA                 | NA                            | NA                 |
| Kabuli_wild_18221099 | NA                                  | Ca_kabuli_denovo | 18221099                | A/C  | NA                 | NA                            | NA                 |
| Kabuli_wild_18221100 | NA                                  | Ca_kabuli_denovo | 18221100                | T/G  | NA                 | NA                            | NA                 |
| Kabuli_wild_18221101 | NA                                  | Ca_kabuli_denovo | 18221101                | G/A  | NA                 | NA                            | NA                 |
| Kabuli_wild_18221102 | NA                                  | Ca_kabuli_denovo | 18221102                | C/T  | NA                 | NA                            | NA                 |
| Kabuli_wild_18225495 | NA                                  | Ca_kabuli_denovo | 18225495                | A/G  | NA                 | NA                            | NA                 |
| Kabuli_wild_18225498 | NA                                  | Ca_kabuli_denovo | 18225498                | A/G  | NA                 | NA                            | NA                 |
| Kabuli_wild_18225499 | NA                                  | Ca_kabuli_denovo | 18225499                | A/G  | NA                 | NA                            | NA                 |
| Kabuli_wild_18225501 | NA                                  | Ca_kabuli_denovo | 18225501                | A/G  | NA                 | NA                            | NA                 |
| Kabuli_wild_18227499 | NA                                  | Ca_kabuli_denovo | 18227499                | G/A  | NA                 | NA                            | NA                 |



| SNP IDs              | NCBI dbSNP accession IDs (NCBI_SS#) | Chromosomes      | Physical positions (bp) | SNPs | Gene accession IDs | Sequence components of genome | Putative functions |
|----------------------|-------------------------------------|------------------|-------------------------|------|--------------------|-------------------------------|--------------------|
| Kabuli_wild_18229068 | NA                                  | Ca_kabuli_denovo | 18229068                | A/C  | NA                 | NA                            | NA                 |
| Kabuli_wild_18229677 | NA                                  | Ca_kabuli_denovo | 18229677                | G/A  | NA                 | NA                            | NA                 |
| Kabuli_wild_18231388 | NA                                  | Ca_kabuli_denovo | 18231388                | G/A  | NA                 | NA                            | NA                 |
| Kabuli_wild_18231389 | NA                                  | Ca_kabuli_denovo | 18231389                | A/T  | NA                 | NA                            | NA                 |
| Kabuli_wild_18231390 | NA                                  | Ca_kabuli_denovo | 18231390                | T/C  | NA                 | NA                            | NA                 |
| Kabuli_wild_18232376 | NA                                  | Ca_kabuli_denovo | 18232376                | C/G  | NA                 | NA                            | NA                 |
| Kabuli_wild_18233466 | NA                                  | Ca_kabuli_denovo | 18233466                | A/G  | NA                 | NA                            | NA                 |
| Kabuli_wild_18233472 | NA                                  | Ca_kabuli_denovo | 18233472                | T/G  | NA                 | NA                            | NA                 |
| Kabuli_wild_18233498 | NA                                  | Ca_kabuli_denovo | 18233498                | G/C  | NA                 | NA                            | NA                 |
| Kabuli_wild_18236147 | NA                                  | Ca_kabuli_denovo | 18236147                | T/A  | NA                 | NA                            | NA                 |
| Kabuli_wild_18236148 | NA                                  | Ca_kabuli_denovo | 18236148                | C/T  | NA                 | NA                            | NA                 |
| Kabuli_wild_18236151 | NA                                  | Ca_kabuli_denovo | 18236151                | C/T  | NA                 | NA                            | NA                 |
| Kabuli_wild_18237323 | NA                                  | Ca_kabuli_denovo | 18237323                | T/G  | NA                 | NA                            | NA                 |
| Kabuli_wild_18237339 | NA                                  | Ca_kabuli_denovo | 18237339                | C/G  | NA                 | NA                            | NA                 |
| Kabuli_wild_18237421 | NA                                  | Ca_kabuli_denovo | 18237421                | C/G  | NA                 | NA                            | NA                 |
| Kabuli_wild_18238174 | NA                                  | Ca_kabuli_denovo | 18238174                | G/T  | NA                 | NA                            | NA                 |
| Kabuli_wild_18238175 | NA                                  | Ca_kabuli_denovo | 18238175                | A/C  | NA                 | NA                            | NA                 |
| Kabuli_wild_18238866 | NA                                  | Ca_kabuli_denovo | 18238866                | A/G  | NA                 | NA                            | NA                 |
| Kabuli_wild_18238985 | NA                                  | Ca_kabuli_denovo | 18238985                | C/G  | NA                 | NA                            | NA                 |
| Kabuli_wild_18240838 | NA                                  | Ca_kabuli_denovo | 18240838                | A/G  | NA                 | NA                            | NA                 |
| Kabuli_wild_18241979 | NA                                  | Ca_kabuli_denovo | 18241979                | T/A  | NA                 | NA                            | NA                 |
| Kabuli_wild_18241989 | NA                                  | Ca_kabuli_denovo | 18241989                | C/G  | NA                 | NA                            | NA                 |
| Kabuli_wild_18242021 | NA                                  | Ca_kabuli_denovo | 18242021                | T/G  | NA                 | NA                            | NA                 |
| Kabuli_wild_18242307 | NA                                  | Ca_kabuli_denovo | 18242307                | G/T  | NA                 | NA                            | NA                 |
| Kabuli_wild_18242309 | NA                                  | Ca_kabuli_denovo | 18242309                | G/T  | NA                 | NA                            | NA                 |
| Kabuli_wild_18242566 | NA                                  | Ca_kabuli_denovo | 18242566                | T/G  | NA                 | NA                            | NA                 |
| Kabuli_wild_18243988 | NA                                  | Ca_kabuli_denovo | 18243988                | C/G  | NA                 | NA                            | NA                 |
| Kabuli_wild_18249351 | NA                                  | Ca_kabuli_denovo | 18249351                | A/G  | NA                 | NA                            | NA                 |
| Kabuli_wild_18249404 | NA                                  | Ca_kabuli_denovo | 18249404                | A/G  | NA                 | NA                            | NA                 |
| Kabuli_wild_18250818 | NA                                  | Ca_kabuli_denovo | 18250818                | T/A  | NA                 | NA                            | NA                 |
| Kabuli_wild_18250826 | NA                                  | Ca_kabuli_denovo | 18250826                | T/G  | NA                 | NA                            | NA                 |
| Kabuli_wild_18250841 | NA                                  | Ca_kabuli_denovo | 18250841                | G/A  | NA                 | NA                            | NA                 |
| Kabuli_wild_18250843 | NA                                  | Ca_kabuli_denovo | 18250843                | T/G  | NA                 | NA                            | NA                 |
| Kabuli_wild_18251167 | NA                                  | Ca_kabuli_denovo | 18251167                | A/G  | NA                 | NA                            | NA                 |
| Kabuli_wild_18251169 | NA                                  | Ca_kabuli_denovo | 18251169                | G/A  | NA                 | NA                            | NA                 |
| Kabuli_wild_18251171 | NA                                  | Ca_kabuli_denovo | 18251171                | T/A  | NA                 | NA                            | NA                 |
| Kabuli_wild_18251469 | NA                                  | Ca_kabuli_denovo | 18251469                | A/G  | NA                 | NA                            | NA                 |
| Kabuli_wild_18251472 | NA                                  | Ca_kabuli_denovo | 18251472                | G/T  | NA                 | NA                            | NA                 |
| Kabuli_wild_18251473 | NA                                  | Ca_kabuli_denovo | 18251473                | C/G  | NA                 | NA                            | NA                 |
| Kabuli_wild_18251827 | NA                                  | Ca_kabuli_denovo | 18251827                | C/T  | NA                 | NA                            | NA                 |
| Kabuli_wild_18251831 | NA                                  | Ca_kabuli_denovo | 18251831                | A/G  | NA                 | NA                            | NA                 |
| Kabuli_wild_18252842 | NA                                  | Ca_kabuli_denovo | 18252842                | G/A  | NA                 | NA                            | NA                 |
| Kabuli_wild_18252867 | NA                                  | Ca_kabuli_denovo | 18252867                | G/T  | NA                 | NA                            | NA                 |
| Kabuli_wild_18252880 | NA                                  | Ca_kabuli_denovo | 18252880                | T/C  | NA                 | NA                            | NA                 |

| SNP IDs              | NCBI dbSNP accession IDs (NCBI_SS#) | Chromosomes      | Physical positions (bp) | SNPs | Gene accession IDs | Sequence components of genome | Putative functions |
|----------------------|-------------------------------------|------------------|-------------------------|------|--------------------|-------------------------------|--------------------|
| Kabuli_wild_18252881 | NA                                  | Ca_kabuli_denovo | 18252881                | T/A  | NA                 | NA                            | NA                 |
| Kabuli_wild_18254569 | NA                                  | Ca_kabuli_denovo | 18254569                | G/T  | NA                 | NA                            | NA                 |
| Kabuli_wild_18254570 | NA                                  | Ca_kabuli_denovo | 18254570                | A/C  | NA                 | NA                            | NA                 |
| Kabuli_wild_18254576 | NA                                  | Ca_kabuli_denovo | 18254576                | T/G  | NA                 | NA                            | NA                 |
| Kabuli_wild_18254612 | NA                                  | Ca_kabuli_denovo | 18254612                | C/G  | NA                 | NA                            | NA                 |
| Kabuli_wild_18254674 | NA                                  | Ca_kabuli_denovo | 18254674                | A/G  | NA                 | NA                            | NA                 |
| Kabuli_wild_18254846 | NA                                  | Ca_kabuli_denovo | 18254846                | C/T  | NA                 | NA                            | NA                 |
| Kabuli_wild_18254850 | NA                                  | Ca_kabuli_denovo | 18254850                | A/G  | NA                 | NA                            | NA                 |
| Kabuli_wild_18256412 | NA                                  | Ca_kabuli_denovo | 18256412                | C/T  | NA                 | NA                            | NA                 |
| Kabuli_wild_18256459 | NA                                  | Ca_kabuli_denovo | 18256459                | A/T  | NA                 | NA                            | NA                 |
| Kabuli_wild_18256606 | NA                                  | Ca_kabuli_denovo | 18256606                | G/C  | NA                 | NA                            | NA                 |
| Kabuli_wild_18257305 | NA                                  | Ca_kabuli_denovo | 18257305                | T/C  | NA                 | NA                            | NA                 |
| Kabuli_wild_18257569 | NA                                  | Ca_kabuli_denovo | 18257569                | C/T  | NA                 | NA                            | NA                 |
| Kabuli_wild_18257590 | NA                                  | Ca_kabuli_denovo | 18257590                | A/G  | NA                 | NA                            | NA                 |
| Kabuli_wild_18257608 | NA                                  | Ca_kabuli_denovo | 18257608                | C/T  | NA                 | NA                            | NA                 |
| Kabuli_wild_18258937 | NA                                  | Ca_kabuli_denovo | 18258937                | C/T  | NA                 | NA                            | NA                 |
| Kabuli_wild_18259482 | NA                                  | Ca_kabuli_denovo | 18259482                | G/A  | NA                 | NA                            | NA                 |
| Kabuli_wild_18260165 | NA                                  | Ca_kabuli_denovo | 18260165                | C/T  | NA                 | NA                            | NA                 |
| Kabuli_wild_18260178 | NA                                  | Ca_kabuli_denovo | 18260178                | G/A  | NA                 | NA                            | NA                 |
| Kabuli_wild_18260283 | NA                                  | Ca_kabuli_denovo | 18260283                | G/C  | NA                 | NA                            | NA                 |
| Kabuli_wild_18261125 | NA                                  | Ca_kabuli_denovo | 18261125                | C/T  | NA                 | NA                            | NA                 |
| Kabuli_wild_18261681 | NA                                  | Ca_kabuli_denovo | 18261681                | A/G  | NA                 | NA                            | NA                 |
| Kabuli_wild_18264093 | NA                                  | Ca_kabuli_denovo | 18264093                | A/C  | NA                 | NA                            | NA                 |
| Kabuli_wild_18266768 | NA                                  | Ca_kabuli_denovo | 18266768                | C/G  | NA                 | NA                            | NA                 |
| Kabuli_wild_18267574 | NA                                  | Ca_kabuli_denovo | 18267574                | G/C  | NA                 | NA                            | NA                 |
| Kabuli_wild_18267900 | NA                                  | Ca_kabuli_denovo | 18267900                | C/T  | NA                 | NA                            | NA                 |
| Kabuli_wild_18268768 | NA                                  | Ca_kabuli_denovo | 18268768                | A/G  | NA                 | NA                            | NA                 |
| Kabuli_wild_18268776 | NA                                  | Ca_kabuli_denovo | 18268776                | A/C  | NA                 | NA                            | NA                 |
| Kabuli_wild_18268862 | NA                                  | Ca_kabuli_denovo | 18268862                | A/G  | NA                 | NA                            | NA                 |
| Kabuli_wild_18268893 | NA                                  | Ca_kabuli_denovo | 18268893                | A/G  | NA                 | NA                            | NA                 |
| Kabuli_wild_18269449 | NA                                  | Ca_kabuli_denovo | 18269449                | C/G  | NA                 | NA                            | NA                 |
| Kabuli_wild_18270493 | NA                                  | Ca_kabuli_denovo | 18270493                | C/T  | NA                 | NA                            | NA                 |
| Kabuli_wild_18270896 | NA                                  | Ca_kabuli_denovo | 18270896                | C/T  | NA                 | NA                            | NA                 |
| Kabuli_wild_18272587 | NA                                  | Ca_kabuli_denovo | 18272587                | C/A  | NA                 | NA                            | NA                 |
| Kabuli_wild_18272821 | NA                                  | Ca_kabuli_denovo | 18272821                | C/T  | NA                 | NA                            | NA                 |
| Kabuli_wild_18273874 | NA                                  | Ca_kabuli_denovo | 18273874                | G/C  | NA                 | NA                            | NA                 |
| Kabuli_wild_18273880 | NA                                  | Ca_kabuli_denovo | 18273880                | G/A  | NA                 | NA                            | NA                 |
| Kabuli_wild_18274369 | NA                                  | Ca_kabuli_denovo | 18274369                | A/T  | NA                 | NA                            | NA                 |
| Kabuli_wild_18274956 | NA                                  | Ca_kabuli_denovo | 18274956                | C/G  | NA                 | NA                            | NA                 |
| Kabuli_wild_18274963 | NA                                  | Ca_kabuli_denovo | 18274963                | C/T  | NA                 | NA                            | NA                 |
| Kabuli_wild_18274976 | NA                                  | Ca_kabuli_denovo | 18274976                | A/C  | NA                 | NA                            | NA                 |
| Kabuli_wild_18275332 | NA                                  | Ca_kabuli_denovo | 18275332                | T/G  | NA                 | NA                            | NA                 |
| Kabuli_wild_18275710 | NA                                  | Ca_kabuli_denovo | 18275710                | G/T  | NA                 | NA                            | NA                 |
| Kabuli_wild_18276278 | NA                                  | Ca_kabuli_denovo | 18276278                | G/A  | NA                 | NA                            | NA                 |

| SNP IDs              | NCBI dbSNP accession IDs (NCBI_SS#) | Chromosomes      | Physical positions (bp) | SNPs | Gene accession IDs | Sequence components of genome | Putative functions |
|----------------------|-------------------------------------|------------------|-------------------------|------|--------------------|-------------------------------|--------------------|
| Kabuli_wild_18276859 | NA                                  | Ca_kabuli_denovo | 18276859                | G/A  | NA                 | NA                            | NA                 |
| Kabuli_wild_18276874 | NA                                  | Ca_kabuli_denovo | 18276874                | A/C  | NA                 | NA                            | NA                 |
| Kabuli_wild_18276957 | NA                                  | Ca_kabuli_denovo | 18276957                | A/G  | NA                 | NA                            | NA                 |
| Kabuli_wild_18276960 | NA                                  | Ca_kabuli_denovo | 18276960                | A/G  | NA                 | NA                            | NA                 |
| Kabuli_wild_18277617 | NA                                  | Ca_kabuli_denovo | 18277617                | G/T  | NA                 | NA                            | NA                 |
| Kabuli_wild_18277648 | NA                                  | Ca_kabuli_denovo | 18277648                | A/C  | NA                 | NA                            | NA                 |
| Kabuli_wild_18277954 | NA                                  | Ca_kabuli_denovo | 18277954                | C/T  | NA                 | NA                            | NA                 |
| Kabuli_wild_18277959 | NA                                  | Ca_kabuli_denovo | 18277959                | C/T  | NA                 | NA                            | NA                 |
| Kabuli_wild_18278022 | NA                                  | Ca_kabuli_denovo | 18278022                | G/A  | NA                 | NA                            | NA                 |
| Kabuli_wild_18278571 | NA                                  | Ca_kabuli_denovo | 18278571                | A/C  | NA                 | NA                            | NA                 |
| Kabuli_wild_18279245 | NA                                  | Ca_kabuli_denovo | 18279245                | A/G  | NA                 | NA                            | NA                 |
| Kabuli_wild_18279742 | NA                                  | Ca_kabuli_denovo | 18279742                | T/G  | NA                 | NA                            | NA                 |
| Kabuli_wild_18281204 | NA                                  | Ca_kabuli_denovo | 18281204                | A/T  | NA                 | NA                            | NA                 |
| Kabuli_wild_18281435 | NA                                  | Ca_kabuli_denovo | 18281435                | C/T  | NA                 | NA                            | NA                 |
| Kabuli_wild_18281489 | NA                                  | Ca_kabuli_denovo | 18281489                | G/A  | NA                 | NA                            | NA                 |
| Kabuli_wild_18281510 | NA                                  | Ca_kabuli_denovo | 18281510                | G/A  | NA                 | NA                            | NA                 |
| Kabuli_wild_18281525 | NA                                  | Ca_kabuli_denovo | 18281525                | C/T  | NA                 | NA                            | NA                 |
| Kabuli_wild_18281563 | NA                                  | Ca_kabuli_denovo | 18281563                | G/A  | NA                 | NA                            | NA                 |
| Kabuli_wild_18281587 | NA                                  | Ca_kabuli_denovo | 18281587                | G/A  | NA                 | NA                            | NA                 |
| Kabuli_wild_18281619 | NA                                  | Ca_kabuli_denovo | 18281619                | A/C  | NA                 | NA                            | NA                 |
| Kabuli_wild_18281620 | NA                                  | Ca_kabuli_denovo | 18281620                | G/A  | NA                 | NA                            | NA                 |
| Kabuli_wild_18281684 | NA                                  | Ca_kabuli_denovo | 18281684                | C/T  | NA                 | NA                            | NA                 |
| Kabuli_wild_18282523 | NA                                  | Ca_kabuli_denovo | 18282523                | T/C  | NA                 | NA                            | NA                 |
| Kabuli_wild_18282741 | NA                                  | Ca_kabuli_denovo | 18282741                | C/A  | NA                 | NA                            | NA                 |
| Kabuli_wild_18282764 | NA                                  | Ca_kabuli_denovo | 18282764                | C/T  | NA                 | NA                            | NA                 |
| Kabuli_wild_18282771 | NA                                  | Ca_kabuli_denovo | 18282771                | A/C  | NA                 | NA                            | NA                 |
| Kabuli_wild_18282772 | NA                                  | Ca_kabuli_denovo | 18282772                | G/T  | NA                 | NA                            | NA                 |
| Kabuli_wild_18282807 | NA                                  | Ca_kabuli_denovo | 18282807                | C/G  | NA                 | NA                            | NA                 |
| Kabuli_wild_18282812 | NA                                  | Ca_kabuli_denovo | 18282812                | C/T  | NA                 | NA                            | NA                 |
| Kabuli_wild_18285254 | NA                                  | Ca_kabuli_denovo | 18285254                | C/T  | NA                 | NA                            | NA                 |
| Kabuli_wild_18285525 | NA                                  | Ca_kabuli_denovo | 18285525                | G/T  | NA                 | NA                            | NA                 |
| Kabuli_wild_18285531 | NA                                  | Ca_kabuli_denovo | 18285531                | A/G  | NA                 | NA                            | NA                 |
| Kabuli_wild_18285535 | NA                                  | Ca_kabuli_denovo | 18285535                | C/T  | NA                 | NA                            | NA                 |
| Kabuli_wild_18285537 | NA                                  | Ca_kabuli_denovo | 18285537                | A/C  | NA                 | NA                            | NA                 |
| Kabuli_wild_18285662 | NA                                  | Ca_kabuli_denovo | 18285662                | G/C  | NA                 | NA                            | NA                 |
| Kabuli_wild_18285680 | NA                                  | Ca_kabuli_denovo | 18285680                | C/G  | NA                 | NA                            | NA                 |
| Kabuli_wild_18285683 | NA                                  | Ca_kabuli_denovo | 18285683                | T/C  | NA                 | NA                            | NA                 |
| Kabuli_wild_18285691 | NA                                  | Ca_kabuli_denovo | 18285691                | T/G  | NA                 | NA                            | NA                 |
| Kabuli_wild_18286839 | NA                                  | Ca_kabuli_denovo | 18286839                | G/A  | NA                 | NA                            | NA                 |
| Kabuli_wild_18290375 | NA                                  | Ca_kabuli_denovo | 18290375                | G/A  | NA                 | NA                            | NA                 |
| Kabuli_wild_18290396 | NA                                  | Ca_kabuli_denovo | 18290396                | A/C  | NA                 | NA                            | NA                 |
| Kabuli_wild_18290415 | NA                                  | Ca_kabuli_denovo | 18290415                | G/T  | NA                 | NA                            | NA                 |
| Kabuli_wild_18291360 | NA                                  | Ca_kabuli_denovo | 18291360                | G/A  | NA                 | NA                            | NA                 |
| Kabuli_wild_18291383 | NA                                  | Ca_kabuli_denovo | 18291383                | T/G  | NA                 | NA                            | NA                 |

| SNP IDs              | NCBI dbSNP accession IDs (NCBI_SS#) | Chromosomes      | Physical positions (bp) | SNPs | Gene accession IDs | Sequence components of genome | Putative functions |
|----------------------|-------------------------------------|------------------|-------------------------|------|--------------------|-------------------------------|--------------------|
| Kabuli_wild_18291420 | NA                                  | Ca_kabuli_denovo | 18291420                | C/G  | NA                 | NA                            | NA                 |
| Kabuli_wild_18294476 | NA                                  | Ca_kabuli_denovo | 18294476                | C/T  | NA                 | NA                            | NA                 |
| Kabuli_wild_18294781 | NA                                  | Ca_kabuli_denovo | 18294781                | C/T  | NA                 | NA                            | NA                 |
| Kabuli_wild_18294847 | NA                                  | Ca_kabuli_denovo | 18294847                | A/G  | NA                 | NA                            | NA                 |
| Kabuli_wild_18294853 | NA                                  | Ca_kabuli_denovo | 18294853                | G/T  | NA                 | NA                            | NA                 |
| Kabuli_wild_18294857 | NA                                  | Ca_kabuli_denovo | 18294857                | G/T  | NA                 | NA                            | NA                 |
| Kabuli_wild_18294870 | NA                                  | Ca_kabuli_denovo | 18294870                | G/T  | NA                 | NA                            | NA                 |
| Kabuli_wild_18295085 | NA                                  | Ca_kabuli_denovo | 18295085                | G/A  | NA                 | NA                            | NA                 |
| Kabuli_wild_18295204 | NA                                  | Ca_kabuli_denovo | 18295204                | T/C  | NA                 | NA                            | NA                 |
| Kabuli_wild_18295222 | NA                                  | Ca_kabuli_denovo | 18295222                | C/T  | NA                 | NA                            | NA                 |
| Kabuli_wild_18295444 | NA                                  | Ca_kabuli_denovo | 18295444                | T/C  | NA                 | NA                            | NA                 |
| Kabuli_wild_18295455 | NA                                  | Ca_kabuli_denovo | 18295455                | A/C  | NA                 | NA                            | NA                 |
| Kabuli_wild_18295509 | NA                                  | Ca_kabuli_denovo | 18295509                | G/T  | NA                 | NA                            | NA                 |
| Kabuli_wild_18295536 | NA                                  | Ca_kabuli_denovo | 18295536                | A/G  | NA                 | NA                            | NA                 |
| Kabuli_wild_18295540 | NA                                  | Ca_kabuli_denovo | 18295540                | C/T  | NA                 | NA                            | NA                 |
| Kabuli_wild_18295542 | NA                                  | Ca_kabuli_denovo | 18295542                | C/T  | NA                 | NA                            | NA                 |
| Kabuli_wild_18296061 | NA                                  | Ca_kabuli_denovo | 18296061                | A/G  | NA                 | NA                            | NA                 |
| Kabuli_wild_18296067 | NA                                  | Ca_kabuli_denovo | 18296067                | G/A  | NA                 | NA                            | NA                 |
| Kabuli_wild_18296070 | NA                                  | Ca_kabuli_denovo | 18296070                | T/A  | NA                 | NA                            | NA                 |
| Kabuli_wild_18296416 | NA                                  | Ca_kabuli_denovo | 18296416                | A/G  | NA                 | NA                            | NA                 |
| Kabuli_wild_18296427 | NA                                  | Ca_kabuli_denovo | 18296427                | C/T  | NA                 | NA                            | NA                 |
| Kabuli_wild_18296529 | NA                                  | Ca_kabuli_denovo | 18296529                | C/T  | NA                 | NA                            | NA                 |
| Kabuli_wild_18296545 | NA                                  | Ca_kabuli_denovo | 18296545                | C/T  | NA                 | NA                            | NA                 |
| Kabuli_wild_18296635 | NA                                  | Ca_kabuli_denovo | 18296635                | A/G  | NA                 | NA                            | NA                 |
| Kabuli_wild_18299322 | NA                                  | Ca_kabuli_denovo | 18299322                | A/T  | NA                 | NA                            | NA                 |
| Kabuli_wild_18300069 | NA                                  | Ca_kabuli_denovo | 18300069                | C/T  | NA                 | NA                            | NA                 |
| Kabuli_wild_18301950 | NA                                  | Ca_kabuli_denovo | 18301950                | T/A  | NA                 | NA                            | NA                 |
| Kabuli_wild_18301952 | NA                                  | Ca_kabuli_denovo | 18301952                | G/T  | NA                 | NA                            | NA                 |
| Kabuli_wild_18303333 | NA                                  | Ca_kabuli_denovo | 18303333                | T/G  | NA                 | NA                            | NA                 |
| Kabuli_wild_18303372 | NA                                  | Ca_kabuli_denovo | 18303372                | T/G  | NA                 | NA                            | NA                 |
| Kabuli_wild_18308021 | NA                                  | Ca_kabuli_denovo | 18308021                | A/C  | NA                 | NA                            | NA                 |
| Kabuli_wild_18308022 | NA                                  | Ca_kabuli_denovo | 18308022                | G/T  | NA                 | NA                            | NA                 |
| Kabuli_wild_18308517 | NA                                  | Ca_kabuli_denovo | 18308517                | A/G  | NA                 | NA                            | NA                 |
| Kabuli_wild_18308902 | NA                                  | Ca_kabuli_denovo | 18308902                | A/G  | NA                 | NA                            | NA                 |
| Kabuli_wild_18310589 | NA                                  | Ca_kabuli_denovo | 18310589                | A/G  | NA                 | NA                            | NA                 |
| Kabuli_wild_18311636 | NA                                  | Ca_kabuli_denovo | 18311636                | C/T  | NA                 | NA                            | NA                 |
| Kabuli_wild_18311777 | NA                                  | Ca_kabuli_denovo | 18311777                | G/A  | NA                 | NA                            | NA                 |
| Kabuli_wild_18311781 | NA                                  | Ca_kabuli_denovo | 18311781                | C/T  | NA                 | NA                            | NA                 |
| Kabuli_wild_18311789 | NA                                  | Ca_kabuli_denovo | 18311789                | A/G  | NA                 | NA                            | NA                 |
| Kabuli_wild_18311798 | NA                                  | Ca_kabuli_denovo | 18311798                | C/T  | NA                 | NA                            | NA                 |
| Kabuli_wild_18311801 | NA                                  | Ca_kabuli_denovo | 18311801                | G/T  | NA                 | NA                            | NA                 |
| Kabuli_wild_18312084 | NA                                  | Ca_kabuli_denovo | 18312084                | T/C  | NA                 | NA                            | NA                 |
| Kabuli_wild_18312432 | NA                                  | Ca_kabuli_denovo | 18312432                | C/T  | NA                 | NA                            | NA                 |
| Kabuli_wild_18313037 | NA                                  | Ca_kabuli_denovo | 18313037                | C/A  | NA                 | NA                            | NA                 |

| SNP IDs              | NCBI dbSNP accession IDs (NCBI_SS#) | Chromosomes      | Physical positions (bp) | SNPs | Gene accession IDs | Sequence components of genome | Putative functions |
|----------------------|-------------------------------------|------------------|-------------------------|------|--------------------|-------------------------------|--------------------|
| Kabuli_wild_18313045 | NA                                  | Ca_kabuli_denovo | 18313045                | C/G  | NA                 | NA                            | NA                 |
| Kabuli_wild_18313701 | NA                                  | Ca_kabuli_denovo | 18313701                | C/T  | NA                 | NA                            | NA                 |
| Kabuli_wild_18313803 | NA                                  | Ca_kabuli_denovo | 18313803                | A/G  | NA                 | NA                            | NA                 |
| Kabuli_wild_18314036 | NA                                  | Ca_kabuli_denovo | 18314036                | A/G  | NA                 | NA                            | NA                 |
| Kabuli_wild_18314045 | NA                                  | Ca_kabuli_denovo | 18314045                | G/T  | NA                 | NA                            | NA                 |
| Kabuli_wild_18315347 | NA                                  | Ca_kabuli_denovo | 18315347                | C/T  | NA                 | NA                            | NA                 |
| Kabuli_wild_18318319 | NA                                  | Ca_kabuli_denovo | 18318319                | T/A  | NA                 | NA                            | NA                 |
| Kabuli_wild_18318659 | NA                                  | Ca_kabuli_denovo | 18318659                | A/G  | NA                 | NA                            | NA                 |
| Kabuli_wild_18318793 | NA                                  | Ca_kabuli_denovo | 18318793                | A/C  | NA                 | NA                            | NA                 |
| Kabuli_wild_18319203 | NA                                  | Ca_kabuli_denovo | 18319203                | A/T  | NA                 | NA                            | NA                 |
| Kabuli_wild_18320067 | NA                                  | Ca_kabuli_denovo | 18320067                | A/G  | NA                 | NA                            | NA                 |
| Kabuli_wild_18321586 | NA                                  | Ca_kabuli_denovo | 18321586                | A/G  | NA                 | NA                            | NA                 |
| Kabuli_wild_18322265 | NA                                  | Ca_kabuli_denovo | 18322265                | C/T  | NA                 | NA                            | NA                 |
| Kabuli_wild_18322643 | NA                                  | Ca_kabuli_denovo | 18322643                | C/T  | NA                 | NA                            | NA                 |
| Kabuli_wild_18323201 | NA                                  | Ca_kabuli_denovo | 18323201                | A/G  | NA                 | NA                            | NA                 |
| Kabuli_wild_18323232 | NA                                  | Ca_kabuli_denovo | 18323232                | A/G  | NA                 | NA                            | NA                 |
| Kabuli_wild_18324255 | NA                                  | Ca_kabuli_denovo | 18324255                | G/A  | NA                 | NA                            | NA                 |
| Kabuli_wild_18324300 | NA                                  | Ca_kabuli_denovo | 18324300                | A/G  | NA                 | NA                            | NA                 |
| Kabuli_wild_18325334 | NA                                  | Ca_kabuli_denovo | 18325334                | G/T  | NA                 | NA                            | NA                 |
| Kabuli_wild_18326178 | NA                                  | Ca_kabuli_denovo | 18326178                | A/G  | NA                 | NA                            | NA                 |
| Kabuli_wild_18326202 | NA                                  | Ca_kabuli_denovo | 18326202                | A/T  | NA                 | NA                            | NA                 |
| Kabuli_wild_18326517 | NA                                  | Ca_kabuli_denovo | 18326517                | A/C  | NA                 | NA                            | NA                 |
| Kabuli_wild_18326548 | NA                                  | Ca_kabuli_denovo | 18326548                | G/A  | NA                 | NA                            | NA                 |
| Kabuli_wild_18326556 | NA                                  | Ca_kabuli_denovo | 18326556                | A/C  | NA                 | NA                            | NA                 |
| Kabuli_wild_18326590 | NA                                  | Ca_kabuli_denovo | 18326590                | T/G  | NA                 | NA                            | NA                 |
| Kabuli_wild_18326602 | NA                                  | Ca_kabuli_denovo | 18326602                | C/G  | NA                 | NA                            | NA                 |
| Kabuli_wild_18326686 | NA                                  | Ca_kabuli_denovo | 18326686                | T/G  | NA                 | NA                            | NA                 |
| Kabuli_wild_18326716 | NA                                  | Ca_kabuli_denovo | 18326716                | G/T  | NA                 | NA                            | NA                 |
| Kabuli_wild_18326725 | NA                                  | Ca_kabuli_denovo | 18326725                | A/G  | NA                 | NA                            | NA                 |
| Kabuli_wild_18326735 | NA                                  | Ca_kabuli_denovo | 18326735                | C/G  | NA                 | NA                            | NA                 |
| Kabuli_wild_18326945 | NA                                  | Ca_kabuli_denovo | 18326945                | A/C  | NA                 | NA                            | NA                 |
| Kabuli_wild_18326955 | NA                                  | Ca_kabuli_denovo | 18326955                | C/T  | NA                 | NA                            | NA                 |
| Kabuli_wild_18326958 | NA                                  | Ca_kabuli_denovo | 18326958                | A/G  | NA                 | NA                            | NA                 |
| Kabuli_wild_18328333 | NA                                  | Ca_kabuli_denovo | 18328333                | C/G  | NA                 | NA                            | NA                 |
| Kabuli_wild_18328592 | NA                                  | Ca_kabuli_denovo | 18328592                | A/G  | NA                 | NA                            | NA                 |
| Kabuli_wild_18328681 | NA                                  | Ca_kabuli_denovo | 18328681                | A/G  | NA                 | NA                            | NA                 |
| Kabuli_wild_18329247 | NA                                  | Ca_kabuli_denovo | 18329247                | C/T  | NA                 | NA                            | NA                 |
| Kabuli_wild_18329248 | NA                                  | Ca_kabuli_denovo | 18329248                | A/G  | NA                 | NA                            | NA                 |
| Kabuli_wild_18329273 | NA                                  | Ca_kabuli_denovo | 18329273                | C/T  | NA                 | NA                            | NA                 |
| Kabuli_wild_18330274 | NA                                  | Ca_kabuli_denovo | 18330274                | G/A  | NA                 | NA                            | NA                 |
| Kabuli_wild_18330387 | NA                                  | Ca_kabuli_denovo | 18330387                | A/T  | NA                 | NA                            | NA                 |
| Kabuli_wild_18331237 | NA                                  | Ca_kabuli_denovo | 18331237                | G/T  | NA                 | NA                            | NA                 |
| Kabuli_wild_18332020 | NA                                  | Ca_kabuli_denovo | 18332020                | C/G  | NA                 | NA                            | NA                 |
| Kabuli_wild_18332022 | NA                                  | Ca_kabuli_denovo | 18332022                | A/G  | NA                 | NA                            | NA                 |

| SNP IDs              | NCBI dbSNP accession IDs (NCBI_SS#) | Chromosomes      | Physical positions (bp) | SNPs | Gene accession IDs | Sequence components of genome | Putative functions |
|----------------------|-------------------------------------|------------------|-------------------------|------|--------------------|-------------------------------|--------------------|
| Kabuli_wild_18332534 | NA                                  | Ca_kabuli_denovo | 18332534                | A/G  | NA                 | NA                            | NA                 |
| Kabuli_wild_18332760 | NA                                  | Ca_kabuli_denovo | 18332760                | A/G  | NA                 | NA                            | NA                 |
| Kabuli_wild_18332770 | NA                                  | Ca_kabuli_denovo | 18332770                | C/T  | NA                 | NA                            | NA                 |
| Kabuli_wild_18332774 | NA                                  | Ca_kabuli_denovo | 18332774                | C/T  | NA                 | NA                            | NA                 |
| Kabuli_wild_18333675 | NA                                  | Ca_kabuli_denovo | 18333675                | C/T  | NA                 | NA                            | NA                 |
| Kabuli_wild_18334444 | NA                                  | Ca_kabuli_denovo | 18334444                | T/G  | NA                 | NA                            | NA                 |
| Kabuli_wild_18334452 | NA                                  | Ca_kabuli_denovo | 18334452                | T/C  | NA                 | NA                            | NA                 |
| Kabuli_wild_18334570 | NA                                  | Ca_kabuli_denovo | 18334570                | A/G  | NA                 | NA                            | NA                 |
| Kabuli_wild_18335493 | NA                                  | Ca_kabuli_denovo | 18335493                | T/C  | NA                 | NA                            | NA                 |
| Kabuli_wild_18336648 | NA                                  | Ca_kabuli_denovo | 18336648                | A/G  | NA                 | NA                            | NA                 |
| Kabuli_wild_18336651 | NA                                  | Ca_kabuli_denovo | 18336651                | C/T  | NA                 | NA                            | NA                 |
| Kabuli_wild_18336740 | NA                                  | Ca_kabuli_denovo | 18336740                | C/T  | NA                 | NA                            | NA                 |
| Kabuli_wild_18336945 | NA                                  | Ca_kabuli_denovo | 18336945                | C/T  | NA                 | NA                            | NA                 |
| Kabuli_wild_18338173 | NA                                  | Ca_kabuli_denovo | 18338173                | A/G  | NA                 | NA                            | NA                 |
| Kabuli_wild_18338652 | NA                                  | Ca_kabuli_denovo | 18338652                | A/G  | NA                 | NA                            | NA                 |
| Kabuli_wild_18338659 | NA                                  | Ca_kabuli_denovo | 18338659                | C/G  | NA                 | NA                            | NA                 |
| Kabuli_wild_18338679 | NA                                  | Ca_kabuli_denovo | 18338679                | C/T  | NA                 | NA                            | NA                 |
| Kabuli_wild_18338868 | NA                                  | Ca_kabuli_denovo | 18338868                | G/T  | NA                 | NA                            | NA                 |
| Kabuli_wild_18338870 | NA                                  | Ca_kabuli_denovo | 18338870                | C/G  | NA                 | NA                            | NA                 |
| Kabuli_wild_18338903 | NA                                  | Ca_kabuli_denovo | 18338903                | A/G  | NA                 | NA                            | NA                 |
| Kabuli_wild_18339813 | NA                                  | Ca_kabuli_denovo | 18339813                | G/C  | NA                 | NA                            | NA                 |
| Kabuli_wild_18339840 | NA                                  | Ca_kabuli_denovo | 18339840                | A/C  | NA                 | NA                            | NA                 |
| Kabuli_wild_18339845 | NA                                  | Ca_kabuli_denovo | 18339845                | T/A  | NA                 | NA                            | NA                 |
| Kabuli_wild_18339847 | NA                                  | Ca_kabuli_denovo | 18339847                | G/A  | NA                 | NA                            | NA                 |
| Kabuli_wild_18341730 | NA                                  | Ca_kabuli_denovo | 18341730                | C/A  | NA                 | NA                            | NA                 |
| Kabuli_wild_18341740 | NA                                  | Ca_kabuli_denovo | 18341740                | C/T  | NA                 | NA                            | NA                 |
| Kabuli_wild_18341767 | NA                                  | Ca_kabuli_denovo | 18341767                | C/A  | NA                 | NA                            | NA                 |
| Kabuli_wild_18341809 | NA                                  | Ca_kabuli_denovo | 18341809                | C/A  | NA                 | NA                            | NA                 |
| Kabuli_wild_18342564 | NA                                  | Ca_kabuli_denovo | 18342564                | C/T  | NA                 | NA                            | NA                 |
| Kabuli_wild_18342807 | NA                                  | Ca_kabuli_denovo | 18342807                | C/G  | NA                 | NA                            | NA                 |
| Kabuli_wild_18343121 | NA                                  | Ca_kabuli_denovo | 18343121                | A/G  | NA                 | NA                            | NA                 |
| Kabuli_wild_18346256 | NA                                  | Ca_kabuli_denovo | 18346256                | C/A  | NA                 | NA                            | NA                 |
| Kabuli_wild_18346264 | NA                                  | Ca_kabuli_denovo | 18346264                | T/C  | NA                 | NA                            | NA                 |
| Kabuli_wild_18346268 | NA                                  | Ca_kabuli_denovo | 18346268                | A/G  | NA                 | NA                            | NA                 |
| Kabuli_wild_18346278 | NA                                  | Ca_kabuli_denovo | 18346278                | G/A  | NA                 | NA                            | NA                 |
| Kabuli_wild_18346727 | NA                                  | Ca_kabuli_denovo | 18346727                | C/G  | NA                 | NA                            | NA                 |
| Kabuli_wild_18347099 | NA                                  | Ca_kabuli_denovo | 18347099                | A/G  | NA                 | NA                            | NA                 |
| Kabuli_wild_18347105 | NA                                  | Ca_kabuli_denovo | 18347105                | A/G  | NA                 | NA                            | NA                 |
| Kabuli_wild_18347135 | NA                                  | Ca_kabuli_denovo | 18347135                | G/T  | NA                 | NA                            | NA                 |
| Kabuli_wild_18347785 | NA                                  | Ca_kabuli_denovo | 18347785                | G/T  | NA                 | NA                            | NA                 |
| Kabuli_wild_18347812 | NA                                  | Ca_kabuli_denovo | 18347812                | C/G  | NA                 | NA                            | NA                 |
| Kabuli_wild_18349699 | NA                                  | Ca_kabuli_denovo | 18349699                | C/T  | NA                 | NA                            | NA                 |
| Kabuli_wild_18351444 | NA                                  | Ca_kabuli_denovo | 18351444                | T/A  | NA                 | NA                            | NA                 |
| Kabuli_wild_18351612 | NA                                  | Ca_kabuli_denovo | 18351612                | A/C  | NA                 | NA                            | NA                 |

| SNP IDs              | NCBI dbSNP accession IDs (NCBI_SS#) | Chromosomes      | Physical positions (bp) | SNPs | Gene accession IDs | Sequence components of genome | Putative functions |
|----------------------|-------------------------------------|------------------|-------------------------|------|--------------------|-------------------------------|--------------------|
| Kabuli_wild_18351666 | NA                                  | Ca_kabuli_denovo | 18351666                | G/T  | NA                 | NA                            | NA                 |
| Kabuli_wild_18351697 | NA                                  | Ca_kabuli_denovo | 18351697                | T/C  | NA                 | NA                            | NA                 |
| Kabuli_wild_18352419 | NA                                  | Ca_kabuli_denovo | 18352419                | G/A  | NA                 | NA                            | NA                 |
| Kabuli_wild_18352438 | NA                                  | Ca_kabuli_denovo | 18352438                | G/A  | NA                 | NA                            | NA                 |
| Kabuli_wild_18352671 | NA                                  | Ca_kabuli_denovo | 18352671                | G/A  | NA                 | NA                            | NA                 |
| Kabuli_wild_18353081 | NA                                  | Ca_kabuli_denovo | 18353081                | A/G  | NA                 | NA                            | NA                 |
| Kabuli_wild_18353645 | NA                                  | Ca_kabuli_denovo | 18353645                | C/T  | NA                 | NA                            | NA                 |
| Kabuli_wild_18353678 | NA                                  | Ca_kabuli_denovo | 18353678                | A/C  | NA                 | NA                            | NA                 |
| Kabuli_wild_18355603 | NA                                  | Ca_kabuli_denovo | 18355603                | A/G  | NA                 | NA                            | NA                 |
| Kabuli_wild_18355941 | NA                                  | Ca_kabuli_denovo | 18355941                | G/A  | NA                 | NA                            | NA                 |
| Kabuli_wild_18355942 | NA                                  | Ca_kabuli_denovo | 18355942                | C/T  | NA                 | NA                            | NA                 |
| Kabuli_wild_18356700 | NA                                  | Ca_kabuli_denovo | 18356700                | C/G  | NA                 | NA                            | NA                 |
| Kabuli_wild_18357277 | NA                                  | Ca_kabuli_denovo | 18357277                | A/G  | NA                 | NA                            | NA                 |
| Kabuli_wild_18357304 | NA                                  | Ca_kabuli_denovo | 18357304                | T/C  | NA                 | NA                            | NA                 |
| Kabuli_wild_18357607 | NA                                  | Ca_kabuli_denovo | 18357607                | C/T  | NA                 | NA                            | NA                 |
| Kabuli_wild_18359398 | NA                                  | Ca_kabuli_denovo | 18359398                | G/C  | NA                 | NA                            | NA                 |
| Kabuli_wild_18360079 | NA                                  | Ca_kabuli_denovo | 18360079                | C/T  | NA                 | NA                            | NA                 |
| Kabuli_wild_18361421 | NA                                  | Ca_kabuli_denovo | 18361421                | G/C  | NA                 | NA                            | NA                 |
| Kabuli_wild_18361720 | NA                                  | Ca_kabuli_denovo | 18361720                | C/T  | NA                 | NA                            | NA                 |
| Kabuli_wild_18363750 | NA                                  | Ca_kabuli_denovo | 18363750                | C/T  | NA                 | NA                            | NA                 |
| Kabuli_wild_18363777 | NA                                  | Ca_kabuli_denovo | 18363777                | A/G  | NA                 | NA                            | NA                 |
| Kabuli_wild_18364328 | NA                                  | Ca_kabuli_denovo | 18364328                | T/A  | NA                 | NA                            | NA                 |
| Kabuli_wild_18365729 | NA                                  | Ca_kabuli_denovo | 18365729                | A/C  | NA                 | NA                            | NA                 |
| Kabuli_wild_18365738 | NA                                  | Ca_kabuli_denovo | 18365738                | C/T  | NA                 | NA                            | NA                 |
| Kabuli_wild_18365750 | NA                                  | Ca_kabuli_denovo | 18365750                | A/C  | NA                 | NA                            | NA                 |
| Kabuli_wild_18365774 | NA                                  | Ca_kabuli_denovo | 18365774                | A/G  | NA                 | NA                            | NA                 |
| Kabuli_wild_18366149 | NA                                  | Ca_kabuli_denovo | 18366149                | C/G  | NA                 | NA                            | NA                 |
| Kabuli_wild_18366219 | NA                                  | Ca_kabuli_denovo | 18366219                | C/T  | NA                 | NA                            | NA                 |
| Kabuli_wild_18366250 | NA                                  | Ca_kabuli_denovo | 18366250                | C/T  | NA                 | NA                            | NA                 |
| Kabuli_wild_18366899 | NA                                  | Ca_kabuli_denovo | 18366899                | G/A  | NA                 | NA                            | NA                 |
| Kabuli_wild_18367078 | NA                                  | Ca_kabuli_denovo | 18367078                | A/G  | NA                 | NA                            | NA                 |
| Kabuli_wild_18368155 | NA                                  | Ca_kabuli_denovo | 18368155                | C/T  | NA                 | NA                            | NA                 |
| Kabuli_wild_18368182 | NA                                  | Ca_kabuli_denovo | 18368182                | G/A  | NA                 | NA                            | NA                 |
| Kabuli_wild_18368441 | NA                                  | Ca_kabuli_denovo | 18368441                | G/A  | NA                 | NA                            | NA                 |
| Kabuli_wild_18368457 | NA                                  | Ca_kabuli_denovo | 18368457                | T/A  | NA                 | NA                            | NA                 |
| Kabuli_wild_18368508 | NA                                  | Ca_kabuli_denovo | 18368508                | A/G  | NA                 | NA                            | NA                 |
| Kabuli_wild_18368547 | NA                                  | Ca_kabuli_denovo | 18368547                | A/T  | NA                 | NA                            | NA                 |
| Kabuli_wild_18372061 | NA                                  | Ca_kabuli_denovo | 18372061                | G/T  | NA                 | NA                            | NA                 |
| Kabuli_wild_18372659 | NA                                  | Ca_kabuli_denovo | 18372659                | C/T  | NA                 | NA                            | NA                 |
| Kabuli_wild_18372982 | NA                                  | Ca_kabuli_denovo | 18372982                | G/C  | NA                 | NA                            | NA                 |
| Kabuli_wild_18373504 | NA                                  | Ca_kabuli_denovo | 18373504                | C/T  | NA                 | NA                            | NA                 |
| Kabuli_wild_18374436 | NA                                  | Ca_kabuli_denovo | 18374436                | A/C  | NA                 | NA                            | NA                 |
| Kabuli_wild_18377773 | NA                                  | Ca_kabuli_denovo | 18377773                | T/C  | NA                 | NA                            | NA                 |
| Kabuli_wild_18380137 | NA                                  | Ca_kabuli_denovo | 18380137                | C/T  | NA                 | NA                            | NA                 |

| SNP IDs                     | NCBI dbSNP accession IDs (NCBI_SS#) | Chromosomes             | Physical positions (bp) | SNPs | Gene accession IDs | Sequence components of genome | Putative functions |
|-----------------------------|-------------------------------------|-------------------------|-------------------------|------|--------------------|-------------------------------|--------------------|
| <i>Kabuli_wild_18380384</i> | NA                                  | <i>Ca_kabuli_denovo</i> | 18380384                | C/T  | NA                 | NA                            | NA                 |
| <i>Kabuli_wild_18380929</i> | NA                                  | <i>Ca_kabuli_denovo</i> | 18380929                | A/G  | NA                 | NA                            | NA                 |
| <i>Kabuli_wild_18381084</i> | NA                                  | <i>Ca_kabuli_denovo</i> | 18381084                | C/G  | NA                 | NA                            | NA                 |
| <i>Kabuli_wild_18381234</i> | NA                                  | <i>Ca_kabuli_denovo</i> | 18381234                | C/A  | NA                 | NA                            | NA                 |
| <i>Kabuli_wild_18381265</i> | NA                                  | <i>Ca_kabuli_denovo</i> | 18381265                | T/G  | NA                 | NA                            | NA                 |
| <i>Kabuli_wild_18381394</i> | NA                                  | <i>Ca_kabuli_denovo</i> | 18381394                | A/C  | NA                 | NA                            | NA                 |
| <i>Kabuli_wild_18381576</i> | NA                                  | <i>Ca_kabuli_denovo</i> | 18381576                | A/T  | NA                 | NA                            | NA                 |
| <i>Kabuli_wild_18381581</i> | NA                                  | <i>Ca_kabuli_denovo</i> | 18381581                | T/G  | NA                 | NA                            | NA                 |
| <i>Kabuli_wild_18381710</i> | NA                                  | <i>Ca_kabuli_denovo</i> | 18381710                | A/C  | NA                 | NA                            | NA                 |
| <i>Kabuli_wild_18381766</i> | NA                                  | <i>Ca_kabuli_denovo</i> | 18381766                | C/T  | NA                 | NA                            | NA                 |
| <i>Kabuli_wild_18381877</i> | NA                                  | <i>Ca_kabuli_denovo</i> | 18381877                | T/C  | NA                 | NA                            | NA                 |
| <i>Kabuli_wild_18382683</i> | NA                                  | <i>Ca_kabuli_denovo</i> | 18382683                | C/A  | NA                 | NA                            | NA                 |
| <i>Kabuli_wild_18383206</i> | NA                                  | <i>Ca_kabuli_denovo</i> | 18383206                | T/C  | NA                 | NA                            | NA                 |
| <i>Kabuli_wild_18384008</i> | NA                                  | <i>Ca_kabuli_denovo</i> | 18384008                | G/A  | NA                 | NA                            | NA                 |
| <i>Kabuli_wild_18384015</i> | NA                                  | <i>Ca_kabuli_denovo</i> | 18384015                | A/G  | NA                 | NA                            | NA                 |
| <i>Kabuli_wild_18384062</i> | NA                                  | <i>Ca_kabuli_denovo</i> | 18384062                | G/T  | NA                 | NA                            | NA                 |
| <i>Kabuli_wild_18385643</i> | NA                                  | <i>Ca_kabuli_denovo</i> | 18385643                | C/T  | NA                 | NA                            | NA                 |
| <i>Kabuli_wild_18387712</i> | NA                                  | <i>Ca_kabuli_denovo</i> | 18387712                | T/C  | NA                 | NA                            | NA                 |
| <i>Kabuli_wild_18387826</i> | NA                                  | <i>Ca_kabuli_denovo</i> | 18387826                | C/T  | NA                 | NA                            | NA                 |
| <i>Kabuli_wild_18388672</i> | NA                                  | <i>Ca_kabuli_denovo</i> | 18388672                | A/G  | NA                 | NA                            | NA                 |
| <i>Kabuli_wild_18389659</i> | NA                                  | <i>Ca_kabuli_denovo</i> | 18389659                | A/G  | NA                 | NA                            | NA                 |
| <i>Kabuli_wild_18389771</i> | NA                                  | <i>Ca_kabuli_denovo</i> | 18389771                | T/A  | NA                 | NA                            | NA                 |
| <i>Kabuli_wild_18391465</i> | NA                                  | <i>Ca_kabuli_denovo</i> | 18391465                | A/G  | NA                 | NA                            | NA                 |
| <i>Kabuli_wild_18391518</i> | NA                                  | <i>Ca_kabuli_denovo</i> | 18391518                | A/T  | NA                 | NA                            | NA                 |
| <i>Kabuli_wild_18392030</i> | NA                                  | <i>Ca_kabuli_denovo</i> | 18392030                | T/C  | NA                 | NA                            | NA                 |
| <i>Kabuli_wild_18392147</i> | NA                                  | <i>Ca_kabuli_denovo</i> | 18392147                | A/G  | NA                 | NA                            | NA                 |
| <i>Kabuli_wild_18393523</i> | NA                                  | <i>Ca_kabuli_denovo</i> | 18393523                | T/C  | NA                 | NA                            | NA                 |
| <i>Kabuli_wild_18393553</i> | NA                                  | <i>Ca_kabuli_denovo</i> | 18393553                | T/C  | NA                 | NA                            | NA                 |
| <i>Kabuli_wild_18393776</i> | NA                                  | <i>Ca_kabuli_denovo</i> | 18393776                | T/C  | NA                 | NA                            | NA                 |
| <i>Kabuli_wild_18393980</i> | NA                                  | <i>Ca_kabuli_denovo</i> | 18393980                | G/T  | NA                 | NA                            | NA                 |
| <i>Kabuli_wild_18394058</i> | NA                                  | <i>Ca_kabuli_denovo</i> | 18394058                | G/A  | NA                 | NA                            | NA                 |
| <i>Kabuli_wild_18394062</i> | NA                                  | <i>Ca_kabuli_denovo</i> | 18394062                | C/T  | NA                 | NA                            | NA                 |
| <i>Kabuli_wild_18394072</i> | NA                                  | <i>Ca_kabuli_denovo</i> | 18394072                | A/G  | NA                 | NA                            | NA                 |
| <i>Kabuli_wild_18394073</i> | NA                                  | <i>Ca_kabuli_denovo</i> | 18394073                | C/T  | NA                 | NA                            | NA                 |
| <i>Kabuli_wild_18394562</i> | NA                                  | <i>Ca_kabuli_denovo</i> | 18394562                | C/T  | NA                 | NA                            | NA                 |
| <i>Kabuli_wild_18394579</i> | NA                                  | <i>Ca_kabuli_denovo</i> | 18394579                | G/A  | NA                 | NA                            | NA                 |
| <i>Kabuli_wild_18395320</i> | NA                                  | <i>Ca_kabuli_denovo</i> | 18395320                | C/T  | NA                 | NA                            | NA                 |
| <i>Kabuli_wild_18396364</i> | NA                                  | <i>Ca_kabuli_denovo</i> | 18396364                | A/G  | NA                 | NA                            | NA                 |
| <i>Kabuli_wild_18396646</i> | NA                                  | <i>Ca_kabuli_denovo</i> | 18396646                | A/T  | NA                 | NA                            | NA                 |
| <i>Kabuli_wild_18397406</i> | NA                                  | <i>Ca_kabuli_denovo</i> | 18397406                | C/T  | NA                 | NA                            | NA                 |
| <i>Kabuli_wild_18397698</i> | NA                                  | <i>Ca_kabuli_denovo</i> | 18397698                | A/G  | NA                 | NA                            | NA                 |
| <i>Kabuli_wild_18397750</i> | NA                                  | <i>Ca_kabuli_denovo</i> | 18397750                | A/T  | NA                 | NA                            | NA                 |
| <i>Kabuli_wild_18398205</i> | NA                                  | <i>Ca_kabuli_denovo</i> | 18398205                | A/G  | NA                 | NA                            | NA                 |
| <i>Kabuli_wild_18398232</i> | NA                                  | <i>Ca_kabuli_denovo</i> | 18398232                | A/G  | NA                 | NA                            | NA                 |



| SNP IDs              | NCBI dbSNP accession IDs (NCBI_SS#) | Chromosomes      | Physical positions (bp) | SNPs | Gene accession IDs | Sequence components of genome | Putative functions |
|----------------------|-------------------------------------|------------------|-------------------------|------|--------------------|-------------------------------|--------------------|
| Kabuli_wild_18398683 | NA                                  | Ca_kabuli_denovo | 18398683                | G/A  | NA                 | NA                            | NA                 |
| Kabuli_wild_18400451 | NA                                  | Ca_kabuli_denovo | 18400451                | C/T  | NA                 | NA                            | NA                 |
| Kabuli_wild_18401406 | NA                                  | Ca_kabuli_denovo | 18401406                | G/C  | NA                 | NA                            | NA                 |
| Kabuli_wild_18401851 | NA                                  | Ca_kabuli_denovo | 18401851                | A/C  | NA                 | NA                            | NA                 |
| Kabuli_wild_18401904 | NA                                  | Ca_kabuli_denovo | 18401904                | G/A  | NA                 | NA                            | NA                 |
| Kabuli_wild_18402750 | NA                                  | Ca_kabuli_denovo | 18402750                | T/C  | NA                 | NA                            | NA                 |
| Kabuli_wild_18403590 | NA                                  | Ca_kabuli_denovo | 18403590                | G/T  | NA                 | NA                            | NA                 |
| Kabuli_wild_18403803 | NA                                  | Ca_kabuli_denovo | 18403803                | G/A  | NA                 | NA                            | NA                 |
| Kabuli_wild_18405134 | NA                                  | Ca_kabuli_denovo | 18405134                | A/G  | NA                 | NA                            | NA                 |
| Kabuli_wild_18405155 | NA                                  | Ca_kabuli_denovo | 18405155                | C/T  | NA                 | NA                            | NA                 |
| Kabuli_wild_18405158 | NA                                  | Ca_kabuli_denovo | 18405158                | A/G  | NA                 | NA                            | NA                 |
| Kabuli_wild_18405471 | NA                                  | Ca_kabuli_denovo | 18405471                | C/T  | NA                 | NA                            | NA                 |
| Kabuli_wild_18406444 | NA                                  | Ca_kabuli_denovo | 18406444                | C/T  | NA                 | NA                            | NA                 |
| Kabuli_wild_18406719 | NA                                  | Ca_kabuli_denovo | 18406719                | A/G  | NA                 | NA                            | NA                 |
| Kabuli_wild_18406729 | NA                                  | Ca_kabuli_denovo | 18406729                | A/G  | NA                 | NA                            | NA                 |
| Kabuli_wild_18407120 | NA                                  | Ca_kabuli_denovo | 18407120                | C/T  | NA                 | NA                            | NA                 |
| Kabuli_wild_18407137 | NA                                  | Ca_kabuli_denovo | 18407137                | G/A  | NA                 | NA                            | NA                 |
| Kabuli_wild_18407772 | NA                                  | Ca_kabuli_denovo | 18407772                | C/G  | NA                 | NA                            | NA                 |
| Kabuli_wild_18409921 | NA                                  | Ca_kabuli_denovo | 18409921                | C/T  | NA                 | NA                            | NA                 |
| Kabuli_wild_18409942 | NA                                  | Ca_kabuli_denovo | 18409942                | A/T  | NA                 | NA                            | NA                 |
| Kabuli_wild_18409981 | NA                                  | Ca_kabuli_denovo | 18409981                | C/T  | NA                 | NA                            | NA                 |
| Kabuli_wild_18410044 | NA                                  | Ca_kabuli_denovo | 18410044                | C/T  | NA                 | NA                            | NA                 |
| Kabuli_wild_18410594 | NA                                  | Ca_kabuli_denovo | 18410594                | A/G  | NA                 | NA                            | NA                 |
| Kabuli_wild_18410672 | NA                                  | Ca_kabuli_denovo | 18410672                | C/T  | NA                 | NA                            | NA                 |
| Kabuli_wild_18410689 | NA                                  | Ca_kabuli_denovo | 18410689                | G/A  | NA                 | NA                            | NA                 |
| Kabuli_wild_18410955 | NA                                  | Ca_kabuli_denovo | 18410955                | C/T  | NA                 | NA                            | NA                 |
| Kabuli_wild_18410986 | NA                                  | Ca_kabuli_denovo | 18410986                | C/T  | NA                 | NA                            | NA                 |
| Kabuli_wild_18411170 | NA                                  | Ca_kabuli_denovo | 18411170                | C/T  | NA                 | NA                            | NA                 |
| Kabuli_wild_18411632 | NA                                  | Ca_kabuli_denovo | 18411632                | T/C  | NA                 | NA                            | NA                 |
| Kabuli_wild_18411812 | NA                                  | Ca_kabuli_denovo | 18411812                | A/G  | NA                 | NA                            | NA                 |
| Kabuli_wild_18412287 | NA                                  | Ca_kabuli_denovo | 18412287                | G/T  | NA                 | NA                            | NA                 |
| Kabuli_wild_18412302 | NA                                  | Ca_kabuli_denovo | 18412302                | C/T  | NA                 | NA                            | NA                 |
| Kabuli_wild_18412389 | NA                                  | Ca_kabuli_denovo | 18412389                | A/G  | NA                 | NA                            | NA                 |
| Kabuli_wild_18412484 | NA                                  | Ca_kabuli_denovo | 18412484                | C/T  | NA                 | NA                            | NA                 |
| Kabuli_wild_18412508 | NA                                  | Ca_kabuli_denovo | 18412508                | A/G  | NA                 | NA                            | NA                 |
| Kabuli_wild_18412516 | NA                                  | Ca_kabuli_denovo | 18412516                | C/T  | NA                 | NA                            | NA                 |
| Kabuli_wild_18412523 | NA                                  | Ca_kabuli_denovo | 18412523                | G/A  | NA                 | NA                            | NA                 |
| Kabuli_wild_18414108 | NA                                  | Ca_kabuli_denovo | 18414108                | A/G  | NA                 | NA                            | NA                 |
| Kabuli_wild_18414141 | NA                                  | Ca_kabuli_denovo | 18414141                | A/G  | NA                 | NA                            | NA                 |
| Kabuli_wild_18415093 | NA                                  | Ca_kabuli_denovo | 18415093                | A/G  | NA                 | NA                            | NA                 |
| Kabuli_wild_18415984 | NA                                  | Ca_kabuli_denovo | 18415984                | A/G  | NA                 | NA                            | NA                 |
| Kabuli_wild_18415985 | NA                                  | Ca_kabuli_denovo | 18415985                | C/G  | NA                 | NA                            | NA                 |
| Kabuli_wild_18416428 | NA                                  | Ca_kabuli_denovo | 18416428                | C/G  | NA                 | NA                            | NA                 |
| Kabuli_wild_18416431 | NA                                  | Ca_kabuli_denovo | 18416431                | C/G  | NA                 | NA                            | NA                 |

| SNP IDs              | NCBI dbSNP accession IDs (NCBI_SS#) | Chromosomes      | Physical positions (bp) | SNPs | Gene accession IDs | Sequence components of genome | Putative functions |
|----------------------|-------------------------------------|------------------|-------------------------|------|--------------------|-------------------------------|--------------------|
| Kabuli_wild_18416432 | NA                                  | Ca_kabuli_denovo | 18416432                | C/A  | NA                 | NA                            | NA                 |
| Kabuli_wild_18416435 | NA                                  | Ca_kabuli_denovo | 18416435                | G/A  | NA                 | NA                            | NA                 |
| Kabuli_wild_18416531 | NA                                  | Ca_kabuli_denovo | 18416531                | A/G  | NA                 | NA                            | NA                 |
| Kabuli_wild_18416684 | NA                                  | Ca_kabuli_denovo | 18416684                | G/T  | NA                 | NA                            | NA                 |
| Kabuli_wild_18417096 | NA                                  | Ca_kabuli_denovo | 18417096                | A/C  | NA                 | NA                            | NA                 |
| Kabuli_wild_18417126 | NA                                  | Ca_kabuli_denovo | 18417126                | G/A  | NA                 | NA                            | NA                 |
| Kabuli_wild_18419004 | NA                                  | Ca_kabuli_denovo | 18419004                | C/G  | NA                 | NA                            | NA                 |
| Kabuli_wild_18420560 | NA                                  | Ca_kabuli_denovo | 18420560                | T/C  | NA                 | NA                            | NA                 |
| Kabuli_wild_18421453 | NA                                  | Ca_kabuli_denovo | 18421453                | A/C  | NA                 | NA                            | NA                 |
| Kabuli_wild_18422092 | NA                                  | Ca_kabuli_denovo | 18422092                | G/C  | NA                 | NA                            | NA                 |
| Kabuli_wild_18422093 | NA                                  | Ca_kabuli_denovo | 18422093                | T/C  | NA                 | NA                            | NA                 |
| Kabuli_wild_18422371 | NA                                  | Ca_kabuli_denovo | 18422371                | C/G  | NA                 | NA                            | NA                 |
| Kabuli_wild_18422372 | NA                                  | Ca_kabuli_denovo | 18422372                | T/G  | NA                 | NA                            | NA                 |
| Kabuli_wild_18422379 | NA                                  | Ca_kabuli_denovo | 18422379                | C/G  | NA                 | NA                            | NA                 |
| Kabuli_wild_18423944 | NA                                  | Ca_kabuli_denovo | 18423944                | C/T  | NA                 | NA                            | NA                 |
| Kabuli_wild_18424098 | NA                                  | Ca_kabuli_denovo | 18424098                | C/T  | NA                 | NA                            | NA                 |
| Kabuli_wild_18424916 | NA                                  | Ca_kabuli_denovo | 18424916                | G/T  | NA                 | NA                            | NA                 |
| Kabuli_wild_18424963 | NA                                  | Ca_kabuli_denovo | 18424963                | A/G  | NA                 | NA                            | NA                 |
| Kabuli_wild_18425566 | NA                                  | Ca_kabuli_denovo | 18425566                | G/C  | NA                 | NA                            | NA                 |
| Kabuli_wild_18427000 | NA                                  | Ca_kabuli_denovo | 18427000                | C/T  | NA                 | NA                            | NA                 |
| Kabuli_wild_18427006 | NA                                  | Ca_kabuli_denovo | 18427006                | A/C  | NA                 | NA                            | NA                 |
| Kabuli_wild_18427844 | NA                                  | Ca_kabuli_denovo | 18427844                | C/G  | NA                 | NA                            | NA                 |
| Kabuli_wild_18429019 | NA                                  | Ca_kabuli_denovo | 18429019                | A/C  | NA                 | NA                            | NA                 |
| Kabuli_wild_18429021 | NA                                  | Ca_kabuli_denovo | 18429021                | A/T  | NA                 | NA                            | NA                 |
| Kabuli_wild_18429034 | NA                                  | Ca_kabuli_denovo | 18429034                | A/G  | NA                 | NA                            | NA                 |
| Kabuli_wild_18430568 | NA                                  | Ca_kabuli_denovo | 18430568                | A/C  | NA                 | NA                            | NA                 |
| Kabuli_wild_18431602 | NA                                  | Ca_kabuli_denovo | 18431602                | A/T  | NA                 | NA                            | NA                 |
| Kabuli_wild_18431842 | NA                                  | Ca_kabuli_denovo | 18431842                | A/G  | NA                 | NA                            | NA                 |
| Kabuli_wild_18431859 | NA                                  | Ca_kabuli_denovo | 18431859                | C/T  | NA                 | NA                            | NA                 |
| Kabuli_wild_18432552 | NA                                  | Ca_kabuli_denovo | 18432552                | C/T  | NA                 | NA                            | NA                 |
| Kabuli_wild_18432611 | NA                                  | Ca_kabuli_denovo | 18432611                | A/G  | NA                 | NA                            | NA                 |
| Kabuli_wild_18434512 | NA                                  | Ca_kabuli_denovo | 18434512                | A/C  | NA                 | NA                            | NA                 |
| Kabuli_wild_18436020 | NA                                  | Ca_kabuli_denovo | 18436020                | A/G  | NA                 | NA                            | NA                 |
| Kabuli_wild_18436029 | NA                                  | Ca_kabuli_denovo | 18436029                | G/A  | NA                 | NA                            | NA                 |
| Kabuli_wild_18436073 | NA                                  | Ca_kabuli_denovo | 18436073                | T/C  | NA                 | NA                            | NA                 |
| Kabuli_wild_18436405 | NA                                  | Ca_kabuli_denovo | 18436405                | A/G  | NA                 | NA                            | NA                 |
| Kabuli_wild_18436424 | NA                                  | Ca_kabuli_denovo | 18436424                | G/T  | NA                 | NA                            | NA                 |
| Kabuli_wild_18436976 | NA                                  | Ca_kabuli_denovo | 18436976                | G/C  | NA                 | NA                            | NA                 |
| Kabuli_wild_18437959 | NA                                  | Ca_kabuli_denovo | 18437959                | A/G  | NA                 | NA                            | NA                 |
| Kabuli_wild_18437989 | NA                                  | Ca_kabuli_denovo | 18437989                | A/T  | NA                 | NA                            | NA                 |
| Kabuli_wild_18437998 | NA                                  | Ca_kabuli_denovo | 18437998                | A/T  | NA                 | NA                            | NA                 |
| Kabuli_wild_18438039 | NA                                  | Ca_kabuli_denovo | 18438039                | C/A  | NA                 | NA                            | NA                 |
| Kabuli_wild_18439135 | NA                                  | Ca_kabuli_denovo | 18439135                | A/G  | NA                 | NA                            | NA                 |
| Kabuli_wild_18439144 | NA                                  | Ca_kabuli_denovo | 18439144                | G/T  | NA                 | NA                            | NA                 |

| SNP IDs              | NCBI dbSNP accession IDs (NCBI_SS#) | Chromosomes      | Physical positions (bp) | SNPs | Gene accession IDs | Sequence components of genome | Putative functions |
|----------------------|-------------------------------------|------------------|-------------------------|------|--------------------|-------------------------------|--------------------|
| Kabuli_wild_18439273 | NA                                  | Ca_kabuli_denovo | 18439273                | T/C  | NA                 | NA                            | NA                 |
| Kabuli_wild_18439283 | NA                                  | Ca_kabuli_denovo | 18439283                | C/A  | NA                 | NA                            | NA                 |
| Kabuli_wild_18439300 | NA                                  | Ca_kabuli_denovo | 18439300                | A/T  | NA                 | NA                            | NA                 |
| Kabuli_wild_18439798 | NA                                  | Ca_kabuli_denovo | 18439798                | A/C  | NA                 | NA                            | NA                 |
| Kabuli_wild_18440003 | NA                                  | Ca_kabuli_denovo | 18440003                | T/G  | NA                 | NA                            | NA                 |
| Kabuli_wild_18440151 | NA                                  | Ca_kabuli_denovo | 18440151                | C/T  | NA                 | NA                            | NA                 |
| Kabuli_wild_18440226 | NA                                  | Ca_kabuli_denovo | 18440226                | C/T  | NA                 | NA                            | NA                 |
| Kabuli_wild_18440233 | NA                                  | Ca_kabuli_denovo | 18440233                | T/C  | NA                 | NA                            | NA                 |
| Kabuli_wild_18440450 | NA                                  | Ca_kabuli_denovo | 18440450                | T/C  | NA                 | NA                            | NA                 |
| Kabuli_wild_18440462 | NA                                  | Ca_kabuli_denovo | 18440462                | C/T  | NA                 | NA                            | NA                 |
| Kabuli_wild_18440500 | NA                                  | Ca_kabuli_denovo | 18440500                | T/G  | NA                 | NA                            | NA                 |
| Kabuli_wild_18441601 | NA                                  | Ca_kabuli_denovo | 18441601                | A/G  | NA                 | NA                            | NA                 |
| Kabuli_wild_18445043 | NA                                  | Ca_kabuli_denovo | 18445043                | G/T  | NA                 | NA                            | NA                 |
| Kabuli_wild_18445119 | NA                                  | Ca_kabuli_denovo | 18445119                | C/T  | NA                 | NA                            | NA                 |
| Kabuli_wild_18445127 | NA                                  | Ca_kabuli_denovo | 18445127                | A/G  | NA                 | NA                            | NA                 |
| Kabuli_wild_18445144 | NA                                  | Ca_kabuli_denovo | 18445144                | T/C  | NA                 | NA                            | NA                 |
| Kabuli_wild_18446794 | NA                                  | Ca_kabuli_denovo | 18446794                | T/C  | NA                 | NA                            | NA                 |
| Kabuli_wild_18446821 | NA                                  | Ca_kabuli_denovo | 18446821                | C/T  | NA                 | NA                            | NA                 |
| Kabuli_wild_18448793 | NA                                  | Ca_kabuli_denovo | 18448793                | C/T  | NA                 | NA                            | NA                 |
| Kabuli_wild_18449013 | NA                                  | Ca_kabuli_denovo | 18449013                | G/A  | NA                 | NA                            | NA                 |
| Kabuli_wild_18450236 | NA                                  | Ca_kabuli_denovo | 18450236                | T/A  | NA                 | NA                            | NA                 |
| Kabuli_wild_18451184 | NA                                  | Ca_kabuli_denovo | 18451184                | A/C  | NA                 | NA                            | NA                 |
| Kabuli_wild_18451190 | NA                                  | Ca_kabuli_denovo | 18451190                | C/G  | NA                 | NA                            | NA                 |
| Kabuli_wild_18451227 | NA                                  | Ca_kabuli_denovo | 18451227                | G/T  | NA                 | NA                            | NA                 |
| Kabuli_wild_18451245 | NA                                  | Ca_kabuli_denovo | 18451245                | G/A  | NA                 | NA                            | NA                 |
| Kabuli_wild_18453584 | NA                                  | Ca_kabuli_denovo | 18453584                | A/T  | NA                 | NA                            | NA                 |
| Kabuli_wild_18454008 | NA                                  | Ca_kabuli_denovo | 18454008                | A/G  | NA                 | NA                            | NA                 |
| Kabuli_wild_18455557 | NA                                  | Ca_kabuli_denovo | 18455557                | C/T  | NA                 | NA                            | NA                 |
| Kabuli_wild_18456463 | NA                                  | Ca_kabuli_denovo | 18456463                | T/C  | NA                 | NA                            | NA                 |
| Kabuli_wild_18457620 | NA                                  | Ca_kabuli_denovo | 18457620                | G/A  | NA                 | NA                            | NA                 |
| Kabuli_wild_18459082 | NA                                  | Ca_kabuli_denovo | 18459082                | C/T  | NA                 | NA                            | NA                 |
| Kabuli_wild_18459091 | NA                                  | Ca_kabuli_denovo | 18459091                | A/G  | NA                 | NA                            | NA                 |
| Kabuli_wild_18459094 | NA                                  | Ca_kabuli_denovo | 18459094                | A/C  | NA                 | NA                            | NA                 |
| Kabuli_wild_18459181 | NA                                  | Ca_kabuli_denovo | 18459181                | T/A  | NA                 | NA                            | NA                 |
| Kabuli_wild_18459198 | NA                                  | Ca_kabuli_denovo | 18459198                | C/T  | NA                 | NA                            | NA                 |
| Kabuli_wild_18460016 | NA                                  | Ca_kabuli_denovo | 18460016                | A/G  | NA                 | NA                            | NA                 |
| Kabuli_wild_18460248 | NA                                  | Ca_kabuli_denovo | 18460248                | A/G  | NA                 | NA                            | NA                 |
| Kabuli_wild_18460300 | NA                                  | Ca_kabuli_denovo | 18460300                | A/G  | NA                 | NA                            | NA                 |
| Kabuli_wild_18460306 | NA                                  | Ca_kabuli_denovo | 18460306                | A/T  | NA                 | NA                            | NA                 |
| Kabuli_wild_18460354 | NA                                  | Ca_kabuli_denovo | 18460354                | C/G  | NA                 | NA                            | NA                 |
| Kabuli_wild_18460863 | NA                                  | Ca_kabuli_denovo | 18460863                | G/A  | NA                 | NA                            | NA                 |
| Kabuli_wild_18460970 | NA                                  | Ca_kabuli_denovo | 18460970                | C/T  | NA                 | NA                            | NA                 |
| Kabuli_wild_18460973 | NA                                  | Ca_kabuli_denovo | 18460973                | C/A  | NA                 | NA                            | NA                 |
| Kabuli_wild_18460980 | NA                                  | Ca_kabuli_denovo | 18460980                | T/C  | NA                 | NA                            | NA                 |

| SNP IDs              | NCBI dbSNP accession IDs (NCBI_SS#) | Chromosomes      | Physical positions (bp) | SNPs | Gene accession IDs | Sequence components of genome | Putative functions |
|----------------------|-------------------------------------|------------------|-------------------------|------|--------------------|-------------------------------|--------------------|
| Kabuli_wild_18461847 | NA                                  | Ca_kabuli_denovo | 18461847                | A/T  | NA                 | NA                            | NA                 |
| Kabuli_wild_18461888 | NA                                  | Ca_kabuli_denovo | 18461888                | A/T  | NA                 | NA                            | NA                 |
| Kabuli_wild_18462781 | NA                                  | Ca_kabuli_denovo | 18462781                | T/A  | NA                 | NA                            | NA                 |
| Kabuli_wild_18462783 | NA                                  | Ca_kabuli_denovo | 18462783                | G/A  | NA                 | NA                            | NA                 |
| Kabuli_wild_18464083 | NA                                  | Ca_kabuli_denovo | 18464083                | A/C  | NA                 | NA                            | NA                 |
| Kabuli_wild_18464285 | NA                                  | Ca_kabuli_denovo | 18464285                | G/A  | NA                 | NA                            | NA                 |
| Kabuli_wild_18466741 | NA                                  | Ca_kabuli_denovo | 18466741                | G/A  | NA                 | NA                            | NA                 |
| Kabuli_wild_18468480 | NA                                  | Ca_kabuli_denovo | 18468480                | T/C  | NA                 | NA                            | NA                 |
| Kabuli_wild_18469983 | NA                                  | Ca_kabuli_denovo | 18469983                | C/T  | NA                 | NA                            | NA                 |
| Kabuli_wild_18470012 | NA                                  | Ca_kabuli_denovo | 18470012                | A/T  | NA                 | NA                            | NA                 |
| Kabuli_wild_18472185 | NA                                  | Ca_kabuli_denovo | 18472185                | G/T  | NA                 | NA                            | NA                 |
| Kabuli_wild_18472280 | NA                                  | Ca_kabuli_denovo | 18472280                | A/G  | NA                 | NA                            | NA                 |
| Kabuli_wild_18472470 | NA                                  | Ca_kabuli_denovo | 18472470                | T/A  | NA                 | NA                            | NA                 |
| Kabuli_wild_18472495 | NA                                  | Ca_kabuli_denovo | 18472495                | G/A  | NA                 | NA                            | NA                 |
| Kabuli_wild_18472915 | NA                                  | Ca_kabuli_denovo | 18472915                | C/G  | NA                 | NA                            | NA                 |
| Kabuli_wild_18472919 | NA                                  | Ca_kabuli_denovo | 18472919                | A/T  | NA                 | NA                            | NA                 |
| Kabuli_wild_18472928 | NA                                  | Ca_kabuli_denovo | 18472928                | T/G  | NA                 | NA                            | NA                 |
| Kabuli_wild_18472982 | NA                                  | Ca_kabuli_denovo | 18472982                | A/G  | NA                 | NA                            | NA                 |
| Kabuli_wild_18473332 | NA                                  | Ca_kabuli_denovo | 18473332                | T/G  | NA                 | NA                            | NA                 |
| Kabuli_wild_18473344 | NA                                  | Ca_kabuli_denovo | 18473344                | G/T  | NA                 | NA                            | NA                 |
| Kabuli_wild_18473359 | NA                                  | Ca_kabuli_denovo | 18473359                | T/G  | NA                 | NA                            | NA                 |
| Kabuli_wild_18473379 | NA                                  | Ca_kabuli_denovo | 18473379                | A/G  | NA                 | NA                            | NA                 |
| Kabuli_wild_18473675 | NA                                  | Ca_kabuli_denovo | 18473675                | A/G  | NA                 | NA                            | NA                 |
| Kabuli_wild_18474100 | NA                                  | Ca_kabuli_denovo | 18474100                | A/G  | NA                 | NA                            | NA                 |
| Kabuli_wild_18474749 | NA                                  | Ca_kabuli_denovo | 18474749                | A/G  | NA                 | NA                            | NA                 |
| Kabuli_wild_18474844 | NA                                  | Ca_kabuli_denovo | 18474844                | A/G  | NA                 | NA                            | NA                 |
| Kabuli_wild_18475319 | NA                                  | Ca_kabuli_denovo | 18475319                | A/C  | NA                 | NA                            | NA                 |
| Kabuli_wild_18475321 | NA                                  | Ca_kabuli_denovo | 18475321                | C/G  | NA                 | NA                            | NA                 |
| Kabuli_wild_18475699 | NA                                  | Ca_kabuli_denovo | 18475699                | C/G  | NA                 | NA                            | NA                 |
| Kabuli_wild_18475797 | NA                                  | Ca_kabuli_denovo | 18475797                | A/G  | NA                 | NA                            | NA                 |
| Kabuli_wild_18476553 | NA                                  | Ca_kabuli_denovo | 18476553                | G/A  | NA                 | NA                            | NA                 |
| Kabuli_wild_18476579 | NA                                  | Ca_kabuli_denovo | 18476579                | A/G  | NA                 | NA                            | NA                 |
| Kabuli_wild_18476581 | NA                                  | Ca_kabuli_denovo | 18476581                | T/G  | NA                 | NA                            | NA                 |
| Kabuli_wild_18476594 | NA                                  | Ca_kabuli_denovo | 18476594                | C/G  | NA                 | NA                            | NA                 |
| Kabuli_wild_18476631 | NA                                  | Ca_kabuli_denovo | 18476631                | G/C  | NA                 | NA                            | NA                 |
| Kabuli_wild_18476840 | NA                                  | Ca_kabuli_denovo | 18476840                | A/G  | NA                 | NA                            | NA                 |
| Kabuli_wild_18476860 | NA                                  | Ca_kabuli_denovo | 18476860                | T/G  | NA                 | NA                            | NA                 |
| Kabuli_wild_18476864 | NA                                  | Ca_kabuli_denovo | 18476864                | C/G  | NA                 | NA                            | NA                 |
| Kabuli_wild_18477101 | NA                                  | Ca_kabuli_denovo | 18477101                | A/G  | NA                 | NA                            | NA                 |
| Kabuli_wild_18477717 | NA                                  | Ca_kabuli_denovo | 18477717                | A/C  | NA                 | NA                            | NA                 |
| Kabuli_wild_18478661 | NA                                  | Ca_kabuli_denovo | 18478661                | A/G  | NA                 | NA                            | NA                 |
| Kabuli_wild_18478677 | NA                                  | Ca_kabuli_denovo | 18478677                | G/A  | NA                 | NA                            | NA                 |
| Kabuli_wild_18478680 | NA                                  | Ca_kabuli_denovo | 18478680                | A/G  | NA                 | NA                            | NA                 |
| Kabuli_wild_18478698 | NA                                  | Ca_kabuli_denovo | 18478698                | A/G  | NA                 | NA                            | NA                 |

| SNP IDs              | NCBI dbSNP accession IDs (NCBI_SS#) | Chromosomes      | Physical positions (bp) | SNPs | Gene accession IDs | Sequence components of genome | Putative functions |
|----------------------|-------------------------------------|------------------|-------------------------|------|--------------------|-------------------------------|--------------------|
| Kabuli_wild_18478764 | NA                                  | Ca_kabuli_denovo | 18478764                | G/T  | NA                 | NA                            | NA                 |
| Kabuli_wild_18479432 | NA                                  | Ca_kabuli_denovo | 18479432                | T/G  | NA                 | NA                            | NA                 |
| Kabuli_wild_18479438 | NA                                  | Ca_kabuli_denovo | 18479438                | A/G  | NA                 | NA                            | NA                 |
| Kabuli_wild_18479444 | NA                                  | Ca_kabuli_denovo | 18479444                | C/G  | NA                 | NA                            | NA                 |
| Kabuli_wild_18479455 | NA                                  | Ca_kabuli_denovo | 18479455                | G/A  | NA                 | NA                            | NA                 |
| Kabuli_wild_18479588 | NA                                  | Ca_kabuli_denovo | 18479588                | C/G  | NA                 | NA                            | NA                 |
| Kabuli_wild_18479703 | NA                                  | Ca_kabuli_denovo | 18479703                | T/A  | NA                 | NA                            | NA                 |
| Kabuli_wild_18479830 | NA                                  | Ca_kabuli_denovo | 18479830                | C/A  | NA                 | NA                            | NA                 |
| Kabuli_wild_18479837 | NA                                  | Ca_kabuli_denovo | 18479837                | C/G  | NA                 | NA                            | NA                 |
| Kabuli_wild_18479868 | NA                                  | Ca_kabuli_denovo | 18479868                | C/A  | NA                 | NA                            | NA                 |
| Kabuli_wild_18480231 | NA                                  | Ca_kabuli_denovo | 18480231                | G/A  | NA                 | NA                            | NA                 |
| Kabuli_wild_18480392 | NA                                  | Ca_kabuli_denovo | 18480392                | A/G  | NA                 | NA                            | NA                 |
| Kabuli_wild_18480502 | NA                                  | Ca_kabuli_denovo | 18480502                | A/G  | NA                 | NA                            | NA                 |
| Kabuli_wild_18480641 | NA                                  | Ca_kabuli_denovo | 18480641                | G/A  | NA                 | NA                            | NA                 |
| Kabuli_wild_18480854 | NA                                  | Ca_kabuli_denovo | 18480854                | C/G  | NA                 | NA                            | NA                 |
| Kabuli_wild_18481033 | NA                                  | Ca_kabuli_denovo | 18481033                | T/A  | NA                 | NA                            | NA                 |
| Kabuli_wild_18481066 | NA                                  | Ca_kabuli_denovo | 18481066                | A/T  | NA                 | NA                            | NA                 |
| Kabuli_wild_18481083 | NA                                  | Ca_kabuli_denovo | 18481083                | T/G  | NA                 | NA                            | NA                 |
| Kabuli_wild_18481102 | NA                                  | Ca_kabuli_denovo | 18481102                | C/A  | NA                 | NA                            | NA                 |
| Kabuli_wild_18481114 | NA                                  | Ca_kabuli_denovo | 18481114                | T/G  | NA                 | NA                            | NA                 |
| Kabuli_wild_18481122 | NA                                  | Ca_kabuli_denovo | 18481122                | A/G  | NA                 | NA                            | NA                 |
| Kabuli_wild_18481149 | NA                                  | Ca_kabuli_denovo | 18481149                | A/G  | NA                 | NA                            | NA                 |
| Kabuli_wild_18481158 | NA                                  | Ca_kabuli_denovo | 18481158                | T/C  | NA                 | NA                            | NA                 |
| Kabuli_wild_18481169 | NA                                  | Ca_kabuli_denovo | 18481169                | G/T  | NA                 | NA                            | NA                 |
| Kabuli_wild_18481187 | NA                                  | Ca_kabuli_denovo | 18481187                | A/C  | NA                 | NA                            | NA                 |
| Kabuli_wild_18481195 | NA                                  | Ca_kabuli_denovo | 18481195                | G/A  | NA                 | NA                            | NA                 |
| Kabuli_wild_18482151 | NA                                  | Ca_kabuli_denovo | 18482151                | C/G  | NA                 | NA                            | NA                 |
| Kabuli_wild_18482636 | NA                                  | Ca_kabuli_denovo | 18482636                | G/T  | NA                 | NA                            | NA                 |
| Kabuli_wild_18483343 | NA                                  | Ca_kabuli_denovo | 18483343                | A/G  | NA                 | NA                            | NA                 |
| Kabuli_wild_18483387 | NA                                  | Ca_kabuli_denovo | 18483387                | A/C  | NA                 | NA                            | NA                 |
| Kabuli_wild_18483980 | NA                                  | Ca_kabuli_denovo | 18483980                | A/G  | NA                 | NA                            | NA                 |
| Kabuli_wild_18484198 | NA                                  | Ca_kabuli_denovo | 18484198                | T/G  | NA                 | NA                            | NA                 |
| Kabuli_wild_18484391 | NA                                  | Ca_kabuli_denovo | 18484391                | G/T  | NA                 | NA                            | NA                 |
| Kabuli_wild_18484443 | NA                                  | Ca_kabuli_denovo | 18484443                | A/G  | NA                 | NA                            | NA                 |
| Kabuli_wild_18484490 | NA                                  | Ca_kabuli_denovo | 18484490                | T/G  | NA                 | NA                            | NA                 |
| Kabuli_wild_18484763 | NA                                  | Ca_kabuli_denovo | 18484763                | A/G  | NA                 | NA                            | NA                 |
| Kabuli_wild_18486169 | NA                                  | Ca_kabuli_denovo | 18486169                | T/A  | NA                 | NA                            | NA                 |
| Kabuli_wild_18486690 | NA                                  | Ca_kabuli_denovo | 18486690                | A/T  | NA                 | NA                            | NA                 |
| Kabuli_wild_18486948 | NA                                  | Ca_kabuli_denovo | 18486948                | G/T  | NA                 | NA                            | NA                 |
| Kabuli_wild_18487328 | NA                                  | Ca_kabuli_denovo | 18487328                | A/G  | NA                 | NA                            | NA                 |
| Kabuli_wild_18488178 | NA                                  | Ca_kabuli_denovo | 18488178                | G/T  | NA                 | NA                            | NA                 |
| Kabuli_wild_18488527 | NA                                  | Ca_kabuli_denovo | 18488527                | G/T  | NA                 | NA                            | NA                 |
| Kabuli_wild_18488631 | NA                                  | Ca_kabuli_denovo | 18488631                | A/G  | NA                 | NA                            | NA                 |
| Kabuli_wild_18488908 | NA                                  | Ca_kabuli_denovo | 18488908                | G/T  | NA                 | NA                            | NA                 |

| SNP IDs              | NCBI dbSNP accession IDs (NCBI_SS#) | Chromosomes      | Physical positions (bp) | SNPs | Gene accession IDs | Sequence components of genome | Putative functions |
|----------------------|-------------------------------------|------------------|-------------------------|------|--------------------|-------------------------------|--------------------|
| Kabuli_wild_18489104 | NA                                  | Ca_kabuli_denovo | 18489104                | A/T  | NA                 | NA                            | NA                 |
| Kabuli_wild_18489116 | NA                                  | Ca_kabuli_denovo | 18489116                | A/T  | NA                 | NA                            | NA                 |
| Kabuli_wild_18489447 | NA                                  | Ca_kabuli_denovo | 18489447                | A/C  | NA                 | NA                            | NA                 |
| Kabuli_wild_18489449 | NA                                  | Ca_kabuli_denovo | 18489449                | G/C  | NA                 | NA                            | NA                 |
| Kabuli_wild_18489450 | NA                                  | Ca_kabuli_denovo | 18489450                | T/G  | NA                 | NA                            | NA                 |
| Kabuli_wild_18489451 | NA                                  | Ca_kabuli_denovo | 18489451                | T/G  | NA                 | NA                            | NA                 |
| Kabuli_wild_18489452 | NA                                  | Ca_kabuli_denovo | 18489452                | C/T  | NA                 | NA                            | NA                 |
| Kabuli_wild_18490805 | NA                                  | Ca_kabuli_denovo | 18490805                | G/T  | NA                 | NA                            | NA                 |
| Kabuli_wild_18490994 | NA                                  | Ca_kabuli_denovo | 18490994                | T/G  | NA                 | NA                            | NA                 |
| Kabuli_wild_18491060 | NA                                  | Ca_kabuli_denovo | 18491060                | C/G  | NA                 | NA                            | NA                 |
| Kabuli_wild_18491064 | NA                                  | Ca_kabuli_denovo | 18491064                | A/T  | NA                 | NA                            | NA                 |
| Kabuli_wild_18491073 | NA                                  | Ca_kabuli_denovo | 18491073                | G/T  | NA                 | NA                            | NA                 |
| Kabuli_wild_18493316 | NA                                  | Ca_kabuli_denovo | 18493316                | A/G  | NA                 | NA                            | NA                 |
| Kabuli_wild_18493465 | NA                                  | Ca_kabuli_denovo | 18493465                | T/G  | NA                 | NA                            | NA                 |
| Kabuli_wild_18493474 | NA                                  | Ca_kabuli_denovo | 18493474                | T/A  | NA                 | NA                            | NA                 |
| Kabuli_wild_18493497 | NA                                  | Ca_kabuli_denovo | 18493497                | C/G  | NA                 | NA                            | NA                 |
| Kabuli_wild_18493550 | NA                                  | Ca_kabuli_denovo | 18493550                | T/A  | NA                 | NA                            | NA                 |
| Kabuli_wild_18494149 | NA                                  | Ca_kabuli_denovo | 18494149                | C/T  | NA                 | NA                            | NA                 |
| Kabuli_wild_18496199 | NA                                  | Ca_kabuli_denovo | 18496199                | A/C  | NA                 | NA                            | NA                 |
| Kabuli_wild_18496368 | NA                                  | Ca_kabuli_denovo | 18496368                | G/T  | NA                 | NA                            | NA                 |
| Kabuli_wild_18496633 | NA                                  | Ca_kabuli_denovo | 18496633                | A/G  | NA                 | NA                            | NA                 |
| Kabuli_wild_18496660 | NA                                  | Ca_kabuli_denovo | 18496660                | A/G  | NA                 | NA                            | NA                 |
| Kabuli_wild_18496900 | NA                                  | Ca_kabuli_denovo | 18496900                | A/C  | NA                 | NA                            | NA                 |
| Kabuli_wild_18497615 | NA                                  | Ca_kabuli_denovo | 18497615                | A/G  | NA                 | NA                            | NA                 |
| Kabuli_wild_18497892 | NA                                  | Ca_kabuli_denovo | 18497892                | A/G  | NA                 | NA                            | NA                 |
| Kabuli_wild_18499016 | NA                                  | Ca_kabuli_denovo | 18499016                | G/T  | NA                 | NA                            | NA                 |
| Kabuli_wild_18531156 | NA                                  | Ca_kabuli_denovo | 18531156                | T/C  | NA                 | NA                            | NA                 |
| Kabuli_wild_18549605 | NA                                  | Ca_kabuli_denovo | 18549605                | C/T  | NA                 | NA                            | NA                 |
| Kabuli_wild_18549608 | NA                                  | Ca_kabuli_denovo | 18549608                | C/T  | NA                 | NA                            | NA                 |
| Kabuli_wild_18554569 | NA                                  | Ca_kabuli_denovo | 18554569                | A/T  | NA                 | NA                            | NA                 |
| Kabuli_wild_18555143 | NA                                  | Ca_kabuli_denovo | 18555143                | T/C  | NA                 | NA                            | NA                 |
| Kabuli_wild_18555150 | NA                                  | Ca_kabuli_denovo | 18555150                | T/A  | NA                 | NA                            | NA                 |
| Kabuli_wild_18555158 | NA                                  | Ca_kabuli_denovo | 18555158                | T/C  | NA                 | NA                            | NA                 |
| Kabuli_wild_18555162 | NA                                  | Ca_kabuli_denovo | 18555162                | A/G  | NA                 | NA                            | NA                 |
| Kabuli_wild_18556211 | NA                                  | Ca_kabuli_denovo | 18556211                | C/A  | NA                 | NA                            | NA                 |
| Kabuli_wild_18556245 | NA                                  | Ca_kabuli_denovo | 18556245                | C/G  | NA                 | NA                            | NA                 |
| Kabuli_wild_18558394 | NA                                  | Ca_kabuli_denovo | 18558394                | C/T  | NA                 | NA                            | NA                 |
| Kabuli_wild_18573847 | NA                                  | Ca_kabuli_denovo | 18573847                | T/G  | NA                 | NA                            | NA                 |
| Kabuli_wild_18573850 | NA                                  | Ca_kabuli_denovo | 18573850                | T/A  | NA                 | NA                            | NA                 |
| Kabuli_wild_18576273 | NA                                  | Ca_kabuli_denovo | 18576273                | A/T  | NA                 | NA                            | NA                 |
| Kabuli_wild_18576293 | NA                                  | Ca_kabuli_denovo | 18576293                | A/G  | NA                 | NA                            | NA                 |
| Kabuli_wild_18585383 | NA                                  | Ca_kabuli_denovo | 18585383                | A/C  | NA                 | NA                            | NA                 |
| Kabuli_wild_18597717 | NA                                  | Ca_kabuli_denovo | 18597717                | A/G  | NA                 | NA                            | NA                 |
| Kabuli_wild_18598866 | NA                                  | Ca_kabuli_denovo | 18598866                | A/C  | NA                 | NA                            | NA                 |

| SNP IDs              | NCBI dbSNP accession IDs (NCBI_SS#) | Chromosomes      | Physical positions (bp) | SNPs | Gene accession IDs | Sequence components of genome | Putative functions |
|----------------------|-------------------------------------|------------------|-------------------------|------|--------------------|-------------------------------|--------------------|
| Kabuli_wild_18606471 | NA                                  | Ca_kabuli_denovo | 18606471                | T/G  | NA                 | NA                            | NA                 |
| Kabuli_wild_18609086 | NA                                  | Ca_kabuli_denovo | 18609086                | A/C  | NA                 | NA                            | NA                 |
| Kabuli_wild_18613583 | NA                                  | Ca_kabuli_denovo | 18613583                | A/G  | NA                 | NA                            | NA                 |
| Kabuli_wild_18625071 | NA                                  | Ca_kabuli_denovo | 18625071                | A/G  | NA                 | NA                            | NA                 |
| Kabuli_wild_18625104 | NA                                  | Ca_kabuli_denovo | 18625104                | C/T  | NA                 | NA                            | NA                 |
| Kabuli_wild_18625107 | NA                                  | Ca_kabuli_denovo | 18625107                | C/T  | NA                 | NA                            | NA                 |
| Kabuli_wild_18628657 | NA                                  | Ca_kabuli_denovo | 18628657                | G/C  | NA                 | NA                            | NA                 |
| Kabuli_wild_18628753 | NA                                  | Ca_kabuli_denovo | 18628753                | G/T  | NA                 | NA                            | NA                 |
| Kabuli_wild_18670458 | NA                                  | Ca_kabuli_denovo | 18670458                | C/A  | NA                 | NA                            | NA                 |
| Kabuli_wild_18670506 | NA                                  | Ca_kabuli_denovo | 18670506                | A/G  | NA                 | NA                            | NA                 |
| Kabuli_wild_18670510 | NA                                  | Ca_kabuli_denovo | 18670510                | C/T  | NA                 | NA                            | NA                 |
| Kabuli_wild_18677525 | NA                                  | Ca_kabuli_denovo | 18677525                | C/T  | NA                 | NA                            | NA                 |
| Kabuli_wild_18686792 | NA                                  | Ca_kabuli_denovo | 18686792                | A/G  | NA                 | NA                            | NA                 |
| Kabuli_wild_18699174 | NA                                  | Ca_kabuli_denovo | 18699174                | A/G  | NA                 | NA                            | NA                 |
| Kabuli_wild_18717226 | NA                                  | Ca_kabuli_denovo | 18717226                | C/G  | NA                 | NA                            | NA                 |
| Kabuli_wild_18717238 | NA                                  | Ca_kabuli_denovo | 18717238                | C/G  | NA                 | NA                            | NA                 |
| Kabuli_wild_18719192 | NA                                  | Ca_kabuli_denovo | 18719192                | C/T  | NA                 | NA                            | NA                 |
| Kabuli_wild_18739676 | NA                                  | Ca_kabuli_denovo | 18739676                | A/G  | NA                 | NA                            | NA                 |
| Kabuli_wild_18739677 | NA                                  | Ca_kabuli_denovo | 18739677                | C/G  | NA                 | NA                            | NA                 |
| Kabuli_wild_18744194 | NA                                  | Ca_kabuli_denovo | 18744194                | C/T  | NA                 | NA                            | NA                 |
| Kabuli_wild_18749126 | NA                                  | Ca_kabuli_denovo | 18749126                | C/T  | NA                 | NA                            | NA                 |
| Kabuli_wild_18749129 | NA                                  | Ca_kabuli_denovo | 18749129                | A/G  | NA                 | NA                            | NA                 |
| Kabuli_wild_18749147 | NA                                  | Ca_kabuli_denovo | 18749147                | C/T  | NA                 | NA                            | NA                 |
| Kabuli_wild_18765748 | NA                                  | Ca_kabuli_denovo | 18765748                | C/G  | NA                 | NA                            | NA                 |
| Kabuli_wild_18770684 | NA                                  | Ca_kabuli_denovo | 18770684                | C/T  | NA                 | NA                            | NA                 |
| Kabuli_wild_18771635 | NA                                  | Ca_kabuli_denovo | 18771635                | C/T  | NA                 | NA                            | NA                 |
| Kabuli_wild_18771640 | NA                                  | Ca_kabuli_denovo | 18771640                | A/T  | NA                 | NA                            | NA                 |
| Kabuli_wild_18782618 | NA                                  | Ca_kabuli_denovo | 18782618                | T/C  | NA                 | NA                            | NA                 |
| Kabuli_wild_18799993 | NA                                  | Ca_kabuli_denovo | 18799993                | G/T  | NA                 | NA                            | NA                 |
| Kabuli_wild_18803661 | NA                                  | Ca_kabuli_denovo | 18803661                | A/G  | NA                 | NA                            | NA                 |
| Kabuli_wild_18803682 | NA                                  | Ca_kabuli_denovo | 18803682                | C/G  | NA                 | NA                            | NA                 |
| Kabuli_wild_18803691 | NA                                  | Ca_kabuli_denovo | 18803691                | A/G  | NA                 | NA                            | NA                 |
| Kabuli_wild_18810234 | NA                                  | Ca_kabuli_denovo | 18810234                | G/C  | NA                 | NA                            | NA                 |
| Kabuli_wild_18810261 | NA                                  | Ca_kabuli_denovo | 18810261                | A/G  | NA                 | NA                            | NA                 |
| Kabuli_wild_18810282 | NA                                  | Ca_kabuli_denovo | 18810282                | A/G  | NA                 | NA                            | NA                 |
| Kabuli_wild_18810285 | NA                                  | Ca_kabuli_denovo | 18810285                | T/C  | NA                 | NA                            | NA                 |
| Kabuli_wild_18828569 | NA                                  | Ca_kabuli_denovo | 18828569                | T/C  | NA                 | NA                            | NA                 |
| Kabuli_wild_18828617 | NA                                  | Ca_kabuli_denovo | 18828617                | A/G  | NA                 | NA                            | NA                 |
| Kabuli_wild_18830369 | NA                                  | Ca_kabuli_denovo | 18830369                | T/G  | NA                 | NA                            | NA                 |
| Kabuli_wild_18830384 | NA                                  | Ca_kabuli_denovo | 18830384                | C/T  | NA                 | NA                            | NA                 |
| Kabuli_wild_18836659 | NA                                  | Ca_kabuli_denovo | 18836659                | C/G  | NA                 | NA                            | NA                 |
| Kabuli_wild_18836663 | NA                                  | Ca_kabuli_denovo | 18836663                | G/T  | NA                 | NA                            | NA                 |
| Kabuli_wild_18839549 | NA                                  | Ca_kabuli_denovo | 18839549                | C/T  | NA                 | NA                            | NA                 |
| Kabuli_wild_18839553 | NA                                  | Ca_kabuli_denovo | 18839553                | C/G  | NA                 | NA                            | NA                 |

| SNP IDs              | NCBI dbSNP accession IDs (NCBI_SS#) | Chromosomes      | Physical positions (bp) | SNPs | Gene accession IDs | Sequence components of genome | Putative functions |
|----------------------|-------------------------------------|------------------|-------------------------|------|--------------------|-------------------------------|--------------------|
| Kabuli_wild_18839555 | NA                                  | Ca_kabuli_denovo | 18839555                | C/T  | NA                 | NA                            | NA                 |
| Kabuli_wild_18839562 | NA                                  | Ca_kabuli_denovo | 18839562                | C/T  | NA                 | NA                            | NA                 |
| Kabuli_wild_18843800 | NA                                  | Ca_kabuli_denovo | 18843800                | C/T  | NA                 | NA                            | NA                 |
| Kabuli_wild_18843851 | NA                                  | Ca_kabuli_denovo | 18843851                | G/A  | NA                 | NA                            | NA                 |
| Kabuli_wild_18858047 | NA                                  | Ca_kabuli_denovo | 18858047                | A/C  | NA                 | NA                            | NA                 |
| Kabuli_wild_18858048 | NA                                  | Ca_kabuli_denovo | 18858048                | A/G  | NA                 | NA                            | NA                 |
| Kabuli_wild_18858049 | NA                                  | Ca_kabuli_denovo | 18858049                | A/T  | NA                 | NA                            | NA                 |
| Kabuli_wild_18858050 | NA                                  | Ca_kabuli_denovo | 18858050                | C/T  | NA                 | NA                            | NA                 |
| Kabuli_wild_18859068 | NA                                  | Ca_kabuli_denovo | 18859068                | C/G  | NA                 | NA                            | NA                 |
| Kabuli_wild_18859558 | NA                                  | Ca_kabuli_denovo | 18859558                | G/A  | NA                 | NA                            | NA                 |
| Kabuli_wild_18859585 | NA                                  | Ca_kabuli_denovo | 18859585                | T/G  | NA                 | NA                            | NA                 |
| Kabuli_wild_18866111 | NA                                  | Ca_kabuli_denovo | 18866111                | G/A  | NA                 | NA                            | NA                 |
| Kabuli_wild_18866577 | NA                                  | Ca_kabuli_denovo | 18866577                | G/T  | NA                 | NA                            | NA                 |
| Kabuli_wild_18883196 | NA                                  | Ca_kabuli_denovo | 18883196                | C/G  | NA                 | NA                            | NA                 |
| Kabuli_wild_18885041 | NA                                  | Ca_kabuli_denovo | 18885041                | C/T  | NA                 | NA                            | NA                 |
| Kabuli_wild_18885785 | NA                                  | Ca_kabuli_denovo | 18885785                | C/A  | NA                 | NA                            | NA                 |
| Kabuli_wild_18887642 | NA                                  | Ca_kabuli_denovo | 18887642                | G/A  | NA                 | NA                            | NA                 |
| Kabuli_wild_18887717 | NA                                  | Ca_kabuli_denovo | 18887717                | C/T  | NA                 | NA                            | NA                 |
| Kabuli_wild_18887723 | NA                                  | Ca_kabuli_denovo | 18887723                | A/G  | NA                 | NA                            | NA                 |
| Kabuli_wild_18907333 | NA                                  | Ca_kabuli_denovo | 18907333                | A/C  | NA                 | NA                            | NA                 |
| Kabuli_wild_18915420 | NA                                  | Ca_kabuli_denovo | 18915420                | C/G  | NA                 | NA                            | NA                 |
| Kabuli_wild_18919476 | NA                                  | Ca_kabuli_denovo | 18919476                | G/A  | NA                 | NA                            | NA                 |
| Kabuli_wild_18919692 | NA                                  | Ca_kabuli_denovo | 18919692                | A/G  | NA                 | NA                            | NA                 |
| Kabuli_wild_18919702 | NA                                  | Ca_kabuli_denovo | 18919702                | A/G  | NA                 | NA                            | NA                 |
| Kabuli_wild_18925693 | NA                                  | Ca_kabuli_denovo | 18925693                | G/A  | NA                 | NA                            | NA                 |
| Kabuli_wild_18934608 | NA                                  | Ca_kabuli_denovo | 18934608                | A/C  | NA                 | NA                            | NA                 |
| Kabuli_wild_18934611 | NA                                  | Ca_kabuli_denovo | 18934611                | C/G  | NA                 | NA                            | NA                 |
| Kabuli_wild_18940149 | NA                                  | Ca_kabuli_denovo | 18940149                | C/G  | NA                 | NA                            | NA                 |
| Kabuli_wild_18941580 | NA                                  | Ca_kabuli_denovo | 18941580                | T/C  | NA                 | NA                            | NA                 |
| Kabuli_wild_18941592 | NA                                  | Ca_kabuli_denovo | 18941592                | G/A  | NA                 | NA                            | NA                 |
| Kabuli_wild_18947502 | NA                                  | Ca_kabuli_denovo | 18947502                | A/C  | NA                 | NA                            | NA                 |
| Kabuli_wild_18950327 | NA                                  | Ca_kabuli_denovo | 18950327                | C/A  | NA                 | NA                            | NA                 |
| Kabuli_wild_18959711 | NA                                  | Ca_kabuli_denovo | 18959711                | A/C  | NA                 | NA                            | NA                 |
| Kabuli_wild_18961082 | NA                                  | Ca_kabuli_denovo | 18961082                | A/G  | NA                 | NA                            | NA                 |
| Kabuli_wild_18972718 | NA                                  | Ca_kabuli_denovo | 18972718                | C/T  | NA                 | NA                            | NA                 |
| Kabuli_wild_18982224 | NA                                  | Ca_kabuli_denovo | 18982224                | A/C  | NA                 | NA                            | NA                 |
| Kabuli_wild_18995205 | NA                                  | Ca_kabuli_denovo | 18995205                | A/C  | NA                 | NA                            | NA                 |
| Kabuli_wild_18995206 | NA                                  | Ca_kabuli_denovo | 18995206                | C/G  | NA                 | NA                            | NA                 |
| Kabuli_wild_18995207 | NA                                  | Ca_kabuli_denovo | 18995207                | A/C  | NA                 | NA                            | NA                 |
| Kabuli_wild_18995688 | NA                                  | Ca_kabuli_denovo | 18995688                | A/C  | NA                 | NA                            | NA                 |
| Kabuli_wild_18995691 | NA                                  | Ca_kabuli_denovo | 18995691                | C/T  | NA                 | NA                            | NA                 |
| Kabuli_wild_18995826 | NA                                  | Ca_kabuli_denovo | 18995826                | G/C  | NA                 | NA                            | NA                 |
| Kabuli_wild_18995831 | NA                                  | Ca_kabuli_denovo | 18995831                | C/T  | NA                 | NA                            | NA                 |
| Kabuli_wild_19011213 | NA                                  | Ca_kabuli_denovo | 19011213                | A/C  | NA                 | NA                            | NA                 |



| SNP IDs              | NCBI dbSNP accession IDs (NCBI_SS#) | Chromosomes      | Physical positions (bp) | SNPs | Gene accession IDs | Sequence components of genome | Putative functions |
|----------------------|-------------------------------------|------------------|-------------------------|------|--------------------|-------------------------------|--------------------|
| Kabuli_wild_19017614 | NA                                  | Ca_kabuli_denovo | 19017614                | A/C  | NA                 | NA                            | NA                 |
| Kabuli_wild_19027236 | NA                                  | Ca_kabuli_denovo | 19027236                | G/A  | NA                 | NA                            | NA                 |
| Kabuli_wild_19027251 | NA                                  | Ca_kabuli_denovo | 19027251                | T/C  | NA                 | NA                            | NA                 |
| Kabuli_wild_19029766 | NA                                  | Ca_kabuli_denovo | 19029766                | C/T  | NA                 | NA                            | NA                 |
| Kabuli_wild_19029822 | NA                                  | Ca_kabuli_denovo | 19029822                | T/C  | NA                 | NA                            | NA                 |
| Kabuli_wild_19035009 | NA                                  | Ca_kabuli_denovo | 19035009                | C/T  | NA                 | NA                            | NA                 |
| Kabuli_wild_19035017 | NA                                  | Ca_kabuli_denovo | 19035017                | C/T  | NA                 | NA                            | NA                 |
| Kabuli_wild_19037013 | NA                                  | Ca_kabuli_denovo | 19037013                | G/T  | NA                 | NA                            | NA                 |
| Kabuli_wild_19040033 | NA                                  | Ca_kabuli_denovo | 19040033                | T/C  | NA                 | NA                            | NA                 |
| Kabuli_wild_19040320 | NA                                  | Ca_kabuli_denovo | 19040320                | C/T  | NA                 | NA                            | NA                 |
| Kabuli_wild_19041362 | NA                                  | Ca_kabuli_denovo | 19041362                | G/T  | NA                 | NA                            | NA                 |
| Kabuli_wild_19041375 | NA                                  | Ca_kabuli_denovo | 19041375                | A/C  | NA                 | NA                            | NA                 |
| Kabuli_wild_19045396 | NA                                  | Ca_kabuli_denovo | 19045396                | C/T  | NA                 | NA                            | NA                 |
| Kabuli_wild_19052571 | NA                                  | Ca_kabuli_denovo | 19052571                | G/A  | NA                 | NA                            | NA                 |
| Kabuli_wild_19056057 | NA                                  | Ca_kabuli_denovo | 19056057                | G/C  | NA                 | NA                            | NA                 |
| Kabuli_wild_19062352 | NA                                  | Ca_kabuli_denovo | 19062352                | C/G  | NA                 | NA                            | NA                 |
| Kabuli_wild_19062367 | NA                                  | Ca_kabuli_denovo | 19062367                | C/A  | NA                 | NA                            | NA                 |
| Kabuli_wild_19065830 | NA                                  | Ca_kabuli_denovo | 19065830                | G/C  | NA                 | NA                            | NA                 |
| Kabuli_wild_19067404 | NA                                  | Ca_kabuli_denovo | 19067404                | A/C  | NA                 | NA                            | NA                 |
| Kabuli_wild_19067408 | NA                                  | Ca_kabuli_denovo | 19067408                | C/A  | NA                 | NA                            | NA                 |
| Kabuli_wild_19073131 | NA                                  | Ca_kabuli_denovo | 19073131                | G/C  | NA                 | NA                            | NA                 |
| Kabuli_wild_19073156 | NA                                  | Ca_kabuli_denovo | 19073156                | A/G  | NA                 | NA                            | NA                 |
| Kabuli_wild_19075281 | NA                                  | Ca_kabuli_denovo | 19075281                | T/C  | NA                 | NA                            | NA                 |
| Kabuli_wild_19078451 | NA                                  | Ca_kabuli_denovo | 19078451                | C/T  | NA                 | NA                            | NA                 |
| Kabuli_wild_19078478 | NA                                  | Ca_kabuli_denovo | 19078478                | G/A  | NA                 | NA                            | NA                 |
| Kabuli_wild_19095809 | NA                                  | Ca_kabuli_denovo | 19095809                | C/G  | NA                 | NA                            | NA                 |
| Kabuli_wild_19095830 | NA                                  | Ca_kabuli_denovo | 19095830                | T/C  | NA                 | NA                            | NA                 |
| Kabuli_wild_19105755 | NA                                  | Ca_kabuli_denovo | 19105755                | T/G  | NA                 | NA                            | NA                 |
| Kabuli_wild_19116976 | NA                                  | Ca_kabuli_denovo | 19116976                | A/G  | NA                 | NA                            | NA                 |
| Kabuli_wild_19116982 | NA                                  | Ca_kabuli_denovo | 19116982                | C/G  | NA                 | NA                            | NA                 |
| Kabuli_wild_19117635 | NA                                  | Ca_kabuli_denovo | 19117635                | A/G  | NA                 | NA                            | NA                 |
| Kabuli_wild_19117638 | NA                                  | Ca_kabuli_denovo | 19117638                | A/G  | NA                 | NA                            | NA                 |
| Kabuli_wild_19117650 | NA                                  | Ca_kabuli_denovo | 19117650                | C/G  | NA                 | NA                            | NA                 |
| Kabuli_wild_19118608 | NA                                  | Ca_kabuli_denovo | 19118608                | G/T  | NA                 | NA                            | NA                 |
| Kabuli_wild_19118623 | NA                                  | Ca_kabuli_denovo | 19118623                | C/T  | NA                 | NA                            | NA                 |
| Kabuli_wild_19118626 | NA                                  | Ca_kabuli_denovo | 19118626                | G/C  | NA                 | NA                            | NA                 |
| Kabuli_wild_19118629 | NA                                  | Ca_kabuli_denovo | 19118629                | C/G  | NA                 | NA                            | NA                 |
| Kabuli_wild_19124486 | NA                                  | Ca_kabuli_denovo | 19124486                | A/G  | NA                 | NA                            | NA                 |
| Kabuli_wild_19124488 | NA                                  | Ca_kabuli_denovo | 19124488                | T/A  | NA                 | NA                            | NA                 |
| Kabuli_wild_19124489 | NA                                  | Ca_kabuli_denovo | 19124489                | G/T  | NA                 | NA                            | NA                 |
| Kabuli_wild_19126585 | NA                                  | Ca_kabuli_denovo | 19126585                | T/C  | NA                 | NA                            | NA                 |
| Kabuli_wild_19131354 | NA                                  | Ca_kabuli_denovo | 19131354                | T/G  | NA                 | NA                            | NA                 |
| Kabuli_wild_19132870 | NA                                  | Ca_kabuli_denovo | 19132870                | A/G  | NA                 | NA                            | NA                 |
| Kabuli_wild_19134738 | NA                                  | Ca_kabuli_denovo | 19134738                | A/G  | NA                 | NA                            | NA                 |

| SNP IDs              | NCBI dbSNP accession IDs (NCBI_SS#) | Chromosomes      | Physical positions (bp) | SNPs | Gene accession IDs | Sequence components of genome | Putative functions |
|----------------------|-------------------------------------|------------------|-------------------------|------|--------------------|-------------------------------|--------------------|
| Kabuli_wild_19149566 | NA                                  | Ca_kabuli_denovo | 19149566                | A/G  | NA                 | NA                            | NA                 |
| Kabuli_wild_19149569 | NA                                  | Ca_kabuli_denovo | 19149569                | C/G  | NA                 | NA                            | NA                 |
| Kabuli_wild_19152004 | NA                                  | Ca_kabuli_denovo | 19152004                | G/C  | NA                 | NA                            | NA                 |
| Kabuli_wild_19153816 | NA                                  | Ca_kabuli_denovo | 19153816                | A/G  | NA                 | NA                            | NA                 |
| Kabuli_wild_19153819 | NA                                  | Ca_kabuli_denovo | 19153819                | A/G  | NA                 | NA                            | NA                 |
| Kabuli_wild_19154698 | NA                                  | Ca_kabuli_denovo | 19154698                | G/A  | NA                 | NA                            | NA                 |
| Kabuli_wild_19154707 | NA                                  | Ca_kabuli_denovo | 19154707                | A/G  | NA                 | NA                            | NA                 |
| Kabuli_wild_19160514 | NA                                  | Ca_kabuli_denovo | 19160514                | T/C  | NA                 | NA                            | NA                 |
| Kabuli_wild_19160528 | NA                                  | Ca_kabuli_denovo | 19160528                | T/C  | NA                 | NA                            | NA                 |
| Kabuli_wild_19163367 | NA                                  | Ca_kabuli_denovo | 19163367                | T/C  | NA                 | NA                            | NA                 |
| Kabuli_wild_19178286 | NA                                  | Ca_kabuli_denovo | 19178286                | G/A  | NA                 | NA                            | NA                 |
| Kabuli_wild_19178293 | NA                                  | Ca_kabuli_denovo | 19178293                | C/T  | NA                 | NA                            | NA                 |
| Kabuli_wild_19188351 | NA                                  | Ca_kabuli_denovo | 19188351                | A/C  | NA                 | NA                            | NA                 |
| Kabuli_wild_19196297 | NA                                  | Ca_kabuli_denovo | 19196297                | C/G  | NA                 | NA                            | NA                 |
| Kabuli_wild_19198638 | NA                                  | Ca_kabuli_denovo | 19198638                | A/G  | NA                 | NA                            | NA                 |
| Kabuli_wild_19202740 | NA                                  | Ca_kabuli_denovo | 19202740                | C/T  | NA                 | NA                            | NA                 |
| Kabuli_wild_19246701 | NA                                  | Ca_kabuli_denovo | 19246701                | C/G  | NA                 | NA                            | NA                 |
| Kabuli_wild_19253146 | NA                                  | Ca_kabuli_denovo | 19253146                | G/T  | NA                 | NA                            | NA                 |
| Kabuli_wild_19253158 | NA                                  | Ca_kabuli_denovo | 19253158                | C/T  | NA                 | NA                            | NA                 |
| Kabuli_wild_19254890 | NA                                  | Ca_kabuli_denovo | 19254890                | G/T  | NA                 | NA                            | NA                 |
| Kabuli_wild_19262060 | NA                                  | Ca_kabuli_denovo | 19262060                | C/G  | NA                 | NA                            | NA                 |
| Kabuli_wild_19262108 | NA                                  | Ca_kabuli_denovo | 19262108                | A/G  | NA                 | NA                            | NA                 |
| Kabuli_wild_19270130 | NA                                  | Ca_kabuli_denovo | 19270130                | C/G  | NA                 | NA                            | NA                 |
| Kabuli_wild_19272636 | NA                                  | Ca_kabuli_denovo | 19272636                | C/T  | NA                 | NA                            | NA                 |
| Kabuli_wild_19272638 | NA                                  | Ca_kabuli_denovo | 19272638                | C/G  | NA                 | NA                            | NA                 |
| Kabuli_wild_19272650 | NA                                  | Ca_kabuli_denovo | 19272650                | C/G  | NA                 | NA                            | NA                 |
| Kabuli_wild_19272664 | NA                                  | Ca_kabuli_denovo | 19272664                | G/T  | NA                 | NA                            | NA                 |
| Kabuli_wild_19273333 | NA                                  | Ca_kabuli_denovo | 19273333                | C/T  | NA                 | NA                            | NA                 |
| Kabuli_wild_19273393 | NA                                  | Ca_kabuli_denovo | 19273393                | A/C  | NA                 | NA                            | NA                 |
| Kabuli_wild_19274024 | NA                                  | Ca_kabuli_denovo | 19274024                | C/T  | NA                 | NA                            | NA                 |
| Kabuli_wild_19275973 | NA                                  | Ca_kabuli_denovo | 19275973                | G/A  | NA                 | NA                            | NA                 |
| Kabuli_wild_19278170 | NA                                  | Ca_kabuli_denovo | 19278170                | C/G  | NA                 | NA                            | NA                 |
| Kabuli_wild_19278197 | NA                                  | Ca_kabuli_denovo | 19278197                | C/G  | NA                 | NA                            | NA                 |
| Kabuli_wild_19281561 | NA                                  | Ca_kabuli_denovo | 19281561                | A/G  | NA                 | NA                            | NA                 |
| Kabuli_wild_19285759 | NA                                  | Ca_kabuli_denovo | 19285759                | T/A  | NA                 | NA                            | NA                 |
| Kabuli_wild_19286733 | NA                                  | Ca_kabuli_denovo | 19286733                | A/G  | NA                 | NA                            | NA                 |
| Kabuli_wild_19301649 | NA                                  | Ca_kabuli_denovo | 19301649                | C/T  | NA                 | NA                            | NA                 |
| Kabuli_wild_19301650 | NA                                  | Ca_kabuli_denovo | 19301650                | A/T  | NA                 | NA                            | NA                 |
| Kabuli_wild_19301651 | NA                                  | Ca_kabuli_denovo | 19301651                | G/C  | NA                 | NA                            | NA                 |
| Kabuli_wild_19301653 | NA                                  | Ca_kabuli_denovo | 19301653                | T/A  | NA                 | NA                            | NA                 |
| Kabuli_wild_19310246 | NA                                  | Ca_kabuli_denovo | 19310246                | C/T  | NA                 | NA                            | NA                 |
| Kabuli_wild_19313264 | NA                                  | Ca_kabuli_denovo | 19313264                | T/A  | NA                 | NA                            | NA                 |
| Kabuli_wild_19313266 | NA                                  | Ca_kabuli_denovo | 19313266                | A/C  | NA                 | NA                            | NA                 |
| Kabuli_wild_19320981 | NA                                  | Ca_kabuli_denovo | 19320981                | T/G  | NA                 | NA                            | NA                 |

| SNP IDs              | NCBI dbSNP accession IDs (NCBI_SS#) | Chromosomes      | Physical positions (bp) | SNPs | Gene accession IDs | Sequence components of genome | Putative functions |
|----------------------|-------------------------------------|------------------|-------------------------|------|--------------------|-------------------------------|--------------------|
| Kabuli_wild_19325218 | NA                                  | Ca_kabuli_denovo | 19325218                | G/C  | NA                 | NA                            | NA                 |
| Kabuli_wild_19325251 | NA                                  | Ca_kabuli_denovo | 19325251                | T/C  | NA                 | NA                            | NA                 |
| Kabuli_wild_19325256 | NA                                  | Ca_kabuli_denovo | 19325256                | C/G  | NA                 | NA                            | NA                 |
| Kabuli_wild_19325257 | NA                                  | Ca_kabuli_denovo | 19325257                | G/C  | NA                 | NA                            | NA                 |
| Kabuli_wild_19333781 | NA                                  | Ca_kabuli_denovo | 19333781                | C/T  | NA                 | NA                            | NA                 |
| Kabuli_wild_19352285 | NA                                  | Ca_kabuli_denovo | 19352285                | C/T  | NA                 | NA                            | NA                 |
| Kabuli_wild_19360385 | NA                                  | Ca_kabuli_denovo | 19360385                | T/C  | NA                 | NA                            | NA                 |
| Kabuli_wild_19363254 | NA                                  | Ca_kabuli_denovo | 19363254                | C/G  | NA                 | NA                            | NA                 |
| Kabuli_wild_19368394 | NA                                  | Ca_kabuli_denovo | 19368394                | T/C  | NA                 | NA                            | NA                 |
| Kabuli_wild_19371135 | NA                                  | Ca_kabuli_denovo | 19371135                | T/C  | NA                 | NA                            | NA                 |
| Kabuli_wild_19376249 | NA                                  | Ca_kabuli_denovo | 19376249                | C/G  | NA                 | NA                            | NA                 |
| Kabuli_wild_19376294 | NA                                  | Ca_kabuli_denovo | 19376294                | T/G  | NA                 | NA                            | NA                 |
| Kabuli_wild_19378404 | NA                                  | Ca_kabuli_denovo | 19378404                | G/T  | NA                 | NA                            | NA                 |
| Kabuli_wild_19378583 | NA                                  | Ca_kabuli_denovo | 19378583                | C/G  | NA                 | NA                            | NA                 |
| Kabuli_wild_19414629 | NA                                  | Ca_kabuli_denovo | 19414629                | A/G  | NA                 | NA                            | NA                 |
| Kabuli_wild_19415776 | NA                                  | Ca_kabuli_denovo | 19415776                | A/G  | NA                 | NA                            | NA                 |
| Kabuli_wild_19440562 | NA                                  | Ca_kabuli_denovo | 19440562                | A/G  | NA                 | NA                            | NA                 |
| Kabuli_wild_19446167 | NA                                  | Ca_kabuli_denovo | 19446167                | T/G  | NA                 | NA                            | NA                 |
| Kabuli_wild_19450829 | NA                                  | Ca_kabuli_denovo | 19450829                | T/C  | NA                 | NA                            | NA                 |
| Kabuli_wild_19456266 | NA                                  | Ca_kabuli_denovo | 19456266                | C/T  | NA                 | NA                            | NA                 |
| Kabuli_wild_19464255 | NA                                  | Ca_kabuli_denovo | 19464255                | T/G  | NA                 | NA                            | NA                 |
| Kabuli_wild_19464277 | NA                                  | Ca_kabuli_denovo | 19464277                | T/G  | NA                 | NA                            | NA                 |
| Kabuli_wild_19466266 | NA                                  | Ca_kabuli_denovo | 19466266                | C/G  | NA                 | NA                            | NA                 |
| Kabuli_wild_19471002 | NA                                  | Ca_kabuli_denovo | 19471002                | T/C  | NA                 | NA                            | NA                 |
| Kabuli_wild_19486901 | NA                                  | Ca_kabuli_denovo | 19486901                | A/C  | NA                 | NA                            | NA                 |
| Kabuli_wild_19498700 | NA                                  | Ca_kabuli_denovo | 19498700                | G/C  | NA                 | NA                            | NA                 |
| Kabuli_wild_19502559 | NA                                  | Ca_kabuli_denovo | 19502559                | A/C  | NA                 | NA                            | NA                 |
| Kabuli_wild_19503515 | NA                                  | Ca_kabuli_denovo | 19503515                | A/G  | NA                 | NA                            | NA                 |
| Kabuli_wild_19503518 | NA                                  | Ca_kabuli_denovo | 19503518                | G/A  | NA                 | NA                            | NA                 |
| Kabuli_wild_19503532 | NA                                  | Ca_kabuli_denovo | 19503532                | T/A  | NA                 | NA                            | NA                 |
| Kabuli_wild_19511806 | NA                                  | Ca_kabuli_denovo | 19511806                | G/T  | NA                 | NA                            | NA                 |
| Kabuli_wild_19513982 | NA                                  | Ca_kabuli_denovo | 19513982                | C/T  | NA                 | NA                            | NA                 |
| Kabuli_wild_19534765 | NA                                  | Ca_kabuli_denovo | 19534765                | A/G  | NA                 | NA                            | NA                 |
| Kabuli_wild_19535156 | NA                                  | Ca_kabuli_denovo | 19535156                | A/G  | NA                 | NA                            | NA                 |
| Kabuli_wild_19543954 | NA                                  | Ca_kabuli_denovo | 19543954                | A/G  | NA                 | NA                            | NA                 |
| Kabuli_wild_19547990 | NA                                  | Ca_kabuli_denovo | 19547990                | C/T  | NA                 | NA                            | NA                 |
| Kabuli_wild_19551168 | NA                                  | Ca_kabuli_denovo | 19551168                | A/G  | NA                 | NA                            | NA                 |
| Kabuli_wild_19560416 | NA                                  | Ca_kabuli_denovo | 19560416                | A/C  | NA                 | NA                            | NA                 |
| Kabuli_wild_19560419 | NA                                  | Ca_kabuli_denovo | 19560419                | A/G  | NA                 | NA                            | NA                 |
| Kabuli_wild_19566181 | NA                                  | Ca_kabuli_denovo | 19566181                | C/T  | NA                 | NA                            | NA                 |
| Kabuli_wild_19566214 | NA                                  | Ca_kabuli_denovo | 19566214                | A/G  | NA                 | NA                            | NA                 |
| Kabuli_wild_19566219 | NA                                  | Ca_kabuli_denovo | 19566219                | A/C  | NA                 | NA                            | NA                 |
| Kabuli_wild_19568245 | NA                                  | Ca_kabuli_denovo | 19568245                | C/T  | NA                 | NA                            | NA                 |
| Kabuli_wild_19571397 | NA                                  | Ca_kabuli_denovo | 19571397                | G/A  | NA                 | NA                            | NA                 |

| SNP IDs              | NCBI dbSNP accession IDs (NCBI_SS#) | Chromosomes      | Physical positions (bp) | SNPs | Gene accession IDs | Sequence components of genome | Putative functions |
|----------------------|-------------------------------------|------------------|-------------------------|------|--------------------|-------------------------------|--------------------|
| Kabuli_wild_19575953 | NA                                  | Ca_kabuli_denovo | 19575953                | C/G  | NA                 | NA                            | NA                 |
| Kabuli_wild_19590868 | NA                                  | Ca_kabuli_denovo | 19590868                | C/T  | NA                 | NA                            | NA                 |
| Kabuli_wild_19595569 | NA                                  | Ca_kabuli_denovo | 19595569                | G/A  | NA                 | NA                            | NA                 |
| Kabuli_wild_19604955 | NA                                  | Ca_kabuli_denovo | 19604955                | G/A  | NA                 | NA                            | NA                 |
| Kabuli_wild_19605357 | NA                                  | Ca_kabuli_denovo | 19605357                | A/G  | NA                 | NA                            | NA                 |
| Kabuli_wild_19609035 | NA                                  | Ca_kabuli_denovo | 19609035                | C/A  | NA                 | NA                            | NA                 |
| Kabuli_wild_19609036 | NA                                  | Ca_kabuli_denovo | 19609036                | G/A  | NA                 | NA                            | NA                 |
| Kabuli_wild_19609037 | NA                                  | Ca_kabuli_denovo | 19609037                | C/G  | NA                 | NA                            | NA                 |
| Kabuli_wild_19609040 | NA                                  | Ca_kabuli_denovo | 19609040                | T/C  | NA                 | NA                            | NA                 |
| Kabuli_wild_19609043 | NA                                  | Ca_kabuli_denovo | 19609043                | C/G  | NA                 | NA                            | NA                 |
| Kabuli_wild_19609179 | NA                                  | Ca_kabuli_denovo | 19609179                | A/G  | NA                 | NA                            | NA                 |
| Kabuli_wild_19609203 | NA                                  | Ca_kabuli_denovo | 19609203                | A/G  | NA                 | NA                            | NA                 |
| Kabuli_wild_19611963 | NA                                  | Ca_kabuli_denovo | 19611963                | G/C  | NA                 | NA                            | NA                 |
| Kabuli_wild_19611972 | NA                                  | Ca_kabuli_denovo | 19611972                | G/C  | NA                 | NA                            | NA                 |
| Kabuli_wild_19616689 | NA                                  | Ca_kabuli_denovo | 19616689                | T/A  | NA                 | NA                            | NA                 |
| Kabuli_wild_19624075 | NA                                  | Ca_kabuli_denovo | 19624075                | G/T  | NA                 | NA                            | NA                 |
| Kabuli_wild_19624087 | NA                                  | Ca_kabuli_denovo | 19624087                | C/G  | NA                 | NA                            | NA                 |
| Kabuli_wild_19634300 | NA                                  | Ca_kabuli_denovo | 19634300                | A/T  | NA                 | NA                            | NA                 |
| Kabuli_wild_19662276 | NA                                  | Ca_kabuli_denovo | 19662276                | T/C  | NA                 | NA                            | NA                 |
| Kabuli_wild_19696224 | NA                                  | Ca_kabuli_denovo | 19696224                | G/T  | NA                 | NA                            | NA                 |
| Kabuli_wild_19696642 | NA                                  | Ca_kabuli_denovo | 19696642                | C/G  | NA                 | NA                            | NA                 |
| Kabuli_wild_19697203 | NA                                  | Ca_kabuli_denovo | 19697203                | C/G  | NA                 | NA                            | NA                 |
| Kabuli_wild_19714196 | NA                                  | Ca_kabuli_denovo | 19714196                | C/G  | NA                 | NA                            | NA                 |
| Kabuli_wild_19714619 | NA                                  | Ca_kabuli_denovo | 19714619                | G/T  | NA                 | NA                            | NA                 |
| Kabuli_wild_19714760 | NA                                  | Ca_kabuli_denovo | 19714760                | C/T  | NA                 | NA                            | NA                 |
| Kabuli_wild_19714763 | NA                                  | Ca_kabuli_denovo | 19714763                | T/C  | NA                 | NA                            | NA                 |
| Kabuli_wild_19725422 | NA                                  | Ca_kabuli_denovo | 19725422                | A/C  | NA                 | NA                            | NA                 |
| Kabuli_wild_19725423 | NA                                  | Ca_kabuli_denovo | 19725423                | G/A  | NA                 | NA                            | NA                 |
| Kabuli_wild_19749108 | NA                                  | Ca_kabuli_denovo | 19749108                | G/A  | NA                 | NA                            | NA                 |
| Kabuli_wild_19757387 | NA                                  | Ca_kabuli_denovo | 19757387                | A/T  | NA                 | NA                            | NA                 |
| Kabuli_wild_19757516 | NA                                  | Ca_kabuli_denovo | 19757516                | C/G  | NA                 | NA                            | NA                 |
| Kabuli_wild_19766472 | NA                                  | Ca_kabuli_denovo | 19766472                | G/C  | NA                 | NA                            | NA                 |
| Kabuli_wild_19766489 | NA                                  | Ca_kabuli_denovo | 19766489                | A/C  | NA                 | NA                            | NA                 |
| Kabuli_wild_19766490 | NA                                  | Ca_kabuli_denovo | 19766490                | A/G  | NA                 | NA                            | NA                 |
| Kabuli_wild_19766491 | NA                                  | Ca_kabuli_denovo | 19766491                | G/T  | NA                 | NA                            | NA                 |
| Kabuli_wild_19767227 | NA                                  | Ca_kabuli_denovo | 19767227                | T/A  | NA                 | NA                            | NA                 |
| Kabuli_wild_19767228 | NA                                  | Ca_kabuli_denovo | 19767228                | A/C  | NA                 | NA                            | NA                 |
| Kabuli_wild_19767231 | NA                                  | Ca_kabuli_denovo | 19767231                | A/C  | NA                 | NA                            | NA                 |
| Kabuli_wild_19769477 | NA                                  | Ca_kabuli_denovo | 19769477                | T/G  | NA                 | NA                            | NA                 |
| Kabuli_wild_19785611 | NA                                  | Ca_kabuli_denovo | 19785611                | G/A  | NA                 | NA                            | NA                 |
| Kabuli_wild_19789756 | NA                                  | Ca_kabuli_denovo | 19789756                | C/T  | NA                 | NA                            | NA                 |
| Kabuli_wild_19789762 | NA                                  | Ca_kabuli_denovo | 19789762                | A/G  | NA                 | NA                            | NA                 |
| Kabuli_wild_19789767 | NA                                  | Ca_kabuli_denovo | 19789767                | A/C  | NA                 | NA                            | NA                 |
| Kabuli_wild_19789768 | NA                                  | Ca_kabuli_denovo | 19789768                | G/C  | NA                 | NA                            | NA                 |

| SNP IDs              | NCBI dbSNP accession IDs (NCBI_SS#) | Chromosomes      | Physical positions (bp) | SNPs | Gene accession IDs | Sequence components of genome | Putative functions |
|----------------------|-------------------------------------|------------------|-------------------------|------|--------------------|-------------------------------|--------------------|
| Kabuli_wild_19796987 | NA                                  | Ca_kabuli_denovo | 19796987                | A/C  | NA                 | NA                            | NA                 |
| Kabuli_wild_19817005 | NA                                  | Ca_kabuli_denovo | 19817005                | T/G  | NA                 | NA                            | NA                 |
| Kabuli_wild_19822057 | NA                                  | Ca_kabuli_denovo | 19822057                | C/T  | NA                 | NA                            | NA                 |
| Kabuli_wild_19822061 | NA                                  | Ca_kabuli_denovo | 19822061                | A/G  | NA                 | NA                            | NA                 |
| Kabuli_wild_19822072 | NA                                  | Ca_kabuli_denovo | 19822072                | C/G  | NA                 | NA                            | NA                 |
| Kabuli_wild_19822073 | NA                                  | Ca_kabuli_denovo | 19822073                | A/G  | NA                 | NA                            | NA                 |
| Kabuli_wild_19827208 | NA                                  | Ca_kabuli_denovo | 19827208                | A/C  | NA                 | NA                            | NA                 |
| Kabuli_wild_19827214 | NA                                  | Ca_kabuli_denovo | 19827214                | C/T  | NA                 | NA                            | NA                 |
| Kabuli_wild_19827220 | NA                                  | Ca_kabuli_denovo | 19827220                | C/G  | NA                 | NA                            | NA                 |
| Kabuli_wild_19833037 | NA                                  | Ca_kabuli_denovo | 19833037                | T/G  | NA                 | NA                            | NA                 |
| Kabuli_wild_19845338 | NA                                  | Ca_kabuli_denovo | 19845338                | C/T  | NA                 | NA                            | NA                 |
| Kabuli_wild_19845350 | NA                                  | Ca_kabuli_denovo | 19845350                | C/T  | NA                 | NA                            | NA                 |
| Kabuli_wild_19845353 | NA                                  | Ca_kabuli_denovo | 19845353                | C/T  | NA                 | NA                            | NA                 |
| Kabuli_wild_19860280 | NA                                  | Ca_kabuli_denovo | 19860280                | A/C  | NA                 | NA                            | NA                 |
| Kabuli_wild_19866602 | NA                                  | Ca_kabuli_denovo | 19866602                | C/T  | NA                 | NA                            | NA                 |
| Kabuli_wild_19866685 | NA                                  | Ca_kabuli_denovo | 19866685                | G/T  | NA                 | NA                            | NA                 |
| Kabuli_wild_19871963 | NA                                  | Ca_kabuli_denovo | 19871963                | T/G  | NA                 | NA                            | NA                 |
| Kabuli_wild_19872902 | NA                                  | Ca_kabuli_denovo | 19872902                | T/G  | NA                 | NA                            | NA                 |
| Kabuli_wild_19872959 | NA                                  | Ca_kabuli_denovo | 19872959                | C/T  | NA                 | NA                            | NA                 |
| Kabuli_wild_19873489 | NA                                  | Ca_kabuli_denovo | 19873489                | T/G  | NA                 | NA                            | NA                 |
| Kabuli_wild_19873645 | NA                                  | Ca_kabuli_denovo | 19873645                | A/C  | NA                 | NA                            | NA                 |
| Kabuli_wild_19874222 | NA                                  | Ca_kabuli_denovo | 19874222                | A/C  | NA                 | NA                            | NA                 |
| Kabuli_wild_19874615 | NA                                  | Ca_kabuli_denovo | 19874615                | G/T  | NA                 | NA                            | NA                 |
| Kabuli_wild_19874656 | NA                                  | Ca_kabuli_denovo | 19874656                | A/G  | NA                 | NA                            | NA                 |
| Kabuli_wild_19874822 | NA                                  | Ca_kabuli_denovo | 19874822                | G/A  | NA                 | NA                            | NA                 |
| Kabuli_wild_19875343 | NA                                  | Ca_kabuli_denovo | 19875343                | T/G  | NA                 | NA                            | NA                 |
| Kabuli_wild_19875586 | NA                                  | Ca_kabuli_denovo | 19875586                | C/G  | NA                 | NA                            | NA                 |
| Kabuli_wild_19875612 | NA                                  | Ca_kabuli_denovo | 19875612                | A/G  | NA                 | NA                            | NA                 |
| Kabuli_wild_19875926 | NA                                  | Ca_kabuli_denovo | 19875926                | T/C  | NA                 | NA                            | NA                 |
| Kabuli_wild_19876753 | NA                                  | Ca_kabuli_denovo | 19876753                | A/G  | NA                 | NA                            | NA                 |
| Kabuli_wild_19876963 | NA                                  | Ca_kabuli_denovo | 19876963                | C/A  | NA                 | NA                            | NA                 |
| Kabuli_wild_19876979 | NA                                  | Ca_kabuli_denovo | 19876979                | G/T  | NA                 | NA                            | NA                 |
| Kabuli_wild_19877144 | NA                                  | Ca_kabuli_denovo | 19877144                | G/A  | NA                 | NA                            | NA                 |
| Kabuli_wild_19877181 | NA                                  | Ca_kabuli_denovo | 19877181                | T/A  | NA                 | NA                            | NA                 |
| Kabuli_wild_19877229 | NA                                  | Ca_kabuli_denovo | 19877229                | A/G  | NA                 | NA                            | NA                 |
| Kabuli_wild_19878324 | NA                                  | Ca_kabuli_denovo | 19878324                | T/G  | NA                 | NA                            | NA                 |
| Kabuli_wild_19878369 | NA                                  | Ca_kabuli_denovo | 19878369                | A/G  | NA                 | NA                            | NA                 |
| Kabuli_wild_19879117 | NA                                  | Ca_kabuli_denovo | 19879117                | A/G  | NA                 | NA                            | NA                 |
| Kabuli_wild_19879612 | NA                                  | Ca_kabuli_denovo | 19879612                | T/C  | NA                 | NA                            | NA                 |
| Kabuli_wild_19879813 | NA                                  | Ca_kabuli_denovo | 19879813                | C/G  | NA                 | NA                            | NA                 |
| Kabuli_wild_19880105 | NA                                  | Ca_kabuli_denovo | 19880105                | C/G  | NA                 | NA                            | NA                 |
| Kabuli_wild_19880242 | NA                                  | Ca_kabuli_denovo | 19880242                | C/A  | NA                 | NA                            | NA                 |
| Kabuli_wild_19880347 | NA                                  | Ca_kabuli_denovo | 19880347                | A/G  | NA                 | NA                            | NA                 |
| Kabuli_wild_19880632 | NA                                  | Ca_kabuli_denovo | 19880632                | C/G  | NA                 | NA                            | NA                 |

| SNP IDs                     | NCBI dbSNP accession IDs (NCBI_SS#) | Chromosomes             | Physical positions (bp) | SNPs | Gene accession IDs | Sequence components of genome | Putative functions |
|-----------------------------|-------------------------------------|-------------------------|-------------------------|------|--------------------|-------------------------------|--------------------|
| <i>Kabuli_wild_19881606</i> | NA                                  | <i>Ca_kabuli_denovo</i> | 19881606                | T/C  | NA                 | NA                            | NA                 |
| <i>Kabuli_wild_19881666</i> | NA                                  | <i>Ca_kabuli_denovo</i> | 19881666                | G/A  | NA                 | NA                            | NA                 |
| <i>Kabuli_wild_19883155</i> | NA                                  | <i>Ca_kabuli_denovo</i> | 19883155                | C/T  | NA                 | NA                            | NA                 |
| <i>Kabuli_wild_19884433</i> | NA                                  | <i>Ca_kabuli_denovo</i> | 19884433                | C/G  | NA                 | NA                            | NA                 |
| <i>Kabuli_wild_19888127</i> | NA                                  | <i>Ca_kabuli_denovo</i> | 19888127                | G/T  | NA                 | NA                            | NA                 |
| <i>Kabuli_wild_19899938</i> | NA                                  | <i>Ca_kabuli_denovo</i> | 19899938                | G/C  | NA                 | NA                            | NA                 |
| <i>Kabuli_wild_19899948</i> | NA                                  | <i>Ca_kabuli_denovo</i> | 19899948                | C/A  | NA                 | NA                            | NA                 |
| <i>Kabuli_wild_19903328</i> | NA                                  | <i>Ca_kabuli_denovo</i> | 19903328                | G/C  | NA                 | NA                            | NA                 |
| <i>Kabuli_wild_19903341</i> | NA                                  | <i>Ca_kabuli_denovo</i> | 19903341                | C/G  | NA                 | NA                            | NA                 |
| <i>Kabuli_wild_19903368</i> | NA                                  | <i>Ca_kabuli_denovo</i> | 19903368                | T/C  | NA                 | NA                            | NA                 |
| <i>Kabuli_wild_19907987</i> | NA                                  | <i>Ca_kabuli_denovo</i> | 19907987                | G/A  | NA                 | NA                            | NA                 |
| <i>Kabuli_wild_19907996</i> | NA                                  | <i>Ca_kabuli_denovo</i> | 19907996                | C/T  | NA                 | NA                            | NA                 |
| <i>Kabuli_wild_19909087</i> | NA                                  | <i>Ca_kabuli_denovo</i> | 19909087                | C/T  | NA                 | NA                            | NA                 |
| <i>Kabuli_wild_19909090</i> | NA                                  | <i>Ca_kabuli_denovo</i> | 19909090                | T/C  | NA                 | NA                            | NA                 |
| <i>Kabuli_wild_19913723</i> | NA                                  | <i>Ca_kabuli_denovo</i> | 19913723                | C/T  | NA                 | NA                            | NA                 |
| <i>Kabuli_wild_19913735</i> | NA                                  | <i>Ca_kabuli_denovo</i> | 19913735                | C/T  | NA                 | NA                            | NA                 |
| <i>Kabuli_wild_19919610</i> | NA                                  | <i>Ca_kabuli_denovo</i> | 19919610                | C/G  | NA                 | NA                            | NA                 |
| <i>Kabuli_wild_19919611</i> | NA                                  | <i>Ca_kabuli_denovo</i> | 19919611                | A/C  | NA                 | NA                            | NA                 |
| <i>Kabuli_wild_19933908</i> | NA                                  | <i>Ca_kabuli_denovo</i> | 19933908                | C/G  | NA                 | NA                            | NA                 |
| <i>Kabuli_wild_19934081</i> | NA                                  | <i>Ca_kabuli_denovo</i> | 19934081                | G/A  | NA                 | NA                            | NA                 |
| <i>Kabuli_wild_19934121</i> | NA                                  | <i>Ca_kabuli_denovo</i> | 19934121                | T/G  | NA                 | NA                            | NA                 |
| <i>Kabuli_wild_19934138</i> | NA                                  | <i>Ca_kabuli_denovo</i> | 19934138                | G/C  | NA                 | NA                            | NA                 |
| <i>Kabuli_wild_19934141</i> | NA                                  | <i>Ca_kabuli_denovo</i> | 19934141                | T/G  | NA                 | NA                            | NA                 |
| <i>Kabuli_wild_19934142</i> | NA                                  | <i>Ca_kabuli_denovo</i> | 19934142                | T/A  | NA                 | NA                            | NA                 |
| <i>Kabuli_wild_19955597</i> | NA                                  | <i>Ca_kabuli_denovo</i> | 19955597                | A/G  | NA                 | NA                            | NA                 |
| <i>Kabuli_wild_19955599</i> | NA                                  | <i>Ca_kabuli_denovo</i> | 19955599                | G/A  | NA                 | NA                            | NA                 |
| <i>Kabuli_wild_19955601</i> | NA                                  | <i>Ca_kabuli_denovo</i> | 19955601                | A/T  | NA                 | NA                            | NA                 |
| <i>Kabuli_wild_19955603</i> | NA                                  | <i>Ca_kabuli_denovo</i> | 19955603                | C/G  | NA                 | NA                            | NA                 |
| <i>Kabuli_wild_19960843</i> | NA                                  | <i>Ca_kabuli_denovo</i> | 19960843                | A/C  | NA                 | NA                            | NA                 |
| <i>Kabuli_wild_19974733</i> | NA                                  | <i>Ca_kabuli_denovo</i> | 19974733                | T/C  | NA                 | NA                            | NA                 |
| <i>Kabuli_wild_19976743</i> | NA                                  | <i>Ca_kabuli_denovo</i> | 19976743                | C/G  | NA                 | NA                            | NA                 |
| <i>Kabuli_wild_19983071</i> | NA                                  | <i>Ca_kabuli_denovo</i> | 19983071                | C/T  | NA                 | NA                            | NA                 |
| <i>Kabuli_wild_19986776</i> | NA                                  | <i>Ca_kabuli_denovo</i> | 19986776                | G/A  | NA                 | NA                            | NA                 |
| <i>Kabuli_wild_19994352</i> | NA                                  | <i>Ca_kabuli_denovo</i> | 19994352                | A/G  | NA                 | NA                            | NA                 |
| <i>Kabuli_wild_19995015</i> | NA                                  | <i>Ca_kabuli_denovo</i> | 19995015                | A/C  | NA                 | NA                            | NA                 |
| <i>Kabuli_wild_19995017</i> | NA                                  | <i>Ca_kabuli_denovo</i> | 19995017                | C/G  | NA                 | NA                            | NA                 |
| <i>Kabuli_wild_19995020</i> | NA                                  | <i>Ca_kabuli_denovo</i> | 19995020                | C/T  | NA                 | NA                            | NA                 |
| <i>Kabuli_wild_20009066</i> | NA                                  | <i>Ca_kabuli_denovo</i> | 20009066                | G/T  | NA                 | NA                            | NA                 |
| <i>Kabuli_wild_20009143</i> | NA                                  | <i>Ca_kabuli_denovo</i> | 20009143                | C/G  | NA                 | NA                            | NA                 |
| <i>Kabuli_wild_20009145</i> | NA                                  | <i>Ca_kabuli_denovo</i> | 20009145                | A/G  | NA                 | NA                            | NA                 |
| <i>Kabuli_wild_20032434</i> | NA                                  | <i>Ca_kabuli_denovo</i> | 20032434                | C/T  | NA                 | NA                            | NA                 |
| <i>Kabuli_wild_20032475</i> | NA                                  | <i>Ca_kabuli_denovo</i> | 20032475                | C/T  | NA                 | NA                            | NA                 |
| <i>Kabuli_wild_20049925</i> | NA                                  | <i>Ca_kabuli_denovo</i> | 20049925                | C/T  | NA                 | NA                            | NA                 |
| <i>Kabuli_wild_20050903</i> | NA                                  | <i>Ca_kabuli_denovo</i> | 20050903                | T/G  | NA                 | NA                            | NA                 |

| SNP IDs              | NCBI dbSNP accession IDs (NCBI_SS#) | Chromosomes      | Physical positions (bp) | SNPs | Gene accession IDs | Sequence components of genome | Putative functions |
|----------------------|-------------------------------------|------------------|-------------------------|------|--------------------|-------------------------------|--------------------|
| Kabuli_wild_20052329 | NA                                  | Ca_kabuli_denovo | 20052329                | G/A  | NA                 | NA                            | NA                 |
| Kabuli_wild_20056529 | NA                                  | Ca_kabuli_denovo | 20056529                | C/G  | NA                 | NA                            | NA                 |
| Kabuli_wild_20074784 | NA                                  | Ca_kabuli_denovo | 20074784                | C/T  | NA                 | NA                            | NA                 |
| Kabuli_wild_20075998 | NA                                  | Ca_kabuli_denovo | 20075998                | C/G  | NA                 | NA                            | NA                 |
| Kabuli_wild_20076001 | NA                                  | Ca_kabuli_denovo | 20076001                | C/G  | NA                 | NA                            | NA                 |
| Kabuli_wild_20076007 | NA                                  | Ca_kabuli_denovo | 20076007                | C/G  | NA                 | NA                            | NA                 |
| Kabuli_wild_20083685 | NA                                  | Ca_kabuli_denovo | 20083685                | C/A  | NA                 | NA                            | NA                 |
| Kabuli_wild_20083715 | NA                                  | Ca_kabuli_denovo | 20083715                | C/T  | NA                 | NA                            | NA                 |
| Kabuli_wild_20085889 | NA                                  | Ca_kabuli_denovo | 20085889                | A/G  | NA                 | NA                            | NA                 |
| Kabuli_wild_20085910 | NA                                  | Ca_kabuli_denovo | 20085910                | C/G  | NA                 | NA                            | NA                 |
| Kabuli_wild_20088283 | NA                                  | Ca_kabuli_denovo | 20088283                | A/G  | NA                 | NA                            | NA                 |
| Kabuli_wild_20099962 | NA                                  | Ca_kabuli_denovo | 20099962                | A/C  | NA                 | NA                            | NA                 |
| Kabuli_wild_20099995 | NA                                  | Ca_kabuli_denovo | 20099995                | C/G  | NA                 | NA                            | NA                 |
| Kabuli_wild_20103430 | NA                                  | Ca_kabuli_denovo | 20103430                | A/G  | NA                 | NA                            | NA                 |
| Kabuli_wild_20105029 | NA                                  | Ca_kabuli_denovo | 20105029                | T/C  | NA                 | NA                            | NA                 |
| Kabuli_wild_20105046 | NA                                  | Ca_kabuli_denovo | 20105046                | G/A  | NA                 | NA                            | NA                 |
| Kabuli_wild_20105531 | NA                                  | Ca_kabuli_denovo | 20105531                | A/G  | NA                 | NA                            | NA                 |
| Kabuli_wild_20110718 | NA                                  | Ca_kabuli_denovo | 20110718                | A/G  | NA                 | NA                            | NA                 |
| Kabuli_wild_20115374 | NA                                  | Ca_kabuli_denovo | 20115374                | T/C  | NA                 | NA                            | NA                 |
| Kabuli_wild_20115380 | NA                                  | Ca_kabuli_denovo | 20115380                | T/C  | NA                 | NA                            | NA                 |
| Kabuli_wild_20115386 | NA                                  | Ca_kabuli_denovo | 20115386                | A/G  | NA                 | NA                            | NA                 |
| Kabuli_wild_20115403 | NA                                  | Ca_kabuli_denovo | 20115403                | A/T  | NA                 | NA                            | NA                 |
| Kabuli_wild_20118861 | NA                                  | Ca_kabuli_denovo | 20118861                | G/C  | NA                 | NA                            | NA                 |
| Kabuli_wild_20118888 | NA                                  | Ca_kabuli_denovo | 20118888                | G/T  | NA                 | NA                            | NA                 |
| Kabuli_wild_20118890 | NA                                  | Ca_kabuli_denovo | 20118890                | G/A  | NA                 | NA                            | NA                 |
| Kabuli_wild_20118891 | NA                                  | Ca_kabuli_denovo | 20118891                | G/C  | NA                 | NA                            | NA                 |
| Kabuli_wild_20129844 | NA                                  | Ca_kabuli_denovo | 20129844                | C/T  | NA                 | NA                            | NA                 |
| Kabuli_wild_20133142 | NA                                  | Ca_kabuli_denovo | 20133142                | A/G  | NA                 | NA                            | NA                 |
| Kabuli_wild_20133160 | NA                                  | Ca_kabuli_denovo | 20133160                | C/G  | NA                 | NA                            | NA                 |
| Kabuli_wild_20133737 | NA                                  | Ca_kabuli_denovo | 20133737                | A/C  | NA                 | NA                            | NA                 |
| Kabuli_wild_20143516 | NA                                  | Ca_kabuli_denovo | 20143516                | A/G  | NA                 | NA                            | NA                 |
| Kabuli_wild_20143527 | NA                                  | Ca_kabuli_denovo | 20143527                | A/C  | NA                 | NA                            | NA                 |
| Kabuli_wild_20143555 | NA                                  | Ca_kabuli_denovo | 20143555                | A/C  | NA                 | NA                            | NA                 |
| Kabuli_wild_20143582 | NA                                  | Ca_kabuli_denovo | 20143582                | A/G  | NA                 | NA                            | NA                 |
| Kabuli_wild_20144770 | NA                                  | Ca_kabuli_denovo | 20144770                | C/T  | NA                 | NA                            | NA                 |
| Kabuli_wild_20144782 | NA                                  | Ca_kabuli_denovo | 20144782                | C/G  | NA                 | NA                            | NA                 |
| Kabuli_wild_20157273 | NA                                  | Ca_kabuli_denovo | 20157273                | G/C  | NA                 | NA                            | NA                 |
| Kabuli_wild_20159028 | NA                                  | Ca_kabuli_denovo | 20159028                | T/C  | NA                 | NA                            | NA                 |
| Kabuli_wild_20167577 | NA                                  | Ca_kabuli_denovo | 20167577                | C/A  | NA                 | NA                            | NA                 |
| Kabuli_wild_20196105 | NA                                  | Ca_kabuli_denovo | 20196105                | A/C  | NA                 | NA                            | NA                 |
| Kabuli_wild_20208418 | NA                                  | Ca_kabuli_denovo | 20208418                | A/G  | NA                 | NA                            | NA                 |
| Kabuli_wild_20210044 | NA                                  | Ca_kabuli_denovo | 20210044                | A/G  | NA                 | NA                            | NA                 |
| Kabuli_wild_20213832 | NA                                  | Ca_kabuli_denovo | 20213832                | A/G  | NA                 | NA                            | NA                 |
| Kabuli_wild_20214203 | NA                                  | Ca_kabuli_denovo | 20214203                | A/G  | NA                 | NA                            | NA                 |

| SNP IDs              | NCBI dbSNP accession IDs (NCBI_SS#) | Chromosomes      | Physical positions (bp) | SNPs | Gene accession IDs | Sequence components of genome | Putative functions |
|----------------------|-------------------------------------|------------------|-------------------------|------|--------------------|-------------------------------|--------------------|
| Kabuli_wild_20218375 | NA                                  | Ca_kabuli_denovo | 20218375                | A/T  | NA                 | NA                            | NA                 |
| Kabuli_wild_20218379 | NA                                  | Ca_kabuli_denovo | 20218379                | C/T  | NA                 | NA                            | NA                 |
| Kabuli_wild_20221082 | NA                                  | Ca_kabuli_denovo | 20221082                | A/T  | NA                 | NA                            | NA                 |
| Kabuli_wild_20221094 | NA                                  | Ca_kabuli_denovo | 20221094                | G/T  | NA                 | NA                            | NA                 |
| Kabuli_wild_20221096 | NA                                  | Ca_kabuli_denovo | 20221096                | A/C  | NA                 | NA                            | NA                 |
| Kabuli_wild_20227489 | NA                                  | Ca_kabuli_denovo | 20227489                | A/G  | NA                 | NA                            | NA                 |
| Kabuli_wild_20227517 | NA                                  | Ca_kabuli_denovo | 20227517                | G/T  | NA                 | NA                            | NA                 |
| Kabuli_wild_20244823 | NA                                  | Ca_kabuli_denovo | 20244823                | C/T  | NA                 | NA                            | NA                 |
| Kabuli_wild_20244876 | NA                                  | Ca_kabuli_denovo | 20244876                | A/G  | NA                 | NA                            | NA                 |
| Kabuli_wild_20244887 | NA                                  | Ca_kabuli_denovo | 20244887                | T/C  | NA                 | NA                            | NA                 |
| Kabuli_wild_20244895 | NA                                  | Ca_kabuli_denovo | 20244895                | C/T  | NA                 | NA                            | NA                 |
| Kabuli_wild_20247159 | NA                                  | Ca_kabuli_denovo | 20247159                | A/T  | NA                 | NA                            | NA                 |
| Kabuli_wild_20251821 | NA                                  | Ca_kabuli_denovo | 20251821                | C/T  | NA                 | NA                            | NA                 |
| Kabuli_wild_20255163 | NA                                  | Ca_kabuli_denovo | 20255163                | A/C  | NA                 | NA                            | NA                 |
| Kabuli_wild_20255166 | NA                                  | Ca_kabuli_denovo | 20255166                | G/T  | NA                 | NA                            | NA                 |
| Kabuli_wild_20256665 | NA                                  | Ca_kabuli_denovo | 20256665                | C/T  | NA                 | NA                            | NA                 |
| Kabuli_wild_20260199 | NA                                  | Ca_kabuli_denovo | 20260199                | C/T  | NA                 | NA                            | NA                 |
| Kabuli_wild_20262319 | NA                                  | Ca_kabuli_denovo | 20262319                | C/T  | NA                 | NA                            | NA                 |
| Kabuli_wild_20265011 | NA                                  | Ca_kabuli_denovo | 20265011                | A/G  | NA                 | NA                            | NA                 |
| Kabuli_wild_20265046 | NA                                  | Ca_kabuli_denovo | 20265046                | T/C  | NA                 | NA                            | NA                 |
| Kabuli_wild_20265058 | NA                                  | Ca_kabuli_denovo | 20265058                | G/C  | NA                 | NA                            | NA                 |
| Kabuli_wild_20274744 | NA                                  | Ca_kabuli_denovo | 20274744                | C/G  | NA                 | NA                            | NA                 |
| Kabuli_wild_20277558 | NA                                  | Ca_kabuli_denovo | 20277558                | G/T  | NA                 | NA                            | NA                 |
| Kabuli_wild_20277597 | NA                                  | Ca_kabuli_denovo | 20277597                | C/G  | NA                 | NA                            | NA                 |
| Kabuli_wild_20277630 | NA                                  | Ca_kabuli_denovo | 20277630                | A/G  | NA                 | NA                            | NA                 |
| Kabuli_wild_20280144 | NA                                  | Ca_kabuli_denovo | 20280144                | G/T  | NA                 | NA                            | NA                 |
| Kabuli_wild_20280164 | NA                                  | Ca_kabuli_denovo | 20280164                | G/T  | NA                 | NA                            | NA                 |
| Kabuli_wild_20282141 | NA                                  | Ca_kabuli_denovo | 20282141                | C/T  | NA                 | NA                            | NA                 |
| Kabuli_wild_20282156 | NA                                  | Ca_kabuli_denovo | 20282156                | A/G  | NA                 | NA                            | NA                 |
| Kabuli_wild_20282859 | NA                                  | Ca_kabuli_denovo | 20282859                | C/T  | NA                 | NA                            | NA                 |
| Kabuli_wild_20286584 | NA                                  | Ca_kabuli_denovo | 20286584                | A/G  | NA                 | NA                            | NA                 |
| Kabuli_wild_20286597 | NA                                  | Ca_kabuli_denovo | 20286597                | A/G  | NA                 | NA                            | NA                 |
| Kabuli_wild_20286606 | NA                                  | Ca_kabuli_denovo | 20286606                | A/G  | NA                 | NA                            | NA                 |
| Kabuli_wild_20288605 | NA                                  | Ca_kabuli_denovo | 20288605                | C/T  | NA                 | NA                            | NA                 |
| Kabuli_wild_20290419 | NA                                  | Ca_kabuli_denovo | 20290419                | G/T  | NA                 | NA                            | NA                 |
| Kabuli_wild_20292092 | NA                                  | Ca_kabuli_denovo | 20292092                | A/C  | NA                 | NA                            | NA                 |
| Kabuli_wild_20305469 | NA                                  | Ca_kabuli_denovo | 20305469                | A/T  | NA                 | NA                            | NA                 |
| Kabuli_wild_20312285 | NA                                  | Ca_kabuli_denovo | 20312285                | C/A  | NA                 | NA                            | NA                 |
| Kabuli_wild_20312286 | NA                                  | Ca_kabuli_denovo | 20312286                | A/G  | NA                 | NA                            | NA                 |
| Kabuli_wild_20312287 | NA                                  | Ca_kabuli_denovo | 20312287                | G/C  | NA                 | NA                            | NA                 |
| Kabuli_wild_20320902 | NA                                  | Ca_kabuli_denovo | 20320902                | C/T  | NA                 | NA                            | NA                 |
| Kabuli_wild_20321896 | NA                                  | Ca_kabuli_denovo | 20321896                | A/G  | NA                 | NA                            | NA                 |
| Kabuli_wild_20322714 | NA                                  | Ca_kabuli_denovo | 20322714                | A/G  | NA                 | NA                            | NA                 |
| Kabuli_wild_20326389 | NA                                  | Ca_kabuli_denovo | 20326389                | A/G  | NA                 | NA                            | NA                 |



| SNP IDs              | NCBI dbSNP accession IDs (NCBI_SS#) | Chromosomes      | Physical positions (bp) | SNPs | Gene accession IDs | Sequence components of genome | Putative functions |
|----------------------|-------------------------------------|------------------|-------------------------|------|--------------------|-------------------------------|--------------------|
| Kabuli_wild_20326671 | NA                                  | Ca_kabuli_denovo | 20326671                | A/C  | NA                 | NA                            | NA                 |
| Kabuli_wild_20332244 | NA                                  | Ca_kabuli_denovo | 20332244                | A/G  | NA                 | NA                            | NA                 |
| Kabuli_wild_20334585 | NA                                  | Ca_kabuli_denovo | 20334585                | A/C  | NA                 | NA                            | NA                 |
| Kabuli_wild_20347772 | NA                                  | Ca_kabuli_denovo | 20347772                | A/C  | NA                 | NA                            | NA                 |
| Kabuli_wild_20347773 | NA                                  | Ca_kabuli_denovo | 20347773                | A/C  | NA                 | NA                            | NA                 |
| Kabuli_wild_20349799 | NA                                  | Ca_kabuli_denovo | 20349799                | C/G  | NA                 | NA                            | NA                 |
| Kabuli_wild_20349800 | NA                                  | Ca_kabuli_denovo | 20349800                | A/T  | NA                 | NA                            | NA                 |
| Kabuli_wild_20351763 | NA                                  | Ca_kabuli_denovo | 20351763                | C/G  | NA                 | NA                            | NA                 |
| Kabuli_wild_20352959 | NA                                  | Ca_kabuli_denovo | 20352959                | A/C  | NA                 | NA                            | NA                 |
| Kabuli_wild_20356381 | NA                                  | Ca_kabuli_denovo | 20356381                | A/G  | NA                 | NA                            | NA                 |
| Kabuli_wild_20356382 | NA                                  | Ca_kabuli_denovo | 20356382                | A/C  | NA                 | NA                            | NA                 |
| Kabuli_wild_20365812 | NA                                  | Ca_kabuli_denovo | 20365812                | C/T  | NA                 | NA                            | NA                 |
| Kabuli_wild_20387628 | NA                                  | Ca_kabuli_denovo | 20387628                | C/T  | NA                 | NA                            | NA                 |
| Kabuli_wild_20389262 | NA                                  | Ca_kabuli_denovo | 20389262                | A/C  | NA                 | NA                            | NA                 |
| Kabuli_wild_20389298 | NA                                  | Ca_kabuli_denovo | 20389298                | A/T  | NA                 | NA                            | NA                 |
| Kabuli_wild_20389590 | NA                                  | Ca_kabuli_denovo | 20389590                | G/T  | NA                 | NA                            | NA                 |
| Kabuli_wild_20389628 | NA                                  | Ca_kabuli_denovo | 20389628                | G/T  | NA                 | NA                            | NA                 |
| Kabuli_wild_20390298 | NA                                  | Ca_kabuli_denovo | 20390298                | C/G  | NA                 | NA                            | NA                 |
| Kabuli_wild_20391005 | NA                                  | Ca_kabuli_denovo | 20391005                | G/T  | NA                 | NA                            | NA                 |
| Kabuli_wild_20391586 | NA                                  | Ca_kabuli_denovo | 20391586                | G/T  | NA                 | NA                            | NA                 |
| Kabuli_wild_20391664 | NA                                  | Ca_kabuli_denovo | 20391664                | A/G  | NA                 | NA                            | NA                 |
| Kabuli_wild_20391980 | NA                                  | Ca_kabuli_denovo | 20391980                | A/G  | NA                 | NA                            | NA                 |
| Kabuli_wild_20392152 | NA                                  | Ca_kabuli_denovo | 20392152                | G/A  | NA                 | NA                            | NA                 |
| Kabuli_wild_20392185 | NA                                  | Ca_kabuli_denovo | 20392185                | A/G  | NA                 | NA                            | NA                 |
| Kabuli_wild_20392210 | NA                                  | Ca_kabuli_denovo | 20392210                | G/C  | NA                 | NA                            | NA                 |
| Kabuli_wild_20393263 | NA                                  | Ca_kabuli_denovo | 20393263                | G/T  | NA                 | NA                            | NA                 |
| Kabuli_wild_20393268 | NA                                  | Ca_kabuli_denovo | 20393268                | G/T  | NA                 | NA                            | NA                 |
| Kabuli_wild_20393305 | NA                                  | Ca_kabuli_denovo | 20393305                | C/T  | NA                 | NA                            | NA                 |
| Kabuli_wild_20393348 | NA                                  | Ca_kabuli_denovo | 20393348                | G/T  | NA                 | NA                            | NA                 |
| Kabuli_wild_20393462 | NA                                  | Ca_kabuli_denovo | 20393462                | A/G  | NA                 | NA                            | NA                 |
| Kabuli_wild_20393662 | NA                                  | Ca_kabuli_denovo | 20393662                | A/C  | NA                 | NA                            | NA                 |
| Kabuli_wild_20394192 | NA                                  | Ca_kabuli_denovo | 20394192                | G/T  | NA                 | NA                            | NA                 |
| Kabuli_wild_20395655 | NA                                  | Ca_kabuli_denovo | 20395655                | G/T  | NA                 | NA                            | NA                 |
| Kabuli_wild_20397597 | NA                                  | Ca_kabuli_denovo | 20397597                | T/G  | NA                 | NA                            | NA                 |
| Kabuli_wild_20397696 | NA                                  | Ca_kabuli_denovo | 20397696                | G/T  | NA                 | NA                            | NA                 |
| Kabuli_wild_20397975 | NA                                  | Ca_kabuli_denovo | 20397975                | G/T  | NA                 | NA                            | NA                 |
| Kabuli_wild_20398091 | NA                                  | Ca_kabuli_denovo | 20398091                | A/C  | NA                 | NA                            | NA                 |
| Kabuli_wild_20398285 | NA                                  | Ca_kabuli_denovo | 20398285                | A/G  | NA                 | NA                            | NA                 |
| Kabuli_wild_20398294 | NA                                  | Ca_kabuli_denovo | 20398294                | A/G  | NA                 | NA                            | NA                 |
| Kabuli_wild_20398656 | NA                                  | Ca_kabuli_denovo | 20398656                | C/G  | NA                 | NA                            | NA                 |
| Kabuli_wild_20399414 | NA                                  | Ca_kabuli_denovo | 20399414                | A/G  | NA                 | NA                            | NA                 |
| Kabuli_wild_20399599 | NA                                  | Ca_kabuli_denovo | 20399599                | G/T  | NA                 | NA                            | NA                 |
| Kabuli_wild_20400373 | NA                                  | Ca_kabuli_denovo | 20400373                | T/G  | NA                 | NA                            | NA                 |
| Kabuli_wild_20400416 | NA                                  | Ca_kabuli_denovo | 20400416                | A/G  | NA                 | NA                            | NA                 |

| SNP IDs              | NCBI dbSNP accession IDs (NCBI_SS#) | Chromosomes      | Physical positions (bp) | SNPs | Gene accession IDs | Sequence components of genome | Putative functions |
|----------------------|-------------------------------------|------------------|-------------------------|------|--------------------|-------------------------------|--------------------|
| Kabuli_wild_20400458 | NA                                  | Ca_kabuli_denovo | 20400458                | A/G  | NA                 | NA                            | NA                 |
| Kabuli_wild_20400734 | NA                                  | Ca_kabuli_denovo | 20400734                | C/G  | NA                 | NA                            | NA                 |
| Kabuli_wild_20401109 | NA                                  | Ca_kabuli_denovo | 20401109                | A/G  | NA                 | NA                            | NA                 |
| Kabuli_wild_20401241 | NA                                  | Ca_kabuli_denovo | 20401241                | A/C  | NA                 | NA                            | NA                 |
| Kabuli_wild_20401319 | NA                                  | Ca_kabuli_denovo | 20401319                | A/G  | NA                 | NA                            | NA                 |
| Kabuli_wild_20402677 | NA                                  | Ca_kabuli_denovo | 20402677                | A/G  | NA                 | NA                            | NA                 |
| Kabuli_wild_20403072 | NA                                  | Ca_kabuli_denovo | 20403072                | G/T  | NA                 | NA                            | NA                 |
| Kabuli_wild_20403785 | NA                                  | Ca_kabuli_denovo | 20403785                | A/G  | NA                 | NA                            | NA                 |
| Kabuli_wild_20403911 | NA                                  | Ca_kabuli_denovo | 20403911                | A/G  | NA                 | NA                            | NA                 |
| Kabuli_wild_20404822 | NA                                  | Ca_kabuli_denovo | 20404822                | A/C  | NA                 | NA                            | NA                 |
| Kabuli_wild_20406033 | NA                                  | Ca_kabuli_denovo | 20406033                | A/T  | NA                 | NA                            | NA                 |
| Kabuli_wild_20415051 | NA                                  | Ca_kabuli_denovo | 20415051                | A/G  | NA                 | NA                            | NA                 |
| Kabuli_wild_20437853 | NA                                  | Ca_kabuli_denovo | 20437853                | G/T  | NA                 | NA                            | NA                 |
| Kabuli_wild_20437950 | NA                                  | Ca_kabuli_denovo | 20437950                | G/T  | NA                 | NA                            | NA                 |
| Kabuli_wild_20438049 | NA                                  | Ca_kabuli_denovo | 20438049                | A/G  | NA                 | NA                            | NA                 |
| Kabuli_wild_20440666 | NA                                  | Ca_kabuli_denovo | 20440666                | G/T  | NA                 | NA                            | NA                 |
| Kabuli_wild_20440674 | NA                                  | Ca_kabuli_denovo | 20440674                | T/G  | NA                 | NA                            | NA                 |
| Kabuli_wild_20440695 | NA                                  | Ca_kabuli_denovo | 20440695                | T/G  | NA                 | NA                            | NA                 |
| Kabuli_wild_20442544 | NA                                  | Ca_kabuli_denovo | 20442544                | T/C  | NA                 | NA                            | NA                 |
| Kabuli_wild_20443330 | NA                                  | Ca_kabuli_denovo | 20443330                | T/C  | NA                 | NA                            | NA                 |
| Kabuli_wild_20444960 | NA                                  | Ca_kabuli_denovo | 20444960                | C/G  | NA                 | NA                            | NA                 |
| Kabuli_wild_20450406 | NA                                  | Ca_kabuli_denovo | 20450406                | G/C  | NA                 | NA                            | NA                 |
| Kabuli_wild_20450407 | NA                                  | Ca_kabuli_denovo | 20450407                | A/C  | NA                 | NA                            | NA                 |
| Kabuli_wild_20450408 | NA                                  | Ca_kabuli_denovo | 20450408                | A/G  | NA                 | NA                            | NA                 |
| Kabuli_wild_20450410 | NA                                  | Ca_kabuli_denovo | 20450410                | A/G  | NA                 | NA                            | NA                 |
| Kabuli_wild_20450412 | NA                                  | Ca_kabuli_denovo | 20450412                | T/A  | NA                 | NA                            | NA                 |
| Kabuli_wild_20453224 | NA                                  | Ca_kabuli_denovo | 20453224                | A/C  | NA                 | NA                            | NA                 |
| Kabuli_wild_20465765 | NA                                  | Ca_kabuli_denovo | 20465765                | A/T  | NA                 | NA                            | NA                 |
| Kabuli_wild_20467202 | NA                                  | Ca_kabuli_denovo | 20467202                | A/C  | NA                 | NA                            | NA                 |
| Kabuli_wild_20467208 | NA                                  | Ca_kabuli_denovo | 20467208                | A/G  | NA                 | NA                            | NA                 |
| Kabuli_wild_20472577 | NA                                  | Ca_kabuli_denovo | 20472577                | G/A  | NA                 | NA                            | NA                 |
| Kabuli_wild_20474114 | NA                                  | Ca_kabuli_denovo | 20474114                | A/G  | NA                 | NA                            | NA                 |
| Kabuli_wild_20475200 | NA                                  | Ca_kabuli_denovo | 20475200                | T/C  | NA                 | NA                            | NA                 |
| Kabuli_wild_20482156 | NA                                  | Ca_kabuli_denovo | 20482156                | C/G  | NA                 | NA                            | NA                 |
| Kabuli_wild_20502187 | NA                                  | Ca_kabuli_denovo | 20502187                | A/C  | NA                 | NA                            | NA                 |
| Kabuli_wild_20502189 | NA                                  | Ca_kabuli_denovo | 20502189                | A/C  | NA                 | NA                            | NA                 |
| Kabuli_wild_20503190 | NA                                  | Ca_kabuli_denovo | 20503190                | C/G  | NA                 | NA                            | NA                 |
| Kabuli_wild_20503231 | NA                                  | Ca_kabuli_denovo | 20503231                | G/T  | NA                 | NA                            | NA                 |
| Kabuli_wild_20515099 | NA                                  | Ca_kabuli_denovo | 20515099                | C/G  | NA                 | NA                            | NA                 |
| Kabuli_wild_20515100 | NA                                  | Ca_kabuli_denovo | 20515100                | A/C  | NA                 | NA                            | NA                 |
| Kabuli_wild_20515101 | NA                                  | Ca_kabuli_denovo | 20515101                | T/G  | NA                 | NA                            | NA                 |
| Kabuli_wild_20515102 | NA                                  | Ca_kabuli_denovo | 20515102                | C/A  | NA                 | NA                            | NA                 |
| Kabuli_wild_20521060 | NA                                  | Ca_kabuli_denovo | 20521060                | A/C  | NA                 | NA                            | NA                 |
| Kabuli_wild_20523331 | NA                                  | Ca_kabuli_denovo | 20523331                | C/G  | NA                 | NA                            | NA                 |

| SNP IDs              | NCBI dbSNP accession IDs (NCBI_SS#) | Chromosomes      | Physical positions (bp) | SNPs | Gene accession IDs | Sequence components of genome | Putative functions |
|----------------------|-------------------------------------|------------------|-------------------------|------|--------------------|-------------------------------|--------------------|
| Kabuli_wild_20527655 | NA                                  | Ca_kabuli_denovo | 20527655                | G/A  | NA                 | NA                            | NA                 |
| Kabuli_wild_20530515 | NA                                  | Ca_kabuli_denovo | 20530515                | G/A  | NA                 | NA                            | NA                 |
| Kabuli_wild_20530516 | NA                                  | Ca_kabuli_denovo | 20530516                | G/T  | NA                 | NA                            | NA                 |
| Kabuli_wild_20530517 | NA                                  | Ca_kabuli_denovo | 20530517                | A/C  | NA                 | NA                            | NA                 |
| Kabuli_wild_20535838 | NA                                  | Ca_kabuli_denovo | 20535838                | C/T  | NA                 | NA                            | NA                 |
| Kabuli_wild_20539716 | NA                                  | Ca_kabuli_denovo | 20539716                | T/C  | NA                 | NA                            | NA                 |
| Kabuli_wild_20539731 | NA                                  | Ca_kabuli_denovo | 20539731                | A/C  | NA                 | NA                            | NA                 |
| Kabuli_wild_20543282 | NA                                  | Ca_kabuli_denovo | 20543282                | T/A  | NA                 | NA                            | NA                 |
| Kabuli_wild_20543290 | NA                                  | Ca_kabuli_denovo | 20543290                | T/G  | NA                 | NA                            | NA                 |
| Kabuli_wild_20543297 | NA                                  | Ca_kabuli_denovo | 20543297                | A/G  | NA                 | NA                            | NA                 |
| Kabuli_wild_20543343 | NA                                  | Ca_kabuli_denovo | 20543343                | T/G  | NA                 | NA                            | NA                 |
| Kabuli_wild_20547324 | NA                                  | Ca_kabuli_denovo | 20547324                | C/T  | NA                 | NA                            | NA                 |
| Kabuli_wild_20547333 | NA                                  | Ca_kabuli_denovo | 20547333                | C/T  | NA                 | NA                            | NA                 |
| Kabuli_wild_20547367 | NA                                  | Ca_kabuli_denovo | 20547367                | A/G  | NA                 | NA                            | NA                 |
| Kabuli_wild_20547594 | NA                                  | Ca_kabuli_denovo | 20547594                | A/G  | NA                 | NA                            | NA                 |
| Kabuli_wild_20547613 | NA                                  | Ca_kabuli_denovo | 20547613                | G/T  | NA                 | NA                            | NA                 |
| Kabuli_wild_20551127 | NA                                  | Ca_kabuli_denovo | 20551127                | A/G  | NA                 | NA                            | NA                 |
| Kabuli_wild_20551202 | NA                                  | Ca_kabuli_denovo | 20551202                | A/G  | NA                 | NA                            | NA                 |
| Kabuli_wild_20551924 | NA                                  | Ca_kabuli_denovo | 20551924                | A/T  | NA                 | NA                            | NA                 |
| Kabuli_wild_20551952 | NA                                  | Ca_kabuli_denovo | 20551952                | G/A  | NA                 | NA                            | NA                 |
| Kabuli_wild_20551953 | NA                                  | Ca_kabuli_denovo | 20551953                | C/T  | NA                 | NA                            | NA                 |
| Kabuli_wild_20551997 | NA                                  | Ca_kabuli_denovo | 20551997                | A/G  | NA                 | NA                            | NA                 |
| Kabuli_wild_20553071 | NA                                  | Ca_kabuli_denovo | 20553071                | T/C  | NA                 | NA                            | NA                 |
| Kabuli_wild_20556797 | NA                                  | Ca_kabuli_denovo | 20556797                | G/A  | NA                 | NA                            | NA                 |
| Kabuli_wild_20558245 | NA                                  | Ca_kabuli_denovo | 20558245                | A/G  | NA                 | NA                            | NA                 |
| Kabuli_wild_20558285 | NA                                  | Ca_kabuli_denovo | 20558285                | T/G  | NA                 | NA                            | NA                 |
| Kabuli_wild_20559690 | NA                                  | Ca_kabuli_denovo | 20559690                | C/T  | NA                 | NA                            | NA                 |
| Kabuli_wild_20560547 | NA                                  | Ca_kabuli_denovo | 20560547                | G/A  | NA                 | NA                            | NA                 |
| Kabuli_wild_20570204 | NA                                  | Ca_kabuli_denovo | 20570204                | C/T  | NA                 | NA                            | NA                 |
| Kabuli_wild_20572562 | NA                                  | Ca_kabuli_denovo | 20572562                | A/G  | NA                 | NA                            | NA                 |
| Kabuli_wild_20580461 | NA                                  | Ca_kabuli_denovo | 20580461                | A/T  | NA                 | NA                            | NA                 |
| Kabuli_wild_20585799 | NA                                  | Ca_kabuli_denovo | 20585799                | A/G  | NA                 | NA                            | NA                 |
| Kabuli_wild_20587824 | NA                                  | Ca_kabuli_denovo | 20587824                | A/G  | NA                 | NA                            | NA                 |
| Kabuli_wild_20588213 | NA                                  | Ca_kabuli_denovo | 20588213                | A/C  | NA                 | NA                            | NA                 |
| Kabuli_wild_20588253 | NA                                  | Ca_kabuli_denovo | 20588253                | T/C  | NA                 | NA                            | NA                 |
| Kabuli_wild_20595772 | NA                                  | Ca_kabuli_denovo | 20595772                | C/G  | NA                 | NA                            | NA                 |
| Kabuli_wild_20596740 | NA                                  | Ca_kabuli_denovo | 20596740                | G/T  | NA                 | NA                            | NA                 |
| Kabuli_wild_20597110 | NA                                  | Ca_kabuli_denovo | 20597110                | A/G  | NA                 | NA                            | NA                 |
| Kabuli_wild_20597181 | NA                                  | Ca_kabuli_denovo | 20597181                | A/C  | NA                 | NA                            | NA                 |
| Kabuli_wild_20597735 | NA                                  | Ca_kabuli_denovo | 20597735                | A/G  | NA                 | NA                            | NA                 |
| Kabuli_wild_20598604 | NA                                  | Ca_kabuli_denovo | 20598604                | A/C  | NA                 | NA                            | NA                 |
| Kabuli_wild_20598605 | NA                                  | Ca_kabuli_denovo | 20598605                | A/G  | NA                 | NA                            | NA                 |
| Kabuli_wild_20598901 | NA                                  | Ca_kabuli_denovo | 20598901                | G/T  | NA                 | NA                            | NA                 |
| Kabuli_wild_20599090 | NA                                  | Ca_kabuli_denovo | 20599090                | C/G  | NA                 | NA                            | NA                 |

| SNP IDs              | NCBI dbSNP accession IDs (NCBI_SS#) | Chromosomes      | Physical positions (bp) | SNPs | Gene accession IDs | Sequence components of genome | Putative functions |
|----------------------|-------------------------------------|------------------|-------------------------|------|--------------------|-------------------------------|--------------------|
| Kabuli_wild_20599108 | NA                                  | Ca_kabuli_denovo | 20599108                | G/A  | NA                 | NA                            | NA                 |
| Kabuli_wild_20600801 | NA                                  | Ca_kabuli_denovo | 20600801                | A/T  | NA                 | NA                            | NA                 |
| Kabuli_wild_20600818 | NA                                  | Ca_kabuli_denovo | 20600818                | G/T  | NA                 | NA                            | NA                 |
| Kabuli_wild_20600833 | NA                                  | Ca_kabuli_denovo | 20600833                | G/T  | NA                 | NA                            | NA                 |
| Kabuli_wild_20600848 | NA                                  | Ca_kabuli_denovo | 20600848                | C/G  | NA                 | NA                            | NA                 |
| Kabuli_wild_20600870 | NA                                  | Ca_kabuli_denovo | 20600870                | A/G  | NA                 | NA                            | NA                 |
| Kabuli_wild_20601226 | NA                                  | Ca_kabuli_denovo | 20601226                | C/T  | NA                 | NA                            | NA                 |
| Kabuli_wild_20601234 | NA                                  | Ca_kabuli_denovo | 20601234                | G/T  | NA                 | NA                            | NA                 |
| Kabuli_wild_20601362 | NA                                  | Ca_kabuli_denovo | 20601362                | G/T  | NA                 | NA                            | NA                 |
| Kabuli_wild_20601574 | NA                                  | Ca_kabuli_denovo | 20601574                | G/A  | NA                 | NA                            | NA                 |
| Kabuli_wild_20601602 | NA                                  | Ca_kabuli_denovo | 20601602                | T/G  | NA                 | NA                            | NA                 |
| Kabuli_wild_20601611 | NA                                  | Ca_kabuli_denovo | 20601611                | A/C  | NA                 | NA                            | NA                 |
| Kabuli_wild_20602343 | NA                                  | Ca_kabuli_denovo | 20602343                | G/T  | NA                 | NA                            | NA                 |
| Kabuli_wild_20602358 | NA                                  | Ca_kabuli_denovo | 20602358                | C/G  | NA                 | NA                            | NA                 |
| Kabuli_wild_20602362 | NA                                  | Ca_kabuli_denovo | 20602362                | A/T  | NA                 | NA                            | NA                 |
| Kabuli_wild_20602371 | NA                                  | Ca_kabuli_denovo | 20602371                | A/C  | NA                 | NA                            | NA                 |
| Kabuli_wild_20602413 | NA                                  | Ca_kabuli_denovo | 20602413                | A/T  | NA                 | NA                            | NA                 |
| Kabuli_wild_20602466 | NA                                  | Ca_kabuli_denovo | 20602466                | C/A  | NA                 | NA                            | NA                 |
| Kabuli_wild_20602483 | NA                                  | Ca_kabuli_denovo | 20602483                | A/G  | NA                 | NA                            | NA                 |
| Kabuli_wild_20602824 | NA                                  | Ca_kabuli_denovo | 20602824                | C/G  | NA                 | NA                            | NA                 |
| Kabuli_wild_20603130 | NA                                  | Ca_kabuli_denovo | 20603130                | C/G  | NA                 | NA                            | NA                 |
| Kabuli_wild_20603641 | NA                                  | Ca_kabuli_denovo | 20603641                | C/G  | NA                 | NA                            | NA                 |
| Kabuli_wild_20606673 | NA                                  | Ca_kabuli_denovo | 20606673                | A/T  | NA                 | NA                            | NA                 |
| Kabuli_wild_20608162 | NA                                  | Ca_kabuli_denovo | 20608162                | A/G  | NA                 | NA                            | NA                 |
| Kabuli_wild_20608917 | NA                                  | Ca_kabuli_denovo | 20608917                | G/T  | NA                 | NA                            | NA                 |
| Kabuli_wild_20608919 | NA                                  | Ca_kabuli_denovo | 20608919                | A/C  | NA                 | NA                            | NA                 |
| Kabuli_wild_20609964 | NA                                  | Ca_kabuli_denovo | 20609964                | A/G  | NA                 | NA                            | NA                 |
| Kabuli_wild_20613582 | NA                                  | Ca_kabuli_denovo | 20613582                | G/T  | NA                 | NA                            | NA                 |
| Kabuli_wild_20614597 | NA                                  | Ca_kabuli_denovo | 20614597                | C/G  | NA                 | NA                            | NA                 |
| Kabuli_wild_20614866 | NA                                  | Ca_kabuli_denovo | 20614866                | A/G  | NA                 | NA                            | NA                 |
| Kabuli_wild_20615750 | NA                                  | Ca_kabuli_denovo | 20615750                | C/G  | NA                 | NA                            | NA                 |
| Kabuli_wild_20615801 | NA                                  | Ca_kabuli_denovo | 20615801                | C/T  | NA                 | NA                            | NA                 |
| Kabuli_wild_20615822 | NA                                  | Ca_kabuli_denovo | 20615822                | C/T  | NA                 | NA                            | NA                 |
| Kabuli_wild_20615857 | NA                                  | Ca_kabuli_denovo | 20615857                | C/T  | NA                 | NA                            | NA                 |
| Kabuli_wild_20615860 | NA                                  | Ca_kabuli_denovo | 20615860                | C/T  | NA                 | NA                            | NA                 |
| Kabuli_wild_20616559 | NA                                  | Ca_kabuli_denovo | 20616559                | A/G  | NA                 | NA                            | NA                 |
| Kabuli_wild_20617605 | NA                                  | Ca_kabuli_denovo | 20617605                | C/T  | NA                 | NA                            | NA                 |
| Kabuli_wild_20617644 | NA                                  | Ca_kabuli_denovo | 20617644                | C/T  | NA                 | NA                            | NA                 |
| Kabuli_wild_20617665 | NA                                  | Ca_kabuli_denovo | 20617665                | A/C  | NA                 | NA                            | NA                 |
| Kabuli_wild_20617674 | NA                                  | Ca_kabuli_denovo | 20617674                | C/G  | NA                 | NA                            | NA                 |
| Kabuli_wild_20618197 | NA                                  | Ca_kabuli_denovo | 20618197                | A/G  | NA                 | NA                            | NA                 |
| Kabuli_wild_20618358 | NA                                  | Ca_kabuli_denovo | 20618358                | A/G  | NA                 | NA                            | NA                 |
| Kabuli_wild_20619965 | NA                                  | Ca_kabuli_denovo | 20619965                | T/G  | NA                 | NA                            | NA                 |
| Kabuli_wild_20619973 | NA                                  | Ca_kabuli_denovo | 20619973                | G/T  | NA                 | NA                            | NA                 |

| SNP IDs              | NCBI dbSNP accession IDs (NCBI_SS#) | Chromosomes      | Physical positions (bp) | SNPs | Gene accession IDs | Sequence components of genome | Putative functions |
|----------------------|-------------------------------------|------------------|-------------------------|------|--------------------|-------------------------------|--------------------|
| Kabuli_wild_20620137 | NA                                  | Ca_kabuli_denovo | 20620137                | A/G  | NA                 | NA                            | NA                 |
| Kabuli_wild_20620184 | NA                                  | Ca_kabuli_denovo | 20620184                | G/T  | NA                 | NA                            | NA                 |
| Kabuli_wild_20620580 | NA                                  | Ca_kabuli_denovo | 20620580                | C/T  | NA                 | NA                            | NA                 |
| Kabuli_wild_20620586 | NA                                  | Ca_kabuli_denovo | 20620586                | G/T  | NA                 | NA                            | NA                 |
| Kabuli_wild_20621160 | NA                                  | Ca_kabuli_denovo | 20621160                | C/T  | NA                 | NA                            | NA                 |
| Kabuli_wild_20621175 | NA                                  | Ca_kabuli_denovo | 20621175                | C/T  | NA                 | NA                            | NA                 |
| Kabuli_wild_20621723 | NA                                  | Ca_kabuli_denovo | 20621723                | A/T  | NA                 | NA                            | NA                 |
| Kabuli_wild_20622009 | NA                                  | Ca_kabuli_denovo | 20622009                | A/G  | NA                 | NA                            | NA                 |
| Kabuli_wild_20622012 | NA                                  | Ca_kabuli_denovo | 20622012                | A/T  | NA                 | NA                            | NA                 |
| Kabuli_wild_20622325 | NA                                  | Ca_kabuli_denovo | 20622325                | C/T  | NA                 | NA                            | NA                 |
| Kabuli_wild_20623160 | NA                                  | Ca_kabuli_denovo | 20623160                | A/G  | NA                 | NA                            | NA                 |
| Kabuli_wild_20623161 | NA                                  | Ca_kabuli_denovo | 20623161                | C/G  | NA                 | NA                            | NA                 |
| Kabuli_wild_20623415 | NA                                  | Ca_kabuli_denovo | 20623415                | C/G  | NA                 | NA                            | NA                 |
| Kabuli_wild_20623424 | NA                                  | Ca_kabuli_denovo | 20623424                | A/T  | NA                 | NA                            | NA                 |
| Kabuli_wild_20623901 | NA                                  | Ca_kabuli_denovo | 20623901                | A/G  | NA                 | NA                            | NA                 |
| Kabuli_wild_20624722 | NA                                  | Ca_kabuli_denovo | 20624722                | A/T  | NA                 | NA                            | NA                 |
| Kabuli_wild_20625213 | NA                                  | Ca_kabuli_denovo | 20625213                | A/G  | NA                 | NA                            | NA                 |
| Kabuli_wild_20627013 | NA                                  | Ca_kabuli_denovo | 20627013                | C/T  | NA                 | NA                            | NA                 |
| Kabuli_wild_20627918 | NA                                  | Ca_kabuli_denovo | 20627918                | G/T  | NA                 | NA                            | NA                 |
| Kabuli_wild_20627926 | NA                                  | Ca_kabuli_denovo | 20627926                | C/T  | NA                 | NA                            | NA                 |
| Kabuli_wild_20629481 | NA                                  | Ca_kabuli_denovo | 20629481                | A/G  | NA                 | NA                            | NA                 |
| Kabuli_wild_20629490 | NA                                  | Ca_kabuli_denovo | 20629490                | A/G  | NA                 | NA                            | NA                 |
| Kabuli_wild_20629505 | NA                                  | Ca_kabuli_denovo | 20629505                | A/G  | NA                 | NA                            | NA                 |
| Kabuli_wild_20630455 | NA                                  | Ca_kabuli_denovo | 20630455                | A/G  | NA                 | NA                            | NA                 |
| Kabuli_wild_20630508 | NA                                  | Ca_kabuli_denovo | 20630508                | C/T  | NA                 | NA                            | NA                 |
| Kabuli_wild_20630584 | NA                                  | Ca_kabuli_denovo | 20630584                | A/G  | NA                 | NA                            | NA                 |
| Kabuli_wild_20630762 | NA                                  | Ca_kabuli_denovo | 20630762                | A/C  | NA                 | NA                            | NA                 |
| Kabuli_wild_20630935 | NA                                  | Ca_kabuli_denovo | 20630935                | A/T  | NA                 | NA                            | NA                 |
| Kabuli_wild_20635166 | NA                                  | Ca_kabuli_denovo | 20635166                | C/T  | NA                 | NA                            | NA                 |
| Kabuli_wild_20635657 | NA                                  | Ca_kabuli_denovo | 20635657                | A/G  | NA                 | NA                            | NA                 |
| Kabuli_wild_20635680 | NA                                  | Ca_kabuli_denovo | 20635680                | A/G  | NA                 | NA                            | NA                 |
| Kabuli_wild_20636518 | NA                                  | Ca_kabuli_denovo | 20636518                | C/T  | NA                 | NA                            | NA                 |
| Kabuli_wild_20636550 | NA                                  | Ca_kabuli_denovo | 20636550                | C/G  | NA                 | NA                            | NA                 |
| Kabuli_wild_20638750 | NA                                  | Ca_kabuli_denovo | 20638750                | T/C  | NA                 | NA                            | NA                 |
| Kabuli_wild_20638763 | NA                                  | Ca_kabuli_denovo | 20638763                | A/G  | NA                 | NA                            | NA                 |
| Kabuli_wild_20638764 | NA                                  | Ca_kabuli_denovo | 20638764                | C/T  | NA                 | NA                            | NA                 |
| Kabuli_wild_20639156 | NA                                  | Ca_kabuli_denovo | 20639156                | C/T  | NA                 | NA                            | NA                 |
| Kabuli_wild_20639468 | NA                                  | Ca_kabuli_denovo | 20639468                | A/C  | NA                 | NA                            | NA                 |
| Kabuli_wild_20639493 | NA                                  | Ca_kabuli_denovo | 20639493                | A/T  | NA                 | NA                            | NA                 |
| Kabuli_wild_20640130 | NA                                  | Ca_kabuli_denovo | 20640130                | C/T  | NA                 | NA                            | NA                 |
| Kabuli_wild_20640266 | NA                                  | Ca_kabuli_denovo | 20640266                | A/C  | NA                 | NA                            | NA                 |
| Kabuli_wild_20640971 | NA                                  | Ca_kabuli_denovo | 20640971                | C/T  | NA                 | NA                            | NA                 |
| Kabuli_wild_20641031 | NA                                  | Ca_kabuli_denovo | 20641031                | A/G  | NA                 | NA                            | NA                 |
| Kabuli_wild_20641034 | NA                                  | Ca_kabuli_denovo | 20641034                | C/T  | NA                 | NA                            | NA                 |

| SNP IDs              | NCBI dbSNP accession IDs (NCBI_SS#) | Chromosomes      | Physical positions (bp) | SNPs | Gene accession IDs | Sequence components of genome | Putative functions |
|----------------------|-------------------------------------|------------------|-------------------------|------|--------------------|-------------------------------|--------------------|
| Kabuli_wild_20641083 | NA                                  | Ca_kabuli_denovo | 20641083                | A/G  | NA                 | NA                            | NA                 |
| Kabuli_wild_20641091 | NA                                  | Ca_kabuli_denovo | 20641091                | A/G  | NA                 | NA                            | NA                 |
| Kabuli_wild_20641474 | NA                                  | Ca_kabuli_denovo | 20641474                | A/G  | NA                 | NA                            | NA                 |
| Kabuli_wild_20641934 | NA                                  | Ca_kabuli_denovo | 20641934                | C/G  | NA                 | NA                            | NA                 |
| Kabuli_wild_20642062 | NA                                  | Ca_kabuli_denovo | 20642062                | A/G  | NA                 | NA                            | NA                 |
| Kabuli_wild_20642082 | NA                                  | Ca_kabuli_denovo | 20642082                | A/T  | NA                 | NA                            | NA                 |
| Kabuli_wild_20642353 | NA                                  | Ca_kabuli_denovo | 20642353                | C/G  | NA                 | NA                            | NA                 |
| Kabuli_wild_20643430 | NA                                  | Ca_kabuli_denovo | 20643430                | A/G  | NA                 | NA                            | NA                 |
| Kabuli_wild_20643537 | NA                                  | Ca_kabuli_denovo | 20643537                | C/T  | NA                 | NA                            | NA                 |
| Kabuli_wild_20643541 | NA                                  | Ca_kabuli_denovo | 20643541                | A/G  | NA                 | NA                            | NA                 |
| Kabuli_wild_20643719 | NA                                  | Ca_kabuli_denovo | 20643719                | A/T  | NA                 | NA                            | NA                 |
| Kabuli_wild_20644286 | NA                                  | Ca_kabuli_denovo | 20644286                | A/G  | NA                 | NA                            | NA                 |
| Kabuli_wild_20644301 | NA                                  | Ca_kabuli_denovo | 20644301                | C/T  | NA                 | NA                            | NA                 |
| Kabuli_wild_20645797 | NA                                  | Ca_kabuli_denovo | 20645797                | A/T  | NA                 | NA                            | NA                 |
| Kabuli_wild_20646624 | NA                                  | Ca_kabuli_denovo | 20646624                | C/T  | NA                 | NA                            | NA                 |
| Kabuli_wild_20647322 | NA                                  | Ca_kabuli_denovo | 20647322                | C/T  | NA                 | NA                            | NA                 |
| Kabuli_wild_20648190 | NA                                  | Ca_kabuli_denovo | 20648190                | C/T  | NA                 | NA                            | NA                 |
| Kabuli_wild_20648380 | NA                                  | Ca_kabuli_denovo | 20648380                | C/T  | NA                 | NA                            | NA                 |
| Kabuli_wild_20648381 | NA                                  | Ca_kabuli_denovo | 20648381                | A/T  | NA                 | NA                            | NA                 |
| Kabuli_wild_20648657 | NA                                  | Ca_kabuli_denovo | 20648657                | A/T  | NA                 | NA                            | NA                 |
| Kabuli_wild_20648666 | NA                                  | Ca_kabuli_denovo | 20648666                | C/T  | NA                 | NA                            | NA                 |
| Kabuli_wild_20649054 | NA                                  | Ca_kabuli_denovo | 20649054                | C/T  | NA                 | NA                            | NA                 |
| Kabuli_wild_20649681 | NA                                  | Ca_kabuli_denovo | 20649681                | C/T  | NA                 | NA                            | NA                 |
| Kabuli_wild_20649754 | NA                                  | Ca_kabuli_denovo | 20649754                | C/T  | NA                 | NA                            | NA                 |
| Kabuli_wild_20650523 | NA                                  | Ca_kabuli_denovo | 20650523                | C/T  | NA                 | NA                            | NA                 |
| Kabuli_wild_20650592 | NA                                  | Ca_kabuli_denovo | 20650592                | T/A  | NA                 | NA                            | NA                 |
| Kabuli_wild_20650612 | NA                                  | Ca_kabuli_denovo | 20650612                | T/G  | NA                 | NA                            | NA                 |
| Kabuli_wild_20650614 | NA                                  | Ca_kabuli_denovo | 20650614                | C/A  | NA                 | NA                            | NA                 |
| Kabuli_wild_20652811 | NA                                  | Ca_kabuli_denovo | 20652811                | C/T  | NA                 | NA                            | NA                 |
| Kabuli_wild_20653034 | NA                                  | Ca_kabuli_denovo | 20653034                | A/C  | NA                 | NA                            | NA                 |
| Kabuli_wild_20653083 | NA                                  | Ca_kabuli_denovo | 20653083                | A/G  | NA                 | NA                            | NA                 |
| Kabuli_wild_20653627 | NA                                  | Ca_kabuli_denovo | 20653627                | C/T  | NA                 | NA                            | NA                 |
| Kabuli_wild_20655244 | NA                                  | Ca_kabuli_denovo | 20655244                | A/C  | NA                 | NA                            | NA                 |
| Kabuli_wild_20655313 | NA                                  | Ca_kabuli_denovo | 20655313                | A/G  | NA                 | NA                            | NA                 |
| Kabuli_wild_20655347 | NA                                  | Ca_kabuli_denovo | 20655347                | C/T  | NA                 | NA                            | NA                 |
| Kabuli_wild_20656228 | NA                                  | Ca_kabuli_denovo | 20656228                | A/G  | NA                 | NA                            | NA                 |
| Kabuli_wild_20656528 | NA                                  | Ca_kabuli_denovo | 20656528                | C/T  | NA                 | NA                            | NA                 |
| Kabuli_wild_20656535 | NA                                  | Ca_kabuli_denovo | 20656535                | G/T  | NA                 | NA                            | NA                 |
| Kabuli_wild_20657558 | NA                                  | Ca_kabuli_denovo | 20657558                | G/T  | NA                 | NA                            | NA                 |
| Kabuli_wild_20657787 | NA                                  | Ca_kabuli_denovo | 20657787                | C/T  | NA                 | NA                            | NA                 |
| Kabuli_wild_20657800 | NA                                  | Ca_kabuli_denovo | 20657800                | G/T  | NA                 | NA                            | NA                 |
| Kabuli_wild_20657801 | NA                                  | Ca_kabuli_denovo | 20657801                | A/G  | NA                 | NA                            | NA                 |
| Kabuli_wild_20657884 | NA                                  | Ca_kabuli_denovo | 20657884                | C/T  | NA                 | NA                            | NA                 |
| Kabuli_wild_20657906 | NA                                  | Ca_kabuli_denovo | 20657906                | C/T  | NA                 | NA                            | NA                 |

| SNP IDs              | NCBI dbSNP accession IDs (NCBI_SS#) | Chromosomes      | Physical positions (bp) | SNPs | Gene accession IDs | Sequence components of genome | Putative functions |
|----------------------|-------------------------------------|------------------|-------------------------|------|--------------------|-------------------------------|--------------------|
| Kabuli_wild_20658874 | NA                                  | Ca_kabuli_denovo | 20658874                | A/C  | NA                 | NA                            | NA                 |
| Kabuli_wild_20662798 | NA                                  | Ca_kabuli_denovo | 20662798                | A/C  | NA                 | NA                            | NA                 |
| Kabuli_wild_20662815 | NA                                  | Ca_kabuli_denovo | 20662815                | C/G  | NA                 | NA                            | NA                 |
| Kabuli_wild_20662927 | NA                                  | Ca_kabuli_denovo | 20662927                | C/T  | NA                 | NA                            | NA                 |
| Kabuli_wild_20662930 | NA                                  | Ca_kabuli_denovo | 20662930                | A/G  | NA                 | NA                            | NA                 |
| Kabuli_wild_20665795 | NA                                  | Ca_kabuli_denovo | 20665795                | C/G  | NA                 | NA                            | NA                 |
| Kabuli_wild_20665813 | NA                                  | Ca_kabuli_denovo | 20665813                | C/T  | NA                 | NA                            | NA                 |
| Kabuli_wild_20665818 | NA                                  | Ca_kabuli_denovo | 20665818                | A/T  | NA                 | NA                            | NA                 |
| Kabuli_wild_20665876 | NA                                  | Ca_kabuli_denovo | 20665876                | C/T  | NA                 | NA                            | NA                 |
| Kabuli_wild_20666208 | NA                                  | Ca_kabuli_denovo | 20666208                | A/G  | NA                 | NA                            | NA                 |
| Kabuli_wild_20668237 | NA                                  | Ca_kabuli_denovo | 20668237                | A/G  | NA                 | NA                            | NA                 |
| Kabuli_wild_20668242 | NA                                  | Ca_kabuli_denovo | 20668242                | C/G  | NA                 | NA                            | NA                 |
| Kabuli_wild_20668327 | NA                                  | Ca_kabuli_denovo | 20668327                | C/G  | NA                 | NA                            | NA                 |
| Kabuli_wild_20669953 | NA                                  | Ca_kabuli_denovo | 20669953                | A/T  | NA                 | NA                            | NA                 |
| Kabuli_wild_20669959 | NA                                  | Ca_kabuli_denovo | 20669959                | A/G  | NA                 | NA                            | NA                 |
| Kabuli_wild_20672786 | NA                                  | Ca_kabuli_denovo | 20672786                | A/G  | NA                 | NA                            | NA                 |
| Kabuli_wild_20672788 | NA                                  | Ca_kabuli_denovo | 20672788                | C/T  | NA                 | NA                            | NA                 |
| Kabuli_wild_20673096 | NA                                  | Ca_kabuli_denovo | 20673096                | C/T  | NA                 | NA                            | NA                 |
| Kabuli_wild_20673125 | NA                                  | Ca_kabuli_denovo | 20673125                | A/C  | NA                 | NA                            | NA                 |
| Kabuli_wild_20673138 | NA                                  | Ca_kabuli_denovo | 20673138                | G/A  | NA                 | NA                            | NA                 |
| Kabuli_wild_20673155 | NA                                  | Ca_kabuli_denovo | 20673155                | T/C  | NA                 | NA                            | NA                 |
| Kabuli_wild_20674246 | NA                                  | Ca_kabuli_denovo | 20674246                | C/T  | NA                 | NA                            | NA                 |
| Kabuli_wild_20674282 | NA                                  | Ca_kabuli_denovo | 20674282                | C/G  | NA                 | NA                            | NA                 |
| Kabuli_wild_20675437 | NA                                  | Ca_kabuli_denovo | 20675437                | A/G  | NA                 | NA                            | NA                 |
| Kabuli_wild_20675930 | NA                                  | Ca_kabuli_denovo | 20675930                | C/T  | NA                 | NA                            | NA                 |
| Kabuli_wild_20679694 | NA                                  | Ca_kabuli_denovo | 20679694                | A/C  | NA                 | NA                            | NA                 |
| Kabuli_wild_20679730 | NA                                  | Ca_kabuli_denovo | 20679730                | A/C  | NA                 | NA                            | NA                 |
| Kabuli_wild_20679790 | NA                                  | Ca_kabuli_denovo | 20679790                | C/T  | NA                 | NA                            | NA                 |
| Kabuli_wild_20681854 | NA                                  | Ca_kabuli_denovo | 20681854                | C/G  | NA                 | NA                            | NA                 |
| Kabuli_wild_20682995 | NA                                  | Ca_kabuli_denovo | 20682995                | A/G  | NA                 | NA                            | NA                 |
| Kabuli_wild_20683031 | NA                                  | Ca_kabuli_denovo | 20683031                | G/T  | NA                 | NA                            | NA                 |
| Kabuli_wild_20683034 | NA                                  | Ca_kabuli_denovo | 20683034                | A/T  | NA                 | NA                            | NA                 |
| Kabuli_wild_20683040 | NA                                  | Ca_kabuli_denovo | 20683040                | A/G  | NA                 | NA                            | NA                 |
| Kabuli_wild_20683793 | NA                                  | Ca_kabuli_denovo | 20683793                | C/T  | NA                 | NA                            | NA                 |
| Kabuli_wild_20686078 | NA                                  | Ca_kabuli_denovo | 20686078                | A/G  | NA                 | NA                            | NA                 |
| Kabuli_wild_20686080 | NA                                  | Ca_kabuli_denovo | 20686080                | A/T  | NA                 | NA                            | NA                 |
| Kabuli_wild_20686120 | NA                                  | Ca_kabuli_denovo | 20686120                | C/T  | NA                 | NA                            | NA                 |
| Kabuli_wild_20686749 | NA                                  | Ca_kabuli_denovo | 20686749                | C/T  | NA                 | NA                            | NA                 |
| Kabuli_wild_20689471 | NA                                  | Ca_kabuli_denovo | 20689471                | C/T  | NA                 | NA                            | NA                 |
| Kabuli_wild_20691858 | NA                                  | Ca_kabuli_denovo | 20691858                | A/T  | NA                 | NA                            | NA                 |
| Kabuli_wild_20691862 | NA                                  | Ca_kabuli_denovo | 20691862                | A/C  | NA                 | NA                            | NA                 |
| Kabuli_wild_20691874 | NA                                  | Ca_kabuli_denovo | 20691874                | G/T  | NA                 | NA                            | NA                 |
| Kabuli_wild_20691888 | NA                                  | Ca_kabuli_denovo | 20691888                | C/T  | NA                 | NA                            | NA                 |
| Kabuli_wild_20693932 | NA                                  | Ca_kabuli_denovo | 20693932                | A/C  | NA                 | NA                            | NA                 |

| SNP IDs              | NCBI dbSNP accession IDs (NCBI_SS#) | Chromosomes      | Physical positions (bp) | SNPs | Gene accession IDs | Sequence components of genome | Putative functions |
|----------------------|-------------------------------------|------------------|-------------------------|------|--------------------|-------------------------------|--------------------|
| Kabuli_wild_20700253 | NA                                  | Ca_kabuli_denovo | 20700253                | A/T  | NA                 | NA                            | NA                 |
| Kabuli_wild_20700312 | NA                                  | Ca_kabuli_denovo | 20700312                | A/G  | NA                 | NA                            | NA                 |
| Kabuli_wild_20701772 | NA                                  | Ca_kabuli_denovo | 20701772                | C/T  | NA                 | NA                            | NA                 |
| Kabuli_wild_20704506 | NA                                  | Ca_kabuli_denovo | 20704506                | A/G  | NA                 | NA                            | NA                 |
| Kabuli_wild_20706617 | NA                                  | Ca_kabuli_denovo | 20706617                | C/G  | NA                 | NA                            | NA                 |
| Kabuli_wild_20710142 | NA                                  | Ca_kabuli_denovo | 20710142                | A/G  | NA                 | NA                            | NA                 |
| Kabuli_wild_20710733 | NA                                  | Ca_kabuli_denovo | 20710733                | A/G  | NA                 | NA                            | NA                 |
| Kabuli_wild_20713114 | NA                                  | Ca_kabuli_denovo | 20713114                | A/G  | NA                 | NA                            | NA                 |
| Kabuli_wild_20713123 | NA                                  | Ca_kabuli_denovo | 20713123                | A/T  | NA                 | NA                            | NA                 |
| Kabuli_wild_20715009 | NA                                  | Ca_kabuli_denovo | 20715009                | A/G  | NA                 | NA                            | NA                 |
| Kabuli_wild_20715218 | NA                                  | Ca_kabuli_denovo | 20715218                | C/T  | NA                 | NA                            | NA                 |
| Kabuli_wild_20715227 | NA                                  | Ca_kabuli_denovo | 20715227                | C/T  | NA                 | NA                            | NA                 |
| Kabuli_wild_20715228 | NA                                  | Ca_kabuli_denovo | 20715228                | C/T  | NA                 | NA                            | NA                 |
| Kabuli_wild_20715938 | NA                                  | Ca_kabuli_denovo | 20715938                | A/T  | NA                 | NA                            | NA                 |
| Kabuli_wild_20715941 | NA                                  | Ca_kabuli_denovo | 20715941                | A/G  | NA                 | NA                            | NA                 |
| Kabuli_wild_20716958 | NA                                  | Ca_kabuli_denovo | 20716958                | C/T  | NA                 | NA                            | NA                 |
| Kabuli_wild_20717159 | NA                                  | Ca_kabuli_denovo | 20717159                | C/G  | NA                 | NA                            | NA                 |
| Kabuli_wild_20717164 | NA                                  | Ca_kabuli_denovo | 20717164                | C/T  | NA                 | NA                            | NA                 |
| Kabuli_wild_20718090 | NA                                  | Ca_kabuli_denovo | 20718090                | A/G  | NA                 | NA                            | NA                 |
| Kabuli_wild_20718117 | NA                                  | Ca_kabuli_denovo | 20718117                | C/T  | NA                 | NA                            | NA                 |
| Kabuli_wild_20718129 | NA                                  | Ca_kabuli_denovo | 20718129                | C/T  | NA                 | NA                            | NA                 |
| Kabuli_wild_20718141 | NA                                  | Ca_kabuli_denovo | 20718141                | A/G  | NA                 | NA                            | NA                 |
| Kabuli_wild_20722591 | NA                                  | Ca_kabuli_denovo | 20722591                | A/G  | NA                 | NA                            | NA                 |
| Kabuli_wild_20724007 | NA                                  | Ca_kabuli_denovo | 20724007                | A/G  | NA                 | NA                            | NA                 |
| Kabuli_wild_20725069 | NA                                  | Ca_kabuli_denovo | 20725069                | C/G  | NA                 | NA                            | NA                 |
| Kabuli_wild_20725078 | NA                                  | Ca_kabuli_denovo | 20725078                | G/T  | NA                 | NA                            | NA                 |
| Kabuli_wild_20725081 | NA                                  | Ca_kabuli_denovo | 20725081                | A/G  | NA                 | NA                            | NA                 |
| Kabuli_wild_20727971 | NA                                  | Ca_kabuli_denovo | 20727971                | A/C  | NA                 | NA                            | NA                 |
| Kabuli_wild_20727972 | NA                                  | Ca_kabuli_denovo | 20727972                | A/G  | NA                 | NA                            | NA                 |
| Kabuli_wild_20727973 | NA                                  | Ca_kabuli_denovo | 20727973                | A/G  | NA                 | NA                            | NA                 |
| Kabuli_wild_20727974 | NA                                  | Ca_kabuli_denovo | 20727974                | A/T  | NA                 | NA                            | NA                 |
| Kabuli_wild_20730412 | NA                                  | Ca_kabuli_denovo | 20730412                | C/T  | NA                 | NA                            | NA                 |
| Kabuli_wild_20733036 | NA                                  | Ca_kabuli_denovo | 20733036                | C/T  | NA                 | NA                            | NA                 |
| Kabuli_wild_20733078 | NA                                  | Ca_kabuli_denovo | 20733078                | A/C  | NA                 | NA                            | NA                 |
| Kabuli_wild_20733417 | NA                                  | Ca_kabuli_denovo | 20733417                | A/T  | NA                 | NA                            | NA                 |
| Kabuli_wild_20734007 | NA                                  | Ca_kabuli_denovo | 20734007                | A/T  | NA                 | NA                            | NA                 |
| Kabuli_wild_20734010 | NA                                  | Ca_kabuli_denovo | 20734010                | C/G  | NA                 | NA                            | NA                 |
| Kabuli_wild_20734279 | NA                                  | Ca_kabuli_denovo | 20734279                | C/T  | NA                 | NA                            | NA                 |
| Kabuli_wild_20736065 | NA                                  | Ca_kabuli_denovo | 20736065                | C/T  | NA                 | NA                            | NA                 |
| Kabuli_wild_20741509 | NA                                  | Ca_kabuli_denovo | 20741509                | A/G  | NA                 | NA                            | NA                 |
| Kabuli_wild_20741537 | NA                                  | Ca_kabuli_denovo | 20741537                | A/G  | NA                 | NA                            | NA                 |
| Kabuli_wild_20744763 | NA                                  | Ca_kabuli_denovo | 20744763                | C/T  | NA                 | NA                            | NA                 |
| Kabuli_wild_20744780 | NA                                  | Ca_kabuli_denovo | 20744780                | C/T  | NA                 | NA                            | NA                 |
| Kabuli_wild_20746424 | NA                                  | Ca_kabuli_denovo | 20746424                | C/T  | NA                 | NA                            | NA                 |



| SNP IDs              | NCBI dbSNP accession IDs (NCBI_SS#) | Chromosomes      | Physical positions (bp) | SNPs | Gene accession IDs | Sequence components of genome | Putative functions |
|----------------------|-------------------------------------|------------------|-------------------------|------|--------------------|-------------------------------|--------------------|
| Kabuli_wild_20751371 | NA                                  | Ca_kabuli_denovo | 20751371                | A/G  | NA                 | NA                            | NA                 |
| Kabuli_wild_20752461 | NA                                  | Ca_kabuli_denovo | 20752461                | A/T  | NA                 | NA                            | NA                 |
| Kabuli_wild_20759420 | NA                                  | Ca_kabuli_denovo | 20759420                | C/G  | NA                 | NA                            | NA                 |
| Kabuli_wild_20759426 | NA                                  | Ca_kabuli_denovo | 20759426                | A/G  | NA                 | NA                            | NA                 |
| Kabuli_wild_20759432 | NA                                  | Ca_kabuli_denovo | 20759432                | C/T  | NA                 | NA                            | NA                 |
| Kabuli_wild_20762725 | NA                                  | Ca_kabuli_denovo | 20762725                | C/G  | NA                 | NA                            | NA                 |
| Kabuli_wild_20763926 | NA                                  | Ca_kabuli_denovo | 20763926                | A/G  | NA                 | NA                            | NA                 |
| Kabuli_wild_20765276 | NA                                  | Ca_kabuli_denovo | 20765276                | A/T  | NA                 | NA                            | NA                 |
| Kabuli_wild_20768368 | NA                                  | Ca_kabuli_denovo | 20768368                | G/T  | NA                 | NA                            | NA                 |
| Kabuli_wild_20769413 | NA                                  | Ca_kabuli_denovo | 20769413                | C/T  | NA                 | NA                            | NA                 |
| Kabuli_wild_20769414 | NA                                  | Ca_kabuli_denovo | 20769414                | C/G  | NA                 | NA                            | NA                 |
| Kabuli_wild_20769454 | NA                                  | Ca_kabuli_denovo | 20769454                | C/T  | NA                 | NA                            | NA                 |
| Kabuli_wild_20769458 | NA                                  | Ca_kabuli_denovo | 20769458                | A/G  | NA                 | NA                            | NA                 |
| Kabuli_wild_20769928 | NA                                  | Ca_kabuli_denovo | 20769928                | A/G  | NA                 | NA                            | NA                 |
| Kabuli_wild_20769949 | NA                                  | Ca_kabuli_denovo | 20769949                | A/G  | NA                 | NA                            | NA                 |
| Kabuli_wild_20773741 | NA                                  | Ca_kabuli_denovo | 20773741                | A/G  | NA                 | NA                            | NA                 |
| Kabuli_wild_20773758 | NA                                  | Ca_kabuli_denovo | 20773758                | C/T  | NA                 | NA                            | NA                 |
| Kabuli_wild_20775246 | NA                                  | Ca_kabuli_denovo | 20775246                | A/C  | NA                 | NA                            | NA                 |
| Kabuli_wild_20776225 | NA                                  | Ca_kabuli_denovo | 20776225                | G/A  | NA                 | NA                            | NA                 |
| Kabuli_wild_20777288 | NA                                  | Ca_kabuli_denovo | 20777288                | C/T  | NA                 | NA                            | NA                 |
| Kabuli_wild_20777973 | NA                                  | Ca_kabuli_denovo | 20777973                | G/T  | NA                 | NA                            | NA                 |
| Kabuli_wild_20777994 | NA                                  | Ca_kabuli_denovo | 20777994                | A/T  | NA                 | NA                            | NA                 |
| Kabuli_wild_20778023 | NA                                  | Ca_kabuli_denovo | 20778023                | C/T  | NA                 | NA                            | NA                 |
| Kabuli_wild_20778854 | NA                                  | Ca_kabuli_denovo | 20778854                | C/T  | NA                 | NA                            | NA                 |
| Kabuli_wild_20778861 | NA                                  | Ca_kabuli_denovo | 20778861                | C/T  | NA                 | NA                            | NA                 |
| Kabuli_wild_20778962 | NA                                  | Ca_kabuli_denovo | 20778962                | A/T  | NA                 | NA                            | NA                 |
| Kabuli_wild_20779690 | NA                                  | Ca_kabuli_denovo | 20779690                | C/G  | NA                 | NA                            | NA                 |
| Kabuli_wild_20780237 | NA                                  | Ca_kabuli_denovo | 20780237                | A/G  | NA                 | NA                            | NA                 |
| Kabuli_wild_20783893 | NA                                  | Ca_kabuli_denovo | 20783893                | C/T  | NA                 | NA                            | NA                 |
| Kabuli_wild_20785501 | NA                                  | Ca_kabuli_denovo | 20785501                | A/C  | NA                 | NA                            | NA                 |
| Kabuli_wild_20788718 | NA                                  | Ca_kabuli_denovo | 20788718                | C/T  | NA                 | NA                            | NA                 |
| Kabuli_wild_20788719 | NA                                  | Ca_kabuli_denovo | 20788719                | C/T  | NA                 | NA                            | NA                 |
| Kabuli_wild_20788739 | NA                                  | Ca_kabuli_denovo | 20788739                | C/G  | NA                 | NA                            | NA                 |
| Kabuli_wild_20792224 | NA                                  | Ca_kabuli_denovo | 20792224                | A/G  | NA                 | NA                            | NA                 |
| Kabuli_wild_20792225 | NA                                  | Ca_kabuli_denovo | 20792225                | A/G  | NA                 | NA                            | NA                 |
| Kabuli_wild_20792245 | NA                                  | Ca_kabuli_denovo | 20792245                | G/T  | NA                 | NA                            | NA                 |
| Kabuli_wild_20792248 | NA                                  | Ca_kabuli_denovo | 20792248                | A/T  | NA                 | NA                            | NA                 |
| Kabuli_wild_20793495 | NA                                  | Ca_kabuli_denovo | 20793495                | C/G  | NA                 | NA                            | NA                 |
| Kabuli_wild_20794012 | NA                                  | Ca_kabuli_denovo | 20794012                | C/T  | NA                 | NA                            | NA                 |
| Kabuli_wild_20794739 | NA                                  | Ca_kabuli_denovo | 20794739                | C/T  | NA                 | NA                            | NA                 |
| Kabuli_wild_20794745 | NA                                  | Ca_kabuli_denovo | 20794745                | A/T  | NA                 | NA                            | NA                 |
| Kabuli_wild_20799680 | NA                                  | Ca_kabuli_denovo | 20799680                | G/T  | NA                 | NA                            | NA                 |
| Kabuli_wild_20799681 | NA                                  | Ca_kabuli_denovo | 20799681                | A/C  | NA                 | NA                            | NA                 |
| Kabuli_wild_20799682 | NA                                  | Ca_kabuli_denovo | 20799682                | G/T  | NA                 | NA                            | NA                 |

| SNP IDs                     | NCBI dbSNP accession IDs (NCBI_SS#) | Chromosomes             | Physical positions (bp) | SNPs | Gene accession IDs | Sequence components of genome | Putative functions |
|-----------------------------|-------------------------------------|-------------------------|-------------------------|------|--------------------|-------------------------------|--------------------|
| <i>Kabuli_wild_20805843</i> | NA                                  | <i>Ca_kabuli_denovo</i> | 20805843                | C/T  | NA                 | NA                            | NA                 |
| <i>Kabuli_wild_20805847</i> | NA                                  | <i>Ca_kabuli_denovo</i> | 20805847                | G/T  | NA                 | NA                            | NA                 |
| <i>Kabuli_wild_20805853</i> | NA                                  | <i>Ca_kabuli_denovo</i> | 20805853                | C/T  | NA                 | NA                            | NA                 |
| <i>Kabuli_wild_20807487</i> | NA                                  | <i>Ca_kabuli_denovo</i> | 20807487                | A/G  | NA                 | NA                            | NA                 |
| <i>Kabuli_wild_20810357</i> | NA                                  | <i>Ca_kabuli_denovo</i> | 20810357                | C/T  | NA                 | NA                            | NA                 |
| <i>Kabuli_wild_20810733</i> | NA                                  | <i>Ca_kabuli_denovo</i> | 20810733                | A/T  | NA                 | NA                            | NA                 |
| <i>Kabuli_wild_20812042</i> | NA                                  | <i>Ca_kabuli_denovo</i> | 20812042                | A/T  | NA                 | NA                            | NA                 |
| <i>Kabuli_wild_20812775</i> | NA                                  | <i>Ca_kabuli_denovo</i> | 20812775                | C/T  | NA                 | NA                            | NA                 |
| <i>Kabuli_wild_20813248</i> | NA                                  | <i>Ca_kabuli_denovo</i> | 20813248                | C/G  | NA                 | NA                            | NA                 |
| <i>Kabuli_wild_20813270</i> | NA                                  | <i>Ca_kabuli_denovo</i> | 20813270                | A/G  | NA                 | NA                            | NA                 |
| <i>Kabuli_wild_20813282</i> | NA                                  | <i>Ca_kabuli_denovo</i> | 20813282                | C/G  | NA                 | NA                            | NA                 |
| <i>Kabuli_wild_20813382</i> | NA                                  | <i>Ca_kabuli_denovo</i> | 20813382                | C/G  | NA                 | NA                            | NA                 |
| <i>Kabuli_wild_20813468</i> | NA                                  | <i>Ca_kabuli_denovo</i> | 20813468                | A/T  | NA                 | NA                            | NA                 |
| <i>Kabuli_wild_20813484</i> | NA                                  | <i>Ca_kabuli_denovo</i> | 20813484                | C/G  | NA                 | NA                            | NA                 |
| <i>Kabuli_wild_20813656</i> | NA                                  | <i>Ca_kabuli_denovo</i> | 20813656                | C/T  | NA                 | NA                            | NA                 |
| <i>Kabuli_wild_20813692</i> | NA                                  | <i>Ca_kabuli_denovo</i> | 20813692                | C/T  | NA                 | NA                            | NA                 |
| <i>Kabuli_wild_20815968</i> | NA                                  | <i>Ca_kabuli_denovo</i> | 20815968                | C/T  | NA                 | NA                            | NA                 |
| <i>Kabuli_wild_20816855</i> | NA                                  | <i>Ca_kabuli_denovo</i> | 20816855                | G/C  | NA                 | NA                            | NA                 |
| <i>Kabuli_wild_20821598</i> | NA                                  | <i>Ca_kabuli_denovo</i> | 20821598                | C/T  | NA                 | NA                            | NA                 |
| <i>Kabuli_wild_20821615</i> | NA                                  | <i>Ca_kabuli_denovo</i> | 20821615                | A/G  | NA                 | NA                            | NA                 |
| <i>Kabuli_wild_20825005</i> | NA                                  | <i>Ca_kabuli_denovo</i> | 20825005                | A/C  | NA                 | NA                            | NA                 |
| <i>Kabuli_wild_20825006</i> | NA                                  | <i>Ca_kabuli_denovo</i> | 20825006                | C/G  | NA                 | NA                            | NA                 |
| <i>Kabuli_wild_20825189</i> | NA                                  | <i>Ca_kabuli_denovo</i> | 20825189                | C/T  | NA                 | NA                            | NA                 |
| <i>Kabuli_wild_20825191</i> | NA                                  | <i>Ca_kabuli_denovo</i> | 20825191                | A/G  | NA                 | NA                            | NA                 |
| <i>Kabuli_wild_20826347</i> | NA                                  | <i>Ca_kabuli_denovo</i> | 20826347                | A/T  | NA                 | NA                            | NA                 |
| <i>Kabuli_wild_20826874</i> | NA                                  | <i>Ca_kabuli_denovo</i> | 20826874                | A/G  | NA                 | NA                            | NA                 |
| <i>Kabuli_wild_20826888</i> | NA                                  | <i>Ca_kabuli_denovo</i> | 20826888                | C/T  | NA                 | NA                            | NA                 |
| <i>Kabuli_wild_20827566</i> | NA                                  | <i>Ca_kabuli_denovo</i> | 20827566                | C/G  | NA                 | NA                            | NA                 |
| <i>Kabuli_wild_20827578</i> | NA                                  | <i>Ca_kabuli_denovo</i> | 20827578                | A/T  | NA                 | NA                            | NA                 |
| <i>Kabuli_wild_20828779</i> | NA                                  | <i>Ca_kabuli_denovo</i> | 20828779                | C/T  | NA                 | NA                            | NA                 |
| <i>Kabuli_wild_20828785</i> | NA                                  | <i>Ca_kabuli_denovo</i> | 20828785                | C/T  | NA                 | NA                            | NA                 |
| <i>Kabuli_wild_20832934</i> | NA                                  | <i>Ca_kabuli_denovo</i> | 20832934                | A/C  | NA                 | NA                            | NA                 |
| <i>Kabuli_wild_20832972</i> | NA                                  | <i>Ca_kabuli_denovo</i> | 20832972                | C/T  | NA                 | NA                            | NA                 |
| <i>Kabuli_wild_20834719</i> | NA                                  | <i>Ca_kabuli_denovo</i> | 20834719                | C/G  | NA                 | NA                            | NA                 |
| <i>Kabuli_wild_20835556</i> | NA                                  | <i>Ca_kabuli_denovo</i> | 20835556                | A/G  | NA                 | NA                            | NA                 |
| <i>Kabuli_wild_20835578</i> | NA                                  | <i>Ca_kabuli_denovo</i> | 20835578                | A/T  | NA                 | NA                            | NA                 |
| <i>Kabuli_wild_20835601</i> | NA                                  | <i>Ca_kabuli_denovo</i> | 20835601                | A/G  | NA                 | NA                            | NA                 |
| <i>Kabuli_wild_20835876</i> | NA                                  | <i>Ca_kabuli_denovo</i> | 20835876                | A/G  | NA                 | NA                            | NA                 |
| <i>Kabuli_wild_20835903</i> | NA                                  | <i>Ca_kabuli_denovo</i> | 20835903                | A/C  | NA                 | NA                            | NA                 |
| <i>Kabuli_wild_20837629</i> | NA                                  | <i>Ca_kabuli_denovo</i> | 20837629                | A/C  | NA                 | NA                            | NA                 |
| <i>Kabuli_wild_20837633</i> | NA                                  | <i>Ca_kabuli_denovo</i> | 20837633                | C/T  | NA                 | NA                            | NA                 |
| <i>Kabuli_wild_20837634</i> | NA                                  | <i>Ca_kabuli_denovo</i> | 20837634                | C/T  | NA                 | NA                            | NA                 |
| <i>Kabuli_wild_20837659</i> | NA                                  | <i>Ca_kabuli_denovo</i> | 20837659                | C/G  | NA                 | NA                            | NA                 |
| <i>Kabuli_wild_20838970</i> | NA                                  | <i>Ca_kabuli_denovo</i> | 20838970                | G/T  | NA                 | NA                            | NA                 |

| SNP IDs              | NCBI dbSNP accession IDs (NCBI_SS#) | Chromosomes      | Physical positions (bp) | SNPs | Gene accession IDs | Sequence components of genome | Putative functions |
|----------------------|-------------------------------------|------------------|-------------------------|------|--------------------|-------------------------------|--------------------|
| Kabuli_wild_20838987 | NA                                  | Ca_kabuli_denovo | 20838987                | A/G  | NA                 | NA                            | NA                 |
| Kabuli_wild_20839005 | NA                                  | Ca_kabuli_denovo | 20839005                | C/G  | NA                 | NA                            | NA                 |
| Kabuli_wild_20839015 | NA                                  | Ca_kabuli_denovo | 20839015                | A/C  | NA                 | NA                            | NA                 |
| Kabuli_wild_20840023 | NA                                  | Ca_kabuli_denovo | 20840023                | A/G  | NA                 | NA                            | NA                 |
| Kabuli_wild_20840026 | NA                                  | Ca_kabuli_denovo | 20840026                | A/T  | NA                 | NA                            | NA                 |
| Kabuli_wild_20840061 | NA                                  | Ca_kabuli_denovo | 20840061                | A/T  | NA                 | NA                            | NA                 |
| Kabuli_wild_20840908 | NA                                  | Ca_kabuli_denovo | 20840908                | C/T  | NA                 | NA                            | NA                 |
| Kabuli_wild_20840938 | NA                                  | Ca_kabuli_denovo | 20840938                | C/T  | NA                 | NA                            | NA                 |
| Kabuli_wild_20842602 | NA                                  | Ca_kabuli_denovo | 20842602                | C/T  | NA                 | NA                            | NA                 |
| Kabuli_wild_20843147 | NA                                  | Ca_kabuli_denovo | 20843147                | C/T  | NA                 | NA                            | NA                 |
| Kabuli_wild_20845477 | NA                                  | Ca_kabuli_denovo | 20845477                | G/T  | NA                 | NA                            | NA                 |
| Kabuli_wild_20845525 | NA                                  | Ca_kabuli_denovo | 20845525                | A/T  | NA                 | NA                            | NA                 |
| Kabuli_wild_20845538 | NA                                  | Ca_kabuli_denovo | 20845538                | G/T  | NA                 | NA                            | NA                 |
| Kabuli_wild_20847684 | NA                                  | Ca_kabuli_denovo | 20847684                | A/G  | NA                 | NA                            | NA                 |
| Kabuli_wild_20848454 | NA                                  | Ca_kabuli_denovo | 20848454                | A/G  | NA                 | NA                            | NA                 |
| Kabuli_wild_20848690 | NA                                  | Ca_kabuli_denovo | 20848690                | T/C  | NA                 | NA                            | NA                 |
| Kabuli_wild_20849623 | NA                                  | Ca_kabuli_denovo | 20849623                | A/G  | NA                 | NA                            | NA                 |
| Kabuli_wild_20849685 | NA                                  | Ca_kabuli_denovo | 20849685                | A/G  | NA                 | NA                            | NA                 |
| Kabuli_wild_20853465 | NA                                  | Ca_kabuli_denovo | 20853465                | C/G  | NA                 | NA                            | NA                 |
| Kabuli_wild_20853902 | NA                                  | Ca_kabuli_denovo | 20853902                | C/G  | NA                 | NA                            | NA                 |
| Kabuli_wild_20853912 | NA                                  | Ca_kabuli_denovo | 20853912                | A/T  | NA                 | NA                            | NA                 |
| Kabuli_wild_20854012 | NA                                  | Ca_kabuli_denovo | 20854012                | A/G  | NA                 | NA                            | NA                 |
| Kabuli_wild_20857227 | NA                                  | Ca_kabuli_denovo | 20857227                | A/T  | NA                 | NA                            | NA                 |
| Kabuli_wild_20857314 | NA                                  | Ca_kabuli_denovo | 20857314                | G/T  | NA                 | NA                            | NA                 |
| Kabuli_wild_20857320 | NA                                  | Ca_kabuli_denovo | 20857320                | C/T  | NA                 | NA                            | NA                 |
| Kabuli_wild_20857980 | NA                                  | Ca_kabuli_denovo | 20857980                | C/T  | NA                 | NA                            | NA                 |
| Kabuli_wild_20858584 | NA                                  | Ca_kabuli_denovo | 20858584                | C/G  | NA                 | NA                            | NA                 |
| Kabuli_wild_20861198 | NA                                  | Ca_kabuli_denovo | 20861198                | G/T  | NA                 | NA                            | NA                 |
| Kabuli_wild_20863153 | NA                                  | Ca_kabuli_denovo | 20863153                | C/G  | NA                 | NA                            | NA                 |
| Kabuli_wild_20863302 | NA                                  | Ca_kabuli_denovo | 20863302                | A/G  | NA                 | NA                            | NA                 |
| Kabuli_wild_20863341 | NA                                  | Ca_kabuli_denovo | 20863341                | C/T  | NA                 | NA                            | NA                 |
| Kabuli_wild_20865582 | NA                                  | Ca_kabuli_denovo | 20865582                | A/T  | NA                 | NA                            | NA                 |
| Kabuli_wild_20865751 | NA                                  | Ca_kabuli_denovo | 20865751                | A/G  | NA                 | NA                            | NA                 |
| Kabuli_wild_20865756 | NA                                  | Ca_kabuli_denovo | 20865756                | A/G  | NA                 | NA                            | NA                 |
| Kabuli_wild_20865762 | NA                                  | Ca_kabuli_denovo | 20865762                | C/T  | NA                 | NA                            | NA                 |
| Kabuli_wild_20865766 | NA                                  | Ca_kabuli_denovo | 20865766                | A/T  | NA                 | NA                            | NA                 |
| Kabuli_wild_20867589 | NA                                  | Ca_kabuli_denovo | 20867589                | A/C  | NA                 | NA                            | NA                 |
| Kabuli_wild_20867810 | NA                                  | Ca_kabuli_denovo | 20867810                | A/T  | NA                 | NA                            | NA                 |
| Kabuli_wild_20871714 | NA                                  | Ca_kabuli_denovo | 20871714                | C/G  | NA                 | NA                            | NA                 |
| Kabuli_wild_20871901 | NA                                  | Ca_kabuli_denovo | 20871901                | C/T  | NA                 | NA                            | NA                 |
| Kabuli_wild_20873778 | NA                                  | Ca_kabuli_denovo | 20873778                | C/T  | NA                 | NA                            | NA                 |
| Kabuli_wild_20874657 | NA                                  | Ca_kabuli_denovo | 20874657                | A/G  | NA                 | NA                            | NA                 |
| Kabuli_wild_20878547 | NA                                  | Ca_kabuli_denovo | 20878547                | G/A  | NA                 | NA                            | NA                 |
| Kabuli_wild_20879317 | NA                                  | Ca_kabuli_denovo | 20879317                | C/T  | NA                 | NA                            | NA                 |

| SNP IDs              | NCBI dbSNP accession IDs (NCBI_SS#) | Chromosomes      | Physical positions (bp) | SNPs | Gene accession IDs | Sequence components of genome | Putative functions |
|----------------------|-------------------------------------|------------------|-------------------------|------|--------------------|-------------------------------|--------------------|
| Kabuli_wild_20879957 | NA                                  | Ca_kabuli_denovo | 20879957                | C/G  | NA                 | NA                            | NA                 |
| Kabuli_wild_20894265 | NA                                  | Ca_kabuli_denovo | 20894265                | C/G  | NA                 | NA                            | NA                 |
| Kabuli_wild_20894837 | NA                                  | Ca_kabuli_denovo | 20894837                | C/T  | NA                 | NA                            | NA                 |
| Kabuli_wild_20896090 | NA                                  | Ca_kabuli_denovo | 20896090                | C/T  | NA                 | NA                            | NA                 |
| Kabuli_wild_20896105 | NA                                  | Ca_kabuli_denovo | 20896105                | A/G  | NA                 | NA                            | NA                 |
| Kabuli_wild_20896204 | NA                                  | Ca_kabuli_denovo | 20896204                | A/G  | NA                 | NA                            | NA                 |
| Kabuli_wild_20896205 | NA                                  | Ca_kabuli_denovo | 20896205                | C/G  | NA                 | NA                            | NA                 |
| Kabuli_wild_20896865 | NA                                  | Ca_kabuli_denovo | 20896865                | A/T  | NA                 | NA                            | NA                 |
| Kabuli_wild_20896928 | NA                                  | Ca_kabuli_denovo | 20896928                | A/G  | NA                 | NA                            | NA                 |
| Kabuli_wild_20896967 | NA                                  | Ca_kabuli_denovo | 20896967                | A/G  | NA                 | NA                            | NA                 |
| Kabuli_wild_20898438 | NA                                  | Ca_kabuli_denovo | 20898438                | C/G  | NA                 | NA                            | NA                 |
| Kabuli_wild_20898486 | NA                                  | Ca_kabuli_denovo | 20898486                | C/T  | NA                 | NA                            | NA                 |
| Kabuli_wild_20898499 | NA                                  | Ca_kabuli_denovo | 20898499                | C/T  | NA                 | NA                            | NA                 |
| Kabuli_wild_20899057 | NA                                  | Ca_kabuli_denovo | 20899057                | A/G  | NA                 | NA                            | NA                 |
| Kabuli_wild_20899238 | NA                                  | Ca_kabuli_denovo | 20899238                | G/T  | NA                 | NA                            | NA                 |
| Kabuli_wild_20902501 | NA                                  | Ca_kabuli_denovo | 20902501                | G/T  | NA                 | NA                            | NA                 |
| Kabuli_wild_20903775 | NA                                  | Ca_kabuli_denovo | 20903775                | A/G  | NA                 | NA                            | NA                 |
| Kabuli_wild_20903975 | NA                                  | Ca_kabuli_denovo | 20903975                | T/A  | NA                 | NA                            | NA                 |
| Kabuli_wild_20903981 | NA                                  | Ca_kabuli_denovo | 20903981                | A/G  | NA                 | NA                            | NA                 |
| Kabuli_wild_20908415 | NA                                  | Ca_kabuli_denovo | 20908415                | C/T  | NA                 | NA                            | NA                 |
| Kabuli_wild_20908508 | NA                                  | Ca_kabuli_denovo | 20908508                | G/T  | NA                 | NA                            | NA                 |
| Kabuli_wild_20908540 | NA                                  | Ca_kabuli_denovo | 20908540                | C/G  | NA                 | NA                            | NA                 |
| Kabuli_wild_20910454 | NA                                  | Ca_kabuli_denovo | 20910454                | C/T  | NA                 | NA                            | NA                 |
| Kabuli_wild_20911417 | NA                                  | Ca_kabuli_denovo | 20911417                | A/G  | NA                 | NA                            | NA                 |
| Kabuli_wild_20913181 | NA                                  | Ca_kabuli_denovo | 20913181                | A/G  | NA                 | NA                            | NA                 |
| Kabuli_wild_20914166 | NA                                  | Ca_kabuli_denovo | 20914166                | T/A  | NA                 | NA                            | NA                 |
| Kabuli_wild_20914223 | NA                                  | Ca_kabuli_denovo | 20914223                | A/G  | NA                 | NA                            | NA                 |
| Kabuli_wild_20914238 | NA                                  | Ca_kabuli_denovo | 20914238                | G/T  | NA                 | NA                            | NA                 |
| Kabuli_wild_20915253 | NA                                  | Ca_kabuli_denovo | 20915253                | A/G  | NA                 | NA                            | NA                 |
| Kabuli_wild_20916167 | NA                                  | Ca_kabuli_denovo | 20916167                | A/G  | NA                 | NA                            | NA                 |
| Kabuli_wild_20916173 | NA                                  | Ca_kabuli_denovo | 20916173                | A/G  | NA                 | NA                            | NA                 |
| Kabuli_wild_20916209 | NA                                  | Ca_kabuli_denovo | 20916209                | C/T  | NA                 | NA                            | NA                 |
| Kabuli_wild_20918903 | NA                                  | Ca_kabuli_denovo | 20918903                | C/T  | NA                 | NA                            | NA                 |
| Kabuli_wild_20918925 | NA                                  | Ca_kabuli_denovo | 20918925                | A/G  | NA                 | NA                            | NA                 |
| Kabuli_wild_20920721 | NA                                  | Ca_kabuli_denovo | 20920721                | A/T  | NA                 | NA                            | NA                 |
| Kabuli_wild_20922293 | NA                                  | Ca_kabuli_denovo | 20922293                | C/T  | NA                 | NA                            | NA                 |
| Kabuli_wild_20923933 | NA                                  | Ca_kabuli_denovo | 20923933                | C/T  | NA                 | NA                            | NA                 |
| Kabuli_wild_20923943 | NA                                  | Ca_kabuli_denovo | 20923943                | A/C  | NA                 | NA                            | NA                 |
| Kabuli_wild_20924316 | NA                                  | Ca_kabuli_denovo | 20924316                | A/C  | NA                 | NA                            | NA                 |
| Kabuli_wild_20924340 | NA                                  | Ca_kabuli_denovo | 20924340                | C/T  | NA                 | NA                            | NA                 |
| Kabuli_wild_20924355 | NA                                  | Ca_kabuli_denovo | 20924355                | C/G  | NA                 | NA                            | NA                 |
| Kabuli_wild_20924385 | NA                                  | Ca_kabuli_denovo | 20924385                | C/T  | NA                 | NA                            | NA                 |
| Kabuli_wild_20924511 | NA                                  | Ca_kabuli_denovo | 20924511                | A/G  | NA                 | NA                            | NA                 |
| Kabuli_wild_20924559 | NA                                  | Ca_kabuli_denovo | 20924559                | C/T  | NA                 | NA                            | NA                 |

| SNP IDs              | NCBI dbSNP accession IDs (NCBI_SS#) | Chromosomes      | Physical positions (bp) | SNPs | Gene accession IDs | Sequence components of genome | Putative functions |
|----------------------|-------------------------------------|------------------|-------------------------|------|--------------------|-------------------------------|--------------------|
| Kabuli_wild_20925987 | NA                                  | Ca_kabuli_denovo | 20925987                | C/T  | NA                 | NA                            | NA                 |
| Kabuli_wild_20926026 | NA                                  | Ca_kabuli_denovo | 20926026                | A/G  | NA                 | NA                            | NA                 |
| Kabuli_wild_20927831 | NA                                  | Ca_kabuli_denovo | 20927831                | C/T  | NA                 | NA                            | NA                 |
| Kabuli_wild_20929064 | NA                                  | Ca_kabuli_denovo | 20929064                | C/T  | NA                 | NA                            | NA                 |
| Kabuli_wild_20929218 | NA                                  | Ca_kabuli_denovo | 20929218                | C/G  | NA                 | NA                            | NA                 |
| Kabuli_wild_20931147 | NA                                  | Ca_kabuli_denovo | 20931147                | A/G  | NA                 | NA                            | NA                 |
| Kabuli_wild_20932853 | NA                                  | Ca_kabuli_denovo | 20932853                | C/G  | NA                 | NA                            | NA                 |
| Kabuli_wild_20932877 | NA                                  | Ca_kabuli_denovo | 20932877                | C/T  | NA                 | NA                            | NA                 |
| Kabuli_wild_20934499 | NA                                  | Ca_kabuli_denovo | 20934499                | A/G  | NA                 | NA                            | NA                 |
| Kabuli_wild_20936058 | NA                                  | Ca_kabuli_denovo | 20936058                | A/G  | NA                 | NA                            | NA                 |
| Kabuli_wild_20936892 | NA                                  | Ca_kabuli_denovo | 20936892                | C/T  | NA                 | NA                            | NA                 |
| Kabuli_wild_20936910 | NA                                  | Ca_kabuli_denovo | 20936910                | A/G  | NA                 | NA                            | NA                 |
| Kabuli_wild_20937579 | NA                                  | Ca_kabuli_denovo | 20937579                | C/G  | NA                 | NA                            | NA                 |
| Kabuli_wild_20937580 | NA                                  | Ca_kabuli_denovo | 20937580                | C/T  | NA                 | NA                            | NA                 |
| Kabuli_wild_20937581 | NA                                  | Ca_kabuli_denovo | 20937581                | C/T  | NA                 | NA                            | NA                 |
| Kabuli_wild_20937583 | NA                                  | Ca_kabuli_denovo | 20937583                | C/T  | NA                 | NA                            | NA                 |
| Kabuli_wild_20938087 | NA                                  | Ca_kabuli_denovo | 20938087                | A/G  | NA                 | NA                            | NA                 |
| Kabuli_wild_20938100 | NA                                  | Ca_kabuli_denovo | 20938100                | A/C  | NA                 | NA                            | NA                 |
| Kabuli_wild_20938108 | NA                                  | Ca_kabuli_denovo | 20938108                | C/T  | NA                 | NA                            | NA                 |
| Kabuli_wild_20938123 | NA                                  | Ca_kabuli_denovo | 20938123                | A/G  | NA                 | NA                            | NA                 |
| Kabuli_wild_20938303 | NA                                  | Ca_kabuli_denovo | 20938303                | G/T  | NA                 | NA                            | NA                 |
| Kabuli_wild_20938330 | NA                                  | Ca_kabuli_denovo | 20938330                | C/T  | NA                 | NA                            | NA                 |
| Kabuli_wild_20938396 | NA                                  | Ca_kabuli_denovo | 20938396                | C/T  | NA                 | NA                            | NA                 |
| Kabuli_wild_20939118 | NA                                  | Ca_kabuli_denovo | 20939118                | A/T  | NA                 | NA                            | NA                 |
| Kabuli_wild_20939119 | NA                                  | Ca_kabuli_denovo | 20939119                | C/T  | NA                 | NA                            | NA                 |
| Kabuli_wild_20939122 | NA                                  | Ca_kabuli_denovo | 20939122                | A/G  | NA                 | NA                            | NA                 |
| Kabuli_wild_20939276 | NA                                  | Ca_kabuli_denovo | 20939276                | A/G  | NA                 | NA                            | NA                 |
| Kabuli_wild_20940223 | NA                                  | Ca_kabuli_denovo | 20940223                | C/T  | NA                 | NA                            | NA                 |
| Kabuli_wild_20940235 | NA                                  | Ca_kabuli_denovo | 20940235                | A/G  | NA                 | NA                            | NA                 |
| Kabuli_wild_20940725 | NA                                  | Ca_kabuli_denovo | 20940725                | A/G  | NA                 | NA                            | NA                 |
| Kabuli_wild_20940739 | NA                                  | Ca_kabuli_denovo | 20940739                | G/C  | NA                 | NA                            | NA                 |
| Kabuli_wild_20940749 | NA                                  | Ca_kabuli_denovo | 20940749                | G/A  | NA                 | NA                            | NA                 |
| Kabuli_wild_20940751 | NA                                  | Ca_kabuli_denovo | 20940751                | G/A  | NA                 | NA                            | NA                 |
| Kabuli_wild_20941111 | NA                                  | Ca_kabuli_denovo | 20941111                | G/T  | NA                 | NA                            | NA                 |
| Kabuli_wild_20941493 | NA                                  | Ca_kabuli_denovo | 20941493                | C/T  | NA                 | NA                            | NA                 |
| Kabuli_wild_20941805 | NA                                  | Ca_kabuli_denovo | 20941805                | A/T  | NA                 | NA                            | NA                 |
| Kabuli_wild_20944349 | NA                                  | Ca_kabuli_denovo | 20944349                | C/T  | NA                 | NA                            | NA                 |
| Kabuli_wild_20944446 | NA                                  | Ca_kabuli_denovo | 20944446                | C/T  | NA                 | NA                            | NA                 |
| Kabuli_wild_20945440 | NA                                  | Ca_kabuli_denovo | 20945440                | C/G  | NA                 | NA                            | NA                 |
| Kabuli_wild_20946070 | NA                                  | Ca_kabuli_denovo | 20946070                | G/A  | NA                 | NA                            | NA                 |
| Kabuli_wild_20946072 | NA                                  | Ca_kabuli_denovo | 20946072                | G/T  | NA                 | NA                            | NA                 |
| Kabuli_wild_20947526 | NA                                  | Ca_kabuli_denovo | 20947526                | A/C  | NA                 | NA                            | NA                 |
| Kabuli_wild_20947598 | NA                                  | Ca_kabuli_denovo | 20947598                | C/T  | NA                 | NA                            | NA                 |
| Kabuli_wild_20949621 | NA                                  | Ca_kabuli_denovo | 20949621                | A/T  | NA                 | NA                            | NA                 |

| SNP IDs              | NCBI dbSNP accession IDs (NCBI_SS#) | Chromosomes      | Physical positions (bp) | SNPs | Gene accession IDs | Sequence components of genome | Putative functions |
|----------------------|-------------------------------------|------------------|-------------------------|------|--------------------|-------------------------------|--------------------|
| Kabuli_wild_20949645 | NA                                  | Ca_kabuli_denovo | 20949645                | A/C  | NA                 | NA                            | NA                 |
| Kabuli_wild_20949652 | NA                                  | Ca_kabuli_denovo | 20949652                | A/T  | NA                 | NA                            | NA                 |
| Kabuli_wild_20950439 | NA                                  | Ca_kabuli_denovo | 20950439                | A/C  | NA                 | NA                            | NA                 |
| Kabuli_wild_20951511 | NA                                  | Ca_kabuli_denovo | 20951511                | C/T  | NA                 | NA                            | NA                 |
| Kabuli_wild_20951613 | NA                                  | Ca_kabuli_denovo | 20951613                | A/G  | NA                 | NA                            | NA                 |
| Kabuli_wild_20951827 | NA                                  | Ca_kabuli_denovo | 20951827                | G/T  | NA                 | NA                            | NA                 |
| Kabuli_wild_20953195 | NA                                  | Ca_kabuli_denovo | 20953195                | A/G  | NA                 | NA                            | NA                 |
| Kabuli_wild_20955006 | NA                                  | Ca_kabuli_denovo | 20955006                | A/G  | NA                 | NA                            | NA                 |
| Kabuli_wild_20955014 | NA                                  | Ca_kabuli_denovo | 20955014                | A/C  | NA                 | NA                            | NA                 |
| Kabuli_wild_20955019 | NA                                  | Ca_kabuli_denovo | 20955019                | A/T  | NA                 | NA                            | NA                 |
| Kabuli_wild_20956706 | NA                                  | Ca_kabuli_denovo | 20956706                | A/G  | NA                 | NA                            | NA                 |
| Kabuli_wild_20956713 | NA                                  | Ca_kabuli_denovo | 20956713                | C/T  | NA                 | NA                            | NA                 |
| Kabuli_wild_20957590 | NA                                  | Ca_kabuli_denovo | 20957590                | C/T  | NA                 | NA                            | NA                 |
| Kabuli_wild_20957627 | NA                                  | Ca_kabuli_denovo | 20957627                | A/T  | NA                 | NA                            | NA                 |
| Kabuli_wild_20959422 | NA                                  | Ca_kabuli_denovo | 20959422                | C/G  | NA                 | NA                            | NA                 |
| Kabuli_wild_20960327 | NA                                  | Ca_kabuli_denovo | 20960327                | A/G  | NA                 | NA                            | NA                 |
| Kabuli_wild_20960372 | NA                                  | Ca_kabuli_denovo | 20960372                | C/T  | NA                 | NA                            | NA                 |
| Kabuli_wild_20960378 | NA                                  | Ca_kabuli_denovo | 20960378                | A/G  | NA                 | NA                            | NA                 |
| Kabuli_wild_20960629 | NA                                  | Ca_kabuli_denovo | 20960629                | A/T  | NA                 | NA                            | NA                 |
| Kabuli_wild_20960693 | NA                                  | Ca_kabuli_denovo | 20960693                | A/G  | NA                 | NA                            | NA                 |
| Kabuli_wild_20960885 | NA                                  | Ca_kabuli_denovo | 20960885                | C/T  | NA                 | NA                            | NA                 |
| Kabuli_wild_20962078 | NA                                  | Ca_kabuli_denovo | 20962078                | C/T  | NA                 | NA                            | NA                 |
| Kabuli_wild_20964177 | NA                                  | Ca_kabuli_denovo | 20964177                | A/G  | NA                 | NA                            | NA                 |
| Kabuli_wild_20965866 | NA                                  | Ca_kabuli_denovo | 20965866                | C/G  | NA                 | NA                            | NA                 |
| Kabuli_wild_20967957 | NA                                  | Ca_kabuli_denovo | 20967957                | A/G  | NA                 | NA                            | NA                 |
| Kabuli_wild_20968740 | NA                                  | Ca_kabuli_denovo | 20968740                | A/G  | NA                 | NA                            | NA                 |
| Kabuli_wild_20968782 | NA                                  | Ca_kabuli_denovo | 20968782                | C/T  | NA                 | NA                            | NA                 |
| Kabuli_wild_20969422 | NA                                  | Ca_kabuli_denovo | 20969422                | A/G  | NA                 | NA                            | NA                 |
| Kabuli_wild_20969514 | NA                                  | Ca_kabuli_denovo | 20969514                | A/C  | NA                 | NA                            | NA                 |
| Kabuli_wild_20969516 | NA                                  | Ca_kabuli_denovo | 20969516                | A/T  | NA                 | NA                            | NA                 |
| Kabuli_wild_20969576 | NA                                  | Ca_kabuli_denovo | 20969576                | A/C  | NA                 | NA                            | NA                 |
| Kabuli_wild_20969711 | NA                                  | Ca_kabuli_denovo | 20969711                | C/T  | NA                 | NA                            | NA                 |
| Kabuli_wild_20970294 | NA                                  | Ca_kabuli_denovo | 20970294                | A/T  | NA                 | NA                            | NA                 |
| Kabuli_wild_20970327 | NA                                  | Ca_kabuli_denovo | 20970327                | C/T  | NA                 | NA                            | NA                 |
| Kabuli_wild_20970814 | NA                                  | Ca_kabuli_denovo | 20970814                | A/G  | NA                 | NA                            | NA                 |
| Kabuli_wild_20971164 | NA                                  | Ca_kabuli_denovo | 20971164                | A/G  | NA                 | NA                            | NA                 |
| Kabuli_wild_20971180 | NA                                  | Ca_kabuli_denovo | 20971180                | A/G  | NA                 | NA                            | NA                 |
| Kabuli_wild_20971878 | NA                                  | Ca_kabuli_denovo | 20971878                | A/G  | NA                 | NA                            | NA                 |
| Kabuli_wild_20971884 | NA                                  | Ca_kabuli_denovo | 20971884                | C/G  | NA                 | NA                            | NA                 |
| Kabuli_wild_20973684 | NA                                  | Ca_kabuli_denovo | 20973684                | C/G  | NA                 | NA                            | NA                 |
| Kabuli_wild_20973691 | NA                                  | Ca_kabuli_denovo | 20973691                | A/T  | NA                 | NA                            | NA                 |
| Kabuli_wild_20976025 | NA                                  | Ca_kabuli_denovo | 20976025                | C/T  | NA                 | NA                            | NA                 |
| Kabuli_wild_20976032 | NA                                  | Ca_kabuli_denovo | 20976032                | C/T  | NA                 | NA                            | NA                 |
| Kabuli_wild_20976048 | NA                                  | Ca_kabuli_denovo | 20976048                | G/T  | NA                 | NA                            | NA                 |

| SNP IDs              | NCBI dbSNP accession IDs (NCBI_SS#) | Chromosomes      | Physical positions (bp) | SNPs | Gene accession IDs | Sequence components of genome | Putative functions |
|----------------------|-------------------------------------|------------------|-------------------------|------|--------------------|-------------------------------|--------------------|
| Kabuli_wild_20976050 | NA                                  | Ca_kabuli_denovo | 20976050                | C/T  | NA                 | NA                            | NA                 |
| Kabuli_wild_20976178 | NA                                  | Ca_kabuli_denovo | 20976178                | C/T  | NA                 | NA                            | NA                 |
| Kabuli_wild_20977857 | NA                                  | Ca_kabuli_denovo | 20977857                | A/T  | NA                 | NA                            | NA                 |
| Kabuli_wild_20978291 | NA                                  | Ca_kabuli_denovo | 20978291                | A/T  | NA                 | NA                            | NA                 |
| Kabuli_wild_20978926 | NA                                  | Ca_kabuli_denovo | 20978926                | C/T  | NA                 | NA                            | NA                 |
| Kabuli_wild_20979753 | NA                                  | Ca_kabuli_denovo | 20979753                | G/T  | NA                 | NA                            | NA                 |
| Kabuli_wild_20983191 | NA                                  | Ca_kabuli_denovo | 20983191                | G/T  | NA                 | NA                            | NA                 |
| Kabuli_wild_20983193 | NA                                  | Ca_kabuli_denovo | 20983193                | G/T  | NA                 | NA                            | NA                 |
| Kabuli_wild_20983611 | NA                                  | Ca_kabuli_denovo | 20983611                | C/G  | NA                 | NA                            | NA                 |
| Kabuli_wild_20983645 | NA                                  | Ca_kabuli_denovo | 20983645                | A/G  | NA                 | NA                            | NA                 |
| Kabuli_wild_20986924 | NA                                  | Ca_kabuli_denovo | 20986924                | A/C  | NA                 | NA                            | NA                 |
| Kabuli_wild_20988829 | NA                                  | Ca_kabuli_denovo | 20988829                | C/T  | NA                 | NA                            | NA                 |
| Kabuli_wild_20988867 | NA                                  | Ca_kabuli_denovo | 20988867                | C/T  | NA                 | NA                            | NA                 |
| Kabuli_wild_20989064 | NA                                  | Ca_kabuli_denovo | 20989064                | A/C  | NA                 | NA                            | NA                 |
| Kabuli_wild_20989238 | NA                                  | Ca_kabuli_denovo | 20989238                | C/T  | NA                 | NA                            | NA                 |
| Kabuli_wild_20989337 | NA                                  | Ca_kabuli_denovo | 20989337                | C/T  | NA                 | NA                            | NA                 |
| Kabuli_wild_20989413 | NA                                  | Ca_kabuli_denovo | 20989413                | G/T  | NA                 | NA                            | NA                 |
| Kabuli_wild_20989459 | NA                                  | Ca_kabuli_denovo | 20989459                | C/T  | NA                 | NA                            | NA                 |
| Kabuli_wild_20990192 | NA                                  | Ca_kabuli_denovo | 20990192                | A/T  | NA                 | NA                            | NA                 |
| Kabuli_wild_20990199 | NA                                  | Ca_kabuli_denovo | 20990199                | A/G  | NA                 | NA                            | NA                 |
| Kabuli_wild_20990426 | NA                                  | Ca_kabuli_denovo | 20990426                | C/G  | NA                 | NA                            | NA                 |
| Kabuli_wild_20990575 | NA                                  | Ca_kabuli_denovo | 20990575                | C/T  | NA                 | NA                            | NA                 |
| Kabuli_wild_20990621 | NA                                  | Ca_kabuli_denovo | 20990621                | A/G  | NA                 | NA                            | NA                 |
| Kabuli_wild_20990974 | NA                                  | Ca_kabuli_denovo | 20990974                | A/G  | NA                 | NA                            | NA                 |
| Kabuli_wild_20991749 | NA                                  | Ca_kabuli_denovo | 20991749                | A/C  | NA                 | NA                            | NA                 |
| Kabuli_wild_20992607 | NA                                  | Ca_kabuli_denovo | 20992607                | A/G  | NA                 | NA                            | NA                 |
| Kabuli_wild_20992622 | NA                                  | Ca_kabuli_denovo | 20992622                | C/T  | NA                 | NA                            | NA                 |
| Kabuli_wild_20992669 | NA                                  | Ca_kabuli_denovo | 20992669                | A/G  | NA                 | NA                            | NA                 |
| Kabuli_wild_20992888 | NA                                  | Ca_kabuli_denovo | 20992888                | A/G  | NA                 | NA                            | NA                 |
| Kabuli_wild_20992903 | NA                                  | Ca_kabuli_denovo | 20992903                | C/T  | NA                 | NA                            | NA                 |
| Kabuli_wild_20992918 | NA                                  | Ca_kabuli_denovo | 20992918                | A/G  | NA                 | NA                            | NA                 |
| Kabuli_wild_20993406 | NA                                  | Ca_kabuli_denovo | 20993406                | A/T  | NA                 | NA                            | NA                 |
| Kabuli_wild_20994343 | NA                                  | Ca_kabuli_denovo | 20994343                | G/T  | NA                 | NA                            | NA                 |
| Kabuli_wild_20994350 | NA                                  | Ca_kabuli_denovo | 20994350                | C/T  | NA                 | NA                            | NA                 |
| Kabuli_wild_20995583 | NA                                  | Ca_kabuli_denovo | 20995583                | C/T  | NA                 | NA                            | NA                 |
| Kabuli_wild_20995714 | NA                                  | Ca_kabuli_denovo | 20995714                | A/G  | NA                 | NA                            | NA                 |
| Kabuli_wild_20995726 | NA                                  | Ca_kabuli_denovo | 20995726                | C/G  | NA                 | NA                            | NA                 |
| Kabuli_wild_20995750 | NA                                  | Ca_kabuli_denovo | 20995750                | A/C  | NA                 | NA                            | NA                 |
| Kabuli_wild_20996420 | NA                                  | Ca_kabuli_denovo | 20996420                | A/T  | NA                 | NA                            | NA                 |
| Kabuli_wild_20997856 | NA                                  | Ca_kabuli_denovo | 20997856                | A/G  | NA                 | NA                            | NA                 |
| Kabuli_wild_20998267 | NA                                  | Ca_kabuli_denovo | 20998267                | C/T  | NA                 | NA                            | NA                 |
| Kabuli_wild_20998286 | NA                                  | Ca_kabuli_denovo | 20998286                | A/G  | NA                 | NA                            | NA                 |
| Kabuli_wild_20998339 | NA                                  | Ca_kabuli_denovo | 20998339                | A/G  | NA                 | NA                            | NA                 |
| Kabuli_wild_20999410 | NA                                  | Ca_kabuli_denovo | 20999410                | C/T  | NA                 | NA                            | NA                 |

| SNP IDs              | NCBI dbSNP accession IDs (NCBI_SS#) | Chromosomes      | Physical positions (bp) | SNPs | Gene accession IDs | Sequence components of genome | Putative functions |
|----------------------|-------------------------------------|------------------|-------------------------|------|--------------------|-------------------------------|--------------------|
| Kabuli_wild_20999412 | NA                                  | Ca_kabuli_denovo | 20999412                | G/T  | NA                 | NA                            | NA                 |
| Kabuli_wild_20999413 | NA                                  | Ca_kabuli_denovo | 20999413                | C/T  | NA                 | NA                            | NA                 |
| Kabuli_wild_21000504 | NA                                  | Ca_kabuli_denovo | 21000504                | G/T  | NA                 | NA                            | NA                 |
| Kabuli_wild_21000528 | NA                                  | Ca_kabuli_denovo | 21000528                | C/G  | NA                 | NA                            | NA                 |
| Kabuli_wild_21001354 | NA                                  | Ca_kabuli_denovo | 21001354                | A/G  | NA                 | NA                            | NA                 |
| Kabuli_wild_21001922 | NA                                  | Ca_kabuli_denovo | 21001922                | C/T  | NA                 | NA                            | NA                 |
| Kabuli_wild_21002033 | NA                                  | Ca_kabuli_denovo | 21002033                | A/C  | NA                 | NA                            | NA                 |
| Kabuli_wild_21004675 | NA                                  | Ca_kabuli_denovo | 21004675                | A/G  | NA                 | NA                            | NA                 |
| Kabuli_wild_21005273 | NA                                  | Ca_kabuli_denovo | 21005273                | C/G  | NA                 | NA                            | NA                 |
| Kabuli_wild_21005607 | NA                                  | Ca_kabuli_denovo | 21005607                | A/T  | NA                 | NA                            | NA                 |
| Kabuli_wild_21007087 | NA                                  | Ca_kabuli_denovo | 21007087                | G/T  | NA                 | NA                            | NA                 |
| Kabuli_wild_21007096 | NA                                  | Ca_kabuli_denovo | 21007096                | A/T  | NA                 | NA                            | NA                 |
| Kabuli_wild_21007135 | NA                                  | Ca_kabuli_denovo | 21007135                | C/T  | NA                 | NA                            | NA                 |
| Kabuli_wild_21007360 | NA                                  | Ca_kabuli_denovo | 21007360                | A/G  | NA                 | NA                            | NA                 |
| Kabuli_wild_21008725 | NA                                  | Ca_kabuli_denovo | 21008725                | C/T  | NA                 | NA                            | NA                 |
| Kabuli_wild_21009034 | NA                                  | Ca_kabuli_denovo | 21009034                | T/C  | NA                 | NA                            | NA                 |
| Kabuli_wild_21009216 | NA                                  | Ca_kabuli_denovo | 21009216                | A/C  | NA                 | NA                            | NA                 |
| Kabuli_wild_21009617 | NA                                  | Ca_kabuli_denovo | 21009617                | C/T  | NA                 | NA                            | NA                 |
| Kabuli_wild_21010445 | NA                                  | Ca_kabuli_denovo | 21010445                | C/T  | NA                 | NA                            | NA                 |
| Kabuli_wild_21010510 | NA                                  | Ca_kabuli_denovo | 21010510                | C/T  | NA                 | NA                            | NA                 |
| Kabuli_wild_21010957 | NA                                  | Ca_kabuli_denovo | 21010957                | C/T  | NA                 | NA                            | NA                 |
| Kabuli_wild_21011035 | NA                                  | Ca_kabuli_denovo | 21011035                | C/T  | NA                 | NA                            | NA                 |
| Kabuli_wild_21011094 | NA                                  | Ca_kabuli_denovo | 21011094                | A/G  | NA                 | NA                            | NA                 |
| Kabuli_wild_21011126 | NA                                  | Ca_kabuli_denovo | 21011126                | C/T  | NA                 | NA                            | NA                 |
| Kabuli_wild_21011231 | NA                                  | Ca_kabuli_denovo | 21011231                | C/T  | NA                 | NA                            | NA                 |
| Kabuli_wild_21011384 | NA                                  | Ca_kabuli_denovo | 21011384                | A/C  | NA                 | NA                            | NA                 |
| Kabuli_wild_21011604 | NA                                  | Ca_kabuli_denovo | 21011604                | A/T  | NA                 | NA                            | NA                 |
| Kabuli_wild_21012312 | NA                                  | Ca_kabuli_denovo | 21012312                | G/T  | NA                 | NA                            | NA                 |
| Kabuli_wild_21012342 | NA                                  | Ca_kabuli_denovo | 21012342                | C/G  | NA                 | NA                            | NA                 |
| Kabuli_wild_21013481 | NA                                  | Ca_kabuli_denovo | 21013481                | C/T  | NA                 | NA                            | NA                 |
| Kabuli_wild_21013952 | NA                                  | Ca_kabuli_denovo | 21013952                | A/T  | NA                 | NA                            | NA                 |
| Kabuli_wild_21014427 | NA                                  | Ca_kabuli_denovo | 21014427                | A/G  | NA                 | NA                            | NA                 |
| Kabuli_wild_21015146 | NA                                  | Ca_kabuli_denovo | 21015146                | A/G  | NA                 | NA                            | NA                 |
| Kabuli_wild_21015184 | NA                                  | Ca_kabuli_denovo | 21015184                | A/G  | NA                 | NA                            | NA                 |
| Kabuli_wild_21015331 | NA                                  | Ca_kabuli_denovo | 21015331                | A/C  | NA                 | NA                            | NA                 |
| Kabuli_wild_21015409 | NA                                  | Ca_kabuli_denovo | 21015409                | A/G  | NA                 | NA                            | NA                 |
| Kabuli_wild_21015516 | NA                                  | Ca_kabuli_denovo | 21015516                | C/T  | NA                 | NA                            | NA                 |
| Kabuli_wild_21015525 | NA                                  | Ca_kabuli_denovo | 21015525                | A/T  | NA                 | NA                            | NA                 |
| Kabuli_wild_21017529 | NA                                  | Ca_kabuli_denovo | 21017529                | A/G  | NA                 | NA                            | NA                 |
| Kabuli_wild_21017657 | NA                                  | Ca_kabuli_denovo | 21017657                | G/T  | NA                 | NA                            | NA                 |
| Kabuli_wild_21017863 | NA                                  | Ca_kabuli_denovo | 21017863                | C/G  | NA                 | NA                            | NA                 |
| Kabuli_wild_21017988 | NA                                  | Ca_kabuli_denovo | 21017988                | C/G  | NA                 | NA                            | NA                 |
| Kabuli_wild_21018425 | NA                                  | Ca_kabuli_denovo | 21018425                | G/T  | NA                 | NA                            | NA                 |
| Kabuli_wild_21018448 | NA                                  | Ca_kabuli_denovo | 21018448                | A/G  | NA                 | NA                            | NA                 |



| SNP IDs              | NCBI dbSNP accession IDs (NCBI_SS#) | Chromosomes      | Physical positions (bp) | SNPs | Gene accession IDs | Sequence components of genome | Putative functions |
|----------------------|-------------------------------------|------------------|-------------------------|------|--------------------|-------------------------------|--------------------|
| Kabuli_wild_21018516 | NA                                  | Ca_kabuli_denovo | 21018516                | A/G  | NA                 | NA                            | NA                 |
| Kabuli_wild_21018567 | NA                                  | Ca_kabuli_denovo | 21018567                | A/G  | NA                 | NA                            | NA                 |
| Kabuli_wild_21018569 | NA                                  | Ca_kabuli_denovo | 21018569                | A/G  | NA                 | NA                            | NA                 |
| Kabuli_wild_21018573 | NA                                  | Ca_kabuli_denovo | 21018573                | C/T  | NA                 | NA                            | NA                 |
| Kabuli_wild_21018640 | NA                                  | Ca_kabuli_denovo | 21018640                | A/G  | NA                 | NA                            | NA                 |
| Kabuli_wild_21018664 | NA                                  | Ca_kabuli_denovo | 21018664                | A/G  | NA                 | NA                            | NA                 |
| Kabuli_wild_21018675 | NA                                  | Ca_kabuli_denovo | 21018675                | C/T  | NA                 | NA                            | NA                 |
| Kabuli_wild_21018676 | NA                                  | Ca_kabuli_denovo | 21018676                | C/G  | NA                 | NA                            | NA                 |
| Kabuli_wild_21018723 | NA                                  | Ca_kabuli_denovo | 21018723                | C/T  | NA                 | NA                            | NA                 |
| Kabuli_wild_21018798 | NA                                  | Ca_kabuli_denovo | 21018798                | C/T  | NA                 | NA                            | NA                 |
| Kabuli_wild_21019071 | NA                                  | Ca_kabuli_denovo | 21019071                | A/G  | NA                 | NA                            | NA                 |
| Kabuli_wild_21019186 | NA                                  | Ca_kabuli_denovo | 21019186                | C/T  | NA                 | NA                            | NA                 |
| Kabuli_wild_21019348 | NA                                  | Ca_kabuli_denovo | 21019348                | A/G  | NA                 | NA                            | NA                 |
| Kabuli_wild_21019436 | NA                                  | Ca_kabuli_denovo | 21019436                | A/G  | NA                 | NA                            | NA                 |
| Kabuli_wild_21019524 | NA                                  | Ca_kabuli_denovo | 21019524                | A/C  | NA                 | NA                            | NA                 |
| Kabuli_wild_21019613 | NA                                  | Ca_kabuli_denovo | 21019613                | A/G  | NA                 | NA                            | NA                 |
| Kabuli_wild_21019737 | NA                                  | Ca_kabuli_denovo | 21019737                | C/T  | NA                 | NA                            | NA                 |
| Kabuli_wild_21019810 | NA                                  | Ca_kabuli_denovo | 21019810                | C/G  | NA                 | NA                            | NA                 |
| Kabuli_wild_21020086 | NA                                  | Ca_kabuli_denovo | 21020086                | C/T  | NA                 | NA                            | NA                 |
| Kabuli_wild_21020092 | NA                                  | Ca_kabuli_denovo | 21020092                | G/T  | NA                 | NA                            | NA                 |
| Kabuli_wild_21020093 | NA                                  | Ca_kabuli_denovo | 21020093                | A/T  | NA                 | NA                            | NA                 |
| Kabuli_wild_21020097 | NA                                  | Ca_kabuli_denovo | 21020097                | A/T  | NA                 | NA                            | NA                 |
| Kabuli_wild_21020121 | NA                                  | Ca_kabuli_denovo | 21020121                | A/G  | NA                 | NA                            | NA                 |
| Kabuli_wild_21020143 | NA                                  | Ca_kabuli_denovo | 21020143                | A/T  | NA                 | NA                            | NA                 |
| Kabuli_wild_21020679 | NA                                  | Ca_kabuli_denovo | 21020679                | A/G  | NA                 | NA                            | NA                 |
| Kabuli_wild_21020718 | NA                                  | Ca_kabuli_denovo | 21020718                | C/T  | NA                 | NA                            | NA                 |
| Kabuli_wild_21020824 | NA                                  | Ca_kabuli_denovo | 21020824                | C/T  | NA                 | NA                            | NA                 |
| Kabuli_wild_21020860 | NA                                  | Ca_kabuli_denovo | 21020860                | C/T  | NA                 | NA                            | NA                 |
| Kabuli_wild_21020865 | NA                                  | Ca_kabuli_denovo | 21020865                | C/T  | NA                 | NA                            | NA                 |
| Kabuli_wild_21020887 | NA                                  | Ca_kabuli_denovo | 21020887                | C/T  | NA                 | NA                            | NA                 |
| Kabuli_wild_21020891 | NA                                  | Ca_kabuli_denovo | 21020891                | C/G  | NA                 | NA                            | NA                 |
| Kabuli_wild_21020921 | NA                                  | Ca_kabuli_denovo | 21020921                | C/T  | NA                 | NA                            | NA                 |
| Kabuli_wild_21020961 | NA                                  | Ca_kabuli_denovo | 21020961                | A/T  | NA                 | NA                            | NA                 |
| Kabuli_wild_21020965 | NA                                  | Ca_kabuli_denovo | 21020965                | C/G  | NA                 | NA                            | NA                 |
| Kabuli_wild_21020978 | NA                                  | Ca_kabuli_denovo | 21020978                | C/T  | NA                 | NA                            | NA                 |
| Kabuli_wild_21020983 | NA                                  | Ca_kabuli_denovo | 21020983                | A/G  | NA                 | NA                            | NA                 |
| Kabuli_wild_21020988 | NA                                  | Ca_kabuli_denovo | 21020988                | C/G  | NA                 | NA                            | NA                 |
| Kabuli_wild_21020989 | NA                                  | Ca_kabuli_denovo | 21020989                | A/G  | NA                 | NA                            | NA                 |
| Kabuli_wild_21020998 | NA                                  | Ca_kabuli_denovo | 21020998                | A/T  | NA                 | NA                            | NA                 |
| Kabuli_wild_21021002 | NA                                  | Ca_kabuli_denovo | 21021002                | G/T  | NA                 | NA                            | NA                 |
| Kabuli_wild_21021003 | NA                                  | Ca_kabuli_denovo | 21021003                | C/T  | NA                 | NA                            | NA                 |
| Kabuli_wild_21021004 | NA                                  | Ca_kabuli_denovo | 21021004                | G/T  | NA                 | NA                            | NA                 |
| Kabuli_wild_21022568 | NA                                  | Ca_kabuli_denovo | 21022568                | A/G  | NA                 | NA                            | NA                 |
| Kabuli_wild_21022574 | NA                                  | Ca_kabuli_denovo | 21022574                | A/G  | NA                 | NA                            | NA                 |

| SNP IDs              | NCBI dbSNP accession IDs (NCBI_SS#) | Chromosomes      | Physical positions (bp) | SNPs | Gene accession IDs | Sequence components of genome | Putative functions |
|----------------------|-------------------------------------|------------------|-------------------------|------|--------------------|-------------------------------|--------------------|
| Kabuli_wild_21022672 | NA                                  | Ca_kabuli_denovo | 21022672                | C/T  | NA                 | NA                            | NA                 |
| Kabuli_wild_21022684 | NA                                  | Ca_kabuli_denovo | 21022684                | A/G  | NA                 | NA                            | NA                 |
| Kabuli_wild_21023353 | NA                                  | Ca_kabuli_denovo | 21023353                | A/G  | NA                 | NA                            | NA                 |
| Kabuli_wild_21023744 | NA                                  | Ca_kabuli_denovo | 21023744                | C/T  | NA                 | NA                            | NA                 |
| Kabuli_wild_21024862 | NA                                  | Ca_kabuli_denovo | 21024862                | G/T  | NA                 | NA                            | NA                 |
| Kabuli_wild_21024869 | NA                                  | Ca_kabuli_denovo | 21024869                | A/G  | NA                 | NA                            | NA                 |
| Kabuli_wild_21025514 | NA                                  | Ca_kabuli_denovo | 21025514                | C/T  | NA                 | NA                            | NA                 |
| Kabuli_wild_21026019 | NA                                  | Ca_kabuli_denovo | 21026019                | A/C  | NA                 | NA                            | NA                 |
| Kabuli_wild_21026051 | NA                                  | Ca_kabuli_denovo | 21026051                | A/T  | NA                 | NA                            | NA                 |
| Kabuli_wild_21026054 | NA                                  | Ca_kabuli_denovo | 21026054                | A/T  | NA                 | NA                            | NA                 |
| Kabuli_wild_21026240 | NA                                  | Ca_kabuli_denovo | 21026240                | A/T  | NA                 | NA                            | NA                 |
| Kabuli_wild_21026629 | NA                                  | Ca_kabuli_denovo | 21026629                | C/T  | NA                 | NA                            | NA                 |
| Kabuli_wild_21026675 | NA                                  | Ca_kabuli_denovo | 21026675                | C/G  | NA                 | NA                            | NA                 |
| Kabuli_wild_21026794 | NA                                  | Ca_kabuli_denovo | 21026794                | A/G  | NA                 | NA                            | NA                 |
| Kabuli_wild_21026805 | NA                                  | Ca_kabuli_denovo | 21026805                | C/T  | NA                 | NA                            | NA                 |
| Kabuli_wild_21026920 | NA                                  | Ca_kabuli_denovo | 21026920                | C/T  | NA                 | NA                            | NA                 |
| Kabuli_wild_21027024 | NA                                  | Ca_kabuli_denovo | 21027024                | G/T  | NA                 | NA                            | NA                 |
| Kabuli_wild_21027043 | NA                                  | Ca_kabuli_denovo | 21027043                | A/G  | NA                 | NA                            | NA                 |
| Kabuli_wild_21027135 | NA                                  | Ca_kabuli_denovo | 21027135                | C/G  | NA                 | NA                            | NA                 |
| Kabuli_wild_21027233 | NA                                  | Ca_kabuli_denovo | 21027233                | A/G  | NA                 | NA                            | NA                 |
| Kabuli_wild_21027252 | NA                                  | Ca_kabuli_denovo | 21027252                | C/T  | NA                 | NA                            | NA                 |
| Kabuli_wild_21027347 | NA                                  | Ca_kabuli_denovo | 21027347                | C/T  | NA                 | NA                            | NA                 |
| Kabuli_wild_21027531 | NA                                  | Ca_kabuli_denovo | 21027531                | A/T  | NA                 | NA                            | NA                 |
| Kabuli_wild_21027535 | NA                                  | Ca_kabuli_denovo | 21027535                | C/T  | NA                 | NA                            | NA                 |
| Kabuli_wild_21027628 | NA                                  | Ca_kabuli_denovo | 21027628                | A/T  | NA                 | NA                            | NA                 |
| Kabuli_wild_21027646 | NA                                  | Ca_kabuli_denovo | 21027646                | A/G  | NA                 | NA                            | NA                 |
| Kabuli_wild_21027740 | NA                                  | Ca_kabuli_denovo | 21027740                | T/C  | NA                 | NA                            | NA                 |
| Kabuli_wild_21027755 | NA                                  | Ca_kabuli_denovo | 21027755                | T/C  | NA                 | NA                            | NA                 |
| Kabuli_wild_21027822 | NA                                  | Ca_kabuli_denovo | 21027822                | A/T  | NA                 | NA                            | NA                 |
| Kabuli_wild_21027866 | NA                                  | Ca_kabuli_denovo | 21027866                | A/T  | NA                 | NA                            | NA                 |
| Kabuli_wild_21028220 | NA                                  | Ca_kabuli_denovo | 21028220                | C/T  | NA                 | NA                            | NA                 |
| Kabuli_wild_21028227 | NA                                  | Ca_kabuli_denovo | 21028227                | C/T  | NA                 | NA                            | NA                 |
| Kabuli_wild_21028240 | NA                                  | Ca_kabuli_denovo | 21028240                | C/T  | NA                 | NA                            | NA                 |
| Kabuli_wild_21028251 | NA                                  | Ca_kabuli_denovo | 21028251                | A/G  | NA                 | NA                            | NA                 |
| Kabuli_wild_21028256 | NA                                  | Ca_kabuli_denovo | 21028256                | G/T  | NA                 | NA                            | NA                 |
| Kabuli_wild_21029409 | NA                                  | Ca_kabuli_denovo | 21029409                | A/G  | NA                 | NA                            | NA                 |
| Kabuli_wild_21029455 | NA                                  | Ca_kabuli_denovo | 21029455                | A/G  | NA                 | NA                            | NA                 |
| Kabuli_wild_21031431 | NA                                  | Ca_kabuli_denovo | 21031431                | A/G  | NA                 | NA                            | NA                 |
| Kabuli_wild_21032539 | NA                                  | Ca_kabuli_denovo | 21032539                | A/T  | NA                 | NA                            | NA                 |
| Kabuli_wild_21033187 | NA                                  | Ca_kabuli_denovo | 21033187                | C/G  | NA                 | NA                            | NA                 |
| Kabuli_wild_21033232 | NA                                  | Ca_kabuli_denovo | 21033232                | C/T  | NA                 | NA                            | NA                 |
| Kabuli_wild_21033254 | NA                                  | Ca_kabuli_denovo | 21033254                | G/A  | NA                 | NA                            | NA                 |
| Kabuli_wild_21033426 | NA                                  | Ca_kabuli_denovo | 21033426                | G/T  | NA                 | NA                            | NA                 |
| Kabuli_wild_21033782 | NA                                  | Ca_kabuli_denovo | 21033782                | A/C  | NA                 | NA                            | NA                 |

| SNP IDs                     | NCBI dbSNP accession IDs (NCBI_SS#) | Chromosomes             | Physical positions (bp) | SNPs | Gene accession IDs | Sequence components of genome | Putative functions |
|-----------------------------|-------------------------------------|-------------------------|-------------------------|------|--------------------|-------------------------------|--------------------|
| <i>Kabuli_wild_21033903</i> | NA                                  | <i>Ca_kabuli_denovo</i> | 21033903                | C/G  | NA                 | NA                            | NA                 |
| <i>Kabuli_wild_21034000</i> | NA                                  | <i>Ca_kabuli_denovo</i> | 21034000                | G/T  | NA                 | NA                            | NA                 |
| <i>Kabuli_wild_21034031</i> | NA                                  | <i>Ca_kabuli_denovo</i> | 21034031                | C/T  | NA                 | NA                            | NA                 |
| <i>Kabuli_wild_21034415</i> | NA                                  | <i>Ca_kabuli_denovo</i> | 21034415                | A/T  | NA                 | NA                            | NA                 |
| <i>Kabuli_wild_21034658</i> | NA                                  | <i>Ca_kabuli_denovo</i> | 21034658                | G/A  | NA                 | NA                            | NA                 |
| <i>Kabuli_wild_21034661</i> | NA                                  | <i>Ca_kabuli_denovo</i> | 21034661                | C/T  | NA                 | NA                            | NA                 |
| <i>Kabuli_wild_21036444</i> | NA                                  | <i>Ca_kabuli_denovo</i> | 21036444                | A/T  | NA                 | NA                            | NA                 |
| <i>Kabuli_wild_21036480</i> | NA                                  | <i>Ca_kabuli_denovo</i> | 21036480                | A/G  | NA                 | NA                            | NA                 |
| <i>Kabuli_wild_21036569</i> | NA                                  | <i>Ca_kabuli_denovo</i> | 21036569                | C/T  | NA                 | NA                            | NA                 |
| <i>Kabuli_wild_21036590</i> | NA                                  | <i>Ca_kabuli_denovo</i> | 21036590                | A/G  | NA                 | NA                            | NA                 |
| <i>Kabuli_wild_21037516</i> | NA                                  | <i>Ca_kabuli_denovo</i> | 21037516                | G/C  | NA                 | NA                            | NA                 |
| <i>Kabuli_wild_21038670</i> | NA                                  | <i>Ca_kabuli_denovo</i> | 21038670                | A/G  | NA                 | NA                            | NA                 |
| <i>Kabuli_wild_21038712</i> | NA                                  | <i>Ca_kabuli_denovo</i> | 21038712                | A/G  | NA                 | NA                            | NA                 |
| <i>Kabuli_wild_21039843</i> | NA                                  | <i>Ca_kabuli_denovo</i> | 21039843                | A/T  | NA                 | NA                            | NA                 |
| <i>Kabuli_wild_21039864</i> | NA                                  | <i>Ca_kabuli_denovo</i> | 21039864                | A/G  | NA                 | NA                            | NA                 |
| <i>Kabuli_wild_21040053</i> | NA                                  | <i>Ca_kabuli_denovo</i> | 21040053                | G/T  | NA                 | NA                            | NA                 |
| <i>Kabuli_wild_21040240</i> | NA                                  | <i>Ca_kabuli_denovo</i> | 21040240                | C/T  | NA                 | NA                            | NA                 |
| <i>Kabuli_wild_21041399</i> | NA                                  | <i>Ca_kabuli_denovo</i> | 21041399                | A/G  | NA                 | NA                            | NA                 |
| <i>Kabuli_wild_21041414</i> | NA                                  | <i>Ca_kabuli_denovo</i> | 21041414                | A/G  | NA                 | NA                            | NA                 |
| <i>Kabuli_wild_21042188</i> | NA                                  | <i>Ca_kabuli_denovo</i> | 21042188                | A/C  | NA                 | NA                            | NA                 |
| <i>Kabuli_wild_21042254</i> | NA                                  | <i>Ca_kabuli_denovo</i> | 21042254                | C/T  | NA                 | NA                            | NA                 |
| <i>Kabuli_wild_21042400</i> | NA                                  | <i>Ca_kabuli_denovo</i> | 21042400                | G/T  | NA                 | NA                            | NA                 |
| <i>Kabuli_wild_21042748</i> | NA                                  | <i>Ca_kabuli_denovo</i> | 21042748                | A/T  | NA                 | NA                            | NA                 |
| <i>Kabuli_wild_21042940</i> | NA                                  | <i>Ca_kabuli_denovo</i> | 21042940                | C/T  | NA                 | NA                            | NA                 |
| <i>Kabuli_wild_21043043</i> | NA                                  | <i>Ca_kabuli_denovo</i> | 21043043                | C/T  | NA                 | NA                            | NA                 |
| <i>Kabuli_wild_21043152</i> | NA                                  | <i>Ca_kabuli_denovo</i> | 21043152                | C/T  | NA                 | NA                            | NA                 |
| <i>Kabuli_wild_21043157</i> | NA                                  | <i>Ca_kabuli_denovo</i> | 21043157                | A/G  | NA                 | NA                            | NA                 |
| <i>Kabuli_wild_21043175</i> | NA                                  | <i>Ca_kabuli_denovo</i> | 21043175                | G/T  | NA                 | NA                            | NA                 |
| <i>Kabuli_wild_21043182</i> | NA                                  | <i>Ca_kabuli_denovo</i> | 21043182                | A/G  | NA                 | NA                            | NA                 |
| <i>Kabuli_wild_21044014</i> | NA                                  | <i>Ca_kabuli_denovo</i> | 21044014                | A/G  | NA                 | NA                            | NA                 |
| <i>Kabuli_wild_21044512</i> | NA                                  | <i>Ca_kabuli_denovo</i> | 21044512                | A/T  | NA                 | NA                            | NA                 |
| <i>Kabuli_wild_21048096</i> | NA                                  | <i>Ca_kabuli_denovo</i> | 21048096                | A/G  | NA                 | NA                            | NA                 |
| <i>Kabuli_wild_21050705</i> | NA                                  | <i>Ca_kabuli_denovo</i> | 21050705                | A/G  | NA                 | NA                            | NA                 |
| <i>Kabuli_wild_21051575</i> | NA                                  | <i>Ca_kabuli_denovo</i> | 21051575                | C/G  | NA                 | NA                            | NA                 |
| <i>Kabuli_wild_21051637</i> | NA                                  | <i>Ca_kabuli_denovo</i> | 21051637                | A/G  | NA                 | NA                            | NA                 |
| <i>Kabuli_wild_21052856</i> | NA                                  | <i>Ca_kabuli_denovo</i> | 21052856                | G/T  | NA                 | NA                            | NA                 |
| <i>Kabuli_wild_21052857</i> | NA                                  | <i>Ca_kabuli_denovo</i> | 21052857                | A/G  | NA                 | NA                            | NA                 |
| <i>Kabuli_wild_21052858</i> | NA                                  | <i>Ca_kabuli_denovo</i> | 21052858                | C/G  | NA                 | NA                            | NA                 |
| <i>Kabuli_wild_21052859</i> | NA                                  | <i>Ca_kabuli_denovo</i> | 21052859                | A/G  | NA                 | NA                            | NA                 |
| <i>Kabuli_wild_21056855</i> | NA                                  | <i>Ca_kabuli_denovo</i> | 21056855                | A/T  | NA                 | NA                            | NA                 |
| <i>Kabuli_wild_21057600</i> | NA                                  | <i>Ca_kabuli_denovo</i> | 21057600                | C/T  | NA                 | NA                            | NA                 |
| <i>Kabuli_wild_21059040</i> | NA                                  | <i>Ca_kabuli_denovo</i> | 21059040                | A/G  | NA                 | NA                            | NA                 |
| <i>Kabuli_wild_21059068</i> | NA                                  | <i>Ca_kabuli_denovo</i> | 21059068                | A/G  | NA                 | NA                            | NA                 |
| <i>Kabuli_wild_21059566</i> | NA                                  | <i>Ca_kabuli_denovo</i> | 21059566                | A/T  | NA                 | NA                            | NA                 |

| SNP IDs              | NCBI dbSNP accession IDs (NCBI_SS#) | Chromosomes      | Physical positions (bp) | SNPs | Gene accession IDs | Sequence components of genome | Putative functions |
|----------------------|-------------------------------------|------------------|-------------------------|------|--------------------|-------------------------------|--------------------|
| Kabuli_wild_21059650 | NA                                  | Ca_kabuli_denovo | 21059650                | C/T  | NA                 | NA                            | NA                 |
| Kabuli_wild_21062096 | NA                                  | Ca_kabuli_denovo | 21062096                | C/T  | NA                 | NA                            | NA                 |
| Kabuli_wild_21063324 | NA                                  | Ca_kabuli_denovo | 21063324                | C/T  | NA                 | NA                            | NA                 |
| Kabuli_wild_21063363 | NA                                  | Ca_kabuli_denovo | 21063363                | A/G  | NA                 | NA                            | NA                 |
| Kabuli_wild_21063494 | NA                                  | Ca_kabuli_denovo | 21063494                | A/T  | NA                 | NA                            | NA                 |
| Kabuli_wild_21063497 | NA                                  | Ca_kabuli_denovo | 21063497                | C/T  | NA                 | NA                            | NA                 |
| Kabuli_wild_21066416 | NA                                  | Ca_kabuli_denovo | 21066416                | A/T  | NA                 | NA                            | NA                 |
| Kabuli_wild_21066523 | NA                                  | Ca_kabuli_denovo | 21066523                | A/G  | NA                 | NA                            | NA                 |
| Kabuli_wild_21066564 | NA                                  | Ca_kabuli_denovo | 21066564                | C/T  | NA                 | NA                            | NA                 |
| Kabuli_wild_21066567 | NA                                  | Ca_kabuli_denovo | 21066567                | C/T  | NA                 | NA                            | NA                 |
| Kabuli_wild_21067202 | NA                                  | Ca_kabuli_denovo | 21067202                | C/T  | NA                 | NA                            | NA                 |
| Kabuli_wild_21067668 | NA                                  | Ca_kabuli_denovo | 21067668                | C/G  | NA                 | NA                            | NA                 |
| Kabuli_wild_21068194 | NA                                  | Ca_kabuli_denovo | 21068194                | C/T  | NA                 | NA                            | NA                 |
| Kabuli_wild_21068552 | NA                                  | Ca_kabuli_denovo | 21068552                | C/T  | NA                 | NA                            | NA                 |
| Kabuli_wild_21069226 | NA                                  | Ca_kabuli_denovo | 21069226                | C/T  | NA                 | NA                            | NA                 |
| Kabuli_wild_21069241 | NA                                  | Ca_kabuli_denovo | 21069241                | C/T  | NA                 | NA                            | NA                 |
| Kabuli_wild_21069284 | NA                                  | Ca_kabuli_denovo | 21069284                | C/T  | NA                 | NA                            | NA                 |
| Kabuli_wild_21069286 | NA                                  | Ca_kabuli_denovo | 21069286                | A/C  | NA                 | NA                            | NA                 |
| Kabuli_wild_21070001 | NA                                  | Ca_kabuli_denovo | 21070001                | A/T  | NA                 | NA                            | NA                 |
| Kabuli_wild_21070508 | NA                                  | Ca_kabuli_denovo | 21070508                | A/C  | NA                 | NA                            | NA                 |
| Kabuli_wild_21070531 | NA                                  | Ca_kabuli_denovo | 21070531                | C/T  | NA                 | NA                            | NA                 |
| Kabuli_wild_21071135 | NA                                  | Ca_kabuli_denovo | 21071135                | C/T  | NA                 | NA                            | NA                 |
| Kabuli_wild_21071229 | NA                                  | Ca_kabuli_denovo | 21071229                | C/T  | NA                 | NA                            | NA                 |
| Kabuli_wild_21071253 | NA                                  | Ca_kabuli_denovo | 21071253                | A/C  | NA                 | NA                            | NA                 |
| Kabuli_wild_21072236 | NA                                  | Ca_kabuli_denovo | 21072236                | A/G  | NA                 | NA                            | NA                 |
| Kabuli_wild_21072819 | NA                                  | Ca_kabuli_denovo | 21072819                | G/A  | NA                 | NA                            | NA                 |
| Kabuli_wild_21072933 | NA                                  | Ca_kabuli_denovo | 21072933                | A/G  | NA                 | NA                            | NA                 |
| Kabuli_wild_21073790 | NA                                  | Ca_kabuli_denovo | 21073790                | C/T  | NA                 | NA                            | NA                 |
| Kabuli_wild_21073819 | NA                                  | Ca_kabuli_denovo | 21073819                | A/G  | NA                 | NA                            | NA                 |
| Kabuli_wild_21074158 | NA                                  | Ca_kabuli_denovo | 21074158                | C/T  | NA                 | NA                            | NA                 |
| Kabuli_wild_21074195 | NA                                  | Ca_kabuli_denovo | 21074195                | A/T  | NA                 | NA                            | NA                 |
| Kabuli_wild_21074210 | NA                                  | Ca_kabuli_denovo | 21074210                | C/T  | NA                 | NA                            | NA                 |
| Kabuli_wild_21076117 | NA                                  | Ca_kabuli_denovo | 21076117                | A/G  | NA                 | NA                            | NA                 |
| Kabuli_wild_21076211 | NA                                  | Ca_kabuli_denovo | 21076211                | C/T  | NA                 | NA                            | NA                 |
| Kabuli_wild_21076439 | NA                                  | Ca_kabuli_denovo | 21076439                | A/C  | NA                 | NA                            | NA                 |
| Kabuli_wild_21076476 | NA                                  | Ca_kabuli_denovo | 21076476                | A/C  | NA                 | NA                            | NA                 |
| Kabuli_wild_21078856 | NA                                  | Ca_kabuli_denovo | 21078856                | A/C  | NA                 | NA                            | NA                 |
| Kabuli_wild_21079702 | NA                                  | Ca_kabuli_denovo | 21079702                | A/G  | NA                 | NA                            | NA                 |
| Kabuli_wild_21080441 | NA                                  | Ca_kabuli_denovo | 21080441                | A/G  | NA                 | NA                            | NA                 |
| Kabuli_wild_21081185 | NA                                  | Ca_kabuli_denovo | 21081185                | A/G  | NA                 | NA                            | NA                 |
| Kabuli_wild_21081280 | NA                                  | Ca_kabuli_denovo | 21081280                | C/T  | NA                 | NA                            | NA                 |
| Kabuli_wild_21081290 | NA                                  | Ca_kabuli_denovo | 21081290                | C/T  | NA                 | NA                            | NA                 |
| Kabuli_wild_21081378 | NA                                  | Ca_kabuli_denovo | 21081378                | A/G  | NA                 | NA                            | NA                 |
| Kabuli_wild_21081517 | NA                                  | Ca_kabuli_denovo | 21081517                | C/T  | NA                 | NA                            | NA                 |

| SNP IDs              | NCBI dbSNP accession IDs (NCBI_SS#) | Chromosomes      | Physical positions (bp) | SNPs | Gene accession IDs | Sequence components of genome | Putative functions |
|----------------------|-------------------------------------|------------------|-------------------------|------|--------------------|-------------------------------|--------------------|
| Kabuli_wild_21081561 | NA                                  | Ca_kabuli_denovo | 21081561                | A/G  | NA                 | NA                            | NA                 |
| Kabuli_wild_21081686 | NA                                  | Ca_kabuli_denovo | 21081686                | C/T  | NA                 | NA                            | NA                 |
| Kabuli_wild_21081740 | NA                                  | Ca_kabuli_denovo | 21081740                | C/T  | NA                 | NA                            | NA                 |
| Kabuli_wild_21084850 | NA                                  | Ca_kabuli_denovo | 21084850                | G/A  | NA                 | NA                            | NA                 |
| Kabuli_wild_21084853 | NA                                  | Ca_kabuli_denovo | 21084853                | T/C  | NA                 | NA                            | NA                 |
| Kabuli_wild_21084856 | NA                                  | Ca_kabuli_denovo | 21084856                | G/A  | NA                 | NA                            | NA                 |
| Kabuli_wild_21084997 | NA                                  | Ca_kabuli_denovo | 21084997                | C/G  | NA                 | NA                            | NA                 |
| Kabuli_wild_21085170 | NA                                  | Ca_kabuli_denovo | 21085170                | A/T  | NA                 | NA                            | NA                 |
| Kabuli_wild_21085784 | NA                                  | Ca_kabuli_denovo | 21085784                | G/T  | NA                 | NA                            | NA                 |
| Kabuli_wild_21085807 | NA                                  | Ca_kabuli_denovo | 21085807                | G/T  | NA                 | NA                            | NA                 |
| Kabuli_wild_21085830 | NA                                  | Ca_kabuli_denovo | 21085830                | G/T  | NA                 | NA                            | NA                 |
| Kabuli_wild_21087961 | NA                                  | Ca_kabuli_denovo | 21087961                | A/T  | NA                 | NA                            | NA                 |
| Kabuli_wild_21089116 | NA                                  | Ca_kabuli_denovo | 21089116                | C/G  | NA                 | NA                            | NA                 |
| Kabuli_wild_21089140 | NA                                  | Ca_kabuli_denovo | 21089140                | A/G  | NA                 | NA                            | NA                 |
| Kabuli_wild_21089521 | NA                                  | Ca_kabuli_denovo | 21089521                | A/G  | NA                 | NA                            | NA                 |
| Kabuli_wild_21090372 | NA                                  | Ca_kabuli_denovo | 21090372                | A/G  | NA                 | NA                            | NA                 |
| Kabuli_wild_21090403 | NA                                  | Ca_kabuli_denovo | 21090403                | C/T  | NA                 | NA                            | NA                 |
| Kabuli_wild_21091640 | NA                                  | Ca_kabuli_denovo | 21091640                | A/G  | NA                 | NA                            | NA                 |
| Kabuli_wild_21092604 | NA                                  | Ca_kabuli_denovo | 21092604                | A/G  | NA                 | NA                            | NA                 |
| Kabuli_wild_21092623 | NA                                  | Ca_kabuli_denovo | 21092623                | C/G  | NA                 | NA                            | NA                 |
| Kabuli_wild_21092931 | NA                                  | Ca_kabuli_denovo | 21092931                | C/T  | NA                 | NA                            | NA                 |
| Kabuli_wild_21093706 | NA                                  | Ca_kabuli_denovo | 21093706                | A/T  | NA                 | NA                            | NA                 |
| Kabuli_wild_21095051 | NA                                  | Ca_kabuli_denovo | 21095051                | A/G  | NA                 | NA                            | NA                 |
| Kabuli_wild_21096022 | NA                                  | Ca_kabuli_denovo | 21096022                | C/T  | NA                 | NA                            | NA                 |
| Kabuli_wild_21096081 | NA                                  | Ca_kabuli_denovo | 21096081                | C/G  | NA                 | NA                            | NA                 |
| Kabuli_wild_21099437 | NA                                  | Ca_kabuli_denovo | 21099437                | C/T  | NA                 | NA                            | NA                 |
| Kabuli_wild_21099634 | NA                                  | Ca_kabuli_denovo | 21099634                | A/G  | NA                 | NA                            | NA                 |
| Kabuli_wild_21099639 | NA                                  | Ca_kabuli_denovo | 21099639                | A/T  | NA                 | NA                            | NA                 |
| Kabuli_wild_21099866 | NA                                  | Ca_kabuli_denovo | 21099866                | A/G  | NA                 | NA                            | NA                 |
| Kabuli_wild_21100577 | NA                                  | Ca_kabuli_denovo | 21100577                | A/G  | NA                 | NA                            | NA                 |
| Kabuli_wild_21100580 | NA                                  | Ca_kabuli_denovo | 21100580                | C/T  | NA                 | NA                            | NA                 |
| Kabuli_wild_21100622 | NA                                  | Ca_kabuli_denovo | 21100622                | A/G  | NA                 | NA                            | NA                 |
| Kabuli_wild_21102622 | NA                                  | Ca_kabuli_denovo | 21102622                | C/T  | NA                 | NA                            | NA                 |
| Kabuli_wild_21102625 | NA                                  | Ca_kabuli_denovo | 21102625                | A/G  | NA                 | NA                            | NA                 |
| Kabuli_wild_21103316 | NA                                  | Ca_kabuli_denovo | 21103316                | C/T  | NA                 | NA                            | NA                 |
| Kabuli_wild_21103361 | NA                                  | Ca_kabuli_denovo | 21103361                | G/T  | NA                 | NA                            | NA                 |
| Kabuli_wild_21105779 | NA                                  | Ca_kabuli_denovo | 21105779                | A/G  | NA                 | NA                            | NA                 |
| Kabuli_wild_21105785 | NA                                  | Ca_kabuli_denovo | 21105785                | C/T  | NA                 | NA                            | NA                 |
| Kabuli_wild_21106025 | NA                                  | Ca_kabuli_denovo | 21106025                | A/C  | NA                 | NA                            | NA                 |
| Kabuli_wild_21109832 | NA                                  | Ca_kabuli_denovo | 21109832                | C/T  | NA                 | NA                            | NA                 |
| Kabuli_wild_21111348 | NA                                  | Ca_kabuli_denovo | 21111348                | G/T  | NA                 | NA                            | NA                 |
| Kabuli_wild_21111358 | NA                                  | Ca_kabuli_denovo | 21111358                | A/G  | NA                 | NA                            | NA                 |
| Kabuli_wild_21112532 | NA                                  | Ca_kabuli_denovo | 21112532                | A/T  | NA                 | NA                            | NA                 |
| Kabuli_wild_21112571 | NA                                  | Ca_kabuli_denovo | 21112571                | C/T  | NA                 | NA                            | NA                 |

| SNP IDs              | NCBI dbSNP accession IDs (NCBI_SS#) | Chromosomes      | Physical positions (bp) | SNPs | Gene accession IDs | Sequence components of genome | Putative functions |
|----------------------|-------------------------------------|------------------|-------------------------|------|--------------------|-------------------------------|--------------------|
| Kabuli_wild_21113907 | NA                                  | Ca_kabuli_denovo | 21113907                | A/G  | NA                 | NA                            | NA                 |
| Kabuli_wild_21113965 | NA                                  | Ca_kabuli_denovo | 21113965                | C/T  | NA                 | NA                            | NA                 |
| Kabuli_wild_21113982 | NA                                  | Ca_kabuli_denovo | 21113982                | A/G  | NA                 | NA                            | NA                 |
| Kabuli_wild_21114047 | NA                                  | Ca_kabuli_denovo | 21114047                | C/G  | NA                 | NA                            | NA                 |
| Kabuli_wild_21114077 | NA                                  | Ca_kabuli_denovo | 21114077                | A/G  | NA                 | NA                            | NA                 |
| Kabuli_wild_21116174 | NA                                  | Ca_kabuli_denovo | 21116174                | A/G  | NA                 | NA                            | NA                 |
| Kabuli_wild_21116198 | NA                                  | Ca_kabuli_denovo | 21116198                | A/G  | NA                 | NA                            | NA                 |
| Kabuli_wild_21116855 | NA                                  | Ca_kabuli_denovo | 21116855                | A/C  | NA                 | NA                            | NA                 |
| Kabuli_wild_21118505 | NA                                  | Ca_kabuli_denovo | 21118505                | A/G  | NA                 | NA                            | NA                 |
| Kabuli_wild_21119088 | NA                                  | Ca_kabuli_denovo | 21119088                | A/G  | NA                 | NA                            | NA                 |
| Kabuli_wild_21120043 | NA                                  | Ca_kabuli_denovo | 21120043                | A/G  | NA                 | NA                            | NA                 |
| Kabuli_wild_21120416 | NA                                  | Ca_kabuli_denovo | 21120416                | C/G  | NA                 | NA                            | NA                 |
| Kabuli_wild_21120417 | NA                                  | Ca_kabuli_denovo | 21120417                | C/G  | NA                 | NA                            | NA                 |
| Kabuli_wild_21121253 | NA                                  | Ca_kabuli_denovo | 21121253                | A/G  | NA                 | NA                            | NA                 |
| Kabuli_wild_21121316 | NA                                  | Ca_kabuli_denovo | 21121316                | A/G  | NA                 | NA                            | NA                 |
| Kabuli_wild_21121367 | NA                                  | Ca_kabuli_denovo | 21121367                | A/T  | NA                 | NA                            | NA                 |
| Kabuli_wild_21122512 | NA                                  | Ca_kabuli_denovo | 21122512                | A/G  | NA                 | NA                            | NA                 |
| Kabuli_wild_21124347 | NA                                  | Ca_kabuli_denovo | 21124347                | A/T  | NA                 | NA                            | NA                 |
| Kabuli_wild_21124363 | NA                                  | Ca_kabuli_denovo | 21124363                | A/G  | NA                 | NA                            | NA                 |
| Kabuli_wild_21124946 | NA                                  | Ca_kabuli_denovo | 21124946                | C/T  | NA                 | NA                            | NA                 |
| Kabuli_wild_21124949 | NA                                  | Ca_kabuli_denovo | 21124949                | A/G  | NA                 | NA                            | NA                 |
| Kabuli_wild_21125829 | NA                                  | Ca_kabuli_denovo | 21125829                | C/T  | NA                 | NA                            | NA                 |
| Kabuli_wild_21125886 | NA                                  | Ca_kabuli_denovo | 21125886                | A/G  | NA                 | NA                            | NA                 |
| Kabuli_wild_21126106 | NA                                  | Ca_kabuli_denovo | 21126106                | G/T  | NA                 | NA                            | NA                 |
| Kabuli_wild_21128886 | NA                                  | Ca_kabuli_denovo | 21128886                | A/G  | NA                 | NA                            | NA                 |
| Kabuli_wild_21131524 | NA                                  | Ca_kabuli_denovo | 21131524                | C/T  | NA                 | NA                            | NA                 |
| Kabuli_wild_21133592 | NA                                  | Ca_kabuli_denovo | 21133592                | C/T  | NA                 | NA                            | NA                 |
| Kabuli_wild_21133852 | NA                                  | Ca_kabuli_denovo | 21133852                | A/G  | NA                 | NA                            | NA                 |
| Kabuli_wild_21134237 | NA                                  | Ca_kabuli_denovo | 21134237                | A/T  | NA                 | NA                            | NA                 |
| Kabuli_wild_21135778 | NA                                  | Ca_kabuli_denovo | 21135778                | C/T  | NA                 | NA                            | NA                 |
| Kabuli_wild_21135794 | NA                                  | Ca_kabuli_denovo | 21135794                | G/T  | NA                 | NA                            | NA                 |
| Kabuli_wild_21135798 | NA                                  | Ca_kabuli_denovo | 21135798                | A/T  | NA                 | NA                            | NA                 |
| Kabuli_wild_21135809 | NA                                  | Ca_kabuli_denovo | 21135809                | A/T  | NA                 | NA                            | NA                 |
| Kabuli_wild_21136693 | NA                                  | Ca_kabuli_denovo | 21136693                | C/T  | NA                 | NA                            | NA                 |
| Kabuli_wild_21136695 | NA                                  | Ca_kabuli_denovo | 21136695                | C/T  | NA                 | NA                            | NA                 |
| Kabuli_wild_21136932 | NA                                  | Ca_kabuli_denovo | 21136932                | A/C  | NA                 | NA                            | NA                 |
| Kabuli_wild_21136936 | NA                                  | Ca_kabuli_denovo | 21136936                | C/T  | NA                 | NA                            | NA                 |
| Kabuli_wild_21136944 | NA                                  | Ca_kabuli_denovo | 21136944                | C/G  | NA                 | NA                            | NA                 |
| Kabuli_wild_21136953 | NA                                  | Ca_kabuli_denovo | 21136953                | A/G  | NA                 | NA                            | NA                 |
| Kabuli_wild_21138497 | NA                                  | Ca_kabuli_denovo | 21138497                | C/T  | NA                 | NA                            | NA                 |
| Kabuli_wild_21138501 | NA                                  | Ca_kabuli_denovo | 21138501                | C/T  | NA                 | NA                            | NA                 |
| Kabuli_wild_21139447 | NA                                  | Ca_kabuli_denovo | 21139447                | A/C  | NA                 | NA                            | NA                 |
| Kabuli_wild_21140726 | NA                                  | Ca_kabuli_denovo | 21140726                | A/T  | NA                 | NA                            | NA                 |
| Kabuli_wild_21142147 | NA                                  | Ca_kabuli_denovo | 21142147                | C/T  | NA                 | NA                            | NA                 |

| SNP IDs              | NCBI dbSNP accession IDs (NCBI_SS#) | Chromosomes      | Physical positions (bp) | SNPs | Gene accession IDs | Sequence components of genome | Putative functions |
|----------------------|-------------------------------------|------------------|-------------------------|------|--------------------|-------------------------------|--------------------|
| Kabuli_wild_21142150 | NA                                  | Ca_kabuli_denovo | 21142150                | A/G  | NA                 | NA                            | NA                 |
| Kabuli_wild_21143658 | NA                                  | Ca_kabuli_denovo | 21143658                | A/G  | NA                 | NA                            | NA                 |
| Kabuli_wild_21145135 | NA                                  | Ca_kabuli_denovo | 21145135                | C/T  | NA                 | NA                            | NA                 |
| Kabuli_wild_21147481 | NA                                  | Ca_kabuli_denovo | 21147481                | C/G  | NA                 | NA                            | NA                 |
| Kabuli_wild_21147483 | NA                                  | Ca_kabuli_denovo | 21147483                | G/T  | NA                 | NA                            | NA                 |
| Kabuli_wild_21148620 | NA                                  | Ca_kabuli_denovo | 21148620                | A/T  | NA                 | NA                            | NA                 |
| Kabuli_wild_21148638 | NA                                  | Ca_kabuli_denovo | 21148638                | C/T  | NA                 | NA                            | NA                 |
| Kabuli_wild_21153332 | NA                                  | Ca_kabuli_denovo | 21153332                | C/T  | NA                 | NA                            | NA                 |
| Kabuli_wild_21153556 | NA                                  | Ca_kabuli_denovo | 21153556                | A/G  | NA                 | NA                            | NA                 |
| Kabuli_wild_21154137 | NA                                  | Ca_kabuli_denovo | 21154137                | A/G  | NA                 | NA                            | NA                 |
| Kabuli_wild_21154165 | NA                                  | Ca_kabuli_denovo | 21154165                | A/G  | NA                 | NA                            | NA                 |
| Kabuli_wild_21154204 | NA                                  | Ca_kabuli_denovo | 21154204                | A/G  | NA                 | NA                            | NA                 |
| Kabuli_wild_21154216 | NA                                  | Ca_kabuli_denovo | 21154216                | A/G  | NA                 | NA                            | NA                 |
| Kabuli_wild_21158203 | NA                                  | Ca_kabuli_denovo | 21158203                | A/G  | NA                 | NA                            | NA                 |
| Kabuli_wild_21158211 | NA                                  | Ca_kabuli_denovo | 21158211                | A/G  | NA                 | NA                            | NA                 |
| Kabuli_wild_21158396 | NA                                  | Ca_kabuli_denovo | 21158396                | C/T  | NA                 | NA                            | NA                 |
| Kabuli_wild_21161100 | NA                                  | Ca_kabuli_denovo | 21161100                | A/G  | NA                 | NA                            | NA                 |
| Kabuli_wild_21162563 | NA                                  | Ca_kabuli_denovo | 21162563                | A/T  | NA                 | NA                            | NA                 |
| Kabuli_wild_21162581 | NA                                  | Ca_kabuli_denovo | 21162581                | C/T  | NA                 | NA                            | NA                 |
| Kabuli_wild_21163638 | NA                                  | Ca_kabuli_denovo | 21163638                | G/T  | NA                 | NA                            | NA                 |
| Kabuli_wild_21164023 | NA                                  | Ca_kabuli_denovo | 21164023                | A/C  | NA                 | NA                            | NA                 |
| Kabuli_wild_21164497 | NA                                  | Ca_kabuli_denovo | 21164497                | A/G  | NA                 | NA                            | NA                 |
| Kabuli_wild_21166122 | NA                                  | Ca_kabuli_denovo | 21166122                | A/C  | NA                 | NA                            | NA                 |
| Kabuli_wild_21167379 | NA                                  | Ca_kabuli_denovo | 21167379                | A/G  | NA                 | NA                            | NA                 |
| Kabuli_wild_21167381 | NA                                  | Ca_kabuli_denovo | 21167381                | A/G  | NA                 | NA                            | NA                 |
| Kabuli_wild_21168968 | NA                                  | Ca_kabuli_denovo | 21168968                | A/C  | NA                 | NA                            | NA                 |
| Kabuli_wild_21169742 | NA                                  | Ca_kabuli_denovo | 21169742                | A/G  | NA                 | NA                            | NA                 |
| Kabuli_wild_21169841 | NA                                  | Ca_kabuli_denovo | 21169841                | G/T  | NA                 | NA                            | NA                 |
| Kabuli_wild_21172643 | NA                                  | Ca_kabuli_denovo | 21172643                | A/T  | NA                 | NA                            | NA                 |
| Kabuli_wild_21176678 | NA                                  | Ca_kabuli_denovo | 21176678                | A/T  | NA                 | NA                            | NA                 |
| Kabuli_wild_21177678 | NA                                  | Ca_kabuli_denovo | 21177678                | C/T  | NA                 | NA                            | NA                 |
| Kabuli_wild_21178522 | NA                                  | Ca_kabuli_denovo | 21178522                | A/T  | NA                 | NA                            | NA                 |
| Kabuli_wild_21178556 | NA                                  | Ca_kabuli_denovo | 21178556                | C/T  | NA                 | NA                            | NA                 |
| Kabuli_wild_21178571 | NA                                  | Ca_kabuli_denovo | 21178571                | G/T  | NA                 | NA                            | NA                 |
| Kabuli_wild_21181088 | NA                                  | Ca_kabuli_denovo | 21181088                | A/G  | NA                 | NA                            | NA                 |
| Kabuli_wild_21182369 | NA                                  | Ca_kabuli_denovo | 21182369                | A/G  | NA                 | NA                            | NA                 |
| Kabuli_wild_21182494 | NA                                  | Ca_kabuli_denovo | 21182494                | A/G  | NA                 | NA                            | NA                 |
| Kabuli_wild_21182729 | NA                                  | Ca_kabuli_denovo | 21182729                | A/G  | NA                 | NA                            | NA                 |
| Kabuli_wild_21183495 | NA                                  | Ca_kabuli_denovo | 21183495                | C/T  | NA                 | NA                            | NA                 |
| Kabuli_wild_21183508 | NA                                  | Ca_kabuli_denovo | 21183508                | C/G  | NA                 | NA                            | NA                 |
| Kabuli_wild_21184011 | NA                                  | Ca_kabuli_denovo | 21184011                | A/G  | NA                 | NA                            | NA                 |
| Kabuli_wild_21184044 | NA                                  | Ca_kabuli_denovo | 21184044                | C/G  | NA                 | NA                            | NA                 |
| Kabuli_wild_21184463 | NA                                  | Ca_kabuli_denovo | 21184463                | A/G  | NA                 | NA                            | NA                 |
| Kabuli_wild_21184471 | NA                                  | Ca_kabuli_denovo | 21184471                | A/G  | NA                 | NA                            | NA                 |

| SNP IDs              | NCBI dbSNP accession IDs (NCBI_SS#) | Chromosomes      | Physical positions (bp) | SNPs | Gene accession IDs | Sequence components of genome | Putative functions |
|----------------------|-------------------------------------|------------------|-------------------------|------|--------------------|-------------------------------|--------------------|
| Kabuli_wild_21185770 | NA                                  | Ca_kabuli_denovo | 21185770                | C/G  | NA                 | NA                            | NA                 |
| Kabuli_wild_21185778 | NA                                  | Ca_kabuli_denovo | 21185778                | C/G  | NA                 | NA                            | NA                 |
| Kabuli_wild_21186320 | NA                                  | Ca_kabuli_denovo | 21186320                | C/T  | NA                 | NA                            | NA                 |
| Kabuli_wild_21187527 | NA                                  | Ca_kabuli_denovo | 21187527                | C/T  | NA                 | NA                            | NA                 |
| Kabuli_wild_21191182 | NA                                  | Ca_kabuli_denovo | 21191182                | A/G  | NA                 | NA                            | NA                 |
| Kabuli_wild_21193574 | NA                                  | Ca_kabuli_denovo | 21193574                | A/C  | NA                 | NA                            | NA                 |
| Kabuli_wild_21196054 | NA                                  | Ca_kabuli_denovo | 21196054                | C/T  | NA                 | NA                            | NA                 |
| Kabuli_wild_21197197 | NA                                  | Ca_kabuli_denovo | 21197197                | A/G  | NA                 | NA                            | NA                 |
| Kabuli_wild_21198827 | NA                                  | Ca_kabuli_denovo | 21198827                | C/T  | NA                 | NA                            | NA                 |
| Kabuli_wild_21198830 | NA                                  | Ca_kabuli_denovo | 21198830                | A/G  | NA                 | NA                            | NA                 |
| Kabuli_wild_21201062 | NA                                  | Ca_kabuli_denovo | 21201062                | C/T  | NA                 | NA                            | NA                 |
| Kabuli_wild_21201098 | NA                                  | Ca_kabuli_denovo | 21201098                | C/T  | NA                 | NA                            | NA                 |
| Kabuli_wild_21201885 | NA                                  | Ca_kabuli_denovo | 21201885                | A/G  | NA                 | NA                            | NA                 |
| Kabuli_wild_21202823 | NA                                  | Ca_kabuli_denovo | 21202823                | A/G  | NA                 | NA                            | NA                 |
| Kabuli_wild_21204052 | NA                                  | Ca_kabuli_denovo | 21204052                | A/T  | NA                 | NA                            | NA                 |
| Kabuli_wild_21204184 | NA                                  | Ca_kabuli_denovo | 21204184                | A/G  | NA                 | NA                            | NA                 |
| Kabuli_wild_21204404 | NA                                  | Ca_kabuli_denovo | 21204404                | C/T  | NA                 | NA                            | NA                 |
| Kabuli_wild_21204410 | NA                                  | Ca_kabuli_denovo | 21204410                | A/G  | NA                 | NA                            | NA                 |
| Kabuli_wild_21205303 | NA                                  | Ca_kabuli_denovo | 21205303                | C/T  | NA                 | NA                            | NA                 |
| Kabuli_wild_21206007 | NA                                  | Ca_kabuli_denovo | 21206007                | C/T  | NA                 | NA                            | NA                 |
| Kabuli_wild_21206031 | NA                                  | Ca_kabuli_denovo | 21206031                | C/T  | NA                 | NA                            | NA                 |
| Kabuli_wild_21206637 | NA                                  | Ca_kabuli_denovo | 21206637                | A/G  | NA                 | NA                            | NA                 |
| Kabuli_wild_21206643 | NA                                  | Ca_kabuli_denovo | 21206643                | G/T  | NA                 | NA                            | NA                 |
| Kabuli_wild_21206693 | NA                                  | Ca_kabuli_denovo | 21206693                | C/T  | NA                 | NA                            | NA                 |
| Kabuli_wild_21206702 | NA                                  | Ca_kabuli_denovo | 21206702                | C/T  | NA                 | NA                            | NA                 |
| Kabuli_wild_21207200 | NA                                  | Ca_kabuli_denovo | 21207200                | A/T  | NA                 | NA                            | NA                 |
| Kabuli_wild_21208714 | NA                                  | Ca_kabuli_denovo | 21208714                | A/G  | NA                 | NA                            | NA                 |
| Kabuli_wild_21209596 | NA                                  | Ca_kabuli_denovo | 21209596                | C/T  | NA                 | NA                            | NA                 |
| Kabuli_wild_21209789 | NA                                  | Ca_kabuli_denovo | 21209789                | C/T  | NA                 | NA                            | NA                 |
| Kabuli_wild_21209804 | NA                                  | Ca_kabuli_denovo | 21209804                | A/G  | NA                 | NA                            | NA                 |
| Kabuli_wild_21213807 | NA                                  | Ca_kabuli_denovo | 21213807                | C/T  | NA                 | NA                            | NA                 |
| Kabuli_wild_21215599 | NA                                  | Ca_kabuli_denovo | 21215599                | A/G  | NA                 | NA                            | NA                 |
| Kabuli_wild_21215907 | NA                                  | Ca_kabuli_denovo | 21215907                | A/G  | NA                 | NA                            | NA                 |
| Kabuli_wild_21215941 | NA                                  | Ca_kabuli_denovo | 21215941                | A/G  | NA                 | NA                            | NA                 |
| Kabuli_wild_21216012 | NA                                  | Ca_kabuli_denovo | 21216012                | T/C  | NA                 | NA                            | NA                 |
| Kabuli_wild_21216043 | NA                                  | Ca_kabuli_denovo | 21216043                | C/T  | NA                 | NA                            | NA                 |
| Kabuli_wild_21216797 | NA                                  | Ca_kabuli_denovo | 21216797                | A/G  | NA                 | NA                            | NA                 |
| Kabuli_wild_21217952 | NA                                  | Ca_kabuli_denovo | 21217952                | A/G  | NA                 | NA                            | NA                 |
| Kabuli_wild_21218949 | NA                                  | Ca_kabuli_denovo | 21218949                | A/C  | NA                 | NA                            | NA                 |
| Kabuli_wild_21218977 | NA                                  | Ca_kabuli_denovo | 21218977                | C/T  | NA                 | NA                            | NA                 |
| Kabuli_wild_21220264 | NA                                  | Ca_kabuli_denovo | 21220264                | C/T  | NA                 | NA                            | NA                 |
| Kabuli_wild_21221717 | NA                                  | Ca_kabuli_denovo | 21221717                | G/T  | NA                 | NA                            | NA                 |
| Kabuli_wild_21221756 | NA                                  | Ca_kabuli_denovo | 21221756                | A/C  | NA                 | NA                            | NA                 |
| Kabuli_wild_21223541 | NA                                  | Ca_kabuli_denovo | 21223541                | A/G  | NA                 | NA                            | NA                 |



| SNP IDs              | NCBI dbSNP accession IDs (NCBI_SS#) | Chromosomes      | Physical positions (bp) | SNPs | Gene accession IDs | Sequence components of genome | Putative functions |
|----------------------|-------------------------------------|------------------|-------------------------|------|--------------------|-------------------------------|--------------------|
| Kabuli_wild_21225104 | NA                                  | Ca_kabuli_denovo | 21225104                | A/G  | NA                 | NA                            | NA                 |
| Kabuli_wild_21230441 | NA                                  | Ca_kabuli_denovo | 21230441                | G/T  | NA                 | NA                            | NA                 |
| Kabuli_wild_21230550 | NA                                  | Ca_kabuli_denovo | 21230550                | A/C  | NA                 | NA                            | NA                 |
| Kabuli_wild_21231510 | NA                                  | Ca_kabuli_denovo | 21231510                | C/T  | NA                 | NA                            | NA                 |
| Kabuli_wild_21232909 | NA                                  | Ca_kabuli_denovo | 21232909                | A/G  | NA                 | NA                            | NA                 |
| Kabuli_wild_21232916 | NA                                  | Ca_kabuli_denovo | 21232916                | G/T  | NA                 | NA                            | NA                 |
| Kabuli_wild_21233493 | NA                                  | Ca_kabuli_denovo | 21233493                | C/T  | NA                 | NA                            | NA                 |
| Kabuli_wild_21234532 | NA                                  | Ca_kabuli_denovo | 21234532                | C/T  | NA                 | NA                            | NA                 |
| Kabuli_wild_21235194 | NA                                  | Ca_kabuli_denovo | 21235194                | G/T  | NA                 | NA                            | NA                 |
| Kabuli_wild_21235211 | NA                                  | Ca_kabuli_denovo | 21235211                | G/T  | NA                 | NA                            | NA                 |
| Kabuli_wild_21235901 | NA                                  | Ca_kabuli_denovo | 21235901                | A/G  | NA                 | NA                            | NA                 |
| Kabuli_wild_21238202 | NA                                  | Ca_kabuli_denovo | 21238202                | C/T  | NA                 | NA                            | NA                 |
| Kabuli_wild_21238232 | NA                                  | Ca_kabuli_denovo | 21238232                | A/G  | NA                 | NA                            | NA                 |
| Kabuli_wild_21238247 | NA                                  | Ca_kabuli_denovo | 21238247                | C/T  | NA                 | NA                            | NA                 |
| Kabuli_wild_21240826 | NA                                  | Ca_kabuli_denovo | 21240826                | A/T  | NA                 | NA                            | NA                 |
| Kabuli_wild_21241127 | NA                                  | Ca_kabuli_denovo | 21241127                | A/C  | NA                 | NA                            | NA                 |
| Kabuli_wild_21241312 | NA                                  | Ca_kabuli_denovo | 21241312                | A/G  | NA                 | NA                            | NA                 |
| Kabuli_wild_21241317 | NA                                  | Ca_kabuli_denovo | 21241317                | A/G  | NA                 | NA                            | NA                 |
| Kabuli_wild_21241352 | NA                                  | Ca_kabuli_denovo | 21241352                | A/G  | NA                 | NA                            | NA                 |
| Kabuli_wild_21241797 | NA                                  | Ca_kabuli_denovo | 21241797                | A/G  | NA                 | NA                            | NA                 |
| Kabuli_wild_21242125 | NA                                  | Ca_kabuli_denovo | 21242125                | C/T  | NA                 | NA                            | NA                 |
| Kabuli_wild_21242136 | NA                                  | Ca_kabuli_denovo | 21242136                | C/T  | NA                 | NA                            | NA                 |
| Kabuli_wild_21242670 | NA                                  | Ca_kabuli_denovo | 21242670                | C/T  | NA                 | NA                            | NA                 |
| Kabuli_wild_21245981 | NA                                  | Ca_kabuli_denovo | 21245981                | A/G  | NA                 | NA                            | NA                 |
| Kabuli_wild_21246283 | NA                                  | Ca_kabuli_denovo | 21246283                | C/G  | NA                 | NA                            | NA                 |
| Kabuli_wild_21246850 | NA                                  | Ca_kabuli_denovo | 21246850                | C/T  | NA                 | NA                            | NA                 |
| Kabuli_wild_21246864 | NA                                  | Ca_kabuli_denovo | 21246864                | A/C  | NA                 | NA                            | NA                 |
| Kabuli_wild_21248879 | NA                                  | Ca_kabuli_denovo | 21248879                | A/T  | NA                 | NA                            | NA                 |
| Kabuli_wild_21250797 | NA                                  | Ca_kabuli_denovo | 21250797                | A/G  | NA                 | NA                            | NA                 |
| Kabuli_wild_21253075 | NA                                  | Ca_kabuli_denovo | 21253075                | A/G  | NA                 | NA                            | NA                 |
| Kabuli_wild_21253105 | NA                                  | Ca_kabuli_denovo | 21253105                | G/T  | NA                 | NA                            | NA                 |
| Kabuli_wild_21253412 | NA                                  | Ca_kabuli_denovo | 21253412                | T/C  | NA                 | NA                            | NA                 |
| Kabuli_wild_21254809 | NA                                  | Ca_kabuli_denovo | 21254809                | C/T  | NA                 | NA                            | NA                 |
| Kabuli_wild_21259162 | NA                                  | Ca_kabuli_denovo | 21259162                | C/T  | NA                 | NA                            | NA                 |
| Kabuli_wild_21259655 | NA                                  | Ca_kabuli_denovo | 21259655                | C/T  | NA                 | NA                            | NA                 |
| Kabuli_wild_21259853 | NA                                  | Ca_kabuli_denovo | 21259853                | A/G  | NA                 | NA                            | NA                 |
| Kabuli_wild_21259859 | NA                                  | Ca_kabuli_denovo | 21259859                | A/G  | NA                 | NA                            | NA                 |
| Kabuli_wild_21259862 | NA                                  | Ca_kabuli_denovo | 21259862                | C/G  | NA                 | NA                            | NA                 |
| Kabuli_wild_21259868 | NA                                  | Ca_kabuli_denovo | 21259868                | G/T  | NA                 | NA                            | NA                 |
| Kabuli_wild_21260431 | NA                                  | Ca_kabuli_denovo | 21260431                | G/T  | NA                 | NA                            | NA                 |
| Kabuli_wild_21260498 | NA                                  | Ca_kabuli_denovo | 21260498                | A/T  | NA                 | NA                            | NA                 |
| Kabuli_wild_21261626 | NA                                  | Ca_kabuli_denovo | 21261626                | C/T  | NA                 | NA                            | NA                 |
| Kabuli_wild_21261632 | NA                                  | Ca_kabuli_denovo | 21261632                | C/T  | NA                 | NA                            | NA                 |
| Kabuli_wild_21261663 | NA                                  | Ca_kabuli_denovo | 21261663                | A/C  | NA                 | NA                            | NA                 |

| SNP IDs              | NCBI dbSNP accession IDs (NCBI_SS#) | Chromosomes      | Physical positions (bp) | SNPs | Gene accession IDs | Sequence components of genome | Putative functions |
|----------------------|-------------------------------------|------------------|-------------------------|------|--------------------|-------------------------------|--------------------|
| Kabuli_wild_21262837 | NA                                  | Ca_kabuli_denovo | 21262837                | A/C  | NA                 | NA                            | NA                 |
| Kabuli_wild_21262876 | NA                                  | Ca_kabuli_denovo | 21262876                | A/T  | NA                 | NA                            | NA                 |
| Kabuli_wild_21263506 | NA                                  | Ca_kabuli_denovo | 21263506                | A/T  | NA                 | NA                            | NA                 |
| Kabuli_wild_21263927 | NA                                  | Ca_kabuli_denovo | 21263927                | G/T  | NA                 | NA                            | NA                 |
| Kabuli_wild_21264408 | NA                                  | Ca_kabuli_denovo | 21264408                | A/G  | NA                 | NA                            | NA                 |
| Kabuli_wild_21264988 | NA                                  | Ca_kabuli_denovo | 21264988                | C/G  | NA                 | NA                            | NA                 |
| Kabuli_wild_21266582 | NA                                  | Ca_kabuli_denovo | 21266582                | A/G  | NA                 | NA                            | NA                 |
| Kabuli_wild_21266770 | NA                                  | Ca_kabuli_denovo | 21266770                | C/G  | NA                 | NA                            | NA                 |
| Kabuli_wild_21268405 | NA                                  | Ca_kabuli_denovo | 21268405                | C/T  | NA                 | NA                            | NA                 |
| Kabuli_wild_21268409 | NA                                  | Ca_kabuli_denovo | 21268409                | A/C  | NA                 | NA                            | NA                 |
| Kabuli_wild_21268458 | NA                                  | Ca_kabuli_denovo | 21268458                | A/G  | NA                 | NA                            | NA                 |
| Kabuli_wild_21269564 | NA                                  | Ca_kabuli_denovo | 21269564                | A/G  | NA                 | NA                            | NA                 |
| Kabuli_wild_21272213 | NA                                  | Ca_kabuli_denovo | 21272213                | C/T  | NA                 | NA                            | NA                 |
| Kabuli_wild_21272682 | NA                                  | Ca_kabuli_denovo | 21272682                | A/G  | NA                 | NA                            | NA                 |
| Kabuli_wild_21273812 | NA                                  | Ca_kabuli_denovo | 21273812                | T/C  | NA                 | NA                            | NA                 |
| Kabuli_wild_21275004 | NA                                  | Ca_kabuli_denovo | 21275004                | A/C  | NA                 | NA                            | NA                 |
| Kabuli_wild_21275006 | NA                                  | Ca_kabuli_denovo | 21275006                | A/G  | NA                 | NA                            | NA                 |
| Kabuli_wild_21276351 | NA                                  | Ca_kabuli_denovo | 21276351                | C/T  | NA                 | NA                            | NA                 |
| Kabuli_wild_21276623 | NA                                  | Ca_kabuli_denovo | 21276623                | A/G  | NA                 | NA                            | NA                 |
| Kabuli_wild_21276827 | NA                                  | Ca_kabuli_denovo | 21276827                | A/G  | NA                 | NA                            | NA                 |
| Kabuli_wild_21278763 | NA                                  | Ca_kabuli_denovo | 21278763                | C/G  | NA                 | NA                            | NA                 |
| Kabuli_wild_21278769 | NA                                  | Ca_kabuli_denovo | 21278769                | C/T  | NA                 | NA                            | NA                 |
| Kabuli_wild_21279620 | NA                                  | Ca_kabuli_denovo | 21279620                | A/G  | NA                 | NA                            | NA                 |
| Kabuli_wild_21279653 | NA                                  | Ca_kabuli_denovo | 21279653                | A/G  | NA                 | NA                            | NA                 |
| Kabuli_wild_21279674 | NA                                  | Ca_kabuli_denovo | 21279674                | A/C  | NA                 | NA                            | NA                 |
| Kabuli_wild_21279952 | NA                                  | Ca_kabuli_denovo | 21279952                | A/C  | NA                 | NA                            | NA                 |
| Kabuli_wild_21283037 | NA                                  | Ca_kabuli_denovo | 21283037                | C/T  | NA                 | NA                            | NA                 |
| Kabuli_wild_21289129 | NA                                  | Ca_kabuli_denovo | 21289129                | C/T  | NA                 | NA                            | NA                 |
| Kabuli_wild_21289141 | NA                                  | Ca_kabuli_denovo | 21289141                | C/T  | NA                 | NA                            | NA                 |
| Kabuli_wild_21289193 | NA                                  | Ca_kabuli_denovo | 21289193                | C/T  | NA                 | NA                            | NA                 |
| Kabuli_wild_21290239 | NA                                  | Ca_kabuli_denovo | 21290239                | A/G  | NA                 | NA                            | NA                 |
| Kabuli_wild_21290247 | NA                                  | Ca_kabuli_denovo | 21290247                | C/T  | NA                 | NA                            | NA                 |
| Kabuli_wild_21294376 | NA                                  | Ca_kabuli_denovo | 21294376                | A/G  | NA                 | NA                            | NA                 |
| Kabuli_wild_21296407 | NA                                  | Ca_kabuli_denovo | 21296407                | C/G  | NA                 | NA                            | NA                 |
| Kabuli_wild_21298049 | NA                                  | Ca_kabuli_denovo | 21298049                | C/G  | NA                 | NA                            | NA                 |
| Kabuli_wild_21298075 | NA                                  | Ca_kabuli_denovo | 21298075                | A/G  | NA                 | NA                            | NA                 |
| Kabuli_wild_21298262 | NA                                  | Ca_kabuli_denovo | 21298262                | A/T  | NA                 | NA                            | NA                 |
| Kabuli_wild_21298264 | NA                                  | Ca_kabuli_denovo | 21298264                | A/G  | NA                 | NA                            | NA                 |
| Kabuli_wild_21298287 | NA                                  | Ca_kabuli_denovo | 21298287                | A/T  | NA                 | NA                            | NA                 |
| Kabuli_wild_21298886 | NA                                  | Ca_kabuli_denovo | 21298886                | C/T  | NA                 | NA                            | NA                 |
| Kabuli_wild_21300499 | NA                                  | Ca_kabuli_denovo | 21300499                | C/G  | NA                 | NA                            | NA                 |
| Kabuli_wild_21301055 | NA                                  | Ca_kabuli_denovo | 21301055                | C/T  | NA                 | NA                            | NA                 |
| Kabuli_wild_21301070 | NA                                  | Ca_kabuli_denovo | 21301070                | A/G  | NA                 | NA                            | NA                 |
| Kabuli_wild_21301082 | NA                                  | Ca_kabuli_denovo | 21301082                | A/G  | NA                 | NA                            | NA                 |

| SNP IDs              | NCBI dbSNP accession IDs (NCBI_SS#) | Chromosomes      | Physical positions (bp) | SNPs | Gene accession IDs | Sequence components of genome | Putative functions |
|----------------------|-------------------------------------|------------------|-------------------------|------|--------------------|-------------------------------|--------------------|
| Kabuli_wild_21301097 | NA                                  | Ca_kabuli_denovo | 21301097                | C/G  | NA                 | NA                            | NA                 |
| Kabuli_wild_21302165 | NA                                  | Ca_kabuli_denovo | 21302165                | C/T  | NA                 | NA                            | NA                 |
| Kabuli_wild_21302178 | NA                                  | Ca_kabuli_denovo | 21302178                | C/T  | NA                 | NA                            | NA                 |
| Kabuli_wild_21304924 | NA                                  | Ca_kabuli_denovo | 21304924                | C/T  | NA                 | NA                            | NA                 |
| Kabuli_wild_21305624 | NA                                  | Ca_kabuli_denovo | 21305624                | A/G  | NA                 | NA                            | NA                 |
| Kabuli_wild_21306249 | NA                                  | Ca_kabuli_denovo | 21306249                | A/G  | NA                 | NA                            | NA                 |
| Kabuli_wild_21306259 | NA                                  | Ca_kabuli_denovo | 21306259                | A/G  | NA                 | NA                            | NA                 |
| Kabuli_wild_21306298 | NA                                  | Ca_kabuli_denovo | 21306298                | A/G  | NA                 | NA                            | NA                 |
| Kabuli_wild_21306335 | NA                                  | Ca_kabuli_denovo | 21306335                | A/G  | NA                 | NA                            | NA                 |
| Kabuli_wild_21306382 | NA                                  | Ca_kabuli_denovo | 21306382                | A/G  | NA                 | NA                            | NA                 |
| Kabuli_wild_21308636 | NA                                  | Ca_kabuli_denovo | 21308636                | A/G  | NA                 | NA                            | NA                 |
| Kabuli_wild_21309990 | NA                                  | Ca_kabuli_denovo | 21309990                | C/T  | NA                 | NA                            | NA                 |
| Kabuli_wild_21312336 | NA                                  | Ca_kabuli_denovo | 21312336                | A/G  | NA                 | NA                            | NA                 |
| Kabuli_wild_21312396 | NA                                  | Ca_kabuli_denovo | 21312396                | C/T  | NA                 | NA                            | NA                 |
| Kabuli_wild_21314274 | NA                                  | Ca_kabuli_denovo | 21314274                | C/T  | NA                 | NA                            | NA                 |
| Kabuli_wild_21317158 | NA                                  | Ca_kabuli_denovo | 21317158                | A/G  | NA                 | NA                            | NA                 |
| Kabuli_wild_21317166 | NA                                  | Ca_kabuli_denovo | 21317166                | A/G  | NA                 | NA                            | NA                 |
| Kabuli_wild_21317191 | NA                                  | Ca_kabuli_denovo | 21317191                | C/T  | NA                 | NA                            | NA                 |
| Kabuli_wild_21317460 | NA                                  | Ca_kabuli_denovo | 21317460                | A/G  | NA                 | NA                            | NA                 |
| Kabuli_wild_21317838 | NA                                  | Ca_kabuli_denovo | 21317838                | A/G  | NA                 | NA                            | NA                 |
| Kabuli_wild_21318014 | NA                                  | Ca_kabuli_denovo | 21318014                | A/C  | NA                 | NA                            | NA                 |
| Kabuli_wild_21318928 | NA                                  | Ca_kabuli_denovo | 21318928                | C/T  | NA                 | NA                            | NA                 |
| Kabuli_wild_21319777 | NA                                  | Ca_kabuli_denovo | 21319777                | A/G  | NA                 | NA                            | NA                 |
| Kabuli_wild_21319788 | NA                                  | Ca_kabuli_denovo | 21319788                | G/T  | NA                 | NA                            | NA                 |
| Kabuli_wild_21319809 | NA                                  | Ca_kabuli_denovo | 21319809                | A/T  | NA                 | NA                            | NA                 |
| Kabuli_wild_21320079 | NA                                  | Ca_kabuli_denovo | 21320079                | C/G  | NA                 | NA                            | NA                 |
| Kabuli_wild_21320080 | NA                                  | Ca_kabuli_denovo | 21320080                | C/T  | NA                 | NA                            | NA                 |
| Kabuli_wild_21320501 | NA                                  | Ca_kabuli_denovo | 21320501                | A/C  | NA                 | NA                            | NA                 |
| Kabuli_wild_21322280 | NA                                  | Ca_kabuli_denovo | 21322280                | A/T  | NA                 | NA                            | NA                 |
| Kabuli_wild_21325139 | NA                                  | Ca_kabuli_denovo | 21325139                | C/T  | NA                 | NA                            | NA                 |
| Kabuli_wild_21325161 | NA                                  | Ca_kabuli_denovo | 21325161                | A/T  | NA                 | NA                            | NA                 |
| Kabuli_wild_21325516 | NA                                  | Ca_kabuli_denovo | 21325516                | C/T  | NA                 | NA                            | NA                 |
| Kabuli_wild_21326547 | NA                                  | Ca_kabuli_denovo | 21326547                | C/T  | NA                 | NA                            | NA                 |
| Kabuli_wild_21326551 | NA                                  | Ca_kabuli_denovo | 21326551                | C/T  | NA                 | NA                            | NA                 |
| Kabuli_wild_21327742 | NA                                  | Ca_kabuli_denovo | 21327742                | C/T  | NA                 | NA                            | NA                 |
| Kabuli_wild_21330170 | NA                                  | Ca_kabuli_denovo | 21330170                | C/T  | NA                 | NA                            | NA                 |
| Kabuli_wild_21330172 | NA                                  | Ca_kabuli_denovo | 21330172                | C/T  | NA                 | NA                            | NA                 |
| Kabuli_wild_21334526 | NA                                  | Ca_kabuli_denovo | 21334526                | A/G  | NA                 | NA                            | NA                 |
| Kabuli_wild_21337025 | NA                                  | Ca_kabuli_denovo | 21337025                | C/G  | NA                 | NA                            | NA                 |
| Kabuli_wild_21337793 | NA                                  | Ca_kabuli_denovo | 21337793                | A/T  | NA                 | NA                            | NA                 |
| Kabuli_wild_21339275 | NA                                  | Ca_kabuli_denovo | 21339275                | C/G  | NA                 | NA                            | NA                 |
| Kabuli_wild_21339291 | NA                                  | Ca_kabuli_denovo | 21339291                | A/C  | NA                 | NA                            | NA                 |
| Kabuli_wild_21339292 | NA                                  | Ca_kabuli_denovo | 21339292                | C/T  | NA                 | NA                            | NA                 |
| Kabuli_wild_21343546 | NA                                  | Ca_kabuli_denovo | 21343546                | A/C  | NA                 | NA                            | NA                 |

| SNP IDs              | NCBI dbSNP accession IDs (NCBI_SS#) | Chromosomes      | Physical positions (bp) | SNPs | Gene accession IDs | Sequence components of genome | Putative functions |
|----------------------|-------------------------------------|------------------|-------------------------|------|--------------------|-------------------------------|--------------------|
| Kabuli_wild_21344609 | NA                                  | Ca_kabuli_denovo | 21344609                | A/G  | NA                 | NA                            | NA                 |
| Kabuli_wild_21344648 | NA                                  | Ca_kabuli_denovo | 21344648                | C/T  | NA                 | NA                            | NA                 |
| Kabuli_wild_21347227 | NA                                  | Ca_kabuli_denovo | 21347227                | C/T  | NA                 | NA                            | NA                 |
| Kabuli_wild_21347243 | NA                                  | Ca_kabuli_denovo | 21347243                | C/T  | NA                 | NA                            | NA                 |
| Kabuli_wild_21347266 | NA                                  | Ca_kabuli_denovo | 21347266                | C/T  | NA                 | NA                            | NA                 |
| Kabuli_wild_21348006 | NA                                  | Ca_kabuli_denovo | 21348006                | A/G  | NA                 | NA                            | NA                 |
| Kabuli_wild_21349217 | NA                                  | Ca_kabuli_denovo | 21349217                | G/T  | NA                 | NA                            | NA                 |
| Kabuli_wild_21350845 | NA                                  | Ca_kabuli_denovo | 21350845                | G/T  | NA                 | NA                            | NA                 |
| Kabuli_wild_21350886 | NA                                  | Ca_kabuli_denovo | 21350886                | A/G  | NA                 | NA                            | NA                 |
| Kabuli_wild_21352680 | NA                                  | Ca_kabuli_denovo | 21352680                | C/T  | NA                 | NA                            | NA                 |
| Kabuli_wild_21353499 | NA                                  | Ca_kabuli_denovo | 21353499                | C/T  | NA                 | NA                            | NA                 |
| Kabuli_wild_21354065 | NA                                  | Ca_kabuli_denovo | 21354065                | A/T  | NA                 | NA                            | NA                 |
| Kabuli_wild_21357678 | NA                                  | Ca_kabuli_denovo | 21357678                | A/G  | NA                 | NA                            | NA                 |
| Kabuli_wild_21358287 | NA                                  | Ca_kabuli_denovo | 21358287                | A/G  | NA                 | NA                            | NA                 |
| Kabuli_wild_21358332 | NA                                  | Ca_kabuli_denovo | 21358332                | C/T  | NA                 | NA                            | NA                 |
| Kabuli_wild_21358334 | NA                                  | Ca_kabuli_denovo | 21358334                | G/T  | NA                 | NA                            | NA                 |
| Kabuli_wild_21358776 | NA                                  | Ca_kabuli_denovo | 21358776                | A/G  | NA                 | NA                            | NA                 |
| Kabuli_wild_21363041 | NA                                  | Ca_kabuli_denovo | 21363041                | A/G  | NA                 | NA                            | NA                 |
| Kabuli_wild_21363555 | NA                                  | Ca_kabuli_denovo | 21363555                | C/T  | NA                 | NA                            | NA                 |
| Kabuli_wild_21364008 | NA                                  | Ca_kabuli_denovo | 21364008                | G/T  | NA                 | NA                            | NA                 |
| Kabuli_wild_21365982 | NA                                  | Ca_kabuli_denovo | 21365982                | G/T  | NA                 | NA                            | NA                 |
| Kabuli_wild_21367919 | NA                                  | Ca_kabuli_denovo | 21367919                | C/G  | NA                 | NA                            | NA                 |
| Kabuli_wild_21369917 | NA                                  | Ca_kabuli_denovo | 21369917                | A/C  | NA                 | NA                            | NA                 |
| Kabuli_wild_21370219 | NA                                  | Ca_kabuli_denovo | 21370219                | C/T  | NA                 | NA                            | NA                 |
| Kabuli_wild_21370234 | NA                                  | Ca_kabuli_denovo | 21370234                | G/T  | NA                 | NA                            | NA                 |
| Kabuli_wild_21370237 | NA                                  | Ca_kabuli_denovo | 21370237                | A/G  | NA                 | NA                            | NA                 |
| Kabuli_wild_21370255 | NA                                  | Ca_kabuli_denovo | 21370255                | A/G  | NA                 | NA                            | NA                 |
| Kabuli_wild_21371012 | NA                                  | Ca_kabuli_denovo | 21371012                | C/T  | NA                 | NA                            | NA                 |
| Kabuli_wild_21371289 | NA                                  | Ca_kabuli_denovo | 21371289                | A/G  | NA                 | NA                            | NA                 |
| Kabuli_wild_21371895 | NA                                  | Ca_kabuli_denovo | 21371895                | G/T  | NA                 | NA                            | NA                 |
| Kabuli_wild_21371912 | NA                                  | Ca_kabuli_denovo | 21371912                | A/G  | NA                 | NA                            | NA                 |
| Kabuli_wild_21372095 | NA                                  | Ca_kabuli_denovo | 21372095                | A/T  | NA                 | NA                            | NA                 |
| Kabuli_wild_21372187 | NA                                  | Ca_kabuli_denovo | 21372187                | A/G  | NA                 | NA                            | NA                 |
| Kabuli_wild_21372292 | NA                                  | Ca_kabuli_denovo | 21372292                | A/G  | NA                 | NA                            | NA                 |
| Kabuli_wild_21372313 | NA                                  | Ca_kabuli_denovo | 21372313                | C/T  | NA                 | NA                            | NA                 |
| Kabuli_wild_21372963 | NA                                  | Ca_kabuli_denovo | 21372963                | A/G  | NA                 | NA                            | NA                 |
| Kabuli_wild_21375502 | NA                                  | Ca_kabuli_denovo | 21375502                | G/T  | NA                 | NA                            | NA                 |
| Kabuli_wild_21379875 | NA                                  | Ca_kabuli_denovo | 21379875                | G/T  | NA                 | NA                            | NA                 |
| Kabuli_wild_21380693 | NA                                  | Ca_kabuli_denovo | 21380693                | C/T  | NA                 | NA                            | NA                 |
| Kabuli_wild_21381127 | NA                                  | Ca_kabuli_denovo | 21381127                | C/T  | NA                 | NA                            | NA                 |
| Kabuli_wild_21381202 | NA                                  | Ca_kabuli_denovo | 21381202                | C/T  | NA                 | NA                            | NA                 |
| Kabuli_wild_21381887 | NA                                  | Ca_kabuli_denovo | 21381887                | A/C  | NA                 | NA                            | NA                 |
| Kabuli_wild_21382043 | NA                                  | Ca_kabuli_denovo | 21382043                | A/T  | NA                 | NA                            | NA                 |
| Kabuli_wild_21383579 | NA                                  | Ca_kabuli_denovo | 21383579                | A/C  | NA                 | NA                            | NA                 |

| SNP IDs              | NCBI dbSNP accession IDs (NCBI_SS#) | Chromosomes      | Physical positions (bp) | SNPs | Gene accession IDs | Sequence components of genome | Putative functions |
|----------------------|-------------------------------------|------------------|-------------------------|------|--------------------|-------------------------------|--------------------|
| Kabuli_wild_21386831 | NA                                  | Ca_kabuli_denovo | 21386831                | A/C  | NA                 | NA                            | NA                 |
| Kabuli_wild_21386846 | NA                                  | Ca_kabuli_denovo | 21386846                | C/T  | NA                 | NA                            | NA                 |
| Kabuli_wild_21388552 | NA                                  | Ca_kabuli_denovo | 21388552                | C/G  | NA                 | NA                            | NA                 |
| Kabuli_wild_21388613 | NA                                  | Ca_kabuli_denovo | 21388613                | A/G  | NA                 | NA                            | NA                 |
| Kabuli_wild_21388614 | NA                                  | Ca_kabuli_denovo | 21388614                | A/G  | NA                 | NA                            | NA                 |
| Kabuli_wild_21388658 | NA                                  | Ca_kabuli_denovo | 21388658                | A/G  | NA                 | NA                            | NA                 |
| Kabuli_wild_21388684 | NA                                  | Ca_kabuli_denovo | 21388684                | A/G  | NA                 | NA                            | NA                 |
| Kabuli_wild_21390120 | NA                                  | Ca_kabuli_denovo | 21390120                | A/G  | NA                 | NA                            | NA                 |
| Kabuli_wild_21390123 | NA                                  | Ca_kabuli_denovo | 21390123                | A/G  | NA                 | NA                            | NA                 |
| Kabuli_wild_21390552 | NA                                  | Ca_kabuli_denovo | 21390552                | G/T  | NA                 | NA                            | NA                 |
| Kabuli_wild_21391303 | NA                                  | Ca_kabuli_denovo | 21391303                | C/T  | NA                 | NA                            | NA                 |
| Kabuli_wild_21391304 | NA                                  | Ca_kabuli_denovo | 21391304                | A/T  | NA                 | NA                            | NA                 |
| Kabuli_wild_21393657 | NA                                  | Ca_kabuli_denovo | 21393657                | C/T  | NA                 | NA                            | NA                 |
| Kabuli_wild_21393659 | NA                                  | Ca_kabuli_denovo | 21393659                | C/T  | NA                 | NA                            | NA                 |
| Kabuli_wild_21396934 | NA                                  | Ca_kabuli_denovo | 21396934                | C/T  | NA                 | NA                            | NA                 |
| Kabuli_wild_21398270 | NA                                  | Ca_kabuli_denovo | 21398270                | A/C  | NA                 | NA                            | NA                 |
| Kabuli_wild_21399563 | NA                                  | Ca_kabuli_denovo | 21399563                | C/T  | NA                 | NA                            | NA                 |
| Kabuli_wild_21400388 | NA                                  | Ca_kabuli_denovo | 21400388                | C/G  | NA                 | NA                            | NA                 |
| Kabuli_wild_21400418 | NA                                  | Ca_kabuli_denovo | 21400418                | A/G  | NA                 | NA                            | NA                 |
| Kabuli_wild_21400465 | NA                                  | Ca_kabuli_denovo | 21400465                | A/C  | NA                 | NA                            | NA                 |
| Kabuli_wild_21402048 | NA                                  | Ca_kabuli_denovo | 21402048                | A/T  | NA                 | NA                            | NA                 |
| Kabuli_wild_21402476 | NA                                  | Ca_kabuli_denovo | 21402476                | C/T  | NA                 | NA                            | NA                 |
| Kabuli_wild_21402488 | NA                                  | Ca_kabuli_denovo | 21402488                | C/G  | NA                 | NA                            | NA                 |
| Kabuli_wild_21404671 | NA                                  | Ca_kabuli_denovo | 21404671                | C/T  | NA                 | NA                            | NA                 |
| Kabuli_wild_21409345 | NA                                  | Ca_kabuli_denovo | 21409345                | A/C  | NA                 | NA                            | NA                 |
| Kabuli_wild_21409514 | NA                                  | Ca_kabuli_denovo | 21409514                | C/G  | NA                 | NA                            | NA                 |
| Kabuli_wild_21411274 | NA                                  | Ca_kabuli_denovo | 21411274                | A/G  | NA                 | NA                            | NA                 |
| Kabuli_wild_21412445 | NA                                  | Ca_kabuli_denovo | 21412445                | A/G  | NA                 | NA                            | NA                 |
| Kabuli_wild_21412448 | NA                                  | Ca_kabuli_denovo | 21412448                | A/G  | NA                 | NA                            | NA                 |
| Kabuli_wild_21412605 | NA                                  | Ca_kabuli_denovo | 21412605                | C/G  | NA                 | NA                            | NA                 |
| Kabuli_wild_21412608 | NA                                  | Ca_kabuli_denovo | 21412608                | G/T  | NA                 | NA                            | NA                 |
| Kabuli_wild_21412611 | NA                                  | Ca_kabuli_denovo | 21412611                | C/T  | NA                 | NA                            | NA                 |
| Kabuli_wild_21412614 | NA                                  | Ca_kabuli_denovo | 21412614                | C/G  | NA                 | NA                            | NA                 |
| Kabuli_wild_21413466 | NA                                  | Ca_kabuli_denovo | 21413466                | C/G  | NA                 | NA                            | NA                 |
| Kabuli_wild_21414775 | NA                                  | Ca_kabuli_denovo | 21414775                | G/T  | NA                 | NA                            | NA                 |
| Kabuli_wild_21414831 | NA                                  | Ca_kabuli_denovo | 21414831                | G/T  | NA                 | NA                            | NA                 |
| Kabuli_wild_21416097 | NA                                  | Ca_kabuli_denovo | 21416097                | A/G  | NA                 | NA                            | NA                 |
| Kabuli_wild_21416505 | NA                                  | Ca_kabuli_denovo | 21416505                | A/G  | NA                 | NA                            | NA                 |
| Kabuli_wild_21417471 | NA                                  | Ca_kabuli_denovo | 21417471                | C/T  | NA                 | NA                            | NA                 |
| Kabuli_wild_21418717 | NA                                  | Ca_kabuli_denovo | 21418717                | A/G  | NA                 | NA                            | NA                 |
| Kabuli_wild_21419519 | NA                                  | Ca_kabuli_denovo | 21419519                | G/A  | NA                 | NA                            | NA                 |
| Kabuli_wild_21421136 | NA                                  | Ca_kabuli_denovo | 21421136                | A/G  | NA                 | NA                            | NA                 |
| Kabuli_wild_21421791 | NA                                  | Ca_kabuli_denovo | 21421791                | A/T  | NA                 | NA                            | NA                 |
| Kabuli_wild_21426980 | NA                                  | Ca_kabuli_denovo | 21426980                | A/G  | NA                 | NA                            | NA                 |

| SNP IDs              | NCBI dbSNP accession IDs (NCBI_SS#) | Chromosomes      | Physical positions (bp) | SNPs | Gene accession IDs | Sequence components of genome | Putative functions |
|----------------------|-------------------------------------|------------------|-------------------------|------|--------------------|-------------------------------|--------------------|
| Kabuli_wild_21426983 | NA                                  | Ca_kabuli_denovo | 21426983                | A/G  | NA                 | NA                            | NA                 |
| Kabuli_wild_21428130 | NA                                  | Ca_kabuli_denovo | 21428130                | T/A  | NA                 | NA                            | NA                 |
| Kabuli_wild_21428339 | NA                                  | Ca_kabuli_denovo | 21428339                | A/G  | NA                 | NA                            | NA                 |
| Kabuli_wild_21428345 | NA                                  | Ca_kabuli_denovo | 21428345                | A/G  | NA                 | NA                            | NA                 |
| Kabuli_wild_21428712 | NA                                  | Ca_kabuli_denovo | 21428712                | G/T  | NA                 | NA                            | NA                 |
| Kabuli_wild_21428796 | NA                                  | Ca_kabuli_denovo | 21428796                | C/G  | NA                 | NA                            | NA                 |
| Kabuli_wild_21430735 | NA                                  | Ca_kabuli_denovo | 21430735                | G/T  | NA                 | NA                            | NA                 |
| Kabuli_wild_21432572 | NA                                  | Ca_kabuli_denovo | 21432572                | G/T  | NA                 | NA                            | NA                 |
| Kabuli_wild_21433418 | NA                                  | Ca_kabuli_denovo | 21433418                | C/T  | NA                 | NA                            | NA                 |
| Kabuli_wild_21433455 | NA                                  | Ca_kabuli_denovo | 21433455                | C/T  | NA                 | NA                            | NA                 |
| Kabuli_wild_21433861 | NA                                  | Ca_kabuli_denovo | 21433861                | C/T  | NA                 | NA                            | NA                 |
| Kabuli_wild_21434092 | NA                                  | Ca_kabuli_denovo | 21434092                | A/C  | NA                 | NA                            | NA                 |
| Kabuli_wild_21434102 | NA                                  | Ca_kabuli_denovo | 21434102                | C/G  | NA                 | NA                            | NA                 |
| Kabuli_wild_21434618 | NA                                  | Ca_kabuli_denovo | 21434618                | A/C  | NA                 | NA                            | NA                 |
| Kabuli_wild_21434619 | NA                                  | Ca_kabuli_denovo | 21434619                | G/T  | NA                 | NA                            | NA                 |
| Kabuli_wild_21436115 | NA                                  | Ca_kabuli_denovo | 21436115                | A/C  | NA                 | NA                            | NA                 |
| Kabuli_wild_21436894 | NA                                  | Ca_kabuli_denovo | 21436894                | C/T  | NA                 | NA                            | NA                 |
| Kabuli_wild_21437543 | NA                                  | Ca_kabuli_denovo | 21437543                | G/T  | NA                 | NA                            | NA                 |
| Kabuli_wild_21438546 | NA                                  | Ca_kabuli_denovo | 21438546                | A/T  | NA                 | NA                            | NA                 |
| Kabuli_wild_21438806 | NA                                  | Ca_kabuli_denovo | 21438806                | A/G  | NA                 | NA                            | NA                 |
| Kabuli_wild_21441511 | NA                                  | Ca_kabuli_denovo | 21441511                | A/G  | NA                 | NA                            | NA                 |
| Kabuli_wild_21441567 | NA                                  | Ca_kabuli_denovo | 21441567                | A/C  | NA                 | NA                            | NA                 |
| Kabuli_wild_21441738 | NA                                  | Ca_kabuli_denovo | 21441738                | A/G  | NA                 | NA                            | NA                 |
| Kabuli_wild_21441747 | NA                                  | Ca_kabuli_denovo | 21441747                | A/G  | NA                 | NA                            | NA                 |
| Kabuli_wild_21442013 | NA                                  | Ca_kabuli_denovo | 21442013                | A/G  | NA                 | NA                            | NA                 |
| Kabuli_wild_21442073 | NA                                  | Ca_kabuli_denovo | 21442073                | G/T  | NA                 | NA                            | NA                 |
| Kabuli_wild_21443672 | NA                                  | Ca_kabuli_denovo | 21443672                | A/G  | NA                 | NA                            | NA                 |
| Kabuli_wild_21444627 | NA                                  | Ca_kabuli_denovo | 21444627                | C/T  | NA                 | NA                            | NA                 |
| Kabuli_wild_21445682 | NA                                  | Ca_kabuli_denovo | 21445682                | A/G  | NA                 | NA                            | NA                 |
| Kabuli_wild_21445811 | NA                                  | Ca_kabuli_denovo | 21445811                | A/G  | NA                 | NA                            | NA                 |
| Kabuli_wild_21446854 | NA                                  | Ca_kabuli_denovo | 21446854                | C/T  | NA                 | NA                            | NA                 |
| Kabuli_wild_21446864 | NA                                  | Ca_kabuli_denovo | 21446864                | A/G  | NA                 | NA                            | NA                 |
| Kabuli_wild_21447142 | NA                                  | Ca_kabuli_denovo | 21447142                | C/T  | NA                 | NA                            | NA                 |
| Kabuli_wild_21447727 | NA                                  | Ca_kabuli_denovo | 21447727                | A/C  | NA                 | NA                            | NA                 |
| Kabuli_wild_21447734 | NA                                  | Ca_kabuli_denovo | 21447734                | A/G  | NA                 | NA                            | NA                 |
| Kabuli_wild_21449663 | NA                                  | Ca_kabuli_denovo | 21449663                | A/C  | NA                 | NA                            | NA                 |
| Kabuli_wild_21449669 | NA                                  | Ca_kabuli_denovo | 21449669                | C/T  | NA                 | NA                            | NA                 |
| Kabuli_wild_21450175 | NA                                  | Ca_kabuli_denovo | 21450175                | A/G  | NA                 | NA                            | NA                 |
| Kabuli_wild_21450187 | NA                                  | Ca_kabuli_denovo | 21450187                | A/C  | NA                 | NA                            | NA                 |
| Kabuli_wild_21450202 | NA                                  | Ca_kabuli_denovo | 21450202                | C/T  | NA                 | NA                            | NA                 |
| Kabuli_wild_21456648 | NA                                  | Ca_kabuli_denovo | 21456648                | A/G  | NA                 | NA                            | NA                 |
| Kabuli_wild_21458435 | NA                                  | Ca_kabuli_denovo | 21458435                | A/G  | NA                 | NA                            | NA                 |
| Kabuli_wild_21458475 | NA                                  | Ca_kabuli_denovo | 21458475                | G/T  | NA                 | NA                            | NA                 |
| Kabuli_wild_21458853 | NA                                  | Ca_kabuli_denovo | 21458853                | A/T  | NA                 | NA                            | NA                 |

| SNP IDs                     | NCBI dbSNP accession IDs (NCBI_SS#) | Chromosomes             | Physical positions (bp) | SNPs | Gene accession IDs | Sequence components of genome | Putative functions |
|-----------------------------|-------------------------------------|-------------------------|-------------------------|------|--------------------|-------------------------------|--------------------|
| <i>Kabuli_wild_21458991</i> | NA                                  | <i>Ca_kabuli_denovo</i> | 21458991                | C/T  | NA                 | NA                            | NA                 |
| <i>Kabuli_wild_21460531</i> | NA                                  | <i>Ca_kabuli_denovo</i> | 21460531                | G/T  | NA                 | NA                            | NA                 |
| <i>Kabuli_wild_21460542</i> | NA                                  | <i>Ca_kabuli_denovo</i> | 21460542                | A/G  | NA                 | NA                            | NA                 |
| <i>Kabuli_wild_21461016</i> | NA                                  | <i>Ca_kabuli_denovo</i> | 21461016                | A/C  | NA                 | NA                            | NA                 |
| <i>Kabuli_wild_21461798</i> | NA                                  | <i>Ca_kabuli_denovo</i> | 21461798                | A/C  | NA                 | NA                            | NA                 |
| <i>Kabuli_wild_21461827</i> | NA                                  | <i>Ca_kabuli_denovo</i> | 21461827                | A/G  | NA                 | NA                            | NA                 |
| <i>Kabuli_wild_21461866</i> | NA                                  | <i>Ca_kabuli_denovo</i> | 21461866                | C/T  | NA                 | NA                            | NA                 |
| <i>Kabuli_wild_21464309</i> | NA                                  | <i>Ca_kabuli_denovo</i> | 21464309                | A/C  | NA                 | NA                            | NA                 |
| <i>Kabuli_wild_21464377</i> | NA                                  | <i>Ca_kabuli_denovo</i> | 21464377                | G/T  | NA                 | NA                            | NA                 |
| <i>Kabuli_wild_21465101</i> | NA                                  | <i>Ca_kabuli_denovo</i> | 21465101                | A/G  | NA                 | NA                            | NA                 |
| <i>Kabuli_wild_21465219</i> | NA                                  | <i>Ca_kabuli_denovo</i> | 21465219                | G/T  | NA                 | NA                            | NA                 |
| <i>Kabuli_wild_21465252</i> | NA                                  | <i>Ca_kabuli_denovo</i> | 21465252                | A/G  | NA                 | NA                            | NA                 |
| <i>Kabuli_wild_21472949</i> | NA                                  | <i>Ca_kabuli_denovo</i> | 21472949                | A/G  | NA                 | NA                            | NA                 |
| <i>Kabuli_wild_21472952</i> | NA                                  | <i>Ca_kabuli_denovo</i> | 21472952                | A/G  | NA                 | NA                            | NA                 |
| <i>Kabuli_wild_21472967</i> | NA                                  | <i>Ca_kabuli_denovo</i> | 21472967                | A/T  | NA                 | NA                            | NA                 |
| <i>Kabuli_wild_21473757</i> | NA                                  | <i>Ca_kabuli_denovo</i> | 21473757                | A/G  | NA                 | NA                            | NA                 |
| <i>Kabuli_wild_21477761</i> | NA                                  | <i>Ca_kabuli_denovo</i> | 21477761                | A/G  | NA                 | NA                            | NA                 |
| <i>Kabuli_wild_21478214</i> | NA                                  | <i>Ca_kabuli_denovo</i> | 21478214                | A/G  | NA                 | NA                            | NA                 |
| <i>Kabuli_wild_21478261</i> | NA                                  | <i>Ca_kabuli_denovo</i> | 21478261                | C/G  | NA                 | NA                            | NA                 |
| <i>Kabuli_wild_21480960</i> | NA                                  | <i>Ca_kabuli_denovo</i> | 21480960                | A/T  | NA                 | NA                            | NA                 |
| <i>Kabuli_wild_21481396</i> | NA                                  | <i>Ca_kabuli_denovo</i> | 21481396                | A/G  | NA                 | NA                            | NA                 |
| <i>Kabuli_wild_21481413</i> | NA                                  | <i>Ca_kabuli_denovo</i> | 21481413                | C/T  | NA                 | NA                            | NA                 |
| <i>Kabuli_wild_21481524</i> | NA                                  | <i>Ca_kabuli_denovo</i> | 21481524                | C/G  | NA                 | NA                            | NA                 |
| <i>Kabuli_wild_21482896</i> | NA                                  | <i>Ca_kabuli_denovo</i> | 21482896                | A/T  | NA                 | NA                            | NA                 |
| <i>Kabuli_wild_21482905</i> | NA                                  | <i>Ca_kabuli_denovo</i> | 21482905                | A/T  | NA                 | NA                            | NA                 |
| <i>Kabuli_wild_21482911</i> | NA                                  | <i>Ca_kabuli_denovo</i> | 21482911                | A/G  | NA                 | NA                            | NA                 |
| <i>Kabuli_wild_21484199</i> | NA                                  | <i>Ca_kabuli_denovo</i> | 21484199                | A/G  | NA                 | NA                            | NA                 |
| <i>Kabuli_wild_21484241</i> | NA                                  | <i>Ca_kabuli_denovo</i> | 21484241                | C/T  | NA                 | NA                            | NA                 |
| <i>Kabuli_wild_21484910</i> | NA                                  | <i>Ca_kabuli_denovo</i> | 21484910                | A/T  | NA                 | NA                            | NA                 |
| <i>Kabuli_wild_21485671</i> | NA                                  | <i>Ca_kabuli_denovo</i> | 21485671                | A/G  | NA                 | NA                            | NA                 |
| <i>Kabuli_wild_21485673</i> | NA                                  | <i>Ca_kabuli_denovo</i> | 21485673                | C/G  | NA                 | NA                            | NA                 |
| <i>Kabuli_wild_21487205</i> | NA                                  | <i>Ca_kabuli_denovo</i> | 21487205                | C/T  | NA                 | NA                            | NA                 |
| <i>Kabuli_wild_21489193</i> | NA                                  | <i>Ca_kabuli_denovo</i> | 21489193                | C/T  | NA                 | NA                            | NA                 |
| <i>Kabuli_wild_21489851</i> | NA                                  | <i>Ca_kabuli_denovo</i> | 21489851                | A/G  | NA                 | NA                            | NA                 |
| <i>Kabuli_wild_21490208</i> | NA                                  | <i>Ca_kabuli_denovo</i> | 21490208                | C/G  | NA                 | NA                            | NA                 |
| <i>Kabuli_wild_21490990</i> | NA                                  | <i>Ca_kabuli_denovo</i> | 21490990                | A/G  | NA                 | NA                            | NA                 |
| <i>Kabuli_wild_21491679</i> | NA                                  | <i>Ca_kabuli_denovo</i> | 21491679                | A/G  | NA                 | NA                            | NA                 |
| <i>Kabuli_wild_21491694</i> | NA                                  | <i>Ca_kabuli_denovo</i> | 21491694                | A/G  | NA                 | NA                            | NA                 |
| <i>Kabuli_wild_21492149</i> | NA                                  | <i>Ca_kabuli_denovo</i> | 21492149                | C/G  | NA                 | NA                            | NA                 |
| <i>Kabuli_wild_21498943</i> | NA                                  | <i>Ca_kabuli_denovo</i> | 21498943                | A/T  | NA                 | NA                            | NA                 |
| <i>Kabuli_wild_21499590</i> | NA                                  | <i>Ca_kabuli_denovo</i> | 21499590                | G/T  | NA                 | NA                            | NA                 |
| <i>Kabuli_wild_21501302</i> | NA                                  | <i>Ca_kabuli_denovo</i> | 21501302                | A/G  | NA                 | NA                            | NA                 |
| <i>Kabuli_wild_21501665</i> | NA                                  | <i>Ca_kabuli_denovo</i> | 21501665                | C/G  | NA                 | NA                            | NA                 |
| <i>Kabuli_wild_21503091</i> | NA                                  | <i>Ca_kabuli_denovo</i> | 21503091                | G/T  | NA                 | NA                            | NA                 |

| SNP IDs              | NCBI dbSNP accession IDs (NCBI_SS#) | Chromosomes      | Physical positions (bp) | SNPs | Gene accession IDs | Sequence components of genome | Putative functions |
|----------------------|-------------------------------------|------------------|-------------------------|------|--------------------|-------------------------------|--------------------|
| Kabuli_wild_21503099 | NA                                  | Ca_kabuli_denovo | 21503099                | A/G  | NA                 | NA                            | NA                 |
| Kabuli_wild_21503442 | NA                                  | Ca_kabuli_denovo | 21503442                | A/G  | NA                 | NA                            | NA                 |
| Kabuli_wild_21504490 | NA                                  | Ca_kabuli_denovo | 21504490                | C/T  | NA                 | NA                            | NA                 |
| Kabuli_wild_21504516 | NA                                  | Ca_kabuli_denovo | 21504516                | A/C  | NA                 | NA                            | NA                 |
| Kabuli_wild_21507458 | NA                                  | Ca_kabuli_denovo | 21507458                | G/T  | NA                 | NA                            | NA                 |
| Kabuli_wild_21509910 | NA                                  | Ca_kabuli_denovo | 21509910                | C/G  | NA                 | NA                            | NA                 |
| Kabuli_wild_21511332 | NA                                  | Ca_kabuli_denovo | 21511332                | A/T  | NA                 | NA                            | NA                 |
| Kabuli_wild_21511346 | NA                                  | Ca_kabuli_denovo | 21511346                | C/T  | NA                 | NA                            | NA                 |
| Kabuli_wild_21512159 | NA                                  | Ca_kabuli_denovo | 21512159                | A/T  | NA                 | NA                            | NA                 |
| Kabuli_wild_21513683 | NA                                  | Ca_kabuli_denovo | 21513683                | A/C  | NA                 | NA                            | NA                 |
| Kabuli_wild_21513894 | NA                                  | Ca_kabuli_denovo | 21513894                | A/G  | NA                 | NA                            | NA                 |
| Kabuli_wild_21515845 | NA                                  | Ca_kabuli_denovo | 21515845                | A/T  | NA                 | NA                            | NA                 |
| Kabuli_wild_21516399 | NA                                  | Ca_kabuli_denovo | 21516399                | C/T  | NA                 | NA                            | NA                 |
| Kabuli_wild_21516476 | NA                                  | Ca_kabuli_denovo | 21516476                | A/G  | NA                 | NA                            | NA                 |
| Kabuli_wild_21519635 | NA                                  | Ca_kabuli_denovo | 21519635                | C/T  | NA                 | NA                            | NA                 |
| Kabuli_wild_21519653 | NA                                  | Ca_kabuli_denovo | 21519653                | G/T  | NA                 | NA                            | NA                 |
| Kabuli_wild_21520769 | NA                                  | Ca_kabuli_denovo | 21520769                | C/T  | NA                 | NA                            | NA                 |
| Kabuli_wild_21520814 | NA                                  | Ca_kabuli_denovo | 21520814                | G/T  | NA                 | NA                            | NA                 |
| Kabuli_wild_21520888 | NA                                  | Ca_kabuli_denovo | 21520888                | C/T  | NA                 | NA                            | NA                 |
| Kabuli_wild_21520897 | NA                                  | Ca_kabuli_denovo | 21520897                | A/G  | NA                 | NA                            | NA                 |
| Kabuli_wild_21522904 | NA                                  | Ca_kabuli_denovo | 21522904                | A/G  | NA                 | NA                            | NA                 |
| Kabuli_wild_21522911 | NA                                  | Ca_kabuli_denovo | 21522911                | C/T  | NA                 | NA                            | NA                 |
| Kabuli_wild_21522927 | NA                                  | Ca_kabuli_denovo | 21522927                | A/G  | NA                 | NA                            | NA                 |
| Kabuli_wild_21523706 | NA                                  | Ca_kabuli_denovo | 21523706                | A/G  | NA                 | NA                            | NA                 |
| Kabuli_wild_21523723 | NA                                  | Ca_kabuli_denovo | 21523723                | A/C  | NA                 | NA                            | NA                 |
| Kabuli_wild_21524474 | NA                                  | Ca_kabuli_denovo | 21524474                | G/T  | NA                 | NA                            | NA                 |
| Kabuli_wild_21524475 | NA                                  | Ca_kabuli_denovo | 21524475                | C/T  | NA                 | NA                            | NA                 |
| Kabuli_wild_21524880 | NA                                  | Ca_kabuli_denovo | 21524880                | C/G  | NA                 | NA                            | NA                 |
| Kabuli_wild_21524887 | NA                                  | Ca_kabuli_denovo | 21524887                | A/T  | NA                 | NA                            | NA                 |
| Kabuli_wild_21526199 | NA                                  | Ca_kabuli_denovo | 21526199                | C/T  | NA                 | NA                            | NA                 |
| Kabuli_wild_21526202 | NA                                  | Ca_kabuli_denovo | 21526202                | A/G  | NA                 | NA                            | NA                 |
| Kabuli_wild_21526214 | NA                                  | Ca_kabuli_denovo | 21526214                | C/G  | NA                 | NA                            | NA                 |
| Kabuli_wild_21526953 | NA                                  | Ca_kabuli_denovo | 21526953                | C/G  | NA                 | NA                            | NA                 |
| Kabuli_wild_21526956 | NA                                  | Ca_kabuli_denovo | 21526956                | C/T  | NA                 | NA                            | NA                 |
| Kabuli_wild_21527942 | NA                                  | Ca_kabuli_denovo | 21527942                | A/G  | NA                 | NA                            | NA                 |
| Kabuli_wild_21532033 | NA                                  | Ca_kabuli_denovo | 21532033                | A/G  | NA                 | NA                            | NA                 |
| Kabuli_wild_21532057 | NA                                  | Ca_kabuli_denovo | 21532057                | A/T  | NA                 | NA                            | NA                 |
| Kabuli_wild_21534466 | NA                                  | Ca_kabuli_denovo | 21534466                | A/C  | NA                 | NA                            | NA                 |
| Kabuli_wild_21535333 | NA                                  | Ca_kabuli_denovo | 21535333                | A/G  | NA                 | NA                            | NA                 |
| Kabuli_wild_21537193 | NA                                  | Ca_kabuli_denovo | 21537193                | A/T  | NA                 | NA                            | NA                 |
| Kabuli_wild_21537202 | NA                                  | Ca_kabuli_denovo | 21537202                | A/T  | NA                 | NA                            | NA                 |
| Kabuli_wild_21537211 | NA                                  | Ca_kabuli_denovo | 21537211                | A/G  | NA                 | NA                            | NA                 |
| Kabuli_wild_21537469 | NA                                  | Ca_kabuli_denovo | 21537469                | C/T  | NA                 | NA                            | NA                 |
| Kabuli_wild_21537510 | NA                                  | Ca_kabuli_denovo | 21537510                | C/T  | NA                 | NA                            | NA                 |



| SNP IDs              | NCBI dbSNP accession IDs (NCBI_SS#) | Chromosomes      | Physical positions (bp) | SNPs | Gene accession IDs | Sequence components of genome | Putative functions |
|----------------------|-------------------------------------|------------------|-------------------------|------|--------------------|-------------------------------|--------------------|
| Kabuli_wild_21537844 | NA                                  | Ca_kabuli_denovo | 21537844                | C/T  | NA                 | NA                            | NA                 |
| Kabuli_wild_21538542 | NA                                  | Ca_kabuli_denovo | 21538542                | C/G  | NA                 | NA                            | NA                 |
| Kabuli_wild_21538547 | NA                                  | Ca_kabuli_denovo | 21538547                | A/G  | NA                 | NA                            | NA                 |
| Kabuli_wild_21540678 | NA                                  | Ca_kabuli_denovo | 21540678                | C/T  | NA                 | NA                            | NA                 |
| Kabuli_wild_21540687 | NA                                  | Ca_kabuli_denovo | 21540687                | A/T  | NA                 | NA                            | NA                 |
| Kabuli_wild_21542061 | NA                                  | Ca_kabuli_denovo | 21542061                | A/G  | NA                 | NA                            | NA                 |
| Kabuli_wild_21543124 | NA                                  | Ca_kabuli_denovo | 21543124                | A/G  | NA                 | NA                            | NA                 |
| Kabuli_wild_21543136 | NA                                  | Ca_kabuli_denovo | 21543136                | C/G  | NA                 | NA                            | NA                 |
| Kabuli_wild_21546229 | NA                                  | Ca_kabuli_denovo | 21546229                | C/G  | NA                 | NA                            | NA                 |
| Kabuli_wild_21547683 | NA                                  | Ca_kabuli_denovo | 21547683                | A/G  | NA                 | NA                            | NA                 |
| Kabuli_wild_21548007 | NA                                  | Ca_kabuli_denovo | 21548007                | A/T  | NA                 | NA                            | NA                 |
| Kabuli_wild_21548009 | NA                                  | Ca_kabuli_denovo | 21548009                | A/G  | NA                 | NA                            | NA                 |
| Kabuli_wild_21549001 | NA                                  | Ca_kabuli_denovo | 21549001                | C/T  | NA                 | NA                            | NA                 |
| Kabuli_wild_21553270 | NA                                  | Ca_kabuli_denovo | 21553270                | C/G  | NA                 | NA                            | NA                 |
| Kabuli_wild_21554035 | NA                                  | Ca_kabuli_denovo | 21554035                | A/G  | NA                 | NA                            | NA                 |
| Kabuli_wild_21554050 | NA                                  | Ca_kabuli_denovo | 21554050                | A/C  | NA                 | NA                            | NA                 |
| Kabuli_wild_21554051 | NA                                  | Ca_kabuli_denovo | 21554051                | C/T  | NA                 | NA                            | NA                 |
| Kabuli_wild_21554069 | NA                                  | Ca_kabuli_denovo | 21554069                | C/T  | NA                 | NA                            | NA                 |
| Kabuli_wild_21556795 | NA                                  | Ca_kabuli_denovo | 21556795                | A/G  | NA                 | NA                            | NA                 |
| Kabuli_wild_21558539 | NA                                  | Ca_kabuli_denovo | 21558539                | C/T  | NA                 | NA                            | NA                 |
| Kabuli_wild_21559084 | NA                                  | Ca_kabuli_denovo | 21559084                | C/T  | NA                 | NA                            | NA                 |
| Kabuli_wild_21559099 | NA                                  | Ca_kabuli_denovo | 21559099                | C/T  | NA                 | NA                            | NA                 |
| Kabuli_wild_21563926 | NA                                  | Ca_kabuli_denovo | 21563926                | A/G  | NA                 | NA                            | NA                 |
| Kabuli_wild_21564687 | NA                                  | Ca_kabuli_denovo | 21564687                | A/T  | NA                 | NA                            | NA                 |
| Kabuli_wild_21564688 | NA                                  | Ca_kabuli_denovo | 21564688                | C/T  | NA                 | NA                            | NA                 |
| Kabuli_wild_21567550 | NA                                  | Ca_kabuli_denovo | 21567550                | A/G  | NA                 | NA                            | NA                 |
| Kabuli_wild_21569795 | NA                                  | Ca_kabuli_denovo | 21569795                | A/T  | NA                 | NA                            | NA                 |
| Kabuli_wild_21571605 | NA                                  | Ca_kabuli_denovo | 21571605                | C/T  | NA                 | NA                            | NA                 |
| Kabuli_wild_21572902 | NA                                  | Ca_kabuli_denovo | 21572902                | A/G  | NA                 | NA                            | NA                 |
| Kabuli_wild_21573247 | NA                                  | Ca_kabuli_denovo | 21573247                | G/T  | NA                 | NA                            | NA                 |
| Kabuli_wild_21573260 | NA                                  | Ca_kabuli_denovo | 21573260                | C/G  | NA                 | NA                            | NA                 |
| Kabuli_wild_21575088 | NA                                  | Ca_kabuli_denovo | 21575088                | C/T  | NA                 | NA                            | NA                 |
| Kabuli_wild_21575136 | NA                                  | Ca_kabuli_denovo | 21575136                | C/T  | NA                 | NA                            | NA                 |
| Kabuli_wild_21575156 | NA                                  | Ca_kabuli_denovo | 21575156                | C/G  | NA                 | NA                            | NA                 |
| Kabuli_wild_21575442 | NA                                  | Ca_kabuli_denovo | 21575442                | C/T  | NA                 | NA                            | NA                 |
| Kabuli_wild_21575792 | NA                                  | Ca_kabuli_denovo | 21575792                | A/T  | NA                 | NA                            | NA                 |
| Kabuli_wild_21576668 | NA                                  | Ca_kabuli_denovo | 21576668                | A/G  | NA                 | NA                            | NA                 |
| Kabuli_wild_21579746 | NA                                  | Ca_kabuli_denovo | 21579746                | A/G  | NA                 | NA                            | NA                 |
| Kabuli_wild_21580313 | NA                                  | Ca_kabuli_denovo | 21580313                | A/C  | NA                 | NA                            | NA                 |
| Kabuli_wild_21581192 | NA                                  | Ca_kabuli_denovo | 21581192                | C/T  | NA                 | NA                            | NA                 |
| Kabuli_wild_21581235 | NA                                  | Ca_kabuli_denovo | 21581235                | C/T  | NA                 | NA                            | NA                 |
| Kabuli_wild_21582140 | NA                                  | Ca_kabuli_denovo | 21582140                | A/G  | NA                 | NA                            | NA                 |
| Kabuli_wild_21583555 | NA                                  | Ca_kabuli_denovo | 21583555                | C/G  | NA                 | NA                            | NA                 |
| Kabuli_wild_21583567 | NA                                  | Ca_kabuli_denovo | 21583567                | C/T  | NA                 | NA                            | NA                 |

| SNP IDs                     | NCBI dbSNP accession IDs (NCBI_SS#) | Chromosomes             | Physical positions (bp) | SNPs | Gene accession IDs | Sequence components of genome | Putative functions |
|-----------------------------|-------------------------------------|-------------------------|-------------------------|------|--------------------|-------------------------------|--------------------|
| <i>Kabuli_wild_21583595</i> | NA                                  | <i>Ca_kabuli_denovo</i> | 21583595                | A/G  | NA                 | NA                            | NA                 |
| <i>Kabuli_wild_21584170</i> | NA                                  | <i>Ca_kabuli_denovo</i> | 21584170                | C/A  | NA                 | NA                            | NA                 |
| <i>Kabuli_wild_21585393</i> | NA                                  | <i>Ca_kabuli_denovo</i> | 21585393                | A/G  | NA                 | NA                            | NA                 |
| <i>Kabuli_wild_21586071</i> | NA                                  | <i>Ca_kabuli_denovo</i> | 21586071                | A/G  | NA                 | NA                            | NA                 |
| <i>Kabuli_wild_21587800</i> | NA                                  | <i>Ca_kabuli_denovo</i> | 21587800                | G/T  | NA                 | NA                            | NA                 |
| <i>Kabuli_wild_21587850</i> | NA                                  | <i>Ca_kabuli_denovo</i> | 21587850                | A/G  | NA                 | NA                            | NA                 |
| <i>Kabuli_wild_21588105</i> | NA                                  | <i>Ca_kabuli_denovo</i> | 21588105                | A/T  | NA                 | NA                            | NA                 |
| <i>Kabuli_wild_21592269</i> | NA                                  | <i>Ca_kabuli_denovo</i> | 21592269                | A/G  | NA                 | NA                            | NA                 |
| <i>Kabuli_wild_21593143</i> | NA                                  | <i>Ca_kabuli_denovo</i> | 21593143                | C/T  | NA                 | NA                            | NA                 |
| <i>Kabuli_wild_21593170</i> | NA                                  | <i>Ca_kabuli_denovo</i> | 21593170                | A/G  | NA                 | NA                            | NA                 |
| <i>Kabuli_wild_21593177</i> | NA                                  | <i>Ca_kabuli_denovo</i> | 21593177                | C/T  | NA                 | NA                            | NA                 |
| <i>Kabuli_wild_21593496</i> | NA                                  | <i>Ca_kabuli_denovo</i> | 21593496                | C/T  | NA                 | NA                            | NA                 |
| <i>Kabuli_wild_21593939</i> | NA                                  | <i>Ca_kabuli_denovo</i> | 21593939                | A/C  | NA                 | NA                            | NA                 |
| <i>Kabuli_wild_21593942</i> | NA                                  | <i>Ca_kabuli_denovo</i> | 21593942                | C/T  | NA                 | NA                            | NA                 |
| <i>Kabuli_wild_21594650</i> | NA                                  | <i>Ca_kabuli_denovo</i> | 21594650                | A/T  | NA                 | NA                            | NA                 |
| <i>Kabuli_wild_21595164</i> | NA                                  | <i>Ca_kabuli_denovo</i> | 21595164                | C/G  | NA                 | NA                            | NA                 |
| <i>Kabuli_wild_21595175</i> | NA                                  | <i>Ca_kabuli_denovo</i> | 21595175                | C/G  | NA                 | NA                            | NA                 |
| <i>Kabuli_wild_21596234</i> | NA                                  | <i>Ca_kabuli_denovo</i> | 21596234                | A/C  | NA                 | NA                            | NA                 |
| <i>Kabuli_wild_21596281</i> | NA                                  | <i>Ca_kabuli_denovo</i> | 21596281                | C/T  | NA                 | NA                            | NA                 |
| <i>Kabuli_wild_21596351</i> | NA                                  | <i>Ca_kabuli_denovo</i> | 21596351                | C/T  | NA                 | NA                            | NA                 |
| <i>Kabuli_wild_21596955</i> | NA                                  | <i>Ca_kabuli_denovo</i> | 21596955                | A/G  | NA                 | NA                            | NA                 |
| <i>Kabuli_wild_21600343</i> | NA                                  | <i>Ca_kabuli_denovo</i> | 21600343                | C/G  | NA                 | NA                            | NA                 |
| <i>Kabuli_wild_21600421</i> | NA                                  | <i>Ca_kabuli_denovo</i> | 21600421                | A/C  | NA                 | NA                            | NA                 |
| <i>Kabuli_wild_21600826</i> | NA                                  | <i>Ca_kabuli_denovo</i> | 21600826                | C/T  | NA                 | NA                            | NA                 |
| <i>Kabuli_wild_21601972</i> | NA                                  | <i>Ca_kabuli_denovo</i> | 21601972                | A/G  | NA                 | NA                            | NA                 |
| <i>Kabuli_wild_21601984</i> | NA                                  | <i>Ca_kabuli_denovo</i> | 21601984                | C/T  | NA                 | NA                            | NA                 |
| <i>Kabuli_wild_21601987</i> | NA                                  | <i>Ca_kabuli_denovo</i> | 21601987                | C/T  | NA                 | NA                            | NA                 |
| <i>Kabuli_wild_21602850</i> | NA                                  | <i>Ca_kabuli_denovo</i> | 21602850                | A/C  | NA                 | NA                            | NA                 |
| <i>Kabuli_wild_21602877</i> | NA                                  | <i>Ca_kabuli_denovo</i> | 21602877                | A/G  | NA                 | NA                            | NA                 |
| <i>Kabuli_wild_21602895</i> | NA                                  | <i>Ca_kabuli_denovo</i> | 21602895                | C/T  | NA                 | NA                            | NA                 |
| <i>Kabuli_wild_21603164</i> | NA                                  | <i>Ca_kabuli_denovo</i> | 21603164                | C/T  | NA                 | NA                            | NA                 |
| <i>Kabuli_wild_21606047</i> | NA                                  | <i>Ca_kabuli_denovo</i> | 21606047                | G/T  | NA                 | NA                            | NA                 |
| <i>Kabuli_wild_21606517</i> | NA                                  | <i>Ca_kabuli_denovo</i> | 21606517                | G/T  | NA                 | NA                            | NA                 |
| <i>Kabuli_wild_21606535</i> | NA                                  | <i>Ca_kabuli_denovo</i> | 21606535                | C/G  | NA                 | NA                            | NA                 |
| <i>Kabuli_wild_21606570</i> | NA                                  | <i>Ca_kabuli_denovo</i> | 21606570                | A/G  | NA                 | NA                            | NA                 |
| <i>Kabuli_wild_21606729</i> | NA                                  | <i>Ca_kabuli_denovo</i> | 21606729                | G/T  | NA                 | NA                            | NA                 |
| <i>Kabuli_wild_21609042</i> | NA                                  | <i>Ca_kabuli_denovo</i> | 21609042                | C/T  | NA                 | NA                            | NA                 |
| <i>Kabuli_wild_21609929</i> | NA                                  | <i>Ca_kabuli_denovo</i> | 21609929                | A/C  | NA                 | NA                            | NA                 |
| <i>Kabuli_wild_21609930</i> | NA                                  | <i>Ca_kabuli_denovo</i> | 21609930                | A/G  | NA                 | NA                            | NA                 |
| <i>Kabuli_wild_21615175</i> | NA                                  | <i>Ca_kabuli_denovo</i> | 21615175                | C/T  | NA                 | NA                            | NA                 |
| <i>Kabuli_wild_21615233</i> | NA                                  | <i>Ca_kabuli_denovo</i> | 21615233                | G/T  | NA                 | NA                            | NA                 |
| <i>Kabuli_wild_21615942</i> | NA                                  | <i>Ca_kabuli_denovo</i> | 21615942                | C/T  | NA                 | NA                            | NA                 |
| <i>Kabuli_wild_21619033</i> | NA                                  | <i>Ca_kabuli_denovo</i> | 21619033                | A/T  | NA                 | NA                            | NA                 |
| <i>Kabuli_wild_21619085</i> | NA                                  | <i>Ca_kabuli_denovo</i> | 21619085                | C/G  | NA                 | NA                            | NA                 |

| SNP IDs              | NCBI dbSNP accession IDs (NCBI_SS#) | Chromosomes      | Physical positions (bp) | SNPs | Gene accession IDs | Sequence components of genome | Putative functions |
|----------------------|-------------------------------------|------------------|-------------------------|------|--------------------|-------------------------------|--------------------|
| Kabuli_wild_21622342 | NA                                  | Ca_kabuli_denovo | 21622342                | A/G  | NA                 | NA                            | NA                 |
| Kabuli_wild_21622352 | NA                                  | Ca_kabuli_denovo | 21622352                | C/T  | NA                 | NA                            | NA                 |
| Kabuli_wild_21622417 | NA                                  | Ca_kabuli_denovo | 21622417                | A/G  | NA                 | NA                            | NA                 |
| Kabuli_wild_21622420 | NA                                  | Ca_kabuli_denovo | 21622420                | A/G  | NA                 | NA                            | NA                 |
| Kabuli_wild_21622435 | NA                                  | Ca_kabuli_denovo | 21622435                | A/G  | NA                 | NA                            | NA                 |
| Kabuli_wild_21623444 | NA                                  | Ca_kabuli_denovo | 21623444                | A/C  | NA                 | NA                            | NA                 |
| Kabuli_wild_21624349 | NA                                  | Ca_kabuli_denovo | 21624349                | A/C  | NA                 | NA                            | NA                 |
| Kabuli_wild_21626582 | NA                                  | Ca_kabuli_denovo | 21626582                | C/G  | NA                 | NA                            | NA                 |
| Kabuli_wild_21627752 | NA                                  | Ca_kabuli_denovo | 21627752                | C/T  | NA                 | NA                            | NA                 |
| Kabuli_wild_21627779 | NA                                  | Ca_kabuli_denovo | 21627779                | A/G  | NA                 | NA                            | NA                 |
| Kabuli_wild_21627797 | NA                                  | Ca_kabuli_denovo | 21627797                | C/G  | NA                 | NA                            | NA                 |
| Kabuli_wild_21628247 | NA                                  | Ca_kabuli_denovo | 21628247                | C/G  | NA                 | NA                            | NA                 |
| Kabuli_wild_21628533 | NA                                  | Ca_kabuli_denovo | 21628533                | C/T  | NA                 | NA                            | NA                 |
| Kabuli_wild_21628675 | NA                                  | Ca_kabuli_denovo | 21628675                | A/T  | NA                 | NA                            | NA                 |
| Kabuli_wild_21630502 | NA                                  | Ca_kabuli_denovo | 21630502                | A/T  | NA                 | NA                            | NA                 |
| Kabuli_wild_21633313 | NA                                  | Ca_kabuli_denovo | 21633313                | C/G  | NA                 | NA                            | NA                 |
| Kabuli_wild_21633316 | NA                                  | Ca_kabuli_denovo | 21633316                | A/T  | NA                 | NA                            | NA                 |
| Kabuli_wild_21634458 | NA                                  | Ca_kabuli_denovo | 21634458                | A/G  | NA                 | NA                            | NA                 |
| Kabuli_wild_21634485 | NA                                  | Ca_kabuli_denovo | 21634485                | C/T  | NA                 | NA                            | NA                 |
| Kabuli_wild_21634753 | NA                                  | Ca_kabuli_denovo | 21634753                | C/T  | NA                 | NA                            | NA                 |
| Kabuli_wild_21635634 | NA                                  | Ca_kabuli_denovo | 21635634                | C/T  | NA                 | NA                            | NA                 |
| Kabuli_wild_21636111 | NA                                  | Ca_kabuli_denovo | 21636111                | C/T  | NA                 | NA                            | NA                 |
| Kabuli_wild_21636239 | NA                                  | Ca_kabuli_denovo | 21636239                | A/C  | NA                 | NA                            | NA                 |
| Kabuli_wild_21636619 | NA                                  | Ca_kabuli_denovo | 21636619                | A/T  | NA                 | NA                            | NA                 |
| Kabuli_wild_21637569 | NA                                  | Ca_kabuli_denovo | 21637569                | C/T  | NA                 | NA                            | NA                 |
| Kabuli_wild_21637575 | NA                                  | Ca_kabuli_denovo | 21637575                | A/G  | NA                 | NA                            | NA                 |
| Kabuli_wild_21640192 | NA                                  | Ca_kabuli_denovo | 21640192                | A/T  | NA                 | NA                            | NA                 |
| Kabuli_wild_21643985 | NA                                  | Ca_kabuli_denovo | 21643985                | G/T  | NA                 | NA                            | NA                 |
| Kabuli_wild_21644001 | NA                                  | Ca_kabuli_denovo | 21644001                | C/T  | NA                 | NA                            | NA                 |
| Kabuli_wild_21644404 | NA                                  | Ca_kabuli_denovo | 21644404                | G/T  | NA                 | NA                            | NA                 |
| Kabuli_wild_21646304 | NA                                  | Ca_kabuli_denovo | 21646304                | A/G  | NA                 | NA                            | NA                 |
| Kabuli_wild_21646770 | NA                                  | Ca_kabuli_denovo | 21646770                | A/G  | NA                 | NA                            | NA                 |
| Kabuli_wild_21651741 | NA                                  | Ca_kabuli_denovo | 21651741                | C/G  | NA                 | NA                            | NA                 |
| Kabuli_wild_21653498 | NA                                  | Ca_kabuli_denovo | 21653498                | C/T  | NA                 | NA                            | NA                 |
| Kabuli_wild_21654239 | NA                                  | Ca_kabuli_denovo | 21654239                | C/T  | NA                 | NA                            | NA                 |
| Kabuli_wild_21655899 | NA                                  | Ca_kabuli_denovo | 21655899                | C/T  | NA                 | NA                            | NA                 |
| Kabuli_wild_21655948 | NA                                  | Ca_kabuli_denovo | 21655948                | A/T  | NA                 | NA                            | NA                 |
| Kabuli_wild_21655953 | NA                                  | Ca_kabuli_denovo | 21655953                | A/T  | NA                 | NA                            | NA                 |
| Kabuli_wild_21657456 | NA                                  | Ca_kabuli_denovo | 21657456                | C/T  | NA                 | NA                            | NA                 |
| Kabuli_wild_21663052 | NA                                  | Ca_kabuli_denovo | 21663052                | G/T  | NA                 | NA                            | NA                 |
| Kabuli_wild_21664031 | NA                                  | Ca_kabuli_denovo | 21664031                | G/A  | NA                 | NA                            | NA                 |
| Kabuli_wild_21665406 | NA                                  | Ca_kabuli_denovo | 21665406                | C/G  | NA                 | NA                            | NA                 |
| Kabuli_wild_21666251 | NA                                  | Ca_kabuli_denovo | 21666251                | C/T  | NA                 | NA                            | NA                 |
| Kabuli_wild_21667665 | NA                                  | Ca_kabuli_denovo | 21667665                | A/G  | NA                 | NA                            | NA                 |

| SNP IDs              | NCBI dbSNP accession IDs (NCBI_SS#) | Chromosomes      | Physical positions (bp) | SNPs | Gene accession IDs | Sequence components of genome | Putative functions |
|----------------------|-------------------------------------|------------------|-------------------------|------|--------------------|-------------------------------|--------------------|
| Kabuli_wild_21667695 | NA                                  | Ca_kabuli_denovo | 21667695                | A/G  | NA                 | NA                            | NA                 |
| Kabuli_wild_21667708 | NA                                  | Ca_kabuli_denovo | 21667708                | A/G  | NA                 | NA                            | NA                 |
| Kabuli_wild_21669270 | NA                                  | Ca_kabuli_denovo | 21669270                | G/T  | NA                 | NA                            | NA                 |
| Kabuli_wild_21672961 | NA                                  | Ca_kabuli_denovo | 21672961                | A/C  | NA                 | NA                            | NA                 |
| Kabuli_wild_21673010 | NA                                  | Ca_kabuli_denovo | 21673010                | A/G  | NA                 | NA                            | NA                 |
| Kabuli_wild_21673021 | NA                                  | Ca_kabuli_denovo | 21673021                | G/T  | NA                 | NA                            | NA                 |
| Kabuli_wild_21673284 | NA                                  | Ca_kabuli_denovo | 21673284                | G/T  | NA                 | NA                            | NA                 |
| Kabuli_wild_21673303 | NA                                  | Ca_kabuli_denovo | 21673303                | A/G  | NA                 | NA                            | NA                 |
| Kabuli_wild_21673323 | NA                                  | Ca_kabuli_denovo | 21673323                | A/G  | NA                 | NA                            | NA                 |
| Kabuli_wild_21675842 | NA                                  | Ca_kabuli_denovo | 21675842                | A/C  | NA                 | NA                            | NA                 |
| Kabuli_wild_21676176 | NA                                  | Ca_kabuli_denovo | 21676176                | A/T  | NA                 | NA                            | NA                 |
| Kabuli_wild_21686173 | NA                                  | Ca_kabuli_denovo | 21686173                | C/T  | NA                 | NA                            | NA                 |
| Kabuli_wild_21686267 | NA                                  | Ca_kabuli_denovo | 21686267                | C/T  | NA                 | NA                            | NA                 |
| Kabuli_wild_21686313 | NA                                  | Ca_kabuli_denovo | 21686313                | A/G  | NA                 | NA                            | NA                 |
| Kabuli_wild_21687761 | NA                                  | Ca_kabuli_denovo | 21687761                | C/T  | NA                 | NA                            | NA                 |
| Kabuli_wild_21687929 | NA                                  | Ca_kabuli_denovo | 21687929                | A/T  | NA                 | NA                            | NA                 |
| Kabuli_wild_21690205 | NA                                  | Ca_kabuli_denovo | 21690205                | C/T  | NA                 | NA                            | NA                 |
| Kabuli_wild_21693527 | NA                                  | Ca_kabuli_denovo | 21693527                | C/T  | NA                 | NA                            | NA                 |
| Kabuli_wild_21693544 | NA                                  | Ca_kabuli_denovo | 21693544                | C/T  | NA                 | NA                            | NA                 |
| Kabuli_wild_21699001 | NA                                  | Ca_kabuli_denovo | 21699001                | A/T  | NA                 | NA                            | NA                 |
| Kabuli_wild_21699450 | NA                                  | Ca_kabuli_denovo | 21699450                | A/G  | NA                 | NA                            | NA                 |
| Kabuli_wild_21702600 | NA                                  | Ca_kabuli_denovo | 21702600                | C/T  | NA                 | NA                            | NA                 |
| Kabuli_wild_21703907 | NA                                  | Ca_kabuli_denovo | 21703907                | C/T  | NA                 | NA                            | NA                 |
| Kabuli_wild_21703979 | NA                                  | Ca_kabuli_denovo | 21703979                | C/T  | NA                 | NA                            | NA                 |
| Kabuli_wild_21703982 | NA                                  | Ca_kabuli_denovo | 21703982                | C/T  | NA                 | NA                            | NA                 |
| Kabuli_wild_21706960 | NA                                  | Ca_kabuli_denovo | 21706960                | G/T  | NA                 | NA                            | NA                 |
| Kabuli_wild_21709099 | NA                                  | Ca_kabuli_denovo | 21709099                | C/T  | NA                 | NA                            | NA                 |
| Kabuli_wild_21709947 | NA                                  | Ca_kabuli_denovo | 21709947                | C/T  | NA                 | NA                            | NA                 |
| Kabuli_wild_21710302 | NA                                  | Ca_kabuli_denovo | 21710302                | C/T  | NA                 | NA                            | NA                 |
| Kabuli_wild_21711287 | NA                                  | Ca_kabuli_denovo | 21711287                | A/G  | NA                 | NA                            | NA                 |
| Kabuli_wild_21711302 | NA                                  | Ca_kabuli_denovo | 21711302                | A/G  | NA                 | NA                            | NA                 |
| Kabuli_wild_21711317 | NA                                  | Ca_kabuli_denovo | 21711317                | C/T  | NA                 | NA                            | NA                 |
| Kabuli_wild_21713029 | NA                                  | Ca_kabuli_denovo | 21713029                | A/C  | NA                 | NA                            | NA                 |
| Kabuli_wild_21713552 | NA                                  | Ca_kabuli_denovo | 21713552                | G/T  | NA                 | NA                            | NA                 |
| Kabuli_wild_21714755 | NA                                  | Ca_kabuli_denovo | 21714755                | G/T  | NA                 | NA                            | NA                 |
| Kabuli_wild_21716244 | NA                                  | Ca_kabuli_denovo | 21716244                | G/T  | NA                 | NA                            | NA                 |
| Kabuli_wild_21716286 | NA                                  | Ca_kabuli_denovo | 21716286                | G/T  | NA                 | NA                            | NA                 |
| Kabuli_wild_21717314 | NA                                  | Ca_kabuli_denovo | 21717314                | G/T  | NA                 | NA                            | NA                 |
| Kabuli_wild_21718745 | NA                                  | Ca_kabuli_denovo | 21718745                | C/T  | NA                 | NA                            | NA                 |
| Kabuli_wild_21718769 | NA                                  | Ca_kabuli_denovo | 21718769                | A/G  | NA                 | NA                            | NA                 |
| Kabuli_wild_21719623 | NA                                  | Ca_kabuli_denovo | 21719623                | A/G  | NA                 | NA                            | NA                 |
| Kabuli_wild_21720873 | NA                                  | Ca_kabuli_denovo | 21720873                | C/T  | NA                 | NA                            | NA                 |
| Kabuli_wild_21720895 | NA                                  | Ca_kabuli_denovo | 21720895                | C/G  | NA                 | NA                            | NA                 |
| Kabuli_wild_21720903 | NA                                  | Ca_kabuli_denovo | 21720903                | A/C  | NA                 | NA                            | NA                 |

| SNP IDs              | NCBI dbSNP accession IDs (NCBI_SS#) | Chromosomes      | Physical positions (bp) | SNPs | Gene accession IDs | Sequence components of genome | Putative functions |
|----------------------|-------------------------------------|------------------|-------------------------|------|--------------------|-------------------------------|--------------------|
| Kabuli_wild_21720904 | NA                                  | Ca_kabuli_denovo | 21720904                | C/T  | NA                 | NA                            | NA                 |
| Kabuli_wild_21720907 | NA                                  | Ca_kabuli_denovo | 21720907                | C/G  | NA                 | NA                            | NA                 |
| Kabuli_wild_21722746 | NA                                  | Ca_kabuli_denovo | 21722746                | A/C  | NA                 | NA                            | NA                 |
| Kabuli_wild_21723506 | NA                                  | Ca_kabuli_denovo | 21723506                | G/T  | NA                 | NA                            | NA                 |
| Kabuli_wild_21723510 | NA                                  | Ca_kabuli_denovo | 21723510                | A/G  | NA                 | NA                            | NA                 |
| Kabuli_wild_21723530 | NA                                  | Ca_kabuli_denovo | 21723530                | G/T  | NA                 | NA                            | NA                 |
| Kabuli_wild_21724172 | NA                                  | Ca_kabuli_denovo | 21724172                | C/T  | NA                 | NA                            | NA                 |
| Kabuli_wild_21724215 | NA                                  | Ca_kabuli_denovo | 21724215                | A/G  | NA                 | NA                            | NA                 |
| Kabuli_wild_21725449 | NA                                  | Ca_kabuli_denovo | 21725449                | C/T  | NA                 | NA                            | NA                 |
| Kabuli_wild_21725480 | NA                                  | Ca_kabuli_denovo | 21725480                | A/T  | NA                 | NA                            | NA                 |
| Kabuli_wild_21729217 | NA                                  | Ca_kabuli_denovo | 21729217                | A/G  | NA                 | NA                            | NA                 |
| Kabuli_wild_21731477 | NA                                  | Ca_kabuli_denovo | 21731477                | C/T  | NA                 | NA                            | NA                 |
| Kabuli_wild_21732125 | NA                                  | Ca_kabuli_denovo | 21732125                | A/G  | NA                 | NA                            | NA                 |
| Kabuli_wild_21732155 | NA                                  | Ca_kabuli_denovo | 21732155                | A/G  | NA                 | NA                            | NA                 |
| Kabuli_wild_21733135 | NA                                  | Ca_kabuli_denovo | 21733135                | C/T  | NA                 | NA                            | NA                 |
| Kabuli_wild_21734391 | NA                                  | Ca_kabuli_denovo | 21734391                | A/C  | NA                 | NA                            | NA                 |
| Kabuli_wild_21734540 | NA                                  | Ca_kabuli_denovo | 21734540                | C/T  | NA                 | NA                            | NA                 |
| Kabuli_wild_21735881 | NA                                  | Ca_kabuli_denovo | 21735881                | A/T  | NA                 | NA                            | NA                 |
| Kabuli_wild_21736979 | NA                                  | Ca_kabuli_denovo | 21736979                | C/T  | NA                 | NA                            | NA                 |
| Kabuli_wild_21737376 | NA                                  | Ca_kabuli_denovo | 21737376                | C/T  | NA                 | NA                            | NA                 |
| Kabuli_wild_21737493 | NA                                  | Ca_kabuli_denovo | 21737493                | G/T  | NA                 | NA                            | NA                 |
| Kabuli_wild_21738153 | NA                                  | Ca_kabuli_denovo | 21738153                | A/G  | NA                 | NA                            | NA                 |
| Kabuli_wild_21738448 | NA                                  | Ca_kabuli_denovo | 21738448                | C/G  | NA                 | NA                            | NA                 |
| Kabuli_wild_21739587 | NA                                  | Ca_kabuli_denovo | 21739587                | A/C  | NA                 | NA                            | NA                 |
| Kabuli_wild_21740759 | NA                                  | Ca_kabuli_denovo | 21740759                | C/G  | NA                 | NA                            | NA                 |
| Kabuli_wild_21747139 | NA                                  | Ca_kabuli_denovo | 21747139                | C/T  | NA                 | NA                            | NA                 |
| Kabuli_wild_21747522 | NA                                  | Ca_kabuli_denovo | 21747522                | C/G  | NA                 | NA                            | NA                 |
| Kabuli_wild_21748328 | NA                                  | Ca_kabuli_denovo | 21748328                | A/G  | NA                 | NA                            | NA                 |
| Kabuli_wild_21748652 | NA                                  | Ca_kabuli_denovo | 21748652                | A/T  | NA                 | NA                            | NA                 |
| Kabuli_wild_21755752 | NA                                  | Ca_kabuli_denovo | 21755752                | C/T  | NA                 | NA                            | NA                 |
| Kabuli_wild_21758531 | NA                                  | Ca_kabuli_denovo | 21758531                | A/G  | NA                 | NA                            | NA                 |
| Kabuli_wild_21758572 | NA                                  | Ca_kabuli_denovo | 21758572                | C/T  | NA                 | NA                            | NA                 |
| Kabuli_wild_21759963 | NA                                  | Ca_kabuli_denovo | 21759963                | A/G  | NA                 | NA                            | NA                 |
| Kabuli_wild_21759980 | NA                                  | Ca_kabuli_denovo | 21759980                | A/T  | NA                 | NA                            | NA                 |
| Kabuli_wild_21759997 | NA                                  | Ca_kabuli_denovo | 21759997                | A/G  | NA                 | NA                            | NA                 |
| Kabuli_wild_21760016 | NA                                  | Ca_kabuli_denovo | 21760016                | G/T  | NA                 | NA                            | NA                 |
| Kabuli_wild_21760234 | NA                                  | Ca_kabuli_denovo | 21760234                | A/G  | NA                 | NA                            | NA                 |
| Kabuli_wild_21761022 | NA                                  | Ca_kabuli_denovo | 21761022                | C/T  | NA                 | NA                            | NA                 |
| Kabuli_wild_21761261 | NA                                  | Ca_kabuli_denovo | 21761261                | C/T  | NA                 | NA                            | NA                 |
| Kabuli_wild_21761270 | NA                                  | Ca_kabuli_denovo | 21761270                | C/G  | NA                 | NA                            | NA                 |
| Kabuli_wild_21763979 | NA                                  | Ca_kabuli_denovo | 21763979                | G/T  | NA                 | NA                            | NA                 |
| Kabuli_wild_21766030 | NA                                  | Ca_kabuli_denovo | 21766030                | A/T  | NA                 | NA                            | NA                 |
| Kabuli_wild_21766861 | NA                                  | Ca_kabuli_denovo | 21766861                | A/G  | NA                 | NA                            | NA                 |
| Kabuli_wild_21766864 | NA                                  | Ca_kabuli_denovo | 21766864                | C/T  | NA                 | NA                            | NA                 |

| SNP IDs              | NCBI dbSNP accession IDs (NCBI_SS#) | Chromosomes      | Physical positions (bp) | SNPs | Gene accession IDs | Sequence components of genome | Putative functions |
|----------------------|-------------------------------------|------------------|-------------------------|------|--------------------|-------------------------------|--------------------|
| Kabuli_wild_21767163 | NA                                  | Ca_kabuli_denovo | 21767163                | A/C  | NA                 | NA                            | NA                 |
| Kabuli_wild_21767548 | NA                                  | Ca_kabuli_denovo | 21767548                | A/G  | NA                 | NA                            | NA                 |
| Kabuli_wild_21768322 | NA                                  | Ca_kabuli_denovo | 21768322                | C/T  | NA                 | NA                            | NA                 |
| Kabuli_wild_21769784 | NA                                  | Ca_kabuli_denovo | 21769784                | C/T  | NA                 | NA                            | NA                 |
| Kabuli_wild_21769801 | NA                                  | Ca_kabuli_denovo | 21769801                | C/T  | NA                 | NA                            | NA                 |
| Kabuli_wild_21769812 | NA                                  | Ca_kabuli_denovo | 21769812                | G/A  | NA                 | NA                            | NA                 |
| Kabuli_wild_21769831 | NA                                  | Ca_kabuli_denovo | 21769831                | A/G  | NA                 | NA                            | NA                 |
| Kabuli_wild_21770979 | NA                                  | Ca_kabuli_denovo | 21770979                | C/T  | NA                 | NA                            | NA                 |
| Kabuli_wild_21777259 | NA                                  | Ca_kabuli_denovo | 21777259                | A/G  | NA                 | NA                            | NA                 |
| Kabuli_wild_21777338 | NA                                  | Ca_kabuli_denovo | 21777338                | A/G  | NA                 | NA                            | NA                 |
| Kabuli_wild_21777356 | NA                                  | Ca_kabuli_denovo | 21777356                | A/G  | NA                 | NA                            | NA                 |
| Kabuli_wild_21777365 | NA                                  | Ca_kabuli_denovo | 21777365                | A/G  | NA                 | NA                            | NA                 |
| Kabuli_wild_21777370 | NA                                  | Ca_kabuli_denovo | 21777370                | A/G  | NA                 | NA                            | NA                 |
| Kabuli_wild_21779957 | NA                                  | Ca_kabuli_denovo | 21779957                | C/T  | NA                 | NA                            | NA                 |
| Kabuli_wild_21779969 | NA                                  | Ca_kabuli_denovo | 21779969                | A/C  | NA                 | NA                            | NA                 |
| Kabuli_wild_21782310 | NA                                  | Ca_kabuli_denovo | 21782310                | C/T  | NA                 | NA                            | NA                 |
| Kabuli_wild_21782319 | NA                                  | Ca_kabuli_denovo | 21782319                | C/T  | NA                 | NA                            | NA                 |
| Kabuli_wild_21782602 | NA                                  | Ca_kabuli_denovo | 21782602                | C/T  | NA                 | NA                            | NA                 |
| Kabuli_wild_21783457 | NA                                  | Ca_kabuli_denovo | 21783457                | G/T  | NA                 | NA                            | NA                 |
| Kabuli_wild_21784474 | NA                                  | Ca_kabuli_denovo | 21784474                | A/G  | NA                 | NA                            | NA                 |
| Kabuli_wild_21784497 | NA                                  | Ca_kabuli_denovo | 21784497                | A/G  | NA                 | NA                            | NA                 |
| Kabuli_wild_21785895 | NA                                  | Ca_kabuli_denovo | 21785895                | A/G  | NA                 | NA                            | NA                 |
| Kabuli_wild_21787193 | NA                                  | Ca_kabuli_denovo | 21787193                | C/T  | NA                 | NA                            | NA                 |
| Kabuli_wild_21790068 | NA                                  | Ca_kabuli_denovo | 21790068                | G/T  | NA                 | NA                            | NA                 |
| Kabuli_wild_21793054 | NA                                  | Ca_kabuli_denovo | 21793054                | G/T  | NA                 | NA                            | NA                 |
| Kabuli_wild_21793055 | NA                                  | Ca_kabuli_denovo | 21793055                | C/G  | NA                 | NA                            | NA                 |
| Kabuli_wild_21793447 | NA                                  | Ca_kabuli_denovo | 21793447                | A/G  | NA                 | NA                            | NA                 |
| Kabuli_wild_21793453 | NA                                  | Ca_kabuli_denovo | 21793453                | C/T  | NA                 | NA                            | NA                 |
| Kabuli_wild_21794533 | NA                                  | Ca_kabuli_denovo | 21794533                | C/T  | NA                 | NA                            | NA                 |
| Kabuli_wild_21794984 | NA                                  | Ca_kabuli_denovo | 21794984                | A/G  | NA                 | NA                            | NA                 |
| Kabuli_wild_21795034 | NA                                  | Ca_kabuli_denovo | 21795034                | A/C  | NA                 | NA                            | NA                 |
| Kabuli_wild_21795045 | NA                                  | Ca_kabuli_denovo | 21795045                | A/G  | NA                 | NA                            | NA                 |
| Kabuli_wild_21796937 | NA                                  | Ca_kabuli_denovo | 21796937                | C/T  | NA                 | NA                            | NA                 |
| Kabuli_wild_21796958 | NA                                  | Ca_kabuli_denovo | 21796958                | C/T  | NA                 | NA                            | NA                 |
| Kabuli_wild_21796992 | NA                                  | Ca_kabuli_denovo | 21796992                | A/G  | NA                 | NA                            | NA                 |
| Kabuli_wild_21798865 | NA                                  | Ca_kabuli_denovo | 21798865                | A/G  | NA                 | NA                            | NA                 |
| Kabuli_wild_21798907 | NA                                  | Ca_kabuli_denovo | 21798907                | A/G  | NA                 | NA                            | NA                 |
| Kabuli_wild_21800639 | NA                                  | Ca_kabuli_denovo | 21800639                | C/T  | NA                 | NA                            | NA                 |
| Kabuli_wild_21803259 | NA                                  | Ca_kabuli_denovo | 21803259                | A/G  | NA                 | NA                            | NA                 |
| Kabuli_wild_21805997 | NA                                  | Ca_kabuli_denovo | 21805997                | G/T  | NA                 | NA                            | NA                 |
| Kabuli_wild_21806008 | NA                                  | Ca_kabuli_denovo | 21806008                | C/T  | NA                 | NA                            | NA                 |
| Kabuli_wild_21808685 | NA                                  | Ca_kabuli_denovo | 21808685                | C/T  | NA                 | NA                            | NA                 |
| Kabuli_wild_21815002 | NA                                  | Ca_kabuli_denovo | 21815002                | A/G  | NA                 | NA                            | NA                 |
| Kabuli_wild_21815278 | NA                                  | Ca_kabuli_denovo | 21815278                | A/G  | NA                 | NA                            | NA                 |

| SNP IDs              | NCBI dbSNP accession IDs (NCBI_SS#) | Chromosomes      | Physical positions (bp) | SNPs | Gene accession IDs | Sequence components of genome | Putative functions |
|----------------------|-------------------------------------|------------------|-------------------------|------|--------------------|-------------------------------|--------------------|
| Kabuli_wild_21822715 | NA                                  | Ca_kabuli_denovo | 21822715                | G/T  | NA                 | NA                            | NA                 |
| Kabuli_wild_21826804 | NA                                  | Ca_kabuli_denovo | 21826804                | C/T  | NA                 | NA                            | NA                 |
| Kabuli_wild_21826840 | NA                                  | Ca_kabuli_denovo | 21826840                | A/T  | NA                 | NA                            | NA                 |
| Kabuli_wild_21828286 | NA                                  | Ca_kabuli_denovo | 21828286                | A/G  | NA                 | NA                            | NA                 |
| Kabuli_wild_21832273 | NA                                  | Ca_kabuli_denovo | 21832273                | A/T  | NA                 | NA                            | NA                 |
| Kabuli_wild_21832289 | NA                                  | Ca_kabuli_denovo | 21832289                | C/T  | NA                 | NA                            | NA                 |
| Kabuli_wild_21836642 | NA                                  | Ca_kabuli_denovo | 21836642                | C/T  | NA                 | NA                            | NA                 |
| Kabuli_wild_21836660 | NA                                  | Ca_kabuli_denovo | 21836660                | C/T  | NA                 | NA                            | NA                 |
| Kabuli_wild_21841161 | NA                                  | Ca_kabuli_denovo | 21841161                | C/T  | NA                 | NA                            | NA                 |
| Kabuli_wild_21841739 | NA                                  | Ca_kabuli_denovo | 21841739                | C/G  | NA                 | NA                            | NA                 |
| Kabuli_wild_21841757 | NA                                  | Ca_kabuli_denovo | 21841757                | C/G  | NA                 | NA                            | NA                 |
| Kabuli_wild_21841760 | NA                                  | Ca_kabuli_denovo | 21841760                | A/C  | NA                 | NA                            | NA                 |
| Kabuli_wild_21843000 | NA                                  | Ca_kabuli_denovo | 21843000                | A/G  | NA                 | NA                            | NA                 |
| Kabuli_wild_21843209 | NA                                  | Ca_kabuli_denovo | 21843209                | A/G  | NA                 | NA                            | NA                 |
| Kabuli_wild_21843968 | NA                                  | Ca_kabuli_denovo | 21843968                | C/T  | NA                 | NA                            | NA                 |
| Kabuli_wild_21844123 | NA                                  | Ca_kabuli_denovo | 21844123                | C/T  | NA                 | NA                            | NA                 |
| Kabuli_wild_21844132 | NA                                  | Ca_kabuli_denovo | 21844132                | A/T  | NA                 | NA                            | NA                 |
| Kabuli_wild_21850085 | NA                                  | Ca_kabuli_denovo | 21850085                | C/T  | NA                 | NA                            | NA                 |
| Kabuli_wild_21850503 | NA                                  | Ca_kabuli_denovo | 21850503                | A/C  | NA                 | NA                            | NA                 |
| Kabuli_wild_21852625 | NA                                  | Ca_kabuli_denovo | 21852625                | A/G  | NA                 | NA                            | NA                 |
| Kabuli_wild_21852636 | NA                                  | Ca_kabuli_denovo | 21852636                | A/T  | NA                 | NA                            | NA                 |
| Kabuli_wild_21852660 | NA                                  | Ca_kabuli_denovo | 21852660                | A/G  | NA                 | NA                            | NA                 |
| Kabuli_wild_21853277 | NA                                  | Ca_kabuli_denovo | 21853277                | C/T  | NA                 | NA                            | NA                 |
| Kabuli_wild_21853313 | NA                                  | Ca_kabuli_denovo | 21853313                | C/T  | NA                 | NA                            | NA                 |
| Kabuli_wild_21854254 | NA                                  | Ca_kabuli_denovo | 21854254                | C/T  | NA                 | NA                            | NA                 |
| Kabuli_wild_21854282 | NA                                  | Ca_kabuli_denovo | 21854282                | A/G  | NA                 | NA                            | NA                 |
| Kabuli_wild_21856773 | NA                                  | Ca_kabuli_denovo | 21856773                | C/T  | NA                 | NA                            | NA                 |
| Kabuli_wild_21860508 | NA                                  | Ca_kabuli_denovo | 21860508                | C/T  | NA                 | NA                            | NA                 |
| Kabuli_wild_21865326 | NA                                  | Ca_kabuli_denovo | 21865326                | C/G  | NA                 | NA                            | NA                 |
| Kabuli_wild_21865333 | NA                                  | Ca_kabuli_denovo | 21865333                | C/G  | NA                 | NA                            | NA                 |
| Kabuli_wild_21866392 | NA                                  | Ca_kabuli_denovo | 21866392                | A/T  | NA                 | NA                            | NA                 |
| Kabuli_wild_21866452 | NA                                  | Ca_kabuli_denovo | 21866452                | C/G  | NA                 | NA                            | NA                 |
| Kabuli_wild_21866573 | NA                                  | Ca_kabuli_denovo | 21866573                | C/T  | NA                 | NA                            | NA                 |
| Kabuli_wild_21868668 | NA                                  | Ca_kabuli_denovo | 21868668                | A/G  | NA                 | NA                            | NA                 |
| Kabuli_wild_21872055 | NA                                  | Ca_kabuli_denovo | 21872055                | T/G  | NA                 | NA                            | NA                 |
| Kabuli_wild_21872080 | NA                                  | Ca_kabuli_denovo | 21872080                | T/G  | NA                 | NA                            | NA                 |
| Kabuli_wild_21874195 | NA                                  | Ca_kabuli_denovo | 21874195                | A/G  | NA                 | NA                            | NA                 |
| Kabuli_wild_21874652 | NA                                  | Ca_kabuli_denovo | 21874652                | C/G  | NA                 | NA                            | NA                 |
| Kabuli_wild_21876029 | NA                                  | Ca_kabuli_denovo | 21876029                | A/T  | NA                 | NA                            | NA                 |
| Kabuli_wild_21877789 | NA                                  | Ca_kabuli_denovo | 21877789                | A/T  | NA                 | NA                            | NA                 |
| Kabuli_wild_21878929 | NA                                  | Ca_kabuli_denovo | 21878929                | A/G  | NA                 | NA                            | NA                 |
| Kabuli_wild_21880650 | NA                                  | Ca_kabuli_denovo | 21880650                | A/T  | NA                 | NA                            | NA                 |
| Kabuli_wild_21882211 | NA                                  | Ca_kabuli_denovo | 21882211                | C/T  | NA                 | NA                            | NA                 |
| Kabuli_wild_21882410 | NA                                  | Ca_kabuli_denovo | 21882410                | C/G  | NA                 | NA                            | NA                 |

| SNP IDs                     | NCBI dbSNP accession IDs (NCBI_SS#) | Chromosomes             | Physical positions (bp) | SNPs | Gene accession IDs | Sequence components of genome | Putative functions |
|-----------------------------|-------------------------------------|-------------------------|-------------------------|------|--------------------|-------------------------------|--------------------|
| <i>Kabuli_wild_21882413</i> | NA                                  | <i>Ca_kabuli_denovo</i> | 21882413                | C/T  | NA                 | NA                            | NA                 |
| <i>Kabuli_wild_21884302</i> | NA                                  | <i>Ca_kabuli_denovo</i> | 21884302                | G/T  | NA                 | NA                            | NA                 |
| <i>Kabuli_wild_21884969</i> | NA                                  | <i>Ca_kabuli_denovo</i> | 21884969                | A/T  | NA                 | NA                            | NA                 |
| <i>Kabuli_wild_21885227</i> | NA                                  | <i>Ca_kabuli_denovo</i> | 21885227                | A/G  | NA                 | NA                            | NA                 |
| <i>Kabuli_wild_21885238</i> | NA                                  | <i>Ca_kabuli_denovo</i> | 21885238                | A/G  | NA                 | NA                            | NA                 |
| <i>Kabuli_wild_21885529</i> | NA                                  | <i>Ca_kabuli_denovo</i> | 21885529                | C/T  | NA                 | NA                            | NA                 |
| <i>Kabuli_wild_21885555</i> | NA                                  | <i>Ca_kabuli_denovo</i> | 21885555                | G/T  | NA                 | NA                            | NA                 |
| <i>Kabuli_wild_21886644</i> | NA                                  | <i>Ca_kabuli_denovo</i> | 21886644                | A/G  | NA                 | NA                            | NA                 |
| <i>Kabuli_wild_21886670</i> | NA                                  | <i>Ca_kabuli_denovo</i> | 21886670                | C/T  | NA                 | NA                            | NA                 |
| <i>Kabuli_wild_21887738</i> | NA                                  | <i>Ca_kabuli_denovo</i> | 21887738                | A/G  | NA                 | NA                            | NA                 |
| <i>Kabuli_wild_21890635</i> | NA                                  | <i>Ca_kabuli_denovo</i> | 21890635                | G/T  | NA                 | NA                            | NA                 |
| <i>Kabuli_wild_21890663</i> | NA                                  | <i>Ca_kabuli_denovo</i> | 21890663                | G/T  | NA                 | NA                            | NA                 |
| <i>Kabuli_wild_21890665</i> | NA                                  | <i>Ca_kabuli_denovo</i> | 21890665                | A/T  | NA                 | NA                            | NA                 |
| <i>Kabuli_wild_21892779</i> | NA                                  | <i>Ca_kabuli_denovo</i> | 21892779                | G/T  | NA                 | NA                            | NA                 |
| <i>Kabuli_wild_21893340</i> | NA                                  | <i>Ca_kabuli_denovo</i> | 21893340                | A/G  | NA                 | NA                            | NA                 |
| <i>Kabuli_wild_21901992</i> | NA                                  | <i>Ca_kabuli_denovo</i> | 21901992                | G/T  | NA                 | NA                            | NA                 |
| <i>Kabuli_wild_21902007</i> | NA                                  | <i>Ca_kabuli_denovo</i> | 21902007                | C/T  | NA                 | NA                            | NA                 |
| <i>Kabuli_wild_21904309</i> | NA                                  | <i>Ca_kabuli_denovo</i> | 21904309                | A/G  | NA                 | NA                            | NA                 |
| <i>Kabuli_wild_21907719</i> | NA                                  | <i>Ca_kabuli_denovo</i> | 21907719                | A/T  | NA                 | NA                            | NA                 |
| <i>Kabuli_wild_21907735</i> | NA                                  | <i>Ca_kabuli_denovo</i> | 21907735                | G/T  | NA                 | NA                            | NA                 |
| <i>Kabuli_wild_21907795</i> | NA                                  | <i>Ca_kabuli_denovo</i> | 21907795                | A/G  | NA                 | NA                            | NA                 |
| <i>Kabuli_wild_21908308</i> | NA                                  | <i>Ca_kabuli_denovo</i> | 21908308                | A/G  | NA                 | NA                            | NA                 |
| <i>Kabuli_wild_21908321</i> | NA                                  | <i>Ca_kabuli_denovo</i> | 21908321                | A/C  | NA                 | NA                            | NA                 |
| <i>Kabuli_wild_21911215</i> | NA                                  | <i>Ca_kabuli_denovo</i> | 21911215                | A/C  | NA                 | NA                            | NA                 |
| <i>Kabuli_wild_21911233</i> | NA                                  | <i>Ca_kabuli_denovo</i> | 21911233                | C/G  | NA                 | NA                            | NA                 |
| <i>Kabuli_wild_21913062</i> | NA                                  | <i>Ca_kabuli_denovo</i> | 21913062                | A/G  | NA                 | NA                            | NA                 |
| <i>Kabuli_wild_21916453</i> | NA                                  | <i>Ca_kabuli_denovo</i> | 21916453                | A/T  | NA                 | NA                            | NA                 |
| <i>Kabuli_wild_21918860</i> | NA                                  | <i>Ca_kabuli_denovo</i> | 21918860                | A/G  | NA                 | NA                            | NA                 |
| <i>Kabuli_wild_21921381</i> | NA                                  | <i>Ca_kabuli_denovo</i> | 21921381                | A/G  | NA                 | NA                            | NA                 |
| <i>Kabuli_wild_21921408</i> | NA                                  | <i>Ca_kabuli_denovo</i> | 21921408                | A/T  | NA                 | NA                            | NA                 |
| <i>Kabuli_wild_21922593</i> | NA                                  | <i>Ca_kabuli_denovo</i> | 21922593                | A/T  | NA                 | NA                            | NA                 |
| <i>Kabuli_wild_21922653</i> | NA                                  | <i>Ca_kabuli_denovo</i> | 21922653                | C/T  | NA                 | NA                            | NA                 |
| <i>Kabuli_wild_21922695</i> | NA                                  | <i>Ca_kabuli_denovo</i> | 21922695                | C/T  | NA                 | NA                            | NA                 |
| <i>Kabuli_wild_21923706</i> | NA                                  | <i>Ca_kabuli_denovo</i> | 21923706                | C/T  | NA                 | NA                            | NA                 |
| <i>Kabuli_wild_21923736</i> | NA                                  | <i>Ca_kabuli_denovo</i> | 21923736                | C/T  | NA                 | NA                            | NA                 |
| <i>Kabuli_wild_21925161</i> | NA                                  | <i>Ca_kabuli_denovo</i> | 21925161                | C/T  | NA                 | NA                            | NA                 |
| <i>Kabuli_wild_21925236</i> | NA                                  | <i>Ca_kabuli_denovo</i> | 21925236                | A/T  | NA                 | NA                            | NA                 |
| <i>Kabuli_wild_21928375</i> | NA                                  | <i>Ca_kabuli_denovo</i> | 21928375                | C/T  | NA                 | NA                            | NA                 |
| <i>Kabuli_wild_21928431</i> | NA                                  | <i>Ca_kabuli_denovo</i> | 21928431                | A/G  | NA                 | NA                            | NA                 |
| <i>Kabuli_wild_21929158</i> | NA                                  | <i>Ca_kabuli_denovo</i> | 21929158                | C/T  | NA                 | NA                            | NA                 |
| <i>Kabuli_wild_21930677</i> | NA                                  | <i>Ca_kabuli_denovo</i> | 21930677                | A/G  | NA                 | NA                            | NA                 |
| <i>Kabuli_wild_21930932</i> | NA                                  | <i>Ca_kabuli_denovo</i> | 21930932                | A/G  | NA                 | NA                            | NA                 |
| <i>Kabuli_wild_21930937</i> | NA                                  | <i>Ca_kabuli_denovo</i> | 21930937                | A/G  | NA                 | NA                            | NA                 |
| <i>Kabuli_wild_21932250</i> | NA                                  | <i>Ca_kabuli_denovo</i> | 21932250                | A/G  | NA                 | NA                            | NA                 |



| SNP IDs                     | NCBI dbSNP accession IDs (NCBI_SS#) | Chromosomes             | Physical positions (bp) | SNPs | Gene accession IDs | Sequence components of genome | Putative functions |
|-----------------------------|-------------------------------------|-------------------------|-------------------------|------|--------------------|-------------------------------|--------------------|
| <i>Kabuli_wild_21932857</i> | NA                                  | <i>Ca_kabuli_denovo</i> | 21932857                | A/G  | NA                 | NA                            | NA                 |
| <i>Kabuli_wild_21933946</i> | NA                                  | <i>Ca_kabuli_denovo</i> | 21933946                | A/G  | NA                 | NA                            | NA                 |
| <i>Kabuli_wild_21934288</i> | NA                                  | <i>Ca_kabuli_denovo</i> | 21934288                | C/T  | NA                 | NA                            | NA                 |
| <i>Kabuli_wild_21934320</i> | NA                                  | <i>Ca_kabuli_denovo</i> | 21934320                | A/T  | NA                 | NA                            | NA                 |
| <i>Kabuli_wild_21935199</i> | NA                                  | <i>Ca_kabuli_denovo</i> | 21935199                | A/G  | NA                 | NA                            | NA                 |
| <i>Kabuli_wild_21936313</i> | NA                                  | <i>Ca_kabuli_denovo</i> | 21936313                | A/G  | NA                 | NA                            | NA                 |
| <i>Kabuli_wild_21941209</i> | NA                                  | <i>Ca_kabuli_denovo</i> | 21941209                | A/G  | NA                 | NA                            | NA                 |
| <i>Kabuli_wild_21944070</i> | NA                                  | <i>Ca_kabuli_denovo</i> | 21944070                | C/T  | NA                 | NA                            | NA                 |
| <i>Kabuli_wild_21944118</i> | NA                                  | <i>Ca_kabuli_denovo</i> | 21944118                | A/C  | NA                 | NA                            | NA                 |
| <i>Kabuli_wild_21946514</i> | NA                                  | <i>Ca_kabuli_denovo</i> | 21946514                | A/G  | NA                 | NA                            | NA                 |
| <i>Kabuli_wild_21947860</i> | NA                                  | <i>Ca_kabuli_denovo</i> | 21947860                | C/T  | NA                 | NA                            | NA                 |
| <i>Kabuli_wild_21947882</i> | NA                                  | <i>Ca_kabuli_denovo</i> | 21947882                | A/G  | NA                 | NA                            | NA                 |
| <i>Kabuli_wild_21948867</i> | NA                                  | <i>Ca_kabuli_denovo</i> | 21948867                | A/C  | NA                 | NA                            | NA                 |
| <i>Kabuli_wild_21953320</i> | NA                                  | <i>Ca_kabuli_denovo</i> | 21953320                | A/G  | NA                 | NA                            | NA                 |
| <i>Kabuli_wild_21954216</i> | NA                                  | <i>Ca_kabuli_denovo</i> | 21954216                | C/T  | NA                 | NA                            | NA                 |
| <i>Kabuli_wild_21956924</i> | NA                                  | <i>Ca_kabuli_denovo</i> | 21956924                | G/A  | NA                 | NA                            | NA                 |
| <i>Kabuli_wild_21956927</i> | NA                                  | <i>Ca_kabuli_denovo</i> | 21956927                | C/G  | NA                 | NA                            | NA                 |
| <i>Kabuli_wild_21958716</i> | NA                                  | <i>Ca_kabuli_denovo</i> | 21958716                | A/G  | NA                 | NA                            | NA                 |
| <i>Kabuli_wild_21958939</i> | NA                                  | <i>Ca_kabuli_denovo</i> | 21958939                | A/T  | NA                 | NA                            | NA                 |
| <i>Kabuli_wild_21959401</i> | NA                                  | <i>Ca_kabuli_denovo</i> | 21959401                | C/T  | NA                 | NA                            | NA                 |
| <i>Kabuli_wild_21959461</i> | NA                                  | <i>Ca_kabuli_denovo</i> | 21959461                | A/T  | NA                 | NA                            | NA                 |
| <i>Kabuli_wild_21961276</i> | NA                                  | <i>Ca_kabuli_denovo</i> | 21961276                | A/G  | NA                 | NA                            | NA                 |
| <i>Kabuli_wild_21961278</i> | NA                                  | <i>Ca_kabuli_denovo</i> | 21961278                | A/G  | NA                 | NA                            | NA                 |
| <i>Kabuli_wild_21961684</i> | NA                                  | <i>Ca_kabuli_denovo</i> | 21961684                | C/T  | NA                 | NA                            | NA                 |
| <i>Kabuli_wild_21961699</i> | NA                                  | <i>Ca_kabuli_denovo</i> | 21961699                | A/G  | NA                 | NA                            | NA                 |
| <i>Kabuli_wild_21961864</i> | NA                                  | <i>Ca_kabuli_denovo</i> | 21961864                | C/T  | NA                 | NA                            | NA                 |
| <i>Kabuli_wild_21961887</i> | NA                                  | <i>Ca_kabuli_denovo</i> | 21961887                | C/G  | NA                 | NA                            | NA                 |
| <i>Kabuli_wild_21962342</i> | NA                                  | <i>Ca_kabuli_denovo</i> | 21962342                | C/G  | NA                 | NA                            | NA                 |
| <i>Kabuli_wild_21963116</i> | NA                                  | <i>Ca_kabuli_denovo</i> | 21963116                | A/G  | NA                 | NA                            | NA                 |
| <i>Kabuli_wild_21963129</i> | NA                                  | <i>Ca_kabuli_denovo</i> | 21963129                | C/G  | NA                 | NA                            | NA                 |
| <i>Kabuli_wild_21963137</i> | NA                                  | <i>Ca_kabuli_denovo</i> | 21963137                | C/T  | NA                 | NA                            | NA                 |
| <i>Kabuli_wild_21963162</i> | NA                                  | <i>Ca_kabuli_denovo</i> | 21963162                | A/C  | NA                 | NA                            | NA                 |
| <i>Kabuli_wild_21963223</i> | NA                                  | <i>Ca_kabuli_denovo</i> | 21963223                | A/G  | NA                 | NA                            | NA                 |
| <i>Kabuli_wild_21964375</i> | NA                                  | <i>Ca_kabuli_denovo</i> | 21964375                | A/G  | NA                 | NA                            | NA                 |
| <i>Kabuli_wild_21964673</i> | NA                                  | <i>Ca_kabuli_denovo</i> | 21964673                | A/G  | NA                 | NA                            | NA                 |
| <i>Kabuli_wild_21965415</i> | NA                                  | <i>Ca_kabuli_denovo</i> | 21965415                | C/G  | NA                 | NA                            | NA                 |
| <i>Kabuli_wild_21965460</i> | NA                                  | <i>Ca_kabuli_denovo</i> | 21965460                | A/G  | NA                 | NA                            | NA                 |
| <i>Kabuli_wild_21965493</i> | NA                                  | <i>Ca_kabuli_denovo</i> | 21965493                | C/T  | NA                 | NA                            | NA                 |
| <i>Kabuli_wild_21967941</i> | NA                                  | <i>Ca_kabuli_denovo</i> | 21967941                | A/G  | NA                 | NA                            | NA                 |
| <i>Kabuli_wild_21968001</i> | NA                                  | <i>Ca_kabuli_denovo</i> | 21968001                | C/T  | NA                 | NA                            | NA                 |
| <i>Kabuli_wild_21970441</i> | NA                                  | <i>Ca_kabuli_denovo</i> | 21970441                | A/G  | NA                 | NA                            | NA                 |
| <i>Kabuli_wild_21970468</i> | NA                                  | <i>Ca_kabuli_denovo</i> | 21970468                | C/T  | NA                 | NA                            | NA                 |
| <i>Kabuli_wild_21971338</i> | NA                                  | <i>Ca_kabuli_denovo</i> | 21971338                | A/C  | NA                 | NA                            | NA                 |
| <i>Kabuli_wild_21971342</i> | NA                                  | <i>Ca_kabuli_denovo</i> | 21971342                | A/C  | NA                 | NA                            | NA                 |

| SNP IDs              | NCBI dbSNP accession IDs (NCBI_SS#) | Chromosomes      | Physical positions (bp) | SNPs | Gene accession IDs | Sequence components of genome | Putative functions |
|----------------------|-------------------------------------|------------------|-------------------------|------|--------------------|-------------------------------|--------------------|
| Kabuli_wild_21972161 | NA                                  | Ca_kabuli_denovo | 21972161                | A/G  | NA                 | NA                            | NA                 |
| Kabuli_wild_21973346 | NA                                  | Ca_kabuli_denovo | 21973346                | C/T  | NA                 | NA                            | NA                 |
| Kabuli_wild_21978274 | NA                                  | Ca_kabuli_denovo | 21978274                | A/G  | NA                 | NA                            | NA                 |
| Kabuli_wild_21978608 | NA                                  | Ca_kabuli_denovo | 21978608                | C/T  | NA                 | NA                            | NA                 |
| Kabuli_wild_21978801 | NA                                  | Ca_kabuli_denovo | 21978801                | A/G  | NA                 | NA                            | NA                 |
| Kabuli_wild_21979011 | NA                                  | Ca_kabuli_denovo | 21979011                | C/T  | NA                 | NA                            | NA                 |
| Kabuli_wild_21980265 | NA                                  | Ca_kabuli_denovo | 21980265                | A/G  | NA                 | NA                            | NA                 |
| Kabuli_wild_21980291 | NA                                  | Ca_kabuli_denovo | 21980291                | A/T  | NA                 | NA                            | NA                 |
| Kabuli_wild_21980314 | NA                                  | Ca_kabuli_denovo | 21980314                | C/T  | NA                 | NA                            | NA                 |
| Kabuli_wild_21981068 | NA                                  | Ca_kabuli_denovo | 21981068                | A/G  | NA                 | NA                            | NA                 |
| Kabuli_wild_21982821 | NA                                  | Ca_kabuli_denovo | 21982821                | C/T  | NA                 | NA                            | NA                 |
| Kabuli_wild_21983388 | NA                                  | Ca_kabuli_denovo | 21983388                | A/G  | NA                 | NA                            | NA                 |
| Kabuli_wild_21986016 | NA                                  | Ca_kabuli_denovo | 21986016                | A/G  | NA                 | NA                            | NA                 |
| Kabuli_wild_21986021 | NA                                  | Ca_kabuli_denovo | 21986021                | C/G  | NA                 | NA                            | NA                 |
| Kabuli_wild_21989477 | NA                                  | Ca_kabuli_denovo | 21989477                | A/C  | NA                 | NA                            | NA                 |
| Kabuli_wild_21989490 | NA                                  | Ca_kabuli_denovo | 21989490                | C/T  | NA                 | NA                            | NA                 |
| Kabuli_wild_21989554 | NA                                  | Ca_kabuli_denovo | 21989554                | A/G  | NA                 | NA                            | NA                 |
| Kabuli_wild_21990623 | NA                                  | Ca_kabuli_denovo | 21990623                | A/G  | NA                 | NA                            | NA                 |
| Kabuli_wild_21991169 | NA                                  | Ca_kabuli_denovo | 21991169                | C/T  | NA                 | NA                            | NA                 |
| Kabuli_wild_21992613 | NA                                  | Ca_kabuli_denovo | 21992613                | C/G  | NA                 | NA                            | NA                 |
| Kabuli_wild_21992768 | NA                                  | Ca_kabuli_denovo | 21992768                | G/A  | NA                 | NA                            | NA                 |
| Kabuli_wild_21999982 | NA                                  | Ca_kabuli_denovo | 21999982                | A/G  | NA                 | NA                            | NA                 |
| Kabuli_wild_22001736 | NA                                  | Ca_kabuli_denovo | 22001736                | C/T  | NA                 | NA                            | NA                 |
| Kabuli_wild_22002277 | NA                                  | Ca_kabuli_denovo | 22002277                | C/T  | NA                 | NA                            | NA                 |
| Kabuli_wild_22002281 | NA                                  | Ca_kabuli_denovo | 22002281                | C/T  | NA                 | NA                            | NA                 |
| Kabuli_wild_22003634 | NA                                  | Ca_kabuli_denovo | 22003634                | C/G  | NA                 | NA                            | NA                 |
| Kabuli_wild_22003772 | NA                                  | Ca_kabuli_denovo | 22003772                | C/G  | NA                 | NA                            | NA                 |
| Kabuli_wild_22004247 | NA                                  | Ca_kabuli_denovo | 22004247                | A/G  | NA                 | NA                            | NA                 |
| Kabuli_wild_22004523 | NA                                  | Ca_kabuli_denovo | 22004523                | A/C  | NA                 | NA                            | NA                 |
| Kabuli_wild_22004555 | NA                                  | Ca_kabuli_denovo | 22004555                | C/T  | NA                 | NA                            | NA                 |
| Kabuli_wild_22004949 | NA                                  | Ca_kabuli_denovo | 22004949                | C/T  | NA                 | NA                            | NA                 |
| Kabuli_wild_22005138 | NA                                  | Ca_kabuli_denovo | 22005138                | A/G  | NA                 | NA                            | NA                 |
| Kabuli_wild_22005816 | NA                                  | Ca_kabuli_denovo | 22005816                | A/C  | NA                 | NA                            | NA                 |
| Kabuli_wild_22006973 | NA                                  | Ca_kabuli_denovo | 22006973                | C/T  | NA                 | NA                            | NA                 |
| Kabuli_wild_22007713 | NA                                  | Ca_kabuli_denovo | 22007713                | C/G  | NA                 | NA                            | NA                 |
| Kabuli_wild_22007744 | NA                                  | Ca_kabuli_denovo | 22007744                | A/G  | NA                 | NA                            | NA                 |
| Kabuli_wild_22007783 | NA                                  | Ca_kabuli_denovo | 22007783                | A/G  | NA                 | NA                            | NA                 |
| Kabuli_wild_22007851 | NA                                  | Ca_kabuli_denovo | 22007851                | A/G  | NA                 | NA                            | NA                 |
| Kabuli_wild_22008119 | NA                                  | Ca_kabuli_denovo | 22008119                | A/T  | NA                 | NA                            | NA                 |
| Kabuli_wild_22009593 | NA                                  | Ca_kabuli_denovo | 22009593                | A/C  | NA                 | NA                            | NA                 |
| Kabuli_wild_22011318 | NA                                  | Ca_kabuli_denovo | 22011318                | C/T  | NA                 | NA                            | NA                 |
| Kabuli_wild_22013960 | NA                                  | Ca_kabuli_denovo | 22013960                | A/G  | NA                 | NA                            | NA                 |
| Kabuli_wild_22014817 | NA                                  | Ca_kabuli_denovo | 22014817                | A/G  | NA                 | NA                            | NA                 |
| Kabuli_wild_22015625 | NA                                  | Ca_kabuli_denovo | 22015625                | C/T  | NA                 | NA                            | NA                 |

| SNP IDs              | NCBI dbSNP accession IDs (NCBI_SS#) | Chromosomes      | Physical positions (bp) | SNPs | Gene accession IDs | Sequence components of genome | Putative functions |
|----------------------|-------------------------------------|------------------|-------------------------|------|--------------------|-------------------------------|--------------------|
| Kabuli_wild_22016325 | NA                                  | Ca_kabuli_denovo | 22016325                | A/G  | NA                 | NA                            | NA                 |
| Kabuli_wild_22017619 | NA                                  | Ca_kabuli_denovo | 22017619                | A/G  | NA                 | NA                            | NA                 |
| Kabuli_wild_22017654 | NA                                  | Ca_kabuli_denovo | 22017654                | C/G  | NA                 | NA                            | NA                 |
| Kabuli_wild_22020360 | NA                                  | Ca_kabuli_denovo | 22020360                | A/T  | NA                 | NA                            | NA                 |
| Kabuli_wild_22022776 | NA                                  | Ca_kabuli_denovo | 22022776                | C/T  | NA                 | NA                            | NA                 |
| Kabuli_wild_22022779 | NA                                  | Ca_kabuli_denovo | 22022779                | C/T  | NA                 | NA                            | NA                 |
| Kabuli_wild_22023133 | NA                                  | Ca_kabuli_denovo | 22023133                | A/C  | NA                 | NA                            | NA                 |
| Kabuli_wild_22023148 | NA                                  | Ca_kabuli_denovo | 22023148                | A/G  | NA                 | NA                            | NA                 |
| Kabuli_wild_22024356 | NA                                  | Ca_kabuli_denovo | 22024356                | C/T  | NA                 | NA                            | NA                 |
| Kabuli_wild_22024744 | NA                                  | Ca_kabuli_denovo | 22024744                | C/T  | NA                 | NA                            | NA                 |
| Kabuli_wild_22027038 | NA                                  | Ca_kabuli_denovo | 22027038                | G/T  | NA                 | NA                            | NA                 |
| Kabuli_wild_22027072 | NA                                  | Ca_kabuli_denovo | 22027072                | C/T  | NA                 | NA                            | NA                 |
| Kabuli_wild_22027256 | NA                                  | Ca_kabuli_denovo | 22027256                | A/G  | NA                 | NA                            | NA                 |
| Kabuli_wild_22028026 | NA                                  | Ca_kabuli_denovo | 22028026                | C/G  | NA                 | NA                            | NA                 |
| Kabuli_wild_22028121 | NA                                  | Ca_kabuli_denovo | 22028121                | A/G  | NA                 | NA                            | NA                 |
| Kabuli_wild_22029087 | NA                                  | Ca_kabuli_denovo | 22029087                | A/G  | NA                 | NA                            | NA                 |
| Kabuli_wild_22030217 | NA                                  | Ca_kabuli_denovo | 22030217                | G/T  | NA                 | NA                            | NA                 |
| Kabuli_wild_22030838 | NA                                  | Ca_kabuli_denovo | 22030838                | C/G  | NA                 | NA                            | NA                 |
| Kabuli_wild_22033268 | NA                                  | Ca_kabuli_denovo | 22033268                | C/T  | NA                 | NA                            | NA                 |
| Kabuli_wild_22034396 | NA                                  | Ca_kabuli_denovo | 22034396                | C/A  | NA                 | NA                            | NA                 |
| Kabuli_wild_22034834 | NA                                  | Ca_kabuli_denovo | 22034834                | C/T  | NA                 | NA                            | NA                 |
| Kabuli_wild_22035359 | NA                                  | Ca_kabuli_denovo | 22035359                | C/T  | NA                 | NA                            | NA                 |
| Kabuli_wild_22035442 | NA                                  | Ca_kabuli_denovo | 22035442                | A/C  | NA                 | NA                            | NA                 |
| Kabuli_wild_22035460 | NA                                  | Ca_kabuli_denovo | 22035460                | C/T  | NA                 | NA                            | NA                 |
| Kabuli_wild_22035764 | NA                                  | Ca_kabuli_denovo | 22035764                | A/T  | NA                 | NA                            | NA                 |
| Kabuli_wild_22036510 | NA                                  | Ca_kabuli_denovo | 22036510                | G/T  | NA                 | NA                            | NA                 |
| Kabuli_wild_22036625 | NA                                  | Ca_kabuli_denovo | 22036625                | G/T  | NA                 | NA                            | NA                 |
| Kabuli_wild_22036662 | NA                                  | Ca_kabuli_denovo | 22036662                | A/G  | NA                 | NA                            | NA                 |
| Kabuli_wild_22036751 | NA                                  | Ca_kabuli_denovo | 22036751                | A/C  | NA                 | NA                            | NA                 |
| Kabuli_wild_22036753 | NA                                  | Ca_kabuli_denovo | 22036753                | G/T  | NA                 | NA                            | NA                 |
| Kabuli_wild_22038466 | NA                                  | Ca_kabuli_denovo | 22038466                | A/G  | NA                 | NA                            | NA                 |
| Kabuli_wild_22038484 | NA                                  | Ca_kabuli_denovo | 22038484                | C/T  | NA                 | NA                            | NA                 |
| Kabuli_wild_22040724 | NA                                  | Ca_kabuli_denovo | 22040724                | G/T  | NA                 | NA                            | NA                 |
| Kabuli_wild_22040744 | NA                                  | Ca_kabuli_denovo | 22040744                | C/G  | NA                 | NA                            | NA                 |
| Kabuli_wild_22041306 | NA                                  | Ca_kabuli_denovo | 22041306                | A/G  | NA                 | NA                            | NA                 |
| Kabuli_wild_22041458 | NA                                  | Ca_kabuli_denovo | 22041458                | C/T  | NA                 | NA                            | NA                 |
| Kabuli_wild_22042260 | NA                                  | Ca_kabuli_denovo | 22042260                | C/T  | NA                 | NA                            | NA                 |
| Kabuli_wild_22043918 | NA                                  | Ca_kabuli_denovo | 22043918                | A/G  | NA                 | NA                            | NA                 |
| Kabuli_wild_22045436 | NA                                  | Ca_kabuli_denovo | 22045436                | A/G  | NA                 | NA                            | NA                 |
| Kabuli_wild_22045499 | NA                                  | Ca_kabuli_denovo | 22045499                | C/T  | NA                 | NA                            | NA                 |
| Kabuli_wild_22046251 | NA                                  | Ca_kabuli_denovo | 22046251                | G/T  | NA                 | NA                            | NA                 |
| Kabuli_wild_22048737 | NA                                  | Ca_kabuli_denovo | 22048737                | G/T  | NA                 | NA                            | NA                 |
| Kabuli_wild_22048764 | NA                                  | Ca_kabuli_denovo | 22048764                | C/T  | NA                 | NA                            | NA                 |
| Kabuli_wild_22048937 | NA                                  | Ca_kabuli_denovo | 22048937                | A/G  | NA                 | NA                            | NA                 |

| SNP IDs              | NCBI dbSNP accession IDs (NCBI_SS#) | Chromosomes      | Physical positions (bp) | SNPs | Gene accession IDs | Sequence components of genome | Putative functions |
|----------------------|-------------------------------------|------------------|-------------------------|------|--------------------|-------------------------------|--------------------|
| Kabuli_wild_22051506 | NA                                  | Ca_kabuli_denovo | 22051506                | A/G  | NA                 | NA                            | NA                 |
| Kabuli_wild_22051894 | NA                                  | Ca_kabuli_denovo | 22051894                | A/G  | NA                 | NA                            | NA                 |
| Kabuli_wild_22052036 | NA                                  | Ca_kabuli_denovo | 22052036                | G/T  | NA                 | NA                            | NA                 |
| Kabuli_wild_22054850 | NA                                  | Ca_kabuli_denovo | 22054850                | A/C  | NA                 | NA                            | NA                 |
| Kabuli_wild_22056213 | NA                                  | Ca_kabuli_denovo | 22056213                | A/T  | NA                 | NA                            | NA                 |
| Kabuli_wild_22058433 | NA                                  | Ca_kabuli_denovo | 22058433                | A/G  | NA                 | NA                            | NA                 |
| Kabuli_wild_22058458 | NA                                  | Ca_kabuli_denovo | 22058458                | A/T  | NA                 | NA                            | NA                 |
| Kabuli_wild_22058488 | NA                                  | Ca_kabuli_denovo | 22058488                | A/G  | NA                 | NA                            | NA                 |
| Kabuli_wild_22060896 | NA                                  | Ca_kabuli_denovo | 22060896                | C/G  | NA                 | NA                            | NA                 |
| Kabuli_wild_22061810 | NA                                  | Ca_kabuli_denovo | 22061810                | A/G  | NA                 | NA                            | NA                 |
| Kabuli_wild_22061830 | NA                                  | Ca_kabuli_denovo | 22061830                | G/T  | NA                 | NA                            | NA                 |
| Kabuli_wild_22061833 | NA                                  | Ca_kabuli_denovo | 22061833                | A/C  | NA                 | NA                            | NA                 |
| Kabuli_wild_22061840 | NA                                  | Ca_kabuli_denovo | 22061840                | A/C  | NA                 | NA                            | NA                 |
| Kabuli_wild_22061842 | NA                                  | Ca_kabuli_denovo | 22061842                | A/G  | NA                 | NA                            | NA                 |
| Kabuli_wild_22062070 | NA                                  | Ca_kabuli_denovo | 22062070                | A/C  | NA                 | NA                            | NA                 |
| Kabuli_wild_22062548 | NA                                  | Ca_kabuli_denovo | 22062548                | C/T  | NA                 | NA                            | NA                 |
| Kabuli_wild_22062584 | NA                                  | Ca_kabuli_denovo | 22062584                | C/T  | NA                 | NA                            | NA                 |
| Kabuli_wild_22062724 | NA                                  | Ca_kabuli_denovo | 22062724                | A/C  | NA                 | NA                            | NA                 |
| Kabuli_wild_22062727 | NA                                  | Ca_kabuli_denovo | 22062727                | C/T  | NA                 | NA                            | NA                 |
| Kabuli_wild_22062828 | NA                                  | Ca_kabuli_denovo | 22062828                | C/T  | NA                 | NA                            | NA                 |
| Kabuli_wild_22063969 | NA                                  | Ca_kabuli_denovo | 22063969                | C/T  | NA                 | NA                            | NA                 |
| Kabuli_wild_22065270 | NA                                  | Ca_kabuli_denovo | 22065270                | C/T  | NA                 | NA                            | NA                 |
| Kabuli_wild_22065563 | NA                                  | Ca_kabuli_denovo | 22065563                | A/G  | NA                 | NA                            | NA                 |
| Kabuli_wild_22065904 | NA                                  | Ca_kabuli_denovo | 22065904                | A/G  | NA                 | NA                            | NA                 |
| Kabuli_wild_22065957 | NA                                  | Ca_kabuli_denovo | 22065957                | A/G  | NA                 | NA                            | NA                 |
| Kabuli_wild_22066288 | NA                                  | Ca_kabuli_denovo | 22066288                | A/G  | NA                 | NA                            | NA                 |
| Kabuli_wild_22066321 | NA                                  | Ca_kabuli_denovo | 22066321                | G/T  | NA                 | NA                            | NA                 |
| Kabuli_wild_22066330 | NA                                  | Ca_kabuli_denovo | 22066330                | C/T  | NA                 | NA                            | NA                 |
| Kabuli_wild_22067172 | NA                                  | Ca_kabuli_denovo | 22067172                | A/G  | NA                 | NA                            | NA                 |
| Kabuli_wild_22067298 | NA                                  | Ca_kabuli_denovo | 22067298                | A/T  | NA                 | NA                            | NA                 |
| Kabuli_wild_22067330 | NA                                  | Ca_kabuli_denovo | 22067330                | C/T  | NA                 | NA                            | NA                 |
| Kabuli_wild_22067549 | NA                                  | Ca_kabuli_denovo | 22067549                | A/G  | NA                 | NA                            | NA                 |
| Kabuli_wild_22067569 | NA                                  | Ca_kabuli_denovo | 22067569                | A/T  | NA                 | NA                            | NA                 |
| Kabuli_wild_22067937 | NA                                  | Ca_kabuli_denovo | 22067937                | G/T  | NA                 | NA                            | NA                 |
| Kabuli_wild_22067939 | NA                                  | Ca_kabuli_denovo | 22067939                | A/C  | NA                 | NA                            | NA                 |
| Kabuli_wild_22068332 | NA                                  | Ca_kabuli_denovo | 22068332                | A/G  | NA                 | NA                            | NA                 |
| Kabuli_wild_22068538 | NA                                  | Ca_kabuli_denovo | 22068538                | A/G  | NA                 | NA                            | NA                 |
| Kabuli_wild_22068565 | NA                                  | Ca_kabuli_denovo | 22068565                | C/T  | NA                 | NA                            | NA                 |
| Kabuli_wild_22069598 | NA                                  | Ca_kabuli_denovo | 22069598                | C/T  | NA                 | NA                            | NA                 |
| Kabuli_wild_22069628 | NA                                  | Ca_kabuli_denovo | 22069628                | C/T  | NA                 | NA                            | NA                 |
| Kabuli_wild_22069655 | NA                                  | Ca_kabuli_denovo | 22069655                | A/G  | NA                 | NA                            | NA                 |
| Kabuli_wild_22069666 | NA                                  | Ca_kabuli_denovo | 22069666                | A/T  | NA                 | NA                            | NA                 |
| Kabuli_wild_22069791 | NA                                  | Ca_kabuli_denovo | 22069791                | C/G  | NA                 | NA                            | NA                 |
| Kabuli_wild_22070093 | NA                                  | Ca_kabuli_denovo | 22070093                | C/G  | NA                 | NA                            | NA                 |

| SNP IDs              | NCBI dbSNP accession IDs (NCBI_SS#) | Chromosomes      | Physical positions (bp) | SNPs | Gene accession IDs | Sequence components of genome | Putative functions |
|----------------------|-------------------------------------|------------------|-------------------------|------|--------------------|-------------------------------|--------------------|
| Kabuli_wild_22071853 | NA                                  | Ca_kabuli_denovo | 22071853                | C/T  | NA                 | NA                            | NA                 |
| Kabuli_wild_22072869 | NA                                  | Ca_kabuli_denovo | 22072869                | C/T  | NA                 | NA                            | NA                 |
| Kabuli_wild_22073757 | NA                                  | Ca_kabuli_denovo | 22073757                | A/G  | NA                 | NA                            | NA                 |
| Kabuli_wild_22074683 | NA                                  | Ca_kabuli_denovo | 22074683                | A/C  | NA                 | NA                            | NA                 |
| Kabuli_wild_22074695 | NA                                  | Ca_kabuli_denovo | 22074695                | A/G  | NA                 | NA                            | NA                 |
| Kabuli_wild_22074829 | NA                                  | Ca_kabuli_denovo | 22074829                | C/T  | NA                 | NA                            | NA                 |
| Kabuli_wild_22074874 | NA                                  | Ca_kabuli_denovo | 22074874                | C/T  | NA                 | NA                            | NA                 |
| Kabuli_wild_22075219 | NA                                  | Ca_kabuli_denovo | 22075219                | C/T  | NA                 | NA                            | NA                 |
| Kabuli_wild_22075255 | NA                                  | Ca_kabuli_denovo | 22075255                | G/T  | NA                 | NA                            | NA                 |
| Kabuli_wild_22075994 | NA                                  | Ca_kabuli_denovo | 22075994                | A/G  | NA                 | NA                            | NA                 |
| Kabuli_wild_22076024 | NA                                  | Ca_kabuli_denovo | 22076024                | A/G  | NA                 | NA                            | NA                 |
| Kabuli_wild_22076244 | NA                                  | Ca_kabuli_denovo | 22076244                | A/G  | NA                 | NA                            | NA                 |
| Kabuli_wild_22082102 | NA                                  | Ca_kabuli_denovo | 22082102                | C/T  | NA                 | NA                            | NA                 |
| Kabuli_wild_22082844 | NA                                  | Ca_kabuli_denovo | 22082844                | C/G  | NA                 | NA                            | NA                 |
| Kabuli_wild_22083020 | NA                                  | Ca_kabuli_denovo | 22083020                | A/C  | NA                 | NA                            | NA                 |
| Kabuli_wild_22088228 | NA                                  | Ca_kabuli_denovo | 22088228                | C/T  | NA                 | NA                            | NA                 |
| Kabuli_wild_22088235 | NA                                  | Ca_kabuli_denovo | 22088235                | A/C  | NA                 | NA                            | NA                 |
| Kabuli_wild_22088252 | NA                                  | Ca_kabuli_denovo | 22088252                | C/T  | NA                 | NA                            | NA                 |
| Kabuli_wild_22088810 | NA                                  | Ca_kabuli_denovo | 22088810                | C/G  | NA                 | NA                            | NA                 |
| Kabuli_wild_22089191 | NA                                  | Ca_kabuli_denovo | 22089191                | C/T  | NA                 | NA                            | NA                 |
| Kabuli_wild_22090000 | NA                                  | Ca_kabuli_denovo | 22090000                | C/T  | NA                 | NA                            | NA                 |
| Kabuli_wild_22090532 | NA                                  | Ca_kabuli_denovo | 22090532                | C/T  | NA                 | NA                            | NA                 |
| Kabuli_wild_22090879 | NA                                  | Ca_kabuli_denovo | 22090879                | A/T  | NA                 | NA                            | NA                 |
| Kabuli_wild_22091501 | NA                                  | Ca_kabuli_denovo | 22091501                | A/C  | NA                 | NA                            | NA                 |
| Kabuli_wild_22092598 | NA                                  | Ca_kabuli_denovo | 22092598                | A/G  | NA                 | NA                            | NA                 |
| Kabuli_wild_22095362 | NA                                  | Ca_kabuli_denovo | 22095362                | A/G  | NA                 | NA                            | NA                 |
| Kabuli_wild_22097283 | NA                                  | Ca_kabuli_denovo | 22097283                | C/T  | NA                 | NA                            | NA                 |
| Kabuli_wild_22099328 | NA                                  | Ca_kabuli_denovo | 22099328                | C/T  | NA                 | NA                            | NA                 |
| Kabuli_wild_22101315 | NA                                  | Ca_kabuli_denovo | 22101315                | A/C  | NA                 | NA                            | NA                 |
| Kabuli_wild_22101967 | NA                                  | Ca_kabuli_denovo | 22101967                | A/G  | NA                 | NA                            | NA                 |
| Kabuli_wild_22102580 | NA                                  | Ca_kabuli_denovo | 22102580                | A/G  | NA                 | NA                            | NA                 |
| Kabuli_wild_22106453 | NA                                  | Ca_kabuli_denovo | 22106453                | T/C  | NA                 | NA                            | NA                 |
| Kabuli_wild_22106463 | NA                                  | Ca_kabuli_denovo | 22106463                | T/A  | NA                 | NA                            | NA                 |
| Kabuli_wild_22106492 | NA                                  | Ca_kabuli_denovo | 22106492                | A/G  | NA                 | NA                            | NA                 |
| Kabuli_wild_22106531 | NA                                  | Ca_kabuli_denovo | 22106531                | C/T  | NA                 | NA                            | NA                 |
| Kabuli_wild_22106594 | NA                                  | Ca_kabuli_denovo | 22106594                | A/C  | NA                 | NA                            | NA                 |
| Kabuli_wild_22106898 | NA                                  | Ca_kabuli_denovo | 22106898                | C/G  | NA                 | NA                            | NA                 |
| Kabuli_wild_22106933 | NA                                  | Ca_kabuli_denovo | 22106933                | A/T  | NA                 | NA                            | NA                 |
| Kabuli_wild_22106948 | NA                                  | Ca_kabuli_denovo | 22106948                | C/T  | NA                 | NA                            | NA                 |
| Kabuli_wild_22106984 | NA                                  | Ca_kabuli_denovo | 22106984                | A/T  | NA                 | NA                            | NA                 |
| Kabuli_wild_22107457 | NA                                  | Ca_kabuli_denovo | 22107457                | A/G  | NA                 | NA                            | NA                 |
| Kabuli_wild_22107467 | NA                                  | Ca_kabuli_denovo | 22107467                | A/G  | NA                 | NA                            | NA                 |
| Kabuli_wild_22107476 | NA                                  | Ca_kabuli_denovo | 22107476                | C/T  | NA                 | NA                            | NA                 |
| Kabuli_wild_22107486 | NA                                  | Ca_kabuli_denovo | 22107486                | G/T  | NA                 | NA                            | NA                 |

| SNP IDs              | NCBI dbSNP accession IDs (NCBI_SS#) | Chromosomes      | Physical positions (bp) | SNPs | Gene accession IDs | Sequence components of genome | Putative functions |
|----------------------|-------------------------------------|------------------|-------------------------|------|--------------------|-------------------------------|--------------------|
| Kabuli_wild_22107505 | NA                                  | Ca_kabuli_denovo | 22107505                | C/T  | NA                 | NA                            | NA                 |
| Kabuli_wild_22107571 | NA                                  | Ca_kabuli_denovo | 22107571                | C/G  | NA                 | NA                            | NA                 |
| Kabuli_wild_22110235 | NA                                  | Ca_kabuli_denovo | 22110235                | A/T  | NA                 | NA                            | NA                 |
| Kabuli_wild_22110242 | NA                                  | Ca_kabuli_denovo | 22110242                | A/T  | NA                 | NA                            | NA                 |
| Kabuli_wild_22110257 | NA                                  | Ca_kabuli_denovo | 22110257                | C/G  | NA                 | NA                            | NA                 |
| Kabuli_wild_22110296 | NA                                  | Ca_kabuli_denovo | 22110296                | A/T  | NA                 | NA                            | NA                 |
| Kabuli_wild_22110760 | NA                                  | Ca_kabuli_denovo | 22110760                | C/G  | NA                 | NA                            | NA                 |
| Kabuli_wild_22111496 | NA                                  | Ca_kabuli_denovo | 22111496                | C/G  | NA                 | NA                            | NA                 |
| Kabuli_wild_22114598 | NA                                  | Ca_kabuli_denovo | 22114598                | A/G  | NA                 | NA                            | NA                 |
| Kabuli_wild_22114791 | NA                                  | Ca_kabuli_denovo | 22114791                | G/T  | NA                 | NA                            | NA                 |
| Kabuli_wild_22114803 | NA                                  | Ca_kabuli_denovo | 22114803                | A/C  | NA                 | NA                            | NA                 |
| Kabuli_wild_22114836 | NA                                  | Ca_kabuli_denovo | 22114836                | C/T  | NA                 | NA                            | NA                 |
| Kabuli_wild_22116764 | NA                                  | Ca_kabuli_denovo | 22116764                | A/G  | NA                 | NA                            | NA                 |
| Kabuli_wild_22120326 | NA                                  | Ca_kabuli_denovo | 22120326                | C/T  | NA                 | NA                            | NA                 |
| Kabuli_wild_22120359 | NA                                  | Ca_kabuli_denovo | 22120359                | G/A  | NA                 | NA                            | NA                 |
| Kabuli_wild_22120407 | NA                                  | Ca_kabuli_denovo | 22120407                | A/G  | NA                 | NA                            | NA                 |
| Kabuli_wild_22122897 | NA                                  | Ca_kabuli_denovo | 22122897                | A/T  | NA                 | NA                            | NA                 |
| Kabuli_wild_22123394 | NA                                  | Ca_kabuli_denovo | 22123394                | C/G  | NA                 | NA                            | NA                 |
| Kabuli_wild_22123559 | NA                                  | Ca_kabuli_denovo | 22123559                | A/G  | NA                 | NA                            | NA                 |
| Kabuli_wild_22125185 | NA                                  | Ca_kabuli_denovo | 22125185                | C/T  | NA                 | NA                            | NA                 |
| Kabuli_wild_22125644 | NA                                  | Ca_kabuli_denovo | 22125644                | G/T  | NA                 | NA                            | NA                 |
| Kabuli_wild_22126858 | NA                                  | Ca_kabuli_denovo | 22126858                | C/G  | NA                 | NA                            | NA                 |
| Kabuli_wild_22127027 | NA                                  | Ca_kabuli_denovo | 22127027                | A/G  | NA                 | NA                            | NA                 |
| Kabuli_wild_22127121 | NA                                  | Ca_kabuli_denovo | 22127121                | C/T  | NA                 | NA                            | NA                 |
| Kabuli_wild_22127418 | NA                                  | Ca_kabuli_denovo | 22127418                | C/T  | NA                 | NA                            | NA                 |
| Kabuli_wild_22127813 | NA                                  | Ca_kabuli_denovo | 22127813                | C/T  | NA                 | NA                            | NA                 |
| Kabuli_wild_22129521 | NA                                  | Ca_kabuli_denovo | 22129521                | C/T  | NA                 | NA                            | NA                 |
| Kabuli_wild_22132662 | NA                                  | Ca_kabuli_denovo | 22132662                | A/G  | NA                 | NA                            | NA                 |
| Kabuli_wild_22134928 | NA                                  | Ca_kabuli_denovo | 22134928                | T/G  | NA                 | NA                            | NA                 |
| Kabuli_wild_22135025 | NA                                  | Ca_kabuli_denovo | 22135025                | G/T  | NA                 | NA                            | NA                 |
| Kabuli_wild_22135038 | NA                                  | Ca_kabuli_denovo | 22135038                | A/G  | NA                 | NA                            | NA                 |
| Kabuli_wild_22135040 | NA                                  | Ca_kabuli_denovo | 22135040                | C/G  | NA                 | NA                            | NA                 |
| Kabuli_wild_22135046 | NA                                  | Ca_kabuli_denovo | 22135046                | A/G  | NA                 | NA                            | NA                 |
| Kabuli_wild_22136044 | NA                                  | Ca_kabuli_denovo | 22136044                | C/T  | NA                 | NA                            | NA                 |
| Kabuli_wild_22138090 | NA                                  | Ca_kabuli_denovo | 22138090                | A/C  | NA                 | NA                            | NA                 |
| Kabuli_wild_22139150 | NA                                  | Ca_kabuli_denovo | 22139150                | A/G  | NA                 | NA                            | NA                 |
| Kabuli_wild_22139183 | NA                                  | Ca_kabuli_denovo | 22139183                | A/T  | NA                 | NA                            | NA                 |
| Kabuli_wild_22139947 | NA                                  | Ca_kabuli_denovo | 22139947                | A/G  | NA                 | NA                            | NA                 |
| Kabuli_wild_22142299 | NA                                  | Ca_kabuli_denovo | 22142299                | C/T  | NA                 | NA                            | NA                 |
| Kabuli_wild_22144472 | NA                                  | Ca_kabuli_denovo | 22144472                | C/T  | NA                 | NA                            | NA                 |
| Kabuli_wild_22146547 | NA                                  | Ca_kabuli_denovo | 22146547                | A/G  | NA                 | NA                            | NA                 |
| Kabuli_wild_22146851 | NA                                  | Ca_kabuli_denovo | 22146851                | A/G  | NA                 | NA                            | NA                 |
| Kabuli_wild_22148369 | NA                                  | Ca_kabuli_denovo | 22148369                | C/T  | NA                 | NA                            | NA                 |
| Kabuli_wild_22148408 | NA                                  | Ca_kabuli_denovo | 22148408                | G/T  | NA                 | NA                            | NA                 |

| SNP IDs              | NCBI dbSNP accession IDs (NCBI_SS#) | Chromosomes      | Physical positions (bp) | SNPs | Gene accession IDs | Sequence components of genome | Putative functions |
|----------------------|-------------------------------------|------------------|-------------------------|------|--------------------|-------------------------------|--------------------|
| Kabuli_wild_22150297 | NA                                  | Ca_kabuli_denovo | 22150297                | A/G  | NA                 | NA                            | NA                 |
| Kabuli_wild_22150325 | NA                                  | Ca_kabuli_denovo | 22150325                | C/G  | NA                 | NA                            | NA                 |
| Kabuli_wild_22150401 | NA                                  | Ca_kabuli_denovo | 22150401                | C/T  | NA                 | NA                            | NA                 |
| Kabuli_wild_22150886 | NA                                  | Ca_kabuli_denovo | 22150886                | A/G  | NA                 | NA                            | NA                 |
| Kabuli_wild_22150901 | NA                                  | Ca_kabuli_denovo | 22150901                | C/G  | NA                 | NA                            | NA                 |
| Kabuli_wild_22150904 | NA                                  | Ca_kabuli_denovo | 22150904                | G/T  | NA                 | NA                            | NA                 |
| Kabuli_wild_22152204 | NA                                  | Ca_kabuli_denovo | 22152204                | C/G  | NA                 | NA                            | NA                 |
| Kabuli_wild_22153515 | NA                                  | Ca_kabuli_denovo | 22153515                | C/T  | NA                 | NA                            | NA                 |
| Kabuli_wild_22153784 | NA                                  | Ca_kabuli_denovo | 22153784                | C/T  | NA                 | NA                            | NA                 |
| Kabuli_wild_22153815 | NA                                  | Ca_kabuli_denovo | 22153815                | A/G  | NA                 | NA                            | NA                 |
| Kabuli_wild_22153851 | NA                                  | Ca_kabuli_denovo | 22153851                | C/G  | NA                 | NA                            | NA                 |
| Kabuli_wild_22154948 | NA                                  | Ca_kabuli_denovo | 22154948                | C/T  | NA                 | NA                            | NA                 |
| Kabuli_wild_22155026 | NA                                  | Ca_kabuli_denovo | 22155026                | A/C  | NA                 | NA                            | NA                 |
| Kabuli_wild_22159636 | NA                                  | Ca_kabuli_denovo | 22159636                | A/T  | NA                 | NA                            | NA                 |
| Kabuli_wild_22162535 | NA                                  | Ca_kabuli_denovo | 22162535                | C/T  | NA                 | NA                            | NA                 |
| Kabuli_wild_22163356 | NA                                  | Ca_kabuli_denovo | 22163356                | A/T  | NA                 | NA                            | NA                 |
| Kabuli_wild_22165423 | NA                                  | Ca_kabuli_denovo | 22165423                | C/G  | NA                 | NA                            | NA                 |
| Kabuli_wild_22166927 | NA                                  | Ca_kabuli_denovo | 22166927                | C/T  | NA                 | NA                            | NA                 |
| Kabuli_wild_22167811 | NA                                  | Ca_kabuli_denovo | 22167811                | A/T  | NA                 | NA                            | NA                 |
| Kabuli_wild_22172697 | NA                                  | Ca_kabuli_denovo | 22172697                | A/T  | NA                 | NA                            | NA                 |
| Kabuli_wild_22172733 | NA                                  | Ca_kabuli_denovo | 22172733                | G/T  | NA                 | NA                            | NA                 |
| Kabuli_wild_22176326 | NA                                  | Ca_kabuli_denovo | 22176326                | A/G  | NA                 | NA                            | NA                 |
| Kabuli_wild_22176353 | NA                                  | Ca_kabuli_denovo | 22176353                | C/T  | NA                 | NA                            | NA                 |
| Kabuli_wild_22178687 | NA                                  | Ca_kabuli_denovo | 22178687                | A/G  | NA                 | NA                            | NA                 |
| Kabuli_wild_22178688 | NA                                  | Ca_kabuli_denovo | 22178688                | A/C  | NA                 | NA                            | NA                 |
| Kabuli_wild_22178692 | NA                                  | Ca_kabuli_denovo | 22178692                | A/C  | NA                 | NA                            | NA                 |
| Kabuli_wild_22180199 | NA                                  | Ca_kabuli_denovo | 22180199                | C/T  | NA                 | NA                            | NA                 |
| Kabuli_wild_22180207 | NA                                  | Ca_kabuli_denovo | 22180207                | A/T  | NA                 | NA                            | NA                 |
| Kabuli_wild_22181063 | NA                                  | Ca_kabuli_denovo | 22181063                | A/G  | NA                 | NA                            | NA                 |
| Kabuli_wild_22181242 | NA                                  | Ca_kabuli_denovo | 22181242                | G/T  | NA                 | NA                            | NA                 |
| Kabuli_wild_22181250 | NA                                  | Ca_kabuli_denovo | 22181250                | A/C  | NA                 | NA                            | NA                 |
| Kabuli_wild_22182556 | NA                                  | Ca_kabuli_denovo | 22182556                | G/T  | NA                 | NA                            | NA                 |
| Kabuli_wild_22183518 | NA                                  | Ca_kabuli_denovo | 22183518                | C/G  | NA                 | NA                            | NA                 |
| Kabuli_wild_22184543 | NA                                  | Ca_kabuli_denovo | 22184543                | A/C  | NA                 | NA                            | NA                 |
| Kabuli_wild_22184564 | NA                                  | Ca_kabuli_denovo | 22184564                | C/T  | NA                 | NA                            | NA                 |
| Kabuli_wild_22185862 | NA                                  | Ca_kabuli_denovo | 22185862                | A/C  | NA                 | NA                            | NA                 |
| Kabuli_wild_22187564 | NA                                  | Ca_kabuli_denovo | 22187564                | A/G  | NA                 | NA                            | NA                 |
| Kabuli_wild_22188620 | NA                                  | Ca_kabuli_denovo | 22188620                | C/T  | NA                 | NA                            | NA                 |
| Kabuli_wild_22188906 | NA                                  | Ca_kabuli_denovo | 22188906                | C/G  | NA                 | NA                            | NA                 |
| Kabuli_wild_22192929 | NA                                  | Ca_kabuli_denovo | 22192929                | C/T  | NA                 | NA                            | NA                 |
| Kabuli_wild_22193268 | NA                                  | Ca_kabuli_denovo | 22193268                | A/G  | NA                 | NA                            | NA                 |
| Kabuli_wild_22193967 | NA                                  | Ca_kabuli_denovo | 22193967                | A/G  | NA                 | NA                            | NA                 |
| Kabuli_wild_22193979 | NA                                  | Ca_kabuli_denovo | 22193979                | A/G  | NA                 | NA                            | NA                 |
| Kabuli_wild_22193985 | NA                                  | Ca_kabuli_denovo | 22193985                | A/G  | NA                 | NA                            | NA                 |

| SNP IDs              | NCBI dbSNP accession IDs (NCBI_SS#) | Chromosomes      | Physical positions (bp) | SNPs | Gene accession IDs | Sequence components of genome | Putative functions |
|----------------------|-------------------------------------|------------------|-------------------------|------|--------------------|-------------------------------|--------------------|
| Kabuli_wild_22194416 | NA                                  | Ca_kabuli_denovo | 22194416                | C/T  | NA                 | NA                            | NA                 |
| Kabuli_wild_22194432 | NA                                  | Ca_kabuli_denovo | 22194432                | A/G  | NA                 | NA                            | NA                 |
| Kabuli_wild_22196804 | NA                                  | Ca_kabuli_denovo | 22196804                | A/G  | NA                 | NA                            | NA                 |
| Kabuli_wild_22196822 | NA                                  | Ca_kabuli_denovo | 22196822                | A/G  | NA                 | NA                            | NA                 |
| Kabuli_wild_22197147 | NA                                  | Ca_kabuli_denovo | 22197147                | A/G  | NA                 | NA                            | NA                 |
| Kabuli_wild_22197257 | NA                                  | Ca_kabuli_denovo | 22197257                | G/T  | NA                 | NA                            | NA                 |
| Kabuli_wild_22197277 | NA                                  | Ca_kabuli_denovo | 22197277                | A/G  | NA                 | NA                            | NA                 |
| Kabuli_wild_22197328 | NA                                  | Ca_kabuli_denovo | 22197328                | C/T  | NA                 | NA                            | NA                 |
| Kabuli_wild_22198132 | NA                                  | Ca_kabuli_denovo | 22198132                | A/G  | NA                 | NA                            | NA                 |
| Kabuli_wild_22198200 | NA                                  | Ca_kabuli_denovo | 22198200                | G/T  | NA                 | NA                            | NA                 |
| Kabuli_wild_22198202 | NA                                  | Ca_kabuli_denovo | 22198202                | C/T  | NA                 | NA                            | NA                 |
| Kabuli_wild_22201653 | NA                                  | Ca_kabuli_denovo | 22201653                | G/T  | NA                 | NA                            | NA                 |
| Kabuli_wild_22202120 | NA                                  | Ca_kabuli_denovo | 22202120                | C/T  | NA                 | NA                            | NA                 |
| Kabuli_wild_22202399 | NA                                  | Ca_kabuli_denovo | 22202399                | A/G  | NA                 | NA                            | NA                 |
| Kabuli_wild_22207624 | NA                                  | Ca_kabuli_denovo | 22207624                | C/G  | NA                 | NA                            | NA                 |
| Kabuli_wild_22208625 | NA                                  | Ca_kabuli_denovo | 22208625                | A/C  | NA                 | NA                            | NA                 |
| Kabuli_wild_22208626 | NA                                  | Ca_kabuli_denovo | 22208626                | A/G  | NA                 | NA                            | NA                 |
| Kabuli_wild_22209984 | NA                                  | Ca_kabuli_denovo | 22209984                | C/T  | NA                 | NA                            | NA                 |
| Kabuli_wild_22211070 | NA                                  | Ca_kabuli_denovo | 22211070                | A/T  | NA                 | NA                            | NA                 |
| Kabuli_wild_22212377 | NA                                  | Ca_kabuli_denovo | 22212377                | A/T  | NA                 | NA                            | NA                 |
| Kabuli_wild_22212593 | NA                                  | Ca_kabuli_denovo | 22212593                | A/G  | NA                 | NA                            | NA                 |
| Kabuli_wild_22212996 | NA                                  | Ca_kabuli_denovo | 22212996                | A/T  | NA                 | NA                            | NA                 |
| Kabuli_wild_22213017 | NA                                  | Ca_kabuli_denovo | 22213017                | A/T  | NA                 | NA                            | NA                 |
| Kabuli_wild_22217033 | NA                                  | Ca_kabuli_denovo | 22217033                | C/G  | NA                 | NA                            | NA                 |
| Kabuli_wild_22219861 | NA                                  | Ca_kabuli_denovo | 22219861                | C/T  | NA                 | NA                            | NA                 |
| Kabuli_wild_22223453 | NA                                  | Ca_kabuli_denovo | 22223453                | A/G  | NA                 | NA                            | NA                 |
| Kabuli_wild_22223816 | NA                                  | Ca_kabuli_denovo | 22223816                | C/T  | NA                 | NA                            | NA                 |
| Kabuli_wild_22225182 | NA                                  | Ca_kabuli_denovo | 22225182                | A/T  | NA                 | NA                            | NA                 |
| Kabuli_wild_22225639 | NA                                  | Ca_kabuli_denovo | 22225639                | C/T  | NA                 | NA                            | NA                 |
| Kabuli_wild_22226949 | NA                                  | Ca_kabuli_denovo | 22226949                | A/G  | NA                 | NA                            | NA                 |
| Kabuli_wild_22227215 | NA                                  | Ca_kabuli_denovo | 22227215                | A/T  | NA                 | NA                            | NA                 |
| Kabuli_wild_22228045 | NA                                  | Ca_kabuli_denovo | 22228045                | C/T  | NA                 | NA                            | NA                 |
| Kabuli_wild_22231016 | NA                                  | Ca_kabuli_denovo | 22231016                | A/T  | NA                 | NA                            | NA                 |
| Kabuli_wild_22231110 | NA                                  | Ca_kabuli_denovo | 22231110                | C/T  | NA                 | NA                            | NA                 |
| Kabuli_wild_22231322 | NA                                  | Ca_kabuli_denovo | 22231322                | C/T  | NA                 | NA                            | NA                 |
| Kabuli_wild_22231355 | NA                                  | Ca_kabuli_denovo | 22231355                | G/T  | NA                 | NA                            | NA                 |
| Kabuli_wild_22231358 | NA                                  | Ca_kabuli_denovo | 22231358                | A/G  | NA                 | NA                            | NA                 |
| Kabuli_wild_22235789 | NA                                  | Ca_kabuli_denovo | 22235789                | C/T  | NA                 | NA                            | NA                 |
| Kabuli_wild_22235803 | NA                                  | Ca_kabuli_denovo | 22235803                | A/C  | NA                 | NA                            | NA                 |
| Kabuli_wild_22238598 | NA                                  | Ca_kabuli_denovo | 22238598                | A/G  | NA                 | NA                            | NA                 |
| Kabuli_wild_22238611 | NA                                  | Ca_kabuli_denovo | 22238611                | C/T  | NA                 | NA                            | NA                 |
| Kabuli_wild_22238889 | NA                                  | Ca_kabuli_denovo | 22238889                | C/T  | NA                 | NA                            | NA                 |
| Kabuli_wild_22239741 | NA                                  | Ca_kabuli_denovo | 22239741                | C/T  | NA                 | NA                            | NA                 |
| Kabuli_wild_22240043 | NA                                  | Ca_kabuli_denovo | 22240043                | A/T  | NA                 | NA                            | NA                 |



| SNP IDs              | NCBI dbSNP accession IDs (NCBI_SS#) | Chromosomes      | Physical positions (bp) | SNPs | Gene accession IDs | Sequence components of genome | Putative functions |
|----------------------|-------------------------------------|------------------|-------------------------|------|--------------------|-------------------------------|--------------------|
| Kabuli_wild_22241281 | NA                                  | Ca_kabuli_denovo | 22241281                | A/G  | NA                 | NA                            | NA                 |
| Kabuli_wild_22242521 | NA                                  | Ca_kabuli_denovo | 22242521                | C/G  | NA                 | NA                            | NA                 |
| Kabuli_wild_22242892 | NA                                  | Ca_kabuli_denovo | 22242892                | A/T  | NA                 | NA                            | NA                 |
| Kabuli_wild_22242893 | NA                                  | Ca_kabuli_denovo | 22242893                | C/G  | NA                 | NA                            | NA                 |
| Kabuli_wild_22242894 | NA                                  | Ca_kabuli_denovo | 22242894                | A/T  | NA                 | NA                            | NA                 |
| Kabuli_wild_22243004 | NA                                  | Ca_kabuli_denovo | 22243004                | C/T  | NA                 | NA                            | NA                 |
| Kabuli_wild_22243902 | NA                                  | Ca_kabuli_denovo | 22243902                | G/T  | NA                 | NA                            | NA                 |
| Kabuli_wild_22244186 | NA                                  | Ca_kabuli_denovo | 22244186                | C/T  | NA                 | NA                            | NA                 |
| Kabuli_wild_22244195 | NA                                  | Ca_kabuli_denovo | 22244195                | C/T  | NA                 | NA                            | NA                 |
| Kabuli_wild_22244213 | NA                                  | Ca_kabuli_denovo | 22244213                | C/T  | NA                 | NA                            | NA                 |
| Kabuli_wild_22244605 | NA                                  | Ca_kabuli_denovo | 22244605                | A/T  | NA                 | NA                            | NA                 |
| Kabuli_wild_22244638 | NA                                  | Ca_kabuli_denovo | 22244638                | C/T  | NA                 | NA                            | NA                 |
| Kabuli_wild_22244683 | NA                                  | Ca_kabuli_denovo | 22244683                | G/T  | NA                 | NA                            | NA                 |
| Kabuli_wild_22244732 | NA                                  | Ca_kabuli_denovo | 22244732                | C/T  | NA                 | NA                            | NA                 |
| Kabuli_wild_22244743 | NA                                  | Ca_kabuli_denovo | 22244743                | A/G  | NA                 | NA                            | NA                 |
| Kabuli_wild_22245951 | NA                                  | Ca_kabuli_denovo | 22245951                | C/T  | NA                 | NA                            | NA                 |
| Kabuli_wild_22248163 | NA                                  | Ca_kabuli_denovo | 22248163                | C/T  | NA                 | NA                            | NA                 |
| Kabuli_wild_22248218 | NA                                  | Ca_kabuli_denovo | 22248218                | A/G  | NA                 | NA                            | NA                 |
| Kabuli_wild_22248219 | NA                                  | Ca_kabuli_denovo | 22248219                | A/C  | NA                 | NA                            | NA                 |
| Kabuli_wild_22251186 | NA                                  | Ca_kabuli_denovo | 22251186                | C/G  | NA                 | NA                            | NA                 |
| Kabuli_wild_22251921 | NA                                  | Ca_kabuli_denovo | 22251921                | A/G  | NA                 | NA                            | NA                 |
| Kabuli_wild_22251927 | NA                                  | Ca_kabuli_denovo | 22251927                | C/T  | NA                 | NA                            | NA                 |
| Kabuli_wild_22252861 | NA                                  | Ca_kabuli_denovo | 22252861                | A/G  | NA                 | NA                            | NA                 |
| Kabuli_wild_22252888 | NA                                  | Ca_kabuli_denovo | 22252888                | C/T  | NA                 | NA                            | NA                 |
| Kabuli_wild_22252931 | NA                                  | Ca_kabuli_denovo | 22252931                | A/G  | NA                 | NA                            | NA                 |
| Kabuli_wild_22252970 | NA                                  | Ca_kabuli_denovo | 22252970                | A/G  | NA                 | NA                            | NA                 |
| Kabuli_wild_22253307 | NA                                  | Ca_kabuli_denovo | 22253307                | A/G  | NA                 | NA                            | NA                 |
| Kabuli_wild_22253319 | NA                                  | Ca_kabuli_denovo | 22253319                | A/G  | NA                 | NA                            | NA                 |
| Kabuli_wild_22253349 | NA                                  | Ca_kabuli_denovo | 22253349                | A/T  | NA                 | NA                            | NA                 |
| Kabuli_wild_22253838 | NA                                  | Ca_kabuli_denovo | 22253838                | C/T  | NA                 | NA                            | NA                 |
| Kabuli_wild_22256562 | NA                                  | Ca_kabuli_denovo | 22256562                | C/T  | NA                 | NA                            | NA                 |
| Kabuli_wild_22260234 | NA                                  | Ca_kabuli_denovo | 22260234                | C/T  | NA                 | NA                            | NA                 |
| Kabuli_wild_22260235 | NA                                  | Ca_kabuli_denovo | 22260235                | C/T  | NA                 | NA                            | NA                 |
| Kabuli_wild_22261692 | NA                                  | Ca_kabuli_denovo | 22261692                | C/T  | NA                 | NA                            | NA                 |
| Kabuli_wild_22266138 | NA                                  | Ca_kabuli_denovo | 22266138                | A/C  | NA                 | NA                            | NA                 |
| Kabuli_wild_22268445 | NA                                  | Ca_kabuli_denovo | 22268445                | C/T  | NA                 | NA                            | NA                 |
| Kabuli_wild_22271319 | NA                                  | Ca_kabuli_denovo | 22271319                | C/T  | NA                 | NA                            | NA                 |
| Kabuli_wild_22273930 | NA                                  | Ca_kabuli_denovo | 22273930                | A/G  | NA                 | NA                            | NA                 |
| Kabuli_wild_22273960 | NA                                  | Ca_kabuli_denovo | 22273960                | C/G  | NA                 | NA                            | NA                 |
| Kabuli_wild_22274295 | NA                                  | Ca_kabuli_denovo | 22274295                | C/G  | NA                 | NA                            | NA                 |
| Kabuli_wild_22278359 | NA                                  | Ca_kabuli_denovo | 22278359                | C/T  | NA                 | NA                            | NA                 |
| Kabuli_wild_22278361 | NA                                  | Ca_kabuli_denovo | 22278361                | A/G  | NA                 | NA                            | NA                 |
| Kabuli_wild_22278363 | NA                                  | Ca_kabuli_denovo | 22278363                | A/G  | NA                 | NA                            | NA                 |
| Kabuli_wild_22281144 | NA                                  | Ca_kabuli_denovo | 22281144                | C/G  | NA                 | NA                            | NA                 |

| SNP IDs              | NCBI dbSNP accession IDs (NCBI_SS#) | Chromosomes      | Physical positions (bp) | SNPs | Gene accession IDs | Sequence components of genome | Putative functions |
|----------------------|-------------------------------------|------------------|-------------------------|------|--------------------|-------------------------------|--------------------|
| Kabuli_wild_22283139 | NA                                  | Ca_kabuli_denovo | 22283139                | C/T  | NA                 | NA                            | NA                 |
| Kabuli_wild_22286157 | NA                                  | Ca_kabuli_denovo | 22286157                | C/T  | NA                 | NA                            | NA                 |
| Kabuli_wild_22289022 | NA                                  | Ca_kabuli_denovo | 22289022                | A/T  | NA                 | NA                            | NA                 |
| Kabuli_wild_22293445 | NA                                  | Ca_kabuli_denovo | 22293445                | A/G  | NA                 | NA                            | NA                 |
| Kabuli_wild_22293476 | NA                                  | Ca_kabuli_denovo | 22293476                | A/G  | NA                 | NA                            | NA                 |
| Kabuli_wild_22294576 | NA                                  | Ca_kabuli_denovo | 22294576                | A/G  | NA                 | NA                            | NA                 |
| Kabuli_wild_22294821 | NA                                  | Ca_kabuli_denovo | 22294821                | C/G  | NA                 | NA                            | NA                 |
| Kabuli_wild_22294833 | NA                                  | Ca_kabuli_denovo | 22294833                | C/T  | NA                 | NA                            | NA                 |
| Kabuli_wild_22295501 | NA                                  | Ca_kabuli_denovo | 22295501                | C/G  | NA                 | NA                            | NA                 |
| Kabuli_wild_22295504 | NA                                  | Ca_kabuli_denovo | 22295504                | C/T  | NA                 | NA                            | NA                 |
| Kabuli_wild_22295548 | NA                                  | Ca_kabuli_denovo | 22295548                | G/T  | NA                 | NA                            | NA                 |
| Kabuli_wild_22296379 | NA                                  | Ca_kabuli_denovo | 22296379                | A/G  | NA                 | NA                            | NA                 |
| Kabuli_wild_22301332 | NA                                  | Ca_kabuli_denovo | 22301332                | A/G  | NA                 | NA                            | NA                 |
| Kabuli_wild_22301384 | NA                                  | Ca_kabuli_denovo | 22301384                | A/C  | NA                 | NA                            | NA                 |
| Kabuli_wild_22301386 | NA                                  | Ca_kabuli_denovo | 22301386                | C/G  | NA                 | NA                            | NA                 |
| Kabuli_wild_22304271 | NA                                  | Ca_kabuli_denovo | 22304271                | A/G  | NA                 | NA                            | NA                 |
| Kabuli_wild_22304838 | NA                                  | Ca_kabuli_denovo | 22304838                | A/G  | NA                 | NA                            | NA                 |
| Kabuli_wild_22316658 | NA                                  | Ca_kabuli_denovo | 22316658                | C/T  | NA                 | NA                            | NA                 |
| Kabuli_wild_22316661 | NA                                  | Ca_kabuli_denovo | 22316661                | A/C  | NA                 | NA                            | NA                 |
| Kabuli_wild_22324248 | NA                                  | Ca_kabuli_denovo | 22324248                | A/C  | NA                 | NA                            | NA                 |
| Kabuli_wild_22327171 | NA                                  | Ca_kabuli_denovo | 22327171                | A/G  | NA                 | NA                            | NA                 |
| Kabuli_wild_22327173 | NA                                  | Ca_kabuli_denovo | 22327173                | A/G  | NA                 | NA                            | NA                 |
| Kabuli_wild_22327174 | NA                                  | Ca_kabuli_denovo | 22327174                | A/G  | NA                 | NA                            | NA                 |
| Kabuli_wild_22327667 | NA                                  | Ca_kabuli_denovo | 22327667                | A/G  | NA                 | NA                            | NA                 |
| Kabuli_wild_22327908 | NA                                  | Ca_kabuli_denovo | 22327908                | A/G  | NA                 | NA                            | NA                 |
| Kabuli_wild_22330139 | NA                                  | Ca_kabuli_denovo | 22330139                | A/G  | NA                 | NA                            | NA                 |
| Kabuli_wild_22330141 | NA                                  | Ca_kabuli_denovo | 22330141                | A/G  | NA                 | NA                            | NA                 |
| Kabuli_wild_22332994 | NA                                  | Ca_kabuli_denovo | 22332994                | C/T  | NA                 | NA                            | NA                 |
| Kabuli_wild_22333326 | NA                                  | Ca_kabuli_denovo | 22333326                | A/T  | NA                 | NA                            | NA                 |
| Kabuli_wild_22334105 | NA                                  | Ca_kabuli_denovo | 22334105                | C/G  | NA                 | NA                            | NA                 |
| Kabuli_wild_22334848 | NA                                  | Ca_kabuli_denovo | 22334848                | A/T  | NA                 | NA                            | NA                 |
| Kabuli_wild_22341108 | NA                                  | Ca_kabuli_denovo | 22341108                | C/T  | NA                 | NA                            | NA                 |
| Kabuli_wild_22343231 | NA                                  | Ca_kabuli_denovo | 22343231                | A/G  | NA                 | NA                            | NA                 |
| Kabuli_wild_22349245 | NA                                  | Ca_kabuli_denovo | 22349245                | C/T  | NA                 | NA                            | NA                 |
| Kabuli_wild_22349251 | NA                                  | Ca_kabuli_denovo | 22349251                | C/T  | NA                 | NA                            | NA                 |
| Kabuli_wild_22351032 | NA                                  | Ca_kabuli_denovo | 22351032                | A/G  | NA                 | NA                            | NA                 |
| Kabuli_wild_22351377 | NA                                  | Ca_kabuli_denovo | 22351377                | A/G  | NA                 | NA                            | NA                 |
| Kabuli_wild_22351433 | NA                                  | Ca_kabuli_denovo | 22351433                | A/C  | NA                 | NA                            | NA                 |
| Kabuli_wild_22352060 | NA                                  | Ca_kabuli_denovo | 22352060                | A/G  | NA                 | NA                            | NA                 |
| Kabuli_wild_22352080 | NA                                  | Ca_kabuli_denovo | 22352080                | C/G  | NA                 | NA                            | NA                 |
| Kabuli_wild_22353567 | NA                                  | Ca_kabuli_denovo | 22353567                | A/G  | NA                 | NA                            | NA                 |
| Kabuli_wild_22353935 | NA                                  | Ca_kabuli_denovo | 22353935                | C/T  | NA                 | NA                            | NA                 |
| Kabuli_wild_22354194 | NA                                  | Ca_kabuli_denovo | 22354194                | G/T  | NA                 | NA                            | NA                 |
| Kabuli_wild_22357510 | NA                                  | Ca_kabuli_denovo | 22357510                | A/T  | NA                 | NA                            | NA                 |

| SNP IDs              | NCBI dbSNP accession IDs (NCBI_SS#) | Chromosomes      | Physical positions (bp) | SNPs | Gene accession IDs | Sequence components of genome | Putative functions |
|----------------------|-------------------------------------|------------------|-------------------------|------|--------------------|-------------------------------|--------------------|
| Kabuli_wild_22358263 | NA                                  | Ca_kabuli_denovo | 22358263                | C/T  | NA                 | NA                            | NA                 |
| Kabuli_wild_22360266 | NA                                  | Ca_kabuli_denovo | 22360266                | C/G  | NA                 | NA                            | NA                 |
| Kabuli_wild_22360902 | NA                                  | Ca_kabuli_denovo | 22360902                | C/T  | NA                 | NA                            | NA                 |
| Kabuli_wild_22360930 | NA                                  | Ca_kabuli_denovo | 22360930                | C/T  | NA                 | NA                            | NA                 |
| Kabuli_wild_22361579 | NA                                  | Ca_kabuli_denovo | 22361579                | G/T  | NA                 | NA                            | NA                 |
| Kabuli_wild_22361584 | NA                                  | Ca_kabuli_denovo | 22361584                | C/T  | NA                 | NA                            | NA                 |
| Kabuli_wild_22365860 | NA                                  | Ca_kabuli_denovo | 22365860                | C/T  | NA                 | NA                            | NA                 |
| Kabuli_wild_22367498 | NA                                  | Ca_kabuli_denovo | 22367498                | C/T  | NA                 | NA                            | NA                 |
| Kabuli_wild_22374024 | NA                                  | Ca_kabuli_denovo | 22374024                | A/G  | NA                 | NA                            | NA                 |
| Kabuli_wild_22376272 | NA                                  | Ca_kabuli_denovo | 22376272                | C/G  | NA                 | NA                            | NA                 |
| Kabuli_wild_22376518 | NA                                  | Ca_kabuli_denovo | 22376518                | A/T  | NA                 | NA                            | NA                 |
| Kabuli_wild_22376556 | NA                                  | Ca_kabuli_denovo | 22376556                | A/G  | NA                 | NA                            | NA                 |
| Kabuli_wild_22376890 | NA                                  | Ca_kabuli_denovo | 22376890                | C/T  | NA                 | NA                            | NA                 |
| Kabuli_wild_22376955 | NA                                  | Ca_kabuli_denovo | 22376955                | C/G  | NA                 | NA                            | NA                 |
| Kabuli_wild_22377101 | NA                                  | Ca_kabuli_denovo | 22377101                | C/T  | NA                 | NA                            | NA                 |
| Kabuli_wild_22378253 | NA                                  | Ca_kabuli_denovo | 22378253                | A/G  | NA                 | NA                            | NA                 |
| Kabuli_wild_22379541 | NA                                  | Ca_kabuli_denovo | 22379541                | A/G  | NA                 | NA                            | NA                 |
| Kabuli_wild_22380304 | NA                                  | Ca_kabuli_denovo | 22380304                | G/T  | NA                 | NA                            | NA                 |
| Kabuli_wild_22380813 | NA                                  | Ca_kabuli_denovo | 22380813                | A/T  | NA                 | NA                            | NA                 |
| Kabuli_wild_22381157 | NA                                  | Ca_kabuli_denovo | 22381157                | A/C  | NA                 | NA                            | NA                 |
| Kabuli_wild_22381860 | NA                                  | Ca_kabuli_denovo | 22381860                | C/G  | NA                 | NA                            | NA                 |
| Kabuli_wild_22385074 | NA                                  | Ca_kabuli_denovo | 22385074                | A/G  | NA                 | NA                            | NA                 |
| Kabuli_wild_22386432 | NA                                  | Ca_kabuli_denovo | 22386432                | A/G  | NA                 | NA                            | NA                 |
| Kabuli_wild_22390141 | NA                                  | Ca_kabuli_denovo | 22390141                | A/G  | NA                 | NA                            | NA                 |
| Kabuli_wild_22391141 | NA                                  | Ca_kabuli_denovo | 22391141                | A/G  | NA                 | NA                            | NA                 |
| Kabuli_wild_22391149 | NA                                  | Ca_kabuli_denovo | 22391149                | A/C  | NA                 | NA                            | NA                 |
| Kabuli_wild_22391161 | NA                                  | Ca_kabuli_denovo | 22391161                | A/G  | NA                 | NA                            | NA                 |
| Kabuli_wild_22391239 | NA                                  | Ca_kabuli_denovo | 22391239                | A/G  | NA                 | NA                            | NA                 |
| Kabuli_wild_22391280 | NA                                  | Ca_kabuli_denovo | 22391280                | A/G  | NA                 | NA                            | NA                 |
| Kabuli_wild_22392225 | NA                                  | Ca_kabuli_denovo | 22392225                | C/T  | NA                 | NA                            | NA                 |
| Kabuli_wild_22392835 | NA                                  | Ca_kabuli_denovo | 22392835                | A/T  | NA                 | NA                            | NA                 |
| Kabuli_wild_22394090 | NA                                  | Ca_kabuli_denovo | 22394090                | C/T  | NA                 | NA                            | NA                 |
| Kabuli_wild_22395852 | NA                                  | Ca_kabuli_denovo | 22395852                | A/G  | NA                 | NA                            | NA                 |
| Kabuli_wild_22395994 | NA                                  | Ca_kabuli_denovo | 22395994                | C/T  | NA                 | NA                            | NA                 |
| Kabuli_wild_22395996 | NA                                  | Ca_kabuli_denovo | 22395996                | A/G  | NA                 | NA                            | NA                 |
| Kabuli_wild_22396023 | NA                                  | Ca_kabuli_denovo | 22396023                | A/G  | NA                 | NA                            | NA                 |
| Kabuli_wild_22396284 | NA                                  | Ca_kabuli_denovo | 22396284                | C/G  | NA                 | NA                            | NA                 |
| Kabuli_wild_22396297 | NA                                  | Ca_kabuli_denovo | 22396297                | A/G  | NA                 | NA                            | NA                 |
| Kabuli_wild_22396334 | NA                                  | Ca_kabuli_denovo | 22396334                | A/G  | NA                 | NA                            | NA                 |
| Kabuli_wild_22398633 | NA                                  | Ca_kabuli_denovo | 22398633                | A/G  | NA                 | NA                            | NA                 |
| Kabuli_wild_22398651 | NA                                  | Ca_kabuli_denovo | 22398651                | G/T  | NA                 | NA                            | NA                 |
| Kabuli_wild_22399388 | NA                                  | Ca_kabuli_denovo | 22399388                | A/T  | NA                 | NA                            | NA                 |
| Kabuli_wild_22401169 | NA                                  | Ca_kabuli_denovo | 22401169                | A/C  | NA                 | NA                            | NA                 |
| Kabuli_wild_22401200 | NA                                  | Ca_kabuli_denovo | 22401200                | G/T  | NA                 | NA                            | NA                 |

| SNP IDs              | NCBI dbSNP accession IDs (NCBI_SS#) | Chromosomes      | Physical positions (bp) | SNPs | Gene accession IDs | Sequence components of genome | Putative functions |
|----------------------|-------------------------------------|------------------|-------------------------|------|--------------------|-------------------------------|--------------------|
| Kabuli_wild_22402229 | NA                                  | Ca_kabuli_denovo | 22402229                | A/G  | NA                 | NA                            | NA                 |
| Kabuli_wild_22403678 | NA                                  | Ca_kabuli_denovo | 22403678                | G/T  | NA                 | NA                            | NA                 |
| Kabuli_wild_22407004 | NA                                  | Ca_kabuli_denovo | 22407004                | A/C  | NA                 | NA                            | NA                 |
| Kabuli_wild_22407343 | NA                                  | Ca_kabuli_denovo | 22407343                | A/G  | NA                 | NA                            | NA                 |
| Kabuli_wild_22409715 | NA                                  | Ca_kabuli_denovo | 22409715                | C/T  | NA                 | NA                            | NA                 |
| Kabuli_wild_22410351 | NA                                  | Ca_kabuli_denovo | 22410351                | G/T  | NA                 | NA                            | NA                 |
| Kabuli_wild_22410371 | NA                                  | Ca_kabuli_denovo | 22410371                | A/G  | NA                 | NA                            | NA                 |
| Kabuli_wild_22411033 | NA                                  | Ca_kabuli_denovo | 22411033                | C/T  | NA                 | NA                            | NA                 |
| Kabuli_wild_22411225 | NA                                  | Ca_kabuli_denovo | 22411225                | C/G  | NA                 | NA                            | NA                 |
| Kabuli_wild_22412608 | NA                                  | Ca_kabuli_denovo | 22412608                | C/G  | NA                 | NA                            | NA                 |
| Kabuli_wild_22412613 | NA                                  | Ca_kabuli_denovo | 22412613                | C/T  | NA                 | NA                            | NA                 |
| Kabuli_wild_22412616 | NA                                  | Ca_kabuli_denovo | 22412616                | C/T  | NA                 | NA                            | NA                 |
| Kabuli_wild_22412748 | NA                                  | Ca_kabuli_denovo | 22412748                | C/T  | NA                 | NA                            | NA                 |
| Kabuli_wild_22413497 | NA                                  | Ca_kabuli_denovo | 22413497                | C/T  | NA                 | NA                            | NA                 |
| Kabuli_wild_22413865 | NA                                  | Ca_kabuli_denovo | 22413865                | A/C  | NA                 | NA                            | NA                 |
| Kabuli_wild_22414648 | NA                                  | Ca_kabuli_denovo | 22414648                | C/G  | NA                 | NA                            | NA                 |
| Kabuli_wild_22415900 | NA                                  | Ca_kabuli_denovo | 22415900                | A/G  | NA                 | NA                            | NA                 |
| Kabuli_wild_22415916 | NA                                  | Ca_kabuli_denovo | 22415916                | A/C  | NA                 | NA                            | NA                 |
| Kabuli_wild_22415946 | NA                                  | Ca_kabuli_denovo | 22415946                | A/C  | NA                 | NA                            | NA                 |
| Kabuli_wild_22415968 | NA                                  | Ca_kabuli_denovo | 22415968                | A/T  | NA                 | NA                            | NA                 |
| Kabuli_wild_22418451 | NA                                  | Ca_kabuli_denovo | 22418451                | G/A  | NA                 | NA                            | NA                 |
| Kabuli_wild_22418512 | NA                                  | Ca_kabuli_denovo | 22418512                | A/C  | NA                 | NA                            | NA                 |
| Kabuli_wild_22418548 | NA                                  | Ca_kabuli_denovo | 22418548                | C/T  | NA                 | NA                            | NA                 |
| Kabuli_wild_22418554 | NA                                  | Ca_kabuli_denovo | 22418554                | A/G  | NA                 | NA                            | NA                 |
| Kabuli_wild_22419011 | NA                                  | Ca_kabuli_denovo | 22419011                | A/C  | NA                 | NA                            | NA                 |
| Kabuli_wild_22419045 | NA                                  | Ca_kabuli_denovo | 22419045                | C/G  | NA                 | NA                            | NA                 |
| Kabuli_wild_22419659 | NA                                  | Ca_kabuli_denovo | 22419659                | C/T  | NA                 | NA                            | NA                 |
| Kabuli_wild_22421447 | NA                                  | Ca_kabuli_denovo | 22421447                | A/G  | NA                 | NA                            | NA                 |
| Kabuli_wild_22421699 | NA                                  | Ca_kabuli_denovo | 22421699                | G/T  | NA                 | NA                            | NA                 |
| Kabuli_wild_22421700 | NA                                  | Ca_kabuli_denovo | 22421700                | C/G  | NA                 | NA                            | NA                 |
| Kabuli_wild_22423952 | NA                                  | Ca_kabuli_denovo | 22423952                | A/G  | NA                 | NA                            | NA                 |
| Kabuli_wild_22425359 | NA                                  | Ca_kabuli_denovo | 22425359                | A/G  | NA                 | NA                            | NA                 |
| Kabuli_wild_22426010 | NA                                  | Ca_kabuli_denovo | 22426010                | C/T  | NA                 | NA                            | NA                 |
| Kabuli_wild_22426319 | NA                                  | Ca_kabuli_denovo | 22426319                | C/T  | NA                 | NA                            | NA                 |
| Kabuli_wild_22426455 | NA                                  | Ca_kabuli_denovo | 22426455                | A/T  | NA                 | NA                            | NA                 |
| Kabuli_wild_22426481 | NA                                  | Ca_kabuli_denovo | 22426481                | G/A  | NA                 | NA                            | NA                 |
| Kabuli_wild_22428838 | NA                                  | Ca_kabuli_denovo | 22428838                | C/G  | NA                 | NA                            | NA                 |
| Kabuli_wild_22429786 | NA                                  | Ca_kabuli_denovo | 22429786                | A/G  | NA                 | NA                            | NA                 |
| Kabuli_wild_22429787 | NA                                  | Ca_kabuli_denovo | 22429787                | C/T  | NA                 | NA                            | NA                 |
| Kabuli_wild_22430764 | NA                                  | Ca_kabuli_denovo | 22430764                | C/T  | NA                 | NA                            | NA                 |
| Kabuli_wild_22430766 | NA                                  | Ca_kabuli_denovo | 22430766                | C/T  | NA                 | NA                            | NA                 |
| Kabuli_wild_22430768 | NA                                  | Ca_kabuli_denovo | 22430768                | C/T  | NA                 | NA                            | NA                 |
| Kabuli_wild_22430788 | NA                                  | Ca_kabuli_denovo | 22430788                | A/C  | NA                 | NA                            | NA                 |
| Kabuli_wild_22435479 | NA                                  | Ca_kabuli_denovo | 22435479                | T/C  | NA                 | NA                            | NA                 |

| SNP IDs              | NCBI dbSNP accession IDs (NCBI_SS#) | Chromosomes      | Physical positions (bp) | SNPs | Gene accession IDs | Sequence components of genome | Putative functions |
|----------------------|-------------------------------------|------------------|-------------------------|------|--------------------|-------------------------------|--------------------|
| Kabuli_wild_22435893 | NA                                  | Ca_kabuli_denovo | 22435893                | A/T  | NA                 | NA                            | NA                 |
| Kabuli_wild_22436698 | NA                                  | Ca_kabuli_denovo | 22436698                | G/T  | NA                 | NA                            | NA                 |
| Kabuli_wild_22436731 | NA                                  | Ca_kabuli_denovo | 22436731                | A/G  | NA                 | NA                            | NA                 |
| Kabuli_wild_22436785 | NA                                  | Ca_kabuli_denovo | 22436785                | C/G  | NA                 | NA                            | NA                 |
| Kabuli_wild_22436806 | NA                                  | Ca_kabuli_denovo | 22436806                | A/C  | NA                 | NA                            | NA                 |
| Kabuli_wild_22439267 | NA                                  | Ca_kabuli_denovo | 22439267                | A/C  | NA                 | NA                            | NA                 |
| Kabuli_wild_22439327 | NA                                  | Ca_kabuli_denovo | 22439327                | A/G  | NA                 | NA                            | NA                 |
| Kabuli_wild_22439477 | NA                                  | Ca_kabuli_denovo | 22439477                | G/T  | NA                 | NA                            | NA                 |
| Kabuli_wild_22440819 | NA                                  | Ca_kabuli_denovo | 22440819                | G/T  | NA                 | NA                            | NA                 |
| Kabuli_wild_22440821 | NA                                  | Ca_kabuli_denovo | 22440821                | C/G  | NA                 | NA                            | NA                 |
| Kabuli_wild_22442058 | NA                                  | Ca_kabuli_denovo | 22442058                | C/T  | NA                 | NA                            | NA                 |
| Kabuli_wild_22442469 | NA                                  | Ca_kabuli_denovo | 22442469                | C/T  | NA                 | NA                            | NA                 |
| Kabuli_wild_22442703 | NA                                  | Ca_kabuli_denovo | 22442703                | C/T  | NA                 | NA                            | NA                 |
| Kabuli_wild_22442712 | NA                                  | Ca_kabuli_denovo | 22442712                | C/T  | NA                 | NA                            | NA                 |
| Kabuli_wild_22444231 | NA                                  | Ca_kabuli_denovo | 22444231                | G/T  | NA                 | NA                            | NA                 |
| Kabuli_wild_22445598 | NA                                  | Ca_kabuli_denovo | 22445598                | C/T  | NA                 | NA                            | NA                 |
| Kabuli_wild_22445667 | NA                                  | Ca_kabuli_denovo | 22445667                | G/A  | NA                 | NA                            | NA                 |
| Kabuli_wild_22445678 | NA                                  | Ca_kabuli_denovo | 22445678                | C/T  | NA                 | NA                            | NA                 |
| Kabuli_wild_22445688 | NA                                  | Ca_kabuli_denovo | 22445688                | C/A  | NA                 | NA                            | NA                 |
| Kabuli_wild_22449423 | NA                                  | Ca_kabuli_denovo | 22449423                | A/G  | NA                 | NA                            | NA                 |
| Kabuli_wild_22449430 | NA                                  | Ca_kabuli_denovo | 22449430                | G/T  | NA                 | NA                            | NA                 |
| Kabuli_wild_22449441 | NA                                  | Ca_kabuli_denovo | 22449441                | C/T  | NA                 | NA                            | NA                 |
| Kabuli_wild_22449641 | NA                                  | Ca_kabuli_denovo | 22449641                | C/T  | NA                 | NA                            | NA                 |
| Kabuli_wild_22449974 | NA                                  | Ca_kabuli_denovo | 22449974                | C/T  | NA                 | NA                            | NA                 |
| Kabuli_wild_22451799 | NA                                  | Ca_kabuli_denovo | 22451799                | C/G  | NA                 | NA                            | NA                 |
| Kabuli_wild_22451833 | NA                                  | Ca_kabuli_denovo | 22451833                | A/G  | NA                 | NA                            | NA                 |
| Kabuli_wild_22455413 | NA                                  | Ca_kabuli_denovo | 22455413                | A/G  | NA                 | NA                            | NA                 |
| Kabuli_wild_22455418 | NA                                  | Ca_kabuli_denovo | 22455418                | G/T  | NA                 | NA                            | NA                 |
| Kabuli_wild_22456070 | NA                                  | Ca_kabuli_denovo | 22456070                | A/G  | NA                 | NA                            | NA                 |
| Kabuli_wild_22456131 | NA                                  | Ca_kabuli_denovo | 22456131                | A/C  | NA                 | NA                            | NA                 |
| Kabuli_wild_22456139 | NA                                  | Ca_kabuli_denovo | 22456139                | C/G  | NA                 | NA                            | NA                 |
| Kabuli_wild_22456176 | NA                                  | Ca_kabuli_denovo | 22456176                | A/G  | NA                 | NA                            | NA                 |
| Kabuli_wild_22456280 | NA                                  | Ca_kabuli_denovo | 22456280                | A/G  | NA                 | NA                            | NA                 |
| Kabuli_wild_22457063 | NA                                  | Ca_kabuli_denovo | 22457063                | C/T  | NA                 | NA                            | NA                 |
| Kabuli_wild_22459812 | NA                                  | Ca_kabuli_denovo | 22459812                | A/C  | NA                 | NA                            | NA                 |
| Kabuli_wild_22461325 | NA                                  | Ca_kabuli_denovo | 22461325                | A/G  | NA                 | NA                            | NA                 |
| Kabuli_wild_22463444 | NA                                  | Ca_kabuli_denovo | 22463444                | G/T  | NA                 | NA                            | NA                 |
| Kabuli_wild_22468648 | NA                                  | Ca_kabuli_denovo | 22468648                | A/C  | NA                 | NA                            | NA                 |
| Kabuli_wild_22470489 | NA                                  | Ca_kabuli_denovo | 22470489                | A/G  | NA                 | NA                            | NA                 |
| Kabuli_wild_22470531 | NA                                  | Ca_kabuli_denovo | 22470531                | A/T  | NA                 | NA                            | NA                 |
| Kabuli_wild_22470543 | NA                                  | Ca_kabuli_denovo | 22470543                | C/T  | NA                 | NA                            | NA                 |
| Kabuli_wild_22474878 | NA                                  | Ca_kabuli_denovo | 22474878                | C/T  | NA                 | NA                            | NA                 |
| Kabuli_wild_22474899 | NA                                  | Ca_kabuli_denovo | 22474899                | C/G  | NA                 | NA                            | NA                 |
| Kabuli_wild_22478156 | NA                                  | Ca_kabuli_denovo | 22478156                | A/C  | NA                 | NA                            | NA                 |

| SNP IDs              | NCBI dbSNP accession IDs (NCBI_SS#) | Chromosomes      | Physical positions (bp) | SNPs | Gene accession IDs | Sequence components of genome | Putative functions |
|----------------------|-------------------------------------|------------------|-------------------------|------|--------------------|-------------------------------|--------------------|
| Kabuli_wild_22478157 | NA                                  | Ca_kabuli_denovo | 22478157                | C/G  | NA                 | NA                            | NA                 |
| Kabuli_wild_22478503 | NA                                  | Ca_kabuli_denovo | 22478503                | G/T  | NA                 | NA                            | NA                 |
| Kabuli_wild_22478720 | NA                                  | Ca_kabuli_denovo | 22478720                | T/G  | NA                 | NA                            | NA                 |
| Kabuli_wild_22481859 | NA                                  | Ca_kabuli_denovo | 22481859                | A/G  | NA                 | NA                            | NA                 |
| Kabuli_wild_22481880 | NA                                  | Ca_kabuli_denovo | 22481880                | C/T  | NA                 | NA                            | NA                 |
| Kabuli_wild_22482431 | NA                                  | Ca_kabuli_denovo | 22482431                | C/G  | NA                 | NA                            | NA                 |
| Kabuli_wild_22482909 | NA                                  | Ca_kabuli_denovo | 22482909                | A/G  | NA                 | NA                            | NA                 |
| Kabuli_wild_22483948 | NA                                  | Ca_kabuli_denovo | 22483948                | C/G  | NA                 | NA                            | NA                 |
| Kabuli_wild_22487136 | NA                                  | Ca_kabuli_denovo | 22487136                | A/G  | NA                 | NA                            | NA                 |
| Kabuli_wild_22488360 | NA                                  | Ca_kabuli_denovo | 22488360                | G/T  | NA                 | NA                            | NA                 |
| Kabuli_wild_22488931 | NA                                  | Ca_kabuli_denovo | 22488931                | C/T  | NA                 | NA                            | NA                 |
| Kabuli_wild_22491126 | NA                                  | Ca_kabuli_denovo | 22491126                | G/A  | NA                 | NA                            | NA                 |
| Kabuli_wild_22494008 | NA                                  | Ca_kabuli_denovo | 22494008                | G/T  | NA                 | NA                            | NA                 |
| Kabuli_wild_22494016 | NA                                  | Ca_kabuli_denovo | 22494016                | C/T  | NA                 | NA                            | NA                 |
| Kabuli_wild_22494020 | NA                                  | Ca_kabuli_denovo | 22494020                | C/T  | NA                 | NA                            | NA                 |
| Kabuli_wild_22495612 | NA                                  | Ca_kabuli_denovo | 22495612                | C/T  | NA                 | NA                            | NA                 |
| Kabuli_wild_22495649 | NA                                  | Ca_kabuli_denovo | 22495649                | C/T  | NA                 | NA                            | NA                 |
| Kabuli_wild_22495662 | NA                                  | Ca_kabuli_denovo | 22495662                | C/G  | NA                 | NA                            | NA                 |
| Kabuli_wild_22495942 | NA                                  | Ca_kabuli_denovo | 22495942                | A/G  | NA                 | NA                            | NA                 |
| Kabuli_wild_22495945 | NA                                  | Ca_kabuli_denovo | 22495945                | G/T  | NA                 | NA                            | NA                 |
| Kabuli_wild_22495951 | NA                                  | Ca_kabuli_denovo | 22495951                | C/T  | NA                 | NA                            | NA                 |
| Kabuli_wild_22496963 | NA                                  | Ca_kabuli_denovo | 22496963                | A/G  | NA                 | NA                            | NA                 |
| Kabuli_wild_22496989 | NA                                  | Ca_kabuli_denovo | 22496989                | C/T  | NA                 | NA                            | NA                 |
| Kabuli_wild_22497001 | NA                                  | Ca_kabuli_denovo | 22497001                | G/A  | NA                 | NA                            | NA                 |
| Kabuli_wild_22497864 | NA                                  | Ca_kabuli_denovo | 22497864                | A/G  | NA                 | NA                            | NA                 |
| Kabuli_wild_22499737 | NA                                  | Ca_kabuli_denovo | 22499737                | A/G  | NA                 | NA                            | NA                 |
| Kabuli_wild_22499740 | NA                                  | Ca_kabuli_denovo | 22499740                | A/G  | NA                 | NA                            | NA                 |
| Kabuli_wild_22504188 | NA                                  | Ca_kabuli_denovo | 22504188                | G/T  | NA                 | NA                            | NA                 |
| Kabuli_wild_22506157 | NA                                  | Ca_kabuli_denovo | 22506157                | G/T  | NA                 | NA                            | NA                 |
| Kabuli_wild_22506174 | NA                                  | Ca_kabuli_denovo | 22506174                | A/G  | NA                 | NA                            | NA                 |
| Kabuli_wild_22507221 | NA                                  | Ca_kabuli_denovo | 22507221                | C/G  | NA                 | NA                            | NA                 |
| Kabuli_wild_22507453 | NA                                  | Ca_kabuli_denovo | 22507453                | A/T  | NA                 | NA                            | NA                 |
| Kabuli_wild_22508257 | NA                                  | Ca_kabuli_denovo | 22508257                | A/G  | NA                 | NA                            | NA                 |
| Kabuli_wild_22508609 | NA                                  | Ca_kabuli_denovo | 22508609                | C/G  | NA                 | NA                            | NA                 |
| Kabuli_wild_22510081 | NA                                  | Ca_kabuli_denovo | 22510081                | A/G  | NA                 | NA                            | NA                 |
| Kabuli_wild_22510138 | NA                                  | Ca_kabuli_denovo | 22510138                | A/G  | NA                 | NA                            | NA                 |
| Kabuli_wild_22517572 | NA                                  | Ca_kabuli_denovo | 22517572                | A/G  | NA                 | NA                            | NA                 |
| Kabuli_wild_22519992 | NA                                  | Ca_kabuli_denovo | 22519992                | C/G  | NA                 | NA                            | NA                 |
| Kabuli_wild_22520417 | NA                                  | Ca_kabuli_denovo | 22520417                | G/T  | NA                 | NA                            | NA                 |
| Kabuli_wild_22520443 | NA                                  | Ca_kabuli_denovo | 22520443                | A/G  | NA                 | NA                            | NA                 |
| Kabuli_wild_22520456 | NA                                  | Ca_kabuli_denovo | 22520456                | A/T  | NA                 | NA                            | NA                 |
| Kabuli_wild_22520490 | NA                                  | Ca_kabuli_denovo | 22520490                | C/G  | NA                 | NA                            | NA                 |
| Kabuli_wild_22522121 | NA                                  | Ca_kabuli_denovo | 22522121                | T/C  | NA                 | NA                            | NA                 |
| Kabuli_wild_22523737 | NA                                  | Ca_kabuli_denovo | 22523737                | A/T  | NA                 | NA                            | NA                 |

| SNP IDs              | NCBI dbSNP accession IDs (NCBI_SS#) | Chromosomes      | Physical positions (bp) | SNPs | Gene accession IDs | Sequence components of genome | Putative functions |
|----------------------|-------------------------------------|------------------|-------------------------|------|--------------------|-------------------------------|--------------------|
| Kabuli_wild_22523740 | NA                                  | Ca_kabuli_denovo | 22523740                | A/G  | NA                 | NA                            | NA                 |
| Kabuli_wild_22523946 | NA                                  | Ca_kabuli_denovo | 22523946                | C/T  | NA                 | NA                            | NA                 |
| Kabuli_wild_22523955 | NA                                  | Ca_kabuli_denovo | 22523955                | A/C  | NA                 | NA                            | NA                 |
| Kabuli_wild_22524048 | NA                                  | Ca_kabuli_denovo | 22524048                | C/T  | NA                 | NA                            | NA                 |
| Kabuli_wild_22524351 | NA                                  | Ca_kabuli_denovo | 22524351                | G/T  | NA                 | NA                            | NA                 |
| Kabuli_wild_22526977 | NA                                  | Ca_kabuli_denovo | 22526977                | C/T  | NA                 | NA                            | NA                 |
| Kabuli_wild_22527554 | NA                                  | Ca_kabuli_denovo | 22527554                | A/T  | NA                 | NA                            | NA                 |
| Kabuli_wild_22527844 | NA                                  | Ca_kabuli_denovo | 22527844                | C/T  | NA                 | NA                            | NA                 |
| Kabuli_wild_22532798 | NA                                  | Ca_kabuli_denovo | 22532798                | A/G  | NA                 | NA                            | NA                 |
| Kabuli_wild_22532996 | NA                                  | Ca_kabuli_denovo | 22532996                | C/T  | NA                 | NA                            | NA                 |
| Kabuli_wild_22534899 | NA                                  | Ca_kabuli_denovo | 22534899                | A/G  | NA                 | NA                            | NA                 |
| Kabuli_wild_22534919 | NA                                  | Ca_kabuli_denovo | 22534919                | A/G  | NA                 | NA                            | NA                 |
| Kabuli_wild_22534933 | NA                                  | Ca_kabuli_denovo | 22534933                | A/G  | NA                 | NA                            | NA                 |
| Kabuli_wild_22537313 | NA                                  | Ca_kabuli_denovo | 22537313                | G/T  | NA                 | NA                            | NA                 |
| Kabuli_wild_22537314 | NA                                  | Ca_kabuli_denovo | 22537314                | A/G  | NA                 | NA                            | NA                 |
| Kabuli_wild_22537315 | NA                                  | Ca_kabuli_denovo | 22537315                | A/T  | NA                 | NA                            | NA                 |
| Kabuli_wild_22538411 | NA                                  | Ca_kabuli_denovo | 22538411                | C/G  | NA                 | NA                            | NA                 |
| Kabuli_wild_22538415 | NA                                  | Ca_kabuli_denovo | 22538415                | G/T  | NA                 | NA                            | NA                 |
| Kabuli_wild_22538815 | NA                                  | Ca_kabuli_denovo | 22538815                | A/G  | NA                 | NA                            | NA                 |
| Kabuli_wild_22538879 | NA                                  | Ca_kabuli_denovo | 22538879                | C/T  | NA                 | NA                            | NA                 |
| Kabuli_wild_22545891 | NA                                  | Ca_kabuli_denovo | 22545891                | C/G  | NA                 | NA                            | NA                 |
| Kabuli_wild_22547331 | NA                                  | Ca_kabuli_denovo | 22547331                | A/T  | NA                 | NA                            | NA                 |
| Kabuli_wild_22547399 | NA                                  | Ca_kabuli_denovo | 22547399                | C/T  | NA                 | NA                            | NA                 |
| Kabuli_wild_22547426 | NA                                  | Ca_kabuli_denovo | 22547426                | C/G  | NA                 | NA                            | NA                 |
| Kabuli_wild_22547459 | NA                                  | Ca_kabuli_denovo | 22547459                | A/G  | NA                 | NA                            | NA                 |
| Kabuli_wild_22549554 | NA                                  | Ca_kabuli_denovo | 22549554                | C/G  | NA                 | NA                            | NA                 |
| Kabuli_wild_22549569 | NA                                  | Ca_kabuli_denovo | 22549569                | A/G  | NA                 | NA                            | NA                 |
| Kabuli_wild_22549861 | NA                                  | Ca_kabuli_denovo | 22549861                | A/G  | NA                 | NA                            | NA                 |
| Kabuli_wild_22549867 | NA                                  | Ca_kabuli_denovo | 22549867                | C/T  | NA                 | NA                            | NA                 |
| Kabuli_wild_22550812 | NA                                  | Ca_kabuli_denovo | 22550812                | A/G  | NA                 | NA                            | NA                 |
| Kabuli_wild_22551810 | NA                                  | Ca_kabuli_denovo | 22551810                | C/G  | NA                 | NA                            | NA                 |
| Kabuli_wild_22556546 | NA                                  | Ca_kabuli_denovo | 22556546                | A/T  | NA                 | NA                            | NA                 |
| Kabuli_wild_22557421 | NA                                  | Ca_kabuli_denovo | 22557421                | A/G  | NA                 | NA                            | NA                 |
| Kabuli_wild_22557440 | NA                                  | Ca_kabuli_denovo | 22557440                | C/T  | NA                 | NA                            | NA                 |
| Kabuli_wild_22559838 | NA                                  | Ca_kabuli_denovo | 22559838                | C/T  | NA                 | NA                            | NA                 |
| Kabuli_wild_22559844 | NA                                  | Ca_kabuli_denovo | 22559844                | A/G  | NA                 | NA                            | NA                 |
| Kabuli_wild_22561204 | NA                                  | Ca_kabuli_denovo | 22561204                | C/T  | NA                 | NA                            | NA                 |
| Kabuli_wild_22562957 | NA                                  | Ca_kabuli_denovo | 22562957                | A/G  | NA                 | NA                            | NA                 |
| Kabuli_wild_22563078 | NA                                  | Ca_kabuli_denovo | 22563078                | C/T  | NA                 | NA                            | NA                 |
| Kabuli_wild_22567238 | NA                                  | Ca_kabuli_denovo | 22567238                | A/C  | NA                 | NA                            | NA                 |
| Kabuli_wild_22567341 | NA                                  | Ca_kabuli_denovo | 22567341                | C/T  | NA                 | NA                            | NA                 |
| Kabuli_wild_22567382 | NA                                  | Ca_kabuli_denovo | 22567382                | A/G  | NA                 | NA                            | NA                 |
| Kabuli_wild_22567513 | NA                                  | Ca_kabuli_denovo | 22567513                | A/G  | NA                 | NA                            | NA                 |
| Kabuli_wild_22567519 | NA                                  | Ca_kabuli_denovo | 22567519                | C/G  | NA                 | NA                            | NA                 |

| SNP IDs              | NCBI dbSNP accession IDs (NCBI_SS#) | Chromosomes      | Physical positions (bp) | SNPs | Gene accession IDs | Sequence components of genome | Putative functions |
|----------------------|-------------------------------------|------------------|-------------------------|------|--------------------|-------------------------------|--------------------|
| Kabuli_wild_22568920 | NA                                  | Ca_kabuli_denovo | 22568920                | A/G  | NA                 | NA                            | NA                 |
| Kabuli_wild_22569285 | NA                                  | Ca_kabuli_denovo | 22569285                | C/G  | NA                 | NA                            | NA                 |
| Kabuli_wild_22570921 | NA                                  | Ca_kabuli_denovo | 22570921                | C/T  | NA                 | NA                            | NA                 |
| Kabuli_wild_22571635 | NA                                  | Ca_kabuli_denovo | 22571635                | A/T  | NA                 | NA                            | NA                 |
| Kabuli_wild_22571636 | NA                                  | Ca_kabuli_denovo | 22571636                | A/C  | NA                 | NA                            | NA                 |
| Kabuli_wild_22573217 | NA                                  | Ca_kabuli_denovo | 22573217                | G/T  | NA                 | NA                            | NA                 |
| Kabuli_wild_22573237 | NA                                  | Ca_kabuli_denovo | 22573237                | G/T  | NA                 | NA                            | NA                 |
| Kabuli_wild_22573238 | NA                                  | Ca_kabuli_denovo | 22573238                | A/G  | NA                 | NA                            | NA                 |
| Kabuli_wild_22573897 | NA                                  | Ca_kabuli_denovo | 22573897                | A/G  | NA                 | NA                            | NA                 |
| Kabuli_wild_22573933 | NA                                  | Ca_kabuli_denovo | 22573933                | C/T  | NA                 | NA                            | NA                 |
| Kabuli_wild_22574389 | NA                                  | Ca_kabuli_denovo | 22574389                | A/G  | NA                 | NA                            | NA                 |
| Kabuli_wild_22575555 | NA                                  | Ca_kabuli_denovo | 22575555                | C/T  | NA                 | NA                            | NA                 |
| Kabuli_wild_22576149 | NA                                  | Ca_kabuli_denovo | 22576149                | C/T  | NA                 | NA                            | NA                 |
| Kabuli_wild_22576158 | NA                                  | Ca_kabuli_denovo | 22576158                | C/T  | NA                 | NA                            | NA                 |
| Kabuli_wild_22578400 | NA                                  | Ca_kabuli_denovo | 22578400                | G/T  | NA                 | NA                            | NA                 |
| Kabuli_wild_22579248 | NA                                  | Ca_kabuli_denovo | 22579248                | C/T  | NA                 | NA                            | NA                 |
| Kabuli_wild_22582141 | NA                                  | Ca_kabuli_denovo | 22582141                | A/G  | NA                 | NA                            | NA                 |
| Kabuli_wild_22582159 | NA                                  | Ca_kabuli_denovo | 22582159                | A/T  | NA                 | NA                            | NA                 |
| Kabuli_wild_22584103 | NA                                  | Ca_kabuli_denovo | 22584103                | C/T  | NA                 | NA                            | NA                 |
| Kabuli_wild_22584365 | NA                                  | Ca_kabuli_denovo | 22584365                | C/T  | NA                 | NA                            | NA                 |
| Kabuli_wild_22584399 | NA                                  | Ca_kabuli_denovo | 22584399                | C/G  | NA                 | NA                            | NA                 |
| Kabuli_wild_22584934 | NA                                  | Ca_kabuli_denovo | 22584934                | C/T  | NA                 | NA                            | NA                 |
| Kabuli_wild_22584935 | NA                                  | Ca_kabuli_denovo | 22584935                | C/T  | NA                 | NA                            | NA                 |
| Kabuli_wild_22586181 | NA                                  | Ca_kabuli_denovo | 22586181                | C/T  | NA                 | NA                            | NA                 |
| Kabuli_wild_22587179 | NA                                  | Ca_kabuli_denovo | 22587179                | C/T  | NA                 | NA                            | NA                 |
| Kabuli_wild_22588852 | NA                                  | Ca_kabuli_denovo | 22588852                | A/C  | NA                 | NA                            | NA                 |
| Kabuli_wild_22588853 | NA                                  | Ca_kabuli_denovo | 22588853                | A/G  | NA                 | NA                            | NA                 |
| Kabuli_wild_22590767 | NA                                  | Ca_kabuli_denovo | 22590767                | A/G  | NA                 | NA                            | NA                 |
| Kabuli_wild_22590834 | NA                                  | Ca_kabuli_denovo | 22590834                | C/T  | NA                 | NA                            | NA                 |
| Kabuli_wild_22590876 | NA                                  | Ca_kabuli_denovo | 22590876                | A/T  | NA                 | NA                            | NA                 |
| Kabuli_wild_22591282 | NA                                  | Ca_kabuli_denovo | 22591282                | T/C  | NA                 | NA                            | NA                 |
| Kabuli_wild_22591526 | NA                                  | Ca_kabuli_denovo | 22591526                | C/T  | NA                 | NA                            | NA                 |
| Kabuli_wild_22593405 | NA                                  | Ca_kabuli_denovo | 22593405                | C/T  | NA                 | NA                            | NA                 |
| Kabuli_wild_22594852 | NA                                  | Ca_kabuli_denovo | 22594852                | C/T  | NA                 | NA                            | NA                 |
| Kabuli_wild_22594961 | NA                                  | Ca_kabuli_denovo | 22594961                | A/C  | NA                 | NA                            | NA                 |
| Kabuli_wild_22597586 | NA                                  | Ca_kabuli_denovo | 22597586                | A/T  | NA                 | NA                            | NA                 |
| Kabuli_wild_22598928 | NA                                  | Ca_kabuli_denovo | 22598928                | T/C  | NA                 | NA                            | NA                 |
| Kabuli_wild_22601173 | NA                                  | Ca_kabuli_denovo | 22601173                | C/G  | NA                 | NA                            | NA                 |
| Kabuli_wild_22601225 | NA                                  | Ca_kabuli_denovo | 22601225                | C/T  | NA                 | NA                            | NA                 |
| Kabuli_wild_22601625 | NA                                  | Ca_kabuli_denovo | 22601625                | G/T  | NA                 | NA                            | NA                 |
| Kabuli_wild_22601626 | NA                                  | Ca_kabuli_denovo | 22601626                | A/C  | NA                 | NA                            | NA                 |
| Kabuli_wild_22603685 | NA                                  | Ca_kabuli_denovo | 22603685                | A/C  | NA                 | NA                            | NA                 |
| Kabuli_wild_22604372 | NA                                  | Ca_kabuli_denovo | 22604372                | G/T  | NA                 | NA                            | NA                 |
| Kabuli_wild_22604917 | NA                                  | Ca_kabuli_denovo | 22604917                | A/G  | NA                 | NA                            | NA                 |



| SNP IDs              | NCBI dbSNP accession IDs (NCBI_SS#) | Chromosomes      | Physical positions (bp) | SNPs | Gene accession IDs | Sequence components of genome | Putative functions |
|----------------------|-------------------------------------|------------------|-------------------------|------|--------------------|-------------------------------|--------------------|
| Kabuli_wild_22605141 | NA                                  | Ca_kabuli_denovo | 22605141                | C/T  | NA                 | NA                            | NA                 |
| Kabuli_wild_22605705 | NA                                  | Ca_kabuli_denovo | 22605705                | G/T  | NA                 | NA                            | NA                 |
| Kabuli_wild_22606678 | NA                                  | Ca_kabuli_denovo | 22606678                | A/T  | NA                 | NA                            | NA                 |
| Kabuli_wild_22606706 | NA                                  | Ca_kabuli_denovo | 22606706                | C/G  | NA                 | NA                            | NA                 |
| Kabuli_wild_22607060 | NA                                  | Ca_kabuli_denovo | 22607060                | A/T  | NA                 | NA                            | NA                 |
| Kabuli_wild_22607320 | NA                                  | Ca_kabuli_denovo | 22607320                | A/G  | NA                 | NA                            | NA                 |
| Kabuli_wild_22608582 | NA                                  | Ca_kabuli_denovo | 22608582                | A/G  | NA                 | NA                            | NA                 |
| Kabuli_wild_22609044 | NA                                  | Ca_kabuli_denovo | 22609044                | A/G  | NA                 | NA                            | NA                 |
| Kabuli_wild_22609914 | NA                                  | Ca_kabuli_denovo | 22609914                | A/G  | NA                 | NA                            | NA                 |
| Kabuli_wild_22609924 | NA                                  | Ca_kabuli_denovo | 22609924                | A/G  | NA                 | NA                            | NA                 |
| Kabuli_wild_22611300 | NA                                  | Ca_kabuli_denovo | 22611300                | A/G  | NA                 | NA                            | NA                 |
| Kabuli_wild_22611841 | NA                                  | Ca_kabuli_denovo | 22611841                | A/G  | NA                 | NA                            | NA                 |
| Kabuli_wild_22612720 | NA                                  | Ca_kabuli_denovo | 22612720                | A/G  | NA                 | NA                            | NA                 |
| Kabuli_wild_22613713 | NA                                  | Ca_kabuli_denovo | 22613713                | A/G  | NA                 | NA                            | NA                 |
| Kabuli_wild_22618613 | NA                                  | Ca_kabuli_denovo | 22618613                | A/T  | NA                 | NA                            | NA                 |
| Kabuli_wild_22618646 | NA                                  | Ca_kabuli_denovo | 22618646                | A/T  | NA                 | NA                            | NA                 |
| Kabuli_wild_22619493 | NA                                  | Ca_kabuli_denovo | 22619493                | C/G  | NA                 | NA                            | NA                 |
| Kabuli_wild_22622319 | NA                                  | Ca_kabuli_denovo | 22622319                | G/T  | NA                 | NA                            | NA                 |
| Kabuli_wild_22624441 | NA                                  | Ca_kabuli_denovo | 22624441                | C/G  | NA                 | NA                            | NA                 |
| Kabuli_wild_22625908 | NA                                  | Ca_kabuli_denovo | 22625908                | C/T  | NA                 | NA                            | NA                 |
| Kabuli_wild_22625915 | NA                                  | Ca_kabuli_denovo | 22625915                | A/C  | NA                 | NA                            | NA                 |
| Kabuli_wild_22626460 | NA                                  | Ca_kabuli_denovo | 22626460                | A/T  | NA                 | NA                            | NA                 |
| Kabuli_wild_22626528 | NA                                  | Ca_kabuli_denovo | 22626528                | C/T  | NA                 | NA                            | NA                 |
| Kabuli_wild_22629666 | NA                                  | Ca_kabuli_denovo | 22629666                | A/G  | NA                 | NA                            | NA                 |
| Kabuli_wild_22630903 | NA                                  | Ca_kabuli_denovo | 22630903                | A/G  | NA                 | NA                            | NA                 |
| Kabuli_wild_22631288 | NA                                  | Ca_kabuli_denovo | 22631288                | G/T  | NA                 | NA                            | NA                 |
| Kabuli_wild_22631620 | NA                                  | Ca_kabuli_denovo | 22631620                | C/T  | NA                 | NA                            | NA                 |
| Kabuli_wild_22631640 | NA                                  | Ca_kabuli_denovo | 22631640                | C/T  | NA                 | NA                            | NA                 |
| Kabuli_wild_22632480 | NA                                  | Ca_kabuli_denovo | 22632480                | A/G  | NA                 | NA                            | NA                 |
| Kabuli_wild_22635423 | NA                                  | Ca_kabuli_denovo | 22635423                | C/T  | NA                 | NA                            | NA                 |
| Kabuli_wild_22636074 | NA                                  | Ca_kabuli_denovo | 22636074                | G/T  | NA                 | NA                            | NA                 |
| Kabuli_wild_22637380 | NA                                  | Ca_kabuli_denovo | 22637380                | G/A  | NA                 | NA                            | NA                 |
| Kabuli_wild_22637462 | NA                                  | Ca_kabuli_denovo | 22637462                | A/T  | NA                 | NA                            | NA                 |
| Kabuli_wild_22638229 | NA                                  | Ca_kabuli_denovo | 22638229                | C/T  | NA                 | NA                            | NA                 |
| Kabuli_wild_22643548 | NA                                  | Ca_kabuli_denovo | 22643548                | A/G  | NA                 | NA                            | NA                 |
| Kabuli_wild_22646546 | NA                                  | Ca_kabuli_denovo | 22646546                | C/G  | NA                 | NA                            | NA                 |
| Kabuli_wild_22648512 | NA                                  | Ca_kabuli_denovo | 22648512                | C/T  | NA                 | NA                            | NA                 |
| Kabuli_wild_22648545 | NA                                  | Ca_kabuli_denovo | 22648545                | A/G  | NA                 | NA                            | NA                 |
| Kabuli_wild_22648800 | NA                                  | Ca_kabuli_denovo | 22648800                | C/G  | NA                 | NA                            | NA                 |
| Kabuli_wild_22650907 | NA                                  | Ca_kabuli_denovo | 22650907                | A/T  | NA                 | NA                            | NA                 |
| Kabuli_wild_22652182 | NA                                  | Ca_kabuli_denovo | 22652182                | C/T  | NA                 | NA                            | NA                 |
| Kabuli_wild_22652221 | NA                                  | Ca_kabuli_denovo | 22652221                | C/T  | NA                 | NA                            | NA                 |
| Kabuli_wild_22652260 | NA                                  | Ca_kabuli_denovo | 22652260                | A/T  | NA                 | NA                            | NA                 |
| Kabuli_wild_22652851 | NA                                  | Ca_kabuli_denovo | 22652851                | G/T  | NA                 | NA                            | NA                 |

| SNP IDs              | NCBI dbSNP accession IDs (NCBI_SS#) | Chromosomes      | Physical positions (bp) | SNPs | Gene accession IDs | Sequence components of genome | Putative functions |
|----------------------|-------------------------------------|------------------|-------------------------|------|--------------------|-------------------------------|--------------------|
| Kabuli_wild_22653066 | NA                                  | Ca_kabuli_denovo | 22653066                | G/A  | NA                 | NA                            | NA                 |
| Kabuli_wild_22656643 | NA                                  | Ca_kabuli_denovo | 22656643                | G/T  | NA                 | NA                            | NA                 |
| Kabuli_wild_22656671 | NA                                  | Ca_kabuli_denovo | 22656671                | A/C  | NA                 | NA                            | NA                 |
| Kabuli_wild_22658396 | NA                                  | Ca_kabuli_denovo | 22658396                | C/G  | NA                 | NA                            | NA                 |
| Kabuli_wild_22658463 | NA                                  | Ca_kabuli_denovo | 22658463                | C/T  | NA                 | NA                            | NA                 |
| Kabuli_wild_22658467 | NA                                  | Ca_kabuli_denovo | 22658467                | A/C  | NA                 | NA                            | NA                 |
| Kabuli_wild_22659476 | NA                                  | Ca_kabuli_denovo | 22659476                | C/G  | NA                 | NA                            | NA                 |
| Kabuli_wild_22661735 | NA                                  | Ca_kabuli_denovo | 22661735                | G/T  | NA                 | NA                            | NA                 |
| Kabuli_wild_22662590 | NA                                  | Ca_kabuli_denovo | 22662590                | C/G  | NA                 | NA                            | NA                 |
| Kabuli_wild_22662608 | NA                                  | Ca_kabuli_denovo | 22662608                | C/T  | NA                 | NA                            | NA                 |
| Kabuli_wild_22662832 | NA                                  | Ca_kabuli_denovo | 22662832                | G/T  | NA                 | NA                            | NA                 |
| Kabuli_wild_22666068 | NA                                  | Ca_kabuli_denovo | 22666068                | C/T  | NA                 | NA                            | NA                 |
| Kabuli_wild_22668246 | NA                                  | Ca_kabuli_denovo | 22668246                | C/T  | NA                 | NA                            | NA                 |
| Kabuli_wild_22673849 | NA                                  | Ca_kabuli_denovo | 22673849                | C/T  | NA                 | NA                            | NA                 |
| Kabuli_wild_22675050 | NA                                  | Ca_kabuli_denovo | 22675050                | A/T  | NA                 | NA                            | NA                 |
| Kabuli_wild_22675073 | NA                                  | Ca_kabuli_denovo | 22675073                | A/T  | NA                 | NA                            | NA                 |
| Kabuli_wild_22678412 | NA                                  | Ca_kabuli_denovo | 22678412                | A/G  | NA                 | NA                            | NA                 |
| Kabuli_wild_22680761 | NA                                  | Ca_kabuli_denovo | 22680761                | A/G  | NA                 | NA                            | NA                 |
| Kabuli_wild_22680774 | NA                                  | Ca_kabuli_denovo | 22680774                | T/C  | NA                 | NA                            | NA                 |
| Kabuli_wild_22687621 | NA                                  | Ca_kabuli_denovo | 22687621                | A/G  | NA                 | NA                            | NA                 |
| Kabuli_wild_22687637 | NA                                  | Ca_kabuli_denovo | 22687637                | C/T  | NA                 | NA                            | NA                 |
| Kabuli_wild_22689980 | NA                                  | Ca_kabuli_denovo | 22689980                | C/T  | NA                 | NA                            | NA                 |
| Kabuli_wild_22691817 | NA                                  | Ca_kabuli_denovo | 22691817                | A/T  | NA                 | NA                            | NA                 |
| Kabuli_wild_22691845 | NA                                  | Ca_kabuli_denovo | 22691845                | A/T  | NA                 | NA                            | NA                 |
| Kabuli_wild_22691855 | NA                                  | Ca_kabuli_denovo | 22691855                | A/T  | NA                 | NA                            | NA                 |
| Kabuli_wild_22694729 | NA                                  | Ca_kabuli_denovo | 22694729                | A/T  | NA                 | NA                            | NA                 |
| Kabuli_wild_22698956 | NA                                  | Ca_kabuli_denovo | 22698956                | A/C  | NA                 | NA                            | NA                 |
| Kabuli_wild_22700950 | NA                                  | Ca_kabuli_denovo | 22700950                | C/T  | NA                 | NA                            | NA                 |
| Kabuli_wild_22702168 | NA                                  | Ca_kabuli_denovo | 22702168                | C/T  | NA                 | NA                            | NA                 |
| Kabuli_wild_22702485 | NA                                  | Ca_kabuli_denovo | 22702485                | A/T  | NA                 | NA                            | NA                 |
| Kabuli_wild_22706156 | NA                                  | Ca_kabuli_denovo | 22706156                | G/T  | NA                 | NA                            | NA                 |
| Kabuli_wild_22706202 | NA                                  | Ca_kabuli_denovo | 22706202                | A/T  | NA                 | NA                            | NA                 |
| Kabuli_wild_22708534 | NA                                  | Ca_kabuli_denovo | 22708534                | A/C  | NA                 | NA                            | NA                 |
| Kabuli_wild_22710141 | NA                                  | Ca_kabuli_denovo | 22710141                | C/T  | NA                 | NA                            | NA                 |
| Kabuli_wild_22712088 | NA                                  | Ca_kabuli_denovo | 22712088                | A/G  | NA                 | NA                            | NA                 |
| Kabuli_wild_22712092 | NA                                  | Ca_kabuli_denovo | 22712092                | A/G  | NA                 | NA                            | NA                 |
| Kabuli_wild_22713144 | NA                                  | Ca_kabuli_denovo | 22713144                | C/G  | NA                 | NA                            | NA                 |
| Kabuli_wild_22714824 | NA                                  | Ca_kabuli_denovo | 22714824                | G/T  | NA                 | NA                            | NA                 |
| Kabuli_wild_22714949 | NA                                  | Ca_kabuli_denovo | 22714949                | A/G  | NA                 | NA                            | NA                 |
| Kabuli_wild_22717856 | NA                                  | Ca_kabuli_denovo | 22717856                | A/G  | NA                 | NA                            | NA                 |
| Kabuli_wild_22719998 | NA                                  | Ca_kabuli_denovo | 22719998                | C/T  | NA                 | NA                            | NA                 |
| Kabuli_wild_22720019 | NA                                  | Ca_kabuli_denovo | 22720019                | C/T  | NA                 | NA                            | NA                 |
| Kabuli_wild_22720978 | NA                                  | Ca_kabuli_denovo | 22720978                | A/G  | NA                 | NA                            | NA                 |
| Kabuli_wild_22721980 | NA                                  | Ca_kabuli_denovo | 22721980                | A/G  | NA                 | NA                            | NA                 |

| SNP IDs              | NCBI dbSNP accession IDs (NCBI_SS#) | Chromosomes      | Physical positions (bp) | SNPs | Gene accession IDs | Sequence components of genome | Putative functions |
|----------------------|-------------------------------------|------------------|-------------------------|------|--------------------|-------------------------------|--------------------|
| Kabuli_wild_22722064 | NA                                  | Ca_kabuli_denovo | 22722064                | C/T  | NA                 | NA                            | NA                 |
| Kabuli_wild_22723144 | NA                                  | Ca_kabuli_denovo | 22723144                | A/C  | NA                 | NA                            | NA                 |
| Kabuli_wild_22723171 | NA                                  | Ca_kabuli_denovo | 22723171                | A/G  | NA                 | NA                            | NA                 |
| Kabuli_wild_22725504 | NA                                  | Ca_kabuli_denovo | 22725504                | C/G  | NA                 | NA                            | NA                 |
| Kabuli_wild_22727492 | NA                                  | Ca_kabuli_denovo | 22727492                | C/T  | NA                 | NA                            | NA                 |
| Kabuli_wild_22727547 | NA                                  | Ca_kabuli_denovo | 22727547                | A/T  | NA                 | NA                            | NA                 |
| Kabuli_wild_22727705 | NA                                  | Ca_kabuli_denovo | 22727705                | A/T  | NA                 | NA                            | NA                 |
| Kabuli_wild_22729124 | NA                                  | Ca_kabuli_denovo | 22729124                | A/G  | NA                 | NA                            | NA                 |
| Kabuli_wild_22730089 | NA                                  | Ca_kabuli_denovo | 22730089                | G/T  | NA                 | NA                            | NA                 |
| Kabuli_wild_22735608 | NA                                  | Ca_kabuli_denovo | 22735608                | A/G  | NA                 | NA                            | NA                 |
| Kabuli_wild_22736350 | NA                                  | Ca_kabuli_denovo | 22736350                | A/G  | NA                 | NA                            | NA                 |
| Kabuli_wild_22739802 | NA                                  | Ca_kabuli_denovo | 22739802                | A/C  | NA                 | NA                            | NA                 |
| Kabuli_wild_22744407 | NA                                  | Ca_kabuli_denovo | 22744407                | A/G  | NA                 | NA                            | NA                 |
| Kabuli_wild_22744410 | NA                                  | Ca_kabuli_denovo | 22744410                | A/G  | NA                 | NA                            | NA                 |
| Kabuli_wild_22750787 | NA                                  | Ca_kabuli_denovo | 22750787                | C/T  | NA                 | NA                            | NA                 |
| Kabuli_wild_22756098 | NA                                  | Ca_kabuli_denovo | 22756098                | A/G  | NA                 | NA                            | NA                 |
| Kabuli_wild_22756116 | NA                                  | Ca_kabuli_denovo | 22756116                | A/T  | NA                 | NA                            | NA                 |
| Kabuli_wild_22756118 | NA                                  | Ca_kabuli_denovo | 22756118                | G/A  | NA                 | NA                            | NA                 |
| Kabuli_wild_22756138 | NA                                  | Ca_kabuli_denovo | 22756138                | C/T  | NA                 | NA                            | NA                 |
| Kabuli_wild_22758771 | NA                                  | Ca_kabuli_denovo | 22758771                | A/C  | NA                 | NA                            | NA                 |
| Kabuli_wild_22758826 | NA                                  | Ca_kabuli_denovo | 22758826                | A/C  | NA                 | NA                            | NA                 |
| Kabuli_wild_22765413 | NA                                  | Ca_kabuli_denovo | 22765413                | C/G  | NA                 | NA                            | NA                 |
| Kabuli_wild_22765420 | NA                                  | Ca_kabuli_denovo | 22765420                | C/G  | NA                 | NA                            | NA                 |
| Kabuli_wild_22766135 | NA                                  | Ca_kabuli_denovo | 22766135                | A/T  | NA                 | NA                            | NA                 |
| Kabuli_wild_22767586 | NA                                  | Ca_kabuli_denovo | 22767586                | A/C  | NA                 | NA                            | NA                 |
| Kabuli_wild_22767609 | NA                                  | Ca_kabuli_denovo | 22767609                | C/G  | NA                 | NA                            | NA                 |
| Kabuli_wild_22767614 | NA                                  | Ca_kabuli_denovo | 22767614                | G/T  | NA                 | NA                            | NA                 |
| Kabuli_wild_22769510 | NA                                  | Ca_kabuli_denovo | 22769510                | G/T  | NA                 | NA                            | NA                 |
| Kabuli_wild_22770063 | NA                                  | Ca_kabuli_denovo | 22770063                | A/G  | NA                 | NA                            | NA                 |
| Kabuli_wild_22773006 | NA                                  | Ca_kabuli_denovo | 22773006                | A/T  | NA                 | NA                            | NA                 |
| Kabuli_wild_22775102 | NA                                  | Ca_kabuli_denovo | 22775102                | C/G  | NA                 | NA                            | NA                 |
| Kabuli_wild_22775109 | NA                                  | Ca_kabuli_denovo | 22775109                | C/T  | NA                 | NA                            | NA                 |
| Kabuli_wild_22783040 | NA                                  | Ca_kabuli_denovo | 22783040                | C/T  | NA                 | NA                            | NA                 |
| Kabuli_wild_22785191 | NA                                  | Ca_kabuli_denovo | 22785191                | A/G  | NA                 | NA                            | NA                 |
| Kabuli_wild_22790951 | NA                                  | Ca_kabuli_denovo | 22790951                | A/G  | NA                 | NA                            | NA                 |
| Kabuli_wild_22790954 | NA                                  | Ca_kabuli_denovo | 22790954                | C/G  | NA                 | NA                            | NA                 |
| Kabuli_wild_22792122 | NA                                  | Ca_kabuli_denovo | 22792122                | A/G  | NA                 | NA                            | NA                 |
| Kabuli_wild_22792210 | NA                                  | Ca_kabuli_denovo | 22792210                | C/T  | NA                 | NA                            | NA                 |
| Kabuli_wild_22794959 | NA                                  | Ca_kabuli_denovo | 22794959                | C/G  | NA                 | NA                            | NA                 |
| Kabuli_wild_22797029 | NA                                  | Ca_kabuli_denovo | 22797029                | A/G  | NA                 | NA                            | NA                 |
| Kabuli_wild_22797044 | NA                                  | Ca_kabuli_denovo | 22797044                | A/T  | NA                 | NA                            | NA                 |
| Kabuli_wild_22797409 | NA                                  | Ca_kabuli_denovo | 22797409                | C/T  | NA                 | NA                            | NA                 |
| Kabuli_wild_22798352 | NA                                  | Ca_kabuli_denovo | 22798352                | C/G  | NA                 | NA                            | NA                 |
| Kabuli_wild_22798384 | NA                                  | Ca_kabuli_denovo | 22798384                | C/T  | NA                 | NA                            | NA                 |

| SNP IDs              | NCBI dbSNP accession IDs (NCBI_SS#) | Chromosomes      | Physical positions (bp) | SNPs | Gene accession IDs | Sequence components of genome | Putative functions |
|----------------------|-------------------------------------|------------------|-------------------------|------|--------------------|-------------------------------|--------------------|
| Kabuli_wild_22799516 | NA                                  | Ca_kabuli_denovo | 22799516                | C/T  | NA                 | NA                            | NA                 |
| Kabuli_wild_22803624 | NA                                  | Ca_kabuli_denovo | 22803624                | A/C  | NA                 | NA                            | NA                 |
| Kabuli_wild_22803644 | NA                                  | Ca_kabuli_denovo | 22803644                | A/G  | NA                 | NA                            | NA                 |
| Kabuli_wild_22803667 | NA                                  | Ca_kabuli_denovo | 22803667                | A/C  | NA                 | NA                            | NA                 |
| Kabuli_wild_22806804 | NA                                  | Ca_kabuli_denovo | 22806804                | A/G  | NA                 | NA                            | NA                 |
| Kabuli_wild_22807299 | NA                                  | Ca_kabuli_denovo | 22807299                | A/G  | NA                 | NA                            | NA                 |
| Kabuli_wild_22807300 | NA                                  | Ca_kabuli_denovo | 22807300                | C/T  | NA                 | NA                            | NA                 |
| Kabuli_wild_22807399 | NA                                  | Ca_kabuli_denovo | 22807399                | C/T  | NA                 | NA                            | NA                 |
| Kabuli_wild_22809114 | NA                                  | Ca_kabuli_denovo | 22809114                | C/T  | NA                 | NA                            | NA                 |
| Kabuli_wild_22815582 | NA                                  | Ca_kabuli_denovo | 22815582                | A/C  | NA                 | NA                            | NA                 |
| Kabuli_wild_22817014 | NA                                  | Ca_kabuli_denovo | 22817014                | G/A  | NA                 | NA                            | NA                 |
| Kabuli_wild_22818397 | NA                                  | Ca_kabuli_denovo | 22818397                | G/T  | NA                 | NA                            | NA                 |
| Kabuli_wild_22822784 | NA                                  | Ca_kabuli_denovo | 22822784                | G/A  | NA                 | NA                            | NA                 |
| Kabuli_wild_22823640 | NA                                  | Ca_kabuli_denovo | 22823640                | C/G  | NA                 | NA                            | NA                 |
| Kabuli_wild_22826400 | NA                                  | Ca_kabuli_denovo | 22826400                | C/T  | NA                 | NA                            | NA                 |
| Kabuli_wild_22827966 | NA                                  | Ca_kabuli_denovo | 22827966                | C/T  | NA                 | NA                            | NA                 |
| Kabuli_wild_22827975 | NA                                  | Ca_kabuli_denovo | 22827975                | A/G  | NA                 | NA                            | NA                 |
| Kabuli_wild_22827984 | NA                                  | Ca_kabuli_denovo | 22827984                | A/T  | NA                 | NA                            | NA                 |
| Kabuli_wild_22828643 | NA                                  | Ca_kabuli_denovo | 22828643                | A/T  | NA                 | NA                            | NA                 |
| Kabuli_wild_22828649 | NA                                  | Ca_kabuli_denovo | 22828649                | C/T  | NA                 | NA                            | NA                 |
| Kabuli_wild_22829677 | NA                                  | Ca_kabuli_denovo | 22829677                | C/T  | NA                 | NA                            | NA                 |
| Kabuli_wild_22832397 | NA                                  | Ca_kabuli_denovo | 22832397                | A/C  | NA                 | NA                            | NA                 |
| Kabuli_wild_22832450 | NA                                  | Ca_kabuli_denovo | 22832450                | C/T  | NA                 | NA                            | NA                 |
| Kabuli_wild_22833885 | NA                                  | Ca_kabuli_denovo | 22833885                | G/A  | NA                 | NA                            | NA                 |
| Kabuli_wild_22833979 | NA                                  | Ca_kabuli_denovo | 22833979                | C/T  | NA                 | NA                            | NA                 |
| Kabuli_wild_22838251 | NA                                  | Ca_kabuli_denovo | 22838251                | A/G  | NA                 | NA                            | NA                 |
| Kabuli_wild_22838516 | NA                                  | Ca_kabuli_denovo | 22838516                | A/T  | NA                 | NA                            | NA                 |
| Kabuli_wild_22838522 | NA                                  | Ca_kabuli_denovo | 22838522                | C/T  | NA                 | NA                            | NA                 |
| Kabuli_wild_22842634 | NA                                  | Ca_kabuli_denovo | 22842634                | C/G  | NA                 | NA                            | NA                 |
| Kabuli_wild_22842637 | NA                                  | Ca_kabuli_denovo | 22842637                | C/T  | NA                 | NA                            | NA                 |
| Kabuli_wild_22846850 | NA                                  | Ca_kabuli_denovo | 22846850                | T/G  | NA                 | NA                            | NA                 |
| Kabuli_wild_22847417 | NA                                  | Ca_kabuli_denovo | 22847417                | A/C  | NA                 | NA                            | NA                 |
| Kabuli_wild_22849843 | NA                                  | Ca_kabuli_denovo | 22849843                | G/T  | NA                 | NA                            | NA                 |
| Kabuli_wild_22852407 | NA                                  | Ca_kabuli_denovo | 22852407                | A/G  | NA                 | NA                            | NA                 |
| Kabuli_wild_22852413 | NA                                  | Ca_kabuli_denovo | 22852413                | A/G  | NA                 | NA                            | NA                 |
| Kabuli_wild_22853341 | NA                                  | Ca_kabuli_denovo | 22853341                | G/T  | NA                 | NA                            | NA                 |
| Kabuli_wild_22853367 | NA                                  | Ca_kabuli_denovo | 22853367                | A/G  | NA                 | NA                            | NA                 |
| Kabuli_wild_22856520 | NA                                  | Ca_kabuli_denovo | 22856520                | A/G  | NA                 | NA                            | NA                 |
| Kabuli_wild_22856521 | NA                                  | Ca_kabuli_denovo | 22856521                | C/T  | NA                 | NA                            | NA                 |
| Kabuli_wild_22856825 | NA                                  | Ca_kabuli_denovo | 22856825                | C/T  | NA                 | NA                            | NA                 |
| Kabuli_wild_22856852 | NA                                  | Ca_kabuli_denovo | 22856852                | G/T  | NA                 | NA                            | NA                 |
| Kabuli_wild_22859067 | NA                                  | Ca_kabuli_denovo | 22859067                | G/T  | NA                 | NA                            | NA                 |
| Kabuli_wild_22859079 | NA                                  | Ca_kabuli_denovo | 22859079                | T/G  | NA                 | NA                            | NA                 |
| Kabuli_wild_22859100 | NA                                  | Ca_kabuli_denovo | 22859100                | T/C  | NA                 | NA                            | NA                 |

| SNP IDs              | NCBI dbSNP accession IDs (NCBI_SS#) | Chromosomes      | Physical positions (bp) | SNPs | Gene accession IDs | Sequence components of genome | Putative functions |
|----------------------|-------------------------------------|------------------|-------------------------|------|--------------------|-------------------------------|--------------------|
| Kabuli_wild_22859445 | NA                                  | Ca_kabuli_denovo | 22859445                | A/T  | NA                 | NA                            | NA                 |
| Kabuli_wild_22859492 | NA                                  | Ca_kabuli_denovo | 22859492                | A/G  | NA                 | NA                            | NA                 |
| Kabuli_wild_22860135 | NA                                  | Ca_kabuli_denovo | 22860135                | G/T  | NA                 | NA                            | NA                 |
| Kabuli_wild_22860496 | NA                                  | Ca_kabuli_denovo | 22860496                | C/T  | NA                 | NA                            | NA                 |
| Kabuli_wild_22860539 | NA                                  | Ca_kabuli_denovo | 22860539                | C/T  | NA                 | NA                            | NA                 |
| Kabuli_wild_22860551 | NA                                  | Ca_kabuli_denovo | 22860551                | A/G  | NA                 | NA                            | NA                 |
| Kabuli_wild_22860886 | NA                                  | Ca_kabuli_denovo | 22860886                | A/G  | NA                 | NA                            | NA                 |
| Kabuli_wild_22860904 | NA                                  | Ca_kabuli_denovo | 22860904                | A/G  | NA                 | NA                            | NA                 |
| Kabuli_wild_22860958 | NA                                  | Ca_kabuli_denovo | 22860958                | A/G  | NA                 | NA                            | NA                 |
| Kabuli_wild_22860959 | NA                                  | Ca_kabuli_denovo | 22860959                | A/T  | NA                 | NA                            | NA                 |
| Kabuli_wild_22860971 | NA                                  | Ca_kabuli_denovo | 22860971                | A/G  | NA                 | NA                            | NA                 |
| Kabuli_wild_22867056 | NA                                  | Ca_kabuli_denovo | 22867056                | A/T  | NA                 | NA                            | NA                 |
| Kabuli_wild_22868847 | NA                                  | Ca_kabuli_denovo | 22868847                | C/T  | NA                 | NA                            | NA                 |
| Kabuli_wild_22869334 | NA                                  | Ca_kabuli_denovo | 22869334                | C/G  | NA                 | NA                            | NA                 |
| Kabuli_wild_22878591 | NA                                  | Ca_kabuli_denovo | 22878591                | A/G  | NA                 | NA                            | NA                 |
| Kabuli_wild_22879508 | NA                                  | Ca_kabuli_denovo | 22879508                | C/G  | NA                 | NA                            | NA                 |
| Kabuli_wild_22879520 | NA                                  | Ca_kabuli_denovo | 22879520                | C/G  | NA                 | NA                            | NA                 |
| Kabuli_wild_22884761 | NA                                  | Ca_kabuli_denovo | 22884761                | G/A  | NA                 | NA                            | NA                 |
| Kabuli_wild_22885594 | NA                                  | Ca_kabuli_denovo | 22885594                | T/C  | NA                 | NA                            | NA                 |
| Kabuli_wild_22887030 | NA                                  | Ca_kabuli_denovo | 22887030                | A/G  | NA                 | NA                            | NA                 |
| Kabuli_wild_22888257 | NA                                  | Ca_kabuli_denovo | 22888257                | A/G  | NA                 | NA                            | NA                 |
| Kabuli_wild_22888281 | NA                                  | Ca_kabuli_denovo | 22888281                | A/G  | NA                 | NA                            | NA                 |
| Kabuli_wild_22888423 | NA                                  | Ca_kabuli_denovo | 22888423                | G/C  | NA                 | NA                            | NA                 |
| Kabuli_wild_22893009 | NA                                  | Ca_kabuli_denovo | 22893009                | T/G  | NA                 | NA                            | NA                 |
| Kabuli_wild_22893024 | NA                                  | Ca_kabuli_denovo | 22893024                | A/G  | NA                 | NA                            | NA                 |
| Kabuli_wild_22894518 | NA                                  | Ca_kabuli_denovo | 22894518                | C/G  | NA                 | NA                            | NA                 |
| Kabuli_wild_22894526 | NA                                  | Ca_kabuli_denovo | 22894526                | A/G  | NA                 | NA                            | NA                 |
| Kabuli_wild_22894529 | NA                                  | Ca_kabuli_denovo | 22894529                | C/T  | NA                 | NA                            | NA                 |
| Kabuli_wild_22894797 | NA                                  | Ca_kabuli_denovo | 22894797                | A/G  | NA                 | NA                            | NA                 |
| Kabuli_wild_22894813 | NA                                  | Ca_kabuli_denovo | 22894813                | C/T  | NA                 | NA                            | NA                 |
| Kabuli_wild_22894827 | NA                                  | Ca_kabuli_denovo | 22894827                | C/T  | NA                 | NA                            | NA                 |
| Kabuli_wild_22895790 | NA                                  | Ca_kabuli_denovo | 22895790                | T/A  | NA                 | NA                            | NA                 |
| Kabuli_wild_22895792 | NA                                  | Ca_kabuli_denovo | 22895792                | G/T  | NA                 | NA                            | NA                 |
| Kabuli_wild_22895815 | NA                                  | Ca_kabuli_denovo | 22895815                | A/C  | NA                 | NA                            | NA                 |
| Kabuli_wild_22898561 | NA                                  | Ca_kabuli_denovo | 22898561                | T/G  | NA                 | NA                            | NA                 |
| Kabuli_wild_22898579 | NA                                  | Ca_kabuli_denovo | 22898579                | C/T  | NA                 | NA                            | NA                 |
| Kabuli_wild_22902633 | NA                                  | Ca_kabuli_denovo | 22902633                | T/C  | NA                 | NA                            | NA                 |
| Kabuli_wild_22903160 | NA                                  | Ca_kabuli_denovo | 22903160                | C/T  | NA                 | NA                            | NA                 |
| Kabuli_wild_22903163 | NA                                  | Ca_kabuli_denovo | 22903163                | T/C  | NA                 | NA                            | NA                 |
| Kabuli_wild_22903169 | NA                                  | Ca_kabuli_denovo | 22903169                | G/A  | NA                 | NA                            | NA                 |
| Kabuli_wild_22903199 | NA                                  | Ca_kabuli_denovo | 22903199                | C/T  | NA                 | NA                            | NA                 |
| Kabuli_wild_22904534 | NA                                  | Ca_kabuli_denovo | 22904534                | C/T  | NA                 | NA                            | NA                 |
| Kabuli_wild_22905700 | NA                                  | Ca_kabuli_denovo | 22905700                | A/C  | NA                 | NA                            | NA                 |
| Kabuli_wild_22905719 | NA                                  | Ca_kabuli_denovo | 22905719                | C/T  | NA                 | NA                            | NA                 |

| SNP IDs              | NCBI dbSNP accession IDs (NCBI_SS#) | Chromosomes      | Physical positions (bp) | SNPs | Gene accession IDs | Sequence components of genome | Putative functions |
|----------------------|-------------------------------------|------------------|-------------------------|------|--------------------|-------------------------------|--------------------|
| Kabuli_wild_22905743 | NA                                  | Ca_kabuli_denovo | 22905743                | A/C  | NA                 | NA                            | NA                 |
| Kabuli_wild_22905974 | NA                                  | Ca_kabuli_denovo | 22905974                | C/T  | NA                 | NA                            | NA                 |
| Kabuli_wild_22908181 | NA                                  | Ca_kabuli_denovo | 22908181                | C/G  | NA                 | NA                            | NA                 |
| Kabuli_wild_22909211 | NA                                  | Ca_kabuli_denovo | 22909211                | A/G  | NA                 | NA                            | NA                 |
| Kabuli_wild_22910868 | NA                                  | Ca_kabuli_denovo | 22910868                | A/G  | NA                 | NA                            | NA                 |
| Kabuli_wild_22911244 | NA                                  | Ca_kabuli_denovo | 22911244                | G/T  | NA                 | NA                            | NA                 |
| Kabuli_wild_22911251 | NA                                  | Ca_kabuli_denovo | 22911251                | A/G  | NA                 | NA                            | NA                 |
| Kabuli_wild_22911347 | NA                                  | Ca_kabuli_denovo | 22911347                | C/T  | NA                 | NA                            | NA                 |
| Kabuli_wild_22914075 | NA                                  | Ca_kabuli_denovo | 22914075                | C/T  | NA                 | NA                            | NA                 |
| Kabuli_wild_22914096 | NA                                  | Ca_kabuli_denovo | 22914096                | T/C  | NA                 | NA                            | NA                 |
| Kabuli_wild_22914101 | NA                                  | Ca_kabuli_denovo | 22914101                | G/C  | NA                 | NA                            | NA                 |
| Kabuli_wild_22914645 | NA                                  | Ca_kabuli_denovo | 22914645                | C/A  | NA                 | NA                            | NA                 |
| Kabuli_wild_22914657 | NA                                  | Ca_kabuli_denovo | 22914657                | C/T  | NA                 | NA                            | NA                 |
| Kabuli_wild_22914667 | NA                                  | Ca_kabuli_denovo | 22914667                | G/T  | NA                 | NA                            | NA                 |
| Kabuli_wild_22918295 | NA                                  | Ca_kabuli_denovo | 22918295                | T/C  | NA                 | NA                            | NA                 |
| Kabuli_wild_22918296 | NA                                  | Ca_kabuli_denovo | 22918296                | A/T  | NA                 | NA                            | NA                 |
| Kabuli_wild_22919793 | NA                                  | Ca_kabuli_denovo | 22919793                | A/G  | NA                 | NA                            | NA                 |
| Kabuli_wild_22919808 | NA                                  | Ca_kabuli_denovo | 22919808                | G/A  | NA                 | NA                            | NA                 |
| Kabuli_wild_22919826 | NA                                  | Ca_kabuli_denovo | 22919826                | A/C  | NA                 | NA                            | NA                 |
| Kabuli_wild_22920092 | NA                                  | Ca_kabuli_denovo | 22920092                | A/G  | NA                 | NA                            | NA                 |
| Kabuli_wild_22920099 | NA                                  | Ca_kabuli_denovo | 22920099                | A/G  | NA                 | NA                            | NA                 |
| Kabuli_wild_22920224 | NA                                  | Ca_kabuli_denovo | 22920224                | A/G  | NA                 | NA                            | NA                 |
| Kabuli_wild_22922894 | NA                                  | Ca_kabuli_denovo | 22922894                | A/G  | NA                 | NA                            | NA                 |
| Kabuli_wild_22923904 | NA                                  | Ca_kabuli_denovo | 22923904                | A/G  | NA                 | NA                            | NA                 |
| Kabuli_wild_22924210 | NA                                  | Ca_kabuli_denovo | 22924210                | A/G  | NA                 | NA                            | NA                 |
| Kabuli_wild_22926686 | NA                                  | Ca_kabuli_denovo | 22926686                | A/G  | NA                 | NA                            | NA                 |
| Kabuli_wild_22928694 | NA                                  | Ca_kabuli_denovo | 22928694                | C/T  | NA                 | NA                            | NA                 |
| Kabuli_wild_22932390 | NA                                  | Ca_kabuli_denovo | 22932390                | G/A  | NA                 | NA                            | NA                 |
| Kabuli_wild_22932392 | NA                                  | Ca_kabuli_denovo | 22932392                | C/T  | NA                 | NA                            | NA                 |
| Kabuli_wild_22932425 | NA                                  | Ca_kabuli_denovo | 22932425                | T/C  | NA                 | NA                            | NA                 |
| Kabuli_wild_22932617 | NA                                  | Ca_kabuli_denovo | 22932617                | C/T  | NA                 | NA                            | NA                 |
| Kabuli_wild_22933367 | NA                                  | Ca_kabuli_denovo | 22933367                | G/T  | NA                 | NA                            | NA                 |
| Kabuli_wild_22933384 | NA                                  | Ca_kabuli_denovo | 22933384                | C/T  | NA                 | NA                            | NA                 |
| Kabuli_wild_22933905 | NA                                  | Ca_kabuli_denovo | 22933905                | C/T  | NA                 | NA                            | NA                 |
| Kabuli_wild_22933932 | NA                                  | Ca_kabuli_denovo | 22933932                | G/A  | NA                 | NA                            | NA                 |
| Kabuli_wild_22933933 | NA                                  | Ca_kabuli_denovo | 22933933                | G/A  | NA                 | NA                            | NA                 |
| Kabuli_wild_22935717 | NA                                  | Ca_kabuli_denovo | 22935717                | C/T  | NA                 | NA                            | NA                 |
| Kabuli_wild_22936809 | NA                                  | Ca_kabuli_denovo | 22936809                | A/C  | NA                 | NA                            | NA                 |
| Kabuli_wild_22937133 | NA                                  | Ca_kabuli_denovo | 22937133                | C/T  | NA                 | NA                            | NA                 |
| Kabuli_wild_22937564 | NA                                  | Ca_kabuli_denovo | 22937564                | C/T  | NA                 | NA                            | NA                 |
| Kabuli_wild_22937567 | NA                                  | Ca_kabuli_denovo | 22937567                | C/T  | NA                 | NA                            | NA                 |
| Kabuli_wild_22940298 | NA                                  | Ca_kabuli_denovo | 22940298                | C/T  | NA                 | NA                            | NA                 |
| Kabuli_wild_22940304 | NA                                  | Ca_kabuli_denovo | 22940304                | T/C  | NA                 | NA                            | NA                 |
| Kabuli_wild_22940345 | NA                                  | Ca_kabuli_denovo | 22940345                | G/A  | NA                 | NA                            | NA                 |

| SNP IDs              | NCBI dbSNP accession IDs (NCBI_SS#) | Chromosomes      | Physical positions (bp) | SNPs | Gene accession IDs | Sequence components of genome | Putative functions |
|----------------------|-------------------------------------|------------------|-------------------------|------|--------------------|-------------------------------|--------------------|
| Kabuli_wild_22941497 | NA                                  | Ca_kabuli_denovo | 22941497                | G/A  | NA                 | NA                            | NA                 |
| Kabuli_wild_22944566 | NA                                  | Ca_kabuli_denovo | 22944566                | C/G  | NA                 | NA                            | NA                 |
| Kabuli_wild_22944910 | NA                                  | Ca_kabuli_denovo | 22944910                | A/T  | NA                 | NA                            | NA                 |
| Kabuli_wild_22945927 | NA                                  | Ca_kabuli_denovo | 22945927                | G/T  | NA                 | NA                            | NA                 |
| Kabuli_wild_22945936 | NA                                  | Ca_kabuli_denovo | 22945936                | A/G  | NA                 | NA                            | NA                 |
| Kabuli_wild_22947091 | NA                                  | Ca_kabuli_denovo | 22947091                | G/A  | NA                 | NA                            | NA                 |
| Kabuli_wild_22948399 | NA                                  | Ca_kabuli_denovo | 22948399                | C/T  | NA                 | NA                            | NA                 |
| Kabuli_wild_22949969 | NA                                  | Ca_kabuli_denovo | 22949969                | A/T  | NA                 | NA                            | NA                 |
| Kabuli_wild_22950543 | NA                                  | Ca_kabuli_denovo | 22950543                | C/T  | NA                 | NA                            | NA                 |
| Kabuli_wild_22951281 | NA                                  | Ca_kabuli_denovo | 22951281                | A/G  | NA                 | NA                            | NA                 |
| Kabuli_wild_22951306 | NA                                  | Ca_kabuli_denovo | 22951306                | A/G  | NA                 | NA                            | NA                 |
| Kabuli_wild_22951327 | NA                                  | Ca_kabuli_denovo | 22951327                | A/C  | NA                 | NA                            | NA                 |
| Kabuli_wild_22951392 | NA                                  | Ca_kabuli_denovo | 22951392                | A/C  | NA                 | NA                            | NA                 |
| Kabuli_wild_22952387 | NA                                  | Ca_kabuli_denovo | 22952387                | C/G  | NA                 | NA                            | NA                 |
| Kabuli_wild_22952609 | NA                                  | Ca_kabuli_denovo | 22952609                | C/T  | NA                 | NA                            | NA                 |
| Kabuli_wild_22954765 | NA                                  | Ca_kabuli_denovo | 22954765                | G/T  | NA                 | NA                            | NA                 |
| Kabuli_wild_22957481 | NA                                  | Ca_kabuli_denovo | 22957481                | A/T  | NA                 | NA                            | NA                 |
| Kabuli_wild_22957505 | NA                                  | Ca_kabuli_denovo | 22957505                | A/G  | NA                 | NA                            | NA                 |
| Kabuli_wild_22957540 | NA                                  | Ca_kabuli_denovo | 22957540                | A/C  | NA                 | NA                            | NA                 |
| Kabuli_wild_22957985 | NA                                  | Ca_kabuli_denovo | 22957985                | A/G  | NA                 | NA                            | NA                 |
| Kabuli_wild_22959028 | NA                                  | Ca_kabuli_denovo | 22959028                | A/T  | NA                 | NA                            | NA                 |
| Kabuli_wild_22962855 | NA                                  | Ca_kabuli_denovo | 22962855                | A/T  | NA                 | NA                            | NA                 |
| Kabuli_wild_22963024 | NA                                  | Ca_kabuli_denovo | 22963024                | A/G  | NA                 | NA                            | NA                 |
| Kabuli_wild_22963047 | NA                                  | Ca_kabuli_denovo | 22963047                | A/G  | NA                 | NA                            | NA                 |
| Kabuli_wild_22963264 | NA                                  | Ca_kabuli_denovo | 22963264                | G/T  | NA                 | NA                            | NA                 |
| Kabuli_wild_22964694 | NA                                  | Ca_kabuli_denovo | 22964694                | A/G  | NA                 | NA                            | NA                 |
| Kabuli_wild_22964809 | NA                                  | Ca_kabuli_denovo | 22964809                | C/T  | NA                 | NA                            | NA                 |
| Kabuli_wild_22965734 | NA                                  | Ca_kabuli_denovo | 22965734                | A/G  | NA                 | NA                            | NA                 |
| Kabuli_wild_22965868 | NA                                  | Ca_kabuli_denovo | 22965868                | G/T  | NA                 | NA                            | NA                 |
| Kabuli_wild_22966270 | NA                                  | Ca_kabuli_denovo | 22966270                | A/G  | NA                 | NA                            | NA                 |
| Kabuli_wild_22966538 | NA                                  | Ca_kabuli_denovo | 22966538                | A/G  | NA                 | NA                            | NA                 |
| Kabuli_wild_22966541 | NA                                  | Ca_kabuli_denovo | 22966541                | C/G  | NA                 | NA                            | NA                 |
| Kabuli_wild_22967214 | NA                                  | Ca_kabuli_denovo | 22967214                | A/G  | NA                 | NA                            | NA                 |
| Kabuli_wild_22967230 | NA                                  | Ca_kabuli_denovo | 22967230                | A/G  | NA                 | NA                            | NA                 |
| Kabuli_wild_22967557 | NA                                  | Ca_kabuli_denovo | 22967557                | G/T  | NA                 | NA                            | NA                 |
| Kabuli_wild_22969364 | NA                                  | Ca_kabuli_denovo | 22969364                | G/T  | NA                 | NA                            | NA                 |
| Kabuli_wild_22969608 | NA                                  | Ca_kabuli_denovo | 22969608                | C/G  | NA                 | NA                            | NA                 |
| Kabuli_wild_22969609 | NA                                  | Ca_kabuli_denovo | 22969609                | A/G  | NA                 | NA                            | NA                 |
| Kabuli_wild_22969964 | NA                                  | Ca_kabuli_denovo | 22969964                | A/C  | NA                 | NA                            | NA                 |
| Kabuli_wild_22969965 | NA                                  | Ca_kabuli_denovo | 22969965                | A/C  | NA                 | NA                            | NA                 |
| Kabuli_wild_22974218 | NA                                  | Ca_kabuli_denovo | 22974218                | C/G  | NA                 | NA                            | NA                 |
| Kabuli_wild_22974220 | NA                                  | Ca_kabuli_denovo | 22974220                | T/A  | NA                 | NA                            | NA                 |
| Kabuli_wild_22976601 | NA                                  | Ca_kabuli_denovo | 22976601                | T/G  | NA                 | NA                            | NA                 |
| Kabuli_wild_22978827 | NA                                  | Ca_kabuli_denovo | 22978827                | C/T  | NA                 | NA                            | NA                 |

| SNP IDs              | NCBI dbSNP accession IDs (NCBI_SS#) | Chromosomes      | Physical positions (bp) | SNPs | Gene accession IDs | Sequence components of genome | Putative functions |
|----------------------|-------------------------------------|------------------|-------------------------|------|--------------------|-------------------------------|--------------------|
| Kabuli_wild_22982750 | NA                                  | Ca_kabuli_denovo | 22982750                | A/C  | NA                 | NA                            | NA                 |
| Kabuli_wild_22982755 | NA                                  | Ca_kabuli_denovo | 22982755                | A/G  | NA                 | NA                            | NA                 |
| Kabuli_wild_22985698 | NA                                  | Ca_kabuli_denovo | 22985698                | A/G  | NA                 | NA                            | NA                 |
| Kabuli_wild_23012205 | NA                                  | Ca_kabuli_denovo | 23012205                | A/T  | NA                 | NA                            | NA                 |
| Kabuli_wild_23018301 | NA                                  | Ca_kabuli_denovo | 23018301                | G/T  | NA                 | NA                            | NA                 |
| Kabuli_wild_23018455 | NA                                  | Ca_kabuli_denovo | 23018455                | C/T  | NA                 | NA                            | NA                 |
| Kabuli_wild_23018552 | NA                                  | Ca_kabuli_denovo | 23018552                | C/G  | NA                 | NA                            | NA                 |
| Kabuli_wild_23024325 | NA                                  | Ca_kabuli_denovo | 23024325                | C/G  | NA                 | NA                            | NA                 |
| Kabuli_wild_23033939 | NA                                  | Ca_kabuli_denovo | 23033939                | A/G  | NA                 | NA                            | NA                 |
| Kabuli_wild_23036389 | NA                                  | Ca_kabuli_denovo | 23036389                | A/G  | NA                 | NA                            | NA                 |
| Kabuli_wild_23036390 | NA                                  | Ca_kabuli_denovo | 23036390                | C/G  | NA                 | NA                            | NA                 |
| Kabuli_wild_23052702 | NA                                  | Ca_kabuli_denovo | 23052702                | G/C  | NA                 | NA                            | NA                 |
| Kabuli_wild_23052720 | NA                                  | Ca_kabuli_denovo | 23052720                | C/T  | NA                 | NA                            | NA                 |
| Kabuli_wild_23060357 | NA                                  | Ca_kabuli_denovo | 23060357                | A/C  | NA                 | NA                            | NA                 |
| Kabuli_wild_23062182 | NA                                  | Ca_kabuli_denovo | 23062182                | G/A  | NA                 | NA                            | NA                 |
| Kabuli_wild_23082077 | NA                                  | Ca_kabuli_denovo | 23082077                | C/G  | NA                 | NA                            | NA                 |
| Kabuli_wild_23085992 | NA                                  | Ca_kabuli_denovo | 23085992                | A/T  | NA                 | NA                            | NA                 |
| Kabuli_wild_23086465 | NA                                  | Ca_kabuli_denovo | 23086465                | C/T  | NA                 | NA                            | NA                 |
| Kabuli_wild_23086500 | NA                                  | Ca_kabuli_denovo | 23086500                | T/C  | NA                 | NA                            | NA                 |
| Kabuli_wild_23086519 | NA                                  | Ca_kabuli_denovo | 23086519                | G/A  | NA                 | NA                            | NA                 |
| Kabuli_wild_23086522 | NA                                  | Ca_kabuli_denovo | 23086522                | T/G  | NA                 | NA                            | NA                 |
| Kabuli_wild_23087639 | NA                                  | Ca_kabuli_denovo | 23087639                | C/G  | NA                 | NA                            | NA                 |
| Kabuli_wild_23087643 | NA                                  | Ca_kabuli_denovo | 23087643                | T/C  | NA                 | NA                            | NA                 |
| Kabuli_wild_23095041 | NA                                  | Ca_kabuli_denovo | 23095041                | A/G  | NA                 | NA                            | NA                 |
| Kabuli_wild_23096091 | NA                                  | Ca_kabuli_denovo | 23096091                | G/T  | NA                 | NA                            | NA                 |
| Kabuli_wild_23096092 | NA                                  | Ca_kabuli_denovo | 23096092                | A/T  | NA                 | NA                            | NA                 |
| Kabuli_wild_23103960 | NA                                  | Ca_kabuli_denovo | 23103960                | T/A  | NA                 | NA                            | NA                 |
| Kabuli_wild_23104913 | NA                                  | Ca_kabuli_denovo | 23104913                | A/T  | NA                 | NA                            | NA                 |
| Kabuli_wild_23116237 | NA                                  | Ca_kabuli_denovo | 23116237                | C/G  | NA                 | NA                            | NA                 |
| Kabuli_wild_23116240 | NA                                  | Ca_kabuli_denovo | 23116240                | A/C  | NA                 | NA                            | NA                 |
| Kabuli_wild_23124007 | NA                                  | Ca_kabuli_denovo | 23124007                | C/G  | NA                 | NA                            | NA                 |
| Kabuli_wild_23124027 | NA                                  | Ca_kabuli_denovo | 23124027                | C/G  | NA                 | NA                            | NA                 |
| Kabuli_wild_23127987 | NA                                  | Ca_kabuli_denovo | 23127987                | G/A  | NA                 | NA                            | NA                 |
| Kabuli_wild_23135785 | NA                                  | Ca_kabuli_denovo | 23135785                | A/G  | NA                 | NA                            | NA                 |
| Kabuli_wild_23137674 | NA                                  | Ca_kabuli_denovo | 23137674                | A/G  | NA                 | NA                            | NA                 |
| Kabuli_wild_23139474 | NA                                  | Ca_kabuli_denovo | 23139474                | A/C  | NA                 | NA                            | NA                 |
| Kabuli_wild_23143390 | NA                                  | Ca_kabuli_denovo | 23143390                | A/T  | NA                 | NA                            | NA                 |
| Kabuli_wild_23143393 | NA                                  | Ca_kabuli_denovo | 23143393                | C/T  | NA                 | NA                            | NA                 |
| Kabuli_wild_23144261 | NA                                  | Ca_kabuli_denovo | 23144261                | G/C  | NA                 | NA                            | NA                 |
| Kabuli_wild_23144264 | NA                                  | Ca_kabuli_denovo | 23144264                | G/T  | NA                 | NA                            | NA                 |
| Kabuli_wild_23144287 | NA                                  | Ca_kabuli_denovo | 23144287                | A/G  | NA                 | NA                            | NA                 |
| Kabuli_wild_23144302 | NA                                  | Ca_kabuli_denovo | 23144302                | G/A  | NA                 | NA                            | NA                 |
| Kabuli_wild_23144313 | NA                                  | Ca_kabuli_denovo | 23144313                | C/T  | NA                 | NA                            | NA                 |
| Kabuli_wild_23145356 | NA                                  | Ca_kabuli_denovo | 23145356                | G/A  | NA                 | NA                            | NA                 |



| SNP IDs              | NCBI dbSNP accession IDs (NCBI_SS#) | Chromosomes      | Physical positions (bp) | SNPs | Gene accession IDs | Sequence components of genome | Putative functions |
|----------------------|-------------------------------------|------------------|-------------------------|------|--------------------|-------------------------------|--------------------|
| Kabuli_wild_23148959 | NA                                  | Ca_kabuli_denovo | 23148959                | A/T  | NA                 | NA                            | NA                 |
| Kabuli_wild_23153692 | NA                                  | Ca_kabuli_denovo | 23153692                | A/G  | NA                 | NA                            | NA                 |
| Kabuli_wild_23166263 | NA                                  | Ca_kabuli_denovo | 23166263                | A/T  | NA                 | NA                            | NA                 |
| Kabuli_wild_23167942 | NA                                  | Ca_kabuli_denovo | 23167942                | C/T  | NA                 | NA                            | NA                 |
| Kabuli_wild_23172232 | NA                                  | Ca_kabuli_denovo | 23172232                | C/T  | NA                 | NA                            | NA                 |
| Kabuli_wild_23174317 | NA                                  | Ca_kabuli_denovo | 23174317                | A/G  | NA                 | NA                            | NA                 |
| Kabuli_wild_23177215 | NA                                  | Ca_kabuli_denovo | 23177215                | A/G  | NA                 | NA                            | NA                 |
| Kabuli_wild_23178826 | NA                                  | Ca_kabuli_denovo | 23178826                | C/G  | NA                 | NA                            | NA                 |
| Kabuli_wild_23181448 | NA                                  | Ca_kabuli_denovo | 23181448                | G/T  | NA                 | NA                            | NA                 |
| Kabuli_wild_23186023 | NA                                  | Ca_kabuli_denovo | 23186023                | C/T  | NA                 | NA                            | NA                 |
| Kabuli_wild_23186066 | NA                                  | Ca_kabuli_denovo | 23186066                | G/T  | NA                 | NA                            | NA                 |
| Kabuli_wild_23186421 | NA                                  | Ca_kabuli_denovo | 23186421                | A/T  | NA                 | NA                            | NA                 |
| Kabuli_wild_23188608 | NA                                  | Ca_kabuli_denovo | 23188608                | A/G  | NA                 | NA                            | NA                 |
| Kabuli_wild_23188644 | NA                                  | Ca_kabuli_denovo | 23188644                | C/T  | NA                 | NA                            | NA                 |
| Kabuli_wild_23193734 | NA                                  | Ca_kabuli_denovo | 23193734                | G/A  | NA                 | NA                            | NA                 |
| Kabuli_wild_23207260 | NA                                  | Ca_kabuli_denovo | 23207260                | G/T  | NA                 | NA                            | NA                 |
| Kabuli_wild_23207262 | NA                                  | Ca_kabuli_denovo | 23207262                | A/C  | NA                 | NA                            | NA                 |
| Kabuli_wild_23208140 | NA                                  | Ca_kabuli_denovo | 23208140                | C/G  | NA                 | NA                            | NA                 |
| Kabuli_wild_23211708 | NA                                  | Ca_kabuli_denovo | 23211708                | G/T  | NA                 | NA                            | NA                 |
| Kabuli_wild_23216710 | NA                                  | Ca_kabuli_denovo | 23216710                | A/T  | NA                 | NA                            | NA                 |
| Kabuli_wild_23217541 | NA                                  | Ca_kabuli_denovo | 23217541                | G/C  | NA                 | NA                            | NA                 |
| Kabuli_wild_23217542 | NA                                  | Ca_kabuli_denovo | 23217542                | T/A  | NA                 | NA                            | NA                 |
| Kabuli_wild_23217543 | NA                                  | Ca_kabuli_denovo | 23217543                | T/G  | NA                 | NA                            | NA                 |
| Kabuli_wild_23218534 | NA                                  | Ca_kabuli_denovo | 23218534                | A/G  | NA                 | NA                            | NA                 |
| Kabuli_wild_23222012 | NA                                  | Ca_kabuli_denovo | 23222012                | C/T  | NA                 | NA                            | NA                 |
| Kabuli_wild_23229167 | NA                                  | Ca_kabuli_denovo | 23229167                | A/T  | NA                 | NA                            | NA                 |
| Kabuli_wild_23234364 | NA                                  | Ca_kabuli_denovo | 23234364                | C/G  | NA                 | NA                            | NA                 |
| Kabuli_wild_23243519 | NA                                  | Ca_kabuli_denovo | 23243519                | A/T  | NA                 | NA                            | NA                 |
| Kabuli_wild_23246765 | NA                                  | Ca_kabuli_denovo | 23246765                | T/C  | NA                 | NA                            | NA                 |
| Kabuli_wild_23257108 | NA                                  | Ca_kabuli_denovo | 23257108                | G/A  | NA                 | NA                            | NA                 |
| Kabuli_wild_23257111 | NA                                  | Ca_kabuli_denovo | 23257111                | A/C  | NA                 | NA                            | NA                 |
| Kabuli_wild_23257112 | NA                                  | Ca_kabuli_denovo | 23257112                | C/T  | NA                 | NA                            | NA                 |
| Kabuli_wild_23259551 | NA                                  | Ca_kabuli_denovo | 23259551                | G/C  | NA                 | NA                            | NA                 |
| Kabuli_wild_23259557 | NA                                  | Ca_kabuli_denovo | 23259557                | C/G  | NA                 | NA                            | NA                 |
| Kabuli_wild_23263971 | NA                                  | Ca_kabuli_denovo | 23263971                | C/T  | NA                 | NA                            | NA                 |
| Kabuli_wild_23268550 | NA                                  | Ca_kabuli_denovo | 23268550                | C/G  | NA                 | NA                            | NA                 |
| Kabuli_wild_23290718 | NA                                  | Ca_kabuli_denovo | 23290718                | C/G  | NA                 | NA                            | NA                 |
| Kabuli_wild_23311008 | NA                                  | Ca_kabuli_denovo | 23311008                | C/T  | NA                 | NA                            | NA                 |
| Kabuli_wild_23311018 | NA                                  | Ca_kabuli_denovo | 23311018                | T/G  | NA                 | NA                            | NA                 |
| Kabuli_wild_23312674 | NA                                  | Ca_kabuli_denovo | 23312674                | C/T  | NA                 | NA                            | NA                 |
| Kabuli_wild_23316539 | NA                                  | Ca_kabuli_denovo | 23316539                | G/T  | NA                 | NA                            | NA                 |
| Kabuli_wild_23320612 | NA                                  | Ca_kabuli_denovo | 23320612                | C/A  | NA                 | NA                            | NA                 |
| Kabuli_wild_23323573 | NA                                  | Ca_kabuli_denovo | 23323573                | C/A  | NA                 | NA                            | NA                 |
| Kabuli_wild_23323590 | NA                                  | Ca_kabuli_denovo | 23323590                | T/A  | NA                 | NA                            | NA                 |

| SNP IDs              | NCBI dbSNP accession IDs (NCBI_SS#) | Chromosomes      | Physical positions (bp) | SNPs | Gene accession IDs | Sequence components of genome | Putative functions |
|----------------------|-------------------------------------|------------------|-------------------------|------|--------------------|-------------------------------|--------------------|
| Kabuli_wild_23327986 | NA                                  | Ca_kabuli_denovo | 23327986                | G/C  | NA                 | NA                            | NA                 |
| Kabuli_wild_23327992 | NA                                  | Ca_kabuli_denovo | 23327992                | T/G  | NA                 | NA                            | NA                 |
| Kabuli_wild_23336789 | NA                                  | Ca_kabuli_denovo | 23336789                | T/A  | NA                 | NA                            | NA                 |
| Kabuli_wild_23361850 | NA                                  | Ca_kabuli_denovo | 23361850                | A/G  | NA                 | NA                            | NA                 |
| Kabuli_wild_23361853 | NA                                  | Ca_kabuli_denovo | 23361853                | A/C  | NA                 | NA                            | NA                 |
| Kabuli_wild_23370549 | NA                                  | Ca_kabuli_denovo | 23370549                | C/T  | NA                 | NA                            | NA                 |
| Kabuli_wild_23390600 | NA                                  | Ca_kabuli_denovo | 23390600                | A/G  | NA                 | NA                            | NA                 |
| Kabuli_wild_23390608 | NA                                  | Ca_kabuli_denovo | 23390608                | A/G  | NA                 | NA                            | NA                 |
| Kabuli_wild_23390629 | NA                                  | Ca_kabuli_denovo | 23390629                | A/T  | NA                 | NA                            | NA                 |
| Kabuli_wild_23395509 | NA                                  | Ca_kabuli_denovo | 23395509                | A/C  | NA                 | NA                            | NA                 |
| Kabuli_wild_23397166 | NA                                  | Ca_kabuli_denovo | 23397166                | C/G  | NA                 | NA                            | NA                 |
| Kabuli_wild_23397167 | NA                                  | Ca_kabuli_denovo | 23397167                | A/T  | NA                 | NA                            | NA                 |
| Kabuli_wild_23397964 | NA                                  | Ca_kabuli_denovo | 23397964                | A/T  | NA                 | NA                            | NA                 |
| Kabuli_wild_23402958 | NA                                  | Ca_kabuli_denovo | 23402958                | A/T  | NA                 | NA                            | NA                 |
| Kabuli_wild_23404143 | NA                                  | Ca_kabuli_denovo | 23404143                | G/T  | NA                 | NA                            | NA                 |
| Kabuli_wild_23406654 | NA                                  | Ca_kabuli_denovo | 23406654                | A/C  | NA                 | NA                            | NA                 |
| Kabuli_wild_23407942 | NA                                  | Ca_kabuli_denovo | 23407942                | G/A  | NA                 | NA                            | NA                 |
| Kabuli_wild_23411079 | NA                                  | Ca_kabuli_denovo | 23411079                | C/T  | NA                 | NA                            | NA                 |
| Kabuli_wild_23412699 | NA                                  | Ca_kabuli_denovo | 23412699                | A/T  | NA                 | NA                            | NA                 |
| Kabuli_wild_23412700 | NA                                  | Ca_kabuli_denovo | 23412700                | C/G  | NA                 | NA                            | NA                 |
| Kabuli_wild_23413210 | NA                                  | Ca_kabuli_denovo | 23413210                | C/G  | NA                 | NA                            | NA                 |
| Kabuli_wild_23420160 | NA                                  | Ca_kabuli_denovo | 23420160                | A/G  | NA                 | NA                            | NA                 |
| Kabuli_wild_23420173 | NA                                  | Ca_kabuli_denovo | 23420173                | G/T  | NA                 | NA                            | NA                 |
| Kabuli_wild_23421127 | NA                                  | Ca_kabuli_denovo | 23421127                | A/C  | NA                 | NA                            | NA                 |
| Kabuli_wild_23421300 | NA                                  | Ca_kabuli_denovo | 23421300                | T/G  | NA                 | NA                            | NA                 |
| Kabuli_wild_23421304 | NA                                  | Ca_kabuli_denovo | 23421304                | C/G  | NA                 | NA                            | NA                 |
| Kabuli_wild_23421306 | NA                                  | Ca_kabuli_denovo | 23421306                | G/A  | NA                 | NA                            | NA                 |
| Kabuli_wild_23421307 | NA                                  | Ca_kabuli_denovo | 23421307                | G/T  | NA                 | NA                            | NA                 |
| Kabuli_wild_23421308 | NA                                  | Ca_kabuli_denovo | 23421308                | A/G  | NA                 | NA                            | NA                 |
| Kabuli_wild_23421309 | NA                                  | Ca_kabuli_denovo | 23421309                | A/C  | NA                 | NA                            | NA                 |
| Kabuli_wild_23421310 | NA                                  | Ca_kabuli_denovo | 23421310                | T/C  | NA                 | NA                            | NA                 |
| Kabuli_wild_23421312 | NA                                  | Ca_kabuli_denovo | 23421312                | C/A  | NA                 | NA                            | NA                 |
| Kabuli_wild_23421313 | NA                                  | Ca_kabuli_denovo | 23421313                | C/G  | NA                 | NA                            | NA                 |
| Kabuli_wild_23421314 | NA                                  | Ca_kabuli_denovo | 23421314                | A/G  | NA                 | NA                            | NA                 |
| Kabuli_wild_23421318 | NA                                  | Ca_kabuli_denovo | 23421318                | C/A  | NA                 | NA                            | NA                 |
| Kabuli_wild_23424208 | NA                                  | Ca_kabuli_denovo | 23424208                | A/G  | NA                 | NA                            | NA                 |
| Kabuli_wild_23463887 | NA                                  | Ca_kabuli_denovo | 23463887                | C/T  | NA                 | NA                            | NA                 |
| Kabuli_wild_23463923 | NA                                  | Ca_kabuli_denovo | 23463923                | A/C  | NA                 | NA                            | NA                 |
| Kabuli_wild_23468160 | NA                                  | Ca_kabuli_denovo | 23468160                | A/G  | NA                 | NA                            | NA                 |
| Kabuli_wild_23469325 | NA                                  | Ca_kabuli_denovo | 23469325                | G/T  | NA                 | NA                            | NA                 |
| Kabuli_wild_23470298 | NA                                  | Ca_kabuli_denovo | 23470298                | G/T  | NA                 | NA                            | NA                 |
| Kabuli_wild_23470424 | NA                                  | Ca_kabuli_denovo | 23470424                | G/T  | NA                 | NA                            | NA                 |
| Kabuli_wild_23470450 | NA                                  | Ca_kabuli_denovo | 23470450                | G/T  | NA                 | NA                            | NA                 |
| Kabuli_wild_23471175 | NA                                  | Ca_kabuli_denovo | 23471175                | C/T  | NA                 | NA                            | NA                 |

| SNP IDs              | NCBI dbSNP accession IDs (NCBI_SS#) | Chromosomes      | Physical positions (bp) | SNPs | Gene accession IDs | Sequence components of genome | Putative functions |
|----------------------|-------------------------------------|------------------|-------------------------|------|--------------------|-------------------------------|--------------------|
| Kabuli_wild_23471298 | NA                                  | Ca_kabuli_denovo | 23471298                | G/T  | NA                 | NA                            | NA                 |
| Kabuli_wild_23472507 | NA                                  | Ca_kabuli_denovo | 23472507                | A/C  | NA                 | NA                            | NA                 |
| Kabuli_wild_23472540 | NA                                  | Ca_kabuli_denovo | 23472540                | C/G  | NA                 | NA                            | NA                 |
| Kabuli_wild_23473172 | NA                                  | Ca_kabuli_denovo | 23473172                | C/G  | NA                 | NA                            | NA                 |
| Kabuli_wild_23473268 | NA                                  | Ca_kabuli_denovo | 23473268                | G/C  | NA                 | NA                            | NA                 |
| Kabuli_wild_23475835 | NA                                  | Ca_kabuli_denovo | 23475835                | A/G  | NA                 | NA                            | NA                 |
| Kabuli_wild_23476013 | NA                                  | Ca_kabuli_denovo | 23476013                | A/T  | NA                 | NA                            | NA                 |
| Kabuli_wild_23479024 | NA                                  | Ca_kabuli_denovo | 23479024                | A/T  | NA                 | NA                            | NA                 |
| Kabuli_wild_23484495 | NA                                  | Ca_kabuli_denovo | 23484495                | A/G  | NA                 | NA                            | NA                 |
| Kabuli_wild_23484497 | NA                                  | Ca_kabuli_denovo | 23484497                | A/G  | NA                 | NA                            | NA                 |
| Kabuli_wild_23484498 | NA                                  | Ca_kabuli_denovo | 23484498                | A/G  | NA                 | NA                            | NA                 |
| Kabuli_wild_23484899 | NA                                  | Ca_kabuli_denovo | 23484899                | A/G  | NA                 | NA                            | NA                 |
| Kabuli_wild_23488189 | NA                                  | Ca_kabuli_denovo | 23488189                | G/T  | NA                 | NA                            | NA                 |
| Kabuli_wild_23488191 | NA                                  | Ca_kabuli_denovo | 23488191                | C/T  | NA                 | NA                            | NA                 |
| Kabuli_wild_23488625 | NA                                  | Ca_kabuli_denovo | 23488625                | A/G  | NA                 | NA                            | NA                 |
| Kabuli_wild_23509651 | NA                                  | Ca_kabuli_denovo | 23509651                | T/G  | NA                 | NA                            | NA                 |
| Kabuli_wild_23509674 | NA                                  | Ca_kabuli_denovo | 23509674                | G/A  | NA                 | NA                            | NA                 |
| Kabuli_wild_23509727 | NA                                  | Ca_kabuli_denovo | 23509727                | G/A  | NA                 | NA                            | NA                 |
| Kabuli_wild_23513053 | NA                                  | Ca_kabuli_denovo | 23513053                | T/G  | NA                 | NA                            | NA                 |
| Kabuli_wild_23519961 | NA                                  | Ca_kabuli_denovo | 23519961                | C/T  | NA                 | NA                            | NA                 |
| Kabuli_wild_23528301 | NA                                  | Ca_kabuli_denovo | 23528301                | C/T  | NA                 | NA                            | NA                 |
| Kabuli_wild_23540116 | NA                                  | Ca_kabuli_denovo | 23540116                | A/G  | NA                 | NA                            | NA                 |
| Kabuli_wild_23542444 | NA                                  | Ca_kabuli_denovo | 23542444                | C/G  | NA                 | NA                            | NA                 |
| Kabuli_wild_23542482 | NA                                  | Ca_kabuli_denovo | 23542482                | G/C  | NA                 | NA                            | NA                 |
| Kabuli_wild_23542495 | NA                                  | Ca_kabuli_denovo | 23542495                | C/G  | NA                 | NA                            | NA                 |
| Kabuli_wild_23543742 | NA                                  | Ca_kabuli_denovo | 23543742                | T/G  | NA                 | NA                            | NA                 |
| Kabuli_wild_23543833 | NA                                  | Ca_kabuli_denovo | 23543833                | A/G  | NA                 | NA                            | NA                 |
| Kabuli_wild_23553229 | NA                                  | Ca_kabuli_denovo | 23553229                | A/G  | NA                 | NA                            | NA                 |
| Kabuli_wild_23553498 | NA                                  | Ca_kabuli_denovo | 23553498                | A/G  | NA                 | NA                            | NA                 |
| Kabuli_wild_23553555 | NA                                  | Ca_kabuli_denovo | 23553555                | A/T  | NA                 | NA                            | NA                 |
| Kabuli_wild_23554359 | NA                                  | Ca_kabuli_denovo | 23554359                | A/T  | NA                 | NA                            | NA                 |
| Kabuli_wild_23554360 | NA                                  | Ca_kabuli_denovo | 23554360                | C/T  | NA                 | NA                            | NA                 |
| Kabuli_wild_23554361 | NA                                  | Ca_kabuli_denovo | 23554361                | C/T  | NA                 | NA                            | NA                 |
| Kabuli_wild_23557893 | NA                                  | Ca_kabuli_denovo | 23557893                | T/C  | NA                 | NA                            | NA                 |
| Kabuli_wild_23562625 | NA                                  | Ca_kabuli_denovo | 23562625                | C/G  | NA                 | NA                            | NA                 |
| Kabuli_wild_23562643 | NA                                  | Ca_kabuli_denovo | 23562643                | T/C  | NA                 | NA                            | NA                 |
| Kabuli_wild_23562883 | NA                                  | Ca_kabuli_denovo | 23562883                | G/T  | NA                 | NA                            | NA                 |
| Kabuli_wild_23568034 | NA                                  | Ca_kabuli_denovo | 23568034                | C/G  | NA                 | NA                            | NA                 |
| Kabuli_wild_23568036 | NA                                  | Ca_kabuli_denovo | 23568036                | A/G  | NA                 | NA                            | NA                 |
| Kabuli_wild_23568037 | NA                                  | Ca_kabuli_denovo | 23568037                | G/T  | NA                 | NA                            | NA                 |
| Kabuli_wild_23568038 | NA                                  | Ca_kabuli_denovo | 23568038                | A/G  | NA                 | NA                            | NA                 |
| Kabuli_wild_23577860 | NA                                  | Ca_kabuli_denovo | 23577860                | C/G  | NA                 | NA                            | NA                 |
| Kabuli_wild_23579746 | NA                                  | Ca_kabuli_denovo | 23579746                | G/T  | NA                 | NA                            | NA                 |
| Kabuli_wild_23579749 | NA                                  | Ca_kabuli_denovo | 23579749                | A/G  | NA                 | NA                            | NA                 |

| SNP IDs              | NCBI dbSNP accession IDs (NCBI_SS#) | Chromosomes      | Physical positions (bp) | SNPs | Gene accession IDs | Sequence components of genome | Putative functions |
|----------------------|-------------------------------------|------------------|-------------------------|------|--------------------|-------------------------------|--------------------|
| Kabuli_wild_23584517 | NA                                  | Ca_kabuli_denovo | 23584517                | A/G  | NA                 | NA                            | NA                 |
| Kabuli_wild_23584532 | NA                                  | Ca_kabuli_denovo | 23584532                | A/G  | NA                 | NA                            | NA                 |
| Kabuli_wild_23588189 | NA                                  | Ca_kabuli_denovo | 23588189                | G/T  | NA                 | NA                            | NA                 |
| Kabuli_wild_23588228 | NA                                  | Ca_kabuli_denovo | 23588228                | A/G  | NA                 | NA                            | NA                 |
| Kabuli_wild_23592694 | NA                                  | Ca_kabuli_denovo | 23592694                | C/A  | NA                 | NA                            | NA                 |
| Kabuli_wild_23592709 | NA                                  | Ca_kabuli_denovo | 23592709                | T/C  | NA                 | NA                            | NA                 |
| Kabuli_wild_23594639 | NA                                  | Ca_kabuli_denovo | 23594639                | A/G  | NA                 | NA                            | NA                 |
| Kabuli_wild_23594652 | NA                                  | Ca_kabuli_denovo | 23594652                | T/C  | NA                 | NA                            | NA                 |
| Kabuli_wild_23618199 | NA                                  | Ca_kabuli_denovo | 23618199                | G/T  | NA                 | NA                            | NA                 |
| Kabuli_wild_23623528 | NA                                  | Ca_kabuli_denovo | 23623528                | T/C  | NA                 | NA                            | NA                 |
| Kabuli_wild_23647506 | NA                                  | Ca_kabuli_denovo | 23647506                | T/G  | NA                 | NA                            | NA                 |
| Kabuli_wild_23648467 | NA                                  | Ca_kabuli_denovo | 23648467                | T/G  | NA                 | NA                            | NA                 |
| Kabuli_wild_23649671 | NA                                  | Ca_kabuli_denovo | 23649671                | C/A  | NA                 | NA                            | NA                 |
| Kabuli_wild_23655471 | NA                                  | Ca_kabuli_denovo | 23655471                | A/G  | NA                 | NA                            | NA                 |
| Kabuli_wild_23655474 | NA                                  | Ca_kabuli_denovo | 23655474                | A/G  | NA                 | NA                            | NA                 |
| Kabuli_wild_23655737 | NA                                  | Ca_kabuli_denovo | 23655737                | A/C  | NA                 | NA                            | NA                 |
| Kabuli_wild_23674499 | NA                                  | Ca_kabuli_denovo | 23674499                | A/G  | NA                 | NA                            | NA                 |
| Kabuli_wild_23674514 | NA                                  | Ca_kabuli_denovo | 23674514                | G/A  | NA                 | NA                            | NA                 |
| Kabuli_wild_23678851 | NA                                  | Ca_kabuli_denovo | 23678851                | T/C  | NA                 | NA                            | NA                 |
| Kabuli_wild_23680838 | NA                                  | Ca_kabuli_denovo | 23680838                | A/G  | NA                 | NA                            | NA                 |
| Kabuli_wild_23680877 | NA                                  | Ca_kabuli_denovo | 23680877                | G/A  | NA                 | NA                            | NA                 |
| Kabuli_wild_23680880 | NA                                  | Ca_kabuli_denovo | 23680880                | T/G  | NA                 | NA                            | NA                 |
| Kabuli_wild_23681791 | NA                                  | Ca_kabuli_denovo | 23681791                | G/A  | NA                 | NA                            | NA                 |
| Kabuli_wild_23681803 | NA                                  | Ca_kabuli_denovo | 23681803                | G/A  | NA                 | NA                            | NA                 |
| Kabuli_wild_23696345 | NA                                  | Ca_kabuli_denovo | 23696345                | A/C  | NA                 | NA                            | NA                 |
| Kabuli_wild_23696347 | NA                                  | Ca_kabuli_denovo | 23696347                | A/T  | NA                 | NA                            | NA                 |
| Kabuli_wild_23699114 | NA                                  | Ca_kabuli_denovo | 23699114                | T/C  | NA                 | NA                            | NA                 |
| Kabuli_wild_23703361 | NA                                  | Ca_kabuli_denovo | 23703361                | A/G  | NA                 | NA                            | NA                 |
| Kabuli_wild_23706312 | NA                                  | Ca_kabuli_denovo | 23706312                | C/A  | NA                 | NA                            | NA                 |
| Kabuli_wild_23707825 | NA                                  | Ca_kabuli_denovo | 23707825                | T/G  | NA                 | NA                            | NA                 |
| Kabuli_wild_23712427 | NA                                  | Ca_kabuli_denovo | 23712427                | G/A  | NA                 | NA                            | NA                 |
| Kabuli_wild_23714896 | NA                                  | Ca_kabuli_denovo | 23714896                | T/C  | NA                 | NA                            | NA                 |
| Kabuli_wild_23714952 | NA                                  | Ca_kabuli_denovo | 23714952                | T/C  | NA                 | NA                            | NA                 |
| Kabuli_wild_23721471 | NA                                  | Ca_kabuli_denovo | 23721471                | T/C  | NA                 | NA                            | NA                 |
| Kabuli_wild_23731304 | NA                                  | Ca_kabuli_denovo | 23731304                | C/G  | NA                 | NA                            | NA                 |
| Kabuli_wild_23741683 | NA                                  | Ca_kabuli_denovo | 23741683                | C/A  | NA                 | NA                            | NA                 |
| Kabuli_wild_23743471 | NA                                  | Ca_kabuli_denovo | 23743471                | G/T  | NA                 | NA                            | NA                 |
| Kabuli_wild_23751227 | NA                                  | Ca_kabuli_denovo | 23751227                | A/G  | NA                 | NA                            | NA                 |
| Kabuli_wild_23752615 | NA                                  | Ca_kabuli_denovo | 23752615                | A/G  | NA                 | NA                            | NA                 |
| Kabuli_wild_23753661 | NA                                  | Ca_kabuli_denovo | 23753661                | T/A  | NA                 | NA                            | NA                 |
| Kabuli_wild_23763225 | NA                                  | Ca_kabuli_denovo | 23763225                | A/G  | NA                 | NA                            | NA                 |
| Kabuli_wild_23763228 | NA                                  | Ca_kabuli_denovo | 23763228                | A/T  | NA                 | NA                            | NA                 |
| Kabuli_wild_23767190 | NA                                  | Ca_kabuli_denovo | 23767190                | A/C  | NA                 | NA                            | NA                 |
| Kabuli_wild_23767691 | NA                                  | Ca_kabuli_denovo | 23767691                | C/T  | NA                 | NA                            | NA                 |

| SNP IDs              | NCBI dbSNP accession IDs (NCBI_SS#) | Chromosomes      | Physical positions (bp) | SNPs | Gene accession IDs | Sequence components of genome | Putative functions |
|----------------------|-------------------------------------|------------------|-------------------------|------|--------------------|-------------------------------|--------------------|
| Kabuli_wild_23777863 | NA                                  | Ca_kabuli_denovo | 23777863                | A/G  | NA                 | NA                            | NA                 |
| Kabuli_wild_23779396 | NA                                  | Ca_kabuli_denovo | 23779396                | C/T  | NA                 | NA                            | NA                 |
| Kabuli_wild_23779399 | NA                                  | Ca_kabuli_denovo | 23779399                | C/T  | NA                 | NA                            | NA                 |
| Kabuli_wild_23783267 | NA                                  | Ca_kabuli_denovo | 23783267                | G/A  | NA                 | NA                            | NA                 |
| Kabuli_wild_23783279 | NA                                  | Ca_kabuli_denovo | 23783279                | C/G  | NA                 | NA                            | NA                 |
| Kabuli_wild_23783449 | NA                                  | Ca_kabuli_denovo | 23783449                | A/G  | NA                 | NA                            | NA                 |
| Kabuli_wild_23784395 | NA                                  | Ca_kabuli_denovo | 23784395                | A/G  | NA                 | NA                            | NA                 |
| Kabuli_wild_23784938 | NA                                  | Ca_kabuli_denovo | 23784938                | T/G  | NA                 | NA                            | NA                 |
| Kabuli_wild_23784974 | NA                                  | Ca_kabuli_denovo | 23784974                | C/A  | NA                 | NA                            | NA                 |
| Kabuli_wild_23785007 | NA                                  | Ca_kabuli_denovo | 23785007                | A/G  | NA                 | NA                            | NA                 |
| Kabuli_wild_23787693 | NA                                  | Ca_kabuli_denovo | 23787693                | T/G  | NA                 | NA                            | NA                 |
| Kabuli_wild_23790617 | NA                                  | Ca_kabuli_denovo | 23790617                | G/T  | NA                 | NA                            | NA                 |
| Kabuli_wild_23793068 | NA                                  | Ca_kabuli_denovo | 23793068                | T/G  | NA                 | NA                            | NA                 |
| Kabuli_wild_23796226 | NA                                  | Ca_kabuli_denovo | 23796226                | G/C  | NA                 | NA                            | NA                 |
| Kabuli_wild_23800371 | NA                                  | Ca_kabuli_denovo | 23800371                | C/T  | NA                 | NA                            | NA                 |
| Kabuli_wild_23809951 | NA                                  | Ca_kabuli_denovo | 23809951                | T/C  | NA                 | NA                            | NA                 |
| Kabuli_wild_23809981 | NA                                  | Ca_kabuli_denovo | 23809981                | A/G  | NA                 | NA                            | NA                 |
| Kabuli_wild_23822990 | NA                                  | Ca_kabuli_denovo | 23822990                | A/C  | NA                 | NA                            | NA                 |
| Kabuli_wild_23838055 | NA                                  | Ca_kabuli_denovo | 23838055                | A/G  | NA                 | NA                            | NA                 |
| Kabuli_wild_23838071 | NA                                  | Ca_kabuli_denovo | 23838071                | C/T  | NA                 | NA                            | NA                 |
| Kabuli_wild_23840155 | NA                                  | Ca_kabuli_denovo | 23840155                | A/C  | NA                 | NA                            | NA                 |
| Kabuli_wild_23842477 | NA                                  | Ca_kabuli_denovo | 23842477                | G/A  | NA                 | NA                            | NA                 |
| Kabuli_wild_23842496 | NA                                  | Ca_kabuli_denovo | 23842496                | C/T  | NA                 | NA                            | NA                 |
| Kabuli_wild_23858730 | NA                                  | Ca_kabuli_denovo | 23858730                | G/T  | NA                 | NA                            | NA                 |
| Kabuli_wild_23858855 | NA                                  | Ca_kabuli_denovo | 23858855                | T/C  | NA                 | NA                            | NA                 |
| Kabuli_wild_23863071 | NA                                  | Ca_kabuli_denovo | 23863071                | C/T  | NA                 | NA                            | NA                 |
| Kabuli_wild_23863078 | NA                                  | Ca_kabuli_denovo | 23863078                | G/C  | NA                 | NA                            | NA                 |
| Kabuli_wild_23863850 | NA                                  | Ca_kabuli_denovo | 23863850                | G/C  | NA                 | NA                            | NA                 |
| Kabuli_wild_23866022 | NA                                  | Ca_kabuli_denovo | 23866022                | G/T  | NA                 | NA                            | NA                 |
| Kabuli_wild_23878181 | NA                                  | Ca_kabuli_denovo | 23878181                | C/T  | NA                 | NA                            | NA                 |
| Kabuli_wild_23878182 | NA                                  | Ca_kabuli_denovo | 23878182                | C/T  | NA                 | NA                            | NA                 |
| Kabuli_wild_23884409 | NA                                  | Ca_kabuli_denovo | 23884409                | A/C  | NA                 | NA                            | NA                 |
| Kabuli_wild_23884410 | NA                                  | Ca_kabuli_denovo | 23884410                | G/T  | NA                 | NA                            | NA                 |
| Kabuli_wild_23891894 | NA                                  | Ca_kabuli_denovo | 23891894                | G/C  | NA                 | NA                            | NA                 |
| Kabuli_wild_23892317 | NA                                  | Ca_kabuli_denovo | 23892317                | T/C  | NA                 | NA                            | NA                 |
| Kabuli_wild_23892359 | NA                                  | Ca_kabuli_denovo | 23892359                | G/C  | NA                 | NA                            | NA                 |
| Kabuli_wild_23894238 | NA                                  | Ca_kabuli_denovo | 23894238                | A/G  | NA                 | NA                            | NA                 |
| Kabuli_wild_23894239 | NA                                  | Ca_kabuli_denovo | 23894239                | G/A  | NA                 | NA                            | NA                 |
| Kabuli_wild_23896902 | NA                                  | Ca_kabuli_denovo | 23896902                | T/C  | NA                 | NA                            | NA                 |
| Kabuli_wild_23896916 | NA                                  | Ca_kabuli_denovo | 23896916                | A/T  | NA                 | NA                            | NA                 |
| Kabuli_wild_23898695 | NA                                  | Ca_kabuli_denovo | 23898695                | G/T  | NA                 | NA                            | NA                 |
| Kabuli_wild_23938573 | NA                                  | Ca_kabuli_denovo | 23938573                | A/G  | NA                 | NA                            | NA                 |
| Kabuli_wild_23947636 | NA                                  | Ca_kabuli_denovo | 23947636                | A/G  | NA                 | NA                            | NA                 |
| Kabuli_wild_23947874 | NA                                  | Ca_kabuli_denovo | 23947874                | T/C  | NA                 | NA                            | NA                 |

| SNP IDs              | NCBI dbSNP accession IDs (NCBI_SS#) | Chromosomes      | Physical positions (bp) | SNPs | Gene accession IDs | Sequence components of genome | Putative functions |
|----------------------|-------------------------------------|------------------|-------------------------|------|--------------------|-------------------------------|--------------------|
| Kabuli_wild_23950467 | NA                                  | Ca_kabuli_denovo | 23950467                | A/G  | NA                 | NA                            | NA                 |
| Kabuli_wild_23950525 | NA                                  | Ca_kabuli_denovo | 23950525                | T/C  | NA                 | NA                            | NA                 |
| Kabuli_wild_23961625 | NA                                  | Ca_kabuli_denovo | 23961625                | C/T  | NA                 | NA                            | NA                 |
| Kabuli_wild_23961673 | NA                                  | Ca_kabuli_denovo | 23961673                | C/T  | NA                 | NA                            | NA                 |
| Kabuli_wild_23961879 | NA                                  | Ca_kabuli_denovo | 23961879                | A/C  | NA                 | NA                            | NA                 |
| Kabuli_wild_23968657 | NA                                  | Ca_kabuli_denovo | 23968657                | C/T  | NA                 | NA                            | NA                 |
| Kabuli_wild_23968678 | NA                                  | Ca_kabuli_denovo | 23968678                | T/A  | NA                 | NA                            | NA                 |
| Kabuli_wild_23973979 | NA                                  | Ca_kabuli_denovo | 23973979                | G/T  | NA                 | NA                            | NA                 |
| Kabuli_wild_23990148 | NA                                  | Ca_kabuli_denovo | 23990148                | T/G  | NA                 | NA                            | NA                 |
| Kabuli_wild_23998474 | NA                                  | Ca_kabuli_denovo | 23998474                | C/T  | NA                 | NA                            | NA                 |
| Kabuli_wild_23999531 | NA                                  | Ca_kabuli_denovo | 23999531                | C/G  | NA                 | NA                            | NA                 |
| Kabuli_wild_24000034 | NA                                  | Ca_kabuli_denovo | 24000034                | C/T  | NA                 | NA                            | NA                 |
| Kabuli_wild_24000038 | NA                                  | Ca_kabuli_denovo | 24000038                | G/A  | NA                 | NA                            | NA                 |
| Kabuli_wild_24000077 | NA                                  | Ca_kabuli_denovo | 24000077                | C/A  | NA                 | NA                            | NA                 |
| Kabuli_wild_24003186 | NA                                  | Ca_kabuli_denovo | 24003186                | G/C  | NA                 | NA                            | NA                 |
| Kabuli_wild_24021985 | NA                                  | Ca_kabuli_denovo | 24021985                | G/T  | NA                 | NA                            | NA                 |
| Kabuli_wild_24021992 | NA                                  | Ca_kabuli_denovo | 24021992                | A/G  | NA                 | NA                            | NA                 |
| Kabuli_wild_24022745 | NA                                  | Ca_kabuli_denovo | 24022745                | A/G  | NA                 | NA                            | NA                 |
| Kabuli_wild_24022939 | NA                                  | Ca_kabuli_denovo | 24022939                | G/T  | NA                 | NA                            | NA                 |
| Kabuli_wild_24023254 | NA                                  | Ca_kabuli_denovo | 24023254                | T/C  | NA                 | NA                            | NA                 |
| Kabuli_wild_24023263 | NA                                  | Ca_kabuli_denovo | 24023263                | A/C  | NA                 | NA                            | NA                 |
| Kabuli_wild_24031442 | NA                                  | Ca_kabuli_denovo | 24031442                | G/A  | NA                 | NA                            | NA                 |
| Kabuli_wild_24035052 | NA                                  | Ca_kabuli_denovo | 24035052                | A/C  | NA                 | NA                            | NA                 |
| Kabuli_wild_24035058 | NA                                  | Ca_kabuli_denovo | 24035058                | G/A  | NA                 | NA                            | NA                 |
| Kabuli_wild_24042066 | NA                                  | Ca_kabuli_denovo | 24042066                | T/G  | NA                 | NA                            | NA                 |
| Kabuli_wild_24042326 | NA                                  | Ca_kabuli_denovo | 24042326                | A/C  | NA                 | NA                            | NA                 |
| Kabuli_wild_24042330 | NA                                  | Ca_kabuli_denovo | 24042330                | C/T  | NA                 | NA                            | NA                 |
| Kabuli_wild_24043290 | NA                                  | Ca_kabuli_denovo | 24043290                | A/C  | NA                 | NA                            | NA                 |
| Kabuli_wild_24054093 | NA                                  | Ca_kabuli_denovo | 24054093                | A/C  | NA                 | NA                            | NA                 |
| Kabuli_wild_24064949 | NA                                  | Ca_kabuli_denovo | 24064949                | C/T  | NA                 | NA                            | NA                 |
| Kabuli_wild_24064977 | NA                                  | Ca_kabuli_denovo | 24064977                | G/T  | NA                 | NA                            | NA                 |
| Kabuli_wild_24072858 | NA                                  | Ca_kabuli_denovo | 24072858                | A/C  | NA                 | NA                            | NA                 |
| Kabuli_wild_24074366 | NA                                  | Ca_kabuli_denovo | 24074366                | T/C  | NA                 | NA                            | NA                 |
| Kabuli_wild_24080850 | NA                                  | Ca_kabuli_denovo | 24080850                | G/A  | NA                 | NA                            | NA                 |
| Kabuli_wild_24080856 | NA                                  | Ca_kabuli_denovo | 24080856                | C/T  | NA                 | NA                            | NA                 |
| Kabuli_wild_24081933 | NA                                  | Ca_kabuli_denovo | 24081933                | T/G  | NA                 | NA                            | NA                 |
| Kabuli_wild_24081956 | NA                                  | Ca_kabuli_denovo | 24081956                | T/A  | NA                 | NA                            | NA                 |
| Kabuli_wild_24083430 | NA                                  | Ca_kabuli_denovo | 24083430                | A/G  | NA                 | NA                            | NA                 |
| Kabuli_wild_24084643 | NA                                  | Ca_kabuli_denovo | 24084643                | G/C  | NA                 | NA                            | NA                 |
| Kabuli_wild_24085272 | NA                                  | Ca_kabuli_denovo | 24085272                | A/T  | NA                 | NA                            | NA                 |
| Kabuli_wild_24085296 | NA                                  | Ca_kabuli_denovo | 24085296                | A/G  | NA                 | NA                            | NA                 |
| Kabuli_wild_24092051 | NA                                  | Ca_kabuli_denovo | 24092051                | G/A  | NA                 | NA                            | NA                 |
| Kabuli_wild_24107226 | NA                                  | Ca_kabuli_denovo | 24107226                | G/T  | NA                 | NA                            | NA                 |
| Kabuli_wild_24107344 | NA                                  | Ca_kabuli_denovo | 24107344                | A/C  | NA                 | NA                            | NA                 |

| SNP IDs              | NCBI dbSNP accession IDs (NCBI_SS#) | Chromosomes      | Physical positions (bp) | SNPs | Gene accession IDs | Sequence components of genome | Putative functions |
|----------------------|-------------------------------------|------------------|-------------------------|------|--------------------|-------------------------------|--------------------|
| Kabuli_wild_24118437 | NA                                  | Ca_kabuli_denovo | 24118437                | C/T  | NA                 | NA                            | NA                 |
| Kabuli_wild_24118877 | NA                                  | Ca_kabuli_denovo | 24118877                | A/G  | NA                 | NA                            | NA                 |
| Kabuli_wild_24121986 | NA                                  | Ca_kabuli_denovo | 24121986                | G/T  | NA                 | NA                            | NA                 |
| Kabuli_wild_24127328 | NA                                  | Ca_kabuli_denovo | 24127328                | G/T  | NA                 | NA                            | NA                 |
| Kabuli_wild_24128064 | NA                                  | Ca_kabuli_denovo | 24128064                | A/G  | NA                 | NA                            | NA                 |
| Kabuli_wild_24128070 | NA                                  | Ca_kabuli_denovo | 24128070                | T/C  | NA                 | NA                            | NA                 |
| Kabuli_wild_24131450 | NA                                  | Ca_kabuli_denovo | 24131450                | G/C  | NA                 | NA                            | NA                 |
| Kabuli_wild_24131630 | NA                                  | Ca_kabuli_denovo | 24131630                | A/G  | NA                 | NA                            | NA                 |
| Kabuli_wild_24147457 | NA                                  | Ca_kabuli_denovo | 24147457                | T/C  | NA                 | NA                            | NA                 |
| Kabuli_wild_24148673 | NA                                  | Ca_kabuli_denovo | 24148673                | G/C  | NA                 | NA                            | NA                 |
| Kabuli_wild_24150736 | NA                                  | Ca_kabuli_denovo | 24150736                | C/T  | NA                 | NA                            | NA                 |
| Kabuli_wild_24150811 | NA                                  | Ca_kabuli_denovo | 24150811                | A/C  | NA                 | NA                            | NA                 |
| Kabuli_wild_24153110 | NA                                  | Ca_kabuli_denovo | 24153110                | T/G  | NA                 | NA                            | NA                 |
| Kabuli_wild_24153352 | NA                                  | Ca_kabuli_denovo | 24153352                | T/A  | NA                 | NA                            | NA                 |
| Kabuli_wild_24153373 | NA                                  | Ca_kabuli_denovo | 24153373                | T/C  | NA                 | NA                            | NA                 |
| Kabuli_wild_24158619 | NA                                  | Ca_kabuli_denovo | 24158619                | C/T  | NA                 | NA                            | NA                 |
| Kabuli_wild_24166733 | NA                                  | Ca_kabuli_denovo | 24166733                | A/C  | NA                 | NA                            | NA                 |
| Kabuli_wild_24175267 | NA                                  | Ca_kabuli_denovo | 24175267                | A/G  | NA                 | NA                            | NA                 |
| Kabuli_wild_24183210 | NA                                  | Ca_kabuli_denovo | 24183210                | C/G  | NA                 | NA                            | NA                 |
| Kabuli_wild_24188069 | NA                                  | Ca_kabuli_denovo | 24188069                | G/A  | NA                 | NA                            | NA                 |
| Kabuli_wild_24188093 | NA                                  | Ca_kabuli_denovo | 24188093                | C/T  | NA                 | NA                            | NA                 |
| Kabuli_wild_24196216 | NA                                  | Ca_kabuli_denovo | 24196216                | G/T  | NA                 | NA                            | NA                 |
| Kabuli_wild_24197782 | NA                                  | Ca_kabuli_denovo | 24197782                | G/C  | NA                 | NA                            | NA                 |
| Kabuli_wild_24200561 | NA                                  | Ca_kabuli_denovo | 24200561                | T/G  | NA                 | NA                            | NA                 |
| Kabuli_wild_24203025 | NA                                  | Ca_kabuli_denovo | 24203025                | T/C  | NA                 | NA                            | NA                 |
| Kabuli_wild_24205581 | NA                                  | Ca_kabuli_denovo | 24205581                | C/T  | NA                 | NA                            | NA                 |
| Kabuli_wild_24205584 | NA                                  | Ca_kabuli_denovo | 24205584                | T/C  | NA                 | NA                            | NA                 |
| Kabuli_wild_24206152 | NA                                  | Ca_kabuli_denovo | 24206152                | C/T  | NA                 | NA                            | NA                 |
| Kabuli_wild_24213307 | NA                                  | Ca_kabuli_denovo | 24213307                | A/C  | NA                 | NA                            | NA                 |
| Kabuli_wild_24213728 | NA                                  | Ca_kabuli_denovo | 24213728                | A/G  | NA                 | NA                            | NA                 |
| Kabuli_wild_24226362 | NA                                  | Ca_kabuli_denovo | 24226362                | A/C  | NA                 | NA                            | NA                 |
| Kabuli_wild_24226363 | NA                                  | Ca_kabuli_denovo | 24226363                | A/G  | NA                 | NA                            | NA                 |
| Kabuli_wild_24226892 | NA                                  | Ca_kabuli_denovo | 24226892                | T/A  | NA                 | NA                            | NA                 |
| Kabuli_wild_24226914 | NA                                  | Ca_kabuli_denovo | 24226914                | C/A  | NA                 | NA                            | NA                 |
| Kabuli_wild_24229536 | NA                                  | Ca_kabuli_denovo | 24229536                | C/T  | NA                 | NA                            | NA                 |
| Kabuli_wild_24229625 | NA                                  | Ca_kabuli_denovo | 24229625                | A/G  | NA                 | NA                            | NA                 |
| Kabuli_wild_24230519 | NA                                  | Ca_kabuli_denovo | 24230519                | C/T  | NA                 | NA                            | NA                 |
| Kabuli_wild_24230548 | NA                                  | Ca_kabuli_denovo | 24230548                | A/C  | NA                 | NA                            | NA                 |
| Kabuli_wild_24231545 | NA                                  | Ca_kabuli_denovo | 24231545                | A/C  | NA                 | NA                            | NA                 |
| Kabuli_wild_24231546 | NA                                  | Ca_kabuli_denovo | 24231546                | C/G  | NA                 | NA                            | NA                 |
| Kabuli_wild_24231547 | NA                                  | Ca_kabuli_denovo | 24231547                | A/G  | NA                 | NA                            | NA                 |
| Kabuli_wild_24242638 | NA                                  | Ca_kabuli_denovo | 24242638                | T/C  | NA                 | NA                            | NA                 |
| Kabuli_wild_24244788 | NA                                  | Ca_kabuli_denovo | 24244788                | C/T  | NA                 | NA                            | NA                 |
| Kabuli_wild_24246922 | NA                                  | Ca_kabuli_denovo | 24246922                | C/T  | NA                 | NA                            | NA                 |

| SNP IDs              | NCBI dbSNP accession IDs (NCBI_SS#) | Chromosomes      | Physical positions (bp) | SNPs | Gene accession IDs | Sequence components of genome | Putative functions |
|----------------------|-------------------------------------|------------------|-------------------------|------|--------------------|-------------------------------|--------------------|
| Kabuli_wild_24247604 | NA                                  | Ca_kabuli_denovo | 24247604                | C/G  | NA                 | NA                            | NA                 |
| Kabuli_wild_24249067 | NA                                  | Ca_kabuli_denovo | 24249067                | T/C  | NA                 | NA                            | NA                 |
| Kabuli_wild_24253339 | NA                                  | Ca_kabuli_denovo | 24253339                | G/T  | NA                 | NA                            | NA                 |
| Kabuli_wild_24256051 | NA                                  | Ca_kabuli_denovo | 24256051                | A/G  | NA                 | NA                            | NA                 |
| Kabuli_wild_24256062 | NA                                  | Ca_kabuli_denovo | 24256062                | G/A  | NA                 | NA                            | NA                 |
| Kabuli_wild_24258709 | NA                                  | Ca_kabuli_denovo | 24258709                | G/T  | NA                 | NA                            | NA                 |
| Kabuli_wild_24258872 | NA                                  | Ca_kabuli_denovo | 24258872                | G/T  | NA                 | NA                            | NA                 |
| Kabuli_wild_24258898 | NA                                  | Ca_kabuli_denovo | 24258898                | C/A  | NA                 | NA                            | NA                 |
| Kabuli_wild_24261716 | NA                                  | Ca_kabuli_denovo | 24261716                | G/A  | NA                 | NA                            | NA                 |
| Kabuli_wild_24261749 | NA                                  | Ca_kabuli_denovo | 24261749                | C/G  | NA                 | NA                            | NA                 |
| Kabuli_wild_24263143 | NA                                  | Ca_kabuli_denovo | 24263143                | T/C  | NA                 | NA                            | NA                 |
| Kabuli_wild_24263170 | NA                                  | Ca_kabuli_denovo | 24263170                | C/A  | NA                 | NA                            | NA                 |
| Kabuli_wild_24265458 | NA                                  | Ca_kabuli_denovo | 24265458                | G/A  | NA                 | NA                            | NA                 |
| Kabuli_wild_24265499 | NA                                  | Ca_kabuli_denovo | 24265499                | G/A  | NA                 | NA                            | NA                 |
| Kabuli_wild_24267350 | NA                                  | Ca_kabuli_denovo | 24267350                | C/G  | NA                 | NA                            | NA                 |
| Kabuli_wild_24267353 | NA                                  | Ca_kabuli_denovo | 24267353                | C/G  | NA                 | NA                            | NA                 |
| Kabuli_wild_24279209 | NA                                  | Ca_kabuli_denovo | 24279209                | G/A  | NA                 | NA                            | NA                 |
| Kabuli_wild_24280760 | NA                                  | Ca_kabuli_denovo | 24280760                | G/T  | NA                 | NA                            | NA                 |
| Kabuli_wild_24283219 | NA                                  | Ca_kabuli_denovo | 24283219                | A/G  | NA                 | NA                            | NA                 |
| Kabuli_wild_24289079 | NA                                  | Ca_kabuli_denovo | 24289079                | G/A  | NA                 | NA                            | NA                 |
| Kabuli_wild_24298376 | NA                                  | Ca_kabuli_denovo | 24298376                | C/T  | NA                 | NA                            | NA                 |
| Kabuli_wild_24298397 | NA                                  | Ca_kabuli_denovo | 24298397                | C/G  | NA                 | NA                            | NA                 |
| Kabuli_wild_24298400 | NA                                  | Ca_kabuli_denovo | 24298400                | C/G  | NA                 | NA                            | NA                 |
| Kabuli_wild_24298495 | NA                                  | Ca_kabuli_denovo | 24298495                | C/T  | NA                 | NA                            | NA                 |
| Kabuli_wild_24298499 | NA                                  | Ca_kabuli_denovo | 24298499                | A/G  | NA                 | NA                            | NA                 |
| Kabuli_wild_24299011 | NA                                  | Ca_kabuli_denovo | 24299011                | G/A  | NA                 | NA                            | NA                 |
| Kabuli_wild_24299167 | NA                                  | Ca_kabuli_denovo | 24299167                | C/A  | NA                 | NA                            | NA                 |
| Kabuli_wild_24299179 | NA                                  | Ca_kabuli_denovo | 24299179                | T/C  | NA                 | NA                            | NA                 |
| Kabuli_wild_24303566 | NA                                  | Ca_kabuli_denovo | 24303566                | A/G  | NA                 | NA                            | NA                 |
| Kabuli_wild_24303599 | NA                                  | Ca_kabuli_denovo | 24303599                | A/G  | NA                 | NA                            | NA                 |
| Kabuli_wild_24304852 | NA                                  | Ca_kabuli_denovo | 24304852                | A/G  | NA                 | NA                            | NA                 |
| Kabuli_wild_24306533 | NA                                  | Ca_kabuli_denovo | 24306533                | G/T  | NA                 | NA                            | NA                 |
| Kabuli_wild_24306542 | NA                                  | Ca_kabuli_denovo | 24306542                | C/G  | NA                 | NA                            | NA                 |
| Kabuli_wild_24306566 | NA                                  | Ca_kabuli_denovo | 24306566                | C/G  | NA                 | NA                            | NA                 |
| Kabuli_wild_24307230 | NA                                  | Ca_kabuli_denovo | 24307230                | T/G  | NA                 | NA                            | NA                 |
| Kabuli_wild_24311179 | NA                                  | Ca_kabuli_denovo | 24311179                | T/C  | NA                 | NA                            | NA                 |
| Kabuli_wild_24311611 | NA                                  | Ca_kabuli_denovo | 24311611                | C/G  | NA                 | NA                            | NA                 |
| Kabuli_wild_24317441 | NA                                  | Ca_kabuli_denovo | 24317441                | G/A  | NA                 | NA                            | NA                 |
| Kabuli_wild_24321241 | NA                                  | Ca_kabuli_denovo | 24321241                | C/T  | NA                 | NA                            | NA                 |
| Kabuli_wild_24321242 | NA                                  | Ca_kabuli_denovo | 24321242                | G/A  | NA                 | NA                            | NA                 |
| Kabuli_wild_24325626 | NA                                  | Ca_kabuli_denovo | 24325626                | C/T  | NA                 | NA                            | NA                 |
| Kabuli_wild_24327582 | NA                                  | Ca_kabuli_denovo | 24327582                | G/C  | NA                 | NA                            | NA                 |
| Kabuli_wild_24327947 | NA                                  | Ca_kabuli_denovo | 24327947                | A/C  | NA                 | NA                            | NA                 |
| Kabuli_wild_24340993 | NA                                  | Ca_kabuli_denovo | 24340993                | C/T  | NA                 | NA                            | NA                 |



| SNP IDs              | NCBI dbSNP accession IDs (NCBI_SS#) | Chromosomes      | Physical positions (bp) | SNPs | Gene accession IDs | Sequence components of genome | Putative functions |
|----------------------|-------------------------------------|------------------|-------------------------|------|--------------------|-------------------------------|--------------------|
| Kabuli_wild_24341011 | NA                                  | Ca_kabuli_denovo | 24341011                | A/G  | NA                 | NA                            | NA                 |
| Kabuli_wild_24346510 | NA                                  | Ca_kabuli_denovo | 24346510                | A/G  | NA                 | NA                            | NA                 |
| Kabuli_wild_24346519 | NA                                  | Ca_kabuli_denovo | 24346519                | T/C  | NA                 | NA                            | NA                 |
| Kabuli_wild_24347322 | NA                                  | Ca_kabuli_denovo | 24347322                | A/C  | NA                 | NA                            | NA                 |
| Kabuli_wild_24352077 | NA                                  | Ca_kabuli_denovo | 24352077                | T/G  | NA                 | NA                            | NA                 |
| Kabuli_wild_24357693 | NA                                  | Ca_kabuli_denovo | 24357693                | A/T  | NA                 | NA                            | NA                 |
| Kabuli_wild_24357744 | NA                                  | Ca_kabuli_denovo | 24357744                | T/G  | NA                 | NA                            | NA                 |
| Kabuli_wild_24366811 | NA                                  | Ca_kabuli_denovo | 24366811                | A/C  | NA                 | NA                            | NA                 |
| Kabuli_wild_24370604 | NA                                  | Ca_kabuli_denovo | 24370604                | G/T  | NA                 | NA                            | NA                 |
| Kabuli_wild_24373352 | NA                                  | Ca_kabuli_denovo | 24373352                | A/G  | NA                 | NA                            | NA                 |
| Kabuli_wild_24373418 | NA                                  | Ca_kabuli_denovo | 24373418                | C/T  | NA                 | NA                            | NA                 |
| Kabuli_wild_24376346 | NA                                  | Ca_kabuli_denovo | 24376346                | A/G  | NA                 | NA                            | NA                 |
| Kabuli_wild_24378043 | NA                                  | Ca_kabuli_denovo | 24378043                | C/G  | NA                 | NA                            | NA                 |
| Kabuli_wild_24378648 | NA                                  | Ca_kabuli_denovo | 24378648                | G/A  | NA                 | NA                            | NA                 |
| Kabuli_wild_24378660 | NA                                  | Ca_kabuli_denovo | 24378660                | C/T  | NA                 | NA                            | NA                 |
| Kabuli_wild_24379407 | NA                                  | Ca_kabuli_denovo | 24379407                | C/G  | NA                 | NA                            | NA                 |
| Kabuli_wild_24379437 | NA                                  | Ca_kabuli_denovo | 24379437                | G/A  | NA                 | NA                            | NA                 |
| Kabuli_wild_24380442 | NA                                  | Ca_kabuli_denovo | 24380442                | A/C  | NA                 | NA                            | NA                 |
| Kabuli_wild_24380443 | NA                                  | Ca_kabuli_denovo | 24380443                | G/T  | NA                 | NA                            | NA                 |
| Kabuli_wild_24395885 | NA                                  | Ca_kabuli_denovo | 24395885                | A/G  | NA                 | NA                            | NA                 |
| Kabuli_wild_24398414 | NA                                  | Ca_kabuli_denovo | 24398414                | T/A  | NA                 | NA                            | NA                 |
| Kabuli_wild_24398466 | NA                                  | Ca_kabuli_denovo | 24398466                | C/A  | NA                 | NA                            | NA                 |
| Kabuli_wild_24400717 | NA                                  | Ca_kabuli_denovo | 24400717                | A/G  | NA                 | NA                            | NA                 |
| Kabuli_wild_24402476 | NA                                  | Ca_kabuli_denovo | 24402476                | T/C  | NA                 | NA                            | NA                 |
| Kabuli_wild_24404585 | NA                                  | Ca_kabuli_denovo | 24404585                | C/T  | NA                 | NA                            | NA                 |
| Kabuli_wild_24415080 | NA                                  | Ca_kabuli_denovo | 24415080                | G/T  | NA                 | NA                            | NA                 |
| Kabuli_wild_24416075 | NA                                  | Ca_kabuli_denovo | 24416075                | C/T  | NA                 | NA                            | NA                 |
| Kabuli_wild_24416304 | NA                                  | Ca_kabuli_denovo | 24416304                | A/G  | NA                 | NA                            | NA                 |
| Kabuli_wild_24418390 | NA                                  | Ca_kabuli_denovo | 24418390                | T/C  | NA                 | NA                            | NA                 |
| Kabuli_wild_24421116 | NA                                  | Ca_kabuli_denovo | 24421116                | G/A  | NA                 | NA                            | NA                 |
| Kabuli_wild_24421480 | NA                                  | Ca_kabuli_denovo | 24421480                | G/T  | NA                 | NA                            | NA                 |
| Kabuli_wild_24437742 | NA                                  | Ca_kabuli_denovo | 24437742                | A/G  | NA                 | NA                            | NA                 |
| Kabuli_wild_24437754 | NA                                  | Ca_kabuli_denovo | 24437754                | A/G  | NA                 | NA                            | NA                 |
| Kabuli_wild_24443898 | NA                                  | Ca_kabuli_denovo | 24443898                | A/C  | NA                 | NA                            | NA                 |
| Kabuli_wild_24443899 | NA                                  | Ca_kabuli_denovo | 24443899                | A/G  | NA                 | NA                            | NA                 |
| Kabuli_wild_24444563 | NA                                  | Ca_kabuli_denovo | 24444563                | A/G  | NA                 | NA                            | NA                 |
| Kabuli_wild_24448198 | NA                                  | Ca_kabuli_denovo | 24448198                | G/T  | NA                 | NA                            | NA                 |
| Kabuli_wild_24457584 | NA                                  | Ca_kabuli_denovo | 24457584                | A/G  | NA                 | NA                            | NA                 |
| Kabuli_wild_24457623 | NA                                  | Ca_kabuli_denovo | 24457623                | C/T  | NA                 | NA                            | NA                 |
| Kabuli_wild_24458980 | NA                                  | Ca_kabuli_denovo | 24458980                | C/T  | NA                 | NA                            | NA                 |
| Kabuli_wild_24458983 | NA                                  | Ca_kabuli_denovo | 24458983                | G/C  | NA                 | NA                            | NA                 |
| Kabuli_wild_24460931 | NA                                  | Ca_kabuli_denovo | 24460931                | G/T  | NA                 | NA                            | NA                 |
| Kabuli_wild_24460967 | NA                                  | Ca_kabuli_denovo | 24460967                | G/C  | NA                 | NA                            | NA                 |
| Kabuli_wild_24467969 | NA                                  | Ca_kabuli_denovo | 24467969                | C/A  | NA                 | NA                            | NA                 |

| SNP IDs              | NCBI dbSNP accession IDs (NCBI_SS#) | Chromosomes      | Physical positions (bp) | SNPs | Gene accession IDs | Sequence components of genome | Putative functions |
|----------------------|-------------------------------------|------------------|-------------------------|------|--------------------|-------------------------------|--------------------|
| Kabuli_wild_24472697 | NA                                  | Ca_kabuli_denovo | 24472697                | A/C  | NA                 | NA                            | NA                 |
| Kabuli_wild_24477605 | NA                                  | Ca_kabuli_denovo | 24477605                | A/C  | NA                 | NA                            | NA                 |
| Kabuli_wild_24477656 | NA                                  | Ca_kabuli_denovo | 24477656                | A/G  | NA                 | NA                            | NA                 |
| Kabuli_wild_24480881 | NA                                  | Ca_kabuli_denovo | 24480881                | G/A  | NA                 | NA                            | NA                 |
| Kabuli_wild_24482427 | NA                                  | Ca_kabuli_denovo | 24482427                | A/G  | NA                 | NA                            | NA                 |
| Kabuli_wild_24482451 | NA                                  | Ca_kabuli_denovo | 24482451                | A/G  | NA                 | NA                            | NA                 |
| Kabuli_wild_24482491 | NA                                  | Ca_kabuli_denovo | 24482491                | A/C  | NA                 | NA                            | NA                 |
| Kabuli_wild_24484256 | NA                                  | Ca_kabuli_denovo | 24484256                | G/A  | NA                 | NA                            | NA                 |
| Kabuli_wild_24484286 | NA                                  | Ca_kabuli_denovo | 24484286                | C/A  | NA                 | NA                            | NA                 |
| Kabuli_wild_24489146 | NA                                  | Ca_kabuli_denovo | 24489146                | C/T  | NA                 | NA                            | NA                 |
| Kabuli_wild_24492475 | NA                                  | Ca_kabuli_denovo | 24492475                | A/C  | NA                 | NA                            | NA                 |
| Kabuli_wild_24496123 | NA                                  | Ca_kabuli_denovo | 24496123                | A/C  | NA                 | NA                            | NA                 |
| Kabuli_wild_24501139 | NA                                  | Ca_kabuli_denovo | 24501139                | T/C  | NA                 | NA                            | NA                 |
| Kabuli_wild_24503227 | NA                                  | Ca_kabuli_denovo | 24503227                | G/T  | NA                 | NA                            | NA                 |
| Kabuli_wild_24503813 | NA                                  | Ca_kabuli_denovo | 24503813                | A/G  | NA                 | NA                            | NA                 |
| Kabuli_wild_24503897 | NA                                  | Ca_kabuli_denovo | 24503897                | C/G  | NA                 | NA                            | NA                 |
| Kabuli_wild_24503899 | NA                                  | Ca_kabuli_denovo | 24503899                | C/G  | NA                 | NA                            | NA                 |
| Kabuli_wild_24504377 | NA                                  | Ca_kabuli_denovo | 24504377                | A/C  | NA                 | NA                            | NA                 |
| Kabuli_wild_24504593 | NA                                  | Ca_kabuli_denovo | 24504593                | C/T  | NA                 | NA                            | NA                 |
| Kabuli_wild_24505211 | NA                                  | Ca_kabuli_denovo | 24505211                | A/G  | NA                 | NA                            | NA                 |
| Kabuli_wild_24512057 | NA                                  | Ca_kabuli_denovo | 24512057                | T/G  | NA                 | NA                            | NA                 |
| Kabuli_wild_24518113 | NA                                  | Ca_kabuli_denovo | 24518113                | C/T  | NA                 | NA                            | NA                 |
| Kabuli_wild_24522206 | NA                                  | Ca_kabuli_denovo | 24522206                | A/G  | NA                 | NA                            | NA                 |
| Kabuli_wild_24525509 | NA                                  | Ca_kabuli_denovo | 24525509                | G/C  | NA                 | NA                            | NA                 |
| Kabuli_wild_24525523 | NA                                  | Ca_kabuli_denovo | 24525523                | T/C  | NA                 | NA                            | NA                 |
| Kabuli_wild_24525527 | NA                                  | Ca_kabuli_denovo | 24525527                | C/A  | NA                 | NA                            | NA                 |
| Kabuli_wild_24532410 | NA                                  | Ca_kabuli_denovo | 24532410                | A/C  | NA                 | NA                            | NA                 |
| Kabuli_wild_24535507 | NA                                  | Ca_kabuli_denovo | 24535507                | G/A  | NA                 | NA                            | NA                 |
| Kabuli_wild_24536608 | NA                                  | Ca_kabuli_denovo | 24536608                | C/G  | NA                 | NA                            | NA                 |
| Kabuli_wild_24537306 | NA                                  | Ca_kabuli_denovo | 24537306                | A/C  | NA                 | NA                            | NA                 |
| Kabuli_wild_24537307 | NA                                  | Ca_kabuli_denovo | 24537307                | C/G  | NA                 | NA                            | NA                 |
| Kabuli_wild_24539512 | NA                                  | Ca_kabuli_denovo | 24539512                | A/C  | NA                 | NA                            | NA                 |
| Kabuli_wild_24539707 | NA                                  | Ca_kabuli_denovo | 24539707                | A/C  | NA                 | NA                            | NA                 |
| Kabuli_wild_24539899 | NA                                  | Ca_kabuli_denovo | 24539899                | A/C  | NA                 | NA                            | NA                 |
| Kabuli_wild_24543799 | NA                                  | Ca_kabuli_denovo | 24543799                | T/G  | NA                 | NA                            | NA                 |
| Kabuli_wild_24545655 | NA                                  | Ca_kabuli_denovo | 24545655                | G/T  | NA                 | NA                            | NA                 |
| Kabuli_wild_24546559 | NA                                  | Ca_kabuli_denovo | 24546559                | T/A  | NA                 | NA                            | NA                 |
| Kabuli_wild_24546587 | NA                                  | Ca_kabuli_denovo | 24546587                | A/G  | NA                 | NA                            | NA                 |
| Kabuli_wild_24547002 | NA                                  | Ca_kabuli_denovo | 24547002                | A/C  | NA                 | NA                            | NA                 |
| Kabuli_wild_24547761 | NA                                  | Ca_kabuli_denovo | 24547761                | G/T  | NA                 | NA                            | NA                 |
| Kabuli_wild_24547821 | NA                                  | Ca_kabuli_denovo | 24547821                | C/T  | NA                 | NA                            | NA                 |
| Kabuli_wild_24549049 | NA                                  | Ca_kabuli_denovo | 24549049                | C/G  | NA                 | NA                            | NA                 |
| Kabuli_wild_24550145 | NA                                  | Ca_kabuli_denovo | 24550145                | C/T  | NA                 | NA                            | NA                 |
| Kabuli_wild_24550154 | NA                                  | Ca_kabuli_denovo | 24550154                | A/G  | NA                 | NA                            | NA                 |

| SNP IDs              | NCBI dbSNP accession IDs (NCBI_SS#) | Chromosomes      | Physical positions (bp) | SNPs | Gene accession IDs | Sequence components of genome | Putative functions |
|----------------------|-------------------------------------|------------------|-------------------------|------|--------------------|-------------------------------|--------------------|
| Kabuli_wild_24550171 | NA                                  | Ca_kabuli_denovo | 24550171                | G/T  | NA                 | NA                            | NA                 |
| Kabuli_wild_24551116 | NA                                  | Ca_kabuli_denovo | 24551116                | G/T  | NA                 | NA                            | NA                 |
| Kabuli_wild_24556409 | NA                                  | Ca_kabuli_denovo | 24556409                | A/C  | NA                 | NA                            | NA                 |
| Kabuli_wild_24557393 | NA                                  | Ca_kabuli_denovo | 24557393                | G/C  | NA                 | NA                            | NA                 |
| Kabuli_wild_24557459 | NA                                  | Ca_kabuli_denovo | 24557459                | A/C  | NA                 | NA                            | NA                 |
| Kabuli_wild_24561314 | NA                                  | Ca_kabuli_denovo | 24561314                | G/A  | NA                 | NA                            | NA                 |
| Kabuli_wild_24561392 | NA                                  | Ca_kabuli_denovo | 24561392                | A/G  | NA                 | NA                            | NA                 |
| Kabuli_wild_24563247 | NA                                  | Ca_kabuli_denovo | 24563247                | A/C  | NA                 | NA                            | NA                 |
| Kabuli_wild_24567559 | NA                                  | Ca_kabuli_denovo | 24567559                | C/G  | NA                 | NA                            | NA                 |
| Kabuli_wild_24567634 | NA                                  | Ca_kabuli_denovo | 24567634                | C/T  | NA                 | NA                            | NA                 |
| Kabuli_wild_24568884 | NA                                  | Ca_kabuli_denovo | 24568884                | G/T  | NA                 | NA                            | NA                 |
| Kabuli_wild_24574793 | NA                                  | Ca_kabuli_denovo | 24574793                | C/T  | NA                 | NA                            | NA                 |
| Kabuli_wild_24586360 | NA                                  | Ca_kabuli_denovo | 24586360                | A/G  | NA                 | NA                            | NA                 |
| Kabuli_wild_24593095 | NA                                  | Ca_kabuli_denovo | 24593095                | T/G  | NA                 | NA                            | NA                 |
| Kabuli_wild_24593164 | NA                                  | Ca_kabuli_denovo | 24593164                | T/C  | NA                 | NA                            | NA                 |
| Kabuli_wild_24593304 | NA                                  | Ca_kabuli_denovo | 24593304                | A/G  | NA                 | NA                            | NA                 |
| Kabuli_wild_24597830 | NA                                  | Ca_kabuli_denovo | 24597830                | C/G  | NA                 | NA                            | NA                 |
| Kabuli_wild_24597866 | NA                                  | Ca_kabuli_denovo | 24597866                | C/T  | NA                 | NA                            | NA                 |
| Kabuli_wild_24604647 | NA                                  | Ca_kabuli_denovo | 24604647                | G/T  | NA                 | NA                            | NA                 |
| Kabuli_wild_24604717 | NA                                  | Ca_kabuli_denovo | 24604717                | G/A  | NA                 | NA                            | NA                 |
| Kabuli_wild_24604789 | NA                                  | Ca_kabuli_denovo | 24604789                | T/C  | NA                 | NA                            | NA                 |
| Kabuli_wild_24609992 | NA                                  | Ca_kabuli_denovo | 24609992                | C/T  | NA                 | NA                            | NA                 |
| Kabuli_wild_24609998 | NA                                  | Ca_kabuli_denovo | 24609998                | C/T  | NA                 | NA                            | NA                 |
| Kabuli_wild_24610171 | NA                                  | Ca_kabuli_denovo | 24610171                | C/G  | NA                 | NA                            | NA                 |
| Kabuli_wild_24614372 | NA                                  | Ca_kabuli_denovo | 24614372                | A/G  | NA                 | NA                            | NA                 |
| Kabuli_wild_24614390 | NA                                  | Ca_kabuli_denovo | 24614390                | A/G  | NA                 | NA                            | NA                 |
| Kabuli_wild_24616927 | NA                                  | Ca_kabuli_denovo | 24616927                | G/T  | NA                 | NA                            | NA                 |
| Kabuli_wild_24616966 | NA                                  | Ca_kabuli_denovo | 24616966                | C/T  | NA                 | NA                            | NA                 |
| Kabuli_wild_24620827 | NA                                  | Ca_kabuli_denovo | 24620827                | G/T  | NA                 | NA                            | NA                 |
| Kabuli_wild_24621317 | NA                                  | Ca_kabuli_denovo | 24621317                | C/T  | NA                 | NA                            | NA                 |
| Kabuli_wild_24621335 | NA                                  | Ca_kabuli_denovo | 24621335                | C/T  | NA                 | NA                            | NA                 |
| Kabuli_wild_24623446 | NA                                  | Ca_kabuli_denovo | 24623446                | G/A  | NA                 | NA                            | NA                 |
| Kabuli_wild_24630540 | NA                                  | Ca_kabuli_denovo | 24630540                | C/T  | NA                 | NA                            | NA                 |
| Kabuli_wild_24634289 | NA                                  | Ca_kabuli_denovo | 24634289                | A/G  | NA                 | NA                            | NA                 |
| Kabuli_wild_24634293 | NA                                  | Ca_kabuli_denovo | 24634293                | T/C  | NA                 | NA                            | NA                 |
| Kabuli_wild_24634337 | NA                                  | Ca_kabuli_denovo | 24634337                | A/C  | NA                 | NA                            | NA                 |
| Kabuli_wild_24634340 | NA                                  | Ca_kabuli_denovo | 24634340                | G/A  | NA                 | NA                            | NA                 |
| Kabuli_wild_24634547 | NA                                  | Ca_kabuli_denovo | 24634547                | G/T  | NA                 | NA                            | NA                 |
| Kabuli_wild_24635705 | NA                                  | Ca_kabuli_denovo | 24635705                | A/C  | NA                 | NA                            | NA                 |
| Kabuli_wild_24636955 | NA                                  | Ca_kabuli_denovo | 24636955                | C/A  | NA                 | NA                            | NA                 |
| Kabuli_wild_24637407 | NA                                  | Ca_kabuli_denovo | 24637407                | G/A  | NA                 | NA                            | NA                 |
| Kabuli_wild_24637413 | NA                                  | Ca_kabuli_denovo | 24637413                | C/G  | NA                 | NA                            | NA                 |
| Kabuli_wild_24637641 | NA                                  | Ca_kabuli_denovo | 24637641                | A/C  | NA                 | NA                            | NA                 |
| Kabuli_wild_24637656 | NA                                  | Ca_kabuli_denovo | 24637656                | A/G  | NA                 | NA                            | NA                 |

| SNP IDs                     | NCBI dbSNP accession IDs (NCBI_SS#) | Chromosomes             | Physical positions (bp) | SNPs | Gene accession IDs | Sequence components of genome | Putative functions |
|-----------------------------|-------------------------------------|-------------------------|-------------------------|------|--------------------|-------------------------------|--------------------|
| <i>Kabuli_wild_24644371</i> | NA                                  | <i>Ca_kabuli_denovo</i> | 24644371                | A/G  | NA                 | NA                            | NA                 |
| <i>Kabuli_wild_24644406</i> | NA                                  | <i>Ca_kabuli_denovo</i> | 24644406                | C/T  | NA                 | NA                            | NA                 |
| <i>Kabuli_wild_24647360</i> | NA                                  | <i>Ca_kabuli_denovo</i> | 24647360                | A/T  | NA                 | NA                            | NA                 |
| <i>Kabuli_wild_24647384</i> | NA                                  | <i>Ca_kabuli_denovo</i> | 24647384                | T/C  | NA                 | NA                            | NA                 |
| <i>Kabuli_wild_24649162</i> | NA                                  | <i>Ca_kabuli_denovo</i> | 24649162                | A/G  | NA                 | NA                            | NA                 |
| <i>Kabuli_wild_24652885</i> | NA                                  | <i>Ca_kabuli_denovo</i> | 24652885                | T/G  | NA                 | NA                            | NA                 |
| <i>Kabuli_wild_24656826</i> | NA                                  | <i>Ca_kabuli_denovo</i> | 24656826                | A/C  | NA                 | NA                            | NA                 |
| <i>Kabuli_wild_24658121</i> | NA                                  | <i>Ca_kabuli_denovo</i> | 24658121                | C/G  | NA                 | NA                            | NA                 |
| <i>Kabuli_wild_24662323</i> | NA                                  | <i>Ca_kabuli_denovo</i> | 24662323                | A/T  | NA                 | NA                            | NA                 |
| <i>Kabuli_wild_24662345</i> | NA                                  | <i>Ca_kabuli_denovo</i> | 24662345                | G/A  | NA                 | NA                            | NA                 |
| <i>Kabuli_wild_24662713</i> | NA                                  | <i>Ca_kabuli_denovo</i> | 24662713                | A/G  | NA                 | NA                            | NA                 |
| <i>Kabuli_wild_24664600</i> | NA                                  | <i>Ca_kabuli_denovo</i> | 24664600                | C/G  | NA                 | NA                            | NA                 |
| <i>Kabuli_wild_24672295</i> | NA                                  | <i>Ca_kabuli_denovo</i> | 24672295                | G/T  | NA                 | NA                            | NA                 |
| <i>Kabuli_wild_24672296</i> | NA                                  | <i>Ca_kabuli_denovo</i> | 24672296                | C/G  | NA                 | NA                            | NA                 |
| <i>Kabuli_wild_24676916</i> | NA                                  | <i>Ca_kabuli_denovo</i> | 24676916                | G/C  | NA                 | NA                            | NA                 |
| <i>Kabuli_wild_24682359</i> | NA                                  | <i>Ca_kabuli_denovo</i> | 24682359                | G/T  | NA                 | NA                            | NA                 |
| <i>Kabuli_wild_24682594</i> | NA                                  | <i>Ca_kabuli_denovo</i> | 24682594                | T/C  | NA                 | NA                            | NA                 |
| <i>Kabuli_wild_24683300</i> | NA                                  | <i>Ca_kabuli_denovo</i> | 24683300                | G/A  | NA                 | NA                            | NA                 |
| <i>Kabuli_wild_24683320</i> | NA                                  | <i>Ca_kabuli_denovo</i> | 24683320                | G/T  | NA                 | NA                            | NA                 |
| <i>Kabuli_wild_24683322</i> | NA                                  | <i>Ca_kabuli_denovo</i> | 24683322                | T/G  | NA                 | NA                            | NA                 |
| <i>Kabuli_wild_24684948</i> | NA                                  | <i>Ca_kabuli_denovo</i> | 24684948                | A/C  | NA                 | NA                            | NA                 |
| <i>Kabuli_wild_24684954</i> | NA                                  | <i>Ca_kabuli_denovo</i> | 24684954                | T/C  | NA                 | NA                            | NA                 |
| <i>Kabuli_wild_24687208</i> | NA                                  | <i>Ca_kabuli_denovo</i> | 24687208                | T/C  | NA                 | NA                            | NA                 |
| <i>Kabuli_wild_24687209</i> | NA                                  | <i>Ca_kabuli_denovo</i> | 24687209                | A/G  | NA                 | NA                            | NA                 |
| <i>Kabuli_wild_24687385</i> | NA                                  | <i>Ca_kabuli_denovo</i> | 24687385                | C/T  | NA                 | NA                            | NA                 |
| <i>Kabuli_wild_24687391</i> | NA                                  | <i>Ca_kabuli_denovo</i> | 24687391                | A/T  | NA                 | NA                            | NA                 |
| <i>Kabuli_wild_24693553</i> | NA                                  | <i>Ca_kabuli_denovo</i> | 24693553                | G/A  | NA                 | NA                            | NA                 |
| <i>Kabuli_wild_24693565</i> | NA                                  | <i>Ca_kabuli_denovo</i> | 24693565                | A/G  | NA                 | NA                            | NA                 |
| <i>Kabuli_wild_24697040</i> | NA                                  | <i>Ca_kabuli_denovo</i> | 24697040                | A/C  | NA                 | NA                            | NA                 |
| <i>Kabuli_wild_24699402</i> | NA                                  | <i>Ca_kabuli_denovo</i> | 24699402                | C/T  | NA                 | NA                            | NA                 |
| <i>Kabuli_wild_24699636</i> | NA                                  | <i>Ca_kabuli_denovo</i> | 24699636                | G/T  | NA                 | NA                            | NA                 |
| <i>Kabuli_wild_24700175</i> | NA                                  | <i>Ca_kabuli_denovo</i> | 24700175                | C/T  | NA                 | NA                            | NA                 |
| <i>Kabuli_wild_24701751</i> | NA                                  | <i>Ca_kabuli_denovo</i> | 24701751                | A/C  | NA                 | NA                            | NA                 |
| <i>Kabuli_wild_24701752</i> | NA                                  | <i>Ca_kabuli_denovo</i> | 24701752                | G/A  | NA                 | NA                            | NA                 |
| <i>Kabuli_wild_24704566</i> | NA                                  | <i>Ca_kabuli_denovo</i> | 24704566                | C/T  | NA                 | NA                            | NA                 |
| <i>Kabuli_wild_24706658</i> | NA                                  | <i>Ca_kabuli_denovo</i> | 24706658                | C/T  | NA                 | NA                            | NA                 |
| <i>Kabuli_wild_24706692</i> | NA                                  | <i>Ca_kabuli_denovo</i> | 24706692                | G/A  | NA                 | NA                            | NA                 |
| <i>Kabuli_wild_24711393</i> | NA                                  | <i>Ca_kabuli_denovo</i> | 24711393                | G/A  | NA                 | NA                            | NA                 |
| <i>Kabuli_wild_24712985</i> | NA                                  | <i>Ca_kabuli_denovo</i> | 24712985                | A/C  | NA                 | NA                            | NA                 |
| <i>Kabuli_wild_24712987</i> | NA                                  | <i>Ca_kabuli_denovo</i> | 24712987                | A/G  | NA                 | NA                            | NA                 |
| <i>Kabuli_wild_24717506</i> | NA                                  | <i>Ca_kabuli_denovo</i> | 24717506                | G/A  | NA                 | NA                            | NA                 |
| <i>Kabuli_wild_24717563</i> | NA                                  | <i>Ca_kabuli_denovo</i> | 24717563                | G/A  | NA                 | NA                            | NA                 |
| <i>Kabuli_wild_24722088</i> | NA                                  | <i>Ca_kabuli_denovo</i> | 24722088                | G/T  | NA                 | NA                            | NA                 |
| <i>Kabuli_wild_24723997</i> | NA                                  | <i>Ca_kabuli_denovo</i> | 24723997                | A/G  | NA                 | NA                            | NA                 |

| SNP IDs              | NCBI dbSNP accession IDs (NCBI_SS#) | Chromosomes      | Physical positions (bp) | SNPs | Gene accession IDs | Sequence components of genome | Putative functions |
|----------------------|-------------------------------------|------------------|-------------------------|------|--------------------|-------------------------------|--------------------|
| Kabuli_wild_24729137 | NA                                  | Ca_kabuli_denovo | 24729137                | T/C  | NA                 | NA                            | NA                 |
| Kabuli_wild_24729188 | NA                                  | Ca_kabuli_denovo | 24729188                | T/C  | NA                 | NA                            | NA                 |
| Kabuli_wild_24732581 | NA                                  | Ca_kabuli_denovo | 24732581                | C/T  | NA                 | NA                            | NA                 |
| Kabuli_wild_24733858 | NA                                  | Ca_kabuli_denovo | 24733858                | G/A  | NA                 | NA                            | NA                 |
| Kabuli_wild_24733882 | NA                                  | Ca_kabuli_denovo | 24733882                | T/C  | NA                 | NA                            | NA                 |
| Kabuli_wild_24734987 | NA                                  | Ca_kabuli_denovo | 24734987                | C/T  | NA                 | NA                            | NA                 |
| Kabuli_wild_24738138 | NA                                  | Ca_kabuli_denovo | 24738138                | A/G  | NA                 | NA                            | NA                 |
| Kabuli_wild_24748549 | NA                                  | Ca_kabuli_denovo | 24748549                | A/G  | NA                 | NA                            | NA                 |
| Kabuli_wild_24754442 | NA                                  | Ca_kabuli_denovo | 24754442                | A/T  | NA                 | NA                            | NA                 |
| Kabuli_wild_24755721 | NA                                  | Ca_kabuli_denovo | 24755721                | G/C  | NA                 | NA                            | NA                 |
| Kabuli_wild_24755864 | NA                                  | Ca_kabuli_denovo | 24755864                | G/A  | NA                 | NA                            | NA                 |
| Kabuli_wild_24759065 | NA                                  | Ca_kabuli_denovo | 24759065                | A/C  | NA                 | NA                            | NA                 |
| Kabuli_wild_24759066 | NA                                  | Ca_kabuli_denovo | 24759066                | A/G  | NA                 | NA                            | NA                 |
| Kabuli_wild_24759067 | NA                                  | Ca_kabuli_denovo | 24759067                | A/G  | NA                 | NA                            | NA                 |
| Kabuli_wild_24763099 | NA                                  | Ca_kabuli_denovo | 24763099                | A/C  | NA                 | NA                            | NA                 |
| Kabuli_wild_24774037 | NA                                  | Ca_kabuli_denovo | 24774037                | A/C  | NA                 | NA                            | NA                 |
| Kabuli_wild_24774574 | NA                                  | Ca_kabuli_denovo | 24774574                | C/T  | NA                 | NA                            | NA                 |
| Kabuli_wild_24774661 | NA                                  | Ca_kabuli_denovo | 24774661                | G/C  | NA                 | NA                            | NA                 |
| Kabuli_wild_24774697 | NA                                  | Ca_kabuli_denovo | 24774697                | G/A  | NA                 | NA                            | NA                 |
| Kabuli_wild_24775756 | NA                                  | Ca_kabuli_denovo | 24775756                | A/G  | NA                 | NA                            | NA                 |
| Kabuli_wild_24775762 | NA                                  | Ca_kabuli_denovo | 24775762                | A/C  | NA                 | NA                            | NA                 |
| Kabuli_wild_24777542 | NA                                  | Ca_kabuli_denovo | 24777542                | T/C  | NA                 | NA                            | NA                 |
| Kabuli_wild_24790019 | NA                                  | Ca_kabuli_denovo | 24790019                | G/T  | NA                 | NA                            | NA                 |
| Kabuli_wild_24791384 | NA                                  | Ca_kabuli_denovo | 24791384                | C/T  | NA                 | NA                            | NA                 |
| Kabuli_wild_24800625 | NA                                  | Ca_kabuli_denovo | 24800625                | T/C  | NA                 | NA                            | NA                 |
| Kabuli_wild_24803629 | NA                                  | Ca_kabuli_denovo | 24803629                | C/T  | NA                 | NA                            | NA                 |
| Kabuli_wild_24803668 | NA                                  | Ca_kabuli_denovo | 24803668                | C/T  | NA                 | NA                            | NA                 |
| Kabuli_wild_24804040 | NA                                  | Ca_kabuli_denovo | 24804040                | A/G  | NA                 | NA                            | NA                 |
| Kabuli_wild_24804216 | NA                                  | Ca_kabuli_denovo | 24804216                | A/C  | NA                 | NA                            | NA                 |
| Kabuli_wild_24804220 | NA                                  | Ca_kabuli_denovo | 24804220                | A/G  | NA                 | NA                            | NA                 |
| Kabuli_wild_24804263 | NA                                  | Ca_kabuli_denovo | 24804263                | C/T  | NA                 | NA                            | NA                 |
| Kabuli_wild_24804272 | NA                                  | Ca_kabuli_denovo | 24804272                | T/A  | NA                 | NA                            | NA                 |
| Kabuli_wild_24807160 | NA                                  | Ca_kabuli_denovo | 24807160                | G/C  | NA                 | NA                            | NA                 |
| Kabuli_wild_24808985 | NA                                  | Ca_kabuli_denovo | 24808985                | T/G  | NA                 | NA                            | NA                 |
| Kabuli_wild_24810232 | NA                                  | Ca_kabuli_denovo | 24810232                | A/C  | NA                 | NA                            | NA                 |
| Kabuli_wild_24816697 | NA                                  | Ca_kabuli_denovo | 24816697                | G/C  | NA                 | NA                            | NA                 |
| Kabuli_wild_24816761 | NA                                  | Ca_kabuli_denovo | 24816761                | G/T  | NA                 | NA                            | NA                 |
| Kabuli_wild_24817156 | NA                                  | Ca_kabuli_denovo | 24817156                | C/T  | NA                 | NA                            | NA                 |
| Kabuli_wild_24822040 | NA                                  | Ca_kabuli_denovo | 24822040                | G/T  | NA                 | NA                            | NA                 |
| Kabuli_wild_24822952 | NA                                  | Ca_kabuli_denovo | 24822952                | G/T  | NA                 | NA                            | NA                 |
| Kabuli_wild_24824914 | NA                                  | Ca_kabuli_denovo | 24824914                | C/G  | NA                 | NA                            | NA                 |
| Kabuli_wild_24824920 | NA                                  | Ca_kabuli_denovo | 24824920                | C/G  | NA                 | NA                            | NA                 |
| Kabuli_wild_24837848 | NA                                  | Ca_kabuli_denovo | 24837848                | G/A  | NA                 | NA                            | NA                 |
| Kabuli_wild_24838495 | NA                                  | Ca_kabuli_denovo | 24838495                | T/G  | NA                 | NA                            | NA                 |

| SNP IDs                     | NCBI dbSNP accession IDs (NCBI_SS#) | Chromosomes             | Physical positions (bp) | SNPs | Gene accession IDs | Sequence components of genome | Putative functions |
|-----------------------------|-------------------------------------|-------------------------|-------------------------|------|--------------------|-------------------------------|--------------------|
| <i>Kabuli_wild_24843520</i> | NA                                  | <i>Ca_kabuli_denovo</i> | 24843520                | A/G  | NA                 | NA                            | NA                 |
| <i>Kabuli_wild_24856810</i> | NA                                  | <i>Ca_kabuli_denovo</i> | 24856810                | C/T  | NA                 | NA                            | NA                 |
| <i>Kabuli_wild_24858040</i> | NA                                  | <i>Ca_kabuli_denovo</i> | 24858040                | G/T  | NA                 | NA                            | NA                 |
| <i>Kabuli_wild_24860878</i> | NA                                  | <i>Ca_kabuli_denovo</i> | 24860878                | C/G  | NA                 | NA                            | NA                 |
| <i>Kabuli_wild_24862470</i> | NA                                  | <i>Ca_kabuli_denovo</i> | 24862470                | A/T  | NA                 | NA                            | NA                 |
| <i>Kabuli_wild_24862756</i> | NA                                  | <i>Ca_kabuli_denovo</i> | 24862756                | T/C  | NA                 | NA                            | NA                 |
| <i>Kabuli_wild_24864400</i> | NA                                  | <i>Ca_kabuli_denovo</i> | 24864400                | T/C  | NA                 | NA                            | NA                 |
| <i>Kabuli_wild_24864549</i> | NA                                  | <i>Ca_kabuli_denovo</i> | 24864549                | A/C  | NA                 | NA                            | NA                 |
| <i>Kabuli_wild_24867065</i> | NA                                  | <i>Ca_kabuli_denovo</i> | 24867065                | A/G  | NA                 | NA                            | NA                 |
| <i>Kabuli_wild_24869635</i> | NA                                  | <i>Ca_kabuli_denovo</i> | 24869635                | G/A  | NA                 | NA                            | NA                 |
| <i>Kabuli_wild_24878990</i> | NA                                  | <i>Ca_kabuli_denovo</i> | 24878990                | T/C  | NA                 | NA                            | NA                 |
| <i>Kabuli_wild_24879002</i> | NA                                  | <i>Ca_kabuli_denovo</i> | 24879002                | G/A  | NA                 | NA                            | NA                 |
| <i>Kabuli_wild_24879005</i> | NA                                  | <i>Ca_kabuli_denovo</i> | 24879005                | T/C  | NA                 | NA                            | NA                 |
| <i>Kabuli_wild_24879035</i> | NA                                  | <i>Ca_kabuli_denovo</i> | 24879035                | T/A  | NA                 | NA                            | NA                 |
| <i>Kabuli_wild_24883096</i> | NA                                  | <i>Ca_kabuli_denovo</i> | 24883096                | A/C  | NA                 | NA                            | NA                 |
| <i>Kabuli_wild_24883544</i> | NA                                  | <i>Ca_kabuli_denovo</i> | 24883544                | T/C  | NA                 | NA                            | NA                 |
| <i>Kabuli_wild_24883553</i> | NA                                  | <i>Ca_kabuli_denovo</i> | 24883553                | C/T  | NA                 | NA                            | NA                 |
| <i>Kabuli_wild_24885425</i> | NA                                  | <i>Ca_kabuli_denovo</i> | 24885425                | C/G  | NA                 | NA                            | NA                 |
| <i>Kabuli_wild_24889709</i> | NA                                  | <i>Ca_kabuli_denovo</i> | 24889709                | C/G  | NA                 | NA                            | NA                 |
| <i>Kabuli_wild_24895578</i> | NA                                  | <i>Ca_kabuli_denovo</i> | 24895578                | G/T  | NA                 | NA                            | NA                 |
| <i>Kabuli_wild_24896837</i> | NA                                  | <i>Ca_kabuli_denovo</i> | 24896837                | A/C  | NA                 | NA                            | NA                 |
| <i>Kabuli_wild_24896855</i> | NA                                  | <i>Ca_kabuli_denovo</i> | 24896855                | A/G  | NA                 | NA                            | NA                 |
| <i>Kabuli_wild_24896870</i> | NA                                  | <i>Ca_kabuli_denovo</i> | 24896870                | G/A  | NA                 | NA                            | NA                 |
| <i>Kabuli_wild_24897787</i> | NA                                  | <i>Ca_kabuli_denovo</i> | 24897787                | A/C  | NA                 | NA                            | NA                 |
| <i>Kabuli_wild_24897877</i> | NA                                  | <i>Ca_kabuli_denovo</i> | 24897877                | A/G  | NA                 | NA                            | NA                 |
| <i>Kabuli_wild_24898843</i> | NA                                  | <i>Ca_kabuli_denovo</i> | 24898843                | G/T  | NA                 | NA                            | NA                 |
| <i>Kabuli_wild_24901973</i> | NA                                  | <i>Ca_kabuli_denovo</i> | 24901973                | G/T  | NA                 | NA                            | NA                 |
| <i>Kabuli_wild_24903732</i> | NA                                  | <i>Ca_kabuli_denovo</i> | 24903732                | A/G  | NA                 | NA                            | NA                 |
| <i>Kabuli_wild_24904748</i> | NA                                  | <i>Ca_kabuli_denovo</i> | 24904748                | T/C  | NA                 | NA                            | NA                 |
| <i>Kabuli_wild_24904762</i> | NA                                  | <i>Ca_kabuli_denovo</i> | 24904762                | T/C  | NA                 | NA                            | NA                 |
| <i>Kabuli_wild_24905651</i> | NA                                  | <i>Ca_kabuli_denovo</i> | 24905651                | G/T  | NA                 | NA                            | NA                 |
| <i>Kabuli_wild_24910560</i> | NA                                  | <i>Ca_kabuli_denovo</i> | 24910560                | C/G  | NA                 | NA                            | NA                 |
| <i>Kabuli_wild_24910575</i> | NA                                  | <i>Ca_kabuli_denovo</i> | 24910575                | G/A  | NA                 | NA                            | NA                 |
| <i>Kabuli_wild_24912662</i> | NA                                  | <i>Ca_kabuli_denovo</i> | 24912662                | G/T  | NA                 | NA                            | NA                 |
| <i>Kabuli_wild_24915144</i> | NA                                  | <i>Ca_kabuli_denovo</i> | 24915144                | G/T  | NA                 | NA                            | NA                 |
| <i>Kabuli_wild_24924868</i> | NA                                  | <i>Ca_kabuli_denovo</i> | 24924868                | A/T  | NA                 | NA                            | NA                 |
| <i>Kabuli_wild_24924891</i> | NA                                  | <i>Ca_kabuli_denovo</i> | 24924891                | A/C  | NA                 | NA                            | NA                 |
| <i>Kabuli_wild_24928465</i> | NA                                  | <i>Ca_kabuli_denovo</i> | 24928465                | T/C  | NA                 | NA                            | NA                 |
| <i>Kabuli_wild_24937105</i> | NA                                  | <i>Ca_kabuli_denovo</i> | 24937105                | T/G  | NA                 | NA                            | NA                 |
| <i>Kabuli_wild_24937369</i> | NA                                  | <i>Ca_kabuli_denovo</i> | 24937369                | A/G  | NA                 | NA                            | NA                 |
| <i>Kabuli_wild_24937399</i> | NA                                  | <i>Ca_kabuli_denovo</i> | 24937399                | A/G  | NA                 | NA                            | NA                 |
| <i>Kabuli_wild_24938526</i> | NA                                  | <i>Ca_kabuli_denovo</i> | 24938526                | G/A  | NA                 | NA                            | NA                 |
| <i>Kabuli_wild_24938540</i> | NA                                  | <i>Ca_kabuli_denovo</i> | 24938540                | G/C  | NA                 | NA                            | NA                 |
| <i>Kabuli_wild_24941139</i> | NA                                  | <i>Ca_kabuli_denovo</i> | 24941139                | C/T  | NA                 | NA                            | NA                 |

| SNP IDs              | NCBI dbSNP accession IDs (NCBI_SS#) | Chromosomes      | Physical positions (bp) | SNPs | Gene accession IDs | Sequence components of genome | Putative functions |
|----------------------|-------------------------------------|------------------|-------------------------|------|--------------------|-------------------------------|--------------------|
| Kabuli_wild_24945794 | NA                                  | Ca_kabuli_denovo | 24945794                | T/C  | NA                 | NA                            | NA                 |
| Kabuli_wild_24947318 | NA                                  | Ca_kabuli_denovo | 24947318                | A/C  | NA                 | NA                            | NA                 |
| Kabuli_wild_24955189 | NA                                  | Ca_kabuli_denovo | 24955189                | A/T  | NA                 | NA                            | NA                 |
| Kabuli_wild_24955195 | NA                                  | Ca_kabuli_denovo | 24955195                | G/T  | NA                 | NA                            | NA                 |
| Kabuli_wild_24957205 | NA                                  | Ca_kabuli_denovo | 24957205                | T/A  | NA                 | NA                            | NA                 |
| Kabuli_wild_24963572 | NA                                  | Ca_kabuli_denovo | 24963572                | C/G  | NA                 | NA                            | NA                 |
| Kabuli_wild_24963581 | NA                                  | Ca_kabuli_denovo | 24963581                | A/G  | NA                 | NA                            | NA                 |
| Kabuli_wild_24975642 | NA                                  | Ca_kabuli_denovo | 24975642                | T/G  | NA                 | NA                            | NA                 |
| Kabuli_wild_24975697 | NA                                  | Ca_kabuli_denovo | 24975697                | G/A  | NA                 | NA                            | NA                 |
| Kabuli_wild_24976094 | NA                                  | Ca_kabuli_denovo | 24976094                | T/G  | NA                 | NA                            | NA                 |
| Kabuli_wild_24983608 | NA                                  | Ca_kabuli_denovo | 24983608                | G/T  | NA                 | NA                            | NA                 |
| Kabuli_wild_24995802 | NA                                  | Ca_kabuli_denovo | 24995802                | T/G  | NA                 | NA                            | NA                 |
| Kabuli_wild_24997531 | NA                                  | Ca_kabuli_denovo | 24997531                | A/C  | NA                 | NA                            | NA                 |
| Kabuli_wild_24998029 | NA                                  | Ca_kabuli_denovo | 24998029                | A/G  | NA                 | NA                            | NA                 |
| Kabuli_wild_24998053 | NA                                  | Ca_kabuli_denovo | 24998053                | T/C  | NA                 | NA                            | NA                 |
| Kabuli_wild_24999039 | NA                                  | Ca_kabuli_denovo | 24999039                | C/G  | NA                 | NA                            | NA                 |
| Kabuli_wild_25001100 | NA                                  | Ca_kabuli_denovo | 25001100                | G/A  | NA                 | NA                            | NA                 |
| Kabuli_wild_25001142 | NA                                  | Ca_kabuli_denovo | 25001142                | C/T  | NA                 | NA                            | NA                 |
| Kabuli_wild_25003186 | NA                                  | Ca_kabuli_denovo | 25003186                | T/C  | NA                 | NA                            | NA                 |
| Kabuli_wild_25010812 | NA                                  | Ca_kabuli_denovo | 25010812                | G/A  | NA                 | NA                            | NA                 |
| Kabuli_wild_25010866 | NA                                  | Ca_kabuli_denovo | 25010866                | A/C  | NA                 | NA                            | NA                 |
| Kabuli_wild_25013531 | NA                                  | Ca_kabuli_denovo | 25013531                | T/C  | NA                 | NA                            | NA                 |
| Kabuli_wild_25013540 | NA                                  | Ca_kabuli_denovo | 25013540                | T/G  | NA                 | NA                            | NA                 |
| Kabuli_wild_25015557 | NA                                  | Ca_kabuli_denovo | 25015557                | G/T  | NA                 | NA                            | NA                 |
| Kabuli_wild_25020184 | NA                                  | Ca_kabuli_denovo | 25020184                | A/C  | NA                 | NA                            | NA                 |
| Kabuli_wild_25035571 | NA                                  | Ca_kabuli_denovo | 25035571                | T/C  | NA                 | NA                            | NA                 |
| Kabuli_wild_25039793 | NA                                  | Ca_kabuli_denovo | 25039793                | C/G  | NA                 | NA                            | NA                 |
| Kabuli_wild_25044080 | NA                                  | Ca_kabuli_denovo | 25044080                | T/G  | NA                 | NA                            | NA                 |
| Kabuli_wild_25045347 | NA                                  | Ca_kabuli_denovo | 25045347                | C/A  | NA                 | NA                            | NA                 |
| Kabuli_wild_25045378 | NA                                  | Ca_kabuli_denovo | 25045378                | G/A  | NA                 | NA                            | NA                 |
| Kabuli_wild_25050331 | NA                                  | Ca_kabuli_denovo | 25050331                | A/C  | NA                 | NA                            | NA                 |
| Kabuli_wild_25050364 | NA                                  | Ca_kabuli_denovo | 25050364                | G/A  | NA                 | NA                            | NA                 |
| Kabuli_wild_25050420 | NA                                  | Ca_kabuli_denovo | 25050420                | T/C  | NA                 | NA                            | NA                 |
| Kabuli_wild_25053229 | NA                                  | Ca_kabuli_denovo | 25053229                | T/G  | NA                 | NA                            | NA                 |
| Kabuli_wild_25053301 | NA                                  | Ca_kabuli_denovo | 25053301                | T/G  | NA                 | NA                            | NA                 |
| Kabuli_wild_25060315 | NA                                  | Ca_kabuli_denovo | 25060315                | A/C  | NA                 | NA                            | NA                 |
| Kabuli_wild_25060693 | NA                                  | Ca_kabuli_denovo | 25060693                | G/T  | NA                 | NA                            | NA                 |
| Kabuli_wild_25062301 | NA                                  | Ca_kabuli_denovo | 25062301                | G/T  | NA                 | NA                            | NA                 |
| Kabuli_wild_25070584 | NA                                  | Ca_kabuli_denovo | 25070584                | A/C  | NA                 | NA                            | NA                 |
| Kabuli_wild_25070692 | NA                                  | Ca_kabuli_denovo | 25070692                | C/T  | NA                 | NA                            | NA                 |
| Kabuli_wild_25070719 | NA                                  | Ca_kabuli_denovo | 25070719                | C/T  | NA                 | NA                            | NA                 |
| Kabuli_wild_25072059 | NA                                  | Ca_kabuli_denovo | 25072059                | C/G  | NA                 | NA                            | NA                 |
| Kabuli_wild_25073525 | NA                                  | Ca_kabuli_denovo | 25073525                | G/A  | NA                 | NA                            | NA                 |
| Kabuli_wild_25073537 | NA                                  | Ca_kabuli_denovo | 25073537                | G/A  | NA                 | NA                            | NA                 |

| SNP IDs              | NCBI dbSNP accession IDs (NCBI_SS#) | Chromosomes      | Physical positions (bp) | SNPs | Gene accession IDs | Sequence components of genome | Putative functions |
|----------------------|-------------------------------------|------------------|-------------------------|------|--------------------|-------------------------------|--------------------|
| Kabuli_wild_25079457 | NA                                  | Ca_kabuli_denovo | 25079457                | A/G  | NA                 | NA                            | NA                 |
| Kabuli_wild_25080514 | NA                                  | Ca_kabuli_denovo | 25080514                | G/A  | NA                 | NA                            | NA                 |
| Kabuli_wild_25080677 | NA                                  | Ca_kabuli_denovo | 25080677                | T/C  | NA                 | NA                            | NA                 |
| Kabuli_wild_25080719 | NA                                  | Ca_kabuli_denovo | 25080719                | C/G  | NA                 | NA                            | NA                 |
| Kabuli_wild_25080780 | NA                                  | Ca_kabuli_denovo | 25080780                | C/G  | NA                 | NA                            | NA                 |
| Kabuli_wild_25088260 | NA                                  | Ca_kabuli_denovo | 25088260                | T/C  | NA                 | NA                            | NA                 |
| Kabuli_wild_25088329 | NA                                  | Ca_kabuli_denovo | 25088329                | T/G  | NA                 | NA                            | NA                 |
| Kabuli_wild_25088335 | NA                                  | Ca_kabuli_denovo | 25088335                | C/G  | NA                 | NA                            | NA                 |
| Kabuli_wild_25090094 | NA                                  | Ca_kabuli_denovo | 25090094                | G/C  | NA                 | NA                            | NA                 |
| Kabuli_wild_25090167 | NA                                  | Ca_kabuli_denovo | 25090167                | A/G  | NA                 | NA                            | NA                 |
| Kabuli_wild_25095688 | NA                                  | Ca_kabuli_denovo | 25095688                | G/T  | NA                 | NA                            | NA                 |
| Kabuli_wild_25095917 | NA                                  | Ca_kabuli_denovo | 25095917                | G/T  | NA                 | NA                            | NA                 |
| Kabuli_wild_25098137 | NA                                  | Ca_kabuli_denovo | 25098137                | A/C  | NA                 | NA                            | NA                 |
| Kabuli_wild_25098138 | NA                                  | Ca_kabuli_denovo | 25098138                | G/T  | NA                 | NA                            | NA                 |
| Kabuli_wild_25098139 | NA                                  | Ca_kabuli_denovo | 25098139                | A/G  | NA                 | NA                            | NA                 |
| Kabuli_wild_25101746 | NA                                  | Ca_kabuli_denovo | 25101746                | A/G  | NA                 | NA                            | NA                 |
| Kabuli_wild_25105382 | NA                                  | Ca_kabuli_denovo | 25105382                | G/T  | NA                 | NA                            | NA                 |
| Kabuli_wild_25113251 | NA                                  | Ca_kabuli_denovo | 25113251                | A/G  | NA                 | NA                            | NA                 |
| Kabuli_wild_25113254 | NA                                  | Ca_kabuli_denovo | 25113254                | C/T  | NA                 | NA                            | NA                 |
| Kabuli_wild_25113729 | NA                                  | Ca_kabuli_denovo | 25113729                | T/C  | NA                 | NA                            | NA                 |
| Kabuli_wild_25114630 | NA                                  | Ca_kabuli_denovo | 25114630                | G/T  | NA                 | NA                            | NA                 |
| Kabuli_wild_25120506 | NA                                  | Ca_kabuli_denovo | 25120506                | G/T  | NA                 | NA                            | NA                 |
| Kabuli_wild_25126163 | NA                                  | Ca_kabuli_denovo | 25126163                | G/T  | NA                 | NA                            | NA                 |
| Kabuli_wild_25131477 | NA                                  | Ca_kabuli_denovo | 25131477                | C/T  | NA                 | NA                            | NA                 |
| Kabuli_wild_25133315 | NA                                  | Ca_kabuli_denovo | 25133315                | C/T  | NA                 | NA                            | NA                 |
| Kabuli_wild_25133321 | NA                                  | Ca_kabuli_denovo | 25133321                | T/C  | NA                 | NA                            | NA                 |
| Kabuli_wild_25134571 | NA                                  | Ca_kabuli_denovo | 25134571                | G/T  | NA                 | NA                            | NA                 |
| Kabuli_wild_25136259 | NA                                  | Ca_kabuli_denovo | 25136259                | C/G  | NA                 | NA                            | NA                 |
| Kabuli_wild_25139215 | NA                                  | Ca_kabuli_denovo | 25139215                | A/T  | NA                 | NA                            | NA                 |
| Kabuli_wild_25139426 | NA                                  | Ca_kabuli_denovo | 25139426                | C/T  | NA                 | NA                            | NA                 |
| Kabuli_wild_25139436 | NA                                  | Ca_kabuli_denovo | 25139436                | A/G  | NA                 | NA                            | NA                 |
| Kabuli_wild_25145557 | NA                                  | Ca_kabuli_denovo | 25145557                | A/C  | NA                 | NA                            | NA                 |
| Kabuli_wild_25146130 | NA                                  | Ca_kabuli_denovo | 25146130                | T/G  | NA                 | NA                            | NA                 |
| Kabuli_wild_25147770 | NA                                  | Ca_kabuli_denovo | 25147770                | A/C  | NA                 | NA                            | NA                 |
| Kabuli_wild_25147771 | NA                                  | Ca_kabuli_denovo | 25147771                | A/G  | NA                 | NA                            | NA                 |
| Kabuli_wild_25148093 | NA                                  | Ca_kabuli_denovo | 25148093                | C/T  | NA                 | NA                            | NA                 |
| Kabuli_wild_25149732 | NA                                  | Ca_kabuli_denovo | 25149732                | G/T  | NA                 | NA                            | NA                 |
| Kabuli_wild_25152091 | NA                                  | Ca_kabuli_denovo | 25152091                | A/C  | NA                 | NA                            | NA                 |
| Kabuli_wild_25157585 | NA                                  | Ca_kabuli_denovo | 25157585                | C/T  | NA                 | NA                            | NA                 |
| Kabuli_wild_25157611 | NA                                  | Ca_kabuli_denovo | 25157611                | C/T  | NA                 | NA                            | NA                 |
| Kabuli_wild_25159628 | NA                                  | Ca_kabuli_denovo | 25159628                | A/G  | NA                 | NA                            | NA                 |
| Kabuli_wild_25159631 | NA                                  | Ca_kabuli_denovo | 25159631                | T/C  | NA                 | NA                            | NA                 |
| Kabuli_wild_25159687 | NA                                  | Ca_kabuli_denovo | 25159687                | C/T  | NA                 | NA                            | NA                 |
| Kabuli_wild_25165543 | NA                                  | Ca_kabuli_denovo | 25165543                | G/A  | NA                 | NA                            | NA                 |



| SNP IDs              | NCBI dbSNP accession IDs (NCBI_SS#) | Chromosomes      | Physical positions (bp) | SNPs | Gene accession IDs | Sequence components of genome | Putative functions |
|----------------------|-------------------------------------|------------------|-------------------------|------|--------------------|-------------------------------|--------------------|
| Kabuli_wild_25165549 | NA                                  | Ca_kabuli_denovo | 25165549                | T/C  | NA                 | NA                            | NA                 |
| Kabuli_wild_25166528 | NA                                  | Ca_kabuli_denovo | 25166528                | C/G  | NA                 | NA                            | NA                 |
| Kabuli_wild_25167353 | NA                                  | Ca_kabuli_denovo | 25167353                | G/T  | NA                 | NA                            | NA                 |
| Kabuli_wild_25174338 | NA                                  | Ca_kabuli_denovo | 25174338                | G/T  | NA                 | NA                            | NA                 |
| Kabuli_wild_25176571 | NA                                  | Ca_kabuli_denovo | 25176571                | A/C  | NA                 | NA                            | NA                 |
| Kabuli_wild_25177434 | NA                                  | Ca_kabuli_denovo | 25177434                | G/T  | NA                 | NA                            | NA                 |
| Kabuli_wild_25189199 | NA                                  | Ca_kabuli_denovo | 25189199                | C/A  | NA                 | NA                            | NA                 |
| Kabuli_wild_25190079 | NA                                  | Ca_kabuli_denovo | 25190079                | G/T  | NA                 | NA                            | NA                 |
| Kabuli_wild_25193534 | NA                                  | Ca_kabuli_denovo | 25193534                | A/G  | NA                 | NA                            | NA                 |
| Kabuli_wild_25193560 | NA                                  | Ca_kabuli_denovo | 25193560                | C/T  | NA                 | NA                            | NA                 |
| Kabuli_wild_25197566 | NA                                  | Ca_kabuli_denovo | 25197566                | A/T  | NA                 | NA                            | NA                 |
| Kabuli_wild_25197716 | NA                                  | Ca_kabuli_denovo | 25197716                | G/A  | NA                 | NA                            | NA                 |
| Kabuli_wild_25197733 | NA                                  | Ca_kabuli_denovo | 25197733                | C/T  | NA                 | NA                            | NA                 |
| Kabuli_wild_25197748 | NA                                  | Ca_kabuli_denovo | 25197748                | G/A  | NA                 | NA                            | NA                 |
| Kabuli_wild_25202705 | NA                                  | Ca_kabuli_denovo | 25202705                | G/C  | NA                 | NA                            | NA                 |
| Kabuli_wild_25202727 | NA                                  | Ca_kabuli_denovo | 25202727                | T/C  | NA                 | NA                            | NA                 |
| Kabuli_wild_25203472 | NA                                  | Ca_kabuli_denovo | 25203472                | T/C  | NA                 | NA                            | NA                 |
| Kabuli_wild_25206958 | NA                                  | Ca_kabuli_denovo | 25206958                | C/A  | NA                 | NA                            | NA                 |
| Kabuli_wild_25206981 | NA                                  | Ca_kabuli_denovo | 25206981                | C/G  | NA                 | NA                            | NA                 |
| Kabuli_wild_25212091 | NA                                  | Ca_kabuli_denovo | 25212091                | A/C  | NA                 | NA                            | NA                 |
| Kabuli_wild_25214444 | NA                                  | Ca_kabuli_denovo | 25214444                | A/G  | NA                 | NA                            | NA                 |
| Kabuli_wild_25214483 | NA                                  | Ca_kabuli_denovo | 25214483                | C/G  | NA                 | NA                            | NA                 |
| Kabuli_wild_25216036 | NA                                  | Ca_kabuli_denovo | 25216036                | C/G  | NA                 | NA                            | NA                 |
| Kabuli_wild_25216070 | NA                                  | Ca_kabuli_denovo | 25216070                | C/G  | NA                 | NA                            | NA                 |
| Kabuli_wild_25222808 | NA                                  | Ca_kabuli_denovo | 25222808                | A/G  | NA                 | NA                            | NA                 |
| Kabuli_wild_25226873 | NA                                  | Ca_kabuli_denovo | 25226873                | A/C  | NA                 | NA                            | NA                 |
| Kabuli_wild_25229561 | NA                                  | Ca_kabuli_denovo | 25229561                | T/G  | NA                 | NA                            | NA                 |
| Kabuli_wild_25230374 | NA                                  | Ca_kabuli_denovo | 25230374                | A/G  | NA                 | NA                            | NA                 |
| Kabuli_wild_25230377 | NA                                  | Ca_kabuli_denovo | 25230377                | A/G  | NA                 | NA                            | NA                 |
| Kabuli_wild_25240146 | NA                                  | Ca_kabuli_denovo | 25240146                | C/G  | NA                 | NA                            | NA                 |
| Kabuli_wild_25244510 | NA                                  | Ca_kabuli_denovo | 25244510                | T/G  | NA                 | NA                            | NA                 |
| Kabuli_wild_25248717 | NA                                  | Ca_kabuli_denovo | 25248717                | G/T  | NA                 | NA                            | NA                 |
| Kabuli_wild_25250292 | NA                                  | Ca_kabuli_denovo | 25250292                | G/T  | NA                 | NA                            | NA                 |
| Kabuli_wild_25254166 | NA                                  | Ca_kabuli_denovo | 25254166                | A/G  | NA                 | NA                            | NA                 |
| Kabuli_wild_25257995 | NA                                  | Ca_kabuli_denovo | 25257995                | C/G  | NA                 | NA                            | NA                 |
| Kabuli_wild_25258052 | NA                                  | Ca_kabuli_denovo | 25258052                | T/G  | NA                 | NA                            | NA                 |
| Kabuli_wild_25261886 | NA                                  | Ca_kabuli_denovo | 25261886                | G/T  | NA                 | NA                            | NA                 |
| Kabuli_wild_25265893 | NA                                  | Ca_kabuli_denovo | 25265893                | G/T  | NA                 | NA                            | NA                 |
| Kabuli_wild_25267592 | NA                                  | Ca_kabuli_denovo | 25267592                | T/C  | NA                 | NA                            | NA                 |
| Kabuli_wild_25267640 | NA                                  | Ca_kabuli_denovo | 25267640                | T/C  | NA                 | NA                            | NA                 |
| Kabuli_wild_25273448 | NA                                  | Ca_kabuli_denovo | 25273448                | A/G  | NA                 | NA                            | NA                 |
| Kabuli_wild_25274826 | NA                                  | Ca_kabuli_denovo | 25274826                | C/T  | NA                 | NA                            | NA                 |
| Kabuli_wild_25274833 | NA                                  | Ca_kabuli_denovo | 25274833                | C/A  | NA                 | NA                            | NA                 |
| Kabuli_wild_25284498 | NA                                  | Ca_kabuli_denovo | 25284498                | C/T  | NA                 | NA                            | NA                 |

| SNP IDs              | NCBI dbSNP accession IDs (NCBI_SS#) | Chromosomes      | Physical positions (bp) | SNPs | Gene accession IDs | Sequence components of genome | Putative functions |
|----------------------|-------------------------------------|------------------|-------------------------|------|--------------------|-------------------------------|--------------------|
| Kabuli_wild_25284524 | NA                                  | Ca_kabuli_denovo | 25284524                | C/G  | NA                 | NA                            | NA                 |
| Kabuli_wild_25287487 | NA                                  | Ca_kabuli_denovo | 25287487                | A/G  | NA                 | NA                            | NA                 |
| Kabuli_wild_25289876 | NA                                  | Ca_kabuli_denovo | 25289876                | T/C  | NA                 | NA                            | NA                 |
| Kabuli_wild_25301858 | NA                                  | Ca_kabuli_denovo | 25301858                | G/A  | NA                 | NA                            | NA                 |
| Kabuli_wild_25301885 | NA                                  | Ca_kabuli_denovo | 25301885                | G/T  | NA                 | NA                            | NA                 |
| Kabuli_wild_25302383 | NA                                  | Ca_kabuli_denovo | 25302383                | C/T  | NA                 | NA                            | NA                 |
| Kabuli_wild_25305896 | NA                                  | Ca_kabuli_denovo | 25305896                | G/C  | NA                 | NA                            | NA                 |
| Kabuli_wild_25319593 | NA                                  | Ca_kabuli_denovo | 25319593                | C/T  | NA                 | NA                            | NA                 |
| Kabuli_wild_25321551 | NA                                  | Ca_kabuli_denovo | 25321551                | C/T  | NA                 | NA                            | NA                 |
| Kabuli_wild_25321600 | NA                                  | Ca_kabuli_denovo | 25321600                | A/C  | NA                 | NA                            | NA                 |
| Kabuli_wild_25322431 | NA                                  | Ca_kabuli_denovo | 25322431                | C/T  | NA                 | NA                            | NA                 |
| Kabuli_wild_25322449 | NA                                  | Ca_kabuli_denovo | 25322449                | G/A  | NA                 | NA                            | NA                 |
| Kabuli_wild_25325137 | NA                                  | Ca_kabuli_denovo | 25325137                | G/T  | NA                 | NA                            | NA                 |
| Kabuli_wild_25325418 | NA                                  | Ca_kabuli_denovo | 25325418                | A/G  | NA                 | NA                            | NA                 |
| Kabuli_wild_25325434 | NA                                  | Ca_kabuli_denovo | 25325434                | G/A  | NA                 | NA                            | NA                 |
| Kabuli_wild_25333114 | NA                                  | Ca_kabuli_denovo | 25333114                | G/A  | NA                 | NA                            | NA                 |
| Kabuli_wild_25333473 | NA                                  | Ca_kabuli_denovo | 25333473                | A/G  | NA                 | NA                            | NA                 |
| Kabuli_wild_25333486 | NA                                  | Ca_kabuli_denovo | 25333486                | A/G  | NA                 | NA                            | NA                 |
| Kabuli_wild_25334489 | NA                                  | Ca_kabuli_denovo | 25334489                | C/G  | NA                 | NA                            | NA                 |
| Kabuli_wild_25336906 | NA                                  | Ca_kabuli_denovo | 25336906                | A/G  | NA                 | NA                            | NA                 |
| Kabuli_wild_25338421 | NA                                  | Ca_kabuli_denovo | 25338421                | C/T  | NA                 | NA                            | NA                 |
| Kabuli_wild_25341041 | NA                                  | Ca_kabuli_denovo | 25341041                | A/C  | NA                 | NA                            | NA                 |
| Kabuli_wild_25341054 | NA                                  | Ca_kabuli_denovo | 25341054                | C/T  | NA                 | NA                            | NA                 |
| Kabuli_wild_25342112 | NA                                  | Ca_kabuli_denovo | 25342112                | G/A  | NA                 | NA                            | NA                 |
| Kabuli_wild_25342148 | NA                                  | Ca_kabuli_denovo | 25342148                | A/G  | NA                 | NA                            | NA                 |
| Kabuli_wild_25344009 | NA                                  | Ca_kabuli_denovo | 25344009                | C/G  | NA                 | NA                            | NA                 |
| Kabuli_wild_25344064 | NA                                  | Ca_kabuli_denovo | 25344064                | G/A  | NA                 | NA                            | NA                 |
| Kabuli_wild_25348180 | NA                                  | Ca_kabuli_denovo | 25348180                | C/G  | NA                 | NA                            | NA                 |
| Kabuli_wild_25349275 | NA                                  | Ca_kabuli_denovo | 25349275                | G/T  | NA                 | NA                            | NA                 |
| Kabuli_wild_25349416 | NA                                  | Ca_kabuli_denovo | 25349416                | C/G  | NA                 | NA                            | NA                 |
| Kabuli_wild_25367596 | NA                                  | Ca_kabuli_denovo | 25367596                | A/C  | NA                 | NA                            | NA                 |
| Kabuli_wild_25369640 | NA                                  | Ca_kabuli_denovo | 25369640                | T/C  | NA                 | NA                            | NA                 |
| Kabuli_wild_25376647 | NA                                  | Ca_kabuli_denovo | 25376647                | A/G  | NA                 | NA                            | NA                 |
| Kabuli_wild_25376690 | NA                                  | Ca_kabuli_denovo | 25376690                | G/A  | NA                 | NA                            | NA                 |
| Kabuli_wild_25381454 | NA                                  | Ca_kabuli_denovo | 25381454                | G/C  | NA                 | NA                            | NA                 |
| Kabuli_wild_25384463 | NA                                  | Ca_kabuli_denovo | 25384463                | G/T  | NA                 | NA                            | NA                 |
| Kabuli_wild_25396229 | NA                                  | Ca_kabuli_denovo | 25396229                | G/C  | NA                 | NA                            | NA                 |
| Kabuli_wild_25408681 | NA                                  | Ca_kabuli_denovo | 25408681                | C/T  | NA                 | NA                            | NA                 |
| Kabuli_wild_25411520 | NA                                  | Ca_kabuli_denovo | 25411520                | A/G  | NA                 | NA                            | NA                 |
| Kabuli_wild_25411553 | NA                                  | Ca_kabuli_denovo | 25411553                | T/C  | NA                 | NA                            | NA                 |
| Kabuli_wild_25413218 | NA                                  | Ca_kabuli_denovo | 25413218                | T/C  | NA                 | NA                            | NA                 |
| Kabuli_wild_25415148 | NA                                  | Ca_kabuli_denovo | 25415148                | T/C  | NA                 | NA                            | NA                 |
| Kabuli_wild_25440497 | NA                                  | Ca_kabuli_denovo | 25440497                | A/G  | NA                 | NA                            | NA                 |
| Kabuli_wild_25440503 | NA                                  | Ca_kabuli_denovo | 25440503                | G/A  | NA                 | NA                            | NA                 |

| SNP IDs              | NCBI dbSNP accession IDs (NCBI_SS#) | Chromosomes      | Physical positions (bp) | SNPs | Gene accession IDs | Sequence components of genome | Putative functions |
|----------------------|-------------------------------------|------------------|-------------------------|------|--------------------|-------------------------------|--------------------|
| Kabuli_wild_25440557 | NA                                  | Ca_kabuli_denovo | 25440557                | A/G  | NA                 | NA                            | NA                 |
| Kabuli_wild_25440952 | NA                                  | Ca_kabuli_denovo | 25440952                | A/C  | NA                 | NA                            | NA                 |
| Kabuli_wild_25440954 | NA                                  | Ca_kabuli_denovo | 25440954                | A/C  | NA                 | NA                            | NA                 |
| Kabuli_wild_25442596 | NA                                  | Ca_kabuli_denovo | 25442596                | T/C  | NA                 | NA                            | NA                 |
| Kabuli_wild_25443273 | NA                                  | Ca_kabuli_denovo | 25443273                | G/A  | NA                 | NA                            | NA                 |
| Kabuli_wild_25444602 | NA                                  | Ca_kabuli_denovo | 25444602                | A/C  | NA                 | NA                            | NA                 |
| Kabuli_wild_25446536 | NA                                  | Ca_kabuli_denovo | 25446536                | G/A  | NA                 | NA                            | NA                 |
| Kabuli_wild_25446602 | NA                                  | Ca_kabuli_denovo | 25446602                | C/G  | NA                 | NA                            | NA                 |
| Kabuli_wild_25447115 | NA                                  | Ca_kabuli_denovo | 25447115                | C/G  | NA                 | NA                            | NA                 |
| Kabuli_wild_25447143 | NA                                  | Ca_kabuli_denovo | 25447143                | C/T  | NA                 | NA                            | NA                 |
| Kabuli_wild_25450145 | NA                                  | Ca_kabuli_denovo | 25450145                | G/A  | NA                 | NA                            | NA                 |
| Kabuli_wild_25457272 | NA                                  | Ca_kabuli_denovo | 25457272                | G/T  | NA                 | NA                            | NA                 |
| Kabuli_wild_25458936 | NA                                  | Ca_kabuli_denovo | 25458936                | C/T  | NA                 | NA                            | NA                 |
| Kabuli_wild_25458991 | NA                                  | Ca_kabuli_denovo | 25458991                | C/T  | NA                 | NA                            | NA                 |
| Kabuli_wild_25461260 | NA                                  | Ca_kabuli_denovo | 25461260                | T/C  | NA                 | NA                            | NA                 |
| Kabuli_wild_25484442 | NA                                  | Ca_kabuli_denovo | 25484442                | A/C  | NA                 | NA                            | NA                 |
| Kabuli_wild_25484443 | NA                                  | Ca_kabuli_denovo | 25484443                | A/G  | NA                 | NA                            | NA                 |
| Kabuli_wild_25490276 | NA                                  | Ca_kabuli_denovo | 25490276                | C/G  | NA                 | NA                            | NA                 |
| Kabuli_wild_25490296 | NA                                  | Ca_kabuli_denovo | 25490296                | C/T  | NA                 | NA                            | NA                 |
| Kabuli_wild_25491786 | NA                                  | Ca_kabuli_denovo | 25491786                | T/G  | NA                 | NA                            | NA                 |
| Kabuli_wild_25499769 | NA                                  | Ca_kabuli_denovo | 25499769                | G/T  | NA                 | NA                            | NA                 |
| Kabuli_wild_25509277 | NA                                  | Ca_kabuli_denovo | 25509277                | A/G  | NA                 | NA                            | NA                 |
| Kabuli_wild_25509304 | NA                                  | Ca_kabuli_denovo | 25509304                | G/A  | NA                 | NA                            | NA                 |
| Kabuli_wild_25510689 | NA                                  | Ca_kabuli_denovo | 25510689                | G/C  | NA                 | NA                            | NA                 |
| Kabuli_wild_25511749 | NA                                  | Ca_kabuli_denovo | 25511749                | C/A  | NA                 | NA                            | NA                 |
| Kabuli_wild_25511778 | NA                                  | Ca_kabuli_denovo | 25511778                | T/C  | NA                 | NA                            | NA                 |
| Kabuli_wild_25511938 | NA                                  | Ca_kabuli_denovo | 25511938                | G/A  | NA                 | NA                            | NA                 |
| Kabuli_wild_25511969 | NA                                  | Ca_kabuli_denovo | 25511969                | A/G  | NA                 | NA                            | NA                 |
| Kabuli_wild_25511975 | NA                                  | Ca_kabuli_denovo | 25511975                | C/G  | NA                 | NA                            | NA                 |
| Kabuli_wild_25514608 | NA                                  | Ca_kabuli_denovo | 25514608                | A/G  | NA                 | NA                            | NA                 |
| Kabuli_wild_25514628 | NA                                  | Ca_kabuli_denovo | 25514628                | A/T  | NA                 | NA                            | NA                 |
| Kabuli_wild_25517275 | NA                                  | Ca_kabuli_denovo | 25517275                | G/T  | NA                 | NA                            | NA                 |
| Kabuli_wild_25517325 | NA                                  | Ca_kabuli_denovo | 25517325                | T/G  | NA                 | NA                            | NA                 |
| Kabuli_wild_25522466 | NA                                  | Ca_kabuli_denovo | 25522466                | T/G  | NA                 | NA                            | NA                 |
| Kabuli_wild_25522700 | NA                                  | Ca_kabuli_denovo | 25522700                | T/C  | NA                 | NA                            | NA                 |
| Kabuli_wild_25522717 | NA                                  | Ca_kabuli_denovo | 25522717                | A/G  | NA                 | NA                            | NA                 |
| Kabuli_wild_25530804 | NA                                  | Ca_kabuli_denovo | 25530804                | T/C  | NA                 | NA                            | NA                 |
| Kabuli_wild_25532080 | NA                                  | Ca_kabuli_denovo | 25532080                | C/A  | NA                 | NA                            | NA                 |
| Kabuli_wild_25532091 | NA                                  | Ca_kabuli_denovo | 25532091                | A/G  | NA                 | NA                            | NA                 |
| Kabuli_wild_25537661 | NA                                  | Ca_kabuli_denovo | 25537661                | A/T  | NA                 | NA                            | NA                 |
| Kabuli_wild_25537682 | NA                                  | Ca_kabuli_denovo | 25537682                | G/A  | NA                 | NA                            | NA                 |
| Kabuli_wild_25545893 | NA                                  | Ca_kabuli_denovo | 25545893                | G/A  | NA                 | NA                            | NA                 |
| Kabuli_wild_25545929 | NA                                  | Ca_kabuli_denovo | 25545929                | A/G  | NA                 | NA                            | NA                 |
| Kabuli_wild_25553064 | NA                                  | Ca_kabuli_denovo | 25553064                | C/G  | NA                 | NA                            | NA                 |

| SNP IDs              | NCBI dbSNP accession IDs (NCBI_SS#) | Chromosomes      | Physical positions (bp) | SNPs | Gene accession IDs | Sequence components of genome | Putative functions |
|----------------------|-------------------------------------|------------------|-------------------------|------|--------------------|-------------------------------|--------------------|
| Kabuli_wild_25554788 | NA                                  | Ca_kabuli_denovo | 25554788                | G/T  | NA                 | NA                            | NA                 |
| Kabuli_wild_25555577 | NA                                  | Ca_kabuli_denovo | 25555577                | A/C  | NA                 | NA                            | NA                 |
| Kabuli_wild_25556522 | NA                                  | Ca_kabuli_denovo | 25556522                | C/G  | NA                 | NA                            | NA                 |
| Kabuli_wild_25558423 | NA                                  | Ca_kabuli_denovo | 25558423                | C/T  | NA                 | NA                            | NA                 |
| Kabuli_wild_25559040 | NA                                  | Ca_kabuli_denovo | 25559040                | C/A  | NA                 | NA                            | NA                 |
| Kabuli_wild_25559100 | NA                                  | Ca_kabuli_denovo | 25559100                | G/C  | NA                 | NA                            | NA                 |
| Kabuli_wild_25559106 | NA                                  | Ca_kabuli_denovo | 25559106                | A/G  | NA                 | NA                            | NA                 |
| Kabuli_wild_25559121 | NA                                  | Ca_kabuli_denovo | 25559121                | T/C  | NA                 | NA                            | NA                 |
| Kabuli_wild_25561448 | NA                                  | Ca_kabuli_denovo | 25561448                | T/C  | NA                 | NA                            | NA                 |
| Kabuli_wild_25565587 | NA                                  | Ca_kabuli_denovo | 25565587                | C/T  | NA                 | NA                            | NA                 |
| Kabuli_wild_25568096 | NA                                  | Ca_kabuli_denovo | 25568096                | G/A  | NA                 | NA                            | NA                 |
| Kabuli_wild_25568102 | NA                                  | Ca_kabuli_denovo | 25568102                | T/C  | NA                 | NA                            | NA                 |
| Kabuli_wild_25569208 | NA                                  | Ca_kabuli_denovo | 25569208                | A/C  | NA                 | NA                            | NA                 |
| Kabuli_wild_25569209 | NA                                  | Ca_kabuli_denovo | 25569209                | A/G  | NA                 | NA                            | NA                 |
| Kabuli_wild_25569210 | NA                                  | Ca_kabuli_denovo | 25569210                | A/G  | NA                 | NA                            | NA                 |
| Kabuli_wild_25569211 | NA                                  | Ca_kabuli_denovo | 25569211                | A/T  | NA                 | NA                            | NA                 |
| Kabuli_wild_25570922 | NA                                  | Ca_kabuli_denovo | 25570922                | C/T  | NA                 | NA                            | NA                 |
| Kabuli_wild_25570928 | NA                                  | Ca_kabuli_denovo | 25570928                | C/G  | NA                 | NA                            | NA                 |
| Kabuli_wild_25580506 | NA                                  | Ca_kabuli_denovo | 25580506                | T/C  | NA                 | NA                            | NA                 |
| Kabuli_wild_25580530 | NA                                  | Ca_kabuli_denovo | 25580530                | C/T  | NA                 | NA                            | NA                 |
| Kabuli_wild_25583087 | NA                                  | Ca_kabuli_denovo | 25583087                | T/C  | NA                 | NA                            | NA                 |
| Kabuli_wild_25583766 | NA                                  | Ca_kabuli_denovo | 25583766                | T/C  | NA                 | NA                            | NA                 |
| Kabuli_wild_25590869 | NA                                  | Ca_kabuli_denovo | 25590869                | C/G  | NA                 | NA                            | NA                 |
| Kabuli_wild_25590899 | NA                                  | Ca_kabuli_denovo | 25590899                | A/G  | NA                 | NA                            | NA                 |
| Kabuli_wild_25595530 | NA                                  | Ca_kabuli_denovo | 25595530                | T/C  | NA                 | NA                            | NA                 |
| Kabuli_wild_25597203 | NA                                  | Ca_kabuli_denovo | 25597203                | G/A  | NA                 | NA                            | NA                 |
| Kabuli_wild_25597213 | NA                                  | Ca_kabuli_denovo | 25597213                | A/T  | NA                 | NA                            | NA                 |
| Kabuli_wild_25597412 | NA                                  | Ca_kabuli_denovo | 25597412                | T/C  | NA                 | NA                            | NA                 |
| Kabuli_wild_25600812 | NA                                  | Ca_kabuli_denovo | 25600812                | C/T  | NA                 | NA                            | NA                 |
| Kabuli_wild_25600839 | NA                                  | Ca_kabuli_denovo | 25600839                | T/C  | NA                 | NA                            | NA                 |
| Kabuli_wild_25612024 | NA                                  | Ca_kabuli_denovo | 25612024                | A/C  | NA                 | NA                            | NA                 |
| Kabuli_wild_25629645 | NA                                  | Ca_kabuli_denovo | 25629645                | G/T  | NA                 | NA                            | NA                 |
| Kabuli_wild_25645042 | NA                                  | Ca_kabuli_denovo | 25645042                | T/G  | NA                 | NA                            | NA                 |
| Kabuli_wild_25646107 | NA                                  | Ca_kabuli_denovo | 25646107                | A/C  | NA                 | NA                            | NA                 |
| Kabuli_wild_25655819 | NA                                  | Ca_kabuli_denovo | 25655819                | T/C  | NA                 | NA                            | NA                 |
| Kabuli_wild_25655839 | NA                                  | Ca_kabuli_denovo | 25655839                | A/G  | NA                 | NA                            | NA                 |
| Kabuli_wild_25658545 | NA                                  | Ca_kabuli_denovo | 25658545                | G/A  | NA                 | NA                            | NA                 |
| Kabuli_wild_25659225 | NA                                  | Ca_kabuli_denovo | 25659225                | T/G  | NA                 | NA                            | NA                 |
| Kabuli_wild_25659228 | NA                                  | Ca_kabuli_denovo | 25659228                | C/T  | NA                 | NA                            | NA                 |
| Kabuli_wild_25675153 | NA                                  | Ca_kabuli_denovo | 25675153                | T/A  | NA                 | NA                            | NA                 |
| Kabuli_wild_25681581 | NA                                  | Ca_kabuli_denovo | 25681581                | G/T  | NA                 | NA                            | NA                 |
| Kabuli_wild_25681592 | NA                                  | Ca_kabuli_denovo | 25681592                | T/G  | NA                 | NA                            | NA                 |
| Kabuli_wild_25681767 | NA                                  | Ca_kabuli_denovo | 25681767                | G/T  | NA                 | NA                            | NA                 |
| Kabuli_wild_25683460 | NA                                  | Ca_kabuli_denovo | 25683460                | T/C  | NA                 | NA                            | NA                 |

| SNP IDs              | NCBI dbSNP accession IDs (NCBI_SS#) | Chromosomes      | Physical positions (bp) | SNPs | Gene accession IDs | Sequence components of genome | Putative functions |
|----------------------|-------------------------------------|------------------|-------------------------|------|--------------------|-------------------------------|--------------------|
| Kabuli_wild_25683527 | NA                                  | Ca_kabuli_denovo | 25683527                | A/G  | NA                 | NA                            | NA                 |
| Kabuli_wild_25685589 | NA                                  | Ca_kabuli_denovo | 25685589                | C/G  | NA                 | NA                            | NA                 |
| Kabuli_wild_25687364 | NA                                  | Ca_kabuli_denovo | 25687364                | T/G  | NA                 | NA                            | NA                 |
| Kabuli_wild_25687379 | NA                                  | Ca_kabuli_denovo | 25687379                | G/A  | NA                 | NA                            | NA                 |
| Kabuli_wild_25688354 | NA                                  | Ca_kabuli_denovo | 25688354                | T/G  | NA                 | NA                            | NA                 |
| Kabuli_wild_25688381 | NA                                  | Ca_kabuli_denovo | 25688381                | C/T  | NA                 | NA                            | NA                 |
| Kabuli_wild_25690780 | NA                                  | Ca_kabuli_denovo | 25690780                | A/G  | NA                 | NA                            | NA                 |
| Kabuli_wild_25690800 | NA                                  | Ca_kabuli_denovo | 25690800                | G/A  | NA                 | NA                            | NA                 |
| Kabuli_wild_25690828 | NA                                  | Ca_kabuli_denovo | 25690828                | C/A  | NA                 | NA                            | NA                 |
| Kabuli_wild_25690837 | NA                                  | Ca_kabuli_denovo | 25690837                | C/T  | NA                 | NA                            | NA                 |
| Kabuli_wild_25694603 | NA                                  | Ca_kabuli_denovo | 25694603                | A/T  | NA                 | NA                            | NA                 |
| Kabuli_wild_25699524 | NA                                  | Ca_kabuli_denovo | 25699524                | C/T  | NA                 | NA                            | NA                 |
| Kabuli_wild_25706701 | NA                                  | Ca_kabuli_denovo | 25706701                | G/C  | NA                 | NA                            | NA                 |
| Kabuli_wild_25706727 | NA                                  | Ca_kabuli_denovo | 25706727                | T/C  | NA                 | NA                            | NA                 |
| Kabuli_wild_25713431 | NA                                  | Ca_kabuli_denovo | 25713431                | G/T  | NA                 | NA                            | NA                 |
| Kabuli_wild_25714951 | NA                                  | Ca_kabuli_denovo | 25714951                | T/C  | NA                 | NA                            | NA                 |
| Kabuli_wild_25714963 | NA                                  | Ca_kabuli_denovo | 25714963                | G/A  | NA                 | NA                            | NA                 |
| Kabuli_wild_25725143 | NA                                  | Ca_kabuli_denovo | 25725143                | G/A  | NA                 | NA                            | NA                 |
| Kabuli_wild_25726349 | NA                                  | Ca_kabuli_denovo | 25726349                | G/T  | NA                 | NA                            | NA                 |
| Kabuli_wild_25732772 | NA                                  | Ca_kabuli_denovo | 25732772                | C/T  | NA                 | NA                            | NA                 |
| Kabuli_wild_25748438 | NA                                  | Ca_kabuli_denovo | 25748438                | C/T  | NA                 | NA                            | NA                 |
| Kabuli_wild_25753772 | NA                                  | Ca_kabuli_denovo | 25753772                | G/A  | NA                 | NA                            | NA                 |
| Kabuli_wild_25753802 | NA                                  | Ca_kabuli_denovo | 25753802                | C/T  | NA                 | NA                            | NA                 |
| Kabuli_wild_25755061 | NA                                  | Ca_kabuli_denovo | 25755061                | G/T  | NA                 | NA                            | NA                 |
| Kabuli_wild_25756217 | NA                                  | Ca_kabuli_denovo | 25756217                | C/G  | NA                 | NA                            | NA                 |
| Kabuli_wild_25756219 | NA                                  | Ca_kabuli_denovo | 25756219                | G/T  | NA                 | NA                            | NA                 |
| Kabuli_wild_25762335 | NA                                  | Ca_kabuli_denovo | 25762335                | G/T  | NA                 | NA                            | NA                 |
| Kabuli_wild_25767509 | NA                                  | Ca_kabuli_denovo | 25767509                | A/G  | NA                 | NA                            | NA                 |
| Kabuli_wild_25767530 | NA                                  | Ca_kabuli_denovo | 25767530                | C/G  | NA                 | NA                            | NA                 |
| Kabuli_wild_25776283 | NA                                  | Ca_kabuli_denovo | 25776283                | C/G  | NA                 | NA                            | NA                 |
| Kabuli_wild_25786481 | NA                                  | Ca_kabuli_denovo | 25786481                | T/A  | NA                 | NA                            | NA                 |
| Kabuli_wild_25786938 | NA                                  | Ca_kabuli_denovo | 25786938                | A/C  | NA                 | NA                            | NA                 |
| Kabuli_wild_25786939 | NA                                  | Ca_kabuli_denovo | 25786939                | G/T  | NA                 | NA                            | NA                 |
| Kabuli_wild_25789829 | NA                                  | Ca_kabuli_denovo | 25789829                | A/C  | NA                 | NA                            | NA                 |
| Kabuli_wild_25790061 | NA                                  | Ca_kabuli_denovo | 25790061                | A/G  | NA                 | NA                            | NA                 |
| Kabuli_wild_25791089 | NA                                  | Ca_kabuli_denovo | 25791089                | A/G  | NA                 | NA                            | NA                 |
| Kabuli_wild_25791104 | NA                                  | Ca_kabuli_denovo | 25791104                | C/G  | NA                 | NA                            | NA                 |
| Kabuli_wild_25793884 | NA                                  | Ca_kabuli_denovo | 25793884                | T/C  | NA                 | NA                            | NA                 |
| Kabuli_wild_25793908 | NA                                  | Ca_kabuli_denovo | 25793908                | G/C  | NA                 | NA                            | NA                 |
| Kabuli_wild_25799651 | NA                                  | Ca_kabuli_denovo | 25799651                | A/T  | NA                 | NA                            | NA                 |
| Kabuli_wild_25803257 | NA                                  | Ca_kabuli_denovo | 25803257                | A/C  | NA                 | NA                            | NA                 |
| Kabuli_wild_25806684 | NA                                  | Ca_kabuli_denovo | 25806684                | T/C  | NA                 | NA                            | NA                 |
| Kabuli_wild_25811246 | NA                                  | Ca_kabuli_denovo | 25811246                | C/T  | NA                 | NA                            | NA                 |
| Kabuli_wild_25825568 | NA                                  | Ca_kabuli_denovo | 25825568                | T/C  | NA                 | NA                            | NA                 |

| SNP IDs              | NCBI dbSNP accession IDs (NCBI_SS#) | Chromosomes      | Physical positions (bp) | SNPs | Gene accession IDs | Sequence components of genome | Putative functions |
|----------------------|-------------------------------------|------------------|-------------------------|------|--------------------|-------------------------------|--------------------|
| Kabuli_wild_25825583 | NA                                  | Ca_kabuli_denovo | 25825583                | T/C  | NA                 | NA                            | NA                 |
| Kabuli_wild_25828729 | NA                                  | Ca_kabuli_denovo | 25828729                | A/G  | NA                 | NA                            | NA                 |
| Kabuli_wild_25829310 | NA                                  | Ca_kabuli_denovo | 25829310                | T/A  | NA                 | NA                            | NA                 |
| Kabuli_wild_25832177 | NA                                  | Ca_kabuli_denovo | 25832177                | A/G  | NA                 | NA                            | NA                 |
| Kabuli_wild_25834762 | NA                                  | Ca_kabuli_denovo | 25834762                | C/G  | NA                 | NA                            | NA                 |
| Kabuli_wild_25836606 | NA                                  | Ca_kabuli_denovo | 25836606                | G/A  | NA                 | NA                            | NA                 |
| Kabuli_wild_25838153 | NA                                  | Ca_kabuli_denovo | 25838153                | C/T  | NA                 | NA                            | NA                 |
| Kabuli_wild_25838187 | NA                                  | Ca_kabuli_denovo | 25838187                | C/T  | NA                 | NA                            | NA                 |
| Kabuli_wild_25846004 | NA                                  | Ca_kabuli_denovo | 25846004                | A/C  | NA                 | NA                            | NA                 |
| Kabuli_wild_25859016 | NA                                  | Ca_kabuli_denovo | 25859016                | G/T  | NA                 | NA                            | NA                 |
| Kabuli_wild_25859174 | NA                                  | Ca_kabuli_denovo | 25859174                | G/T  | NA                 | NA                            | NA                 |
| Kabuli_wild_25859224 | NA                                  | Ca_kabuli_denovo | 25859224                | C/G  | NA                 | NA                            | NA                 |
| Kabuli_wild_25859233 | NA                                  | Ca_kabuli_denovo | 25859233                | T/G  | NA                 | NA                            | NA                 |
| Kabuli_wild_25859253 | NA                                  | Ca_kabuli_denovo | 25859253                | T/C  | NA                 | NA                            | NA                 |
| Kabuli_wild_25859799 | NA                                  | Ca_kabuli_denovo | 25859799                | A/T  | NA                 | NA                            | NA                 |
| Kabuli_wild_25865743 | NA                                  | Ca_kabuli_denovo | 25865743                | C/T  | NA                 | NA                            | NA                 |
| Kabuli_wild_25866830 | NA                                  | Ca_kabuli_denovo | 25866830                | G/A  | NA                 | NA                            | NA                 |
| Kabuli_wild_25866831 | NA                                  | Ca_kabuli_denovo | 25866831                | T/C  | NA                 | NA                            | NA                 |
| Kabuli_wild_25866853 | NA                                  | Ca_kabuli_denovo | 25866853                | A/C  | NA                 | NA                            | NA                 |
| Kabuli_wild_25867329 | NA                                  | Ca_kabuli_denovo | 25867329                | G/T  | NA                 | NA                            | NA                 |
| Kabuli_wild_25889083 | NA                                  | Ca_kabuli_denovo | 25889083                | A/C  | NA                 | NA                            | NA                 |
| Kabuli_wild_25894234 | NA                                  | Ca_kabuli_denovo | 25894234                | G/T  | NA                 | NA                            | NA                 |
| Kabuli_wild_25894582 | NA                                  | Ca_kabuli_denovo | 25894582                | C/G  | NA                 | NA                            | NA                 |
| Kabuli_wild_25894826 | NA                                  | Ca_kabuli_denovo | 25894826                | A/G  | NA                 | NA                            | NA                 |
| Kabuli_wild_25897849 | NA                                  | Ca_kabuli_denovo | 25897849                | C/G  | NA                 | NA                            | NA                 |
| Kabuli_wild_25898818 | NA                                  | Ca_kabuli_denovo | 25898818                | T/G  | NA                 | NA                            | NA                 |
| Kabuli_wild_25899662 | NA                                  | Ca_kabuli_denovo | 25899662                | C/T  | NA                 | NA                            | NA                 |
| Kabuli_wild_25899688 | NA                                  | Ca_kabuli_denovo | 25899688                | C/T  | NA                 | NA                            | NA                 |
| Kabuli_wild_25910695 | NA                                  | Ca_kabuli_denovo | 25910695                | A/G  | NA                 | NA                            | NA                 |
| Kabuli_wild_25910728 | NA                                  | Ca_kabuli_denovo | 25910728                | A/G  | NA                 | NA                            | NA                 |
| Kabuli_wild_25910734 | NA                                  | Ca_kabuli_denovo | 25910734                | T/C  | NA                 | NA                            | NA                 |
| Kabuli_wild_25910770 | NA                                  | Ca_kabuli_denovo | 25910770                | C/T  | NA                 | NA                            | NA                 |
| Kabuli_wild_25913071 | NA                                  | Ca_kabuli_denovo | 25913071                | C/T  | NA                 | NA                            | NA                 |
| Kabuli_wild_25913083 | NA                                  | Ca_kabuli_denovo | 25913083                | A/C  | NA                 | NA                            | NA                 |
| Kabuli_wild_25915673 | NA                                  | Ca_kabuli_denovo | 25915673                | A/C  | NA                 | NA                            | NA                 |
| Kabuli_wild_25920747 | NA                                  | Ca_kabuli_denovo | 25920747                | T/G  | NA                 | NA                            | NA                 |
| Kabuli_wild_25927821 | NA                                  | Ca_kabuli_denovo | 25927821                | G/T  | NA                 | NA                            | NA                 |
| Kabuli_wild_25928039 | NA                                  | Ca_kabuli_denovo | 25928039                | A/C  | NA                 | NA                            | NA                 |
| Kabuli_wild_25934158 | NA                                  | Ca_kabuli_denovo | 25934158                | G/A  | NA                 | NA                            | NA                 |
| Kabuli_wild_25934176 | NA                                  | Ca_kabuli_denovo | 25934176                | A/G  | NA                 | NA                            | NA                 |
| Kabuli_wild_25934188 | NA                                  | Ca_kabuli_denovo | 25934188                | C/A  | NA                 | NA                            | NA                 |
| Kabuli_wild_25937165 | NA                                  | Ca_kabuli_denovo | 25937165                | T/C  | NA                 | NA                            | NA                 |
| Kabuli_wild_25937171 | NA                                  | Ca_kabuli_denovo | 25937171                | C/G  | NA                 | NA                            | NA                 |
| Kabuli_wild_25946408 | NA                                  | Ca_kabuli_denovo | 25946408                | C/A  | NA                 | NA                            | NA                 |

| SNP IDs              | NCBI dbSNP accession IDs (NCBI_SS#) | Chromosomes      | Physical positions (bp) | SNPs | Gene accession IDs | Sequence components of genome | Putative functions |
|----------------------|-------------------------------------|------------------|-------------------------|------|--------------------|-------------------------------|--------------------|
| Kabuli_wild_25946467 | NA                                  | Ca_kabuli_denovo | 25946467                | C/T  | NA                 | NA                            | NA                 |
| Kabuli_wild_25946504 | NA                                  | Ca_kabuli_denovo | 25946504                | A/G  | NA                 | NA                            | NA                 |
| Kabuli_wild_25951433 | NA                                  | Ca_kabuli_denovo | 25951433                | C/G  | NA                 | NA                            | NA                 |
| Kabuli_wild_25951445 | NA                                  | Ca_kabuli_denovo | 25951445                | A/G  | NA                 | NA                            | NA                 |
| Kabuli_wild_25951451 | NA                                  | Ca_kabuli_denovo | 25951451                | A/G  | NA                 | NA                            | NA                 |
| Kabuli_wild_25954209 | NA                                  | Ca_kabuli_denovo | 25954209                | C/A  | NA                 | NA                            | NA                 |
| Kabuli_wild_25954224 | NA                                  | Ca_kabuli_denovo | 25954224                | A/G  | NA                 | NA                            | NA                 |
| Kabuli_wild_25958872 | NA                                  | Ca_kabuli_denovo | 25958872                | A/C  | NA                 | NA                            | NA                 |
| Kabuli_wild_25958875 | NA                                  | Ca_kabuli_denovo | 25958875                | G/T  | NA                 | NA                            | NA                 |
| Kabuli_wild_25959553 | NA                                  | Ca_kabuli_denovo | 25959553                | A/G  | NA                 | NA                            | NA                 |
| Kabuli_wild_25959574 | NA                                  | Ca_kabuli_denovo | 25959574                | T/A  | NA                 | NA                            | NA                 |
| Kabuli_wild_25961657 | NA                                  | Ca_kabuli_denovo | 25961657                | T/G  | NA                 | NA                            | NA                 |
| Kabuli_wild_25967894 | NA                                  | Ca_kabuli_denovo | 25967894                | G/T  | NA                 | NA                            | NA                 |
| Kabuli_wild_25969228 | NA                                  | Ca_kabuli_denovo | 25969228                | G/T  | NA                 | NA                            | NA                 |
| Kabuli_wild_25970432 | NA                                  | Ca_kabuli_denovo | 25970432                | G/C  | NA                 | NA                            | NA                 |
| Kabuli_wild_25970477 | NA                                  | Ca_kabuli_denovo | 25970477                | G/C  | NA                 | NA                            | NA                 |
| Kabuli_wild_25978771 | NA                                  | Ca_kabuli_denovo | 25978771                | C/T  | NA                 | NA                            | NA                 |
| Kabuli_wild_25978776 | NA                                  | Ca_kabuli_denovo | 25978776                | C/T  | NA                 | NA                            | NA                 |
| Kabuli_wild_25982052 | NA                                  | Ca_kabuli_denovo | 25982052                | A/G  | NA                 | NA                            | NA                 |
| Kabuli_wild_25983876 | NA                                  | Ca_kabuli_denovo | 25983876                | C/T  | NA                 | NA                            | NA                 |
| Kabuli_wild_25983917 | NA                                  | Ca_kabuli_denovo | 25983917                | C/G  | NA                 | NA                            | NA                 |
| Kabuli_wild_25984083 | NA                                  | Ca_kabuli_denovo | 25984083                | A/G  | NA                 | NA                            | NA                 |
| Kabuli_wild_25984265 | NA                                  | Ca_kabuli_denovo | 25984265                | G/T  | NA                 | NA                            | NA                 |
| Kabuli_wild_25989770 | NA                                  | Ca_kabuli_denovo | 25989770                | G/A  | NA                 | NA                            | NA                 |
| Kabuli_wild_25991447 | NA                                  | Ca_kabuli_denovo | 25991447                | C/T  | NA                 | NA                            | NA                 |
| Kabuli_wild_25992579 | NA                                  | Ca_kabuli_denovo | 25992579                | T/A  | NA                 | NA                            | NA                 |
| Kabuli_wild_25992608 | NA                                  | Ca_kabuli_denovo | 25992608                | C/G  | NA                 | NA                            | NA                 |
| Kabuli_wild_25994573 | NA                                  | Ca_kabuli_denovo | 25994573                | G/T  | NA                 | NA                            | NA                 |
| Kabuli_wild_25998454 | NA                                  | Ca_kabuli_denovo | 25998454                | A/G  | NA                 | NA                            | NA                 |
| Kabuli_wild_26001647 | NA                                  | Ca_kabuli_denovo | 26001647                | T/C  | NA                 | NA                            | NA                 |
| Kabuli_wild_26014305 | NA                                  | Ca_kabuli_denovo | 26014305                | A/C  | NA                 | NA                            | NA                 |
| Kabuli_wild_26024634 | NA                                  | Ca_kabuli_denovo | 26024634                | T/G  | NA                 | NA                            | NA                 |
| Kabuli_wild_26026987 | NA                                  | Ca_kabuli_denovo | 26026987                | C/T  | NA                 | NA                            | NA                 |
| Kabuli_wild_26030247 | NA                                  | Ca_kabuli_denovo | 26030247                | A/G  | NA                 | NA                            | NA                 |
| Kabuli_wild_26032696 | NA                                  | Ca_kabuli_denovo | 26032696                | C/G  | NA                 | NA                            | NA                 |
| Kabuli_wild_26033233 | NA                                  | Ca_kabuli_denovo | 26033233                | A/C  | NA                 | NA                            | NA                 |
| Kabuli_wild_26035578 | NA                                  | Ca_kabuli_denovo | 26035578                | A/C  | NA                 | NA                            | NA                 |
| Kabuli_wild_26035579 | NA                                  | Ca_kabuli_denovo | 26035579                | A/G  | NA                 | NA                            | NA                 |
| Kabuli_wild_26036165 | NA                                  | Ca_kabuli_denovo | 26036165                | G/A  | NA                 | NA                            | NA                 |
| Kabuli_wild_26036213 | NA                                  | Ca_kabuli_denovo | 26036213                | T/C  | NA                 | NA                            | NA                 |
| Kabuli_wild_26038744 | NA                                  | Ca_kabuli_denovo | 26038744                | A/C  | NA                 | NA                            | NA                 |
| Kabuli_wild_26038745 | NA                                  | Ca_kabuli_denovo | 26038745                | A/G  | NA                 | NA                            | NA                 |
| Kabuli_wild_26038746 | NA                                  | Ca_kabuli_denovo | 26038746                | A/G  | NA                 | NA                            | NA                 |
| Kabuli_wild_26038747 | NA                                  | Ca_kabuli_denovo | 26038747                | A/T  | NA                 | NA                            | NA                 |

| SNP IDs              | NCBI dbSNP accession IDs (NCBI_SS#) | Chromosomes      | Physical positions (bp) | SNPs | Gene accession IDs | Sequence components of genome | Putative functions |
|----------------------|-------------------------------------|------------------|-------------------------|------|--------------------|-------------------------------|--------------------|
| Kabuli_wild_26041941 | NA                                  | Ca_kabuli_denovo | 26041941                | A/G  | NA                 | NA                            | NA                 |
| Kabuli_wild_26042003 | NA                                  | Ca_kabuli_denovo | 26042003                | A/G  | NA                 | NA                            | NA                 |
| Kabuli_wild_26043350 | NA                                  | Ca_kabuli_denovo | 26043350                | G/T  | NA                 | NA                            | NA                 |
| Kabuli_wild_26047499 | NA                                  | Ca_kabuli_denovo | 26047499                | A/C  | NA                 | NA                            | NA                 |
| Kabuli_wild_26047516 | NA                                  | Ca_kabuli_denovo | 26047516                | C/T  | NA                 | NA                            | NA                 |
| Kabuli_wild_26049169 | NA                                  | Ca_kabuli_denovo | 26049169                | C/T  | NA                 | NA                            | NA                 |
| Kabuli_wild_26049184 | NA                                  | Ca_kabuli_denovo | 26049184                | C/G  | NA                 | NA                            | NA                 |
| Kabuli_wild_26056292 | NA                                  | Ca_kabuli_denovo | 26056292                | T/G  | NA                 | NA                            | NA                 |
| Kabuli_wild_26060967 | NA                                  | Ca_kabuli_denovo | 26060967                | C/A  | NA                 | NA                            | NA                 |
| Kabuli_wild_26060996 | NA                                  | Ca_kabuli_denovo | 26060996                | G/A  | NA                 | NA                            | NA                 |
| Kabuli_wild_26064995 | NA                                  | Ca_kabuli_denovo | 26064995                | A/G  | NA                 | NA                            | NA                 |
| Kabuli_wild_26065026 | NA                                  | Ca_kabuli_denovo | 26065026                | T/C  | NA                 | NA                            | NA                 |
| Kabuli_wild_26065787 | NA                                  | Ca_kabuli_denovo | 26065787                | G/A  | NA                 | NA                            | NA                 |
| Kabuli_wild_26065811 | NA                                  | Ca_kabuli_denovo | 26065811                | T/C  | NA                 | NA                            | NA                 |
| Kabuli_wild_26071934 | NA                                  | Ca_kabuli_denovo | 26071934                | A/G  | NA                 | NA                            | NA                 |
| Kabuli_wild_26078202 | NA                                  | Ca_kabuli_denovo | 26078202                | A/C  | NA                 | NA                            | NA                 |
| Kabuli_wild_26078203 | NA                                  | Ca_kabuli_denovo | 26078203                | G/T  | NA                 | NA                            | NA                 |
| Kabuli_wild_26078777 | NA                                  | Ca_kabuli_denovo | 26078777                | G/T  | NA                 | NA                            | NA                 |
| Kabuli_wild_26080021 | NA                                  | Ca_kabuli_denovo | 26080021                | T/G  | NA                 | NA                            | NA                 |
| Kabuli_wild_26081194 | NA                                  | Ca_kabuli_denovo | 26081194                | A/C  | NA                 | NA                            | NA                 |
| Kabuli_wild_26081201 | NA                                  | Ca_kabuli_denovo | 26081201                | G/C  | NA                 | NA                            | NA                 |
| Kabuli_wild_26083975 | NA                                  | Ca_kabuli_denovo | 26083975                | C/T  | NA                 | NA                            | NA                 |
| Kabuli_wild_26085115 | NA                                  | Ca_kabuli_denovo | 26085115                | A/G  | NA                 | NA                            | NA                 |
| Kabuli_wild_26086201 | NA                                  | Ca_kabuli_denovo | 26086201                | A/G  | NA                 | NA                            | NA                 |
| Kabuli_wild_26086459 | NA                                  | Ca_kabuli_denovo | 26086459                | C/G  | NA                 | NA                            | NA                 |
| Kabuli_wild_26094290 | NA                                  | Ca_kabuli_denovo | 26094290                | G/C  | NA                 | NA                            | NA                 |
| Kabuli_wild_26094308 | NA                                  | Ca_kabuli_denovo | 26094308                | G/C  | NA                 | NA                            | NA                 |
| Kabuli_wild_26094311 | NA                                  | Ca_kabuli_denovo | 26094311                | G/A  | NA                 | NA                            | NA                 |
| Kabuli_wild_26101147 | NA                                  | Ca_kabuli_denovo | 26101147                | A/C  | NA                 | NA                            | NA                 |
| Kabuli_wild_26102414 | NA                                  | Ca_kabuli_denovo | 26102414                | C/T  | NA                 | NA                            | NA                 |
| Kabuli_wild_26103497 | NA                                  | Ca_kabuli_denovo | 26103497                | C/G  | NA                 | NA                            | NA                 |
| Kabuli_wild_26103512 | NA                                  | Ca_kabuli_denovo | 26103512                | C/G  | NA                 | NA                            | NA                 |
| Kabuli_wild_26104244 | NA                                  | Ca_kabuli_denovo | 26104244                | A/G  | NA                 | NA                            | NA                 |
| Kabuli_wild_26104279 | NA                                  | Ca_kabuli_denovo | 26104279                | C/G  | NA                 | NA                            | NA                 |
| Kabuli_wild_26122424 | NA                                  | Ca_kabuli_denovo | 26122424                | C/T  | NA                 | NA                            | NA                 |
| Kabuli_wild_26125467 | NA                                  | Ca_kabuli_denovo | 26125467                | G/T  | NA                 | NA                            | NA                 |
| Kabuli_wild_26125473 | NA                                  | Ca_kabuli_denovo | 26125473                | G/T  | NA                 | NA                            | NA                 |
| Kabuli_wild_26125541 | NA                                  | Ca_kabuli_denovo | 26125541                | A/C  | NA                 | NA                            | NA                 |
| Kabuli_wild_26125545 | NA                                  | Ca_kabuli_denovo | 26125545                | G/A  | NA                 | NA                            | NA                 |
| Kabuli_wild_26127238 | NA                                  | Ca_kabuli_denovo | 26127238                | G/A  | NA                 | NA                            | NA                 |
| Kabuli_wild_26127247 | NA                                  | Ca_kabuli_denovo | 26127247                | T/C  | NA                 | NA                            | NA                 |
| Kabuli_wild_26130418 | NA                                  | Ca_kabuli_denovo | 26130418                | T/G  | NA                 | NA                            | NA                 |
| Kabuli_wild_26130810 | NA                                  | Ca_kabuli_denovo | 26130810                | A/C  | NA                 | NA                            | NA                 |
| Kabuli_wild_26130811 | NA                                  | Ca_kabuli_denovo | 26130811                | A/G  | NA                 | NA                            | NA                 |



| SNP IDs              | NCBI dbSNP accession IDs (NCBI_SS#) | Chromosomes      | Physical positions (bp) | SNPs | Gene accession IDs | Sequence components of genome | Putative functions |
|----------------------|-------------------------------------|------------------|-------------------------|------|--------------------|-------------------------------|--------------------|
| Kabuli_wild_26131958 | NA                                  | Ca_kabuli_denovo | 26131958                | G/T  | NA                 | NA                            | NA                 |
| Kabuli_wild_26131962 | NA                                  | Ca_kabuli_denovo | 26131962                | G/C  | NA                 | NA                            | NA                 |
| Kabuli_wild_26136072 | NA                                  | Ca_kabuli_denovo | 26136072                | G/T  | NA                 | NA                            | NA                 |
| Kabuli_wild_26137123 | NA                                  | Ca_kabuli_denovo | 26137123                | C/T  | NA                 | NA                            | NA                 |
| Kabuli_wild_26139288 | NA                                  | Ca_kabuli_denovo | 26139288                | G/A  | NA                 | NA                            | NA                 |
| Kabuli_wild_26142926 | NA                                  | Ca_kabuli_denovo | 26142926                | A/T  | NA                 | NA                            | NA                 |
| Kabuli_wild_26149082 | NA                                  | Ca_kabuli_denovo | 26149082                | C/G  | NA                 | NA                            | NA                 |
| Kabuli_wild_26151004 | NA                                  | Ca_kabuli_denovo | 26151004                | A/G  | NA                 | NA                            | NA                 |
| Kabuli_wild_26164133 | NA                                  | Ca_kabuli_denovo | 26164133                | C/T  | NA                 | NA                            | NA                 |
| Kabuli_wild_26173091 | NA                                  | Ca_kabuli_denovo | 26173091                | G/C  | NA                 | NA                            | NA                 |
| Kabuli_wild_26179030 | NA                                  | Ca_kabuli_denovo | 26179030                | G/A  | NA                 | NA                            | NA                 |
| Kabuli_wild_26179770 | NA                                  | Ca_kabuli_denovo | 26179770                | A/C  | NA                 | NA                            | NA                 |
| Kabuli_wild_26181366 | NA                                  | Ca_kabuli_denovo | 26181366                | T/G  | NA                 | NA                            | NA                 |
| Kabuli_wild_26182055 | NA                                  | Ca_kabuli_denovo | 26182055                | C/G  | NA                 | NA                            | NA                 |
| Kabuli_wild_26184283 | NA                                  | Ca_kabuli_denovo | 26184283                | G/T  | NA                 | NA                            | NA                 |
| Kabuli_wild_26186007 | NA                                  | Ca_kabuli_denovo | 26186007                | A/C  | NA                 | NA                            | NA                 |
| Kabuli_wild_26186009 | NA                                  | Ca_kabuli_denovo | 26186009                | A/C  | NA                 | NA                            | NA                 |
| Kabuli_wild_26186580 | NA                                  | Ca_kabuli_denovo | 26186580                | A/G  | NA                 | NA                            | NA                 |
| Kabuli_wild_26188057 | NA                                  | Ca_kabuli_denovo | 26188057                | C/T  | NA                 | NA                            | NA                 |
| Kabuli_wild_26188477 | NA                                  | Ca_kabuli_denovo | 26188477                | A/G  | NA                 | NA                            | NA                 |
| Kabuli_wild_26189840 | NA                                  | Ca_kabuli_denovo | 26189840                | G/T  | NA                 | NA                            | NA                 |
| Kabuli_wild_26191703 | NA                                  | Ca_kabuli_denovo | 26191703                | T/C  | NA                 | NA                            | NA                 |
| Kabuli_wild_26195701 | NA                                  | Ca_kabuli_denovo | 26195701                | C/G  | NA                 | NA                            | NA                 |
| Kabuli_wild_26195703 | NA                                  | Ca_kabuli_denovo | 26195703                | T/C  | NA                 | NA                            | NA                 |
| Kabuli_wild_26195705 | NA                                  | Ca_kabuli_denovo | 26195705                | C/A  | NA                 | NA                            | NA                 |
| Kabuli_wild_26195706 | NA                                  | Ca_kabuli_denovo | 26195706                | G/T  | NA                 | NA                            | NA                 |
| Kabuli_wild_26195707 | NA                                  | Ca_kabuli_denovo | 26195707                | A/G  | NA                 | NA                            | NA                 |
| Kabuli_wild_26196791 | NA                                  | Ca_kabuli_denovo | 26196791                | C/G  | NA                 | NA                            | NA                 |
| Kabuli_wild_26196813 | NA                                  | Ca_kabuli_denovo | 26196813                | C/G  | NA                 | NA                            | NA                 |
| Kabuli_wild_26211961 | NA                                  | Ca_kabuli_denovo | 26211961                | G/A  | NA                 | NA                            | NA                 |
| Kabuli_wild_26212471 | NA                                  | Ca_kabuli_denovo | 26212471                | G/A  | NA                 | NA                            | NA                 |
| Kabuli_wild_26218395 | NA                                  | Ca_kabuli_denovo | 26218395                | T/G  | NA                 | NA                            | NA                 |
| Kabuli_wild_26218426 | NA                                  | Ca_kabuli_denovo | 26218426                | T/C  | NA                 | NA                            | NA                 |
| Kabuli_wild_26219833 | NA                                  | Ca_kabuli_denovo | 26219833                | C/T  | NA                 | NA                            | NA                 |
| Kabuli_wild_26224901 | NA                                  | Ca_kabuli_denovo | 26224901                | A/G  | NA                 | NA                            | NA                 |
| Kabuli_wild_26228608 | NA                                  | Ca_kabuli_denovo | 26228608                | G/T  | NA                 | NA                            | NA                 |
| Kabuli_wild_26229492 | NA                                  | Ca_kabuli_denovo | 26229492                | G/T  | NA                 | NA                            | NA                 |
| Kabuli_wild_26229494 | NA                                  | Ca_kabuli_denovo | 26229494                | C/T  | NA                 | NA                            | NA                 |
| Kabuli_wild_26230560 | NA                                  | Ca_kabuli_denovo | 26230560                | G/T  | NA                 | NA                            | NA                 |
| Kabuli_wild_26230611 | NA                                  | Ca_kabuli_denovo | 26230611                | C/T  | NA                 | NA                            | NA                 |
| Kabuli_wild_26233572 | NA                                  | Ca_kabuli_denovo | 26233572                | T/G  | NA                 | NA                            | NA                 |
| Kabuli_wild_26239380 | NA                                  | Ca_kabuli_denovo | 26239380                | G/T  | NA                 | NA                            | NA                 |
| Kabuli_wild_26242907 | NA                                  | Ca_kabuli_denovo | 26242907                | C/T  | NA                 | NA                            | NA                 |
| Kabuli_wild_26245860 | NA                                  | Ca_kabuli_denovo | 26245860                | C/T  | NA                 | NA                            | NA                 |

| SNP IDs              | NCBI dbSNP accession IDs (NCBI_SS#) | Chromosomes      | Physical positions (bp) | SNPs | Gene accession IDs | Sequence components of genome | Putative functions |
|----------------------|-------------------------------------|------------------|-------------------------|------|--------------------|-------------------------------|--------------------|
| Kabuli_wild_26245877 | NA                                  | Ca_kabuli_denovo | 26245877                | A/G  | NA                 | NA                            | NA                 |
| Kabuli_wild_26247544 | NA                                  | Ca_kabuli_denovo | 26247544                | A/G  | NA                 | NA                            | NA                 |
| Kabuli_wild_26248885 | NA                                  | Ca_kabuli_denovo | 26248885                | C/T  | NA                 | NA                            | NA                 |
| Kabuli_wild_26254002 | NA                                  | Ca_kabuli_denovo | 26254002                | G/C  | NA                 | NA                            | NA                 |
| Kabuli_wild_26273440 | NA                                  | Ca_kabuli_denovo | 26273440                | A/G  | NA                 | NA                            | NA                 |
| Kabuli_wild_26276721 | NA                                  | Ca_kabuli_denovo | 26276721                | G/A  | NA                 | NA                            | NA                 |
| Kabuli_wild_26282917 | NA                                  | Ca_kabuli_denovo | 26282917                | G/A  | NA                 | NA                            | NA                 |
| Kabuli_wild_26284361 | NA                                  | Ca_kabuli_denovo | 26284361                | T/G  | NA                 | NA                            | NA                 |
| Kabuli_wild_26285481 | NA                                  | Ca_kabuli_denovo | 26285481                | C/T  | NA                 | NA                            | NA                 |
| Kabuli_wild_26292589 | NA                                  | Ca_kabuli_denovo | 26292589                | A/G  | NA                 | NA                            | NA                 |
| Kabuli_wild_26298500 | NA                                  | Ca_kabuli_denovo | 26298500                | G/T  | NA                 | NA                            | NA                 |
| Kabuli_wild_26306831 | NA                                  | Ca_kabuli_denovo | 26306831                | G/A  | NA                 | NA                            | NA                 |
| Kabuli_wild_26306852 | NA                                  | Ca_kabuli_denovo | 26306852                | C/T  | NA                 | NA                            | NA                 |
| Kabuli_wild_26309315 | NA                                  | Ca_kabuli_denovo | 26309315                | T/G  | NA                 | NA                            | NA                 |
| Kabuli_wild_26309320 | NA                                  | Ca_kabuli_denovo | 26309320                | T/C  | NA                 | NA                            | NA                 |
| Kabuli_wild_26311596 | NA                                  | Ca_kabuli_denovo | 26311596                | A/G  | NA                 | NA                            | NA                 |
| Kabuli_wild_26311632 | NA                                  | Ca_kabuli_denovo | 26311632                | C/A  | NA                 | NA                            | NA                 |
| Kabuli_wild_26313974 | NA                                  | Ca_kabuli_denovo | 26313974                | A/C  | NA                 | NA                            | NA                 |
| Kabuli_wild_26313976 | NA                                  | Ca_kabuli_denovo | 26313976                | A/G  | NA                 | NA                            | NA                 |
| Kabuli_wild_26318182 | NA                                  | Ca_kabuli_denovo | 26318182                | C/T  | NA                 | NA                            | NA                 |
| Kabuli_wild_26320248 | NA                                  | Ca_kabuli_denovo | 26320248                | A/C  | NA                 | NA                            | NA                 |
| Kabuli_wild_26320342 | NA                                  | Ca_kabuli_denovo | 26320342                | A/G  | NA                 | NA                            | NA                 |
| Kabuli_wild_26320352 | NA                                  | Ca_kabuli_denovo | 26320352                | T/C  | NA                 | NA                            | NA                 |
| Kabuli_wild_26327930 | NA                                  | Ca_kabuli_denovo | 26327930                | G/T  | NA                 | NA                            | NA                 |
| Kabuli_wild_26332315 | NA                                  | Ca_kabuli_denovo | 26332315                | A/C  | NA                 | NA                            | NA                 |
| Kabuli_wild_26334886 | NA                                  | Ca_kabuli_denovo | 26334886                | A/C  | NA                 | NA                            | NA                 |
| Kabuli_wild_26356793 | NA                                  | Ca_kabuli_denovo | 26356793                | A/C  | NA                 | NA                            | NA                 |
| Kabuli_wild_26359462 | NA                                  | Ca_kabuli_denovo | 26359462                | C/T  | NA                 | NA                            | NA                 |
| Kabuli_wild_26360868 | NA                                  | Ca_kabuli_denovo | 26360868                | G/T  | NA                 | NA                            | NA                 |
| Kabuli_wild_26360888 | NA                                  | Ca_kabuli_denovo | 26360888                | T/G  | NA                 | NA                            | NA                 |
| Kabuli_wild_26361218 | NA                                  | Ca_kabuli_denovo | 26361218                | C/G  | NA                 | NA                            | NA                 |
| Kabuli_wild_26361275 | NA                                  | Ca_kabuli_denovo | 26361275                | T/A  | NA                 | NA                            | NA                 |
| Kabuli_wild_26362938 | NA                                  | Ca_kabuli_denovo | 26362938                | A/C  | NA                 | NA                            | NA                 |
| Kabuli_wild_26367745 | NA                                  | Ca_kabuli_denovo | 26367745                | A/G  | NA                 | NA                            | NA                 |
| Kabuli_wild_26370258 | NA                                  | Ca_kabuli_denovo | 26370258                | C/G  | NA                 | NA                            | NA                 |
| Kabuli_wild_26370261 | NA                                  | Ca_kabuli_denovo | 26370261                | G/A  | NA                 | NA                            | NA                 |
| Kabuli_wild_26370877 | NA                                  | Ca_kabuli_denovo | 26370877                | C/G  | NA                 | NA                            | NA                 |
| Kabuli_wild_26370890 | NA                                  | Ca_kabuli_denovo | 26370890                | G/C  | NA                 | NA                            | NA                 |
| Kabuli_wild_26376226 | NA                                  | Ca_kabuli_denovo | 26376226                | G/C  | NA                 | NA                            | NA                 |
| Kabuli_wild_26378792 | NA                                  | Ca_kabuli_denovo | 26378792                | A/G  | NA                 | NA                            | NA                 |
| Kabuli_wild_26378794 | NA                                  | Ca_kabuli_denovo | 26378794                | C/T  | NA                 | NA                            | NA                 |
| Kabuli_wild_26380423 | NA                                  | Ca_kabuli_denovo | 26380423                | C/T  | NA                 | NA                            | NA                 |
| Kabuli_wild_26384551 | NA                                  | Ca_kabuli_denovo | 26384551                | A/G  | NA                 | NA                            | NA                 |
| Kabuli_wild_26384554 | NA                                  | Ca_kabuli_denovo | 26384554                | A/G  | NA                 | NA                            | NA                 |

| SNP IDs              | NCBI dbSNP accession IDs (NCBI_SS#) | Chromosomes      | Physical positions (bp) | SNPs | Gene accession IDs | Sequence components of genome | Putative functions |
|----------------------|-------------------------------------|------------------|-------------------------|------|--------------------|-------------------------------|--------------------|
| Kabuli_wild_26389806 | NA                                  | Ca_kabuli_denovo | 26389806                | G/A  | NA                 | NA                            | NA                 |
| Kabuli_wild_26389862 | NA                                  | Ca_kabuli_denovo | 26389862                | A/G  | NA                 | NA                            | NA                 |
| Kabuli_wild_26395973 | NA                                  | Ca_kabuli_denovo | 26395973                | G/T  | NA                 | NA                            | NA                 |
| Kabuli_wild_26395983 | NA                                  | Ca_kabuli_denovo | 26395983                | G/A  | NA                 | NA                            | NA                 |
| Kabuli_wild_26399045 | NA                                  | Ca_kabuli_denovo | 26399045                | C/T  | NA                 | NA                            | NA                 |
| Kabuli_wild_26399102 | NA                                  | Ca_kabuli_denovo | 26399102                | C/G  | NA                 | NA                            | NA                 |
| Kabuli_wild_26399126 | NA                                  | Ca_kabuli_denovo | 26399126                | G/A  | NA                 | NA                            | NA                 |
| Kabuli_wild_26402198 | NA                                  | Ca_kabuli_denovo | 26402198                | G/C  | NA                 | NA                            | NA                 |
| Kabuli_wild_26402240 | NA                                  | Ca_kabuli_denovo | 26402240                | G/C  | NA                 | NA                            | NA                 |
| Kabuli_wild_26408129 | NA                                  | Ca_kabuli_denovo | 26408129                | G/A  | NA                 | NA                            | NA                 |
| Kabuli_wild_26411218 | NA                                  | Ca_kabuli_denovo | 26411218                | C/G  | NA                 | NA                            | NA                 |
| Kabuli_wild_26414491 | NA                                  | Ca_kabuli_denovo | 26414491                | C/G  | NA                 | NA                            | NA                 |
| Kabuli_wild_26417491 | NA                                  | Ca_kabuli_denovo | 26417491                | A/C  | NA                 | NA                            | NA                 |
| Kabuli_wild_26418416 | NA                                  | Ca_kabuli_denovo | 26418416                | T/G  | NA                 | NA                            | NA                 |
| Kabuli_wild_26431042 | NA                                  | Ca_kabuli_denovo | 26431042                | C/T  | NA                 | NA                            | NA                 |
| Kabuli_wild_26431060 | NA                                  | Ca_kabuli_denovo | 26431060                | C/G  | NA                 | NA                            | NA                 |
| Kabuli_wild_26433583 | NA                                  | Ca_kabuli_denovo | 26433583                | G/T  | NA                 | NA                            | NA                 |
| Kabuli_wild_26435400 | NA                                  | Ca_kabuli_denovo | 26435400                | G/A  | NA                 | NA                            | NA                 |
| Kabuli_wild_26447839 | NA                                  | Ca_kabuli_denovo | 26447839                | G/C  | NA                 | NA                            | NA                 |
| Kabuli_wild_26447852 | NA                                  | Ca_kabuli_denovo | 26447852                | G/C  | NA                 | NA                            | NA                 |
| Kabuli_wild_26447872 | NA                                  | Ca_kabuli_denovo | 26447872                | G/C  | NA                 | NA                            | NA                 |
| Kabuli_wild_26447893 | NA                                  | Ca_kabuli_denovo | 26447893                | C/G  | NA                 | NA                            | NA                 |
| Kabuli_wild_26450968 | NA                                  | Ca_kabuli_denovo | 26450968                | G/T  | NA                 | NA                            | NA                 |
| Kabuli_wild_26451109 | NA                                  | Ca_kabuli_denovo | 26451109                | A/G  | NA                 | NA                            | NA                 |
| Kabuli_wild_26456922 | NA                                  | Ca_kabuli_denovo | 26456922                | T/G  | NA                 | NA                            | NA                 |
| Kabuli_wild_26456953 | NA                                  | Ca_kabuli_denovo | 26456953                | T/G  | NA                 | NA                            | NA                 |
| Kabuli_wild_26458283 | NA                                  | Ca_kabuli_denovo | 26458283                | G/T  | NA                 | NA                            | NA                 |
| Kabuli_wild_26460360 | NA                                  | Ca_kabuli_denovo | 26460360                | G/A  | NA                 | NA                            | NA                 |
| Kabuli_wild_26472621 | NA                                  | Ca_kabuli_denovo | 26472621                | T/C  | NA                 | NA                            | NA                 |
| Kabuli_wild_26478619 | NA                                  | Ca_kabuli_denovo | 26478619                | G/T  | NA                 | NA                            | NA                 |
| Kabuli_wild_26485552 | NA                                  | Ca_kabuli_denovo | 26485552                | T/C  | NA                 | NA                            | NA                 |
| Kabuli_wild_26485555 | NA                                  | Ca_kabuli_denovo | 26485555                | G/C  | NA                 | NA                            | NA                 |
| Kabuli_wild_26486039 | NA                                  | Ca_kabuli_denovo | 26486039                | A/G  | NA                 | NA                            | NA                 |
| Kabuli_wild_26486076 | NA                                  | Ca_kabuli_denovo | 26486076                | A/G  | NA                 | NA                            | NA                 |
| Kabuli_wild_26487212 | NA                                  | Ca_kabuli_denovo | 26487212                | T/C  | NA                 | NA                            | NA                 |
| Kabuli_wild_26488149 | NA                                  | Ca_kabuli_denovo | 26488149                | G/C  | NA                 | NA                            | NA                 |
| Kabuli_wild_26488175 | NA                                  | Ca_kabuli_denovo | 26488175                | C/T  | NA                 | NA                            | NA                 |
| Kabuli_wild_26488332 | NA                                  | Ca_kabuli_denovo | 26488332                | T/G  | NA                 | NA                            | NA                 |
| Kabuli_wild_26488392 | NA                                  | Ca_kabuli_denovo | 26488392                | G/A  | NA                 | NA                            | NA                 |
| Kabuli_wild_26491435 | NA                                  | Ca_kabuli_denovo | 26491435                | C/G  | NA                 | NA                            | NA                 |
| Kabuli_wild_26491439 | NA                                  | Ca_kabuli_denovo | 26491439                | C/G  | NA                 | NA                            | NA                 |
| Kabuli_wild_26491451 | NA                                  | Ca_kabuli_denovo | 26491451                | G/C  | NA                 | NA                            | NA                 |
| Kabuli_wild_26495323 | NA                                  | Ca_kabuli_denovo | 26495323                | T/G  | NA                 | NA                            | NA                 |
| Kabuli_wild_26495863 | NA                                  | Ca_kabuli_denovo | 26495863                | T/C  | NA                 | NA                            | NA                 |

| SNP IDs              | NCBI dbSNP accession IDs (NCBI_SS#) | Chromosomes      | Physical positions (bp) | SNPs | Gene accession IDs | Sequence components of genome | Putative functions |
|----------------------|-------------------------------------|------------------|-------------------------|------|--------------------|-------------------------------|--------------------|
| Kabuli_wild_26499789 | NA                                  | Ca_kabuli_denovo | 26499789                | A/G  | NA                 | NA                            | NA                 |
| Kabuli_wild_26502745 | NA                                  | Ca_kabuli_denovo | 26502745                | G/C  | NA                 | NA                            | NA                 |
| Kabuli_wild_26502784 | NA                                  | Ca_kabuli_denovo | 26502784                | A/G  | NA                 | NA                            | NA                 |
| Kabuli_wild_26503442 | NA                                  | Ca_kabuli_denovo | 26503442                | A/G  | NA                 | NA                            | NA                 |
| Kabuli_wild_26503467 | NA                                  | Ca_kabuli_denovo | 26503467                | G/A  | NA                 | NA                            | NA                 |
| Kabuli_wild_26503700 | NA                                  | Ca_kabuli_denovo | 26503700                | A/G  | NA                 | NA                            | NA                 |
| Kabuli_wild_26511048 | NA                                  | Ca_kabuli_denovo | 26511048                | T/G  | NA                 | NA                            | NA                 |
| Kabuli_wild_26511793 | NA                                  | Ca_kabuli_denovo | 26511793                | G/A  | NA                 | NA                            | NA                 |
| Kabuli_wild_26511807 | NA                                  | Ca_kabuli_denovo | 26511807                | A/G  | NA                 | NA                            | NA                 |
| Kabuli_wild_26522312 | NA                                  | Ca_kabuli_denovo | 26522312                | C/T  | NA                 | NA                            | NA                 |
| Kabuli_wild_26522314 | NA                                  | Ca_kabuli_denovo | 26522314                | G/A  | NA                 | NA                            | NA                 |
| Kabuli_wild_26522333 | NA                                  | Ca_kabuli_denovo | 26522333                | A/G  | NA                 | NA                            | NA                 |
| Kabuli_wild_26522351 | NA                                  | Ca_kabuli_denovo | 26522351                | G/C  | NA                 | NA                            | NA                 |
| Kabuli_wild_26525117 | NA                                  | Ca_kabuli_denovo | 26525117                | A/G  | NA                 | NA                            | NA                 |
| Kabuli_wild_26525127 | NA                                  | Ca_kabuli_denovo | 26525127                | A/G  | NA                 | NA                            | NA                 |
| Kabuli_wild_26533390 | NA                                  | Ca_kabuli_denovo | 26533390                | C/T  | NA                 | NA                            | NA                 |
| Kabuli_wild_26545228 | NA                                  | Ca_kabuli_denovo | 26545228                | T/C  | NA                 | NA                            | NA                 |
| Kabuli_wild_26545237 | NA                                  | Ca_kabuli_denovo | 26545237                | T/C  | NA                 | NA                            | NA                 |
| Kabuli_wild_26551499 | NA                                  | Ca_kabuli_denovo | 26551499                | G/C  | NA                 | NA                            | NA                 |
| Kabuli_wild_26551517 | NA                                  | Ca_kabuli_denovo | 26551517                | C/A  | NA                 | NA                            | NA                 |
| Kabuli_wild_26551519 | NA                                  | Ca_kabuli_denovo | 26551519                | T/G  | NA                 | NA                            | NA                 |
| Kabuli_wild_26556041 | NA                                  | Ca_kabuli_denovo | 26556041                | C/T  | NA                 | NA                            | NA                 |
| Kabuli_wild_26556068 | NA                                  | Ca_kabuli_denovo | 26556068                | G/C  | NA                 | NA                            | NA                 |
| Kabuli_wild_26558328 | NA                                  | Ca_kabuli_denovo | 26558328                | C/T  | NA                 | NA                            | NA                 |
| Kabuli_wild_26564363 | NA                                  | Ca_kabuli_denovo | 26564363                | G/A  | NA                 | NA                            | NA                 |
| Kabuli_wild_26566296 | NA                                  | Ca_kabuli_denovo | 26566296                | C/T  | NA                 | NA                            | NA                 |
| Kabuli_wild_26567281 | NA                                  | Ca_kabuli_denovo | 26567281                | G/A  | NA                 | NA                            | NA                 |
| Kabuli_wild_26570457 | NA                                  | Ca_kabuli_denovo | 26570457                | T/C  | NA                 | NA                            | NA                 |
| Kabuli_wild_26575342 | NA                                  | Ca_kabuli_denovo | 26575342                | T/G  | NA                 | NA                            | NA                 |
| Kabuli_wild_26585483 | NA                                  | Ca_kabuli_denovo | 26585483                | C/T  | NA                 | NA                            | NA                 |
| Kabuli_wild_26589225 | NA                                  | Ca_kabuli_denovo | 26589225                | T/C  | NA                 | NA                            | NA                 |
| Kabuli_wild_26589242 | NA                                  | Ca_kabuli_denovo | 26589242                | G/C  | NA                 | NA                            | NA                 |
| Kabuli_wild_26594636 | NA                                  | Ca_kabuli_denovo | 26594636                | G/T  | NA                 | NA                            | NA                 |
| Kabuli_wild_26602567 | NA                                  | Ca_kabuli_denovo | 26602567                | A/G  | NA                 | NA                            | NA                 |
| Kabuli_wild_26606525 | NA                                  | Ca_kabuli_denovo | 26606525                | T/C  | NA                 | NA                            | NA                 |
| Kabuli_wild_26606555 | NA                                  | Ca_kabuli_denovo | 26606555                | A/C  | NA                 | NA                            | NA                 |
| Kabuli_wild_26607998 | NA                                  | Ca_kabuli_denovo | 26607998                | C/T  | NA                 | NA                            | NA                 |
| Kabuli_wild_26609104 | NA                                  | Ca_kabuli_denovo | 26609104                | A/G  | NA                 | NA                            | NA                 |
| Kabuli_wild_26609515 | NA                                  | Ca_kabuli_denovo | 26609515                | A/G  | NA                 | NA                            | NA                 |
| Kabuli_wild_26609539 | NA                                  | Ca_kabuli_denovo | 26609539                | T/C  | NA                 | NA                            | NA                 |
| Kabuli_wild_26610844 | NA                                  | Ca_kabuli_denovo | 26610844                | A/T  | NA                 | NA                            | NA                 |
| Kabuli_wild_26610878 | NA                                  | Ca_kabuli_denovo | 26610878                | T/C  | NA                 | NA                            | NA                 |
| Kabuli_wild_26613227 | NA                                  | Ca_kabuli_denovo | 26613227                | G/A  | NA                 | NA                            | NA                 |
| Kabuli_wild_26613584 | NA                                  | Ca_kabuli_denovo | 26613584                | T/G  | NA                 | NA                            | NA                 |

| SNP IDs              | NCBI dbSNP accession IDs (NCBI_SS#) | Chromosomes      | Physical positions (bp) | SNPs | Gene accession IDs | Sequence components of genome | Putative functions |
|----------------------|-------------------------------------|------------------|-------------------------|------|--------------------|-------------------------------|--------------------|
| Kabuli_wild_26617545 | NA                                  | Ca_kabuli_denovo | 26617545                | T/G  | NA                 | NA                            | NA                 |
| Kabuli_wild_26622902 | NA                                  | Ca_kabuli_denovo | 26622902                | T/G  | NA                 | NA                            | NA                 |
| Kabuli_wild_26623963 | NA                                  | Ca_kabuli_denovo | 26623963                | A/T  | NA                 | NA                            | NA                 |
| Kabuli_wild_26626934 | NA                                  | Ca_kabuli_denovo | 26626934                | C/G  | NA                 | NA                            | NA                 |
| Kabuli_wild_26632831 | NA                                  | Ca_kabuli_denovo | 26632831                | G/C  | NA                 | NA                            | NA                 |
| Kabuli_wild_26632881 | NA                                  | Ca_kabuli_denovo | 26632881                | G/A  | NA                 | NA                            | NA                 |
| Kabuli_wild_26644785 | NA                                  | Ca_kabuli_denovo | 26644785                | G/T  | NA                 | NA                            | NA                 |
| Kabuli_wild_26648693 | NA                                  | Ca_kabuli_denovo | 26648693                | G/A  | NA                 | NA                            | NA                 |
| Kabuli_wild_26649813 | NA                                  | Ca_kabuli_denovo | 26649813                | T/C  | NA                 | NA                            | NA                 |
| Kabuli_wild_26654868 | NA                                  | Ca_kabuli_denovo | 26654868                | T/C  | NA                 | NA                            | NA                 |
| Kabuli_wild_26656909 | NA                                  | Ca_kabuli_denovo | 26656909                | C/T  | NA                 | NA                            | NA                 |
| Kabuli_wild_26657254 | NA                                  | Ca_kabuli_denovo | 26657254                | C/G  | NA                 | NA                            | NA                 |
| Kabuli_wild_26660306 | NA                                  | Ca_kabuli_denovo | 26660306                | G/A  | NA                 | NA                            | NA                 |
| Kabuli_wild_26662806 | NA                                  | Ca_kabuli_denovo | 26662806                | C/A  | NA                 | NA                            | NA                 |
| Kabuli_wild_26662825 | NA                                  | Ca_kabuli_denovo | 26662825                | A/G  | NA                 | NA                            | NA                 |
| Kabuli_wild_26663564 | NA                                  | Ca_kabuli_denovo | 26663564                | T/C  | NA                 | NA                            | NA                 |
| Kabuli_wild_26663567 | NA                                  | Ca_kabuli_denovo | 26663567                | T/C  | NA                 | NA                            | NA                 |
| Kabuli_wild_26675618 | NA                                  | Ca_kabuli_denovo | 26675618                | T/C  | NA                 | NA                            | NA                 |
| Kabuli_wild_26681980 | NA                                  | Ca_kabuli_denovo | 26681980                | A/G  | NA                 | NA                            | NA                 |
| Kabuli_wild_26692424 | NA                                  | Ca_kabuli_denovo | 26692424                | C/G  | NA                 | NA                            | NA                 |
| Kabuli_wild_26694569 | NA                                  | Ca_kabuli_denovo | 26694569                | T/G  | NA                 | NA                            | NA                 |
| Kabuli_wild_26707150 | NA                                  | Ca_kabuli_denovo | 26707150                | C/G  | NA                 | NA                            | NA                 |
| Kabuli_wild_26707166 | NA                                  | Ca_kabuli_denovo | 26707166                | C/A  | NA                 | NA                            | NA                 |
| Kabuli_wild_26707925 | NA                                  | Ca_kabuli_denovo | 26707925                | C/T  | NA                 | NA                            | NA                 |
| Kabuli_wild_26731912 | NA                                  | Ca_kabuli_denovo | 26731912                | C/T  | NA                 | NA                            | NA                 |
| Kabuli_wild_26735271 | NA                                  | Ca_kabuli_denovo | 26735271                | G/T  | NA                 | NA                            | NA                 |
| Kabuli_wild_26741618 | NA                                  | Ca_kabuli_denovo | 26741618                | A/C  | NA                 | NA                            | NA                 |
| Kabuli_wild_26743224 | NA                                  | Ca_kabuli_denovo | 26743224                | T/G  | NA                 | NA                            | NA                 |
| Kabuli_wild_26763344 | NA                                  | Ca_kabuli_denovo | 26763344                | T/G  | NA                 | NA                            | NA                 |
| Kabuli_wild_26766436 | NA                                  | Ca_kabuli_denovo | 26766436                | G/A  | NA                 | NA                            | NA                 |
| Kabuli_wild_26766441 | NA                                  | Ca_kabuli_denovo | 26766441                | T/C  | NA                 | NA                            | NA                 |
| Kabuli_wild_26768518 | NA                                  | Ca_kabuli_denovo | 26768518                | C/T  | NA                 | NA                            | NA                 |
| Kabuli_wild_26768534 | NA                                  | Ca_kabuli_denovo | 26768534                | T/C  | NA                 | NA                            | NA                 |
| Kabuli_wild_26775709 | NA                                  | Ca_kabuli_denovo | 26775709                | C/G  | NA                 | NA                            | NA                 |
| Kabuli_wild_26777557 | NA                                  | Ca_kabuli_denovo | 26777557                | G/C  | NA                 | NA                            | NA                 |
| Kabuli_wild_26780086 | NA                                  | Ca_kabuli_denovo | 26780086                | C/T  | NA                 | NA                            | NA                 |
| Kabuli_wild_26782282 | NA                                  | Ca_kabuli_denovo | 26782282                | T/C  | NA                 | NA                            | NA                 |
| Kabuli_wild_26782692 | NA                                  | Ca_kabuli_denovo | 26782692                | G/T  | NA                 | NA                            | NA                 |
| Kabuli_wild_26794527 | NA                                  | Ca_kabuli_denovo | 26794527                | G/T  | NA                 | NA                            | NA                 |
| Kabuli_wild_26794532 | NA                                  | Ca_kabuli_denovo | 26794532                | T/G  | NA                 | NA                            | NA                 |
| Kabuli_wild_26800273 | NA                                  | Ca_kabuli_denovo | 26800273                | A/C  | NA                 | NA                            | NA                 |
| Kabuli_wild_26800302 | NA                                  | Ca_kabuli_denovo | 26800302                | G/C  | NA                 | NA                            | NA                 |
| Kabuli_wild_26807353 | NA                                  | Ca_kabuli_denovo | 26807353                | T/C  | NA                 | NA                            | NA                 |
| Kabuli_wild_26817225 | NA                                  | Ca_kabuli_denovo | 26817225                | C/T  | NA                 | NA                            | NA                 |

| SNP IDs              | NCBI dbSNP accession IDs (NCBI_SS#) | Chromosomes      | Physical positions (bp) | SNPs | Gene accession IDs | Sequence components of genome | Putative functions |
|----------------------|-------------------------------------|------------------|-------------------------|------|--------------------|-------------------------------|--------------------|
| Kabuli_wild_26817266 | NA                                  | Ca_kabuli_denovo | 26817266                | G/T  | NA                 | NA                            | NA                 |
| Kabuli_wild_26825779 | NA                                  | Ca_kabuli_denovo | 26825779                | T/C  | NA                 | NA                            | NA                 |
| Kabuli_wild_26825815 | NA                                  | Ca_kabuli_denovo | 26825815                | G/C  | NA                 | NA                            | NA                 |
| Kabuli_wild_26826733 | NA                                  | Ca_kabuli_denovo | 26826733                | A/G  | NA                 | NA                            | NA                 |
| Kabuli_wild_26826803 | NA                                  | Ca_kabuli_denovo | 26826803                | T/C  | NA                 | NA                            | NA                 |
| Kabuli_wild_26827345 | NA                                  | Ca_kabuli_denovo | 26827345                | C/G  | NA                 | NA                            | NA                 |
| Kabuli_wild_26828810 | NA                                  | Ca_kabuli_denovo | 26828810                | A/G  | NA                 | NA                            | NA                 |
| Kabuli_wild_26831899 | NA                                  | Ca_kabuli_denovo | 26831899                | A/G  | NA                 | NA                            | NA                 |
| Kabuli_wild_26832388 | NA                                  | Ca_kabuli_denovo | 26832388                | C/T  | NA                 | NA                            | NA                 |
| Kabuli_wild_26836090 | NA                                  | Ca_kabuli_denovo | 26836090                | C/T  | NA                 | NA                            | NA                 |
| Kabuli_wild_26844686 | NA                                  | Ca_kabuli_denovo | 26844686                | T/C  | NA                 | NA                            | NA                 |
| Kabuli_wild_26844725 | NA                                  | Ca_kabuli_denovo | 26844725                | C/G  | NA                 | NA                            | NA                 |
| Kabuli_wild_26856890 | NA                                  | Ca_kabuli_denovo | 26856890                | A/T  | NA                 | NA                            | NA                 |
| Kabuli_wild_26856928 | NA                                  | Ca_kabuli_denovo | 26856928                | T/C  | NA                 | NA                            | NA                 |
| Kabuli_wild_26859005 | NA                                  | Ca_kabuli_denovo | 26859005                | T/C  | NA                 | NA                            | NA                 |
| Kabuli_wild_26859641 | NA                                  | Ca_kabuli_denovo | 26859641                | A/C  | NA                 | NA                            | NA                 |
| Kabuli_wild_26865587 | NA                                  | Ca_kabuli_denovo | 26865587                | G/T  | NA                 | NA                            | NA                 |
| Kabuli_wild_26875610 | NA                                  | Ca_kabuli_denovo | 26875610                | A/C  | NA                 | NA                            | NA                 |
| Kabuli_wild_26875652 | NA                                  | Ca_kabuli_denovo | 26875652                | A/G  | NA                 | NA                            | NA                 |
| Kabuli_wild_26881173 | NA                                  | Ca_kabuli_denovo | 26881173                | G/T  | NA                 | NA                            | NA                 |
| Kabuli_wild_26883418 | NA                                  | Ca_kabuli_denovo | 26883418                | T/G  | NA                 | NA                            | NA                 |
| Kabuli_wild_26884165 | NA                                  | Ca_kabuli_denovo | 26884165                | C/T  | NA                 | NA                            | NA                 |
| Kabuli_wild_26886311 | NA                                  | Ca_kabuli_denovo | 26886311                | G/T  | NA                 | NA                            | NA                 |
| Kabuli_wild_26891001 | NA                                  | Ca_kabuli_denovo | 26891001                | C/T  | NA                 | NA                            | NA                 |
| Kabuli_wild_26891016 | NA                                  | Ca_kabuli_denovo | 26891016                | A/G  | NA                 | NA                            | NA                 |
| Kabuli_wild_26891031 | NA                                  | Ca_kabuli_denovo | 26891031                | A/C  | NA                 | NA                            | NA                 |
| Kabuli_wild_26899719 | NA                                  | Ca_kabuli_denovo | 26899719                | C/T  | NA                 | NA                            | NA                 |
| Kabuli_wild_26902350 | NA                                  | Ca_kabuli_denovo | 26902350                | C/G  | NA                 | NA                            | NA                 |
| Kabuli_wild_26903088 | NA                                  | Ca_kabuli_denovo | 26903088                | G/T  | NA                 | NA                            | NA                 |
| Kabuli_wild_26912362 | NA                                  | Ca_kabuli_denovo | 26912362                | T/C  | NA                 | NA                            | NA                 |
| Kabuli_wild_26912365 | NA                                  | Ca_kabuli_denovo | 26912365                | G/A  | NA                 | NA                            | NA                 |
| Kabuli_wild_26917471 | NA                                  | Ca_kabuli_denovo | 26917471                | A/G  | NA                 | NA                            | NA                 |
| Kabuli_wild_26917493 | NA                                  | Ca_kabuli_denovo | 26917493                | C/T  | NA                 | NA                            | NA                 |
| Kabuli_wild_26923008 | NA                                  | Ca_kabuli_denovo | 26923008                | G/A  | NA                 | NA                            | NA                 |
| Kabuli_wild_26923010 | NA                                  | Ca_kabuli_denovo | 26923010                | C/T  | NA                 | NA                            | NA                 |
| Kabuli_wild_26923043 | NA                                  | Ca_kabuli_denovo | 26923043                | T/C  | NA                 | NA                            | NA                 |
| Kabuli_wild_26937522 | NA                                  | Ca_kabuli_denovo | 26937522                | A/G  | NA                 | NA                            | NA                 |
| Kabuli_wild_26939559 | NA                                  | Ca_kabuli_denovo | 26939559                | A/G  | NA                 | NA                            | NA                 |
| Kabuli_wild_26942272 | NA                                  | Ca_kabuli_denovo | 26942272                | G/T  | NA                 | NA                            | NA                 |
| Kabuli_wild_26950091 | NA                                  | Ca_kabuli_denovo | 26950091                | G/T  | NA                 | NA                            | NA                 |
| Kabuli_wild_26950103 | NA                                  | Ca_kabuli_denovo | 26950103                | G/C  | NA                 | NA                            | NA                 |
| Kabuli_wild_26950196 | NA                                  | Ca_kabuli_denovo | 26950196                | A/G  | NA                 | NA                            | NA                 |
| Kabuli_wild_26951234 | NA                                  | Ca_kabuli_denovo | 26951234                | C/T  | NA                 | NA                            | NA                 |
| Kabuli_wild_26951930 | NA                                  | Ca_kabuli_denovo | 26951930                | A/C  | NA                 | NA                            | NA                 |

| SNP IDs              | NCBI dbSNP accession IDs (NCBI_SS#) | Chromosomes      | Physical positions (bp) | SNPs | Gene accession IDs | Sequence components of genome | Putative functions |
|----------------------|-------------------------------------|------------------|-------------------------|------|--------------------|-------------------------------|--------------------|
| Kabuli_wild_26956226 | NA                                  | Ca_kabuli_denovo | 26956226                | A/G  | NA                 | NA                            | NA                 |
| Kabuli_wild_26956265 | NA                                  | Ca_kabuli_denovo | 26956265                | C/G  | NA                 | NA                            | NA                 |
| Kabuli_wild_26964241 | NA                                  | Ca_kabuli_denovo | 26964241                | T/C  | NA                 | NA                            | NA                 |
| Kabuli_wild_26964280 | NA                                  | Ca_kabuli_denovo | 26964280                | G/C  | NA                 | NA                            | NA                 |
| Kabuli_wild_26987348 | NA                                  | Ca_kabuli_denovo | 26987348                | C/T  | NA                 | NA                            | NA                 |
| Kabuli_wild_26994611 | NA                                  | Ca_kabuli_denovo | 26994611                | G/T  | NA                 | NA                            | NA                 |
| Kabuli_wild_26997684 | NA                                  | Ca_kabuli_denovo | 26997684                | T/C  | NA                 | NA                            | NA                 |
| Kabuli_wild_27005250 | NA                                  | Ca_kabuli_denovo | 27005250                | A/C  | NA                 | NA                            | NA                 |
| Kabuli_wild_27006657 | NA                                  | Ca_kabuli_denovo | 27006657                | A/C  | NA                 | NA                            | NA                 |
| Kabuli_wild_27007027 | NA                                  | Ca_kabuli_denovo | 27007027                | T/C  | NA                 | NA                            | NA                 |
| Kabuli_wild_27007045 | NA                                  | Ca_kabuli_denovo | 27007045                | A/G  | NA                 | NA                            | NA                 |
| Kabuli_wild_27013156 | NA                                  | Ca_kabuli_denovo | 27013156                | T/C  | NA                 | NA                            | NA                 |
| Kabuli_wild_27015716 | NA                                  | Ca_kabuli_denovo | 27015716                | G/T  | NA                 | NA                            | NA                 |
| Kabuli_wild_27021581 | NA                                  | Ca_kabuli_denovo | 27021581                | G/T  | NA                 | NA                            | NA                 |
| Kabuli_wild_27025173 | NA                                  | Ca_kabuli_denovo | 27025173                | T/C  | NA                 | NA                            | NA                 |
| Kabuli_wild_27027993 | NA                                  | Ca_kabuli_denovo | 27027993                | C/A  | NA                 | NA                            | NA                 |
| Kabuli_wild_27035621 | NA                                  | Ca_kabuli_denovo | 27035621                | C/T  | NA                 | NA                            | NA                 |
| Kabuli_wild_27035633 | NA                                  | Ca_kabuli_denovo | 27035633                | G/A  | NA                 | NA                            | NA                 |
| Kabuli_wild_27035636 | NA                                  | Ca_kabuli_denovo | 27035636                | C/G  | NA                 | NA                            | NA                 |
| Kabuli_wild_27035639 | NA                                  | Ca_kabuli_denovo | 27035639                | G/T  | NA                 | NA                            | NA                 |
| Kabuli_wild_27036345 | NA                                  | Ca_kabuli_denovo | 27036345                | G/T  | NA                 | NA                            | NA                 |
| Kabuli_wild_27051297 | NA                                  | Ca_kabuli_denovo | 27051297                | A/G  | NA                 | NA                            | NA                 |
| Kabuli_wild_27051334 | NA                                  | Ca_kabuli_denovo | 27051334                | C/T  | NA                 | NA                            | NA                 |
| Kabuli_wild_27058686 | NA                                  | Ca_kabuli_denovo | 27058686                | C/T  | NA                 | NA                            | NA                 |
| Kabuli_wild_27058817 | NA                                  | Ca_kabuli_denovo | 27058817                | A/G  | NA                 | NA                            | NA                 |
| Kabuli_wild_27058826 | NA                                  | Ca_kabuli_denovo | 27058826                | A/G  | NA                 | NA                            | NA                 |
| Kabuli_wild_27062582 | NA                                  | Ca_kabuli_denovo | 27062582                | T/G  | NA                 | NA                            | NA                 |
| Kabuli_wild_27070106 | NA                                  | Ca_kabuli_denovo | 27070106                | G/C  | NA                 | NA                            | NA                 |
| Kabuli_wild_27072833 | NA                                  | Ca_kabuli_denovo | 27072833                | T/C  | NA                 | NA                            | NA                 |
| Kabuli_wild_27075158 | NA                                  | Ca_kabuli_denovo | 27075158                | G/T  | NA                 | NA                            | NA                 |
| Kabuli_wild_27075177 | NA                                  | Ca_kabuli_denovo | 27075177                | C/A  | NA                 | NA                            | NA                 |
| Kabuli_wild_27075192 | NA                                  | Ca_kabuli_denovo | 27075192                | A/G  | NA                 | NA                            | NA                 |
| Kabuli_wild_27075234 | NA                                  | Ca_kabuli_denovo | 27075234                | G/A  | NA                 | NA                            | NA                 |
| Kabuli_wild_27080296 | NA                                  | Ca_kabuli_denovo | 27080296                | C/T  | NA                 | NA                            | NA                 |
| Kabuli_wild_27080299 | NA                                  | Ca_kabuli_denovo | 27080299                | A/G  | NA                 | NA                            | NA                 |
| Kabuli_wild_27080308 | NA                                  | Ca_kabuli_denovo | 27080308                | G/T  | NA                 | NA                            | NA                 |
| Kabuli_wild_27088254 | NA                                  | Ca_kabuli_denovo | 27088254                | A/G  | NA                 | NA                            | NA                 |
| Kabuli_wild_27088291 | NA                                  | Ca_kabuli_denovo | 27088291                | G/A  | NA                 | NA                            | NA                 |
| Kabuli_wild_27093209 | NA                                  | Ca_kabuli_denovo | 27093209                | G/T  | NA                 | NA                            | NA                 |
| Kabuli_wild_27093958 | NA                                  | Ca_kabuli_denovo | 27093958                | T/C  | NA                 | NA                            | NA                 |
| Kabuli_wild_27099323 | NA                                  | Ca_kabuli_denovo | 27099323                | G/A  | NA                 | NA                            | NA                 |
| Kabuli_wild_27103999 | NA                                  | Ca_kabuli_denovo | 27103999                | G/A  | NA                 | NA                            | NA                 |
| Kabuli_wild_27104002 | NA                                  | Ca_kabuli_denovo | 27104002                | A/G  | NA                 | NA                            | NA                 |
| Kabuli_wild_27108981 | NA                                  | Ca_kabuli_denovo | 27108981                | C/A  | NA                 | NA                            | NA                 |

| SNP IDs              | NCBI dbSNP accession IDs (NCBI_SS#) | Chromosomes      | Physical positions (bp) | SNPs | Gene accession IDs | Sequence components of genome | Putative functions |
|----------------------|-------------------------------------|------------------|-------------------------|------|--------------------|-------------------------------|--------------------|
| Kabuli_wild_27109005 | NA                                  | Ca_kabuli_denovo | 27109005                | C/G  | NA                 | NA                            | NA                 |
| Kabuli_wild_27111184 | NA                                  | Ca_kabuli_denovo | 27111184                | G/C  | NA                 | NA                            | NA                 |
| Kabuli_wild_27115050 | NA                                  | Ca_kabuli_denovo | 27115050                | G/T  | NA                 | NA                            | NA                 |
| Kabuli_wild_27115051 | NA                                  | Ca_kabuli_denovo | 27115051                | C/T  | NA                 | NA                            | NA                 |
| Kabuli_wild_27122662 | NA                                  | Ca_kabuli_denovo | 27122662                | G/T  | NA                 | NA                            | NA                 |
| Kabuli_wild_27129170 | NA                                  | Ca_kabuli_denovo | 27129170                | C/T  | NA                 | NA                            | NA                 |
| Kabuli_wild_27129174 | NA                                  | Ca_kabuli_denovo | 27129174                | C/G  | NA                 | NA                            | NA                 |
| Kabuli_wild_27130447 | NA                                  | Ca_kabuli_denovo | 27130447                | C/T  | NA                 | NA                            | NA                 |
| Kabuli_wild_27136548 | NA                                  | Ca_kabuli_denovo | 27136548                | T/C  | NA                 | NA                            | NA                 |
| Kabuli_wild_27138373 | NA                                  | Ca_kabuli_denovo | 27138373                | C/T  | NA                 | NA                            | NA                 |
| Kabuli_wild_27138561 | NA                                  | Ca_kabuli_denovo | 27138561                | C/G  | NA                 | NA                            | NA                 |
| Kabuli_wild_27138610 | NA                                  | Ca_kabuli_denovo | 27138610                | A/G  | NA                 | NA                            | NA                 |
| Kabuli_wild_27149672 | NA                                  | Ca_kabuli_denovo | 27149672                | A/G  | NA                 | NA                            | NA                 |
| Kabuli_wild_27158100 | NA                                  | Ca_kabuli_denovo | 27158100                | G/C  | NA                 | NA                            | NA                 |
| Kabuli_wild_27168910 | NA                                  | Ca_kabuli_denovo | 27168910                | C/T  | NA                 | NA                            | NA                 |
| Kabuli_wild_27175290 | NA                                  | Ca_kabuli_denovo | 27175290                | A/C  | NA                 | NA                            | NA                 |
| Kabuli_wild_27176607 | NA                                  | Ca_kabuli_denovo | 27176607                | G/C  | NA                 | NA                            | NA                 |
| Kabuli_wild_27176841 | NA                                  | Ca_kabuli_denovo | 27176841                | A/C  | NA                 | NA                            | NA                 |
| Kabuli_wild_27181214 | NA                                  | Ca_kabuli_denovo | 27181214                | T/C  | NA                 | NA                            | NA                 |
| Kabuli_wild_27182406 | NA                                  | Ca_kabuli_denovo | 27182406                | T/C  | NA                 | NA                            | NA                 |
| Kabuli_wild_27182944 | NA                                  | Ca_kabuli_denovo | 27182944                | T/C  | NA                 | NA                            | NA                 |
| Kabuli_wild_27186998 | NA                                  | Ca_kabuli_denovo | 27186998                | G/T  | NA                 | NA                            | NA                 |
| Kabuli_wild_27187638 | NA                                  | Ca_kabuli_denovo | 27187638                | T/C  | NA                 | NA                            | NA                 |
| Kabuli_wild_27195873 | NA                                  | Ca_kabuli_denovo | 27195873                | C/A  | NA                 | NA                            | NA                 |
| Kabuli_wild_27199897 | NA                                  | Ca_kabuli_denovo | 27199897                | C/T  | NA                 | NA                            | NA                 |
| Kabuli_wild_27203269 | NA                                  | Ca_kabuli_denovo | 27203269                | T/C  | NA                 | NA                            | NA                 |
| Kabuli_wild_27203287 | NA                                  | Ca_kabuli_denovo | 27203287                | C/T  | NA                 | NA                            | NA                 |
| Kabuli_wild_27204100 | NA                                  | Ca_kabuli_denovo | 27204100                | C/A  | NA                 | NA                            | NA                 |
| Kabuli_wild_27220189 | NA                                  | Ca_kabuli_denovo | 27220189                | C/G  | NA                 | NA                            | NA                 |
| Kabuli_wild_27231847 | NA                                  | Ca_kabuli_denovo | 27231847                | A/G  | NA                 | NA                            | NA                 |
| Kabuli_wild_27234996 | NA                                  | Ca_kabuli_denovo | 27234996                | G/T  | NA                 | NA                            | NA                 |
| Kabuli_wild_27239570 | NA                                  | Ca_kabuli_denovo | 27239570                | G/T  | NA                 | NA                            | NA                 |
| Kabuli_wild_27239603 | NA                                  | Ca_kabuli_denovo | 27239603                | T/C  | NA                 | NA                            | NA                 |
| Kabuli_wild_27241376 | NA                                  | Ca_kabuli_denovo | 27241376                | C/T  | NA                 | NA                            | NA                 |
| Kabuli_wild_27241425 | NA                                  | Ca_kabuli_denovo | 27241425                | A/T  | NA                 | NA                            | NA                 |
| Kabuli_wild_27244697 | NA                                  | Ca_kabuli_denovo | 27244697                | A/C  | NA                 | NA                            | NA                 |
| Kabuli_wild_27244813 | NA                                  | Ca_kabuli_denovo | 27244813                | C/T  | NA                 | NA                            | NA                 |
| Kabuli_wild_27245174 | NA                                  | Ca_kabuli_denovo | 27245174                | A/C  | NA                 | NA                            | NA                 |
| Kabuli_wild_27247227 | NA                                  | Ca_kabuli_denovo | 27247227                | G/A  | NA                 | NA                            | NA                 |
| Kabuli_wild_27247254 | NA                                  | Ca_kabuli_denovo | 27247254                | T/C  | NA                 | NA                            | NA                 |
| Kabuli_wild_27253774 | NA                                  | Ca_kabuli_denovo | 27253774                | G/C  | NA                 | NA                            | NA                 |
| Kabuli_wild_27257427 | NA                                  | Ca_kabuli_denovo | 27257427                | T/C  | NA                 | NA                            | NA                 |
| Kabuli_wild_27261225 | NA                                  | Ca_kabuli_denovo | 27261225                | A/G  | NA                 | NA                            | NA                 |
| Kabuli_wild_27261273 | NA                                  | Ca_kabuli_denovo | 27261273                | A/G  | NA                 | NA                            | NA                 |



| SNP IDs              | NCBI dbSNP accession IDs (NCBI_SS#) | Chromosomes      | Physical positions (bp) | SNPs | Gene accession IDs | Sequence components of genome | Putative functions |
|----------------------|-------------------------------------|------------------|-------------------------|------|--------------------|-------------------------------|--------------------|
| Kabuli_wild_27261494 | NA                                  | Ca_kabuli_denovo | 27261494                | C/G  | NA                 | NA                            | NA                 |
| Kabuli_wild_27262546 | NA                                  | Ca_kabuli_denovo | 27262546                | C/G  | NA                 | NA                            | NA                 |
| Kabuli_wild_27264643 | NA                                  | Ca_kabuli_denovo | 27264643                | C/T  | NA                 | NA                            | NA                 |
| Kabuli_wild_27264692 | NA                                  | Ca_kabuli_denovo | 27264692                | G/T  | NA                 | NA                            | NA                 |
| Kabuli_wild_27264843 | NA                                  | Ca_kabuli_denovo | 27264843                | T/G  | NA                 | NA                            | NA                 |
| Kabuli_wild_27268438 | NA                                  | Ca_kabuli_denovo | 27268438                | C/G  | NA                 | NA                            | NA                 |
| Kabuli_wild_27268484 | NA                                  | Ca_kabuli_denovo | 27268484                | C/T  | NA                 | NA                            | NA                 |
| Kabuli_wild_27269499 | NA                                  | Ca_kabuli_denovo | 27269499                | C/T  | NA                 | NA                            | NA                 |
| Kabuli_wild_27271002 | NA                                  | Ca_kabuli_denovo | 27271002                | A/C  | NA                 | NA                            | NA                 |
| Kabuli_wild_27271003 | NA                                  | Ca_kabuli_denovo | 27271003                | A/G  | NA                 | NA                            | NA                 |
| Kabuli_wild_27276414 | NA                                  | Ca_kabuli_denovo | 27276414                | G/A  | NA                 | NA                            | NA                 |
| Kabuli_wild_27276420 | NA                                  | Ca_kabuli_denovo | 27276420                | T/A  | NA                 | NA                            | NA                 |
| Kabuli_wild_27288359 | NA                                  | Ca_kabuli_denovo | 27288359                | G/T  | NA                 | NA                            | NA                 |
| Kabuli_wild_27290334 | NA                                  | Ca_kabuli_denovo | 27290334                | A/G  | NA                 | NA                            | NA                 |
| Kabuli_wild_27290365 | NA                                  | Ca_kabuli_denovo | 27290365                | G/A  | NA                 | NA                            | NA                 |
| Kabuli_wild_27293011 | NA                                  | Ca_kabuli_denovo | 27293011                | G/C  | NA                 | NA                            | NA                 |
| Kabuli_wild_27302488 | NA                                  | Ca_kabuli_denovo | 27302488                | A/C  | NA                 | NA                            | NA                 |
| Kabuli_wild_27306337 | NA                                  | Ca_kabuli_denovo | 27306337                | C/T  | NA                 | NA                            | NA                 |
| Kabuli_wild_27306387 | NA                                  | Ca_kabuli_denovo | 27306387                | G/A  | NA                 | NA                            | NA                 |
| Kabuli_wild_27306406 | NA                                  | Ca_kabuli_denovo | 27306406                | G/T  | NA                 | NA                            | NA                 |
| Kabuli_wild_27310415 | NA                                  | Ca_kabuli_denovo | 27310415                | T/C  | NA                 | NA                            | NA                 |
| Kabuli_wild_27310429 | NA                                  | Ca_kabuli_denovo | 27310429                | T/C  | NA                 | NA                            | NA                 |
| Kabuli_wild_27313146 | NA                                  | Ca_kabuli_denovo | 27313146                | A/C  | NA                 | NA                            | NA                 |
| Kabuli_wild_27313147 | NA                                  | Ca_kabuli_denovo | 27313147                | G/C  | NA                 | NA                            | NA                 |
| Kabuli_wild_27320577 | NA                                  | Ca_kabuli_denovo | 27320577                | T/A  | NA                 | NA                            | NA                 |
| Kabuli_wild_27320579 | NA                                  | Ca_kabuli_denovo | 27320579                | T/C  | NA                 | NA                            | NA                 |
| Kabuli_wild_27323512 | NA                                  | Ca_kabuli_denovo | 27323512                | T/G  | NA                 | NA                            | NA                 |
| Kabuli_wild_27324525 | NA                                  | Ca_kabuli_denovo | 27324525                | T/C  | NA                 | NA                            | NA                 |
| Kabuli_wild_27324762 | NA                                  | Ca_kabuli_denovo | 27324762                | A/C  | NA                 | NA                            | NA                 |
| Kabuli_wild_27327673 | NA                                  | Ca_kabuli_denovo | 27327673                | A/G  | NA                 | NA                            | NA                 |
| Kabuli_wild_27327697 | NA                                  | Ca_kabuli_denovo | 27327697                | G/A  | NA                 | NA                            | NA                 |
| Kabuli_wild_27328499 | NA                                  | Ca_kabuli_denovo | 27328499                | T/G  | NA                 | NA                            | NA                 |
| Kabuli_wild_27336570 | NA                                  | Ca_kabuli_denovo | 27336570                | G/T  | NA                 | NA                            | NA                 |
| Kabuli_wild_27336783 | NA                                  | Ca_kabuli_denovo | 27336783                | G/C  | NA                 | NA                            | NA                 |
| Kabuli_wild_27336798 | NA                                  | Ca_kabuli_denovo | 27336798                | C/G  | NA                 | NA                            | NA                 |
| Kabuli_wild_27341733 | NA                                  | Ca_kabuli_denovo | 27341733                | G/T  | NA                 | NA                            | NA                 |
| Kabuli_wild_27342572 | NA                                  | Ca_kabuli_denovo | 27342572                | C/T  | NA                 | NA                            | NA                 |
| Kabuli_wild_27343782 | NA                                  | Ca_kabuli_denovo | 27343782                | A/G  | NA                 | NA                            | NA                 |
| Kabuli_wild_27354507 | NA                                  | Ca_kabuli_denovo | 27354507                | G/T  | NA                 | NA                            | NA                 |
| Kabuli_wild_27360593 | NA                                  | Ca_kabuli_denovo | 27360593                | G/C  | NA                 | NA                            | NA                 |
| Kabuli_wild_27360656 | NA                                  | Ca_kabuli_denovo | 27360656                | T/G  | NA                 | NA                            | NA                 |
| Kabuli_wild_27364441 | NA                                  | Ca_kabuli_denovo | 27364441                | C/G  | NA                 | NA                            | NA                 |
| Kabuli_wild_27382738 | NA                                  | Ca_kabuli_denovo | 27382738                | C/G  | NA                 | NA                            | NA                 |
| Kabuli_wild_27382741 | NA                                  | Ca_kabuli_denovo | 27382741                | A/T  | NA                 | NA                            | NA                 |

| SNP IDs              | NCBI dbSNP accession IDs (NCBI_SS#) | Chromosomes      | Physical positions (bp) | SNPs | Gene accession IDs | Sequence components of genome | Putative functions |
|----------------------|-------------------------------------|------------------|-------------------------|------|--------------------|-------------------------------|--------------------|
| Kabuli_wild_27384449 | NA                                  | Ca_kabuli_denovo | 27384449                | G/A  | NA                 | NA                            | NA                 |
| Kabuli_wild_27384452 | NA                                  | Ca_kabuli_denovo | 27384452                | A/C  | NA                 | NA                            | NA                 |
| Kabuli_wild_27388948 | NA                                  | Ca_kabuli_denovo | 27388948                | A/G  | NA                 | NA                            | NA                 |
| Kabuli_wild_27388969 | NA                                  | Ca_kabuli_denovo | 27388969                | A/G  | NA                 | NA                            | NA                 |
| Kabuli_wild_27389530 | NA                                  | Ca_kabuli_denovo | 27389530                | T/G  | NA                 | NA                            | NA                 |
| Kabuli_wild_27393332 | NA                                  | Ca_kabuli_denovo | 27393332                | A/G  | NA                 | NA                            | NA                 |
| Kabuli_wild_27405676 | NA                                  | Ca_kabuli_denovo | 27405676                | A/G  | NA                 | NA                            | NA                 |
| Kabuli_wild_27405679 | NA                                  | Ca_kabuli_denovo | 27405679                | C/G  | NA                 | NA                            | NA                 |
| Kabuli_wild_27407321 | NA                                  | Ca_kabuli_denovo | 27407321                | A/C  | NA                 | NA                            | NA                 |
| Kabuli_wild_27409235 | NA                                  | Ca_kabuli_denovo | 27409235                | T/G  | NA                 | NA                            | NA                 |
| Kabuli_wild_27416291 | NA                                  | Ca_kabuli_denovo | 27416291                | G/T  | NA                 | NA                            | NA                 |
| Kabuli_wild_27418361 | NA                                  | Ca_kabuli_denovo | 27418361                | G/T  | NA                 | NA                            | NA                 |
| Kabuli_wild_27418588 | NA                                  | Ca_kabuli_denovo | 27418588                | G/C  | NA                 | NA                            | NA                 |
| Kabuli_wild_27418593 | NA                                  | Ca_kabuli_denovo | 27418593                | C/T  | NA                 | NA                            | NA                 |
| Kabuli_wild_27419094 | NA                                  | Ca_kabuli_denovo | 27419094                | T/C  | NA                 | NA                            | NA                 |
| Kabuli_wild_27419120 | NA                                  | Ca_kabuli_denovo | 27419120                | A/G  | NA                 | NA                            | NA                 |
| Kabuli_wild_27429208 | NA                                  | Ca_kabuli_denovo | 27429208                | A/C  | NA                 | NA                            | NA                 |
| Kabuli_wild_27431223 | NA                                  | Ca_kabuli_denovo | 27431223                | G/T  | NA                 | NA                            | NA                 |
| Kabuli_wild_27432988 | NA                                  | Ca_kabuli_denovo | 27432988                | C/G  | NA                 | NA                            | NA                 |
| Kabuli_wild_27433001 | NA                                  | Ca_kabuli_denovo | 27433001                | T/C  | NA                 | NA                            | NA                 |
| Kabuli_wild_27434633 | NA                                  | Ca_kabuli_denovo | 27434633                | T/G  | NA                 | NA                            | NA                 |
| Kabuli_wild_27448966 | NA                                  | Ca_kabuli_denovo | 27448966                | T/C  | NA                 | NA                            | NA                 |
| Kabuli_wild_27450367 | NA                                  | Ca_kabuli_denovo | 27450367                | G/C  | NA                 | NA                            | NA                 |
| Kabuli_wild_27450382 | NA                                  | Ca_kabuli_denovo | 27450382                | A/G  | NA                 | NA                            | NA                 |
| Kabuli_wild_27451768 | NA                                  | Ca_kabuli_denovo | 27451768                | C/G  | NA                 | NA                            | NA                 |
| Kabuli_wild_27454441 | NA                                  | Ca_kabuli_denovo | 27454441                | G/T  | NA                 | NA                            | NA                 |
| Kabuli_wild_27468122 | NA                                  | Ca_kabuli_denovo | 27468122                | C/G  | NA                 | NA                            | NA                 |
| Kabuli_wild_27469689 | NA                                  | Ca_kabuli_denovo | 27469689                | A/T  | NA                 | NA                            | NA                 |
| Kabuli_wild_27477322 | NA                                  | Ca_kabuli_denovo | 27477322                | G/C  | NA                 | NA                            | NA                 |
| Kabuli_wild_27477330 | NA                                  | Ca_kabuli_denovo | 27477330                | G/A  | NA                 | NA                            | NA                 |
| Kabuli_wild_27483468 | NA                                  | Ca_kabuli_denovo | 27483468                | A/G  | NA                 | NA                            | NA                 |
| Kabuli_wild_27483482 | NA                                  | Ca_kabuli_denovo | 27483482                | T/C  | NA                 | NA                            | NA                 |
| Kabuli_wild_27483698 | NA                                  | Ca_kabuli_denovo | 27483698                | G/T  | NA                 | NA                            | NA                 |
| Kabuli_wild_27486148 | NA                                  | Ca_kabuli_denovo | 27486148                | C/G  | NA                 | NA                            | NA                 |
| Kabuli_wild_27486197 | NA                                  | Ca_kabuli_denovo | 27486197                | A/G  | NA                 | NA                            | NA                 |
| Kabuli_wild_27486209 | NA                                  | Ca_kabuli_denovo | 27486209                | A/C  | NA                 | NA                            | NA                 |
| Kabuli_wild_27486217 | NA                                  | Ca_kabuli_denovo | 27486217                | G/A  | NA                 | NA                            | NA                 |
| Kabuli_wild_27495158 | NA                                  | Ca_kabuli_denovo | 27495158                | C/G  | NA                 | NA                            | NA                 |
| Kabuli_wild_27501414 | NA                                  | Ca_kabuli_denovo | 27501414                | C/T  | NA                 | NA                            | NA                 |
| Kabuli_wild_27501417 | NA                                  | Ca_kabuli_denovo | 27501417                | A/G  | NA                 | NA                            | NA                 |
| Kabuli_wild_27506720 | NA                                  | Ca_kabuli_denovo | 27506720                | C/T  | NA                 | NA                            | NA                 |
| Kabuli_wild_27513114 | NA                                  | Ca_kabuli_denovo | 27513114                | C/T  | NA                 | NA                            | NA                 |
| Kabuli_wild_27515362 | NA                                  | Ca_kabuli_denovo | 27515362                | G/T  | NA                 | NA                            | NA                 |
| Kabuli_wild_27516162 | NA                                  | Ca_kabuli_denovo | 27516162                | T/G  | NA                 | NA                            | NA                 |

| SNP IDs              | NCBI dbSNP accession IDs (NCBI_SS#) | Chromosomes      | Physical positions (bp) | SNPs | Gene accession IDs | Sequence components of genome | Putative functions |
|----------------------|-------------------------------------|------------------|-------------------------|------|--------------------|-------------------------------|--------------------|
| Kabuli_wild_27530578 | NA                                  | Ca_kabuli_denovo | 27530578                | C/T  | NA                 | NA                            | NA                 |
| Kabuli_wild_27533650 | NA                                  | Ca_kabuli_denovo | 27533650                | C/G  | NA                 | NA                            | NA                 |
| Kabuli_wild_27539350 | NA                                  | Ca_kabuli_denovo | 27539350                | T/C  | NA                 | NA                            | NA                 |
| Kabuli_wild_27542103 | NA                                  | Ca_kabuli_denovo | 27542103                | G/T  | NA                 | NA                            | NA                 |
| Kabuli_wild_27547647 | NA                                  | Ca_kabuli_denovo | 27547647                | A/G  | NA                 | NA                            | NA                 |
| Kabuli_wild_27549401 | NA                                  | Ca_kabuli_denovo | 27549401                | G/T  | NA                 | NA                            | NA                 |
| Kabuli_wild_27559853 | NA                                  | Ca_kabuli_denovo | 27559853                | T/C  | NA                 | NA                            | NA                 |
| Kabuli_wild_27560439 | NA                                  | Ca_kabuli_denovo | 27560439                | G/T  | NA                 | NA                            | NA                 |
| Kabuli_wild_27562984 | NA                                  | Ca_kabuli_denovo | 27562984                | C/T  | NA                 | NA                            | NA                 |
| Kabuli_wild_27563019 | NA                                  | Ca_kabuli_denovo | 27563019                | G/A  | NA                 | NA                            | NA                 |
| Kabuli_wild_27564039 | NA                                  | Ca_kabuli_denovo | 27564039                | G/T  | NA                 | NA                            | NA                 |
| Kabuli_wild_27571669 | NA                                  | Ca_kabuli_denovo | 27571669                | G/T  | NA                 | NA                            | NA                 |
| Kabuli_wild_27571916 | NA                                  | Ca_kabuli_denovo | 27571916                | C/G  | NA                 | NA                            | NA                 |
| Kabuli_wild_27577675 | NA                                  | Ca_kabuli_denovo | 27577675                | G/C  | NA                 | NA                            | NA                 |
| Kabuli_wild_27577702 | NA                                  | Ca_kabuli_denovo | 27577702                | A/G  | NA                 | NA                            | NA                 |
| Kabuli_wild_27579252 | NA                                  | Ca_kabuli_denovo | 27579252                | T/G  | NA                 | NA                            | NA                 |
| Kabuli_wild_27579880 | NA                                  | Ca_kabuli_denovo | 27579880                | T/C  | NA                 | NA                            | NA                 |
| Kabuli_wild_27581749 | NA                                  | Ca_kabuli_denovo | 27581749                | C/G  | NA                 | NA                            | NA                 |
| Kabuli_wild_27581753 | NA                                  | Ca_kabuli_denovo | 27581753                | C/T  | NA                 | NA                            | NA                 |
| Kabuli_wild_27582348 | NA                                  | Ca_kabuli_denovo | 27582348                | G/T  | NA                 | NA                            | NA                 |
| Kabuli_wild_27583900 | NA                                  | Ca_kabuli_denovo | 27583900                | C/T  | NA                 | NA                            | NA                 |
| Kabuli_wild_27588781 | NA                                  | Ca_kabuli_denovo | 27588781                | C/T  | NA                 | NA                            | NA                 |
| Kabuli_wild_27588896 | NA                                  | Ca_kabuli_denovo | 27588896                | A/G  | NA                 | NA                            | NA                 |
| Kabuli_wild_27588905 | NA                                  | Ca_kabuli_denovo | 27588905                | C/A  | NA                 | NA                            | NA                 |
| Kabuli_wild_27588967 | NA                                  | Ca_kabuli_denovo | 27588967                | G/C  | NA                 | NA                            | NA                 |
| Kabuli_wild_27589042 | NA                                  | Ca_kabuli_denovo | 27589042                | C/A  | NA                 | NA                            | NA                 |
| Kabuli_wild_27591886 | NA                                  | Ca_kabuli_denovo | 27591886                | C/T  | NA                 | NA                            | NA                 |
| Kabuli_wild_27591889 | NA                                  | Ca_kabuli_denovo | 27591889                | T/C  | NA                 | NA                            | NA                 |
| Kabuli_wild_27593096 | NA                                  | Ca_kabuli_denovo | 27593096                | G/T  | NA                 | NA                            | NA                 |
| Kabuli_wild_27593127 | NA                                  | Ca_kabuli_denovo | 27593127                | C/T  | NA                 | NA                            | NA                 |
| Kabuli_wild_27595826 | NA                                  | Ca_kabuli_denovo | 27595826                | A/G  | NA                 | NA                            | NA                 |
| Kabuli_wild_27599369 | NA                                  | Ca_kabuli_denovo | 27599369                | A/T  | NA                 | NA                            | NA                 |
| Kabuli_wild_27601380 | NA                                  | Ca_kabuli_denovo | 27601380                | C/A  | NA                 | NA                            | NA                 |
| Kabuli_wild_27601401 | NA                                  | Ca_kabuli_denovo | 27601401                | T/C  | NA                 | NA                            | NA                 |
| Kabuli_wild_27602344 | NA                                  | Ca_kabuli_denovo | 27602344                | G/C  | NA                 | NA                            | NA                 |
| Kabuli_wild_27603610 | NA                                  | Ca_kabuli_denovo | 27603610                | G/C  | NA                 | NA                            | NA                 |
| Kabuli_wild_27603637 | NA                                  | Ca_kabuli_denovo | 27603637                | C/G  | NA                 | NA                            | NA                 |
| Kabuli_wild_27603640 | NA                                  | Ca_kabuli_denovo | 27603640                | A/C  | NA                 | NA                            | NA                 |
| Kabuli_wild_27603843 | NA                                  | Ca_kabuli_denovo | 27603843                | A/C  | NA                 | NA                            | NA                 |
| Kabuli_wild_27603871 | NA                                  | Ca_kabuli_denovo | 27603871                | A/G  | NA                 | NA                            | NA                 |
| Kabuli_wild_27604411 | NA                                  | Ca_kabuli_denovo | 27604411                | G/T  | NA                 | NA                            | NA                 |
| Kabuli_wild_27608056 | NA                                  | Ca_kabuli_denovo | 27608056                | C/T  | NA                 | NA                            | NA                 |
| Kabuli_wild_27611403 | NA                                  | Ca_kabuli_denovo | 27611403                | G/T  | NA                 | NA                            | NA                 |
| Kabuli_wild_27611914 | NA                                  | Ca_kabuli_denovo | 27611914                | A/G  | NA                 | NA                            | NA                 |

| SNP IDs              | NCBI dbSNP accession IDs (NCBI_SS#) | Chromosomes      | Physical positions (bp) | SNPs | Gene accession IDs | Sequence components of genome | Putative functions |
|----------------------|-------------------------------------|------------------|-------------------------|------|--------------------|-------------------------------|--------------------|
| Kabuli_wild_27611929 | NA                                  | Ca_kabuli_denovo | 27611929                | A/T  | NA                 | NA                            | NA                 |
| Kabuli_wild_27615673 | NA                                  | Ca_kabuli_denovo | 27615673                | G/T  | NA                 | NA                            | NA                 |
| Kabuli_wild_27619225 | NA                                  | Ca_kabuli_denovo | 27619225                | A/T  | NA                 | NA                            | NA                 |
| Kabuli_wild_27619261 | NA                                  | Ca_kabuli_denovo | 27619261                | G/A  | NA                 | NA                            | NA                 |
| Kabuli_wild_27619767 | NA                                  | Ca_kabuli_denovo | 27619767                | A/C  | NA                 | NA                            | NA                 |
| Kabuli_wild_27619769 | NA                                  | Ca_kabuli_denovo | 27619769                | A/G  | NA                 | NA                            | NA                 |
| Kabuli_wild_27620913 | NA                                  | Ca_kabuli_denovo | 27620913                | G/T  | NA                 | NA                            | NA                 |
| Kabuli_wild_27638258 | NA                                  | Ca_kabuli_denovo | 27638258                | G/C  | NA                 | NA                            | NA                 |
| Kabuli_wild_27641655 | NA                                  | Ca_kabuli_denovo | 27641655                | G/T  | NA                 | NA                            | NA                 |
| Kabuli_wild_27644478 | NA                                  | Ca_kabuli_denovo | 27644478                | T/G  | NA                 | NA                            | NA                 |
| Kabuli_wild_27644502 | NA                                  | Ca_kabuli_denovo | 27644502                | T/G  | NA                 | NA                            | NA                 |
| Kabuli_wild_27649265 | NA                                  | Ca_kabuli_denovo | 27649265                | C/T  | NA                 | NA                            | NA                 |
| Kabuli_wild_27649275 | NA                                  | Ca_kabuli_denovo | 27649275                | C/G  | NA                 | NA                            | NA                 |
| Kabuli_wild_27652266 | NA                                  | Ca_kabuli_denovo | 27652266                | G/T  | NA                 | NA                            | NA                 |
| Kabuli_wild_27653023 | NA                                  | Ca_kabuli_denovo | 27653023                | C/T  | NA                 | NA                            | NA                 |
| Kabuli_wild_27660269 | NA                                  | Ca_kabuli_denovo | 27660269                | A/G  | NA                 | NA                            | NA                 |
| Kabuli_wild_27660278 | NA                                  | Ca_kabuli_denovo | 27660278                | C/G  | NA                 | NA                            | NA                 |
| Kabuli_wild_27660768 | NA                                  | Ca_kabuli_denovo | 27660768                | A/G  | NA                 | NA                            | NA                 |
| Kabuli_wild_27667867 | NA                                  | Ca_kabuli_denovo | 27667867                | A/C  | NA                 | NA                            | NA                 |
| Kabuli_wild_27668001 | NA                                  | Ca_kabuli_denovo | 27668001                | C/T  | NA                 | NA                            | NA                 |
| Kabuli_wild_27669060 | NA                                  | Ca_kabuli_denovo | 27669060                | T/G  | NA                 | NA                            | NA                 |
| Kabuli_wild_27671842 | NA                                  | Ca_kabuli_denovo | 27671842                | C/T  | NA                 | NA                            | NA                 |
| Kabuli_wild_27671843 | NA                                  | Ca_kabuli_denovo | 27671843                | A/G  | NA                 | NA                            | NA                 |
| Kabuli_wild_27672280 | NA                                  | Ca_kabuli_denovo | 27672280                | A/C  | NA                 | NA                            | NA                 |
| Kabuli_wild_27673625 | NA                                  | Ca_kabuli_denovo | 27673625                | A/C  | NA                 | NA                            | NA                 |
| Kabuli_wild_27676771 | NA                                  | Ca_kabuli_denovo | 27676771                | C/A  | NA                 | NA                            | NA                 |
| Kabuli_wild_27680625 | NA                                  | Ca_kabuli_denovo | 27680625                | G/T  | NA                 | NA                            | NA                 |
| Kabuli_wild_27681660 | NA                                  | Ca_kabuli_denovo | 27681660                | G/A  | NA                 | NA                            | NA                 |
| Kabuli_wild_27684002 | NA                                  | Ca_kabuli_denovo | 27684002                | A/G  | NA                 | NA                            | NA                 |
| Kabuli_wild_27684083 | NA                                  | Ca_kabuli_denovo | 27684083                | C/T  | NA                 | NA                            | NA                 |
| Kabuli_wild_27687544 | NA                                  | Ca_kabuli_denovo | 27687544                | A/C  | NA                 | NA                            | NA                 |
| Kabuli_wild_27687547 | NA                                  | Ca_kabuli_denovo | 27687547                | A/T  | NA                 | NA                            | NA                 |
| Kabuli_wild_27688699 | NA                                  | Ca_kabuli_denovo | 27688699                | A/C  | NA                 | NA                            | NA                 |
| Kabuli_wild_27691162 | NA                                  | Ca_kabuli_denovo | 27691162                | C/T  | NA                 | NA                            | NA                 |
| Kabuli_wild_27691181 | NA                                  | Ca_kabuli_denovo | 27691181                | T/C  | NA                 | NA                            | NA                 |
| Kabuli_wild_27691262 | NA                                  | Ca_kabuli_denovo | 27691262                | A/G  | NA                 | NA                            | NA                 |
| Kabuli_wild_27694481 | NA                                  | Ca_kabuli_denovo | 27694481                | T/G  | NA                 | NA                            | NA                 |
| Kabuli_wild_27694517 | NA                                  | Ca_kabuli_denovo | 27694517                | T/C  | NA                 | NA                            | NA                 |
| Kabuli_wild_27699435 | NA                                  | Ca_kabuli_denovo | 27699435                | A/G  | NA                 | NA                            | NA                 |
| Kabuli_wild_27702130 | NA                                  | Ca_kabuli_denovo | 27702130                | T/C  | NA                 | NA                            | NA                 |
| Kabuli_wild_27703003 | NA                                  | Ca_kabuli_denovo | 27703003                | A/C  | NA                 | NA                            | NA                 |
| Kabuli_wild_27703129 | NA                                  | Ca_kabuli_denovo | 27703129                | G/T  | NA                 | NA                            | NA                 |
| Kabuli_wild_27704162 | NA                                  | Ca_kabuli_denovo | 27704162                | A/G  | NA                 | NA                            | NA                 |
| Kabuli_wild_27710939 | NA                                  | Ca_kabuli_denovo | 27710939                | A/C  | NA                 | NA                            | NA                 |

| SNP IDs              | NCBI dbSNP accession IDs (NCBI_SS#) | Chromosomes      | Physical positions (bp) | SNPs | Gene accession IDs | Sequence components of genome | Putative functions |
|----------------------|-------------------------------------|------------------|-------------------------|------|--------------------|-------------------------------|--------------------|
| Kabuli_wild_27729932 | NA                                  | Ca_kabuli_denovo | 27729932                | C/T  | NA                 | NA                            | NA                 |
| Kabuli_wild_27740477 | NA                                  | Ca_kabuli_denovo | 27740477                | G/A  | NA                 | NA                            | NA                 |
| Kabuli_wild_27740889 | NA                                  | Ca_kabuli_denovo | 27740889                | G/A  | NA                 | NA                            | NA                 |
| Kabuli_wild_27746063 | NA                                  | Ca_kabuli_denovo | 27746063                | A/C  | NA                 | NA                            | NA                 |
| Kabuli_wild_27748934 | NA                                  | Ca_kabuli_denovo | 27748934                | G/T  | NA                 | NA                            | NA                 |
| Kabuli_wild_27750279 | NA                                  | Ca_kabuli_denovo | 27750279                | C/G  | NA                 | NA                            | NA                 |
| Kabuli_wild_27750299 | NA                                  | Ca_kabuli_denovo | 27750299                | T/C  | NA                 | NA                            | NA                 |
| Kabuli_wild_27750316 | NA                                  | Ca_kabuli_denovo | 27750316                | G/T  | NA                 | NA                            | NA                 |
| Kabuli_wild_27753625 | NA                                  | Ca_kabuli_denovo | 27753625                | G/T  | NA                 | NA                            | NA                 |
| Kabuli_wild_27753683 | NA                                  | Ca_kabuli_denovo | 27753683                | G/T  | NA                 | NA                            | NA                 |
| Kabuli_wild_27756611 | NA                                  | Ca_kabuli_denovo | 27756611                | G/T  | NA                 | NA                            | NA                 |
| Kabuli_wild_27760854 | NA                                  | Ca_kabuli_denovo | 27760854                | A/G  | NA                 | NA                            | NA                 |
| Kabuli_wild_27765739 | NA                                  | Ca_kabuli_denovo | 27765739                | G/C  | NA                 | NA                            | NA                 |
| Kabuli_wild_27765776 | NA                                  | Ca_kabuli_denovo | 27765776                | G/C  | NA                 | NA                            | NA                 |
| Kabuli_wild_27765779 | NA                                  | Ca_kabuli_denovo | 27765779                | A/G  | NA                 | NA                            | NA                 |
| Kabuli_wild_27768798 | NA                                  | Ca_kabuli_denovo | 27768798                | G/T  | NA                 | NA                            | NA                 |
| Kabuli_wild_27770392 | NA                                  | Ca_kabuli_denovo | 27770392                | C/G  | NA                 | NA                            | NA                 |
| Kabuli_wild_27770393 | NA                                  | Ca_kabuli_denovo | 27770393                | A/C  | NA                 | NA                            | NA                 |
| Kabuli_wild_27804427 | NA                                  | Ca_kabuli_denovo | 27804427                | G/T  | NA                 | NA                            | NA                 |
| Kabuli_wild_27805651 | NA                                  | Ca_kabuli_denovo | 27805651                | A/G  | NA                 | NA                            | NA                 |
| Kabuli_wild_27805668 | NA                                  | Ca_kabuli_denovo | 27805668                | A/G  | NA                 | NA                            | NA                 |
| Kabuli_wild_27807989 | NA                                  | Ca_kabuli_denovo | 27807989                | G/T  | NA                 | NA                            | NA                 |
| Kabuli_wild_27814958 | NA                                  | Ca_kabuli_denovo | 27814958                | T/C  | NA                 | NA                            | NA                 |
| Kabuli_wild_27821576 | NA                                  | Ca_kabuli_denovo | 27821576                | A/G  | NA                 | NA                            | NA                 |
| Kabuli_wild_27821594 | NA                                  | Ca_kabuli_denovo | 27821594                | A/G  | NA                 | NA                            | NA                 |
| Kabuli_wild_27821621 | NA                                  | Ca_kabuli_denovo | 27821621                | G/A  | NA                 | NA                            | NA                 |
| Kabuli_wild_27825854 | NA                                  | Ca_kabuli_denovo | 27825854                | G/A  | NA                 | NA                            | NA                 |
| Kabuli_wild_27825878 | NA                                  | Ca_kabuli_denovo | 27825878                | G/C  | NA                 | NA                            | NA                 |
| Kabuli_wild_27831252 | NA                                  | Ca_kabuli_denovo | 27831252                | T/G  | NA                 | NA                            | NA                 |
| Kabuli_wild_27836829 | NA                                  | Ca_kabuli_denovo | 27836829                | T/A  | NA                 | NA                            | NA                 |
| Kabuli_wild_27836856 | NA                                  | Ca_kabuli_denovo | 27836856                | G/A  | NA                 | NA                            | NA                 |
| Kabuli_wild_27842635 | NA                                  | Ca_kabuli_denovo | 27842635                | A/G  | NA                 | NA                            | NA                 |
| Kabuli_wild_27842644 | NA                                  | Ca_kabuli_denovo | 27842644                | T/C  | NA                 | NA                            | NA                 |
| Kabuli_wild_27842665 | NA                                  | Ca_kabuli_denovo | 27842665                | C/T  | NA                 | NA                            | NA                 |
| Kabuli_wild_27842871 | NA                                  | Ca_kabuli_denovo | 27842871                | G/T  | NA                 | NA                            | NA                 |
| Kabuli_wild_27845383 | NA                                  | Ca_kabuli_denovo | 27845383                | A/G  | NA                 | NA                            | NA                 |
| Kabuli_wild_27845392 | NA                                  | Ca_kabuli_denovo | 27845392                | G/A  | NA                 | NA                            | NA                 |
| Kabuli_wild_27846641 | NA                                  | Ca_kabuli_denovo | 27846641                | T/C  | NA                 | NA                            | NA                 |
| Kabuli_wild_27846665 | NA                                  | Ca_kabuli_denovo | 27846665                | T/G  | NA                 | NA                            | NA                 |
| Kabuli_wild_27849018 | NA                                  | Ca_kabuli_denovo | 27849018                | C/G  | NA                 | NA                            | NA                 |
| Kabuli_wild_27849148 | NA                                  | Ca_kabuli_denovo | 27849148                | A/G  | NA                 | NA                            | NA                 |
| Kabuli_wild_27854394 | NA                                  | Ca_kabuli_denovo | 27854394                | A/C  | NA                 | NA                            | NA                 |
| Kabuli_wild_27854804 | NA                                  | Ca_kabuli_denovo | 27854804                | G/A  | NA                 | NA                            | NA                 |
| Kabuli_wild_27854864 | NA                                  | Ca_kabuli_denovo | 27854864                | C/T  | NA                 | NA                            | NA                 |

| SNP IDs              | NCBI dbSNP accession IDs (NCBI_SS#) | Chromosomes      | Physical positions (bp) | SNPs | Gene accession IDs | Sequence components of genome | Putative functions |
|----------------------|-------------------------------------|------------------|-------------------------|------|--------------------|-------------------------------|--------------------|
| Kabuli_wild_27854881 | NA                                  | Ca_kabuli_denovo | 27854881                | C/T  | NA                 | NA                            | NA                 |
| Kabuli_wild_27854890 | NA                                  | Ca_kabuli_denovo | 27854890                | G/T  | NA                 | NA                            | NA                 |
| Kabuli_wild_27855100 | NA                                  | Ca_kabuli_denovo | 27855100                | T/C  | NA                 | NA                            | NA                 |
| Kabuli_wild_27856311 | NA                                  | Ca_kabuli_denovo | 27856311                | A/C  | NA                 | NA                            | NA                 |
| Kabuli_wild_27859537 | NA                                  | Ca_kabuli_denovo | 27859537                | G/T  | NA                 | NA                            | NA                 |
| Kabuli_wild_27859880 | NA                                  | Ca_kabuli_denovo | 27859880                | G/A  | NA                 | NA                            | NA                 |
| Kabuli_wild_27859911 | NA                                  | Ca_kabuli_denovo | 27859911                | T/C  | NA                 | NA                            | NA                 |
| Kabuli_wild_27862455 | NA                                  | Ca_kabuli_denovo | 27862455                | T/C  | NA                 | NA                            | NA                 |
| Kabuli_wild_27864086 | NA                                  | Ca_kabuli_denovo | 27864086                | C/T  | NA                 | NA                            | NA                 |
| Kabuli_wild_27867067 | NA                                  | Ca_kabuli_denovo | 27867067                | G/T  | NA                 | NA                            | NA                 |
| Kabuli_wild_27868838 | NA                                  | Ca_kabuli_denovo | 27868838                | C/T  | NA                 | NA                            | NA                 |
| Kabuli_wild_27868859 | NA                                  | Ca_kabuli_denovo | 27868859                | G/C  | NA                 | NA                            | NA                 |
| Kabuli_wild_27873228 | NA                                  | Ca_kabuli_denovo | 27873228                | C/T  | NA                 | NA                            | NA                 |
| Kabuli_wild_27873506 | NA                                  | Ca_kabuli_denovo | 27873506                | G/A  | NA                 | NA                            | NA                 |
| Kabuli_wild_27873575 | NA                                  | Ca_kabuli_denovo | 27873575                | A/C  | NA                 | NA                            | NA                 |
| Kabuli_wild_27878295 | NA                                  | Ca_kabuli_denovo | 27878295                | A/C  | NA                 | NA                            | NA                 |
| Kabuli_wild_27878298 | NA                                  | Ca_kabuli_denovo | 27878298                | C/T  | NA                 | NA                            | NA                 |
| Kabuli_wild_27879317 | NA                                  | Ca_kabuli_denovo | 27879317                | C/T  | NA                 | NA                            | NA                 |
| Kabuli_wild_27881851 | NA                                  | Ca_kabuli_denovo | 27881851                | C/G  | NA                 | NA                            | NA                 |
| Kabuli_wild_27883683 | NA                                  | Ca_kabuli_denovo | 27883683                | C/T  | NA                 | NA                            | NA                 |
| Kabuli_wild_27892293 | NA                                  | Ca_kabuli_denovo | 27892293                | C/T  | NA                 | NA                            | NA                 |
| Kabuli_wild_27894451 | NA                                  | Ca_kabuli_denovo | 27894451                | C/G  | NA                 | NA                            | NA                 |
| Kabuli_wild_27897245 | NA                                  | Ca_kabuli_denovo | 27897245                | A/G  | NA                 | NA                            | NA                 |
| Kabuli_wild_27908030 | NA                                  | Ca_kabuli_denovo | 27908030                | C/G  | NA                 | NA                            | NA                 |
| Kabuli_wild_27922574 | NA                                  | Ca_kabuli_denovo | 27922574                | C/T  | NA                 | NA                            | NA                 |
| Kabuli_wild_27922640 | NA                                  | Ca_kabuli_denovo | 27922640                | A/G  | NA                 | NA                            | NA                 |
| Kabuli_wild_27924755 | NA                                  | Ca_kabuli_denovo | 27924755                | G/T  | NA                 | NA                            | NA                 |
| Kabuli_wild_27924763 | NA                                  | Ca_kabuli_denovo | 27924763                | G/T  | NA                 | NA                            | NA                 |
| Kabuli_wild_27926525 | NA                                  | Ca_kabuli_denovo | 27926525                | G/A  | NA                 | NA                            | NA                 |
| Kabuli_wild_27926527 | NA                                  | Ca_kabuli_denovo | 27926527                | G/C  | NA                 | NA                            | NA                 |
| Kabuli_wild_27927313 | NA                                  | Ca_kabuli_denovo | 27927313                | G/T  | NA                 | NA                            | NA                 |
| Kabuli_wild_27933163 | NA                                  | Ca_kabuli_denovo | 27933163                | C/T  | NA                 | NA                            | NA                 |
| Kabuli_wild_27933191 | NA                                  | Ca_kabuli_denovo | 27933191                | C/G  | NA                 | NA                            | NA                 |
| Kabuli_wild_27935924 | NA                                  | Ca_kabuli_denovo | 27935924                | A/G  | NA                 | NA                            | NA                 |
| Kabuli_wild_27937621 | NA                                  | Ca_kabuli_denovo | 27937621                | G/T  | NA                 | NA                            | NA                 |
| Kabuli_wild_27944812 | NA                                  | Ca_kabuli_denovo | 27944812                | G/T  | NA                 | NA                            | NA                 |
| Kabuli_wild_27944948 | NA                                  | Ca_kabuli_denovo | 27944948                | G/A  | NA                 | NA                            | NA                 |
| Kabuli_wild_27946485 | NA                                  | Ca_kabuli_denovo | 27946485                | G/T  | NA                 | NA                            | NA                 |
| Kabuli_wild_27947237 | NA                                  | Ca_kabuli_denovo | 27947237                | A/G  | NA                 | NA                            | NA                 |
| Kabuli_wild_27947249 | NA                                  | Ca_kabuli_denovo | 27947249                | G/C  | NA                 | NA                            | NA                 |
| Kabuli_wild_27952497 | NA                                  | Ca_kabuli_denovo | 27952497                | G/T  | NA                 | NA                            | NA                 |
| Kabuli_wild_27953241 | NA                                  | Ca_kabuli_denovo | 27953241                | C/G  | NA                 | NA                            | NA                 |
| Kabuli_wild_27953265 | NA                                  | Ca_kabuli_denovo | 27953265                | T/C  | NA                 | NA                            | NA                 |
| Kabuli_wild_27961404 | NA                                  | Ca_kabuli_denovo | 27961404                | C/A  | NA                 | NA                            | NA                 |

| SNP IDs              | NCBI dbSNP accession IDs (NCBI_SS#) | Chromosomes      | Physical positions (bp) | SNPs | Gene accession IDs | Sequence components of genome | Putative functions |
|----------------------|-------------------------------------|------------------|-------------------------|------|--------------------|-------------------------------|--------------------|
| Kabuli_wild_27961405 | NA                                  | Ca_kabuli_denovo | 27961405                | G/C  | NA                 | NA                            | NA                 |
| Kabuli_wild_27964921 | NA                                  | Ca_kabuli_denovo | 27964921                | G/T  | NA                 | NA                            | NA                 |
| Kabuli_wild_27968488 | NA                                  | Ca_kabuli_denovo | 27968488                | G/T  | NA                 | NA                            | NA                 |
| Kabuli_wild_27975448 | NA                                  | Ca_kabuli_denovo | 27975448                | A/C  | NA                 | NA                            | NA                 |
| Kabuli_wild_27975450 | NA                                  | Ca_kabuli_denovo | 27975450                | A/C  | NA                 | NA                            | NA                 |
| Kabuli_wild_27975451 | NA                                  | Ca_kabuli_denovo | 27975451                | G/T  | NA                 | NA                            | NA                 |
| Kabuli_wild_27979954 | NA                                  | Ca_kabuli_denovo | 27979954                | A/G  | NA                 | NA                            | NA                 |
| Kabuli_wild_27984232 | NA                                  | Ca_kabuli_denovo | 27984232                | T/C  | NA                 | NA                            | NA                 |
| Kabuli_wild_27990770 | NA                                  | Ca_kabuli_denovo | 27990770                | G/A  | NA                 | NA                            | NA                 |
| Kabuli_wild_27991816 | NA                                  | Ca_kabuli_denovo | 27991816                | C/T  | NA                 | NA                            | NA                 |
| Kabuli_wild_27992425 | NA                                  | Ca_kabuli_denovo | 27992425                | G/T  | NA                 | NA                            | NA                 |
| Kabuli_wild_28000815 | NA                                  | Ca_kabuli_denovo | 28000815                | G/C  | NA                 | NA                            | NA                 |
| Kabuli_wild_28000828 | NA                                  | Ca_kabuli_denovo | 28000828                | G/T  | NA                 | NA                            | NA                 |
| Kabuli_wild_28011785 | NA                                  | Ca_kabuli_denovo | 28011785                | C/T  | NA                 | NA                            | NA                 |
| Kabuli_wild_28011806 | NA                                  | Ca_kabuli_denovo | 28011806                | G/A  | NA                 | NA                            | NA                 |
| Kabuli_wild_28014367 | NA                                  | Ca_kabuli_denovo | 28014367                | A/T  | NA                 | NA                            | NA                 |
| Kabuli_wild_28014392 | NA                                  | Ca_kabuli_denovo | 28014392                | C/A  | NA                 | NA                            | NA                 |
| Kabuli_wild_28014420 | NA                                  | Ca_kabuli_denovo | 28014420                | A/G  | NA                 | NA                            | NA                 |
| Kabuli_wild_28015118 | NA                                  | Ca_kabuli_denovo | 28015118                | A/G  | NA                 | NA                            | NA                 |
| Kabuli_wild_28018195 | NA                                  | Ca_kabuli_denovo | 28018195                | A/G  | NA                 | NA                            | NA                 |
| Kabuli_wild_28018702 | NA                                  | Ca_kabuli_denovo | 28018702                | C/T  | NA                 | NA                            | NA                 |
| Kabuli_wild_28019290 | NA                                  | Ca_kabuli_denovo | 28019290                | C/T  | NA                 | NA                            | NA                 |
| Kabuli_wild_28027767 | NA                                  | Ca_kabuli_denovo | 28027767                | G/T  | NA                 | NA                            | NA                 |
| Kabuli_wild_28030595 | NA                                  | Ca_kabuli_denovo | 28030595                | G/A  | NA                 | NA                            | NA                 |
| Kabuli_wild_28034401 | NA                                  | Ca_kabuli_denovo | 28034401                | G/A  | NA                 | NA                            | NA                 |
| Kabuli_wild_28034414 | NA                                  | Ca_kabuli_denovo | 28034414                | A/G  | NA                 | NA                            | NA                 |
| Kabuli_wild_28038646 | NA                                  | Ca_kabuli_denovo | 28038646                | T/G  | NA                 | NA                            | NA                 |
| Kabuli_wild_28038676 | NA                                  | Ca_kabuli_denovo | 28038676                | T/C  | NA                 | NA                            | NA                 |
| Kabuli_wild_28038745 | NA                                  | Ca_kabuli_denovo | 28038745                | C/T  | NA                 | NA                            | NA                 |
| Kabuli_wild_28038746 | NA                                  | Ca_kabuli_denovo | 28038746                | C/T  | NA                 | NA                            | NA                 |
| Kabuli_wild_28039922 | NA                                  | Ca_kabuli_denovo | 28039922                | C/G  | NA                 | NA                            | NA                 |
| Kabuli_wild_28039925 | NA                                  | Ca_kabuli_denovo | 28039925                | C/T  | NA                 | NA                            | NA                 |
| Kabuli_wild_28040778 | NA                                  | Ca_kabuli_denovo | 28040778                | T/C  | NA                 | NA                            | NA                 |
| Kabuli_wild_28041108 | NA                                  | Ca_kabuli_denovo | 28041108                | G/C  | NA                 | NA                            | NA                 |
| Kabuli_wild_28044404 | NA                                  | Ca_kabuli_denovo | 28044404                | A/T  | NA                 | NA                            | NA                 |
| Kabuli_wild_28044469 | NA                                  | Ca_kabuli_denovo | 28044469                | T/A  | NA                 | NA                            | NA                 |
| Kabuli_wild_28046805 | NA                                  | Ca_kabuli_denovo | 28046805                | A/G  | NA                 | NA                            | NA                 |
| Kabuli_wild_28047363 | NA                                  | Ca_kabuli_denovo | 28047363                | G/C  | NA                 | NA                            | NA                 |
| Kabuli_wild_28047425 | NA                                  | Ca_kabuli_denovo | 28047425                | A/G  | NA                 | NA                            | NA                 |
| Kabuli_wild_28050635 | NA                                  | Ca_kabuli_denovo | 28050635                | G/A  | NA                 | NA                            | NA                 |
| Kabuli_wild_28050668 | NA                                  | Ca_kabuli_denovo | 28050668                | T/C  | NA                 | NA                            | NA                 |
| Kabuli_wild_28051265 | NA                                  | Ca_kabuli_denovo | 28051265                | G/T  | NA                 | NA                            | NA                 |
| Kabuli_wild_28054051 | NA                                  | Ca_kabuli_denovo | 28054051                | T/G  | NA                 | NA                            | NA                 |
| Kabuli_wild_28054889 | NA                                  | Ca_kabuli_denovo | 28054889                | A/C  | NA                 | NA                            | NA                 |

| SNP IDs              | NCBI dbSNP accession IDs (NCBI_SS#) | Chromosomes      | Physical positions (bp) | SNPs | Gene accession IDs | Sequence components of genome | Putative functions |
|----------------------|-------------------------------------|------------------|-------------------------|------|--------------------|-------------------------------|--------------------|
| Kabuli_wild_28056576 | NA                                  | Ca_kabuli_denovo | 28056576                | G/A  | NA                 | NA                            | NA                 |
| Kabuli_wild_28056578 | NA                                  | Ca_kabuli_denovo | 28056578                | A/C  | NA                 | NA                            | NA                 |
| Kabuli_wild_28062009 | NA                                  | Ca_kabuli_denovo | 28062009                | G/C  | NA                 | NA                            | NA                 |
| Kabuli_wild_28062038 | NA                                  | Ca_kabuli_denovo | 28062038                | A/T  | NA                 | NA                            | NA                 |
| Kabuli_wild_28062496 | NA                                  | Ca_kabuli_denovo | 28062496                | C/G  | NA                 | NA                            | NA                 |
| Kabuli_wild_28063017 | NA                                  | Ca_kabuli_denovo | 28063017                | C/A  | NA                 | NA                            | NA                 |
| Kabuli_wild_28065307 | NA                                  | Ca_kabuli_denovo | 28065307                | A/C  | NA                 | NA                            | NA                 |
| Kabuli_wild_28069272 | NA                                  | Ca_kabuli_denovo | 28069272                | A/T  | NA                 | NA                            | NA                 |
| Kabuli_wild_28070053 | NA                                  | Ca_kabuli_denovo | 28070053                | A/G  | NA                 | NA                            | NA                 |
| Kabuli_wild_28070074 | NA                                  | Ca_kabuli_denovo | 28070074                | C/G  | NA                 | NA                            | NA                 |
| Kabuli_wild_28073028 | NA                                  | Ca_kabuli_denovo | 28073028                | G/T  | NA                 | NA                            | NA                 |
| Kabuli_wild_28075112 | NA                                  | Ca_kabuli_denovo | 28075112                | C/T  | NA                 | NA                            | NA                 |
| Kabuli_wild_28076774 | NA                                  | Ca_kabuli_denovo | 28076774                | G/A  | NA                 | NA                            | NA                 |
| Kabuli_wild_28076779 | NA                                  | Ca_kabuli_denovo | 28076779                | C/T  | NA                 | NA                            | NA                 |
| Kabuli_wild_28080388 | NA                                  | Ca_kabuli_denovo | 28080388                | T/A  | NA                 | NA                            | NA                 |
| Kabuli_wild_28080415 | NA                                  | Ca_kabuli_denovo | 28080415                | C/A  | NA                 | NA                            | NA                 |
| Kabuli_wild_28081559 | NA                                  | Ca_kabuli_denovo | 28081559                | C/T  | NA                 | NA                            | NA                 |
| Kabuli_wild_28081583 | NA                                  | Ca_kabuli_denovo | 28081583                | T/C  | NA                 | NA                            | NA                 |
| Kabuli_wild_28081786 | NA                                  | Ca_kabuli_denovo | 28081786                | A/G  | NA                 | NA                            | NA                 |
| Kabuli_wild_28083045 | NA                                  | Ca_kabuli_denovo | 28083045                | C/T  | NA                 | NA                            | NA                 |
| Kabuli_wild_28083198 | NA                                  | Ca_kabuli_denovo | 28083198                | A/G  | NA                 | NA                            | NA                 |
| Kabuli_wild_28087141 | NA                                  | Ca_kabuli_denovo | 28087141                | G/C  | NA                 | NA                            | NA                 |
| Kabuli_wild_28087180 | NA                                  | Ca_kabuli_denovo | 28087180                | C/G  | NA                 | NA                            | NA                 |
| Kabuli_wild_28091713 | NA                                  | Ca_kabuli_denovo | 28091713                | T/G  | NA                 | NA                            | NA                 |
| Kabuli_wild_28091727 | NA                                  | Ca_kabuli_denovo | 28091727                | C/A  | NA                 | NA                            | NA                 |
| Kabuli_wild_28095255 | NA                                  | Ca_kabuli_denovo | 28095255                | G/T  | NA                 | NA                            | NA                 |
| Kabuli_wild_28098855 | NA                                  | Ca_kabuli_denovo | 28098855                | G/T  | NA                 | NA                            | NA                 |
| Kabuli_wild_28098859 | NA                                  | Ca_kabuli_denovo | 28098859                | G/T  | NA                 | NA                            | NA                 |
| Kabuli_wild_28100363 | NA                                  | Ca_kabuli_denovo | 28100363                | T/C  | NA                 | NA                            | NA                 |
| Kabuli_wild_28100416 | NA                                  | Ca_kabuli_denovo | 28100416                | C/G  | NA                 | NA                            | NA                 |
| Kabuli_wild_28103611 | NA                                  | Ca_kabuli_denovo | 28103611                | G/T  | NA                 | NA                            | NA                 |
| Kabuli_wild_28105942 | NA                                  | Ca_kabuli_denovo | 28105942                | A/G  | NA                 | NA                            | NA                 |
| Kabuli_wild_28106401 | NA                                  | Ca_kabuli_denovo | 28106401                | C/T  | NA                 | NA                            | NA                 |
| Kabuli_wild_28106425 | NA                                  | Ca_kabuli_denovo | 28106425                | A/T  | NA                 | NA                            | NA                 |
| Kabuli_wild_28109389 | NA                                  | Ca_kabuli_denovo | 28109389                | C/T  | NA                 | NA                            | NA                 |
| Kabuli_wild_28112614 | NA                                  | Ca_kabuli_denovo | 28112614                | A/G  | NA                 | NA                            | NA                 |
| Kabuli_wild_28113346 | NA                                  | Ca_kabuli_denovo | 28113346                | G/A  | NA                 | NA                            | NA                 |
| Kabuli_wild_28114401 | NA                                  | Ca_kabuli_denovo | 28114401                | A/G  | NA                 | NA                            | NA                 |
| Kabuli_wild_28114413 | NA                                  | Ca_kabuli_denovo | 28114413                | A/G  | NA                 | NA                            | NA                 |
| Kabuli_wild_28118769 | NA                                  | Ca_kabuli_denovo | 28118769                | G/A  | NA                 | NA                            | NA                 |
| Kabuli_wild_28131076 | NA                                  | Ca_kabuli_denovo | 28131076                | G/A  | NA                 | NA                            | NA                 |
| Kabuli_wild_28131122 | NA                                  | Ca_kabuli_denovo | 28131122                | A/G  | NA                 | NA                            | NA                 |
| Kabuli_wild_28131137 | NA                                  | Ca_kabuli_denovo | 28131137                | A/G  | NA                 | NA                            | NA                 |
| Kabuli_wild_28131981 | NA                                  | Ca_kabuli_denovo | 28131981                | C/T  | NA                 | NA                            | NA                 |



| SNP IDs              | NCBI dbSNP accession IDs (NCBI_SS#) | Chromosomes      | Physical positions (bp) | SNPs | Gene accession IDs | Sequence components of genome | Putative functions |
|----------------------|-------------------------------------|------------------|-------------------------|------|--------------------|-------------------------------|--------------------|
| Kabuli_wild_28133150 | NA                                  | Ca_kabuli_denovo | 28133150                | G/T  | NA                 | NA                            | NA                 |
| Kabuli_wild_28133713 | NA                                  | Ca_kabuli_denovo | 28133713                | G/C  | NA                 | NA                            | NA                 |
| Kabuli_wild_28133728 | NA                                  | Ca_kabuli_denovo | 28133728                | C/G  | NA                 | NA                            | NA                 |
| Kabuli_wild_28135589 | NA                                  | Ca_kabuli_denovo | 28135589                | G/A  | NA                 | NA                            | NA                 |
| Kabuli_wild_28135808 | NA                                  | Ca_kabuli_denovo | 28135808                | C/G  | NA                 | NA                            | NA                 |
| Kabuli_wild_28143943 | NA                                  | Ca_kabuli_denovo | 28143943                | C/T  | NA                 | NA                            | NA                 |
| Kabuli_wild_28145781 | NA                                  | Ca_kabuli_denovo | 28145781                | A/C  | NA                 | NA                            | NA                 |
| Kabuli_wild_28146203 | NA                                  | Ca_kabuli_denovo | 28146203                | A/G  | NA                 | NA                            | NA                 |
| Kabuli_wild_28146218 | NA                                  | Ca_kabuli_denovo | 28146218                | G/A  | NA                 | NA                            | NA                 |
| Kabuli_wild_28146463 | NA                                  | Ca_kabuli_denovo | 28146463                | G/A  | NA                 | NA                            | NA                 |
| Kabuli_wild_28146479 | NA                                  | Ca_kabuli_denovo | 28146479                | G/A  | NA                 | NA                            | NA                 |
| Kabuli_wild_28150757 | NA                                  | Ca_kabuli_denovo | 28150757                | C/T  | NA                 | NA                            | NA                 |
| Kabuli_wild_28150785 | NA                                  | Ca_kabuli_denovo | 28150785                | C/T  | NA                 | NA                            | NA                 |
| Kabuli_wild_28151784 | NA                                  | Ca_kabuli_denovo | 28151784                | T/G  | NA                 | NA                            | NA                 |
| Kabuli_wild_28153090 | NA                                  | Ca_kabuli_denovo | 28153090                | T/C  | NA                 | NA                            | NA                 |
| Kabuli_wild_28153117 | NA                                  | Ca_kabuli_denovo | 28153117                | G/A  | NA                 | NA                            | NA                 |
| Kabuli_wild_28159352 | NA                                  | Ca_kabuli_denovo | 28159352                | G/T  | NA                 | NA                            | NA                 |
| Kabuli_wild_28159478 | NA                                  | Ca_kabuli_denovo | 28159478                | A/C  | NA                 | NA                            | NA                 |
| Kabuli_wild_28161211 | NA                                  | Ca_kabuli_denovo | 28161211                | A/C  | NA                 | NA                            | NA                 |
| Kabuli_wild_28163466 | NA                                  | Ca_kabuli_denovo | 28163466                | G/T  | NA                 | NA                            | NA                 |
| Kabuli_wild_28168439 | NA                                  | Ca_kabuli_denovo | 28168439                | C/T  | NA                 | NA                            | NA                 |
| Kabuli_wild_28181079 | NA                                  | Ca_kabuli_denovo | 28181079                | G/T  | NA                 | NA                            | NA                 |
| Kabuli_wild_28181370 | NA                                  | Ca_kabuli_denovo | 28181370                | A/C  | NA                 | NA                            | NA                 |
| Kabuli_wild_28181371 | NA                                  | Ca_kabuli_denovo | 28181371                | A/G  | NA                 | NA                            | NA                 |
| Kabuli_wild_28182966 | NA                                  | Ca_kabuli_denovo | 28182966                | T/A  | NA                 | NA                            | NA                 |
| Kabuli_wild_28189061 | NA                                  | Ca_kabuli_denovo | 28189061                | G/C  | NA                 | NA                            | NA                 |
| Kabuli_wild_28189088 | NA                                  | Ca_kabuli_denovo | 28189088                | T/C  | NA                 | NA                            | NA                 |
| Kabuli_wild_28189091 | NA                                  | Ca_kabuli_denovo | 28189091                | C/A  | NA                 | NA                            | NA                 |
| Kabuli_wild_28189115 | NA                                  | Ca_kabuli_denovo | 28189115                | A/G  | NA                 | NA                            | NA                 |
| Kabuli_wild_28193105 | NA                                  | Ca_kabuli_denovo | 28193105                | C/T  | NA                 | NA                            | NA                 |
| Kabuli_wild_28193143 | NA                                  | Ca_kabuli_denovo | 28193143                | C/T  | NA                 | NA                            | NA                 |
| Kabuli_wild_28193161 | NA                                  | Ca_kabuli_denovo | 28193161                | C/T  | NA                 | NA                            | NA                 |
| Kabuli_wild_28195299 | NA                                  | Ca_kabuli_denovo | 28195299                | G/A  | NA                 | NA                            | NA                 |
| Kabuli_wild_28195328 | NA                                  | Ca_kabuli_denovo | 28195328                | A/T  | NA                 | NA                            | NA                 |
| Kabuli_wild_28195338 | NA                                  | Ca_kabuli_denovo | 28195338                | C/G  | NA                 | NA                            | NA                 |
| Kabuli_wild_28195663 | NA                                  | Ca_kabuli_denovo | 28195663                | G/T  | NA                 | NA                            | NA                 |
| Kabuli_wild_28196843 | NA                                  | Ca_kabuli_denovo | 28196843                | C/G  | NA                 | NA                            | NA                 |
| Kabuli_wild_28196855 | NA                                  | Ca_kabuli_denovo | 28196855                | C/T  | NA                 | NA                            | NA                 |
| Kabuli_wild_28196858 | NA                                  | Ca_kabuli_denovo | 28196858                | G/T  | NA                 | NA                            | NA                 |
| Kabuli_wild_28206097 | NA                                  | Ca_kabuli_denovo | 28206097                | G/T  | NA                 | NA                            | NA                 |
| Kabuli_wild_28208058 | NA                                  | Ca_kabuli_denovo | 28208058                | A/C  | NA                 | NA                            | NA                 |
| Kabuli_wild_28208059 | NA                                  | Ca_kabuli_denovo | 28208059                | C/G  | NA                 | NA                            | NA                 |
| Kabuli_wild_28213911 | NA                                  | Ca_kabuli_denovo | 28213911                | A/G  | NA                 | NA                            | NA                 |
| Kabuli_wild_28217920 | NA                                  | Ca_kabuli_denovo | 28217920                | C/T  | NA                 | NA                            | NA                 |

| SNP IDs              | NCBI dbSNP accession IDs (NCBI_SS#) | Chromosomes      | Physical positions (bp) | SNPs | Gene accession IDs | Sequence components of genome | Putative functions |
|----------------------|-------------------------------------|------------------|-------------------------|------|--------------------|-------------------------------|--------------------|
| Kabuli_wild_28217926 | NA                                  | Ca_kabuli_denovo | 28217926                | C/T  | NA                 | NA                            | NA                 |
| Kabuli_wild_28218370 | NA                                  | Ca_kabuli_denovo | 28218370                | G/T  | NA                 | NA                            | NA                 |
| Kabuli_wild_28218374 | NA                                  | Ca_kabuli_denovo | 28218374                | A/G  | NA                 | NA                            | NA                 |
| Kabuli_wild_28218922 | NA                                  | Ca_kabuli_denovo | 28218922                | C/G  | NA                 | NA                            | NA                 |
| Kabuli_wild_28218928 | NA                                  | Ca_kabuli_denovo | 28218928                | A/T  | NA                 | NA                            | NA                 |
| Kabuli_wild_28218929 | NA                                  | Ca_kabuli_denovo | 28218929                | C/T  | NA                 | NA                            | NA                 |
| Kabuli_wild_28228325 | NA                                  | Ca_kabuli_denovo | 28228325                | G/T  | NA                 | NA                            | NA                 |
| Kabuli_wild_28228331 | NA                                  | Ca_kabuli_denovo | 28228331                | A/C  | NA                 | NA                            | NA                 |
| Kabuli_wild_28228836 | NA                                  | Ca_kabuli_denovo | 28228836                | T/G  | NA                 | NA                            | NA                 |
| Kabuli_wild_28233206 | NA                                  | Ca_kabuli_denovo | 28233206                | A/G  | NA                 | NA                            | NA                 |
| Kabuli_wild_28237645 | NA                                  | Ca_kabuli_denovo | 28237645                | G/C  | NA                 | NA                            | NA                 |
| Kabuli_wild_28254016 | NA                                  | Ca_kabuli_denovo | 28254016                | G/T  | NA                 | NA                            | NA                 |
| Kabuli_wild_28257010 | NA                                  | Ca_kabuli_denovo | 28257010                | T/C  | NA                 | NA                            | NA                 |
| Kabuli_wild_28261201 | NA                                  | Ca_kabuli_denovo | 28261201                | C/G  | NA                 | NA                            | NA                 |
| Kabuli_wild_28261236 | NA                                  | Ca_kabuli_denovo | 28261236                | G/T  | NA                 | NA                            | NA                 |
| Kabuli_wild_28268744 | NA                                  | Ca_kabuli_denovo | 28268744                | G/T  | NA                 | NA                            | NA                 |
| Kabuli_wild_28268746 | NA                                  | Ca_kabuli_denovo | 28268746                | C/G  | NA                 | NA                            | NA                 |
| Kabuli_wild_28268785 | NA                                  | Ca_kabuli_denovo | 28268785                | G/C  | NA                 | NA                            | NA                 |
| Kabuli_wild_28270252 | NA                                  | Ca_kabuli_denovo | 28270252                | G/T  | NA                 | NA                            | NA                 |
| Kabuli_wild_28271165 | NA                                  | Ca_kabuli_denovo | 28271165                | C/G  | NA                 | NA                            | NA                 |
| Kabuli_wild_28274105 | NA                                  | Ca_kabuli_denovo | 28274105                | A/G  | NA                 | NA                            | NA                 |
| Kabuli_wild_28276795 | NA                                  | Ca_kabuli_denovo | 28276795                | G/T  | NA                 | NA                            | NA                 |
| Kabuli_wild_28277212 | NA                                  | Ca_kabuli_denovo | 28277212                | G/A  | NA                 | NA                            | NA                 |
| Kabuli_wild_28277234 | NA                                  | Ca_kabuli_denovo | 28277234                | C/G  | NA                 | NA                            | NA                 |
| Kabuli_wild_28281819 | NA                                  | Ca_kabuli_denovo | 28281819                | A/C  | NA                 | NA                            | NA                 |
| Kabuli_wild_28285818 | NA                                  | Ca_kabuli_denovo | 28285818                | A/C  | NA                 | NA                            | NA                 |
| Kabuli_wild_28291630 | NA                                  | Ca_kabuli_denovo | 28291630                | G/T  | NA                 | NA                            | NA                 |
| Kabuli_wild_28292059 | NA                                  | Ca_kabuli_denovo | 28292059                | G/T  | NA                 | NA                            | NA                 |
| Kabuli_wild_28293345 | NA                                  | Ca_kabuli_denovo | 28293345                | T/G  | NA                 | NA                            | NA                 |
| Kabuli_wild_28296591 | NA                                  | Ca_kabuli_denovo | 28296591                | G/A  | NA                 | NA                            | NA                 |
| Kabuli_wild_28296621 | NA                                  | Ca_kabuli_denovo | 28296621                | C/T  | NA                 | NA                            | NA                 |
| Kabuli_wild_28300397 | NA                                  | Ca_kabuli_denovo | 28300397                | G/T  | NA                 | NA                            | NA                 |
| Kabuli_wild_28305135 | NA                                  | Ca_kabuli_denovo | 28305135                | C/G  | NA                 | NA                            | NA                 |
| Kabuli_wild_28308176 | NA                                  | Ca_kabuli_denovo | 28308176                | G/T  | NA                 | NA                            | NA                 |
| Kabuli_wild_28311023 | NA                                  | Ca_kabuli_denovo | 28311023                | T/C  | NA                 | NA                            | NA                 |
| Kabuli_wild_28311387 | NA                                  | Ca_kabuli_denovo | 28311387                | A/G  | NA                 | NA                            | NA                 |
| Kabuli_wild_28311391 | NA                                  | Ca_kabuli_denovo | 28311391                | G/C  | NA                 | NA                            | NA                 |
| Kabuli_wild_28312067 | NA                                  | Ca_kabuli_denovo | 28312067                | G/C  | NA                 | NA                            | NA                 |
| Kabuli_wild_28312088 | NA                                  | Ca_kabuli_denovo | 28312088                | T/C  | NA                 | NA                            | NA                 |
| Kabuli_wild_28313827 | NA                                  | Ca_kabuli_denovo | 28313827                | A/G  | NA                 | NA                            | NA                 |
| Kabuli_wild_28314337 | NA                                  | Ca_kabuli_denovo | 28314337                | A/G  | NA                 | NA                            | NA                 |
| Kabuli_wild_28317838 | NA                                  | Ca_kabuli_denovo | 28317838                | C/T  | NA                 | NA                            | NA                 |
| Kabuli_wild_28325042 | NA                                  | Ca_kabuli_denovo | 28325042                | G/T  | NA                 | NA                            | NA                 |
| Kabuli_wild_28328240 | NA                                  | Ca_kabuli_denovo | 28328240                | C/T  | NA                 | NA                            | NA                 |

| SNP IDs                     | NCBI dbSNP accession IDs (NCBI_SS#) | Chromosomes             | Physical positions (bp) | SNPs | Gene accession IDs | Sequence components of genome | Putative functions |
|-----------------------------|-------------------------------------|-------------------------|-------------------------|------|--------------------|-------------------------------|--------------------|
| <i>Kabuli_wild_28331089</i> | NA                                  | <i>Ca_kabuli_denovo</i> | 28331089                | G/T  | NA                 | NA                            | NA                 |
| <i>Kabuli_wild_28331093</i> | NA                                  | <i>Ca_kabuli_denovo</i> | 28331093                | C/A  | NA                 | NA                            | NA                 |
| <i>Kabuli_wild_28331636</i> | NA                                  | <i>Ca_kabuli_denovo</i> | 28331636                | T/C  | NA                 | NA                            | NA                 |
| <i>Kabuli_wild_28337368</i> | NA                                  | <i>Ca_kabuli_denovo</i> | 28337368                | A/C  | NA                 | NA                            | NA                 |
| <i>Kabuli_wild_28343860</i> | NA                                  | <i>Ca_kabuli_denovo</i> | 28343860                | G/T  | NA                 | NA                            | NA                 |
| <i>Kabuli_wild_28345555</i> | NA                                  | <i>Ca_kabuli_denovo</i> | 28345555                | C/G  | NA                 | NA                            | NA                 |
| <i>Kabuli_wild_28345588</i> | NA                                  | <i>Ca_kabuli_denovo</i> | 28345588                | A/G  | NA                 | NA                            | NA                 |
| <i>Kabuli_wild_28345624</i> | NA                                  | <i>Ca_kabuli_denovo</i> | 28345624                | A/G  | NA                 | NA                            | NA                 |
| <i>Kabuli_wild_28350043</i> | NA                                  | <i>Ca_kabuli_denovo</i> | 28350043                | G/T  | NA                 | NA                            | NA                 |
| <i>Kabuli_wild_28359334</i> | NA                                  | <i>Ca_kabuli_denovo</i> | 28359334                | T/G  | NA                 | NA                            | NA                 |
| <i>Kabuli_wild_28359383</i> | NA                                  | <i>Ca_kabuli_denovo</i> | 28359383                | C/T  | NA                 | NA                            | NA                 |
| <i>Kabuli_wild_28359393</i> | NA                                  | <i>Ca_kabuli_denovo</i> | 28359393                | G/A  | NA                 | NA                            | NA                 |
| <i>Kabuli_wild_28366265</i> | NA                                  | <i>Ca_kabuli_denovo</i> | 28366265                | C/G  | NA                 | NA                            | NA                 |
| <i>Kabuli_wild_28366267</i> | NA                                  | <i>Ca_kabuli_denovo</i> | 28366267                | C/G  | NA                 | NA                            | NA                 |
| <i>Kabuli_wild_28370788</i> | NA                                  | <i>Ca_kabuli_denovo</i> | 28370788                | G/C  | NA                 | NA                            | NA                 |
| <i>Kabuli_wild_28370830</i> | NA                                  | <i>Ca_kabuli_denovo</i> | 28370830                | A/G  | NA                 | NA                            | NA                 |
| <i>Kabuli_wild_28370854</i> | NA                                  | <i>Ca_kabuli_denovo</i> | 28370854                | T/G  | NA                 | NA                            | NA                 |
| <i>Kabuli_wild_28371354</i> | NA                                  | <i>Ca_kabuli_denovo</i> | 28371354                | A/G  | NA                 | NA                            | NA                 |
| <i>Kabuli_wild_28380364</i> | NA                                  | <i>Ca_kabuli_denovo</i> | 28380364                | G/A  | NA                 | NA                            | NA                 |
| <i>Kabuli_wild_28383547</i> | NA                                  | <i>Ca_kabuli_denovo</i> | 28383547                | A/C  | NA                 | NA                            | NA                 |
| <i>Kabuli_wild_28383805</i> | NA                                  | <i>Ca_kabuli_denovo</i> | 28383805                | C/G  | NA                 | NA                            | NA                 |
| <i>Kabuli_wild_28383809</i> | NA                                  | <i>Ca_kabuli_denovo</i> | 28383809                | C/G  | NA                 | NA                            | NA                 |
| <i>Kabuli_wild_28384118</i> | NA                                  | <i>Ca_kabuli_denovo</i> | 28384118                | G/A  | NA                 | NA                            | NA                 |
| <i>Kabuli_wild_28388972</i> | NA                                  | <i>Ca_kabuli_denovo</i> | 28388972                | T/C  | NA                 | NA                            | NA                 |
| <i>Kabuli_wild_28389016</i> | NA                                  | <i>Ca_kabuli_denovo</i> | 28389016                | G/C  | NA                 | NA                            | NA                 |
| <i>Kabuli_wild_28398452</i> | NA                                  | <i>Ca_kabuli_denovo</i> | 28398452                | T/C  | NA                 | NA                            | NA                 |
| <i>Kabuli_wild_28398514</i> | NA                                  | <i>Ca_kabuli_denovo</i> | 28398514                | G/T  | NA                 | NA                            | NA                 |
| <i>Kabuli_wild_28398522</i> | NA                                  | <i>Ca_kabuli_denovo</i> | 28398522                | A/G  | NA                 | NA                            | NA                 |
| <i>Kabuli_wild_28403207</i> | NA                                  | <i>Ca_kabuli_denovo</i> | 28403207                | T/C  | NA                 | NA                            | NA                 |
| <i>Kabuli_wild_28403210</i> | NA                                  | <i>Ca_kabuli_denovo</i> | 28403210                | A/C  | NA                 | NA                            | NA                 |
| <i>Kabuli_wild_28403705</i> | NA                                  | <i>Ca_kabuli_denovo</i> | 28403705                | A/C  | NA                 | NA                            | NA                 |
| <i>Kabuli_wild_28403706</i> | NA                                  | <i>Ca_kabuli_denovo</i> | 28403706                | C/G  | NA                 | NA                            | NA                 |
| <i>Kabuli_wild_28403707</i> | NA                                  | <i>Ca_kabuli_denovo</i> | 28403707                | A/G  | NA                 | NA                            | NA                 |
| <i>Kabuli_wild_28407295</i> | NA                                  | <i>Ca_kabuli_denovo</i> | 28407295                | G/T  | NA                 | NA                            | NA                 |
| <i>Kabuli_wild_28410945</i> | NA                                  | <i>Ca_kabuli_denovo</i> | 28410945                | A/G  | NA                 | NA                            | NA                 |
| <i>Kabuli_wild_28410965</i> | NA                                  | <i>Ca_kabuli_denovo</i> | 28410965                | G/T  | NA                 | NA                            | NA                 |
| <i>Kabuli_wild_28425037</i> | NA                                  | <i>Ca_kabuli_denovo</i> | 28425037                | G/A  | NA                 | NA                            | NA                 |
| <i>Kabuli_wild_28425058</i> | NA                                  | <i>Ca_kabuli_denovo</i> | 28425058                | C/T  | NA                 | NA                            | NA                 |
| <i>Kabuli_wild_28426168</i> | NA                                  | <i>Ca_kabuli_denovo</i> | 28426168                | A/C  | NA                 | NA                            | NA                 |
| <i>Kabuli_wild_28430251</i> | NA                                  | <i>Ca_kabuli_denovo</i> | 28430251                | A/G  | NA                 | NA                            | NA                 |
| <i>Kabuli_wild_28432168</i> | NA                                  | <i>Ca_kabuli_denovo</i> | 28432168                | G/T  | NA                 | NA                            | NA                 |
| <i>Kabuli_wild_28432209</i> | NA                                  | <i>Ca_kabuli_denovo</i> | 28432209                | G/T  | NA                 | NA                            | NA                 |
| <i>Kabuli_wild_28433916</i> | NA                                  | <i>Ca_kabuli_denovo</i> | 28433916                | G/C  | NA                 | NA                            | NA                 |
| <i>Kabuli_wild_28434989</i> | NA                                  | <i>Ca_kabuli_denovo</i> | 28434989                | T/C  | NA                 | NA                            | NA                 |

| SNP IDs              | NCBI dbSNP accession IDs (NCBI_SS#) | Chromosomes      | Physical positions (bp) | SNPs | Gene accession IDs | Sequence components of genome | Putative functions |
|----------------------|-------------------------------------|------------------|-------------------------|------|--------------------|-------------------------------|--------------------|
| Kabuli_wild_28434998 | NA                                  | Ca_kabuli_denovo | 28434998                | C/T  | NA                 | NA                            | NA                 |
| Kabuli_wild_28443346 | NA                                  | Ca_kabuli_denovo | 28443346                | G/T  | NA                 | NA                            | NA                 |
| Kabuli_wild_28443737 | NA                                  | Ca_kabuli_denovo | 28443737                | A/C  | NA                 | NA                            | NA                 |
| Kabuli_wild_28448522 | NA                                  | Ca_kabuli_denovo | 28448522                | G/A  | NA                 | NA                            | NA                 |
| Kabuli_wild_28449824 | NA                                  | Ca_kabuli_denovo | 28449824                | T/C  | NA                 | NA                            | NA                 |
| Kabuli_wild_28449832 | NA                                  | Ca_kabuli_denovo | 28449832                | C/T  | NA                 | NA                            | NA                 |
| Kabuli_wild_28451096 | NA                                  | Ca_kabuli_denovo | 28451096                | T/C  | NA                 | NA                            | NA                 |
| Kabuli_wild_28451110 | NA                                  | Ca_kabuli_denovo | 28451110                | A/G  | NA                 | NA                            | NA                 |
| Kabuli_wild_28455673 | NA                                  | Ca_kabuli_denovo | 28455673                | C/G  | NA                 | NA                            | NA                 |
| Kabuli_wild_28455674 | NA                                  | Ca_kabuli_denovo | 28455674                | A/C  | NA                 | NA                            | NA                 |
| Kabuli_wild_28457942 | NA                                  | Ca_kabuli_denovo | 28457942                | G/C  | NA                 | NA                            | NA                 |
| Kabuli_wild_28460014 | NA                                  | Ca_kabuli_denovo | 28460014                | G/C  | NA                 | NA                            | NA                 |
| Kabuli_wild_28460023 | NA                                  | Ca_kabuli_denovo | 28460023                | G/A  | NA                 | NA                            | NA                 |
| Kabuli_wild_28460360 | NA                                  | Ca_kabuli_denovo | 28460360                | C/T  | NA                 | NA                            | NA                 |
| Kabuli_wild_28467368 | NA                                  | Ca_kabuli_denovo | 28467368                | G/T  | NA                 | NA                            | NA                 |
| Kabuli_wild_28467400 | NA                                  | Ca_kabuli_denovo | 28467400                | T/C  | NA                 | NA                            | NA                 |
| Kabuli_wild_28472950 | NA                                  | Ca_kabuli_denovo | 28472950                | T/A  | NA                 | NA                            | NA                 |
| Kabuli_wild_28473907 | NA                                  | Ca_kabuli_denovo | 28473907                | A/G  | NA                 | NA                            | NA                 |
| Kabuli_wild_28474022 | NA                                  | Ca_kabuli_denovo | 28474022                | C/T  | NA                 | NA                            | NA                 |
| Kabuli_wild_28474094 | NA                                  | Ca_kabuli_denovo | 28474094                | G/T  | NA                 | NA                            | NA                 |
| Kabuli_wild_28474105 | NA                                  | Ca_kabuli_denovo | 28474105                | T/G  | NA                 | NA                            | NA                 |
| Kabuli_wild_28477611 | NA                                  | Ca_kabuli_denovo | 28477611                | A/G  | NA                 | NA                            | NA                 |
| Kabuli_wild_28477616 | NA                                  | Ca_kabuli_denovo | 28477616                | C/A  | NA                 | NA                            | NA                 |
| Kabuli_wild_28478913 | NA                                  | Ca_kabuli_denovo | 28478913                | T/G  | NA                 | NA                            | NA                 |
| Kabuli_wild_28481378 | NA                                  | Ca_kabuli_denovo | 28481378                | A/G  | NA                 | NA                            | NA                 |
| Kabuli_wild_28484731 | NA                                  | Ca_kabuli_denovo | 28484731                | A/C  | NA                 | NA                            | NA                 |
| Kabuli_wild_28489896 | NA                                  | Ca_kabuli_denovo | 28489896                | T/C  | NA                 | NA                            | NA                 |
| Kabuli_wild_28497901 | NA                                  | Ca_kabuli_denovo | 28497901                | C/T  | NA                 | NA                            | NA                 |
| Kabuli_wild_28498574 | NA                                  | Ca_kabuli_denovo | 28498574                | G/C  | NA                 | NA                            | NA                 |
| Kabuli_wild_28498587 | NA                                  | Ca_kabuli_denovo | 28498587                | T/G  | NA                 | NA                            | NA                 |
| Kabuli_wild_28498599 | NA                                  | Ca_kabuli_denovo | 28498599                | G/T  | NA                 | NA                            | NA                 |
| Kabuli_wild_28503150 | NA                                  | Ca_kabuli_denovo | 28503150                | A/C  | NA                 | NA                            | NA                 |
| Kabuli_wild_28510210 | NA                                  | Ca_kabuli_denovo | 28510210                | A/G  | NA                 | NA                            | NA                 |
| Kabuli_wild_28516251 | NA                                  | Ca_kabuli_denovo | 28516251                | G/A  | NA                 | NA                            | NA                 |
| Kabuli_wild_28516896 | NA                                  | Ca_kabuli_denovo | 28516896                | A/G  | NA                 | NA                            | NA                 |
| Kabuli_wild_28516923 | NA                                  | Ca_kabuli_denovo | 28516923                | T/C  | NA                 | NA                            | NA                 |
| Kabuli_wild_28519684 | NA                                  | Ca_kabuli_denovo | 28519684                | A/G  | NA                 | NA                            | NA                 |
| Kabuli_wild_28519698 | NA                                  | Ca_kabuli_denovo | 28519698                | T/G  | NA                 | NA                            | NA                 |
| Kabuli_wild_28520082 | NA                                  | Ca_kabuli_denovo | 28520082                | G/A  | NA                 | NA                            | NA                 |
| Kabuli_wild_28520104 | NA                                  | Ca_kabuli_denovo | 28520104                | T/C  | NA                 | NA                            | NA                 |
| Kabuli_wild_28525077 | NA                                  | Ca_kabuli_denovo | 28525077                | T/A  | NA                 | NA                            | NA                 |
| Kabuli_wild_28525080 | NA                                  | Ca_kabuli_denovo | 28525080                | A/G  | NA                 | NA                            | NA                 |
| Kabuli_wild_28528392 | NA                                  | Ca_kabuli_denovo | 28528392                | A/G  | NA                 | NA                            | NA                 |
| Kabuli_wild_28543717 | NA                                  | Ca_kabuli_denovo | 28543717                | A/G  | NA                 | NA                            | NA                 |

| SNP IDs              | NCBI dbSNP accession IDs (NCBI_SS#) | Chromosomes      | Physical positions (bp) | SNPs | Gene accession IDs | Sequence components of genome | Putative functions |
|----------------------|-------------------------------------|------------------|-------------------------|------|--------------------|-------------------------------|--------------------|
| Kabuli_wild_28544738 | NA                                  | Ca_kabuli_denovo | 28544738                | C/T  | NA                 | NA                            | NA                 |
| Kabuli_wild_28546178 | NA                                  | Ca_kabuli_denovo | 28546178                | A/G  | NA                 | NA                            | NA                 |
| Kabuli_wild_28546243 | NA                                  | Ca_kabuli_denovo | 28546243                | G/T  | NA                 | NA                            | NA                 |
| Kabuli_wild_28547322 | NA                                  | Ca_kabuli_denovo | 28547322                | A/C  | NA                 | NA                            | NA                 |
| Kabuli_wild_28547362 | NA                                  | Ca_kabuli_denovo | 28547362                | G/T  | NA                 | NA                            | NA                 |
| Kabuli_wild_28547386 | NA                                  | Ca_kabuli_denovo | 28547386                | C/T  | NA                 | NA                            | NA                 |
| Kabuli_wild_28547410 | NA                                  | Ca_kabuli_denovo | 28547410                | T/C  | NA                 | NA                            | NA                 |
| Kabuli_wild_28562941 | NA                                  | Ca_kabuli_denovo | 28562941                | A/G  | NA                 | NA                            | NA                 |
| Kabuli_wild_28562977 | NA                                  | Ca_kabuli_denovo | 28562977                | A/G  | NA                 | NA                            | NA                 |
| Kabuli_wild_28566445 | NA                                  | Ca_kabuli_denovo | 28566445                | C/G  | NA                 | NA                            | NA                 |
| Kabuli_wild_28569922 | NA                                  | Ca_kabuli_denovo | 28569922                | A/G  | NA                 | NA                            | NA                 |
| Kabuli_wild_28569952 | NA                                  | Ca_kabuli_denovo | 28569952                | G/C  | NA                 | NA                            | NA                 |
| Kabuli_wild_28570373 | NA                                  | Ca_kabuli_denovo | 28570373                | C/A  | NA                 | NA                            | NA                 |
| Kabuli_wild_28570393 | NA                                  | Ca_kabuli_denovo | 28570393                | C/G  | NA                 | NA                            | NA                 |
| Kabuli_wild_28570427 | NA                                  | Ca_kabuli_denovo | 28570427                | T/C  | NA                 | NA                            | NA                 |
| Kabuli_wild_28577897 | NA                                  | Ca_kabuli_denovo | 28577897                | A/G  | NA                 | NA                            | NA                 |
| Kabuli_wild_28577917 | NA                                  | Ca_kabuli_denovo | 28577917                | A/C  | NA                 | NA                            | NA                 |
| Kabuli_wild_28581012 | NA                                  | Ca_kabuli_denovo | 28581012                | G/T  | NA                 | NA                            | NA                 |
| Kabuli_wild_28586295 | NA                                  | Ca_kabuli_denovo | 28586295                | A/G  | NA                 | NA                            | NA                 |
| Kabuli_wild_28587975 | NA                                  | Ca_kabuli_denovo | 28587975                | T/G  | NA                 | NA                            | NA                 |
| Kabuli_wild_28587982 | NA                                  | Ca_kabuli_denovo | 28587982                | T/G  | NA                 | NA                            | NA                 |
| Kabuli_wild_28588734 | NA                                  | Ca_kabuli_denovo | 28588734                | C/A  | NA                 | NA                            | NA                 |
| Kabuli_wild_28593539 | NA                                  | Ca_kabuli_denovo | 28593539                | G/T  | NA                 | NA                            | NA                 |
| Kabuli_wild_28594358 | NA                                  | Ca_kabuli_denovo | 28594358                | T/G  | NA                 | NA                            | NA                 |
| Kabuli_wild_28595055 | NA                                  | Ca_kabuli_denovo | 28595055                | C/T  | NA                 | NA                            | NA                 |
| Kabuli_wild_28595085 | NA                                  | Ca_kabuli_denovo | 28595085                | C/T  | NA                 | NA                            | NA                 |
| Kabuli_wild_28600073 | NA                                  | Ca_kabuli_denovo | 28600073                | G/T  | NA                 | NA                            | NA                 |
| Kabuli_wild_28600897 | NA                                  | Ca_kabuli_denovo | 28600897                | C/T  | NA                 | NA                            | NA                 |
| Kabuli_wild_28600981 | NA                                  | Ca_kabuli_denovo | 28600981                | T/A  | NA                 | NA                            | NA                 |
| Kabuli_wild_28602468 | NA                                  | Ca_kabuli_denovo | 28602468                | G/C  | NA                 | NA                            | NA                 |
| Kabuli_wild_28603478 | NA                                  | Ca_kabuli_denovo | 28603478                | G/T  | NA                 | NA                            | NA                 |
| Kabuli_wild_28603983 | NA                                  | Ca_kabuli_denovo | 28603983                | G/A  | NA                 | NA                            | NA                 |
| Kabuli_wild_28603986 | NA                                  | Ca_kabuli_denovo | 28603986                | T/C  | NA                 | NA                            | NA                 |
| Kabuli_wild_28613273 | NA                                  | Ca_kabuli_denovo | 28613273                | A/C  | NA                 | NA                            | NA                 |
| Kabuli_wild_28613275 | NA                                  | Ca_kabuli_denovo | 28613275                | A/C  | NA                 | NA                            | NA                 |
| Kabuli_wild_28617248 | NA                                  | Ca_kabuli_denovo | 28617248                | C/G  | NA                 | NA                            | NA                 |
| Kabuli_wild_28617285 | NA                                  | Ca_kabuli_denovo | 28617285                | G/C  | NA                 | NA                            | NA                 |
| Kabuli_wild_28618554 | NA                                  | Ca_kabuli_denovo | 28618554                | G/T  | NA                 | NA                            | NA                 |
| Kabuli_wild_28622486 | NA                                  | Ca_kabuli_denovo | 28622486                | G/T  | NA                 | NA                            | NA                 |
| Kabuli_wild_28637313 | NA                                  | Ca_kabuli_denovo | 28637313                | C/T  | NA                 | NA                            | NA                 |
| Kabuli_wild_28637330 | NA                                  | Ca_kabuli_denovo | 28637330                | A/G  | NA                 | NA                            | NA                 |
| Kabuli_wild_28639267 | NA                                  | Ca_kabuli_denovo | 28639267                | G/T  | NA                 | NA                            | NA                 |
| Kabuli_wild_28642674 | NA                                  | Ca_kabuli_denovo | 28642674                | C/G  | NA                 | NA                            | NA                 |
| Kabuli_wild_28642675 | NA                                  | Ca_kabuli_denovo | 28642675                | T/C  | NA                 | NA                            | NA                 |

| SNP IDs              | NCBI dbSNP accession IDs (NCBI_SS#) | Chromosomes      | Physical positions (bp) | SNPs | Gene accession IDs | Sequence components of genome | Putative functions |
|----------------------|-------------------------------------|------------------|-------------------------|------|--------------------|-------------------------------|--------------------|
| Kabuli_wild_28644247 | NA                                  | Ca_kabuli_denovo | 28644247                | G/T  | NA                 | NA                            | NA                 |
| Kabuli_wild_28647342 | NA                                  | Ca_kabuli_denovo | 28647342                | G/T  | NA                 | NA                            | NA                 |
| Kabuli_wild_28655077 | NA                                  | Ca_kabuli_denovo | 28655077                | C/G  | NA                 | NA                            | NA                 |
| Kabuli_wild_28655563 | NA                                  | Ca_kabuli_denovo | 28655563                | C/G  | NA                 | NA                            | NA                 |
| Kabuli_wild_28657088 | NA                                  | Ca_kabuli_denovo | 28657088                | G/A  | NA                 | NA                            | NA                 |
| Kabuli_wild_28657115 | NA                                  | Ca_kabuli_denovo | 28657115                | A/G  | NA                 | NA                            | NA                 |
| Kabuli_wild_28667995 | NA                                  | Ca_kabuli_denovo | 28667995                | G/T  | NA                 | NA                            | NA                 |
| Kabuli_wild_28674619 | NA                                  | Ca_kabuli_denovo | 28674619                | A/C  | NA                 | NA                            | NA                 |
| Kabuli_wild_28675593 | NA                                  | Ca_kabuli_denovo | 28675593                | A/C  | NA                 | NA                            | NA                 |
| Kabuli_wild_28675622 | NA                                  | Ca_kabuli_denovo | 28675622                | C/T  | NA                 | NA                            | NA                 |
| Kabuli_wild_28678747 | NA                                  | Ca_kabuli_denovo | 28678747                | T/C  | NA                 | NA                            | NA                 |
| Kabuli_wild_28679921 | NA                                  | Ca_kabuli_denovo | 28679921                | A/G  | NA                 | NA                            | NA                 |
| Kabuli_wild_28689591 | NA                                  | Ca_kabuli_denovo | 28689591                | C/G  | NA                 | NA                            | NA                 |
| Kabuli_wild_28698519 | NA                                  | Ca_kabuli_denovo | 28698519                | G/T  | NA                 | NA                            | NA                 |
| Kabuli_wild_28699472 | NA                                  | Ca_kabuli_denovo | 28699472                | G/T  | NA                 | NA                            | NA                 |
| Kabuli_wild_28700266 | NA                                  | Ca_kabuli_denovo | 28700266                | T/C  | NA                 | NA                            | NA                 |
| Kabuli_wild_28700308 | NA                                  | Ca_kabuli_denovo | 28700308                | A/C  | NA                 | NA                            | NA                 |
| Kabuli_wild_28702008 | NA                                  | Ca_kabuli_denovo | 28702008                | C/T  | NA                 | NA                            | NA                 |
| Kabuli_wild_28703589 | NA                                  | Ca_kabuli_denovo | 28703589                | T/C  | NA                 | NA                            | NA                 |
| Kabuli_wild_28715558 | NA                                  | Ca_kabuli_denovo | 28715558                | G/A  | NA                 | NA                            | NA                 |
| Kabuli_wild_28715602 | NA                                  | Ca_kabuli_denovo | 28715602                | G/A  | NA                 | NA                            | NA                 |
| Kabuli_wild_28719668 | NA                                  | Ca_kabuli_denovo | 28719668                | T/G  | NA                 | NA                            | NA                 |
| Kabuli_wild_28719674 | NA                                  | Ca_kabuli_denovo | 28719674                | C/T  | NA                 | NA                            | NA                 |
| Kabuli_wild_28719677 | NA                                  | Ca_kabuli_denovo | 28719677                | A/G  | NA                 | NA                            | NA                 |
| Kabuli_wild_28721319 | NA                                  | Ca_kabuli_denovo | 28721319                | T/G  | NA                 | NA                            | NA                 |
| Kabuli_wild_28721337 | NA                                  | Ca_kabuli_denovo | 28721337                | G/C  | NA                 | NA                            | NA                 |
| Kabuli_wild_28727925 | NA                                  | Ca_kabuli_denovo | 28727925                | C/T  | NA                 | NA                            | NA                 |
| Kabuli_wild_28733953 | NA                                  | Ca_kabuli_denovo | 28733953                | G/A  | NA                 | NA                            | NA                 |
| Kabuli_wild_28736879 | NA                                  | Ca_kabuli_denovo | 28736879                | G/T  | NA                 | NA                            | NA                 |
| Kabuli_wild_28737416 | NA                                  | Ca_kabuli_denovo | 28737416                | T/C  | NA                 | NA                            | NA                 |
| Kabuli_wild_28737428 | NA                                  | Ca_kabuli_denovo | 28737428                | T/C  | NA                 | NA                            | NA                 |
| Kabuli_wild_28743266 | NA                                  | Ca_kabuli_denovo | 28743266                | A/C  | NA                 | NA                            | NA                 |
| Kabuli_wild_28743269 | NA                                  | Ca_kabuli_denovo | 28743269                | C/T  | NA                 | NA                            | NA                 |
| Kabuli_wild_28743278 | NA                                  | Ca_kabuli_denovo | 28743278                | C/T  | NA                 | NA                            | NA                 |
| Kabuli_wild_28745560 | NA                                  | Ca_kabuli_denovo | 28745560                | T/C  | NA                 | NA                            | NA                 |
| Kabuli_wild_28749737 | NA                                  | Ca_kabuli_denovo | 28749737                | G/C  | NA                 | NA                            | NA                 |
| Kabuli_wild_28756978 | NA                                  | Ca_kabuli_denovo | 28756978                | G/T  | NA                 | NA                            | NA                 |
| Kabuli_wild_28761019 | NA                                  | Ca_kabuli_denovo | 28761019                | A/C  | NA                 | NA                            | NA                 |
| Kabuli_wild_28764637 | NA                                  | Ca_kabuli_denovo | 28764637                | G/T  | NA                 | NA                            | NA                 |
| Kabuli_wild_28764781 | NA                                  | Ca_kabuli_denovo | 28764781                | G/C  | NA                 | NA                            | NA                 |
| Kabuli_wild_28768409 | NA                                  | Ca_kabuli_denovo | 28768409                | A/C  | NA                 | NA                            | NA                 |
| Kabuli_wild_28769598 | NA                                  | Ca_kabuli_denovo | 28769598                | G/T  | NA                 | NA                            | NA                 |
| Kabuli_wild_28774346 | NA                                  | Ca_kabuli_denovo | 28774346                | G/T  | NA                 | NA                            | NA                 |
| Kabuli_wild_28774720 | NA                                  | Ca_kabuli_denovo | 28774720                | T/G  | NA                 | NA                            | NA                 |

| SNP IDs              | NCBI dbSNP accession IDs (NCBI_SS#) | Chromosomes      | Physical positions (bp) | SNPs | Gene accession IDs | Sequence components of genome | Putative functions |
|----------------------|-------------------------------------|------------------|-------------------------|------|--------------------|-------------------------------|--------------------|
| Kabuli_wild_28774738 | NA                                  | Ca_kabuli_denovo | 28774738                | G/A  | NA                 | NA                            | NA                 |
| Kabuli_wild_28775833 | NA                                  | Ca_kabuli_denovo | 28775833                | A/G  | NA                 | NA                            | NA                 |
| Kabuli_wild_28775872 | NA                                  | Ca_kabuli_denovo | 28775872                | A/G  | NA                 | NA                            | NA                 |
| Kabuli_wild_28777180 | NA                                  | Ca_kabuli_denovo | 28777180                | G/C  | NA                 | NA                            | NA                 |
| Kabuli_wild_28783401 | NA                                  | Ca_kabuli_denovo | 28783401                | T/C  | NA                 | NA                            | NA                 |
| Kabuli_wild_28783447 | NA                                  | Ca_kabuli_denovo | 28783447                | A/G  | NA                 | NA                            | NA                 |
| Kabuli_wild_28792993 | NA                                  | Ca_kabuli_denovo | 28792993                | A/G  | NA                 | NA                            | NA                 |
| Kabuli_wild_28793041 | NA                                  | Ca_kabuli_denovo | 28793041                | G/A  | NA                 | NA                            | NA                 |
| Kabuli_wild_28797991 | NA                                  | Ca_kabuli_denovo | 28797991                | T/C  | NA                 | NA                            | NA                 |
| Kabuli_wild_28798003 | NA                                  | Ca_kabuli_denovo | 28798003                | T/G  | NA                 | NA                            | NA                 |
| Kabuli_wild_28802114 | NA                                  | Ca_kabuli_denovo | 28802114                | A/G  | NA                 | NA                            | NA                 |
| Kabuli_wild_28803135 | NA                                  | Ca_kabuli_denovo | 28803135                | A/G  | NA                 | NA                            | NA                 |
| Kabuli_wild_28803162 | NA                                  | Ca_kabuli_denovo | 28803162                | T/G  | NA                 | NA                            | NA                 |
| Kabuli_wild_28804403 | NA                                  | Ca_kabuli_denovo | 28804403                | G/T  | NA                 | NA                            | NA                 |
| Kabuli_wild_28804407 | NA                                  | Ca_kabuli_denovo | 28804407                | C/G  | NA                 | NA                            | NA                 |
| Kabuli_wild_28804410 | NA                                  | Ca_kabuli_denovo | 28804410                | C/T  | NA                 | NA                            | NA                 |
| Kabuli_wild_28806732 | NA                                  | Ca_kabuli_denovo | 28806732                | C/G  | NA                 | NA                            | NA                 |
| Kabuli_wild_28808573 | NA                                  | Ca_kabuli_denovo | 28808573                | G/A  | NA                 | NA                            | NA                 |
| Kabuli_wild_28808594 | NA                                  | Ca_kabuli_denovo | 28808594                | C/G  | NA                 | NA                            | NA                 |
| Kabuli_wild_28815076 | NA                                  | Ca_kabuli_denovo | 28815076                | T/C  | NA                 | NA                            | NA                 |
| Kabuli_wild_28815109 | NA                                  | Ca_kabuli_denovo | 28815109                | G/A  | NA                 | NA                            | NA                 |
| Kabuli_wild_28815110 | NA                                  | Ca_kabuli_denovo | 28815110                | C/T  | NA                 | NA                            | NA                 |
| Kabuli_wild_28816373 | NA                                  | Ca_kabuli_denovo | 28816373                | C/A  | NA                 | NA                            | NA                 |
| Kabuli_wild_28816394 | NA                                  | Ca_kabuli_denovo | 28816394                | C/T  | NA                 | NA                            | NA                 |
| Kabuli_wild_28820650 | NA                                  | Ca_kabuli_denovo | 28820650                | A/G  | NA                 | NA                            | NA                 |
| Kabuli_wild_28820692 | NA                                  | Ca_kabuli_denovo | 28820692                | G/C  | NA                 | NA                            | NA                 |
| Kabuli_wild_28831342 | NA                                  | Ca_kabuli_denovo | 28831342                | G/T  | NA                 | NA                            | NA                 |
| Kabuli_wild_28831370 | NA                                  | Ca_kabuli_denovo | 28831370                | G/T  | NA                 | NA                            | NA                 |
| Kabuli_wild_28832525 | NA                                  | Ca_kabuli_denovo | 28832525                | C/G  | NA                 | NA                            | NA                 |
| Kabuli_wild_28832634 | NA                                  | Ca_kabuli_denovo | 28832634                | A/C  | NA                 | NA                            | NA                 |
| Kabuli_wild_28832635 | NA                                  | Ca_kabuli_denovo | 28832635                | G/T  | NA                 | NA                            | NA                 |
| Kabuli_wild_28833979 | NA                                  | Ca_kabuli_denovo | 28833979                | A/C  | NA                 | NA                            | NA                 |
| Kabuli_wild_28839877 | NA                                  | Ca_kabuli_denovo | 28839877                | A/T  | NA                 | NA                            | NA                 |
| Kabuli_wild_28840027 | NA                                  | Ca_kabuli_denovo | 28840027                | A/C  | NA                 | NA                            | NA                 |
| Kabuli_wild_28842701 | NA                                  | Ca_kabuli_denovo | 28842701                | G/T  | NA                 | NA                            | NA                 |
| Kabuli_wild_28847073 | NA                                  | Ca_kabuli_denovo | 28847073                | T/C  | NA                 | NA                            | NA                 |
| Kabuli_wild_28853655 | NA                                  | Ca_kabuli_denovo | 28853655                | T/G  | NA                 | NA                            | NA                 |
| Kabuli_wild_28854747 | NA                                  | Ca_kabuli_denovo | 28854747                | C/A  | NA                 | NA                            | NA                 |
| Kabuli_wild_28859126 | NA                                  | Ca_kabuli_denovo | 28859126                | A/C  | NA                 | NA                            | NA                 |
| Kabuli_wild_28859129 | NA                                  | Ca_kabuli_denovo | 28859129                | C/T  | NA                 | NA                            | NA                 |
| Kabuli_wild_28863354 | NA                                  | Ca_kabuli_denovo | 28863354                | A/C  | NA                 | NA                            | NA                 |
| Kabuli_wild_28863355 | NA                                  | Ca_kabuli_denovo | 28863355                | G/T  | NA                 | NA                            | NA                 |
| Kabuli_wild_28870742 | NA                                  | Ca_kabuli_denovo | 28870742                | A/C  | NA                 | NA                            | NA                 |
| Kabuli_wild_28870816 | NA                                  | Ca_kabuli_denovo | 28870816                | G/T  | NA                 | NA                            | NA                 |

| SNP IDs              | NCBI dbSNP accession IDs (NCBI_SS#) | Chromosomes      | Physical positions (bp) | SNPs | Gene accession IDs | Sequence components of genome | Putative functions |
|----------------------|-------------------------------------|------------------|-------------------------|------|--------------------|-------------------------------|--------------------|
| Kabuli_wild_28885830 | NA                                  | Ca_kabuli_denovo | 28885830                | G/A  | NA                 | NA                            | NA                 |
| Kabuli_wild_28885863 | NA                                  | Ca_kabuli_denovo | 28885863                | G/C  | NA                 | NA                            | NA                 |
| Kabuli_wild_28888341 | NA                                  | Ca_kabuli_denovo | 28888341                | T/C  | NA                 | NA                            | NA                 |
| Kabuli_wild_28888407 | NA                                  | Ca_kabuli_denovo | 28888407                | C/G  | NA                 | NA                            | NA                 |
| Kabuli_wild_28893144 | NA                                  | Ca_kabuli_denovo | 28893144                | C/G  | NA                 | NA                            | NA                 |
| Kabuli_wild_28893380 | NA                                  | Ca_kabuli_denovo | 28893380                | A/G  | NA                 | NA                            | NA                 |
| Kabuli_wild_28899313 | NA                                  | Ca_kabuli_denovo | 28899313                | C/T  | NA                 | NA                            | NA                 |
| Kabuli_wild_28901563 | NA                                  | Ca_kabuli_denovo | 28901563                | A/C  | NA                 | NA                            | NA                 |
| Kabuli_wild_28905182 | NA                                  | Ca_kabuli_denovo | 28905182                | T/C  | NA                 | NA                            | NA                 |
| Kabuli_wild_28909435 | NA                                  | Ca_kabuli_denovo | 28909435                | A/C  | NA                 | NA                            | NA                 |
| Kabuli_wild_28909571 | NA                                  | Ca_kabuli_denovo | 28909571                | T/A  | NA                 | NA                            | NA                 |
| Kabuli_wild_28909601 | NA                                  | Ca_kabuli_denovo | 28909601                | A/G  | NA                 | NA                            | NA                 |
| Kabuli_wild_28924024 | NA                                  | Ca_kabuli_denovo | 28924024                | A/C  | NA                 | NA                            | NA                 |
| Kabuli_wild_28924025 | NA                                  | Ca_kabuli_denovo | 28924025                | G/T  | NA                 | NA                            | NA                 |
| Kabuli_wild_28924026 | NA                                  | Ca_kabuli_denovo | 28924026                | A/C  | NA                 | NA                            | NA                 |
| Kabuli_wild_28924027 | NA                                  | Ca_kabuli_denovo | 28924027                | A/T  | NA                 | NA                            | NA                 |
| Kabuli_wild_28933443 | NA                                  | Ca_kabuli_denovo | 28933443                | G/C  | NA                 | NA                            | NA                 |
| Kabuli_wild_28933497 | NA                                  | Ca_kabuli_denovo | 28933497                | G/C  | NA                 | NA                            | NA                 |
| Kabuli_wild_28934701 | NA                                  | Ca_kabuli_denovo | 28934701                | C/G  | NA                 | NA                            | NA                 |
| Kabuli_wild_28936039 | NA                                  | Ca_kabuli_denovo | 28936039                | G/A  | NA                 | NA                            | NA                 |
| Kabuli_wild_28957573 | NA                                  | Ca_kabuli_denovo | 28957573                | A/G  | NA                 | NA                            | NA                 |
| Kabuli_wild_28966347 | NA                                  | Ca_kabuli_denovo | 28966347                | G/A  | NA                 | NA                            | NA                 |
| Kabuli_wild_28983737 | NA                                  | Ca_kabuli_denovo | 28983737                | A/C  | NA                 | NA                            | NA                 |
| Kabuli_wild_28984749 | NA                                  | Ca_kabuli_denovo | 28984749                | T/C  | NA                 | NA                            | NA                 |
| Kabuli_wild_28994411 | NA                                  | Ca_kabuli_denovo | 28994411                | G/T  | NA                 | NA                            | NA                 |
| Kabuli_wild_28994414 | NA                                  | Ca_kabuli_denovo | 28994414                | T/C  | NA                 | NA                            | NA                 |
| Kabuli_wild_28996947 | NA                                  | Ca_kabuli_denovo | 28996947                | T/G  | NA                 | NA                            | NA                 |
| Kabuli_wild_29007301 | NA                                  | Ca_kabuli_denovo | 29007301                | G/A  | NA                 | NA                            | NA                 |
| Kabuli_wild_29007504 | NA                                  | Ca_kabuli_denovo | 29007504                | A/G  | NA                 | NA                            | NA                 |
| Kabuli_wild_29016391 | NA                                  | Ca_kabuli_denovo | 29016391                | A/G  | NA                 | NA                            | NA                 |
| Kabuli_wild_29016468 | NA                                  | Ca_kabuli_denovo | 29016468                | T/C  | NA                 | NA                            | NA                 |
| Kabuli_wild_29023846 | NA                                  | Ca_kabuli_denovo | 29023846                | A/G  | NA                 | NA                            | NA                 |
| Kabuli_wild_29025226 | NA                                  | Ca_kabuli_denovo | 29025226                | A/G  | NA                 | NA                            | NA                 |
| Kabuli_wild_29025231 | NA                                  | Ca_kabuli_denovo | 29025231                | C/G  | NA                 | NA                            | NA                 |
| Kabuli_wild_29025232 | NA                                  | Ca_kabuli_denovo | 29025232                | A/C  | NA                 | NA                            | NA                 |
| Kabuli_wild_29025241 | NA                                  | Ca_kabuli_denovo | 29025241                | C/T  | NA                 | NA                            | NA                 |
| Kabuli_wild_29025712 | NA                                  | Ca_kabuli_denovo | 29025712                | A/G  | NA                 | NA                            | NA                 |
| Kabuli_wild_29025770 | NA                                  | Ca_kabuli_denovo | 29025770                | A/G  | NA                 | NA                            | NA                 |
| Kabuli_wild_29025947 | NA                                  | Ca_kabuli_denovo | 29025947                | T/G  | NA                 | NA                            | NA                 |
| Kabuli_wild_29029531 | NA                                  | Ca_kabuli_denovo | 29029531                | A/C  | NA                 | NA                            | NA                 |
| Kabuli_wild_29033777 | NA                                  | Ca_kabuli_denovo | 29033777                | T/G  | NA                 | NA                            | NA                 |
| Kabuli_wild_29033806 | NA                                  | Ca_kabuli_denovo | 29033806                | T/C  | NA                 | NA                            | NA                 |
| Kabuli_wild_29036738 | NA                                  | Ca_kabuli_denovo | 29036738                | C/T  | NA                 | NA                            | NA                 |
| Kabuli_wild_29047211 | NA                                  | Ca_kabuli_denovo | 29047211                | A/G  | NA                 | NA                            | NA                 |



| SNP IDs                     | NCBI dbSNP accession IDs (NCBI_SS#) | Chromosomes             | Physical positions (bp) | SNPs | Gene accession IDs | Sequence components of genome | Putative functions |
|-----------------------------|-------------------------------------|-------------------------|-------------------------|------|--------------------|-------------------------------|--------------------|
| <i>Kabuli_wild_29052239</i> | NA                                  | <i>Ca_kabuli_denovo</i> | 29052239                | G/C  | NA                 | NA                            | NA                 |
| <i>Kabuli_wild_29052263</i> | NA                                  | <i>Ca_kabuli_denovo</i> | 29052263                | C/G  | NA                 | NA                            | NA                 |
| <i>Kabuli_wild_29052912</i> | NA                                  | <i>Ca_kabuli_denovo</i> | 29052912                | G/C  | NA                 | NA                            | NA                 |
| <i>Kabuli_wild_29052915</i> | NA                                  | <i>Ca_kabuli_denovo</i> | 29052915                | C/T  | NA                 | NA                            | NA                 |
| <i>Kabuli_wild_29055203</i> | NA                                  | <i>Ca_kabuli_denovo</i> | 29055203                | G/A  | NA                 | NA                            | NA                 |
| <i>Kabuli_wild_29060083</i> | NA                                  | <i>Ca_kabuli_denovo</i> | 29060083                | C/A  | NA                 | NA                            | NA                 |
| <i>Kabuli_wild_29068046</i> | NA                                  | <i>Ca_kabuli_denovo</i> | 29068046                | C/T  | NA                 | NA                            | NA                 |
| <i>Kabuli_wild_29080860</i> | NA                                  | <i>Ca_kabuli_denovo</i> | 29080860                | G/T  | NA                 | NA                            | NA                 |
| <i>Kabuli_wild_29090068</i> | NA                                  | <i>Ca_kabuli_denovo</i> | 29090068                | A/G  | NA                 | NA                            | NA                 |
| <i>Kabuli_wild_29090080</i> | NA                                  | <i>Ca_kabuli_denovo</i> | 29090080                | T/C  | NA                 | NA                            | NA                 |
| <i>Kabuli_wild_29090312</i> | NA                                  | <i>Ca_kabuli_denovo</i> | 29090312                | A/C  | NA                 | NA                            | NA                 |
| <i>Kabuli_wild_29090585</i> | NA                                  | <i>Ca_kabuli_denovo</i> | 29090585                | A/C  | NA                 | NA                            | NA                 |
| <i>Kabuli_wild_29090586</i> | NA                                  | <i>Ca_kabuli_denovo</i> | 29090586                | A/G  | NA                 | NA                            | NA                 |
| <i>Kabuli_wild_29090587</i> | NA                                  | <i>Ca_kabuli_denovo</i> | 29090587                | A/C  | NA                 | NA                            | NA                 |
| <i>Kabuli_wild_29091336</i> | NA                                  | <i>Ca_kabuli_denovo</i> | 29091336                | C/G  | NA                 | NA                            | NA                 |
| <i>Kabuli_wild_29091480</i> | NA                                  | <i>Ca_kabuli_denovo</i> | 29091480                | G/T  | NA                 | NA                            | NA                 |
| <i>Kabuli_wild_29091488</i> | NA                                  | <i>Ca_kabuli_denovo</i> | 29091488                | C/T  | NA                 | NA                            | NA                 |
| <i>Kabuli_wild_29093673</i> | NA                                  | <i>Ca_kabuli_denovo</i> | 29093673                | G/C  | NA                 | NA                            | NA                 |
| <i>Kabuli_wild_29094135</i> | NA                                  | <i>Ca_kabuli_denovo</i> | 29094135                | A/G  | NA                 | NA                            | NA                 |
| <i>Kabuli_wild_29095387</i> | NA                                  | <i>Ca_kabuli_denovo</i> | 29095387                | C/G  | NA                 | NA                            | NA                 |
| <i>Kabuli_wild_29100474</i> | NA                                  | <i>Ca_kabuli_denovo</i> | 29100474                | C/A  | NA                 | NA                            | NA                 |
| <i>Kabuli_wild_29106626</i> | NA                                  | <i>Ca_kabuli_denovo</i> | 29106626                | T/C  | NA                 | NA                            | NA                 |
| <i>Kabuli_wild_29120857</i> | NA                                  | <i>Ca_kabuli_denovo</i> | 29120857                | T/C  | NA                 | NA                            | NA                 |
| <i>Kabuli_wild_29120863</i> | NA                                  | <i>Ca_kabuli_denovo</i> | 29120863                | T/G  | NA                 | NA                            | NA                 |
| <i>Kabuli_wild_29134095</i> | NA                                  | <i>Ca_kabuli_denovo</i> | 29134095                | G/A  | NA                 | NA                            | NA                 |
| <i>Kabuli_wild_29134111</i> | NA                                  | <i>Ca_kabuli_denovo</i> | 29134111                | G/A  | NA                 | NA                            | NA                 |
| <i>Kabuli_wild_29136558</i> | NA                                  | <i>Ca_kabuli_denovo</i> | 29136558                | T/C  | NA                 | NA                            | NA                 |
| <i>Kabuli_wild_29145328</i> | NA                                  | <i>Ca_kabuli_denovo</i> | 29145328                | A/G  | NA                 | NA                            | NA                 |
| <i>Kabuli_wild_29145361</i> | NA                                  | <i>Ca_kabuli_denovo</i> | 29145361                | C/A  | NA                 | NA                            | NA                 |
| <i>Kabuli_wild_29151593</i> | NA                                  | <i>Ca_kabuli_denovo</i> | 29151593                | A/G  | NA                 | NA                            | NA                 |
| <i>Kabuli_wild_29152312</i> | NA                                  | <i>Ca_kabuli_denovo</i> | 29152312                | A/C  | NA                 | NA                            | NA                 |
| <i>Kabuli_wild_29152313</i> | NA                                  | <i>Ca_kabuli_denovo</i> | 29152313                | G/T  | NA                 | NA                            | NA                 |
| <i>Kabuli_wild_29152314</i> | NA                                  | <i>Ca_kabuli_denovo</i> | 29152314                | A/T  | NA                 | NA                            | NA                 |
| <i>Kabuli_wild_29152315</i> | NA                                  | <i>Ca_kabuli_denovo</i> | 29152315                | C/T  | NA                 | NA                            | NA                 |
| <i>Kabuli_wild_29154056</i> | NA                                  | <i>Ca_kabuli_denovo</i> | 29154056                | A/G  | NA                 | NA                            | NA                 |
| <i>Kabuli_wild_29155867</i> | NA                                  | <i>Ca_kabuli_denovo</i> | 29155867                | A/C  | NA                 | NA                            | NA                 |
| <i>Kabuli_wild_29157354</i> | NA                                  | <i>Ca_kabuli_denovo</i> | 29157354                | G/T  | NA                 | NA                            | NA                 |
| <i>Kabuli_wild_29157379</i> | NA                                  | <i>Ca_kabuli_denovo</i> | 29157379                | G/C  | NA                 | NA                            | NA                 |
| <i>Kabuli_wild_29166198</i> | NA                                  | <i>Ca_kabuli_denovo</i> | 29166198                | A/G  | NA                 | NA                            | NA                 |
| <i>Kabuli_wild_29167015</i> | NA                                  | <i>Ca_kabuli_denovo</i> | 29167015                | T/C  | NA                 | NA                            | NA                 |
| <i>Kabuli_wild_29169364</i> | NA                                  | <i>Ca_kabuli_denovo</i> | 29169364                | A/G  | NA                 | NA                            | NA                 |
| <i>Kabuli_wild_29169375</i> | NA                                  | <i>Ca_kabuli_denovo</i> | 29169375                | G/A  | NA                 | NA                            | NA                 |
| <i>Kabuli_wild_29170309</i> | NA                                  | <i>Ca_kabuli_denovo</i> | 29170309                | T/C  | NA                 | NA                            | NA                 |
| <i>Kabuli_wild_29170312</i> | NA                                  | <i>Ca_kabuli_denovo</i> | 29170312                | C/T  | NA                 | NA                            | NA                 |

| SNP IDs              | NCBI dbSNP accession IDs (NCBI_SS#) | Chromosomes      | Physical positions (bp) | SNPs | Gene accession IDs | Sequence components of genome | Putative functions |
|----------------------|-------------------------------------|------------------|-------------------------|------|--------------------|-------------------------------|--------------------|
| Kabuli_wild_29170318 | NA                                  | Ca_kabuli_denovo | 29170318                | G/C  | NA                 | NA                            | NA                 |
| Kabuli_wild_29173207 | NA                                  | Ca_kabuli_denovo | 29173207                | T/C  | NA                 | NA                            | NA                 |
| Kabuli_wild_29173222 | NA                                  | Ca_kabuli_denovo | 29173222                | T/G  | NA                 | NA                            | NA                 |
| Kabuli_wild_29175098 | NA                                  | Ca_kabuli_denovo | 29175098                | G/C  | NA                 | NA                            | NA                 |
| Kabuli_wild_29175134 | NA                                  | Ca_kabuli_denovo | 29175134                | G/A  | NA                 | NA                            | NA                 |
| Kabuli_wild_29182670 | NA                                  | Ca_kabuli_denovo | 29182670                | C/G  | NA                 | NA                            | NA                 |
| Kabuli_wild_29187077 | NA                                  | Ca_kabuli_denovo | 29187077                | A/G  | NA                 | NA                            | NA                 |
| Kabuli_wild_29187137 | NA                                  | Ca_kabuli_denovo | 29187137                | G/A  | NA                 | NA                            | NA                 |
| Kabuli_wild_29188676 | NA                                  | Ca_kabuli_denovo | 29188676                | G/C  | NA                 | NA                            | NA                 |
| Kabuli_wild_29193258 | NA                                  | Ca_kabuli_denovo | 29193258                | G/C  | NA                 | NA                            | NA                 |
| Kabuli_wild_29193273 | NA                                  | Ca_kabuli_denovo | 29193273                | G/C  | NA                 | NA                            | NA                 |
| Kabuli_wild_29208196 | NA                                  | Ca_kabuli_denovo | 29208196                | C/G  | NA                 | NA                            | NA                 |
| Kabuli_wild_29208202 | NA                                  | Ca_kabuli_denovo | 29208202                | G/T  | NA                 | NA                            | NA                 |
| Kabuli_wild_29221825 | NA                                  | Ca_kabuli_denovo | 29221825                | A/G  | NA                 | NA                            | NA                 |
| Kabuli_wild_29226538 | NA                                  | Ca_kabuli_denovo | 29226538                | C/A  | NA                 | NA                            | NA                 |
| Kabuli_wild_29226600 | NA                                  | Ca_kabuli_denovo | 29226600                | C/T  | NA                 | NA                            | NA                 |
| Kabuli_wild_29226606 | NA                                  | Ca_kabuli_denovo | 29226606                | A/G  | NA                 | NA                            | NA                 |
| Kabuli_wild_29237656 | NA                                  | Ca_kabuli_denovo | 29237656                | A/C  | NA                 | NA                            | NA                 |
| Kabuli_wild_29242179 | NA                                  | Ca_kabuli_denovo | 29242179                | A/G  | NA                 | NA                            | NA                 |
| Kabuli_wild_29242182 | NA                                  | Ca_kabuli_denovo | 29242182                | T/C  | NA                 | NA                            | NA                 |
| Kabuli_wild_29244024 | NA                                  | Ca_kabuli_denovo | 29244024                | T/A  | NA                 | NA                            | NA                 |
| Kabuli_wild_29248981 | NA                                  | Ca_kabuli_denovo | 29248981                | C/G  | NA                 | NA                            | NA                 |
| Kabuli_wild_29252887 | NA                                  | Ca_kabuli_denovo | 29252887                | C/T  | NA                 | NA                            | NA                 |
| Kabuli_wild_29252890 | NA                                  | Ca_kabuli_denovo | 29252890                | G/A  | NA                 | NA                            | NA                 |
| Kabuli_wild_29255130 | NA                                  | Ca_kabuli_denovo | 29255130                | A/C  | NA                 | NA                            | NA                 |
| Kabuli_wild_29255131 | NA                                  | Ca_kabuli_denovo | 29255131                | A/G  | NA                 | NA                            | NA                 |
| Kabuli_wild_29256541 | NA                                  | Ca_kabuli_denovo | 29256541                | A/G  | NA                 | NA                            | NA                 |
| Kabuli_wild_29256718 | NA                                  | Ca_kabuli_denovo | 29256718                | A/G  | NA                 | NA                            | NA                 |
| Kabuli_wild_29269211 | NA                                  | Ca_kabuli_denovo | 29269211                | G/A  | NA                 | NA                            | NA                 |
| Kabuli_wild_29282372 | NA                                  | Ca_kabuli_denovo | 29282372                | T/C  | NA                 | NA                            | NA                 |
| Kabuli_wild_29282390 | NA                                  | Ca_kabuli_denovo | 29282390                | G/T  | NA                 | NA                            | NA                 |
| Kabuli_wild_29295159 | NA                                  | Ca_kabuli_denovo | 29295159                | A/T  | NA                 | NA                            | NA                 |
| Kabuli_wild_29295163 | NA                                  | Ca_kabuli_denovo | 29295163                | A/C  | NA                 | NA                            | NA                 |
| Kabuli_wild_29299179 | NA                                  | Ca_kabuli_denovo | 29299179                | A/G  | NA                 | NA                            | NA                 |
| Kabuli_wild_29299186 | NA                                  | Ca_kabuli_denovo | 29299186                | A/T  | NA                 | NA                            | NA                 |
| Kabuli_wild_29299768 | NA                                  | Ca_kabuli_denovo | 29299768                | C/G  | NA                 | NA                            | NA                 |
| Kabuli_wild_29302387 | NA                                  | Ca_kabuli_denovo | 29302387                | G/T  | NA                 | NA                            | NA                 |
| Kabuli_wild_29302420 | NA                                  | Ca_kabuli_denovo | 29302420                | G/A  | NA                 | NA                            | NA                 |
| Kabuli_wild_29321925 | NA                                  | Ca_kabuli_denovo | 29321925                | G/T  | NA                 | NA                            | NA                 |
| Kabuli_wild_29325260 | NA                                  | Ca_kabuli_denovo | 29325260                | A/G  | NA                 | NA                            | NA                 |
| Kabuli_wild_29340215 | NA                                  | Ca_kabuli_denovo | 29340215                | A/G  | NA                 | NA                            | NA                 |
| Kabuli_wild_29340241 | NA                                  | Ca_kabuli_denovo | 29340241                | T/C  | NA                 | NA                            | NA                 |
| Kabuli_wild_29341001 | NA                                  | Ca_kabuli_denovo | 29341001                | G/A  | NA                 | NA                            | NA                 |
| Kabuli_wild_29341005 | NA                                  | Ca_kabuli_denovo | 29341005                | C/T  | NA                 | NA                            | NA                 |

| SNP IDs              | NCBI dbSNP accession IDs (NCBI_SS#) | Chromosomes      | Physical positions (bp) | SNPs | Gene accession IDs | Sequence components of genome | Putative functions |
|----------------------|-------------------------------------|------------------|-------------------------|------|--------------------|-------------------------------|--------------------|
| Kabuli_wild_29342514 | NA                                  | Ca_kabuli_denovo | 29342514                | G/A  | NA                 | NA                            | NA                 |
| Kabuli_wild_29344673 | NA                                  | Ca_kabuli_denovo | 29344673                | A/T  | NA                 | NA                            | NA                 |
| Kabuli_wild_29348852 | NA                                  | Ca_kabuli_denovo | 29348852                | A/C  | NA                 | NA                            | NA                 |
| Kabuli_wild_29359130 | NA                                  | Ca_kabuli_denovo | 29359130                | A/G  | NA                 | NA                            | NA                 |
| Kabuli_wild_29359135 | NA                                  | Ca_kabuli_denovo | 29359135                | G/A  | NA                 | NA                            | NA                 |
| Kabuli_wild_29364571 | NA                                  | Ca_kabuli_denovo | 29364571                | G/T  | NA                 | NA                            | NA                 |
| Kabuli_wild_29379724 | NA                                  | Ca_kabuli_denovo | 29379724                | A/G  | NA                 | NA                            | NA                 |
| Kabuli_wild_29382726 | NA                                  | Ca_kabuli_denovo | 29382726                | G/C  | NA                 | NA                            | NA                 |
| Kabuli_wild_29382774 | NA                                  | Ca_kabuli_denovo | 29382774                | C/T  | NA                 | NA                            | NA                 |
| Kabuli_wild_29394303 | NA                                  | Ca_kabuli_denovo | 29394303                | C/T  | NA                 | NA                            | NA                 |
| Kabuli_wild_29398606 | NA                                  | Ca_kabuli_denovo | 29398606                | C/T  | NA                 | NA                            | NA                 |
| Kabuli_wild_29410477 | NA                                  | Ca_kabuli_denovo | 29410477                | T/C  | NA                 | NA                            | NA                 |
| Kabuli_wild_29413163 | NA                                  | Ca_kabuli_denovo | 29413163                | G/A  | NA                 | NA                            | NA                 |
| Kabuli_wild_29413225 | NA                                  | Ca_kabuli_denovo | 29413225                | T/C  | NA                 | NA                            | NA                 |
| Kabuli_wild_29416517 | NA                                  | Ca_kabuli_denovo | 29416517                | C/T  | NA                 | NA                            | NA                 |
| Kabuli_wild_29421523 | NA                                  | Ca_kabuli_denovo | 29421523                | G/A  | NA                 | NA                            | NA                 |
| Kabuli_wild_29421577 | NA                                  | Ca_kabuli_denovo | 29421577                | T/A  | NA                 | NA                            | NA                 |
| Kabuli_wild_29422126 | NA                                  | Ca_kabuli_denovo | 29422126                | G/T  | NA                 | NA                            | NA                 |
| Kabuli_wild_29422131 | NA                                  | Ca_kabuli_denovo | 29422131                | T/G  | NA                 | NA                            | NA                 |
| Kabuli_wild_29426894 | NA                                  | Ca_kabuli_denovo | 29426894                | G/C  | NA                 | NA                            | NA                 |
| Kabuli_wild_29437319 | NA                                  | Ca_kabuli_denovo | 29437319                | A/T  | NA                 | NA                            | NA                 |
| Kabuli_wild_29439641 | NA                                  | Ca_kabuli_denovo | 29439641                | G/T  | NA                 | NA                            | NA                 |
| Kabuli_wild_29441765 | NA                                  | Ca_kabuli_denovo | 29441765                | G/A  | NA                 | NA                            | NA                 |
| Kabuli_wild_29446382 | NA                                  | Ca_kabuli_denovo | 29446382                | A/G  | NA                 | NA                            | NA                 |
| Kabuli_wild_29448029 | NA                                  | Ca_kabuli_denovo | 29448029                | A/G  | NA                 | NA                            | NA                 |
| Kabuli_wild_29448065 | NA                                  | Ca_kabuli_denovo | 29448065                | G/A  | NA                 | NA                            | NA                 |
| Kabuli_wild_29450888 | NA                                  | Ca_kabuli_denovo | 29450888                | G/A  | NA                 | NA                            | NA                 |
| Kabuli_wild_29451251 | NA                                  | Ca_kabuli_denovo | 29451251                | T/G  | NA                 | NA                            | NA                 |
| Kabuli_wild_29454043 | NA                                  | Ca_kabuli_denovo | 29454043                | C/G  | NA                 | NA                            | NA                 |
| Kabuli_wild_29461352 | NA                                  | Ca_kabuli_denovo | 29461352                | C/G  | NA                 | NA                            | NA                 |
| Kabuli_wild_29461367 | NA                                  | Ca_kabuli_denovo | 29461367                | T/C  | NA                 | NA                            | NA                 |
| Kabuli_wild_29461411 | NA                                  | Ca_kabuli_denovo | 29461411                | G/A  | NA                 | NA                            | NA                 |
| Kabuli_wild_29461412 | NA                                  | Ca_kabuli_denovo | 29461412                | C/T  | NA                 | NA                            | NA                 |
| Kabuli_wild_29462113 | NA                                  | Ca_kabuli_denovo | 29462113                | G/A  | NA                 | NA                            | NA                 |
| Kabuli_wild_29463880 | NA                                  | Ca_kabuli_denovo | 29463880                | C/T  | NA                 | NA                            | NA                 |
| Kabuli_wild_29472047 | NA                                  | Ca_kabuli_denovo | 29472047                | G/C  | NA                 | NA                            | NA                 |
| Kabuli_wild_29472054 | NA                                  | Ca_kabuli_denovo | 29472054                | A/G  | NA                 | NA                            | NA                 |
| Kabuli_wild_29475370 | NA                                  | Ca_kabuli_denovo | 29475370                | T/C  | NA                 | NA                            | NA                 |
| Kabuli_wild_29486940 | NA                                  | Ca_kabuli_denovo | 29486940                | C/G  | NA                 | NA                            | NA                 |
| Kabuli_wild_29486949 | NA                                  | Ca_kabuli_denovo | 29486949                | T/C  | NA                 | NA                            | NA                 |
| Kabuli_wild_29490979 | NA                                  | Ca_kabuli_denovo | 29490979                | C/G  | NA                 | NA                            | NA                 |
| Kabuli_wild_29491000 | NA                                  | Ca_kabuli_denovo | 29491000                | G/A  | NA                 | NA                            | NA                 |
| Kabuli_wild_29494600 | NA                                  | Ca_kabuli_denovo | 29494600                | G/T  | NA                 | NA                            | NA                 |
| Kabuli_wild_29511257 | NA                                  | Ca_kabuli_denovo | 29511257                | A/C  | NA                 | NA                            | NA                 |

| SNP IDs              | NCBI dbSNP accession IDs (NCBI_SS#) | Chromosomes      | Physical positions (bp) | SNPs | Gene accession IDs | Sequence components of genome | Putative functions |
|----------------------|-------------------------------------|------------------|-------------------------|------|--------------------|-------------------------------|--------------------|
| Kabuli_wild_29512307 | NA                                  | Ca_kabuli_denovo | 29512307                | G/T  | NA                 | NA                            | NA                 |
| Kabuli_wild_29512860 | NA                                  | Ca_kabuli_denovo | 29512860                | G/C  | NA                 | NA                            | NA                 |
| Kabuli_wild_29512984 | NA                                  | Ca_kabuli_denovo | 29512984                | A/C  | NA                 | NA                            | NA                 |
| Kabuli_wild_29513291 | NA                                  | Ca_kabuli_denovo | 29513291                | A/G  | NA                 | NA                            | NA                 |
| Kabuli_wild_29513362 | NA                                  | Ca_kabuli_denovo | 29513362                | G/A  | NA                 | NA                            | NA                 |
| Kabuli_wild_29515700 | NA                                  | Ca_kabuli_denovo | 29515700                | T/C  | NA                 | NA                            | NA                 |
| Kabuli_wild_29515704 | NA                                  | Ca_kabuli_denovo | 29515704                | C/A  | NA                 | NA                            | NA                 |
| Kabuli_wild_29529252 | NA                                  | Ca_kabuli_denovo | 29529252                | G/T  | NA                 | NA                            | NA                 |
| Kabuli_wild_29530717 | NA                                  | Ca_kabuli_denovo | 29530717                | C/G  | NA                 | NA                            | NA                 |
| Kabuli_wild_29536513 | NA                                  | Ca_kabuli_denovo | 29536513                | G/A  | NA                 | NA                            | NA                 |
| Kabuli_wild_29536594 | NA                                  | Ca_kabuli_denovo | 29536594                | T/C  | NA                 | NA                            | NA                 |
| Kabuli_wild_29536601 | NA                                  | Ca_kabuli_denovo | 29536601                | A/C  | NA                 | NA                            | NA                 |
| Kabuli_wild_29558182 | NA                                  | Ca_kabuli_denovo | 29558182                | G/T  | NA                 | NA                            | NA                 |
| Kabuli_wild_29558432 | NA                                  | Ca_kabuli_denovo | 29558432                | G/C  | NA                 | NA                            | NA                 |
| Kabuli_wild_29558489 | NA                                  | Ca_kabuli_denovo | 29558489                | G/T  | NA                 | NA                            | NA                 |
| Kabuli_wild_29565508 | NA                                  | Ca_kabuli_denovo | 29565508                | T/C  | NA                 | NA                            | NA                 |
| Kabuli_wild_29565592 | NA                                  | Ca_kabuli_denovo | 29565592                | G/A  | NA                 | NA                            | NA                 |
| Kabuli_wild_29565625 | NA                                  | Ca_kabuli_denovo | 29565625                | C/T  | NA                 | NA                            | NA                 |
| Kabuli_wild_29566913 | NA                                  | Ca_kabuli_denovo | 29566913                | C/T  | NA                 | NA                            | NA                 |
| Kabuli_wild_29568246 | NA                                  | Ca_kabuli_denovo | 29568246                | T/C  | NA                 | NA                            | NA                 |
| Kabuli_wild_29580483 | NA                                  | Ca_kabuli_denovo | 29580483                | A/G  | NA                 | NA                            | NA                 |
| Kabuli_wild_29583981 | NA                                  | Ca_kabuli_denovo | 29583981                | C/T  | NA                 | NA                            | NA                 |
| Kabuli_wild_29583993 | NA                                  | Ca_kabuli_denovo | 29583993                | C/T  | NA                 | NA                            | NA                 |
| Kabuli_wild_29585819 | NA                                  | Ca_kabuli_denovo | 29585819                | G/T  | NA                 | NA                            | NA                 |
| Kabuli_wild_29587779 | NA                                  | Ca_kabuli_denovo | 29587779                | G/C  | NA                 | NA                            | NA                 |
| Kabuli_wild_29587800 | NA                                  | Ca_kabuli_denovo | 29587800                | G/A  | NA                 | NA                            | NA                 |
| Kabuli_wild_29594202 | NA                                  | Ca_kabuli_denovo | 29594202                | G/T  | NA                 | NA                            | NA                 |
| Kabuli_wild_29595067 | NA                                  | Ca_kabuli_denovo | 29595067                | A/C  | NA                 | NA                            | NA                 |
| Kabuli_wild_29595362 | NA                                  | Ca_kabuli_denovo | 29595362                | C/G  | NA                 | NA                            | NA                 |
| Kabuli_wild_29595377 | NA                                  | Ca_kabuli_denovo | 29595377                | A/G  | NA                 | NA                            | NA                 |
| Kabuli_wild_29603742 | NA                                  | Ca_kabuli_denovo | 29603742                | T/G  | NA                 | NA                            | NA                 |
| Kabuli_wild_29603743 | NA                                  | Ca_kabuli_denovo | 29603743                | C/A  | NA                 | NA                            | NA                 |
| Kabuli_wild_29611249 | NA                                  | Ca_kabuli_denovo | 29611249                | C/A  | NA                 | NA                            | NA                 |
| Kabuli_wild_29620780 | NA                                  | Ca_kabuli_denovo | 29620780                | T/G  | NA                 | NA                            | NA                 |
| Kabuli_wild_29622946 | NA                                  | Ca_kabuli_denovo | 29622946                | G/A  | NA                 | NA                            | NA                 |
| Kabuli_wild_29622991 | NA                                  | Ca_kabuli_denovo | 29622991                | C/T  | NA                 | NA                            | NA                 |
| Kabuli_wild_29629200 | NA                                  | Ca_kabuli_denovo | 29629200                | G/T  | NA                 | NA                            | NA                 |
| Kabuli_wild_29635220 | NA                                  | Ca_kabuli_denovo | 29635220                | A/G  | NA                 | NA                            | NA                 |
| Kabuli_wild_29637075 | NA                                  | Ca_kabuli_denovo | 29637075                | A/G  | NA                 | NA                            | NA                 |
| Kabuli_wild_29637078 | NA                                  | Ca_kabuli_denovo | 29637078                | C/T  | NA                 | NA                            | NA                 |
| Kabuli_wild_29642170 | NA                                  | Ca_kabuli_denovo | 29642170                | T/C  | NA                 | NA                            | NA                 |
| Kabuli_wild_29642197 | NA                                  | Ca_kabuli_denovo | 29642197                | C/G  | NA                 | NA                            | NA                 |
| Kabuli_wild_29642200 | NA                                  | Ca_kabuli_denovo | 29642200                | C/T  | NA                 | NA                            | NA                 |
| Kabuli_wild_29642818 | NA                                  | Ca_kabuli_denovo | 29642818                | G/T  | NA                 | NA                            | NA                 |

| SNP IDs              | NCBI dbSNP accession IDs (NCBI_SS#) | Chromosomes      | Physical positions (bp) | SNPs | Gene accession IDs | Sequence components of genome | Putative functions |
|----------------------|-------------------------------------|------------------|-------------------------|------|--------------------|-------------------------------|--------------------|
| Kabuli_wild_29648059 | NA                                  | Ca_kabuli_denovo | 29648059                | G/T  | NA                 | NA                            | NA                 |
| Kabuli_wild_29661610 | NA                                  | Ca_kabuli_denovo | 29661610                | G/A  | NA                 | NA                            | NA                 |
| Kabuli_wild_29661631 | NA                                  | Ca_kabuli_denovo | 29661631                | C/A  | NA                 | NA                            | NA                 |
| Kabuli_wild_29661634 | NA                                  | Ca_kabuli_denovo | 29661634                | T/C  | NA                 | NA                            | NA                 |
| Kabuli_wild_29673921 | NA                                  | Ca_kabuli_denovo | 29673921                | T/G  | NA                 | NA                            | NA                 |
| Kabuli_wild_29676680 | NA                                  | Ca_kabuli_denovo | 29676680                | C/G  | NA                 | NA                            | NA                 |
| Kabuli_wild_29677901 | NA                                  | Ca_kabuli_denovo | 29677901                | C/T  | NA                 | NA                            | NA                 |
| Kabuli_wild_29682542 | NA                                  | Ca_kabuli_denovo | 29682542                | A/C  | NA                 | NA                            | NA                 |
| Kabuli_wild_29686115 | NA                                  | Ca_kabuli_denovo | 29686115                | C/T  | NA                 | NA                            | NA                 |
| Kabuli_wild_29690222 | NA                                  | Ca_kabuli_denovo | 29690222                | C/G  | NA                 | NA                            | NA                 |
| Kabuli_wild_29690270 | NA                                  | Ca_kabuli_denovo | 29690270                | G/A  | NA                 | NA                            | NA                 |
| Kabuli_wild_29691655 | NA                                  | Ca_kabuli_denovo | 29691655                | A/G  | NA                 | NA                            | NA                 |
| Kabuli_wild_29691712 | NA                                  | Ca_kabuli_denovo | 29691712                | A/G  | NA                 | NA                            | NA                 |
| Kabuli_wild_29702777 | NA                                  | Ca_kabuli_denovo | 29702777                | A/C  | NA                 | NA                            | NA                 |
| Kabuli_wild_29702779 | NA                                  | Ca_kabuli_denovo | 29702779                | A/C  | NA                 | NA                            | NA                 |
| Kabuli_wild_29707533 | NA                                  | Ca_kabuli_denovo | 29707533                | G/T  | NA                 | NA                            | NA                 |
| Kabuli_wild_29713963 | NA                                  | Ca_kabuli_denovo | 29713963                | C/T  | NA                 | NA                            | NA                 |
| Kabuli_wild_29713972 | NA                                  | Ca_kabuli_denovo | 29713972                | C/T  | NA                 | NA                            | NA                 |
| Kabuli_wild_29714011 | NA                                  | Ca_kabuli_denovo | 29714011                | G/T  | NA                 | NA                            | NA                 |
| Kabuli_wild_29718905 | NA                                  | Ca_kabuli_denovo | 29718905                | G/T  | NA                 | NA                            | NA                 |
| Kabuli_wild_29720769 | NA                                  | Ca_kabuli_denovo | 29720769                | G/C  | NA                 | NA                            | NA                 |
| Kabuli_wild_29720770 | NA                                  | Ca_kabuli_denovo | 29720770                | G/C  | NA                 | NA                            | NA                 |
| Kabuli_wild_29721163 | NA                                  | Ca_kabuli_denovo | 29721163                | C/G  | NA                 | NA                            | NA                 |
| Kabuli_wild_29721190 | NA                                  | Ca_kabuli_denovo | 29721190                | C/T  | NA                 | NA                            | NA                 |
| Kabuli_wild_29727103 | NA                                  | Ca_kabuli_denovo | 29727103                | T/C  | NA                 | NA                            | NA                 |
| Kabuli_wild_29729013 | NA                                  | Ca_kabuli_denovo | 29729013                | A/G  | NA                 | NA                            | NA                 |
| Kabuli_wild_29729061 | NA                                  | Ca_kabuli_denovo | 29729061                | C/T  | NA                 | NA                            | NA                 |
| Kabuli_wild_29733040 | NA                                  | Ca_kabuli_denovo | 29733040                | G/C  | NA                 | NA                            | NA                 |
| Kabuli_wild_29734029 | NA                                  | Ca_kabuli_denovo | 29734029                | T/C  | NA                 | NA                            | NA                 |
| Kabuli_wild_29734664 | NA                                  | Ca_kabuli_denovo | 29734664                | C/T  | NA                 | NA                            | NA                 |
| Kabuli_wild_29750831 | NA                                  | Ca_kabuli_denovo | 29750831                | G/C  | NA                 | NA                            | NA                 |
| Kabuli_wild_29750857 | NA                                  | Ca_kabuli_denovo | 29750857                | T/C  | NA                 | NA                            | NA                 |
| Kabuli_wild_29750905 | NA                                  | Ca_kabuli_denovo | 29750905                | G/C  | NA                 | NA                            | NA                 |
| Kabuli_wild_29753048 | NA                                  | Ca_kabuli_denovo | 29753048                | T/C  | NA                 | NA                            | NA                 |
| Kabuli_wild_29756171 | NA                                  | Ca_kabuli_denovo | 29756171                | C/T  | NA                 | NA                            | NA                 |
| Kabuli_wild_29769595 | NA                                  | Ca_kabuli_denovo | 29769595                | G/T  | NA                 | NA                            | NA                 |
| Kabuli_wild_29769771 | NA                                  | Ca_kabuli_denovo | 29769771                | T/G  | NA                 | NA                            | NA                 |
| Kabuli_wild_29769772 | NA                                  | Ca_kabuli_denovo | 29769772                | T/A  | NA                 | NA                            | NA                 |
| Kabuli_wild_29773921 | NA                                  | Ca_kabuli_denovo | 29773921                | C/G  | NA                 | NA                            | NA                 |
| Kabuli_wild_29773947 | NA                                  | Ca_kabuli_denovo | 29773947                | A/G  | NA                 | NA                            | NA                 |
| Kabuli_wild_29774512 | NA                                  | Ca_kabuli_denovo | 29774512                | C/T  | NA                 | NA                            | NA                 |
| Kabuli_wild_29775082 | NA                                  | Ca_kabuli_denovo | 29775082                | T/C  | NA                 | NA                            | NA                 |
| Kabuli_wild_29776450 | NA                                  | Ca_kabuli_denovo | 29776450                | A/G  | NA                 | NA                            | NA                 |
| Kabuli_wild_29777396 | NA                                  | Ca_kabuli_denovo | 29777396                | G/C  | NA                 | NA                            | NA                 |

| SNP IDs              | NCBI dbSNP accession IDs (NCBI_SS#) | Chromosomes      | Physical positions (bp) | SNPs | Gene accession IDs | Sequence components of genome | Putative functions |
|----------------------|-------------------------------------|------------------|-------------------------|------|--------------------|-------------------------------|--------------------|
| Kabuli_wild_29778205 | NA                                  | Ca_kabuli_denovo | 29778205                | T/C  | NA                 | NA                            | NA                 |
| Kabuli_wild_29781229 | NA                                  | Ca_kabuli_denovo | 29781229                | A/G  | NA                 | NA                            | NA                 |
| Kabuli_wild_29781274 | NA                                  | Ca_kabuli_denovo | 29781274                | T/G  | NA                 | NA                            | NA                 |
| Kabuli_wild_29788576 | NA                                  | Ca_kabuli_denovo | 29788576                | G/T  | NA                 | NA                            | NA                 |
| Kabuli_wild_29789764 | NA                                  | Ca_kabuli_denovo | 29789764                | A/T  | NA                 | NA                            | NA                 |
| Kabuli_wild_29796845 | NA                                  | Ca_kabuli_denovo | 29796845                | G/A  | NA                 | NA                            | NA                 |
| Kabuli_wild_29797574 | NA                                  | Ca_kabuli_denovo | 29797574                | T/G  | NA                 | NA                            | NA                 |
| Kabuli_wild_29801851 | NA                                  | Ca_kabuli_denovo | 29801851                | C/G  | NA                 | NA                            | NA                 |
| Kabuli_wild_29807074 | NA                                  | Ca_kabuli_denovo | 29807074                | T/C  | NA                 | NA                            | NA                 |
| Kabuli_wild_29807083 | NA                                  | Ca_kabuli_denovo | 29807083                | G/T  | NA                 | NA                            | NA                 |
| Kabuli_wild_29814200 | NA                                  | Ca_kabuli_denovo | 29814200                | A/G  | NA                 | NA                            | NA                 |
| Kabuli_wild_29816251 | NA                                  | Ca_kabuli_denovo | 29816251                | A/C  | NA                 | NA                            | NA                 |
| Kabuli_wild_29819045 | NA                                  | Ca_kabuli_denovo | 29819045                | G/A  | NA                 | NA                            | NA                 |
| Kabuli_wild_29819124 | NA                                  | Ca_kabuli_denovo | 29819124                | G/A  | NA                 | NA                            | NA                 |
| Kabuli_wild_29824219 | NA                                  | Ca_kabuli_denovo | 29824219                | C/G  | NA                 | NA                            | NA                 |
| Kabuli_wild_29824314 | NA                                  | Ca_kabuli_denovo | 29824314                | A/C  | NA                 | NA                            | NA                 |
| Kabuli_wild_29824315 | NA                                  | Ca_kabuli_denovo | 29824315                | G/T  | NA                 | NA                            | NA                 |
| Kabuli_wild_29825680 | NA                                  | Ca_kabuli_denovo | 29825680                | G/A  | NA                 | NA                            | NA                 |
| Kabuli_wild_29825688 | NA                                  | Ca_kabuli_denovo | 29825688                | C/G  | NA                 | NA                            | NA                 |
| Kabuli_wild_29830669 | NA                                  | Ca_kabuli_denovo | 29830669                | G/A  | NA                 | NA                            | NA                 |
| Kabuli_wild_29830691 | NA                                  | Ca_kabuli_denovo | 29830691                | T/C  | NA                 | NA                            | NA                 |
| Kabuli_wild_29831726 | NA                                  | Ca_kabuli_denovo | 29831726                | T/C  | NA                 | NA                            | NA                 |
| Kabuli_wild_29831730 | NA                                  | Ca_kabuli_denovo | 29831730                | A/G  | NA                 | NA                            | NA                 |
| Kabuli_wild_29838373 | NA                                  | Ca_kabuli_denovo | 29838373                | C/G  | NA                 | NA                            | NA                 |
| Kabuli_wild_29838421 | NA                                  | Ca_kabuli_denovo | 29838421                | C/G  | NA                 | NA                            | NA                 |
| Kabuli_wild_29854161 | NA                                  | Ca_kabuli_denovo | 29854161                | G/T  | NA                 | NA                            | NA                 |
| Kabuli_wild_29854758 | NA                                  | Ca_kabuli_denovo | 29854758                | A/C  | NA                 | NA                            | NA                 |
| Kabuli_wild_29855086 | NA                                  | Ca_kabuli_denovo | 29855086                | C/A  | NA                 | NA                            | NA                 |
| Kabuli_wild_29855127 | NA                                  | Ca_kabuli_denovo | 29855127                | C/T  | NA                 | NA                            | NA                 |
| Kabuli_wild_29857723 | NA                                  | Ca_kabuli_denovo | 29857723                | C/G  | NA                 | NA                            | NA                 |
| Kabuli_wild_29864665 | NA                                  | Ca_kabuli_denovo | 29864665                | C/G  | NA                 | NA                            | NA                 |
| Kabuli_wild_29871098 | NA                                  | Ca_kabuli_denovo | 29871098                | G/A  | NA                 | NA                            | NA                 |
| Kabuli_wild_29873945 | NA                                  | Ca_kabuli_denovo | 29873945                | A/C  | NA                 | NA                            | NA                 |
| Kabuli_wild_29879945 | NA                                  | Ca_kabuli_denovo | 29879945                | G/T  | NA                 | NA                            | NA                 |
| Kabuli_wild_29883654 | NA                                  | Ca_kabuli_denovo | 29883654                | A/G  | NA                 | NA                            | NA                 |
| Kabuli_wild_29883776 | NA                                  | Ca_kabuli_denovo | 29883776                | A/G  | NA                 | NA                            | NA                 |
| Kabuli_wild_29883791 | NA                                  | Ca_kabuli_denovo | 29883791                | G/A  | NA                 | NA                            | NA                 |
| Kabuli_wild_29899303 | NA                                  | Ca_kabuli_denovo | 29899303                | C/T  | NA                 | NA                            | NA                 |
| Kabuli_wild_29903443 | NA                                  | Ca_kabuli_denovo | 29903443                | C/A  | NA                 | NA                            | NA                 |
| Kabuli_wild_29907001 | NA                                  | Ca_kabuli_denovo | 29907001                | C/T  | NA                 | NA                            | NA                 |
| Kabuli_wild_29907033 | NA                                  | Ca_kabuli_denovo | 29907033                | T/C  | NA                 | NA                            | NA                 |
| Kabuli_wild_29910903 | NA                                  | Ca_kabuli_denovo | 29910903                | A/T  | NA                 | NA                            | NA                 |
| Kabuli_wild_29913595 | NA                                  | Ca_kabuli_denovo | 29913595                | A/G  | NA                 | NA                            | NA                 |
| Kabuli_wild_29922225 | NA                                  | Ca_kabuli_denovo | 29922225                | T/C  | NA                 | NA                            | NA                 |

| SNP IDs                     | NCBI dbSNP accession IDs (NCBI_SS#) | Chromosomes             | Physical positions (bp) | SNPs | Gene accession IDs | Sequence components of genome | Putative functions |
|-----------------------------|-------------------------------------|-------------------------|-------------------------|------|--------------------|-------------------------------|--------------------|
| <i>Kabuli_wild_29923633</i> | NA                                  | <i>Ca_kabuli_denovo</i> | 29923633                | C/T  | NA                 | NA                            | NA                 |
| <i>Kabuli_wild_29925051</i> | NA                                  | <i>Ca_kabuli_denovo</i> | 29925051                | T/G  | NA                 | NA                            | NA                 |
| <i>Kabuli_wild_29925099</i> | NA                                  | <i>Ca_kabuli_denovo</i> | 29925099                | C/T  | NA                 | NA                            | NA                 |
| <i>Kabuli_wild_29929255</i> | NA                                  | <i>Ca_kabuli_denovo</i> | 29929255                | G/A  | NA                 | NA                            | NA                 |
| <i>Kabuli_wild_29931024</i> | NA                                  | <i>Ca_kabuli_denovo</i> | 29931024                | G/T  | NA                 | NA                            | NA                 |
| <i>Kabuli_wild_29931365</i> | NA                                  | <i>Ca_kabuli_denovo</i> | 29931365                | G/A  | NA                 | NA                            | NA                 |
| <i>Kabuli_wild_29931443</i> | NA                                  | <i>Ca_kabuli_denovo</i> | 29931443                | A/G  | NA                 | NA                            | NA                 |
| <i>Kabuli_wild_29949532</i> | NA                                  | <i>Ca_kabuli_denovo</i> | 29949532                | G/T  | NA                 | NA                            | NA                 |
| <i>Kabuli_wild_29950006</i> | NA                                  | <i>Ca_kabuli_denovo</i> | 29950006                | C/A  | NA                 | NA                            | NA                 |
| <i>Kabuli_wild_29950009</i> | NA                                  | <i>Ca_kabuli_denovo</i> | 29950009                | G/A  | NA                 | NA                            | NA                 |
| <i>Kabuli_wild_29950036</i> | NA                                  | <i>Ca_kabuli_denovo</i> | 29950036                | G/A  | NA                 | NA                            | NA                 |
| <i>Kabuli_wild_29950080</i> | NA                                  | <i>Ca_kabuli_denovo</i> | 29950080                | A/G  | NA                 | NA                            | NA                 |
| <i>Kabuli_wild_29950112</i> | NA                                  | <i>Ca_kabuli_denovo</i> | 29950112                | C/T  | NA                 | NA                            | NA                 |
| <i>Kabuli_wild_29950142</i> | NA                                  | <i>Ca_kabuli_denovo</i> | 29950142                | T/G  | NA                 | NA                            | NA                 |
| <i>Kabuli_wild_29952310</i> | NA                                  | <i>Ca_kabuli_denovo</i> | 29952310                | C/T  | NA                 | NA                            | NA                 |
| <i>Kabuli_wild_29956616</i> | NA                                  | <i>Ca_kabuli_denovo</i> | 29956616                | C/G  | NA                 | NA                            | NA                 |
| <i>Kabuli_wild_29958811</i> | NA                                  | <i>Ca_kabuli_denovo</i> | 29958811                | A/G  | NA                 | NA                            | NA                 |
| <i>Kabuli_wild_29967257</i> | NA                                  | <i>Ca_kabuli_denovo</i> | 29967257                | A/C  | NA                 | NA                            | NA                 |
| <i>Kabuli_wild_29967258</i> | NA                                  | <i>Ca_kabuli_denovo</i> | 29967258                | A/G  | NA                 | NA                            | NA                 |
| <i>Kabuli_wild_29972750</i> | NA                                  | <i>Ca_kabuli_denovo</i> | 29972750                | T/G  | NA                 | NA                            | NA                 |
| <i>Kabuli_wild_29972757</i> | NA                                  | <i>Ca_kabuli_denovo</i> | 29972757                | A/T  | NA                 | NA                            | NA                 |
| <i>Kabuli_wild_29975099</i> | NA                                  | <i>Ca_kabuli_denovo</i> | 29975099                | A/G  | NA                 | NA                            | NA                 |
| <i>Kabuli_wild_29983034</i> | NA                                  | <i>Ca_kabuli_denovo</i> | 29983034                | A/G  | NA                 | NA                            | NA                 |
| <i>Kabuli_wild_29986411</i> | NA                                  | <i>Ca_kabuli_denovo</i> | 29986411                | G/A  | NA                 | NA                            | NA                 |
| <i>Kabuli_wild_29988130</i> | NA                                  | <i>Ca_kabuli_denovo</i> | 29988130                | C/T  | NA                 | NA                            | NA                 |
| <i>Kabuli_wild_29989523</i> | NA                                  | <i>Ca_kabuli_denovo</i> | 29989523                | G/T  | NA                 | NA                            | NA                 |
| <i>Kabuli_wild_29993291</i> | NA                                  | <i>Ca_kabuli_denovo</i> | 29993291                | G/A  | NA                 | NA                            | NA                 |
| <i>Kabuli_wild_29998972</i> | NA                                  | <i>Ca_kabuli_denovo</i> | 29998972                | T/C  | NA                 | NA                            | NA                 |
| <i>Kabuli_wild_29998978</i> | NA                                  | <i>Ca_kabuli_denovo</i> | 29998978                | A/G  | NA                 | NA                            | NA                 |
| <i>Kabuli_wild_29999020</i> | NA                                  | <i>Ca_kabuli_denovo</i> | 29999020                | A/G  | NA                 | NA                            | NA                 |
| <i>Kabuli_wild_29999023</i> | NA                                  | <i>Ca_kabuli_denovo</i> | 29999023                | C/T  | NA                 | NA                            | NA                 |
| <i>Kabuli_wild_29999578</i> | NA                                  | <i>Ca_kabuli_denovo</i> | 29999578                | A/C  | NA                 | NA                            | NA                 |
| <i>Kabuli_wild_29999596</i> | NA                                  | <i>Ca_kabuli_denovo</i> | 29999596                | C/T  | NA                 | NA                            | NA                 |
| <i>Kabuli_wild_30001072</i> | NA                                  | <i>Ca_kabuli_denovo</i> | 30001072                | C/T  | NA                 | NA                            | NA                 |
| <i>Kabuli_wild_30001101</i> | NA                                  | <i>Ca_kabuli_denovo</i> | 30001101                | A/G  | NA                 | NA                            | NA                 |
| <i>Kabuli_wild_30002794</i> | NA                                  | <i>Ca_kabuli_denovo</i> | 30002794                | G/A  | NA                 | NA                            | NA                 |
| <i>Kabuli_wild_30002851</i> | NA                                  | <i>Ca_kabuli_denovo</i> | 30002851                | C/T  | NA                 | NA                            | NA                 |
| <i>Kabuli_wild_30007387</i> | NA                                  | <i>Ca_kabuli_denovo</i> | 30007387                | G/T  | NA                 | NA                            | NA                 |
| <i>Kabuli_wild_30017558</i> | NA                                  | <i>Ca_kabuli_denovo</i> | 30017558                | A/C  | NA                 | NA                            | NA                 |
| <i>Kabuli_wild_30017562</i> | NA                                  | <i>Ca_kabuli_denovo</i> | 30017562                | C/G  | NA                 | NA                            | NA                 |
| <i>Kabuli_wild_30017607</i> | NA                                  | <i>Ca_kabuli_denovo</i> | 30017607                | A/C  | NA                 | NA                            | NA                 |
| <i>Kabuli_wild_30017611</i> | NA                                  | <i>Ca_kabuli_denovo</i> | 30017611                | T/C  | NA                 | NA                            | NA                 |
| <i>Kabuli_wild_30018505</i> | NA                                  | <i>Ca_kabuli_denovo</i> | 30018505                | T/C  | NA                 | NA                            | NA                 |
| <i>Kabuli_wild_30019784</i> | NA                                  | <i>Ca_kabuli_denovo</i> | 30019784                | T/C  | NA                 | NA                            | NA                 |

| SNP IDs              | NCBI dbSNP accession IDs (NCBI_SS#) | Chromosomes      | Physical positions (bp) | SNPs | Gene accession IDs | Sequence components of genome | Putative functions |
|----------------------|-------------------------------------|------------------|-------------------------|------|--------------------|-------------------------------|--------------------|
| Kabuli_wild_30020538 | NA                                  | Ca_kabuli_denovo | 30020538                | G/T  | NA                 | NA                            | NA                 |
| Kabuli_wild_30021860 | NA                                  | Ca_kabuli_denovo | 30021860                | G/T  | NA                 | NA                            | NA                 |
| Kabuli_wild_30022837 | NA                                  | Ca_kabuli_denovo | 30022837                | C/G  | NA                 | NA                            | NA                 |
| Kabuli_wild_30022839 | NA                                  | Ca_kabuli_denovo | 30022839                | T/G  | NA                 | NA                            | NA                 |
| Kabuli_wild_30023954 | NA                                  | Ca_kabuli_denovo | 30023954                | T/G  | NA                 | NA                            | NA                 |
| Kabuli_wild_30025971 | NA                                  | Ca_kabuli_denovo | 30025971                | G/C  | NA                 | NA                            | NA                 |
| Kabuli_wild_30025978 | NA                                  | Ca_kabuli_denovo | 30025978                | G/A  | NA                 | NA                            | NA                 |
| Kabuli_wild_30027215 | NA                                  | Ca_kabuli_denovo | 30027215                | A/G  | NA                 | NA                            | NA                 |
| Kabuli_wild_30033783 | NA                                  | Ca_kabuli_denovo | 30033783                | G/T  | NA                 | NA                            | NA                 |
| Kabuli_wild_30049882 | NA                                  | Ca_kabuli_denovo | 30049882                | T/G  | NA                 | NA                            | NA                 |
| Kabuli_wild_30057114 | NA                                  | Ca_kabuli_denovo | 30057114                | A/C  | NA                 | NA                            | NA                 |
| Kabuli_wild_30057115 | NA                                  | Ca_kabuli_denovo | 30057115                | G/T  | NA                 | NA                            | NA                 |
| Kabuli_wild_30061049 | NA                                  | Ca_kabuli_denovo | 30061049                | A/C  | NA                 | NA                            | NA                 |
| Kabuli_wild_30061050 | NA                                  | Ca_kabuli_denovo | 30061050                | G/T  | NA                 | NA                            | NA                 |
| Kabuli_wild_30061051 | NA                                  | Ca_kabuli_denovo | 30061051                | A/G  | NA                 | NA                            | NA                 |
| Kabuli_wild_30064526 | NA                                  | Ca_kabuli_denovo | 30064526                | G/C  | NA                 | NA                            | NA                 |
| Kabuli_wild_30064530 | NA                                  | Ca_kabuli_denovo | 30064530                | G/C  | NA                 | NA                            | NA                 |
| Kabuli_wild_30074353 | NA                                  | Ca_kabuli_denovo | 30074353                | G/A  | NA                 | NA                            | NA                 |
| Kabuli_wild_30074382 | NA                                  | Ca_kabuli_denovo | 30074382                | A/T  | NA                 | NA                            | NA                 |
| Kabuli_wild_30076331 | NA                                  | Ca_kabuli_denovo | 30076331                | C/T  | NA                 | NA                            | NA                 |
| Kabuli_wild_30083156 | NA                                  | Ca_kabuli_denovo | 30083156                | A/G  | NA                 | NA                            | NA                 |
| Kabuli_wild_30084124 | NA                                  | Ca_kabuli_denovo | 30084124                | A/G  | NA                 | NA                            | NA                 |
| Kabuli_wild_30084151 | NA                                  | Ca_kabuli_denovo | 30084151                | C/T  | NA                 | NA                            | NA                 |
| Kabuli_wild_30087906 | NA                                  | Ca_kabuli_denovo | 30087906                | C/T  | NA                 | NA                            | NA                 |
| Kabuli_wild_30088698 | NA                                  | Ca_kabuli_denovo | 30088698                | A/C  | NA                 | NA                            | NA                 |
| Kabuli_wild_30093700 | NA                                  | Ca_kabuli_denovo | 30093700                | G/A  | NA                 | NA                            | NA                 |
| Kabuli_wild_30093746 | NA                                  | Ca_kabuli_denovo | 30093746                | T/C  | NA                 | NA                            | NA                 |
| Kabuli_wild_30093939 | NA                                  | Ca_kabuli_denovo | 30093939                | T/C  | NA                 | NA                            | NA                 |
| Kabuli_wild_30094508 | NA                                  | Ca_kabuli_denovo | 30094508                | A/T  | NA                 | NA                            | NA                 |
| Kabuli_wild_30094543 | NA                                  | Ca_kabuli_denovo | 30094543                | G/A  | NA                 | NA                            | NA                 |
| Kabuli_wild_30106030 | NA                                  | Ca_kabuli_denovo | 30106030                | G/T  | NA                 | NA                            | NA                 |
| Kabuli_wild_30107578 | NA                                  | Ca_kabuli_denovo | 30107578                | G/C  | NA                 | NA                            | NA                 |
| Kabuli_wild_30109286 | NA                                  | Ca_kabuli_denovo | 30109286                | G/T  | NA                 | NA                            | NA                 |
| Kabuli_wild_30109538 | NA                                  | Ca_kabuli_denovo | 30109538                | T/C  | NA                 | NA                            | NA                 |
| Kabuli_wild_30109580 | NA                                  | Ca_kabuli_denovo | 30109580                | C/G  | NA                 | NA                            | NA                 |
| Kabuli_wild_30110805 | NA                                  | Ca_kabuli_denovo | 30110805                | A/G  | NA                 | NA                            | NA                 |
| Kabuli_wild_30113562 | NA                                  | Ca_kabuli_denovo | 30113562                | A/C  | NA                 | NA                            | NA                 |
| Kabuli_wild_30114137 | NA                                  | Ca_kabuli_denovo | 30114137                | A/C  | NA                 | NA                            | NA                 |
| Kabuli_wild_30114138 | NA                                  | Ca_kabuli_denovo | 30114138                | G/T  | NA                 | NA                            | NA                 |
| Kabuli_wild_30114139 | NA                                  | Ca_kabuli_denovo | 30114139                | A/G  | NA                 | NA                            | NA                 |
| Kabuli_wild_30131536 | NA                                  | Ca_kabuli_denovo | 30131536                | T/C  | NA                 | NA                            | NA                 |
| Kabuli_wild_30131539 | NA                                  | Ca_kabuli_denovo | 30131539                | G/C  | NA                 | NA                            | NA                 |
| Kabuli_wild_30137686 | NA                                  | Ca_kabuli_denovo | 30137686                | G/A  | NA                 | NA                            | NA                 |
| Kabuli_wild_30137707 | NA                                  | Ca_kabuli_denovo | 30137707                | C/T  | NA                 | NA                            | NA                 |



| SNP IDs              | NCBI dbSNP accession IDs (NCBI_SS#) | Chromosomes      | Physical positions (bp) | SNPs | Gene accession IDs | Sequence components of genome | Putative functions |
|----------------------|-------------------------------------|------------------|-------------------------|------|--------------------|-------------------------------|--------------------|
| Kabuli_wild_30139276 | NA                                  | Ca_kabuli_denovo | 30139276                | C/G  | NA                 | NA                            | NA                 |
| Kabuli_wild_30139288 | NA                                  | Ca_kabuli_denovo | 30139288                | T/C  | NA                 | NA                            | NA                 |
| Kabuli_wild_30141374 | NA                                  | Ca_kabuli_denovo | 30141374                | T/A  | NA                 | NA                            | NA                 |
| Kabuli_wild_30145827 | NA                                  | Ca_kabuli_denovo | 30145827                | C/T  | NA                 | NA                            | NA                 |
| Kabuli_wild_30150025 | NA                                  | Ca_kabuli_denovo | 30150025                | C/A  | NA                 | NA                            | NA                 |
| Kabuli_wild_30151792 | NA                                  | Ca_kabuli_denovo | 30151792                | A/C  | NA                 | NA                            | NA                 |
| Kabuli_wild_30151809 | NA                                  | Ca_kabuli_denovo | 30151809                | G/C  | NA                 | NA                            | NA                 |
| Kabuli_wild_30156291 | NA                                  | Ca_kabuli_denovo | 30156291                | A/G  | NA                 | NA                            | NA                 |
| Kabuli_wild_30156309 | NA                                  | Ca_kabuli_denovo | 30156309                | C/G  | NA                 | NA                            | NA                 |
| Kabuli_wild_30163405 | NA                                  | Ca_kabuli_denovo | 30163405                | C/G  | NA                 | NA                            | NA                 |
| Kabuli_wild_30163417 | NA                                  | Ca_kabuli_denovo | 30163417                | G/C  | NA                 | NA                            | NA                 |
| Kabuli_wild_30165031 | NA                                  | Ca_kabuli_denovo | 30165031                | G/C  | NA                 | NA                            | NA                 |
| Kabuli_wild_30165364 | NA                                  | Ca_kabuli_denovo | 30165364                | G/A  | NA                 | NA                            | NA                 |
| Kabuli_wild_30177113 | NA                                  | Ca_kabuli_denovo | 30177113                | A/C  | NA                 | NA                            | NA                 |
| Kabuli_wild_30181019 | NA                                  | Ca_kabuli_denovo | 30181019                | A/G  | NA                 | NA                            | NA                 |
| Kabuli_wild_30181042 | NA                                  | Ca_kabuli_denovo | 30181042                | T/G  | NA                 | NA                            | NA                 |
| Kabuli_wild_30181813 | NA                                  | Ca_kabuli_denovo | 30181813                | G/T  | NA                 | NA                            | NA                 |
| Kabuli_wild_30186715 | NA                                  | Ca_kabuli_denovo | 30186715                | G/T  | NA                 | NA                            | NA                 |
| Kabuli_wild_30186993 | NA                                  | Ca_kabuli_denovo | 30186993                | A/G  | NA                 | NA                            | NA                 |
| Kabuli_wild_30187854 | NA                                  | Ca_kabuli_denovo | 30187854                | A/G  | NA                 | NA                            | NA                 |
| Kabuli_wild_30190219 | NA                                  | Ca_kabuli_denovo | 30190219                | G/C  | NA                 | NA                            | NA                 |
| Kabuli_wild_30190252 | NA                                  | Ca_kabuli_denovo | 30190252                | C/T  | NA                 | NA                            | NA                 |
| Kabuli_wild_30191331 | NA                                  | Ca_kabuli_denovo | 30191331                | A/G  | NA                 | NA                            | NA                 |
| Kabuli_wild_30191486 | NA                                  | Ca_kabuli_denovo | 30191486                | T/A  | NA                 | NA                            | NA                 |
| Kabuli_wild_30193901 | NA                                  | Ca_kabuli_denovo | 30193901                | C/G  | NA                 | NA                            | NA                 |
| Kabuli_wild_30196907 | NA                                  | Ca_kabuli_denovo | 30196907                | A/G  | NA                 | NA                            | NA                 |
| Kabuli_wild_30196952 | NA                                  | Ca_kabuli_denovo | 30196952                | T/C  | NA                 | NA                            | NA                 |
| Kabuli_wild_30201900 | NA                                  | Ca_kabuli_denovo | 30201900                | A/C  | NA                 | NA                            | NA                 |
| Kabuli_wild_30201928 | NA                                  | Ca_kabuli_denovo | 30201928                | C/T  | NA                 | NA                            | NA                 |
| Kabuli_wild_30203319 | NA                                  | Ca_kabuli_denovo | 30203319                | G/T  | NA                 | NA                            | NA                 |
| Kabuli_wild_30206105 | NA                                  | Ca_kabuli_denovo | 30206105                | T/G  | NA                 | NA                            | NA                 |
| Kabuli_wild_30207015 | NA                                  | Ca_kabuli_denovo | 30207015                | G/T  | NA                 | NA                            | NA                 |
| Kabuli_wild_30207257 | NA                                  | Ca_kabuli_denovo | 30207257                | C/G  | NA                 | NA                            | NA                 |
| Kabuli_wild_30209482 | NA                                  | Ca_kabuli_denovo | 30209482                | C/T  | NA                 | NA                            | NA                 |
| Kabuli_wild_30215138 | NA                                  | Ca_kabuli_denovo | 30215138                | A/C  | NA                 | NA                            | NA                 |
| Kabuli_wild_30215146 | NA                                  | Ca_kabuli_denovo | 30215146                | C/G  | NA                 | NA                            | NA                 |
| Kabuli_wild_30215185 | NA                                  | Ca_kabuli_denovo | 30215185                | T/G  | NA                 | NA                            | NA                 |
| Kabuli_wild_30222768 | NA                                  | Ca_kabuli_denovo | 30222768                | T/C  | NA                 | NA                            | NA                 |
| Kabuli_wild_30227225 | NA                                  | Ca_kabuli_denovo | 30227225                | A/C  | NA                 | NA                            | NA                 |
| Kabuli_wild_30228126 | NA                                  | Ca_kabuli_denovo | 30228126                | A/T  | NA                 | NA                            | NA                 |
| Kabuli_wild_30230028 | NA                                  | Ca_kabuli_denovo | 30230028                | C/T  | NA                 | NA                            | NA                 |
| Kabuli_wild_30238384 | NA                                  | Ca_kabuli_denovo | 30238384                | C/T  | NA                 | NA                            | NA                 |
| Kabuli_wild_30238385 | NA                                  | Ca_kabuli_denovo | 30238385                | A/G  | NA                 | NA                            | NA                 |
| Kabuli_wild_30238427 | NA                                  | Ca_kabuli_denovo | 30238427                | C/G  | NA                 | NA                            | NA                 |

| SNP IDs              | NCBI dbSNP accession IDs (NCBI_SS#) | Chromosomes      | Physical positions (bp) | SNPs | Gene accession IDs | Sequence components of genome | Putative functions |
|----------------------|-------------------------------------|------------------|-------------------------|------|--------------------|-------------------------------|--------------------|
| Kabuli_wild_30239473 | NA                                  | Ca_kabuli_denovo | 30239473                | A/G  | NA                 | NA                            | NA                 |
| Kabuli_wild_30247098 | NA                                  | Ca_kabuli_denovo | 30247098                | A/C  | NA                 | NA                            | NA                 |
| Kabuli_wild_30247586 | NA                                  | Ca_kabuli_denovo | 30247586                | T/G  | NA                 | NA                            | NA                 |
| Kabuli_wild_30247658 | NA                                  | Ca_kabuli_denovo | 30247658                | A/G  | NA                 | NA                            | NA                 |
| Kabuli_wild_30248827 | NA                                  | Ca_kabuli_denovo | 30248827                | C/G  | NA                 | NA                            | NA                 |
| Kabuli_wild_30262068 | NA                                  | Ca_kabuli_denovo | 30262068                | A/C  | NA                 | NA                            | NA                 |
| Kabuli_wild_30263060 | NA                                  | Ca_kabuli_denovo | 30263060                | A/G  | NA                 | NA                            | NA                 |
| Kabuli_wild_30263079 | NA                                  | Ca_kabuli_denovo | 30263079                | T/C  | NA                 | NA                            | NA                 |
| Kabuli_wild_30278427 | NA                                  | Ca_kabuli_denovo | 30278427                | A/G  | NA                 | NA                            | NA                 |
| Kabuli_wild_30278484 | NA                                  | Ca_kabuli_denovo | 30278484                | C/G  | NA                 | NA                            | NA                 |
| Kabuli_wild_30279092 | NA                                  | Ca_kabuli_denovo | 30279092                | C/T  | NA                 | NA                            | NA                 |
| Kabuli_wild_30279095 | NA                                  | Ca_kabuli_denovo | 30279095                | A/G  | NA                 | NA                            | NA                 |
| Kabuli_wild_30280051 | NA                                  | Ca_kabuli_denovo | 30280051                | C/G  | NA                 | NA                            | NA                 |
| Kabuli_wild_30284589 | NA                                  | Ca_kabuli_denovo | 30284589                | T/A  | NA                 | NA                            | NA                 |
| Kabuli_wild_30284596 | NA                                  | Ca_kabuli_denovo | 30284596                | A/C  | NA                 | NA                            | NA                 |
| Kabuli_wild_30290523 | NA                                  | Ca_kabuli_denovo | 30290523                | A/G  | NA                 | NA                            | NA                 |
| Kabuli_wild_30294257 | NA                                  | Ca_kabuli_denovo | 30294257                | A/G  | NA                 | NA                            | NA                 |
| Kabuli_wild_30294267 | NA                                  | Ca_kabuli_denovo | 30294267                | G/A  | NA                 | NA                            | NA                 |
| Kabuli_wild_30296471 | NA                                  | Ca_kabuli_denovo | 30296471                | A/G  | NA                 | NA                            | NA                 |
| Kabuli_wild_30296497 | NA                                  | Ca_kabuli_denovo | 30296497                | T/C  | NA                 | NA                            | NA                 |
| Kabuli_wild_30297024 | NA                                  | Ca_kabuli_denovo | 30297024                | C/T  | NA                 | NA                            | NA                 |
| Kabuli_wild_30297031 | NA                                  | Ca_kabuli_denovo | 30297031                | C/G  | NA                 | NA                            | NA                 |
| Kabuli_wild_30304407 | NA                                  | Ca_kabuli_denovo | 30304407                | G/A  | NA                 | NA                            | NA                 |
| Kabuli_wild_30305281 | NA                                  | Ca_kabuli_denovo | 30305281                | C/T  | NA                 | NA                            | NA                 |
| Kabuli_wild_30305283 | NA                                  | Ca_kabuli_denovo | 30305283                | A/G  | NA                 | NA                            | NA                 |
| Kabuli_wild_30309017 | NA                                  | Ca_kabuli_denovo | 30309017                | C/G  | NA                 | NA                            | NA                 |
| Kabuli_wild_30320729 | NA                                  | Ca_kabuli_denovo | 30320729                | A/C  | NA                 | NA                            | NA                 |
| Kabuli_wild_30320730 | NA                                  | Ca_kabuli_denovo | 30320730                | A/G  | NA                 | NA                            | NA                 |
| Kabuli_wild_30320731 | NA                                  | Ca_kabuli_denovo | 30320731                | A/G  | NA                 | NA                            | NA                 |
| Kabuli_wild_30321278 | NA                                  | Ca_kabuli_denovo | 30321278                | A/G  | NA                 | NA                            | NA                 |
| Kabuli_wild_30321288 | NA                                  | Ca_kabuli_denovo | 30321288                | C/G  | NA                 | NA                            | NA                 |
| Kabuli_wild_30324979 | NA                                  | Ca_kabuli_denovo | 30324979                | G/A  | NA                 | NA                            | NA                 |
| Kabuli_wild_30332453 | NA                                  | Ca_kabuli_denovo | 30332453                | C/G  | NA                 | NA                            | NA                 |
| Kabuli_wild_30336115 | NA                                  | Ca_kabuli_denovo | 30336115                | C/G  | NA                 | NA                            | NA                 |
| Kabuli_wild_30336127 | NA                                  | Ca_kabuli_denovo | 30336127                | C/T  | NA                 | NA                            | NA                 |
| Kabuli_wild_30336902 | NA                                  | Ca_kabuli_denovo | 30336902                | C/G  | NA                 | NA                            | NA                 |
| Kabuli_wild_30348472 | NA                                  | Ca_kabuli_denovo | 30348472                | G/T  | NA                 | NA                            | NA                 |
| Kabuli_wild_30349905 | NA                                  | Ca_kabuli_denovo | 30349905                | A/G  | NA                 | NA                            | NA                 |
| Kabuli_wild_30350677 | NA                                  | Ca_kabuli_denovo | 30350677                | A/G  | NA                 | NA                            | NA                 |
| Kabuli_wild_30353023 | NA                                  | Ca_kabuli_denovo | 30353023                | G/C  | NA                 | NA                            | NA                 |
| Kabuli_wild_30356947 | NA                                  | Ca_kabuli_denovo | 30356947                | C/T  | NA                 | NA                            | NA                 |
| Kabuli_wild_30358471 | NA                                  | Ca_kabuli_denovo | 30358471                | C/T  | NA                 | NA                            | NA                 |
| Kabuli_wild_30358474 | NA                                  | Ca_kabuli_denovo | 30358474                | A/G  | NA                 | NA                            | NA                 |
| Kabuli_wild_30358488 | NA                                  | Ca_kabuli_denovo | 30358488                | A/G  | NA                 | NA                            | NA                 |

| SNP IDs              | NCBI dbSNP accession IDs (NCBI_SS#) | Chromosomes      | Physical positions (bp) | SNPs | Gene accession IDs | Sequence components of genome | Putative functions |
|----------------------|-------------------------------------|------------------|-------------------------|------|--------------------|-------------------------------|--------------------|
| Kabuli_wild_30358509 | NA                                  | Ca_kabuli_denovo | 30358509                | A/G  | NA                 | NA                            | NA                 |
| Kabuli_wild_30364726 | NA                                  | Ca_kabuli_denovo | 30364726                | C/T  | NA                 | NA                            | NA                 |
| Kabuli_wild_30375067 | NA                                  | Ca_kabuli_denovo | 30375067                | G/T  | NA                 | NA                            | NA                 |
| Kabuli_wild_30378308 | NA                                  | Ca_kabuli_denovo | 30378308                | G/T  | NA                 | NA                            | NA                 |
| Kabuli_wild_30378990 | NA                                  | Ca_kabuli_denovo | 30378990                | C/T  | NA                 | NA                            | NA                 |
| Kabuli_wild_30385586 | NA                                  | Ca_kabuli_denovo | 30385586                | C/T  | NA                 | NA                            | NA                 |
| Kabuli_wild_30385601 | NA                                  | Ca_kabuli_denovo | 30385601                | C/T  | NA                 | NA                            | NA                 |
| Kabuli_wild_30387568 | NA                                  | Ca_kabuli_denovo | 30387568                | T/C  | NA                 | NA                            | NA                 |
| Kabuli_wild_30399930 | NA                                  | Ca_kabuli_denovo | 30399930                | A/C  | NA                 | NA                            | NA                 |
| Kabuli_wild_30402637 | NA                                  | Ca_kabuli_denovo | 30402637                | G/C  | NA                 | NA                            | NA                 |
| Kabuli_wild_30402644 | NA                                  | Ca_kabuli_denovo | 30402644                | T/G  | NA                 | NA                            | NA                 |
| Kabuli_wild_30402651 | NA                                  | Ca_kabuli_denovo | 30402651                | C/A  | NA                 | NA                            | NA                 |
| Kabuli_wild_30407139 | NA                                  | Ca_kabuli_denovo | 30407139                | C/T  | NA                 | NA                            | NA                 |
| Kabuli_wild_30413291 | NA                                  | Ca_kabuli_denovo | 30413291                | T/C  | NA                 | NA                            | NA                 |
| Kabuli_wild_30413329 | NA                                  | Ca_kabuli_denovo | 30413329                | C/T  | NA                 | NA                            | NA                 |
| Kabuli_wild_30420773 | NA                                  | Ca_kabuli_denovo | 30420773                | T/G  | NA                 | NA                            | NA                 |
| Kabuli_wild_30420845 | NA                                  | Ca_kabuli_denovo | 30420845                | T/G  | NA                 | NA                            | NA                 |
| Kabuli_wild_30423176 | NA                                  | Ca_kabuli_denovo | 30423176                | A/T  | NA                 | NA                            | NA                 |
| Kabuli_wild_30423197 | NA                                  | Ca_kabuli_denovo | 30423197                | T/C  | NA                 | NA                            | NA                 |
| Kabuli_wild_30425483 | NA                                  | Ca_kabuli_denovo | 30425483                | C/G  | NA                 | NA                            | NA                 |
| Kabuli_wild_30425504 | NA                                  | Ca_kabuli_denovo | 30425504                | G/A  | NA                 | NA                            | NA                 |
| Kabuli_wild_30429450 | NA                                  | Ca_kabuli_denovo | 30429450                | G/A  | NA                 | NA                            | NA                 |
| Kabuli_wild_30444500 | NA                                  | Ca_kabuli_denovo | 30444500                | T/G  | NA                 | NA                            | NA                 |
| Kabuli_wild_30444507 | NA                                  | Ca_kabuli_denovo | 30444507                | T/C  | NA                 | NA                            | NA                 |
| Kabuli_wild_30444560 | NA                                  | Ca_kabuli_denovo | 30444560                | G/A  | NA                 | NA                            | NA                 |
| Kabuli_wild_30444660 | NA                                  | Ca_kabuli_denovo | 30444660                | C/T  | NA                 | NA                            | NA                 |
| Kabuli_wild_30453411 | NA                                  | Ca_kabuli_denovo | 30453411                | A/G  | NA                 | NA                            | NA                 |
| Kabuli_wild_30453469 | NA                                  | Ca_kabuli_denovo | 30453469                | T/C  | NA                 | NA                            | NA                 |
| Kabuli_wild_30464511 | NA                                  | Ca_kabuli_denovo | 30464511                | T/A  | NA                 | NA                            | NA                 |
| Kabuli_wild_30468673 | NA                                  | Ca_kabuli_denovo | 30468673                | G/C  | NA                 | NA                            | NA                 |
| Kabuli_wild_30468745 | NA                                  | Ca_kabuli_denovo | 30468745                | T/C  | NA                 | NA                            | NA                 |
| Kabuli_wild_30471534 | NA                                  | Ca_kabuli_denovo | 30471534                | G/A  | NA                 | NA                            | NA                 |
| Kabuli_wild_30475071 | NA                                  | Ca_kabuli_denovo | 30475071                | G/T  | NA                 | NA                            | NA                 |
| Kabuli_wild_30476114 | NA                                  | Ca_kabuli_denovo | 30476114                | G/T  | NA                 | NA                            | NA                 |
| Kabuli_wild_30481423 | NA                                  | Ca_kabuli_denovo | 30481423                | G/T  | NA                 | NA                            | NA                 |
| Kabuli_wild_30484603 | NA                                  | Ca_kabuli_denovo | 30484603                | C/G  | NA                 | NA                            | NA                 |
| Kabuli_wild_30489340 | NA                                  | Ca_kabuli_denovo | 30489340                | G/T  | NA                 | NA                            | NA                 |
| Kabuli_wild_30493642 | NA                                  | Ca_kabuli_denovo | 30493642                | A/G  | NA                 | NA                            | NA                 |
| Kabuli_wild_30496198 | NA                                  | Ca_kabuli_denovo | 30496198                | T/C  | NA                 | NA                            | NA                 |
| Kabuli_wild_30496201 | NA                                  | Ca_kabuli_denovo | 30496201                | G/C  | NA                 | NA                            | NA                 |
| Kabuli_wild_30499982 | NA                                  | Ca_kabuli_denovo | 30499982                | G/C  | NA                 | NA                            | NA                 |
| Kabuli_wild_30499988 | NA                                  | Ca_kabuli_denovo | 30499988                | C/T  | NA                 | NA                            | NA                 |
| Kabuli_wild_30501545 | NA                                  | Ca_kabuli_denovo | 30501545                | G/T  | NA                 | NA                            | NA                 |
| Kabuli_wild_30507139 | NA                                  | Ca_kabuli_denovo | 30507139                | T/C  | NA                 | NA                            | NA                 |

| SNP IDs              | NCBI dbSNP accession IDs (NCBI_SS#) | Chromosomes      | Physical positions (bp) | SNPs | Gene accession IDs | Sequence components of genome | Putative functions |
|----------------------|-------------------------------------|------------------|-------------------------|------|--------------------|-------------------------------|--------------------|
| Kabuli_wild_30510690 | NA                                  | Ca_kabuli_denovo | 30510690                | A/G  | NA                 | NA                            | NA                 |
| Kabuli_wild_30512155 | NA                                  | Ca_kabuli_denovo | 30512155                | G/T  | NA                 | NA                            | NA                 |
| Kabuli_wild_30528055 | NA                                  | Ca_kabuli_denovo | 30528055                | C/T  | NA                 | NA                            | NA                 |
| Kabuli_wild_30532802 | NA                                  | Ca_kabuli_denovo | 30532802                | A/G  | NA                 | NA                            | NA                 |
| Kabuli_wild_30548456 | NA                                  | Ca_kabuli_denovo | 30548456                | A/G  | NA                 | NA                            | NA                 |
| Kabuli_wild_30548468 | NA                                  | Ca_kabuli_denovo | 30548468                | G/C  | NA                 | NA                            | NA                 |
| Kabuli_wild_30550595 | NA                                  | Ca_kabuli_denovo | 30550595                | T/C  | NA                 | NA                            | NA                 |
| Kabuli_wild_30551850 | NA                                  | Ca_kabuli_denovo | 30551850                | T/C  | NA                 | NA                            | NA                 |
| Kabuli_wild_30551882 | NA                                  | Ca_kabuli_denovo | 30551882                | C/G  | NA                 | NA                            | NA                 |
| Kabuli_wild_30554126 | NA                                  | Ca_kabuli_denovo | 30554126                | C/T  | NA                 | NA                            | NA                 |
| Kabuli_wild_30554162 | NA                                  | Ca_kabuli_denovo | 30554162                | C/G  | NA                 | NA                            | NA                 |
| Kabuli_wild_30554164 | NA                                  | Ca_kabuli_denovo | 30554164                | C/T  | NA                 | NA                            | NA                 |
| Kabuli_wild_30564913 | NA                                  | Ca_kabuli_denovo | 30564913                | A/G  | NA                 | NA                            | NA                 |
| Kabuli_wild_30565002 | NA                                  | Ca_kabuli_denovo | 30565002                | C/G  | NA                 | NA                            | NA                 |
| Kabuli_wild_30572344 | NA                                  | Ca_kabuli_denovo | 30572344                | A/C  | NA                 | NA                            | NA                 |
| Kabuli_wild_30572487 | NA                                  | Ca_kabuli_denovo | 30572487                | A/G  | NA                 | NA                            | NA                 |
| Kabuli_wild_30576955 | NA                                  | Ca_kabuli_denovo | 30576955                | A/C  | NA                 | NA                            | NA                 |
| Kabuli_wild_30577185 | NA                                  | Ca_kabuli_denovo | 30577185                | T/C  | NA                 | NA                            | NA                 |
| Kabuli_wild_30586246 | NA                                  | Ca_kabuli_denovo | 30586246                | G/T  | NA                 | NA                            | NA                 |
| Kabuli_wild_30595616 | NA                                  | Ca_kabuli_denovo | 30595616                | T/C  | NA                 | NA                            | NA                 |
| Kabuli_wild_30597143 | NA                                  | Ca_kabuli_denovo | 30597143                | C/T  | NA                 | NA                            | NA                 |
| Kabuli_wild_30597402 | NA                                  | Ca_kabuli_denovo | 30597402                | A/C  | NA                 | NA                            | NA                 |
| Kabuli_wild_30597403 | NA                                  | Ca_kabuli_denovo | 30597403                | G/T  | NA                 | NA                            | NA                 |
| Kabuli_wild_30598377 | NA                                  | Ca_kabuli_denovo | 30598377                | A/G  | NA                 | NA                            | NA                 |
| Kabuli_wild_30598660 | NA                                  | Ca_kabuli_denovo | 30598660                | T/A  | NA                 | NA                            | NA                 |
| Kabuli_wild_30598675 | NA                                  | Ca_kabuli_denovo | 30598675                | T/C  | NA                 | NA                            | NA                 |
| Kabuli_wild_30601076 | NA                                  | Ca_kabuli_denovo | 30601076                | A/G  | NA                 | NA                            | NA                 |
| Kabuli_wild_30601105 | NA                                  | Ca_kabuli_denovo | 30601105                | C/T  | NA                 | NA                            | NA                 |
| Kabuli_wild_30602113 | NA                                  | Ca_kabuli_denovo | 30602113                | C/T  | NA                 | NA                            | NA                 |
| Kabuli_wild_30612308 | NA                                  | Ca_kabuli_denovo | 30612308                | G/C  | NA                 | NA                            | NA                 |
| Kabuli_wild_30612317 | NA                                  | Ca_kabuli_denovo | 30612317                | G/T  | NA                 | NA                            | NA                 |
| Kabuli_wild_30614491 | NA                                  | Ca_kabuli_denovo | 30614491                | A/C  | NA                 | NA                            | NA                 |
| Kabuli_wild_30617557 | NA                                  | Ca_kabuli_denovo | 30617557                | G/A  | NA                 | NA                            | NA                 |
| Kabuli_wild_30625251 | NA                                  | Ca_kabuli_denovo | 30625251                | G/A  | NA                 | NA                            | NA                 |
| Kabuli_wild_30627103 | NA                                  | Ca_kabuli_denovo | 30627103                | A/G  | NA                 | NA                            | NA                 |
| Kabuli_wild_30627125 | NA                                  | Ca_kabuli_denovo | 30627125                | C/T  | NA                 | NA                            | NA                 |
| Kabuli_wild_30632845 | NA                                  | Ca_kabuli_denovo | 30632845                | G/A  | NA                 | NA                            | NA                 |
| Kabuli_wild_30634047 | NA                                  | Ca_kabuli_denovo | 30634047                | G/T  | NA                 | NA                            | NA                 |
| Kabuli_wild_30637768 | NA                                  | Ca_kabuli_denovo | 30637768                | G/T  | NA                 | NA                            | NA                 |
| Kabuli_wild_30640013 | NA                                  | Ca_kabuli_denovo | 30640013                | G/T  | NA                 | NA                            | NA                 |
| Kabuli_wild_30640504 | NA                                  | Ca_kabuli_denovo | 30640504                | G/T  | NA                 | NA                            | NA                 |
| Kabuli_wild_30641700 | NA                                  | Ca_kabuli_denovo | 30641700                | C/T  | NA                 | NA                            | NA                 |
| Kabuli_wild_30641701 | NA                                  | Ca_kabuli_denovo | 30641701                | C/T  | NA                 | NA                            | NA                 |
| Kabuli_wild_30642016 | NA                                  | Ca_kabuli_denovo | 30642016                | T/G  | NA                 | NA                            | NA                 |

| SNP IDs                     | NCBI dbSNP accession IDs (NCBI_SS#) | Chromosomes             | Physical positions (bp) | SNPs | Gene accession IDs | Sequence components of genome | Putative functions |
|-----------------------------|-------------------------------------|-------------------------|-------------------------|------|--------------------|-------------------------------|--------------------|
| <i>Kabuli_wild_30647810</i> | NA                                  | <i>Ca_kabuli_denovo</i> | 30647810                | C/T  | NA                 | NA                            | NA                 |
| <i>Kabuli_wild_30650860</i> | NA                                  | <i>Ca_kabuli_denovo</i> | 30650860                | C/T  | NA                 | NA                            | NA                 |
| <i>Kabuli_wild_30650872</i> | NA                                  | <i>Ca_kabuli_denovo</i> | 30650872                | A/G  | NA                 | NA                            | NA                 |
| <i>Kabuli_wild_30654725</i> | NA                                  | <i>Ca_kabuli_denovo</i> | 30654725                | A/G  | NA                 | NA                            | NA                 |
| <i>Kabuli_wild_30654731</i> | NA                                  | <i>Ca_kabuli_denovo</i> | 30654731                | A/C  | NA                 | NA                            | NA                 |
| <i>Kabuli_wild_30656480</i> | NA                                  | <i>Ca_kabuli_denovo</i> | 30656480                | G/C  | NA                 | NA                            | NA                 |
| <i>Kabuli_wild_30656513</i> | NA                                  | <i>Ca_kabuli_denovo</i> | 30656513                | C/T  | NA                 | NA                            | NA                 |
| <i>Kabuli_wild_30656517</i> | NA                                  | <i>Ca_kabuli_denovo</i> | 30656517                | A/G  | NA                 | NA                            | NA                 |
| <i>Kabuli_wild_30666138</i> | NA                                  | <i>Ca_kabuli_denovo</i> | 30666138                | G/T  | NA                 | NA                            | NA                 |
| <i>Kabuli_wild_30668504</i> | NA                                  | <i>Ca_kabuli_denovo</i> | 30668504                | A/G  | NA                 | NA                            | NA                 |
| <i>Kabuli_wild_30668507</i> | NA                                  | <i>Ca_kabuli_denovo</i> | 30668507                | A/G  | NA                 | NA                            | NA                 |
| <i>Kabuli_wild_30674142</i> | NA                                  | <i>Ca_kabuli_denovo</i> | 30674142                | T/A  | NA                 | NA                            | NA                 |
| <i>Kabuli_wild_30674165</i> | NA                                  | <i>Ca_kabuli_denovo</i> | 30674165                | G/A  | NA                 | NA                            | NA                 |
| <i>Kabuli_wild_30675676</i> | NA                                  | <i>Ca_kabuli_denovo</i> | 30675676                | G/C  | NA                 | NA                            | NA                 |
| <i>Kabuli_wild_30675727</i> | NA                                  | <i>Ca_kabuli_denovo</i> | 30675727                | G/C  | NA                 | NA                            | NA                 |
| <i>Kabuli_wild_30679151</i> | NA                                  | <i>Ca_kabuli_denovo</i> | 30679151                | T/C  | NA                 | NA                            | NA                 |
| <i>Kabuli_wild_30679152</i> | NA                                  | <i>Ca_kabuli_denovo</i> | 30679152                | T/C  | NA                 | NA                            | NA                 |
| <i>Kabuli_wild_30684164</i> | NA                                  | <i>Ca_kabuli_denovo</i> | 30684164                | C/T  | NA                 | NA                            | NA                 |
| <i>Kabuli_wild_30687121</i> | NA                                  | <i>Ca_kabuli_denovo</i> | 30687121                | G/C  | NA                 | NA                            | NA                 |
| <i>Kabuli_wild_30688746</i> | NA                                  | <i>Ca_kabuli_denovo</i> | 30688746                | C/T  | NA                 | NA                            | NA                 |
| <i>Kabuli_wild_30691586</i> | NA                                  | <i>Ca_kabuli_denovo</i> | 30691586                | G/A  | NA                 | NA                            | NA                 |
| <i>Kabuli_wild_30691598</i> | NA                                  | <i>Ca_kabuli_denovo</i> | 30691598                | G/A  | NA                 | NA                            | NA                 |
| <i>Kabuli_wild_30712064</i> | NA                                  | <i>Ca_kabuli_denovo</i> | 30712064                | A/G  | NA                 | NA                            | NA                 |
| <i>Kabuli_wild_30722595</i> | NA                                  | <i>Ca_kabuli_denovo</i> | 30722595                | C/G  | NA                 | NA                            | NA                 |
| <i>Kabuli_wild_30722611</i> | NA                                  | <i>Ca_kabuli_denovo</i> | 30722611                | T/C  | NA                 | NA                            | NA                 |
| <i>Kabuli_wild_30724313</i> | NA                                  | <i>Ca_kabuli_denovo</i> | 30724313                | A/G  | NA                 | NA                            | NA                 |
| <i>Kabuli_wild_30724448</i> | NA                                  | <i>Ca_kabuli_denovo</i> | 30724448                | C/T  | NA                 | NA                            | NA                 |
| <i>Kabuli_wild_30727951</i> | NA                                  | <i>Ca_kabuli_denovo</i> | 30727951                | C/A  | NA                 | NA                            | NA                 |
| <i>Kabuli_wild_30736017</i> | NA                                  | <i>Ca_kabuli_denovo</i> | 30736017                | G/T  | NA                 | NA                            | NA                 |
| <i>Kabuli_wild_30746909</i> | NA                                  | <i>Ca_kabuli_denovo</i> | 30746909                | T/A  | NA                 | NA                            | NA                 |
| <i>Kabuli_wild_30749189</i> | NA                                  | <i>Ca_kabuli_denovo</i> | 30749189                | C/G  | NA                 | NA                            | NA                 |
| <i>Kabuli_wild_30750648</i> | NA                                  | <i>Ca_kabuli_denovo</i> | 30750648                | T/C  | NA                 | NA                            | NA                 |
| <i>Kabuli_wild_30750694</i> | NA                                  | <i>Ca_kabuli_denovo</i> | 30750694                | C/T  | NA                 | NA                            | NA                 |
| <i>Kabuli_wild_30755595</i> | NA                                  | <i>Ca_kabuli_denovo</i> | 30755595                | T/C  | NA                 | NA                            | NA                 |
| <i>Kabuli_wild_30755607</i> | NA                                  | <i>Ca_kabuli_denovo</i> | 30755607                | C/T  | NA                 | NA                            | NA                 |
| <i>Kabuli_wild_30761579</i> | NA                                  | <i>Ca_kabuli_denovo</i> | 30761579                | A/G  | NA                 | NA                            | NA                 |
| <i>Kabuli_wild_30763696</i> | NA                                  | <i>Ca_kabuli_denovo</i> | 30763696                | G/C  | NA                 | NA                            | NA                 |
| <i>Kabuli_wild_30774130</i> | NA                                  | <i>Ca_kabuli_denovo</i> | 30774130                | G/T  | NA                 | NA                            | NA                 |
| <i>Kabuli_wild_30774988</i> | NA                                  | <i>Ca_kabuli_denovo</i> | 30774988                | G/T  | NA                 | NA                            | NA                 |
| <i>Kabuli_wild_30783803</i> | NA                                  | <i>Ca_kabuli_denovo</i> | 30783803                | G/C  | NA                 | NA                            | NA                 |
| <i>Kabuli_wild_30784526</i> | NA                                  | <i>Ca_kabuli_denovo</i> | 30784526                | C/T  | NA                 | NA                            | NA                 |
| <i>Kabuli_wild_30785877</i> | NA                                  | <i>Ca_kabuli_denovo</i> | 30785877                | T/G  | NA                 | NA                            | NA                 |
| <i>Kabuli_wild_30785928</i> | NA                                  | <i>Ca_kabuli_denovo</i> | 30785928                | G/C  | NA                 | NA                            | NA                 |
| <i>Kabuli_wild_30790780</i> | NA                                  | <i>Ca_kabuli_denovo</i> | 30790780                | C/A  | NA                 | NA                            | NA                 |

| SNP IDs              | NCBI dbSNP accession IDs (NCBI_SS#) | Chromosomes      | Physical positions (bp) | SNPs | Gene accession IDs | Sequence components of genome | Putative functions |
|----------------------|-------------------------------------|------------------|-------------------------|------|--------------------|-------------------------------|--------------------|
| Kabuli_wild_30792943 | NA                                  | Ca_kabuli_denovo | 30792943                | G/T  | NA                 | NA                            | NA                 |
| Kabuli_wild_30792949 | NA                                  | Ca_kabuli_denovo | 30792949                | G/T  | NA                 | NA                            | NA                 |
| Kabuli_wild_30793685 | NA                                  | Ca_kabuli_denovo | 30793685                | A/G  | NA                 | NA                            | NA                 |
| Kabuli_wild_30793699 | NA                                  | Ca_kabuli_denovo | 30793699                | T/C  | NA                 | NA                            | NA                 |
| Kabuli_wild_30810532 | NA                                  | Ca_kabuli_denovo | 30810532                | A/G  | NA                 | NA                            | NA                 |
| Kabuli_wild_30810577 | NA                                  | Ca_kabuli_denovo | 30810577                | A/G  | NA                 | NA                            | NA                 |
| Kabuli_wild_30813496 | NA                                  | Ca_kabuli_denovo | 30813496                | A/C  | NA                 | NA                            | NA                 |
| Kabuli_wild_30814177 | NA                                  | Ca_kabuli_denovo | 30814177                | A/C  | NA                 | NA                            | NA                 |
| Kabuli_wild_30814184 | NA                                  | Ca_kabuli_denovo | 30814184                | G/A  | NA                 | NA                            | NA                 |
| Kabuli_wild_30818830 | NA                                  | Ca_kabuli_denovo | 30818830                | G/T  | NA                 | NA                            | NA                 |
| Kabuli_wild_30818968 | NA                                  | Ca_kabuli_denovo | 30818968                | A/C  | NA                 | NA                            | NA                 |
| Kabuli_wild_30818969 | NA                                  | Ca_kabuli_denovo | 30818969                | A/G  | NA                 | NA                            | NA                 |
| Kabuli_wild_30818970 | NA                                  | Ca_kabuli_denovo | 30818970                | A/G  | NA                 | NA                            | NA                 |
| Kabuli_wild_30818971 | NA                                  | Ca_kabuli_denovo | 30818971                | A/T  | NA                 | NA                            | NA                 |
| Kabuli_wild_30819063 | NA                                  | Ca_kabuli_denovo | 30819063                | A/C  | NA                 | NA                            | NA                 |
| Kabuli_wild_30825058 | NA                                  | Ca_kabuli_denovo | 30825058                | G/A  | NA                 | NA                            | NA                 |
| Kabuli_wild_30825074 | NA                                  | Ca_kabuli_denovo | 30825074                | T/C  | NA                 | NA                            | NA                 |
| Kabuli_wild_30825096 | NA                                  | Ca_kabuli_denovo | 30825096                | C/G  | NA                 | NA                            | NA                 |
| Kabuli_wild_30829914 | NA                                  | Ca_kabuli_denovo | 30829914                | T/C  | NA                 | NA                            | NA                 |
| Kabuli_wild_30831560 | NA                                  | Ca_kabuli_denovo | 30831560                | G/T  | NA                 | NA                            | NA                 |
| Kabuli_wild_30831625 | NA                                  | Ca_kabuli_denovo | 30831625                | C/A  | NA                 | NA                            | NA                 |
| Kabuli_wild_30836392 | NA                                  | Ca_kabuli_denovo | 30836392                | G/T  | NA                 | NA                            | NA                 |
| Kabuli_wild_30841716 | NA                                  | Ca_kabuli_denovo | 30841716                | G/T  | NA                 | NA                            | NA                 |
| Kabuli_wild_30844339 | NA                                  | Ca_kabuli_denovo | 30844339                | T/G  | NA                 | NA                            | NA                 |
| Kabuli_wild_30846722 | NA                                  | Ca_kabuli_denovo | 30846722                | T/C  | NA                 | NA                            | NA                 |
| Kabuli_wild_30848827 | NA                                  | Ca_kabuli_denovo | 30848827                | C/G  | NA                 | NA                            | NA                 |
| Kabuli_wild_30861691 | NA                                  | Ca_kabuli_denovo | 30861691                | A/C  | NA                 | NA                            | NA                 |
| Kabuli_wild_30864385 | NA                                  | Ca_kabuli_denovo | 30864385                | T/C  | NA                 | NA                            | NA                 |
| Kabuli_wild_30864453 | NA                                  | Ca_kabuli_denovo | 30864453                | C/T  | NA                 | NA                            | NA                 |
| Kabuli_wild_30869680 | NA                                  | Ca_kabuli_denovo | 30869680                | T/C  | NA                 | NA                            | NA                 |
| Kabuli_wild_30869681 | NA                                  | Ca_kabuli_denovo | 30869681                | A/T  | NA                 | NA                            | NA                 |
| Kabuli_wild_30871046 | NA                                  | Ca_kabuli_denovo | 30871046                | C/G  | NA                 | NA                            | NA                 |
| Kabuli_wild_30877100 | NA                                  | Ca_kabuli_denovo | 30877100                | C/G  | NA                 | NA                            | NA                 |
| Kabuli_wild_30877125 | NA                                  | Ca_kabuli_denovo | 30877125                | T/C  | NA                 | NA                            | NA                 |
| Kabuli_wild_30877925 | NA                                  | Ca_kabuli_denovo | 30877925                | C/T  | NA                 | NA                            | NA                 |
| Kabuli_wild_30877955 | NA                                  | Ca_kabuli_denovo | 30877955                | G/T  | NA                 | NA                            | NA                 |
| Kabuli_wild_30879348 | NA                                  | Ca_kabuli_denovo | 30879348                | C/T  | NA                 | NA                            | NA                 |
| Kabuli_wild_30882586 | NA                                  | Ca_kabuli_denovo | 30882586                | T/A  | NA                 | NA                            | NA                 |
| Kabuli_wild_30882587 | NA                                  | Ca_kabuli_denovo | 30882587                | T/C  | NA                 | NA                            | NA                 |
| Kabuli_wild_30883385 | NA                                  | Ca_kabuli_denovo | 30883385                | C/G  | NA                 | NA                            | NA                 |
| Kabuli_wild_30884506 | NA                                  | Ca_kabuli_denovo | 30884506                | C/G  | NA                 | NA                            | NA                 |
| Kabuli_wild_30884510 | NA                                  | Ca_kabuli_denovo | 30884510                | T/A  | NA                 | NA                            | NA                 |
| Kabuli_wild_30884527 | NA                                  | Ca_kabuli_denovo | 30884527                | G/A  | NA                 | NA                            | NA                 |
| Kabuli_wild_30887129 | NA                                  | Ca_kabuli_denovo | 30887129                | A/C  | NA                 | NA                            | NA                 |

| SNP IDs                     | NCBI dbSNP accession IDs (NCBI_SS#) | Chromosomes             | Physical positions (bp) | SNPs | Gene accession IDs | Sequence components of genome | Putative functions |
|-----------------------------|-------------------------------------|-------------------------|-------------------------|------|--------------------|-------------------------------|--------------------|
| <i>Kabuli_wild_30888101</i> | NA                                  | <i>Ca_kabuli_denovo</i> | 30888101                | T/A  | NA                 | NA                            | NA                 |
| <i>Kabuli_wild_30888992</i> | NA                                  | <i>Ca_kabuli_denovo</i> | 30888992                | G/C  | NA                 | NA                            | NA                 |
| <i>Kabuli_wild_30889015</i> | NA                                  | <i>Ca_kabuli_denovo</i> | 30889015                | C/T  | NA                 | NA                            | NA                 |
| <i>Kabuli_wild_30889040</i> | NA                                  | <i>Ca_kabuli_denovo</i> | 30889040                | A/G  | NA                 | NA                            | NA                 |
| <i>Kabuli_wild_30890329</i> | NA                                  | <i>Ca_kabuli_denovo</i> | 30890329                | G/C  | NA                 | NA                            | NA                 |
| <i>Kabuli_wild_30893927</i> | NA                                  | <i>Ca_kabuli_denovo</i> | 30893927                | T/G  | NA                 | NA                            | NA                 |
| <i>Kabuli_wild_30897258</i> | NA                                  | <i>Ca_kabuli_denovo</i> | 30897258                | G/C  | NA                 | NA                            | NA                 |
| <i>Kabuli_wild_30897295</i> | NA                                  | <i>Ca_kabuli_denovo</i> | 30897295                | T/G  | NA                 | NA                            | NA                 |
| <i>Kabuli_wild_30897594</i> | NA                                  | <i>Ca_kabuli_denovo</i> | 30897594                | A/C  | NA                 | NA                            | NA                 |
| <i>Kabuli_wild_30899844</i> | NA                                  | <i>Ca_kabuli_denovo</i> | 30899844                | C/T  | NA                 | NA                            | NA                 |
| <i>Kabuli_wild_30901905</i> | NA                                  | <i>Ca_kabuli_denovo</i> | 30901905                | T/C  | NA                 | NA                            | NA                 |
| <i>Kabuli_wild_30902056</i> | NA                                  | <i>Ca_kabuli_denovo</i> | 30902056                | G/C  | NA                 | NA                            | NA                 |
| <i>Kabuli_wild_30912113</i> | NA                                  | <i>Ca_kabuli_denovo</i> | 30912113                | C/G  | NA                 | NA                            | NA                 |
| <i>Kabuli_wild_30912148</i> | NA                                  | <i>Ca_kabuli_denovo</i> | 30912148                | A/G  | NA                 | NA                            | NA                 |
| <i>Kabuli_wild_30912864</i> | NA                                  | <i>Ca_kabuli_denovo</i> | 30912864                | C/G  | NA                 | NA                            | NA                 |
| <i>Kabuli_wild_30912867</i> | NA                                  | <i>Ca_kabuli_denovo</i> | 30912867                | G/A  | NA                 | NA                            | NA                 |
| <i>Kabuli_wild_30925180</i> | NA                                  | <i>Ca_kabuli_denovo</i> | 30925180                | C/T  | NA                 | NA                            | NA                 |
| <i>Kabuli_wild_30928040</i> | NA                                  | <i>Ca_kabuli_denovo</i> | 30928040                | C/T  | NA                 | NA                            | NA                 |
| <i>Kabuli_wild_30928080</i> | NA                                  | <i>Ca_kabuli_denovo</i> | 30928080                | A/G  | NA                 | NA                            | NA                 |
| <i>Kabuli_wild_30929088</i> | NA                                  | <i>Ca_kabuli_denovo</i> | 30929088                | G/C  | NA                 | NA                            | NA                 |
| <i>Kabuli_wild_30929092</i> | NA                                  | <i>Ca_kabuli_denovo</i> | 30929092                | C/T  | NA                 | NA                            | NA                 |
| <i>Kabuli_wild_30930065</i> | NA                                  | <i>Ca_kabuli_denovo</i> | 30930065                | A/G  | NA                 | NA                            | NA                 |
| <i>Kabuli_wild_30930095</i> | NA                                  | <i>Ca_kabuli_denovo</i> | 30930095                | T/C  | NA                 | NA                            | NA                 |
| <i>Kabuli_wild_30939280</i> | NA                                  | <i>Ca_kabuli_denovo</i> | 30939280                | C/G  | NA                 | NA                            | NA                 |
| <i>Kabuli_wild_30939450</i> | NA                                  | <i>Ca_kabuli_denovo</i> | 30939450                | A/C  | NA                 | NA                            | NA                 |
| <i>Kabuli_wild_30940304</i> | NA                                  | <i>Ca_kabuli_denovo</i> | 30940304                | A/G  | NA                 | NA                            | NA                 |
| <i>Kabuli_wild_30942091</i> | NA                                  | <i>Ca_kabuli_denovo</i> | 30942091                | T/C  | NA                 | NA                            | NA                 |
| <i>Kabuli_wild_30942097</i> | NA                                  | <i>Ca_kabuli_denovo</i> | 30942097                | C/G  | NA                 | NA                            | NA                 |
| <i>Kabuli_wild_30947366</i> | NA                                  | <i>Ca_kabuli_denovo</i> | 30947366                | T/C  | NA                 | NA                            | NA                 |
| <i>Kabuli_wild_30957893</i> | NA                                  | <i>Ca_kabuli_denovo</i> | 30957893                | C/G  | NA                 | NA                            | NA                 |
| <i>Kabuli_wild_30957923</i> | NA                                  | <i>Ca_kabuli_denovo</i> | 30957923                | A/C  | NA                 | NA                            | NA                 |
| <i>Kabuli_wild_30960800</i> | NA                                  | <i>Ca_kabuli_denovo</i> | 30960800                | A/G  | NA                 | NA                            | NA                 |
| <i>Kabuli_wild_30961856</i> | NA                                  | <i>Ca_kabuli_denovo</i> | 30961856                | T/C  | NA                 | NA                            | NA                 |
| <i>Kabuli_wild_30967807</i> | NA                                  | <i>Ca_kabuli_denovo</i> | 30967807                | A/G  | NA                 | NA                            | NA                 |
| <i>Kabuli_wild_30971890</i> | NA                                  | <i>Ca_kabuli_denovo</i> | 30971890                | G/T  | NA                 | NA                            | NA                 |
| <i>Kabuli_wild_30973961</i> | NA                                  | <i>Ca_kabuli_denovo</i> | 30973961                | G/T  | NA                 | NA                            | NA                 |
| <i>Kabuli_wild_30977627</i> | NA                                  | <i>Ca_kabuli_denovo</i> | 30977627                | T/C  | NA                 | NA                            | NA                 |
| <i>Kabuli_wild_30977639</i> | NA                                  | <i>Ca_kabuli_denovo</i> | 30977639                | G/A  | NA                 | NA                            | NA                 |
| <i>Kabuli_wild_30980910</i> | NA                                  | <i>Ca_kabuli_denovo</i> | 30980910                | G/T  | NA                 | NA                            | NA                 |
| <i>Kabuli_wild_30981864</i> | NA                                  | <i>Ca_kabuli_denovo</i> | 30981864                | C/T  | NA                 | NA                            | NA                 |
| <i>Kabuli_wild_30982082</i> | NA                                  | <i>Ca_kabuli_denovo</i> | 30982082                | T/C  | NA                 | NA                            | NA                 |
| <i>Kabuli_wild_30982107</i> | NA                                  | <i>Ca_kabuli_denovo</i> | 30982107                | G/A  | NA                 | NA                            | NA                 |
| <i>Kabuli_wild_30982115</i> | NA                                  | <i>Ca_kabuli_denovo</i> | 30982115                | T/C  | NA                 | NA                            | NA                 |
| <i>Kabuli_wild_30985157</i> | NA                                  | <i>Ca_kabuli_denovo</i> | 30985157                | A/G  | NA                 | NA                            | NA                 |

| SNP IDs              | NCBI dbSNP accession IDs (NCBI_SS#) | Chromosomes      | Physical positions (bp) | SNPs | Gene accession IDs | Sequence components of genome | Putative functions |
|----------------------|-------------------------------------|------------------|-------------------------|------|--------------------|-------------------------------|--------------------|
| Kabuli_wild_30985163 | NA                                  | Ca_kabuli_denovo | 30985163                | T/C  | NA                 | NA                            | NA                 |
| Kabuli_wild_30991801 | NA                                  | Ca_kabuli_denovo | 30991801                | C/G  | NA                 | NA                            | NA                 |
| Kabuli_wild_30993286 | NA                                  | Ca_kabuli_denovo | 30993286                | T/C  | NA                 | NA                            | NA                 |
| Kabuli_wild_30994976 | NA                                  | Ca_kabuli_denovo | 30994976                | G/C  | NA                 | NA                            | NA                 |
| Kabuli_wild_30995030 | NA                                  | Ca_kabuli_denovo | 30995030                | A/C  | NA                 | NA                            | NA                 |
| Kabuli_wild_30999128 | NA                                  | Ca_kabuli_denovo | 30999128                | G/A  | NA                 | NA                            | NA                 |
| Kabuli_wild_31000889 | NA                                  | Ca_kabuli_denovo | 31000889                | A/C  | NA                 | NA                            | NA                 |
| Kabuli_wild_31002164 | NA                                  | Ca_kabuli_denovo | 31002164                | A/G  | NA                 | NA                            | NA                 |
| Kabuli_wild_31003798 | NA                                  | Ca_kabuli_denovo | 31003798                | T/C  | NA                 | NA                            | NA                 |
| Kabuli_wild_31004482 | NA                                  | Ca_kabuli_denovo | 31004482                | A/G  | NA                 | NA                            | NA                 |
| Kabuli_wild_31004506 | NA                                  | Ca_kabuli_denovo | 31004506                | C/T  | NA                 | NA                            | NA                 |
| Kabuli_wild_31009634 | NA                                  | Ca_kabuli_denovo | 31009634                | C/T  | NA                 | NA                            | NA                 |
| Kabuli_wild_31013187 | NA                                  | Ca_kabuli_denovo | 31013187                | A/G  | NA                 | NA                            | NA                 |
| Kabuli_wild_31013226 | NA                                  | Ca_kabuli_denovo | 31013226                | C/A  | NA                 | NA                            | NA                 |
| Kabuli_wild_31016654 | NA                                  | Ca_kabuli_denovo | 31016654                | A/G  | NA                 | NA                            | NA                 |
| Kabuli_wild_31017552 | NA                                  | Ca_kabuli_denovo | 31017552                | A/G  | NA                 | NA                            | NA                 |
| Kabuli_wild_31020224 | NA                                  | Ca_kabuli_denovo | 31020224                | A/G  | NA                 | NA                            | NA                 |
| Kabuli_wild_31022035 | NA                                  | Ca_kabuli_denovo | 31022035                | A/G  | NA                 | NA                            | NA                 |
| Kabuli_wild_31022059 | NA                                  | Ca_kabuli_denovo | 31022059                | G/A  | NA                 | NA                            | NA                 |
| Kabuli_wild_31026709 | NA                                  | Ca_kabuli_denovo | 31026709                | A/G  | NA                 | NA                            | NA                 |
| Kabuli_wild_31028056 | NA                                  | Ca_kabuli_denovo | 31028056                | A/C  | NA                 | NA                            | NA                 |
| Kabuli_wild_31029476 | NA                                  | Ca_kabuli_denovo | 31029476                | C/A  | NA                 | NA                            | NA                 |
| Kabuli_wild_31029482 | NA                                  | Ca_kabuli_denovo | 31029482                | A/G  | NA                 | NA                            | NA                 |
| Kabuli_wild_31033008 | NA                                  | Ca_kabuli_denovo | 31033008                | G/T  | NA                 | NA                            | NA                 |
| Kabuli_wild_31034717 | NA                                  | Ca_kabuli_denovo | 31034717                | G/C  | NA                 | NA                            | NA                 |
| Kabuli_wild_31041110 | NA                                  | Ca_kabuli_denovo | 31041110                | C/T  | NA                 | NA                            | NA                 |
| Kabuli_wild_31041334 | NA                                  | Ca_kabuli_denovo | 31041334                | A/G  | NA                 | NA                            | NA                 |
| Kabuli_wild_31041335 | NA                                  | Ca_kabuli_denovo | 31041335                | A/G  | NA                 | NA                            | NA                 |
| Kabuli_wild_31041346 | NA                                  | Ca_kabuli_denovo | 31041346                | T/G  | NA                 | NA                            | NA                 |
| Kabuli_wild_31041356 | NA                                  | Ca_kabuli_denovo | 31041356                | C/T  | NA                 | NA                            | NA                 |
| Kabuli_wild_31042939 | NA                                  | Ca_kabuli_denovo | 31042939                | C/T  | NA                 | NA                            | NA                 |
| Kabuli_wild_31046159 | NA                                  | Ca_kabuli_denovo | 31046159                | T/C  | NA                 | NA                            | NA                 |
| Kabuli_wild_31061116 | NA                                  | Ca_kabuli_denovo | 31061116                | G/T  | NA                 | NA                            | NA                 |
| Kabuli_wild_31067349 | NA                                  | Ca_kabuli_denovo | 31067349                | A/G  | NA                 | NA                            | NA                 |
| Kabuli_wild_31076697 | NA                                  | Ca_kabuli_denovo | 31076697                | C/G  | NA                 | NA                            | NA                 |
| Kabuli_wild_31077298 | NA                                  | Ca_kabuli_denovo | 31077298                | C/T  | NA                 | NA                            | NA                 |
| Kabuli_wild_31080400 | NA                                  | Ca_kabuli_denovo | 31080400                | T/G  | NA                 | NA                            | NA                 |
| Kabuli_wild_31081370 | NA                                  | Ca_kabuli_denovo | 31081370                | A/G  | NA                 | NA                            | NA                 |
| Kabuli_wild_31081382 | NA                                  | Ca_kabuli_denovo | 31081382                | G/T  | NA                 | NA                            | NA                 |
| Kabuli_wild_31086292 | NA                                  | Ca_kabuli_denovo | 31086292                | A/T  | NA                 | NA                            | NA                 |
| Kabuli_wild_31091968 | NA                                  | Ca_kabuli_denovo | 31091968                | C/G  | NA                 | NA                            | NA                 |
| Kabuli_wild_31091972 | NA                                  | Ca_kabuli_denovo | 31091972                | C/G  | NA                 | NA                            | NA                 |
| Kabuli_wild_31101460 | NA                                  | Ca_kabuli_denovo | 31101460                | G/C  | NA                 | NA                            | NA                 |
| Kabuli_wild_31101472 | NA                                  | Ca_kabuli_denovo | 31101472                | G/A  | NA                 | NA                            | NA                 |



| SNP IDs              | NCBI dbSNP accession IDs (NCBI_SS#) | Chromosomes      | Physical positions (bp) | SNPs | Gene accession IDs | Sequence components of genome | Putative functions |
|----------------------|-------------------------------------|------------------|-------------------------|------|--------------------|-------------------------------|--------------------|
| Kabuli_wild_31103412 | NA                                  | Ca_kabuli_denovo | 31103412                | A/G  | NA                 | NA                            | NA                 |
| Kabuli_wild_31103415 | NA                                  | Ca_kabuli_denovo | 31103415                | A/C  | NA                 | NA                            | NA                 |
| Kabuli_wild_31105336 | NA                                  | Ca_kabuli_denovo | 31105336                | G/T  | NA                 | NA                            | NA                 |
| Kabuli_wild_31105531 | NA                                  | Ca_kabuli_denovo | 31105531                | A/C  | NA                 | NA                            | NA                 |
| Kabuli_wild_31116042 | NA                                  | Ca_kabuli_denovo | 31116042                | A/G  | NA                 | NA                            | NA                 |
| Kabuli_wild_31120455 | NA                                  | Ca_kabuli_denovo | 31120455                | A/T  | NA                 | NA                            | NA                 |
| Kabuli_wild_31120477 | NA                                  | Ca_kabuli_denovo | 31120477                | A/G  | NA                 | NA                            | NA                 |
| Kabuli_wild_31123152 | NA                                  | Ca_kabuli_denovo | 31123152                | T/C  | NA                 | NA                            | NA                 |
| Kabuli_wild_31123866 | NA                                  | Ca_kabuli_denovo | 31123866                | G/T  | NA                 | NA                            | NA                 |
| Kabuli_wild_31129582 | NA                                  | Ca_kabuli_denovo | 31129582                | G/T  | NA                 | NA                            | NA                 |
| Kabuli_wild_31135097 | NA                                  | Ca_kabuli_denovo | 31135097                | C/T  | NA                 | NA                            | NA                 |
| Kabuli_wild_31142856 | NA                                  | Ca_kabuli_denovo | 31142856                | G/A  | NA                 | NA                            | NA                 |
| Kabuli_wild_31142860 | NA                                  | Ca_kabuli_denovo | 31142860                | A/G  | NA                 | NA                            | NA                 |
| Kabuli_wild_31144809 | NA                                  | Ca_kabuli_denovo | 31144809                | G/C  | NA                 | NA                            | NA                 |
| Kabuli_wild_31145390 | NA                                  | Ca_kabuli_denovo | 31145390                | T/C  | NA                 | NA                            | NA                 |
| Kabuli_wild_31145400 | NA                                  | Ca_kabuli_denovo | 31145400                | G/A  | NA                 | NA                            | NA                 |
| Kabuli_wild_31147825 | NA                                  | Ca_kabuli_denovo | 31147825                | G/T  | NA                 | NA                            | NA                 |
| Kabuli_wild_31148003 | NA                                  | Ca_kabuli_denovo | 31148003                | T/G  | NA                 | NA                            | NA                 |
| Kabuli_wild_31150647 | NA                                  | Ca_kabuli_denovo | 31150647                | G/T  | NA                 | NA                            | NA                 |
| Kabuli_wild_31150705 | NA                                  | Ca_kabuli_denovo | 31150705                | G/A  | NA                 | NA                            | NA                 |
| Kabuli_wild_31150955 | NA                                  | Ca_kabuli_denovo | 31150955                | G/A  | NA                 | NA                            | NA                 |
| Kabuli_wild_31150967 | NA                                  | Ca_kabuli_denovo | 31150967                | A/G  | NA                 | NA                            | NA                 |
| Kabuli_wild_31156309 | NA                                  | Ca_kabuli_denovo | 31156309                | G/C  | NA                 | NA                            | NA                 |
| Kabuli_wild_31161542 | NA                                  | Ca_kabuli_denovo | 31161542                | G/T  | NA                 | NA                            | NA                 |
| Kabuli_wild_31163217 | NA                                  | Ca_kabuli_denovo | 31163217                | C/T  | NA                 | NA                            | NA                 |
| Kabuli_wild_31165834 | NA                                  | Ca_kabuli_denovo | 31165834                | T/A  | NA                 | NA                            | NA                 |
| Kabuli_wild_31165864 | NA                                  | Ca_kabuli_denovo | 31165864                | A/G  | NA                 | NA                            | NA                 |
| Kabuli_wild_31169763 | NA                                  | Ca_kabuli_denovo | 31169763                | G/T  | NA                 | NA                            | NA                 |
| Kabuli_wild_31169828 | NA                                  | Ca_kabuli_denovo | 31169828                | A/G  | NA                 | NA                            | NA                 |
| Kabuli_wild_31176697 | NA                                  | Ca_kabuli_denovo | 31176697                | C/T  | NA                 | NA                            | NA                 |
| Kabuli_wild_31177050 | NA                                  | Ca_kabuli_denovo | 31177050                | C/G  | NA                 | NA                            | NA                 |
| Kabuli_wild_31183891 | NA                                  | Ca_kabuli_denovo | 31183891                | G/A  | NA                 | NA                            | NA                 |
| Kabuli_wild_31185896 | NA                                  | Ca_kabuli_denovo | 31185896                | C/A  | NA                 | NA                            | NA                 |
| Kabuli_wild_31185996 | NA                                  | Ca_kabuli_denovo | 31185996                | T/A  | NA                 | NA                            | NA                 |
| Kabuli_wild_31193207 | NA                                  | Ca_kabuli_denovo | 31193207                | T/G  | NA                 | NA                            | NA                 |
| Kabuli_wild_31195912 | NA                                  | Ca_kabuli_denovo | 31195912                | T/C  | NA                 | NA                            | NA                 |
| Kabuli_wild_31198000 | NA                                  | Ca_kabuli_denovo | 31198000                | A/G  | NA                 | NA                            | NA                 |
| Kabuli_wild_31207834 | NA                                  | Ca_kabuli_denovo | 31207834                | G/T  | NA                 | NA                            | NA                 |
| Kabuli_wild_31209935 | NA                                  | Ca_kabuli_denovo | 31209935                | G/A  | NA                 | NA                            | NA                 |
| Kabuli_wild_31212076 | NA                                  | Ca_kabuli_denovo | 31212076                | C/A  | NA                 | NA                            | NA                 |
| Kabuli_wild_31212079 | NA                                  | Ca_kabuli_denovo | 31212079                | G/A  | NA                 | NA                            | NA                 |
| Kabuli_wild_31212087 | NA                                  | Ca_kabuli_denovo | 31212087                | T/C  | NA                 | NA                            | NA                 |
| Kabuli_wild_31213460 | NA                                  | Ca_kabuli_denovo | 31213460                | A/G  | NA                 | NA                            | NA                 |
| Kabuli_wild_31218423 | NA                                  | Ca_kabuli_denovo | 31218423                | T/G  | NA                 | NA                            | NA                 |

| SNP IDs              | NCBI dbSNP accession IDs (NCBI_SS#) | Chromosomes      | Physical positions (bp) | SNPs | Gene accession IDs | Sequence components of genome | Putative functions |
|----------------------|-------------------------------------|------------------|-------------------------|------|--------------------|-------------------------------|--------------------|
| Kabuli_wild_31220965 | NA                                  | Ca_kabuli_denovo | 31220965                | T/C  | NA                 | NA                            | NA                 |
| Kabuli_wild_31221737 | NA                                  | Ca_kabuli_denovo | 31221737                | G/T  | NA                 | NA                            | NA                 |
| Kabuli_wild_31236172 | NA                                  | Ca_kabuli_denovo | 31236172                | A/G  | NA                 | NA                            | NA                 |
| Kabuli_wild_31240603 | NA                                  | Ca_kabuli_denovo | 31240603                | T/G  | NA                 | NA                            | NA                 |
| Kabuli_wild_31241192 | NA                                  | Ca_kabuli_denovo | 31241192                | A/G  | NA                 | NA                            | NA                 |
| Kabuli_wild_31249051 | NA                                  | Ca_kabuli_denovo | 31249051                | A/C  | NA                 | NA                            | NA                 |
| Kabuli_wild_31251175 | NA                                  | Ca_kabuli_denovo | 31251175                | A/G  | NA                 | NA                            | NA                 |
| Kabuli_wild_31256346 | NA                                  | Ca_kabuli_denovo | 31256346                | G/T  | NA                 | NA                            | NA                 |
| Kabuli_wild_31259157 | NA                                  | Ca_kabuli_denovo | 31259157                | C/G  | NA                 | NA                            | NA                 |
| Kabuli_wild_31260254 | NA                                  | Ca_kabuli_denovo | 31260254                | C/T  | NA                 | NA                            | NA                 |
| Kabuli_wild_31262689 | NA                                  | Ca_kabuli_denovo | 31262689                | C/T  | NA                 | NA                            | NA                 |
| Kabuli_wild_31262712 | NA                                  | Ca_kabuli_denovo | 31262712                | C/G  | NA                 | NA                            | NA                 |
| Kabuli_wild_31262750 | NA                                  | Ca_kabuli_denovo | 31262750                | C/A  | NA                 | NA                            | NA                 |
| Kabuli_wild_31262756 | NA                                  | Ca_kabuli_denovo | 31262756                | C/T  | NA                 | NA                            | NA                 |
| Kabuli_wild_31263321 | NA                                  | Ca_kabuli_denovo | 31263321                | C/A  | NA                 | NA                            | NA                 |
| Kabuli_wild_31263331 | NA                                  | Ca_kabuli_denovo | 31263331                | G/C  | NA                 | NA                            | NA                 |
| Kabuli_wild_31264018 | NA                                  | Ca_kabuli_denovo | 31264018                | A/G  | NA                 | NA                            | NA                 |
| Kabuli_wild_31271393 | NA                                  | Ca_kabuli_denovo | 31271393                | G/C  | NA                 | NA                            | NA                 |
| Kabuli_wild_31274749 | NA                                  | Ca_kabuli_denovo | 31274749                | T/G  | NA                 | NA                            | NA                 |
| Kabuli_wild_31275163 | NA                                  | Ca_kabuli_denovo | 31275163                | C/T  | NA                 | NA                            | NA                 |
| Kabuli_wild_31285658 | NA                                  | Ca_kabuli_denovo | 31285658                | A/T  | NA                 | NA                            | NA                 |
| Kabuli_wild_31285688 | NA                                  | Ca_kabuli_denovo | 31285688                | C/T  | NA                 | NA                            | NA                 |
| Kabuli_wild_31287658 | NA                                  | Ca_kabuli_denovo | 31287658                | C/G  | NA                 | NA                            | NA                 |
| Kabuli_wild_31287667 | NA                                  | Ca_kabuli_denovo | 31287667                | T/G  | NA                 | NA                            | NA                 |
| Kabuli_wild_31287733 | NA                                  | Ca_kabuli_denovo | 31287733                | T/C  | NA                 | NA                            | NA                 |
| Kabuli_wild_31292594 | NA                                  | Ca_kabuli_denovo | 31292594                | T/C  | NA                 | NA                            | NA                 |
| Kabuli_wild_31292600 | NA                                  | Ca_kabuli_denovo | 31292600                | C/T  | NA                 | NA                            | NA                 |
| Kabuli_wild_31292826 | NA                                  | Ca_kabuli_denovo | 31292826                | A/G  | NA                 | NA                            | NA                 |
| Kabuli_wild_31295491 | NA                                  | Ca_kabuli_denovo | 31295491                | C/T  | NA                 | NA                            | NA                 |
| Kabuli_wild_31299643 | NA                                  | Ca_kabuli_denovo | 31299643                | A/G  | NA                 | NA                            | NA                 |
| Kabuli_wild_31301883 | NA                                  | Ca_kabuli_denovo | 31301883                | A/G  | NA                 | NA                            | NA                 |
| Kabuli_wild_31302403 | NA                                  | Ca_kabuli_denovo | 31302403                | C/G  | NA                 | NA                            | NA                 |
| Kabuli_wild_31307442 | NA                                  | Ca_kabuli_denovo | 31307442                | C/T  | NA                 | NA                            | NA                 |
| Kabuli_wild_31307484 | NA                                  | Ca_kabuli_denovo | 31307484                | G/C  | NA                 | NA                            | NA                 |
| Kabuli_wild_31310000 | NA                                  | Ca_kabuli_denovo | 31310000                | G/T  | NA                 | NA                            | NA                 |
| Kabuli_wild_31310717 | NA                                  | Ca_kabuli_denovo | 31310717                | A/G  | NA                 | NA                            | NA                 |
| Kabuli_wild_31310720 | NA                                  | Ca_kabuli_denovo | 31310720                | A/G  | NA                 | NA                            | NA                 |
| Kabuli_wild_31310960 | NA                                  | Ca_kabuli_denovo | 31310960                | T/C  | NA                 | NA                            | NA                 |
| Kabuli_wild_31312078 | NA                                  | Ca_kabuli_denovo | 31312078                | G/T  | NA                 | NA                            | NA                 |
| Kabuli_wild_31313707 | NA                                  | Ca_kabuli_denovo | 31313707                | G/C  | NA                 | NA                            | NA                 |
| Kabuli_wild_31323701 | NA                                  | Ca_kabuli_denovo | 31323701                | C/T  | NA                 | NA                            | NA                 |
| Kabuli_wild_31323707 | NA                                  | Ca_kabuli_denovo | 31323707                | C/T  | NA                 | NA                            | NA                 |
| Kabuli_wild_31324698 | NA                                  | Ca_kabuli_denovo | 31324698                | A/C  | NA                 | NA                            | NA                 |
| Kabuli_wild_31332891 | NA                                  | Ca_kabuli_denovo | 31332891                | G/T  | NA                 | NA                            | NA                 |

| SNP IDs              | NCBI dbSNP accession IDs (NCBI_SS#) | Chromosomes      | Physical positions (bp) | SNPs | Gene accession IDs | Sequence components of genome | Putative functions |
|----------------------|-------------------------------------|------------------|-------------------------|------|--------------------|-------------------------------|--------------------|
| Kabuli_wild_31338881 | NA                                  | Ca_kabuli_denovo | 31338881                | G/A  | NA                 | NA                            | NA                 |
| Kabuli_wild_31339748 | NA                                  | Ca_kabuli_denovo | 31339748                | T/G  | NA                 | NA                            | NA                 |
| Kabuli_wild_31346133 | NA                                  | Ca_kabuli_denovo | 31346133                | G/A  | NA                 | NA                            | NA                 |
| Kabuli_wild_31346160 | NA                                  | Ca_kabuli_denovo | 31346160                | T/C  | NA                 | NA                            | NA                 |
| Kabuli_wild_31353595 | NA                                  | Ca_kabuli_denovo | 31353595                | T/G  | NA                 | NA                            | NA                 |
| Kabuli_wild_31354910 | NA                                  | Ca_kabuli_denovo | 31354910                | C/G  | NA                 | NA                            | NA                 |
| Kabuli_wild_31354922 | NA                                  | Ca_kabuli_denovo | 31354922                | C/T  | NA                 | NA                            | NA                 |
| Kabuli_wild_31355269 | NA                                  | Ca_kabuli_denovo | 31355269                | A/G  | NA                 | NA                            | NA                 |
| Kabuli_wild_31355287 | NA                                  | Ca_kabuli_denovo | 31355287                | T/C  | NA                 | NA                            | NA                 |
| Kabuli_wild_31358542 | NA                                  | Ca_kabuli_denovo | 31358542                | G/C  | NA                 | NA                            | NA                 |
| Kabuli_wild_31372255 | NA                                  | Ca_kabuli_denovo | 31372255                | G/C  | NA                 | NA                            | NA                 |
| Kabuli_wild_31372258 | NA                                  | Ca_kabuli_denovo | 31372258                | T/C  | NA                 | NA                            | NA                 |
| Kabuli_wild_31373626 | NA                                  | Ca_kabuli_denovo | 31373626                | C/A  | NA                 | NA                            | NA                 |
| Kabuli_wild_31373629 | NA                                  | Ca_kabuli_denovo | 31373629                | G/A  | NA                 | NA                            | NA                 |
| Kabuli_wild_31373648 | NA                                  | Ca_kabuli_denovo | 31373648                | T/C  | NA                 | NA                            | NA                 |
| Kabuli_wild_31378979 | NA                                  | Ca_kabuli_denovo | 31378979                | A/G  | NA                 | NA                            | NA                 |
| Kabuli_wild_31378999 | NA                                  | Ca_kabuli_denovo | 31378999                | C/T  | NA                 | NA                            | NA                 |
| Kabuli_wild_31386792 | NA                                  | Ca_kabuli_denovo | 31386792                | C/G  | NA                 | NA                            | NA                 |
| Kabuli_wild_31387045 | NA                                  | Ca_kabuli_denovo | 31387045                | T/C  | NA                 | NA                            | NA                 |
| Kabuli_wild_31394199 | NA                                  | Ca_kabuli_denovo | 31394199                | A/G  | NA                 | NA                            | NA                 |
| Kabuli_wild_31394602 | NA                                  | Ca_kabuli_denovo | 31394602                | G/T  | NA                 | NA                            | NA                 |
| Kabuli_wild_31402881 | NA                                  | Ca_kabuli_denovo | 31402881                | T/C  | NA                 | NA                            | NA                 |
| Kabuli_wild_31403290 | NA                                  | Ca_kabuli_denovo | 31403290                | C/G  | NA                 | NA                            | NA                 |
| Kabuli_wild_31407182 | NA                                  | Ca_kabuli_denovo | 31407182                | G/C  | NA                 | NA                            | NA                 |
| Kabuli_wild_31407197 | NA                                  | Ca_kabuli_denovo | 31407197                | G/C  | NA                 | NA                            | NA                 |
| Kabuli_wild_31407446 | NA                                  | Ca_kabuli_denovo | 31407446                | C/T  | NA                 | NA                            | NA                 |
| Kabuli_wild_31407579 | NA                                  | Ca_kabuli_denovo | 31407579                | A/G  | NA                 | NA                            | NA                 |
| Kabuli_wild_31409500 | NA                                  | Ca_kabuli_denovo | 31409500                | G/T  | NA                 | NA                            | NA                 |
| Kabuli_wild_31412738 | NA                                  | Ca_kabuli_denovo | 31412738                | A/G  | NA                 | NA                            | NA                 |
| Kabuli_wild_31412774 | NA                                  | Ca_kabuli_denovo | 31412774                | A/G  | NA                 | NA                            | NA                 |
| Kabuli_wild_31416501 | NA                                  | Ca_kabuli_denovo | 31416501                | T/G  | NA                 | NA                            | NA                 |
| Kabuli_wild_31429146 | NA                                  | Ca_kabuli_denovo | 31429146                | A/C  | NA                 | NA                            | NA                 |
| Kabuli_wild_31429147 | NA                                  | Ca_kabuli_denovo | 31429147                | A/G  | NA                 | NA                            | NA                 |
| Kabuli_wild_31430419 | NA                                  | Ca_kabuli_denovo | 31430419                | C/T  | NA                 | NA                            | NA                 |
| Kabuli_wild_31434452 | NA                                  | Ca_kabuli_denovo | 31434452                | A/G  | NA                 | NA                            | NA                 |
| Kabuli_wild_31438672 | NA                                  | Ca_kabuli_denovo | 31438672                | G/C  | NA                 | NA                            | NA                 |
| Kabuli_wild_31445416 | NA                                  | Ca_kabuli_denovo | 31445416                | C/G  | NA                 | NA                            | NA                 |
| Kabuli_wild_31455027 | NA                                  | Ca_kabuli_denovo | 31455027                | G/A  | NA                 | NA                            | NA                 |
| Kabuli_wild_31455036 | NA                                  | Ca_kabuli_denovo | 31455036                | C/T  | NA                 | NA                            | NA                 |
| Kabuli_wild_31461351 | NA                                  | Ca_kabuli_denovo | 31461351                | C/T  | NA                 | NA                            | NA                 |
| Kabuli_wild_31461359 | NA                                  | Ca_kabuli_denovo | 31461359                | A/G  | NA                 | NA                            | NA                 |
| Kabuli_wild_31464091 | NA                                  | Ca_kabuli_denovo | 31464091                | A/G  | NA                 | NA                            | NA                 |
| Kabuli_wild_31465839 | NA                                  | Ca_kabuli_denovo | 31465839                | G/T  | NA                 | NA                            | NA                 |
| Kabuli_wild_31465848 | NA                                  | Ca_kabuli_denovo | 31465848                | C/G  | NA                 | NA                            | NA                 |

| SNP IDs                     | NCBI dbSNP accession IDs (NCBI_SS#) | Chromosomes             | Physical positions (bp) | SNPs | Gene accession IDs | Sequence components of genome | Putative functions |
|-----------------------------|-------------------------------------|-------------------------|-------------------------|------|--------------------|-------------------------------|--------------------|
| <i>Kabuli_wild_31470449</i> | NA                                  | <i>Ca_kabuli_denovo</i> | 31470449                | T/C  | NA                 | NA                            | NA                 |
| <i>Kabuli_wild_31479554</i> | NA                                  | <i>Ca_kabuli_denovo</i> | 31479554                | A/G  | NA                 | NA                            | NA                 |
| <i>Kabuli_wild_31480689</i> | NA                                  | <i>Ca_kabuli_denovo</i> | 31480689                | G/T  | NA                 | NA                            | NA                 |
| <i>Kabuli_wild_31481225</i> | NA                                  | <i>Ca_kabuli_denovo</i> | 31481225                | T/C  | NA                 | NA                            | NA                 |
| <i>Kabuli_wild_31483483</i> | NA                                  | <i>Ca_kabuli_denovo</i> | 31483483                | G/T  | NA                 | NA                            | NA                 |
| <i>Kabuli_wild_31485185</i> | NA                                  | <i>Ca_kabuli_denovo</i> | 31485185                | A/G  | NA                 | NA                            | NA                 |
| <i>Kabuli_wild_31485787</i> | NA                                  | <i>Ca_kabuli_denovo</i> | 31485787                | G/T  | NA                 | NA                            | NA                 |
| <i>Kabuli_wild_31488684</i> | NA                                  | <i>Ca_kabuli_denovo</i> | 31488684                | C/T  | NA                 | NA                            | NA                 |
| <i>Kabuli_wild_31488742</i> | NA                                  | <i>Ca_kabuli_denovo</i> | 31488742                | A/G  | NA                 | NA                            | NA                 |
| <i>Kabuli_wild_31495079</i> | NA                                  | <i>Ca_kabuli_denovo</i> | 31495079                | C/G  | NA                 | NA                            | NA                 |
| <i>Kabuli_wild_31503926</i> | NA                                  | <i>Ca_kabuli_denovo</i> | 31503926                | A/C  | NA                 | NA                            | NA                 |
| <i>Kabuli_wild_31503929</i> | NA                                  | <i>Ca_kabuli_denovo</i> | 31503929                | G/T  | NA                 | NA                            | NA                 |
| <i>Kabuli_wild_31510420</i> | NA                                  | <i>Ca_kabuli_denovo</i> | 31510420                | G/T  | NA                 | NA                            | NA                 |
| <i>Kabuli_wild_31515312</i> | NA                                  | <i>Ca_kabuli_denovo</i> | 31515312                | A/G  | NA                 | NA                            | NA                 |
| <i>Kabuli_wild_31515351</i> | NA                                  | <i>Ca_kabuli_denovo</i> | 31515351                | T/C  | NA                 | NA                            | NA                 |
| <i>Kabuli_wild_31518040</i> | NA                                  | <i>Ca_kabuli_denovo</i> | 31518040                | T/C  | NA                 | NA                            | NA                 |
| <i>Kabuli_wild_31520562</i> | NA                                  | <i>Ca_kabuli_denovo</i> | 31520562                | G/T  | NA                 | NA                            | NA                 |
| <i>Kabuli_wild_31521433</i> | NA                                  | <i>Ca_kabuli_denovo</i> | 31521433                | T/C  | NA                 | NA                            | NA                 |
| <i>Kabuli_wild_31531924</i> | NA                                  | <i>Ca_kabuli_denovo</i> | 31531924                | T/C  | NA                 | NA                            | NA                 |
| <i>Kabuli_wild_31531932</i> | NA                                  | <i>Ca_kabuli_denovo</i> | 31531932                | C/T  | NA                 | NA                            | NA                 |
| <i>Kabuli_wild_31535471</i> | NA                                  | <i>Ca_kabuli_denovo</i> | 31535471                | C/G  | NA                 | NA                            | NA                 |
| <i>Kabuli_wild_31545398</i> | NA                                  | <i>Ca_kabuli_denovo</i> | 31545398                | G/T  | NA                 | NA                            | NA                 |
| <i>Kabuli_wild_31545824</i> | NA                                  | <i>Ca_kabuli_denovo</i> | 31545824                | A/G  | NA                 | NA                            | NA                 |
| <i>Kabuli_wild_31551571</i> | NA                                  | <i>Ca_kabuli_denovo</i> | 31551571                | C/T  | NA                 | NA                            | NA                 |
| <i>Kabuli_wild_31556609</i> | NA                                  | <i>Ca_kabuli_denovo</i> | 31556609                | G/T  | NA                 | NA                            | NA                 |
| <i>Kabuli_wild_31556612</i> | NA                                  | <i>Ca_kabuli_denovo</i> | 31556612                | G/T  | NA                 | NA                            | NA                 |
| <i>Kabuli_wild_31558039</i> | NA                                  | <i>Ca_kabuli_denovo</i> | 31558039                | T/C  | NA                 | NA                            | NA                 |
| <i>Kabuli_wild_31558138</i> | NA                                  | <i>Ca_kabuli_denovo</i> | 31558138                | A/G  | NA                 | NA                            | NA                 |
| <i>Kabuli_wild_31558161</i> | NA                                  | <i>Ca_kabuli_denovo</i> | 31558161                | G/T  | NA                 | NA                            | NA                 |
| <i>Kabuli_wild_31564887</i> | NA                                  | <i>Ca_kabuli_denovo</i> | 31564887                | T/G  | NA                 | NA                            | NA                 |
| <i>Kabuli_wild_31566882</i> | NA                                  | <i>Ca_kabuli_denovo</i> | 31566882                | G/T  | NA                 | NA                            | NA                 |
| <i>Kabuli_wild_31567553</i> | NA                                  | <i>Ca_kabuli_denovo</i> | 31567553                | T/C  | NA                 | NA                            | NA                 |
| <i>Kabuli_wild_31567555</i> | NA                                  | <i>Ca_kabuli_denovo</i> | 31567555                | G/A  | NA                 | NA                            | NA                 |
| <i>Kabuli_wild_31569712</i> | NA                                  | <i>Ca_kabuli_denovo</i> | 31569712                | C/T  | NA                 | NA                            | NA                 |
| <i>Kabuli_wild_31569784</i> | NA                                  | <i>Ca_kabuli_denovo</i> | 31569784                | A/G  | NA                 | NA                            | NA                 |
| <i>Kabuli_wild_31571452</i> | NA                                  | <i>Ca_kabuli_denovo</i> | 31571452                | G/T  | NA                 | NA                            | NA                 |
| <i>Kabuli_wild_31572788</i> | NA                                  | <i>Ca_kabuli_denovo</i> | 31572788                | C/T  | NA                 | NA                            | NA                 |
| <i>Kabuli_wild_31572792</i> | NA                                  | <i>Ca_kabuli_denovo</i> | 31572792                | T/G  | NA                 | NA                            | NA                 |
| <i>Kabuli_wild_31573249</i> | NA                                  | <i>Ca_kabuli_denovo</i> | 31573249                | C/T  | NA                 | NA                            | NA                 |
| <i>Kabuli_wild_31573264</i> | NA                                  | <i>Ca_kabuli_denovo</i> | 31573264                | A/G  | NA                 | NA                            | NA                 |
| <i>Kabuli_wild_31576616</i> | NA                                  | <i>Ca_kabuli_denovo</i> | 31576616                | A/G  | NA                 | NA                            | NA                 |
| <i>Kabuli_wild_31576631</i> | NA                                  | <i>Ca_kabuli_denovo</i> | 31576631                | A/G  | NA                 | NA                            | NA                 |
| <i>Kabuli_wild_31576807</i> | NA                                  | <i>Ca_kabuli_denovo</i> | 31576807                | C/T  | NA                 | NA                            | NA                 |
| <i>Kabuli_wild_31576828</i> | NA                                  | <i>Ca_kabuli_denovo</i> | 31576828                | C/G  | NA                 | NA                            | NA                 |

| SNP IDs              | NCBI dbSNP accession IDs (NCBI_SS#) | Chromosomes      | Physical positions (bp) | SNPs | Gene accession IDs | Sequence components of genome | Putative functions |
|----------------------|-------------------------------------|------------------|-------------------------|------|--------------------|-------------------------------|--------------------|
| Kabuli_wild_31580766 | NA                                  | Ca_kabuli_denovo | 31580766                | C/T  | NA                 | NA                            | NA                 |
| Kabuli_wild_31581394 | NA                                  | Ca_kabuli_denovo | 31581394                | G/T  | NA                 | NA                            | NA                 |
| Kabuli_wild_31589876 | NA                                  | Ca_kabuli_denovo | 31589876                | A/G  | NA                 | NA                            | NA                 |
| Kabuli_wild_31593121 | NA                                  | Ca_kabuli_denovo | 31593121                | A/G  | NA                 | NA                            | NA                 |
| Kabuli_wild_31599067 | NA                                  | Ca_kabuli_denovo | 31599067                | A/G  | NA                 | NA                            | NA                 |
| Kabuli_wild_31604209 | NA                                  | Ca_kabuli_denovo | 31604209                | T/C  | NA                 | NA                            | NA                 |
| Kabuli_wild_31609571 | NA                                  | Ca_kabuli_denovo | 31609571                | A/T  | NA                 | NA                            | NA                 |
| Kabuli_wild_31614611 | NA                                  | Ca_kabuli_denovo | 31614611                | T/G  | NA                 | NA                            | NA                 |
| Kabuli_wild_31615963 | NA                                  | Ca_kabuli_denovo | 31615963                | C/G  | NA                 | NA                            | NA                 |
| Kabuli_wild_31618068 | NA                                  | Ca_kabuli_denovo | 31618068                | A/G  | NA                 | NA                            | NA                 |
| Kabuli_wild_31618769 | NA                                  | Ca_kabuli_denovo | 31618769                | C/G  | NA                 | NA                            | NA                 |
| Kabuli_wild_31618802 | NA                                  | Ca_kabuli_denovo | 31618802                | C/T  | NA                 | NA                            | NA                 |
| Kabuli_wild_31620148 | NA                                  | Ca_kabuli_denovo | 31620148                | C/T  | NA                 | NA                            | NA                 |
| Kabuli_wild_31623867 | NA                                  | Ca_kabuli_denovo | 31623867                | A/G  | NA                 | NA                            | NA                 |
| Kabuli_wild_31627490 | NA                                  | Ca_kabuli_denovo | 31627490                | A/G  | NA                 | NA                            | NA                 |
| Kabuli_wild_31629608 | NA                                  | Ca_kabuli_denovo | 31629608                | A/G  | NA                 | NA                            | NA                 |
| Kabuli_wild_31641226 | NA                                  | Ca_kabuli_denovo | 31641226                | T/C  | NA                 | NA                            | NA                 |
| Kabuli_wild_31641233 | NA                                  | Ca_kabuli_denovo | 31641233                | C/G  | NA                 | NA                            | NA                 |
| Kabuli_wild_31654650 | NA                                  | Ca_kabuli_denovo | 31654650                | C/G  | NA                 | NA                            | NA                 |
| Kabuli_wild_31657709 | NA                                  | Ca_kabuli_denovo | 31657709                | A/C  | NA                 | NA                            | NA                 |
| Kabuli_wild_31660309 | NA                                  | Ca_kabuli_denovo | 31660309                | G/T  | NA                 | NA                            | NA                 |
| Kabuli_wild_31671597 | NA                                  | Ca_kabuli_denovo | 31671597                | T/C  | NA                 | NA                            | NA                 |
| Kabuli_wild_31671619 | NA                                  | Ca_kabuli_denovo | 31671619                | G/C  | NA                 | NA                            | NA                 |
| Kabuli_wild_31671626 | NA                                  | Ca_kabuli_denovo | 31671626                | G/T  | NA                 | NA                            | NA                 |
| Kabuli_wild_31671635 | NA                                  | Ca_kabuli_denovo | 31671635                | A/T  | NA                 | NA                            | NA                 |
| Kabuli_wild_31672411 | NA                                  | Ca_kabuli_denovo | 31672411                | A/C  | NA                 | NA                            | NA                 |
| Kabuli_wild_31673101 | NA                                  | Ca_kabuli_denovo | 31673101                | G/A  | NA                 | NA                            | NA                 |
| Kabuli_wild_31674576 | NA                                  | Ca_kabuli_denovo | 31674576                | G/C  | NA                 | NA                            | NA                 |
| Kabuli_wild_31675345 | NA                                  | Ca_kabuli_denovo | 31675345                | T/C  | NA                 | NA                            | NA                 |
| Kabuli_wild_31676536 | NA                                  | Ca_kabuli_denovo | 31676536                | C/G  | NA                 | NA                            | NA                 |
| Kabuli_wild_31676538 | NA                                  | Ca_kabuli_denovo | 31676538                | T/C  | NA                 | NA                            | NA                 |
| Kabuli_wild_31679079 | NA                                  | Ca_kabuli_denovo | 31679079                | G/T  | NA                 | NA                            | NA                 |
| Kabuli_wild_31683931 | NA                                  | Ca_kabuli_denovo | 31683931                | A/C  | NA                 | NA                            | NA                 |
| Kabuli_wild_31684327 | NA                                  | Ca_kabuli_denovo | 31684327                | A/C  | NA                 | NA                            | NA                 |
| Kabuli_wild_31684366 | NA                                  | Ca_kabuli_denovo | 31684366                | C/G  | NA                 | NA                            | NA                 |
| Kabuli_wild_31689541 | NA                                  | Ca_kabuli_denovo | 31689541                | G/T  | NA                 | NA                            | NA                 |
| Kabuli_wild_31698035 | NA                                  | Ca_kabuli_denovo | 31698035                | G/T  | NA                 | NA                            | NA                 |
| Kabuli_wild_31699759 | NA                                  | Ca_kabuli_denovo | 31699759                | C/T  | NA                 | NA                            | NA                 |
| Kabuli_wild_31705501 | NA                                  | Ca_kabuli_denovo | 31705501                | G/T  | NA                 | NA                            | NA                 |
| Kabuli_wild_31707671 | NA                                  | Ca_kabuli_denovo | 31707671                | T/C  | NA                 | NA                            | NA                 |
| Kabuli_wild_31710011 | NA                                  | Ca_kabuli_denovo | 31710011                | G/A  | NA                 | NA                            | NA                 |
| Kabuli_wild_31720180 | NA                                  | Ca_kabuli_denovo | 31720180                | G/T  | NA                 | NA                            | NA                 |
| Kabuli_wild_31720527 | NA                                  | Ca_kabuli_denovo | 31720527                | C/T  | NA                 | NA                            | NA                 |
| Kabuli_wild_31721970 | NA                                  | Ca_kabuli_denovo | 31721970                | C/G  | NA                 | NA                            | NA                 |

| SNP IDs              | NCBI dbSNP accession IDs (NCBI_SS#) | Chromosomes      | Physical positions (bp) | SNPs | Gene accession IDs | Sequence components of genome | Putative functions |
|----------------------|-------------------------------------|------------------|-------------------------|------|--------------------|-------------------------------|--------------------|
| Kabuli_wild_31722021 | NA                                  | Ca_kabuli_denovo | 31722021                | A/G  | NA                 | NA                            | NA                 |
| Kabuli_wild_31722029 | NA                                  | Ca_kabuli_denovo | 31722029                | T/C  | NA                 | NA                            | NA                 |
| Kabuli_wild_31723190 | NA                                  | Ca_kabuli_denovo | 31723190                | A/G  | NA                 | NA                            | NA                 |
| Kabuli_wild_31726234 | NA                                  | Ca_kabuli_denovo | 31726234                | G/A  | NA                 | NA                            | NA                 |
| Kabuli_wild_31726709 | NA                                  | Ca_kabuli_denovo | 31726709                | C/G  | NA                 | NA                            | NA                 |
| Kabuli_wild_31726715 | NA                                  | Ca_kabuli_denovo | 31726715                | C/T  | NA                 | NA                            | NA                 |
| Kabuli_wild_31727032 | NA                                  | Ca_kabuli_denovo | 31727032                | G/T  | NA                 | NA                            | NA                 |
| Kabuli_wild_31727366 | NA                                  | Ca_kabuli_denovo | 31727366                | C/G  | NA                 | NA                            | NA                 |
| Kabuli_wild_31727397 | NA                                  | Ca_kabuli_denovo | 31727397                | G/C  | NA                 | NA                            | NA                 |
| Kabuli_wild_31741706 | NA                                  | Ca_kabuli_denovo | 31741706                | T/G  | NA                 | NA                            | NA                 |
| Kabuli_wild_31748975 | NA                                  | Ca_kabuli_denovo | 31748975                | T/G  | NA                 | NA                            | NA                 |
| Kabuli_wild_31753880 | NA                                  | Ca_kabuli_denovo | 31753880                | A/G  | NA                 | NA                            | NA                 |
| Kabuli_wild_31754131 | NA                                  | Ca_kabuli_denovo | 31754131                | C/T  | NA                 | NA                            | NA                 |
| Kabuli_wild_31764686 | NA                                  | Ca_kabuli_denovo | 31764686                | G/A  | NA                 | NA                            | NA                 |
| Kabuli_wild_31767451 | NA                                  | Ca_kabuli_denovo | 31767451                | A/C  | NA                 | NA                            | NA                 |
| Kabuli_wild_31769071 | NA                                  | Ca_kabuli_denovo | 31769071                | G/A  | NA                 | NA                            | NA                 |
| Kabuli_wild_31775151 | NA                                  | Ca_kabuli_denovo | 31775151                | C/T  | NA                 | NA                            | NA                 |
| Kabuli_wild_31775159 | NA                                  | Ca_kabuli_denovo | 31775159                | C/G  | NA                 | NA                            | NA                 |
| Kabuli_wild_31778052 | NA                                  | Ca_kabuli_denovo | 31778052                | G/A  | NA                 | NA                            | NA                 |
| Kabuli_wild_31778085 | NA                                  | Ca_kabuli_denovo | 31778085                | T/G  | NA                 | NA                            | NA                 |
| Kabuli_wild_31779610 | NA                                  | Ca_kabuli_denovo | 31779610                | C/G  | NA                 | NA                            | NA                 |
| Kabuli_wild_31783591 | NA                                  | Ca_kabuli_denovo | 31783591                | A/G  | NA                 | NA                            | NA                 |
| Kabuli_wild_31789646 | NA                                  | Ca_kabuli_denovo | 31789646                | G/A  | NA                 | NA                            | NA                 |
| Kabuli_wild_31789673 | NA                                  | Ca_kabuli_denovo | 31789673                | C/T  | NA                 | NA                            | NA                 |
| Kabuli_wild_31789687 | NA                                  | Ca_kabuli_denovo | 31789687                | G/T  | NA                 | NA                            | NA                 |
| Kabuli_wild_31789714 | NA                                  | Ca_kabuli_denovo | 31789714                | C/A  | NA                 | NA                            | NA                 |
| Kabuli_wild_31801573 | NA                                  | Ca_kabuli_denovo | 31801573                | T/G  | NA                 | NA                            | NA                 |
| Kabuli_wild_31806214 | NA                                  | Ca_kabuli_denovo | 31806214                | G/T  | NA                 | NA                            | NA                 |
| Kabuli_wild_31811054 | NA                                  | Ca_kabuli_denovo | 31811054                | T/A  | NA                 | NA                            | NA                 |
| Kabuli_wild_31811108 | NA                                  | Ca_kabuli_denovo | 31811108                | A/G  | NA                 | NA                            | NA                 |
| Kabuli_wild_31812814 | NA                                  | Ca_kabuli_denovo | 31812814                | C/T  | NA                 | NA                            | NA                 |
| Kabuli_wild_31812829 | NA                                  | Ca_kabuli_denovo | 31812829                | C/G  | NA                 | NA                            | NA                 |
| Kabuli_wild_31816985 | NA                                  | Ca_kabuli_denovo | 31816985                | A/C  | NA                 | NA                            | NA                 |
| Kabuli_wild_31822661 | NA                                  | Ca_kabuli_denovo | 31822661                | C/T  | NA                 | NA                            | NA                 |
| Kabuli_wild_31825310 | NA                                  | Ca_kabuli_denovo | 31825310                | A/G  | NA                 | NA                            | NA                 |
| Kabuli_wild_31825639 | NA                                  | Ca_kabuli_denovo | 31825639                | A/G  | NA                 | NA                            | NA                 |
| Kabuli_wild_31825676 | NA                                  | Ca_kabuli_denovo | 31825676                | T/C  | NA                 | NA                            | NA                 |
| Kabuli_wild_31828963 | NA                                  | Ca_kabuli_denovo | 31828963                | G/A  | NA                 | NA                            | NA                 |
| Kabuli_wild_31832008 | NA                                  | Ca_kabuli_denovo | 31832008                | T/G  | NA                 | NA                            | NA                 |
| Kabuli_wild_31838433 | NA                                  | Ca_kabuli_denovo | 31838433                | C/G  | NA                 | NA                            | NA                 |
| Kabuli_wild_31838458 | NA                                  | Ca_kabuli_denovo | 31838458                | C/T  | NA                 | NA                            | NA                 |
| Kabuli_wild_31838586 | NA                                  | Ca_kabuli_denovo | 31838586                | C/G  | NA                 | NA                            | NA                 |
| Kabuli_wild_31842329 | NA                                  | Ca_kabuli_denovo | 31842329                | C/G  | NA                 | NA                            | NA                 |
| Kabuli_wild_31845499 | NA                                  | Ca_kabuli_denovo | 31845499                | G/T  | NA                 | NA                            | NA                 |

| SNP IDs                     | NCBI dbSNP accession IDs (NCBI_SS#) | Chromosomes             | Physical positions (bp) | SNPs | Gene accession IDs | Sequence components of genome | Putative functions |
|-----------------------------|-------------------------------------|-------------------------|-------------------------|------|--------------------|-------------------------------|--------------------|
| <i>Kabuli_wild_31855320</i> | NA                                  | <i>Ca_kabuli_denovo</i> | 31855320                | A/C  | NA                 | NA                            | NA                 |
| <i>Kabuli_wild_31859100</i> | NA                                  | <i>Ca_kabuli_denovo</i> | 31859100                | C/T  | NA                 | NA                            | NA                 |
| <i>Kabuli_wild_31859113</i> | NA                                  | <i>Ca_kabuli_denovo</i> | 31859113                | G/A  | NA                 | NA                            | NA                 |
| <i>Kabuli_wild_31861637</i> | NA                                  | <i>Ca_kabuli_denovo</i> | 31861637                | T/C  | NA                 | NA                            | NA                 |
| <i>Kabuli_wild_31862637</i> | NA                                  | <i>Ca_kabuli_denovo</i> | 31862637                | T/G  | NA                 | NA                            | NA                 |
| <i>Kabuli_wild_31862760</i> | NA                                  | <i>Ca_kabuli_denovo</i> | 31862760                | T/C  | NA                 | NA                            | NA                 |
| <i>Kabuli_wild_31869307</i> | NA                                  | <i>Ca_kabuli_denovo</i> | 31869307                | G/T  | NA                 | NA                            | NA                 |
| <i>Kabuli_wild_31871803</i> | NA                                  | <i>Ca_kabuli_denovo</i> | 31871803                | A/C  | NA                 | NA                            | NA                 |
| <i>Kabuli_wild_31875580</i> | NA                                  | <i>Ca_kabuli_denovo</i> | 31875580                | A/T  | NA                 | NA                            | NA                 |
| <i>Kabuli_wild_31875594</i> | NA                                  | <i>Ca_kabuli_denovo</i> | 31875594                | A/C  | NA                 | NA                            | NA                 |
| <i>Kabuli_wild_31875606</i> | NA                                  | <i>Ca_kabuli_denovo</i> | 31875606                | A/G  | NA                 | NA                            | NA                 |
| <i>Kabuli_wild_31881002</i> | NA                                  | <i>Ca_kabuli_denovo</i> | 31881002                | G/T  | NA                 | NA                            | NA                 |
| <i>Kabuli_wild_31883206</i> | NA                                  | <i>Ca_kabuli_denovo</i> | 31883206                | C/T  | NA                 | NA                            | NA                 |
| <i>Kabuli_wild_31891459</i> | NA                                  | <i>Ca_kabuli_denovo</i> | 31891459                | A/G  | NA                 | NA                            | NA                 |
| <i>Kabuli_wild_31900390</i> | NA                                  | <i>Ca_kabuli_denovo</i> | 31900390                | G/T  | NA                 | NA                            | NA                 |
| <i>Kabuli_wild_31902373</i> | NA                                  | <i>Ca_kabuli_denovo</i> | 31902373                | C/T  | NA                 | NA                            | NA                 |
| <i>Kabuli_wild_31902397</i> | NA                                  | <i>Ca_kabuli_denovo</i> | 31902397                | T/C  | NA                 | NA                            | NA                 |
| <i>Kabuli_wild_31902418</i> | NA                                  | <i>Ca_kabuli_denovo</i> | 31902418                | T/C  | NA                 | NA                            | NA                 |
| <i>Kabuli_wild_31904161</i> | NA                                  | <i>Ca_kabuli_denovo</i> | 31904161                | A/G  | NA                 | NA                            | NA                 |
| <i>Kabuli_wild_31905780</i> | NA                                  | <i>Ca_kabuli_denovo</i> | 31905780                | G/T  | NA                 | NA                            | NA                 |
| <i>Kabuli_wild_31906091</i> | NA                                  | <i>Ca_kabuli_denovo</i> | 31906091                | A/G  | NA                 | NA                            | NA                 |
| <i>Kabuli_wild_31906124</i> | NA                                  | <i>Ca_kabuli_denovo</i> | 31906124                | C/T  | NA                 | NA                            | NA                 |
| <i>Kabuli_wild_31922537</i> | NA                                  | <i>Ca_kabuli_denovo</i> | 31922537                | A/G  | NA                 | NA                            | NA                 |
| <i>Kabuli_wild_31929684</i> | NA                                  | <i>Ca_kabuli_denovo</i> | 31929684                | T/G  | NA                 | NA                            | NA                 |
| <i>Kabuli_wild_31930080</i> | NA                                  | <i>Ca_kabuli_denovo</i> | 31930080                | C/G  | NA                 | NA                            | NA                 |
| <i>Kabuli_wild_31930101</i> | NA                                  | <i>Ca_kabuli_denovo</i> | 31930101                | T/C  | NA                 | NA                            | NA                 |
| <i>Kabuli_wild_31933064</i> | NA                                  | <i>Ca_kabuli_denovo</i> | 31933064                | C/G  | NA                 | NA                            | NA                 |
| <i>Kabuli_wild_31933100</i> | NA                                  | <i>Ca_kabuli_denovo</i> | 31933100                | A/G  | NA                 | NA                            | NA                 |
| <i>Kabuli_wild_31942069</i> | NA                                  | <i>Ca_kabuli_denovo</i> | 31942069                | G/T  | NA                 | NA                            | NA                 |
| <i>Kabuli_wild_31944098</i> | NA                                  | <i>Ca_kabuli_denovo</i> | 31944098                | A/G  | NA                 | NA                            | NA                 |
| <i>Kabuli_wild_31944116</i> | NA                                  | <i>Ca_kabuli_denovo</i> | 31944116                | A/G  | NA                 | NA                            | NA                 |
| <i>Kabuli_wild_31944173</i> | NA                                  | <i>Ca_kabuli_denovo</i> | 31944173                | C/A  | NA                 | NA                            | NA                 |
| <i>Kabuli_wild_31948348</i> | NA                                  | <i>Ca_kabuli_denovo</i> | 31948348                | A/G  | NA                 | NA                            | NA                 |
| <i>Kabuli_wild_31951992</i> | NA                                  | <i>Ca_kabuli_denovo</i> | 31951992                | A/G  | NA                 | NA                            | NA                 |
| <i>Kabuli_wild_31952029</i> | NA                                  | <i>Ca_kabuli_denovo</i> | 31952029                | G/A  | NA                 | NA                            | NA                 |
| <i>Kabuli_wild_31956799</i> | NA                                  | <i>Ca_kabuli_denovo</i> | 31956799                | A/G  | NA                 | NA                            | NA                 |
| <i>Kabuli_wild_31959507</i> | NA                                  | <i>Ca_kabuli_denovo</i> | 31959507                | A/G  | NA                 | NA                            | NA                 |
| <i>Kabuli_wild_31960314</i> | NA                                  | <i>Ca_kabuli_denovo</i> | 31960314                | A/C  | NA                 | NA                            | NA                 |
| <i>Kabuli_wild_31960315</i> | NA                                  | <i>Ca_kabuli_denovo</i> | 31960315                | C/G  | NA                 | NA                            | NA                 |
| <i>Kabuli_wild_31961550</i> | NA                                  | <i>Ca_kabuli_denovo</i> | 31961550                | T/C  | NA                 | NA                            | NA                 |
| <i>Kabuli_wild_31968292</i> | NA                                  | <i>Ca_kabuli_denovo</i> | 31968292                | C/T  | NA                 | NA                            | NA                 |
| <i>Kabuli_wild_31970107</i> | NA                                  | <i>Ca_kabuli_denovo</i> | 31970107                | A/C  | NA                 | NA                            | NA                 |
| <i>Kabuli_wild_31971575</i> | NA                                  | <i>Ca_kabuli_denovo</i> | 31971575                | G/A  | NA                 | NA                            | NA                 |
| <i>Kabuli_wild_31971591</i> | NA                                  | <i>Ca_kabuli_denovo</i> | 31971591                | G/T  | NA                 | NA                            | NA                 |

| SNP IDs                     | NCBI dbSNP accession IDs (NCBI_SS#) | Chromosomes             | Physical positions (bp) | SNPs | Gene accession IDs | Sequence components of genome | Putative functions |
|-----------------------------|-------------------------------------|-------------------------|-------------------------|------|--------------------|-------------------------------|--------------------|
| <i>Kabuli_wild_31971738</i> | NA                                  | <i>Ca_kabuli_denovo</i> | 31971738                | T/G  | NA                 | NA                            | NA                 |
| <i>Kabuli_wild_31973752</i> | NA                                  | <i>Ca_kabuli_denovo</i> | 31973752                | A/C  | NA                 | NA                            | NA                 |
| <i>Kabuli_wild_31973755</i> | NA                                  | <i>Ca_kabuli_denovo</i> | 31973755                | C/T  | NA                 | NA                            | NA                 |
| <i>Kabuli_wild_31974449</i> | NA                                  | <i>Ca_kabuli_denovo</i> | 31974449                | G/C  | NA                 | NA                            | NA                 |
| <i>Kabuli_wild_31974500</i> | NA                                  | <i>Ca_kabuli_denovo</i> | 31974500                | A/G  | NA                 | NA                            | NA                 |
| <i>Kabuli_wild_31976436</i> | NA                                  | <i>Ca_kabuli_denovo</i> | 31976436                | G/T  | NA                 | NA                            | NA                 |
| <i>Kabuli_wild_31989059</i> | NA                                  | <i>Ca_kabuli_denovo</i> | 31989059                | T/C  | NA                 | NA                            | NA                 |
| <i>Kabuli_wild_31990141</i> | NA                                  | <i>Ca_kabuli_denovo</i> | 31990141                | A/G  | NA                 | NA                            | NA                 |
| <i>Kabuli_wild_31990169</i> | NA                                  | <i>Ca_kabuli_denovo</i> | 31990169                | A/C  | NA                 | NA                            | NA                 |
| <i>Kabuli_wild_31994680</i> | NA                                  | <i>Ca_kabuli_denovo</i> | 31994680                | A/C  | NA                 | NA                            | NA                 |
| <i>Kabuli_wild_31994682</i> | NA                                  | <i>Ca_kabuli_denovo</i> | 31994682                | A/C  | NA                 | NA                            | NA                 |
| <i>Kabuli_wild_31997204</i> | NA                                  | <i>Ca_kabuli_denovo</i> | 31997204                | G/C  | NA                 | NA                            | NA                 |
| <i>Kabuli_wild_31997219</i> | NA                                  | <i>Ca_kabuli_denovo</i> | 31997219                | T/C  | NA                 | NA                            | NA                 |
| <i>Kabuli_wild_31997251</i> | NA                                  | <i>Ca_kabuli_denovo</i> | 31997251                | A/G  | NA                 | NA                            | NA                 |
| <i>Kabuli_wild_31997350</i> | NA                                  | <i>Ca_kabuli_denovo</i> | 31997350                | A/C  | NA                 | NA                            | NA                 |
| <i>Kabuli_wild_32008110</i> | NA                                  | <i>Ca_kabuli_denovo</i> | 32008110                | C/T  | NA                 | NA                            | NA                 |
| <i>Kabuli_wild_32008120</i> | NA                                  | <i>Ca_kabuli_denovo</i> | 32008120                | G/A  | NA                 | NA                            | NA                 |
| <i>Kabuli_wild_32009079</i> | NA                                  | <i>Ca_kabuli_denovo</i> | 32009079                | A/G  | NA                 | NA                            | NA                 |
| <i>Kabuli_wild_32011302</i> | NA                                  | <i>Ca_kabuli_denovo</i> | 32011302                | C/T  | NA                 | NA                            | NA                 |
| <i>Kabuli_wild_32025319</i> | NA                                  | <i>Ca_kabuli_denovo</i> | 32025319                | C/T  | NA                 | NA                            | NA                 |
| <i>Kabuli_wild_32025352</i> | NA                                  | <i>Ca_kabuli_denovo</i> | 32025352                | G/A  | NA                 | NA                            | NA                 |
| <i>Kabuli_wild_32029915</i> | NA                                  | <i>Ca_kabuli_denovo</i> | 32029915                | A/C  | NA                 | NA                            | NA                 |
| <i>Kabuli_wild_32034664</i> | NA                                  | <i>Ca_kabuli_denovo</i> | 32034664                | G/T  | NA                 | NA                            | NA                 |
| <i>Kabuli_wild_32037062</i> | NA                                  | <i>Ca_kabuli_denovo</i> | 32037062                | G/T  | NA                 | NA                            | NA                 |
| <i>Kabuli_wild_32037178</i> | NA                                  | <i>Ca_kabuli_denovo</i> | 32037178                | G/T  | NA                 | NA                            | NA                 |
| <i>Kabuli_wild_32056324</i> | NA                                  | <i>Ca_kabuli_denovo</i> | 32056324                | G/A  | NA                 | NA                            | NA                 |
| <i>Kabuli_wild_32056337</i> | NA                                  | <i>Ca_kabuli_denovo</i> | 32056337                | A/G  | NA                 | NA                            | NA                 |
| <i>Kabuli_wild_32069539</i> | NA                                  | <i>Ca_kabuli_denovo</i> | 32069539                | G/C  | NA                 | NA                            | NA                 |
| <i>Kabuli_wild_32069542</i> | NA                                  | <i>Ca_kabuli_denovo</i> | 32069542                | G/C  | NA                 | NA                            | NA                 |
| <i>Kabuli_wild_32074841</i> | NA                                  | <i>Ca_kabuli_denovo</i> | 32074841                | G/T  | NA                 | NA                            | NA                 |
| <i>Kabuli_wild_32079163</i> | NA                                  | <i>Ca_kabuli_denovo</i> | 32079163                | G/T  | NA                 | NA                            | NA                 |
| <i>Kabuli_wild_32081754</i> | NA                                  | <i>Ca_kabuli_denovo</i> | 32081754                | G/T  | NA                 | NA                            | NA                 |
| <i>Kabuli_wild_32090881</i> | NA                                  | <i>Ca_kabuli_denovo</i> | 32090881                | A/G  | NA                 | NA                            | NA                 |
| <i>Kabuli_wild_32090934</i> | NA                                  | <i>Ca_kabuli_denovo</i> | 32090934                | C/A  | NA                 | NA                            | NA                 |
| <i>Kabuli_wild_32092204</i> | NA                                  | <i>Ca_kabuli_denovo</i> | 32092204                | C/T  | NA                 | NA                            | NA                 |
| <i>Kabuli_wild_32092205</i> | NA                                  | <i>Ca_kabuli_denovo</i> | 32092205                | G/A  | NA                 | NA                            | NA                 |
| <i>Kabuli_wild_32093089</i> | NA                                  | <i>Ca_kabuli_denovo</i> | 32093089                | A/G  | NA                 | NA                            | NA                 |
| <i>Kabuli_wild_32096209</i> | NA                                  | <i>Ca_kabuli_denovo</i> | 32096209                | G/T  | NA                 | NA                            | NA                 |
| <i>Kabuli_wild_32099898</i> | NA                                  | <i>Ca_kabuli_denovo</i> | 32099898                | A/C  | NA                 | NA                            | NA                 |
| <i>Kabuli_wild_32106953</i> | NA                                  | <i>Ca_kabuli_denovo</i> | 32106953                | C/A  | NA                 | NA                            | NA                 |
| <i>Kabuli_wild_32118340</i> | NA                                  | <i>Ca_kabuli_denovo</i> | 32118340                | A/C  | NA                 | NA                            | NA                 |
| <i>Kabuli_wild_32125811</i> | NA                                  | <i>Ca_kabuli_denovo</i> | 32125811                | G/A  | NA                 | NA                            | NA                 |
| <i>Kabuli_wild_32125812</i> | NA                                  | <i>Ca_kabuli_denovo</i> | 32125812                | A/T  | NA                 | NA                            | NA                 |
| <i>Kabuli_wild_32125814</i> | NA                                  | <i>Ca_kabuli_denovo</i> | 32125814                | G/T  | NA                 | NA                            | NA                 |



| SNP IDs              | NCBI dbSNP accession IDs (NCBI_SS#) | Chromosomes      | Physical positions (bp) | SNPs | Gene accession IDs | Sequence components of genome | Putative functions |
|----------------------|-------------------------------------|------------------|-------------------------|------|--------------------|-------------------------------|--------------------|
| Kabuli_wild_32125816 | NA                                  | Ca_kabuli_denovo | 32125816                | G/A  | NA                 | NA                            | NA                 |
| Kabuli_wild_32140240 | NA                                  | Ca_kabuli_denovo | 32140240                | A/G  | NA                 | NA                            | NA                 |
| Kabuli_wild_32140273 | NA                                  | Ca_kabuli_denovo | 32140273                | A/G  | NA                 | NA                            | NA                 |
| Kabuli_wild_32140303 | NA                                  | Ca_kabuli_denovo | 32140303                | G/T  | NA                 | NA                            | NA                 |
| Kabuli_wild_32143859 | NA                                  | Ca_kabuli_denovo | 32143859                | T/C  | NA                 | NA                            | NA                 |
| Kabuli_wild_32151449 | NA                                  | Ca_kabuli_denovo | 32151449                | A/C  | NA                 | NA                            | NA                 |
| Kabuli_wild_32151450 | NA                                  | Ca_kabuli_denovo | 32151450                | G/T  | NA                 | NA                            | NA                 |
| Kabuli_wild_32151451 | NA                                  | Ca_kabuli_denovo | 32151451                | A/G  | NA                 | NA                            | NA                 |
| Kabuli_wild_32151774 | NA                                  | Ca_kabuli_denovo | 32151774                | G/A  | NA                 | NA                            | NA                 |
| Kabuli_wild_32154232 | NA                                  | Ca_kabuli_denovo | 32154232                | A/C  | NA                 | NA                            | NA                 |
| Kabuli_wild_32154233 | NA                                  | Ca_kabuli_denovo | 32154233                | A/G  | NA                 | NA                            | NA                 |
| Kabuli_wild_32154234 | NA                                  | Ca_kabuli_denovo | 32154234                | A/G  | NA                 | NA                            | NA                 |
| Kabuli_wild_32154443 | NA                                  | Ca_kabuli_denovo | 32154443                | G/C  | NA                 | NA                            | NA                 |
| Kabuli_wild_32155566 | NA                                  | Ca_kabuli_denovo | 32155566                | A/G  | NA                 | NA                            | NA                 |
| Kabuli_wild_32161456 | NA                                  | Ca_kabuli_denovo | 32161456                | A/C  | NA                 | NA                            | NA                 |
| Kabuli_wild_32165110 | NA                                  | Ca_kabuli_denovo | 32165110                | C/G  | NA                 | NA                            | NA                 |
| Kabuli_wild_32165114 | NA                                  | Ca_kabuli_denovo | 32165114                | A/T  | NA                 | NA                            | NA                 |
| Kabuli_wild_32165167 | NA                                  | Ca_kabuli_denovo | 32165167                | C/T  | NA                 | NA                            | NA                 |
| Kabuli_wild_32165174 | NA                                  | Ca_kabuli_denovo | 32165174                | G/T  | NA                 | NA                            | NA                 |
| Kabuli_wild_32169820 | NA                                  | Ca_kabuli_denovo | 32169820                | A/C  | NA                 | NA                            | NA                 |
| Kabuli_wild_32169880 | NA                                  | Ca_kabuli_denovo | 32169880                | T/G  | NA                 | NA                            | NA                 |
| Kabuli_wild_32171247 | NA                                  | Ca_kabuli_denovo | 32171247                | A/T  | NA                 | NA                            | NA                 |
| Kabuli_wild_32174785 | NA                                  | Ca_kabuli_denovo | 32174785                | G/T  | NA                 | NA                            | NA                 |
| Kabuli_wild_32177431 | NA                                  | Ca_kabuli_denovo | 32177431                | G/A  | NA                 | NA                            | NA                 |
| Kabuli_wild_32177462 | NA                                  | Ca_kabuli_denovo | 32177462                | C/G  | NA                 | NA                            | NA                 |
| Kabuli_wild_32181521 | NA                                  | Ca_kabuli_denovo | 32181521                | A/T  | NA                 | NA                            | NA                 |
| Kabuli_wild_32182949 | NA                                  | Ca_kabuli_denovo | 32182949                | G/A  | NA                 | NA                            | NA                 |
| Kabuli_wild_32182952 | NA                                  | Ca_kabuli_denovo | 32182952                | G/C  | NA                 | NA                            | NA                 |
| Kabuli_wild_32188232 | NA                                  | Ca_kabuli_denovo | 32188232                | G/C  | NA                 | NA                            | NA                 |
| Kabuli_wild_32188271 | NA                                  | Ca_kabuli_denovo | 32188271                | A/G  | NA                 | NA                            | NA                 |
| Kabuli_wild_32193446 | NA                                  | Ca_kabuli_denovo | 32193446                | A/G  | NA                 | NA                            | NA                 |
| Kabuli_wild_32204467 | NA                                  | Ca_kabuli_denovo | 32204467                | C/T  | NA                 | NA                            | NA                 |
| Kabuli_wild_32213665 | NA                                  | Ca_kabuli_denovo | 32213665                | A/G  | NA                 | NA                            | NA                 |
| Kabuli_wild_32214763 | NA                                  | Ca_kabuli_denovo | 32214763                | G/T  | NA                 | NA                            | NA                 |
| Kabuli_wild_32216083 | NA                                  | Ca_kabuli_denovo | 32216083                | G/T  | NA                 | NA                            | NA                 |
| Kabuli_wild_32230989 | NA                                  | Ca_kabuli_denovo | 32230989                | G/T  | NA                 | NA                            | NA                 |
| Kabuli_wild_32231027 | NA                                  | Ca_kabuli_denovo | 32231027                | G/T  | NA                 | NA                            | NA                 |
| Kabuli_wild_32233603 | NA                                  | Ca_kabuli_denovo | 32233603                | G/A  | NA                 | NA                            | NA                 |
| Kabuli_wild_32237197 | NA                                  | Ca_kabuli_denovo | 32237197                | C/T  | NA                 | NA                            | NA                 |
| Kabuli_wild_32237226 | NA                                  | Ca_kabuli_denovo | 32237226                | G/T  | NA                 | NA                            | NA                 |
| Kabuli_wild_32245349 | NA                                  | Ca_kabuli_denovo | 32245349                | A/G  | NA                 | NA                            | NA                 |
| Kabuli_wild_32245419 | NA                                  | Ca_kabuli_denovo | 32245419                | G/T  | NA                 | NA                            | NA                 |
| Kabuli_wild_32246021 | NA                                  | Ca_kabuli_denovo | 32246021                | G/A  | NA                 | NA                            | NA                 |
| Kabuli_wild_32246036 | NA                                  | Ca_kabuli_denovo | 32246036                | C/T  | NA                 | NA                            | NA                 |

| SNP IDs              | NCBI dbSNP accession IDs (NCBI_SS#) | Chromosomes      | Physical positions (bp) | SNPs | Gene accession IDs | Sequence components of genome | Putative functions |
|----------------------|-------------------------------------|------------------|-------------------------|------|--------------------|-------------------------------|--------------------|
| Kabuli_wild_32247320 | NA                                  | Ca_kabuli_denovo | 32247320                | T/C  | NA                 | NA                            | NA                 |
| Kabuli_wild_32247344 | NA                                  | Ca_kabuli_denovo | 32247344                | C/T  | NA                 | NA                            | NA                 |
| Kabuli_wild_32247604 | NA                                  | Ca_kabuli_denovo | 32247604                | C/T  | NA                 | NA                            | NA                 |
| Kabuli_wild_32248855 | NA                                  | Ca_kabuli_denovo | 32248855                | C/A  | NA                 | NA                            | NA                 |
| Kabuli_wild_32248879 | NA                                  | Ca_kabuli_denovo | 32248879                | G/T  | NA                 | NA                            | NA                 |
| Kabuli_wild_32248940 | NA                                  | Ca_kabuli_denovo | 32248940                | T/G  | NA                 | NA                            | NA                 |
| Kabuli_wild_32250506 | NA                                  | Ca_kabuli_denovo | 32250506                | C/G  | NA                 | NA                            | NA                 |
| Kabuli_wild_32252895 | NA                                  | Ca_kabuli_denovo | 32252895                | G/C  | NA                 | NA                            | NA                 |
| Kabuli_wild_32252902 | NA                                  | Ca_kabuli_denovo | 32252902                | A/C  | NA                 | NA                            | NA                 |
| Kabuli_wild_32253096 | NA                                  | Ca_kabuli_denovo | 32253096                | T/G  | NA                 | NA                            | NA                 |
| Kabuli_wild_32263519 | NA                                  | Ca_kabuli_denovo | 32263519                | T/C  | NA                 | NA                            | NA                 |
| Kabuli_wild_32263534 | NA                                  | Ca_kabuli_denovo | 32263534                | C/T  | NA                 | NA                            | NA                 |
| Kabuli_wild_32263620 | NA                                  | Ca_kabuli_denovo | 32263620                | T/C  | NA                 | NA                            | NA                 |
| Kabuli_wild_32263729 | NA                                  | Ca_kabuli_denovo | 32263729                | A/G  | NA                 | NA                            | NA                 |
| Kabuli_wild_32265517 | NA                                  | Ca_kabuli_denovo | 32265517                | A/G  | NA                 | NA                            | NA                 |
| Kabuli_wild_32268024 | NA                                  | Ca_kabuli_denovo | 32268024                | A/T  | NA                 | NA                            | NA                 |
| Kabuli_wild_32269157 | NA                                  | Ca_kabuli_denovo | 32269157                | A/G  | NA                 | NA                            | NA                 |
| Kabuli_wild_32269213 | NA                                  | Ca_kabuli_denovo | 32269213                | C/T  | NA                 | NA                            | NA                 |
| Kabuli_wild_32269216 | NA                                  | Ca_kabuli_denovo | 32269216                | C/T  | NA                 | NA                            | NA                 |
| Kabuli_wild_32281063 | NA                                  | Ca_kabuli_denovo | 32281063                | G/T  | NA                 | NA                            | NA                 |
| Kabuli_wild_32281100 | NA                                  | Ca_kabuli_denovo | 32281100                | A/G  | NA                 | NA                            | NA                 |
| Kabuli_wild_32282310 | NA                                  | Ca_kabuli_denovo | 32282310                | T/C  | NA                 | NA                            | NA                 |
| Kabuli_wild_32282375 | NA                                  | Ca_kabuli_denovo | 32282375                | G/A  | NA                 | NA                            | NA                 |
| Kabuli_wild_32288393 | NA                                  | Ca_kabuli_denovo | 32288393                | A/G  | NA                 | NA                            | NA                 |
| Kabuli_wild_32291339 | NA                                  | Ca_kabuli_denovo | 32291339                | A/G  | NA                 | NA                            | NA                 |
| Kabuli_wild_32291396 | NA                                  | Ca_kabuli_denovo | 32291396                | T/C  | NA                 | NA                            | NA                 |
| Kabuli_wild_32297654 | NA                                  | Ca_kabuli_denovo | 32297654                | G/T  | NA                 | NA                            | NA                 |
| Kabuli_wild_32310182 | NA                                  | Ca_kabuli_denovo | 32310182                | A/G  | NA                 | NA                            | NA                 |
| Kabuli_wild_32310230 | NA                                  | Ca_kabuli_denovo | 32310230                | T/C  | NA                 | NA                            | NA                 |
| Kabuli_wild_32311586 | NA                                  | Ca_kabuli_denovo | 32311586                | G/T  | NA                 | NA                            | NA                 |
| Kabuli_wild_32323150 | NA                                  | Ca_kabuli_denovo | 32323150                | G/C  | NA                 | NA                            | NA                 |
| Kabuli_wild_32343368 | NA                                  | Ca_kabuli_denovo | 32343368                | T/C  | NA                 | NA                            | NA                 |
| Kabuli_wild_32343370 | NA                                  | Ca_kabuli_denovo | 32343370                | T/G  | NA                 | NA                            | NA                 |
| Kabuli_wild_32344012 | NA                                  | Ca_kabuli_denovo | 32344012                | T/C  | NA                 | NA                            | NA                 |
| Kabuli_wild_32344651 | NA                                  | Ca_kabuli_denovo | 32344651                | T/G  | NA                 | NA                            | NA                 |
| Kabuli_wild_32351530 | NA                                  | Ca_kabuli_denovo | 32351530                | A/G  | NA                 | NA                            | NA                 |
| Kabuli_wild_32352685 | NA                                  | Ca_kabuli_denovo | 32352685                | A/G  | NA                 | NA                            | NA                 |
| Kabuli_wild_32352727 | NA                                  | Ca_kabuli_denovo | 32352727                | G/A  | NA                 | NA                            | NA                 |
| Kabuli_wild_32356351 | NA                                  | Ca_kabuli_denovo | 32356351                | T/C  | NA                 | NA                            | NA                 |
| Kabuli_wild_32356913 | NA                                  | Ca_kabuli_denovo | 32356913                | G/C  | NA                 | NA                            | NA                 |
| Kabuli_wild_32356919 | NA                                  | Ca_kabuli_denovo | 32356919                | C/T  | NA                 | NA                            | NA                 |
| Kabuli_wild_32362667 | NA                                  | Ca_kabuli_denovo | 32362667                | G/A  | NA                 | NA                            | NA                 |
| Kabuli_wild_32365838 | NA                                  | Ca_kabuli_denovo | 32365838                | C/A  | NA                 | NA                            | NA                 |
| Kabuli_wild_32365888 | NA                                  | Ca_kabuli_denovo | 32365888                | C/G  | NA                 | NA                            | NA                 |

| SNP IDs              | NCBI dbSNP accession IDs (NCBI_SS#) | Chromosomes      | Physical positions (bp) | SNPs | Gene accession IDs | Sequence components of genome | Putative functions |
|----------------------|-------------------------------------|------------------|-------------------------|------|--------------------|-------------------------------|--------------------|
| Kabuli_wild_32365910 | NA                                  | Ca_kabuli_denovo | 32365910                | G/T  | NA                 | NA                            | NA                 |
| Kabuli_wild_32367530 | NA                                  | Ca_kabuli_denovo | 32367530                | A/G  | NA                 | NA                            | NA                 |
| Kabuli_wild_32369222 | NA                                  | Ca_kabuli_denovo | 32369222                | A/G  | NA                 | NA                            | NA                 |
| Kabuli_wild_32369270 | NA                                  | Ca_kabuli_denovo | 32369270                | C/G  | NA                 | NA                            | NA                 |
| Kabuli_wild_32383041 | NA                                  | Ca_kabuli_denovo | 32383041                | C/G  | NA                 | NA                            | NA                 |
| Kabuli_wild_32383236 | NA                                  | Ca_kabuli_denovo | 32383236                | T/G  | NA                 | NA                            | NA                 |
| Kabuli_wild_32383696 | NA                                  | Ca_kabuli_denovo | 32383696                | G/A  | NA                 | NA                            | NA                 |
| Kabuli_wild_32386616 | NA                                  | Ca_kabuli_denovo | 32386616                | C/T  | NA                 | NA                            | NA                 |
| Kabuli_wild_32388542 | NA                                  | Ca_kabuli_denovo | 32388542                | A/G  | NA                 | NA                            | NA                 |
| Kabuli_wild_32396851 | NA                                  | Ca_kabuli_denovo | 32396851                | T/C  | NA                 | NA                            | NA                 |
| Kabuli_wild_32396869 | NA                                  | Ca_kabuli_denovo | 32396869                | G/C  | NA                 | NA                            | NA                 |
| Kabuli_wild_32396870 | NA                                  | Ca_kabuli_denovo | 32396870                | C/G  | NA                 | NA                            | NA                 |
| Kabuli_wild_32400107 | NA                                  | Ca_kabuli_denovo | 32400107                | T/C  | NA                 | NA                            | NA                 |
| Kabuli_wild_32400118 | NA                                  | Ca_kabuli_denovo | 32400118                | C/A  | NA                 | NA                            | NA                 |
| Kabuli_wild_32400128 | NA                                  | Ca_kabuli_denovo | 32400128                | T/C  | NA                 | NA                            | NA                 |
| Kabuli_wild_32401553 | NA                                  | Ca_kabuli_denovo | 32401553                | C/A  | NA                 | NA                            | NA                 |
| Kabuli_wild_32401569 | NA                                  | Ca_kabuli_denovo | 32401569                | A/G  | NA                 | NA                            | NA                 |
| Kabuli_wild_32403749 | NA                                  | Ca_kabuli_denovo | 32403749                | A/G  | NA                 | NA                            | NA                 |
| Kabuli_wild_32417123 | NA                                  | Ca_kabuli_denovo | 32417123                | T/C  | NA                 | NA                            | NA                 |
| Kabuli_wild_32422552 | NA                                  | Ca_kabuli_denovo | 32422552                | G/T  | NA                 | NA                            | NA                 |
| Kabuli_wild_32423201 | NA                                  | Ca_kabuli_denovo | 32423201                | A/C  | NA                 | NA                            | NA                 |
| Kabuli_wild_32423705 | NA                                  | Ca_kabuli_denovo | 32423705                | A/C  | NA                 | NA                            | NA                 |
| Kabuli_wild_32427456 | NA                                  | Ca_kabuli_denovo | 32427456                | G/A  | NA                 | NA                            | NA                 |
| Kabuli_wild_32433594 | NA                                  | Ca_kabuli_denovo | 32433594                | A/C  | NA                 | NA                            | NA                 |
| Kabuli_wild_32433595 | NA                                  | Ca_kabuli_denovo | 32433595                | A/G  | NA                 | NA                            | NA                 |
| Kabuli_wild_32438119 | NA                                  | Ca_kabuli_denovo | 32438119                | T/A  | NA                 | NA                            | NA                 |
| Kabuli_wild_32457916 | NA                                  | Ca_kabuli_denovo | 32457916                | T/C  | NA                 | NA                            | NA                 |
| Kabuli_wild_32459994 | NA                                  | Ca_kabuli_denovo | 32459994                | A/C  | NA                 | NA                            | NA                 |
| Kabuli_wild_32466857 | NA                                  | Ca_kabuli_denovo | 32466857                | C/G  | NA                 | NA                            | NA                 |
| Kabuli_wild_32466899 | NA                                  | Ca_kabuli_denovo | 32466899                | G/A  | NA                 | NA                            | NA                 |
| Kabuli_wild_32467673 | NA                                  | Ca_kabuli_denovo | 32467673                | C/G  | NA                 | NA                            | NA                 |
| Kabuli_wild_32467674 | NA                                  | Ca_kabuli_denovo | 32467674                | G/T  | NA                 | NA                            | NA                 |
| Kabuli_wild_32467675 | NA                                  | Ca_kabuli_denovo | 32467675                | G/T  | NA                 | NA                            | NA                 |
| Kabuli_wild_32469798 | NA                                  | Ca_kabuli_denovo | 32469798                | A/G  | NA                 | NA                            | NA                 |
| Kabuli_wild_32473668 | NA                                  | Ca_kabuli_denovo | 32473668                | G/C  | NA                 | NA                            | NA                 |
| Kabuli_wild_32494368 | NA                                  | Ca_kabuli_denovo | 32494368                | G/A  | NA                 | NA                            | NA                 |
| Kabuli_wild_32494387 | NA                                  | Ca_kabuli_denovo | 32494387                | G/T  | NA                 | NA                            | NA                 |
| Kabuli_wild_32494443 | NA                                  | Ca_kabuli_denovo | 32494443                | C/T  | NA                 | NA                            | NA                 |
| Kabuli_wild_32496994 | NA                                  | Ca_kabuli_denovo | 32496994                | G/A  | NA                 | NA                            | NA                 |
| Kabuli_wild_32497464 | NA                                  | Ca_kabuli_denovo | 32497464                | T/C  | NA                 | NA                            | NA                 |
| Kabuli_wild_32497476 | NA                                  | Ca_kabuli_denovo | 32497476                | A/C  | NA                 | NA                            | NA                 |
| Kabuli_wild_32502217 | NA                                  | Ca_kabuli_denovo | 32502217                | T/C  | NA                 | NA                            | NA                 |
| Kabuli_wild_32502220 | NA                                  | Ca_kabuli_denovo | 32502220                | C/T  | NA                 | NA                            | NA                 |
| Kabuli_wild_32515334 | NA                                  | Ca_kabuli_denovo | 32515334                | G/A  | NA                 | NA                            | NA                 |

| SNP IDs              | NCBI dbSNP accession IDs (NCBI_SS#) | Chromosomes      | Physical positions (bp) | SNPs | Gene accession IDs | Sequence components of genome | Putative functions |
|----------------------|-------------------------------------|------------------|-------------------------|------|--------------------|-------------------------------|--------------------|
| Kabuli_wild_32515370 | NA                                  | Ca_kabuli_denovo | 32515370                | G/A  | NA                 | NA                            | NA                 |
| Kabuli_wild_32519081 | NA                                  | Ca_kabuli_denovo | 32519081                | G/C  | NA                 | NA                            | NA                 |
| Kabuli_wild_32519083 | NA                                  | Ca_kabuli_denovo | 32519083                | G/C  | NA                 | NA                            | NA                 |
| Kabuli_wild_32519096 | NA                                  | Ca_kabuli_denovo | 32519096                | G/A  | NA                 | NA                            | NA                 |
| Kabuli_wild_32521001 | NA                                  | Ca_kabuli_denovo | 32521001                | A/G  | NA                 | NA                            | NA                 |
| Kabuli_wild_32523574 | NA                                  | Ca_kabuli_denovo | 32523574                | G/A  | NA                 | NA                            | NA                 |
| Kabuli_wild_32534256 | NA                                  | Ca_kabuli_denovo | 32534256                | G/T  | NA                 | NA                            | NA                 |
| Kabuli_wild_32534321 | NA                                  | Ca_kabuli_denovo | 32534321                | C/A  | NA                 | NA                            | NA                 |
| Kabuli_wild_32568506 | NA                                  | Ca_kabuli_denovo | 32568506                | G/T  | NA                 | NA                            | NA                 |
| Kabuli_wild_32570790 | NA                                  | Ca_kabuli_denovo | 32570790                | A/G  | NA                 | NA                            | NA                 |
| Kabuli_wild_32573395 | NA                                  | Ca_kabuli_denovo | 32573395                | C/A  | NA                 | NA                            | NA                 |
| Kabuli_wild_32581884 | NA                                  | Ca_kabuli_denovo | 32581884                | A/G  | NA                 | NA                            | NA                 |
| Kabuli_wild_32583385 | NA                                  | Ca_kabuli_denovo | 32583385                | G/T  | NA                 | NA                            | NA                 |
| Kabuli_wild_32583437 | NA                                  | Ca_kabuli_denovo | 32583437                | T/G  | NA                 | NA                            | NA                 |
| Kabuli_wild_32583450 | NA                                  | Ca_kabuli_denovo | 32583450                | A/C  | NA                 | NA                            | NA                 |
| Kabuli_wild_32601793 | NA                                  | Ca_kabuli_denovo | 32601793                | A/C  | NA                 | NA                            | NA                 |
| Kabuli_wild_32606524 | NA                                  | Ca_kabuli_denovo | 32606524                | G/A  | NA                 | NA                            | NA                 |
| Kabuli_wild_32609568 | NA                                  | Ca_kabuli_denovo | 32609568                | G/C  | NA                 | NA                            | NA                 |
| Kabuli_wild_32609625 | NA                                  | Ca_kabuli_denovo | 32609625                | T/C  | NA                 | NA                            | NA                 |
| Kabuli_wild_32612058 | NA                                  | Ca_kabuli_denovo | 32612058                | A/C  | NA                 | NA                            | NA                 |
| Kabuli_wild_32622967 | NA                                  | Ca_kabuli_denovo | 32622967                | T/C  | NA                 | NA                            | NA                 |
| Kabuli_wild_32624069 | NA                                  | Ca_kabuli_denovo | 32624069                | C/A  | NA                 | NA                            | NA                 |
| Kabuli_wild_32626741 | NA                                  | Ca_kabuli_denovo | 32626741                | G/T  | NA                 | NA                            | NA                 |
| Kabuli_wild_32639352 | NA                                  | Ca_kabuli_denovo | 32639352                | T/A  | NA                 | NA                            | NA                 |
| Kabuli_wild_32639361 | NA                                  | Ca_kabuli_denovo | 32639361                | A/G  | NA                 | NA                            | NA                 |
| Kabuli_wild_32640880 | NA                                  | Ca_kabuli_denovo | 32640880                | A/C  | NA                 | NA                            | NA                 |
| Kabuli_wild_32640883 | NA                                  | Ca_kabuli_denovo | 32640883                | C/T  | NA                 | NA                            | NA                 |
| Kabuli_wild_32650483 | NA                                  | Ca_kabuli_denovo | 32650483                | G/A  | NA                 | NA                            | NA                 |
| Kabuli_wild_32651725 | NA                                  | Ca_kabuli_denovo | 32651725                | C/T  | NA                 | NA                            | NA                 |
| Kabuli_wild_32651779 | NA                                  | Ca_kabuli_denovo | 32651779                | T/C  | NA                 | NA                            | NA                 |
| Kabuli_wild_32664024 | NA                                  | Ca_kabuli_denovo | 32664024                | G/A  | NA                 | NA                            | NA                 |
| Kabuli_wild_32664068 | NA                                  | Ca_kabuli_denovo | 32664068                | G/A  | NA                 | NA                            | NA                 |
| Kabuli_wild_32665396 | NA                                  | Ca_kabuli_denovo | 32665396                | C/G  | NA                 | NA                            | NA                 |
| Kabuli_wild_32666068 | NA                                  | Ca_kabuli_denovo | 32666068                | C/T  | NA                 | NA                            | NA                 |
| Kabuli_wild_32666079 | NA                                  | Ca_kabuli_denovo | 32666079                | A/G  | NA                 | NA                            | NA                 |
| Kabuli_wild_32672106 | NA                                  | Ca_kabuli_denovo | 32672106                | G/T  | NA                 | NA                            | NA                 |
| Kabuli_wild_32685398 | NA                                  | Ca_kabuli_denovo | 32685398                | C/T  | NA                 | NA                            | NA                 |
| Kabuli_wild_32686255 | NA                                  | Ca_kabuli_denovo | 32686255                | G/T  | NA                 | NA                            | NA                 |
| Kabuli_wild_32687051 | NA                                  | Ca_kabuli_denovo | 32687051                | C/G  | NA                 | NA                            | NA                 |
| Kabuli_wild_32687054 | NA                                  | Ca_kabuli_denovo | 32687054                | A/C  | NA                 | NA                            | NA                 |
| Kabuli_wild_32687057 | NA                                  | Ca_kabuli_denovo | 32687057                | G/A  | NA                 | NA                            | NA                 |
| Kabuli_wild_32694329 | NA                                  | Ca_kabuli_denovo | 32694329                | A/C  | NA                 | NA                            | NA                 |
| Kabuli_wild_32694330 | NA                                  | Ca_kabuli_denovo | 32694330                | A/G  | NA                 | NA                            | NA                 |
| Kabuli_wild_32694331 | NA                                  | Ca_kabuli_denovo | 32694331                | A/C  | NA                 | NA                            | NA                 |

| SNP IDs              | NCBI dbSNP accession IDs (NCBI_SS#) | Chromosomes      | Physical positions (bp) | SNPs | Gene accession IDs | Sequence components of genome | Putative functions |
|----------------------|-------------------------------------|------------------|-------------------------|------|--------------------|-------------------------------|--------------------|
| Kabuli_wild_32703562 | NA                                  | Ca_kabuli_denovo | 32703562                | A/G  | NA                 | NA                            | NA                 |
| Kabuli_wild_32706161 | NA                                  | Ca_kabuli_denovo | 32706161                | C/G  | NA                 | NA                            | NA                 |
| Kabuli_wild_32710554 | NA                                  | Ca_kabuli_denovo | 32710554                | A/C  | NA                 | NA                            | NA                 |
| Kabuli_wild_32716601 | NA                                  | Ca_kabuli_denovo | 32716601                | A/C  | NA                 | NA                            | NA                 |
| Kabuli_wild_32718703 | NA                                  | Ca_kabuli_denovo | 32718703                | A/G  | NA                 | NA                            | NA                 |
| Kabuli_wild_32720198 | NA                                  | Ca_kabuli_denovo | 32720198                | T/C  | NA                 | NA                            | NA                 |
| Kabuli_wild_32720212 | NA                                  | Ca_kabuli_denovo | 32720212                | C/T  | NA                 | NA                            | NA                 |
| Kabuli_wild_32721850 | NA                                  | Ca_kabuli_denovo | 32721850                | G/T  | NA                 | NA                            | NA                 |
| Kabuli_wild_32723956 | NA                                  | Ca_kabuli_denovo | 32723956                | T/C  | NA                 | NA                            | NA                 |
| Kabuli_wild_32736485 | NA                                  | Ca_kabuli_denovo | 32736485                | C/G  | NA                 | NA                            | NA                 |
| Kabuli_wild_32744079 | NA                                  | Ca_kabuli_denovo | 32744079                | A/G  | NA                 | NA                            | NA                 |
| Kabuli_wild_32749336 | NA                                  | Ca_kabuli_denovo | 32749336                | C/G  | NA                 | NA                            | NA                 |
| Kabuli_wild_32749339 | NA                                  | Ca_kabuli_denovo | 32749339                | C/G  | NA                 | NA                            | NA                 |
| Kabuli_wild_32753238 | NA                                  | Ca_kabuli_denovo | 32753238                | T/G  | NA                 | NA                            | NA                 |
| Kabuli_wild_32756250 | NA                                  | Ca_kabuli_denovo | 32756250                | A/C  | NA                 | NA                            | NA                 |
| Kabuli_wild_32756251 | NA                                  | Ca_kabuli_denovo | 32756251                | G/T  | NA                 | NA                            | NA                 |
| Kabuli_wild_32762888 | NA                                  | Ca_kabuli_denovo | 32762888                | A/C  | NA                 | NA                            | NA                 |
| Kabuli_wild_32762917 | NA                                  | Ca_kabuli_denovo | 32762917                | G/A  | NA                 | NA                            | NA                 |
| Kabuli_wild_32770882 | NA                                  | Ca_kabuli_denovo | 32770882                | C/G  | NA                 | NA                            | NA                 |
| Kabuli_wild_32780613 | NA                                  | Ca_kabuli_denovo | 32780613                | A/G  | NA                 | NA                            | NA                 |
| Kabuli_wild_32790041 | NA                                  | Ca_kabuli_denovo | 32790041                | A/C  | NA                 | NA                            | NA                 |
| Kabuli_wild_32790042 | NA                                  | Ca_kabuli_denovo | 32790042                | G/T  | NA                 | NA                            | NA                 |
| Kabuli_wild_32790043 | NA                                  | Ca_kabuli_denovo | 32790043                | A/G  | NA                 | NA                            | NA                 |
| Kabuli_wild_32790065 | NA                                  | Ca_kabuli_denovo | 32790065                | G/A  | NA                 | NA                            | NA                 |
| Kabuli_wild_32796750 | NA                                  | Ca_kabuli_denovo | 32796750                | C/T  | NA                 | NA                            | NA                 |
| Kabuli_wild_32797732 | NA                                  | Ca_kabuli_denovo | 32797732                | G/C  | NA                 | NA                            | NA                 |
| Kabuli_wild_32806312 | NA                                  | Ca_kabuli_denovo | 32806312                | G/A  | NA                 | NA                            | NA                 |
| Kabuli_wild_32810266 | NA                                  | Ca_kabuli_denovo | 32810266                | G/A  | NA                 | NA                            | NA                 |
| Kabuli_wild_32815570 | NA                                  | Ca_kabuli_denovo | 32815570                | C/T  | NA                 | NA                            | NA                 |
| Kabuli_wild_32815573 | NA                                  | Ca_kabuli_denovo | 32815573                | C/T  | NA                 | NA                            | NA                 |
| Kabuli_wild_32815578 | NA                                  | Ca_kabuli_denovo | 32815578                | T/G  | NA                 | NA                            | NA                 |
| Kabuli_wild_32821460 | NA                                  | Ca_kabuli_denovo | 32821460                | A/G  | NA                 | NA                            | NA                 |
| Kabuli_wild_32829115 | NA                                  | Ca_kabuli_denovo | 32829115                | G/T  | NA                 | NA                            | NA                 |
| Kabuli_wild_32831526 | NA                                  | Ca_kabuli_denovo | 32831526                | A/G  | NA                 | NA                            | NA                 |
| Kabuli_wild_32831528 | NA                                  | Ca_kabuli_denovo | 32831528                | C/T  | NA                 | NA                            | NA                 |
| Kabuli_wild_32832756 | NA                                  | Ca_kabuli_denovo | 32832756                | G/T  | NA                 | NA                            | NA                 |
| Kabuli_wild_32832760 | NA                                  | Ca_kabuli_denovo | 32832760                | G/T  | NA                 | NA                            | NA                 |
| Kabuli_wild_32834639 | NA                                  | Ca_kabuli_denovo | 32834639                | A/G  | NA                 | NA                            | NA                 |
| Kabuli_wild_32836767 | NA                                  | Ca_kabuli_denovo | 32836767                | G/T  | NA                 | NA                            | NA                 |
| Kabuli_wild_32845759 | NA                                  | Ca_kabuli_denovo | 32845759                | G/A  | NA                 | NA                            | NA                 |
| Kabuli_wild_32845777 | NA                                  | Ca_kabuli_denovo | 32845777                | C/T  | NA                 | NA                            | NA                 |
| Kabuli_wild_32851713 | NA                                  | Ca_kabuli_denovo | 32851713                | G/T  | NA                 | NA                            | NA                 |
| Kabuli_wild_32852978 | NA                                  | Ca_kabuli_denovo | 32852978                | G/T  | NA                 | NA                            | NA                 |
| Kabuli_wild_32865444 | NA                                  | Ca_kabuli_denovo | 32865444                | C/T  | NA                 | NA                            | NA                 |

| SNP IDs              | NCBI dbSNP accession IDs (NCBI_SS#) | Chromosomes      | Physical positions (bp) | SNPs | Gene accession IDs | Sequence components of genome | Putative functions |
|----------------------|-------------------------------------|------------------|-------------------------|------|--------------------|-------------------------------|--------------------|
| Kabuli_wild_32865465 | NA                                  | Ca_kabuli_denovo | 32865465                | C/T  | NA                 | NA                            | NA                 |
| Kabuli_wild_32872820 | NA                                  | Ca_kabuli_denovo | 32872820                | C/G  | NA                 | NA                            | NA                 |
| Kabuli_wild_32873129 | NA                                  | Ca_kabuli_denovo | 32873129                | G/A  | NA                 | NA                            | NA                 |
| Kabuli_wild_32873139 | NA                                  | Ca_kabuli_denovo | 32873139                | T/C  | NA                 | NA                            | NA                 |
| Kabuli_wild_32877096 | NA                                  | Ca_kabuli_denovo | 32877096                | G/T  | NA                 | NA                            | NA                 |
| Kabuli_wild_32886161 | NA                                  | Ca_kabuli_denovo | 32886161                | G/T  | NA                 | NA                            | NA                 |
| Kabuli_wild_32887523 | NA                                  | Ca_kabuli_denovo | 32887523                | G/T  | NA                 | NA                            | NA                 |
| Kabuli_wild_32890214 | NA                                  | Ca_kabuli_denovo | 32890214                | G/T  | NA                 | NA                            | NA                 |
| Kabuli_wild_32890215 | NA                                  | Ca_kabuli_denovo | 32890215                | G/A  | NA                 | NA                            | NA                 |
| Kabuli_wild_32890242 | NA                                  | Ca_kabuli_denovo | 32890242                | A/G  | NA                 | NA                            | NA                 |
| Kabuli_wild_32904852 | NA                                  | Ca_kabuli_denovo | 32904852                | G/T  | NA                 | NA                            | NA                 |
| Kabuli_wild_32906488 | NA                                  | Ca_kabuli_denovo | 32906488                | C/A  | NA                 | NA                            | NA                 |
| Kabuli_wild_32908802 | NA                                  | Ca_kabuli_denovo | 32908802                | A/G  | NA                 | NA                            | NA                 |
| Kabuli_wild_32911720 | NA                                  | Ca_kabuli_denovo | 32911720                | C/G  | NA                 | NA                            | NA                 |
| Kabuli_wild_32916114 | NA                                  | Ca_kabuli_denovo | 32916114                | C/G  | NA                 | NA                            | NA                 |
| Kabuli_wild_32916910 | NA                                  | Ca_kabuli_denovo | 32916910                | A/T  | NA                 | NA                            | NA                 |
| Kabuli_wild_32918147 | NA                                  | Ca_kabuli_denovo | 32918147                | C/T  | NA                 | NA                            | NA                 |
| Kabuli_wild_32918149 | NA                                  | Ca_kabuli_denovo | 32918149                | G/A  | NA                 | NA                            | NA                 |
| Kabuli_wild_32924373 | NA                                  | Ca_kabuli_denovo | 32924373                | A/G  | NA                 | NA                            | NA                 |
| Kabuli_wild_32924648 | NA                                  | Ca_kabuli_denovo | 32924648                | C/T  | NA                 | NA                            | NA                 |
| Kabuli_wild_32937356 | NA                                  | Ca_kabuli_denovo | 32937356                | C/G  | NA                 | NA                            | NA                 |
| Kabuli_wild_32940557 | NA                                  | Ca_kabuli_denovo | 32940557                | G/T  | NA                 | NA                            | NA                 |
| Kabuli_wild_32941543 | NA                                  | Ca_kabuli_denovo | 32941543                | G/A  | NA                 | NA                            | NA                 |
| Kabuli_wild_32941555 | NA                                  | Ca_kabuli_denovo | 32941555                | C/T  | NA                 | NA                            | NA                 |
| Kabuli_wild_32941608 | NA                                  | Ca_kabuli_denovo | 32941608                | C/G  | NA                 | NA                            | NA                 |
| Kabuli_wild_32944002 | NA                                  | Ca_kabuli_denovo | 32944002                | T/C  | NA                 | NA                            | NA                 |
| Kabuli_wild_32944820 | NA                                  | Ca_kabuli_denovo | 32944820                | G/T  | NA                 | NA                            | NA                 |
| Kabuli_wild_32946050 | NA                                  | Ca_kabuli_denovo | 32946050                | A/G  | NA                 | NA                            | NA                 |
| Kabuli_wild_32955048 | NA                                  | Ca_kabuli_denovo | 32955048                | T/G  | NA                 | NA                            | NA                 |
| Kabuli_wild_32956131 | NA                                  | Ca_kabuli_denovo | 32956131                | A/C  | NA                 | NA                            | NA                 |
| Kabuli_wild_32956214 | NA                                  | Ca_kabuli_denovo | 32956214                | A/C  | NA                 | NA                            | NA                 |
| Kabuli_wild_32965766 | NA                                  | Ca_kabuli_denovo | 32965766                | A/G  | NA                 | NA                            | NA                 |
| Kabuli_wild_32965772 | NA                                  | Ca_kabuli_denovo | 32965772                | A/G  | NA                 | NA                            | NA                 |
| Kabuli_wild_32966226 | NA                                  | Ca_kabuli_denovo | 32966226                | G/A  | NA                 | NA                            | NA                 |
| Kabuli_wild_32968213 | NA                                  | Ca_kabuli_denovo | 32968213                | G/T  | NA                 | NA                            | NA                 |
| Kabuli_wild_32978680 | NA                                  | Ca_kabuli_denovo | 32978680                | A/C  | NA                 | NA                            | NA                 |
| Kabuli_wild_32982827 | NA                                  | Ca_kabuli_denovo | 32982827                | A/C  | NA                 | NA                            | NA                 |
| Kabuli_wild_32984458 | NA                                  | Ca_kabuli_denovo | 32984458                | T/C  | NA                 | NA                            | NA                 |
| Kabuli_wild_32984461 | NA                                  | Ca_kabuli_denovo | 32984461                | G/A  | NA                 | NA                            | NA                 |
| Kabuli_wild_32987926 | NA                                  | Ca_kabuli_denovo | 32987926                | G/T  | NA                 | NA                            | NA                 |
| Kabuli_wild_32989114 | NA                                  | Ca_kabuli_denovo | 32989114                | T/G  | NA                 | NA                            | NA                 |
| Kabuli_wild_32989126 | NA                                  | Ca_kabuli_denovo | 32989126                | A/G  | NA                 | NA                            | NA                 |
| Kabuli_wild_32993012 | NA                                  | Ca_kabuli_denovo | 32993012                | G/C  | NA                 | NA                            | NA                 |
| Kabuli_wild_32998725 | NA                                  | Ca_kabuli_denovo | 32998725                | T/G  | NA                 | NA                            | NA                 |

| SNP IDs              | NCBI dbSNP accession IDs (NCBI_SS#) | Chromosomes      | Physical positions (bp) | SNPs | Gene accession IDs | Sequence components of genome | Putative functions |
|----------------------|-------------------------------------|------------------|-------------------------|------|--------------------|-------------------------------|--------------------|
| Kabuli_wild_32999624 | NA                                  | Ca_kabuli_denovo | 32999624                | A/G  | NA                 | NA                            | NA                 |
| Kabuli_wild_32999645 | NA                                  | Ca_kabuli_denovo | 32999645                | G/C  | NA                 | NA                            | NA                 |
| Kabuli_wild_33005271 | NA                                  | Ca_kabuli_denovo | 33005271                | C/G  | NA                 | NA                            | NA                 |
| Kabuli_wild_33005272 | NA                                  | Ca_kabuli_denovo | 33005272                | C/G  | NA                 | NA                            | NA                 |
| Kabuli_wild_33005273 | NA                                  | Ca_kabuli_denovo | 33005273                | C/G  | NA                 | NA                            | NA                 |
| Kabuli_wild_33009128 | NA                                  | Ca_kabuli_denovo | 33009128                | A/G  | NA                 | NA                            | NA                 |
| Kabuli_wild_33009205 | NA                                  | Ca_kabuli_denovo | 33009205                | T/C  | NA                 | NA                            | NA                 |
| Kabuli_wild_33009425 | NA                                  | Ca_kabuli_denovo | 33009425                | G/C  | NA                 | NA                            | NA                 |
| Kabuli_wild_33009431 | NA                                  | Ca_kabuli_denovo | 33009431                | A/G  | NA                 | NA                            | NA                 |
| Kabuli_wild_33009446 | NA                                  | Ca_kabuli_denovo | 33009446                | A/G  | NA                 | NA                            | NA                 |
| Kabuli_wild_33019949 | NA                                  | Ca_kabuli_denovo | 33019949                | G/C  | NA                 | NA                            | NA                 |
| Kabuli_wild_33023448 | NA                                  | Ca_kabuli_denovo | 33023448                | C/A  | NA                 | NA                            | NA                 |
| Kabuli_wild_33026209 | NA                                  | Ca_kabuli_denovo | 33026209                | A/G  | NA                 | NA                            | NA                 |
| Kabuli_wild_33026287 | NA                                  | Ca_kabuli_denovo | 33026287                | T/C  | NA                 | NA                            | NA                 |
| Kabuli_wild_33028969 | NA                                  | Ca_kabuli_denovo | 33028969                | G/T  | NA                 | NA                            | NA                 |
| Kabuli_wild_33030684 | NA                                  | Ca_kabuli_denovo | 33030684                | T/C  | NA                 | NA                            | NA                 |
| Kabuli_wild_33035195 | NA                                  | Ca_kabuli_denovo | 33035195                | G/T  | NA                 | NA                            | NA                 |
| Kabuli_wild_33035863 | NA                                  | Ca_kabuli_denovo | 33035863                | C/T  | NA                 | NA                            | NA                 |
| Kabuli_wild_33035890 | NA                                  | Ca_kabuli_denovo | 33035890                | A/G  | NA                 | NA                            | NA                 |
| Kabuli_wild_33036715 | NA                                  | Ca_kabuli_denovo | 33036715                | G/C  | NA                 | NA                            | NA                 |
| Kabuli_wild_33049544 | NA                                  | Ca_kabuli_denovo | 33049544                | A/C  | NA                 | NA                            | NA                 |
| Kabuli_wild_33049573 | NA                                  | Ca_kabuli_denovo | 33049573                | G/A  | NA                 | NA                            | NA                 |
| Kabuli_wild_33053272 | NA                                  | Ca_kabuli_denovo | 33053272                | G/A  | NA                 | NA                            | NA                 |
| Kabuli_wild_33066576 | NA                                  | Ca_kabuli_denovo | 33066576                | G/T  | NA                 | NA                            | NA                 |
| Kabuli_wild_33068221 | NA                                  | Ca_kabuli_denovo | 33068221                | G/T  | NA                 | NA                            | NA                 |
| Kabuli_wild_33068312 | NA                                  | Ca_kabuli_denovo | 33068312                | C/T  | NA                 | NA                            | NA                 |
| Kabuli_wild_33068327 | NA                                  | Ca_kabuli_denovo | 33068327                | G/T  | NA                 | NA                            | NA                 |
| Kabuli_wild_33083237 | NA                                  | Ca_kabuli_denovo | 33083237                | A/G  | NA                 | NA                            | NA                 |
| Kabuli_wild_33083260 | NA                                  | Ca_kabuli_denovo | 33083260                | G/A  | NA                 | NA                            | NA                 |
| Kabuli_wild_33088423 | NA                                  | Ca_kabuli_denovo | 33088423                | C/T  | NA                 | NA                            | NA                 |
| Kabuli_wild_33088472 | NA                                  | Ca_kabuli_denovo | 33088472                | T/C  | NA                 | NA                            | NA                 |
| Kabuli_wild_33112562 | NA                                  | Ca_kabuli_denovo | 33112562                | C/T  | NA                 | NA                            | NA                 |
| Kabuli_wild_33113057 | NA                                  | Ca_kabuli_denovo | 33113057                | T/C  | NA                 | NA                            | NA                 |
| Kabuli_wild_33113060 | NA                                  | Ca_kabuli_denovo | 33113060                | G/C  | NA                 | NA                            | NA                 |
| Kabuli_wild_33114245 | NA                                  | Ca_kabuli_denovo | 33114245                | A/G  | NA                 | NA                            | NA                 |
| Kabuli_wild_33115584 | NA                                  | Ca_kabuli_denovo | 33115584                | G/A  | NA                 | NA                            | NA                 |
| Kabuli_wild_33115646 | NA                                  | Ca_kabuli_denovo | 33115646                | C/T  | NA                 | NA                            | NA                 |
| Kabuli_wild_33119137 | NA                                  | Ca_kabuli_denovo | 33119137                | A/G  | NA                 | NA                            | NA                 |
| Kabuli_wild_33119143 | NA                                  | Ca_kabuli_denovo | 33119143                | C/G  | NA                 | NA                            | NA                 |
| Kabuli_wild_33119634 | NA                                  | Ca_kabuli_denovo | 33119634                | C/T  | NA                 | NA                            | NA                 |
| Kabuli_wild_33119690 | NA                                  | Ca_kabuli_denovo | 33119690                | C/T  | NA                 | NA                            | NA                 |
| Kabuli_wild_33120440 | NA                                  | Ca_kabuli_denovo | 33120440                | C/A  | NA                 | NA                            | NA                 |
| Kabuli_wild_33120889 | NA                                  | Ca_kabuli_denovo | 33120889                | T/C  | NA                 | NA                            | NA                 |
| Kabuli_wild_33122116 | NA                                  | Ca_kabuli_denovo | 33122116                | G/A  | NA                 | NA                            | NA                 |

| SNP IDs              | NCBI dbSNP accession IDs (NCBI_SS#) | Chromosomes      | Physical positions (bp) | SNPs | Gene accession IDs | Sequence components of genome | Putative functions |
|----------------------|-------------------------------------|------------------|-------------------------|------|--------------------|-------------------------------|--------------------|
| Kabuli_wild_33123667 | NA                                  | Ca_kabuli_denovo | 33123667                | C/T  | NA                 | NA                            | NA                 |
| Kabuli_wild_33123724 | NA                                  | Ca_kabuli_denovo | 33123724                | C/G  | NA                 | NA                            | NA                 |
| Kabuli_wild_33123736 | NA                                  | Ca_kabuli_denovo | 33123736                | T/C  | NA                 | NA                            | NA                 |
| Kabuli_wild_33129766 | NA                                  | Ca_kabuli_denovo | 33129766                | A/G  | NA                 | NA                            | NA                 |
| Kabuli_wild_33129775 | NA                                  | Ca_kabuli_denovo | 33129775                | C/T  | NA                 | NA                            | NA                 |
| Kabuli_wild_33132472 | NA                                  | Ca_kabuli_denovo | 33132472                | A/C  | NA                 | NA                            | NA                 |
| Kabuli_wild_33145817 | NA                                  | Ca_kabuli_denovo | 33145817                | A/G  | NA                 | NA                            | NA                 |
| Kabuli_wild_33152491 | NA                                  | Ca_kabuli_denovo | 33152491                | C/G  | NA                 | NA                            | NA                 |
| Kabuli_wild_33152644 | NA                                  | Ca_kabuli_denovo | 33152644                | C/T  | NA                 | NA                            | NA                 |
| Kabuli_wild_33154834 | NA                                  | Ca_kabuli_denovo | 33154834                | C/G  | NA                 | NA                            | NA                 |
| Kabuli_wild_33154838 | NA                                  | Ca_kabuli_denovo | 33154838                | A/C  | NA                 | NA                            | NA                 |
| Kabuli_wild_33156207 | NA                                  | Ca_kabuli_denovo | 33156207                | T/C  | NA                 | NA                            | NA                 |
| Kabuli_wild_33156378 | NA                                  | Ca_kabuli_denovo | 33156378                | A/C  | NA                 | NA                            | NA                 |
| Kabuli_wild_33156379 | NA                                  | Ca_kabuli_denovo | 33156379                | G/T  | NA                 | NA                            | NA                 |
| Kabuli_wild_33165339 | NA                                  | Ca_kabuli_denovo | 33165339                | G/A  | NA                 | NA                            | NA                 |
| Kabuli_wild_33165701 | NA                                  | Ca_kabuli_denovo | 33165701                | T/G  | NA                 | NA                            | NA                 |
| Kabuli_wild_33165717 | NA                                  | Ca_kabuli_denovo | 33165717                | A/G  | NA                 | NA                            | NA                 |
| Kabuli_wild_33166337 | NA                                  | Ca_kabuli_denovo | 33166337                | A/C  | NA                 | NA                            | NA                 |
| Kabuli_wild_33166350 | NA                                  | Ca_kabuli_denovo | 33166350                | T/G  | NA                 | NA                            | NA                 |
| Kabuli_wild_33167160 | NA                                  | Ca_kabuli_denovo | 33167160                | T/A  | NA                 | NA                            | NA                 |
| Kabuli_wild_33170446 | NA                                  | Ca_kabuli_denovo | 33170446                | A/T  | NA                 | NA                            | NA                 |
| Kabuli_wild_33172985 | NA                                  | Ca_kabuli_denovo | 33172985                | A/C  | NA                 | NA                            | NA                 |
| Kabuli_wild_33172986 | NA                                  | Ca_kabuli_denovo | 33172986                | G/T  | NA                 | NA                            | NA                 |
| Kabuli_wild_33172987 | NA                                  | Ca_kabuli_denovo | 33172987                | A/G  | NA                 | NA                            | NA                 |
| Kabuli_wild_33179800 | NA                                  | Ca_kabuli_denovo | 33179800                | C/G  | NA                 | NA                            | NA                 |
| Kabuli_wild_33182057 | NA                                  | Ca_kabuli_denovo | 33182057                | G/A  | NA                 | NA                            | NA                 |
| Kabuli_wild_33187144 | NA                                  | Ca_kabuli_denovo | 33187144                | G/T  | NA                 | NA                            | NA                 |
| Kabuli_wild_33188155 | NA                                  | Ca_kabuli_denovo | 33188155                | G/T  | NA                 | NA                            | NA                 |
| Kabuli_wild_33193238 | NA                                  | Ca_kabuli_denovo | 33193238                | G/T  | NA                 | NA                            | NA                 |
| Kabuli_wild_33193273 | NA                                  | Ca_kabuli_denovo | 33193273                | A/G  | NA                 | NA                            | NA                 |
| Kabuli_wild_33193278 | NA                                  | Ca_kabuli_denovo | 33193278                | C/G  | NA                 | NA                            | NA                 |
| Kabuli_wild_33194056 | NA                                  | Ca_kabuli_denovo | 33194056                | G/C  | NA                 | NA                            | NA                 |
| Kabuli_wild_33194057 | NA                                  | Ca_kabuli_denovo | 33194057                | G/A  | NA                 | NA                            | NA                 |
| Kabuli_wild_33194058 | NA                                  | Ca_kabuli_denovo | 33194058                | C/G  | NA                 | NA                            | NA                 |
| Kabuli_wild_33197012 | NA                                  | Ca_kabuli_denovo | 33197012                | G/A  | NA                 | NA                            | NA                 |
| Kabuli_wild_33207662 | NA                                  | Ca_kabuli_denovo | 33207662                | A/G  | NA                 | NA                            | NA                 |
| Kabuli_wild_33207665 | NA                                  | Ca_kabuli_denovo | 33207665                | G/A  | NA                 | NA                            | NA                 |
| Kabuli_wild_33209228 | NA                                  | Ca_kabuli_denovo | 33209228                | A/G  | NA                 | NA                            | NA                 |
| Kabuli_wild_33219234 | NA                                  | Ca_kabuli_denovo | 33219234                | G/T  | NA                 | NA                            | NA                 |
| Kabuli_wild_33221255 | NA                                  | Ca_kabuli_denovo | 33221255                | A/T  | NA                 | NA                            | NA                 |
| Kabuli_wild_33221258 | NA                                  | Ca_kabuli_denovo | 33221258                | T/C  | NA                 | NA                            | NA                 |
| Kabuli_wild_33221941 | NA                                  | Ca_kabuli_denovo | 33221941                | G/T  | NA                 | NA                            | NA                 |
| Kabuli_wild_33223408 | NA                                  | Ca_kabuli_denovo | 33223408                | A/G  | NA                 | NA                            | NA                 |
| Kabuli_wild_33223480 | NA                                  | Ca_kabuli_denovo | 33223480                | T/C  | NA                 | NA                            | NA                 |



| SNP IDs              | NCBI dbSNP accession IDs (NCBI_SS#) | Chromosomes      | Physical positions (bp) | SNPs | Gene accession IDs | Sequence components of genome | Putative functions |
|----------------------|-------------------------------------|------------------|-------------------------|------|--------------------|-------------------------------|--------------------|
| Kabuli_wild_33227124 | NA                                  | Ca_kabuli_denovo | 33227124                | G/T  | NA                 | NA                            | NA                 |
| Kabuli_wild_33228679 | NA                                  | Ca_kabuli_denovo | 33228679                | G/A  | NA                 | NA                            | NA                 |
| Kabuli_wild_33232602 | NA                                  | Ca_kabuli_denovo | 33232602                | A/C  | NA                 | NA                            | NA                 |
| Kabuli_wild_33233810 | NA                                  | Ca_kabuli_denovo | 33233810                | G/T  | NA                 | NA                            | NA                 |
| Kabuli_wild_33234802 | NA                                  | Ca_kabuli_denovo | 33234802                | G/T  | NA                 | NA                            | NA                 |
| Kabuli_wild_33240336 | NA                                  | Ca_kabuli_denovo | 33240336                | A/G  | NA                 | NA                            | NA                 |
| Kabuli_wild_33240354 | NA                                  | Ca_kabuli_denovo | 33240354                | T/C  | NA                 | NA                            | NA                 |
| Kabuli_wild_33247501 | NA                                  | Ca_kabuli_denovo | 33247501                | A/G  | NA                 | NA                            | NA                 |
| Kabuli_wild_33247503 | NA                                  | Ca_kabuli_denovo | 33247503                | G/A  | NA                 | NA                            | NA                 |
| Kabuli_wild_33247508 | NA                                  | Ca_kabuli_denovo | 33247508                | G/C  | NA                 | NA                            | NA                 |
| Kabuli_wild_33247510 | NA                                  | Ca_kabuli_denovo | 33247510                | C/G  | NA                 | NA                            | NA                 |
| Kabuli_wild_33247511 | NA                                  | Ca_kabuli_denovo | 33247511                | A/C  | NA                 | NA                            | NA                 |
| Kabuli_wild_33247541 | NA                                  | Ca_kabuli_denovo | 33247541                | T/G  | NA                 | NA                            | NA                 |
| Kabuli_wild_33255941 | NA                                  | Ca_kabuli_denovo | 33255941                | C/T  | NA                 | NA                            | NA                 |
| Kabuli_wild_33255972 | NA                                  | Ca_kabuli_denovo | 33255972                | G/T  | NA                 | NA                            | NA                 |
| Kabuli_wild_33263167 | NA                                  | Ca_kabuli_denovo | 33263167                | G/A  | NA                 | NA                            | NA                 |
| Kabuli_wild_33263223 | NA                                  | Ca_kabuli_denovo | 33263223                | T/A  | NA                 | NA                            | NA                 |
| Kabuli_wild_33267401 | NA                                  | Ca_kabuli_denovo | 33267401                | A/G  | NA                 | NA                            | NA                 |
| Kabuli_wild_33268910 | NA                                  | Ca_kabuli_denovo | 33268910                | T/C  | NA                 | NA                            | NA                 |
| Kabuli_wild_33277162 | NA                                  | Ca_kabuli_denovo | 33277162                | C/G  | NA                 | NA                            | NA                 |
| Kabuli_wild_33278606 | NA                                  | Ca_kabuli_denovo | 33278606                | C/G  | NA                 | NA                            | NA                 |
| Kabuli_wild_33282434 | NA                                  | Ca_kabuli_denovo | 33282434                | C/T  | NA                 | NA                            | NA                 |
| Kabuli_wild_33282452 | NA                                  | Ca_kabuli_denovo | 33282452                | A/G  | NA                 | NA                            | NA                 |
| Kabuli_wild_33285602 | NA                                  | Ca_kabuli_denovo | 33285602                | G/C  | NA                 | NA                            | NA                 |
| Kabuli_wild_33285641 | NA                                  | Ca_kabuli_denovo | 33285641                | C/T  | NA                 | NA                            | NA                 |
| Kabuli_wild_33285650 | NA                                  | Ca_kabuli_denovo | 33285650                | A/C  | NA                 | NA                            | NA                 |
| Kabuli_wild_33285656 | NA                                  | Ca_kabuli_denovo | 33285656                | T/C  | NA                 | NA                            | NA                 |
| Kabuli_wild_33286459 | NA                                  | Ca_kabuli_denovo | 33286459                | G/T  | NA                 | NA                            | NA                 |
| Kabuli_wild_33290385 | NA                                  | Ca_kabuli_denovo | 33290385                | A/G  | NA                 | NA                            | NA                 |
| Kabuli_wild_33291822 | NA                                  | Ca_kabuli_denovo | 33291822                | G/T  | NA                 | NA                            | NA                 |
| Kabuli_wild_33292433 | NA                                  | Ca_kabuli_denovo | 33292433                | C/G  | NA                 | NA                            | NA                 |
| Kabuli_wild_33299284 | NA                                  | Ca_kabuli_denovo | 33299284                | C/G  | NA                 | NA                            | NA                 |
| Kabuli_wild_33303966 | NA                                  | Ca_kabuli_denovo | 33303966                | G/T  | NA                 | NA                            | NA                 |
| Kabuli_wild_33305272 | NA                                  | Ca_kabuli_denovo | 33305272                | G/T  | NA                 | NA                            | NA                 |
| Kabuli_wild_33311429 | NA                                  | Ca_kabuli_denovo | 33311429                | G/A  | NA                 | NA                            | NA                 |
| Kabuli_wild_33311434 | NA                                  | Ca_kabuli_denovo | 33311434                | C/G  | NA                 | NA                            | NA                 |
| Kabuli_wild_33315790 | NA                                  | Ca_kabuli_denovo | 33315790                | T/C  | NA                 | NA                            | NA                 |
| Kabuli_wild_33315831 | NA                                  | Ca_kabuli_denovo | 33315831                | C/T  | NA                 | NA                            | NA                 |
| Kabuli_wild_33328810 | NA                                  | Ca_kabuli_denovo | 33328810                | C/G  | NA                 | NA                            | NA                 |
| Kabuli_wild_33328838 | NA                                  | Ca_kabuli_denovo | 33328838                | G/A  | NA                 | NA                            | NA                 |
| Kabuli_wild_33339846 | NA                                  | Ca_kabuli_denovo | 33339846                | G/A  | NA                 | NA                            | NA                 |
| Kabuli_wild_33341222 | NA                                  | Ca_kabuli_denovo | 33341222                | T/C  | NA                 | NA                            | NA                 |
| Kabuli_wild_33341267 | NA                                  | Ca_kabuli_denovo | 33341267                | T/C  | NA                 | NA                            | NA                 |
| Kabuli_wild_33343798 | NA                                  | Ca_kabuli_denovo | 33343798                | G/C  | NA                 | NA                            | NA                 |

| SNP IDs              | NCBI dbSNP accession IDs (NCBI_SS#) | Chromosomes      | Physical positions (bp) | SNPs | Gene accession IDs | Sequence components of genome | Putative functions |
|----------------------|-------------------------------------|------------------|-------------------------|------|--------------------|-------------------------------|--------------------|
| Kabuli_wild_33345424 | NA                                  | Ca_kabuli_denovo | 33345424                | G/T  | NA                 | NA                            | NA                 |
| Kabuli_wild_33345427 | NA                                  | Ca_kabuli_denovo | 33345427                | T/A  | NA                 | NA                            | NA                 |
| Kabuli_wild_33350427 | NA                                  | Ca_kabuli_denovo | 33350427                | G/T  | NA                 | NA                            | NA                 |
| Kabuli_wild_33350968 | NA                                  | Ca_kabuli_denovo | 33350968                | C/G  | NA                 | NA                            | NA                 |
| Kabuli_wild_33354816 | NA                                  | Ca_kabuli_denovo | 33354816                | G/A  | NA                 | NA                            | NA                 |
| Kabuli_wild_33362643 | NA                                  | Ca_kabuli_denovo | 33362643                | C/G  | NA                 | NA                            | NA                 |
| Kabuli_wild_33367406 | NA                                  | Ca_kabuli_denovo | 33367406                | G/A  | NA                 | NA                            | NA                 |
| Kabuli_wild_33388436 | NA                                  | Ca_kabuli_denovo | 33388436                | A/G  | NA                 | NA                            | NA                 |
| Kabuli_wild_33388469 | NA                                  | Ca_kabuli_denovo | 33388469                | G/A  | NA                 | NA                            | NA                 |
| Kabuli_wild_33388483 | NA                                  | Ca_kabuli_denovo | 33388483                | C/T  | NA                 | NA                            | NA                 |
| Kabuli_wild_33390618 | NA                                  | Ca_kabuli_denovo | 33390618                | G/T  | NA                 | NA                            | NA                 |
| Kabuli_wild_33393977 | NA                                  | Ca_kabuli_denovo | 33393977                | C/G  | NA                 | NA                            | NA                 |
| Kabuli_wild_33394960 | NA                                  | Ca_kabuli_denovo | 33394960                | C/G  | NA                 | NA                            | NA                 |
| Kabuli_wild_33401684 | NA                                  | Ca_kabuli_denovo | 33401684                | C/G  | NA                 | NA                            | NA                 |
| Kabuli_wild_33404554 | NA                                  | Ca_kabuli_denovo | 33404554                | A/C  | NA                 | NA                            | NA                 |
| Kabuli_wild_33406426 | NA                                  | Ca_kabuli_denovo | 33406426                | A/C  | NA                 | NA                            | NA                 |
| Kabuli_wild_33406741 | NA                                  | Ca_kabuli_denovo | 33406741                | G/C  | NA                 | NA                            | NA                 |
| Kabuli_wild_33407074 | NA                                  | Ca_kabuli_denovo | 33407074                | A/G  | NA                 | NA                            | NA                 |
| Kabuli_wild_33407104 | NA                                  | Ca_kabuli_denovo | 33407104                | G/C  | NA                 | NA                            | NA                 |
| Kabuli_wild_33407119 | NA                                  | Ca_kabuli_denovo | 33407119                | A/C  | NA                 | NA                            | NA                 |
| Kabuli_wild_33407940 | NA                                  | Ca_kabuli_denovo | 33407940                | A/G  | NA                 | NA                            | NA                 |
| Kabuli_wild_33410129 | NA                                  | Ca_kabuli_denovo | 33410129                | A/G  | NA                 | NA                            | NA                 |
| Kabuli_wild_33410132 | NA                                  | Ca_kabuli_denovo | 33410132                | C/G  | NA                 | NA                            | NA                 |
| Kabuli_wild_33416347 | NA                                  | Ca_kabuli_denovo | 33416347                | C/G  | NA                 | NA                            | NA                 |
| Kabuli_wild_33419799 | NA                                  | Ca_kabuli_denovo | 33419799                | C/G  | NA                 | NA                            | NA                 |
| Kabuli_wild_33427070 | NA                                  | Ca_kabuli_denovo | 33427070                | G/T  | NA                 | NA                            | NA                 |
| Kabuli_wild_33427186 | NA                                  | Ca_kabuli_denovo | 33427186                | G/T  | NA                 | NA                            | NA                 |
| Kabuli_wild_33427187 | NA                                  | Ca_kabuli_denovo | 33427187                | C/T  | NA                 | NA                            | NA                 |
| Kabuli_wild_33427411 | NA                                  | Ca_kabuli_denovo | 33427411                | T/A  | NA                 | NA                            | NA                 |
| Kabuli_wild_33436144 | NA                                  | Ca_kabuli_denovo | 33436144                | C/T  | NA                 | NA                            | NA                 |
| Kabuli_wild_33436193 | NA                                  | Ca_kabuli_denovo | 33436193                | T/A  | NA                 | NA                            | NA                 |
| Kabuli_wild_33436214 | NA                                  | Ca_kabuli_denovo | 33436214                | C/T  | NA                 | NA                            | NA                 |
| Kabuli_wild_33437319 | NA                                  | Ca_kabuli_denovo | 33437319                | G/T  | NA                 | NA                            | NA                 |
| Kabuli_wild_33440057 | NA                                  | Ca_kabuli_denovo | 33440057                | G/T  | NA                 | NA                            | NA                 |
| Kabuli_wild_33442496 | NA                                  | Ca_kabuli_denovo | 33442496                | C/G  | NA                 | NA                            | NA                 |
| Kabuli_wild_33442523 | NA                                  | Ca_kabuli_denovo | 33442523                | C/T  | NA                 | NA                            | NA                 |
| Kabuli_wild_33444232 | NA                                  | Ca_kabuli_denovo | 33444232                | G/T  | NA                 | NA                            | NA                 |
| Kabuli_wild_33447487 | NA                                  | Ca_kabuli_denovo | 33447487                | G/A  | NA                 | NA                            | NA                 |
| Kabuli_wild_33447503 | NA                                  | Ca_kabuli_denovo | 33447503                | A/C  | NA                 | NA                            | NA                 |
| Kabuli_wild_33451911 | NA                                  | Ca_kabuli_denovo | 33451911                | G/T  | NA                 | NA                            | NA                 |
| Kabuli_wild_33452546 | NA                                  | Ca_kabuli_denovo | 33452546                | A/G  | NA                 | NA                            | NA                 |
| Kabuli_wild_33459958 | NA                                  | Ca_kabuli_denovo | 33459958                | A/G  | NA                 | NA                            | NA                 |
| Kabuli_wild_33459961 | NA                                  | Ca_kabuli_denovo | 33459961                | G/T  | NA                 | NA                            | NA                 |
| Kabuli_wild_33461894 | NA                                  | Ca_kabuli_denovo | 33461894                | T/C  | NA                 | NA                            | NA                 |

| SNP IDs                     | NCBI dbSNP accession IDs (NCBI_SS#) | Chromosomes             | Physical positions (bp) | SNPs | Gene accession IDs | Sequence components of genome | Putative functions |
|-----------------------------|-------------------------------------|-------------------------|-------------------------|------|--------------------|-------------------------------|--------------------|
| <i>Kabuli_wild_33466803</i> | NA                                  | <i>Ca_kabuli_denovo</i> | 33466803                | A/G  | NA                 | NA                            | NA                 |
| <i>Kabuli_wild_33466806</i> | NA                                  | <i>Ca_kabuli_denovo</i> | 33466806                | A/T  | NA                 | NA                            | NA                 |
| <i>Kabuli_wild_33469670</i> | NA                                  | <i>Ca_kabuli_denovo</i> | 33469670                | G/A  | NA                 | NA                            | NA                 |
| <i>Kabuli_wild_33479373</i> | NA                                  | <i>Ca_kabuli_denovo</i> | 33479373                | G/C  | NA                 | NA                            | NA                 |
| <i>Kabuli_wild_33489704</i> | NA                                  | <i>Ca_kabuli_denovo</i> | 33489704                | T/G  | NA                 | NA                            | NA                 |
| <i>Kabuli_wild_33489733</i> | NA                                  | <i>Ca_kabuli_denovo</i> | 33489733                | G/A  | NA                 | NA                            | NA                 |
| <i>Kabuli_wild_33494860</i> | NA                                  | <i>Ca_kabuli_denovo</i> | 33494860                | G/T  | NA                 | NA                            | NA                 |
| <i>Kabuli_wild_33496726</i> | NA                                  | <i>Ca_kabuli_denovo</i> | 33496726                | G/A  | NA                 | NA                            | NA                 |
| <i>Kabuli_wild_33499522</i> | NA                                  | <i>Ca_kabuli_denovo</i> | 33499522                | G/A  | NA                 | NA                            | NA                 |
| <i>Kabuli_wild_33499525</i> | NA                                  | <i>Ca_kabuli_denovo</i> | 33499525                | G/A  | NA                 | NA                            | NA                 |
| <i>Kabuli_wild_33503953</i> | NA                                  | <i>Ca_kabuli_denovo</i> | 33503953                | T/G  | NA                 | NA                            | NA                 |
| <i>Kabuli_wild_33503974</i> | NA                                  | <i>Ca_kabuli_denovo</i> | 33503974                | C/T  | NA                 | NA                            | NA                 |
| <i>Kabuli_wild_33504554</i> | NA                                  | <i>Ca_kabuli_denovo</i> | 33504554                | G/T  | NA                 | NA                            | NA                 |
| <i>Kabuli_wild_33515496</i> | NA                                  | <i>Ca_kabuli_denovo</i> | 33515496                | A/G  | NA                 | NA                            | NA                 |
| <i>Kabuli_wild_33527803</i> | NA                                  | <i>Ca_kabuli_denovo</i> | 33527803                | A/C  | NA                 | NA                            | NA                 |
| <i>Kabuli_wild_33539381</i> | NA                                  | <i>Ca_kabuli_denovo</i> | 33539381                | G/C  | NA                 | NA                            | NA                 |
| <i>Kabuli_wild_33542279</i> | NA                                  | <i>Ca_kabuli_denovo</i> | 33542279                | T/G  | NA                 | NA                            | NA                 |
| <i>Kabuli_wild_33548869</i> | NA                                  | <i>Ca_kabuli_denovo</i> | 33548869                | C/G  | NA                 | NA                            | NA                 |
| <i>Kabuli_wild_33551081</i> | NA                                  | <i>Ca_kabuli_denovo</i> | 33551081                | T/C  | NA                 | NA                            | NA                 |
| <i>Kabuli_wild_33553477</i> | NA                                  | <i>Ca_kabuli_denovo</i> | 33553477                | C/T  | NA                 | NA                            | NA                 |
| <i>Kabuli_wild_33553480</i> | NA                                  | <i>Ca_kabuli_denovo</i> | 33553480                | C/G  | NA                 | NA                            | NA                 |
| <i>Kabuli_wild_33555139</i> | NA                                  | <i>Ca_kabuli_denovo</i> | 33555139                | G/C  | NA                 | NA                            | NA                 |
| <i>Kabuli_wild_33555157</i> | NA                                  | <i>Ca_kabuli_denovo</i> | 33555157                | T/C  | NA                 | NA                            | NA                 |
| <i>Kabuli_wild_33555631</i> | NA                                  | <i>Ca_kabuli_denovo</i> | 33555631                | C/T  | NA                 | NA                            | NA                 |
| <i>Kabuli_wild_33555636</i> | NA                                  | <i>Ca_kabuli_denovo</i> | 33555636                | T/C  | NA                 | NA                            | NA                 |
| <i>Kabuli_wild_33558520</i> | NA                                  | <i>Ca_kabuli_denovo</i> | 33558520                | A/G  | NA                 | NA                            | NA                 |
| <i>Kabuli_wild_33566104</i> | NA                                  | <i>Ca_kabuli_denovo</i> | 33566104                | A/C  | NA                 | NA                            | NA                 |
| <i>Kabuli_wild_33568454</i> | NA                                  | <i>Ca_kabuli_denovo</i> | 33568454                | A/G  | NA                 | NA                            | NA                 |
| <i>Kabuli_wild_33568494</i> | NA                                  | <i>Ca_kabuli_denovo</i> | 33568494                | A/G  | NA                 | NA                            | NA                 |
| <i>Kabuli_wild_33572665</i> | NA                                  | <i>Ca_kabuli_denovo</i> | 33572665                | C/G  | NA                 | NA                            | NA                 |
| <i>Kabuli_wild_33572725</i> | NA                                  | <i>Ca_kabuli_denovo</i> | 33572725                | C/T  | NA                 | NA                            | NA                 |
| <i>Kabuli_wild_33575594</i> | NA                                  | <i>Ca_kabuli_denovo</i> | 33575594                | C/T  | NA                 | NA                            | NA                 |
| <i>Kabuli_wild_33581214</i> | NA                                  | <i>Ca_kabuli_denovo</i> | 33581214                | A/G  | NA                 | NA                            | NA                 |
| <i>Kabuli_wild_33581253</i> | NA                                  | <i>Ca_kabuli_denovo</i> | 33581253                | T/G  | NA                 | NA                            | NA                 |
| <i>Kabuli_wild_33587642</i> | NA                                  | <i>Ca_kabuli_denovo</i> | 33587642                | T/C  | NA                 | NA                            | NA                 |
| <i>Kabuli_wild_33588967</i> | NA                                  | <i>Ca_kabuli_denovo</i> | 33588967                | T/A  | NA                 | NA                            | NA                 |
| <i>Kabuli_wild_33589029</i> | NA                                  | <i>Ca_kabuli_denovo</i> | 33589029                | C/G  | NA                 | NA                            | NA                 |
| <i>Kabuli_wild_33599899</i> | NA                                  | <i>Ca_kabuli_denovo</i> | 33599899                | A/G  | NA                 | NA                            | NA                 |
| <i>Kabuli_wild_33601352</i> | NA                                  | <i>Ca_kabuli_denovo</i> | 33601352                | A/G  | NA                 | NA                            | NA                 |
| <i>Kabuli_wild_33601373</i> | NA                                  | <i>Ca_kabuli_denovo</i> | 33601373                | G/C  | NA                 | NA                            | NA                 |
| <i>Kabuli_wild_33604176</i> | NA                                  | <i>Ca_kabuli_denovo</i> | 33604176                | G/C  | NA                 | NA                            | NA                 |
| <i>Kabuli_wild_33604206</i> | NA                                  | <i>Ca_kabuli_denovo</i> | 33604206                | G/A  | NA                 | NA                            | NA                 |
| <i>Kabuli_wild_33607478</i> | NA                                  | <i>Ca_kabuli_denovo</i> | 33607478                | G/T  | NA                 | NA                            | NA                 |
| <i>Kabuli_wild_33607670</i> | NA                                  | <i>Ca_kabuli_denovo</i> | 33607670                | G/T  | NA                 | NA                            | NA                 |

| SNP IDs              | NCBI dbSNP accession IDs (NCBI_SS#) | Chromosomes      | Physical positions (bp) | SNPs | Gene accession IDs | Sequence components of genome | Putative functions |
|----------------------|-------------------------------------|------------------|-------------------------|------|--------------------|-------------------------------|--------------------|
| Kabuli_wild_33620558 | NA                                  | Ca_kabuli_denovo | 33620558                | G/C  | NA                 | NA                            | NA                 |
| Kabuli_wild_33620559 | NA                                  | Ca_kabuli_denovo | 33620559                | T/C  | NA                 | NA                            | NA                 |
| Kabuli_wild_33623126 | NA                                  | Ca_kabuli_denovo | 33623126                | C/G  | NA                 | NA                            | NA                 |
| Kabuli_wild_33623129 | NA                                  | Ca_kabuli_denovo | 33623129                | A/C  | NA                 | NA                            | NA                 |
| Kabuli_wild_33624857 | NA                                  | Ca_kabuli_denovo | 33624857                | A/C  | NA                 | NA                            | NA                 |
| Kabuli_wild_33628141 | NA                                  | Ca_kabuli_denovo | 33628141                | A/G  | NA                 | NA                            | NA                 |
| Kabuli_wild_33628192 | NA                                  | Ca_kabuli_denovo | 33628192                | A/G  | NA                 | NA                            | NA                 |
| Kabuli_wild_33633092 | NA                                  | Ca_kabuli_denovo | 33633092                | T/C  | NA                 | NA                            | NA                 |
| Kabuli_wild_33636625 | NA                                  | Ca_kabuli_denovo | 33636625                | T/C  | NA                 | NA                            | NA                 |
| Kabuli_wild_33637743 | NA                                  | Ca_kabuli_denovo | 33637743                | A/G  | NA                 | NA                            | NA                 |
| Kabuli_wild_33637811 | NA                                  | Ca_kabuli_denovo | 33637811                | A/G  | NA                 | NA                            | NA                 |
| Kabuli_wild_33639016 | NA                                  | Ca_kabuli_denovo | 33639016                | T/A  | NA                 | NA                            | NA                 |
| Kabuli_wild_33639028 | NA                                  | Ca_kabuli_denovo | 33639028                | T/C  | NA                 | NA                            | NA                 |
| Kabuli_wild_33639938 | NA                                  | Ca_kabuli_denovo | 33639938                | A/G  | NA                 | NA                            | NA                 |
| Kabuli_wild_33643741 | NA                                  | Ca_kabuli_denovo | 33643741                | C/A  | NA                 | NA                            | NA                 |
| Kabuli_wild_33648672 | NA                                  | Ca_kabuli_denovo | 33648672                | T/C  | NA                 | NA                            | NA                 |
| Kabuli_wild_33650929 | NA                                  | Ca_kabuli_denovo | 33650929                | G/A  | NA                 | NA                            | NA                 |
| Kabuli_wild_33650938 | NA                                  | Ca_kabuli_denovo | 33650938                | C/G  | NA                 | NA                            | NA                 |
| Kabuli_wild_33659831 | NA                                  | Ca_kabuli_denovo | 33659831                | G/A  | NA                 | NA                            | NA                 |
| Kabuli_wild_33661704 | NA                                  | Ca_kabuli_denovo | 33661704                | T/G  | NA                 | NA                            | NA                 |
| Kabuli_wild_33663930 | NA                                  | Ca_kabuli_denovo | 33663930                | A/C  | NA                 | NA                            | NA                 |
| Kabuli_wild_33669979 | NA                                  | Ca_kabuli_denovo | 33669979                | G/T  | NA                 | NA                            | NA                 |
| Kabuli_wild_33670525 | NA                                  | Ca_kabuli_denovo | 33670525                | C/T  | NA                 | NA                            | NA                 |
| Kabuli_wild_33678923 | NA                                  | Ca_kabuli_denovo | 33678923                | C/G  | NA                 | NA                            | NA                 |
| Kabuli_wild_33678982 | NA                                  | Ca_kabuli_denovo | 33678982                | G/C  | NA                 | NA                            | NA                 |
| Kabuli_wild_33683164 | NA                                  | Ca_kabuli_denovo | 33683164                | T/C  | NA                 | NA                            | NA                 |
| Kabuli_wild_33683221 | NA                                  | Ca_kabuli_denovo | 33683221                | C/T  | NA                 | NA                            | NA                 |
| Kabuli_wild_33683514 | NA                                  | Ca_kabuli_denovo | 33683514                | A/T  | NA                 | NA                            | NA                 |
| Kabuli_wild_33683515 | NA                                  | Ca_kabuli_denovo | 33683515                | C/T  | NA                 | NA                            | NA                 |
| Kabuli_wild_33707561 | NA                                  | Ca_kabuli_denovo | 33707561                | T/C  | NA                 | NA                            | NA                 |
| Kabuli_wild_33707567 | NA                                  | Ca_kabuli_denovo | 33707567                | C/G  | NA                 | NA                            | NA                 |
| Kabuli_wild_33709721 | NA                                  | Ca_kabuli_denovo | 33709721                | A/C  | NA                 | NA                            | NA                 |
| Kabuli_wild_33709723 | NA                                  | Ca_kabuli_denovo | 33709723                | A/C  | NA                 | NA                            | NA                 |
| Kabuli_wild_33712049 | NA                                  | Ca_kabuli_denovo | 33712049                | A/G  | NA                 | NA                            | NA                 |
| Kabuli_wild_33712050 | NA                                  | Ca_kabuli_denovo | 33712050                | C/T  | NA                 | NA                            | NA                 |
| Kabuli_wild_33712051 | NA                                  | Ca_kabuli_denovo | 33712051                | C/T  | NA                 | NA                            | NA                 |
| Kabuli_wild_33712058 | NA                                  | Ca_kabuli_denovo | 33712058                | G/T  | NA                 | NA                            | NA                 |
| Kabuli_wild_33714903 | NA                                  | Ca_kabuli_denovo | 33714903                | A/C  | NA                 | NA                            | NA                 |
| Kabuli_wild_33717546 | NA                                  | Ca_kabuli_denovo | 33717546                | G/A  | NA                 | NA                            | NA                 |
| Kabuli_wild_33717572 | NA                                  | Ca_kabuli_denovo | 33717572                | G/T  | NA                 | NA                            | NA                 |
| Kabuli_wild_33728199 | NA                                  | Ca_kabuli_denovo | 33728199                | T/C  | NA                 | NA                            | NA                 |
| Kabuli_wild_33730564 | NA                                  | Ca_kabuli_denovo | 33730564                | G/A  | NA                 | NA                            | NA                 |
| Kabuli_wild_33733808 | NA                                  | Ca_kabuli_denovo | 33733808                | C/T  | NA                 | NA                            | NA                 |
| Kabuli_wild_33738043 | NA                                  | Ca_kabuli_denovo | 33738043                | G/T  | NA                 | NA                            | NA                 |

| SNP IDs              | NCBI dbSNP accession IDs (NCBI_SS#) | Chromosomes      | Physical positions (bp) | SNPs | Gene accession IDs | Sequence components of genome | Putative functions |
|----------------------|-------------------------------------|------------------|-------------------------|------|--------------------|-------------------------------|--------------------|
| Kabuli_wild_33740984 | NA                                  | Ca_kabuli_denovo | 33740984                | G/T  | NA                 | NA                            | NA                 |
| Kabuli_wild_33741814 | NA                                  | Ca_kabuli_denovo | 33741814                | A/G  | NA                 | NA                            | NA                 |
| Kabuli_wild_33743418 | NA                                  | Ca_kabuli_denovo | 33743418                | A/C  | NA                 | NA                            | NA                 |
| Kabuli_wild_33743419 | NA                                  | Ca_kabuli_denovo | 33743419                | G/T  | NA                 | NA                            | NA                 |
| Kabuli_wild_33744646 | NA                                  | Ca_kabuli_denovo | 33744646                | T/C  | NA                 | NA                            | NA                 |
| Kabuli_wild_33751785 | NA                                  | Ca_kabuli_denovo | 33751785                | G/A  | NA                 | NA                            | NA                 |
| Kabuli_wild_33754764 | NA                                  | Ca_kabuli_denovo | 33754764                | G/T  | NA                 | NA                            | NA                 |
| Kabuli_wild_33754785 | NA                                  | Ca_kabuli_denovo | 33754785                | A/C  | NA                 | NA                            | NA                 |
| Kabuli_wild_33754800 | NA                                  | Ca_kabuli_denovo | 33754800                | C/A  | NA                 | NA                            | NA                 |
| Kabuli_wild_33754809 | NA                                  | Ca_kabuli_denovo | 33754809                | G/C  | NA                 | NA                            | NA                 |
| Kabuli_wild_33761828 | NA                                  | Ca_kabuli_denovo | 33761828                | G/T  | NA                 | NA                            | NA                 |
| Kabuli_wild_33762588 | NA                                  | Ca_kabuli_denovo | 33762588                | T/G  | NA                 | NA                            | NA                 |
| Kabuli_wild_33763029 | NA                                  | Ca_kabuli_denovo | 33763029                | A/G  | NA                 | NA                            | NA                 |
| Kabuli_wild_33763352 | NA                                  | Ca_kabuli_denovo | 33763352                | G/C  | NA                 | NA                            | NA                 |
| Kabuli_wild_33763579 | NA                                  | Ca_kabuli_denovo | 33763579                | G/T  | NA                 | NA                            | NA                 |
| Kabuli_wild_33765267 | NA                                  | Ca_kabuli_denovo | 33765267                | T/C  | NA                 | NA                            | NA                 |
| Kabuli_wild_33765423 | NA                                  | Ca_kabuli_denovo | 33765423                | C/G  | NA                 | NA                            | NA                 |
| Kabuli_wild_33765476 | NA                                  | Ca_kabuli_denovo | 33765476                | C/T  | NA                 | NA                            | NA                 |
| Kabuli_wild_33771131 | NA                                  | Ca_kabuli_denovo | 33771131                | T/A  | NA                 | NA                            | NA                 |
| Kabuli_wild_33772454 | NA                                  | Ca_kabuli_denovo | 33772454                | G/T  | NA                 | NA                            | NA                 |
| Kabuli_wild_33805056 | NA                                  | Ca_kabuli_denovo | 33805056                | T/C  | NA                 | NA                            | NA                 |
| Kabuli_wild_33805059 | NA                                  | Ca_kabuli_denovo | 33805059                | C/T  | NA                 | NA                            | NA                 |
| Kabuli_wild_33805119 | NA                                  | Ca_kabuli_denovo | 33805119                | C/T  | NA                 | NA                            | NA                 |
| Kabuli_wild_33805744 | NA                                  | Ca_kabuli_denovo | 33805744                | C/G  | NA                 | NA                            | NA                 |
| Kabuli_wild_33805765 | NA                                  | Ca_kabuli_denovo | 33805765                | T/C  | NA                 | NA                            | NA                 |
| Kabuli_wild_33809942 | NA                                  | Ca_kabuli_denovo | 33809942                | G/A  | NA                 | NA                            | NA                 |
| Kabuli_wild_33812363 | NA                                  | Ca_kabuli_denovo | 33812363                | A/T  | NA                 | NA                            | NA                 |
| Kabuli_wild_33813014 | NA                                  | Ca_kabuli_denovo | 33813014                | G/T  | NA                 | NA                            | NA                 |
| Kabuli_wild_33815279 | NA                                  | Ca_kabuli_denovo | 33815279                | A/G  | NA                 | NA                            | NA                 |
| Kabuli_wild_33815303 | NA                                  | Ca_kabuli_denovo | 33815303                | T/C  | NA                 | NA                            | NA                 |
| Kabuli_wild_33818419 | NA                                  | Ca_kabuli_denovo | 33818419                | G/C  | NA                 | NA                            | NA                 |
| Kabuli_wild_33818481 | NA                                  | Ca_kabuli_denovo | 33818481                | A/G  | NA                 | NA                            | NA                 |
| Kabuli_wild_33819597 | NA                                  | Ca_kabuli_denovo | 33819597                | G/C  | NA                 | NA                            | NA                 |
| Kabuli_wild_33819617 | NA                                  | Ca_kabuli_denovo | 33819617                | T/C  | NA                 | NA                            | NA                 |
| Kabuli_wild_33824413 | NA                                  | Ca_kabuli_denovo | 33824413                | C/G  | NA                 | NA                            | NA                 |
| Kabuli_wild_33826489 | NA                                  | Ca_kabuli_denovo | 33826489                | A/G  | NA                 | NA                            | NA                 |
| Kabuli_wild_33832858 | NA                                  | Ca_kabuli_denovo | 33832858                | A/G  | NA                 | NA                            | NA                 |
| Kabuli_wild_33834129 | NA                                  | Ca_kabuli_denovo | 33834129                | A/C  | NA                 | NA                            | NA                 |
| Kabuli_wild_33835977 | NA                                  | Ca_kabuli_denovo | 33835977                | C/A  | NA                 | NA                            | NA                 |
| Kabuli_wild_33837064 | NA                                  | Ca_kabuli_denovo | 33837064                | G/T  | NA                 | NA                            | NA                 |
| Kabuli_wild_33844757 | NA                                  | Ca_kabuli_denovo | 33844757                | A/G  | NA                 | NA                            | NA                 |
| Kabuli_wild_33844770 | NA                                  | Ca_kabuli_denovo | 33844770                | G/C  | NA                 | NA                            | NA                 |
| Kabuli_wild_33845561 | NA                                  | Ca_kabuli_denovo | 33845561                | C/G  | NA                 | NA                            | NA                 |
| Kabuli_wild_33848851 | NA                                  | Ca_kabuli_denovo | 33848851                | A/G  | NA                 | NA                            | NA                 |

| SNP IDs                     | NCBI dbSNP accession IDs (NCBI_SS#) | Chromosomes             | Physical positions (bp) | SNPs | Gene accession IDs | Sequence components of genome | Putative functions |
|-----------------------------|-------------------------------------|-------------------------|-------------------------|------|--------------------|-------------------------------|--------------------|
| <i>Kabuli_wild_33850705</i> | NA                                  | <i>Ca_kabuli_denovo</i> | 33850705                | G/A  | NA                 | NA                            | NA                 |
| <i>Kabuli_wild_33857572</i> | NA                                  | <i>Ca_kabuli_denovo</i> | 33857572                | G/T  | NA                 | NA                            | NA                 |
| <i>Kabuli_wild_33857578</i> | NA                                  | <i>Ca_kabuli_denovo</i> | 33857578                | T/G  | NA                 | NA                            | NA                 |
| <i>Kabuli_wild_33861142</i> | NA                                  | <i>Ca_kabuli_denovo</i> | 33861142                | C/T  | NA                 | NA                            | NA                 |
| <i>Kabuli_wild_33868829</i> | NA                                  | <i>Ca_kabuli_denovo</i> | 33868829                | G/A  | NA                 | NA                            | NA                 |
| <i>Kabuli_wild_33868832</i> | NA                                  | <i>Ca_kabuli_denovo</i> | 33868832                | A/G  | NA                 | NA                            | NA                 |
| <i>Kabuli_wild_33871126</i> | NA                                  | <i>Ca_kabuli_denovo</i> | 33871126                | C/A  | NA                 | NA                            | NA                 |
| <i>Kabuli_wild_33879057</i> | NA                                  | <i>Ca_kabuli_denovo</i> | 33879057                | G/T  | NA                 | NA                            | NA                 |
| <i>Kabuli_wild_33879418</i> | NA                                  | <i>Ca_kabuli_denovo</i> | 33879418                | C/T  | NA                 | NA                            | NA                 |
| <i>Kabuli_wild_33879442</i> | NA                                  | <i>Ca_kabuli_denovo</i> | 33879442                | G/C  | NA                 | NA                            | NA                 |
| <i>Kabuli_wild_33880117</i> | NA                                  | <i>Ca_kabuli_denovo</i> | 33880117                | C/A  | NA                 | NA                            | NA                 |
| <i>Kabuli_wild_33882945</i> | NA                                  | <i>Ca_kabuli_denovo</i> | 33882945                | G/T  | NA                 | NA                            | NA                 |
| <i>Kabuli_wild_33888136</i> | NA                                  | <i>Ca_kabuli_denovo</i> | 33888136                | T/G  | NA                 | NA                            | NA                 |
| <i>Kabuli_wild_33894406</i> | NA                                  | <i>Ca_kabuli_denovo</i> | 33894406                | T/C  | NA                 | NA                            | NA                 |
| <i>Kabuli_wild_33894419</i> | NA                                  | <i>Ca_kabuli_denovo</i> | 33894419                | G/T  | NA                 | NA                            | NA                 |
| <i>Kabuli_wild_33894421</i> | NA                                  | <i>Ca_kabuli_denovo</i> | 33894421                | C/G  | NA                 | NA                            | NA                 |
| <i>Kabuli_wild_33894426</i> | NA                                  | <i>Ca_kabuli_denovo</i> | 33894426                | C/T  | NA                 | NA                            | NA                 |
| <i>Kabuli_wild_33895387</i> | NA                                  | <i>Ca_kabuli_denovo</i> | 33895387                | A/C  | NA                 | NA                            | NA                 |
| <i>Kabuli_wild_33898074</i> | NA                                  | <i>Ca_kabuli_denovo</i> | 33898074                | A/C  | NA                 | NA                            | NA                 |
| <i>Kabuli_wild_33900676</i> | NA                                  | <i>Ca_kabuli_denovo</i> | 33900676                | A/G  | NA                 | NA                            | NA                 |
| <i>Kabuli_wild_33900736</i> | NA                                  | <i>Ca_kabuli_denovo</i> | 33900736                | C/T  | NA                 | NA                            | NA                 |
| <i>Kabuli_wild_33901267</i> | NA                                  | <i>Ca_kabuli_denovo</i> | 33901267                | G/C  | NA                 | NA                            | NA                 |
| <i>Kabuli_wild_33904315</i> | NA                                  | <i>Ca_kabuli_denovo</i> | 33904315                | A/C  | NA                 | NA                            | NA                 |
| <i>Kabuli_wild_33910284</i> | NA                                  | <i>Ca_kabuli_denovo</i> | 33910284                | T/A  | NA                 | NA                            | NA                 |
| <i>Kabuli_wild_33910287</i> | NA                                  | <i>Ca_kabuli_denovo</i> | 33910287                | T/C  | NA                 | NA                            | NA                 |
| <i>Kabuli_wild_33915948</i> | NA                                  | <i>Ca_kabuli_denovo</i> | 33915948                | C/T  | NA                 | NA                            | NA                 |
| <i>Kabuli_wild_33926153</i> | NA                                  | <i>Ca_kabuli_denovo</i> | 33926153                | G/T  | NA                 | NA                            | NA                 |
| <i>Kabuli_wild_33926954</i> | NA                                  | <i>Ca_kabuli_denovo</i> | 33926954                | C/G  | NA                 | NA                            | NA                 |
| <i>Kabuli_wild_33928632</i> | NA                                  | <i>Ca_kabuli_denovo</i> | 33928632                | G/A  | NA                 | NA                            | NA                 |
| <i>Kabuli_wild_33934184</i> | NA                                  | <i>Ca_kabuli_denovo</i> | 33934184                | A/G  | NA                 | NA                            | NA                 |
| <i>Kabuli_wild_33936611</i> | NA                                  | <i>Ca_kabuli_denovo</i> | 33936611                | C/T  | NA                 | NA                            | NA                 |
| <i>Kabuli_wild_33936626</i> | NA                                  | <i>Ca_kabuli_denovo</i> | 33936626                | A/G  | NA                 | NA                            | NA                 |
| <i>Kabuli_wild_33946423</i> | NA                                  | <i>Ca_kabuli_denovo</i> | 33946423                | G/A  | NA                 | NA                            | NA                 |
| <i>Kabuli_wild_33946453</i> | NA                                  | <i>Ca_kabuli_denovo</i> | 33946453                | T/C  | NA                 | NA                            | NA                 |
| <i>Kabuli_wild_33949625</i> | NA                                  | <i>Ca_kabuli_denovo</i> | 33949625                | A/G  | NA                 | NA                            | NA                 |
| <i>Kabuli_wild_33953148</i> | NA                                  | <i>Ca_kabuli_denovo</i> | 33953148                | A/T  | NA                 | NA                            | NA                 |
| <i>Kabuli_wild_33953168</i> | NA                                  | <i>Ca_kabuli_denovo</i> | 33953168                | T/A  | NA                 | NA                            | NA                 |
| <i>Kabuli_wild_33955402</i> | NA                                  | <i>Ca_kabuli_denovo</i> | 33955402                | A/C  | NA                 | NA                            | NA                 |
| <i>Kabuli_wild_33958582</i> | NA                                  | <i>Ca_kabuli_denovo</i> | 33958582                | A/C  | NA                 | NA                            | NA                 |
| <i>Kabuli_wild_33959040</i> | NA                                  | <i>Ca_kabuli_denovo</i> | 33959040                | C/T  | NA                 | NA                            | NA                 |
| <i>Kabuli_wild_33959067</i> | NA                                  | <i>Ca_kabuli_denovo</i> | 33959067                | C/G  | NA                 | NA                            | NA                 |
| <i>Kabuli_wild_33961252</i> | NA                                  | <i>Ca_kabuli_denovo</i> | 33961252                | A/C  | NA                 | NA                            | NA                 |
| <i>Kabuli_wild_33968278</i> | NA                                  | <i>Ca_kabuli_denovo</i> | 33968278                | T/C  | NA                 | NA                            | NA                 |
| <i>Kabuli_wild_33974143</i> | NA                                  | <i>Ca_kabuli_denovo</i> | 33974143                | T/C  | NA                 | NA                            | NA                 |

| SNP IDs              | NCBI dbSNP accession IDs (NCBI_SS#) | Chromosomes      | Physical positions (bp) | SNPs | Gene accession IDs | Sequence components of genome | Putative functions |
|----------------------|-------------------------------------|------------------|-------------------------|------|--------------------|-------------------------------|--------------------|
| Kabuli_wild_33974176 | NA                                  | Ca_kabuli_denovo | 33974176                | G/C  | NA                 | NA                            | NA                 |
| Kabuli_wild_33982873 | NA                                  | Ca_kabuli_denovo | 33982873                | C/T  | NA                 | NA                            | NA                 |
| Kabuli_wild_33986133 | NA                                  | Ca_kabuli_denovo | 33986133                | T/C  | NA                 | NA                            | NA                 |
| Kabuli_wild_33986166 | NA                                  | Ca_kabuli_denovo | 33986166                | G/C  | NA                 | NA                            | NA                 |
| Kabuli_wild_33987995 | NA                                  | Ca_kabuli_denovo | 33987995                | A/C  | NA                 | NA                            | NA                 |
| Kabuli_wild_33992311 | NA                                  | Ca_kabuli_denovo | 33992311                | G/T  | NA                 | NA                            | NA                 |
| Kabuli_wild_33994369 | NA                                  | Ca_kabuli_denovo | 33994369                | T/C  | NA                 | NA                            | NA                 |
| Kabuli_wild_33994372 | NA                                  | Ca_kabuli_denovo | 33994372                | G/T  | NA                 | NA                            | NA                 |
| Kabuli_wild_33994939 | NA                                  | Ca_kabuli_denovo | 33994939                | A/C  | NA                 | NA                            | NA                 |
| Kabuli_wild_34007273 | NA                                  | Ca_kabuli_denovo | 34007273                | A/C  | NA                 | NA                            | NA                 |
| Kabuli_wild_34008311 | NA                                  | Ca_kabuli_denovo | 34008311                | G/A  | NA                 | NA                            | NA                 |
| Kabuli_wild_34008347 | NA                                  | Ca_kabuli_denovo | 34008347                | T/C  | NA                 | NA                            | NA                 |
| Kabuli_wild_34011286 | NA                                  | Ca_kabuli_denovo | 34011286                | G/T  | NA                 | NA                            | NA                 |
| Kabuli_wild_34011304 | NA                                  | Ca_kabuli_denovo | 34011304                | A/G  | NA                 | NA                            | NA                 |
| Kabuli_wild_34011305 | NA                                  | Ca_kabuli_denovo | 34011305                | C/T  | NA                 | NA                            | NA                 |
| Kabuli_wild_34013947 | NA                                  | Ca_kabuli_denovo | 34013947                | A/C  | NA                 | NA                            | NA                 |
| Kabuli_wild_34021339 | NA                                  | Ca_kabuli_denovo | 34021339                | C/G  | NA                 | NA                            | NA                 |
| Kabuli_wild_34026631 | NA                                  | Ca_kabuli_denovo | 34026631                | T/C  | NA                 | NA                            | NA                 |
| Kabuli_wild_34037705 | NA                                  | Ca_kabuli_denovo | 34037705                | G/C  | NA                 | NA                            | NA                 |
| Kabuli_wild_34037746 | NA                                  | Ca_kabuli_denovo | 34037746                | A/G  | NA                 | NA                            | NA                 |
| Kabuli_wild_34040358 | NA                                  | Ca_kabuli_denovo | 34040358                | A/G  | NA                 | NA                            | NA                 |
| Kabuli_wild_34040383 | NA                                  | Ca_kabuli_denovo | 34040383                | A/C  | NA                 | NA                            | NA                 |
| Kabuli_wild_34042286 | NA                                  | Ca_kabuli_denovo | 34042286                | A/G  | NA                 | NA                            | NA                 |
| Kabuli_wild_34043705 | NA                                  | Ca_kabuli_denovo | 34043705                | G/T  | NA                 | NA                            | NA                 |
| Kabuli_wild_34047739 | NA                                  | Ca_kabuli_denovo | 34047739                | T/G  | NA                 | NA                            | NA                 |
| Kabuli_wild_34051588 | NA                                  | Ca_kabuli_denovo | 34051588                | C/T  | NA                 | NA                            | NA                 |
| Kabuli_wild_34053538 | NA                                  | Ca_kabuli_denovo | 34053538                | G/T  | NA                 | NA                            | NA                 |
| Kabuli_wild_34053565 | NA                                  | Ca_kabuli_denovo | 34053565                | G/C  | NA                 | NA                            | NA                 |
| Kabuli_wild_34053644 | NA                                  | Ca_kabuli_denovo | 34053644                | A/G  | NA                 | NA                            | NA                 |
| Kabuli_wild_34053646 | NA                                  | Ca_kabuli_denovo | 34053646                | T/C  | NA                 | NA                            | NA                 |
| Kabuli_wild_34056900 | NA                                  | Ca_kabuli_denovo | 34056900                | C/T  | NA                 | NA                            | NA                 |
| Kabuli_wild_34056940 | NA                                  | Ca_kabuli_denovo | 34056940                | C/T  | NA                 | NA                            | NA                 |
| Kabuli_wild_34061876 | NA                                  | Ca_kabuli_denovo | 34061876                | C/T  | NA                 | NA                            | NA                 |
| Kabuli_wild_34068649 | NA                                  | Ca_kabuli_denovo | 34068649                | C/T  | NA                 | NA                            | NA                 |
| Kabuli_wild_34074396 | NA                                  | Ca_kabuli_denovo | 34074396                | G/A  | NA                 | NA                            | NA                 |
| Kabuli_wild_34078964 | NA                                  | Ca_kabuli_denovo | 34078964                | C/T  | NA                 | NA                            | NA                 |
| Kabuli_wild_34079424 | NA                                  | Ca_kabuli_denovo | 34079424                | C/T  | NA                 | NA                            | NA                 |
| Kabuli_wild_34079451 | NA                                  | Ca_kabuli_denovo | 34079451                | G/C  | NA                 | NA                            | NA                 |
| Kabuli_wild_34081338 | NA                                  | Ca_kabuli_denovo | 34081338                | A/C  | NA                 | NA                            | NA                 |
| Kabuli_wild_34081339 | NA                                  | Ca_kabuli_denovo | 34081339                | G/T  | NA                 | NA                            | NA                 |
| Kabuli_wild_34082531 | NA                                  | Ca_kabuli_denovo | 34082531                | C/T  | NA                 | NA                            | NA                 |
| Kabuli_wild_34083968 | NA                                  | Ca_kabuli_denovo | 34083968                | A/G  | NA                 | NA                            | NA                 |
| Kabuli_wild_34085139 | NA                                  | Ca_kabuli_denovo | 34085139                | G/T  | NA                 | NA                            | NA                 |
| Kabuli_wild_34096477 | NA                                  | Ca_kabuli_denovo | 34096477                | G/T  | NA                 | NA                            | NA                 |

| SNP IDs              | NCBI dbSNP accession IDs (NCBI_SS#) | Chromosomes      | Physical positions (bp) | SNPs | Gene accession IDs | Sequence components of genome | Putative functions |
|----------------------|-------------------------------------|------------------|-------------------------|------|--------------------|-------------------------------|--------------------|
| Kabuli_wild_34096756 | NA                                  | Ca_kabuli_denovo | 34096756                | A/G  | NA                 | NA                            | NA                 |
| Kabuli_wild_34096768 | NA                                  | Ca_kabuli_denovo | 34096768                | T/G  | NA                 | NA                            | NA                 |
| Kabuli_wild_34100344 | NA                                  | Ca_kabuli_denovo | 34100344                | A/G  | NA                 | NA                            | NA                 |
| Kabuli_wild_34100346 | NA                                  | Ca_kabuli_denovo | 34100346                | A/G  | NA                 | NA                            | NA                 |
| Kabuli_wild_34107208 | NA                                  | Ca_kabuli_denovo | 34107208                | G/T  | NA                 | NA                            | NA                 |
| Kabuli_wild_34113239 | NA                                  | Ca_kabuli_denovo | 34113239                | G/A  | NA                 | NA                            | NA                 |
| Kabuli_wild_34113301 | NA                                  | Ca_kabuli_denovo | 34113301                | C/G  | NA                 | NA                            | NA                 |
| Kabuli_wild_34114554 | NA                                  | Ca_kabuli_denovo | 34114554                | G/T  | NA                 | NA                            | NA                 |
| Kabuli_wild_34118122 | NA                                  | Ca_kabuli_denovo | 34118122                | C/T  | NA                 | NA                            | NA                 |
| Kabuli_wild_34119013 | NA                                  | Ca_kabuli_denovo | 34119013                | G/T  | NA                 | NA                            | NA                 |
| Kabuli_wild_34120012 | NA                                  | Ca_kabuli_denovo | 34120012                | G/T  | NA                 | NA                            | NA                 |
| Kabuli_wild_34120332 | NA                                  | Ca_kabuli_denovo | 34120332                | A/T  | NA                 | NA                            | NA                 |
| Kabuli_wild_34120396 | NA                                  | Ca_kabuli_denovo | 34120396                | G/C  | NA                 | NA                            | NA                 |
| Kabuli_wild_34120401 | NA                                  | Ca_kabuli_denovo | 34120401                | C/T  | NA                 | NA                            | NA                 |
| Kabuli_wild_34126898 | NA                                  | Ca_kabuli_denovo | 34126898                | G/A  | NA                 | NA                            | NA                 |
| Kabuli_wild_34126919 | NA                                  | Ca_kabuli_denovo | 34126919                | C/T  | NA                 | NA                            | NA                 |
| Kabuli_wild_34135313 | NA                                  | Ca_kabuli_denovo | 34135313                | A/G  | NA                 | NA                            | NA                 |
| Kabuli_wild_34138772 | NA                                  | Ca_kabuli_denovo | 34138772                | C/T  | NA                 | NA                            | NA                 |
| Kabuli_wild_34138815 | NA                                  | Ca_kabuli_denovo | 34138815                | C/T  | NA                 | NA                            | NA                 |
| Kabuli_wild_34141291 | NA                                  | Ca_kabuli_denovo | 34141291                | C/T  | NA                 | NA                            | NA                 |
| Kabuli_wild_34141336 | NA                                  | Ca_kabuli_denovo | 34141336                | C/T  | NA                 | NA                            | NA                 |
| Kabuli_wild_34141632 | NA                                  | Ca_kabuli_denovo | 34141632                | A/T  | NA                 | NA                            | NA                 |
| Kabuli_wild_34141633 | NA                                  | Ca_kabuli_denovo | 34141633                | C/T  | NA                 | NA                            | NA                 |
| Kabuli_wild_34144576 | NA                                  | Ca_kabuli_denovo | 34144576                | T/C  | NA                 | NA                            | NA                 |
| Kabuli_wild_34144591 | NA                                  | Ca_kabuli_denovo | 34144591                | C/G  | NA                 | NA                            | NA                 |
| Kabuli_wild_34151945 | NA                                  | Ca_kabuli_denovo | 34151945                | T/C  | NA                 | NA                            | NA                 |
| Kabuli_wild_34152647 | NA                                  | Ca_kabuli_denovo | 34152647                | A/C  | NA                 | NA                            | NA                 |
| Kabuli_wild_34152650 | NA                                  | Ca_kabuli_denovo | 34152650                | A/G  | NA                 | NA                            | NA                 |
| Kabuli_wild_34159235 | NA                                  | Ca_kabuli_denovo | 34159235                | T/C  | NA                 | NA                            | NA                 |
| Kabuli_wild_34165539 | NA                                  | Ca_kabuli_denovo | 34165539                | G/A  | NA                 | NA                            | NA                 |
| Kabuli_wild_34165600 | NA                                  | Ca_kabuli_denovo | 34165600                | G/A  | NA                 | NA                            | NA                 |
| Kabuli_wild_34173700 | NA                                  | Ca_kabuli_denovo | 34173700                | C/G  | NA                 | NA                            | NA                 |
| Kabuli_wild_34173703 | NA                                  | Ca_kabuli_denovo | 34173703                | C/G  | NA                 | NA                            | NA                 |
| Kabuli_wild_34180448 | NA                                  | Ca_kabuli_denovo | 34180448                | C/T  | NA                 | NA                            | NA                 |
| Kabuli_wild_34182436 | NA                                  | Ca_kabuli_denovo | 34182436                | T/C  | NA                 | NA                            | NA                 |
| Kabuli_wild_34182481 | NA                                  | Ca_kabuli_denovo | 34182481                | T/C  | NA                 | NA                            | NA                 |
| Kabuli_wild_34183999 | NA                                  | Ca_kabuli_denovo | 34183999                | A/G  | NA                 | NA                            | NA                 |
| Kabuli_wild_34185027 | NA                                  | Ca_kabuli_denovo | 34185027                | T/G  | NA                 | NA                            | NA                 |
| Kabuli_wild_34185051 | NA                                  | Ca_kabuli_denovo | 34185051                | C/T  | NA                 | NA                            | NA                 |
| Kabuli_wild_34188749 | NA                                  | Ca_kabuli_denovo | 34188749                | T/C  | NA                 | NA                            | NA                 |
| Kabuli_wild_34190985 | NA                                  | Ca_kabuli_denovo | 34190985                | C/T  | NA                 | NA                            | NA                 |
| Kabuli_wild_34191006 | NA                                  | Ca_kabuli_denovo | 34191006                | G/C  | NA                 | NA                            | NA                 |
| Kabuli_wild_34191009 | NA                                  | Ca_kabuli_denovo | 34191009                | G/C  | NA                 | NA                            | NA                 |
| Kabuli_wild_34191052 | NA                                  | Ca_kabuli_denovo | 34191052                | T/G  | NA                 | NA                            | NA                 |



| SNP IDs              | NCBI dbSNP accession IDs (NCBI_SS#) | Chromosomes      | Physical positions (bp) | SNPs | Gene accession IDs | Sequence components of genome | Putative functions |
|----------------------|-------------------------------------|------------------|-------------------------|------|--------------------|-------------------------------|--------------------|
| Kabuli_wild_34191835 | NA                                  | Ca_kabuli_denovo | 34191835                | A/C  | NA                 | NA                            | NA                 |
| Kabuli_wild_34192633 | NA                                  | Ca_kabuli_denovo | 34192633                | A/G  | NA                 | NA                            | NA                 |
| Kabuli_wild_34192672 | NA                                  | Ca_kabuli_denovo | 34192672                | A/G  | NA                 | NA                            | NA                 |
| Kabuli_wild_34193954 | NA                                  | Ca_kabuli_denovo | 34193954                | A/G  | NA                 | NA                            | NA                 |
| Kabuli_wild_34193996 | NA                                  | Ca_kabuli_denovo | 34193996                | C/T  | NA                 | NA                            | NA                 |
| Kabuli_wild_34197610 | NA                                  | Ca_kabuli_denovo | 34197610                | A/T  | NA                 | NA                            | NA                 |
| Kabuli_wild_34198458 | NA                                  | Ca_kabuli_denovo | 34198458                | A/C  | NA                 | NA                            | NA                 |
| Kabuli_wild_34202907 | NA                                  | Ca_kabuli_denovo | 34202907                | T/C  | NA                 | NA                            | NA                 |
| Kabuli_wild_34203502 | NA                                  | Ca_kabuli_denovo | 34203502                | G/T  | NA                 | NA                            | NA                 |
| Kabuli_wild_34206348 | NA                                  | Ca_kabuli_denovo | 34206348                | C/T  | NA                 | NA                            | NA                 |
| Kabuli_wild_34211238 | NA                                  | Ca_kabuli_denovo | 34211238                | G/C  | NA                 | NA                            | NA                 |
| Kabuli_wild_34211271 | NA                                  | Ca_kabuli_denovo | 34211271                | C/T  | NA                 | NA                            | NA                 |
| Kabuli_wild_34213226 | NA                                  | Ca_kabuli_denovo | 34213226                | A/G  | NA                 | NA                            | NA                 |
| Kabuli_wild_34215379 | NA                                  | Ca_kabuli_denovo | 34215379                | C/A  | NA                 | NA                            | NA                 |
| Kabuli_wild_34215385 | NA                                  | Ca_kabuli_denovo | 34215385                | G/C  | NA                 | NA                            | NA                 |
| Kabuli_wild_34218106 | NA                                  | Ca_kabuli_denovo | 34218106                | A/G  | NA                 | NA                            | NA                 |
| Kabuli_wild_34218120 | NA                                  | Ca_kabuli_denovo | 34218120                | T/C  | NA                 | NA                            | NA                 |
| Kabuli_wild_34221091 | NA                                  | Ca_kabuli_denovo | 34221091                | G/T  | NA                 | NA                            | NA                 |
| Kabuli_wild_34223364 | NA                                  | Ca_kabuli_denovo | 34223364                | A/G  | NA                 | NA                            | NA                 |
| Kabuli_wild_34223747 | NA                                  | Ca_kabuli_denovo | 34223747                | G/C  | NA                 | NA                            | NA                 |
| Kabuli_wild_34223756 | NA                                  | Ca_kabuli_denovo | 34223756                | G/A  | NA                 | NA                            | NA                 |
| Kabuli_wild_34226793 | NA                                  | Ca_kabuli_denovo | 34226793                | T/C  | NA                 | NA                            | NA                 |
| Kabuli_wild_34226800 | NA                                  | Ca_kabuli_denovo | 34226800                | C/T  | NA                 | NA                            | NA                 |
| Kabuli_wild_34233121 | NA                                  | Ca_kabuli_denovo | 34233121                | T/C  | NA                 | NA                            | NA                 |
| Kabuli_wild_34233205 | NA                                  | Ca_kabuli_denovo | 34233205                | C/G  | NA                 | NA                            | NA                 |
| Kabuli_wild_34233281 | NA                                  | Ca_kabuli_denovo | 34233281                | C/T  | NA                 | NA                            | NA                 |
| Kabuli_wild_34258094 | NA                                  | Ca_kabuli_denovo | 34258094                | G/A  | NA                 | NA                            | NA                 |
| Kabuli_wild_34260163 | NA                                  | Ca_kabuli_denovo | 34260163                | A/G  | NA                 | NA                            | NA                 |
| Kabuli_wild_34260178 | NA                                  | Ca_kabuli_denovo | 34260178                | C/T  | NA                 | NA                            | NA                 |
| Kabuli_wild_34261074 | NA                                  | Ca_kabuli_denovo | 34261074                | C/T  | NA                 | NA                            | NA                 |
| Kabuli_wild_34261084 | NA                                  | Ca_kabuli_denovo | 34261084                | A/G  | NA                 | NA                            | NA                 |
| Kabuli_wild_34262485 | NA                                  | Ca_kabuli_denovo | 34262485                | C/G  | NA                 | NA                            | NA                 |
| Kabuli_wild_34269216 | NA                                  | Ca_kabuli_denovo | 34269216                | G/C  | NA                 | NA                            | NA                 |
| Kabuli_wild_34269919 | NA                                  | Ca_kabuli_denovo | 34269919                | T/G  | NA                 | NA                            | NA                 |
| Kabuli_wild_34272972 | NA                                  | Ca_kabuli_denovo | 34272972                | C/A  | NA                 | NA                            | NA                 |
| Kabuli_wild_34274235 | NA                                  | Ca_kabuli_denovo | 34274235                | G/T  | NA                 | NA                            | NA                 |
| Kabuli_wild_34278348 | NA                                  | Ca_kabuli_denovo | 34278348                | G/T  | NA                 | NA                            | NA                 |
| Kabuli_wild_34282648 | NA                                  | Ca_kabuli_denovo | 34282648                | A/C  | NA                 | NA                            | NA                 |
| Kabuli_wild_34288313 | NA                                  | Ca_kabuli_denovo | 34288313                | A/C  | NA                 | NA                            | NA                 |
| Kabuli_wild_34288314 | NA                                  | Ca_kabuli_denovo | 34288314                | G/T  | NA                 | NA                            | NA                 |
| Kabuli_wild_34288315 | NA                                  | Ca_kabuli_denovo | 34288315                | A/G  | NA                 | NA                            | NA                 |
| Kabuli_wild_34295354 | NA                                  | Ca_kabuli_denovo | 34295354                | A/G  | NA                 | NA                            | NA                 |
| Kabuli_wild_34295410 | NA                                  | Ca_kabuli_denovo | 34295410                | C/T  | NA                 | NA                            | NA                 |
| Kabuli_wild_34297990 | NA                                  | Ca_kabuli_denovo | 34297990                | G/T  | NA                 | NA                            | NA                 |

| SNP IDs              | NCBI dbSNP accession IDs (NCBI_SS#) | Chromosomes      | Physical positions (bp) | SNPs | Gene accession IDs | Sequence components of genome | Putative functions |
|----------------------|-------------------------------------|------------------|-------------------------|------|--------------------|-------------------------------|--------------------|
| Kabuli_wild_34300774 | NA                                  | Ca_kabuli_denovo | 34300774                | T/A  | NA                 | NA                            | NA                 |
| Kabuli_wild_34300775 | NA                                  | Ca_kabuli_denovo | 34300775                | G/A  | NA                 | NA                            | NA                 |
| Kabuli_wild_34310060 | NA                                  | Ca_kabuli_denovo | 34310060                | G/T  | NA                 | NA                            | NA                 |
| Kabuli_wild_34310776 | NA                                  | Ca_kabuli_denovo | 34310776                | T/G  | NA                 | NA                            | NA                 |
| Kabuli_wild_34315993 | NA                                  | Ca_kabuli_denovo | 34315993                | C/A  | NA                 | NA                            | NA                 |
| Kabuli_wild_34319275 | NA                                  | Ca_kabuli_denovo | 34319275                | G/T  | NA                 | NA                            | NA                 |
| Kabuli_wild_34336810 | NA                                  | Ca_kabuli_denovo | 34336810                | T/C  | NA                 | NA                            | NA                 |
| Kabuli_wild_34336834 | NA                                  | Ca_kabuli_denovo | 34336834                | A/G  | NA                 | NA                            | NA                 |
| Kabuli_wild_34339298 | NA                                  | Ca_kabuli_denovo | 34339298                | C/T  | NA                 | NA                            | NA                 |
| Kabuli_wild_34339330 | NA                                  | Ca_kabuli_denovo | 34339330                | C/G  | NA                 | NA                            | NA                 |
| Kabuli_wild_34340918 | NA                                  | Ca_kabuli_denovo | 34340918                | C/T  | NA                 | NA                            | NA                 |
| Kabuli_wild_34341224 | NA                                  | Ca_kabuli_denovo | 34341224                | C/G  | NA                 | NA                            | NA                 |
| Kabuli_wild_34343645 | NA                                  | Ca_kabuli_denovo | 34343645                | T/C  | NA                 | NA                            | NA                 |
| Kabuli_wild_34352451 | NA                                  | Ca_kabuli_denovo | 34352451                | T/C  | NA                 | NA                            | NA                 |
| Kabuli_wild_34352476 | NA                                  | Ca_kabuli_denovo | 34352476                | C/G  | NA                 | NA                            | NA                 |
| Kabuli_wild_34353646 | NA                                  | Ca_kabuli_denovo | 34353646                | C/A  | NA                 | NA                            | NA                 |
| Kabuli_wild_34364710 | NA                                  | Ca_kabuli_denovo | 34364710                | C/T  | NA                 | NA                            | NA                 |
| Kabuli_wild_34367417 | NA                                  | Ca_kabuli_denovo | 34367417                | G/T  | NA                 | NA                            | NA                 |
| Kabuli_wild_34369445 | NA                                  | Ca_kabuli_denovo | 34369445                | C/G  | NA                 | NA                            | NA                 |
| Kabuli_wild_34369462 | NA                                  | Ca_kabuli_denovo | 34369462                | T/G  | NA                 | NA                            | NA                 |
| Kabuli_wild_34369476 | NA                                  | Ca_kabuli_denovo | 34369476                | C/T  | NA                 | NA                            | NA                 |
| Kabuli_wild_34369486 | NA                                  | Ca_kabuli_denovo | 34369486                | C/A  | NA                 | NA                            | NA                 |
| Kabuli_wild_34371063 | NA                                  | Ca_kabuli_denovo | 34371063                | T/C  | NA                 | NA                            | NA                 |
| Kabuli_wild_34377533 | NA                                  | Ca_kabuli_denovo | 34377533                | C/A  | NA                 | NA                            | NA                 |
| Kabuli_wild_34380878 | NA                                  | Ca_kabuli_denovo | 34380878                | T/C  | NA                 | NA                            | NA                 |
| Kabuli_wild_34380935 | NA                                  | Ca_kabuli_denovo | 34380935                | A/T  | NA                 | NA                            | NA                 |
| Kabuli_wild_34380944 | NA                                  | Ca_kabuli_denovo | 34380944                | G/A  | NA                 | NA                            | NA                 |
| Kabuli_wild_34386397 | NA                                  | Ca_kabuli_denovo | 34386397                | G/A  | NA                 | NA                            | NA                 |
| Kabuli_wild_34387866 | NA                                  | Ca_kabuli_denovo | 34387866                | A/C  | NA                 | NA                            | NA                 |
| Kabuli_wild_34389628 | NA                                  | Ca_kabuli_denovo | 34389628                | T/C  | NA                 | NA                            | NA                 |
| Kabuli_wild_34390064 | NA                                  | Ca_kabuli_denovo | 34390064                | C/A  | NA                 | NA                            | NA                 |
| Kabuli_wild_34393893 | NA                                  | Ca_kabuli_denovo | 34393893                | G/T  | NA                 | NA                            | NA                 |
| Kabuli_wild_34397723 | NA                                  | Ca_kabuli_denovo | 34397723                | G/A  | NA                 | NA                            | NA                 |
| Kabuli_wild_34399979 | NA                                  | Ca_kabuli_denovo | 34399979                | T/C  | NA                 | NA                            | NA                 |
| Kabuli_wild_34399988 | NA                                  | Ca_kabuli_denovo | 34399988                | G/C  | NA                 | NA                            | NA                 |
| Kabuli_wild_34401306 | NA                                  | Ca_kabuli_denovo | 34401306                | A/C  | NA                 | NA                            | NA                 |
| Kabuli_wild_34401307 | NA                                  | Ca_kabuli_denovo | 34401307                | A/G  | NA                 | NA                            | NA                 |
| Kabuli_wild_34411594 | NA                                  | Ca_kabuli_denovo | 34411594                | C/G  | NA                 | NA                            | NA                 |
| Kabuli_wild_34411612 | NA                                  | Ca_kabuli_denovo | 34411612                | C/A  | NA                 | NA                            | NA                 |
| Kabuli_wild_34412155 | NA                                  | Ca_kabuli_denovo | 34412155                | A/G  | NA                 | NA                            | NA                 |
| Kabuli_wild_34416701 | NA                                  | Ca_kabuli_denovo | 34416701                | C/T  | NA                 | NA                            | NA                 |
| Kabuli_wild_34416706 | NA                                  | Ca_kabuli_denovo | 34416706                | G/T  | NA                 | NA                            | NA                 |
| Kabuli_wild_34423688 | NA                                  | Ca_kabuli_denovo | 34423688                | G/A  | NA                 | NA                            | NA                 |
| Kabuli_wild_34423999 | NA                                  | Ca_kabuli_denovo | 34423999                | C/T  | NA                 | NA                            | NA                 |

| SNP IDs              | NCBI dbSNP accession IDs (NCBI_SS#) | Chromosomes      | Physical positions (bp) | SNPs | Gene accession IDs | Sequence components of genome | Putative functions |
|----------------------|-------------------------------------|------------------|-------------------------|------|--------------------|-------------------------------|--------------------|
| Kabuli_wild_34424345 | NA                                  | Ca_kabuli_denovo | 34424345                | G/T  | NA                 | NA                            | NA                 |
| Kabuli_wild_34426043 | NA                                  | Ca_kabuli_denovo | 34426043                | C/T  | NA                 | NA                            | NA                 |
| Kabuli_wild_34426055 | NA                                  | Ca_kabuli_denovo | 34426055                | C/T  | NA                 | NA                            | NA                 |
| Kabuli_wild_34427504 | NA                                  | Ca_kabuli_denovo | 34427504                | A/G  | NA                 | NA                            | NA                 |
| Kabuli_wild_34429721 | NA                                  | Ca_kabuli_denovo | 34429721                | A/C  | NA                 | NA                            | NA                 |
| Kabuli_wild_34444849 | NA                                  | Ca_kabuli_denovo | 34444849                | C/G  | NA                 | NA                            | NA                 |
| Kabuli_wild_34452496 | NA                                  | Ca_kabuli_denovo | 34452496                | C/G  | NA                 | NA                            | NA                 |
| Kabuli_wild_34459402 | NA                                  | Ca_kabuli_denovo | 34459402                | G/A  | NA                 | NA                            | NA                 |
| Kabuli_wild_34459465 | NA                                  | Ca_kabuli_denovo | 34459465                | A/G  | NA                 | NA                            | NA                 |
| Kabuli_wild_34460731 | NA                                  | Ca_kabuli_denovo | 34460731                | A/C  | NA                 | NA                            | NA                 |
| Kabuli_wild_34462180 | NA                                  | Ca_kabuli_denovo | 34462180                | C/T  | NA                 | NA                            | NA                 |
| Kabuli_wild_34465058 | NA                                  | Ca_kabuli_denovo | 34465058                | A/G  | NA                 | NA                            | NA                 |
| Kabuli_wild_34465064 | NA                                  | Ca_kabuli_denovo | 34465064                | G/C  | NA                 | NA                            | NA                 |
| Kabuli_wild_34466616 | NA                                  | Ca_kabuli_denovo | 34466616                | G/T  | NA                 | NA                            | NA                 |
| Kabuli_wild_34466926 | NA                                  | Ca_kabuli_denovo | 34466926                | A/T  | NA                 | NA                            | NA                 |
| Kabuli_wild_34476088 | NA                                  | Ca_kabuli_denovo | 34476088                | A/C  | NA                 | NA                            | NA                 |
| Kabuli_wild_34482695 | NA                                  | Ca_kabuli_denovo | 34482695                | A/C  | NA                 | NA                            | NA                 |
| Kabuli_wild_34493849 | NA                                  | Ca_kabuli_denovo | 34493849                | A/G  | NA                 | NA                            | NA                 |
| Kabuli_wild_34505778 | NA                                  | Ca_kabuli_denovo | 34505778                | C/T  | NA                 | NA                            | NA                 |
| Kabuli_wild_34505815 | NA                                  | Ca_kabuli_denovo | 34505815                | T/A  | NA                 | NA                            | NA                 |
| Kabuli_wild_34507758 | NA                                  | Ca_kabuli_denovo | 34507758                | A/G  | NA                 | NA                            | NA                 |
| Kabuli_wild_34516721 | NA                                  | Ca_kabuli_denovo | 34516721                | G/A  | NA                 | NA                            | NA                 |
| Kabuli_wild_34531139 | NA                                  | Ca_kabuli_denovo | 34531139                | G/A  | NA                 | NA                            | NA                 |
| Kabuli_wild_34533678 | NA                                  | Ca_kabuli_denovo | 34533678                | G/T  | NA                 | NA                            | NA                 |
| Kabuli_wild_34536420 | NA                                  | Ca_kabuli_denovo | 34536420                | C/G  | NA                 | NA                            | NA                 |
| Kabuli_wild_34537979 | NA                                  | Ca_kabuli_denovo | 34537979                | G/A  | NA                 | NA                            | NA                 |
| Kabuli_wild_34550778 | NA                                  | Ca_kabuli_denovo | 34550778                | A/T  | NA                 | NA                            | NA                 |
| Kabuli_wild_34552366 | NA                                  | Ca_kabuli_denovo | 34552366                | G/T  | NA                 | NA                            | NA                 |
| Kabuli_wild_34555561 | NA                                  | Ca_kabuli_denovo | 34555561                | C/T  | NA                 | NA                            | NA                 |
| Kabuli_wild_34566809 | NA                                  | Ca_kabuli_denovo | 34566809                | G/T  | NA                 | NA                            | NA                 |
| Kabuli_wild_34567801 | NA                                  | Ca_kabuli_denovo | 34567801                | A/G  | NA                 | NA                            | NA                 |
| Kabuli_wild_34567806 | NA                                  | Ca_kabuli_denovo | 34567806                | A/C  | NA                 | NA                            | NA                 |
| Kabuli_wild_34571655 | NA                                  | Ca_kabuli_denovo | 34571655                | T/C  | NA                 | NA                            | NA                 |
| Kabuli_wild_34571656 | NA                                  | Ca_kabuli_denovo | 34571656                | C/T  | NA                 | NA                            | NA                 |
| Kabuli_wild_34571674 | NA                                  | Ca_kabuli_denovo | 34571674                | T/C  | NA                 | NA                            | NA                 |
| Kabuli_wild_34571704 | NA                                  | Ca_kabuli_denovo | 34571704                | T/C  | NA                 | NA                            | NA                 |
| Kabuli_wild_34572136 | NA                                  | Ca_kabuli_denovo | 34572136                | A/G  | NA                 | NA                            | NA                 |
| Kabuli_wild_34575298 | NA                                  | Ca_kabuli_denovo | 34575298                | G/A  | NA                 | NA                            | NA                 |
| Kabuli_wild_34584859 | NA                                  | Ca_kabuli_denovo | 34584859                | A/G  | NA                 | NA                            | NA                 |
| Kabuli_wild_34586276 | NA                                  | Ca_kabuli_denovo | 34586276                | G/T  | NA                 | NA                            | NA                 |
| Kabuli_wild_34587537 | NA                                  | Ca_kabuli_denovo | 34587537                | G/C  | NA                 | NA                            | NA                 |
| Kabuli_wild_34592376 | NA                                  | Ca_kabuli_denovo | 34592376                | G/T  | NA                 | NA                            | NA                 |
| Kabuli_wild_34593000 | NA                                  | Ca_kabuli_denovo | 34593000                | G/C  | NA                 | NA                            | NA                 |
| Kabuli_wild_34593016 | NA                                  | Ca_kabuli_denovo | 34593016                | C/T  | NA                 | NA                            | NA                 |

| SNP IDs              | NCBI dbSNP accession IDs (NCBI_SS#) | Chromosomes      | Physical positions (bp) | SNPs | Gene accession IDs | Sequence components of genome | Putative functions |
|----------------------|-------------------------------------|------------------|-------------------------|------|--------------------|-------------------------------|--------------------|
| Kabuli_wild_34595160 | NA                                  | Ca_kabuli_denovo | 34595160                | A/G  | NA                 | NA                            | NA                 |
| Kabuli_wild_34604006 | NA                                  | Ca_kabuli_denovo | 34604006                | G/C  | NA                 | NA                            | NA                 |
| Kabuli_wild_34604015 | NA                                  | Ca_kabuli_denovo | 34604015                | G/A  | NA                 | NA                            | NA                 |
| Kabuli_wild_34604248 | NA                                  | Ca_kabuli_denovo | 34604248                | A/G  | NA                 | NA                            | NA                 |
| Kabuli_wild_34605229 | NA                                  | Ca_kabuli_denovo | 34605229                | C/T  | NA                 | NA                            | NA                 |
| Kabuli_wild_34606428 | NA                                  | Ca_kabuli_denovo | 34606428                | C/T  | NA                 | NA                            | NA                 |
| Kabuli_wild_34609072 | NA                                  | Ca_kabuli_denovo | 34609072                | T/C  | NA                 | NA                            | NA                 |
| Kabuli_wild_34609100 | NA                                  | Ca_kabuli_denovo | 34609100                | G/T  | NA                 | NA                            | NA                 |
| Kabuli_wild_34609115 | NA                                  | Ca_kabuli_denovo | 34609115                | T/C  | NA                 | NA                            | NA                 |
| Kabuli_wild_34612001 | NA                                  | Ca_kabuli_denovo | 34612001                | G/T  | NA                 | NA                            | NA                 |
| Kabuli_wild_34614374 | NA                                  | Ca_kabuli_denovo | 34614374                | A/G  | NA                 | NA                            | NA                 |
| Kabuli_wild_34618272 | NA                                  | Ca_kabuli_denovo | 34618272                | G/C  | NA                 | NA                            | NA                 |
| Kabuli_wild_34618308 | NA                                  | Ca_kabuli_denovo | 34618308                | C/T  | NA                 | NA                            | NA                 |
| Kabuli_wild_34624199 | NA                                  | Ca_kabuli_denovo | 34624199                | C/T  | NA                 | NA                            | NA                 |
| Kabuli_wild_34624214 | NA                                  | Ca_kabuli_denovo | 34624214                | C/T  | NA                 | NA                            | NA                 |
| Kabuli_wild_34624343 | NA                                  | Ca_kabuli_denovo | 34624343                | C/T  | NA                 | NA                            | NA                 |
| Kabuli_wild_34629244 | NA                                  | Ca_kabuli_denovo | 34629244                | T/C  | NA                 | NA                            | NA                 |
| Kabuli_wild_34634294 | NA                                  | Ca_kabuli_denovo | 34634294                | C/T  | NA                 | NA                            | NA                 |
| Kabuli_wild_34643289 | NA                                  | Ca_kabuli_denovo | 34643289                | C/T  | NA                 | NA                            | NA                 |
| Kabuli_wild_34651683 | NA                                  | Ca_kabuli_denovo | 34651683                | G/A  | NA                 | NA                            | NA                 |
| Kabuli_wild_34651715 | NA                                  | Ca_kabuli_denovo | 34651715                | C/A  | NA                 | NA                            | NA                 |
| Kabuli_wild_34652627 | NA                                  | Ca_kabuli_denovo | 34652627                | T/C  | NA                 | NA                            | NA                 |
| Kabuli_wild_34657278 | NA                                  | Ca_kabuli_denovo | 34657278                | A/T  | NA                 | NA                            | NA                 |
| Kabuli_wild_34658167 | NA                                  | Ca_kabuli_denovo | 34658167                | G/C  | NA                 | NA                            | NA                 |
| Kabuli_wild_34658185 | NA                                  | Ca_kabuli_denovo | 34658185                | T/C  | NA                 | NA                            | NA                 |
| Kabuli_wild_34659019 | NA                                  | Ca_kabuli_denovo | 34659019                | G/A  | NA                 | NA                            | NA                 |
| Kabuli_wild_34663142 | NA                                  | Ca_kabuli_denovo | 34663142                | G/C  | NA                 | NA                            | NA                 |
| Kabuli_wild_34663183 | NA                                  | Ca_kabuli_denovo | 34663183                | A/G  | NA                 | NA                            | NA                 |
| Kabuli_wild_34665591 | NA                                  | Ca_kabuli_denovo | 34665591                | A/C  | NA                 | NA                            | NA                 |
| Kabuli_wild_34665920 | NA                                  | Ca_kabuli_denovo | 34665920                | T/C  | NA                 | NA                            | NA                 |
| Kabuli_wild_34666794 | NA                                  | Ca_kabuli_denovo | 34666794                | T/A  | NA                 | NA                            | NA                 |
| Kabuli_wild_34666801 | NA                                  | Ca_kabuli_denovo | 34666801                | A/C  | NA                 | NA                            | NA                 |
| Kabuli_wild_34677109 | NA                                  | Ca_kabuli_denovo | 34677109                | G/C  | NA                 | NA                            | NA                 |
| Kabuli_wild_34689085 | NA                                  | Ca_kabuli_denovo | 34689085                | T/G  | NA                 | NA                            | NA                 |
| Kabuli_wild_34693721 | NA                                  | Ca_kabuli_denovo | 34693721                | G/T  | NA                 | NA                            | NA                 |
| Kabuli_wild_34693722 | NA                                  | Ca_kabuli_denovo | 34693722                | C/G  | NA                 | NA                            | NA                 |
| Kabuli_wild_34701649 | NA                                  | Ca_kabuli_denovo | 34701649                | A/G  | NA                 | NA                            | NA                 |
| Kabuli_wild_34702294 | NA                                  | Ca_kabuli_denovo | 34702294                | A/G  | NA                 | NA                            | NA                 |
| Kabuli_wild_34702342 | NA                                  | Ca_kabuli_denovo | 34702342                | C/A  | NA                 | NA                            | NA                 |
| Kabuli_wild_34702734 | NA                                  | Ca_kabuli_denovo | 34702734                | C/A  | NA                 | NA                            | NA                 |
| Kabuli_wild_34711670 | NA                                  | Ca_kabuli_denovo | 34711670                | G/T  | NA                 | NA                            | NA                 |
| Kabuli_wild_34721639 | NA                                  | Ca_kabuli_denovo | 34721639                | G/C  | NA                 | NA                            | NA                 |
| Kabuli_wild_34732552 | NA                                  | Ca_kabuli_denovo | 34732552                | T/C  | NA                 | NA                            | NA                 |
| Kabuli_wild_34740762 | NA                                  | Ca_kabuli_denovo | 34740762                | A/C  | NA                 | NA                            | NA                 |

| SNP IDs              | NCBI dbSNP accession IDs (NCBI_SS#) | Chromosomes      | Physical positions (bp) | SNPs | Gene accession IDs | Sequence components of genome | Putative functions |
|----------------------|-------------------------------------|------------------|-------------------------|------|--------------------|-------------------------------|--------------------|
| Kabuli_wild_34744417 | NA                                  | Ca_kabuli_denovo | 34744417                | C/T  | NA                 | NA                            | NA                 |
| Kabuli_wild_34745799 | NA                                  | Ca_kabuli_denovo | 34745799                | C/G  | NA                 | NA                            | NA                 |
| Kabuli_wild_34750021 | NA                                  | Ca_kabuli_denovo | 34750021                | G/C  | NA                 | NA                            | NA                 |
| Kabuli_wild_34756427 | NA                                  | Ca_kabuli_denovo | 34756427                | G/A  | NA                 | NA                            | NA                 |
| Kabuli_wild_34769848 | NA                                  | Ca_kabuli_denovo | 34769848                | A/C  | NA                 | NA                            | NA                 |
| Kabuli_wild_34782994 | NA                                  | Ca_kabuli_denovo | 34782994                | G/T  | NA                 | NA                            | NA                 |
| Kabuli_wild_34783269 | NA                                  | Ca_kabuli_denovo | 34783269                | A/G  | NA                 | NA                            | NA                 |
| Kabuli_wild_34784943 | NA                                  | Ca_kabuli_denovo | 34784943                | C/G  | NA                 | NA                            | NA                 |
| Kabuli_wild_34784962 | NA                                  | Ca_kabuli_denovo | 34784962                | G/A  | NA                 | NA                            | NA                 |
| Kabuli_wild_34784985 | NA                                  | Ca_kabuli_denovo | 34784985                | A/G  | NA                 | NA                            | NA                 |
| Kabuli_wild_34785014 | NA                                  | Ca_kabuli_denovo | 34785014                | A/C  | NA                 | NA                            | NA                 |
| Kabuli_wild_34792469 | NA                                  | Ca_kabuli_denovo | 34792469                | G/T  | NA                 | NA                            | NA                 |
| Kabuli_wild_34804913 | NA                                  | Ca_kabuli_denovo | 34804913                | G/A  | NA                 | NA                            | NA                 |
| Kabuli_wild_34804917 | NA                                  | Ca_kabuli_denovo | 34804917                | A/G  | NA                 | NA                            | NA                 |
| Kabuli_wild_34804945 | NA                                  | Ca_kabuli_denovo | 34804945                | T/G  | NA                 | NA                            | NA                 |
| Kabuli_wild_34807152 | NA                                  | Ca_kabuli_denovo | 34807152                | G/T  | NA                 | NA                            | NA                 |
| Kabuli_wild_34807181 | NA                                  | Ca_kabuli_denovo | 34807181                | T/G  | NA                 | NA                            | NA                 |
| Kabuli_wild_34808903 | NA                                  | Ca_kabuli_denovo | 34808903                | T/G  | NA                 | NA                            | NA                 |
| Kabuli_wild_34810108 | NA                                  | Ca_kabuli_denovo | 34810108                | A/G  | NA                 | NA                            | NA                 |
| Kabuli_wild_34811513 | NA                                  | Ca_kabuli_denovo | 34811513                | G/T  | NA                 | NA                            | NA                 |
| Kabuli_wild_34818642 | NA                                  | Ca_kabuli_denovo | 34818642                | C/G  | NA                 | NA                            | NA                 |
| Kabuli_wild_34823035 | NA                                  | Ca_kabuli_denovo | 34823035                | C/G  | NA                 | NA                            | NA                 |
| Kabuli_wild_34825476 | NA                                  | Ca_kabuli_denovo | 34825476                | A/G  | NA                 | NA                            | NA                 |
| Kabuli_wild_34827013 | NA                                  | Ca_kabuli_denovo | 34827013                | G/A  | NA                 | NA                            | NA                 |
| Kabuli_wild_34830809 | NA                                  | Ca_kabuli_denovo | 34830809                | A/C  | NA                 | NA                            | NA                 |
| Kabuli_wild_34839162 | NA                                  | Ca_kabuli_denovo | 34839162                | G/T  | NA                 | NA                            | NA                 |
| Kabuli_wild_34844495 | NA                                  | Ca_kabuli_denovo | 34844495                | G/T  | NA                 | NA                            | NA                 |
| Kabuli_wild_34846303 | NA                                  | Ca_kabuli_denovo | 34846303                | C/T  | NA                 | NA                            | NA                 |
| Kabuli_wild_34846324 | NA                                  | Ca_kabuli_denovo | 34846324                | A/G  | NA                 | NA                            | NA                 |
| Kabuli_wild_34853577 | NA                                  | Ca_kabuli_denovo | 34853577                | A/G  | NA                 | NA                            | NA                 |
| Kabuli_wild_34853583 | NA                                  | Ca_kabuli_denovo | 34853583                | T/G  | NA                 | NA                            | NA                 |
| Kabuli_wild_34853850 | NA                                  | Ca_kabuli_denovo | 34853850                | A/C  | NA                 | NA                            | NA                 |
| Kabuli_wild_34853851 | NA                                  | Ca_kabuli_denovo | 34853851                | A/G  | NA                 | NA                            | NA                 |
| Kabuli_wild_34854116 | NA                                  | Ca_kabuli_denovo | 34854116                | G/T  | NA                 | NA                            | NA                 |
| Kabuli_wild_34855297 | NA                                  | Ca_kabuli_denovo | 34855297                | C/G  | NA                 | NA                            | NA                 |
| Kabuli_wild_34860800 | NA                                  | Ca_kabuli_denovo | 34860800                | T/C  | NA                 | NA                            | NA                 |
| Kabuli_wild_34864691 | NA                                  | Ca_kabuli_denovo | 34864691                | G/T  | NA                 | NA                            | NA                 |
| Kabuli_wild_34865861 | NA                                  | Ca_kabuli_denovo | 34865861                | A/G  | NA                 | NA                            | NA                 |
| Kabuli_wild_34866422 | NA                                  | Ca_kabuli_denovo | 34866422                | A/C  | NA                 | NA                            | NA                 |
| Kabuli_wild_34866426 | NA                                  | Ca_kabuli_denovo | 34866426                | C/T  | NA                 | NA                            | NA                 |
| Kabuli_wild_34867611 | NA                                  | Ca_kabuli_denovo | 34867611                | C/A  | NA                 | NA                            | NA                 |
| Kabuli_wild_34867626 | NA                                  | Ca_kabuli_denovo | 34867626                | T/C  | NA                 | NA                            | NA                 |
| Kabuli_wild_34871608 | NA                                  | Ca_kabuli_denovo | 34871608                | A/C  | NA                 | NA                            | NA                 |
| Kabuli_wild_34873062 | NA                                  | Ca_kabuli_denovo | 34873062                | T/G  | NA                 | NA                            | NA                 |

| SNP IDs              | NCBI dbSNP accession IDs (NCBI_SS#) | Chromosomes      | Physical positions (bp) | SNPs | Gene accession IDs | Sequence components of genome | Putative functions |
|----------------------|-------------------------------------|------------------|-------------------------|------|--------------------|-------------------------------|--------------------|
| Kabuli_wild_34873090 | NA                                  | Ca_kabuli_denovo | 34873090                | C/T  | NA                 | NA                            | NA                 |
| Kabuli_wild_34873136 | NA                                  | Ca_kabuli_denovo | 34873136                | C/A  | NA                 | NA                            | NA                 |
| Kabuli_wild_34875299 | NA                                  | Ca_kabuli_denovo | 34875299                | C/T  | NA                 | NA                            | NA                 |
| Kabuli_wild_34883727 | NA                                  | Ca_kabuli_denovo | 34883727                | G/A  | NA                 | NA                            | NA                 |
| Kabuli_wild_34890291 | NA                                  | Ca_kabuli_denovo | 34890291                | A/T  | NA                 | NA                            | NA                 |
| Kabuli_wild_34895500 | NA                                  | Ca_kabuli_denovo | 34895500                | G/T  | NA                 | NA                            | NA                 |
| Kabuli_wild_34896400 | NA                                  | Ca_kabuli_denovo | 34896400                | G/C  | NA                 | NA                            | NA                 |
| Kabuli_wild_34896462 | NA                                  | Ca_kabuli_denovo | 34896462                | C/T  | NA                 | NA                            | NA                 |
| Kabuli_wild_34898861 | NA                                  | Ca_kabuli_denovo | 34898861                | T/G  | NA                 | NA                            | NA                 |
| Kabuli_wild_34900042 | NA                                  | Ca_kabuli_denovo | 34900042                | T/A  | NA                 | NA                            | NA                 |
| Kabuli_wild_34900056 | NA                                  | Ca_kabuli_denovo | 34900056                | G/A  | NA                 | NA                            | NA                 |
| Kabuli_wild_34900138 | NA                                  | Ca_kabuli_denovo | 34900138                | G/A  | NA                 | NA                            | NA                 |
| Kabuli_wild_34905211 | NA                                  | Ca_kabuli_denovo | 34905211                | A/C  | NA                 | NA                            | NA                 |
| Kabuli_wild_34911727 | NA                                  | Ca_kabuli_denovo | 34911727                | T/G  | NA                 | NA                            | NA                 |
| Kabuli_wild_34918531 | NA                                  | Ca_kabuli_denovo | 34918531                | T/A  | NA                 | NA                            | NA                 |
| Kabuli_wild_34921241 | NA                                  | Ca_kabuli_denovo | 34921241                | A/C  | NA                 | NA                            | NA                 |
| Kabuli_wild_34923803 | NA                                  | Ca_kabuli_denovo | 34923803                | G/T  | NA                 | NA                            | NA                 |
| Kabuli_wild_34925965 | NA                                  | Ca_kabuli_denovo | 34925965                | C/T  | NA                 | NA                            | NA                 |
| Kabuli_wild_34927088 | NA                                  | Ca_kabuli_denovo | 34927088                | T/C  | NA                 | NA                            | NA                 |
| Kabuli_wild_34928648 | NA                                  | Ca_kabuli_denovo | 34928648                | G/C  | NA                 | NA                            | NA                 |
| Kabuli_wild_34928704 | NA                                  | Ca_kabuli_denovo | 34928704                | G/T  | NA                 | NA                            | NA                 |
| Kabuli_wild_34932279 | NA                                  | Ca_kabuli_denovo | 34932279                | C/G  | NA                 | NA                            | NA                 |
| Kabuli_wild_34933654 | NA                                  | Ca_kabuli_denovo | 34933654                | C/T  | NA                 | NA                            | NA                 |
| Kabuli_wild_34933666 | NA                                  | Ca_kabuli_denovo | 34933666                | G/A  | NA                 | NA                            | NA                 |
| Kabuli_wild_34941211 | NA                                  | Ca_kabuli_denovo | 34941211                | A/C  | NA                 | NA                            | NA                 |
| Kabuli_wild_34941618 | NA                                  | Ca_kabuli_denovo | 34941618                | C/T  | NA                 | NA                            | NA                 |
| Kabuli_wild_34941622 | NA                                  | Ca_kabuli_denovo | 34941622                | C/T  | NA                 | NA                            | NA                 |
| Kabuli_wild_34942459 | NA                                  | Ca_kabuli_denovo | 34942459                | T/G  | NA                 | NA                            | NA                 |
| Kabuli_wild_34946872 | NA                                  | Ca_kabuli_denovo | 34946872                | G/T  | NA                 | NA                            | NA                 |
| Kabuli_wild_34947108 | NA                                  | Ca_kabuli_denovo | 34947108                | G/C  | NA                 | NA                            | NA                 |
| Kabuli_wild_34947136 | NA                                  | Ca_kabuli_denovo | 34947136                | C/T  | NA                 | NA                            | NA                 |
| Kabuli_wild_34949808 | NA                                  | Ca_kabuli_denovo | 34949808                | T/G  | NA                 | NA                            | NA                 |
| Kabuli_wild_34957209 | NA                                  | Ca_kabuli_denovo | 34957209                | T/C  | NA                 | NA                            | NA                 |
| Kabuli_wild_34959181 | NA                                  | Ca_kabuli_denovo | 34959181                | C/A  | NA                 | NA                            | NA                 |
| Kabuli_wild_34959206 | NA                                  | Ca_kabuli_denovo | 34959206                | G/T  | NA                 | NA                            | NA                 |
| Kabuli_wild_34964244 | NA                                  | Ca_kabuli_denovo | 34964244                | G/T  | NA                 | NA                            | NA                 |
| Kabuli_wild_34964250 | NA                                  | Ca_kabuli_denovo | 34964250                | A/G  | NA                 | NA                            | NA                 |
| Kabuli_wild_34977421 | NA                                  | Ca_kabuli_denovo | 34977421                | C/G  | NA                 | NA                            | NA                 |
| Kabuli_wild_34981692 | NA                                  | Ca_kabuli_denovo | 34981692                | C/T  | NA                 | NA                            | NA                 |
| Kabuli_wild_34983783 | NA                                  | Ca_kabuli_denovo | 34983783                | T/G  | NA                 | NA                            | NA                 |
| Kabuli_wild_34983784 | NA                                  | Ca_kabuli_denovo | 34983784                | T/A  | NA                 | NA                            | NA                 |
| Kabuli_wild_34985869 | NA                                  | Ca_kabuli_denovo | 34985869                | C/T  | NA                 | NA                            | NA                 |
| Kabuli_wild_34985911 | NA                                  | Ca_kabuli_denovo | 34985911                | T/C  | NA                 | NA                            | NA                 |
| Kabuli_wild_34987501 | NA                                  | Ca_kabuli_denovo | 34987501                | C/G  | NA                 | NA                            | NA                 |

| SNP IDs              | NCBI dbSNP accession IDs (NCBI_SS#) | Chromosomes      | Physical positions (bp) | SNPs | Gene accession IDs | Sequence components of genome | Putative functions |
|----------------------|-------------------------------------|------------------|-------------------------|------|--------------------|-------------------------------|--------------------|
| Kabuli_wild_34987522 | NA                                  | Ca_kabuli_denovo | 34987522                | C/T  | NA                 | NA                            | NA                 |
| Kabuli_wild_34995400 | NA                                  | Ca_kabuli_denovo | 34995400                | T/C  | NA                 | NA                            | NA                 |
| Kabuli_wild_34995568 | NA                                  | Ca_kabuli_denovo | 34995568                | C/A  | NA                 | NA                            | NA                 |
| Kabuli_wild_34995931 | NA                                  | Ca_kabuli_denovo | 34995931                | A/C  | NA                 | NA                            | NA                 |
| Kabuli_wild_35000096 | NA                                  | Ca_kabuli_denovo | 35000096                | A/G  | NA                 | NA                            | NA                 |
| Kabuli_wild_35000111 | NA                                  | Ca_kabuli_denovo | 35000111                | G/A  | NA                 | NA                            | NA                 |
| Kabuli_wild_35004474 | NA                                  | Ca_kabuli_denovo | 35004474                | G/T  | NA                 | NA                            | NA                 |
| Kabuli_wild_35005540 | NA                                  | Ca_kabuli_denovo | 35005540                | T/C  | NA                 | NA                            | NA                 |
| Kabuli_wild_35005620 | NA                                  | Ca_kabuli_denovo | 35005620                | G/C  | NA                 | NA                            | NA                 |
| Kabuli_wild_35009050 | NA                                  | Ca_kabuli_denovo | 35009050                | C/T  | NA                 | NA                            | NA                 |
| Kabuli_wild_35010186 | NA                                  | Ca_kabuli_denovo | 35010186                | T/C  | NA                 | NA                            | NA                 |
| Kabuli_wild_35010886 | NA                                  | Ca_kabuli_denovo | 35010886                | A/G  | NA                 | NA                            | NA                 |
| Kabuli_wild_35011012 | NA                                  | Ca_kabuli_denovo | 35011012                | A/T  | NA                 | NA                            | NA                 |
| Kabuli_wild_35011018 | NA                                  | Ca_kabuli_denovo | 35011018                | A/C  | NA                 | NA                            | NA                 |
| Kabuli_wild_35015150 | NA                                  | Ca_kabuli_denovo | 35015150                | G/C  | NA                 | NA                            | NA                 |
| Kabuli_wild_35015208 | NA                                  | Ca_kabuli_denovo | 35015208                | C/T  | NA                 | NA                            | NA                 |
| Kabuli_wild_35016283 | NA                                  | Ca_kabuli_denovo | 35016283                | A/C  | NA                 | NA                            | NA                 |
| Kabuli_wild_35022119 | NA                                  | Ca_kabuli_denovo | 35022119                | C/G  | NA                 | NA                            | NA                 |
| Kabuli_wild_35026058 | NA                                  | Ca_kabuli_denovo | 35026058                | G/T  | NA                 | NA                            | NA                 |
| Kabuli_wild_35027878 | NA                                  | Ca_kabuli_denovo | 35027878                | G/T  | NA                 | NA                            | NA                 |
| Kabuli_wild_35028505 | NA                                  | Ca_kabuli_denovo | 35028505                | C/T  | NA                 | NA                            | NA                 |
| Kabuli_wild_35028526 | NA                                  | Ca_kabuli_denovo | 35028526                | G/C  | NA                 | NA                            | NA                 |
| Kabuli_wild_35032107 | NA                                  | Ca_kabuli_denovo | 35032107                | C/T  | NA                 | NA                            | NA                 |
| Kabuli_wild_35035246 | NA                                  | Ca_kabuli_denovo | 35035246                | T/C  | NA                 | NA                            | NA                 |
| Kabuli_wild_35037169 | NA                                  | Ca_kabuli_denovo | 35037169                | A/G  | NA                 | NA                            | NA                 |
| Kabuli_wild_35037170 | NA                                  | Ca_kabuli_denovo | 35037170                | T/C  | NA                 | NA                            | NA                 |
| Kabuli_wild_35048000 | NA                                  | Ca_kabuli_denovo | 35048000                | C/G  | NA                 | NA                            | NA                 |
| Kabuli_wild_35049651 | NA                                  | Ca_kabuli_denovo | 35049651                | T/G  | NA                 | NA                            | NA                 |
| Kabuli_wild_35050405 | NA                                  | Ca_kabuli_denovo | 35050405                | C/T  | NA                 | NA                            | NA                 |
| Kabuli_wild_35053352 | NA                                  | Ca_kabuli_denovo | 35053352                | T/C  | NA                 | NA                            | NA                 |
| Kabuli_wild_35053423 | NA                                  | Ca_kabuli_denovo | 35053423                | G/A  | NA                 | NA                            | NA                 |
| Kabuli_wild_35054152 | NA                                  | Ca_kabuli_denovo | 35054152                | T/C  | NA                 | NA                            | NA                 |
| Kabuli_wild_35059554 | NA                                  | Ca_kabuli_denovo | 35059554                | T/G  | NA                 | NA                            | NA                 |
| Kabuli_wild_35063527 | NA                                  | Ca_kabuli_denovo | 35063527                | T/C  | NA                 | NA                            | NA                 |
| Kabuli_wild_35063557 | NA                                  | Ca_kabuli_denovo | 35063557                | T/G  | NA                 | NA                            | NA                 |
| Kabuli_wild_35072066 | NA                                  | Ca_kabuli_denovo | 35072066                | C/T  | NA                 | NA                            | NA                 |
| Kabuli_wild_35072069 | NA                                  | Ca_kabuli_denovo | 35072069                | C/T  | NA                 | NA                            | NA                 |
| Kabuli_wild_35075034 | NA                                  | Ca_kabuli_denovo | 35075034                | A/C  | NA                 | NA                            | NA                 |
| Kabuli_wild_35075035 | NA                                  | Ca_kabuli_denovo | 35075035                | G/T  | NA                 | NA                            | NA                 |
| Kabuli_wild_35077470 | NA                                  | Ca_kabuli_denovo | 35077470                | A/G  | NA                 | NA                            | NA                 |
| Kabuli_wild_35078020 | NA                                  | Ca_kabuli_denovo | 35078020                | C/T  | NA                 | NA                            | NA                 |
| Kabuli_wild_35079575 | NA                                  | Ca_kabuli_denovo | 35079575                | G/A  | NA                 | NA                            | NA                 |
| Kabuli_wild_35079602 | NA                                  | Ca_kabuli_denovo | 35079602                | T/C  | NA                 | NA                            | NA                 |
| Kabuli_wild_35082756 | NA                                  | Ca_kabuli_denovo | 35082756                | G/A  | NA                 | NA                            | NA                 |

| SNP IDs              | NCBI dbSNP accession IDs (NCBI_SS#) | Chromosomes      | Physical positions (bp) | SNPs | Gene accession IDs | Sequence components of genome | Putative functions |
|----------------------|-------------------------------------|------------------|-------------------------|------|--------------------|-------------------------------|--------------------|
| Kabuli_wild_35086906 | NA                                  | Ca_kabuli_denovo | 35086906                | G/T  | NA                 | NA                            | NA                 |
| Kabuli_wild_35089170 | NA                                  | Ca_kabuli_denovo | 35089170                | C/G  | NA                 | NA                            | NA                 |
| Kabuli_wild_35089176 | NA                                  | Ca_kabuli_denovo | 35089176                | C/T  | NA                 | NA                            | NA                 |
| Kabuli_wild_35090201 | NA                                  | Ca_kabuli_denovo | 35090201                | A/C  | NA                 | NA                            | NA                 |
| Kabuli_wild_35090202 | NA                                  | Ca_kabuli_denovo | 35090202                | G/C  | NA                 | NA                            | NA                 |
| Kabuli_wild_35090203 | NA                                  | Ca_kabuli_denovo | 35090203                | A/G  | NA                 | NA                            | NA                 |
| Kabuli_wild_35091847 | NA                                  | Ca_kabuli_denovo | 35091847                | T/C  | NA                 | NA                            | NA                 |
| Kabuli_wild_35112413 | NA                                  | Ca_kabuli_denovo | 35112413                | G/A  | NA                 | NA                            | NA                 |
| Kabuli_wild_35115453 | NA                                  | Ca_kabuli_denovo | 35115453                | A/T  | NA                 | NA                            | NA                 |
| Kabuli_wild_35115468 | NA                                  | Ca_kabuli_denovo | 35115468                | A/G  | NA                 | NA                            | NA                 |
| Kabuli_wild_35115534 | NA                                  | Ca_kabuli_denovo | 35115534                | T/G  | NA                 | NA                            | NA                 |
| Kabuli_wild_35121304 | NA                                  | Ca_kabuli_denovo | 35121304                | A/C  | NA                 | NA                            | NA                 |
| Kabuli_wild_35124474 | NA                                  | Ca_kabuli_denovo | 35124474                | A/C  | NA                 | NA                            | NA                 |
| Kabuli_wild_35128092 | NA                                  | Ca_kabuli_denovo | 35128092                | C/T  | NA                 | NA                            | NA                 |
| Kabuli_wild_35133040 | NA                                  | Ca_kabuli_denovo | 35133040                | G/A  | NA                 | NA                            | NA                 |
| Kabuli_wild_35135813 | NA                                  | Ca_kabuli_denovo | 35135813                | T/C  | NA                 | NA                            | NA                 |
| Kabuli_wild_35135852 | NA                                  | Ca_kabuli_denovo | 35135852                | A/C  | NA                 | NA                            | NA                 |
| Kabuli_wild_35136610 | NA                                  | Ca_kabuli_denovo | 35136610                | G/A  | NA                 | NA                            | NA                 |
| Kabuli_wild_35136634 | NA                                  | Ca_kabuli_denovo | 35136634                | C/T  | NA                 | NA                            | NA                 |
| Kabuli_wild_35139586 | NA                                  | Ca_kabuli_denovo | 35139586                | G/C  | NA                 | NA                            | NA                 |
| Kabuli_wild_35141666 | NA                                  | Ca_kabuli_denovo | 35141666                | T/C  | NA                 | NA                            | NA                 |
| Kabuli_wild_35141693 | NA                                  | Ca_kabuli_denovo | 35141693                | T/C  | NA                 | NA                            | NA                 |
| Kabuli_wild_35141744 | NA                                  | Ca_kabuli_denovo | 35141744                | A/C  | NA                 | NA                            | NA                 |
| Kabuli_wild_35157242 | NA                                  | Ca_kabuli_denovo | 35157242                | G/A  | NA                 | NA                            | NA                 |
| Kabuli_wild_35157275 | NA                                  | Ca_kabuli_denovo | 35157275                | C/G  | NA                 | NA                            | NA                 |
| Kabuli_wild_35169707 | NA                                  | Ca_kabuli_denovo | 35169707                | A/G  | NA                 | NA                            | NA                 |
| Kabuli_wild_35175603 | NA                                  | Ca_kabuli_denovo | 35175603                | T/G  | NA                 | NA                            | NA                 |
| Kabuli_wild_35176727 | NA                                  | Ca_kabuli_denovo | 35176727                | C/A  | NA                 | NA                            | NA                 |
| Kabuli_wild_35185961 | NA                                  | Ca_kabuli_denovo | 35185961                | A/G  | NA                 | NA                            | NA                 |
| Kabuli_wild_35185970 | NA                                  | Ca_kabuli_denovo | 35185970                | G/A  | NA                 | NA                            | NA                 |
| Kabuli_wild_35189675 | NA                                  | Ca_kabuli_denovo | 35189675                | T/C  | NA                 | NA                            | NA                 |
| Kabuli_wild_35196130 | NA                                  | Ca_kabuli_denovo | 35196130                | G/T  | NA                 | NA                            | NA                 |
| Kabuli_wild_35198196 | NA                                  | Ca_kabuli_denovo | 35198196                | G/T  | NA                 | NA                            | NA                 |
| Kabuli_wild_35199732 | NA                                  | Ca_kabuli_denovo | 35199732                | G/C  | NA                 | NA                            | NA                 |
| Kabuli_wild_35208945 | NA                                  | Ca_kabuli_denovo | 35208945                | A/G  | NA                 | NA                            | NA                 |
| Kabuli_wild_35208951 | NA                                  | Ca_kabuli_denovo | 35208951                | C/A  | NA                 | NA                            | NA                 |
| Kabuli_wild_35209464 | NA                                  | Ca_kabuli_denovo | 35209464                | A/G  | NA                 | NA                            | NA                 |
| Kabuli_wild_35209471 | NA                                  | Ca_kabuli_denovo | 35209471                | A/G  | NA                 | NA                            | NA                 |
| Kabuli_wild_35209477 | NA                                  | Ca_kabuli_denovo | 35209477                | T/C  | NA                 | NA                            | NA                 |
| Kabuli_wild_35215284 | NA                                  | Ca_kabuli_denovo | 35215284                | T/G  | NA                 | NA                            | NA                 |
| Kabuli_wild_35219557 | NA                                  | Ca_kabuli_denovo | 35219557                | C/T  | NA                 | NA                            | NA                 |
| Kabuli_wild_35220601 | NA                                  | Ca_kabuli_denovo | 35220601                | A/T  | NA                 | NA                            | NA                 |
| Kabuli_wild_35226328 | NA                                  | Ca_kabuli_denovo | 35226328                | A/C  | NA                 | NA                            | NA                 |
| Kabuli_wild_35228769 | NA                                  | Ca_kabuli_denovo | 35228769                | G/T  | NA                 | NA                            | NA                 |



| SNP IDs              | NCBI dbSNP accession IDs (NCBI_SS#) | Chromosomes      | Physical positions (bp) | SNPs | Gene accession IDs | Sequence components of genome | Putative functions |
|----------------------|-------------------------------------|------------------|-------------------------|------|--------------------|-------------------------------|--------------------|
| Kabuli_wild_35230935 | NA                                  | Ca_kabuli_denovo | 35230935                | G/C  | NA                 | NA                            | NA                 |
| Kabuli_wild_35231329 | NA                                  | Ca_kabuli_denovo | 35231329                | T/C  | NA                 | NA                            | NA                 |
| Kabuli_wild_35231344 | NA                                  | Ca_kabuli_denovo | 35231344                | T/C  | NA                 | NA                            | NA                 |
| Kabuli_wild_35237082 | NA                                  | Ca_kabuli_denovo | 35237082                | A/C  | NA                 | NA                            | NA                 |
| Kabuli_wild_35237083 | NA                                  | Ca_kabuli_denovo | 35237083                | G/T  | NA                 | NA                            | NA                 |
| Kabuli_wild_35240665 | NA                                  | Ca_kabuli_denovo | 35240665                | G/T  | NA                 | NA                            | NA                 |
| Kabuli_wild_35242614 | NA                                  | Ca_kabuli_denovo | 35242614                | T/C  | NA                 | NA                            | NA                 |
| Kabuli_wild_35244280 | NA                                  | Ca_kabuli_denovo | 35244280                | C/G  | NA                 | NA                            | NA                 |
| Kabuli_wild_35247451 | NA                                  | Ca_kabuli_denovo | 35247451                | G/T  | NA                 | NA                            | NA                 |
| Kabuli_wild_35248707 | NA                                  | Ca_kabuli_denovo | 35248707                | A/T  | NA                 | NA                            | NA                 |
| Kabuli_wild_35250681 | NA                                  | Ca_kabuli_denovo | 35250681                | C/A  | NA                 | NA                            | NA                 |
| Kabuli_wild_35251073 | NA                                  | Ca_kabuli_denovo | 35251073                | G/A  | NA                 | NA                            | NA                 |
| Kabuli_wild_35252039 | NA                                  | Ca_kabuli_denovo | 35252039                | C/A  | NA                 | NA                            | NA                 |
| Kabuli_wild_35252877 | NA                                  | Ca_kabuli_denovo | 35252877                | T/C  | NA                 | NA                            | NA                 |
| Kabuli_wild_35255743 | NA                                  | Ca_kabuli_denovo | 35255743                | G/C  | NA                 | NA                            | NA                 |
| Kabuli_wild_35258223 | NA                                  | Ca_kabuli_denovo | 35258223                | T/G  | NA                 | NA                            | NA                 |
| Kabuli_wild_35264007 | NA                                  | Ca_kabuli_denovo | 35264007                | C/G  | NA                 | NA                            | NA                 |
| Kabuli_wild_35265736 | NA                                  | Ca_kabuli_denovo | 35265736                | T/C  | NA                 | NA                            | NA                 |
| Kabuli_wild_35266370 | NA                                  | Ca_kabuli_denovo | 35266370                | C/T  | NA                 | NA                            | NA                 |
| Kabuli_wild_35267620 | NA                                  | Ca_kabuli_denovo | 35267620                | C/G  | NA                 | NA                            | NA                 |
| Kabuli_wild_35284587 | NA                                  | Ca_kabuli_denovo | 35284587                | G/C  | NA                 | NA                            | NA                 |
| Kabuli_wild_35287367 | NA                                  | Ca_kabuli_denovo | 35287367                | T/G  | NA                 | NA                            | NA                 |
| Kabuli_wild_35287974 | NA                                  | Ca_kabuli_denovo | 35287974                | A/C  | NA                 | NA                            | NA                 |
| Kabuli_wild_35297407 | NA                                  | Ca_kabuli_denovo | 35297407                | T/C  | NA                 | NA                            | NA                 |
| Kabuli_wild_35297441 | NA                                  | Ca_kabuli_denovo | 35297441                | C/T  | NA                 | NA                            | NA                 |
| Kabuli_wild_35303056 | NA                                  | Ca_kabuli_denovo | 35303056                | C/G  | NA                 | NA                            | NA                 |
| Kabuli_wild_35303059 | NA                                  | Ca_kabuli_denovo | 35303059                | C/T  | NA                 | NA                            | NA                 |
| Kabuli_wild_35304197 | NA                                  | Ca_kabuli_denovo | 35304197                | T/G  | NA                 | NA                            | NA                 |
| Kabuli_wild_35304214 | NA                                  | Ca_kabuli_denovo | 35304214                | G/A  | NA                 | NA                            | NA                 |
| Kabuli_wild_35304776 | NA                                  | Ca_kabuli_denovo | 35304776                | C/T  | NA                 | NA                            | NA                 |
| Kabuli_wild_35304848 | NA                                  | Ca_kabuli_denovo | 35304848                | T/C  | NA                 | NA                            | NA                 |
| Kabuli_wild_35306394 | NA                                  | Ca_kabuli_denovo | 35306394                | G/T  | NA                 | NA                            | NA                 |
| Kabuli_wild_35308813 | NA                                  | Ca_kabuli_denovo | 35308813                | C/T  | NA                 | NA                            | NA                 |
| Kabuli_wild_35309139 | NA                                  | Ca_kabuli_denovo | 35309139                | G/T  | NA                 | NA                            | NA                 |
| Kabuli_wild_35310256 | NA                                  | Ca_kabuli_denovo | 35310256                | G/T  | NA                 | NA                            | NA                 |
| Kabuli_wild_35310305 | NA                                  | Ca_kabuli_denovo | 35310305                | C/G  | NA                 | NA                            | NA                 |
| Kabuli_wild_35311373 | NA                                  | Ca_kabuli_denovo | 35311373                | G/T  | NA                 | NA                            | NA                 |
| Kabuli_wild_35316753 | NA                                  | Ca_kabuli_denovo | 35316753                | G/T  | NA                 | NA                            | NA                 |
| Kabuli_wild_35331963 | NA                                  | Ca_kabuli_denovo | 35331963                | C/G  | NA                 | NA                            | NA                 |
| Kabuli_wild_35331971 | NA                                  | Ca_kabuli_denovo | 35331971                | C/T  | NA                 | NA                            | NA                 |
| Kabuli_wild_35339336 | NA                                  | Ca_kabuli_denovo | 35339336                | A/G  | NA                 | NA                            | NA                 |
| Kabuli_wild_35339356 | NA                                  | Ca_kabuli_denovo | 35339356                | C/T  | NA                 | NA                            | NA                 |
| Kabuli_wild_35339373 | NA                                  | Ca_kabuli_denovo | 35339373                | A/T  | NA                 | NA                            | NA                 |
| Kabuli_wild_35342676 | NA                                  | Ca_kabuli_denovo | 35342676                | A/G  | NA                 | NA                            | NA                 |

| SNP IDs              | NCBI dbSNP accession IDs (NCBI_SS#) | Chromosomes      | Physical positions (bp) | SNPs | Gene accession IDs | Sequence components of genome | Putative functions |
|----------------------|-------------------------------------|------------------|-------------------------|------|--------------------|-------------------------------|--------------------|
| Kabuli_wild_35343033 | NA                                  | Ca_kabuli_denovo | 35343033                | A/G  | NA                 | NA                            | NA                 |
| Kabuli_wild_35343364 | NA                                  | Ca_kabuli_denovo | 35343364                | C/T  | NA                 | NA                            | NA                 |
| Kabuli_wild_35343367 | NA                                  | Ca_kabuli_denovo | 35343367                | A/G  | NA                 | NA                            | NA                 |
| Kabuli_wild_35343627 | NA                                  | Ca_kabuli_denovo | 35343627                | A/C  | NA                 | NA                            | NA                 |
| Kabuli_wild_35344622 | NA                                  | Ca_kabuli_denovo | 35344622                | C/G  | NA                 | NA                            | NA                 |
| Kabuli_wild_35347431 | NA                                  | Ca_kabuli_denovo | 35347431                | G/A  | NA                 | NA                            | NA                 |
| Kabuli_wild_35347982 | NA                                  | Ca_kabuli_denovo | 35347982                | G/T  | NA                 | NA                            | NA                 |
| Kabuli_wild_35354663 | NA                                  | Ca_kabuli_denovo | 35354663                | C/T  | NA                 | NA                            | NA                 |
| Kabuli_wild_35354892 | NA                                  | Ca_kabuli_denovo | 35354892                | A/T  | NA                 | NA                            | NA                 |
| Kabuli_wild_35356464 | NA                                  | Ca_kabuli_denovo | 35356464                | G/T  | NA                 | NA                            | NA                 |
| Kabuli_wild_35357026 | NA                                  | Ca_kabuli_denovo | 35357026                | A/G  | NA                 | NA                            | NA                 |
| Kabuli_wild_35362489 | NA                                  | Ca_kabuli_denovo | 35362489                | G/A  | NA                 | NA                            | NA                 |
| Kabuli_wild_35362502 | NA                                  | Ca_kabuli_denovo | 35362502                | C/T  | NA                 | NA                            | NA                 |
| Kabuli_wild_35369347 | NA                                  | Ca_kabuli_denovo | 35369347                | G/C  | NA                 | NA                            | NA                 |
| Kabuli_wild_35393698 | NA                                  | Ca_kabuli_denovo | 35393698                | G/A  | NA                 | NA                            | NA                 |
| Kabuli_wild_35393725 | NA                                  | Ca_kabuli_denovo | 35393725                | T/C  | NA                 | NA                            | NA                 |
| Kabuli_wild_35393752 | NA                                  | Ca_kabuli_denovo | 35393752                | T/G  | NA                 | NA                            | NA                 |
| Kabuli_wild_35396658 | NA                                  | Ca_kabuli_denovo | 35396658                | G/A  | NA                 | NA                            | NA                 |
| Kabuli_wild_35396680 | NA                                  | Ca_kabuli_denovo | 35396680                | A/T  | NA                 | NA                            | NA                 |
| Kabuli_wild_35396700 | NA                                  | Ca_kabuli_denovo | 35396700                | A/G  | NA                 | NA                            | NA                 |
| Kabuli_wild_35398365 | NA                                  | Ca_kabuli_denovo | 35398365                | T/A  | NA                 | NA                            | NA                 |
| Kabuli_wild_35413913 | NA                                  | Ca_kabuli_denovo | 35413913                | A/C  | NA                 | NA                            | NA                 |
| Kabuli_wild_35415177 | NA                                  | Ca_kabuli_denovo | 35415177                | A/G  | NA                 | NA                            | NA                 |
| Kabuli_wild_35415213 | NA                                  | Ca_kabuli_denovo | 35415213                | G/C  | NA                 | NA                            | NA                 |
| Kabuli_wild_35426835 | NA                                  | Ca_kabuli_denovo | 35426835                | T/C  | NA                 | NA                            | NA                 |
| Kabuli_wild_35426846 | NA                                  | Ca_kabuli_denovo | 35426846                | C/G  | NA                 | NA                            | NA                 |
| Kabuli_wild_35431997 | NA                                  | Ca_kabuli_denovo | 35431997                | G/T  | NA                 | NA                            | NA                 |
| Kabuli_wild_35435596 | NA                                  | Ca_kabuli_denovo | 35435596                | G/A  | NA                 | NA                            | NA                 |
| Kabuli_wild_35437230 | NA                                  | Ca_kabuli_denovo | 35437230                | G/T  | NA                 | NA                            | NA                 |
| Kabuli_wild_35438381 | NA                                  | Ca_kabuli_denovo | 35438381                | C/G  | NA                 | NA                            | NA                 |
| Kabuli_wild_35438384 | NA                                  | Ca_kabuli_denovo | 35438384                | G/C  | NA                 | NA                            | NA                 |
| Kabuli_wild_35439534 | NA                                  | Ca_kabuli_denovo | 35439534                | T/C  | NA                 | NA                            | NA                 |
| Kabuli_wild_35439685 | NA                                  | Ca_kabuli_denovo | 35439685                | C/T  | NA                 | NA                            | NA                 |
| Kabuli_wild_35443641 | NA                                  | Ca_kabuli_denovo | 35443641                | G/T  | NA                 | NA                            | NA                 |
| Kabuli_wild_35456674 | NA                                  | Ca_kabuli_denovo | 35456674                | G/A  | NA                 | NA                            | NA                 |
| Kabuli_wild_35457895 | NA                                  | Ca_kabuli_denovo | 35457895                | C/A  | NA                 | NA                            | NA                 |
| Kabuli_wild_35459028 | NA                                  | Ca_kabuli_denovo | 35459028                | G/T  | NA                 | NA                            | NA                 |
| Kabuli_wild_35459508 | NA                                  | Ca_kabuli_denovo | 35459508                | T/C  | NA                 | NA                            | NA                 |
| Kabuli_wild_35461384 | NA                                  | Ca_kabuli_denovo | 35461384                | G/T  | NA                 | NA                            | NA                 |
| Kabuli_wild_35463886 | NA                                  | Ca_kabuli_denovo | 35463886                | C/T  | NA                 | NA                            | NA                 |
| Kabuli_wild_35463975 | NA                                  | Ca_kabuli_denovo | 35463975                | G/T  | NA                 | NA                            | NA                 |
| Kabuli_wild_35465153 | NA                                  | Ca_kabuli_denovo | 35465153                | C/T  | NA                 | NA                            | NA                 |
| Kabuli_wild_35470361 | NA                                  | Ca_kabuli_denovo | 35470361                | A/C  | NA                 | NA                            | NA                 |
| Kabuli_wild_35482840 | NA                                  | Ca_kabuli_denovo | 35482840                | C/T  | NA                 | NA                            | NA                 |

| SNP IDs              | NCBI dbSNP accession IDs (NCBI_SS#) | Chromosomes      | Physical positions (bp) | SNPs | Gene accession IDs | Sequence components of genome | Putative functions |
|----------------------|-------------------------------------|------------------|-------------------------|------|--------------------|-------------------------------|--------------------|
| Kabuli_wild_35485835 | NA                                  | Ca_kabuli_denovo | 35485835                | C/A  | NA                 | NA                            | NA                 |
| Kabuli_wild_35485868 | NA                                  | Ca_kabuli_denovo | 35485868                | A/G  | NA                 | NA                            | NA                 |
| Kabuli_wild_35488792 | NA                                  | Ca_kabuli_denovo | 35488792                | T/G  | NA                 | NA                            | NA                 |
| Kabuli_wild_35496900 | NA                                  | Ca_kabuli_denovo | 35496900                | C/T  | NA                 | NA                            | NA                 |
| Kabuli_wild_35496909 | NA                                  | Ca_kabuli_denovo | 35496909                | C/T  | NA                 | NA                            | NA                 |
| Kabuli_wild_35497606 | NA                                  | Ca_kabuli_denovo | 35497606                | C/G  | NA                 | NA                            | NA                 |
| Kabuli_wild_35501732 | NA                                  | Ca_kabuli_denovo | 35501732                | G/T  | NA                 | NA                            | NA                 |
| Kabuli_wild_35504654 | NA                                  | Ca_kabuli_denovo | 35504654                | G/C  | NA                 | NA                            | NA                 |
| Kabuli_wild_35504655 | NA                                  | Ca_kabuli_denovo | 35504655                | T/C  | NA                 | NA                            | NA                 |
| Kabuli_wild_35505077 | NA                                  | Ca_kabuli_denovo | 35505077                | G/A  | NA                 | NA                            | NA                 |
| Kabuli_wild_35507079 | NA                                  | Ca_kabuli_denovo | 35507079                | G/A  | NA                 | NA                            | NA                 |
| Kabuli_wild_35511648 | NA                                  | Ca_kabuli_denovo | 35511648                | A/G  | NA                 | NA                            | NA                 |
| Kabuli_wild_35511724 | NA                                  | Ca_kabuli_denovo | 35511724                | C/T  | NA                 | NA                            | NA                 |
| Kabuli_wild_35514762 | NA                                  | Ca_kabuli_denovo | 35514762                | C/T  | NA                 | NA                            | NA                 |
| Kabuli_wild_35517449 | NA                                  | Ca_kabuli_denovo | 35517449                | A/C  | NA                 | NA                            | NA                 |
| Kabuli_wild_35521134 | NA                                  | Ca_kabuli_denovo | 35521134                | G/T  | NA                 | NA                            | NA                 |
| Kabuli_wild_35526325 | NA                                  | Ca_kabuli_denovo | 35526325                | G/T  | NA                 | NA                            | NA                 |
| Kabuli_wild_35531969 | NA                                  | Ca_kabuli_denovo | 35531969                | C/G  | NA                 | NA                            | NA                 |
| Kabuli_wild_35539927 | NA                                  | Ca_kabuli_denovo | 35539927                | C/T  | NA                 | NA                            | NA                 |
| Kabuli_wild_35540591 | NA                                  | Ca_kabuli_denovo | 35540591                | T/C  | NA                 | NA                            | NA                 |
| Kabuli_wild_35542443 | NA                                  | Ca_kabuli_denovo | 35542443                | T/C  | NA                 | NA                            | NA                 |
| Kabuli_wild_35548909 | NA                                  | Ca_kabuli_denovo | 35548909                | C/G  | NA                 | NA                            | NA                 |
| Kabuli_wild_35548976 | NA                                  | Ca_kabuli_denovo | 35548976                | C/T  | NA                 | NA                            | NA                 |
| Kabuli_wild_35551195 | NA                                  | Ca_kabuli_denovo | 35551195                | G/T  | NA                 | NA                            | NA                 |
| Kabuli_wild_35557946 | NA                                  | Ca_kabuli_denovo | 35557946                | G/A  | NA                 | NA                            | NA                 |
| Kabuli_wild_35562394 | NA                                  | Ca_kabuli_denovo | 35562394                | G/A  | NA                 | NA                            | NA                 |
| Kabuli_wild_35562421 | NA                                  | Ca_kabuli_denovo | 35562421                | G/A  | NA                 | NA                            | NA                 |
| Kabuli_wild_35565491 | NA                                  | Ca_kabuli_denovo | 35565491                | G/T  | NA                 | NA                            | NA                 |
| Kabuli_wild_35569751 | NA                                  | Ca_kabuli_denovo | 35569751                | C/T  | NA                 | NA                            | NA                 |
| Kabuli_wild_35569790 | NA                                  | Ca_kabuli_denovo | 35569790                | T/C  | NA                 | NA                            | NA                 |
| Kabuli_wild_35571649 | NA                                  | Ca_kabuli_denovo | 35571649                | A/G  | NA                 | NA                            | NA                 |
| Kabuli_wild_35571661 | NA                                  | Ca_kabuli_denovo | 35571661                | A/T  | NA                 | NA                            | NA                 |
| Kabuli_wild_35572365 | NA                                  | Ca_kabuli_denovo | 35572365                | T/C  | NA                 | NA                            | NA                 |
| Kabuli_wild_35580690 | NA                                  | Ca_kabuli_denovo | 35580690                | T/C  | NA                 | NA                            | NA                 |
| Kabuli_wild_35580731 | NA                                  | Ca_kabuli_denovo | 35580731                | C/G  | NA                 | NA                            | NA                 |
| Kabuli_wild_35582680 | NA                                  | Ca_kabuli_denovo | 35582680                | A/C  | NA                 | NA                            | NA                 |
| Kabuli_wild_35585502 | NA                                  | Ca_kabuli_denovo | 35585502                | G/T  | NA                 | NA                            | NA                 |
| Kabuli_wild_35590273 | NA                                  | Ca_kabuli_denovo | 35590273                | T/C  | NA                 | NA                            | NA                 |
| Kabuli_wild_35593353 | NA                                  | Ca_kabuli_denovo | 35593353                | T/C  | NA                 | NA                            | NA                 |
| Kabuli_wild_35593380 | NA                                  | Ca_kabuli_denovo | 35593380                | C/G  | NA                 | NA                            | NA                 |
| Kabuli_wild_35595736 | NA                                  | Ca_kabuli_denovo | 35595736                | A/C  | NA                 | NA                            | NA                 |
| Kabuli_wild_35595739 | NA                                  | Ca_kabuli_denovo | 35595739                | C/T  | NA                 | NA                            | NA                 |
| Kabuli_wild_35600938 | NA                                  | Ca_kabuli_denovo | 35600938                | T/C  | NA                 | NA                            | NA                 |
| Kabuli_wild_35600941 | NA                                  | Ca_kabuli_denovo | 35600941                | A/T  | NA                 | NA                            | NA                 |

| SNP IDs              | NCBI dbSNP accession IDs (NCBI_SS#) | Chromosomes      | Physical positions (bp) | SNPs | Gene accession IDs | Sequence components of genome | Putative functions |
|----------------------|-------------------------------------|------------------|-------------------------|------|--------------------|-------------------------------|--------------------|
| Kabuli_wild_35604292 | NA                                  | Ca_kabuli_denovo | 35604292                | G/C  | NA                 | NA                            | NA                 |
| Kabuli_wild_35604372 | NA                                  | Ca_kabuli_denovo | 35604372                | G/C  | NA                 | NA                            | NA                 |
| Kabuli_wild_35604487 | NA                                  | Ca_kabuli_denovo | 35604487                | T/C  | NA                 | NA                            | NA                 |
| Kabuli_wild_35604516 | NA                                  | Ca_kabuli_denovo | 35604516                | G/A  | NA                 | NA                            | NA                 |
| Kabuli_wild_35610725 | NA                                  | Ca_kabuli_denovo | 35610725                | C/A  | NA                 | NA                            | NA                 |
| Kabuli_wild_35613799 | NA                                  | Ca_kabuli_denovo | 35613799                | A/C  | NA                 | NA                            | NA                 |
| Kabuli_wild_35615438 | NA                                  | Ca_kabuli_denovo | 35615438                | C/G  | NA                 | NA                            | NA                 |
| Kabuli_wild_35620527 | NA                                  | Ca_kabuli_denovo | 35620527                | T/C  | NA                 | NA                            | NA                 |
| Kabuli_wild_35623574 | NA                                  | Ca_kabuli_denovo | 35623574                | G/T  | NA                 | NA                            | NA                 |
| Kabuli_wild_35623724 | NA                                  | Ca_kabuli_denovo | 35623724                | G/C  | NA                 | NA                            | NA                 |
| Kabuli_wild_35627513 | NA                                  | Ca_kabuli_denovo | 35627513                | A/C  | NA                 | NA                            | NA                 |
| Kabuli_wild_35627515 | NA                                  | Ca_kabuli_denovo | 35627515                | A/C  | NA                 | NA                            | NA                 |
| Kabuli_wild_35628269 | NA                                  | Ca_kabuli_denovo | 35628269                | C/T  | NA                 | NA                            | NA                 |
| Kabuli_wild_35649902 | NA                                  | Ca_kabuli_denovo | 35649902                | C/T  | NA                 | NA                            | NA                 |
| Kabuli_wild_35649924 | NA                                  | Ca_kabuli_denovo | 35649924                | A/G  | NA                 | NA                            | NA                 |
| Kabuli_wild_35655554 | NA                                  | Ca_kabuli_denovo | 35655554                | C/G  | NA                 | NA                            | NA                 |
| Kabuli_wild_35658197 | NA                                  | Ca_kabuli_denovo | 35658197                | C/T  | NA                 | NA                            | NA                 |
| Kabuli_wild_35659021 | NA                                  | Ca_kabuli_denovo | 35659021                | G/T  | NA                 | NA                            | NA                 |
| Kabuli_wild_35659079 | NA                                  | Ca_kabuli_denovo | 35659079                | T/G  | NA                 | NA                            | NA                 |
| Kabuli_wild_35659697 | NA                                  | Ca_kabuli_denovo | 35659697                | C/G  | NA                 | NA                            | NA                 |
| Kabuli_wild_35661167 | NA                                  | Ca_kabuli_denovo | 35661167                | C/T  | NA                 | NA                            | NA                 |
| Kabuli_wild_35674640 | NA                                  | Ca_kabuli_denovo | 35674640                | G/T  | NA                 | NA                            | NA                 |
| Kabuli_wild_35678887 | NA                                  | Ca_kabuli_denovo | 35678887                | G/A  | NA                 | NA                            | NA                 |
| Kabuli_wild_35678923 | NA                                  | Ca_kabuli_denovo | 35678923                | G/A  | NA                 | NA                            | NA                 |
| Kabuli_wild_35697235 | NA                                  | Ca_kabuli_denovo | 35697235                | C/T  | NA                 | NA                            | NA                 |
| Kabuli_wild_35697236 | NA                                  | Ca_kabuli_denovo | 35697236                | G/A  | NA                 | NA                            | NA                 |
| Kabuli_wild_35702104 | NA                                  | Ca_kabuli_denovo | 35702104                | C/A  | NA                 | NA                            | NA                 |
| Kabuli_wild_35717853 | NA                                  | Ca_kabuli_denovo | 35717853                | T/A  | NA                 | NA                            | NA                 |
| Kabuli_wild_35717871 | NA                                  | Ca_kabuli_denovo | 35717871                | G/T  | NA                 | NA                            | NA                 |
| Kabuli_wild_35721757 | NA                                  | Ca_kabuli_denovo | 35721757                | C/T  | NA                 | NA                            | NA                 |
| Kabuli_wild_35731401 | NA                                  | Ca_kabuli_denovo | 35731401                | A/G  | NA                 | NA                            | NA                 |
| Kabuli_wild_35737264 | NA                                  | Ca_kabuli_denovo | 35737264                | C/G  | NA                 | NA                            | NA                 |
| Kabuli_wild_35739638 | NA                                  | Ca_kabuli_denovo | 35739638                | C/G  | NA                 | NA                            | NA                 |
| Kabuli_wild_35739643 | NA                                  | Ca_kabuli_denovo | 35739643                | G/T  | NA                 | NA                            | NA                 |
| Kabuli_wild_35744562 | NA                                  | Ca_kabuli_denovo | 35744562                | C/T  | NA                 | NA                            | NA                 |
| Kabuli_wild_35747442 | NA                                  | Ca_kabuli_denovo | 35747442                | T/C  | NA                 | NA                            | NA                 |
| Kabuli_wild_35747469 | NA                                  | Ca_kabuli_denovo | 35747469                | C/T  | NA                 | NA                            | NA                 |
| Kabuli_wild_35756647 | NA                                  | Ca_kabuli_denovo | 35756647                | C/T  | NA                 | NA                            | NA                 |
| Kabuli_wild_35758974 | NA                                  | Ca_kabuli_denovo | 35758974                | C/T  | NA                 | NA                            | NA                 |
| Kabuli_wild_35759600 | NA                                  | Ca_kabuli_denovo | 35759600                | G/T  | NA                 | NA                            | NA                 |
| Kabuli_wild_35764513 | NA                                  | Ca_kabuli_denovo | 35764513                | T/C  | NA                 | NA                            | NA                 |
| Kabuli_wild_35765314 | NA                                  | Ca_kabuli_denovo | 35765314                | A/G  | NA                 | NA                            | NA                 |
| Kabuli_wild_35765320 | NA                                  | Ca_kabuli_denovo | 35765320                | C/G  | NA                 | NA                            | NA                 |
| Kabuli_wild_35769253 | NA                                  | Ca_kabuli_denovo | 35769253                | A/G  | NA                 | NA                            | NA                 |

| SNP IDs              | NCBI dbSNP accession IDs (NCBI_SS#) | Chromosomes      | Physical positions (bp) | SNPs | Gene accession IDs | Sequence components of genome | Putative functions |
|----------------------|-------------------------------------|------------------|-------------------------|------|--------------------|-------------------------------|--------------------|
| Kabuli_wild_35769256 | NA                                  | Ca_kabuli_denovo | 35769256                | G/T  | NA                 | NA                            | NA                 |
| Kabuli_wild_35773754 | NA                                  | Ca_kabuli_denovo | 35773754                | A/G  | NA                 | NA                            | NA                 |
| Kabuli_wild_35773786 | NA                                  | Ca_kabuli_denovo | 35773786                | G/C  | NA                 | NA                            | NA                 |
| Kabuli_wild_35779886 | NA                                  | Ca_kabuli_denovo | 35779886                | T/G  | NA                 | NA                            | NA                 |
| Kabuli_wild_35779893 | NA                                  | Ca_kabuli_denovo | 35779893                | A/T  | NA                 | NA                            | NA                 |
| Kabuli_wild_35781221 | NA                                  | Ca_kabuli_denovo | 35781221                | C/G  | NA                 | NA                            | NA                 |
| Kabuli_wild_35781224 | NA                                  | Ca_kabuli_denovo | 35781224                | C/T  | NA                 | NA                            | NA                 |
| Kabuli_wild_35781233 | NA                                  | Ca_kabuli_denovo | 35781233                | C/G  | NA                 | NA                            | NA                 |
| Kabuli_wild_35781260 | NA                                  | Ca_kabuli_denovo | 35781260                | C/G  | NA                 | NA                            | NA                 |
| Kabuli_wild_35782082 | NA                                  | Ca_kabuli_denovo | 35782082                | C/G  | NA                 | NA                            | NA                 |
| Kabuli_wild_35783600 | NA                                  | Ca_kabuli_denovo | 35783600                | C/T  | NA                 | NA                            | NA                 |
| Kabuli_wild_35785241 | NA                                  | Ca_kabuli_denovo | 35785241                | A/C  | NA                 | NA                            | NA                 |
| Kabuli_wild_35795304 | NA                                  | Ca_kabuli_denovo | 35795304                | A/G  | NA                 | NA                            | NA                 |
| Kabuli_wild_35795316 | NA                                  | Ca_kabuli_denovo | 35795316                | T/C  | NA                 | NA                            | NA                 |
| Kabuli_wild_35799275 | NA                                  | Ca_kabuli_denovo | 35799275                | T/A  | NA                 | NA                            | NA                 |
| Kabuli_wild_35805910 | NA                                  | Ca_kabuli_denovo | 35805910                | G/C  | NA                 | NA                            | NA                 |
| Kabuli_wild_35808112 | NA                                  | Ca_kabuli_denovo | 35808112                | G/C  | NA                 | NA                            | NA                 |
| Kabuli_wild_35808172 | NA                                  | Ca_kabuli_denovo | 35808172                | A/G  | NA                 | NA                            | NA                 |
| Kabuli_wild_35812852 | NA                                  | Ca_kabuli_denovo | 35812852                | C/G  | NA                 | NA                            | NA                 |
| Kabuli_wild_35812877 | NA                                  | Ca_kabuli_denovo | 35812877                | C/G  | NA                 | NA                            | NA                 |
| Kabuli_wild_35812987 | NA                                  | Ca_kabuli_denovo | 35812987                | G/T  | NA                 | NA                            | NA                 |
| Kabuli_wild_35814595 | NA                                  | Ca_kabuli_denovo | 35814595                | C/T  | NA                 | NA                            | NA                 |
| Kabuli_wild_35818396 | NA                                  | Ca_kabuli_denovo | 35818396                | T/C  | NA                 | NA                            | NA                 |
| Kabuli_wild_35820289 | NA                                  | Ca_kabuli_denovo | 35820289                | A/C  | NA                 | NA                            | NA                 |
| Kabuli_wild_35820323 | NA                                  | Ca_kabuli_denovo | 35820323                | A/C  | NA                 | NA                            | NA                 |
| Kabuli_wild_35822011 | NA                                  | Ca_kabuli_denovo | 35822011                | A/C  | NA                 | NA                            | NA                 |
| Kabuli_wild_35823403 | NA                                  | Ca_kabuli_denovo | 35823403                | G/T  | NA                 | NA                            | NA                 |
| Kabuli_wild_35825292 | NA                                  | Ca_kabuli_denovo | 35825292                | G/C  | NA                 | NA                            | NA                 |
| Kabuli_wild_35825346 | NA                                  | Ca_kabuli_denovo | 35825346                | G/C  | NA                 | NA                            | NA                 |
| Kabuli_wild_35828345 | NA                                  | Ca_kabuli_denovo | 35828345                | A/C  | NA                 | NA                            | NA                 |
| Kabuli_wild_35828347 | NA                                  | Ca_kabuli_denovo | 35828347                | A/C  | NA                 | NA                            | NA                 |
| Kabuli_wild_35830792 | NA                                  | Ca_kabuli_denovo | 35830792                | G/T  | NA                 | NA                            | NA                 |
| Kabuli_wild_35837026 | NA                                  | Ca_kabuli_denovo | 35837026                | C/T  | NA                 | NA                            | NA                 |
| Kabuli_wild_35837458 | NA                                  | Ca_kabuli_denovo | 35837458                | A/G  | NA                 | NA                            | NA                 |
| Kabuli_wild_35840959 | NA                                  | Ca_kabuli_denovo | 35840959                | G/T  | NA                 | NA                            | NA                 |
| Kabuli_wild_35844008 | NA                                  | Ca_kabuli_denovo | 35844008                | A/G  | NA                 | NA                            | NA                 |
| Kabuli_wild_35844330 | NA                                  | Ca_kabuli_denovo | 35844330                | T/C  | NA                 | NA                            | NA                 |
| Kabuli_wild_35845370 | NA                                  | Ca_kabuli_denovo | 35845370                | G/C  | NA                 | NA                            | NA                 |
| Kabuli_wild_35846264 | NA                                  | Ca_kabuli_denovo | 35846264                | A/G  | NA                 | NA                            | NA                 |
| Kabuli_wild_35852055 | NA                                  | Ca_kabuli_denovo | 35852055                | A/C  | NA                 | NA                            | NA                 |
| Kabuli_wild_35852467 | NA                                  | Ca_kabuli_denovo | 35852467                | C/T  | NA                 | NA                            | NA                 |
| Kabuli_wild_35852921 | NA                                  | Ca_kabuli_denovo | 35852921                | A/C  | NA                 | NA                            | NA                 |
| Kabuli_wild_35852922 | NA                                  | Ca_kabuli_denovo | 35852922                | A/G  | NA                 | NA                            | NA                 |
| Kabuli_wild_35852923 | NA                                  | Ca_kabuli_denovo | 35852923                | A/G  | NA                 | NA                            | NA                 |

| SNP IDs              | NCBI dbSNP accession IDs (NCBI_SS#) | Chromosomes      | Physical positions (bp) | SNPs | Gene accession IDs | Sequence components of genome | Putative functions |
|----------------------|-------------------------------------|------------------|-------------------------|------|--------------------|-------------------------------|--------------------|
| Kabuli_wild_35854070 | NA                                  | Ca_kabuli_denovo | 35854070                | T/C  | NA                 | NA                            | NA                 |
| Kabuli_wild_35854512 | NA                                  | Ca_kabuli_denovo | 35854512                | T/C  | NA                 | NA                            | NA                 |
| Kabuli_wild_35855110 | NA                                  | Ca_kabuli_denovo | 35855110                | T/C  | NA                 | NA                            | NA                 |
| Kabuli_wild_35861680 | NA                                  | Ca_kabuli_denovo | 35861680                | T/C  | NA                 | NA                            | NA                 |
| Kabuli_wild_35861716 | NA                                  | Ca_kabuli_denovo | 35861716                | C/T  | NA                 | NA                            | NA                 |
| Kabuli_wild_35866091 | NA                                  | Ca_kabuli_denovo | 35866091                | A/G  | NA                 | NA                            | NA                 |
| Kabuli_wild_35872258 | NA                                  | Ca_kabuli_denovo | 35872258                | T/G  | NA                 | NA                            | NA                 |
| Kabuli_wild_35873288 | NA                                  | Ca_kabuli_denovo | 35873288                | C/T  | NA                 | NA                            | NA                 |
| Kabuli_wild_35879826 | NA                                  | Ca_kabuli_denovo | 35879826                | G/A  | NA                 | NA                            | NA                 |
| Kabuli_wild_35879857 | NA                                  | Ca_kabuli_denovo | 35879857                | G/C  | NA                 | NA                            | NA                 |
| Kabuli_wild_35880296 | NA                                  | Ca_kabuli_denovo | 35880296                | T/G  | NA                 | NA                            | NA                 |
| Kabuli_wild_35880374 | NA                                  | Ca_kabuli_denovo | 35880374                | T/C  | NA                 | NA                            | NA                 |
| Kabuli_wild_35881924 | NA                                  | Ca_kabuli_denovo | 35881924                | A/G  | NA                 | NA                            | NA                 |
| Kabuli_wild_35896216 | NA                                  | Ca_kabuli_denovo | 35896216                | A/G  | NA                 | NA                            | NA                 |
| Kabuli_wild_35903611 | NA                                  | Ca_kabuli_denovo | 35903611                | C/G  | NA                 | NA                            | NA                 |
| Kabuli_wild_35904050 | NA                                  | Ca_kabuli_denovo | 35904050                | A/G  | NA                 | NA                            | NA                 |
| Kabuli_wild_35907469 | NA                                  | Ca_kabuli_denovo | 35907469                | G/C  | NA                 | NA                            | NA                 |
| Kabuli_wild_35910233 | NA                                  | Ca_kabuli_denovo | 35910233                | A/C  | NA                 | NA                            | NA                 |
| Kabuli_wild_35910235 | NA                                  | Ca_kabuli_denovo | 35910235                | A/C  | NA                 | NA                            | NA                 |
| Kabuli_wild_35916793 | NA                                  | Ca_kabuli_denovo | 35916793                | G/T  | NA                 | NA                            | NA                 |
| Kabuli_wild_35928329 | NA                                  | Ca_kabuli_denovo | 35928329                | A/G  | NA                 | NA                            | NA                 |
| Kabuli_wild_35929929 | NA                                  | Ca_kabuli_denovo | 35929929                | G/A  | NA                 | NA                            | NA                 |
| Kabuli_wild_35929959 | NA                                  | Ca_kabuli_denovo | 35929959                | T/G  | NA                 | NA                            | NA                 |
| Kabuli_wild_35935453 | NA                                  | Ca_kabuli_denovo | 35935453                | T/C  | NA                 | NA                            | NA                 |
| Kabuli_wild_35941592 | NA                                  | Ca_kabuli_denovo | 35941592                | T/G  | NA                 | NA                            | NA                 |
| Kabuli_wild_35942777 | NA                                  | Ca_kabuli_denovo | 35942777                | G/T  | NA                 | NA                            | NA                 |
| Kabuli_wild_35948537 | NA                                  | Ca_kabuli_denovo | 35948537                | A/C  | NA                 | NA                            | NA                 |
| Kabuli_wild_35948539 | NA                                  | Ca_kabuli_denovo | 35948539                | A/G  | NA                 | NA                            | NA                 |
| Kabuli_wild_35953557 | NA                                  | Ca_kabuli_denovo | 35953557                | A/G  | NA                 | NA                            | NA                 |
| Kabuli_wild_35958603 | NA                                  | Ca_kabuli_denovo | 35958603                | G/T  | NA                 | NA                            | NA                 |
| Kabuli_wild_35962275 | NA                                  | Ca_kabuli_denovo | 35962275                | T/C  | NA                 | NA                            | NA                 |
| Kabuli_wild_35977531 | NA                                  | Ca_kabuli_denovo | 35977531                | G/T  | NA                 | NA                            | NA                 |
| Kabuli_wild_35979959 | NA                                  | Ca_kabuli_denovo | 35979959                | C/A  | NA                 | NA                            | NA                 |
| Kabuli_wild_35979974 | NA                                  | Ca_kabuli_denovo | 35979974                | A/G  | NA                 | NA                            | NA                 |
| Kabuli_wild_35983672 | NA                                  | Ca_kabuli_denovo | 35983672                | A/C  | NA                 | NA                            | NA                 |
| Kabuli_wild_35983674 | NA                                  | Ca_kabuli_denovo | 35983674                | A/C  | NA                 | NA                            | NA                 |
| Kabuli_wild_35983675 | NA                                  | Ca_kabuli_denovo | 35983675                | C/T  | NA                 | NA                            | NA                 |
| Kabuli_wild_35984065 | NA                                  | Ca_kabuli_denovo | 35984065                | A/G  | NA                 | NA                            | NA                 |
| Kabuli_wild_35984079 | NA                                  | Ca_kabuli_denovo | 35984079                | C/T  | NA                 | NA                            | NA                 |
| Kabuli_wild_35990298 | NA                                  | Ca_kabuli_denovo | 35990298                | A/C  | NA                 | NA                            | NA                 |
| Kabuli_wild_35990299 | NA                                  | Ca_kabuli_denovo | 35990299                | G/T  | NA                 | NA                            | NA                 |
| Kabuli_wild_35991418 | NA                                  | Ca_kabuli_denovo | 35991418                | G/T  | NA                 | NA                            | NA                 |
| Kabuli_wild_35995947 | NA                                  | Ca_kabuli_denovo | 35995947                | T/G  | NA                 | NA                            | NA                 |
| Kabuli_wild_36002035 | NA                                  | Ca_kabuli_denovo | 36002035                | G/C  | NA                 | NA                            | NA                 |

| SNP IDs              | NCBI dbSNP accession IDs (NCBI_SS#) | Chromosomes      | Physical positions (bp) | SNPs | Gene accession IDs | Sequence components of genome | Putative functions |
|----------------------|-------------------------------------|------------------|-------------------------|------|--------------------|-------------------------------|--------------------|
| Kabuli_wild_36010374 | NA                                  | Ca_kabuli_denovo | 36010374                | A/T  | NA                 | NA                            | NA                 |
| Kabuli_wild_36010401 | NA                                  | Ca_kabuli_denovo | 36010401                | A/G  | NA                 | NA                            | NA                 |
| Kabuli_wild_36010720 | NA                                  | Ca_kabuli_denovo | 36010720                | G/A  | NA                 | NA                            | NA                 |
| Kabuli_wild_36010734 | NA                                  | Ca_kabuli_denovo | 36010734                | G/C  | NA                 | NA                            | NA                 |
| Kabuli_wild_36021743 | NA                                  | Ca_kabuli_denovo | 36021743                | A/T  | NA                 | NA                            | NA                 |
| Kabuli_wild_36021770 | NA                                  | Ca_kabuli_denovo | 36021770                | A/C  | NA                 | NA                            | NA                 |
| Kabuli_wild_36022549 | NA                                  | Ca_kabuli_denovo | 36022549                | G/T  | NA                 | NA                            | NA                 |
| Kabuli_wild_36024874 | NA                                  | Ca_kabuli_denovo | 36024874                | T/G  | NA                 | NA                            | NA                 |
| Kabuli_wild_36036994 | NA                                  | Ca_kabuli_denovo | 36036994                | G/T  | NA                 | NA                            | NA                 |
| Kabuli_wild_36037434 | NA                                  | Ca_kabuli_denovo | 36037434                | A/C  | NA                 | NA                            | NA                 |
| Kabuli_wild_36037435 | NA                                  | Ca_kabuli_denovo | 36037435                | A/G  | NA                 | NA                            | NA                 |
| Kabuli_wild_36047564 | NA                                  | Ca_kabuli_denovo | 36047564                | A/C  | NA                 | NA                            | NA                 |
| Kabuli_wild_36054694 | NA                                  | Ca_kabuli_denovo | 36054694                | G/T  | NA                 | NA                            | NA                 |
| Kabuli_wild_36056273 | NA                                  | Ca_kabuli_denovo | 36056273                | G/A  | NA                 | NA                            | NA                 |
| Kabuli_wild_36056312 | NA                                  | Ca_kabuli_denovo | 36056312                | C/T  | NA                 | NA                            | NA                 |
| Kabuli_wild_36060553 | NA                                  | Ca_kabuli_denovo | 36060553                | C/T  | NA                 | NA                            | NA                 |
| Kabuli_wild_36060555 | NA                                  | Ca_kabuli_denovo | 36060555                | A/T  | NA                 | NA                            | NA                 |
| Kabuli_wild_36060565 | NA                                  | Ca_kabuli_denovo | 36060565                | C/G  | NA                 | NA                            | NA                 |
| Kabuli_wild_36063456 | NA                                  | Ca_kabuli_denovo | 36063456                | C/T  | NA                 | NA                            | NA                 |
| Kabuli_wild_36063478 | NA                                  | Ca_kabuli_denovo | 36063478                | C/T  | NA                 | NA                            | NA                 |
| Kabuli_wild_36067873 | NA                                  | Ca_kabuli_denovo | 36067873                | T/G  | NA                 | NA                            | NA                 |
| Kabuli_wild_36067876 | NA                                  | Ca_kabuli_denovo | 36067876                | C/T  | NA                 | NA                            | NA                 |
| Kabuli_wild_36085064 | NA                                  | Ca_kabuli_denovo | 36085064                | C/G  | NA                 | NA                            | NA                 |
| Kabuli_wild_36085113 | NA                                  | Ca_kabuli_denovo | 36085113                | C/A  | NA                 | NA                            | NA                 |
| Kabuli_wild_36094795 | NA                                  | Ca_kabuli_denovo | 36094795                | C/T  | NA                 | NA                            | NA                 |
| Kabuli_wild_36097816 | NA                                  | Ca_kabuli_denovo | 36097816                | A/C  | NA                 | NA                            | NA                 |
| Kabuli_wild_36105997 | NA                                  | Ca_kabuli_denovo | 36105997                | C/T  | NA                 | NA                            | NA                 |
| Kabuli_wild_36106046 | NA                                  | Ca_kabuli_denovo | 36106046                | A/G  | NA                 | NA                            | NA                 |
| Kabuli_wild_36108763 | NA                                  | Ca_kabuli_denovo | 36108763                | T/G  | NA                 | NA                            | NA                 |
| Kabuli_wild_36115818 | NA                                  | Ca_kabuli_denovo | 36115818                | C/G  | NA                 | NA                            | NA                 |
| Kabuli_wild_36115852 | NA                                  | Ca_kabuli_denovo | 36115852                | G/C  | NA                 | NA                            | NA                 |
| Kabuli_wild_36117235 | NA                                  | Ca_kabuli_denovo | 36117235                | T/C  | NA                 | NA                            | NA                 |
| Kabuli_wild_36118804 | NA                                  | Ca_kabuli_denovo | 36118804                | G/C  | NA                 | NA                            | NA                 |
| Kabuli_wild_36119257 | NA                                  | Ca_kabuli_denovo | 36119257                | C/G  | NA                 | NA                            | NA                 |
| Kabuli_wild_36119291 | NA                                  | Ca_kabuli_denovo | 36119291                | C/G  | NA                 | NA                            | NA                 |
| Kabuli_wild_36132953 | NA                                  | Ca_kabuli_denovo | 36132953                | A/C  | NA                 | NA                            | NA                 |
| Kabuli_wild_36134510 | NA                                  | Ca_kabuli_denovo | 36134510                | G/T  | NA                 | NA                            | NA                 |
| Kabuli_wild_36134534 | NA                                  | Ca_kabuli_denovo | 36134534                | G/C  | NA                 | NA                            | NA                 |
| Kabuli_wild_36139242 | NA                                  | Ca_kabuli_denovo | 36139242                | C/T  | NA                 | NA                            | NA                 |
| Kabuli_wild_36139245 | NA                                  | Ca_kabuli_denovo | 36139245                | G/C  | NA                 | NA                            | NA                 |
| Kabuli_wild_36145690 | NA                                  | Ca_kabuli_denovo | 36145690                | C/T  | NA                 | NA                            | NA                 |
| Kabuli_wild_36153164 | NA                                  | Ca_kabuli_denovo | 36153164                | G/T  | NA                 | NA                            | NA                 |
| Kabuli_wild_36158124 | NA                                  | Ca_kabuli_denovo | 36158124                | C/T  | NA                 | NA                            | NA                 |
| Kabuli_wild_36158167 | NA                                  | Ca_kabuli_denovo | 36158167                | T/G  | NA                 | NA                            | NA                 |

| SNP IDs              | NCBI dbSNP accession IDs (NCBI_SS#) | Chromosomes      | Physical positions (bp) | SNPs | Gene accession IDs | Sequence components of genome | Putative functions |
|----------------------|-------------------------------------|------------------|-------------------------|------|--------------------|-------------------------------|--------------------|
| Kabuli_wild_36160146 | NA                                  | Ca_kabuli_denovo | 36160146                | A/T  | NA                 | NA                            | NA                 |
| Kabuli_wild_36160205 | NA                                  | Ca_kabuli_denovo | 36160205                | C/T  | NA                 | NA                            | NA                 |
| Kabuli_wild_36161388 | NA                                  | Ca_kabuli_denovo | 36161388                | A/G  | NA                 | NA                            | NA                 |
| Kabuli_wild_36162393 | NA                                  | Ca_kabuli_denovo | 36162393                | C/T  | NA                 | NA                            | NA                 |
| Kabuli_wild_36163482 | NA                                  | Ca_kabuli_denovo | 36163482                | C/G  | NA                 | NA                            | NA                 |
| Kabuli_wild_36166843 | NA                                  | Ca_kabuli_denovo | 36166843                | G/C  | NA                 | NA                            | NA                 |
| Kabuli_wild_36169184 | NA                                  | Ca_kabuli_denovo | 36169184                | T/C  | NA                 | NA                            | NA                 |
| Kabuli_wild_36178352 | NA                                  | Ca_kabuli_denovo | 36178352                | G/T  | NA                 | NA                            | NA                 |
| Kabuli_wild_36184555 | NA                                  | Ca_kabuli_denovo | 36184555                | T/C  | NA                 | NA                            | NA                 |
| Kabuli_wild_36184561 | NA                                  | Ca_kabuli_denovo | 36184561                | G/A  | NA                 | NA                            | NA                 |
| Kabuli_wild_36190997 | NA                                  | Ca_kabuli_denovo | 36190997                | A/G  | NA                 | NA                            | NA                 |
| Kabuli_wild_36191000 | NA                                  | Ca_kabuli_denovo | 36191000                | C/G  | NA                 | NA                            | NA                 |
| Kabuli_wild_36191024 | NA                                  | Ca_kabuli_denovo | 36191024                | C/G  | NA                 | NA                            | NA                 |
| Kabuli_wild_36191030 | NA                                  | Ca_kabuli_denovo | 36191030                | T/C  | NA                 | NA                            | NA                 |
| Kabuli_wild_36194586 | NA                                  | Ca_kabuli_denovo | 36194586                | A/C  | NA                 | NA                            | NA                 |
| Kabuli_wild_36198199 | NA                                  | Ca_kabuli_denovo | 36198199                | G/C  | NA                 | NA                            | NA                 |
| Kabuli_wild_36200848 | NA                                  | Ca_kabuli_denovo | 36200848                | G/C  | NA                 | NA                            | NA                 |
| Kabuli_wild_36200851 | NA                                  | Ca_kabuli_denovo | 36200851                | T/C  | NA                 | NA                            | NA                 |
| Kabuli_wild_36218264 | NA                                  | Ca_kabuli_denovo | 36218264                | A/G  | NA                 | NA                            | NA                 |
| Kabuli_wild_36220999 | NA                                  | Ca_kabuli_denovo | 36220999                | T/C  | NA                 | NA                            | NA                 |
| Kabuli_wild_36221050 | NA                                  | Ca_kabuli_denovo | 36221050                | T/C  | NA                 | NA                            | NA                 |
| Kabuli_wild_36221378 | NA                                  | Ca_kabuli_denovo | 36221378                | G/A  | NA                 | NA                            | NA                 |
| Kabuli_wild_36221408 | NA                                  | Ca_kabuli_denovo | 36221408                | C/G  | NA                 | NA                            | NA                 |
| Kabuli_wild_36224967 | NA                                  | Ca_kabuli_denovo | 36224967                | C/T  | NA                 | NA                            | NA                 |
| Kabuli_wild_36225014 | NA                                  | Ca_kabuli_denovo | 36225014                | A/C  | NA                 | NA                            | NA                 |
| Kabuli_wild_36225018 | NA                                  | Ca_kabuli_denovo | 36225018                | G/T  | NA                 | NA                            | NA                 |
| Kabuli_wild_36230698 | NA                                  | Ca_kabuli_denovo | 36230698                | A/G  | NA                 | NA                            | NA                 |
| Kabuli_wild_36235663 | NA                                  | Ca_kabuli_denovo | 36235663                | G/A  | NA                 | NA                            | NA                 |
| Kabuli_wild_36239586 | NA                                  | Ca_kabuli_denovo | 36239586                | C/G  | NA                 | NA                            | NA                 |
| Kabuli_wild_36246328 | NA                                  | Ca_kabuli_denovo | 36246328                | T/G  | NA                 | NA                            | NA                 |
| Kabuli_wild_36266252 | NA                                  | Ca_kabuli_denovo | 36266252                | A/G  | NA                 | NA                            | NA                 |
| Kabuli_wild_36266291 | NA                                  | Ca_kabuli_denovo | 36266291                | G/A  | NA                 | NA                            | NA                 |
| Kabuli_wild_36266294 | NA                                  | Ca_kabuli_denovo | 36266294                | A/C  | NA                 | NA                            | NA                 |
| Kabuli_wild_36271084 | NA                                  | Ca_kabuli_denovo | 36271084                | C/T  | NA                 | NA                            | NA                 |
| Kabuli_wild_36271093 | NA                                  | Ca_kabuli_denovo | 36271093                | C/G  | NA                 | NA                            | NA                 |
| Kabuli_wild_36271096 | NA                                  | Ca_kabuli_denovo | 36271096                | C/T  | NA                 | NA                            | NA                 |
| Kabuli_wild_36272763 | NA                                  | Ca_kabuli_denovo | 36272763                | A/G  | NA                 | NA                            | NA                 |
| Kabuli_wild_36275000 | NA                                  | Ca_kabuli_denovo | 36275000                | A/G  | NA                 | NA                            | NA                 |
| Kabuli_wild_36275006 | NA                                  | Ca_kabuli_denovo | 36275006                | C/T  | NA                 | NA                            | NA                 |
| Kabuli_wild_36275025 | NA                                  | Ca_kabuli_denovo | 36275025                | G/T  | NA                 | NA                            | NA                 |
| Kabuli_wild_36275151 | NA                                  | Ca_kabuli_denovo | 36275151                | A/C  | NA                 | NA                            | NA                 |
| Kabuli_wild_36276719 | NA                                  | Ca_kabuli_denovo | 36276719                | G/T  | NA                 | NA                            | NA                 |
| Kabuli_wild_36276877 | NA                                  | Ca_kabuli_denovo | 36276877                | T/C  | NA                 | NA                            | NA                 |
| Kabuli_wild_36276943 | NA                                  | Ca_kabuli_denovo | 36276943                | C/T  | NA                 | NA                            | NA                 |



| SNP IDs              | NCBI dbSNP accession IDs (NCBI_SS#) | Chromosomes      | Physical positions (bp) | SNPs | Gene accession IDs | Sequence components of genome | Putative functions |
|----------------------|-------------------------------------|------------------|-------------------------|------|--------------------|-------------------------------|--------------------|
| Kabuli_wild_36277789 | NA                                  | Ca_kabuli_denovo | 36277789                | T/C  | NA                 | NA                            | NA                 |
| Kabuli_wild_36278453 | NA                                  | Ca_kabuli_denovo | 36278453                | G/C  | NA                 | NA                            | NA                 |
| Kabuli_wild_36291704 | NA                                  | Ca_kabuli_denovo | 36291704                | C/G  | NA                 | NA                            | NA                 |
| Kabuli_wild_36291736 | NA                                  | Ca_kabuli_denovo | 36291736                | T/A  | NA                 | NA                            | NA                 |
| Kabuli_wild_36305606 | NA                                  | Ca_kabuli_denovo | 36305606                | A/G  | NA                 | NA                            | NA                 |
| Kabuli_wild_36313869 | NA                                  | Ca_kabuli_denovo | 36313869                | T/C  | NA                 | NA                            | NA                 |
| Kabuli_wild_36326663 | NA                                  | Ca_kabuli_denovo | 36326663                | G/T  | NA                 | NA                            | NA                 |
| Kabuli_wild_36330905 | NA                                  | Ca_kabuli_denovo | 36330905                | A/C  | NA                 | NA                            | NA                 |
| Kabuli_wild_36334427 | NA                                  | Ca_kabuli_denovo | 36334427                | C/G  | NA                 | NA                            | NA                 |
| Kabuli_wild_36334874 | NA                                  | Ca_kabuli_denovo | 36334874                | T/C  | NA                 | NA                            | NA                 |
| Kabuli_wild_36334875 | NA                                  | Ca_kabuli_denovo | 36334875                | T/C  | NA                 | NA                            | NA                 |
| Kabuli_wild_36342632 | NA                                  | Ca_kabuli_denovo | 36342632                | G/C  | NA                 | NA                            | NA                 |
| Kabuli_wild_36342656 | NA                                  | Ca_kabuli_denovo | 36342656                | G/C  | NA                 | NA                            | NA                 |
| Kabuli_wild_36352744 | NA                                  | Ca_kabuli_denovo | 36352744                | A/C  | NA                 | NA                            | NA                 |
| Kabuli_wild_36356960 | NA                                  | Ca_kabuli_denovo | 36356960                | G/A  | NA                 | NA                            | NA                 |
| Kabuli_wild_36356966 | NA                                  | Ca_kabuli_denovo | 36356966                | C/G  | NA                 | NA                            | NA                 |
| Kabuli_wild_36356987 | NA                                  | Ca_kabuli_denovo | 36356987                | G/A  | NA                 | NA                            | NA                 |
| Kabuli_wild_36357008 | NA                                  | Ca_kabuli_denovo | 36357008                | C/G  | NA                 | NA                            | NA                 |
| Kabuli_wild_36367533 | NA                                  | Ca_kabuli_denovo | 36367533                | A/G  | NA                 | NA                            | NA                 |
| Kabuli_wild_36369317 | NA                                  | Ca_kabuli_denovo | 36369317                | G/C  | NA                 | NA                            | NA                 |
| Kabuli_wild_36369325 | NA                                  | Ca_kabuli_denovo | 36369325                | T/G  | NA                 | NA                            | NA                 |
| Kabuli_wild_36396778 | NA                                  | Ca_kabuli_denovo | 36396778                | G/A  | NA                 | NA                            | NA                 |
| Kabuli_wild_36396781 | NA                                  | Ca_kabuli_denovo | 36396781                | C/T  | NA                 | NA                            | NA                 |
| Kabuli_wild_36396796 | NA                                  | Ca_kabuli_denovo | 36396796                | C/G  | NA                 | NA                            | NA                 |
| Kabuli_wild_36396799 | NA                                  | Ca_kabuli_denovo | 36396799                | A/G  | NA                 | NA                            | NA                 |
| Kabuli_wild_36398641 | NA                                  | Ca_kabuli_denovo | 36398641                | G/T  | NA                 | NA                            | NA                 |
| Kabuli_wild_36401422 | NA                                  | Ca_kabuli_denovo | 36401422                | T/C  | NA                 | NA                            | NA                 |
| Kabuli_wild_36401444 | NA                                  | Ca_kabuli_denovo | 36401444                | A/G  | NA                 | NA                            | NA                 |
| Kabuli_wild_36408075 | NA                                  | Ca_kabuli_denovo | 36408075                | C/T  | NA                 | NA                            | NA                 |
| Kabuli_wild_36409031 | NA                                  | Ca_kabuli_denovo | 36409031                | G/T  | NA                 | NA                            | NA                 |
| Kabuli_wild_36424884 | NA                                  | Ca_kabuli_denovo | 36424884                | G/T  | NA                 | NA                            | NA                 |
| Kabuli_wild_36425495 | NA                                  | Ca_kabuli_denovo | 36425495                | C/T  | NA                 | NA                            | NA                 |
| Kabuli_wild_36425515 | NA                                  | Ca_kabuli_denovo | 36425515                | C/T  | NA                 | NA                            | NA                 |
| Kabuli_wild_36432957 | NA                                  | Ca_kabuli_denovo | 36432957                | T/A  | NA                 | NA                            | NA                 |
| Kabuli_wild_36433633 | NA                                  | Ca_kabuli_denovo | 36433633                | C/A  | NA                 | NA                            | NA                 |
| Kabuli_wild_36445579 | NA                                  | Ca_kabuli_denovo | 36445579                | G/A  | NA                 | NA                            | NA                 |
| Kabuli_wild_36445612 | NA                                  | Ca_kabuli_denovo | 36445612                | G/T  | NA                 | NA                            | NA                 |
| Kabuli_wild_36451225 | NA                                  | Ca_kabuli_denovo | 36451225                | T/C  | NA                 | NA                            | NA                 |
| Kabuli_wild_36451228 | NA                                  | Ca_kabuli_denovo | 36451228                | C/T  | NA                 | NA                            | NA                 |
| Kabuli_wild_36452285 | NA                                  | Ca_kabuli_denovo | 36452285                | T/C  | NA                 | NA                            | NA                 |
| Kabuli_wild_36453626 | NA                                  | Ca_kabuli_denovo | 36453626                | C/T  | NA                 | NA                            | NA                 |
| Kabuli_wild_36454856 | NA                                  | Ca_kabuli_denovo | 36454856                | T/C  | NA                 | NA                            | NA                 |
| Kabuli_wild_36454892 | NA                                  | Ca_kabuli_denovo | 36454892                | G/A  | NA                 | NA                            | NA                 |
| Kabuli_wild_36460048 | NA                                  | Ca_kabuli_denovo | 36460048                | A/G  | NA                 | NA                            | NA                 |

| SNP IDs              | NCBI dbSNP accession IDs (NCBI_SS#) | Chromosomes      | Physical positions (bp) | SNPs | Gene accession IDs | Sequence components of genome | Putative functions |
|----------------------|-------------------------------------|------------------|-------------------------|------|--------------------|-------------------------------|--------------------|
| Kabuli_wild_36467282 | NA                                  | Ca_kabuli_denovo | 36467282                | C/T  | NA                 | NA                            | NA                 |
| Kabuli_wild_36469192 | NA                                  | Ca_kabuli_denovo | 36469192                | G/C  | NA                 | NA                            | NA                 |
| Kabuli_wild_36470202 | NA                                  | Ca_kabuli_denovo | 36470202                | G/T  | NA                 | NA                            | NA                 |
| Kabuli_wild_36471370 | NA                                  | Ca_kabuli_denovo | 36471370                | C/G  | NA                 | NA                            | NA                 |
| Kabuli_wild_36471397 | NA                                  | Ca_kabuli_denovo | 36471397                | G/A  | NA                 | NA                            | NA                 |
| Kabuli_wild_36473179 | NA                                  | Ca_kabuli_denovo | 36473179                | G/T  | NA                 | NA                            | NA                 |
| Kabuli_wild_36474923 | NA                                  | Ca_kabuli_denovo | 36474923                | C/G  | NA                 | NA                            | NA                 |
| Kabuli_wild_36484032 | NA                                  | Ca_kabuli_denovo | 36484032                | G/C  | NA                 | NA                            | NA                 |
| Kabuli_wild_36484952 | NA                                  | Ca_kabuli_denovo | 36484952                | A/T  | NA                 | NA                            | NA                 |
| Kabuli_wild_36487481 | NA                                  | Ca_kabuli_denovo | 36487481                | A/C  | NA                 | NA                            | NA                 |
| Kabuli_wild_36487483 | NA                                  | Ca_kabuli_denovo | 36487483                | A/G  | NA                 | NA                            | NA                 |
| Kabuli_wild_36489253 | NA                                  | Ca_kabuli_denovo | 36489253                | C/T  | NA                 | NA                            | NA                 |
| Kabuli_wild_36489926 | NA                                  | Ca_kabuli_denovo | 36489926                | T/C  | NA                 | NA                            | NA                 |
| Kabuli_wild_36489944 | NA                                  | Ca_kabuli_denovo | 36489944                | G/C  | NA                 | NA                            | NA                 |
| Kabuli_wild_36490295 | NA                                  | Ca_kabuli_denovo | 36490295                | G/C  | NA                 | NA                            | NA                 |
| Kabuli_wild_36490308 | NA                                  | Ca_kabuli_denovo | 36490308                | T/C  | NA                 | NA                            | NA                 |
| Kabuli_wild_36491706 | NA                                  | Ca_kabuli_denovo | 36491706                | A/C  | NA                 | NA                            | NA                 |
| Kabuli_wild_36498076 | NA                                  | Ca_kabuli_denovo | 36498076                | C/T  | NA                 | NA                            | NA                 |
| Kabuli_wild_36498109 | NA                                  | Ca_kabuli_denovo | 36498109                | G/C  | NA                 | NA                            | NA                 |
| Kabuli_wild_36501935 | NA                                  | Ca_kabuli_denovo | 36501935                | T/G  | NA                 | NA                            | NA                 |
| Kabuli_wild_36505141 | NA                                  | Ca_kabuli_denovo | 36505141                | A/G  | NA                 | NA                            | NA                 |
| Kabuli_wild_36507955 | NA                                  | Ca_kabuli_denovo | 36507955                | T/C  | NA                 | NA                            | NA                 |
| Kabuli_wild_36509335 | NA                                  | Ca_kabuli_denovo | 36509335                | T/A  | NA                 | NA                            | NA                 |
| Kabuli_wild_36509344 | NA                                  | Ca_kabuli_denovo | 36509344                | T/C  | NA                 | NA                            | NA                 |
| Kabuli_wild_36511121 | NA                                  | Ca_kabuli_denovo | 36511121                | A/G  | NA                 | NA                            | NA                 |
| Kabuli_wild_36511300 | NA                                  | Ca_kabuli_denovo | 36511300                | C/G  | NA                 | NA                            | NA                 |
| Kabuli_wild_36512738 | NA                                  | Ca_kabuli_denovo | 36512738                | A/G  | NA                 | NA                            | NA                 |
| Kabuli_wild_36512768 | NA                                  | Ca_kabuli_denovo | 36512768                | A/T  | NA                 | NA                            | NA                 |
| Kabuli_wild_36516279 | NA                                  | Ca_kabuli_denovo | 36516279                | G/T  | NA                 | NA                            | NA                 |
| Kabuli_wild_36519451 | NA                                  | Ca_kabuli_denovo | 36519451                | G/T  | NA                 | NA                            | NA                 |
| Kabuli_wild_36527266 | NA                                  | Ca_kabuli_denovo | 36527266                | C/A  | NA                 | NA                            | NA                 |
| Kabuli_wild_36537594 | NA                                  | Ca_kabuli_denovo | 36537594                | A/C  | NA                 | NA                            | NA                 |
| Kabuli_wild_36537595 | NA                                  | Ca_kabuli_denovo | 36537595                | G/T  | NA                 | NA                            | NA                 |
| Kabuli_wild_36540808 | NA                                  | Ca_kabuli_denovo | 36540808                | G/C  | NA                 | NA                            | NA                 |
| Kabuli_wild_36542407 | NA                                  | Ca_kabuli_denovo | 36542407                | T/C  | NA                 | NA                            | NA                 |
| Kabuli_wild_36542416 | NA                                  | Ca_kabuli_denovo | 36542416                | G/C  | NA                 | NA                            | NA                 |
| Kabuli_wild_36549732 | NA                                  | Ca_kabuli_denovo | 36549732                | C/G  | NA                 | NA                            | NA                 |
| Kabuli_wild_36562780 | NA                                  | Ca_kabuli_denovo | 36562780                | G/C  | NA                 | NA                            | NA                 |
| Kabuli_wild_36565265 | NA                                  | Ca_kabuli_denovo | 36565265                | G/C  | NA                 | NA                            | NA                 |
| Kabuli_wild_36565922 | NA                                  | Ca_kabuli_denovo | 36565922                | A/G  | NA                 | NA                            | NA                 |
| Kabuli_wild_36565943 | NA                                  | Ca_kabuli_denovo | 36565943                | A/G  | NA                 | NA                            | NA                 |
| Kabuli_wild_36571003 | NA                                  | Ca_kabuli_denovo | 36571003                | G/T  | NA                 | NA                            | NA                 |
| Kabuli_wild_36575282 | NA                                  | Ca_kabuli_denovo | 36575282                | T/C  | NA                 | NA                            | NA                 |
| Kabuli_wild_36580944 | NA                                  | Ca_kabuli_denovo | 36580944                | A/G  | NA                 | NA                            | NA                 |

| SNP IDs              | NCBI dbSNP accession IDs (NCBI_SS#) | Chromosomes      | Physical positions (bp) | SNPs | Gene accession IDs | Sequence components of genome | Putative functions |
|----------------------|-------------------------------------|------------------|-------------------------|------|--------------------|-------------------------------|--------------------|
| Kabuli_wild_36581356 | NA                                  | Ca_kabuli_denovo | 36581356                | G/A  | NA                 | NA                            | NA                 |
| Kabuli_wild_36581360 | NA                                  | Ca_kabuli_denovo | 36581360                | A/G  | NA                 | NA                            | NA                 |
| Kabuli_wild_36582399 | NA                                  | Ca_kabuli_denovo | 36582399                | C/T  | NA                 | NA                            | NA                 |
| Kabuli_wild_36582423 | NA                                  | Ca_kabuli_denovo | 36582423                | G/A  | NA                 | NA                            | NA                 |
| Kabuli_wild_36582650 | NA                                  | Ca_kabuli_denovo | 36582650                | T/C  | NA                 | NA                            | NA                 |
| Kabuli_wild_36588815 | NA                                  | Ca_kabuli_denovo | 36588815                | A/T  | NA                 | NA                            | NA                 |
| Kabuli_wild_36591716 | NA                                  | Ca_kabuli_denovo | 36591716                | A/G  | NA                 | NA                            | NA                 |
| Kabuli_wild_36594190 | NA                                  | Ca_kabuli_denovo | 36594190                | G/C  | NA                 | NA                            | NA                 |
| Kabuli_wild_36594219 | NA                                  | Ca_kabuli_denovo | 36594219                | A/T  | NA                 | NA                            | NA                 |
| Kabuli_wild_36595427 | NA                                  | Ca_kabuli_denovo | 36595427                | G/A  | NA                 | NA                            | NA                 |
| Kabuli_wild_36598754 | NA                                  | Ca_kabuli_denovo | 36598754                | A/G  | NA                 | NA                            | NA                 |
| Kabuli_wild_36598769 | NA                                  | Ca_kabuli_denovo | 36598769                | C/A  | NA                 | NA                            | NA                 |
| Kabuli_wild_36601653 | NA                                  | Ca_kabuli_denovo | 36601653                | G/C  | NA                 | NA                            | NA                 |
| Kabuli_wild_36601698 | NA                                  | Ca_kabuli_denovo | 36601698                | G/C  | NA                 | NA                            | NA                 |
| Kabuli_wild_36605942 | NA                                  | Ca_kabuli_denovo | 36605942                | G/T  | NA                 | NA                            | NA                 |
| Kabuli_wild_36607490 | NA                                  | Ca_kabuli_denovo | 36607490                | C/T  | NA                 | NA                            | NA                 |
| Kabuli_wild_36613333 | NA                                  | Ca_kabuli_denovo | 36613333                | A/G  | NA                 | NA                            | NA                 |
| Kabuli_wild_36617101 | NA                                  | Ca_kabuli_denovo | 36617101                | T/A  | NA                 | NA                            | NA                 |
| Kabuli_wild_36617166 | NA                                  | Ca_kabuli_denovo | 36617166                | G/A  | NA                 | NA                            | NA                 |
| Kabuli_wild_36628120 | NA                                  | Ca_kabuli_denovo | 36628120                | G/T  | NA                 | NA                            | NA                 |
| Kabuli_wild_36634313 | NA                                  | Ca_kabuli_denovo | 36634313                | C/T  | NA                 | NA                            | NA                 |
| Kabuli_wild_36634363 | NA                                  | Ca_kabuli_denovo | 36634363                | C/G  | NA                 | NA                            | NA                 |
| Kabuli_wild_36635787 | NA                                  | Ca_kabuli_denovo | 36635787                | G/T  | NA                 | NA                            | NA                 |
| Kabuli_wild_36644997 | NA                                  | Ca_kabuli_denovo | 36644997                | C/T  | NA                 | NA                            | NA                 |
| Kabuli_wild_36650227 | NA                                  | Ca_kabuli_denovo | 36650227                | G/T  | NA                 | NA                            | NA                 |
| Kabuli_wild_36650249 | NA                                  | Ca_kabuli_denovo | 36650249                | G/T  | NA                 | NA                            | NA                 |
| Kabuli_wild_36650281 | NA                                  | Ca_kabuli_denovo | 36650281                | G/T  | NA                 | NA                            | NA                 |
| Kabuli_wild_36652925 | NA                                  | Ca_kabuli_denovo | 36652925                | C/G  | NA                 | NA                            | NA                 |
| Kabuli_wild_36662768 | NA                                  | Ca_kabuli_denovo | 36662768                | T/C  | NA                 | NA                            | NA                 |
| Kabuli_wild_36665498 | NA                                  | Ca_kabuli_denovo | 36665498                | C/T  | NA                 | NA                            | NA                 |
| Kabuli_wild_36665510 | NA                                  | Ca_kabuli_denovo | 36665510                | G/T  | NA                 | NA                            | NA                 |
| Kabuli_wild_36669211 | NA                                  | Ca_kabuli_denovo | 36669211                | G/T  | NA                 | NA                            | NA                 |
| Kabuli_wild_36673139 | NA                                  | Ca_kabuli_denovo | 36673139                | T/G  | NA                 | NA                            | NA                 |
| Kabuli_wild_36679615 | NA                                  | Ca_kabuli_denovo | 36679615                | G/T  | NA                 | NA                            | NA                 |
| Kabuli_wild_36681182 | NA                                  | Ca_kabuli_denovo | 36681182                | C/T  | NA                 | NA                            | NA                 |
| Kabuli_wild_36685182 | NA                                  | Ca_kabuli_denovo | 36685182                | A/T  | NA                 | NA                            | NA                 |
| Kabuli_wild_36685187 | NA                                  | Ca_kabuli_denovo | 36685187                | A/C  | NA                 | NA                            | NA                 |
| Kabuli_wild_36685797 | NA                                  | Ca_kabuli_denovo | 36685797                | C/A  | NA                 | NA                            | NA                 |
| Kabuli_wild_36686793 | NA                                  | Ca_kabuli_denovo | 36686793                | A/C  | NA                 | NA                            | NA                 |
| Kabuli_wild_36691876 | NA                                  | Ca_kabuli_denovo | 36691876                | A/G  | NA                 | NA                            | NA                 |
| Kabuli_wild_36691925 | NA                                  | Ca_kabuli_denovo | 36691925                | T/G  | NA                 | NA                            | NA                 |
| Kabuli_wild_36692083 | NA                                  | Ca_kabuli_denovo | 36692083                | A/T  | NA                 | NA                            | NA                 |
| Kabuli_wild_36693593 | NA                                  | Ca_kabuli_denovo | 36693593                | G/T  | NA                 | NA                            | NA                 |
| Kabuli_wild_36696187 | NA                                  | Ca_kabuli_denovo | 36696187                | A/C  | NA                 | NA                            | NA                 |

| SNP IDs              | NCBI dbSNP accession IDs (NCBI_SS#) | Chromosomes      | Physical positions (bp) | SNPs | Gene accession IDs | Sequence components of genome | Putative functions |
|----------------------|-------------------------------------|------------------|-------------------------|------|--------------------|-------------------------------|--------------------|
| Kabuli_wild_36697243 | NA                                  | Ca_kabuli_denovo | 36697243                | A/C  | NA                 | NA                            | NA                 |
| Kabuli_wild_36699768 | NA                                  | Ca_kabuli_denovo | 36699768                | T/C  | NA                 | NA                            | NA                 |
| Kabuli_wild_36701883 | NA                                  | Ca_kabuli_denovo | 36701883                | T/G  | NA                 | NA                            | NA                 |
| Kabuli_wild_36703336 | NA                                  | Ca_kabuli_denovo | 36703336                | C/A  | NA                 | NA                            | NA                 |
| Kabuli_wild_36703355 | NA                                  | Ca_kabuli_denovo | 36703355                | A/G  | NA                 | NA                            | NA                 |
| Kabuli_wild_36704050 | NA                                  | Ca_kabuli_denovo | 36704050                | T/A  | NA                 | NA                            | NA                 |
| Kabuli_wild_36706120 | NA                                  | Ca_kabuli_denovo | 36706120                | G/T  | NA                 | NA                            | NA                 |
| Kabuli_wild_36708467 | NA                                  | Ca_kabuli_denovo | 36708467                | G/T  | NA                 | NA                            | NA                 |
| Kabuli_wild_36723180 | NA                                  | Ca_kabuli_denovo | 36723180                | G/A  | NA                 | NA                            | NA                 |
| Kabuli_wild_36723186 | NA                                  | Ca_kabuli_denovo | 36723186                | T/C  | NA                 | NA                            | NA                 |
| Kabuli_wild_36723488 | NA                                  | Ca_kabuli_denovo | 36723488                | G/T  | NA                 | NA                            | NA                 |
| Kabuli_wild_36723515 | NA                                  | Ca_kabuli_denovo | 36723515                | C/T  | NA                 | NA                            | NA                 |
| Kabuli_wild_36723527 | NA                                  | Ca_kabuli_denovo | 36723527                | G/A  | NA                 | NA                            | NA                 |
| Kabuli_wild_36726231 | NA                                  | Ca_kabuli_denovo | 36726231                | T/G  | NA                 | NA                            | NA                 |
| Kabuli_wild_36727300 | NA                                  | Ca_kabuli_denovo | 36727300                | T/C  | NA                 | NA                            | NA                 |
| Kabuli_wild_36727579 | NA                                  | Ca_kabuli_denovo | 36727579                | C/T  | NA                 | NA                            | NA                 |
| Kabuli_wild_36729521 | NA                                  | Ca_kabuli_denovo | 36729521                | A/G  | NA                 | NA                            | NA                 |
| Kabuli_wild_36729549 | NA                                  | Ca_kabuli_denovo | 36729549                | T/G  | NA                 | NA                            | NA                 |
| Kabuli_wild_36731993 | NA                                  | Ca_kabuli_denovo | 36731993                | A/C  | NA                 | NA                            | NA                 |
| Kabuli_wild_36733400 | NA                                  | Ca_kabuli_denovo | 36733400                | C/G  | NA                 | NA                            | NA                 |
| Kabuli_wild_36733420 | NA                                  | Ca_kabuli_denovo | 36733420                | G/T  | NA                 | NA                            | NA                 |
| Kabuli_wild_36735461 | NA                                  | Ca_kabuli_denovo | 36735461                | C/T  | NA                 | NA                            | NA                 |
| Kabuli_wild_36736461 | NA                                  | Ca_kabuli_denovo | 36736461                | C/G  | NA                 | NA                            | NA                 |
| Kabuli_wild_36736482 | NA                                  | Ca_kabuli_denovo | 36736482                | A/G  | NA                 | NA                            | NA                 |
| Kabuli_wild_36736996 | NA                                  | Ca_kabuli_denovo | 36736996                | T/G  | NA                 | NA                            | NA                 |
| Kabuli_wild_36737054 | NA                                  | Ca_kabuli_denovo | 36737054                | G/C  | NA                 | NA                            | NA                 |
| Kabuli_wild_36743035 | NA                                  | Ca_kabuli_denovo | 36743035                | A/C  | NA                 | NA                            | NA                 |
| Kabuli_wild_36745101 | NA                                  | Ca_kabuli_denovo | 36745101                | G/T  | NA                 | NA                            | NA                 |
| Kabuli_wild_36746225 | NA                                  | Ca_kabuli_denovo | 36746225                | C/A  | NA                 | NA                            | NA                 |
| Kabuli_wild_36752634 | NA                                  | Ca_kabuli_denovo | 36752634                | A/C  | NA                 | NA                            | NA                 |
| Kabuli_wild_36752635 | NA                                  | Ca_kabuli_denovo | 36752635                | G/T  | NA                 | NA                            | NA                 |
| Kabuli_wild_36756758 | NA                                  | Ca_kabuli_denovo | 36756758                | G/T  | NA                 | NA                            | NA                 |
| Kabuli_wild_36760070 | NA                                  | Ca_kabuli_denovo | 36760070                | A/G  | NA                 | NA                            | NA                 |
| Kabuli_wild_36760073 | NA                                  | Ca_kabuli_denovo | 36760073                | C/T  | NA                 | NA                            | NA                 |
| Kabuli_wild_36761128 | NA                                  | Ca_kabuli_denovo | 36761128                | G/A  | NA                 | NA                            | NA                 |
| Kabuli_wild_36761143 | NA                                  | Ca_kabuli_denovo | 36761143                | A/C  | NA                 | NA                            | NA                 |
| Kabuli_wild_36763439 | NA                                  | Ca_kabuli_denovo | 36763439                | C/T  | NA                 | NA                            | NA                 |
| Kabuli_wild_36763468 | NA                                  | Ca_kabuli_denovo | 36763468                | C/A  | NA                 | NA                            | NA                 |
| Kabuli_wild_36768753 | NA                                  | Ca_kabuli_denovo | 36768753                | A/G  | NA                 | NA                            | NA                 |
| Kabuli_wild_36771707 | NA                                  | Ca_kabuli_denovo | 36771707                | A/T  | NA                 | NA                            | NA                 |
| Kabuli_wild_36774810 | NA                                  | Ca_kabuli_denovo | 36774810                | T/G  | NA                 | NA                            | NA                 |
| Kabuli_wild_36777604 | NA                                  | Ca_kabuli_denovo | 36777604                | T/C  | NA                 | NA                            | NA                 |
| Kabuli_wild_36777643 | NA                                  | Ca_kabuli_denovo | 36777643                | C/G  | NA                 | NA                            | NA                 |
| Kabuli_wild_36777652 | NA                                  | Ca_kabuli_denovo | 36777652                | C/T  | NA                 | NA                            | NA                 |

| SNP IDs              | NCBI dbSNP accession IDs (NCBI_SS#) | Chromosomes      | Physical positions (bp) | SNPs | Gene accession IDs | Sequence components of genome | Putative functions |
|----------------------|-------------------------------------|------------------|-------------------------|------|--------------------|-------------------------------|--------------------|
| Kabuli_wild_36777661 | NA                                  | Ca_kabuli_denovo | 36777661                | T/C  | NA                 | NA                            | NA                 |
| Kabuli_wild_36781145 | NA                                  | Ca_kabuli_denovo | 36781145                | A/C  | NA                 | NA                            | NA                 |
| Kabuli_wild_36781146 | NA                                  | Ca_kabuli_denovo | 36781146                | G/T  | NA                 | NA                            | NA                 |
| Kabuli_wild_36781147 | NA                                  | Ca_kabuli_denovo | 36781147                | A/G  | NA                 | NA                            | NA                 |
| Kabuli_wild_36781381 | NA                                  | Ca_kabuli_denovo | 36781381                | G/T  | NA                 | NA                            | NA                 |
| Kabuli_wild_36784555 | NA                                  | Ca_kabuli_denovo | 36784555                | G/A  | NA                 | NA                            | NA                 |
| Kabuli_wild_36784558 | NA                                  | Ca_kabuli_denovo | 36784558                | A/G  | NA                 | NA                            | NA                 |
| Kabuli_wild_36786521 | NA                                  | Ca_kabuli_denovo | 36786521                | A/C  | NA                 | NA                            | NA                 |
| Kabuli_wild_36786522 | NA                                  | Ca_kabuli_denovo | 36786522                | A/G  | NA                 | NA                            | NA                 |
| Kabuli_wild_36786523 | NA                                  | Ca_kabuli_denovo | 36786523                | A/G  | NA                 | NA                            | NA                 |
| Kabuli_wild_36791525 | NA                                  | Ca_kabuli_denovo | 36791525                | A/G  | NA                 | NA                            | NA                 |
| Kabuli_wild_36791546 | NA                                  | Ca_kabuli_denovo | 36791546                | A/C  | NA                 | NA                            | NA                 |
| Kabuli_wild_36801293 | NA                                  | Ca_kabuli_denovo | 36801293                | T/G  | NA                 | NA                            | NA                 |
| Kabuli_wild_36803347 | NA                                  | Ca_kabuli_denovo | 36803347                | G/C  | NA                 | NA                            | NA                 |
| Kabuli_wild_36803369 | NA                                  | Ca_kabuli_denovo | 36803369                | A/G  | NA                 | NA                            | NA                 |
| Kabuli_wild_36803414 | NA                                  | Ca_kabuli_denovo | 36803414                | A/G  | NA                 | NA                            | NA                 |
| Kabuli_wild_36808218 | NA                                  | Ca_kabuli_denovo | 36808218                | A/C  | NA                 | NA                            | NA                 |
| Kabuli_wild_36808219 | NA                                  | Ca_kabuli_denovo | 36808219                | G/T  | NA                 | NA                            | NA                 |
| Kabuli_wild_36808903 | NA                                  | Ca_kabuli_denovo | 36808903                | T/C  | NA                 | NA                            | NA                 |
| Kabuli_wild_36808920 | NA                                  | Ca_kabuli_denovo | 36808920                | G/C  | NA                 | NA                            | NA                 |
| Kabuli_wild_36810730 | NA                                  | Ca_kabuli_denovo | 36810730                | A/T  | NA                 | NA                            | NA                 |
| Kabuli_wild_36810779 | NA                                  | Ca_kabuli_denovo | 36810779                | C/T  | NA                 | NA                            | NA                 |
| Kabuli_wild_36811097 | NA                                  | Ca_kabuli_denovo | 36811097                | A/C  | NA                 | NA                            | NA                 |
| Kabuli_wild_36816146 | NA                                  | Ca_kabuli_denovo | 36816146                | A/G  | NA                 | NA                            | NA                 |
| Kabuli_wild_36816211 | NA                                  | Ca_kabuli_denovo | 36816211                | C/T  | NA                 | NA                            | NA                 |
| Kabuli_wild_36816272 | NA                                  | Ca_kabuli_denovo | 36816272                | C/T  | NA                 | NA                            | NA                 |
| Kabuli_wild_36830672 | NA                                  | Ca_kabuli_denovo | 36830672                | G/T  | NA                 | NA                            | NA                 |
| Kabuli_wild_36833362 | NA                                  | Ca_kabuli_denovo | 36833362                | G/T  | NA                 | NA                            | NA                 |
| Kabuli_wild_36839273 | NA                                  | Ca_kabuli_denovo | 36839273                | C/T  | NA                 | NA                            | NA                 |
| Kabuli_wild_36841083 | NA                                  | Ca_kabuli_denovo | 36841083                | C/G  | NA                 | NA                            | NA                 |
| Kabuli_wild_36841124 | NA                                  | Ca_kabuli_denovo | 36841124                | A/T  | NA                 | NA                            | NA                 |
| Kabuli_wild_36841142 | NA                                  | Ca_kabuli_denovo | 36841142                | G/C  | NA                 | NA                            | NA                 |
| Kabuli_wild_36844332 | NA                                  | Ca_kabuli_denovo | 36844332                | C/G  | NA                 | NA                            | NA                 |
| Kabuli_wild_36844341 | NA                                  | Ca_kabuli_denovo | 36844341                | A/G  | NA                 | NA                            | NA                 |
| Kabuli_wild_36844348 | NA                                  | Ca_kabuli_denovo | 36844348                | G/T  | NA                 | NA                            | NA                 |
| Kabuli_wild_36849144 | NA                                  | Ca_kabuli_denovo | 36849144                | C/T  | NA                 | NA                            | NA                 |
| Kabuli_wild_36849159 | NA                                  | Ca_kabuli_denovo | 36849159                | G/C  | NA                 | NA                            | NA                 |
| Kabuli_wild_36857008 | NA                                  | Ca_kabuli_denovo | 36857008                | G/C  | NA                 | NA                            | NA                 |
| Kabuli_wild_36863693 | NA                                  | Ca_kabuli_denovo | 36863693                | G/T  | NA                 | NA                            | NA                 |
| Kabuli_wild_36865156 | NA                                  | Ca_kabuli_denovo | 36865156                | C/T  | NA                 | NA                            | NA                 |
| Kabuli_wild_36865177 | NA                                  | Ca_kabuli_denovo | 36865177                | C/G  | NA                 | NA                            | NA                 |
| Kabuli_wild_36871413 | NA                                  | Ca_kabuli_denovo | 36871413                | T/C  | NA                 | NA                            | NA                 |
| Kabuli_wild_36871445 | NA                                  | Ca_kabuli_denovo | 36871445                | T/A  | NA                 | NA                            | NA                 |
| Kabuli_wild_36881386 | NA                                  | Ca_kabuli_denovo | 36881386                | C/A  | NA                 | NA                            | NA                 |

| SNP IDs              | NCBI dbSNP accession IDs (NCBI_SS#) | Chromosomes      | Physical positions (bp) | SNPs | Gene accession IDs | Sequence components of genome | Putative functions |
|----------------------|-------------------------------------|------------------|-------------------------|------|--------------------|-------------------------------|--------------------|
| Kabuli_wild_36881400 | NA                                  | Ca_kabuli_denovo | 36881400                | C/G  | NA                 | NA                            | NA                 |
| Kabuli_wild_36883528 | NA                                  | Ca_kabuli_denovo | 36883528                | C/T  | NA                 | NA                            | NA                 |
| Kabuli_wild_36883562 | NA                                  | Ca_kabuli_denovo | 36883562                | T/C  | NA                 | NA                            | NA                 |
| Kabuli_wild_36885818 | NA                                  | Ca_kabuli_denovo | 36885818                | G/T  | NA                 | NA                            | NA                 |
| Kabuli_wild_36885868 | NA                                  | Ca_kabuli_denovo | 36885868                | G/A  | NA                 | NA                            | NA                 |
| Kabuli_wild_36903465 | NA                                  | Ca_kabuli_denovo | 36903465                | C/G  | NA                 | NA                            | NA                 |
| Kabuli_wild_36905584 | NA                                  | Ca_kabuli_denovo | 36905584                | C/T  | NA                 | NA                            | NA                 |
| Kabuli_wild_36905622 | NA                                  | Ca_kabuli_denovo | 36905622                | A/C  | NA                 | NA                            | NA                 |
| Kabuli_wild_36905646 | NA                                  | Ca_kabuli_denovo | 36905646                | A/G  | NA                 | NA                            | NA                 |
| Kabuli_wild_36910133 | NA                                  | Ca_kabuli_denovo | 36910133                | T/G  | NA                 | NA                            | NA                 |
| Kabuli_wild_36912181 | NA                                  | Ca_kabuli_denovo | 36912181                | C/T  | NA                 | NA                            | NA                 |
| Kabuli_wild_36912183 | NA                                  | Ca_kabuli_denovo | 36912183                | G/T  | NA                 | NA                            | NA                 |
| Kabuli_wild_36918894 | NA                                  | Ca_kabuli_denovo | 36918894                | A/C  | NA                 | NA                            | NA                 |
| Kabuli_wild_36918902 | NA                                  | Ca_kabuli_denovo | 36918902                | T/C  | NA                 | NA                            | NA                 |
| Kabuli_wild_36919880 | NA                                  | Ca_kabuli_denovo | 36919880                | G/T  | NA                 | NA                            | NA                 |
| Kabuli_wild_36919883 | NA                                  | Ca_kabuli_denovo | 36919883                | C/T  | NA                 | NA                            | NA                 |
| Kabuli_wild_36920038 | NA                                  | Ca_kabuli_denovo | 36920038                | T/G  | NA                 | NA                            | NA                 |
| Kabuli_wild_36924814 | NA                                  | Ca_kabuli_denovo | 36924814                | A/C  | NA                 | NA                            | NA                 |
| Kabuli_wild_36924820 | NA                                  | Ca_kabuli_denovo | 36924820                | A/T  | NA                 | NA                            | NA                 |
| Kabuli_wild_36926078 | NA                                  | Ca_kabuli_denovo | 36926078                | A/G  | NA                 | NA                            | NA                 |
| Kabuli_wild_36929425 | NA                                  | Ca_kabuli_denovo | 36929425                | C/A  | NA                 | NA                            | NA                 |
| Kabuli_wild_36929437 | NA                                  | Ca_kabuli_denovo | 36929437                | T/C  | NA                 | NA                            | NA                 |
| Kabuli_wild_36933193 | NA                                  | Ca_kabuli_denovo | 36933193                | G/C  | NA                 | NA                            | NA                 |
| Kabuli_wild_36933812 | NA                                  | Ca_kabuli_denovo | 36933812                | A/G  | NA                 | NA                            | NA                 |
| Kabuli_wild_36935333 | NA                                  | Ca_kabuli_denovo | 36935333                | A/G  | NA                 | NA                            | NA                 |
| Kabuli_wild_36935946 | NA                                  | Ca_kabuli_denovo | 36935946                | G/T  | NA                 | NA                            | NA                 |
| Kabuli_wild_36935987 | NA                                  | Ca_kabuli_denovo | 36935987                | G/T  | NA                 | NA                            | NA                 |
| Kabuli_wild_36937980 | NA                                  | Ca_kabuli_denovo | 36937980                | T/G  | NA                 | NA                            | NA                 |
| Kabuli_wild_36938395 | NA                                  | Ca_kabuli_denovo | 36938395                | A/C  | NA                 | NA                            | NA                 |
| Kabuli_wild_36953760 | NA                                  | Ca_kabuli_denovo | 36953760                | C/T  | NA                 | NA                            | NA                 |
| Kabuli_wild_36953762 | NA                                  | Ca_kabuli_denovo | 36953762                | C/T  | NA                 | NA                            | NA                 |
| Kabuli_wild_36959428 | NA                                  | Ca_kabuli_denovo | 36959428                | A/G  | NA                 | NA                            | NA                 |
| Kabuli_wild_36959442 | NA                                  | Ca_kabuli_denovo | 36959442                | T/C  | NA                 | NA                            | NA                 |
| Kabuli_wild_36960944 | NA                                  | Ca_kabuli_denovo | 36960944                | C/T  | NA                 | NA                            | NA                 |
| Kabuli_wild_36971694 | NA                                  | Ca_kabuli_denovo | 36971694                | G/T  | NA                 | NA                            | NA                 |
| Kabuli_wild_36972220 | NA                                  | Ca_kabuli_denovo | 36972220                | A/G  | NA                 | NA                            | NA                 |
| Kabuli_wild_36972235 | NA                                  | Ca_kabuli_denovo | 36972235                | C/T  | NA                 | NA                            | NA                 |
| Kabuli_wild_36973536 | NA                                  | Ca_kabuli_denovo | 36973536                | T/C  | NA                 | NA                            | NA                 |
| Kabuli_wild_36973577 | NA                                  | Ca_kabuli_denovo | 36973577                | G/A  | NA                 | NA                            | NA                 |
| Kabuli_wild_36973843 | NA                                  | Ca_kabuli_denovo | 36973843                | T/C  | NA                 | NA                            | NA                 |
| Kabuli_wild_36997048 | NA                                  | Ca_kabuli_denovo | 36997048                | A/C  | NA                 | NA                            | NA                 |
| Kabuli_wild_36998810 | NA                                  | Ca_kabuli_denovo | 36998810                | C/T  | NA                 | NA                            | NA                 |
| Kabuli_wild_37000225 | NA                                  | Ca_kabuli_denovo | 37000225                | A/G  | NA                 | NA                            | NA                 |
| Kabuli_wild_37000237 | NA                                  | Ca_kabuli_denovo | 37000237                | A/G  | NA                 | NA                            | NA                 |

| SNP IDs              | NCBI dbSNP accession IDs (NCBI_SS#) | Chromosomes      | Physical positions (bp) | SNPs | Gene accession IDs | Sequence components of genome | Putative functions |
|----------------------|-------------------------------------|------------------|-------------------------|------|--------------------|-------------------------------|--------------------|
| Kabuli_wild_37000238 | NA                                  | Ca_kabuli_denovo | 37000238                | T/C  | NA                 | NA                            | NA                 |
| Kabuli_wild_37008210 | NA                                  | Ca_kabuli_denovo | 37008210                | G/C  | NA                 | NA                            | NA                 |
| Kabuli_wild_37009903 | NA                                  | Ca_kabuli_denovo | 37009903                | A/G  | NA                 | NA                            | NA                 |
| Kabuli_wild_37009912 | NA                                  | Ca_kabuli_denovo | 37009912                | C/A  | NA                 | NA                            | NA                 |
| Kabuli_wild_37010914 | NA                                  | Ca_kabuli_denovo | 37010914                | A/G  | NA                 | NA                            | NA                 |
| Kabuli_wild_37022526 | NA                                  | Ca_kabuli_denovo | 37022526                | C/T  | NA                 | NA                            | NA                 |
| Kabuli_wild_37025962 | NA                                  | Ca_kabuli_denovo | 37025962                | C/T  | NA                 | NA                            | NA                 |
| Kabuli_wild_37025990 | NA                                  | Ca_kabuli_denovo | 37025990                | A/G  | NA                 | NA                            | NA                 |
| Kabuli_wild_37028396 | NA                                  | Ca_kabuli_denovo | 37028396                | T/C  | NA                 | NA                            | NA                 |
| Kabuli_wild_37033831 | NA                                  | Ca_kabuli_denovo | 37033831                | A/G  | NA                 | NA                            | NA                 |
| Kabuli_wild_37041881 | NA                                  | Ca_kabuli_denovo | 37041881                | G/T  | NA                 | NA                            | NA                 |
| Kabuli_wild_37049203 | NA                                  | Ca_kabuli_denovo | 37049203                | C/T  | NA                 | NA                            | NA                 |
| Kabuli_wild_37049241 | NA                                  | Ca_kabuli_denovo | 37049241                | G/A  | NA                 | NA                            | NA                 |
| Kabuli_wild_37050614 | NA                                  | Ca_kabuli_denovo | 37050614                | C/T  | NA                 | NA                            | NA                 |
| Kabuli_wild_37050765 | NA                                  | Ca_kabuli_denovo | 37050765                | T/C  | NA                 | NA                            | NA                 |
| Kabuli_wild_37050777 | NA                                  | Ca_kabuli_denovo | 37050777                | T/C  | NA                 | NA                            | NA                 |
| Kabuli_wild_37054184 | NA                                  | Ca_kabuli_denovo | 37054184                | G/T  | NA                 | NA                            | NA                 |
| Kabuli_wild_37054248 | NA                                  | Ca_kabuli_denovo | 37054248                | A/C  | NA                 | NA                            | NA                 |
| Kabuli_wild_37054843 | NA                                  | Ca_kabuli_denovo | 37054843                | A/C  | NA                 | NA                            | NA                 |
| Kabuli_wild_37055748 | NA                                  | Ca_kabuli_denovo | 37055748                | G/T  | NA                 | NA                            | NA                 |
| Kabuli_wild_37062715 | NA                                  | Ca_kabuli_denovo | 37062715                | A/C  | NA                 | NA                            | NA                 |
| Kabuli_wild_37067510 | NA                                  | Ca_kabuli_denovo | 37067510                | G/A  | NA                 | NA                            | NA                 |
| Kabuli_wild_37075984 | NA                                  | Ca_kabuli_denovo | 37075984                | A/G  | NA                 | NA                            | NA                 |
| Kabuli_wild_37076755 | NA                                  | Ca_kabuli_denovo | 37076755                | C/T  | NA                 | NA                            | NA                 |
| Kabuli_wild_37076822 | NA                                  | Ca_kabuli_denovo | 37076822                | C/G  | NA                 | NA                            | NA                 |
| Kabuli_wild_37076823 | NA                                  | Ca_kabuli_denovo | 37076823                | T/C  | NA                 | NA                            | NA                 |
| Kabuli_wild_37076826 | NA                                  | Ca_kabuli_denovo | 37076826                | C/G  | NA                 | NA                            | NA                 |
| Kabuli_wild_37076849 | NA                                  | Ca_kabuli_denovo | 37076849                | C/T  | NA                 | NA                            | NA                 |
| Kabuli_wild_37077847 | NA                                  | Ca_kabuli_denovo | 37077847                | C/T  | NA                 | NA                            | NA                 |
| Kabuli_wild_37078457 | NA                                  | Ca_kabuli_denovo | 37078457                | A/C  | NA                 | NA                            | NA                 |
| Kabuli_wild_37081322 | NA                                  | Ca_kabuli_denovo | 37081322                | C/T  | NA                 | NA                            | NA                 |
| Kabuli_wild_37087141 | NA                                  | Ca_kabuli_denovo | 37087141                | G/T  | NA                 | NA                            | NA                 |
| Kabuli_wild_37089532 | NA                                  | Ca_kabuli_denovo | 37089532                | A/G  | NA                 | NA                            | NA                 |
| Kabuli_wild_37089571 | NA                                  | Ca_kabuli_denovo | 37089571                | C/G  | NA                 | NA                            | NA                 |
| Kabuli_wild_37097648 | NA                                  | Ca_kabuli_denovo | 37097648                | A/G  | NA                 | NA                            | NA                 |
| Kabuli_wild_37100112 | NA                                  | Ca_kabuli_denovo | 37100112                | T/C  | NA                 | NA                            | NA                 |
| Kabuli_wild_37100140 | NA                                  | Ca_kabuli_denovo | 37100140                | T/G  | NA                 | NA                            | NA                 |
| Kabuli_wild_37115416 | NA                                  | Ca_kabuli_denovo | 37115416                | G/T  | NA                 | NA                            | NA                 |
| Kabuli_wild_37116223 | NA                                  | Ca_kabuli_denovo | 37116223                | C/G  | NA                 | NA                            | NA                 |
| Kabuli_wild_37116244 | NA                                  | Ca_kabuli_denovo | 37116244                | T/G  | NA                 | NA                            | NA                 |
| Kabuli_wild_37119989 | NA                                  | Ca_kabuli_denovo | 37119989                | A/G  | NA                 | NA                            | NA                 |
| Kabuli_wild_37120022 | NA                                  | Ca_kabuli_denovo | 37120022                | A/G  | NA                 | NA                            | NA                 |
| Kabuli_wild_37136530 | NA                                  | Ca_kabuli_denovo | 37136530                | T/A  | NA                 | NA                            | NA                 |
| Kabuli_wild_37141405 | NA                                  | Ca_kabuli_denovo | 37141405                | C/G  | NA                 | NA                            | NA                 |

| SNP IDs              | NCBI dbSNP accession IDs (NCBI_SS#) | Chromosomes      | Physical positions (bp) | SNPs | Gene accession IDs | Sequence components of genome | Putative functions |
|----------------------|-------------------------------------|------------------|-------------------------|------|--------------------|-------------------------------|--------------------|
| Kabuli_wild_37142635 | NA                                  | Ca_kabuli_denovo | 37142635                | C/T  | NA                 | NA                            | NA                 |
| Kabuli_wild_37146312 | NA                                  | Ca_kabuli_denovo | 37146312                | A/C  | NA                 | NA                            | NA                 |
| Kabuli_wild_37148939 | NA                                  | Ca_kabuli_denovo | 37148939                | C/G  | NA                 | NA                            | NA                 |
| Kabuli_wild_37148961 | NA                                  | Ca_kabuli_denovo | 37148961                | A/T  | NA                 | NA                            | NA                 |
| Kabuli_wild_37149019 | NA                                  | Ca_kabuli_denovo | 37149019                | C/G  | NA                 | NA                            | NA                 |
| Kabuli_wild_37160061 | NA                                  | Ca_kabuli_denovo | 37160061                | A/T  | NA                 | NA                            | NA                 |
| Kabuli_wild_37166726 | NA                                  | Ca_kabuli_denovo | 37166726                | A/G  | NA                 | NA                            | NA                 |
| Kabuli_wild_37167004 | NA                                  | Ca_kabuli_denovo | 37167004                | A/G  | NA                 | NA                            | NA                 |
| Kabuli_wild_37167051 | NA                                  | Ca_kabuli_denovo | 37167051                | A/G  | NA                 | NA                            | NA                 |
| Kabuli_wild_37169637 | NA                                  | Ca_kabuli_denovo | 37169637                | G/T  | NA                 | NA                            | NA                 |
| Kabuli_wild_37171770 | NA                                  | Ca_kabuli_denovo | 37171770                | A/C  | NA                 | NA                            | NA                 |
| Kabuli_wild_37171771 | NA                                  | Ca_kabuli_denovo | 37171771                | G/T  | NA                 | NA                            | NA                 |
| Kabuli_wild_37177650 | NA                                  | Ca_kabuli_denovo | 37177650                | G/T  | NA                 | NA                            | NA                 |
| Kabuli_wild_37182544 | NA                                  | Ca_kabuli_denovo | 37182544                | T/G  | NA                 | NA                            | NA                 |
| Kabuli_wild_37196615 | NA                                  | Ca_kabuli_denovo | 37196615                | C/G  | NA                 | NA                            | NA                 |
| Kabuli_wild_37205124 | NA                                  | Ca_kabuli_denovo | 37205124                | T/C  | NA                 | NA                            | NA                 |
| Kabuli_wild_37205168 | NA                                  | Ca_kabuli_denovo | 37205168                | G/A  | NA                 | NA                            | NA                 |
| Kabuli_wild_37212333 | NA                                  | Ca_kabuli_denovo | 37212333                | T/G  | NA                 | NA                            | NA                 |
| Kabuli_wild_37218680 | NA                                  | Ca_kabuli_denovo | 37218680                | C/A  | NA                 | NA                            | NA                 |
| Kabuli_wild_37220851 | NA                                  | Ca_kabuli_denovo | 37220851                | C/T  | NA                 | NA                            | NA                 |
| Kabuli_wild_37226203 | NA                                  | Ca_kabuli_denovo | 37226203                | A/C  | NA                 | NA                            | NA                 |
| Kabuli_wild_37233317 | NA                                  | Ca_kabuli_denovo | 37233317                | A/C  | NA                 | NA                            | NA                 |
| Kabuli_wild_37233322 | NA                                  | Ca_kabuli_denovo | 37233322                | T/G  | NA                 | NA                            | NA                 |
| Kabuli_wild_37244571 | NA                                  | Ca_kabuli_denovo | 37244571                | T/C  | NA                 | NA                            | NA                 |
| Kabuli_wild_37250697 | NA                                  | Ca_kabuli_denovo | 37250697                | C/T  | NA                 | NA                            | NA                 |
| Kabuli_wild_37250763 | NA                                  | Ca_kabuli_denovo | 37250763                | G/C  | NA                 | NA                            | NA                 |
| Kabuli_wild_37252838 | NA                                  | Ca_kabuli_denovo | 37252838                | C/T  | NA                 | NA                            | NA                 |
| Kabuli_wild_37252842 | NA                                  | Ca_kabuli_denovo | 37252842                | T/A  | NA                 | NA                            | NA                 |
| Kabuli_wild_37255025 | NA                                  | Ca_kabuli_denovo | 37255025                | G/C  | NA                 | NA                            | NA                 |
| Kabuli_wild_37261215 | NA                                  | Ca_kabuli_denovo | 37261215                | G/T  | NA                 | NA                            | NA                 |
| Kabuli_wild_37262391 | NA                                  | Ca_kabuli_denovo | 37262391                | G/T  | NA                 | NA                            | NA                 |
| Kabuli_wild_37262577 | NA                                  | Ca_kabuli_denovo | 37262577                | G/T  | NA                 | NA                            | NA                 |
| Kabuli_wild_37262583 | NA                                  | Ca_kabuli_denovo | 37262583                | T/C  | NA                 | NA                            | NA                 |
| Kabuli_wild_37263179 | NA                                  | Ca_kabuli_denovo | 37263179                | C/A  | NA                 | NA                            | NA                 |
| Kabuli_wild_37263215 | NA                                  | Ca_kabuli_denovo | 37263215                | T/G  | NA                 | NA                            | NA                 |
| Kabuli_wild_37263230 | NA                                  | Ca_kabuli_denovo | 37263230                | G/A  | NA                 | NA                            | NA                 |
| Kabuli_wild_37270249 | NA                                  | Ca_kabuli_denovo | 37270249                | T/G  | NA                 | NA                            | NA                 |
| Kabuli_wild_37274673 | NA                                  | Ca_kabuli_denovo | 37274673                | G/T  | NA                 | NA                            | NA                 |
| Kabuli_wild_37277838 | NA                                  | Ca_kabuli_denovo | 37277838                | T/G  | NA                 | NA                            | NA                 |
| Kabuli_wild_37277844 | NA                                  | Ca_kabuli_denovo | 37277844                | G/T  | NA                 | NA                            | NA                 |
| Kabuli_wild_37284731 | NA                                  | Ca_kabuli_denovo | 37284731                | G/T  | NA                 | NA                            | NA                 |
| Kabuli_wild_37284737 | NA                                  | Ca_kabuli_denovo | 37284737                | A/G  | NA                 | NA                            | NA                 |
| Kabuli_wild_37288081 | NA                                  | Ca_kabuli_denovo | 37288081                | T/C  | NA                 | NA                            | NA                 |
| Kabuli_wild_37292661 | NA                                  | Ca_kabuli_denovo | 37292661                | C/T  | NA                 | NA                            | NA                 |



| SNP IDs              | NCBI dbSNP accession IDs (NCBI_SS#) | Chromosomes      | Physical positions (bp) | SNPs | Gene accession IDs | Sequence components of genome | Putative functions |
|----------------------|-------------------------------------|------------------|-------------------------|------|--------------------|-------------------------------|--------------------|
| Kabuli_wild_37292857 | NA                                  | Ca_kabuli_denovo | 37292857                | G/C  | NA                 | NA                            | NA                 |
| Kabuli_wild_37292944 | NA                                  | Ca_kabuli_denovo | 37292944                | C/G  | NA                 | NA                            | NA                 |
| Kabuli_wild_37292980 | NA                                  | Ca_kabuli_denovo | 37292980                | C/T  | NA                 | NA                            | NA                 |
| Kabuli_wild_37298055 | NA                                  | Ca_kabuli_denovo | 37298055                | G/T  | NA                 | NA                            | NA                 |
| Kabuli_wild_37303345 | NA                                  | Ca_kabuli_denovo | 37303345                | T/G  | NA                 | NA                            | NA                 |
| Kabuli_wild_37303366 | NA                                  | Ca_kabuli_denovo | 37303366                | T/C  | NA                 | NA                            | NA                 |
| Kabuli_wild_37307728 | NA                                  | Ca_kabuli_denovo | 37307728                | T/G  | NA                 | NA                            | NA                 |
| Kabuli_wild_37317662 | NA                                  | Ca_kabuli_denovo | 37317662                | G/T  | NA                 | NA                            | NA                 |
| Kabuli_wild_37318026 | NA                                  | Ca_kabuli_denovo | 37318026                | A/G  | NA                 | NA                            | NA                 |
| Kabuli_wild_37320656 | NA                                  | Ca_kabuli_denovo | 37320656                | T/G  | NA                 | NA                            | NA                 |
| Kabuli_wild_37321402 | NA                                  | Ca_kabuli_denovo | 37321402                | G/T  | NA                 | NA                            | NA                 |
| Kabuli_wild_37324299 | NA                                  | Ca_kabuli_denovo | 37324299                | T/G  | NA                 | NA                            | NA                 |
| Kabuli_wild_37342519 | NA                                  | Ca_kabuli_denovo | 37342519                | G/A  | NA                 | NA                            | NA                 |
| Kabuli_wild_37347451 | NA                                  | Ca_kabuli_denovo | 37347451                | A/C  | NA                 | NA                            | NA                 |
| Kabuli_wild_37352153 | NA                                  | Ca_kabuli_denovo | 37352153                | A/C  | NA                 | NA                            | NA                 |
| Kabuli_wild_37354745 | NA                                  | Ca_kabuli_denovo | 37354745                | G/T  | NA                 | NA                            | NA                 |
| Kabuli_wild_37371938 | NA                                  | Ca_kabuli_denovo | 37371938                | G/C  | NA                 | NA                            | NA                 |
| Kabuli_wild_37371972 | NA                                  | Ca_kabuli_denovo | 37371972                | G/C  | NA                 | NA                            | NA                 |
| Kabuli_wild_37379322 | NA                                  | Ca_kabuli_denovo | 37379322                | G/T  | NA                 | NA                            | NA                 |
| Kabuli_wild_37379437 | NA                                  | Ca_kabuli_denovo | 37379437                | C/T  | NA                 | NA                            | NA                 |
| Kabuli_wild_37379512 | NA                                  | Ca_kabuli_denovo | 37379512                | G/T  | NA                 | NA                            | NA                 |
| Kabuli_wild_37381577 | NA                                  | Ca_kabuli_denovo | 37381577                | A/C  | NA                 | NA                            | NA                 |
| Kabuli_wild_37381595 | NA                                  | Ca_kabuli_denovo | 37381595                | C/A  | NA                 | NA                            | NA                 |
| Kabuli_wild_37386078 | NA                                  | Ca_kabuli_denovo | 37386078                | T/A  | NA                 | NA                            | NA                 |
| Kabuli_wild_37390238 | NA                                  | Ca_kabuli_denovo | 37390238                | C/T  | NA                 | NA                            | NA                 |
| Kabuli_wild_37391087 | NA                                  | Ca_kabuli_denovo | 37391087                | A/G  | NA                 | NA                            | NA                 |
| Kabuli_wild_37391117 | NA                                  | Ca_kabuli_denovo | 37391117                | A/C  | NA                 | NA                            | NA                 |
| Kabuli_wild_37394621 | NA                                  | Ca_kabuli_denovo | 37394621                | G/A  | NA                 | NA                            | NA                 |
| Kabuli_wild_37394977 | NA                                  | Ca_kabuli_denovo | 37394977                | C/T  | NA                 | NA                            | NA                 |
| Kabuli_wild_37397194 | NA                                  | Ca_kabuli_denovo | 37397194                | C/T  | NA                 | NA                            | NA                 |
| Kabuli_wild_37398711 | NA                                  | Ca_kabuli_denovo | 37398711                | C/G  | NA                 | NA                            | NA                 |
| Kabuli_wild_37398713 | NA                                  | Ca_kabuli_denovo | 37398713                | C/G  | NA                 | NA                            | NA                 |
| Kabuli_wild_37407386 | NA                                  | Ca_kabuli_denovo | 37407386                | C/T  | NA                 | NA                            | NA                 |
| Kabuli_wild_37411687 | NA                                  | Ca_kabuli_denovo | 37411687                | C/G  | NA                 | NA                            | NA                 |
| Kabuli_wild_37419188 | NA                                  | Ca_kabuli_denovo | 37419188                | C/G  | NA                 | NA                            | NA                 |
| Kabuli_wild_37419227 | NA                                  | Ca_kabuli_denovo | 37419227                | C/G  | NA                 | NA                            | NA                 |
| Kabuli_wild_37421300 | NA                                  | Ca_kabuli_denovo | 37421300                | G/A  | NA                 | NA                            | NA                 |
| Kabuli_wild_37421998 | NA                                  | Ca_kabuli_denovo | 37421998                | C/T  | NA                 | NA                            | NA                 |
| Kabuli_wild_37422137 | NA                                  | Ca_kabuli_denovo | 37422137                | A/C  | NA                 | NA                            | NA                 |
| Kabuli_wild_37424086 | NA                                  | Ca_kabuli_denovo | 37424086                | C/T  | NA                 | NA                            | NA                 |
| Kabuli_wild_37424095 | NA                                  | Ca_kabuli_denovo | 37424095                | C/G  | NA                 | NA                            | NA                 |
| Kabuli_wild_37427822 | NA                                  | Ca_kabuli_denovo | 37427822                | G/T  | NA                 | NA                            | NA                 |
| Kabuli_wild_37427825 | NA                                  | Ca_kabuli_denovo | 37427825                | G/A  | NA                 | NA                            | NA                 |
| Kabuli_wild_37427828 | NA                                  | Ca_kabuli_denovo | 37427828                | G/C  | NA                 | NA                            | NA                 |

| SNP IDs              | NCBI dbSNP accession IDs (NCBI_SS#) | Chromosomes      | Physical positions (bp) | SNPs | Gene accession IDs | Sequence components of genome | Putative functions |
|----------------------|-------------------------------------|------------------|-------------------------|------|--------------------|-------------------------------|--------------------|
| Kabuli_wild_37427852 | NA                                  | Ca_kabuli_denovo | 37427852                | T/C  | NA                 | NA                            | NA                 |
| Kabuli_wild_37433059 | NA                                  | Ca_kabuli_denovo | 37433059                | A/G  | NA                 | NA                            | NA                 |
| Kabuli_wild_37434591 | NA                                  | Ca_kabuli_denovo | 37434591                | G/T  | NA                 | NA                            | NA                 |
| Kabuli_wild_37435508 | NA                                  | Ca_kabuli_denovo | 37435508                | A/C  | NA                 | NA                            | NA                 |
| Kabuli_wild_37436249 | NA                                  | Ca_kabuli_denovo | 37436249                | A/C  | NA                 | NA                            | NA                 |
| Kabuli_wild_37436251 | NA                                  | Ca_kabuli_denovo | 37436251                | A/G  | NA                 | NA                            | NA                 |
| Kabuli_wild_37436473 | NA                                  | Ca_kabuli_denovo | 37436473                | C/T  | NA                 | NA                            | NA                 |
| Kabuli_wild_37436486 | NA                                  | Ca_kabuli_denovo | 37436486                | G/A  | NA                 | NA                            | NA                 |
| Kabuli_wild_37453155 | NA                                  | Ca_kabuli_denovo | 37453155                | T/G  | NA                 | NA                            | NA                 |
| Kabuli_wild_37453183 | NA                                  | Ca_kabuli_denovo | 37453183                | C/T  | NA                 | NA                            | NA                 |
| Kabuli_wild_37453223 | NA                                  | Ca_kabuli_denovo | 37453223                | A/G  | NA                 | NA                            | NA                 |
| Kabuli_wild_37453229 | NA                                  | Ca_kabuli_denovo | 37453229                | C/A  | NA                 | NA                            | NA                 |
| Kabuli_wild_37453237 | NA                                  | Ca_kabuli_denovo | 37453237                | A/C  | NA                 | NA                            | NA                 |
| Kabuli_wild_37453242 | NA                                  | Ca_kabuli_denovo | 37453242                | C/G  | NA                 | NA                            | NA                 |
| Kabuli_wild_37454278 | NA                                  | Ca_kabuli_denovo | 37454278                | C/T  | NA                 | NA                            | NA                 |
| Kabuli_wild_37454845 | NA                                  | Ca_kabuli_denovo | 37454845                | C/G  | NA                 | NA                            | NA                 |
| Kabuli_wild_37462563 | NA                                  | Ca_kabuli_denovo | 37462563                | G/A  | NA                 | NA                            | NA                 |
| Kabuli_wild_37462591 | NA                                  | Ca_kabuli_denovo | 37462591                | G/C  | NA                 | NA                            | NA                 |
| Kabuli_wild_37465766 | NA                                  | Ca_kabuli_denovo | 37465766                | G/C  | NA                 | NA                            | NA                 |
| Kabuli_wild_37468023 | NA                                  | Ca_kabuli_denovo | 37468023                | G/T  | NA                 | NA                            | NA                 |
| Kabuli_wild_37471572 | NA                                  | Ca_kabuli_denovo | 37471572                | G/T  | NA                 | NA                            | NA                 |
| Kabuli_wild_37472148 | NA                                  | Ca_kabuli_denovo | 37472148                | G/T  | NA                 | NA                            | NA                 |
| Kabuli_wild_37493623 | NA                                  | Ca_kabuli_denovo | 37493623                | T/A  | NA                 | NA                            | NA                 |
| Kabuli_wild_37494211 | NA                                  | Ca_kabuli_denovo | 37494211                | T/G  | NA                 | NA                            | NA                 |
| Kabuli_wild_37503546 | NA                                  | Ca_kabuli_denovo | 37503546                | G/T  | NA                 | NA                            | NA                 |
| Kabuli_wild_37512166 | NA                                  | Ca_kabuli_denovo | 37512166                | G/T  | NA                 | NA                            | NA                 |
| Kabuli_wild_37515642 | NA                                  | Ca_kabuli_denovo | 37515642                | G/T  | NA                 | NA                            | NA                 |
| Kabuli_wild_37516138 | NA                                  | Ca_kabuli_denovo | 37516138                | T/C  | NA                 | NA                            | NA                 |
| Kabuli_wild_37525915 | NA                                  | Ca_kabuli_denovo | 37525915                | G/T  | NA                 | NA                            | NA                 |
| Kabuli_wild_37529986 | NA                                  | Ca_kabuli_denovo | 37529986                | A/C  | NA                 | NA                            | NA                 |
| Kabuli_wild_37535569 | NA                                  | Ca_kabuli_denovo | 37535569                | A/G  | NA                 | NA                            | NA                 |
| Kabuli_wild_37535833 | NA                                  | Ca_kabuli_denovo | 37535833                | G/C  | NA                 | NA                            | NA                 |
| Kabuli_wild_37535858 | NA                                  | Ca_kabuli_denovo | 37535858                | A/G  | NA                 | NA                            | NA                 |
| Kabuli_wild_37542484 | NA                                  | Ca_kabuli_denovo | 37542484                | C/T  | NA                 | NA                            | NA                 |
| Kabuli_wild_37543096 | NA                                  | Ca_kabuli_denovo | 37543096                | A/C  | NA                 | NA                            | NA                 |
| Kabuli_wild_37545126 | NA                                  | Ca_kabuli_denovo | 37545126                | C/G  | NA                 | NA                            | NA                 |
| Kabuli_wild_37547870 | NA                                  | Ca_kabuli_denovo | 37547870                | A/C  | NA                 | NA                            | NA                 |
| Kabuli_wild_37554341 | NA                                  | Ca_kabuli_denovo | 37554341                | T/C  | NA                 | NA                            | NA                 |
| Kabuli_wild_37558795 | NA                                  | Ca_kabuli_denovo | 37558795                | G/C  | NA                 | NA                            | NA                 |
| Kabuli_wild_37558798 | NA                                  | Ca_kabuli_denovo | 37558798                | G/A  | NA                 | NA                            | NA                 |
| Kabuli_wild_37561705 | NA                                  | Ca_kabuli_denovo | 37561705                | A/G  | NA                 | NA                            | NA                 |
| Kabuli_wild_37561706 | NA                                  | Ca_kabuli_denovo | 37561706                | A/G  | NA                 | NA                            | NA                 |
| Kabuli_wild_37562437 | NA                                  | Ca_kabuli_denovo | 37562437                | G/T  | NA                 | NA                            | NA                 |
| Kabuli_wild_37564320 | NA                                  | Ca_kabuli_denovo | 37564320                | G/C  | NA                 | NA                            | NA                 |

| SNP IDs              | NCBI dbSNP accession IDs (NCBI_SS#) | Chromosomes      | Physical positions (bp) | SNPs | Gene accession IDs | Sequence components of genome | Putative functions |
|----------------------|-------------------------------------|------------------|-------------------------|------|--------------------|-------------------------------|--------------------|
| Kabuli_wild_37567760 | NA                                  | Ca_kabuli_denovo | 37567760                | T/C  | NA                 | NA                            | NA                 |
| Kabuli_wild_37575446 | NA                                  | Ca_kabuli_denovo | 37575446                | A/C  | NA                 | NA                            | NA                 |
| Kabuli_wild_37575449 | NA                                  | Ca_kabuli_denovo | 37575449                | C/T  | NA                 | NA                            | NA                 |
| Kabuli_wild_37576958 | NA                                  | Ca_kabuli_denovo | 37576958                | A/G  | NA                 | NA                            | NA                 |
| Kabuli_wild_37579550 | NA                                  | Ca_kabuli_denovo | 37579550                | A/G  | NA                 | NA                            | NA                 |
| Kabuli_wild_37579570 | NA                                  | Ca_kabuli_denovo | 37579570                | T/C  | NA                 | NA                            | NA                 |
| Kabuli_wild_37584002 | NA                                  | Ca_kabuli_denovo | 37584002                | A/G  | NA                 | NA                            | NA                 |
| Kabuli_wild_37584062 | NA                                  | Ca_kabuli_denovo | 37584062                | G/A  | NA                 | NA                            | NA                 |
| Kabuli_wild_37588235 | NA                                  | Ca_kabuli_denovo | 37588235                | C/G  | NA                 | NA                            | NA                 |
| Kabuli_wild_37588559 | NA                                  | Ca_kabuli_denovo | 37588559                | G/C  | NA                 | NA                            | NA                 |
| Kabuli_wild_37588577 | NA                                  | Ca_kabuli_denovo | 37588577                | T/G  | NA                 | NA                            | NA                 |
| Kabuli_wild_37590188 | NA                                  | Ca_kabuli_denovo | 37590188                | T/C  | NA                 | NA                            | NA                 |
| Kabuli_wild_37598845 | NA                                  | Ca_kabuli_denovo | 37598845                | G/A  | NA                 | NA                            | NA                 |
| Kabuli_wild_37610105 | NA                                  | Ca_kabuli_denovo | 37610105                | A/C  | NA                 | NA                            | NA                 |
| Kabuli_wild_37610106 | NA                                  | Ca_kabuli_denovo | 37610106                | G/C  | NA                 | NA                            | NA                 |
| Kabuli_wild_37610539 | NA                                  | Ca_kabuli_denovo | 37610539                | A/G  | NA                 | NA                            | NA                 |
| Kabuli_wild_37615877 | NA                                  | Ca_kabuli_denovo | 37615877                | G/A  | NA                 | NA                            | NA                 |
| Kabuli_wild_37615928 | NA                                  | Ca_kabuli_denovo | 37615928                | G/C  | NA                 | NA                            | NA                 |
| Kabuli_wild_37616576 | NA                                  | Ca_kabuli_denovo | 37616576                | C/T  | NA                 | NA                            | NA                 |
| Kabuli_wild_37616602 | NA                                  | Ca_kabuli_denovo | 37616602                | A/C  | NA                 | NA                            | NA                 |
| Kabuli_wild_37628968 | NA                                  | Ca_kabuli_denovo | 37628968                | A/G  | NA                 | NA                            | NA                 |
| Kabuli_wild_37638096 | NA                                  | Ca_kabuli_denovo | 37638096                | A/G  | NA                 | NA                            | NA                 |
| Kabuli_wild_37638097 | NA                                  | Ca_kabuli_denovo | 37638097                | A/G  | NA                 | NA                            | NA                 |
| Kabuli_wild_37647361 | NA                                  | Ca_kabuli_denovo | 37647361                | C/T  | NA                 | NA                            | NA                 |
| Kabuli_wild_37647364 | NA                                  | Ca_kabuli_denovo | 37647364                | C/T  | NA                 | NA                            | NA                 |
| Kabuli_wild_37647382 | NA                                  | Ca_kabuli_denovo | 37647382                | C/T  | NA                 | NA                            | NA                 |
| Kabuli_wild_37647393 | NA                                  | Ca_kabuli_denovo | 37647393                | A/C  | NA                 | NA                            | NA                 |
| Kabuli_wild_37654579 | NA                                  | Ca_kabuli_denovo | 37654579                | A/C  | NA                 | NA                            | NA                 |
| Kabuli_wild_37657118 | NA                                  | Ca_kabuli_denovo | 37657118                | C/G  | NA                 | NA                            | NA                 |
| Kabuli_wild_37657136 | NA                                  | Ca_kabuli_denovo | 37657136                | A/C  | NA                 | NA                            | NA                 |
| Kabuli_wild_37661025 | NA                                  | Ca_kabuli_denovo | 37661025                | C/T  | NA                 | NA                            | NA                 |
| Kabuli_wild_37664375 | NA                                  | Ca_kabuli_denovo | 37664375                | A/T  | NA                 | NA                            | NA                 |
| Kabuli_wild_37664396 | NA                                  | Ca_kabuli_denovo | 37664396                | G/A  | NA                 | NA                            | NA                 |
| Kabuli_wild_37667792 | NA                                  | Ca_kabuli_denovo | 37667792                | G/T  | NA                 | NA                            | NA                 |
| Kabuli_wild_37669357 | NA                                  | Ca_kabuli_denovo | 37669357                | A/G  | NA                 | NA                            | NA                 |
| Kabuli_wild_37669359 | NA                                  | Ca_kabuli_denovo | 37669359                | A/G  | NA                 | NA                            | NA                 |
| Kabuli_wild_37669364 | NA                                  | Ca_kabuli_denovo | 37669364                | G/C  | NA                 | NA                            | NA                 |
| Kabuli_wild_37669366 | NA                                  | Ca_kabuli_denovo | 37669366                | C/G  | NA                 | NA                            | NA                 |
| Kabuli_wild_37669367 | NA                                  | Ca_kabuli_denovo | 37669367                | A/C  | NA                 | NA                            | NA                 |
| Kabuli_wild_37669400 | NA                                  | Ca_kabuli_denovo | 37669400                | T/G  | NA                 | NA                            | NA                 |
| Kabuli_wild_37678502 | NA                                  | Ca_kabuli_denovo | 37678502                | T/G  | NA                 | NA                            | NA                 |
| Kabuli_wild_37683562 | NA                                  | Ca_kabuli_denovo | 37683562                | C/T  | NA                 | NA                            | NA                 |
| Kabuli_wild_37683565 | NA                                  | Ca_kabuli_denovo | 37683565                | T/G  | NA                 | NA                            | NA                 |
| Kabuli_wild_37688200 | NA                                  | Ca_kabuli_denovo | 37688200                | G/T  | NA                 | NA                            | NA                 |

| SNP IDs              | NCBI dbSNP accession IDs (NCBI_SS#) | Chromosomes      | Physical positions (bp) | SNPs | Gene accession IDs | Sequence components of genome | Putative functions |
|----------------------|-------------------------------------|------------------|-------------------------|------|--------------------|-------------------------------|--------------------|
| Kabuli_wild_37688251 | NA                                  | Ca_kabuli_denovo | 37688251                | G/T  | NA                 | NA                            | NA                 |
| Kabuli_wild_37691783 | NA                                  | Ca_kabuli_denovo | 37691783                | C/G  | NA                 | NA                            | NA                 |
| Kabuli_wild_37692598 | NA                                  | Ca_kabuli_denovo | 37692598                | G/A  | NA                 | NA                            | NA                 |
| Kabuli_wild_37692604 | NA                                  | Ca_kabuli_denovo | 37692604                | A/G  | NA                 | NA                            | NA                 |
| Kabuli_wild_37696229 | NA                                  | Ca_kabuli_denovo | 37696229                | G/A  | NA                 | NA                            | NA                 |
| Kabuli_wild_37696234 | NA                                  | Ca_kabuli_denovo | 37696234                | C/G  | NA                 | NA                            | NA                 |
| Kabuli_wild_37697754 | NA                                  | Ca_kabuli_denovo | 37697754                | A/C  | NA                 | NA                            | NA                 |
| Kabuli_wild_37697755 | NA                                  | Ca_kabuli_denovo | 37697755                | C/G  | NA                 | NA                            | NA                 |
| Kabuli_wild_37703523 | NA                                  | Ca_kabuli_denovo | 37703523                | G/A  | NA                 | NA                            | NA                 |
| Kabuli_wild_37703589 | NA                                  | Ca_kabuli_denovo | 37703589                | A/G  | NA                 | NA                            | NA                 |
| Kabuli_wild_37704762 | NA                                  | Ca_kabuli_denovo | 37704762                | A/C  | NA                 | NA                            | NA                 |
| Kabuli_wild_37704763 | NA                                  | Ca_kabuli_denovo | 37704763                | A/G  | NA                 | NA                            | NA                 |
| Kabuli_wild_37706042 | NA                                  | Ca_kabuli_denovo | 37706042                | T/C  | NA                 | NA                            | NA                 |
| Kabuli_wild_37706089 | NA                                  | Ca_kabuli_denovo | 37706089                | C/T  | NA                 | NA                            | NA                 |
| Kabuli_wild_37706098 | NA                                  | Ca_kabuli_denovo | 37706098                | C/G  | NA                 | NA                            | NA                 |
| Kabuli_wild_37707165 | NA                                  | Ca_kabuli_denovo | 37707165                | T/A  | NA                 | NA                            | NA                 |
| Kabuli_wild_37707200 | NA                                  | Ca_kabuli_denovo | 37707200                | C/T  | NA                 | NA                            | NA                 |
| Kabuli_wild_37709233 | NA                                  | Ca_kabuli_denovo | 37709233                | T/G  | NA                 | NA                            | NA                 |
| Kabuli_wild_37712092 | NA                                  | Ca_kabuli_denovo | 37712092                | T/C  | NA                 | NA                            | NA                 |
| Kabuli_wild_37712116 | NA                                  | Ca_kabuli_denovo | 37712116                | G/C  | NA                 | NA                            | NA                 |
| Kabuli_wild_37713037 | NA                                  | Ca_kabuli_denovo | 37713037                | A/C  | NA                 | NA                            | NA                 |
| Kabuli_wild_37720812 | NA                                  | Ca_kabuli_denovo | 37720812                | A/C  | NA                 | NA                            | NA                 |
| Kabuli_wild_37721601 | NA                                  | Ca_kabuli_denovo | 37721601                | A/G  | NA                 | NA                            | NA                 |
| Kabuli_wild_37721616 | NA                                  | Ca_kabuli_denovo | 37721616                | G/C  | NA                 | NA                            | NA                 |
| Kabuli_wild_37722234 | NA                                  | Ca_kabuli_denovo | 37722234                | A/C  | NA                 | NA                            | NA                 |
| Kabuli_wild_37722466 | NA                                  | Ca_kabuli_denovo | 37722466                | T/G  | NA                 | NA                            | NA                 |
| Kabuli_wild_37722593 | NA                                  | Ca_kabuli_denovo | 37722593                | G/A  | NA                 | NA                            | NA                 |
| Kabuli_wild_37726484 | NA                                  | Ca_kabuli_denovo | 37726484                | T/G  | NA                 | NA                            | NA                 |
| Kabuli_wild_37729463 | NA                                  | Ca_kabuli_denovo | 37729463                | G/A  | NA                 | NA                            | NA                 |
| Kabuli_wild_37733228 | NA                                  | Ca_kabuli_denovo | 37733228                | G/T  | NA                 | NA                            | NA                 |
| Kabuli_wild_37735509 | NA                                  | Ca_kabuli_denovo | 37735509                | C/G  | NA                 | NA                            | NA                 |
| Kabuli_wild_37735512 | NA                                  | Ca_kabuli_denovo | 37735512                | C/T  | NA                 | NA                            | NA                 |
| Kabuli_wild_37740582 | NA                                  | Ca_kabuli_denovo | 37740582                | C/A  | NA                 | NA                            | NA                 |
| Kabuli_wild_37743268 | NA                                  | Ca_kabuli_denovo | 37743268                | C/G  | NA                 | NA                            | NA                 |
| Kabuli_wild_37743514 | NA                                  | Ca_kabuli_denovo | 37743514                | C/G  | NA                 | NA                            | NA                 |
| Kabuli_wild_37756646 | NA                                  | Ca_kabuli_denovo | 37756646                | C/G  | NA                 | NA                            | NA                 |
| Kabuli_wild_37756685 | NA                                  | Ca_kabuli_denovo | 37756685                | A/G  | NA                 | NA                            | NA                 |
| Kabuli_wild_37756708 | NA                                  | Ca_kabuli_denovo | 37756708                | A/C  | NA                 | NA                            | NA                 |
| Kabuli_wild_37756732 | NA                                  | Ca_kabuli_denovo | 37756732                | C/G  | NA                 | NA                            | NA                 |
| Kabuli_wild_37757710 | NA                                  | Ca_kabuli_denovo | 37757710                | G/T  | NA                 | NA                            | NA                 |
| Kabuli_wild_37758547 | NA                                  | Ca_kabuli_denovo | 37758547                | T/C  | NA                 | NA                            | NA                 |
| Kabuli_wild_37758553 | NA                                  | Ca_kabuli_denovo | 37758553                | C/T  | NA                 | NA                            | NA                 |
| Kabuli_wild_37758589 | NA                                  | Ca_kabuli_denovo | 37758589                | T/C  | NA                 | NA                            | NA                 |
| Kabuli_wild_37763840 | NA                                  | Ca_kabuli_denovo | 37763840                | G/C  | NA                 | NA                            | NA                 |

| SNP IDs              | NCBI dbSNP accession IDs (NCBI_SS#) | Chromosomes      | Physical positions (bp) | SNPs | Gene accession IDs | Sequence components of genome | Putative functions |
|----------------------|-------------------------------------|------------------|-------------------------|------|--------------------|-------------------------------|--------------------|
| Kabuli_wild_37764185 | NA                                  | Ca_kabuli_denovo | 37764185                | G/T  | NA                 | NA                            | NA                 |
| Kabuli_wild_37766328 | NA                                  | Ca_kabuli_denovo | 37766328                | A/G  | NA                 | NA                            | NA                 |
| Kabuli_wild_37766383 | NA                                  | Ca_kabuli_denovo | 37766383                | C/G  | NA                 | NA                            | NA                 |
| Kabuli_wild_37766395 | NA                                  | Ca_kabuli_denovo | 37766395                | A/C  | NA                 | NA                            | NA                 |
| Kabuli_wild_37767546 | NA                                  | Ca_kabuli_denovo | 37767546                | C/G  | NA                 | NA                            | NA                 |
| Kabuli_wild_37769240 | NA                                  | Ca_kabuli_denovo | 37769240                | C/T  | NA                 | NA                            | NA                 |
| Kabuli_wild_37771048 | NA                                  | Ca_kabuli_denovo | 37771048                | A/G  | NA                 | NA                            | NA                 |
| Kabuli_wild_37771592 | NA                                  | Ca_kabuli_denovo | 37771592                | C/T  | NA                 | NA                            | NA                 |
| Kabuli_wild_37771637 | NA                                  | Ca_kabuli_denovo | 37771637                | T/C  | NA                 | NA                            | NA                 |
| Kabuli_wild_37771955 | NA                                  | Ca_kabuli_denovo | 37771955                | C/A  | NA                 | NA                            | NA                 |
| Kabuli_wild_37778368 | NA                                  | Ca_kabuli_denovo | 37778368                | G/T  | NA                 | NA                            | NA                 |
| Kabuli_wild_37781291 | NA                                  | Ca_kabuli_denovo | 37781291                | G/A  | NA                 | NA                            | NA                 |
| Kabuli_wild_37784280 | NA                                  | Ca_kabuli_denovo | 37784280                | G/T  | NA                 | NA                            | NA                 |
| Kabuli_wild_37784296 | NA                                  | Ca_kabuli_denovo | 37784296                | G/T  | NA                 | NA                            | NA                 |
| Kabuli_wild_37789074 | NA                                  | Ca_kabuli_denovo | 37789074                | C/T  | NA                 | NA                            | NA                 |
| Kabuli_wild_37790101 | NA                                  | Ca_kabuli_denovo | 37790101                | A/G  | NA                 | NA                            | NA                 |
| Kabuli_wild_37791059 | NA                                  | Ca_kabuli_denovo | 37791059                | G/T  | NA                 | NA                            | NA                 |
| Kabuli_wild_37796731 | NA                                  | Ca_kabuli_denovo | 37796731                | G/T  | NA                 | NA                            | NA                 |
| Kabuli_wild_37799873 | NA                                  | Ca_kabuli_denovo | 37799873                | G/T  | NA                 | NA                            | NA                 |
| Kabuli_wild_37804217 | NA                                  | Ca_kabuli_denovo | 37804217                | A/C  | NA                 | NA                            | NA                 |
| Kabuli_wild_37807288 | NA                                  | Ca_kabuli_denovo | 37807288                | G/T  | NA                 | NA                            | NA                 |
| Kabuli_wild_37820058 | NA                                  | Ca_kabuli_denovo | 37820058                | A/C  | NA                 | NA                            | NA                 |
| Kabuli_wild_37820059 | NA                                  | Ca_kabuli_denovo | 37820059                | G/T  | NA                 | NA                            | NA                 |
| Kabuli_wild_37822282 | NA                                  | Ca_kabuli_denovo | 37822282                | G/C  | NA                 | NA                            | NA                 |
| Kabuli_wild_37822288 | NA                                  | Ca_kabuli_denovo | 37822288                | G/C  | NA                 | NA                            | NA                 |
| Kabuli_wild_37826779 | NA                                  | Ca_kabuli_denovo | 37826779                | C/G  | NA                 | NA                            | NA                 |
| Kabuli_wild_37833015 | NA                                  | Ca_kabuli_denovo | 37833015                | A/T  | NA                 | NA                            | NA                 |
| Kabuli_wild_37853890 | NA                                  | Ca_kabuli_denovo | 37853890                | A/G  | NA                 | NA                            | NA                 |
| Kabuli_wild_37862565 | NA                                  | Ca_kabuli_denovo | 37862565                | T/C  | NA                 | NA                            | NA                 |
| Kabuli_wild_37862902 | NA                                  | Ca_kabuli_denovo | 37862902                | G/T  | NA                 | NA                            | NA                 |
| Kabuli_wild_37863188 | NA                                  | Ca_kabuli_denovo | 37863188                | G/A  | NA                 | NA                            | NA                 |
| Kabuli_wild_37863374 | NA                                  | Ca_kabuli_denovo | 37863374                | T/C  | NA                 | NA                            | NA                 |
| Kabuli_wild_37864299 | NA                                  | Ca_kabuli_denovo | 37864299                | C/G  | NA                 | NA                            | NA                 |
| Kabuli_wild_37867520 | NA                                  | Ca_kabuli_denovo | 37867520                | A/G  | NA                 | NA                            | NA                 |
| Kabuli_wild_37867540 | NA                                  | Ca_kabuli_denovo | 37867540                | C/T  | NA                 | NA                            | NA                 |
| Kabuli_wild_37879702 | NA                                  | Ca_kabuli_denovo | 37879702                | T/C  | NA                 | NA                            | NA                 |
| Kabuli_wild_37882639 | NA                                  | Ca_kabuli_denovo | 37882639                | G/C  | NA                 | NA                            | NA                 |
| Kabuli_wild_37883407 | NA                                  | Ca_kabuli_denovo | 37883407                | A/G  | NA                 | NA                            | NA                 |
| Kabuli_wild_37883408 | NA                                  | Ca_kabuli_denovo | 37883408                | G/A  | NA                 | NA                            | NA                 |
| Kabuli_wild_37883414 | NA                                  | Ca_kabuli_denovo | 37883414                | A/G  | NA                 | NA                            | NA                 |
| Kabuli_wild_37884580 | NA                                  | Ca_kabuli_denovo | 37884580                | T/C  | NA                 | NA                            | NA                 |
| Kabuli_wild_37884628 | NA                                  | Ca_kabuli_denovo | 37884628                | G/A  | NA                 | NA                            | NA                 |
| Kabuli_wild_37885241 | NA                                  | Ca_kabuli_denovo | 37885241                | A/C  | NA                 | NA                            | NA                 |
| Kabuli_wild_37894450 | NA                                  | Ca_kabuli_denovo | 37894450                | G/C  | NA                 | NA                            | NA                 |

| SNP IDs              | NCBI dbSNP accession IDs (NCBI_SS#) | Chromosomes      | Physical positions (bp) | SNPs | Gene accession IDs | Sequence components of genome | Putative functions |
|----------------------|-------------------------------------|------------------|-------------------------|------|--------------------|-------------------------------|--------------------|
| Kabuli_wild_37902285 | NA                                  | Ca_kabuli_denovo | 37902285                | T/C  | NA                 | NA                            | NA                 |
| Kabuli_wild_37902327 | NA                                  | Ca_kabuli_denovo | 37902327                | C/T  | NA                 | NA                            | NA                 |
| Kabuli_wild_37902732 | NA                                  | Ca_kabuli_denovo | 37902732                | A/C  | NA                 | NA                            | NA                 |
| Kabuli_wild_37904059 | NA                                  | Ca_kabuli_denovo | 37904059                | T/G  | NA                 | NA                            | NA                 |
| Kabuli_wild_37908102 | NA                                  | Ca_kabuli_denovo | 37908102                | G/T  | NA                 | NA                            | NA                 |
| Kabuli_wild_37908110 | NA                                  | Ca_kabuli_denovo | 37908110                | A/G  | NA                 | NA                            | NA                 |
| Kabuli_wild_37908151 | NA                                  | Ca_kabuli_denovo | 37908151                | C/A  | NA                 | NA                            | NA                 |
| Kabuli_wild_37912258 | NA                                  | Ca_kabuli_denovo | 37912258                | G/C  | NA                 | NA                            | NA                 |
| Kabuli_wild_37912259 | NA                                  | Ca_kabuli_denovo | 37912259                | A/G  | NA                 | NA                            | NA                 |
| Kabuli_wild_37920991 | NA                                  | Ca_kabuli_denovo | 37920991                | C/G  | NA                 | NA                            | NA                 |
| Kabuli_wild_37921027 | NA                                  | Ca_kabuli_denovo | 37921027                | C/T  | NA                 | NA                            | NA                 |
| Kabuli_wild_37922062 | NA                                  | Ca_kabuli_denovo | 37922062                | C/T  | NA                 | NA                            | NA                 |
| Kabuli_wild_37928182 | NA                                  | Ca_kabuli_denovo | 37928182                | C/T  | NA                 | NA                            | NA                 |
| Kabuli_wild_37928195 | NA                                  | Ca_kabuli_denovo | 37928195                | G/A  | NA                 | NA                            | NA                 |
| Kabuli_wild_37929298 | NA                                  | Ca_kabuli_denovo | 37929298                | C/T  | NA                 | NA                            | NA                 |
| Kabuli_wild_37934898 | NA                                  | Ca_kabuli_denovo | 37934898                | G/C  | NA                 | NA                            | NA                 |
| Kabuli_wild_37934929 | NA                                  | Ca_kabuli_denovo | 37934929                | T/C  | NA                 | NA                            | NA                 |
| Kabuli_wild_37940998 | NA                                  | Ca_kabuli_denovo | 37940998                | C/T  | NA                 | NA                            | NA                 |
| Kabuli_wild_37941015 | NA                                  | Ca_kabuli_denovo | 37941015                | G/T  | NA                 | NA                            | NA                 |
| Kabuli_wild_37941018 | NA                                  | Ca_kabuli_denovo | 37941018                | C/G  | NA                 | NA                            | NA                 |
| Kabuli_wild_37941019 | NA                                  | Ca_kabuli_denovo | 37941019                | C/T  | NA                 | NA                            | NA                 |
| Kabuli_wild_37944196 | NA                                  | Ca_kabuli_denovo | 37944196                | C/T  | NA                 | NA                            | NA                 |
| Kabuli_wild_37944775 | NA                                  | Ca_kabuli_denovo | 37944775                | A/G  | NA                 | NA                            | NA                 |
| Kabuli_wild_37944802 | NA                                  | Ca_kabuli_denovo | 37944802                | C/T  | NA                 | NA                            | NA                 |
| Kabuli_wild_37945294 | NA                                  | Ca_kabuli_denovo | 37945294                | G/C  | NA                 | NA                            | NA                 |
| Kabuli_wild_37946275 | NA                                  | Ca_kabuli_denovo | 37946275                | C/G  | NA                 | NA                            | NA                 |
| Kabuli_wild_37962824 | NA                                  | Ca_kabuli_denovo | 37962824                | A/G  | NA                 | NA                            | NA                 |
| Kabuli_wild_37962847 | NA                                  | Ca_kabuli_denovo | 37962847                | G/A  | NA                 | NA                            | NA                 |
| Kabuli_wild_37969360 | NA                                  | Ca_kabuli_denovo | 37969360                | C/T  | NA                 | NA                            | NA                 |
| Kabuli_wild_37969382 | NA                                  | Ca_kabuli_denovo | 37969382                | A/G  | NA                 | NA                            | NA                 |
| Kabuli_wild_37969435 | NA                                  | Ca_kabuli_denovo | 37969435                | G/T  | NA                 | NA                            | NA                 |
| Kabuli_wild_37974042 | NA                                  | Ca_kabuli_denovo | 37974042                | A/G  | NA                 | NA                            | NA                 |
| Kabuli_wild_37983223 | NA                                  | Ca_kabuli_denovo | 37983223                | T/C  | NA                 | NA                            | NA                 |
| Kabuli_wild_37988972 | NA                                  | Ca_kabuli_denovo | 37988972                | C/T  | NA                 | NA                            | NA                 |
| Kabuli_wild_37994065 | NA                                  | Ca_kabuli_denovo | 37994065                | A/G  | NA                 | NA                            | NA                 |
| Kabuli_wild_37994066 | NA                                  | Ca_kabuli_denovo | 37994066                | A/G  | NA                 | NA                            | NA                 |
| Kabuli_wild_37997123 | NA                                  | Ca_kabuli_denovo | 37997123                | C/T  | NA                 | NA                            | NA                 |
| Kabuli_wild_37997126 | NA                                  | Ca_kabuli_denovo | 37997126                | A/G  | NA                 | NA                            | NA                 |
| Kabuli_wild_37998552 | NA                                  | Ca_kabuli_denovo | 37998552                | T/C  | NA                 | NA                            | NA                 |
| Kabuli_wild_37999767 | NA                                  | Ca_kabuli_denovo | 37999767                | T/C  | NA                 | NA                            | NA                 |
| Kabuli_wild_38018921 | NA                                  | Ca_kabuli_denovo | 38018921                | T/G  | NA                 | NA                            | NA                 |
| Kabuli_wild_38020433 | NA                                  | Ca_kabuli_denovo | 38020433                | C/T  | NA                 | NA                            | NA                 |
| Kabuli_wild_38020439 | NA                                  | Ca_kabuli_denovo | 38020439                | G/A  | NA                 | NA                            | NA                 |
| Kabuli_wild_38020454 | NA                                  | Ca_kabuli_denovo | 38020454                | A/G  | NA                 | NA                            | NA                 |

| SNP IDs              | NCBI dbSNP accession IDs (NCBI_SS#) | Chromosomes      | Physical positions (bp) | SNPs | Gene accession IDs | Sequence components of genome | Putative functions |
|----------------------|-------------------------------------|------------------|-------------------------|------|--------------------|-------------------------------|--------------------|
| Kabuli_wild_38032315 | NA                                  | Ca_kabuli_denovo | 38032315                | A/C  | NA                 | NA                            | NA                 |
| Kabuli_wild_38036330 | NA                                  | Ca_kabuli_denovo | 38036330                | G/C  | NA                 | NA                            | NA                 |
| Kabuli_wild_38039635 | NA                                  | Ca_kabuli_denovo | 38039635                | C/T  | NA                 | NA                            | NA                 |
| Kabuli_wild_38041611 | NA                                  | Ca_kabuli_denovo | 38041611                | C/T  | NA                 | NA                            | NA                 |
| Kabuli_wild_38043834 | NA                                  | Ca_kabuli_denovo | 38043834                | G/T  | NA                 | NA                            | NA                 |
| Kabuli_wild_38046507 | NA                                  | Ca_kabuli_denovo | 38046507                | T/G  | NA                 | NA                            | NA                 |
| Kabuli_wild_38047377 | NA                                  | Ca_kabuli_denovo | 38047377                | G/A  | NA                 | NA                            | NA                 |
| Kabuli_wild_38064401 | NA                                  | Ca_kabuli_denovo | 38064401                | A/G  | NA                 | NA                            | NA                 |
| Kabuli_wild_38070903 | NA                                  | Ca_kabuli_denovo | 38070903                | T/G  | NA                 | NA                            | NA                 |
| Kabuli_wild_38073686 | NA                                  | Ca_kabuli_denovo | 38073686                | A/G  | NA                 | NA                            | NA                 |
| Kabuli_wild_38080313 | NA                                  | Ca_kabuli_denovo | 38080313                | G/T  | NA                 | NA                            | NA                 |
| Kabuli_wild_38081746 | NA                                  | Ca_kabuli_denovo | 38081746                | C/G  | NA                 | NA                            | NA                 |
| Kabuli_wild_38091519 | NA                                  | Ca_kabuli_denovo | 38091519                | T/C  | NA                 | NA                            | NA                 |
| Kabuli_wild_38091529 | NA                                  | Ca_kabuli_denovo | 38091529                | G/C  | NA                 | NA                            | NA                 |
| Kabuli_wild_38093665 | NA                                  | Ca_kabuli_denovo | 38093665                | T/C  | NA                 | NA                            | NA                 |
| Kabuli_wild_38093674 | NA                                  | Ca_kabuli_denovo | 38093674                | C/G  | NA                 | NA                            | NA                 |
| Kabuli_wild_38093680 | NA                                  | Ca_kabuli_denovo | 38093680                | G/A  | NA                 | NA                            | NA                 |
| Kabuli_wild_38100201 | NA                                  | Ca_kabuli_denovo | 38100201                | A/G  | NA                 | NA                            | NA                 |
| Kabuli_wild_38100210 | NA                                  | Ca_kabuli_denovo | 38100210                | T/C  | NA                 | NA                            | NA                 |
| Kabuli_wild_38100302 | NA                                  | Ca_kabuli_denovo | 38100302                | G/A  | NA                 | NA                            | NA                 |
| Kabuli_wild_38102707 | NA                                  | Ca_kabuli_denovo | 38102707                | C/G  | NA                 | NA                            | NA                 |
| Kabuli_wild_38102759 | NA                                  | Ca_kabuli_denovo | 38102759                | G/A  | NA                 | NA                            | NA                 |
| Kabuli_wild_38111041 | NA                                  | Ca_kabuli_denovo | 38111041                | G/A  | NA                 | NA                            | NA                 |
| Kabuli_wild_38111062 | NA                                  | Ca_kabuli_denovo | 38111062                | A/G  | NA                 | NA                            | NA                 |
| Kabuli_wild_38111081 | NA                                  | Ca_kabuli_denovo | 38111081                | G/T  | NA                 | NA                            | NA                 |
| Kabuli_wild_38111128 | NA                                  | Ca_kabuli_denovo | 38111128                | A/G  | NA                 | NA                            | NA                 |
| Kabuli_wild_38117912 | NA                                  | Ca_kabuli_denovo | 38117912                | T/C  | NA                 | NA                            | NA                 |
| Kabuli_wild_38117919 | NA                                  | Ca_kabuli_denovo | 38117919                | A/G  | NA                 | NA                            | NA                 |
| Kabuli_wild_38118614 | NA                                  | Ca_kabuli_denovo | 38118614                | G/T  | NA                 | NA                            | NA                 |
| Kabuli_wild_38118619 | NA                                  | Ca_kabuli_denovo | 38118619                | C/G  | NA                 | NA                            | NA                 |
| Kabuli_wild_38123140 | NA                                  | Ca_kabuli_denovo | 38123140                | C/T  | NA                 | NA                            | NA                 |
| Kabuli_wild_38123182 | NA                                  | Ca_kabuli_denovo | 38123182                | T/C  | NA                 | NA                            | NA                 |
| Kabuli_wild_38123185 | NA                                  | Ca_kabuli_denovo | 38123185                | A/G  | NA                 | NA                            | NA                 |
| Kabuli_wild_38123215 | NA                                  | Ca_kabuli_denovo | 38123215                | T/G  | NA                 | NA                            | NA                 |
| Kabuli_wild_38123788 | NA                                  | Ca_kabuli_denovo | 38123788                | C/A  | NA                 | NA                            | NA                 |
| Kabuli_wild_38126816 | NA                                  | Ca_kabuli_denovo | 38126816                | T/C  | NA                 | NA                            | NA                 |
| Kabuli_wild_38134877 | NA                                  | Ca_kabuli_denovo | 38134877                | G/A  | NA                 | NA                            | NA                 |
| Kabuli_wild_38135360 | NA                                  | Ca_kabuli_denovo | 38135360                | C/T  | NA                 | NA                            | NA                 |
| Kabuli_wild_38136235 | NA                                  | Ca_kabuli_denovo | 38136235                | G/A  | NA                 | NA                            | NA                 |
| Kabuli_wild_38136625 | NA                                  | Ca_kabuli_denovo | 38136625                | C/T  | NA                 | NA                            | NA                 |
| Kabuli_wild_38136658 | NA                                  | Ca_kabuli_denovo | 38136658                | C/G  | NA                 | NA                            | NA                 |
| Kabuli_wild_38139898 | NA                                  | Ca_kabuli_denovo | 38139898                | G/T  | NA                 | NA                            | NA                 |
| Kabuli_wild_38142169 | NA                                  | Ca_kabuli_denovo | 38142169                | G/C  | NA                 | NA                            | NA                 |
| Kabuli_wild_38144583 | NA                                  | Ca_kabuli_denovo | 38144583                | T/G  | NA                 | NA                            | NA                 |

| SNP IDs              | NCBI dbSNP accession IDs (NCBI_SS#) | Chromosomes      | Physical positions (bp) | SNPs | Gene accession IDs | Sequence components of genome | Putative functions |
|----------------------|-------------------------------------|------------------|-------------------------|------|--------------------|-------------------------------|--------------------|
| Kabuli_wild_38146479 | NA                                  | Ca_kabuli_denovo | 38146479                | G/T  | NA                 | NA                            | NA                 |
| Kabuli_wild_38146514 | NA                                  | Ca_kabuli_denovo | 38146514                | A/C  | NA                 | NA                            | NA                 |
| Kabuli_wild_38155410 | NA                                  | Ca_kabuli_denovo | 38155410                | A/G  | NA                 | NA                            | NA                 |
| Kabuli_wild_38155438 | NA                                  | Ca_kabuli_denovo | 38155438                | A/G  | NA                 | NA                            | NA                 |
| Kabuli_wild_38155771 | NA                                  | Ca_kabuli_denovo | 38155771                | A/C  | NA                 | NA                            | NA                 |
| Kabuli_wild_38157259 | NA                                  | Ca_kabuli_denovo | 38157259                | T/C  | NA                 | NA                            | NA                 |
| Kabuli_wild_38161730 | NA                                  | Ca_kabuli_denovo | 38161730                | A/T  | NA                 | NA                            | NA                 |
| Kabuli_wild_38161750 | NA                                  | Ca_kabuli_denovo | 38161750                | C/T  | NA                 | NA                            | NA                 |
| Kabuli_wild_38162092 | NA                                  | Ca_kabuli_denovo | 38162092                | C/T  | NA                 | NA                            | NA                 |
| Kabuli_wild_38167814 | NA                                  | Ca_kabuli_denovo | 38167814                | A/G  | NA                 | NA                            | NA                 |
| Kabuli_wild_38169257 | NA                                  | Ca_kabuli_denovo | 38169257                | T/A  | NA                 | NA                            | NA                 |
| Kabuli_wild_38171443 | NA                                  | Ca_kabuli_denovo | 38171443                | G/C  | NA                 | NA                            | NA                 |
| Kabuli_wild_38171984 | NA                                  | Ca_kabuli_denovo | 38171984                | G/T  | NA                 | NA                            | NA                 |
| Kabuli_wild_38173643 | NA                                  | Ca_kabuli_denovo | 38173643                | A/G  | NA                 | NA                            | NA                 |
| Kabuli_wild_38173714 | NA                                  | Ca_kabuli_denovo | 38173714                | A/G  | NA                 | NA                            | NA                 |
| Kabuli_wild_38175182 | NA                                  | Ca_kabuli_denovo | 38175182                | C/T  | NA                 | NA                            | NA                 |
| Kabuli_wild_38175216 | NA                                  | Ca_kabuli_denovo | 38175216                | C/T  | NA                 | NA                            | NA                 |
| Kabuli_wild_38175251 | NA                                  | Ca_kabuli_denovo | 38175251                | G/T  | NA                 | NA                            | NA                 |
| Kabuli_wild_38177081 | NA                                  | Ca_kabuli_denovo | 38177081                | A/C  | NA                 | NA                            | NA                 |
| Kabuli_wild_38185514 | NA                                  | Ca_kabuli_denovo | 38185514                | T/C  | NA                 | NA                            | NA                 |
| Kabuli_wild_38185526 | NA                                  | Ca_kabuli_denovo | 38185526                | A/C  | NA                 | NA                            | NA                 |
| Kabuli_wild_38187413 | NA                                  | Ca_kabuli_denovo | 38187413                | G/T  | NA                 | NA                            | NA                 |
| Kabuli_wild_38192260 | NA                                  | Ca_kabuli_denovo | 38192260                | A/G  | NA                 | NA                            | NA                 |
| Kabuli_wild_38192302 | NA                                  | Ca_kabuli_denovo | 38192302                | C/G  | NA                 | NA                            | NA                 |
| Kabuli_wild_38198159 | NA                                  | Ca_kabuli_denovo | 38198159                | C/T  | NA                 | NA                            | NA                 |
| Kabuli_wild_38200652 | NA                                  | Ca_kabuli_denovo | 38200652                | A/G  | NA                 | NA                            | NA                 |
| Kabuli_wild_38201941 | NA                                  | Ca_kabuli_denovo | 38201941                | T/C  | NA                 | NA                            | NA                 |
| Kabuli_wild_38201944 | NA                                  | Ca_kabuli_denovo | 38201944                | C/T  | NA                 | NA                            | NA                 |
| Kabuli_wild_38208379 | NA                                  | Ca_kabuli_denovo | 38208379                | G/T  | NA                 | NA                            | NA                 |
| Kabuli_wild_38216443 | NA                                  | Ca_kabuli_denovo | 38216443                | C/T  | NA                 | NA                            | NA                 |
| Kabuli_wild_38221272 | NA                                  | Ca_kabuli_denovo | 38221272                | G/C  | NA                 | NA                            | NA                 |
| Kabuli_wild_38221287 | NA                                  | Ca_kabuli_denovo | 38221287                | A/C  | NA                 | NA                            | NA                 |
| Kabuli_wild_38226673 | NA                                  | Ca_kabuli_denovo | 38226673                | T/G  | NA                 | NA                            | NA                 |
| Kabuli_wild_38228325 | NA                                  | Ca_kabuli_denovo | 38228325                | C/G  | NA                 | NA                            | NA                 |
| Kabuli_wild_38228331 | NA                                  | Ca_kabuli_denovo | 38228331                | C/G  | NA                 | NA                            | NA                 |
| Kabuli_wild_38231063 | NA                                  | Ca_kabuli_denovo | 38231063                | G/A  | NA                 | NA                            | NA                 |
| Kabuli_wild_38231068 | NA                                  | Ca_kabuli_denovo | 38231068                | T/C  | NA                 | NA                            | NA                 |
| Kabuli_wild_38237986 | NA                                  | Ca_kabuli_denovo | 38237986                | G/T  | NA                 | NA                            | NA                 |
| Kabuli_wild_38244127 | NA                                  | Ca_kabuli_denovo | 38244127                | C/G  | NA                 | NA                            | NA                 |
| Kabuli_wild_38244128 | NA                                  | Ca_kabuli_denovo | 38244128                | C/G  | NA                 | NA                            | NA                 |
| Kabuli_wild_38244145 | NA                                  | Ca_kabuli_denovo | 38244145                | A/G  | NA                 | NA                            | NA                 |
| Kabuli_wild_38244155 | NA                                  | Ca_kabuli_denovo | 38244155                | A/T  | NA                 | NA                            | NA                 |
| Kabuli_wild_38251091 | NA                                  | Ca_kabuli_denovo | 38251091                | G/T  | NA                 | NA                            | NA                 |
| Kabuli_wild_38269263 | NA                                  | Ca_kabuli_denovo | 38269263                | T/C  | NA                 | NA                            | NA                 |



| SNP IDs              | NCBI dbSNP accession IDs (NCBI_SS#) | Chromosomes      | Physical positions (bp) | SNPs | Gene accession IDs | Sequence components of genome | Putative functions |
|----------------------|-------------------------------------|------------------|-------------------------|------|--------------------|-------------------------------|--------------------|
| Kabuli_wild_38269266 | NA                                  | Ca_kabuli_denovo | 38269266                | G/A  | NA                 | NA                            | NA                 |
| Kabuli_wild_38272609 | NA                                  | Ca_kabuli_denovo | 38272609                | A/G  | NA                 | NA                            | NA                 |
| Kabuli_wild_38280929 | NA                                  | Ca_kabuli_denovo | 38280929                | G/A  | NA                 | NA                            | NA                 |
| Kabuli_wild_38283936 | NA                                  | Ca_kabuli_denovo | 38283936                | G/A  | NA                 | NA                            | NA                 |
| Kabuli_wild_38283974 | NA                                  | Ca_kabuli_denovo | 38283974                | C/A  | NA                 | NA                            | NA                 |
| Kabuli_wild_38286562 | NA                                  | Ca_kabuli_denovo | 38286562                | C/T  | NA                 | NA                            | NA                 |
| Kabuli_wild_38286569 | NA                                  | Ca_kabuli_denovo | 38286569                | T/G  | NA                 | NA                            | NA                 |
| Kabuli_wild_38287578 | NA                                  | Ca_kabuli_denovo | 38287578                | G/T  | NA                 | NA                            | NA                 |
| Kabuli_wild_38310695 | NA                                  | Ca_kabuli_denovo | 38310695                | C/T  | NA                 | NA                            | NA                 |
| Kabuli_wild_38313977 | NA                                  | Ca_kabuli_denovo | 38313977                | T/G  | NA                 | NA                            | NA                 |
| Kabuli_wild_38319794 | NA                                  | Ca_kabuli_denovo | 38319794                | C/G  | NA                 | NA                            | NA                 |
| Kabuli_wild_38321975 | NA                                  | Ca_kabuli_denovo | 38321975                | G/A  | NA                 | NA                            | NA                 |
| Kabuli_wild_38322012 | NA                                  | Ca_kabuli_denovo | 38322012                | A/G  | NA                 | NA                            | NA                 |
| Kabuli_wild_38329336 | NA                                  | Ca_kabuli_denovo | 38329336                | C/T  | NA                 | NA                            | NA                 |
| Kabuli_wild_38329448 | NA                                  | Ca_kabuli_denovo | 38329448                | A/C  | NA                 | NA                            | NA                 |
| Kabuli_wild_38329505 | NA                                  | Ca_kabuli_denovo | 38329505                | G/A  | NA                 | NA                            | NA                 |
| Kabuli_wild_38355073 | NA                                  | Ca_kabuli_denovo | 38355073                | C/G  | NA                 | NA                            | NA                 |
| Kabuli_wild_38366513 | NA                                  | Ca_kabuli_denovo | 38366513                | A/T  | NA                 | NA                            | NA                 |
| Kabuli_wild_38372212 | NA                                  | Ca_kabuli_denovo | 38372212                | C/G  | NA                 | NA                            | NA                 |
| Kabuli_wild_38372238 | NA                                  | Ca_kabuli_denovo | 38372238                | A/G  | NA                 | NA                            | NA                 |
| Kabuli_wild_38372538 | NA                                  | Ca_kabuli_denovo | 38372538                | G/T  | NA                 | NA                            | NA                 |
| Kabuli_wild_38374876 | NA                                  | Ca_kabuli_denovo | 38374876                | G/A  | NA                 | NA                            | NA                 |
| Kabuli_wild_38386784 | NA                                  | Ca_kabuli_denovo | 38386784                | C/A  | NA                 | NA                            | NA                 |
| Kabuli_wild_38386823 | NA                                  | Ca_kabuli_denovo | 38386823                | C/G  | NA                 | NA                            | NA                 |
| Kabuli_wild_38395192 | NA                                  | Ca_kabuli_denovo | 38395192                | A/C  | NA                 | NA                            | NA                 |
| Kabuli_wild_38408088 | NA                                  | Ca_kabuli_denovo | 38408088                | T/G  | NA                 | NA                            | NA                 |
| Kabuli_wild_38412376 | NA                                  | Ca_kabuli_denovo | 38412376                | A/C  | NA                 | NA                            | NA                 |
| Kabuli_wild_38413431 | NA                                  | Ca_kabuli_denovo | 38413431                | A/C  | NA                 | NA                            | NA                 |
| Kabuli_wild_38413432 | NA                                  | Ca_kabuli_denovo | 38413432                | G/T  | NA                 | NA                            | NA                 |
| Kabuli_wild_38413433 | NA                                  | Ca_kabuli_denovo | 38413433                | A/G  | NA                 | NA                            | NA                 |
| Kabuli_wild_38420625 | NA                                  | Ca_kabuli_denovo | 38420625                | G/T  | NA                 | NA                            | NA                 |
| Kabuli_wild_38421021 | NA                                  | Ca_kabuli_denovo | 38421021                | T/A  | NA                 | NA                            | NA                 |
| Kabuli_wild_38421050 | NA                                  | Ca_kabuli_denovo | 38421050                | C/T  | NA                 | NA                            | NA                 |
| Kabuli_wild_38422931 | NA                                  | Ca_kabuli_denovo | 38422931                | T/C  | NA                 | NA                            | NA                 |
| Kabuli_wild_38423895 | NA                                  | Ca_kabuli_denovo | 38423895                | A/G  | NA                 | NA                            | NA                 |
| Kabuli_wild_38425733 | NA                                  | Ca_kabuli_denovo | 38425733                | C/G  | NA                 | NA                            | NA                 |
| Kabuli_wild_38425739 | NA                                  | Ca_kabuli_denovo | 38425739                | G/T  | NA                 | NA                            | NA                 |
| Kabuli_wild_38433715 | NA                                  | Ca_kabuli_denovo | 38433715                | C/T  | NA                 | NA                            | NA                 |
| Kabuli_wild_38434286 | NA                                  | Ca_kabuli_denovo | 38434286                | A/G  | NA                 | NA                            | NA                 |
| Kabuli_wild_38437556 | NA                                  | Ca_kabuli_denovo | 38437556                | C/T  | NA                 | NA                            | NA                 |
| Kabuli_wild_38437566 | NA                                  | Ca_kabuli_denovo | 38437566                | G/C  | NA                 | NA                            | NA                 |
| Kabuli_wild_38437587 | NA                                  | Ca_kabuli_denovo | 38437587                | T/A  | NA                 | NA                            | NA                 |
| Kabuli_wild_38439557 | NA                                  | Ca_kabuli_denovo | 38439557                | A/G  | NA                 | NA                            | NA                 |
| Kabuli_wild_38442641 | NA                                  | Ca_kabuli_denovo | 38442641                | C/G  | NA                 | NA                            | NA                 |

| SNP IDs              | NCBI dbSNP accession IDs (NCBI_SS#) | Chromosomes      | Physical positions (bp) | SNPs | Gene accession IDs | Sequence components of genome | Putative functions |
|----------------------|-------------------------------------|------------------|-------------------------|------|--------------------|-------------------------------|--------------------|
| Kabuli_wild_38442677 | NA                                  | Ca_kabuli_denovo | 38442677                | A/G  | NA                 | NA                            | NA                 |
| Kabuli_wild_38443298 | NA                                  | Ca_kabuli_denovo | 38443298                | G/A  | NA                 | NA                            | NA                 |
| Kabuli_wild_38443594 | NA                                  | Ca_kabuli_denovo | 38443594                | C/T  | NA                 | NA                            | NA                 |
| Kabuli_wild_38443606 | NA                                  | Ca_kabuli_denovo | 38443606                | G/A  | NA                 | NA                            | NA                 |
| Kabuli_wild_38466022 | NA                                  | Ca_kabuli_denovo | 38466022                | G/T  | NA                 | NA                            | NA                 |
| Kabuli_wild_38467551 | NA                                  | Ca_kabuli_denovo | 38467551                | T/G  | NA                 | NA                            | NA                 |
| Kabuli_wild_38472101 | NA                                  | Ca_kabuli_denovo | 38472101                | G/C  | NA                 | NA                            | NA                 |
| Kabuli_wild_38472103 | NA                                  | Ca_kabuli_denovo | 38472103                | T/C  | NA                 | NA                            | NA                 |
| Kabuli_wild_38478660 | NA                                  | Ca_kabuli_denovo | 38478660                | C/T  | NA                 | NA                            | NA                 |
| Kabuli_wild_38478666 | NA                                  | Ca_kabuli_denovo | 38478666                | T/G  | NA                 | NA                            | NA                 |
| Kabuli_wild_38483512 | NA                                  | Ca_kabuli_denovo | 38483512                | A/C  | NA                 | NA                            | NA                 |
| Kabuli_wild_38487584 | NA                                  | Ca_kabuli_denovo | 38487584                | A/C  | NA                 | NA                            | NA                 |
| Kabuli_wild_38487590 | NA                                  | Ca_kabuli_denovo | 38487590                | A/G  | NA                 | NA                            | NA                 |
| Kabuli_wild_38488530 | NA                                  | Ca_kabuli_denovo | 38488530                | G/A  | NA                 | NA                            | NA                 |
| Kabuli_wild_38488581 | NA                                  | Ca_kabuli_denovo | 38488581                | C/T  | NA                 | NA                            | NA                 |
| Kabuli_wild_38491778 | NA                                  | Ca_kabuli_denovo | 38491778                | G/C  | NA                 | NA                            | NA                 |
| Kabuli_wild_38491781 | NA                                  | Ca_kabuli_denovo | 38491781                | T/G  | NA                 | NA                            | NA                 |
| Kabuli_wild_38491796 | NA                                  | Ca_kabuli_denovo | 38491796                | G/C  | NA                 | NA                            | NA                 |
| Kabuli_wild_38491832 | NA                                  | Ca_kabuli_denovo | 38491832                | G/A  | NA                 | NA                            | NA                 |
| Kabuli_wild_38493824 | NA                                  | Ca_kabuli_denovo | 38493824                | A/G  | NA                 | NA                            | NA                 |
| Kabuli_wild_38493839 | NA                                  | Ca_kabuli_denovo | 38493839                | G/A  | NA                 | NA                            | NA                 |
| Kabuli_wild_38494579 | NA                                  | Ca_kabuli_denovo | 38494579                | C/A  | NA                 | NA                            | NA                 |
| Kabuli_wild_38500422 | NA                                  | Ca_kabuli_denovo | 38500422                | C/T  | NA                 | NA                            | NA                 |
| Kabuli_wild_38508539 | NA                                  | Ca_kabuli_denovo | 38508539                | T/G  | NA                 | NA                            | NA                 |
| Kabuli_wild_38508916 | NA                                  | Ca_kabuli_denovo | 38508916                | T/C  | NA                 | NA                            | NA                 |
| Kabuli_wild_38508938 | NA                                  | Ca_kabuli_denovo | 38508938                | G/T  | NA                 | NA                            | NA                 |
| Kabuli_wild_38513765 | NA                                  | Ca_kabuli_denovo | 38513765                | C/G  | NA                 | NA                            | NA                 |
| Kabuli_wild_38513813 | NA                                  | Ca_kabuli_denovo | 38513813                | G/T  | NA                 | NA                            | NA                 |
| Kabuli_wild_38519089 | NA                                  | Ca_kabuli_denovo | 38519089                | T/A  | NA                 | NA                            | NA                 |
| Kabuli_wild_38520694 | NA                                  | Ca_kabuli_denovo | 38520694                | G/A  | NA                 | NA                            | NA                 |
| Kabuli_wild_38520736 | NA                                  | Ca_kabuli_denovo | 38520736                | G/C  | NA                 | NA                            | NA                 |
| Kabuli_wild_38524024 | NA                                  | Ca_kabuli_denovo | 38524024                | C/G  | NA                 | NA                            | NA                 |
| Kabuli_wild_38524027 | NA                                  | Ca_kabuli_denovo | 38524027                | A/G  | NA                 | NA                            | NA                 |
| Kabuli_wild_38524586 | NA                                  | Ca_kabuli_denovo | 38524586                | T/G  | NA                 | NA                            | NA                 |
| Kabuli_wild_38531514 | NA                                  | Ca_kabuli_denovo | 38531514                | C/T  | NA                 | NA                            | NA                 |
| Kabuli_wild_38535736 | NA                                  | Ca_kabuli_denovo | 38535736                | A/G  | NA                 | NA                            | NA                 |
| Kabuli_wild_38540634 | NA                                  | Ca_kabuli_denovo | 38540634                | A/C  | NA                 | NA                            | NA                 |
| Kabuli_wild_38540635 | NA                                  | Ca_kabuli_denovo | 38540635                | G/T  | NA                 | NA                            | NA                 |
| Kabuli_wild_38542578 | NA                                  | Ca_kabuli_denovo | 38542578                | A/T  | NA                 | NA                            | NA                 |
| Kabuli_wild_38542579 | NA                                  | Ca_kabuli_denovo | 38542579                | A/G  | NA                 | NA                            | NA                 |
| Kabuli_wild_38542621 | NA                                  | Ca_kabuli_denovo | 38542621                | C/G  | NA                 | NA                            | NA                 |
| Kabuli_wild_38544871 | NA                                  | Ca_kabuli_denovo | 38544871                | A/G  | NA                 | NA                            | NA                 |
| Kabuli_wild_38544877 | NA                                  | Ca_kabuli_denovo | 38544877                | A/G  | NA                 | NA                            | NA                 |
| Kabuli_wild_38544976 | NA                                  | Ca_kabuli_denovo | 38544976                | C/T  | NA                 | NA                            | NA                 |

| SNP IDs              | NCBI dbSNP accession IDs (NCBI_SS#) | Chromosomes      | Physical positions (bp) | SNPs | Gene accession IDs | Sequence components of genome | Putative functions |
|----------------------|-------------------------------------|------------------|-------------------------|------|--------------------|-------------------------------|--------------------|
| Kabuli_wild_38545819 | NA                                  | Ca_kabuli_denovo | 38545819                | G/A  | NA                 | NA                            | NA                 |
| Kabuli_wild_38546452 | NA                                  | Ca_kabuli_denovo | 38546452                | C/T  | NA                 | NA                            | NA                 |
| Kabuli_wild_38546465 | NA                                  | Ca_kabuli_denovo | 38546465                | T/C  | NA                 | NA                            | NA                 |
| Kabuli_wild_38548506 | NA                                  | Ca_kabuli_denovo | 38548506                | A/C  | NA                 | NA                            | NA                 |
| Kabuli_wild_38550783 | NA                                  | Ca_kabuli_denovo | 38550783                | T/G  | NA                 | NA                            | NA                 |
| Kabuli_wild_38550803 | NA                                  | Ca_kabuli_denovo | 38550803                | T/G  | NA                 | NA                            | NA                 |
| Kabuli_wild_38552688 | NA                                  | Ca_kabuli_denovo | 38552688                | T/C  | NA                 | NA                            | NA                 |
| Kabuli_wild_38552730 | NA                                  | Ca_kabuli_denovo | 38552730                | G/C  | NA                 | NA                            | NA                 |
| Kabuli_wild_38554763 | NA                                  | Ca_kabuli_denovo | 38554763                | A/T  | NA                 | NA                            | NA                 |
| Kabuli_wild_38554783 | NA                                  | Ca_kabuli_denovo | 38554783                | A/G  | NA                 | NA                            | NA                 |
| Kabuli_wild_38554957 | NA                                  | Ca_kabuli_denovo | 38554957                | A/G  | NA                 | NA                            | NA                 |
| Kabuli_wild_38557020 | NA                                  | Ca_kabuli_denovo | 38557020                | A/G  | NA                 | NA                            | NA                 |
| Kabuli_wild_38557024 | NA                                  | Ca_kabuli_denovo | 38557024                | A/G  | NA                 | NA                            | NA                 |
| Kabuli_wild_38557656 | NA                                  | Ca_kabuli_denovo | 38557656                | A/G  | NA                 | NA                            | NA                 |
| Kabuli_wild_38557658 | NA                                  | Ca_kabuli_denovo | 38557658                | A/G  | NA                 | NA                            | NA                 |
| Kabuli_wild_38558678 | NA                                  | Ca_kabuli_denovo | 38558678                | A/G  | NA                 | NA                            | NA                 |
| Kabuli_wild_38559063 | NA                                  | Ca_kabuli_denovo | 38559063                | A/G  | NA                 | NA                            | NA                 |
| Kabuli_wild_38559157 | NA                                  | Ca_kabuli_denovo | 38559157                | A/T  | NA                 | NA                            | NA                 |
| Kabuli_wild_38559174 | NA                                  | Ca_kabuli_denovo | 38559174                | A/G  | NA                 | NA                            | NA                 |
| Kabuli_wild_38559235 | NA                                  | Ca_kabuli_denovo | 38559235                | G/T  | NA                 | NA                            | NA                 |
| Kabuli_wild_38559237 | NA                                  | Ca_kabuli_denovo | 38559237                | C/T  | NA                 | NA                            | NA                 |
| Kabuli_wild_38559691 | NA                                  | Ca_kabuli_denovo | 38559691                | G/A  | NA                 | NA                            | NA                 |
| Kabuli_wild_38559693 | NA                                  | Ca_kabuli_denovo | 38559693                | A/T  | NA                 | NA                            | NA                 |
| Kabuli_wild_38559694 | NA                                  | Ca_kabuli_denovo | 38559694                | G/T  | NA                 | NA                            | NA                 |
| Kabuli_wild_38560466 | NA                                  | Ca_kabuli_denovo | 38560466                | C/G  | NA                 | NA                            | NA                 |
| Kabuli_wild_38561752 | NA                                  | Ca_kabuli_denovo | 38561752                | A/C  | NA                 | NA                            | NA                 |
| Kabuli_wild_38564136 | NA                                  | Ca_kabuli_denovo | 38564136                | A/G  | NA                 | NA                            | NA                 |
| Kabuli_wild_38569529 | NA                                  | Ca_kabuli_denovo | 38569529                | A/C  | NA                 | NA                            | NA                 |
| Kabuli_wild_38607606 | NA                                  | Ca_kabuli_denovo | 38607606                | A/G  | NA                 | NA                            | NA                 |
| Kabuli_wild_38607608 | NA                                  | Ca_kabuli_denovo | 38607608                | C/G  | NA                 | NA                            | NA                 |
| Kabuli_wild_38640166 | NA                                  | Ca_kabuli_denovo | 38640166                | A/G  | NA                 | NA                            | NA                 |
| Kabuli_wild_38640167 | NA                                  | Ca_kabuli_denovo | 38640167                | C/T  | NA                 | NA                            | NA                 |
| Kabuli_wild_38681396 | NA                                  | Ca_kabuli_denovo | 38681396                | A/C  | NA                 | NA                            | NA                 |
| Kabuli_wild_38681397 | NA                                  | Ca_kabuli_denovo | 38681397                | G/T  | NA                 | NA                            | NA                 |
| Kabuli_wild_38738358 | NA                                  | Ca_kabuli_denovo | 38738358                | G/T  | NA                 | NA                            | NA                 |
| Kabuli_wild_38743598 | NA                                  | Ca_kabuli_denovo | 38743598                | C/G  | NA                 | NA                            | NA                 |
| Kabuli_wild_38749017 | NA                                  | Ca_kabuli_denovo | 38749017                | A/G  | NA                 | NA                            | NA                 |
| Kabuli_wild_38749026 | NA                                  | Ca_kabuli_denovo | 38749026                | C/T  | NA                 | NA                            | NA                 |
| Kabuli_wild_38756190 | NA                                  | Ca_kabuli_denovo | 38756190                | A/G  | NA                 | NA                            | NA                 |
| Kabuli_wild_38756232 | NA                                  | Ca_kabuli_denovo | 38756232                | A/G  | NA                 | NA                            | NA                 |
| Kabuli_wild_38758763 | NA                                  | Ca_kabuli_denovo | 38758763                | A/C  | NA                 | NA                            | NA                 |
| Kabuli_wild_38760533 | NA                                  | Ca_kabuli_denovo | 38760533                | A/G  | NA                 | NA                            | NA                 |
| Kabuli_wild_38789332 | NA                                  | Ca_kabuli_denovo | 38789332                | G/C  | NA                 | NA                            | NA                 |
| Kabuli_wild_38818215 | NA                                  | Ca_kabuli_denovo | 38818215                | T/C  | NA                 | NA                            | NA                 |

| SNP IDs              | NCBI dbSNP accession IDs (NCBI_SS#) | Chromosomes      | Physical positions (bp) | SNPs | Gene accession IDs | Sequence components of genome | Putative functions |
|----------------------|-------------------------------------|------------------|-------------------------|------|--------------------|-------------------------------|--------------------|
| Kabuli_wild_38820618 | NA                                  | Ca_kabuli_denovo | 38820618                | A/C  | NA                 | NA                            | NA                 |
| Kabuli_wild_38839034 | NA                                  | Ca_kabuli_denovo | 38839034                | G/T  | NA                 | NA                            | NA                 |
| Kabuli_wild_38839108 | NA                                  | Ca_kabuli_denovo | 38839108                | C/T  | NA                 | NA                            | NA                 |
| Kabuli_wild_38847131 | NA                                  | Ca_kabuli_denovo | 38847131                | C/T  | NA                 | NA                            | NA                 |
| Kabuli_wild_38866195 | NA                                  | Ca_kabuli_denovo | 38866195                | G/T  | NA                 | NA                            | NA                 |
| Kabuli_wild_38874741 | NA                                  | Ca_kabuli_denovo | 38874741                | C/G  | NA                 | NA                            | NA                 |
| Kabuli_wild_38888082 | NA                                  | Ca_kabuli_denovo | 38888082                | A/C  | NA                 | NA                            | NA                 |
| Kabuli_wild_38901387 | NA                                  | Ca_kabuli_denovo | 38901387                | C/G  | NA                 | NA                            | NA                 |
| Kabuli_wild_38901489 | NA                                  | Ca_kabuli_denovo | 38901489                | C/T  | NA                 | NA                            | NA                 |
| Kabuli_wild_38907636 | NA                                  | Ca_kabuli_denovo | 38907636                | A/T  | NA                 | NA                            | NA                 |
| Kabuli_wild_38907689 | NA                                  | Ca_kabuli_denovo | 38907689                | A/G  | NA                 | NA                            | NA                 |
| Kabuli_wild_38914449 | NA                                  | Ca_kabuli_denovo | 38914449                | C/G  | NA                 | NA                            | NA                 |
| Kabuli_wild_38914450 | NA                                  | Ca_kabuli_denovo | 38914450                | A/T  | NA                 | NA                            | NA                 |
| Kabuli_wild_38914826 | NA                                  | Ca_kabuli_denovo | 38914826                | G/A  | NA                 | NA                            | NA                 |
| Kabuli_wild_38919214 | NA                                  | Ca_kabuli_denovo | 38919214                | G/A  | NA                 | NA                            | NA                 |
| Kabuli_wild_38919227 | NA                                  | Ca_kabuli_denovo | 38919227                | C/T  | NA                 | NA                            | NA                 |
| Kabuli_wild_38920055 | NA                                  | Ca_kabuli_denovo | 38920055                | C/G  | NA                 | NA                            | NA                 |
| Kabuli_wild_38920129 | NA                                  | Ca_kabuli_denovo | 38920129                | A/G  | NA                 | NA                            | NA                 |
| Kabuli_wild_38923788 | NA                                  | Ca_kabuli_denovo | 38923788                | C/T  | NA                 | NA                            | NA                 |
| Kabuli_wild_38925217 | NA                                  | Ca_kabuli_denovo | 38925217                | C/T  | NA                 | NA                            | NA                 |
| Kabuli_wild_38940346 | NA                                  | Ca_kabuli_denovo | 38940346                | C/G  | NA                 | NA                            | NA                 |
| Kabuli_wild_38944666 | NA                                  | Ca_kabuli_denovo | 38944666                | C/G  | NA                 | NA                            | NA                 |
| Kabuli_wild_38954716 | NA                                  | Ca_kabuli_denovo | 38954716                | G/T  | NA                 | NA                            | NA                 |
| Kabuli_wild_38954792 | NA                                  | Ca_kabuli_denovo | 38954792                | A/C  | NA                 | NA                            | NA                 |
| Kabuli_wild_38979718 | NA                                  | Ca_kabuli_denovo | 38979718                | A/C  | NA                 | NA                            | NA                 |
| Kabuli_wild_38985738 | NA                                  | Ca_kabuli_denovo | 38985738                | C/G  | NA                 | NA                            | NA                 |
| Kabuli_wild_38985753 | NA                                  | Ca_kabuli_denovo | 38985753                | C/T  | NA                 | NA                            | NA                 |
| Kabuli_wild_38991937 | NA                                  | Ca_kabuli_denovo | 38991937                | A/T  | NA                 | NA                            | NA                 |
| Kabuli_wild_38998464 | NA                                  | Ca_kabuli_denovo | 38998464                | A/G  | NA                 | NA                            | NA                 |
| Kabuli_wild_39034162 | NA                                  | Ca_kabuli_denovo | 39034162                | A/C  | NA                 | NA                            | NA                 |
| Kabuli_wild_39034183 | NA                                  | Ca_kabuli_denovo | 39034183                | A/T  | NA                 | NA                            | NA                 |
| Kabuli_wild_39034224 | NA                                  | Ca_kabuli_denovo | 39034224                | A/C  | NA                 | NA                            | NA                 |
| Kabuli_wild_39047200 | NA                                  | Ca_kabuli_denovo | 39047200                | A/G  | NA                 | NA                            | NA                 |
| Kabuli_wild_39056167 | NA                                  | Ca_kabuli_denovo | 39056167                | A/G  | NA                 | NA                            | NA                 |
| Kabuli_wild_39056170 | NA                                  | Ca_kabuli_denovo | 39056170                | C/G  | NA                 | NA                            | NA                 |
| Kabuli_wild_39056225 | NA                                  | Ca_kabuli_denovo | 39056225                | G/A  | NA                 | NA                            | NA                 |
| Kabuli_wild_39057384 | NA                                  | Ca_kabuli_denovo | 39057384                | G/C  | NA                 | NA                            | NA                 |
| Kabuli_wild_39057402 | NA                                  | Ca_kabuli_denovo | 39057402                | T/G  | NA                 | NA                            | NA                 |
| Kabuli_wild_39057405 | NA                                  | Ca_kabuli_denovo | 39057405                | G/A  | NA                 | NA                            | NA                 |
| Kabuli_wild_39057438 | NA                                  | Ca_kabuli_denovo | 39057438                | G/A  | NA                 | NA                            | NA                 |
| Kabuli_wild_39059823 | NA                                  | Ca_kabuli_denovo | 39059823                | C/T  | NA                 | NA                            | NA                 |
| Kabuli_wild_39059830 | NA                                  | Ca_kabuli_denovo | 39059830                | C/G  | NA                 | NA                            | NA                 |
| Kabuli_wild_39067893 | NA                                  | Ca_kabuli_denovo | 39067893                | C/T  | NA                 | NA                            | NA                 |
| Kabuli_wild_39091016 | NA                                  | Ca_kabuli_denovo | 39091016                | T/G  | NA                 | NA                            | NA                 |

| SNP IDs              | NCBI dbSNP accession IDs (NCBI_SS#) | Chromosomes      | Physical positions (bp) | SNPs | Gene accession IDs | Sequence components of genome | Putative functions |
|----------------------|-------------------------------------|------------------|-------------------------|------|--------------------|-------------------------------|--------------------|
| Kabuli_wild_39092526 | NA                                  | Ca_kabuli_denovo | 39092526                | G/C  | NA                 | NA                            | NA                 |
| Kabuli_wild_39092559 | NA                                  | Ca_kabuli_denovo | 39092559                | C/G  | NA                 | NA                            | NA                 |
| Kabuli_wild_39092565 | NA                                  | Ca_kabuli_denovo | 39092565                | C/T  | NA                 | NA                            | NA                 |
| Kabuli_wild_39100243 | NA                                  | Ca_kabuli_denovo | 39100243                | C/G  | NA                 | NA                            | NA                 |
| Kabuli_wild_39100262 | NA                                  | Ca_kabuli_denovo | 39100262                | C/T  | NA                 | NA                            | NA                 |
| Kabuli_wild_39102971 | NA                                  | Ca_kabuli_denovo | 39102971                | A/C  | NA                 | NA                            | NA                 |
| Kabuli_wild_39102992 | NA                                  | Ca_kabuli_denovo | 39102992                | C/G  | NA                 | NA                            | NA                 |
| Kabuli_wild_39104375 | NA                                  | Ca_kabuli_denovo | 39104375                | G/A  | NA                 | NA                            | NA                 |
| Kabuli_wild_39107784 | NA                                  | Ca_kabuli_denovo | 39107784                | A/G  | NA                 | NA                            | NA                 |
| Kabuli_wild_39107799 | NA                                  | Ca_kabuli_denovo | 39107799                | A/G  | NA                 | NA                            | NA                 |
| Kabuli_wild_39107820 | NA                                  | Ca_kabuli_denovo | 39107820                | C/G  | NA                 | NA                            | NA                 |
| Kabuli_wild_39108055 | NA                                  | Ca_kabuli_denovo | 39108055                | T/C  | NA                 | NA                            | NA                 |
| Kabuli_wild_39108078 | NA                                  | Ca_kabuli_denovo | 39108078                | C/T  | NA                 | NA                            | NA                 |
| Kabuli_wild_39109104 | NA                                  | Ca_kabuli_denovo | 39109104                | G/T  | NA                 | NA                            | NA                 |
| Kabuli_wild_39109106 | NA                                  | Ca_kabuli_denovo | 39109106                | A/C  | NA                 | NA                            | NA                 |
| Kabuli_wild_39110007 | NA                                  | Ca_kabuli_denovo | 39110007                | C/G  | NA                 | NA                            | NA                 |
| Kabuli_wild_39110010 | NA                                  | Ca_kabuli_denovo | 39110010                | A/G  | NA                 | NA                            | NA                 |
| Kabuli_wild_39110033 | NA                                  | Ca_kabuli_denovo | 39110033                | C/G  | NA                 | NA                            | NA                 |
| Kabuli_wild_39124996 | NA                                  | Ca_kabuli_denovo | 39124996                | A/T  | NA                 | NA                            | NA                 |
| Kabuli_wild_39125037 | NA                                  | Ca_kabuli_denovo | 39125037                | C/T  | NA                 | NA                            | NA                 |
| Kabuli_wild_39125737 | NA                                  | Ca_kabuli_denovo | 39125737                | A/G  | NA                 | NA                            | NA                 |
| Kabuli_wild_39125761 | NA                                  | Ca_kabuli_denovo | 39125761                | C/T  | NA                 | NA                            | NA                 |
| Kabuli_wild_39125765 | NA                                  | Ca_kabuli_denovo | 39125765                | A/G  | NA                 | NA                            | NA                 |
| Kabuli_wild_39126456 | NA                                  | Ca_kabuli_denovo | 39126456                | C/G  | NA                 | NA                            | NA                 |
| Kabuli_wild_39126529 | NA                                  | Ca_kabuli_denovo | 39126529                | A/G  | NA                 | NA                            | NA                 |
| Kabuli_wild_39132257 | NA                                  | Ca_kabuli_denovo | 39132257                | T/C  | NA                 | NA                            | NA                 |
| Kabuli_wild_39132269 | NA                                  | Ca_kabuli_denovo | 39132269                | A/G  | NA                 | NA                            | NA                 |
| Kabuli_wild_39132278 | NA                                  | Ca_kabuli_denovo | 39132278                | G/T  | NA                 | NA                            | NA                 |
| Kabuli_wild_39138654 | NA                                  | Ca_kabuli_denovo | 39138654                | T/G  | NA                 | NA                            | NA                 |
| Kabuli_wild_39138663 | NA                                  | Ca_kabuli_denovo | 39138663                | T/C  | NA                 | NA                            | NA                 |
| Kabuli_wild_39140413 | NA                                  | Ca_kabuli_denovo | 39140413                | C/G  | NA                 | NA                            | NA                 |
| Kabuli_wild_39140428 | NA                                  | Ca_kabuli_denovo | 39140428                | G/A  | NA                 | NA                            | NA                 |
| Kabuli_wild_39140485 | NA                                  | Ca_kabuli_denovo | 39140485                | C/T  | NA                 | NA                            | NA                 |
| Kabuli_wild_39143262 | NA                                  | Ca_kabuli_denovo | 39143262                | C/T  | NA                 | NA                            | NA                 |
| Kabuli_wild_39143676 | NA                                  | Ca_kabuli_denovo | 39143676                | A/G  | NA                 | NA                            | NA                 |
| Kabuli_wild_39143744 | NA                                  | Ca_kabuli_denovo | 39143744                | A/G  | NA                 | NA                            | NA                 |
| Kabuli_wild_39151393 | NA                                  | Ca_kabuli_denovo | 39151393                | A/G  | NA                 | NA                            | NA                 |
| Kabuli_wild_39151396 | NA                                  | Ca_kabuli_denovo | 39151396                | A/G  | NA                 | NA                            | NA                 |
| Kabuli_wild_39153454 | NA                                  | Ca_kabuli_denovo | 39153454                | A/G  | NA                 | NA                            | NA                 |
| Kabuli_wild_39153469 | NA                                  | Ca_kabuli_denovo | 39153469                | A/G  | NA                 | NA                            | NA                 |
| Kabuli_wild_39153510 | NA                                  | Ca_kabuli_denovo | 39153510                | C/G  | NA                 | NA                            | NA                 |
| Kabuli_wild_39155837 | NA                                  | Ca_kabuli_denovo | 39155837                | A/C  | NA                 | NA                            | NA                 |
| Kabuli_wild_39157341 | NA                                  | Ca_kabuli_denovo | 39157341                | C/G  | NA                 | NA                            | NA                 |
| Kabuli_wild_39159774 | NA                                  | Ca_kabuli_denovo | 39159774                | T/G  | NA                 | NA                            | NA                 |

| SNP IDs              | NCBI dbSNP accession IDs (NCBI_SS#) | Chromosomes      | Physical positions (bp) | SNPs | Gene accession IDs | Sequence components of genome | Putative functions |
|----------------------|-------------------------------------|------------------|-------------------------|------|--------------------|-------------------------------|--------------------|
| Kabuli_wild_39161055 | NA                                  | Ca_kabuli_denovo | 39161055                | C/G  | NA                 | NA                            | NA                 |
| Kabuli_wild_39161088 | NA                                  | Ca_kabuli_denovo | 39161088                | C/T  | NA                 | NA                            | NA                 |
| Kabuli_wild_39166439 | NA                                  | Ca_kabuli_denovo | 39166439                | A/C  | NA                 | NA                            | NA                 |
| Kabuli_wild_39166440 | NA                                  | Ca_kabuli_denovo | 39166440                | G/T  | NA                 | NA                            | NA                 |
| Kabuli_wild_39177892 | NA                                  | Ca_kabuli_denovo | 39177892                | A/C  | NA                 | NA                            | NA                 |
| Kabuli_wild_39177916 | NA                                  | Ca_kabuli_denovo | 39177916                | C/T  | NA                 | NA                            | NA                 |
| Kabuli_wild_39177919 | NA                                  | Ca_kabuli_denovo | 39177919                | C/G  | NA                 | NA                            | NA                 |
| Kabuli_wild_39187829 | NA                                  | Ca_kabuli_denovo | 39187829                | A/G  | NA                 | NA                            | NA                 |
| Kabuli_wild_39193987 | NA                                  | Ca_kabuli_denovo | 39193987                | A/C  | NA                 | NA                            | NA                 |
| Kabuli_wild_39196462 | NA                                  | Ca_kabuli_denovo | 39196462                | A/G  | NA                 | NA                            | NA                 |
| Kabuli_wild_39203027 | NA                                  | Ca_kabuli_denovo | 39203027                | C/G  | NA                 | NA                            | NA                 |
| Kabuli_wild_39210267 | NA                                  | Ca_kabuli_denovo | 39210267                | A/G  | NA                 | NA                            | NA                 |
| Kabuli_wild_39210909 | NA                                  | Ca_kabuli_denovo | 39210909                | G/A  | NA                 | NA                            | NA                 |
| Kabuli_wild_39210951 | NA                                  | Ca_kabuli_denovo | 39210951                | A/C  | NA                 | NA                            | NA                 |
| Kabuli_wild_39214425 | NA                                  | Ca_kabuli_denovo | 39214425                | G/T  | NA                 | NA                            | NA                 |
| Kabuli_wild_39218536 | NA                                  | Ca_kabuli_denovo | 39218536                | A/C  | NA                 | NA                            | NA                 |
| Kabuli_wild_39218566 | NA                                  | Ca_kabuli_denovo | 39218566                | A/G  | NA                 | NA                            | NA                 |
| Kabuli_wild_39219550 | NA                                  | Ca_kabuli_denovo | 39219550                | C/G  | NA                 | NA                            | NA                 |
| Kabuli_wild_39220239 | NA                                  | Ca_kabuli_denovo | 39220239                | T/C  | NA                 | NA                            | NA                 |
| Kabuli_wild_39220252 | NA                                  | Ca_kabuli_denovo | 39220252                | T/C  | NA                 | NA                            | NA                 |
| Kabuli_wild_39226276 | NA                                  | Ca_kabuli_denovo | 39226276                | C/T  | NA                 | NA                            | NA                 |
| Kabuli_wild_39226285 | NA                                  | Ca_kabuli_denovo | 39226285                | C/T  | NA                 | NA                            | NA                 |
| Kabuli_wild_39226330 | NA                                  | Ca_kabuli_denovo | 39226330                | C/T  | NA                 | NA                            | NA                 |
| Kabuli_wild_39227541 | NA                                  | Ca_kabuli_denovo | 39227541                | G/T  | NA                 | NA                            | NA                 |
| Kabuli_wild_39235436 | NA                                  | Ca_kabuli_denovo | 39235436                | A/T  | NA                 | NA                            | NA                 |
| Kabuli_wild_39235444 | NA                                  | Ca_kabuli_denovo | 39235444                | A/C  | NA                 | NA                            | NA                 |
| Kabuli_wild_39236434 | NA                                  | Ca_kabuli_denovo | 39236434                | C/T  | NA                 | NA                            | NA                 |
| Kabuli_wild_39237352 | NA                                  | Ca_kabuli_denovo | 39237352                | A/C  | NA                 | NA                            | NA                 |
| Kabuli_wild_39237435 | NA                                  | Ca_kabuli_denovo | 39237435                | C/T  | NA                 | NA                            | NA                 |
| Kabuli_wild_39237437 | NA                                  | Ca_kabuli_denovo | 39237437                | A/T  | NA                 | NA                            | NA                 |
| Kabuli_wild_39237956 | NA                                  | Ca_kabuli_denovo | 39237956                | A/G  | NA                 | NA                            | NA                 |
| Kabuli_wild_39239081 | NA                                  | Ca_kabuli_denovo | 39239081                | C/T  | NA                 | NA                            | NA                 |
| Kabuli_wild_39241317 | NA                                  | Ca_kabuli_denovo | 39241317                | A/G  | NA                 | NA                            | NA                 |
| Kabuli_wild_39241331 | NA                                  | Ca_kabuli_denovo | 39241331                | C/T  | NA                 | NA                            | NA                 |
| Kabuli_wild_39241886 | NA                                  | Ca_kabuli_denovo | 39241886                | T/C  | NA                 | NA                            | NA                 |
| Kabuli_wild_39241891 | NA                                  | Ca_kabuli_denovo | 39241891                | G/A  | NA                 | NA                            | NA                 |
| Kabuli_wild_39243289 | NA                                  | Ca_kabuli_denovo | 39243289                | C/T  | NA                 | NA                            | NA                 |
| Kabuli_wild_39247171 | NA                                  | Ca_kabuli_denovo | 39247171                | A/C  | NA                 | NA                            | NA                 |
| Kabuli_wild_39247189 | NA                                  | Ca_kabuli_denovo | 39247189                | A/G  | NA                 | NA                            | NA                 |
| Kabuli_wild_39248689 | NA                                  | Ca_kabuli_denovo | 39248689                | A/G  | NA                 | NA                            | NA                 |
| Kabuli_wild_39263644 | NA                                  | Ca_kabuli_denovo | 39263644                | A/G  | NA                 | NA                            | NA                 |
| Kabuli_wild_39263699 | NA                                  | Ca_kabuli_denovo | 39263699                | A/G  | NA                 | NA                            | NA                 |
| Kabuli_wild_39263700 | NA                                  | Ca_kabuli_denovo | 39263700                | C/T  | NA                 | NA                            | NA                 |
| Kabuli_wild_39268048 | NA                                  | Ca_kabuli_denovo | 39268048                | A/G  | NA                 | NA                            | NA                 |

| SNP IDs              | NCBI dbSNP accession IDs (NCBI_SS#) | Chromosomes      | Physical positions (bp) | SNPs | Gene accession IDs | Sequence components of genome | Putative functions |
|----------------------|-------------------------------------|------------------|-------------------------|------|--------------------|-------------------------------|--------------------|
| Kabuli_wild_39268060 | NA                                  | Ca_kabuli_denovo | 39268060                | A/G  | NA                 | NA                            | NA                 |
| Kabuli_wild_39268066 | NA                                  | Ca_kabuli_denovo | 39268066                | A/G  | NA                 | NA                            | NA                 |
| Kabuli_wild_39268227 | NA                                  | Ca_kabuli_denovo | 39268227                | G/C  | NA                 | NA                            | NA                 |
| Kabuli_wild_39268233 | NA                                  | Ca_kabuli_denovo | 39268233                | A/G  | NA                 | NA                            | NA                 |
| Kabuli_wild_39268243 | NA                                  | Ca_kabuli_denovo | 39268243                | T/C  | NA                 | NA                            | NA                 |
| Kabuli_wild_39273589 | NA                                  | Ca_kabuli_denovo | 39273589                | C/G  | NA                 | NA                            | NA                 |
| Kabuli_wild_39273597 | NA                                  | Ca_kabuli_denovo | 39273597                | C/T  | NA                 | NA                            | NA                 |
| Kabuli_wild_39273628 | NA                                  | Ca_kabuli_denovo | 39273628                | A/G  | NA                 | NA                            | NA                 |
| Kabuli_wild_39276661 | NA                                  | Ca_kabuli_denovo | 39276661                | T/A  | NA                 | NA                            | NA                 |
| Kabuli_wild_39276725 | NA                                  | Ca_kabuli_denovo | 39276725                | T/G  | NA                 | NA                            | NA                 |
| Kabuli_wild_39279178 | NA                                  | Ca_kabuli_denovo | 39279178                | T/G  | NA                 | NA                            | NA                 |
| Kabuli_wild_39286635 | NA                                  | Ca_kabuli_denovo | 39286635                | C/G  | NA                 | NA                            | NA                 |
| Kabuli_wild_39286639 | NA                                  | Ca_kabuli_denovo | 39286639                | C/G  | NA                 | NA                            | NA                 |
| Kabuli_wild_39286674 | NA                                  | Ca_kabuli_denovo | 39286674                | G/T  | NA                 | NA                            | NA                 |
| Kabuli_wild_39286683 | NA                                  | Ca_kabuli_denovo | 39286683                | C/G  | NA                 | NA                            | NA                 |
| Kabuli_wild_39287905 | NA                                  | Ca_kabuli_denovo | 39287905                | G/T  | NA                 | NA                            | NA                 |
| Kabuli_wild_39287947 | NA                                  | Ca_kabuli_denovo | 39287947                | C/G  | NA                 | NA                            | NA                 |
| Kabuli_wild_39288277 | NA                                  | Ca_kabuli_denovo | 39288277                | C/T  | NA                 | NA                            | NA                 |
| Kabuli_wild_39288295 | NA                                  | Ca_kabuli_denovo | 39288295                | C/T  | NA                 | NA                            | NA                 |
| Kabuli_wild_39288310 | NA                                  | Ca_kabuli_denovo | 39288310                | A/G  | NA                 | NA                            | NA                 |
| Kabuli_wild_39288316 | NA                                  | Ca_kabuli_denovo | 39288316                | C/G  | NA                 | NA                            | NA                 |
| Kabuli_wild_39288876 | NA                                  | Ca_kabuli_denovo | 39288876                | C/T  | NA                 | NA                            | NA                 |
| Kabuli_wild_39288890 | NA                                  | Ca_kabuli_denovo | 39288890                | C/T  | NA                 | NA                            | NA                 |
| Kabuli_wild_39290356 | NA                                  | Ca_kabuli_denovo | 39290356                | G/T  | NA                 | NA                            | NA                 |
| Kabuli_wild_39290383 | NA                                  | Ca_kabuli_denovo | 39290383                | C/G  | NA                 | NA                            | NA                 |
| Kabuli_wild_39305130 | NA                                  | Ca_kabuli_denovo | 39305130                | A/C  | NA                 | NA                            | NA                 |
| Kabuli_wild_39305171 | NA                                  | Ca_kabuli_denovo | 39305171                | C/G  | NA                 | NA                            | NA                 |
| Kabuli_wild_39318042 | NA                                  | Ca_kabuli_denovo | 39318042                | C/T  | NA                 | NA                            | NA                 |
| Kabuli_wild_39318043 | NA                                  | Ca_kabuli_denovo | 39318043                | C/T  | NA                 | NA                            | NA                 |
| Kabuli_wild_39318061 | NA                                  | Ca_kabuli_denovo | 39318061                | A/G  | NA                 | NA                            | NA                 |
| Kabuli_wild_39318084 | NA                                  | Ca_kabuli_denovo | 39318084                | C/G  | NA                 | NA                            | NA                 |
| Kabuli_wild_39318607 | NA                                  | Ca_kabuli_denovo | 39318607                | A/C  | NA                 | NA                            | NA                 |
| Kabuli_wild_39321067 | NA                                  | Ca_kabuli_denovo | 39321067                | A/C  | NA                 | NA                            | NA                 |
| Kabuli_wild_39321310 | NA                                  | Ca_kabuli_denovo | 39321310                | G/A  | NA                 | NA                            | NA                 |
| Kabuli_wild_39322719 | NA                                  | Ca_kabuli_denovo | 39322719                | A/G  | NA                 | NA                            | NA                 |
| Kabuli_wild_39322737 | NA                                  | Ca_kabuli_denovo | 39322737                | A/C  | NA                 | NA                            | NA                 |
| Kabuli_wild_39322743 | NA                                  | Ca_kabuli_denovo | 39322743                | C/T  | NA                 | NA                            | NA                 |
| Kabuli_wild_39324464 | NA                                  | Ca_kabuli_denovo | 39324464                | C/T  | NA                 | NA                            | NA                 |
| Kabuli_wild_39326678 | NA                                  | Ca_kabuli_denovo | 39326678                | A/C  | NA                 | NA                            | NA                 |
| Kabuli_wild_39326679 | NA                                  | Ca_kabuli_denovo | 39326679                | A/G  | NA                 | NA                            | NA                 |
| Kabuli_wild_39331402 | NA                                  | Ca_kabuli_denovo | 39331402                | A/T  | NA                 | NA                            | NA                 |
| Kabuli_wild_39346818 | NA                                  | Ca_kabuli_denovo | 39346818                | G/T  | NA                 | NA                            | NA                 |
| Kabuli_wild_39359090 | NA                                  | Ca_kabuli_denovo | 39359090                | G/T  | NA                 | NA                            | NA                 |
| Kabuli_wild_39369934 | NA                                  | Ca_kabuli_denovo | 39369934                | T/C  | NA                 | NA                            | NA                 |

| SNP IDs              | NCBI dbSNP accession IDs (NCBI_SS#) | Chromosomes      | Physical positions (bp) | SNPs | Gene accession IDs | Sequence components of genome | Putative functions |
|----------------------|-------------------------------------|------------------|-------------------------|------|--------------------|-------------------------------|--------------------|
| Kabuli_wild_39380002 | NA                                  | Ca_kabuli_denovo | 39380002                | C/T  | NA                 | NA                            | NA                 |
| Kabuli_wild_39384810 | NA                                  | Ca_kabuli_denovo | 39384810                | A/C  | NA                 | NA                            | NA                 |
| Kabuli_wild_39385750 | NA                                  | Ca_kabuli_denovo | 39385750                | C/G  | NA                 | NA                            | NA                 |
| Kabuli_wild_39385814 | NA                                  | Ca_kabuli_denovo | 39385814                | A/G  | NA                 | NA                            | NA                 |
| Kabuli_wild_39401199 | NA                                  | Ca_kabuli_denovo | 39401199                | A/G  | NA                 | NA                            | NA                 |
| Kabuli_wild_39405356 | NA                                  | Ca_kabuli_denovo | 39405356                | A/C  | NA                 | NA                            | NA                 |
| Kabuli_wild_39406885 | NA                                  | Ca_kabuli_denovo | 39406885                | C/T  | NA                 | NA                            | NA                 |
| Kabuli_wild_39410871 | NA                                  | Ca_kabuli_denovo | 39410871                | C/A  | NA                 | NA                            | NA                 |
| Kabuli_wild_39410886 | NA                                  | Ca_kabuli_denovo | 39410886                | C/T  | NA                 | NA                            | NA                 |
| Kabuli_wild_39413733 | NA                                  | Ca_kabuli_denovo | 39413733                | C/G  | NA                 | NA                            | NA                 |
| Kabuli_wild_39413804 | NA                                  | Ca_kabuli_denovo | 39413804                | A/G  | NA                 | NA                            | NA                 |
| Kabuli_wild_39418293 | NA                                  | Ca_kabuli_denovo | 39418293                | C/T  | NA                 | NA                            | NA                 |
| Kabuli_wild_39418360 | NA                                  | Ca_kabuli_denovo | 39418360                | C/T  | NA                 | NA                            | NA                 |
| Kabuli_wild_39418374 | NA                                  | Ca_kabuli_denovo | 39418374                | A/G  | NA                 | NA                            | NA                 |
| Kabuli_wild_39420530 | NA                                  | Ca_kabuli_denovo | 39420530                | A/C  | NA                 | NA                            | NA                 |
| Kabuli_wild_39420531 | NA                                  | Ca_kabuli_denovo | 39420531                | T/C  | NA                 | NA                            | NA                 |
| Kabuli_wild_39420545 | NA                                  | Ca_kabuli_denovo | 39420545                | C/T  | NA                 | NA                            | NA                 |
| Kabuli_wild_39424903 | NA                                  | Ca_kabuli_denovo | 39424903                | C/T  | NA                 | NA                            | NA                 |
| Kabuli_wild_39427163 | NA                                  | Ca_kabuli_denovo | 39427163                | A/C  | NA                 | NA                            | NA                 |
| Kabuli_wild_39427167 | NA                                  | Ca_kabuli_denovo | 39427167                | C/G  | NA                 | NA                            | NA                 |
| Kabuli_wild_39428371 | NA                                  | Ca_kabuli_denovo | 39428371                | A/C  | NA                 | NA                            | NA                 |
| Kabuli_wild_39433176 | NA                                  | Ca_kabuli_denovo | 39433176                | C/T  | NA                 | NA                            | NA                 |
| Kabuli_wild_39434363 | NA                                  | Ca_kabuli_denovo | 39434363                | A/G  | NA                 | NA                            | NA                 |
| Kabuli_wild_39438657 | NA                                  | Ca_kabuli_denovo | 39438657                | G/C  | NA                 | NA                            | NA                 |
| Kabuli_wild_39438663 | NA                                  | Ca_kabuli_denovo | 39438663                | T/C  | NA                 | NA                            | NA                 |
| Kabuli_wild_39438678 | NA                                  | Ca_kabuli_denovo | 39438678                | G/A  | NA                 | NA                            | NA                 |
| Kabuli_wild_39438696 | NA                                  | Ca_kabuli_denovo | 39438696                | G/A  | NA                 | NA                            | NA                 |
| Kabuli_wild_39481383 | NA                                  | Ca_kabuli_denovo | 39481383                | G/T  | NA                 | NA                            | NA                 |
| Kabuli_wild_39484588 | NA                                  | Ca_kabuli_denovo | 39484588                | C/T  | NA                 | NA                            | NA                 |
| Kabuli_wild_39484591 | NA                                  | Ca_kabuli_denovo | 39484591                | C/G  | NA                 | NA                            | NA                 |
| Kabuli_wild_39521519 | NA                                  | Ca_kabuli_denovo | 39521519                | A/C  | NA                 | NA                            | NA                 |
| Kabuli_wild_39521520 | NA                                  | Ca_kabuli_denovo | 39521520                | A/G  | NA                 | NA                            | NA                 |
| Kabuli_wild_39521521 | NA                                  | Ca_kabuli_denovo | 39521521                | A/G  | NA                 | NA                            | NA                 |
| Kabuli_wild_39529794 | NA                                  | Ca_kabuli_denovo | 39529794                | A/G  | NA                 | NA                            | NA                 |
| Kabuli_wild_39562613 | NA                                  | Ca_kabuli_denovo | 39562613                | C/G  | NA                 | NA                            | NA                 |
| Kabuli_wild_39577791 | NA                                  | Ca_kabuli_denovo | 39577791                | C/G  | NA                 | NA                            | NA                 |
| Kabuli_wild_39577794 | NA                                  | Ca_kabuli_denovo | 39577794                | C/G  | NA                 | NA                            | NA                 |
| Kabuli_wild_39595572 | NA                                  | Ca_kabuli_denovo | 39595572                | G/T  | NA                 | NA                            | NA                 |
| Kabuli_wild_39605458 | NA                                  | Ca_kabuli_denovo | 39605458                | C/G  | NA                 | NA                            | NA                 |
| Kabuli_wild_39607762 | NA                                  | Ca_kabuli_denovo | 39607762                | A/G  | NA                 | NA                            | NA                 |
| Kabuli_wild_39607786 | NA                                  | Ca_kabuli_denovo | 39607786                | C/G  | NA                 | NA                            | NA                 |
| Kabuli_wild_39608261 | NA                                  | Ca_kabuli_denovo | 39608261                | A/T  | NA                 | NA                            | NA                 |
| Kabuli_wild_39608270 | NA                                  | Ca_kabuli_denovo | 39608270                | C/G  | NA                 | NA                            | NA                 |
| Kabuli_wild_39633856 | NA                                  | Ca_kabuli_denovo | 39633856                | C/G  | NA                 | NA                            | NA                 |



| SNP IDs              | NCBI dbSNP accession IDs (NCBI_SS#) | Chromosomes      | Physical positions (bp) | SNPs | Gene accession IDs | Sequence components of genome | Putative functions |
|----------------------|-------------------------------------|------------------|-------------------------|------|--------------------|-------------------------------|--------------------|
| Kabuli_wild_39633891 | NA                                  | Ca_kabuli_denovo | 39633891                | C/T  | NA                 | NA                            | NA                 |
| Kabuli_wild_39664654 | NA                                  | Ca_kabuli_denovo | 39664654                | A/G  | NA                 | NA                            | NA                 |
| Kabuli_wild_39664663 | NA                                  | Ca_kabuli_denovo | 39664663                | C/T  | NA                 | NA                            | NA                 |
| Kabuli_wild_39664669 | NA                                  | Ca_kabuli_denovo | 39664669                | C/T  | NA                 | NA                            | NA                 |
| Kabuli_wild_39674843 | NA                                  | Ca_kabuli_denovo | 39674843                | A/G  | NA                 | NA                            | NA                 |
| Kabuli_wild_39687984 | NA                                  | Ca_kabuli_denovo | 39687984                | C/G  | NA                 | NA                            | NA                 |
| Kabuli_wild_39688005 | NA                                  | Ca_kabuli_denovo | 39688005                | A/G  | NA                 | NA                            | NA                 |
| Kabuli_wild_39706401 | NA                                  | Ca_kabuli_denovo | 39706401                | A/C  | NA                 | NA                            | NA                 |
| Kabuli_wild_39706402 | NA                                  | Ca_kabuli_denovo | 39706402                | A/G  | NA                 | NA                            | NA                 |
| Kabuli_wild_39706403 | NA                                  | Ca_kabuli_denovo | 39706403                | A/G  | NA                 | NA                            | NA                 |
| Kabuli_wild_39706404 | NA                                  | Ca_kabuli_denovo | 39706404                | A/T  | NA                 | NA                            | NA                 |
| Kabuli_wild_39751414 | NA                                  | Ca_kabuli_denovo | 39751414                | A/T  | NA                 | NA                            | NA                 |
| Kabuli_wild_39762132 | NA                                  | Ca_kabuli_denovo | 39762132                | G/T  | NA                 | NA                            | NA                 |
| Kabuli_wild_39794956 | NA                                  | Ca_kabuli_denovo | 39794956                | A/G  | NA                 | NA                            | NA                 |
| Kabuli_wild_39807847 | NA                                  | Ca_kabuli_denovo | 39807847                | G/T  | NA                 | NA                            | NA                 |
| Kabuli_wild_39811378 | NA                                  | Ca_kabuli_denovo | 39811378                | C/G  | NA                 | NA                            | NA                 |
| Kabuli_wild_39814692 | NA                                  | Ca_kabuli_denovo | 39814692                | C/T  | NA                 | NA                            | NA                 |
| Kabuli_wild_39828489 | NA                                  | Ca_kabuli_denovo | 39828489                | C/T  | NA                 | NA                            | NA                 |
| Kabuli_wild_39831900 | NA                                  | Ca_kabuli_denovo | 39831900                | C/T  | NA                 | NA                            | NA                 |
| Kabuli_wild_39846108 | NA                                  | Ca_kabuli_denovo | 39846108                | G/T  | NA                 | NA                            | NA                 |
| Kabuli_wild_39846118 | NA                                  | Ca_kabuli_denovo | 39846118                | A/G  | NA                 | NA                            | NA                 |
| Kabuli_wild_39887810 | NA                                  | Ca_kabuli_denovo | 39887810                | A/G  | NA                 | NA                            | NA                 |
| Kabuli_wild_39887843 | NA                                  | Ca_kabuli_denovo | 39887843                | A/G  | NA                 | NA                            | NA                 |
| Kabuli_wild_39889601 | NA                                  | Ca_kabuli_denovo | 39889601                | G/T  | NA                 | NA                            | NA                 |
| Kabuli_wild_39890973 | NA                                  | Ca_kabuli_denovo | 39890973                | A/C  | NA                 | NA                            | NA                 |
| Kabuli_wild_39890974 | NA                                  | Ca_kabuli_denovo | 39890974                | A/C  | NA                 | NA                            | NA                 |
| Kabuli_wild_39890975 | NA                                  | Ca_kabuli_denovo | 39890975                | C/G  | NA                 | NA                            | NA                 |
| Kabuli_wild_39893222 | NA                                  | Ca_kabuli_denovo | 39893222                | A/G  | NA                 | NA                            | NA                 |
| Kabuli_wild_39902156 | NA                                  | Ca_kabuli_denovo | 39902156                | C/T  | NA                 | NA                            | NA                 |
| Kabuli_wild_39902162 | NA                                  | Ca_kabuli_denovo | 39902162                | C/T  | NA                 | NA                            | NA                 |
| Kabuli_wild_39902185 | NA                                  | Ca_kabuli_denovo | 39902185                | A/G  | NA                 | NA                            | NA                 |
| Kabuli_wild_39902186 | NA                                  | Ca_kabuli_denovo | 39902186                | C/G  | NA                 | NA                            | NA                 |
| Kabuli_wild_39906650 | NA                                  | Ca_kabuli_denovo | 39906650                | G/T  | NA                 | NA                            | NA                 |
| Kabuli_wild_39906680 | NA                                  | Ca_kabuli_denovo | 39906680                | C/G  | NA                 | NA                            | NA                 |
| Kabuli_wild_39928365 | NA                                  | Ca_kabuli_denovo | 39928365                | A/G  | NA                 | NA                            | NA                 |
| Kabuli_wild_39928380 | NA                                  | Ca_kabuli_denovo | 39928380                | A/G  | NA                 | NA                            | NA                 |
| Kabuli_wild_39928383 | NA                                  | Ca_kabuli_denovo | 39928383                | C/T  | NA                 | NA                            | NA                 |
| Kabuli_wild_39949825 | NA                                  | Ca_kabuli_denovo | 39949825                | G/C  | NA                 | NA                            | NA                 |
| Kabuli_wild_39957198 | NA                                  | Ca_kabuli_denovo | 39957198                | C/T  | NA                 | NA                            | NA                 |
| Kabuli_wild_39973331 | NA                                  | Ca_kabuli_denovo | 39973331                | G/T  | NA                 | NA                            | NA                 |
| Kabuli_wild_40016366 | NA                                  | Ca_kabuli_denovo | 40016366                | G/T  | NA                 | NA                            | NA                 |
| Kabuli_wild_40028208 | NA                                  | Ca_kabuli_denovo | 40028208                | G/T  | NA                 | NA                            | NA                 |
| Kabuli_wild_40029294 | NA                                  | Ca_kabuli_denovo | 40029294                | A/C  | NA                 | NA                            | NA                 |
| Kabuli_wild_40042420 | NA                                  | Ca_kabuli_denovo | 40042420                | G/T  | NA                 | NA                            | NA                 |

| SNP IDs              | NCBI dbSNP accession IDs (NCBI_SS#) | Chromosomes      | Physical positions (bp) | SNPs | Gene accession IDs | Sequence components of genome | Putative functions |
|----------------------|-------------------------------------|------------------|-------------------------|------|--------------------|-------------------------------|--------------------|
| Kabuli_wild_40042421 | NA                                  | Ca_kabuli_denovo | 40042421                | C/G  | NA                 | NA                            | NA                 |
| Kabuli_wild_40050172 | NA                                  | Ca_kabuli_denovo | 40050172                | A/C  | NA                 | NA                            | NA                 |
| Kabuli_wild_40076084 | NA                                  | Ca_kabuli_denovo | 40076084                | C/G  | NA                 | NA                            | NA                 |
| Kabuli_wild_40076090 | NA                                  | Ca_kabuli_denovo | 40076090                | C/G  | NA                 | NA                            | NA                 |
| Kabuli_wild_40076096 | NA                                  | Ca_kabuli_denovo | 40076096                | C/G  | NA                 | NA                            | NA                 |
| Kabuli_wild_40077234 | NA                                  | Ca_kabuli_denovo | 40077234                | C/T  | NA                 | NA                            | NA                 |
| Kabuli_wild_40083831 | NA                                  | Ca_kabuli_denovo | 40083831                | G/T  | NA                 | NA                            | NA                 |
| Kabuli_wild_40087342 | NA                                  | Ca_kabuli_denovo | 40087342                | A/G  | NA                 | NA                            | NA                 |
| Kabuli_wild_40087354 | NA                                  | Ca_kabuli_denovo | 40087354                | C/T  | NA                 | NA                            | NA                 |
| Kabuli_wild_40087357 | NA                                  | Ca_kabuli_denovo | 40087357                | C/T  | NA                 | NA                            | NA                 |
| Kabuli_wild_40088584 | NA                                  | Ca_kabuli_denovo | 40088584                | A/C  | NA                 | NA                            | NA                 |
| Kabuli_wild_40099362 | NA                                  | Ca_kabuli_denovo | 40099362                | C/G  | NA                 | NA                            | NA                 |
| Kabuli_wild_40099384 | NA                                  | Ca_kabuli_denovo | 40099384                | C/T  | NA                 | NA                            | NA                 |
| Kabuli_wild_40099387 | NA                                  | Ca_kabuli_denovo | 40099387                | A/G  | NA                 | NA                            | NA                 |
| Kabuli_wild_40099390 | NA                                  | Ca_kabuli_denovo | 40099390                | C/T  | NA                 | NA                            | NA                 |
| Kabuli_wild_40119674 | NA                                  | Ca_kabuli_denovo | 40119674                | A/T  | NA                 | NA                            | NA                 |
| Kabuli_wild_40174040 | NA                                  | Ca_kabuli_denovo | 40174040                | C/T  | NA                 | NA                            | NA                 |
| Kabuli_wild_40187839 | NA                                  | Ca_kabuli_denovo | 40187839                | A/G  | NA                 | NA                            | NA                 |
| Kabuli_wild_40187840 | NA                                  | Ca_kabuli_denovo | 40187840                | A/C  | NA                 | NA                            | NA                 |
| Kabuli_wild_40187847 | NA                                  | Ca_kabuli_denovo | 40187847                | A/G  | NA                 | NA                            | NA                 |
| Kabuli_wild_40187848 | NA                                  | Ca_kabuli_denovo | 40187848                | A/C  | NA                 | NA                            | NA                 |
| Kabuli_wild_40225864 | NA                                  | Ca_kabuli_denovo | 40225864                | A/G  | NA                 | NA                            | NA                 |
| Kabuli_wild_40225870 | NA                                  | Ca_kabuli_denovo | 40225870                | A/G  | NA                 | NA                            | NA                 |
| Kabuli_wild_40253636 | NA                                  | Ca_kabuli_denovo | 40253636                | C/T  | NA                 | NA                            | NA                 |
| Kabuli_wild_40277964 | NA                                  | Ca_kabuli_denovo | 40277964                | G/T  | NA                 | NA                            | NA                 |
| Kabuli_wild_40298132 | NA                                  | Ca_kabuli_denovo | 40298132                | A/G  | NA                 | NA                            | NA                 |
| Kabuli_wild_40298135 | NA                                  | Ca_kabuli_denovo | 40298135                | C/T  | NA                 | NA                            | NA                 |
| Kabuli_wild_40305473 | NA                                  | Ca_kabuli_denovo | 40305473                | G/T  | NA                 | NA                            | NA                 |
| Kabuli_wild_40343935 | NA                                  | Ca_kabuli_denovo | 40343935                | A/G  | NA                 | NA                            | NA                 |
| Kabuli_wild_40388686 | NA                                  | Ca_kabuli_denovo | 40388686                | C/T  | NA                 | NA                            | NA                 |
| Kabuli_wild_40389220 | NA                                  | Ca_kabuli_denovo | 40389220                | G/T  | NA                 | NA                            | NA                 |
| Kabuli_wild_40416474 | NA                                  | Ca_kabuli_denovo | 40416474                | C/G  | NA                 | NA                            | NA                 |
| Kabuli_wild_40449722 | NA                                  | Ca_kabuli_denovo | 40449722                | C/G  | NA                 | NA                            | NA                 |
| Kabuli_wild_40449731 | NA                                  | Ca_kabuli_denovo | 40449731                | C/G  | NA                 | NA                            | NA                 |
| Kabuli_wild_40458922 | NA                                  | Ca_kabuli_denovo | 40458922                | G/T  | NA                 | NA                            | NA                 |
| Kabuli_wild_40470095 | NA                                  | Ca_kabuli_denovo | 40470095                | A/G  | NA                 | NA                            | NA                 |
| Kabuli_wild_40470098 | NA                                  | Ca_kabuli_denovo | 40470098                | A/G  | NA                 | NA                            | NA                 |
| Kabuli_wild_40470110 | NA                                  | Ca_kabuli_denovo | 40470110                | A/G  | NA                 | NA                            | NA                 |
| Kabuli_wild_40471695 | NA                                  | Ca_kabuli_denovo | 40471695                | C/T  | NA                 | NA                            | NA                 |
| Kabuli_wild_40488666 | NA                                  | Ca_kabuli_denovo | 40488666                | A/G  | NA                 | NA                            | NA                 |
| Kabuli_wild_40488681 | NA                                  | Ca_kabuli_denovo | 40488681                | G/T  | NA                 | NA                            | NA                 |
| Kabuli_wild_40489084 | NA                                  | Ca_kabuli_denovo | 40489084                | C/G  | NA                 | NA                            | NA                 |
| Kabuli_wild_40494719 | NA                                  | Ca_kabuli_denovo | 40494719                | G/A  | NA                 | NA                            | NA                 |
| Kabuli_wild_40494721 | NA                                  | Ca_kabuli_denovo | 40494721                | A/G  | NA                 | NA                            | NA                 |

| SNP IDs              | NCBI dbSNP accession IDs (NCBI_SS#) | Chromosomes      | Physical positions (bp) | SNPs | Gene accession IDs | Sequence components of genome | Putative functions |
|----------------------|-------------------------------------|------------------|-------------------------|------|--------------------|-------------------------------|--------------------|
| Kabuli_wild_40497179 | NA                                  | Ca_kabuli_denovo | 40497179                | A/T  | NA                 | NA                            | NA                 |
| Kabuli_wild_40497184 | NA                                  | Ca_kabuli_denovo | 40497184                | A/T  | NA                 | NA                            | NA                 |
| Kabuli_wild_40499282 | NA                                  | Ca_kabuli_denovo | 40499282                | A/C  | NA                 | NA                            | NA                 |
| Kabuli_wild_40499379 | NA                                  | Ca_kabuli_denovo | 40499379                | G/T  | NA                 | NA                            | NA                 |
| Kabuli_wild_40501156 | NA                                  | Ca_kabuli_denovo | 40501156                | C/T  | NA                 | NA                            | NA                 |
| Kabuli_wild_40501178 | NA                                  | Ca_kabuli_denovo | 40501178                | A/T  | NA                 | NA                            | NA                 |
| Kabuli_wild_40505292 | NA                                  | Ca_kabuli_denovo | 40505292                | C/T  | NA                 | NA                            | NA                 |
| Kabuli_wild_40505462 | NA                                  | Ca_kabuli_denovo | 40505462                | G/T  | NA                 | NA                            | NA                 |
| Kabuli_wild_40505464 | NA                                  | Ca_kabuli_denovo | 40505464                | C/T  | NA                 | NA                            | NA                 |
| Kabuli_wild_40506744 | NA                                  | Ca_kabuli_denovo | 40506744                | G/A  | NA                 | NA                            | NA                 |
| Kabuli_wild_40506745 | NA                                  | Ca_kabuli_denovo | 40506745                | A/G  | NA                 | NA                            | NA                 |
| Kabuli_wild_40506746 | NA                                  | Ca_kabuli_denovo | 40506746                | C/A  | NA                 | NA                            | NA                 |
| Kabuli_wild_40507447 | NA                                  | Ca_kabuli_denovo | 40507447                | A/G  | NA                 | NA                            | NA                 |
| Kabuli_wild_40509054 | NA                                  | Ca_kabuli_denovo | 40509054                | G/T  | NA                 | NA                            | NA                 |
| Kabuli_wild_40510041 | NA                                  | Ca_kabuli_denovo | 40510041                | G/T  | NA                 | NA                            | NA                 |
| Kabuli_wild_40510042 | NA                                  | Ca_kabuli_denovo | 40510042                | A/C  | NA                 | NA                            | NA                 |
| Kabuli_wild_40511952 | NA                                  | Ca_kabuli_denovo | 40511952                | A/T  | NA                 | NA                            | NA                 |
| Kabuli_wild_40512651 | NA                                  | Ca_kabuli_denovo | 40512651                | C/G  | NA                 | NA                            | NA                 |
| Kabuli_wild_40512839 | NA                                  | Ca_kabuli_denovo | 40512839                | C/G  | NA                 | NA                            | NA                 |
| Kabuli_wild_40516032 | NA                                  | Ca_kabuli_denovo | 40516032                | C/G  | NA                 | NA                            | NA                 |
| Kabuli_wild_40518390 | NA                                  | Ca_kabuli_denovo | 40518390                | A/G  | NA                 | NA                            | NA                 |
| Kabuli_wild_40521525 | NA                                  | Ca_kabuli_denovo | 40521525                | C/G  | NA                 | NA                            | NA                 |
| Kabuli_wild_40531215 | NA                                  | Ca_kabuli_denovo | 40531215                | A/T  | NA                 | NA                            | NA                 |
| Kabuli_wild_40536927 | NA                                  | Ca_kabuli_denovo | 40536927                | A/T  | NA                 | NA                            | NA                 |
| Kabuli_wild_40536930 | NA                                  | Ca_kabuli_denovo | 40536930                | A/G  | NA                 | NA                            | NA                 |
| Kabuli_wild_40541104 | NA                                  | Ca_kabuli_denovo | 40541104                | A/G  | NA                 | NA                            | NA                 |
| Kabuli_wild_40541140 | NA                                  | Ca_kabuli_denovo | 40541140                | A/G  | NA                 | NA                            | NA                 |
| Kabuli_wild_40542439 | NA                                  | Ca_kabuli_denovo | 40542439                | G/T  | NA                 | NA                            | NA                 |
| Kabuli_wild_40544400 | NA                                  | Ca_kabuli_denovo | 40544400                | C/G  | NA                 | NA                            | NA                 |
| Kabuli_wild_40544403 | NA                                  | Ca_kabuli_denovo | 40544403                | G/T  | NA                 | NA                            | NA                 |
| Kabuli_wild_40555419 | NA                                  | Ca_kabuli_denovo | 40555419                | G/T  | NA                 | NA                            | NA                 |
| Kabuli_wild_40558116 | NA                                  | Ca_kabuli_denovo | 40558116                | A/T  | NA                 | NA                            | NA                 |
| Kabuli_wild_40571976 | NA                                  | Ca_kabuli_denovo | 40571976                | G/T  | NA                 | NA                            | NA                 |
| Kabuli_wild_40571986 | NA                                  | Ca_kabuli_denovo | 40571986                | C/T  | NA                 | NA                            | NA                 |
| Kabuli_wild_40580268 | NA                                  | Ca_kabuli_denovo | 40580268                | G/T  | NA                 | NA                            | NA                 |
| Kabuli_wild_40583784 | NA                                  | Ca_kabuli_denovo | 40583784                | A/G  | NA                 | NA                            | NA                 |
| Kabuli_wild_40607643 | NA                                  | Ca_kabuli_denovo | 40607643                | A/G  | NA                 | NA                            | NA                 |
| Kabuli_wild_40607789 | NA                                  | Ca_kabuli_denovo | 40607789                | C/T  | NA                 | NA                            | NA                 |
| Kabuli_wild_40612295 | NA                                  | Ca_kabuli_denovo | 40612295                | G/A  | NA                 | NA                            | NA                 |
| Kabuli_wild_40613015 | NA                                  | Ca_kabuli_denovo | 40613015                | G/A  | NA                 | NA                            | NA                 |
| Kabuli_wild_40618579 | NA                                  | Ca_kabuli_denovo | 40618579                | G/A  | NA                 | NA                            | NA                 |
| Kabuli_wild_40618633 | NA                                  | Ca_kabuli_denovo | 40618633                | G/A  | NA                 | NA                            | NA                 |
| Kabuli_wild_40621839 | NA                                  | Ca_kabuli_denovo | 40621839                | C/T  | NA                 | NA                            | NA                 |
| Kabuli_wild_40621946 | NA                                  | Ca_kabuli_denovo | 40621946                | G/T  | NA                 | NA                            | NA                 |

| SNP IDs              | NCBI dbSNP accession IDs (NCBI_SS#) | Chromosomes      | Physical positions (bp) | SNPs | Gene accession IDs | Sequence components of genome | Putative functions |
|----------------------|-------------------------------------|------------------|-------------------------|------|--------------------|-------------------------------|--------------------|
| Kabuli_wild_40623766 | NA                                  | Ca_kabuli_denovo | 40623766                | A/G  | NA                 | NA                            | NA                 |
| Kabuli_wild_40623779 | NA                                  | Ca_kabuli_denovo | 40623779                | A/T  | NA                 | NA                            | NA                 |
| Kabuli_wild_40626911 | NA                                  | Ca_kabuli_denovo | 40626911                | A/C  | NA                 | NA                            | NA                 |
| Kabuli_wild_40626912 | NA                                  | Ca_kabuli_denovo | 40626912                | A/G  | NA                 | NA                            | NA                 |
| Kabuli_wild_40626913 | NA                                  | Ca_kabuli_denovo | 40626913                | A/T  | NA                 | NA                            | NA                 |
| Kabuli_wild_40628231 | NA                                  | Ca_kabuli_denovo | 40628231                | C/G  | NA                 | NA                            | NA                 |
| Kabuli_wild_40628239 | NA                                  | Ca_kabuli_denovo | 40628239                | G/C  | NA                 | NA                            | NA                 |
| Kabuli_wild_40639230 | NA                                  | Ca_kabuli_denovo | 40639230                | A/G  | NA                 | NA                            | NA                 |
| Kabuli_wild_40667200 | NA                                  | Ca_kabuli_denovo | 40667200                | A/T  | NA                 | NA                            | NA                 |
| Kabuli_wild_40667209 | NA                                  | Ca_kabuli_denovo | 40667209                | C/T  | NA                 | NA                            | NA                 |
| Kabuli_wild_40667210 | NA                                  | Ca_kabuli_denovo | 40667210                | C/T  | NA                 | NA                            | NA                 |
| Kabuli_wild_40668362 | NA                                  | Ca_kabuli_denovo | 40668362                | A/C  | NA                 | NA                            | NA                 |
| Kabuli_wild_40681773 | NA                                  | Ca_kabuli_denovo | 40681773                | T/G  | NA                 | NA                            | NA                 |
| Kabuli_wild_40681777 | NA                                  | Ca_kabuli_denovo | 40681777                | C/G  | NA                 | NA                            | NA                 |
| Kabuli_wild_40681883 | NA                                  | Ca_kabuli_denovo | 40681883                | T/C  | NA                 | NA                            | NA                 |
| Kabuli_wild_40691847 | NA                                  | Ca_kabuli_denovo | 40691847                | A/G  | NA                 | NA                            | NA                 |
| Kabuli_wild_40692925 | NA                                  | Ca_kabuli_denovo | 40692925                | C/G  | NA                 | NA                            | NA                 |
| Kabuli_wild_40692970 | NA                                  | Ca_kabuli_denovo | 40692970                | A/G  | NA                 | NA                            | NA                 |
| Kabuli_wild_40692976 | NA                                  | Ca_kabuli_denovo | 40692976                | C/G  | NA                 | NA                            | NA                 |
| Kabuli_wild_40693829 | NA                                  | Ca_kabuli_denovo | 40693829                | C/T  | NA                 | NA                            | NA                 |
| Kabuli_wild_40693835 | NA                                  | Ca_kabuli_denovo | 40693835                | C/T  | NA                 | NA                            | NA                 |
| Kabuli_wild_40694401 | NA                                  | Ca_kabuli_denovo | 40694401                | G/T  | NA                 | NA                            | NA                 |
| Kabuli_wild_40694543 | NA                                  | Ca_kabuli_denovo | 40694543                | C/T  | NA                 | NA                            | NA                 |
| Kabuli_wild_40695708 | NA                                  | Ca_kabuli_denovo | 40695708                | G/A  | NA                 | NA                            | NA                 |
| Kabuli_wild_40695750 | NA                                  | Ca_kabuli_denovo | 40695750                | A/G  | NA                 | NA                            | NA                 |
| Kabuli_wild_40698335 | NA                                  | Ca_kabuli_denovo | 40698335                | A/G  | NA                 | NA                            | NA                 |
| Kabuli_wild_40698339 | NA                                  | Ca_kabuli_denovo | 40698339                | A/G  | NA                 | NA                            | NA                 |
| Kabuli_wild_40702734 | NA                                  | Ca_kabuli_denovo | 40702734                | A/C  | NA                 | NA                            | NA                 |
| Kabuli_wild_40702742 | NA                                  | Ca_kabuli_denovo | 40702742                | C/T  | NA                 | NA                            | NA                 |
| Kabuli_wild_40702748 | NA                                  | Ca_kabuli_denovo | 40702748                | A/G  | NA                 | NA                            | NA                 |
| Kabuli_wild_40702757 | NA                                  | Ca_kabuli_denovo | 40702757                | A/G  | NA                 | NA                            | NA                 |
| Kabuli_wild_40704736 | NA                                  | Ca_kabuli_denovo | 40704736                | G/T  | NA                 | NA                            | NA                 |
| Kabuli_wild_40704928 | NA                                  | Ca_kabuli_denovo | 40704928                | G/T  | NA                 | NA                            | NA                 |
| Kabuli_wild_40705010 | NA                                  | Ca_kabuli_denovo | 40705010                | C/T  | NA                 | NA                            | NA                 |
| Kabuli_wild_40705021 | NA                                  | Ca_kabuli_denovo | 40705021                | G/T  | NA                 | NA                            | NA                 |
| Kabuli_wild_40711566 | NA                                  | Ca_kabuli_denovo | 40711566                | C/T  | NA                 | NA                            | NA                 |
| Kabuli_wild_40711575 | NA                                  | Ca_kabuli_denovo | 40711575                | A/G  | NA                 | NA                            | NA                 |
| Kabuli_wild_40711576 | NA                                  | Ca_kabuli_denovo | 40711576                | C/G  | NA                 | NA                            | NA                 |
| Kabuli_wild_40715082 | NA                                  | Ca_kabuli_denovo | 40715082                | C/T  | NA                 | NA                            | NA                 |
| Kabuli_wild_40715092 | NA                                  | Ca_kabuli_denovo | 40715092                | C/G  | NA                 | NA                            | NA                 |
| Kabuli_wild_40726891 | NA                                  | Ca_kabuli_denovo | 40726891                | A/G  | NA                 | NA                            | NA                 |
| Kabuli_wild_40726892 | NA                                  | Ca_kabuli_denovo | 40726892                | A/C  | NA                 | NA                            | NA                 |
| Kabuli_wild_40729602 | NA                                  | Ca_kabuli_denovo | 40729602                | A/T  | NA                 | NA                            | NA                 |
| Kabuli_wild_40729655 | NA                                  | Ca_kabuli_denovo | 40729655                | C/G  | NA                 | NA                            | NA                 |

| SNP IDs              | NCBI dbSNP accession IDs (NCBI_SS#) | Chromosomes      | Physical positions (bp) | SNPs | Gene accession IDs | Sequence components of genome | Putative functions |
|----------------------|-------------------------------------|------------------|-------------------------|------|--------------------|-------------------------------|--------------------|
| Kabuli_wild_40729659 | NA                                  | Ca_kabuli_denovo | 40729659                | A/C  | NA                 | NA                            | NA                 |
| Kabuli_wild_40731410 | NA                                  | Ca_kabuli_denovo | 40731410                | A/C  | NA                 | NA                            | NA                 |
| Kabuli_wild_40731414 | NA                                  | Ca_kabuli_denovo | 40731414                | A/T  | NA                 | NA                            | NA                 |
| Kabuli_wild_40736041 | NA                                  | Ca_kabuli_denovo | 40736041                | C/G  | NA                 | NA                            | NA                 |
| Kabuli_wild_40740480 | NA                                  | Ca_kabuli_denovo | 40740480                | C/G  | NA                 | NA                            | NA                 |
| Kabuli_wild_40740500 | NA                                  | Ca_kabuli_denovo | 40740500                | A/G  | NA                 | NA                            | NA                 |
| Kabuli_wild_40742537 | NA                                  | Ca_kabuli_denovo | 40742537                | A/G  | NA                 | NA                            | NA                 |
| Kabuli_wild_40748637 | NA                                  | Ca_kabuli_denovo | 40748637                | C/G  | NA                 | NA                            | NA                 |
| Kabuli_wild_40748664 | NA                                  | Ca_kabuli_denovo | 40748664                | A/G  | NA                 | NA                            | NA                 |
| Kabuli_wild_40749023 | NA                                  | Ca_kabuli_denovo | 40749023                | A/G  | NA                 | NA                            | NA                 |
| Kabuli_wild_40753000 | NA                                  | Ca_kabuli_denovo | 40753000                | A/C  | NA                 | NA                            | NA                 |
| Kabuli_wild_40765205 | NA                                  | Ca_kabuli_denovo | 40765205                | G/T  | NA                 | NA                            | NA                 |
| Kabuli_wild_40769357 | NA                                  | Ca_kabuli_denovo | 40769357                | G/T  | NA                 | NA                            | NA                 |
| Kabuli_wild_40769363 | NA                                  | Ca_kabuli_denovo | 40769363                | C/T  | NA                 | NA                            | NA                 |
| Kabuli_wild_40775776 | NA                                  | Ca_kabuli_denovo | 40775776                | A/G  | NA                 | NA                            | NA                 |
| Kabuli_wild_40775788 | NA                                  | Ca_kabuli_denovo | 40775788                | A/G  | NA                 | NA                            | NA                 |
| Kabuli_wild_40779055 | NA                                  | Ca_kabuli_denovo | 40779055                | C/T  | NA                 | NA                            | NA                 |
| Kabuli_wild_40779113 | NA                                  | Ca_kabuli_denovo | 40779113                | C/T  | NA                 | NA                            | NA                 |
| Kabuli_wild_40786611 | NA                                  | Ca_kabuli_denovo | 40786611                | C/T  | NA                 | NA                            | NA                 |
| Kabuli_wild_40787542 | NA                                  | Ca_kabuli_denovo | 40787542                | T/G  | NA                 | NA                            | NA                 |
| Kabuli_wild_40805849 | NA                                  | Ca_kabuli_denovo | 40805849                | A/G  | NA                 | NA                            | NA                 |
| Kabuli_wild_40814784 | NA                                  | Ca_kabuli_denovo | 40814784                | A/G  | NA                 | NA                            | NA                 |
| Kabuli_wild_40822749 | NA                                  | Ca_kabuli_denovo | 40822749                | G/T  | NA                 | NA                            | NA                 |
| Kabuli_wild_40822757 | NA                                  | Ca_kabuli_denovo | 40822757                | A/G  | NA                 | NA                            | NA                 |
| Kabuli_wild_40823424 | NA                                  | Ca_kabuli_denovo | 40823424                | A/G  | NA                 | NA                            | NA                 |
| Kabuli_wild_40824412 | NA                                  | Ca_kabuli_denovo | 40824412                | A/G  | NA                 | NA                            | NA                 |
| Kabuli_wild_40824600 | NA                                  | Ca_kabuli_denovo | 40824600                | A/C  | NA                 | NA                            | NA                 |
| Kabuli_wild_40824961 | NA                                  | Ca_kabuli_denovo | 40824961                | C/G  | NA                 | NA                            | NA                 |
| Kabuli_wild_40842813 | NA                                  | Ca_kabuli_denovo | 40842813                | C/T  | NA                 | NA                            | NA                 |
| Kabuli_wild_40842853 | NA                                  | Ca_kabuli_denovo | 40842853                | A/G  | NA                 | NA                            | NA                 |
| Kabuli_wild_40855380 | NA                                  | Ca_kabuli_denovo | 40855380                | C/T  | NA                 | NA                            | NA                 |
| Kabuli_wild_40944376 | NA                                  | Ca_kabuli_denovo | 40944376                | C/T  | NA                 | NA                            | NA                 |
| Kabuli_wild_40944442 | NA                                  | Ca_kabuli_denovo | 40944442                | C/T  | NA                 | NA                            | NA                 |
| Kabuli_wild_41042460 | NA                                  | Ca_kabuli_denovo | 41042460                | G/T  | NA                 | NA                            | NA                 |
| Kabuli_wild_41046833 | NA                                  | Ca_kabuli_denovo | 41046833                | C/T  | NA                 | NA                            | NA                 |
| Kabuli_wild_41046847 | NA                                  | Ca_kabuli_denovo | 41046847                | A/G  | NA                 | NA                            | NA                 |
| Kabuli_wild_41064973 | NA                                  | Ca_kabuli_denovo | 41064973                | A/G  | NA                 | NA                            | NA                 |
| Kabuli_wild_41064976 | NA                                  | Ca_kabuli_denovo | 41064976                | C/T  | NA                 | NA                            | NA                 |
| Kabuli_wild_41066294 | NA                                  | Ca_kabuli_denovo | 41066294                | A/T  | NA                 | NA                            | NA                 |
| Kabuli_wild_41098128 | NA                                  | Ca_kabuli_denovo | 41098128                | C/G  | NA                 | NA                            | NA                 |
| Kabuli_wild_41098131 | NA                                  | Ca_kabuli_denovo | 41098131                | A/C  | NA                 | NA                            | NA                 |
| Kabuli_wild_41098170 | NA                                  | Ca_kabuli_denovo | 41098170                | C/T  | NA                 | NA                            | NA                 |
| Kabuli_wild_41098200 | NA                                  | Ca_kabuli_denovo | 41098200                | A/G  | NA                 | NA                            | NA                 |
| Kabuli_wild_41106971 | NA                                  | Ca_kabuli_denovo | 41106971                | A/G  | NA                 | NA                            | NA                 |

| SNP IDs              | NCBI dbSNP accession IDs (NCBI_SS#) | Chromosomes      | Physical positions (bp) | SNPs | Gene accession IDs | Sequence components of genome | Putative functions |
|----------------------|-------------------------------------|------------------|-------------------------|------|--------------------|-------------------------------|--------------------|
| Kabuli_wild_41106980 | NA                                  | Ca_kabuli_denovo | 41106980                | A/G  | NA                 | NA                            | NA                 |
| Kabuli_wild_41106992 | NA                                  | Ca_kabuli_denovo | 41106992                | A/G  | NA                 | NA                            | NA                 |
| Kabuli_wild_41106994 | NA                                  | Ca_kabuli_denovo | 41106994                | A/G  | NA                 | NA                            | NA                 |
| Kabuli_wild_41124848 | NA                                  | Ca_kabuli_denovo | 41124848                | A/G  | NA                 | NA                            | NA                 |
| Kabuli_wild_41133561 | NA                                  | Ca_kabuli_denovo | 41133561                | C/T  | NA                 | NA                            | NA                 |
| Kabuli_wild_41137377 | NA                                  | Ca_kabuli_denovo | 41137377                | C/T  | NA                 | NA                            | NA                 |
| Kabuli_wild_41139361 | NA                                  | Ca_kabuli_denovo | 41139361                | C/G  | NA                 | NA                            | NA                 |
| Kabuli_wild_41148962 | NA                                  | Ca_kabuli_denovo | 41148962                | C/T  | NA                 | NA                            | NA                 |
| Kabuli_wild_41148977 | NA                                  | Ca_kabuli_denovo | 41148977                | A/G  | NA                 | NA                            | NA                 |
| Kabuli_wild_41148989 | NA                                  | Ca_kabuli_denovo | 41148989                | A/G  | NA                 | NA                            | NA                 |
| Kabuli_wild_41154180 | NA                                  | Ca_kabuli_denovo | 41154180                | A/G  | NA                 | NA                            | NA                 |
| Kabuli_wild_41154193 | NA                                  | Ca_kabuli_denovo | 41154193                | C/T  | NA                 | NA                            | NA                 |
| Kabuli_wild_41194050 | NA                                  | Ca_kabuli_denovo | 41194050                | A/G  | NA                 | NA                            | NA                 |
| Kabuli_wild_41194051 | NA                                  | Ca_kabuli_denovo | 41194051                | C/T  | NA                 | NA                            | NA                 |
| Kabuli_wild_41194052 | NA                                  | Ca_kabuli_denovo | 41194052                | C/G  | NA                 | NA                            | NA                 |
| Kabuli_wild_41214606 | NA                                  | Ca_kabuli_denovo | 41214606                | C/T  | NA                 | NA                            | NA                 |
| Kabuli_wild_41222217 | NA                                  | Ca_kabuli_denovo | 41222217                | C/T  | NA                 | NA                            | NA                 |
| Kabuli_wild_41227724 | NA                                  | Ca_kabuli_denovo | 41227724                | A/C  | NA                 | NA                            | NA                 |
| Kabuli_wild_41227733 | NA                                  | Ca_kabuli_denovo | 41227733                | C/G  | NA                 | NA                            | NA                 |
| Kabuli_wild_41231084 | NA                                  | Ca_kabuli_denovo | 41231084                | A/C  | NA                 | NA                            | NA                 |
| Kabuli_wild_41236086 | NA                                  | Ca_kabuli_denovo | 41236086                | C/G  | NA                 | NA                            | NA                 |
| Kabuli_wild_41236095 | NA                                  | Ca_kabuli_denovo | 41236095                | G/T  | NA                 | NA                            | NA                 |
| Kabuli_wild_41239786 | NA                                  | Ca_kabuli_denovo | 41239786                | C/G  | NA                 | NA                            | NA                 |
| Kabuli_wild_41257851 | NA                                  | Ca_kabuli_denovo | 41257851                | A/C  | NA                 | NA                            | NA                 |
| Kabuli_wild_41257871 | NA                                  | Ca_kabuli_denovo | 41257871                | A/G  | NA                 | NA                            | NA                 |
| Kabuli_wild_41261167 | NA                                  | Ca_kabuli_denovo | 41261167                | A/C  | NA                 | NA                            | NA                 |
| Kabuli_wild_41266705 | NA                                  | Ca_kabuli_denovo | 41266705                | A/G  | NA                 | NA                            | NA                 |
| Kabuli_wild_41266728 | NA                                  | Ca_kabuli_denovo | 41266728                | A/T  | NA                 | NA                            | NA                 |
| Kabuli_wild_41286447 | NA                                  | Ca_kabuli_denovo | 41286447                | C/T  | NA                 | NA                            | NA                 |
| Kabuli_wild_41286459 | NA                                  | Ca_kabuli_denovo | 41286459                | A/T  | NA                 | NA                            | NA                 |
| Kabuli_wild_41296032 | NA                                  | Ca_kabuli_denovo | 41296032                | A/C  | NA                 | NA                            | NA                 |
| Kabuli_wild_41296076 | NA                                  | Ca_kabuli_denovo | 41296076                | A/G  | NA                 | NA                            | NA                 |
| Kabuli_wild_41317565 | NA                                  | Ca_kabuli_denovo | 41317565                | A/C  | NA                 | NA                            | NA                 |
| Kabuli_wild_41338586 | NA                                  | Ca_kabuli_denovo | 41338586                | A/G  | NA                 | NA                            | NA                 |
| Kabuli_wild_41338587 | NA                                  | Ca_kabuli_denovo | 41338587                | A/G  | NA                 | NA                            | NA                 |
| Kabuli_wild_41346058 | NA                                  | Ca_kabuli_denovo | 41346058                | A/G  | NA                 | NA                            | NA                 |
| Kabuli_wild_41346059 | NA                                  | Ca_kabuli_denovo | 41346059                | A/G  | NA                 | NA                            | NA                 |
| Kabuli_wild_41356517 | NA                                  | Ca_kabuli_denovo | 41356517                | A/T  | NA                 | NA                            | NA                 |
| Kabuli_wild_41433994 | NA                                  | Ca_kabuli_denovo | 41433994                | A/C  | NA                 | NA                            | NA                 |
| Kabuli_wild_41434060 | NA                                  | Ca_kabuli_denovo | 41434060                | G/T  | NA                 | NA                            | NA                 |
| Kabuli_wild_41440236 | NA                                  | Ca_kabuli_denovo | 41440236                | C/T  | NA                 | NA                            | NA                 |
| Kabuli_wild_41452817 | NA                                  | Ca_kabuli_denovo | 41452817                | A/T  | NA                 | NA                            | NA                 |
| Kabuli_wild_41487133 | NA                                  | Ca_kabuli_denovo | 41487133                | A/G  | NA                 | NA                            | NA                 |
| Kabuli_wild_41496393 | NA                                  | Ca_kabuli_denovo | 41496393                | A/C  | NA                 | NA                            | NA                 |

| SNP IDs                     | NCBI dbSNP accession IDs (NCBI_SS#) | Chromosomes             | Physical positions (bp) | SNPs | Gene accession IDs | Sequence components of genome | Putative functions |
|-----------------------------|-------------------------------------|-------------------------|-------------------------|------|--------------------|-------------------------------|--------------------|
| <i>Kabuli_wild_41496394</i> | NA                                  | <i>Ca_kabuli_denovo</i> | 41496394                | G/T  | NA                 | NA                            | NA                 |
| <i>Kabuli_wild_41497829</i> | NA                                  | <i>Ca_kabuli_denovo</i> | 41497829                | A/G  | NA                 | NA                            | NA                 |
| <i>Kabuli_wild_41497842</i> | NA                                  | <i>Ca_kabuli_denovo</i> | 41497842                | C/T  | NA                 | NA                            | NA                 |
| <i>Kabuli_wild_41549247</i> | NA                                  | <i>Ca_kabuli_denovo</i> | 41549247                | T/C  | NA                 | NA                            | NA                 |
| <i>Kabuli_wild_41549277</i> | NA                                  | <i>Ca_kabuli_denovo</i> | 41549277                | T/G  | NA                 | NA                            | NA                 |
| <i>Kabuli_wild_41549300</i> | NA                                  | <i>Ca_kabuli_denovo</i> | 41549300                | C/T  | NA                 | NA                            | NA                 |
| <i>Kabuli_wild_41549477</i> | NA                                  | <i>Ca_kabuli_denovo</i> | 41549477                | A/T  | NA                 | NA                            | NA                 |
| <i>Kabuli_wild_41549515</i> | NA                                  | <i>Ca_kabuli_denovo</i> | 41549515                | A/G  | NA                 | NA                            | NA                 |
| <i>Kabuli_wild_41550336</i> | NA                                  | <i>Ca_kabuli_denovo</i> | 41550336                | A/G  | NA                 | NA                            | NA                 |
| <i>Kabuli_wild_41550440</i> | NA                                  | <i>Ca_kabuli_denovo</i> | 41550440                | C/G  | NA                 | NA                            | NA                 |
| <i>Kabuli_wild_41550555</i> | NA                                  | <i>Ca_kabuli_denovo</i> | 41550555                | A/G  | NA                 | NA                            | NA                 |
| <i>Kabuli_wild_41551175</i> | NA                                  | <i>Ca_kabuli_denovo</i> | 41551175                | C/G  | NA                 | NA                            | NA                 |
| <i>Kabuli_wild_41551460</i> | NA                                  | <i>Ca_kabuli_denovo</i> | 41551460                | C/G  | NA                 | NA                            | NA                 |
| <i>Kabuli_wild_41551697</i> | NA                                  | <i>Ca_kabuli_denovo</i> | 41551697                | C/G  | NA                 | NA                            | NA                 |
| <i>Kabuli_wild_41554360</i> | NA                                  | <i>Ca_kabuli_denovo</i> | 41554360                | A/G  | NA                 | NA                            | NA                 |
| <i>Kabuli_wild_41555038</i> | NA                                  | <i>Ca_kabuli_denovo</i> | 41555038                | G/T  | NA                 | NA                            | NA                 |
| <i>Kabuli_wild_41555048</i> | NA                                  | <i>Ca_kabuli_denovo</i> | 41555048                | A/G  | NA                 | NA                            | NA                 |
| <i>Kabuli_wild_41555357</i> | NA                                  | <i>Ca_kabuli_denovo</i> | 41555357                | C/G  | NA                 | NA                            | NA                 |
| <i>Kabuli_wild_41557445</i> | NA                                  | <i>Ca_kabuli_denovo</i> | 41557445                | A/G  | NA                 | NA                            | NA                 |
| <i>Kabuli_wild_41559373</i> | NA                                  | <i>Ca_kabuli_denovo</i> | 41559373                | C/T  | NA                 | NA                            | NA                 |
| <i>Kabuli_wild_41559404</i> | NA                                  | <i>Ca_kabuli_denovo</i> | 41559404                | A/G  | NA                 | NA                            | NA                 |
| <i>Kabuli_wild_41559431</i> | NA                                  | <i>Ca_kabuli_denovo</i> | 41559431                | A/G  | NA                 | NA                            | NA                 |
| <i>Kabuli_wild_41559432</i> | NA                                  | <i>Ca_kabuli_denovo</i> | 41559432                | A/T  | NA                 | NA                            | NA                 |
| <i>Kabuli_wild_41559639</i> | NA                                  | <i>Ca_kabuli_denovo</i> | 41559639                | A/G  | NA                 | NA                            | NA                 |
| <i>Kabuli_wild_41560619</i> | NA                                  | <i>Ca_kabuli_denovo</i> | 41560619                | C/G  | NA                 | NA                            | NA                 |
| <i>Kabuli_wild_41560691</i> | NA                                  | <i>Ca_kabuli_denovo</i> | 41560691                | C/T  | NA                 | NA                            | NA                 |
| <i>Kabuli_wild_41560783</i> | NA                                  | <i>Ca_kabuli_denovo</i> | 41560783                | C/G  | NA                 | NA                            | NA                 |
| <i>Kabuli_wild_41560784</i> | NA                                  | <i>Ca_kabuli_denovo</i> | 41560784                | A/C  | NA                 | NA                            | NA                 |
| <i>Kabuli_wild_41561466</i> | NA                                  | <i>Ca_kabuli_denovo</i> | 41561466                | C/G  | NA                 | NA                            | NA                 |
| <i>Kabuli_wild_41561932</i> | NA                                  | <i>Ca_kabuli_denovo</i> | 41561932                | G/T  | NA                 | NA                            | NA                 |
| <i>Kabuli_wild_41563600</i> | NA                                  | <i>Ca_kabuli_denovo</i> | 41563600                | A/C  | NA                 | NA                            | NA                 |
| <i>Kabuli_wild_41563602</i> | NA                                  | <i>Ca_kabuli_denovo</i> | 41563602                | A/G  | NA                 | NA                            | NA                 |
| <i>Kabuli_wild_41563603</i> | NA                                  | <i>Ca_kabuli_denovo</i> | 41563603                | G/T  | NA                 | NA                            | NA                 |
| <i>Kabuli_wild_41612989</i> | NA                                  | <i>Ca_kabuli_denovo</i> | 41612989                | G/A  | NA                 | NA                            | NA                 |
| <i>Kabuli_wild_41623386</i> | NA                                  | <i>Ca_kabuli_denovo</i> | 41623386                | T/G  | NA                 | NA                            | NA                 |
| <i>Kabuli_wild_41623388</i> | NA                                  | <i>Ca_kabuli_denovo</i> | 41623388                | C/A  | NA                 | NA                            | NA                 |
| <i>Kabuli_wild_41623400</i> | NA                                  | <i>Ca_kabuli_denovo</i> | 41623400                | T/C  | NA                 | NA                            | NA                 |
| <i>Kabuli_wild_41694232</i> | NA                                  | <i>Ca_kabuli_denovo</i> | 41694232                | G/T  | NA                 | NA                            | NA                 |
| <i>Kabuli_wild_41695354</i> | NA                                  | <i>Ca_kabuli_denovo</i> | 41695354                | G/T  | NA                 | NA                            | NA                 |
| <i>Kabuli_wild_41698798</i> | NA                                  | <i>Ca_kabuli_denovo</i> | 41698798                | C/G  | NA                 | NA                            | NA                 |
| <i>Kabuli_wild_41730244</i> | NA                                  | <i>Ca_kabuli_denovo</i> | 41730244                | C/G  | NA                 | NA                            | NA                 |
| <i>Kabuli_wild_41740202</i> | NA                                  | <i>Ca_kabuli_denovo</i> | 41740202                | G/T  | NA                 | NA                            | NA                 |
| <i>Kabuli_wild_41743070</i> | NA                                  | <i>Ca_kabuli_denovo</i> | 41743070                | G/T  | NA                 | NA                            | NA                 |
| <i>Kabuli_wild_41751257</i> | NA                                  | <i>Ca_kabuli_denovo</i> | 41751257                | C/T  | NA                 | NA                            | NA                 |

| SNP IDs              | NCBI dbSNP accession IDs (NCBI_SS#) | Chromosomes      | Physical positions (bp) | SNPs | Gene accession IDs | Sequence components of genome | Putative functions |
|----------------------|-------------------------------------|------------------|-------------------------|------|--------------------|-------------------------------|--------------------|
| Kabuli_wild_41751275 | NA                                  | Ca_kabuli_denovo | 41751275                | G/T  | NA                 | NA                            | NA                 |
| Kabuli_wild_41751278 | NA                                  | Ca_kabuli_denovo | 41751278                | A/C  | NA                 | NA                            | NA                 |
| Kabuli_wild_41751281 | NA                                  | Ca_kabuli_denovo | 41751281                | C/G  | NA                 | NA                            | NA                 |
| Kabuli_wild_41751999 | NA                                  | Ca_kabuli_denovo | 41751999                | A/C  | NA                 | NA                            | NA                 |
| Kabuli_wild_41758506 | NA                                  | Ca_kabuli_denovo | 41758506                | G/T  | NA                 | NA                            | NA                 |
| Kabuli_wild_41764781 | NA                                  | Ca_kabuli_denovo | 41764781                | G/T  | NA                 | NA                            | NA                 |
| Kabuli_wild_41804912 | NA                                  | Ca_kabuli_denovo | 41804912                | C/G  | NA                 | NA                            | NA                 |
| Kabuli_wild_41818881 | NA                                  | Ca_kabuli_denovo | 41818881                | A/C  | NA                 | NA                            | NA                 |
| Kabuli_wild_41834651 | NA                                  | Ca_kabuli_denovo | 41834651                | A/C  | NA                 | NA                            | NA                 |
| Kabuli_wild_41837121 | NA                                  | Ca_kabuli_denovo | 41837121                | A/C  | NA                 | NA                            | NA                 |
| Kabuli_wild_41870620 | NA                                  | Ca_kabuli_denovo | 41870620                | G/T  | NA                 | NA                            | NA                 |
| Kabuli_wild_41873720 | NA                                  | Ca_kabuli_denovo | 41873720                | G/A  | NA                 | NA                            | NA                 |
| Kabuli_wild_41873762 | NA                                  | Ca_kabuli_denovo | 41873762                | C/G  | NA                 | NA                            | NA                 |
| Kabuli_wild_41879395 | NA                                  | Ca_kabuli_denovo | 41879395                | A/C  | NA                 | NA                            | NA                 |
| Kabuli_wild_41879396 | NA                                  | Ca_kabuli_denovo | 41879396                | G/T  | NA                 | NA                            | NA                 |
| Kabuli_wild_41891688 | NA                                  | Ca_kabuli_denovo | 41891688                | C/T  | NA                 | NA                            | NA                 |
| Kabuli_wild_41891715 | NA                                  | Ca_kabuli_denovo | 41891715                | A/G  | NA                 | NA                            | NA                 |
| Kabuli_wild_41896557 | NA                                  | Ca_kabuli_denovo | 41896557                | G/T  | NA                 | NA                            | NA                 |
| Kabuli_wild_41905520 | NA                                  | Ca_kabuli_denovo | 41905520                | C/G  | NA                 | NA                            | NA                 |
| Kabuli_wild_41918300 | NA                                  | Ca_kabuli_denovo | 41918300                | G/T  | NA                 | NA                            | NA                 |
| Kabuli_wild_41918306 | NA                                  | Ca_kabuli_denovo | 41918306                | G/T  | NA                 | NA                            | NA                 |
| Kabuli_wild_41918344 | NA                                  | Ca_kabuli_denovo | 41918344                | G/T  | NA                 | NA                            | NA                 |
| Kabuli_wild_41932595 | NA                                  | Ca_kabuli_denovo | 41932595                | A/C  | NA                 | NA                            | NA                 |
| Kabuli_wild_41974384 | NA                                  | Ca_kabuli_denovo | 41974384                | G/T  | NA                 | NA                            | NA                 |
| Kabuli_wild_41984804 | NA                                  | Ca_kabuli_denovo | 41984804                | G/T  | NA                 | NA                            | NA                 |
| Kabuli_wild_41993111 | NA                                  | Ca_kabuli_denovo | 41993111                | G/T  | NA                 | NA                            | NA                 |
| Kabuli_wild_41996351 | NA                                  | Ca_kabuli_denovo | 41996351                | C/T  | NA                 | NA                            | NA                 |
| Kabuli_wild_42001661 | NA                                  | Ca_kabuli_denovo | 42001661                | G/T  | NA                 | NA                            | NA                 |
| Kabuli_wild_42019952 | NA                                  | Ca_kabuli_denovo | 42019952                | C/T  | NA                 | NA                            | NA                 |
| Kabuli_wild_42021778 | NA                                  | Ca_kabuli_denovo | 42021778                | G/T  | NA                 | NA                            | NA                 |
| Kabuli_wild_42027405 | NA                                  | Ca_kabuli_denovo | 42027405                | A/C  | NA                 | NA                            | NA                 |
| Kabuli_wild_42033972 | NA                                  | Ca_kabuli_denovo | 42033972                | C/T  | NA                 | NA                            | NA                 |
| Kabuli_wild_42045075 | NA                                  | Ca_kabuli_denovo | 42045075                | A/C  | NA                 | NA                            | NA                 |
| Kabuli_wild_42048779 | NA                                  | Ca_kabuli_denovo | 42048779                | A/C  | NA                 | NA                            | NA                 |
| Kabuli_wild_42071296 | NA                                  | Ca_kabuli_denovo | 42071296                | A/G  | NA                 | NA                            | NA                 |
| Kabuli_wild_42096131 | NA                                  | Ca_kabuli_denovo | 42096131                | G/T  | NA                 | NA                            | NA                 |
| Kabuli_wild_42099320 | NA                                  | Ca_kabuli_denovo | 42099320                | C/T  | NA                 | NA                            | NA                 |
| Kabuli_wild_42126582 | NA                                  | Ca_kabuli_denovo | 42126582                | G/T  | NA                 | NA                            | NA                 |
| Kabuli_wild_42135032 | NA                                  | Ca_kabuli_denovo | 42135032                | G/T  | NA                 | NA                            | NA                 |
| Kabuli_wild_42143875 | NA                                  | Ca_kabuli_denovo | 42143875                | A/C  | NA                 | NA                            | NA                 |
| Kabuli_wild_42143876 | NA                                  | Ca_kabuli_denovo | 42143876                | A/G  | NA                 | NA                            | NA                 |
| Kabuli_wild_42151890 | NA                                  | Ca_kabuli_denovo | 42151890                | A/G  | NA                 | NA                            | NA                 |
| Kabuli_wild_42151891 | NA                                  | Ca_kabuli_denovo | 42151891                | C/T  | NA                 | NA                            | NA                 |
| Kabuli_wild_42152102 | NA                                  | Ca_kabuli_denovo | 42152102                | T/G  | NA                 | NA                            | NA                 |



| SNP IDs              | NCBI dbSNP accession IDs (NCBI_SS#) | Chromosomes      | Physical positions (bp) | SNPs | Gene accession IDs | Sequence components of genome | Putative functions |
|----------------------|-------------------------------------|------------------|-------------------------|------|--------------------|-------------------------------|--------------------|
| Kabuli_wild_42158030 | NA                                  | Ca_kabuli_denovo | 42158030                | A/C  | NA                 | NA                            | NA                 |
| Kabuli_wild_42158031 | NA                                  | Ca_kabuli_denovo | 42158031                | A/G  | NA                 | NA                            | NA                 |
| Kabuli_wild_42160089 | NA                                  | Ca_kabuli_denovo | 42160089                | C/T  | NA                 | NA                            | NA                 |
| Kabuli_wild_42160098 | NA                                  | Ca_kabuli_denovo | 42160098                | C/T  | NA                 | NA                            | NA                 |
| Kabuli_wild_42175036 | NA                                  | Ca_kabuli_denovo | 42175036                | C/G  | NA                 | NA                            | NA                 |
| Kabuli_wild_42179539 | NA                                  | Ca_kabuli_denovo | 42179539                | A/G  | NA                 | NA                            | NA                 |
| Kabuli_wild_42189094 | NA                                  | Ca_kabuli_denovo | 42189094                | G/T  | NA                 | NA                            | NA                 |
| Kabuli_wild_42215696 | NA                                  | Ca_kabuli_denovo | 42215696                | G/T  | NA                 | NA                            | NA                 |
| Kabuli_wild_42238210 | NA                                  | Ca_kabuli_denovo | 42238210                | A/C  | NA                 | NA                            | NA                 |
| Kabuli_wild_42238211 | NA                                  | Ca_kabuli_denovo | 42238211                | C/G  | NA                 | NA                            | NA                 |
| Kabuli_wild_42253883 | NA                                  | Ca_kabuli_denovo | 42253883                | A/G  | NA                 | NA                            | NA                 |
| Kabuli_wild_42266631 | NA                                  | Ca_kabuli_denovo | 42266631                | C/G  | NA                 | NA                            | NA                 |
| Kabuli_wild_42266685 | NA                                  | Ca_kabuli_denovo | 42266685                | A/G  | NA                 | NA                            | NA                 |
| Kabuli_wild_42282541 | NA                                  | Ca_kabuli_denovo | 42282541                | A/G  | NA                 | NA                            | NA                 |
| Kabuli_wild_42350688 | NA                                  | Ca_kabuli_denovo | 42350688                | A/G  | NA                 | NA                            | NA                 |
| Kabuli_wild_42350690 | NA                                  | Ca_kabuli_denovo | 42350690                | C/T  | NA                 | NA                            | NA                 |
| Kabuli_wild_42366909 | NA                                  | Ca_kabuli_denovo | 42366909                | G/T  | NA                 | NA                            | NA                 |
| Kabuli_wild_42378614 | NA                                  | Ca_kabuli_denovo | 42378614                | A/G  | NA                 | NA                            | NA                 |
| Kabuli_wild_42452531 | NA                                  | Ca_kabuli_denovo | 42452531                | G/T  | NA                 | NA                            | NA                 |
| Kabuli_wild_42462066 | NA                                  | Ca_kabuli_denovo | 42462066                | G/T  | NA                 | NA                            | NA                 |
| Kabuli_wild_42466590 | NA                                  | Ca_kabuli_denovo | 42466590                | A/C  | NA                 | NA                            | NA                 |
| Kabuli_wild_42466591 | NA                                  | Ca_kabuli_denovo | 42466591                | A/G  | NA                 | NA                            | NA                 |
| Kabuli_wild_42483754 | NA                                  | Ca_kabuli_denovo | 42483754                | C/G  | NA                 | NA                            | NA                 |
| Kabuli_wild_42487868 | NA                                  | Ca_kabuli_denovo | 42487868                | C/T  | NA                 | NA                            | NA                 |
| Kabuli_wild_42514450 | NA                                  | Ca_kabuli_denovo | 42514450                | G/T  | NA                 | NA                            | NA                 |
| Kabuli_wild_42520140 | NA                                  | Ca_kabuli_denovo | 42520140                | C/T  | NA                 | NA                            | NA                 |
| Kabuli_wild_42523584 | NA                                  | Ca_kabuli_denovo | 42523584                | G/T  | NA                 | NA                            | NA                 |
| Kabuli_wild_42528260 | NA                                  | Ca_kabuli_denovo | 42528260                | G/C  | NA                 | NA                            | NA                 |
| Kabuli_wild_42528296 | NA                                  | Ca_kabuli_denovo | 42528296                | C/T  | NA                 | NA                            | NA                 |
| Kabuli_wild_42531424 | NA                                  | Ca_kabuli_denovo | 42531424                | G/T  | NA                 | NA                            | NA                 |
| Kabuli_wild_42544491 | NA                                  | Ca_kabuli_denovo | 42544491                | G/T  | NA                 | NA                            | NA                 |
| Kabuli_wild_42548962 | NA                                  | Ca_kabuli_denovo | 42548962                | A/G  | NA                 | NA                            | NA                 |
| Kabuli_wild_42550095 | NA                                  | Ca_kabuli_denovo | 42550095                | A/C  | NA                 | NA                            | NA                 |
| Kabuli_wild_42550096 | NA                                  | Ca_kabuli_denovo | 42550096                | A/G  | NA                 | NA                            | NA                 |
| Kabuli_wild_42565106 | NA                                  | Ca_kabuli_denovo | 42565106                | C/T  | NA                 | NA                            | NA                 |
| Kabuli_wild_42570555 | NA                                  | Ca_kabuli_denovo | 42570555                | G/T  | NA                 | NA                            | NA                 |
| Kabuli_wild_42578301 | NA                                  | Ca_kabuli_denovo | 42578301                | G/T  | NA                 | NA                            | NA                 |
| Kabuli_wild_42586670 | NA                                  | Ca_kabuli_denovo | 42586670                | A/C  | NA                 | NA                            | NA                 |
| Kabuli_wild_42606626 | NA                                  | Ca_kabuli_denovo | 42606626                | C/T  | NA                 | NA                            | NA                 |
| Kabuli_wild_42606650 | NA                                  | Ca_kabuli_denovo | 42606650                | A/G  | NA                 | NA                            | NA                 |
| Kabuli_wild_42607022 | NA                                  | Ca_kabuli_denovo | 42607022                | A/G  | NA                 | NA                            | NA                 |
| Kabuli_wild_42609311 | NA                                  | Ca_kabuli_denovo | 42609311                | C/T  | NA                 | NA                            | NA                 |
| Kabuli_wild_42616786 | NA                                  | Ca_kabuli_denovo | 42616786                | G/T  | NA                 | NA                            | NA                 |
| Kabuli_wild_42636461 | NA                                  | Ca_kabuli_denovo | 42636461                | C/T  | NA                 | NA                            | NA                 |

| SNP IDs              | NCBI dbSNP accession IDs (NCBI_SS#) | Chromosomes      | Physical positions (bp) | SNPs | Gene accession IDs | Sequence components of genome | Putative functions |
|----------------------|-------------------------------------|------------------|-------------------------|------|--------------------|-------------------------------|--------------------|
| Kabuli_wild_42636477 | NA                                  | Ca_kabuli_denovo | 42636477                | A/G  | NA                 | NA                            | NA                 |
| Kabuli_wild_42636484 | NA                                  | Ca_kabuli_denovo | 42636484                | G/T  | NA                 | NA                            | NA                 |
| Kabuli_wild_42636514 | NA                                  | Ca_kabuli_denovo | 42636514                | A/C  | NA                 | NA                            | NA                 |
| Kabuli_wild_42636640 | NA                                  | Ca_kabuli_denovo | 42636640                | A/C  | NA                 | NA                            | NA                 |
| Kabuli_wild_42643288 | NA                                  | Ca_kabuli_denovo | 42643288                | G/T  | NA                 | NA                            | NA                 |
| Kabuli_wild_42650483 | NA                                  | Ca_kabuli_denovo | 42650483                | G/T  | NA                 | NA                            | NA                 |
| Kabuli_wild_42655069 | NA                                  | Ca_kabuli_denovo | 42655069                | A/C  | NA                 | NA                            | NA                 |
| Kabuli_wild_42686404 | NA                                  | Ca_kabuli_denovo | 42686404                | A/G  | NA                 | NA                            | NA                 |
| Kabuli_wild_42686418 | NA                                  | Ca_kabuli_denovo | 42686418                | C/G  | NA                 | NA                            | NA                 |
| Kabuli_wild_42694151 | NA                                  | Ca_kabuli_denovo | 42694151                | G/T  | NA                 | NA                            | NA                 |
| Kabuli_wild_42696966 | NA                                  | Ca_kabuli_denovo | 42696966                | A/C  | NA                 | NA                            | NA                 |
| Kabuli_wild_42701460 | NA                                  | Ca_kabuli_denovo | 42701460                | A/G  | NA                 | NA                            | NA                 |
| Kabuli_wild_42714632 | NA                                  | Ca_kabuli_denovo | 42714632                | G/T  | NA                 | NA                            | NA                 |
| Kabuli_wild_42714635 | NA                                  | Ca_kabuli_denovo | 42714635                | C/T  | NA                 | NA                            | NA                 |
| Kabuli_wild_42722804 | NA                                  | Ca_kabuli_denovo | 42722804                | G/T  | NA                 | NA                            | NA                 |
| Kabuli_wild_42722877 | NA                                  | Ca_kabuli_denovo | 42722877                | G/T  | NA                 | NA                            | NA                 |
| Kabuli_wild_42726700 | NA                                  | Ca_kabuli_denovo | 42726700                | A/C  | NA                 | NA                            | NA                 |
| Kabuli_wild_42726701 | NA                                  | Ca_kabuli_denovo | 42726701                | G/T  | NA                 | NA                            | NA                 |
| Kabuli_wild_42736670 | NA                                  | Ca_kabuli_denovo | 42736670                | A/C  | NA                 | NA                            | NA                 |
| Kabuli_wild_42740755 | NA                                  | Ca_kabuli_denovo | 42740755                | G/T  | NA                 | NA                            | NA                 |
| Kabuli_wild_42741138 | NA                                  | Ca_kabuli_denovo | 42741138                | A/C  | NA                 | NA                            | NA                 |
| Kabuli_wild_42741139 | NA                                  | Ca_kabuli_denovo | 42741139                | C/G  | NA                 | NA                            | NA                 |
| Kabuli_wild_42741140 | NA                                  | Ca_kabuli_denovo | 42741140                | A/G  | NA                 | NA                            | NA                 |
| Kabuli_wild_42741141 | NA                                  | Ca_kabuli_denovo | 42741141                | C/T  | NA                 | NA                            | NA                 |
| Kabuli_wild_42749497 | NA                                  | Ca_kabuli_denovo | 42749497                | G/T  | NA                 | NA                            | NA                 |
| Kabuli_wild_42754215 | NA                                  | Ca_kabuli_denovo | 42754215                | C/T  | NA                 | NA                            | NA                 |
| Kabuli_wild_42754218 | NA                                  | Ca_kabuli_denovo | 42754218                | C/T  | NA                 | NA                            | NA                 |
| Kabuli_wild_42755866 | NA                                  | Ca_kabuli_denovo | 42755866                | G/T  | NA                 | NA                            | NA                 |
| Kabuli_wild_42772338 | NA                                  | Ca_kabuli_denovo | 42772338                | A/G  | NA                 | NA                            | NA                 |
| Kabuli_wild_42778190 | NA                                  | Ca_kabuli_denovo | 42778190                | A/C  | NA                 | NA                            | NA                 |
| Kabuli_wild_42778191 | NA                                  | Ca_kabuli_denovo | 42778191                | A/G  | NA                 | NA                            | NA                 |
| Kabuli_wild_42779806 | NA                                  | Ca_kabuli_denovo | 42779806                | G/T  | NA                 | NA                            | NA                 |
| Kabuli_wild_42784606 | NA                                  | Ca_kabuli_denovo | 42784606                | G/T  | NA                 | NA                            | NA                 |
| Kabuli_wild_42863078 | NA                                  | Ca_kabuli_denovo | 42863078                | G/A  | NA                 | NA                            | NA                 |
| Kabuli_wild_42900644 | NA                                  | Ca_kabuli_denovo | 42900644                | A/C  | NA                 | NA                            | NA                 |
| Kabuli_wild_42903924 | NA                                  | Ca_kabuli_denovo | 42903924                | G/T  | NA                 | NA                            | NA                 |
| Kabuli_wild_42904873 | NA                                  | Ca_kabuli_denovo | 42904873                | G/T  | NA                 | NA                            | NA                 |
| Kabuli_wild_42938726 | NA                                  | Ca_kabuli_denovo | 42938726                | A/T  | NA                 | NA                            | NA                 |
| Kabuli_wild_42947324 | NA                                  | Ca_kabuli_denovo | 42947324                | A/G  | NA                 | NA                            | NA                 |
| Kabuli_wild_42950710 | NA                                  | Ca_kabuli_denovo | 42950710                | A/C  | NA                 | NA                            | NA                 |
| Kabuli_wild_42951450 | NA                                  | Ca_kabuli_denovo | 42951450                | G/A  | NA                 | NA                            | NA                 |
| Kabuli_wild_43002141 | NA                                  | Ca_kabuli_denovo | 43002141                | A/T  | NA                 | NA                            | NA                 |
| Kabuli_wild_43033463 | NA                                  | Ca_kabuli_denovo | 43033463                | T/C  | NA                 | NA                            | NA                 |
| Kabuli_wild_43033499 | NA                                  | Ca_kabuli_denovo | 43033499                | G/C  | NA                 | NA                            | NA                 |

| SNP IDs              | NCBI dbSNP accession IDs (NCBI_SS#) | Chromosomes      | Physical positions (bp) | SNPs | Gene accession IDs | Sequence components of genome | Putative functions |
|----------------------|-------------------------------------|------------------|-------------------------|------|--------------------|-------------------------------|--------------------|
| Kabuli_wild_43033514 | NA                                  | Ca_kabuli_denovo | 43033514                | C/A  | NA                 | NA                            | NA                 |
| Kabuli_wild_43073147 | NA                                  | Ca_kabuli_denovo | 43073147                | C/G  | NA                 | NA                            | NA                 |
| Kabuli_wild_43085041 | NA                                  | Ca_kabuli_denovo | 43085041                | C/T  | NA                 | NA                            | NA                 |
| Kabuli_wild_43091501 | NA                                  | Ca_kabuli_denovo | 43091501                | A/C  | NA                 | NA                            | NA                 |
| Kabuli_wild_43091785 | NA                                  | Ca_kabuli_denovo | 43091785                | G/T  | NA                 | NA                            | NA                 |
| Kabuli_wild_43094445 | NA                                  | Ca_kabuli_denovo | 43094445                | A/C  | NA                 | NA                            | NA                 |
| Kabuli_wild_43111621 | NA                                  | Ca_kabuli_denovo | 43111621                | G/T  | NA                 | NA                            | NA                 |
| Kabuli_wild_43113920 | NA                                  | Ca_kabuli_denovo | 43113920                | C/G  | NA                 | NA                            | NA                 |
| Kabuli_wild_43118237 | NA                                  | Ca_kabuli_denovo | 43118237                | G/T  | NA                 | NA                            | NA                 |
| Kabuli_wild_43123229 | NA                                  | Ca_kabuli_denovo | 43123229                | G/T  | NA                 | NA                            | NA                 |
| Kabuli_wild_43123231 | NA                                  | Ca_kabuli_denovo | 43123231                | C/G  | NA                 | NA                            | NA                 |
| Kabuli_wild_43128386 | NA                                  | Ca_kabuli_denovo | 43128386                | A/G  | NA                 | NA                            | NA                 |
| Kabuli_wild_43128387 | NA                                  | Ca_kabuli_denovo | 43128387                | C/T  | NA                 | NA                            | NA                 |
| Kabuli_wild_43128545 | NA                                  | Ca_kabuli_denovo | 43128545                | G/T  | NA                 | NA                            | NA                 |
| Kabuli_wild_43149260 | NA                                  | Ca_kabuli_denovo | 43149260                | A/C  | NA                 | NA                            | NA                 |
| Kabuli_wild_43149261 | NA                                  | Ca_kabuli_denovo | 43149261                | G/T  | NA                 | NA                            | NA                 |
| Kabuli_wild_43152173 | NA                                  | Ca_kabuli_denovo | 43152173                | G/T  | NA                 | NA                            | NA                 |
| Kabuli_wild_43156998 | NA                                  | Ca_kabuli_denovo | 43156998                | C/T  | NA                 | NA                            | NA                 |
| Kabuli_wild_43179943 | NA                                  | Ca_kabuli_denovo | 43179943                | C/G  | NA                 | NA                            | NA                 |
| Kabuli_wild_43184260 | NA                                  | Ca_kabuli_denovo | 43184260                | G/T  | NA                 | NA                            | NA                 |
| Kabuli_wild_43184426 | NA                                  | Ca_kabuli_denovo | 43184426                | C/T  | NA                 | NA                            | NA                 |
| Kabuli_wild_43184429 | NA                                  | Ca_kabuli_denovo | 43184429                | C/T  | NA                 | NA                            | NA                 |
| Kabuli_wild_43184438 | NA                                  | Ca_kabuli_denovo | 43184438                | C/T  | NA                 | NA                            | NA                 |
| Kabuli_wild_43189689 | NA                                  | Ca_kabuli_denovo | 43189689                | A/G  | NA                 | NA                            | NA                 |
| Kabuli_wild_43198470 | NA                                  | Ca_kabuli_denovo | 43198470                | A/C  | NA                 | NA                            | NA                 |
| Kabuli_wild_43204361 | NA                                  | Ca_kabuli_denovo | 43204361                | G/T  | NA                 | NA                            | NA                 |
| Kabuli_wild_43215576 | NA                                  | Ca_kabuli_denovo | 43215576                | A/G  | NA                 | NA                            | NA                 |
| Kabuli_wild_43220936 | NA                                  | Ca_kabuli_denovo | 43220936                | G/T  | NA                 | NA                            | NA                 |
| Kabuli_wild_43240165 | NA                                  | Ca_kabuli_denovo | 43240165                | G/T  | NA                 | NA                            | NA                 |
| Kabuli_wild_43240169 | NA                                  | Ca_kabuli_denovo | 43240169                | G/T  | NA                 | NA                            | NA                 |
| Kabuli_wild_43240768 | NA                                  | Ca_kabuli_denovo | 43240768                | A/G  | NA                 | NA                            | NA                 |
| Kabuli_wild_43281117 | NA                                  | Ca_kabuli_denovo | 43281117                | G/T  | NA                 | NA                            | NA                 |
| Kabuli_wild_43286440 | NA                                  | Ca_kabuli_denovo | 43286440                | A/C  | NA                 | NA                            | NA                 |
| Kabuli_wild_43287010 | NA                                  | Ca_kabuli_denovo | 43287010                | A/C  | NA                 | NA                            | NA                 |
| Kabuli_wild_43298351 | NA                                  | Ca_kabuli_denovo | 43298351                | G/T  | NA                 | NA                            | NA                 |
| Kabuli_wild_43308953 | NA                                  | Ca_kabuli_denovo | 43308953                | A/C  | NA                 | NA                            | NA                 |
| Kabuli_wild_43310534 | NA                                  | Ca_kabuli_denovo | 43310534                | A/G  | NA                 | NA                            | NA                 |
| Kabuli_wild_43321752 | NA                                  | Ca_kabuli_denovo | 43321752                | G/T  | NA                 | NA                            | NA                 |
| Kabuli_wild_43326813 | NA                                  | Ca_kabuli_denovo | 43326813                | A/C  | NA                 | NA                            | NA                 |
| Kabuli_wild_43330900 | NA                                  | Ca_kabuli_denovo | 43330900                | A/C  | NA                 | NA                            | NA                 |
| Kabuli_wild_43330901 | NA                                  | Ca_kabuli_denovo | 43330901                | A/G  | NA                 | NA                            | NA                 |
| Kabuli_wild_43332798 | NA                                  | Ca_kabuli_denovo | 43332798                | A/C  | NA                 | NA                            | NA                 |
| Kabuli_wild_43345529 | NA                                  | Ca_kabuli_denovo | 43345529                | G/T  | NA                 | NA                            | NA                 |
| Kabuli_wild_43350073 | NA                                  | Ca_kabuli_denovo | 43350073                | A/C  | NA                 | NA                            | NA                 |

| SNP IDs              | NCBI dbSNP accession IDs (NCBI_SS#) | Chromosomes      | Physical positions (bp) | SNPs | Gene accession IDs | Sequence components of genome | Putative functions |
|----------------------|-------------------------------------|------------------|-------------------------|------|--------------------|-------------------------------|--------------------|
| Kabuli_wild_43365190 | NA                                  | Ca_kabuli_denovo | 43365190                | C/G  | NA                 | NA                            | NA                 |
| Kabuli_wild_43367761 | NA                                  | Ca_kabuli_denovo | 43367761                | G/T  | NA                 | NA                            | NA                 |
| Kabuli_wild_43370595 | NA                                  | Ca_kabuli_denovo | 43370595                | G/T  | NA                 | NA                            | NA                 |
| Kabuli_wild_43372511 | NA                                  | Ca_kabuli_denovo | 43372511                | A/C  | NA                 | NA                            | NA                 |
| Kabuli_wild_43385431 | NA                                  | Ca_kabuli_denovo | 43385431                | G/T  | NA                 | NA                            | NA                 |
| Kabuli_wild_43389917 | NA                                  | Ca_kabuli_denovo | 43389917                | G/T  | NA                 | NA                            | NA                 |
| Kabuli_wild_43390749 | NA                                  | Ca_kabuli_denovo | 43390749                | G/T  | NA                 | NA                            | NA                 |
| Kabuli_wild_43392741 | NA                                  | Ca_kabuli_denovo | 43392741                | C/G  | NA                 | NA                            | NA                 |
| Kabuli_wild_43398350 | NA                                  | Ca_kabuli_denovo | 43398350                | G/T  | NA                 | NA                            | NA                 |
| Kabuli_wild_43422564 | NA                                  | Ca_kabuli_denovo | 43422564                | G/T  | NA                 | NA                            | NA                 |
| Kabuli_wild_43437298 | NA                                  | Ca_kabuli_denovo | 43437298                | T/G  | NA                 | NA                            | NA                 |
| Kabuli_wild_43448753 | NA                                  | Ca_kabuli_denovo | 43448753                | A/G  | NA                 | NA                            | NA                 |
| Kabuli_wild_43448755 | NA                                  | Ca_kabuli_denovo | 43448755                | G/T  | NA                 | NA                            | NA                 |
| Kabuli_wild_43525767 | NA                                  | Ca_kabuli_denovo | 43525767                | A/G  | NA                 | NA                            | NA                 |
| Kabuli_wild_43525776 | NA                                  | Ca_kabuli_denovo | 43525776                | A/G  | NA                 | NA                            | NA                 |
| Kabuli_wild_43532488 | NA                                  | Ca_kabuli_denovo | 43532488                | G/T  | NA                 | NA                            | NA                 |
| Kabuli_wild_43573623 | NA                                  | Ca_kabuli_denovo | 43573623                | A/C  | NA                 | NA                            | NA                 |
| Kabuli_wild_43573624 | NA                                  | Ca_kabuli_denovo | 43573624                | G/T  | NA                 | NA                            | NA                 |
| Kabuli_wild_43605322 | NA                                  | Ca_kabuli_denovo | 43605322                | G/T  | NA                 | NA                            | NA                 |
| Kabuli_wild_43640027 | NA                                  | Ca_kabuli_denovo | 43640027                | G/T  | NA                 | NA                            | NA                 |
| Kabuli_wild_43642808 | NA                                  | Ca_kabuli_denovo | 43642808                | C/T  | NA                 | NA                            | NA                 |
| Kabuli_wild_43642848 | NA                                  | Ca_kabuli_denovo | 43642848                | A/G  | NA                 | NA                            | NA                 |
| Kabuli_wild_43654013 | NA                                  | Ca_kabuli_denovo | 43654013                | C/T  | NA                 | NA                            | NA                 |
| Kabuli_wild_43654034 | NA                                  | Ca_kabuli_denovo | 43654034                | A/G  | NA                 | NA                            | NA                 |
| Kabuli_wild_43676130 | NA                                  | Ca_kabuli_denovo | 43676130                | A/C  | NA                 | NA                            | NA                 |
| Kabuli_wild_43719240 | NA                                  | Ca_kabuli_denovo | 43719240                | G/T  | NA                 | NA                            | NA                 |
| Kabuli_wild_43727335 | NA                                  | Ca_kabuli_denovo | 43727335                | A/C  | NA                 | NA                            | NA                 |
| Kabuli_wild_43731896 | NA                                  | Ca_kabuli_denovo | 43731896                | A/G  | NA                 | NA                            | NA                 |
| Kabuli_wild_43737774 | NA                                  | Ca_kabuli_denovo | 43737774                | G/T  | NA                 | NA                            | NA                 |
| Kabuli_wild_43738067 | NA                                  | Ca_kabuli_denovo | 43738067                | C/G  | NA                 | NA                            | NA                 |
| Kabuli_wild_43762655 | NA                                  | Ca_kabuli_denovo | 43762655                | G/T  | NA                 | NA                            | NA                 |
| Kabuli_wild_43772886 | NA                                  | Ca_kabuli_denovo | 43772886                | C/G  | NA                 | NA                            | NA                 |
| Kabuli_wild_43796115 | NA                                  | Ca_kabuli_denovo | 43796115                | A/C  | NA                 | NA                            | NA                 |
| Kabuli_wild_43796116 | NA                                  | Ca_kabuli_denovo | 43796116                | A/G  | NA                 | NA                            | NA                 |
| Kabuli_wild_43798651 | NA                                  | Ca_kabuli_denovo | 43798651                | A/C  | NA                 | NA                            | NA                 |
| Kabuli_wild_43800363 | NA                                  | Ca_kabuli_denovo | 43800363                | G/T  | NA                 | NA                            | NA                 |
| Kabuli_wild_43809764 | NA                                  | Ca_kabuli_denovo | 43809764                | C/G  | NA                 | NA                            | NA                 |
| Kabuli_wild_43814355 | NA                                  | Ca_kabuli_denovo | 43814355                | A/C  | NA                 | NA                            | NA                 |
| Kabuli_wild_43814356 | NA                                  | Ca_kabuli_denovo | 43814356                | A/G  | NA                 | NA                            | NA                 |
| Kabuli_wild_43814785 | NA                                  | Ca_kabuli_denovo | 43814785                | G/T  | NA                 | NA                            | NA                 |
| Kabuli_wild_43824690 | NA                                  | Ca_kabuli_denovo | 43824690                | G/T  | NA                 | NA                            | NA                 |
| Kabuli_wild_43828412 | NA                                  | Ca_kabuli_denovo | 43828412                | C/G  | NA                 | NA                            | NA                 |
| Kabuli_wild_43833824 | NA                                  | Ca_kabuli_denovo | 43833824                | G/T  | NA                 | NA                            | NA                 |
| Kabuli_wild_43861761 | NA                                  | Ca_kabuli_denovo | 43861761                | G/T  | NA                 | NA                            | NA                 |

| SNP IDs              | NCBI dbSNP accession IDs (NCBI_SS#) | Chromosomes      | Physical positions (bp) | SNPs | Gene accession IDs | Sequence components of genome | Putative functions |
|----------------------|-------------------------------------|------------------|-------------------------|------|--------------------|-------------------------------|--------------------|
| Kabuli_wild_43865246 | NA                                  | Ca_kabuli_denovo | 43865246                | G/T  | NA                 | NA                            | NA                 |
| Kabuli_wild_43872020 | NA                                  | Ca_kabuli_denovo | 43872020                | G/T  | NA                 | NA                            | NA                 |
| Kabuli_wild_43897825 | NA                                  | Ca_kabuli_denovo | 43897825                | G/T  | NA                 | NA                            | NA                 |
| Kabuli_wild_43907260 | NA                                  | Ca_kabuli_denovo | 43907260                | A/C  | NA                 | NA                            | NA                 |
| Kabuli_wild_43950103 | NA                                  | Ca_kabuli_denovo | 43950103                | G/T  | NA                 | NA                            | NA                 |
| Kabuli_wild_43966831 | NA                                  | Ca_kabuli_denovo | 43966831                | G/T  | NA                 | NA                            | NA                 |
| Kabuli_wild_43985729 | NA                                  | Ca_kabuli_denovo | 43985729                | C/G  | NA                 | NA                            | NA                 |
| Kabuli_wild_44074315 | NA                                  | Ca_kabuli_denovo | 44074315                | C/T  | NA                 | NA                            | NA                 |
| Kabuli_wild_44074341 | NA                                  | Ca_kabuli_denovo | 44074341                | A/G  | NA                 | NA                            | NA                 |
| Kabuli_wild_44074371 | NA                                  | Ca_kabuli_denovo | 44074371                | A/T  | NA                 | NA                            | NA                 |
| Kabuli_wild_44078264 | NA                                  | Ca_kabuli_denovo | 44078264                | G/T  | NA                 | NA                            | NA                 |
| Kabuli_wild_44081191 | NA                                  | Ca_kabuli_denovo | 44081191                | A/G  | NA                 | NA                            | NA                 |
| Kabuli_wild_44082541 | NA                                  | Ca_kabuli_denovo | 44082541                | G/T  | NA                 | NA                            | NA                 |
| Kabuli_wild_44097929 | NA                                  | Ca_kabuli_denovo | 44097929                | C/G  | NA                 | NA                            | NA                 |
| Kabuli_wild_44097930 | NA                                  | Ca_kabuli_denovo | 44097930                | A/G  | NA                 | NA                            | NA                 |
| Kabuli_wild_44138021 | NA                                  | Ca_kabuli_denovo | 44138021                | G/T  | NA                 | NA                            | NA                 |
| Kabuli_wild_44144614 | NA                                  | Ca_kabuli_denovo | 44144614                | C/G  | NA                 | NA                            | NA                 |
| Kabuli_wild_44158567 | NA                                  | Ca_kabuli_denovo | 44158567                | G/A  | NA                 | NA                            | NA                 |
| Kabuli_wild_44168446 | NA                                  | Ca_kabuli_denovo | 44168446                | T/G  | NA                 | NA                            | NA                 |
| Kabuli_wild_44170320 | NA                                  | Ca_kabuli_denovo | 44170320                | A/C  | NA                 | NA                            | NA                 |
| Kabuli_wild_44170502 | NA                                  | Ca_kabuli_denovo | 44170502                | C/G  | NA                 | NA                            | NA                 |
| Kabuli_wild_44173440 | NA                                  | Ca_kabuli_denovo | 44173440                | G/T  | NA                 | NA                            | NA                 |
| Kabuli_wild_44192453 | NA                                  | Ca_kabuli_denovo | 44192453                | C/T  | NA                 | NA                            | NA                 |
| Kabuli_wild_44192456 | NA                                  | Ca_kabuli_denovo | 44192456                | C/G  | NA                 | NA                            | NA                 |
| Kabuli_wild_44256768 | NA                                  | Ca_kabuli_denovo | 44256768                | A/C  | NA                 | NA                            | NA                 |
| Kabuli_wild_44256769 | NA                                  | Ca_kabuli_denovo | 44256769                | G/T  | NA                 | NA                            | NA                 |
| Kabuli_wild_44276526 | NA                                  | Ca_kabuli_denovo | 44276526                | C/G  | NA                 | NA                            | NA                 |
| Kabuli_wild_44276529 | NA                                  | Ca_kabuli_denovo | 44276529                | C/G  | NA                 | NA                            | NA                 |
| Kabuli_wild_44305592 | NA                                  | Ca_kabuli_denovo | 44305592                | G/A  | NA                 | NA                            | NA                 |
| Kabuli_wild_44307932 | NA                                  | Ca_kabuli_denovo | 44307932                | G/T  | NA                 | NA                            | NA                 |
| Kabuli_wild_44338799 | NA                                  | Ca_kabuli_denovo | 44338799                | A/G  | NA                 | NA                            | NA                 |
| Kabuli_wild_44352088 | NA                                  | Ca_kabuli_denovo | 44352088                | C/G  | NA                 | NA                            | NA                 |
| Kabuli_wild_44352100 | NA                                  | Ca_kabuli_denovo | 44352100                | C/G  | NA                 | NA                            | NA                 |
| Kabuli_wild_44354115 | NA                                  | Ca_kabuli_denovo | 44354115                | C/G  | NA                 | NA                            | NA                 |
| Kabuli_wild_44359560 | NA                                  | Ca_kabuli_denovo | 44359560                | A/C  | NA                 | NA                            | NA                 |
| Kabuli_wild_44359561 | NA                                  | Ca_kabuli_denovo | 44359561                | A/G  | NA                 | NA                            | NA                 |
| Kabuli_wild_44360603 | NA                                  | Ca_kabuli_denovo | 44360603                | C/G  | NA                 | NA                            | NA                 |
| Kabuli_wild_44367619 | NA                                  | Ca_kabuli_denovo | 44367619                | G/T  | NA                 | NA                            | NA                 |
| Kabuli_wild_44369532 | NA                                  | Ca_kabuli_denovo | 44369532                | G/T  | NA                 | NA                            | NA                 |
| Kabuli_wild_44392200 | NA                                  | Ca_kabuli_denovo | 44392200                | G/T  | NA                 | NA                            | NA                 |
| Kabuli_wild_44451046 | NA                                  | Ca_kabuli_denovo | 44451046                | G/T  | NA                 | NA                            | NA                 |
| Kabuli_wild_44470330 | NA                                  | Ca_kabuli_denovo | 44470330                | A/C  | NA                 | NA                            | NA                 |
| Kabuli_wild_44483343 | NA                                  | Ca_kabuli_denovo | 44483343                | A/C  | NA                 | NA                            | NA                 |
| Kabuli_wild_44483344 | NA                                  | Ca_kabuli_denovo | 44483344                | A/G  | NA                 | NA                            | NA                 |

| SNP IDs              | NCBI dbSNP accession IDs (NCBI_SS#) | Chromosomes      | Physical positions (bp) | SNPs | Gene accession IDs | Sequence components of genome | Putative functions |
|----------------------|-------------------------------------|------------------|-------------------------|------|--------------------|-------------------------------|--------------------|
| Kabuli_wild_44483345 | NA                                  | Ca_kabuli_denovo | 44483345                | A/G  | NA                 | NA                            | NA                 |
| Kabuli_wild_44491383 | NA                                  | Ca_kabuli_denovo | 44491383                | G/T  | NA                 | NA                            | NA                 |
| Kabuli_wild_44528994 | NA                                  | Ca_kabuli_denovo | 44528994                | G/T  | NA                 | NA                            | NA                 |
| Kabuli_wild_44529610 | NA                                  | Ca_kabuli_denovo | 44529610                | A/C  | NA                 | NA                            | NA                 |
| Kabuli_wild_44549181 | NA                                  | Ca_kabuli_denovo | 44549181                | G/T  | NA                 | NA                            | NA                 |
| Kabuli_wild_44567706 | NA                                  | Ca_kabuli_denovo | 44567706                | G/T  | NA                 | NA                            | NA                 |
| Kabuli_wild_44584277 | NA                                  | Ca_kabuli_denovo | 44584277                | T/G  | NA                 | NA                            | NA                 |
| Kabuli_wild_44589321 | NA                                  | Ca_kabuli_denovo | 44589321                | T/G  | NA                 | NA                            | NA                 |
| Kabuli_wild_44589356 | NA                                  | Ca_kabuli_denovo | 44589356                | T/G  | NA                 | NA                            | NA                 |
| Kabuli_wild_44602714 | NA                                  | Ca_kabuli_denovo | 44602714                | G/T  | NA                 | NA                            | NA                 |
| Kabuli_wild_44605394 | NA                                  | Ca_kabuli_denovo | 44605394                | G/T  | NA                 | NA                            | NA                 |
| Kabuli_wild_44629688 | NA                                  | Ca_kabuli_denovo | 44629688                | G/T  | NA                 | NA                            | NA                 |
| Kabuli_wild_44646357 | NA                                  | Ca_kabuli_denovo | 44646357                | A/G  | NA                 | NA                            | NA                 |
| Kabuli_wild_44646360 | NA                                  | Ca_kabuli_denovo | 44646360                | C/G  | NA                 | NA                            | NA                 |
| Kabuli_wild_44654102 | NA                                  | Ca_kabuli_denovo | 44654102                | G/T  | NA                 | NA                            | NA                 |
| Kabuli_wild_44687689 | NA                                  | Ca_kabuli_denovo | 44687689                | A/C  | NA                 | NA                            | NA                 |
| Kabuli_wild_44687690 | NA                                  | Ca_kabuli_denovo | 44687690                | G/T  | NA                 | NA                            | NA                 |
| Kabuli_wild_44687691 | NA                                  | Ca_kabuli_denovo | 44687691                | A/G  | NA                 | NA                            | NA                 |
| Kabuli_wild_44696666 | NA                                  | Ca_kabuli_denovo | 44696666                | G/T  | NA                 | NA                            | NA                 |
| Kabuli_wild_44740957 | NA                                  | Ca_kabuli_denovo | 44740957                | G/T  | NA                 | NA                            | NA                 |
| Kabuli_wild_44773936 | NA                                  | Ca_kabuli_denovo | 44773936                | A/G  | NA                 | NA                            | NA                 |
| Kabuli_wild_44773950 | NA                                  | Ca_kabuli_denovo | 44773950                | G/T  | NA                 | NA                            | NA                 |
| Kabuli_wild_44785919 | NA                                  | Ca_kabuli_denovo | 44785919                | T/G  | NA                 | NA                            | NA                 |
| Kabuli_wild_44797650 | NA                                  | Ca_kabuli_denovo | 44797650                | C/G  | NA                 | NA                            | NA                 |
| Kabuli_wild_44801648 | NA                                  | Ca_kabuli_denovo | 44801648                | G/T  | NA                 | NA                            | NA                 |
| Kabuli_wild_44963377 | NA                                  | Ca_kabuli_denovo | 44963377                | C/G  | NA                 | NA                            | NA                 |
| Kabuli_wild_44969932 | NA                                  | Ca_kabuli_denovo | 44969932                | C/G  | NA                 | NA                            | NA                 |
| Kabuli_wild_45037143 | NA                                  | Ca_kabuli_denovo | 45037143                | G/T  | NA                 | NA                            | NA                 |
| Kabuli_wild_45069588 | NA                                  | Ca_kabuli_denovo | 45069588                | C/G  | NA                 | NA                            | NA                 |
| Kabuli_wild_45069590 | NA                                  | Ca_kabuli_denovo | 45069590                | A/G  | NA                 | NA                            | NA                 |
| Kabuli_wild_45113668 | NA                                  | Ca_kabuli_denovo | 45113668                | A/C  | NA                 | NA                            | NA                 |
| Kabuli_wild_45117946 | NA                                  | Ca_kabuli_denovo | 45117946                | G/T  | NA                 | NA                            | NA                 |
| Kabuli_wild_45167883 | NA                                  | Ca_kabuli_denovo | 45167883                | G/T  | NA                 | NA                            | NA                 |
| Kabuli_wild_45171009 | NA                                  | Ca_kabuli_denovo | 45171009                | G/T  | NA                 | NA                            | NA                 |
| Kabuli_wild_45196221 | NA                                  | Ca_kabuli_denovo | 45196221                | A/C  | NA                 | NA                            | NA                 |
| Kabuli_wild_45207520 | NA                                  | Ca_kabuli_denovo | 45207520                | C/G  | NA                 | NA                            | NA                 |
| Kabuli_wild_45215594 | NA                                  | Ca_kabuli_denovo | 45215594                | G/T  | NA                 | NA                            | NA                 |
| Kabuli_wild_45217791 | NA                                  | Ca_kabuli_denovo | 45217791                | A/C  | NA                 | NA                            | NA                 |
| Kabuli_wild_45220394 | NA                                  | Ca_kabuli_denovo | 45220394                | A/C  | NA                 | NA                            | NA                 |
| Kabuli_wild_45221694 | NA                                  | Ca_kabuli_denovo | 45221694                | A/G  | NA                 | NA                            | NA                 |
| Kabuli_wild_45247145 | NA                                  | Ca_kabuli_denovo | 45247145                | A/C  | NA                 | NA                            | NA                 |
| Kabuli_wild_45247146 | NA                                  | Ca_kabuli_denovo | 45247146                | G/T  | NA                 | NA                            | NA                 |
| Kabuli_wild_45269660 | NA                                  | Ca_kabuli_denovo | 45269660                | A/C  | NA                 | NA                            | NA                 |
| Kabuli_wild_45269661 | NA                                  | Ca_kabuli_denovo | 45269661                | G/T  | NA                 | NA                            | NA                 |

| SNP IDs              | NCBI dbSNP accession IDs (NCBI_SS#) | Chromosomes      | Physical positions (bp) | SNPs | Gene accession IDs | Sequence components of genome | Putative functions |
|----------------------|-------------------------------------|------------------|-------------------------|------|--------------------|-------------------------------|--------------------|
| Kabuli_wild_45271465 | NA                                  | Ca_kabuli_denovo | 45271465                | A/C  | NA                 | NA                            | NA                 |
| Kabuli_wild_45271466 | NA                                  | Ca_kabuli_denovo | 45271466                | A/G  | NA                 | NA                            | NA                 |
| Kabuli_wild_45276214 | NA                                  | Ca_kabuli_denovo | 45276214                | G/T  | NA                 | NA                            | NA                 |
| Kabuli_wild_45285960 | NA                                  | Ca_kabuli_denovo | 45285960                | G/T  | NA                 | NA                            | NA                 |
| Kabuli_wild_45289227 | NA                                  | Ca_kabuli_denovo | 45289227                | G/T  | NA                 | NA                            | NA                 |
| Kabuli_wild_45304129 | NA                                  | Ca_kabuli_denovo | 45304129                | G/T  | NA                 | NA                            | NA                 |
| Kabuli_wild_45304240 | NA                                  | Ca_kabuli_denovo | 45304240                | A/C  | NA                 | NA                            | NA                 |
| Kabuli_wild_45305612 | NA                                  | Ca_kabuli_denovo | 45305612                | G/T  | NA                 | NA                            | NA                 |
| Kabuli_wild_45308420 | NA                                  | Ca_kabuli_denovo | 45308420                | A/C  | NA                 | NA                            | NA                 |
| Kabuli_wild_45308421 | NA                                  | Ca_kabuli_denovo | 45308421                | C/G  | NA                 | NA                            | NA                 |
| Kabuli_wild_45312876 | NA                                  | Ca_kabuli_denovo | 45312876                | C/T  | NA                 | NA                            | NA                 |
| Kabuli_wild_45316210 | NA                                  | Ca_kabuli_denovo | 45316210                | A/C  | NA                 | NA                            | NA                 |
| Kabuli_wild_45316211 | NA                                  | Ca_kabuli_denovo | 45316211                | G/T  | NA                 | NA                            | NA                 |
| Kabuli_wild_45334349 | NA                                  | Ca_kabuli_denovo | 45334349                | G/T  | NA                 | NA                            | NA                 |
| Kabuli_wild_45337395 | NA                                  | Ca_kabuli_denovo | 45337395                | C/G  | NA                 | NA                            | NA                 |
| Kabuli_wild_45350347 | NA                                  | Ca_kabuli_denovo | 45350347                | A/G  | NA                 | NA                            | NA                 |
| Kabuli_wild_45356819 | NA                                  | Ca_kabuli_denovo | 45356819                | G/T  | NA                 | NA                            | NA                 |
| Kabuli_wild_45361049 | NA                                  | Ca_kabuli_denovo | 45361049                | G/T  | NA                 | NA                            | NA                 |
| Kabuli_wild_45363996 | NA                                  | Ca_kabuli_denovo | 45363996                | G/T  | NA                 | NA                            | NA                 |
| Kabuli_wild_45382133 | NA                                  | Ca_kabuli_denovo | 45382133                | C/G  | NA                 | NA                            | NA                 |
| Kabuli_wild_45384706 | NA                                  | Ca_kabuli_denovo | 45384706                | G/T  | NA                 | NA                            | NA                 |
| Kabuli_wild_45385330 | NA                                  | Ca_kabuli_denovo | 45385330                | C/T  | NA                 | NA                            | NA                 |
| Kabuli_wild_45394125 | NA                                  | Ca_kabuli_denovo | 45394125                | A/G  | NA                 | NA                            | NA                 |
| Kabuli_wild_45394128 | NA                                  | Ca_kabuli_denovo | 45394128                | C/T  | NA                 | NA                            | NA                 |
| Kabuli_wild_45403230 | NA                                  | Ca_kabuli_denovo | 45403230                | A/G  | NA                 | NA                            | NA                 |
| Kabuli_wild_45410545 | NA                                  | Ca_kabuli_denovo | 45410545                | A/C  | NA                 | NA                            | NA                 |
| Kabuli_wild_45410546 | NA                                  | Ca_kabuli_denovo | 45410546                | A/G  | NA                 | NA                            | NA                 |
| Kabuli_wild_45413477 | NA                                  | Ca_kabuli_denovo | 45413477                | G/T  | NA                 | NA                            | NA                 |
| Kabuli_wild_45415502 | NA                                  | Ca_kabuli_denovo | 45415502                | C/T  | NA                 | NA                            | NA                 |
| Kabuli_wild_45428595 | NA                                  | Ca_kabuli_denovo | 45428595                | A/C  | NA                 | NA                            | NA                 |
| Kabuli_wild_45428596 | NA                                  | Ca_kabuli_denovo | 45428596                | A/G  | NA                 | NA                            | NA                 |
| Kabuli_wild_45429692 | NA                                  | Ca_kabuli_denovo | 45429692                | G/T  | NA                 | NA                            | NA                 |
| Kabuli_wild_45442796 | NA                                  | Ca_kabuli_denovo | 45442796                | G/T  | NA                 | NA                            | NA                 |
| Kabuli_wild_45443700 | NA                                  | Ca_kabuli_denovo | 45443700                | A/C  | NA                 | NA                            | NA                 |
| Kabuli_wild_45455303 | NA                                  | Ca_kabuli_denovo | 45455303                | A/G  | NA                 | NA                            | NA                 |
| Kabuli_wild_45455305 | NA                                  | Ca_kabuli_denovo | 45455305                | A/G  | NA                 | NA                            | NA                 |
| Kabuli_wild_45457685 | NA                                  | Ca_kabuli_denovo | 45457685                | G/A  | NA                 | NA                            | NA                 |
| Kabuli_wild_45457718 | NA                                  | Ca_kabuli_denovo | 45457718                | T/G  | NA                 | NA                            | NA                 |
| Kabuli_wild_45457720 | NA                                  | Ca_kabuli_denovo | 45457720                | C/T  | NA                 | NA                            | NA                 |
| Kabuli_wild_45457733 | NA                                  | Ca_kabuli_denovo | 45457733                | A/C  | NA                 | NA                            | NA                 |
| Kabuli_wild_45459600 | NA                                  | Ca_kabuli_denovo | 45459600                | A/C  | NA                 | NA                            | NA                 |
| Kabuli_wild_45477471 | NA                                  | Ca_kabuli_denovo | 45477471                | G/T  | NA                 | NA                            | NA                 |
| Kabuli_wild_45477498 | NA                                  | Ca_kabuli_denovo | 45477498                | G/T  | NA                 | NA                            | NA                 |
| Kabuli_wild_45485406 | NA                                  | Ca_kabuli_denovo | 45485406                | C/G  | NA                 | NA                            | NA                 |

| SNP IDs              | NCBI dbSNP accession IDs (NCBI_SS#) | Chromosomes      | Physical positions (bp) | SNPs | Gene accession IDs | Sequence components of genome | Putative functions |
|----------------------|-------------------------------------|------------------|-------------------------|------|--------------------|-------------------------------|--------------------|
| Kabuli_wild_45485641 | NA                                  | Ca_kabuli_denovo | 45485641                | A/G  | NA                 | NA                            | NA                 |
| Kabuli_wild_45487100 | NA                                  | Ca_kabuli_denovo | 45487100                | G/T  | NA                 | NA                            | NA                 |
| Kabuli_wild_45498133 | NA                                  | Ca_kabuli_denovo | 45498133                | G/T  | NA                 | NA                            | NA                 |
| Kabuli_wild_45500700 | NA                                  | Ca_kabuli_denovo | 45500700                | A/C  | NA                 | NA                            | NA                 |
| Kabuli_wild_45517420 | NA                                  | Ca_kabuli_denovo | 45517420                | A/C  | NA                 | NA                            | NA                 |
| Kabuli_wild_45517421 | NA                                  | Ca_kabuli_denovo | 45517421                | C/G  | NA                 | NA                            | NA                 |
| Kabuli_wild_45517514 | NA                                  | Ca_kabuli_denovo | 45517514                | G/T  | NA                 | NA                            | NA                 |
| Kabuli_wild_45521118 | NA                                  | Ca_kabuli_denovo | 45521118                | G/T  | NA                 | NA                            | NA                 |
| Kabuli_wild_45526636 | NA                                  | Ca_kabuli_denovo | 45526636                | G/T  | NA                 | NA                            | NA                 |
| Kabuli_wild_45528815 | NA                                  | Ca_kabuli_denovo | 45528815                | A/G  | NA                 | NA                            | NA                 |
| Kabuli_wild_45534945 | NA                                  | Ca_kabuli_denovo | 45534945                | G/T  | NA                 | NA                            | NA                 |
| Kabuli_wild_45537844 | NA                                  | Ca_kabuli_denovo | 45537844                | G/C  | NA                 | NA                            | NA                 |
| Kabuli_wild_45539333 | NA                                  | Ca_kabuli_denovo | 45539333                | G/T  | NA                 | NA                            | NA                 |
| Kabuli_wild_45542583 | NA                                  | Ca_kabuli_denovo | 45542583                | G/T  | NA                 | NA                            | NA                 |
| Kabuli_wild_45555040 | NA                                  | Ca_kabuli_denovo | 45555040                | A/C  | NA                 | NA                            | NA                 |
| Kabuli_wild_45555041 | NA                                  | Ca_kabuli_denovo | 45555041                | A/G  | NA                 | NA                            | NA                 |
| Kabuli_wild_45572901 | NA                                  | Ca_kabuli_denovo | 45572901                | C/G  | NA                 | NA                            | NA                 |
| Kabuli_wild_45588478 | NA                                  | Ca_kabuli_denovo | 45588478                | C/G  | NA                 | NA                            | NA                 |
| Kabuli_wild_45589410 | NA                                  | Ca_kabuli_denovo | 45589410                | A/G  | NA                 | NA                            | NA                 |
| Kabuli_wild_45605765 | NA                                  | Ca_kabuli_denovo | 45605765                | G/T  | NA                 | NA                            | NA                 |
| Kabuli_wild_45631228 | NA                                  | Ca_kabuli_denovo | 45631228                | G/T  | NA                 | NA                            | NA                 |
| Kabuli_wild_45650912 | NA                                  | Ca_kabuli_denovo | 45650912                | C/G  | NA                 | NA                            | NA                 |
| Kabuli_wild_45653746 | NA                                  | Ca_kabuli_denovo | 45653746                | G/T  | NA                 | NA                            | NA                 |
| Kabuli_wild_45657545 | NA                                  | Ca_kabuli_denovo | 45657545                | A/C  | NA                 | NA                            | NA                 |
| Kabuli_wild_45657546 | NA                                  | Ca_kabuli_denovo | 45657546                | A/G  | NA                 | NA                            | NA                 |
| Kabuli_wild_45663981 | NA                                  | Ca_kabuli_denovo | 45663981                | A/G  | NA                 | NA                            | NA                 |
| Kabuli_wild_45663991 | NA                                  | Ca_kabuli_denovo | 45663991                | C/T  | NA                 | NA                            | NA                 |
| Kabuli_wild_45664290 | NA                                  | Ca_kabuli_denovo | 45664290                | G/T  | NA                 | NA                            | NA                 |
| Kabuli_wild_45677582 | NA                                  | Ca_kabuli_denovo | 45677582                | G/T  | NA                 | NA                            | NA                 |
| Kabuli_wild_45695019 | NA                                  | Ca_kabuli_denovo | 45695019                | G/T  | NA                 | NA                            | NA                 |
| Kabuli_wild_45695257 | NA                                  | Ca_kabuli_denovo | 45695257                | C/G  | NA                 | NA                            | NA                 |
| Kabuli_wild_45695286 | NA                                  | Ca_kabuli_denovo | 45695286                | A/G  | NA                 | NA                            | NA                 |
| Kabuli_wild_45703521 | NA                                  | Ca_kabuli_denovo | 45703521                | C/G  | NA                 | NA                            | NA                 |
| Kabuli_wild_45724294 | NA                                  | Ca_kabuli_denovo | 45724294                | G/T  | NA                 | NA                            | NA                 |
| Kabuli_wild_45740421 | NA                                  | Ca_kabuli_denovo | 45740421                | G/T  | NA                 | NA                            | NA                 |
| Kabuli_wild_45745015 | NA                                  | Ca_kabuli_denovo | 45745015                | G/T  | NA                 | NA                            | NA                 |
| Kabuli_wild_45753496 | NA                                  | Ca_kabuli_denovo | 45753496                | C/T  | NA                 | NA                            | NA                 |
| Kabuli_wild_45768830 | NA                                  | Ca_kabuli_denovo | 45768830                | G/T  | NA                 | NA                            | NA                 |
| Kabuli_wild_45771124 | NA                                  | Ca_kabuli_denovo | 45771124                | T/G  | NA                 | NA                            | NA                 |
| Kabuli_wild_45779429 | NA                                  | Ca_kabuli_denovo | 45779429                | G/T  | NA                 | NA                            | NA                 |
| Kabuli_wild_45784742 | NA                                  | Ca_kabuli_denovo | 45784742                | C/G  | NA                 | NA                            | NA                 |
| Kabuli_wild_45797766 | NA                                  | Ca_kabuli_denovo | 45797766                | C/T  | NA                 | NA                            | NA                 |
| Kabuli_wild_45803465 | NA                                  | Ca_kabuli_denovo | 45803465                | A/C  | NA                 | NA                            | NA                 |
| Kabuli_wild_45803466 | NA                                  | Ca_kabuli_denovo | 45803466                | A/G  | NA                 | NA                            | NA                 |



| SNP IDs              | NCBI dbSNP accession IDs (NCBI_SS#) | Chromosomes      | Physical positions (bp) | SNPs | Gene accession IDs | Sequence components of genome | Putative functions |
|----------------------|-------------------------------------|------------------|-------------------------|------|--------------------|-------------------------------|--------------------|
| Kabuli_wild_45816560 | NA                                  | Ca_kabuli_denovo | 45816560                | G/T  | NA                 | NA                            | NA                 |
| Kabuli_wild_45822655 | NA                                  | Ca_kabuli_denovo | 45822655                | A/C  | NA                 | NA                            | NA                 |
| Kabuli_wild_45824935 | NA                                  | Ca_kabuli_denovo | 45824935                | A/C  | NA                 | NA                            | NA                 |
| Kabuli_wild_45824936 | NA                                  | Ca_kabuli_denovo | 45824936                | G/T  | NA                 | NA                            | NA                 |
| Kabuli_wild_45838234 | NA                                  | Ca_kabuli_denovo | 45838234                | A/C  | NA                 | NA                            | NA                 |
| Kabuli_wild_45839091 | NA                                  | Ca_kabuli_denovo | 45839091                | G/T  | NA                 | NA                            | NA                 |
| Kabuli_wild_45848021 | NA                                  | Ca_kabuli_denovo | 45848021                | G/T  | NA                 | NA                            | NA                 |
| Kabuli_wild_45852863 | NA                                  | Ca_kabuli_denovo | 45852863                | A/C  | NA                 | NA                            | NA                 |
| Kabuli_wild_45865216 | NA                                  | Ca_kabuli_denovo | 45865216                | A/C  | NA                 | NA                            | NA                 |
| Kabuli_wild_45874140 | NA                                  | Ca_kabuli_denovo | 45874140                | C/G  | NA                 | NA                            | NA                 |
| Kabuli_wild_45874141 | NA                                  | Ca_kabuli_denovo | 45874141                | C/G  | NA                 | NA                            | NA                 |
| Kabuli_wild_45874146 | NA                                  | Ca_kabuli_denovo | 45874146                | A/T  | NA                 | NA                            | NA                 |
| Kabuli_wild_45874556 | NA                                  | Ca_kabuli_denovo | 45874556                | G/T  | NA                 | NA                            | NA                 |
| Kabuli_wild_45876329 | NA                                  | Ca_kabuli_denovo | 45876329                | G/T  | NA                 | NA                            | NA                 |
| Kabuli_wild_45893160 | NA                                  | Ca_kabuli_denovo | 45893160                | C/T  | NA                 | NA                            | NA                 |
| Kabuli_wild_45893172 | NA                                  | Ca_kabuli_denovo | 45893172                | A/T  | NA                 | NA                            | NA                 |
| Kabuli_wild_45893178 | NA                                  | Ca_kabuli_denovo | 45893178                | A/C  | NA                 | NA                            | NA                 |
| Kabuli_wild_45894161 | NA                                  | Ca_kabuli_denovo | 45894161                | G/T  | NA                 | NA                            | NA                 |
| Kabuli_wild_45895989 | NA                                  | Ca_kabuli_denovo | 45895989                | C/T  | NA                 | NA                            | NA                 |
| Kabuli_wild_45907776 | NA                                  | Ca_kabuli_denovo | 45907776                | A/C  | NA                 | NA                            | NA                 |
| Kabuli_wild_45911386 | NA                                  | Ca_kabuli_denovo | 45911386                | G/T  | NA                 | NA                            | NA                 |
| Kabuli_wild_45916903 | NA                                  | Ca_kabuli_denovo | 45916903                | A/G  | NA                 | NA                            | NA                 |
| Kabuli_wild_45918511 | NA                                  | Ca_kabuli_denovo | 45918511                | A/C  | NA                 | NA                            | NA                 |
| Kabuli_wild_45949001 | NA                                  | Ca_kabuli_denovo | 45949001                | G/T  | NA                 | NA                            | NA                 |
| Kabuli_wild_45951774 | NA                                  | Ca_kabuli_denovo | 45951774                | A/T  | NA                 | NA                            | NA                 |
| Kabuli_wild_45957663 | NA                                  | Ca_kabuli_denovo | 45957663                | C/T  | NA                 | NA                            | NA                 |
| Kabuli_wild_45960412 | NA                                  | Ca_kabuli_denovo | 45960412                | C/T  | NA                 | NA                            | NA                 |
| Kabuli_wild_45976466 | NA                                  | Ca_kabuli_denovo | 45976466                | A/G  | NA                 | NA                            | NA                 |
| Kabuli_wild_45977408 | NA                                  | Ca_kabuli_denovo | 45977408                | A/C  | NA                 | NA                            | NA                 |
| Kabuli_wild_45987386 | NA                                  | Ca_kabuli_denovo | 45987386                | A/C  | NA                 | NA                            | NA                 |
| Kabuli_wild_45993370 | NA                                  | Ca_kabuli_denovo | 45993370                | A/G  | NA                 | NA                            | NA                 |
| Kabuli_wild_46001160 | NA                                  | Ca_kabuli_denovo | 46001160                | A/C  | NA                 | NA                            | NA                 |
| Kabuli_wild_46003738 | NA                                  | Ca_kabuli_denovo | 46003738                | C/T  | NA                 | NA                            | NA                 |
| Kabuli_wild_46003744 | NA                                  | Ca_kabuli_denovo | 46003744                | A/T  | NA                 | NA                            | NA                 |
| Kabuli_wild_46014366 | NA                                  | Ca_kabuli_denovo | 46014366                | A/G  | NA                 | NA                            | NA                 |
| Kabuli_wild_46019116 | NA                                  | Ca_kabuli_denovo | 46019116                | G/T  | NA                 | NA                            | NA                 |
| Kabuli_wild_46019169 | NA                                  | Ca_kabuli_denovo | 46019169                | G/T  | NA                 | NA                            | NA                 |
| Kabuli_wild_46039160 | NA                                  | Ca_kabuli_denovo | 46039160                | A/C  | NA                 | NA                            | NA                 |
| Kabuli_wild_46039161 | NA                                  | Ca_kabuli_denovo | 46039161                | A/G  | NA                 | NA                            | NA                 |
| Kabuli_wild_46039730 | NA                                  | Ca_kabuli_denovo | 46039730                | G/T  | NA                 | NA                            | NA                 |
| Kabuli_wild_46041726 | NA                                  | Ca_kabuli_denovo | 46041726                | G/T  | NA                 | NA                            | NA                 |
| Kabuli_wild_46050130 | NA                                  | Ca_kabuli_denovo | 46050130                | G/T  | NA                 | NA                            | NA                 |
| Kabuli_wild_46060528 | NA                                  | Ca_kabuli_denovo | 46060528                | A/G  | NA                 | NA                            | NA                 |
| Kabuli_wild_46060531 | NA                                  | Ca_kabuli_denovo | 46060531                | A/G  | NA                 | NA                            | NA                 |

| SNP IDs              | NCBI dbSNP accession IDs (NCBI_SS#) | Chromosomes      | Physical positions (bp) | SNPs | Gene accession IDs | Sequence components of genome | Putative functions |
|----------------------|-------------------------------------|------------------|-------------------------|------|--------------------|-------------------------------|--------------------|
| Kabuli_wild_46068790 | NA                                  | Ca_kabuli_denovo | 46068790                | G/T  | NA                 | NA                            | NA                 |
| Kabuli_wild_46073167 | NA                                  | Ca_kabuli_denovo | 46073167                | G/T  | NA                 | NA                            | NA                 |
| Kabuli_wild_46077400 | NA                                  | Ca_kabuli_denovo | 46077400                | G/T  | NA                 | NA                            | NA                 |
| Kabuli_wild_46105754 | NA                                  | Ca_kabuli_denovo | 46105754                | C/T  | NA                 | NA                            | NA                 |
| Kabuli_wild_46115823 | NA                                  | Ca_kabuli_denovo | 46115823                | C/G  | NA                 | NA                            | NA                 |
| Kabuli_wild_46115826 | NA                                  | Ca_kabuli_denovo | 46115826                | A/G  | NA                 | NA                            | NA                 |
| Kabuli_wild_46138435 | NA                                  | Ca_kabuli_denovo | 46138435                | A/C  | NA                 | NA                            | NA                 |
| Kabuli_wild_46210444 | NA                                  | Ca_kabuli_denovo | 46210444                | A/C  | NA                 | NA                            | NA                 |
| Kabuli_wild_46228649 | NA                                  | Ca_kabuli_denovo | 46228649                | G/T  | NA                 | NA                            | NA                 |
| Kabuli_wild_46237984 | NA                                  | Ca_kabuli_denovo | 46237984                | G/T  | NA                 | NA                            | NA                 |
| Kabuli_wild_46284546 | NA                                  | Ca_kabuli_denovo | 46284546                | G/T  | NA                 | NA                            | NA                 |
| Kabuli_wild_46294900 | NA                                  | Ca_kabuli_denovo | 46294900                | A/C  | NA                 | NA                            | NA                 |
| Kabuli_wild_46296938 | NA                                  | Ca_kabuli_denovo | 46296938                | C/T  | NA                 | NA                            | NA                 |
| Kabuli_wild_46363205 | NA                                  | Ca_kabuli_denovo | 46363205                | A/C  | NA                 | NA                            | NA                 |
| Kabuli_wild_46363206 | NA                                  | Ca_kabuli_denovo | 46363206                | G/T  | NA                 | NA                            | NA                 |
| Kabuli_wild_46397025 | NA                                  | Ca_kabuli_denovo | 46397025                | A/C  | NA                 | NA                            | NA                 |
| Kabuli_wild_46402438 | NA                                  | Ca_kabuli_denovo | 46402438                | A/T  | NA                 | NA                            | NA                 |
| Kabuli_wild_46448516 | NA                                  | Ca_kabuli_denovo | 46448516                | G/T  | NA                 | NA                            | NA                 |
| Kabuli_wild_46451921 | NA                                  | Ca_kabuli_denovo | 46451921                | G/T  | NA                 | NA                            | NA                 |
| Kabuli_wild_46457157 | NA                                  | Ca_kabuli_denovo | 46457157                | A/C  | NA                 | NA                            | NA                 |
| Kabuli_wild_46457158 | NA                                  | Ca_kabuli_denovo | 46457158                | G/T  | NA                 | NA                            | NA                 |
| Kabuli_wild_46457159 | NA                                  | Ca_kabuli_denovo | 46457159                | A/C  | NA                 | NA                            | NA                 |
| Kabuli_wild_46457161 | NA                                  | Ca_kabuli_denovo | 46457161                | A/C  | NA                 | NA                            | NA                 |
| Kabuli_wild_46467706 | NA                                  | Ca_kabuli_denovo | 46467706                | A/G  | NA                 | NA                            | NA                 |
| Kabuli_wild_46474641 | NA                                  | Ca_kabuli_denovo | 46474641                | G/T  | NA                 | NA                            | NA                 |
| Kabuli_wild_46475019 | NA                                  | Ca_kabuli_denovo | 46475019                | G/T  | NA                 | NA                            | NA                 |
| Kabuli_wild_46480120 | NA                                  | Ca_kabuli_denovo | 46480120                | G/T  | NA                 | NA                            | NA                 |
| Kabuli_wild_46489358 | NA                                  | Ca_kabuli_denovo | 46489358                | G/T  | NA                 | NA                            | NA                 |
| Kabuli_wild_46498958 | NA                                  | Ca_kabuli_denovo | 46498958                | C/G  | NA                 | NA                            | NA                 |
| Kabuli_wild_46507954 | NA                                  | Ca_kabuli_denovo | 46507954                | G/T  | NA                 | NA                            | NA                 |
| Kabuli_wild_46517672 | NA                                  | Ca_kabuli_denovo | 46517672                | G/T  | NA                 | NA                            | NA                 |
| Kabuli_wild_46538195 | NA                                  | Ca_kabuli_denovo | 46538195                | A/C  | NA                 | NA                            | NA                 |
| Kabuli_wild_46538196 | NA                                  | Ca_kabuli_denovo | 46538196                | G/T  | NA                 | NA                            | NA                 |
| Kabuli_wild_46549250 | NA                                  | Ca_kabuli_denovo | 46549250                | G/T  | NA                 | NA                            | NA                 |
| Kabuli_wild_46558193 | NA                                  | Ca_kabuli_denovo | 46558193                | C/T  | NA                 | NA                            | NA                 |
| Kabuli_wild_46558217 | NA                                  | Ca_kabuli_denovo | 46558217                | C/T  | NA                 | NA                            | NA                 |
| Kabuli_wild_46560803 | NA                                  | Ca_kabuli_denovo | 46560803                | G/T  | NA                 | NA                            | NA                 |
| Kabuli_wild_46567169 | NA                                  | Ca_kabuli_denovo | 46567169                | A/C  | NA                 | NA                            | NA                 |
| Kabuli_wild_46584602 | NA                                  | Ca_kabuli_denovo | 46584602                | A/G  | NA                 | NA                            | NA                 |
| Kabuli_wild_46590822 | NA                                  | Ca_kabuli_denovo | 46590822                | G/T  | NA                 | NA                            | NA                 |
| Kabuli_wild_46592913 | NA                                  | Ca_kabuli_denovo | 46592913                | G/T  | NA                 | NA                            | NA                 |
| Kabuli_wild_46618239 | NA                                  | Ca_kabuli_denovo | 46618239                | G/T  | NA                 | NA                            | NA                 |
| Kabuli_wild_46618375 | NA                                  | Ca_kabuli_denovo | 46618375                | A/C  | NA                 | NA                            | NA                 |
| Kabuli_wild_46637577 | NA                                  | Ca_kabuli_denovo | 46637577                | A/G  | NA                 | NA                            | NA                 |

| SNP IDs              | NCBI dbSNP accession IDs (NCBI_SS#) | Chromosomes      | Physical positions (bp) | SNPs | Gene accession IDs | Sequence components of genome | Putative functions |
|----------------------|-------------------------------------|------------------|-------------------------|------|--------------------|-------------------------------|--------------------|
| Kabuli_wild_46642309 | NA                                  | Ca_kabuli_denovo | 46642309                | G/T  | NA                 | NA                            | NA                 |
| Kabuli_wild_46642313 | NA                                  | Ca_kabuli_denovo | 46642313                | A/G  | NA                 | NA                            | NA                 |
| Kabuli_wild_46661315 | NA                                  | Ca_kabuli_denovo | 46661315                | A/C  | NA                 | NA                            | NA                 |
| Kabuli_wild_46668914 | NA                                  | Ca_kabuli_denovo | 46668914                | A/C  | NA                 | NA                            | NA                 |
| Kabuli_wild_46669048 | NA                                  | Ca_kabuli_denovo | 46669048                | G/T  | NA                 | NA                            | NA                 |
| Kabuli_wild_46682696 | NA                                  | Ca_kabuli_denovo | 46682696                | A/T  | NA                 | NA                            | NA                 |
| Kabuli_wild_46682727 | NA                                  | Ca_kabuli_denovo | 46682727                | A/G  | NA                 | NA                            | NA                 |
| Kabuli_wild_46692884 | NA                                  | Ca_kabuli_denovo | 46692884                | A/G  | NA                 | NA                            | NA                 |
| Kabuli_wild_46692904 | NA                                  | Ca_kabuli_denovo | 46692904                | A/G  | NA                 | NA                            | NA                 |
| Kabuli_wild_46705206 | NA                                  | Ca_kabuli_denovo | 46705206                | A/C  | NA                 | NA                            | NA                 |
| Kabuli_wild_46707722 | NA                                  | Ca_kabuli_denovo | 46707722                | C/G  | NA                 | NA                            | NA                 |
| Kabuli_wild_46712234 | NA                                  | Ca_kabuli_denovo | 46712234                | C/G  | NA                 | NA                            | NA                 |
| Kabuli_wild_46712803 | NA                                  | Ca_kabuli_denovo | 46712803                | A/C  | NA                 | NA                            | NA                 |
| Kabuli_wild_46712806 | NA                                  | Ca_kabuli_denovo | 46712806                | A/T  | NA                 | NA                            | NA                 |
| Kabuli_wild_46743776 | NA                                  | Ca_kabuli_denovo | 46743776                | A/C  | NA                 | NA                            | NA                 |
| Kabuli_wild_46764391 | NA                                  | Ca_kabuli_denovo | 46764391                | G/T  | NA                 | NA                            | NA                 |
| Kabuli_wild_46768286 | NA                                  | Ca_kabuli_denovo | 46768286                | A/G  | NA                 | NA                            | NA                 |
| Kabuli_wild_46768475 | NA                                  | Ca_kabuli_denovo | 46768475                | C/G  | NA                 | NA                            | NA                 |
| Kabuli_wild_46775981 | NA                                  | Ca_kabuli_denovo | 46775981                | G/T  | NA                 | NA                            | NA                 |
| Kabuli_wild_46780161 | NA                                  | Ca_kabuli_denovo | 46780161                | G/T  | NA                 | NA                            | NA                 |
| Kabuli_wild_46782820 | NA                                  | Ca_kabuli_denovo | 46782820                | A/C  | NA                 | NA                            | NA                 |
| Kabuli_wild_46791825 | NA                                  | Ca_kabuli_denovo | 46791825                | G/T  | NA                 | NA                            | NA                 |
| Kabuli_wild_46791828 | NA                                  | Ca_kabuli_denovo | 46791828                | G/T  | NA                 | NA                            | NA                 |
| Kabuli_wild_46801057 | NA                                  | Ca_kabuli_denovo | 46801057                | G/T  | NA                 | NA                            | NA                 |
| Kabuli_wild_46844951 | NA                                  | Ca_kabuli_denovo | 46844951                | A/C  | NA                 | NA                            | NA                 |
| Kabuli_wild_46845504 | NA                                  | Ca_kabuli_denovo | 46845504                | G/T  | NA                 | NA                            | NA                 |
| Kabuli_wild_46853114 | NA                                  | Ca_kabuli_denovo | 46853114                | A/C  | NA                 | NA                            | NA                 |
| Kabuli_wild_46853117 | NA                                  | Ca_kabuli_denovo | 46853117                | C/G  | NA                 | NA                            | NA                 |
| Kabuli_wild_46856386 | NA                                  | Ca_kabuli_denovo | 46856386                | G/T  | NA                 | NA                            | NA                 |
| Kabuli_wild_46856541 | NA                                  | Ca_kabuli_denovo | 46856541                | A/G  | NA                 | NA                            | NA                 |
| Kabuli_wild_46867557 | NA                                  | Ca_kabuli_denovo | 46867557                | G/T  | NA                 | NA                            | NA                 |
| Kabuli_wild_46878568 | NA                                  | Ca_kabuli_denovo | 46878568                | G/T  | NA                 | NA                            | NA                 |
| Kabuli_wild_46883901 | NA                                  | Ca_kabuli_denovo | 46883901                | G/T  | NA                 | NA                            | NA                 |
| Kabuli_wild_46891959 | NA                                  | Ca_kabuli_denovo | 46891959                | A/T  | NA                 | NA                            | NA                 |
| Kabuli_wild_46915964 | NA                                  | Ca_kabuli_denovo | 46915964                | A/G  | NA                 | NA                            | NA                 |
| Kabuli_wild_46915966 | NA                                  | Ca_kabuli_denovo | 46915966                | C/G  | NA                 | NA                            | NA                 |
| Kabuli_wild_46915974 | NA                                  | Ca_kabuli_denovo | 46915974                | A/T  | NA                 | NA                            | NA                 |
| Kabuli_wild_46931372 | NA                                  | Ca_kabuli_denovo | 46931372                | G/T  | NA                 | NA                            | NA                 |
| Kabuli_wild_46936877 | NA                                  | Ca_kabuli_denovo | 46936877                | G/T  | NA                 | NA                            | NA                 |
| Kabuli_wild_46946783 | NA                                  | Ca_kabuli_denovo | 46946783                | G/T  | NA                 | NA                            | NA                 |
| Kabuli_wild_46946789 | NA                                  | Ca_kabuli_denovo | 46946789                | A/C  | NA                 | NA                            | NA                 |
| Kabuli_wild_46946790 | NA                                  | Ca_kabuli_denovo | 46946790                | G/T  | NA                 | NA                            | NA                 |
| Kabuli_wild_46954512 | NA                                  | Ca_kabuli_denovo | 46954512                | G/T  | NA                 | NA                            | NA                 |
| Kabuli_wild_46963962 | NA                                  | Ca_kabuli_denovo | 46963962                | C/G  | NA                 | NA                            | NA                 |

| SNP IDs              | NCBI dbSNP accession IDs (NCBI_SS#) | Chromosomes      | Physical positions (bp) | SNPs | Gene accession IDs | Sequence components of genome | Putative functions |
|----------------------|-------------------------------------|------------------|-------------------------|------|--------------------|-------------------------------|--------------------|
| Kabuli_wild_46966740 | NA                                  | Ca_kabuli_denovo | 46966740                | A/C  | NA                 | NA                            | NA                 |
| Kabuli_wild_46966741 | NA                                  | Ca_kabuli_denovo | 46966741                | G/T  | NA                 | NA                            | NA                 |
| Kabuli_wild_46975748 | NA                                  | Ca_kabuli_denovo | 46975748                | A/G  | NA                 | NA                            | NA                 |
| Kabuli_wild_46976607 | NA                                  | Ca_kabuli_denovo | 46976607                | G/T  | NA                 | NA                            | NA                 |
| Kabuli_wild_47008653 | NA                                  | Ca_kabuli_denovo | 47008653                | C/T  | NA                 | NA                            | NA                 |
| Kabuli_wild_47008673 | NA                                  | Ca_kabuli_denovo | 47008673                | C/T  | NA                 | NA                            | NA                 |
| Kabuli_wild_47013911 | NA                                  | Ca_kabuli_denovo | 47013911                | G/T  | NA                 | NA                            | NA                 |
| Kabuli_wild_47013943 | NA                                  | Ca_kabuli_denovo | 47013943                | G/T  | NA                 | NA                            | NA                 |
| Kabuli_wild_47015760 | NA                                  | Ca_kabuli_denovo | 47015760                | A/C  | NA                 | NA                            | NA                 |
| Kabuli_wild_47015761 | NA                                  | Ca_kabuli_denovo | 47015761                | G/T  | NA                 | NA                            | NA                 |
| Kabuli_wild_47024405 | NA                                  | Ca_kabuli_denovo | 47024405                | A/C  | NA                 | NA                            | NA                 |
| Kabuli_wild_47024406 | NA                                  | Ca_kabuli_denovo | 47024406                | A/G  | NA                 | NA                            | NA                 |
| Kabuli_wild_47027630 | NA                                  | Ca_kabuli_denovo | 47027630                | A/G  | NA                 | NA                            | NA                 |
| Kabuli_wild_47054760 | NA                                  | Ca_kabuli_denovo | 47054760                | C/T  | NA                 | NA                            | NA                 |
| Kabuli_wild_47071097 | NA                                  | Ca_kabuli_denovo | 47071097                | G/T  | NA                 | NA                            | NA                 |
| Kabuli_wild_47076897 | NA                                  | Ca_kabuli_denovo | 47076897                | G/T  | NA                 | NA                            | NA                 |
| Kabuli_wild_47080117 | NA                                  | Ca_kabuli_denovo | 47080117                | G/T  | NA                 | NA                            | NA                 |
| Kabuli_wild_47089733 | NA                                  | Ca_kabuli_denovo | 47089733                | G/T  | NA                 | NA                            | NA                 |
| Kabuli_wild_47090811 | NA                                  | Ca_kabuli_denovo | 47090811                | G/T  | NA                 | NA                            | NA                 |
| Kabuli_wild_47128999 | NA                                  | Ca_kabuli_denovo | 47128999                | A/C  | NA                 | NA                            | NA                 |
| Kabuli_wild_47140210 | NA                                  | Ca_kabuli_denovo | 47140210                | A/C  | NA                 | NA                            | NA                 |
| Kabuli_wild_47191791 | NA                                  | Ca_kabuli_denovo | 47191791                | C/G  | NA                 | NA                            | NA                 |
| Kabuli_wild_47191795 | NA                                  | Ca_kabuli_denovo | 47191795                | C/G  | NA                 | NA                            | NA                 |
| Kabuli_wild_47197180 | NA                                  | Ca_kabuli_denovo | 47197180                | G/T  | NA                 | NA                            | NA                 |
| Kabuli_wild_47197609 | NA                                  | Ca_kabuli_denovo | 47197609                | C/G  | NA                 | NA                            | NA                 |
| Kabuli_wild_47207373 | NA                                  | Ca_kabuli_denovo | 47207373                | A/G  | NA                 | NA                            | NA                 |
| Kabuli_wild_47212515 | NA                                  | Ca_kabuli_denovo | 47212515                | C/T  | NA                 | NA                            | NA                 |
| Kabuli_wild_47217046 | NA                                  | Ca_kabuli_denovo | 47217046                | G/T  | NA                 | NA                            | NA                 |
| Kabuli_wild_47218681 | NA                                  | Ca_kabuli_denovo | 47218681                | C/T  | NA                 | NA                            | NA                 |
| Kabuli_wild_47289271 | NA                                  | Ca_kabuli_denovo | 47289271                | T/A  | NA                 | NA                            | NA                 |
| Kabuli_wild_47289285 | NA                                  | Ca_kabuli_denovo | 47289285                | G/A  | NA                 | NA                            | NA                 |
| Kabuli_wild_47323129 | NA                                  | Ca_kabuli_denovo | 47323129                | A/C  | NA                 | NA                            | NA                 |
| Kabuli_wild_47333248 | NA                                  | Ca_kabuli_denovo | 47333248                | A/C  | NA                 | NA                            | NA                 |
| Kabuli_wild_47333249 | NA                                  | Ca_kabuli_denovo | 47333249                | A/G  | NA                 | NA                            | NA                 |
| Kabuli_wild_47333250 | NA                                  | Ca_kabuli_denovo | 47333250                | A/G  | NA                 | NA                            | NA                 |
| Kabuli_wild_47341222 | NA                                  | Ca_kabuli_denovo | 47341222                | A/G  | NA                 | NA                            | NA                 |
| Kabuli_wild_47342909 | NA                                  | Ca_kabuli_denovo | 47342909                | G/T  | NA                 | NA                            | NA                 |
| Kabuli_wild_47356796 | NA                                  | Ca_kabuli_denovo | 47356796                | A/G  | NA                 | NA                            | NA                 |
| Kabuli_wild_47356953 | NA                                  | Ca_kabuli_denovo | 47356953                | G/T  | NA                 | NA                            | NA                 |
| Kabuli_wild_47369601 | NA                                  | Ca_kabuli_denovo | 47369601                | G/T  | NA                 | NA                            | NA                 |
| Kabuli_wild_47369622 | NA                                  | Ca_kabuli_denovo | 47369622                | G/T  | NA                 | NA                            | NA                 |
| Kabuli_wild_47381839 | NA                                  | Ca_kabuli_denovo | 47381839                | A/G  | NA                 | NA                            | NA                 |
| Kabuli_wild_47381842 | NA                                  | Ca_kabuli_denovo | 47381842                | C/G  | NA                 | NA                            | NA                 |
| Kabuli_wild_47393765 | NA                                  | Ca_kabuli_denovo | 47393765                | A/C  | NA                 | NA                            | NA                 |

| SNP IDs              | NCBI dbSNP accession IDs (NCBI_SS#) | Chromosomes      | Physical positions (bp) | SNPs | Gene accession IDs | Sequence components of genome | Putative functions |
|----------------------|-------------------------------------|------------------|-------------------------|------|--------------------|-------------------------------|--------------------|
| Kabuli_wild_47393766 | NA                                  | Ca_kabuli_denovo | 47393766                | A/G  | NA                 | NA                            | NA                 |
| Kabuli_wild_47401361 | NA                                  | Ca_kabuli_denovo | 47401361                | G/T  | NA                 | NA                            | NA                 |
| Kabuli_wild_47414473 | NA                                  | Ca_kabuli_denovo | 47414473                | G/T  | NA                 | NA                            | NA                 |
| Kabuli_wild_47417736 | NA                                  | Ca_kabuli_denovo | 47417736                | A/G  | NA                 | NA                            | NA                 |
| Kabuli_wild_47424399 | NA                                  | Ca_kabuli_denovo | 47424399                | A/G  | NA                 | NA                            | NA                 |
| Kabuli_wild_47434305 | NA                                  | Ca_kabuli_denovo | 47434305                | T/G  | NA                 | NA                            | NA                 |
| Kabuli_wild_47443449 | NA                                  | Ca_kabuli_denovo | 47443449                | A/C  | NA                 | NA                            | NA                 |
| Kabuli_wild_47448484 | NA                                  | Ca_kabuli_denovo | 47448484                | G/T  | NA                 | NA                            | NA                 |
| Kabuli_wild_47452826 | NA                                  | Ca_kabuli_denovo | 47452826                | A/G  | NA                 | NA                            | NA                 |
| Kabuli_wild_47476412 | NA                                  | Ca_kabuli_denovo | 47476412                | G/T  | NA                 | NA                            | NA                 |
| Kabuli_wild_47493990 | NA                                  | Ca_kabuli_denovo | 47493990                | A/C  | NA                 | NA                            | NA                 |
| Kabuli_wild_47493991 | NA                                  | Ca_kabuli_denovo | 47493991                | G/T  | NA                 | NA                            | NA                 |
| Kabuli_wild_47511754 | NA                                  | Ca_kabuli_denovo | 47511754                | A/G  | NA                 | NA                            | NA                 |
| Kabuli_wild_47531398 | NA                                  | Ca_kabuli_denovo | 47531398                | G/T  | NA                 | NA                            | NA                 |
| Kabuli_wild_47532031 | NA                                  | Ca_kabuli_denovo | 47532031                | A/G  | NA                 | NA                            | NA                 |
| Kabuli_wild_47540253 | NA                                  | Ca_kabuli_denovo | 47540253                | A/G  | NA                 | NA                            | NA                 |
| Kabuli_wild_47540254 | NA                                  | Ca_kabuli_denovo | 47540254                | C/G  | NA                 | NA                            | NA                 |
| Kabuli_wild_47540255 | NA                                  | Ca_kabuli_denovo | 47540255                | C/G  | NA                 | NA                            | NA                 |
| Kabuli_wild_47540917 | NA                                  | Ca_kabuli_denovo | 47540917                | A/C  | NA                 | NA                            | NA                 |
| Kabuli_wild_47548140 | NA                                  | Ca_kabuli_denovo | 47548140                | A/C  | NA                 | NA                            | NA                 |
| Kabuli_wild_47548141 | NA                                  | Ca_kabuli_denovo | 47548141                | A/G  | NA                 | NA                            | NA                 |
| Kabuli_wild_47556397 | NA                                  | Ca_kabuli_denovo | 47556397                | C/G  | NA                 | NA                            | NA                 |
| Kabuli_wild_47559439 | NA                                  | Ca_kabuli_denovo | 47559439                | G/T  | NA                 | NA                            | NA                 |
| Kabuli_wild_47571578 | NA                                  | Ca_kabuli_denovo | 47571578                | G/T  | NA                 | NA                            | NA                 |
| Kabuli_wild_47638485 | NA                                  | Ca_kabuli_denovo | 47638485                | A/C  | NA                 | NA                            | NA                 |
| Kabuli_wild_47638486 | NA                                  | Ca_kabuli_denovo | 47638486                | G/T  | NA                 | NA                            | NA                 |
| Kabuli_wild_47642570 | NA                                  | Ca_kabuli_denovo | 47642570                | A/C  | NA                 | NA                            | NA                 |
| Kabuli_wild_47642571 | NA                                  | Ca_kabuli_denovo | 47642571                | G/T  | NA                 | NA                            | NA                 |
| Kabuli_wild_47650263 | NA                                  | Ca_kabuli_denovo | 47650263                | C/G  | NA                 | NA                            | NA                 |
| Kabuli_wild_47650355 | NA                                  | Ca_kabuli_denovo | 47650355                | A/C  | NA                 | NA                            | NA                 |
| Kabuli_wild_47654285 | NA                                  | Ca_kabuli_denovo | 47654285                | G/T  | NA                 | NA                            | NA                 |
| Kabuli_wild_47657485 | NA                                  | Ca_kabuli_denovo | 47657485                | G/T  | NA                 | NA                            | NA                 |
| Kabuli_wild_47666784 | NA                                  | Ca_kabuli_denovo | 47666784                | G/T  | NA                 | NA                            | NA                 |
| Kabuli_wild_47680513 | NA                                  | Ca_kabuli_denovo | 47680513                | C/T  | NA                 | NA                            | NA                 |
| Kabuli_wild_47691626 | NA                                  | Ca_kabuli_denovo | 47691626                | T/G  | NA                 | NA                            | NA                 |
| Kabuli_wild_47691651 | NA                                  | Ca_kabuli_denovo | 47691651                | G/T  | NA                 | NA                            | NA                 |
| Kabuli_wild_47701659 | NA                                  | Ca_kabuli_denovo | 47701659                | A/C  | NA                 | NA                            | NA                 |
| Kabuli_wild_47709873 | NA                                  | Ca_kabuli_denovo | 47709873                | A/C  | NA                 | NA                            | NA                 |
| Kabuli_wild_47741939 | NA                                  | Ca_kabuli_denovo | 47741939                | G/T  | NA                 | NA                            | NA                 |
| Kabuli_wild_47752101 | NA                                  | Ca_kabuli_denovo | 47752101                | G/T  | NA                 | NA                            | NA                 |
| Kabuli_wild_47759976 | NA                                  | Ca_kabuli_denovo | 47759976                | T/G  | NA                 | NA                            | NA                 |
| Kabuli_wild_47764306 | NA                                  | Ca_kabuli_denovo | 47764306                | G/T  | NA                 | NA                            | NA                 |
| Kabuli_wild_47768913 | NA                                  | Ca_kabuli_denovo | 47768913                | G/T  | NA                 | NA                            | NA                 |
| Kabuli_wild_47768915 | NA                                  | Ca_kabuli_denovo | 47768915                | C/G  | NA                 | NA                            | NA                 |

| SNP IDs              | NCBI dbSNP accession IDs (NCBI_SS#) | Chromosomes      | Physical positions (bp) | SNPs | Gene accession IDs | Sequence components of genome | Putative functions |
|----------------------|-------------------------------------|------------------|-------------------------|------|--------------------|-------------------------------|--------------------|
| Kabuli_wild_47768921 | NA                                  | Ca_kabuli_denovo | 47768921                | A/C  | NA                 | NA                            | NA                 |
| Kabuli_wild_47796514 | NA                                  | Ca_kabuli_denovo | 47796514                | G/T  | NA                 | NA                            | NA                 |
| Kabuli_wild_47796561 | NA                                  | Ca_kabuli_denovo | 47796561                | G/T  | NA                 | NA                            | NA                 |
| Kabuli_wild_47805401 | NA                                  | Ca_kabuli_denovo | 47805401                | G/T  | NA                 | NA                            | NA                 |
| Kabuli_wild_47805887 | NA                                  | Ca_kabuli_denovo | 47805887                | G/T  | NA                 | NA                            | NA                 |
| Kabuli_wild_47816135 | NA                                  | Ca_kabuli_denovo | 47816135                | A/C  | NA                 | NA                            | NA                 |
| Kabuli_wild_47816136 | NA                                  | Ca_kabuli_denovo | 47816136                | A/G  | NA                 | NA                            | NA                 |
| Kabuli_wild_47839378 | NA                                  | Ca_kabuli_denovo | 47839378                | G/T  | NA                 | NA                            | NA                 |
| Kabuli_wild_47839407 | NA                                  | Ca_kabuli_denovo | 47839407                | C/G  | NA                 | NA                            | NA                 |
| Kabuli_wild_47839410 | NA                                  | Ca_kabuli_denovo | 47839410                | A/C  | NA                 | NA                            | NA                 |
| Kabuli_wild_47859171 | NA                                  | Ca_kabuli_denovo | 47859171                | A/C  | NA                 | NA                            | NA                 |
| Kabuli_wild_47863627 | NA                                  | Ca_kabuli_denovo | 47863627                | G/T  | NA                 | NA                            | NA                 |
| Kabuli_wild_47871711 | NA                                  | Ca_kabuli_denovo | 47871711                | C/G  | NA                 | NA                            | NA                 |
| Kabuli_wild_47923231 | NA                                  | Ca_kabuli_denovo | 47923231                | C/T  | NA                 | NA                            | NA                 |
| Kabuli_wild_47923244 | NA                                  | Ca_kabuli_denovo | 47923244                | A/T  | NA                 | NA                            | NA                 |
| Kabuli_wild_47926954 | NA                                  | Ca_kabuli_denovo | 47926954                | G/T  | NA                 | NA                            | NA                 |
| Kabuli_wild_47940964 | NA                                  | Ca_kabuli_denovo | 47940964                | C/G  | NA                 | NA                            | NA                 |
| Kabuli_wild_47944690 | NA                                  | Ca_kabuli_denovo | 47944690                | G/T  | NA                 | NA                            | NA                 |
| Kabuli_wild_47944691 | NA                                  | Ca_kabuli_denovo | 47944691                | C/G  | NA                 | NA                            | NA                 |
| Kabuli_wild_47946853 | NA                                  | Ca_kabuli_denovo | 47946853                | G/T  | NA                 | NA                            | NA                 |
| Kabuli_wild_47973076 | NA                                  | Ca_kabuli_denovo | 47973076                | G/T  | NA                 | NA                            | NA                 |
| Kabuli_wild_47990216 | NA                                  | Ca_kabuli_denovo | 47990216                | A/G  | NA                 | NA                            | NA                 |
| Kabuli_wild_48010069 | NA                                  | Ca_kabuli_denovo | 48010069                | C/T  | NA                 | NA                            | NA                 |
| Kabuli_wild_48027359 | NA                                  | Ca_kabuli_denovo | 48027359                | G/T  | NA                 | NA                            | NA                 |
| Kabuli_wild_48038434 | NA                                  | Ca_kabuli_denovo | 48038434                | A/G  | NA                 | NA                            | NA                 |
| Kabuli_wild_48040808 | NA                                  | Ca_kabuli_denovo | 48040808                | A/G  | NA                 | NA                            | NA                 |
| Kabuli_wild_48041826 | NA                                  | Ca_kabuli_denovo | 48041826                | G/T  | NA                 | NA                            | NA                 |
| Kabuli_wild_48041847 | NA                                  | Ca_kabuli_denovo | 48041847                | G/T  | NA                 | NA                            | NA                 |
| Kabuli_wild_48044135 | NA                                  | Ca_kabuli_denovo | 48044135                | A/C  | NA                 | NA                            | NA                 |
| Kabuli_wild_48052399 | NA                                  | Ca_kabuli_denovo | 48052399                | A/C  | NA                 | NA                            | NA                 |
| Kabuli_wild_48053635 | NA                                  | Ca_kabuli_denovo | 48053635                | A/C  | NA                 | NA                            | NA                 |
| Kabuli_wild_48053636 | NA                                  | Ca_kabuli_denovo | 48053636                | A/G  | NA                 | NA                            | NA                 |
| Kabuli_wild_48079458 | NA                                  | Ca_kabuli_denovo | 48079458                | G/T  | NA                 | NA                            | NA                 |
| Kabuli_wild_48079950 | NA                                  | Ca_kabuli_denovo | 48079950                | A/C  | NA                 | NA                            | NA                 |
| Kabuli_wild_48079951 | NA                                  | Ca_kabuli_denovo | 48079951                | A/G  | NA                 | NA                            | NA                 |
| Kabuli_wild_48082512 | NA                                  | Ca_kabuli_denovo | 48082512                | T/G  | NA                 | NA                            | NA                 |
| Kabuli_wild_48117096 | NA                                  | Ca_kabuli_denovo | 48117096                | G/T  | NA                 | NA                            | NA                 |
| Kabuli_wild_48120025 | NA                                  | Ca_kabuli_denovo | 48120025                | A/T  | NA                 | NA                            | NA                 |
| Kabuli_wild_48120031 | NA                                  | Ca_kabuli_denovo | 48120031                | A/G  | NA                 | NA                            | NA                 |
| Kabuli_wild_48124206 | NA                                  | Ca_kabuli_denovo | 48124206                | G/T  | NA                 | NA                            | NA                 |
| Kabuli_wild_48134763 | NA                                  | Ca_kabuli_denovo | 48134763                | G/T  | NA                 | NA                            | NA                 |
| Kabuli_wild_48135145 | NA                                  | Ca_kabuli_denovo | 48135145                | A/C  | NA                 | NA                            | NA                 |
| Kabuli_wild_48135146 | NA                                  | Ca_kabuli_denovo | 48135146                | G/T  | NA                 | NA                            | NA                 |
| Kabuli_wild_48159993 | NA                                  | Ca_kabuli_denovo | 48159993                | C/T  | NA                 | NA                            | NA                 |

| SNP IDs              | NCBI dbSNP accession IDs (NCBI_SS#) | Chromosomes      | Physical positions (bp) | SNPs | Gene accession IDs | Sequence components of genome | Putative functions |
|----------------------|-------------------------------------|------------------|-------------------------|------|--------------------|-------------------------------|--------------------|
| Kabuli_wild_48160581 | NA                                  | Ca_kabuli_denovo | 48160581                | G/T  | NA                 | NA                            | NA                 |
| Kabuli_wild_48172669 | NA                                  | Ca_kabuli_denovo | 48172669                | C/G  | NA                 | NA                            | NA                 |
| Kabuli_wild_48173525 | NA                                  | Ca_kabuli_denovo | 48173525                | A/C  | NA                 | NA                            | NA                 |
| Kabuli_wild_48173526 | NA                                  | Ca_kabuli_denovo | 48173526                | A/G  | NA                 | NA                            | NA                 |
| Kabuli_wild_48175044 | NA                                  | Ca_kabuli_denovo | 48175044                | A/C  | NA                 | NA                            | NA                 |
| Kabuli_wild_48175046 | NA                                  | Ca_kabuli_denovo | 48175046                | A/G  | NA                 | NA                            | NA                 |
| Kabuli_wild_48186442 | NA                                  | Ca_kabuli_denovo | 48186442                | A/C  | NA                 | NA                            | NA                 |
| Kabuli_wild_48193186 | NA                                  | Ca_kabuli_denovo | 48193186                | C/G  | NA                 | NA                            | NA                 |
| Kabuli_wild_48195172 | NA                                  | Ca_kabuli_denovo | 48195172                | G/T  | NA                 | NA                            | NA                 |
| Kabuli_wild_48206766 | NA                                  | Ca_kabuli_denovo | 48206766                | G/T  | NA                 | NA                            | NA                 |
| Kabuli_wild_48210645 | NA                                  | Ca_kabuli_denovo | 48210645                | G/T  | NA                 | NA                            | NA                 |
| Kabuli_wild_48218020 | NA                                  | Ca_kabuli_denovo | 48218020                | A/G  | NA                 | NA                            | NA                 |
| Kabuli_wild_48221150 | NA                                  | Ca_kabuli_denovo | 48221150                | A/G  | NA                 | NA                            | NA                 |
| Kabuli_wild_48224848 | NA                                  | Ca_kabuli_denovo | 48224848                | A/G  | NA                 | NA                            | NA                 |
| Kabuli_wild_48224863 | NA                                  | Ca_kabuli_denovo | 48224863                | C/G  | NA                 | NA                            | NA                 |
| Kabuli_wild_48232235 | NA                                  | Ca_kabuli_denovo | 48232235                | A/C  | NA                 | NA                            | NA                 |
| Kabuli_wild_48235360 | NA                                  | Ca_kabuli_denovo | 48235360                | G/T  | NA                 | NA                            | NA                 |
| Kabuli_wild_48239659 | NA                                  | Ca_kabuli_denovo | 48239659                | G/T  | NA                 | NA                            | NA                 |
| Kabuli_wild_48239722 | NA                                  | Ca_kabuli_denovo | 48239722                | A/T  | NA                 | NA                            | NA                 |
| Kabuli_wild_48240632 | NA                                  | Ca_kabuli_denovo | 48240632                | C/T  | NA                 | NA                            | NA                 |
| Kabuli_wild_48243131 | NA                                  | Ca_kabuli_denovo | 48243131                | G/T  | NA                 | NA                            | NA                 |
| Kabuli_wild_48256700 | NA                                  | Ca_kabuli_denovo | 48256700                | A/G  | NA                 | NA                            | NA                 |
| Kabuli_wild_48256706 | NA                                  | Ca_kabuli_denovo | 48256706                | C/T  | NA                 | NA                            | NA                 |
| Kabuli_wild_48256722 | NA                                  | Ca_kabuli_denovo | 48256722                | T/C  | NA                 | NA                            | NA                 |
| Kabuli_wild_48261744 | NA                                  | Ca_kabuli_denovo | 48261744                | G/T  | NA                 | NA                            | NA                 |
| Kabuli_wild_48262348 | NA                                  | Ca_kabuli_denovo | 48262348                | G/T  | NA                 | NA                            | NA                 |
| Kabuli_wild_48266338 | NA                                  | Ca_kabuli_denovo | 48266338                | A/G  | NA                 | NA                            | NA                 |
| Kabuli_wild_48280986 | NA                                  | Ca_kabuli_denovo | 48280986                | A/G  | NA                 | NA                            | NA                 |
| Kabuli_wild_48280987 | NA                                  | Ca_kabuli_denovo | 48280987                | C/G  | NA                 | NA                            | NA                 |
| Kabuli_wild_48292353 | NA                                  | Ca_kabuli_denovo | 48292353                | G/T  | NA                 | NA                            | NA                 |
| Kabuli_wild_48312606 | NA                                  | Ca_kabuli_denovo | 48312606                | A/G  | NA                 | NA                            | NA                 |
| Kabuli_wild_48327235 | NA                                  | Ca_kabuli_denovo | 48327235                | A/C  | NA                 | NA                            | NA                 |
| Kabuli_wild_48329888 | NA                                  | Ca_kabuli_denovo | 48329888                | C/G  | NA                 | NA                            | NA                 |
| Kabuli_wild_48336070 | NA                                  | Ca_kabuli_denovo | 48336070                | A/C  | NA                 | NA                            | NA                 |
| Kabuli_wild_48336071 | NA                                  | Ca_kabuli_denovo | 48336071                | A/G  | NA                 | NA                            | NA                 |
| Kabuli_wild_48382513 | NA                                  | Ca_kabuli_denovo | 48382513                | G/T  | NA                 | NA                            | NA                 |
| Kabuli_wild_48383380 | NA                                  | Ca_kabuli_denovo | 48383380                | A/C  | NA                 | NA                            | NA                 |
| Kabuli_wild_48383381 | NA                                  | Ca_kabuli_denovo | 48383381                | A/G  | NA                 | NA                            | NA                 |
| Kabuli_wild_48390221 | NA                                  | Ca_kabuli_denovo | 48390221                | A/C  | NA                 | NA                            | NA                 |
| Kabuli_wild_48394211 | NA                                  | Ca_kabuli_denovo | 48394211                | A/C  | NA                 | NA                            | NA                 |
| Kabuli_wild_48419195 | NA                                  | Ca_kabuli_denovo | 48419195                | C/G  | NA                 | NA                            | NA                 |
| Kabuli_wild_48426871 | NA                                  | Ca_kabuli_denovo | 48426871                | G/T  | NA                 | NA                            | NA                 |
| Kabuli_wild_48429645 | NA                                  | Ca_kabuli_denovo | 48429645                | G/T  | NA                 | NA                            | NA                 |
| Kabuli_wild_48459148 | NA                                  | Ca_kabuli_denovo | 48459148                | A/G  | NA                 | NA                            | NA                 |

| SNP IDs              | NCBI dbSNP accession IDs (NCBI_SS#) | Chromosomes      | Physical positions (bp) | SNPs | Gene accession IDs | Sequence components of genome | Putative functions |
|----------------------|-------------------------------------|------------------|-------------------------|------|--------------------|-------------------------------|--------------------|
| Kabuli_wild_48464604 | NA                                  | Ca_kabuli_denovo | 48464604                | A/G  | NA                 | NA                            | NA                 |
| Kabuli_wild_48470763 | NA                                  | Ca_kabuli_denovo | 48470763                | A/G  | NA                 | NA                            | NA                 |
| Kabuli_wild_48471811 | NA                                  | Ca_kabuli_denovo | 48471811                | G/T  | NA                 | NA                            | NA                 |
| Kabuli_wild_48482555 | NA                                  | Ca_kabuli_denovo | 48482555                | G/T  | NA                 | NA                            | NA                 |
| Kabuli_wild_48490065 | NA                                  | Ca_kabuli_denovo | 48490065                | A/C  | NA                 | NA                            | NA                 |
| Kabuli_wild_48500218 | NA                                  | Ca_kabuli_denovo | 48500218                | G/T  | NA                 | NA                            | NA                 |
| Kabuli_wild_48529395 | NA                                  | Ca_kabuli_denovo | 48529395                | A/C  | NA                 | NA                            | NA                 |
| Kabuli_wild_48529396 | NA                                  | Ca_kabuli_denovo | 48529396                | A/G  | NA                 | NA                            | NA                 |
| Kabuli_wild_48529965 | NA                                  | Ca_kabuli_denovo | 48529965                | C/G  | NA                 | NA                            | NA                 |
| Kabuli_wild_48537712 | NA                                  | Ca_kabuli_denovo | 48537712                | G/A  | NA                 | NA                            | NA                 |
| Kabuli_wild_48537713 | NA                                  | Ca_kabuli_denovo | 48537713                | C/A  | NA                 | NA                            | NA                 |
| Kabuli_wild_48557846 | NA                                  | Ca_kabuli_denovo | 48557846                | G/T  | NA                 | NA                            | NA                 |
| Kabuli_wild_48557895 | NA                                  | Ca_kabuli_denovo | 48557895                | G/T  | NA                 | NA                            | NA                 |
| Kabuli_wild_48568415 | NA                                  | Ca_kabuli_denovo | 48568415                | G/T  | NA                 | NA                            | NA                 |
| Kabuli_wild_48597605 | NA                                  | Ca_kabuli_denovo | 48597605                | A/C  | NA                 | NA                            | NA                 |
| Kabuli_wild_48597606 | NA                                  | Ca_kabuli_denovo | 48597606                | G/T  | NA                 | NA                            | NA                 |
| Kabuli_wild_48613659 | NA                                  | Ca_kabuli_denovo | 48613659                | G/T  | NA                 | NA                            | NA                 |
| Kabuli_wild_48647963 | NA                                  | Ca_kabuli_denovo | 48647963                | A/G  | NA                 | NA                            | NA                 |
| Kabuli_wild_48648004 | NA                                  | Ca_kabuli_denovo | 48648004                | C/G  | NA                 | NA                            | NA                 |
| Kabuli_wild_48651565 | NA                                  | Ca_kabuli_denovo | 48651565                | G/T  | NA                 | NA                            | NA                 |
| Kabuli_wild_48667423 | NA                                  | Ca_kabuli_denovo | 48667423                | G/T  | NA                 | NA                            | NA                 |
| Kabuli_wild_48669046 | NA                                  | Ca_kabuli_denovo | 48669046                | A/C  | NA                 | NA                            | NA                 |
| Kabuli_wild_48753406 | NA                                  | Ca_kabuli_denovo | 48753406                | A/C  | NA                 | NA                            | NA                 |
| Kabuli_wild_48772180 | NA                                  | Ca_kabuli_denovo | 48772180                | G/T  | NA                 | NA                            | NA                 |
| Kabuli_wild_48776521 | NA                                  | Ca_kabuli_denovo | 48776521                | C/G  | NA                 | NA                            | NA                 |
| Kabuli_wild_48816901 | NA                                  | Ca_kabuli_denovo | 48816901                | G/T  | NA                 | NA                            | NA                 |
| Kabuli_wild_48816957 | NA                                  | Ca_kabuli_denovo | 48816957                | G/T  | NA                 | NA                            | NA                 |
| Kabuli_wild_48846645 | NA                                  | Ca_kabuli_denovo | 48846645                | G/T  | NA                 | NA                            | NA                 |
| Kabuli_wild_48862750 | NA                                  | Ca_kabuli_denovo | 48862750                | A/C  | NA                 | NA                            | NA                 |
| Kabuli_wild_48862751 | NA                                  | Ca_kabuli_denovo | 48862751                | A/G  | NA                 | NA                            | NA                 |
| Kabuli_wild_48877836 | NA                                  | Ca_kabuli_denovo | 48877836                | G/T  | NA                 | NA                            | NA                 |
| Kabuli_wild_48879895 | NA                                  | Ca_kabuli_denovo | 48879895                | G/T  | NA                 | NA                            | NA                 |
| Kabuli_wild_48890680 | NA                                  | Ca_kabuli_denovo | 48890680                | A/C  | NA                 | NA                            | NA                 |
| Kabuli_wild_48894005 | NA                                  | Ca_kabuli_denovo | 48894005                | A/C  | NA                 | NA                            | NA                 |
| Kabuli_wild_48894006 | NA                                  | Ca_kabuli_denovo | 48894006                | A/G  | NA                 | NA                            | NA                 |
| Kabuli_wild_48895579 | NA                                  | Ca_kabuli_denovo | 48895579                | A/G  | NA                 | NA                            | NA                 |
| Kabuli_wild_48902650 | NA                                  | Ca_kabuli_denovo | 48902650                | C/G  | NA                 | NA                            | NA                 |
| Kabuli_wild_48909681 | NA                                  | Ca_kabuli_denovo | 48909681                | A/C  | NA                 | NA                            | NA                 |
| Kabuli_wild_48914335 | NA                                  | Ca_kabuli_denovo | 48914335                | A/C  | NA                 | NA                            | NA                 |
| Kabuli_wild_48918421 | NA                                  | Ca_kabuli_denovo | 48918421                | G/T  | NA                 | NA                            | NA                 |
| Kabuli_wild_48925735 | NA                                  | Ca_kabuli_denovo | 48925735                | A/C  | NA                 | NA                            | NA                 |
| Kabuli_wild_48925736 | NA                                  | Ca_kabuli_denovo | 48925736                | A/G  | NA                 | NA                            | NA                 |
| Kabuli_wild_48930960 | NA                                  | Ca_kabuli_denovo | 48930960                | A/C  | NA                 | NA                            | NA                 |
| Kabuli_wild_48930961 | NA                                  | Ca_kabuli_denovo | 48930961                | A/G  | NA                 | NA                            | NA                 |



| SNP IDs              | NCBI dbSNP accession IDs (NCBI_SS#) | Chromosomes      | Physical positions (bp) | SNPs | Gene accession IDs | Sequence components of genome | Putative functions |
|----------------------|-------------------------------------|------------------|-------------------------|------|--------------------|-------------------------------|--------------------|
| Kabuli_wild_48932258 | NA                                  | Ca_kabuli_denovo | 48932258                | G/T  | NA                 | NA                            | NA                 |
| Kabuli_wild_48944900 | NA                                  | Ca_kabuli_denovo | 48944900                | T/G  | NA                 | NA                            | NA                 |
| Kabuli_wild_48954085 | NA                                  | Ca_kabuli_denovo | 48954085                | A/G  | NA                 | NA                            | NA                 |
| Kabuli_wild_48954121 | NA                                  | Ca_kabuli_denovo | 48954121                | C/T  | NA                 | NA                            | NA                 |
| Kabuli_wild_48954124 | NA                                  | Ca_kabuli_denovo | 48954124                | C/T  | NA                 | NA                            | NA                 |
| Kabuli_wild_48957337 | NA                                  | Ca_kabuli_denovo | 48957337                | C/G  | NA                 | NA                            | NA                 |
| Kabuli_wild_48960234 | NA                                  | Ca_kabuli_denovo | 48960234                | C/G  | NA                 | NA                            | NA                 |
| Kabuli_wild_48960252 | NA                                  | Ca_kabuli_denovo | 48960252                | A/C  | NA                 | NA                            | NA                 |
| Kabuli_wild_48960329 | NA                                  | Ca_kabuli_denovo | 48960329                | C/T  | NA                 | NA                            | NA                 |
| Kabuli_wild_48964020 | NA                                  | Ca_kabuli_denovo | 48964020                | A/C  | NA                 | NA                            | NA                 |
| Kabuli_wild_48967915 | NA                                  | Ca_kabuli_denovo | 48967915                | A/C  | NA                 | NA                            | NA                 |
| Kabuli_wild_48967916 | NA                                  | Ca_kabuli_denovo | 48967916                | A/G  | NA                 | NA                            | NA                 |
| Kabuli_wild_48978196 | NA                                  | Ca_kabuli_denovo | 48978196                | A/C  | NA                 | NA                            | NA                 |
| Kabuli_wild_48978223 | NA                                  | Ca_kabuli_denovo | 48978223                | A/G  | NA                 | NA                            | NA                 |
| Kabuli_wild_48979506 | NA                                  | Ca_kabuli_denovo | 48979506                | G/T  | NA                 | NA                            | NA                 |
| Kabuli_wild_48995276 | NA                                  | Ca_kabuli_denovo | 48995276                | G/T  | NA                 | NA                            | NA                 |
| Kabuli_wild_48999549 | NA                                  | Ca_kabuli_denovo | 48999549                | C/G  | NA                 | NA                            | NA                 |
| Kabuli_wild_49008756 | NA                                  | Ca_kabuli_denovo | 49008756                | G/T  | NA                 | NA                            | NA                 |
| Kabuli_wild_49013989 | NA                                  | Ca_kabuli_denovo | 49013989                | A/C  | NA                 | NA                            | NA                 |
| Kabuli_wild_49014559 | NA                                  | Ca_kabuli_denovo | 49014559                | G/T  | NA                 | NA                            | NA                 |
| Kabuli_wild_49014561 | NA                                  | Ca_kabuli_denovo | 49014561                | A/G  | NA                 | NA                            | NA                 |
| Kabuli_wild_49019873 | NA                                  | Ca_kabuli_denovo | 49019873                | T/G  | NA                 | NA                            | NA                 |
| Kabuli_wild_49021399 | NA                                  | Ca_kabuli_denovo | 49021399                | G/T  | NA                 | NA                            | NA                 |
| Kabuli_wild_49044507 | NA                                  | Ca_kabuli_denovo | 49044507                | A/G  | NA                 | NA                            | NA                 |
| Kabuli_wild_49044508 | NA                                  | Ca_kabuli_denovo | 49044508                | C/T  | NA                 | NA                            | NA                 |
| Kabuli_wild_49046193 | NA                                  | Ca_kabuli_denovo | 49046193                | A/C  | NA                 | NA                            | NA                 |
| Kabuli_wild_49046195 | NA                                  | Ca_kabuli_denovo | 49046195                | A/G  | NA                 | NA                            | NA                 |
| Kabuli_wild_49058581 | NA                                  | Ca_kabuli_denovo | 49058581                | G/T  | NA                 | NA                            | NA                 |
| Kabuli_wild_49070801 | NA                                  | Ca_kabuli_denovo | 49070801                | A/C  | NA                 | NA                            | NA                 |
| Kabuli_wild_49080184 | NA                                  | Ca_kabuli_denovo | 49080184                | C/T  | NA                 | NA                            | NA                 |
| Kabuli_wild_49119243 | NA                                  | Ca_kabuli_denovo | 49119243                | G/T  | NA                 | NA                            | NA                 |
| Kabuli_wild_49142905 | NA                                  | Ca_kabuli_denovo | 49142905                | A/C  | NA                 | NA                            | NA                 |
| Kabuli_wild_49147757 | NA                                  | Ca_kabuli_denovo | 49147757                | A/G  | NA                 | NA                            | NA                 |
| Kabuli_wild_49150693 | NA                                  | Ca_kabuli_denovo | 49150693                | C/T  | NA                 | NA                            | NA                 |
| Kabuli_wild_49152591 | NA                                  | Ca_kabuli_denovo | 49152591                | C/G  | NA                 | NA                            | NA                 |
| Kabuli_wild_49152593 | NA                                  | Ca_kabuli_denovo | 49152593                | A/G  | NA                 | NA                            | NA                 |
| Kabuli_wild_49161190 | NA                                  | Ca_kabuli_denovo | 49161190                | G/T  | NA                 | NA                            | NA                 |
| Kabuli_wild_49163990 | NA                                  | Ca_kabuli_denovo | 49163990                | A/G  | NA                 | NA                            | NA                 |
| Kabuli_wild_49166180 | NA                                  | Ca_kabuli_denovo | 49166180                | A/C  | NA                 | NA                            | NA                 |
| Kabuli_wild_49166181 | NA                                  | Ca_kabuli_denovo | 49166181                | A/G  | NA                 | NA                            | NA                 |
| Kabuli_wild_49168075 | NA                                  | Ca_kabuli_denovo | 49168075                | G/T  | NA                 | NA                            | NA                 |
| Kabuli_wild_49168645 | NA                                  | Ca_kabuli_denovo | 49168645                | G/T  | NA                 | NA                            | NA                 |
| Kabuli_wild_49169410 | NA                                  | Ca_kabuli_denovo | 49169410                | A/C  | NA                 | NA                            | NA                 |
| Kabuli_wild_49169411 | NA                                  | Ca_kabuli_denovo | 49169411                | A/G  | NA                 | NA                            | NA                 |

| SNP IDs              | NCBI dbSNP accession IDs (NCBI_SS#) | Chromosomes      | Physical positions (bp) | SNPs | Gene accession IDs | Sequence components of genome | Putative functions |
|----------------------|-------------------------------------|------------------|-------------------------|------|--------------------|-------------------------------|--------------------|
| Kabuli_wild_49170544 | NA                                  | Ca_kabuli_denovo | 49170544                | A/G  | NA                 | NA                            | NA                 |
| Kabuli_wild_49173116 | NA                                  | Ca_kabuli_denovo | 49173116                | G/T  | NA                 | NA                            | NA                 |
| Kabuli_wild_49173439 | NA                                  | Ca_kabuli_denovo | 49173439                | G/T  | NA                 | NA                            | NA                 |
| Kabuli_wild_49173666 | NA                                  | Ca_kabuli_denovo | 49173666                | G/T  | NA                 | NA                            | NA                 |
| Kabuli_wild_49175588 | NA                                  | Ca_kabuli_denovo | 49175588                | A/T  | NA                 | NA                            | NA                 |
| Kabuli_wild_49177056 | NA                                  | Ca_kabuli_denovo | 49177056                | G/T  | NA                 | NA                            | NA                 |
| Kabuli_wild_49182275 | NA                                  | Ca_kabuli_denovo | 49182275                | G/T  | NA                 | NA                            | NA                 |
| Kabuli_wild_49211970 | NA                                  | Ca_kabuli_denovo | 49211970                | A/C  | NA                 | NA                            | NA                 |
| Kabuli_wild_49211971 | NA                                  | Ca_kabuli_denovo | 49211971                | A/G  | NA                 | NA                            | NA                 |
| Kabuli_wild_49224087 | NA                                  | Ca_kabuli_denovo | 49224087                | G/T  | NA                 | NA                            | NA                 |
| Kabuli_wild_49242371 | NA                                  | Ca_kabuli_denovo | 49242371                | A/G  | NA                 | NA                            | NA                 |
| Kabuli_wild_49265038 | NA                                  | Ca_kabuli_denovo | 49265038                | G/T  | NA                 | NA                            | NA                 |
| Kabuli_wild_49267828 | NA                                  | Ca_kabuli_denovo | 49267828                | A/C  | NA                 | NA                            | NA                 |
| Kabuli_wild_49269404 | NA                                  | Ca_kabuli_denovo | 49269404                | G/T  | NA                 | NA                            | NA                 |
| Kabuli_wild_49271423 | NA                                  | Ca_kabuli_denovo | 49271423                | G/T  | NA                 | NA                            | NA                 |
| Kabuli_wild_49275241 | NA                                  | Ca_kabuli_denovo | 49275241                | A/C  | NA                 | NA                            | NA                 |
| Kabuli_wild_49283031 | NA                                  | Ca_kabuli_denovo | 49283031                | A/C  | NA                 | NA                            | NA                 |
| Kabuli_wild_49284063 | NA                                  | Ca_kabuli_denovo | 49284063                | G/T  | NA                 | NA                            | NA                 |
| Kabuli_wild_49290016 | NA                                  | Ca_kabuli_denovo | 49290016                | G/T  | NA                 | NA                            | NA                 |
| Kabuli_wild_49296329 | NA                                  | Ca_kabuli_denovo | 49296329                | A/C  | NA                 | NA                            | NA                 |
| Kabuli_wild_49301059 | NA                                  | Ca_kabuli_denovo | 49301059                | C/G  | NA                 | NA                            | NA                 |
| Kabuli_wild_49302514 | NA                                  | Ca_kabuli_denovo | 49302514                | C/T  | NA                 | NA                            | NA                 |
| Kabuli_wild_49302580 | NA                                  | Ca_kabuli_denovo | 49302580                | A/C  | NA                 | NA                            | NA                 |
| Kabuli_wild_49305153 | NA                                  | Ca_kabuli_denovo | 49305153                | G/T  | NA                 | NA                            | NA                 |
| Kabuli_wild_49305918 | NA                                  | Ca_kabuli_denovo | 49305918                | C/G  | NA                 | NA                            | NA                 |
| Kabuli_wild_49311531 | NA                                  | Ca_kabuli_denovo | 49311531                | A/C  | NA                 | NA                            | NA                 |
| Kabuli_wild_49318941 | NA                                  | Ca_kabuli_denovo | 49318941                | G/T  | NA                 | NA                            | NA                 |
| Kabuli_wild_49333190 | NA                                  | Ca_kabuli_denovo | 49333190                | A/C  | NA                 | NA                            | NA                 |
| Kabuli_wild_49333191 | NA                                  | Ca_kabuli_denovo | 49333191                | G/T  | NA                 | NA                            | NA                 |
| Kabuli_wild_49337800 | NA                                  | Ca_kabuli_denovo | 49337800                | A/G  | NA                 | NA                            | NA                 |
| Kabuli_wild_49337809 | NA                                  | Ca_kabuli_denovo | 49337809                | C/G  | NA                 | NA                            | NA                 |
| Kabuli_wild_49352951 | NA                                  | Ca_kabuli_denovo | 49352951                | G/T  | NA                 | NA                            | NA                 |
| Kabuli_wild_49365814 | NA                                  | Ca_kabuli_denovo | 49365814                | G/T  | NA                 | NA                            | NA                 |
| Kabuli_wild_49370935 | NA                                  | Ca_kabuli_denovo | 49370935                | G/T  | NA                 | NA                            | NA                 |
| Kabuli_wild_49377077 | NA                                  | Ca_kabuli_denovo | 49377077                | A/C  | NA                 | NA                            | NA                 |
| Kabuli_wild_49377650 | NA                                  | Ca_kabuli_denovo | 49377650                | A/C  | NA                 | NA                            | NA                 |
| Kabuli_wild_49377651 | NA                                  | Ca_kabuli_denovo | 49377651                | A/G  | NA                 | NA                            | NA                 |
| Kabuli_wild_49379406 | NA                                  | Ca_kabuli_denovo | 49379406                | T/G  | NA                 | NA                            | NA                 |
| Kabuli_wild_49384964 | NA                                  | Ca_kabuli_denovo | 49384964                | A/C  | NA                 | NA                            | NA                 |
| Kabuli_wild_49390149 | NA                                  | Ca_kabuli_denovo | 49390149                | A/G  | NA                 | NA                            | NA                 |
| Kabuli_wild_49393837 | NA                                  | Ca_kabuli_denovo | 49393837                | C/G  | NA                 | NA                            | NA                 |
| Kabuli_wild_49393878 | NA                                  | Ca_kabuli_denovo | 49393878                | C/T  | NA                 | NA                            | NA                 |
| Kabuli_wild_49399873 | NA                                  | Ca_kabuli_denovo | 49399873                | G/T  | NA                 | NA                            | NA                 |
| Kabuli_wild_49406812 | NA                                  | Ca_kabuli_denovo | 49406812                | C/T  | NA                 | NA                            | NA                 |

| SNP IDs              | NCBI dbSNP accession IDs (NCBI_SS#) | Chromosomes      | Physical positions (bp) | SNPs | Gene accession IDs | Sequence components of genome | Putative functions |
|----------------------|-------------------------------------|------------------|-------------------------|------|--------------------|-------------------------------|--------------------|
| Kabuli_wild_49407006 | NA                                  | Ca_kabuli_denovo | 49407006                | G/T  | NA                 | NA                            | NA                 |
| Kabuli_wild_49407291 | NA                                  | Ca_kabuli_denovo | 49407291                | C/G  | NA                 | NA                            | NA                 |
| Kabuli_wild_49410478 | NA                                  | Ca_kabuli_denovo | 49410478                | G/T  | NA                 | NA                            | NA                 |
| Kabuli_wild_49413252 | NA                                  | Ca_kabuli_denovo | 49413252                | A/T  | NA                 | NA                            | NA                 |
| Kabuli_wild_49415269 | NA                                  | Ca_kabuli_denovo | 49415269                | C/G  | NA                 | NA                            | NA                 |
| Kabuli_wild_49415936 | NA                                  | Ca_kabuli_denovo | 49415936                | G/T  | NA                 | NA                            | NA                 |
| Kabuli_wild_49439305 | NA                                  | Ca_kabuli_denovo | 49439305                | A/C  | NA                 | NA                            | NA                 |
| Kabuli_wild_49439306 | NA                                  | Ca_kabuli_denovo | 49439306                | A/G  | NA                 | NA                            | NA                 |
| Kabuli_wild_49443251 | NA                                  | Ca_kabuli_denovo | 49443251                | G/T  | NA                 | NA                            | NA                 |
| Kabuli_wild_49444336 | NA                                  | Ca_kabuli_denovo | 49444336                | G/T  | NA                 | NA                            | NA                 |
| Kabuli_wild_49449468 | NA                                  | Ca_kabuli_denovo | 49449468                | A/G  | NA                 | NA                            | NA                 |
| Kabuli_wild_49451178 | NA                                  | Ca_kabuli_denovo | 49451178                | G/T  | NA                 | NA                            | NA                 |
| Kabuli_wild_49467233 | NA                                  | Ca_kabuli_denovo | 49467233                | G/T  | NA                 | NA                            | NA                 |
| Kabuli_wild_49467665 | NA                                  | Ca_kabuli_denovo | 49467665                | G/T  | NA                 | NA                            | NA                 |
| Kabuli_wild_49496306 | NA                                  | Ca_kabuli_denovo | 49496306                | G/T  | NA                 | NA                            | NA                 |
| Kabuli_wild_49500156 | NA                                  | Ca_kabuli_denovo | 49500156                | G/T  | NA                 | NA                            | NA                 |
| Kabuli_wild_49537534 | NA                                  | Ca_kabuli_denovo | 49537534                | A/G  | NA                 | NA                            | NA                 |
| Kabuli_wild_49538105 | NA                                  | Ca_kabuli_denovo | 49538105                | G/T  | NA                 | NA                            | NA                 |
| Kabuli_wild_49539092 | NA                                  | Ca_kabuli_denovo | 49539092                | G/T  | NA                 | NA                            | NA                 |
| Kabuli_wild_49544798 | NA                                  | Ca_kabuli_denovo | 49544798                | G/T  | NA                 | NA                            | NA                 |
| Kabuli_wild_49561444 | NA                                  | Ca_kabuli_denovo | 49561444                | C/A  | NA                 | NA                            | NA                 |
| Kabuli_wild_49562879 | NA                                  | Ca_kabuli_denovo | 49562879                | G/T  | NA                 | NA                            | NA                 |
| Kabuli_wild_49564189 | NA                                  | Ca_kabuli_denovo | 49564189                | G/T  | NA                 | NA                            | NA                 |
| Kabuli_wild_49574674 | NA                                  | Ca_kabuli_denovo | 49574674                | C/G  | NA                 | NA                            | NA                 |
| Kabuli_wild_49574678 | NA                                  | Ca_kabuli_denovo | 49574678                | A/C  | NA                 | NA                            | NA                 |
| Kabuli_wild_49576389 | NA                                  | Ca_kabuli_denovo | 49576389                | G/T  | NA                 | NA                            | NA                 |
| Kabuli_wild_49616288 | NA                                  | Ca_kabuli_denovo | 49616288                | A/C  | NA                 | NA                            | NA                 |
| Kabuli_wild_49623224 | NA                                  | Ca_kabuli_denovo | 49623224                | A/C  | NA                 | NA                            | NA                 |
| Kabuli_wild_49625029 | NA                                  | Ca_kabuli_denovo | 49625029                | A/G  | NA                 | NA                            | NA                 |
| Kabuli_wild_49627626 | NA                                  | Ca_kabuli_denovo | 49627626                | A/C  | NA                 | NA                            | NA                 |
| Kabuli_wild_49632793 | NA                                  | Ca_kabuli_denovo | 49632793                | A/G  | NA                 | NA                            | NA                 |
| Kabuli_wild_49633726 | NA                                  | Ca_kabuli_denovo | 49633726                | G/T  | NA                 | NA                            | NA                 |
| Kabuli_wild_49648730 | NA                                  | Ca_kabuli_denovo | 49648730                | G/T  | NA                 | NA                            | NA                 |
| Kabuli_wild_49664641 | NA                                  | Ca_kabuli_denovo | 49664641                | A/G  | NA                 | NA                            | NA                 |
| Kabuli_wild_49664644 | NA                                  | Ca_kabuli_denovo | 49664644                | A/G  | NA                 | NA                            | NA                 |
| Kabuli_wild_49666812 | NA                                  | Ca_kabuli_denovo | 49666812                | G/T  | NA                 | NA                            | NA                 |
| Kabuli_wild_49672625 | NA                                  | Ca_kabuli_denovo | 49672625                | C/G  | NA                 | NA                            | NA                 |
| Kabuli_wild_49680812 | NA                                  | Ca_kabuli_denovo | 49680812                | A/C  | NA                 | NA                            | NA                 |
| Kabuli_wild_49685254 | NA                                  | Ca_kabuli_denovo | 49685254                | A/G  | NA                 | NA                            | NA                 |
| Kabuli_wild_49697800 | NA                                  | Ca_kabuli_denovo | 49697800                | A/C  | NA                 | NA                            | NA                 |
| Kabuli_wild_49697801 | NA                                  | Ca_kabuli_denovo | 49697801                | A/G  | NA                 | NA                            | NA                 |
| Kabuli_wild_49702234 | NA                                  | Ca_kabuli_denovo | 49702234                | C/T  | NA                 | NA                            | NA                 |
| Kabuli_wild_49705399 | NA                                  | Ca_kabuli_denovo | 49705399                | A/C  | NA                 | NA                            | NA                 |
| Kabuli_wild_49705401 | NA                                  | Ca_kabuli_denovo | 49705401                | A/G  | NA                 | NA                            | NA                 |

| SNP IDs              | NCBI dbSNP accession IDs (NCBI_SS#) | Chromosomes      | Physical positions (bp) | SNPs | Gene accession IDs | Sequence components of genome | Putative functions |
|----------------------|-------------------------------------|------------------|-------------------------|------|--------------------|-------------------------------|--------------------|
| Kabuli_wild_49706161 | NA                                  | Ca_kabuli_denovo | 49706161                | A/C  | NA                 | NA                            | NA                 |
| Kabuli_wild_49711554 | NA                                  | Ca_kabuli_denovo | 49711554                | A/T  | NA                 | NA                            | NA                 |
| Kabuli_wild_49714235 | NA                                  | Ca_kabuli_denovo | 49714235                | A/C  | NA                 | NA                            | NA                 |
| Kabuli_wild_49722839 | NA                                  | Ca_kabuli_denovo | 49722839                | G/T  | NA                 | NA                            | NA                 |
| Kabuli_wild_49723720 | NA                                  | Ca_kabuli_denovo | 49723720                | G/T  | NA                 | NA                            | NA                 |
| Kabuli_wild_49728106 | NA                                  | Ca_kabuli_denovo | 49728106                | G/T  | NA                 | NA                            | NA                 |
| Kabuli_wild_49734182 | NA                                  | Ca_kabuli_denovo | 49734182                | G/T  | NA                 | NA                            | NA                 |
| Kabuli_wild_49739269 | NA                                  | Ca_kabuli_denovo | 49739269                | G/T  | NA                 | NA                            | NA                 |
| Kabuli_wild_49745394 | NA                                  | Ca_kabuli_denovo | 49745394                | C/G  | NA                 | NA                            | NA                 |
| Kabuli_wild_49745395 | NA                                  | Ca_kabuli_denovo | 49745395                | C/T  | NA                 | NA                            | NA                 |
| Kabuli_wild_49769621 | NA                                  | Ca_kabuli_denovo | 49769621                | G/T  | NA                 | NA                            | NA                 |
| Kabuli_wild_49782730 | NA                                  | Ca_kabuli_denovo | 49782730                | A/C  | NA                 | NA                            | NA                 |
| Kabuli_wild_49782731 | NA                                  | Ca_kabuli_denovo | 49782731                | C/G  | NA                 | NA                            | NA                 |
| Kabuli_wild_49819003 | NA                                  | Ca_kabuli_denovo | 49819003                | G/T  | NA                 | NA                            | NA                 |
| Kabuli_wild_49868611 | NA                                  | Ca_kabuli_denovo | 49868611                | A/C  | NA                 | NA                            | NA                 |
| Kabuli_wild_49872179 | NA                                  | Ca_kabuli_denovo | 49872179                | G/T  | NA                 | NA                            | NA                 |
| Kabuli_wild_49872501 | NA                                  | Ca_kabuli_denovo | 49872501                | A/G  | NA                 | NA                            | NA                 |
| Kabuli_wild_49915104 | NA                                  | Ca_kabuli_denovo | 49915104                | G/T  | NA                 | NA                            | NA                 |
| Kabuli_wild_49928170 | NA                                  | Ca_kabuli_denovo | 49928170                | G/T  | NA                 | NA                            | NA                 |
| Kabuli_wild_49929591 | NA                                  | Ca_kabuli_denovo | 49929591                | G/T  | NA                 | NA                            | NA                 |
| Kabuli_wild_49938433 | NA                                  | Ca_kabuli_denovo | 49938433                | G/T  | NA                 | NA                            | NA                 |
| Kabuli_wild_49947767 | NA                                  | Ca_kabuli_denovo | 49947767                | G/A  | NA                 | NA                            | NA                 |
| Kabuli_wild_49949470 | NA                                  | Ca_kabuli_denovo | 49949470                | T/C  | NA                 | NA                            | NA                 |
| Kabuli_wild_49949526 | NA                                  | Ca_kabuli_denovo | 49949526                | C/G  | NA                 | NA                            | NA                 |
| Kabuli_wild_49966738 | NA                                  | Ca_kabuli_denovo | 49966738                | G/A  | NA                 | NA                            | NA                 |
| Kabuli_wild_49994388 | NA                                  | Ca_kabuli_denovo | 49994388                | A/G  | NA                 | NA                            | NA                 |
| Kabuli_wild_50011393 | NA                                  | Ca_kabuli_denovo | 50011393                | A/C  | NA                 | NA                            | NA                 |
| Kabuli_wild_50011394 | NA                                  | Ca_kabuli_denovo | 50011394                | G/T  | NA                 | NA                            | NA                 |
| Kabuli_wild_50011395 | NA                                  | Ca_kabuli_denovo | 50011395                | A/G  | NA                 | NA                            | NA                 |
| Kabuli_wild_50011396 | NA                                  | Ca_kabuli_denovo | 50011396                | C/T  | NA                 | NA                            | NA                 |
| Kabuli_wild_50044456 | NA                                  | Ca_kabuli_denovo | 50044456                | G/T  | NA                 | NA                            | NA                 |
| Kabuli_wild_50055854 | NA                                  | Ca_kabuli_denovo | 50055854                | A/G  | NA                 | NA                            | NA                 |
| Kabuli_wild_50058031 | NA                                  | Ca_kabuli_denovo | 50058031                | G/T  | NA                 | NA                            | NA                 |
| Kabuli_wild_50070105 | NA                                  | Ca_kabuli_denovo | 50070105                | A/C  | NA                 | NA                            | NA                 |
| Kabuli_wild_50077319 | NA                                  | Ca_kabuli_denovo | 50077319                | A/G  | NA                 | NA                            | NA                 |
| Kabuli_wild_50077329 | NA                                  | Ca_kabuli_denovo | 50077329                | G/T  | NA                 | NA                            | NA                 |
| Kabuli_wild_50093732 | NA                                  | Ca_kabuli_denovo | 50093732                | C/G  | NA                 | NA                            | NA                 |
| Kabuli_wild_50093735 | NA                                  | Ca_kabuli_denovo | 50093735                | C/G  | NA                 | NA                            | NA                 |
| Kabuli_wild_50103191 | NA                                  | Ca_kabuli_denovo | 50103191                | A/T  | NA                 | NA                            | NA                 |
| Kabuli_wild_50103210 | NA                                  | Ca_kabuli_denovo | 50103210                | C/T  | NA                 | NA                            | NA                 |
| Kabuli_wild_50103238 | NA                                  | Ca_kabuli_denovo | 50103238                | C/T  | NA                 | NA                            | NA                 |
| Kabuli_wild_50112257 | NA                                  | Ca_kabuli_denovo | 50112257                | A/G  | NA                 | NA                            | NA                 |
| Kabuli_wild_50118838 | NA                                  | Ca_kabuli_denovo | 50118838                | C/G  | NA                 | NA                            | NA                 |
| Kabuli_wild_50118843 | NA                                  | Ca_kabuli_denovo | 50118843                | C/T  | NA                 | NA                            | NA                 |

| SNP IDs              | NCBI dbSNP accession IDs (NCBI_SS#) | Chromosomes      | Physical positions (bp) | SNPs | Gene accession IDs | Sequence components of genome | Putative functions |
|----------------------|-------------------------------------|------------------|-------------------------|------|--------------------|-------------------------------|--------------------|
| Kabuli_wild_50125192 | NA                                  | Ca_kabuli_denovo | 50125192                | G/T  | NA                 | NA                            | NA                 |
| Kabuli_wild_50131096 | NA                                  | Ca_kabuli_denovo | 50131096                | C/T  | NA                 | NA                            | NA                 |
| Kabuli_wild_50131141 | NA                                  | Ca_kabuli_denovo | 50131141                | A/G  | NA                 | NA                            | NA                 |
| Kabuli_wild_50131400 | NA                                  | Ca_kabuli_denovo | 50131400                | C/T  | NA                 | NA                            | NA                 |
| Kabuli_wild_50145501 | NA                                  | Ca_kabuli_denovo | 50145501                | A/G  | NA                 | NA                            | NA                 |
| Kabuli_wild_50145533 | NA                                  | Ca_kabuli_denovo | 50145533                | A/G  | NA                 | NA                            | NA                 |
| Kabuli_wild_50145537 | NA                                  | Ca_kabuli_denovo | 50145537                | A/G  | NA                 | NA                            | NA                 |
| Kabuli_wild_50175263 | NA                                  | Ca_kabuli_denovo | 50175263                | C/G  | NA                 | NA                            | NA                 |
| Kabuli_wild_50185685 | NA                                  | Ca_kabuli_denovo | 50185685                | C/G  | NA                 | NA                            | NA                 |
| Kabuli_wild_50185706 | NA                                  | Ca_kabuli_denovo | 50185706                | C/G  | NA                 | NA                            | NA                 |
| Kabuli_wild_50194969 | NA                                  | Ca_kabuli_denovo | 50194969                | A/C  | NA                 | NA                            | NA                 |
| Kabuli_wild_50196007 | NA                                  | Ca_kabuli_denovo | 50196007                | C/G  | NA                 | NA                            | NA                 |
| Kabuli_wild_50196034 | NA                                  | Ca_kabuli_denovo | 50196034                | C/T  | NA                 | NA                            | NA                 |
| Kabuli_wild_50200403 | NA                                  | Ca_kabuli_denovo | 50200403                | C/T  | NA                 | NA                            | NA                 |
| Kabuli_wild_50200404 | NA                                  | Ca_kabuli_denovo | 50200404                | G/T  | NA                 | NA                            | NA                 |
| Kabuli_wild_50213319 | NA                                  | Ca_kabuli_denovo | 50213319                | A/G  | NA                 | NA                            | NA                 |
| Kabuli_wild_50219935 | NA                                  | Ca_kabuli_denovo | 50219935                | C/T  | NA                 | NA                            | NA                 |
| Kabuli_wild_50231734 | NA                                  | Ca_kabuli_denovo | 50231734                | C/G  | NA                 | NA                            | NA                 |
| Kabuli_wild_50237321 | NA                                  | Ca_kabuli_denovo | 50237321                | A/G  | NA                 | NA                            | NA                 |
| Kabuli_wild_50249202 | NA                                  | Ca_kabuli_denovo | 50249202                | A/G  | NA                 | NA                            | NA                 |
| Kabuli_wild_50249212 | NA                                  | Ca_kabuli_denovo | 50249212                | C/G  | NA                 | NA                            | NA                 |
| Kabuli_wild_50262525 | NA                                  | Ca_kabuli_denovo | 50262525                | C/T  | NA                 | NA                            | NA                 |
| Kabuli_wild_50274682 | NA                                  | Ca_kabuli_denovo | 50274682                | A/T  | NA                 | NA                            | NA                 |
| Kabuli_wild_50278512 | NA                                  | Ca_kabuli_denovo | 50278512                | C/G  | NA                 | NA                            | NA                 |
| Kabuli_wild_50278537 | NA                                  | Ca_kabuli_denovo | 50278537                | A/C  | NA                 | NA                            | NA                 |
| Kabuli_wild_50290962 | NA                                  | Ca_kabuli_denovo | 50290962                | C/G  | NA                 | NA                            | NA                 |
| Kabuli_wild_50290974 | NA                                  | Ca_kabuli_denovo | 50290974                | A/G  | NA                 | NA                            | NA                 |
| Kabuli_wild_50290979 | NA                                  | Ca_kabuli_denovo | 50290979                | A/T  | NA                 | NA                            | NA                 |
| Kabuli_wild_50290991 | NA                                  | Ca_kabuli_denovo | 50290991                | G/T  | NA                 | NA                            | NA                 |
| Kabuli_wild_50327793 | NA                                  | Ca_kabuli_denovo | 50327793                | A/G  | NA                 | NA                            | NA                 |
| Kabuli_wild_50354946 | NA                                  | Ca_kabuli_denovo | 50354946                | A/G  | NA                 | NA                            | NA                 |
| Kabuli_wild_50354961 | NA                                  | Ca_kabuli_denovo | 50354961                | C/T  | NA                 | NA                            | NA                 |
| Kabuli_wild_50357364 | NA                                  | Ca_kabuli_denovo | 50357364                | A/G  | NA                 | NA                            | NA                 |
| Kabuli_wild_50366208 | NA                                  | Ca_kabuli_denovo | 50366208                | C/T  | NA                 | NA                            | NA                 |
| Kabuli_wild_50382861 | NA                                  | Ca_kabuli_denovo | 50382861                | C/T  | NA                 | NA                            | NA                 |
| Kabuli_wild_50382865 | NA                                  | Ca_kabuli_denovo | 50382865                | C/T  | NA                 | NA                            | NA                 |
| Kabuli_wild_50382868 | NA                                  | Ca_kabuli_denovo | 50382868                | A/G  | NA                 | NA                            | NA                 |
| Kabuli_wild_50399207 | NA                                  | Ca_kabuli_denovo | 50399207                | A/G  | NA                 | NA                            | NA                 |
| Kabuli_wild_50399211 | NA                                  | Ca_kabuli_denovo | 50399211                | A/C  | NA                 | NA                            | NA                 |
| Kabuli_wild_50399212 | NA                                  | Ca_kabuli_denovo | 50399212                | A/G  | NA                 | NA                            | NA                 |
| Kabuli_wild_50399218 | NA                                  | Ca_kabuli_denovo | 50399218                | C/T  | NA                 | NA                            | NA                 |
| Kabuli_wild_50414907 | NA                                  | Ca_kabuli_denovo | 50414907                | A/T  | NA                 | NA                            | NA                 |
| Kabuli_wild_50414920 | NA                                  | Ca_kabuli_denovo | 50414920                | T/A  | NA                 | NA                            | NA                 |
| Kabuli_wild_50421817 | NA                                  | Ca_kabuli_denovo | 50421817                | A/C  | NA                 | NA                            | NA                 |

| SNP IDs              | NCBI dbSNP accession IDs (NCBI_SS#) | Chromosomes      | Physical positions (bp) | SNPs | Gene accession IDs | Sequence components of genome | Putative functions |
|----------------------|-------------------------------------|------------------|-------------------------|------|--------------------|-------------------------------|--------------------|
| Kabuli_wild_50421842 | NA                                  | Ca_kabuli_denovo | 50421842                | A/T  | NA                 | NA                            | NA                 |
| Kabuli_wild_50423613 | NA                                  | Ca_kabuli_denovo | 50423613                | C/G  | NA                 | NA                            | NA                 |
| Kabuli_wild_50423972 | NA                                  | Ca_kabuli_denovo | 50423972                | C/G  | NA                 | NA                            | NA                 |
| Kabuli_wild_50424713 | NA                                  | Ca_kabuli_denovo | 50424713                | G/A  | NA                 | NA                            | NA                 |
| Kabuli_wild_50425755 | NA                                  | Ca_kabuli_denovo | 50425755                | C/T  | NA                 | NA                            | NA                 |
| Kabuli_wild_50425928 | NA                                  | Ca_kabuli_denovo | 50425928                | A/T  | NA                 | NA                            | NA                 |
| Kabuli_wild_50425972 | NA                                  | Ca_kabuli_denovo | 50425972                | A/C  | NA                 | NA                            | NA                 |
| Kabuli_wild_50426022 | NA                                  | Ca_kabuli_denovo | 50426022                | A/T  | NA                 | NA                            | NA                 |
| Kabuli_wild_50429120 | NA                                  | Ca_kabuli_denovo | 50429120                | A/T  | NA                 | NA                            | NA                 |
| Kabuli_wild_50431313 | NA                                  | Ca_kabuli_denovo | 50431313                | T/C  | NA                 | NA                            | NA                 |
| Kabuli_wild_50431974 | NA                                  | Ca_kabuli_denovo | 50431974                | A/G  | NA                 | NA                            | NA                 |
| Kabuli_wild_50432719 | NA                                  | Ca_kabuli_denovo | 50432719                | A/G  | NA                 | NA                            | NA                 |
| Kabuli_wild_50433174 | NA                                  | Ca_kabuli_denovo | 50433174                | C/G  | NA                 | NA                            | NA                 |
| Kabuli_wild_50433330 | NA                                  | Ca_kabuli_denovo | 50433330                | C/T  | NA                 | NA                            | NA                 |
| Kabuli_wild_50433401 | NA                                  | Ca_kabuli_denovo | 50433401                | A/T  | NA                 | NA                            | NA                 |
| Kabuli_wild_50433903 | NA                                  | Ca_kabuli_denovo | 50433903                | A/C  | NA                 | NA                            | NA                 |
| Kabuli_wild_50434656 | NA                                  | Ca_kabuli_denovo | 50434656                | A/T  | NA                 | NA                            | NA                 |
| Kabuli_wild_50434681 | NA                                  | Ca_kabuli_denovo | 50434681                | A/C  | NA                 | NA                            | NA                 |
| Kabuli_wild_50437089 | NA                                  | Ca_kabuli_denovo | 50437089                | G/C  | NA                 | NA                            | NA                 |
| Kabuli_wild_50440818 | NA                                  | Ca_kabuli_denovo | 50440818                | A/T  | NA                 | NA                            | NA                 |
| Kabuli_wild_50440820 | NA                                  | Ca_kabuli_denovo | 50440820                | A/G  | NA                 | NA                            | NA                 |
| Kabuli_wild_50442872 | NA                                  | Ca_kabuli_denovo | 50442872                | G/T  | NA                 | NA                            | NA                 |
| Kabuli_wild_50444510 | NA                                  | Ca_kabuli_denovo | 50444510                | C/G  | NA                 | NA                            | NA                 |
| Kabuli_wild_50447468 | NA                                  | Ca_kabuli_denovo | 50447468                | A/G  | NA                 | NA                            | NA                 |
| Kabuli_wild_50447795 | NA                                  | Ca_kabuli_denovo | 50447795                | C/T  | NA                 | NA                            | NA                 |
| Kabuli_wild_50449868 | NA                                  | Ca_kabuli_denovo | 50449868                | C/T  | NA                 | NA                            | NA                 |
| Kabuli_wild_50449952 | NA                                  | Ca_kabuli_denovo | 50449952                | C/T  | NA                 | NA                            | NA                 |
| Kabuli_wild_50451325 | NA                                  | Ca_kabuli_denovo | 50451325                | G/T  | NA                 | NA                            | NA                 |
| Kabuli_wild_50451326 | NA                                  | Ca_kabuli_denovo | 50451326                | C/G  | NA                 | NA                            | NA                 |
| Kabuli_wild_50452163 | NA                                  | Ca_kabuli_denovo | 50452163                | C/T  | NA                 | NA                            | NA                 |
| Kabuli_wild_50452252 | NA                                  | Ca_kabuli_denovo | 50452252                | A/C  | NA                 | NA                            | NA                 |
| Kabuli_wild_50452253 | NA                                  | Ca_kabuli_denovo | 50452253                | C/T  | NA                 | NA                            | NA                 |
| Kabuli_wild_50453280 | NA                                  | Ca_kabuli_denovo | 50453280                | A/T  | NA                 | NA                            | NA                 |
| Kabuli_wild_50454481 | NA                                  | Ca_kabuli_denovo | 50454481                | G/T  | NA                 | NA                            | NA                 |
| Kabuli_wild_50456739 | NA                                  | Ca_kabuli_denovo | 50456739                | A/G  | NA                 | NA                            | NA                 |
| Kabuli_wild_50457610 | NA                                  | Ca_kabuli_denovo | 50457610                | A/G  | NA                 | NA                            | NA                 |
| Kabuli_wild_50458245 | NA                                  | Ca_kabuli_denovo | 50458245                | A/G  | NA                 | NA                            | NA                 |
| Kabuli_wild_50458249 | NA                                  | Ca_kabuli_denovo | 50458249                | A/T  | NA                 | NA                            | NA                 |
| Kabuli_wild_50459812 | NA                                  | Ca_kabuli_denovo | 50459812                | C/T  | NA                 | NA                            | NA                 |
| Kabuli_wild_50459917 | NA                                  | Ca_kabuli_denovo | 50459917                | C/G  | NA                 | NA                            | NA                 |
| Kabuli_wild_50460378 | NA                                  | Ca_kabuli_denovo | 50460378                | A/T  | NA                 | NA                            | NA                 |
| Kabuli_wild_50460587 | NA                                  | Ca_kabuli_denovo | 50460587                | C/G  | NA                 | NA                            | NA                 |
| Kabuli_wild_50461545 | NA                                  | Ca_kabuli_denovo | 50461545                | G/C  | NA                 | NA                            | NA                 |
| Kabuli_wild_50461553 | NA                                  | Ca_kabuli_denovo | 50461553                | A/G  | NA                 | NA                            | NA                 |

| SNP IDs              | NCBI dbSNP accession IDs (NCBI_SS#) | Chromosomes      | Physical positions (bp) | SNPs | Gene accession IDs | Sequence components of genome | Putative functions |
|----------------------|-------------------------------------|------------------|-------------------------|------|--------------------|-------------------------------|--------------------|
| Kabuli_wild_50462328 | NA                                  | Ca_kabuli_denovo | 50462328                | C/G  | NA                 | NA                            | NA                 |
| Kabuli_wild_50466062 | NA                                  | Ca_kabuli_denovo | 50466062                | A/C  | NA                 | NA                            | NA                 |
| Kabuli_wild_50466091 | NA                                  | Ca_kabuli_denovo | 50466091                | A/G  | NA                 | NA                            | NA                 |
| Kabuli_wild_50467203 | NA                                  | Ca_kabuli_denovo | 50467203                | A/C  | NA                 | NA                            | NA                 |
| Kabuli_wild_50467259 | NA                                  | Ca_kabuli_denovo | 50467259                | C/T  | NA                 | NA                            | NA                 |
| Kabuli_wild_50467261 | NA                                  | Ca_kabuli_denovo | 50467261                | C/G  | NA                 | NA                            | NA                 |
| Kabuli_wild_50467886 | NA                                  | Ca_kabuli_denovo | 50467886                | C/G  | NA                 | NA                            | NA                 |
| Kabuli_wild_50468959 | NA                                  | Ca_kabuli_denovo | 50468959                | C/T  | NA                 | NA                            | NA                 |
| Kabuli_wild_50470876 | NA                                  | Ca_kabuli_denovo | 50470876                | A/G  | NA                 | NA                            | NA                 |
| Kabuli_wild_50473666 | NA                                  | Ca_kabuli_denovo | 50473666                | C/T  | NA                 | NA                            | NA                 |
| Kabuli_wild_50480338 | NA                                  | Ca_kabuli_denovo | 50480338                | A/G  | NA                 | NA                            | NA                 |
| Kabuli_wild_50483094 | NA                                  | Ca_kabuli_denovo | 50483094                | A/T  | NA                 | NA                            | NA                 |
| Kabuli_wild_50486084 | NA                                  | Ca_kabuli_denovo | 50486084                | G/T  | NA                 | NA                            | NA                 |
| Kabuli_wild_50486106 | NA                                  | Ca_kabuli_denovo | 50486106                | C/G  | NA                 | NA                            | NA                 |
| Kabuli_wild_50486622 | NA                                  | Ca_kabuli_denovo | 50486622                | C/T  | NA                 | NA                            | NA                 |
| Kabuli_wild_50487093 | NA                                  | Ca_kabuli_denovo | 50487093                | A/C  | NA                 | NA                            | NA                 |
| Kabuli_wild_50487324 | NA                                  | Ca_kabuli_denovo | 50487324                | G/T  | NA                 | NA                            | NA                 |
| Kabuli_wild_50487346 | NA                                  | Ca_kabuli_denovo | 50487346                | G/T  | NA                 | NA                            | NA                 |
| Kabuli_wild_50489175 | NA                                  | Ca_kabuli_denovo | 50489175                | C/T  | NA                 | NA                            | NA                 |
| Kabuli_wild_50489181 | NA                                  | Ca_kabuli_denovo | 50489181                | T/G  | NA                 | NA                            | NA                 |
| Kabuli_wild_50489965 | NA                                  | Ca_kabuli_denovo | 50489965                | T/C  | NA                 | NA                            | NA                 |
| Kabuli_wild_50499314 | NA                                  | Ca_kabuli_denovo | 50499314                | G/T  | NA                 | NA                            | NA                 |
| Kabuli_wild_50508799 | NA                                  | Ca_kabuli_denovo | 50508799                | G/T  | NA                 | NA                            | NA                 |
| Kabuli_wild_50509945 | NA                                  | Ca_kabuli_denovo | 50509945                | A/G  | NA                 | NA                            | NA                 |
| Kabuli_wild_50517128 | NA                                  | Ca_kabuli_denovo | 50517128                | A/G  | NA                 | NA                            | NA                 |
| Kabuli_wild_50517129 | NA                                  | Ca_kabuli_denovo | 50517129                | G/A  | NA                 | NA                            | NA                 |
| Kabuli_wild_50519815 | NA                                  | Ca_kabuli_denovo | 50519815                | C/A  | NA                 | NA                            | NA                 |
| Kabuli_wild_50521271 | NA                                  | Ca_kabuli_denovo | 50521271                | G/T  | NA                 | NA                            | NA                 |
| Kabuli_wild_50521429 | NA                                  | Ca_kabuli_denovo | 50521429                | C/G  | NA                 | NA                            | NA                 |
| Kabuli_wild_50521935 | NA                                  | Ca_kabuli_denovo | 50521935                | G/T  | NA                 | NA                            | NA                 |
| Kabuli_wild_50524691 | NA                                  | Ca_kabuli_denovo | 50524691                | A/T  | NA                 | NA                            | NA                 |
| Kabuli_wild_50526312 | NA                                  | Ca_kabuli_denovo | 50526312                | T/G  | NA                 | NA                            | NA                 |
| Kabuli_wild_50526315 | NA                                  | Ca_kabuli_denovo | 50526315                | A/G  | NA                 | NA                            | NA                 |
| Kabuli_wild_50527900 | NA                                  | Ca_kabuli_denovo | 50527900                | G/A  | NA                 | NA                            | NA                 |
| Kabuli_wild_50530197 | NA                                  | Ca_kabuli_denovo | 50530197                | G/T  | NA                 | NA                            | NA                 |
| Kabuli_wild_50534183 | NA                                  | Ca_kabuli_denovo | 50534183                | C/G  | NA                 | NA                            | NA                 |
| Kabuli_wild_50534378 | NA                                  | Ca_kabuli_denovo | 50534378                | C/G  | NA                 | NA                            | NA                 |
| Kabuli_wild_50534855 | NA                                  | Ca_kabuli_denovo | 50534855                | A/T  | NA                 | NA                            | NA                 |
| Kabuli_wild_50535266 | NA                                  | Ca_kabuli_denovo | 50535266                | G/A  | NA                 | NA                            | NA                 |
| Kabuli_wild_50535277 | NA                                  | Ca_kabuli_denovo | 50535277                | G/A  | NA                 | NA                            | NA                 |
| Kabuli_wild_50539918 | NA                                  | Ca_kabuli_denovo | 50539918                | C/T  | NA                 | NA                            | NA                 |
| Kabuli_wild_50539927 | NA                                  | Ca_kabuli_denovo | 50539927                | C/G  | NA                 | NA                            | NA                 |
| Kabuli_wild_50545505 | NA                                  | Ca_kabuli_denovo | 50545505                | C/G  | NA                 | NA                            | NA                 |
| Kabuli_wild_50545588 | NA                                  | Ca_kabuli_denovo | 50545588                | A/G  | NA                 | NA                            | NA                 |

| SNP IDs                     | NCBI dbSNP accession IDs (NCBI_SS#) | Chromosomes             | Physical positions (bp) | SNPs | Gene accession IDs | Sequence components of genome | Putative functions |
|-----------------------------|-------------------------------------|-------------------------|-------------------------|------|--------------------|-------------------------------|--------------------|
| <i>Kabuli_wild_50547325</i> | NA                                  | <i>Ca_kabuli_denovo</i> | 50547325                | C/T  | NA                 | NA                            | NA                 |
| <i>Kabuli_wild_50547358</i> | NA                                  | <i>Ca_kabuli_denovo</i> | 50547358                | A/G  | NA                 | NA                            | NA                 |
| <i>Kabuli_wild_50547373</i> | NA                                  | <i>Ca_kabuli_denovo</i> | 50547373                | C/G  | NA                 | NA                            | NA                 |
| <i>Kabuli_wild_50547394</i> | NA                                  | <i>Ca_kabuli_denovo</i> | 50547394                | A/G  | NA                 | NA                            | NA                 |
| <i>Kabuli_wild_50554039</i> | NA                                  | <i>Ca_kabuli_denovo</i> | 50554039                | T/G  | NA                 | NA                            | NA                 |
| <i>Kabuli_wild_50556135</i> | NA                                  | <i>Ca_kabuli_denovo</i> | 50556135                | C/G  | NA                 | NA                            | NA                 |
| <i>Kabuli_wild_50556136</i> | NA                                  | <i>Ca_kabuli_denovo</i> | 50556136                | C/G  | NA                 | NA                            | NA                 |
| <i>Kabuli_wild_50561183</i> | NA                                  | <i>Ca_kabuli_denovo</i> | 50561183                | G/A  | NA                 | NA                            | NA                 |
| <i>Kabuli_wild_50561254</i> | NA                                  | <i>Ca_kabuli_denovo</i> | 50561254                | G/T  | NA                 | NA                            | NA                 |
| <i>Kabuli_wild_50561303</i> | NA                                  | <i>Ca_kabuli_denovo</i> | 50561303                | A/G  | NA                 | NA                            | NA                 |
| <i>Kabuli_wild_50561324</i> | NA                                  | <i>Ca_kabuli_denovo</i> | 50561324                | G/A  | NA                 | NA                            | NA                 |
| <i>Kabuli_wild_50561872</i> | NA                                  | <i>Ca_kabuli_denovo</i> | 50561872                | A/G  | NA                 | NA                            | NA                 |
| <i>Kabuli_wild_50561910</i> | NA                                  | <i>Ca_kabuli_denovo</i> | 50561910                | G/A  | NA                 | NA                            | NA                 |
| <i>Kabuli_wild_50572087</i> | NA                                  | <i>Ca_kabuli_denovo</i> | 50572087                | A/G  | NA                 | NA                            | NA                 |
| <i>Kabuli_wild_50573567</i> | NA                                  | <i>Ca_kabuli_denovo</i> | 50573567                | G/A  | NA                 | NA                            | NA                 |
| <i>Kabuli_wild_50592391</i> | NA                                  | <i>Ca_kabuli_denovo</i> | 50592391                | G/A  | NA                 | NA                            | NA                 |
| <i>Kabuli_wild_50594872</i> | NA                                  | <i>Ca_kabuli_denovo</i> | 50594872                | G/T  | NA                 | NA                            | NA                 |
| <i>Kabuli_wild_50596714</i> | NA                                  | <i>Ca_kabuli_denovo</i> | 50596714                | G/A  | NA                 | NA                            | NA                 |
| <i>Kabuli_wild_50596783</i> | NA                                  | <i>Ca_kabuli_denovo</i> | 50596783                | C/T  | NA                 | NA                            | NA                 |
| <i>Kabuli_wild_50614082</i> | NA                                  | <i>Ca_kabuli_denovo</i> | 50614082                | A/G  | NA                 | NA                            | NA                 |
| <i>Kabuli_wild_50618446</i> | NA                                  | <i>Ca_kabuli_denovo</i> | 50618446                | T/A  | NA                 | NA                            | NA                 |
| <i>Kabuli_wild_50620101</i> | NA                                  | <i>Ca_kabuli_denovo</i> | 50620101                | G/T  | NA                 | NA                            | NA                 |
| <i>Kabuli_wild_50620232</i> | NA                                  | <i>Ca_kabuli_denovo</i> | 50620232                | T/C  | NA                 | NA                            | NA                 |
| <i>Kabuli_wild_50622609</i> | NA                                  | <i>Ca_kabuli_denovo</i> | 50622609                | G/T  | NA                 | NA                            | NA                 |
| <i>Kabuli_wild_50624517</i> | NA                                  | <i>Ca_kabuli_denovo</i> | 50624517                | G/C  | NA                 | NA                            | NA                 |
| <i>Kabuli_wild_50624523</i> | NA                                  | <i>Ca_kabuli_denovo</i> | 50624523                | C/T  | NA                 | NA                            | NA                 |
| <i>Kabuli_wild_50630230</i> | NA                                  | <i>Ca_kabuli_denovo</i> | 50630230                | T/G  | NA                 | NA                            | NA                 |
| <i>Kabuli_wild_50633796</i> | NA                                  | <i>Ca_kabuli_denovo</i> | 50633796                | A/G  | NA                 | NA                            | NA                 |
| <i>Kabuli_wild_50633812</i> | NA                                  | <i>Ca_kabuli_denovo</i> | 50633812                | G/C  | NA                 | NA                            | NA                 |
| <i>Kabuli_wild_50633843</i> | NA                                  | <i>Ca_kabuli_denovo</i> | 50633843                | C/G  | NA                 | NA                            | NA                 |
| <i>Kabuli_wild_50634428</i> | NA                                  | <i>Ca_kabuli_denovo</i> | 50634428                | G/C  | NA                 | NA                            | NA                 |
| <i>Kabuli_wild_50634500</i> | NA                                  | <i>Ca_kabuli_denovo</i> | 50634500                | G/A  | NA                 | NA                            | NA                 |
| <i>Kabuli_wild_50636527</i> | NA                                  | <i>Ca_kabuli_denovo</i> | 50636527                | G/A  | NA                 | NA                            | NA                 |
| <i>Kabuli_wild_50636565</i> | NA                                  | <i>Ca_kabuli_denovo</i> | 50636565                | C/T  | NA                 | NA                            | NA                 |
| <i>Kabuli_wild_50641064</i> | NA                                  | <i>Ca_kabuli_denovo</i> | 50641064                | G/T  | NA                 | NA                            | NA                 |
| <i>Kabuli_wild_50643298</i> | NA                                  | <i>Ca_kabuli_denovo</i> | 50643298                | G/T  | NA                 | NA                            | NA                 |
| <i>Kabuli_wild_50643327</i> | NA                                  | <i>Ca_kabuli_denovo</i> | 50643327                | G/T  | NA                 | NA                            | NA                 |
| <i>Kabuli_wild_50645400</i> | NA                                  | <i>Ca_kabuli_denovo</i> | 50645400                | C/T  | NA                 | NA                            | NA                 |
| <i>Kabuli_wild_50645410</i> | NA                                  | <i>Ca_kabuli_denovo</i> | 50645410                | G/T  | NA                 | NA                            | NA                 |
| <i>Kabuli_wild_50646766</i> | NA                                  | <i>Ca_kabuli_denovo</i> | 50646766                | A/G  | NA                 | NA                            | NA                 |
| <i>Kabuli_wild_50647900</i> | NA                                  | <i>Ca_kabuli_denovo</i> | 50647900                | T/C  | NA                 | NA                            | NA                 |
| <i>Kabuli_wild_50647901</i> | NA                                  | <i>Ca_kabuli_denovo</i> | 50647901                | G/T  | NA                 | NA                            | NA                 |
| <i>Kabuli_wild_50647904</i> | NA                                  | <i>Ca_kabuli_denovo</i> | 50647904                | G/T  | NA                 | NA                            | NA                 |
| <i>Kabuli_wild_50647995</i> | NA                                  | <i>Ca_kabuli_denovo</i> | 50647995                | C/G  | NA                 | NA                            | NA                 |



| SNP IDs              | NCBI dbSNP accession IDs (NCBI_SS#) | Chromosomes      | Physical positions (bp) | SNPs | Gene accession IDs | Sequence components of genome | Putative functions |
|----------------------|-------------------------------------|------------------|-------------------------|------|--------------------|-------------------------------|--------------------|
| Kabuli_wild_50650564 | NA                                  | Ca_kabuli_denovo | 50650564                | C/G  | NA                 | NA                            | NA                 |
| Kabuli_wild_50653416 | NA                                  | Ca_kabuli_denovo | 50653416                | G/T  | NA                 | NA                            | NA                 |
| Kabuli_wild_50657569 | NA                                  | Ca_kabuli_denovo | 50657569                | G/T  | NA                 | NA                            | NA                 |
| Kabuli_wild_50658845 | NA                                  | Ca_kabuli_denovo | 50658845                | C/G  | NA                 | NA                            | NA                 |
| Kabuli_wild_50660227 | NA                                  | Ca_kabuli_denovo | 50660227                | G/T  | NA                 | NA                            | NA                 |
| Kabuli_wild_50665584 | NA                                  | Ca_kabuli_denovo | 50665584                | G/A  | NA                 | NA                            | NA                 |
| Kabuli_wild_50666039 | NA                                  | Ca_kabuli_denovo | 50666039                | G/T  | NA                 | NA                            | NA                 |
| Kabuli_wild_50667146 | NA                                  | Ca_kabuli_denovo | 50667146                | G/A  | NA                 | NA                            | NA                 |
| Kabuli_wild_50667163 | NA                                  | Ca_kabuli_denovo | 50667163                | A/G  | NA                 | NA                            | NA                 |
| Kabuli_wild_50671566 | NA                                  | Ca_kabuli_denovo | 50671566                | C/G  | NA                 | NA                            | NA                 |
| Kabuli_wild_50671624 | NA                                  | Ca_kabuli_denovo | 50671624                | A/C  | NA                 | NA                            | NA                 |
| Kabuli_wild_50671626 | NA                                  | Ca_kabuli_denovo | 50671626                | G/T  | NA                 | NA                            | NA                 |
| Kabuli_wild_50671648 | NA                                  | Ca_kabuli_denovo | 50671648                | G/T  | NA                 | NA                            | NA                 |
| Kabuli_wild_50674690 | NA                                  | Ca_kabuli_denovo | 50674690                | A/G  | NA                 | NA                            | NA                 |
| Kabuli_wild_50676809 | NA                                  | Ca_kabuli_denovo | 50676809                | G/C  | NA                 | NA                            | NA                 |
| Kabuli_wild_50676833 | NA                                  | Ca_kabuli_denovo | 50676833                | G/T  | NA                 | NA                            | NA                 |
| Kabuli_wild_50677300 | NA                                  | Ca_kabuli_denovo | 50677300                | T/C  | NA                 | NA                            | NA                 |
| Kabuli_wild_50677303 | NA                                  | Ca_kabuli_denovo | 50677303                | A/C  | NA                 | NA                            | NA                 |
| Kabuli_wild_50679537 | NA                                  | Ca_kabuli_denovo | 50679537                | C/G  | NA                 | NA                            | NA                 |
| Kabuli_wild_50681585 | NA                                  | Ca_kabuli_denovo | 50681585                | A/G  | NA                 | NA                            | NA                 |
| Kabuli_wild_50684677 | NA                                  | Ca_kabuli_denovo | 50684677                | T/C  | NA                 | NA                            | NA                 |
| Kabuli_wild_50684686 | NA                                  | Ca_kabuli_denovo | 50684686                | T/C  | NA                 | NA                            | NA                 |
| Kabuli_wild_50684725 | NA                                  | Ca_kabuli_denovo | 50684725                | G/C  | NA                 | NA                            | NA                 |
| Kabuli_wild_50693314 | NA                                  | Ca_kabuli_denovo | 50693314                | C/T  | NA                 | NA                            | NA                 |
| Kabuli_wild_50695320 | NA                                  | Ca_kabuli_denovo | 50695320                | G/A  | NA                 | NA                            | NA                 |
| Kabuli_wild_50695350 | NA                                  | Ca_kabuli_denovo | 50695350                | T/C  | NA                 | NA                            | NA                 |
| Kabuli_wild_50695380 | NA                                  | Ca_kabuli_denovo | 50695380                | T/G  | NA                 | NA                            | NA                 |
| Kabuli_wild_50695381 | NA                                  | Ca_kabuli_denovo | 50695381                | G/A  | NA                 | NA                            | NA                 |
| Kabuli_wild_50698412 | NA                                  | Ca_kabuli_denovo | 50698412                | T/C  | NA                 | NA                            | NA                 |
| Kabuli_wild_50702270 | NA                                  | Ca_kabuli_denovo | 50702270                | A/G  | NA                 | NA                            | NA                 |
| Kabuli_wild_50702279 | NA                                  | Ca_kabuli_denovo | 50702279                | C/T  | NA                 | NA                            | NA                 |
| Kabuli_wild_50703237 | NA                                  | Ca_kabuli_denovo | 50703237                | G/T  | NA                 | NA                            | NA                 |
| Kabuli_wild_50705412 | NA                                  | Ca_kabuli_denovo | 50705412                | G/C  | NA                 | NA                            | NA                 |
| Kabuli_wild_50705424 | NA                                  | Ca_kabuli_denovo | 50705424                | A/G  | NA                 | NA                            | NA                 |
| Kabuli_wild_50705435 | NA                                  | Ca_kabuli_denovo | 50705435                | T/C  | NA                 | NA                            | NA                 |
| Kabuli_wild_50705966 | NA                                  | Ca_kabuli_denovo | 50705966                | C/T  | NA                 | NA                            | NA                 |
| Kabuli_wild_50705973 | NA                                  | Ca_kabuli_denovo | 50705973                | G/A  | NA                 | NA                            | NA                 |
| Kabuli_wild_50707306 | NA                                  | Ca_kabuli_denovo | 50707306                | A/C  | NA                 | NA                            | NA                 |
| Kabuli_wild_50707333 | NA                                  | Ca_kabuli_denovo | 50707333                | G/A  | NA                 | NA                            | NA                 |
| Kabuli_wild_50716183 | NA                                  | Ca_kabuli_denovo | 50716183                | G/T  | NA                 | NA                            | NA                 |
| Kabuli_wild_50717815 | NA                                  | Ca_kabuli_denovo | 50717815                | G/C  | NA                 | NA                            | NA                 |
| Kabuli_wild_50720289 | NA                                  | Ca_kabuli_denovo | 50720289                | G/A  | NA                 | NA                            | NA                 |
| Kabuli_wild_50720290 | NA                                  | Ca_kabuli_denovo | 50720290                | C/A  | NA                 | NA                            | NA                 |
| Kabuli_wild_50721892 | NA                                  | Ca_kabuli_denovo | 50721892                | A/C  | NA                 | NA                            | NA                 |

| SNP IDs              | NCBI dbSNP accession IDs (NCBI_SS#) | Chromosomes      | Physical positions (bp) | SNPs | Gene accession IDs | Sequence components of genome | Putative functions |
|----------------------|-------------------------------------|------------------|-------------------------|------|--------------------|-------------------------------|--------------------|
| Kabuli_wild_50721893 | NA                                  | Ca_kabuli_denovo | 50721893                | A/G  | NA                 | NA                            | NA                 |
| Kabuli_wild_50726564 | NA                                  | Ca_kabuli_denovo | 50726564                | G/T  | NA                 | NA                            | NA                 |
| Kabuli_wild_50728738 | NA                                  | Ca_kabuli_denovo | 50728738                | G/T  | NA                 | NA                            | NA                 |
| Kabuli_wild_50728740 | NA                                  | Ca_kabuli_denovo | 50728740                | C/T  | NA                 | NA                            | NA                 |
| Kabuli_wild_50728741 | NA                                  | Ca_kabuli_denovo | 50728741                | A/C  | NA                 | NA                            | NA                 |
| Kabuli_wild_50728742 | NA                                  | Ca_kabuli_denovo | 50728742                | A/G  | NA                 | NA                            | NA                 |
| Kabuli_wild_50729594 | NA                                  | Ca_kabuli_denovo | 50729594                | G/T  | NA                 | NA                            | NA                 |
| Kabuli_wild_50731504 | NA                                  | Ca_kabuli_denovo | 50731504                | T/G  | NA                 | NA                            | NA                 |
| Kabuli_wild_50732351 | NA                                  | Ca_kabuli_denovo | 50732351                | G/T  | NA                 | NA                            | NA                 |
| Kabuli_wild_50741394 | NA                                  | Ca_kabuli_denovo | 50741394                | T/C  | NA                 | NA                            | NA                 |
| Kabuli_wild_50741408 | NA                                  | Ca_kabuli_denovo | 50741408                | G/A  | NA                 | NA                            | NA                 |
| Kabuli_wild_50746888 | NA                                  | Ca_kabuli_denovo | 50746888                | C/G  | NA                 | NA                            | NA                 |
| Kabuli_wild_50746891 | NA                                  | Ca_kabuli_denovo | 50746891                | C/G  | NA                 | NA                            | NA                 |
| Kabuli_wild_50746893 | NA                                  | Ca_kabuli_denovo | 50746893                | C/T  | NA                 | NA                            | NA                 |
| Kabuli_wild_50747394 | NA                                  | Ca_kabuli_denovo | 50747394                | A/G  | NA                 | NA                            | NA                 |
| Kabuli_wild_50747418 | NA                                  | Ca_kabuli_denovo | 50747418                | G/A  | NA                 | NA                            | NA                 |
| Kabuli_wild_50747455 | NA                                  | Ca_kabuli_denovo | 50747455                | T/G  | NA                 | NA                            | NA                 |
| Kabuli_wild_50747473 | NA                                  | Ca_kabuli_denovo | 50747473                | G/C  | NA                 | NA                            | NA                 |
| Kabuli_wild_50751949 | NA                                  | Ca_kabuli_denovo | 50751949                | G/C  | NA                 | NA                            | NA                 |
| Kabuli_wild_50754631 | NA                                  | Ca_kabuli_denovo | 50754631                | C/T  | NA                 | NA                            | NA                 |
| Kabuli_wild_50754678 | NA                                  | Ca_kabuli_denovo | 50754678                | A/C  | NA                 | NA                            | NA                 |
| Kabuli_wild_50756438 | NA                                  | Ca_kabuli_denovo | 50756438                | G/T  | NA                 | NA                            | NA                 |
| Kabuli_wild_50762896 | NA                                  | Ca_kabuli_denovo | 50762896                | A/C  | NA                 | NA                            | NA                 |
| Kabuli_wild_50762951 | NA                                  | Ca_kabuli_denovo | 50762951                | G/T  | NA                 | NA                            | NA                 |
| Kabuli_wild_50765362 | NA                                  | Ca_kabuli_denovo | 50765362                | A/C  | NA                 | NA                            | NA                 |
| Kabuli_wild_50766732 | NA                                  | Ca_kabuli_denovo | 50766732                | C/G  | NA                 | NA                            | NA                 |
| Kabuli_wild_50766744 | NA                                  | Ca_kabuli_denovo | 50766744                | A/G  | NA                 | NA                            | NA                 |
| Kabuli_wild_50772391 | NA                                  | Ca_kabuli_denovo | 50772391                | G/A  | NA                 | NA                            | NA                 |
| Kabuli_wild_50772395 | NA                                  | Ca_kabuli_denovo | 50772395                | C/T  | NA                 | NA                            | NA                 |
| Kabuli_wild_50774919 | NA                                  | Ca_kabuli_denovo | 50774919                | C/T  | NA                 | NA                            | NA                 |
| Kabuli_wild_50780145 | NA                                  | Ca_kabuli_denovo | 50780145                | A/C  | NA                 | NA                            | NA                 |
| Kabuli_wild_50781386 | NA                                  | Ca_kabuli_denovo | 50781386                | G/T  | NA                 | NA                            | NA                 |
| Kabuli_wild_50781447 | NA                                  | Ca_kabuli_denovo | 50781447                | T/A  | NA                 | NA                            | NA                 |
| Kabuli_wild_50781471 | NA                                  | Ca_kabuli_denovo | 50781471                | G/A  | NA                 | NA                            | NA                 |
| Kabuli_wild_50785940 | NA                                  | Ca_kabuli_denovo | 50785940                | A/T  | NA                 | NA                            | NA                 |
| Kabuli_wild_50786272 | NA                                  | Ca_kabuli_denovo | 50786272                | A/T  | NA                 | NA                            | NA                 |
| Kabuli_wild_50786292 | NA                                  | Ca_kabuli_denovo | 50786292                | T/C  | NA                 | NA                            | NA                 |
| Kabuli_wild_50788122 | NA                                  | Ca_kabuli_denovo | 50788122                | A/C  | NA                 | NA                            | NA                 |
| Kabuli_wild_50788589 | NA                                  | Ca_kabuli_denovo | 50788589                | C/G  | NA                 | NA                            | NA                 |
| Kabuli_wild_50789396 | NA                                  | Ca_kabuli_denovo | 50789396                | T/C  | NA                 | NA                            | NA                 |
| Kabuli_wild_50789831 | NA                                  | Ca_kabuli_denovo | 50789831                | G/T  | NA                 | NA                            | NA                 |
| Kabuli_wild_50791294 | NA                                  | Ca_kabuli_denovo | 50791294                | G/A  | NA                 | NA                            | NA                 |
| Kabuli_wild_50791296 | NA                                  | Ca_kabuli_denovo | 50791296                | T/C  | NA                 | NA                            | NA                 |
| Kabuli_wild_50793572 | NA                                  | Ca_kabuli_denovo | 50793572                | C/G  | NA                 | NA                            | NA                 |

| SNP IDs              | NCBI dbSNP accession IDs (NCBI_SS#) | Chromosomes      | Physical positions (bp) | SNPs | Gene accession IDs | Sequence components of genome | Putative functions |
|----------------------|-------------------------------------|------------------|-------------------------|------|--------------------|-------------------------------|--------------------|
| Kabuli_wild_50796306 | NA                                  | Ca_kabuli_denovo | 50796306                | T/C  | NA                 | NA                            | NA                 |
| Kabuli_wild_50797148 | NA                                  | Ca_kabuli_denovo | 50797148                | T/C  | NA                 | NA                            | NA                 |
| Kabuli_wild_50810619 | NA                                  | Ca_kabuli_denovo | 50810619                | A/G  | NA                 | NA                            | NA                 |
| Kabuli_wild_50812883 | NA                                  | Ca_kabuli_denovo | 50812883                | C/T  | NA                 | NA                            | NA                 |
| Kabuli_wild_50824618 | NA                                  | Ca_kabuli_denovo | 50824618                | C/G  | NA                 | NA                            | NA                 |
| Kabuli_wild_50824672 | NA                                  | Ca_kabuli_denovo | 50824672                | G/T  | NA                 | NA                            | NA                 |
| Kabuli_wild_50825661 | NA                                  | Ca_kabuli_denovo | 50825661                | C/A  | NA                 | NA                            | NA                 |
| Kabuli_wild_50825665 | NA                                  | Ca_kabuli_denovo | 50825665                | G/C  | NA                 | NA                            | NA                 |
| Kabuli_wild_50827169 | NA                                  | Ca_kabuli_denovo | 50827169                | C/G  | NA                 | NA                            | NA                 |
| Kabuli_wild_50827694 | NA                                  | Ca_kabuli_denovo | 50827694                | T/C  | NA                 | NA                            | NA                 |
| Kabuli_wild_50829913 | NA                                  | Ca_kabuli_denovo | 50829913                | C/G  | NA                 | NA                            | NA                 |
| Kabuli_wild_50829919 | NA                                  | Ca_kabuli_denovo | 50829919                | G/A  | NA                 | NA                            | NA                 |
| Kabuli_wild_50838299 | NA                                  | Ca_kabuli_denovo | 50838299                | G/A  | NA                 | NA                            | NA                 |
| Kabuli_wild_50838359 | NA                                  | Ca_kabuli_denovo | 50838359                | T/C  | NA                 | NA                            | NA                 |
| Kabuli_wild_50844504 | NA                                  | Ca_kabuli_denovo | 50844504                | A/G  | NA                 | NA                            | NA                 |
| Kabuli_wild_50844543 | NA                                  | Ca_kabuli_denovo | 50844543                | G/C  | NA                 | NA                            | NA                 |
| Kabuli_wild_50845468 | NA                                  | Ca_kabuli_denovo | 50845468                | G/T  | NA                 | NA                            | NA                 |
| Kabuli_wild_50845474 | NA                                  | Ca_kabuli_denovo | 50845474                | G/T  | NA                 | NA                            | NA                 |
| Kabuli_wild_50845503 | NA                                  | Ca_kabuli_denovo | 50845503                | G/T  | NA                 | NA                            | NA                 |
| Kabuli_wild_50846047 | NA                                  | Ca_kabuli_denovo | 50846047                | A/G  | NA                 | NA                            | NA                 |
| Kabuli_wild_50849821 | NA                                  | Ca_kabuli_denovo | 50849821                | C/T  | NA                 | NA                            | NA                 |
| Kabuli_wild_50856669 | NA                                  | Ca_kabuli_denovo | 50856669                | T/C  | NA                 | NA                            | NA                 |
| Kabuli_wild_50856683 | NA                                  | Ca_kabuli_denovo | 50856683                | G/A  | NA                 | NA                            | NA                 |
| Kabuli_wild_50857482 | NA                                  | Ca_kabuli_denovo | 50857482                | A/G  | NA                 | NA                            | NA                 |
| Kabuli_wild_50857512 | NA                                  | Ca_kabuli_denovo | 50857512                | T/C  | NA                 | NA                            | NA                 |
| Kabuli_wild_50859494 | NA                                  | Ca_kabuli_denovo | 50859494                | T/C  | NA                 | NA                            | NA                 |
| Kabuli_wild_50859513 | NA                                  | Ca_kabuli_denovo | 50859513                | A/G  | NA                 | NA                            | NA                 |
| Kabuli_wild_50862251 | NA                                  | Ca_kabuli_denovo | 50862251                | C/G  | NA                 | NA                            | NA                 |
| Kabuli_wild_50862301 | NA                                  | Ca_kabuli_denovo | 50862301                | C/G  | NA                 | NA                            | NA                 |
| Kabuli_wild_50868282 | NA                                  | Ca_kabuli_denovo | 50868282                | C/T  | NA                 | NA                            | NA                 |
| Kabuli_wild_50873861 | NA                                  | Ca_kabuli_denovo | 50873861                | A/G  | NA                 | NA                            | NA                 |
| Kabuli_wild_50873910 | NA                                  | Ca_kabuli_denovo | 50873910                | C/T  | NA                 | NA                            | NA                 |
| Kabuli_wild_50876655 | NA                                  | Ca_kabuli_denovo | 50876655                | C/T  | NA                 | NA                            | NA                 |
| Kabuli_wild_50877612 | NA                                  | Ca_kabuli_denovo | 50877612                | C/G  | NA                 | NA                            | NA                 |
| Kabuli_wild_50879580 | NA                                  | Ca_kabuli_denovo | 50879580                | G/A  | NA                 | NA                            | NA                 |
| Kabuli_wild_50896292 | NA                                  | Ca_kabuli_denovo | 50896292                | C/G  | NA                 | NA                            | NA                 |
| Kabuli_wild_50896307 | NA                                  | Ca_kabuli_denovo | 50896307                | G/T  | NA                 | NA                            | NA                 |
| Kabuli_wild_50898522 | NA                                  | Ca_kabuli_denovo | 50898522                | T/C  | NA                 | NA                            | NA                 |
| Kabuli_wild_50898535 | NA                                  | Ca_kabuli_denovo | 50898535                | A/G  | NA                 | NA                            | NA                 |
| Kabuli_wild_50899472 | NA                                  | Ca_kabuli_denovo | 50899472                | A/G  | NA                 | NA                            | NA                 |
| Kabuli_wild_50899547 | NA                                  | Ca_kabuli_denovo | 50899547                | C/T  | NA                 | NA                            | NA                 |
| Kabuli_wild_50903163 | NA                                  | Ca_kabuli_denovo | 50903163                | G/T  | NA                 | NA                            | NA                 |
| Kabuli_wild_50909258 | NA                                  | Ca_kabuli_denovo | 50909258                | G/A  | NA                 | NA                            | NA                 |
| Kabuli_wild_50909261 | NA                                  | Ca_kabuli_denovo | 50909261                | A/G  | NA                 | NA                            | NA                 |

| SNP IDs              | NCBI dbSNP accession IDs (NCBI_SS#) | Chromosomes      | Physical positions (bp) | SNPs | Gene accession IDs | Sequence components of genome | Putative functions |
|----------------------|-------------------------------------|------------------|-------------------------|------|--------------------|-------------------------------|--------------------|
| Kabuli_wild_50909551 | NA                                  | Ca_kabuli_denovo | 50909551                | C/T  | NA                 | NA                            | NA                 |
| Kabuli_wild_50909584 | NA                                  | Ca_kabuli_denovo | 50909584                | G/A  | NA                 | NA                            | NA                 |
| Kabuli_wild_50910217 | NA                                  | Ca_kabuli_denovo | 50910217                | C/G  | NA                 | NA                            | NA                 |
| Kabuli_wild_50911359 | NA                                  | Ca_kabuli_denovo | 50911359                | T/G  | NA                 | NA                            | NA                 |
| Kabuli_wild_50911387 | NA                                  | Ca_kabuli_denovo | 50911387                | A/T  | NA                 | NA                            | NA                 |
| Kabuli_wild_50912357 | NA                                  | Ca_kabuli_denovo | 50912357                | G/A  | NA                 | NA                            | NA                 |
| Kabuli_wild_50912364 | NA                                  | Ca_kabuli_denovo | 50912364                | C/A  | NA                 | NA                            | NA                 |
| Kabuli_wild_50913614 | NA                                  | Ca_kabuli_denovo | 50913614                | G/T  | NA                 | NA                            | NA                 |
| Kabuli_wild_50919345 | NA                                  | Ca_kabuli_denovo | 50919345                | T/C  | NA                 | NA                            | NA                 |
| Kabuli_wild_50931100 | NA                                  | Ca_kabuli_denovo | 50931100                | G/T  | NA                 | NA                            | NA                 |
| Kabuli_wild_50932452 | NA                                  | Ca_kabuli_denovo | 50932452                | C/G  | NA                 | NA                            | NA                 |
| Kabuli_wild_50937856 | NA                                  | Ca_kabuli_denovo | 50937856                | C/T  | NA                 | NA                            | NA                 |
| Kabuli_wild_50944451 | NA                                  | Ca_kabuli_denovo | 50944451                | C/T  | NA                 | NA                            | NA                 |
| Kabuli_wild_50944747 | NA                                  | Ca_kabuli_denovo | 50944747                | G/T  | NA                 | NA                            | NA                 |
| Kabuli_wild_50946965 | NA                                  | Ca_kabuli_denovo | 50946965                | A/T  | NA                 | NA                            | NA                 |
| Kabuli_wild_50951978 | NA                                  | Ca_kabuli_denovo | 50951978                | C/G  | NA                 | NA                            | NA                 |
| Kabuli_wild_50955151 | NA                                  | Ca_kabuli_denovo | 50955151                | T/C  | NA                 | NA                            | NA                 |
| Kabuli_wild_50957350 | NA                                  | Ca_kabuli_denovo | 50957350                | T/C  | NA                 | NA                            | NA                 |
| Kabuli_wild_50957371 | NA                                  | Ca_kabuli_denovo | 50957371                | C/G  | NA                 | NA                            | NA                 |
| Kabuli_wild_50957414 | NA                                  | Ca_kabuli_denovo | 50957414                | C/G  | NA                 | NA                            | NA                 |
| Kabuli_wild_50962597 | NA                                  | Ca_kabuli_denovo | 50962597                | C/A  | NA                 | NA                            | NA                 |
| Kabuli_wild_50964030 | NA                                  | Ca_kabuli_denovo | 50964030                | A/C  | NA                 | NA                            | NA                 |
| Kabuli_wild_50966673 | NA                                  | Ca_kabuli_denovo | 50966673                | T/G  | NA                 | NA                            | NA                 |
| Kabuli_wild_50968609 | NA                                  | Ca_kabuli_denovo | 50968609                | C/T  | NA                 | NA                            | NA                 |
| Kabuli_wild_50968624 | NA                                  | Ca_kabuli_denovo | 50968624                | C/A  | NA                 | NA                            | NA                 |
| Kabuli_wild_50973635 | NA                                  | Ca_kabuli_denovo | 50973635                | G/A  | NA                 | NA                            | NA                 |
| Kabuli_wild_50981704 | NA                                  | Ca_kabuli_denovo | 50981704                | G/T  | NA                 | NA                            | NA                 |
| Kabuli_wild_50983968 | NA                                  | Ca_kabuli_denovo | 50983968                | G/A  | NA                 | NA                            | NA                 |
| Kabuli_wild_50985066 | NA                                  | Ca_kabuli_denovo | 50985066                | C/T  | NA                 | NA                            | NA                 |
| Kabuli_wild_50985090 | NA                                  | Ca_kabuli_denovo | 50985090                | A/G  | NA                 | NA                            | NA                 |
| Kabuli_wild_50987520 | NA                                  | Ca_kabuli_denovo | 50987520                | C/G  | NA                 | NA                            | NA                 |
| Kabuli_wild_50987531 | NA                                  | Ca_kabuli_denovo | 50987531                | C/G  | NA                 | NA                            | NA                 |
| Kabuli_wild_50987956 | NA                                  | Ca_kabuli_denovo | 50987956                | G/C  | NA                 | NA                            | NA                 |
| Kabuli_wild_50987974 | NA                                  | Ca_kabuli_denovo | 50987974                | T/C  | NA                 | NA                            | NA                 |
| Kabuli_wild_50987996 | NA                                  | Ca_kabuli_denovo | 50987996                | A/G  | NA                 | NA                            | NA                 |
| Kabuli_wild_50992403 | NA                                  | Ca_kabuli_denovo | 50992403                | C/T  | NA                 | NA                            | NA                 |
| Kabuli_wild_50992438 | NA                                  | Ca_kabuli_denovo | 50992438                | T/C  | NA                 | NA                            | NA                 |
| Kabuli_wild_50997692 | NA                                  | Ca_kabuli_denovo | 50997692                | G/T  | NA                 | NA                            | NA                 |
| Kabuli_wild_51002702 | NA                                  | Ca_kabuli_denovo | 51002702                | C/G  | NA                 | NA                            | NA                 |
| Kabuli_wild_51003610 | NA                                  | Ca_kabuli_denovo | 51003610                | C/G  | NA                 | NA                            | NA                 |
| Kabuli_wild_51003625 | NA                                  | Ca_kabuli_denovo | 51003625                | A/G  | NA                 | NA                            | NA                 |
| Kabuli_wild_51003650 | NA                                  | Ca_kabuli_denovo | 51003650                | C/G  | NA                 | NA                            | NA                 |
| Kabuli_wild_51003844 | NA                                  | Ca_kabuli_denovo | 51003844                | G/T  | NA                 | NA                            | NA                 |
| Kabuli_wild_51005191 | NA                                  | Ca_kabuli_denovo | 51005191                | C/G  | NA                 | NA                            | NA                 |

| SNP IDs              | NCBI dbSNP accession IDs (NCBI_SS#) | Chromosomes      | Physical positions (bp) | SNPs | Gene accession IDs | Sequence components of genome | Putative functions |
|----------------------|-------------------------------------|------------------|-------------------------|------|--------------------|-------------------------------|--------------------|
| Kabuli_wild_51005199 | NA                                  | Ca_kabuli_denovo | 51005199                | A/T  | NA                 | NA                            | NA                 |
| Kabuli_wild_51006640 | NA                                  | Ca_kabuli_denovo | 51006640                | G/A  | NA                 | NA                            | NA                 |
| Kabuli_wild_51006664 | NA                                  | Ca_kabuli_denovo | 51006664                | A/G  | NA                 | NA                            | NA                 |
| Kabuli_wild_51006706 | NA                                  | Ca_kabuli_denovo | 51006706                | A/G  | NA                 | NA                            | NA                 |
| Kabuli_wild_51006717 | NA                                  | Ca_kabuli_denovo | 51006717                | T/A  | NA                 | NA                            | NA                 |
| Kabuli_wild_51007194 | NA                                  | Ca_kabuli_denovo | 51007194                | G/T  | NA                 | NA                            | NA                 |
| Kabuli_wild_51007953 | NA                                  | Ca_kabuli_denovo | 51007953                | A/G  | NA                 | NA                            | NA                 |
| Kabuli_wild_51008650 | NA                                  | Ca_kabuli_denovo | 51008650                | C/T  | NA                 | NA                            | NA                 |
| Kabuli_wild_51008662 | NA                                  | Ca_kabuli_denovo | 51008662                | T/C  | NA                 | NA                            | NA                 |
| Kabuli_wild_51016704 | NA                                  | Ca_kabuli_denovo | 51016704                | G/T  | NA                 | NA                            | NA                 |
| Kabuli_wild_51022443 | NA                                  | Ca_kabuli_denovo | 51022443                | G/T  | NA                 | NA                            | NA                 |
| Kabuli_wild_51022703 | NA                                  | Ca_kabuli_denovo | 51022703                | T/C  | NA                 | NA                            | NA                 |
| Kabuli_wild_51022720 | NA                                  | Ca_kabuli_denovo | 51022720                | T/G  | NA                 | NA                            | NA                 |
| Kabuli_wild_51022730 | NA                                  | Ca_kabuli_denovo | 51022730                | T/C  | NA                 | NA                            | NA                 |
| Kabuli_wild_51022758 | NA                                  | Ca_kabuli_denovo | 51022758                | T/C  | NA                 | NA                            | NA                 |
| Kabuli_wild_51022978 | NA                                  | Ca_kabuli_denovo | 51022978                | A/G  | NA                 | NA                            | NA                 |
| Kabuli_wild_51022989 | NA                                  | Ca_kabuli_denovo | 51022989                | T/C  | NA                 | NA                            | NA                 |
| Kabuli_wild_51022993 | NA                                  | Ca_kabuli_denovo | 51022993                | G/A  | NA                 | NA                            | NA                 |
| Kabuli_wild_51024446 | NA                                  | Ca_kabuli_denovo | 51024446                | C/G  | NA                 | NA                            | NA                 |
| Kabuli_wild_51024877 | NA                                  | Ca_kabuli_denovo | 51024877                | G/C  | NA                 | NA                            | NA                 |
| Kabuli_wild_51028829 | NA                                  | Ca_kabuli_denovo | 51028829                | G/A  | NA                 | NA                            | NA                 |
| Kabuli_wild_51028869 | NA                                  | Ca_kabuli_denovo | 51028869                | G/A  | NA                 | NA                            | NA                 |
| Kabuli_wild_51028923 | NA                                  | Ca_kabuli_denovo | 51028923                | A/C  | NA                 | NA                            | NA                 |
| Kabuli_wild_51034245 | NA                                  | Ca_kabuli_denovo | 51034245                | A/G  | NA                 | NA                            | NA                 |
| Kabuli_wild_51034254 | NA                                  | Ca_kabuli_denovo | 51034254                | C/T  | NA                 | NA                            | NA                 |
| Kabuli_wild_51036118 | NA                                  | Ca_kabuli_denovo | 51036118                | G/T  | NA                 | NA                            | NA                 |
| Kabuli_wild_51039425 | NA                                  | Ca_kabuli_denovo | 51039425                | C/T  | NA                 | NA                            | NA                 |
| Kabuli_wild_51039799 | NA                                  | Ca_kabuli_denovo | 51039799                | A/G  | NA                 | NA                            | NA                 |
| Kabuli_wild_51041118 | NA                                  | Ca_kabuli_denovo | 51041118                | A/G  | NA                 | NA                            | NA                 |
| Kabuli_wild_51041121 | NA                                  | Ca_kabuli_denovo | 51041121                | A/G  | NA                 | NA                            | NA                 |
| Kabuli_wild_51041483 | NA                                  | Ca_kabuli_denovo | 51041483                | G/T  | NA                 | NA                            | NA                 |
| Kabuli_wild_51045175 | NA                                  | Ca_kabuli_denovo | 51045175                | T/C  | NA                 | NA                            | NA                 |
| Kabuli_wild_51047255 | NA                                  | Ca_kabuli_denovo | 51047255                | G/A  | NA                 | NA                            | NA                 |
| Kabuli_wild_51047851 | NA                                  | Ca_kabuli_denovo | 51047851                | C/T  | NA                 | NA                            | NA                 |
| Kabuli_wild_51047852 | NA                                  | Ca_kabuli_denovo | 51047852                | T/C  | NA                 | NA                            | NA                 |
| Kabuli_wild_51048737 | NA                                  | Ca_kabuli_denovo | 51048737                | C/T  | NA                 | NA                            | NA                 |
| Kabuli_wild_51052806 | NA                                  | Ca_kabuli_denovo | 51052806                | C/G  | NA                 | NA                            | NA                 |
| Kabuli_wild_51052935 | NA                                  | Ca_kabuli_denovo | 51052935                | G/T  | NA                 | NA                            | NA                 |
| Kabuli_wild_51054157 | NA                                  | Ca_kabuli_denovo | 51054157                | G/A  | NA                 | NA                            | NA                 |
| Kabuli_wild_51054160 | NA                                  | Ca_kabuli_denovo | 51054160                | G/C  | NA                 | NA                            | NA                 |
| Kabuli_wild_51054196 | NA                                  | Ca_kabuli_denovo | 51054196                | G/A  | NA                 | NA                            | NA                 |
| Kabuli_wild_51058470 | NA                                  | Ca_kabuli_denovo | 51058470                | A/G  | NA                 | NA                            | NA                 |
| Kabuli_wild_51059059 | NA                                  | Ca_kabuli_denovo | 51059059                | G/T  | NA                 | NA                            | NA                 |
| Kabuli_wild_51061270 | NA                                  | Ca_kabuli_denovo | 51061270                | C/G  | NA                 | NA                            | NA                 |

| SNP IDs              | NCBI dbSNP accession IDs (NCBI_SS#) | Chromosomes      | Physical positions (bp) | SNPs | Gene accession IDs | Sequence components of genome | Putative functions |
|----------------------|-------------------------------------|------------------|-------------------------|------|--------------------|-------------------------------|--------------------|
| Kabuli_wild_51065164 | NA                                  | Ca_kabuli_denovo | 51065164                | G/C  | NA                 | NA                            | NA                 |
| Kabuli_wild_51070301 | NA                                  | Ca_kabuli_denovo | 51070301                | C/A  | NA                 | NA                            | NA                 |
| Kabuli_wild_51070346 | NA                                  | Ca_kabuli_denovo | 51070346                | T/C  | NA                 | NA                            | NA                 |
| Kabuli_wild_51070967 | NA                                  | Ca_kabuli_denovo | 51070967                | G/C  | NA                 | NA                            | NA                 |
| Kabuli_wild_51071019 | NA                                  | Ca_kabuli_denovo | 51071019                | G/C  | NA                 | NA                            | NA                 |
| Kabuli_wild_51076282 | NA                                  | Ca_kabuli_denovo | 51076282                | G/C  | NA                 | NA                            | NA                 |
| Kabuli_wild_51083032 | NA                                  | Ca_kabuli_denovo | 51083032                | A/G  | NA                 | NA                            | NA                 |
| Kabuli_wild_51085328 | NA                                  | Ca_kabuli_denovo | 51085328                | A/C  | NA                 | NA                            | NA                 |
| Kabuli_wild_51085355 | NA                                  | Ca_kabuli_denovo | 51085355                | C/G  | NA                 | NA                            | NA                 |
| Kabuli_wild_51092149 | NA                                  | Ca_kabuli_denovo | 51092149                | A/G  | NA                 | NA                            | NA                 |
| Kabuli_wild_51095910 | NA                                  | Ca_kabuli_denovo | 51095910                | G/A  | NA                 | NA                            | NA                 |
| Kabuli_wild_51095922 | NA                                  | Ca_kabuli_denovo | 51095922                | A/G  | NA                 | NA                            | NA                 |
| Kabuli_wild_51101341 | NA                                  | Ca_kabuli_denovo | 51101341                | G/T  | NA                 | NA                            | NA                 |
| Kabuli_wild_51103440 | NA                                  | Ca_kabuli_denovo | 51103440                | C/T  | NA                 | NA                            | NA                 |
| Kabuli_wild_51106096 | NA                                  | Ca_kabuli_denovo | 51106096                | G/C  | NA                 | NA                            | NA                 |
| Kabuli_wild_51106108 | NA                                  | Ca_kabuli_denovo | 51106108                | G/A  | NA                 | NA                            | NA                 |
| Kabuli_wild_51107506 | NA                                  | Ca_kabuli_denovo | 51107506                | T/C  | NA                 | NA                            | NA                 |
| Kabuli_wild_51109087 | NA                                  | Ca_kabuli_denovo | 51109087                | A/G  | NA                 | NA                            | NA                 |
| Kabuli_wild_51110108 | NA                                  | Ca_kabuli_denovo | 51110108                | A/G  | NA                 | NA                            | NA                 |
| Kabuli_wild_51113616 | NA                                  | Ca_kabuli_denovo | 51113616                | G/A  | NA                 | NA                            | NA                 |
| Kabuli_wild_51113664 | NA                                  | Ca_kabuli_denovo | 51113664                | G/C  | NA                 | NA                            | NA                 |
| Kabuli_wild_51118280 | NA                                  | Ca_kabuli_denovo | 51118280                | T/C  | NA                 | NA                            | NA                 |
| Kabuli_wild_51118318 | NA                                  | Ca_kabuli_denovo | 51118318                | A/C  | NA                 | NA                            | NA                 |
| Kabuli_wild_51119132 | NA                                  | Ca_kabuli_denovo | 51119132                | A/C  | NA                 | NA                            | NA                 |
| Kabuli_wild_51120052 | NA                                  | Ca_kabuli_denovo | 51120052                | C/T  | NA                 | NA                            | NA                 |
| Kabuli_wild_51129118 | NA                                  | Ca_kabuli_denovo | 51129118                | G/A  | NA                 | NA                            | NA                 |
| Kabuli_wild_51132572 | NA                                  | Ca_kabuli_denovo | 51132572                | G/T  | NA                 | NA                            | NA                 |
| Kabuli_wild_51133353 | NA                                  | Ca_kabuli_denovo | 51133353                | G/T  | NA                 | NA                            | NA                 |
| Kabuli_wild_51133680 | NA                                  | Ca_kabuli_denovo | 51133680                | C/A  | NA                 | NA                            | NA                 |
| Kabuli_wild_51133719 | NA                                  | Ca_kabuli_denovo | 51133719                | A/C  | NA                 | NA                            | NA                 |
| Kabuli_wild_51134934 | NA                                  | Ca_kabuli_denovo | 51134934                | A/C  | NA                 | NA                            | NA                 |
| Kabuli_wild_51134967 | NA                                  | Ca_kabuli_denovo | 51134967                | C/T  | NA                 | NA                            | NA                 |
| Kabuli_wild_51139923 | NA                                  | Ca_kabuli_denovo | 51139923                | T/C  | NA                 | NA                            | NA                 |
| Kabuli_wild_51143735 | NA                                  | Ca_kabuli_denovo | 51143735                | C/T  | NA                 | NA                            | NA                 |
| Kabuli_wild_51143918 | NA                                  | Ca_kabuli_denovo | 51143918                | C/T  | NA                 | NA                            | NA                 |
| Kabuli_wild_51143945 | NA                                  | Ca_kabuli_denovo | 51143945                | G/A  | NA                 | NA                            | NA                 |
| Kabuli_wild_51143954 | NA                                  | Ca_kabuli_denovo | 51143954                | C/T  | NA                 | NA                            | NA                 |
| Kabuli_wild_51149769 | NA                                  | Ca_kabuli_denovo | 51149769                | T/G  | NA                 | NA                            | NA                 |
| Kabuli_wild_51149913 | NA                                  | Ca_kabuli_denovo | 51149913                | A/G  | NA                 | NA                            | NA                 |
| Kabuli_wild_51149974 | NA                                  | Ca_kabuli_denovo | 51149974                | G/C  | NA                 | NA                            | NA                 |
| Kabuli_wild_51159385 | NA                                  | Ca_kabuli_denovo | 51159385                | A/T  | NA                 | NA                            | NA                 |
| Kabuli_wild_51160501 | NA                                  | Ca_kabuli_denovo | 51160501                | A/C  | NA                 | NA                            | NA                 |
| Kabuli_wild_51160518 | NA                                  | Ca_kabuli_denovo | 51160518                | G/C  | NA                 | NA                            | NA                 |
| Kabuli_wild_51166542 | NA                                  | Ca_kabuli_denovo | 51166542                | A/G  | NA                 | NA                            | NA                 |

| SNP IDs              | NCBI dbSNP accession IDs (NCBI_SS#) | Chromosomes      | Physical positions (bp) | SNPs | Gene accession IDs | Sequence components of genome | Putative functions |
|----------------------|-------------------------------------|------------------|-------------------------|------|--------------------|-------------------------------|--------------------|
| Kabuli_wild_51166563 | NA                                  | Ca_kabuli_denovo | 51166563                | C/G  | NA                 | NA                            | NA                 |
| Kabuli_wild_51169430 | NA                                  | Ca_kabuli_denovo | 51169430                | C/T  | NA                 | NA                            | NA                 |
| Kabuli_wild_51169433 | NA                                  | Ca_kabuli_denovo | 51169433                | T/C  | NA                 | NA                            | NA                 |
| Kabuli_wild_51185124 | NA                                  | Ca_kabuli_denovo | 51185124                | G/T  | NA                 | NA                            | NA                 |
| Kabuli_wild_51192551 | NA                                  | Ca_kabuli_denovo | 51192551                | C/A  | NA                 | NA                            | NA                 |
| Kabuli_wild_51192605 | NA                                  | Ca_kabuli_denovo | 51192605                | C/T  | NA                 | NA                            | NA                 |
| Kabuli_wild_51197004 | NA                                  | Ca_kabuli_denovo | 51197004                | G/T  | NA                 | NA                            | NA                 |
| Kabuli_wild_51197383 | NA                                  | Ca_kabuli_denovo | 51197383                | T/G  | NA                 | NA                            | NA                 |
| Kabuli_wild_51200806 | NA                                  | Ca_kabuli_denovo | 51200806                | G/T  | NA                 | NA                            | NA                 |
| Kabuli_wild_51204689 | NA                                  | Ca_kabuli_denovo | 51204689                | G/T  | NA                 | NA                            | NA                 |
| Kabuli_wild_51205851 | NA                                  | Ca_kabuli_denovo | 51205851                | C/G  | NA                 | NA                            | NA                 |
| Kabuli_wild_51205875 | NA                                  | Ca_kabuli_denovo | 51205875                | C/G  | NA                 | NA                            | NA                 |
| Kabuli_wild_51205899 | NA                                  | Ca_kabuli_denovo | 51205899                | C/G  | NA                 | NA                            | NA                 |
| Kabuli_wild_51209285 | NA                                  | Ca_kabuli_denovo | 51209285                | T/C  | NA                 | NA                            | NA                 |
| Kabuli_wild_51209298 | NA                                  | Ca_kabuli_denovo | 51209298                | C/T  | NA                 | NA                            | NA                 |
| Kabuli_wild_51210293 | NA                                  | Ca_kabuli_denovo | 51210293                | C/G  | NA                 | NA                            | NA                 |
| Kabuli_wild_51210295 | NA                                  | Ca_kabuli_denovo | 51210295                | A/G  | NA                 | NA                            | NA                 |
| Kabuli_wild_51215492 | NA                                  | Ca_kabuli_denovo | 51215492                | C/T  | NA                 | NA                            | NA                 |
| Kabuli_wild_51216910 | NA                                  | Ca_kabuli_denovo | 51216910                | T/G  | NA                 | NA                            | NA                 |
| Kabuli_wild_51216915 | NA                                  | Ca_kabuli_denovo | 51216915                | G/A  | NA                 | NA                            | NA                 |
| Kabuli_wild_51237756 | NA                                  | Ca_kabuli_denovo | 51237756                | A/G  | NA                 | NA                            | NA                 |
| Kabuli_wild_51252396 | NA                                  | Ca_kabuli_denovo | 51252396                | A/C  | NA                 | NA                            | NA                 |
| Kabuli_wild_51268260 | NA                                  | Ca_kabuli_denovo | 51268260                | C/T  | NA                 | NA                            | NA                 |
| Kabuli_wild_51268404 | NA                                  | Ca_kabuli_denovo | 51268404                | C/G  | NA                 | NA                            | NA                 |
| Kabuli_wild_51268586 | NA                                  | Ca_kabuli_denovo | 51268586                | C/T  | NA                 | NA                            | NA                 |
| Kabuli_wild_51268621 | NA                                  | Ca_kabuli_denovo | 51268621                | A/G  | NA                 | NA                            | NA                 |
| Kabuli_wild_51268713 | NA                                  | Ca_kabuli_denovo | 51268713                | G/T  | NA                 | NA                            | NA                 |
| Kabuli_wild_51280744 | NA                                  | Ca_kabuli_denovo | 51280744                | A/C  | NA                 | NA                            | NA                 |
| Kabuli_wild_51281613 | NA                                  | Ca_kabuli_denovo | 51281613                | A/T  | NA                 | NA                            | NA                 |
| Kabuli_wild_51281614 | NA                                  | Ca_kabuli_denovo | 51281614                | A/C  | NA                 | NA                            | NA                 |
| Kabuli_wild_51281806 | NA                                  | Ca_kabuli_denovo | 51281806                | A/C  | NA                 | NA                            | NA                 |
| Kabuli_wild_51288981 | NA                                  | Ca_kabuli_denovo | 51288981                | G/T  | NA                 | NA                            | NA                 |
| Kabuli_wild_51293470 | NA                                  | Ca_kabuli_denovo | 51293470                | C/G  | NA                 | NA                            | NA                 |
| Kabuli_wild_51294818 | NA                                  | Ca_kabuli_denovo | 51294818                | G/T  | NA                 | NA                            | NA                 |
| Kabuli_wild_51295767 | NA                                  | Ca_kabuli_denovo | 51295767                | A/G  | NA                 | NA                            | NA                 |
| Kabuli_wild_51301186 | NA                                  | Ca_kabuli_denovo | 51301186                | A/G  | NA                 | NA                            | NA                 |
| Kabuli_wild_51301255 | NA                                  | Ca_kabuli_denovo | 51301255                | C/T  | NA                 | NA                            | NA                 |
| Kabuli_wild_51309575 | NA                                  | Ca_kabuli_denovo | 51309575                | T/C  | NA                 | NA                            | NA                 |
| Kabuli_wild_51312983 | NA                                  | Ca_kabuli_denovo | 51312983                | G/T  | NA                 | NA                            | NA                 |
| Kabuli_wild_51314460 | NA                                  | Ca_kabuli_denovo | 51314460                | C/G  | NA                 | NA                            | NA                 |
| Kabuli_wild_51314463 | NA                                  | Ca_kabuli_denovo | 51314463                | C/G  | NA                 | NA                            | NA                 |
| Kabuli_wild_51314480 | NA                                  | Ca_kabuli_denovo | 51314480                | C/T  | NA                 | NA                            | NA                 |
| Kabuli_wild_51323233 | NA                                  | Ca_kabuli_denovo | 51323233                | A/G  | NA                 | NA                            | NA                 |
| Kabuli_wild_51326325 | NA                                  | Ca_kabuli_denovo | 51326325                | G/T  | NA                 | NA                            | NA                 |

| SNP IDs              | NCBI dbSNP accession IDs (NCBI_SS#) | Chromosomes      | Physical positions (bp) | SNPs | Gene accession IDs | Sequence components of genome | Putative functions |
|----------------------|-------------------------------------|------------------|-------------------------|------|--------------------|-------------------------------|--------------------|
| Kabuli_wild_51331819 | NA                                  | Ca_kabuli_denovo | 51331819                | A/C  | NA                 | NA                            | NA                 |
| Kabuli_wild_51331856 | NA                                  | Ca_kabuli_denovo | 51331856                | A/C  | NA                 | NA                            | NA                 |
| Kabuli_wild_51331860 | NA                                  | Ca_kabuli_denovo | 51331860                | A/C  | NA                 | NA                            | NA                 |
| Kabuli_wild_51332042 | NA                                  | Ca_kabuli_denovo | 51332042                | G/T  | NA                 | NA                            | NA                 |
| Kabuli_wild_51333571 | NA                                  | Ca_kabuli_denovo | 51333571                | G/T  | NA                 | NA                            | NA                 |
| Kabuli_wild_51346885 | NA                                  | Ca_kabuli_denovo | 51346885                | C/T  | NA                 | NA                            | NA                 |
| Kabuli_wild_51346904 | NA                                  | Ca_kabuli_denovo | 51346904                | C/G  | NA                 | NA                            | NA                 |
| Kabuli_wild_51347645 | NA                                  | Ca_kabuli_denovo | 51347645                | A/G  | NA                 | NA                            | NA                 |
| Kabuli_wild_51357426 | NA                                  | Ca_kabuli_denovo | 51357426                | C/T  | NA                 | NA                            | NA                 |
| Kabuli_wild_51357436 | NA                                  | Ca_kabuli_denovo | 51357436                | A/T  | NA                 | NA                            | NA                 |
| Kabuli_wild_51360060 | NA                                  | Ca_kabuli_denovo | 51360060                | A/G  | NA                 | NA                            | NA                 |
| Kabuli_wild_51366405 | NA                                  | Ca_kabuli_denovo | 51366405                | A/G  | NA                 | NA                            | NA                 |
| Kabuli_wild_51366459 | NA                                  | Ca_kabuli_denovo | 51366459                | A/G  | NA                 | NA                            | NA                 |
| Kabuli_wild_51367919 | NA                                  | Ca_kabuli_denovo | 51367919                | C/G  | NA                 | NA                            | NA                 |
| Kabuli_wild_51369110 | NA                                  | Ca_kabuli_denovo | 51369110                | C/T  | NA                 | NA                            | NA                 |
| Kabuli_wild_51371565 | NA                                  | Ca_kabuli_denovo | 51371565                | A/G  | NA                 | NA                            | NA                 |
| Kabuli_wild_51379637 | NA                                  | Ca_kabuli_denovo | 51379637                | A/T  | NA                 | NA                            | NA                 |
| Kabuli_wild_51379690 | NA                                  | Ca_kabuli_denovo | 51379690                | C/T  | NA                 | NA                            | NA                 |
| Kabuli_wild_51379693 | NA                                  | Ca_kabuli_denovo | 51379693                | A/T  | NA                 | NA                            | NA                 |
| Kabuli_wild_51384508 | NA                                  | Ca_kabuli_denovo | 51384508                | C/G  | NA                 | NA                            | NA                 |
| Kabuli_wild_51387745 | NA                                  | Ca_kabuli_denovo | 51387745                | A/T  | NA                 | NA                            | NA                 |
| Kabuli_wild_51388172 | NA                                  | Ca_kabuli_denovo | 51388172                | A/C  | NA                 | NA                            | NA                 |
| Kabuli_wild_51403537 | NA                                  | Ca_kabuli_denovo | 51403537                | A/G  | NA                 | NA                            | NA                 |
| Kabuli_wild_51403568 | NA                                  | Ca_kabuli_denovo | 51403568                | A/C  | NA                 | NA                            | NA                 |
| Kabuli_wild_51403572 | NA                                  | Ca_kabuli_denovo | 51403572                | A/C  | NA                 | NA                            | NA                 |
| Kabuli_wild_51404115 | NA                                  | Ca_kabuli_denovo | 51404115                | C/T  | NA                 | NA                            | NA                 |
| Kabuli_wild_51404152 | NA                                  | Ca_kabuli_denovo | 51404152                | A/G  | NA                 | NA                            | NA                 |
| Kabuli_wild_51411276 | NA                                  | Ca_kabuli_denovo | 51411276                | A/C  | NA                 | NA                            | NA                 |
| Kabuli_wild_51411975 | NA                                  | Ca_kabuli_denovo | 51411975                | C/T  | NA                 | NA                            | NA                 |
| Kabuli_wild_51412007 | NA                                  | Ca_kabuli_denovo | 51412007                | G/T  | NA                 | NA                            | NA                 |
| Kabuli_wild_51415849 | NA                                  | Ca_kabuli_denovo | 51415849                | A/G  | NA                 | NA                            | NA                 |
| Kabuli_wild_51418589 | NA                                  | Ca_kabuli_denovo | 51418589                | G/T  | NA                 | NA                            | NA                 |
| Kabuli_wild_51424518 | NA                                  | Ca_kabuli_denovo | 51424518                | G/T  | NA                 | NA                            | NA                 |
| Kabuli_wild_51434847 | NA                                  | Ca_kabuli_denovo | 51434847                | A/G  | NA                 | NA                            | NA                 |
| Kabuli_wild_51438459 | NA                                  | Ca_kabuli_denovo | 51438459                | G/T  | NA                 | NA                            | NA                 |
| Kabuli_wild_51448848 | NA                                  | Ca_kabuli_denovo | 51448848                | A/G  | NA                 | NA                            | NA                 |
| Kabuli_wild_51448893 | NA                                  | Ca_kabuli_denovo | 51448893                | C/T  | NA                 | NA                            | NA                 |
| Kabuli_wild_51464153 | NA                                  | Ca_kabuli_denovo | 51464153                | C/G  | NA                 | NA                            | NA                 |
| Kabuli_wild_51464166 | NA                                  | Ca_kabuli_denovo | 51464166                | C/T  | NA                 | NA                            | NA                 |
| Kabuli_wild_51474159 | NA                                  | Ca_kabuli_denovo | 51474159                | G/T  | NA                 | NA                            | NA                 |
| Kabuli_wild_51475863 | NA                                  | Ca_kabuli_denovo | 51475863                | A/G  | NA                 | NA                            | NA                 |
| Kabuli_wild_51475870 | NA                                  | Ca_kabuli_denovo | 51475870                | G/T  | NA                 | NA                            | NA                 |
| Kabuli_wild_51483707 | NA                                  | Ca_kabuli_denovo | 51483707                | G/T  | NA                 | NA                            | NA                 |
| Kabuli_wild_51485963 | NA                                  | Ca_kabuli_denovo | 51485963                | A/G  | NA                 | NA                            | NA                 |



| SNP IDs                     | NCBI dbSNP accession IDs (NCBI_SS#) | Chromosomes             | Physical positions (bp) | SNPs | Gene accession IDs | Sequence components of genome | Putative functions |
|-----------------------------|-------------------------------------|-------------------------|-------------------------|------|--------------------|-------------------------------|--------------------|
| <i>Kabuli_wild_51488810</i> | NA                                  | <i>Ca_kabuli_denovo</i> | 51488810                | A/G  | NA                 | NA                            | NA                 |
| <i>Kabuli_wild_51488819</i> | NA                                  | <i>Ca_kabuli_denovo</i> | 51488819                | A/T  | NA                 | NA                            | NA                 |
| <i>Kabuli_wild_51490804</i> | NA                                  | <i>Ca_kabuli_denovo</i> | 51490804                | C/T  | NA                 | NA                            | NA                 |
| <i>Kabuli_wild_51491064</i> | NA                                  | <i>Ca_kabuli_denovo</i> | 51491064                | C/G  | NA                 | NA                            | NA                 |
| <i>Kabuli_wild_51491068</i> | NA                                  | <i>Ca_kabuli_denovo</i> | 51491068                | A/C  | NA                 | NA                            | NA                 |
| <i>Kabuli_wild_51492359</i> | NA                                  | <i>Ca_kabuli_denovo</i> | 51492359                | G/T  | NA                 | NA                            | NA                 |
| <i>Kabuli_wild_51492397</i> | NA                                  | <i>Ca_kabuli_denovo</i> | 51492397                | G/T  | NA                 | NA                            | NA                 |
| <i>Kabuli_wild_51494971</i> | NA                                  | <i>Ca_kabuli_denovo</i> | 51494971                | A/G  | NA                 | NA                            | NA                 |
| <i>Kabuli_wild_51500497</i> | NA                                  | <i>Ca_kabuli_denovo</i> | 51500497                | A/G  | NA                 | NA                            | NA                 |
| <i>Kabuli_wild_51500536</i> | NA                                  | <i>Ca_kabuli_denovo</i> | 51500536                | A/G  | NA                 | NA                            | NA                 |
| <i>Kabuli_wild_51500545</i> | NA                                  | <i>Ca_kabuli_denovo</i> | 51500545                | A/C  | NA                 | NA                            | NA                 |
| <i>Kabuli_wild_51500549</i> | NA                                  | <i>Ca_kabuli_denovo</i> | 51500549                | A/G  | NA                 | NA                            | NA                 |
| <i>Kabuli_wild_51516392</i> | NA                                  | <i>Ca_kabuli_denovo</i> | 51516392                | G/T  | NA                 | NA                            | NA                 |
| <i>Kabuli_wild_51521619</i> | NA                                  | <i>Ca_kabuli_denovo</i> | 51521619                | A/G  | NA                 | NA                            | NA                 |
| <i>Kabuli_wild_51521629</i> | NA                                  | <i>Ca_kabuli_denovo</i> | 51521629                | A/G  | NA                 | NA                            | NA                 |
| <i>Kabuli_wild_51521631</i> | NA                                  | <i>Ca_kabuli_denovo</i> | 51521631                | A/G  | NA                 | NA                            | NA                 |
| <i>Kabuli_wild_51521654</i> | NA                                  | <i>Ca_kabuli_denovo</i> | 51521654                | A/C  | NA                 | NA                            | NA                 |
| <i>Kabuli_wild_51534089</i> | NA                                  | <i>Ca_kabuli_denovo</i> | 51534089                | A/G  | NA                 | NA                            | NA                 |
| <i>Kabuli_wild_51534714</i> | NA                                  | <i>Ca_kabuli_denovo</i> | 51534714                | C/G  | NA                 | NA                            | NA                 |
| <i>Kabuli_wild_51547703</i> | NA                                  | <i>Ca_kabuli_denovo</i> | 51547703                | G/T  | NA                 | NA                            | NA                 |
| <i>Kabuli_wild_51556361</i> | NA                                  | <i>Ca_kabuli_denovo</i> | 51556361                | A/G  | NA                 | NA                            | NA                 |
| <i>Kabuli_wild_51556365</i> | NA                                  | <i>Ca_kabuli_denovo</i> | 51556365                | A/T  | NA                 | NA                            | NA                 |
| <i>Kabuli_wild_51556406</i> | NA                                  | <i>Ca_kabuli_denovo</i> | 51556406                | C/T  | NA                 | NA                            | NA                 |
| <i>Kabuli_wild_51561442</i> | NA                                  | <i>Ca_kabuli_denovo</i> | 51561442                | G/T  | NA                 | NA                            | NA                 |
| <i>Kabuli_wild_51561489</i> | NA                                  | <i>Ca_kabuli_denovo</i> | 51561489                | A/T  | NA                 | NA                            | NA                 |
| <i>Kabuli_wild_51566907</i> | NA                                  | <i>Ca_kabuli_denovo</i> | 51566907                | G/T  | NA                 | NA                            | NA                 |
| <i>Kabuli_wild_51569246</i> | NA                                  | <i>Ca_kabuli_denovo</i> | 51569246                | A/G  | NA                 | NA                            | NA                 |
| <i>Kabuli_wild_51569252</i> | NA                                  | <i>Ca_kabuli_denovo</i> | 51569252                | G/T  | NA                 | NA                            | NA                 |
| <i>Kabuli_wild_51569263</i> | NA                                  | <i>Ca_kabuli_denovo</i> | 51569263                | C/G  | NA                 | NA                            | NA                 |
| <i>Kabuli_wild_51571283</i> | NA                                  | <i>Ca_kabuli_denovo</i> | 51571283                | A/G  | NA                 | NA                            | NA                 |
| <i>Kabuli_wild_51575323</i> | NA                                  | <i>Ca_kabuli_denovo</i> | 51575323                | A/G  | NA                 | NA                            | NA                 |
| <i>Kabuli_wild_51583003</i> | NA                                  | <i>Ca_kabuli_denovo</i> | 51583003                | A/C  | NA                 | NA                            | NA                 |
| <i>Kabuli_wild_51583331</i> | NA                                  | <i>Ca_kabuli_denovo</i> | 51583331                | A/G  | NA                 | NA                            | NA                 |
| <i>Kabuli_wild_51586544</i> | NA                                  | <i>Ca_kabuli_denovo</i> | 51586544                | C/T  | NA                 | NA                            | NA                 |
| <i>Kabuli_wild_51587843</i> | NA                                  | <i>Ca_kabuli_denovo</i> | 51587843                | C/T  | NA                 | NA                            | NA                 |
| <i>Kabuli_wild_51587852</i> | NA                                  | <i>Ca_kabuli_denovo</i> | 51587852                | A/G  | NA                 | NA                            | NA                 |
| <i>Kabuli_wild_51590045</i> | NA                                  | <i>Ca_kabuli_denovo</i> | 51590045                | A/C  | NA                 | NA                            | NA                 |
| <i>Kabuli_wild_51597117</i> | NA                                  | <i>Ca_kabuli_denovo</i> | 51597117                | A/G  | NA                 | NA                            | NA                 |
| <i>Kabuli_wild_51597118</i> | NA                                  | <i>Ca_kabuli_denovo</i> | 51597118                | A/G  | NA                 | NA                            | NA                 |
| <i>Kabuli_wild_51597140</i> | NA                                  | <i>Ca_kabuli_denovo</i> | 51597140                | A/G  | NA                 | NA                            | NA                 |
| <i>Kabuli_wild_51597148</i> | NA                                  | <i>Ca_kabuli_denovo</i> | 51597148                | C/T  | NA                 | NA                            | NA                 |
| <i>Kabuli_wild_51598979</i> | NA                                  | <i>Ca_kabuli_denovo</i> | 51598979                | C/T  | NA                 | NA                            | NA                 |
| <i>Kabuli_wild_51599027</i> | NA                                  | <i>Ca_kabuli_denovo</i> | 51599027                | C/T  | NA                 | NA                            | NA                 |
| <i>Kabuli_wild_51599791</i> | NA                                  | <i>Ca_kabuli_denovo</i> | 51599791                | A/T  | NA                 | NA                            | NA                 |

| SNP IDs              | NCBI dbSNP accession IDs (NCBI_SS#) | Chromosomes      | Physical positions (bp) | SNPs | Gene accession IDs | Sequence components of genome | Putative functions |
|----------------------|-------------------------------------|------------------|-------------------------|------|--------------------|-------------------------------|--------------------|
| Kabuli_wild_51599813 | NA                                  | Ca_kabuli_denovo | 51599813                | C/G  | NA                 | NA                            | NA                 |
| Kabuli_wild_51601753 | NA                                  | Ca_kabuli_denovo | 51601753                | A/G  | NA                 | NA                            | NA                 |
| Kabuli_wild_51607600 | NA                                  | Ca_kabuli_denovo | 51607600                | C/T  | NA                 | NA                            | NA                 |
| Kabuli_wild_51608446 | NA                                  | Ca_kabuli_denovo | 51608446                | C/T  | NA                 | NA                            | NA                 |
| Kabuli_wild_51608464 | NA                                  | Ca_kabuli_denovo | 51608464                | C/T  | NA                 | NA                            | NA                 |
| Kabuli_wild_51621481 | NA                                  | Ca_kabuli_denovo | 51621481                | C/G  | NA                 | NA                            | NA                 |
| Kabuli_wild_51621488 | NA                                  | Ca_kabuli_denovo | 51621488                | A/C  | NA                 | NA                            | NA                 |
| Kabuli_wild_51621490 | NA                                  | Ca_kabuli_denovo | 51621490                | C/T  | NA                 | NA                            | NA                 |
| Kabuli_wild_51627059 | NA                                  | Ca_kabuli_denovo | 51627059                | A/G  | NA                 | NA                            | NA                 |
| Kabuli_wild_51627063 | NA                                  | Ca_kabuli_denovo | 51627063                | C/T  | NA                 | NA                            | NA                 |
| Kabuli_wild_51636599 | NA                                  | Ca_kabuli_denovo | 51636599                | C/G  | NA                 | NA                            | NA                 |
| Kabuli_wild_51657447 | NA                                  | Ca_kabuli_denovo | 51657447                | C/G  | NA                 | NA                            | NA                 |
| Kabuli_wild_51657458 | NA                                  | Ca_kabuli_denovo | 51657458                | A/C  | NA                 | NA                            | NA                 |
| Kabuli_wild_51657464 | NA                                  | Ca_kabuli_denovo | 51657464                | C/T  | NA                 | NA                            | NA                 |
| Kabuli_wild_51678453 | NA                                  | Ca_kabuli_denovo | 51678453                | C/T  | NA                 | NA                            | NA                 |
| Kabuli_wild_51679621 | NA                                  | Ca_kabuli_denovo | 51679621                | G/T  | NA                 | NA                            | NA                 |
| Kabuli_wild_51679622 | NA                                  | Ca_kabuli_denovo | 51679622                | A/T  | NA                 | NA                            | NA                 |
| Kabuli_wild_51682502 | NA                                  | Ca_kabuli_denovo | 51682502                | C/G  | NA                 | NA                            | NA                 |
| Kabuli_wild_51682517 | NA                                  | Ca_kabuli_denovo | 51682517                | C/T  | NA                 | NA                            | NA                 |
| Kabuli_wild_51687049 | NA                                  | Ca_kabuli_denovo | 51687049                | G/T  | NA                 | NA                            | NA                 |
| Kabuli_wild_51690395 | NA                                  | Ca_kabuli_denovo | 51690395                | A/T  | NA                 | NA                            | NA                 |
| Kabuli_wild_51690409 | NA                                  | Ca_kabuli_denovo | 51690409                | A/T  | NA                 | NA                            | NA                 |
| Kabuli_wild_51696889 | NA                                  | Ca_kabuli_denovo | 51696889                | C/G  | NA                 | NA                            | NA                 |
| Kabuli_wild_51696893 | NA                                  | Ca_kabuli_denovo | 51696893                | C/G  | NA                 | NA                            | NA                 |
| Kabuli_wild_51700094 | NA                                  | Ca_kabuli_denovo | 51700094                | G/T  | NA                 | NA                            | NA                 |
| Kabuli_wild_51702365 | NA                                  | Ca_kabuli_denovo | 51702365                | G/T  | NA                 | NA                            | NA                 |
| Kabuli_wild_51704419 | NA                                  | Ca_kabuli_denovo | 51704419                | C/G  | NA                 | NA                            | NA                 |
| Kabuli_wild_51704661 | NA                                  | Ca_kabuli_denovo | 51704661                | G/T  | NA                 | NA                            | NA                 |
| Kabuli_wild_51705816 | NA                                  | Ca_kabuli_denovo | 51705816                | G/T  | NA                 | NA                            | NA                 |
| Kabuli_wild_51705818 | NA                                  | Ca_kabuli_denovo | 51705818                | A/G  | NA                 | NA                            | NA                 |
| Kabuli_wild_51707217 | NA                                  | Ca_kabuli_denovo | 51707217                | G/T  | NA                 | NA                            | NA                 |
| Kabuli_wild_51708553 | NA                                  | Ca_kabuli_denovo | 51708553                | C/T  | NA                 | NA                            | NA                 |
| Kabuli_wild_51712938 | NA                                  | Ca_kabuli_denovo | 51712938                | G/T  | NA                 | NA                            | NA                 |
| Kabuli_wild_51712993 | NA                                  | Ca_kabuli_denovo | 51712993                | C/T  | NA                 | NA                            | NA                 |
| Kabuli_wild_51716405 | NA                                  | Ca_kabuli_denovo | 51716405                | C/T  | NA                 | NA                            | NA                 |
| Kabuli_wild_51716429 | NA                                  | Ca_kabuli_denovo | 51716429                | G/T  | NA                 | NA                            | NA                 |
| Kabuli_wild_51718416 | NA                                  | Ca_kabuli_denovo | 51718416                | A/T  | NA                 | NA                            | NA                 |
| Kabuli_wild_51718432 | NA                                  | Ca_kabuli_denovo | 51718432                | G/T  | NA                 | NA                            | NA                 |
| Kabuli_wild_51718528 | NA                                  | Ca_kabuli_denovo | 51718528                | G/T  | NA                 | NA                            | NA                 |
| Kabuli_wild_51721232 | NA                                  | Ca_kabuli_denovo | 51721232                | G/T  | NA                 | NA                            | NA                 |
| Kabuli_wild_51722290 | NA                                  | Ca_kabuli_denovo | 51722290                | A/G  | NA                 | NA                            | NA                 |
| Kabuli_wild_51722321 | NA                                  | Ca_kabuli_denovo | 51722321                | A/G  | NA                 | NA                            | NA                 |
| Kabuli_wild_51722421 | NA                                  | Ca_kabuli_denovo | 51722421                | G/T  | NA                 | NA                            | NA                 |
| Kabuli_wild_51723194 | NA                                  | Ca_kabuli_denovo | 51723194                | G/T  | NA                 | NA                            | NA                 |

| SNP IDs              | NCBI dbSNP accession IDs (NCBI_SS#) | Chromosomes      | Physical positions (bp) | SNPs | Gene accession IDs | Sequence components of genome | Putative functions |
|----------------------|-------------------------------------|------------------|-------------------------|------|--------------------|-------------------------------|--------------------|
| Kabuli_wild_51726651 | NA                                  | Ca_kabuli_denovo | 51726651                | C/T  | NA                 | NA                            | NA                 |
| Kabuli_wild_51730092 | NA                                  | Ca_kabuli_denovo | 51730092                | G/T  | NA                 | NA                            | NA                 |
| Kabuli_wild_51735279 | NA                                  | Ca_kabuli_denovo | 51735279                | G/T  | NA                 | NA                            | NA                 |
| Kabuli_wild_51736061 | NA                                  | Ca_kabuli_denovo | 51736061                | A/G  | NA                 | NA                            | NA                 |
| Kabuli_wild_51736536 | NA                                  | Ca_kabuli_denovo | 51736536                | G/T  | NA                 | NA                            | NA                 |
| Kabuli_wild_51736540 | NA                                  | Ca_kabuli_denovo | 51736540                | A/C  | NA                 | NA                            | NA                 |
| Kabuli_wild_51738662 | NA                                  | Ca_kabuli_denovo | 51738662                | C/T  | NA                 | NA                            | NA                 |
| Kabuli_wild_51738689 | NA                                  | Ca_kabuli_denovo | 51738689                | C/T  | NA                 | NA                            | NA                 |
| Kabuli_wild_51739272 | NA                                  | Ca_kabuli_denovo | 51739272                | C/G  | NA                 | NA                            | NA                 |
| Kabuli_wild_51739331 | NA                                  | Ca_kabuli_denovo | 51739331                | A/G  | NA                 | NA                            | NA                 |
| Kabuli_wild_51739336 | NA                                  | Ca_kabuli_denovo | 51739336                | G/T  | NA                 | NA                            | NA                 |
| Kabuli_wild_51739337 | NA                                  | Ca_kabuli_denovo | 51739337                | C/T  | NA                 | NA                            | NA                 |
| Kabuli_wild_51739368 | NA                                  | Ca_kabuli_denovo | 51739368                | C/G  | NA                 | NA                            | NA                 |
| Kabuli_wild_51746784 | NA                                  | Ca_kabuli_denovo | 51746784                | G/T  | NA                 | NA                            | NA                 |
| Kabuli_wild_51746802 | NA                                  | Ca_kabuli_denovo | 51746802                | C/G  | NA                 | NA                            | NA                 |
| Kabuli_wild_51749528 | NA                                  | Ca_kabuli_denovo | 51749528                | A/G  | NA                 | NA                            | NA                 |
| Kabuli_wild_51749531 | NA                                  | Ca_kabuli_denovo | 51749531                | C/G  | NA                 | NA                            | NA                 |
| Kabuli_wild_51750701 | NA                                  | Ca_kabuli_denovo | 51750701                | C/T  | NA                 | NA                            | NA                 |
| Kabuli_wild_51751723 | NA                                  | Ca_kabuli_denovo | 51751723                | A/G  | NA                 | NA                            | NA                 |
| Kabuli_wild_51751736 | NA                                  | Ca_kabuli_denovo | 51751736                | C/G  | NA                 | NA                            | NA                 |
| Kabuli_wild_51751802 | NA                                  | Ca_kabuli_denovo | 51751802                | C/T  | NA                 | NA                            | NA                 |
| Kabuli_wild_51751819 | NA                                  | Ca_kabuli_denovo | 51751819                | A/G  | NA                 | NA                            | NA                 |
| Kabuli_wild_51751915 | NA                                  | Ca_kabuli_denovo | 51751915                | A/G  | NA                 | NA                            | NA                 |
| Kabuli_wild_51751922 | NA                                  | Ca_kabuli_denovo | 51751922                | A/G  | NA                 | NA                            | NA                 |
| Kabuli_wild_51751950 | NA                                  | Ca_kabuli_denovo | 51751950                | A/G  | NA                 | NA                            | NA                 |
| Kabuli_wild_51751978 | NA                                  | Ca_kabuli_denovo | 51751978                | A/G  | NA                 | NA                            | NA                 |
| Kabuli_wild_51752470 | NA                                  | Ca_kabuli_denovo | 51752470                | G/T  | NA                 | NA                            | NA                 |
| Kabuli_wild_51756121 | NA                                  | Ca_kabuli_denovo | 51756121                | G/T  | NA                 | NA                            | NA                 |
| Kabuli_wild_51758265 | NA                                  | Ca_kabuli_denovo | 51758265                | G/C  | NA                 | NA                            | NA                 |
| Kabuli_wild_51764108 | NA                                  | Ca_kabuli_denovo | 51764108                | A/G  | NA                 | NA                            | NA                 |
| Kabuli_wild_51764114 | NA                                  | Ca_kabuli_denovo | 51764114                | A/G  | NA                 | NA                            | NA                 |
| Kabuli_wild_51771691 | NA                                  | Ca_kabuli_denovo | 51771691                | A/G  | NA                 | NA                            | NA                 |
| Kabuli_wild_51771693 | NA                                  | Ca_kabuli_denovo | 51771693                | C/T  | NA                 | NA                            | NA                 |
| Kabuli_wild_51772636 | NA                                  | Ca_kabuli_denovo | 51772636                | G/T  | NA                 | NA                            | NA                 |
| Kabuli_wild_51773712 | NA                                  | Ca_kabuli_denovo | 51773712                | C/G  | NA                 | NA                            | NA                 |
| Kabuli_wild_51775561 | NA                                  | Ca_kabuli_denovo | 51775561                | C/T  | NA                 | NA                            | NA                 |
| Kabuli_wild_51776704 | NA                                  | Ca_kabuli_denovo | 51776704                | G/T  | NA                 | NA                            | NA                 |
| Kabuli_wild_51779353 | NA                                  | Ca_kabuli_denovo | 51779353                | C/G  | NA                 | NA                            | NA                 |
| Kabuli_wild_51779355 | NA                                  | Ca_kabuli_denovo | 51779355                | C/G  | NA                 | NA                            | NA                 |
| Kabuli_wild_51784068 | NA                                  | Ca_kabuli_denovo | 51784068                | G/T  | NA                 | NA                            | NA                 |
| Kabuli_wild_51785788 | NA                                  | Ca_kabuli_denovo | 51785788                | A/C  | NA                 | NA                            | NA                 |
| Kabuli_wild_51785789 | NA                                  | Ca_kabuli_denovo | 51785789                | A/G  | NA                 | NA                            | NA                 |
| Kabuli_wild_51790905 | NA                                  | Ca_kabuli_denovo | 51790905                | G/T  | NA                 | NA                            | NA                 |
| Kabuli_wild_51790906 | NA                                  | Ca_kabuli_denovo | 51790906                | A/G  | NA                 | NA                            | NA                 |

| SNP IDs              | NCBI dbSNP accession IDs (NCBI_SS#) | Chromosomes      | Physical positions (bp) | SNPs | Gene accession IDs | Sequence components of genome | Putative functions |
|----------------------|-------------------------------------|------------------|-------------------------|------|--------------------|-------------------------------|--------------------|
| Kabuli_wild_51796733 | NA                                  | Ca_kabuli_denovo | 51796733                | G/T  | NA                 | NA                            | NA                 |
| Kabuli_wild_51797035 | NA                                  | Ca_kabuli_denovo | 51797035                | C/T  | NA                 | NA                            | NA                 |
| Kabuli_wild_51800084 | NA                                  | Ca_kabuli_denovo | 51800084                | G/T  | NA                 | NA                            | NA                 |
| Kabuli_wild_51801639 | NA                                  | Ca_kabuli_denovo | 51801639                | C/T  | NA                 | NA                            | NA                 |
| Kabuli_wild_51802973 | NA                                  | Ca_kabuli_denovo | 51802973                | A/G  | NA                 | NA                            | NA                 |
| Kabuli_wild_51803844 | NA                                  | Ca_kabuli_denovo | 51803844                | A/G  | NA                 | NA                            | NA                 |
| Kabuli_wild_51803853 | NA                                  | Ca_kabuli_denovo | 51803853                | A/G  | NA                 | NA                            | NA                 |
| Kabuli_wild_51803889 | NA                                  | Ca_kabuli_denovo | 51803889                | C/G  | NA                 | NA                            | NA                 |
| Kabuli_wild_51804721 | NA                                  | Ca_kabuli_denovo | 51804721                | C/G  | NA                 | NA                            | NA                 |
| Kabuli_wild_51804740 | NA                                  | Ca_kabuli_denovo | 51804740                | A/G  | NA                 | NA                            | NA                 |
| Kabuli_wild_51805940 | NA                                  | Ca_kabuli_denovo | 51805940                | G/T  | NA                 | NA                            | NA                 |
| Kabuli_wild_51807999 | NA                                  | Ca_kabuli_denovo | 51807999                | A/G  | NA                 | NA                            | NA                 |
| Kabuli_wild_51841681 | NA                                  | Ca_kabuli_denovo | 51841681                | A/C  | NA                 | NA                            | NA                 |
| Kabuli_wild_51848861 | NA                                  | Ca_kabuli_denovo | 51848861                | A/C  | NA                 | NA                            | NA                 |
| Kabuli_wild_51854218 | NA                                  | Ca_kabuli_denovo | 51854218                | A/G  | NA                 | NA                            | NA                 |
| Kabuli_wild_51854219 | NA                                  | Ca_kabuli_denovo | 51854219                | A/G  | NA                 | NA                            | NA                 |
| Kabuli_wild_51861663 | NA                                  | Ca_kabuli_denovo | 51861663                | G/T  | NA                 | NA                            | NA                 |
| Kabuli_wild_51861668 | NA                                  | Ca_kabuli_denovo | 51861668                | G/T  | NA                 | NA                            | NA                 |
| Kabuli_wild_51862809 | NA                                  | Ca_kabuli_denovo | 51862809                | C/T  | NA                 | NA                            | NA                 |
| Kabuli_wild_51862849 | NA                                  | Ca_kabuli_denovo | 51862849                | A/T  | NA                 | NA                            | NA                 |
| Kabuli_wild_51886632 | NA                                  | Ca_kabuli_denovo | 51886632                | C/T  | NA                 | NA                            | NA                 |
| Kabuli_wild_51886683 | NA                                  | Ca_kabuli_denovo | 51886683                | A/C  | NA                 | NA                            | NA                 |
| Kabuli_wild_51886684 | NA                                  | Ca_kabuli_denovo | 51886684                | C/G  | NA                 | NA                            | NA                 |
| Kabuli_wild_51886685 | NA                                  | Ca_kabuli_denovo | 51886685                | A/C  | NA                 | NA                            | NA                 |
| Kabuli_wild_51906015 | NA                                  | Ca_kabuli_denovo | 51906015                | A/T  | NA                 | NA                            | NA                 |
| Kabuli_wild_51909398 | NA                                  | Ca_kabuli_denovo | 51909398                | C/T  | NA                 | NA                            | NA                 |
| Kabuli_wild_51909403 | NA                                  | Ca_kabuli_denovo | 51909403                | A/G  | NA                 | NA                            | NA                 |
| Kabuli_wild_51915190 | NA                                  | Ca_kabuli_denovo | 51915190                | G/T  | NA                 | NA                            | NA                 |
| Kabuli_wild_51927981 | NA                                  | Ca_kabuli_denovo | 51927981                | C/G  | NA                 | NA                            | NA                 |
| Kabuli_wild_51928014 | NA                                  | Ca_kabuli_denovo | 51928014                | A/G  | NA                 | NA                            | NA                 |
| Kabuli_wild_51928035 | NA                                  | Ca_kabuli_denovo | 51928035                | A/G  | NA                 | NA                            | NA                 |
| Kabuli_wild_51928798 | NA                                  | Ca_kabuli_denovo | 51928798                | G/T  | NA                 | NA                            | NA                 |
| Kabuli_wild_51947267 | NA                                  | Ca_kabuli_denovo | 51947267                | G/T  | NA                 | NA                            | NA                 |
| Kabuli_wild_51947285 | NA                                  | Ca_kabuli_denovo | 51947285                | C/T  | NA                 | NA                            | NA                 |
| Kabuli_wild_51947291 | NA                                  | Ca_kabuli_denovo | 51947291                | A/G  | NA                 | NA                            | NA                 |
| Kabuli_wild_51947300 | NA                                  | Ca_kabuli_denovo | 51947300                | C/T  | NA                 | NA                            | NA                 |
| Kabuli_wild_51951233 | NA                                  | Ca_kabuli_denovo | 51951233                | C/T  | NA                 | NA                            | NA                 |
| Kabuli_wild_51959450 | NA                                  | Ca_kabuli_denovo | 51959450                | G/T  | NA                 | NA                            | NA                 |
| Kabuli_wild_51961757 | NA                                  | Ca_kabuli_denovo | 51961757                | G/T  | NA                 | NA                            | NA                 |
| Kabuli_wild_51962259 | NA                                  | Ca_kabuli_denovo | 51962259                | C/T  | NA                 | NA                            | NA                 |
| Kabuli_wild_51979176 | NA                                  | Ca_kabuli_denovo | 51979176                | G/T  | NA                 | NA                            | NA                 |
| Kabuli_wild_51989664 | NA                                  | Ca_kabuli_denovo | 51989664                | C/T  | NA                 | NA                            | NA                 |
| Kabuli_wild_51990706 | NA                                  | Ca_kabuli_denovo | 51990706                | G/T  | NA                 | NA                            | NA                 |
| Kabuli_wild_51993336 | NA                                  | Ca_kabuli_denovo | 51993336                | G/T  | NA                 | NA                            | NA                 |

| SNP IDs              | NCBI dbSNP accession IDs (NCBI_SS#) | Chromosomes      | Physical positions (bp) | SNPs | Gene accession IDs | Sequence components of genome | Putative functions |
|----------------------|-------------------------------------|------------------|-------------------------|------|--------------------|-------------------------------|--------------------|
| Kabuli_wild_51999627 | NA                                  | Ca_kabuli_denovo | 51999627                | G/T  | NA                 | NA                            | NA                 |
| Kabuli_wild_52000753 | NA                                  | Ca_kabuli_denovo | 52000753                | A/G  | NA                 | NA                            | NA                 |
| Kabuli_wild_52000767 | NA                                  | Ca_kabuli_denovo | 52000767                | A/G  | NA                 | NA                            | NA                 |
| Kabuli_wild_52015718 | NA                                  | Ca_kabuli_denovo | 52015718                | A/T  | NA                 | NA                            | NA                 |
| Kabuli_wild_52015770 | NA                                  | Ca_kabuli_denovo | 52015770                | A/G  | NA                 | NA                            | NA                 |
| Kabuli_wild_52015776 | NA                                  | Ca_kabuli_denovo | 52015776                | G/T  | NA                 | NA                            | NA                 |
| Kabuli_wild_52015787 | NA                                  | Ca_kabuli_denovo | 52015787                | C/T  | NA                 | NA                            | NA                 |
| Kabuli_wild_52022414 | NA                                  | Ca_kabuli_denovo | 52022414                | C/T  | NA                 | NA                            | NA                 |
| Kabuli_wild_52048844 | NA                                  | Ca_kabuli_denovo | 52048844                | C/G  | NA                 | NA                            | NA                 |
| Kabuli_wild_52048865 | NA                                  | Ca_kabuli_denovo | 52048865                | C/G  | NA                 | NA                            | NA                 |
| Kabuli_wild_52051356 | NA                                  | Ca_kabuli_denovo | 52051356                | A/T  | NA                 | NA                            | NA                 |
| Kabuli_wild_52051408 | NA                                  | Ca_kabuli_denovo | 52051408                | C/T  | NA                 | NA                            | NA                 |
| Kabuli_wild_52063854 | NA                                  | Ca_kabuli_denovo | 52063854                | A/T  | NA                 | NA                            | NA                 |
| Kabuli_wild_52069111 | NA                                  | Ca_kabuli_denovo | 52069111                | G/T  | NA                 | NA                            | NA                 |
| Kabuli_wild_52074429 | NA                                  | Ca_kabuli_denovo | 52074429                | C/T  | NA                 | NA                            | NA                 |
| Kabuli_wild_52082339 | NA                                  | Ca_kabuli_denovo | 52082339                | A/C  | NA                 | NA                            | NA                 |
| Kabuli_wild_52082340 | NA                                  | Ca_kabuli_denovo | 52082340                | A/T  | NA                 | NA                            | NA                 |
| Kabuli_wild_52082356 | NA                                  | Ca_kabuli_denovo | 52082356                | C/G  | NA                 | NA                            | NA                 |
| Kabuli_wild_52082365 | NA                                  | Ca_kabuli_denovo | 52082365                | A/C  | NA                 | NA                            | NA                 |
| Kabuli_wild_52082390 | NA                                  | Ca_kabuli_denovo | 52082390                | A/G  | NA                 | NA                            | NA                 |
| Kabuli_wild_52083597 | NA                                  | Ca_kabuli_denovo | 52083597                | A/G  | NA                 | NA                            | NA                 |
| Kabuli_wild_52083816 | NA                                  | Ca_kabuli_denovo | 52083816                | G/T  | NA                 | NA                            | NA                 |
| Kabuli_wild_52083864 | NA                                  | Ca_kabuli_denovo | 52083864                | G/T  | NA                 | NA                            | NA                 |
| Kabuli_wild_52088093 | NA                                  | Ca_kabuli_denovo | 52088093                | A/C  | NA                 | NA                            | NA                 |
| Kabuli_wild_52107299 | NA                                  | Ca_kabuli_denovo | 52107299                | C/G  | NA                 | NA                            | NA                 |
| Kabuli_wild_52111883 | NA                                  | Ca_kabuli_denovo | 52111883                | G/T  | NA                 | NA                            | NA                 |
| Kabuli_wild_52115486 | NA                                  | Ca_kabuli_denovo | 52115486                | G/T  | NA                 | NA                            | NA                 |
| Kabuli_wild_52127267 | NA                                  | Ca_kabuli_denovo | 52127267                | C/G  | NA                 | NA                            | NA                 |
| Kabuli_wild_52127279 | NA                                  | Ca_kabuli_denovo | 52127279                | C/G  | NA                 | NA                            | NA                 |
| Kabuli_wild_52135203 | NA                                  | Ca_kabuli_denovo | 52135203                | C/T  | NA                 | NA                            | NA                 |
| Kabuli_wild_52155382 | NA                                  | Ca_kabuli_denovo | 52155382                | G/T  | NA                 | NA                            | NA                 |
| Kabuli_wild_52155683 | NA                                  | Ca_kabuli_denovo | 52155683                | C/G  | NA                 | NA                            | NA                 |
| Kabuli_wild_52158190 | NA                                  | Ca_kabuli_denovo | 52158190                | C/T  | NA                 | NA                            | NA                 |
| Kabuli_wild_52158211 | NA                                  | Ca_kabuli_denovo | 52158211                | C/T  | NA                 | NA                            | NA                 |
| Kabuli_wild_52166520 | NA                                  | Ca_kabuli_denovo | 52166520                | A/C  | NA                 | NA                            | NA                 |
| Kabuli_wild_52168472 | NA                                  | Ca_kabuli_denovo | 52168472                | C/T  | NA                 | NA                            | NA                 |
| Kabuli_wild_52174962 | NA                                  | Ca_kabuli_denovo | 52174962                | G/T  | NA                 | NA                            | NA                 |
| Kabuli_wild_52177326 | NA                                  | Ca_kabuli_denovo | 52177326                | G/T  | NA                 | NA                            | NA                 |
| Kabuli_wild_52179499 | NA                                  | Ca_kabuli_denovo | 52179499                | C/T  | NA                 | NA                            | NA                 |
| Kabuli_wild_52185037 | NA                                  | Ca_kabuli_denovo | 52185037                | C/T  | NA                 | NA                            | NA                 |
| Kabuli_wild_52203593 | NA                                  | Ca_kabuli_denovo | 52203593                | C/T  | NA                 | NA                            | NA                 |
| Kabuli_wild_52203598 | NA                                  | Ca_kabuli_denovo | 52203598                | C/T  | NA                 | NA                            | NA                 |
| Kabuli_wild_52203771 | NA                                  | Ca_kabuli_denovo | 52203771                | A/C  | NA                 | NA                            | NA                 |
| Kabuli_wild_52209128 | NA                                  | Ca_kabuli_denovo | 52209128                | A/G  | NA                 | NA                            | NA                 |

| SNP IDs              | NCBI dbSNP accession IDs (NCBI_SS#) | Chromosomes      | Physical positions (bp) | SNPs | Gene accession IDs | Sequence components of genome | Putative functions |
|----------------------|-------------------------------------|------------------|-------------------------|------|--------------------|-------------------------------|--------------------|
| Kabuli_wild_52210393 | NA                                  | Ca_kabuli_denovo | 52210393                | A/C  | NA                 | NA                            | NA                 |
| Kabuli_wild_52216773 | NA                                  | Ca_kabuli_denovo | 52216773                | C/T  | NA                 | NA                            | NA                 |
| Kabuli_wild_52216780 | NA                                  | Ca_kabuli_denovo | 52216780                | A/G  | NA                 | NA                            | NA                 |
| Kabuli_wild_52230169 | NA                                  | Ca_kabuli_denovo | 52230169                | C/G  | NA                 | NA                            | NA                 |
| Kabuli_wild_52232476 | NA                                  | Ca_kabuli_denovo | 52232476                | G/T  | NA                 | NA                            | NA                 |
| Kabuli_wild_52234491 | NA                                  | Ca_kabuli_denovo | 52234491                | A/C  | NA                 | NA                            | NA                 |
| Kabuli_wild_52239499 | NA                                  | Ca_kabuli_denovo | 52239499                | C/G  | NA                 | NA                            | NA                 |
| Kabuli_wild_52239537 | NA                                  | Ca_kabuli_denovo | 52239537                | C/T  | NA                 | NA                            | NA                 |
| Kabuli_wild_52243797 | NA                                  | Ca_kabuli_denovo | 52243797                | A/T  | NA                 | NA                            | NA                 |
| Kabuli_wild_52244331 | NA                                  | Ca_kabuli_denovo | 52244331                | C/T  | NA                 | NA                            | NA                 |
| Kabuli_wild_52249465 | NA                                  | Ca_kabuli_denovo | 52249465                | A/G  | NA                 | NA                            | NA                 |
| Kabuli_wild_52252949 | NA                                  | Ca_kabuli_denovo | 52252949                | A/G  | NA                 | NA                            | NA                 |
| Kabuli_wild_52252966 | NA                                  | Ca_kabuli_denovo | 52252966                | C/T  | NA                 | NA                            | NA                 |
| Kabuli_wild_52256704 | NA                                  | Ca_kabuli_denovo | 52256704                | A/G  | NA                 | NA                            | NA                 |
| Kabuli_wild_52257064 | NA                                  | Ca_kabuli_denovo | 52257064                | A/G  | NA                 | NA                            | NA                 |
| Kabuli_wild_52257086 | NA                                  | Ca_kabuli_denovo | 52257086                | C/T  | NA                 | NA                            | NA                 |
| Kabuli_wild_52257087 | NA                                  | Ca_kabuli_denovo | 52257087                | A/C  | NA                 | NA                            | NA                 |
| Kabuli_wild_52259165 | NA                                  | Ca_kabuli_denovo | 52259165                | A/G  | NA                 | NA                            | NA                 |
| Kabuli_wild_52266051 | NA                                  | Ca_kabuli_denovo | 52266051                | C/T  | NA                 | NA                            | NA                 |
| Kabuli_wild_52275284 | NA                                  | Ca_kabuli_denovo | 52275284                | A/C  | NA                 | NA                            | NA                 |
| Kabuli_wild_52279419 | NA                                  | Ca_kabuli_denovo | 52279419                | G/T  | NA                 | NA                            | NA                 |
| Kabuli_wild_52279578 | NA                                  | Ca_kabuli_denovo | 52279578                | A/G  | NA                 | NA                            | NA                 |
| Kabuli_wild_52279602 | NA                                  | Ca_kabuli_denovo | 52279602                | C/T  | NA                 | NA                            | NA                 |
| Kabuli_wild_52279608 | NA                                  | Ca_kabuli_denovo | 52279608                | A/G  | NA                 | NA                            | NA                 |
| Kabuli_wild_52279611 | NA                                  | Ca_kabuli_denovo | 52279611                | C/T  | NA                 | NA                            | NA                 |
| Kabuli_wild_52290449 | NA                                  | Ca_kabuli_denovo | 52290449                | G/T  | NA                 | NA                            | NA                 |
| Kabuli_wild_52292897 | NA                                  | Ca_kabuli_denovo | 52292897                | C/T  | NA                 | NA                            | NA                 |
| Kabuli_wild_52299211 | NA                                  | Ca_kabuli_denovo | 52299211                | A/G  | NA                 | NA                            | NA                 |
| Kabuli_wild_52299238 | NA                                  | Ca_kabuli_denovo | 52299238                | C/T  | NA                 | NA                            | NA                 |
| Kabuli_wild_52316396 | NA                                  | Ca_kabuli_denovo | 52316396                | C/G  | NA                 | NA                            | NA                 |
| Kabuli_wild_52320015 | NA                                  | Ca_kabuli_denovo | 52320015                | G/T  | NA                 | NA                            | NA                 |
| Kabuli_wild_52320218 | NA                                  | Ca_kabuli_denovo | 52320218                | A/C  | NA                 | NA                            | NA                 |
| Kabuli_wild_52330347 | NA                                  | Ca_kabuli_denovo | 52330347                | G/T  | NA                 | NA                            | NA                 |
| Kabuli_wild_52334345 | NA                                  | Ca_kabuli_denovo | 52334345                | G/A  | NA                 | NA                            | NA                 |
| Kabuli_wild_52334368 | NA                                  | Ca_kabuli_denovo | 52334368                | C/A  | NA                 | NA                            | NA                 |
| Kabuli_wild_52349762 | NA                                  | Ca_kabuli_denovo | 52349762                | A/G  | NA                 | NA                            | NA                 |
| Kabuli_wild_52352225 | NA                                  | Ca_kabuli_denovo | 52352225                | G/T  | NA                 | NA                            | NA                 |
| Kabuli_wild_52361848 | NA                                  | Ca_kabuli_denovo | 52361848                | A/G  | NA                 | NA                            | NA                 |
| Kabuli_wild_52375995 | NA                                  | Ca_kabuli_denovo | 52375995                | C/G  | NA                 | NA                            | NA                 |
| Kabuli_wild_52375996 | NA                                  | Ca_kabuli_denovo | 52375996                | A/C  | NA                 | NA                            | NA                 |
| Kabuli_wild_52391907 | NA                                  | Ca_kabuli_denovo | 52391907                | G/T  | NA                 | NA                            | NA                 |
| Kabuli_wild_52397616 | NA                                  | Ca_kabuli_denovo | 52397616                | C/T  | NA                 | NA                            | NA                 |
| Kabuli_wild_52403771 | NA                                  | Ca_kabuli_denovo | 52403771                | G/T  | NA                 | NA                            | NA                 |
| Kabuli_wild_52404924 | NA                                  | Ca_kabuli_denovo | 52404924                | C/G  | NA                 | NA                            | NA                 |

| SNP IDs              | NCBI dbSNP accession IDs (NCBI_SS#) | Chromosomes      | Physical positions (bp) | SNPs | Gene accession IDs | Sequence components of genome | Putative functions |
|----------------------|-------------------------------------|------------------|-------------------------|------|--------------------|-------------------------------|--------------------|
| Kabuli_wild_52404925 | NA                                  | Ca_kabuli_denovo | 52404925                | A/G  | NA                 | NA                            | NA                 |
| Kabuli_wild_52405039 | NA                                  | Ca_kabuli_denovo | 52405039                | C/G  | NA                 | NA                            | NA                 |
| Kabuli_wild_52412394 | NA                                  | Ca_kabuli_denovo | 52412394                | A/T  | NA                 | NA                            | NA                 |
| Kabuli_wild_52412446 | NA                                  | Ca_kabuli_denovo | 52412446                | A/G  | NA                 | NA                            | NA                 |
| Kabuli_wild_52424381 | NA                                  | Ca_kabuli_denovo | 52424381                | G/T  | NA                 | NA                            | NA                 |
| Kabuli_wild_52436892 | NA                                  | Ca_kabuli_denovo | 52436892                | A/G  | NA                 | NA                            | NA                 |
| Kabuli_wild_52437651 | NA                                  | Ca_kabuli_denovo | 52437651                | A/G  | NA                 | NA                            | NA                 |
| Kabuli_wild_52468060 | NA                                  | Ca_kabuli_denovo | 52468060                | A/G  | NA                 | NA                            | NA                 |
| Kabuli_wild_52471931 | NA                                  | Ca_kabuli_denovo | 52471931                | A/G  | NA                 | NA                            | NA                 |
| Kabuli_wild_52471997 | NA                                  | Ca_kabuli_denovo | 52471997                | C/T  | NA                 | NA                            | NA                 |
| Kabuli_wild_52483828 | NA                                  | Ca_kabuli_denovo | 52483828                | C/T  | NA                 | NA                            | NA                 |
| Kabuli_wild_52487675 | NA                                  | Ca_kabuli_denovo | 52487675                | C/T  | NA                 | NA                            | NA                 |
| Kabuli_wild_52487685 | NA                                  | Ca_kabuli_denovo | 52487685                | A/C  | NA                 | NA                            | NA                 |
| Kabuli_wild_52490445 | NA                                  | Ca_kabuli_denovo | 52490445                | C/G  | NA                 | NA                            | NA                 |
| Kabuli_wild_52493804 | NA                                  | Ca_kabuli_denovo | 52493804                | C/T  | NA                 | NA                            | NA                 |
| Kabuli_wild_52493828 | NA                                  | Ca_kabuli_denovo | 52493828                | C/G  | NA                 | NA                            | NA                 |
| Kabuli_wild_52503225 | NA                                  | Ca_kabuli_denovo | 52503225                | A/C  | NA                 | NA                            | NA                 |
| Kabuli_wild_52504351 | NA                                  | Ca_kabuli_denovo | 52504351                | A/T  | NA                 | NA                            | NA                 |
| Kabuli_wild_52504395 | NA                                  | Ca_kabuli_denovo | 52504395                | C/G  | NA                 | NA                            | NA                 |
| Kabuli_wild_52506448 | NA                                  | Ca_kabuli_denovo | 52506448                | G/T  | NA                 | NA                            | NA                 |
| Kabuli_wild_52506668 | NA                                  | Ca_kabuli_denovo | 52506668                | A/G  | NA                 | NA                            | NA                 |
| Kabuli_wild_52507613 | NA                                  | Ca_kabuli_denovo | 52507613                | A/T  | NA                 | NA                            | NA                 |
| Kabuli_wild_52510259 | NA                                  | Ca_kabuli_denovo | 52510259                | C/T  | NA                 | NA                            | NA                 |
| Kabuli_wild_52510355 | NA                                  | Ca_kabuli_denovo | 52510355                | C/T  | NA                 | NA                            | NA                 |
| Kabuli_wild_52512915 | NA                                  | Ca_kabuli_denovo | 52512915                | C/T  | NA                 | NA                            | NA                 |
| Kabuli_wild_52512947 | NA                                  | Ca_kabuli_denovo | 52512947                | C/T  | NA                 | NA                            | NA                 |
| Kabuli_wild_52515904 | NA                                  | Ca_kabuli_denovo | 52515904                | C/T  | NA                 | NA                            | NA                 |
| Kabuli_wild_52515919 | NA                                  | Ca_kabuli_denovo | 52515919                | C/T  | NA                 | NA                            | NA                 |
| Kabuli_wild_52524690 | NA                                  | Ca_kabuli_denovo | 52524690                | G/T  | NA                 | NA                            | NA                 |
| Kabuli_wild_52527250 | NA                                  | Ca_kabuli_denovo | 52527250                | G/T  | NA                 | NA                            | NA                 |
| Kabuli_wild_52537485 | NA                                  | Ca_kabuli_denovo | 52537485                | A/G  | NA                 | NA                            | NA                 |
| Kabuli_wild_52537493 | NA                                  | Ca_kabuli_denovo | 52537493                | C/T  | NA                 | NA                            | NA                 |
| Kabuli_wild_52557591 | NA                                  | Ca_kabuli_denovo | 52557591                | A/G  | NA                 | NA                            | NA                 |
| Kabuli_wild_52557619 | NA                                  | Ca_kabuli_denovo | 52557619                | C/T  | NA                 | NA                            | NA                 |
| Kabuli_wild_52559843 | NA                                  | Ca_kabuli_denovo | 52559843                | C/G  | NA                 | NA                            | NA                 |
| Kabuli_wild_52561293 | NA                                  | Ca_kabuli_denovo | 52561293                | C/T  | NA                 | NA                            | NA                 |
| Kabuli_wild_52561353 | NA                                  | Ca_kabuli_denovo | 52561353                | C/T  | NA                 | NA                            | NA                 |
| Kabuli_wild_52568762 | NA                                  | Ca_kabuli_denovo | 52568762                | G/T  | NA                 | NA                            | NA                 |
| Kabuli_wild_52569156 | NA                                  | Ca_kabuli_denovo | 52569156                | A/G  | NA                 | NA                            | NA                 |
| Kabuli_wild_52569186 | NA                                  | Ca_kabuli_denovo | 52569186                | A/G  | NA                 | NA                            | NA                 |
| Kabuli_wild_52569355 | NA                                  | Ca_kabuli_denovo | 52569355                | A/C  | NA                 | NA                            | NA                 |
| Kabuli_wild_52584462 | NA                                  | Ca_kabuli_denovo | 52584462                | G/T  | NA                 | NA                            | NA                 |
| Kabuli_wild_52585394 | NA                                  | Ca_kabuli_denovo | 52585394                | G/T  | NA                 | NA                            | NA                 |
| Kabuli_wild_52585423 | NA                                  | Ca_kabuli_denovo | 52585423                | C/T  | NA                 | NA                            | NA                 |

| SNP IDs              | NCBI dbSNP accession IDs (NCBI_SS#) | Chromosomes      | Physical positions (bp) | SNPs | Gene accession IDs | Sequence components of genome | Putative functions |
|----------------------|-------------------------------------|------------------|-------------------------|------|--------------------|-------------------------------|--------------------|
| Kabuli_wild_52591337 | NA                                  | Ca_kabuli_denovo | 52591337                | A/G  | NA                 | NA                            | NA                 |
| Kabuli_wild_52591352 | NA                                  | Ca_kabuli_denovo | 52591352                | A/T  | NA                 | NA                            | NA                 |
| Kabuli_wild_52611609 | NA                                  | Ca_kabuli_denovo | 52611609                | C/G  | NA                 | NA                            | NA                 |
| Kabuli_wild_52611615 | NA                                  | Ca_kabuli_denovo | 52611615                | A/G  | NA                 | NA                            | NA                 |
| Kabuli_wild_52611641 | NA                                  | Ca_kabuli_denovo | 52611641                | C/T  | NA                 | NA                            | NA                 |
| Kabuli_wild_52613224 | NA                                  | Ca_kabuli_denovo | 52613224                | A/G  | NA                 | NA                            | NA                 |
| Kabuli_wild_52622001 | NA                                  | Ca_kabuli_denovo | 52622001                | A/C  | NA                 | NA                            | NA                 |
| Kabuli_wild_52622002 | NA                                  | Ca_kabuli_denovo | 52622002                | A/T  | NA                 | NA                            | NA                 |
| Kabuli_wild_52623981 | NA                                  | Ca_kabuli_denovo | 52623981                | A/G  | NA                 | NA                            | NA                 |
| Kabuli_wild_52624060 | NA                                  | Ca_kabuli_denovo | 52624060                | A/T  | NA                 | NA                            | NA                 |
| Kabuli_wild_52632743 | NA                                  | Ca_kabuli_denovo | 52632743                | G/A  | NA                 | NA                            | NA                 |
| Kabuli_wild_52634813 | NA                                  | Ca_kabuli_denovo | 52634813                | A/C  | NA                 | NA                            | NA                 |
| Kabuli_wild_52640093 | NA                                  | Ca_kabuli_denovo | 52640093                | A/C  | NA                 | NA                            | NA                 |
| Kabuli_wild_52654611 | NA                                  | Ca_kabuli_denovo | 52654611                | A/G  | NA                 | NA                            | NA                 |
| Kabuli_wild_52654617 | NA                                  | Ca_kabuli_denovo | 52654617                | A/G  | NA                 | NA                            | NA                 |
| Kabuli_wild_52658052 | NA                                  | Ca_kabuli_denovo | 52658052                | C/T  | NA                 | NA                            | NA                 |
| Kabuli_wild_52661690 | NA                                  | Ca_kabuli_denovo | 52661690                | G/T  | NA                 | NA                            | NA                 |
| Kabuli_wild_52664781 | NA                                  | Ca_kabuli_denovo | 52664781                | A/C  | NA                 | NA                            | NA                 |
| Kabuli_wild_52664786 | NA                                  | Ca_kabuli_denovo | 52664786                | A/C  | NA                 | NA                            | NA                 |
| Kabuli_wild_52667293 | NA                                  | Ca_kabuli_denovo | 52667293                | C/T  | NA                 | NA                            | NA                 |
| Kabuli_wild_52667344 | NA                                  | Ca_kabuli_denovo | 52667344                | A/G  | NA                 | NA                            | NA                 |
| Kabuli_wild_52668437 | NA                                  | Ca_kabuli_denovo | 52668437                | C/T  | NA                 | NA                            | NA                 |
| Kabuli_wild_52674642 | NA                                  | Ca_kabuli_denovo | 52674642                | A/T  | NA                 | NA                            | NA                 |
| Kabuli_wild_52674668 | NA                                  | Ca_kabuli_denovo | 52674668                | A/T  | NA                 | NA                            | NA                 |
| Kabuli_wild_52675760 | NA                                  | Ca_kabuli_denovo | 52675760                | G/T  | NA                 | NA                            | NA                 |
| Kabuli_wild_52675995 | NA                                  | Ca_kabuli_denovo | 52675995                | G/T  | NA                 | NA                            | NA                 |
| Kabuli_wild_52683905 | NA                                  | Ca_kabuli_denovo | 52683905                | C/G  | NA                 | NA                            | NA                 |
| Kabuli_wild_52686587 | NA                                  | Ca_kabuli_denovo | 52686587                | A/G  | NA                 | NA                            | NA                 |
| Kabuli_wild_52686617 | NA                                  | Ca_kabuli_denovo | 52686617                | C/T  | NA                 | NA                            | NA                 |
| Kabuli_wild_52686632 | NA                                  | Ca_kabuli_denovo | 52686632                | C/T  | NA                 | NA                            | NA                 |
| Kabuli_wild_52699517 | NA                                  | Ca_kabuli_denovo | 52699517                | A/C  | NA                 | NA                            | NA                 |
| Kabuli_wild_52699539 | NA                                  | Ca_kabuli_denovo | 52699539                | G/T  | NA                 | NA                            | NA                 |
| Kabuli_wild_52699554 | NA                                  | Ca_kabuli_denovo | 52699554                | A/G  | NA                 | NA                            | NA                 |
| Kabuli_wild_52699560 | NA                                  | Ca_kabuli_denovo | 52699560                | A/T  | NA                 | NA                            | NA                 |
| Kabuli_wild_52699818 | NA                                  | Ca_kabuli_denovo | 52699818                | A/G  | NA                 | NA                            | NA                 |
| Kabuli_wild_52703545 | NA                                  | Ca_kabuli_denovo | 52703545                | C/G  | NA                 | NA                            | NA                 |
| Kabuli_wild_52709239 | NA                                  | Ca_kabuli_denovo | 52709239                | G/T  | NA                 | NA                            | NA                 |
| Kabuli_wild_52709242 | NA                                  | Ca_kabuli_denovo | 52709242                | C/T  | NA                 | NA                            | NA                 |
| Kabuli_wild_52710071 | NA                                  | Ca_kabuli_denovo | 52710071                | G/T  | NA                 | NA                            | NA                 |
| Kabuli_wild_52710077 | NA                                  | Ca_kabuli_denovo | 52710077                | A/C  | NA                 | NA                            | NA                 |
| Kabuli_wild_52713263 | NA                                  | Ca_kabuli_denovo | 52713263                | A/C  | NA                 | NA                            | NA                 |
| Kabuli_wild_52714718 | NA                                  | Ca_kabuli_denovo | 52714718                | C/T  | NA                 | NA                            | NA                 |
| Kabuli_wild_52714744 | NA                                  | Ca_kabuli_denovo | 52714744                | A/G  | NA                 | NA                            | NA                 |
| Kabuli_wild_52714757 | NA                                  | Ca_kabuli_denovo | 52714757                | G/T  | NA                 | NA                            | NA                 |



| SNP IDs              | NCBI dbSNP accession IDs (NCBI_SS#) | Chromosomes      | Physical positions (bp) | SNPs | Gene accession IDs | Sequence components of genome | Putative functions |
|----------------------|-------------------------------------|------------------|-------------------------|------|--------------------|-------------------------------|--------------------|
| Kabuli_wild_52718489 | NA                                  | Ca_kabuli_denovo | 52718489                | C/G  | NA                 | NA                            | NA                 |
| Kabuli_wild_52720016 | NA                                  | Ca_kabuli_denovo | 52720016                | G/T  | NA                 | NA                            | NA                 |
| Kabuli_wild_52720632 | NA                                  | Ca_kabuli_denovo | 52720632                | C/G  | NA                 | NA                            | NA                 |
| Kabuli_wild_52722221 | NA                                  | Ca_kabuli_denovo | 52722221                | C/G  | NA                 | NA                            | NA                 |
| Kabuli_wild_52727751 | NA                                  | Ca_kabuli_denovo | 52727751                | A/G  | NA                 | NA                            | NA                 |
| Kabuli_wild_52728236 | NA                                  | Ca_kabuli_denovo | 52728236                | A/G  | NA                 | NA                            | NA                 |
| Kabuli_wild_52733828 | NA                                  | Ca_kabuli_denovo | 52733828                | C/G  | NA                 | NA                            | NA                 |
| Kabuli_wild_52735875 | NA                                  | Ca_kabuli_denovo | 52735875                | A/G  | NA                 | NA                            | NA                 |
| Kabuli_wild_52735896 | NA                                  | Ca_kabuli_denovo | 52735896                | C/G  | NA                 | NA                            | NA                 |
| Kabuli_wild_52737360 | NA                                  | Ca_kabuli_denovo | 52737360                | C/G  | NA                 | NA                            | NA                 |
| Kabuli_wild_52740266 | NA                                  | Ca_kabuli_denovo | 52740266                | G/T  | NA                 | NA                            | NA                 |
| Kabuli_wild_52744786 | NA                                  | Ca_kabuli_denovo | 52744786                | C/T  | NA                 | NA                            | NA                 |
| Kabuli_wild_52755440 | NA                                  | Ca_kabuli_denovo | 52755440                | G/T  | NA                 | NA                            | NA                 |
| Kabuli_wild_52758075 | NA                                  | Ca_kabuli_denovo | 52758075                | C/G  | NA                 | NA                            | NA                 |
| Kabuli_wild_52763829 | NA                                  | Ca_kabuli_denovo | 52763829                | G/T  | NA                 | NA                            | NA                 |
| Kabuli_wild_52768156 | NA                                  | Ca_kabuli_denovo | 52768156                | G/T  | NA                 | NA                            | NA                 |
| Kabuli_wild_52776804 | NA                                  | Ca_kabuli_denovo | 52776804                | G/T  | NA                 | NA                            | NA                 |
| Kabuli_wild_52776815 | NA                                  | Ca_kabuli_denovo | 52776815                | G/T  | NA                 | NA                            | NA                 |
| Kabuli_wild_52788377 | NA                                  | Ca_kabuli_denovo | 52788377                | G/T  | NA                 | NA                            | NA                 |
| Kabuli_wild_52791851 | NA                                  | Ca_kabuli_denovo | 52791851                | G/T  | NA                 | NA                            | NA                 |
| Kabuli_wild_52794804 | NA                                  | Ca_kabuli_denovo | 52794804                | C/T  | NA                 | NA                            | NA                 |
| Kabuli_wild_52798781 | NA                                  | Ca_kabuli_denovo | 52798781                | G/T  | NA                 | NA                            | NA                 |
| Kabuli_wild_52804317 | NA                                  | Ca_kabuli_denovo | 52804317                | A/C  | NA                 | NA                            | NA                 |
| Kabuli_wild_52804632 | NA                                  | Ca_kabuli_denovo | 52804632                | A/G  | NA                 | NA                            | NA                 |
| Kabuli_wild_52804635 | NA                                  | Ca_kabuli_denovo | 52804635                | A/G  | NA                 | NA                            | NA                 |
| Kabuli_wild_52813342 | NA                                  | Ca_kabuli_denovo | 52813342                | G/T  | NA                 | NA                            | NA                 |
| Kabuli_wild_52820195 | NA                                  | Ca_kabuli_denovo | 52820195                | C/T  | NA                 | NA                            | NA                 |
| Kabuli_wild_52820246 | NA                                  | Ca_kabuli_denovo | 52820246                | A/G  | NA                 | NA                            | NA                 |
| Kabuli_wild_52830055 | NA                                  | Ca_kabuli_denovo | 52830055                | G/T  | NA                 | NA                            | NA                 |
| Kabuli_wild_52830763 | NA                                  | Ca_kabuli_denovo | 52830763                | C/G  | NA                 | NA                            | NA                 |
| Kabuli_wild_52830799 | NA                                  | Ca_kabuli_denovo | 52830799                | C/T  | NA                 | NA                            | NA                 |
| Kabuli_wild_52846099 | NA                                  | Ca_kabuli_denovo | 52846099                | G/T  | NA                 | NA                            | NA                 |
| Kabuli_wild_52862515 | NA                                  | Ca_kabuli_denovo | 52862515                | C/T  | NA                 | NA                            | NA                 |
| Kabuli_wild_52865555 | NA                                  | Ca_kabuli_denovo | 52865555                | G/T  | NA                 | NA                            | NA                 |
| Kabuli_wild_52870040 | NA                                  | Ca_kabuli_denovo | 52870040                | G/T  | NA                 | NA                            | NA                 |
| Kabuli_wild_52870050 | NA                                  | Ca_kabuli_denovo | 52870050                | C/T  | NA                 | NA                            | NA                 |
| Kabuli_wild_52870092 | NA                                  | Ca_kabuli_denovo | 52870092                | C/T  | NA                 | NA                            | NA                 |
| Kabuli_wild_52889690 | NA                                  | Ca_kabuli_denovo | 52889690                | C/G  | NA                 | NA                            | NA                 |
| Kabuli_wild_52910818 | NA                                  | Ca_kabuli_denovo | 52910818                | A/G  | NA                 | NA                            | NA                 |
| Kabuli_wild_52910824 | NA                                  | Ca_kabuli_denovo | 52910824                | G/T  | NA                 | NA                            | NA                 |
| Kabuli_wild_52911885 | NA                                  | Ca_kabuli_denovo | 52911885                | C/T  | NA                 | NA                            | NA                 |
| Kabuli_wild_52911888 | NA                                  | Ca_kabuli_denovo | 52911888                | A/G  | NA                 | NA                            | NA                 |
| Kabuli_wild_52921678 | NA                                  | Ca_kabuli_denovo | 52921678                | C/T  | NA                 | NA                            | NA                 |
| Kabuli_wild_52925691 | NA                                  | Ca_kabuli_denovo | 52925691                | A/G  | NA                 | NA                            | NA                 |

| SNP IDs              | NCBI dbSNP accession IDs (NCBI_SS#) | Chromosomes      | Physical positions (bp) | SNPs | Gene accession IDs | Sequence components of genome | Putative functions |
|----------------------|-------------------------------------|------------------|-------------------------|------|--------------------|-------------------------------|--------------------|
| Kabuli_wild_52929460 | NA                                  | Ca_kabuli_denovo | 52929460                | C/T  | NA                 | NA                            | NA                 |
| Kabuli_wild_52933142 | NA                                  | Ca_kabuli_denovo | 52933142                | G/T  | NA                 | NA                            | NA                 |
| Kabuli_wild_52933313 | NA                                  | Ca_kabuli_denovo | 52933313                | A/G  | NA                 | NA                            | NA                 |
| Kabuli_wild_52933336 | NA                                  | Ca_kabuli_denovo | 52933336                | C/T  | NA                 | NA                            | NA                 |
| Kabuli_wild_52933981 | NA                                  | Ca_kabuli_denovo | 52933981                | G/T  | NA                 | NA                            | NA                 |
| Kabuli_wild_52934229 | NA                                  | Ca_kabuli_denovo | 52934229                | A/G  | NA                 | NA                            | NA                 |
| Kabuli_wild_52943359 | NA                                  | Ca_kabuli_denovo | 52943359                | A/T  | NA                 | NA                            | NA                 |
| Kabuli_wild_52946927 | NA                                  | Ca_kabuli_denovo | 52946927                | A/G  | NA                 | NA                            | NA                 |
| Kabuli_wild_52947956 | NA                                  | Ca_kabuli_denovo | 52947956                | G/T  | NA                 | NA                            | NA                 |
| Kabuli_wild_52948775 | NA                                  | Ca_kabuli_denovo | 52948775                | C/T  | NA                 | NA                            | NA                 |
| Kabuli_wild_52952092 | NA                                  | Ca_kabuli_denovo | 52952092                | G/T  | NA                 | NA                            | NA                 |
| Kabuli_wild_52957464 | NA                                  | Ca_kabuli_denovo | 52957464                | C/G  | NA                 | NA                            | NA                 |
| Kabuli_wild_52957465 | NA                                  | Ca_kabuli_denovo | 52957465                | A/C  | NA                 | NA                            | NA                 |
| Kabuli_wild_52985228 | NA                                  | Ca_kabuli_denovo | 52985228                | C/T  | NA                 | NA                            | NA                 |
| Kabuli_wild_52985234 | NA                                  | Ca_kabuli_denovo | 52985234                | A/G  | NA                 | NA                            | NA                 |
| Kabuli_wild_52985267 | NA                                  | Ca_kabuli_denovo | 52985267                | A/C  | NA                 | NA                            | NA                 |
| Kabuli_wild_52986548 | NA                                  | Ca_kabuli_denovo | 52986548                | G/T  | NA                 | NA                            | NA                 |
| Kabuli_wild_52992910 | NA                                  | Ca_kabuli_denovo | 52992910                | A/C  | NA                 | NA                            | NA                 |
| Kabuli_wild_52994937 | NA                                  | Ca_kabuli_denovo | 52994937                | A/T  | NA                 | NA                            | NA                 |
| Kabuli_wild_52998380 | NA                                  | Ca_kabuli_denovo | 52998380                | C/T  | NA                 | NA                            | NA                 |
| Kabuli_wild_53003927 | NA                                  | Ca_kabuli_denovo | 53003927                | C/G  | NA                 | NA                            | NA                 |
| Kabuli_wild_53012159 | NA                                  | Ca_kabuli_denovo | 53012159                | C/T  | NA                 | NA                            | NA                 |
| Kabuli_wild_53016367 | NA                                  | Ca_kabuli_denovo | 53016367                | A/G  | NA                 | NA                            | NA                 |
| Kabuli_wild_53020933 | NA                                  | Ca_kabuli_denovo | 53020933                | A/G  | NA                 | NA                            | NA                 |
| Kabuli_wild_53021010 | NA                                  | Ca_kabuli_denovo | 53021010                | A/G  | NA                 | NA                            | NA                 |
| Kabuli_wild_53027155 | NA                                  | Ca_kabuli_denovo | 53027155                | G/T  | NA                 | NA                            | NA                 |
| Kabuli_wild_53036629 | NA                                  | Ca_kabuli_denovo | 53036629                | G/T  | NA                 | NA                            | NA                 |
| Kabuli_wild_53056445 | NA                                  | Ca_kabuli_denovo | 53056445                | G/T  | NA                 | NA                            | NA                 |
| Kabuli_wild_53060972 | NA                                  | Ca_kabuli_denovo | 53060972                | A/G  | NA                 | NA                            | NA                 |
| Kabuli_wild_53060978 | NA                                  | Ca_kabuli_denovo | 53060978                | A/G  | NA                 | NA                            | NA                 |
| Kabuli_wild_53064517 | NA                                  | Ca_kabuli_denovo | 53064517                | C/T  | NA                 | NA                            | NA                 |
| Kabuli_wild_53072218 | NA                                  | Ca_kabuli_denovo | 53072218                | C/G  | NA                 | NA                            | NA                 |
| Kabuli_wild_53073641 | NA                                  | Ca_kabuli_denovo | 53073641                | C/G  | NA                 | NA                            | NA                 |
| Kabuli_wild_53073690 | NA                                  | Ca_kabuli_denovo | 53073690                | A/G  | NA                 | NA                            | NA                 |
| Kabuli_wild_53083658 | NA                                  | Ca_kabuli_denovo | 53083658                | G/T  | NA                 | NA                            | NA                 |
| Kabuli_wild_53091253 | NA                                  | Ca_kabuli_denovo | 53091253                | C/T  | NA                 | NA                            | NA                 |
| Kabuli_wild_53093324 | NA                                  | Ca_kabuli_denovo | 53093324                | A/G  | NA                 | NA                            | NA                 |
| Kabuli_wild_53094521 | NA                                  | Ca_kabuli_denovo | 53094521                | G/T  | NA                 | NA                            | NA                 |
| Kabuli_wild_53098052 | NA                                  | Ca_kabuli_denovo | 53098052                | A/T  | NA                 | NA                            | NA                 |
| Kabuli_wild_53118173 | NA                                  | Ca_kabuli_denovo | 53118173                | C/G  | NA                 | NA                            | NA                 |
| Kabuli_wild_53123151 | NA                                  | Ca_kabuli_denovo | 53123151                | G/T  | NA                 | NA                            | NA                 |
| Kabuli_wild_53135271 | NA                                  | Ca_kabuli_denovo | 53135271                | A/T  | NA                 | NA                            | NA                 |
| Kabuli_wild_53135602 | NA                                  | Ca_kabuli_denovo | 53135602                | G/T  | NA                 | NA                            | NA                 |
| Kabuli_wild_53157350 | NA                                  | Ca_kabuli_denovo | 53157350                | A/G  | NA                 | NA                            | NA                 |

| SNP IDs              | NCBI dbSNP accession IDs (NCBI_SS#) | Chromosomes      | Physical positions (bp) | SNPs | Gene accession IDs | Sequence components of genome | Putative functions |
|----------------------|-------------------------------------|------------------|-------------------------|------|--------------------|-------------------------------|--------------------|
| Kabuli_wild_53157351 | NA                                  | Ca_kabuli_denovo | 53157351                | A/G  | NA                 | NA                            | NA                 |
| Kabuli_wild_53182319 | NA                                  | Ca_kabuli_denovo | 53182319                | A/G  | NA                 | NA                            | NA                 |
| Kabuli_wild_53182445 | NA                                  | Ca_kabuli_denovo | 53182445                | A/G  | NA                 | NA                            | NA                 |
| Kabuli_wild_53194214 | NA                                  | Ca_kabuli_denovo | 53194214                | C/G  | NA                 | NA                            | NA                 |
| Kabuli_wild_53194223 | NA                                  | Ca_kabuli_denovo | 53194223                | C/G  | NA                 | NA                            | NA                 |
| Kabuli_wild_53206847 | NA                                  | Ca_kabuli_denovo | 53206847                | T/C  | NA                 | NA                            | NA                 |
| Kabuli_wild_53213432 | NA                                  | Ca_kabuli_denovo | 53213432                | A/C  | NA                 | NA                            | NA                 |
| Kabuli_wild_53219748 | NA                                  | Ca_kabuli_denovo | 53219748                | C/G  | NA                 | NA                            | NA                 |
| Kabuli_wild_53219765 | NA                                  | Ca_kabuli_denovo | 53219765                | C/G  | NA                 | NA                            | NA                 |
| Kabuli_wild_53248451 | NA                                  | Ca_kabuli_denovo | 53248451                | C/T  | NA                 | NA                            | NA                 |
| Kabuli_wild_53249281 | NA                                  | Ca_kabuli_denovo | 53249281                | C/T  | NA                 | NA                            | NA                 |
| Kabuli_wild_53249304 | NA                                  | Ca_kabuli_denovo | 53249304                | C/T  | NA                 | NA                            | NA                 |
| Kabuli_wild_53251721 | NA                                  | Ca_kabuli_denovo | 53251721                | A/G  | NA                 | NA                            | NA                 |
| Kabuli_wild_53258239 | NA                                  | Ca_kabuli_denovo | 53258239                | A/T  | NA                 | NA                            | NA                 |
| Kabuli_wild_53267289 | NA                                  | Ca_kabuli_denovo | 53267289                | G/T  | NA                 | NA                            | NA                 |
| Kabuli_wild_53275224 | NA                                  | Ca_kabuli_denovo | 53275224                | G/T  | NA                 | NA                            | NA                 |
| Kabuli_wild_53297364 | NA                                  | Ca_kabuli_denovo | 53297364                | G/T  | NA                 | NA                            | NA                 |
| Kabuli_wild_53310788 | NA                                  | Ca_kabuli_denovo | 53310788                | C/T  | NA                 | NA                            | NA                 |
| Kabuli_wild_53310792 | NA                                  | Ca_kabuli_denovo | 53310792                | A/C  | NA                 | NA                            | NA                 |
| Kabuli_wild_53312179 | NA                                  | Ca_kabuli_denovo | 53312179                | A/G  | NA                 | NA                            | NA                 |
| Kabuli_wild_53312180 | NA                                  | Ca_kabuli_denovo | 53312180                | C/G  | NA                 | NA                            | NA                 |
| Kabuli_wild_53312181 | NA                                  | Ca_kabuli_denovo | 53312181                | C/G  | NA                 | NA                            | NA                 |
| Kabuli_wild_53315449 | NA                                  | Ca_kabuli_denovo | 53315449                | G/T  | NA                 | NA                            | NA                 |
| Kabuli_wild_53315453 | NA                                  | Ca_kabuli_denovo | 53315453                | G/T  | NA                 | NA                            | NA                 |
| Kabuli_wild_53323361 | NA                                  | Ca_kabuli_denovo | 53323361                | A/G  | NA                 | NA                            | NA                 |
| Kabuli_wild_53334727 | NA                                  | Ca_kabuli_denovo | 53334727                | C/T  | NA                 | NA                            | NA                 |
| Kabuli_wild_53334742 | NA                                  | Ca_kabuli_denovo | 53334742                | A/C  | NA                 | NA                            | NA                 |
| Kabuli_wild_53346557 | NA                                  | Ca_kabuli_denovo | 53346557                | G/T  | NA                 | NA                            | NA                 |
| Kabuli_wild_53352407 | NA                                  | Ca_kabuli_denovo | 53352407                | C/G  | NA                 | NA                            | NA                 |
| Kabuli_wild_53356845 | NA                                  | Ca_kabuli_denovo | 53356845                | C/G  | NA                 | NA                            | NA                 |
| Kabuli_wild_53356854 | NA                                  | Ca_kabuli_denovo | 53356854                | C/G  | NA                 | NA                            | NA                 |
| Kabuli_wild_53374410 | NA                                  | Ca_kabuli_denovo | 53374410                | C/T  | NA                 | NA                            | NA                 |
| Kabuli_wild_53374462 | NA                                  | Ca_kabuli_denovo | 53374462                | A/C  | NA                 | NA                            | NA                 |
| Kabuli_wild_53382536 | NA                                  | Ca_kabuli_denovo | 53382536                | G/A  | NA                 | NA                            | NA                 |
| Kabuli_wild_53382665 | NA                                  | Ca_kabuli_denovo | 53382665                | C/T  | NA                 | NA                            | NA                 |
| Kabuli_wild_53382695 | NA                                  | Ca_kabuli_denovo | 53382695                | A/C  | NA                 | NA                            | NA                 |
| Kabuli_wild_53383279 | NA                                  | Ca_kabuli_denovo | 53383279                | G/T  | NA                 | NA                            | NA                 |
| Kabuli_wild_53392859 | NA                                  | Ca_kabuli_denovo | 53392859                | A/G  | NA                 | NA                            | NA                 |
| Kabuli_wild_53399982 | NA                                  | Ca_kabuli_denovo | 53399982                | C/G  | NA                 | NA                            | NA                 |
| Kabuli_wild_53407091 | NA                                  | Ca_kabuli_denovo | 53407091                | C/G  | NA                 | NA                            | NA                 |
| Kabuli_wild_53415495 | NA                                  | Ca_kabuli_denovo | 53415495                | G/T  | NA                 | NA                            | NA                 |
| Kabuli_wild_53419029 | NA                                  | Ca_kabuli_denovo | 53419029                | G/T  | NA                 | NA                            | NA                 |
| Kabuli_wild_53419452 | NA                                  | Ca_kabuli_denovo | 53419452                | C/T  | NA                 | NA                            | NA                 |
| Kabuli_wild_53419478 | NA                                  | Ca_kabuli_denovo | 53419478                | C/T  | NA                 | NA                            | NA                 |

| SNP IDs              | NCBI dbSNP accession IDs (NCBI_SS#) | Chromosomes      | Physical positions (bp) | SNPs | Gene accession IDs | Sequence components of genome | Putative functions |
|----------------------|-------------------------------------|------------------|-------------------------|------|--------------------|-------------------------------|--------------------|
| Kabuli_wild_53451232 | NA                                  | Ca_kabuli_denovo | 53451232                | A/G  | NA                 | NA                            | NA                 |
| Kabuli_wild_53462668 | NA                                  | Ca_kabuli_denovo | 53462668                | A/G  | NA                 | NA                            | NA                 |
| Kabuli_wild_53462697 | NA                                  | Ca_kabuli_denovo | 53462697                | C/T  | NA                 | NA                            | NA                 |
| Kabuli_wild_53466822 | NA                                  | Ca_kabuli_denovo | 53466822                | C/T  | NA                 | NA                            | NA                 |
| Kabuli_wild_53466918 | NA                                  | Ca_kabuli_denovo | 53466918                | C/T  | NA                 | NA                            | NA                 |
| Kabuli_wild_53467035 | NA                                  | Ca_kabuli_denovo | 53467035                | A/G  | NA                 | NA                            | NA                 |
| Kabuli_wild_53467245 | NA                                  | Ca_kabuli_denovo | 53467245                | C/T  | NA                 | NA                            | NA                 |
| Kabuli_wild_53467248 | NA                                  | Ca_kabuli_denovo | 53467248                | A/G  | NA                 | NA                            | NA                 |
| Kabuli_wild_53469149 | NA                                  | Ca_kabuli_denovo | 53469149                | G/T  | NA                 | NA                            | NA                 |
| Kabuli_wild_53472615 | NA                                  | Ca_kabuli_denovo | 53472615                | G/A  | NA                 | NA                            | NA                 |
| Kabuli_wild_53472639 | NA                                  | Ca_kabuli_denovo | 53472639                | G/A  | NA                 | NA                            | NA                 |
| Kabuli_wild_53477244 | NA                                  | Ca_kabuli_denovo | 53477244                | A/G  | NA                 | NA                            | NA                 |
| Kabuli_wild_53478411 | NA                                  | Ca_kabuli_denovo | 53478411                | C/T  | NA                 | NA                            | NA                 |
| Kabuli_wild_53482492 | NA                                  | Ca_kabuli_denovo | 53482492                | A/C  | NA                 | NA                            | NA                 |
| Kabuli_wild_53486429 | NA                                  | Ca_kabuli_denovo | 53486429                | G/T  | NA                 | NA                            | NA                 |
| Kabuli_wild_53487232 | NA                                  | Ca_kabuli_denovo | 53487232                | C/T  | NA                 | NA                            | NA                 |
| Kabuli_wild_53487256 | NA                                  | Ca_kabuli_denovo | 53487256                | A/G  | NA                 | NA                            | NA                 |
| Kabuli_wild_53489510 | NA                                  | Ca_kabuli_denovo | 53489510                | C/G  | NA                 | NA                            | NA                 |
| Kabuli_wild_53497650 | NA                                  | Ca_kabuli_denovo | 53497650                | A/C  | NA                 | NA                            | NA                 |
| Kabuli_wild_53506924 | NA                                  | Ca_kabuli_denovo | 53506924                | A/T  | NA                 | NA                            | NA                 |
| Kabuli_wild_53511865 | NA                                  | Ca_kabuli_denovo | 53511865                | C/G  | NA                 | NA                            | NA                 |
| Kabuli_wild_53514844 | NA                                  | Ca_kabuli_denovo | 53514844                | G/T  | NA                 | NA                            | NA                 |
| Kabuli_wild_53516963 | NA                                  | Ca_kabuli_denovo | 53516963                | A/G  | NA                 | NA                            | NA                 |
| Kabuli_wild_53517013 | NA                                  | Ca_kabuli_denovo | 53517013                | C/T  | NA                 | NA                            | NA                 |
| Kabuli_wild_53517015 | NA                                  | Ca_kabuli_denovo | 53517015                | C/T  | NA                 | NA                            | NA                 |
| Kabuli_wild_53517053 | NA                                  | Ca_kabuli_denovo | 53517053                | C/T  | NA                 | NA                            | NA                 |
| Kabuli_wild_53517272 | NA                                  | Ca_kabuli_denovo | 53517272                | A/G  | NA                 | NA                            | NA                 |
| Kabuli_wild_53518492 | NA                                  | Ca_kabuli_denovo | 53518492                | A/C  | NA                 | NA                            | NA                 |
| Kabuli_wild_53519603 | NA                                  | Ca_kabuli_denovo | 53519603                | G/T  | NA                 | NA                            | NA                 |
| Kabuli_wild_53532989 | NA                                  | Ca_kabuli_denovo | 53532989                | G/T  | NA                 | NA                            | NA                 |
| Kabuli_wild_53535551 | NA                                  | Ca_kabuli_denovo | 53535551                | C/T  | NA                 | NA                            | NA                 |
| Kabuli_wild_53541366 | NA                                  | Ca_kabuli_denovo | 53541366                | C/G  | NA                 | NA                            | NA                 |
| Kabuli_wild_53541378 | NA                                  | Ca_kabuli_denovo | 53541378                | C/G  | NA                 | NA                            | NA                 |
| Kabuli_wild_53543018 | NA                                  | Ca_kabuli_denovo | 53543018                | C/T  | NA                 | NA                            | NA                 |
| Kabuli_wild_53547540 | NA                                  | Ca_kabuli_denovo | 53547540                | A/G  | NA                 | NA                            | NA                 |
| Kabuli_wild_53547541 | NA                                  | Ca_kabuli_denovo | 53547541                | G/T  | NA                 | NA                            | NA                 |
| Kabuli_wild_53552749 | NA                                  | Ca_kabuli_denovo | 53552749                | G/T  | NA                 | NA                            | NA                 |
| Kabuli_wild_53563516 | NA                                  | Ca_kabuli_denovo | 53563516                | A/C  | NA                 | NA                            | NA                 |
| Kabuli_wild_53578697 | NA                                  | Ca_kabuli_denovo | 53578697                | C/T  | NA                 | NA                            | NA                 |
| Kabuli_wild_53594312 | NA                                  | Ca_kabuli_denovo | 53594312                | G/T  | NA                 | NA                            | NA                 |
| Kabuli_wild_53610187 | NA                                  | Ca_kabuli_denovo | 53610187                | A/G  | NA                 | NA                            | NA                 |
| Kabuli_wild_53610195 | NA                                  | Ca_kabuli_denovo | 53610195                | A/C  | NA                 | NA                            | NA                 |
| Kabuli_wild_53628196 | NA                                  | Ca_kabuli_denovo | 53628196                | G/T  | NA                 | NA                            | NA                 |
| Kabuli_wild_53642620 | NA                                  | Ca_kabuli_denovo | 53642620                | G/T  | NA                 | NA                            | NA                 |

| SNP IDs                     | NCBI dbSNP accession IDs (NCBI_SS#) | Chromosomes             | Physical positions (bp) | SNPs | Gene accession IDs | Sequence components of genome | Putative functions |
|-----------------------------|-------------------------------------|-------------------------|-------------------------|------|--------------------|-------------------------------|--------------------|
| <i>Kabuli_wild_53648425</i> | NA                                  | <i>Ca_kabuli_denovo</i> | 53648425                | C/T  | NA                 | NA                            | NA                 |
| <i>Kabuli_wild_53648446</i> | NA                                  | <i>Ca_kabuli_denovo</i> | 53648446                | A/G  | NA                 | NA                            | NA                 |
| <i>Kabuli_wild_53648464</i> | NA                                  | <i>Ca_kabuli_denovo</i> | 53648464                | C/T  | NA                 | NA                            | NA                 |
| <i>Kabuli_wild_53648473</i> | NA                                  | <i>Ca_kabuli_denovo</i> | 53648473                | C/T  | NA                 | NA                            | NA                 |
| <i>Kabuli_wild_53650855</i> | NA                                  | <i>Ca_kabuli_denovo</i> | 53650855                | C/T  | NA                 | NA                            | NA                 |
| <i>Kabuli_wild_53650861</i> | NA                                  | <i>Ca_kabuli_denovo</i> | 53650861                | C/T  | NA                 | NA                            | NA                 |
| <i>Kabuli_wild_53651098</i> | NA                                  | <i>Ca_kabuli_denovo</i> | 53651098                | A/G  | NA                 | NA                            | NA                 |
| <i>Kabuli_wild_53651815</i> | NA                                  | <i>Ca_kabuli_denovo</i> | 53651815                | G/T  | NA                 | NA                            | NA                 |
| <i>Kabuli_wild_53658399</i> | NA                                  | <i>Ca_kabuli_denovo</i> | 53658399                | A/G  | NA                 | NA                            | NA                 |
| <i>Kabuli_wild_53661953</i> | NA                                  | <i>Ca_kabuli_denovo</i> | 53661953                | A/G  | NA                 | NA                            | NA                 |
| <i>Kabuli_wild_53661968</i> | NA                                  | <i>Ca_kabuli_denovo</i> | 53661968                | C/T  | NA                 | NA                            | NA                 |
| <i>Kabuli_wild_53663447</i> | NA                                  | <i>Ca_kabuli_denovo</i> | 53663447                | C/G  | NA                 | NA                            | NA                 |
| <i>Kabuli_wild_53665012</i> | NA                                  | <i>Ca_kabuli_denovo</i> | 53665012                | A/G  | NA                 | NA                            | NA                 |
| <i>Kabuli_wild_53669595</i> | NA                                  | <i>Ca_kabuli_denovo</i> | 53669595                | A/C  | NA                 | NA                            | NA                 |
| <i>Kabuli_wild_53672252</i> | NA                                  | <i>Ca_kabuli_denovo</i> | 53672252                | C/G  | NA                 | NA                            | NA                 |
| <i>Kabuli_wild_53674109</i> | NA                                  | <i>Ca_kabuli_denovo</i> | 53674109                | A/C  | NA                 | NA                            | NA                 |
| <i>Kabuli_wild_53677332</i> | NA                                  | <i>Ca_kabuli_denovo</i> | 53677332                | A/T  | NA                 | NA                            | NA                 |
| <i>Kabuli_wild_53677362</i> | NA                                  | <i>Ca_kabuli_denovo</i> | 53677362                | C/T  | NA                 | NA                            | NA                 |
| <i>Kabuli_wild_53680288</i> | NA                                  | <i>Ca_kabuli_denovo</i> | 53680288                | A/C  | NA                 | NA                            | NA                 |
| <i>Kabuli_wild_53682296</i> | NA                                  | <i>Ca_kabuli_denovo</i> | 53682296                | A/C  | NA                 | NA                            | NA                 |
| <i>Kabuli_wild_53682297</i> | NA                                  | <i>Ca_kabuli_denovo</i> | 53682297                | A/G  | NA                 | NA                            | NA                 |
| <i>Kabuli_wild_53682404</i> | NA                                  | <i>Ca_kabuli_denovo</i> | 53682404                | C/T  | NA                 | NA                            | NA                 |
| <i>Kabuli_wild_53682764</i> | NA                                  | <i>Ca_kabuli_denovo</i> | 53682764                | A/G  | NA                 | NA                            | NA                 |
| <i>Kabuli_wild_53682769</i> | NA                                  | <i>Ca_kabuli_denovo</i> | 53682769                | C/T  | NA                 | NA                            | NA                 |
| <i>Kabuli_wild_53682785</i> | NA                                  | <i>Ca_kabuli_denovo</i> | 53682785                | A/G  | NA                 | NA                            | NA                 |
| <i>Kabuli_wild_53683140</i> | NA                                  | <i>Ca_kabuli_denovo</i> | 53683140                | C/T  | NA                 | NA                            | NA                 |
| <i>Kabuli_wild_53683188</i> | NA                                  | <i>Ca_kabuli_denovo</i> | 53683188                | A/G  | NA                 | NA                            | NA                 |
| <i>Kabuli_wild_53684014</i> | NA                                  | <i>Ca_kabuli_denovo</i> | 53684014                | A/T  | NA                 | NA                            | NA                 |
| <i>Kabuli_wild_53685199</i> | NA                                  | <i>Ca_kabuli_denovo</i> | 53685199                | G/T  | NA                 | NA                            | NA                 |
| <i>Kabuli_wild_53685235</i> | NA                                  | <i>Ca_kabuli_denovo</i> | 53685235                | G/T  | NA                 | NA                            | NA                 |
| <i>Kabuli_wild_53688507</i> | NA                                  | <i>Ca_kabuli_denovo</i> | 53688507                | G/T  | NA                 | NA                            | NA                 |
| <i>Kabuli_wild_53694389</i> | NA                                  | <i>Ca_kabuli_denovo</i> | 53694389                | A/G  | NA                 | NA                            | NA                 |
| <i>Kabuli_wild_53694853</i> | NA                                  | <i>Ca_kabuli_denovo</i> | 53694853                | A/G  | NA                 | NA                            | NA                 |
| <i>Kabuli_wild_53697232</i> | NA                                  | <i>Ca_kabuli_denovo</i> | 53697232                | G/T  | NA                 | NA                            | NA                 |
| <i>Kabuli_wild_53704912</i> | NA                                  | <i>Ca_kabuli_denovo</i> | 53704912                | A/G  | NA                 | NA                            | NA                 |
| <i>Kabuli_wild_53707917</i> | NA                                  | <i>Ca_kabuli_denovo</i> | 53707917                | C/G  | NA                 | NA                            | NA                 |
| <i>Kabuli_wild_53707954</i> | NA                                  | <i>Ca_kabuli_denovo</i> | 53707954                | A/T  | NA                 | NA                            | NA                 |
| <i>Kabuli_wild_53716239</i> | NA                                  | <i>Ca_kabuli_denovo</i> | 53716239                | G/T  | NA                 | NA                            | NA                 |
| <i>Kabuli_wild_53720851</i> | NA                                  | <i>Ca_kabuli_denovo</i> | 53720851                | G/T  | NA                 | NA                            | NA                 |
| <i>Kabuli_wild_53721819</i> | NA                                  | <i>Ca_kabuli_denovo</i> | 53721819                | C/G  | NA                 | NA                            | NA                 |
| <i>Kabuli_wild_53724529</i> | NA                                  | <i>Ca_kabuli_denovo</i> | 53724529                | G/T  | NA                 | NA                            | NA                 |
| <i>Kabuli_wild_53726792</i> | NA                                  | <i>Ca_kabuli_denovo</i> | 53726792                | G/T  | NA                 | NA                            | NA                 |
| <i>Kabuli_wild_53738971</i> | NA                                  | <i>Ca_kabuli_denovo</i> | 53738971                | C/T  | NA                 | NA                            | NA                 |
| <i>Kabuli_wild_53739049</i> | NA                                  | <i>Ca_kabuli_denovo</i> | 53739049                | A/G  | NA                 | NA                            | NA                 |

| SNP IDs              | NCBI dbSNP accession IDs (NCBI_SS#) | Chromosomes      | Physical positions (bp) | SNPs | Gene accession IDs | Sequence components of genome | Putative functions |
|----------------------|-------------------------------------|------------------|-------------------------|------|--------------------|-------------------------------|--------------------|
| Kabuli_wild_53739094 | NA                                  | Ca_kabuli_denovo | 53739094                | A/G  | NA                 | NA                            | NA                 |
| Kabuli_wild_53743409 | NA                                  | Ca_kabuli_denovo | 53743409                | G/T  | NA                 | NA                            | NA                 |
| Kabuli_wild_53747694 | NA                                  | Ca_kabuli_denovo | 53747694                | A/T  | NA                 | NA                            | NA                 |
| Kabuli_wild_53748654 | NA                                  | Ca_kabuli_denovo | 53748654                | T/G  | NA                 | NA                            | NA                 |
| Kabuli_wild_53748656 | NA                                  | Ca_kabuli_denovo | 53748656                | G/C  | NA                 | NA                            | NA                 |
| Kabuli_wild_53750719 | NA                                  | Ca_kabuli_denovo | 53750719                | G/T  | NA                 | NA                            | NA                 |
| Kabuli_wild_53750815 | NA                                  | Ca_kabuli_denovo | 53750815                | A/G  | NA                 | NA                            | NA                 |
| Kabuli_wild_53756517 | NA                                  | Ca_kabuli_denovo | 53756517                | C/T  | NA                 | NA                            | NA                 |
| Kabuli_wild_53756521 | NA                                  | Ca_kabuli_denovo | 53756521                | A/G  | NA                 | NA                            | NA                 |
| Kabuli_wild_53757246 | NA                                  | Ca_kabuli_denovo | 53757246                | A/G  | NA                 | NA                            | NA                 |
| Kabuli_wild_53758735 | NA                                  | Ca_kabuli_denovo | 53758735                | C/G  | NA                 | NA                            | NA                 |
| Kabuli_wild_53759622 | NA                                  | Ca_kabuli_denovo | 53759622                | A/T  | NA                 | NA                            | NA                 |
| Kabuli_wild_53759624 | NA                                  | Ca_kabuli_denovo | 53759624                | C/G  | NA                 | NA                            | NA                 |
| Kabuli_wild_53762791 | NA                                  | Ca_kabuli_denovo | 53762791                | A/G  | NA                 | NA                            | NA                 |
| Kabuli_wild_53762843 | NA                                  | Ca_kabuli_denovo | 53762843                | A/T  | NA                 | NA                            | NA                 |
| Kabuli_wild_53762846 | NA                                  | Ca_kabuli_denovo | 53762846                | A/C  | NA                 | NA                            | NA                 |
| Kabuli_wild_53764130 | NA                                  | Ca_kabuli_denovo | 53764130                | A/T  | NA                 | NA                            | NA                 |
| Kabuli_wild_53764436 | NA                                  | Ca_kabuli_denovo | 53764436                | A/T  | NA                 | NA                            | NA                 |
| Kabuli_wild_53766908 | NA                                  | Ca_kabuli_denovo | 53766908                | C/T  | NA                 | NA                            | NA                 |
| Kabuli_wild_53767234 | NA                                  | Ca_kabuli_denovo | 53767234                | A/T  | NA                 | NA                            | NA                 |
| Kabuli_wild_53767299 | NA                                  | Ca_kabuli_denovo | 53767299                | C/T  | NA                 | NA                            | NA                 |
| Kabuli_wild_53768783 | NA                                  | Ca_kabuli_denovo | 53768783                | A/T  | NA                 | NA                            | NA                 |
| Kabuli_wild_53768811 | NA                                  | Ca_kabuli_denovo | 53768811                | G/T  | NA                 | NA                            | NA                 |
| Kabuli_wild_53769566 | NA                                  | Ca_kabuli_denovo | 53769566                | A/T  | NA                 | NA                            | NA                 |
| Kabuli_wild_53770342 | NA                                  | Ca_kabuli_denovo | 53770342                | C/G  | NA                 | NA                            | NA                 |
| Kabuli_wild_53770343 | NA                                  | Ca_kabuli_denovo | 53770343                | A/C  | NA                 | NA                            | NA                 |
| Kabuli_wild_53777822 | NA                                  | Ca_kabuli_denovo | 53777822                | G/T  | NA                 | NA                            | NA                 |
| Kabuli_wild_53778338 | NA                                  | Ca_kabuli_denovo | 53778338                | A/G  | NA                 | NA                            | NA                 |
| Kabuli_wild_53778622 | NA                                  | Ca_kabuli_denovo | 53778622                | A/G  | NA                 | NA                            | NA                 |
| Kabuli_wild_53778642 | NA                                  | Ca_kabuli_denovo | 53778642                | G/T  | NA                 | NA                            | NA                 |
| Kabuli_wild_53779017 | NA                                  | Ca_kabuli_denovo | 53779017                | G/T  | NA                 | NA                            | NA                 |
| Kabuli_wild_53779279 | NA                                  | Ca_kabuli_denovo | 53779279                | C/T  | NA                 | NA                            | NA                 |
| Kabuli_wild_53779284 | NA                                  | Ca_kabuli_denovo | 53779284                | A/G  | NA                 | NA                            | NA                 |
| Kabuli_wild_53779602 | NA                                  | Ca_kabuli_denovo | 53779602                | C/G  | NA                 | NA                            | NA                 |
| Kabuli_wild_53779654 | NA                                  | Ca_kabuli_denovo | 53779654                | A/T  | NA                 | NA                            | NA                 |
| Kabuli_wild_53780946 | NA                                  | Ca_kabuli_denovo | 53780946                | A/C  | NA                 | NA                            | NA                 |
| Kabuli_wild_53780947 | NA                                  | Ca_kabuli_denovo | 53780947                | C/T  | NA                 | NA                            | NA                 |
| Kabuli_wild_53781331 | NA                                  | Ca_kabuli_denovo | 53781331                | A/C  | NA                 | NA                            | NA                 |
| Kabuli_wild_53781332 | NA                                  | Ca_kabuli_denovo | 53781332                | A/T  | NA                 | NA                            | NA                 |
| Kabuli_wild_53781391 | NA                                  | Ca_kabuli_denovo | 53781391                | G/T  | NA                 | NA                            | NA                 |
| Kabuli_wild_53781663 | NA                                  | Ca_kabuli_denovo | 53781663                | A/G  | NA                 | NA                            | NA                 |
| Kabuli_wild_53781855 | NA                                  | Ca_kabuli_denovo | 53781855                | A/G  | NA                 | NA                            | NA                 |
| Kabuli_wild_53782030 | NA                                  | Ca_kabuli_denovo | 53782030                | G/T  | NA                 | NA                            | NA                 |
| Kabuli_wild_53782049 | NA                                  | Ca_kabuli_denovo | 53782049                | T/C  | NA                 | NA                            | NA                 |

| SNP IDs              | NCBI dbSNP accession IDs (NCBI_SS#) | Chromosomes      | Physical positions (bp) | SNPs | Gene accession IDs | Sequence components of genome | Putative functions |
|----------------------|-------------------------------------|------------------|-------------------------|------|--------------------|-------------------------------|--------------------|
| Kabuli_wild_53782075 | NA                                  | Ca_kabuli_denovo | 53782075                | A/G  | NA                 | NA                            | NA                 |
| Kabuli_wild_53782076 | NA                                  | Ca_kabuli_denovo | 53782076                | A/G  | NA                 | NA                            | NA                 |
| Kabuli_wild_53782478 | NA                                  | Ca_kabuli_denovo | 53782478                | G/T  | NA                 | NA                            | NA                 |
| Kabuli_wild_53782515 | NA                                  | Ca_kabuli_denovo | 53782515                | A/G  | NA                 | NA                            | NA                 |
| Kabuli_wild_53782524 | NA                                  | Ca_kabuli_denovo | 53782524                | A/G  | NA                 | NA                            | NA                 |
| Kabuli_wild_53782582 | NA                                  | Ca_kabuli_denovo | 53782582                | G/T  | NA                 | NA                            | NA                 |
| Kabuli_wild_53785034 | NA                                  | Ca_kabuli_denovo | 53785034                | C/G  | NA                 | NA                            | NA                 |
| Kabuli_wild_53787563 | NA                                  | Ca_kabuli_denovo | 53787563                | G/T  | NA                 | NA                            | NA                 |
| Kabuli_wild_53787585 | NA                                  | Ca_kabuli_denovo | 53787585                | A/C  | NA                 | NA                            | NA                 |
| Kabuli_wild_53788218 | NA                                  | Ca_kabuli_denovo | 53788218                | C/G  | NA                 | NA                            | NA                 |
| Kabuli_wild_53788312 | NA                                  | Ca_kabuli_denovo | 53788312                | A/G  | NA                 | NA                            | NA                 |
| Kabuli_wild_53788324 | NA                                  | Ca_kabuli_denovo | 53788324                | A/T  | NA                 | NA                            | NA                 |
| Kabuli_wild_53790582 | NA                                  | Ca_kabuli_denovo | 53790582                | C/T  | NA                 | NA                            | NA                 |
| Kabuli_wild_53790599 | NA                                  | Ca_kabuli_denovo | 53790599                | A/G  | NA                 | NA                            | NA                 |
| Kabuli_wild_53791181 | NA                                  | Ca_kabuli_denovo | 53791181                | G/T  | NA                 | NA                            | NA                 |
| Kabuli_wild_53803950 | NA                                  | Ca_kabuli_denovo | 53803950                | C/T  | NA                 | NA                            | NA                 |
| Kabuli_wild_53829797 | NA                                  | Ca_kabuli_denovo | 53829797                | C/T  | NA                 | NA                            | NA                 |
| Kabuli_wild_53851457 | NA                                  | Ca_kabuli_denovo | 53851457                | C/T  | NA                 | NA                            | NA                 |
| Kabuli_wild_53866353 | NA                                  | Ca_kabuli_denovo | 53866353                | A/T  | NA                 | NA                            | NA                 |
| Kabuli_wild_53866371 | NA                                  | Ca_kabuli_denovo | 53866371                | A/C  | NA                 | NA                            | NA                 |
| Kabuli_wild_53901631 | NA                                  | Ca_kabuli_denovo | 53901631                | C/T  | NA                 | NA                            | NA                 |
| Kabuli_wild_53904474 | NA                                  | Ca_kabuli_denovo | 53904474                | A/G  | NA                 | NA                            | NA                 |
| Kabuli_wild_53938047 | NA                                  | Ca_kabuli_denovo | 53938047                | C/G  | NA                 | NA                            | NA                 |
| Kabuli_wild_53942882 | NA                                  | Ca_kabuli_denovo | 53942882                | A/G  | NA                 | NA                            | NA                 |
| Kabuli_wild_53978625 | NA                                  | Ca_kabuli_denovo | 53978625                | A/C  | NA                 | NA                            | NA                 |
| Kabuli_wild_53978626 | NA                                  | Ca_kabuli_denovo | 53978626                | G/T  | NA                 | NA                            | NA                 |
| Kabuli_wild_53979795 | NA                                  | Ca_kabuli_denovo | 53979795                | C/G  | NA                 | NA                            | NA                 |
| Kabuli_wild_53979834 | NA                                  | Ca_kabuli_denovo | 53979834                | C/G  | NA                 | NA                            | NA                 |
| Kabuli_wild_53991378 | NA                                  | Ca_kabuli_denovo | 53991378                | C/T  | NA                 | NA                            | NA                 |
| Kabuli_wild_53991397 | NA                                  | Ca_kabuli_denovo | 53991397                | A/C  | NA                 | NA                            | NA                 |
| Kabuli_wild_53994481 | NA                                  | Ca_kabuli_denovo | 53994481                | A/C  | NA                 | NA                            | NA                 |
| Kabuli_wild_54010087 | NA                                  | Ca_kabuli_denovo | 54010087                | A/G  | NA                 | NA                            | NA                 |
| Kabuli_wild_54010137 | NA                                  | Ca_kabuli_denovo | 54010137                | C/T  | NA                 | NA                            | NA                 |
| Kabuli_wild_54027296 | NA                                  | Ca_kabuli_denovo | 54027296                | C/T  | NA                 | NA                            | NA                 |
| Kabuli_wild_54027302 | NA                                  | Ca_kabuli_denovo | 54027302                | C/T  | NA                 | NA                            | NA                 |
| Kabuli_wild_54027314 | NA                                  | Ca_kabuli_denovo | 54027314                | C/T  | NA                 | NA                            | NA                 |
| Kabuli_wild_54031384 | NA                                  | Ca_kabuli_denovo | 54031384                | A/C  | NA                 | NA                            | NA                 |
| Kabuli_wild_54031387 | NA                                  | Ca_kabuli_denovo | 54031387                | G/T  | NA                 | NA                            | NA                 |
| Kabuli_wild_54031429 | NA                                  | Ca_kabuli_denovo | 54031429                | C/T  | NA                 | NA                            | NA                 |
| Kabuli_wild_54031447 | NA                                  | Ca_kabuli_denovo | 54031447                | G/A  | NA                 | NA                            | NA                 |
| Kabuli_wild_54045670 | NA                                  | Ca_kabuli_denovo | 54045670                | C/T  | NA                 | NA                            | NA                 |
| Kabuli_wild_54091864 | NA                                  | Ca_kabuli_denovo | 54091864                | T/A  | NA                 | NA                            | NA                 |
| Kabuli_wild_54091865 | NA                                  | Ca_kabuli_denovo | 54091865                | C/G  | NA                 | NA                            | NA                 |
| Kabuli_wild_54091869 | NA                                  | Ca_kabuli_denovo | 54091869                | A/C  | NA                 | NA                            | NA                 |

| SNP IDs              | NCBI dbSNP accession IDs (NCBI_SS#) | Chromosomes      | Physical positions (bp) | SNPs | Gene accession IDs | Sequence components of genome | Putative functions |
|----------------------|-------------------------------------|------------------|-------------------------|------|--------------------|-------------------------------|--------------------|
| Kabuli_wild_54100156 | NA                                  | Ca_kabuli_denovo | 54100156                | C/T  | NA                 | NA                            | NA                 |
| Kabuli_wild_54100190 | NA                                  | Ca_kabuli_denovo | 54100190                | C/T  | NA                 | NA                            | NA                 |
| Kabuli_wild_54101479 | NA                                  | Ca_kabuli_denovo | 54101479                | A/G  | NA                 | NA                            | NA                 |
| Kabuli_wild_54101489 | NA                                  | Ca_kabuli_denovo | 54101489                | C/T  | NA                 | NA                            | NA                 |
| Kabuli_wild_54101495 | NA                                  | Ca_kabuli_denovo | 54101495                | C/G  | NA                 | NA                            | NA                 |
| Kabuli_wild_54107089 | NA                                  | Ca_kabuli_denovo | 54107089                | C/T  | NA                 | NA                            | NA                 |
| Kabuli_wild_54123644 | NA                                  | Ca_kabuli_denovo | 54123644                | G/T  | NA                 | NA                            | NA                 |
| Kabuli_wild_54124355 | NA                                  | Ca_kabuli_denovo | 54124355                | A/G  | NA                 | NA                            | NA                 |
| Kabuli_wild_54127354 | NA                                  | Ca_kabuli_denovo | 54127354                | A/G  | NA                 | NA                            | NA                 |
| Kabuli_wild_54127366 | NA                                  | Ca_kabuli_denovo | 54127366                | C/T  | NA                 | NA                            | NA                 |
| Kabuli_wild_54147685 | NA                                  | Ca_kabuli_denovo | 54147685                | A/G  | NA                 | NA                            | NA                 |
| Kabuli_wild_54149144 | NA                                  | Ca_kabuli_denovo | 54149144                | C/T  | NA                 | NA                            | NA                 |
| Kabuli_wild_54234684 | NA                                  | Ca_kabuli_denovo | 54234684                | C/T  | NA                 | NA                            | NA                 |
| Kabuli_wild_54250681 | NA                                  | Ca_kabuli_denovo | 54250681                | G/T  | NA                 | NA                            | NA                 |
| Kabuli_wild_54260865 | NA                                  | Ca_kabuli_denovo | 54260865                | A/C  | NA                 | NA                            | NA                 |
| Kabuli_wild_54270030 | NA                                  | Ca_kabuli_denovo | 54270030                | G/T  | NA                 | NA                            | NA                 |
| Kabuli_wild_54270078 | NA                                  | Ca_kabuli_denovo | 54270078                | G/T  | NA                 | NA                            | NA                 |
| Kabuli_wild_54290100 | NA                                  | Ca_kabuli_denovo | 54290100                | C/T  | NA                 | NA                            | NA                 |
| Kabuli_wild_54304224 | NA                                  | Ca_kabuli_denovo | 54304224                | C/T  | NA                 | NA                            | NA                 |
| Kabuli_wild_54324067 | NA                                  | Ca_kabuli_denovo | 54324067                | A/G  | NA                 | NA                            | NA                 |
| Kabuli_wild_54324169 | NA                                  | Ca_kabuli_denovo | 54324169                | C/G  | NA                 | NA                            | NA                 |
| Kabuli_wild_54326797 | NA                                  | Ca_kabuli_denovo | 54326797                | G/T  | NA                 | NA                            | NA                 |
| Kabuli_wild_54327988 | NA                                  | Ca_kabuli_denovo | 54327988                | A/G  | NA                 | NA                            | NA                 |
| Kabuli_wild_54328006 | NA                                  | Ca_kabuli_denovo | 54328006                | A/G  | NA                 | NA                            | NA                 |
| Kabuli_wild_54341046 | NA                                  | Ca_kabuli_denovo | 54341046                | A/G  | NA                 | NA                            | NA                 |
| Kabuli_wild_54358535 | NA                                  | Ca_kabuli_denovo | 54358535                | C/T  | NA                 | NA                            | NA                 |
| Kabuli_wild_54363918 | NA                                  | Ca_kabuli_denovo | 54363918                | C/T  | NA                 | NA                            | NA                 |
| Kabuli_wild_54367785 | NA                                  | Ca_kabuli_denovo | 54367785                | A/C  | NA                 | NA                            | NA                 |
| Kabuli_wild_54369088 | NA                                  | Ca_kabuli_denovo | 54369088                | A/G  | NA                 | NA                            | NA                 |
| Kabuli_wild_54379771 | NA                                  | Ca_kabuli_denovo | 54379771                | A/G  | NA                 | NA                            | NA                 |
| Kabuli_wild_54382974 | NA                                  | Ca_kabuli_denovo | 54382974                | C/T  | NA                 | NA                            | NA                 |
| Kabuli_wild_54396827 | NA                                  | Ca_kabuli_denovo | 54396827                | A/T  | NA                 | NA                            | NA                 |
| Kabuli_wild_54403043 | NA                                  | Ca_kabuli_denovo | 54403043                | C/G  | NA                 | NA                            | NA                 |
| Kabuli_wild_54405597 | NA                                  | Ca_kabuli_denovo | 54405597                | C/G  | NA                 | NA                            | NA                 |
| Kabuli_wild_54414555 | NA                                  | Ca_kabuli_denovo | 54414555                | C/G  | NA                 | NA                            | NA                 |
| Kabuli_wild_54442883 | NA                                  | Ca_kabuli_denovo | 54442883                | A/G  | NA                 | NA                            | NA                 |
| Kabuli_wild_54484225 | NA                                  | Ca_kabuli_denovo | 54484225                | G/T  | NA                 | NA                            | NA                 |
| Kabuli_wild_54487302 | NA                                  | Ca_kabuli_denovo | 54487302                | C/T  | NA                 | NA                            | NA                 |
| Kabuli_wild_54491190 | NA                                  | Ca_kabuli_denovo | 54491190                | C/T  | NA                 | NA                            | NA                 |
| Kabuli_wild_54491208 | NA                                  | Ca_kabuli_denovo | 54491208                | C/T  | NA                 | NA                            | NA                 |
| Kabuli_wild_54503153 | NA                                  | Ca_kabuli_denovo | 54503153                | A/G  | NA                 | NA                            | NA                 |
| Kabuli_wild_54518362 | NA                                  | Ca_kabuli_denovo | 54518362                | C/G  | NA                 | NA                            | NA                 |
| Kabuli_wild_54524339 | NA                                  | Ca_kabuli_denovo | 54524339                | G/T  | NA                 | NA                            | NA                 |
| Kabuli_wild_54529769 | NA                                  | Ca_kabuli_denovo | 54529769                | C/T  | NA                 | NA                            | NA                 |



| SNP IDs              | NCBI dbSNP accession IDs (NCBI_SS#) | Chromosomes      | Physical positions (bp) | SNPs | Gene accession IDs | Sequence components of genome | Putative functions |
|----------------------|-------------------------------------|------------------|-------------------------|------|--------------------|-------------------------------|--------------------|
| Kabuli_wild_54529805 | NA                                  | Ca_kabuli_denovo | 54529805                | A/G  | NA                 | NA                            | NA                 |
| Kabuli_wild_54533708 | NA                                  | Ca_kabuli_denovo | 54533708                | C/G  | NA                 | NA                            | NA                 |
| Kabuli_wild_54545854 | NA                                  | Ca_kabuli_denovo | 54545854                | G/T  | NA                 | NA                            | NA                 |
| Kabuli_wild_54562900 | NA                                  | Ca_kabuli_denovo | 54562900                | C/T  | NA                 | NA                            | NA                 |
| Kabuli_wild_54565761 | NA                                  | Ca_kabuli_denovo | 54565761                | C/T  | NA                 | NA                            | NA                 |
| Kabuli_wild_54565763 | NA                                  | Ca_kabuli_denovo | 54565763                | A/C  | NA                 | NA                            | NA                 |
| Kabuli_wild_54566173 | NA                                  | Ca_kabuli_denovo | 54566173                | A/G  | NA                 | NA                            | NA                 |
| Kabuli_wild_54567933 | NA                                  | Ca_kabuli_denovo | 54567933                | C/G  | NA                 | NA                            | NA                 |
| Kabuli_wild_54572836 | NA                                  | Ca_kabuli_denovo | 54572836                | G/T  | NA                 | NA                            | NA                 |
| Kabuli_wild_54573392 | NA                                  | Ca_kabuli_denovo | 54573392                | A/C  | NA                 | NA                            | NA                 |
| Kabuli_wild_54574278 | NA                                  | Ca_kabuli_denovo | 54574278                | G/T  | NA                 | NA                            | NA                 |
| Kabuli_wild_54574968 | NA                                  | Ca_kabuli_denovo | 54574968                | G/T  | NA                 | NA                            | NA                 |
| Kabuli_wild_54576832 | NA                                  | Ca_kabuli_denovo | 54576832                | G/T  | NA                 | NA                            | NA                 |
| Kabuli_wild_54582108 | NA                                  | Ca_kabuli_denovo | 54582108                | C/T  | NA                 | NA                            | NA                 |
| Kabuli_wild_54585947 | NA                                  | Ca_kabuli_denovo | 54585947                | A/C  | NA                 | NA                            | NA                 |
| Kabuli_wild_54586178 | NA                                  | Ca_kabuli_denovo | 54586178                | G/T  | NA                 | NA                            | NA                 |
| Kabuli_wild_54586354 | NA                                  | Ca_kabuli_denovo | 54586354                | G/T  | NA                 | NA                            | NA                 |
| Kabuli_wild_54589067 | NA                                  | Ca_kabuli_denovo | 54589067                | G/T  | NA                 | NA                            | NA                 |
| Kabuli_wild_54591665 | NA                                  | Ca_kabuli_denovo | 54591665                | A/G  | NA                 | NA                            | NA                 |
| Kabuli_wild_54594876 | NA                                  | Ca_kabuli_denovo | 54594876                | A/C  | NA                 | NA                            | NA                 |
| Kabuli_wild_54594877 | NA                                  | Ca_kabuli_denovo | 54594877                | G/T  | NA                 | NA                            | NA                 |
| Kabuli_wild_54600127 | NA                                  | Ca_kabuli_denovo | 54600127                | A/G  | NA                 | NA                            | NA                 |
| Kabuli_wild_54600828 | NA                                  | Ca_kabuli_denovo | 54600828                | A/C  | NA                 | NA                            | NA                 |
| Kabuli_wild_54612544 | NA                                  | Ca_kabuli_denovo | 54612544                | G/T  | NA                 | NA                            | NA                 |
| Kabuli_wild_54616251 | NA                                  | Ca_kabuli_denovo | 54616251                | A/C  | NA                 | NA                            | NA                 |
| Kabuli_wild_54634317 | NA                                  | Ca_kabuli_denovo | 54634317                | C/T  | NA                 | NA                            | NA                 |
| Kabuli_wild_54634771 | NA                                  | Ca_kabuli_denovo | 54634771                | C/T  | NA                 | NA                            | NA                 |
| Kabuli_wild_54634772 | NA                                  | Ca_kabuli_denovo | 54634772                | C/T  | NA                 | NA                            | NA                 |
| Kabuli_wild_54662973 | NA                                  | Ca_kabuli_denovo | 54662973                | A/C  | NA                 | NA                            | NA                 |
| Kabuli_wild_54663194 | NA                                  | Ca_kabuli_denovo | 54663194                | A/G  | NA                 | NA                            | NA                 |
| Kabuli_wild_54663225 | NA                                  | Ca_kabuli_denovo | 54663225                | A/G  | NA                 | NA                            | NA                 |
| Kabuli_wild_54666003 | NA                                  | Ca_kabuli_denovo | 54666003                | G/T  | NA                 | NA                            | NA                 |
| Kabuli_wild_54669098 | NA                                  | Ca_kabuli_denovo | 54669098                | G/T  | NA                 | NA                            | NA                 |
| Kabuli_wild_54669149 | NA                                  | Ca_kabuli_denovo | 54669149                | A/G  | NA                 | NA                            | NA                 |
| Kabuli_wild_54678813 | NA                                  | Ca_kabuli_denovo | 54678813                | C/T  | NA                 | NA                            | NA                 |
| Kabuli_wild_54678816 | NA                                  | Ca_kabuli_denovo | 54678816                | C/T  | NA                 | NA                            | NA                 |
| Kabuli_wild_54689307 | NA                                  | Ca_kabuli_denovo | 54689307                | A/G  | NA                 | NA                            | NA                 |
| Kabuli_wild_54693639 | NA                                  | Ca_kabuli_denovo | 54693639                | A/C  | NA                 | NA                            | NA                 |
| Kabuli_wild_54693642 | NA                                  | Ca_kabuli_denovo | 54693642                | A/T  | NA                 | NA                            | NA                 |
| Kabuli_wild_54693643 | NA                                  | Ca_kabuli_denovo | 54693643                | C/T  | NA                 | NA                            | NA                 |
| Kabuli_wild_54699617 | NA                                  | Ca_kabuli_denovo | 54699617                | A/C  | NA                 | NA                            | NA                 |
| Kabuli_wild_54700189 | NA                                  | Ca_kabuli_denovo | 54700189                | C/G  | NA                 | NA                            | NA                 |
| Kabuli_wild_54720891 | NA                                  | Ca_kabuli_denovo | 54720891                | A/C  | NA                 | NA                            | NA                 |
| Kabuli_wild_54720892 | NA                                  | Ca_kabuli_denovo | 54720892                | G/T  | NA                 | NA                            | NA                 |

| SNP IDs              | NCBI dbSNP accession IDs (NCBI_SS#) | Chromosomes      | Physical positions (bp) | SNPs | Gene accession IDs | Sequence components of genome | Putative functions |
|----------------------|-------------------------------------|------------------|-------------------------|------|--------------------|-------------------------------|--------------------|
| Kabuli_wild_54726988 | NA                                  | Ca_kabuli_denovo | 54726988                | C/G  | NA                 | NA                            | NA                 |
| Kabuli_wild_54726992 | NA                                  | Ca_kabuli_denovo | 54726992                | C/G  | NA                 | NA                            | NA                 |
| Kabuli_wild_54730602 | NA                                  | Ca_kabuli_denovo | 54730602                | C/G  | NA                 | NA                            | NA                 |
| Kabuli_wild_54730611 | NA                                  | Ca_kabuli_denovo | 54730611                | A/G  | NA                 | NA                            | NA                 |
| Kabuli_wild_54730748 | NA                                  | Ca_kabuli_denovo | 54730748                | G/T  | NA                 | NA                            | NA                 |
| Kabuli_wild_54736858 | NA                                  | Ca_kabuli_denovo | 54736858                | C/T  | NA                 | NA                            | NA                 |
| Kabuli_wild_54753477 | NA                                  | Ca_kabuli_denovo | 54753477                | C/G  | NA                 | NA                            | NA                 |
| Kabuli_wild_54753510 | NA                                  | Ca_kabuli_denovo | 54753510                | C/T  | NA                 | NA                            | NA                 |
| Kabuli_wild_54765177 | NA                                  | Ca_kabuli_denovo | 54765177                | C/G  | NA                 | NA                            | NA                 |
| Kabuli_wild_54765179 | NA                                  | Ca_kabuli_denovo | 54765179                | C/T  | NA                 | NA                            | NA                 |
| Kabuli_wild_54768244 | NA                                  | Ca_kabuli_denovo | 54768244                | A/G  | NA                 | NA                            | NA                 |
| Kabuli_wild_54772414 | NA                                  | Ca_kabuli_denovo | 54772414                | A/C  | NA                 | NA                            | NA                 |
| Kabuli_wild_54785625 | NA                                  | Ca_kabuli_denovo | 54785625                | A/G  | NA                 | NA                            | NA                 |
| Kabuli_wild_54785632 | NA                                  | Ca_kabuli_denovo | 54785632                | C/G  | NA                 | NA                            | NA                 |
| Kabuli_wild_54785697 | NA                                  | Ca_kabuli_denovo | 54785697                | C/G  | NA                 | NA                            | NA                 |
| Kabuli_wild_54789853 | NA                                  | Ca_kabuli_denovo | 54789853                | G/T  | NA                 | NA                            | NA                 |
| Kabuli_wild_54789860 | NA                                  | Ca_kabuli_denovo | 54789860                | C/T  | NA                 | NA                            | NA                 |
| Kabuli_wild_54798844 | NA                                  | Ca_kabuli_denovo | 54798844                | C/G  | NA                 | NA                            | NA                 |
| Kabuli_wild_54799281 | NA                                  | Ca_kabuli_denovo | 54799281                | G/T  | NA                 | NA                            | NA                 |
| Kabuli_wild_54819823 | NA                                  | Ca_kabuli_denovo | 54819823                | C/G  | NA                 | NA                            | NA                 |
| Kabuli_wild_54822727 | NA                                  | Ca_kabuli_denovo | 54822727                | C/G  | NA                 | NA                            | NA                 |
| Kabuli_wild_54824711 | NA                                  | Ca_kabuli_denovo | 54824711                | A/G  | NA                 | NA                            | NA                 |
| Kabuli_wild_54841882 | NA                                  | Ca_kabuli_denovo | 54841882                | A/C  | NA                 | NA                            | NA                 |
| Kabuli_wild_54841883 | NA                                  | Ca_kabuli_denovo | 54841883                | A/G  | NA                 | NA                            | NA                 |
| Kabuli_wild_54841885 | NA                                  | Ca_kabuli_denovo | 54841885                | G/T  | NA                 | NA                            | NA                 |
| Kabuli_wild_54846906 | NA                                  | Ca_kabuli_denovo | 54846906                | G/T  | NA                 | NA                            | NA                 |
| Kabuli_wild_54860496 | NA                                  | Ca_kabuli_denovo | 54860496                | A/T  | NA                 | NA                            | NA                 |
| Kabuli_wild_54860509 | NA                                  | Ca_kabuli_denovo | 54860509                | C/G  | NA                 | NA                            | NA                 |
| Kabuli_wild_54860539 | NA                                  | Ca_kabuli_denovo | 54860539                | C/G  | NA                 | NA                            | NA                 |
| Kabuli_wild_54860887 | NA                                  | Ca_kabuli_denovo | 54860887                | C/G  | NA                 | NA                            | NA                 |
| Kabuli_wild_54860902 | NA                                  | Ca_kabuli_denovo | 54860902                | A/C  | NA                 | NA                            | NA                 |
| Kabuli_wild_54868055 | NA                                  | Ca_kabuli_denovo | 54868055                | C/G  | NA                 | NA                            | NA                 |
| Kabuli_wild_54870699 | NA                                  | Ca_kabuli_denovo | 54870699                | G/T  | NA                 | NA                            | NA                 |
| Kabuli_wild_54872521 | NA                                  | Ca_kabuli_denovo | 54872521                | C/G  | NA                 | NA                            | NA                 |
| Kabuli_wild_54872560 | NA                                  | Ca_kabuli_denovo | 54872560                | C/T  | NA                 | NA                            | NA                 |
| Kabuli_wild_54872575 | NA                                  | Ca_kabuli_denovo | 54872575                | C/G  | NA                 | NA                            | NA                 |
| Kabuli_wild_54873124 | NA                                  | Ca_kabuli_denovo | 54873124                | G/T  | NA                 | NA                            | NA                 |
| Kabuli_wild_54878209 | NA                                  | Ca_kabuli_denovo | 54878209                | C/T  | NA                 | NA                            | NA                 |
| Kabuli_wild_54881272 | NA                                  | Ca_kabuli_denovo | 54881272                | A/G  | NA                 | NA                            | NA                 |
| Kabuli_wild_54881311 | NA                                  | Ca_kabuli_denovo | 54881311                | C/T  | NA                 | NA                            | NA                 |
| Kabuli_wild_54884896 | NA                                  | Ca_kabuli_denovo | 54884896                | G/T  | NA                 | NA                            | NA                 |
| Kabuli_wild_54888994 | NA                                  | Ca_kabuli_denovo | 54888994                | G/T  | NA                 | NA                            | NA                 |
| Kabuli_wild_54891175 | NA                                  | Ca_kabuli_denovo | 54891175                | G/T  | NA                 | NA                            | NA                 |
| Kabuli_wild_54893289 | NA                                  | Ca_kabuli_denovo | 54893289                | G/T  | NA                 | NA                            | NA                 |

| SNP IDs              | NCBI dbSNP accession IDs (NCBI_SS#) | Chromosomes      | Physical positions (bp) | SNPs | Gene accession IDs | Sequence components of genome | Putative functions |
|----------------------|-------------------------------------|------------------|-------------------------|------|--------------------|-------------------------------|--------------------|
| Kabuli_wild_54893354 | NA                                  | Ca_kabuli_denovo | 54893354                | C/G  | NA                 | NA                            | NA                 |
| Kabuli_wild_54893375 | NA                                  | Ca_kabuli_denovo | 54893375                | C/T  | NA                 | NA                            | NA                 |
| Kabuli_wild_54893378 | NA                                  | Ca_kabuli_denovo | 54893378                | A/C  | NA                 | NA                            | NA                 |
| Kabuli_wild_54893901 | NA                                  | Ca_kabuli_denovo | 54893901                | A/T  | NA                 | NA                            | NA                 |
| Kabuli_wild_54896146 | NA                                  | Ca_kabuli_denovo | 54896146                | G/T  | NA                 | NA                            | NA                 |
| Kabuli_wild_54896174 | NA                                  | Ca_kabuli_denovo | 54896174                | G/T  | NA                 | NA                            | NA                 |
| Kabuli_wild_54896178 | NA                                  | Ca_kabuli_denovo | 54896178                | A/G  | NA                 | NA                            | NA                 |
| Kabuli_wild_54899731 | NA                                  | Ca_kabuli_denovo | 54899731                | G/T  | NA                 | NA                            | NA                 |
| Kabuli_wild_54900382 | NA                                  | Ca_kabuli_denovo | 54900382                | C/T  | NA                 | NA                            | NA                 |
| Kabuli_wild_54902690 | NA                                  | Ca_kabuli_denovo | 54902690                | C/T  | NA                 | NA                            | NA                 |
| Kabuli_wild_54906705 | NA                                  | Ca_kabuli_denovo | 54906705                | C/T  | NA                 | NA                            | NA                 |
| Kabuli_wild_54922872 | NA                                  | Ca_kabuli_denovo | 54922872                | G/T  | NA                 | NA                            | NA                 |
| Kabuli_wild_54925125 | NA                                  | Ca_kabuli_denovo | 54925125                | A/G  | NA                 | NA                            | NA                 |
| Kabuli_wild_54925146 | NA                                  | Ca_kabuli_denovo | 54925146                | C/T  | NA                 | NA                            | NA                 |
| Kabuli_wild_54926980 | NA                                  | Ca_kabuli_denovo | 54926980                | A/G  | NA                 | NA                            | NA                 |
| Kabuli_wild_54928438 | NA                                  | Ca_kabuli_denovo | 54928438                | A/G  | NA                 | NA                            | NA                 |
| Kabuli_wild_54928444 | NA                                  | Ca_kabuli_denovo | 54928444                | A/G  | NA                 | NA                            | NA                 |
| Kabuli_wild_54934664 | NA                                  | Ca_kabuli_denovo | 54934664                | A/G  | NA                 | NA                            | NA                 |
| Kabuli_wild_54935307 | NA                                  | Ca_kabuli_denovo | 54935307                | G/T  | NA                 | NA                            | NA                 |
| Kabuli_wild_54940378 | NA                                  | Ca_kabuli_denovo | 54940378                | C/T  | NA                 | NA                            | NA                 |
| Kabuli_wild_54940382 | NA                                  | Ca_kabuli_denovo | 54940382                | C/G  | NA                 | NA                            | NA                 |
| Kabuli_wild_54945333 | NA                                  | Ca_kabuli_denovo | 54945333                | C/T  | NA                 | NA                            | NA                 |
| Kabuli_wild_54945358 | NA                                  | Ca_kabuli_denovo | 54945358                | C/T  | NA                 | NA                            | NA                 |
| Kabuli_wild_54945365 | NA                                  | Ca_kabuli_denovo | 54945365                | A/G  | NA                 | NA                            | NA                 |
| Kabuli_wild_54945367 | NA                                  | Ca_kabuli_denovo | 54945367                | A/G  | NA                 | NA                            | NA                 |
| Kabuli_wild_54945952 | NA                                  | Ca_kabuli_denovo | 54945952                | C/G  | NA                 | NA                            | NA                 |
| Kabuli_wild_54954592 | NA                                  | Ca_kabuli_denovo | 54954592                | G/T  | NA                 | NA                            | NA                 |
| Kabuli_wild_54974441 | NA                                  | Ca_kabuli_denovo | 54974441                | C/G  | NA                 | NA                            | NA                 |
| Kabuli_wild_54974447 | NA                                  | Ca_kabuli_denovo | 54974447                | A/G  | NA                 | NA                            | NA                 |
| Kabuli_wild_54974453 | NA                                  | Ca_kabuli_denovo | 54974453                | C/G  | NA                 | NA                            | NA                 |
| Kabuli_wild_54974501 | NA                                  | Ca_kabuli_denovo | 54974501                | A/G  | NA                 | NA                            | NA                 |
| Kabuli_wild_54977794 | NA                                  | Ca_kabuli_denovo | 54977794                | G/T  | NA                 | NA                            | NA                 |
| Kabuli_wild_54977828 | NA                                  | Ca_kabuli_denovo | 54977828                | A/T  | NA                 | NA                            | NA                 |
| Kabuli_wild_54988638 | NA                                  | Ca_kabuli_denovo | 54988638                | C/G  | NA                 | NA                            | NA                 |
| Kabuli_wild_54993748 | NA                                  | Ca_kabuli_denovo | 54993748                | G/T  | NA                 | NA                            | NA                 |
| Kabuli_wild_55018489 | NA                                  | Ca_kabuli_denovo | 55018489                | G/T  | NA                 | NA                            | NA                 |
| Kabuli_wild_55019196 | NA                                  | Ca_kabuli_denovo | 55019196                | A/G  | NA                 | NA                            | NA                 |
| Kabuli_wild_55019232 | NA                                  | Ca_kabuli_denovo | 55019232                | C/G  | NA                 | NA                            | NA                 |
| Kabuli_wild_55039997 | NA                                  | Ca_kabuli_denovo | 55039997                | C/T  | NA                 | NA                            | NA                 |
| Kabuli_wild_55052622 | NA                                  | Ca_kabuli_denovo | 55052622                | G/T  | NA                 | NA                            | NA                 |
| Kabuli_wild_55053471 | NA                                  | Ca_kabuli_denovo | 55053471                | A/G  | NA                 | NA                            | NA                 |
| Kabuli_wild_55058654 | NA                                  | Ca_kabuli_denovo | 55058654                | G/T  | NA                 | NA                            | NA                 |
| Kabuli_wild_55064245 | NA                                  | Ca_kabuli_denovo | 55064245                | A/C  | NA                 | NA                            | NA                 |
| Kabuli_wild_55064247 | NA                                  | Ca_kabuli_denovo | 55064247                | A/C  | NA                 | NA                            | NA                 |

| SNP IDs              | NCBI dbSNP accession IDs (NCBI_SS#) | Chromosomes      | Physical positions (bp) | SNPs | Gene accession IDs | Sequence components of genome | Putative functions |
|----------------------|-------------------------------------|------------------|-------------------------|------|--------------------|-------------------------------|--------------------|
| Kabuli_wild_55065354 | NA                                  | Ca_kabuli_denovo | 55065354                | G/T  | NA                 | NA                            | NA                 |
| Kabuli_wild_55075696 | NA                                  | Ca_kabuli_denovo | 55075696                | A/C  | NA                 | NA                            | NA                 |
| Kabuli_wild_55075720 | NA                                  | Ca_kabuli_denovo | 55075720                | A/G  | NA                 | NA                            | NA                 |
| Kabuli_wild_55077104 | NA                                  | Ca_kabuli_denovo | 55077104                | C/G  | NA                 | NA                            | NA                 |
| Kabuli_wild_55077140 | NA                                  | Ca_kabuli_denovo | 55077140                | C/T  | NA                 | NA                            | NA                 |
| Kabuli_wild_55082193 | NA                                  | Ca_kabuli_denovo | 55082193                | A/G  | NA                 | NA                            | NA                 |
| Kabuli_wild_55082194 | NA                                  | Ca_kabuli_denovo | 55082194                | A/T  | NA                 | NA                            | NA                 |
| Kabuli_wild_55090133 | NA                                  | Ca_kabuli_denovo | 55090133                | G/T  | NA                 | NA                            | NA                 |
| Kabuli_wild_55090674 | NA                                  | Ca_kabuli_denovo | 55090674                | A/G  | NA                 | NA                            | NA                 |
| Kabuli_wild_55108417 | NA                                  | Ca_kabuli_denovo | 55108417                | A/C  | NA                 | NA                            | NA                 |
| Kabuli_wild_55118137 | NA                                  | Ca_kabuli_denovo | 55118137                | A/G  | NA                 | NA                            | NA                 |
| Kabuli_wild_55120046 | NA                                  | Ca_kabuli_denovo | 55120046                | A/C  | NA                 | NA                            | NA                 |
| Kabuli_wild_55122156 | NA                                  | Ca_kabuli_denovo | 55122156                | A/C  | NA                 | NA                            | NA                 |
| Kabuli_wild_55123744 | NA                                  | Ca_kabuli_denovo | 55123744                | G/T  | NA                 | NA                            | NA                 |
| Kabuli_wild_55123759 | NA                                  | Ca_kabuli_denovo | 55123759                | C/G  | NA                 | NA                            | NA                 |
| Kabuli_wild_55123761 | NA                                  | Ca_kabuli_denovo | 55123761                | A/G  | NA                 | NA                            | NA                 |
| Kabuli_wild_55123766 | NA                                  | Ca_kabuli_denovo | 55123766                | A/G  | NA                 | NA                            | NA                 |
| Kabuli_wild_55126432 | NA                                  | Ca_kabuli_denovo | 55126432                | G/T  | NA                 | NA                            | NA                 |
| Kabuli_wild_55126928 | NA                                  | Ca_kabuli_denovo | 55126928                | C/G  | NA                 | NA                            | NA                 |
| Kabuli_wild_55130348 | NA                                  | Ca_kabuli_denovo | 55130348                | G/T  | NA                 | NA                            | NA                 |
| Kabuli_wild_55130700 | NA                                  | Ca_kabuli_denovo | 55130700                | G/T  | NA                 | NA                            | NA                 |
| Kabuli_wild_55130949 | NA                                  | Ca_kabuli_denovo | 55130949                | A/G  | NA                 | NA                            | NA                 |
| Kabuli_wild_55132178 | NA                                  | Ca_kabuli_denovo | 55132178                | G/T  | NA                 | NA                            | NA                 |
| Kabuli_wild_55137976 | NA                                  | Ca_kabuli_denovo | 55137976                | A/C  | NA                 | NA                            | NA                 |
| Kabuli_wild_55138606 | NA                                  | Ca_kabuli_denovo | 55138606                | G/T  | NA                 | NA                            | NA                 |
| Kabuli_wild_55142407 | NA                                  | Ca_kabuli_denovo | 55142407                | G/T  | NA                 | NA                            | NA                 |
| Kabuli_wild_55146515 | NA                                  | Ca_kabuli_denovo | 55146515                | C/T  | NA                 | NA                            | NA                 |
| Kabuli_wild_55147458 | NA                                  | Ca_kabuli_denovo | 55147458                | G/T  | NA                 | NA                            | NA                 |
| Kabuli_wild_55147483 | NA                                  | Ca_kabuli_denovo | 55147483                | A/C  | NA                 | NA                            | NA                 |
| Kabuli_wild_55148620 | NA                                  | Ca_kabuli_denovo | 55148620                | C/T  | NA                 | NA                            | NA                 |
| Kabuli_wild_55148622 | NA                                  | Ca_kabuli_denovo | 55148622                | C/G  | NA                 | NA                            | NA                 |
| Kabuli_wild_55148633 | NA                                  | Ca_kabuli_denovo | 55148633                | C/T  | NA                 | NA                            | NA                 |
| Kabuli_wild_55157640 | NA                                  | Ca_kabuli_denovo | 55157640                | C/T  | NA                 | NA                            | NA                 |
| Kabuli_wild_55157840 | NA                                  | Ca_kabuli_denovo | 55157840                | C/T  | NA                 | NA                            | NA                 |
| Kabuli_wild_55157864 | NA                                  | Ca_kabuli_denovo | 55157864                | C/T  | NA                 | NA                            | NA                 |
| Kabuli_wild_55161154 | NA                                  | Ca_kabuli_denovo | 55161154                | C/T  | NA                 | NA                            | NA                 |
| Kabuli_wild_55163028 | NA                                  | Ca_kabuli_denovo | 55163028                | A/G  | NA                 | NA                            | NA                 |
| Kabuli_wild_55163043 | NA                                  | Ca_kabuli_denovo | 55163043                | A/G  | NA                 | NA                            | NA                 |
| Kabuli_wild_55163567 | NA                                  | Ca_kabuli_denovo | 55163567                | G/T  | NA                 | NA                            | NA                 |
| Kabuli_wild_55165796 | NA                                  | Ca_kabuli_denovo | 55165796                | G/T  | NA                 | NA                            | NA                 |
| Kabuli_wild_55166079 | NA                                  | Ca_kabuli_denovo | 55166079                | A/C  | NA                 | NA                            | NA                 |
| Kabuli_wild_55167290 | NA                                  | Ca_kabuli_denovo | 55167290                | A/C  | NA                 | NA                            | NA                 |
| Kabuli_wild_55169863 | NA                                  | Ca_kabuli_denovo | 55169863                | C/T  | NA                 | NA                            | NA                 |
| Kabuli_wild_55171569 | NA                                  | Ca_kabuli_denovo | 55171569                | G/T  | NA                 | NA                            | NA                 |

| SNP IDs              | NCBI dbSNP accession IDs (NCBI_SS#) | Chromosomes      | Physical positions (bp) | SNPs | Gene accession IDs | Sequence components of genome | Putative functions |
|----------------------|-------------------------------------|------------------|-------------------------|------|--------------------|-------------------------------|--------------------|
| Kabuli_wild_55179352 | NA                                  | Ca_kabuli_denovo | 55179352                | A/C  | NA                 | NA                            | NA                 |
| Kabuli_wild_55179370 | NA                                  | Ca_kabuli_denovo | 55179370                | C/T  | NA                 | NA                            | NA                 |
| Kabuli_wild_55179719 | NA                                  | Ca_kabuli_denovo | 55179719                | A/G  | NA                 | NA                            | NA                 |
| Kabuli_wild_55181614 | NA                                  | Ca_kabuli_denovo | 55181614                | A/C  | NA                 | NA                            | NA                 |
| Kabuli_wild_55189075 | NA                                  | Ca_kabuli_denovo | 55189075                | G/T  | NA                 | NA                            | NA                 |
| Kabuli_wild_55189117 | NA                                  | Ca_kabuli_denovo | 55189117                | A/C  | NA                 | NA                            | NA                 |
| Kabuli_wild_55189703 | NA                                  | Ca_kabuli_denovo | 55189703                | A/C  | NA                 | NA                            | NA                 |
| Kabuli_wild_55189705 | NA                                  | Ca_kabuli_denovo | 55189705                | A/C  | NA                 | NA                            | NA                 |
| Kabuli_wild_55191795 | NA                                  | Ca_kabuli_denovo | 55191795                | G/T  | NA                 | NA                            | NA                 |
| Kabuli_wild_55194076 | NA                                  | Ca_kabuli_denovo | 55194076                | G/T  | NA                 | NA                            | NA                 |
| Kabuli_wild_55200265 | NA                                  | Ca_kabuli_denovo | 55200265                | A/C  | NA                 | NA                            | NA                 |
| Kabuli_wild_55200266 | NA                                  | Ca_kabuli_denovo | 55200266                | C/G  | NA                 | NA                            | NA                 |
| Kabuli_wild_55209057 | NA                                  | Ca_kabuli_denovo | 55209057                | A/C  | NA                 | NA                            | NA                 |
| Kabuli_wild_55214929 | NA                                  | Ca_kabuli_denovo | 55214929                | C/G  | NA                 | NA                            | NA                 |
| Kabuli_wild_55214948 | NA                                  | Ca_kabuli_denovo | 55214948                | A/C  | NA                 | NA                            | NA                 |
| Kabuli_wild_55214950 | NA                                  | Ca_kabuli_denovo | 55214950                | C/G  | NA                 | NA                            | NA                 |
| Kabuli_wild_55214983 | NA                                  | Ca_kabuli_denovo | 55214983                | C/G  | NA                 | NA                            | NA                 |
| Kabuli_wild_55216494 | NA                                  | Ca_kabuli_denovo | 55216494                | C/T  | NA                 | NA                            | NA                 |
| Kabuli_wild_55216530 | NA                                  | Ca_kabuli_denovo | 55216530                | C/G  | NA                 | NA                            | NA                 |
| Kabuli_wild_55223104 | NA                                  | Ca_kabuli_denovo | 55223104                | C/T  | NA                 | NA                            | NA                 |
| Kabuli_wild_55223120 | NA                                  | Ca_kabuli_denovo | 55223120                | C/T  | NA                 | NA                            | NA                 |
| Kabuli_wild_55223928 | NA                                  | Ca_kabuli_denovo | 55223928                | C/G  | NA                 | NA                            | NA                 |
| Kabuli_wild_55224061 | NA                                  | Ca_kabuli_denovo | 55224061                | C/T  | NA                 | NA                            | NA                 |
| Kabuli_wild_55224097 | NA                                  | Ca_kabuli_denovo | 55224097                | G/T  | NA                 | NA                            | NA                 |
| Kabuli_wild_55227866 | NA                                  | Ca_kabuli_denovo | 55227866                | A/T  | NA                 | NA                            | NA                 |
| Kabuli_wild_55230763 | NA                                  | Ca_kabuli_denovo | 55230763                | C/T  | NA                 | NA                            | NA                 |
| Kabuli_wild_55230772 | NA                                  | Ca_kabuli_denovo | 55230772                | C/T  | NA                 | NA                            | NA                 |
| Kabuli_wild_55233911 | NA                                  | Ca_kabuli_denovo | 55233911                | A/G  | NA                 | NA                            | NA                 |
| Kabuli_wild_55233916 | NA                                  | Ca_kabuli_denovo | 55233916                | A/C  | NA                 | NA                            | NA                 |
| Kabuli_wild_55236936 | NA                                  | Ca_kabuli_denovo | 55236936                | G/T  | NA                 | NA                            | NA                 |
| Kabuli_wild_55237242 | NA                                  | Ca_kabuli_denovo | 55237242                | C/T  | NA                 | NA                            | NA                 |
| Kabuli_wild_55242098 | NA                                  | Ca_kabuli_denovo | 55242098                | G/T  | NA                 | NA                            | NA                 |
| Kabuli_wild_55245000 | NA                                  | Ca_kabuli_denovo | 55245000                | A/C  | NA                 | NA                            | NA                 |
| Kabuli_wild_55246654 | NA                                  | Ca_kabuli_denovo | 55246654                | C/T  | NA                 | NA                            | NA                 |
| Kabuli_wild_55246846 | NA                                  | Ca_kabuli_denovo | 55246846                | C/T  | NA                 | NA                            | NA                 |
| Kabuli_wild_55246925 | NA                                  | Ca_kabuli_denovo | 55246925                | C/T  | NA                 | NA                            | NA                 |
| Kabuli_wild_55246928 | NA                                  | Ca_kabuli_denovo | 55246928                | C/T  | NA                 | NA                            | NA                 |
| Kabuli_wild_55247230 | NA                                  | Ca_kabuli_denovo | 55247230                | G/T  | NA                 | NA                            | NA                 |
| Kabuli_wild_55250248 | NA                                  | Ca_kabuli_denovo | 55250248                | C/G  | NA                 | NA                            | NA                 |
| Kabuli_wild_55250804 | NA                                  | Ca_kabuli_denovo | 55250804                | G/T  | NA                 | NA                            | NA                 |
| Kabuli_wild_55265807 | NA                                  | Ca_kabuli_denovo | 55265807                | G/T  | NA                 | NA                            | NA                 |
| Kabuli_wild_55265842 | NA                                  | Ca_kabuli_denovo | 55265842                | C/G  | NA                 | NA                            | NA                 |
| Kabuli_wild_55271612 | NA                                  | Ca_kabuli_denovo | 55271612                | G/T  | NA                 | NA                            | NA                 |
| Kabuli_wild_55272844 | NA                                  | Ca_kabuli_denovo | 55272844                | G/T  | NA                 | NA                            | NA                 |

| SNP IDs              | NCBI dbSNP accession IDs (NCBI_SS#) | Chromosomes      | Physical positions (bp) | SNPs | Gene accession IDs | Sequence components of genome | Putative functions |
|----------------------|-------------------------------------|------------------|-------------------------|------|--------------------|-------------------------------|--------------------|
| Kabuli_wild_55299072 | NA                                  | Ca_kabuli_denovo | 55299072                | C/T  | NA                 | NA                            | NA                 |
| Kabuli_wild_55299073 | NA                                  | Ca_kabuli_denovo | 55299073                | C/G  | NA                 | NA                            | NA                 |
| Kabuli_wild_55310556 | NA                                  | Ca_kabuli_denovo | 55310556                | C/T  | NA                 | NA                            | NA                 |
| Kabuli_wild_55320525 | NA                                  | Ca_kabuli_denovo | 55320525                | C/T  | NA                 | NA                            | NA                 |
| Kabuli_wild_55320534 | NA                                  | Ca_kabuli_denovo | 55320534                | C/T  | NA                 | NA                            | NA                 |
| Kabuli_wild_55320538 | NA                                  | Ca_kabuli_denovo | 55320538                | C/T  | NA                 | NA                            | NA                 |
| Kabuli_wild_55330039 | NA                                  | Ca_kabuli_denovo | 55330039                | A/C  | NA                 | NA                            | NA                 |
| Kabuli_wild_55332878 | NA                                  | Ca_kabuli_denovo | 55332878                | C/G  | NA                 | NA                            | NA                 |
| Kabuli_wild_55334878 | NA                                  | Ca_kabuli_denovo | 55334878                | A/C  | NA                 | NA                            | NA                 |
| Kabuli_wild_55340036 | NA                                  | Ca_kabuli_denovo | 55340036                | A/G  | NA                 | NA                            | NA                 |
| Kabuli_wild_55344745 | NA                                  | Ca_kabuli_denovo | 55344745                | C/G  | NA                 | NA                            | NA                 |
| Kabuli_wild_55353544 | NA                                  | Ca_kabuli_denovo | 55353544                | G/T  | NA                 | NA                            | NA                 |
| Kabuli_wild_55356872 | NA                                  | Ca_kabuli_denovo | 55356872                | A/G  | NA                 | NA                            | NA                 |
| Kabuli_wild_55356878 | NA                                  | Ca_kabuli_denovo | 55356878                | A/G  | NA                 | NA                            | NA                 |
| Kabuli_wild_55376967 | NA                                  | Ca_kabuli_denovo | 55376967                | A/G  | NA                 | NA                            | NA                 |
| Kabuli_wild_55378823 | NA                                  | Ca_kabuli_denovo | 55378823                | G/T  | NA                 | NA                            | NA                 |
| Kabuli_wild_55378972 | NA                                  | Ca_kabuli_denovo | 55378972                | C/T  | NA                 | NA                            | NA                 |
| Kabuli_wild_55390144 | NA                                  | Ca_kabuli_denovo | 55390144                | A/G  | NA                 | NA                            | NA                 |
| Kabuli_wild_55390160 | NA                                  | Ca_kabuli_denovo | 55390160                | C/T  | NA                 | NA                            | NA                 |
| Kabuli_wild_55398948 | NA                                  | Ca_kabuli_denovo | 55398948                | A/C  | NA                 | NA                            | NA                 |
| Kabuli_wild_55398955 | NA                                  | Ca_kabuli_denovo | 55398955                | A/C  | NA                 | NA                            | NA                 |
| Kabuli_wild_55424540 | NA                                  | Ca_kabuli_denovo | 55424540                | C/G  | NA                 | NA                            | NA                 |
| Kabuli_wild_55431950 | NA                                  | Ca_kabuli_denovo | 55431950                | A/G  | NA                 | NA                            | NA                 |
| Kabuli_wild_55441037 | NA                                  | Ca_kabuli_denovo | 55441037                | G/T  | NA                 | NA                            | NA                 |
| Kabuli_wild_55445841 | NA                                  | Ca_kabuli_denovo | 55445841                | G/T  | NA                 | NA                            | NA                 |
| Kabuli_wild_55445843 | NA                                  | Ca_kabuli_denovo | 55445843                | C/G  | NA                 | NA                            | NA                 |
| Kabuli_wild_55445853 | NA                                  | Ca_kabuli_denovo | 55445853                | A/C  | NA                 | NA                            | NA                 |
| Kabuli_wild_55446340 | NA                                  | Ca_kabuli_denovo | 55446340                | C/T  | NA                 | NA                            | NA                 |
| Kabuli_wild_55446371 | NA                                  | Ca_kabuli_denovo | 55446371                | A/G  | NA                 | NA                            | NA                 |
| Kabuli_wild_55446380 | NA                                  | Ca_kabuli_denovo | 55446380                | A/G  | NA                 | NA                            | NA                 |
| Kabuli_wild_55451914 | NA                                  | Ca_kabuli_denovo | 55451914                | G/T  | NA                 | NA                            | NA                 |
| Kabuli_wild_55452779 | NA                                  | Ca_kabuli_denovo | 55452779                | G/T  | NA                 | NA                            | NA                 |
| Kabuli_wild_55454991 | NA                                  | Ca_kabuli_denovo | 55454991                | C/T  | NA                 | NA                            | NA                 |
| Kabuli_wild_55455499 | NA                                  | Ca_kabuli_denovo | 55455499                | G/T  | NA                 | NA                            | NA                 |
| Kabuli_wild_55456986 | NA                                  | Ca_kabuli_denovo | 55456986                | G/T  | NA                 | NA                            | NA                 |
| Kabuli_wild_55465580 | NA                                  | Ca_kabuli_denovo | 55465580                | C/G  | NA                 | NA                            | NA                 |
| Kabuli_wild_55467409 | NA                                  | Ca_kabuli_denovo | 55467409                | A/G  | NA                 | NA                            | NA                 |
| Kabuli_wild_55467425 | NA                                  | Ca_kabuli_denovo | 55467425                | C/G  | NA                 | NA                            | NA                 |
| Kabuli_wild_55467481 | NA                                  | Ca_kabuli_denovo | 55467481                | C/T  | NA                 | NA                            | NA                 |
| Kabuli_wild_55469819 | NA                                  | Ca_kabuli_denovo | 55469819                | A/C  | NA                 | NA                            | NA                 |
| Kabuli_wild_55475493 | NA                                  | Ca_kabuli_denovo | 55475493                | G/T  | NA                 | NA                            | NA                 |
| Kabuli_wild_55479356 | NA                                  | Ca_kabuli_denovo | 55479356                | C/G  | NA                 | NA                            | NA                 |
| Kabuli_wild_55481538 | NA                                  | Ca_kabuli_denovo | 55481538                | A/C  | NA                 | NA                            | NA                 |
| Kabuli_wild_55481539 | NA                                  | Ca_kabuli_denovo | 55481539                | A/G  | NA                 | NA                            | NA                 |

| SNP IDs              | NCBI dbSNP accession IDs (NCBI_SS#) | Chromosomes      | Physical positions (bp) | SNPs | Gene accession IDs | Sequence components of genome | Putative functions |
|----------------------|-------------------------------------|------------------|-------------------------|------|--------------------|-------------------------------|--------------------|
| Kabuli_wild_55490634 | NA                                  | Ca_kabuli_denovo | 55490634                | G/T  | NA                 | NA                            | NA                 |
| Kabuli_wild_55491482 | NA                                  | Ca_kabuli_denovo | 55491482                | G/T  | NA                 | NA                            | NA                 |
| Kabuli_wild_55493557 | NA                                  | Ca_kabuli_denovo | 55493557                | C/G  | NA                 | NA                            | NA                 |
| Kabuli_wild_55494093 | NA                                  | Ca_kabuli_denovo | 55494093                | A/C  | NA                 | NA                            | NA                 |
| Kabuli_wild_55494094 | NA                                  | Ca_kabuli_denovo | 55494094                | A/G  | NA                 | NA                            | NA                 |
| Kabuli_wild_55503033 | NA                                  | Ca_kabuli_denovo | 55503033                | A/T  | NA                 | NA                            | NA                 |
| Kabuli_wild_55510916 | NA                                  | Ca_kabuli_denovo | 55510916                | A/G  | NA                 | NA                            | NA                 |
| Kabuli_wild_55520937 | NA                                  | Ca_kabuli_denovo | 55520937                | G/T  | NA                 | NA                            | NA                 |
| Kabuli_wild_55529830 | NA                                  | Ca_kabuli_denovo | 55529830                | A/G  | NA                 | NA                            | NA                 |
| Kabuli_wild_55529869 | NA                                  | Ca_kabuli_denovo | 55529869                | A/G  | NA                 | NA                            | NA                 |
| Kabuli_wild_55532075 | NA                                  | Ca_kabuli_denovo | 55532075                | A/T  | NA                 | NA                            | NA                 |
| Kabuli_wild_55534974 | NA                                  | Ca_kabuli_denovo | 55534974                | A/G  | NA                 | NA                            | NA                 |
| Kabuli_wild_55537711 | NA                                  | Ca_kabuli_denovo | 55537711                | A/C  | NA                 | NA                            | NA                 |
| Kabuli_wild_55543672 | NA                                  | Ca_kabuli_denovo | 55543672                | A/G  | NA                 | NA                            | NA                 |
| Kabuli_wild_55543719 | NA                                  | Ca_kabuli_denovo | 55543719                | C/G  | NA                 | NA                            | NA                 |
| Kabuli_wild_55548214 | NA                                  | Ca_kabuli_denovo | 55548214                | A/G  | NA                 | NA                            | NA                 |
| Kabuli_wild_55557716 | NA                                  | Ca_kabuli_denovo | 55557716                | C/T  | NA                 | NA                            | NA                 |
| Kabuli_wild_55559180 | NA                                  | Ca_kabuli_denovo | 55559180                | C/G  | NA                 | NA                            | NA                 |
| Kabuli_wild_55561820 | NA                                  | Ca_kabuli_denovo | 55561820                | A/G  | NA                 | NA                            | NA                 |
| Kabuli_wild_55561838 | NA                                  | Ca_kabuli_denovo | 55561838                | A/G  | NA                 | NA                            | NA                 |
| Kabuli_wild_55564316 | NA                                  | Ca_kabuli_denovo | 55564316                | A/C  | NA                 | NA                            | NA                 |
| Kabuli_wild_55564343 | NA                                  | Ca_kabuli_denovo | 55564343                | C/T  | NA                 | NA                            | NA                 |
| Kabuli_wild_55564443 | NA                                  | Ca_kabuli_denovo | 55564443                | G/T  | NA                 | NA                            | NA                 |
| Kabuli_wild_55566099 | NA                                  | Ca_kabuli_denovo | 55566099                | C/T  | NA                 | NA                            | NA                 |
| Kabuli_wild_55569721 | NA                                  | Ca_kabuli_denovo | 55569721                | C/T  | NA                 | NA                            | NA                 |
| Kabuli_wild_55573097 | NA                                  | Ca_kabuli_denovo | 55573097                | A/G  | NA                 | NA                            | NA                 |
| Kabuli_wild_55573111 | NA                                  | Ca_kabuli_denovo | 55573111                | A/G  | NA                 | NA                            | NA                 |
| Kabuli_wild_55573210 | NA                                  | Ca_kabuli_denovo | 55573210                | C/G  | NA                 | NA                            | NA                 |
| Kabuli_wild_55574301 | NA                                  | Ca_kabuli_denovo | 55574301                | C/T  | NA                 | NA                            | NA                 |
| Kabuli_wild_55576908 | NA                                  | Ca_kabuli_denovo | 55576908                | A/G  | NA                 | NA                            | NA                 |
| Kabuli_wild_55584878 | NA                                  | Ca_kabuli_denovo | 55584878                | C/T  | NA                 | NA                            | NA                 |
| Kabuli_wild_55584919 | NA                                  | Ca_kabuli_denovo | 55584919                | C/T  | NA                 | NA                            | NA                 |
| Kabuli_wild_55584952 | NA                                  | Ca_kabuli_denovo | 55584952                | C/T  | NA                 | NA                            | NA                 |
| Kabuli_wild_55585000 | NA                                  | Ca_kabuli_denovo | 55585000                | G/T  | NA                 | NA                            | NA                 |
| Kabuli_wild_55585984 | NA                                  | Ca_kabuli_denovo | 55585984                | C/T  | NA                 | NA                            | NA                 |
| Kabuli_wild_55587717 | NA                                  | Ca_kabuli_denovo | 55587717                | G/T  | NA                 | NA                            | NA                 |
| Kabuli_wild_55589418 | NA                                  | Ca_kabuli_denovo | 55589418                | G/T  | NA                 | NA                            | NA                 |
| Kabuli_wild_55591965 | NA                                  | Ca_kabuli_denovo | 55591965                | G/T  | NA                 | NA                            | NA                 |
| Kabuli_wild_55594292 | NA                                  | Ca_kabuli_denovo | 55594292                | G/T  | NA                 | NA                            | NA                 |
| Kabuli_wild_55596998 | NA                                  | Ca_kabuli_denovo | 55596998                | A/G  | NA                 | NA                            | NA                 |
| Kabuli_wild_55597510 | NA                                  | Ca_kabuli_denovo | 55597510                | A/G  | NA                 | NA                            | NA                 |
| Kabuli_wild_55606810 | NA                                  | Ca_kabuli_denovo | 55606810                | C/T  | NA                 | NA                            | NA                 |
| Kabuli_wild_55610992 | NA                                  | Ca_kabuli_denovo | 55610992                | G/T  | NA                 | NA                            | NA                 |
| Kabuli_wild_55611488 | NA                                  | Ca_kabuli_denovo | 55611488                | A/G  | NA                 | NA                            | NA                 |

| SNP IDs              | NCBI dbSNP accession IDs (NCBI_SS#) | Chromosomes      | Physical positions (bp) | SNPs | Gene accession IDs | Sequence components of genome | Putative functions |
|----------------------|-------------------------------------|------------------|-------------------------|------|--------------------|-------------------------------|--------------------|
| Kabuli_wild_55613178 | NA                                  | Ca_kabuli_denovo | 55613178                | C/T  | NA                 | NA                            | NA                 |
| Kabuli_wild_55613220 | NA                                  | Ca_kabuli_denovo | 55613220                | A/T  | NA                 | NA                            | NA                 |
| Kabuli_wild_55614200 | NA                                  | Ca_kabuli_denovo | 55614200                | G/T  | NA                 | NA                            | NA                 |
| Kabuli_wild_55616370 | NA                                  | Ca_kabuli_denovo | 55616370                | G/T  | NA                 | NA                            | NA                 |
| Kabuli_wild_55619069 | NA                                  | Ca_kabuli_denovo | 55619069                | G/T  | NA                 | NA                            | NA                 |
| Kabuli_wild_55621936 | NA                                  | Ca_kabuli_denovo | 55621936                | G/T  | NA                 | NA                            | NA                 |
| Kabuli_wild_55625526 | NA                                  | Ca_kabuli_denovo | 55625526                | C/G  | NA                 | NA                            | NA                 |
| Kabuli_wild_55630804 | NA                                  | Ca_kabuli_denovo | 55630804                | A/C  | NA                 | NA                            | NA                 |
| Kabuli_wild_55632507 | NA                                  | Ca_kabuli_denovo | 55632507                | A/G  | NA                 | NA                            | NA                 |
| Kabuli_wild_55640432 | NA                                  | Ca_kabuli_denovo | 55640432                | C/T  | NA                 | NA                            | NA                 |
| Kabuli_wild_55640441 | NA                                  | Ca_kabuli_denovo | 55640441                | A/T  | NA                 | NA                            | NA                 |
| Kabuli_wild_55650438 | NA                                  | Ca_kabuli_denovo | 55650438                | C/T  | NA                 | NA                            | NA                 |
| Kabuli_wild_55650477 | NA                                  | Ca_kabuli_denovo | 55650477                | C/G  | NA                 | NA                            | NA                 |
| Kabuli_wild_55652449 | NA                                  | Ca_kabuli_denovo | 55652449                | A/G  | NA                 | NA                            | NA                 |
| Kabuli_wild_55654610 | NA                                  | Ca_kabuli_denovo | 55654610                | G/T  | NA                 | NA                            | NA                 |
| Kabuli_wild_55658858 | NA                                  | Ca_kabuli_denovo | 55658858                | A/T  | NA                 | NA                            | NA                 |
| Kabuli_wild_55662237 | NA                                  | Ca_kabuli_denovo | 55662237                | A/G  | NA                 | NA                            | NA                 |
| Kabuli_wild_55662527 | NA                                  | Ca_kabuli_denovo | 55662527                | A/G  | NA                 | NA                            | NA                 |
| Kabuli_wild_55662751 | NA                                  | Ca_kabuli_denovo | 55662751                | A/G  | NA                 | NA                            | NA                 |
| Kabuli_wild_55662765 | NA                                  | Ca_kabuli_denovo | 55662765                | C/T  | NA                 | NA                            | NA                 |
| Kabuli_wild_55664283 | NA                                  | Ca_kabuli_denovo | 55664283                | A/G  | NA                 | NA                            | NA                 |
| Kabuli_wild_55668557 | NA                                  | Ca_kabuli_denovo | 55668557                | A/G  | NA                 | NA                            | NA                 |
| Kabuli_wild_55669732 | NA                                  | Ca_kabuli_denovo | 55669732                | G/T  | NA                 | NA                            | NA                 |
| Kabuli_wild_55671443 | NA                                  | Ca_kabuli_denovo | 55671443                | A/C  | NA                 | NA                            | NA                 |
| Kabuli_wild_55672931 | NA                                  | Ca_kabuli_denovo | 55672931                | A/C  | NA                 | NA                            | NA                 |
| Kabuli_wild_55676785 | NA                                  | Ca_kabuli_denovo | 55676785                | C/T  | NA                 | NA                            | NA                 |
| Kabuli_wild_55676788 | NA                                  | Ca_kabuli_denovo | 55676788                | C/T  | NA                 | NA                            | NA                 |
| Kabuli_wild_55678057 | NA                                  | Ca_kabuli_denovo | 55678057                | A/G  | NA                 | NA                            | NA                 |
| Kabuli_wild_55680356 | NA                                  | Ca_kabuli_denovo | 55680356                | G/T  | NA                 | NA                            | NA                 |
| Kabuli_wild_55681116 | NA                                  | Ca_kabuli_denovo | 55681116                | G/T  | NA                 | NA                            | NA                 |
| Kabuli_wild_55681732 | NA                                  | Ca_kabuli_denovo | 55681732                | G/T  | NA                 | NA                            | NA                 |
| Kabuli_wild_55686324 | NA                                  | Ca_kabuli_denovo | 55686324                | A/C  | NA                 | NA                            | NA                 |
| Kabuli_wild_55686325 | NA                                  | Ca_kabuli_denovo | 55686325                | A/G  | NA                 | NA                            | NA                 |
| Kabuli_wild_55698656 | NA                                  | Ca_kabuli_denovo | 55698656                | C/T  | NA                 | NA                            | NA                 |
| Kabuli_wild_55698689 | NA                                  | Ca_kabuli_denovo | 55698689                | G/T  | NA                 | NA                            | NA                 |
| Kabuli_wild_55707240 | NA                                  | Ca_kabuli_denovo | 55707240                | C/G  | NA                 | NA                            | NA                 |
| Kabuli_wild_55707241 | NA                                  | Ca_kabuli_denovo | 55707241                | G/T  | NA                 | NA                            | NA                 |
| Kabuli_wild_55736915 | NA                                  | Ca_kabuli_denovo | 55736915                | A/C  | NA                 | NA                            | NA                 |
| Kabuli_wild_55741162 | NA                                  | Ca_kabuli_denovo | 55741162                | G/T  | NA                 | NA                            | NA                 |
| Kabuli_wild_55745377 | NA                                  | Ca_kabuli_denovo | 55745377                | G/T  | NA                 | NA                            | NA                 |
| Kabuli_wild_55745748 | NA                                  | Ca_kabuli_denovo | 55745748                | G/T  | NA                 | NA                            | NA                 |
| Kabuli_wild_55778949 | NA                                  | Ca_kabuli_denovo | 55778949                | C/G  | NA                 | NA                            | NA                 |
| Kabuli_wild_55781168 | NA                                  | Ca_kabuli_denovo | 55781168                | A/G  | NA                 | NA                            | NA                 |
| Kabuli_wild_55786674 | NA                                  | Ca_kabuli_denovo | 55786674                | A/T  | NA                 | NA                            | NA                 |



| SNP IDs              | NCBI dbSNP accession IDs (NCBI_SS#) | Chromosomes      | Physical positions (bp) | SNPs | Gene accession IDs | Sequence components of genome | Putative functions |
|----------------------|-------------------------------------|------------------|-------------------------|------|--------------------|-------------------------------|--------------------|
| Kabuli_wild_55788139 | NA                                  | Ca_kabuli_denovo | 55788139                | G/T  | NA                 | NA                            | NA                 |
| Kabuli_wild_55815076 | NA                                  | Ca_kabuli_denovo | 55815076                | G/T  | NA                 | NA                            | NA                 |
| Kabuli_wild_55815961 | NA                                  | Ca_kabuli_denovo | 55815961                | A/G  | NA                 | NA                            | NA                 |
| Kabuli_wild_55818497 | NA                                  | Ca_kabuli_denovo | 55818497                | G/T  | NA                 | NA                            | NA                 |
| Kabuli_wild_55818509 | NA                                  | Ca_kabuli_denovo | 55818509                | C/G  | NA                 | NA                            | NA                 |
| Kabuli_wild_55824818 | NA                                  | Ca_kabuli_denovo | 55824818                | A/C  | NA                 | NA                            | NA                 |
| Kabuli_wild_55826668 | NA                                  | Ca_kabuli_denovo | 55826668                | C/G  | NA                 | NA                            | NA                 |
| Kabuli_wild_55827724 | NA                                  | Ca_kabuli_denovo | 55827724                | A/G  | NA                 | NA                            | NA                 |
| Kabuli_wild_55827728 | NA                                  | Ca_kabuli_denovo | 55827728                | C/G  | NA                 | NA                            | NA                 |
| Kabuli_wild_55833441 | NA                                  | Ca_kabuli_denovo | 55833441                | G/T  | NA                 | NA                            | NA                 |
| Kabuli_wild_55833946 | NA                                  | Ca_kabuli_denovo | 55833946                | C/T  | NA                 | NA                            | NA                 |
| Kabuli_wild_55833985 | NA                                  | Ca_kabuli_denovo | 55833985                | A/G  | NA                 | NA                            | NA                 |
| Kabuli_wild_55835514 | NA                                  | Ca_kabuli_denovo | 55835514                | C/T  | NA                 | NA                            | NA                 |
| Kabuli_wild_55835515 | NA                                  | Ca_kabuli_denovo | 55835515                | A/G  | NA                 | NA                            | NA                 |
| Kabuli_wild_55844008 | NA                                  | Ca_kabuli_denovo | 55844008                | A/G  | NA                 | NA                            | NA                 |
| Kabuli_wild_55845959 | NA                                  | Ca_kabuli_denovo | 55845959                | G/T  | NA                 | NA                            | NA                 |
| Kabuli_wild_55850586 | NA                                  | Ca_kabuli_denovo | 55850586                | A/G  | NA                 | NA                            | NA                 |
| Kabuli_wild_55852360 | NA                                  | Ca_kabuli_denovo | 55852360                | C/T  | NA                 | NA                            | NA                 |
| Kabuli_wild_55869440 | NA                                  | Ca_kabuli_denovo | 55869440                | G/T  | NA                 | NA                            | NA                 |
| Kabuli_wild_55871567 | NA                                  | Ca_kabuli_denovo | 55871567                | A/C  | NA                 | NA                            | NA                 |
| Kabuli_wild_55882089 | NA                                  | Ca_kabuli_denovo | 55882089                | C/G  | NA                 | NA                            | NA                 |
| Kabuli_wild_55884042 | NA                                  | Ca_kabuli_denovo | 55884042                | G/T  | NA                 | NA                            | NA                 |
| Kabuli_wild_55889611 | NA                                  | Ca_kabuli_denovo | 55889611                | G/T  | NA                 | NA                            | NA                 |
| Kabuli_wild_55891575 | NA                                  | Ca_kabuli_denovo | 55891575                | A/G  | NA                 | NA                            | NA                 |
| Kabuli_wild_55906837 | NA                                  | Ca_kabuli_denovo | 55906837                | A/G  | NA                 | NA                            | NA                 |
| Kabuli_wild_55906918 | NA                                  | Ca_kabuli_denovo | 55906918                | C/G  | NA                 | NA                            | NA                 |
| Kabuli_wild_55907342 | NA                                  | Ca_kabuli_denovo | 55907342                | A/T  | NA                 | NA                            | NA                 |
| Kabuli_wild_55908143 | NA                                  | Ca_kabuli_denovo | 55908143                | C/T  | NA                 | NA                            | NA                 |
| Kabuli_wild_55908160 | NA                                  | Ca_kabuli_denovo | 55908160                | A/G  | NA                 | NA                            | NA                 |
| Kabuli_wild_55908966 | NA                                  | Ca_kabuli_denovo | 55908966                | G/T  | NA                 | NA                            | NA                 |
| Kabuli_wild_55911367 | NA                                  | Ca_kabuli_denovo | 55911367                | G/T  | NA                 | NA                            | NA                 |
| Kabuli_wild_55920525 | NA                                  | Ca_kabuli_denovo | 55920525                | C/T  | NA                 | NA                            | NA                 |
| Kabuli_wild_55922250 | NA                                  | Ca_kabuli_denovo | 55922250                | G/T  | NA                 | NA                            | NA                 |
| Kabuli_wild_55924915 | NA                                  | Ca_kabuli_denovo | 55924915                | C/G  | NA                 | NA                            | NA                 |
| Kabuli_wild_55924929 | NA                                  | Ca_kabuli_denovo | 55924929                | C/T  | NA                 | NA                            | NA                 |
| Kabuli_wild_55926949 | NA                                  | Ca_kabuli_denovo | 55926949                | A/G  | NA                 | NA                            | NA                 |
| Kabuli_wild_55926955 | NA                                  | Ca_kabuli_denovo | 55926955                | A/G  | NA                 | NA                            | NA                 |
| Kabuli_wild_55934216 | NA                                  | Ca_kabuli_denovo | 55934216                | A/G  | NA                 | NA                            | NA                 |
| Kabuli_wild_55937145 | NA                                  | Ca_kabuli_denovo | 55937145                | G/T  | NA                 | NA                            | NA                 |
| Kabuli_wild_55943804 | NA                                  | Ca_kabuli_denovo | 55943804                | C/T  | NA                 | NA                            | NA                 |
| Kabuli_wild_55944987 | NA                                  | Ca_kabuli_denovo | 55944987                | C/T  | NA                 | NA                            | NA                 |
| Kabuli_wild_55950631 | NA                                  | Ca_kabuli_denovo | 55950631                | C/G  | NA                 | NA                            | NA                 |
| Kabuli_wild_55960110 | NA                                  | Ca_kabuli_denovo | 55960110                | A/G  | NA                 | NA                            | NA                 |
| Kabuli_wild_55960368 | NA                                  | Ca_kabuli_denovo | 55960368                | G/T  | NA                 | NA                            | NA                 |

| SNP IDs              | NCBI dbSNP accession IDs (NCBI_SS#) | Chromosomes      | Physical positions (bp) | SNPs | Gene accession IDs | Sequence components of genome | Putative functions |
|----------------------|-------------------------------------|------------------|-------------------------|------|--------------------|-------------------------------|--------------------|
| Kabuli_wild_55965313 | NA                                  | Ca_kabuli_denovo | 55965313                | C/G  | NA                 | NA                            | NA                 |
| Kabuli_wild_55966078 | NA                                  | Ca_kabuli_denovo | 55966078                | C/T  | NA                 | NA                            | NA                 |
| Kabuli_wild_55966079 | NA                                  | Ca_kabuli_denovo | 55966079                | A/G  | NA                 | NA                            | NA                 |
| Kabuli_wild_55973182 | NA                                  | Ca_kabuli_denovo | 55973182                | C/T  | NA                 | NA                            | NA                 |
| Kabuli_wild_55973199 | NA                                  | Ca_kabuli_denovo | 55973199                | C/G  | NA                 | NA                            | NA                 |
| Kabuli_wild_55978191 | NA                                  | Ca_kabuli_denovo | 55978191                | C/T  | NA                 | NA                            | NA                 |
| Kabuli_wild_55987000 | NA                                  | Ca_kabuli_denovo | 55987000                | C/G  | NA                 | NA                            | NA                 |
| Kabuli_wild_55987012 | NA                                  | Ca_kabuli_denovo | 55987012                | A/C  | NA                 | NA                            | NA                 |
| Kabuli_wild_55987614 | NA                                  | Ca_kabuli_denovo | 55987614                | C/G  | NA                 | NA                            | NA                 |
| Kabuli_wild_55990005 | NA                                  | Ca_kabuli_denovo | 55990005                | A/G  | NA                 | NA                            | NA                 |
| Kabuli_wild_55994674 | NA                                  | Ca_kabuli_denovo | 55994674                | C/T  | NA                 | NA                            | NA                 |
| Kabuli_wild_55994684 | NA                                  | Ca_kabuli_denovo | 55994684                | A/G  | NA                 | NA                            | NA                 |
| Kabuli_wild_56001409 | NA                                  | Ca_kabuli_denovo | 56001409                | G/T  | NA                 | NA                            | NA                 |
| Kabuli_wild_56002796 | NA                                  | Ca_kabuli_denovo | 56002796                | A/G  | NA                 | NA                            | NA                 |
| Kabuli_wild_56007233 | NA                                  | Ca_kabuli_denovo | 56007233                | C/T  | NA                 | NA                            | NA                 |
| Kabuli_wild_56007449 | NA                                  | Ca_kabuli_denovo | 56007449                | A/C  | NA                 | NA                            | NA                 |
| Kabuli_wild_56007628 | NA                                  | Ca_kabuli_denovo | 56007628                | C/G  | NA                 | NA                            | NA                 |
| Kabuli_wild_56008393 | NA                                  | Ca_kabuli_denovo | 56008393                | C/T  | NA                 | NA                            | NA                 |
| Kabuli_wild_56008440 | NA                                  | Ca_kabuli_denovo | 56008440                | C/T  | NA                 | NA                            | NA                 |
| Kabuli_wild_56008474 | NA                                  | Ca_kabuli_denovo | 56008474                | C/G  | NA                 | NA                            | NA                 |
| Kabuli_wild_56008569 | NA                                  | Ca_kabuli_denovo | 56008569                | A/C  | NA                 | NA                            | NA                 |
| Kabuli_wild_56008570 | NA                                  | Ca_kabuli_denovo | 56008570                | G/T  | NA                 | NA                            | NA                 |
| Kabuli_wild_56010839 | NA                                  | Ca_kabuli_denovo | 56010839                | C/T  | NA                 | NA                            | NA                 |
| Kabuli_wild_56010842 | NA                                  | Ca_kabuli_denovo | 56010842                | C/G  | NA                 | NA                            | NA                 |
| Kabuli_wild_56012046 | NA                                  | Ca_kabuli_denovo | 56012046                | C/T  | NA                 | NA                            | NA                 |
| Kabuli_wild_56018840 | NA                                  | Ca_kabuli_denovo | 56018840                | C/T  | NA                 | NA                            | NA                 |
| Kabuli_wild_56019679 | NA                                  | Ca_kabuli_denovo | 56019679                | A/G  | NA                 | NA                            | NA                 |
| Kabuli_wild_56020804 | NA                                  | Ca_kabuli_denovo | 56020804                | C/T  | NA                 | NA                            | NA                 |
| Kabuli_wild_56020835 | NA                                  | Ca_kabuli_denovo | 56020835                | A/G  | NA                 | NA                            | NA                 |
| Kabuli_wild_56059855 | NA                                  | Ca_kabuli_denovo | 56059855                | G/T  | NA                 | NA                            | NA                 |
| Kabuli_wild_56067710 | NA                                  | Ca_kabuli_denovo | 56067710                | C/G  | NA                 | NA                            | NA                 |
| Kabuli_wild_56081844 | NA                                  | Ca_kabuli_denovo | 56081844                | G/T  | NA                 | NA                            | NA                 |
| Kabuli_wild_56087084 | NA                                  | Ca_kabuli_denovo | 56087084                | A/T  | NA                 | NA                            | NA                 |
| Kabuli_wild_56095747 | NA                                  | Ca_kabuli_denovo | 56095747                | C/T  | NA                 | NA                            | NA                 |
| Kabuli_wild_56096821 | NA                                  | Ca_kabuli_denovo | 56096821                | C/G  | NA                 | NA                            | NA                 |
| Kabuli_wild_56096826 | NA                                  | Ca_kabuli_denovo | 56096826                | A/C  | NA                 | NA                            | NA                 |
| Kabuli_wild_56097067 | NA                                  | Ca_kabuli_denovo | 56097067                | A/T  | NA                 | NA                            | NA                 |
| Kabuli_wild_56097069 | NA                                  | Ca_kabuli_denovo | 56097069                | A/G  | NA                 | NA                            | NA                 |
| Kabuli_wild_56097076 | NA                                  | Ca_kabuli_denovo | 56097076                | A/C  | NA                 | NA                            | NA                 |
| Kabuli_wild_56114882 | NA                                  | Ca_kabuli_denovo | 56114882                | C/G  | NA                 | NA                            | NA                 |
| Kabuli_wild_56114894 | NA                                  | Ca_kabuli_denovo | 56114894                | C/G  | NA                 | NA                            | NA                 |
| Kabuli_wild_56114903 | NA                                  | Ca_kabuli_denovo | 56114903                | C/G  | NA                 | NA                            | NA                 |
| Kabuli_wild_56114915 | NA                                  | Ca_kabuli_denovo | 56114915                | C/T  | NA                 | NA                            | NA                 |
| Kabuli_wild_56119064 | NA                                  | Ca_kabuli_denovo | 56119064                | A/G  | NA                 | NA                            | NA                 |

| SNP IDs              | NCBI dbSNP accession IDs (NCBI_SS#) | Chromosomes      | Physical positions (bp) | SNPs | Gene accession IDs | Sequence components of genome | Putative functions |
|----------------------|-------------------------------------|------------------|-------------------------|------|--------------------|-------------------------------|--------------------|
| Kabuli_wild_56119070 | NA                                  | Ca_kabuli_denovo | 56119070                | C/T  | NA                 | NA                            | NA                 |
| Kabuli_wild_56121351 | NA                                  | Ca_kabuli_denovo | 56121351                | A/C  | NA                 | NA                            | NA                 |
| Kabuli_wild_56121353 | NA                                  | Ca_kabuli_denovo | 56121353                | C/G  | NA                 | NA                            | NA                 |
| Kabuli_wild_56128165 | NA                                  | Ca_kabuli_denovo | 56128165                | A/C  | NA                 | NA                            | NA                 |
| Kabuli_wild_56134189 | NA                                  | Ca_kabuli_denovo | 56134189                | G/T  | NA                 | NA                            | NA                 |
| Kabuli_wild_56141772 | NA                                  | Ca_kabuli_denovo | 56141772                | A/G  | NA                 | NA                            | NA                 |
| Kabuli_wild_56165848 | NA                                  | Ca_kabuli_denovo | 56165848                | A/G  | NA                 | NA                            | NA                 |
| Kabuli_wild_56169765 | NA                                  | Ca_kabuli_denovo | 56169765                | C/T  | NA                 | NA                            | NA                 |
| Kabuli_wild_56169772 | NA                                  | Ca_kabuli_denovo | 56169772                | A/G  | NA                 | NA                            | NA                 |
| Kabuli_wild_56184324 | NA                                  | Ca_kabuli_denovo | 56184324                | G/T  | NA                 | NA                            | NA                 |
| Kabuli_wild_56198447 | NA                                  | Ca_kabuli_denovo | 56198447                | A/G  | NA                 | NA                            | NA                 |
| Kabuli_wild_56205257 | NA                                  | Ca_kabuli_denovo | 56205257                | G/T  | NA                 | NA                            | NA                 |
| Kabuli_wild_56208518 | NA                                  | Ca_kabuli_denovo | 56208518                | A/G  | NA                 | NA                            | NA                 |
| Kabuli_wild_56208519 | NA                                  | Ca_kabuli_denovo | 56208519                | G/T  | NA                 | NA                            | NA                 |
| Kabuli_wild_56214829 | NA                                  | Ca_kabuli_denovo | 56214829                | G/T  | NA                 | NA                            | NA                 |
| Kabuli_wild_56220452 | NA                                  | Ca_kabuli_denovo | 56220452                | C/T  | NA                 | NA                            | NA                 |
| Kabuli_wild_56229567 | NA                                  | Ca_kabuli_denovo | 56229567                | A/G  | NA                 | NA                            | NA                 |
| Kabuli_wild_56233283 | NA                                  | Ca_kabuli_denovo | 56233283                | G/T  | NA                 | NA                            | NA                 |
| Kabuli_wild_56233287 | NA                                  | Ca_kabuli_denovo | 56233287                | C/G  | NA                 | NA                            | NA                 |
| Kabuli_wild_56234791 | NA                                  | Ca_kabuli_denovo | 56234791                | G/T  | NA                 | NA                            | NA                 |
| Kabuli_wild_56241905 | NA                                  | Ca_kabuli_denovo | 56241905                | G/T  | NA                 | NA                            | NA                 |
| Kabuli_wild_56246355 | NA                                  | Ca_kabuli_denovo | 56246355                | C/T  | NA                 | NA                            | NA                 |
| Kabuli_wild_56247616 | NA                                  | Ca_kabuli_denovo | 56247616                | C/T  | NA                 | NA                            | NA                 |
| Kabuli_wild_56249158 | NA                                  | Ca_kabuli_denovo | 56249158                | A/C  | NA                 | NA                            | NA                 |
| Kabuli_wild_56249159 | NA                                  | Ca_kabuli_denovo | 56249159                | A/G  | NA                 | NA                            | NA                 |
| Kabuli_wild_56249160 | NA                                  | Ca_kabuli_denovo | 56249160                | A/C  | NA                 | NA                            | NA                 |
| Kabuli_wild_56249161 | NA                                  | Ca_kabuli_denovo | 56249161                | C/T  | NA                 | NA                            | NA                 |
| Kabuli_wild_56269672 | NA                                  | Ca_kabuli_denovo | 56269672                | A/G  | NA                 | NA                            | NA                 |
| Kabuli_wild_56269696 | NA                                  | Ca_kabuli_denovo | 56269696                | C/G  | NA                 | NA                            | NA                 |
| Kabuli_wild_56278403 | NA                                  | Ca_kabuli_denovo | 56278403                | G/T  | NA                 | NA                            | NA                 |
| Kabuli_wild_56280511 | NA                                  | Ca_kabuli_denovo | 56280511                | C/T  | NA                 | NA                            | NA                 |
| Kabuli_wild_56285095 | NA                                  | Ca_kabuli_denovo | 56285095                | C/T  | NA                 | NA                            | NA                 |
| Kabuli_wild_56285125 | NA                                  | Ca_kabuli_denovo | 56285125                | A/G  | NA                 | NA                            | NA                 |
| Kabuli_wild_56285128 | NA                                  | Ca_kabuli_denovo | 56285128                | C/T  | NA                 | NA                            | NA                 |
| Kabuli_wild_56285152 | NA                                  | Ca_kabuli_denovo | 56285152                | C/T  | NA                 | NA                            | NA                 |
| Kabuli_wild_56292620 | NA                                  | Ca_kabuli_denovo | 56292620                | A/G  | NA                 | NA                            | NA                 |
| Kabuli_wild_56292682 | NA                                  | Ca_kabuli_denovo | 56292682                | A/G  | NA                 | NA                            | NA                 |
| Kabuli_wild_56300028 | NA                                  | Ca_kabuli_denovo | 56300028                | A/C  | NA                 | NA                            | NA                 |
| Kabuli_wild_56300030 | NA                                  | Ca_kabuli_denovo | 56300030                | A/G  | NA                 | NA                            | NA                 |
| Kabuli_wild_56300031 | NA                                  | Ca_kabuli_denovo | 56300031                | A/T  | NA                 | NA                            | NA                 |
| Kabuli_wild_56300032 | NA                                  | Ca_kabuli_denovo | 56300032                | A/C  | NA                 | NA                            | NA                 |
| Kabuli_wild_56307109 | NA                                  | Ca_kabuli_denovo | 56307109                | A/G  | NA                 | NA                            | NA                 |
| Kabuli_wild_56319868 | NA                                  | Ca_kabuli_denovo | 56319868                | G/T  | NA                 | NA                            | NA                 |
| Kabuli_wild_56319877 | NA                                  | Ca_kabuli_denovo | 56319877                | G/T  | NA                 | NA                            | NA                 |

| SNP IDs              | NCBI dbSNP accession IDs (NCBI_SS#) | Chromosomes      | Physical positions (bp) | SNPs | Gene accession IDs | Sequence components of genome | Putative functions |
|----------------------|-------------------------------------|------------------|-------------------------|------|--------------------|-------------------------------|--------------------|
| Kabuli_wild_56321863 | NA                                  | Ca_kabuli_denovo | 56321863                | C/G  | NA                 | NA                            | NA                 |
| Kabuli_wild_56348611 | NA                                  | Ca_kabuli_denovo | 56348611                | C/T  | NA                 | NA                            | NA                 |
| Kabuli_wild_56356505 | NA                                  | Ca_kabuli_denovo | 56356505                | C/G  | NA                 | NA                            | NA                 |
| Kabuli_wild_56356508 | NA                                  | Ca_kabuli_denovo | 56356508                | C/T  | NA                 | NA                            | NA                 |
| Kabuli_wild_56375833 | NA                                  | Ca_kabuli_denovo | 56375833                | A/C  | NA                 | NA                            | NA                 |
| Kabuli_wild_56378007 | NA                                  | Ca_kabuli_denovo | 56378007                | G/T  | NA                 | NA                            | NA                 |
| Kabuli_wild_56379082 | NA                                  | Ca_kabuli_denovo | 56379082                | A/G  | NA                 | NA                            | NA                 |
| Kabuli_wild_56379573 | NA                                  | Ca_kabuli_denovo | 56379573                | C/T  | NA                 | NA                            | NA                 |
| Kabuli_wild_56380468 | NA                                  | Ca_kabuli_denovo | 56380468                | G/T  | NA                 | NA                            | NA                 |
| Kabuli_wild_56387728 | NA                                  | Ca_kabuli_denovo | 56387728                | G/T  | NA                 | NA                            | NA                 |
| Kabuli_wild_56399829 | NA                                  | Ca_kabuli_denovo | 56399829                | C/G  | NA                 | NA                            | NA                 |
| Kabuli_wild_56399894 | NA                                  | Ca_kabuli_denovo | 56399894                | A/G  | NA                 | NA                            | NA                 |
| Kabuli_wild_56404459 | NA                                  | Ca_kabuli_denovo | 56404459                | C/T  | NA                 | NA                            | NA                 |
| Kabuli_wild_56406931 | NA                                  | Ca_kabuli_denovo | 56406931                | C/T  | NA                 | NA                            | NA                 |
| Kabuli_wild_56406953 | NA                                  | Ca_kabuli_denovo | 56406953                | A/G  | NA                 | NA                            | NA                 |
| Kabuli_wild_56419011 | NA                                  | Ca_kabuli_denovo | 56419011                | C/T  | NA                 | NA                            | NA                 |
| Kabuli_wild_56421742 | NA                                  | Ca_kabuli_denovo | 56421742                | G/T  | NA                 | NA                            | NA                 |
| Kabuli_wild_56423877 | NA                                  | Ca_kabuli_denovo | 56423877                | A/G  | NA                 | NA                            | NA                 |
| Kabuli_wild_56424381 | NA                                  | Ca_kabuli_denovo | 56424381                | A/C  | NA                 | NA                            | NA                 |
| Kabuli_wild_56424419 | NA                                  | Ca_kabuli_denovo | 56424419                | C/G  | NA                 | NA                            | NA                 |
| Kabuli_wild_56425328 | NA                                  | Ca_kabuli_denovo | 56425328                | A/G  | NA                 | NA                            | NA                 |
| Kabuli_wild_56425342 | NA                                  | Ca_kabuli_denovo | 56425342                | C/T  | NA                 | NA                            | NA                 |
| Kabuli_wild_56425343 | NA                                  | Ca_kabuli_denovo | 56425343                | C/T  | NA                 | NA                            | NA                 |
| Kabuli_wild_56425362 | NA                                  | Ca_kabuli_denovo | 56425362                | C/G  | NA                 | NA                            | NA                 |
| Kabuli_wild_56425969 | NA                                  | Ca_kabuli_denovo | 56425969                | C/T  | NA                 | NA                            | NA                 |
| Kabuli_wild_56426414 | NA                                  | Ca_kabuli_denovo | 56426414                | A/T  | NA                 | NA                            | NA                 |
| Kabuli_wild_56426416 | NA                                  | Ca_kabuli_denovo | 56426416                | C/G  | NA                 | NA                            | NA                 |
| Kabuli_wild_56432123 | NA                                  | Ca_kabuli_denovo | 56432123                | C/G  | NA                 | NA                            | NA                 |
| Kabuli_wild_56436919 | NA                                  | Ca_kabuli_denovo | 56436919                | G/T  | NA                 | NA                            | NA                 |
| Kabuli_wild_56437553 | NA                                  | Ca_kabuli_denovo | 56437553                | C/G  | NA                 | NA                            | NA                 |
| Kabuli_wild_56448267 | NA                                  | Ca_kabuli_denovo | 56448267                | G/T  | NA                 | NA                            | NA                 |
| Kabuli_wild_56451803 | NA                                  | Ca_kabuli_denovo | 56451803                | C/G  | NA                 | NA                            | NA                 |
| Kabuli_wild_56453416 | NA                                  | Ca_kabuli_denovo | 56453416                | C/G  | NA                 | NA                            | NA                 |
| Kabuli_wild_56459532 | NA                                  | Ca_kabuli_denovo | 56459532                | C/T  | NA                 | NA                            | NA                 |
| Kabuli_wild_56461294 | NA                                  | Ca_kabuli_denovo | 56461294                | G/T  | NA                 | NA                            | NA                 |
| Kabuli_wild_56461587 | NA                                  | Ca_kabuli_denovo | 56461587                | G/T  | NA                 | NA                            | NA                 |
| Kabuli_wild_56461605 | NA                                  | Ca_kabuli_denovo | 56461605                | C/G  | NA                 | NA                            | NA                 |
| Kabuli_wild_56462407 | NA                                  | Ca_kabuli_denovo | 56462407                | G/T  | NA                 | NA                            | NA                 |
| Kabuli_wild_56462915 | NA                                  | Ca_kabuli_denovo | 56462915                | C/G  | NA                 | NA                            | NA                 |
| Kabuli_wild_56462933 | NA                                  | Ca_kabuli_denovo | 56462933                | A/C  | NA                 | NA                            | NA                 |
| Kabuli_wild_56467152 | NA                                  | Ca_kabuli_denovo | 56467152                | G/T  | NA                 | NA                            | NA                 |
| Kabuli_wild_56471282 | NA                                  | Ca_kabuli_denovo | 56471282                | G/T  | NA                 | NA                            | NA                 |
| Kabuli_wild_56473957 | NA                                  | Ca_kabuli_denovo | 56473957                | C/G  | NA                 | NA                            | NA                 |
| Kabuli_wild_56473974 | NA                                  | Ca_kabuli_denovo | 56473974                | A/G  | NA                 | NA                            | NA                 |

| SNP IDs              | NCBI dbSNP accession IDs (NCBI_SS#) | Chromosomes      | Physical positions (bp) | SNPs | Gene accession IDs | Sequence components of genome | Putative functions |
|----------------------|-------------------------------------|------------------|-------------------------|------|--------------------|-------------------------------|--------------------|
| Kabuli_wild_56477391 | NA                                  | Ca_kabuli_denovo | 56477391                | A/G  | NA                 | NA                            | NA                 |
| Kabuli_wild_56477450 | NA                                  | Ca_kabuli_denovo | 56477450                | A/G  | NA                 | NA                            | NA                 |
| Kabuli_wild_56478741 | NA                                  | Ca_kabuli_denovo | 56478741                | A/G  | NA                 | NA                            | NA                 |
| Kabuli_wild_56478764 | NA                                  | Ca_kabuli_denovo | 56478764                | G/T  | NA                 | NA                            | NA                 |
| Kabuli_wild_56478950 | NA                                  | Ca_kabuli_denovo | 56478950                | G/T  | NA                 | NA                            | NA                 |
| Kabuli_wild_56479798 | NA                                  | Ca_kabuli_denovo | 56479798                | A/C  | NA                 | NA                            | NA                 |
| Kabuli_wild_56480544 | NA                                  | Ca_kabuli_denovo | 56480544                | A/G  | NA                 | NA                            | NA                 |
| Kabuli_wild_56483146 | NA                                  | Ca_kabuli_denovo | 56483146                | C/G  | NA                 | NA                            | NA                 |
| Kabuli_wild_56486142 | NA                                  | Ca_kabuli_denovo | 56486142                | A/G  | NA                 | NA                            | NA                 |
| Kabuli_wild_56486516 | NA                                  | Ca_kabuli_denovo | 56486516                | A/G  | NA                 | NA                            | NA                 |
| Kabuli_wild_56489881 | NA                                  | Ca_kabuli_denovo | 56489881                | G/T  | NA                 | NA                            | NA                 |
| Kabuli_wild_56489882 | NA                                  | Ca_kabuli_denovo | 56489882                | C/G  | NA                 | NA                            | NA                 |
| Kabuli_wild_56499260 | NA                                  | Ca_kabuli_denovo | 56499260                | C/G  | NA                 | NA                            | NA                 |
| Kabuli_wild_56509300 | NA                                  | Ca_kabuli_denovo | 56509300                | A/C  | NA                 | NA                            | NA                 |
| Kabuli_wild_56509360 | NA                                  | Ca_kabuli_denovo | 56509360                | A/G  | NA                 | NA                            | NA                 |
| Kabuli_wild_56512165 | NA                                  | Ca_kabuli_denovo | 56512165                | G/T  | NA                 | NA                            | NA                 |
| Kabuli_wild_56517291 | NA                                  | Ca_kabuli_denovo | 56517291                | C/G  | NA                 | NA                            | NA                 |
| Kabuli_wild_56517292 | NA                                  | Ca_kabuli_denovo | 56517292                | A/G  | NA                 | NA                            | NA                 |
| Kabuli_wild_56520986 | NA                                  | Ca_kabuli_denovo | 56520986                | G/T  | NA                 | NA                            | NA                 |
| Kabuli_wild_56524828 | NA                                  | Ca_kabuli_denovo | 56524828                | A/G  | NA                 | NA                            | NA                 |
| Kabuli_wild_56529578 | NA                                  | Ca_kabuli_denovo | 56529578                | C/T  | NA                 | NA                            | NA                 |
| Kabuli_wild_56531053 | NA                                  | Ca_kabuli_denovo | 56531053                | A/G  | NA                 | NA                            | NA                 |
| Kabuli_wild_56538424 | NA                                  | Ca_kabuli_denovo | 56538424                | A/G  | NA                 | NA                            | NA                 |
| Kabuli_wild_56543902 | NA                                  | Ca_kabuli_denovo | 56543902                | C/T  | NA                 | NA                            | NA                 |
| Kabuli_wild_56543933 | NA                                  | Ca_kabuli_denovo | 56543933                | A/G  | NA                 | NA                            | NA                 |
| Kabuli_wild_56543957 | NA                                  | Ca_kabuli_denovo | 56543957                | C/G  | NA                 | NA                            | NA                 |
| Kabuli_wild_56551168 | NA                                  | Ca_kabuli_denovo | 56551168                | C/T  | NA                 | NA                            | NA                 |
| Kabuli_wild_56551191 | NA                                  | Ca_kabuli_denovo | 56551191                | C/T  | NA                 | NA                            | NA                 |
| Kabuli_wild_56559408 | NA                                  | Ca_kabuli_denovo | 56559408                | A/C  | NA                 | NA                            | NA                 |
| Kabuli_wild_56559409 | NA                                  | Ca_kabuli_denovo | 56559409                | C/G  | NA                 | NA                            | NA                 |
| Kabuli_wild_56560897 | NA                                  | Ca_kabuli_denovo | 56560897                | A/C  | NA                 | NA                            | NA                 |
| Kabuli_wild_56561727 | NA                                  | Ca_kabuli_denovo | 56561727                | G/T  | NA                 | NA                            | NA                 |
| Kabuli_wild_56561733 | NA                                  | Ca_kabuli_denovo | 56561733                | G/T  | NA                 | NA                            | NA                 |
| Kabuli_wild_56564524 | NA                                  | Ca_kabuli_denovo | 56564524                | G/T  | NA                 | NA                            | NA                 |
| Kabuli_wild_56565966 | NA                                  | Ca_kabuli_denovo | 56565966                | G/T  | NA                 | NA                            | NA                 |
| Kabuli_wild_56566576 | NA                                  | Ca_kabuli_denovo | 56566576                | A/G  | NA                 | NA                            | NA                 |
| Kabuli_wild_56571963 | NA                                  | Ca_kabuli_denovo | 56571963                | G/T  | NA                 | NA                            | NA                 |
| Kabuli_wild_56573484 | NA                                  | Ca_kabuli_denovo | 56573484                | C/G  | NA                 | NA                            | NA                 |
| Kabuli_wild_56573496 | NA                                  | Ca_kabuli_denovo | 56573496                | G/T  | NA                 | NA                            | NA                 |
| Kabuli_wild_56581725 | NA                                  | Ca_kabuli_denovo | 56581725                | G/T  | NA                 | NA                            | NA                 |
| Kabuli_wild_56582423 | NA                                  | Ca_kabuli_denovo | 56582423                | G/T  | NA                 | NA                            | NA                 |
| Kabuli_wild_56592058 | NA                                  | Ca_kabuli_denovo | 56592058                | C/G  | NA                 | NA                            | NA                 |
| Kabuli_wild_56593958 | NA                                  | Ca_kabuli_denovo | 56593958                | G/T  | NA                 | NA                            | NA                 |
| Kabuli_wild_56606291 | NA                                  | Ca_kabuli_denovo | 56606291                | A/G  | NA                 | NA                            | NA                 |

| SNP IDs              | NCBI dbSNP accession IDs (NCBI_SS#) | Chromosomes      | Physical positions (bp) | SNPs | Gene accession IDs | Sequence components of genome | Putative functions |
|----------------------|-------------------------------------|------------------|-------------------------|------|--------------------|-------------------------------|--------------------|
| Kabuli_wild_56611918 | NA                                  | Ca_kabuli_denovo | 56611918                | A/G  | NA                 | NA                            | NA                 |
| Kabuli_wild_56611924 | NA                                  | Ca_kabuli_denovo | 56611924                | C/T  | NA                 | NA                            | NA                 |
| Kabuli_wild_56614526 | NA                                  | Ca_kabuli_denovo | 56614526                | C/T  | NA                 | NA                            | NA                 |
| Kabuli_wild_56614554 | NA                                  | Ca_kabuli_denovo | 56614554                | A/G  | NA                 | NA                            | NA                 |
| Kabuli_wild_56614555 | NA                                  | Ca_kabuli_denovo | 56614555                | A/C  | NA                 | NA                            | NA                 |
| Kabuli_wild_56614556 | NA                                  | Ca_kabuli_denovo | 56614556                | A/T  | NA                 | NA                            | NA                 |
| Kabuli_wild_56618849 | NA                                  | Ca_kabuli_denovo | 56618849                | C/T  | NA                 | NA                            | NA                 |
| Kabuli_wild_56618888 | NA                                  | Ca_kabuli_denovo | 56618888                | A/G  | NA                 | NA                            | NA                 |
| Kabuli_wild_56627852 | NA                                  | Ca_kabuli_denovo | 56627852                | A/C  | NA                 | NA                            | NA                 |
| Kabuli_wild_56629299 | NA                                  | Ca_kabuli_denovo | 56629299                | C/T  | NA                 | NA                            | NA                 |
| Kabuli_wild_56630088 | NA                                  | Ca_kabuli_denovo | 56630088                | G/T  | NA                 | NA                            | NA                 |
| Kabuli_wild_56636366 | NA                                  | Ca_kabuli_denovo | 56636366                | A/T  | NA                 | NA                            | NA                 |
| Kabuli_wild_56639575 | NA                                  | Ca_kabuli_denovo | 56639575                | A/G  | NA                 | NA                            | NA                 |
| Kabuli_wild_56643646 | NA                                  | Ca_kabuli_denovo | 56643646                | G/T  | NA                 | NA                            | NA                 |
| Kabuli_wild_56650826 | NA                                  | Ca_kabuli_denovo | 56650826                | A/C  | NA                 | NA                            | NA                 |
| Kabuli_wild_56654765 | NA                                  | Ca_kabuli_denovo | 56654765                | A/T  | NA                 | NA                            | NA                 |
| Kabuli_wild_56656447 | NA                                  | Ca_kabuli_denovo | 56656447                | A/T  | NA                 | NA                            | NA                 |
| Kabuli_wild_56662689 | NA                                  | Ca_kabuli_denovo | 56662689                | C/G  | NA                 | NA                            | NA                 |
| Kabuli_wild_56662723 | NA                                  | Ca_kabuli_denovo | 56662723                | C/G  | NA                 | NA                            | NA                 |
| Kabuli_wild_56662821 | NA                                  | Ca_kabuli_denovo | 56662821                | A/C  | NA                 | NA                            | NA                 |
| Kabuli_wild_56664642 | NA                                  | Ca_kabuli_denovo | 56664642                | A/G  | NA                 | NA                            | NA                 |
| Kabuli_wild_56667195 | NA                                  | Ca_kabuli_denovo | 56667195                | A/G  | NA                 | NA                            | NA                 |
| Kabuli_wild_56670802 | NA                                  | Ca_kabuli_denovo | 56670802                | A/G  | NA                 | NA                            | NA                 |
| Kabuli_wild_56670809 | NA                                  | Ca_kabuli_denovo | 56670809                | C/G  | NA                 | NA                            | NA                 |
| Kabuli_wild_56674623 | NA                                  | Ca_kabuli_denovo | 56674623                | G/T  | NA                 | NA                            | NA                 |
| Kabuli_wild_56675242 | NA                                  | Ca_kabuli_denovo | 56675242                | C/T  | NA                 | NA                            | NA                 |
| Kabuli_wild_56676370 | NA                                  | Ca_kabuli_denovo | 56676370                | A/C  | NA                 | NA                            | NA                 |
| Kabuli_wild_56678169 | NA                                  | Ca_kabuli_denovo | 56678169                | A/C  | NA                 | NA                            | NA                 |
| Kabuli_wild_56681538 | NA                                  | Ca_kabuli_denovo | 56681538                | C/T  | NA                 | NA                            | NA                 |
| Kabuli_wild_56681581 | NA                                  | Ca_kabuli_denovo | 56681581                | G/T  | NA                 | NA                            | NA                 |
| Kabuli_wild_56689072 | NA                                  | Ca_kabuli_denovo | 56689072                | G/T  | NA                 | NA                            | NA                 |
| Kabuli_wild_56690743 | NA                                  | Ca_kabuli_denovo | 56690743                | A/T  | NA                 | NA                            | NA                 |
| Kabuli_wild_56690752 | NA                                  | Ca_kabuli_denovo | 56690752                | A/G  | NA                 | NA                            | NA                 |
| Kabuli_wild_56690764 | NA                                  | Ca_kabuli_denovo | 56690764                | C/T  | NA                 | NA                            | NA                 |
| Kabuli_wild_56693729 | NA                                  | Ca_kabuli_denovo | 56693729                | C/T  | NA                 | NA                            | NA                 |
| Kabuli_wild_56693751 | NA                                  | Ca_kabuli_denovo | 56693751                | C/T  | NA                 | NA                            | NA                 |
| Kabuli_wild_56697605 | NA                                  | Ca_kabuli_denovo | 56697605                | A/C  | NA                 | NA                            | NA                 |
| Kabuli_wild_56702152 | NA                                  | Ca_kabuli_denovo | 56702152                | G/T  | NA                 | NA                            | NA                 |
| Kabuli_wild_56707924 | NA                                  | Ca_kabuli_denovo | 56707924                | A/G  | NA                 | NA                            | NA                 |
| Kabuli_wild_56710360 | NA                                  | Ca_kabuli_denovo | 56710360                | A/C  | NA                 | NA                            | NA                 |
| Kabuli_wild_56710416 | NA                                  | Ca_kabuli_denovo | 56710416                | C/G  | NA                 | NA                            | NA                 |
| Kabuli_wild_56713786 | NA                                  | Ca_kabuli_denovo | 56713786                | C/T  | NA                 | NA                            | NA                 |
| Kabuli_wild_56714381 | NA                                  | Ca_kabuli_denovo | 56714381                | A/T  | NA                 | NA                            | NA                 |
| Kabuli_wild_56718899 | NA                                  | Ca_kabuli_denovo | 56718899                | G/T  | NA                 | NA                            | NA                 |

| SNP IDs              | NCBI dbSNP accession IDs (NCBI_SS#) | Chromosomes      | Physical positions (bp) | SNPs | Gene accession IDs | Sequence components of genome | Putative functions |
|----------------------|-------------------------------------|------------------|-------------------------|------|--------------------|-------------------------------|--------------------|
| Kabuli_wild_56742022 | NA                                  | Ca_kabuli_denovo | 56742022                | G/T  | NA                 | NA                            | NA                 |
| Kabuli_wild_56744186 | NA                                  | Ca_kabuli_denovo | 56744186                | C/G  | NA                 | NA                            | NA                 |
| Kabuli_wild_56750407 | NA                                  | Ca_kabuli_denovo | 56750407                | G/T  | NA                 | NA                            | NA                 |
| Kabuli_wild_56762637 | NA                                  | Ca_kabuli_denovo | 56762637                | A/T  | NA                 | NA                            | NA                 |
| Kabuli_wild_56763052 | NA                                  | Ca_kabuli_denovo | 56763052                | G/T  | NA                 | NA                            | NA                 |
| Kabuli_wild_56767052 | NA                                  | Ca_kabuli_denovo | 56767052                | A/T  | NA                 | NA                            | NA                 |
| Kabuli_wild_56768736 | NA                                  | Ca_kabuli_denovo | 56768736                | G/T  | NA                 | NA                            | NA                 |
| Kabuli_wild_56769010 | NA                                  | Ca_kabuli_denovo | 56769010                | C/T  | NA                 | NA                            | NA                 |
| Kabuli_wild_56775493 | NA                                  | Ca_kabuli_denovo | 56775493                | G/T  | NA                 | NA                            | NA                 |
| Kabuli_wild_56775504 | NA                                  | Ca_kabuli_denovo | 56775504                | G/T  | NA                 | NA                            | NA                 |
| Kabuli_wild_56775817 | NA                                  | Ca_kabuli_denovo | 56775817                | A/G  | NA                 | NA                            | NA                 |
| Kabuli_wild_56776616 | NA                                  | Ca_kabuli_denovo | 56776616                | A/G  | NA                 | NA                            | NA                 |
| Kabuli_wild_56779014 | NA                                  | Ca_kabuli_denovo | 56779014                | G/T  | NA                 | NA                            | NA                 |
| Kabuli_wild_56780951 | NA                                  | Ca_kabuli_denovo | 56780951                | C/T  | NA                 | NA                            | NA                 |
| Kabuli_wild_56787770 | NA                                  | Ca_kabuli_denovo | 56787770                | C/T  | NA                 | NA                            | NA                 |
| Kabuli_wild_56789103 | NA                                  | Ca_kabuli_denovo | 56789103                | C/T  | NA                 | NA                            | NA                 |
| Kabuli_wild_56790607 | NA                                  | Ca_kabuli_denovo | 56790607                | A/C  | NA                 | NA                            | NA                 |
| Kabuli_wild_56802697 | NA                                  | Ca_kabuli_denovo | 56802697                | A/T  | NA                 | NA                            | NA                 |
| Kabuli_wild_56805511 | NA                                  | Ca_kabuli_denovo | 56805511                | C/T  | NA                 | NA                            | NA                 |
| Kabuli_wild_56805520 | NA                                  | Ca_kabuli_denovo | 56805520                | C/G  | NA                 | NA                            | NA                 |
| Kabuli_wild_56805840 | NA                                  | Ca_kabuli_denovo | 56805840                | G/T  | NA                 | NA                            | NA                 |
| Kabuli_wild_56806814 | NA                                  | Ca_kabuli_denovo | 56806814                | C/T  | NA                 | NA                            | NA                 |
| Kabuli_wild_56812913 | NA                                  | Ca_kabuli_denovo | 56812913                | A/G  | NA                 | NA                            | NA                 |
| Kabuli_wild_56815638 | NA                                  | Ca_kabuli_denovo | 56815638                | A/C  | NA                 | NA                            | NA                 |
| Kabuli_wild_56816556 | NA                                  | Ca_kabuli_denovo | 56816556                | A/T  | NA                 | NA                            | NA                 |
| Kabuli_wild_56816565 | NA                                  | Ca_kabuli_denovo | 56816565                | A/T  | NA                 | NA                            | NA                 |
| Kabuli_wild_56816592 | NA                                  | Ca_kabuli_denovo | 56816592                | C/G  | NA                 | NA                            | NA                 |
| Kabuli_wild_56826418 | NA                                  | Ca_kabuli_denovo | 56826418                | C/G  | NA                 | NA                            | NA                 |
| Kabuli_wild_56827711 | NA                                  | Ca_kabuli_denovo | 56827711                | A/C  | NA                 | NA                            | NA                 |
| Kabuli_wild_56827712 | NA                                  | Ca_kabuli_denovo | 56827712                | C/G  | NA                 | NA                            | NA                 |
| Kabuli_wild_56827713 | NA                                  | Ca_kabuli_denovo | 56827713                | A/C  | NA                 | NA                            | NA                 |
| Kabuli_wild_56827714 | NA                                  | Ca_kabuli_denovo | 56827714                | C/T  | NA                 | NA                            | NA                 |
| Kabuli_wild_56828178 | NA                                  | Ca_kabuli_denovo | 56828178                | A/C  | NA                 | NA                            | NA                 |
| Kabuli_wild_56833472 | NA                                  | Ca_kabuli_denovo | 56833472                | C/G  | NA                 | NA                            | NA                 |
| Kabuli_wild_56839757 | NA                                  | Ca_kabuli_denovo | 56839757                | C/G  | NA                 | NA                            | NA                 |
| Kabuli_wild_56847871 | NA                                  | Ca_kabuli_denovo | 56847871                | G/T  | NA                 | NA                            | NA                 |
| Kabuli_wild_56849861 | NA                                  | Ca_kabuli_denovo | 56849861                | A/C  | NA                 | NA                            | NA                 |
| Kabuli_wild_56850565 | NA                                  | Ca_kabuli_denovo | 56850565                | A/G  | NA                 | NA                            | NA                 |
| Kabuli_wild_56853614 | NA                                  | Ca_kabuli_denovo | 56853614                | C/T  | NA                 | NA                            | NA                 |
| Kabuli_wild_56853628 | NA                                  | Ca_kabuli_denovo | 56853628                | A/T  | NA                 | NA                            | NA                 |
| Kabuli_wild_56855376 | NA                                  | Ca_kabuli_denovo | 56855376                | A/G  | NA                 | NA                            | NA                 |
| Kabuli_wild_56855406 | NA                                  | Ca_kabuli_denovo | 56855406                | A/G  | NA                 | NA                            | NA                 |
| Kabuli_wild_56858166 | NA                                  | Ca_kabuli_denovo | 56858166                | A/C  | NA                 | NA                            | NA                 |
| Kabuli_wild_56861092 | NA                                  | Ca_kabuli_denovo | 56861092                | C/G  | NA                 | NA                            | NA                 |

| SNP IDs              | NCBI dbSNP accession IDs (NCBI_SS#) | Chromosomes      | Physical positions (bp) | SNPs | Gene accession IDs | Sequence components of genome | Putative functions |
|----------------------|-------------------------------------|------------------|-------------------------|------|--------------------|-------------------------------|--------------------|
| Kabuli_wild_56861592 | NA                                  | Ca_kabuli_denovo | 56861592                | G/C  | NA                 | NA                            | NA                 |
| Kabuli_wild_56861593 | NA                                  | Ca_kabuli_denovo | 56861593                | C/A  | NA                 | NA                            | NA                 |
| Kabuli_wild_56861594 | NA                                  | Ca_kabuli_denovo | 56861594                | G/A  | NA                 | NA                            | NA                 |
| Kabuli_wild_56867995 | NA                                  | Ca_kabuli_denovo | 56867995                | A/G  | NA                 | NA                            | NA                 |
| Kabuli_wild_56874072 | NA                                  | Ca_kabuli_denovo | 56874072                | A/C  | NA                 | NA                            | NA                 |
| Kabuli_wild_56874094 | NA                                  | Ca_kabuli_denovo | 56874094                | C/T  | NA                 | NA                            | NA                 |
| Kabuli_wild_56874257 | NA                                  | Ca_kabuli_denovo | 56874257                | C/T  | NA                 | NA                            | NA                 |
| Kabuli_wild_56874269 | NA                                  | Ca_kabuli_denovo | 56874269                | A/G  | NA                 | NA                            | NA                 |
| Kabuli_wild_56876242 | NA                                  | Ca_kabuli_denovo | 56876242                | A/G  | NA                 | NA                            | NA                 |
| Kabuli_wild_56878365 | NA                                  | Ca_kabuli_denovo | 56878365                | A/C  | NA                 | NA                            | NA                 |
| Kabuli_wild_56878368 | NA                                  | Ca_kabuli_denovo | 56878368                | C/G  | NA                 | NA                            | NA                 |
| Kabuli_wild_56879331 | NA                                  | Ca_kabuli_denovo | 56879331                | A/G  | NA                 | NA                            | NA                 |
| Kabuli_wild_56880219 | NA                                  | Ca_kabuli_denovo | 56880219                | A/G  | NA                 | NA                            | NA                 |
| Kabuli_wild_56880244 | NA                                  | Ca_kabuli_denovo | 56880244                | A/G  | NA                 | NA                            | NA                 |
| Kabuli_wild_56886925 | NA                                  | Ca_kabuli_denovo | 56886925                | A/T  | NA                 | NA                            | NA                 |
| Kabuli_wild_56886945 | NA                                  | Ca_kabuli_denovo | 56886945                | A/G  | NA                 | NA                            | NA                 |
| Kabuli_wild_56890689 | NA                                  | Ca_kabuli_denovo | 56890689                | C/T  | NA                 | NA                            | NA                 |
| Kabuli_wild_56890722 | NA                                  | Ca_kabuli_denovo | 56890722                | A/G  | NA                 | NA                            | NA                 |
| Kabuli_wild_56894226 | NA                                  | Ca_kabuli_denovo | 56894226                | A/G  | NA                 | NA                            | NA                 |
| Kabuli_wild_56894245 | NA                                  | Ca_kabuli_denovo | 56894245                | A/C  | NA                 | NA                            | NA                 |
| Kabuli_wild_56894247 | NA                                  | Ca_kabuli_denovo | 56894247                | A/G  | NA                 | NA                            | NA                 |
| Kabuli_wild_56894301 | NA                                  | Ca_kabuli_denovo | 56894301                | A/G  | NA                 | NA                            | NA                 |
| Kabuli_wild_56894701 | NA                                  | Ca_kabuli_denovo | 56894701                | A/G  | NA                 | NA                            | NA                 |
| Kabuli_wild_56900853 | NA                                  | Ca_kabuli_denovo | 56900853                | T/C  | NA                 | NA                            | NA                 |
| Kabuli_wild_56900854 | NA                                  | Ca_kabuli_denovo | 56900854                | C/G  | NA                 | NA                            | NA                 |
| Kabuli_wild_56900884 | NA                                  | Ca_kabuli_denovo | 56900884                | C/A  | NA                 | NA                            | NA                 |
| Kabuli_wild_56900907 | NA                                  | Ca_kabuli_denovo | 56900907                | G/A  | NA                 | NA                            | NA                 |
| Kabuli_wild_56903973 | NA                                  | Ca_kabuli_denovo | 56903973                | A/G  | NA                 | NA                            | NA                 |
| Kabuli_wild_56904396 | NA                                  | Ca_kabuli_denovo | 56904396                | A/T  | NA                 | NA                            | NA                 |
| Kabuli_wild_56906029 | NA                                  | Ca_kabuli_denovo | 56906029                | A/G  | NA                 | NA                            | NA                 |
| Kabuli_wild_56908723 | NA                                  | Ca_kabuli_denovo | 56908723                | A/G  | NA                 | NA                            | NA                 |
| Kabuli_wild_56912731 | NA                                  | Ca_kabuli_denovo | 56912731                | C/T  | NA                 | NA                            | NA                 |
| Kabuli_wild_56915948 | NA                                  | Ca_kabuli_denovo | 56915948                | A/T  | NA                 | NA                            | NA                 |
| Kabuli_wild_56921218 | NA                                  | Ca_kabuli_denovo | 56921218                | C/G  | NA                 | NA                            | NA                 |
| Kabuli_wild_56921228 | NA                                  | Ca_kabuli_denovo | 56921228                | A/G  | NA                 | NA                            | NA                 |
| Kabuli_wild_56922362 | NA                                  | Ca_kabuli_denovo | 56922362                | A/G  | NA                 | NA                            | NA                 |
| Kabuli_wild_56923169 | NA                                  | Ca_kabuli_denovo | 56923169                | A/T  | NA                 | NA                            | NA                 |
| Kabuli_wild_56926532 | NA                                  | Ca_kabuli_denovo | 56926532                | C/T  | NA                 | NA                            | NA                 |
| Kabuli_wild_56927133 | NA                                  | Ca_kabuli_denovo | 56927133                | A/C  | NA                 | NA                            | NA                 |
| Kabuli_wild_56930617 | NA                                  | Ca_kabuli_denovo | 56930617                | C/T  | NA                 | NA                            | NA                 |
| Kabuli_wild_56931010 | NA                                  | Ca_kabuli_denovo | 56931010                | A/G  | NA                 | NA                            | NA                 |
| Kabuli_wild_56932151 | NA                                  | Ca_kabuli_denovo | 56932151                | C/T  | NA                 | NA                            | NA                 |
| Kabuli_wild_56933794 | NA                                  | Ca_kabuli_denovo | 56933794                | C/T  | NA                 | NA                            | NA                 |
| Kabuli_wild_56936772 | NA                                  | Ca_kabuli_denovo | 56936772                | G/T  | NA                 | NA                            | NA                 |



| SNP IDs              | NCBI dbSNP accession IDs (NCBI_SS#) | Chromosomes      | Physical positions (bp) | SNPs | Gene accession IDs | Sequence components of genome | Putative functions |
|----------------------|-------------------------------------|------------------|-------------------------|------|--------------------|-------------------------------|--------------------|
| Kabuli_wild_56937816 | NA                                  | Ca_kabuli_denovo | 56937816                | A/C  | NA                 | NA                            | NA                 |
| Kabuli_wild_56937862 | NA                                  | Ca_kabuli_denovo | 56937862                | A/G  | NA                 | NA                            | NA                 |
| Kabuli_wild_56937875 | NA                                  | Ca_kabuli_denovo | 56937875                | C/T  | NA                 | NA                            | NA                 |
| Kabuli_wild_56939002 | NA                                  | Ca_kabuli_denovo | 56939002                | C/T  | NA                 | NA                            | NA                 |
| Kabuli_wild_56941298 | NA                                  | Ca_kabuli_denovo | 56941298                | A/T  | NA                 | NA                            | NA                 |
| Kabuli_wild_56943020 | NA                                  | Ca_kabuli_denovo | 56943020                | A/G  | NA                 | NA                            | NA                 |
| Kabuli_wild_56943026 | NA                                  | Ca_kabuli_denovo | 56943026                | A/G  | NA                 | NA                            | NA                 |
| Kabuli_wild_56943499 | NA                                  | Ca_kabuli_denovo | 56943499                | C/T  | NA                 | NA                            | NA                 |
| Kabuli_wild_56945435 | NA                                  | Ca_kabuli_denovo | 56945435                | G/T  | NA                 | NA                            | NA                 |
| Kabuli_wild_56947512 | NA                                  | Ca_kabuli_denovo | 56947512                | C/T  | NA                 | NA                            | NA                 |
| Kabuli_wild_56953548 | NA                                  | Ca_kabuli_denovo | 56953548                | A/G  | NA                 | NA                            | NA                 |
| Kabuli_wild_56953552 | NA                                  | Ca_kabuli_denovo | 56953552                | C/T  | NA                 | NA                            | NA                 |
| Kabuli_wild_56955454 | NA                                  | Ca_kabuli_denovo | 56955454                | G/T  | NA                 | NA                            | NA                 |
| Kabuli_wild_56959745 | NA                                  | Ca_kabuli_denovo | 56959745                | A/G  | NA                 | NA                            | NA                 |
| Kabuli_wild_56960008 | NA                                  | Ca_kabuli_denovo | 56960008                | A/G  | NA                 | NA                            | NA                 |
| Kabuli_wild_56960024 | NA                                  | Ca_kabuli_denovo | 56960024                | C/G  | NA                 | NA                            | NA                 |
| Kabuli_wild_56962217 | NA                                  | Ca_kabuli_denovo | 56962217                | A/T  | NA                 | NA                            | NA                 |
| Kabuli_wild_56962239 | NA                                  | Ca_kabuli_denovo | 56962239                | A/C  | NA                 | NA                            | NA                 |
| Kabuli_wild_56965598 | NA                                  | Ca_kabuli_denovo | 56965598                | A/T  | NA                 | NA                            | NA                 |
| Kabuli_wild_56978813 | NA                                  | Ca_kabuli_denovo | 56978813                | A/G  | NA                 | NA                            | NA                 |
| Kabuli_wild_56978838 | NA                                  | Ca_kabuli_denovo | 56978838                | A/T  | NA                 | NA                            | NA                 |
| Kabuli_wild_56983782 | NA                                  | Ca_kabuli_denovo | 56983782                | A/G  | NA                 | NA                            | NA                 |
| Kabuli_wild_56983820 | NA                                  | Ca_kabuli_denovo | 56983820                | A/G  | NA                 | NA                            | NA                 |
| Kabuli_wild_56985263 | NA                                  | Ca_kabuli_denovo | 56985263                | A/G  | NA                 | NA                            | NA                 |
| Kabuli_wild_56985268 | NA                                  | Ca_kabuli_denovo | 56985268                | A/G  | NA                 | NA                            | NA                 |
| Kabuli_wild_56985313 | NA                                  | Ca_kabuli_denovo | 56985313                | A/G  | NA                 | NA                            | NA                 |
| Kabuli_wild_56986911 | NA                                  | Ca_kabuli_denovo | 56986911                | A/G  | NA                 | NA                            | NA                 |
| Kabuli_wild_56986982 | NA                                  | Ca_kabuli_denovo | 56986982                | C/G  | NA                 | NA                            | NA                 |
| Kabuli_wild_56986989 | NA                                  | Ca_kabuli_denovo | 56986989                | T/C  | NA                 | NA                            | NA                 |
| Kabuli_wild_56989386 | NA                                  | Ca_kabuli_denovo | 56989386                | A/G  | NA                 | NA                            | NA                 |
| Kabuli_wild_56994759 | NA                                  | Ca_kabuli_denovo | 56994759                | A/G  | NA                 | NA                            | NA                 |
| Kabuli_wild_56994775 | NA                                  | Ca_kabuli_denovo | 56994775                | A/G  | NA                 | NA                            | NA                 |
| Kabuli_wild_56997868 | NA                                  | Ca_kabuli_denovo | 56997868                | T/A  | NA                 | NA                            | NA                 |
| Kabuli_wild_56998129 | NA                                  | Ca_kabuli_denovo | 56998129                | C/T  | NA                 | NA                            | NA                 |
| Kabuli_wild_56998182 | NA                                  | Ca_kabuli_denovo | 56998182                | T/C  | NA                 | NA                            | NA                 |
| Kabuli_wild_57001739 | NA                                  | Ca_kabuli_denovo | 57001739                | A/G  | NA                 | NA                            | NA                 |
| Kabuli_wild_57004443 | NA                                  | Ca_kabuli_denovo | 57004443                | A/C  | NA                 | NA                            | NA                 |
| Kabuli_wild_57010530 | NA                                  | Ca_kabuli_denovo | 57010530                | A/G  | NA                 | NA                            | NA                 |
| Kabuli_wild_57013547 | NA                                  | Ca_kabuli_denovo | 57013547                | A/T  | NA                 | NA                            | NA                 |
| Kabuli_wild_57013575 | NA                                  | Ca_kabuli_denovo | 57013575                | A/G  | NA                 | NA                            | NA                 |
| Kabuli_wild_57016679 | NA                                  | Ca_kabuli_denovo | 57016679                | C/T  | NA                 | NA                            | NA                 |
| Kabuli_wild_57017431 | NA                                  | Ca_kabuli_denovo | 57017431                | G/T  | NA                 | NA                            | NA                 |
| Kabuli_wild_57019421 | NA                                  | Ca_kabuli_denovo | 57019421                | A/G  | NA                 | NA                            | NA                 |
| Kabuli_wild_57025431 | NA                                  | Ca_kabuli_denovo | 57025431                | A/G  | NA                 | NA                            | NA                 |

| SNP IDs              | NCBI dbSNP accession IDs (NCBI_SS#) | Chromosomes      | Physical positions (bp) | SNPs | Gene accession IDs | Sequence components of genome | Putative functions |
|----------------------|-------------------------------------|------------------|-------------------------|------|--------------------|-------------------------------|--------------------|
| Kabuli_wild_57026682 | NA                                  | Ca_kabuli_denovo | 57026682                | A/T  | NA                 | NA                            | NA                 |
| Kabuli_wild_57027219 | NA                                  | Ca_kabuli_denovo | 57027219                | A/T  | NA                 | NA                            | NA                 |
| Kabuli_wild_57028779 | NA                                  | Ca_kabuli_denovo | 57028779                | C/T  | NA                 | NA                            | NA                 |
| Kabuli_wild_57028782 | NA                                  | Ca_kabuli_denovo | 57028782                | C/T  | NA                 | NA                            | NA                 |
| Kabuli_wild_57030198 | NA                                  | Ca_kabuli_denovo | 57030198                | C/T  | NA                 | NA                            | NA                 |
| Kabuli_wild_57030909 | NA                                  | Ca_kabuli_denovo | 57030909                | C/T  | NA                 | NA                            | NA                 |
| Kabuli_wild_57031505 | NA                                  | Ca_kabuli_denovo | 57031505                | A/T  | NA                 | NA                            | NA                 |
| Kabuli_wild_57032346 | NA                                  | Ca_kabuli_denovo | 57032346                | A/G  | NA                 | NA                            | NA                 |
| Kabuli_wild_57032354 | NA                                  | Ca_kabuli_denovo | 57032354                | C/T  | NA                 | NA                            | NA                 |
| Kabuli_wild_57032366 | NA                                  | Ca_kabuli_denovo | 57032366                | A/C  | NA                 | NA                            | NA                 |
| Kabuli_wild_57032384 | NA                                  | Ca_kabuli_denovo | 57032384                | A/C  | NA                 | NA                            | NA                 |
| Kabuli_wild_57033844 | NA                                  | Ca_kabuli_denovo | 57033844                | A/T  | NA                 | NA                            | NA                 |
| Kabuli_wild_57033891 | NA                                  | Ca_kabuli_denovo | 57033891                | C/A  | NA                 | NA                            | NA                 |
| Kabuli_wild_57033897 | NA                                  | Ca_kabuli_denovo | 57033897                | C/T  | NA                 | NA                            | NA                 |
| Kabuli_wild_57035560 | NA                                  | Ca_kabuli_denovo | 57035560                | C/T  | NA                 | NA                            | NA                 |
| Kabuli_wild_57035567 | NA                                  | Ca_kabuli_denovo | 57035567                | A/T  | NA                 | NA                            | NA                 |
| Kabuli_wild_57042511 | NA                                  | Ca_kabuli_denovo | 57042511                | A/G  | NA                 | NA                            | NA                 |
| Kabuli_wild_57051801 | NA                                  | Ca_kabuli_denovo | 57051801                | A/C  | NA                 | NA                            | NA                 |
| Kabuli_wild_57055402 | NA                                  | Ca_kabuli_denovo | 57055402                | A/G  | NA                 | NA                            | NA                 |
| Kabuli_wild_57055411 | NA                                  | Ca_kabuli_denovo | 57055411                | A/C  | NA                 | NA                            | NA                 |
| Kabuli_wild_57055413 | NA                                  | Ca_kabuli_denovo | 57055413                | C/T  | NA                 | NA                            | NA                 |
| Kabuli_wild_57056339 | NA                                  | Ca_kabuli_denovo | 57056339                | G/A  | NA                 | NA                            | NA                 |
| Kabuli_wild_57057366 | NA                                  | Ca_kabuli_denovo | 57057366                | T/A  | NA                 | NA                            | NA                 |
| Kabuli_wild_57060207 | NA                                  | Ca_kabuli_denovo | 57060207                | C/T  | NA                 | NA                            | NA                 |
| Kabuli_wild_57060212 | NA                                  | Ca_kabuli_denovo | 57060212                | C/T  | NA                 | NA                            | NA                 |
| Kabuli_wild_57060292 | NA                                  | Ca_kabuli_denovo | 57060292                | A/G  | NA                 | NA                            | NA                 |
| Kabuli_wild_57061239 | NA                                  | Ca_kabuli_denovo | 57061239                | G/T  | NA                 | NA                            | NA                 |
| Kabuli_wild_57067733 | NA                                  | Ca_kabuli_denovo | 57067733                | C/T  | NA                 | NA                            | NA                 |
| Kabuli_wild_57068020 | NA                                  | Ca_kabuli_denovo | 57068020                | A/C  | NA                 | NA                            | NA                 |
| Kabuli_wild_57068785 | NA                                  | Ca_kabuli_denovo | 57068785                | C/T  | NA                 | NA                            | NA                 |
| Kabuli_wild_57072465 | NA                                  | Ca_kabuli_denovo | 57072465                | G/T  | NA                 | NA                            | NA                 |
| Kabuli_wild_57073927 | NA                                  | Ca_kabuli_denovo | 57073927                | C/T  | NA                 | NA                            | NA                 |
| Kabuli_wild_57074863 | NA                                  | Ca_kabuli_denovo | 57074863                | C/T  | NA                 | NA                            | NA                 |
| Kabuli_wild_57080500 | NA                                  | Ca_kabuli_denovo | 57080500                | A/G  | NA                 | NA                            | NA                 |
| Kabuli_wild_57086007 | NA                                  | Ca_kabuli_denovo | 57086007                | C/G  | NA                 | NA                            | NA                 |
| Kabuli_wild_57086784 | NA                                  | Ca_kabuli_denovo | 57086784                | C/G  | NA                 | NA                            | NA                 |
| Kabuli_wild_57086948 | NA                                  | Ca_kabuli_denovo | 57086948                | C/G  | NA                 | NA                            | NA                 |
| Kabuli_wild_57086974 | NA                                  | Ca_kabuli_denovo | 57086974                | G/T  | NA                 | NA                            | NA                 |
| Kabuli_wild_57087009 | NA                                  | Ca_kabuli_denovo | 57087009                | C/T  | NA                 | NA                            | NA                 |
| Kabuli_wild_57087019 | NA                                  | Ca_kabuli_denovo | 57087019                | C/G  | NA                 | NA                            | NA                 |
| Kabuli_wild_57087233 | NA                                  | Ca_kabuli_denovo | 57087233                | A/C  | NA                 | NA                            | NA                 |
| Kabuli_wild_57087235 | NA                                  | Ca_kabuli_denovo | 57087235                | A/C  | NA                 | NA                            | NA                 |
| Kabuli_wild_57087381 | NA                                  | Ca_kabuli_denovo | 57087381                | G/T  | NA                 | NA                            | NA                 |
| Kabuli_wild_57090025 | NA                                  | Ca_kabuli_denovo | 57090025                | G/T  | NA                 | NA                            | NA                 |

| SNP IDs              | NCBI dbSNP accession IDs (NCBI_SS#) | Chromosomes      | Physical positions (bp) | SNPs | Gene accession IDs | Sequence components of genome | Putative functions |
|----------------------|-------------------------------------|------------------|-------------------------|------|--------------------|-------------------------------|--------------------|
| Kabuli_wild_57091827 | NA                                  | Ca_kabuli_denovo | 57091827                | A/G  | NA                 | NA                            | NA                 |
| Kabuli_wild_57091973 | NA                                  | Ca_kabuli_denovo | 57091973                | C/G  | NA                 | NA                            | NA                 |
| Kabuli_wild_57097103 | NA                                  | Ca_kabuli_denovo | 57097103                | A/G  | NA                 | NA                            | NA                 |
| Kabuli_wild_57097104 | NA                                  | Ca_kabuli_denovo | 57097104                | C/G  | NA                 | NA                            | NA                 |
| Kabuli_wild_57097105 | NA                                  | Ca_kabuli_denovo | 57097105                | A/C  | NA                 | NA                            | NA                 |
| Kabuli_wild_57097106 | NA                                  | Ca_kabuli_denovo | 57097106                | C/G  | NA                 | NA                            | NA                 |
| Kabuli_wild_57097107 | NA                                  | Ca_kabuli_denovo | 57097107                | A/C  | NA                 | NA                            | NA                 |
| Kabuli_wild_57097572 | NA                                  | Ca_kabuli_denovo | 57097572                | C/T  | NA                 | NA                            | NA                 |
| Kabuli_wild_57098753 | NA                                  | Ca_kabuli_denovo | 57098753                | C/G  | NA                 | NA                            | NA                 |
| Kabuli_wild_57100254 | NA                                  | Ca_kabuli_denovo | 57100254                | C/G  | NA                 | NA                            | NA                 |
| Kabuli_wild_57100715 | NA                                  | Ca_kabuli_denovo | 57100715                | G/T  | NA                 | NA                            | NA                 |
| Kabuli_wild_57100729 | NA                                  | Ca_kabuli_denovo | 57100729                | A/G  | NA                 | NA                            | NA                 |
| Kabuli_wild_57101090 | NA                                  | Ca_kabuli_denovo | 57101090                | C/G  | NA                 | NA                            | NA                 |
| Kabuli_wild_57103226 | NA                                  | Ca_kabuli_denovo | 57103226                | A/G  | NA                 | NA                            | NA                 |
| Kabuli_wild_57104269 | NA                                  | Ca_kabuli_denovo | 57104269                | G/T  | NA                 | NA                            | NA                 |
| Kabuli_wild_57104488 | NA                                  | Ca_kabuli_denovo | 57104488                | G/T  | NA                 | NA                            | NA                 |
| Kabuli_wild_57105016 | NA                                  | Ca_kabuli_denovo | 57105016                | A/G  | NA                 | NA                            | NA                 |
| Kabuli_wild_57106289 | NA                                  | Ca_kabuli_denovo | 57106289                | C/G  | NA                 | NA                            | NA                 |
| Kabuli_wild_57107115 | NA                                  | Ca_kabuli_denovo | 57107115                | G/T  | NA                 | NA                            | NA                 |
| Kabuli_wild_57108321 | NA                                  | Ca_kabuli_denovo | 57108321                | A/C  | NA                 | NA                            | NA                 |
| Kabuli_wild_57108397 | NA                                  | Ca_kabuli_denovo | 57108397                | A/C  | NA                 | NA                            | NA                 |
| Kabuli_wild_57110780 | NA                                  | Ca_kabuli_denovo | 57110780                | C/G  | NA                 | NA                            | NA                 |
| Kabuli_wild_57110822 | NA                                  | Ca_kabuli_denovo | 57110822                | C/G  | NA                 | NA                            | NA                 |
| Kabuli_wild_57113956 | NA                                  | Ca_kabuli_denovo | 57113956                | C/T  | NA                 | NA                            | NA                 |
| Kabuli_wild_57113962 | NA                                  | Ca_kabuli_denovo | 57113962                | C/G  | NA                 | NA                            | NA                 |
| Kabuli_wild_57118588 | NA                                  | Ca_kabuli_denovo | 57118588                | C/G  | NA                 | NA                            | NA                 |
| Kabuli_wild_57118591 | NA                                  | Ca_kabuli_denovo | 57118591                | A/G  | NA                 | NA                            | NA                 |
| Kabuli_wild_57118600 | NA                                  | Ca_kabuli_denovo | 57118600                | C/G  | NA                 | NA                            | NA                 |
| Kabuli_wild_57119437 | NA                                  | Ca_kabuli_denovo | 57119437                | C/T  | NA                 | NA                            | NA                 |
| Kabuli_wild_57123896 | NA                                  | Ca_kabuli_denovo | 57123896                | A/C  | NA                 | NA                            | NA                 |
| Kabuli_wild_57124644 | NA                                  | Ca_kabuli_denovo | 57124644                | A/C  | NA                 | NA                            | NA                 |
| Kabuli_wild_57124646 | NA                                  | Ca_kabuli_denovo | 57124646                | C/G  | NA                 | NA                            | NA                 |
| Kabuli_wild_57126495 | NA                                  | Ca_kabuli_denovo | 57126495                | C/G  | NA                 | NA                            | NA                 |
| Kabuli_wild_57126496 | NA                                  | Ca_kabuli_denovo | 57126496                | A/T  | NA                 | NA                            | NA                 |
| Kabuli_wild_57126503 | NA                                  | Ca_kabuli_denovo | 57126503                | C/G  | NA                 | NA                            | NA                 |
| Kabuli_wild_57126509 | NA                                  | Ca_kabuli_denovo | 57126509                | C/T  | NA                 | NA                            | NA                 |
| Kabuli_wild_57129654 | NA                                  | Ca_kabuli_denovo | 57129654                | G/T  | NA                 | NA                            | NA                 |
| Kabuli_wild_57129656 | NA                                  | Ca_kabuli_denovo | 57129656                | C/G  | NA                 | NA                            | NA                 |
| Kabuli_wild_57130123 | NA                                  | Ca_kabuli_denovo | 57130123                | C/T  | NA                 | NA                            | NA                 |
| Kabuli_wild_57130147 | NA                                  | Ca_kabuli_denovo | 57130147                | C/G  | NA                 | NA                            | NA                 |
| Kabuli_wild_57130344 | NA                                  | Ca_kabuli_denovo | 57130344                | G/T  | NA                 | NA                            | NA                 |
| Kabuli_wild_57132172 | NA                                  | Ca_kabuli_denovo | 57132172                | C/G  | NA                 | NA                            | NA                 |
| Kabuli_wild_57132187 | NA                                  | Ca_kabuli_denovo | 57132187                | C/G  | NA                 | NA                            | NA                 |
| Kabuli_wild_57132748 | NA                                  | Ca_kabuli_denovo | 57132748                | A/G  | NA                 | NA                            | NA                 |

| SNP IDs              | NCBI dbSNP accession IDs (NCBI_SS#) | Chromosomes      | Physical positions (bp) | SNPs | Gene accession IDs | Sequence components of genome | Putative functions |
|----------------------|-------------------------------------|------------------|-------------------------|------|--------------------|-------------------------------|--------------------|
| Kabuli_wild_57133886 | NA                                  | Ca_kabuli_denovo | 57133886                | A/G  | NA                 | NA                            | NA                 |
| Kabuli_wild_57134416 | NA                                  | Ca_kabuli_denovo | 57134416                | C/G  | NA                 | NA                            | NA                 |
| Kabuli_wild_57134417 | NA                                  | Ca_kabuli_denovo | 57134417                | C/T  | NA                 | NA                            | NA                 |
| Kabuli_wild_57134438 | NA                                  | Ca_kabuli_denovo | 57134438                | A/G  | NA                 | NA                            | NA                 |
| Kabuli_wild_57134966 | NA                                  | Ca_kabuli_denovo | 57134966                | C/T  | NA                 | NA                            | NA                 |
| Kabuli_wild_57135541 | NA                                  | Ca_kabuli_denovo | 57135541                | C/G  | NA                 | NA                            | NA                 |
| Kabuli_wild_57136875 | NA                                  | Ca_kabuli_denovo | 57136875                | C/T  | NA                 | NA                            | NA                 |
| Kabuli_wild_57137281 | NA                                  | Ca_kabuli_denovo | 57137281                | C/T  | NA                 | NA                            | NA                 |
| Kabuli_wild_57138865 | NA                                  | Ca_kabuli_denovo | 57138865                | C/G  | NA                 | NA                            | NA                 |
| Kabuli_wild_57142264 | NA                                  | Ca_kabuli_denovo | 57142264                | C/G  | NA                 | NA                            | NA                 |
| Kabuli_wild_57142266 | NA                                  | Ca_kabuli_denovo | 57142266                | A/C  | NA                 | NA                            | NA                 |
| Kabuli_wild_57142861 | NA                                  | Ca_kabuli_denovo | 57142861                | C/G  | NA                 | NA                            | NA                 |
| Kabuli_wild_57142921 | NA                                  | Ca_kabuli_denovo | 57142921                | C/T  | NA                 | NA                            | NA                 |
| Kabuli_wild_57142930 | NA                                  | Ca_kabuli_denovo | 57142930                | A/G  | NA                 | NA                            | NA                 |
| Kabuli_wild_57142940 | NA                                  | Ca_kabuli_denovo | 57142940                | G/T  | NA                 | NA                            | NA                 |
| Kabuli_wild_57143211 | NA                                  | Ca_kabuli_denovo | 57143211                | C/T  | NA                 | NA                            | NA                 |
| Kabuli_wild_57145654 | NA                                  | Ca_kabuli_denovo | 57145654                | C/T  | NA                 | NA                            | NA                 |
| Kabuli_wild_57145669 | NA                                  | Ca_kabuli_denovo | 57145669                | C/T  | NA                 | NA                            | NA                 |
| Kabuli_wild_57146360 | NA                                  | Ca_kabuli_denovo | 57146360                | A/C  | NA                 | NA                            | NA                 |
| Kabuli_wild_57146366 | NA                                  | Ca_kabuli_denovo | 57146366                | C/G  | NA                 | NA                            | NA                 |
| Kabuli_wild_57146515 | NA                                  | Ca_kabuli_denovo | 57146515                | C/G  | NA                 | NA                            | NA                 |
| Kabuli_wild_57146525 | NA                                  | Ca_kabuli_denovo | 57146525                | C/G  | NA                 | NA                            | NA                 |
| Kabuli_wild_57147438 | NA                                  | Ca_kabuli_denovo | 57147438                | C/T  | NA                 | NA                            | NA                 |
| Kabuli_wild_57148879 | NA                                  | Ca_kabuli_denovo | 57148879                | C/T  | NA                 | NA                            | NA                 |
| Kabuli_wild_57149374 | NA                                  | Ca_kabuli_denovo | 57149374                | A/C  | NA                 | NA                            | NA                 |
| Kabuli_wild_57149386 | NA                                  | Ca_kabuli_denovo | 57149386                | C/T  | NA                 | NA                            | NA                 |
| Kabuli_wild_57149519 | NA                                  | Ca_kabuli_denovo | 57149519                | C/G  | NA                 | NA                            | NA                 |
| Kabuli_wild_57151078 | NA                                  | Ca_kabuli_denovo | 57151078                | A/G  | NA                 | NA                            | NA                 |
| Kabuli_wild_57155008 | NA                                  | Ca_kabuli_denovo | 57155008                | C/G  | NA                 | NA                            | NA                 |
| Kabuli_wild_57156623 | NA                                  | Ca_kabuli_denovo | 57156623                | C/T  | NA                 | NA                            | NA                 |
| Kabuli_wild_57164650 | NA                                  | Ca_kabuli_denovo | 57164650                | A/C  | NA                 | NA                            | NA                 |
| Kabuli_wild_57169157 | NA                                  | Ca_kabuli_denovo | 57169157                | C/G  | NA                 | NA                            | NA                 |
| Kabuli_wild_57171627 | NA                                  | Ca_kabuli_denovo | 57171627                | C/T  | NA                 | NA                            | NA                 |
| Kabuli_wild_57171650 | NA                                  | Ca_kabuli_denovo | 57171650                | A/T  | NA                 | NA                            | NA                 |
| Kabuli_wild_57171653 | NA                                  | Ca_kabuli_denovo | 57171653                | C/G  | NA                 | NA                            | NA                 |
| Kabuli_wild_57172242 | NA                                  | Ca_kabuli_denovo | 57172242                | A/T  | NA                 | NA                            | NA                 |
| Kabuli_wild_57175473 | NA                                  | Ca_kabuli_denovo | 57175473                | C/G  | NA                 | NA                            | NA                 |
| Kabuli_wild_57177736 | NA                                  | Ca_kabuli_denovo | 57177736                | A/G  | NA                 | NA                            | NA                 |
| Kabuli_wild_57178016 | NA                                  | Ca_kabuli_denovo | 57178016                | A/G  | NA                 | NA                            | NA                 |
| Kabuli_wild_57180817 | NA                                  | Ca_kabuli_denovo | 57180817                | C/T  | NA                 | NA                            | NA                 |
| Kabuli_wild_57186998 | NA                                  | Ca_kabuli_denovo | 57186998                | C/T  | NA                 | NA                            | NA                 |
| Kabuli_wild_57187267 | NA                                  | Ca_kabuli_denovo | 57187267                | A/G  | NA                 | NA                            | NA                 |
| Kabuli_wild_57187295 | NA                                  | Ca_kabuli_denovo | 57187295                | A/G  | NA                 | NA                            | NA                 |
| Kabuli_wild_57187298 | NA                                  | Ca_kabuli_denovo | 57187298                | A/C  | NA                 | NA                            | NA                 |

| SNP IDs              | NCBI dbSNP accession IDs (NCBI_SS#) | Chromosomes      | Physical positions (bp) | SNPs | Gene accession IDs | Sequence components of genome | Putative functions |
|----------------------|-------------------------------------|------------------|-------------------------|------|--------------------|-------------------------------|--------------------|
| Kabuli_wild_57187302 | NA                                  | Ca_kabuli_denovo | 57187302                | C/T  | NA                 | NA                            | NA                 |
| Kabuli_wild_57188708 | NA                                  | Ca_kabuli_denovo | 57188708                | C/G  | NA                 | NA                            | NA                 |
| Kabuli_wild_57188714 | NA                                  | Ca_kabuli_denovo | 57188714                | A/G  | NA                 | NA                            | NA                 |
| Kabuli_wild_57189191 | NA                                  | Ca_kabuli_denovo | 57189191                | C/G  | NA                 | NA                            | NA                 |
| Kabuli_wild_57191296 | NA                                  | Ca_kabuli_denovo | 57191296                | C/T  | NA                 | NA                            | NA                 |
| Kabuli_wild_57194939 | NA                                  | Ca_kabuli_denovo | 57194939                | C/T  | NA                 | NA                            | NA                 |
| Kabuli_wild_57194951 | NA                                  | Ca_kabuli_denovo | 57194951                | C/T  | NA                 | NA                            | NA                 |
| Kabuli_wild_57199687 | NA                                  | Ca_kabuli_denovo | 57199687                | A/G  | NA                 | NA                            | NA                 |
| Kabuli_wild_57199711 | NA                                  | Ca_kabuli_denovo | 57199711                | A/G  | NA                 | NA                            | NA                 |
| Kabuli_wild_57200272 | NA                                  | Ca_kabuli_denovo | 57200272                | C/T  | NA                 | NA                            | NA                 |
| Kabuli_wild_57203075 | NA                                  | Ca_kabuli_denovo | 57203075                | C/G  | NA                 | NA                            | NA                 |
| Kabuli_wild_57203501 | NA                                  | Ca_kabuli_denovo | 57203501                | A/G  | NA                 | NA                            | NA                 |
| Kabuli_wild_57205743 | NA                                  | Ca_kabuli_denovo | 57205743                | A/G  | NA                 | NA                            | NA                 |
| Kabuli_wild_57206765 | NA                                  | Ca_kabuli_denovo | 57206765                | A/G  | NA                 | NA                            | NA                 |
| Kabuli_wild_57208437 | NA                                  | Ca_kabuli_denovo | 57208437                | G/T  | NA                 | NA                            | NA                 |
| Kabuli_wild_57209299 | NA                                  | Ca_kabuli_denovo | 57209299                | C/T  | NA                 | NA                            | NA                 |
| Kabuli_wild_57209743 | NA                                  | Ca_kabuli_denovo | 57209743                | C/T  | NA                 | NA                            | NA                 |
| Kabuli_wild_57209746 | NA                                  | Ca_kabuli_denovo | 57209746                | G/T  | NA                 | NA                            | NA                 |
| Kabuli_wild_57213122 | NA                                  | Ca_kabuli_denovo | 57213122                | A/G  | NA                 | NA                            | NA                 |
| Kabuli_wild_57213125 | NA                                  | Ca_kabuli_denovo | 57213125                | A/G  | NA                 | NA                            | NA                 |
| Kabuli_wild_57214391 | NA                                  | Ca_kabuli_denovo | 57214391                | C/T  | NA                 | NA                            | NA                 |
| Kabuli_wild_57214400 | NA                                  | Ca_kabuli_denovo | 57214400                | A/T  | NA                 | NA                            | NA                 |
| Kabuli_wild_57217666 | NA                                  | Ca_kabuli_denovo | 57217666                | G/T  | NA                 | NA                            | NA                 |
| Kabuli_wild_57218407 | NA                                  | Ca_kabuli_denovo | 57218407                | C/G  | NA                 | NA                            | NA                 |
| Kabuli_wild_57222748 | NA                                  | Ca_kabuli_denovo | 57222748                | A/C  | NA                 | NA                            | NA                 |
| Kabuli_wild_57222751 | NA                                  | Ca_kabuli_denovo | 57222751                | A/G  | NA                 | NA                            | NA                 |
| Kabuli_wild_57224999 | NA                                  | Ca_kabuli_denovo | 57224999                | A/T  | NA                 | NA                            | NA                 |
| Kabuli_wild_57225015 | NA                                  | Ca_kabuli_denovo | 57225015                | A/C  | NA                 | NA                            | NA                 |
| Kabuli_wild_57225055 | NA                                  | Ca_kabuli_denovo | 57225055                | C/G  | NA                 | NA                            | NA                 |
| Kabuli_wild_57225057 | NA                                  | Ca_kabuli_denovo | 57225057                | C/T  | NA                 | NA                            | NA                 |
| Kabuli_wild_57230903 | NA                                  | Ca_kabuli_denovo | 57230903                | C/G  | NA                 | NA                            | NA                 |
| Kabuli_wild_57230915 | NA                                  | Ca_kabuli_denovo | 57230915                | C/T  | NA                 | NA                            | NA                 |
| Kabuli_wild_57231208 | NA                                  | Ca_kabuli_denovo | 57231208                | C/T  | NA                 | NA                            | NA                 |
| Kabuli_wild_57232141 | NA                                  | Ca_kabuli_denovo | 57232141                | C/T  | NA                 | NA                            | NA                 |
| Kabuli_wild_57232147 | NA                                  | Ca_kabuli_denovo | 57232147                | A/G  | NA                 | NA                            | NA                 |
| Kabuli_wild_57235394 | NA                                  | Ca_kabuli_denovo | 57235394                | C/T  | NA                 | NA                            | NA                 |
| Kabuli_wild_57235395 | NA                                  | Ca_kabuli_denovo | 57235395                | A/G  | NA                 | NA                            | NA                 |
| Kabuli_wild_57237474 | NA                                  | Ca_kabuli_denovo | 57237474                | C/T  | NA                 | NA                            | NA                 |
| Kabuli_wild_57237665 | NA                                  | Ca_kabuli_denovo | 57237665                | C/T  | NA                 | NA                            | NA                 |
| Kabuli_wild_57241268 | NA                                  | Ca_kabuli_denovo | 57241268                | A/G  | NA                 | NA                            | NA                 |
| Kabuli_wild_57241280 | NA                                  | Ca_kabuli_denovo | 57241280                | A/C  | NA                 | NA                            | NA                 |
| Kabuli_wild_57241286 | NA                                  | Ca_kabuli_denovo | 57241286                | A/G  | NA                 | NA                            | NA                 |
| Kabuli_wild_57241298 | NA                                  | Ca_kabuli_denovo | 57241298                | C/T  | NA                 | NA                            | NA                 |
| Kabuli_wild_57244696 | NA                                  | Ca_kabuli_denovo | 57244696                | C/G  | NA                 | NA                            | NA                 |

| SNP IDs              | NCBI dbSNP accession IDs (NCBI_SS#) | Chromosomes      | Physical positions (bp) | SNPs | Gene accession IDs | Sequence components of genome | Putative functions |
|----------------------|-------------------------------------|------------------|-------------------------|------|--------------------|-------------------------------|--------------------|
| Kabuli_wild_57244706 | NA                                  | Ca_kabuli_denovo | 57244706                | C/G  | NA                 | NA                            | NA                 |
| Kabuli_wild_57244714 | NA                                  | Ca_kabuli_denovo | 57244714                | A/G  | NA                 | NA                            | NA                 |
| Kabuli_wild_57245946 | NA                                  | Ca_kabuli_denovo | 57245946                | C/T  | NA                 | NA                            | NA                 |
| Kabuli_wild_57245947 | NA                                  | Ca_kabuli_denovo | 57245947                | A/G  | NA                 | NA                            | NA                 |
| Kabuli_wild_57246844 | NA                                  | Ca_kabuli_denovo | 57246844                | C/G  | NA                 | NA                            | NA                 |
| Kabuli_wild_57246877 | NA                                  | Ca_kabuli_denovo | 57246877                | A/G  | NA                 | NA                            | NA                 |
| Kabuli_wild_57249966 | NA                                  | Ca_kabuli_denovo | 57249966                | G/T  | NA                 | NA                            | NA                 |
| Kabuli_wild_57252085 | NA                                  | Ca_kabuli_denovo | 57252085                | C/G  | NA                 | NA                            | NA                 |
| Kabuli_wild_57252970 | NA                                  | Ca_kabuli_denovo | 57252970                | A/G  | NA                 | NA                            | NA                 |
| Kabuli_wild_57253722 | NA                                  | Ca_kabuli_denovo | 57253722                | A/G  | NA                 | NA                            | NA                 |
| Kabuli_wild_57259205 | NA                                  | Ca_kabuli_denovo | 57259205                | A/G  | NA                 | NA                            | NA                 |
| Kabuli_wild_57259671 | NA                                  | Ca_kabuli_denovo | 57259671                | C/T  | NA                 | NA                            | NA                 |
| Kabuli_wild_57261043 | NA                                  | Ca_kabuli_denovo | 57261043                | C/T  | NA                 | NA                            | NA                 |
| Kabuli_wild_57267731 | NA                                  | Ca_kabuli_denovo | 57267731                | A/G  | NA                 | NA                            | NA                 |
| Kabuli_wild_57267734 | NA                                  | Ca_kabuli_denovo | 57267734                | C/G  | NA                 | NA                            | NA                 |
| Kabuli_wild_57269542 | NA                                  | Ca_kabuli_denovo | 57269542                | C/T  | NA                 | NA                            | NA                 |
| Kabuli_wild_57269554 | NA                                  | Ca_kabuli_denovo | 57269554                | C/T  | NA                 | NA                            | NA                 |
| Kabuli_wild_57274549 | NA                                  | Ca_kabuli_denovo | 57274549                | A/G  | NA                 | NA                            | NA                 |
| Kabuli_wild_57274631 | NA                                  | Ca_kabuli_denovo | 57274631                | C/G  | NA                 | NA                            | NA                 |
| Kabuli_wild_57275710 | NA                                  | Ca_kabuli_denovo | 57275710                | A/G  | NA                 | NA                            | NA                 |
| Kabuli_wild_57281989 | NA                                  | Ca_kabuli_denovo | 57281989                | C/G  | NA                 | NA                            | NA                 |
| Kabuli_wild_57282037 | NA                                  | Ca_kabuli_denovo | 57282037                | C/T  | NA                 | NA                            | NA                 |
| Kabuli_wild_57284066 | NA                                  | Ca_kabuli_denovo | 57284066                | A/G  | NA                 | NA                            | NA                 |
| Kabuli_wild_57284072 | NA                                  | Ca_kabuli_denovo | 57284072                | C/T  | NA                 | NA                            | NA                 |
| Kabuli_wild_57289666 | NA                                  | Ca_kabuli_denovo | 57289666                | A/C  | NA                 | NA                            | NA                 |
| Kabuli_wild_57292885 | NA                                  | Ca_kabuli_denovo | 57292885                | C/T  | NA                 | NA                            | NA                 |
| Kabuli_wild_57292891 | NA                                  | Ca_kabuli_denovo | 57292891                | C/T  | NA                 | NA                            | NA                 |
| Kabuli_wild_57294643 | NA                                  | Ca_kabuli_denovo | 57294643                | C/T  | NA                 | NA                            | NA                 |
| Kabuli_wild_57294689 | NA                                  | Ca_kabuli_denovo | 57294689                | A/G  | NA                 | NA                            | NA                 |
| Kabuli_wild_57296453 | NA                                  | Ca_kabuli_denovo | 57296453                | C/G  | NA                 | NA                            | NA                 |
| Kabuli_wild_57298489 | NA                                  | Ca_kabuli_denovo | 57298489                | A/G  | NA                 | NA                            | NA                 |
| Kabuli_wild_57300808 | NA                                  | Ca_kabuli_denovo | 57300808                | G/T  | NA                 | NA                            | NA                 |
| Kabuli_wild_57304996 | NA                                  | Ca_kabuli_denovo | 57304996                | C/G  | NA                 | NA                            | NA                 |
| Kabuli_wild_57305245 | NA                                  | Ca_kabuli_denovo | 57305245                | C/T  | NA                 | NA                            | NA                 |
| Kabuli_wild_57305274 | NA                                  | Ca_kabuli_denovo | 57305274                | A/G  | NA                 | NA                            | NA                 |
| Kabuli_wild_57306259 | NA                                  | Ca_kabuli_denovo | 57306259                | C/T  | NA                 | NA                            | NA                 |
| Kabuli_wild_57306262 | NA                                  | Ca_kabuli_denovo | 57306262                | A/G  | NA                 | NA                            | NA                 |
| Kabuli_wild_57306968 | NA                                  | Ca_kabuli_denovo | 57306968                | A/G  | NA                 | NA                            | NA                 |
| Kabuli_wild_57306983 | NA                                  | Ca_kabuli_denovo | 57306983                | C/G  | NA                 | NA                            | NA                 |
| Kabuli_wild_57307190 | NA                                  | Ca_kabuli_denovo | 57307190                | C/T  | NA                 | NA                            | NA                 |
| Kabuli_wild_57307211 | NA                                  | Ca_kabuli_denovo | 57307211                | A/G  | NA                 | NA                            | NA                 |
| Kabuli_wild_57307217 | NA                                  | Ca_kabuli_denovo | 57307217                | C/T  | NA                 | NA                            | NA                 |
| Kabuli_wild_57307993 | NA                                  | Ca_kabuli_denovo | 57307993                | C/T  | NA                 | NA                            | NA                 |
| Kabuli_wild_57308526 | NA                                  | Ca_kabuli_denovo | 57308526                | G/T  | NA                 | NA                            | NA                 |

| SNP IDs              | NCBI dbSNP accession IDs (NCBI_SS#) | Chromosomes      | Physical positions (bp) | SNPs | Gene accession IDs | Sequence components of genome | Putative functions |
|----------------------|-------------------------------------|------------------|-------------------------|------|--------------------|-------------------------------|--------------------|
| Kabuli_wild_57308609 | NA                                  | Ca_kabuli_denovo | 57308609                | C/T  | NA                 | NA                            | NA                 |
| Kabuli_wild_57320956 | NA                                  | Ca_kabuli_denovo | 57320956                | C/G  | NA                 | NA                            | NA                 |
| Kabuli_wild_57320965 | NA                                  | Ca_kabuli_denovo | 57320965                | C/G  | NA                 | NA                            | NA                 |
| Kabuli_wild_57325808 | NA                                  | Ca_kabuli_denovo | 57325808                | C/T  | NA                 | NA                            | NA                 |
| Kabuli_wild_57327579 | NA                                  | Ca_kabuli_denovo | 57327579                | A/G  | NA                 | NA                            | NA                 |
| Kabuli_wild_57327582 | NA                                  | Ca_kabuli_denovo | 57327582                | G/T  | NA                 | NA                            | NA                 |
| Kabuli_wild_57327588 | NA                                  | Ca_kabuli_denovo | 57327588                | C/T  | NA                 | NA                            | NA                 |
| Kabuli_wild_57328673 | NA                                  | Ca_kabuli_denovo | 57328673                | A/C  | NA                 | NA                            | NA                 |
| Kabuli_wild_57328727 | NA                                  | Ca_kabuli_denovo | 57328727                | C/G  | NA                 | NA                            | NA                 |
| Kabuli_wild_57332496 | NA                                  | Ca_kabuli_denovo | 57332496                | C/G  | NA                 | NA                            | NA                 |
| Kabuli_wild_57334830 | NA                                  | Ca_kabuli_denovo | 57334830                | C/G  | NA                 | NA                            | NA                 |
| Kabuli_wild_57337148 | NA                                  | Ca_kabuli_denovo | 57337148                | C/G  | NA                 | NA                            | NA                 |
| Kabuli_wild_57340220 | NA                                  | Ca_kabuli_denovo | 57340220                | C/G  | NA                 | NA                            | NA                 |
| Kabuli_wild_57343097 | NA                                  | Ca_kabuli_denovo | 57343097                | A/G  | NA                 | NA                            | NA                 |
| Kabuli_wild_57343819 | NA                                  | Ca_kabuli_denovo | 57343819                | G/T  | NA                 | NA                            | NA                 |
| Kabuli_wild_57346269 | NA                                  | Ca_kabuli_denovo | 57346269                | G/T  | NA                 | NA                            | NA                 |
| Kabuli_wild_57346270 | NA                                  | Ca_kabuli_denovo | 57346270                | C/G  | NA                 | NA                            | NA                 |
| Kabuli_wild_57347737 | NA                                  | Ca_kabuli_denovo | 57347737                | A/G  | NA                 | NA                            | NA                 |
| Kabuli_wild_57347755 | NA                                  | Ca_kabuli_denovo | 57347755                | G/T  | NA                 | NA                            | NA                 |
| Kabuli_wild_57347787 | NA                                  | Ca_kabuli_denovo | 57347787                | C/G  | NA                 | NA                            | NA                 |
| Kabuli_wild_57348294 | NA                                  | Ca_kabuli_denovo | 57348294                | A/T  | NA                 | NA                            | NA                 |
| Kabuli_wild_57348320 | NA                                  | Ca_kabuli_denovo | 57348320                | C/G  | NA                 | NA                            | NA                 |
| Kabuli_wild_57348854 | NA                                  | Ca_kabuli_denovo | 57348854                | C/G  | NA                 | NA                            | NA                 |
| Kabuli_wild_57348870 | NA                                  | Ca_kabuli_denovo | 57348870                | C/T  | NA                 | NA                            | NA                 |
| Kabuli_wild_57350099 | NA                                  | Ca_kabuli_denovo | 57350099                | C/T  | NA                 | NA                            | NA                 |
| Kabuli_wild_57352601 | NA                                  | Ca_kabuli_denovo | 57352601                | G/T  | NA                 | NA                            | NA                 |
| Kabuli_wild_57352604 | NA                                  | Ca_kabuli_denovo | 57352604                | C/T  | NA                 | NA                            | NA                 |
| Kabuli_wild_57352607 | NA                                  | Ca_kabuli_denovo | 57352607                | C/G  | NA                 | NA                            | NA                 |
| Kabuli_wild_57353336 | NA                                  | Ca_kabuli_denovo | 57353336                | A/G  | NA                 | NA                            | NA                 |
| Kabuli_wild_57353341 | NA                                  | Ca_kabuli_denovo | 57353341                | A/G  | NA                 | NA                            | NA                 |
| Kabuli_wild_57353503 | NA                                  | Ca_kabuli_denovo | 57353503                | C/G  | NA                 | NA                            | NA                 |
| Kabuli_wild_57361350 | NA                                  | Ca_kabuli_denovo | 57361350                | C/T  | NA                 | NA                            | NA                 |
| Kabuli_wild_57361361 | NA                                  | Ca_kabuli_denovo | 57361361                | C/T  | NA                 | NA                            | NA                 |
| Kabuli_wild_57361368 | NA                                  | Ca_kabuli_denovo | 57361368                | A/G  | NA                 | NA                            | NA                 |
| Kabuli_wild_57362996 | NA                                  | Ca_kabuli_denovo | 57362996                | C/G  | NA                 | NA                            | NA                 |
| Kabuli_wild_57364572 | NA                                  | Ca_kabuli_denovo | 57364572                | C/T  | NA                 | NA                            | NA                 |
| Kabuli_wild_57366859 | NA                                  | Ca_kabuli_denovo | 57366859                | C/T  | NA                 | NA                            | NA                 |
| Kabuli_wild_57366883 | NA                                  | Ca_kabuli_denovo | 57366883                | C/G  | NA                 | NA                            | NA                 |
| Kabuli_wild_57368119 | NA                                  | Ca_kabuli_denovo | 57368119                | C/G  | NA                 | NA                            | NA                 |
| Kabuli_wild_57368140 | NA                                  | Ca_kabuli_denovo | 57368140                | C/T  | NA                 | NA                            | NA                 |
| Kabuli_wild_57368143 | NA                                  | Ca_kabuli_denovo | 57368143                | C/T  | NA                 | NA                            | NA                 |
| Kabuli_wild_57376197 | NA                                  | Ca_kabuli_denovo | 57376197                | A/C  | NA                 | NA                            | NA                 |
| Kabuli_wild_57377414 | NA                                  | Ca_kabuli_denovo | 57377414                | A/G  | NA                 | NA                            | NA                 |
| Kabuli_wild_57377504 | NA                                  | Ca_kabuli_denovo | 57377504                | C/T  | NA                 | NA                            | NA                 |

| SNP IDs              | NCBI dbSNP accession IDs (NCBI_SS#) | Chromosomes      | Physical positions (bp) | SNPs | Gene accession IDs | Sequence components of genome | Putative functions |
|----------------------|-------------------------------------|------------------|-------------------------|------|--------------------|-------------------------------|--------------------|
| Kabuli_wild_57377507 | NA                                  | Ca_kabuli_denovo | 57377507                | C/G  | NA                 | NA                            | NA                 |
| Kabuli_wild_57377528 | NA                                  | Ca_kabuli_denovo | 57377528                | C/G  | NA                 | NA                            | NA                 |
| Kabuli_wild_57377558 | NA                                  | Ca_kabuli_denovo | 57377558                | C/G  | NA                 | NA                            | NA                 |
| Kabuli_wild_57377780 | NA                                  | Ca_kabuli_denovo | 57377780                | A/G  | NA                 | NA                            | NA                 |
| Kabuli_wild_57377803 | NA                                  | Ca_kabuli_denovo | 57377803                | C/G  | NA                 | NA                            | NA                 |
| Kabuli_wild_57378058 | NA                                  | Ca_kabuli_denovo | 57378058                | C/T  | NA                 | NA                            | NA                 |
| Kabuli_wild_57378106 | NA                                  | Ca_kabuli_denovo | 57378106                | C/T  | NA                 | NA                            | NA                 |
| Kabuli_wild_57379369 | NA                                  | Ca_kabuli_denovo | 57379369                | G/T  | NA                 | NA                            | NA                 |
| Kabuli_wild_57379381 | NA                                  | Ca_kabuli_denovo | 57379381                | A/G  | NA                 | NA                            | NA                 |
| Kabuli_wild_57379791 | NA                                  | Ca_kabuli_denovo | 57379791                | C/T  | NA                 | NA                            | NA                 |
| Kabuli_wild_57380771 | NA                                  | Ca_kabuli_denovo | 57380771                | C/G  | NA                 | NA                            | NA                 |
| Kabuli_wild_57385783 | NA                                  | Ca_kabuli_denovo | 57385783                | C/G  | NA                 | NA                            | NA                 |
| Kabuli_wild_57385795 | NA                                  | Ca_kabuli_denovo | 57385795                | C/T  | NA                 | NA                            | NA                 |
| Kabuli_wild_57389312 | NA                                  | Ca_kabuli_denovo | 57389312                | A/G  | NA                 | NA                            | NA                 |
| Kabuli_wild_57390340 | NA                                  | Ca_kabuli_denovo | 57390340                | A/G  | NA                 | NA                            | NA                 |
| Kabuli_wild_57390863 | NA                                  | Ca_kabuli_denovo | 57390863                | A/G  | NA                 | NA                            | NA                 |
| Kabuli_wild_57390871 | NA                                  | Ca_kabuli_denovo | 57390871                | G/T  | NA                 | NA                            | NA                 |
| Kabuli_wild_57391666 | NA                                  | Ca_kabuli_denovo | 57391666                | G/T  | NA                 | NA                            | NA                 |
| Kabuli_wild_57393032 | NA                                  | Ca_kabuli_denovo | 57393032                | A/G  | NA                 | NA                            | NA                 |
| Kabuli_wild_57396031 | NA                                  | Ca_kabuli_denovo | 57396031                | A/G  | NA                 | NA                            | NA                 |
| Kabuli_wild_57396037 | NA                                  | Ca_kabuli_denovo | 57396037                | A/G  | NA                 | NA                            | NA                 |
| Kabuli_wild_57396061 | NA                                  | Ca_kabuli_denovo | 57396061                | A/G  | NA                 | NA                            | NA                 |
| Kabuli_wild_57396122 | NA                                  | Ca_kabuli_denovo | 57396122                | G/T  | NA                 | NA                            | NA                 |
| Kabuli_wild_57397259 | NA                                  | Ca_kabuli_denovo | 57397259                | A/G  | NA                 | NA                            | NA                 |
| Kabuli_wild_57405496 | NA                                  | Ca_kabuli_denovo | 57405496                | C/G  | NA                 | NA                            | NA                 |
| Kabuli_wild_57410546 | NA                                  | Ca_kabuli_denovo | 57410546                | C/G  | NA                 | NA                            | NA                 |
| Kabuli_wild_57410554 | NA                                  | Ca_kabuli_denovo | 57410554                | G/T  | NA                 | NA                            | NA                 |
| Kabuli_wild_57410639 | NA                                  | Ca_kabuli_denovo | 57410639                | C/T  | NA                 | NA                            | NA                 |
| Kabuli_wild_57416469 | NA                                  | Ca_kabuli_denovo | 57416469                | A/G  | NA                 | NA                            | NA                 |
| Kabuli_wild_57417398 | NA                                  | Ca_kabuli_denovo | 57417398                | C/G  | NA                 | NA                            | NA                 |
| Kabuli_wild_57417407 | NA                                  | Ca_kabuli_denovo | 57417407                | G/T  | NA                 | NA                            | NA                 |
| Kabuli_wild_57419140 | NA                                  | Ca_kabuli_denovo | 57419140                | C/T  | NA                 | NA                            | NA                 |
| Kabuli_wild_57423075 | NA                                  | Ca_kabuli_denovo | 57423075                | C/T  | NA                 | NA                            | NA                 |
| Kabuli_wild_57434673 | NA                                  | Ca_kabuli_denovo | 57434673                | G/T  | NA                 | NA                            | NA                 |
| Kabuli_wild_57434962 | NA                                  | Ca_kabuli_denovo | 57434962                | C/T  | NA                 | NA                            | NA                 |
| Kabuli_wild_57436104 | NA                                  | Ca_kabuli_denovo | 57436104                | C/T  | NA                 | NA                            | NA                 |
| Kabuli_wild_57436139 | NA                                  | Ca_kabuli_denovo | 57436139                | A/G  | NA                 | NA                            | NA                 |
| Kabuli_wild_57439715 | NA                                  | Ca_kabuli_denovo | 57439715                | C/G  | NA                 | NA                            | NA                 |
| Kabuli_wild_57448738 | NA                                  | Ca_kabuli_denovo | 57448738                | C/G  | NA                 | NA                            | NA                 |
| Kabuli_wild_57449762 | NA                                  | Ca_kabuli_denovo | 57449762                | A/G  | NA                 | NA                            | NA                 |
| Kabuli_wild_57452842 | NA                                  | Ca_kabuli_denovo | 57452842                | C/T  | NA                 | NA                            | NA                 |
| Kabuli_wild_57459157 | NA                                  | Ca_kabuli_denovo | 57459157                | C/G  | NA                 | NA                            | NA                 |
| Kabuli_wild_57459178 | NA                                  | Ca_kabuli_denovo | 57459178                | C/T  | NA                 | NA                            | NA                 |
| Kabuli_wild_57460646 | NA                                  | Ca_kabuli_denovo | 57460646                | C/G  | NA                 | NA                            | NA                 |



| SNP IDs              | NCBI dbSNP accession IDs (NCBI_SS#) | Chromosomes      | Physical positions (bp) | SNPs | Gene accession IDs | Sequence components of genome | Putative functions |
|----------------------|-------------------------------------|------------------|-------------------------|------|--------------------|-------------------------------|--------------------|
| Kabuli_wild_57466178 | NA                                  | Ca_kabuli_denovo | 57466178                | A/G  | NA                 | NA                            | NA                 |
| Kabuli_wild_57466525 | NA                                  | Ca_kabuli_denovo | 57466525                | A/G  | NA                 | NA                            | NA                 |
| Kabuli_wild_57466972 | NA                                  | Ca_kabuli_denovo | 57466972                | C/T  | NA                 | NA                            | NA                 |
| Kabuli_wild_57468825 | NA                                  | Ca_kabuli_denovo | 57468825                | A/G  | NA                 | NA                            | NA                 |
| Kabuli_wild_57469685 | NA                                  | Ca_kabuli_denovo | 57469685                | A/G  | NA                 | NA                            | NA                 |
| Kabuli_wild_57473480 | NA                                  | Ca_kabuli_denovo | 57473480                | C/G  | NA                 | NA                            | NA                 |
| Kabuli_wild_57473501 | NA                                  | Ca_kabuli_denovo | 57473501                | C/G  | NA                 | NA                            | NA                 |
| Kabuli_wild_57475613 | NA                                  | Ca_kabuli_denovo | 57475613                | C/T  | NA                 | NA                            | NA                 |
| Kabuli_wild_57478358 | NA                                  | Ca_kabuli_denovo | 57478358                | A/G  | NA                 | NA                            | NA                 |
| Kabuli_wild_57480458 | NA                                  | Ca_kabuli_denovo | 57480458                | C/G  | NA                 | NA                            | NA                 |
| Kabuli_wild_57481106 | NA                                  | Ca_kabuli_denovo | 57481106                | A/G  | NA                 | NA                            | NA                 |
| Kabuli_wild_57483518 | NA                                  | Ca_kabuli_denovo | 57483518                | C/T  | NA                 | NA                            | NA                 |
| Kabuli_wild_57489206 | NA                                  | Ca_kabuli_denovo | 57489206                | A/C  | NA                 | NA                            | NA                 |
| Kabuli_wild_57489237 | NA                                  | Ca_kabuli_denovo | 57489237                | C/T  | NA                 | NA                            | NA                 |
| Kabuli_wild_57489238 | NA                                  | Ca_kabuli_denovo | 57489238                | C/T  | NA                 | NA                            | NA                 |
| Kabuli_wild_57490333 | NA                                  | Ca_kabuli_denovo | 57490333                | C/T  | NA                 | NA                            | NA                 |
| Kabuli_wild_57493199 | NA                                  | Ca_kabuli_denovo | 57493199                | A/G  | NA                 | NA                            | NA                 |
| Kabuli_wild_57495069 | NA                                  | Ca_kabuli_denovo | 57495069                | A/G  | NA                 | NA                            | NA                 |
| Kabuli_wild_57498512 | NA                                  | Ca_kabuli_denovo | 57498512                | C/G  | NA                 | NA                            | NA                 |
| Kabuli_wild_57498551 | NA                                  | Ca_kabuli_denovo | 57498551                | C/G  | NA                 | NA                            | NA                 |
| Kabuli_wild_57503329 | NA                                  | Ca_kabuli_denovo | 57503329                | C/T  | NA                 | NA                            | NA                 |
| Kabuli_wild_57503332 | NA                                  | Ca_kabuli_denovo | 57503332                | C/G  | NA                 | NA                            | NA                 |
| Kabuli_wild_57503350 | NA                                  | Ca_kabuli_denovo | 57503350                | C/T  | NA                 | NA                            | NA                 |
| Kabuli_wild_57503713 | NA                                  | Ca_kabuli_denovo | 57503713                | C/T  | NA                 | NA                            | NA                 |
| Kabuli_wild_57504546 | NA                                  | Ca_kabuli_denovo | 57504546                | G/T  | NA                 | NA                            | NA                 |
| Kabuli_wild_57513742 | NA                                  | Ca_kabuli_denovo | 57513742                | C/G  | NA                 | NA                            | NA                 |
| Kabuli_wild_57520556 | NA                                  | Ca_kabuli_denovo | 57520556                | A/G  | NA                 | NA                            | NA                 |
| Kabuli_wild_57522319 | NA                                  | Ca_kabuli_denovo | 57522319                | C/G  | NA                 | NA                            | NA                 |
| Kabuli_wild_57522734 | NA                                  | Ca_kabuli_denovo | 57522734                | G/T  | NA                 | NA                            | NA                 |
| Kabuli_wild_57522736 | NA                                  | Ca_kabuli_denovo | 57522736                | C/G  | NA                 | NA                            | NA                 |
| Kabuli_wild_57523250 | NA                                  | Ca_kabuli_denovo | 57523250                | A/G  | NA                 | NA                            | NA                 |
| Kabuli_wild_57523298 | NA                                  | Ca_kabuli_denovo | 57523298                | C/G  | NA                 | NA                            | NA                 |
| Kabuli_wild_57523310 | NA                                  | Ca_kabuli_denovo | 57523310                | C/G  | NA                 | NA                            | NA                 |
| Kabuli_wild_57524473 | NA                                  | Ca_kabuli_denovo | 57524473                | C/T  | NA                 | NA                            | NA                 |
| Kabuli_wild_57527803 | NA                                  | Ca_kabuli_denovo | 57527803                | C/G  | NA                 | NA                            | NA                 |
| Kabuli_wild_57530100 | NA                                  | Ca_kabuli_denovo | 57530100                | G/T  | NA                 | NA                            | NA                 |
| Kabuli_wild_57531322 | NA                                  | Ca_kabuli_denovo | 57531322                | C/T  | NA                 | NA                            | NA                 |
| Kabuli_wild_57535142 | NA                                  | Ca_kabuli_denovo | 57535142                | C/G  | NA                 | NA                            | NA                 |
| Kabuli_wild_57535154 | NA                                  | Ca_kabuli_denovo | 57535154                | A/G  | NA                 | NA                            | NA                 |
| Kabuli_wild_57537408 | NA                                  | Ca_kabuli_denovo | 57537408                | A/C  | NA                 | NA                            | NA                 |
| Kabuli_wild_57541468 | NA                                  | Ca_kabuli_denovo | 57541468                | A/T  | NA                 | NA                            | NA                 |
| Kabuli_wild_57541700 | NA                                  | Ca_kabuli_denovo | 57541700                | C/G  | NA                 | NA                            | NA                 |
| Kabuli_wild_57541702 | NA                                  | Ca_kabuli_denovo | 57541702                | A/C  | NA                 | NA                            | NA                 |
| Kabuli_wild_57541706 | NA                                  | Ca_kabuli_denovo | 57541706                | C/T  | NA                 | NA                            | NA                 |

| SNP IDs              | NCBI dbSNP accession IDs (NCBI_SS#) | Chromosomes      | Physical positions (bp) | SNPs | Gene accession IDs | Sequence components of genome | Putative functions |
|----------------------|-------------------------------------|------------------|-------------------------|------|--------------------|-------------------------------|--------------------|
| Kabuli_wild_57541719 | NA                                  | Ca_kabuli_denovo | 57541719                | C/T  | NA                 | NA                            | NA                 |
| Kabuli_wild_57544642 | NA                                  | Ca_kabuli_denovo | 57544642                | A/G  | NA                 | NA                            | NA                 |
| Kabuli_wild_57545312 | NA                                  | Ca_kabuli_denovo | 57545312                | G/T  | NA                 | NA                            | NA                 |
| Kabuli_wild_57552725 | NA                                  | Ca_kabuli_denovo | 57552725                | A/G  | NA                 | NA                            | NA                 |
| Kabuli_wild_57552728 | NA                                  | Ca_kabuli_denovo | 57552728                | C/G  | NA                 | NA                            | NA                 |
| Kabuli_wild_57553082 | NA                                  | Ca_kabuli_denovo | 57553082                | A/G  | NA                 | NA                            | NA                 |
| Kabuli_wild_57553091 | NA                                  | Ca_kabuli_denovo | 57553091                | C/T  | NA                 | NA                            | NA                 |
| Kabuli_wild_57560016 | NA                                  | Ca_kabuli_denovo | 57560016                | A/G  | NA                 | NA                            | NA                 |
| Kabuli_wild_57564475 | NA                                  | Ca_kabuli_denovo | 57564475                | C/G  | NA                 | NA                            | NA                 |
| Kabuli_wild_57564496 | NA                                  | Ca_kabuli_denovo | 57564496                | A/G  | NA                 | NA                            | NA                 |
| Kabuli_wild_57574039 | NA                                  | Ca_kabuli_denovo | 57574039                | C/G  | NA                 | NA                            | NA                 |
| Kabuli_wild_57575115 | NA                                  | Ca_kabuli_denovo | 57575115                | C/T  | NA                 | NA                            | NA                 |
| Kabuli_wild_57576661 | NA                                  | Ca_kabuli_denovo | 57576661                | C/T  | NA                 | NA                            | NA                 |
| Kabuli_wild_57577103 | NA                                  | Ca_kabuli_denovo | 57577103                | A/G  | NA                 | NA                            | NA                 |
| Kabuli_wild_57578599 | NA                                  | Ca_kabuli_denovo | 57578599                | A/G  | NA                 | NA                            | NA                 |
| Kabuli_wild_57579428 | NA                                  | Ca_kabuli_denovo | 57579428                | C/T  | NA                 | NA                            | NA                 |
| Kabuli_wild_57579431 | NA                                  | Ca_kabuli_denovo | 57579431                | A/G  | NA                 | NA                            | NA                 |
| Kabuli_wild_57579448 | NA                                  | Ca_kabuli_denovo | 57579448                | A/G  | NA                 | NA                            | NA                 |
| Kabuli_wild_57582203 | NA                                  | Ca_kabuli_denovo | 57582203                | A/G  | NA                 | NA                            | NA                 |
| Kabuli_wild_57586780 | NA                                  | Ca_kabuli_denovo | 57586780                | C/T  | NA                 | NA                            | NA                 |
| Kabuli_wild_57587239 | NA                                  | Ca_kabuli_denovo | 57587239                | A/G  | NA                 | NA                            | NA                 |
| Kabuli_wild_57587243 | NA                                  | Ca_kabuli_denovo | 57587243                | A/G  | NA                 | NA                            | NA                 |
| Kabuli_wild_57593372 | NA                                  | Ca_kabuli_denovo | 57593372                | A/C  | NA                 | NA                            | NA                 |
| Kabuli_wild_57595303 | NA                                  | Ca_kabuli_denovo | 57595303                | C/T  | NA                 | NA                            | NA                 |
| Kabuli_wild_57595934 | NA                                  | Ca_kabuli_denovo | 57595934                | C/T  | NA                 | NA                            | NA                 |
| Kabuli_wild_57597844 | NA                                  | Ca_kabuli_denovo | 57597844                | C/T  | NA                 | NA                            | NA                 |
| Kabuli_wild_57599489 | NA                                  | Ca_kabuli_denovo | 57599489                | C/G  | NA                 | NA                            | NA                 |
| Kabuli_wild_57599504 | NA                                  | Ca_kabuli_denovo | 57599504                | C/G  | NA                 | NA                            | NA                 |
| Kabuli_wild_57599546 | NA                                  | Ca_kabuli_denovo | 57599546                | C/T  | NA                 | NA                            | NA                 |
| Kabuli_wild_57599884 | NA                                  | Ca_kabuli_denovo | 57599884                | C/G  | NA                 | NA                            | NA                 |
| Kabuli_wild_57599893 | NA                                  | Ca_kabuli_denovo | 57599893                | A/G  | NA                 | NA                            | NA                 |
| Kabuli_wild_57604541 | NA                                  | Ca_kabuli_denovo | 57604541                | C/G  | NA                 | NA                            | NA                 |
| Kabuli_wild_57605172 | NA                                  | Ca_kabuli_denovo | 57605172                | C/G  | NA                 | NA                            | NA                 |
| Kabuli_wild_57605194 | NA                                  | Ca_kabuli_denovo | 57605194                | A/G  | NA                 | NA                            | NA                 |
| Kabuli_wild_57605209 | NA                                  | Ca_kabuli_denovo | 57605209                | A/G  | NA                 | NA                            | NA                 |
| Kabuli_wild_57606388 | NA                                  | Ca_kabuli_denovo | 57606388                | C/G  | NA                 | NA                            | NA                 |
| Kabuli_wild_57606400 | NA                                  | Ca_kabuli_denovo | 57606400                | C/T  | NA                 | NA                            | NA                 |
| Kabuli_wild_57608251 | NA                                  | Ca_kabuli_denovo | 57608251                | A/G  | NA                 | NA                            | NA                 |
| Kabuli_wild_57609002 | NA                                  | Ca_kabuli_denovo | 57609002                | C/T  | NA                 | NA                            | NA                 |
| Kabuli_wild_57609005 | NA                                  | Ca_kabuli_denovo | 57609005                | A/G  | NA                 | NA                            | NA                 |
| Kabuli_wild_57610308 | NA                                  | Ca_kabuli_denovo | 57610308                | C/G  | NA                 | NA                            | NA                 |
| Kabuli_wild_57614465 | NA                                  | Ca_kabuli_denovo | 57614465                | A/G  | NA                 | NA                            | NA                 |
| Kabuli_wild_57615022 | NA                                  | Ca_kabuli_denovo | 57615022                | A/G  | NA                 | NA                            | NA                 |
| Kabuli_wild_57615061 | NA                                  | Ca_kabuli_denovo | 57615061                | A/G  | NA                 | NA                            | NA                 |

| SNP IDs              | NCBI dbSNP accession IDs (NCBI_SS#) | Chromosomes      | Physical positions (bp) | SNPs | Gene accession IDs | Sequence components of genome | Putative functions |
|----------------------|-------------------------------------|------------------|-------------------------|------|--------------------|-------------------------------|--------------------|
| Kabuli_wild_57615064 | NA                                  | Ca_kabuli_denovo | 57615064                | G/T  | NA                 | NA                            | NA                 |
| Kabuli_wild_57618395 | NA                                  | Ca_kabuli_denovo | 57618395                | A/G  | NA                 | NA                            | NA                 |
| Kabuli_wild_57619403 | NA                                  | Ca_kabuli_denovo | 57619403                | C/G  | NA                 | NA                            | NA                 |
| Kabuli_wild_57619406 | NA                                  | Ca_kabuli_denovo | 57619406                | C/G  | NA                 | NA                            | NA                 |
| Kabuli_wild_57621169 | NA                                  | Ca_kabuli_denovo | 57621169                | C/G  | NA                 | NA                            | NA                 |
| Kabuli_wild_57623411 | NA                                  | Ca_kabuli_denovo | 57623411                | C/G  | NA                 | NA                            | NA                 |
| Kabuli_wild_57623444 | NA                                  | Ca_kabuli_denovo | 57623444                | A/C  | NA                 | NA                            | NA                 |
| Kabuli_wild_57624178 | NA                                  | Ca_kabuli_denovo | 57624178                | C/T  | NA                 | NA                            | NA                 |
| Kabuli_wild_57624186 | NA                                  | Ca_kabuli_denovo | 57624186                | A/T  | NA                 | NA                            | NA                 |
| Kabuli_wild_57624493 | NA                                  | Ca_kabuli_denovo | 57624493                | C/G  | NA                 | NA                            | NA                 |
| Kabuli_wild_57624884 | NA                                  | Ca_kabuli_denovo | 57624884                | C/T  | NA                 | NA                            | NA                 |
| Kabuli_wild_57632125 | NA                                  | Ca_kabuli_denovo | 57632125                | C/G  | NA                 | NA                            | NA                 |
| Kabuli_wild_57632513 | NA                                  | Ca_kabuli_denovo | 57632513                | C/T  | NA                 | NA                            | NA                 |
| Kabuli_wild_57634796 | NA                                  | Ca_kabuli_denovo | 57634796                | C/G  | NA                 | NA                            | NA                 |
| Kabuli_wild_57634799 | NA                                  | Ca_kabuli_denovo | 57634799                | A/G  | NA                 | NA                            | NA                 |
| Kabuli_wild_57634802 | NA                                  | Ca_kabuli_denovo | 57634802                | A/G  | NA                 | NA                            | NA                 |
| Kabuli_wild_57635903 | NA                                  | Ca_kabuli_denovo | 57635903                | C/G  | NA                 | NA                            | NA                 |
| Kabuli_wild_57635906 | NA                                  | Ca_kabuli_denovo | 57635906                | A/C  | NA                 | NA                            | NA                 |
| Kabuli_wild_57636911 | NA                                  | Ca_kabuli_denovo | 57636911                | A/G  | NA                 | NA                            | NA                 |
| Kabuli_wild_57636944 | NA                                  | Ca_kabuli_denovo | 57636944                | A/G  | NA                 | NA                            | NA                 |
| Kabuli_wild_57639598 | NA                                  | Ca_kabuli_denovo | 57639598                | C/T  | NA                 | NA                            | NA                 |
| Kabuli_wild_57639609 | NA                                  | Ca_kabuli_denovo | 57639609                | C/T  | NA                 | NA                            | NA                 |
| Kabuli_wild_57639697 | NA                                  | Ca_kabuli_denovo | 57639697                | A/C  | NA                 | NA                            | NA                 |
| Kabuli_wild_57641357 | NA                                  | Ca_kabuli_denovo | 57641357                | C/G  | NA                 | NA                            | NA                 |
| Kabuli_wild_57647676 | NA                                  | Ca_kabuli_denovo | 57647676                | A/G  | NA                 | NA                            | NA                 |
| Kabuli_wild_57648600 | NA                                  | Ca_kabuli_denovo | 57648600                | C/T  | NA                 | NA                            | NA                 |
| Kabuli_wild_57648620 | NA                                  | Ca_kabuli_denovo | 57648620                | A/G  | NA                 | NA                            | NA                 |
| Kabuli_wild_57648621 | NA                                  | Ca_kabuli_denovo | 57648621                | C/T  | NA                 | NA                            | NA                 |
| Kabuli_wild_57651701 | NA                                  | Ca_kabuli_denovo | 57651701                | A/G  | NA                 | NA                            | NA                 |
| Kabuli_wild_57653743 | NA                                  | Ca_kabuli_denovo | 57653743                | C/G  | NA                 | NA                            | NA                 |
| Kabuli_wild_57657092 | NA                                  | Ca_kabuli_denovo | 57657092                | C/G  | NA                 | NA                            | NA                 |
| Kabuli_wild_57660518 | NA                                  | Ca_kabuli_denovo | 57660518                | C/T  | NA                 | NA                            | NA                 |
| Kabuli_wild_57668615 | NA                                  | Ca_kabuli_denovo | 57668615                | C/G  | NA                 | NA                            | NA                 |
| Kabuli_wild_57668707 | NA                                  | Ca_kabuli_denovo | 57668707                | C/T  | NA                 | NA                            | NA                 |
| Kabuli_wild_57670634 | NA                                  | Ca_kabuli_denovo | 57670634                | A/G  | NA                 | NA                            | NA                 |
| Kabuli_wild_57670637 | NA                                  | Ca_kabuli_denovo | 57670637                | C/G  | NA                 | NA                            | NA                 |
| Kabuli_wild_57673172 | NA                                  | Ca_kabuli_denovo | 57673172                | C/T  | NA                 | NA                            | NA                 |
| Kabuli_wild_57674924 | NA                                  | Ca_kabuli_denovo | 57674924                | C/T  | NA                 | NA                            | NA                 |
| Kabuli_wild_57674933 | NA                                  | Ca_kabuli_denovo | 57674933                | C/T  | NA                 | NA                            | NA                 |
| Kabuli_wild_57677251 | NA                                  | Ca_kabuli_denovo | 57677251                | G/T  | NA                 | NA                            | NA                 |
| Kabuli_wild_57677989 | NA                                  | Ca_kabuli_denovo | 57677989                | C/G  | NA                 | NA                            | NA                 |
| Kabuli_wild_57678013 | NA                                  | Ca_kabuli_denovo | 57678013                | C/G  | NA                 | NA                            | NA                 |
| Kabuli_wild_57680618 | NA                                  | Ca_kabuli_denovo | 57680618                | C/T  | NA                 | NA                            | NA                 |
| Kabuli_wild_57680654 | NA                                  | Ca_kabuli_denovo | 57680654                | C/T  | NA                 | NA                            | NA                 |

| SNP IDs              | NCBI dbSNP accession IDs (NCBI_SS#) | Chromosomes      | Physical positions (bp) | SNPs | Gene accession IDs | Sequence components of genome | Putative functions |
|----------------------|-------------------------------------|------------------|-------------------------|------|--------------------|-------------------------------|--------------------|
| Kabuli_wild_57687106 | NA                                  | Ca_kabuli_denovo | 57687106                | A/G  | NA                 | NA                            | NA                 |
| Kabuli_wild_57687139 | NA                                  | Ca_kabuli_denovo | 57687139                | A/G  | NA                 | NA                            | NA                 |
| Kabuli_wild_57687145 | NA                                  | Ca_kabuli_denovo | 57687145                | A/G  | NA                 | NA                            | NA                 |
| Kabuli_wild_57687281 | NA                                  | Ca_kabuli_denovo | 57687281                | C/G  | NA                 | NA                            | NA                 |
| Kabuli_wild_57690167 | NA                                  | Ca_kabuli_denovo | 57690167                | C/G  | NA                 | NA                            | NA                 |
| Kabuli_wild_57690245 | NA                                  | Ca_kabuli_denovo | 57690245                | C/T  | NA                 | NA                            | NA                 |
| Kabuli_wild_57693514 | NA                                  | Ca_kabuli_denovo | 57693514                | A/G  | NA                 | NA                            | NA                 |
| Kabuli_wild_57693520 | NA                                  | Ca_kabuli_denovo | 57693520                | C/T  | NA                 | NA                            | NA                 |
| Kabuli_wild_57693526 | NA                                  | Ca_kabuli_denovo | 57693526                | G/T  | NA                 | NA                            | NA                 |
| Kabuli_wild_57696515 | NA                                  | Ca_kabuli_denovo | 57696515                | A/G  | NA                 | NA                            | NA                 |
| Kabuli_wild_57696560 | NA                                  | Ca_kabuli_denovo | 57696560                | A/G  | NA                 | NA                            | NA                 |
| Kabuli_wild_57697626 | NA                                  | Ca_kabuli_denovo | 57697626                | A/G  | NA                 | NA                            | NA                 |
| Kabuli_wild_57697629 | NA                                  | Ca_kabuli_denovo | 57697629                | A/G  | NA                 | NA                            | NA                 |
| Kabuli_wild_57700138 | NA                                  | Ca_kabuli_denovo | 57700138                | A/C  | NA                 | NA                            | NA                 |
| Kabuli_wild_57700150 | NA                                  | Ca_kabuli_denovo | 57700150                | C/T  | NA                 | NA                            | NA                 |
| Kabuli_wild_57704311 | NA                                  | Ca_kabuli_denovo | 57704311                | C/G  | NA                 | NA                            | NA                 |
| Kabuli_wild_57705142 | NA                                  | Ca_kabuli_denovo | 57705142                | C/G  | NA                 | NA                            | NA                 |
| Kabuli_wild_57705145 | NA                                  | Ca_kabuli_denovo | 57705145                | C/G  | NA                 | NA                            | NA                 |
| Kabuli_wild_57705153 | NA                                  | Ca_kabuli_denovo | 57705153                | G/T  | NA                 | NA                            | NA                 |
| Kabuli_wild_57706939 | NA                                  | Ca_kabuli_denovo | 57706939                | G/T  | NA                 | NA                            | NA                 |
| Kabuli_wild_57712973 | NA                                  | Ca_kabuli_denovo | 57712973                | A/G  | NA                 | NA                            | NA                 |
| Kabuli_wild_57713381 | NA                                  | Ca_kabuli_denovo | 57713381                | A/G  | NA                 | NA                            | NA                 |
| Kabuli_wild_57714815 | NA                                  | Ca_kabuli_denovo | 57714815                | C/G  | NA                 | NA                            | NA                 |
| Kabuli_wild_57718475 | NA                                  | Ca_kabuli_denovo | 57718475                | C/G  | NA                 | NA                            | NA                 |
| Kabuli_wild_57718487 | NA                                  | Ca_kabuli_denovo | 57718487                | A/G  | NA                 | NA                            | NA                 |
| Kabuli_wild_57718527 | NA                                  | Ca_kabuli_denovo | 57718527                | C/G  | NA                 | NA                            | NA                 |
| Kabuli_wild_57718549 | NA                                  | Ca_kabuli_denovo | 57718549                | C/T  | NA                 | NA                            | NA                 |
| Kabuli_wild_57718555 | NA                                  | Ca_kabuli_denovo | 57718555                | C/T  | NA                 | NA                            | NA                 |
| Kabuli_wild_57718567 | NA                                  | Ca_kabuli_denovo | 57718567                | C/G  | NA                 | NA                            | NA                 |
| Kabuli_wild_57720676 | NA                                  | Ca_kabuli_denovo | 57720676                | C/T  | NA                 | NA                            | NA                 |
| Kabuli_wild_57720685 | NA                                  | Ca_kabuli_denovo | 57720685                | C/G  | NA                 | NA                            | NA                 |
| Kabuli_wild_57721419 | NA                                  | Ca_kabuli_denovo | 57721419                | A/T  | NA                 | NA                            | NA                 |
| Kabuli_wild_57721425 | NA                                  | Ca_kabuli_denovo | 57721425                | A/G  | NA                 | NA                            | NA                 |
| Kabuli_wild_57723610 | NA                                  | Ca_kabuli_denovo | 57723610                | C/T  | NA                 | NA                            | NA                 |
| Kabuli_wild_57725534 | NA                                  | Ca_kabuli_denovo | 57725534                | A/G  | NA                 | NA                            | NA                 |
| Kabuli_wild_57725536 | NA                                  | Ca_kabuli_denovo | 57725536                | C/T  | NA                 | NA                            | NA                 |
| Kabuli_wild_57725537 | NA                                  | Ca_kabuli_denovo | 57725537                | A/T  | NA                 | NA                            | NA                 |
| Kabuli_wild_57725538 | NA                                  | Ca_kabuli_denovo | 57725538                | G/T  | NA                 | NA                            | NA                 |
| Kabuli_wild_57730190 | NA                                  | Ca_kabuli_denovo | 57730190                | C/T  | NA                 | NA                            | NA                 |
| Kabuli_wild_57731777 | NA                                  | Ca_kabuli_denovo | 57731777                | A/G  | NA                 | NA                            | NA                 |
| Kabuli_wild_57738946 | NA                                  | Ca_kabuli_denovo | 57738946                | A/G  | NA                 | NA                            | NA                 |
| Kabuli_wild_57747286 | NA                                  | Ca_kabuli_denovo | 57747286                | C/G  | NA                 | NA                            | NA                 |
| Kabuli_wild_57747289 | NA                                  | Ca_kabuli_denovo | 57747289                | C/G  | NA                 | NA                            | NA                 |
| Kabuli_wild_57747488 | NA                                  | Ca_kabuli_denovo | 57747488                | C/G  | NA                 | NA                            | NA                 |

| SNP IDs              | NCBI dbSNP accession IDs (NCBI_SS#) | Chromosomes      | Physical positions (bp) | SNPs | Gene accession IDs | Sequence components of genome | Putative functions |
|----------------------|-------------------------------------|------------------|-------------------------|------|--------------------|-------------------------------|--------------------|
| Kabuli_wild_57748231 | NA                                  | Ca_kabuli_denovo | 57748231                | C/G  | NA                 | NA                            | NA                 |
| Kabuli_wild_57748496 | NA                                  | Ca_kabuli_denovo | 57748496                | A/G  | NA                 | NA                            | NA                 |
| Kabuli_wild_57750431 | NA                                  | Ca_kabuli_denovo | 57750431                | A/G  | NA                 | NA                            | NA                 |
| Kabuli_wild_57750728 | NA                                  | Ca_kabuli_denovo | 57750728                | C/G  | NA                 | NA                            | NA                 |
| Kabuli_wild_57750770 | NA                                  | Ca_kabuli_denovo | 57750770                | A/C  | NA                 | NA                            | NA                 |
| Kabuli_wild_57750788 | NA                                  | Ca_kabuli_denovo | 57750788                | C/G  | NA                 | NA                            | NA                 |
| Kabuli_wild_57757405 | NA                                  | Ca_kabuli_denovo | 57757405                | C/T  | NA                 | NA                            | NA                 |
| Kabuli_wild_57757408 | NA                                  | Ca_kabuli_denovo | 57757408                | C/T  | NA                 | NA                            | NA                 |
| Kabuli_wild_57757420 | NA                                  | Ca_kabuli_denovo | 57757420                | C/G  | NA                 | NA                            | NA                 |
| Kabuli_wild_57762986 | NA                                  | Ca_kabuli_denovo | 57762986                | C/G  | NA                 | NA                            | NA                 |
| Kabuli_wild_57763995 | NA                                  | Ca_kabuli_denovo | 57763995                | A/C  | NA                 | NA                            | NA                 |
| Kabuli_wild_57763996 | NA                                  | Ca_kabuli_denovo | 57763996                | A/G  | NA                 | NA                            | NA                 |
| Kabuli_wild_57763998 | NA                                  | Ca_kabuli_denovo | 57763998                | C/T  | NA                 | NA                            | NA                 |
| Kabuli_wild_57763999 | NA                                  | Ca_kabuli_denovo | 57763999                | A/C  | NA                 | NA                            | NA                 |
| Kabuli_wild_57765986 | NA                                  | Ca_kabuli_denovo | 57765986                | A/G  | NA                 | NA                            | NA                 |
| Kabuli_wild_57766074 | NA                                  | Ca_kabuli_denovo | 57766074                | G/T  | NA                 | NA                            | NA                 |
| Kabuli_wild_57766294 | NA                                  | Ca_kabuli_denovo | 57766294                | C/G  | NA                 | NA                            | NA                 |
| Kabuli_wild_57766312 | NA                                  | Ca_kabuli_denovo | 57766312                | C/G  | NA                 | NA                            | NA                 |
| Kabuli_wild_57768020 | NA                                  | Ca_kabuli_denovo | 57768020                | A/G  | NA                 | NA                            | NA                 |
| Kabuli_wild_57768083 | NA                                  | Ca_kabuli_denovo | 57768083                | C/G  | NA                 | NA                            | NA                 |
| Kabuli_wild_57768329 | NA                                  | Ca_kabuli_denovo | 57768329                | C/T  | NA                 | NA                            | NA                 |
| Kabuli_wild_57769528 | NA                                  | Ca_kabuli_denovo | 57769528                | A/T  | NA                 | NA                            | NA                 |
| Kabuli_wild_57769529 | NA                                  | Ca_kabuli_denovo | 57769529                | G/T  | NA                 | NA                            | NA                 |
| Kabuli_wild_57774529 | NA                                  | Ca_kabuli_denovo | 57774529                | G/T  | NA                 | NA                            | NA                 |
| Kabuli_wild_57778057 | NA                                  | Ca_kabuli_denovo | 57778057                | A/G  | NA                 | NA                            | NA                 |
| Kabuli_wild_57778072 | NA                                  | Ca_kabuli_denovo | 57778072                | C/T  | NA                 | NA                            | NA                 |
| Kabuli_wild_57778078 | NA                                  | Ca_kabuli_denovo | 57778078                | C/T  | NA                 | NA                            | NA                 |
| Kabuli_wild_57778117 | NA                                  | Ca_kabuli_denovo | 57778117                | A/G  | NA                 | NA                            | NA                 |
| Kabuli_wild_57783013 | NA                                  | Ca_kabuli_denovo | 57783013                | C/G  | NA                 | NA                            | NA                 |
| Kabuli_wild_57784475 | NA                                  | Ca_kabuli_denovo | 57784475                | A/G  | NA                 | NA                            | NA                 |
| Kabuli_wild_57784484 | NA                                  | Ca_kabuli_denovo | 57784484                | C/T  | NA                 | NA                            | NA                 |
| Kabuli_wild_57786704 | NA                                  | Ca_kabuli_denovo | 57786704                | C/G  | NA                 | NA                            | NA                 |
| Kabuli_wild_57788104 | NA                                  | Ca_kabuli_denovo | 57788104                | C/G  | NA                 | NA                            | NA                 |
| Kabuli_wild_57788114 | NA                                  | Ca_kabuli_denovo | 57788114                | C/T  | NA                 | NA                            | NA                 |
| Kabuli_wild_57788128 | NA                                  | Ca_kabuli_denovo | 57788128                | C/G  | NA                 | NA                            | NA                 |
| Kabuli_wild_57788969 | NA                                  | Ca_kabuli_denovo | 57788969                | C/T  | NA                 | NA                            | NA                 |
| Kabuli_wild_57788985 | NA                                  | Ca_kabuli_denovo | 57788985                | C/T  | NA                 | NA                            | NA                 |
| Kabuli_wild_57791879 | NA                                  | Ca_kabuli_denovo | 57791879                | C/G  | NA                 | NA                            | NA                 |
| Kabuli_wild_57799507 | NA                                  | Ca_kabuli_denovo | 57799507                | A/G  | NA                 | NA                            | NA                 |
| Kabuli_wild_57799835 | NA                                  | Ca_kabuli_denovo | 57799835                | C/T  | NA                 | NA                            | NA                 |
| Kabuli_wild_57805026 | NA                                  | Ca_kabuli_denovo | 57805026                | C/T  | NA                 | NA                            | NA                 |
| Kabuli_wild_57805688 | NA                                  | Ca_kabuli_denovo | 57805688                | C/G  | NA                 | NA                            | NA                 |
| Kabuli_wild_57809113 | NA                                  | Ca_kabuli_denovo | 57809113                | C/T  | NA                 | NA                            | NA                 |
| Kabuli_wild_57809146 | NA                                  | Ca_kabuli_denovo | 57809146                | C/T  | NA                 | NA                            | NA                 |

| SNP IDs              | NCBI dbSNP accession IDs (NCBI_SS#) | Chromosomes      | Physical positions (bp) | SNPs | Gene accession IDs | Sequence components of genome | Putative functions |
|----------------------|-------------------------------------|------------------|-------------------------|------|--------------------|-------------------------------|--------------------|
| Kabuli_wild_57813602 | NA                                  | Ca_kabuli_denovo | 57813602                | C/T  | NA                 | NA                            | NA                 |
| Kabuli_wild_57813644 | NA                                  | Ca_kabuli_denovo | 57813644                | A/G  | NA                 | NA                            | NA                 |
| Kabuli_wild_57816645 | NA                                  | Ca_kabuli_denovo | 57816645                | A/C  | NA                 | NA                            | NA                 |
| Kabuli_wild_57816656 | NA                                  | Ca_kabuli_denovo | 57816656                | C/G  | NA                 | NA                            | NA                 |
| Kabuli_wild_57816658 | NA                                  | Ca_kabuli_denovo | 57816658                | A/C  | NA                 | NA                            | NA                 |
| Kabuli_wild_57819641 | NA                                  | Ca_kabuli_denovo | 57819641                | C/T  | NA                 | NA                            | NA                 |
| Kabuli_wild_57819647 | NA                                  | Ca_kabuli_denovo | 57819647                | C/G  | NA                 | NA                            | NA                 |
| Kabuli_wild_57819671 | NA                                  | Ca_kabuli_denovo | 57819671                | A/G  | NA                 | NA                            | NA                 |
| Kabuli_wild_57820652 | NA                                  | Ca_kabuli_denovo | 57820652                | A/G  | NA                 | NA                            | NA                 |
| Kabuli_wild_57820664 | NA                                  | Ca_kabuli_denovo | 57820664                | A/G  | NA                 | NA                            | NA                 |
| Kabuli_wild_57823738 | NA                                  | Ca_kabuli_denovo | 57823738                | C/G  | NA                 | NA                            | NA                 |
| Kabuli_wild_57823774 | NA                                  | Ca_kabuli_denovo | 57823774                | A/C  | NA                 | NA                            | NA                 |
| Kabuli_wild_57832369 | NA                                  | Ca_kabuli_denovo | 57832369                | C/T  | NA                 | NA                            | NA                 |
| Kabuli_wild_57832387 | NA                                  | Ca_kabuli_denovo | 57832387                | C/G  | NA                 | NA                            | NA                 |
| Kabuli_wild_57832417 | NA                                  | Ca_kabuli_denovo | 57832417                | G/T  | NA                 | NA                            | NA                 |
| Kabuli_wild_57832970 | NA                                  | Ca_kabuli_denovo | 57832970                | C/T  | NA                 | NA                            | NA                 |
| Kabuli_wild_57834161 | NA                                  | Ca_kabuli_denovo | 57834161                | A/G  | NA                 | NA                            | NA                 |
| Kabuli_wild_57834166 | NA                                  | Ca_kabuli_denovo | 57834166                | A/G  | NA                 | NA                            | NA                 |
| Kabuli_wild_57834415 | NA                                  | Ca_kabuli_denovo | 57834415                | C/T  | NA                 | NA                            | NA                 |
| Kabuli_wild_57835245 | NA                                  | Ca_kabuli_denovo | 57835245                | A/T  | NA                 | NA                            | NA                 |
| Kabuli_wild_57835256 | NA                                  | Ca_kabuli_denovo | 57835256                | A/C  | NA                 | NA                            | NA                 |
| Kabuli_wild_57835259 | NA                                  | Ca_kabuli_denovo | 57835259                | A/G  | NA                 | NA                            | NA                 |
| Kabuli_wild_57838781 | NA                                  | Ca_kabuli_denovo | 57838781                | C/T  | NA                 | NA                            | NA                 |
| Kabuli_wild_57838796 | NA                                  | Ca_kabuli_denovo | 57838796                | A/G  | NA                 | NA                            | NA                 |
| Kabuli_wild_57841205 | NA                                  | Ca_kabuli_denovo | 57841205                | C/T  | NA                 | NA                            | NA                 |
| Kabuli_wild_57841226 | NA                                  | Ca_kabuli_denovo | 57841226                | A/G  | NA                 | NA                            | NA                 |
| Kabuli_wild_57844265 | NA                                  | Ca_kabuli_denovo | 57844265                | C/G  | NA                 | NA                            | NA                 |
| Kabuli_wild_57844295 | NA                                  | Ca_kabuli_denovo | 57844295                | A/C  | NA                 | NA                            | NA                 |
| Kabuli_wild_57847891 | NA                                  | Ca_kabuli_denovo | 57847891                | A/G  | NA                 | NA                            | NA                 |
| Kabuli_wild_57848287 | NA                                  | Ca_kabuli_denovo | 57848287                | A/G  | NA                 | NA                            | NA                 |
| Kabuli_wild_57848294 | NA                                  | Ca_kabuli_denovo | 57848294                | C/G  | NA                 | NA                            | NA                 |
| Kabuli_wild_57848870 | NA                                  | Ca_kabuli_denovo | 57848870                | A/G  | NA                 | NA                            | NA                 |
| Kabuli_wild_57848873 | NA                                  | Ca_kabuli_denovo | 57848873                | C/G  | NA                 | NA                            | NA                 |
| Kabuli_wild_57848876 | NA                                  | Ca_kabuli_denovo | 57848876                | A/G  | NA                 | NA                            | NA                 |
| Kabuli_wild_57848935 | NA                                  | Ca_kabuli_denovo | 57848935                | A/G  | NA                 | NA                            | NA                 |
| Kabuli_wild_57849440 | NA                                  | Ca_kabuli_denovo | 57849440                | A/G  | NA                 | NA                            | NA                 |
| Kabuli_wild_57849565 | NA                                  | Ca_kabuli_denovo | 57849565                | C/G  | NA                 | NA                            | NA                 |
| Kabuli_wild_57849580 | NA                                  | Ca_kabuli_denovo | 57849580                | C/G  | NA                 | NA                            | NA                 |
| Kabuli_wild_57849583 | NA                                  | Ca_kabuli_denovo | 57849583                | C/T  | NA                 | NA                            | NA                 |
| Kabuli_wild_57849589 | NA                                  | Ca_kabuli_denovo | 57849589                | C/G  | NA                 | NA                            | NA                 |
| Kabuli_wild_57849991 | NA                                  | Ca_kabuli_denovo | 57849991                | G/T  | NA                 | NA                            | NA                 |
| Kabuli_wild_57850966 | NA                                  | Ca_kabuli_denovo | 57850966                | C/T  | NA                 | NA                            | NA                 |
| Kabuli_wild_57850975 | NA                                  | Ca_kabuli_denovo | 57850975                | A/G  | NA                 | NA                            | NA                 |
| Kabuli_wild_57851708 | NA                                  | Ca_kabuli_denovo | 57851708                | C/T  | NA                 | NA                            | NA                 |

| SNP IDs              | NCBI dbSNP accession IDs (NCBI_SS#) | Chromosomes      | Physical positions (bp) | SNPs | Gene accession IDs | Sequence components of genome | Putative functions |
|----------------------|-------------------------------------|------------------|-------------------------|------|--------------------|-------------------------------|--------------------|
| Kabuli_wild_57853787 | NA                                  | Ca_kabuli_denovo | 57853787                | G/T  | NA                 | NA                            | NA                 |
| Kabuli_wild_57853832 | NA                                  | Ca_kabuli_denovo | 57853832                | A/C  | NA                 | NA                            | NA                 |
| Kabuli_wild_57855420 | NA                                  | Ca_kabuli_denovo | 57855420                | A/T  | NA                 | NA                            | NA                 |
| Kabuli_wild_57855476 | NA                                  | Ca_kabuli_denovo | 57855476                | C/G  | NA                 | NA                            | NA                 |
| Kabuli_wild_57855477 | NA                                  | Ca_kabuli_denovo | 57855477                | A/T  | NA                 | NA                            | NA                 |
| Kabuli_wild_57860918 | NA                                  | Ca_kabuli_denovo | 57860918                | C/G  | NA                 | NA                            | NA                 |
| Kabuli_wild_57860936 | NA                                  | Ca_kabuli_denovo | 57860936                | C/G  | NA                 | NA                            | NA                 |
| Kabuli_wild_57863815 | NA                                  | Ca_kabuli_denovo | 57863815                | C/G  | NA                 | NA                            | NA                 |
| Kabuli_wild_57864981 | NA                                  | Ca_kabuli_denovo | 57864981                | C/G  | NA                 | NA                            | NA                 |
| Kabuli_wild_57864990 | NA                                  | Ca_kabuli_denovo | 57864990                | A/C  | NA                 | NA                            | NA                 |
| Kabuli_wild_57865758 | NA                                  | Ca_kabuli_denovo | 57865758                | A/G  | NA                 | NA                            | NA                 |
| Kabuli_wild_57870535 | NA                                  | Ca_kabuli_denovo | 57870535                | C/G  | NA                 | NA                            | NA                 |
| Kabuli_wild_57873290 | NA                                  | Ca_kabuli_denovo | 57873290                | C/T  | NA                 | NA                            | NA                 |
| Kabuli_wild_57876923 | NA                                  | Ca_kabuli_denovo | 57876923                | A/T  | NA                 | NA                            | NA                 |
| Kabuli_wild_57876947 | NA                                  | Ca_kabuli_denovo | 57876947                | A/G  | NA                 | NA                            | NA                 |
| Kabuli_wild_57876950 | NA                                  | Ca_kabuli_denovo | 57876950                | G/T  | NA                 | NA                            | NA                 |
| Kabuli_wild_57877093 | NA                                  | Ca_kabuli_denovo | 57877093                | C/G  | NA                 | NA                            | NA                 |
| Kabuli_wild_57877156 | NA                                  | Ca_kabuli_denovo | 57877156                | G/T  | NA                 | NA                            | NA                 |
| Kabuli_wild_57877159 | NA                                  | Ca_kabuli_denovo | 57877159                | A/G  | NA                 | NA                            | NA                 |
| Kabuli_wild_57881375 | NA                                  | Ca_kabuli_denovo | 57881375                | C/G  | NA                 | NA                            | NA                 |
| Kabuli_wild_57885013 | NA                                  | Ca_kabuli_denovo | 57885013                | C/G  | NA                 | NA                            | NA                 |
| Kabuli_wild_57886711 | NA                                  | Ca_kabuli_denovo | 57886711                | C/G  | NA                 | NA                            | NA                 |
| Kabuli_wild_57886717 | NA                                  | Ca_kabuli_denovo | 57886717                | C/G  | NA                 | NA                            | NA                 |
| Kabuli_wild_57893162 | NA                                  | Ca_kabuli_denovo | 57893162                | G/T  | NA                 | NA                            | NA                 |
| Kabuli_wild_57899120 | NA                                  | Ca_kabuli_denovo | 57899120                | A/G  | NA                 | NA                            | NA                 |
| Kabuli_wild_57903635 | NA                                  | Ca_kabuli_denovo | 57903635                | G/T  | NA                 | NA                            | NA                 |
| Kabuli_wild_57903806 | NA                                  | Ca_kabuli_denovo | 57903806                | C/T  | NA                 | NA                            | NA                 |
| Kabuli_wild_57903894 | NA                                  | Ca_kabuli_denovo | 57903894                | A/G  | NA                 | NA                            | NA                 |
| Kabuli_wild_57903897 | NA                                  | Ca_kabuli_denovo | 57903897                | A/G  | NA                 | NA                            | NA                 |
| Kabuli_wild_57903930 | NA                                  | Ca_kabuli_denovo | 57903930                | A/G  | NA                 | NA                            | NA                 |
| Kabuli_wild_57911099 | NA                                  | Ca_kabuli_denovo | 57911099                | C/T  | NA                 | NA                            | NA                 |
| Kabuli_wild_57913775 | NA                                  | Ca_kabuli_denovo | 57913775                | C/T  | NA                 | NA                            | NA                 |
| Kabuli_wild_57913796 | NA                                  | Ca_kabuli_denovo | 57913796                | C/T  | NA                 | NA                            | NA                 |
| Kabuli_wild_57913799 | NA                                  | Ca_kabuli_denovo | 57913799                | C/G  | NA                 | NA                            | NA                 |
| Kabuli_wild_57913805 | NA                                  | Ca_kabuli_denovo | 57913805                | A/G  | NA                 | NA                            | NA                 |
| Kabuli_wild_57916722 | NA                                  | Ca_kabuli_denovo | 57916722                | C/T  | NA                 | NA                            | NA                 |
| Kabuli_wild_57918952 | NA                                  | Ca_kabuli_denovo | 57918952                | C/T  | NA                 | NA                            | NA                 |
| Kabuli_wild_57918977 | NA                                  | Ca_kabuli_denovo | 57918977                | A/G  | NA                 | NA                            | NA                 |
| Kabuli_wild_57919022 | NA                                  | Ca_kabuli_denovo | 57919022                | A/G  | NA                 | NA                            | NA                 |
| Kabuli_wild_57919601 | NA                                  | Ca_kabuli_denovo | 57919601                | A/C  | NA                 | NA                            | NA                 |
| Kabuli_wild_57919603 | NA                                  | Ca_kabuli_denovo | 57919603                | G/T  | NA                 | NA                            | NA                 |
| Kabuli_wild_57919633 | NA                                  | Ca_kabuli_denovo | 57919633                | G/T  | NA                 | NA                            | NA                 |
| Kabuli_wild_57919636 | NA                                  | Ca_kabuli_denovo | 57919636                | C/T  | NA                 | NA                            | NA                 |
| Kabuli_wild_57922765 | NA                                  | Ca_kabuli_denovo | 57922765                | A/C  | NA                 | NA                            | NA                 |

| SNP IDs              | NCBI dbSNP accession IDs (NCBI_SS#) | Chromosomes      | Physical positions (bp) | SNPs | Gene accession IDs | Sequence components of genome | Putative functions |
|----------------------|-------------------------------------|------------------|-------------------------|------|--------------------|-------------------------------|--------------------|
| Kabuli_wild_57923237 | NA                                  | Ca_kabuli_denovo | 57923237                | C/G  | NA                 | NA                            | NA                 |
| Kabuli_wild_57924343 | NA                                  | Ca_kabuli_denovo | 57924343                | C/G  | NA                 | NA                            | NA                 |
| Kabuli_wild_57924619 | NA                                  | Ca_kabuli_denovo | 57924619                | C/G  | NA                 | NA                            | NA                 |
| Kabuli_wild_57924640 | NA                                  | Ca_kabuli_denovo | 57924640                | C/G  | NA                 | NA                            | NA                 |
| Kabuli_wild_57925681 | NA                                  | Ca_kabuli_denovo | 57925681                | C/G  | NA                 | NA                            | NA                 |
| Kabuli_wild_57927472 | NA                                  | Ca_kabuli_denovo | 57927472                | A/G  | NA                 | NA                            | NA                 |
| Kabuli_wild_57930800 | NA                                  | Ca_kabuli_denovo | 57930800                | C/T  | NA                 | NA                            | NA                 |
| Kabuli_wild_57931598 | NA                                  | Ca_kabuli_denovo | 57931598                | A/C  | NA                 | NA                            | NA                 |
| Kabuli_wild_57931659 | NA                                  | Ca_kabuli_denovo | 57931659                | A/G  | NA                 | NA                            | NA                 |
| Kabuli_wild_57937825 | NA                                  | Ca_kabuli_denovo | 57937825                | A/G  | NA                 | NA                            | NA                 |
| Kabuli_wild_57937921 | NA                                  | Ca_kabuli_denovo | 57937921                | A/G  | NA                 | NA                            | NA                 |
| Kabuli_wild_57937934 | NA                                  | Ca_kabuli_denovo | 57937934                | A/G  | NA                 | NA                            | NA                 |
| Kabuli_wild_57939038 | NA                                  | Ca_kabuli_denovo | 57939038                | C/T  | NA                 | NA                            | NA                 |
| Kabuli_wild_57939087 | NA                                  | Ca_kabuli_denovo | 57939087                | C/T  | NA                 | NA                            | NA                 |
| Kabuli_wild_57939104 | NA                                  | Ca_kabuli_denovo | 57939104                | A/G  | NA                 | NA                            | NA                 |
| Kabuli_wild_57940088 | NA                                  | Ca_kabuli_denovo | 57940088                | C/G  | NA                 | NA                            | NA                 |
| Kabuli_wild_57941654 | NA                                  | Ca_kabuli_denovo | 57941654                | A/G  | NA                 | NA                            | NA                 |
| Kabuli_wild_57948008 | NA                                  | Ca_kabuli_denovo | 57948008                | C/G  | NA                 | NA                            | NA                 |
| Kabuli_wild_57949885 | NA                                  | Ca_kabuli_denovo | 57949885                | A/G  | NA                 | NA                            | NA                 |
| Kabuli_wild_57951155 | NA                                  | Ca_kabuli_denovo | 57951155                | C/G  | NA                 | NA                            | NA                 |
| Kabuli_wild_57956051 | NA                                  | Ca_kabuli_denovo | 57956051                | A/G  | NA                 | NA                            | NA                 |
| Kabuli_wild_57956070 | NA                                  | Ca_kabuli_denovo | 57956070                | C/T  | NA                 | NA                            | NA                 |
| Kabuli_wild_57956443 | NA                                  | Ca_kabuli_denovo | 57956443                | C/G  | NA                 | NA                            | NA                 |
| Kabuli_wild_57956449 | NA                                  | Ca_kabuli_denovo | 57956449                | G/T  | NA                 | NA                            | NA                 |
| Kabuli_wild_57956454 | NA                                  | Ca_kabuli_denovo | 57956454                | A/T  | NA                 | NA                            | NA                 |
| Kabuli_wild_57962560 | NA                                  | Ca_kabuli_denovo | 57962560                | A/G  | NA                 | NA                            | NA                 |
| Kabuli_wild_57962584 | NA                                  | Ca_kabuli_denovo | 57962584                | A/G  | NA                 | NA                            | NA                 |
| Kabuli_wild_57962601 | NA                                  | Ca_kabuli_denovo | 57962601                | C/T  | NA                 | NA                            | NA                 |
| Kabuli_wild_57962653 | NA                                  | Ca_kabuli_denovo | 57962653                | C/G  | NA                 | NA                            | NA                 |
| Kabuli_wild_57962671 | NA                                  | Ca_kabuli_denovo | 57962671                | C/G  | NA                 | NA                            | NA                 |
| Kabuli_wild_57962674 | NA                                  | Ca_kabuli_denovo | 57962674                | C/T  | NA                 | NA                            | NA                 |
| Kabuli_wild_57963680 | NA                                  | Ca_kabuli_denovo | 57963680                | C/G  | NA                 | NA                            | NA                 |
| Kabuli_wild_57970711 | NA                                  | Ca_kabuli_denovo | 57970711                | G/T  | NA                 | NA                            | NA                 |
| Kabuli_wild_57971582 | NA                                  | Ca_kabuli_denovo | 57971582                | C/G  | NA                 | NA                            | NA                 |
| Kabuli_wild_57971600 | NA                                  | Ca_kabuli_denovo | 57971600                | C/G  | NA                 | NA                            | NA                 |
| Kabuli_wild_57971612 | NA                                  | Ca_kabuli_denovo | 57971612                | C/T  | NA                 | NA                            | NA                 |
| Kabuli_wild_57971905 | NA                                  | Ca_kabuli_denovo | 57971905                | A/G  | NA                 | NA                            | NA                 |
| Kabuli_wild_57971927 | NA                                  | Ca_kabuli_denovo | 57971927                | C/T  | NA                 | NA                            | NA                 |
| Kabuli_wild_57974956 | NA                                  | Ca_kabuli_denovo | 57974956                | C/G  | NA                 | NA                            | NA                 |
| Kabuli_wild_57974967 | NA                                  | Ca_kabuli_denovo | 57974967                | C/T  | NA                 | NA                            | NA                 |
| Kabuli_wild_57975331 | NA                                  | Ca_kabuli_denovo | 57975331                | C/T  | NA                 | NA                            | NA                 |
| Kabuli_wild_57977660 | NA                                  | Ca_kabuli_denovo | 57977660                | A/G  | NA                 | NA                            | NA                 |
| Kabuli_wild_57978323 | NA                                  | Ca_kabuli_denovo | 57978323                | C/T  | NA                 | NA                            | NA                 |
| Kabuli_wild_57981560 | NA                                  | Ca_kabuli_denovo | 57981560                | C/G  | NA                 | NA                            | NA                 |



| SNP IDs              | NCBI dbSNP accession IDs (NCBI_SS#) | Chromosomes      | Physical positions (bp) | SNPs | Gene accession IDs | Sequence components of genome | Putative functions |
|----------------------|-------------------------------------|------------------|-------------------------|------|--------------------|-------------------------------|--------------------|
| Kabuli_wild_57981566 | NA                                  | Ca_kabuli_denovo | 57981566                | A/C  | NA                 | NA                            | NA                 |
| Kabuli_wild_57981572 | NA                                  | Ca_kabuli_denovo | 57981572                | G/T  | NA                 | NA                            | NA                 |
| Kabuli_wild_57981575 | NA                                  | Ca_kabuli_denovo | 57981575                | C/G  | NA                 | NA                            | NA                 |
| Kabuli_wild_57983867 | NA                                  | Ca_kabuli_denovo | 57983867                | A/G  | NA                 | NA                            | NA                 |
| Kabuli_wild_57983899 | NA                                  | Ca_kabuli_denovo | 57983899                | G/T  | NA                 | NA                            | NA                 |
| Kabuli_wild_57984248 | NA                                  | Ca_kabuli_denovo | 57984248                | A/G  | NA                 | NA                            | NA                 |
| Kabuli_wild_57984299 | NA                                  | Ca_kabuli_denovo | 57984299                | A/G  | NA                 | NA                            | NA                 |
| Kabuli_wild_57991877 | NA                                  | Ca_kabuli_denovo | 57991877                | A/G  | NA                 | NA                            | NA                 |
| Kabuli_wild_57993479 | NA                                  | Ca_kabuli_denovo | 57993479                | C/G  | NA                 | NA                            | NA                 |
| Kabuli_wild_57994329 | NA                                  | Ca_kabuli_denovo | 57994329                | G/T  | NA                 | NA                            | NA                 |
| Kabuli_wild_57995900 | NA                                  | Ca_kabuli_denovo | 57995900                | A/G  | NA                 | NA                            | NA                 |
| Kabuli_wild_57997165 | NA                                  | Ca_kabuli_denovo | 57997165                | C/T  | NA                 | NA                            | NA                 |
| Kabuli_wild_57997174 | NA                                  | Ca_kabuli_denovo | 57997174                | C/G  | NA                 | NA                            | NA                 |
| Kabuli_wild_57997189 | NA                                  | Ca_kabuli_denovo | 57997189                | C/T  | NA                 | NA                            | NA                 |
| Kabuli_wild_58005080 | NA                                  | Ca_kabuli_denovo | 58005080                | C/T  | NA                 | NA                            | NA                 |
| Kabuli_wild_58006961 | NA                                  | Ca_kabuli_denovo | 58006961                | C/T  | NA                 | NA                            | NA                 |
| Kabuli_wild_58008143 | NA                                  | Ca_kabuli_denovo | 58008143                | A/G  | NA                 | NA                            | NA                 |
| Kabuli_wild_58008145 | NA                                  | Ca_kabuli_denovo | 58008145                | A/C  | NA                 | NA                            | NA                 |
| Kabuli_wild_58009849 | NA                                  | Ca_kabuli_denovo | 58009849                | C/G  | NA                 | NA                            | NA                 |
| Kabuli_wild_58009907 | NA                                  | Ca_kabuli_denovo | 58009907                | C/G  | NA                 | NA                            | NA                 |
| Kabuli_wild_58014176 | NA                                  | Ca_kabuli_denovo | 58014176                | C/G  | NA                 | NA                            | NA                 |
| Kabuli_wild_58014181 | NA                                  | Ca_kabuli_denovo | 58014181                | A/G  | NA                 | NA                            | NA                 |
| Kabuli_wild_58016518 | NA                                  | Ca_kabuli_denovo | 58016518                | C/T  | NA                 | NA                            | NA                 |
| Kabuli_wild_58024874 | NA                                  | Ca_kabuli_denovo | 58024874                | A/G  | NA                 | NA                            | NA                 |
| Kabuli_wild_58032127 | NA                                  | Ca_kabuli_denovo | 58032127                | A/T  | NA                 | NA                            | NA                 |
| Kabuli_wild_58032129 | NA                                  | Ca_kabuli_denovo | 58032129                | C/G  | NA                 | NA                            | NA                 |
| Kabuli_wild_58034465 | NA                                  | Ca_kabuli_denovo | 58034465                | C/G  | NA                 | NA                            | NA                 |
| Kabuli_wild_58034548 | NA                                  | Ca_kabuli_denovo | 58034548                | A/G  | NA                 | NA                            | NA                 |
| Kabuli_wild_58035392 | NA                                  | Ca_kabuli_denovo | 58035392                | A/G  | NA                 | NA                            | NA                 |
| Kabuli_wild_58036820 | NA                                  | Ca_kabuli_denovo | 58036820                | C/T  | NA                 | NA                            | NA                 |
| Kabuli_wild_58037204 | NA                                  | Ca_kabuli_denovo | 58037204                | A/G  | NA                 | NA                            | NA                 |
| Kabuli_wild_58039887 | NA                                  | Ca_kabuli_denovo | 58039887                | A/G  | NA                 | NA                            | NA                 |
| Kabuli_wild_58040060 | NA                                  | Ca_kabuli_denovo | 58040060                | A/G  | NA                 | NA                            | NA                 |
| Kabuli_wild_58041713 | NA                                  | Ca_kabuli_denovo | 58041713                | A/G  | NA                 | NA                            | NA                 |
| Kabuli_wild_58044443 | NA                                  | Ca_kabuli_denovo | 58044443                | C/G  | NA                 | NA                            | NA                 |
| Kabuli_wild_58044658 | NA                                  | Ca_kabuli_denovo | 58044658                | A/G  | NA                 | NA                            | NA                 |
| Kabuli_wild_58044661 | NA                                  | Ca_kabuli_denovo | 58044661                | C/G  | NA                 | NA                            | NA                 |
| Kabuli_wild_58044667 | NA                                  | Ca_kabuli_denovo | 58044667                | C/T  | NA                 | NA                            | NA                 |
| Kabuli_wild_58047132 | NA                                  | Ca_kabuli_denovo | 58047132                | A/G  | NA                 | NA                            | NA                 |
| Kabuli_wild_58047776 | NA                                  | Ca_kabuli_denovo | 58047776                | C/T  | NA                 | NA                            | NA                 |
| Kabuli_wild_58047782 | NA                                  | Ca_kabuli_denovo | 58047782                | A/G  | NA                 | NA                            | NA                 |
| Kabuli_wild_58047785 | NA                                  | Ca_kabuli_denovo | 58047785                | C/G  | NA                 | NA                            | NA                 |
| Kabuli_wild_58051192 | NA                                  | Ca_kabuli_denovo | 58051192                | C/T  | NA                 | NA                            | NA                 |
| Kabuli_wild_58051216 | NA                                  | Ca_kabuli_denovo | 58051216                | C/T  | NA                 | NA                            | NA                 |

| SNP IDs              | NCBI dbSNP accession IDs (NCBI_SS#) | Chromosomes      | Physical positions (bp) | SNPs | Gene accession IDs | Sequence components of genome | Putative functions |
|----------------------|-------------------------------------|------------------|-------------------------|------|--------------------|-------------------------------|--------------------|
| Kabuli_wild_58054351 | NA                                  | Ca_kabuli_denovo | 58054351                | C/G  | NA                 | NA                            | NA                 |
| Kabuli_wild_58054375 | NA                                  | Ca_kabuli_denovo | 58054375                | C/G  | NA                 | NA                            | NA                 |
| Kabuli_wild_58054730 | NA                                  | Ca_kabuli_denovo | 58054730                | G/T  | NA                 | NA                            | NA                 |
| Kabuli_wild_58056242 | NA                                  | Ca_kabuli_denovo | 58056242                | C/T  | NA                 | NA                            | NA                 |
| Kabuli_wild_58056257 | NA                                  | Ca_kabuli_denovo | 58056257                | C/T  | NA                 | NA                            | NA                 |
| Kabuli_wild_58056280 | NA                                  | Ca_kabuli_denovo | 58056280                | C/T  | NA                 | NA                            | NA                 |
| Kabuli_wild_58057079 | NA                                  | Ca_kabuli_denovo | 58057079                | C/T  | NA                 | NA                            | NA                 |
| Kabuli_wild_58059296 | NA                                  | Ca_kabuli_denovo | 58059296                | A/G  | NA                 | NA                            | NA                 |
| Kabuli_wild_58059362 | NA                                  | Ca_kabuli_denovo | 58059362                | A/G  | NA                 | NA                            | NA                 |
| Kabuli_wild_58059364 | NA                                  | Ca_kabuli_denovo | 58059364                | A/C  | NA                 | NA                            | NA                 |
| Kabuli_wild_58059366 | NA                                  | Ca_kabuli_denovo | 58059366                | A/C  | NA                 | NA                            | NA                 |
| Kabuli_wild_58064492 | NA                                  | Ca_kabuli_denovo | 58064492                | C/G  | NA                 | NA                            | NA                 |
| Kabuli_wild_58067185 | NA                                  | Ca_kabuli_denovo | 58067185                | A/T  | NA                 | NA                            | NA                 |
| Kabuli_wild_58068400 | NA                                  | Ca_kabuli_denovo | 58068400                | G/T  | NA                 | NA                            | NA                 |
| Kabuli_wild_58068409 | NA                                  | Ca_kabuli_denovo | 58068409                | C/G  | NA                 | NA                            | NA                 |
| Kabuli_wild_58068412 | NA                                  | Ca_kabuli_denovo | 58068412                | C/T  | NA                 | NA                            | NA                 |
| Kabuli_wild_58076310 | NA                                  | Ca_kabuli_denovo | 58076310                | A/G  | NA                 | NA                            | NA                 |
| Kabuli_wild_58077625 | NA                                  | Ca_kabuli_denovo | 58077625                | C/G  | NA                 | NA                            | NA                 |
| Kabuli_wild_58078532 | NA                                  | Ca_kabuli_denovo | 58078532                | A/G  | NA                 | NA                            | NA                 |
| Kabuli_wild_58078556 | NA                                  | Ca_kabuli_denovo | 58078556                | A/G  | NA                 | NA                            | NA                 |
| Kabuli_wild_58078559 | NA                                  | Ca_kabuli_denovo | 58078559                | A/G  | NA                 | NA                            | NA                 |
| Kabuli_wild_58079798 | NA                                  | Ca_kabuli_denovo | 58079798                | A/G  | NA                 | NA                            | NA                 |
| Kabuli_wild_58081177 | NA                                  | Ca_kabuli_denovo | 58081177                | C/T  | NA                 | NA                            | NA                 |
| Kabuli_wild_58086076 | NA                                  | Ca_kabuli_denovo | 58086076                | A/G  | NA                 | NA                            | NA                 |
| Kabuli_wild_58086124 | NA                                  | Ca_kabuli_denovo | 58086124                | C/T  | NA                 | NA                            | NA                 |
| Kabuli_wild_58091768 | NA                                  | Ca_kabuli_denovo | 58091768                | C/G  | NA                 | NA                            | NA                 |
| Kabuli_wild_58091771 | NA                                  | Ca_kabuli_denovo | 58091771                | C/G  | NA                 | NA                            | NA                 |
| Kabuli_wild_58091774 | NA                                  | Ca_kabuli_denovo | 58091774                | A/G  | NA                 | NA                            | NA                 |
| Kabuli_wild_58091865 | NA                                  | Ca_kabuli_denovo | 58091865                | C/G  | NA                 | NA                            | NA                 |
| Kabuli_wild_58092869 | NA                                  | Ca_kabuli_denovo | 58092869                | C/G  | NA                 | NA                            | NA                 |
| Kabuli_wild_58092874 | NA                                  | Ca_kabuli_denovo | 58092874                | C/G  | NA                 | NA                            | NA                 |
| Kabuli_wild_58093349 | NA                                  | Ca_kabuli_denovo | 58093349                | A/G  | NA                 | NA                            | NA                 |
| Kabuli_wild_58095099 | NA                                  | Ca_kabuli_denovo | 58095099                | C/T  | NA                 | NA                            | NA                 |
| Kabuli_wild_58096577 | NA                                  | Ca_kabuli_denovo | 58096577                | A/G  | NA                 | NA                            | NA                 |
| Kabuli_wild_58096602 | NA                                  | Ca_kabuli_denovo | 58096602                | C/T  | NA                 | NA                            | NA                 |
| Kabuli_wild_58098481 | NA                                  | Ca_kabuli_denovo | 58098481                | C/G  | NA                 | NA                            | NA                 |
| Kabuli_wild_58098949 | NA                                  | Ca_kabuli_denovo | 58098949                | C/T  | NA                 | NA                            | NA                 |
| Kabuli_wild_58106911 | NA                                  | Ca_kabuli_denovo | 58106911                | C/G  | NA                 | NA                            | NA                 |
| Kabuli_wild_58106914 | NA                                  | Ca_kabuli_denovo | 58106914                | C/G  | NA                 | NA                            | NA                 |
| Kabuli_wild_58114559 | NA                                  | Ca_kabuli_denovo | 58114559                | A/C  | NA                 | NA                            | NA                 |
| Kabuli_wild_58115766 | NA                                  | Ca_kabuli_denovo | 58115766                | G/T  | NA                 | NA                            | NA                 |
| Kabuli_wild_58116205 | NA                                  | Ca_kabuli_denovo | 58116205                | C/G  | NA                 | NA                            | NA                 |
| Kabuli_wild_58116422 | NA                                  | Ca_kabuli_denovo | 58116422                | A/G  | NA                 | NA                            | NA                 |
| Kabuli_wild_58119831 | NA                                  | Ca_kabuli_denovo | 58119831                | C/G  | NA                 | NA                            | NA                 |

| SNP IDs              | NCBI dbSNP accession IDs (NCBI_SS#) | Chromosomes      | Physical positions (bp) | SNPs | Gene accession IDs | Sequence components of genome | Putative functions |
|----------------------|-------------------------------------|------------------|-------------------------|------|--------------------|-------------------------------|--------------------|
| Kabuli_wild_58119866 | NA                                  | Ca_kabuli_denovo | 58119866                | C/G  | NA                 | NA                            | NA                 |
| Kabuli_wild_58123086 | NA                                  | Ca_kabuli_denovo | 58123086                | G/T  | NA                 | NA                            | NA                 |
| Kabuli_wild_58123088 | NA                                  | Ca_kabuli_denovo | 58123088                | C/T  | NA                 | NA                            | NA                 |
| Kabuli_wild_58123133 | NA                                  | Ca_kabuli_denovo | 58123133                | A/G  | NA                 | NA                            | NA                 |
| Kabuli_wild_58123146 | NA                                  | Ca_kabuli_denovo | 58123146                | C/G  | NA                 | NA                            | NA                 |
| Kabuli_wild_58123366 | NA                                  | Ca_kabuli_denovo | 58123366                | C/T  | NA                 | NA                            | NA                 |
| Kabuli_wild_58123402 | NA                                  | Ca_kabuli_denovo | 58123402                | A/G  | NA                 | NA                            | NA                 |
| Kabuli_wild_58125128 | NA                                  | Ca_kabuli_denovo | 58125128                | C/G  | NA                 | NA                            | NA                 |
| Kabuli_wild_58128998 | NA                                  | Ca_kabuli_denovo | 58128998                | C/T  | NA                 | NA                            | NA                 |
| Kabuli_wild_58131438 | NA                                  | Ca_kabuli_denovo | 58131438                | A/G  | NA                 | NA                            | NA                 |
| Kabuli_wild_58137242 | NA                                  | Ca_kabuli_denovo | 58137242                | C/G  | NA                 | NA                            | NA                 |
| Kabuli_wild_58137682 | NA                                  | Ca_kabuli_denovo | 58137682                | C/G  | NA                 | NA                            | NA                 |
| Kabuli_wild_58137694 | NA                                  | Ca_kabuli_denovo | 58137694                | C/T  | NA                 | NA                            | NA                 |
| Kabuli_wild_58137733 | NA                                  | Ca_kabuli_denovo | 58137733                | C/G  | NA                 | NA                            | NA                 |
| Kabuli_wild_58137745 | NA                                  | Ca_kabuli_denovo | 58137745                | C/T  | NA                 | NA                            | NA                 |
| Kabuli_wild_58139927 | NA                                  | Ca_kabuli_denovo | 58139927                | C/G  | NA                 | NA                            | NA                 |
| Kabuli_wild_58139930 | NA                                  | Ca_kabuli_denovo | 58139930                | C/T  | NA                 | NA                            | NA                 |
| Kabuli_wild_58140556 | NA                                  | Ca_kabuli_denovo | 58140556                | C/G  | NA                 | NA                            | NA                 |
| Kabuli_wild_58141165 | NA                                  | Ca_kabuli_denovo | 58141165                | C/G  | NA                 | NA                            | NA                 |
| Kabuli_wild_58147631 | NA                                  | Ca_kabuli_denovo | 58147631                | C/G  | NA                 | NA                            | NA                 |
| Kabuli_wild_58147646 | NA                                  | Ca_kabuli_denovo | 58147646                | A/G  | NA                 | NA                            | NA                 |
| Kabuli_wild_58147661 | NA                                  | Ca_kabuli_denovo | 58147661                | A/G  | NA                 | NA                            | NA                 |
| Kabuli_wild_58148989 | NA                                  | Ca_kabuli_denovo | 58148989                | C/G  | NA                 | NA                            | NA                 |
| Kabuli_wild_58150067 | NA                                  | Ca_kabuli_denovo | 58150067                | C/T  | NA                 | NA                            | NA                 |
| Kabuli_wild_58150071 | NA                                  | Ca_kabuli_denovo | 58150071                | G/T  | NA                 | NA                            | NA                 |
| Kabuli_wild_58152533 | NA                                  | Ca_kabuli_denovo | 58152533                | C/T  | NA                 | NA                            | NA                 |
| Kabuli_wild_58153212 | NA                                  | Ca_kabuli_denovo | 58153212                | C/G  | NA                 | NA                            | NA                 |
| Kabuli_wild_58154520 | NA                                  | Ca_kabuli_denovo | 58154520                | A/G  | NA                 | NA                            | NA                 |
| Kabuli_wild_58154564 | NA                                  | Ca_kabuli_denovo | 58154564                | A/G  | NA                 | NA                            | NA                 |
| Kabuli_wild_58154642 | NA                                  | Ca_kabuli_denovo | 58154642                | C/G  | NA                 | NA                            | NA                 |
| Kabuli_wild_58154651 | NA                                  | Ca_kabuli_denovo | 58154651                | A/G  | NA                 | NA                            | NA                 |
| Kabuli_wild_58156931 | NA                                  | Ca_kabuli_denovo | 58156931                | C/G  | NA                 | NA                            | NA                 |
| Kabuli_wild_58158921 | NA                                  | Ca_kabuli_denovo | 58158921                | C/T  | NA                 | NA                            | NA                 |
| Kabuli_wild_58160309 | NA                                  | Ca_kabuli_denovo | 58160309                | C/T  | NA                 | NA                            | NA                 |
| Kabuli_wild_58161316 | NA                                  | Ca_kabuli_denovo | 58161316                | A/G  | NA                 | NA                            | NA                 |
| Kabuli_wild_58161343 | NA                                  | Ca_kabuli_denovo | 58161343                | C/G  | NA                 | NA                            | NA                 |
| Kabuli_wild_58161346 | NA                                  | Ca_kabuli_denovo | 58161346                | G/T  | NA                 | NA                            | NA                 |
| Kabuli_wild_58170047 | NA                                  | Ca_kabuli_denovo | 58170047                | A/G  | NA                 | NA                            | NA                 |
| Kabuli_wild_58170059 | NA                                  | Ca_kabuli_denovo | 58170059                | A/G  | NA                 | NA                            | NA                 |
| Kabuli_wild_58175728 | NA                                  | Ca_kabuli_denovo | 58175728                | A/G  | NA                 | NA                            | NA                 |
| Kabuli_wild_58177121 | NA                                  | Ca_kabuli_denovo | 58177121                | G/T  | NA                 | NA                            | NA                 |
| Kabuli_wild_58180830 | NA                                  | Ca_kabuli_denovo | 58180830                | A/G  | NA                 | NA                            | NA                 |
| Kabuli_wild_58180852 | NA                                  | Ca_kabuli_denovo | 58180852                | C/T  | NA                 | NA                            | NA                 |
| Kabuli_wild_58182510 | NA                                  | Ca_kabuli_denovo | 58182510                | G/T  | NA                 | NA                            | NA                 |

| SNP IDs              | NCBI dbSNP accession IDs (NCBI_SS#) | Chromosomes      | Physical positions (bp) | SNPs | Gene accession IDs | Sequence components of genome | Putative functions |
|----------------------|-------------------------------------|------------------|-------------------------|------|--------------------|-------------------------------|--------------------|
| Kabuli_wild_58182536 | NA                                  | Ca_kabuli_denovo | 58182536                | C/G  | NA                 | NA                            | NA                 |
| Kabuli_wild_58183094 | NA                                  | Ca_kabuli_denovo | 58183094                | A/G  | NA                 | NA                            | NA                 |
| Kabuli_wild_58183109 | NA                                  | Ca_kabuli_denovo | 58183109                | G/T  | NA                 | NA                            | NA                 |
| Kabuli_wild_58183775 | NA                                  | Ca_kabuli_denovo | 58183775                | C/T  | NA                 | NA                            | NA                 |
| Kabuli_wild_58185568 | NA                                  | Ca_kabuli_denovo | 58185568                | C/T  | NA                 | NA                            | NA                 |
| Kabuli_wild_58185593 | NA                                  | Ca_kabuli_denovo | 58185593                | A/G  | NA                 | NA                            | NA                 |
| Kabuli_wild_58185647 | NA                                  | Ca_kabuli_denovo | 58185647                | A/C  | NA                 | NA                            | NA                 |
| Kabuli_wild_58192031 | NA                                  | Ca_kabuli_denovo | 58192031                | A/G  | NA                 | NA                            | NA                 |
| Kabuli_wild_58194851 | NA                                  | Ca_kabuli_denovo | 58194851                | G/T  | NA                 | NA                            | NA                 |
| Kabuli_wild_58195086 | NA                                  | Ca_kabuli_denovo | 58195086                | C/G  | NA                 | NA                            | NA                 |
| Kabuli_wild_58195862 | NA                                  | Ca_kabuli_denovo | 58195862                | A/G  | NA                 | NA                            | NA                 |
| Kabuli_wild_58196569 | NA                                  | Ca_kabuli_denovo | 58196569                | A/G  | NA                 | NA                            | NA                 |
| Kabuli_wild_58196813 | NA                                  | Ca_kabuli_denovo | 58196813                | G/T  | NA                 | NA                            | NA                 |
| Kabuli_wild_58197769 | NA                                  | Ca_kabuli_denovo | 58197769                | C/G  | NA                 | NA                            | NA                 |
| Kabuli_wild_58198144 | NA                                  | Ca_kabuli_denovo | 58198144                | C/G  | NA                 | NA                            | NA                 |
| Kabuli_wild_58198418 | NA                                  | Ca_kabuli_denovo | 58198418                | C/T  | NA                 | NA                            | NA                 |
| Kabuli_wild_58198781 | NA                                  | Ca_kabuli_denovo | 58198781                | C/T  | NA                 | NA                            | NA                 |
| Kabuli_wild_58198880 | NA                                  | Ca_kabuli_denovo | 58198880                | A/G  | NA                 | NA                            | NA                 |
| Kabuli_wild_58198898 | NA                                  | Ca_kabuli_denovo | 58198898                | A/G  | NA                 | NA                            | NA                 |
| Kabuli_wild_58198904 | NA                                  | Ca_kabuli_denovo | 58198904                | A/G  | NA                 | NA                            | NA                 |
| Kabuli_wild_58198916 | NA                                  | Ca_kabuli_denovo | 58198916                | C/T  | NA                 | NA                            | NA                 |
| Kabuli_wild_58199169 | NA                                  | Ca_kabuli_denovo | 58199169                | G/T  | NA                 | NA                            | NA                 |
| Kabuli_wild_58199839 | NA                                  | Ca_kabuli_denovo | 58199839                | C/T  | NA                 | NA                            | NA                 |
| Kabuli_wild_58199900 | NA                                  | Ca_kabuli_denovo | 58199900                | C/T  | NA                 | NA                            | NA                 |
| Kabuli_wild_58199919 | NA                                  | Ca_kabuli_denovo | 58199919                | A/G  | NA                 | NA                            | NA                 |
| Kabuli_wild_58200100 | NA                                  | Ca_kabuli_denovo | 58200100                | C/T  | NA                 | NA                            | NA                 |
| Kabuli_wild_58200124 | NA                                  | Ca_kabuli_denovo | 58200124                | C/T  | NA                 | NA                            | NA                 |
| Kabuli_wild_58200125 | NA                                  | Ca_kabuli_denovo | 58200125                | C/G  | NA                 | NA                            | NA                 |
| Kabuli_wild_58203545 | NA                                  | Ca_kabuli_denovo | 58203545                | A/G  | NA                 | NA                            | NA                 |
| Kabuli_wild_58203554 | NA                                  | Ca_kabuli_denovo | 58203554                | A/G  | NA                 | NA                            | NA                 |
| Kabuli_wild_58203830 | NA                                  | Ca_kabuli_denovo | 58203830                | A/G  | NA                 | NA                            | NA                 |
| Kabuli_wild_58203832 | NA                                  | Ca_kabuli_denovo | 58203832                | A/G  | NA                 | NA                            | NA                 |
| Kabuli_wild_58203993 | NA                                  | Ca_kabuli_denovo | 58203993                | C/T  | NA                 | NA                            | NA                 |
| Kabuli_wild_58207316 | NA                                  | Ca_kabuli_denovo | 58207316                | C/T  | NA                 | NA                            | NA                 |
| Kabuli_wild_58215767 | NA                                  | Ca_kabuli_denovo | 58215767                | A/G  | NA                 | NA                            | NA                 |
| Kabuli_wild_58215770 | NA                                  | Ca_kabuli_denovo | 58215770                | C/T  | NA                 | NA                            | NA                 |
| Kabuli_wild_58217962 | NA                                  | Ca_kabuli_denovo | 58217962                | A/C  | NA                 | NA                            | NA                 |
| Kabuli_wild_58217963 | NA                                  | Ca_kabuli_denovo | 58217963                | A/G  | NA                 | NA                            | NA                 |
| Kabuli_wild_58223863 | NA                                  | Ca_kabuli_denovo | 58223863                | A/C  | NA                 | NA                            | NA                 |
| Kabuli_wild_58225381 | NA                                  | Ca_kabuli_denovo | 58225381                | A/G  | NA                 | NA                            | NA                 |
| Kabuli_wild_58225384 | NA                                  | Ca_kabuli_denovo | 58225384                | A/G  | NA                 | NA                            | NA                 |
| Kabuli_wild_58227550 | NA                                  | Ca_kabuli_denovo | 58227550                | G/T  | NA                 | NA                            | NA                 |
| Kabuli_wild_58228768 | NA                                  | Ca_kabuli_denovo | 58228768                | A/G  | NA                 | NA                            | NA                 |
| Kabuli_wild_58236179 | NA                                  | Ca_kabuli_denovo | 58236179                | C/T  | NA                 | NA                            | NA                 |

| SNP IDs              | NCBI dbSNP accession IDs (NCBI_SS#) | Chromosomes      | Physical positions (bp) | SNPs | Gene accession IDs | Sequence components of genome | Putative functions |
|----------------------|-------------------------------------|------------------|-------------------------|------|--------------------|-------------------------------|--------------------|
| Kabuli_wild_58236182 | NA                                  | Ca_kabuli_denovo | 58236182                | C/G  | NA                 | NA                            | NA                 |
| Kabuli_wild_58236224 | NA                                  | Ca_kabuli_denovo | 58236224                | A/G  | NA                 | NA                            | NA                 |
| Kabuli_wild_58236824 | NA                                  | Ca_kabuli_denovo | 58236824                | C/T  | NA                 | NA                            | NA                 |
| Kabuli_wild_58236848 | NA                                  | Ca_kabuli_denovo | 58236848                | C/T  | NA                 | NA                            | NA                 |
| Kabuli_wild_58237193 | NA                                  | Ca_kabuli_denovo | 58237193                | A/G  | NA                 | NA                            | NA                 |
| Kabuli_wild_58237211 | NA                                  | Ca_kabuli_denovo | 58237211                | A/G  | NA                 | NA                            | NA                 |
| Kabuli_wild_58237241 | NA                                  | Ca_kabuli_denovo | 58237241                | A/G  | NA                 | NA                            | NA                 |
| Kabuli_wild_58241594 | NA                                  | Ca_kabuli_denovo | 58241594                | C/G  | NA                 | NA                            | NA                 |
| Kabuli_wild_58244569 | NA                                  | Ca_kabuli_denovo | 58244569                | A/G  | NA                 | NA                            | NA                 |
| Kabuli_wild_58244953 | NA                                  | Ca_kabuli_denovo | 58244953                | C/T  | NA                 | NA                            | NA                 |
| Kabuli_wild_58245386 | NA                                  | Ca_kabuli_denovo | 58245386                | C/G  | NA                 | NA                            | NA                 |
| Kabuli_wild_58245387 | NA                                  | Ca_kabuli_denovo | 58245387                | C/G  | NA                 | NA                            | NA                 |
| Kabuli_wild_58245410 | NA                                  | Ca_kabuli_denovo | 58245410                | C/G  | NA                 | NA                            | NA                 |
| Kabuli_wild_58245584 | NA                                  | Ca_kabuli_denovo | 58245584                | C/T  | NA                 | NA                            | NA                 |
| Kabuli_wild_58248449 | NA                                  | Ca_kabuli_denovo | 58248449                | C/T  | NA                 | NA                            | NA                 |
| Kabuli_wild_58253101 | NA                                  | Ca_kabuli_denovo | 58253101                | C/G  | NA                 | NA                            | NA                 |
| Kabuli_wild_58253140 | NA                                  | Ca_kabuli_denovo | 58253140                | C/T  | NA                 | NA                            | NA                 |
| Kabuli_wild_58259745 | NA                                  | Ca_kabuli_denovo | 58259745                | A/G  | NA                 | NA                            | NA                 |
| Kabuli_wild_58263884 | NA                                  | Ca_kabuli_denovo | 58263884                | A/G  | NA                 | NA                            | NA                 |
| Kabuli_wild_58264240 | NA                                  | Ca_kabuli_denovo | 58264240                | A/C  | NA                 | NA                            | NA                 |
| Kabuli_wild_58264631 | NA                                  | Ca_kabuli_denovo | 58264631                | C/G  | NA                 | NA                            | NA                 |
| Kabuli_wild_58264667 | NA                                  | Ca_kabuli_denovo | 58264667                | C/G  | NA                 | NA                            | NA                 |
| Kabuli_wild_58264673 | NA                                  | Ca_kabuli_denovo | 58264673                | C/G  | NA                 | NA                            | NA                 |
| Kabuli_wild_58267792 | NA                                  | Ca_kabuli_denovo | 58267792                | C/T  | NA                 | NA                            | NA                 |
| Kabuli_wild_58267793 | NA                                  | Ca_kabuli_denovo | 58267793                | C/T  | NA                 | NA                            | NA                 |
| Kabuli_wild_58269368 | NA                                  | Ca_kabuli_denovo | 58269368                | C/T  | NA                 | NA                            | NA                 |
| Kabuli_wild_58269416 | NA                                  | Ca_kabuli_denovo | 58269416                | C/T  | NA                 | NA                            | NA                 |
| Kabuli_wild_58269419 | NA                                  | Ca_kabuli_denovo | 58269419                | C/T  | NA                 | NA                            | NA                 |
| Kabuli_wild_58270957 | NA                                  | Ca_kabuli_denovo | 58270957                | G/T  | NA                 | NA                            | NA                 |
| Kabuli_wild_58271247 | NA                                  | Ca_kabuli_denovo | 58271247                | A/G  | NA                 | NA                            | NA                 |
| Kabuli_wild_58274594 | NA                                  | Ca_kabuli_denovo | 58274594                | C/G  | NA                 | NA                            | NA                 |
| Kabuli_wild_58275415 | NA                                  | Ca_kabuli_denovo | 58275415                | C/G  | NA                 | NA                            | NA                 |
| Kabuli_wild_58275417 | NA                                  | Ca_kabuli_denovo | 58275417                | A/G  | NA                 | NA                            | NA                 |
| Kabuli_wild_58275442 | NA                                  | Ca_kabuli_denovo | 58275442                | A/G  | NA                 | NA                            | NA                 |
| Kabuli_wild_58275459 | NA                                  | Ca_kabuli_denovo | 58275459                | G/T  | NA                 | NA                            | NA                 |
| Kabuli_wild_58275827 | NA                                  | Ca_kabuli_denovo | 58275827                | A/G  | NA                 | NA                            | NA                 |
| Kabuli_wild_58275935 | NA                                  | Ca_kabuli_denovo | 58275935                | C/T  | NA                 | NA                            | NA                 |
| Kabuli_wild_58276081 | NA                                  | Ca_kabuli_denovo | 58276081                | A/G  | NA                 | NA                            | NA                 |
| Kabuli_wild_58276085 | NA                                  | Ca_kabuli_denovo | 58276085                | C/T  | NA                 | NA                            | NA                 |
| Kabuli_wild_58276115 | NA                                  | Ca_kabuli_denovo | 58276115                | C/T  | NA                 | NA                            | NA                 |
| Kabuli_wild_58278260 | NA                                  | Ca_kabuli_denovo | 58278260                | A/G  | NA                 | NA                            | NA                 |
| Kabuli_wild_58280131 | NA                                  | Ca_kabuli_denovo | 58280131                | C/G  | NA                 | NA                            | NA                 |
| Kabuli_wild_58281682 | NA                                  | Ca_kabuli_denovo | 58281682                | A/G  | NA                 | NA                            | NA                 |
| Kabuli_wild_58284818 | NA                                  | Ca_kabuli_denovo | 58284818                | C/G  | NA                 | NA                            | NA                 |

| SNP IDs              | NCBI dbSNP accession IDs (NCBI_SS#) | Chromosomes      | Physical positions (bp) | SNPs | Gene accession IDs | Sequence components of genome | Putative functions |
|----------------------|-------------------------------------|------------------|-------------------------|------|--------------------|-------------------------------|--------------------|
| Kabuli_wild_58284869 | NA                                  | Ca_kabuli_denovo | 58284869                | C/G  | NA                 | NA                            | NA                 |
| Kabuli_wild_58289056 | NA                                  | Ca_kabuli_denovo | 58289056                | A/G  | NA                 | NA                            | NA                 |
| Kabuli_wild_58289375 | NA                                  | Ca_kabuli_denovo | 58289375                | A/G  | NA                 | NA                            | NA                 |
| Kabuli_wild_58289393 | NA                                  | Ca_kabuli_denovo | 58289393                | C/T  | NA                 | NA                            | NA                 |
| Kabuli_wild_58290439 | NA                                  | Ca_kabuli_denovo | 58290439                | C/T  | NA                 | NA                            | NA                 |
| Kabuli_wild_58290689 | NA                                  | Ca_kabuli_denovo | 58290689                | G/T  | NA                 | NA                            | NA                 |
| Kabuli_wild_58291045 | NA                                  | Ca_kabuli_denovo | 58291045                | A/G  | NA                 | NA                            | NA                 |
| Kabuli_wild_58295493 | NA                                  | Ca_kabuli_denovo | 58295493                | A/C  | NA                 | NA                            | NA                 |
| Kabuli_wild_58295494 | NA                                  | Ca_kabuli_denovo | 58295494                | C/G  | NA                 | NA                            | NA                 |
| Kabuli_wild_58296448 | NA                                  | Ca_kabuli_denovo | 58296448                | C/T  | NA                 | NA                            | NA                 |
| Kabuli_wild_58296472 | NA                                  | Ca_kabuli_denovo | 58296472                | C/G  | NA                 | NA                            | NA                 |
| Kabuli_wild_58296505 | NA                                  | Ca_kabuli_denovo | 58296505                | C/G  | NA                 | NA                            | NA                 |
| Kabuli_wild_58297774 | NA                                  | Ca_kabuli_denovo | 58297774                | C/G  | NA                 | NA                            | NA                 |
| Kabuli_wild_58300909 | NA                                  | Ca_kabuli_denovo | 58300909                | A/G  | NA                 | NA                            | NA                 |
| Kabuli_wild_58302049 | NA                                  | Ca_kabuli_denovo | 58302049                | C/T  | NA                 | NA                            | NA                 |
| Kabuli_wild_58302077 | NA                                  | Ca_kabuli_denovo | 58302077                | C/T  | NA                 | NA                            | NA                 |
| Kabuli_wild_58302078 | NA                                  | Ca_kabuli_denovo | 58302078                | C/G  | NA                 | NA                            | NA                 |
| Kabuli_wild_58302304 | NA                                  | Ca_kabuli_denovo | 58302304                | A/G  | NA                 | NA                            | NA                 |
| Kabuli_wild_58304554 | NA                                  | Ca_kabuli_denovo | 58304554                | A/G  | NA                 | NA                            | NA                 |
| Kabuli_wild_58304578 | NA                                  | Ca_kabuli_denovo | 58304578                | C/T  | NA                 | NA                            | NA                 |
| Kabuli_wild_58304581 | NA                                  | Ca_kabuli_denovo | 58304581                | C/G  | NA                 | NA                            | NA                 |
| Kabuli_wild_58313569 | NA                                  | Ca_kabuli_denovo | 58313569                | C/T  | NA                 | NA                            | NA                 |
| Kabuli_wild_58313578 | NA                                  | Ca_kabuli_denovo | 58313578                | C/T  | NA                 | NA                            | NA                 |
| Kabuli_wild_58315216 | NA                                  | Ca_kabuli_denovo | 58315216                | A/G  | NA                 | NA                            | NA                 |
| Kabuli_wild_58315240 | NA                                  | Ca_kabuli_denovo | 58315240                | A/G  | NA                 | NA                            | NA                 |
| Kabuli_wild_58316452 | NA                                  | Ca_kabuli_denovo | 58316452                | C/G  | NA                 | NA                            | NA                 |
| Kabuli_wild_58316455 | NA                                  | Ca_kabuli_denovo | 58316455                | C/G  | NA                 | NA                            | NA                 |
| Kabuli_wild_58317821 | NA                                  | Ca_kabuli_denovo | 58317821                | A/G  | NA                 | NA                            | NA                 |
| Kabuli_wild_58321112 | NA                                  | Ca_kabuli_denovo | 58321112                | A/G  | NA                 | NA                            | NA                 |
| Kabuli_wild_58322312 | NA                                  | Ca_kabuli_denovo | 58322312                | C/G  | NA                 | NA                            | NA                 |
| Kabuli_wild_58326101 | NA                                  | Ca_kabuli_denovo | 58326101                | A/G  | NA                 | NA                            | NA                 |
| Kabuli_wild_58326517 | NA                                  | Ca_kabuli_denovo | 58326517                | A/T  | NA                 | NA                            | NA                 |
| Kabuli_wild_58326534 | NA                                  | Ca_kabuli_denovo | 58326534                | C/T  | NA                 | NA                            | NA                 |
| Kabuli_wild_58326550 | NA                                  | Ca_kabuli_denovo | 58326550                | G/T  | NA                 | NA                            | NA                 |
| Kabuli_wild_58326554 | NA                                  | Ca_kabuli_denovo | 58326554                | C/T  | NA                 | NA                            | NA                 |
| Kabuli_wild_58329061 | NA                                  | Ca_kabuli_denovo | 58329061                | A/C  | NA                 | NA                            | NA                 |
| Kabuli_wild_58329064 | NA                                  | Ca_kabuli_denovo | 58329064                | A/G  | NA                 | NA                            | NA                 |
| Kabuli_wild_58333675 | NA                                  | Ca_kabuli_denovo | 58333675                | C/T  | NA                 | NA                            | NA                 |
| Kabuli_wild_58333684 | NA                                  | Ca_kabuli_denovo | 58333684                | C/T  | NA                 | NA                            | NA                 |
| Kabuli_wild_58336714 | NA                                  | Ca_kabuli_denovo | 58336714                | C/G  | NA                 | NA                            | NA                 |
| Kabuli_wild_58336984 | NA                                  | Ca_kabuli_denovo | 58336984                | A/G  | NA                 | NA                            | NA                 |
| Kabuli_wild_58336990 | NA                                  | Ca_kabuli_denovo | 58336990                | C/T  | NA                 | NA                            | NA                 |
| Kabuli_wild_58342177 | NA                                  | Ca_kabuli_denovo | 58342177                | A/C  | NA                 | NA                            | NA                 |
| Kabuli_wild_58344862 | NA                                  | Ca_kabuli_denovo | 58344862                | C/G  | NA                 | NA                            | NA                 |

| SNP IDs              | NCBI dbSNP accession IDs (NCBI_SS#) | Chromosomes      | Physical positions (bp) | SNPs | Gene accession IDs | Sequence components of genome | Putative functions |
|----------------------|-------------------------------------|------------------|-------------------------|------|--------------------|-------------------------------|--------------------|
| Kabuli_wild_58346693 | NA                                  | Ca_kabuli_denovo | 58346693                | A/G  | NA                 | NA                            | NA                 |
| Kabuli_wild_58347588 | NA                                  | Ca_kabuli_denovo | 58347588                | A/G  | NA                 | NA                            | NA                 |
| Kabuli_wild_58348423 | NA                                  | Ca_kabuli_denovo | 58348423                | A/G  | NA                 | NA                            | NA                 |
| Kabuli_wild_58348429 | NA                                  | Ca_kabuli_denovo | 58348429                | A/G  | NA                 | NA                            | NA                 |
| Kabuli_wild_58348555 | NA                                  | Ca_kabuli_denovo | 58348555                | A/C  | NA                 | NA                            | NA                 |
| Kabuli_wild_58348596 | NA                                  | Ca_kabuli_denovo | 58348596                | A/C  | NA                 | NA                            | NA                 |
| Kabuli_wild_58348597 | NA                                  | Ca_kabuli_denovo | 58348597                | A/G  | NA                 | NA                            | NA                 |
| Kabuli_wild_58351517 | NA                                  | Ca_kabuli_denovo | 58351517                | A/G  | NA                 | NA                            | NA                 |
| Kabuli_wild_58353358 | NA                                  | Ca_kabuli_denovo | 58353358                | G/T  | NA                 | NA                            | NA                 |
| Kabuli_wild_58353383 | NA                                  | Ca_kabuli_denovo | 58353383                | A/G  | NA                 | NA                            | NA                 |
| Kabuli_wild_58354958 | NA                                  | Ca_kabuli_denovo | 58354958                | C/G  | NA                 | NA                            | NA                 |
| Kabuli_wild_58354961 | NA                                  | Ca_kabuli_denovo | 58354961                | C/G  | NA                 | NA                            | NA                 |
| Kabuli_wild_58354991 | NA                                  | Ca_kabuli_denovo | 58354991                | A/G  | NA                 | NA                            | NA                 |
| Kabuli_wild_58357357 | NA                                  | Ca_kabuli_denovo | 58357357                | A/G  | NA                 | NA                            | NA                 |
| Kabuli_wild_58357405 | NA                                  | Ca_kabuli_denovo | 58357405                | A/G  | NA                 | NA                            | NA                 |
| Kabuli_wild_58360330 | NA                                  | Ca_kabuli_denovo | 58360330                | C/G  | NA                 | NA                            | NA                 |
| Kabuli_wild_58367809 | NA                                  | Ca_kabuli_denovo | 58367809                | C/T  | NA                 | NA                            | NA                 |
| Kabuli_wild_58367830 | NA                                  | Ca_kabuli_denovo | 58367830                | C/G  | NA                 | NA                            | NA                 |
| Kabuli_wild_58369003 | NA                                  | Ca_kabuli_denovo | 58369003                | A/G  | NA                 | NA                            | NA                 |
| Kabuli_wild_58371525 | NA                                  | Ca_kabuli_denovo | 58371525                | C/G  | NA                 | NA                            | NA                 |
| Kabuli_wild_58373272 | NA                                  | Ca_kabuli_denovo | 58373272                | C/T  | NA                 | NA                            | NA                 |
| Kabuli_wild_58376188 | NA                                  | Ca_kabuli_denovo | 58376188                | C/G  | NA                 | NA                            | NA                 |
| Kabuli_wild_58379801 | NA                                  | Ca_kabuli_denovo | 58379801                | A/G  | NA                 | NA                            | NA                 |
| Kabuli_wild_58383874 | NA                                  | Ca_kabuli_denovo | 58383874                | C/T  | NA                 | NA                            | NA                 |
| Kabuli_wild_58385953 | NA                                  | Ca_kabuli_denovo | 58385953                | A/T  | NA                 | NA                            | NA                 |
| Kabuli_wild_58387057 | NA                                  | Ca_kabuli_denovo | 58387057                | C/G  | NA                 | NA                            | NA                 |
| Kabuli_wild_58388722 | NA                                  | Ca_kabuli_denovo | 58388722                | A/G  | NA                 | NA                            | NA                 |
| Kabuli_wild_58393429 | NA                                  | Ca_kabuli_denovo | 58393429                | A/G  | NA                 | NA                            | NA                 |
| Kabuli_wild_58393441 | NA                                  | Ca_kabuli_denovo | 58393441                | C/G  | NA                 | NA                            | NA                 |
| Kabuli_wild_58393465 | NA                                  | Ca_kabuli_denovo | 58393465                | C/T  | NA                 | NA                            | NA                 |
| Kabuli_wild_58398100 | NA                                  | Ca_kabuli_denovo | 58398100                | A/T  | NA                 | NA                            | NA                 |
| Kabuli_wild_58400627 | NA                                  | Ca_kabuli_denovo | 58400627                | C/G  | NA                 | NA                            | NA                 |
| Kabuli_wild_58401266 | NA                                  | Ca_kabuli_denovo | 58401266                | C/T  | NA                 | NA                            | NA                 |
| Kabuli_wild_58402547 | NA                                  | Ca_kabuli_denovo | 58402547                | C/G  | NA                 | NA                            | NA                 |
| Kabuli_wild_58402562 | NA                                  | Ca_kabuli_denovo | 58402562                | C/T  | NA                 | NA                            | NA                 |
| Kabuli_wild_58402571 | NA                                  | Ca_kabuli_denovo | 58402571                | C/G  | NA                 | NA                            | NA                 |
| Kabuli_wild_58403849 | NA                                  | Ca_kabuli_denovo | 58403849                | C/G  | NA                 | NA                            | NA                 |
| Kabuli_wild_58404158 | NA                                  | Ca_kabuli_denovo | 58404158                | A/G  | NA                 | NA                            | NA                 |
| Kabuli_wild_58404508 | NA                                  | Ca_kabuli_denovo | 58404508                | C/T  | NA                 | NA                            | NA                 |
| Kabuli_wild_58404514 | NA                                  | Ca_kabuli_denovo | 58404514                | C/T  | NA                 | NA                            | NA                 |
| Kabuli_wild_58411303 | NA                                  | Ca_kabuli_denovo | 58411303                | A/G  | NA                 | NA                            | NA                 |
| Kabuli_wild_58411312 | NA                                  | Ca_kabuli_denovo | 58411312                | C/T  | NA                 | NA                            | NA                 |
| Kabuli_wild_58411335 | NA                                  | Ca_kabuli_denovo | 58411335                | A/T  | NA                 | NA                            | NA                 |
| Kabuli_wild_58417954 | NA                                  | Ca_kabuli_denovo | 58417954                | C/T  | NA                 | NA                            | NA                 |

| SNP IDs              | NCBI dbSNP accession IDs (NCBI_SS#) | Chromosomes      | Physical positions (bp) | SNPs | Gene accession IDs | Sequence components of genome | Putative functions |
|----------------------|-------------------------------------|------------------|-------------------------|------|--------------------|-------------------------------|--------------------|
| Kabuli_wild_58423125 | NA                                  | Ca_kabuli_denovo | 58423125                | A/G  | NA                 | NA                            | NA                 |
| Kabuli_wild_58423143 | NA                                  | Ca_kabuli_denovo | 58423143                | G/T  | NA                 | NA                            | NA                 |
| Kabuli_wild_58423146 | NA                                  | Ca_kabuli_denovo | 58423146                | A/G  | NA                 | NA                            | NA                 |
| Kabuli_wild_58423158 | NA                                  | Ca_kabuli_denovo | 58423158                | A/T  | NA                 | NA                            | NA                 |
| Kabuli_wild_58424526 | NA                                  | Ca_kabuli_denovo | 58424526                | A/G  | NA                 | NA                            | NA                 |
| Kabuli_wild_58426087 | NA                                  | Ca_kabuli_denovo | 58426087                | C/T  | NA                 | NA                            | NA                 |
| Kabuli_wild_58429551 | NA                                  | Ca_kabuli_denovo | 58429551                | C/T  | NA                 | NA                            | NA                 |
| Kabuli_wild_58430715 | NA                                  | Ca_kabuli_denovo | 58430715                | C/G  | NA                 | NA                            | NA                 |
| Kabuli_wild_58431389 | NA                                  | Ca_kabuli_denovo | 58431389                | C/T  | NA                 | NA                            | NA                 |
| Kabuli_wild_58431415 | NA                                  | Ca_kabuli_denovo | 58431415                | C/T  | NA                 | NA                            | NA                 |
| Kabuli_wild_58438468 | NA                                  | Ca_kabuli_denovo | 58438468                | C/G  | NA                 | NA                            | NA                 |
| Kabuli_wild_58438504 | NA                                  | Ca_kabuli_denovo | 58438504                | G/T  | NA                 | NA                            | NA                 |
| Kabuli_wild_58440545 | NA                                  | Ca_kabuli_denovo | 58440545                | C/G  | NA                 | NA                            | NA                 |
| Kabuli_wild_58445617 | NA                                  | Ca_kabuli_denovo | 58445617                | A/G  | NA                 | NA                            | NA                 |
| Kabuli_wild_58445623 | NA                                  | Ca_kabuli_denovo | 58445623                | C/T  | NA                 | NA                            | NA                 |
| Kabuli_wild_58447861 | NA                                  | Ca_kabuli_denovo | 58447861                | C/T  | NA                 | NA                            | NA                 |
| Kabuli_wild_58452499 | NA                                  | Ca_kabuli_denovo | 58452499                | G/T  | NA                 | NA                            | NA                 |
| Kabuli_wild_58453742 | NA                                  | Ca_kabuli_denovo | 58453742                | A/C  | NA                 | NA                            | NA                 |
| Kabuli_wild_58453759 | NA                                  | Ca_kabuli_denovo | 58453759                | C/G  | NA                 | NA                            | NA                 |
| Kabuli_wild_58453760 | NA                                  | Ca_kabuli_denovo | 58453760                | C/G  | NA                 | NA                            | NA                 |
| Kabuli_wild_58453763 | NA                                  | Ca_kabuli_denovo | 58453763                | C/T  | NA                 | NA                            | NA                 |
| Kabuli_wild_58460903 | NA                                  | Ca_kabuli_denovo | 58460903                | C/T  | NA                 | NA                            | NA                 |
| Kabuli_wild_58465322 | NA                                  | Ca_kabuli_denovo | 58465322                | C/T  | NA                 | NA                            | NA                 |
| Kabuli_wild_58465323 | NA                                  | Ca_kabuli_denovo | 58465323                | G/T  | NA                 | NA                            | NA                 |
| Kabuli_wild_58465358 | NA                                  | Ca_kabuli_denovo | 58465358                | C/G  | NA                 | NA                            | NA                 |
| Kabuli_wild_58466288 | NA                                  | Ca_kabuli_denovo | 58466288                | C/G  | NA                 | NA                            | NA                 |
| Kabuli_wild_58468393 | NA                                  | Ca_kabuli_denovo | 58468393                | C/T  | NA                 | NA                            | NA                 |
| Kabuli_wild_58468871 | NA                                  | Ca_kabuli_denovo | 58468871                | A/C  | NA                 | NA                            | NA                 |
| Kabuli_wild_58476131 | NA                                  | Ca_kabuli_denovo | 58476131                | C/G  | NA                 | NA                            | NA                 |
| Kabuli_wild_58477145 | NA                                  | Ca_kabuli_denovo | 58477145                | C/G  | NA                 | NA                            | NA                 |
| Kabuli_wild_58477148 | NA                                  | Ca_kabuli_denovo | 58477148                | A/G  | NA                 | NA                            | NA                 |
| Kabuli_wild_58479935 | NA                                  | Ca_kabuli_denovo | 58479935                | C/G  | NA                 | NA                            | NA                 |
| Kabuli_wild_58484966 | NA                                  | Ca_kabuli_denovo | 58484966                | C/G  | NA                 | NA                            | NA                 |
| Kabuli_wild_58485008 | NA                                  | Ca_kabuli_denovo | 58485008                | G/T  | NA                 | NA                            | NA                 |
| Kabuli_wild_58488679 | NA                                  | Ca_kabuli_denovo | 58488679                | C/T  | NA                 | NA                            | NA                 |
| Kabuli_wild_58488681 | NA                                  | Ca_kabuli_denovo | 58488681                | A/C  | NA                 | NA                            | NA                 |
| Kabuli_wild_58490540 | NA                                  | Ca_kabuli_denovo | 58490540                | C/G  | NA                 | NA                            | NA                 |
| Kabuli_wild_58490600 | NA                                  | Ca_kabuli_denovo | 58490600                | A/G  | NA                 | NA                            | NA                 |
| Kabuli_wild_58492685 | NA                                  | Ca_kabuli_denovo | 58492685                | C/T  | NA                 | NA                            | NA                 |
| Kabuli_wild_58492697 | NA                                  | Ca_kabuli_denovo | 58492697                | A/C  | NA                 | NA                            | NA                 |
| Kabuli_wild_58497509 | NA                                  | Ca_kabuli_denovo | 58497509                | C/G  | NA                 | NA                            | NA                 |
| Kabuli_wild_58497977 | NA                                  | Ca_kabuli_denovo | 58497977                | C/G  | NA                 | NA                            | NA                 |
| Kabuli_wild_58501961 | NA                                  | Ca_kabuli_denovo | 58501961                | A/G  | NA                 | NA                            | NA                 |
| Kabuli_wild_58501997 | NA                                  | Ca_kabuli_denovo | 58501997                | C/T  | NA                 | NA                            | NA                 |



| SNP IDs              | NCBI dbSNP accession IDs (NCBI_SS#) | Chromosomes      | Physical positions (bp) | SNPs | Gene accession IDs | Sequence components of genome | Putative functions |
|----------------------|-------------------------------------|------------------|-------------------------|------|--------------------|-------------------------------|--------------------|
| Kabuli_wild_58507549 | NA                                  | Ca_kabuli_denovo | 58507549                | C/G  | NA                 | NA                            | NA                 |
| Kabuli_wild_58507579 | NA                                  | Ca_kabuli_denovo | 58507579                | C/G  | NA                 | NA                            | NA                 |
| Kabuli_wild_58508945 | NA                                  | Ca_kabuli_denovo | 58508945                | A/G  | NA                 | NA                            | NA                 |
| Kabuli_wild_58509011 | NA                                  | Ca_kabuli_denovo | 58509011                | A/G  | NA                 | NA                            | NA                 |
| Kabuli_wild_58510253 | NA                                  | Ca_kabuli_denovo | 58510253                | C/G  | NA                 | NA                            | NA                 |
| Kabuli_wild_58511450 | NA                                  | Ca_kabuli_denovo | 58511450                | C/T  | NA                 | NA                            | NA                 |
| Kabuli_wild_58511495 | NA                                  | Ca_kabuli_denovo | 58511495                | C/T  | NA                 | NA                            | NA                 |
| Kabuli_wild_58511531 | NA                                  | Ca_kabuli_denovo | 58511531                | A/G  | NA                 | NA                            | NA                 |
| Kabuli_wild_58511546 | NA                                  | Ca_kabuli_denovo | 58511546                | A/G  | NA                 | NA                            | NA                 |
| Kabuli_wild_58511572 | NA                                  | Ca_kabuli_denovo | 58511572                | A/G  | NA                 | NA                            | NA                 |
| Kabuli_wild_58515278 | NA                                  | Ca_kabuli_denovo | 58515278                | A/C  | NA                 | NA                            | NA                 |
| Kabuli_wild_58515284 | NA                                  | Ca_kabuli_denovo | 58515284                | A/T  | NA                 | NA                            | NA                 |
| Kabuli_wild_58516659 | NA                                  | Ca_kabuli_denovo | 58516659                | A/C  | NA                 | NA                            | NA                 |
| Kabuli_wild_58517239 | NA                                  | Ca_kabuli_denovo | 58517239                | C/G  | NA                 | NA                            | NA                 |
| Kabuli_wild_58517309 | NA                                  | Ca_kabuli_denovo | 58517309                | C/T  | NA                 | NA                            | NA                 |
| Kabuli_wild_58517798 | NA                                  | Ca_kabuli_denovo | 58517798                | A/G  | NA                 | NA                            | NA                 |
| Kabuli_wild_58518045 | NA                                  | Ca_kabuli_denovo | 58518045                | A/T  | NA                 | NA                            | NA                 |
| Kabuli_wild_58518106 | NA                                  | Ca_kabuli_denovo | 58518106                | A/T  | NA                 | NA                            | NA                 |
| Kabuli_wild_58519101 | NA                                  | Ca_kabuli_denovo | 58519101                | G/T  | NA                 | NA                            | NA                 |
| Kabuli_wild_58519102 | NA                                  | Ca_kabuli_denovo | 58519102                | C/G  | NA                 | NA                            | NA                 |
| Kabuli_wild_58521526 | NA                                  | Ca_kabuli_denovo | 58521526                | C/T  | NA                 | NA                            | NA                 |
| Kabuli_wild_58523105 | NA                                  | Ca_kabuli_denovo | 58523105                | A/G  | NA                 | NA                            | NA                 |
| Kabuli_wild_58523123 | NA                                  | Ca_kabuli_denovo | 58523123                | A/G  | NA                 | NA                            | NA                 |
| Kabuli_wild_58523126 | NA                                  | Ca_kabuli_denovo | 58523126                | C/T  | NA                 | NA                            | NA                 |
| Kabuli_wild_58525881 | NA                                  | Ca_kabuli_denovo | 58525881                | A/G  | NA                 | NA                            | NA                 |
| Kabuli_wild_58525897 | NA                                  | Ca_kabuli_denovo | 58525897                | A/G  | NA                 | NA                            | NA                 |
| Kabuli_wild_58526743 | NA                                  | Ca_kabuli_denovo | 58526743                | C/T  | NA                 | NA                            | NA                 |
| Kabuli_wild_58528880 | NA                                  | Ca_kabuli_denovo | 58528880                | C/T  | NA                 | NA                            | NA                 |
| Kabuli_wild_58528883 | NA                                  | Ca_kabuli_denovo | 58528883                | C/G  | NA                 | NA                            | NA                 |
| Kabuli_wild_58531357 | NA                                  | Ca_kabuli_denovo | 58531357                | A/G  | NA                 | NA                            | NA                 |
| Kabuli_wild_58531359 | NA                                  | Ca_kabuli_denovo | 58531359                | C/G  | NA                 | NA                            | NA                 |
| Kabuli_wild_58531372 | NA                                  | Ca_kabuli_denovo | 58531372                | C/T  | NA                 | NA                            | NA                 |
| Kabuli_wild_58533800 | NA                                  | Ca_kabuli_denovo | 58533800                | C/G  | NA                 | NA                            | NA                 |
| Kabuli_wild_58533887 | NA                                  | Ca_kabuli_denovo | 58533887                | C/T  | NA                 | NA                            | NA                 |
| Kabuli_wild_58534264 | NA                                  | Ca_kabuli_denovo | 58534264                | A/G  | NA                 | NA                            | NA                 |
| Kabuli_wild_58534273 | NA                                  | Ca_kabuli_denovo | 58534273                | A/G  | NA                 | NA                            | NA                 |
| Kabuli_wild_58540310 | NA                                  | Ca_kabuli_denovo | 58540310                | C/T  | NA                 | NA                            | NA                 |
| Kabuli_wild_58540325 | NA                                  | Ca_kabuli_denovo | 58540325                | C/G  | NA                 | NA                            | NA                 |
| Kabuli_wild_58540346 | NA                                  | Ca_kabuli_denovo | 58540346                | C/G  | NA                 | NA                            | NA                 |
| Kabuli_wild_58541528 | NA                                  | Ca_kabuli_denovo | 58541528                | C/T  | NA                 | NA                            | NA                 |
| Kabuli_wild_58544030 | NA                                  | Ca_kabuli_denovo | 58544030                | C/T  | NA                 | NA                            | NA                 |
| Kabuli_wild_58545038 | NA                                  | Ca_kabuli_denovo | 58545038                | A/C  | NA                 | NA                            | NA                 |
| Kabuli_wild_58548283 | NA                                  | Ca_kabuli_denovo | 58548283                | C/G  | NA                 | NA                            | NA                 |
| Kabuli_wild_58548316 | NA                                  | Ca_kabuli_denovo | 58548316                | C/T  | NA                 | NA                            | NA                 |

| SNP IDs              | NCBI dbSNP accession IDs (NCBI_SS#) | Chromosomes      | Physical positions (bp) | SNPs | Gene accession IDs | Sequence components of genome | Putative functions |
|----------------------|-------------------------------------|------------------|-------------------------|------|--------------------|-------------------------------|--------------------|
| Kabuli_wild_58548631 | NA                                  | Ca_kabuli_denovo | 58548631                | A/G  | NA                 | NA                            | NA                 |
| Kabuli_wild_58549505 | NA                                  | Ca_kabuli_denovo | 58549505                | C/G  | NA                 | NA                            | NA                 |
| Kabuli_wild_58549516 | NA                                  | Ca_kabuli_denovo | 58549516                | C/G  | NA                 | NA                            | NA                 |
| Kabuli_wild_58551073 | NA                                  | Ca_kabuli_denovo | 58551073                | A/G  | NA                 | NA                            | NA                 |
| Kabuli_wild_58551076 | NA                                  | Ca_kabuli_denovo | 58551076                | A/C  | NA                 | NA                            | NA                 |
| Kabuli_wild_58553442 | NA                                  | Ca_kabuli_denovo | 58553442                | A/C  | NA                 | NA                            | NA                 |
| Kabuli_wild_58553466 | NA                                  | Ca_kabuli_denovo | 58553466                | A/T  | NA                 | NA                            | NA                 |
| Kabuli_wild_58553469 | NA                                  | Ca_kabuli_denovo | 58553469                | G/T  | NA                 | NA                            | NA                 |
| Kabuli_wild_58553722 | NA                                  | Ca_kabuli_denovo | 58553722                | C/G  | NA                 | NA                            | NA                 |
| Kabuli_wild_58555175 | NA                                  | Ca_kabuli_denovo | 58555175                | A/G  | NA                 | NA                            | NA                 |
| Kabuli_wild_58555190 | NA                                  | Ca_kabuli_denovo | 58555190                | C/G  | NA                 | NA                            | NA                 |
| Kabuli_wild_58555262 | NA                                  | Ca_kabuli_denovo | 58555262                | G/T  | NA                 | NA                            | NA                 |
| Kabuli_wild_58555322 | NA                                  | Ca_kabuli_denovo | 58555322                | G/T  | NA                 | NA                            | NA                 |
| Kabuli_wild_58556021 | NA                                  | Ca_kabuli_denovo | 58556021                | A/G  | NA                 | NA                            | NA                 |
| Kabuli_wild_58564158 | NA                                  | Ca_kabuli_denovo | 58564158                | C/T  | NA                 | NA                            | NA                 |
| Kabuli_wild_58564159 | NA                                  | Ca_kabuli_denovo | 58564159                | A/G  | NA                 | NA                            | NA                 |
| Kabuli_wild_58564162 | NA                                  | Ca_kabuli_denovo | 58564162                | A/G  | NA                 | NA                            | NA                 |
| Kabuli_wild_58569592 | NA                                  | Ca_kabuli_denovo | 58569592                | C/G  | NA                 | NA                            | NA                 |
| Kabuli_wild_58573212 | NA                                  | Ca_kabuli_denovo | 58573212                | A/G  | NA                 | NA                            | NA                 |
| Kabuli_wild_58576274 | NA                                  | Ca_kabuli_denovo | 58576274                | C/T  | NA                 | NA                            | NA                 |
| Kabuli_wild_58576292 | NA                                  | Ca_kabuli_denovo | 58576292                | C/G  | NA                 | NA                            | NA                 |
| Kabuli_wild_58576295 | NA                                  | Ca_kabuli_denovo | 58576295                | A/G  | NA                 | NA                            | NA                 |
| Kabuli_wild_58577108 | NA                                  | Ca_kabuli_denovo | 58577108                | A/G  | NA                 | NA                            | NA                 |
| Kabuli_wild_58577578 | NA                                  | Ca_kabuli_denovo | 58577578                | C/G  | NA                 | NA                            | NA                 |
| Kabuli_wild_58577580 | NA                                  | Ca_kabuli_denovo | 58577580                | A/G  | NA                 | NA                            | NA                 |
| Kabuli_wild_58577596 | NA                                  | Ca_kabuli_denovo | 58577596                | C/G  | NA                 | NA                            | NA                 |
| Kabuli_wild_58579251 | NA                                  | Ca_kabuli_denovo | 58579251                | C/G  | NA                 | NA                            | NA                 |
| Kabuli_wild_58579354 | NA                                  | Ca_kabuli_denovo | 58579354                | A/G  | NA                 | NA                            | NA                 |
| Kabuli_wild_58579621 | NA                                  | Ca_kabuli_denovo | 58579621                | C/G  | NA                 | NA                            | NA                 |
| Kabuli_wild_58579630 | NA                                  | Ca_kabuli_denovo | 58579630                | C/G  | NA                 | NA                            | NA                 |
| Kabuli_wild_58579642 | NA                                  | Ca_kabuli_denovo | 58579642                | A/G  | NA                 | NA                            | NA                 |
| Kabuli_wild_58580569 | NA                                  | Ca_kabuli_denovo | 58580569                | C/T  | NA                 | NA                            | NA                 |
| Kabuli_wild_58580578 | NA                                  | Ca_kabuli_denovo | 58580578                | C/G  | NA                 | NA                            | NA                 |
| Kabuli_wild_58581203 | NA                                  | Ca_kabuli_denovo | 58581203                | C/G  | NA                 | NA                            | NA                 |
| Kabuli_wild_58584107 | NA                                  | Ca_kabuli_denovo | 58584107                | A/C  | NA                 | NA                            | NA                 |
| Kabuli_wild_58584162 | NA                                  | Ca_kabuli_denovo | 58584162                | C/G  | NA                 | NA                            | NA                 |
| Kabuli_wild_58585853 | NA                                  | Ca_kabuli_denovo | 58585853                | A/G  | NA                 | NA                            | NA                 |
| Kabuli_wild_58585859 | NA                                  | Ca_kabuli_denovo | 58585859                | G/T  | NA                 | NA                            | NA                 |
| Kabuli_wild_58586062 | NA                                  | Ca_kabuli_denovo | 58586062                | A/C  | NA                 | NA                            | NA                 |
| Kabuli_wild_58586150 | NA                                  | Ca_kabuli_denovo | 58586150                | A/G  | NA                 | NA                            | NA                 |
| Kabuli_wild_58587710 | NA                                  | Ca_kabuli_denovo | 58587710                | C/T  | NA                 | NA                            | NA                 |
| Kabuli_wild_58587740 | NA                                  | Ca_kabuli_denovo | 58587740                | G/T  | NA                 | NA                            | NA                 |
| Kabuli_wild_58591447 | NA                                  | Ca_kabuli_denovo | 58591447                | C/G  | NA                 | NA                            | NA                 |
| Kabuli_wild_58591450 | NA                                  | Ca_kabuli_denovo | 58591450                | A/G  | NA                 | NA                            | NA                 |

| SNP IDs              | NCBI dbSNP accession IDs (NCBI_SS#) | Chromosomes      | Physical positions (bp) | SNPs | Gene accession IDs | Sequence components of genome | Putative functions |
|----------------------|-------------------------------------|------------------|-------------------------|------|--------------------|-------------------------------|--------------------|
| Kabuli_wild_58592744 | NA                                  | Ca_kabuli_denovo | 58592744                | G/T  | NA                 | NA                            | NA                 |
| Kabuli_wild_58598873 | NA                                  | Ca_kabuli_denovo | 58598873                | A/G  | NA                 | NA                            | NA                 |
| Kabuli_wild_58598881 | NA                                  | Ca_kabuli_denovo | 58598881                | A/G  | NA                 | NA                            | NA                 |
| Kabuli_wild_58599163 | NA                                  | Ca_kabuli_denovo | 58599163                | A/C  | NA                 | NA                            | NA                 |
| Kabuli_wild_58603627 | NA                                  | Ca_kabuli_denovo | 58603627                | C/T  | NA                 | NA                            | NA                 |
| Kabuli_wild_58603814 | NA                                  | Ca_kabuli_denovo | 58603814                | A/G  | NA                 | NA                            | NA                 |
| Kabuli_wild_58603988 | NA                                  | Ca_kabuli_denovo | 58603988                | A/G  | NA                 | NA                            | NA                 |
| Kabuli_wild_58603991 | NA                                  | Ca_kabuli_denovo | 58603991                | C/G  | NA                 | NA                            | NA                 |
| Kabuli_wild_58606715 | NA                                  | Ca_kabuli_denovo | 58606715                | G/T  | NA                 | NA                            | NA                 |
| Kabuli_wild_58609125 | NA                                  | Ca_kabuli_denovo | 58609125                | A/G  | NA                 | NA                            | NA                 |
| Kabuli_wild_58609723 | NA                                  | Ca_kabuli_denovo | 58609723                | C/T  | NA                 | NA                            | NA                 |
| Kabuli_wild_58610742 | NA                                  | Ca_kabuli_denovo | 58610742                | A/G  | NA                 | NA                            | NA                 |
| Kabuli_wild_58614234 | NA                                  | Ca_kabuli_denovo | 58614234                | G/T  | NA                 | NA                            | NA                 |
| Kabuli_wild_58614692 | NA                                  | Ca_kabuli_denovo | 58614692                | C/G  | NA                 | NA                            | NA                 |
| Kabuli_wild_58615892 | NA                                  | Ca_kabuli_denovo | 58615892                | C/T  | NA                 | NA                            | NA                 |
| Kabuli_wild_58615982 | NA                                  | Ca_kabuli_denovo | 58615982                | C/G  | NA                 | NA                            | NA                 |
| Kabuli_wild_58615997 | NA                                  | Ca_kabuli_denovo | 58615997                | C/T  | NA                 | NA                            | NA                 |
| Kabuli_wild_58616015 | NA                                  | Ca_kabuli_denovo | 58616015                | C/G  | NA                 | NA                            | NA                 |
| Kabuli_wild_58616251 | NA                                  | Ca_kabuli_denovo | 58616251                | A/C  | NA                 | NA                            | NA                 |
| Kabuli_wild_58616750 | NA                                  | Ca_kabuli_denovo | 58616750                | C/T  | NA                 | NA                            | NA                 |
| Kabuli_wild_58616751 | NA                                  | Ca_kabuli_denovo | 58616751                | G/T  | NA                 | NA                            | NA                 |
| Kabuli_wild_58616762 | NA                                  | Ca_kabuli_denovo | 58616762                | A/C  | NA                 | NA                            | NA                 |
| Kabuli_wild_58617594 | NA                                  | Ca_kabuli_denovo | 58617594                | A/G  | NA                 | NA                            | NA                 |
| Kabuli_wild_58617625 | NA                                  | Ca_kabuli_denovo | 58617625                | C/T  | NA                 | NA                            | NA                 |
| Kabuli_wild_58617939 | NA                                  | Ca_kabuli_denovo | 58617939                | C/T  | NA                 | NA                            | NA                 |
| Kabuli_wild_58617940 | NA                                  | Ca_kabuli_denovo | 58617940                | G/T  | NA                 | NA                            | NA                 |
| Kabuli_wild_58620125 | NA                                  | Ca_kabuli_denovo | 58620125                | A/G  | NA                 | NA                            | NA                 |
| Kabuli_wild_58623611 | NA                                  | Ca_kabuli_denovo | 58623611                | C/G  | NA                 | NA                            | NA                 |
| Kabuli_wild_58624856 | NA                                  | Ca_kabuli_denovo | 58624856                | C/T  | NA                 | NA                            | NA                 |
| Kabuli_wild_58624883 | NA                                  | Ca_kabuli_denovo | 58624883                | A/G  | NA                 | NA                            | NA                 |
| Kabuli_wild_58628075 | NA                                  | Ca_kabuli_denovo | 58628075                | C/G  | NA                 | NA                            | NA                 |
| Kabuli_wild_58628096 | NA                                  | Ca_kabuli_denovo | 58628096                | C/T  | NA                 | NA                            | NA                 |
| Kabuli_wild_58628099 | NA                                  | Ca_kabuli_denovo | 58628099                | A/G  | NA                 | NA                            | NA                 |
| Kabuli_wild_58629204 | NA                                  | Ca_kabuli_denovo | 58629204                | A/G  | NA                 | NA                            | NA                 |
| Kabuli_wild_58631516 | NA                                  | Ca_kabuli_denovo | 58631516                | C/G  | NA                 | NA                            | NA                 |
| Kabuli_wild_58631555 | NA                                  | Ca_kabuli_denovo | 58631555                | A/G  | NA                 | NA                            | NA                 |
| Kabuli_wild_58631735 | NA                                  | Ca_kabuli_denovo | 58631735                | C/G  | NA                 | NA                            | NA                 |
| Kabuli_wild_58631738 | NA                                  | Ca_kabuli_denovo | 58631738                | G/T  | NA                 | NA                            | NA                 |
| Kabuli_wild_58631741 | NA                                  | Ca_kabuli_denovo | 58631741                | C/G  | NA                 | NA                            | NA                 |
| Kabuli_wild_58632679 | NA                                  | Ca_kabuli_denovo | 58632679                | C/T  | NA                 | NA                            | NA                 |
| Kabuli_wild_58635881 | NA                                  | Ca_kabuli_denovo | 58635881                | A/G  | NA                 | NA                            | NA                 |
| Kabuli_wild_58635920 | NA                                  | Ca_kabuli_denovo | 58635920                | A/G  | NA                 | NA                            | NA                 |
| Kabuli_wild_58638317 | NA                                  | Ca_kabuli_denovo | 58638317                | G/T  | NA                 | NA                            | NA                 |
| Kabuli_wild_58638341 | NA                                  | Ca_kabuli_denovo | 58638341                | A/C  | NA                 | NA                            | NA                 |

| SNP IDs              | NCBI dbSNP accession IDs (NCBI_SS#) | Chromosomes      | Physical positions (bp) | SNPs | Gene accession IDs | Sequence components of genome | Putative functions |
|----------------------|-------------------------------------|------------------|-------------------------|------|--------------------|-------------------------------|--------------------|
| Kabuli_wild_58640871 | NA                                  | Ca_kabuli_denovo | 58640871                | C/T  | NA                 | NA                            | NA                 |
| Kabuli_wild_58643641 | NA                                  | Ca_kabuli_denovo | 58643641                | A/G  | NA                 | NA                            | NA                 |
| Kabuli_wild_58643994 | NA                                  | Ca_kabuli_denovo | 58643994                | C/G  | NA                 | NA                            | NA                 |
| Kabuli_wild_58644445 | NA                                  | Ca_kabuli_denovo | 58644445                | C/G  | NA                 | NA                            | NA                 |
| Kabuli_wild_58644463 | NA                                  | Ca_kabuli_denovo | 58644463                | C/T  | NA                 | NA                            | NA                 |
| Kabuli_wild_58645192 | NA                                  | Ca_kabuli_denovo | 58645192                | C/G  | NA                 | NA                            | NA                 |
| Kabuli_wild_58645255 | NA                                  | Ca_kabuli_denovo | 58645255                | C/G  | NA                 | NA                            | NA                 |
| Kabuli_wild_58645552 | NA                                  | Ca_kabuli_denovo | 58645552                | A/G  | NA                 | NA                            | NA                 |
| Kabuli_wild_58645560 | NA                                  | Ca_kabuli_denovo | 58645560                | A/C  | NA                 | NA                            | NA                 |
| Kabuli_wild_58645572 | NA                                  | Ca_kabuli_denovo | 58645572                | G/T  | NA                 | NA                            | NA                 |
| Kabuli_wild_58645579 | NA                                  | Ca_kabuli_denovo | 58645579                | C/G  | NA                 | NA                            | NA                 |
| Kabuli_wild_58647049 | NA                                  | Ca_kabuli_denovo | 58647049                | A/G  | NA                 | NA                            | NA                 |
| Kabuli_wild_58647064 | NA                                  | Ca_kabuli_denovo | 58647064                | A/G  | NA                 | NA                            | NA                 |
| Kabuli_wild_58647784 | NA                                  | Ca_kabuli_denovo | 58647784                | G/T  | NA                 | NA                            | NA                 |
| Kabuli_wild_58647793 | NA                                  | Ca_kabuli_denovo | 58647793                | A/C  | NA                 | NA                            | NA                 |
| Kabuli_wild_58650580 | NA                                  | Ca_kabuli_denovo | 58650580                | C/T  | NA                 | NA                            | NA                 |
| Kabuli_wild_58650584 | NA                                  | Ca_kabuli_denovo | 58650584                | C/T  | NA                 | NA                            | NA                 |
| Kabuli_wild_58650586 | NA                                  | Ca_kabuli_denovo | 58650586                | C/T  | NA                 | NA                            | NA                 |
| Kabuli_wild_58650587 | NA                                  | Ca_kabuli_denovo | 58650587                | A/G  | NA                 | NA                            | NA                 |
| Kabuli_wild_58653542 | NA                                  | Ca_kabuli_denovo | 58653542                | G/T  | NA                 | NA                            | NA                 |
| Kabuli_wild_58657356 | NA                                  | Ca_kabuli_denovo | 58657356                | C/T  | NA                 | NA                            | NA                 |
| Kabuli_wild_58658555 | NA                                  | Ca_kabuli_denovo | 58658555                | C/G  | NA                 | NA                            | NA                 |
| Kabuli_wild_58658556 | NA                                  | Ca_kabuli_denovo | 58658556                | A/G  | NA                 | NA                            | NA                 |
| Kabuli_wild_58661183 | NA                                  | Ca_kabuli_denovo | 58661183                | C/T  | NA                 | NA                            | NA                 |
| Kabuli_wild_58661204 | NA                                  | Ca_kabuli_denovo | 58661204                | A/G  | NA                 | NA                            | NA                 |
| Kabuli_wild_58661222 | NA                                  | Ca_kabuli_denovo | 58661222                | C/T  | NA                 | NA                            | NA                 |
| Kabuli_wild_58661243 | NA                                  | Ca_kabuli_denovo | 58661243                | C/T  | NA                 | NA                            | NA                 |
| Kabuli_wild_58662224 | NA                                  | Ca_kabuli_denovo | 58662224                | C/G  | NA                 | NA                            | NA                 |
| Kabuli_wild_58662248 | NA                                  | Ca_kabuli_denovo | 58662248                | C/T  | NA                 | NA                            | NA                 |
| Kabuli_wild_58662260 | NA                                  | Ca_kabuli_denovo | 58662260                | C/G  | NA                 | NA                            | NA                 |
| Kabuli_wild_58662263 | NA                                  | Ca_kabuli_denovo | 58662263                | C/G  | NA                 | NA                            | NA                 |
| Kabuli_wild_58663798 | NA                                  | Ca_kabuli_denovo | 58663798                | C/G  | NA                 | NA                            | NA                 |
| Kabuli_wild_58663816 | NA                                  | Ca_kabuli_denovo | 58663816                | C/T  | NA                 | NA                            | NA                 |
| Kabuli_wild_58663822 | NA                                  | Ca_kabuli_denovo | 58663822                | C/T  | NA                 | NA                            | NA                 |
| Kabuli_wild_58665087 | NA                                  | Ca_kabuli_denovo | 58665087                | A/C  | NA                 | NA                            | NA                 |
| Kabuli_wild_58666035 | NA                                  | Ca_kabuli_denovo | 58666035                | A/T  | NA                 | NA                            | NA                 |
| Kabuli_wild_58666265 | NA                                  | Ca_kabuli_denovo | 58666265                | G/T  | NA                 | NA                            | NA                 |
| Kabuli_wild_58666313 | NA                                  | Ca_kabuli_denovo | 58666313                | C/G  | NA                 | NA                            | NA                 |
| Kabuli_wild_58666489 | NA                                  | Ca_kabuli_denovo | 58666489                | G/T  | NA                 | NA                            | NA                 |
| Kabuli_wild_58670503 | NA                                  | Ca_kabuli_denovo | 58670503                | G/T  | NA                 | NA                            | NA                 |
| Kabuli_wild_58670764 | NA                                  | Ca_kabuli_denovo | 58670764                | C/T  | NA                 | NA                            | NA                 |
| Kabuli_wild_58672618 | NA                                  | Ca_kabuli_denovo | 58672618                | C/G  | NA                 | NA                            | NA                 |
| Kabuli_wild_58674439 | NA                                  | Ca_kabuli_denovo | 58674439                | A/G  | NA                 | NA                            | NA                 |
| Kabuli_wild_58676483 | NA                                  | Ca_kabuli_denovo | 58676483                | C/T  | NA                 | NA                            | NA                 |

| SNP IDs              | NCBI dbSNP accession IDs (NCBI_SS#) | Chromosomes      | Physical positions (bp) | SNPs | Gene accession IDs | Sequence components of genome | Putative functions |
|----------------------|-------------------------------------|------------------|-------------------------|------|--------------------|-------------------------------|--------------------|
| Kabuli_wild_58678291 | NA                                  | Ca_kabuli_denovo | 58678291                | A/G  | NA                 | NA                            | NA                 |
| Kabuli_wild_58678351 | NA                                  | Ca_kabuli_denovo | 58678351                | A/G  | NA                 | NA                            | NA                 |
| Kabuli_wild_58682797 | NA                                  | Ca_kabuli_denovo | 58682797                | C/G  | NA                 | NA                            | NA                 |
| Kabuli_wild_58685455 | NA                                  | Ca_kabuli_denovo | 58685455                | C/T  | NA                 | NA                            | NA                 |
| Kabuli_wild_58685887 | NA                                  | Ca_kabuli_denovo | 58685887                | A/G  | NA                 | NA                            | NA                 |
| Kabuli_wild_58686772 | NA                                  | Ca_kabuli_denovo | 58686772                | C/T  | NA                 | NA                            | NA                 |
| Kabuli_wild_58686778 | NA                                  | Ca_kabuli_denovo | 58686778                | C/T  | NA                 | NA                            | NA                 |
| Kabuli_wild_58686787 | NA                                  | Ca_kabuli_denovo | 58686787                | C/G  | NA                 | NA                            | NA                 |
| Kabuli_wild_58686814 | NA                                  | Ca_kabuli_denovo | 58686814                | C/G  | NA                 | NA                            | NA                 |
| Kabuli_wild_58688912 | NA                                  | Ca_kabuli_denovo | 58688912                | A/G  | NA                 | NA                            | NA                 |
| Kabuli_wild_58688920 | NA                                  | Ca_kabuli_denovo | 58688920                | A/G  | NA                 | NA                            | NA                 |
| Kabuli_wild_58699138 | NA                                  | Ca_kabuli_denovo | 58699138                | A/C  | NA                 | NA                            | NA                 |
| Kabuli_wild_58699449 | NA                                  | Ca_kabuli_denovo | 58699449                | A/T  | NA                 | NA                            | NA                 |
| Kabuli_wild_58703226 | NA                                  | Ca_kabuli_denovo | 58703226                | A/C  | NA                 | NA                            | NA                 |
| Kabuli_wild_58705757 | NA                                  | Ca_kabuli_denovo | 58705757                | C/G  | NA                 | NA                            | NA                 |
| Kabuli_wild_58705772 | NA                                  | Ca_kabuli_denovo | 58705772                | C/G  | NA                 | NA                            | NA                 |
| Kabuli_wild_58707698 | NA                                  | Ca_kabuli_denovo | 58707698                | C/T  | NA                 | NA                            | NA                 |
| Kabuli_wild_58708272 | NA                                  | Ca_kabuli_denovo | 58708272                | G/T  | NA                 | NA                            | NA                 |
| Kabuli_wild_58709270 | NA                                  | Ca_kabuli_denovo | 58709270                | C/T  | NA                 | NA                            | NA                 |
| Kabuli_wild_58709451 | NA                                  | Ca_kabuli_denovo | 58709451                | C/T  | NA                 | NA                            | NA                 |
| Kabuli_wild_58709916 | NA                                  | Ca_kabuli_denovo | 58709916                | A/G  | NA                 | NA                            | NA                 |
| Kabuli_wild_58709951 | NA                                  | Ca_kabuli_denovo | 58709951                | C/G  | NA                 | NA                            | NA                 |
| Kabuli_wild_58709964 | NA                                  | Ca_kabuli_denovo | 58709964                | A/G  | NA                 | NA                            | NA                 |
| Kabuli_wild_58709967 | NA                                  | Ca_kabuli_denovo | 58709967                | C/T  | NA                 | NA                            | NA                 |
| Kabuli_wild_58711495 | NA                                  | Ca_kabuli_denovo | 58711495                | C/T  | NA                 | NA                            | NA                 |
| Kabuli_wild_58713458 | NA                                  | Ca_kabuli_denovo | 58713458                | A/G  | NA                 | NA                            | NA                 |
| Kabuli_wild_58717814 | NA                                  | Ca_kabuli_denovo | 58717814                | A/C  | NA                 | NA                            | NA                 |
| Kabuli_wild_58717816 | NA                                  | Ca_kabuli_denovo | 58717816                | G/T  | NA                 | NA                            | NA                 |
| Kabuli_wild_58717825 | NA                                  | Ca_kabuli_denovo | 58717825                | C/T  | NA                 | NA                            | NA                 |
| Kabuli_wild_58718686 | NA                                  | Ca_kabuli_denovo | 58718686                | C/T  | NA                 | NA                            | NA                 |
| Kabuli_wild_58719433 | NA                                  | Ca_kabuli_denovo | 58719433                | C/G  | NA                 | NA                            | NA                 |
| Kabuli_wild_58719788 | NA                                  | Ca_kabuli_denovo | 58719788                | C/G  | NA                 | NA                            | NA                 |
| Kabuli_wild_58719803 | NA                                  | Ca_kabuli_denovo | 58719803                | C/T  | NA                 | NA                            | NA                 |
| Kabuli_wild_58719821 | NA                                  | Ca_kabuli_denovo | 58719821                | A/G  | NA                 | NA                            | NA                 |
| Kabuli_wild_58719851 | NA                                  | Ca_kabuli_denovo | 58719851                | A/G  | NA                 | NA                            | NA                 |
| Kabuli_wild_58720192 | NA                                  | Ca_kabuli_denovo | 58720192                | C/T  | NA                 | NA                            | NA                 |
| Kabuli_wild_58720204 | NA                                  | Ca_kabuli_denovo | 58720204                | G/T  | NA                 | NA                            | NA                 |
| Kabuli_wild_58720216 | NA                                  | Ca_kabuli_denovo | 58720216                | C/T  | NA                 | NA                            | NA                 |
| Kabuli_wild_58722304 | NA                                  | Ca_kabuli_denovo | 58722304                | C/T  | NA                 | NA                            | NA                 |
| Kabuli_wild_58722314 | NA                                  | Ca_kabuli_denovo | 58722314                | C/G  | NA                 | NA                            | NA                 |
| Kabuli_wild_58724881 | NA                                  | Ca_kabuli_denovo | 58724881                | A/G  | NA                 | NA                            | NA                 |
| Kabuli_wild_58724889 | NA                                  | Ca_kabuli_denovo | 58724889                | C/G  | NA                 | NA                            | NA                 |
| Kabuli_wild_58724890 | NA                                  | Ca_kabuli_denovo | 58724890                | C/G  | NA                 | NA                            | NA                 |
| Kabuli_wild_58724909 | NA                                  | Ca_kabuli_denovo | 58724909                | C/G  | NA                 | NA                            | NA                 |

| SNP IDs              | NCBI dbSNP accession IDs (NCBI_SS#) | Chromosomes      | Physical positions (bp) | SNPs | Gene accession IDs | Sequence components of genome | Putative functions |
|----------------------|-------------------------------------|------------------|-------------------------|------|--------------------|-------------------------------|--------------------|
| Kabuli_wild_58726595 | NA                                  | Ca_kabuli_denovo | 58726595                | C/T  | NA                 | NA                            | NA                 |
| Kabuli_wild_58727857 | NA                                  | Ca_kabuli_denovo | 58727857                | A/G  | NA                 | NA                            | NA                 |
| Kabuli_wild_58727861 | NA                                  | Ca_kabuli_denovo | 58727861                | A/G  | NA                 | NA                            | NA                 |
| Kabuli_wild_58727866 | NA                                  | Ca_kabuli_denovo | 58727866                | C/T  | NA                 | NA                            | NA                 |
| Kabuli_wild_58728695 | NA                                  | Ca_kabuli_denovo | 58728695                | C/G  | NA                 | NA                            | NA                 |
| Kabuli_wild_58729159 | NA                                  | Ca_kabuli_denovo | 58729159                | C/G  | NA                 | NA                            | NA                 |
| Kabuli_wild_58729163 | NA                                  | Ca_kabuli_denovo | 58729163                | A/G  | NA                 | NA                            | NA                 |
| Kabuli_wild_58729165 | NA                                  | Ca_kabuli_denovo | 58729165                | C/G  | NA                 | NA                            | NA                 |
| Kabuli_wild_58729181 | NA                                  | Ca_kabuli_denovo | 58729181                | A/G  | NA                 | NA                            | NA                 |
| Kabuli_wild_58729448 | NA                                  | Ca_kabuli_denovo | 58729448                | A/G  | NA                 | NA                            | NA                 |
| Kabuli_wild_58729720 | NA                                  | Ca_kabuli_denovo | 58729720                | C/T  | NA                 | NA                            | NA                 |
| Kabuli_wild_58730356 | NA                                  | Ca_kabuli_denovo | 58730356                | C/T  | NA                 | NA                            | NA                 |
| Kabuli_wild_58731488 | NA                                  | Ca_kabuli_denovo | 58731488                | C/T  | NA                 | NA                            | NA                 |
| Kabuli_wild_58735160 | NA                                  | Ca_kabuli_denovo | 58735160                | A/G  | NA                 | NA                            | NA                 |
| Kabuli_wild_58736521 | NA                                  | Ca_kabuli_denovo | 58736521                | A/G  | NA                 | NA                            | NA                 |
| Kabuli_wild_58736833 | NA                                  | Ca_kabuli_denovo | 58736833                | C/T  | NA                 | NA                            | NA                 |
| Kabuli_wild_58738558 | NA                                  | Ca_kabuli_denovo | 58738558                | C/T  | NA                 | NA                            | NA                 |
| Kabuli_wild_58740525 | NA                                  | Ca_kabuli_denovo | 58740525                | A/T  | NA                 | NA                            | NA                 |
| Kabuli_wild_58740549 | NA                                  | Ca_kabuli_denovo | 58740549                | C/T  | NA                 | NA                            | NA                 |
| Kabuli_wild_58741553 | NA                                  | Ca_kabuli_denovo | 58741553                | C/T  | NA                 | NA                            | NA                 |
| Kabuli_wild_58741572 | NA                                  | Ca_kabuli_denovo | 58741572                | A/G  | NA                 | NA                            | NA                 |
| Kabuli_wild_58741574 | NA                                  | Ca_kabuli_denovo | 58741574                | C/T  | NA                 | NA                            | NA                 |
| Kabuli_wild_58746296 | NA                                  | Ca_kabuli_denovo | 58746296                | C/T  | NA                 | NA                            | NA                 |
| Kabuli_wild_58746306 | NA                                  | Ca_kabuli_denovo | 58746306                | C/T  | NA                 | NA                            | NA                 |
| Kabuli_wild_58748429 | NA                                  | Ca_kabuli_denovo | 58748429                | C/G  | NA                 | NA                            | NA                 |
| Kabuli_wild_58748465 | NA                                  | Ca_kabuli_denovo | 58748465                | C/T  | NA                 | NA                            | NA                 |
| Kabuli_wild_58749714 | NA                                  | Ca_kabuli_denovo | 58749714                | A/G  | NA                 | NA                            | NA                 |
| Kabuli_wild_58750843 | NA                                  | Ca_kabuli_denovo | 58750843                | A/G  | NA                 | NA                            | NA                 |
| Kabuli_wild_58750861 | NA                                  | Ca_kabuli_denovo | 58750861                | C/T  | NA                 | NA                            | NA                 |
| Kabuli_wild_58752724 | NA                                  | Ca_kabuli_denovo | 58752724                | A/G  | NA                 | NA                            | NA                 |
| Kabuli_wild_58752734 | NA                                  | Ca_kabuli_denovo | 58752734                | A/G  | NA                 | NA                            | NA                 |
| Kabuli_wild_58752797 | NA                                  | Ca_kabuli_denovo | 58752797                | C/G  | NA                 | NA                            | NA                 |
| Kabuli_wild_58752808 | NA                                  | Ca_kabuli_denovo | 58752808                | C/T  | NA                 | NA                            | NA                 |
| Kabuli_wild_58752836 | NA                                  | Ca_kabuli_denovo | 58752836                | A/G  | NA                 | NA                            | NA                 |
| Kabuli_wild_58752845 | NA                                  | Ca_kabuli_denovo | 58752845                | G/T  | NA                 | NA                            | NA                 |
| Kabuli_wild_58753063 | NA                                  | Ca_kabuli_denovo | 58753063                | C/G  | NA                 | NA                            | NA                 |
| Kabuli_wild_58753105 | NA                                  | Ca_kabuli_denovo | 58753105                | C/T  | NA                 | NA                            | NA                 |
| Kabuli_wild_58753111 | NA                                  | Ca_kabuli_denovo | 58753111                | C/T  | NA                 | NA                            | NA                 |
| Kabuli_wild_58758326 | NA                                  | Ca_kabuli_denovo | 58758326                | C/T  | NA                 | NA                            | NA                 |
| Kabuli_wild_58760785 | NA                                  | Ca_kabuli_denovo | 58760785                | A/G  | NA                 | NA                            | NA                 |
| Kabuli_wild_58760788 | NA                                  | Ca_kabuli_denovo | 58760788                | C/G  | NA                 | NA                            | NA                 |
| Kabuli_wild_58761187 | NA                                  | Ca_kabuli_denovo | 58761187                | C/T  | NA                 | NA                            | NA                 |
| Kabuli_wild_58762477 | NA                                  | Ca_kabuli_denovo | 58762477                | C/T  | NA                 | NA                            | NA                 |
| Kabuli_wild_58763225 | NA                                  | Ca_kabuli_denovo | 58763225                | A/G  | NA                 | NA                            | NA                 |

| SNP IDs              | NCBI dbSNP accession IDs (NCBI_SS#) | Chromosomes      | Physical positions (bp) | SNPs | Gene accession IDs | Sequence components of genome | Putative functions |
|----------------------|-------------------------------------|------------------|-------------------------|------|--------------------|-------------------------------|--------------------|
| Kabuli_wild_58763255 | NA                                  | Ca_kabuli_denovo | 58763255                | A/G  | NA                 | NA                            | NA                 |
| Kabuli_wild_58763267 | NA                                  | Ca_kabuli_denovo | 58763267                | C/G  | NA                 | NA                            | NA                 |
| Kabuli_wild_58765187 | NA                                  | Ca_kabuli_denovo | 58765187                | A/G  | NA                 | NA                            | NA                 |
| Kabuli_wild_58765540 | NA                                  | Ca_kabuli_denovo | 58765540                | C/T  | NA                 | NA                            | NA                 |
| Kabuli_wild_58765546 | NA                                  | Ca_kabuli_denovo | 58765546                | C/G  | NA                 | NA                            | NA                 |
| Kabuli_wild_58771383 | NA                                  | Ca_kabuli_denovo | 58771383                | A/G  | NA                 | NA                            | NA                 |
| Kabuli_wild_58771763 | NA                                  | Ca_kabuli_denovo | 58771763                | A/G  | NA                 | NA                            | NA                 |
| Kabuli_wild_58771802 | NA                                  | Ca_kabuli_denovo | 58771802                | A/G  | NA                 | NA                            | NA                 |
| Kabuli_wild_58772035 | NA                                  | Ca_kabuli_denovo | 58772035                | G/T  | NA                 | NA                            | NA                 |
| Kabuli_wild_58772786 | NA                                  | Ca_kabuli_denovo | 58772786                | A/G  | NA                 | NA                            | NA                 |
| Kabuli_wild_58775025 | NA                                  | Ca_kabuli_denovo | 58775025                | G/T  | NA                 | NA                            | NA                 |
| Kabuli_wild_58775853 | NA                                  | Ca_kabuli_denovo | 58775853                | C/G  | NA                 | NA                            | NA                 |
| Kabuli_wild_58775876 | NA                                  | Ca_kabuli_denovo | 58775876                | C/G  | NA                 | NA                            | NA                 |
| Kabuli_wild_58775879 | NA                                  | Ca_kabuli_denovo | 58775879                | A/G  | NA                 | NA                            | NA                 |
| Kabuli_wild_58778736 | NA                                  | Ca_kabuli_denovo | 58778736                | C/T  | NA                 | NA                            | NA                 |
| Kabuli_wild_58781149 | NA                                  | Ca_kabuli_denovo | 58781149                | C/T  | NA                 | NA                            | NA                 |
| Kabuli_wild_58781345 | NA                                  | Ca_kabuli_denovo | 58781345                | C/T  | NA                 | NA                            | NA                 |
| Kabuli_wild_58791189 | NA                                  | Ca_kabuli_denovo | 58791189                | A/G  | NA                 | NA                            | NA                 |
| Kabuli_wild_58794373 | NA                                  | Ca_kabuli_denovo | 58794373                | C/T  | NA                 | NA                            | NA                 |
| Kabuli_wild_58794421 | NA                                  | Ca_kabuli_denovo | 58794421                | C/T  | NA                 | NA                            | NA                 |
| Kabuli_wild_58797183 | NA                                  | Ca_kabuli_denovo | 58797183                | A/G  | NA                 | NA                            | NA                 |
| Kabuli_wild_58797195 | NA                                  | Ca_kabuli_denovo | 58797195                | G/T  | NA                 | NA                            | NA                 |
| Kabuli_wild_58798940 | NA                                  | Ca_kabuli_denovo | 58798940                | C/T  | NA                 | NA                            | NA                 |
| Kabuli_wild_58798943 | NA                                  | Ca_kabuli_denovo | 58798943                | C/G  | NA                 | NA                            | NA                 |
| Kabuli_wild_58798945 | NA                                  | Ca_kabuli_denovo | 58798945                | C/T  | NA                 | NA                            | NA                 |
| Kabuli_wild_58798951 | NA                                  | Ca_kabuli_denovo | 58798951                | A/C  | NA                 | NA                            | NA                 |
| Kabuli_wild_58800239 | NA                                  | Ca_kabuli_denovo | 58800239                | A/G  | NA                 | NA                            | NA                 |
| Kabuli_wild_58800242 | NA                                  | Ca_kabuli_denovo | 58800242                | C/G  | NA                 | NA                            | NA                 |
| Kabuli_wild_58800245 | NA                                  | Ca_kabuli_denovo | 58800245                | A/G  | NA                 | NA                            | NA                 |
| Kabuli_wild_58800255 | NA                                  | Ca_kabuli_denovo | 58800255                | A/T  | NA                 | NA                            | NA                 |
| Kabuli_wild_58802444 | NA                                  | Ca_kabuli_denovo | 58802444                | A/C  | NA                 | NA                            | NA                 |
| Kabuli_wild_58802625 | NA                                  | Ca_kabuli_denovo | 58802625                | A/T  | NA                 | NA                            | NA                 |
| Kabuli_wild_58803305 | NA                                  | Ca_kabuli_denovo | 58803305                | C/T  | NA                 | NA                            | NA                 |
| Kabuli_wild_58803306 | NA                                  | Ca_kabuli_denovo | 58803306                | A/G  | NA                 | NA                            | NA                 |
| Kabuli_wild_58803308 | NA                                  | Ca_kabuli_denovo | 58803308                | C/G  | NA                 | NA                            | NA                 |
| Kabuli_wild_58804409 | NA                                  | Ca_kabuli_denovo | 58804409                | A/G  | NA                 | NA                            | NA                 |
| Kabuli_wild_58804412 | NA                                  | Ca_kabuli_denovo | 58804412                | C/G  | NA                 | NA                            | NA                 |
| Kabuli_wild_58806837 | NA                                  | Ca_kabuli_denovo | 58806837                | A/G  | NA                 | NA                            | NA                 |
| Kabuli_wild_58806847 | NA                                  | Ca_kabuli_denovo | 58806847                | C/G  | NA                 | NA                            | NA                 |
| Kabuli_wild_58808394 | NA                                  | Ca_kabuli_denovo | 58808394                | A/C  | NA                 | NA                            | NA                 |
| Kabuli_wild_58808436 | NA                                  | Ca_kabuli_denovo | 58808436                | C/G  | NA                 | NA                            | NA                 |
| Kabuli_wild_58808445 | NA                                  | Ca_kabuli_denovo | 58808445                | A/G  | NA                 | NA                            | NA                 |
| Kabuli_wild_58808612 | NA                                  | Ca_kabuli_denovo | 58808612                | C/T  | NA                 | NA                            | NA                 |
| Kabuli_wild_58808614 | NA                                  | Ca_kabuli_denovo | 58808614                | A/T  | NA                 | NA                            | NA                 |

| SNP IDs              | NCBI dbSNP accession IDs (NCBI_SS#) | Chromosomes      | Physical positions (bp) | SNPs | Gene accession IDs | Sequence components of genome | Putative functions |
|----------------------|-------------------------------------|------------------|-------------------------|------|--------------------|-------------------------------|--------------------|
| Kabuli_wild_58812292 | NA                                  | Ca_kabuli_denovo | 58812292                | C/T  | NA                 | NA                            | NA                 |
| Kabuli_wild_58812440 | NA                                  | Ca_kabuli_denovo | 58812440                | A/C  | NA                 | NA                            | NA                 |
| Kabuli_wild_58813621 | NA                                  | Ca_kabuli_denovo | 58813621                | C/T  | NA                 | NA                            | NA                 |
| Kabuli_wild_58813633 | NA                                  | Ca_kabuli_denovo | 58813633                | C/G  | NA                 | NA                            | NA                 |
| Kabuli_wild_58815044 | NA                                  | Ca_kabuli_denovo | 58815044                | C/T  | NA                 | NA                            | NA                 |
| Kabuli_wild_58820476 | NA                                  | Ca_kabuli_denovo | 58820476                | C/G  | NA                 | NA                            | NA                 |
| Kabuli_wild_58821270 | NA                                  | Ca_kabuli_denovo | 58821270                | C/T  | NA                 | NA                            | NA                 |
| Kabuli_wild_58822067 | NA                                  | Ca_kabuli_denovo | 58822067                | C/T  | NA                 | NA                            | NA                 |
| Kabuli_wild_58822118 | NA                                  | Ca_kabuli_denovo | 58822118                | A/G  | NA                 | NA                            | NA                 |
| Kabuli_wild_58824130 | NA                                  | Ca_kabuli_denovo | 58824130                | C/G  | NA                 | NA                            | NA                 |
| Kabuli_wild_58824157 | NA                                  | Ca_kabuli_denovo | 58824157                | C/T  | NA                 | NA                            | NA                 |
| Kabuli_wild_58824178 | NA                                  | Ca_kabuli_denovo | 58824178                | C/T  | NA                 | NA                            | NA                 |
| Kabuli_wild_58825909 | NA                                  | Ca_kabuli_denovo | 58825909                | C/G  | NA                 | NA                            | NA                 |
| Kabuli_wild_58828210 | NA                                  | Ca_kabuli_denovo | 58828210                | A/G  | NA                 | NA                            | NA                 |
| Kabuli_wild_58828233 | NA                                  | Ca_kabuli_denovo | 58828233                | A/C  | NA                 | NA                            | NA                 |
| Kabuli_wild_58828237 | NA                                  | Ca_kabuli_denovo | 58828237                | C/G  | NA                 | NA                            | NA                 |
| Kabuli_wild_58828240 | NA                                  | Ca_kabuli_denovo | 58828240                | G/T  | NA                 | NA                            | NA                 |
| Kabuli_wild_58829042 | NA                                  | Ca_kabuli_denovo | 58829042                | A/C  | NA                 | NA                            | NA                 |
| Kabuli_wild_58830641 | NA                                  | Ca_kabuli_denovo | 58830641                | C/T  | NA                 | NA                            | NA                 |
| Kabuli_wild_58839945 | NA                                  | Ca_kabuli_denovo | 58839945                | A/C  | NA                 | NA                            | NA                 |
| Kabuli_wild_58843049 | NA                                  | Ca_kabuli_denovo | 58843049                | A/G  | NA                 | NA                            | NA                 |
| Kabuli_wild_58845139 | NA                                  | Ca_kabuli_denovo | 58845139                | C/T  | NA                 | NA                            | NA                 |
| Kabuli_wild_58848944 | NA                                  | Ca_kabuli_denovo | 58848944                | G/T  | NA                 | NA                            | NA                 |
| Kabuli_wild_58848947 | NA                                  | Ca_kabuli_denovo | 58848947                | C/G  | NA                 | NA                            | NA                 |
| Kabuli_wild_58851061 | NA                                  | Ca_kabuli_denovo | 58851061                | C/T  | NA                 | NA                            | NA                 |
| Kabuli_wild_58851458 | NA                                  | Ca_kabuli_denovo | 58851458                | C/G  | NA                 | NA                            | NA                 |
| Kabuli_wild_58851460 | NA                                  | Ca_kabuli_denovo | 58851460                | C/G  | NA                 | NA                            | NA                 |
| Kabuli_wild_58851475 | NA                                  | Ca_kabuli_denovo | 58851475                | C/G  | NA                 | NA                            | NA                 |
| Kabuli_wild_58854999 | NA                                  | Ca_kabuli_denovo | 58854999                | C/T  | NA                 | NA                            | NA                 |
| Kabuli_wild_58855065 | NA                                  | Ca_kabuli_denovo | 58855065                | C/G  | NA                 | NA                            | NA                 |
| Kabuli_wild_58856699 | NA                                  | Ca_kabuli_denovo | 58856699                | G/T  | NA                 | NA                            | NA                 |
| Kabuli_wild_58856702 | NA                                  | Ca_kabuli_denovo | 58856702                | C/T  | NA                 | NA                            | NA                 |
| Kabuli_wild_58858000 | NA                                  | Ca_kabuli_denovo | 58858000                | A/G  | NA                 | NA                            | NA                 |
| Kabuli_wild_58861967 | NA                                  | Ca_kabuli_denovo | 58861967                | C/T  | NA                 | NA                            | NA                 |
| Kabuli_wild_58861982 | NA                                  | Ca_kabuli_denovo | 58861982                | C/T  | NA                 | NA                            | NA                 |
| Kabuli_wild_58862009 | NA                                  | Ca_kabuli_denovo | 58862009                | C/T  | NA                 | NA                            | NA                 |
| Kabuli_wild_58862048 | NA                                  | Ca_kabuli_denovo | 58862048                | A/C  | NA                 | NA                            | NA                 |
| Kabuli_wild_58862168 | NA                                  | Ca_kabuli_denovo | 58862168                | C/G  | NA                 | NA                            | NA                 |
| Kabuli_wild_58862171 | NA                                  | Ca_kabuli_denovo | 58862171                | A/G  | NA                 | NA                            | NA                 |
| Kabuli_wild_58862207 | NA                                  | Ca_kabuli_denovo | 58862207                | A/C  | NA                 | NA                            | NA                 |
| Kabuli_wild_58864289 | NA                                  | Ca_kabuli_denovo | 58864289                | C/G  | NA                 | NA                            | NA                 |
| Kabuli_wild_58864293 | NA                                  | Ca_kabuli_denovo | 58864293                | A/C  | NA                 | NA                            | NA                 |
| Kabuli_wild_58864358 | NA                                  | Ca_kabuli_denovo | 58864358                | C/T  | NA                 | NA                            | NA                 |
| Kabuli_wild_58865057 | NA                                  | Ca_kabuli_denovo | 58865057                | A/G  | NA                 | NA                            | NA                 |



| SNP IDs              | NCBI dbSNP accession IDs (NCBI_SS#) | Chromosomes      | Physical positions (bp) | SNPs | Gene accession IDs | Sequence components of genome | Putative functions |
|----------------------|-------------------------------------|------------------|-------------------------|------|--------------------|-------------------------------|--------------------|
| Kabuli_wild_58867134 | NA                                  | Ca_kabuli_denovo | 58867134                | C/G  | NA                 | NA                            | NA                 |
| Kabuli_wild_58869227 | NA                                  | Ca_kabuli_denovo | 58869227                | C/G  | NA                 | NA                            | NA                 |
| Kabuli_wild_58869230 | NA                                  | Ca_kabuli_denovo | 58869230                | A/G  | NA                 | NA                            | NA                 |
| Kabuli_wild_58869233 | NA                                  | Ca_kabuli_denovo | 58869233                | A/G  | NA                 | NA                            | NA                 |
| Kabuli_wild_58869257 | NA                                  | Ca_kabuli_denovo | 58869257                | A/G  | NA                 | NA                            | NA                 |
| Kabuli_wild_58872193 | NA                                  | Ca_kabuli_denovo | 58872193                | C/T  | NA                 | NA                            | NA                 |
| Kabuli_wild_58872217 | NA                                  | Ca_kabuli_denovo | 58872217                | A/G  | NA                 | NA                            | NA                 |
| Kabuli_wild_58872230 | NA                                  | Ca_kabuli_denovo | 58872230                | A/G  | NA                 | NA                            | NA                 |
| Kabuli_wild_58876318 | NA                                  | Ca_kabuli_denovo | 58876318                | C/T  | NA                 | NA                            | NA                 |
| Kabuli_wild_58878622 | NA                                  | Ca_kabuli_denovo | 58878622                | A/C  | NA                 | NA                            | NA                 |
| Kabuli_wild_58881245 | NA                                  | Ca_kabuli_denovo | 58881245                | A/G  | NA                 | NA                            | NA                 |
| Kabuli_wild_58881248 | NA                                  | Ca_kabuli_denovo | 58881248                | A/G  | NA                 | NA                            | NA                 |
| Kabuli_wild_58881293 | NA                                  | Ca_kabuli_denovo | 58881293                | A/G  | NA                 | NA                            | NA                 |
| Kabuli_wild_58881745 | NA                                  | Ca_kabuli_denovo | 58881745                | C/T  | NA                 | NA                            | NA                 |
| Kabuli_wild_58881766 | NA                                  | Ca_kabuli_denovo | 58881766                | A/G  | NA                 | NA                            | NA                 |
| Kabuli_wild_58883856 | NA                                  | Ca_kabuli_denovo | 58883856                | C/T  | NA                 | NA                            | NA                 |
| Kabuli_wild_58884761 | NA                                  | Ca_kabuli_denovo | 58884761                | C/T  | NA                 | NA                            | NA                 |
| Kabuli_wild_58884770 | NA                                  | Ca_kabuli_denovo | 58884770                | A/G  | NA                 | NA                            | NA                 |
| Kabuli_wild_58884776 | NA                                  | Ca_kabuli_denovo | 58884776                | C/G  | NA                 | NA                            | NA                 |
| Kabuli_wild_58889038 | NA                                  | Ca_kabuli_denovo | 58889038                | C/T  | NA                 | NA                            | NA                 |
| Kabuli_wild_58889051 | NA                                  | Ca_kabuli_denovo | 58889051                | C/G  | NA                 | NA                            | NA                 |
| Kabuli_wild_58889058 | NA                                  | Ca_kabuli_denovo | 58889058                | C/T  | NA                 | NA                            | NA                 |
| Kabuli_wild_58894894 | NA                                  | Ca_kabuli_denovo | 58894894                | C/G  | NA                 | NA                            | NA                 |
| Kabuli_wild_58901337 | NA                                  | Ca_kabuli_denovo | 58901337                | A/G  | NA                 | NA                            | NA                 |
| Kabuli_wild_58901956 | NA                                  | Ca_kabuli_denovo | 58901956                | C/G  | NA                 | NA                            | NA                 |
| Kabuli_wild_58904108 | NA                                  | Ca_kabuli_denovo | 58904108                | A/G  | NA                 | NA                            | NA                 |
| Kabuli_wild_58904132 | NA                                  | Ca_kabuli_denovo | 58904132                | G/T  | NA                 | NA                            | NA                 |
| Kabuli_wild_58904566 | NA                                  | Ca_kabuli_denovo | 58904566                | G/T  | NA                 | NA                            | NA                 |
| Kabuli_wild_58904598 | NA                                  | Ca_kabuli_denovo | 58904598                | A/G  | NA                 | NA                            | NA                 |
| Kabuli_wild_58904599 | NA                                  | Ca_kabuli_denovo | 58904599                | A/T  | NA                 | NA                            | NA                 |
| Kabuli_wild_58904666 | NA                                  | Ca_kabuli_denovo | 58904666                | A/C  | NA                 | NA                            | NA                 |
| Kabuli_wild_58906384 | NA                                  | Ca_kabuli_denovo | 58906384                | A/G  | NA                 | NA                            | NA                 |
| Kabuli_wild_58911691 | NA                                  | Ca_kabuli_denovo | 58911691                | C/T  | NA                 | NA                            | NA                 |
| Kabuli_wild_58911694 | NA                                  | Ca_kabuli_denovo | 58911694                | C/G  | NA                 | NA                            | NA                 |
| Kabuli_wild_58911697 | NA                                  | Ca_kabuli_denovo | 58911697                | A/G  | NA                 | NA                            | NA                 |
| Kabuli_wild_58914982 | NA                                  | Ca_kabuli_denovo | 58914982                | C/G  | NA                 | NA                            | NA                 |
| Kabuli_wild_58914988 | NA                                  | Ca_kabuli_denovo | 58914988                | C/G  | NA                 | NA                            | NA                 |
| Kabuli_wild_58914994 | NA                                  | Ca_kabuli_denovo | 58914994                | A/G  | NA                 | NA                            | NA                 |
| Kabuli_wild_58915003 | NA                                  | Ca_kabuli_denovo | 58915003                | A/C  | NA                 | NA                            | NA                 |
| Kabuli_wild_58915456 | NA                                  | Ca_kabuli_denovo | 58915456                | G/T  | NA                 | NA                            | NA                 |
| Kabuli_wild_58920361 | NA                                  | Ca_kabuli_denovo | 58920361                | A/C  | NA                 | NA                            | NA                 |
| Kabuli_wild_58921287 | NA                                  | Ca_kabuli_denovo | 58921287                | A/G  | NA                 | NA                            | NA                 |
| Kabuli_wild_58921288 | NA                                  | Ca_kabuli_denovo | 58921288                | A/T  | NA                 | NA                            | NA                 |
| Kabuli_wild_58922911 | NA                                  | Ca_kabuli_denovo | 58922911                | C/T  | NA                 | NA                            | NA                 |

| SNP IDs              | NCBI dbSNP accession IDs (NCBI_SS#) | Chromosomes      | Physical positions (bp) | SNPs | Gene accession IDs | Sequence components of genome | Putative functions |
|----------------------|-------------------------------------|------------------|-------------------------|------|--------------------|-------------------------------|--------------------|
| Kabuli_wild_58923626 | NA                                  | Ca_kabuli_denovo | 58923626                | A/C  | NA                 | NA                            | NA                 |
| Kabuli_wild_58923671 | NA                                  | Ca_kabuli_denovo | 58923671                | C/G  | NA                 | NA                            | NA                 |
| Kabuli_wild_58934153 | NA                                  | Ca_kabuli_denovo | 58934153                | G/T  | NA                 | NA                            | NA                 |
| Kabuli_wild_58934210 | NA                                  | Ca_kabuli_denovo | 58934210                | C/G  | NA                 | NA                            | NA                 |
| Kabuli_wild_58936475 | NA                                  | Ca_kabuli_denovo | 58936475                | C/T  | NA                 | NA                            | NA                 |
| Kabuli_wild_58936520 | NA                                  | Ca_kabuli_denovo | 58936520                | C/G  | NA                 | NA                            | NA                 |
| Kabuli_wild_58937443 | NA                                  | Ca_kabuli_denovo | 58937443                | C/T  | NA                 | NA                            | NA                 |
| Kabuli_wild_58938595 | NA                                  | Ca_kabuli_denovo | 58938595                | A/G  | NA                 | NA                            | NA                 |
| Kabuli_wild_58938622 | NA                                  | Ca_kabuli_denovo | 58938622                | C/G  | NA                 | NA                            | NA                 |
| Kabuli_wild_58940390 | NA                                  | Ca_kabuli_denovo | 58940390                | C/G  | NA                 | NA                            | NA                 |
| Kabuli_wild_58940497 | NA                                  | Ca_kabuli_denovo | 58940497                | A/G  | NA                 | NA                            | NA                 |
| Kabuli_wild_58940898 | NA                                  | Ca_kabuli_denovo | 58940898                | A/G  | NA                 | NA                            | NA                 |
| Kabuli_wild_58941208 | NA                                  | Ca_kabuli_denovo | 58941208                | G/T  | NA                 | NA                            | NA                 |
| Kabuli_wild_58941223 | NA                                  | Ca_kabuli_denovo | 58941223                | C/G  | NA                 | NA                            | NA                 |
| Kabuli_wild_58945037 | NA                                  | Ca_kabuli_denovo | 58945037                | C/T  | NA                 | NA                            | NA                 |
| Kabuli_wild_58945056 | NA                                  | Ca_kabuli_denovo | 58945056                | A/G  | NA                 | NA                            | NA                 |
| Kabuli_wild_58945065 | NA                                  | Ca_kabuli_denovo | 58945065                | A/G  | NA                 | NA                            | NA                 |
| Kabuli_wild_58946072 | NA                                  | Ca_kabuli_denovo | 58946072                | C/T  | NA                 | NA                            | NA                 |
| Kabuli_wild_58947713 | NA                                  | Ca_kabuli_denovo | 58947713                | C/T  | NA                 | NA                            | NA                 |
| Kabuli_wild_58948087 | NA                                  | Ca_kabuli_denovo | 58948087                | C/G  | NA                 | NA                            | NA                 |
| Kabuli_wild_58948114 | NA                                  | Ca_kabuli_denovo | 58948114                | C/T  | NA                 | NA                            | NA                 |
| Kabuli_wild_58950883 | NA                                  | Ca_kabuli_denovo | 58950883                | C/T  | NA                 | NA                            | NA                 |
| Kabuli_wild_58950920 | NA                                  | Ca_kabuli_denovo | 58950920                | A/C  | NA                 | NA                            | NA                 |
| Kabuli_wild_58950922 | NA                                  | Ca_kabuli_denovo | 58950922                | G/T  | NA                 | NA                            | NA                 |
| Kabuli_wild_58951900 | NA                                  | Ca_kabuli_denovo | 58951900                | C/T  | NA                 | NA                            | NA                 |
| Kabuli_wild_58951975 | NA                                  | Ca_kabuli_denovo | 58951975                | C/T  | NA                 | NA                            | NA                 |
| Kabuli_wild_58952732 | NA                                  | Ca_kabuli_denovo | 58952732                | A/G  | NA                 | NA                            | NA                 |
| Kabuli_wild_58957153 | NA                                  | Ca_kabuli_denovo | 58957153                | C/G  | NA                 | NA                            | NA                 |
| Kabuli_wild_58962410 | NA                                  | Ca_kabuli_denovo | 58962410                | C/T  | NA                 | NA                            | NA                 |
| Kabuli_wild_58966241 | NA                                  | Ca_kabuli_denovo | 58966241                | A/C  | NA                 | NA                            | NA                 |
| Kabuli_wild_58967828 | NA                                  | Ca_kabuli_denovo | 58967828                | C/G  | NA                 | NA                            | NA                 |
| Kabuli_wild_58973326 | NA                                  | Ca_kabuli_denovo | 58973326                | C/G  | NA                 | NA                            | NA                 |
| Kabuli_wild_58977298 | NA                                  | Ca_kabuli_denovo | 58977298                | A/G  | NA                 | NA                            | NA                 |
| Kabuli_wild_58977300 | NA                                  | Ca_kabuli_denovo | 58977300                | C/T  | NA                 | NA                            | NA                 |
| Kabuli_wild_58982588 | NA                                  | Ca_kabuli_denovo | 58982588                | C/G  | NA                 | NA                            | NA                 |
| Kabuli_wild_58982594 | NA                                  | Ca_kabuli_denovo | 58982594                | A/G  | NA                 | NA                            | NA                 |
| Kabuli_wild_58982600 | NA                                  | Ca_kabuli_denovo | 58982600                | C/G  | NA                 | NA                            | NA                 |
| Kabuli_wild_58982603 | NA                                  | Ca_kabuli_denovo | 58982603                | C/G  | NA                 | NA                            | NA                 |
| Kabuli_wild_58983623 | NA                                  | Ca_kabuli_denovo | 58983623                | A/G  | NA                 | NA                            | NA                 |
| Kabuli_wild_58986809 | NA                                  | Ca_kabuli_denovo | 58986809                | C/T  | NA                 | NA                            | NA                 |
| Kabuli_wild_58997438 | NA                                  | Ca_kabuli_denovo | 58997438                | A/G  | NA                 | NA                            | NA                 |
| Kabuli_wild_58998253 | NA                                  | Ca_kabuli_denovo | 58998253                | C/G  | NA                 | NA                            | NA                 |
| Kabuli_wild_58998260 | NA                                  | Ca_kabuli_denovo | 58998260                | A/G  | NA                 | NA                            | NA                 |
| Kabuli_wild_59001020 | NA                                  | Ca_kabuli_denovo | 59001020                | C/G  | NA                 | NA                            | NA                 |

| SNP IDs              | NCBI dbSNP accession IDs (NCBI_SS#) | Chromosomes      | Physical positions (bp) | SNPs | Gene accession IDs | Sequence components of genome | Putative functions |
|----------------------|-------------------------------------|------------------|-------------------------|------|--------------------|-------------------------------|--------------------|
| Kabuli_wild_59002220 | NA                                  | Ca_kabuli_denovo | 59002220                | C/G  | NA                 | NA                            | NA                 |
| Kabuli_wild_59002229 | NA                                  | Ca_kabuli_denovo | 59002229                | C/G  | NA                 | NA                            | NA                 |
| Kabuli_wild_59005005 | NA                                  | Ca_kabuli_denovo | 59005005                | A/T  | NA                 | NA                            | NA                 |
| Kabuli_wild_59005012 | NA                                  | Ca_kabuli_denovo | 59005012                | C/G  | NA                 | NA                            | NA                 |
| Kabuli_wild_59005466 | NA                                  | Ca_kabuli_denovo | 59005466                | A/G  | NA                 | NA                            | NA                 |
| Kabuli_wild_59005523 | NA                                  | Ca_kabuli_denovo | 59005523                | C/G  | NA                 | NA                            | NA                 |
| Kabuli_wild_59007740 | NA                                  | Ca_kabuli_denovo | 59007740                | C/T  | NA                 | NA                            | NA                 |
| Kabuli_wild_59007761 | NA                                  | Ca_kabuli_denovo | 59007761                | A/C  | NA                 | NA                            | NA                 |
| Kabuli_wild_59009584 | NA                                  | Ca_kabuli_denovo | 59009584                | G/T  | NA                 | NA                            | NA                 |
| Kabuli_wild_59010512 | NA                                  | Ca_kabuli_denovo | 59010512                | A/G  | NA                 | NA                            | NA                 |
| Kabuli_wild_59011816 | NA                                  | Ca_kabuli_denovo | 59011816                | C/T  | NA                 | NA                            | NA                 |
| Kabuli_wild_59011817 | NA                                  | Ca_kabuli_denovo | 59011817                | A/G  | NA                 | NA                            | NA                 |
| Kabuli_wild_59013938 | NA                                  | Ca_kabuli_denovo | 59013938                | A/G  | NA                 | NA                            | NA                 |
| Kabuli_wild_59013941 | NA                                  | Ca_kabuli_denovo | 59013941                | C/T  | NA                 | NA                            | NA                 |
| Kabuli_wild_59015887 | NA                                  | Ca_kabuli_denovo | 59015887                | C/T  | NA                 | NA                            | NA                 |
| Kabuli_wild_59015899 | NA                                  | Ca_kabuli_denovo | 59015899                | C/T  | NA                 | NA                            | NA                 |
| Kabuli_wild_59015907 | NA                                  | Ca_kabuli_denovo | 59015907                | A/T  | NA                 | NA                            | NA                 |
| Kabuli_wild_59016666 | NA                                  | Ca_kabuli_denovo | 59016666                | A/G  | NA                 | NA                            | NA                 |
| Kabuli_wild_59020313 | NA                                  | Ca_kabuli_denovo | 59020313                | C/T  | NA                 | NA                            | NA                 |
| Kabuli_wild_59021197 | NA                                  | Ca_kabuli_denovo | 59021197                | C/G  | NA                 | NA                            | NA                 |
| Kabuli_wild_59024162 | NA                                  | Ca_kabuli_denovo | 59024162                | G/T  | NA                 | NA                            | NA                 |
| Kabuli_wild_59024166 | NA                                  | Ca_kabuli_denovo | 59024166                | C/G  | NA                 | NA                            | NA                 |
| Kabuli_wild_59024168 | NA                                  | Ca_kabuli_denovo | 59024168                | A/C  | NA                 | NA                            | NA                 |
| Kabuli_wild_59025925 | NA                                  | Ca_kabuli_denovo | 59025925                | G/T  | NA                 | NA                            | NA                 |
| Kabuli_wild_59025944 | NA                                  | Ca_kabuli_denovo | 59025944                | A/G  | NA                 | NA                            | NA                 |
| Kabuli_wild_59025950 | NA                                  | Ca_kabuli_denovo | 59025950                | A/G  | NA                 | NA                            | NA                 |
| Kabuli_wild_59026205 | NA                                  | Ca_kabuli_denovo | 59026205                | C/T  | NA                 | NA                            | NA                 |
| Kabuli_wild_59026239 | NA                                  | Ca_kabuli_denovo | 59026239                | C/G  | NA                 | NA                            | NA                 |
| Kabuli_wild_59026265 | NA                                  | Ca_kabuli_denovo | 59026265                | C/T  | NA                 | NA                            | NA                 |
| Kabuli_wild_59032103 | NA                                  | Ca_kabuli_denovo | 59032103                | C/T  | NA                 | NA                            | NA                 |
| Kabuli_wild_59035223 | NA                                  | Ca_kabuli_denovo | 59035223                | A/G  | NA                 | NA                            | NA                 |
| Kabuli_wild_59038424 | NA                                  | Ca_kabuli_denovo | 59038424                | A/G  | NA                 | NA                            | NA                 |
| Kabuli_wild_59039053 | NA                                  | Ca_kabuli_denovo | 59039053                | C/T  | NA                 | NA                            | NA                 |
| Kabuli_wild_59039071 | NA                                  | Ca_kabuli_denovo | 59039071                | A/G  | NA                 | NA                            | NA                 |
| Kabuli_wild_59040087 | NA                                  | Ca_kabuli_denovo | 59040087                | G/T  | NA                 | NA                            | NA                 |
| Kabuli_wild_59040090 | NA                                  | Ca_kabuli_denovo | 59040090                | A/G  | NA                 | NA                            | NA                 |
| Kabuli_wild_59040811 | NA                                  | Ca_kabuli_denovo | 59040811                | C/G  | NA                 | NA                            | NA                 |
| Kabuli_wild_59040814 | NA                                  | Ca_kabuli_denovo | 59040814                | A/G  | NA                 | NA                            | NA                 |
| Kabuli_wild_59045048 | NA                                  | Ca_kabuli_denovo | 59045048                | A/G  | NA                 | NA                            | NA                 |
| Kabuli_wild_59045051 | NA                                  | Ca_kabuli_denovo | 59045051                | C/G  | NA                 | NA                            | NA                 |
| Kabuli_wild_59046202 | NA                                  | Ca_kabuli_denovo | 59046202                | C/T  | NA                 | NA                            | NA                 |
| Kabuli_wild_59046203 | NA                                  | Ca_kabuli_denovo | 59046203                | A/G  | NA                 | NA                            | NA                 |
| Kabuli_wild_59046479 | NA                                  | Ca_kabuli_denovo | 59046479                | A/G  | NA                 | NA                            | NA                 |
| Kabuli_wild_59047430 | NA                                  | Ca_kabuli_denovo | 59047430                | C/T  | NA                 | NA                            | NA                 |

| SNP IDs              | NCBI dbSNP accession IDs (NCBI_SS#) | Chromosomes      | Physical positions (bp) | SNPs | Gene accession IDs | Sequence components of genome | Putative functions |
|----------------------|-------------------------------------|------------------|-------------------------|------|--------------------|-------------------------------|--------------------|
| Kabuli_wild_59047460 | NA                                  | Ca_kabuli_denovo | 59047460                | C/T  | NA                 | NA                            | NA                 |
| Kabuli_wild_59047706 | NA                                  | Ca_kabuli_denovo | 59047706                | A/G  | NA                 | NA                            | NA                 |
| Kabuli_wild_59047971 | NA                                  | Ca_kabuli_denovo | 59047971                | A/G  | NA                 | NA                            | NA                 |
| Kabuli_wild_59047991 | NA                                  | Ca_kabuli_denovo | 59047991                | C/T  | NA                 | NA                            | NA                 |
| Kabuli_wild_59050115 | NA                                  | Ca_kabuli_denovo | 59050115                | A/G  | NA                 | NA                            | NA                 |
| Kabuli_wild_59055412 | NA                                  | Ca_kabuli_denovo | 59055412                | C/T  | NA                 | NA                            | NA                 |
| Kabuli_wild_59055442 | NA                                  | Ca_kabuli_denovo | 59055442                | C/T  | NA                 | NA                            | NA                 |
| Kabuli_wild_59055646 | NA                                  | Ca_kabuli_denovo | 59055646                | C/T  | NA                 | NA                            | NA                 |
| Kabuli_wild_59057735 | NA                                  | Ca_kabuli_denovo | 59057735                | C/T  | NA                 | NA                            | NA                 |
| Kabuli_wild_59057749 | NA                                  | Ca_kabuli_denovo | 59057749                | C/G  | NA                 | NA                            | NA                 |
| Kabuli_wild_59057944 | NA                                  | Ca_kabuli_denovo | 59057944                | A/G  | NA                 | NA                            | NA                 |
| Kabuli_wild_59057945 | NA                                  | Ca_kabuli_denovo | 59057945                | C/G  | NA                 | NA                            | NA                 |
| Kabuli_wild_59061949 | NA                                  | Ca_kabuli_denovo | 59061949                | A/G  | NA                 | NA                            | NA                 |
| Kabuli_wild_59062879 | NA                                  | Ca_kabuli_denovo | 59062879                | C/T  | NA                 | NA                            | NA                 |
| Kabuli_wild_59062891 | NA                                  | Ca_kabuli_denovo | 59062891                | A/G  | NA                 | NA                            | NA                 |
| Kabuli_wild_59066380 | NA                                  | Ca_kabuli_denovo | 59066380                | C/G  | NA                 | NA                            | NA                 |
| Kabuli_wild_59066395 | NA                                  | Ca_kabuli_denovo | 59066395                | C/T  | NA                 | NA                            | NA                 |
| Kabuli_wild_59066407 | NA                                  | Ca_kabuli_denovo | 59066407                | C/T  | NA                 | NA                            | NA                 |
| Kabuli_wild_59068991 | NA                                  | Ca_kabuli_denovo | 59068991                | C/G  | NA                 | NA                            | NA                 |
| Kabuli_wild_59069000 | NA                                  | Ca_kabuli_denovo | 59069000                | C/G  | NA                 | NA                            | NA                 |
| Kabuli_wild_59069030 | NA                                  | Ca_kabuli_denovo | 59069030                | C/T  | NA                 | NA                            | NA                 |
| Kabuli_wild_59069031 | NA                                  | Ca_kabuli_denovo | 59069031                | A/G  | NA                 | NA                            | NA                 |
| Kabuli_wild_59069354 | NA                                  | Ca_kabuli_denovo | 59069354                | C/G  | NA                 | NA                            | NA                 |
| Kabuli_wild_59075051 | NA                                  | Ca_kabuli_denovo | 59075051                | C/T  | NA                 | NA                            | NA                 |
| Kabuli_wild_59075107 | NA                                  | Ca_kabuli_denovo | 59075107                | C/T  | NA                 | NA                            | NA                 |
| Kabuli_wild_59083344 | NA                                  | Ca_kabuli_denovo | 59083344                | C/T  | NA                 | NA                            | NA                 |
| Kabuli_wild_59083373 | NA                                  | Ca_kabuli_denovo | 59083373                | A/C  | NA                 | NA                            | NA                 |
| Kabuli_wild_59083381 | NA                                  | Ca_kabuli_denovo | 59083381                | A/G  | NA                 | NA                            | NA                 |
| Kabuli_wild_59084986 | NA                                  | Ca_kabuli_denovo | 59084986                | C/T  | NA                 | NA                            | NA                 |
| Kabuli_wild_59085949 | NA                                  | Ca_kabuli_denovo | 59085949                | C/T  | NA                 | NA                            | NA                 |
| Kabuli_wild_59085968 | NA                                  | Ca_kabuli_denovo | 59085968                | C/G  | NA                 | NA                            | NA                 |
| Kabuli_wild_59085977 | NA                                  | Ca_kabuli_denovo | 59085977                | C/G  | NA                 | NA                            | NA                 |
| Kabuli_wild_59085983 | NA                                  | Ca_kabuli_denovo | 59085983                | C/G  | NA                 | NA                            | NA                 |
| Kabuli_wild_59086847 | NA                                  | Ca_kabuli_denovo | 59086847                | G/T  | NA                 | NA                            | NA                 |
| Kabuli_wild_59086849 | NA                                  | Ca_kabuli_denovo | 59086849                | C/G  | NA                 | NA                            | NA                 |
| Kabuli_wild_59089369 | NA                                  | Ca_kabuli_denovo | 59089369                | C/T  | NA                 | NA                            | NA                 |
| Kabuli_wild_59090858 | NA                                  | Ca_kabuli_denovo | 59090858                | C/T  | NA                 | NA                            | NA                 |
| Kabuli_wild_59090861 | NA                                  | Ca_kabuli_denovo | 59090861                | G/T  | NA                 | NA                            | NA                 |
| Kabuli_wild_59091603 | NA                                  | Ca_kabuli_denovo | 59091603                | C/T  | NA                 | NA                            | NA                 |
| Kabuli_wild_59092049 | NA                                  | Ca_kabuli_denovo | 59092049                | A/G  | NA                 | NA                            | NA                 |
| Kabuli_wild_59094507 | NA                                  | Ca_kabuli_denovo | 59094507                | C/T  | NA                 | NA                            | NA                 |
| Kabuli_wild_59095321 | NA                                  | Ca_kabuli_denovo | 59095321                | C/G  | NA                 | NA                            | NA                 |
| Kabuli_wild_59098973 | NA                                  | Ca_kabuli_denovo | 59098973                | A/G  | NA                 | NA                            | NA                 |
| Kabuli_wild_59100061 | NA                                  | Ca_kabuli_denovo | 59100061                | C/T  | NA                 | NA                            | NA                 |

| SNP IDs              | NCBI dbSNP accession IDs (NCBI_SS#) | Chromosomes      | Physical positions (bp) | SNPs | Gene accession IDs | Sequence components of genome | Putative functions |
|----------------------|-------------------------------------|------------------|-------------------------|------|--------------------|-------------------------------|--------------------|
| Kabuli_wild_59100096 | NA                                  | Ca_kabuli_denovo | 59100096                | A/G  | NA                 | NA                            | NA                 |
| Kabuli_wild_59100470 | NA                                  | Ca_kabuli_denovo | 59100470                | A/G  | NA                 | NA                            | NA                 |
| Kabuli_wild_59103581 | NA                                  | Ca_kabuli_denovo | 59103581                | C/T  | NA                 | NA                            | NA                 |
| Kabuli_wild_59103596 | NA                                  | Ca_kabuli_denovo | 59103596                | C/G  | NA                 | NA                            | NA                 |
| Kabuli_wild_59104321 | NA                                  | Ca_kabuli_denovo | 59104321                | A/G  | NA                 | NA                            | NA                 |
| Kabuli_wild_59104375 | NA                                  | Ca_kabuli_denovo | 59104375                | C/T  | NA                 | NA                            | NA                 |
| Kabuli_wild_59104396 | NA                                  | Ca_kabuli_denovo | 59104396                | C/G  | NA                 | NA                            | NA                 |
| Kabuli_wild_59104399 | NA                                  | Ca_kabuli_denovo | 59104399                | C/T  | NA                 | NA                            | NA                 |
| Kabuli_wild_59107513 | NA                                  | Ca_kabuli_denovo | 59107513                | C/T  | NA                 | NA                            | NA                 |
| Kabuli_wild_59107528 | NA                                  | Ca_kabuli_denovo | 59107528                | C/G  | NA                 | NA                            | NA                 |
| Kabuli_wild_59109095 | NA                                  | Ca_kabuli_denovo | 59109095                | C/G  | NA                 | NA                            | NA                 |
| Kabuli_wild_59109097 | NA                                  | Ca_kabuli_denovo | 59109097                | C/T  | NA                 | NA                            | NA                 |
| Kabuli_wild_59109098 | NA                                  | Ca_kabuli_denovo | 59109098                | C/G  | NA                 | NA                            | NA                 |
| Kabuli_wild_59109568 | NA                                  | Ca_kabuli_denovo | 59109568                | A/C  | NA                 | NA                            | NA                 |
| Kabuli_wild_59111566 | NA                                  | Ca_kabuli_denovo | 59111566                | C/T  | NA                 | NA                            | NA                 |
| Kabuli_wild_59111615 | NA                                  | Ca_kabuli_denovo | 59111615                | A/G  | NA                 | NA                            | NA                 |
| Kabuli_wild_59114675 | NA                                  | Ca_kabuli_denovo | 59114675                | G/T  | NA                 | NA                            | NA                 |
| Kabuli_wild_59114677 | NA                                  | Ca_kabuli_denovo | 59114677                | C/T  | NA                 | NA                            | NA                 |
| Kabuli_wild_59115121 | NA                                  | Ca_kabuli_denovo | 59115121                | C/T  | NA                 | NA                            | NA                 |
| Kabuli_wild_59115166 | NA                                  | Ca_kabuli_denovo | 59115166                | C/T  | NA                 | NA                            | NA                 |
| Kabuli_wild_59115172 | NA                                  | Ca_kabuli_denovo | 59115172                | C/T  | NA                 | NA                            | NA                 |
| Kabuli_wild_59117083 | NA                                  | Ca_kabuli_denovo | 59117083                | C/G  | NA                 | NA                            | NA                 |
| Kabuli_wild_59117115 | NA                                  | Ca_kabuli_denovo | 59117115                | A/T  | NA                 | NA                            | NA                 |
| Kabuli_wild_59118842 | NA                                  | Ca_kabuli_denovo | 59118842                | C/G  | NA                 | NA                            | NA                 |
| Kabuli_wild_59120154 | NA                                  | Ca_kabuli_denovo | 59120154                | A/G  | NA                 | NA                            | NA                 |
| Kabuli_wild_59122562 | NA                                  | Ca_kabuli_denovo | 59122562                | C/G  | NA                 | NA                            | NA                 |
| Kabuli_wild_59122568 | NA                                  | Ca_kabuli_denovo | 59122568                | C/G  | NA                 | NA                            | NA                 |
| Kabuli_wild_59122571 | NA                                  | Ca_kabuli_denovo | 59122571                | C/G  | NA                 | NA                            | NA                 |
| Kabuli_wild_59124223 | NA                                  | Ca_kabuli_denovo | 59124223                | C/G  | NA                 | NA                            | NA                 |
| Kabuli_wild_59124229 | NA                                  | Ca_kabuli_denovo | 59124229                | C/G  | NA                 | NA                            | NA                 |
| Kabuli_wild_59125260 | NA                                  | Ca_kabuli_denovo | 59125260                | A/G  | NA                 | NA                            | NA                 |
| Kabuli_wild_59126288 | NA                                  | Ca_kabuli_denovo | 59126288                | A/G  | NA                 | NA                            | NA                 |
| Kabuli_wild_59130661 | NA                                  | Ca_kabuli_denovo | 59130661                | C/G  | NA                 | NA                            | NA                 |
| Kabuli_wild_59130845 | NA                                  | Ca_kabuli_denovo | 59130845                | A/G  | NA                 | NA                            | NA                 |
| Kabuli_wild_59130848 | NA                                  | Ca_kabuli_denovo | 59130848                | C/T  | NA                 | NA                            | NA                 |
| Kabuli_wild_59132060 | NA                                  | Ca_kabuli_denovo | 59132060                | A/G  | NA                 | NA                            | NA                 |
| Kabuli_wild_59135593 | NA                                  | Ca_kabuli_denovo | 59135593                | C/T  | NA                 | NA                            | NA                 |
| Kabuli_wild_59137119 | NA                                  | Ca_kabuli_denovo | 59137119                | C/T  | NA                 | NA                            | NA                 |
| Kabuli_wild_59137122 | NA                                  | Ca_kabuli_denovo | 59137122                | A/G  | NA                 | NA                            | NA                 |
| Kabuli_wild_59137949 | NA                                  | Ca_kabuli_denovo | 59137949                | C/G  | NA                 | NA                            | NA                 |
| Kabuli_wild_59138210 | NA                                  | Ca_kabuli_denovo | 59138210                | C/G  | NA                 | NA                            | NA                 |
| Kabuli_wild_59138986 | NA                                  | Ca_kabuli_denovo | 59138986                | G/T  | NA                 | NA                            | NA                 |
| Kabuli_wild_59139711 | NA                                  | Ca_kabuli_denovo | 59139711                | A/G  | NA                 | NA                            | NA                 |
| Kabuli_wild_59140795 | NA                                  | Ca_kabuli_denovo | 59140795                | C/T  | NA                 | NA                            | NA                 |

| SNP IDs              | NCBI dbSNP accession IDs (NCBI_SS#) | Chromosomes      | Physical positions (bp) | SNPs | Gene accession IDs | Sequence components of genome | Putative functions |
|----------------------|-------------------------------------|------------------|-------------------------|------|--------------------|-------------------------------|--------------------|
| Kabuli_wild_59140798 | NA                                  | Ca_kabuli_denovo | 59140798                | C/G  | NA                 | NA                            | NA                 |
| Kabuli_wild_59140804 | NA                                  | Ca_kabuli_denovo | 59140804                | A/G  | NA                 | NA                            | NA                 |
| Kabuli_wild_59140849 | NA                                  | Ca_kabuli_denovo | 59140849                | C/T  | NA                 | NA                            | NA                 |
| Kabuli_wild_59142499 | NA                                  | Ca_kabuli_denovo | 59142499                | A/G  | NA                 | NA                            | NA                 |
| Kabuli_wild_59144218 | NA                                  | Ca_kabuli_denovo | 59144218                | C/T  | NA                 | NA                            | NA                 |
| Kabuli_wild_59144233 | NA                                  | Ca_kabuli_denovo | 59144233                | C/G  | NA                 | NA                            | NA                 |
| Kabuli_wild_59144263 | NA                                  | Ca_kabuli_denovo | 59144263                | A/G  | NA                 | NA                            | NA                 |
| Kabuli_wild_59144608 | NA                                  | Ca_kabuli_denovo | 59144608                | A/G  | NA                 | NA                            | NA                 |
| Kabuli_wild_59144932 | NA                                  | Ca_kabuli_denovo | 59144932                | C/G  | NA                 | NA                            | NA                 |
| Kabuli_wild_59150246 | NA                                  | Ca_kabuli_denovo | 59150246                | C/G  | NA                 | NA                            | NA                 |
| Kabuli_wild_59152334 | NA                                  | Ca_kabuli_denovo | 59152334                | C/G  | NA                 | NA                            | NA                 |
| Kabuli_wild_59159208 | NA                                  | Ca_kabuli_denovo | 59159208                | C/T  | NA                 | NA                            | NA                 |
| Kabuli_wild_59159252 | NA                                  | Ca_kabuli_denovo | 59159252                | G/T  | NA                 | NA                            | NA                 |
| Kabuli_wild_59160251 | NA                                  | Ca_kabuli_denovo | 59160251                | C/T  | NA                 | NA                            | NA                 |
| Kabuli_wild_59163638 | NA                                  | Ca_kabuli_denovo | 59163638                | C/G  | NA                 | NA                            | NA                 |
| Kabuli_wild_59165707 | NA                                  | Ca_kabuli_denovo | 59165707                | C/T  | NA                 | NA                            | NA                 |
| Kabuli_wild_59165731 | NA                                  | Ca_kabuli_denovo | 59165731                | A/G  | NA                 | NA                            | NA                 |
| Kabuli_wild_59167264 | NA                                  | Ca_kabuli_denovo | 59167264                | A/G  | NA                 | NA                            | NA                 |
| Kabuli_wild_59170072 | NA                                  | Ca_kabuli_denovo | 59170072                | A/G  | NA                 | NA                            | NA                 |
| Kabuli_wild_59170826 | NA                                  | Ca_kabuli_denovo | 59170826                | C/G  | NA                 | NA                            | NA                 |
| Kabuli_wild_59170838 | NA                                  | Ca_kabuli_denovo | 59170838                | C/G  | NA                 | NA                            | NA                 |
| Kabuli_wild_59170841 | NA                                  | Ca_kabuli_denovo | 59170841                | C/T  | NA                 | NA                            | NA                 |
| Kabuli_wild_59170856 | NA                                  | Ca_kabuli_denovo | 59170856                | A/G  | NA                 | NA                            | NA                 |
| Kabuli_wild_59175505 | NA                                  | Ca_kabuli_denovo | 59175505                | A/G  | NA                 | NA                            | NA                 |
| Kabuli_wild_59176607 | NA                                  | Ca_kabuli_denovo | 59176607                | C/T  | NA                 | NA                            | NA                 |
| Kabuli_wild_59176628 | NA                                  | Ca_kabuli_denovo | 59176628                | C/G  | NA                 | NA                            | NA                 |
| Kabuli_wild_59180384 | NA                                  | Ca_kabuli_denovo | 59180384                | A/G  | NA                 | NA                            | NA                 |
| Kabuli_wild_59185718 | NA                                  | Ca_kabuli_denovo | 59185718                | C/T  | NA                 | NA                            | NA                 |
| Kabuli_wild_59185735 | NA                                  | Ca_kabuli_denovo | 59185735                | C/G  | NA                 | NA                            | NA                 |
| Kabuli_wild_59186570 | NA                                  | Ca_kabuli_denovo | 59186570                | C/T  | NA                 | NA                            | NA                 |
| Kabuli_wild_59187572 | NA                                  | Ca_kabuli_denovo | 59187572                | C/T  | NA                 | NA                            | NA                 |
| Kabuli_wild_59187757 | NA                                  | Ca_kabuli_denovo | 59187757                | C/G  | NA                 | NA                            | NA                 |
| Kabuli_wild_59189696 | NA                                  | Ca_kabuli_denovo | 59189696                | A/G  | NA                 | NA                            | NA                 |
| Kabuli_wild_59191420 | NA                                  | Ca_kabuli_denovo | 59191420                | C/T  | NA                 | NA                            | NA                 |
| Kabuli_wild_59191592 | NA                                  | Ca_kabuli_denovo | 59191592                | A/G  | NA                 | NA                            | NA                 |
| Kabuli_wild_59191673 | NA                                  | Ca_kabuli_denovo | 59191673                | G/T  | NA                 | NA                            | NA                 |
| Kabuli_wild_59191674 | NA                                  | Ca_kabuli_denovo | 59191674                | A/C  | NA                 | NA                            | NA                 |
| Kabuli_wild_59191684 | NA                                  | Ca_kabuli_denovo | 59191684                | C/T  | NA                 | NA                            | NA                 |
| Kabuli_wild_59195501 | NA                                  | Ca_kabuli_denovo | 59195501                | C/T  | NA                 | NA                            | NA                 |
| Kabuli_wild_59195525 | NA                                  | Ca_kabuli_denovo | 59195525                | C/T  | NA                 | NA                            | NA                 |
| Kabuli_wild_59196781 | NA                                  | Ca_kabuli_denovo | 59196781                | A/G  | NA                 | NA                            | NA                 |
| Kabuli_wild_59204360 | NA                                  | Ca_kabuli_denovo | 59204360                | C/G  | NA                 | NA                            | NA                 |
| Kabuli_wild_59207309 | NA                                  | Ca_kabuli_denovo | 59207309                | C/G  | NA                 | NA                            | NA                 |
| Kabuli_wild_59207330 | NA                                  | Ca_kabuli_denovo | 59207330                | A/G  | NA                 | NA                            | NA                 |

| SNP IDs              | NCBI dbSNP accession IDs (NCBI_SS#) | Chromosomes      | Physical positions (bp) | SNPs | Gene accession IDs | Sequence components of genome | Putative functions |
|----------------------|-------------------------------------|------------------|-------------------------|------|--------------------|-------------------------------|--------------------|
| Kabuli_wild_59207348 | NA                                  | Ca_kabuli_denovo | 59207348                | C/G  | NA                 | NA                            | NA                 |
| Kabuli_wild_59210540 | NA                                  | Ca_kabuli_denovo | 59210540                | A/G  | NA                 | NA                            | NA                 |
| Kabuli_wild_59212639 | NA                                  | Ca_kabuli_denovo | 59212639                | C/T  | NA                 | NA                            | NA                 |
| Kabuli_wild_59212651 | NA                                  | Ca_kabuli_denovo | 59212651                | C/T  | NA                 | NA                            | NA                 |
| Kabuli_wild_59214467 | NA                                  | Ca_kabuli_denovo | 59214467                | C/T  | NA                 | NA                            | NA                 |
| Kabuli_wild_59214470 | NA                                  | Ca_kabuli_denovo | 59214470                | G/T  | NA                 | NA                            | NA                 |
| Kabuli_wild_59215382 | NA                                  | Ca_kabuli_denovo | 59215382                | C/T  | NA                 | NA                            | NA                 |
| Kabuli_wild_59215534 | NA                                  | Ca_kabuli_denovo | 59215534                | G/T  | NA                 | NA                            | NA                 |
| Kabuli_wild_59216320 | NA                                  | Ca_kabuli_denovo | 59216320                | G/T  | NA                 | NA                            | NA                 |
| Kabuli_wild_59216332 | NA                                  | Ca_kabuli_denovo | 59216332                | C/T  | NA                 | NA                            | NA                 |
| Kabuli_wild_59216725 | NA                                  | Ca_kabuli_denovo | 59216725                | A/G  | NA                 | NA                            | NA                 |
| Kabuli_wild_59217599 | NA                                  | Ca_kabuli_denovo | 59217599                | C/T  | NA                 | NA                            | NA                 |
| Kabuli_wild_59219904 | NA                                  | Ca_kabuli_denovo | 59219904                | C/G  | NA                 | NA                            | NA                 |
| Kabuli_wild_59221062 | NA                                  | Ca_kabuli_denovo | 59221062                | A/G  | NA                 | NA                            | NA                 |
| Kabuli_wild_59224759 | NA                                  | Ca_kabuli_denovo | 59224759                | A/G  | NA                 | NA                            | NA                 |
| Kabuli_wild_59224907 | NA                                  | Ca_kabuli_denovo | 59224907                | A/C  | NA                 | NA                            | NA                 |
| Kabuli_wild_59225795 | NA                                  | Ca_kabuli_denovo | 59225795                | C/T  | NA                 | NA                            | NA                 |
| Kabuli_wild_59228308 | NA                                  | Ca_kabuli_denovo | 59228308                | A/G  | NA                 | NA                            | NA                 |
| Kabuli_wild_59228677 | NA                                  | Ca_kabuli_denovo | 59228677                | C/T  | NA                 | NA                            | NA                 |
| Kabuli_wild_59229157 | NA                                  | Ca_kabuli_denovo | 59229157                | C/T  | NA                 | NA                            | NA                 |
| Kabuli_wild_59229214 | NA                                  | Ca_kabuli_denovo | 59229214                | C/T  | NA                 | NA                            | NA                 |
| Kabuli_wild_59229952 | NA                                  | Ca_kabuli_denovo | 59229952                | G/T  | NA                 | NA                            | NA                 |
| Kabuli_wild_59235206 | NA                                  | Ca_kabuli_denovo | 59235206                | C/G  | NA                 | NA                            | NA                 |
| Kabuli_wild_59240606 | NA                                  | Ca_kabuli_denovo | 59240606                | C/G  | NA                 | NA                            | NA                 |
| Kabuli_wild_59240937 | NA                                  | Ca_kabuli_denovo | 59240937                | A/G  | NA                 | NA                            | NA                 |
| Kabuli_wild_59241406 | NA                                  | Ca_kabuli_denovo | 59241406                | C/T  | NA                 | NA                            | NA                 |
| Kabuli_wild_59241415 | NA                                  | Ca_kabuli_denovo | 59241415                | C/G  | NA                 | NA                            | NA                 |
| Kabuli_wild_59241436 | NA                                  | Ca_kabuli_denovo | 59241436                | C/T  | NA                 | NA                            | NA                 |
| Kabuli_wild_59243312 | NA                                  | Ca_kabuli_denovo | 59243312                | A/G  | NA                 | NA                            | NA                 |
| Kabuli_wild_59244197 | NA                                  | Ca_kabuli_denovo | 59244197                | C/G  | NA                 | NA                            | NA                 |
| Kabuli_wild_59244236 | NA                                  | Ca_kabuli_denovo | 59244236                | C/G  | NA                 | NA                            | NA                 |
| Kabuli_wild_59244239 | NA                                  | Ca_kabuli_denovo | 59244239                | C/G  | NA                 | NA                            | NA                 |
| Kabuli_wild_59247010 | NA                                  | Ca_kabuli_denovo | 59247010                | A/C  | NA                 | NA                            | NA                 |
| Kabuli_wild_59249684 | NA                                  | Ca_kabuli_denovo | 59249684                | C/G  | NA                 | NA                            | NA                 |
| Kabuli_wild_59249708 | NA                                  | Ca_kabuli_denovo | 59249708                | C/T  | NA                 | NA                            | NA                 |
| Kabuli_wild_59249927 | NA                                  | Ca_kabuli_denovo | 59249927                | C/G  | NA                 | NA                            | NA                 |
| Kabuli_wild_59249939 | NA                                  | Ca_kabuli_denovo | 59249939                | C/G  | NA                 | NA                            | NA                 |
| Kabuli_wild_59249940 | NA                                  | Ca_kabuli_denovo | 59249940                | A/G  | NA                 | NA                            | NA                 |
| Kabuli_wild_59256191 | NA                                  | Ca_kabuli_denovo | 59256191                | C/G  | NA                 | NA                            | NA                 |
| Kabuli_wild_59256200 | NA                                  | Ca_kabuli_denovo | 59256200                | C/G  | NA                 | NA                            | NA                 |
| Kabuli_wild_59256209 | NA                                  | Ca_kabuli_denovo | 59256209                | A/G  | NA                 | NA                            | NA                 |
| Kabuli_wild_59256392 | NA                                  | Ca_kabuli_denovo | 59256392                | C/T  | NA                 | NA                            | NA                 |
| Kabuli_wild_59258466 | NA                                  | Ca_kabuli_denovo | 59258466                | A/G  | NA                 | NA                            | NA                 |
| Kabuli_wild_59258480 | NA                                  | Ca_kabuli_denovo | 59258480                | C/T  | NA                 | NA                            | NA                 |

| SNP IDs              | NCBI dbSNP accession IDs (NCBI_SS#) | Chromosomes      | Physical positions (bp) | SNPs | Gene accession IDs | Sequence components of genome | Putative functions |
|----------------------|-------------------------------------|------------------|-------------------------|------|--------------------|-------------------------------|--------------------|
| Kabuli_wild_59258915 | NA                                  | Ca_kabuli_denovo | 59258915                | A/T  | NA                 | NA                            | NA                 |
| Kabuli_wild_59258927 | NA                                  | Ca_kabuli_denovo | 59258927                | C/G  | NA                 | NA                            | NA                 |
| Kabuli_wild_59261495 | NA                                  | Ca_kabuli_denovo | 59261495                | A/G  | NA                 | NA                            | NA                 |
| Kabuli_wild_59261537 | NA                                  | Ca_kabuli_denovo | 59261537                | A/G  | NA                 | NA                            | NA                 |
| Kabuli_wild_59267907 | NA                                  | Ca_kabuli_denovo | 59267907                | A/G  | NA                 | NA                            | NA                 |
| Kabuli_wild_59267918 | NA                                  | Ca_kabuli_denovo | 59267918                | A/G  | NA                 | NA                            | NA                 |
| Kabuli_wild_59267958 | NA                                  | Ca_kabuli_denovo | 59267958                | A/G  | NA                 | NA                            | NA                 |
| Kabuli_wild_59268676 | NA                                  | Ca_kabuli_denovo | 59268676                | C/G  | NA                 | NA                            | NA                 |
| Kabuli_wild_59268685 | NA                                  | Ca_kabuli_denovo | 59268685                | A/G  | NA                 | NA                            | NA                 |
| Kabuli_wild_59269874 | NA                                  | Ca_kabuli_denovo | 59269874                | C/T  | NA                 | NA                            | NA                 |
| Kabuli_wild_59271074 | NA                                  | Ca_kabuli_denovo | 59271074                | C/G  | NA                 | NA                            | NA                 |
| Kabuli_wild_59271095 | NA                                  | Ca_kabuli_denovo | 59271095                | C/T  | NA                 | NA                            | NA                 |
| Kabuli_wild_59273419 | NA                                  | Ca_kabuli_denovo | 59273419                | C/T  | NA                 | NA                            | NA                 |
| Kabuli_wild_59273830 | NA                                  | Ca_kabuli_denovo | 59273830                | A/G  | NA                 | NA                            | NA                 |
| Kabuli_wild_59285257 | NA                                  | Ca_kabuli_denovo | 59285257                | C/T  | NA                 | NA                            | NA                 |
| Kabuli_wild_59285504 | NA                                  | Ca_kabuli_denovo | 59285504                | C/G  | NA                 | NA                            | NA                 |
| Kabuli_wild_59285522 | NA                                  | Ca_kabuli_denovo | 59285522                | A/G  | NA                 | NA                            | NA                 |
| Kabuli_wild_59288897 | NA                                  | Ca_kabuli_denovo | 59288897                | A/G  | NA                 | NA                            | NA                 |
| Kabuli_wild_59289398 | NA                                  | Ca_kabuli_denovo | 59289398                | C/T  | NA                 | NA                            | NA                 |
| Kabuli_wild_59290384 | NA                                  | Ca_kabuli_denovo | 59290384                | A/G  | NA                 | NA                            | NA                 |
| Kabuli_wild_59291455 | NA                                  | Ca_kabuli_denovo | 59291455                | C/T  | NA                 | NA                            | NA                 |
| Kabuli_wild_59294049 | NA                                  | Ca_kabuli_denovo | 59294049                | C/T  | NA                 | NA                            | NA                 |
| Kabuli_wild_59294064 | NA                                  | Ca_kabuli_denovo | 59294064                | G/T  | NA                 | NA                            | NA                 |
| Kabuli_wild_59294168 | NA                                  | Ca_kabuli_denovo | 59294168                | A/C  | NA                 | NA                            | NA                 |
| Kabuli_wild_59294896 | NA                                  | Ca_kabuli_denovo | 59294896                | A/G  | NA                 | NA                            | NA                 |
| Kabuli_wild_59296940 | NA                                  | Ca_kabuli_denovo | 59296940                | C/G  | NA                 | NA                            | NA                 |
| Kabuli_wild_59297414 | NA                                  | Ca_kabuli_denovo | 59297414                | C/G  | NA                 | NA                            | NA                 |
| Kabuli_wild_59297447 | NA                                  | Ca_kabuli_denovo | 59297447                | C/G  | NA                 | NA                            | NA                 |
| Kabuli_wild_59299345 | NA                                  | Ca_kabuli_denovo | 59299345                | A/G  | NA                 | NA                            | NA                 |
| Kabuli_wild_59299414 | NA                                  | Ca_kabuli_denovo | 59299414                | C/G  | NA                 | NA                            | NA                 |
| Kabuli_wild_59301964 | NA                                  | Ca_kabuli_denovo | 59301964                | C/T  | NA                 | NA                            | NA                 |
| Kabuli_wild_59301967 | NA                                  | Ca_kabuli_denovo | 59301967                | C/G  | NA                 | NA                            | NA                 |
| Kabuli_wild_59301982 | NA                                  | Ca_kabuli_denovo | 59301982                | C/G  | NA                 | NA                            | NA                 |
| Kabuli_wild_59301988 | NA                                  | Ca_kabuli_denovo | 59301988                | C/G  | NA                 | NA                            | NA                 |
| Kabuli_wild_59304273 | NA                                  | Ca_kabuli_denovo | 59304273                | A/G  | NA                 | NA                            | NA                 |
| Kabuli_wild_59304289 | NA                                  | Ca_kabuli_denovo | 59304289                | A/G  | NA                 | NA                            | NA                 |
| Kabuli_wild_59312522 | NA                                  | Ca_kabuli_denovo | 59312522                | A/G  | NA                 | NA                            | NA                 |
| Kabuli_wild_59317904 | NA                                  | Ca_kabuli_denovo | 59317904                | C/G  | NA                 | NA                            | NA                 |
| Kabuli_wild_59318597 | NA                                  | Ca_kabuli_denovo | 59318597                | C/T  | NA                 | NA                            | NA                 |
| Kabuli_wild_59318600 | NA                                  | Ca_kabuli_denovo | 59318600                | C/T  | NA                 | NA                            | NA                 |
| Kabuli_wild_59320642 | NA                                  | Ca_kabuli_denovo | 59320642                | C/T  | NA                 | NA                            | NA                 |
| Kabuli_wild_59321120 | NA                                  | Ca_kabuli_denovo | 59321120                | C/T  | NA                 | NA                            | NA                 |
| Kabuli_wild_59321126 | NA                                  | Ca_kabuli_denovo | 59321126                | C/G  | NA                 | NA                            | NA                 |
| Kabuli_wild_59321348 | NA                                  | Ca_kabuli_denovo | 59321348                | C/T  | NA                 | NA                            | NA                 |



| SNP IDs              | NCBI dbSNP accession IDs (NCBI_SS#) | Chromosomes      | Physical positions (bp) | SNPs | Gene accession IDs | Sequence components of genome | Putative functions |
|----------------------|-------------------------------------|------------------|-------------------------|------|--------------------|-------------------------------|--------------------|
| Kabuli_wild_59322046 | NA                                  | Ca_kabuli_denovo | 59322046                | C/T  | NA                 | NA                            | NA                 |
| Kabuli_wild_59322971 | NA                                  | Ca_kabuli_denovo | 59322971                | C/G  | NA                 | NA                            | NA                 |
| Kabuli_wild_59322992 | NA                                  | Ca_kabuli_denovo | 59322992                | A/G  | NA                 | NA                            | NA                 |
| Kabuli_wild_59325032 | NA                                  | Ca_kabuli_denovo | 59325032                | G/T  | NA                 | NA                            | NA                 |
| Kabuli_wild_59326220 | NA                                  | Ca_kabuli_denovo | 59326220                | C/T  | NA                 | NA                            | NA                 |
| Kabuli_wild_59326232 | NA                                  | Ca_kabuli_denovo | 59326232                | C/G  | NA                 | NA                            | NA                 |
| Kabuli_wild_59327080 | NA                                  | Ca_kabuli_denovo | 59327080                | A/G  | NA                 | NA                            | NA                 |
| Kabuli_wild_59330782 | NA                                  | Ca_kabuli_denovo | 59330782                | A/G  | NA                 | NA                            | NA                 |
| Kabuli_wild_59330818 | NA                                  | Ca_kabuli_denovo | 59330818                | C/G  | NA                 | NA                            | NA                 |
| Kabuli_wild_59330894 | NA                                  | Ca_kabuli_denovo | 59330894                | A/G  | NA                 | NA                            | NA                 |
| Kabuli_wild_59333864 | NA                                  | Ca_kabuli_denovo | 59333864                | A/G  | NA                 | NA                            | NA                 |
| Kabuli_wild_59333879 | NA                                  | Ca_kabuli_denovo | 59333879                | C/T  | NA                 | NA                            | NA                 |
| Kabuli_wild_59334244 | NA                                  | Ca_kabuli_denovo | 59334244                | C/T  | NA                 | NA                            | NA                 |
| Kabuli_wild_59334247 | NA                                  | Ca_kabuli_denovo | 59334247                | C/G  | NA                 | NA                            | NA                 |
| Kabuli_wild_59334262 | NA                                  | Ca_kabuli_denovo | 59334262                | C/T  | NA                 | NA                            | NA                 |
| Kabuli_wild_59337412 | NA                                  | Ca_kabuli_denovo | 59337412                | C/T  | NA                 | NA                            | NA                 |
| Kabuli_wild_59337851 | NA                                  | Ca_kabuli_denovo | 59337851                | A/G  | NA                 | NA                            | NA                 |
| Kabuli_wild_59337854 | NA                                  | Ca_kabuli_denovo | 59337854                | C/G  | NA                 | NA                            | NA                 |
| Kabuli_wild_59338274 | NA                                  | Ca_kabuli_denovo | 59338274                | A/G  | NA                 | NA                            | NA                 |
| Kabuli_wild_59341565 | NA                                  | Ca_kabuli_denovo | 59341565                | A/G  | NA                 | NA                            | NA                 |
| Kabuli_wild_59341937 | NA                                  | Ca_kabuli_denovo | 59341937                | A/G  | NA                 | NA                            | NA                 |
| Kabuli_wild_59342666 | NA                                  | Ca_kabuli_denovo | 59342666                | C/T  | NA                 | NA                            | NA                 |
| Kabuli_wild_59345294 | NA                                  | Ca_kabuli_denovo | 59345294                | C/T  | NA                 | NA                            | NA                 |
| Kabuli_wild_59345306 | NA                                  | Ca_kabuli_denovo | 59345306                | A/G  | NA                 | NA                            | NA                 |
| Kabuli_wild_59345320 | NA                                  | Ca_kabuli_denovo | 59345320                | C/T  | NA                 | NA                            | NA                 |
| Kabuli_wild_59345980 | NA                                  | Ca_kabuli_denovo | 59345980                | A/T  | NA                 | NA                            | NA                 |
| Kabuli_wild_59345990 | NA                                  | Ca_kabuli_denovo | 59345990                | C/G  | NA                 | NA                            | NA                 |
| Kabuli_wild_59345996 | NA                                  | Ca_kabuli_denovo | 59345996                | C/G  | NA                 | NA                            | NA                 |
| Kabuli_wild_59346011 | NA                                  | Ca_kabuli_denovo | 59346011                | C/G  | NA                 | NA                            | NA                 |
| Kabuli_wild_59346038 | NA                                  | Ca_kabuli_denovo | 59346038                | A/G  | NA                 | NA                            | NA                 |
| Kabuli_wild_59347163 | NA                                  | Ca_kabuli_denovo | 59347163                | C/G  | NA                 | NA                            | NA                 |
| Kabuli_wild_59347167 | NA                                  | Ca_kabuli_denovo | 59347167                | A/C  | NA                 | NA                            | NA                 |
| Kabuli_wild_59347197 | NA                                  | Ca_kabuli_denovo | 59347197                | C/G  | NA                 | NA                            | NA                 |
| Kabuli_wild_59347206 | NA                                  | Ca_kabuli_denovo | 59347206                | C/T  | NA                 | NA                            | NA                 |
| Kabuli_wild_59348000 | NA                                  | Ca_kabuli_denovo | 59348000                | C/G  | NA                 | NA                            | NA                 |
| Kabuli_wild_59349594 | NA                                  | Ca_kabuli_denovo | 59349594                | C/T  | NA                 | NA                            | NA                 |
| Kabuli_wild_59355079 | NA                                  | Ca_kabuli_denovo | 59355079                | A/G  | NA                 | NA                            | NA                 |
| Kabuli_wild_59355103 | NA                                  | Ca_kabuli_denovo | 59355103                | A/C  | NA                 | NA                            | NA                 |
| Kabuli_wild_59355523 | NA                                  | Ca_kabuli_denovo | 59355523                | C/T  | NA                 | NA                            | NA                 |
| Kabuli_wild_59358361 | NA                                  | Ca_kabuli_denovo | 59358361                | A/G  | NA                 | NA                            | NA                 |
| Kabuli_wild_59358983 | NA                                  | Ca_kabuli_denovo | 59358983                | A/G  | NA                 | NA                            | NA                 |
| Kabuli_wild_59359267 | NA                                  | Ca_kabuli_denovo | 59359267                | C/T  | NA                 | NA                            | NA                 |
| Kabuli_wild_59360454 | NA                                  | Ca_kabuli_denovo | 59360454                | C/G  | NA                 | NA                            | NA                 |
| Kabuli_wild_59360456 | NA                                  | Ca_kabuli_denovo | 59360456                | A/C  | NA                 | NA                            | NA                 |

| SNP IDs              | NCBI dbSNP accession IDs (NCBI_SS#) | Chromosomes      | Physical positions (bp) | SNPs | Gene accession IDs | Sequence components of genome | Putative functions |
|----------------------|-------------------------------------|------------------|-------------------------|------|--------------------|-------------------------------|--------------------|
| Kabuli_wild_59360476 | NA                                  | Ca_kabuli_denovo | 59360476                | C/G  | NA                 | NA                            | NA                 |
| Kabuli_wild_59364290 | NA                                  | Ca_kabuli_denovo | 59364290                | C/T  | NA                 | NA                            | NA                 |
| Kabuli_wild_59365885 | NA                                  | Ca_kabuli_denovo | 59365885                | C/T  | NA                 | NA                            | NA                 |
| Kabuli_wild_59367829 | NA                                  | Ca_kabuli_denovo | 59367829                | C/G  | NA                 | NA                            | NA                 |
| Kabuli_wild_59367836 | NA                                  | Ca_kabuli_denovo | 59367836                | A/G  | NA                 | NA                            | NA                 |
| Kabuli_wild_59367837 | NA                                  | Ca_kabuli_denovo | 59367837                | C/T  | NA                 | NA                            | NA                 |
| Kabuli_wild_59368721 | NA                                  | Ca_kabuli_denovo | 59368721                | C/T  | NA                 | NA                            | NA                 |
| Kabuli_wild_59369473 | NA                                  | Ca_kabuli_denovo | 59369473                | A/G  | NA                 | NA                            | NA                 |
| Kabuli_wild_59369494 | NA                                  | Ca_kabuli_denovo | 59369494                | C/G  | NA                 | NA                            | NA                 |
| Kabuli_wild_59371714 | NA                                  | Ca_kabuli_denovo | 59371714                | C/G  | NA                 | NA                            | NA                 |
| Kabuli_wild_59371715 | NA                                  | Ca_kabuli_denovo | 59371715                | C/G  | NA                 | NA                            | NA                 |
| Kabuli_wild_59371716 | NA                                  | Ca_kabuli_denovo | 59371716                | A/T  | NA                 | NA                            | NA                 |
| Kabuli_wild_59374224 | NA                                  | Ca_kabuli_denovo | 59374224                | C/T  | NA                 | NA                            | NA                 |
| Kabuli_wild_59377948 | NA                                  | Ca_kabuli_denovo | 59377948                | C/T  | NA                 | NA                            | NA                 |
| Kabuli_wild_59381378 | NA                                  | Ca_kabuli_denovo | 59381378                | A/G  | NA                 | NA                            | NA                 |
| Kabuli_wild_59381390 | NA                                  | Ca_kabuli_denovo | 59381390                | G/T  | NA                 | NA                            | NA                 |
| Kabuli_wild_59381491 | NA                                  | Ca_kabuli_denovo | 59381491                | C/T  | NA                 | NA                            | NA                 |
| Kabuli_wild_59381495 | NA                                  | Ca_kabuli_denovo | 59381495                | A/G  | NA                 | NA                            | NA                 |
| Kabuli_wild_59381527 | NA                                  | Ca_kabuli_denovo | 59381527                | A/G  | NA                 | NA                            | NA                 |
| Kabuli_wild_59381535 | NA                                  | Ca_kabuli_denovo | 59381535                | C/T  | NA                 | NA                            | NA                 |
| Kabuli_wild_59385650 | NA                                  | Ca_kabuli_denovo | 59385650                | C/T  | NA                 | NA                            | NA                 |
| Kabuli_wild_59385683 | NA                                  | Ca_kabuli_denovo | 59385683                | A/G  | NA                 | NA                            | NA                 |
| Kabuli_wild_59385776 | NA                                  | Ca_kabuli_denovo | 59385776                | C/G  | NA                 | NA                            | NA                 |
| Kabuli_wild_59386591 | NA                                  | Ca_kabuli_denovo | 59386591                | G/T  | NA                 | NA                            | NA                 |
| Kabuli_wild_59392922 | NA                                  | Ca_kabuli_denovo | 59392922                | C/G  | NA                 | NA                            | NA                 |
| Kabuli_wild_59393489 | NA                                  | Ca_kabuli_denovo | 59393489                | C/T  | NA                 | NA                            | NA                 |
| Kabuli_wild_59395694 | NA                                  | Ca_kabuli_denovo | 59395694                | C/G  | NA                 | NA                            | NA                 |
| Kabuli_wild_59395699 | NA                                  | Ca_kabuli_denovo | 59395699                | C/T  | NA                 | NA                            | NA                 |
| Kabuli_wild_59395709 | NA                                  | Ca_kabuli_denovo | 59395709                | C/T  | NA                 | NA                            | NA                 |
| Kabuli_wild_59398760 | NA                                  | Ca_kabuli_denovo | 59398760                | C/G  | NA                 | NA                            | NA                 |
| Kabuli_wild_59400713 | NA                                  | Ca_kabuli_denovo | 59400713                | A/C  | NA                 | NA                            | NA                 |
| Kabuli_wild_59400734 | NA                                  | Ca_kabuli_denovo | 59400734                | A/C  | NA                 | NA                            | NA                 |
| Kabuli_wild_59401463 | NA                                  | Ca_kabuli_denovo | 59401463                | C/G  | NA                 | NA                            | NA                 |
| Kabuli_wild_59401484 | NA                                  | Ca_kabuli_denovo | 59401484                | A/G  | NA                 | NA                            | NA                 |
| Kabuli_wild_59401487 | NA                                  | Ca_kabuli_denovo | 59401487                | A/G  | NA                 | NA                            | NA                 |
| Kabuli_wild_59408849 | NA                                  | Ca_kabuli_denovo | 59408849                | A/G  | NA                 | NA                            | NA                 |
| Kabuli_wild_59410784 | NA                                  | Ca_kabuli_denovo | 59410784                | C/G  | NA                 | NA                            | NA                 |
| Kabuli_wild_59411879 | NA                                  | Ca_kabuli_denovo | 59411879                | C/G  | NA                 | NA                            | NA                 |
| Kabuli_wild_59411887 | NA                                  | Ca_kabuli_denovo | 59411887                | A/G  | NA                 | NA                            | NA                 |
| Kabuli_wild_59413099 | NA                                  | Ca_kabuli_denovo | 59413099                | A/C  | NA                 | NA                            | NA                 |
| Kabuli_wild_59413102 | NA                                  | Ca_kabuli_denovo | 59413102                | C/T  | NA                 | NA                            | NA                 |
| Kabuli_wild_59415055 | NA                                  | Ca_kabuli_denovo | 59415055                | C/T  | NA                 | NA                            | NA                 |
| Kabuli_wild_59415058 | NA                                  | Ca_kabuli_denovo | 59415058                | C/G  | NA                 | NA                            | NA                 |
| Kabuli_wild_59415407 | NA                                  | Ca_kabuli_denovo | 59415407                | C/G  | NA                 | NA                            | NA                 |

| SNP IDs              | NCBI dbSNP accession IDs (NCBI_SS#) | Chromosomes      | Physical positions (bp) | SNPs | Gene accession IDs | Sequence components of genome | Putative functions |
|----------------------|-------------------------------------|------------------|-------------------------|------|--------------------|-------------------------------|--------------------|
| Kabuli_wild_59416244 | NA                                  | Ca_kabuli_denovo | 59416244                | C/G  | NA                 | NA                            | NA                 |
| Kabuli_wild_59416265 | NA                                  | Ca_kabuli_denovo | 59416265                | A/G  | NA                 | NA                            | NA                 |
| Kabuli_wild_59419379 | NA                                  | Ca_kabuli_denovo | 59419379                | A/G  | NA                 | NA                            | NA                 |
| Kabuli_wild_59419622 | NA                                  | Ca_kabuli_denovo | 59419622                | A/C  | NA                 | NA                            | NA                 |
| Kabuli_wild_59419634 | NA                                  | Ca_kabuli_denovo | 59419634                | A/G  | NA                 | NA                            | NA                 |
| Kabuli_wild_59421823 | NA                                  | Ca_kabuli_denovo | 59421823                | A/G  | NA                 | NA                            | NA                 |
| Kabuli_wild_59421824 | NA                                  | Ca_kabuli_denovo | 59421824                | C/T  | NA                 | NA                            | NA                 |
| Kabuli_wild_59421828 | NA                                  | Ca_kabuli_denovo | 59421828                | A/G  | NA                 | NA                            | NA                 |
| Kabuli_wild_59421835 | NA                                  | Ca_kabuli_denovo | 59421835                | C/G  | NA                 | NA                            | NA                 |
| Kabuli_wild_59422102 | NA                                  | Ca_kabuli_denovo | 59422102                | G/T  | NA                 | NA                            | NA                 |
| Kabuli_wild_59422111 | NA                                  | Ca_kabuli_denovo | 59422111                | C/T  | NA                 | NA                            | NA                 |
| Kabuli_wild_59422138 | NA                                  | Ca_kabuli_denovo | 59422138                | A/G  | NA                 | NA                            | NA                 |
| Kabuli_wild_59427325 | NA                                  | Ca_kabuli_denovo | 59427325                | C/T  | NA                 | NA                            | NA                 |
| Kabuli_wild_59427341 | NA                                  | Ca_kabuli_denovo | 59427341                | C/T  | NA                 | NA                            | NA                 |
| Kabuli_wild_59427407 | NA                                  | Ca_kabuli_denovo | 59427407                | A/C  | NA                 | NA                            | NA                 |
| Kabuli_wild_59427422 | NA                                  | Ca_kabuli_denovo | 59427422                | C/G  | NA                 | NA                            | NA                 |
| Kabuli_wild_59427458 | NA                                  | Ca_kabuli_denovo | 59427458                | C/G  | NA                 | NA                            | NA                 |
| Kabuli_wild_59428075 | NA                                  | Ca_kabuli_denovo | 59428075                | C/T  | NA                 | NA                            | NA                 |
| Kabuli_wild_59429356 | NA                                  | Ca_kabuli_denovo | 59429356                | C/G  | NA                 | NA                            | NA                 |
| Kabuli_wild_59429374 | NA                                  | Ca_kabuli_denovo | 59429374                | A/G  | NA                 | NA                            | NA                 |
| Kabuli_wild_59433731 | NA                                  | Ca_kabuli_denovo | 59433731                | A/G  | NA                 | NA                            | NA                 |
| Kabuli_wild_59436487 | NA                                  | Ca_kabuli_denovo | 59436487                | G/T  | NA                 | NA                            | NA                 |
| Kabuli_wild_59438527 | NA                                  | Ca_kabuli_denovo | 59438527                | C/T  | NA                 | NA                            | NA                 |
| Kabuli_wild_59438545 | NA                                  | Ca_kabuli_denovo | 59438545                | C/G  | NA                 | NA                            | NA                 |
| Kabuli_wild_59439362 | NA                                  | Ca_kabuli_denovo | 59439362                | C/G  | NA                 | NA                            | NA                 |
| Kabuli_wild_59439988 | NA                                  | Ca_kabuli_denovo | 59439988                | A/G  | NA                 | NA                            | NA                 |
| Kabuli_wild_59443543 | NA                                  | Ca_kabuli_denovo | 59443543                | C/G  | NA                 | NA                            | NA                 |
| Kabuli_wild_59444066 | NA                                  | Ca_kabuli_denovo | 59444066                | G/T  | NA                 | NA                            | NA                 |
| Kabuli_wild_59448833 | NA                                  | Ca_kabuli_denovo | 59448833                | A/C  | NA                 | NA                            | NA                 |
| Kabuli_wild_59448838 | NA                                  | Ca_kabuli_denovo | 59448838                | A/G  | NA                 | NA                            | NA                 |
| Kabuli_wild_59451185 | NA                                  | Ca_kabuli_denovo | 59451185                | C/G  | NA                 | NA                            | NA                 |
| Kabuli_wild_59451197 | NA                                  | Ca_kabuli_denovo | 59451197                | C/T  | NA                 | NA                            | NA                 |
| Kabuli_wild_59451203 | NA                                  | Ca_kabuli_denovo | 59451203                | A/G  | NA                 | NA                            | NA                 |
| Kabuli_wild_59453572 | NA                                  | Ca_kabuli_denovo | 59453572                | A/C  | NA                 | NA                            | NA                 |
| Kabuli_wild_59454008 | NA                                  | Ca_kabuli_denovo | 59454008                | C/G  | NA                 | NA                            | NA                 |
| Kabuli_wild_59455492 | NA                                  | Ca_kabuli_denovo | 59455492                | C/T  | NA                 | NA                            | NA                 |
| Kabuli_wild_59458942 | NA                                  | Ca_kabuli_denovo | 59458942                | C/T  | NA                 | NA                            | NA                 |
| Kabuli_wild_59459056 | NA                                  | Ca_kabuli_denovo | 59459056                | C/T  | NA                 | NA                            | NA                 |
| Kabuli_wild_59459065 | NA                                  | Ca_kabuli_denovo | 59459065                | C/G  | NA                 | NA                            | NA                 |
| Kabuli_wild_59459076 | NA                                  | Ca_kabuli_denovo | 59459076                | A/G  | NA                 | NA                            | NA                 |
| Kabuli_wild_59460559 | NA                                  | Ca_kabuli_denovo | 59460559                | C/G  | NA                 | NA                            | NA                 |
| Kabuli_wild_59465756 | NA                                  | Ca_kabuli_denovo | 59465756                | A/T  | NA                 | NA                            | NA                 |
| Kabuli_wild_59468087 | NA                                  | Ca_kabuli_denovo | 59468087                | A/G  | NA                 | NA                            | NA                 |
| Kabuli_wild_59469487 | NA                                  | Ca_kabuli_denovo | 59469487                | C/T  | NA                 | NA                            | NA                 |

| SNP IDs              | NCBI dbSNP accession IDs (NCBI_SS#) | Chromosomes      | Physical positions (bp) | SNPs | Gene accession IDs | Sequence components of genome | Putative functions |
|----------------------|-------------------------------------|------------------|-------------------------|------|--------------------|-------------------------------|--------------------|
| Kabuli_wild_59471344 | NA                                  | Ca_kabuli_denovo | 59471344                | A/G  | NA                 | NA                            | NA                 |
| Kabuli_wild_59473117 | NA                                  | Ca_kabuli_denovo | 59473117                | C/G  | NA                 | NA                            | NA                 |
| Kabuli_wild_59473168 | NA                                  | Ca_kabuli_denovo | 59473168                | C/G  | NA                 | NA                            | NA                 |
| Kabuli_wild_59475773 | NA                                  | Ca_kabuli_denovo | 59475773                | A/G  | NA                 | NA                            | NA                 |
| Kabuli_wild_59475782 | NA                                  | Ca_kabuli_denovo | 59475782                | C/T  | NA                 | NA                            | NA                 |
| Kabuli_wild_59475797 | NA                                  | Ca_kabuli_denovo | 59475797                | A/G  | NA                 | NA                            | NA                 |
| Kabuli_wild_59475815 | NA                                  | Ca_kabuli_denovo | 59475815                | A/G  | NA                 | NA                            | NA                 |
| Kabuli_wild_59477608 | NA                                  | Ca_kabuli_denovo | 59477608                | C/T  | NA                 | NA                            | NA                 |
| Kabuli_wild_59477616 | NA                                  | Ca_kabuli_denovo | 59477616                | C/T  | NA                 | NA                            | NA                 |
| Kabuli_wild_59479891 | NA                                  | Ca_kabuli_denovo | 59479891                | C/T  | NA                 | NA                            | NA                 |
| Kabuli_wild_59481344 | NA                                  | Ca_kabuli_denovo | 59481344                | C/G  | NA                 | NA                            | NA                 |
| Kabuli_wild_59481347 | NA                                  | Ca_kabuli_denovo | 59481347                | C/G  | NA                 | NA                            | NA                 |
| Kabuli_wild_59481368 | NA                                  | Ca_kabuli_denovo | 59481368                | C/G  | NA                 | NA                            | NA                 |
| Kabuli_wild_59485912 | NA                                  | Ca_kabuli_denovo | 59485912                | A/C  | NA                 | NA                            | NA                 |
| Kabuli_wild_59490221 | NA                                  | Ca_kabuli_denovo | 59490221                | C/T  | NA                 | NA                            | NA                 |
| Kabuli_wild_59495132 | NA                                  | Ca_kabuli_denovo | 59495132                | C/G  | NA                 | NA                            | NA                 |
| Kabuli_wild_59495138 | NA                                  | Ca_kabuli_denovo | 59495138                | A/G  | NA                 | NA                            | NA                 |
| Kabuli_wild_59495144 | NA                                  | Ca_kabuli_denovo | 59495144                | A/G  | NA                 | NA                            | NA                 |
| Kabuli_wild_59495162 | NA                                  | Ca_kabuli_denovo | 59495162                | A/G  | NA                 | NA                            | NA                 |
| Kabuli_wild_59497856 | NA                                  | Ca_kabuli_denovo | 59497856                | C/T  | NA                 | NA                            | NA                 |
| Kabuli_wild_59499412 | NA                                  | Ca_kabuli_denovo | 59499412                | A/G  | NA                 | NA                            | NA                 |
| Kabuli_wild_59502446 | NA                                  | Ca_kabuli_denovo | 59502446                | A/G  | NA                 | NA                            | NA                 |
| Kabuli_wild_59504501 | NA                                  | Ca_kabuli_denovo | 59504501                | C/T  | NA                 | NA                            | NA                 |
| Kabuli_wild_59504518 | NA                                  | Ca_kabuli_denovo | 59504518                | A/C  | NA                 | NA                            | NA                 |
| Kabuli_wild_59509465 | NA                                  | Ca_kabuli_denovo | 59509465                | A/G  | NA                 | NA                            | NA                 |
| Kabuli_wild_59510406 | NA                                  | Ca_kabuli_denovo | 59510406                | C/G  | NA                 | NA                            | NA                 |
| Kabuli_wild_59514467 | NA                                  | Ca_kabuli_denovo | 59514467                | C/T  | NA                 | NA                            | NA                 |
| Kabuli_wild_59525264 | NA                                  | Ca_kabuli_denovo | 59525264                | A/G  | NA                 | NA                            | NA                 |
| Kabuli_wild_59525276 | NA                                  | Ca_kabuli_denovo | 59525276                | A/G  | NA                 | NA                            | NA                 |
| Kabuli_wild_59525288 | NA                                  | Ca_kabuli_denovo | 59525288                | G/T  | NA                 | NA                            | NA                 |
| Kabuli_wild_59525291 | NA                                  | Ca_kabuli_denovo | 59525291                | A/C  | NA                 | NA                            | NA                 |
| Kabuli_wild_59525425 | NA                                  | Ca_kabuli_denovo | 59525425                | C/T  | NA                 | NA                            | NA                 |
| Kabuli_wild_59525461 | NA                                  | Ca_kabuli_denovo | 59525461                | A/G  | NA                 | NA                            | NA                 |
| Kabuli_wild_59525464 | NA                                  | Ca_kabuli_denovo | 59525464                | C/T  | NA                 | NA                            | NA                 |
| Kabuli_wild_59526208 | NA                                  | Ca_kabuli_denovo | 59526208                | C/G  | NA                 | NA                            | NA                 |
| Kabuli_wild_59527013 | NA                                  | Ca_kabuli_denovo | 59527013                | A/C  | NA                 | NA                            | NA                 |
| Kabuli_wild_59527037 | NA                                  | Ca_kabuli_denovo | 59527037                | A/G  | NA                 | NA                            | NA                 |
| Kabuli_wild_59529997 | NA                                  | Ca_kabuli_denovo | 59529997                | A/G  | NA                 | NA                            | NA                 |
| Kabuli_wild_59530286 | NA                                  | Ca_kabuli_denovo | 59530286                | C/T  | NA                 | NA                            | NA                 |
| Kabuli_wild_59537632 | NA                                  | Ca_kabuli_denovo | 59537632                | A/G  | NA                 | NA                            | NA                 |
| Kabuli_wild_59542639 | NA                                  | Ca_kabuli_denovo | 59542639                | C/G  | NA                 | NA                            | NA                 |
| Kabuli_wild_59542645 | NA                                  | Ca_kabuli_denovo | 59542645                | C/T  | NA                 | NA                            | NA                 |
| Kabuli_wild_59543381 | NA                                  | Ca_kabuli_denovo | 59543381                | C/G  | NA                 | NA                            | NA                 |
| Kabuli_wild_59547479 | NA                                  | Ca_kabuli_denovo | 59547479                | A/G  | NA                 | NA                            | NA                 |

| SNP IDs              | NCBI dbSNP accession IDs (NCBI_SS#) | Chromosomes      | Physical positions (bp) | SNPs | Gene accession IDs | Sequence components of genome | Putative functions |
|----------------------|-------------------------------------|------------------|-------------------------|------|--------------------|-------------------------------|--------------------|
| Kabuli_wild_59547482 | NA                                  | Ca_kabuli_denovo | 59547482                | A/G  | NA                 | NA                            | NA                 |
| Kabuli_wild_59547488 | NA                                  | Ca_kabuli_denovo | 59547488                | C/G  | NA                 | NA                            | NA                 |
| Kabuli_wild_59547490 | NA                                  | Ca_kabuli_denovo | 59547490                | A/C  | NA                 | NA                            | NA                 |
| Kabuli_wild_59547563 | NA                                  | Ca_kabuli_denovo | 59547563                | C/T  | NA                 | NA                            | NA                 |
| Kabuli_wild_59547572 | NA                                  | Ca_kabuli_denovo | 59547572                | C/T  | NA                 | NA                            | NA                 |
| Kabuli_wild_59548870 | NA                                  | Ca_kabuli_denovo | 59548870                | A/G  | NA                 | NA                            | NA                 |
| Kabuli_wild_59555131 | NA                                  | Ca_kabuli_denovo | 59555131                | A/G  | NA                 | NA                            | NA                 |
| Kabuli_wild_59555152 | NA                                  | Ca_kabuli_denovo | 59555152                | A/G  | NA                 | NA                            | NA                 |
| Kabuli_wild_59557068 | NA                                  | Ca_kabuli_denovo | 59557068                | A/C  | NA                 | NA                            | NA                 |
| Kabuli_wild_59557085 | NA                                  | Ca_kabuli_denovo | 59557085                | G/T  | NA                 | NA                            | NA                 |
| Kabuli_wild_59557818 | NA                                  | Ca_kabuli_denovo | 59557818                | A/G  | NA                 | NA                            | NA                 |
| Kabuli_wild_59564229 | NA                                  | Ca_kabuli_denovo | 59564229                | A/G  | NA                 | NA                            | NA                 |
| Kabuli_wild_59564233 | NA                                  | Ca_kabuli_denovo | 59564233                | A/G  | NA                 | NA                            | NA                 |
| Kabuli_wild_59565251 | NA                                  | Ca_kabuli_denovo | 59565251                | C/G  | NA                 | NA                            | NA                 |
| Kabuli_wild_59567358 | NA                                  | Ca_kabuli_denovo | 59567358                | A/T  | NA                 | NA                            | NA                 |
| Kabuli_wild_59569288 | NA                                  | Ca_kabuli_denovo | 59569288                | A/G  | NA                 | NA                            | NA                 |
| Kabuli_wild_59576041 | NA                                  | Ca_kabuli_denovo | 59576041                | A/G  | NA                 | NA                            | NA                 |
| Kabuli_wild_59576123 | NA                                  | Ca_kabuli_denovo | 59576123                | A/G  | NA                 | NA                            | NA                 |
| Kabuli_wild_59579114 | NA                                  | Ca_kabuli_denovo | 59579114                | G/T  | NA                 | NA                            | NA                 |
| Kabuli_wild_59581418 | NA                                  | Ca_kabuli_denovo | 59581418                | A/G  | NA                 | NA                            | NA                 |
| Kabuli_wild_59581451 | NA                                  | Ca_kabuli_denovo | 59581451                | A/C  | NA                 | NA                            | NA                 |
| Kabuli_wild_59581800 | NA                                  | Ca_kabuli_denovo | 59581800                | A/G  | NA                 | NA                            | NA                 |
| Kabuli_wild_59597429 | NA                                  | Ca_kabuli_denovo | 59597429                | A/G  | NA                 | NA                            | NA                 |
| Kabuli_wild_59597442 | NA                                  | Ca_kabuli_denovo | 59597442                | A/T  | NA                 | NA                            | NA                 |
| Kabuli_wild_59600130 | NA                                  | Ca_kabuli_denovo | 59600130                | A/C  | NA                 | NA                            | NA                 |
| Kabuli_wild_59604772 | NA                                  | Ca_kabuli_denovo | 59604772                | C/G  | NA                 | NA                            | NA                 |
| Kabuli_wild_59605883 | NA                                  | Ca_kabuli_denovo | 59605883                | C/T  | NA                 | NA                            | NA                 |
| Kabuli_wild_59605886 | NA                                  | Ca_kabuli_denovo | 59605886                | C/G  | NA                 | NA                            | NA                 |
| Kabuli_wild_59605889 | NA                                  | Ca_kabuli_denovo | 59605889                | C/G  | NA                 | NA                            | NA                 |
| Kabuli_wild_59608072 | NA                                  | Ca_kabuli_denovo | 59608072                | C/T  | NA                 | NA                            | NA                 |
| Kabuli_wild_59613357 | NA                                  | Ca_kabuli_denovo | 59613357                | A/C  | NA                 | NA                            | NA                 |
| Kabuli_wild_59613396 | NA                                  | Ca_kabuli_denovo | 59613396                | C/G  | NA                 | NA                            | NA                 |
| Kabuli_wild_59616496 | NA                                  | Ca_kabuli_denovo | 59616496                | C/G  | NA                 | NA                            | NA                 |
| Kabuli_wild_59617549 | NA                                  | Ca_kabuli_denovo | 59617549                | A/G  | NA                 | NA                            | NA                 |
| Kabuli_wild_59617581 | NA                                  | Ca_kabuli_denovo | 59617581                | C/T  | NA                 | NA                            | NA                 |
| Kabuli_wild_59624603 | NA                                  | Ca_kabuli_denovo | 59624603                | C/G  | NA                 | NA                            | NA                 |
| Kabuli_wild_59624621 | NA                                  | Ca_kabuli_denovo | 59624621                | A/C  | NA                 | NA                            | NA                 |
| Kabuli_wild_59626916 | NA                                  | Ca_kabuli_denovo | 59626916                | A/C  | NA                 | NA                            | NA                 |
| Kabuli_wild_59627915 | NA                                  | Ca_kabuli_denovo | 59627915                | C/T  | NA                 | NA                            | NA                 |
| Kabuli_wild_59627918 | NA                                  | Ca_kabuli_denovo | 59627918                | C/T  | NA                 | NA                            | NA                 |
| Kabuli_wild_59627930 | NA                                  | Ca_kabuli_denovo | 59627930                | A/G  | NA                 | NA                            | NA                 |
| Kabuli_wild_59627936 | NA                                  | Ca_kabuli_denovo | 59627936                | C/T  | NA                 | NA                            | NA                 |
| Kabuli_wild_59628768 | NA                                  | Ca_kabuli_denovo | 59628768                | C/T  | NA                 | NA                            | NA                 |
| Kabuli_wild_59633983 | NA                                  | Ca_kabuli_denovo | 59633983                | A/G  | NA                 | NA                            | NA                 |

| SNP IDs              | NCBI dbSNP accession IDs (NCBI_SS#) | Chromosomes      | Physical positions (bp) | SNPs | Gene accession IDs | Sequence components of genome | Putative functions |
|----------------------|-------------------------------------|------------------|-------------------------|------|--------------------|-------------------------------|--------------------|
| Kabuli_wild_59633989 | NA                                  | Ca_kabuli_denovo | 59633989                | C/G  | NA                 | NA                            | NA                 |
| Kabuli_wild_59634541 | NA                                  | Ca_kabuli_denovo | 59634541                | C/T  | NA                 | NA                            | NA                 |
| Kabuli_wild_59634547 | NA                                  | Ca_kabuli_denovo | 59634547                | C/T  | NA                 | NA                            | NA                 |
| Kabuli_wild_59637148 | NA                                  | Ca_kabuli_denovo | 59637148                | C/T  | NA                 | NA                            | NA                 |
| Kabuli_wild_59637178 | NA                                  | Ca_kabuli_denovo | 59637178                | C/T  | NA                 | NA                            | NA                 |
| Kabuli_wild_59639570 | NA                                  | Ca_kabuli_denovo | 59639570                | C/G  | NA                 | NA                            | NA                 |
| Kabuli_wild_59639578 | NA                                  | Ca_kabuli_denovo | 59639578                | A/G  | NA                 | NA                            | NA                 |
| Kabuli_wild_59639585 | NA                                  | Ca_kabuli_denovo | 59639585                | C/G  | NA                 | NA                            | NA                 |
| Kabuli_wild_59640323 | NA                                  | Ca_kabuli_denovo | 59640323                | A/G  | NA                 | NA                            | NA                 |
| Kabuli_wild_59645867 | NA                                  | Ca_kabuli_denovo | 59645867                | A/G  | NA                 | NA                            | NA                 |
| Kabuli_wild_59648071 | NA                                  | Ca_kabuli_denovo | 59648071                | A/G  | NA                 | NA                            | NA                 |
| Kabuli_wild_59651270 | NA                                  | Ca_kabuli_denovo | 59651270                | C/G  | NA                 | NA                            | NA                 |
| Kabuli_wild_59651293 | NA                                  | Ca_kabuli_denovo | 59651293                | A/G  | NA                 | NA                            | NA                 |
| Kabuli_wild_59651324 | NA                                  | Ca_kabuli_denovo | 59651324                | C/G  | NA                 | NA                            | NA                 |
| Kabuli_wild_59655754 | NA                                  | Ca_kabuli_denovo | 59655754                | C/G  | NA                 | NA                            | NA                 |
| Kabuli_wild_59655775 | NA                                  | Ca_kabuli_denovo | 59655775                | C/T  | NA                 | NA                            | NA                 |
| Kabuli_wild_59655799 | NA                                  | Ca_kabuli_denovo | 59655799                | C/T  | NA                 | NA                            | NA                 |
| Kabuli_wild_59660636 | NA                                  | Ca_kabuli_denovo | 59660636                | A/G  | NA                 | NA                            | NA                 |
| Kabuli_wild_59664370 | NA                                  | Ca_kabuli_denovo | 59664370                | A/C  | NA                 | NA                            | NA                 |
| Kabuli_wild_59664371 | NA                                  | Ca_kabuli_denovo | 59664371                | C/G  | NA                 | NA                            | NA                 |
| Kabuli_wild_59664383 | NA                                  | Ca_kabuli_denovo | 59664383                | A/G  | NA                 | NA                            | NA                 |
| Kabuli_wild_59678936 | NA                                  | Ca_kabuli_denovo | 59678936                | A/G  | NA                 | NA                            | NA                 |
| Kabuli_wild_59679817 | NA                                  | Ca_kabuli_denovo | 59679817                | C/T  | NA                 | NA                            | NA                 |
| Kabuli_wild_59679826 | NA                                  | Ca_kabuli_denovo | 59679826                | A/C  | NA                 | NA                            | NA                 |
| Kabuli_wild_59682235 | NA                                  | Ca_kabuli_denovo | 59682235                | C/T  | NA                 | NA                            | NA                 |
| Kabuli_wild_59682262 | NA                                  | Ca_kabuli_denovo | 59682262                | C/T  | NA                 | NA                            | NA                 |
| Kabuli_wild_59682277 | NA                                  | Ca_kabuli_denovo | 59682277                | C/T  | NA                 | NA                            | NA                 |
| Kabuli_wild_59682307 | NA                                  | Ca_kabuli_denovo | 59682307                | A/G  | NA                 | NA                            | NA                 |
| Kabuli_wild_59686513 | NA                                  | Ca_kabuli_denovo | 59686513                | C/G  | NA                 | NA                            | NA                 |
| Kabuli_wild_59699251 | NA                                  | Ca_kabuli_denovo | 59699251                | C/T  | NA                 | NA                            | NA                 |
| Kabuli_wild_59700459 | NA                                  | Ca_kabuli_denovo | 59700459                | A/T  | NA                 | NA                            | NA                 |
| Kabuli_wild_59700460 | NA                                  | Ca_kabuli_denovo | 59700460                | G/T  | NA                 | NA                            | NA                 |
| Kabuli_wild_59700471 | NA                                  | Ca_kabuli_denovo | 59700471                | A/G  | NA                 | NA                            | NA                 |
| Kabuli_wild_59700878 | NA                                  | Ca_kabuli_denovo | 59700878                | C/G  | NA                 | NA                            | NA                 |
| Kabuli_wild_59705791 | NA                                  | Ca_kabuli_denovo | 59705791                | A/G  | NA                 | NA                            | NA                 |
| Kabuli_wild_59707924 | NA                                  | Ca_kabuli_denovo | 59707924                | A/G  | NA                 | NA                            | NA                 |
| Kabuli_wild_59707927 | NA                                  | Ca_kabuli_denovo | 59707927                | C/G  | NA                 | NA                            | NA                 |
| Kabuli_wild_59717077 | NA                                  | Ca_kabuli_denovo | 59717077                | C/T  | NA                 | NA                            | NA                 |
| Kabuli_wild_59717086 | NA                                  | Ca_kabuli_denovo | 59717086                | G/T  | NA                 | NA                            | NA                 |
| Kabuli_wild_59717879 | NA                                  | Ca_kabuli_denovo | 59717879                | A/G  | NA                 | NA                            | NA                 |
| Kabuli_wild_59718122 | NA                                  | Ca_kabuli_denovo | 59718122                | A/G  | NA                 | NA                            | NA                 |
| Kabuli_wild_59718149 | NA                                  | Ca_kabuli_denovo | 59718149                | A/G  | NA                 | NA                            | NA                 |
| Kabuli_wild_59718242 | NA                                  | Ca_kabuli_denovo | 59718242                | C/G  | NA                 | NA                            | NA                 |
| Kabuli_wild_59726028 | NA                                  | Ca_kabuli_denovo | 59726028                | C/G  | NA                 | NA                            | NA                 |

| SNP IDs              | NCBI dbSNP accession IDs (NCBI_SS#) | Chromosomes      | Physical positions (bp) | SNPs | Gene accession IDs | Sequence components of genome | Putative functions |
|----------------------|-------------------------------------|------------------|-------------------------|------|--------------------|-------------------------------|--------------------|
| Kabuli_wild_59726048 | NA                                  | Ca_kabuli_denovo | 59726048                | C/G  | NA                 | NA                            | NA                 |
| Kabuli_wild_59726050 | NA                                  | Ca_kabuli_denovo | 59726050                | C/T  | NA                 | NA                            | NA                 |
| Kabuli_wild_59726063 | NA                                  | Ca_kabuli_denovo | 59726063                | C/G  | NA                 | NA                            | NA                 |
| Kabuli_wild_59740102 | NA                                  | Ca_kabuli_denovo | 59740102                | C/T  | NA                 | NA                            | NA                 |
| Kabuli_wild_59740117 | NA                                  | Ca_kabuli_denovo | 59740117                | A/G  | NA                 | NA                            | NA                 |
| Kabuli_wild_59747626 | NA                                  | Ca_kabuli_denovo | 59747626                | C/G  | NA                 | NA                            | NA                 |
| Kabuli_wild_59751287 | NA                                  | Ca_kabuli_denovo | 59751287                | A/G  | NA                 | NA                            | NA                 |
| Kabuli_wild_59751290 | NA                                  | Ca_kabuli_denovo | 59751290                | C/G  | NA                 | NA                            | NA                 |
| Kabuli_wild_59752663 | NA                                  | Ca_kabuli_denovo | 59752663                | A/G  | NA                 | NA                            | NA                 |
| Kabuli_wild_59754415 | NA                                  | Ca_kabuli_denovo | 59754415                | C/T  | NA                 | NA                            | NA                 |
| Kabuli_wild_59755148 | NA                                  | Ca_kabuli_denovo | 59755148                | C/G  | NA                 | NA                            | NA                 |
| Kabuli_wild_59757367 | NA                                  | Ca_kabuli_denovo | 59757367                | C/G  | NA                 | NA                            | NA                 |
| Kabuli_wild_59757409 | NA                                  | Ca_kabuli_denovo | 59757409                | A/G  | NA                 | NA                            | NA                 |
| Kabuli_wild_59757743 | NA                                  | Ca_kabuli_denovo | 59757743                | C/G  | NA                 | NA                            | NA                 |
| Kabuli_wild_59757749 | NA                                  | Ca_kabuli_denovo | 59757749                | C/G  | NA                 | NA                            | NA                 |
| Kabuli_wild_59757751 | NA                                  | Ca_kabuli_denovo | 59757751                | C/G  | NA                 | NA                            | NA                 |
| Kabuli_wild_59757773 | NA                                  | Ca_kabuli_denovo | 59757773                | C/G  | NA                 | NA                            | NA                 |
| Kabuli_wild_59758539 | NA                                  | Ca_kabuli_denovo | 59758539                | A/C  | NA                 | NA                            | NA                 |
| Kabuli_wild_59762530 | NA                                  | Ca_kabuli_denovo | 59762530                | C/G  | NA                 | NA                            | NA                 |
| Kabuli_wild_59763176 | NA                                  | Ca_kabuli_denovo | 59763176                | A/G  | NA                 | NA                            | NA                 |
| Kabuli_wild_59763194 | NA                                  | Ca_kabuli_denovo | 59763194                | A/G  | NA                 | NA                            | NA                 |
| Kabuli_wild_59765005 | NA                                  | Ca_kabuli_denovo | 59765005                | A/G  | NA                 | NA                            | NA                 |
| Kabuli_wild_59765009 | NA                                  | Ca_kabuli_denovo | 59765009                | C/G  | NA                 | NA                            | NA                 |
| Kabuli_wild_59765029 | NA                                  | Ca_kabuli_denovo | 59765029                | C/G  | NA                 | NA                            | NA                 |
| Kabuli_wild_59768534 | NA                                  | Ca_kabuli_denovo | 59768534                | C/T  | NA                 | NA                            | NA                 |
| Kabuli_wild_59771236 | NA                                  | Ca_kabuli_denovo | 59771236                | C/T  | NA                 | NA                            | NA                 |
| Kabuli_wild_59772382 | NA                                  | Ca_kabuli_denovo | 59772382                | A/G  | NA                 | NA                            | NA                 |
| Kabuli_wild_59778853 | NA                                  | Ca_kabuli_denovo | 59778853                | C/G  | NA                 | NA                            | NA                 |
| Kabuli_wild_59785031 | NA                                  | Ca_kabuli_denovo | 59785031                | C/T  | NA                 | NA                            | NA                 |
| Kabuli_wild_59785040 | NA                                  | Ca_kabuli_denovo | 59785040                | C/T  | NA                 | NA                            | NA                 |
| Kabuli_wild_59785041 | NA                                  | Ca_kabuli_denovo | 59785041                | A/G  | NA                 | NA                            | NA                 |
| Kabuli_wild_59785068 | NA                                  | Ca_kabuli_denovo | 59785068                | C/G  | NA                 | NA                            | NA                 |
| Kabuli_wild_59786702 | NA                                  | Ca_kabuli_denovo | 59786702                | C/T  | NA                 | NA                            | NA                 |
| Kabuli_wild_59787596 | NA                                  | Ca_kabuli_denovo | 59787596                | A/G  | NA                 | NA                            | NA                 |
| Kabuli_wild_59787650 | NA                                  | Ca_kabuli_denovo | 59787650                | A/G  | NA                 | NA                            | NA                 |
| Kabuli_wild_59789092 | NA                                  | Ca_kabuli_denovo | 59789092                | C/T  | NA                 | NA                            | NA                 |
| Kabuli_wild_59789150 | NA                                  | Ca_kabuli_denovo | 59789150                | C/G  | NA                 | NA                            | NA                 |
| Kabuli_wild_59801688 | NA                                  | Ca_kabuli_denovo | 59801688                | A/G  | NA                 | NA                            | NA                 |
| Kabuli_wild_59804639 | NA                                  | Ca_kabuli_denovo | 59804639                | C/G  | NA                 | NA                            | NA                 |
| Kabuli_wild_59804675 | NA                                  | Ca_kabuli_denovo | 59804675                | C/G  | NA                 | NA                            | NA                 |
| Kabuli_wild_59805117 | NA                                  | Ca_kabuli_denovo | 59805117                | C/T  | NA                 | NA                            | NA                 |
| Kabuli_wild_59805149 | NA                                  | Ca_kabuli_denovo | 59805149                | C/T  | NA                 | NA                            | NA                 |
| Kabuli_wild_59805155 | NA                                  | Ca_kabuli_denovo | 59805155                | A/G  | NA                 | NA                            | NA                 |
| Kabuli_wild_59808357 | NA                                  | Ca_kabuli_denovo | 59808357                | A/G  | NA                 | NA                            | NA                 |

| SNP IDs              | NCBI dbSNP accession IDs (NCBI_SS#) | Chromosomes      | Physical positions (bp) | SNPs | Gene accession IDs | Sequence components of genome | Putative functions |
|----------------------|-------------------------------------|------------------|-------------------------|------|--------------------|-------------------------------|--------------------|
| Kabuli_wild_59812056 | NA                                  | Ca_kabuli_denovo | 59812056                | C/T  | NA                 | NA                            | NA                 |
| Kabuli_wild_59812074 | NA                                  | Ca_kabuli_denovo | 59812074                | A/G  | NA                 | NA                            | NA                 |
| Kabuli_wild_59815327 | NA                                  | Ca_kabuli_denovo | 59815327                | C/G  | NA                 | NA                            | NA                 |
| Kabuli_wild_59817035 | NA                                  | Ca_kabuli_denovo | 59817035                | A/G  | NA                 | NA                            | NA                 |
| Kabuli_wild_59817271 | NA                                  | Ca_kabuli_denovo | 59817271                | C/G  | NA                 | NA                            | NA                 |
| Kabuli_wild_59817283 | NA                                  | Ca_kabuli_denovo | 59817283                | C/G  | NA                 | NA                            | NA                 |
| Kabuli_wild_59817284 | NA                                  | Ca_kabuli_denovo | 59817284                | A/G  | NA                 | NA                            | NA                 |
| Kabuli_wild_59817286 | NA                                  | Ca_kabuli_denovo | 59817286                | C/T  | NA                 | NA                            | NA                 |
| Kabuli_wild_59826567 | NA                                  | Ca_kabuli_denovo | 59826567                | C/G  | NA                 | NA                            | NA                 |
| Kabuli_wild_59827601 | NA                                  | Ca_kabuli_denovo | 59827601                | A/C  | NA                 | NA                            | NA                 |
| Kabuli_wild_59827658 | NA                                  | Ca_kabuli_denovo | 59827658                | C/T  | NA                 | NA                            | NA                 |
| Kabuli_wild_59827661 | NA                                  | Ca_kabuli_denovo | 59827661                | A/G  | NA                 | NA                            | NA                 |
| Kabuli_wild_59828873 | NA                                  | Ca_kabuli_denovo | 59828873                | C/T  | NA                 | NA                            | NA                 |
| Kabuli_wild_59832887 | NA                                  | Ca_kabuli_denovo | 59832887                | C/G  | NA                 | NA                            | NA                 |
| Kabuli_wild_59832896 | NA                                  | Ca_kabuli_denovo | 59832896                | C/G  | NA                 | NA                            | NA                 |
| Kabuli_wild_59833538 | NA                                  | Ca_kabuli_denovo | 59833538                | C/G  | NA                 | NA                            | NA                 |
| Kabuli_wild_59833970 | NA                                  | Ca_kabuli_denovo | 59833970                | C/T  | NA                 | NA                            | NA                 |
| Kabuli_wild_59834009 | NA                                  | Ca_kabuli_denovo | 59834009                | C/T  | NA                 | NA                            | NA                 |
| Kabuli_wild_59834018 | NA                                  | Ca_kabuli_denovo | 59834018                | C/G  | NA                 | NA                            | NA                 |
| Kabuli_wild_59836712 | NA                                  | Ca_kabuli_denovo | 59836712                | A/G  | NA                 | NA                            | NA                 |
| Kabuli_wild_59836715 | NA                                  | Ca_kabuli_denovo | 59836715                | C/G  | NA                 | NA                            | NA                 |
| Kabuli_wild_59842295 | NA                                  | Ca_kabuli_denovo | 59842295                | A/G  | NA                 | NA                            | NA                 |
| Kabuli_wild_59842343 | NA                                  | Ca_kabuli_denovo | 59842343                | A/G  | NA                 | NA                            | NA                 |
| Kabuli_wild_59842720 | NA                                  | Ca_kabuli_denovo | 59842720                | C/G  | NA                 | NA                            | NA                 |
| Kabuli_wild_59844064 | NA                                  | Ca_kabuli_denovo | 59844064                | C/T  | NA                 | NA                            | NA                 |
| Kabuli_wild_59844078 | NA                                  | Ca_kabuli_denovo | 59844078                | A/G  | NA                 | NA                            | NA                 |
| Kabuli_wild_59845076 | NA                                  | Ca_kabuli_denovo | 59845076                | C/T  | NA                 | NA                            | NA                 |
| Kabuli_wild_59846013 | NA                                  | Ca_kabuli_denovo | 59846013                | G/T  | NA                 | NA                            | NA                 |
| Kabuli_wild_59846034 | NA                                  | Ca_kabuli_denovo | 59846034                | A/G  | NA                 | NA                            | NA                 |
| Kabuli_wild_59847505 | NA                                  | Ca_kabuli_denovo | 59847505                | C/T  | NA                 | NA                            | NA                 |
| Kabuli_wild_59847797 | NA                                  | Ca_kabuli_denovo | 59847797                | A/G  | NA                 | NA                            | NA                 |
| Kabuli_wild_59847815 | NA                                  | Ca_kabuli_denovo | 59847815                | A/G  | NA                 | NA                            | NA                 |
| Kabuli_wild_59849445 | NA                                  | Ca_kabuli_denovo | 59849445                | G/T  | NA                 | NA                            | NA                 |
| Kabuli_wild_59849472 | NA                                  | Ca_kabuli_denovo | 59849472                | C/T  | NA                 | NA                            | NA                 |
| Kabuli_wild_59849478 | NA                                  | Ca_kabuli_denovo | 59849478                | A/G  | NA                 | NA                            | NA                 |
| Kabuli_wild_59850949 | NA                                  | Ca_kabuli_denovo | 59850949                | A/G  | NA                 | NA                            | NA                 |
| Kabuli_wild_59850950 | NA                                  | Ca_kabuli_denovo | 59850950                | C/T  | NA                 | NA                            | NA                 |
| Kabuli_wild_59850977 | NA                                  | Ca_kabuli_denovo | 59850977                | C/T  | NA                 | NA                            | NA                 |
| Kabuli_wild_59850998 | NA                                  | Ca_kabuli_denovo | 59850998                | A/G  | NA                 | NA                            | NA                 |
| Kabuli_wild_59852239 | NA                                  | Ca_kabuli_denovo | 59852239                | A/G  | NA                 | NA                            | NA                 |
| Kabuli_wild_59852678 | NA                                  | Ca_kabuli_denovo | 59852678                | A/C  | NA                 | NA                            | NA                 |
| Kabuli_wild_59852680 | NA                                  | Ca_kabuli_denovo | 59852680                | A/C  | NA                 | NA                            | NA                 |
| Kabuli_wild_59853538 | NA                                  | Ca_kabuli_denovo | 59853538                | C/T  | NA                 | NA                            | NA                 |
| Kabuli_wild_59860373 | NA                                  | Ca_kabuli_denovo | 59860373                | A/G  | NA                 | NA                            | NA                 |



| SNP IDs              | NCBI dbSNP accession IDs (NCBI_SS#) | Chromosomes      | Physical positions (bp) | SNPs | Gene accession IDs | Sequence components of genome | Putative functions |
|----------------------|-------------------------------------|------------------|-------------------------|------|--------------------|-------------------------------|--------------------|
| Kabuli_wild_59860391 | NA                                  | Ca_kabuli_denovo | 59860391                | C/T  | NA                 | NA                            | NA                 |
| Kabuli_wild_59863076 | NA                                  | Ca_kabuli_denovo | 59863076                | G/T  | NA                 | NA                            | NA                 |
| Kabuli_wild_59863079 | NA                                  | Ca_kabuli_denovo | 59863079                | C/G  | NA                 | NA                            | NA                 |
| Kabuli_wild_59867945 | NA                                  | Ca_kabuli_denovo | 59867945                | C/G  | NA                 | NA                            | NA                 |
| Kabuli_wild_59869720 | NA                                  | Ca_kabuli_denovo | 59869720                | C/T  | NA                 | NA                            | NA                 |
| Kabuli_wild_59869732 | NA                                  | Ca_kabuli_denovo | 59869732                | C/T  | NA                 | NA                            | NA                 |
| Kabuli_wild_59869735 | NA                                  | Ca_kabuli_denovo | 59869735                | C/G  | NA                 | NA                            | NA                 |
| Kabuli_wild_59871948 | NA                                  | Ca_kabuli_denovo | 59871948                | C/T  | NA                 | NA                            | NA                 |
| Kabuli_wild_59874455 | NA                                  | Ca_kabuli_denovo | 59874455                | C/T  | NA                 | NA                            | NA                 |
| Kabuli_wild_59874486 | NA                                  | Ca_kabuli_denovo | 59874486                | C/T  | NA                 | NA                            | NA                 |
| Kabuli_wild_59874500 | NA                                  | Ca_kabuli_denovo | 59874500                | A/G  | NA                 | NA                            | NA                 |
| Kabuli_wild_59876612 | NA                                  | Ca_kabuli_denovo | 59876612                | C/T  | NA                 | NA                            | NA                 |
| Kabuli_wild_59876614 | NA                                  | Ca_kabuli_denovo | 59876614                | G/T  | NA                 | NA                            | NA                 |
| Kabuli_wild_59876632 | NA                                  | Ca_kabuli_denovo | 59876632                | C/G  | NA                 | NA                            | NA                 |
| Kabuli_wild_59883203 | NA                                  | Ca_kabuli_denovo | 59883203                | A/T  | NA                 | NA                            | NA                 |
| Kabuli_wild_59883587 | NA                                  | Ca_kabuli_denovo | 59883587                | A/G  | NA                 | NA                            | NA                 |
| Kabuli_wild_59883590 | NA                                  | Ca_kabuli_denovo | 59883590                | C/G  | NA                 | NA                            | NA                 |
| Kabuli_wild_59888441 | NA                                  | Ca_kabuli_denovo | 59888441                | A/G  | NA                 | NA                            | NA                 |
| Kabuli_wild_59889283 | NA                                  | Ca_kabuli_denovo | 59889283                | C/G  | NA                 | NA                            | NA                 |
| Kabuli_wild_59890462 | NA                                  | Ca_kabuli_denovo | 59890462                | C/T  | NA                 | NA                            | NA                 |
| Kabuli_wild_59890471 | NA                                  | Ca_kabuli_denovo | 59890471                | C/G  | NA                 | NA                            | NA                 |
| Kabuli_wild_59896034 | NA                                  | Ca_kabuli_denovo | 59896034                | A/G  | NA                 | NA                            | NA                 |
| Kabuli_wild_59896037 | NA                                  | Ca_kabuli_denovo | 59896037                | A/C  | NA                 | NA                            | NA                 |
| Kabuli_wild_59896049 | NA                                  | Ca_kabuli_denovo | 59896049                | C/G  | NA                 | NA                            | NA                 |
| Kabuli_wild_59898083 | NA                                  | Ca_kabuli_denovo | 59898083                | A/G  | NA                 | NA                            | NA                 |
| Kabuli_wild_59898084 | NA                                  | Ca_kabuli_denovo | 59898084                | C/T  | NA                 | NA                            | NA                 |
| Kabuli_wild_59898094 | NA                                  | Ca_kabuli_denovo | 59898094                | C/G  | NA                 | NA                            | NA                 |
| Kabuli_wild_59898460 | NA                                  | Ca_kabuli_denovo | 59898460                | A/T  | NA                 | NA                            | NA                 |
| Kabuli_wild_59898463 | NA                                  | Ca_kabuli_denovo | 59898463                | A/G  | NA                 | NA                            | NA                 |
| Kabuli_wild_59899859 | NA                                  | Ca_kabuli_denovo | 59899859                | G/T  | NA                 | NA                            | NA                 |
| Kabuli_wild_59899880 | NA                                  | Ca_kabuli_denovo | 59899880                | C/G  | NA                 | NA                            | NA                 |
| Kabuli_wild_59899886 | NA                                  | Ca_kabuli_denovo | 59899886                | A/G  | NA                 | NA                            | NA                 |
| Kabuli_wild_59899917 | NA                                  | Ca_kabuli_denovo | 59899917                | C/G  | NA                 | NA                            | NA                 |
| Kabuli_wild_59900333 | NA                                  | Ca_kabuli_denovo | 59900333                | C/T  | NA                 | NA                            | NA                 |
| Kabuli_wild_59902394 | NA                                  | Ca_kabuli_denovo | 59902394                | C/G  | NA                 | NA                            | NA                 |
| Kabuli_wild_59905252 | NA                                  | Ca_kabuli_denovo | 59905252                | A/C  | NA                 | NA                            | NA                 |
| Kabuli_wild_59905278 | NA                                  | Ca_kabuli_denovo | 59905278                | G/T  | NA                 | NA                            | NA                 |
| Kabuli_wild_59905282 | NA                                  | Ca_kabuli_denovo | 59905282                | G/T  | NA                 | NA                            | NA                 |
| Kabuli_wild_59905307 | NA                                  | Ca_kabuli_denovo | 59905307                | C/G  | NA                 | NA                            | NA                 |
| Kabuli_wild_59910848 | NA                                  | Ca_kabuli_denovo | 59910848                | C/G  | NA                 | NA                            | NA                 |
| Kabuli_wild_59910881 | NA                                  | Ca_kabuli_denovo | 59910881                | C/G  | NA                 | NA                            | NA                 |
| Kabuli_wild_59910893 | NA                                  | Ca_kabuli_denovo | 59910893                | C/T  | NA                 | NA                            | NA                 |
| Kabuli_wild_59914816 | NA                                  | Ca_kabuli_denovo | 59914816                | A/G  | NA                 | NA                            | NA                 |
| Kabuli_wild_59915221 | NA                                  | Ca_kabuli_denovo | 59915221                | A/T  | NA                 | NA                            | NA                 |

| SNP IDs              | NCBI dbSNP accession IDs (NCBI_SS#) | Chromosomes      | Physical positions (bp) | SNPs | Gene accession IDs | Sequence components of genome | Putative functions |
|----------------------|-------------------------------------|------------------|-------------------------|------|--------------------|-------------------------------|--------------------|
| Kabuli_wild_59915281 | NA                                  | Ca_kabuli_denovo | 59915281                | A/C  | NA                 | NA                            | NA                 |
| Kabuli_wild_59915308 | NA                                  | Ca_kabuli_denovo | 59915308                | A/C  | NA                 | NA                            | NA                 |
| Kabuli_wild_59916664 | NA                                  | Ca_kabuli_denovo | 59916664                | C/T  | NA                 | NA                            | NA                 |
| Kabuli_wild_59920091 | NA                                  | Ca_kabuli_denovo | 59920091                | C/G  | NA                 | NA                            | NA                 |
| Kabuli_wild_59924075 | NA                                  | Ca_kabuli_denovo | 59924075                | A/G  | NA                 | NA                            | NA                 |
| Kabuli_wild_59930291 | NA                                  | Ca_kabuli_denovo | 59930291                | A/G  | NA                 | NA                            | NA                 |
| Kabuli_wild_59933415 | NA                                  | Ca_kabuli_denovo | 59933415                | A/G  | NA                 | NA                            | NA                 |
| Kabuli_wild_59935160 | NA                                  | Ca_kabuli_denovo | 59935160                | C/G  | NA                 | NA                            | NA                 |
| Kabuli_wild_59939107 | NA                                  | Ca_kabuli_denovo | 59939107                | G/T  | NA                 | NA                            | NA                 |
| Kabuli_wild_59940695 | NA                                  | Ca_kabuli_denovo | 59940695                | C/G  | NA                 | NA                            | NA                 |
| Kabuli_wild_59944390 | NA                                  | Ca_kabuli_denovo | 59944390                | C/T  | NA                 | NA                            | NA                 |
| Kabuli_wild_59947198 | NA                                  | Ca_kabuli_denovo | 59947198                | C/T  | NA                 | NA                            | NA                 |
| Kabuli_wild_59947246 | NA                                  | Ca_kabuli_denovo | 59947246                | G/T  | NA                 | NA                            | NA                 |
| Kabuli_wild_59948858 | NA                                  | Ca_kabuli_denovo | 59948858                | G/T  | NA                 | NA                            | NA                 |
| Kabuli_wild_59948879 | NA                                  | Ca_kabuli_denovo | 59948879                | A/G  | NA                 | NA                            | NA                 |
| Kabuli_wild_59950428 | NA                                  | Ca_kabuli_denovo | 59950428                | A/C  | NA                 | NA                            | NA                 |
| Kabuli_wild_59950429 | NA                                  | Ca_kabuli_denovo | 59950429                | G/T  | NA                 | NA                            | NA                 |
| Kabuli_wild_59953879 | NA                                  | Ca_kabuli_denovo | 59953879                | A/G  | NA                 | NA                            | NA                 |
| Kabuli_wild_59958913 | NA                                  | Ca_kabuli_denovo | 59958913                | C/G  | NA                 | NA                            | NA                 |
| Kabuli_wild_59961728 | NA                                  | Ca_kabuli_denovo | 59961728                | A/G  | NA                 | NA                            | NA                 |
| Kabuli_wild_59961734 | NA                                  | Ca_kabuli_denovo | 59961734                | C/G  | NA                 | NA                            | NA                 |
| Kabuli_wild_59961736 | NA                                  | Ca_kabuli_denovo | 59961736                | A/G  | NA                 | NA                            | NA                 |
| Kabuli_wild_59963569 | NA                                  | Ca_kabuli_denovo | 59963569                | C/T  | NA                 | NA                            | NA                 |
| Kabuli_wild_59963593 | NA                                  | Ca_kabuli_denovo | 59963593                | G/T  | NA                 | NA                            | NA                 |
| Kabuli_wild_59964128 | NA                                  | Ca_kabuli_denovo | 59964128                | C/G  | NA                 | NA                            | NA                 |
| Kabuli_wild_59964146 | NA                                  | Ca_kabuli_denovo | 59964146                | C/G  | NA                 | NA                            | NA                 |
| Kabuli_wild_59966152 | NA                                  | Ca_kabuli_denovo | 59966152                | C/G  | NA                 | NA                            | NA                 |
| Kabuli_wild_59966167 | NA                                  | Ca_kabuli_denovo | 59966167                | C/G  | NA                 | NA                            | NA                 |
| Kabuli_wild_59980009 | NA                                  | Ca_kabuli_denovo | 59980009                | C/T  | NA                 | NA                            | NA                 |
| Kabuli_wild_59980021 | NA                                  | Ca_kabuli_denovo | 59980021                | C/T  | NA                 | NA                            | NA                 |
| Kabuli_wild_59982193 | NA                                  | Ca_kabuli_denovo | 59982193                | G/T  | NA                 | NA                            | NA                 |
| Kabuli_wild_59986725 | NA                                  | Ca_kabuli_denovo | 59986725                | A/G  | NA                 | NA                            | NA                 |
| Kabuli_wild_59993801 | NA                                  | Ca_kabuli_denovo | 59993801                | A/G  | NA                 | NA                            | NA                 |
| Kabuli_wild_59993822 | NA                                  | Ca_kabuli_denovo | 59993822                | A/G  | NA                 | NA                            | NA                 |
| Kabuli_wild_59996786 | NA                                  | Ca_kabuli_denovo | 59996786                | C/T  | NA                 | NA                            | NA                 |
| Kabuli_wild_60014433 | NA                                  | Ca_kabuli_denovo | 60014433                | C/T  | NA                 | NA                            | NA                 |
| Kabuli_wild_60014436 | NA                                  | Ca_kabuli_denovo | 60014436                | C/T  | NA                 | NA                            | NA                 |
| Kabuli_wild_60014439 | NA                                  | Ca_kabuli_denovo | 60014439                | A/C  | NA                 | NA                            | NA                 |
| Kabuli_wild_60014454 | NA                                  | Ca_kabuli_denovo | 60014454                | C/G  | NA                 | NA                            | NA                 |
| Kabuli_wild_60015647 | NA                                  | Ca_kabuli_denovo | 60015647                | A/G  | NA                 | NA                            | NA                 |
| Kabuli_wild_60016382 | NA                                  | Ca_kabuli_denovo | 60016382                | A/C  | NA                 | NA                            | NA                 |
| Kabuli_wild_60016406 | NA                                  | Ca_kabuli_denovo | 60016406                | A/G  | NA                 | NA                            | NA                 |
| Kabuli_wild_60016412 | NA                                  | Ca_kabuli_denovo | 60016412                | A/G  | NA                 | NA                            | NA                 |
| Kabuli_wild_60016441 | NA                                  | Ca_kabuli_denovo | 60016441                | A/G  | NA                 | NA                            | NA                 |

| SNP IDs              | NCBI dbSNP accession IDs (NCBI_SS#) | Chromosomes      | Physical positions (bp) | SNPs | Gene accession IDs | Sequence components of genome | Putative functions |
|----------------------|-------------------------------------|------------------|-------------------------|------|--------------------|-------------------------------|--------------------|
| Kabuli_wild_60020013 | NA                                  | Ca_kabuli_denovo | 60020013                | A/G  | NA                 | NA                            | NA                 |
| Kabuli_wild_60020019 | NA                                  | Ca_kabuli_denovo | 60020019                | A/G  | NA                 | NA                            | NA                 |
| Kabuli_wild_60020674 | NA                                  | Ca_kabuli_denovo | 60020674                | A/C  | NA                 | NA                            | NA                 |
| Kabuli_wild_60020698 | NA                                  | Ca_kabuli_denovo | 60020698                | A/G  | NA                 | NA                            | NA                 |
| Kabuli_wild_60024578 | NA                                  | Ca_kabuli_denovo | 60024578                | C/T  | NA                 | NA                            | NA                 |
| Kabuli_wild_60029275 | NA                                  | Ca_kabuli_denovo | 60029275                | A/G  | NA                 | NA                            | NA                 |
| Kabuli_wild_60035912 | NA                                  | Ca_kabuli_denovo | 60035912                | C/G  | NA                 | NA                            | NA                 |
| Kabuli_wild_60035918 | NA                                  | Ca_kabuli_denovo | 60035918                | C/G  | NA                 | NA                            | NA                 |
| Kabuli_wild_60035921 | NA                                  | Ca_kabuli_denovo | 60035921                | C/G  | NA                 | NA                            | NA                 |
| Kabuli_wild_60036417 | NA                                  | Ca_kabuli_denovo | 60036417                | G/T  | NA                 | NA                            | NA                 |
| Kabuli_wild_60039550 | NA                                  | Ca_kabuli_denovo | 60039550                | C/G  | NA                 | NA                            | NA                 |
| Kabuli_wild_60042817 | NA                                  | Ca_kabuli_denovo | 60042817                | C/T  | NA                 | NA                            | NA                 |
| Kabuli_wild_60045494 | NA                                  | Ca_kabuli_denovo | 60045494                | A/G  | NA                 | NA                            | NA                 |
| Kabuli_wild_60046148 | NA                                  | Ca_kabuli_denovo | 60046148                | A/G  | NA                 | NA                            | NA                 |
| Kabuli_wild_60048386 | NA                                  | Ca_kabuli_denovo | 60048386                | C/T  | NA                 | NA                            | NA                 |
| Kabuli_wild_60048408 | NA                                  | Ca_kabuli_denovo | 60048408                | A/G  | NA                 | NA                            | NA                 |
| Kabuli_wild_60049214 | NA                                  | Ca_kabuli_denovo | 60049214                | A/T  | NA                 | NA                            | NA                 |
| Kabuli_wild_60049250 | NA                                  | Ca_kabuli_denovo | 60049250                | A/G  | NA                 | NA                            | NA                 |
| Kabuli_wild_60051296 | NA                                  | Ca_kabuli_denovo | 60051296                | C/T  | NA                 | NA                            | NA                 |
| Kabuli_wild_60053035 | NA                                  | Ca_kabuli_denovo | 60053035                | C/G  | NA                 | NA                            | NA                 |
| Kabuli_wild_60054410 | NA                                  | Ca_kabuli_denovo | 60054410                | C/G  | NA                 | NA                            | NA                 |
| Kabuli_wild_60057583 | NA                                  | Ca_kabuli_denovo | 60057583                | A/C  | NA                 | NA                            | NA                 |
| Kabuli_wild_60058057 | NA                                  | Ca_kabuli_denovo | 60058057                | C/T  | NA                 | NA                            | NA                 |
| Kabuli_wild_60059908 | NA                                  | Ca_kabuli_denovo | 60059908                | A/G  | NA                 | NA                            | NA                 |
| Kabuli_wild_60059920 | NA                                  | Ca_kabuli_denovo | 60059920                | C/G  | NA                 | NA                            | NA                 |
| Kabuli_wild_60063633 | NA                                  | Ca_kabuli_denovo | 60063633                | A/G  | NA                 | NA                            | NA                 |
| Kabuli_wild_60063634 | NA                                  | Ca_kabuli_denovo | 60063634                | A/G  | NA                 | NA                            | NA                 |
| Kabuli_wild_60065851 | NA                                  | Ca_kabuli_denovo | 60065851                | C/T  | NA                 | NA                            | NA                 |
| Kabuli_wild_60066070 | NA                                  | Ca_kabuli_denovo | 60066070                | A/G  | NA                 | NA                            | NA                 |
| Kabuli_wild_60068129 | NA                                  | Ca_kabuli_denovo | 60068129                | C/T  | NA                 | NA                            | NA                 |
| Kabuli_wild_60070633 | NA                                  | Ca_kabuli_denovo | 60070633                | C/G  | NA                 | NA                            | NA                 |
| Kabuli_wild_60071449 | NA                                  | Ca_kabuli_denovo | 60071449                | C/T  | NA                 | NA                            | NA                 |
| Kabuli_wild_60072493 | NA                                  | Ca_kabuli_denovo | 60072493                | C/G  | NA                 | NA                            | NA                 |
| Kabuli_wild_60072538 | NA                                  | Ca_kabuli_denovo | 60072538                | A/G  | NA                 | NA                            | NA                 |
| Kabuli_wild_60073832 | NA                                  | Ca_kabuli_denovo | 60073832                | A/G  | NA                 | NA                            | NA                 |
| Kabuli_wild_60075439 | NA                                  | Ca_kabuli_denovo | 60075439                | A/G  | NA                 | NA                            | NA                 |
| Kabuli_wild_60075442 | NA                                  | Ca_kabuli_denovo | 60075442                | C/G  | NA                 | NA                            | NA                 |
| Kabuli_wild_60076536 | NA                                  | Ca_kabuli_denovo | 60076536                | A/G  | NA                 | NA                            | NA                 |
| Kabuli_wild_60077111 | NA                                  | Ca_kabuli_denovo | 60077111                | C/G  | NA                 | NA                            | NA                 |
| Kabuli_wild_60077129 | NA                                  | Ca_kabuli_denovo | 60077129                | A/G  | NA                 | NA                            | NA                 |
| Kabuli_wild_60079124 | NA                                  | Ca_kabuli_denovo | 60079124                | C/G  | NA                 | NA                            | NA                 |
| Kabuli_wild_60080685 | NA                                  | Ca_kabuli_denovo | 60080685                | C/T  | NA                 | NA                            | NA                 |
| Kabuli_wild_60083069 | NA                                  | Ca_kabuli_denovo | 60083069                | C/G  | NA                 | NA                            | NA                 |
| Kabuli_wild_60083072 | NA                                  | Ca_kabuli_denovo | 60083072                | C/G  | NA                 | NA                            | NA                 |

| SNP IDs              | NCBI dbSNP accession IDs (NCBI_SS#) | Chromosomes      | Physical positions (bp) | SNPs | Gene accession IDs | Sequence components of genome | Putative functions |
|----------------------|-------------------------------------|------------------|-------------------------|------|--------------------|-------------------------------|--------------------|
| Kabuli_wild_60083073 | NA                                  | Ca_kabuli_denovo | 60083073                | A/G  | NA                 | NA                            | NA                 |
| Kabuli_wild_60083159 | NA                                  | Ca_kabuli_denovo | 60083159                | C/G  | NA                 | NA                            | NA                 |
| Kabuli_wild_60083161 | NA                                  | Ca_kabuli_denovo | 60083161                | G/T  | NA                 | NA                            | NA                 |
| Kabuli_wild_60083172 | NA                                  | Ca_kabuli_denovo | 60083172                | C/G  | NA                 | NA                            | NA                 |
| Kabuli_wild_60083215 | NA                                  | Ca_kabuli_denovo | 60083215                | C/G  | NA                 | NA                            | NA                 |
| Kabuli_wild_60085943 | NA                                  | Ca_kabuli_denovo | 60085943                | A/G  | NA                 | NA                            | NA                 |
| Kabuli_wild_60085946 | NA                                  | Ca_kabuli_denovo | 60085946                | A/G  | NA                 | NA                            | NA                 |
| Kabuli_wild_60085952 | NA                                  | Ca_kabuli_denovo | 60085952                | C/T  | NA                 | NA                            | NA                 |
| Kabuli_wild_60089297 | NA                                  | Ca_kabuli_denovo | 60089297                | A/G  | NA                 | NA                            | NA                 |
| Kabuli_wild_60089327 | NA                                  | Ca_kabuli_denovo | 60089327                | C/G  | NA                 | NA                            | NA                 |
| Kabuli_wild_60091237 | NA                                  | Ca_kabuli_denovo | 60091237                | C/T  | NA                 | NA                            | NA                 |
| Kabuli_wild_60091285 | NA                                  | Ca_kabuli_denovo | 60091285                | C/T  | NA                 | NA                            | NA                 |
| Kabuli_wild_60091340 | NA                                  | Ca_kabuli_denovo | 60091340                | C/G  | NA                 | NA                            | NA                 |
| Kabuli_wild_60091925 | NA                                  | Ca_kabuli_denovo | 60091925                | C/G  | NA                 | NA                            | NA                 |
| Kabuli_wild_60091933 | NA                                  | Ca_kabuli_denovo | 60091933                | C/T  | NA                 | NA                            | NA                 |
| Kabuli_wild_60093329 | NA                                  | Ca_kabuli_denovo | 60093329                | C/G  | NA                 | NA                            | NA                 |
| Kabuli_wild_60097945 | NA                                  | Ca_kabuli_denovo | 60097945                | C/T  | NA                 | NA                            | NA                 |
| Kabuli_wild_60097963 | NA                                  | Ca_kabuli_denovo | 60097963                | C/T  | NA                 | NA                            | NA                 |
| Kabuli_wild_60097965 | NA                                  | Ca_kabuli_denovo | 60097965                | A/G  | NA                 | NA                            | NA                 |
| Kabuli_wild_60098027 | NA                                  | Ca_kabuli_denovo | 60098027                | C/G  | NA                 | NA                            | NA                 |
| Kabuli_wild_60098096 | NA                                  | Ca_kabuli_denovo | 60098096                | C/G  | NA                 | NA                            | NA                 |
| Kabuli_wild_60099241 | NA                                  | Ca_kabuli_denovo | 60099241                | G/T  | NA                 | NA                            | NA                 |
| Kabuli_wild_60099266 | NA                                  | Ca_kabuli_denovo | 60099266                | C/T  | NA                 | NA                            | NA                 |
| Kabuli_wild_60100312 | NA                                  | Ca_kabuli_denovo | 60100312                | A/G  | NA                 | NA                            | NA                 |
| Kabuli_wild_60100568 | NA                                  | Ca_kabuli_denovo | 60100568                | C/T  | NA                 | NA                            | NA                 |
| Kabuli_wild_60100572 | NA                                  | Ca_kabuli_denovo | 60100572                | A/G  | NA                 | NA                            | NA                 |
| Kabuli_wild_60100577 | NA                                  | Ca_kabuli_denovo | 60100577                | C/T  | NA                 | NA                            | NA                 |
| Kabuli_wild_60100580 | NA                                  | Ca_kabuli_denovo | 60100580                | A/C  | NA                 | NA                            | NA                 |
| Kabuli_wild_60108538 | NA                                  | Ca_kabuli_denovo | 60108538                | C/G  | NA                 | NA                            | NA                 |
| Kabuli_wild_60108920 | NA                                  | Ca_kabuli_denovo | 60108920                | C/T  | NA                 | NA                            | NA                 |
| Kabuli_wild_60108929 | NA                                  | Ca_kabuli_denovo | 60108929                | A/G  | NA                 | NA                            | NA                 |
| Kabuli_wild_60108941 | NA                                  | Ca_kabuli_denovo | 60108941                | C/T  | NA                 | NA                            | NA                 |
| Kabuli_wild_60117865 | NA                                  | Ca_kabuli_denovo | 60117865                | C/G  | NA                 | NA                            | NA                 |
| Kabuli_wild_60120359 | NA                                  | Ca_kabuli_denovo | 60120359                | A/G  | NA                 | NA                            | NA                 |
| Kabuli_wild_60120374 | NA                                  | Ca_kabuli_denovo | 60120374                | A/G  | NA                 | NA                            | NA                 |
| Kabuli_wild_60120397 | NA                                  | Ca_kabuli_denovo | 60120397                | A/G  | NA                 | NA                            | NA                 |
| Kabuli_wild_60122611 | NA                                  | Ca_kabuli_denovo | 60122611                | A/G  | NA                 | NA                            | NA                 |
| Kabuli_wild_60122763 | NA                                  | Ca_kabuli_denovo | 60122763                | C/T  | NA                 | NA                            | NA                 |
| Kabuli_wild_60122825 | NA                                  | Ca_kabuli_denovo | 60122825                | A/G  | NA                 | NA                            | NA                 |
| Kabuli_wild_60122848 | NA                                  | Ca_kabuli_denovo | 60122848                | C/T  | NA                 | NA                            | NA                 |
| Kabuli_wild_60123628 | NA                                  | Ca_kabuli_denovo | 60123628                | C/T  | NA                 | NA                            | NA                 |
| Kabuli_wild_60126316 | NA                                  | Ca_kabuli_denovo | 60126316                | G/T  | NA                 | NA                            | NA                 |
| Kabuli_wild_60127788 | NA                                  | Ca_kabuli_denovo | 60127788                | C/T  | NA                 | NA                            | NA                 |
| Kabuli_wild_60127798 | NA                                  | Ca_kabuli_denovo | 60127798                | A/G  | NA                 | NA                            | NA                 |

| SNP IDs              | NCBI dbSNP accession IDs (NCBI_SS#) | Chromosomes      | Physical positions (bp) | SNPs | Gene accession IDs | Sequence components of genome | Putative functions |
|----------------------|-------------------------------------|------------------|-------------------------|------|--------------------|-------------------------------|--------------------|
| Kabuli_wild_60127832 | NA                                  | Ca_kabuli_denovo | 60127832                | A/C  | NA                 | NA                            | NA                 |
| Kabuli_wild_60127835 | NA                                  | Ca_kabuli_denovo | 60127835                | C/T  | NA                 | NA                            | NA                 |
| Kabuli_wild_60128549 | NA                                  | Ca_kabuli_denovo | 60128549                | C/T  | NA                 | NA                            | NA                 |
| Kabuli_wild_60128561 | NA                                  | Ca_kabuli_denovo | 60128561                | C/G  | NA                 | NA                            | NA                 |
| Kabuli_wild_60128921 | NA                                  | Ca_kabuli_denovo | 60128921                | C/G  | NA                 | NA                            | NA                 |
| Kabuli_wild_60128948 | NA                                  | Ca_kabuli_denovo | 60128948                | A/G  | NA                 | NA                            | NA                 |
| Kabuli_wild_60128996 | NA                                  | Ca_kabuli_denovo | 60128996                | C/T  | NA                 | NA                            | NA                 |
| Kabuli_wild_60129469 | NA                                  | Ca_kabuli_denovo | 60129469                | A/G  | NA                 | NA                            | NA                 |
| Kabuli_wild_60129541 | NA                                  | Ca_kabuli_denovo | 60129541                | C/T  | NA                 | NA                            | NA                 |
| Kabuli_wild_60132544 | NA                                  | Ca_kabuli_denovo | 60132544                | C/T  | NA                 | NA                            | NA                 |
| Kabuli_wild_60134425 | NA                                  | Ca_kabuli_denovo | 60134425                | C/G  | NA                 | NA                            | NA                 |
| Kabuli_wild_60138049 | NA                                  | Ca_kabuli_denovo | 60138049                | C/T  | NA                 | NA                            | NA                 |
| Kabuli_wild_60138070 | NA                                  | Ca_kabuli_denovo | 60138070                | C/T  | NA                 | NA                            | NA                 |
| Kabuli_wild_60140347 | NA                                  | Ca_kabuli_denovo | 60140347                | C/T  | NA                 | NA                            | NA                 |
| Kabuli_wild_60140364 | NA                                  | Ca_kabuli_denovo | 60140364                | C/G  | NA                 | NA                            | NA                 |
| Kabuli_wild_60140402 | NA                                  | Ca_kabuli_denovo | 60140402                | G/T  | NA                 | NA                            | NA                 |
| Kabuli_wild_60143233 | NA                                  | Ca_kabuli_denovo | 60143233                | C/T  | NA                 | NA                            | NA                 |
| Kabuli_wild_60143234 | NA                                  | Ca_kabuli_denovo | 60143234                | C/G  | NA                 | NA                            | NA                 |
| Kabuli_wild_60143245 | NA                                  | Ca_kabuli_denovo | 60143245                | C/T  | NA                 | NA                            | NA                 |
| Kabuli_wild_60143296 | NA                                  | Ca_kabuli_denovo | 60143296                | C/G  | NA                 | NA                            | NA                 |
| Kabuli_wild_60144554 | NA                                  | Ca_kabuli_denovo | 60144554                | C/T  | NA                 | NA                            | NA                 |
| Kabuli_wild_60144566 | NA                                  | Ca_kabuli_denovo | 60144566                | C/T  | NA                 | NA                            | NA                 |
| Kabuli_wild_60145556 | NA                                  | Ca_kabuli_denovo | 60145556                | C/G  | NA                 | NA                            | NA                 |
| Kabuli_wild_60147528 | NA                                  | Ca_kabuli_denovo | 60147528                | A/C  | NA                 | NA                            | NA                 |
| Kabuli_wild_60147529 | NA                                  | Ca_kabuli_denovo | 60147529                | C/G  | NA                 | NA                            | NA                 |
| Kabuli_wild_60147559 | NA                                  | Ca_kabuli_denovo | 60147559                | C/G  | NA                 | NA                            | NA                 |
| Kabuli_wild_60149389 | NA                                  | Ca_kabuli_denovo | 60149389                | A/G  | NA                 | NA                            | NA                 |
| Kabuli_wild_60149653 | NA                                  | Ca_kabuli_denovo | 60149653                | C/G  | NA                 | NA                            | NA                 |
| Kabuli_wild_60149677 | NA                                  | Ca_kabuli_denovo | 60149677                | A/G  | NA                 | NA                            | NA                 |
| Kabuli_wild_60152167 | NA                                  | Ca_kabuli_denovo | 60152167                | C/T  | NA                 | NA                            | NA                 |
| Kabuli_wild_60152467 | NA                                  | Ca_kabuli_denovo | 60152467                | C/T  | NA                 | NA                            | NA                 |
| Kabuli_wild_60152482 | NA                                  | Ca_kabuli_denovo | 60152482                | C/T  | NA                 | NA                            | NA                 |
| Kabuli_wild_60152491 | NA                                  | Ca_kabuli_denovo | 60152491                | C/G  | NA                 | NA                            | NA                 |
| Kabuli_wild_60152528 | NA                                  | Ca_kabuli_denovo | 60152528                | C/G  | NA                 | NA                            | NA                 |
| Kabuli_wild_60152546 | NA                                  | Ca_kabuli_denovo | 60152546                | A/C  | NA                 | NA                            | NA                 |
| Kabuli_wild_60154765 | NA                                  | Ca_kabuli_denovo | 60154765                | A/G  | NA                 | NA                            | NA                 |
| Kabuli_wild_60154783 | NA                                  | Ca_kabuli_denovo | 60154783                | C/G  | NA                 | NA                            | NA                 |
| Kabuli_wild_60162404 | NA                                  | Ca_kabuli_denovo | 60162404                | C/T  | NA                 | NA                            | NA                 |
| Kabuli_wild_60165124 | NA                                  | Ca_kabuli_denovo | 60165124                | C/T  | NA                 | NA                            | NA                 |
| Kabuli_wild_60173969 | NA                                  | Ca_kabuli_denovo | 60173969                | A/G  | NA                 | NA                            | NA                 |
| Kabuli_wild_60173990 | NA                                  | Ca_kabuli_denovo | 60173990                | A/C  | NA                 | NA                            | NA                 |
| Kabuli_wild_60175270 | NA                                  | Ca_kabuli_denovo | 60175270                | G/T  | NA                 | NA                            | NA                 |
| Kabuli_wild_60175277 | NA                                  | Ca_kabuli_denovo | 60175277                | A/G  | NA                 | NA                            | NA                 |
| Kabuli_wild_60176546 | NA                                  | Ca_kabuli_denovo | 60176546                | C/G  | NA                 | NA                            | NA                 |

| SNP IDs              | NCBI dbSNP accession IDs (NCBI_SS#) | Chromosomes      | Physical positions (bp) | SNPs | Gene accession IDs | Sequence components of genome | Putative functions |
|----------------------|-------------------------------------|------------------|-------------------------|------|--------------------|-------------------------------|--------------------|
| Kabuli_wild_60176990 | NA                                  | Ca_kabuli_denovo | 60176990                | A/G  | NA                 | NA                            | NA                 |
| Kabuli_wild_60178495 | NA                                  | Ca_kabuli_denovo | 60178495                | A/G  | NA                 | NA                            | NA                 |
| Kabuli_wild_60180334 | NA                                  | Ca_kabuli_denovo | 60180334                | C/T  | NA                 | NA                            | NA                 |
| Kabuli_wild_60180337 | NA                                  | Ca_kabuli_denovo | 60180337                | A/G  | NA                 | NA                            | NA                 |
| Kabuli_wild_60182097 | NA                                  | Ca_kabuli_denovo | 60182097                | A/G  | NA                 | NA                            | NA                 |
| Kabuli_wild_60183934 | NA                                  | Ca_kabuli_denovo | 60183934                | A/G  | NA                 | NA                            | NA                 |
| Kabuli_wild_60183937 | NA                                  | Ca_kabuli_denovo | 60183937                | C/G  | NA                 | NA                            | NA                 |
| Kabuli_wild_60194897 | NA                                  | Ca_kabuli_denovo | 60194897                | C/G  | NA                 | NA                            | NA                 |
| Kabuli_wild_60197567 | NA                                  | Ca_kabuli_denovo | 60197567                | C/T  | NA                 | NA                            | NA                 |
| Kabuli_wild_60198121 | NA                                  | Ca_kabuli_denovo | 60198121                | C/T  | NA                 | NA                            | NA                 |
| Kabuli_wild_60198152 | NA                                  | Ca_kabuli_denovo | 60198152                | C/T  | NA                 | NA                            | NA                 |
| Kabuli_wild_60201084 | NA                                  | Ca_kabuli_denovo | 60201084                | A/G  | NA                 | NA                            | NA                 |
| Kabuli_wild_60203036 | NA                                  | Ca_kabuli_denovo | 60203036                | A/G  | NA                 | NA                            | NA                 |
| Kabuli_wild_60203045 | NA                                  | Ca_kabuli_denovo | 60203045                | A/G  | NA                 | NA                            | NA                 |
| Kabuli_wild_60203072 | NA                                  | Ca_kabuli_denovo | 60203072                | C/T  | NA                 | NA                            | NA                 |
| Kabuli_wild_60207143 | NA                                  | Ca_kabuli_denovo | 60207143                | C/G  | NA                 | NA                            | NA                 |
| Kabuli_wild_60207173 | NA                                  | Ca_kabuli_denovo | 60207173                | C/G  | NA                 | NA                            | NA                 |
| Kabuli_wild_60210188 | NA                                  | Ca_kabuli_denovo | 60210188                | C/T  | NA                 | NA                            | NA                 |
| Kabuli_wild_60210239 | NA                                  | Ca_kabuli_denovo | 60210239                | C/T  | NA                 | NA                            | NA                 |
| Kabuli_wild_60210260 | NA                                  | Ca_kabuli_denovo | 60210260                | C/T  | NA                 | NA                            | NA                 |
| Kabuli_wild_60210467 | NA                                  | Ca_kabuli_denovo | 60210467                | A/G  | NA                 | NA                            | NA                 |
| Kabuli_wild_60210556 | NA                                  | Ca_kabuli_denovo | 60210556                | C/G  | NA                 | NA                            | NA                 |
| Kabuli_wild_60212136 | NA                                  | Ca_kabuli_denovo | 60212136                | A/C  | NA                 | NA                            | NA                 |
| Kabuli_wild_60212974 | NA                                  | Ca_kabuli_denovo | 60212974                | A/G  | NA                 | NA                            | NA                 |
| Kabuli_wild_60213106 | NA                                  | Ca_kabuli_denovo | 60213106                | C/T  | NA                 | NA                            | NA                 |
| Kabuli_wild_60214565 | NA                                  | Ca_kabuli_denovo | 60214565                | A/G  | NA                 | NA                            | NA                 |
| Kabuli_wild_60215792 | NA                                  | Ca_kabuli_denovo | 60215792                | C/G  | NA                 | NA                            | NA                 |
| Kabuli_wild_60221189 | NA                                  | Ca_kabuli_denovo | 60221189                | C/T  | NA                 | NA                            | NA                 |
| Kabuli_wild_60224716 | NA                                  | Ca_kabuli_denovo | 60224716                | C/T  | NA                 | NA                            | NA                 |
| Kabuli_wild_60227801 | NA                                  | Ca_kabuli_denovo | 60227801                | A/G  | NA                 | NA                            | NA                 |
| Kabuli_wild_60227822 | NA                                  | Ca_kabuli_denovo | 60227822                | G/T  | NA                 | NA                            | NA                 |
| Kabuli_wild_60228707 | NA                                  | Ca_kabuli_denovo | 60228707                | C/T  | NA                 | NA                            | NA                 |
| Kabuli_wild_60230208 | NA                                  | Ca_kabuli_denovo | 60230208                | G/T  | NA                 | NA                            | NA                 |
| Kabuli_wild_60231703 | NA                                  | Ca_kabuli_denovo | 60231703                | A/G  | NA                 | NA                            | NA                 |
| Kabuli_wild_60233678 | NA                                  | Ca_kabuli_denovo | 60233678                | C/T  | NA                 | NA                            | NA                 |
| Kabuli_wild_60236421 | NA                                  | Ca_kabuli_denovo | 60236421                | C/G  | NA                 | NA                            | NA                 |
| Kabuli_wild_60238940 | NA                                  | Ca_kabuli_denovo | 60238940                | C/G  | NA                 | NA                            | NA                 |
| Kabuli_wild_60239494 | NA                                  | Ca_kabuli_denovo | 60239494                | C/T  | NA                 | NA                            | NA                 |
| Kabuli_wild_60239513 | NA                                  | Ca_kabuli_denovo | 60239513                | A/G  | NA                 | NA                            | NA                 |
| Kabuli_wild_60243767 | NA                                  | Ca_kabuli_denovo | 60243767                | A/G  | NA                 | NA                            | NA                 |
| Kabuli_wild_60244195 | NA                                  | Ca_kabuli_denovo | 60244195                | C/T  | NA                 | NA                            | NA                 |
| Kabuli_wild_60244201 | NA                                  | Ca_kabuli_denovo | 60244201                | A/G  | NA                 | NA                            | NA                 |
| Kabuli_wild_60244216 | NA                                  | Ca_kabuli_denovo | 60244216                | C/T  | NA                 | NA                            | NA                 |
| Kabuli_wild_60245461 | NA                                  | Ca_kabuli_denovo | 60245461                | A/G  | NA                 | NA                            | NA                 |

| SNP IDs              | NCBI dbSNP accession IDs (NCBI_SS#) | Chromosomes      | Physical positions (bp) | SNPs | Gene accession IDs | Sequence components of genome | Putative functions |
|----------------------|-------------------------------------|------------------|-------------------------|------|--------------------|-------------------------------|--------------------|
| Kabuli_wild_60247327 | NA                                  | Ca_kabuli_denovo | 60247327                | C/G  | NA                 | NA                            | NA                 |
| Kabuli_wild_60249994 | NA                                  | Ca_kabuli_denovo | 60249994                | C/T  | NA                 | NA                            | NA                 |
| Kabuli_wild_60252691 | NA                                  | Ca_kabuli_denovo | 60252691                | C/G  | NA                 | NA                            | NA                 |
| Kabuli_wild_60252708 | NA                                  | Ca_kabuli_denovo | 60252708                | A/G  | NA                 | NA                            | NA                 |
| Kabuli_wild_60252709 | NA                                  | Ca_kabuli_denovo | 60252709                | A/G  | NA                 | NA                            | NA                 |
| Kabuli_wild_60253898 | NA                                  | Ca_kabuli_denovo | 60253898                | A/G  | NA                 | NA                            | NA                 |
| Kabuli_wild_60256683 | NA                                  | Ca_kabuli_denovo | 60256683                | C/G  | NA                 | NA                            | NA                 |
| Kabuli_wild_60256704 | NA                                  | Ca_kabuli_denovo | 60256704                | C/T  | NA                 | NA                            | NA                 |
| Kabuli_wild_60256712 | NA                                  | Ca_kabuli_denovo | 60256712                | C/T  | NA                 | NA                            | NA                 |
| Kabuli_wild_60256721 | NA                                  | Ca_kabuli_denovo | 60256721                | G/T  | NA                 | NA                            | NA                 |
| Kabuli_wild_60259102 | NA                                  | Ca_kabuli_denovo | 60259102                | C/G  | NA                 | NA                            | NA                 |
| Kabuli_wild_60259198 | NA                                  | Ca_kabuli_denovo | 60259198                | A/G  | NA                 | NA                            | NA                 |
| Kabuli_wild_60259219 | NA                                  | Ca_kabuli_denovo | 60259219                | C/T  | NA                 | NA                            | NA                 |
| Kabuli_wild_60264288 | NA                                  | Ca_kabuli_denovo | 60264288                | G/T  | NA                 | NA                            | NA                 |
| Kabuli_wild_60269278 | NA                                  | Ca_kabuli_denovo | 60269278                | A/G  | NA                 | NA                            | NA                 |
| Kabuli_wild_60269717 | NA                                  | Ca_kabuli_denovo | 60269717                | A/C  | NA                 | NA                            | NA                 |
| Kabuli_wild_60269720 | NA                                  | Ca_kabuli_denovo | 60269720                | A/G  | NA                 | NA                            | NA                 |
| Kabuli_wild_60269729 | NA                                  | Ca_kabuli_denovo | 60269729                | G/T  | NA                 | NA                            | NA                 |
| Kabuli_wild_60279947 | NA                                  | Ca_kabuli_denovo | 60279947                | A/G  | NA                 | NA                            | NA                 |
| Kabuli_wild_60280235 | NA                                  | Ca_kabuli_denovo | 60280235                | A/C  | NA                 | NA                            | NA                 |
| Kabuli_wild_60280237 | NA                                  | Ca_kabuli_denovo | 60280237                | C/G  | NA                 | NA                            | NA                 |
| Kabuli_wild_60280269 | NA                                  | Ca_kabuli_denovo | 60280269                | C/G  | NA                 | NA                            | NA                 |
| Kabuli_wild_60280400 | NA                                  | Ca_kabuli_denovo | 60280400                | C/G  | NA                 | NA                            | NA                 |
| Kabuli_wild_60280406 | NA                                  | Ca_kabuli_denovo | 60280406                | C/G  | NA                 | NA                            | NA                 |
| Kabuli_wild_60280415 | NA                                  | Ca_kabuli_denovo | 60280415                | C/T  | NA                 | NA                            | NA                 |
| Kabuli_wild_60281903 | NA                                  | Ca_kabuli_denovo | 60281903                | C/G  | NA                 | NA                            | NA                 |
| Kabuli_wild_60281933 | NA                                  | Ca_kabuli_denovo | 60281933                | C/G  | NA                 | NA                            | NA                 |
| Kabuli_wild_60282168 | NA                                  | Ca_kabuli_denovo | 60282168                | C/T  | NA                 | NA                            | NA                 |
| Kabuli_wild_60282355 | NA                                  | Ca_kabuli_denovo | 60282355                | G/T  | NA                 | NA                            | NA                 |
| Kabuli_wild_60282384 | NA                                  | Ca_kabuli_denovo | 60282384                | C/G  | NA                 | NA                            | NA                 |
| Kabuli_wild_60282391 | NA                                  | Ca_kabuli_denovo | 60282391                | C/T  | NA                 | NA                            | NA                 |
| Kabuli_wild_60285421 | NA                                  | Ca_kabuli_denovo | 60285421                | C/T  | NA                 | NA                            | NA                 |
| Kabuli_wild_60285442 | NA                                  | Ca_kabuli_denovo | 60285442                | A/G  | NA                 | NA                            | NA                 |
| Kabuli_wild_60285448 | NA                                  | Ca_kabuli_denovo | 60285448                | C/T  | NA                 | NA                            | NA                 |
| Kabuli_wild_60285451 | NA                                  | Ca_kabuli_denovo | 60285451                | C/G  | NA                 | NA                            | NA                 |
| Kabuli_wild_60289616 | NA                                  | Ca_kabuli_denovo | 60289616                | C/T  | NA                 | NA                            | NA                 |
| Kabuli_wild_60292783 | NA                                  | Ca_kabuli_denovo | 60292783                | A/G  | NA                 | NA                            | NA                 |
| Kabuli_wild_60292813 | NA                                  | Ca_kabuli_denovo | 60292813                | C/T  | NA                 | NA                            | NA                 |
| Kabuli_wild_60294149 | NA                                  | Ca_kabuli_denovo | 60294149                | C/T  | NA                 | NA                            | NA                 |
| Kabuli_wild_60294242 | NA                                  | Ca_kabuli_denovo | 60294242                | C/G  | NA                 | NA                            | NA                 |
| Kabuli_wild_60294246 | NA                                  | Ca_kabuli_denovo | 60294246                | A/C  | NA                 | NA                            | NA                 |
| Kabuli_wild_60296027 | NA                                  | Ca_kabuli_denovo | 60296027                | A/G  | NA                 | NA                            | NA                 |
| Kabuli_wild_60296036 | NA                                  | Ca_kabuli_denovo | 60296036                | A/T  | NA                 | NA                            | NA                 |
| Kabuli_wild_60296084 | NA                                  | Ca_kabuli_denovo | 60296084                | C/G  | NA                 | NA                            | NA                 |

| SNP IDs              | NCBI dbSNP accession IDs (NCBI_SS#) | Chromosomes      | Physical positions (bp) | SNPs | Gene accession IDs | Sequence components of genome | Putative functions |
|----------------------|-------------------------------------|------------------|-------------------------|------|--------------------|-------------------------------|--------------------|
| Kabuli_wild_60299024 | NA                                  | Ca_kabuli_denovo | 60299024                | C/G  | NA                 | NA                            | NA                 |
| Kabuli_wild_60299042 | NA                                  | Ca_kabuli_denovo | 60299042                | C/T  | NA                 | NA                            | NA                 |
| Kabuli_wild_60301531 | NA                                  | Ca_kabuli_denovo | 60301531                | C/G  | NA                 | NA                            | NA                 |
| Kabuli_wild_60301904 | NA                                  | Ca_kabuli_denovo | 60301904                | A/G  | NA                 | NA                            | NA                 |
| Kabuli_wild_60301907 | NA                                  | Ca_kabuli_denovo | 60301907                | C/G  | NA                 | NA                            | NA                 |
| Kabuli_wild_60301916 | NA                                  | Ca_kabuli_denovo | 60301916                | C/G  | NA                 | NA                            | NA                 |
| Kabuli_wild_60301949 | NA                                  | Ca_kabuli_denovo | 60301949                | C/G  | NA                 | NA                            | NA                 |
| Kabuli_wild_60303355 | NA                                  | Ca_kabuli_denovo | 60303355                | A/G  | NA                 | NA                            | NA                 |
| Kabuli_wild_60304612 | NA                                  | Ca_kabuli_denovo | 60304612                | C/G  | NA                 | NA                            | NA                 |
| Kabuli_wild_60304630 | NA                                  | Ca_kabuli_denovo | 60304630                | C/T  | NA                 | NA                            | NA                 |
| Kabuli_wild_60315614 | NA                                  | Ca_kabuli_denovo | 60315614                | C/G  | NA                 | NA                            | NA                 |
| Kabuli_wild_60315626 | NA                                  | Ca_kabuli_denovo | 60315626                | C/T  | NA                 | NA                            | NA                 |
| Kabuli_wild_60315662 | NA                                  | Ca_kabuli_denovo | 60315662                | G/T  | NA                 | NA                            | NA                 |
| Kabuli_wild_60316144 | NA                                  | Ca_kabuli_denovo | 60316144                | C/T  | NA                 | NA                            | NA                 |
| Kabuli_wild_60321613 | NA                                  | Ca_kabuli_denovo | 60321613                | C/G  | NA                 | NA                            | NA                 |
| Kabuli_wild_60321643 | NA                                  | Ca_kabuli_denovo | 60321643                | A/G  | NA                 | NA                            | NA                 |
| Kabuli_wild_60329231 | NA                                  | Ca_kabuli_denovo | 60329231                | G/T  | NA                 | NA                            | NA                 |
| Kabuli_wild_60329237 | NA                                  | Ca_kabuli_denovo | 60329237                | C/T  | NA                 | NA                            | NA                 |
| Kabuli_wild_60333982 | NA                                  | Ca_kabuli_denovo | 60333982                | C/T  | NA                 | NA                            | NA                 |
| Kabuli_wild_60339755 | NA                                  | Ca_kabuli_denovo | 60339755                | A/G  | NA                 | NA                            | NA                 |
| Kabuli_wild_60339779 | NA                                  | Ca_kabuli_denovo | 60339779                | A/G  | NA                 | NA                            | NA                 |
| Kabuli_wild_60342659 | NA                                  | Ca_kabuli_denovo | 60342659                | A/C  | NA                 | NA                            | NA                 |
| Kabuli_wild_60342708 | NA                                  | Ca_kabuli_denovo | 60342708                | G/T  | NA                 | NA                            | NA                 |
| Kabuli_wild_60344493 | NA                                  | Ca_kabuli_denovo | 60344493                | A/C  | NA                 | NA                            | NA                 |
| Kabuli_wild_60346220 | NA                                  | Ca_kabuli_denovo | 60346220                | A/G  | NA                 | NA                            | NA                 |
| Kabuli_wild_60346236 | NA                                  | Ca_kabuli_denovo | 60346236                | C/G  | NA                 | NA                            | NA                 |
| Kabuli_wild_60348047 | NA                                  | Ca_kabuli_denovo | 60348047                | C/G  | NA                 | NA                            | NA                 |
| Kabuli_wild_60350363 | NA                                  | Ca_kabuli_denovo | 60350363                | C/G  | NA                 | NA                            | NA                 |
| Kabuli_wild_60350384 | NA                                  | Ca_kabuli_denovo | 60350384                | C/G  | NA                 | NA                            | NA                 |
| Kabuli_wild_60351225 | NA                                  | Ca_kabuli_denovo | 60351225                | C/G  | NA                 | NA                            | NA                 |
| Kabuli_wild_60353898 | NA                                  | Ca_kabuli_denovo | 60353898                | A/G  | NA                 | NA                            | NA                 |
| Kabuli_wild_60354254 | NA                                  | Ca_kabuli_denovo | 60354254                | A/G  | NA                 | NA                            | NA                 |
| Kabuli_wild_60354806 | NA                                  | Ca_kabuli_denovo | 60354806                | A/G  | NA                 | NA                            | NA                 |
| Kabuli_wild_60371933 | NA                                  | Ca_kabuli_denovo | 60371933                | A/G  | NA                 | NA                            | NA                 |
| Kabuli_wild_60372566 | NA                                  | Ca_kabuli_denovo | 60372566                | A/G  | NA                 | NA                            | NA                 |
| Kabuli_wild_60377051 | NA                                  | Ca_kabuli_denovo | 60377051                | C/G  | NA                 | NA                            | NA                 |
| Kabuli_wild_60377054 | NA                                  | Ca_kabuli_denovo | 60377054                | C/G  | NA                 | NA                            | NA                 |
| Kabuli_wild_60379023 | NA                                  | Ca_kabuli_denovo | 60379023                | A/G  | NA                 | NA                            | NA                 |
| Kabuli_wild_60381251 | NA                                  | Ca_kabuli_denovo | 60381251                | C/T  | NA                 | NA                            | NA                 |
| Kabuli_wild_60384387 | NA                                  | Ca_kabuli_denovo | 60384387                | A/G  | NA                 | NA                            | NA                 |
| Kabuli_wild_60384395 | NA                                  | Ca_kabuli_denovo | 60384395                | A/G  | NA                 | NA                            | NA                 |
| Kabuli_wild_60388730 | NA                                  | Ca_kabuli_denovo | 60388730                | C/G  | NA                 | NA                            | NA                 |
| Kabuli_wild_60388733 | NA                                  | Ca_kabuli_denovo | 60388733                | C/G  | NA                 | NA                            | NA                 |
| Kabuli_wild_60389705 | NA                                  | Ca_kabuli_denovo | 60389705                | G/T  | NA                 | NA                            | NA                 |



| SNP IDs              | NCBI dbSNP accession IDs (NCBI_SS#) | Chromosomes      | Physical positions (bp) | SNPs | Gene accession IDs | Sequence components of genome | Putative functions |
|----------------------|-------------------------------------|------------------|-------------------------|------|--------------------|-------------------------------|--------------------|
| Kabuli_wild_60389708 | NA                                  | Ca_kabuli_denovo | 60389708                | A/G  | NA                 | NA                            | NA                 |
| Kabuli_wild_60392765 | NA                                  | Ca_kabuli_denovo | 60392765                | C/G  | NA                 | NA                            | NA                 |
| Kabuli_wild_60392768 | NA                                  | Ca_kabuli_denovo | 60392768                | C/T  | NA                 | NA                            | NA                 |
| Kabuli_wild_60395582 | NA                                  | Ca_kabuli_denovo | 60395582                | A/G  | NA                 | NA                            | NA                 |
| Kabuli_wild_60396406 | NA                                  | Ca_kabuli_denovo | 60396406                | C/T  | NA                 | NA                            | NA                 |
| Kabuli_wild_60396974 | NA                                  | Ca_kabuli_denovo | 60396974                | A/G  | NA                 | NA                            | NA                 |
| Kabuli_wild_60396980 | NA                                  | Ca_kabuli_denovo | 60396980                | A/G  | NA                 | NA                            | NA                 |
| Kabuli_wild_60397399 | NA                                  | Ca_kabuli_denovo | 60397399                | A/G  | NA                 | NA                            | NA                 |
| Kabuli_wild_60397408 | NA                                  | Ca_kabuli_denovo | 60397408                | C/T  | NA                 | NA                            | NA                 |
| Kabuli_wild_60397420 | NA                                  | Ca_kabuli_denovo | 60397420                | C/G  | NA                 | NA                            | NA                 |
| Kabuli_wild_60397424 | NA                                  | Ca_kabuli_denovo | 60397424                | C/G  | NA                 | NA                            | NA                 |
| Kabuli_wild_60397769 | NA                                  | Ca_kabuli_denovo | 60397769                | C/G  | NA                 | NA                            | NA                 |
| Kabuli_wild_60397784 | NA                                  | Ca_kabuli_denovo | 60397784                | C/T  | NA                 | NA                            | NA                 |
| Kabuli_wild_60399086 | NA                                  | Ca_kabuli_denovo | 60399086                | C/T  | NA                 | NA                            | NA                 |
| Kabuli_wild_60399097 | NA                                  | Ca_kabuli_denovo | 60399097                | C/G  | NA                 | NA                            | NA                 |
| Kabuli_wild_60400021 | NA                                  | Ca_kabuli_denovo | 60400021                | C/G  | NA                 | NA                            | NA                 |
| Kabuli_wild_60403534 | NA                                  | Ca_kabuli_denovo | 60403534                | G/T  | NA                 | NA                            | NA                 |
| Kabuli_wild_60403785 | NA                                  | Ca_kabuli_denovo | 60403785                | C/T  | NA                 | NA                            | NA                 |
| Kabuli_wild_60408079 | NA                                  | Ca_kabuli_denovo | 60408079                | C/T  | NA                 | NA                            | NA                 |
| Kabuli_wild_60408418 | NA                                  | Ca_kabuli_denovo | 60408418                | C/G  | NA                 | NA                            | NA                 |
| Kabuli_wild_60410357 | NA                                  | Ca_kabuli_denovo | 60410357                | A/G  | NA                 | NA                            | NA                 |
| Kabuli_wild_60410360 | NA                                  | Ca_kabuli_denovo | 60410360                | C/G  | NA                 | NA                            | NA                 |
| Kabuli_wild_60410830 | NA                                  | Ca_kabuli_denovo | 60410830                | A/G  | NA                 | NA                            | NA                 |
| Kabuli_wild_60414534 | NA                                  | Ca_kabuli_denovo | 60414534                | G/T  | NA                 | NA                            | NA                 |
| Kabuli_wild_60414567 | NA                                  | Ca_kabuli_denovo | 60414567                | A/T  | NA                 | NA                            | NA                 |
| Kabuli_wild_60414796 | NA                                  | Ca_kabuli_denovo | 60414796                | C/T  | NA                 | NA                            | NA                 |
| Kabuli_wild_60414817 | NA                                  | Ca_kabuli_denovo | 60414817                | A/G  | NA                 | NA                            | NA                 |
| Kabuli_wild_60414832 | NA                                  | Ca_kabuli_denovo | 60414832                | C/G  | NA                 | NA                            | NA                 |
| Kabuli_wild_60417350 | NA                                  | Ca_kabuli_denovo | 60417350                | A/G  | NA                 | NA                            | NA                 |
| Kabuli_wild_60423352 | NA                                  | Ca_kabuli_denovo | 60423352                | C/G  | NA                 | NA                            | NA                 |
| Kabuli_wild_60423376 | NA                                  | Ca_kabuli_denovo | 60423376                | C/G  | NA                 | NA                            | NA                 |
| Kabuli_wild_60423449 | NA                                  | Ca_kabuli_denovo | 60423449                | A/G  | NA                 | NA                            | NA                 |
| Kabuli_wild_60426881 | NA                                  | Ca_kabuli_denovo | 60426881                | G/T  | NA                 | NA                            | NA                 |
| Kabuli_wild_60426902 | NA                                  | Ca_kabuli_denovo | 60426902                | C/T  | NA                 | NA                            | NA                 |
| Kabuli_wild_60426905 | NA                                  | Ca_kabuli_denovo | 60426905                | A/G  | NA                 | NA                            | NA                 |
| Kabuli_wild_60432470 | NA                                  | Ca_kabuli_denovo | 60432470                | C/G  | NA                 | NA                            | NA                 |
| Kabuli_wild_60432476 | NA                                  | Ca_kabuli_denovo | 60432476                | C/G  | NA                 | NA                            | NA                 |
| Kabuli_wild_60432554 | NA                                  | Ca_kabuli_denovo | 60432554                | A/G  | NA                 | NA                            | NA                 |
| Kabuli_wild_60432565 | NA                                  | Ca_kabuli_denovo | 60432565                | C/T  | NA                 | NA                            | NA                 |
| Kabuli_wild_60432585 | NA                                  | Ca_kabuli_denovo | 60432585                | C/G  | NA                 | NA                            | NA                 |
| Kabuli_wild_60437290 | NA                                  | Ca_kabuli_denovo | 60437290                | A/G  | NA                 | NA                            | NA                 |
| Kabuli_wild_60438046 | NA                                  | Ca_kabuli_denovo | 60438046                | A/G  | NA                 | NA                            | NA                 |
| Kabuli_wild_60438067 | NA                                  | Ca_kabuli_denovo | 60438067                | A/C  | NA                 | NA                            | NA                 |
| Kabuli_wild_60438884 | NA                                  | Ca_kabuli_denovo | 60438884                | C/T  | NA                 | NA                            | NA                 |

| SNP IDs              | NCBI dbSNP accession IDs (NCBI_SS#) | Chromosomes      | Physical positions (bp) | SNPs | Gene accession IDs | Sequence components of genome | Putative functions |
|----------------------|-------------------------------------|------------------|-------------------------|------|--------------------|-------------------------------|--------------------|
| Kabuli_wild_60438893 | NA                                  | Ca_kabuli_denovo | 60438893                | C/T  | NA                 | NA                            | NA                 |
| Kabuli_wild_60438964 | NA                                  | Ca_kabuli_denovo | 60438964                | C/G  | NA                 | NA                            | NA                 |
| Kabuli_wild_60438968 | NA                                  | Ca_kabuli_denovo | 60438968                | C/T  | NA                 | NA                            | NA                 |
| Kabuli_wild_60441027 | NA                                  | Ca_kabuli_denovo | 60441027                | A/G  | NA                 | NA                            | NA                 |
| Kabuli_wild_60442235 | NA                                  | Ca_kabuli_denovo | 60442235                | C/T  | NA                 | NA                            | NA                 |
| Kabuli_wild_60442238 | NA                                  | Ca_kabuli_denovo | 60442238                | A/G  | NA                 | NA                            | NA                 |
| Kabuli_wild_60442262 | NA                                  | Ca_kabuli_denovo | 60442262                | C/G  | NA                 | NA                            | NA                 |
| Kabuli_wild_60442265 | NA                                  | Ca_kabuli_denovo | 60442265                | C/G  | NA                 | NA                            | NA                 |
| Kabuli_wild_60446704 | NA                                  | Ca_kabuli_denovo | 60446704                | C/T  | NA                 | NA                            | NA                 |
| Kabuli_wild_60446737 | NA                                  | Ca_kabuli_denovo | 60446737                | A/G  | NA                 | NA                            | NA                 |
| Kabuli_wild_60446770 | NA                                  | Ca_kabuli_denovo | 60446770                | C/T  | NA                 | NA                            | NA                 |
| Kabuli_wild_60449886 | NA                                  | Ca_kabuli_denovo | 60449886                | C/T  | NA                 | NA                            | NA                 |
| Kabuli_wild_60451542 | NA                                  | Ca_kabuli_denovo | 60451542                | C/T  | NA                 | NA                            | NA                 |
| Kabuli_wild_60451564 | NA                                  | Ca_kabuli_denovo | 60451564                | A/G  | NA                 | NA                            | NA                 |
| Kabuli_wild_60452553 | NA                                  | Ca_kabuli_denovo | 60452553                | C/T  | NA                 | NA                            | NA                 |
| Kabuli_wild_60453701 | NA                                  | Ca_kabuli_denovo | 60453701                | A/C  | NA                 | NA                            | NA                 |
| Kabuli_wild_60455462 | NA                                  | Ca_kabuli_denovo | 60455462                | C/G  | NA                 | NA                            | NA                 |
| Kabuli_wild_60456275 | NA                                  | Ca_kabuli_denovo | 60456275                | C/G  | NA                 | NA                            | NA                 |
| Kabuli_wild_60457487 | NA                                  | Ca_kabuli_denovo | 60457487                | C/T  | NA                 | NA                            | NA                 |
| Kabuli_wild_60457493 | NA                                  | Ca_kabuli_denovo | 60457493                | C/G  | NA                 | NA                            | NA                 |
| Kabuli_wild_60457496 | NA                                  | Ca_kabuli_denovo | 60457496                | C/G  | NA                 | NA                            | NA                 |
| Kabuli_wild_60457499 | NA                                  | Ca_kabuli_denovo | 60457499                | A/G  | NA                 | NA                            | NA                 |
| Kabuli_wild_60458037 | NA                                  | Ca_kabuli_denovo | 60458037                | A/G  | NA                 | NA                            | NA                 |
| Kabuli_wild_60458311 | NA                                  | Ca_kabuli_denovo | 60458311                | C/T  | NA                 | NA                            | NA                 |
| Kabuli_wild_60459025 | NA                                  | Ca_kabuli_denovo | 60459025                | G/T  | NA                 | NA                            | NA                 |
| Kabuli_wild_60465319 | NA                                  | Ca_kabuli_denovo | 60465319                | A/G  | NA                 | NA                            | NA                 |
| Kabuli_wild_60468550 | NA                                  | Ca_kabuli_denovo | 60468550                | C/T  | NA                 | NA                            | NA                 |
| Kabuli_wild_60470916 | NA                                  | Ca_kabuli_denovo | 60470916                | C/T  | NA                 | NA                            | NA                 |
| Kabuli_wild_60470917 | NA                                  | Ca_kabuli_denovo | 60470917                | C/T  | NA                 | NA                            | NA                 |
| Kabuli_wild_60474407 | NA                                  | Ca_kabuli_denovo | 60474407                | A/G  | NA                 | NA                            | NA                 |
| Kabuli_wild_60474880 | NA                                  | Ca_kabuli_denovo | 60474880                | C/T  | NA                 | NA                            | NA                 |
| Kabuli_wild_60474916 | NA                                  | Ca_kabuli_denovo | 60474916                | A/C  | NA                 | NA                            | NA                 |
| Kabuli_wild_60476768 | NA                                  | Ca_kabuli_denovo | 60476768                | A/G  | NA                 | NA                            | NA                 |
| Kabuli_wild_60476800 | NA                                  | Ca_kabuli_denovo | 60476800                | A/G  | NA                 | NA                            | NA                 |
| Kabuli_wild_60478724 | NA                                  | Ca_kabuli_denovo | 60478724                | C/G  | NA                 | NA                            | NA                 |
| Kabuli_wild_60482137 | NA                                  | Ca_kabuli_denovo | 60482137                | A/G  | NA                 | NA                            | NA                 |
| Kabuli_wild_60482155 | NA                                  | Ca_kabuli_denovo | 60482155                | C/G  | NA                 | NA                            | NA                 |
| Kabuli_wild_60484106 | NA                                  | Ca_kabuli_denovo | 60484106                | A/G  | NA                 | NA                            | NA                 |
| Kabuli_wild_60486415 | NA                                  | Ca_kabuli_denovo | 60486415                | C/G  | NA                 | NA                            | NA                 |
| Kabuli_wild_60490803 | NA                                  | Ca_kabuli_denovo | 60490803                | A/G  | NA                 | NA                            | NA                 |
| Kabuli_wild_60492760 | NA                                  | Ca_kabuli_denovo | 60492760                | C/G  | NA                 | NA                            | NA                 |
| Kabuli_wild_60495352 | NA                                  | Ca_kabuli_denovo | 60495352                | A/G  | NA                 | NA                            | NA                 |
| Kabuli_wild_60495365 | NA                                  | Ca_kabuli_denovo | 60495365                | A/G  | NA                 | NA                            | NA                 |
| Kabuli_wild_60497099 | NA                                  | Ca_kabuli_denovo | 60497099                | C/T  | NA                 | NA                            | NA                 |

| SNP IDs              | NCBI dbSNP accession IDs (NCBI_SS#) | Chromosomes      | Physical positions (bp) | SNPs | Gene accession IDs | Sequence components of genome | Putative functions |
|----------------------|-------------------------------------|------------------|-------------------------|------|--------------------|-------------------------------|--------------------|
| Kabuli_wild_60498589 | NA                                  | Ca_kabuli_denovo | 60498589                | C/T  | NA                 | NA                            | NA                 |
| Kabuli_wild_60500092 | NA                                  | Ca_kabuli_denovo | 60500092                | C/T  | NA                 | NA                            | NA                 |
| Kabuli_wild_60500186 | NA                                  | Ca_kabuli_denovo | 60500186                | A/G  | NA                 | NA                            | NA                 |
| Kabuli_wild_60500188 | NA                                  | Ca_kabuli_denovo | 60500188                | C/T  | NA                 | NA                            | NA                 |
| Kabuli_wild_60501925 | NA                                  | Ca_kabuli_denovo | 60501925                | C/G  | NA                 | NA                            | NA                 |
| Kabuli_wild_60501955 | NA                                  | Ca_kabuli_denovo | 60501955                | A/C  | NA                 | NA                            | NA                 |
| Kabuli_wild_60501961 | NA                                  | Ca_kabuli_denovo | 60501961                | C/G  | NA                 | NA                            | NA                 |
| Kabuli_wild_60501967 | NA                                  | Ca_kabuli_denovo | 60501967                | C/G  | NA                 | NA                            | NA                 |
| Kabuli_wild_60508648 | NA                                  | Ca_kabuli_denovo | 60508648                | G/T  | NA                 | NA                            | NA                 |
| Kabuli_wild_60510016 | NA                                  | Ca_kabuli_denovo | 60510016                | C/G  | NA                 | NA                            | NA                 |
| Kabuli_wild_60510052 | NA                                  | Ca_kabuli_denovo | 60510052                | A/G  | NA                 | NA                            | NA                 |
| Kabuli_wild_60510676 | NA                                  | Ca_kabuli_denovo | 60510676                | C/G  | NA                 | NA                            | NA                 |
| Kabuli_wild_60510691 | NA                                  | Ca_kabuli_denovo | 60510691                | C/G  | NA                 | NA                            | NA                 |
| Kabuli_wild_60514957 | NA                                  | Ca_kabuli_denovo | 60514957                | C/G  | NA                 | NA                            | NA                 |
| Kabuli_wild_60514964 | NA                                  | Ca_kabuli_denovo | 60514964                | C/T  | NA                 | NA                            | NA                 |
| Kabuli_wild_60514966 | NA                                  | Ca_kabuli_denovo | 60514966                | C/G  | NA                 | NA                            | NA                 |
| Kabuli_wild_60515229 | NA                                  | Ca_kabuli_denovo | 60515229                | C/G  | NA                 | NA                            | NA                 |
| Kabuli_wild_60515898 | NA                                  | Ca_kabuli_denovo | 60515898                | A/C  | NA                 | NA                            | NA                 |
| Kabuli_wild_60516443 | NA                                  | Ca_kabuli_denovo | 60516443                | C/G  | NA                 | NA                            | NA                 |
| Kabuli_wild_60516491 | NA                                  | Ca_kabuli_denovo | 60516491                | C/G  | NA                 | NA                            | NA                 |
| Kabuli_wild_60519344 | NA                                  | Ca_kabuli_denovo | 60519344                | C/T  | NA                 | NA                            | NA                 |
| Kabuli_wild_60520183 | NA                                  | Ca_kabuli_denovo | 60520183                | C/T  | NA                 | NA                            | NA                 |
| Kabuli_wild_60520603 | NA                                  | Ca_kabuli_denovo | 60520603                | A/G  | NA                 | NA                            | NA                 |
| Kabuli_wild_60521393 | NA                                  | Ca_kabuli_denovo | 60521393                | A/G  | NA                 | NA                            | NA                 |
| Kabuli_wild_60521828 | NA                                  | Ca_kabuli_denovo | 60521828                | C/T  | NA                 | NA                            | NA                 |
| Kabuli_wild_60521849 | NA                                  | Ca_kabuli_denovo | 60521849                | A/T  | NA                 | NA                            | NA                 |
| Kabuli_wild_60524873 | NA                                  | Ca_kabuli_denovo | 60524873                | C/T  | NA                 | NA                            | NA                 |
| Kabuli_wild_60528779 | NA                                  | Ca_kabuli_denovo | 60528779                | A/G  | NA                 | NA                            | NA                 |
| Kabuli_wild_60529736 | NA                                  | Ca_kabuli_denovo | 60529736                | C/T  | NA                 | NA                            | NA                 |
| Kabuli_wild_60531413 | NA                                  | Ca_kabuli_denovo | 60531413                | C/G  | NA                 | NA                            | NA                 |
| Kabuli_wild_60531416 | NA                                  | Ca_kabuli_denovo | 60531416                | A/G  | NA                 | NA                            | NA                 |
| Kabuli_wild_60531425 | NA                                  | Ca_kabuli_denovo | 60531425                | C/T  | NA                 | NA                            | NA                 |
| Kabuli_wild_60531434 | NA                                  | Ca_kabuli_denovo | 60531434                | A/G  | NA                 | NA                            | NA                 |
| Kabuli_wild_60535861 | NA                                  | Ca_kabuli_denovo | 60535861                | C/T  | NA                 | NA                            | NA                 |
| Kabuli_wild_60536624 | NA                                  | Ca_kabuli_denovo | 60536624                | C/T  | NA                 | NA                            | NA                 |
| Kabuli_wild_60536636 | NA                                  | Ca_kabuli_denovo | 60536636                | C/G  | NA                 | NA                            | NA                 |
| Kabuli_wild_60538754 | NA                                  | Ca_kabuli_denovo | 60538754                | C/T  | NA                 | NA                            | NA                 |
| Kabuli_wild_60538784 | NA                                  | Ca_kabuli_denovo | 60538784                | C/T  | NA                 | NA                            | NA                 |
| Kabuli_wild_60538931 | NA                                  | Ca_kabuli_denovo | 60538931                | A/C  | NA                 | NA                            | NA                 |
| Kabuli_wild_60538932 | NA                                  | Ca_kabuli_denovo | 60538932                | A/G  | NA                 | NA                            | NA                 |
| Kabuli_wild_60538933 | NA                                  | Ca_kabuli_denovo | 60538933                | A/G  | NA                 | NA                            | NA                 |
| Kabuli_wild_60539902 | NA                                  | Ca_kabuli_denovo | 60539902                | C/G  | NA                 | NA                            | NA                 |
| Kabuli_wild_60540101 | NA                                  | Ca_kabuli_denovo | 60540101                | C/G  | NA                 | NA                            | NA                 |
| Kabuli_wild_60540104 | NA                                  | Ca_kabuli_denovo | 60540104                | C/T  | NA                 | NA                            | NA                 |

| SNP IDs              | NCBI dbSNP accession IDs (NCBI_SS#) | Chromosomes      | Physical positions (bp) | SNPs | Gene accession IDs | Sequence components of genome | Putative functions |
|----------------------|-------------------------------------|------------------|-------------------------|------|--------------------|-------------------------------|--------------------|
| Kabuli_wild_60540154 | NA                                  | Ca_kabuli_denovo | 60540154                | C/T  | NA                 | NA                            | NA                 |
| Kabuli_wild_60540202 | NA                                  | Ca_kabuli_denovo | 60540202                | A/G  | NA                 | NA                            | NA                 |
| Kabuli_wild_60540214 | NA                                  | Ca_kabuli_denovo | 60540214                | C/G  | NA                 | NA                            | NA                 |
| Kabuli_wild_60540223 | NA                                  | Ca_kabuli_denovo | 60540223                | C/G  | NA                 | NA                            | NA                 |
| Kabuli_wild_60541567 | NA                                  | Ca_kabuli_denovo | 60541567                | C/T  | NA                 | NA                            | NA                 |
| Kabuli_wild_60542198 | NA                                  | Ca_kabuli_denovo | 60542198                | C/T  | NA                 | NA                            | NA                 |
| Kabuli_wild_60542227 | NA                                  | Ca_kabuli_denovo | 60542227                | C/T  | NA                 | NA                            | NA                 |
| Kabuli_wild_60542720 | NA                                  | Ca_kabuli_denovo | 60542720                | A/G  | NA                 | NA                            | NA                 |
| Kabuli_wild_60543338 | NA                                  | Ca_kabuli_denovo | 60543338                | A/G  | NA                 | NA                            | NA                 |
| Kabuli_wild_60548947 | NA                                  | Ca_kabuli_denovo | 60548947                | C/G  | NA                 | NA                            | NA                 |
| Kabuli_wild_60548950 | NA                                  | Ca_kabuli_denovo | 60548950                | C/T  | NA                 | NA                            | NA                 |
| Kabuli_wild_60548975 | NA                                  | Ca_kabuli_denovo | 60548975                | C/T  | NA                 | NA                            | NA                 |
| Kabuli_wild_60549568 | NA                                  | Ca_kabuli_denovo | 60549568                | A/C  | NA                 | NA                            | NA                 |
| Kabuli_wild_60553760 | NA                                  | Ca_kabuli_denovo | 60553760                | C/G  | NA                 | NA                            | NA                 |
| Kabuli_wild_60564070 | NA                                  | Ca_kabuli_denovo | 60564070                | C/G  | NA                 | NA                            | NA                 |
| Kabuli_wild_60564079 | NA                                  | Ca_kabuli_denovo | 60564079                | A/G  | NA                 | NA                            | NA                 |
| Kabuli_wild_60565166 | NA                                  | Ca_kabuli_denovo | 60565166                | G/T  | NA                 | NA                            | NA                 |
| Kabuli_wild_60565181 | NA                                  | Ca_kabuli_denovo | 60565181                | C/T  | NA                 | NA                            | NA                 |
| Kabuli_wild_60565202 | NA                                  | Ca_kabuli_denovo | 60565202                | A/G  | NA                 | NA                            | NA                 |
| Kabuli_wild_60565232 | NA                                  | Ca_kabuli_denovo | 60565232                | A/G  | NA                 | NA                            | NA                 |
| Kabuli_wild_60566377 | NA                                  | Ca_kabuli_denovo | 60566377                | A/G  | NA                 | NA                            | NA                 |
| Kabuli_wild_60566392 | NA                                  | Ca_kabuli_denovo | 60566392                | C/T  | NA                 | NA                            | NA                 |
| Kabuli_wild_60567070 | NA                                  | Ca_kabuli_denovo | 60567070                | C/T  | NA                 | NA                            | NA                 |
| Kabuli_wild_60567449 | NA                                  | Ca_kabuli_denovo | 60567449                | C/T  | NA                 | NA                            | NA                 |
| Kabuli_wild_60568636 | NA                                  | Ca_kabuli_denovo | 60568636                | C/G  | NA                 | NA                            | NA                 |
| Kabuli_wild_60570797 | NA                                  | Ca_kabuli_denovo | 60570797                | C/G  | NA                 | NA                            | NA                 |
| Kabuli_wild_60571073 | NA                                  | Ca_kabuli_denovo | 60571073                | A/G  | NA                 | NA                            | NA                 |
| Kabuli_wild_60571076 | NA                                  | Ca_kabuli_denovo | 60571076                | A/G  | NA                 | NA                            | NA                 |
| Kabuli_wild_60571721 | NA                                  | Ca_kabuli_denovo | 60571721                | C/G  | NA                 | NA                            | NA                 |
| Kabuli_wild_60572981 | NA                                  | Ca_kabuli_denovo | 60572981                | C/T  | NA                 | NA                            | NA                 |
| Kabuli_wild_60572996 | NA                                  | Ca_kabuli_denovo | 60572996                | A/C  | NA                 | NA                            | NA                 |
| Kabuli_wild_60575773 | NA                                  | Ca_kabuli_denovo | 60575773                | C/T  | NA                 | NA                            | NA                 |
| Kabuli_wild_60575809 | NA                                  | Ca_kabuli_denovo | 60575809                | A/C  | NA                 | NA                            | NA                 |
| Kabuli_wild_60577289 | NA                                  | Ca_kabuli_denovo | 60577289                | C/G  | NA                 | NA                            | NA                 |
| Kabuli_wild_60577313 | NA                                  | Ca_kabuli_denovo | 60577313                | C/T  | NA                 | NA                            | NA                 |
| Kabuli_wild_60577459 | NA                                  | Ca_kabuli_denovo | 60577459                | C/T  | NA                 | NA                            | NA                 |
| Kabuli_wild_60577515 | NA                                  | Ca_kabuli_denovo | 60577515                | C/G  | NA                 | NA                            | NA                 |
| Kabuli_wild_60581074 | NA                                  | Ca_kabuli_denovo | 60581074                | G/T  | NA                 | NA                            | NA                 |
| Kabuli_wild_60581476 | NA                                  | Ca_kabuli_denovo | 60581476                | C/T  | NA                 | NA                            | NA                 |
| Kabuli_wild_60581512 | NA                                  | Ca_kabuli_denovo | 60581512                | C/T  | NA                 | NA                            | NA                 |
| Kabuli_wild_60592631 | NA                                  | Ca_kabuli_denovo | 60592631                | C/T  | NA                 | NA                            | NA                 |
| Kabuli_wild_60592677 | NA                                  | Ca_kabuli_denovo | 60592677                | A/G  | NA                 | NA                            | NA                 |
| Kabuli_wild_60592681 | NA                                  | Ca_kabuli_denovo | 60592681                | C/G  | NA                 | NA                            | NA                 |
| Kabuli_wild_60592811 | NA                                  | Ca_kabuli_denovo | 60592811                | A/G  | NA                 | NA                            | NA                 |

| SNP IDs              | NCBI dbSNP accession IDs (NCBI_SS#) | Chromosomes      | Physical positions (bp) | SNPs | Gene accession IDs | Sequence components of genome | Putative functions |
|----------------------|-------------------------------------|------------------|-------------------------|------|--------------------|-------------------------------|--------------------|
| Kabuli_wild_60594475 | NA                                  | Ca_kabuli_denovo | 60594475                | C/T  | NA                 | NA                            | NA                 |
| Kabuli_wild_60595947 | NA                                  | Ca_kabuli_denovo | 60595947                | A/T  | NA                 | NA                            | NA                 |
| Kabuli_wild_60600077 | NA                                  | Ca_kabuli_denovo | 60600077                | A/G  | NA                 | NA                            | NA                 |
| Kabuli_wild_60602737 | NA                                  | Ca_kabuli_denovo | 60602737                | C/G  | NA                 | NA                            | NA                 |
| Kabuli_wild_60602749 | NA                                  | Ca_kabuli_denovo | 60602749                | A/T  | NA                 | NA                            | NA                 |
| Kabuli_wild_60603109 | NA                                  | Ca_kabuli_denovo | 60603109                | C/G  | NA                 | NA                            | NA                 |
| Kabuli_wild_60603115 | NA                                  | Ca_kabuli_denovo | 60603115                | C/T  | NA                 | NA                            | NA                 |
| Kabuli_wild_60607054 | NA                                  | Ca_kabuli_denovo | 60607054                | A/G  | NA                 | NA                            | NA                 |
| Kabuli_wild_60608599 | NA                                  | Ca_kabuli_denovo | 60608599                | C/G  | NA                 | NA                            | NA                 |
| Kabuli_wild_60608615 | NA                                  | Ca_kabuli_denovo | 60608615                | A/C  | NA                 | NA                            | NA                 |
| Kabuli_wild_60608617 | NA                                  | Ca_kabuli_denovo | 60608617                | C/T  | NA                 | NA                            | NA                 |
| Kabuli_wild_60608620 | NA                                  | Ca_kabuli_denovo | 60608620                | A/C  | NA                 | NA                            | NA                 |
| Kabuli_wild_60609373 | NA                                  | Ca_kabuli_denovo | 60609373                | C/G  | NA                 | NA                            | NA                 |
| Kabuli_wild_60609841 | NA                                  | Ca_kabuli_denovo | 60609841                | C/G  | NA                 | NA                            | NA                 |
| Kabuli_wild_60613298 | NA                                  | Ca_kabuli_denovo | 60613298                | G/T  | NA                 | NA                            | NA                 |
| Kabuli_wild_60614032 | NA                                  | Ca_kabuli_denovo | 60614032                | G/T  | NA                 | NA                            | NA                 |
| Kabuli_wild_60618944 | NA                                  | Ca_kabuli_denovo | 60618944                | C/G  | NA                 | NA                            | NA                 |
| Kabuli_wild_60618945 | NA                                  | Ca_kabuli_denovo | 60618945                | A/T  | NA                 | NA                            | NA                 |
| Kabuli_wild_60618946 | NA                                  | Ca_kabuli_denovo | 60618946                | C/G  | NA                 | NA                            | NA                 |
| Kabuli_wild_60618950 | NA                                  | Ca_kabuli_denovo | 60618950                | C/T  | NA                 | NA                            | NA                 |
| Kabuli_wild_60621953 | NA                                  | Ca_kabuli_denovo | 60621953                | C/T  | NA                 | NA                            | NA                 |
| Kabuli_wild_60623710 | NA                                  | Ca_kabuli_denovo | 60623710                | C/T  | NA                 | NA                            | NA                 |
| Kabuli_wild_60626189 | NA                                  | Ca_kabuli_denovo | 60626189                | C/G  | NA                 | NA                            | NA                 |
| Kabuli_wild_60626198 | NA                                  | Ca_kabuli_denovo | 60626198                | C/G  | NA                 | NA                            | NA                 |
| Kabuli_wild_60627601 | NA                                  | Ca_kabuli_denovo | 60627601                | A/G  | NA                 | NA                            | NA                 |
| Kabuli_wild_60627604 | NA                                  | Ca_kabuli_denovo | 60627604                | C/G  | NA                 | NA                            | NA                 |
| Kabuli_wild_60627619 | NA                                  | Ca_kabuli_denovo | 60627619                | C/G  | NA                 | NA                            | NA                 |
| Kabuli_wild_60629635 | NA                                  | Ca_kabuli_denovo | 60629635                | C/G  | NA                 | NA                            | NA                 |
| Kabuli_wild_60629641 | NA                                  | Ca_kabuli_denovo | 60629641                | C/G  | NA                 | NA                            | NA                 |
| Kabuli_wild_60636317 | NA                                  | Ca_kabuli_denovo | 60636317                | A/G  | NA                 | NA                            | NA                 |
| Kabuli_wild_60636355 | NA                                  | Ca_kabuli_denovo | 60636355                | C/T  | NA                 | NA                            | NA                 |
| Kabuli_wild_60636364 | NA                                  | Ca_kabuli_denovo | 60636364                | C/G  | NA                 | NA                            | NA                 |
| Kabuli_wild_60636380 | NA                                  | Ca_kabuli_denovo | 60636380                | C/T  | NA                 | NA                            | NA                 |
| Kabuli_wild_60637183 | NA                                  | Ca_kabuli_denovo | 60637183                | C/T  | NA                 | NA                            | NA                 |
| Kabuli_wild_60638102 | NA                                  | Ca_kabuli_denovo | 60638102                | C/G  | NA                 | NA                            | NA                 |
| Kabuli_wild_60640638 | NA                                  | Ca_kabuli_denovo | 60640638                | C/T  | NA                 | NA                            | NA                 |
| Kabuli_wild_60643634 | NA                                  | Ca_kabuli_denovo | 60643634                | C/G  | NA                 | NA                            | NA                 |
| Kabuli_wild_60643844 | NA                                  | Ca_kabuli_denovo | 60643844                | C/T  | NA                 | NA                            | NA                 |
| Kabuli_wild_60643848 | NA                                  | Ca_kabuli_denovo | 60643848                | C/T  | NA                 | NA                            | NA                 |
| Kabuli_wild_60643858 | NA                                  | Ca_kabuli_denovo | 60643858                | C/G  | NA                 | NA                            | NA                 |
| Kabuli_wild_60643891 | NA                                  | Ca_kabuli_denovo | 60643891                | C/G  | NA                 | NA                            | NA                 |
| Kabuli_wild_60646541 | NA                                  | Ca_kabuli_denovo | 60646541                | C/G  | NA                 | NA                            | NA                 |
| Kabuli_wild_60646550 | NA                                  | Ca_kabuli_denovo | 60646550                | C/G  | NA                 | NA                            | NA                 |
| Kabuli_wild_60648709 | NA                                  | Ca_kabuli_denovo | 60648709                | C/G  | NA                 | NA                            | NA                 |

| SNP IDs              | NCBI dbSNP accession IDs (NCBI_SS#) | Chromosomes      | Physical positions (bp) | SNPs | Gene accession IDs | Sequence components of genome | Putative functions |
|----------------------|-------------------------------------|------------------|-------------------------|------|--------------------|-------------------------------|--------------------|
| Kabuli_wild_60648715 | NA                                  | Ca_kabuli_denovo | 60648715                | C/G  | NA                 | NA                            | NA                 |
| Kabuli_wild_60648724 | NA                                  | Ca_kabuli_denovo | 60648724                | C/G  | NA                 | NA                            | NA                 |
| Kabuli_wild_60648736 | NA                                  | Ca_kabuli_denovo | 60648736                | C/G  | NA                 | NA                            | NA                 |
| Kabuli_wild_60650725 | NA                                  | Ca_kabuli_denovo | 60650725                | A/G  | NA                 | NA                            | NA                 |
| Kabuli_wild_60650728 | NA                                  | Ca_kabuli_denovo | 60650728                | C/T  | NA                 | NA                            | NA                 |
| Kabuli_wild_60650740 | NA                                  | Ca_kabuli_denovo | 60650740                | C/T  | NA                 | NA                            | NA                 |
| Kabuli_wild_60655867 | NA                                  | Ca_kabuli_denovo | 60655867                | A/G  | NA                 | NA                            | NA                 |
| Kabuli_wild_60655885 | NA                                  | Ca_kabuli_denovo | 60655885                | A/G  | NA                 | NA                            | NA                 |
| Kabuli_wild_60656912 | NA                                  | Ca_kabuli_denovo | 60656912                | A/G  | NA                 | NA                            | NA                 |
| Kabuli_wild_60657530 | NA                                  | Ca_kabuli_denovo | 60657530                | C/T  | NA                 | NA                            | NA                 |
| Kabuli_wild_60657890 | NA                                  | Ca_kabuli_denovo | 60657890                | A/G  | NA                 | NA                            | NA                 |
| Kabuli_wild_60657923 | NA                                  | Ca_kabuli_denovo | 60657923                | C/G  | NA                 | NA                            | NA                 |
| Kabuli_wild_60657926 | NA                                  | Ca_kabuli_denovo | 60657926                | A/G  | NA                 | NA                            | NA                 |
| Kabuli_wild_60660590 | NA                                  | Ca_kabuli_denovo | 60660590                | A/C  | NA                 | NA                            | NA                 |
| Kabuli_wild_60661735 | NA                                  | Ca_kabuli_denovo | 60661735                | A/G  | NA                 | NA                            | NA                 |
| Kabuli_wild_60662835 | NA                                  | Ca_kabuli_denovo | 60662835                | C/T  | NA                 | NA                            | NA                 |
| Kabuli_wild_60663142 | NA                                  | Ca_kabuli_denovo | 60663142                | C/T  | NA                 | NA                            | NA                 |
| Kabuli_wild_60663151 | NA                                  | Ca_kabuli_denovo | 60663151                | A/C  | NA                 | NA                            | NA                 |
| Kabuli_wild_60663152 | NA                                  | Ca_kabuli_denovo | 60663152                | C/G  | NA                 | NA                            | NA                 |
| Kabuli_wild_60663206 | NA                                  | Ca_kabuli_denovo | 60663206                | C/G  | NA                 | NA                            | NA                 |
| Kabuli_wild_60663736 | NA                                  | Ca_kabuli_denovo | 60663736                | C/G  | NA                 | NA                            | NA                 |
| Kabuli_wild_60663739 | NA                                  | Ca_kabuli_denovo | 60663739                | C/T  | NA                 | NA                            | NA                 |
| Kabuli_wild_60665449 | NA                                  | Ca_kabuli_denovo | 60665449                | C/G  | NA                 | NA                            | NA                 |
| Kabuli_wild_60666632 | NA                                  | Ca_kabuli_denovo | 60666632                | C/G  | NA                 | NA                            | NA                 |
| Kabuli_wild_60666650 | NA                                  | Ca_kabuli_denovo | 60666650                | A/G  | NA                 | NA                            | NA                 |
| Kabuli_wild_60668335 | NA                                  | Ca_kabuli_denovo | 60668335                | C/T  | NA                 | NA                            | NA                 |
| Kabuli_wild_60675748 | NA                                  | Ca_kabuli_denovo | 60675748                | A/T  | NA                 | NA                            | NA                 |
| Kabuli_wild_60675820 | NA                                  | Ca_kabuli_denovo | 60675820                | C/G  | NA                 | NA                            | NA                 |
| Kabuli_wild_60676037 | NA                                  | Ca_kabuli_denovo | 60676037                | C/G  | NA                 | NA                            | NA                 |
| Kabuli_wild_60677154 | NA                                  | Ca_kabuli_denovo | 60677154                | C/G  | NA                 | NA                            | NA                 |
| Kabuli_wild_60677155 | NA                                  | Ca_kabuli_denovo | 60677155                | A/T  | NA                 | NA                            | NA                 |
| Kabuli_wild_60677219 | NA                                  | Ca_kabuli_denovo | 60677219                | C/G  | NA                 | NA                            | NA                 |
| Kabuli_wild_60677221 | NA                                  | Ca_kabuli_denovo | 60677221                | G/T  | NA                 | NA                            | NA                 |
| Kabuli_wild_60678533 | NA                                  | Ca_kabuli_denovo | 60678533                | A/G  | NA                 | NA                            | NA                 |
| Kabuli_wild_60678545 | NA                                  | Ca_kabuli_denovo | 60678545                | C/G  | NA                 | NA                            | NA                 |
| Kabuli_wild_60678563 | NA                                  | Ca_kabuli_denovo | 60678563                | A/G  | NA                 | NA                            | NA                 |
| Kabuli_wild_60678964 | NA                                  | Ca_kabuli_denovo | 60678964                | A/G  | NA                 | NA                            | NA                 |
| Kabuli_wild_60685710 | NA                                  | Ca_kabuli_denovo | 60685710                | A/G  | NA                 | NA                            | NA                 |
| Kabuli_wild_60691754 | NA                                  | Ca_kabuli_denovo | 60691754                | G/T  | NA                 | NA                            | NA                 |
| Kabuli_wild_60694361 | NA                                  | Ca_kabuli_denovo | 60694361                | C/G  | NA                 | NA                            | NA                 |
| Kabuli_wild_60694385 | NA                                  | Ca_kabuli_denovo | 60694385                | C/T  | NA                 | NA                            | NA                 |
| Kabuli_wild_60696853 | NA                                  | Ca_kabuli_denovo | 60696853                | A/G  | NA                 | NA                            | NA                 |
| Kabuli_wild_60699402 | NA                                  | Ca_kabuli_denovo | 60699402                | C/T  | NA                 | NA                            | NA                 |
| Kabuli_wild_60700225 | NA                                  | Ca_kabuli_denovo | 60700225                | A/G  | NA                 | NA                            | NA                 |

| SNP IDs              | NCBI dbSNP accession IDs (NCBI_SS#) | Chromosomes      | Physical positions (bp) | SNPs | Gene accession IDs | Sequence components of genome | Putative functions |
|----------------------|-------------------------------------|------------------|-------------------------|------|--------------------|-------------------------------|--------------------|
| Kabuli_wild_60703800 | NA                                  | Ca_kabuli_denovo | 60703800                | A/G  | NA                 | NA                            | NA                 |
| Kabuli_wild_60703804 | NA                                  | Ca_kabuli_denovo | 60703804                | A/T  | NA                 | NA                            | NA                 |
| Kabuli_wild_60707930 | NA                                  | Ca_kabuli_denovo | 60707930                | C/T  | NA                 | NA                            | NA                 |
| Kabuli_wild_60707981 | NA                                  | Ca_kabuli_denovo | 60707981                | A/G  | NA                 | NA                            | NA                 |
| Kabuli_wild_60707996 | NA                                  | Ca_kabuli_denovo | 60707996                | C/T  | NA                 | NA                            | NA                 |
| Kabuli_wild_60710478 | NA                                  | Ca_kabuli_denovo | 60710478                | C/T  | NA                 | NA                            | NA                 |
| Kabuli_wild_60714401 | NA                                  | Ca_kabuli_denovo | 60714401                | A/G  | NA                 | NA                            | NA                 |
| Kabuli_wild_60714405 | NA                                  | Ca_kabuli_denovo | 60714405                | C/T  | NA                 | NA                            | NA                 |
| Kabuli_wild_60715618 | NA                                  | Ca_kabuli_denovo | 60715618                | A/G  | NA                 | NA                            | NA                 |
| Kabuli_wild_60717537 | NA                                  | Ca_kabuli_denovo | 60717537                | G/T  | NA                 | NA                            | NA                 |
| Kabuli_wild_60718265 | NA                                  | Ca_kabuli_denovo | 60718265                | C/G  | NA                 | NA                            | NA                 |
| Kabuli_wild_60718268 | NA                                  | Ca_kabuli_denovo | 60718268                | A/T  | NA                 | NA                            | NA                 |
| Kabuli_wild_60718274 | NA                                  | Ca_kabuli_denovo | 60718274                | A/G  | NA                 | NA                            | NA                 |
| Kabuli_wild_60718275 | NA                                  | Ca_kabuli_denovo | 60718275                | C/T  | NA                 | NA                            | NA                 |
| Kabuli_wild_60718903 | NA                                  | Ca_kabuli_denovo | 60718903                | A/G  | NA                 | NA                            | NA                 |
| Kabuli_wild_60718906 | NA                                  | Ca_kabuli_denovo | 60718906                | C/G  | NA                 | NA                            | NA                 |
| Kabuli_wild_60718957 | NA                                  | Ca_kabuli_denovo | 60718957                | C/T  | NA                 | NA                            | NA                 |
| Kabuli_wild_60719082 | NA                                  | Ca_kabuli_denovo | 60719082                | C/T  | NA                 | NA                            | NA                 |
| Kabuli_wild_60723955 | NA                                  | Ca_kabuli_denovo | 60723955                | C/G  | NA                 | NA                            | NA                 |
| Kabuli_wild_60725311 | NA                                  | Ca_kabuli_denovo | 60725311                | G/T  | NA                 | NA                            | NA                 |
| Kabuli_wild_60727015 | NA                                  | Ca_kabuli_denovo | 60727015                | C/T  | NA                 | NA                            | NA                 |
| Kabuli_wild_60727021 | NA                                  | Ca_kabuli_denovo | 60727021                | C/T  | NA                 | NA                            | NA                 |
| Kabuli_wild_60727042 | NA                                  | Ca_kabuli_denovo | 60727042                | A/G  | NA                 | NA                            | NA                 |
| Kabuli_wild_60727392 | NA                                  | Ca_kabuli_denovo | 60727392                | C/T  | NA                 | NA                            | NA                 |
| Kabuli_wild_60727407 | NA                                  | Ca_kabuli_denovo | 60727407                | C/G  | NA                 | NA                            | NA                 |
| Kabuli_wild_60727408 | NA                                  | Ca_kabuli_denovo | 60727408                | A/T  | NA                 | NA                            | NA                 |
| Kabuli_wild_60727410 | NA                                  | Ca_kabuli_denovo | 60727410                | C/T  | NA                 | NA                            | NA                 |
| Kabuli_wild_60731637 | NA                                  | Ca_kabuli_denovo | 60731637                | C/T  | NA                 | NA                            | NA                 |
| Kabuli_wild_60731662 | NA                                  | Ca_kabuli_denovo | 60731662                | C/T  | NA                 | NA                            | NA                 |
| Kabuli_wild_60731701 | NA                                  | Ca_kabuli_denovo | 60731701                | C/G  | NA                 | NA                            | NA                 |
| Kabuli_wild_60731707 | NA                                  | Ca_kabuli_denovo | 60731707                | C/T  | NA                 | NA                            | NA                 |
| Kabuli_wild_60735281 | NA                                  | Ca_kabuli_denovo | 60735281                | C/T  | NA                 | NA                            | NA                 |
| Kabuli_wild_60737494 | NA                                  | Ca_kabuli_denovo | 60737494                | C/T  | NA                 | NA                            | NA                 |
| Kabuli_wild_60737501 | NA                                  | Ca_kabuli_denovo | 60737501                | C/G  | NA                 | NA                            | NA                 |
| Kabuli_wild_60737503 | NA                                  | Ca_kabuli_denovo | 60737503                | A/G  | NA                 | NA                            | NA                 |
| Kabuli_wild_60737533 | NA                                  | Ca_kabuli_denovo | 60737533                | C/T  | NA                 | NA                            | NA                 |
| Kabuli_wild_60740791 | NA                                  | Ca_kabuli_denovo | 60740791                | C/T  | NA                 | NA                            | NA                 |
| Kabuli_wild_60740794 | NA                                  | Ca_kabuli_denovo | 60740794                | C/G  | NA                 | NA                            | NA                 |
| Kabuli_wild_60741041 | NA                                  | Ca_kabuli_denovo | 60741041                | A/G  | NA                 | NA                            | NA                 |
| Kabuli_wild_60747020 | NA                                  | Ca_kabuli_denovo | 60747020                | C/T  | NA                 | NA                            | NA                 |
| Kabuli_wild_60748763 | NA                                  | Ca_kabuli_denovo | 60748763                | C/T  | NA                 | NA                            | NA                 |
| Kabuli_wild_60748805 | NA                                  | Ca_kabuli_denovo | 60748805                | A/G  | NA                 | NA                            | NA                 |
| Kabuli_wild_60748808 | NA                                  | Ca_kabuli_denovo | 60748808                | C/G  | NA                 | NA                            | NA                 |
| Kabuli_wild_60753050 | NA                                  | Ca_kabuli_denovo | 60753050                | C/G  | NA                 | NA                            | NA                 |

| SNP IDs              | NCBI dbSNP accession IDs (NCBI_SS#) | Chromosomes      | Physical positions (bp) | SNPs | Gene accession IDs | Sequence components of genome | Putative functions |
|----------------------|-------------------------------------|------------------|-------------------------|------|--------------------|-------------------------------|--------------------|
| Kabuli_wild_60753059 | NA                                  | Ca_kabuli_denovo | 60753059                | G/T  | NA                 | NA                            | NA                 |
| Kabuli_wild_60753062 | NA                                  | Ca_kabuli_denovo | 60753062                | A/G  | NA                 | NA                            | NA                 |
| Kabuli_wild_60753083 | NA                                  | Ca_kabuli_denovo | 60753083                | C/G  | NA                 | NA                            | NA                 |
| Kabuli_wild_60757597 | NA                                  | Ca_kabuli_denovo | 60757597                | C/G  | NA                 | NA                            | NA                 |
| Kabuli_wild_60760280 | NA                                  | Ca_kabuli_denovo | 60760280                | A/G  | NA                 | NA                            | NA                 |
| Kabuli_wild_60760286 | NA                                  | Ca_kabuli_denovo | 60760286                | A/G  | NA                 | NA                            | NA                 |
| Kabuli_wild_60760846 | NA                                  | Ca_kabuli_denovo | 60760846                | C/G  | NA                 | NA                            | NA                 |
| Kabuli_wild_60762952 | NA                                  | Ca_kabuli_denovo | 60762952                | C/T  | NA                 | NA                            | NA                 |
| Kabuli_wild_60777771 | NA                                  | Ca_kabuli_denovo | 60777771                | C/G  | NA                 | NA                            | NA                 |
| Kabuli_wild_60777818 | NA                                  | Ca_kabuli_denovo | 60777818                | C/G  | NA                 | NA                            | NA                 |
| Kabuli_wild_60781394 | NA                                  | Ca_kabuli_denovo | 60781394                | A/G  | NA                 | NA                            | NA                 |
| Kabuli_wild_60781877 | NA                                  | Ca_kabuli_denovo | 60781877                | C/G  | NA                 | NA                            | NA                 |
| Kabuli_wild_60781895 | NA                                  | Ca_kabuli_denovo | 60781895                | C/G  | NA                 | NA                            | NA                 |
| Kabuli_wild_60782881 | NA                                  | Ca_kabuli_denovo | 60782881                | C/T  | NA                 | NA                            | NA                 |
| Kabuli_wild_60783650 | NA                                  | Ca_kabuli_denovo | 60783650                | A/G  | NA                 | NA                            | NA                 |
| Kabuli_wild_60787064 | NA                                  | Ca_kabuli_denovo | 60787064                | C/T  | NA                 | NA                            | NA                 |
| Kabuli_wild_60787094 | NA                                  | Ca_kabuli_denovo | 60787094                | A/G  | NA                 | NA                            | NA                 |
| Kabuli_wild_60787130 | NA                                  | Ca_kabuli_denovo | 60787130                | C/T  | NA                 | NA                            | NA                 |
| Kabuli_wild_60787142 | NA                                  | Ca_kabuli_denovo | 60787142                | C/T  | NA                 | NA                            | NA                 |
| Kabuli_wild_60787781 | NA                                  | Ca_kabuli_denovo | 60787781                | A/G  | NA                 | NA                            | NA                 |
| Kabuli_wild_60789055 | NA                                  | Ca_kabuli_denovo | 60789055                | G/T  | NA                 | NA                            | NA                 |
| Kabuli_wild_60789091 | NA                                  | Ca_kabuli_denovo | 60789091                | A/G  | NA                 | NA                            | NA                 |
| Kabuli_wild_60793775 | NA                                  | Ca_kabuli_denovo | 60793775                | A/G  | NA                 | NA                            | NA                 |
| Kabuli_wild_60794161 | NA                                  | Ca_kabuli_denovo | 60794161                | A/G  | NA                 | NA                            | NA                 |
| Kabuli_wild_60794162 | NA                                  | Ca_kabuli_denovo | 60794162                | C/G  | NA                 | NA                            | NA                 |
| Kabuli_wild_60796379 | NA                                  | Ca_kabuli_denovo | 60796379                | A/G  | NA                 | NA                            | NA                 |
| Kabuli_wild_60796395 | NA                                  | Ca_kabuli_denovo | 60796395                | C/T  | NA                 | NA                            | NA                 |
| Kabuli_wild_60796403 | NA                                  | Ca_kabuli_denovo | 60796403                | A/C  | NA                 | NA                            | NA                 |
| Kabuli_wild_60797497 | NA                                  | Ca_kabuli_denovo | 60797497                | A/G  | NA                 | NA                            | NA                 |
| Kabuli_wild_60797551 | NA                                  | Ca_kabuli_denovo | 60797551                | C/T  | NA                 | NA                            | NA                 |
| Kabuli_wild_60797950 | NA                                  | Ca_kabuli_denovo | 60797950                | A/G  | NA                 | NA                            | NA                 |
| Kabuli_wild_60797959 | NA                                  | Ca_kabuli_denovo | 60797959                | C/G  | NA                 | NA                            | NA                 |
| Kabuli_wild_60797980 | NA                                  | Ca_kabuli_denovo | 60797980                | C/G  | NA                 | NA                            | NA                 |
| Kabuli_wild_60797989 | NA                                  | Ca_kabuli_denovo | 60797989                | A/G  | NA                 | NA                            | NA                 |
| Kabuli_wild_60802979 | NA                                  | Ca_kabuli_denovo | 60802979                | A/C  | NA                 | NA                            | NA                 |
| Kabuli_wild_60802990 | NA                                  | Ca_kabuli_denovo | 60802990                | A/C  | NA                 | NA                            | NA                 |
| Kabuli_wild_60808723 | NA                                  | Ca_kabuli_denovo | 60808723                | C/T  | NA                 | NA                            | NA                 |
| Kabuli_wild_60810886 | NA                                  | Ca_kabuli_denovo | 60810886                | A/G  | NA                 | NA                            | NA                 |
| Kabuli_wild_60815168 | NA                                  | Ca_kabuli_denovo | 60815168                | C/G  | NA                 | NA                            | NA                 |
| Kabuli_wild_60815171 | NA                                  | Ca_kabuli_denovo | 60815171                | C/T  | NA                 | NA                            | NA                 |
| Kabuli_wild_60815251 | NA                                  | Ca_kabuli_denovo | 60815251                | C/G  | NA                 | NA                            | NA                 |
| Kabuli_wild_60815261 | NA                                  | Ca_kabuli_denovo | 60815261                | A/G  | NA                 | NA                            | NA                 |
| Kabuli_wild_60815296 | NA                                  | Ca_kabuli_denovo | 60815296                | C/T  | NA                 | NA                            | NA                 |
| Kabuli_wild_60818227 | NA                                  | Ca_kabuli_denovo | 60818227                | C/T  | NA                 | NA                            | NA                 |



| SNP IDs              | NCBI dbSNP accession IDs (NCBI_SS#) | Chromosomes      | Physical positions (bp) | SNPs | Gene accession IDs | Sequence components of genome | Putative functions |
|----------------------|-------------------------------------|------------------|-------------------------|------|--------------------|-------------------------------|--------------------|
| Kabuli_wild_60818233 | NA                                  | Ca_kabuli_denovo | 60818233                | A/G  | NA                 | NA                            | NA                 |
| Kabuli_wild_60822512 | NA                                  | Ca_kabuli_denovo | 60822512                | A/G  | NA                 | NA                            | NA                 |
| Kabuli_wild_60822528 | NA                                  | Ca_kabuli_denovo | 60822528                | C/T  | NA                 | NA                            | NA                 |
| Kabuli_wild_60823401 | NA                                  | Ca_kabuli_denovo | 60823401                | C/G  | NA                 | NA                            | NA                 |
| Kabuli_wild_60823817 | NA                                  | Ca_kabuli_denovo | 60823817                | C/T  | NA                 | NA                            | NA                 |
| Kabuli_wild_60823841 | NA                                  | Ca_kabuli_denovo | 60823841                | C/T  | NA                 | NA                            | NA                 |
| Kabuli_wild_60825316 | NA                                  | Ca_kabuli_denovo | 60825316                | A/G  | NA                 | NA                            | NA                 |
| Kabuli_wild_60828248 | NA                                  | Ca_kabuli_denovo | 60828248                | G/T  | NA                 | NA                            | NA                 |
| Kabuli_wild_60834400 | NA                                  | Ca_kabuli_denovo | 60834400                | C/G  | NA                 | NA                            | NA                 |
| Kabuli_wild_60834412 | NA                                  | Ca_kabuli_denovo | 60834412                | C/G  | NA                 | NA                            | NA                 |
| Kabuli_wild_60834601 | NA                                  | Ca_kabuli_denovo | 60834601                | C/G  | NA                 | NA                            | NA                 |
| Kabuli_wild_60834620 | NA                                  | Ca_kabuli_denovo | 60834620                | C/T  | NA                 | NA                            | NA                 |
| Kabuli_wild_60836336 | NA                                  | Ca_kabuli_denovo | 60836336                | C/T  | NA                 | NA                            | NA                 |
| Kabuli_wild_60837293 | NA                                  | Ca_kabuli_denovo | 60837293                | A/G  | NA                 | NA                            | NA                 |
| Kabuli_wild_60837298 | NA                                  | Ca_kabuli_denovo | 60837298                | C/T  | NA                 | NA                            | NA                 |
| Kabuli_wild_60837308 | NA                                  | Ca_kabuli_denovo | 60837308                | A/G  | NA                 | NA                            | NA                 |
| Kabuli_wild_60837848 | NA                                  | Ca_kabuli_denovo | 60837848                | C/T  | NA                 | NA                            | NA                 |
| Kabuli_wild_60841276 | NA                                  | Ca_kabuli_denovo | 60841276                | A/C  | NA                 | NA                            | NA                 |
| Kabuli_wild_60846964 | NA                                  | Ca_kabuli_denovo | 60846964                | C/T  | NA                 | NA                            | NA                 |
| Kabuli_wild_60846967 | NA                                  | Ca_kabuli_denovo | 60846967                | C/G  | NA                 | NA                            | NA                 |
| Kabuli_wild_60847121 | NA                                  | Ca_kabuli_denovo | 60847121                | A/G  | NA                 | NA                            | NA                 |
| Kabuli_wild_60847124 | NA                                  | Ca_kabuli_denovo | 60847124                | C/G  | NA                 | NA                            | NA                 |
| Kabuli_wild_60847130 | NA                                  | Ca_kabuli_denovo | 60847130                | C/T  | NA                 | NA                            | NA                 |
| Kabuli_wild_60849383 | NA                                  | Ca_kabuli_denovo | 60849383                | A/G  | NA                 | NA                            | NA                 |
| Kabuli_wild_60853563 | NA                                  | Ca_kabuli_denovo | 60853563                | A/T  | NA                 | NA                            | NA                 |
| Kabuli_wild_60853564 | NA                                  | Ca_kabuli_denovo | 60853564                | G/T  | NA                 | NA                            | NA                 |
| Kabuli_wild_60853589 | NA                                  | Ca_kabuli_denovo | 60853589                | A/G  | NA                 | NA                            | NA                 |
| Kabuli_wild_60854149 | NA                                  | Ca_kabuli_denovo | 60854149                | A/G  | NA                 | NA                            | NA                 |
| Kabuli_wild_60854396 | NA                                  | Ca_kabuli_denovo | 60854396                | C/G  | NA                 | NA                            | NA                 |
| Kabuli_wild_60854863 | NA                                  | Ca_kabuli_denovo | 60854863                | A/G  | NA                 | NA                            | NA                 |
| Kabuli_wild_60855481 | NA                                  | Ca_kabuli_denovo | 60855481                | G/T  | NA                 | NA                            | NA                 |
| Kabuli_wild_60858494 | NA                                  | Ca_kabuli_denovo | 60858494                | C/T  | NA                 | NA                            | NA                 |
| Kabuli_wild_60858557 | NA                                  | Ca_kabuli_denovo | 60858557                | A/G  | NA                 | NA                            | NA                 |
| Kabuli_wild_60858563 | NA                                  | Ca_kabuli_denovo | 60858563                | C/T  | NA                 | NA                            | NA                 |
| Kabuli_wild_60860640 | NA                                  | Ca_kabuli_denovo | 60860640                | C/G  | NA                 | NA                            | NA                 |
| Kabuli_wild_60862703 | NA                                  | Ca_kabuli_denovo | 60862703                | C/T  | NA                 | NA                            | NA                 |
| Kabuli_wild_60862752 | NA                                  | Ca_kabuli_denovo | 60862752                | A/G  | NA                 | NA                            | NA                 |
| Kabuli_wild_60862876 | NA                                  | Ca_kabuli_denovo | 60862876                | C/T  | NA                 | NA                            | NA                 |
| Kabuli_wild_60863348 | NA                                  | Ca_kabuli_denovo | 60863348                | C/T  | NA                 | NA                            | NA                 |
| Kabuli_wild_60863635 | NA                                  | Ca_kabuli_denovo | 60863635                | C/G  | NA                 | NA                            | NA                 |
| Kabuli_wild_60863791 | NA                                  | Ca_kabuli_denovo | 60863791                | C/T  | NA                 | NA                            | NA                 |
| Kabuli_wild_60867424 | NA                                  | Ca_kabuli_denovo | 60867424                | A/G  | NA                 | NA                            | NA                 |
| Kabuli_wild_60872288 | NA                                  | Ca_kabuli_denovo | 60872288                | G/T  | NA                 | NA                            | NA                 |
| Kabuli_wild_60873102 | NA                                  | Ca_kabuli_denovo | 60873102                | C/G  | NA                 | NA                            | NA                 |

| SNP IDs              | NCBI dbSNP accession IDs (NCBI_SS#) | Chromosomes      | Physical positions (bp) | SNPs | Gene accession IDs | Sequence components of genome | Putative functions |
|----------------------|-------------------------------------|------------------|-------------------------|------|--------------------|-------------------------------|--------------------|
| Kabuli_wild_60874613 | NA                                  | Ca_kabuli_denovo | 60874613                | A/G  | NA                 | NA                            | NA                 |
| Kabuli_wild_60875630 | NA                                  | Ca_kabuli_denovo | 60875630                | A/G  | NA                 | NA                            | NA                 |
| Kabuli_wild_60881575 | NA                                  | Ca_kabuli_denovo | 60881575                | C/G  | NA                 | NA                            | NA                 |
| Kabuli_wild_60881576 | NA                                  | Ca_kabuli_denovo | 60881576                | C/T  | NA                 | NA                            | NA                 |
| Kabuli_wild_60885521 | NA                                  | Ca_kabuli_denovo | 60885521                | C/G  | NA                 | NA                            | NA                 |
| Kabuli_wild_60888161 | NA                                  | Ca_kabuli_denovo | 60888161                | C/G  | NA                 | NA                            | NA                 |
| Kabuli_wild_60888166 | NA                                  | Ca_kabuli_denovo | 60888166                | C/T  | NA                 | NA                            | NA                 |
| Kabuli_wild_60888203 | NA                                  | Ca_kabuli_denovo | 60888203                | G/T  | NA                 | NA                            | NA                 |
| Kabuli_wild_60893932 | NA                                  | Ca_kabuli_denovo | 60893932                | G/T  | NA                 | NA                            | NA                 |
| Kabuli_wild_60897748 | NA                                  | Ca_kabuli_denovo | 60897748                | G/T  | NA                 | NA                            | NA                 |
| Kabuli_wild_60898295 | NA                                  | Ca_kabuli_denovo | 60898295                | C/G  | NA                 | NA                            | NA                 |
| Kabuli_wild_60898310 | NA                                  | Ca_kabuli_denovo | 60898310                | C/T  | NA                 | NA                            | NA                 |
| Kabuli_wild_60898352 | NA                                  | Ca_kabuli_denovo | 60898352                | C/T  | NA                 | NA                            | NA                 |
| Kabuli_wild_60900605 | NA                                  | Ca_kabuli_denovo | 60900605                | G/T  | NA                 | NA                            | NA                 |
| Kabuli_wild_60900806 | NA                                  | Ca_kabuli_denovo | 60900806                | A/G  | NA                 | NA                            | NA                 |
| Kabuli_wild_60900815 | NA                                  | Ca_kabuli_denovo | 60900815                | C/G  | NA                 | NA                            | NA                 |
| Kabuli_wild_60902227 | NA                                  | Ca_kabuli_denovo | 60902227                | C/G  | NA                 | NA                            | NA                 |
| Kabuli_wild_60903209 | NA                                  | Ca_kabuli_denovo | 60903209                | C/T  | NA                 | NA                            | NA                 |
| Kabuli_wild_60904550 | NA                                  | Ca_kabuli_denovo | 60904550                | A/G  | NA                 | NA                            | NA                 |
| Kabuli_wild_60904900 | NA                                  | Ca_kabuli_denovo | 60904900                | G/T  | NA                 | NA                            | NA                 |
| Kabuli_wild_60904924 | NA                                  | Ca_kabuli_denovo | 60904924                | C/T  | NA                 | NA                            | NA                 |
| Kabuli_wild_60906970 | NA                                  | Ca_kabuli_denovo | 60906970                | C/G  | NA                 | NA                            | NA                 |
| Kabuli_wild_60910157 | NA                                  | Ca_kabuli_denovo | 60910157                | C/G  | NA                 | NA                            | NA                 |
| Kabuli_wild_60910175 | NA                                  | Ca_kabuli_denovo | 60910175                | C/G  | NA                 | NA                            | NA                 |
| Kabuli_wild_60910664 | NA                                  | Ca_kabuli_denovo | 60910664                | C/G  | NA                 | NA                            | NA                 |
| Kabuli_wild_60910676 | NA                                  | Ca_kabuli_denovo | 60910676                | A/G  | NA                 | NA                            | NA                 |
| Kabuli_wild_60919637 | NA                                  | Ca_kabuli_denovo | 60919637                | C/T  | NA                 | NA                            | NA                 |
| Kabuli_wild_60926696 | NA                                  | Ca_kabuli_denovo | 60926696                | G/T  | NA                 | NA                            | NA                 |
| Kabuli_wild_60928724 | NA                                  | Ca_kabuli_denovo | 60928724                | A/G  | NA                 | NA                            | NA                 |
| Kabuli_wild_60929545 | NA                                  | Ca_kabuli_denovo | 60929545                | C/T  | NA                 | NA                            | NA                 |
| Kabuli_wild_60929566 | NA                                  | Ca_kabuli_denovo | 60929566                | A/G  | NA                 | NA                            | NA                 |
| Kabuli_wild_60930488 | NA                                  | Ca_kabuli_denovo | 60930488                | A/G  | NA                 | NA                            | NA                 |
| Kabuli_wild_60930656 | NA                                  | Ca_kabuli_denovo | 60930656                | C/G  | NA                 | NA                            | NA                 |
| Kabuli_wild_60930701 | NA                                  | Ca_kabuli_denovo | 60930701                | A/G  | NA                 | NA                            | NA                 |
| Kabuli_wild_60931307 | NA                                  | Ca_kabuli_denovo | 60931307                | C/T  | NA                 | NA                            | NA                 |
| Kabuli_wild_60931820 | NA                                  | Ca_kabuli_denovo | 60931820                | C/T  | NA                 | NA                            | NA                 |
| Kabuli_wild_60933448 | NA                                  | Ca_kabuli_denovo | 60933448                | C/G  | NA                 | NA                            | NA                 |
| Kabuli_wild_60933451 | NA                                  | Ca_kabuli_denovo | 60933451                | C/G  | NA                 | NA                            | NA                 |
| Kabuli_wild_60935776 | NA                                  | Ca_kabuli_denovo | 60935776                | C/G  | NA                 | NA                            | NA                 |
| Kabuli_wild_60940743 | NA                                  | Ca_kabuli_denovo | 60940743                | C/T  | NA                 | NA                            | NA                 |
| Kabuli_wild_60940781 | NA                                  | Ca_kabuli_denovo | 60940781                | A/C  | NA                 | NA                            | NA                 |
| Kabuli_wild_60943719 | NA                                  | Ca_kabuli_denovo | 60943719                | A/G  | NA                 | NA                            | NA                 |
| Kabuli_wild_60947770 | NA                                  | Ca_kabuli_denovo | 60947770                | C/G  | NA                 | NA                            | NA                 |
| Kabuli_wild_60947782 | NA                                  | Ca_kabuli_denovo | 60947782                | C/G  | NA                 | NA                            | NA                 |

| SNP IDs              | NCBI dbSNP accession IDs (NCBI_SS#) | Chromosomes      | Physical positions (bp) | SNPs | Gene accession IDs | Sequence components of genome | Putative functions |
|----------------------|-------------------------------------|------------------|-------------------------|------|--------------------|-------------------------------|--------------------|
| Kabuli_wild_60947791 | NA                                  | Ca_kabuli_denovo | 60947791                | C/T  | NA                 | NA                            | NA                 |
| Kabuli_wild_60951797 | NA                                  | Ca_kabuli_denovo | 60951797                | A/G  | NA                 | NA                            | NA                 |
| Kabuli_wild_60951836 | NA                                  | Ca_kabuli_denovo | 60951836                | A/G  | NA                 | NA                            | NA                 |
| Kabuli_wild_60955434 | NA                                  | Ca_kabuli_denovo | 60955434                | A/G  | NA                 | NA                            | NA                 |
| Kabuli_wild_60956923 | NA                                  | Ca_kabuli_denovo | 60956923                | A/G  | NA                 | NA                            | NA                 |
| Kabuli_wild_60961559 | NA                                  | Ca_kabuli_denovo | 60961559                | A/G  | NA                 | NA                            | NA                 |
| Kabuli_wild_60961826 | NA                                  | Ca_kabuli_denovo | 60961826                | A/G  | NA                 | NA                            | NA                 |
| Kabuli_wild_60962308 | NA                                  | Ca_kabuli_denovo | 60962308                | C/G  | NA                 | NA                            | NA                 |
| Kabuli_wild_60962311 | NA                                  | Ca_kabuli_denovo | 60962311                | C/G  | NA                 | NA                            | NA                 |
| Kabuli_wild_60962347 | NA                                  | Ca_kabuli_denovo | 60962347                | C/T  | NA                 | NA                            | NA                 |
| Kabuli_wild_60962555 | NA                                  | Ca_kabuli_denovo | 60962555                | A/T  | NA                 | NA                            | NA                 |
| Kabuli_wild_60962572 | NA                                  | Ca_kabuli_denovo | 60962572                | A/G  | NA                 | NA                            | NA                 |
| Kabuli_wild_60962602 | NA                                  | Ca_kabuli_denovo | 60962602                | C/G  | NA                 | NA                            | NA                 |
| Kabuli_wild_60962608 | NA                                  | Ca_kabuli_denovo | 60962608                | C/T  | NA                 | NA                            | NA                 |
| Kabuli_wild_60963755 | NA                                  | Ca_kabuli_denovo | 60963755                | G/T  | NA                 | NA                            | NA                 |
| Kabuli_wild_60965086 | NA                                  | Ca_kabuli_denovo | 60965086                | C/T  | NA                 | NA                            | NA                 |
| Kabuli_wild_60966089 | NA                                  | Ca_kabuli_denovo | 60966089                | C/T  | NA                 | NA                            | NA                 |
| Kabuli_wild_60967782 | NA                                  | Ca_kabuli_denovo | 60967782                | A/G  | NA                 | NA                            | NA                 |
| Kabuli_wild_60968510 | NA                                  | Ca_kabuli_denovo | 60968510                | C/T  | NA                 | NA                            | NA                 |
| Kabuli_wild_60968522 | NA                                  | Ca_kabuli_denovo | 60968522                | C/T  | NA                 | NA                            | NA                 |
| Kabuli_wild_60968525 | NA                                  | Ca_kabuli_denovo | 60968525                | G/T  | NA                 | NA                            | NA                 |
| Kabuli_wild_60968528 | NA                                  | Ca_kabuli_denovo | 60968528                | A/G  | NA                 | NA                            | NA                 |
| Kabuli_wild_60972902 | NA                                  | Ca_kabuli_denovo | 60972902                | C/G  | NA                 | NA                            | NA                 |
| Kabuli_wild_60974380 | NA                                  | Ca_kabuli_denovo | 60974380                | C/T  | NA                 | NA                            | NA                 |
| Kabuli_wild_60974425 | NA                                  | Ca_kabuli_denovo | 60974425                | C/T  | NA                 | NA                            | NA                 |
| Kabuli_wild_60974443 | NA                                  | Ca_kabuli_denovo | 60974443                | C/T  | NA                 | NA                            | NA                 |
| Kabuli_wild_60976327 | NA                                  | Ca_kabuli_denovo | 60976327                | C/T  | NA                 | NA                            | NA                 |
| Kabuli_wild_60976354 | NA                                  | Ca_kabuli_denovo | 60976354                | C/T  | NA                 | NA                            | NA                 |
| Kabuli_wild_60976390 | NA                                  | Ca_kabuli_denovo | 60976390                | C/T  | NA                 | NA                            | NA                 |
| Kabuli_wild_60976783 | NA                                  | Ca_kabuli_denovo | 60976783                | A/C  | NA                 | NA                            | NA                 |
| Kabuli_wild_60976804 | NA                                  | Ca_kabuli_denovo | 60976804                | C/G  | NA                 | NA                            | NA                 |
| Kabuli_wild_60977620 | NA                                  | Ca_kabuli_denovo | 60977620                | C/T  | NA                 | NA                            | NA                 |
| Kabuli_wild_60977639 | NA                                  | Ca_kabuli_denovo | 60977639                | C/T  | NA                 | NA                            | NA                 |
| Kabuli_wild_60978463 | NA                                  | Ca_kabuli_denovo | 60978463                | C/G  | NA                 | NA                            | NA                 |
| Kabuli_wild_60986200 | NA                                  | Ca_kabuli_denovo | 60986200                | A/T  | NA                 | NA                            | NA                 |
| Kabuli_wild_60991774 | NA                                  | Ca_kabuli_denovo | 60991774                | A/G  | NA                 | NA                            | NA                 |
| Kabuli_wild_60994643 | NA                                  | Ca_kabuli_denovo | 60994643                | C/G  | NA                 | NA                            | NA                 |
| Kabuli_wild_61001462 | NA                                  | Ca_kabuli_denovo | 61001462                | C/G  | NA                 | NA                            | NA                 |
| Kabuli_wild_61002944 | NA                                  | Ca_kabuli_denovo | 61002944                | C/G  | NA                 | NA                            | NA                 |
| Kabuli_wild_61003516 | NA                                  | Ca_kabuli_denovo | 61003516                | C/T  | NA                 | NA                            | NA                 |
| Kabuli_wild_61008002 | NA                                  | Ca_kabuli_denovo | 61008002                | G/T  | NA                 | NA                            | NA                 |
| Kabuli_wild_61011193 | NA                                  | Ca_kabuli_denovo | 61011193                | A/G  | NA                 | NA                            | NA                 |
| Kabuli_wild_61011208 | NA                                  | Ca_kabuli_denovo | 61011208                | C/T  | NA                 | NA                            | NA                 |
| Kabuli_wild_61011278 | NA                                  | Ca_kabuli_denovo | 61011278                | A/G  | NA                 | NA                            | NA                 |

| SNP IDs              | NCBI dbSNP accession IDs (NCBI_SS#) | Chromosomes      | Physical positions (bp) | SNPs | Gene accession IDs | Sequence components of genome | Putative functions |
|----------------------|-------------------------------------|------------------|-------------------------|------|--------------------|-------------------------------|--------------------|
| Kabuli_wild_61012688 | NA                                  | Ca_kabuli_denovo | 61012688                | A/G  | NA                 | NA                            | NA                 |
| Kabuli_wild_61012892 | NA                                  | Ca_kabuli_denovo | 61012892                | C/G  | NA                 | NA                            | NA                 |
| Kabuli_wild_61012895 | NA                                  | Ca_kabuli_denovo | 61012895                | C/G  | NA                 | NA                            | NA                 |
| Kabuli_wild_61015663 | NA                                  | Ca_kabuli_denovo | 61015663                | C/G  | NA                 | NA                            | NA                 |
| Kabuli_wild_61015699 | NA                                  | Ca_kabuli_denovo | 61015699                | C/T  | NA                 | NA                            | NA                 |
| Kabuli_wild_61015847 | NA                                  | Ca_kabuli_denovo | 61015847                | C/T  | NA                 | NA                            | NA                 |
| Kabuli_wild_61017557 | NA                                  | Ca_kabuli_denovo | 61017557                | G/T  | NA                 | NA                            | NA                 |
| Kabuli_wild_61018660 | NA                                  | Ca_kabuli_denovo | 61018660                | C/G  | NA                 | NA                            | NA                 |
| Kabuli_wild_61022207 | NA                                  | Ca_kabuli_denovo | 61022207                | A/G  | NA                 | NA                            | NA                 |
| Kabuli_wild_61022210 | NA                                  | Ca_kabuli_denovo | 61022210                | C/G  | NA                 | NA                            | NA                 |
| Kabuli_wild_61025351 | NA                                  | Ca_kabuli_denovo | 61025351                | C/T  | NA                 | NA                            | NA                 |
| Kabuli_wild_61031710 | NA                                  | Ca_kabuli_denovo | 61031710                | C/T  | NA                 | NA                            | NA                 |
| Kabuli_wild_61042434 | NA                                  | Ca_kabuli_denovo | 61042434                | A/C  | NA                 | NA                            | NA                 |
| Kabuli_wild_61045147 | NA                                  | Ca_kabuli_denovo | 61045147                | C/T  | NA                 | NA                            | NA                 |
| Kabuli_wild_61045176 | NA                                  | Ca_kabuli_denovo | 61045176                | A/G  | NA                 | NA                            | NA                 |
| Kabuli_wild_61049449 | NA                                  | Ca_kabuli_denovo | 61049449                | G/T  | NA                 | NA                            | NA                 |
| Kabuli_wild_61051574 | NA                                  | Ca_kabuli_denovo | 61051574                | A/G  | NA                 | NA                            | NA                 |
| Kabuli_wild_61056565 | NA                                  | Ca_kabuli_denovo | 61056565                | C/G  | NA                 | NA                            | NA                 |
| Kabuli_wild_61057333 | NA                                  | Ca_kabuli_denovo | 61057333                | C/T  | NA                 | NA                            | NA                 |
| Kabuli_wild_61062812 | NA                                  | Ca_kabuli_denovo | 61062812                | A/G  | NA                 | NA                            | NA                 |
| Kabuli_wild_61062827 | NA                                  | Ca_kabuli_denovo | 61062827                | A/G  | NA                 | NA                            | NA                 |
| Kabuli_wild_61062848 | NA                                  | Ca_kabuli_denovo | 61062848                | A/C  | NA                 | NA                            | NA                 |
| Kabuli_wild_61072669 | NA                                  | Ca_kabuli_denovo | 61072669                | A/G  | NA                 | NA                            | NA                 |
| Kabuli_wild_61072693 | NA                                  | Ca_kabuli_denovo | 61072693                | C/G  | NA                 | NA                            | NA                 |
| Kabuli_wild_61072696 | NA                                  | Ca_kabuli_denovo | 61072696                | C/G  | NA                 | NA                            | NA                 |
| Kabuli_wild_61072717 | NA                                  | Ca_kabuli_denovo | 61072717                | G/T  | NA                 | NA                            | NA                 |
| Kabuli_wild_61073345 | NA                                  | Ca_kabuli_denovo | 61073345                | A/G  | NA                 | NA                            | NA                 |
| Kabuli_wild_61073387 | NA                                  | Ca_kabuli_denovo | 61073387                | A/C  | NA                 | NA                            | NA                 |
| Kabuli_wild_61073710 | NA                                  | Ca_kabuli_denovo | 61073710                | A/G  | NA                 | NA                            | NA                 |
| Kabuli_wild_61073746 | NA                                  | Ca_kabuli_denovo | 61073746                | A/G  | NA                 | NA                            | NA                 |
| Kabuli_wild_61084375 | NA                                  | Ca_kabuli_denovo | 61084375                | C/T  | NA                 | NA                            | NA                 |
| Kabuli_wild_61084512 | NA                                  | Ca_kabuli_denovo | 61084512                | A/G  | NA                 | NA                            | NA                 |
| Kabuli_wild_61084518 | NA                                  | Ca_kabuli_denovo | 61084518                | C/G  | NA                 | NA                            | NA                 |
| Kabuli_wild_61087556 | NA                                  | Ca_kabuli_denovo | 61087556                | A/G  | NA                 | NA                            | NA                 |
| Kabuli_wild_61088784 | NA                                  | Ca_kabuli_denovo | 61088784                | A/G  | NA                 | NA                            | NA                 |
| Kabuli_wild_61095744 | NA                                  | Ca_kabuli_denovo | 61095744                | C/T  | NA                 | NA                            | NA                 |
| Kabuli_wild_61095770 | NA                                  | Ca_kabuli_denovo | 61095770                | C/G  | NA                 | NA                            | NA                 |
| Kabuli_wild_61096861 | NA                                  | Ca_kabuli_denovo | 61096861                | A/G  | NA                 | NA                            | NA                 |
| Kabuli_wild_61097330 | NA                                  | Ca_kabuli_denovo | 61097330                | C/T  | NA                 | NA                            | NA                 |
| Kabuli_wild_61097895 | NA                                  | Ca_kabuli_denovo | 61097895                | A/G  | NA                 | NA                            | NA                 |
| Kabuli_wild_61097939 | NA                                  | Ca_kabuli_denovo | 61097939                | C/G  | NA                 | NA                            | NA                 |
| Kabuli_wild_61099004 | NA                                  | Ca_kabuli_denovo | 61099004                | A/G  | NA                 | NA                            | NA                 |
| Kabuli_wild_61099010 | NA                                  | Ca_kabuli_denovo | 61099010                | A/C  | NA                 | NA                            | NA                 |
| Kabuli_wild_61100035 | NA                                  | Ca_kabuli_denovo | 61100035                | G/T  | NA                 | NA                            | NA                 |

| SNP IDs              | NCBI dbSNP accession IDs (NCBI_SS#) | Chromosomes      | Physical positions (bp) | SNPs | Gene accession IDs | Sequence components of genome | Putative functions |
|----------------------|-------------------------------------|------------------|-------------------------|------|--------------------|-------------------------------|--------------------|
| Kabuli_wild_61101684 | NA                                  | Ca_kabuli_denovo | 61101684                | A/G  | NA                 | NA                            | NA                 |
| Kabuli_wild_61101924 | NA                                  | Ca_kabuli_denovo | 61101924                | A/G  | NA                 | NA                            | NA                 |
| Kabuli_wild_61105592 | NA                                  | Ca_kabuli_denovo | 61105592                | A/G  | NA                 | NA                            | NA                 |
| Kabuli_wild_61105613 | NA                                  | Ca_kabuli_denovo | 61105613                | A/G  | NA                 | NA                            | NA                 |
| Kabuli_wild_61105622 | NA                                  | Ca_kabuli_denovo | 61105622                | C/T  | NA                 | NA                            | NA                 |
| Kabuli_wild_61110109 | NA                                  | Ca_kabuli_denovo | 61110109                | A/G  | NA                 | NA                            | NA                 |
| Kabuli_wild_61112297 | NA                                  | Ca_kabuli_denovo | 61112297                | G/T  | NA                 | NA                            | NA                 |
| Kabuli_wild_61113338 | NA                                  | Ca_kabuli_denovo | 61113338                | A/G  | NA                 | NA                            | NA                 |
| Kabuli_wild_61113614 | NA                                  | Ca_kabuli_denovo | 61113614                | A/G  | NA                 | NA                            | NA                 |
| Kabuli_wild_61115470 | NA                                  | Ca_kabuli_denovo | 61115470                | G/T  | NA                 | NA                            | NA                 |
| Kabuli_wild_61117043 | NA                                  | Ca_kabuli_denovo | 61117043                | C/G  | NA                 | NA                            | NA                 |
| Kabuli_wild_61117055 | NA                                  | Ca_kabuli_denovo | 61117055                | A/C  | NA                 | NA                            | NA                 |
| Kabuli_wild_61121071 | NA                                  | Ca_kabuli_denovo | 61121071                | A/G  | NA                 | NA                            | NA                 |
| Kabuli_wild_61124570 | NA                                  | Ca_kabuli_denovo | 61124570                | C/G  | NA                 | NA                            | NA                 |
| Kabuli_wild_61124584 | NA                                  | Ca_kabuli_denovo | 61124584                | A/G  | NA                 | NA                            | NA                 |
| Kabuli_wild_61124594 | NA                                  | Ca_kabuli_denovo | 61124594                | C/G  | NA                 | NA                            | NA                 |
| Kabuli_wild_61124603 | NA                                  | Ca_kabuli_denovo | 61124603                | C/G  | NA                 | NA                            | NA                 |
| Kabuli_wild_61126616 | NA                                  | Ca_kabuli_denovo | 61126616                | C/T  | NA                 | NA                            | NA                 |
| Kabuli_wild_61129415 | NA                                  | Ca_kabuli_denovo | 61129415                | A/G  | NA                 | NA                            | NA                 |
| Kabuli_wild_61136372 | NA                                  | Ca_kabuli_denovo | 61136372                | A/G  | NA                 | NA                            | NA                 |
| Kabuli_wild_61136391 | NA                                  | Ca_kabuli_denovo | 61136391                | C/G  | NA                 | NA                            | NA                 |
| Kabuli_wild_61142603 | NA                                  | Ca_kabuli_denovo | 61142603                | C/T  | NA                 | NA                            | NA                 |
| Kabuli_wild_61143163 | NA                                  | Ca_kabuli_denovo | 61143163                | C/T  | NA                 | NA                            | NA                 |
| Kabuli_wild_61143838 | NA                                  | Ca_kabuli_denovo | 61143838                | C/G  | NA                 | NA                            | NA                 |
| Kabuli_wild_61144369 | NA                                  | Ca_kabuli_denovo | 61144369                | A/G  | NA                 | NA                            | NA                 |
| Kabuli_wild_61144372 | NA                                  | Ca_kabuli_denovo | 61144372                | C/G  | NA                 | NA                            | NA                 |
| Kabuli_wild_61144375 | NA                                  | Ca_kabuli_denovo | 61144375                | A/G  | NA                 | NA                            | NA                 |
| Kabuli_wild_61148105 | NA                                  | Ca_kabuli_denovo | 61148105                | C/T  | NA                 | NA                            | NA                 |
| Kabuli_wild_61148312 | NA                                  | Ca_kabuli_denovo | 61148312                | C/G  | NA                 | NA                            | NA                 |
| Kabuli_wild_61148336 | NA                                  | Ca_kabuli_denovo | 61148336                | A/G  | NA                 | NA                            | NA                 |
| Kabuli_wild_61149421 | NA                                  | Ca_kabuli_denovo | 61149421                | G/T  | NA                 | NA                            | NA                 |
| Kabuli_wild_61150244 | NA                                  | Ca_kabuli_denovo | 61150244                | C/G  | NA                 | NA                            | NA                 |
| Kabuli_wild_61150262 | NA                                  | Ca_kabuli_denovo | 61150262                | C/G  | NA                 | NA                            | NA                 |
| Kabuli_wild_61150265 | NA                                  | Ca_kabuli_denovo | 61150265                | C/G  | NA                 | NA                            | NA                 |
| Kabuli_wild_61150274 | NA                                  | Ca_kabuli_denovo | 61150274                | C/T  | NA                 | NA                            | NA                 |
| Kabuli_wild_61152128 | NA                                  | Ca_kabuli_denovo | 61152128                | A/G  | NA                 | NA                            | NA                 |
| Kabuli_wild_61152143 | NA                                  | Ca_kabuli_denovo | 61152143                | A/G  | NA                 | NA                            | NA                 |
| Kabuli_wild_61152146 | NA                                  | Ca_kabuli_denovo | 61152146                | A/G  | NA                 | NA                            | NA                 |
| Kabuli_wild_61152148 | NA                                  | Ca_kabuli_denovo | 61152148                | A/T  | NA                 | NA                            | NA                 |
| Kabuli_wild_61153613 | NA                                  | Ca_kabuli_denovo | 61153613                | C/T  | NA                 | NA                            | NA                 |
| Kabuli_wild_61154042 | NA                                  | Ca_kabuli_denovo | 61154042                | A/C  | NA                 | NA                            | NA                 |
| Kabuli_wild_61154696 | NA                                  | Ca_kabuli_denovo | 61154696                | A/G  | NA                 | NA                            | NA                 |
| Kabuli_wild_61154702 | NA                                  | Ca_kabuli_denovo | 61154702                | C/G  | NA                 | NA                            | NA                 |
| Kabuli_wild_61154744 | NA                                  | Ca_kabuli_denovo | 61154744                | A/G  | NA                 | NA                            | NA                 |

| SNP IDs              | NCBI dbSNP accession IDs (NCBI_SS#) | Chromosomes      | Physical positions (bp) | SNPs | Gene accession IDs | Sequence components of genome | Putative functions |
|----------------------|-------------------------------------|------------------|-------------------------|------|--------------------|-------------------------------|--------------------|
| Kabuli_wild_61155384 | NA                                  | Ca_kabuli_denovo | 61155384                | G/T  | NA                 | NA                            | NA                 |
| Kabuli_wild_61155386 | NA                                  | Ca_kabuli_denovo | 61155386                | C/G  | NA                 | NA                            | NA                 |
| Kabuli_wild_61158049 | NA                                  | Ca_kabuli_denovo | 61158049                | A/C  | NA                 | NA                            | NA                 |
| Kabuli_wild_61158818 | NA                                  | Ca_kabuli_denovo | 61158818                | C/T  | NA                 | NA                            | NA                 |
| Kabuli_wild_61159652 | NA                                  | Ca_kabuli_denovo | 61159652                | C/T  | NA                 | NA                            | NA                 |
| Kabuli_wild_61159685 | NA                                  | Ca_kabuli_denovo | 61159685                | C/T  | NA                 | NA                            | NA                 |
| Kabuli_wild_61168472 | NA                                  | Ca_kabuli_denovo | 61168472                | A/G  | NA                 | NA                            | NA                 |
| Kabuli_wild_61168493 | NA                                  | Ca_kabuli_denovo | 61168493                | A/G  | NA                 | NA                            | NA                 |
| Kabuli_wild_61168505 | NA                                  | Ca_kabuli_denovo | 61168505                | C/T  | NA                 | NA                            | NA                 |
| Kabuli_wild_61170616 | NA                                  | Ca_kabuli_denovo | 61170616                | C/T  | NA                 | NA                            | NA                 |
| Kabuli_wild_61175634 | NA                                  | Ca_kabuli_denovo | 61175634                | A/G  | NA                 | NA                            | NA                 |
| Kabuli_wild_61182154 | NA                                  | Ca_kabuli_denovo | 61182154                | A/G  | NA                 | NA                            | NA                 |
| Kabuli_wild_61182163 | NA                                  | Ca_kabuli_denovo | 61182163                | C/T  | NA                 | NA                            | NA                 |
| Kabuli_wild_61182925 | NA                                  | Ca_kabuli_denovo | 61182925                | C/T  | NA                 | NA                            | NA                 |
| Kabuli_wild_61182940 | NA                                  | Ca_kabuli_denovo | 61182940                | C/T  | NA                 | NA                            | NA                 |
| Kabuli_wild_61183718 | NA                                  | Ca_kabuli_denovo | 61183718                | G/T  | NA                 | NA                            | NA                 |
| Kabuli_wild_61183766 | NA                                  | Ca_kabuli_denovo | 61183766                | A/G  | NA                 | NA                            | NA                 |
| Kabuli_wild_61187413 | NA                                  | Ca_kabuli_denovo | 61187413                | A/G  | NA                 | NA                            | NA                 |
| Kabuli_wild_61188173 | NA                                  | Ca_kabuli_denovo | 61188173                | A/G  | NA                 | NA                            | NA                 |
| Kabuli_wild_61188179 | NA                                  | Ca_kabuli_denovo | 61188179                | C/T  | NA                 | NA                            | NA                 |
| Kabuli_wild_61190796 | NA                                  | Ca_kabuli_denovo | 61190796                | A/G  | NA                 | NA                            | NA                 |
| Kabuli_wild_61195181 | NA                                  | Ca_kabuli_denovo | 61195181                | G/T  | NA                 | NA                            | NA                 |
| Kabuli_wild_61196837 | NA                                  | Ca_kabuli_denovo | 61196837                | C/G  | NA                 | NA                            | NA                 |
| Kabuli_wild_61197298 | NA                                  | Ca_kabuli_denovo | 61197298                | C/G  | NA                 | NA                            | NA                 |
| Kabuli_wild_61197319 | NA                                  | Ca_kabuli_denovo | 61197319                | C/G  | NA                 | NA                            | NA                 |
| Kabuli_wild_61197713 | NA                                  | Ca_kabuli_denovo | 61197713                | A/G  | NA                 | NA                            | NA                 |
| Kabuli_wild_61197742 | NA                                  | Ca_kabuli_denovo | 61197742                | A/G  | NA                 | NA                            | NA                 |
| Kabuli_wild_61199520 | NA                                  | Ca_kabuli_denovo | 61199520                | C/G  | NA                 | NA                            | NA                 |
| Kabuli_wild_61201124 | NA                                  | Ca_kabuli_denovo | 61201124                | A/G  | NA                 | NA                            | NA                 |
| Kabuli_wild_61201142 | NA                                  | Ca_kabuli_denovo | 61201142                | C/T  | NA                 | NA                            | NA                 |
| Kabuli_wild_61201148 | NA                                  | Ca_kabuli_denovo | 61201148                | C/G  | NA                 | NA                            | NA                 |
| Kabuli_wild_61203620 | NA                                  | Ca_kabuli_denovo | 61203620                | C/T  | NA                 | NA                            | NA                 |
| Kabuli_wild_61204649 | NA                                  | Ca_kabuli_denovo | 61204649                | A/G  | NA                 | NA                            | NA                 |
| Kabuli_wild_61208122 | NA                                  | Ca_kabuli_denovo | 61208122                | A/G  | NA                 | NA                            | NA                 |
| Kabuli_wild_61208671 | NA                                  | Ca_kabuli_denovo | 61208671                | A/G  | NA                 | NA                            | NA                 |
| Kabuli_wild_61208758 | NA                                  | Ca_kabuli_denovo | 61208758                | C/G  | NA                 | NA                            | NA                 |
| Kabuli_wild_61212266 | NA                                  | Ca_kabuli_denovo | 61212266                | A/G  | NA                 | NA                            | NA                 |
| Kabuli_wild_61212296 | NA                                  | Ca_kabuli_denovo | 61212296                | A/G  | NA                 | NA                            | NA                 |
| Kabuli_wild_61212298 | NA                                  | Ca_kabuli_denovo | 61212298                | C/T  | NA                 | NA                            | NA                 |
| Kabuli_wild_61215131 | NA                                  | Ca_kabuli_denovo | 61215131                | A/G  | NA                 | NA                            | NA                 |
| Kabuli_wild_61216444 | NA                                  | Ca_kabuli_denovo | 61216444                | A/C  | NA                 | NA                            | NA                 |
| Kabuli_wild_61220417 | NA                                  | Ca_kabuli_denovo | 61220417                | A/G  | NA                 | NA                            | NA                 |
| Kabuli_wild_61220420 | NA                                  | Ca_kabuli_denovo | 61220420                | A/G  | NA                 | NA                            | NA                 |
| Kabuli_wild_61221319 | NA                                  | Ca_kabuli_denovo | 61221319                | G/T  | NA                 | NA                            | NA                 |

| SNP IDs              | NCBI dbSNP accession IDs (NCBI_SS#) | Chromosomes      | Physical positions (bp) | SNPs | Gene accession IDs | Sequence components of genome | Putative functions |
|----------------------|-------------------------------------|------------------|-------------------------|------|--------------------|-------------------------------|--------------------|
| Kabuli_wild_61222822 | NA                                  | Ca_kabuli_denovo | 61222822                | A/G  | NA                 | NA                            | NA                 |
| Kabuli_wild_61224553 | NA                                  | Ca_kabuli_denovo | 61224553                | A/G  | NA                 | NA                            | NA                 |
| Kabuli_wild_61229716 | NA                                  | Ca_kabuli_denovo | 61229716                | C/T  | NA                 | NA                            | NA                 |
| Kabuli_wild_61230793 | NA                                  | Ca_kabuli_denovo | 61230793                | C/G  | NA                 | NA                            | NA                 |
| Kabuli_wild_61232069 | NA                                  | Ca_kabuli_denovo | 61232069                | A/G  | NA                 | NA                            | NA                 |
| Kabuli_wild_61232080 | NA                                  | Ca_kabuli_denovo | 61232080                | C/G  | NA                 | NA                            | NA                 |
| Kabuli_wild_61232441 | NA                                  | Ca_kabuli_denovo | 61232441                | A/G  | NA                 | NA                            | NA                 |
| Kabuli_wild_61232468 | NA                                  | Ca_kabuli_denovo | 61232468                | G/T  | NA                 | NA                            | NA                 |
| Kabuli_wild_61234782 | NA                                  | Ca_kabuli_denovo | 61234782                | G/T  | NA                 | NA                            | NA                 |
| Kabuli_wild_61239046 | NA                                  | Ca_kabuli_denovo | 61239046                | C/T  | NA                 | NA                            | NA                 |
| Kabuli_wild_61239056 | NA                                  | Ca_kabuli_denovo | 61239056                | G/T  | NA                 | NA                            | NA                 |
| Kabuli_wild_61241009 | NA                                  | Ca_kabuli_denovo | 61241009                | C/G  | NA                 | NA                            | NA                 |
| Kabuli_wild_61241497 | NA                                  | Ca_kabuli_denovo | 61241497                | C/T  | NA                 | NA                            | NA                 |
| Kabuli_wild_61242198 | NA                                  | Ca_kabuli_denovo | 61242198                | A/C  | NA                 | NA                            | NA                 |
| Kabuli_wild_61243786 | NA                                  | Ca_kabuli_denovo | 61243786                | C/G  | NA                 | NA                            | NA                 |
| Kabuli_wild_61243828 | NA                                  | Ca_kabuli_denovo | 61243828                | C/T  | NA                 | NA                            | NA                 |
| Kabuli_wild_61244907 | NA                                  | Ca_kabuli_denovo | 61244907                | C/T  | NA                 | NA                            | NA                 |
| Kabuli_wild_61245383 | NA                                  | Ca_kabuli_denovo | 61245383                | C/T  | NA                 | NA                            | NA                 |
| Kabuli_wild_61248661 | NA                                  | Ca_kabuli_denovo | 61248661                | A/C  | NA                 | NA                            | NA                 |
| Kabuli_wild_61250846 | NA                                  | Ca_kabuli_denovo | 61250846                | A/C  | NA                 | NA                            | NA                 |
| Kabuli_wild_61250847 | NA                                  | Ca_kabuli_denovo | 61250847                | G/T  | NA                 | NA                            | NA                 |
| Kabuli_wild_61250848 | NA                                  | Ca_kabuli_denovo | 61250848                | A/G  | NA                 | NA                            | NA                 |
| Kabuli_wild_61252490 | NA                                  | Ca_kabuli_denovo | 61252490                | C/G  | NA                 | NA                            | NA                 |
| Kabuli_wild_61253201 | NA                                  | Ca_kabuli_denovo | 61253201                | A/G  | NA                 | NA                            | NA                 |
| Kabuli_wild_61253225 | NA                                  | Ca_kabuli_denovo | 61253225                | C/T  | NA                 | NA                            | NA                 |
| Kabuli_wild_61256081 | NA                                  | Ca_kabuli_denovo | 61256081                | A/G  | NA                 | NA                            | NA                 |
| Kabuli_wild_61256111 | NA                                  | Ca_kabuli_denovo | 61256111                | A/G  | NA                 | NA                            | NA                 |
| Kabuli_wild_61258309 | NA                                  | Ca_kabuli_denovo | 61258309                | C/T  | NA                 | NA                            | NA                 |
| Kabuli_wild_61258315 | NA                                  | Ca_kabuli_denovo | 61258315                | A/G  | NA                 | NA                            | NA                 |
| Kabuli_wild_61258325 | NA                                  | Ca_kabuli_denovo | 61258325                | A/G  | NA                 | NA                            | NA                 |
| Kabuli_wild_61258339 | NA                                  | Ca_kabuli_denovo | 61258339                | A/C  | NA                 | NA                            | NA                 |
| Kabuli_wild_61261828 | NA                                  | Ca_kabuli_denovo | 61261828                | A/G  | NA                 | NA                            | NA                 |
| Kabuli_wild_61262862 | NA                                  | Ca_kabuli_denovo | 61262862                | C/T  | NA                 | NA                            | NA                 |
| Kabuli_wild_61262870 | NA                                  | Ca_kabuli_denovo | 61262870                | A/G  | NA                 | NA                            | NA                 |
| Kabuli_wild_61264812 | NA                                  | Ca_kabuli_denovo | 61264812                | A/G  | NA                 | NA                            | NA                 |
| Kabuli_wild_61264819 | NA                                  | Ca_kabuli_denovo | 61264819                | A/G  | NA                 | NA                            | NA                 |
| Kabuli_wild_61267754 | NA                                  | Ca_kabuli_denovo | 61267754                | C/T  | NA                 | NA                            | NA                 |
| Kabuli_wild_61270571 | NA                                  | Ca_kabuli_denovo | 61270571                | C/G  | NA                 | NA                            | NA                 |
| Kabuli_wild_61270574 | NA                                  | Ca_kabuli_denovo | 61270574                | A/G  | NA                 | NA                            | NA                 |
| Kabuli_wild_61273495 | NA                                  | Ca_kabuli_denovo | 61273495                | C/G  | NA                 | NA                            | NA                 |
| Kabuli_wild_61273834 | NA                                  | Ca_kabuli_denovo | 61273834                | C/T  | NA                 | NA                            | NA                 |
| Kabuli_wild_61276793 | NA                                  | Ca_kabuli_denovo | 61276793                | C/G  | NA                 | NA                            | NA                 |
| Kabuli_wild_61280614 | NA                                  | Ca_kabuli_denovo | 61280614                | C/G  | NA                 | NA                            | NA                 |
| Kabuli_wild_61280632 | NA                                  | Ca_kabuli_denovo | 61280632                | C/T  | NA                 | NA                            | NA                 |

| SNP IDs              | NCBI dbSNP accession IDs (NCBI_SS#) | Chromosomes      | Physical positions (bp) | SNPs | Gene accession IDs | Sequence components of genome | Putative functions |
|----------------------|-------------------------------------|------------------|-------------------------|------|--------------------|-------------------------------|--------------------|
| Kabuli_wild_61280661 | NA                                  | Ca_kabuli_denovo | 61280661                | A/G  | NA                 | NA                            | NA                 |
| Kabuli_wild_61280665 | NA                                  | Ca_kabuli_denovo | 61280665                | A/T  | NA                 | NA                            | NA                 |
| Kabuli_wild_61281292 | NA                                  | Ca_kabuli_denovo | 61281292                | A/G  | NA                 | NA                            | NA                 |
| Kabuli_wild_61281439 | NA                                  | Ca_kabuli_denovo | 61281439                | C/G  | NA                 | NA                            | NA                 |
| Kabuli_wild_61284070 | NA                                  | Ca_kabuli_denovo | 61284070                | C/T  | NA                 | NA                            | NA                 |
| Kabuli_wild_61284076 | NA                                  | Ca_kabuli_denovo | 61284076                | G/T  | NA                 | NA                            | NA                 |
| Kabuli_wild_61284079 | NA                                  | Ca_kabuli_denovo | 61284079                | A/G  | NA                 | NA                            | NA                 |
| Kabuli_wild_61284112 | NA                                  | Ca_kabuli_denovo | 61284112                | C/T  | NA                 | NA                            | NA                 |
| Kabuli_wild_61286780 | NA                                  | Ca_kabuli_denovo | 61286780                | C/T  | NA                 | NA                            | NA                 |
| Kabuli_wild_61287148 | NA                                  | Ca_kabuli_denovo | 61287148                | A/G  | NA                 | NA                            | NA                 |
| Kabuli_wild_61287149 | NA                                  | Ca_kabuli_denovo | 61287149                | C/G  | NA                 | NA                            | NA                 |
| Kabuli_wild_61287179 | NA                                  | Ca_kabuli_denovo | 61287179                | A/G  | NA                 | NA                            | NA                 |
| Kabuli_wild_61287793 | NA                                  | Ca_kabuli_denovo | 61287793                | C/T  | NA                 | NA                            | NA                 |
| Kabuli_wild_61287802 | NA                                  | Ca_kabuli_denovo | 61287802                | C/T  | NA                 | NA                            | NA                 |
| Kabuli_wild_61288804 | NA                                  | Ca_kabuli_denovo | 61288804                | A/G  | NA                 | NA                            | NA                 |
| Kabuli_wild_61288822 | NA                                  | Ca_kabuli_denovo | 61288822                | C/T  | NA                 | NA                            | NA                 |
| Kabuli_wild_61288854 | NA                                  | Ca_kabuli_denovo | 61288854                | A/G  | NA                 | NA                            | NA                 |
| Kabuli_wild_61289761 | NA                                  | Ca_kabuli_denovo | 61289761                | A/C  | NA                 | NA                            | NA                 |
| Kabuli_wild_61291537 | NA                                  | Ca_kabuli_denovo | 61291537                | C/G  | NA                 | NA                            | NA                 |
| Kabuli_wild_61292542 | NA                                  | Ca_kabuli_denovo | 61292542                | A/G  | NA                 | NA                            | NA                 |
| Kabuli_wild_61293740 | NA                                  | Ca_kabuli_denovo | 61293740                | G/T  | NA                 | NA                            | NA                 |
| Kabuli_wild_61294472 | NA                                  | Ca_kabuli_denovo | 61294472                | C/T  | NA                 | NA                            | NA                 |
| Kabuli_wild_61294473 | NA                                  | Ca_kabuli_denovo | 61294473                | C/G  | NA                 | NA                            | NA                 |
| Kabuli_wild_61303122 | NA                                  | Ca_kabuli_denovo | 61303122                | A/T  | NA                 | NA                            | NA                 |
| Kabuli_wild_61303922 | NA                                  | Ca_kabuli_denovo | 61303922                | A/C  | NA                 | NA                            | NA                 |
| Kabuli_wild_61307692 | NA                                  | Ca_kabuli_denovo | 61307692                | C/G  | NA                 | NA                            | NA                 |
| Kabuli_wild_61307704 | NA                                  | Ca_kabuli_denovo | 61307704                | C/G  | NA                 | NA                            | NA                 |
| Kabuli_wild_61307726 | NA                                  | Ca_kabuli_denovo | 61307726                | A/G  | NA                 | NA                            | NA                 |
| Kabuli_wild_61307737 | NA                                  | Ca_kabuli_denovo | 61307737                | C/G  | NA                 | NA                            | NA                 |
| Kabuli_wild_61312055 | NA                                  | Ca_kabuli_denovo | 61312055                | A/G  | NA                 | NA                            | NA                 |
| Kabuli_wild_61312075 | NA                                  | Ca_kabuli_denovo | 61312075                | C/T  | NA                 | NA                            | NA                 |
| Kabuli_wild_61318663 | NA                                  | Ca_kabuli_denovo | 61318663                | C/G  | NA                 | NA                            | NA                 |
| Kabuli_wild_61324271 | NA                                  | Ca_kabuli_denovo | 61324271                | A/G  | NA                 | NA                            | NA                 |
| Kabuli_wild_61329396 | NA                                  | Ca_kabuli_denovo | 61329396                | A/T  | NA                 | NA                            | NA                 |
| Kabuli_wild_61329424 | NA                                  | Ca_kabuli_denovo | 61329424                | A/T  | NA                 | NA                            | NA                 |
| Kabuli_wild_61329433 | NA                                  | Ca_kabuli_denovo | 61329433                | A/C  | NA                 | NA                            | NA                 |
| Kabuli_wild_61333207 | NA                                  | Ca_kabuli_denovo | 61333207                | C/G  | NA                 | NA                            | NA                 |
| Kabuli_wild_61334677 | NA                                  | Ca_kabuli_denovo | 61334677                | C/G  | NA                 | NA                            | NA                 |
| Kabuli_wild_61335391 | NA                                  | Ca_kabuli_denovo | 61335391                | C/T  | NA                 | NA                            | NA                 |
| Kabuli_wild_61335451 | NA                                  | Ca_kabuli_denovo | 61335451                | C/T  | NA                 | NA                            | NA                 |
| Kabuli_wild_61337091 | NA                                  | Ca_kabuli_denovo | 61337091                | A/C  | NA                 | NA                            | NA                 |
| Kabuli_wild_61337995 | NA                                  | Ca_kabuli_denovo | 61337995                | C/T  | NA                 | NA                            | NA                 |
| Kabuli_wild_61338067 | NA                                  | Ca_kabuli_denovo | 61338067                | C/T  | NA                 | NA                            | NA                 |
| Kabuli_wild_61338070 | NA                                  | Ca_kabuli_denovo | 61338070                | A/G  | NA                 | NA                            | NA                 |



| SNP IDs              | NCBI dbSNP accession IDs (NCBI_SS#) | Chromosomes      | Physical positions (bp) | SNPs | Gene accession IDs | Sequence components of genome | Putative functions |
|----------------------|-------------------------------------|------------------|-------------------------|------|--------------------|-------------------------------|--------------------|
| Kabuli_wild_61339997 | NA                                  | Ca_kabuli_denovo | 61339997                | C/T  | NA                 | NA                            | NA                 |
| Kabuli_wild_61340018 | NA                                  | Ca_kabuli_denovo | 61340018                | C/G  | NA                 | NA                            | NA                 |
| Kabuli_wild_61341548 | NA                                  | Ca_kabuli_denovo | 61341548                | A/G  | NA                 | NA                            | NA                 |
| Kabuli_wild_61341569 | NA                                  | Ca_kabuli_denovo | 61341569                | C/T  | NA                 | NA                            | NA                 |
| Kabuli_wild_61342180 | NA                                  | Ca_kabuli_denovo | 61342180                | C/T  | NA                 | NA                            | NA                 |
| Kabuli_wild_61344079 | NA                                  | Ca_kabuli_denovo | 61344079                | A/G  | NA                 | NA                            | NA                 |
| Kabuli_wild_61346095 | NA                                  | Ca_kabuli_denovo | 61346095                | A/G  | NA                 | NA                            | NA                 |
| Kabuli_wild_61346101 | NA                                  | Ca_kabuli_denovo | 61346101                | C/G  | NA                 | NA                            | NA                 |
| Kabuli_wild_61346146 | NA                                  | Ca_kabuli_denovo | 61346146                | C/T  | NA                 | NA                            | NA                 |
| Kabuli_wild_61349435 | NA                                  | Ca_kabuli_denovo | 61349435                | C/T  | NA                 | NA                            | NA                 |
| Kabuli_wild_61349447 | NA                                  | Ca_kabuli_denovo | 61349447                | C/G  | NA                 | NA                            | NA                 |
| Kabuli_wild_61349448 | NA                                  | Ca_kabuli_denovo | 61349448                | A/C  | NA                 | NA                            | NA                 |
| Kabuli_wild_61352896 | NA                                  | Ca_kabuli_denovo | 61352896                | C/T  | NA                 | NA                            | NA                 |
| Kabuli_wild_61353401 | NA                                  | Ca_kabuli_denovo | 61353401                | C/G  | NA                 | NA                            | NA                 |
| Kabuli_wild_61356328 | NA                                  | Ca_kabuli_denovo | 61356328                | C/T  | NA                 | NA                            | NA                 |
| Kabuli_wild_61356337 | NA                                  | Ca_kabuli_denovo | 61356337                | C/T  | NA                 | NA                            | NA                 |
| Kabuli_wild_61362969 | NA                                  | Ca_kabuli_denovo | 61362969                | A/G  | NA                 | NA                            | NA                 |
| Kabuli_wild_61363504 | NA                                  | Ca_kabuli_denovo | 61363504                | C/T  | NA                 | NA                            | NA                 |
| Kabuli_wild_61363528 | NA                                  | Ca_kabuli_denovo | 61363528                | C/T  | NA                 | NA                            | NA                 |
| Kabuli_wild_61363546 | NA                                  | Ca_kabuli_denovo | 61363546                | C/T  | NA                 | NA                            | NA                 |
| Kabuli_wild_61363564 | NA                                  | Ca_kabuli_denovo | 61363564                | C/T  | NA                 | NA                            | NA                 |
| Kabuli_wild_61367626 | NA                                  | Ca_kabuli_denovo | 61367626                | C/T  | NA                 | NA                            | NA                 |
| Kabuli_wild_61367632 | NA                                  | Ca_kabuli_denovo | 61367632                | C/G  | NA                 | NA                            | NA                 |
| Kabuli_wild_61369103 | NA                                  | Ca_kabuli_denovo | 61369103                | A/G  | NA                 | NA                            | NA                 |
| Kabuli_wild_61369727 | NA                                  | Ca_kabuli_denovo | 61369727                | C/T  | NA                 | NA                            | NA                 |
| Kabuli_wild_61374029 | NA                                  | Ca_kabuli_denovo | 61374029                | C/G  | NA                 | NA                            | NA                 |
| Kabuli_wild_61374094 | NA                                  | Ca_kabuli_denovo | 61374094                | C/T  | NA                 | NA                            | NA                 |
| Kabuli_wild_61375211 | NA                                  | Ca_kabuli_denovo | 61375211                | C/T  | NA                 | NA                            | NA                 |
| Kabuli_wild_61375973 | NA                                  | Ca_kabuli_denovo | 61375973                | A/G  | NA                 | NA                            | NA                 |
| Kabuli_wild_61376468 | NA                                  | Ca_kabuli_denovo | 61376468                | C/G  | NA                 | NA                            | NA                 |
| Kabuli_wild_61376477 | NA                                  | Ca_kabuli_denovo | 61376477                | A/G  | NA                 | NA                            | NA                 |
| Kabuli_wild_61378376 | NA                                  | Ca_kabuli_denovo | 61378376                | C/G  | NA                 | NA                            | NA                 |
| Kabuli_wild_61380358 | NA                                  | Ca_kabuli_denovo | 61380358                | C/G  | NA                 | NA                            | NA                 |
| Kabuli_wild_61381428 | NA                                  | Ca_kabuli_denovo | 61381428                | C/G  | NA                 | NA                            | NA                 |
| Kabuli_wild_61381437 | NA                                  | Ca_kabuli_denovo | 61381437                | C/G  | NA                 | NA                            | NA                 |
| Kabuli_wild_61383193 | NA                                  | Ca_kabuli_denovo | 61383193                | C/G  | NA                 | NA                            | NA                 |
| Kabuli_wild_61383214 | NA                                  | Ca_kabuli_denovo | 61383214                | C/G  | NA                 | NA                            | NA                 |
| Kabuli_wild_61383217 | NA                                  | Ca_kabuli_denovo | 61383217                | C/T  | NA                 | NA                            | NA                 |
| Kabuli_wild_61383776 | NA                                  | Ca_kabuli_denovo | 61383776                | A/G  | NA                 | NA                            | NA                 |
| Kabuli_wild_61388051 | NA                                  | Ca_kabuli_denovo | 61388051                | C/G  | NA                 | NA                            | NA                 |
| Kabuli_wild_61388054 | NA                                  | Ca_kabuli_denovo | 61388054                | A/G  | NA                 | NA                            | NA                 |
| Kabuli_wild_61388123 | NA                                  | Ca_kabuli_denovo | 61388123                | G/T  | NA                 | NA                            | NA                 |
| Kabuli_wild_61395208 | NA                                  | Ca_kabuli_denovo | 61395208                | A/C  | NA                 | NA                            | NA                 |
| Kabuli_wild_61395212 | NA                                  | Ca_kabuli_denovo | 61395212                | A/C  | NA                 | NA                            | NA                 |

| SNP IDs              | NCBI dbSNP accession IDs (NCBI_SS#) | Chromosomes      | Physical positions (bp) | SNPs | Gene accession IDs | Sequence components of genome | Putative functions |
|----------------------|-------------------------------------|------------------|-------------------------|------|--------------------|-------------------------------|--------------------|
| Kabuli_wild_61395232 | NA                                  | Ca_kabuli_denovo | 61395232                | A/C  | NA                 | NA                            | NA                 |
| Kabuli_wild_61398751 | NA                                  | Ca_kabuli_denovo | 61398751                | C/T  | NA                 | NA                            | NA                 |
| Kabuli_wild_61406543 | NA                                  | Ca_kabuli_denovo | 61406543                | A/C  | NA                 | NA                            | NA                 |
| Kabuli_wild_61406846 | NA                                  | Ca_kabuli_denovo | 61406846                | C/G  | NA                 | NA                            | NA                 |
| Kabuli_wild_61406885 | NA                                  | Ca_kabuli_denovo | 61406885                | C/T  | NA                 | NA                            | NA                 |
| Kabuli_wild_61407760 | NA                                  | Ca_kabuli_denovo | 61407760                | C/G  | NA                 | NA                            | NA                 |
| Kabuli_wild_61407763 | NA                                  | Ca_kabuli_denovo | 61407763                | A/G  | NA                 | NA                            | NA                 |
| Kabuli_wild_61409627 | NA                                  | Ca_kabuli_denovo | 61409627                | C/T  | NA                 | NA                            | NA                 |
| Kabuli_wild_61409651 | NA                                  | Ca_kabuli_denovo | 61409651                | C/G  | NA                 | NA                            | NA                 |
| Kabuli_wild_61412693 | NA                                  | Ca_kabuli_denovo | 61412693                | C/G  | NA                 | NA                            | NA                 |
| Kabuli_wild_61412714 | NA                                  | Ca_kabuli_denovo | 61412714                | A/G  | NA                 | NA                            | NA                 |
| Kabuli_wild_61413031 | NA                                  | Ca_kabuli_denovo | 61413031                | G/T  | NA                 | NA                            | NA                 |
| Kabuli_wild_61416372 | NA                                  | Ca_kabuli_denovo | 61416372                | C/T  | NA                 | NA                            | NA                 |
| Kabuli_wild_61420886 | NA                                  | Ca_kabuli_denovo | 61420886                | A/C  | NA                 | NA                            | NA                 |
| Kabuli_wild_61423214 | NA                                  | Ca_kabuli_denovo | 61423214                | A/G  | NA                 | NA                            | NA                 |
| Kabuli_wild_61429229 | NA                                  | Ca_kabuli_denovo | 61429229                | C/G  | NA                 | NA                            | NA                 |
| Kabuli_wild_61429274 | NA                                  | Ca_kabuli_denovo | 61429274                | G/T  | NA                 | NA                            | NA                 |
| Kabuli_wild_61429979 | NA                                  | Ca_kabuli_denovo | 61429979                | A/G  | NA                 | NA                            | NA                 |
| Kabuli_wild_61435348 | NA                                  | Ca_kabuli_denovo | 61435348                | C/T  | NA                 | NA                            | NA                 |
| Kabuli_wild_61437577 | NA                                  | Ca_kabuli_denovo | 61437577                | C/G  | NA                 | NA                            | NA                 |
| Kabuli_wild_61437622 | NA                                  | Ca_kabuli_denovo | 61437622                | A/G  | NA                 | NA                            | NA                 |
| Kabuli_wild_61437646 | NA                                  | Ca_kabuli_denovo | 61437646                | A/G  | NA                 | NA                            | NA                 |
| Kabuli_wild_61438457 | NA                                  | Ca_kabuli_denovo | 61438457                | C/G  | NA                 | NA                            | NA                 |
| Kabuli_wild_61438469 | NA                                  | Ca_kabuli_denovo | 61438469                | A/C  | NA                 | NA                            | NA                 |
| Kabuli_wild_61445790 | NA                                  | Ca_kabuli_denovo | 61445790                | A/G  | NA                 | NA                            | NA                 |
| Kabuli_wild_61445817 | NA                                  | Ca_kabuli_denovo | 61445817                | A/T  | NA                 | NA                            | NA                 |
| Kabuli_wild_61445835 | NA                                  | Ca_kabuli_denovo | 61445835                | A/G  | NA                 | NA                            | NA                 |
| Kabuli_wild_61447458 | NA                                  | Ca_kabuli_denovo | 61447458                | A/G  | NA                 | NA                            | NA                 |
| Kabuli_wild_61448036 | NA                                  | Ca_kabuli_denovo | 61448036                | C/G  | NA                 | NA                            | NA                 |
| Kabuli_wild_61448045 | NA                                  | Ca_kabuli_denovo | 61448045                | C/G  | NA                 | NA                            | NA                 |
| Kabuli_wild_61449236 | NA                                  | Ca_kabuli_denovo | 61449236                | C/G  | NA                 | NA                            | NA                 |
| Kabuli_wild_61449248 | NA                                  | Ca_kabuli_denovo | 61449248                | A/G  | NA                 | NA                            | NA                 |
| Kabuli_wild_61449287 | NA                                  | Ca_kabuli_denovo | 61449287                | C/G  | NA                 | NA                            | NA                 |
| Kabuli_wild_61449973 | NA                                  | Ca_kabuli_denovo | 61449973                | C/G  | NA                 | NA                            | NA                 |
| Kabuli_wild_61449988 | NA                                  | Ca_kabuli_denovo | 61449988                | C/G  | NA                 | NA                            | NA                 |
| Kabuli_wild_61449991 | NA                                  | Ca_kabuli_denovo | 61449991                | A/G  | NA                 | NA                            | NA                 |
| Kabuli_wild_61457537 | NA                                  | Ca_kabuli_denovo | 61457537                | A/C  | NA                 | NA                            | NA                 |
| Kabuli_wild_61462630 | NA                                  | Ca_kabuli_denovo | 61462630                | A/C  | NA                 | NA                            | NA                 |
| Kabuli_wild_61466611 | NA                                  | Ca_kabuli_denovo | 61466611                | C/T  | NA                 | NA                            | NA                 |
| Kabuli_wild_61466627 | NA                                  | Ca_kabuli_denovo | 61466627                | C/T  | NA                 | NA                            | NA                 |
| Kabuli_wild_61469528 | NA                                  | Ca_kabuli_denovo | 61469528                | C/G  | NA                 | NA                            | NA                 |
| Kabuli_wild_61469531 | NA                                  | Ca_kabuli_denovo | 61469531                | G/T  | NA                 | NA                            | NA                 |
| Kabuli_wild_61471602 | NA                                  | Ca_kabuli_denovo | 61471602                | C/T  | NA                 | NA                            | NA                 |
| Kabuli_wild_61484074 | NA                                  | Ca_kabuli_denovo | 61484074                | G/T  | NA                 | NA                            | NA                 |

| SNP IDs                     | NCBI dbSNP accession IDs (NCBI_SS#) | Chromosomes             | Physical positions (bp) | SNPs | Gene accession IDs | Sequence components of genome | Putative functions |
|-----------------------------|-------------------------------------|-------------------------|-------------------------|------|--------------------|-------------------------------|--------------------|
| <i>Kabuli_wild_61484671</i> | NA                                  | <i>Ca_kabuli_denovo</i> | 61484671                | C/T  | NA                 | NA                            | NA                 |
| <i>Kabuli_wild_61495594</i> | NA                                  | <i>Ca_kabuli_denovo</i> | 61495594                | G/T  | NA                 | NA                            | NA                 |
| <i>Kabuli_wild_61495595</i> | NA                                  | <i>Ca_kabuli_denovo</i> | 61495595                | A/C  | NA                 | NA                            | NA                 |
| <i>Kabuli_wild_61502161</i> | NA                                  | <i>Ca_kabuli_denovo</i> | 61502161                | C/G  | NA                 | NA                            | NA                 |
| <i>Kabuli_wild_61510050</i> | NA                                  | <i>Ca_kabuli_denovo</i> | 61510050                | A/C  | NA                 | NA                            | NA                 |
| <i>Kabuli_wild_61525016</i> | NA                                  | <i>Ca_kabuli_denovo</i> | 61525016                | C/T  | NA                 | NA                            | NA                 |
| <i>Kabuli_wild_61525021</i> | NA                                  | <i>Ca_kabuli_denovo</i> | 61525021                | A/G  | NA                 | NA                            | NA                 |
| <i>Kabuli_wild_61525049</i> | NA                                  | <i>Ca_kabuli_denovo</i> | 61525049                | A/T  | NA                 | NA                            | NA                 |
| <i>Kabuli_wild_61526682</i> | NA                                  | <i>Ca_kabuli_denovo</i> | 61526682                | C/G  | NA                 | NA                            | NA                 |
| <i>Kabuli_wild_61530185</i> | NA                                  | <i>Ca_kabuli_denovo</i> | 61530185                | G/T  | NA                 | NA                            | NA                 |
| <i>Kabuli_wild_61532179</i> | NA                                  | <i>Ca_kabuli_denovo</i> | 61532179                | A/C  | NA                 | NA                            | NA                 |
| <i>Kabuli_wild_61532227</i> | NA                                  | <i>Ca_kabuli_denovo</i> | 61532227                | C/G  | NA                 | NA                            | NA                 |
| <i>Kabuli_wild_61532257</i> | NA                                  | <i>Ca_kabuli_denovo</i> | 61532257                | A/G  | NA                 | NA                            | NA                 |
| <i>Kabuli_wild_61537464</i> | NA                                  | <i>Ca_kabuli_denovo</i> | 61537464                | A/G  | NA                 | NA                            | NA                 |
| <i>Kabuli_wild_61544181</i> | NA                                  | <i>Ca_kabuli_denovo</i> | 61544181                | A/G  | NA                 | NA                            | NA                 |
| <i>Kabuli_wild_61544217</i> | NA                                  | <i>Ca_kabuli_denovo</i> | 61544217                | C/T  | NA                 | NA                            | NA                 |
| <i>Kabuli_wild_61548212</i> | NA                                  | <i>Ca_kabuli_denovo</i> | 61548212                | A/T  | NA                 | NA                            | NA                 |
| <i>Kabuli_wild_61552306</i> | NA                                  | <i>Ca_kabuli_denovo</i> | 61552306                | C/T  | NA                 | NA                            | NA                 |
| <i>Kabuli_wild_61555714</i> | NA                                  | <i>Ca_kabuli_denovo</i> | 61555714                | A/T  | NA                 | NA                            | NA                 |
| <i>Kabuli_wild_61557818</i> | NA                                  | <i>Ca_kabuli_denovo</i> | 61557818                | C/G  | NA                 | NA                            | NA                 |
| <i>Kabuli_wild_61566193</i> | NA                                  | <i>Ca_kabuli_denovo</i> | 61566193                | C/G  | NA                 | NA                            | NA                 |
| <i>Kabuli_wild_61580495</i> | NA                                  | <i>Ca_kabuli_denovo</i> | 61580495                | A/G  | NA                 | NA                            | NA                 |
| <i>Kabuli_wild_61580608</i> | NA                                  | <i>Ca_kabuli_denovo</i> | 61580608                | C/G  | NA                 | NA                            | NA                 |
| <i>Kabuli_wild_61583195</i> | NA                                  | <i>Ca_kabuli_denovo</i> | 61583195                | C/T  | NA                 | NA                            | NA                 |
| <i>Kabuli_wild_61588498</i> | NA                                  | <i>Ca_kabuli_denovo</i> | 61588498                | A/T  | NA                 | NA                            | NA                 |
| <i>Kabuli_wild_61591719</i> | NA                                  | <i>Ca_kabuli_denovo</i> | 61591719                | A/T  | NA                 | NA                            | NA                 |
| <i>Kabuli_wild_61592173</i> | NA                                  | <i>Ca_kabuli_denovo</i> | 61592173                | A/C  | NA                 | NA                            | NA                 |
| <i>Kabuli_wild_61592213</i> | NA                                  | <i>Ca_kabuli_denovo</i> | 61592213                | C/T  | NA                 | NA                            | NA                 |
| <i>Kabuli_wild_61592563</i> | NA                                  | <i>Ca_kabuli_denovo</i> | 61592563                | A/C  | NA                 | NA                            | NA                 |
| <i>Kabuli_wild_61592590</i> | NA                                  | <i>Ca_kabuli_denovo</i> | 61592590                | A/G  | NA                 | NA                            | NA                 |
| <i>Kabuli_wild_61593326</i> | NA                                  | <i>Ca_kabuli_denovo</i> | 61593326                | A/C  | NA                 | NA                            | NA                 |
| <i>Kabuli_wild_61593327</i> | NA                                  | <i>Ca_kabuli_denovo</i> | 61593327                | A/T  | NA                 | NA                            | NA                 |
| <i>Kabuli_wild_61603356</i> | NA                                  | <i>Ca_kabuli_denovo</i> | 61603356                | A/C  | NA                 | NA                            | NA                 |
| <i>Kabuli_wild_61608528</i> | NA                                  | <i>Ca_kabuli_denovo</i> | 61608528                | A/G  | NA                 | NA                            | NA                 |
| <i>Kabuli_wild_61608533</i> | NA                                  | <i>Ca_kabuli_denovo</i> | 61608533                | A/C  | NA                 | NA                            | NA                 |
| <i>Kabuli_wild_61609262</i> | NA                                  | <i>Ca_kabuli_denovo</i> | 61609262                | A/T  | NA                 | NA                            | NA                 |
| <i>Kabuli_wild_61609773</i> | NA                                  | <i>Ca_kabuli_denovo</i> | 61609773                | A/G  | NA                 | NA                            | NA                 |
| <i>Kabuli_wild_61613949</i> | NA                                  | <i>Ca_kabuli_denovo</i> | 61613949                | G/T  | NA                 | NA                            | NA                 |
| <i>Kabuli_wild_61620193</i> | NA                                  | <i>Ca_kabuli_denovo</i> | 61620193                | A/G  | NA                 | NA                            | NA                 |
| <i>Kabuli_wild_61620232</i> | NA                                  | <i>Ca_kabuli_denovo</i> | 61620232                | A/T  | NA                 | NA                            | NA                 |
| <i>Kabuli_wild_61622749</i> | NA                                  | <i>Ca_kabuli_denovo</i> | 61622749                | C/G  | NA                 | NA                            | NA                 |
| <i>Kabuli_wild_61622753</i> | NA                                  | <i>Ca_kabuli_denovo</i> | 61622753                | A/G  | NA                 | NA                            | NA                 |
| <i>Kabuli_wild_61623794</i> | NA                                  | <i>Ca_kabuli_denovo</i> | 61623794                | C/T  | NA                 | NA                            | NA                 |
| <i>Kabuli_wild_61623812</i> | NA                                  | <i>Ca_kabuli_denovo</i> | 61623812                | C/T  | NA                 | NA                            | NA                 |

| SNP IDs              | NCBI dbSNP accession IDs (NCBI_SS#) | Chromosomes      | Physical positions (bp) | SNPs | Gene accession IDs | Sequence components of genome | Putative functions |
|----------------------|-------------------------------------|------------------|-------------------------|------|--------------------|-------------------------------|--------------------|
| Kabuli_wild_61623827 | NA                                  | Ca_kabuli_denovo | 61623827                | A/G  | NA                 | NA                            | NA                 |
| Kabuli_wild_61626128 | NA                                  | Ca_kabuli_denovo | 61626128                | A/G  | NA                 | NA                            | NA                 |
| Kabuli_wild_61627969 | NA                                  | Ca_kabuli_denovo | 61627969                | A/G  | NA                 | NA                            | NA                 |
| Kabuli_wild_61628114 | NA                                  | Ca_kabuli_denovo | 61628114                | C/T  | NA                 | NA                            | NA                 |
| Kabuli_wild_61628187 | NA                                  | Ca_kabuli_denovo | 61628187                | A/T  | NA                 | NA                            | NA                 |
| Kabuli_wild_61628214 | NA                                  | Ca_kabuli_denovo | 61628214                | A/C  | NA                 | NA                            | NA                 |
| Kabuli_wild_61628316 | NA                                  | Ca_kabuli_denovo | 61628316                | C/T  | NA                 | NA                            | NA                 |
| Kabuli_wild_61628548 | NA                                  | Ca_kabuli_denovo | 61628548                | G/T  | NA                 | NA                            | NA                 |
| Kabuli_wild_61631863 | NA                                  | Ca_kabuli_denovo | 61631863                | C/T  | NA                 | NA                            | NA                 |
| Kabuli_wild_61632638 | NA                                  | Ca_kabuli_denovo | 61632638                | A/C  | NA                 | NA                            | NA                 |
| Kabuli_wild_61638727 | NA                                  | Ca_kabuli_denovo | 61638727                | C/T  | NA                 | NA                            | NA                 |
| Kabuli_wild_61638764 | NA                                  | Ca_kabuli_denovo | 61638764                | A/G  | NA                 | NA                            | NA                 |
| Kabuli_wild_61640699 | NA                                  | Ca_kabuli_denovo | 61640699                | A/T  | NA                 | NA                            | NA                 |
| Kabuli_wild_61643073 | NA                                  | Ca_kabuli_denovo | 61643073                | A/G  | NA                 | NA                            | NA                 |
| Kabuli_wild_61643116 | NA                                  | Ca_kabuli_denovo | 61643116                | A/G  | NA                 | NA                            | NA                 |
| Kabuli_wild_61645557 | NA                                  | Ca_kabuli_denovo | 61645557                | A/G  | NA                 | NA                            | NA                 |
| Kabuli_wild_61645564 | NA                                  | Ca_kabuli_denovo | 61645564                | A/G  | NA                 | NA                            | NA                 |
| Kabuli_wild_61645834 | NA                                  | Ca_kabuli_denovo | 61645834                | A/T  | NA                 | NA                            | NA                 |
| Kabuli_wild_61645884 | NA                                  | Ca_kabuli_denovo | 61645884                | C/T  | NA                 | NA                            | NA                 |
| Kabuli_wild_61650060 | NA                                  | Ca_kabuli_denovo | 61650060                | C/T  | NA                 | NA                            | NA                 |
| Kabuli_wild_61651389 | NA                                  | Ca_kabuli_denovo | 61651389                | A/T  | NA                 | NA                            | NA                 |
| Kabuli_wild_61655115 | NA                                  | Ca_kabuli_denovo | 61655115                | C/T  | NA                 | NA                            | NA                 |
| Kabuli_wild_61659699 | NA                                  | Ca_kabuli_denovo | 61659699                | C/T  | NA                 | NA                            | NA                 |
| Kabuli_wild_61659777 | NA                                  | Ca_kabuli_denovo | 61659777                | A/G  | NA                 | NA                            | NA                 |
| Kabuli_wild_61661751 | NA                                  | Ca_kabuli_denovo | 61661751                | A/G  | NA                 | NA                            | NA                 |
| Kabuli_wild_61662985 | NA                                  | Ca_kabuli_denovo | 61662985                | A/C  | NA                 | NA                            | NA                 |
| Kabuli_wild_61664273 | NA                                  | Ca_kabuli_denovo | 61664273                | A/T  | NA                 | NA                            | NA                 |
| Kabuli_wild_61673093 | NA                                  | Ca_kabuli_denovo | 61673093                | A/G  | NA                 | NA                            | NA                 |
| Kabuli_wild_61673150 | NA                                  | Ca_kabuli_denovo | 61673150                | G/A  | NA                 | NA                            | NA                 |
| Kabuli_wild_61688596 | NA                                  | Ca_kabuli_denovo | 61688596                | C/G  | NA                 | NA                            | NA                 |
| Kabuli_wild_61688761 | NA                                  | Ca_kabuli_denovo | 61688761                | A/T  | NA                 | NA                            | NA                 |
| Kabuli_wild_61688983 | NA                                  | Ca_kabuli_denovo | 61688983                | T/C  | NA                 | NA                            | NA                 |
| Kabuli_wild_61700469 | NA                                  | Ca_kabuli_denovo | 61700469                | C/T  | NA                 | NA                            | NA                 |
| Kabuli_wild_61701501 | NA                                  | Ca_kabuli_denovo | 61701501                | A/G  | NA                 | NA                            | NA                 |
| Kabuli_wild_61701504 | NA                                  | Ca_kabuli_denovo | 61701504                | G/C  | NA                 | NA                            | NA                 |
| Kabuli_wild_61701546 | NA                                  | Ca_kabuli_denovo | 61701546                | A/T  | NA                 | NA                            | NA                 |
| Kabuli_wild_61701547 | NA                                  | Ca_kabuli_denovo | 61701547                | G/T  | NA                 | NA                            | NA                 |
| Kabuli_wild_61703213 | NA                                  | Ca_kabuli_denovo | 61703213                | C/G  | NA                 | NA                            | NA                 |
| Kabuli_wild_61711009 | NA                                  | Ca_kabuli_denovo | 61711009                | C/T  | NA                 | NA                            | NA                 |
| Kabuli_wild_61711132 | NA                                  | Ca_kabuli_denovo | 61711132                | C/T  | NA                 | NA                            | NA                 |
| Kabuli_wild_61715481 | NA                                  | Ca_kabuli_denovo | 61715481                | C/T  | NA                 | NA                            | NA                 |
| Kabuli_wild_61715505 | NA                                  | Ca_kabuli_denovo | 61715505                | A/C  | NA                 | NA                            | NA                 |
| Kabuli_wild_61716540 | NA                                  | Ca_kabuli_denovo | 61716540                | A/G  | NA                 | NA                            | NA                 |
| Kabuli_wild_61718510 | NA                                  | Ca_kabuli_denovo | 61718510                | T/A  | NA                 | NA                            | NA                 |

| SNP IDs              | NCBI dbSNP accession IDs (NCBI_SS#) | Chromosomes      | Physical positions (bp) | SNPs | Gene accession IDs | Sequence components of genome | Putative functions |
|----------------------|-------------------------------------|------------------|-------------------------|------|--------------------|-------------------------------|--------------------|
| Kabuli_wild_61718511 | NA                                  | Ca_kabuli_denovo | 61718511                | C/T  | NA                 | NA                            | NA                 |
| Kabuli_wild_61718565 | NA                                  | Ca_kabuli_denovo | 61718565                | G/A  | NA                 | NA                            | NA                 |
| Kabuli_wild_61719819 | NA                                  | Ca_kabuli_denovo | 61719819                | A/G  | NA                 | NA                            | NA                 |
| Kabuli_wild_61720380 | NA                                  | Ca_kabuli_denovo | 61720380                | C/T  | NA                 | NA                            | NA                 |
| Kabuli_wild_61722206 | NA                                  | Ca_kabuli_denovo | 61722206                | A/T  | NA                 | NA                            | NA                 |
| Kabuli_wild_61723191 | NA                                  | Ca_kabuli_denovo | 61723191                | A/T  | NA                 | NA                            | NA                 |
| Kabuli_wild_61723625 | NA                                  | Ca_kabuli_denovo | 61723625                | C/T  | NA                 | NA                            | NA                 |
| Kabuli_wild_61723643 | NA                                  | Ca_kabuli_denovo | 61723643                | A/G  | NA                 | NA                            | NA                 |
| Kabuli_wild_61726056 | NA                                  | Ca_kabuli_denovo | 61726056                | C/T  | NA                 | NA                            | NA                 |
| Kabuli_wild_61726261 | NA                                  | Ca_kabuli_denovo | 61726261                | A/T  | NA                 | NA                            | NA                 |
| Kabuli_wild_61728122 | NA                                  | Ca_kabuli_denovo | 61728122                | A/G  | NA                 | NA                            | NA                 |
| Kabuli_wild_61728125 | NA                                  | Ca_kabuli_denovo | 61728125                | A/G  | NA                 | NA                            | NA                 |
| Kabuli_wild_61728138 | NA                                  | Ca_kabuli_denovo | 61728138                | A/G  | NA                 | NA                            | NA                 |
| Kabuli_wild_61728144 | NA                                  | Ca_kabuli_denovo | 61728144                | G/T  | NA                 | NA                            | NA                 |
| Kabuli_wild_61730495 | NA                                  | Ca_kabuli_denovo | 61730495                | G/T  | NA                 | NA                            | NA                 |
| Kabuli_wild_61736124 | NA                                  | Ca_kabuli_denovo | 61736124                | G/T  | NA                 | NA                            | NA                 |
| Kabuli_wild_61736188 | NA                                  | Ca_kabuli_denovo | 61736188                | A/T  | NA                 | NA                            | NA                 |
| Kabuli_wild_61745807 | NA                                  | Ca_kabuli_denovo | 61745807                | A/G  | NA                 | NA                            | NA                 |
| Kabuli_wild_61745852 | NA                                  | Ca_kabuli_denovo | 61745852                | A/C  | NA                 | NA                            | NA                 |
| Kabuli_wild_61747042 | NA                                  | Ca_kabuli_denovo | 61747042                | C/T  | NA                 | NA                            | NA                 |
| Kabuli_wild_61747992 | NA                                  | Ca_kabuli_denovo | 61747992                | C/T  | NA                 | NA                            | NA                 |
| Kabuli_wild_61747997 | NA                                  | Ca_kabuli_denovo | 61747997                | C/A  | NA                 | NA                            | NA                 |
| Kabuli_wild_61748007 | NA                                  | Ca_kabuli_denovo | 61748007                | C/G  | NA                 | NA                            | NA                 |
| Kabuli_wild_61748653 | NA                                  | Ca_kabuli_denovo | 61748653                | C/G  | NA                 | NA                            | NA                 |
| Kabuli_wild_61755121 | NA                                  | Ca_kabuli_denovo | 61755121                | C/G  | NA                 | NA                            | NA                 |
| Kabuli_wild_61755122 | NA                                  | Ca_kabuli_denovo | 61755122                | C/T  | NA                 | NA                            | NA                 |
| Kabuli_wild_61756042 | NA                                  | Ca_kabuli_denovo | 61756042                | A/T  | NA                 | NA                            | NA                 |
| Kabuli_wild_61756095 | NA                                  | Ca_kabuli_denovo | 61756095                | A/C  | NA                 | NA                            | NA                 |
| Kabuli_wild_61757468 | NA                                  | Ca_kabuli_denovo | 61757468                | C/T  | NA                 | NA                            | NA                 |
| Kabuli_wild_61760644 | NA                                  | Ca_kabuli_denovo | 61760644                | A/T  | NA                 | NA                            | NA                 |
| Kabuli_wild_61760666 | NA                                  | Ca_kabuli_denovo | 61760666                | A/G  | NA                 | NA                            | NA                 |
| Kabuli_wild_61769868 | NA                                  | Ca_kabuli_denovo | 61769868                | A/G  | NA                 | NA                            | NA                 |
| Kabuli_wild_61769911 | NA                                  | Ca_kabuli_denovo | 61769911                | A/T  | NA                 | NA                            | NA                 |
| Kabuli_wild_61769937 | NA                                  | Ca_kabuli_denovo | 61769937                | A/T  | NA                 | NA                            | NA                 |
| Kabuli_wild_61774721 | NA                                  | Ca_kabuli_denovo | 61774721                | A/G  | NA                 | NA                            | NA                 |
| Kabuli_wild_61775421 | NA                                  | Ca_kabuli_denovo | 61775421                | C/T  | NA                 | NA                            | NA                 |
| Kabuli_wild_61775469 | NA                                  | Ca_kabuli_denovo | 61775469                | A/G  | NA                 | NA                            | NA                 |
| Kabuli_wild_61775477 | NA                                  | Ca_kabuli_denovo | 61775477                | C/T  | NA                 | NA                            | NA                 |
| Kabuli_wild_61776255 | NA                                  | Ca_kabuli_denovo | 61776255                | C/T  | NA                 | NA                            | NA                 |
| Kabuli_wild_61778653 | NA                                  | Ca_kabuli_denovo | 61778653                | C/T  | NA                 | NA                            | NA                 |
| Kabuli_wild_61780385 | NA                                  | Ca_kabuli_denovo | 61780385                | C/G  | NA                 | NA                            | NA                 |
| Kabuli_wild_61780427 | NA                                  | Ca_kabuli_denovo | 61780427                | G/T  | NA                 | NA                            | NA                 |
| Kabuli_wild_61781164 | NA                                  | Ca_kabuli_denovo | 61781164                | C/T  | NA                 | NA                            | NA                 |
| Kabuli_wild_61782466 | NA                                  | Ca_kabuli_denovo | 61782466                | A/T  | NA                 | NA                            | NA                 |

| SNP IDs              | NCBI dbSNP accession IDs (NCBI_SS#) | Chromosomes      | Physical positions (bp) | SNPs | Gene accession IDs | Sequence components of genome | Putative functions |
|----------------------|-------------------------------------|------------------|-------------------------|------|--------------------|-------------------------------|--------------------|
| Kabuli_wild_61787628 | NA                                  | Ca_kabuli_denovo | 61787628                | A/T  | NA                 | NA                            | NA                 |
| Kabuli_wild_61789222 | NA                                  | Ca_kabuli_denovo | 61789222                | A/G  | NA                 | NA                            | NA                 |
| Kabuli_wild_61789255 | NA                                  | Ca_kabuli_denovo | 61789255                | C/T  | NA                 | NA                            | NA                 |
| Kabuli_wild_61789260 | NA                                  | Ca_kabuli_denovo | 61789260                | A/G  | NA                 | NA                            | NA                 |
| Kabuli_wild_61789267 | NA                                  | Ca_kabuli_denovo | 61789267                | C/G  | NA                 | NA                            | NA                 |
| Kabuli_wild_61793962 | NA                                  | Ca_kabuli_denovo | 61793962                | A/G  | NA                 | NA                            | NA                 |
| Kabuli_wild_61800164 | NA                                  | Ca_kabuli_denovo | 61800164                | G/T  | NA                 | NA                            | NA                 |
| Kabuli_wild_61800167 | NA                                  | Ca_kabuli_denovo | 61800167                | A/G  | NA                 | NA                            | NA                 |
| Kabuli_wild_61800194 | NA                                  | Ca_kabuli_denovo | 61800194                | C/T  | NA                 | NA                            | NA                 |
| Kabuli_wild_61802057 | NA                                  | Ca_kabuli_denovo | 61802057                | C/T  | NA                 | NA                            | NA                 |
| Kabuli_wild_61802688 | NA                                  | Ca_kabuli_denovo | 61802688                | A/C  | NA                 | NA                            | NA                 |
| Kabuli_wild_61804407 | NA                                  | Ca_kabuli_denovo | 61804407                | A/G  | NA                 | NA                            | NA                 |
| Kabuli_wild_61804441 | NA                                  | Ca_kabuli_denovo | 61804441                | C/T  | NA                 | NA                            | NA                 |
| Kabuli_wild_61805790 | NA                                  | Ca_kabuli_denovo | 61805790                | A/G  | NA                 | NA                            | NA                 |
| Kabuli_wild_61819318 | NA                                  | Ca_kabuli_denovo | 61819318                | A/C  | NA                 | NA                            | NA                 |
| Kabuli_wild_61820792 | NA                                  | Ca_kabuli_denovo | 61820792                | A/G  | NA                 | NA                            | NA                 |
| Kabuli_wild_61823484 | NA                                  | Ca_kabuli_denovo | 61823484                | C/G  | NA                 | NA                            | NA                 |
| Kabuli_wild_61824864 | NA                                  | Ca_kabuli_denovo | 61824864                | C/T  | NA                 | NA                            | NA                 |
| Kabuli_wild_61829802 | NA                                  | Ca_kabuli_denovo | 61829802                | C/T  | NA                 | NA                            | NA                 |
| Kabuli_wild_61831060 | NA                                  | Ca_kabuli_denovo | 61831060                | A/C  | NA                 | NA                            | NA                 |
| Kabuli_wild_61834241 | NA                                  | Ca_kabuli_denovo | 61834241                | C/T  | NA                 | NA                            | NA                 |
| Kabuli_wild_61835678 | NA                                  | Ca_kabuli_denovo | 61835678                | A/G  | NA                 | NA                            | NA                 |
| Kabuli_wild_61836235 | NA                                  | Ca_kabuli_denovo | 61836235                | C/T  | NA                 | NA                            | NA                 |
| Kabuli_wild_61836255 | NA                                  | Ca_kabuli_denovo | 61836255                | A/G  | NA                 | NA                            | NA                 |
| Kabuli_wild_61836300 | NA                                  | Ca_kabuli_denovo | 61836300                | C/T  | NA                 | NA                            | NA                 |
| Kabuli_wild_61838496 | NA                                  | Ca_kabuli_denovo | 61838496                | C/T  | NA                 | NA                            | NA                 |
| Kabuli_wild_61839147 | NA                                  | Ca_kabuli_denovo | 61839147                | A/T  | NA                 | NA                            | NA                 |
| Kabuli_wild_61843582 | NA                                  | Ca_kabuli_denovo | 61843582                | A/G  | NA                 | NA                            | NA                 |
| Kabuli_wild_61844183 | NA                                  | Ca_kabuli_denovo | 61844183                | A/T  | NA                 | NA                            | NA                 |
| Kabuli_wild_61844184 | NA                                  | Ca_kabuli_denovo | 61844184                | G/T  | NA                 | NA                            | NA                 |
| Kabuli_wild_61846947 | NA                                  | Ca_kabuli_denovo | 61846947                | A/G  | NA                 | NA                            | NA                 |
| Kabuli_wild_61847011 | NA                                  | Ca_kabuli_denovo | 61847011                | C/T  | NA                 | NA                            | NA                 |
| Kabuli_wild_61847016 | NA                                  | Ca_kabuli_denovo | 61847016                | A/G  | NA                 | NA                            | NA                 |
| Kabuli_wild_61847024 | NA                                  | Ca_kabuli_denovo | 61847024                | A/C  | NA                 | NA                            | NA                 |
| Kabuli_wild_61847197 | NA                                  | Ca_kabuli_denovo | 61847197                | A/G  | NA                 | NA                            | NA                 |
| Kabuli_wild_61851362 | NA                                  | Ca_kabuli_denovo | 61851362                | A/T  | NA                 | NA                            | NA                 |
| Kabuli_wild_61853257 | NA                                  | Ca_kabuli_denovo | 61853257                | A/G  | NA                 | NA                            | NA                 |
| Kabuli_wild_61853284 | NA                                  | Ca_kabuli_denovo | 61853284                | C/G  | NA                 | NA                            | NA                 |
| Kabuli_wild_61854847 | NA                                  | Ca_kabuli_denovo | 61854847                | C/T  | NA                 | NA                            | NA                 |
| Kabuli_wild_61854856 | NA                                  | Ca_kabuli_denovo | 61854856                | C/T  | NA                 | NA                            | NA                 |
| Kabuli_wild_61855316 | NA                                  | Ca_kabuli_denovo | 61855316                | C/T  | NA                 | NA                            | NA                 |
| Kabuli_wild_61857927 | NA                                  | Ca_kabuli_denovo | 61857927                | C/T  | NA                 | NA                            | NA                 |
| Kabuli_wild_61860146 | NA                                  | Ca_kabuli_denovo | 61860146                | C/T  | NA                 | NA                            | NA                 |
| Kabuli_wild_61860355 | NA                                  | Ca_kabuli_denovo | 61860355                | C/T  | NA                 | NA                            | NA                 |

| SNP IDs                     | NCBI dbSNP accession IDs (NCBI_SS#) | Chromosomes             | Physical positions (bp) | SNPs | Gene accession IDs | Sequence components of genome | Putative functions |
|-----------------------------|-------------------------------------|-------------------------|-------------------------|------|--------------------|-------------------------------|--------------------|
| <i>Kabuli_wild_61861348</i> | NA                                  | <i>Ca_kabuli_denovo</i> | 61861348                | C/T  | NA                 | NA                            | NA                 |
| <i>Kabuli_wild_61863792</i> | NA                                  | <i>Ca_kabuli_denovo</i> | 61863792                | A/G  | NA                 | NA                            | NA                 |
| <i>Kabuli_wild_61863801</i> | NA                                  | <i>Ca_kabuli_denovo</i> | 61863801                | A/T  | NA                 | NA                            | NA                 |
| <i>Kabuli_wild_61864425</i> | NA                                  | <i>Ca_kabuli_denovo</i> | 61864425                | A/G  | NA                 | NA                            | NA                 |
| <i>Kabuli_wild_61865501</i> | NA                                  | <i>Ca_kabuli_denovo</i> | 61865501                | A/G  | NA                 | NA                            | NA                 |
| <i>Kabuli_wild_61871188</i> | NA                                  | <i>Ca_kabuli_denovo</i> | 61871188                | C/T  | NA                 | NA                            | NA                 |
| <i>Kabuli_wild_61873251</i> | NA                                  | <i>Ca_kabuli_denovo</i> | 61873251                | C/T  | NA                 | NA                            | NA                 |
| <i>Kabuli_wild_61874862</i> | NA                                  | <i>Ca_kabuli_denovo</i> | 61874862                | A/G  | NA                 | NA                            | NA                 |
| <i>Kabuli_wild_61876560</i> | NA                                  | <i>Ca_kabuli_denovo</i> | 61876560                | C/T  | NA                 | NA                            | NA                 |
| <i>Kabuli_wild_61878521</i> | NA                                  | <i>Ca_kabuli_denovo</i> | 61878521                | A/G  | NA                 | NA                            | NA                 |
| <i>Kabuli_wild_61878548</i> | NA                                  | <i>Ca_kabuli_denovo</i> | 61878548                | C/T  | NA                 | NA                            | NA                 |
| <i>Kabuli_wild_61878551</i> | NA                                  | <i>Ca_kabuli_denovo</i> | 61878551                | A/C  | NA                 | NA                            | NA                 |
| <i>Kabuli_wild_61879675</i> | NA                                  | <i>Ca_kabuli_denovo</i> | 61879675                | A/G  | NA                 | NA                            | NA                 |
| <i>Kabuli_wild_61879698</i> | NA                                  | <i>Ca_kabuli_denovo</i> | 61879698                | C/T  | NA                 | NA                            | NA                 |
| <i>Kabuli_wild_61879712</i> | NA                                  | <i>Ca_kabuli_denovo</i> | 61879712                | C/T  | NA                 | NA                            | NA                 |
| <i>Kabuli_wild_61881066</i> | NA                                  | <i>Ca_kabuli_denovo</i> | 61881066                | A/G  | NA                 | NA                            | NA                 |
| <i>Kabuli_wild_61883074</i> | NA                                  | <i>Ca_kabuli_denovo</i> | 61883074                | C/T  | NA                 | NA                            | NA                 |
| <i>Kabuli_wild_61883085</i> | NA                                  | <i>Ca_kabuli_denovo</i> | 61883085                | C/T  | NA                 | NA                            | NA                 |
| <i>Kabuli_wild_61887409</i> | NA                                  | <i>Ca_kabuli_denovo</i> | 61887409                | A/T  | NA                 | NA                            | NA                 |
| <i>Kabuli_wild_61887889</i> | NA                                  | <i>Ca_kabuli_denovo</i> | 61887889                | C/T  | NA                 | NA                            | NA                 |
| <i>Kabuli_wild_61888771</i> | NA                                  | <i>Ca_kabuli_denovo</i> | 61888771                | A/T  | NA                 | NA                            | NA                 |
| <i>Kabuli_wild_61890156</i> | NA                                  | <i>Ca_kabuli_denovo</i> | 61890156                | G/T  | NA                 | NA                            | NA                 |
| <i>Kabuli_wild_61892340</i> | NA                                  | <i>Ca_kabuli_denovo</i> | 61892340                | G/T  | NA                 | NA                            | NA                 |
| <i>Kabuli_wild_61892358</i> | NA                                  | <i>Ca_kabuli_denovo</i> | 61892358                | A/G  | NA                 | NA                            | NA                 |
| <i>Kabuli_wild_61894051</i> | NA                                  | <i>Ca_kabuli_denovo</i> | 61894051                | A/C  | NA                 | NA                            | NA                 |
| <i>Kabuli_wild_61894054</i> | NA                                  | <i>Ca_kabuli_denovo</i> | 61894054                | C/T  | NA                 | NA                            | NA                 |
| <i>Kabuli_wild_61894073</i> | NA                                  | <i>Ca_kabuli_denovo</i> | 61894073                | C/T  | NA                 | NA                            | NA                 |
| <i>Kabuli_wild_61897152</i> | NA                                  | <i>Ca_kabuli_denovo</i> | 61897152                | A/G  | NA                 | NA                            | NA                 |
| <i>Kabuli_wild_61897797</i> | NA                                  | <i>Ca_kabuli_denovo</i> | 61897797                | A/G  | NA                 | NA                            | NA                 |
| <i>Kabuli_wild_61898177</i> | NA                                  | <i>Ca_kabuli_denovo</i> | 61898177                | A/C  | NA                 | NA                            | NA                 |
| <i>Kabuli_wild_61898180</i> | NA                                  | <i>Ca_kabuli_denovo</i> | 61898180                | A/G  | NA                 | NA                            | NA                 |
| <i>Kabuli_wild_61898189</i> | NA                                  | <i>Ca_kabuli_denovo</i> | 61898189                | C/T  | NA                 | NA                            | NA                 |
| <i>Kabuli_wild_61898207</i> | NA                                  | <i>Ca_kabuli_denovo</i> | 61898207                | C/T  | NA                 | NA                            | NA                 |
| <i>Kabuli_wild_61900159</i> | NA                                  | <i>Ca_kabuli_denovo</i> | 61900159                | C/T  | NA                 | NA                            | NA                 |
| <i>Kabuli_wild_61902519</i> | NA                                  | <i>Ca_kabuli_denovo</i> | 61902519                | G/T  | NA                 | NA                            | NA                 |
| <i>Kabuli_wild_61902523</i> | NA                                  | <i>Ca_kabuli_denovo</i> | 61902523                | A/G  | NA                 | NA                            | NA                 |
| <i>Kabuli_wild_61904872</i> | NA                                  | <i>Ca_kabuli_denovo</i> | 61904872                | A/G  | NA                 | NA                            | NA                 |
| <i>Kabuli_wild_61904876</i> | NA                                  | <i>Ca_kabuli_denovo</i> | 61904876                | A/G  | NA                 | NA                            | NA                 |
| <i>Kabuli_wild_61905555</i> | NA                                  | <i>Ca_kabuli_denovo</i> | 61905555                | A/G  | NA                 | NA                            | NA                 |
| <i>Kabuli_wild_61916938</i> | NA                                  | <i>Ca_kabuli_denovo</i> | 61916938                | A/C  | NA                 | NA                            | NA                 |
| <i>Kabuli_wild_61923526</i> | NA                                  | <i>Ca_kabuli_denovo</i> | 61923526                | C/G  | NA                 | NA                            | NA                 |
| <i>Kabuli_wild_61924437</i> | NA                                  | <i>Ca_kabuli_denovo</i> | 61924437                | A/G  | NA                 | NA                            | NA                 |
| <i>Kabuli_wild_61925480</i> | NA                                  | <i>Ca_kabuli_denovo</i> | 61925480                | C/T  | NA                 | NA                            | NA                 |
| <i>Kabuli_wild_61925492</i> | NA                                  | <i>Ca_kabuli_denovo</i> | 61925492                | C/T  | NA                 | NA                            | NA                 |

| SNP IDs                     | NCBI dbSNP accession IDs (NCBI_SS#) | Chromosomes             | Physical positions (bp) | SNPs | Gene accession IDs | Sequence components of genome | Putative functions |
|-----------------------------|-------------------------------------|-------------------------|-------------------------|------|--------------------|-------------------------------|--------------------|
| <i>Kabuli_wild_61928019</i> | NA                                  | <i>Ca_kabuli_denovo</i> | 61928019                | A/G  | NA                 | NA                            | NA                 |
| <i>Kabuli_wild_61930368</i> | NA                                  | <i>Ca_kabuli_denovo</i> | 61930368                | A/G  | NA                 | NA                            | NA                 |
| <i>Kabuli_wild_61930376</i> | NA                                  | <i>Ca_kabuli_denovo</i> | 61930376                | C/T  | NA                 | NA                            | NA                 |
| <i>Kabuli_wild_61966330</i> | NA                                  | <i>Ca_kabuli_denovo</i> | 61966330                | A/G  | NA                 | NA                            | NA                 |
| <i>Kabuli_wild_61971393</i> | NA                                  | <i>Ca_kabuli_denovo</i> | 61971393                | C/T  | NA                 | NA                            | NA                 |
| <i>Kabuli_wild_61971399</i> | NA                                  | <i>Ca_kabuli_denovo</i> | 61971399                | C/T  | NA                 | NA                            | NA                 |
| <i>Kabuli_wild_61976280</i> | NA                                  | <i>Ca_kabuli_denovo</i> | 61976280                | C/T  | NA                 | NA                            | NA                 |
| <i>Kabuli_wild_61976283</i> | NA                                  | <i>Ca_kabuli_denovo</i> | 61976283                | G/T  | NA                 | NA                            | NA                 |
| <i>Kabuli_wild_61979742</i> | NA                                  | <i>Ca_kabuli_denovo</i> | 61979742                | A/G  | NA                 | NA                            | NA                 |
| <i>Kabuli_wild_61981810</i> | NA                                  | <i>Ca_kabuli_denovo</i> | 61981810                | A/C  | NA                 | NA                            | NA                 |
| <i>Kabuli_wild_61988834</i> | NA                                  | <i>Ca_kabuli_denovo</i> | 61988834                | C/T  | NA                 | NA                            | NA                 |
| <i>Kabuli_wild_61991420</i> | NA                                  | <i>Ca_kabuli_denovo</i> | 61991420                | C/T  | NA                 | NA                            | NA                 |
| <i>Kabuli_wild_61991432</i> | NA                                  | <i>Ca_kabuli_denovo</i> | 61991432                | A/G  | NA                 | NA                            | NA                 |
| <i>Kabuli_wild_61991438</i> | NA                                  | <i>Ca_kabuli_denovo</i> | 61991438                | A/G  | NA                 | NA                            | NA                 |
| <i>Kabuli_wild_61991456</i> | NA                                  | <i>Ca_kabuli_denovo</i> | 61991456                | C/T  | NA                 | NA                            | NA                 |
| <i>Kabuli_wild_62009619</i> | NA                                  | <i>Ca_kabuli_denovo</i> | 62009619                | G/T  | NA                 | NA                            | NA                 |
| <i>Kabuli_wild_62010757</i> | NA                                  | <i>Ca_kabuli_denovo</i> | 62010757                | A/G  | NA                 | NA                            | NA                 |
| <i>Kabuli_wild_62021483</i> | NA                                  | <i>Ca_kabuli_denovo</i> | 62021483                | A/G  | NA                 | NA                            | NA                 |
| <i>Kabuli_wild_62023880</i> | NA                                  | <i>Ca_kabuli_denovo</i> | 62023880                | C/T  | NA                 | NA                            | NA                 |
| <i>Kabuli_wild_62023927</i> | NA                                  | <i>Ca_kabuli_denovo</i> | 62023927                | C/G  | NA                 | NA                            | NA                 |
| <i>Kabuli_wild_62038505</i> | NA                                  | <i>Ca_kabuli_denovo</i> | 62038505                | C/G  | NA                 | NA                            | NA                 |
| <i>Kabuli_wild_62047301</i> | NA                                  | <i>Ca_kabuli_denovo</i> | 62047301                | A/G  | NA                 | NA                            | NA                 |
| <i>Kabuli_wild_62052569</i> | NA                                  | <i>Ca_kabuli_denovo</i> | 62052569                | C/G  | NA                 | NA                            | NA                 |
| <i>Kabuli_wild_62057576</i> | NA                                  | <i>Ca_kabuli_denovo</i> | 62057576                | C/T  | NA                 | NA                            | NA                 |
| <i>Kabuli_wild_62073908</i> | NA                                  | <i>Ca_kabuli_denovo</i> | 62073908                | C/T  | NA                 | NA                            | NA                 |
| <i>Kabuli_wild_62079005</i> | NA                                  | <i>Ca_kabuli_denovo</i> | 62079005                | C/T  | NA                 | NA                            | NA                 |
| <i>Kabuli_wild_62079017</i> | NA                                  | <i>Ca_kabuli_denovo</i> | 62079017                | C/T  | NA                 | NA                            | NA                 |
| <i>Kabuli_wild_62087705</i> | NA                                  | <i>Ca_kabuli_denovo</i> | 62087705                | A/G  | NA                 | NA                            | NA                 |
| <i>Kabuli_wild_62091745</i> | NA                                  | <i>Ca_kabuli_denovo</i> | 62091745                | C/T  | NA                 | NA                            | NA                 |
| <i>Kabuli_wild_62091751</i> | NA                                  | <i>Ca_kabuli_denovo</i> | 62091751                | C/G  | NA                 | NA                            | NA                 |
| <i>Kabuli_wild_62091779</i> | NA                                  | <i>Ca_kabuli_denovo</i> | 62091779                | A/T  | NA                 | NA                            | NA                 |
| <i>Kabuli_wild_62094332</i> | NA                                  | <i>Ca_kabuli_denovo</i> | 62094332                | A/G  | NA                 | NA                            | NA                 |
| <i>Kabuli_wild_62094374</i> | NA                                  | <i>Ca_kabuli_denovo</i> | 62094374                | A/G  | NA                 | NA                            | NA                 |
| <i>Kabuli_wild_62106041</i> | NA                                  | <i>Ca_kabuli_denovo</i> | 62106041                | C/T  | NA                 | NA                            | NA                 |
| <i>Kabuli_wild_62106068</i> | NA                                  | <i>Ca_kabuli_denovo</i> | 62106068                | C/T  | NA                 | NA                            | NA                 |
| <i>Kabuli_wild_62114892</i> | NA                                  | <i>Ca_kabuli_denovo</i> | 62114892                | C/T  | NA                 | NA                            | NA                 |
| <i>Kabuli_wild_62114895</i> | NA                                  | <i>Ca_kabuli_denovo</i> | 62114895                | C/T  | NA                 | NA                            | NA                 |
| <i>Kabuli_wild_62115490</i> | NA                                  | <i>Ca_kabuli_denovo</i> | 62115490                | C/G  | NA                 | NA                            | NA                 |
| <i>Kabuli_wild_62123833</i> | NA                                  | <i>Ca_kabuli_denovo</i> | 62123833                | C/T  | NA                 | NA                            | NA                 |
| <i>Kabuli_wild_62124868</i> | NA                                  | <i>Ca_kabuli_denovo</i> | 62124868                | A/G  | NA                 | NA                            | NA                 |
| <i>Kabuli_wild_62124880</i> | NA                                  | <i>Ca_kabuli_denovo</i> | 62124880                | A/G  | NA                 | NA                            | NA                 |
| <i>Kabuli_wild_62125841</i> | NA                                  | <i>Ca_kabuli_denovo</i> | 62125841                | C/T  | NA                 | NA                            | NA                 |
| <i>Kabuli_wild_62128138</i> | NA                                  | <i>Ca_kabuli_denovo</i> | 62128138                | C/G  | NA                 | NA                            | NA                 |
| <i>Kabuli_wild_62129401</i> | NA                                  | <i>Ca_kabuli_denovo</i> | 62129401                | A/G  | NA                 | NA                            | NA                 |



| SNP IDs              | NCBI dbSNP accession IDs (NCBI_SS#) | Chromosomes      | Physical positions (bp) | SNPs | Gene accession IDs | Sequence components of genome | Putative functions |
|----------------------|-------------------------------------|------------------|-------------------------|------|--------------------|-------------------------------|--------------------|
| Kabuli_wild_62136109 | NA                                  | Ca_kabuli_denovo | 62136109                | C/T  | NA                 | NA                            | NA                 |
| Kabuli_wild_62141215 | NA                                  | Ca_kabuli_denovo | 62141215                | A/G  | NA                 | NA                            | NA                 |
| Kabuli_wild_62147113 | NA                                  | Ca_kabuli_denovo | 62147113                | C/T  | NA                 | NA                            | NA                 |
| Kabuli_wild_62170685 | NA                                  | Ca_kabuli_denovo | 62170685                | A/G  | NA                 | NA                            | NA                 |
| Kabuli_wild_62171147 | NA                                  | Ca_kabuli_denovo | 62171147                | C/G  | NA                 | NA                            | NA                 |
| Kabuli_wild_62210318 | NA                                  | Ca_kabuli_denovo | 62210318                | C/T  | NA                 | NA                            | NA                 |
| Kabuli_wild_62210596 | NA                                  | Ca_kabuli_denovo | 62210596                | A/G  | NA                 | NA                            | NA                 |
| Kabuli_wild_62210644 | NA                                  | Ca_kabuli_denovo | 62210644                | A/C  | NA                 | NA                            | NA                 |
| Kabuli_wild_62210724 | NA                                  | Ca_kabuli_denovo | 62210724                | C/T  | NA                 | NA                            | NA                 |
| Kabuli_wild_62215419 | NA                                  | Ca_kabuli_denovo | 62215419                | G/T  | NA                 | NA                            | NA                 |
| Kabuli_wild_62215439 | NA                                  | Ca_kabuli_denovo | 62215439                | C/G  | NA                 | NA                            | NA                 |
| Kabuli_wild_62215460 | NA                                  | Ca_kabuli_denovo | 62215460                | C/T  | NA                 | NA                            | NA                 |
| Kabuli_wild_62215463 | NA                                  | Ca_kabuli_denovo | 62215463                | C/G  | NA                 | NA                            | NA                 |
| Kabuli_wild_62217526 | NA                                  | Ca_kabuli_denovo | 62217526                | G/T  | NA                 | NA                            | NA                 |
| Kabuli_wild_62217527 | NA                                  | Ca_kabuli_denovo | 62217527                | A/G  | NA                 | NA                            | NA                 |
| Kabuli_wild_62222607 | NA                                  | Ca_kabuli_denovo | 62222607                | A/G  | NA                 | NA                            | NA                 |
| Kabuli_wild_62227883 | NA                                  | Ca_kabuli_denovo | 62227883                | A/T  | NA                 | NA                            | NA                 |
| Kabuli_wild_62227897 | NA                                  | Ca_kabuli_denovo | 62227897                | A/G  | NA                 | NA                            | NA                 |
| Kabuli_wild_62256481 | NA                                  | Ca_kabuli_denovo | 62256481                | A/G  | NA                 | NA                            | NA                 |
| Kabuli_wild_62278414 | NA                                  | Ca_kabuli_denovo | 62278414                | A/T  | NA                 | NA                            | NA                 |
| Kabuli_wild_62278419 | NA                                  | Ca_kabuli_denovo | 62278419                | A/C  | NA                 | NA                            | NA                 |
| Kabuli_wild_62283447 | NA                                  | Ca_kabuli_denovo | 62283447                | A/G  | NA                 | NA                            | NA                 |
| Kabuli_wild_62283489 | NA                                  | Ca_kabuli_denovo | 62283489                | A/T  | NA                 | NA                            | NA                 |
| Kabuli_wild_62286274 | NA                                  | Ca_kabuli_denovo | 62286274                | C/T  | NA                 | NA                            | NA                 |
| Kabuli_wild_62288882 | NA                                  | Ca_kabuli_denovo | 62288882                | A/G  | NA                 | NA                            | NA                 |
| Kabuli_wild_62288900 | NA                                  | Ca_kabuli_denovo | 62288900                | C/T  | NA                 | NA                            | NA                 |
| Kabuli_wild_62305169 | NA                                  | Ca_kabuli_denovo | 62305169                | C/G  | NA                 | NA                            | NA                 |
| Kabuli_wild_62307073 | NA                                  | Ca_kabuli_denovo | 62307073                | C/G  | NA                 | NA                            | NA                 |
| Kabuli_wild_62307085 | NA                                  | Ca_kabuli_denovo | 62307085                | C/T  | NA                 | NA                            | NA                 |
| Kabuli_wild_62325784 | NA                                  | Ca_kabuli_denovo | 62325784                | G/T  | NA                 | NA                            | NA                 |
| Kabuli_wild_62325785 | NA                                  | Ca_kabuli_denovo | 62325785                | A/G  | NA                 | NA                            | NA                 |
| Kabuli_wild_62325787 | NA                                  | Ca_kabuli_denovo | 62325787                | C/G  | NA                 | NA                            | NA                 |
| Kabuli_wild_62329488 | NA                                  | Ca_kabuli_denovo | 62329488                | A/G  | NA                 | NA                            | NA                 |
| Kabuli_wild_62333148 | NA                                  | Ca_kabuli_denovo | 62333148                | C/T  | NA                 | NA                            | NA                 |
| Kabuli_wild_62338647 | NA                                  | Ca_kabuli_denovo | 62338647                | A/G  | NA                 | NA                            | NA                 |
| Kabuli_wild_62352321 | NA                                  | Ca_kabuli_denovo | 62352321                | C/T  | NA                 | NA                            | NA                 |
| Kabuli_wild_62363243 | NA                                  | Ca_kabuli_denovo | 62363243                | C/G  | NA                 | NA                            | NA                 |
| Kabuli_wild_62363255 | NA                                  | Ca_kabuli_denovo | 62363255                | A/G  | NA                 | NA                            | NA                 |
| Kabuli_wild_62363279 | NA                                  | Ca_kabuli_denovo | 62363279                | A/C  | NA                 | NA                            | NA                 |
| Kabuli_wild_62363306 | NA                                  | Ca_kabuli_denovo | 62363306                | A/G  | NA                 | NA                            | NA                 |
| Kabuli_wild_62364393 | NA                                  | Ca_kabuli_denovo | 62364393                | C/G  | NA                 | NA                            | NA                 |
| Kabuli_wild_62374184 | NA                                  | Ca_kabuli_denovo | 62374184                | A/G  | NA                 | NA                            | NA                 |
| Kabuli_wild_62385125 | NA                                  | Ca_kabuli_denovo | 62385125                | C/T  | NA                 | NA                            | NA                 |
| Kabuli_wild_62385155 | NA                                  | Ca_kabuli_denovo | 62385155                | C/T  | NA                 | NA                            | NA                 |

| SNP IDs              | NCBI dbSNP accession IDs (NCBI_SS#) | Chromosomes      | Physical positions (bp) | SNPs | Gene accession IDs | Sequence components of genome | Putative functions |
|----------------------|-------------------------------------|------------------|-------------------------|------|--------------------|-------------------------------|--------------------|
| Kabuli_wild_62387717 | NA                                  | Ca_kabuli_denovo | 62387717                | C/T  | NA                 | NA                            | NA                 |
| Kabuli_wild_62391565 | NA                                  | Ca_kabuli_denovo | 62391565                | C/G  | NA                 | NA                            | NA                 |
| Kabuli_wild_62391574 | NA                                  | Ca_kabuli_denovo | 62391574                | A/G  | NA                 | NA                            | NA                 |
| Kabuli_wild_62403356 | NA                                  | Ca_kabuli_denovo | 62403356                | A/G  | NA                 | NA                            | NA                 |
| Kabuli_wild_62403359 | NA                                  | Ca_kabuli_denovo | 62403359                | C/G  | NA                 | NA                            | NA                 |
| Kabuli_wild_62403382 | NA                                  | Ca_kabuli_denovo | 62403382                | C/T  | NA                 | NA                            | NA                 |
| Kabuli_wild_62403407 | NA                                  | Ca_kabuli_denovo | 62403407                | G/T  | NA                 | NA                            | NA                 |
| Kabuli_wild_62430732 | NA                                  | Ca_kabuli_denovo | 62430732                | C/T  | NA                 | NA                            | NA                 |
| Kabuli_wild_62443048 | NA                                  | Ca_kabuli_denovo | 62443048                | C/T  | NA                 | NA                            | NA                 |
| Kabuli_wild_62443510 | NA                                  | Ca_kabuli_denovo | 62443510                | A/G  | NA                 | NA                            | NA                 |
| Kabuli_wild_62449669 | NA                                  | Ca_kabuli_denovo | 62449669                | C/T  | NA                 | NA                            | NA                 |
| Kabuli_wild_62462017 | NA                                  | Ca_kabuli_denovo | 62462017                | G/T  | NA                 | NA                            | NA                 |
| Kabuli_wild_62462020 | NA                                  | Ca_kabuli_denovo | 62462020                | C/G  | NA                 | NA                            | NA                 |
| Kabuli_wild_62462194 | NA                                  | Ca_kabuli_denovo | 62462194                | G/T  | NA                 | NA                            | NA                 |
| Kabuli_wild_62485818 | NA                                  | Ca_kabuli_denovo | 62485818                | A/G  | NA                 | NA                            | NA                 |
| Kabuli_wild_62485821 | NA                                  | Ca_kabuli_denovo | 62485821                | A/G  | NA                 | NA                            | NA                 |
| Kabuli_wild_62485857 | NA                                  | Ca_kabuli_denovo | 62485857                | A/G  | NA                 | NA                            | NA                 |
| Kabuli_wild_62499448 | NA                                  | Ca_kabuli_denovo | 62499448                | C/T  | NA                 | NA                            | NA                 |
| Kabuli_wild_62506328 | NA                                  | Ca_kabuli_denovo | 62506328                | C/G  | NA                 | NA                            | NA                 |
| Kabuli_wild_62518078 | NA                                  | Ca_kabuli_denovo | 62518078                | C/T  | NA                 | NA                            | NA                 |
| Kabuli_wild_62545343 | NA                                  | Ca_kabuli_denovo | 62545343                | C/G  | NA                 | NA                            | NA                 |
| Kabuli_wild_62545346 | NA                                  | Ca_kabuli_denovo | 62545346                | A/G  | NA                 | NA                            | NA                 |
| Kabuli_wild_62545349 | NA                                  | Ca_kabuli_denovo | 62545349                | A/G  | NA                 | NA                            | NA                 |
| Kabuli_wild_62545353 | NA                                  | Ca_kabuli_denovo | 62545353                | C/T  | NA                 | NA                            | NA                 |
| Kabuli_wild_62553232 | NA                                  | Ca_kabuli_denovo | 62553232                | C/G  | NA                 | NA                            | NA                 |
| Kabuli_wild_62553233 | NA                                  | Ca_kabuli_denovo | 62553233                | A/G  | NA                 | NA                            | NA                 |
| Kabuli_wild_62557258 | NA                                  | Ca_kabuli_denovo | 62557258                | C/T  | NA                 | NA                            | NA                 |
| Kabuli_wild_62557297 | NA                                  | Ca_kabuli_denovo | 62557297                | C/T  | NA                 | NA                            | NA                 |
| Kabuli_wild_62560546 | NA                                  | Ca_kabuli_denovo | 62560546                | C/G  | NA                 | NA                            | NA                 |
| Kabuli_wild_62560990 | NA                                  | Ca_kabuli_denovo | 62560990                | C/T  | NA                 | NA                            | NA                 |
| Kabuli_wild_62561014 | NA                                  | Ca_kabuli_denovo | 62561014                | A/G  | NA                 | NA                            | NA                 |
| Kabuli_wild_62563220 | NA                                  | Ca_kabuli_denovo | 62563220                | C/G  | NA                 | NA                            | NA                 |
| Kabuli_wild_62571382 | NA                                  | Ca_kabuli_denovo | 62571382                | C/G  | NA                 | NA                            | NA                 |
| Kabuli_wild_62574348 | NA                                  | Ca_kabuli_denovo | 62574348                | C/T  | NA                 | NA                            | NA                 |
| Kabuli_wild_62574382 | NA                                  | Ca_kabuli_denovo | 62574382                | A/T  | NA                 | NA                            | NA                 |
| Kabuli_wild_62574403 | NA                                  | Ca_kabuli_denovo | 62574403                | C/G  | NA                 | NA                            | NA                 |
| Kabuli_wild_62578899 | NA                                  | Ca_kabuli_denovo | 62578899                | A/G  | NA                 | NA                            | NA                 |
| Kabuli_wild_62582216 | NA                                  | Ca_kabuli_denovo | 62582216                | A/G  | NA                 | NA                            | NA                 |
| Kabuli_wild_62582219 | NA                                  | Ca_kabuli_denovo | 62582219                | A/G  | NA                 | NA                            | NA                 |
| Kabuli_wild_62582282 | NA                                  | Ca_kabuli_denovo | 62582282                | C/T  | NA                 | NA                            | NA                 |
| Kabuli_wild_62588000 | NA                                  | Ca_kabuli_denovo | 62588000                | A/G  | NA                 | NA                            | NA                 |
| Kabuli_wild_62588009 | NA                                  | Ca_kabuli_denovo | 62588009                | A/C  | NA                 | NA                            | NA                 |
| Kabuli_wild_62595185 | NA                                  | Ca_kabuli_denovo | 62595185                | A/G  | NA                 | NA                            | NA                 |
| Kabuli_wild_62596141 | NA                                  | Ca_kabuli_denovo | 62596141                | A/G  | NA                 | NA                            | NA                 |

| SNP IDs              | NCBI dbSNP accession IDs (NCBI_SS#) | Chromosomes      | Physical positions (bp) | SNPs | Gene accession IDs | Sequence components of genome | Putative functions |
|----------------------|-------------------------------------|------------------|-------------------------|------|--------------------|-------------------------------|--------------------|
| Kabuli_wild_62596151 | NA                                  | Ca_kabuli_denovo | 62596151                | C/T  | NA                 | NA                            | NA                 |
| Kabuli_wild_62607461 | NA                                  | Ca_kabuli_denovo | 62607461                | C/T  | NA                 | NA                            | NA                 |
| Kabuli_wild_62613028 | NA                                  | Ca_kabuli_denovo | 62613028                | C/G  | NA                 | NA                            | NA                 |
| Kabuli_wild_62613890 | NA                                  | Ca_kabuli_denovo | 62613890                | A/G  | NA                 | NA                            | NA                 |
| Kabuli_wild_62613899 | NA                                  | Ca_kabuli_denovo | 62613899                | A/G  | NA                 | NA                            | NA                 |
| Kabuli_wild_62613941 | NA                                  | Ca_kabuli_denovo | 62613941                | C/G  | NA                 | NA                            | NA                 |
| Kabuli_wild_62619005 | NA                                  | Ca_kabuli_denovo | 62619005                | A/G  | NA                 | NA                            | NA                 |
| Kabuli_wild_62619362 | NA                                  | Ca_kabuli_denovo | 62619362                | A/T  | NA                 | NA                            | NA                 |
| Kabuli_wild_62625620 | NA                                  | Ca_kabuli_denovo | 62625620                | A/G  | NA                 | NA                            | NA                 |
| Kabuli_wild_62625629 | NA                                  | Ca_kabuli_denovo | 62625629                | A/G  | NA                 | NA                            | NA                 |
| Kabuli_wild_62626426 | NA                                  | Ca_kabuli_denovo | 62626426                | C/G  | NA                 | NA                            | NA                 |
| Kabuli_wild_62640653 | NA                                  | Ca_kabuli_denovo | 62640653                | A/T  | NA                 | NA                            | NA                 |
| Kabuli_wild_62641346 | NA                                  | Ca_kabuli_denovo | 62641346                | A/G  | NA                 | NA                            | NA                 |
| Kabuli_wild_62641360 | NA                                  | Ca_kabuli_denovo | 62641360                | C/T  | NA                 | NA                            | NA                 |
| Kabuli_wild_62641416 | NA                                  | Ca_kabuli_denovo | 62641416                | A/C  | NA                 | NA                            | NA                 |
| Kabuli_wild_62641428 | NA                                  | Ca_kabuli_denovo | 62641428                | A/G  | NA                 | NA                            | NA                 |
| Kabuli_wild_62641481 | NA                                  | Ca_kabuli_denovo | 62641481                | A/T  | NA                 | NA                            | NA                 |
| Kabuli_wild_62644898 | NA                                  | Ca_kabuli_denovo | 62644898                | A/C  | NA                 | NA                            | NA                 |
| Kabuli_wild_62644900 | NA                                  | Ca_kabuli_denovo | 62644900                | G/T  | NA                 | NA                            | NA                 |
| Kabuli_wild_62644946 | NA                                  | Ca_kabuli_denovo | 62644946                | A/G  | NA                 | NA                            | NA                 |
| Kabuli_wild_62651993 | NA                                  | Ca_kabuli_denovo | 62651993                | A/T  | NA                 | NA                            | NA                 |
| Kabuli_wild_62652163 | NA                                  | Ca_kabuli_denovo | 62652163                | G/T  | NA                 | NA                            | NA                 |
| Kabuli_wild_62652262 | NA                                  | Ca_kabuli_denovo | 62652262                | A/C  | NA                 | NA                            | NA                 |
| Kabuli_wild_62652631 | NA                                  | Ca_kabuli_denovo | 62652631                | A/G  | NA                 | NA                            | NA                 |
| Kabuli_wild_62652909 | NA                                  | Ca_kabuli_denovo | 62652909                | A/T  | NA                 | NA                            | NA                 |
| Kabuli_wild_62652912 | NA                                  | Ca_kabuli_denovo | 62652912                | A/T  | NA                 | NA                            | NA                 |
| Kabuli_wild_62670263 | NA                                  | Ca_kabuli_denovo | 62670263                | C/T  | NA                 | NA                            | NA                 |
| Kabuli_wild_62676626 | NA                                  | Ca_kabuli_denovo | 62676626                | A/C  | NA                 | NA                            | NA                 |
| Kabuli_wild_62676627 | NA                                  | Ca_kabuli_denovo | 62676627                | A/G  | NA                 | NA                            | NA                 |
| Kabuli_wild_62676628 | NA                                  | Ca_kabuli_denovo | 62676628                | C/G  | NA                 | NA                            | NA                 |
| Kabuli_wild_62677655 | NA                                  | Ca_kabuli_denovo | 62677655                | A/G  | NA                 | NA                            | NA                 |
| Kabuli_wild_62677656 | NA                                  | Ca_kabuli_denovo | 62677656                | A/G  | NA                 | NA                            | NA                 |
| Kabuli_wild_62677657 | NA                                  | Ca_kabuli_denovo | 62677657                | A/G  | NA                 | NA                            | NA                 |
| Kabuli_wild_62726089 | NA                                  | Ca_kabuli_denovo | 62726089                | A/C  | NA                 | NA                            | NA                 |
| Kabuli_wild_62726115 | NA                                  | Ca_kabuli_denovo | 62726115                | C/T  | NA                 | NA                            | NA                 |
| Kabuli_wild_62726121 | NA                                  | Ca_kabuli_denovo | 62726121                | C/T  | NA                 | NA                            | NA                 |
| Kabuli_wild_62726146 | NA                                  | Ca_kabuli_denovo | 62726146                | A/C  | NA                 | NA                            | NA                 |
| Desi_wild_1489       | NA                                  | Ca_desi_denovo   | 1489                    | G/A  | NA                 | NA                            | NA                 |
| Desi_wild_1490       | NA                                  | Ca_desi_denovo   | 1490                    | T/G  | NA                 | NA                            | NA                 |
| Desi_wild_2221       | NA                                  | Ca_desi_denovo   | 2221                    | T/G  | NA                 | NA                            | NA                 |
| Desi_wild_2227       | NA                                  | Ca_desi_denovo   | 2227                    | T/G  | NA                 | NA                            | NA                 |
| Desi_wild_6884       | NA                                  | Ca_desi_denovo   | 6884                    | T/G  | NA                 | NA                            | NA                 |
| Desi_wild_8048       | NA                                  | Ca_desi_denovo   | 8048                    | A/C  | NA                 | NA                            | NA                 |
| Desi_wild_8049       | NA                                  | Ca_desi_denovo   | 8049                    | G/A  | NA                 | NA                            | NA                 |

| SNP IDs                | NCBI dbSNP accession IDs (NCBI_SS#) | Chromosomes           | Physical positions (bp) | SNPs | Gene accession IDs | Sequence components of genome | Putative functions |
|------------------------|-------------------------------------|-----------------------|-------------------------|------|--------------------|-------------------------------|--------------------|
| <i>Desi_wild_8050</i>  | NA                                  | <i>Ca_desi_denovo</i> | 8050                    | A/C  | NA                 | NA                            | NA                 |
| <i>Desi_wild_10825</i> | NA                                  | <i>Ca_desi_denovo</i> | 10825                   | A/G  | NA                 | NA                            | NA                 |
| <i>Desi_wild_11632</i> | NA                                  | <i>Ca_desi_denovo</i> | 11632                   | A/G  | NA                 | NA                            | NA                 |
| <i>Desi_wild_18280</i> | NA                                  | <i>Ca_desi_denovo</i> | 18280                   | T/C  | NA                 | NA                            | NA                 |
| <i>Desi_wild_21273</i> | NA                                  | <i>Ca_desi_denovo</i> | 21273                   | A/G  | NA                 | NA                            | NA                 |
| <i>Desi_wild_24691</i> | NA                                  | <i>Ca_desi_denovo</i> | 24691                   | C/A  | NA                 | NA                            | NA                 |
| <i>Desi_wild_25448</i> | NA                                  | <i>Ca_desi_denovo</i> | 25448                   | C/G  | NA                 | NA                            | NA                 |
| <i>Desi_wild_25508</i> | NA                                  | <i>Ca_desi_denovo</i> | 25508                   | A/C  | NA                 | NA                            | NA                 |
| <i>Desi_wild_26961</i> | NA                                  | <i>Ca_desi_denovo</i> | 26961                   | A/G  | NA                 | NA                            | NA                 |
| <i>Desi_wild_27687</i> | NA                                  | <i>Ca_desi_denovo</i> | 27687                   | A/G  | NA                 | NA                            | NA                 |
| <i>Desi_wild_30027</i> | NA                                  | <i>Ca_desi_denovo</i> | 30027                   | T/G  | NA                 | NA                            | NA                 |
| <i>Desi_wild_31154</i> | NA                                  | <i>Ca_desi_denovo</i> | 31154                   | G/A  | NA                 | NA                            | NA                 |
| <i>Desi_wild_34796</i> | NA                                  | <i>Ca_desi_denovo</i> | 34796                   | G/T  | NA                 | NA                            | NA                 |
| <i>Desi_wild_34809</i> | NA                                  | <i>Ca_desi_denovo</i> | 34809                   | G/A  | NA                 | NA                            | NA                 |
| <i>Desi_wild_37394</i> | NA                                  | <i>Ca_desi_denovo</i> | 37394                   | A/G  | NA                 | NA                            | NA                 |
| <i>Desi_wild_38779</i> | NA                                  | <i>Ca_desi_denovo</i> | 38779                   | T/C  | NA                 | NA                            | NA                 |
| <i>Desi_wild_39524</i> | NA                                  | <i>Ca_desi_denovo</i> | 39524                   | T/C  | NA                 | NA                            | NA                 |
| <i>Desi_wild_39595</i> | NA                                  | <i>Ca_desi_denovo</i> | 39595                   | G/T  | NA                 | NA                            | NA                 |
| <i>Desi_wild_45948</i> | NA                                  | <i>Ca_desi_denovo</i> | 45948                   | G/T  | NA                 | NA                            | NA                 |
| <i>Desi_wild_46787</i> | NA                                  | <i>Ca_desi_denovo</i> | 46787                   | A/T  | NA                 | NA                            | NA                 |
| <i>Desi_wild_48042</i> | NA                                  | <i>Ca_desi_denovo</i> | 48042                   | A/G  | NA                 | NA                            | NA                 |
| <i>Desi_wild_48090</i> | NA                                  | <i>Ca_desi_denovo</i> | 48090                   | T/C  | NA                 | NA                            | NA                 |
| <i>Desi_wild_48206</i> | NA                                  | <i>Ca_desi_denovo</i> | 48206                   | A/C  | NA                 | NA                            | NA                 |
| <i>Desi_wild_56311</i> | NA                                  | <i>Ca_desi_denovo</i> | 56311                   | T/G  | NA                 | NA                            | NA                 |
| <i>Desi_wild_58484</i> | NA                                  | <i>Ca_desi_denovo</i> | 58484                   | A/C  | NA                 | NA                            | NA                 |
| <i>Desi_wild_58490</i> | NA                                  | <i>Ca_desi_denovo</i> | 58490                   | T/C  | NA                 | NA                            | NA                 |
| <i>Desi_wild_59576</i> | NA                                  | <i>Ca_desi_denovo</i> | 59576                   | C/T  | NA                 | NA                            | NA                 |
| <i>Desi_wild_61602</i> | NA                                  | <i>Ca_desi_denovo</i> | 61602                   | C/T  | NA                 | NA                            | NA                 |
| <i>Desi_wild_64209</i> | NA                                  | <i>Ca_desi_denovo</i> | 64209                   | C/G  | NA                 | NA                            | NA                 |
| <i>Desi_wild_64210</i> | NA                                  | <i>Ca_desi_denovo</i> | 64210                   | A/C  | NA                 | NA                            | NA                 |
| <i>Desi_wild_64211</i> | NA                                  | <i>Ca_desi_denovo</i> | 64211                   | G/C  | NA                 | NA                            | NA                 |
| <i>Desi_wild_64212</i> | NA                                  | <i>Ca_desi_denovo</i> | 64212                   | C/G  | NA                 | NA                            | NA                 |
| <i>Desi_wild_69713</i> | NA                                  | <i>Ca_desi_denovo</i> | 69713                   | T/G  | NA                 | NA                            | NA                 |
| <i>Desi_wild_73568</i> | NA                                  | <i>Ca_desi_denovo</i> | 73568                   | G/T  | NA                 | NA                            | NA                 |
| <i>Desi_wild_73570</i> | NA                                  | <i>Ca_desi_denovo</i> | 73570                   | T/G  | NA                 | NA                            | NA                 |
| <i>Desi_wild_73572</i> | NA                                  | <i>Ca_desi_denovo</i> | 73572                   | T/G  | NA                 | NA                            | NA                 |
| <i>Desi_wild_73575</i> | NA                                  | <i>Ca_desi_denovo</i> | 73575                   | A/G  | NA                 | NA                            | NA                 |
| <i>Desi_wild_73610</i> | NA                                  | <i>Ca_desi_denovo</i> | 73610                   | A/G  | NA                 | NA                            | NA                 |
| <i>Desi_wild_74682</i> | NA                                  | <i>Ca_desi_denovo</i> | 74682                   | T/C  | NA                 | NA                            | NA                 |
| <i>Desi_wild_74818</i> | NA                                  | <i>Ca_desi_denovo</i> | 74818                   | A/G  | NA                 | NA                            | NA                 |
| <i>Desi_wild_76198</i> | NA                                  | <i>Ca_desi_denovo</i> | 76198                   | T/G  | NA                 | NA                            | NA                 |
| <i>Desi_wild_80314</i> | NA                                  | <i>Ca_desi_denovo</i> | 80314                   | A/C  | NA                 | NA                            | NA                 |
| <i>Desi_wild_82981</i> | NA                                  | <i>Ca_desi_denovo</i> | 82981                   | C/T  | NA                 | NA                            | NA                 |
| <i>Desi_wild_84286</i> | NA                                  | <i>Ca_desi_denovo</i> | 84286                   | T/C  | NA                 | NA                            | NA                 |

| SNP IDs                 | NCBI dbSNP accession IDs (NCBI_SS#) | Chromosomes           | Physical positions (bp) | SNPs | Gene accession IDs | Sequence components of genome | Putative functions |
|-------------------------|-------------------------------------|-----------------------|-------------------------|------|--------------------|-------------------------------|--------------------|
| <i>Desi_wild_85476</i>  | NA                                  | <i>Ca_desi_denovo</i> | 85476                   | T/C  | NA                 | NA                            | NA                 |
| <i>Desi_wild_85477</i>  | NA                                  | <i>Ca_desi_denovo</i> | 85477                   | A/C  | NA                 | NA                            | NA                 |
| <i>Desi_wild_89665</i>  | NA                                  | <i>Ca_desi_denovo</i> | 89665                   | A/G  | NA                 | NA                            | NA                 |
| <i>Desi_wild_96122</i>  | NA                                  | <i>Ca_desi_denovo</i> | 96122                   | T/C  | NA                 | NA                            | NA                 |
| <i>Desi_wild_96223</i>  | NA                                  | <i>Ca_desi_denovo</i> | 96223                   | A/C  | NA                 | NA                            | NA                 |
| <i>Desi_wild_96224</i>  | NA                                  | <i>Ca_desi_denovo</i> | 96224                   | G/T  | NA                 | NA                            | NA                 |
| <i>Desi_wild_96225</i>  | NA                                  | <i>Ca_desi_denovo</i> | 96225                   | A/G  | NA                 | NA                            | NA                 |
| <i>Desi_wild_96303</i>  | NA                                  | <i>Ca_desi_denovo</i> | 96303                   | A/G  | NA                 | NA                            | NA                 |
| <i>Desi_wild_96523</i>  | NA                                  | <i>Ca_desi_denovo</i> | 96523                   | T/G  | NA                 | NA                            | NA                 |
| <i>Desi_wild_98582</i>  | NA                                  | <i>Ca_desi_denovo</i> | 98582                   | T/G  | NA                 | NA                            | NA                 |
| <i>Desi_wild_101305</i> | NA                                  | <i>Ca_desi_denovo</i> | 101305                  | G/A  | NA                 | NA                            | NA                 |
| <i>Desi_wild_103624</i> | NA                                  | <i>Ca_desi_denovo</i> | 103624                  | C/T  | NA                 | NA                            | NA                 |
| <i>Desi_wild_103631</i> | NA                                  | <i>Ca_desi_denovo</i> | 103631                  | G/T  | NA                 | NA                            | NA                 |
| <i>Desi_wild_103902</i> | NA                                  | <i>Ca_desi_denovo</i> | 103902                  | T/G  | NA                 | NA                            | NA                 |
| <i>Desi_wild_109271</i> | NA                                  | <i>Ca_desi_denovo</i> | 109271                  | G/T  | NA                 | NA                            | NA                 |
| <i>Desi_wild_109273</i> | NA                                  | <i>Ca_desi_denovo</i> | 109273                  | T/C  | NA                 | NA                            | NA                 |
| <i>Desi_wild_109276</i> | NA                                  | <i>Ca_desi_denovo</i> | 109276                  | A/C  | NA                 | NA                            | NA                 |
| <i>Desi_wild_109300</i> | NA                                  | <i>Ca_desi_denovo</i> | 109300                  | G/T  | NA                 | NA                            | NA                 |
| <i>Desi_wild_112579</i> | NA                                  | <i>Ca_desi_denovo</i> | 112579                  | A/T  | NA                 | NA                            | NA                 |
| <i>Desi_wild_117449</i> | NA                                  | <i>Ca_desi_denovo</i> | 117449                  | T/A  | NA                 | NA                            | NA                 |
| <i>Desi_wild_117602</i> | NA                                  | <i>Ca_desi_denovo</i> | 117602                  | A/G  | NA                 | NA                            | NA                 |
| <i>Desi_wild_118507</i> | NA                                  | <i>Ca_desi_denovo</i> | 118507                  | T/G  | NA                 | NA                            | NA                 |
| <i>Desi_wild_121002</i> | NA                                  | <i>Ca_desi_denovo</i> | 121002                  | C/G  | NA                 | NA                            | NA                 |
| <i>Desi_wild_121016</i> | NA                                  | <i>Ca_desi_denovo</i> | 121016                  | A/T  | NA                 | NA                            | NA                 |
| <i>Desi_wild_123734</i> | NA                                  | <i>Ca_desi_denovo</i> | 123734                  | T/G  | NA                 | NA                            | NA                 |
| <i>Desi_wild_124300</i> | NA                                  | <i>Ca_desi_denovo</i> | 124300                  | A/T  | NA                 | NA                            | NA                 |
| <i>Desi_wild_129855</i> | NA                                  | <i>Ca_desi_denovo</i> | 129855                  | C/T  | NA                 | NA                            | NA                 |
| <i>Desi_wild_132241</i> | NA                                  | <i>Ca_desi_denovo</i> | 132241                  | T/C  | NA                 | NA                            | NA                 |
| <i>Desi_wild_134229</i> | NA                                  | <i>Ca_desi_denovo</i> | 134229                  | A/G  | NA                 | NA                            | NA                 |
| <i>Desi_wild_134652</i> | NA                                  | <i>Ca_desi_denovo</i> | 134652                  | A/G  | NA                 | NA                            | NA                 |
| <i>Desi_wild_135032</i> | NA                                  | <i>Ca_desi_denovo</i> | 135032                  | G/C  | NA                 | NA                            | NA                 |
| <i>Desi_wild_136136</i> | NA                                  | <i>Ca_desi_denovo</i> | 136136                  | A/G  | NA                 | NA                            | NA                 |
| <i>Desi_wild_136759</i> | NA                                  | <i>Ca_desi_denovo</i> | 136759                  | T/G  | NA                 | NA                            | NA                 |
| <i>Desi_wild_142093</i> | NA                                  | <i>Ca_desi_denovo</i> | 142093                  | C/A  | NA                 | NA                            | NA                 |
| <i>Desi_wild_142094</i> | NA                                  | <i>Ca_desi_denovo</i> | 142094                  | A/G  | NA                 | NA                            | NA                 |
| <i>Desi_wild_142096</i> | NA                                  | <i>Ca_desi_denovo</i> | 142096                  | A/G  | NA                 | NA                            | NA                 |
| <i>Desi_wild_142098</i> | NA                                  | <i>Ca_desi_denovo</i> | 142098                  | A/T  | NA                 | NA                            | NA                 |
| <i>Desi_wild_142099</i> | NA                                  | <i>Ca_desi_denovo</i> | 142099                  | G/T  | NA                 | NA                            | NA                 |
| <i>Desi_wild_143594</i> | NA                                  | <i>Ca_desi_denovo</i> | 143594                  | G/C  | NA                 | NA                            | NA                 |
| <i>Desi_wild_143595</i> | NA                                  | <i>Ca_desi_denovo</i> | 143595                  | C/T  | NA                 | NA                            | NA                 |
| <i>Desi_wild_143599</i> | NA                                  | <i>Ca_desi_denovo</i> | 143599                  | T/G  | NA                 | NA                            | NA                 |
| <i>Desi_wild_143691</i> | NA                                  | <i>Ca_desi_denovo</i> | 143691                  | C/T  | NA                 | NA                            | NA                 |
| <i>Desi_wild_147282</i> | NA                                  | <i>Ca_desi_denovo</i> | 147282                  | T/G  | NA                 | NA                            | NA                 |
| <i>Desi_wild_148014</i> | NA                                  | <i>Ca_desi_denovo</i> | 148014                  | C/T  | NA                 | NA                            | NA                 |

| SNP IDs                 | NCBI dbSNP accession IDs (NCBI_SS#) | Chromosomes           | Physical positions (bp) | SNPs | Gene accession IDs | Sequence components of genome | Putative functions |
|-------------------------|-------------------------------------|-----------------------|-------------------------|------|--------------------|-------------------------------|--------------------|
| <i>Desi_wild_148015</i> | NA                                  | <i>Ca_desi_denovo</i> | 148015                  | G/C  | NA                 | NA                            | NA                 |
| <i>Desi_wild_148016</i> | NA                                  | <i>Ca_desi_denovo</i> | 148016                  | T/A  | NA                 | NA                            | NA                 |
| <i>Desi_wild_148017</i> | NA                                  | <i>Ca_desi_denovo</i> | 148017                  | C/G  | NA                 | NA                            | NA                 |
| <i>Desi_wild_148022</i> | NA                                  | <i>Ca_desi_denovo</i> | 148022                  | G/T  | NA                 | NA                            | NA                 |
| <i>Desi_wild_149134</i> | NA                                  | <i>Ca_desi_denovo</i> | 149134                  | T/G  | NA                 | NA                            | NA                 |
| <i>Desi_wild_149143</i> | NA                                  | <i>Ca_desi_denovo</i> | 149143                  | A/G  | NA                 | NA                            | NA                 |
| <i>Desi_wild_149181</i> | NA                                  | <i>Ca_desi_denovo</i> | 149181                  | T/G  | NA                 | NA                            | NA                 |
| <i>Desi_wild_149184</i> | NA                                  | <i>Ca_desi_denovo</i> | 149184                  | G/T  | NA                 | NA                            | NA                 |
| <i>Desi_wild_149187</i> | NA                                  | <i>Ca_desi_denovo</i> | 149187                  | G/T  | NA                 | NA                            | NA                 |
| <i>Desi_wild_150310</i> | NA                                  | <i>Ca_desi_denovo</i> | 150310                  | A/G  | NA                 | NA                            | NA                 |
| <i>Desi_wild_151900</i> | NA                                  | <i>Ca_desi_denovo</i> | 151900                  | A/C  | NA                 | NA                            | NA                 |
| <i>Desi_wild_151901</i> | NA                                  | <i>Ca_desi_denovo</i> | 151901                  | G/A  | NA                 | NA                            | NA                 |
| <i>Desi_wild_153855</i> | NA                                  | <i>Ca_desi_denovo</i> | 153855                  | C/T  | NA                 | NA                            | NA                 |
| <i>Desi_wild_154923</i> | NA                                  | <i>Ca_desi_denovo</i> | 154923                  | A/G  | NA                 | NA                            | NA                 |
| <i>Desi_wild_154968</i> | NA                                  | <i>Ca_desi_denovo</i> | 154968                  | A/G  | NA                 | NA                            | NA                 |
| <i>Desi_wild_154971</i> | NA                                  | <i>Ca_desi_denovo</i> | 154971                  | C/T  | NA                 | NA                            | NA                 |
| <i>Desi_wild_154977</i> | NA                                  | <i>Ca_desi_denovo</i> | 154977                  | C/T  | NA                 | NA                            | NA                 |
| <i>Desi_wild_159034</i> | NA                                  | <i>Ca_desi_denovo</i> | 159034                  | T/A  | NA                 | NA                            | NA                 |
| <i>Desi_wild_160092</i> | NA                                  | <i>Ca_desi_denovo</i> | 160092                  | G/A  | NA                 | NA                            | NA                 |
| <i>Desi_wild_162925</i> | NA                                  | <i>Ca_desi_denovo</i> | 162925                  | G/A  | NA                 | NA                            | NA                 |
| <i>Desi_wild_163152</i> | NA                                  | <i>Ca_desi_denovo</i> | 163152                  | A/C  | NA                 | NA                            | NA                 |
| <i>Desi_wild_167008</i> | NA                                  | <i>Ca_desi_denovo</i> | 167008                  | C/T  | NA                 | NA                            | NA                 |
| <i>Desi_wild_167018</i> | NA                                  | <i>Ca_desi_denovo</i> | 167018                  | A/T  | NA                 | NA                            | NA                 |
| <i>Desi_wild_167024</i> | NA                                  | <i>Ca_desi_denovo</i> | 167024                  | T/A  | NA                 | NA                            | NA                 |
| <i>Desi_wild_168390</i> | NA                                  | <i>Ca_desi_denovo</i> | 168390                  | A/C  | NA                 | NA                            | NA                 |
| <i>Desi_wild_172295</i> | NA                                  | <i>Ca_desi_denovo</i> | 172295                  | C/T  | NA                 | NA                            | NA                 |
| <i>Desi_wild_172326</i> | NA                                  | <i>Ca_desi_denovo</i> | 172326                  | C/G  | NA                 | NA                            | NA                 |
| <i>Desi_wild_174379</i> | NA                                  | <i>Ca_desi_denovo</i> | 174379                  | A/C  | NA                 | NA                            | NA                 |
| <i>Desi_wild_183524</i> | NA                                  | <i>Ca_desi_denovo</i> | 183524                  | T/G  | NA                 | NA                            | NA                 |
| <i>Desi_wild_186104</i> | NA                                  | <i>Ca_desi_denovo</i> | 186104                  | C/G  | NA                 | NA                            | NA                 |
| <i>Desi_wild_186109</i> | NA                                  | <i>Ca_desi_denovo</i> | 186109                  | A/G  | NA                 | NA                            | NA                 |
| <i>Desi_wild_186454</i> | NA                                  | <i>Ca_desi_denovo</i> | 186454                  | T/C  | NA                 | NA                            | NA                 |
| <i>Desi_wild_186974</i> | NA                                  | <i>Ca_desi_denovo</i> | 186974                  | A/T  | NA                 | NA                            | NA                 |
| <i>Desi_wild_186983</i> | NA                                  | <i>Ca_desi_denovo</i> | 186983                  | A/C  | NA                 | NA                            | NA                 |
| <i>Desi_wild_188513</i> | NA                                  | <i>Ca_desi_denovo</i> | 188513                  | T/G  | NA                 | NA                            | NA                 |
| <i>Desi_wild_191212</i> | NA                                  | <i>Ca_desi_denovo</i> | 191212                  | A/C  | NA                 | NA                            | NA                 |
| <i>Desi_wild_202506</i> | NA                                  | <i>Ca_desi_denovo</i> | 202506                  | A/T  | NA                 | NA                            | NA                 |
| <i>Desi_wild_203098</i> | NA                                  | <i>Ca_desi_denovo</i> | 203098                  | G/C  | NA                 | NA                            | NA                 |
| <i>Desi_wild_203404</i> | NA                                  | <i>Ca_desi_denovo</i> | 203404                  | A/C  | NA                 | NA                            | NA                 |
| <i>Desi_wild_203406</i> | NA                                  | <i>Ca_desi_denovo</i> | 203406                  | A/T  | NA                 | NA                            | NA                 |
| <i>Desi_wild_204281</i> | NA                                  | <i>Ca_desi_denovo</i> | 204281                  | A/C  | NA                 | NA                            | NA                 |
| <i>Desi_wild_205967</i> | NA                                  | <i>Ca_desi_denovo</i> | 205967                  | C/T  | NA                 | NA                            | NA                 |
| <i>Desi_wild_209738</i> | NA                                  | <i>Ca_desi_denovo</i> | 209738                  | A/C  | NA                 | NA                            | NA                 |
| <i>Desi_wild_210911</i> | NA                                  | <i>Ca_desi_denovo</i> | 210911                  | T/C  | NA                 | NA                            | NA                 |

| SNP IDs                 | NCBI dbSNP accession IDs (NCBI_SS#) | Chromosomes           | Physical positions (bp) | SNPs | Gene accession IDs | Sequence components of genome | Putative functions |
|-------------------------|-------------------------------------|-----------------------|-------------------------|------|--------------------|-------------------------------|--------------------|
| <i>Desi_wild_214870</i> | NA                                  | <i>Ca_desi_denovo</i> | 214870                  | T/C  | NA                 | NA                            | NA                 |
| <i>Desi_wild_218611</i> | NA                                  | <i>Ca_desi_denovo</i> | 218611                  | A/G  | NA                 | NA                            | NA                 |
| <i>Desi_wild_221257</i> | NA                                  | <i>Ca_desi_denovo</i> | 221257                  | G/T  | NA                 | NA                            | NA                 |
| <i>Desi_wild_221627</i> | NA                                  | <i>Ca_desi_denovo</i> | 221627                  | A/C  | NA                 | NA                            | NA                 |
| <i>Desi_wild_224281</i> | NA                                  | <i>Ca_desi_denovo</i> | 224281                  | A/G  | NA                 | NA                            | NA                 |
| <i>Desi_wild_225155</i> | NA                                  | <i>Ca_desi_denovo</i> | 225155                  | T/G  | NA                 | NA                            | NA                 |
| <i>Desi_wild_226838</i> | NA                                  | <i>Ca_desi_denovo</i> | 226838                  | C/G  | NA                 | NA                            | NA                 |
| <i>Desi_wild_226867</i> | NA                                  | <i>Ca_desi_denovo</i> | 226867                  | G/T  | NA                 | NA                            | NA                 |
| <i>Desi_wild_228968</i> | NA                                  | <i>Ca_desi_denovo</i> | 228968                  | C/G  | NA                 | NA                            | NA                 |
| <i>Desi_wild_229767</i> | NA                                  | <i>Ca_desi_denovo</i> | 229767                  | C/T  | NA                 | NA                            | NA                 |
| <i>Desi_wild_231234</i> | NA                                  | <i>Ca_desi_denovo</i> | 231234                  | T/G  | NA                 | NA                            | NA                 |
| <i>Desi_wild_231888</i> | NA                                  | <i>Ca_desi_denovo</i> | 231888                  | T/G  | NA                 | NA                            | NA                 |
| <i>Desi_wild_231900</i> | NA                                  | <i>Ca_desi_denovo</i> | 231900                  | T/G  | NA                 | NA                            | NA                 |
| <i>Desi_wild_235453</i> | NA                                  | <i>Ca_desi_denovo</i> | 235453                  | A/T  | NA                 | NA                            | NA                 |
| <i>Desi_wild_235484</i> | NA                                  | <i>Ca_desi_denovo</i> | 235484                  | A/T  | NA                 | NA                            | NA                 |
| <i>Desi_wild_235489</i> | NA                                  | <i>Ca_desi_denovo</i> | 235489                  | A/T  | NA                 | NA                            | NA                 |
| <i>Desi_wild_236777</i> | NA                                  | <i>Ca_desi_denovo</i> | 236777                  | A/C  | NA                 | NA                            | NA                 |
| <i>Desi_wild_237862</i> | NA                                  | <i>Ca_desi_denovo</i> | 237862                  | C/G  | NA                 | NA                            | NA                 |
| <i>Desi_wild_241311</i> | NA                                  | <i>Ca_desi_denovo</i> | 241311                  | T/G  | NA                 | NA                            | NA                 |
| <i>Desi_wild_241917</i> | NA                                  | <i>Ca_desi_denovo</i> | 241917                  | A/C  | NA                 | NA                            | NA                 |
| <i>Desi_wild_242633</i> | NA                                  | <i>Ca_desi_denovo</i> | 242633                  | T/G  | NA                 | NA                            | NA                 |
| <i>Desi_wild_243174</i> | NA                                  | <i>Ca_desi_denovo</i> | 243174                  | A/C  | NA                 | NA                            | NA                 |
| <i>Desi_wild_243175</i> | NA                                  | <i>Ca_desi_denovo</i> | 243175                  | G/A  | NA                 | NA                            | NA                 |
| <i>Desi_wild_243176</i> | NA                                  | <i>Ca_desi_denovo</i> | 243176                  | A/C  | NA                 | NA                            | NA                 |
| <i>Desi_wild_244966</i> | NA                                  | <i>Ca_desi_denovo</i> | 244966                  | G/T  | NA                 | NA                            | NA                 |
| <i>Desi_wild_245010</i> | NA                                  | <i>Ca_desi_denovo</i> | 245010                  | A/G  | NA                 | NA                            | NA                 |
| <i>Desi_wild_245020</i> | NA                                  | <i>Ca_desi_denovo</i> | 245020                  | A/T  | NA                 | NA                            | NA                 |
| <i>Desi_wild_245310</i> | NA                                  | <i>Ca_desi_denovo</i> | 245310                  | A/C  | NA                 | NA                            | NA                 |
| <i>Desi_wild_247642</i> | NA                                  | <i>Ca_desi_denovo</i> | 247642                  | A/C  | NA                 | NA                            | NA                 |
| <i>Desi_wild_249890</i> | NA                                  | <i>Ca_desi_denovo</i> | 249890                  | A/G  | NA                 | NA                            | NA                 |
| <i>Desi_wild_249898</i> | NA                                  | <i>Ca_desi_denovo</i> | 249898                  | G/A  | NA                 | NA                            | NA                 |
| <i>Desi_wild_249942</i> | NA                                  | <i>Ca_desi_denovo</i> | 249942                  | A/C  | NA                 | NA                            | NA                 |
| <i>Desi_wild_249950</i> | NA                                  | <i>Ca_desi_denovo</i> | 249950                  | C/T  | NA                 | NA                            | NA                 |
| <i>Desi_wild_251105</i> | NA                                  | <i>Ca_desi_denovo</i> | 251105                  | T/G  | NA                 | NA                            | NA                 |
| <i>Desi_wild_251616</i> | NA                                  | <i>Ca_desi_denovo</i> | 251616                  | T/G  | NA                 | NA                            | NA                 |
| <i>Desi_wild_252821</i> | NA                                  | <i>Ca_desi_denovo</i> | 252821                  | T/G  | NA                 | NA                            | NA                 |
| <i>Desi_wild_256520</i> | NA                                  | <i>Ca_desi_denovo</i> | 256520                  | C/A  | NA                 | NA                            | NA                 |
| <i>Desi_wild_257369</i> | NA                                  | <i>Ca_desi_denovo</i> | 257369                  | C/T  | NA                 | NA                            | NA                 |
| <i>Desi_wild_257413</i> | NA                                  | <i>Ca_desi_denovo</i> | 257413                  | A/G  | NA                 | NA                            | NA                 |
| <i>Desi_wild_259132</i> | NA                                  | <i>Ca_desi_denovo</i> | 259132                  | T/C  | NA                 | NA                            | NA                 |
| <i>Desi_wild_259397</i> | NA                                  | <i>Ca_desi_denovo</i> | 259397                  | T/G  | NA                 | NA                            | NA                 |
| <i>Desi_wild_262672</i> | NA                                  | <i>Ca_desi_denovo</i> | 262672                  | A/C  | NA                 | NA                            | NA                 |
| <i>Desi_wild_263385</i> | NA                                  | <i>Ca_desi_denovo</i> | 263385                  | G/T  | NA                 | NA                            | NA                 |
| <i>Desi_wild_264580</i> | NA                                  | <i>Ca_desi_denovo</i> | 264580                  | A/G  | NA                 | NA                            | NA                 |

| SNP IDs                 | NCBI dbSNP accession IDs (NCBI_SS#) | Chromosomes           | Physical positions (bp) | SNPs | Gene accession IDs | Sequence components of genome | Putative functions |
|-------------------------|-------------------------------------|-----------------------|-------------------------|------|--------------------|-------------------------------|--------------------|
| <i>Desi_wild_270995</i> | NA                                  | <i>Ca_desi_denovo</i> | 270995                  | T/G  | NA                 | NA                            | NA                 |
| <i>Desi_wild_272082</i> | NA                                  | <i>Ca_desi_denovo</i> | 272082                  | A/C  | NA                 | NA                            | NA                 |
| <i>Desi_wild_272083</i> | NA                                  | <i>Ca_desi_denovo</i> | 272083                  | G/A  | NA                 | NA                            | NA                 |
| <i>Desi_wild_273743</i> | NA                                  | <i>Ca_desi_denovo</i> | 273743                  | T/C  | NA                 | NA                            | NA                 |
| <i>Desi_wild_273973</i> | NA                                  | <i>Ca_desi_denovo</i> | 273973                  | T/G  | NA                 | NA                            | NA                 |
| <i>Desi_wild_274311</i> | NA                                  | <i>Ca_desi_denovo</i> | 274311                  | A/C  | NA                 | NA                            | NA                 |
| <i>Desi_wild_275608</i> | NA                                  | <i>Ca_desi_denovo</i> | 275608                  | C/T  | NA                 | NA                            | NA                 |
| <i>Desi_wild_275659</i> | NA                                  | <i>Ca_desi_denovo</i> | 275659                  | C/T  | NA                 | NA                            | NA                 |
| <i>Desi_wild_277023</i> | NA                                  | <i>Ca_desi_denovo</i> | 277023                  | T/C  | NA                 | NA                            | NA                 |
| <i>Desi_wild_286940</i> | NA                                  | <i>Ca_desi_denovo</i> | 286940                  | A/G  | NA                 | NA                            | NA                 |
| <i>Desi_wild_286976</i> | NA                                  | <i>Ca_desi_denovo</i> | 286976                  | G/A  | NA                 | NA                            | NA                 |
| <i>Desi_wild_287420</i> | NA                                  | <i>Ca_desi_denovo</i> | 287420                  | G/A  | NA                 | NA                            | NA                 |
| <i>Desi_wild_287470</i> | NA                                  | <i>Ca_desi_denovo</i> | 287470                  | A/G  | NA                 | NA                            | NA                 |
| <i>Desi_wild_287737</i> | NA                                  | <i>Ca_desi_denovo</i> | 287737                  | C/T  | NA                 | NA                            | NA                 |
| <i>Desi_wild_287756</i> | NA                                  | <i>Ca_desi_denovo</i> | 287756                  | A/G  | NA                 | NA                            | NA                 |
| <i>Desi_wild_287772</i> | NA                                  | <i>Ca_desi_denovo</i> | 287772                  | A/G  | NA                 | NA                            | NA                 |
| <i>Desi_wild_289204</i> | NA                                  | <i>Ca_desi_denovo</i> | 289204                  | G/C  | NA                 | NA                            | NA                 |
| <i>Desi_wild_289205</i> | NA                                  | <i>Ca_desi_denovo</i> | 289205                  | A/G  | NA                 | NA                            | NA                 |
| <i>Desi_wild_289211</i> | NA                                  | <i>Ca_desi_denovo</i> | 289211                  | G/T  | NA                 | NA                            | NA                 |
| <i>Desi_wild_290264</i> | NA                                  | <i>Ca_desi_denovo</i> | 290264                  | T/C  | NA                 | NA                            | NA                 |
| <i>Desi_wild_292409</i> | NA                                  | <i>Ca_desi_denovo</i> | 292409                  | T/G  | NA                 | NA                            | NA                 |
| <i>Desi_wild_293490</i> | NA                                  | <i>Ca_desi_denovo</i> | 293490                  | G/T  | NA                 | NA                            | NA                 |
| <i>Desi_wild_293491</i> | NA                                  | <i>Ca_desi_denovo</i> | 293491                  | A/G  | NA                 | NA                            | NA                 |
| <i>Desi_wild_293669</i> | NA                                  | <i>Ca_desi_denovo</i> | 293669                  | T/G  | NA                 | NA                            | NA                 |
| <i>Desi_wild_293678</i> | NA                                  | <i>Ca_desi_denovo</i> | 293678                  | A/T  | NA                 | NA                            | NA                 |
| <i>Desi_wild_295940</i> | NA                                  | <i>Ca_desi_denovo</i> | 295940                  | T/C  | NA                 | NA                            | NA                 |
| <i>Desi_wild_295941</i> | NA                                  | <i>Ca_desi_denovo</i> | 295941                  | C/G  | NA                 | NA                            | NA                 |
| <i>Desi_wild_295943</i> | NA                                  | <i>Ca_desi_denovo</i> | 295943                  | T/C  | NA                 | NA                            | NA                 |
| <i>Desi_wild_295944</i> | NA                                  | <i>Ca_desi_denovo</i> | 295944                  | C/T  | NA                 | NA                            | NA                 |
| <i>Desi_wild_295947</i> | NA                                  | <i>Ca_desi_denovo</i> | 295947                  | A/T  | NA                 | NA                            | NA                 |
| <i>Desi_wild_298315</i> | NA                                  | <i>Ca_desi_denovo</i> | 298315                  | G/A  | NA                 | NA                            | NA                 |
| <i>Desi_wild_298949</i> | NA                                  | <i>Ca_desi_denovo</i> | 298949                  | A/C  | NA                 | NA                            | NA                 |
| <i>Desi_wild_298950</i> | NA                                  | <i>Ca_desi_denovo</i> | 298950                  | G/T  | NA                 | NA                            | NA                 |
| <i>Desi_wild_299853</i> | NA                                  | <i>Ca_desi_denovo</i> | 299853                  | T/G  | NA                 | NA                            | NA                 |
| <i>Desi_wild_301696</i> | NA                                  | <i>Ca_desi_denovo</i> | 301696                  | C/G  | NA                 | NA                            | NA                 |
| <i>Desi_wild_302347</i> | NA                                  | <i>Ca_desi_denovo</i> | 302347                  | C/A  | NA                 | NA                            | NA                 |
| <i>Desi_wild_302557</i> | NA                                  | <i>Ca_desi_denovo</i> | 302557                  | G/A  | NA                 | NA                            | NA                 |
| <i>Desi_wild_302608</i> | NA                                  | <i>Ca_desi_denovo</i> | 302608                  | G/A  | NA                 | NA                            | NA                 |
| <i>Desi_wild_309630</i> | NA                                  | <i>Ca_desi_denovo</i> | 309630                  | C/G  | NA                 | NA                            | NA                 |
| <i>Desi_wild_311496</i> | NA                                  | <i>Ca_desi_denovo</i> | 311496                  | C/T  | NA                 | NA                            | NA                 |
| <i>Desi_wild_312742</i> | NA                                  | <i>Ca_desi_denovo</i> | 312742                  | A/G  | NA                 | NA                            | NA                 |
| <i>Desi_wild_313699</i> | NA                                  | <i>Ca_desi_denovo</i> | 313699                  | C/A  | NA                 | NA                            | NA                 |
| <i>Desi_wild_314216</i> | NA                                  | <i>Ca_desi_denovo</i> | 314216                  | A/G  | NA                 | NA                            | NA                 |
| <i>Desi_wild_314222</i> | NA                                  | <i>Ca_desi_denovo</i> | 314222                  | T/G  | NA                 | NA                            | NA                 |



| SNP IDs                 | NCBI dbSNP accession IDs (NCBI_SS#) | Chromosomes           | Physical positions (bp) | SNPs | Gene accession IDs | Sequence components of genome | Putative functions |
|-------------------------|-------------------------------------|-----------------------|-------------------------|------|--------------------|-------------------------------|--------------------|
| <i>Desi_wild_316055</i> | NA                                  | <i>Ca_desi_denovo</i> | 316055                  | T/G  | NA                 | NA                            | NA                 |
| <i>Desi_wild_318974</i> | NA                                  | <i>Ca_desi_denovo</i> | 318974                  | T/G  | NA                 | NA                            | NA                 |
| <i>Desi_wild_319506</i> | NA                                  | <i>Ca_desi_denovo</i> | 319506                  | T/C  | NA                 | NA                            | NA                 |
| <i>Desi_wild_326112</i> | NA                                  | <i>Ca_desi_denovo</i> | 326112                  | A/C  | NA                 | NA                            | NA                 |
| <i>Desi_wild_326532</i> | NA                                  | <i>Ca_desi_denovo</i> | 326532                  | T/G  | NA                 | NA                            | NA                 |
| <i>Desi_wild_326643</i> | NA                                  | <i>Ca_desi_denovo</i> | 326643                  | A/G  | NA                 | NA                            | NA                 |
| <i>Desi_wild_331737</i> | NA                                  | <i>Ca_desi_denovo</i> | 331737                  | T/G  | NA                 | NA                            | NA                 |
| <i>Desi_wild_335031</i> | NA                                  | <i>Ca_desi_denovo</i> | 335031                  | A/T  | NA                 | NA                            | NA                 |
| <i>Desi_wild_335675</i> | NA                                  | <i>Ca_desi_denovo</i> | 335675                  | A/G  | NA                 | NA                            | NA                 |
| <i>Desi_wild_338212</i> | NA                                  | <i>Ca_desi_denovo</i> | 338212                  | A/G  | NA                 | NA                            | NA                 |
| <i>Desi_wild_338547</i> | NA                                  | <i>Ca_desi_denovo</i> | 338547                  | T/C  | NA                 | NA                            | NA                 |
| <i>Desi_wild_338715</i> | NA                                  | <i>Ca_desi_denovo</i> | 338715                  | T/A  | NA                 | NA                            | NA                 |
| <i>Desi_wild_338721</i> | NA                                  | <i>Ca_desi_denovo</i> | 338721                  | G/T  | NA                 | NA                            | NA                 |
| <i>Desi_wild_339775</i> | NA                                  | <i>Ca_desi_denovo</i> | 339775                  | A/C  | NA                 | NA                            | NA                 |
| <i>Desi_wild_341485</i> | NA                                  | <i>Ca_desi_denovo</i> | 341485                  | G/T  | NA                 | NA                            | NA                 |
| <i>Desi_wild_341717</i> | NA                                  | <i>Ca_desi_denovo</i> | 341717                  | C/T  | NA                 | NA                            | NA                 |
| <i>Desi_wild_346159</i> | NA                                  | <i>Ca_desi_denovo</i> | 346159                  | A/G  | NA                 | NA                            | NA                 |
| <i>Desi_wild_348456</i> | NA                                  | <i>Ca_desi_denovo</i> | 348456                  | A/G  | NA                 | NA                            | NA                 |
| <i>Desi_wild_349193</i> | NA                                  | <i>Ca_desi_denovo</i> | 349193                  | A/G  | NA                 | NA                            | NA                 |
| <i>Desi_wild_349369</i> | NA                                  | <i>Ca_desi_denovo</i> | 349369                  | C/T  | NA                 | NA                            | NA                 |
| <i>Desi_wild_349372</i> | NA                                  | <i>Ca_desi_denovo</i> | 349372                  | A/G  | NA                 | NA                            | NA                 |
| <i>Desi_wild_350290</i> | NA                                  | <i>Ca_desi_denovo</i> | 350290                  | C/T  | NA                 | NA                            | NA                 |
| <i>Desi_wild_350291</i> | NA                                  | <i>Ca_desi_denovo</i> | 350291                  | A/C  | NA                 | NA                            | NA                 |
| <i>Desi_wild_351362</i> | NA                                  | <i>Ca_desi_denovo</i> | 351362                  | T/C  | NA                 | NA                            | NA                 |
| <i>Desi_wild_351412</i> | NA                                  | <i>Ca_desi_denovo</i> | 351412                  | T/C  | NA                 | NA                            | NA                 |
| <i>Desi_wild_352057</i> | NA                                  | <i>Ca_desi_denovo</i> | 352057                  | T/G  | NA                 | NA                            | NA                 |
| <i>Desi_wild_364484</i> | NA                                  | <i>Ca_desi_denovo</i> | 364484                  | C/T  | NA                 | NA                            | NA                 |
| <i>Desi_wild_364548</i> | NA                                  | <i>Ca_desi_denovo</i> | 364548                  | C/T  | NA                 | NA                            | NA                 |
| <i>Desi_wild_364598</i> | NA                                  | <i>Ca_desi_denovo</i> | 364598                  | C/T  | NA                 | NA                            | NA                 |
| <i>Desi_wild_365419</i> | NA                                  | <i>Ca_desi_denovo</i> | 365419                  | A/C  | NA                 | NA                            | NA                 |
| <i>Desi_wild_365938</i> | NA                                  | <i>Ca_desi_denovo</i> | 365938                  | G/T  | NA                 | NA                            | NA                 |
| <i>Desi_wild_366862</i> | NA                                  | <i>Ca_desi_denovo</i> | 366862                  | G/A  | NA                 | NA                            | NA                 |
| <i>Desi_wild_366911</i> | NA                                  | <i>Ca_desi_denovo</i> | 366911                  | G/A  | NA                 | NA                            | NA                 |
| <i>Desi_wild_368437</i> | NA                                  | <i>Ca_desi_denovo</i> | 368437                  | G/T  | NA                 | NA                            | NA                 |
| <i>Desi_wild_368820</i> | NA                                  | <i>Ca_desi_denovo</i> | 368820                  | T/C  | NA                 | NA                            | NA                 |
| <i>Desi_wild_376104</i> | NA                                  | <i>Ca_desi_denovo</i> | 376104                  | G/A  | NA                 | NA                            | NA                 |
| <i>Desi_wild_376127</i> | NA                                  | <i>Ca_desi_denovo</i> | 376127                  | A/T  | NA                 | NA                            | NA                 |
| <i>Desi_wild_376128</i> | NA                                  | <i>Ca_desi_denovo</i> | 376128                  | G/A  | NA                 | NA                            | NA                 |
| <i>Desi_wild_376578</i> | NA                                  | <i>Ca_desi_denovo</i> | 376578                  | C/T  | NA                 | NA                            | NA                 |
| <i>Desi_wild_378772</i> | NA                                  | <i>Ca_desi_denovo</i> | 378772                  | T/G  | NA                 | NA                            | NA                 |
| <i>Desi_wild_381073</i> | NA                                  | <i>Ca_desi_denovo</i> | 381073                  | C/T  | NA                 | NA                            | NA                 |
| <i>Desi_wild_381844</i> | NA                                  | <i>Ca_desi_denovo</i> | 381844                  | T/G  | NA                 | NA                            | NA                 |
| <i>Desi_wild_384331</i> | NA                                  | <i>Ca_desi_denovo</i> | 384331                  | A/G  | NA                 | NA                            | NA                 |
| <i>Desi_wild_385521</i> | NA                                  | <i>Ca_desi_denovo</i> | 385521                  | T/G  | NA                 | NA                            | NA                 |

| SNP IDs                 | NCBI dbSNP accession IDs (NCBI_SS#) | Chromosomes           | Physical positions (bp) | SNPs | Gene accession IDs | Sequence components of genome | Putative functions |
|-------------------------|-------------------------------------|-----------------------|-------------------------|------|--------------------|-------------------------------|--------------------|
| <i>Desi_wild_385834</i> | NA                                  | <i>Ca_desi_denovo</i> | 385834                  | A/G  | NA                 | NA                            | NA                 |
| <i>Desi_wild_385838</i> | NA                                  | <i>Ca_desi_denovo</i> | 385838                  | G/C  | NA                 | NA                            | NA                 |
| <i>Desi_wild_387937</i> | NA                                  | <i>Ca_desi_denovo</i> | 387937                  | G/A  | NA                 | NA                            | NA                 |
| <i>Desi_wild_390810</i> | NA                                  | <i>Ca_desi_denovo</i> | 390810                  | A/G  | NA                 | NA                            | NA                 |
| <i>Desi_wild_390811</i> | NA                                  | <i>Ca_desi_denovo</i> | 390811                  | G/C  | NA                 | NA                            | NA                 |
| <i>Desi_wild_391783</i> | NA                                  | <i>Ca_desi_denovo</i> | 391783                  | A/C  | NA                 | NA                            | NA                 |
| <i>Desi_wild_391784</i> | NA                                  | <i>Ca_desi_denovo</i> | 391784                  | G/T  | NA                 | NA                            | NA                 |
| <i>Desi_wild_392851</i> | NA                                  | <i>Ca_desi_denovo</i> | 392851                  | A/C  | NA                 | NA                            | NA                 |
| <i>Desi_wild_394313</i> | NA                                  | <i>Ca_desi_denovo</i> | 394313                  | A/G  | NA                 | NA                            | NA                 |
| <i>Desi_wild_394828</i> | NA                                  | <i>Ca_desi_denovo</i> | 394828                  | T/C  | NA                 | NA                            | NA                 |
| <i>Desi_wild_398479</i> | NA                                  | <i>Ca_desi_denovo</i> | 398479                  | T/A  | NA                 | NA                            | NA                 |
| <i>Desi_wild_398485</i> | NA                                  | <i>Ca_desi_denovo</i> | 398485                  | A/T  | NA                 | NA                            | NA                 |
| <i>Desi_wild_398523</i> | NA                                  | <i>Ca_desi_denovo</i> | 398523                  | A/T  | NA                 | NA                            | NA                 |
| <i>Desi_wild_398535</i> | NA                                  | <i>Ca_desi_denovo</i> | 398535                  | A/G  | NA                 | NA                            | NA                 |
| <i>Desi_wild_404609</i> | NA                                  | <i>Ca_desi_denovo</i> | 404609                  | G/T  | NA                 | NA                            | NA                 |
| <i>Desi_wild_404627</i> | NA                                  | <i>Ca_desi_denovo</i> | 404627                  | G/A  | NA                 | NA                            | NA                 |
| <i>Desi_wild_410070</i> | NA                                  | <i>Ca_desi_denovo</i> | 410070                  | A/T  | NA                 | NA                            | NA                 |
| <i>Desi_wild_412322</i> | NA                                  | <i>Ca_desi_denovo</i> | 412322                  | C/G  | NA                 | NA                            | NA                 |
| <i>Desi_wild_412923</i> | NA                                  | <i>Ca_desi_denovo</i> | 412923                  | A/C  | NA                 | NA                            | NA                 |
| <i>Desi_wild_413149</i> | NA                                  | <i>Ca_desi_denovo</i> | 413149                  | A/G  | NA                 | NA                            | NA                 |
| <i>Desi_wild_413512</i> | NA                                  | <i>Ca_desi_denovo</i> | 413512                  | A/C  | NA                 | NA                            | NA                 |
| <i>Desi_wild_414304</i> | NA                                  | <i>Ca_desi_denovo</i> | 414304                  | A/G  | NA                 | NA                            | NA                 |
| <i>Desi_wild_419727</i> | NA                                  | <i>Ca_desi_denovo</i> | 419727                  | C/A  | NA                 | NA                            | NA                 |
| <i>Desi_wild_422336</i> | NA                                  | <i>Ca_desi_denovo</i> | 422336                  | A/C  | NA                 | NA                            | NA                 |
| <i>Desi_wild_422337</i> | NA                                  | <i>Ca_desi_denovo</i> | 422337                  | G/A  | NA                 | NA                            | NA                 |
| <i>Desi_wild_425431</i> | NA                                  | <i>Ca_desi_denovo</i> | 425431                  | A/G  | NA                 | NA                            | NA                 |
| <i>Desi_wild_425432</i> | NA                                  | <i>Ca_desi_denovo</i> | 425432                  | G/A  | NA                 | NA                            | NA                 |
| <i>Desi_wild_425433</i> | NA                                  | <i>Ca_desi_denovo</i> | 425433                  | G/A  | NA                 | NA                            | NA                 |
| <i>Desi_wild_425434</i> | NA                                  | <i>Ca_desi_denovo</i> | 425434                  | A/G  | NA                 | NA                            | NA                 |
| <i>Desi_wild_425435</i> | NA                                  | <i>Ca_desi_denovo</i> | 425435                  | G/A  | NA                 | NA                            | NA                 |
| <i>Desi_wild_425436</i> | NA                                  | <i>Ca_desi_denovo</i> | 425436                  | A/G  | NA                 | NA                            | NA                 |
| <i>Desi_wild_430716</i> | NA                                  | <i>Ca_desi_denovo</i> | 430716                  | C/T  | NA                 | NA                            | NA                 |
| <i>Desi_wild_430806</i> | NA                                  | <i>Ca_desi_denovo</i> | 430806                  | T/G  | NA                 | NA                            | NA                 |
| <i>Desi_wild_430813</i> | NA                                  | <i>Ca_desi_denovo</i> | 430813                  | C/T  | NA                 | NA                            | NA                 |
| <i>Desi_wild_430910</i> | NA                                  | <i>Ca_desi_denovo</i> | 430910                  | C/T  | NA                 | NA                            | NA                 |
| <i>Desi_wild_431104</i> | NA                                  | <i>Ca_desi_denovo</i> | 431104                  | C/T  | NA                 | NA                            | NA                 |
| <i>Desi_wild_431183</i> | NA                                  | <i>Ca_desi_denovo</i> | 431183                  | G/A  | NA                 | NA                            | NA                 |
| <i>Desi_wild_431415</i> | NA                                  | <i>Ca_desi_denovo</i> | 431415                  | C/G  | NA                 | NA                            | NA                 |
| <i>Desi_wild_431475</i> | NA                                  | <i>Ca_desi_denovo</i> | 431475                  | G/A  | NA                 | NA                            | NA                 |
| <i>Desi_wild_431589</i> | NA                                  | <i>Ca_desi_denovo</i> | 431589                  | C/T  | NA                 | NA                            | NA                 |
| <i>Desi_wild_431686</i> | NA                                  | <i>Ca_desi_denovo</i> | 431686                  | C/T  | NA                 | NA                            | NA                 |
| <i>Desi_wild_431754</i> | NA                                  | <i>Ca_desi_denovo</i> | 431754                  | C/G  | NA                 | NA                            | NA                 |
| <i>Desi_wild_431974</i> | NA                                  | <i>Ca_desi_denovo</i> | 431974                  | T/G  | NA                 | NA                            | NA                 |
| <i>Desi_wild_431981</i> | NA                                  | <i>Ca_desi_denovo</i> | 431981                  | T/G  | NA                 | NA                            | NA                 |

| SNP IDs                 | NCBI dbSNP accession IDs (NCBI_SS#) | Chromosomes           | Physical positions (bp) | SNPs | Gene accession IDs | Sequence components of genome | Putative functions |
|-------------------------|-------------------------------------|-----------------------|-------------------------|------|--------------------|-------------------------------|--------------------|
| <i>Desi_wild_432176</i> | NA                                  | <i>Ca_desi_denovo</i> | 432176                  | T/G  | NA                 | NA                            | NA                 |
| <i>Desi_wild_433685</i> | NA                                  | <i>Ca_desi_denovo</i> | 433685                  | T/G  | NA                 | NA                            | NA                 |
| <i>Desi_wild_433882</i> | NA                                  | <i>Ca_desi_denovo</i> | 433882                  | A/C  | NA                 | NA                            | NA                 |
| <i>Desi_wild_433973</i> | NA                                  | <i>Ca_desi_denovo</i> | 433973                  | A/C  | NA                 | NA                            | NA                 |
| <i>Desi_wild_433974</i> | NA                                  | <i>Ca_desi_denovo</i> | 433974                  | G/C  | NA                 | NA                            | NA                 |
| <i>Desi_wild_435934</i> | NA                                  | <i>Ca_desi_denovo</i> | 435934                  | A/G  | NA                 | NA                            | NA                 |
| <i>Desi_wild_435980</i> | NA                                  | <i>Ca_desi_denovo</i> | 435980                  | A/G  | NA                 | NA                            | NA                 |
| <i>Desi_wild_437284</i> | NA                                  | <i>Ca_desi_denovo</i> | 437284                  | C/A  | NA                 | NA                            | NA                 |
| <i>Desi_wild_437381</i> | NA                                  | <i>Ca_desi_denovo</i> | 437381                  | T/A  | NA                 | NA                            | NA                 |
| <i>Desi_wild_437493</i> | NA                                  | <i>Ca_desi_denovo</i> | 437493                  | T/G  | NA                 | NA                            | NA                 |
| <i>Desi_wild_437500</i> | NA                                  | <i>Ca_desi_denovo</i> | 437500                  | G/A  | NA                 | NA                            | NA                 |
| <i>Desi_wild_437575</i> | NA                                  | <i>Ca_desi_denovo</i> | 437575                  | C/G  | NA                 | NA                            | NA                 |
| <i>Desi_wild_437597</i> | NA                                  | <i>Ca_desi_denovo</i> | 437597                  | G/A  | NA                 | NA                            | NA                 |
| <i>Desi_wild_437608</i> | NA                                  | <i>Ca_desi_denovo</i> | 437608                  | T/G  | NA                 | NA                            | NA                 |
| <i>Desi_wild_437612</i> | NA                                  | <i>Ca_desi_denovo</i> | 437612                  | A/G  | NA                 | NA                            | NA                 |
| <i>Desi_wild_437673</i> | NA                                  | <i>Ca_desi_denovo</i> | 437673                  | C/G  | NA                 | NA                            | NA                 |
| <i>Desi_wild_437694</i> | NA                                  | <i>Ca_desi_denovo</i> | 437694                  | G/A  | NA                 | NA                            | NA                 |
| <i>Desi_wild_437746</i> | NA                                  | <i>Ca_desi_denovo</i> | 437746                  | C/G  | NA                 | NA                            | NA                 |
| <i>Desi_wild_437791</i> | NA                                  | <i>Ca_desi_denovo</i> | 437791                  | G/A  | NA                 | NA                            | NA                 |
| <i>Desi_wild_437855</i> | NA                                  | <i>Ca_desi_denovo</i> | 437855                  | C/G  | NA                 | NA                            | NA                 |
| <i>Desi_wild_437888</i> | NA                                  | <i>Ca_desi_denovo</i> | 437888                  | G/A  | NA                 | NA                            | NA                 |
| <i>Desi_wild_437897</i> | NA                                  | <i>Ca_desi_denovo</i> | 437897                  | A/G  | NA                 | NA                            | NA                 |
| <i>Desi_wild_437930</i> | NA                                  | <i>Ca_desi_denovo</i> | 437930                  | A/G  | NA                 | NA                            | NA                 |
| <i>Desi_wild_437985</i> | NA                                  | <i>Ca_desi_denovo</i> | 437985                  | G/A  | NA                 | NA                            | NA                 |
| <i>Desi_wild_438082</i> | NA                                  | <i>Ca_desi_denovo</i> | 438082                  | G/A  | NA                 | NA                            | NA                 |
| <i>Desi_wild_438094</i> | NA                                  | <i>Ca_desi_denovo</i> | 438094                  | T/G  | NA                 | NA                            | NA                 |
| <i>Desi_wild_438276</i> | NA                                  | <i>Ca_desi_denovo</i> | 438276                  | G/A  | NA                 | NA                            | NA                 |
| <i>Desi_wild_438373</i> | NA                                  | <i>Ca_desi_denovo</i> | 438373                  | G/A  | NA                 | NA                            | NA                 |
| <i>Desi_wild_438390</i> | NA                                  | <i>Ca_desi_denovo</i> | 438390                  | C/A  | NA                 | NA                            | NA                 |
| <i>Desi_wild_438653</i> | NA                                  | <i>Ca_desi_denovo</i> | 438653                  | A/C  | NA                 | NA                            | NA                 |
| <i>Desi_wild_438664</i> | NA                                  | <i>Ca_desi_denovo</i> | 438664                  | G/A  | NA                 | NA                            | NA                 |
| <i>Desi_wild_438676</i> | NA                                  | <i>Ca_desi_denovo</i> | 438676                  | T/G  | NA                 | NA                            | NA                 |
| <i>Desi_wild_438691</i> | NA                                  | <i>Ca_desi_denovo</i> | 438691                  | T/G  | NA                 | NA                            | NA                 |
| <i>Desi_wild_439941</i> | NA                                  | <i>Ca_desi_denovo</i> | 439941                  | T/G  | NA                 | NA                            | NA                 |
| <i>Desi_wild_440804</i> | NA                                  | <i>Ca_desi_denovo</i> | 440804                  | A/G  | NA                 | NA                            | NA                 |
| <i>Desi_wild_444730</i> | NA                                  | <i>Ca_desi_denovo</i> | 444730                  | G/C  | NA                 | NA                            | NA                 |
| <i>Desi_wild_444745</i> | NA                                  | <i>Ca_desi_denovo</i> | 444745                  | G/T  | NA                 | NA                            | NA                 |
| <i>Desi_wild_445561</i> | NA                                  | <i>Ca_desi_denovo</i> | 445561                  | T/G  | NA                 | NA                            | NA                 |
| <i>Desi_wild_445615</i> | NA                                  | <i>Ca_desi_denovo</i> | 445615                  | C/A  | NA                 | NA                            | NA                 |
| <i>Desi_wild_447071</i> | NA                                  | <i>Ca_desi_denovo</i> | 447071                  | A/C  | NA                 | NA                            | NA                 |
| <i>Desi_wild_448266</i> | NA                                  | <i>Ca_desi_denovo</i> | 448266                  | T/C  | NA                 | NA                            | NA                 |
| <i>Desi_wild_454622</i> | NA                                  | <i>Ca_desi_denovo</i> | 454622                  | T/G  | NA                 | NA                            | NA                 |
| <i>Desi_wild_454833</i> | NA                                  | <i>Ca_desi_denovo</i> | 454833                  | C/G  | NA                 | NA                            | NA                 |
| <i>Desi_wild_454834</i> | NA                                  | <i>Ca_desi_denovo</i> | 454834                  | A/C  | NA                 | NA                            | NA                 |

| SNP IDs                 | NCBI dbSNP accession IDs (NCBI_SS#) | Chromosomes           | Physical positions (bp) | SNPs | Gene accession IDs | Sequence components of genome | Putative functions |
|-------------------------|-------------------------------------|-----------------------|-------------------------|------|--------------------|-------------------------------|--------------------|
| <i>Desi_wild_459971</i> | NA                                  | <i>Ca_desi_denovo</i> | 459971                  | G/T  | NA                 | NA                            | NA                 |
| <i>Desi_wild_460482</i> | NA                                  | <i>Ca_desi_denovo</i> | 460482                  | A/G  | NA                 | NA                            | NA                 |
| <i>Desi_wild_460512</i> | NA                                  | <i>Ca_desi_denovo</i> | 460512                  | C/T  | NA                 | NA                            | NA                 |
| <i>Desi_wild_460782</i> | NA                                  | <i>Ca_desi_denovo</i> | 460782                  | A/G  | NA                 | NA                            | NA                 |
| <i>Desi_wild_463015</i> | NA                                  | <i>Ca_desi_denovo</i> | 463015                  | G/T  | NA                 | NA                            | NA                 |
| <i>Desi_wild_467192</i> | NA                                  | <i>Ca_desi_denovo</i> | 467192                  | T/C  | NA                 | NA                            | NA                 |
| <i>Desi_wild_467675</i> | NA                                  | <i>Ca_desi_denovo</i> | 467675                  | T/G  | NA                 | NA                            | NA                 |
| <i>Desi_wild_467682</i> | NA                                  | <i>Ca_desi_denovo</i> | 467682                  | T/G  | NA                 | NA                            | NA                 |
| <i>Desi_wild_468157</i> | NA                                  | <i>Ca_desi_denovo</i> | 468157                  | C/T  | NA                 | NA                            | NA                 |
| <i>Desi_wild_472267</i> | NA                                  | <i>Ca_desi_denovo</i> | 472267                  | T/G  | NA                 | NA                            | NA                 |
| <i>Desi_wild_474271</i> | NA                                  | <i>Ca_desi_denovo</i> | 474271                  | A/G  | NA                 | NA                            | NA                 |
| <i>Desi_wild_474290</i> | NA                                  | <i>Ca_desi_denovo</i> | 474290                  | C/G  | NA                 | NA                            | NA                 |
| <i>Desi_wild_474302</i> | NA                                  | <i>Ca_desi_denovo</i> | 474302                  | A/T  | NA                 | NA                            | NA                 |
| <i>Desi_wild_477171</i> | NA                                  | <i>Ca_desi_denovo</i> | 477171                  | T/G  | NA                 | NA                            | NA                 |
| <i>Desi_wild_480438</i> | NA                                  | <i>Ca_desi_denovo</i> | 480438                  | A/C  | NA                 | NA                            | NA                 |
| <i>Desi_wild_484833</i> | NA                                  | <i>Ca_desi_denovo</i> | 484833                  | T/C  | NA                 | NA                            | NA                 |
| <i>Desi_wild_484838</i> | NA                                  | <i>Ca_desi_denovo</i> | 484838                  | G/C  | NA                 | NA                            | NA                 |
| <i>Desi_wild_486060</i> | NA                                  | <i>Ca_desi_denovo</i> | 486060                  | A/C  | NA                 | NA                            | NA                 |
| <i>Desi_wild_490416</i> | NA                                  | <i>Ca_desi_denovo</i> | 490416                  | T/C  | NA                 | NA                            | NA                 |
| <i>Desi_wild_491618</i> | NA                                  | <i>Ca_desi_denovo</i> | 491618                  | T/C  | NA                 | NA                            | NA                 |
| <i>Desi_wild_492703</i> | NA                                  | <i>Ca_desi_denovo</i> | 492703                  | A/T  | NA                 | NA                            | NA                 |
| <i>Desi_wild_495862</i> | NA                                  | <i>Ca_desi_denovo</i> | 495862                  | A/C  | NA                 | NA                            | NA                 |
| <i>Desi_wild_503329</i> | NA                                  | <i>Ca_desi_denovo</i> | 503329                  | T/C  | NA                 | NA                            | NA                 |
| <i>Desi_wild_503330</i> | NA                                  | <i>Ca_desi_denovo</i> | 503330                  | C/T  | NA                 | NA                            | NA                 |
| <i>Desi_wild_509394</i> | NA                                  | <i>Ca_desi_denovo</i> | 509394                  | G/T  | NA                 | NA                            | NA                 |
| <i>Desi_wild_509405</i> | NA                                  | <i>Ca_desi_denovo</i> | 509405                  | T/G  | NA                 | NA                            | NA                 |
| <i>Desi_wild_510993</i> | NA                                  | <i>Ca_desi_denovo</i> | 510993                  | A/C  | NA                 | NA                            | NA                 |
| <i>Desi_wild_512513</i> | NA                                  | <i>Ca_desi_denovo</i> | 512513                  | C/T  | NA                 | NA                            | NA                 |
| <i>Desi_wild_512528</i> | NA                                  | <i>Ca_desi_denovo</i> | 512528                  | A/T  | NA                 | NA                            | NA                 |
| <i>Desi_wild_512537</i> | NA                                  | <i>Ca_desi_denovo</i> | 512537                  | A/G  | NA                 | NA                            | NA                 |
| <i>Desi_wild_515406</i> | NA                                  | <i>Ca_desi_denovo</i> | 515406                  | T/G  | NA                 | NA                            | NA                 |
| <i>Desi_wild_516057</i> | NA                                  | <i>Ca_desi_denovo</i> | 516057                  | A/G  | NA                 | NA                            | NA                 |
| <i>Desi_wild_516069</i> | NA                                  | <i>Ca_desi_denovo</i> | 516069                  | A/G  | NA                 | NA                            | NA                 |
| <i>Desi_wild_516072</i> | NA                                  | <i>Ca_desi_denovo</i> | 516072                  | A/G  | NA                 | NA                            | NA                 |
| <i>Desi_wild_516073</i> | NA                                  | <i>Ca_desi_denovo</i> | 516073                  | A/G  | NA                 | NA                            | NA                 |
| <i>Desi_wild_516090</i> | NA                                  | <i>Ca_desi_denovo</i> | 516090                  | A/G  | NA                 | NA                            | NA                 |
| <i>Desi_wild_516101</i> | NA                                  | <i>Ca_desi_denovo</i> | 516101                  | T/A  | NA                 | NA                            | NA                 |
| <i>Desi_wild_516103</i> | NA                                  | <i>Ca_desi_denovo</i> | 516103                  | A/C  | NA                 | NA                            | NA                 |
| <i>Desi_wild_518218</i> | NA                                  | <i>Ca_desi_denovo</i> | 518218                  | G/T  | NA                 | NA                            | NA                 |
| <i>Desi_wild_520419</i> | NA                                  | <i>Ca_desi_denovo</i> | 520419                  | A/G  | NA                 | NA                            | NA                 |
| <i>Desi_wild_521370</i> | NA                                  | <i>Ca_desi_denovo</i> | 521370                  | A/C  | NA                 | NA                            | NA                 |
| <i>Desi_wild_522143</i> | NA                                  | <i>Ca_desi_denovo</i> | 522143                  | T/G  | NA                 | NA                            | NA                 |
| <i>Desi_wild_522363</i> | NA                                  | <i>Ca_desi_denovo</i> | 522363                  | T/C  | NA                 | NA                            | NA                 |
| <i>Desi_wild_525896</i> | NA                                  | <i>Ca_desi_denovo</i> | 525896                  | T/C  | NA                 | NA                            | NA                 |

| SNP IDs                 | NCBI dbSNP accession IDs (NCBI_SS#) | Chromosomes           | Physical positions (bp) | SNPs | Gene accession IDs | Sequence components of genome | Putative functions |
|-------------------------|-------------------------------------|-----------------------|-------------------------|------|--------------------|-------------------------------|--------------------|
| <i>Desi_wild_525931</i> | NA                                  | <i>Ca_desi_denovo</i> | 525931                  | A/C  | NA                 | NA                            | NA                 |
| <i>Desi_wild_526613</i> | NA                                  | <i>Ca_desi_denovo</i> | 526613                  | A/T  | NA                 | NA                            | NA                 |
| <i>Desi_wild_528416</i> | NA                                  | <i>Ca_desi_denovo</i> | 528416                  | A/T  | NA                 | NA                            | NA                 |
| <i>Desi_wild_528422</i> | NA                                  | <i>Ca_desi_denovo</i> | 528422                  | A/T  | NA                 | NA                            | NA                 |
| <i>Desi_wild_529753</i> | NA                                  | <i>Ca_desi_denovo</i> | 529753                  | G/A  | NA                 | NA                            | NA                 |
| <i>Desi_wild_531942</i> | NA                                  | <i>Ca_desi_denovo</i> | 531942                  | A/C  | NA                 | NA                            | NA                 |
| <i>Desi_wild_531963</i> | NA                                  | <i>Ca_desi_denovo</i> | 531963                  | C/T  | NA                 | NA                            | NA                 |
| <i>Desi_wild_531981</i> | NA                                  | <i>Ca_desi_denovo</i> | 531981                  | G/A  | NA                 | NA                            | NA                 |
| <i>Desi_wild_532026</i> | NA                                  | <i>Ca_desi_denovo</i> | 532026                  | A/G  | NA                 | NA                            | NA                 |
| <i>Desi_wild_532725</i> | NA                                  | <i>Ca_desi_denovo</i> | 532725                  | A/C  | NA                 | NA                            | NA                 |
| <i>Desi_wild_534104</i> | NA                                  | <i>Ca_desi_denovo</i> | 534104                  | G/T  | NA                 | NA                            | NA                 |
| <i>Desi_wild_534733</i> | NA                                  | <i>Ca_desi_denovo</i> | 534733                  | T/C  | NA                 | NA                            | NA                 |
| <i>Desi_wild_534740</i> | NA                                  | <i>Ca_desi_denovo</i> | 534740                  | G/C  | NA                 | NA                            | NA                 |
| <i>Desi_wild_537669</i> | NA                                  | <i>Ca_desi_denovo</i> | 537669                  | T/A  | NA                 | NA                            | NA                 |
| <i>Desi_wild_537670</i> | NA                                  | <i>Ca_desi_denovo</i> | 537670                  | T/G  | NA                 | NA                            | NA                 |
| <i>Desi_wild_537671</i> | NA                                  | <i>Ca_desi_denovo</i> | 537671                  | G/A  | NA                 | NA                            | NA                 |
| <i>Desi_wild_537672</i> | NA                                  | <i>Ca_desi_denovo</i> | 537672                  | C/T  | NA                 | NA                            | NA                 |
| <i>Desi_wild_538252</i> | NA                                  | <i>Ca_desi_denovo</i> | 538252                  | A/C  | NA                 | NA                            | NA                 |
| <i>Desi_wild_539054</i> | NA                                  | <i>Ca_desi_denovo</i> | 539054                  | G/T  | NA                 | NA                            | NA                 |
| <i>Desi_wild_539510</i> | NA                                  | <i>Ca_desi_denovo</i> | 539510                  | A/C  | NA                 | NA                            | NA                 |
| <i>Desi_wild_539511</i> | NA                                  | <i>Ca_desi_denovo</i> | 539511                  | G/A  | NA                 | NA                            | NA                 |
| <i>Desi_wild_545793</i> | NA                                  | <i>Ca_desi_denovo</i> | 545793                  | A/G  | NA                 | NA                            | NA                 |
| <i>Desi_wild_550890</i> | NA                                  | <i>Ca_desi_denovo</i> | 550890                  | C/T  | NA                 | NA                            | NA                 |
| <i>Desi_wild_550936</i> | NA                                  | <i>Ca_desi_denovo</i> | 550936                  | C/T  | NA                 | NA                            | NA                 |
| <i>Desi_wild_551930</i> | NA                                  | <i>Ca_desi_denovo</i> | 551930                  | T/G  | NA                 | NA                            | NA                 |
| <i>Desi_wild_555255</i> | NA                                  | <i>Ca_desi_denovo</i> | 555255                  | A/G  | NA                 | NA                            | NA                 |
| <i>Desi_wild_556502</i> | NA                                  | <i>Ca_desi_denovo</i> | 556502                  | C/T  | NA                 | NA                            | NA                 |
| <i>Desi_wild_558075</i> | NA                                  | <i>Ca_desi_denovo</i> | 558075                  | G/T  | NA                 | NA                            | NA                 |
| <i>Desi_wild_558076</i> | NA                                  | <i>Ca_desi_denovo</i> | 558076                  | G/T  | NA                 | NA                            | NA                 |
| <i>Desi_wild_558087</i> | NA                                  | <i>Ca_desi_denovo</i> | 558087                  | C/T  | NA                 | NA                            | NA                 |
| <i>Desi_wild_558966</i> | NA                                  | <i>Ca_desi_denovo</i> | 558966                  | G/T  | NA                 | NA                            | NA                 |
| <i>Desi_wild_559007</i> | NA                                  | <i>Ca_desi_denovo</i> | 559007                  | G/T  | NA                 | NA                            | NA                 |
| <i>Desi_wild_564581</i> | NA                                  | <i>Ca_desi_denovo</i> | 564581                  | T/G  | NA                 | NA                            | NA                 |
| <i>Desi_wild_564637</i> | NA                                  | <i>Ca_desi_denovo</i> | 564637                  | A/T  | NA                 | NA                            | NA                 |
| <i>Desi_wild_564939</i> | NA                                  | <i>Ca_desi_denovo</i> | 564939                  | A/G  | NA                 | NA                            | NA                 |
| <i>Desi_wild_565081</i> | NA                                  | <i>Ca_desi_denovo</i> | 565081                  | T/G  | NA                 | NA                            | NA                 |
| <i>Desi_wild_566247</i> | NA                                  | <i>Ca_desi_denovo</i> | 566247                  | G/T  | NA                 | NA                            | NA                 |
| <i>Desi_wild_566471</i> | NA                                  | <i>Ca_desi_denovo</i> | 566471                  | T/G  | NA                 | NA                            | NA                 |
| <i>Desi_wild_566480</i> | NA                                  | <i>Ca_desi_denovo</i> | 566480                  | A/T  | NA                 | NA                            | NA                 |
| <i>Desi_wild_568899</i> | NA                                  | <i>Ca_desi_denovo</i> | 568899                  | G/A  | NA                 | NA                            | NA                 |
| <i>Desi_wild_570552</i> | NA                                  | <i>Ca_desi_denovo</i> | 570552                  | C/T  | NA                 | NA                            | NA                 |
| <i>Desi_wild_570666</i> | NA                                  | <i>Ca_desi_denovo</i> | 570666                  | T/C  | NA                 | NA                            | NA                 |
| <i>Desi_wild_575669</i> | NA                                  | <i>Ca_desi_denovo</i> | 575669                  | A/G  | NA                 | NA                            | NA                 |
| <i>Desi_wild_575704</i> | NA                                  | <i>Ca_desi_denovo</i> | 575704                  | C/T  | NA                 | NA                            | NA                 |

| SNP IDs                 | NCBI dbSNP accession IDs (NCBI_SS#) | Chromosomes           | Physical positions (bp) | SNPs | Gene accession IDs | Sequence components of genome | Putative functions |
|-------------------------|-------------------------------------|-----------------------|-------------------------|------|--------------------|-------------------------------|--------------------|
| <i>Desi_wild_578104</i> | NA                                  | <i>Ca_desi_denovo</i> | 578104                  | C/T  | NA                 | NA                            | NA                 |
| <i>Desi_wild_578828</i> | NA                                  | <i>Ca_desi_denovo</i> | 578828                  | C/A  | NA                 | NA                            | NA                 |
| <i>Desi_wild_578847</i> | NA                                  | <i>Ca_desi_denovo</i> | 578847                  | A/C  | NA                 | NA                            | NA                 |
| <i>Desi_wild_586743</i> | NA                                  | <i>Ca_desi_denovo</i> | 586743                  | T/C  | NA                 | NA                            | NA                 |
| <i>Desi_wild_602627</i> | NA                                  | <i>Ca_desi_denovo</i> | 602627                  | G/A  | NA                 | NA                            | NA                 |
| <i>Desi_wild_607680</i> | NA                                  | <i>Ca_desi_denovo</i> | 607680                  | A/G  | NA                 | NA                            | NA                 |
| <i>Desi_wild_608105</i> | NA                                  | <i>Ca_desi_denovo</i> | 608105                  | A/T  | NA                 | NA                            | NA                 |
| <i>Desi_wild_608109</i> | NA                                  | <i>Ca_desi_denovo</i> | 608109                  | T/G  | NA                 | NA                            | NA                 |
| <i>Desi_wild_608111</i> | NA                                  | <i>Ca_desi_denovo</i> | 608111                  | T/C  | NA                 | NA                            | NA                 |
| <i>Desi_wild_608112</i> | NA                                  | <i>Ca_desi_denovo</i> | 608112                  | C/T  | NA                 | NA                            | NA                 |
| <i>Desi_wild_609257</i> | NA                                  | <i>Ca_desi_denovo</i> | 609257                  | A/T  | NA                 | NA                            | NA                 |
| <i>Desi_wild_610526</i> | NA                                  | <i>Ca_desi_denovo</i> | 610526                  | C/T  | NA                 | NA                            | NA                 |
| <i>Desi_wild_610532</i> | NA                                  | <i>Ca_desi_denovo</i> | 610532                  | T/C  | NA                 | NA                            | NA                 |
| <i>Desi_wild_611381</i> | NA                                  | <i>Ca_desi_denovo</i> | 611381                  | A/G  | NA                 | NA                            | NA                 |
| <i>Desi_wild_611382</i> | NA                                  | <i>Ca_desi_denovo</i> | 611382                  | T/A  | NA                 | NA                            | NA                 |
| <i>Desi_wild_611424</i> | NA                                  | <i>Ca_desi_denovo</i> | 611424                  | T/C  | NA                 | NA                            | NA                 |
| <i>Desi_wild_611875</i> | NA                                  | <i>Ca_desi_denovo</i> | 611875                  | C/T  | NA                 | NA                            | NA                 |
| <i>Desi_wild_625676</i> | NA                                  | <i>Ca_desi_denovo</i> | 625676                  | A/G  | NA                 | NA                            | NA                 |
| <i>Desi_wild_625681</i> | NA                                  | <i>Ca_desi_denovo</i> | 625681                  | C/G  | NA                 | NA                            | NA                 |
| <i>Desi_wild_625710</i> | NA                                  | <i>Ca_desi_denovo</i> | 625710                  | C/T  | NA                 | NA                            | NA                 |
| <i>Desi_wild_625712</i> | NA                                  | <i>Ca_desi_denovo</i> | 625712                  | T/C  | NA                 | NA                            | NA                 |
| <i>Desi_wild_626312</i> | NA                                  | <i>Ca_desi_denovo</i> | 626312                  | C/A  | NA                 | NA                            | NA                 |
| <i>Desi_wild_636063</i> | NA                                  | <i>Ca_desi_denovo</i> | 636063                  | A/T  | NA                 | NA                            | NA                 |
| <i>Desi_wild_641716</i> | NA                                  | <i>Ca_desi_denovo</i> | 641716                  | G/C  | NA                 | NA                            | NA                 |
| <i>Desi_wild_653829</i> | NA                                  | <i>Ca_desi_denovo</i> | 653829                  | C/T  | NA                 | NA                            | NA                 |
| <i>Desi_wild_655164</i> | NA                                  | <i>Ca_desi_denovo</i> | 655164                  | G/T  | NA                 | NA                            | NA                 |
| <i>Desi_wild_662368</i> | NA                                  | <i>Ca_desi_denovo</i> | 662368                  | A/G  | NA                 | NA                            | NA                 |
| <i>Desi_wild_669478</i> | NA                                  | <i>Ca_desi_denovo</i> | 669478                  | A/C  | NA                 | NA                            | NA                 |
| <i>Desi_wild_673398</i> | NA                                  | <i>Ca_desi_denovo</i> | 673398                  | A/C  | NA                 | NA                            | NA                 |
| <i>Desi_wild_673456</i> | NA                                  | <i>Ca_desi_denovo</i> | 673456                  | C/G  | NA                 | NA                            | NA                 |
| <i>Desi_wild_673457</i> | NA                                  | <i>Ca_desi_denovo</i> | 673457                  | A/G  | NA                 | NA                            | NA                 |
| <i>Desi_wild_677139</i> | NA                                  | <i>Ca_desi_denovo</i> | 677139                  | G/A  | NA                 | NA                            | NA                 |
| <i>Desi_wild_677157</i> | NA                                  | <i>Ca_desi_denovo</i> | 677157                  | A/T  | NA                 | NA                            | NA                 |
| <i>Desi_wild_677807</i> | NA                                  | <i>Ca_desi_denovo</i> | 677807                  | C/G  | NA                 | NA                            | NA                 |
| <i>Desi_wild_677814</i> | NA                                  | <i>Ca_desi_denovo</i> | 677814                  | T/C  | NA                 | NA                            | NA                 |
| <i>Desi_wild_677818</i> | NA                                  | <i>Ca_desi_denovo</i> | 677818                  | T/A  | NA                 | NA                            | NA                 |
| <i>Desi_wild_689633</i> | NA                                  | <i>Ca_desi_denovo</i> | 689633                  | C/T  | NA                 | NA                            | NA                 |
| <i>Desi_wild_691820</i> | NA                                  | <i>Ca_desi_denovo</i> | 691820                  | T/G  | NA                 | NA                            | NA                 |
| <i>Desi_wild_691842</i> | NA                                  | <i>Ca_desi_denovo</i> | 691842                  | T/G  | NA                 | NA                            | NA                 |
| <i>Desi_wild_691845</i> | NA                                  | <i>Ca_desi_denovo</i> | 691845                  | A/G  | NA                 | NA                            | NA                 |
| <i>Desi_wild_691854</i> | NA                                  | <i>Ca_desi_denovo</i> | 691854                  | A/G  | NA                 | NA                            | NA                 |
| <i>Desi_wild_691860</i> | NA                                  | <i>Ca_desi_denovo</i> | 691860                  | T/G  | NA                 | NA                            | NA                 |
| <i>Desi_wild_691877</i> | NA                                  | <i>Ca_desi_denovo</i> | 691877                  | A/G  | NA                 | NA                            | NA                 |
| <i>Desi_wild_691898</i> | NA                                  | <i>Ca_desi_denovo</i> | 691898                  | G/A  | NA                 | NA                            | NA                 |

| SNP IDs                 | NCBI dbSNP accession IDs (NCBI_SS#) | Chromosomes           | Physical positions (bp) | SNPs | Gene accession IDs | Sequence components of genome | Putative functions |
|-------------------------|-------------------------------------|-----------------------|-------------------------|------|--------------------|-------------------------------|--------------------|
| <i>Desi_wild_696308</i> | NA                                  | <i>Ca_desi_denovo</i> | 696308                  | A/G  | NA                 | NA                            | NA                 |
| <i>Desi_wild_696748</i> | NA                                  | <i>Ca_desi_denovo</i> | 696748                  | C/G  | NA                 | NA                            | NA                 |
| <i>Desi_wild_702483</i> | NA                                  | <i>Ca_desi_denovo</i> | 702483                  | C/T  | NA                 | NA                            | NA                 |
| <i>Desi_wild_703847</i> | NA                                  | <i>Ca_desi_denovo</i> | 703847                  | C/T  | NA                 | NA                            | NA                 |
| <i>Desi_wild_704773</i> | NA                                  | <i>Ca_desi_denovo</i> | 704773                  | G/T  | NA                 | NA                            | NA                 |
| <i>Desi_wild_710786</i> | NA                                  | <i>Ca_desi_denovo</i> | 710786                  | T/A  | NA                 | NA                            | NA                 |
| <i>Desi_wild_721584</i> | NA                                  | <i>Ca_desi_denovo</i> | 721584                  | T/C  | NA                 | NA                            | NA                 |
| <i>Desi_wild_721589</i> | NA                                  | <i>Ca_desi_denovo</i> | 721589                  | A/G  | NA                 | NA                            | NA                 |
| <i>Desi_wild_721590</i> | NA                                  | <i>Ca_desi_denovo</i> | 721590                  | T/C  | NA                 | NA                            | NA                 |
| <i>Desi_wild_721599</i> | NA                                  | <i>Ca_desi_denovo</i> | 721599                  | A/T  | NA                 | NA                            | NA                 |
| <i>Desi_wild_721603</i> | NA                                  | <i>Ca_desi_denovo</i> | 721603                  | T/C  | NA                 | NA                            | NA                 |
| <i>Desi_wild_721609</i> | NA                                  | <i>Ca_desi_denovo</i> | 721609                  | T/C  | NA                 | NA                            | NA                 |
| <i>Desi_wild_721617</i> | NA                                  | <i>Ca_desi_denovo</i> | 721617                  | C/G  | NA                 | NA                            | NA                 |
| <i>Desi_wild_721618</i> | NA                                  | <i>Ca_desi_denovo</i> | 721618                  | A/G  | NA                 | NA                            | NA                 |
| <i>Desi_wild_721619</i> | NA                                  | <i>Ca_desi_denovo</i> | 721619                  | G/A  | NA                 | NA                            | NA                 |
| <i>Desi_wild_727375</i> | NA                                  | <i>Ca_desi_denovo</i> | 727375                  | C/T  | NA                 | NA                            | NA                 |
| <i>Desi_wild_729682</i> | NA                                  | <i>Ca_desi_denovo</i> | 729682                  | G/A  | NA                 | NA                            | NA                 |
| <i>Desi_wild_746967</i> | NA                                  | <i>Ca_desi_denovo</i> | 746967                  | A/T  | NA                 | NA                            | NA                 |
| <i>Desi_wild_747209</i> | NA                                  | <i>Ca_desi_denovo</i> | 747209                  | T/A  | NA                 | NA                            | NA                 |
| <i>Desi_wild_747218</i> | NA                                  | <i>Ca_desi_denovo</i> | 747218                  | A/G  | NA                 | NA                            | NA                 |
| <i>Desi_wild_756080</i> | NA                                  | <i>Ca_desi_denovo</i> | 756080                  | T/C  | NA                 | NA                            | NA                 |
| <i>Desi_wild_759596</i> | NA                                  | <i>Ca_desi_denovo</i> | 759596                  | A/G  | NA                 | NA                            | NA                 |
| <i>Desi_wild_759620</i> | NA                                  | <i>Ca_desi_denovo</i> | 759620                  | C/T  | NA                 | NA                            | NA                 |
| <i>Desi_wild_761989</i> | NA                                  | <i>Ca_desi_denovo</i> | 761989                  | T/G  | NA                 | NA                            | NA                 |
| <i>Desi_wild_765087</i> | NA                                  | <i>Ca_desi_denovo</i> | 765087                  | A/C  | NA                 | NA                            | NA                 |
| <i>Desi_wild_765088</i> | NA                                  | <i>Ca_desi_denovo</i> | 765088                  | C/G  | NA                 | NA                            | NA                 |
| <i>Desi_wild_765089</i> | NA                                  | <i>Ca_desi_denovo</i> | 765089                  | C/T  | NA                 | NA                            | NA                 |
| <i>Desi_wild_765091</i> | NA                                  | <i>Ca_desi_denovo</i> | 765091                  | G/A  | NA                 | NA                            | NA                 |
| <i>Desi_wild_765112</i> | NA                                  | <i>Ca_desi_denovo</i> | 765112                  | C/A  | NA                 | NA                            | NA                 |
| <i>Desi_wild_774308</i> | NA                                  | <i>Ca_desi_denovo</i> | 774308                  | A/G  | NA                 | NA                            | NA                 |
| <i>Desi_wild_774326</i> | NA                                  | <i>Ca_desi_denovo</i> | 774326                  | A/C  | NA                 | NA                            | NA                 |
| <i>Desi_wild_775449</i> | NA                                  | <i>Ca_desi_denovo</i> | 775449                  | A/T  | NA                 | NA                            | NA                 |
| <i>Desi_wild_775452</i> | NA                                  | <i>Ca_desi_denovo</i> | 775452                  | C/T  | NA                 | NA                            | NA                 |
| <i>Desi_wild_775489</i> | NA                                  | <i>Ca_desi_denovo</i> | 775489                  | C/T  | NA                 | NA                            | NA                 |
| <i>Desi_wild_777172</i> | NA                                  | <i>Ca_desi_denovo</i> | 777172                  | C/T  | NA                 | NA                            | NA                 |
| <i>Desi_wild_777190</i> | NA                                  | <i>Ca_desi_denovo</i> | 777190                  | G/C  | NA                 | NA                            | NA                 |
| <i>Desi_wild_777373</i> | NA                                  | <i>Ca_desi_denovo</i> | 777373                  | C/G  | NA                 | NA                            | NA                 |
| <i>Desi_wild_777396</i> | NA                                  | <i>Ca_desi_denovo</i> | 777396                  | T/C  | NA                 | NA                            | NA                 |
| <i>Desi_wild_786696</i> | NA                                  | <i>Ca_desi_denovo</i> | 786696                  | C/T  | NA                 | NA                            | NA                 |
| <i>Desi_wild_786712</i> | NA                                  | <i>Ca_desi_denovo</i> | 786712                  | C/G  | NA                 | NA                            | NA                 |
| <i>Desi_wild_790958</i> | NA                                  | <i>Ca_desi_denovo</i> | 790958                  | T/C  | NA                 | NA                            | NA                 |
| <i>Desi_wild_793107</i> | NA                                  | <i>Ca_desi_denovo</i> | 793107                  | C/T  | NA                 | NA                            | NA                 |
| <i>Desi_wild_798488</i> | NA                                  | <i>Ca_desi_denovo</i> | 798488                  | C/G  | NA                 | NA                            | NA                 |
| <i>Desi_wild_810677</i> | NA                                  | <i>Ca_desi_denovo</i> | 810677                  | G/A  | NA                 | NA                            | NA                 |

| SNP IDs                 | NCBI dbSNP accession IDs (NCBI_SS#) | Chromosomes           | Physical positions (bp) | SNPs | Gene accession IDs | Sequence components of genome | Putative functions |
|-------------------------|-------------------------------------|-----------------------|-------------------------|------|--------------------|-------------------------------|--------------------|
| <i>Desi_wild_810681</i> | NA                                  | <i>Ca_desi_denovo</i> | 810681                  | C/T  | NA                 | NA                            | NA                 |
| <i>Desi_wild_812588</i> | NA                                  | <i>Ca_desi_denovo</i> | 812588                  | A/T  | NA                 | NA                            | NA                 |
| <i>Desi_wild_812591</i> | NA                                  | <i>Ca_desi_denovo</i> | 812591                  | A/G  | NA                 | NA                            | NA                 |
| <i>Desi_wild_812593</i> | NA                                  | <i>Ca_desi_denovo</i> | 812593                  | G/A  | NA                 | NA                            | NA                 |
| <i>Desi_wild_812605</i> | NA                                  | <i>Ca_desi_denovo</i> | 812605                  | G/C  | NA                 | NA                            | NA                 |
| <i>Desi_wild_812622</i> | NA                                  | <i>Ca_desi_denovo</i> | 812622                  | G/C  | NA                 | NA                            | NA                 |
| <i>Desi_wild_812627</i> | NA                                  | <i>Ca_desi_denovo</i> | 812627                  | T/C  | NA                 | NA                            | NA                 |
| <i>Desi_wild_813358</i> | NA                                  | <i>Ca_desi_denovo</i> | 813358                  | G/T  | NA                 | NA                            | NA                 |
| <i>Desi_wild_823158</i> | NA                                  | <i>Ca_desi_denovo</i> | 823158                  | C/T  | NA                 | NA                            | NA                 |
| <i>Desi_wild_823170</i> | NA                                  | <i>Ca_desi_denovo</i> | 823170                  | A/G  | NA                 | NA                            | NA                 |
| <i>Desi_wild_829013</i> | NA                                  | <i>Ca_desi_denovo</i> | 829013                  | A/G  | NA                 | NA                            | NA                 |
| <i>Desi_wild_831310</i> | NA                                  | <i>Ca_desi_denovo</i> | 831310                  | C/G  | NA                 | NA                            | NA                 |
| <i>Desi_wild_831343</i> | NA                                  | <i>Ca_desi_denovo</i> | 831343                  | C/G  | NA                 | NA                            | NA                 |
| <i>Desi_wild_833058</i> | NA                                  | <i>Ca_desi_denovo</i> | 833058                  | C/A  | NA                 | NA                            | NA                 |
| <i>Desi_wild_834675</i> | NA                                  | <i>Ca_desi_denovo</i> | 834675                  | C/T  | NA                 | NA                            | NA                 |
| <i>Desi_wild_834687</i> | NA                                  | <i>Ca_desi_denovo</i> | 834687                  | T/C  | NA                 | NA                            | NA                 |
| <i>Desi_wild_836309</i> | NA                                  | <i>Ca_desi_denovo</i> | 836309                  | G/A  | NA                 | NA                            | NA                 |
| <i>Desi_wild_836319</i> | NA                                  | <i>Ca_desi_denovo</i> | 836319                  | C/A  | NA                 | NA                            | NA                 |
| <i>Desi_wild_836343</i> | NA                                  | <i>Ca_desi_denovo</i> | 836343                  | C/G  | NA                 | NA                            | NA                 |
| <i>Desi_wild_836885</i> | NA                                  | <i>Ca_desi_denovo</i> | 836885                  | A/G  | NA                 | NA                            | NA                 |
| <i>Desi_wild_838347</i> | NA                                  | <i>Ca_desi_denovo</i> | 838347                  | T/A  | NA                 | NA                            | NA                 |
| <i>Desi_wild_844009</i> | NA                                  | <i>Ca_desi_denovo</i> | 844009                  | C/G  | NA                 | NA                            | NA                 |
| <i>Desi_wild_858505</i> | NA                                  | <i>Ca_desi_denovo</i> | 858505                  | C/T  | NA                 | NA                            | NA                 |
| <i>Desi_wild_861777</i> | NA                                  | <i>Ca_desi_denovo</i> | 861777                  | A/T  | NA                 | NA                            | NA                 |
| <i>Desi_wild_861793</i> | NA                                  | <i>Ca_desi_denovo</i> | 861793                  | A/T  | NA                 | NA                            | NA                 |
| <i>Desi_wild_865731</i> | NA                                  | <i>Ca_desi_denovo</i> | 865731                  | C/G  | NA                 | NA                            | NA                 |
| <i>Desi_wild_865745</i> | NA                                  | <i>Ca_desi_denovo</i> | 865745                  | A/G  | NA                 | NA                            | NA                 |
| <i>Desi_wild_867782</i> | NA                                  | <i>Ca_desi_denovo</i> | 867782                  | G/T  | NA                 | NA                            | NA                 |
| <i>Desi_wild_869041</i> | NA                                  | <i>Ca_desi_denovo</i> | 869041                  | A/T  | NA                 | NA                            | NA                 |
| <i>Desi_wild_869088</i> | NA                                  | <i>Ca_desi_denovo</i> | 869088                  | G/T  | NA                 | NA                            | NA                 |
| <i>Desi_wild_869137</i> | NA                                  | <i>Ca_desi_denovo</i> | 869137                  | T/G  | NA                 | NA                            | NA                 |
| <i>Desi_wild_869149</i> | NA                                  | <i>Ca_desi_denovo</i> | 869149                  | G/T  | NA                 | NA                            | NA                 |
| <i>Desi_wild_869186</i> | NA                                  | <i>Ca_desi_denovo</i> | 869186                  | A/G  | NA                 | NA                            | NA                 |
| <i>Desi_wild_870047</i> | NA                                  | <i>Ca_desi_denovo</i> | 870047                  | G/T  | NA                 | NA                            | NA                 |
| <i>Desi_wild_870048</i> | NA                                  | <i>Ca_desi_denovo</i> | 870048                  | T/G  | NA                 | NA                            | NA                 |
| <i>Desi_wild_870244</i> | NA                                  | <i>Ca_desi_denovo</i> | 870244                  | A/G  | NA                 | NA                            | NA                 |
| <i>Desi_wild_870249</i> | NA                                  | <i>Ca_desi_denovo</i> | 870249                  | A/G  | NA                 | NA                            | NA                 |
| <i>Desi_wild_875675</i> | NA                                  | <i>Ca_desi_denovo</i> | 875675                  | G/C  | NA                 | NA                            | NA                 |
| <i>Desi_wild_875682</i> | NA                                  | <i>Ca_desi_denovo</i> | 875682                  | G/C  | NA                 | NA                            | NA                 |
| <i>Desi_wild_881998</i> | NA                                  | <i>Ca_desi_denovo</i> | 881998                  | C/G  | NA                 | NA                            | NA                 |
| <i>Desi_wild_886996</i> | NA                                  | <i>Ca_desi_denovo</i> | 886996                  | A/G  | NA                 | NA                            | NA                 |
| <i>Desi_wild_887056</i> | NA                                  | <i>Ca_desi_denovo</i> | 887056                  | A/G  | NA                 | NA                            | NA                 |
| <i>Desi_wild_887057</i> | NA                                  | <i>Ca_desi_denovo</i> | 887057                  | A/G  | NA                 | NA                            | NA                 |
| <i>Desi_wild_888989</i> | NA                                  | <i>Ca_desi_denovo</i> | 888989                  | C/A  | NA                 | NA                            | NA                 |



| SNP IDs                 | NCBI dbSNP accession IDs (NCBI_SS#) | Chromosomes           | Physical positions (bp) | SNPs | Gene accession IDs | Sequence components of genome | Putative functions |
|-------------------------|-------------------------------------|-----------------------|-------------------------|------|--------------------|-------------------------------|--------------------|
| <i>Desi_wild_888991</i> | NA                                  | <i>Ca_desi_denovo</i> | 888991                  | C/A  | NA                 | NA                            | NA                 |
| <i>Desi_wild_894872</i> | NA                                  | <i>Ca_desi_denovo</i> | 894872                  | A/G  | NA                 | NA                            | NA                 |
| <i>Desi_wild_894873</i> | NA                                  | <i>Ca_desi_denovo</i> | 894873                  | G/A  | NA                 | NA                            | NA                 |
| <i>Desi_wild_894874</i> | NA                                  | <i>Ca_desi_denovo</i> | 894874                  | G/A  | NA                 | NA                            | NA                 |
| <i>Desi_wild_894887</i> | NA                                  | <i>Ca_desi_denovo</i> | 894887                  | T/G  | NA                 | NA                            | NA                 |
| <i>Desi_wild_894893</i> | NA                                  | <i>Ca_desi_denovo</i> | 894893                  | A/G  | NA                 | NA                            | NA                 |
| <i>Desi_wild_894897</i> | NA                                  | <i>Ca_desi_denovo</i> | 894897                  | A/G  | NA                 | NA                            | NA                 |
| <i>Desi_wild_894898</i> | NA                                  | <i>Ca_desi_denovo</i> | 894898                  | C/G  | NA                 | NA                            | NA                 |
| <i>Desi_wild_896422</i> | NA                                  | <i>Ca_desi_denovo</i> | 896422                  | G/A  | NA                 | NA                            | NA                 |
| <i>Desi_wild_896424</i> | NA                                  | <i>Ca_desi_denovo</i> | 896424                  | G/A  | NA                 | NA                            | NA                 |
| <i>Desi_wild_896425</i> | NA                                  | <i>Ca_desi_denovo</i> | 896425                  | A/G  | NA                 | NA                            | NA                 |
| <i>Desi_wild_902932</i> | NA                                  | <i>Ca_desi_denovo</i> | 902932                  | T/C  | NA                 | NA                            | NA                 |
| <i>Desi_wild_902935</i> | NA                                  | <i>Ca_desi_denovo</i> | 902935                  | C/G  | NA                 | NA                            | NA                 |
| <i>Desi_wild_902952</i> | NA                                  | <i>Ca_desi_denovo</i> | 902952                  | C/G  | NA                 | NA                            | NA                 |
| <i>Desi_wild_902953</i> | NA                                  | <i>Ca_desi_denovo</i> | 902953                  | C/G  | NA                 | NA                            | NA                 |
| <i>Desi_wild_902959</i> | NA                                  | <i>Ca_desi_denovo</i> | 902959                  | A/G  | NA                 | NA                            | NA                 |
| <i>Desi_wild_904195</i> | NA                                  | <i>Ca_desi_denovo</i> | 904195                  | C/G  | NA                 | NA                            | NA                 |
| <i>Desi_wild_904220</i> | NA                                  | <i>Ca_desi_denovo</i> | 904220                  | C/G  | NA                 | NA                            | NA                 |
| <i>Desi_wild_904241</i> | NA                                  | <i>Ca_desi_denovo</i> | 904241                  | A/G  | NA                 | NA                            | NA                 |
| <i>Desi_wild_907160</i> | NA                                  | <i>Ca_desi_denovo</i> | 907160                  | T/C  | NA                 | NA                            | NA                 |
| <i>Desi_wild_907162</i> | NA                                  | <i>Ca_desi_denovo</i> | 907162                  | A/G  | NA                 | NA                            | NA                 |
| <i>Desi_wild_907558</i> | NA                                  | <i>Ca_desi_denovo</i> | 907558                  | G/A  | NA                 | NA                            | NA                 |
| <i>Desi_wild_907623</i> | NA                                  | <i>Ca_desi_denovo</i> | 907623                  | A/G  | NA                 | NA                            | NA                 |
| <i>Desi_wild_907657</i> | NA                                  | <i>Ca_desi_denovo</i> | 907657                  | A/G  | NA                 | NA                            | NA                 |
| <i>Desi_wild_909094</i> | NA                                  | <i>Ca_desi_denovo</i> | 909094                  | G/T  | NA                 | NA                            | NA                 |
| <i>Desi_wild_909946</i> | NA                                  | <i>Ca_desi_denovo</i> | 909946                  | A/G  | NA                 | NA                            | NA                 |
| <i>Desi_wild_910728</i> | NA                                  | <i>Ca_desi_denovo</i> | 910728                  | T/G  | NA                 | NA                            | NA                 |
| <i>Desi_wild_910730</i> | NA                                  | <i>Ca_desi_denovo</i> | 910730                  | C/T  | NA                 | NA                            | NA                 |
| <i>Desi_wild_910826</i> | NA                                  | <i>Ca_desi_denovo</i> | 910826                  | T/C  | NA                 | NA                            | NA                 |
| <i>Desi_wild_912319</i> | NA                                  | <i>Ca_desi_denovo</i> | 912319                  | G/T  | NA                 | NA                            | NA                 |
| <i>Desi_wild_913215</i> | NA                                  | <i>Ca_desi_denovo</i> | 913215                  | C/T  | NA                 | NA                            | NA                 |
| <i>Desi_wild_913286</i> | NA                                  | <i>Ca_desi_denovo</i> | 913286                  | A/G  | NA                 | NA                            | NA                 |
| <i>Desi_wild_915022</i> | NA                                  | <i>Ca_desi_denovo</i> | 915022                  | G/A  | NA                 | NA                            | NA                 |
| <i>Desi_wild_915106</i> | NA                                  | <i>Ca_desi_denovo</i> | 915106                  | T/A  | NA                 | NA                            | NA                 |
| <i>Desi_wild_926411</i> | NA                                  | <i>Ca_desi_denovo</i> | 926411                  | A/G  | NA                 | NA                            | NA                 |
| <i>Desi_wild_926431</i> | NA                                  | <i>Ca_desi_denovo</i> | 926431                  | C/G  | NA                 | NA                            | NA                 |
| <i>Desi_wild_926499</i> | NA                                  | <i>Ca_desi_denovo</i> | 926499                  | C/G  | NA                 | NA                            | NA                 |
| <i>Desi_wild_926525</i> | NA                                  | <i>Ca_desi_denovo</i> | 926525                  | T/A  | NA                 | NA                            | NA                 |
| <i>Desi_wild_927032</i> | NA                                  | <i>Ca_desi_denovo</i> | 927032                  | A/G  | NA                 | NA                            | NA                 |
| <i>Desi_wild_928033</i> | NA                                  | <i>Ca_desi_denovo</i> | 928033                  | A/G  | NA                 | NA                            | NA                 |
| <i>Desi_wild_932094</i> | NA                                  | <i>Ca_desi_denovo</i> | 932094                  | T/G  | NA                 | NA                            | NA                 |
| <i>Desi_wild_935883</i> | NA                                  | <i>Ca_desi_denovo</i> | 935883                  | G/C  | NA                 | NA                            | NA                 |
| <i>Desi_wild_935884</i> | NA                                  | <i>Ca_desi_denovo</i> | 935884                  | C/G  | NA                 | NA                            | NA                 |
| <i>Desi_wild_935886</i> | NA                                  | <i>Ca_desi_denovo</i> | 935886                  | T/G  | NA                 | NA                            | NA                 |

| SNP IDs                 | NCBI dbSNP accession IDs (NCBI_SS#) | Chromosomes           | Physical positions (bp) | SNPs | Gene accession IDs | Sequence components of genome | Putative functions |
|-------------------------|-------------------------------------|-----------------------|-------------------------|------|--------------------|-------------------------------|--------------------|
| <i>Desi_wild_935888</i> | NA                                  | <i>Ca_desi_denovo</i> | 935888                  | C/T  | NA                 | NA                            | NA                 |
| <i>Desi_wild_942483</i> | NA                                  | <i>Ca_desi_denovo</i> | 942483                  | T/G  | NA                 | NA                            | NA                 |
| <i>Desi_wild_943299</i> | NA                                  | <i>Ca_desi_denovo</i> | 943299                  | C/G  | NA                 | NA                            | NA                 |
| <i>Desi_wild_943300</i> | NA                                  | <i>Ca_desi_denovo</i> | 943300                  | A/G  | NA                 | NA                            | NA                 |
| <i>Desi_wild_943301</i> | NA                                  | <i>Ca_desi_denovo</i> | 943301                  | A/T  | NA                 | NA                            | NA                 |
| <i>Desi_wild_944214</i> | NA                                  | <i>Ca_desi_denovo</i> | 944214                  | A/G  | NA                 | NA                            | NA                 |
| <i>Desi_wild_948469</i> | NA                                  | <i>Ca_desi_denovo</i> | 948469                  | C/G  | NA                 | NA                            | NA                 |
| <i>Desi_wild_959561</i> | NA                                  | <i>Ca_desi_denovo</i> | 959561                  | G/T  | NA                 | NA                            | NA                 |
| <i>Desi_wild_960462</i> | NA                                  | <i>Ca_desi_denovo</i> | 960462                  | A/G  | NA                 | NA                            | NA                 |
| <i>Desi_wild_960477</i> | NA                                  | <i>Ca_desi_denovo</i> | 960477                  | C/G  | NA                 | NA                            | NA                 |
| <i>Desi_wild_960485</i> | NA                                  | <i>Ca_desi_denovo</i> | 960485                  | A/G  | NA                 | NA                            | NA                 |
| <i>Desi_wild_963093</i> | NA                                  | <i>Ca_desi_denovo</i> | 963093                  | G/C  | NA                 | NA                            | NA                 |
| <i>Desi_wild_963165</i> | NA                                  | <i>Ca_desi_denovo</i> | 963165                  | C/T  | NA                 | NA                            | NA                 |
| <i>Desi_wild_964265</i> | NA                                  | <i>Ca_desi_denovo</i> | 964265                  | G/T  | NA                 | NA                            | NA                 |
| <i>Desi_wild_964754</i> | NA                                  | <i>Ca_desi_denovo</i> | 964754                  | A/G  | NA                 | NA                            | NA                 |
| <i>Desi_wild_964871</i> | NA                                  | <i>Ca_desi_denovo</i> | 964871                  | A/G  | NA                 | NA                            | NA                 |
| <i>Desi_wild_965056</i> | NA                                  | <i>Ca_desi_denovo</i> | 965056                  | G/C  | NA                 | NA                            | NA                 |
| <i>Desi_wild_965517</i> | NA                                  | <i>Ca_desi_denovo</i> | 965517                  | A/C  | NA                 | NA                            | NA                 |
| <i>Desi_wild_965615</i> | NA                                  | <i>Ca_desi_denovo</i> | 965615                  | G/C  | NA                 | NA                            | NA                 |
| <i>Desi_wild_965660</i> | NA                                  | <i>Ca_desi_denovo</i> | 965660                  | G/C  | NA                 | NA                            | NA                 |
| <i>Desi_wild_966487</i> | NA                                  | <i>Ca_desi_denovo</i> | 966487                  | T/C  | NA                 | NA                            | NA                 |
| <i>Desi_wild_967104</i> | NA                                  | <i>Ca_desi_denovo</i> | 967104                  | G/C  | NA                 | NA                            | NA                 |
| <i>Desi_wild_967361</i> | NA                                  | <i>Ca_desi_denovo</i> | 967361                  | G/A  | NA                 | NA                            | NA                 |
| <i>Desi_wild_967385</i> | NA                                  | <i>Ca_desi_denovo</i> | 967385                  | C/T  | NA                 | NA                            | NA                 |
| <i>Desi_wild_967581</i> | NA                                  | <i>Ca_desi_denovo</i> | 967581                  | C/T  | NA                 | NA                            | NA                 |
| <i>Desi_wild_968356</i> | NA                                  | <i>Ca_desi_denovo</i> | 968356                  | C/T  | NA                 | NA                            | NA                 |
| <i>Desi_wild_968359</i> | NA                                  | <i>Ca_desi_denovo</i> | 968359                  | C/G  | NA                 | NA                            | NA                 |
| <i>Desi_wild_968467</i> | NA                                  | <i>Ca_desi_denovo</i> | 968467                  | T/C  | NA                 | NA                            | NA                 |
| <i>Desi_wild_968630</i> | NA                                  | <i>Ca_desi_denovo</i> | 968630                  | T/C  | NA                 | NA                            | NA                 |
| <i>Desi_wild_968661</i> | NA                                  | <i>Ca_desi_denovo</i> | 968661                  | T/C  | NA                 | NA                            | NA                 |
| <i>Desi_wild_968749</i> | NA                                  | <i>Ca_desi_denovo</i> | 968749                  | C/T  | NA                 | NA                            | NA                 |
| <i>Desi_wild_968755</i> | NA                                  | <i>Ca_desi_denovo</i> | 968755                  | G/A  | NA                 | NA                            | NA                 |
| <i>Desi_wild_969512</i> | NA                                  | <i>Ca_desi_denovo</i> | 969512                  | G/A  | NA                 | NA                            | NA                 |
| <i>Desi_wild_969791</i> | NA                                  | <i>Ca_desi_denovo</i> | 969791                  | G/A  | NA                 | NA                            | NA                 |
| <i>Desi_wild_969851</i> | NA                                  | <i>Ca_desi_denovo</i> | 969851                  | A/G  | NA                 | NA                            | NA                 |
| <i>Desi_wild_970223</i> | NA                                  | <i>Ca_desi_denovo</i> | 970223                  | T/C  | NA                 | NA                            | NA                 |
| <i>Desi_wild_973093</i> | NA                                  | <i>Ca_desi_denovo</i> | 973093                  | G/T  | NA                 | NA                            | NA                 |
| <i>Desi_wild_973412</i> | NA                                  | <i>Ca_desi_denovo</i> | 973412                  | C/T  | NA                 | NA                            | NA                 |
| <i>Desi_wild_973439</i> | NA                                  | <i>Ca_desi_denovo</i> | 973439                  | T/C  | NA                 | NA                            | NA                 |
| <i>Desi_wild_973590</i> | NA                                  | <i>Ca_desi_denovo</i> | 973590                  | C/T  | NA                 | NA                            | NA                 |
| <i>Desi_wild_973599</i> | NA                                  | <i>Ca_desi_denovo</i> | 973599                  | C/T  | NA                 | NA                            | NA                 |
| <i>Desi_wild_977377</i> | NA                                  | <i>Ca_desi_denovo</i> | 977377                  | T/C  | NA                 | NA                            | NA                 |
| <i>Desi_wild_977386</i> | NA                                  | <i>Ca_desi_denovo</i> | 977386                  | T/C  | NA                 | NA                            | NA                 |
| <i>Desi_wild_978739</i> | NA                                  | <i>Ca_desi_denovo</i> | 978739                  | A/T  | NA                 | NA                            | NA                 |

| SNP IDs                 | NCBI dbSNP accession IDs (NCBI_SS#) | Chromosomes           | Physical positions (bp) | SNPs | Gene accession IDs | Sequence components of genome | Putative functions |
|-------------------------|-------------------------------------|-----------------------|-------------------------|------|--------------------|-------------------------------|--------------------|
| <i>Desi_wild_978741</i> | NA                                  | <i>Ca_desi_denovo</i> | 978741                  | G/T  | NA                 | NA                            | NA                 |
| <i>Desi_wild_978752</i> | NA                                  | <i>Ca_desi_denovo</i> | 978752                  | T/C  | NA                 | NA                            | NA                 |
| <i>Desi_wild_979059</i> | NA                                  | <i>Ca_desi_denovo</i> | 979059                  | T/C  | NA                 | NA                            | NA                 |
| <i>Desi_wild_979151</i> | NA                                  | <i>Ca_desi_denovo</i> | 979151                  | C/T  | NA                 | NA                            | NA                 |
| <i>Desi_wild_980265</i> | NA                                  | <i>Ca_desi_denovo</i> | 980265                  | G/C  | NA                 | NA                            | NA                 |
| <i>Desi_wild_980861</i> | NA                                  | <i>Ca_desi_denovo</i> | 980861                  | A/G  | NA                 | NA                            | NA                 |
| <i>Desi_wild_980864</i> | NA                                  | <i>Ca_desi_denovo</i> | 980864                  | C/A  | NA                 | NA                            | NA                 |
| <i>Desi_wild_981036</i> | NA                                  | <i>Ca_desi_denovo</i> | 981036                  | G/A  | NA                 | NA                            | NA                 |
| <i>Desi_wild_982308</i> | NA                                  | <i>Ca_desi_denovo</i> | 982308                  | A/G  | NA                 | NA                            | NA                 |
| <i>Desi_wild_982344</i> | NA                                  | <i>Ca_desi_denovo</i> | 982344                  | G/A  | NA                 | NA                            | NA                 |
| <i>Desi_wild_983089</i> | NA                                  | <i>Ca_desi_denovo</i> | 983089                  | G/C  | NA                 | NA                            | NA                 |
| <i>Desi_wild_983287</i> | NA                                  | <i>Ca_desi_denovo</i> | 983287                  | A/G  | NA                 | NA                            | NA                 |
| <i>Desi_wild_983302</i> | NA                                  | <i>Ca_desi_denovo</i> | 983302                  | A/G  | NA                 | NA                            | NA                 |
| <i>Desi_wild_983595</i> | NA                                  | <i>Ca_desi_denovo</i> | 983595                  | C/T  | NA                 | NA                            | NA                 |
| <i>Desi_wild_984365</i> | NA                                  | <i>Ca_desi_denovo</i> | 984365                  | A/G  | NA                 | NA                            | NA                 |
| <i>Desi_wild_985115</i> | NA                                  | <i>Ca_desi_denovo</i> | 985115                  | G/A  | NA                 | NA                            | NA                 |
| <i>Desi_wild_985118</i> | NA                                  | <i>Ca_desi_denovo</i> | 985118                  | G/A  | NA                 | NA                            | NA                 |
| <i>Desi_wild_985363</i> | NA                                  | <i>Ca_desi_denovo</i> | 985363                  | G/A  | NA                 | NA                            | NA                 |
| <i>Desi_wild_985753</i> | NA                                  | <i>Ca_desi_denovo</i> | 985753                  | G/C  | NA                 | NA                            | NA                 |
| <i>Desi_wild_985771</i> | NA                                  | <i>Ca_desi_denovo</i> | 985771                  | T/C  | NA                 | NA                            | NA                 |
| <i>Desi_wild_985798</i> | NA                                  | <i>Ca_desi_denovo</i> | 985798                  | G/C  | NA                 | NA                            | NA                 |
| <i>Desi_wild_985915</i> | NA                                  | <i>Ca_desi_denovo</i> | 985915                  | C/T  | NA                 | NA                            | NA                 |
| <i>Desi_wild_986056</i> | NA                                  | <i>Ca_desi_denovo</i> | 986056                  | A/G  | NA                 | NA                            | NA                 |
| <i>Desi_wild_986061</i> | NA                                  | <i>Ca_desi_denovo</i> | 986061                  | G/A  | NA                 | NA                            | NA                 |
| <i>Desi_wild_986166</i> | NA                                  | <i>Ca_desi_denovo</i> | 986166                  | T/G  | NA                 | NA                            | NA                 |
| <i>Desi_wild_987540</i> | NA                                  | <i>Ca_desi_denovo</i> | 987540                  | A/G  | NA                 | NA                            | NA                 |
| <i>Desi_wild_987551</i> | NA                                  | <i>Ca_desi_denovo</i> | 987551                  | T/C  | NA                 | NA                            | NA                 |
| <i>Desi_wild_988060</i> | NA                                  | <i>Ca_desi_denovo</i> | 988060                  | G/A  | NA                 | NA                            | NA                 |
| <i>Desi_wild_988319</i> | NA                                  | <i>Ca_desi_denovo</i> | 988319                  | G/A  | NA                 | NA                            | NA                 |
| <i>Desi_wild_988752</i> | NA                                  | <i>Ca_desi_denovo</i> | 988752                  | A/T  | NA                 | NA                            | NA                 |
| <i>Desi_wild_990395</i> | NA                                  | <i>Ca_desi_denovo</i> | 990395                  | T/C  | NA                 | NA                            | NA                 |
| <i>Desi_wild_990940</i> | NA                                  | <i>Ca_desi_denovo</i> | 990940                  | T/C  | NA                 | NA                            | NA                 |
| <i>Desi_wild_990991</i> | NA                                  | <i>Ca_desi_denovo</i> | 990991                  | T/C  | NA                 | NA                            | NA                 |
| <i>Desi_wild_991110</i> | NA                                  | <i>Ca_desi_denovo</i> | 991110                  | A/C  | NA                 | NA                            | NA                 |
| <i>Desi_wild_991320</i> | NA                                  | <i>Ca_desi_denovo</i> | 991320                  | G/A  | NA                 | NA                            | NA                 |
| <i>Desi_wild_991338</i> | NA                                  | <i>Ca_desi_denovo</i> | 991338                  | C/G  | NA                 | NA                            | NA                 |
| <i>Desi_wild_991833</i> | NA                                  | <i>Ca_desi_denovo</i> | 991833                  | T/C  | NA                 | NA                            | NA                 |
| <i>Desi_wild_991872</i> | NA                                  | <i>Ca_desi_denovo</i> | 991872                  | C/T  | NA                 | NA                            | NA                 |
| <i>Desi_wild_992087</i> | NA                                  | <i>Ca_desi_denovo</i> | 992087                  | A/G  | NA                 | NA                            | NA                 |
| <i>Desi_wild_992089</i> | NA                                  | <i>Ca_desi_denovo</i> | 992089                  | A/G  | NA                 | NA                            | NA                 |
| <i>Desi_wild_992280</i> | NA                                  | <i>Ca_desi_denovo</i> | 992280                  | C/G  | NA                 | NA                            | NA                 |
| <i>Desi_wild_992484</i> | NA                                  | <i>Ca_desi_denovo</i> | 992484                  | A/G  | NA                 | NA                            | NA                 |
| <i>Desi_wild_992779</i> | NA                                  | <i>Ca_desi_denovo</i> | 992779                  | A/G  | NA                 | NA                            | NA                 |
| <i>Desi_wild_992800</i> | NA                                  | <i>Ca_desi_denovo</i> | 992800                  | C/T  | NA                 | NA                            | NA                 |

| SNP IDs                  | NCBI dbSNP accession IDs (NCBI_SS#) | Chromosomes           | Physical positions (bp) | SNPs | Gene accession IDs | Sequence components of genome | Putative functions |
|--------------------------|-------------------------------------|-----------------------|-------------------------|------|--------------------|-------------------------------|--------------------|
| <i>Desi_wild_993319</i>  | NA                                  | <i>Ca_desi_denovo</i> | 993319                  | C/G  | NA                 | NA                            | NA                 |
| <i>Desi_wild_994702</i>  | NA                                  | <i>Ca_desi_denovo</i> | 994702                  | T/G  | NA                 | NA                            | NA                 |
| <i>Desi_wild_995418</i>  | NA                                  | <i>Ca_desi_denovo</i> | 995418                  | C/T  | NA                 | NA                            | NA                 |
| <i>Desi_wild_996370</i>  | NA                                  | <i>Ca_desi_denovo</i> | 996370                  | T/C  | NA                 | NA                            | NA                 |
| <i>Desi_wild_996415</i>  | NA                                  | <i>Ca_desi_denovo</i> | 996415                  | A/G  | NA                 | NA                            | NA                 |
| <i>Desi_wild_998311</i>  | NA                                  | <i>Ca_desi_denovo</i> | 998311                  | T/G  | NA                 | NA                            | NA                 |
| <i>Desi_wild_999492</i>  | NA                                  | <i>Ca_desi_denovo</i> | 999492                  | C/G  | NA                 | NA                            | NA                 |
| <i>Desi_wild_1000741</i> | NA                                  | <i>Ca_desi_denovo</i> | 1000741                 | G/C  | NA                 | NA                            | NA                 |
| <i>Desi_wild_1001729</i> | NA                                  | <i>Ca_desi_denovo</i> | 1001729                 | A/G  | NA                 | NA                            | NA                 |
| <i>Desi_wild_1002025</i> | NA                                  | <i>Ca_desi_denovo</i> | 1002025                 | T/C  | NA                 | NA                            | NA                 |
| <i>Desi_wild_1003069</i> | NA                                  | <i>Ca_desi_denovo</i> | 1003069                 | G/A  | NA                 | NA                            | NA                 |
| <i>Desi_wild_1003078</i> | NA                                  | <i>Ca_desi_denovo</i> | 1003078                 | G/A  | NA                 | NA                            | NA                 |
| <i>Desi_wild_1003176</i> | NA                                  | <i>Ca_desi_denovo</i> | 1003176                 | T/C  | NA                 | NA                            | NA                 |
| <i>Desi_wild_1003381</i> | NA                                  | <i>Ca_desi_denovo</i> | 1003381                 | G/A  | NA                 | NA                            | NA                 |
| <i>Desi_wild_1003393</i> | NA                                  | <i>Ca_desi_denovo</i> | 1003393                 | A/G  | NA                 | NA                            | NA                 |
| <i>Desi_wild_1003505</i> | NA                                  | <i>Ca_desi_denovo</i> | 1003505                 | T/G  | NA                 | NA                            | NA                 |
| <i>Desi_wild_1004245</i> | NA                                  | <i>Ca_desi_denovo</i> | 1004245                 | C/G  | NA                 | NA                            | NA                 |
| <i>Desi_wild_1004349</i> | NA                                  | <i>Ca_desi_denovo</i> | 1004349                 | C/T  | NA                 | NA                            | NA                 |
| <i>Desi_wild_1004848</i> | NA                                  | <i>Ca_desi_denovo</i> | 1004848                 | T/G  | NA                 | NA                            | NA                 |
| <i>Desi_wild_1005005</i> | NA                                  | <i>Ca_desi_denovo</i> | 1005005                 | A/G  | NA                 | NA                            | NA                 |
| <i>Desi_wild_1005031</i> | NA                                  | <i>Ca_desi_denovo</i> | 1005031                 | T/C  | NA                 | NA                            | NA                 |
| <i>Desi_wild_1005985</i> | NA                                  | <i>Ca_desi_denovo</i> | 1005985                 | T/C  | NA                 | NA                            | NA                 |
| <i>Desi_wild_1006880</i> | NA                                  | <i>Ca_desi_denovo</i> | 1006880                 | A/G  | NA                 | NA                            | NA                 |
| <i>Desi_wild_1006881</i> | NA                                  | <i>Ca_desi_denovo</i> | 1006881                 | A/G  | NA                 | NA                            | NA                 |
| <i>Desi_wild_1007089</i> | NA                                  | <i>Ca_desi_denovo</i> | 1007089                 | T/A  | NA                 | NA                            | NA                 |
| <i>Desi_wild_1009103</i> | NA                                  | <i>Ca_desi_denovo</i> | 1009103                 | T/C  | NA                 | NA                            | NA                 |
| <i>Desi_wild_1010865</i> | NA                                  | <i>Ca_desi_denovo</i> | 1010865                 | A/T  | NA                 | NA                            | NA                 |
| <i>Desi_wild_1011017</i> | NA                                  | <i>Ca_desi_denovo</i> | 1011017                 | A/T  | NA                 | NA                            | NA                 |
| <i>Desi_wild_1011022</i> | NA                                  | <i>Ca_desi_denovo</i> | 1011022                 | G/A  | NA                 | NA                            | NA                 |
| <i>Desi_wild_1011500</i> | NA                                  | <i>Ca_desi_denovo</i> | 1011500                 | C/G  | NA                 | NA                            | NA                 |
| <i>Desi_wild_1011689</i> | NA                                  | <i>Ca_desi_denovo</i> | 1011689                 | A/G  | NA                 | NA                            | NA                 |
| <i>Desi_wild_1011727</i> | NA                                  | <i>Ca_desi_denovo</i> | 1011727                 | A/T  | NA                 | NA                            | NA                 |
| <i>Desi_wild_1013348</i> | NA                                  | <i>Ca_desi_denovo</i> | 1013348                 | C/T  | NA                 | NA                            | NA                 |
| <i>Desi_wild_1013351</i> | NA                                  | <i>Ca_desi_denovo</i> | 1013351                 | T/C  | NA                 | NA                            | NA                 |
| <i>Desi_wild_1013436</i> | NA                                  | <i>Ca_desi_denovo</i> | 1013436                 | C/T  | NA                 | NA                            | NA                 |
| <i>Desi_wild_1013451</i> | NA                                  | <i>Ca_desi_denovo</i> | 1013451                 | C/T  | NA                 | NA                            | NA                 |
| <i>Desi_wild_1013466</i> | NA                                  | <i>Ca_desi_denovo</i> | 1013466                 | C/T  | NA                 | NA                            | NA                 |
| <i>Desi_wild_1013517</i> | NA                                  | <i>Ca_desi_denovo</i> | 1013517                 | G/A  | NA                 | NA                            | NA                 |
| <i>Desi_wild_1014568</i> | NA                                  | <i>Ca_desi_denovo</i> | 1014568                 | C/A  | NA                 | NA                            | NA                 |
| <i>Desi_wild_1014644</i> | NA                                  | <i>Ca_desi_denovo</i> | 1014644                 | A/G  | NA                 | NA                            | NA                 |
| <i>Desi_wild_1014650</i> | NA                                  | <i>Ca_desi_denovo</i> | 1014650                 | C/A  | NA                 | NA                            | NA                 |
| <i>Desi_wild_1014902</i> | NA                                  | <i>Ca_desi_denovo</i> | 1014902                 | C/T  | NA                 | NA                            | NA                 |
| <i>Desi_wild_1015199</i> | NA                                  | <i>Ca_desi_denovo</i> | 1015199                 | C/T  | NA                 | NA                            | NA                 |
| <i>Desi_wild_1015241</i> | NA                                  | <i>Ca_desi_denovo</i> | 1015241                 | C/G  | NA                 | NA                            | NA                 |

| SNP IDs                  | NCBI dbSNP accession IDs (NCBI_SS#) | Chromosomes           | Physical positions (bp) | SNPs | Gene accession IDs | Sequence components of genome | Putative functions |
|--------------------------|-------------------------------------|-----------------------|-------------------------|------|--------------------|-------------------------------|--------------------|
| <i>Desi_wild_1017233</i> | NA                                  | <i>Ca_desi_denovo</i> | 1017233                 | T/C  | NA                 | NA                            | NA                 |
| <i>Desi_wild_1017875</i> | NA                                  | <i>Ca_desi_denovo</i> | 1017875                 | C/T  | NA                 | NA                            | NA                 |
| <i>Desi_wild_1018100</i> | NA                                  | <i>Ca_desi_denovo</i> | 1018100                 | C/T  | NA                 | NA                            | NA                 |
| <i>Desi_wild_1018191</i> | NA                                  | <i>Ca_desi_denovo</i> | 1018191                 | G/C  | NA                 | NA                            | NA                 |
| <i>Desi_wild_1018257</i> | NA                                  | <i>Ca_desi_denovo</i> | 1018257                 | T/C  | NA                 | NA                            | NA                 |
| <i>Desi_wild_1018514</i> | NA                                  | <i>Ca_desi_denovo</i> | 1018514                 | G/A  | NA                 | NA                            | NA                 |
| <i>Desi_wild_1018558</i> | NA                                  | <i>Ca_desi_denovo</i> | 1018558                 | G/A  | NA                 | NA                            | NA                 |
| <i>Desi_wild_1018642</i> | NA                                  | <i>Ca_desi_denovo</i> | 1018642                 | G/C  | NA                 | NA                            | NA                 |
| <i>Desi_wild_1019256</i> | NA                                  | <i>Ca_desi_denovo</i> | 1019256                 | C/T  | NA                 | NA                            | NA                 |
| <i>Desi_wild_1019270</i> | NA                                  | <i>Ca_desi_denovo</i> | 1019270                 | C/T  | NA                 | NA                            | NA                 |
| <i>Desi_wild_1019410</i> | NA                                  | <i>Ca_desi_denovo</i> | 1019410                 | A/G  | NA                 | NA                            | NA                 |
| <i>Desi_wild_1019413</i> | NA                                  | <i>Ca_desi_denovo</i> | 1019413                 | C/A  | NA                 | NA                            | NA                 |
| <i>Desi_wild_1020210</i> | NA                                  | <i>Ca_desi_denovo</i> | 1020210                 | C/T  | NA                 | NA                            | NA                 |
| <i>Desi_wild_1022309</i> | NA                                  | <i>Ca_desi_denovo</i> | 1022309                 | G/T  | NA                 | NA                            | NA                 |
| <i>Desi_wild_1023428</i> | NA                                  | <i>Ca_desi_denovo</i> | 1023428                 | T/C  | NA                 | NA                            | NA                 |
| <i>Desi_wild_1023461</i> | NA                                  | <i>Ca_desi_denovo</i> | 1023461                 | G/A  | NA                 | NA                            | NA                 |
| <i>Desi_wild_1024706</i> | NA                                  | <i>Ca_desi_denovo</i> | 1024706                 | A/G  | NA                 | NA                            | NA                 |
| <i>Desi_wild_1024715</i> | NA                                  | <i>Ca_desi_denovo</i> | 1024715                 | T/C  | NA                 | NA                            | NA                 |
| <i>Desi_wild_1024721</i> | NA                                  | <i>Ca_desi_denovo</i> | 1024721                 | G/A  | NA                 | NA                            | NA                 |
| <i>Desi_wild_1024730</i> | NA                                  | <i>Ca_desi_denovo</i> | 1024730                 | G/C  | NA                 | NA                            | NA                 |
| <i>Desi_wild_1025542</i> | NA                                  | <i>Ca_desi_denovo</i> | 1025542                 | T/C  | NA                 | NA                            | NA                 |
| <i>Desi_wild_1026470</i> | NA                                  | <i>Ca_desi_denovo</i> | 1026470                 | G/C  | NA                 | NA                            | NA                 |
| <i>Desi_wild_1026492</i> | NA                                  | <i>Ca_desi_denovo</i> | 1026492                 | T/G  | NA                 | NA                            | NA                 |
| <i>Desi_wild_1029959</i> | NA                                  | <i>Ca_desi_denovo</i> | 1029959                 | G/C  | NA                 | NA                            | NA                 |
| <i>Desi_wild_1030723</i> | NA                                  | <i>Ca_desi_denovo</i> | 1030723                 | A/G  | NA                 | NA                            | NA                 |
| <i>Desi_wild_1030725</i> | NA                                  | <i>Ca_desi_denovo</i> | 1030725                 | C/G  | NA                 | NA                            | NA                 |
| <i>Desi_wild_1032302</i> | NA                                  | <i>Ca_desi_denovo</i> | 1032302                 | G/T  | NA                 | NA                            | NA                 |
| <i>Desi_wild_1032366</i> | NA                                  | <i>Ca_desi_denovo</i> | 1032366                 | G/A  | NA                 | NA                            | NA                 |
| <i>Desi_wild_1032393</i> | NA                                  | <i>Ca_desi_denovo</i> | 1032393                 | T/C  | NA                 | NA                            | NA                 |
| <i>Desi_wild_1032460</i> | NA                                  | <i>Ca_desi_denovo</i> | 1032460                 | C/G  | NA                 | NA                            | NA                 |
| <i>Desi_wild_1032757</i> | NA                                  | <i>Ca_desi_denovo</i> | 1032757                 | G/C  | NA                 | NA                            | NA                 |
| <i>Desi_wild_1032799</i> | NA                                  | <i>Ca_desi_denovo</i> | 1032799                 | G/A  | NA                 | NA                            | NA                 |
| <i>Desi_wild_1033264</i> | NA                                  | <i>Ca_desi_denovo</i> | 1033264                 | T/G  | NA                 | NA                            | NA                 |
| <i>Desi_wild_1033551</i> | NA                                  | <i>Ca_desi_denovo</i> | 1033551                 | T/C  | NA                 | NA                            | NA                 |
| <i>Desi_wild_1033633</i> | NA                                  | <i>Ca_desi_denovo</i> | 1033633                 | G/C  | NA                 | NA                            | NA                 |
| <i>Desi_wild_1033641</i> | NA                                  | <i>Ca_desi_denovo</i> | 1033641                 | A/C  | NA                 | NA                            | NA                 |
| <i>Desi_wild_1033667</i> | NA                                  | <i>Ca_desi_denovo</i> | 1033667                 | T/C  | NA                 | NA                            | NA                 |
| <i>Desi_wild_1034079</i> | NA                                  | <i>Ca_desi_denovo</i> | 1034079                 | T/G  | NA                 | NA                            | NA                 |
| <i>Desi_wild_1035162</i> | NA                                  | <i>Ca_desi_denovo</i> | 1035162                 | A/G  | NA                 | NA                            | NA                 |
| <i>Desi_wild_1035193</i> | NA                                  | <i>Ca_desi_denovo</i> | 1035193                 | C/T  | NA                 | NA                            | NA                 |
| <i>Desi_wild_1035455</i> | NA                                  | <i>Ca_desi_denovo</i> | 1035455                 | A/G  | NA                 | NA                            | NA                 |
| <i>Desi_wild_1037921</i> | NA                                  | <i>Ca_desi_denovo</i> | 1037921                 | A/G  | NA                 | NA                            | NA                 |
| <i>Desi_wild_1038221</i> | NA                                  | <i>Ca_desi_denovo</i> | 1038221                 | T/C  | NA                 | NA                            | NA                 |
| <i>Desi_wild_1039249</i> | NA                                  | <i>Ca_desi_denovo</i> | 1039249                 | T/G  | NA                 | NA                            | NA                 |

| SNP IDs                  | NCBI dbSNP accession IDs (NCBI_SS#) | Chromosomes           | Physical positions (bp) | SNPs | Gene accession IDs | Sequence components of genome | Putative functions |
|--------------------------|-------------------------------------|-----------------------|-------------------------|------|--------------------|-------------------------------|--------------------|
| <i>Desi_wild_1039318</i> | NA                                  | <i>Ca_desi_denovo</i> | 1039318                 | T/C  | NA                 | NA                            | NA                 |
| <i>Desi_wild_1039346</i> | NA                                  | <i>Ca_desi_denovo</i> | 1039346                 | C/T  | NA                 | NA                            | NA                 |
| <i>Desi_wild_1040119</i> | NA                                  | <i>Ca_desi_denovo</i> | 1040119                 | T/G  | NA                 | NA                            | NA                 |
| <i>Desi_wild_1040132</i> | NA                                  | <i>Ca_desi_denovo</i> | 1040132                 | C/T  | NA                 | NA                            | NA                 |
| <i>Desi_wild_1040799</i> | NA                                  | <i>Ca_desi_denovo</i> | 1040799                 | A/G  | NA                 | NA                            | NA                 |
| <i>Desi_wild_1040826</i> | NA                                  | <i>Ca_desi_denovo</i> | 1040826                 | G/A  | NA                 | NA                            | NA                 |
| <i>Desi_wild_1041602</i> | NA                                  | <i>Ca_desi_denovo</i> | 1041602                 | A/G  | NA                 | NA                            | NA                 |
| <i>Desi_wild_1041819</i> | NA                                  | <i>Ca_desi_denovo</i> | 1041819                 | C/T  | NA                 | NA                            | NA                 |
| <i>Desi_wild_1041969</i> | NA                                  | <i>Ca_desi_denovo</i> | 1041969                 | G/A  | NA                 | NA                            | NA                 |
| <i>Desi_wild_1042060</i> | NA                                  | <i>Ca_desi_denovo</i> | 1042060                 | G/C  | NA                 | NA                            | NA                 |
| <i>Desi_wild_1042093</i> | NA                                  | <i>Ca_desi_denovo</i> | 1042093                 | C/T  | NA                 | NA                            | NA                 |
| <i>Desi_wild_1042169</i> | NA                                  | <i>Ca_desi_denovo</i> | 1042169                 | C/T  | NA                 | NA                            | NA                 |
| <i>Desi_wild_1042237</i> | NA                                  | <i>Ca_desi_denovo</i> | 1042237                 | T/G  | NA                 | NA                            | NA                 |
| <i>Desi_wild_1042275</i> | NA                                  | <i>Ca_desi_denovo</i> | 1042275                 | A/G  | NA                 | NA                            | NA                 |
| <i>Desi_wild_1042308</i> | NA                                  | <i>Ca_desi_denovo</i> | 1042308                 | T/C  | NA                 | NA                            | NA                 |
| <i>Desi_wild_1042991</i> | NA                                  | <i>Ca_desi_denovo</i> | 1042991                 | G/A  | NA                 | NA                            | NA                 |
| <i>Desi_wild_1043223</i> | NA                                  | <i>Ca_desi_denovo</i> | 1043223                 | A/C  | NA                 | NA                            | NA                 |
| <i>Desi_wild_1043509</i> | NA                                  | <i>Ca_desi_denovo</i> | 1043509                 | T/C  | NA                 | NA                            | NA                 |
| <i>Desi_wild_1044976</i> | NA                                  | <i>Ca_desi_denovo</i> | 1044976                 | T/C  | NA                 | NA                            | NA                 |
| <i>Desi_wild_1045142</i> | NA                                  | <i>Ca_desi_denovo</i> | 1045142                 | G/C  | NA                 | NA                            | NA                 |
| <i>Desi_wild_1045840</i> | NA                                  | <i>Ca_desi_denovo</i> | 1045840                 | G/A  | NA                 | NA                            | NA                 |
| <i>Desi_wild_1045913</i> | NA                                  | <i>Ca_desi_denovo</i> | 1045913                 | T/A  | NA                 | NA                            | NA                 |
| <i>Desi_wild_1045949</i> | NA                                  | <i>Ca_desi_denovo</i> | 1045949                 | A/G  | NA                 | NA                            | NA                 |
| <i>Desi_wild_1046000</i> | NA                                  | <i>Ca_desi_denovo</i> | 1046000                 | G/C  | NA                 | NA                            | NA                 |
| <i>Desi_wild_1046451</i> | NA                                  | <i>Ca_desi_denovo</i> | 1046451                 | C/A  | NA                 | NA                            | NA                 |
| <i>Desi_wild_1046549</i> | NA                                  | <i>Ca_desi_denovo</i> | 1046549                 | A/C  | NA                 | NA                            | NA                 |
| <i>Desi_wild_1047497</i> | NA                                  | <i>Ca_desi_denovo</i> | 1047497                 | T/C  | NA                 | NA                            | NA                 |
| <i>Desi_wild_1047510</i> | NA                                  | <i>Ca_desi_denovo</i> | 1047510                 | G/A  | NA                 | NA                            | NA                 |
| <i>Desi_wild_1047921</i> | NA                                  | <i>Ca_desi_denovo</i> | 1047921                 | C/G  | NA                 | NA                            | NA                 |
| <i>Desi_wild_1048656</i> | NA                                  | <i>Ca_desi_denovo</i> | 1048656                 | A/G  | NA                 | NA                            | NA                 |
| <i>Desi_wild_1049147</i> | NA                                  | <i>Ca_desi_denovo</i> | 1049147                 | C/T  | NA                 | NA                            | NA                 |
| <i>Desi_wild_1049722</i> | NA                                  | <i>Ca_desi_denovo</i> | 1049722                 | C/T  | NA                 | NA                            | NA                 |
| <i>Desi_wild_1049725</i> | NA                                  | <i>Ca_desi_denovo</i> | 1049725                 | A/C  | NA                 | NA                            | NA                 |
| <i>Desi_wild_1049896</i> | NA                                  | <i>Ca_desi_denovo</i> | 1049896                 | C/T  | NA                 | NA                            | NA                 |
| <i>Desi_wild_1051199</i> | NA                                  | <i>Ca_desi_denovo</i> | 1051199                 | T/C  | NA                 | NA                            | NA                 |
| <i>Desi_wild_1053015</i> | NA                                  | <i>Ca_desi_denovo</i> | 1053015                 | A/G  | NA                 | NA                            | NA                 |
| <i>Desi_wild_1055391</i> | NA                                  | <i>Ca_desi_denovo</i> | 1055391                 | A/G  | NA                 | NA                            | NA                 |
| <i>Desi_wild_1056308</i> | NA                                  | <i>Ca_desi_denovo</i> | 1056308                 | T/C  | NA                 | NA                            | NA                 |
| <i>Desi_wild_1056444</i> | NA                                  | <i>Ca_desi_denovo</i> | 1056444                 | A/G  | NA                 | NA                            | NA                 |
| <i>Desi_wild_1057417</i> | NA                                  | <i>Ca_desi_denovo</i> | 1057417                 | C/G  | NA                 | NA                            | NA                 |
| <i>Desi_wild_1059510</i> | NA                                  | <i>Ca_desi_denovo</i> | 1059510                 | G/A  | NA                 | NA                            | NA                 |
| <i>Desi_wild_1059564</i> | NA                                  | <i>Ca_desi_denovo</i> | 1059564                 | T/C  | NA                 | NA                            | NA                 |
| <i>Desi_wild_1059908</i> | NA                                  | <i>Ca_desi_denovo</i> | 1059908                 | T/C  | NA                 | NA                            | NA                 |
| <i>Desi_wild_1060861</i> | NA                                  | <i>Ca_desi_denovo</i> | 1060861                 | A/G  | NA                 | NA                            | NA                 |

| SNP IDs                  | NCBI dbSNP accession IDs (NCBI_SS#) | Chromosomes           | Physical positions (bp) | SNPs | Gene accession IDs | Sequence components of genome | Putative functions |
|--------------------------|-------------------------------------|-----------------------|-------------------------|------|--------------------|-------------------------------|--------------------|
| <i>Desi_wild_1060915</i> | NA                                  | <i>Ca_desi_denovo</i> | 1060915                 | G/C  | NA                 | NA                            | NA                 |
| <i>Desi_wild_1062133</i> | NA                                  | <i>Ca_desi_denovo</i> | 1062133                 | A/G  | NA                 | NA                            | NA                 |
| <i>Desi_wild_1062144</i> | NA                                  | <i>Ca_desi_denovo</i> | 1062144                 | G/T  | NA                 | NA                            | NA                 |
| <i>Desi_wild_1062556</i> | NA                                  | <i>Ca_desi_denovo</i> | 1062556                 | T/G  | NA                 | NA                            | NA                 |
| <i>Desi_wild_1064048</i> | NA                                  | <i>Ca_desi_denovo</i> | 1064048                 | C/G  | NA                 | NA                            | NA                 |
| <i>Desi_wild_1065667</i> | NA                                  | <i>Ca_desi_denovo</i> | 1065667                 | G/T  | NA                 | NA                            | NA                 |
| <i>Desi_wild_1065694</i> | NA                                  | <i>Ca_desi_denovo</i> | 1065694                 | T/C  | NA                 | NA                            | NA                 |
| <i>Desi_wild_1066127</i> | NA                                  | <i>Ca_desi_denovo</i> | 1066127                 | C/G  | NA                 | NA                            | NA                 |
| <i>Desi_wild_1066190</i> | NA                                  | <i>Ca_desi_denovo</i> | 1066190                 | C/T  | NA                 | NA                            | NA                 |
| <i>Desi_wild_1067877</i> | NA                                  | <i>Ca_desi_denovo</i> | 1067877                 | A/G  | NA                 | NA                            | NA                 |
| <i>Desi_wild_1067889</i> | NA                                  | <i>Ca_desi_denovo</i> | 1067889                 | G/A  | NA                 | NA                            | NA                 |
| <i>Desi_wild_1068836</i> | NA                                  | <i>Ca_desi_denovo</i> | 1068836                 | G/C  | NA                 | NA                            | NA                 |
| <i>Desi_wild_1068893</i> | NA                                  | <i>Ca_desi_denovo</i> | 1068893                 | G/T  | NA                 | NA                            | NA                 |
| <i>Desi_wild_1069115</i> | NA                                  | <i>Ca_desi_denovo</i> | 1069115                 | T/C  | NA                 | NA                            | NA                 |
| <i>Desi_wild_1069230</i> | NA                                  | <i>Ca_desi_denovo</i> | 1069230                 | C/A  | NA                 | NA                            | NA                 |
| <i>Desi_wild_1069320</i> | NA                                  | <i>Ca_desi_denovo</i> | 1069320                 | C/A  | NA                 | NA                            | NA                 |
| <i>Desi_wild_1069324</i> | NA                                  | <i>Ca_desi_denovo</i> | 1069324                 | G/C  | NA                 | NA                            | NA                 |
| <i>Desi_wild_1069514</i> | NA                                  | <i>Ca_desi_denovo</i> | 1069514                 | G/A  | NA                 | NA                            | NA                 |
| <i>Desi_wild_1069583</i> | NA                                  | <i>Ca_desi_denovo</i> | 1069583                 | G/A  | NA                 | NA                            | NA                 |
| <i>Desi_wild_1070217</i> | NA                                  | <i>Ca_desi_denovo</i> | 1070217                 | C/G  | NA                 | NA                            | NA                 |
| <i>Desi_wild_1070253</i> | NA                                  | <i>Ca_desi_denovo</i> | 1070253                 | G/A  | NA                 | NA                            | NA                 |
| <i>Desi_wild_1071364</i> | NA                                  | <i>Ca_desi_denovo</i> | 1071364                 | G/C  | NA                 | NA                            | NA                 |
| <i>Desi_wild_1071956</i> | NA                                  | <i>Ca_desi_denovo</i> | 1071956                 | C/G  | NA                 | NA                            | NA                 |
| <i>Desi_wild_1073192</i> | NA                                  | <i>Ca_desi_denovo</i> | 1073192                 | T/C  | NA                 | NA                            | NA                 |
| <i>Desi_wild_1073592</i> | NA                                  | <i>Ca_desi_denovo</i> | 1073592                 | T/C  | NA                 | NA                            | NA                 |
| <i>Desi_wild_1073678</i> | NA                                  | <i>Ca_desi_denovo</i> | 1073678                 | A/T  | NA                 | NA                            | NA                 |
| <i>Desi_wild_1073894</i> | NA                                  | <i>Ca_desi_denovo</i> | 1073894                 | A/G  | NA                 | NA                            | NA                 |
| <i>Desi_wild_1073930</i> | NA                                  | <i>Ca_desi_denovo</i> | 1073930                 | T/A  | NA                 | NA                            | NA                 |
| <i>Desi_wild_1074566</i> | NA                                  | <i>Ca_desi_denovo</i> | 1074566                 | C/A  | NA                 | NA                            | NA                 |
| <i>Desi_wild_1074575</i> | NA                                  | <i>Ca_desi_denovo</i> | 1074575                 | C/T  | NA                 | NA                            | NA                 |
| <i>Desi_wild_1074960</i> | NA                                  | <i>Ca_desi_denovo</i> | 1074960                 | T/C  | NA                 | NA                            | NA                 |
| <i>Desi_wild_1075547</i> | NA                                  | <i>Ca_desi_denovo</i> | 1075547                 | T/C  | NA                 | NA                            | NA                 |
| <i>Desi_wild_1075592</i> | NA                                  | <i>Ca_desi_denovo</i> | 1075592                 | G/A  | NA                 | NA                            | NA                 |
| <i>Desi_wild_1076107</i> | NA                                  | <i>Ca_desi_denovo</i> | 1076107                 | G/A  | NA                 | NA                            | NA                 |
| <i>Desi_wild_1076119</i> | NA                                  | <i>Ca_desi_denovo</i> | 1076119                 | G/C  | NA                 | NA                            | NA                 |
| <i>Desi_wild_1076717</i> | NA                                  | <i>Ca_desi_denovo</i> | 1076717                 | A/G  | NA                 | NA                            | NA                 |
| <i>Desi_wild_1076729</i> | NA                                  | <i>Ca_desi_denovo</i> | 1076729                 | A/G  | NA                 | NA                            | NA                 |
| <i>Desi_wild_1078761</i> | NA                                  | <i>Ca_desi_denovo</i> | 1078761                 | G/A  | NA                 | NA                            | NA                 |
| <i>Desi_wild_1079317</i> | NA                                  | <i>Ca_desi_denovo</i> | 1079317                 | G/C  | NA                 | NA                            | NA                 |
| <i>Desi_wild_1079319</i> | NA                                  | <i>Ca_desi_denovo</i> | 1079319                 | C/A  | NA                 | NA                            | NA                 |
| <i>Desi_wild_1079396</i> | NA                                  | <i>Ca_desi_denovo</i> | 1079396                 | C/G  | NA                 | NA                            | NA                 |
| <i>Desi_wild_1079416</i> | NA                                  | <i>Ca_desi_denovo</i> | 1079416                 | G/A  | NA                 | NA                            | NA                 |
| <i>Desi_wild_1080947</i> | NA                                  | <i>Ca_desi_denovo</i> | 1080947                 | T/G  | NA                 | NA                            | NA                 |
| <i>Desi_wild_1080977</i> | NA                                  | <i>Ca_desi_denovo</i> | 1080977                 | A/G  | NA                 | NA                            | NA                 |

| SNP IDs                  | NCBI dbSNP accession IDs (NCBI_SS#) | Chromosomes           | Physical positions (bp) | SNPs | Gene accession IDs | Sequence components of genome | Putative functions |
|--------------------------|-------------------------------------|-----------------------|-------------------------|------|--------------------|-------------------------------|--------------------|
| <i>Desi_wild_1081244</i> | NA                                  | <i>Ca_desi_denovo</i> | 1081244                 | C/T  | NA                 | NA                            | NA                 |
| <i>Desi_wild_1081768</i> | NA                                  | <i>Ca_desi_denovo</i> | 1081768                 | G/A  | NA                 | NA                            | NA                 |
| <i>Desi_wild_1083092</i> | NA                                  | <i>Ca_desi_denovo</i> | 1083092                 | C/G  | NA                 | NA                            | NA                 |
| <i>Desi_wild_1083153</i> | NA                                  | <i>Ca_desi_denovo</i> | 1083153                 | C/T  | NA                 | NA                            | NA                 |
| <i>Desi_wild_1084090</i> | NA                                  | <i>Ca_desi_denovo</i> | 1084090                 | G/T  | NA                 | NA                            | NA                 |
| <i>Desi_wild_1084093</i> | NA                                  | <i>Ca_desi_denovo</i> | 1084093                 | T/C  | NA                 | NA                            | NA                 |
| <i>Desi_wild_1084343</i> | NA                                  | <i>Ca_desi_denovo</i> | 1084343                 | G/C  | NA                 | NA                            | NA                 |
| <i>Desi_wild_1084393</i> | NA                                  | <i>Ca_desi_denovo</i> | 1084393                 | G/T  | NA                 | NA                            | NA                 |
| <i>Desi_wild_1085614</i> | NA                                  | <i>Ca_desi_denovo</i> | 1085614                 | C/T  | NA                 | NA                            | NA                 |
| <i>Desi_wild_1085615</i> | NA                                  | <i>Ca_desi_denovo</i> | 1085615                 | G/A  | NA                 | NA                            | NA                 |
| <i>Desi_wild_1086089</i> | NA                                  | <i>Ca_desi_denovo</i> | 1086089                 | C/T  | NA                 | NA                            | NA                 |
| <i>Desi_wild_1086518</i> | NA                                  | <i>Ca_desi_denovo</i> | 1086518                 | C/T  | NA                 | NA                            | NA                 |
| <i>Desi_wild_1086794</i> | NA                                  | <i>Ca_desi_denovo</i> | 1086794                 | C/G  | NA                 | NA                            | NA                 |
| <i>Desi_wild_1086820</i> | NA                                  | <i>Ca_desi_denovo</i> | 1086820                 | T/C  | NA                 | NA                            | NA                 |
| <i>Desi_wild_1087448</i> | NA                                  | <i>Ca_desi_denovo</i> | 1087448                 | A/C  | NA                 | NA                            | NA                 |
| <i>Desi_wild_1088149</i> | NA                                  | <i>Ca_desi_denovo</i> | 1088149                 | A/G  | NA                 | NA                            | NA                 |
| <i>Desi_wild_1088405</i> | NA                                  | <i>Ca_desi_denovo</i> | 1088405                 | A/C  | NA                 | NA                            | NA                 |
| <i>Desi_wild_1088565</i> | NA                                  | <i>Ca_desi_denovo</i> | 1088565                 | A/G  | NA                 | NA                            | NA                 |
| <i>Desi_wild_1088568</i> | NA                                  | <i>Ca_desi_denovo</i> | 1088568                 | A/G  | NA                 | NA                            | NA                 |
| <i>Desi_wild_1089335</i> | NA                                  | <i>Ca_desi_denovo</i> | 1089335                 | T/G  | NA                 | NA                            | NA                 |
| <i>Desi_wild_1089344</i> | NA                                  | <i>Ca_desi_denovo</i> | 1089344                 | T/C  | NA                 | NA                            | NA                 |
| <i>Desi_wild_1089622</i> | NA                                  | <i>Ca_desi_denovo</i> | 1089622                 | C/T  | NA                 | NA                            | NA                 |
| <i>Desi_wild_1089945</i> | NA                                  | <i>Ca_desi_denovo</i> | 1089945                 | T/G  | NA                 | NA                            | NA                 |
| <i>Desi_wild_1090016</i> | NA                                  | <i>Ca_desi_denovo</i> | 1090016                 | G/A  | NA                 | NA                            | NA                 |
| <i>Desi_wild_1090027</i> | NA                                  | <i>Ca_desi_denovo</i> | 1090027                 | G/A  | NA                 | NA                            | NA                 |
| <i>Desi_wild_1091268</i> | NA                                  | <i>Ca_desi_denovo</i> | 1091268                 | C/T  | NA                 | NA                            | NA                 |
| <i>Desi_wild_1092882</i> | NA                                  | <i>Ca_desi_denovo</i> | 1092882                 | T/G  | NA                 | NA                            | NA                 |
| <i>Desi_wild_1093267</i> | NA                                  | <i>Ca_desi_denovo</i> | 1093267                 | T/C  | NA                 | NA                            | NA                 |
| <i>Desi_wild_1093270</i> | NA                                  | <i>Ca_desi_denovo</i> | 1093270                 | T/C  | NA                 | NA                            | NA                 |
| <i>Desi_wild_1093276</i> | NA                                  | <i>Ca_desi_denovo</i> | 1093276                 | C/G  | NA                 | NA                            | NA                 |
| <i>Desi_wild_1093279</i> | NA                                  | <i>Ca_desi_denovo</i> | 1093279                 | C/G  | NA                 | NA                            | NA                 |
| <i>Desi_wild_1094070</i> | NA                                  | <i>Ca_desi_denovo</i> | 1094070                 | G/C  | NA                 | NA                            | NA                 |
| <i>Desi_wild_1094079</i> | NA                                  | <i>Ca_desi_denovo</i> | 1094079                 | A/G  | NA                 | NA                            | NA                 |
| <i>Desi_wild_1094711</i> | NA                                  | <i>Ca_desi_denovo</i> | 1094711                 | T/G  | NA                 | NA                            | NA                 |
| <i>Desi_wild_1095456</i> | NA                                  | <i>Ca_desi_denovo</i> | 1095456                 | G/C  | NA                 | NA                            | NA                 |
| <i>Desi_wild_1095694</i> | NA                                  | <i>Ca_desi_denovo</i> | 1095694                 | G/A  | NA                 | NA                            | NA                 |
| <i>Desi_wild_1096917</i> | NA                                  | <i>Ca_desi_denovo</i> | 1096917                 | C/G  | NA                 | NA                            | NA                 |
| <i>Desi_wild_1097448</i> | NA                                  | <i>Ca_desi_denovo</i> | 1097448                 | C/T  | NA                 | NA                            | NA                 |
| <i>Desi_wild_1097457</i> | NA                                  | <i>Ca_desi_denovo</i> | 1097457                 | T/A  | NA                 | NA                            | NA                 |
| <i>Desi_wild_1098046</i> | NA                                  | <i>Ca_desi_denovo</i> | 1098046                 | T/C  | NA                 | NA                            | NA                 |
| <i>Desi_wild_1098091</i> | NA                                  | <i>Ca_desi_denovo</i> | 1098091                 | A/T  | NA                 | NA                            | NA                 |
| <i>Desi_wild_1098100</i> | NA                                  | <i>Ca_desi_denovo</i> | 1098100                 | T/C  | NA                 | NA                            | NA                 |
| <i>Desi_wild_1098132</i> | NA                                  | <i>Ca_desi_denovo</i> | 1098132                 | A/G  | NA                 | NA                            | NA                 |
| <i>Desi_wild_1098138</i> | NA                                  | <i>Ca_desi_denovo</i> | 1098138                 | G/T  | NA                 | NA                            | NA                 |



| SNP IDs                  | NCBI dbSNP accession IDs (NCBI_SS#) | Chromosomes           | Physical positions (bp) | SNPs | Gene accession IDs | Sequence components of genome | Putative functions |
|--------------------------|-------------------------------------|-----------------------|-------------------------|------|--------------------|-------------------------------|--------------------|
| <i>Desi_wild_1098385</i> | NA                                  | <i>Ca_desi_denovo</i> | 1098385                 | A/T  | NA                 | NA                            | NA                 |
| <i>Desi_wild_1098386</i> | NA                                  | <i>Ca_desi_denovo</i> | 1098386                 | C/T  | NA                 | NA                            | NA                 |
| <i>Desi_wild_1098517</i> | NA                                  | <i>Ca_desi_denovo</i> | 1098517                 | C/T  | NA                 | NA                            | NA                 |
| <i>Desi_wild_1098519</i> | NA                                  | <i>Ca_desi_denovo</i> | 1098519                 | C/G  | NA                 | NA                            | NA                 |
| <i>Desi_wild_1098720</i> | NA                                  | <i>Ca_desi_denovo</i> | 1098720                 | C/T  | NA                 | NA                            | NA                 |
| <i>Desi_wild_1099281</i> | NA                                  | <i>Ca_desi_denovo</i> | 1099281                 | G/C  | NA                 | NA                            | NA                 |
| <i>Desi_wild_1099285</i> | NA                                  | <i>Ca_desi_denovo</i> | 1099285                 | G/A  | NA                 | NA                            | NA                 |
| <i>Desi_wild_1100930</i> | NA                                  | <i>Ca_desi_denovo</i> | 1100930                 | T/C  | NA                 | NA                            | NA                 |
| <i>Desi_wild_1100984</i> | NA                                  | <i>Ca_desi_denovo</i> | 1100984                 | C/T  | NA                 | NA                            | NA                 |
| <i>Desi_wild_1101035</i> | NA                                  | <i>Ca_desi_denovo</i> | 1101035                 | A/C  | NA                 | NA                            | NA                 |
| <i>Desi_wild_1101669</i> | NA                                  | <i>Ca_desi_denovo</i> | 1101669                 | G/A  | NA                 | NA                            | NA                 |
| <i>Desi_wild_1102480</i> | NA                                  | <i>Ca_desi_denovo</i> | 1102480                 | C/G  | NA                 | NA                            | NA                 |
| <i>Desi_wild_1102520</i> | NA                                  | <i>Ca_desi_denovo</i> | 1102520                 | A/C  | NA                 | NA                            | NA                 |
| <i>Desi_wild_1104699</i> | NA                                  | <i>Ca_desi_denovo</i> | 1104699                 | T/C  | NA                 | NA                            | NA                 |
| <i>Desi_wild_1104971</i> | NA                                  | <i>Ca_desi_denovo</i> | 1104971                 | G/T  | NA                 | NA                            | NA                 |
| <i>Desi_wild_1105630</i> | NA                                  | <i>Ca_desi_denovo</i> | 1105630                 | C/T  | NA                 | NA                            | NA                 |
| <i>Desi_wild_1105704</i> | NA                                  | <i>Ca_desi_denovo</i> | 1105704                 | C/T  | NA                 | NA                            | NA                 |
| <i>Desi_wild_1105982</i> | NA                                  | <i>Ca_desi_denovo</i> | 1105982                 | G/A  | NA                 | NA                            | NA                 |
| <i>Desi_wild_1106235</i> | NA                                  | <i>Ca_desi_denovo</i> | 1106235                 | A/T  | NA                 | NA                            | NA                 |
| <i>Desi_wild_1106730</i> | NA                                  | <i>Ca_desi_denovo</i> | 1106730                 | G/C  | NA                 | NA                            | NA                 |
| <i>Desi_wild_1106738</i> | NA                                  | <i>Ca_desi_denovo</i> | 1106738                 | T/C  | NA                 | NA                            | NA                 |
| <i>Desi_wild_1106886</i> | NA                                  | <i>Ca_desi_denovo</i> | 1106886                 | T/C  | NA                 | NA                            | NA                 |
| <i>Desi_wild_1106919</i> | NA                                  | <i>Ca_desi_denovo</i> | 1106919                 | G/T  | NA                 | NA                            | NA                 |
| <i>Desi_wild_1106935</i> | NA                                  | <i>Ca_desi_denovo</i> | 1106935                 | C/A  | NA                 | NA                            | NA                 |
| <i>Desi_wild_1108522</i> | NA                                  | <i>Ca_desi_denovo</i> | 1108522                 | T/G  | NA                 | NA                            | NA                 |
| <i>Desi_wild_1111706</i> | NA                                  | <i>Ca_desi_denovo</i> | 1111706                 | C/G  | NA                 | NA                            | NA                 |
| <i>Desi_wild_1111726</i> | NA                                  | <i>Ca_desi_denovo</i> | 1111726                 | C/T  | NA                 | NA                            | NA                 |
| <i>Desi_wild_1111992</i> | NA                                  | <i>Ca_desi_denovo</i> | 1111992                 | G/A  | NA                 | NA                            | NA                 |
| <i>Desi_wild_1112064</i> | NA                                  | <i>Ca_desi_denovo</i> | 1112064                 | G/A  | NA                 | NA                            | NA                 |
| <i>Desi_wild_1112841</i> | NA                                  | <i>Ca_desi_denovo</i> | 1112841                 | C/A  | NA                 | NA                            | NA                 |
| <i>Desi_wild_1114436</i> | NA                                  | <i>Ca_desi_denovo</i> | 1114436                 | C/T  | NA                 | NA                            | NA                 |
| <i>Desi_wild_1114458</i> | NA                                  | <i>Ca_desi_denovo</i> | 1114458                 | C/A  | NA                 | NA                            | NA                 |
| <i>Desi_wild_1114636</i> | NA                                  | <i>Ca_desi_denovo</i> | 1114636                 | A/G  | NA                 | NA                            | NA                 |
| <i>Desi_wild_1114660</i> | NA                                  | <i>Ca_desi_denovo</i> | 1114660                 | G/C  | NA                 | NA                            | NA                 |
| <i>Desi_wild_1115406</i> | NA                                  | <i>Ca_desi_denovo</i> | 1115406                 | G/A  | NA                 | NA                            | NA                 |
| <i>Desi_wild_1115799</i> | NA                                  | <i>Ca_desi_denovo</i> | 1115799                 | C/T  | NA                 | NA                            | NA                 |
| <i>Desi_wild_1116147</i> | NA                                  | <i>Ca_desi_denovo</i> | 1116147                 | A/C  | NA                 | NA                            | NA                 |
| <i>Desi_wild_1116355</i> | NA                                  | <i>Ca_desi_denovo</i> | 1116355                 | A/G  | NA                 | NA                            | NA                 |
| <i>Desi_wild_1116385</i> | NA                                  | <i>Ca_desi_denovo</i> | 1116385                 | G/A  | NA                 | NA                            | NA                 |
| <i>Desi_wild_1116519</i> | NA                                  | <i>Ca_desi_denovo</i> | 1116519                 | C/T  | NA                 | NA                            | NA                 |
| <i>Desi_wild_1116604</i> | NA                                  | <i>Ca_desi_denovo</i> | 1116604                 | T/C  | NA                 | NA                            | NA                 |
| <i>Desi_wild_1117638</i> | NA                                  | <i>Ca_desi_denovo</i> | 1117638                 | G/A  | NA                 | NA                            | NA                 |
| <i>Desi_wild_1117666</i> | NA                                  | <i>Ca_desi_denovo</i> | 1117666                 | C/T  | NA                 | NA                            | NA                 |
| <i>Desi_wild_1117724</i> | NA                                  | <i>Ca_desi_denovo</i> | 1117724                 | T/G  | NA                 | NA                            | NA                 |

| SNP IDs                  | NCBI dbSNP accession IDs (NCBI_SS#) | Chromosomes           | Physical positions (bp) | SNPs | Gene accession IDs | Sequence components of genome | Putative functions |
|--------------------------|-------------------------------------|-----------------------|-------------------------|------|--------------------|-------------------------------|--------------------|
| <i>Desi_wild_1118217</i> | NA                                  | <i>Ca_desi_denovo</i> | 1118217                 | C/G  | NA                 | NA                            | NA                 |
| <i>Desi_wild_1118394</i> | NA                                  | <i>Ca_desi_denovo</i> | 1118394                 | G/A  | NA                 | NA                            | NA                 |
| <i>Desi_wild_1118583</i> | NA                                  | <i>Ca_desi_denovo</i> | 1118583                 | A/C  | NA                 | NA                            | NA                 |
| <i>Desi_wild_1118616</i> | NA                                  | <i>Ca_desi_denovo</i> | 1118616                 | C/T  | NA                 | NA                            | NA                 |
| <i>Desi_wild_1118680</i> | NA                                  | <i>Ca_desi_denovo</i> | 1118680                 | G/T  | NA                 | NA                            | NA                 |
| <i>Desi_wild_1118846</i> | NA                                  | <i>Ca_desi_denovo</i> | 1118846                 | C/T  | NA                 | NA                            | NA                 |
| <i>Desi_wild_1119396</i> | NA                                  | <i>Ca_desi_denovo</i> | 1119396                 | C/A  | NA                 | NA                            | NA                 |
| <i>Desi_wild_1120242</i> | NA                                  | <i>Ca_desi_denovo</i> | 1120242                 | T/C  | NA                 | NA                            | NA                 |
| <i>Desi_wild_1121027</i> | NA                                  | <i>Ca_desi_denovo</i> | 1121027                 | C/T  | NA                 | NA                            | NA                 |
| <i>Desi_wild_1121756</i> | NA                                  | <i>Ca_desi_denovo</i> | 1121756                 | T/C  | NA                 | NA                            | NA                 |
| <i>Desi_wild_1122128</i> | NA                                  | <i>Ca_desi_denovo</i> | 1122128                 | G/A  | NA                 | NA                            | NA                 |
| <i>Desi_wild_1122145</i> | NA                                  | <i>Ca_desi_denovo</i> | 1122145                 | G/T  | NA                 | NA                            | NA                 |
| <i>Desi_wild_1122487</i> | NA                                  | <i>Ca_desi_denovo</i> | 1122487                 | T/C  | NA                 | NA                            | NA                 |
| <i>Desi_wild_1122496</i> | NA                                  | <i>Ca_desi_denovo</i> | 1122496                 | A/G  | NA                 | NA                            | NA                 |
| <i>Desi_wild_1123367</i> | NA                                  | <i>Ca_desi_denovo</i> | 1123367                 | C/A  | NA                 | NA                            | NA                 |
| <i>Desi_wild_1124251</i> | NA                                  | <i>Ca_desi_denovo</i> | 1124251                 | G/A  | NA                 | NA                            | NA                 |
| <i>Desi_wild_1125682</i> | NA                                  | <i>Ca_desi_denovo</i> | 1125682                 | C/T  | NA                 | NA                            | NA                 |
| <i>Desi_wild_1126941</i> | NA                                  | <i>Ca_desi_denovo</i> | 1126941                 | G/T  | NA                 | NA                            | NA                 |
| <i>Desi_wild_1127223</i> | NA                                  | <i>Ca_desi_denovo</i> | 1127223                 | C/G  | NA                 | NA                            | NA                 |
| <i>Desi_wild_1127625</i> | NA                                  | <i>Ca_desi_denovo</i> | 1127625                 | A/G  | NA                 | NA                            | NA                 |
| <i>Desi_wild_1128291</i> | NA                                  | <i>Ca_desi_denovo</i> | 1128291                 | A/G  | NA                 | NA                            | NA                 |
| <i>Desi_wild_1129071</i> | NA                                  | <i>Ca_desi_denovo</i> | 1129071                 | A/C  | NA                 | NA                            | NA                 |
| <i>Desi_wild_1130231</i> | NA                                  | <i>Ca_desi_denovo</i> | 1130231                 | C/T  | NA                 | NA                            | NA                 |
| <i>Desi_wild_1130237</i> | NA                                  | <i>Ca_desi_denovo</i> | 1130237                 | C/T  | NA                 | NA                            | NA                 |
| <i>Desi_wild_1131948</i> | NA                                  | <i>Ca_desi_denovo</i> | 1131948                 | A/G  | NA                 | NA                            | NA                 |
| <i>Desi_wild_1131951</i> | NA                                  | <i>Ca_desi_denovo</i> | 1131951                 | C/G  | NA                 | NA                            | NA                 |
| <i>Desi_wild_1132394</i> | NA                                  | <i>Ca_desi_denovo</i> | 1132394                 | A/G  | NA                 | NA                            | NA                 |
| <i>Desi_wild_1132687</i> | NA                                  | <i>Ca_desi_denovo</i> | 1132687                 | C/T  | NA                 | NA                            | NA                 |
| <i>Desi_wild_1132690</i> | NA                                  | <i>Ca_desi_denovo</i> | 1132690                 | A/G  | NA                 | NA                            | NA                 |
| <i>Desi_wild_1132693</i> | NA                                  | <i>Ca_desi_denovo</i> | 1132693                 | C/T  | NA                 | NA                            | NA                 |
| <i>Desi_wild_1133820</i> | NA                                  | <i>Ca_desi_denovo</i> | 1133820                 | C/G  | NA                 | NA                            | NA                 |
| <i>Desi_wild_1133850</i> | NA                                  | <i>Ca_desi_denovo</i> | 1133850                 | A/G  | NA                 | NA                            | NA                 |
| <i>Desi_wild_1134255</i> | NA                                  | <i>Ca_desi_denovo</i> | 1134255                 | A/G  | NA                 | NA                            | NA                 |
| <i>Desi_wild_1134282</i> | NA                                  | <i>Ca_desi_denovo</i> | 1134282                 | C/T  | NA                 | NA                            | NA                 |
| <i>Desi_wild_1135006</i> | NA                                  | <i>Ca_desi_denovo</i> | 1135006                 | C/G  | NA                 | NA                            | NA                 |
| <i>Desi_wild_1136255</i> | NA                                  | <i>Ca_desi_denovo</i> | 1136255                 | C/T  | NA                 | NA                            | NA                 |
| <i>Desi_wild_1136604</i> | NA                                  | <i>Ca_desi_denovo</i> | 1136604                 | G/A  | NA                 | NA                            | NA                 |
| <i>Desi_wild_1137056</i> | NA                                  | <i>Ca_desi_denovo</i> | 1137056                 | A/G  | NA                 | NA                            | NA                 |
| <i>Desi_wild_1137083</i> | NA                                  | <i>Ca_desi_denovo</i> | 1137083                 | C/T  | NA                 | NA                            | NA                 |
| <i>Desi_wild_1137171</i> | NA                                  | <i>Ca_desi_denovo</i> | 1137171                 | T/G  | NA                 | NA                            | NA                 |
| <i>Desi_wild_1137577</i> | NA                                  | <i>Ca_desi_denovo</i> | 1137577                 | G/T  | NA                 | NA                            | NA                 |
| <i>Desi_wild_1140321</i> | NA                                  | <i>Ca_desi_denovo</i> | 1140321                 | C/T  | NA                 | NA                            | NA                 |
| <i>Desi_wild_1140509</i> | NA                                  | <i>Ca_desi_denovo</i> | 1140509                 | G/A  | NA                 | NA                            | NA                 |
| <i>Desi_wild_1140528</i> | NA                                  | <i>Ca_desi_denovo</i> | 1140528                 | C/T  | NA                 | NA                            | NA                 |

| SNP IDs                  | NCBI dbSNP accession IDs (NCBI_SS#) | Chromosomes           | Physical positions (bp) | SNPs | Gene accession IDs | Sequence components of genome | Putative functions |
|--------------------------|-------------------------------------|-----------------------|-------------------------|------|--------------------|-------------------------------|--------------------|
| <i>Desi_wild_1141799</i> | NA                                  | <i>Ca_desi_denovo</i> | 1141799                 | T/G  | NA                 | NA                            | NA                 |
| <i>Desi_wild_1141838</i> | NA                                  | <i>Ca_desi_denovo</i> | 1141838                 | A/G  | NA                 | NA                            | NA                 |
| <i>Desi_wild_1141890</i> | NA                                  | <i>Ca_desi_denovo</i> | 1141890                 | C/T  | NA                 | NA                            | NA                 |
| <i>Desi_wild_1141922</i> | NA                                  | <i>Ca_desi_denovo</i> | 1141922                 | T/C  | NA                 | NA                            | NA                 |
| <i>Desi_wild_1142752</i> | NA                                  | <i>Ca_desi_denovo</i> | 1142752                 | G/A  | NA                 | NA                            | NA                 |
| <i>Desi_wild_1143153</i> | NA                                  | <i>Ca_desi_denovo</i> | 1143153                 | T/G  | NA                 | NA                            | NA                 |
| <i>Desi_wild_1143439</i> | NA                                  | <i>Ca_desi_denovo</i> | 1143439                 | T/C  | NA                 | NA                            | NA                 |
| <i>Desi_wild_1143602</i> | NA                                  | <i>Ca_desi_denovo</i> | 1143602                 | A/C  | NA                 | NA                            | NA                 |
| <i>Desi_wild_1143603</i> | NA                                  | <i>Ca_desi_denovo</i> | 1143603                 | G/T  | NA                 | NA                            | NA                 |
| <i>Desi_wild_1144064</i> | NA                                  | <i>Ca_desi_denovo</i> | 1144064                 | C/T  | NA                 | NA                            | NA                 |
| <i>Desi_wild_1144883</i> | NA                                  | <i>Ca_desi_denovo</i> | 1144883                 | C/G  | NA                 | NA                            | NA                 |
| <i>Desi_wild_1146105</i> | NA                                  | <i>Ca_desi_denovo</i> | 1146105                 | G/A  | NA                 | NA                            | NA                 |
| <i>Desi_wild_1146840</i> | NA                                  | <i>Ca_desi_denovo</i> | 1146840                 | T/C  | NA                 | NA                            | NA                 |
| <i>Desi_wild_1146866</i> | NA                                  | <i>Ca_desi_denovo</i> | 1146866                 | T/C  | NA                 | NA                            | NA                 |
| <i>Desi_wild_1148663</i> | NA                                  | <i>Ca_desi_denovo</i> | 1148663                 | T/C  | NA                 | NA                            | NA                 |
| <i>Desi_wild_1150157</i> | NA                                  | <i>Ca_desi_denovo</i> | 1150157                 | A/C  | NA                 | NA                            | NA                 |
| <i>Desi_wild_1150309</i> | NA                                  | <i>Ca_desi_denovo</i> | 1150309                 | C/G  | NA                 | NA                            | NA                 |
| <i>Desi_wild_1150378</i> | NA                                  | <i>Ca_desi_denovo</i> | 1150378                 | A/C  | NA                 | NA                            | NA                 |
| <i>Desi_wild_1151590</i> | NA                                  | <i>Ca_desi_denovo</i> | 1151590                 | T/C  | NA                 | NA                            | NA                 |
| <i>Desi_wild_1153918</i> | NA                                  | <i>Ca_desi_denovo</i> | 1153918                 | T/C  | NA                 | NA                            | NA                 |
| <i>Desi_wild_1154756</i> | NA                                  | <i>Ca_desi_denovo</i> | 1154756                 | A/C  | NA                 | NA                            | NA                 |
| <i>Desi_wild_1154783</i> | NA                                  | <i>Ca_desi_denovo</i> | 1154783                 | T/C  | NA                 | NA                            | NA                 |
| <i>Desi_wild_1154834</i> | NA                                  | <i>Ca_desi_denovo</i> | 1154834                 | C/G  | NA                 | NA                            | NA                 |
| <i>Desi_wild_1156222</i> | NA                                  | <i>Ca_desi_denovo</i> | 1156222                 | C/G  | NA                 | NA                            | NA                 |
| <i>Desi_wild_1156306</i> | NA                                  | <i>Ca_desi_denovo</i> | 1156306                 | G/T  | NA                 | NA                            | NA                 |
| <i>Desi_wild_1156538</i> | NA                                  | <i>Ca_desi_denovo</i> | 1156538                 | G/A  | NA                 | NA                            | NA                 |
| <i>Desi_wild_1156763</i> | NA                                  | <i>Ca_desi_denovo</i> | 1156763                 | A/G  | NA                 | NA                            | NA                 |
| <i>Desi_wild_1157017</i> | NA                                  | <i>Ca_desi_denovo</i> | 1157017                 | G/T  | NA                 | NA                            | NA                 |
| <i>Desi_wild_1157340</i> | NA                                  | <i>Ca_desi_denovo</i> | 1157340                 | G/C  | NA                 | NA                            | NA                 |
| <i>Desi_wild_1158379</i> | NA                                  | <i>Ca_desi_denovo</i> | 1158379                 | A/G  | NA                 | NA                            | NA                 |
| <i>Desi_wild_1158424</i> | NA                                  | <i>Ca_desi_denovo</i> | 1158424                 | T/C  | NA                 | NA                            | NA                 |
| <i>Desi_wild_1158436</i> | NA                                  | <i>Ca_desi_denovo</i> | 1158436                 | A/G  | NA                 | NA                            | NA                 |
| <i>Desi_wild_1159635</i> | NA                                  | <i>Ca_desi_denovo</i> | 1159635                 | T/C  | NA                 | NA                            | NA                 |
| <i>Desi_wild_1159683</i> | NA                                  | <i>Ca_desi_denovo</i> | 1159683                 | T/C  | NA                 | NA                            | NA                 |
| <i>Desi_wild_1160823</i> | NA                                  | <i>Ca_desi_denovo</i> | 1160823                 | T/G  | NA                 | NA                            | NA                 |
| <i>Desi_wild_1160844</i> | NA                                  | <i>Ca_desi_denovo</i> | 1160844                 | G/A  | NA                 | NA                            | NA                 |
| <i>Desi_wild_1161894</i> | NA                                  | <i>Ca_desi_denovo</i> | 1161894                 | C/G  | NA                 | NA                            | NA                 |
| <i>Desi_wild_1161909</i> | NA                                  | <i>Ca_desi_denovo</i> | 1161909                 | C/T  | NA                 | NA                            | NA                 |
| <i>Desi_wild_1162100</i> | NA                                  | <i>Ca_desi_denovo</i> | 1162100                 | C/T  | NA                 | NA                            | NA                 |
| <i>Desi_wild_1162233</i> | NA                                  | <i>Ca_desi_denovo</i> | 1162233                 | C/T  | NA                 | NA                            | NA                 |
| <i>Desi_wild_1162240</i> | NA                                  | <i>Ca_desi_denovo</i> | 1162240                 | G/A  | NA                 | NA                            | NA                 |
| <i>Desi_wild_1162631</i> | NA                                  | <i>Ca_desi_denovo</i> | 1162631                 | A/G  | NA                 | NA                            | NA                 |
| <i>Desi_wild_1162688</i> | NA                                  | <i>Ca_desi_denovo</i> | 1162688                 | A/G  | NA                 | NA                            | NA                 |
| <i>Desi_wild_1164468</i> | NA                                  | <i>Ca_desi_denovo</i> | 1164468                 | T/C  | NA                 | NA                            | NA                 |

| SNP IDs                  | NCBI dbSNP accession IDs (NCBI_SS#) | Chromosomes           | Physical positions (bp) | SNPs | Gene accession IDs | Sequence components of genome | Putative functions |
|--------------------------|-------------------------------------|-----------------------|-------------------------|------|--------------------|-------------------------------|--------------------|
| <i>Desi_wild_1165182</i> | NA                                  | <i>Ca_desi_denovo</i> | 1165182                 | T/G  | NA                 | NA                            | NA                 |
| <i>Desi_wild_1165447</i> | NA                                  | <i>Ca_desi_denovo</i> | 1165447                 | A/G  | NA                 | NA                            | NA                 |
| <i>Desi_wild_1165832</i> | NA                                  | <i>Ca_desi_denovo</i> | 1165832                 | G/A  | NA                 | NA                            | NA                 |
| <i>Desi_wild_1165853</i> | NA                                  | <i>Ca_desi_denovo</i> | 1165853                 | A/G  | NA                 | NA                            | NA                 |
| <i>Desi_wild_1166127</i> | NA                                  | <i>Ca_desi_denovo</i> | 1166127                 | C/T  | NA                 | NA                            | NA                 |
| <i>Desi_wild_1166259</i> | NA                                  | <i>Ca_desi_denovo</i> | 1166259                 | C/G  | NA                 | NA                            | NA                 |
| <i>Desi_wild_1166713</i> | NA                                  | <i>Ca_desi_denovo</i> | 1166713                 | G/C  | NA                 | NA                            | NA                 |
| <i>Desi_wild_1166755</i> | NA                                  | <i>Ca_desi_denovo</i> | 1166755                 | G/C  | NA                 | NA                            | NA                 |
| <i>Desi_wild_1167314</i> | NA                                  | <i>Ca_desi_denovo</i> | 1167314                 | G/C  | NA                 | NA                            | NA                 |
| <i>Desi_wild_1167331</i> | NA                                  | <i>Ca_desi_denovo</i> | 1167331                 | G/C  | NA                 | NA                            | NA                 |
| <i>Desi_wild_1167406</i> | NA                                  | <i>Ca_desi_denovo</i> | 1167406                 | G/C  | NA                 | NA                            | NA                 |
| <i>Desi_wild_1167460</i> | NA                                  | <i>Ca_desi_denovo</i> | 1167460                 | G/A  | NA                 | NA                            | NA                 |
| <i>Desi_wild_1167521</i> | NA                                  | <i>Ca_desi_denovo</i> | 1167521                 | T/C  | NA                 | NA                            | NA                 |
| <i>Desi_wild_1167880</i> | NA                                  | <i>Ca_desi_denovo</i> | 1167880                 | G/C  | NA                 | NA                            | NA                 |
| <i>Desi_wild_1168040</i> | NA                                  | <i>Ca_desi_denovo</i> | 1168040                 | G/A  | NA                 | NA                            | NA                 |
| <i>Desi_wild_1170065</i> | NA                                  | <i>Ca_desi_denovo</i> | 1170065                 | T/G  | NA                 | NA                            | NA                 |
| <i>Desi_wild_1170128</i> | NA                                  | <i>Ca_desi_denovo</i> | 1170128                 | C/A  | NA                 | NA                            | NA                 |
| <i>Desi_wild_1170578</i> | NA                                  | <i>Ca_desi_denovo</i> | 1170578                 | C/G  | NA                 | NA                            | NA                 |
| <i>Desi_wild_1170638</i> | NA                                  | <i>Ca_desi_denovo</i> | 1170638                 | C/G  | NA                 | NA                            | NA                 |
| <i>Desi_wild_1170908</i> | NA                                  | <i>Ca_desi_denovo</i> | 1170908                 | A/G  | NA                 | NA                            | NA                 |
| <i>Desi_wild_1171581</i> | NA                                  | <i>Ca_desi_denovo</i> | 1171581                 | A/C  | NA                 | NA                            | NA                 |
| <i>Desi_wild_1171584</i> | NA                                  | <i>Ca_desi_denovo</i> | 1171584                 | G/A  | NA                 | NA                            | NA                 |
| <i>Desi_wild_1172893</i> | NA                                  | <i>Ca_desi_denovo</i> | 1172893                 | A/C  | NA                 | NA                            | NA                 |
| <i>Desi_wild_1173782</i> | NA                                  | <i>Ca_desi_denovo</i> | 1173782                 | G/C  | NA                 | NA                            | NA                 |
| <i>Desi_wild_1173790</i> | NA                                  | <i>Ca_desi_denovo</i> | 1173790                 | A/G  | NA                 | NA                            | NA                 |
| <i>Desi_wild_1174277</i> | NA                                  | <i>Ca_desi_denovo</i> | 1174277                 | C/T  | NA                 | NA                            | NA                 |
| <i>Desi_wild_1174300</i> | NA                                  | <i>Ca_desi_denovo</i> | 1174300                 | C/T  | NA                 | NA                            | NA                 |
| <i>Desi_wild_1174661</i> | NA                                  | <i>Ca_desi_denovo</i> | 1174661                 | C/T  | NA                 | NA                            | NA                 |
| <i>Desi_wild_1174667</i> | NA                                  | <i>Ca_desi_denovo</i> | 1174667                 | C/T  | NA                 | NA                            | NA                 |
| <i>Desi_wild_1176038</i> | NA                                  | <i>Ca_desi_denovo</i> | 1176038                 | C/T  | NA                 | NA                            | NA                 |
| <i>Desi_wild_1176047</i> | NA                                  | <i>Ca_desi_denovo</i> | 1176047                 | T/G  | NA                 | NA                            | NA                 |
| <i>Desi_wild_1176146</i> | NA                                  | <i>Ca_desi_denovo</i> | 1176146                 | C/G  | NA                 | NA                            | NA                 |
| <i>Desi_wild_1176173</i> | NA                                  | <i>Ca_desi_denovo</i> | 1176173                 | C/T  | NA                 | NA                            | NA                 |
| <i>Desi_wild_1176831</i> | NA                                  | <i>Ca_desi_denovo</i> | 1176831                 | C/G  | NA                 | NA                            | NA                 |
| <i>Desi_wild_1176894</i> | NA                                  | <i>Ca_desi_denovo</i> | 1176894                 | G/T  | NA                 | NA                            | NA                 |
| <i>Desi_wild_1176929</i> | NA                                  | <i>Ca_desi_denovo</i> | 1176929                 | C/T  | NA                 | NA                            | NA                 |
| <i>Desi_wild_1177614</i> | NA                                  | <i>Ca_desi_denovo</i> | 1177614                 | A/G  | NA                 | NA                            | NA                 |
| <i>Desi_wild_1178889</i> | NA                                  | <i>Ca_desi_denovo</i> | 1178889                 | A/G  | NA                 | NA                            | NA                 |
| <i>Desi_wild_1178891</i> | NA                                  | <i>Ca_desi_denovo</i> | 1178891                 | G/A  | NA                 | NA                            | NA                 |
| <i>Desi_wild_1179031</i> | NA                                  | <i>Ca_desi_denovo</i> | 1179031                 | T/C  | NA                 | NA                            | NA                 |
| <i>Desi_wild_1179530</i> | NA                                  | <i>Ca_desi_denovo</i> | 1179530                 | G/A  | NA                 | NA                            | NA                 |
| <i>Desi_wild_1179572</i> | NA                                  | <i>Ca_desi_denovo</i> | 1179572                 | A/G  | NA                 | NA                            | NA                 |
| <i>Desi_wild_1180329</i> | NA                                  | <i>Ca_desi_denovo</i> | 1180329                 | C/G  | NA                 | NA                            | NA                 |
| <i>Desi_wild_1180517</i> | NA                                  | <i>Ca_desi_denovo</i> | 1180517                 | C/T  | NA                 | NA                            | NA                 |

| SNP IDs                  | NCBI dbSNP accession IDs (NCBI_SS#) | Chromosomes           | Physical positions (bp) | SNPs | Gene accession IDs | Sequence components of genome | Putative functions |
|--------------------------|-------------------------------------|-----------------------|-------------------------|------|--------------------|-------------------------------|--------------------|
| <i>Desi_wild_1181742</i> | NA                                  | <i>Ca_desi_denovo</i> | 1181742                 | G/T  | NA                 | NA                            | NA                 |
| <i>Desi_wild_1181866</i> | NA                                  | <i>Ca_desi_denovo</i> | 1181866                 | T/G  | NA                 | NA                            | NA                 |
| <i>Desi_wild_1181993</i> | NA                                  | <i>Ca_desi_denovo</i> | 1181993                 | G/T  | NA                 | NA                            | NA                 |
| <i>Desi_wild_1182165</i> | NA                                  | <i>Ca_desi_denovo</i> | 1182165                 | T/C  | NA                 | NA                            | NA                 |
| <i>Desi_wild_1182441</i> | NA                                  | <i>Ca_desi_denovo</i> | 1182441                 | T/G  | NA                 | NA                            | NA                 |
| <i>Desi_wild_1182442</i> | NA                                  | <i>Ca_desi_denovo</i> | 1182442                 | C/A  | NA                 | NA                            | NA                 |
| <i>Desi_wild_1182733</i> | NA                                  | <i>Ca_desi_denovo</i> | 1182733                 | T/A  | NA                 | NA                            | NA                 |
| <i>Desi_wild_1182754</i> | NA                                  | <i>Ca_desi_denovo</i> | 1182754                 | G/C  | NA                 | NA                            | NA                 |
| <i>Desi_wild_1183218</i> | NA                                  | <i>Ca_desi_denovo</i> | 1183218                 | G/A  | NA                 | NA                            | NA                 |
| <i>Desi_wild_1184050</i> | NA                                  | <i>Ca_desi_denovo</i> | 1184050                 | A/C  | NA                 | NA                            | NA                 |
| <i>Desi_wild_1184051</i> | NA                                  | <i>Ca_desi_denovo</i> | 1184051                 | G/T  | NA                 | NA                            | NA                 |
| <i>Desi_wild_1184453</i> | NA                                  | <i>Ca_desi_denovo</i> | 1184453                 | C/G  | NA                 | NA                            | NA                 |
| <i>Desi_wild_1184477</i> | NA                                  | <i>Ca_desi_denovo</i> | 1184477                 | T/C  | NA                 | NA                            | NA                 |
| <i>Desi_wild_1184583</i> | NA                                  | <i>Ca_desi_denovo</i> | 1184583                 | T/G  | NA                 | NA                            | NA                 |
| <i>Desi_wild_1184595</i> | NA                                  | <i>Ca_desi_denovo</i> | 1184595                 | G/T  | NA                 | NA                            | NA                 |
| <i>Desi_wild_1185325</i> | NA                                  | <i>Ca_desi_denovo</i> | 1185325                 | C/A  | NA                 | NA                            | NA                 |
| <i>Desi_wild_1185437</i> | NA                                  | <i>Ca_desi_denovo</i> | 1185437                 | C/A  | NA                 | NA                            | NA                 |
| <i>Desi_wild_1186317</i> | NA                                  | <i>Ca_desi_denovo</i> | 1186317                 | G/A  | NA                 | NA                            | NA                 |
| <i>Desi_wild_1186418</i> | NA                                  | <i>Ca_desi_denovo</i> | 1186418                 | T/C  | NA                 | NA                            | NA                 |
| <i>Desi_wild_1186431</i> | NA                                  | <i>Ca_desi_denovo</i> | 1186431                 | G/A  | NA                 | NA                            | NA                 |
| <i>Desi_wild_1186547</i> | NA                                  | <i>Ca_desi_denovo</i> | 1186547                 | A/G  | NA                 | NA                            | NA                 |
| <i>Desi_wild_1186568</i> | NA                                  | <i>Ca_desi_denovo</i> | 1186568                 | A/G  | NA                 | NA                            | NA                 |
| <i>Desi_wild_1189062</i> | NA                                  | <i>Ca_desi_denovo</i> | 1189062                 | A/G  | NA                 | NA                            | NA                 |
| <i>Desi_wild_1189468</i> | NA                                  | <i>Ca_desi_denovo</i> | 1189468                 | T/C  | NA                 | NA                            | NA                 |
| <i>Desi_wild_1189709</i> | NA                                  | <i>Ca_desi_denovo</i> | 1189709                 | G/C  | NA                 | NA                            | NA                 |
| <i>Desi_wild_1189724</i> | NA                                  | <i>Ca_desi_denovo</i> | 1189724                 | C/T  | NA                 | NA                            | NA                 |
| <i>Desi_wild_1189788</i> | NA                                  | <i>Ca_desi_denovo</i> | 1189788                 | T/A  | NA                 | NA                            | NA                 |
| <i>Desi_wild_1189795</i> | NA                                  | <i>Ca_desi_denovo</i> | 1189795                 | T/C  | NA                 | NA                            | NA                 |
| <i>Desi_wild_1190085</i> | NA                                  | <i>Ca_desi_denovo</i> | 1190085                 | C/G  | NA                 | NA                            | NA                 |
| <i>Desi_wild_1190099</i> | NA                                  | <i>Ca_desi_denovo</i> | 1190099                 | T/C  | NA                 | NA                            | NA                 |
| <i>Desi_wild_1190236</i> | NA                                  | <i>Ca_desi_denovo</i> | 1190236                 | T/C  | NA                 | NA                            | NA                 |
| <i>Desi_wild_1190251</i> | NA                                  | <i>Ca_desi_denovo</i> | 1190251                 | T/C  | NA                 | NA                            | NA                 |
| <i>Desi_wild_1190274</i> | NA                                  | <i>Ca_desi_denovo</i> | 1190274                 | G/A  | NA                 | NA                            | NA                 |
| <i>Desi_wild_1190679</i> | NA                                  | <i>Ca_desi_denovo</i> | 1190679                 | T/C  | NA                 | NA                            | NA                 |
| <i>Desi_wild_1190736</i> | NA                                  | <i>Ca_desi_denovo</i> | 1190736                 | C/T  | NA                 | NA                            | NA                 |
| <i>Desi_wild_1192095</i> | NA                                  | <i>Ca_desi_denovo</i> | 1192095                 | G/T  | NA                 | NA                            | NA                 |
| <i>Desi_wild_1192660</i> | NA                                  | <i>Ca_desi_denovo</i> | 1192660                 | T/C  | NA                 | NA                            | NA                 |
| <i>Desi_wild_1193180</i> | NA                                  | <i>Ca_desi_denovo</i> | 1193180                 | G/A  | NA                 | NA                            | NA                 |
| <i>Desi_wild_1194646</i> | NA                                  | <i>Ca_desi_denovo</i> | 1194646                 | A/C  | NA                 | NA                            | NA                 |
| <i>Desi_wild_1194671</i> | NA                                  | <i>Ca_desi_denovo</i> | 1194671                 | A/C  | NA                 | NA                            | NA                 |
| <i>Desi_wild_1194928</i> | NA                                  | <i>Ca_desi_denovo</i> | 1194928                 | T/C  | NA                 | NA                            | NA                 |
| <i>Desi_wild_1195021</i> | NA                                  | <i>Ca_desi_denovo</i> | 1195021                 | G/T  | NA                 | NA                            | NA                 |
| <i>Desi_wild_1196008</i> | NA                                  | <i>Ca_desi_denovo</i> | 1196008                 | G/C  | NA                 | NA                            | NA                 |
| <i>Desi_wild_1196059</i> | NA                                  | <i>Ca_desi_denovo</i> | 1196059                 | A/G  | NA                 | NA                            | NA                 |

| SNP IDs                  | NCBI dbSNP accession IDs (NCBI_SS#) | Chromosomes           | Physical positions (bp) | SNPs | Gene accession IDs | Sequence components of genome | Putative functions |
|--------------------------|-------------------------------------|-----------------------|-------------------------|------|--------------------|-------------------------------|--------------------|
| <i>Desi_wild_1196896</i> | NA                                  | <i>Ca_desi_denovo</i> | 1196896                 | T/C  | NA                 | NA                            | NA                 |
| <i>Desi_wild_1197334</i> | NA                                  | <i>Ca_desi_denovo</i> | 1197334                 | A/C  | NA                 | NA                            | NA                 |
| <i>Desi_wild_1198065</i> | NA                                  | <i>Ca_desi_denovo</i> | 1198065                 | C/A  | NA                 | NA                            | NA                 |
| <i>Desi_wild_1198282</i> | NA                                  | <i>Ca_desi_denovo</i> | 1198282                 | G/C  | NA                 | NA                            | NA                 |
| <i>Desi_wild_1199566</i> | NA                                  | <i>Ca_desi_denovo</i> | 1199566                 | A/G  | NA                 | NA                            | NA                 |
| <i>Desi_wild_1200163</i> | NA                                  | <i>Ca_desi_denovo</i> | 1200163                 | C/G  | NA                 | NA                            | NA                 |
| <i>Desi_wild_1200223</i> | NA                                  | <i>Ca_desi_denovo</i> | 1200223                 | C/T  | NA                 | NA                            | NA                 |
| <i>Desi_wild_1200353</i> | NA                                  | <i>Ca_desi_denovo</i> | 1200353                 | C/A  | NA                 | NA                            | NA                 |
| <i>Desi_wild_1200479</i> | NA                                  | <i>Ca_desi_denovo</i> | 1200479                 | G/A  | NA                 | NA                            | NA                 |
| <i>Desi_wild_1201762</i> | NA                                  | <i>Ca_desi_denovo</i> | 1201762                 | C/T  | NA                 | NA                            | NA                 |
| <i>Desi_wild_1202044</i> | NA                                  | <i>Ca_desi_denovo</i> | 1202044                 | G/C  | NA                 | NA                            | NA                 |
| <i>Desi_wild_1202134</i> | NA                                  | <i>Ca_desi_denovo</i> | 1202134                 | C/T  | NA                 | NA                            | NA                 |
| <i>Desi_wild_1202481</i> | NA                                  | <i>Ca_desi_denovo</i> | 1202481                 | T/G  | NA                 | NA                            | NA                 |
| <i>Desi_wild_1202619</i> | NA                                  | <i>Ca_desi_denovo</i> | 1202619                 | C/T  | NA                 | NA                            | NA                 |
| <i>Desi_wild_1202669</i> | NA                                  | <i>Ca_desi_denovo</i> | 1202669                 | C/A  | NA                 | NA                            | NA                 |
| <i>Desi_wild_1204451</i> | NA                                  | <i>Ca_desi_denovo</i> | 1204451                 | C/G  | NA                 | NA                            | NA                 |
| <i>Desi_wild_1204515</i> | NA                                  | <i>Ca_desi_denovo</i> | 1204515                 | T/A  | NA                 | NA                            | NA                 |
| <i>Desi_wild_1204749</i> | NA                                  | <i>Ca_desi_denovo</i> | 1204749                 | A/G  | NA                 | NA                            | NA                 |
| <i>Desi_wild_1205238</i> | NA                                  | <i>Ca_desi_denovo</i> | 1205238                 | C/A  | NA                 | NA                            | NA                 |
| <i>Desi_wild_1205241</i> | NA                                  | <i>Ca_desi_denovo</i> | 1205241                 | C/G  | NA                 | NA                            | NA                 |
| <i>Desi_wild_1205717</i> | NA                                  | <i>Ca_desi_denovo</i> | 1205717                 | A/G  | NA                 | NA                            | NA                 |
| <i>Desi_wild_1206384</i> | NA                                  | <i>Ca_desi_denovo</i> | 1206384                 | T/C  | NA                 | NA                            | NA                 |
| <i>Desi_wild_1206390</i> | NA                                  | <i>Ca_desi_denovo</i> | 1206390                 | G/C  | NA                 | NA                            | NA                 |
| <i>Desi_wild_1206794</i> | NA                                  | <i>Ca_desi_denovo</i> | 1206794                 | G/A  | NA                 | NA                            | NA                 |
| <i>Desi_wild_1207423</i> | NA                                  | <i>Ca_desi_denovo</i> | 1207423                 | C/G  | NA                 | NA                            | NA                 |
| <i>Desi_wild_1207871</i> | NA                                  | <i>Ca_desi_denovo</i> | 1207871                 | T/C  | NA                 | NA                            | NA                 |
| <i>Desi_wild_1207901</i> | NA                                  | <i>Ca_desi_denovo</i> | 1207901                 | G/C  | NA                 | NA                            | NA                 |
| <i>Desi_wild_1207940</i> | NA                                  | <i>Ca_desi_denovo</i> | 1207940                 | A/G  | NA                 | NA                            | NA                 |
| <i>Desi_wild_1208562</i> | NA                                  | <i>Ca_desi_denovo</i> | 1208562                 | A/G  | NA                 | NA                            | NA                 |
| <i>Desi_wild_1208586</i> | NA                                  | <i>Ca_desi_denovo</i> | 1208586                 | C/T  | NA                 | NA                            | NA                 |
| <i>Desi_wild_1208869</i> | NA                                  | <i>Ca_desi_denovo</i> | 1208869                 | A/G  | NA                 | NA                            | NA                 |
| <i>Desi_wild_1210168</i> | NA                                  | <i>Ca_desi_denovo</i> | 1210168                 | G/T  | NA                 | NA                            | NA                 |
| <i>Desi_wild_1211243</i> | NA                                  | <i>Ca_desi_denovo</i> | 1211243                 | C/T  | NA                 | NA                            | NA                 |
| <i>Desi_wild_1212408</i> | NA                                  | <i>Ca_desi_denovo</i> | 1212408                 | A/G  | NA                 | NA                            | NA                 |
| <i>Desi_wild_1213461</i> | NA                                  | <i>Ca_desi_denovo</i> | 1213461                 | C/T  | NA                 | NA                            | NA                 |
| <i>Desi_wild_1214623</i> | NA                                  | <i>Ca_desi_denovo</i> | 1214623                 | T/C  | NA                 | NA                            | NA                 |
| <i>Desi_wild_1214683</i> | NA                                  | <i>Ca_desi_denovo</i> | 1214683                 | C/A  | NA                 | NA                            | NA                 |
| <i>Desi_wild_1215001</i> | NA                                  | <i>Ca_desi_denovo</i> | 1215001                 | G/A  | NA                 | NA                            | NA                 |
| <i>Desi_wild_1215400</i> | NA                                  | <i>Ca_desi_denovo</i> | 1215400                 | C/G  | NA                 | NA                            | NA                 |
| <i>Desi_wild_1215505</i> | NA                                  | <i>Ca_desi_denovo</i> | 1215505                 | G/A  | NA                 | NA                            | NA                 |
| <i>Desi_wild_1217004</i> | NA                                  | <i>Ca_desi_denovo</i> | 1217004                 | T/G  | NA                 | NA                            | NA                 |
| <i>Desi_wild_1217426</i> | NA                                  | <i>Ca_desi_denovo</i> | 1217426                 | G/T  | NA                 | NA                            | NA                 |
| <i>Desi_wild_1217784</i> | NA                                  | <i>Ca_desi_denovo</i> | 1217784                 | C/T  | NA                 | NA                            | NA                 |
| <i>Desi_wild_1217795</i> | NA                                  | <i>Ca_desi_denovo</i> | 1217795                 | T/C  | NA                 | NA                            | NA                 |

| SNP IDs                  | NCBI dbSNP accession IDs (NCBI_SS#) | Chromosomes           | Physical positions (bp) | SNPs | Gene accession IDs | Sequence components of genome | Putative functions |
|--------------------------|-------------------------------------|-----------------------|-------------------------|------|--------------------|-------------------------------|--------------------|
| <i>Desi_wild_1218017</i> | NA                                  | <i>Ca_desi_denovo</i> | 1218017                 | G/A  | NA                 | NA                            | NA                 |
| <i>Desi_wild_1219244</i> | NA                                  | <i>Ca_desi_denovo</i> | 1219244                 | A/G  | NA                 | NA                            | NA                 |
| <i>Desi_wild_1220352</i> | NA                                  | <i>Ca_desi_denovo</i> | 1220352                 | T/C  | NA                 | NA                            | NA                 |
| <i>Desi_wild_1220380</i> | NA                                  | <i>Ca_desi_denovo</i> | 1220380                 | G/A  | NA                 | NA                            | NA                 |
| <i>Desi_wild_1220928</i> | NA                                  | <i>Ca_desi_denovo</i> | 1220928                 | A/C  | NA                 | NA                            | NA                 |
| <i>Desi_wild_1221158</i> | NA                                  | <i>Ca_desi_denovo</i> | 1221158                 | C/G  | NA                 | NA                            | NA                 |
| <i>Desi_wild_1221892</i> | NA                                  | <i>Ca_desi_denovo</i> | 1221892                 | C/T  | NA                 | NA                            | NA                 |
| <i>Desi_wild_1221995</i> | NA                                  | <i>Ca_desi_denovo</i> | 1221995                 | G/A  | NA                 | NA                            | NA                 |
| <i>Desi_wild_1222407</i> | NA                                  | <i>Ca_desi_denovo</i> | 1222407                 | C/T  | NA                 | NA                            | NA                 |
| <i>Desi_wild_1222867</i> | NA                                  | <i>Ca_desi_denovo</i> | 1222867                 | A/G  | NA                 | NA                            | NA                 |
| <i>Desi_wild_1223167</i> | NA                                  | <i>Ca_desi_denovo</i> | 1223167                 | A/G  | NA                 | NA                            | NA                 |
| <i>Desi_wild_1223851</i> | NA                                  | <i>Ca_desi_denovo</i> | 1223851                 | G/A  | NA                 | NA                            | NA                 |
| <i>Desi_wild_1223870</i> | NA                                  | <i>Ca_desi_denovo</i> | 1223870                 | C/T  | NA                 | NA                            | NA                 |
| <i>Desi_wild_1224573</i> | NA                                  | <i>Ca_desi_denovo</i> | 1224573                 | C/T  | NA                 | NA                            | NA                 |
| <i>Desi_wild_1226349</i> | NA                                  | <i>Ca_desi_denovo</i> | 1226349                 | C/T  | NA                 | NA                            | NA                 |
| <i>Desi_wild_1227551</i> | NA                                  | <i>Ca_desi_denovo</i> | 1227551                 | T/C  | NA                 | NA                            | NA                 |
| <i>Desi_wild_1227619</i> | NA                                  | <i>Ca_desi_denovo</i> | 1227619                 | C/G  | NA                 | NA                            | NA                 |
| <i>Desi_wild_1227651</i> | NA                                  | <i>Ca_desi_denovo</i> | 1227651                 | T/C  | NA                 | NA                            | NA                 |
| <i>Desi_wild_1227911</i> | NA                                  | <i>Ca_desi_denovo</i> | 1227911                 | A/G  | NA                 | NA                            | NA                 |
| <i>Desi_wild_1229483</i> | NA                                  | <i>Ca_desi_denovo</i> | 1229483                 | G/C  | NA                 | NA                            | NA                 |
| <i>Desi_wild_1229919</i> | NA                                  | <i>Ca_desi_denovo</i> | 1229919                 | T/C  | NA                 | NA                            | NA                 |
| <i>Desi_wild_1230262</i> | NA                                  | <i>Ca_desi_denovo</i> | 1230262                 | G/C  | NA                 | NA                            | NA                 |
| <i>Desi_wild_1230442</i> | NA                                  | <i>Ca_desi_denovo</i> | 1230442                 | G/C  | NA                 | NA                            | NA                 |
| <i>Desi_wild_1230511</i> | NA                                  | <i>Ca_desi_denovo</i> | 1230511                 | G/T  | NA                 | NA                            | NA                 |
| <i>Desi_wild_1230610</i> | NA                                  | <i>Ca_desi_denovo</i> | 1230610                 | A/T  | NA                 | NA                            | NA                 |
| <i>Desi_wild_1230642</i> | NA                                  | <i>Ca_desi_denovo</i> | 1230642                 | C/T  | NA                 | NA                            | NA                 |
| <i>Desi_wild_1230698</i> | NA                                  | <i>Ca_desi_denovo</i> | 1230698                 | G/A  | NA                 | NA                            | NA                 |
| <i>Desi_wild_1231378</i> | NA                                  | <i>Ca_desi_denovo</i> | 1231378                 | C/T  | NA                 | NA                            | NA                 |
| <i>Desi_wild_1231749</i> | NA                                  | <i>Ca_desi_denovo</i> | 1231749                 | C/T  | NA                 | NA                            | NA                 |
| <i>Desi_wild_1232727</i> | NA                                  | <i>Ca_desi_denovo</i> | 1232727                 | G/C  | NA                 | NA                            | NA                 |
| <i>Desi_wild_1233432</i> | NA                                  | <i>Ca_desi_denovo</i> | 1233432                 | G/A  | NA                 | NA                            | NA                 |
| <i>Desi_wild_1233511</i> | NA                                  | <i>Ca_desi_denovo</i> | 1233511                 | C/G  | NA                 | NA                            | NA                 |
| <i>Desi_wild_1234186</i> | NA                                  | <i>Ca_desi_denovo</i> | 1234186                 | G/A  | NA                 | NA                            | NA                 |
| <i>Desi_wild_1235457</i> | NA                                  | <i>Ca_desi_denovo</i> | 1235457                 | A/C  | NA                 | NA                            | NA                 |
| <i>Desi_wild_1235458</i> | NA                                  | <i>Ca_desi_denovo</i> | 1235458                 | G/A  | NA                 | NA                            | NA                 |
| <i>Desi_wild_1235956</i> | NA                                  | <i>Ca_desi_denovo</i> | 1235956                 | G/A  | NA                 | NA                            | NA                 |
| <i>Desi_wild_1235962</i> | NA                                  | <i>Ca_desi_denovo</i> | 1235962                 | A/T  | NA                 | NA                            | NA                 |
| <i>Desi_wild_1237716</i> | NA                                  | <i>Ca_desi_denovo</i> | 1237716                 | C/T  | NA                 | NA                            | NA                 |
| <i>Desi_wild_1238092</i> | NA                                  | <i>Ca_desi_denovo</i> | 1238092                 | C/T  | NA                 | NA                            | NA                 |
| <i>Desi_wild_1238131</i> | NA                                  | <i>Ca_desi_denovo</i> | 1238131                 | A/G  | NA                 | NA                            | NA                 |
| <i>Desi_wild_1238530</i> | NA                                  | <i>Ca_desi_denovo</i> | 1238530                 | A/G  | NA                 | NA                            | NA                 |
| <i>Desi_wild_1238771</i> | NA                                  | <i>Ca_desi_denovo</i> | 1238771                 | C/T  | NA                 | NA                            | NA                 |
| <i>Desi_wild_1238789</i> | NA                                  | <i>Ca_desi_denovo</i> | 1238789                 | G/A  | NA                 | NA                            | NA                 |
| <i>Desi_wild_1239002</i> | NA                                  | <i>Ca_desi_denovo</i> | 1239002                 | A/T  | NA                 | NA                            | NA                 |

| SNP IDs                  | NCBI dbSNP accession IDs (NCBI_SS#) | Chromosomes           | Physical positions (bp) | SNPs | Gene accession IDs | Sequence components of genome | Putative functions |
|--------------------------|-------------------------------------|-----------------------|-------------------------|------|--------------------|-------------------------------|--------------------|
| <i>Desi_wild_1239174</i> | NA                                  | <i>Ca_desi_denovo</i> | 1239174                 | G/C  | NA                 | NA                            | NA                 |
| <i>Desi_wild_1239204</i> | NA                                  | <i>Ca_desi_denovo</i> | 1239204                 | A/C  | NA                 | NA                            | NA                 |
| <i>Desi_wild_1241298</i> | NA                                  | <i>Ca_desi_denovo</i> | 1241298                 | G/A  | NA                 | NA                            | NA                 |
| <i>Desi_wild_1241319</i> | NA                                  | <i>Ca_desi_denovo</i> | 1241319                 | T/C  | NA                 | NA                            | NA                 |
| <i>Desi_wild_1242680</i> | NA                                  | <i>Ca_desi_denovo</i> | 1242680                 | G/C  | NA                 | NA                            | NA                 |
| <i>Desi_wild_1244428</i> | NA                                  | <i>Ca_desi_denovo</i> | 1244428                 | G/A  | NA                 | NA                            | NA                 |
| <i>Desi_wild_1244437</i> | NA                                  | <i>Ca_desi_denovo</i> | 1244437                 | C/A  | NA                 | NA                            | NA                 |
| <i>Desi_wild_1244519</i> | NA                                  | <i>Ca_desi_denovo</i> | 1244519                 | T/G  | NA                 | NA                            | NA                 |
| <i>Desi_wild_1244562</i> | NA                                  | <i>Ca_desi_denovo</i> | 1244562                 | A/G  | NA                 | NA                            | NA                 |
| <i>Desi_wild_1244798</i> | NA                                  | <i>Ca_desi_denovo</i> | 1244798                 | G/A  | NA                 | NA                            | NA                 |
| <i>Desi_wild_1244879</i> | NA                                  | <i>Ca_desi_denovo</i> | 1244879                 | T/C  | NA                 | NA                            | NA                 |
| <i>Desi_wild_1244916</i> | NA                                  | <i>Ca_desi_denovo</i> | 1244916                 | T/C  | NA                 | NA                            | NA                 |
| <i>Desi_wild_1245122</i> | NA                                  | <i>Ca_desi_denovo</i> | 1245122                 | T/C  | NA                 | NA                            | NA                 |
| <i>Desi_wild_1245125</i> | NA                                  | <i>Ca_desi_denovo</i> | 1245125                 | A/G  | NA                 | NA                            | NA                 |
| <i>Desi_wild_1245587</i> | NA                                  | <i>Ca_desi_denovo</i> | 1245587                 | T/C  | NA                 | NA                            | NA                 |
| <i>Desi_wild_1245626</i> | NA                                  | <i>Ca_desi_denovo</i> | 1245626                 | A/G  | NA                 | NA                            | NA                 |
| <i>Desi_wild_1245805</i> | NA                                  | <i>Ca_desi_denovo</i> | 1245805                 | C/T  | NA                 | NA                            | NA                 |
| <i>Desi_wild_1245819</i> | NA                                  | <i>Ca_desi_denovo</i> | 1245819                 | C/T  | NA                 | NA                            | NA                 |
| <i>Desi_wild_1245967</i> | NA                                  | <i>Ca_desi_denovo</i> | 1245967                 | C/G  | NA                 | NA                            | NA                 |
| <i>Desi_wild_1245984</i> | NA                                  | <i>Ca_desi_denovo</i> | 1245984                 | C/G  | NA                 | NA                            | NA                 |
| <i>Desi_wild_1246478</i> | NA                                  | <i>Ca_desi_denovo</i> | 1246478                 | G/A  | NA                 | NA                            | NA                 |
| <i>Desi_wild_1248565</i> | NA                                  | <i>Ca_desi_denovo</i> | 1248565                 | G/A  | NA                 | NA                            | NA                 |
| <i>Desi_wild_1248598</i> | NA                                  | <i>Ca_desi_denovo</i> | 1248598                 | C/G  | NA                 | NA                            | NA                 |
| <i>Desi_wild_1250418</i> | NA                                  | <i>Ca_desi_denovo</i> | 1250418                 | C/T  | NA                 | NA                            | NA                 |
| <i>Desi_wild_1251012</i> | NA                                  | <i>Ca_desi_denovo</i> | 1251012                 | C/T  | NA                 | NA                            | NA                 |
| <i>Desi_wild_1252168</i> | NA                                  | <i>Ca_desi_denovo</i> | 1252168                 | T/C  | NA                 | NA                            | NA                 |
| <i>Desi_wild_1256352</i> | NA                                  | <i>Ca_desi_denovo</i> | 1256352                 | T/C  | NA                 | NA                            | NA                 |
| <i>Desi_wild_1256539</i> | NA                                  | <i>Ca_desi_denovo</i> | 1256539                 | T/C  | NA                 | NA                            | NA                 |
| <i>Desi_wild_1256634</i> | NA                                  | <i>Ca_desi_denovo</i> | 1256634                 | T/C  | NA                 | NA                            | NA                 |
| <i>Desi_wild_1256652</i> | NA                                  | <i>Ca_desi_denovo</i> | 1256652                 | A/G  | NA                 | NA                            | NA                 |
| <i>Desi_wild_1256811</i> | NA                                  | <i>Ca_desi_denovo</i> | 1256811                 | C/T  | NA                 | NA                            | NA                 |
| <i>Desi_wild_1256814</i> | NA                                  | <i>Ca_desi_denovo</i> | 1256814                 | C/T  | NA                 | NA                            | NA                 |
| <i>Desi_wild_1256957</i> | NA                                  | <i>Ca_desi_denovo</i> | 1256957                 | A/G  | NA                 | NA                            | NA                 |
| <i>Desi_wild_1256969</i> | NA                                  | <i>Ca_desi_denovo</i> | 1256969                 | C/T  | NA                 | NA                            | NA                 |
| <i>Desi_wild_1256975</i> | NA                                  | <i>Ca_desi_denovo</i> | 1256975                 | A/G  | NA                 | NA                            | NA                 |
| <i>Desi_wild_1257393</i> | NA                                  | <i>Ca_desi_denovo</i> | 1257393                 | T/A  | NA                 | NA                            | NA                 |
| <i>Desi_wild_1258118</i> | NA                                  | <i>Ca_desi_denovo</i> | 1258118                 | T/C  | NA                 | NA                            | NA                 |
| <i>Desi_wild_1258142</i> | NA                                  | <i>Ca_desi_denovo</i> | 1258142                 | G/C  | NA                 | NA                            | NA                 |
| <i>Desi_wild_1258654</i> | NA                                  | <i>Ca_desi_denovo</i> | 1258654                 | G/A  | NA                 | NA                            | NA                 |
| <i>Desi_wild_1258710</i> | NA                                  | <i>Ca_desi_denovo</i> | 1258710                 | G/A  | NA                 | NA                            | NA                 |
| <i>Desi_wild_1258845</i> | NA                                  | <i>Ca_desi_denovo</i> | 1258845                 | T/C  | NA                 | NA                            | NA                 |
| <i>Desi_wild_1259187</i> | NA                                  | <i>Ca_desi_denovo</i> | 1259187                 | T/C  | NA                 | NA                            | NA                 |
| <i>Desi_wild_1259203</i> | NA                                  | <i>Ca_desi_denovo</i> | 1259203                 | T/C  | NA                 | NA                            | NA                 |
| <i>Desi_wild_1259629</i> | NA                                  | <i>Ca_desi_denovo</i> | 1259629                 | G/C  | NA                 | NA                            | NA                 |



| SNP IDs                  | NCBI dbSNP accession IDs (NCBI_SS#) | Chromosomes           | Physical positions (bp) | SNPs | Gene accession IDs | Sequence components of genome | Putative functions |
|--------------------------|-------------------------------------|-----------------------|-------------------------|------|--------------------|-------------------------------|--------------------|
| <i>Desi_wild_1259675</i> | NA                                  | <i>Ca_desi_denovo</i> | 1259675                 | C/T  | NA                 | NA                            | NA                 |
| <i>Desi_wild_1261173</i> | NA                                  | <i>Ca_desi_denovo</i> | 1261173                 | C/T  | NA                 | NA                            | NA                 |
| <i>Desi_wild_1261634</i> | NA                                  | <i>Ca_desi_denovo</i> | 1261634                 | C/T  | NA                 | NA                            | NA                 |
| <i>Desi_wild_1261644</i> | NA                                  | <i>Ca_desi_denovo</i> | 1261644                 | C/T  | NA                 | NA                            | NA                 |
| <i>Desi_wild_1262895</i> | NA                                  | <i>Ca_desi_denovo</i> | 1262895                 | G/A  | NA                 | NA                            | NA                 |
| <i>Desi_wild_1263002</i> | NA                                  | <i>Ca_desi_denovo</i> | 1263002                 | T/C  | NA                 | NA                            | NA                 |
| <i>Desi_wild_1264202</i> | NA                                  | <i>Ca_desi_denovo</i> | 1264202                 | G/A  | NA                 | NA                            | NA                 |
| <i>Desi_wild_1264362</i> | NA                                  | <i>Ca_desi_denovo</i> | 1264362                 | A/C  | NA                 | NA                            | NA                 |
| <i>Desi_wild_1264947</i> | NA                                  | <i>Ca_desi_denovo</i> | 1264947                 | G/T  | NA                 | NA                            | NA                 |
| <i>Desi_wild_1265069</i> | NA                                  | <i>Ca_desi_denovo</i> | 1265069                 | C/G  | NA                 | NA                            | NA                 |
| <i>Desi_wild_1265075</i> | NA                                  | <i>Ca_desi_denovo</i> | 1265075                 | A/G  | NA                 | NA                            | NA                 |
| <i>Desi_wild_1265441</i> | NA                                  | <i>Ca_desi_denovo</i> | 1265441                 | G/A  | NA                 | NA                            | NA                 |
| <i>Desi_wild_1266103</i> | NA                                  | <i>Ca_desi_denovo</i> | 1266103                 | C/A  | NA                 | NA                            | NA                 |
| <i>Desi_wild_1266127</i> | NA                                  | <i>Ca_desi_denovo</i> | 1266127                 | G/T  | NA                 | NA                            | NA                 |
| <i>Desi_wild_1267027</i> | NA                                  | <i>Ca_desi_denovo</i> | 1267027                 | A/C  | NA                 | NA                            | NA                 |
| <i>Desi_wild_1267035</i> | NA                                  | <i>Ca_desi_denovo</i> | 1267035                 | A/G  | NA                 | NA                            | NA                 |
| <i>Desi_wild_1267333</i> | NA                                  | <i>Ca_desi_denovo</i> | 1267333                 | C/G  | NA                 | NA                            | NA                 |
| <i>Desi_wild_1267339</i> | NA                                  | <i>Ca_desi_denovo</i> | 1267339                 | C/G  | NA                 | NA                            | NA                 |
| <i>Desi_wild_1268748</i> | NA                                  | <i>Ca_desi_denovo</i> | 1268748                 | T/C  | NA                 | NA                            | NA                 |
| <i>Desi_wild_1268933</i> | NA                                  | <i>Ca_desi_denovo</i> | 1268933                 | T/G  | NA                 | NA                            | NA                 |
| <i>Desi_wild_1268939</i> | NA                                  | <i>Ca_desi_denovo</i> | 1268939                 | G/C  | NA                 | NA                            | NA                 |
| <i>Desi_wild_1269147</i> | NA                                  | <i>Ca_desi_denovo</i> | 1269147                 | C/T  | NA                 | NA                            | NA                 |
| <i>Desi_wild_1269157</i> | NA                                  | <i>Ca_desi_denovo</i> | 1269157                 | A/G  | NA                 | NA                            | NA                 |
| <i>Desi_wild_1269725</i> | NA                                  | <i>Ca_desi_denovo</i> | 1269725                 | C/T  | NA                 | NA                            | NA                 |
| <i>Desi_wild_1270100</i> | NA                                  | <i>Ca_desi_denovo</i> | 1270100                 | A/G  | NA                 | NA                            | NA                 |
| <i>Desi_wild_1270173</i> | NA                                  | <i>Ca_desi_denovo</i> | 1270173                 | G/C  | NA                 | NA                            | NA                 |
| <i>Desi_wild_1270333</i> | NA                                  | <i>Ca_desi_denovo</i> | 1270333                 | G/T  | NA                 | NA                            | NA                 |
| <i>Desi_wild_1270694</i> | NA                                  | <i>Ca_desi_denovo</i> | 1270694                 | T/C  | NA                 | NA                            | NA                 |
| <i>Desi_wild_1270724</i> | NA                                  | <i>Ca_desi_denovo</i> | 1270724                 | A/T  | NA                 | NA                            | NA                 |
| <i>Desi_wild_1270872</i> | NA                                  | <i>Ca_desi_denovo</i> | 1270872                 | A/G  | NA                 | NA                            | NA                 |
| <i>Desi_wild_1270905</i> | NA                                  | <i>Ca_desi_denovo</i> | 1270905                 | G/A  | NA                 | NA                            | NA                 |
| <i>Desi_wild_1271477</i> | NA                                  | <i>Ca_desi_denovo</i> | 1271477                 | A/G  | NA                 | NA                            | NA                 |
| <i>Desi_wild_1271714</i> | NA                                  | <i>Ca_desi_denovo</i> | 1271714                 | G/C  | NA                 | NA                            | NA                 |
| <i>Desi_wild_1272255</i> | NA                                  | <i>Ca_desi_denovo</i> | 1272255                 | G/A  | NA                 | NA                            | NA                 |
| <i>Desi_wild_1272282</i> | NA                                  | <i>Ca_desi_denovo</i> | 1272282                 | C/G  | NA                 | NA                            | NA                 |
| <i>Desi_wild_1273009</i> | NA                                  | <i>Ca_desi_denovo</i> | 1273009                 | C/T  | NA                 | NA                            | NA                 |
| <i>Desi_wild_1273211</i> | NA                                  | <i>Ca_desi_denovo</i> | 1273211                 | T/C  | NA                 | NA                            | NA                 |
| <i>Desi_wild_1273726</i> | NA                                  | <i>Ca_desi_denovo</i> | 1273726                 | C/A  | NA                 | NA                            | NA                 |
| <i>Desi_wild_1273771</i> | NA                                  | <i>Ca_desi_denovo</i> | 1273771                 | C/T  | NA                 | NA                            | NA                 |
| <i>Desi_wild_1274293</i> | NA                                  | <i>Ca_desi_denovo</i> | 1274293                 | A/G  | NA                 | NA                            | NA                 |
| <i>Desi_wild_1274320</i> | NA                                  | <i>Ca_desi_denovo</i> | 1274320                 | G/C  | NA                 | NA                            | NA                 |
| <i>Desi_wild_1275557</i> | NA                                  | <i>Ca_desi_denovo</i> | 1275557                 | G/A  | NA                 | NA                            | NA                 |
| <i>Desi_wild_1275723</i> | NA                                  | <i>Ca_desi_denovo</i> | 1275723                 | C/G  | NA                 | NA                            | NA                 |
| <i>Desi_wild_1275726</i> | NA                                  | <i>Ca_desi_denovo</i> | 1275726                 | G/C  | NA                 | NA                            | NA                 |

| SNP IDs                  | NCBI dbSNP accession IDs (NCBI_SS#) | Chromosomes           | Physical positions (bp) | SNPs | Gene accession IDs | Sequence components of genome | Putative functions |
|--------------------------|-------------------------------------|-----------------------|-------------------------|------|--------------------|-------------------------------|--------------------|
| <i>Desi_wild_1276938</i> | NA                                  | <i>Ca_desi_denovo</i> | 1276938                 | G/A  | NA                 | NA                            | NA                 |
| <i>Desi_wild_1277287</i> | NA                                  | <i>Ca_desi_denovo</i> | 1277287                 | T/G  | NA                 | NA                            | NA                 |
| <i>Desi_wild_1277318</i> | NA                                  | <i>Ca_desi_denovo</i> | 1277318                 | C/G  | NA                 | NA                            | NA                 |
| <i>Desi_wild_1277877</i> | NA                                  | <i>Ca_desi_denovo</i> | 1277877                 | G/A  | NA                 | NA                            | NA                 |
| <i>Desi_wild_1277940</i> | NA                                  | <i>Ca_desi_denovo</i> | 1277940                 | C/T  | NA                 | NA                            | NA                 |
| <i>Desi_wild_1278291</i> | NA                                  | <i>Ca_desi_denovo</i> | 1278291                 | A/G  | NA                 | NA                            | NA                 |
| <i>Desi_wild_1278303</i> | NA                                  | <i>Ca_desi_denovo</i> | 1278303                 | A/G  | NA                 | NA                            | NA                 |
| <i>Desi_wild_1279029</i> | NA                                  | <i>Ca_desi_denovo</i> | 1279029                 | C/A  | NA                 | NA                            | NA                 |
| <i>Desi_wild_1280244</i> | NA                                  | <i>Ca_desi_denovo</i> | 1280244                 | A/G  | NA                 | NA                            | NA                 |
| <i>Desi_wild_1280961</i> | NA                                  | <i>Ca_desi_denovo</i> | 1280961                 | C/T  | NA                 | NA                            | NA                 |
| <i>Desi_wild_1280979</i> | NA                                  | <i>Ca_desi_denovo</i> | 1280979                 | A/G  | NA                 | NA                            | NA                 |
| <i>Desi_wild_1281553</i> | NA                                  | <i>Ca_desi_denovo</i> | 1281553                 | T/C  | NA                 | NA                            | NA                 |
| <i>Desi_wild_1281561</i> | NA                                  | <i>Ca_desi_denovo</i> | 1281561                 | G/A  | NA                 | NA                            | NA                 |
| <i>Desi_wild_1282631</i> | NA                                  | <i>Ca_desi_denovo</i> | 1282631                 | G/A  | NA                 | NA                            | NA                 |
| <i>Desi_wild_1282658</i> | NA                                  | <i>Ca_desi_denovo</i> | 1282658                 | A/G  | NA                 | NA                            | NA                 |
| <i>Desi_wild_1282819</i> | NA                                  | <i>Ca_desi_denovo</i> | 1282819                 | G/A  | NA                 | NA                            | NA                 |
| <i>Desi_wild_1282843</i> | NA                                  | <i>Ca_desi_denovo</i> | 1282843                 | G/A  | NA                 | NA                            | NA                 |
| <i>Desi_wild_1282874</i> | NA                                  | <i>Ca_desi_denovo</i> | 1282874                 | A/G  | NA                 | NA                            | NA                 |
| <i>Desi_wild_1282875</i> | NA                                  | <i>Ca_desi_denovo</i> | 1282875                 | T/G  | NA                 | NA                            | NA                 |
| <i>Desi_wild_1283055</i> | NA                                  | <i>Ca_desi_denovo</i> | 1283055                 | C/T  | NA                 | NA                            | NA                 |
| <i>Desi_wild_1283884</i> | NA                                  | <i>Ca_desi_denovo</i> | 1283884                 | C/T  | NA                 | NA                            | NA                 |
| <i>Desi_wild_1284162</i> | NA                                  | <i>Ca_desi_denovo</i> | 1284162                 | A/C  | NA                 | NA                            | NA                 |
| <i>Desi_wild_1284209</i> | NA                                  | <i>Ca_desi_denovo</i> | 1284209                 | C/T  | NA                 | NA                            | NA                 |
| <i>Desi_wild_1284212</i> | NA                                  | <i>Ca_desi_denovo</i> | 1284212                 | G/A  | NA                 | NA                            | NA                 |
| <i>Desi_wild_1285639</i> | NA                                  | <i>Ca_desi_denovo</i> | 1285639                 | A/G  | NA                 | NA                            | NA                 |
| <i>Desi_wild_1285642</i> | NA                                  | <i>Ca_desi_denovo</i> | 1285642                 | G/A  | NA                 | NA                            | NA                 |
| <i>Desi_wild_1286095</i> | NA                                  | <i>Ca_desi_denovo</i> | 1286095                 | A/C  | NA                 | NA                            | NA                 |
| <i>Desi_wild_1286285</i> | NA                                  | <i>Ca_desi_denovo</i> | 1286285                 | A/G  | NA                 | NA                            | NA                 |
| <i>Desi_wild_1286552</i> | NA                                  | <i>Ca_desi_denovo</i> | 1286552                 | G/C  | NA                 | NA                            | NA                 |
| <i>Desi_wild_1286690</i> | NA                                  | <i>Ca_desi_denovo</i> | 1286690                 | T/A  | NA                 | NA                            | NA                 |
| <i>Desi_wild_1288035</i> | NA                                  | <i>Ca_desi_denovo</i> | 1288035                 | T/G  | NA                 | NA                            | NA                 |
| <i>Desi_wild_1288736</i> | NA                                  | <i>Ca_desi_denovo</i> | 1288736                 | C/T  | NA                 | NA                            | NA                 |
| <i>Desi_wild_1289351</i> | NA                                  | <i>Ca_desi_denovo</i> | 1289351                 | C/T  | NA                 | NA                            | NA                 |
| <i>Desi_wild_1290087</i> | NA                                  | <i>Ca_desi_denovo</i> | 1290087                 | A/G  | NA                 | NA                            | NA                 |
| <i>Desi_wild_1290290</i> | NA                                  | <i>Ca_desi_denovo</i> | 1290290                 | A/G  | NA                 | NA                            | NA                 |
| <i>Desi_wild_1290446</i> | NA                                  | <i>Ca_desi_denovo</i> | 1290446                 | A/T  | NA                 | NA                            | NA                 |
| <i>Desi_wild_1291028</i> | NA                                  | <i>Ca_desi_denovo</i> | 1291028                 | C/T  | NA                 | NA                            | NA                 |
| <i>Desi_wild_1293395</i> | NA                                  | <i>Ca_desi_denovo</i> | 1293395                 | A/T  | NA                 | NA                            | NA                 |
| <i>Desi_wild_1293418</i> | NA                                  | <i>Ca_desi_denovo</i> | 1293418                 | C/G  | NA                 | NA                            | NA                 |
| <i>Desi_wild_1293496</i> | NA                                  | <i>Ca_desi_denovo</i> | 1293496                 | C/T  | NA                 | NA                            | NA                 |
| <i>Desi_wild_1294756</i> | NA                                  | <i>Ca_desi_denovo</i> | 1294756                 | G/A  | NA                 | NA                            | NA                 |
| <i>Desi_wild_1294947</i> | NA                                  | <i>Ca_desi_denovo</i> | 1294947                 | A/G  | NA                 | NA                            | NA                 |
| <i>Desi_wild_1294948</i> | NA                                  | <i>Ca_desi_denovo</i> | 1294948                 | T/C  | NA                 | NA                            | NA                 |
| <i>Desi_wild_1296638</i> | NA                                  | <i>Ca_desi_denovo</i> | 1296638                 | A/G  | NA                 | NA                            | NA                 |

| SNP IDs                  | NCBI dbSNP accession IDs (NCBI_SS#) | Chromosomes           | Physical positions (bp) | SNPs | Gene accession IDs | Sequence components of genome | Putative functions |
|--------------------------|-------------------------------------|-----------------------|-------------------------|------|--------------------|-------------------------------|--------------------|
| <i>Desi_wild_1296676</i> | NA                                  | <i>Ca_desi_denovo</i> | 1296676                 | C/T  | NA                 | NA                            | NA                 |
| <i>Desi_wild_1296686</i> | NA                                  | <i>Ca_desi_denovo</i> | 1296686                 | A/G  | NA                 | NA                            | NA                 |
| <i>Desi_wild_1296978</i> | NA                                  | <i>Ca_desi_denovo</i> | 1296978                 | C/T  | NA                 | NA                            | NA                 |
| <i>Desi_wild_1297553</i> | NA                                  | <i>Ca_desi_denovo</i> | 1297553                 | A/G  | NA                 | NA                            | NA                 |
| <i>Desi_wild_1299204</i> | NA                                  | <i>Ca_desi_denovo</i> | 1299204                 | T/C  | NA                 | NA                            | NA                 |
| <i>Desi_wild_1299207</i> | NA                                  | <i>Ca_desi_denovo</i> | 1299207                 | G/A  | NA                 | NA                            | NA                 |
| <i>Desi_wild_1299294</i> | NA                                  | <i>Ca_desi_denovo</i> | 1299294                 | G/A  | NA                 | NA                            | NA                 |
| <i>Desi_wild_1299342</i> | NA                                  | <i>Ca_desi_denovo</i> | 1299342                 | G/T  | NA                 | NA                            | NA                 |
| <i>Desi_wild_1299522</i> | NA                                  | <i>Ca_desi_denovo</i> | 1299522                 | T/C  | NA                 | NA                            | NA                 |
| <i>Desi_wild_1301146</i> | NA                                  | <i>Ca_desi_denovo</i> | 1301146                 | C/T  | NA                 | NA                            | NA                 |
| <i>Desi_wild_1301233</i> | NA                                  | <i>Ca_desi_denovo</i> | 1301233                 | T/C  | NA                 | NA                            | NA                 |
| <i>Desi_wild_1301249</i> | NA                                  | <i>Ca_desi_denovo</i> | 1301249                 | A/G  | NA                 | NA                            | NA                 |
| <i>Desi_wild_1301334</i> | NA                                  | <i>Ca_desi_denovo</i> | 1301334                 | C/A  | NA                 | NA                            | NA                 |
| <i>Desi_wild_1301633</i> | NA                                  | <i>Ca_desi_denovo</i> | 1301633                 | C/T  | NA                 | NA                            | NA                 |
| <i>Desi_wild_1302022</i> | NA                                  | <i>Ca_desi_denovo</i> | 1302022                 | A/G  | NA                 | NA                            | NA                 |
| <i>Desi_wild_1302046</i> | NA                                  | <i>Ca_desi_denovo</i> | 1302046                 | C/G  | NA                 | NA                            | NA                 |
| <i>Desi_wild_1302801</i> | NA                                  | <i>Ca_desi_denovo</i> | 1302801                 | C/T  | NA                 | NA                            | NA                 |
| <i>Desi_wild_1303546</i> | NA                                  | <i>Ca_desi_denovo</i> | 1303546                 | A/G  | NA                 | NA                            | NA                 |
| <i>Desi_wild_1303552</i> | NA                                  | <i>Ca_desi_denovo</i> | 1303552                 | T/G  | NA                 | NA                            | NA                 |
| <i>Desi_wild_1303762</i> | NA                                  | <i>Ca_desi_denovo</i> | 1303762                 | G/A  | NA                 | NA                            | NA                 |
| <i>Desi_wild_1303927</i> | NA                                  | <i>Ca_desi_denovo</i> | 1303927                 | T/G  | NA                 | NA                            | NA                 |
| <i>Desi_wild_1304128</i> | NA                                  | <i>Ca_desi_denovo</i> | 1304128                 | A/G  | NA                 | NA                            | NA                 |
| <i>Desi_wild_1304266</i> | NA                                  | <i>Ca_desi_denovo</i> | 1304266                 | A/G  | NA                 | NA                            | NA                 |
| <i>Desi_wild_1304302</i> | NA                                  | <i>Ca_desi_denovo</i> | 1304302                 | C/T  | NA                 | NA                            | NA                 |
| <i>Desi_wild_1304454</i> | NA                                  | <i>Ca_desi_denovo</i> | 1304454                 | G/A  | NA                 | NA                            | NA                 |
| <i>Desi_wild_1304616</i> | NA                                  | <i>Ca_desi_denovo</i> | 1304616                 | T/G  | NA                 | NA                            | NA                 |
| <i>Desi_wild_1305457</i> | NA                                  | <i>Ca_desi_denovo</i> | 1305457                 | G/A  | NA                 | NA                            | NA                 |
| <i>Desi_wild_1305472</i> | NA                                  | <i>Ca_desi_denovo</i> | 1305472                 | A/G  | NA                 | NA                            | NA                 |
| <i>Desi_wild_1305609</i> | NA                                  | <i>Ca_desi_denovo</i> | 1305609                 | T/C  | NA                 | NA                            | NA                 |
| <i>Desi_wild_1305617</i> | NA                                  | <i>Ca_desi_denovo</i> | 1305617                 | T/G  | NA                 | NA                            | NA                 |
| <i>Desi_wild_1305703</i> | NA                                  | <i>Ca_desi_denovo</i> | 1305703                 | T/C  | NA                 | NA                            | NA                 |
| <i>Desi_wild_1306414</i> | NA                                  | <i>Ca_desi_denovo</i> | 1306414                 | T/C  | NA                 | NA                            | NA                 |
| <i>Desi_wild_1307086</i> | NA                                  | <i>Ca_desi_denovo</i> | 1307086                 | G/A  | NA                 | NA                            | NA                 |
| <i>Desi_wild_1307136</i> | NA                                  | <i>Ca_desi_denovo</i> | 1307136                 | T/G  | NA                 | NA                            | NA                 |
| <i>Desi_wild_1307963</i> | NA                                  | <i>Ca_desi_denovo</i> | 1307963                 | T/C  | NA                 | NA                            | NA                 |
| <i>Desi_wild_1309388</i> | NA                                  | <i>Ca_desi_denovo</i> | 1309388                 | A/G  | NA                 | NA                            | NA                 |
| <i>Desi_wild_1310064</i> | NA                                  | <i>Ca_desi_denovo</i> | 1310064                 | T/C  | NA                 | NA                            | NA                 |
| <i>Desi_wild_1310100</i> | NA                                  | <i>Ca_desi_denovo</i> | 1310100                 | T/G  | NA                 | NA                            | NA                 |
| <i>Desi_wild_1310636</i> | NA                                  | <i>Ca_desi_denovo</i> | 1310636                 | G/T  | NA                 | NA                            | NA                 |
| <i>Desi_wild_1311460</i> | NA                                  | <i>Ca_desi_denovo</i> | 1311460                 | C/G  | NA                 | NA                            | NA                 |
| <i>Desi_wild_1311498</i> | NA                                  | <i>Ca_desi_denovo</i> | 1311498                 | A/G  | NA                 | NA                            | NA                 |
| <i>Desi_wild_1312198</i> | NA                                  | <i>Ca_desi_denovo</i> | 1312198                 | T/C  | NA                 | NA                            | NA                 |
| <i>Desi_wild_1312234</i> | NA                                  | <i>Ca_desi_denovo</i> | 1312234                 | C/T  | NA                 | NA                            | NA                 |
| <i>Desi_wild_1312432</i> | NA                                  | <i>Ca_desi_denovo</i> | 1312432                 | T/C  | NA                 | NA                            | NA                 |

| SNP IDs                  | NCBI dbSNP accession IDs (NCBI_SS#) | Chromosomes           | Physical positions (bp) | SNPs | Gene accession IDs | Sequence components of genome | Putative functions |
|--------------------------|-------------------------------------|-----------------------|-------------------------|------|--------------------|-------------------------------|--------------------|
| <i>Desi_wild_1312468</i> | NA                                  | <i>Ca_desi_denovo</i> | 1312468                 | A/G  | NA                 | NA                            | NA                 |
| <i>Desi_wild_1312691</i> | NA                                  | <i>Ca_desi_denovo</i> | 1312691                 | T/G  | NA                 | NA                            | NA                 |
| <i>Desi_wild_1312697</i> | NA                                  | <i>Ca_desi_denovo</i> | 1312697                 | G/T  | NA                 | NA                            | NA                 |
| <i>Desi_wild_1313483</i> | NA                                  | <i>Ca_desi_denovo</i> | 1313483                 | A/G  | NA                 | NA                            | NA                 |
| <i>Desi_wild_1313489</i> | NA                                  | <i>Ca_desi_denovo</i> | 1313489                 | G/C  | NA                 | NA                            | NA                 |
| <i>Desi_wild_1313775</i> | NA                                  | <i>Ca_desi_denovo</i> | 1313775                 | G/A  | NA                 | NA                            | NA                 |
| <i>Desi_wild_1313814</i> | NA                                  | <i>Ca_desi_denovo</i> | 1313814                 | A/G  | NA                 | NA                            | NA                 |
| <i>Desi_wild_1313969</i> | NA                                  | <i>Ca_desi_denovo</i> | 1313969                 | T/C  | NA                 | NA                            | NA                 |
| <i>Desi_wild_1315105</i> | NA                                  | <i>Ca_desi_denovo</i> | 1315105                 | A/G  | NA                 | NA                            | NA                 |
| <i>Desi_wild_1315125</i> | NA                                  | <i>Ca_desi_denovo</i> | 1315125                 | C/G  | NA                 | NA                            | NA                 |
| <i>Desi_wild_1315289</i> | NA                                  | <i>Ca_desi_denovo</i> | 1315289                 | G/C  | NA                 | NA                            | NA                 |
| <i>Desi_wild_1315415</i> | NA                                  | <i>Ca_desi_denovo</i> | 1315415                 | A/G  | NA                 | NA                            | NA                 |
| <i>Desi_wild_1315870</i> | NA                                  | <i>Ca_desi_denovo</i> | 1315870                 | A/G  | NA                 | NA                            | NA                 |
| <i>Desi_wild_1315917</i> | NA                                  | <i>Ca_desi_denovo</i> | 1315917                 | A/G  | NA                 | NA                            | NA                 |
| <i>Desi_wild_1315962</i> | NA                                  | <i>Ca_desi_denovo</i> | 1315962                 | A/G  | NA                 | NA                            | NA                 |
| <i>Desi_wild_1316551</i> | NA                                  | <i>Ca_desi_denovo</i> | 1316551                 | A/C  | NA                 | NA                            | NA                 |
| <i>Desi_wild_1316763</i> | NA                                  | <i>Ca_desi_denovo</i> | 1316763                 | T/C  | NA                 | NA                            | NA                 |
| <i>Desi_wild_1316886</i> | NA                                  | <i>Ca_desi_denovo</i> | 1316886                 | G/A  | NA                 | NA                            | NA                 |
| <i>Desi_wild_1316962</i> | NA                                  | <i>Ca_desi_denovo</i> | 1316962                 | G/A  | NA                 | NA                            | NA                 |
| <i>Desi_wild_1316986</i> | NA                                  | <i>Ca_desi_denovo</i> | 1316986                 | G/A  | NA                 | NA                            | NA                 |
| <i>Desi_wild_1317060</i> | NA                                  | <i>Ca_desi_denovo</i> | 1317060                 | C/G  | NA                 | NA                            | NA                 |
| <i>Desi_wild_1317134</i> | NA                                  | <i>Ca_desi_denovo</i> | 1317134                 | C/A  | NA                 | NA                            | NA                 |
| <i>Desi_wild_1317136</i> | NA                                  | <i>Ca_desi_denovo</i> | 1317136                 | A/C  | NA                 | NA                            | NA                 |
| <i>Desi_wild_1318716</i> | NA                                  | <i>Ca_desi_denovo</i> | 1318716                 | T/A  | NA                 | NA                            | NA                 |
| <i>Desi_wild_1318986</i> | NA                                  | <i>Ca_desi_denovo</i> | 1318986                 | G/C  | NA                 | NA                            | NA                 |
| <i>Desi_wild_1319019</i> | NA                                  | <i>Ca_desi_denovo</i> | 1319019                 | C/T  | NA                 | NA                            | NA                 |
| <i>Desi_wild_1319210</i> | NA                                  | <i>Ca_desi_denovo</i> | 1319210                 | G/C  | NA                 | NA                            | NA                 |
| <i>Desi_wild_1319381</i> | NA                                  | <i>Ca_desi_denovo</i> | 1319381                 | C/T  | NA                 | NA                            | NA                 |
| <i>Desi_wild_1319422</i> | NA                                  | <i>Ca_desi_denovo</i> | 1319422                 | C/G  | NA                 | NA                            | NA                 |
| <i>Desi_wild_1319969</i> | NA                                  | <i>Ca_desi_denovo</i> | 1319969                 | C/T  | NA                 | NA                            | NA                 |
| <i>Desi_wild_1320175</i> | NA                                  | <i>Ca_desi_denovo</i> | 1320175                 | G/C  | NA                 | NA                            | NA                 |
| <i>Desi_wild_1320555</i> | NA                                  | <i>Ca_desi_denovo</i> | 1320555                 | G/C  | NA                 | NA                            | NA                 |
| <i>Desi_wild_1320576</i> | NA                                  | <i>Ca_desi_denovo</i> | 1320576                 | C/G  | NA                 | NA                            | NA                 |
| <i>Desi_wild_1321267</i> | NA                                  | <i>Ca_desi_denovo</i> | 1321267                 | G/C  | NA                 | NA                            | NA                 |
| <i>Desi_wild_1322220</i> | NA                                  | <i>Ca_desi_denovo</i> | 1322220                 | G/A  | NA                 | NA                            | NA                 |
| <i>Desi_wild_1322243</i> | NA                                  | <i>Ca_desi_denovo</i> | 1322243                 | C/A  | NA                 | NA                            | NA                 |
| <i>Desi_wild_1322564</i> | NA                                  | <i>Ca_desi_denovo</i> | 1322564                 | A/G  | NA                 | NA                            | NA                 |
| <i>Desi_wild_1323131</i> | NA                                  | <i>Ca_desi_denovo</i> | 1323131                 | A/G  | NA                 | NA                            | NA                 |
| <i>Desi_wild_1323143</i> | NA                                  | <i>Ca_desi_denovo</i> | 1323143                 | G/C  | NA                 | NA                            | NA                 |
| <i>Desi_wild_1323269</i> | NA                                  | <i>Ca_desi_denovo</i> | 1323269                 | C/T  | NA                 | NA                            | NA                 |
| <i>Desi_wild_1323283</i> | NA                                  | <i>Ca_desi_denovo</i> | 1323283                 | A/G  | NA                 | NA                            | NA                 |
| <i>Desi_wild_1324125</i> | NA                                  | <i>Ca_desi_denovo</i> | 1324125                 | A/C  | NA                 | NA                            | NA                 |
| <i>Desi_wild_1324182</i> | NA                                  | <i>Ca_desi_denovo</i> | 1324182                 | T/C  | NA                 | NA                            | NA                 |
| <i>Desi_wild_1324237</i> | NA                                  | <i>Ca_desi_denovo</i> | 1324237                 | G/T  | NA                 | NA                            | NA                 |

| SNP IDs                  | NCBI dbSNP accession IDs (NCBI_SS#) | Chromosomes           | Physical positions (bp) | SNPs | Gene accession IDs | Sequence components of genome | Putative functions |
|--------------------------|-------------------------------------|-----------------------|-------------------------|------|--------------------|-------------------------------|--------------------|
| <i>Desi_wild_1324272</i> | NA                                  | <i>Ca_desi_denovo</i> | 1324272                 | C/T  | NA                 | NA                            | NA                 |
| <i>Desi_wild_1324816</i> | NA                                  | <i>Ca_desi_denovo</i> | 1324816                 | G/A  | NA                 | NA                            | NA                 |
| <i>Desi_wild_1324895</i> | NA                                  | <i>Ca_desi_denovo</i> | 1324895                 | T/G  | NA                 | NA                            | NA                 |
| <i>Desi_wild_1325404</i> | NA                                  | <i>Ca_desi_denovo</i> | 1325404                 | T/C  | NA                 | NA                            | NA                 |
| <i>Desi_wild_1325545</i> | NA                                  | <i>Ca_desi_denovo</i> | 1325545                 | A/G  | NA                 | NA                            | NA                 |
| <i>Desi_wild_1325873</i> | NA                                  | <i>Ca_desi_denovo</i> | 1325873                 | C/A  | NA                 | NA                            | NA                 |
| <i>Desi_wild_1325976</i> | NA                                  | <i>Ca_desi_denovo</i> | 1325976                 | G/A  | NA                 | NA                            | NA                 |
| <i>Desi_wild_1326035</i> | NA                                  | <i>Ca_desi_denovo</i> | 1326035                 | T/C  | NA                 | NA                            | NA                 |
| <i>Desi_wild_1326079</i> | NA                                  | <i>Ca_desi_denovo</i> | 1326079                 | C/T  | NA                 | NA                            | NA                 |
| <i>Desi_wild_1326171</i> | NA                                  | <i>Ca_desi_denovo</i> | 1326171                 | G/A  | NA                 | NA                            | NA                 |
| <i>Desi_wild_1327239</i> | NA                                  | <i>Ca_desi_denovo</i> | 1327239                 | C/G  | NA                 | NA                            | NA                 |
| <i>Desi_wild_1327251</i> | NA                                  | <i>Ca_desi_denovo</i> | 1327251                 | C/T  | NA                 | NA                            | NA                 |
| <i>Desi_wild_1328157</i> | NA                                  | <i>Ca_desi_denovo</i> | 1328157                 | A/G  | NA                 | NA                            | NA                 |
| <i>Desi_wild_1329430</i> | NA                                  | <i>Ca_desi_denovo</i> | 1329430                 | C/G  | NA                 | NA                            | NA                 |
| <i>Desi_wild_1329967</i> | NA                                  | <i>Ca_desi_denovo</i> | 1329967                 | A/C  | NA                 | NA                            | NA                 |
| <i>Desi_wild_1329969</i> | NA                                  | <i>Ca_desi_denovo</i> | 1329969                 | A/G  | NA                 | NA                            | NA                 |
| <i>Desi_wild_1330464</i> | NA                                  | <i>Ca_desi_denovo</i> | 1330464                 | G/C  | NA                 | NA                            | NA                 |
| <i>Desi_wild_1330471</i> | NA                                  | <i>Ca_desi_denovo</i> | 1330471                 | G/A  | NA                 | NA                            | NA                 |
| <i>Desi_wild_1330799</i> | NA                                  | <i>Ca_desi_denovo</i> | 1330799                 | G/A  | NA                 | NA                            | NA                 |
| <i>Desi_wild_1330957</i> | NA                                  | <i>Ca_desi_denovo</i> | 1330957                 | G/A  | NA                 | NA                            | NA                 |
| <i>Desi_wild_1331213</i> | NA                                  | <i>Ca_desi_denovo</i> | 1331213                 | T/C  | NA                 | NA                            | NA                 |
| <i>Desi_wild_1331234</i> | NA                                  | <i>Ca_desi_denovo</i> | 1331234                 | T/C  | NA                 | NA                            | NA                 |
| <i>Desi_wild_1331240</i> | NA                                  | <i>Ca_desi_denovo</i> | 1331240                 | G/A  | NA                 | NA                            | NA                 |
| <i>Desi_wild_1331508</i> | NA                                  | <i>Ca_desi_denovo</i> | 1331508                 | G/A  | NA                 | NA                            | NA                 |
| <i>Desi_wild_1331556</i> | NA                                  | <i>Ca_desi_denovo</i> | 1331556                 | T/C  | NA                 | NA                            | NA                 |
| <i>Desi_wild_1332042</i> | NA                                  | <i>Ca_desi_denovo</i> | 1332042                 | G/T  | NA                 | NA                            | NA                 |
| <i>Desi_wild_1332472</i> | NA                                  | <i>Ca_desi_denovo</i> | 1332472                 | A/G  | NA                 | NA                            | NA                 |
| <i>Desi_wild_1332527</i> | NA                                  | <i>Ca_desi_denovo</i> | 1332527                 | C/G  | NA                 | NA                            | NA                 |
| <i>Desi_wild_1333173</i> | NA                                  | <i>Ca_desi_denovo</i> | 1333173                 | C/T  | NA                 | NA                            | NA                 |
| <i>Desi_wild_1333926</i> | NA                                  | <i>Ca_desi_denovo</i> | 1333926                 | A/G  | NA                 | NA                            | NA                 |
| <i>Desi_wild_1333986</i> | NA                                  | <i>Ca_desi_denovo</i> | 1333986                 | C/T  | NA                 | NA                            | NA                 |
| <i>Desi_wild_1334179</i> | NA                                  | <i>Ca_desi_denovo</i> | 1334179                 | T/G  | NA                 | NA                            | NA                 |
| <i>Desi_wild_1335710</i> | NA                                  | <i>Ca_desi_denovo</i> | 1335710                 | T/C  | NA                 | NA                            | NA                 |
| <i>Desi_wild_1336271</i> | NA                                  | <i>Ca_desi_denovo</i> | 1336271                 | T/C  | NA                 | NA                            | NA                 |
| <i>Desi_wild_1336311</i> | NA                                  | <i>Ca_desi_denovo</i> | 1336311                 | G/A  | NA                 | NA                            | NA                 |
| <i>Desi_wild_1337113</i> | NA                                  | <i>Ca_desi_denovo</i> | 1337113                 | G/A  | NA                 | NA                            | NA                 |
| <i>Desi_wild_1337349</i> | NA                                  | <i>Ca_desi_denovo</i> | 1337349                 | C/T  | NA                 | NA                            | NA                 |
| <i>Desi_wild_1338348</i> | NA                                  | <i>Ca_desi_denovo</i> | 1338348                 | A/C  | NA                 | NA                            | NA                 |
| <i>Desi_wild_1338880</i> | NA                                  | <i>Ca_desi_denovo</i> | 1338880                 | G/A  | NA                 | NA                            | NA                 |
| <i>Desi_wild_1338922</i> | NA                                  | <i>Ca_desi_denovo</i> | 1338922                 | C/A  | NA                 | NA                            | NA                 |
| <i>Desi_wild_1339790</i> | NA                                  | <i>Ca_desi_denovo</i> | 1339790                 | C/A  | NA                 | NA                            | NA                 |
| <i>Desi_wild_1339799</i> | NA                                  | <i>Ca_desi_denovo</i> | 1339799                 | T/C  | NA                 | NA                            | NA                 |
| <i>Desi_wild_1339959</i> | NA                                  | <i>Ca_desi_denovo</i> | 1339959                 | A/G  | NA                 | NA                            | NA                 |
| <i>Desi_wild_1339969</i> | NA                                  | <i>Ca_desi_denovo</i> | 1339969                 | T/C  | NA                 | NA                            | NA                 |

| SNP IDs                  | NCBI dbSNP accession IDs (NCBI_SS#) | Chromosomes           | Physical positions (bp) | SNPs | Gene accession IDs | Sequence components of genome | Putative functions |
|--------------------------|-------------------------------------|-----------------------|-------------------------|------|--------------------|-------------------------------|--------------------|
| <i>Desi_wild_1339995</i> | NA                                  | <i>Ca_desi_denovo</i> | 1339995                 | A/T  | NA                 | NA                            | NA                 |
| <i>Desi_wild_1340348</i> | NA                                  | <i>Ca_desi_denovo</i> | 1340348                 | C/A  | NA                 | NA                            | NA                 |
| <i>Desi_wild_1341101</i> | NA                                  | <i>Ca_desi_denovo</i> | 1341101                 | T/C  | NA                 | NA                            | NA                 |
| <i>Desi_wild_1341120</i> | NA                                  | <i>Ca_desi_denovo</i> | 1341120                 | A/G  | NA                 | NA                            | NA                 |
| <i>Desi_wild_1341609</i> | NA                                  | <i>Ca_desi_denovo</i> | 1341609                 | G/A  | NA                 | NA                            | NA                 |
| <i>Desi_wild_1341845</i> | NA                                  | <i>Ca_desi_denovo</i> | 1341845                 | C/A  | NA                 | NA                            | NA                 |
| <i>Desi_wild_1342585</i> | NA                                  | <i>Ca_desi_denovo</i> | 1342585                 | A/G  | NA                 | NA                            | NA                 |
| <i>Desi_wild_1342600</i> | NA                                  | <i>Ca_desi_denovo</i> | 1342600                 | C/T  | NA                 | NA                            | NA                 |
| <i>Desi_wild_1342679</i> | NA                                  | <i>Ca_desi_denovo</i> | 1342679                 | C/T  | NA                 | NA                            | NA                 |
| <i>Desi_wild_1342866</i> | NA                                  | <i>Ca_desi_denovo</i> | 1342866                 | C/G  | NA                 | NA                            | NA                 |
| <i>Desi_wild_1342881</i> | NA                                  | <i>Ca_desi_denovo</i> | 1342881                 | G/A  | NA                 | NA                            | NA                 |
| <i>Desi_wild_1342886</i> | NA                                  | <i>Ca_desi_denovo</i> | 1342886                 | C/T  | NA                 | NA                            | NA                 |
| <i>Desi_wild_1343376</i> | NA                                  | <i>Ca_desi_denovo</i> | 1343376                 | G/A  | NA                 | NA                            | NA                 |
| <i>Desi_wild_1343446</i> | NA                                  | <i>Ca_desi_denovo</i> | 1343446                 | T/C  | NA                 | NA                            | NA                 |
| <i>Desi_wild_1343450</i> | NA                                  | <i>Ca_desi_denovo</i> | 1343450                 | A/G  | NA                 | NA                            | NA                 |
| <i>Desi_wild_1344335</i> | NA                                  | <i>Ca_desi_denovo</i> | 1344335                 | A/T  | NA                 | NA                            | NA                 |
| <i>Desi_wild_1344800</i> | NA                                  | <i>Ca_desi_denovo</i> | 1344800                 | T/C  | NA                 | NA                            | NA                 |
| <i>Desi_wild_1345218</i> | NA                                  | <i>Ca_desi_denovo</i> | 1345218                 | G/T  | NA                 | NA                            | NA                 |
| <i>Desi_wild_1345294</i> | NA                                  | <i>Ca_desi_denovo</i> | 1345294                 | C/T  | NA                 | NA                            | NA                 |
| <i>Desi_wild_1345763</i> | NA                                  | <i>Ca_desi_denovo</i> | 1345763                 | T/G  | NA                 | NA                            | NA                 |
| <i>Desi_wild_1345955</i> | NA                                  | <i>Ca_desi_denovo</i> | 1345955                 | T/G  | NA                 | NA                            | NA                 |
| <i>Desi_wild_1346455</i> | NA                                  | <i>Ca_desi_denovo</i> | 1346455                 | A/G  | NA                 | NA                            | NA                 |
| <i>Desi_wild_1346967</i> | NA                                  | <i>Ca_desi_denovo</i> | 1346967                 | A/G  | NA                 | NA                            | NA                 |
| <i>Desi_wild_1347420</i> | NA                                  | <i>Ca_desi_denovo</i> | 1347420                 | G/C  | NA                 | NA                            | NA                 |
| <i>Desi_wild_1348312</i> | NA                                  | <i>Ca_desi_denovo</i> | 1348312                 | C/A  | NA                 | NA                            | NA                 |
| <i>Desi_wild_1348318</i> | NA                                  | <i>Ca_desi_denovo</i> | 1348318                 | C/T  | NA                 | NA                            | NA                 |
| <i>Desi_wild_1348379</i> | NA                                  | <i>Ca_desi_denovo</i> | 1348379                 | A/C  | NA                 | NA                            | NA                 |
| <i>Desi_wild_1349327</i> | NA                                  | <i>Ca_desi_denovo</i> | 1349327                 | T/C  | NA                 | NA                            | NA                 |
| <i>Desi_wild_1349335</i> | NA                                  | <i>Ca_desi_denovo</i> | 1349335                 | C/G  | NA                 | NA                            | NA                 |
| <i>Desi_wild_1350032</i> | NA                                  | <i>Ca_desi_denovo</i> | 1350032                 | C/T  | NA                 | NA                            | NA                 |
| <i>Desi_wild_1350814</i> | NA                                  | <i>Ca_desi_denovo</i> | 1350814                 | G/A  | NA                 | NA                            | NA                 |
| <i>Desi_wild_1350862</i> | NA                                  | <i>Ca_desi_denovo</i> | 1350862                 | A/G  | NA                 | NA                            | NA                 |
| <i>Desi_wild_1352306</i> | NA                                  | <i>Ca_desi_denovo</i> | 1352306                 | T/C  | NA                 | NA                            | NA                 |
| <i>Desi_wild_1352384</i> | NA                                  | <i>Ca_desi_denovo</i> | 1352384                 | G/A  | NA                 | NA                            | NA                 |
| <i>Desi_wild_1352769</i> | NA                                  | <i>Ca_desi_denovo</i> | 1352769                 | A/G  | NA                 | NA                            | NA                 |
| <i>Desi_wild_1352963</i> | NA                                  | <i>Ca_desi_denovo</i> | 1352963                 | C/A  | NA                 | NA                            | NA                 |
| <i>Desi_wild_1352972</i> | NA                                  | <i>Ca_desi_denovo</i> | 1352972                 | A/G  | NA                 | NA                            | NA                 |
| <i>Desi_wild_1354889</i> | NA                                  | <i>Ca_desi_denovo</i> | 1354889                 | G/A  | NA                 | NA                            | NA                 |
| <i>Desi_wild_1354919</i> | NA                                  | <i>Ca_desi_denovo</i> | 1354919                 | T/C  | NA                 | NA                            | NA                 |
| <i>Desi_wild_1355276</i> | NA                                  | <i>Ca_desi_denovo</i> | 1355276                 | A/G  | NA                 | NA                            | NA                 |
| <i>Desi_wild_1355303</i> | NA                                  | <i>Ca_desi_denovo</i> | 1355303                 | G/C  | NA                 | NA                            | NA                 |
| <i>Desi_wild_1355493</i> | NA                                  | <i>Ca_desi_denovo</i> | 1355493                 | T/C  | NA                 | NA                            | NA                 |
| <i>Desi_wild_1356070</i> | NA                                  | <i>Ca_desi_denovo</i> | 1356070                 | A/G  | NA                 | NA                            | NA                 |
| <i>Desi_wild_1356076</i> | NA                                  | <i>Ca_desi_denovo</i> | 1356076                 | C/T  | NA                 | NA                            | NA                 |

| SNP IDs                  | NCBI dbSNP accession IDs (NCBI_SS#) | Chromosomes           | Physical positions (bp) | SNPs | Gene accession IDs | Sequence components of genome | Putative functions |
|--------------------------|-------------------------------------|-----------------------|-------------------------|------|--------------------|-------------------------------|--------------------|
| <i>Desi_wild_1356632</i> | NA                                  | <i>Ca_desi_denovo</i> | 1356632                 | C/T  | NA                 | NA                            | NA                 |
| <i>Desi_wild_1356634</i> | NA                                  | <i>Ca_desi_denovo</i> | 1356634                 | G/C  | NA                 | NA                            | NA                 |
| <i>Desi_wild_1356955</i> | NA                                  | <i>Ca_desi_denovo</i> | 1356955                 | G/T  | NA                 | NA                            | NA                 |
| <i>Desi_wild_1356982</i> | NA                                  | <i>Ca_desi_denovo</i> | 1356982                 | G/C  | NA                 | NA                            | NA                 |
| <i>Desi_wild_1358189</i> | NA                                  | <i>Ca_desi_denovo</i> | 1358189                 | C/G  | NA                 | NA                            | NA                 |
| <i>Desi_wild_1358507</i> | NA                                  | <i>Ca_desi_denovo</i> | 1358507                 | C/T  | NA                 | NA                            | NA                 |
| <i>Desi_wild_1359285</i> | NA                                  | <i>Ca_desi_denovo</i> | 1359285                 | T/C  | NA                 | NA                            | NA                 |
| <i>Desi_wild_1359934</i> | NA                                  | <i>Ca_desi_denovo</i> | 1359934                 | G/C  | NA                 | NA                            | NA                 |
| <i>Desi_wild_1360896</i> | NA                                  | <i>Ca_desi_denovo</i> | 1360896                 | G/A  | NA                 | NA                            | NA                 |
| <i>Desi_wild_1361250</i> | NA                                  | <i>Ca_desi_denovo</i> | 1361250                 | G/A  | NA                 | NA                            | NA                 |
| <i>Desi_wild_1361261</i> | NA                                  | <i>Ca_desi_denovo</i> | 1361261                 | G/A  | NA                 | NA                            | NA                 |
| <i>Desi_wild_1361576</i> | NA                                  | <i>Ca_desi_denovo</i> | 1361576                 | G/A  | NA                 | NA                            | NA                 |
| <i>Desi_wild_1361607</i> | NA                                  | <i>Ca_desi_denovo</i> | 1361607                 | C/A  | NA                 | NA                            | NA                 |
| <i>Desi_wild_1362027</i> | NA                                  | <i>Ca_desi_denovo</i> | 1362027                 | G/A  | NA                 | NA                            | NA                 |
| <i>Desi_wild_1362531</i> | NA                                  | <i>Ca_desi_denovo</i> | 1362531                 | G/T  | NA                 | NA                            | NA                 |
| <i>Desi_wild_1362605</i> | NA                                  | <i>Ca_desi_denovo</i> | 1362605                 | G/A  | NA                 | NA                            | NA                 |
| <i>Desi_wild_1362920</i> | NA                                  | <i>Ca_desi_denovo</i> | 1362920                 | C/G  | NA                 | NA                            | NA                 |
| <i>Desi_wild_1363187</i> | NA                                  | <i>Ca_desi_denovo</i> | 1363187                 | G/A  | NA                 | NA                            | NA                 |
| <i>Desi_wild_1363980</i> | NA                                  | <i>Ca_desi_denovo</i> | 1363980                 | G/T  | NA                 | NA                            | NA                 |
| <i>Desi_wild_1364209</i> | NA                                  | <i>Ca_desi_denovo</i> | 1364209                 | G/T  | NA                 | NA                            | NA                 |
| <i>Desi_wild_1364212</i> | NA                                  | <i>Ca_desi_denovo</i> | 1364212                 | G/A  | NA                 | NA                            | NA                 |
| <i>Desi_wild_1364536</i> | NA                                  | <i>Ca_desi_denovo</i> | 1364536                 | A/C  | NA                 | NA                            | NA                 |
| <i>Desi_wild_1364896</i> | NA                                  | <i>Ca_desi_denovo</i> | 1364896                 | G/C  | NA                 | NA                            | NA                 |
| <i>Desi_wild_1364938</i> | NA                                  | <i>Ca_desi_denovo</i> | 1364938                 | A/C  | NA                 | NA                            | NA                 |
| <i>Desi_wild_1365564</i> | NA                                  | <i>Ca_desi_denovo</i> | 1365564                 | C/T  | NA                 | NA                            | NA                 |
| <i>Desi_wild_1365606</i> | NA                                  | <i>Ca_desi_denovo</i> | 1365606                 | A/G  | NA                 | NA                            | NA                 |
| <i>Desi_wild_1366548</i> | NA                                  | <i>Ca_desi_denovo</i> | 1366548                 | C/G  | NA                 | NA                            | NA                 |
| <i>Desi_wild_1367485</i> | NA                                  | <i>Ca_desi_denovo</i> | 1367485                 | A/T  | NA                 | NA                            | NA                 |
| <i>Desi_wild_1367502</i> | NA                                  | <i>Ca_desi_denovo</i> | 1367502                 | C/G  | NA                 | NA                            | NA                 |
| <i>Desi_wild_1367673</i> | NA                                  | <i>Ca_desi_denovo</i> | 1367673                 | A/C  | NA                 | NA                            | NA                 |
| <i>Desi_wild_1370989</i> | NA                                  | <i>Ca_desi_denovo</i> | 1370989                 | C/T  | NA                 | NA                            | NA                 |
| <i>Desi_wild_1371022</i> | NA                                  | <i>Ca_desi_denovo</i> | 1371022                 | A/C  | NA                 | NA                            | NA                 |
| <i>Desi_wild_1371956</i> | NA                                  | <i>Ca_desi_denovo</i> | 1371956                 | G/T  | NA                 | NA                            | NA                 |
| <i>Desi_wild_1371994</i> | NA                                  | <i>Ca_desi_denovo</i> | 1371994                 | T/C  | NA                 | NA                            | NA                 |
| <i>Desi_wild_1374483</i> | NA                                  | <i>Ca_desi_denovo</i> | 1374483                 | T/C  | NA                 | NA                            | NA                 |
| <i>Desi_wild_1374535</i> | NA                                  | <i>Ca_desi_denovo</i> | 1374535                 | G/T  | NA                 | NA                            | NA                 |
| <i>Desi_wild_1376356</i> | NA                                  | <i>Ca_desi_denovo</i> | 1376356                 | C/T  | NA                 | NA                            | NA                 |
| <i>Desi_wild_1378061</i> | NA                                  | <i>Ca_desi_denovo</i> | 1378061                 | G/C  | NA                 | NA                            | NA                 |
| <i>Desi_wild_1378204</i> | NA                                  | <i>Ca_desi_denovo</i> | 1378204                 | T/C  | NA                 | NA                            | NA                 |
| <i>Desi_wild_1378213</i> | NA                                  | <i>Ca_desi_denovo</i> | 1378213                 | T/C  | NA                 | NA                            | NA                 |
| <i>Desi_wild_1378683</i> | NA                                  | <i>Ca_desi_denovo</i> | 1378683                 | G/C  | NA                 | NA                            | NA                 |
| <i>Desi_wild_1379513</i> | NA                                  | <i>Ca_desi_denovo</i> | 1379513                 | G/A  | NA                 | NA                            | NA                 |
| <i>Desi_wild_1379987</i> | NA                                  | <i>Ca_desi_denovo</i> | 1379987                 | A/G  | NA                 | NA                            | NA                 |
| <i>Desi_wild_1380644</i> | NA                                  | <i>Ca_desi_denovo</i> | 1380644                 | T/G  | NA                 | NA                            | NA                 |

| SNP IDs                  | NCBI dbSNP accession IDs (NCBI_SS#) | Chromosomes           | Physical positions (bp) | SNPs | Gene accession IDs | Sequence components of genome | Putative functions |
|--------------------------|-------------------------------------|-----------------------|-------------------------|------|--------------------|-------------------------------|--------------------|
| <i>Desi_wild_1382436</i> | NA                                  | <i>Ca_desi_denovo</i> | 1382436                 | C/T  | NA                 | NA                            | NA                 |
| <i>Desi_wild_1384233</i> | NA                                  | <i>Ca_desi_denovo</i> | 1384233                 | A/G  | NA                 | NA                            | NA                 |
| <i>Desi_wild_1384240</i> | NA                                  | <i>Ca_desi_denovo</i> | 1384240                 | T/A  | NA                 | NA                            | NA                 |
| <i>Desi_wild_1384567</i> | NA                                  | <i>Ca_desi_denovo</i> | 1384567                 | C/A  | NA                 | NA                            | NA                 |
| <i>Desi_wild_1386503</i> | NA                                  | <i>Ca_desi_denovo</i> | 1386503                 | C/G  | NA                 | NA                            | NA                 |
| <i>Desi_wild_1387571</i> | NA                                  | <i>Ca_desi_denovo</i> | 1387571                 | C/T  | NA                 | NA                            | NA                 |
| <i>Desi_wild_1387611</i> | NA                                  | <i>Ca_desi_denovo</i> | 1387611                 | A/G  | NA                 | NA                            | NA                 |
| <i>Desi_wild_1388071</i> | NA                                  | <i>Ca_desi_denovo</i> | 1388071                 | G/A  | NA                 | NA                            | NA                 |
| <i>Desi_wild_1388168</i> | NA                                  | <i>Ca_desi_denovo</i> | 1388168                 | C/T  | NA                 | NA                            | NA                 |
| <i>Desi_wild_1389593</i> | NA                                  | <i>Ca_desi_denovo</i> | 1389593                 | T/G  | NA                 | NA                            | NA                 |
| <i>Desi_wild_1389725</i> | NA                                  | <i>Ca_desi_denovo</i> | 1389725                 | T/G  | NA                 | NA                            | NA                 |
| <i>Desi_wild_1389990</i> | NA                                  | <i>Ca_desi_denovo</i> | 1389990                 | C/G  | NA                 | NA                            | NA                 |
| <i>Desi_wild_1390502</i> | NA                                  | <i>Ca_desi_denovo</i> | 1390502                 | C/T  | NA                 | NA                            | NA                 |
| <i>Desi_wild_1390505</i> | NA                                  | <i>Ca_desi_denovo</i> | 1390505                 | T/G  | NA                 | NA                            | NA                 |
| <i>Desi_wild_1392291</i> | NA                                  | <i>Ca_desi_denovo</i> | 1392291                 | T/G  | NA                 | NA                            | NA                 |
| <i>Desi_wild_1392342</i> | NA                                  | <i>Ca_desi_denovo</i> | 1392342                 | G/A  | NA                 | NA                            | NA                 |
| <i>Desi_wild_1392350</i> | NA                                  | <i>Ca_desi_denovo</i> | 1392350                 | A/G  | NA                 | NA                            | NA                 |
| <i>Desi_wild_1393219</i> | NA                                  | <i>Ca_desi_denovo</i> | 1393219                 | G/T  | NA                 | NA                            | NA                 |
| <i>Desi_wild_1393242</i> | NA                                  | <i>Ca_desi_denovo</i> | 1393242                 | A/G  | NA                 | NA                            | NA                 |
| <i>Desi_wild_1395440</i> | NA                                  | <i>Ca_desi_denovo</i> | 1395440                 | T/C  | NA                 | NA                            | NA                 |
| <i>Desi_wild_1395452</i> | NA                                  | <i>Ca_desi_denovo</i> | 1395452                 | C/G  | NA                 | NA                            | NA                 |
| <i>Desi_wild_1395558</i> | NA                                  | <i>Ca_desi_denovo</i> | 1395558                 | G/T  | NA                 | NA                            | NA                 |
| <i>Desi_wild_1396922</i> | NA                                  | <i>Ca_desi_denovo</i> | 1396922                 | C/G  | NA                 | NA                            | NA                 |
| <i>Desi_wild_1396927</i> | NA                                  | <i>Ca_desi_denovo</i> | 1396927                 | C/T  | NA                 | NA                            | NA                 |
| <i>Desi_wild_1397140</i> | NA                                  | <i>Ca_desi_denovo</i> | 1397140                 | G/A  | NA                 | NA                            | NA                 |
| <i>Desi_wild_1397149</i> | NA                                  | <i>Ca_desi_denovo</i> | 1397149                 | G/C  | NA                 | NA                            | NA                 |
| <i>Desi_wild_1397767</i> | NA                                  | <i>Ca_desi_denovo</i> | 1397767                 | C/T  | NA                 | NA                            | NA                 |
| <i>Desi_wild_1397779</i> | NA                                  | <i>Ca_desi_denovo</i> | 1397779                 | G/A  | NA                 | NA                            | NA                 |
| <i>Desi_wild_1399425</i> | NA                                  | <i>Ca_desi_denovo</i> | 1399425                 | T/G  | NA                 | NA                            | NA                 |
| <i>Desi_wild_1399454</i> | NA                                  | <i>Ca_desi_denovo</i> | 1399454                 | G/T  | NA                 | NA                            | NA                 |
| <i>Desi_wild_1399488</i> | NA                                  | <i>Ca_desi_denovo</i> | 1399488                 | G/T  | NA                 | NA                            | NA                 |
| <i>Desi_wild_1399803</i> | NA                                  | <i>Ca_desi_denovo</i> | 1399803                 | T/C  | NA                 | NA                            | NA                 |
| <i>Desi_wild_1399840</i> | NA                                  | <i>Ca_desi_denovo</i> | 1399840                 | G/C  | NA                 | NA                            | NA                 |
| <i>Desi_wild_1400261</i> | NA                                  | <i>Ca_desi_denovo</i> | 1400261                 | G/T  | NA                 | NA                            | NA                 |
| <i>Desi_wild_1401535</i> | NA                                  | <i>Ca_desi_denovo</i> | 1401535                 | G/A  | NA                 | NA                            | NA                 |
| <i>Desi_wild_1401838</i> | NA                                  | <i>Ca_desi_denovo</i> | 1401838                 | C/T  | NA                 | NA                            | NA                 |
| <i>Desi_wild_1401839</i> | NA                                  | <i>Ca_desi_denovo</i> | 1401839                 | G/A  | NA                 | NA                            | NA                 |
| <i>Desi_wild_1402018</i> | NA                                  | <i>Ca_desi_denovo</i> | 1402018                 | A/G  | NA                 | NA                            | NA                 |
| <i>Desi_wild_1402085</i> | NA                                  | <i>Ca_desi_denovo</i> | 1402085                 | A/C  | NA                 | NA                            | NA                 |
| <i>Desi_wild_1402988</i> | NA                                  | <i>Ca_desi_denovo</i> | 1402988                 | T/C  | NA                 | NA                            | NA                 |
| <i>Desi_wild_1403021</i> | NA                                  | <i>Ca_desi_denovo</i> | 1403021                 | G/A  | NA                 | NA                            | NA                 |
| <i>Desi_wild_1403320</i> | NA                                  | <i>Ca_desi_denovo</i> | 1403320                 | A/G  | NA                 | NA                            | NA                 |
| <i>Desi_wild_1403378</i> | NA                                  | <i>Ca_desi_denovo</i> | 1403378                 | T/G  | NA                 | NA                            | NA                 |
| <i>Desi_wild_1403408</i> | NA                                  | <i>Ca_desi_denovo</i> | 1403408                 | C/T  | NA                 | NA                            | NA                 |



| SNP IDs                  | NCBI dbSNP accession IDs (NCBI_SS#) | Chromosomes           | Physical positions (bp) | SNPs | Gene accession IDs | Sequence components of genome | Putative functions |
|--------------------------|-------------------------------------|-----------------------|-------------------------|------|--------------------|-------------------------------|--------------------|
| <i>Desi_wild_1404943</i> | NA                                  | <i>Ca_desi_denovo</i> | 1404943                 | G/A  | NA                 | NA                            | NA                 |
| <i>Desi_wild_1404954</i> | NA                                  | <i>Ca_desi_denovo</i> | 1404954                 | A/T  | NA                 | NA                            | NA                 |
| <i>Desi_wild_1406022</i> | NA                                  | <i>Ca_desi_denovo</i> | 1406022                 | A/G  | NA                 | NA                            | NA                 |
| <i>Desi_wild_1406044</i> | NA                                  | <i>Ca_desi_denovo</i> | 1406044                 | C/T  | NA                 | NA                            | NA                 |
| <i>Desi_wild_1408010</i> | NA                                  | <i>Ca_desi_denovo</i> | 1408010                 | C/T  | NA                 | NA                            | NA                 |
| <i>Desi_wild_1408913</i> | NA                                  | <i>Ca_desi_denovo</i> | 1408913                 | A/G  | NA                 | NA                            | NA                 |
| <i>Desi_wild_1408951</i> | NA                                  | <i>Ca_desi_denovo</i> | 1408951                 | A/C  | NA                 | NA                            | NA                 |
| <i>Desi_wild_1411581</i> | NA                                  | <i>Ca_desi_denovo</i> | 1411581                 | T/G  | NA                 | NA                            | NA                 |
| <i>Desi_wild_1411589</i> | NA                                  | <i>Ca_desi_denovo</i> | 1411589                 | C/T  | NA                 | NA                            | NA                 |
| <i>Desi_wild_1412382</i> | NA                                  | <i>Ca_desi_denovo</i> | 1412382                 | G/T  | NA                 | NA                            | NA                 |
| <i>Desi_wild_1412386</i> | NA                                  | <i>Ca_desi_denovo</i> | 1412386                 | G/T  | NA                 | NA                            | NA                 |
| <i>Desi_wild_1413353</i> | NA                                  | <i>Ca_desi_denovo</i> | 1413353                 | A/G  | NA                 | NA                            | NA                 |
| <i>Desi_wild_1413788</i> | NA                                  | <i>Ca_desi_denovo</i> | 1413788                 | G/C  | NA                 | NA                            | NA                 |
| <i>Desi_wild_1417727</i> | NA                                  | <i>Ca_desi_denovo</i> | 1417727                 | T/A  | NA                 | NA                            | NA                 |
| <i>Desi_wild_1417855</i> | NA                                  | <i>Ca_desi_denovo</i> | 1417855                 | C/T  | NA                 | NA                            | NA                 |
| <i>Desi_wild_1418352</i> | NA                                  | <i>Ca_desi_denovo</i> | 1418352                 | G/A  | NA                 | NA                            | NA                 |
| <i>Desi_wild_1419005</i> | NA                                  | <i>Ca_desi_denovo</i> | 1419005                 | A/G  | NA                 | NA                            | NA                 |
| <i>Desi_wild_1419023</i> | NA                                  | <i>Ca_desi_denovo</i> | 1419023                 | T/G  | NA                 | NA                            | NA                 |
| <i>Desi_wild_1419029</i> | NA                                  | <i>Ca_desi_denovo</i> | 1419029                 | A/G  | NA                 | NA                            | NA                 |
| <i>Desi_wild_1419633</i> | NA                                  | <i>Ca_desi_denovo</i> | 1419633                 | T/C  | NA                 | NA                            | NA                 |
| <i>Desi_wild_1420574</i> | NA                                  | <i>Ca_desi_denovo</i> | 1420574                 | A/G  | NA                 | NA                            | NA                 |
| <i>Desi_wild_1420653</i> | NA                                  | <i>Ca_desi_denovo</i> | 1420653                 | T/C  | NA                 | NA                            | NA                 |
| <i>Desi_wild_1420905</i> | NA                                  | <i>Ca_desi_denovo</i> | 1420905                 | T/C  | NA                 | NA                            | NA                 |
| <i>Desi_wild_1421527</i> | NA                                  | <i>Ca_desi_denovo</i> | 1421527                 | C/T  | NA                 | NA                            | NA                 |
| <i>Desi_wild_1421768</i> | NA                                  | <i>Ca_desi_denovo</i> | 1421768                 | G/A  | NA                 | NA                            | NA                 |
| <i>Desi_wild_1422115</i> | NA                                  | <i>Ca_desi_denovo</i> | 1422115                 | T/C  | NA                 | NA                            | NA                 |
| <i>Desi_wild_1423430</i> | NA                                  | <i>Ca_desi_denovo</i> | 1423430                 | T/G  | NA                 | NA                            | NA                 |
| <i>Desi_wild_1424141</i> | NA                                  | <i>Ca_desi_denovo</i> | 1424141                 | A/C  | NA                 | NA                            | NA                 |
| <i>Desi_wild_1424163</i> | NA                                  | <i>Ca_desi_denovo</i> | 1424163                 | G/C  | NA                 | NA                            | NA                 |
| <i>Desi_wild_1425616</i> | NA                                  | <i>Ca_desi_denovo</i> | 1425616                 | T/C  | NA                 | NA                            | NA                 |
| <i>Desi_wild_1425663</i> | NA                                  | <i>Ca_desi_denovo</i> | 1425663                 | T/C  | NA                 | NA                            | NA                 |
| <i>Desi_wild_1426843</i> | NA                                  | <i>Ca_desi_denovo</i> | 1426843                 | G/T  | NA                 | NA                            | NA                 |
| <i>Desi_wild_1427063</i> | NA                                  | <i>Ca_desi_denovo</i> | 1427063                 | A/C  | NA                 | NA                            | NA                 |
| <i>Desi_wild_1427945</i> | NA                                  | <i>Ca_desi_denovo</i> | 1427945                 | G/C  | NA                 | NA                            | NA                 |
| <i>Desi_wild_1427987</i> | NA                                  | <i>Ca_desi_denovo</i> | 1427987                 | T/C  | NA                 | NA                            | NA                 |
| <i>Desi_wild_1429345</i> | NA                                  | <i>Ca_desi_denovo</i> | 1429345                 | T/C  | NA                 | NA                            | NA                 |
| <i>Desi_wild_1429477</i> | NA                                  | <i>Ca_desi_denovo</i> | 1429477                 | T/C  | NA                 | NA                            | NA                 |
| <i>Desi_wild_1429673</i> | NA                                  | <i>Ca_desi_denovo</i> | 1429673                 | T/C  | NA                 | NA                            | NA                 |
| <i>Desi_wild_1429733</i> | NA                                  | <i>Ca_desi_denovo</i> | 1429733                 | T/G  | NA                 | NA                            | NA                 |
| <i>Desi_wild_1430147</i> | NA                                  | <i>Ca_desi_denovo</i> | 1430147                 | C/A  | NA                 | NA                            | NA                 |
| <i>Desi_wild_1430216</i> | NA                                  | <i>Ca_desi_denovo</i> | 1430216                 | C/G  | NA                 | NA                            | NA                 |
| <i>Desi_wild_1430566</i> | NA                                  | <i>Ca_desi_denovo</i> | 1430566                 | A/T  | NA                 | NA                            | NA                 |
| <i>Desi_wild_1431132</i> | NA                                  | <i>Ca_desi_denovo</i> | 1431132                 | C/T  | NA                 | NA                            | NA                 |
| <i>Desi_wild_1431201</i> | NA                                  | <i>Ca_desi_denovo</i> | 1431201                 | C/A  | NA                 | NA                            | NA                 |

| SNP IDs                  | NCBI dbSNP accession IDs (NCBI_SS#) | Chromosomes           | Physical positions (bp) | SNPs | Gene accession IDs | Sequence components of genome | Putative functions |
|--------------------------|-------------------------------------|-----------------------|-------------------------|------|--------------------|-------------------------------|--------------------|
| <i>Desi_wild_1431338</i> | NA                                  | <i>Ca_desi_denovo</i> | 1431338                 | A/G  | NA                 | NA                            | NA                 |
| <i>Desi_wild_1431348</i> | NA                                  | <i>Ca_desi_denovo</i> | 1431348                 | A/C  | NA                 | NA                            | NA                 |
| <i>Desi_wild_1431822</i> | NA                                  | <i>Ca_desi_denovo</i> | 1431822                 | C/G  | NA                 | NA                            | NA                 |
| <i>Desi_wild_1431910</i> | NA                                  | <i>Ca_desi_denovo</i> | 1431910                 | C/A  | NA                 | NA                            | NA                 |
| <i>Desi_wild_1431914</i> | NA                                  | <i>Ca_desi_denovo</i> | 1431914                 | A/C  | NA                 | NA                            | NA                 |
| <i>Desi_wild_1432396</i> | NA                                  | <i>Ca_desi_denovo</i> | 1432396                 | A/G  | NA                 | NA                            | NA                 |
| <i>Desi_wild_1432429</i> | NA                                  | <i>Ca_desi_denovo</i> | 1432429                 | T/C  | NA                 | NA                            | NA                 |
| <i>Desi_wild_1432982</i> | NA                                  | <i>Ca_desi_denovo</i> | 1432982                 | G/C  | NA                 | NA                            | NA                 |
| <i>Desi_wild_1433532</i> | NA                                  | <i>Ca_desi_denovo</i> | 1433532                 | A/C  | NA                 | NA                            | NA                 |
| <i>Desi_wild_1434045</i> | NA                                  | <i>Ca_desi_denovo</i> | 1434045                 | C/G  | NA                 | NA                            | NA                 |
| <i>Desi_wild_1435045</i> | NA                                  | <i>Ca_desi_denovo</i> | 1435045                 | C/G  | NA                 | NA                            | NA                 |
| <i>Desi_wild_1435083</i> | NA                                  | <i>Ca_desi_denovo</i> | 1435083                 | G/A  | NA                 | NA                            | NA                 |
| <i>Desi_wild_1435309</i> | NA                                  | <i>Ca_desi_denovo</i> | 1435309                 | C/T  | NA                 | NA                            | NA                 |
| <i>Desi_wild_1435507</i> | NA                                  | <i>Ca_desi_denovo</i> | 1435507                 | T/C  | NA                 | NA                            | NA                 |
| <i>Desi_wild_1435699</i> | NA                                  | <i>Ca_desi_denovo</i> | 1435699                 | C/T  | NA                 | NA                            | NA                 |
| <i>Desi_wild_1435736</i> | NA                                  | <i>Ca_desi_denovo</i> | 1435736                 | T/C  | NA                 | NA                            | NA                 |
| <i>Desi_wild_1435970</i> | NA                                  | <i>Ca_desi_denovo</i> | 1435970                 | C/T  | NA                 | NA                            | NA                 |
| <i>Desi_wild_1436649</i> | NA                                  | <i>Ca_desi_denovo</i> | 1436649                 | C/T  | NA                 | NA                            | NA                 |
| <i>Desi_wild_1436668</i> | NA                                  | <i>Ca_desi_denovo</i> | 1436668                 | C/T  | NA                 | NA                            | NA                 |
| <i>Desi_wild_1437798</i> | NA                                  | <i>Ca_desi_denovo</i> | 1437798                 | G/A  | NA                 | NA                            | NA                 |
| <i>Desi_wild_1438548</i> | NA                                  | <i>Ca_desi_denovo</i> | 1438548                 | C/T  | NA                 | NA                            | NA                 |
| <i>Desi_wild_1438574</i> | NA                                  | <i>Ca_desi_denovo</i> | 1438574                 | T/C  | NA                 | NA                            | NA                 |
| <i>Desi_wild_1439790</i> | NA                                  | <i>Ca_desi_denovo</i> | 1439790                 | T/C  | NA                 | NA                            | NA                 |
| <i>Desi_wild_1439990</i> | NA                                  | <i>Ca_desi_denovo</i> | 1439990                 | C/T  | NA                 | NA                            | NA                 |
| <i>Desi_wild_1441721</i> | NA                                  | <i>Ca_desi_denovo</i> | 1441721                 | C/A  | NA                 | NA                            | NA                 |
| <i>Desi_wild_1442206</i> | NA                                  | <i>Ca_desi_denovo</i> | 1442206                 | A/G  | NA                 | NA                            | NA                 |
| <i>Desi_wild_1442693</i> | NA                                  | <i>Ca_desi_denovo</i> | 1442693                 | T/G  | NA                 | NA                            | NA                 |
| <i>Desi_wild_1443186</i> | NA                                  | <i>Ca_desi_denovo</i> | 1443186                 | A/G  | NA                 | NA                            | NA                 |
| <i>Desi_wild_1443811</i> | NA                                  | <i>Ca_desi_denovo</i> | 1443811                 | A/G  | NA                 | NA                            | NA                 |
| <i>Desi_wild_1444539</i> | NA                                  | <i>Ca_desi_denovo</i> | 1444539                 | T/C  | NA                 | NA                            | NA                 |
| <i>Desi_wild_1444559</i> | NA                                  | <i>Ca_desi_denovo</i> | 1444559                 | G/C  | NA                 | NA                            | NA                 |
| <i>Desi_wild_1445797</i> | NA                                  | <i>Ca_desi_denovo</i> | 1445797                 | T/A  | NA                 | NA                            | NA                 |
| <i>Desi_wild_1445812</i> | NA                                  | <i>Ca_desi_denovo</i> | 1445812                 | C/T  | NA                 | NA                            | NA                 |
| <i>Desi_wild_1446257</i> | NA                                  | <i>Ca_desi_denovo</i> | 1446257                 | G/T  | NA                 | NA                            | NA                 |
| <i>Desi_wild_1446332</i> | NA                                  | <i>Ca_desi_denovo</i> | 1446332                 | A/G  | NA                 | NA                            | NA                 |
| <i>Desi_wild_1446461</i> | NA                                  | <i>Ca_desi_denovo</i> | 1446461                 | T/C  | NA                 | NA                            | NA                 |
| <i>Desi_wild_1446777</i> | NA                                  | <i>Ca_desi_denovo</i> | 1446777                 | A/G  | NA                 | NA                            | NA                 |
| <i>Desi_wild_1446972</i> | NA                                  | <i>Ca_desi_denovo</i> | 1446972                 | G/C  | NA                 | NA                            | NA                 |
| <i>Desi_wild_1446980</i> | NA                                  | <i>Ca_desi_denovo</i> | 1446980                 | C/T  | NA                 | NA                            | NA                 |
| <i>Desi_wild_1447427</i> | NA                                  | <i>Ca_desi_denovo</i> | 1447427                 | A/G  | NA                 | NA                            | NA                 |
| <i>Desi_wild_1447546</i> | NA                                  | <i>Ca_desi_denovo</i> | 1447546                 | G/T  | NA                 | NA                            | NA                 |
| <i>Desi_wild_1448386</i> | NA                                  | <i>Ca_desi_denovo</i> | 1448386                 | C/G  | NA                 | NA                            | NA                 |
| <i>Desi_wild_1448413</i> | NA                                  | <i>Ca_desi_denovo</i> | 1448413                 | T/C  | NA                 | NA                            | NA                 |
| <i>Desi_wild_1448891</i> | NA                                  | <i>Ca_desi_denovo</i> | 1448891                 | T/A  | NA                 | NA                            | NA                 |

| SNP IDs                  | NCBI dbSNP accession IDs (NCBI_SS#) | Chromosomes           | Physical positions (bp) | SNPs | Gene accession IDs | Sequence components of genome | Putative functions |
|--------------------------|-------------------------------------|-----------------------|-------------------------|------|--------------------|-------------------------------|--------------------|
| <i>Desi_wild_1449499</i> | NA                                  | <i>Ca_desi_denovo</i> | 1449499                 | G/A  | NA                 | NA                            | NA                 |
| <i>Desi_wild_1449677</i> | NA                                  | <i>Ca_desi_denovo</i> | 1449677                 | T/G  | NA                 | NA                            | NA                 |
| <i>Desi_wild_1450258</i> | NA                                  | <i>Ca_desi_denovo</i> | 1450258                 | A/G  | NA                 | NA                            | NA                 |
| <i>Desi_wild_1452330</i> | NA                                  | <i>Ca_desi_denovo</i> | 1452330                 | T/C  | NA                 | NA                            | NA                 |
| <i>Desi_wild_1453277</i> | NA                                  | <i>Ca_desi_denovo</i> | 1453277                 | A/G  | NA                 | NA                            | NA                 |
| <i>Desi_wild_1453295</i> | NA                                  | <i>Ca_desi_denovo</i> | 1453295                 | C/G  | NA                 | NA                            | NA                 |
| <i>Desi_wild_1454961</i> | NA                                  | <i>Ca_desi_denovo</i> | 1454961                 | A/C  | NA                 | NA                            | NA                 |
| <i>Desi_wild_1455746</i> | NA                                  | <i>Ca_desi_denovo</i> | 1455746                 | A/G  | NA                 | NA                            | NA                 |
| <i>Desi_wild_1455747</i> | NA                                  | <i>Ca_desi_denovo</i> | 1455747                 | G/A  | NA                 | NA                            | NA                 |
| <i>Desi_wild_1455748</i> | NA                                  | <i>Ca_desi_denovo</i> | 1455748                 | A/G  | NA                 | NA                            | NA                 |
| <i>Desi_wild_1456962</i> | NA                                  | <i>Ca_desi_denovo</i> | 1456962                 | C/T  | NA                 | NA                            | NA                 |
| <i>Desi_wild_1457536</i> | NA                                  | <i>Ca_desi_denovo</i> | 1457536                 | C/T  | NA                 | NA                            | NA                 |
| <i>Desi_wild_1457576</i> | NA                                  | <i>Ca_desi_denovo</i> | 1457576                 | A/C  | NA                 | NA                            | NA                 |
| <i>Desi_wild_1458292</i> | NA                                  | <i>Ca_desi_denovo</i> | 1458292                 | C/A  | NA                 | NA                            | NA                 |
| <i>Desi_wild_1458331</i> | NA                                  | <i>Ca_desi_denovo</i> | 1458331                 | G/C  | NA                 | NA                            | NA                 |
| <i>Desi_wild_1458339</i> | NA                                  | <i>Ca_desi_denovo</i> | 1458339                 | T/G  | NA                 | NA                            | NA                 |
| <i>Desi_wild_1459230</i> | NA                                  | <i>Ca_desi_denovo</i> | 1459230                 | T/G  | NA                 | NA                            | NA                 |
| <i>Desi_wild_1459878</i> | NA                                  | <i>Ca_desi_denovo</i> | 1459878                 | G/T  | NA                 | NA                            | NA                 |
| <i>Desi_wild_1460661</i> | NA                                  | <i>Ca_desi_denovo</i> | 1460661                 | C/A  | NA                 | NA                            | NA                 |
| <i>Desi_wild_1460900</i> | NA                                  | <i>Ca_desi_denovo</i> | 1460900                 | G/A  | NA                 | NA                            | NA                 |
| <i>Desi_wild_1460924</i> | NA                                  | <i>Ca_desi_denovo</i> | 1460924                 | C/T  | NA                 | NA                            | NA                 |
| <i>Desi_wild_1461507</i> | NA                                  | <i>Ca_desi_denovo</i> | 1461507                 | G/A  | NA                 | NA                            | NA                 |
| <i>Desi_wild_1462076</i> | NA                                  | <i>Ca_desi_denovo</i> | 1462076                 | G/T  | NA                 | NA                            | NA                 |
| <i>Desi_wild_1462082</i> | NA                                  | <i>Ca_desi_denovo</i> | 1462082                 | T/C  | NA                 | NA                            | NA                 |
| <i>Desi_wild_1462596</i> | NA                                  | <i>Ca_desi_denovo</i> | 1462596                 | C/G  | NA                 | NA                            | NA                 |
| <i>Desi_wild_1462608</i> | NA                                  | <i>Ca_desi_denovo</i> | 1462608                 | T/C  | NA                 | NA                            | NA                 |
| <i>Desi_wild_1462854</i> | NA                                  | <i>Ca_desi_denovo</i> | 1462854                 | G/A  | NA                 | NA                            | NA                 |
| <i>Desi_wild_1462863</i> | NA                                  | <i>Ca_desi_denovo</i> | 1462863                 | G/T  | NA                 | NA                            | NA                 |
| <i>Desi_wild_1463134</i> | NA                                  | <i>Ca_desi_denovo</i> | 1463134                 | T/C  | NA                 | NA                            | NA                 |
| <i>Desi_wild_1463203</i> | NA                                  | <i>Ca_desi_denovo</i> | 1463203                 | A/T  | NA                 | NA                            | NA                 |
| <i>Desi_wild_1463622</i> | NA                                  | <i>Ca_desi_denovo</i> | 1463622                 | C/T  | NA                 | NA                            | NA                 |
| <i>Desi_wild_1464514</i> | NA                                  | <i>Ca_desi_denovo</i> | 1464514                 | G/A  | NA                 | NA                            | NA                 |
| <i>Desi_wild_1464874</i> | NA                                  | <i>Ca_desi_denovo</i> | 1464874                 | C/T  | NA                 | NA                            | NA                 |
| <i>Desi_wild_1464910</i> | NA                                  | <i>Ca_desi_denovo</i> | 1464910                 | C/A  | NA                 | NA                            | NA                 |
| <i>Desi_wild_1465649</i> | NA                                  | <i>Ca_desi_denovo</i> | 1465649                 | A/G  | NA                 | NA                            | NA                 |
| <i>Desi_wild_1466622</i> | NA                                  | <i>Ca_desi_denovo</i> | 1466622                 | T/C  | NA                 | NA                            | NA                 |
| <i>Desi_wild_1466628</i> | NA                                  | <i>Ca_desi_denovo</i> | 1466628                 | T/G  | NA                 | NA                            | NA                 |
| <i>Desi_wild_1467705</i> | NA                                  | <i>Ca_desi_denovo</i> | 1467705                 | A/G  | NA                 | NA                            | NA                 |
| <i>Desi_wild_1467714</i> | NA                                  | <i>Ca_desi_denovo</i> | 1467714                 | C/T  | NA                 | NA                            | NA                 |
| <i>Desi_wild_1467998</i> | NA                                  | <i>Ca_desi_denovo</i> | 1467998                 | A/C  | NA                 | NA                            | NA                 |
| <i>Desi_wild_1467999</i> | NA                                  | <i>Ca_desi_denovo</i> | 1467999                 | G/T  | NA                 | NA                            | NA                 |
| <i>Desi_wild_1468108</i> | NA                                  | <i>Ca_desi_denovo</i> | 1468108                 | C/T  | NA                 | NA                            | NA                 |
| <i>Desi_wild_1468790</i> | NA                                  | <i>Ca_desi_denovo</i> | 1468790                 | C/T  | NA                 | NA                            | NA                 |
| <i>Desi_wild_1468835</i> | NA                                  | <i>Ca_desi_denovo</i> | 1468835                 | A/C  | NA                 | NA                            | NA                 |

| SNP IDs                  | NCBI dbSNP accession IDs (NCBI_SS#) | Chromosomes           | Physical positions (bp) | SNPs | Gene accession IDs | Sequence components of genome | Putative functions |
|--------------------------|-------------------------------------|-----------------------|-------------------------|------|--------------------|-------------------------------|--------------------|
| <i>Desi_wild_1468880</i> | NA                                  | <i>Ca_desi_denovo</i> | 1468880                 | G/A  | NA                 | NA                            | NA                 |
| <i>Desi_wild_1469287</i> | NA                                  | <i>Ca_desi_denovo</i> | 1469287                 | T/G  | NA                 | NA                            | NA                 |
| <i>Desi_wild_1471168</i> | NA                                  | <i>Ca_desi_denovo</i> | 1471168                 | G/C  | NA                 | NA                            | NA                 |
| <i>Desi_wild_1471390</i> | NA                                  | <i>Ca_desi_denovo</i> | 1471390                 | A/G  | NA                 | NA                            | NA                 |
| <i>Desi_wild_1471645</i> | NA                                  | <i>Ca_desi_denovo</i> | 1471645                 | C/A  | NA                 | NA                            | NA                 |
| <i>Desi_wild_1471653</i> | NA                                  | <i>Ca_desi_denovo</i> | 1471653                 | G/A  | NA                 | NA                            | NA                 |
| <i>Desi_wild_1472106</i> | NA                                  | <i>Ca_desi_denovo</i> | 1472106                 | C/G  | NA                 | NA                            | NA                 |
| <i>Desi_wild_1472480</i> | NA                                  | <i>Ca_desi_denovo</i> | 1472480                 | A/C  | NA                 | NA                            | NA                 |
| <i>Desi_wild_1473596</i> | NA                                  | <i>Ca_desi_denovo</i> | 1473596                 | G/T  | NA                 | NA                            | NA                 |
| <i>Desi_wild_1474673</i> | NA                                  | <i>Ca_desi_denovo</i> | 1474673                 | C/A  | NA                 | NA                            | NA                 |
| <i>Desi_wild_1474688</i> | NA                                  | <i>Ca_desi_denovo</i> | 1474688                 | C/A  | NA                 | NA                            | NA                 |
| <i>Desi_wild_1475158</i> | NA                                  | <i>Ca_desi_denovo</i> | 1475158                 | T/C  | NA                 | NA                            | NA                 |
| <i>Desi_wild_1475633</i> | NA                                  | <i>Ca_desi_denovo</i> | 1475633                 | C/G  | NA                 | NA                            | NA                 |
| <i>Desi_wild_1476265</i> | NA                                  | <i>Ca_desi_denovo</i> | 1476265                 | A/G  | NA                 | NA                            | NA                 |
| <i>Desi_wild_1476292</i> | NA                                  | <i>Ca_desi_denovo</i> | 1476292                 | A/G  | NA                 | NA                            | NA                 |
| <i>Desi_wild_1478715</i> | NA                                  | <i>Ca_desi_denovo</i> | 1478715                 | G/A  | NA                 | NA                            | NA                 |
| <i>Desi_wild_1478716</i> | NA                                  | <i>Ca_desi_denovo</i> | 1478716                 | C/T  | NA                 | NA                            | NA                 |
| <i>Desi_wild_1478961</i> | NA                                  | <i>Ca_desi_denovo</i> | 1478961                 | A/G  | NA                 | NA                            | NA                 |
| <i>Desi_wild_1479504</i> | NA                                  | <i>Ca_desi_denovo</i> | 1479504                 | T/G  | NA                 | NA                            | NA                 |
| <i>Desi_wild_1479853</i> | NA                                  | <i>Ca_desi_denovo</i> | 1479853                 | C/T  | NA                 | NA                            | NA                 |
| <i>Desi_wild_1480120</i> | NA                                  | <i>Ca_desi_denovo</i> | 1480120                 | G/A  | NA                 | NA                            | NA                 |
| <i>Desi_wild_1481185</i> | NA                                  | <i>Ca_desi_denovo</i> | 1481185                 | G/C  | NA                 | NA                            | NA                 |
| <i>Desi_wild_1481381</i> | NA                                  | <i>Ca_desi_denovo</i> | 1481381                 | T/C  | NA                 | NA                            | NA                 |
| <i>Desi_wild_1481385</i> | NA                                  | <i>Ca_desi_denovo</i> | 1481385                 | C/T  | NA                 | NA                            | NA                 |
| <i>Desi_wild_1482007</i> | NA                                  | <i>Ca_desi_denovo</i> | 1482007                 | G/T  | NA                 | NA                            | NA                 |
| <i>Desi_wild_1482193</i> | NA                                  | <i>Ca_desi_denovo</i> | 1482193                 | G/A  | NA                 | NA                            | NA                 |
| <i>Desi_wild_1482198</i> | NA                                  | <i>Ca_desi_denovo</i> | 1482198                 | G/A  | NA                 | NA                            | NA                 |
| <i>Desi_wild_1482436</i> | NA                                  | <i>Ca_desi_denovo</i> | 1482436                 | A/G  | NA                 | NA                            | NA                 |
| <i>Desi_wild_1483318</i> | NA                                  | <i>Ca_desi_denovo</i> | 1483318                 | C/T  | NA                 | NA                            | NA                 |
| <i>Desi_wild_1483624</i> | NA                                  | <i>Ca_desi_denovo</i> | 1483624                 | T/C  | NA                 | NA                            | NA                 |
| <i>Desi_wild_1485429</i> | NA                                  | <i>Ca_desi_denovo</i> | 1485429                 | A/G  | NA                 | NA                            | NA                 |
| <i>Desi_wild_1485467</i> | NA                                  | <i>Ca_desi_denovo</i> | 1485467                 | T/C  | NA                 | NA                            | NA                 |
| <i>Desi_wild_1487086</i> | NA                                  | <i>Ca_desi_denovo</i> | 1487086                 | C/T  | NA                 | NA                            | NA                 |
| <i>Desi_wild_1488069</i> | NA                                  | <i>Ca_desi_denovo</i> | 1488069                 | C/G  | NA                 | NA                            | NA                 |
| <i>Desi_wild_1488111</i> | NA                                  | <i>Ca_desi_denovo</i> | 1488111                 | C/A  | NA                 | NA                            | NA                 |
| <i>Desi_wild_1488554</i> | NA                                  | <i>Ca_desi_denovo</i> | 1488554                 | A/G  | NA                 | NA                            | NA                 |
| <i>Desi_wild_1488559</i> | NA                                  | <i>Ca_desi_denovo</i> | 1488559                 | T/C  | NA                 | NA                            | NA                 |
| <i>Desi_wild_1488936</i> | NA                                  | <i>Ca_desi_denovo</i> | 1488936                 | A/C  | NA                 | NA                            | NA                 |
| <i>Desi_wild_1488948</i> | NA                                  | <i>Ca_desi_denovo</i> | 1488948                 | G/C  | NA                 | NA                            | NA                 |
| <i>Desi_wild_1488949</i> | NA                                  | <i>Ca_desi_denovo</i> | 1488949                 | G/A  | NA                 | NA                            | NA                 |
| <i>Desi_wild_1489704</i> | NA                                  | <i>Ca_desi_denovo</i> | 1489704                 | G/C  | NA                 | NA                            | NA                 |
| <i>Desi_wild_1489744</i> | NA                                  | <i>Ca_desi_denovo</i> | 1489744                 | C/G  | NA                 | NA                            | NA                 |
| <i>Desi_wild_1489764</i> | NA                                  | <i>Ca_desi_denovo</i> | 1489764                 | G/A  | NA                 | NA                            | NA                 |
| <i>Desi_wild_1490210</i> | NA                                  | <i>Ca_desi_denovo</i> | 1490210                 | T/C  | NA                 | NA                            | NA                 |

| SNP IDs                  | NCBI dbSNP accession IDs (NCBI_SS#) | Chromosomes           | Physical positions (bp) | SNPs | Gene accession IDs | Sequence components of genome | Putative functions |
|--------------------------|-------------------------------------|-----------------------|-------------------------|------|--------------------|-------------------------------|--------------------|
| <i>Desi_wild_1491954</i> | NA                                  | <i>Ca_desi_denovo</i> | 1491954                 | C/G  | NA                 | NA                            | NA                 |
| <i>Desi_wild_1493031</i> | NA                                  | <i>Ca_desi_denovo</i> | 1493031                 | A/C  | NA                 | NA                            | NA                 |
| <i>Desi_wild_1493741</i> | NA                                  | <i>Ca_desi_denovo</i> | 1493741                 | A/G  | NA                 | NA                            | NA                 |
| <i>Desi_wild_1494478</i> | NA                                  | <i>Ca_desi_denovo</i> | 1494478                 | C/A  | NA                 | NA                            | NA                 |
| <i>Desi_wild_1494481</i> | NA                                  | <i>Ca_desi_denovo</i> | 1494481                 | T/C  | NA                 | NA                            | NA                 |
| <i>Desi_wild_1494877</i> | NA                                  | <i>Ca_desi_denovo</i> | 1494877                 | C/T  | NA                 | NA                            | NA                 |
| <i>Desi_wild_1495011</i> | NA                                  | <i>Ca_desi_denovo</i> | 1495011                 | G/T  | NA                 | NA                            | NA                 |
| <i>Desi_wild_1495542</i> | NA                                  | <i>Ca_desi_denovo</i> | 1495542                 | T/C  | NA                 | NA                            | NA                 |
| <i>Desi_wild_1495947</i> | NA                                  | <i>Ca_desi_denovo</i> | 1495947                 | G/A  | NA                 | NA                            | NA                 |
| <i>Desi_wild_1495959</i> | NA                                  | <i>Ca_desi_denovo</i> | 1495959                 | G/A  | NA                 | NA                            | NA                 |
| <i>Desi_wild_1496714</i> | NA                                  | <i>Ca_desi_denovo</i> | 1496714                 | C/T  | NA                 | NA                            | NA                 |
| <i>Desi_wild_1497131</i> | NA                                  | <i>Ca_desi_denovo</i> | 1497131                 | G/A  | NA                 | NA                            | NA                 |
| <i>Desi_wild_1497243</i> | NA                                  | <i>Ca_desi_denovo</i> | 1497243                 | T/C  | NA                 | NA                            | NA                 |
| <i>Desi_wild_1497712</i> | NA                                  | <i>Ca_desi_denovo</i> | 1497712                 | C/T  | NA                 | NA                            | NA                 |
| <i>Desi_wild_1497722</i> | NA                                  | <i>Ca_desi_denovo</i> | 1497722                 | G/T  | NA                 | NA                            | NA                 |
| <i>Desi_wild_1498271</i> | NA                                  | <i>Ca_desi_denovo</i> | 1498271                 | T/C  | NA                 | NA                            | NA                 |
| <i>Desi_wild_1498380</i> | NA                                  | <i>Ca_desi_denovo</i> | 1498380                 | T/C  | NA                 | NA                            | NA                 |
| <i>Desi_wild_1498701</i> | NA                                  | <i>Ca_desi_denovo</i> | 1498701                 | G/A  | NA                 | NA                            | NA                 |
| <i>Desi_wild_1498704</i> | NA                                  | <i>Ca_desi_denovo</i> | 1498704                 | C/G  | NA                 | NA                            | NA                 |
| <i>Desi_wild_1500290</i> | NA                                  | <i>Ca_desi_denovo</i> | 1500290                 | A/G  | NA                 | NA                            | NA                 |
| <i>Desi_wild_1500292</i> | NA                                  | <i>Ca_desi_denovo</i> | 1500292                 | C/A  | NA                 | NA                            | NA                 |
| <i>Desi_wild_1501384</i> | NA                                  | <i>Ca_desi_denovo</i> | 1501384                 | A/G  | NA                 | NA                            | NA                 |
| <i>Desi_wild_1502304</i> | NA                                  | <i>Ca_desi_denovo</i> | 1502304                 | T/G  | NA                 | NA                            | NA                 |
| <i>Desi_wild_1503472</i> | NA                                  | <i>Ca_desi_denovo</i> | 1503472                 | T/G  | NA                 | NA                            | NA                 |
| <i>Desi_wild_1503788</i> | NA                                  | <i>Ca_desi_denovo</i> | 1503788                 | G/C  | NA                 | NA                            | NA                 |
| <i>Desi_wild_1504084</i> | NA                                  | <i>Ca_desi_denovo</i> | 1504084                 | C/T  | NA                 | NA                            | NA                 |
| <i>Desi_wild_1504223</i> | NA                                  | <i>Ca_desi_denovo</i> | 1504223                 | G/T  | NA                 | NA                            | NA                 |
| <i>Desi_wild_1504677</i> | NA                                  | <i>Ca_desi_denovo</i> | 1504677                 | C/G  | NA                 | NA                            | NA                 |
| <i>Desi_wild_1504695</i> | NA                                  | <i>Ca_desi_denovo</i> | 1504695                 | C/T  | NA                 | NA                            | NA                 |
| <i>Desi_wild_1504750</i> | NA                                  | <i>Ca_desi_denovo</i> | 1504750                 | C/A  | NA                 | NA                            | NA                 |
| <i>Desi_wild_1504768</i> | NA                                  | <i>Ca_desi_denovo</i> | 1504768                 | A/T  | NA                 | NA                            | NA                 |
| <i>Desi_wild_1505224</i> | NA                                  | <i>Ca_desi_denovo</i> | 1505224                 | G/T  | NA                 | NA                            | NA                 |
| <i>Desi_wild_1505232</i> | NA                                  | <i>Ca_desi_denovo</i> | 1505232                 | T/C  | NA                 | NA                            | NA                 |
| <i>Desi_wild_1505235</i> | NA                                  | <i>Ca_desi_denovo</i> | 1505235                 | C/T  | NA                 | NA                            | NA                 |
| <i>Desi_wild_1505525</i> | NA                                  | <i>Ca_desi_denovo</i> | 1505525                 | A/G  | NA                 | NA                            | NA                 |
| <i>Desi_wild_1505829</i> | NA                                  | <i>Ca_desi_denovo</i> | 1505829                 | C/T  | NA                 | NA                            | NA                 |
| <i>Desi_wild_1505831</i> | NA                                  | <i>Ca_desi_denovo</i> | 1505831                 | T/C  | NA                 | NA                            | NA                 |
| <i>Desi_wild_1505913</i> | NA                                  | <i>Ca_desi_denovo</i> | 1505913                 | C/T  | NA                 | NA                            | NA                 |
| <i>Desi_wild_1505928</i> | NA                                  | <i>Ca_desi_denovo</i> | 1505928                 | T/C  | NA                 | NA                            | NA                 |
| <i>Desi_wild_1506142</i> | NA                                  | <i>Ca_desi_denovo</i> | 1506142                 | C/G  | NA                 | NA                            | NA                 |
| <i>Desi_wild_1506164</i> | NA                                  | <i>Ca_desi_denovo</i> | 1506164                 | C/A  | NA                 | NA                            | NA                 |
| <i>Desi_wild_1506489</i> | NA                                  | <i>Ca_desi_denovo</i> | 1506489                 | T/C  | NA                 | NA                            | NA                 |
| <i>Desi_wild_1506509</i> | NA                                  | <i>Ca_desi_denovo</i> | 1506509                 | A/G  | NA                 | NA                            | NA                 |
| <i>Desi_wild_1506622</i> | NA                                  | <i>Ca_desi_denovo</i> | 1506622                 | A/G  | NA                 | NA                            | NA                 |

| SNP IDs                  | NCBI dbSNP accession IDs (NCBI_SS#) | Chromosomes           | Physical positions (bp) | SNPs | Gene accession IDs | Sequence components of genome | Putative functions |
|--------------------------|-------------------------------------|-----------------------|-------------------------|------|--------------------|-------------------------------|--------------------|
| <i>Desi_wild_1506634</i> | NA                                  | <i>Ca_desi_denovo</i> | 1506634                 | A/G  | NA                 | NA                            | NA                 |
| <i>Desi_wild_1507605</i> | NA                                  | <i>Ca_desi_denovo</i> | 1507605                 | A/G  | NA                 | NA                            | NA                 |
| <i>Desi_wild_1508091</i> | NA                                  | <i>Ca_desi_denovo</i> | 1508091                 | T/C  | NA                 | NA                            | NA                 |
| <i>Desi_wild_1510289</i> | NA                                  | <i>Ca_desi_denovo</i> | 1510289                 | T/C  | NA                 | NA                            | NA                 |
| <i>Desi_wild_1510494</i> | NA                                  | <i>Ca_desi_denovo</i> | 1510494                 | A/G  | NA                 | NA                            | NA                 |
| <i>Desi_wild_1510879</i> | NA                                  | <i>Ca_desi_denovo</i> | 1510879                 | T/C  | NA                 | NA                            | NA                 |
| <i>Desi_wild_1510893</i> | NA                                  | <i>Ca_desi_denovo</i> | 1510893                 | G/A  | NA                 | NA                            | NA                 |
| <i>Desi_wild_1511949</i> | NA                                  | <i>Ca_desi_denovo</i> | 1511949                 | G/A  | NA                 | NA                            | NA                 |
| <i>Desi_wild_1513020</i> | NA                                  | <i>Ca_desi_denovo</i> | 1513020                 | G/T  | NA                 | NA                            | NA                 |
| <i>Desi_wild_1513082</i> | NA                                  | <i>Ca_desi_denovo</i> | 1513082                 | T/C  | NA                 | NA                            | NA                 |
| <i>Desi_wild_1513980</i> | NA                                  | <i>Ca_desi_denovo</i> | 1513980                 | G/A  | NA                 | NA                            | NA                 |
| <i>Desi_wild_1514005</i> | NA                                  | <i>Ca_desi_denovo</i> | 1514005                 | C/T  | NA                 | NA                            | NA                 |
| <i>Desi_wild_1514035</i> | NA                                  | <i>Ca_desi_denovo</i> | 1514035                 | G/T  | NA                 | NA                            | NA                 |
| <i>Desi_wild_1514043</i> | NA                                  | <i>Ca_desi_denovo</i> | 1514043                 | G/C  | NA                 | NA                            | NA                 |
| <i>Desi_wild_1514431</i> | NA                                  | <i>Ca_desi_denovo</i> | 1514431                 | A/C  | NA                 | NA                            | NA                 |
| <i>Desi_wild_1514432</i> | NA                                  | <i>Ca_desi_denovo</i> | 1514432                 | G/C  | NA                 | NA                            | NA                 |
| <i>Desi_wild_1514433</i> | NA                                  | <i>Ca_desi_denovo</i> | 1514433                 | A/G  | NA                 | NA                            | NA                 |
| <i>Desi_wild_1514468</i> | NA                                  | <i>Ca_desi_denovo</i> | 1514468                 | C/T  | NA                 | NA                            | NA                 |
| <i>Desi_wild_1514574</i> | NA                                  | <i>Ca_desi_denovo</i> | 1514574                 | T/C  | NA                 | NA                            | NA                 |
| <i>Desi_wild_1514580</i> | NA                                  | <i>Ca_desi_denovo</i> | 1514580                 | A/C  | NA                 | NA                            | NA                 |
| <i>Desi_wild_1514722</i> | NA                                  | <i>Ca_desi_denovo</i> | 1514722                 | A/C  | NA                 | NA                            | NA                 |
| <i>Desi_wild_1514779</i> | NA                                  | <i>Ca_desi_denovo</i> | 1514779                 | A/G  | NA                 | NA                            | NA                 |
| <i>Desi_wild_1516975</i> | NA                                  | <i>Ca_desi_denovo</i> | 1516975                 | A/G  | NA                 | NA                            | NA                 |
| <i>Desi_wild_1516978</i> | NA                                  | <i>Ca_desi_denovo</i> | 1516978                 | T/G  | NA                 | NA                            | NA                 |
| <i>Desi_wild_1518441</i> | NA                                  | <i>Ca_desi_denovo</i> | 1518441                 | G/A  | NA                 | NA                            | NA                 |
| <i>Desi_wild_1519306</i> | NA                                  | <i>Ca_desi_denovo</i> | 1519306                 | T/C  | NA                 | NA                            | NA                 |
| <i>Desi_wild_1519698</i> | NA                                  | <i>Ca_desi_denovo</i> | 1519698                 | G/A  | NA                 | NA                            | NA                 |
| <i>Desi_wild_1519933</i> | NA                                  | <i>Ca_desi_denovo</i> | 1519933                 | T/C  | NA                 | NA                            | NA                 |
| <i>Desi_wild_1520931</i> | NA                                  | <i>Ca_desi_denovo</i> | 1520931                 | T/G  | NA                 | NA                            | NA                 |
| <i>Desi_wild_1521048</i> | NA                                  | <i>Ca_desi_denovo</i> | 1521048                 | C/A  | NA                 | NA                            | NA                 |
| <i>Desi_wild_1521081</i> | NA                                  | <i>Ca_desi_denovo</i> | 1521081                 | T/C  | NA                 | NA                            | NA                 |
| <i>Desi_wild_1521645</i> | NA                                  | <i>Ca_desi_denovo</i> | 1521645                 | T/C  | NA                 | NA                            | NA                 |
| <i>Desi_wild_1521888</i> | NA                                  | <i>Ca_desi_denovo</i> | 1521888                 | C/T  | NA                 | NA                            | NA                 |
| <i>Desi_wild_1522433</i> | NA                                  | <i>Ca_desi_denovo</i> | 1522433                 | G/C  | NA                 | NA                            | NA                 |
| <i>Desi_wild_1523219</i> | NA                                  | <i>Ca_desi_denovo</i> | 1523219                 | T/G  | NA                 | NA                            | NA                 |
| <i>Desi_wild_1523222</i> | NA                                  | <i>Ca_desi_denovo</i> | 1523222                 | T/A  | NA                 | NA                            | NA                 |
| <i>Desi_wild_1523299</i> | NA                                  | <i>Ca_desi_denovo</i> | 1523299                 | G/T  | NA                 | NA                            | NA                 |
| <i>Desi_wild_1523314</i> | NA                                  | <i>Ca_desi_denovo</i> | 1523314                 | G/T  | NA                 | NA                            | NA                 |
| <i>Desi_wild_1523328</i> | NA                                  | <i>Ca_desi_denovo</i> | 1523328                 | C/A  | NA                 | NA                            | NA                 |
| <i>Desi_wild_1523332</i> | NA                                  | <i>Ca_desi_denovo</i> | 1523332                 | A/T  | NA                 | NA                            | NA                 |
| <i>Desi_wild_1523489</i> | NA                                  | <i>Ca_desi_denovo</i> | 1523489                 | A/G  | NA                 | NA                            | NA                 |
| <i>Desi_wild_1524755</i> | NA                                  | <i>Ca_desi_denovo</i> | 1524755                 | C/T  | NA                 | NA                            | NA                 |
| <i>Desi_wild_1524949</i> | NA                                  | <i>Ca_desi_denovo</i> | 1524949                 | G/C  | NA                 | NA                            | NA                 |
| <i>Desi_wild_1525433</i> | NA                                  | <i>Ca_desi_denovo</i> | 1525433                 | A/G  | NA                 | NA                            | NA                 |

| SNP IDs                  | NCBI dbSNP accession IDs (NCBI_SS#) | Chromosomes           | Physical positions (bp) | SNPs | Gene accession IDs | Sequence components of genome | Putative functions |
|--------------------------|-------------------------------------|-----------------------|-------------------------|------|--------------------|-------------------------------|--------------------|
| <i>Desi_wild_1525486</i> | NA                                  | <i>Ca_desi_denovo</i> | 1525486                 | T/G  | NA                 | NA                            | NA                 |
| <i>Desi_wild_1526240</i> | NA                                  | <i>Ca_desi_denovo</i> | 1526240                 | T/C  | NA                 | NA                            | NA                 |
| <i>Desi_wild_1526264</i> | NA                                  | <i>Ca_desi_denovo</i> | 1526264                 | G/C  | NA                 | NA                            | NA                 |
| <i>Desi_wild_1526334</i> | NA                                  | <i>Ca_desi_denovo</i> | 1526334                 | A/C  | NA                 | NA                            | NA                 |
| <i>Desi_wild_1527274</i> | NA                                  | <i>Ca_desi_denovo</i> | 1527274                 | G/T  | NA                 | NA                            | NA                 |
| <i>Desi_wild_1527917</i> | NA                                  | <i>Ca_desi_denovo</i> | 1527917                 | G/T  | NA                 | NA                            | NA                 |
| <i>Desi_wild_1528591</i> | NA                                  | <i>Ca_desi_denovo</i> | 1528591                 | G/T  | NA                 | NA                            | NA                 |
| <i>Desi_wild_1528727</i> | NA                                  | <i>Ca_desi_denovo</i> | 1528727                 | T/C  | NA                 | NA                            | NA                 |
| <i>Desi_wild_1530018</i> | NA                                  | <i>Ca_desi_denovo</i> | 1530018                 | C/T  | NA                 | NA                            | NA                 |
| <i>Desi_wild_1530422</i> | NA                                  | <i>Ca_desi_denovo</i> | 1530422                 | C/T  | NA                 | NA                            | NA                 |
| <i>Desi_wild_1530670</i> | NA                                  | <i>Ca_desi_denovo</i> | 1530670                 | G/T  | NA                 | NA                            | NA                 |
| <i>Desi_wild_1530710</i> | NA                                  | <i>Ca_desi_denovo</i> | 1530710                 | G/A  | NA                 | NA                            | NA                 |
| <i>Desi_wild_1530869</i> | NA                                  | <i>Ca_desi_denovo</i> | 1530869                 | C/G  | NA                 | NA                            | NA                 |
| <i>Desi_wild_1530903</i> | NA                                  | <i>Ca_desi_denovo</i> | 1530903                 | C/G  | NA                 | NA                            | NA                 |
| <i>Desi_wild_1531051</i> | NA                                  | <i>Ca_desi_denovo</i> | 1531051                 | G/A  | NA                 | NA                            | NA                 |
| <i>Desi_wild_1531081</i> | NA                                  | <i>Ca_desi_denovo</i> | 1531081                 | C/T  | NA                 | NA                            | NA                 |
| <i>Desi_wild_1532403</i> | NA                                  | <i>Ca_desi_denovo</i> | 1532403                 | G/A  | NA                 | NA                            | NA                 |
| <i>Desi_wild_1532433</i> | NA                                  | <i>Ca_desi_denovo</i> | 1532433                 | A/C  | NA                 | NA                            | NA                 |
| <i>Desi_wild_1532999</i> | NA                                  | <i>Ca_desi_denovo</i> | 1532999                 | T/C  | NA                 | NA                            | NA                 |
| <i>Desi_wild_1533278</i> | NA                                  | <i>Ca_desi_denovo</i> | 1533278                 | A/G  | NA                 | NA                            | NA                 |
| <i>Desi_wild_1533302</i> | NA                                  | <i>Ca_desi_denovo</i> | 1533302                 | A/G  | NA                 | NA                            | NA                 |
| <i>Desi_wild_1533453</i> | NA                                  | <i>Ca_desi_denovo</i> | 1533453                 | T/C  | NA                 | NA                            | NA                 |
| <i>Desi_wild_1534477</i> | NA                                  | <i>Ca_desi_denovo</i> | 1534477                 | T/A  | NA                 | NA                            | NA                 |
| <i>Desi_wild_1535413</i> | NA                                  | <i>Ca_desi_denovo</i> | 1535413                 | C/T  | NA                 | NA                            | NA                 |
| <i>Desi_wild_1535422</i> | NA                                  | <i>Ca_desi_denovo</i> | 1535422                 | C/G  | NA                 | NA                            | NA                 |
| <i>Desi_wild_1536507</i> | NA                                  | <i>Ca_desi_denovo</i> | 1536507                 | G/A  | NA                 | NA                            | NA                 |
| <i>Desi_wild_1537492</i> | NA                                  | <i>Ca_desi_denovo</i> | 1537492                 | C/G  | NA                 | NA                            | NA                 |
| <i>Desi_wild_1538012</i> | NA                                  | <i>Ca_desi_denovo</i> | 1538012                 | A/C  | NA                 | NA                            | NA                 |
| <i>Desi_wild_1538015</i> | NA                                  | <i>Ca_desi_denovo</i> | 1538015                 | G/A  | NA                 | NA                            | NA                 |
| <i>Desi_wild_1538045</i> | NA                                  | <i>Ca_desi_denovo</i> | 1538045                 | G/A  | NA                 | NA                            | NA                 |
| <i>Desi_wild_1538788</i> | NA                                  | <i>Ca_desi_denovo</i> | 1538788                 | G/C  | NA                 | NA                            | NA                 |
| <i>Desi_wild_1538800</i> | NA                                  | <i>Ca_desi_denovo</i> | 1538800                 | G/A  | NA                 | NA                            | NA                 |
| <i>Desi_wild_1538889</i> | NA                                  | <i>Ca_desi_denovo</i> | 1538889                 | G/C  | NA                 | NA                            | NA                 |
| <i>Desi_wild_1539580</i> | NA                                  | <i>Ca_desi_denovo</i> | 1539580                 | A/C  | NA                 | NA                            | NA                 |
| <i>Desi_wild_1540196</i> | NA                                  | <i>Ca_desi_denovo</i> | 1540196                 | C/T  | NA                 | NA                            | NA                 |
| <i>Desi_wild_1541409</i> | NA                                  | <i>Ca_desi_denovo</i> | 1541409                 | C/G  | NA                 | NA                            | NA                 |
| <i>Desi_wild_1541436</i> | NA                                  | <i>Ca_desi_denovo</i> | 1541436                 | G/C  | NA                 | NA                            | NA                 |
| <i>Desi_wild_1541492</i> | NA                                  | <i>Ca_desi_denovo</i> | 1541492                 | A/C  | NA                 | NA                            | NA                 |
| <i>Desi_wild_1541972</i> | NA                                  | <i>Ca_desi_denovo</i> | 1541972                 | T/G  | NA                 | NA                            | NA                 |
| <i>Desi_wild_1544523</i> | NA                                  | <i>Ca_desi_denovo</i> | 1544523                 | C/T  | NA                 | NA                            | NA                 |
| <i>Desi_wild_1544562</i> | NA                                  | <i>Ca_desi_denovo</i> | 1544562                 | T/G  | NA                 | NA                            | NA                 |
| <i>Desi_wild_1547040</i> | NA                                  | <i>Ca_desi_denovo</i> | 1547040                 | G/A  | NA                 | NA                            | NA                 |
| <i>Desi_wild_1547054</i> | NA                                  | <i>Ca_desi_denovo</i> | 1547054                 | A/G  | NA                 | NA                            | NA                 |
| <i>Desi_wild_1547064</i> | NA                                  | <i>Ca_desi_denovo</i> | 1547064                 | C/T  | NA                 | NA                            | NA                 |

| SNP IDs                  | NCBI dbSNP accession IDs (NCBI_SS#) | Chromosomes           | Physical positions (bp) | SNPs | Gene accession IDs | Sequence components of genome | Putative functions |
|--------------------------|-------------------------------------|-----------------------|-------------------------|------|--------------------|-------------------------------|--------------------|
| <i>Desi_wild_1547327</i> | NA                                  | <i>Ca_desi_denovo</i> | 1547327                 | G/A  | NA                 | NA                            | NA                 |
| <i>Desi_wild_1547396</i> | NA                                  | <i>Ca_desi_denovo</i> | 1547396                 | A/T  | NA                 | NA                            | NA                 |
| <i>Desi_wild_1547598</i> | NA                                  | <i>Ca_desi_denovo</i> | 1547598                 | A/G  | NA                 | NA                            | NA                 |
| <i>Desi_wild_1547599</i> | NA                                  | <i>Ca_desi_denovo</i> | 1547599                 | A/T  | NA                 | NA                            | NA                 |
| <i>Desi_wild_1548510</i> | NA                                  | <i>Ca_desi_denovo</i> | 1548510                 | A/G  | NA                 | NA                            | NA                 |
| <i>Desi_wild_1549819</i> | NA                                  | <i>Ca_desi_denovo</i> | 1549819                 | T/G  | NA                 | NA                            | NA                 |
| <i>Desi_wild_1550185</i> | NA                                  | <i>Ca_desi_denovo</i> | 1550185                 | G/A  | NA                 | NA                            | NA                 |
| <i>Desi_wild_1552866</i> | NA                                  | <i>Ca_desi_denovo</i> | 1552866                 | A/G  | NA                 | NA                            | NA                 |
| <i>Desi_wild_1553364</i> | NA                                  | <i>Ca_desi_denovo</i> | 1553364                 | T/C  | NA                 | NA                            | NA                 |
| <i>Desi_wild_1553641</i> | NA                                  | <i>Ca_desi_denovo</i> | 1553641                 | G/A  | NA                 | NA                            | NA                 |
| <i>Desi_wild_1554235</i> | NA                                  | <i>Ca_desi_denovo</i> | 1554235                 | G/A  | NA                 | NA                            | NA                 |
| <i>Desi_wild_1554253</i> | NA                                  | <i>Ca_desi_denovo</i> | 1554253                 | C/A  | NA                 | NA                            | NA                 |
| <i>Desi_wild_1554918</i> | NA                                  | <i>Ca_desi_denovo</i> | 1554918                 | C/T  | NA                 | NA                            | NA                 |
| <i>Desi_wild_1554978</i> | NA                                  | <i>Ca_desi_denovo</i> | 1554978                 | C/G  | NA                 | NA                            | NA                 |
| <i>Desi_wild_1555378</i> | NA                                  | <i>Ca_desi_denovo</i> | 1555378                 | C/G  | NA                 | NA                            | NA                 |
| <i>Desi_wild_1555990</i> | NA                                  | <i>Ca_desi_denovo</i> | 1555990                 | C/A  | NA                 | NA                            | NA                 |
| <i>Desi_wild_1556000</i> | NA                                  | <i>Ca_desi_denovo</i> | 1556000                 | T/G  | NA                 | NA                            | NA                 |
| <i>Desi_wild_1556085</i> | NA                                  | <i>Ca_desi_denovo</i> | 1556085                 | A/G  | NA                 | NA                            | NA                 |
| <i>Desi_wild_1556096</i> | NA                                  | <i>Ca_desi_denovo</i> | 1556096                 | G/T  | NA                 | NA                            | NA                 |
| <i>Desi_wild_1556745</i> | NA                                  | <i>Ca_desi_denovo</i> | 1556745                 | C/G  | NA                 | NA                            | NA                 |
| <i>Desi_wild_1556754</i> | NA                                  | <i>Ca_desi_denovo</i> | 1556754                 | G/C  | NA                 | NA                            | NA                 |
| <i>Desi_wild_1556766</i> | NA                                  | <i>Ca_desi_denovo</i> | 1556766                 | G/C  | NA                 | NA                            | NA                 |
| <i>Desi_wild_1556930</i> | NA                                  | <i>Ca_desi_denovo</i> | 1556930                 | G/T  | NA                 | NA                            | NA                 |
| <i>Desi_wild_1556978</i> | NA                                  | <i>Ca_desi_denovo</i> | 1556978                 | A/G  | NA                 | NA                            | NA                 |
| <i>Desi_wild_1557148</i> | NA                                  | <i>Ca_desi_denovo</i> | 1557148                 | A/G  | NA                 | NA                            | NA                 |
| <i>Desi_wild_1558223</i> | NA                                  | <i>Ca_desi_denovo</i> | 1558223                 | C/G  | NA                 | NA                            | NA                 |
| <i>Desi_wild_1558274</i> | NA                                  | <i>Ca_desi_denovo</i> | 1558274                 | C/A  | NA                 | NA                            | NA                 |
| <i>Desi_wild_1559402</i> | NA                                  | <i>Ca_desi_denovo</i> | 1559402                 | G/C  | NA                 | NA                            | NA                 |
| <i>Desi_wild_1559848</i> | NA                                  | <i>Ca_desi_denovo</i> | 1559848                 | T/C  | NA                 | NA                            | NA                 |
| <i>Desi_wild_1559854</i> | NA                                  | <i>Ca_desi_denovo</i> | 1559854                 | A/G  | NA                 | NA                            | NA                 |
| <i>Desi_wild_1560155</i> | NA                                  | <i>Ca_desi_denovo</i> | 1560155                 | A/G  | NA                 | NA                            | NA                 |
| <i>Desi_wild_1560352</i> | NA                                  | <i>Ca_desi_denovo</i> | 1560352                 | C/G  | NA                 | NA                            | NA                 |
| <i>Desi_wild_1560899</i> | NA                                  | <i>Ca_desi_denovo</i> | 1560899                 | A/T  | NA                 | NA                            | NA                 |
| <i>Desi_wild_1561311</i> | NA                                  | <i>Ca_desi_denovo</i> | 1561311                 | G/A  | NA                 | NA                            | NA                 |
| <i>Desi_wild_1561364</i> | NA                                  | <i>Ca_desi_denovo</i> | 1561364                 | T/C  | NA                 | NA                            | NA                 |
| <i>Desi_wild_1561791</i> | NA                                  | <i>Ca_desi_denovo</i> | 1561791                 | C/A  | NA                 | NA                            | NA                 |
| <i>Desi_wild_1562006</i> | NA                                  | <i>Ca_desi_denovo</i> | 1562006                 | G/A  | NA                 | NA                            | NA                 |
| <i>Desi_wild_1562600</i> | NA                                  | <i>Ca_desi_denovo</i> | 1562600                 | G/T  | NA                 | NA                            | NA                 |
| <i>Desi_wild_1562947</i> | NA                                  | <i>Ca_desi_denovo</i> | 1562947                 | A/T  | NA                 | NA                            | NA                 |
| <i>Desi_wild_1562968</i> | NA                                  | <i>Ca_desi_denovo</i> | 1562968                 | T/C  | NA                 | NA                            | NA                 |
| <i>Desi_wild_1563195</i> | NA                                  | <i>Ca_desi_denovo</i> | 1563195                 | C/G  | NA                 | NA                            | NA                 |
| <i>Desi_wild_1563971</i> | NA                                  | <i>Ca_desi_denovo</i> | 1563971                 | C/T  | NA                 | NA                            | NA                 |
| <i>Desi_wild_1565174</i> | NA                                  | <i>Ca_desi_denovo</i> | 1565174                 | C/T  | NA                 | NA                            | NA                 |
| <i>Desi_wild_1565194</i> | NA                                  | <i>Ca_desi_denovo</i> | 1565194                 | G/C  | NA                 | NA                            | NA                 |



| SNP IDs                  | NCBI dbSNP accession IDs (NCBI_SS#) | Chromosomes           | Physical positions (bp) | SNPs | Gene accession IDs | Sequence components of genome | Putative functions |
|--------------------------|-------------------------------------|-----------------------|-------------------------|------|--------------------|-------------------------------|--------------------|
| <i>Desi_wild_1565956</i> | NA                                  | <i>Ca_desi_denovo</i> | 1565956                 | T/C  | NA                 | NA                            | NA                 |
| <i>Desi_wild_1565965</i> | NA                                  | <i>Ca_desi_denovo</i> | 1565965                 | A/G  | NA                 | NA                            | NA                 |
| <i>Desi_wild_1566338</i> | NA                                  | <i>Ca_desi_denovo</i> | 1566338                 | C/G  | NA                 | NA                            | NA                 |
| <i>Desi_wild_1566344</i> | NA                                  | <i>Ca_desi_denovo</i> | 1566344                 | A/G  | NA                 | NA                            | NA                 |
| <i>Desi_wild_1566948</i> | NA                                  | <i>Ca_desi_denovo</i> | 1566948                 | A/G  | NA                 | NA                            | NA                 |
| <i>Desi_wild_1566959</i> | NA                                  | <i>Ca_desi_denovo</i> | 1566959                 | T/G  | NA                 | NA                            | NA                 |
| <i>Desi_wild_1566971</i> | NA                                  | <i>Ca_desi_denovo</i> | 1566971                 | C/A  | NA                 | NA                            | NA                 |
| <i>Desi_wild_1567001</i> | NA                                  | <i>Ca_desi_denovo</i> | 1567001                 | T/G  | NA                 | NA                            | NA                 |
| <i>Desi_wild_1567217</i> | NA                                  | <i>Ca_desi_denovo</i> | 1567217                 | A/G  | NA                 | NA                            | NA                 |
| <i>Desi_wild_1567218</i> | NA                                  | <i>Ca_desi_denovo</i> | 1567218                 | T/C  | NA                 | NA                            | NA                 |
| <i>Desi_wild_1568189</i> | NA                                  | <i>Ca_desi_denovo</i> | 1568189                 | T/C  | NA                 | NA                            | NA                 |
| <i>Desi_wild_1568332</i> | NA                                  | <i>Ca_desi_denovo</i> | 1568332                 | T/A  | NA                 | NA                            | NA                 |
| <i>Desi_wild_1568663</i> | NA                                  | <i>Ca_desi_denovo</i> | 1568663                 | A/G  | NA                 | NA                            | NA                 |
| <i>Desi_wild_1568679</i> | NA                                  | <i>Ca_desi_denovo</i> | 1568679                 | C/A  | NA                 | NA                            | NA                 |
| <i>Desi_wild_1570797</i> | NA                                  | <i>Ca_desi_denovo</i> | 1570797                 | G/A  | NA                 | NA                            | NA                 |
| <i>Desi_wild_1571285</i> | NA                                  | <i>Ca_desi_denovo</i> | 1571285                 | T/G  | NA                 | NA                            | NA                 |
| <i>Desi_wild_1571343</i> | NA                                  | <i>Ca_desi_denovo</i> | 1571343                 | G/C  | NA                 | NA                            | NA                 |
| <i>Desi_wild_1571686</i> | NA                                  | <i>Ca_desi_denovo</i> | 1571686                 | G/T  | NA                 | NA                            | NA                 |
| <i>Desi_wild_1572643</i> | NA                                  | <i>Ca_desi_denovo</i> | 1572643                 | C/A  | NA                 | NA                            | NA                 |
| <i>Desi_wild_1572673</i> | NA                                  | <i>Ca_desi_denovo</i> | 1572673                 | T/C  | NA                 | NA                            | NA                 |
| <i>Desi_wild_1573559</i> | NA                                  | <i>Ca_desi_denovo</i> | 1573559                 | T/G  | NA                 | NA                            | NA                 |
| <i>Desi_wild_1574238</i> | NA                                  | <i>Ca_desi_denovo</i> | 1574238                 | G/C  | NA                 | NA                            | NA                 |
| <i>Desi_wild_1575219</i> | NA                                  | <i>Ca_desi_denovo</i> | 1575219                 | T/C  | NA                 | NA                            | NA                 |
| <i>Desi_wild_1575767</i> | NA                                  | <i>Ca_desi_denovo</i> | 1575767                 | C/T  | NA                 | NA                            | NA                 |
| <i>Desi_wild_1576429</i> | NA                                  | <i>Ca_desi_denovo</i> | 1576429                 | A/G  | NA                 | NA                            | NA                 |
| <i>Desi_wild_1576455</i> | NA                                  | <i>Ca_desi_denovo</i> | 1576455                 | T/C  | NA                 | NA                            | NA                 |
| <i>Desi_wild_1578378</i> | NA                                  | <i>Ca_desi_denovo</i> | 1578378                 | C/G  | NA                 | NA                            | NA                 |
| <i>Desi_wild_1578385</i> | NA                                  | <i>Ca_desi_denovo</i> | 1578385                 | T/C  | NA                 | NA                            | NA                 |
| <i>Desi_wild_1579568</i> | NA                                  | <i>Ca_desi_denovo</i> | 1579568                 | C/T  | NA                 | NA                            | NA                 |
| <i>Desi_wild_1579573</i> | NA                                  | <i>Ca_desi_denovo</i> | 1579573                 | T/C  | NA                 | NA                            | NA                 |
| <i>Desi_wild_1579579</i> | NA                                  | <i>Ca_desi_denovo</i> | 1579579                 | G/C  | NA                 | NA                            | NA                 |
| <i>Desi_wild_1580951</i> | NA                                  | <i>Ca_desi_denovo</i> | 1580951                 | G/A  | NA                 | NA                            | NA                 |
| <i>Desi_wild_1581469</i> | NA                                  | <i>Ca_desi_denovo</i> | 1581469                 | C/T  | NA                 | NA                            | NA                 |
| <i>Desi_wild_1581973</i> | NA                                  | <i>Ca_desi_denovo</i> | 1581973                 | G/C  | NA                 | NA                            | NA                 |
| <i>Desi_wild_1581976</i> | NA                                  | <i>Ca_desi_denovo</i> | 1581976                 | C/T  | NA                 | NA                            | NA                 |
| <i>Desi_wild_1582856</i> | NA                                  | <i>Ca_desi_denovo</i> | 1582856                 | G/T  | NA                 | NA                            | NA                 |
| <i>Desi_wild_1583171</i> | NA                                  | <i>Ca_desi_denovo</i> | 1583171                 | C/T  | NA                 | NA                            | NA                 |
| <i>Desi_wild_1583189</i> | NA                                  | <i>Ca_desi_denovo</i> | 1583189                 | C/T  | NA                 | NA                            | NA                 |
| <i>Desi_wild_1583281</i> | NA                                  | <i>Ca_desi_denovo</i> | 1583281                 | G/C  | NA                 | NA                            | NA                 |
| <i>Desi_wild_1584021</i> | NA                                  | <i>Ca_desi_denovo</i> | 1584021                 | G/T  | NA                 | NA                            | NA                 |
| <i>Desi_wild_1584125</i> | NA                                  | <i>Ca_desi_denovo</i> | 1584125                 | A/G  | NA                 | NA                            | NA                 |
| <i>Desi_wild_1584147</i> | NA                                  | <i>Ca_desi_denovo</i> | 1584147                 | C/G  | NA                 | NA                            | NA                 |
| <i>Desi_wild_1584289</i> | NA                                  | <i>Ca_desi_denovo</i> | 1584289                 | C/T  | NA                 | NA                            | NA                 |
| <i>Desi_wild_1584385</i> | NA                                  | <i>Ca_desi_denovo</i> | 1584385                 | C/T  | NA                 | NA                            | NA                 |

| SNP IDs                  | NCBI dbSNP accession IDs (NCBI_SS#) | Chromosomes           | Physical positions (bp) | SNPs | Gene accession IDs | Sequence components of genome | Putative functions |
|--------------------------|-------------------------------------|-----------------------|-------------------------|------|--------------------|-------------------------------|--------------------|
| <i>Desi_wild_1584388</i> | NA                                  | <i>Ca_desi_denovo</i> | 1584388                 | G/C  | NA                 | NA                            | NA                 |
| <i>Desi_wild_1585568</i> | NA                                  | <i>Ca_desi_denovo</i> | 1585568                 | C/A  | NA                 | NA                            | NA                 |
| <i>Desi_wild_1585814</i> | NA                                  | <i>Ca_desi_denovo</i> | 1585814                 | G/A  | NA                 | NA                            | NA                 |
| <i>Desi_wild_1586329</i> | NA                                  | <i>Ca_desi_denovo</i> | 1586329                 | G/C  | NA                 | NA                            | NA                 |
| <i>Desi_wild_1586439</i> | NA                                  | <i>Ca_desi_denovo</i> | 1586439                 | C/T  | NA                 | NA                            | NA                 |
| <i>Desi_wild_1586487</i> | NA                                  | <i>Ca_desi_denovo</i> | 1586487                 | G/C  | NA                 | NA                            | NA                 |
| <i>Desi_wild_1588549</i> | NA                                  | <i>Ca_desi_denovo</i> | 1588549                 | C/T  | NA                 | NA                            | NA                 |
| <i>Desi_wild_1588672</i> | NA                                  | <i>Ca_desi_denovo</i> | 1588672                 | T/C  | NA                 | NA                            | NA                 |
| <i>Desi_wild_1588681</i> | NA                                  | <i>Ca_desi_denovo</i> | 1588681                 | G/T  | NA                 | NA                            | NA                 |
| <i>Desi_wild_1589332</i> | NA                                  | <i>Ca_desi_denovo</i> | 1589332                 | T/C  | NA                 | NA                            | NA                 |
| <i>Desi_wild_1592274</i> | NA                                  | <i>Ca_desi_denovo</i> | 1592274                 | T/C  | NA                 | NA                            | NA                 |
| <i>Desi_wild_1592683</i> | NA                                  | <i>Ca_desi_denovo</i> | 1592683                 | A/G  | NA                 | NA                            | NA                 |
| <i>Desi_wild_1593619</i> | NA                                  | <i>Ca_desi_denovo</i> | 1593619                 | A/G  | NA                 | NA                            | NA                 |
| <i>Desi_wild_1593679</i> | NA                                  | <i>Ca_desi_denovo</i> | 1593679                 | G/A  | NA                 | NA                            | NA                 |
| <i>Desi_wild_1594372</i> | NA                                  | <i>Ca_desi_denovo</i> | 1594372                 | T/G  | NA                 | NA                            | NA                 |
| <i>Desi_wild_1596924</i> | NA                                  | <i>Ca_desi_denovo</i> | 1596924                 | G/A  | NA                 | NA                            | NA                 |
| <i>Desi_wild_1597089</i> | NA                                  | <i>Ca_desi_denovo</i> | 1597089                 | T/C  | NA                 | NA                            | NA                 |
| <i>Desi_wild_1597120</i> | NA                                  | <i>Ca_desi_denovo</i> | 1597120                 | C/G  | NA                 | NA                            | NA                 |
| <i>Desi_wild_1597838</i> | NA                                  | <i>Ca_desi_denovo</i> | 1597838                 | T/G  | NA                 | NA                            | NA                 |
| <i>Desi_wild_1598103</i> | NA                                  | <i>Ca_desi_denovo</i> | 1598103                 | A/G  | NA                 | NA                            | NA                 |
| <i>Desi_wild_1598367</i> | NA                                  | <i>Ca_desi_denovo</i> | 1598367                 | C/T  | NA                 | NA                            | NA                 |
| <i>Desi_wild_1599130</i> | NA                                  | <i>Ca_desi_denovo</i> | 1599130                 | T/C  | NA                 | NA                            | NA                 |
| <i>Desi_wild_1599148</i> | NA                                  | <i>Ca_desi_denovo</i> | 1599148                 | T/C  | NA                 | NA                            | NA                 |
| <i>Desi_wild_1600029</i> | NA                                  | <i>Ca_desi_denovo</i> | 1600029                 | C/T  | NA                 | NA                            | NA                 |
| <i>Desi_wild_1600047</i> | NA                                  | <i>Ca_desi_denovo</i> | 1600047                 | C/G  | NA                 | NA                            | NA                 |
| <i>Desi_wild_1600703</i> | NA                                  | <i>Ca_desi_denovo</i> | 1600703                 | T/C  | NA                 | NA                            | NA                 |
| <i>Desi_wild_1600712</i> | NA                                  | <i>Ca_desi_denovo</i> | 1600712                 | G/T  | NA                 | NA                            | NA                 |
| <i>Desi_wild_1600792</i> | NA                                  | <i>Ca_desi_denovo</i> | 1600792                 | A/G  | NA                 | NA                            | NA                 |
| <i>Desi_wild_1601838</i> | NA                                  | <i>Ca_desi_denovo</i> | 1601838                 | G/A  | NA                 | NA                            | NA                 |
| <i>Desi_wild_1601895</i> | NA                                  | <i>Ca_desi_denovo</i> | 1601895                 | G/A  | NA                 | NA                            | NA                 |
| <i>Desi_wild_1602165</i> | NA                                  | <i>Ca_desi_denovo</i> | 1602165                 | G/A  | NA                 | NA                            | NA                 |
| <i>Desi_wild_1602209</i> | NA                                  | <i>Ca_desi_denovo</i> | 1602209                 | G/T  | NA                 | NA                            | NA                 |
| <i>Desi_wild_1602356</i> | NA                                  | <i>Ca_desi_denovo</i> | 1602356                 | A/G  | NA                 | NA                            | NA                 |
| <i>Desi_wild_1602362</i> | NA                                  | <i>Ca_desi_denovo</i> | 1602362                 | C/G  | NA                 | NA                            | NA                 |
| <i>Desi_wild_1603099</i> | NA                                  | <i>Ca_desi_denovo</i> | 1603099                 | T/A  | NA                 | NA                            | NA                 |
| <i>Desi_wild_1603126</i> | NA                                  | <i>Ca_desi_denovo</i> | 1603126                 | A/G  | NA                 | NA                            | NA                 |
| <i>Desi_wild_1604094</i> | NA                                  | <i>Ca_desi_denovo</i> | 1604094                 | T/G  | NA                 | NA                            | NA                 |
| <i>Desi_wild_1604125</i> | NA                                  | <i>Ca_desi_denovo</i> | 1604125                 | T/C  | NA                 | NA                            | NA                 |
| <i>Desi_wild_1604558</i> | NA                                  | <i>Ca_desi_denovo</i> | 1604558                 | A/G  | NA                 | NA                            | NA                 |
| <i>Desi_wild_1604634</i> | NA                                  | <i>Ca_desi_denovo</i> | 1604634                 | G/A  | NA                 | NA                            | NA                 |
| <i>Desi_wild_1605003</i> | NA                                  | <i>Ca_desi_denovo</i> | 1605003                 | G/T  | NA                 | NA                            | NA                 |
| <i>Desi_wild_1605641</i> | NA                                  | <i>Ca_desi_denovo</i> | 1605641                 | T/C  | NA                 | NA                            | NA                 |
| <i>Desi_wild_1605647</i> | NA                                  | <i>Ca_desi_denovo</i> | 1605647                 | T/G  | NA                 | NA                            | NA                 |
| <i>Desi_wild_1605763</i> | NA                                  | <i>Ca_desi_denovo</i> | 1605763                 | T/C  | NA                 | NA                            | NA                 |

| SNP IDs                  | NCBI dbSNP accession IDs (NCBI_SS#) | Chromosomes           | Physical positions (bp) | SNPs | Gene accession IDs | Sequence components of genome | Putative functions |
|--------------------------|-------------------------------------|-----------------------|-------------------------|------|--------------------|-------------------------------|--------------------|
| <i>Desi_wild_1606205</i> | NA                                  | <i>Ca_desi_denovo</i> | 1606205                 | T/C  | NA                 | NA                            | NA                 |
| <i>Desi_wild_1606801</i> | NA                                  | <i>Ca_desi_denovo</i> | 1606801                 | T/C  | NA                 | NA                            | NA                 |
| <i>Desi_wild_1607185</i> | NA                                  | <i>Ca_desi_denovo</i> | 1607185                 | T/A  | NA                 | NA                            | NA                 |
| <i>Desi_wild_1608258</i> | NA                                  | <i>Ca_desi_denovo</i> | 1608258                 | G/C  | NA                 | NA                            | NA                 |
| <i>Desi_wild_1608306</i> | NA                                  | <i>Ca_desi_denovo</i> | 1608306                 | A/C  | NA                 | NA                            | NA                 |
| <i>Desi_wild_1611321</i> | NA                                  | <i>Ca_desi_denovo</i> | 1611321                 | C/A  | NA                 | NA                            | NA                 |
| <i>Desi_wild_1612229</i> | NA                                  | <i>Ca_desi_denovo</i> | 1612229                 | G/A  | NA                 | NA                            | NA                 |
| <i>Desi_wild_1612238</i> | NA                                  | <i>Ca_desi_denovo</i> | 1612238                 | T/G  | NA                 | NA                            | NA                 |
| <i>Desi_wild_1612527</i> | NA                                  | <i>Ca_desi_denovo</i> | 1612527                 | T/G  | NA                 | NA                            | NA                 |
| <i>Desi_wild_1612716</i> | NA                                  | <i>Ca_desi_denovo</i> | 1612716                 | C/G  | NA                 | NA                            | NA                 |
| <i>Desi_wild_1612743</i> | NA                                  | <i>Ca_desi_denovo</i> | 1612743                 | C/A  | NA                 | NA                            | NA                 |
| <i>Desi_wild_1612749</i> | NA                                  | <i>Ca_desi_denovo</i> | 1612749                 | C/G  | NA                 | NA                            | NA                 |
| <i>Desi_wild_1613211</i> | NA                                  | <i>Ca_desi_denovo</i> | 1613211                 | G/A  | NA                 | NA                            | NA                 |
| <i>Desi_wild_1614751</i> | NA                                  | <i>Ca_desi_denovo</i> | 1614751                 | T/C  | NA                 | NA                            | NA                 |
| <i>Desi_wild_1614796</i> | NA                                  | <i>Ca_desi_denovo</i> | 1614796                 | C/T  | NA                 | NA                            | NA                 |
| <i>Desi_wild_1615324</i> | NA                                  | <i>Ca_desi_denovo</i> | 1615324                 | C/A  | NA                 | NA                            | NA                 |
| <i>Desi_wild_1615392</i> | NA                                  | <i>Ca_desi_denovo</i> | 1615392                 | T/C  | NA                 | NA                            | NA                 |
| <i>Desi_wild_1615464</i> | NA                                  | <i>Ca_desi_denovo</i> | 1615464                 | C/A  | NA                 | NA                            | NA                 |
| <i>Desi_wild_1615539</i> | NA                                  | <i>Ca_desi_denovo</i> | 1615539                 | C/T  | NA                 | NA                            | NA                 |
| <i>Desi_wild_1617366</i> | NA                                  | <i>Ca_desi_denovo</i> | 1617366                 | C/T  | NA                 | NA                            | NA                 |
| <i>Desi_wild_1617387</i> | NA                                  | <i>Ca_desi_denovo</i> | 1617387                 | C/G  | NA                 | NA                            | NA                 |
| <i>Desi_wild_1617409</i> | NA                                  | <i>Ca_desi_denovo</i> | 1617409                 | C/T  | NA                 | NA                            | NA                 |
| <i>Desi_wild_1617457</i> | NA                                  | <i>Ca_desi_denovo</i> | 1617457                 | A/T  | NA                 | NA                            | NA                 |
| <i>Desi_wild_1617500</i> | NA                                  | <i>Ca_desi_denovo</i> | 1617500                 | A/G  | NA                 | NA                            | NA                 |
| <i>Desi_wild_1619501</i> | NA                                  | <i>Ca_desi_denovo</i> | 1619501                 | C/T  | NA                 | NA                            | NA                 |
| <i>Desi_wild_1619685</i> | NA                                  | <i>Ca_desi_denovo</i> | 1619685                 | G/C  | NA                 | NA                            | NA                 |
| <i>Desi_wild_1620145</i> | NA                                  | <i>Ca_desi_denovo</i> | 1620145                 | C/A  | NA                 | NA                            | NA                 |
| <i>Desi_wild_1622310</i> | NA                                  | <i>Ca_desi_denovo</i> | 1622310                 | C/G  | NA                 | NA                            | NA                 |
| <i>Desi_wild_1622314</i> | NA                                  | <i>Ca_desi_denovo</i> | 1622314                 | T/C  | NA                 | NA                            | NA                 |
| <i>Desi_wild_1622703</i> | NA                                  | <i>Ca_desi_denovo</i> | 1622703                 | T/G  | NA                 | NA                            | NA                 |
| <i>Desi_wild_1622763</i> | NA                                  | <i>Ca_desi_denovo</i> | 1622763                 | C/G  | NA                 | NA                            | NA                 |
| <i>Desi_wild_1624808</i> | NA                                  | <i>Ca_desi_denovo</i> | 1624808                 | T/G  | NA                 | NA                            | NA                 |
| <i>Desi_wild_1625942</i> | NA                                  | <i>Ca_desi_denovo</i> | 1625942                 | T/C  | NA                 | NA                            | NA                 |
| <i>Desi_wild_1625966</i> | NA                                  | <i>Ca_desi_denovo</i> | 1625966                 | T/G  | NA                 | NA                            | NA                 |
| <i>Desi_wild_1627097</i> | NA                                  | <i>Ca_desi_denovo</i> | 1627097                 | T/G  | NA                 | NA                            | NA                 |
| <i>Desi_wild_1627658</i> | NA                                  | <i>Ca_desi_denovo</i> | 1627658                 | C/T  | NA                 | NA                            | NA                 |
| <i>Desi_wild_1628033</i> | NA                                  | <i>Ca_desi_denovo</i> | 1628033                 | G/A  | NA                 | NA                            | NA                 |
| <i>Desi_wild_1628285</i> | NA                                  | <i>Ca_desi_denovo</i> | 1628285                 | G/A  | NA                 | NA                            | NA                 |
| <i>Desi_wild_1628291</i> | NA                                  | <i>Ca_desi_denovo</i> | 1628291                 | A/C  | NA                 | NA                            | NA                 |
| <i>Desi_wild_1630039</i> | NA                                  | <i>Ca_desi_denovo</i> | 1630039                 | T/C  | NA                 | NA                            | NA                 |
| <i>Desi_wild_1630082</i> | NA                                  | <i>Ca_desi_denovo</i> | 1630082                 | C/G  | NA                 | NA                            | NA                 |
| <i>Desi_wild_1630550</i> | NA                                  | <i>Ca_desi_denovo</i> | 1630550                 | G/C  | NA                 | NA                            | NA                 |
| <i>Desi_wild_1630592</i> | NA                                  | <i>Ca_desi_denovo</i> | 1630592                 | G/C  | NA                 | NA                            | NA                 |
| <i>Desi_wild_1631621</i> | NA                                  | <i>Ca_desi_denovo</i> | 1631621                 | G/T  | NA                 | NA                            | NA                 |

| SNP IDs                  | NCBI dbSNP accession IDs (NCBI_SS#) | Chromosomes           | Physical positions (bp) | SNPs | Gene accession IDs | Sequence components of genome | Putative functions |
|--------------------------|-------------------------------------|-----------------------|-------------------------|------|--------------------|-------------------------------|--------------------|
| <i>Desi_wild_1631622</i> | NA                                  | <i>Ca_desi_denovo</i> | 1631622                 | G/T  | NA                 | NA                            | NA                 |
| <i>Desi_wild_1632410</i> | NA                                  | <i>Ca_desi_denovo</i> | 1632410                 | G/A  | NA                 | NA                            | NA                 |
| <i>Desi_wild_1632431</i> | NA                                  | <i>Ca_desi_denovo</i> | 1632431                 | C/T  | NA                 | NA                            | NA                 |
| <i>Desi_wild_1632714</i> | NA                                  | <i>Ca_desi_denovo</i> | 1632714                 | A/C  | NA                 | NA                            | NA                 |
| <i>Desi_wild_1632828</i> | NA                                  | <i>Ca_desi_denovo</i> | 1632828                 | C/T  | NA                 | NA                            | NA                 |
| <i>Desi_wild_1632861</i> | NA                                  | <i>Ca_desi_denovo</i> | 1632861                 | A/G  | NA                 | NA                            | NA                 |
| <i>Desi_wild_1634307</i> | NA                                  | <i>Ca_desi_denovo</i> | 1634307                 | T/C  | NA                 | NA                            | NA                 |
| <i>Desi_wild_1634320</i> | NA                                  | <i>Ca_desi_denovo</i> | 1634320                 | C/G  | NA                 | NA                            | NA                 |
| <i>Desi_wild_1634494</i> | NA                                  | <i>Ca_desi_denovo</i> | 1634494                 | G/C  | NA                 | NA                            | NA                 |
| <i>Desi_wild_1634990</i> | NA                                  | <i>Ca_desi_denovo</i> | 1634990                 | T/G  | NA                 | NA                            | NA                 |
| <i>Desi_wild_1635230</i> | NA                                  | <i>Ca_desi_denovo</i> | 1635230                 | T/G  | NA                 | NA                            | NA                 |
| <i>Desi_wild_1636525</i> | NA                                  | <i>Ca_desi_denovo</i> | 1636525                 | A/G  | NA                 | NA                            | NA                 |
| <i>Desi_wild_1637040</i> | NA                                  | <i>Ca_desi_denovo</i> | 1637040                 | A/C  | NA                 | NA                            | NA                 |
| <i>Desi_wild_1637133</i> | NA                                  | <i>Ca_desi_denovo</i> | 1637133                 | T/G  | NA                 | NA                            | NA                 |
| <i>Desi_wild_1638020</i> | NA                                  | <i>Ca_desi_denovo</i> | 1638020                 | G/A  | NA                 | NA                            | NA                 |
| <i>Desi_wild_1638040</i> | NA                                  | <i>Ca_desi_denovo</i> | 1638040                 | G/C  | NA                 | NA                            | NA                 |
| <i>Desi_wild_1641134</i> | NA                                  | <i>Ca_desi_denovo</i> | 1641134                 | G/T  | NA                 | NA                            | NA                 |
| <i>Desi_wild_1641139</i> | NA                                  | <i>Ca_desi_denovo</i> | 1641139                 | A/T  | NA                 | NA                            | NA                 |
| <i>Desi_wild_1641225</i> | NA                                  | <i>Ca_desi_denovo</i> | 1641225                 | C/A  | NA                 | NA                            | NA                 |
| <i>Desi_wild_1642395</i> | NA                                  | <i>Ca_desi_denovo</i> | 1642395                 | C/G  | NA                 | NA                            | NA                 |
| <i>Desi_wild_1642407</i> | NA                                  | <i>Ca_desi_denovo</i> | 1642407                 | G/C  | NA                 | NA                            | NA                 |
| <i>Desi_wild_1643152</i> | NA                                  | <i>Ca_desi_denovo</i> | 1643152                 | T/G  | NA                 | NA                            | NA                 |
| <i>Desi_wild_1643548</i> | NA                                  | <i>Ca_desi_denovo</i> | 1643548                 | A/C  | NA                 | NA                            | NA                 |
| <i>Desi_wild_1643550</i> | NA                                  | <i>Ca_desi_denovo</i> | 1643550                 | T/C  | NA                 | NA                            | NA                 |
| <i>Desi_wild_1644141</i> | NA                                  | <i>Ca_desi_denovo</i> | 1644141                 | T/G  | NA                 | NA                            | NA                 |
| <i>Desi_wild_1644151</i> | NA                                  | <i>Ca_desi_denovo</i> | 1644151                 | A/G  | NA                 | NA                            | NA                 |
| <i>Desi_wild_1644815</i> | NA                                  | <i>Ca_desi_denovo</i> | 1644815                 | T/C  | NA                 | NA                            | NA                 |
| <i>Desi_wild_1645996</i> | NA                                  | <i>Ca_desi_denovo</i> | 1645996                 | C/G  | NA                 | NA                            | NA                 |
| <i>Desi_wild_1646008</i> | NA                                  | <i>Ca_desi_denovo</i> | 1646008                 | C/T  | NA                 | NA                            | NA                 |
| <i>Desi_wild_1646179</i> | NA                                  | <i>Ca_desi_denovo</i> | 1646179                 | C/T  | NA                 | NA                            | NA                 |
| <i>Desi_wild_1646385</i> | NA                                  | <i>Ca_desi_denovo</i> | 1646385                 | T/C  | NA                 | NA                            | NA                 |
| <i>Desi_wild_1646393</i> | NA                                  | <i>Ca_desi_denovo</i> | 1646393                 | G/A  | NA                 | NA                            | NA                 |
| <i>Desi_wild_1648154</i> | NA                                  | <i>Ca_desi_denovo</i> | 1648154                 | A/G  | NA                 | NA                            | NA                 |
| <i>Desi_wild_1648184</i> | NA                                  | <i>Ca_desi_denovo</i> | 1648184                 | T/C  | NA                 | NA                            | NA                 |
| <i>Desi_wild_1648796</i> | NA                                  | <i>Ca_desi_denovo</i> | 1648796                 | A/G  | NA                 | NA                            | NA                 |
| <i>Desi_wild_1648969</i> | NA                                  | <i>Ca_desi_denovo</i> | 1648969                 | T/G  | NA                 | NA                            | NA                 |
| <i>Desi_wild_1649374</i> | NA                                  | <i>Ca_desi_denovo</i> | 1649374                 | C/T  | NA                 | NA                            | NA                 |
| <i>Desi_wild_1649394</i> | NA                                  | <i>Ca_desi_denovo</i> | 1649394                 | C/T  | NA                 | NA                            | NA                 |
| <i>Desi_wild_1649962</i> | NA                                  | <i>Ca_desi_denovo</i> | 1649962                 | C/T  | NA                 | NA                            | NA                 |
| <i>Desi_wild_1649986</i> | NA                                  | <i>Ca_desi_denovo</i> | 1649986                 | G/C  | NA                 | NA                            | NA                 |
| <i>Desi_wild_1650616</i> | NA                                  | <i>Ca_desi_denovo</i> | 1650616                 | A/C  | NA                 | NA                            | NA                 |
| <i>Desi_wild_1651877</i> | NA                                  | <i>Ca_desi_denovo</i> | 1651877                 | G/C  | NA                 | NA                            | NA                 |
| <i>Desi_wild_1652806</i> | NA                                  | <i>Ca_desi_denovo</i> | 1652806                 | T/G  | NA                 | NA                            | NA                 |
| <i>Desi_wild_1653004</i> | NA                                  | <i>Ca_desi_denovo</i> | 1653004                 | C/G  | NA                 | NA                            | NA                 |

| SNP IDs                  | NCBI dbSNP accession IDs (NCBI_SS#) | Chromosomes           | Physical positions (bp) | SNPs | Gene accession IDs | Sequence components of genome | Putative functions |
|--------------------------|-------------------------------------|-----------------------|-------------------------|------|--------------------|-------------------------------|--------------------|
| <i>Desi_wild_1654027</i> | NA                                  | <i>Ca_desi_denovo</i> | 1654027                 | T/C  | NA                 | NA                            | NA                 |
| <i>Desi_wild_1654046</i> | NA                                  | <i>Ca_desi_denovo</i> | 1654046                 | G/A  | NA                 | NA                            | NA                 |
| <i>Desi_wild_1654121</i> | NA                                  | <i>Ca_desi_denovo</i> | 1654121                 | C/T  | NA                 | NA                            | NA                 |
| <i>Desi_wild_1654199</i> | NA                                  | <i>Ca_desi_denovo</i> | 1654199                 | C/T  | NA                 | NA                            | NA                 |
| <i>Desi_wild_1654718</i> | NA                                  | <i>Ca_desi_denovo</i> | 1654718                 | T/C  | NA                 | NA                            | NA                 |
| <i>Desi_wild_1654722</i> | NA                                  | <i>Ca_desi_denovo</i> | 1654722                 | G/A  | NA                 | NA                            | NA                 |
| <i>Desi_wild_1654913</i> | NA                                  | <i>Ca_desi_denovo</i> | 1654913                 | C/T  | NA                 | NA                            | NA                 |
| <i>Desi_wild_1654918</i> | NA                                  | <i>Ca_desi_denovo</i> | 1654918                 | C/A  | NA                 | NA                            | NA                 |
| <i>Desi_wild_1655110</i> | NA                                  | <i>Ca_desi_denovo</i> | 1655110                 | T/G  | NA                 | NA                            | NA                 |
| <i>Desi_wild_1655121</i> | NA                                  | <i>Ca_desi_denovo</i> | 1655121                 | G/C  | NA                 | NA                            | NA                 |
| <i>Desi_wild_1655222</i> | NA                                  | <i>Ca_desi_denovo</i> | 1655222                 | C/T  | NA                 | NA                            | NA                 |
| <i>Desi_wild_1655311</i> | NA                                  | <i>Ca_desi_denovo</i> | 1655311                 | C/A  | NA                 | NA                            | NA                 |
| <i>Desi_wild_1655357</i> | NA                                  | <i>Ca_desi_denovo</i> | 1655357                 | G/C  | NA                 | NA                            | NA                 |
| <i>Desi_wild_1655876</i> | NA                                  | <i>Ca_desi_denovo</i> | 1655876                 | G/C  | NA                 | NA                            | NA                 |
| <i>Desi_wild_1656002</i> | NA                                  | <i>Ca_desi_denovo</i> | 1656002                 | C/G  | NA                 | NA                            | NA                 |
| <i>Desi_wild_1656050</i> | NA                                  | <i>Ca_desi_denovo</i> | 1656050                 | C/T  | NA                 | NA                            | NA                 |
| <i>Desi_wild_1656454</i> | NA                                  | <i>Ca_desi_denovo</i> | 1656454                 | T/C  | NA                 | NA                            | NA                 |
| <i>Desi_wild_1657818</i> | NA                                  | <i>Ca_desi_denovo</i> | 1657818                 | A/G  | NA                 | NA                            | NA                 |
| <i>Desi_wild_1657837</i> | NA                                  | <i>Ca_desi_denovo</i> | 1657837                 | G/T  | NA                 | NA                            | NA                 |
| <i>Desi_wild_1657919</i> | NA                                  | <i>Ca_desi_denovo</i> | 1657919                 | T/C  | NA                 | NA                            | NA                 |
| <i>Desi_wild_1657921</i> | NA                                  | <i>Ca_desi_denovo</i> | 1657921                 | G/C  | NA                 | NA                            | NA                 |
| <i>Desi_wild_1658673</i> | NA                                  | <i>Ca_desi_denovo</i> | 1658673                 | G/T  | NA                 | NA                            | NA                 |
| <i>Desi_wild_1659485</i> | NA                                  | <i>Ca_desi_denovo</i> | 1659485                 | T/G  | NA                 | NA                            | NA                 |
| <i>Desi_wild_1661208</i> | NA                                  | <i>Ca_desi_denovo</i> | 1661208                 | G/A  | NA                 | NA                            | NA                 |
| <i>Desi_wild_1661217</i> | NA                                  | <i>Ca_desi_denovo</i> | 1661217                 | T/C  | NA                 | NA                            | NA                 |
| <i>Desi_wild_1661919</i> | NA                                  | <i>Ca_desi_denovo</i> | 1661919                 | G/A  | NA                 | NA                            | NA                 |
| <i>Desi_wild_1661922</i> | NA                                  | <i>Ca_desi_denovo</i> | 1661922                 | C/G  | NA                 | NA                            | NA                 |
| <i>Desi_wild_1662096</i> | NA                                  | <i>Ca_desi_denovo</i> | 1662096                 | G/A  | NA                 | NA                            | NA                 |
| <i>Desi_wild_1662855</i> | NA                                  | <i>Ca_desi_denovo</i> | 1662855                 | C/A  | NA                 | NA                            | NA                 |
| <i>Desi_wild_1662867</i> | NA                                  | <i>Ca_desi_denovo</i> | 1662867                 | G/C  | NA                 | NA                            | NA                 |
| <i>Desi_wild_1663066</i> | NA                                  | <i>Ca_desi_denovo</i> | 1663066                 | G/C  | NA                 | NA                            | NA                 |
| <i>Desi_wild_1663157</i> | NA                                  | <i>Ca_desi_denovo</i> | 1663157                 | T/C  | NA                 | NA                            | NA                 |
| <i>Desi_wild_1663630</i> | NA                                  | <i>Ca_desi_denovo</i> | 1663630                 | A/G  | NA                 | NA                            | NA                 |
| <i>Desi_wild_1663692</i> | NA                                  | <i>Ca_desi_denovo</i> | 1663692                 | C/T  | NA                 | NA                            | NA                 |
| <i>Desi_wild_1663865</i> | NA                                  | <i>Ca_desi_denovo</i> | 1663865                 | A/G  | NA                 | NA                            | NA                 |
| <i>Desi_wild_1664121</i> | NA                                  | <i>Ca_desi_denovo</i> | 1664121                 | T/C  | NA                 | NA                            | NA                 |
| <i>Desi_wild_1664413</i> | NA                                  | <i>Ca_desi_denovo</i> | 1664413                 | C/T  | NA                 | NA                            | NA                 |
| <i>Desi_wild_1664416</i> | NA                                  | <i>Ca_desi_denovo</i> | 1664416                 | C/T  | NA                 | NA                            | NA                 |
| <i>Desi_wild_1664620</i> | NA                                  | <i>Ca_desi_denovo</i> | 1664620                 | C/T  | NA                 | NA                            | NA                 |
| <i>Desi_wild_1664650</i> | NA                                  | <i>Ca_desi_denovo</i> | 1664650                 | T/C  | NA                 | NA                            | NA                 |
| <i>Desi_wild_1667612</i> | NA                                  | <i>Ca_desi_denovo</i> | 1667612                 | G/A  | NA                 | NA                            | NA                 |
| <i>Desi_wild_1669523</i> | NA                                  | <i>Ca_desi_denovo</i> | 1669523                 | A/G  | NA                 | NA                            | NA                 |
| <i>Desi_wild_1669532</i> | NA                                  | <i>Ca_desi_denovo</i> | 1669532                 | A/G  | NA                 | NA                            | NA                 |
| <i>Desi_wild_1669580</i> | NA                                  | <i>Ca_desi_denovo</i> | 1669580                 | G/A  | NA                 | NA                            | NA                 |

| SNP IDs                  | NCBI dbSNP accession IDs (NCBI_SS#) | Chromosomes           | Physical positions (bp) | SNPs | Gene accession IDs | Sequence components of genome | Putative functions |
|--------------------------|-------------------------------------|-----------------------|-------------------------|------|--------------------|-------------------------------|--------------------|
| <i>Desi_wild_1669835</i> | NA                                  | <i>Ca_desi_denovo</i> | 1669835                 | A/C  | NA                 | NA                            | NA                 |
| <i>Desi_wild_1670449</i> | NA                                  | <i>Ca_desi_denovo</i> | 1670449                 | T/G  | NA                 | NA                            | NA                 |
| <i>Desi_wild_1670502</i> | NA                                  | <i>Ca_desi_denovo</i> | 1670502                 | T/C  | NA                 | NA                            | NA                 |
| <i>Desi_wild_1671694</i> | NA                                  | <i>Ca_desi_denovo</i> | 1671694                 | A/G  | NA                 | NA                            | NA                 |
| <i>Desi_wild_1671790</i> | NA                                  | <i>Ca_desi_denovo</i> | 1671790                 | C/T  | NA                 | NA                            | NA                 |
| <i>Desi_wild_1671897</i> | NA                                  | <i>Ca_desi_denovo</i> | 1671897                 | G/A  | NA                 | NA                            | NA                 |
| <i>Desi_wild_1671906</i> | NA                                  | <i>Ca_desi_denovo</i> | 1671906                 | C/T  | NA                 | NA                            | NA                 |
| <i>Desi_wild_1672664</i> | NA                                  | <i>Ca_desi_denovo</i> | 1672664                 | C/G  | NA                 | NA                            | NA                 |
| <i>Desi_wild_1672898</i> | NA                                  | <i>Ca_desi_denovo</i> | 1672898                 | C/T  | NA                 | NA                            | NA                 |
| <i>Desi_wild_1673018</i> | NA                                  | <i>Ca_desi_denovo</i> | 1673018                 | C/T  | NA                 | NA                            | NA                 |
| <i>Desi_wild_1674013</i> | NA                                  | <i>Ca_desi_denovo</i> | 1674013                 | C/G  | NA                 | NA                            | NA                 |
| <i>Desi_wild_1675185</i> | NA                                  | <i>Ca_desi_denovo</i> | 1675185                 | A/G  | NA                 | NA                            | NA                 |
| <i>Desi_wild_1675218</i> | NA                                  | <i>Ca_desi_denovo</i> | 1675218                 | G/C  | NA                 | NA                            | NA                 |
| <i>Desi_wild_1675573</i> | NA                                  | <i>Ca_desi_denovo</i> | 1675573                 | G/A  | NA                 | NA                            | NA                 |
| <i>Desi_wild_1678267</i> | NA                                  | <i>Ca_desi_denovo</i> | 1678267                 | C/G  | NA                 | NA                            | NA                 |
| <i>Desi_wild_1682407</i> | NA                                  | <i>Ca_desi_denovo</i> | 1682407                 | G/C  | NA                 | NA                            | NA                 |
| <i>Desi_wild_1682416</i> | NA                                  | <i>Ca_desi_denovo</i> | 1682416                 | G/C  | NA                 | NA                            | NA                 |
| <i>Desi_wild_1682596</i> | NA                                  | <i>Ca_desi_denovo</i> | 1682596                 | A/G  | NA                 | NA                            | NA                 |
| <i>Desi_wild_1683374</i> | NA                                  | <i>Ca_desi_denovo</i> | 1683374                 | T/C  | NA                 | NA                            | NA                 |
| <i>Desi_wild_1683831</i> | NA                                  | <i>Ca_desi_denovo</i> | 1683831                 | G/A  | NA                 | NA                            | NA                 |
| <i>Desi_wild_1683881</i> | NA                                  | <i>Ca_desi_denovo</i> | 1683881                 | T/C  | NA                 | NA                            | NA                 |
| <i>Desi_wild_1683935</i> | NA                                  | <i>Ca_desi_denovo</i> | 1683935                 | A/G  | NA                 | NA                            | NA                 |
| <i>Desi_wild_1683985</i> | NA                                  | <i>Ca_desi_denovo</i> | 1683985                 | A/G  | NA                 | NA                            | NA                 |
| <i>Desi_wild_1683999</i> | NA                                  | <i>Ca_desi_denovo</i> | 1683999                 | G/C  | NA                 | NA                            | NA                 |
| <i>Desi_wild_1684674</i> | NA                                  | <i>Ca_desi_denovo</i> | 1684674                 | G/A  | NA                 | NA                            | NA                 |
| <i>Desi_wild_1684716</i> | NA                                  | <i>Ca_desi_denovo</i> | 1684716                 | G/C  | NA                 | NA                            | NA                 |
| <i>Desi_wild_1685017</i> | NA                                  | <i>Ca_desi_denovo</i> | 1685017                 | C/T  | NA                 | NA                            | NA                 |
| <i>Desi_wild_1685169</i> | NA                                  | <i>Ca_desi_denovo</i> | 1685169                 | A/G  | NA                 | NA                            | NA                 |
| <i>Desi_wild_1685596</i> | NA                                  | <i>Ca_desi_denovo</i> | 1685596                 | G/T  | NA                 | NA                            | NA                 |
| <i>Desi_wild_1685672</i> | NA                                  | <i>Ca_desi_denovo</i> | 1685672                 | A/G  | NA                 | NA                            | NA                 |
| <i>Desi_wild_1685977</i> | NA                                  | <i>Ca_desi_denovo</i> | 1685977                 | C/T  | NA                 | NA                            | NA                 |
| <i>Desi_wild_1687668</i> | NA                                  | <i>Ca_desi_denovo</i> | 1687668                 | G/C  | NA                 | NA                            | NA                 |
| <i>Desi_wild_1687959</i> | NA                                  | <i>Ca_desi_denovo</i> | 1687959                 | T/G  | NA                 | NA                            | NA                 |
| <i>Desi_wild_1688208</i> | NA                                  | <i>Ca_desi_denovo</i> | 1688208                 | C/T  | NA                 | NA                            | NA                 |
| <i>Desi_wild_1688741</i> | NA                                  | <i>Ca_desi_denovo</i> | 1688741                 | A/C  | NA                 | NA                            | NA                 |
| <i>Desi_wild_1690768</i> | NA                                  | <i>Ca_desi_denovo</i> | 1690768                 | T/G  | NA                 | NA                            | NA                 |
| <i>Desi_wild_1691970</i> | NA                                  | <i>Ca_desi_denovo</i> | 1691970                 | T/C  | NA                 | NA                            | NA                 |
| <i>Desi_wild_1693148</i> | NA                                  | <i>Ca_desi_denovo</i> | 1693148                 | C/G  | NA                 | NA                            | NA                 |
| <i>Desi_wild_1693353</i> | NA                                  | <i>Ca_desi_denovo</i> | 1693353                 | T/G  | NA                 | NA                            | NA                 |
| <i>Desi_wild_1693422</i> | NA                                  | <i>Ca_desi_denovo</i> | 1693422                 | A/G  | NA                 | NA                            | NA                 |
| <i>Desi_wild_1693475</i> | NA                                  | <i>Ca_desi_denovo</i> | 1693475                 | G/A  | NA                 | NA                            | NA                 |
| <i>Desi_wild_1693843</i> | NA                                  | <i>Ca_desi_denovo</i> | 1693843                 | T/G  | NA                 | NA                            | NA                 |
| <i>Desi_wild_1694868</i> | NA                                  | <i>Ca_desi_denovo</i> | 1694868                 | A/G  | NA                 | NA                            | NA                 |
| <i>Desi_wild_1695277</i> | NA                                  | <i>Ca_desi_denovo</i> | 1695277                 | T/C  | NA                 | NA                            | NA                 |

| SNP IDs                  | NCBI dbSNP accession IDs (NCBI_SS#) | Chromosomes           | Physical positions (bp) | SNPs | Gene accession IDs | Sequence components of genome | Putative functions |
|--------------------------|-------------------------------------|-----------------------|-------------------------|------|--------------------|-------------------------------|--------------------|
| <i>Desi_wild_1695322</i> | NA                                  | <i>Ca_desi_denovo</i> | 1695322                 | A/G  | NA                 | NA                            | NA                 |
| <i>Desi_wild_1696649</i> | NA                                  | <i>Ca_desi_denovo</i> | 1696649                 | T/C  | NA                 | NA                            | NA                 |
| <i>Desi_wild_1696723</i> | NA                                  | <i>Ca_desi_denovo</i> | 1696723                 | G/C  | NA                 | NA                            | NA                 |
| <i>Desi_wild_1697115</i> | NA                                  | <i>Ca_desi_denovo</i> | 1697115                 | C/T  | NA                 | NA                            | NA                 |
| <i>Desi_wild_1697792</i> | NA                                  | <i>Ca_desi_denovo</i> | 1697792                 | G/A  | NA                 | NA                            | NA                 |
| <i>Desi_wild_1698363</i> | NA                                  | <i>Ca_desi_denovo</i> | 1698363                 | C/T  | NA                 | NA                            | NA                 |
| <i>Desi_wild_1698372</i> | NA                                  | <i>Ca_desi_denovo</i> | 1698372                 | G/A  | NA                 | NA                            | NA                 |
| <i>Desi_wild_1698419</i> | NA                                  | <i>Ca_desi_denovo</i> | 1698419                 | T/C  | NA                 | NA                            | NA                 |
| <i>Desi_wild_1699715</i> | NA                                  | <i>Ca_desi_denovo</i> | 1699715                 | T/C  | NA                 | NA                            | NA                 |
| <i>Desi_wild_1700180</i> | NA                                  | <i>Ca_desi_denovo</i> | 1700180                 | T/G  | NA                 | NA                            | NA                 |
| <i>Desi_wild_1701014</i> | NA                                  | <i>Ca_desi_denovo</i> | 1701014                 | G/C  | NA                 | NA                            | NA                 |
| <i>Desi_wild_1701032</i> | NA                                  | <i>Ca_desi_denovo</i> | 1701032                 | T/G  | NA                 | NA                            | NA                 |
| <i>Desi_wild_1701309</i> | NA                                  | <i>Ca_desi_denovo</i> | 1701309                 | T/G  | NA                 | NA                            | NA                 |
| <i>Desi_wild_1701573</i> | NA                                  | <i>Ca_desi_denovo</i> | 1701573                 | C/T  | NA                 | NA                            | NA                 |
| <i>Desi_wild_1702061</i> | NA                                  | <i>Ca_desi_denovo</i> | 1702061                 | A/G  | NA                 | NA                            | NA                 |
| <i>Desi_wild_1702610</i> | NA                                  | <i>Ca_desi_denovo</i> | 1702610                 | C/T  | NA                 | NA                            | NA                 |
| <i>Desi_wild_1703303</i> | NA                                  | <i>Ca_desi_denovo</i> | 1703303                 | A/C  | NA                 | NA                            | NA                 |
| <i>Desi_wild_1704757</i> | NA                                  | <i>Ca_desi_denovo</i> | 1704757                 | G/A  | NA                 | NA                            | NA                 |
| <i>Desi_wild_1704967</i> | NA                                  | <i>Ca_desi_denovo</i> | 1704967                 | A/G  | NA                 | NA                            | NA                 |
| <i>Desi_wild_1706469</i> | NA                                  | <i>Ca_desi_denovo</i> | 1706469                 | C/T  | NA                 | NA                            | NA                 |
| <i>Desi_wild_1707472</i> | NA                                  | <i>Ca_desi_denovo</i> | 1707472                 | C/G  | NA                 | NA                            | NA                 |
| <i>Desi_wild_1707488</i> | NA                                  | <i>Ca_desi_denovo</i> | 1707488                 | T/C  | NA                 | NA                            | NA                 |
| <i>Desi_wild_1707997</i> | NA                                  | <i>Ca_desi_denovo</i> | 1707997                 | A/G  | NA                 | NA                            | NA                 |
| <i>Desi_wild_1708009</i> | NA                                  | <i>Ca_desi_denovo</i> | 1708009                 | T/C  | NA                 | NA                            | NA                 |
| <i>Desi_wild_1708453</i> | NA                                  | <i>Ca_desi_denovo</i> | 1708453                 | A/T  | NA                 | NA                            | NA                 |
| <i>Desi_wild_1708719</i> | NA                                  | <i>Ca_desi_denovo</i> | 1708719                 | G/T  | NA                 | NA                            | NA                 |
| <i>Desi_wild_1709808</i> | NA                                  | <i>Ca_desi_denovo</i> | 1709808                 | G/A  | NA                 | NA                            | NA                 |
| <i>Desi_wild_1709816</i> | NA                                  | <i>Ca_desi_denovo</i> | 1709816                 | C/A  | NA                 | NA                            | NA                 |
| <i>Desi_wild_1710007</i> | NA                                  | <i>Ca_desi_denovo</i> | 1710007                 | C/T  | NA                 | NA                            | NA                 |
| <i>Desi_wild_1710302</i> | NA                                  | <i>Ca_desi_denovo</i> | 1710302                 | G/A  | NA                 | NA                            | NA                 |
| <i>Desi_wild_1710329</i> | NA                                  | <i>Ca_desi_denovo</i> | 1710329                 | T/C  | NA                 | NA                            | NA                 |
| <i>Desi_wild_1710726</i> | NA                                  | <i>Ca_desi_denovo</i> | 1710726                 | A/G  | NA                 | NA                            | NA                 |
| <i>Desi_wild_1711732</i> | NA                                  | <i>Ca_desi_denovo</i> | 1711732                 | A/C  | NA                 | NA                            | NA                 |
| <i>Desi_wild_1712365</i> | NA                                  | <i>Ca_desi_denovo</i> | 1712365                 | C/T  | NA                 | NA                            | NA                 |
| <i>Desi_wild_1713529</i> | NA                                  | <i>Ca_desi_denovo</i> | 1713529                 | G/A  | NA                 | NA                            | NA                 |
| <i>Desi_wild_1713553</i> | NA                                  | <i>Ca_desi_denovo</i> | 1713553                 | T/C  | NA                 | NA                            | NA                 |
| <i>Desi_wild_1713795</i> | NA                                  | <i>Ca_desi_denovo</i> | 1713795                 | C/T  | NA                 | NA                            | NA                 |
| <i>Desi_wild_1713803</i> | NA                                  | <i>Ca_desi_denovo</i> | 1713803                 | G/A  | NA                 | NA                            | NA                 |
| <i>Desi_wild_1713868</i> | NA                                  | <i>Ca_desi_denovo</i> | 1713868                 | T/A  | NA                 | NA                            | NA                 |
| <i>Desi_wild_1713924</i> | NA                                  | <i>Ca_desi_denovo</i> | 1713924                 | A/G  | NA                 | NA                            | NA                 |
| <i>Desi_wild_1714380</i> | NA                                  | <i>Ca_desi_denovo</i> | 1714380                 | G/A  | NA                 | NA                            | NA                 |
| <i>Desi_wild_1714648</i> | NA                                  | <i>Ca_desi_denovo</i> | 1714648                 | T/G  | NA                 | NA                            | NA                 |
| <i>Desi_wild_1714654</i> | NA                                  | <i>Ca_desi_denovo</i> | 1714654                 | T/C  | NA                 | NA                            | NA                 |
| <i>Desi_wild_1715585</i> | NA                                  | <i>Ca_desi_denovo</i> | 1715585                 | C/A  | NA                 | NA                            | NA                 |

| SNP IDs                  | NCBI dbSNP accession IDs (NCBI_SS#) | Chromosomes           | Physical positions (bp) | SNPs | Gene accession IDs | Sequence components of genome | Putative functions |
|--------------------------|-------------------------------------|-----------------------|-------------------------|------|--------------------|-------------------------------|--------------------|
| <i>Desi_wild_1715855</i> | NA                                  | <i>Ca_desi_denovo</i> | 1715855                 | C/G  | NA                 | NA                            | NA                 |
| <i>Desi_wild_1715879</i> | NA                                  | <i>Ca_desi_denovo</i> | 1715879                 | T/G  | NA                 | NA                            | NA                 |
| <i>Desi_wild_1716377</i> | NA                                  | <i>Ca_desi_denovo</i> | 1716377                 | A/G  | NA                 | NA                            | NA                 |
| <i>Desi_wild_1716406</i> | NA                                  | <i>Ca_desi_denovo</i> | 1716406                 | C/T  | NA                 | NA                            | NA                 |
| <i>Desi_wild_1716456</i> | NA                                  | <i>Ca_desi_denovo</i> | 1716456                 | C/T  | NA                 | NA                            | NA                 |
| <i>Desi_wild_1716668</i> | NA                                  | <i>Ca_desi_denovo</i> | 1716668                 | G/T  | NA                 | NA                            | NA                 |
| <i>Desi_wild_1716904</i> | NA                                  | <i>Ca_desi_denovo</i> | 1716904                 | A/T  | NA                 | NA                            | NA                 |
| <i>Desi_wild_1717108</i> | NA                                  | <i>Ca_desi_denovo</i> | 1717108                 | A/G  | NA                 | NA                            | NA                 |
| <i>Desi_wild_1718149</i> | NA                                  | <i>Ca_desi_denovo</i> | 1718149                 | A/G  | NA                 | NA                            | NA                 |
| <i>Desi_wild_1718194</i> | NA                                  | <i>Ca_desi_denovo</i> | 1718194                 | C/G  | NA                 | NA                            | NA                 |
| <i>Desi_wild_1718448</i> | NA                                  | <i>Ca_desi_denovo</i> | 1718448                 | G/A  | NA                 | NA                            | NA                 |
| <i>Desi_wild_1718861</i> | NA                                  | <i>Ca_desi_denovo</i> | 1718861                 | T/C  | NA                 | NA                            | NA                 |
| <i>Desi_wild_1719158</i> | NA                                  | <i>Ca_desi_denovo</i> | 1719158                 | C/T  | NA                 | NA                            | NA                 |
| <i>Desi_wild_1719530</i> | NA                                  | <i>Ca_desi_denovo</i> | 1719530                 | T/C  | NA                 | NA                            | NA                 |
| <i>Desi_wild_1720624</i> | NA                                  | <i>Ca_desi_denovo</i> | 1720624                 | T/G  | NA                 | NA                            | NA                 |
| <i>Desi_wild_1720626</i> | NA                                  | <i>Ca_desi_denovo</i> | 1720626                 | C/G  | NA                 | NA                            | NA                 |
| <i>Desi_wild_1721214</i> | NA                                  | <i>Ca_desi_denovo</i> | 1721214                 | G/C  | NA                 | NA                            | NA                 |
| <i>Desi_wild_1722620</i> | NA                                  | <i>Ca_desi_denovo</i> | 1722620                 | A/G  | NA                 | NA                            | NA                 |
| <i>Desi_wild_1723399</i> | NA                                  | <i>Ca_desi_denovo</i> | 1723399                 | G/C  | NA                 | NA                            | NA                 |
| <i>Desi_wild_1723771</i> | NA                                  | <i>Ca_desi_denovo</i> | 1723771                 | A/T  | NA                 | NA                            | NA                 |
| <i>Desi_wild_1723922</i> | NA                                  | <i>Ca_desi_denovo</i> | 1723922                 | G/C  | NA                 | NA                            | NA                 |
| <i>Desi_wild_1723949</i> | NA                                  | <i>Ca_desi_denovo</i> | 1723949                 | A/G  | NA                 | NA                            | NA                 |
| <i>Desi_wild_1724219</i> | NA                                  | <i>Ca_desi_denovo</i> | 1724219                 | A/G  | NA                 | NA                            | NA                 |
| <i>Desi_wild_1725176</i> | NA                                  | <i>Ca_desi_denovo</i> | 1725176                 | C/T  | NA                 | NA                            | NA                 |
| <i>Desi_wild_1726312</i> | NA                                  | <i>Ca_desi_denovo</i> | 1726312                 | G/C  | NA                 | NA                            | NA                 |
| <i>Desi_wild_1727456</i> | NA                                  | <i>Ca_desi_denovo</i> | 1727456                 | G/C  | NA                 | NA                            | NA                 |
| <i>Desi_wild_1727675</i> | NA                                  | <i>Ca_desi_denovo</i> | 1727675                 | C/A  | NA                 | NA                            | NA                 |
| <i>Desi_wild_1728221</i> | NA                                  | <i>Ca_desi_denovo</i> | 1728221                 | G/T  | NA                 | NA                            | NA                 |
| <i>Desi_wild_1728335</i> | NA                                  | <i>Ca_desi_denovo</i> | 1728335                 | G/A  | NA                 | NA                            | NA                 |
| <i>Desi_wild_1729551</i> | NA                                  | <i>Ca_desi_denovo</i> | 1729551                 | G/A  | NA                 | NA                            | NA                 |
| <i>Desi_wild_1730373</i> | NA                                  | <i>Ca_desi_denovo</i> | 1730373                 | C/G  | NA                 | NA                            | NA                 |
| <i>Desi_wild_1732012</i> | NA                                  | <i>Ca_desi_denovo</i> | 1732012                 | C/T  | NA                 | NA                            | NA                 |
| <i>Desi_wild_1732592</i> | NA                                  | <i>Ca_desi_denovo</i> | 1732592                 | A/G  | NA                 | NA                            | NA                 |
| <i>Desi_wild_1732776</i> | NA                                  | <i>Ca_desi_denovo</i> | 1732776                 | G/T  | NA                 | NA                            | NA                 |
| <i>Desi_wild_1733192</i> | NA                                  | <i>Ca_desi_denovo</i> | 1733192                 | G/A  | NA                 | NA                            | NA                 |
| <i>Desi_wild_1733242</i> | NA                                  | <i>Ca_desi_denovo</i> | 1733242                 | G/A  | NA                 | NA                            | NA                 |
| <i>Desi_wild_1733718</i> | NA                                  | <i>Ca_desi_denovo</i> | 1733718                 | T/C  | NA                 | NA                            | NA                 |
| <i>Desi_wild_1733769</i> | NA                                  | <i>Ca_desi_denovo</i> | 1733769                 | C/A  | NA                 | NA                            | NA                 |
| <i>Desi_wild_1734345</i> | NA                                  | <i>Ca_desi_denovo</i> | 1734345                 | C/G  | NA                 | NA                            | NA                 |
| <i>Desi_wild_1734372</i> | NA                                  | <i>Ca_desi_denovo</i> | 1734372                 | G/A  | NA                 | NA                            | NA                 |
| <i>Desi_wild_1736766</i> | NA                                  | <i>Ca_desi_denovo</i> | 1736766                 | A/G  | NA                 | NA                            | NA                 |
| <i>Desi_wild_1736787</i> | NA                                  | <i>Ca_desi_denovo</i> | 1736787                 | T/A  | NA                 | NA                            | NA                 |
| <i>Desi_wild_1736899</i> | NA                                  | <i>Ca_desi_denovo</i> | 1736899                 | A/G  | NA                 | NA                            | NA                 |
| <i>Desi_wild_1737169</i> | NA                                  | <i>Ca_desi_denovo</i> | 1737169                 | C/G  | NA                 | NA                            | NA                 |



| SNP IDs                  | NCBI dbSNP accession IDs (NCBI_SS#) | Chromosomes           | Physical positions (bp) | SNPs | Gene accession IDs | Sequence components of genome | Putative functions |
|--------------------------|-------------------------------------|-----------------------|-------------------------|------|--------------------|-------------------------------|--------------------|
| <i>Desi_wild_1737216</i> | NA                                  | <i>Ca_desi_denovo</i> | 1737216                 | C/G  | NA                 | NA                            | NA                 |
| <i>Desi_wild_1737482</i> | NA                                  | <i>Ca_desi_denovo</i> | 1737482                 | T/C  | NA                 | NA                            | NA                 |
| <i>Desi_wild_1739289</i> | NA                                  | <i>Ca_desi_denovo</i> | 1739289                 | A/G  | NA                 | NA                            | NA                 |
| <i>Desi_wild_1739313</i> | NA                                  | <i>Ca_desi_denovo</i> | 1739313                 | A/G  | NA                 | NA                            | NA                 |
| <i>Desi_wild_1740677</i> | NA                                  | <i>Ca_desi_denovo</i> | 1740677                 | G/C  | NA                 | NA                            | NA                 |
| <i>Desi_wild_1741856</i> | NA                                  | <i>Ca_desi_denovo</i> | 1741856                 | G/C  | NA                 | NA                            | NA                 |
| <i>Desi_wild_1742068</i> | NA                                  | <i>Ca_desi_denovo</i> | 1742068                 | G/A  | NA                 | NA                            | NA                 |
| <i>Desi_wild_1742472</i> | NA                                  | <i>Ca_desi_denovo</i> | 1742472                 | C/G  | NA                 | NA                            | NA                 |
| <i>Desi_wild_1743287</i> | NA                                  | <i>Ca_desi_denovo</i> | 1743287                 | C/A  | NA                 | NA                            | NA                 |
| <i>Desi_wild_1743974</i> | NA                                  | <i>Ca_desi_denovo</i> | 1743974                 | C/T  | NA                 | NA                            | NA                 |
| <i>Desi_wild_1744574</i> | NA                                  | <i>Ca_desi_denovo</i> | 1744574                 | T/G  | NA                 | NA                            | NA                 |
| <i>Desi_wild_1744578</i> | NA                                  | <i>Ca_desi_denovo</i> | 1744578                 | C/T  | NA                 | NA                            | NA                 |
| <i>Desi_wild_1744595</i> | NA                                  | <i>Ca_desi_denovo</i> | 1744595                 | G/A  | NA                 | NA                            | NA                 |
| <i>Desi_wild_1744719</i> | NA                                  | <i>Ca_desi_denovo</i> | 1744719                 | T/C  | NA                 | NA                            | NA                 |
| <i>Desi_wild_1744767</i> | NA                                  | <i>Ca_desi_denovo</i> | 1744767                 | A/G  | NA                 | NA                            | NA                 |
| <i>Desi_wild_1746301</i> | NA                                  | <i>Ca_desi_denovo</i> | 1746301                 | C/A  | NA                 | NA                            | NA                 |
| <i>Desi_wild_1746310</i> | NA                                  | <i>Ca_desi_denovo</i> | 1746310                 | C/T  | NA                 | NA                            | NA                 |
| <i>Desi_wild_1746385</i> | NA                                  | <i>Ca_desi_denovo</i> | 1746385                 | G/T  | NA                 | NA                            | NA                 |
| <i>Desi_wild_1746594</i> | NA                                  | <i>Ca_desi_denovo</i> | 1746594                 | A/G  | NA                 | NA                            | NA                 |
| <i>Desi_wild_1747215</i> | NA                                  | <i>Ca_desi_denovo</i> | 1747215                 | A/G  | NA                 | NA                            | NA                 |
| <i>Desi_wild_1747247</i> | NA                                  | <i>Ca_desi_denovo</i> | 1747247                 | T/A  | NA                 | NA                            | NA                 |
| <i>Desi_wild_1748723</i> | NA                                  | <i>Ca_desi_denovo</i> | 1748723                 | A/G  | NA                 | NA                            | NA                 |
| <i>Desi_wild_1750256</i> | NA                                  | <i>Ca_desi_denovo</i> | 1750256                 | T/C  | NA                 | NA                            | NA                 |
| <i>Desi_wild_1750678</i> | NA                                  | <i>Ca_desi_denovo</i> | 1750678                 | A/G  | NA                 | NA                            | NA                 |
| <i>Desi_wild_1750782</i> | NA                                  | <i>Ca_desi_denovo</i> | 1750782                 | C/T  | NA                 | NA                            | NA                 |
| <i>Desi_wild_1751078</i> | NA                                  | <i>Ca_desi_denovo</i> | 1751078                 | A/G  | NA                 | NA                            | NA                 |
| <i>Desi_wild_1751606</i> | NA                                  | <i>Ca_desi_denovo</i> | 1751606                 | T/C  | NA                 | NA                            | NA                 |
| <i>Desi_wild_1752220</i> | NA                                  | <i>Ca_desi_denovo</i> | 1752220                 | G/T  | NA                 | NA                            | NA                 |
| <i>Desi_wild_1752438</i> | NA                                  | <i>Ca_desi_denovo</i> | 1752438                 | G/A  | NA                 | NA                            | NA                 |
| <i>Desi_wild_1752985</i> | NA                                  | <i>Ca_desi_denovo</i> | 1752985                 | A/G  | NA                 | NA                            | NA                 |
| <i>Desi_wild_1757001</i> | NA                                  | <i>Ca_desi_denovo</i> | 1757001                 | C/G  | NA                 | NA                            | NA                 |
| <i>Desi_wild_1757067</i> | NA                                  | <i>Ca_desi_denovo</i> | 1757067                 | T/C  | NA                 | NA                            | NA                 |
| <i>Desi_wild_1758027</i> | NA                                  | <i>Ca_desi_denovo</i> | 1758027                 | A/G  | NA                 | NA                            | NA                 |
| <i>Desi_wild_1758033</i> | NA                                  | <i>Ca_desi_denovo</i> | 1758033                 | C/T  | NA                 | NA                            | NA                 |
| <i>Desi_wild_1758300</i> | NA                                  | <i>Ca_desi_denovo</i> | 1758300                 | A/C  | NA                 | NA                            | NA                 |
| <i>Desi_wild_1758366</i> | NA                                  | <i>Ca_desi_denovo</i> | 1758366                 | C/G  | NA                 | NA                            | NA                 |
| <i>Desi_wild_1759082</i> | NA                                  | <i>Ca_desi_denovo</i> | 1759082                 | C/A  | NA                 | NA                            | NA                 |
| <i>Desi_wild_1759133</i> | NA                                  | <i>Ca_desi_denovo</i> | 1759133                 | A/C  | NA                 | NA                            | NA                 |
| <i>Desi_wild_1760545</i> | NA                                  | <i>Ca_desi_denovo</i> | 1760545                 | C/T  | NA                 | NA                            | NA                 |
| <i>Desi_wild_1760722</i> | NA                                  | <i>Ca_desi_denovo</i> | 1760722                 | G/A  | NA                 | NA                            | NA                 |
| <i>Desi_wild_1760737</i> | NA                                  | <i>Ca_desi_denovo</i> | 1760737                 | A/G  | NA                 | NA                            | NA                 |
| <i>Desi_wild_1761220</i> | NA                                  | <i>Ca_desi_denovo</i> | 1761220                 | A/T  | NA                 | NA                            | NA                 |
| <i>Desi_wild_1761248</i> | NA                                  | <i>Ca_desi_denovo</i> | 1761248                 | G/C  | NA                 | NA                            | NA                 |
| <i>Desi_wild_1761896</i> | NA                                  | <i>Ca_desi_denovo</i> | 1761896                 | T/C  | NA                 | NA                            | NA                 |

| SNP IDs                  | NCBI dbSNP accession IDs (NCBI_SS#) | Chromosomes           | Physical positions (bp) | SNPs | Gene accession IDs | Sequence components of genome | Putative functions |
|--------------------------|-------------------------------------|-----------------------|-------------------------|------|--------------------|-------------------------------|--------------------|
| <i>Desi_wild_1763269</i> | NA                                  | <i>Ca_desi_denovo</i> | 1763269                 | C/G  | NA                 | NA                            | NA                 |
| <i>Desi_wild_1763305</i> | NA                                  | <i>Ca_desi_denovo</i> | 1763305                 | C/T  | NA                 | NA                            | NA                 |
| <i>Desi_wild_1764353</i> | NA                                  | <i>Ca_desi_denovo</i> | 1764353                 | C/A  | NA                 | NA                            | NA                 |
| <i>Desi_wild_1764365</i> | NA                                  | <i>Ca_desi_denovo</i> | 1764365                 | G/A  | NA                 | NA                            | NA                 |
| <i>Desi_wild_1766180</i> | NA                                  | <i>Ca_desi_denovo</i> | 1766180                 | G/A  | NA                 | NA                            | NA                 |
| <i>Desi_wild_1766662</i> | NA                                  | <i>Ca_desi_denovo</i> | 1766662                 | A/G  | NA                 | NA                            | NA                 |
| <i>Desi_wild_1767386</i> | NA                                  | <i>Ca_desi_denovo</i> | 1767386                 | A/G  | NA                 | NA                            | NA                 |
| <i>Desi_wild_1767404</i> | NA                                  | <i>Ca_desi_denovo</i> | 1767404                 | G/C  | NA                 | NA                            | NA                 |
| <i>Desi_wild_1768682</i> | NA                                  | <i>Ca_desi_denovo</i> | 1768682                 | C/T  | NA                 | NA                            | NA                 |
| <i>Desi_wild_1768736</i> | NA                                  | <i>Ca_desi_denovo</i> | 1768736                 | C/T  | NA                 | NA                            | NA                 |
| <i>Desi_wild_1768901</i> | NA                                  | <i>Ca_desi_denovo</i> | 1768901                 | G/A  | NA                 | NA                            | NA                 |
| <i>Desi_wild_1768912</i> | NA                                  | <i>Ca_desi_denovo</i> | 1768912                 | C/T  | NA                 | NA                            | NA                 |
| <i>Desi_wild_1769369</i> | NA                                  | <i>Ca_desi_denovo</i> | 1769369                 | A/G  | NA                 | NA                            | NA                 |
| <i>Desi_wild_1769494</i> | NA                                  | <i>Ca_desi_denovo</i> | 1769494                 | G/A  | NA                 | NA                            | NA                 |
| <i>Desi_wild_1769865</i> | NA                                  | <i>Ca_desi_denovo</i> | 1769865                 | G/T  | NA                 | NA                            | NA                 |
| <i>Desi_wild_1770962</i> | NA                                  | <i>Ca_desi_denovo</i> | 1770962                 | T/C  | NA                 | NA                            | NA                 |
| <i>Desi_wild_1770997</i> | NA                                  | <i>Ca_desi_denovo</i> | 1770997                 | A/G  | NA                 | NA                            | NA                 |
| <i>Desi_wild_1771115</i> | NA                                  | <i>Ca_desi_denovo</i> | 1771115                 | A/G  | NA                 | NA                            | NA                 |
| <i>Desi_wild_1772079</i> | NA                                  | <i>Ca_desi_denovo</i> | 1772079                 | G/A  | NA                 | NA                            | NA                 |
| <i>Desi_wild_1772082</i> | NA                                  | <i>Ca_desi_denovo</i> | 1772082                 | A/G  | NA                 | NA                            | NA                 |
| <i>Desi_wild_1772106</i> | NA                                  | <i>Ca_desi_denovo</i> | 1772106                 | T/C  | NA                 | NA                            | NA                 |
| <i>Desi_wild_1772423</i> | NA                                  | <i>Ca_desi_denovo</i> | 1772423                 | T/C  | NA                 | NA                            | NA                 |
| <i>Desi_wild_1772897</i> | NA                                  | <i>Ca_desi_denovo</i> | 1772897                 | T/G  | NA                 | NA                            | NA                 |
| <i>Desi_wild_1774254</i> | NA                                  | <i>Ca_desi_denovo</i> | 1774254                 | G/T  | NA                 | NA                            | NA                 |
| <i>Desi_wild_1774352</i> | NA                                  | <i>Ca_desi_denovo</i> | 1774352                 | A/G  | NA                 | NA                            | NA                 |
| <i>Desi_wild_1774895</i> | NA                                  | <i>Ca_desi_denovo</i> | 1774895                 | A/G  | NA                 | NA                            | NA                 |
| <i>Desi_wild_1774900</i> | NA                                  | <i>Ca_desi_denovo</i> | 1774900                 | A/C  | NA                 | NA                            | NA                 |
| <i>Desi_wild_1776174</i> | NA                                  | <i>Ca_desi_denovo</i> | 1776174                 | A/G  | NA                 | NA                            | NA                 |
| <i>Desi_wild_1776201</i> | NA                                  | <i>Ca_desi_denovo</i> | 1776201                 | T/C  | NA                 | NA                            | NA                 |
| <i>Desi_wild_1776345</i> | NA                                  | <i>Ca_desi_denovo</i> | 1776345                 | T/C  | NA                 | NA                            | NA                 |
| <i>Desi_wild_1776362</i> | NA                                  | <i>Ca_desi_denovo</i> | 1776362                 | G/C  | NA                 | NA                            | NA                 |
| <i>Desi_wild_1776939</i> | NA                                  | <i>Ca_desi_denovo</i> | 1776939                 | C/G  | NA                 | NA                            | NA                 |
| <i>Desi_wild_1778590</i> | NA                                  | <i>Ca_desi_denovo</i> | 1778590                 | C/A  | NA                 | NA                            | NA                 |
| <i>Desi_wild_1778649</i> | NA                                  | <i>Ca_desi_denovo</i> | 1778649                 | A/G  | NA                 | NA                            | NA                 |
| <i>Desi_wild_1778768</i> | NA                                  | <i>Ca_desi_denovo</i> | 1778768                 | T/C  | NA                 | NA                            | NA                 |
| <i>Desi_wild_1779262</i> | NA                                  | <i>Ca_desi_denovo</i> | 1779262                 | C/T  | NA                 | NA                            | NA                 |
| <i>Desi_wild_1779283</i> | NA                                  | <i>Ca_desi_denovo</i> | 1779283                 | C/G  | NA                 | NA                            | NA                 |
| <i>Desi_wild_1779304</i> | NA                                  | <i>Ca_desi_denovo</i> | 1779304                 | G/C  | NA                 | NA                            | NA                 |
| <i>Desi_wild_1782190</i> | NA                                  | <i>Ca_desi_denovo</i> | 1782190                 | C/T  | NA                 | NA                            | NA                 |
| <i>Desi_wild_1782347</i> | NA                                  | <i>Ca_desi_denovo</i> | 1782347                 | G/T  | NA                 | NA                            | NA                 |
| <i>Desi_wild_1782399</i> | NA                                  | <i>Ca_desi_denovo</i> | 1782399                 | C/T  | NA                 | NA                            | NA                 |
| <i>Desi_wild_1782755</i> | NA                                  | <i>Ca_desi_denovo</i> | 1782755                 | G/C  | NA                 | NA                            | NA                 |
| <i>Desi_wild_1782794</i> | NA                                  | <i>Ca_desi_denovo</i> | 1782794                 | C/T  | NA                 | NA                            | NA                 |
| <i>Desi_wild_1783132</i> | NA                                  | <i>Ca_desi_denovo</i> | 1783132                 | A/G  | NA                 | NA                            | NA                 |

| SNP IDs                  | NCBI dbSNP accession IDs (NCBI_SS#) | Chromosomes           | Physical positions (bp) | SNPs | Gene accession IDs | Sequence components of genome | Putative functions |
|--------------------------|-------------------------------------|-----------------------|-------------------------|------|--------------------|-------------------------------|--------------------|
| <i>Desi_wild_1783745</i> | NA                                  | <i>Ca_desi_denovo</i> | 1783745                 | G/C  | NA                 | NA                            | NA                 |
| <i>Desi_wild_1783756</i> | NA                                  | <i>Ca_desi_denovo</i> | 1783756                 | T/C  | NA                 | NA                            | NA                 |
| <i>Desi_wild_1784352</i> | NA                                  | <i>Ca_desi_denovo</i> | 1784352                 | C/G  | NA                 | NA                            | NA                 |
| <i>Desi_wild_1784379</i> | NA                                  | <i>Ca_desi_denovo</i> | 1784379                 | A/C  | NA                 | NA                            | NA                 |
| <i>Desi_wild_1786463</i> | NA                                  | <i>Ca_desi_denovo</i> | 1786463                 | T/G  | NA                 | NA                            | NA                 |
| <i>Desi_wild_1786506</i> | NA                                  | <i>Ca_desi_denovo</i> | 1786506                 | C/T  | NA                 | NA                            | NA                 |
| <i>Desi_wild_1786985</i> | NA                                  | <i>Ca_desi_denovo</i> | 1786985                 | T/G  | NA                 | NA                            | NA                 |
| <i>Desi_wild_1789189</i> | NA                                  | <i>Ca_desi_denovo</i> | 1789189                 | G/C  | NA                 | NA                            | NA                 |
| <i>Desi_wild_1789307</i> | NA                                  | <i>Ca_desi_denovo</i> | 1789307                 | A/C  | NA                 | NA                            | NA                 |
| <i>Desi_wild_1790230</i> | NA                                  | <i>Ca_desi_denovo</i> | 1790230                 | A/G  | NA                 | NA                            | NA                 |
| <i>Desi_wild_1790242</i> | NA                                  | <i>Ca_desi_denovo</i> | 1790242                 | G/C  | NA                 | NA                            | NA                 |
| <i>Desi_wild_1791027</i> | NA                                  | <i>Ca_desi_denovo</i> | 1791027                 | T/C  | NA                 | NA                            | NA                 |
| <i>Desi_wild_1791342</i> | NA                                  | <i>Ca_desi_denovo</i> | 1791342                 | A/G  | NA                 | NA                            | NA                 |
| <i>Desi_wild_1791381</i> | NA                                  | <i>Ca_desi_denovo</i> | 1791381                 | C/T  | NA                 | NA                            | NA                 |
| <i>Desi_wild_1792919</i> | NA                                  | <i>Ca_desi_denovo</i> | 1792919                 | A/C  | NA                 | NA                            | NA                 |
| <i>Desi_wild_1794302</i> | NA                                  | <i>Ca_desi_denovo</i> | 1794302                 | G/C  | NA                 | NA                            | NA                 |
| <i>Desi_wild_1794341</i> | NA                                  | <i>Ca_desi_denovo</i> | 1794341                 | A/G  | NA                 | NA                            | NA                 |
| <i>Desi_wild_1795107</i> | NA                                  | <i>Ca_desi_denovo</i> | 1795107                 | G/T  | NA                 | NA                            | NA                 |
| <i>Desi_wild_1795234</i> | NA                                  | <i>Ca_desi_denovo</i> | 1795234                 | C/G  | NA                 | NA                            | NA                 |
| <i>Desi_wild_1796820</i> | NA                                  | <i>Ca_desi_denovo</i> | 1796820                 | A/G  | NA                 | NA                            | NA                 |
| <i>Desi_wild_1796835</i> | NA                                  | <i>Ca_desi_denovo</i> | 1796835                 | A/G  | NA                 | NA                            | NA                 |
| <i>Desi_wild_1797438</i> | NA                                  | <i>Ca_desi_denovo</i> | 1797438                 | A/G  | NA                 | NA                            | NA                 |
| <i>Desi_wild_1797462</i> | NA                                  | <i>Ca_desi_denovo</i> | 1797462                 | C/G  | NA                 | NA                            | NA                 |
| <i>Desi_wild_1797758</i> | NA                                  | <i>Ca_desi_denovo</i> | 1797758                 | A/G  | NA                 | NA                            | NA                 |
| <i>Desi_wild_1798806</i> | NA                                  | <i>Ca_desi_denovo</i> | 1798806                 | C/A  | NA                 | NA                            | NA                 |
| <i>Desi_wild_1798857</i> | NA                                  | <i>Ca_desi_denovo</i> | 1798857                 | T/G  | NA                 | NA                            | NA                 |
| <i>Desi_wild_1798902</i> | NA                                  | <i>Ca_desi_denovo</i> | 1798902                 | A/C  | NA                 | NA                            | NA                 |
| <i>Desi_wild_1799641</i> | NA                                  | <i>Ca_desi_denovo</i> | 1799641                 | T/C  | NA                 | NA                            | NA                 |
| <i>Desi_wild_1800402</i> | NA                                  | <i>Ca_desi_denovo</i> | 1800402                 | G/A  | NA                 | NA                            | NA                 |
| <i>Desi_wild_1802152</i> | NA                                  | <i>Ca_desi_denovo</i> | 1802152                 | C/G  | NA                 | NA                            | NA                 |
| <i>Desi_wild_1802173</i> | NA                                  | <i>Ca_desi_denovo</i> | 1802173                 | G/A  | NA                 | NA                            | NA                 |
| <i>Desi_wild_1802437</i> | NA                                  | <i>Ca_desi_denovo</i> | 1802437                 | T/C  | NA                 | NA                            | NA                 |
| <i>Desi_wild_1802549</i> | NA                                  | <i>Ca_desi_denovo</i> | 1802549                 | A/C  | NA                 | NA                            | NA                 |
| <i>Desi_wild_1802590</i> | NA                                  | <i>Ca_desi_denovo</i> | 1802590                 | C/G  | NA                 | NA                            | NA                 |
| <i>Desi_wild_1802817</i> | NA                                  | <i>Ca_desi_denovo</i> | 1802817                 | A/T  | NA                 | NA                            | NA                 |
| <i>Desi_wild_1803063</i> | NA                                  | <i>Ca_desi_denovo</i> | 1803063                 | T/C  | NA                 | NA                            | NA                 |
| <i>Desi_wild_1804124</i> | NA                                  | <i>Ca_desi_denovo</i> | 1804124                 | T/C  | NA                 | NA                            | NA                 |
| <i>Desi_wild_1804899</i> | NA                                  | <i>Ca_desi_denovo</i> | 1804899                 | G/A  | NA                 | NA                            | NA                 |
| <i>Desi_wild_1805406</i> | NA                                  | <i>Ca_desi_denovo</i> | 1805406                 | G/T  | NA                 | NA                            | NA                 |
| <i>Desi_wild_1805690</i> | NA                                  | <i>Ca_desi_denovo</i> | 1805690                 | G/A  | NA                 | NA                            | NA                 |
| <i>Desi_wild_1805812</i> | NA                                  | <i>Ca_desi_denovo</i> | 1805812                 | G/C  | NA                 | NA                            | NA                 |
| <i>Desi_wild_1805813</i> | NA                                  | <i>Ca_desi_denovo</i> | 1805813                 | C/T  | NA                 | NA                            | NA                 |
| <i>Desi_wild_1806122</i> | NA                                  | <i>Ca_desi_denovo</i> | 1806122                 | A/G  | NA                 | NA                            | NA                 |
| <i>Desi_wild_1806196</i> | NA                                  | <i>Ca_desi_denovo</i> | 1806196                 | G/A  | NA                 | NA                            | NA                 |

| SNP IDs                  | NCBI dbSNP accession IDs (NCBI_SS#) | Chromosomes           | Physical positions (bp) | SNPs | Gene accession IDs | Sequence components of genome | Putative functions |
|--------------------------|-------------------------------------|-----------------------|-------------------------|------|--------------------|-------------------------------|--------------------|
| <i>Desi_wild_1807499</i> | NA                                  | <i>Ca_desi_denovo</i> | 1807499                 | C/A  | NA                 | NA                            | NA                 |
| <i>Desi_wild_1807577</i> | NA                                  | <i>Ca_desi_denovo</i> | 1807577                 | G/C  | NA                 | NA                            | NA                 |
| <i>Desi_wild_1807780</i> | NA                                  | <i>Ca_desi_denovo</i> | 1807780                 | G/C  | NA                 | NA                            | NA                 |
| <i>Desi_wild_1807849</i> | NA                                  | <i>Ca_desi_denovo</i> | 1807849                 | C/T  | NA                 | NA                            | NA                 |
| <i>Desi_wild_1808544</i> | NA                                  | <i>Ca_desi_denovo</i> | 1808544                 | A/C  | NA                 | NA                            | NA                 |
| <i>Desi_wild_1809910</i> | NA                                  | <i>Ca_desi_denovo</i> | 1809910                 | A/G  | NA                 | NA                            | NA                 |
| <i>Desi_wild_1809963</i> | NA                                  | <i>Ca_desi_denovo</i> | 1809963                 | A/G  | NA                 | NA                            | NA                 |
| <i>Desi_wild_1810332</i> | NA                                  | <i>Ca_desi_denovo</i> | 1810332                 | A/C  | NA                 | NA                            | NA                 |
| <i>Desi_wild_1810508</i> | NA                                  | <i>Ca_desi_denovo</i> | 1810508                 | A/G  | NA                 | NA                            | NA                 |
| <i>Desi_wild_1812818</i> | NA                                  | <i>Ca_desi_denovo</i> | 1812818                 | C/T  | NA                 | NA                            | NA                 |
| <i>Desi_wild_1812946</i> | NA                                  | <i>Ca_desi_denovo</i> | 1812946                 | A/G  | NA                 | NA                            | NA                 |
| <i>Desi_wild_1813589</i> | NA                                  | <i>Ca_desi_denovo</i> | 1813589                 | G/A  | NA                 | NA                            | NA                 |
| <i>Desi_wild_1813645</i> | NA                                  | <i>Ca_desi_denovo</i> | 1813645                 | T/C  | NA                 | NA                            | NA                 |
| <i>Desi_wild_1813708</i> | NA                                  | <i>Ca_desi_denovo</i> | 1813708                 | G/A  | NA                 | NA                            | NA                 |
| <i>Desi_wild_1813722</i> | NA                                  | <i>Ca_desi_denovo</i> | 1813722                 | G/A  | NA                 | NA                            | NA                 |
| <i>Desi_wild_1814137</i> | NA                                  | <i>Ca_desi_denovo</i> | 1814137                 | T/G  | NA                 | NA                            | NA                 |
| <i>Desi_wild_1814158</i> | NA                                  | <i>Ca_desi_denovo</i> | 1814158                 | C/T  | NA                 | NA                            | NA                 |
| <i>Desi_wild_1814294</i> | NA                                  | <i>Ca_desi_denovo</i> | 1814294                 | G/A  | NA                 | NA                            | NA                 |
| <i>Desi_wild_1814970</i> | NA                                  | <i>Ca_desi_denovo</i> | 1814970                 | T/C  | NA                 | NA                            | NA                 |
| <i>Desi_wild_1815051</i> | NA                                  | <i>Ca_desi_denovo</i> | 1815051                 | T/C  | NA                 | NA                            | NA                 |
| <i>Desi_wild_1815059</i> | NA                                  | <i>Ca_desi_denovo</i> | 1815059                 | G/A  | NA                 | NA                            | NA                 |
| <i>Desi_wild_1815343</i> | NA                                  | <i>Ca_desi_denovo</i> | 1815343                 | C/T  | NA                 | NA                            | NA                 |
| <i>Desi_wild_1815376</i> | NA                                  | <i>Ca_desi_denovo</i> | 1815376                 | C/A  | NA                 | NA                            | NA                 |
| <i>Desi_wild_1816504</i> | NA                                  | <i>Ca_desi_denovo</i> | 1816504                 | C/T  | NA                 | NA                            | NA                 |
| <i>Desi_wild_1817150</i> | NA                                  | <i>Ca_desi_denovo</i> | 1817150                 | C/G  | NA                 | NA                            | NA                 |
| <i>Desi_wild_1817185</i> | NA                                  | <i>Ca_desi_denovo</i> | 1817185                 | T/C  | NA                 | NA                            | NA                 |
| <i>Desi_wild_1817383</i> | NA                                  | <i>Ca_desi_denovo</i> | 1817383                 | T/C  | NA                 | NA                            | NA                 |
| <i>Desi_wild_1817865</i> | NA                                  | <i>Ca_desi_denovo</i> | 1817865                 | C/A  | NA                 | NA                            | NA                 |
| <i>Desi_wild_1817893</i> | NA                                  | <i>Ca_desi_denovo</i> | 1817893                 | C/T  | NA                 | NA                            | NA                 |
| <i>Desi_wild_1818327</i> | NA                                  | <i>Ca_desi_denovo</i> | 1818327                 | A/T  | NA                 | NA                            | NA                 |
| <i>Desi_wild_1818422</i> | NA                                  | <i>Ca_desi_denovo</i> | 1818422                 | T/C  | NA                 | NA                            | NA                 |
| <i>Desi_wild_1819188</i> | NA                                  | <i>Ca_desi_denovo</i> | 1819188                 | C/A  | NA                 | NA                            | NA                 |
| <i>Desi_wild_1820240</i> | NA                                  | <i>Ca_desi_denovo</i> | 1820240                 | A/C  | NA                 | NA                            | NA                 |
| <i>Desi_wild_1820749</i> | NA                                  | <i>Ca_desi_denovo</i> | 1820749                 | T/G  | NA                 | NA                            | NA                 |
| <i>Desi_wild_1820963</i> | NA                                  | <i>Ca_desi_denovo</i> | 1820963                 | A/G  | NA                 | NA                            | NA                 |
| <i>Desi_wild_1821204</i> | NA                                  | <i>Ca_desi_denovo</i> | 1821204                 | A/G  | NA                 | NA                            | NA                 |
| <i>Desi_wild_1821948</i> | NA                                  | <i>Ca_desi_denovo</i> | 1821948                 | T/C  | NA                 | NA                            | NA                 |
| <i>Desi_wild_1822046</i> | NA                                  | <i>Ca_desi_denovo</i> | 1822046                 | T/C  | NA                 | NA                            | NA                 |
| <i>Desi_wild_1822068</i> | NA                                  | <i>Ca_desi_denovo</i> | 1822068                 | C/G  | NA                 | NA                            | NA                 |
| <i>Desi_wild_1822277</i> | NA                                  | <i>Ca_desi_denovo</i> | 1822277                 | A/G  | NA                 | NA                            | NA                 |
| <i>Desi_wild_1822279</i> | NA                                  | <i>Ca_desi_denovo</i> | 1822279                 | T/C  | NA                 | NA                            | NA                 |
| <i>Desi_wild_1822601</i> | NA                                  | <i>Ca_desi_denovo</i> | 1822601                 | A/C  | NA                 | NA                            | NA                 |
| <i>Desi_wild_1823410</i> | NA                                  | <i>Ca_desi_denovo</i> | 1823410                 | C/A  | NA                 | NA                            | NA                 |
| <i>Desi_wild_1824164</i> | NA                                  | <i>Ca_desi_denovo</i> | 1824164                 | A/C  | NA                 | NA                            | NA                 |

| SNP IDs                  | NCBI dbSNP accession IDs (NCBI_SS#) | Chromosomes           | Physical positions (bp) | SNPs | Gene accession IDs | Sequence components of genome | Putative functions |
|--------------------------|-------------------------------------|-----------------------|-------------------------|------|--------------------|-------------------------------|--------------------|
| <i>Desi_wild_1824176</i> | NA                                  | <i>Ca_desi_denovo</i> | 1824176                 | G/C  | NA                 | NA                            | NA                 |
| <i>Desi_wild_1824870</i> | NA                                  | <i>Ca_desi_denovo</i> | 1824870                 | T/A  | NA                 | NA                            | NA                 |
| <i>Desi_wild_1825267</i> | NA                                  | <i>Ca_desi_denovo</i> | 1825267                 | G/A  | NA                 | NA                            | NA                 |
| <i>Desi_wild_1825316</i> | NA                                  | <i>Ca_desi_denovo</i> | 1825316                 | A/C  | NA                 | NA                            | NA                 |
| <i>Desi_wild_1825395</i> | NA                                  | <i>Ca_desi_denovo</i> | 1825395                 | C/G  | NA                 | NA                            | NA                 |
| <i>Desi_wild_1825957</i> | NA                                  | <i>Ca_desi_denovo</i> | 1825957                 | C/T  | NA                 | NA                            | NA                 |
| <i>Desi_wild_1826640</i> | NA                                  | <i>Ca_desi_denovo</i> | 1826640                 | C/T  | NA                 | NA                            | NA                 |
| <i>Desi_wild_1827591</i> | NA                                  | <i>Ca_desi_denovo</i> | 1827591                 | T/C  | NA                 | NA                            | NA                 |
| <i>Desi_wild_1828104</i> | NA                                  | <i>Ca_desi_denovo</i> | 1828104                 | G/A  | NA                 | NA                            | NA                 |
| <i>Desi_wild_1828105</i> | NA                                  | <i>Ca_desi_denovo</i> | 1828105                 | A/G  | NA                 | NA                            | NA                 |
| <i>Desi_wild_1828802</i> | NA                                  | <i>Ca_desi_denovo</i> | 1828802                 | G/C  | NA                 | NA                            | NA                 |
| <i>Desi_wild_1830058</i> | NA                                  | <i>Ca_desi_denovo</i> | 1830058                 | G/C  | NA                 | NA                            | NA                 |
| <i>Desi_wild_1830275</i> | NA                                  | <i>Ca_desi_denovo</i> | 1830275                 | T/C  | NA                 | NA                            | NA                 |
| <i>Desi_wild_1830305</i> | NA                                  | <i>Ca_desi_denovo</i> | 1830305                 | C/T  | NA                 | NA                            | NA                 |
| <i>Desi_wild_1831250</i> | NA                                  | <i>Ca_desi_denovo</i> | 1831250                 | T/C  | NA                 | NA                            | NA                 |
| <i>Desi_wild_1831360</i> | NA                                  | <i>Ca_desi_denovo</i> | 1831360                 | T/C  | NA                 | NA                            | NA                 |
| <i>Desi_wild_1832123</i> | NA                                  | <i>Ca_desi_denovo</i> | 1832123                 | A/G  | NA                 | NA                            | NA                 |
| <i>Desi_wild_1832254</i> | NA                                  | <i>Ca_desi_denovo</i> | 1832254                 | T/G  | NA                 | NA                            | NA                 |
| <i>Desi_wild_1832299</i> | NA                                  | <i>Ca_desi_denovo</i> | 1832299                 | T/G  | NA                 | NA                            | NA                 |
| <i>Desi_wild_1832916</i> | NA                                  | <i>Ca_desi_denovo</i> | 1832916                 | G/A  | NA                 | NA                            | NA                 |
| <i>Desi_wild_1834348</i> | NA                                  | <i>Ca_desi_denovo</i> | 1834348                 | G/A  | NA                 | NA                            | NA                 |
| <i>Desi_wild_1834361</i> | NA                                  | <i>Ca_desi_denovo</i> | 1834361                 | T/G  | NA                 | NA                            | NA                 |
| <i>Desi_wild_1834849</i> | NA                                  | <i>Ca_desi_denovo</i> | 1834849                 | T/C  | NA                 | NA                            | NA                 |
| <i>Desi_wild_1835212</i> | NA                                  | <i>Ca_desi_denovo</i> | 1835212                 | A/G  | NA                 | NA                            | NA                 |
| <i>Desi_wild_1835731</i> | NA                                  | <i>Ca_desi_denovo</i> | 1835731                 | A/C  | NA                 | NA                            | NA                 |
| <i>Desi_wild_1835773</i> | NA                                  | <i>Ca_desi_denovo</i> | 1835773                 | A/G  | NA                 | NA                            | NA                 |
| <i>Desi_wild_1837298</i> | NA                                  | <i>Ca_desi_denovo</i> | 1837298                 | G/C  | NA                 | NA                            | NA                 |
| <i>Desi_wild_1837328</i> | NA                                  | <i>Ca_desi_denovo</i> | 1837328                 | C/T  | NA                 | NA                            | NA                 |
| <i>Desi_wild_1837797</i> | NA                                  | <i>Ca_desi_denovo</i> | 1837797                 | C/T  | NA                 | NA                            | NA                 |
| <i>Desi_wild_1838141</i> | NA                                  | <i>Ca_desi_denovo</i> | 1838141                 | C/T  | NA                 | NA                            | NA                 |
| <i>Desi_wild_1838209</i> | NA                                  | <i>Ca_desi_denovo</i> | 1838209                 | T/C  | NA                 | NA                            | NA                 |
| <i>Desi_wild_1838429</i> | NA                                  | <i>Ca_desi_denovo</i> | 1838429                 | A/G  | NA                 | NA                            | NA                 |
| <i>Desi_wild_1838600</i> | NA                                  | <i>Ca_desi_denovo</i> | 1838600                 | T/C  | NA                 | NA                            | NA                 |
| <i>Desi_wild_1838656</i> | NA                                  | <i>Ca_desi_denovo</i> | 1838656                 | T/G  | NA                 | NA                            | NA                 |
| <i>Desi_wild_1838678</i> | NA                                  | <i>Ca_desi_denovo</i> | 1838678                 | T/G  | NA                 | NA                            | NA                 |
| <i>Desi_wild_1839590</i> | NA                                  | <i>Ca_desi_denovo</i> | 1839590                 | A/G  | NA                 | NA                            | NA                 |
| <i>Desi_wild_1839614</i> | NA                                  | <i>Ca_desi_denovo</i> | 1839614                 | C/G  | NA                 | NA                            | NA                 |
| <i>Desi_wild_1839703</i> | NA                                  | <i>Ca_desi_denovo</i> | 1839703                 | T/C  | NA                 | NA                            | NA                 |
| <i>Desi_wild_1839705</i> | NA                                  | <i>Ca_desi_denovo</i> | 1839705                 | C/G  | NA                 | NA                            | NA                 |
| <i>Desi_wild_1839754</i> | NA                                  | <i>Ca_desi_denovo</i> | 1839754                 | T/G  | NA                 | NA                            | NA                 |
| <i>Desi_wild_1840053</i> | NA                                  | <i>Ca_desi_denovo</i> | 1840053                 | T/C  | NA                 | NA                            | NA                 |
| <i>Desi_wild_1841139</i> | NA                                  | <i>Ca_desi_denovo</i> | 1841139                 | G/A  | NA                 | NA                            | NA                 |
| <i>Desi_wild_1841437</i> | NA                                  | <i>Ca_desi_denovo</i> | 1841437                 | T/C  | NA                 | NA                            | NA                 |
| <i>Desi_wild_1841858</i> | NA                                  | <i>Ca_desi_denovo</i> | 1841858                 | T/G  | NA                 | NA                            | NA                 |

| SNP IDs                  | NCBI dbSNP accession IDs (NCBI_SS#) | Chromosomes           | Physical positions (bp) | SNPs | Gene accession IDs | Sequence components of genome | Putative functions |
|--------------------------|-------------------------------------|-----------------------|-------------------------|------|--------------------|-------------------------------|--------------------|
| <i>Desi_wild_1843409</i> | NA                                  | <i>Ca_desi_denovo</i> | 1843409                 | G/C  | NA                 | NA                            | NA                 |
| <i>Desi_wild_1843595</i> | NA                                  | <i>Ca_desi_denovo</i> | 1843595                 | A/G  | NA                 | NA                            | NA                 |
| <i>Desi_wild_1843695</i> | NA                                  | <i>Ca_desi_denovo</i> | 1843695                 | A/G  | NA                 | NA                            | NA                 |
| <i>Desi_wild_1843951</i> | NA                                  | <i>Ca_desi_denovo</i> | 1843951                 | A/G  | NA                 | NA                            | NA                 |
| <i>Desi_wild_1845043</i> | NA                                  | <i>Ca_desi_denovo</i> | 1845043                 | C/T  | NA                 | NA                            | NA                 |
| <i>Desi_wild_1845261</i> | NA                                  | <i>Ca_desi_denovo</i> | 1845261                 | A/G  | NA                 | NA                            | NA                 |
| <i>Desi_wild_1845277</i> | NA                                  | <i>Ca_desi_denovo</i> | 1845277                 | T/A  | NA                 | NA                            | NA                 |
| <i>Desi_wild_1845533</i> | NA                                  | <i>Ca_desi_denovo</i> | 1845533                 | A/G  | NA                 | NA                            | NA                 |
| <i>Desi_wild_1846279</i> | NA                                  | <i>Ca_desi_denovo</i> | 1846279                 | C/A  | NA                 | NA                            | NA                 |
| <i>Desi_wild_1846317</i> | NA                                  | <i>Ca_desi_denovo</i> | 1846317                 | C/G  | NA                 | NA                            | NA                 |
| <i>Desi_wild_1846910</i> | NA                                  | <i>Ca_desi_denovo</i> | 1846910                 | G/C  | NA                 | NA                            | NA                 |
| <i>Desi_wild_1846940</i> | NA                                  | <i>Ca_desi_denovo</i> | 1846940                 | C/T  | NA                 | NA                            | NA                 |
| <i>Desi_wild_1846946</i> | NA                                  | <i>Ca_desi_denovo</i> | 1846946                 | C/T  | NA                 | NA                            | NA                 |
| <i>Desi_wild_1847881</i> | NA                                  | <i>Ca_desi_denovo</i> | 1847881                 | G/C  | NA                 | NA                            | NA                 |
| <i>Desi_wild_1847899</i> | NA                                  | <i>Ca_desi_denovo</i> | 1847899                 | A/C  | NA                 | NA                            | NA                 |
| <i>Desi_wild_1848327</i> | NA                                  | <i>Ca_desi_denovo</i> | 1848327                 | G/A  | NA                 | NA                            | NA                 |
| <i>Desi_wild_1848357</i> | NA                                  | <i>Ca_desi_denovo</i> | 1848357                 | G/A  | NA                 | NA                            | NA                 |
| <i>Desi_wild_1849190</i> | NA                                  | <i>Ca_desi_denovo</i> | 1849190                 | G/A  | NA                 | NA                            | NA                 |
| <i>Desi_wild_1849290</i> | NA                                  | <i>Ca_desi_denovo</i> | 1849290                 | T/G  | NA                 | NA                            | NA                 |
| <i>Desi_wild_1849496</i> | NA                                  | <i>Ca_desi_denovo</i> | 1849496                 | G/A  | NA                 | NA                            | NA                 |
| <i>Desi_wild_1849558</i> | NA                                  | <i>Ca_desi_denovo</i> | 1849558                 | C/A  | NA                 | NA                            | NA                 |
| <i>Desi_wild_1850357</i> | NA                                  | <i>Ca_desi_denovo</i> | 1850357                 | G/A  | NA                 | NA                            | NA                 |
| <i>Desi_wild_1852585</i> | NA                                  | <i>Ca_desi_denovo</i> | 1852585                 | G/C  | NA                 | NA                            | NA                 |
| <i>Desi_wild_1852604</i> | NA                                  | <i>Ca_desi_denovo</i> | 1852604                 | T/C  | NA                 | NA                            | NA                 |
| <i>Desi_wild_1852698</i> | NA                                  | <i>Ca_desi_denovo</i> | 1852698                 | G/A  | NA                 | NA                            | NA                 |
| <i>Desi_wild_1852744</i> | NA                                  | <i>Ca_desi_denovo</i> | 1852744                 | C/A  | NA                 | NA                            | NA                 |
| <i>Desi_wild_1852997</i> | NA                                  | <i>Ca_desi_denovo</i> | 1852997                 | G/T  | NA                 | NA                            | NA                 |
| <i>Desi_wild_1854414</i> | NA                                  | <i>Ca_desi_denovo</i> | 1854414                 | A/G  | NA                 | NA                            | NA                 |
| <i>Desi_wild_1854417</i> | NA                                  | <i>Ca_desi_denovo</i> | 1854417                 | C/G  | NA                 | NA                            | NA                 |
| <i>Desi_wild_1854443</i> | NA                                  | <i>Ca_desi_denovo</i> | 1854443                 | G/C  | NA                 | NA                            | NA                 |
| <i>Desi_wild_1854490</i> | NA                                  | <i>Ca_desi_denovo</i> | 1854490                 | T/C  | NA                 | NA                            | NA                 |
| <i>Desi_wild_1854661</i> | NA                                  | <i>Ca_desi_denovo</i> | 1854661                 | G/T  | NA                 | NA                            | NA                 |
| <i>Desi_wild_1854700</i> | NA                                  | <i>Ca_desi_denovo</i> | 1854700                 | G/T  | NA                 | NA                            | NA                 |
| <i>Desi_wild_1854720</i> | NA                                  | <i>Ca_desi_denovo</i> | 1854720                 | C/G  | NA                 | NA                            | NA                 |
| <i>Desi_wild_1854744</i> | NA                                  | <i>Ca_desi_denovo</i> | 1854744                 | T/C  | NA                 | NA                            | NA                 |
| <i>Desi_wild_1855020</i> | NA                                  | <i>Ca_desi_denovo</i> | 1855020                 | A/C  | NA                 | NA                            | NA                 |
| <i>Desi_wild_1855990</i> | NA                                  | <i>Ca_desi_denovo</i> | 1855990                 | C/G  | NA                 | NA                            | NA                 |
| <i>Desi_wild_1855993</i> | NA                                  | <i>Ca_desi_denovo</i> | 1855993                 | A/G  | NA                 | NA                            | NA                 |
| <i>Desi_wild_1856028</i> | NA                                  | <i>Ca_desi_denovo</i> | 1856028                 | A/C  | NA                 | NA                            | NA                 |
| <i>Desi_wild_1856394</i> | NA                                  | <i>Ca_desi_denovo</i> | 1856394                 | C/T  | NA                 | NA                            | NA                 |
| <i>Desi_wild_1856436</i> | NA                                  | <i>Ca_desi_denovo</i> | 1856436                 | T/C  | NA                 | NA                            | NA                 |
| <i>Desi_wild_1856605</i> | NA                                  | <i>Ca_desi_denovo</i> | 1856605                 | T/G  | NA                 | NA                            | NA                 |
| <i>Desi_wild_1856925</i> | NA                                  | <i>Ca_desi_denovo</i> | 1856925                 | C/T  | NA                 | NA                            | NA                 |
| <i>Desi_wild_1856934</i> | NA                                  | <i>Ca_desi_denovo</i> | 1856934                 | C/G  | NA                 | NA                            | NA                 |

| SNP IDs                  | NCBI dbSNP accession IDs (NCBI_SS#) | Chromosomes           | Physical positions (bp) | SNPs | Gene accession IDs | Sequence components of genome | Putative functions |
|--------------------------|-------------------------------------|-----------------------|-------------------------|------|--------------------|-------------------------------|--------------------|
| <i>Desi_wild_1858402</i> | NA                                  | <i>Ca_desi_denovo</i> | 1858402                 | A/T  | NA                 | NA                            | NA                 |
| <i>Desi_wild_1860358</i> | NA                                  | <i>Ca_desi_denovo</i> | 1860358                 | A/C  | NA                 | NA                            | NA                 |
| <i>Desi_wild_1860366</i> | NA                                  | <i>Ca_desi_denovo</i> | 1860366                 | T/G  | NA                 | NA                            | NA                 |
| <i>Desi_wild_1860540</i> | NA                                  | <i>Ca_desi_denovo</i> | 1860540                 | G/T  | NA                 | NA                            | NA                 |
| <i>Desi_wild_1860560</i> | NA                                  | <i>Ca_desi_denovo</i> | 1860560                 | T/G  | NA                 | NA                            | NA                 |
| <i>Desi_wild_1861363</i> | NA                                  | <i>Ca_desi_denovo</i> | 1861363                 | A/G  | NA                 | NA                            | NA                 |
| <i>Desi_wild_1861384</i> | NA                                  | <i>Ca_desi_denovo</i> | 1861384                 | C/T  | NA                 | NA                            | NA                 |
| <i>Desi_wild_1862126</i> | NA                                  | <i>Ca_desi_denovo</i> | 1862126                 | G/A  | NA                 | NA                            | NA                 |
| <i>Desi_wild_1862494</i> | NA                                  | <i>Ca_desi_denovo</i> | 1862494                 | C/T  | NA                 | NA                            | NA                 |
| <i>Desi_wild_1862638</i> | NA                                  | <i>Ca_desi_denovo</i> | 1862638                 | A/G  | NA                 | NA                            | NA                 |
| <i>Desi_wild_1863648</i> | NA                                  | <i>Ca_desi_denovo</i> | 1863648                 | T/G  | NA                 | NA                            | NA                 |
| <i>Desi_wild_1863677</i> | NA                                  | <i>Ca_desi_denovo</i> | 1863677                 | T/C  | NA                 | NA                            | NA                 |
| <i>Desi_wild_1863746</i> | NA                                  | <i>Ca_desi_denovo</i> | 1863746                 | T/C  | NA                 | NA                            | NA                 |
| <i>Desi_wild_1863768</i> | NA                                  | <i>Ca_desi_denovo</i> | 1863768                 | G/A  | NA                 | NA                            | NA                 |
| <i>Desi_wild_1863785</i> | NA                                  | <i>Ca_desi_denovo</i> | 1863785                 | A/G  | NA                 | NA                            | NA                 |
| <i>Desi_wild_1863809</i> | NA                                  | <i>Ca_desi_denovo</i> | 1863809                 | T/C  | NA                 | NA                            | NA                 |
| <i>Desi_wild_1865205</i> | NA                                  | <i>Ca_desi_denovo</i> | 1865205                 | T/A  | NA                 | NA                            | NA                 |
| <i>Desi_wild_1865237</i> | NA                                  | <i>Ca_desi_denovo</i> | 1865237                 | A/C  | NA                 | NA                            | NA                 |
| <i>Desi_wild_1865320</i> | NA                                  | <i>Ca_desi_denovo</i> | 1865320                 | C/G  | NA                 | NA                            | NA                 |
| <i>Desi_wild_1866275</i> | NA                                  | <i>Ca_desi_denovo</i> | 1866275                 | C/G  | NA                 | NA                            | NA                 |
| <i>Desi_wild_1866293</i> | NA                                  | <i>Ca_desi_denovo</i> | 1866293                 | T/C  | NA                 | NA                            | NA                 |
| <i>Desi_wild_1866406</i> | NA                                  | <i>Ca_desi_denovo</i> | 1866406                 | T/G  | NA                 | NA                            | NA                 |
| <i>Desi_wild_1868224</i> | NA                                  | <i>Ca_desi_denovo</i> | 1868224                 | A/G  | NA                 | NA                            | NA                 |
| <i>Desi_wild_1868465</i> | NA                                  | <i>Ca_desi_denovo</i> | 1868465                 | T/G  | NA                 | NA                            | NA                 |
| <i>Desi_wild_1869794</i> | NA                                  | <i>Ca_desi_denovo</i> | 1869794                 | A/G  | NA                 | NA                            | NA                 |
| <i>Desi_wild_1869833</i> | NA                                  | <i>Ca_desi_denovo</i> | 1869833                 | C/T  | NA                 | NA                            | NA                 |
| <i>Desi_wild_1869988</i> | NA                                  | <i>Ca_desi_denovo</i> | 1869988                 | T/G  | NA                 | NA                            | NA                 |
| <i>Desi_wild_1870031</i> | NA                                  | <i>Ca_desi_denovo</i> | 1870031                 | G/C  | NA                 | NA                            | NA                 |
| <i>Desi_wild_1870058</i> | NA                                  | <i>Ca_desi_denovo</i> | 1870058                 | G/A  | NA                 | NA                            | NA                 |
| <i>Desi_wild_1870073</i> | NA                                  | <i>Ca_desi_denovo</i> | 1870073                 | T/C  | NA                 | NA                            | NA                 |
| <i>Desi_wild_1870199</i> | NA                                  | <i>Ca_desi_denovo</i> | 1870199                 | C/T  | NA                 | NA                            | NA                 |
| <i>Desi_wild_1870316</i> | NA                                  | <i>Ca_desi_denovo</i> | 1870316                 | G/C  | NA                 | NA                            | NA                 |
| <i>Desi_wild_1870760</i> | NA                                  | <i>Ca_desi_denovo</i> | 1870760                 | T/G  | NA                 | NA                            | NA                 |
| <i>Desi_wild_1871538</i> | NA                                  | <i>Ca_desi_denovo</i> | 1871538                 | G/A  | NA                 | NA                            | NA                 |
| <i>Desi_wild_1872513</i> | NA                                  | <i>Ca_desi_denovo</i> | 1872513                 | C/T  | NA                 | NA                            | NA                 |
| <i>Desi_wild_1872809</i> | NA                                  | <i>Ca_desi_denovo</i> | 1872809                 | G/T  | NA                 | NA                            | NA                 |
| <i>Desi_wild_1872839</i> | NA                                  | <i>Ca_desi_denovo</i> | 1872839                 | C/T  | NA                 | NA                            | NA                 |
| <i>Desi_wild_1872840</i> | NA                                  | <i>Ca_desi_denovo</i> | 1872840                 | A/G  | NA                 | NA                            | NA                 |
| <i>Desi_wild_1872842</i> | NA                                  | <i>Ca_desi_denovo</i> | 1872842                 | T/G  | NA                 | NA                            | NA                 |
| <i>Desi_wild_1873348</i> | NA                                  | <i>Ca_desi_denovo</i> | 1873348                 | A/G  | NA                 | NA                            | NA                 |
| <i>Desi_wild_1874504</i> | NA                                  | <i>Ca_desi_denovo</i> | 1874504                 | C/T  | NA                 | NA                            | NA                 |
| <i>Desi_wild_1874509</i> | NA                                  | <i>Ca_desi_denovo</i> | 1874509                 | G/A  | NA                 | NA                            | NA                 |
| <i>Desi_wild_1874630</i> | NA                                  | <i>Ca_desi_denovo</i> | 1874630                 | A/C  | NA                 | NA                            | NA                 |
| <i>Desi_wild_1874666</i> | NA                                  | <i>Ca_desi_denovo</i> | 1874666                 | G/A  | NA                 | NA                            | NA                 |

| SNP IDs                  | NCBI dbSNP accession IDs (NCBI_SS#) | Chromosomes           | Physical positions (bp) | SNPs | Gene accession IDs | Sequence components of genome | Putative functions |
|--------------------------|-------------------------------------|-----------------------|-------------------------|------|--------------------|-------------------------------|--------------------|
| <i>Desi_wild_1875464</i> | NA                                  | <i>Ca_desi_denovo</i> | 1875464                 | T/G  | NA                 | NA                            | NA                 |
| <i>Desi_wild_1877258</i> | NA                                  | <i>Ca_desi_denovo</i> | 1877258                 | T/A  | NA                 | NA                            | NA                 |
| <i>Desi_wild_1877766</i> | NA                                  | <i>Ca_desi_denovo</i> | 1877766                 | T/A  | NA                 | NA                            | NA                 |
| <i>Desi_wild_1879127</i> | NA                                  | <i>Ca_desi_denovo</i> | 1879127                 | A/G  | NA                 | NA                            | NA                 |
| <i>Desi_wild_1879578</i> | NA                                  | <i>Ca_desi_denovo</i> | 1879578                 | C/A  | NA                 | NA                            | NA                 |
| <i>Desi_wild_1879644</i> | NA                                  | <i>Ca_desi_denovo</i> | 1879644                 | G/T  | NA                 | NA                            | NA                 |
| <i>Desi_wild_1880519</i> | NA                                  | <i>Ca_desi_denovo</i> | 1880519                 | G/A  | NA                 | NA                            | NA                 |
| <i>Desi_wild_1880536</i> | NA                                  | <i>Ca_desi_denovo</i> | 1880536                 | A/G  | NA                 | NA                            | NA                 |
| <i>Desi_wild_1881040</i> | NA                                  | <i>Ca_desi_denovo</i> | 1881040                 | T/G  | NA                 | NA                            | NA                 |
| <i>Desi_wild_1881196</i> | NA                                  | <i>Ca_desi_denovo</i> | 1881196                 | G/A  | NA                 | NA                            | NA                 |
| <i>Desi_wild_1881518</i> | NA                                  | <i>Ca_desi_denovo</i> | 1881518                 | G/A  | NA                 | NA                            | NA                 |
| <i>Desi_wild_1882848</i> | NA                                  | <i>Ca_desi_denovo</i> | 1882848                 | T/C  | NA                 | NA                            | NA                 |
| <i>Desi_wild_1882851</i> | NA                                  | <i>Ca_desi_denovo</i> | 1882851                 | G/A  | NA                 | NA                            | NA                 |
| <i>Desi_wild_1883436</i> | NA                                  | <i>Ca_desi_denovo</i> | 1883436                 | C/T  | NA                 | NA                            | NA                 |
| <i>Desi_wild_1883455</i> | NA                                  | <i>Ca_desi_denovo</i> | 1883455                 | T/C  | NA                 | NA                            | NA                 |
| <i>Desi_wild_1885044</i> | NA                                  | <i>Ca_desi_denovo</i> | 1885044                 | G/C  | NA                 | NA                            | NA                 |
| <i>Desi_wild_1885104</i> | NA                                  | <i>Ca_desi_denovo</i> | 1885104                 | T/C  | NA                 | NA                            | NA                 |
| <i>Desi_wild_1885163</i> | NA                                  | <i>Ca_desi_denovo</i> | 1885163                 | G/C  | NA                 | NA                            | NA                 |
| <i>Desi_wild_1885517</i> | NA                                  | <i>Ca_desi_denovo</i> | 1885517                 | T/C  | NA                 | NA                            | NA                 |
| <i>Desi_wild_1885523</i> | NA                                  | <i>Ca_desi_denovo</i> | 1885523                 | C/T  | NA                 | NA                            | NA                 |
| <i>Desi_wild_1886083</i> | NA                                  | <i>Ca_desi_denovo</i> | 1886083                 | T/C  | NA                 | NA                            | NA                 |
| <i>Desi_wild_1886092</i> | NA                                  | <i>Ca_desi_denovo</i> | 1886092                 | G/T  | NA                 | NA                            | NA                 |
| <i>Desi_wild_1886773</i> | NA                                  | <i>Ca_desi_denovo</i> | 1886773                 | A/G  | NA                 | NA                            | NA                 |
| <i>Desi_wild_1886782</i> | NA                                  | <i>Ca_desi_denovo</i> | 1886782                 | A/G  | NA                 | NA                            | NA                 |
| <i>Desi_wild_1887404</i> | NA                                  | <i>Ca_desi_denovo</i> | 1887404                 | C/T  | NA                 | NA                            | NA                 |
| <i>Desi_wild_1888084</i> | NA                                  | <i>Ca_desi_denovo</i> | 1888084                 | T/C  | NA                 | NA                            | NA                 |
| <i>Desi_wild_1888098</i> | NA                                  | <i>Ca_desi_denovo</i> | 1888098                 | G/A  | NA                 | NA                            | NA                 |
| <i>Desi_wild_1890927</i> | NA                                  | <i>Ca_desi_denovo</i> | 1890927                 | G/A  | NA                 | NA                            | NA                 |
| <i>Desi_wild_1890940</i> | NA                                  | <i>Ca_desi_denovo</i> | 1890940                 | T/C  | NA                 | NA                            | NA                 |
| <i>Desi_wild_1891597</i> | NA                                  | <i>Ca_desi_denovo</i> | 1891597                 | G/T  | NA                 | NA                            | NA                 |
| <i>Desi_wild_1891598</i> | NA                                  | <i>Ca_desi_denovo</i> | 1891598                 | T/C  | NA                 | NA                            | NA                 |
| <i>Desi_wild_1891764</i> | NA                                  | <i>Ca_desi_denovo</i> | 1891764                 | A/C  | NA                 | NA                            | NA                 |
| <i>Desi_wild_1892565</i> | NA                                  | <i>Ca_desi_denovo</i> | 1892565                 | T/C  | NA                 | NA                            | NA                 |
| <i>Desi_wild_1892577</i> | NA                                  | <i>Ca_desi_denovo</i> | 1892577                 | G/C  | NA                 | NA                            | NA                 |
| <i>Desi_wild_1893089</i> | NA                                  | <i>Ca_desi_denovo</i> | 1893089                 | A/G  | NA                 | NA                            | NA                 |
| <i>Desi_wild_1893917</i> | NA                                  | <i>Ca_desi_denovo</i> | 1893917                 | G/A  | NA                 | NA                            | NA                 |
| <i>Desi_wild_1893924</i> | NA                                  | <i>Ca_desi_denovo</i> | 1893924                 | A/G  | NA                 | NA                            | NA                 |
| <i>Desi_wild_1894165</i> | NA                                  | <i>Ca_desi_denovo</i> | 1894165                 | C/T  | NA                 | NA                            | NA                 |
| <i>Desi_wild_1894355</i> | NA                                  | <i>Ca_desi_denovo</i> | 1894355                 | C/T  | NA                 | NA                            | NA                 |
| <i>Desi_wild_1894407</i> | NA                                  | <i>Ca_desi_denovo</i> | 1894407                 | G/C  | NA                 | NA                            | NA                 |
| <i>Desi_wild_1894433</i> | NA                                  | <i>Ca_desi_denovo</i> | 1894433                 | A/G  | NA                 | NA                            | NA                 |
| <i>Desi_wild_1894475</i> | NA                                  | <i>Ca_desi_denovo</i> | 1894475                 | G/T  | NA                 | NA                            | NA                 |
| <i>Desi_wild_1894716</i> | NA                                  | <i>Ca_desi_denovo</i> | 1894716                 | A/G  | NA                 | NA                            | NA                 |
| <i>Desi_wild_1895192</i> | NA                                  | <i>Ca_desi_denovo</i> | 1895192                 | G/A  | NA                 | NA                            | NA                 |



| SNP IDs                  | NCBI dbSNP accession IDs (NCBI_SS#) | Chromosomes           | Physical positions (bp) | SNPs | Gene accession IDs | Sequence components of genome | Putative functions |
|--------------------------|-------------------------------------|-----------------------|-------------------------|------|--------------------|-------------------------------|--------------------|
| <i>Desi_wild_1896953</i> | NA                                  | <i>Ca_desi_denovo</i> | 1896953                 | G/A  | NA                 | NA                            | NA                 |
| <i>Desi_wild_1896983</i> | NA                                  | <i>Ca_desi_denovo</i> | 1896983                 | C/G  | NA                 | NA                            | NA                 |
| <i>Desi_wild_1897477</i> | NA                                  | <i>Ca_desi_denovo</i> | 1897477                 | C/T  | NA                 | NA                            | NA                 |
| <i>Desi_wild_1897480</i> | NA                                  | <i>Ca_desi_denovo</i> | 1897480                 | C/T  | NA                 | NA                            | NA                 |
| <i>Desi_wild_1900846</i> | NA                                  | <i>Ca_desi_denovo</i> | 1900846                 | A/G  | NA                 | NA                            | NA                 |
| <i>Desi_wild_1901343</i> | NA                                  | <i>Ca_desi_denovo</i> | 1901343                 | G/C  | NA                 | NA                            | NA                 |
| <i>Desi_wild_1901477</i> | NA                                  | <i>Ca_desi_denovo</i> | 1901477                 | A/G  | NA                 | NA                            | NA                 |
| <i>Desi_wild_1903113</i> | NA                                  | <i>Ca_desi_denovo</i> | 1903113                 | A/C  | NA                 | NA                            | NA                 |
| <i>Desi_wild_1904892</i> | NA                                  | <i>Ca_desi_denovo</i> | 1904892                 | C/G  | NA                 | NA                            | NA                 |
| <i>Desi_wild_1905353</i> | NA                                  | <i>Ca_desi_denovo</i> | 1905353                 | G/C  | NA                 | NA                            | NA                 |
| <i>Desi_wild_1905836</i> | NA                                  | <i>Ca_desi_denovo</i> | 1905836                 | G/A  | NA                 | NA                            | NA                 |
| <i>Desi_wild_1905866</i> | NA                                  | <i>Ca_desi_denovo</i> | 1905866                 | C/G  | NA                 | NA                            | NA                 |
| <i>Desi_wild_1906166</i> | NA                                  | <i>Ca_desi_denovo</i> | 1906166                 | G/C  | NA                 | NA                            | NA                 |
| <i>Desi_wild_1909029</i> | NA                                  | <i>Ca_desi_denovo</i> | 1909029                 | T/G  | NA                 | NA                            | NA                 |
| <i>Desi_wild_1909683</i> | NA                                  | <i>Ca_desi_denovo</i> | 1909683                 | A/G  | NA                 | NA                            | NA                 |
| <i>Desi_wild_1909738</i> | NA                                  | <i>Ca_desi_denovo</i> | 1909738                 | C/G  | NA                 | NA                            | NA                 |
| <i>Desi_wild_1909742</i> | NA                                  | <i>Ca_desi_denovo</i> | 1909742                 | T/G  | NA                 | NA                            | NA                 |
| <i>Desi_wild_1912940</i> | NA                                  | <i>Ca_desi_denovo</i> | 1912940                 | G/A  | NA                 | NA                            | NA                 |
| <i>Desi_wild_1913356</i> | NA                                  | <i>Ca_desi_denovo</i> | 1913356                 | T/A  | NA                 | NA                            | NA                 |
| <i>Desi_wild_1913701</i> | NA                                  | <i>Ca_desi_denovo</i> | 1913701                 | A/G  | NA                 | NA                            | NA                 |
| <i>Desi_wild_1915446</i> | NA                                  | <i>Ca_desi_denovo</i> | 1915446                 | C/G  | NA                 | NA                            | NA                 |
| <i>Desi_wild_1916033</i> | NA                                  | <i>Ca_desi_denovo</i> | 1916033                 | T/G  | NA                 | NA                            | NA                 |
| <i>Desi_wild_1916154</i> | NA                                  | <i>Ca_desi_denovo</i> | 1916154                 | C/G  | NA                 | NA                            | NA                 |
| <i>Desi_wild_1916723</i> | NA                                  | <i>Ca_desi_denovo</i> | 1916723                 | A/C  | NA                 | NA                            | NA                 |
| <i>Desi_wild_1917506</i> | NA                                  | <i>Ca_desi_denovo</i> | 1917506                 | C/T  | NA                 | NA                            | NA                 |
| <i>Desi_wild_1917518</i> | NA                                  | <i>Ca_desi_denovo</i> | 1917518                 | G/A  | NA                 | NA                            | NA                 |
| <i>Desi_wild_1917905</i> | NA                                  | <i>Ca_desi_denovo</i> | 1917905                 | G/A  | NA                 | NA                            | NA                 |
| <i>Desi_wild_1922537</i> | NA                                  | <i>Ca_desi_denovo</i> | 1922537                 | A/G  | NA                 | NA                            | NA                 |
| <i>Desi_wild_1925819</i> | NA                                  | <i>Ca_desi_denovo</i> | 1925819                 | T/C  | NA                 | NA                            | NA                 |
| <i>Desi_wild_1925850</i> | NA                                  | <i>Ca_desi_denovo</i> | 1925850                 | C/T  | NA                 | NA                            | NA                 |
| <i>Desi_wild_1926326</i> | NA                                  | <i>Ca_desi_denovo</i> | 1926326                 | G/A  | NA                 | NA                            | NA                 |
| <i>Desi_wild_1926719</i> | NA                                  | <i>Ca_desi_denovo</i> | 1926719                 | G/T  | NA                 | NA                            | NA                 |
| <i>Desi_wild_1926759</i> | NA                                  | <i>Ca_desi_denovo</i> | 1926759                 | G/A  | NA                 | NA                            | NA                 |
| <i>Desi_wild_1927213</i> | NA                                  | <i>Ca_desi_denovo</i> | 1927213                 | T/C  | NA                 | NA                            | NA                 |
| <i>Desi_wild_1929333</i> | NA                                  | <i>Ca_desi_denovo</i> | 1929333                 | G/C  | NA                 | NA                            | NA                 |
| <i>Desi_wild_1929533</i> | NA                                  | <i>Ca_desi_denovo</i> | 1929533                 | A/G  | NA                 | NA                            | NA                 |
| <i>Desi_wild_1929936</i> | NA                                  | <i>Ca_desi_denovo</i> | 1929936                 | C/T  | NA                 | NA                            | NA                 |
| <i>Desi_wild_1930316</i> | NA                                  | <i>Ca_desi_denovo</i> | 1930316                 | T/G  | NA                 | NA                            | NA                 |
| <i>Desi_wild_1930571</i> | NA                                  | <i>Ca_desi_denovo</i> | 1930571                 | A/G  | NA                 | NA                            | NA                 |
| <i>Desi_wild_1931068</i> | NA                                  | <i>Ca_desi_denovo</i> | 1931068                 | G/A  | NA                 | NA                            | NA                 |
| <i>Desi_wild_1931290</i> | NA                                  | <i>Ca_desi_denovo</i> | 1931290                 | C/T  | NA                 | NA                            | NA                 |
| <i>Desi_wild_1931308</i> | NA                                  | <i>Ca_desi_denovo</i> | 1931308                 | T/G  | NA                 | NA                            | NA                 |
| <i>Desi_wild_1931853</i> | NA                                  | <i>Ca_desi_denovo</i> | 1931853                 | C/A  | NA                 | NA                            | NA                 |
| <i>Desi_wild_1932536</i> | NA                                  | <i>Ca_desi_denovo</i> | 1932536                 | T/A  | NA                 | NA                            | NA                 |

| SNP IDs                  | NCBI dbSNP accession IDs (NCBI_SS#) | Chromosomes           | Physical positions (bp) | SNPs | Gene accession IDs | Sequence components of genome | Putative functions |
|--------------------------|-------------------------------------|-----------------------|-------------------------|------|--------------------|-------------------------------|--------------------|
| <i>Desi_wild_1932849</i> | NA                                  | <i>Ca_desi_denovo</i> | 1932849                 | A/G  | NA                 | NA                            | NA                 |
| <i>Desi_wild_1933807</i> | NA                                  | <i>Ca_desi_denovo</i> | 1933807                 | C/T  | NA                 | NA                            | NA                 |
| <i>Desi_wild_1936227</i> | NA                                  | <i>Ca_desi_denovo</i> | 1936227                 | C/T  | NA                 | NA                            | NA                 |
| <i>Desi_wild_1936272</i> | NA                                  | <i>Ca_desi_denovo</i> | 1936272                 | T/C  | NA                 | NA                            | NA                 |
| <i>Desi_wild_1936856</i> | NA                                  | <i>Ca_desi_denovo</i> | 1936856                 | T/C  | NA                 | NA                            | NA                 |
| <i>Desi_wild_1936862</i> | NA                                  | <i>Ca_desi_denovo</i> | 1936862                 | T/G  | NA                 | NA                            | NA                 |
| <i>Desi_wild_1937085</i> | NA                                  | <i>Ca_desi_denovo</i> | 1937085                 | C/G  | NA                 | NA                            | NA                 |
| <i>Desi_wild_1937120</i> | NA                                  | <i>Ca_desi_denovo</i> | 1937120                 | G/A  | NA                 | NA                            | NA                 |
| <i>Desi_wild_1937620</i> | NA                                  | <i>Ca_desi_denovo</i> | 1937620                 | C/T  | NA                 | NA                            | NA                 |
| <i>Desi_wild_1938547</i> | NA                                  | <i>Ca_desi_denovo</i> | 1938547                 | A/G  | NA                 | NA                            | NA                 |
| <i>Desi_wild_1938555</i> | NA                                  | <i>Ca_desi_denovo</i> | 1938555                 | T/A  | NA                 | NA                            | NA                 |
| <i>Desi_wild_1938821</i> | NA                                  | <i>Ca_desi_denovo</i> | 1938821                 | A/G  | NA                 | NA                            | NA                 |
| <i>Desi_wild_1938838</i> | NA                                  | <i>Ca_desi_denovo</i> | 1938838                 | C/T  | NA                 | NA                            | NA                 |
| <i>Desi_wild_1938856</i> | NA                                  | <i>Ca_desi_denovo</i> | 1938856                 | A/G  | NA                 | NA                            | NA                 |
| <i>Desi_wild_1941870</i> | NA                                  | <i>Ca_desi_denovo</i> | 1941870                 | G/C  | NA                 | NA                            | NA                 |
| <i>Desi_wild_1941879</i> | NA                                  | <i>Ca_desi_denovo</i> | 1941879                 | T/G  | NA                 | NA                            | NA                 |
| <i>Desi_wild_1941946</i> | NA                                  | <i>Ca_desi_denovo</i> | 1941946                 | C/T  | NA                 | NA                            | NA                 |
| <i>Desi_wild_1942028</i> | NA                                  | <i>Ca_desi_denovo</i> | 1942028                 | A/G  | NA                 | NA                            | NA                 |
| <i>Desi_wild_1942031</i> | NA                                  | <i>Ca_desi_denovo</i> | 1942031                 | G/A  | NA                 | NA                            | NA                 |
| <i>Desi_wild_1942420</i> | NA                                  | <i>Ca_desi_denovo</i> | 1942420                 | G/A  | NA                 | NA                            | NA                 |
| <i>Desi_wild_1943204</i> | NA                                  | <i>Ca_desi_denovo</i> | 1943204                 | T/C  | NA                 | NA                            | NA                 |
| <i>Desi_wild_1943212</i> | NA                                  | <i>Ca_desi_denovo</i> | 1943212                 | C/G  | NA                 | NA                            | NA                 |
| <i>Desi_wild_1943214</i> | NA                                  | <i>Ca_desi_denovo</i> | 1943214                 | A/C  | NA                 | NA                            | NA                 |
| <i>Desi_wild_1944538</i> | NA                                  | <i>Ca_desi_denovo</i> | 1944538                 | G/C  | NA                 | NA                            | NA                 |
| <i>Desi_wild_1944834</i> | NA                                  | <i>Ca_desi_denovo</i> | 1944834                 | T/A  | NA                 | NA                            | NA                 |
| <i>Desi_wild_1946385</i> | NA                                  | <i>Ca_desi_denovo</i> | 1946385                 | T/C  | NA                 | NA                            | NA                 |
| <i>Desi_wild_1946421</i> | NA                                  | <i>Ca_desi_denovo</i> | 1946421                 | T/C  | NA                 | NA                            | NA                 |
| <i>Desi_wild_1946673</i> | NA                                  | <i>Ca_desi_denovo</i> | 1946673                 | T/C  | NA                 | NA                            | NA                 |
| <i>Desi_wild_1946676</i> | NA                                  | <i>Ca_desi_denovo</i> | 1946676                 | A/G  | NA                 | NA                            | NA                 |
| <i>Desi_wild_1946788</i> | NA                                  | <i>Ca_desi_denovo</i> | 1946788                 | C/T  | NA                 | NA                            | NA                 |
| <i>Desi_wild_1947168</i> | NA                                  | <i>Ca_desi_denovo</i> | 1947168                 | T/C  | NA                 | NA                            | NA                 |
| <i>Desi_wild_1948138</i> | NA                                  | <i>Ca_desi_denovo</i> | 1948138                 | C/A  | NA                 | NA                            | NA                 |
| <i>Desi_wild_1951664</i> | NA                                  | <i>Ca_desi_denovo</i> | 1951664                 | C/T  | NA                 | NA                            | NA                 |
| <i>Desi_wild_1951726</i> | NA                                  | <i>Ca_desi_denovo</i> | 1951726                 | A/T  | NA                 | NA                            | NA                 |
| <i>Desi_wild_1955032</i> | NA                                  | <i>Ca_desi_denovo</i> | 1955032                 | C/T  | NA                 | NA                            | NA                 |
| <i>Desi_wild_1955089</i> | NA                                  | <i>Ca_desi_denovo</i> | 1955089                 | T/G  | NA                 | NA                            | NA                 |
| <i>Desi_wild_1955502</i> | NA                                  | <i>Ca_desi_denovo</i> | 1955502                 | G/A  | NA                 | NA                            | NA                 |
| <i>Desi_wild_1955541</i> | NA                                  | <i>Ca_desi_denovo</i> | 1955541                 | C/G  | NA                 | NA                            | NA                 |
| <i>Desi_wild_1955709</i> | NA                                  | <i>Ca_desi_denovo</i> | 1955709                 | T/C  | NA                 | NA                            | NA                 |
| <i>Desi_wild_1956112</i> | NA                                  | <i>Ca_desi_denovo</i> | 1956112                 | T/C  | NA                 | NA                            | NA                 |
| <i>Desi_wild_1956876</i> | NA                                  | <i>Ca_desi_denovo</i> | 1956876                 | C/T  | NA                 | NA                            | NA                 |
| <i>Desi_wild_1956921</i> | NA                                  | <i>Ca_desi_denovo</i> | 1956921                 | G/A  | NA                 | NA                            | NA                 |
| <i>Desi_wild_1957934</i> | NA                                  | <i>Ca_desi_denovo</i> | 1957934                 | T/G  | NA                 | NA                            | NA                 |
| <i>Desi_wild_1958342</i> | NA                                  | <i>Ca_desi_denovo</i> | 1958342                 | A/G  | NA                 | NA                            | NA                 |

| SNP IDs                  | NCBI dbSNP accession IDs (NCBI_SS#) | Chromosomes           | Physical positions (bp) | SNPs | Gene accession IDs | Sequence components of genome | Putative functions |
|--------------------------|-------------------------------------|-----------------------|-------------------------|------|--------------------|-------------------------------|--------------------|
| <i>Desi_wild_1959491</i> | NA                                  | <i>Ca_desi_denovo</i> | 1959491                 | C/T  | NA                 | NA                            | NA                 |
| <i>Desi_wild_1960618</i> | NA                                  | <i>Ca_desi_denovo</i> | 1960618                 | A/G  | NA                 | NA                            | NA                 |
| <i>Desi_wild_1960627</i> | NA                                  | <i>Ca_desi_denovo</i> | 1960627                 | C/G  | NA                 | NA                            | NA                 |
| <i>Desi_wild_1961088</i> | NA                                  | <i>Ca_desi_denovo</i> | 1961088                 | G/C  | NA                 | NA                            | NA                 |
| <i>Desi_wild_1961097</i> | NA                                  | <i>Ca_desi_denovo</i> | 1961097                 | T/G  | NA                 | NA                            | NA                 |
| <i>Desi_wild_1961234</i> | NA                                  | <i>Ca_desi_denovo</i> | 1961234                 | C/T  | NA                 | NA                            | NA                 |
| <i>Desi_wild_1961249</i> | NA                                  | <i>Ca_desi_denovo</i> | 1961249                 | T/G  | NA                 | NA                            | NA                 |
| <i>Desi_wild_1961761</i> | NA                                  | <i>Ca_desi_denovo</i> | 1961761                 | C/A  | NA                 | NA                            | NA                 |
| <i>Desi_wild_1961770</i> | NA                                  | <i>Ca_desi_denovo</i> | 1961770                 | T/C  | NA                 | NA                            | NA                 |
| <i>Desi_wild_1963516</i> | NA                                  | <i>Ca_desi_denovo</i> | 1963516                 | T/C  | NA                 | NA                            | NA                 |
| <i>Desi_wild_1963517</i> | NA                                  | <i>Ca_desi_denovo</i> | 1963517                 | A/G  | NA                 | NA                            | NA                 |
| <i>Desi_wild_1963851</i> | NA                                  | <i>Ca_desi_denovo</i> | 1963851                 | C/T  | NA                 | NA                            | NA                 |
| <i>Desi_wild_1963860</i> | NA                                  | <i>Ca_desi_denovo</i> | 1963860                 | G/C  | NA                 | NA                            | NA                 |
| <i>Desi_wild_1963901</i> | NA                                  | <i>Ca_desi_denovo</i> | 1963901                 | G/A  | NA                 | NA                            | NA                 |
| <i>Desi_wild_1964068</i> | NA                                  | <i>Ca_desi_denovo</i> | 1964068                 | A/G  | NA                 | NA                            | NA                 |
| <i>Desi_wild_1964075</i> | NA                                  | <i>Ca_desi_denovo</i> | 1964075                 | G/T  | NA                 | NA                            | NA                 |
| <i>Desi_wild_1964083</i> | NA                                  | <i>Ca_desi_denovo</i> | 1964083                 | C/T  | NA                 | NA                            | NA                 |
| <i>Desi_wild_1964447</i> | NA                                  | <i>Ca_desi_denovo</i> | 1964447                 | C/T  | NA                 | NA                            | NA                 |
| <i>Desi_wild_1964815</i> | NA                                  | <i>Ca_desi_denovo</i> | 1964815                 | T/C  | NA                 | NA                            | NA                 |
| <i>Desi_wild_1965709</i> | NA                                  | <i>Ca_desi_denovo</i> | 1965709                 | A/G  | NA                 | NA                            | NA                 |
| <i>Desi_wild_1966278</i> | NA                                  | <i>Ca_desi_denovo</i> | 1966278                 | C/G  | NA                 | NA                            | NA                 |
| <i>Desi_wild_1966296</i> | NA                                  | <i>Ca_desi_denovo</i> | 1966296                 | C/T  | NA                 | NA                            | NA                 |
| <i>Desi_wild_1966393</i> | NA                                  | <i>Ca_desi_denovo</i> | 1966393                 | T/G  | NA                 | NA                            | NA                 |
| <i>Desi_wild_1966418</i> | NA                                  | <i>Ca_desi_denovo</i> | 1966418                 | T/G  | NA                 | NA                            | NA                 |
| <i>Desi_wild_1966876</i> | NA                                  | <i>Ca_desi_denovo</i> | 1966876                 | T/C  | NA                 | NA                            | NA                 |
| <i>Desi_wild_1967751</i> | NA                                  | <i>Ca_desi_denovo</i> | 1967751                 | G/C  | NA                 | NA                            | NA                 |
| <i>Desi_wild_1967760</i> | NA                                  | <i>Ca_desi_denovo</i> | 1967760                 | T/C  | NA                 | NA                            | NA                 |
| <i>Desi_wild_1967906</i> | NA                                  | <i>Ca_desi_denovo</i> | 1967906                 | A/C  | NA                 | NA                            | NA                 |
| <i>Desi_wild_1969384</i> | NA                                  | <i>Ca_desi_denovo</i> | 1969384                 | A/G  | NA                 | NA                            | NA                 |
| <i>Desi_wild_1969665</i> | NA                                  | <i>Ca_desi_denovo</i> | 1969665                 | T/C  | NA                 | NA                            | NA                 |
| <i>Desi_wild_1970831</i> | NA                                  | <i>Ca_desi_denovo</i> | 1970831                 | C/G  | NA                 | NA                            | NA                 |
| <i>Desi_wild_1970894</i> | NA                                  | <i>Ca_desi_denovo</i> | 1970894                 | G/A  | NA                 | NA                            | NA                 |
| <i>Desi_wild_1971632</i> | NA                                  | <i>Ca_desi_denovo</i> | 1971632                 | T/G  | NA                 | NA                            | NA                 |
| <i>Desi_wild_1972507</i> | NA                                  | <i>Ca_desi_denovo</i> | 1972507                 | T/C  | NA                 | NA                            | NA                 |
| <i>Desi_wild_1972550</i> | NA                                  | <i>Ca_desi_denovo</i> | 1972550                 | A/G  | NA                 | NA                            | NA                 |
| <i>Desi_wild_1974610</i> | NA                                  | <i>Ca_desi_denovo</i> | 1974610                 | G/A  | NA                 | NA                            | NA                 |
| <i>Desi_wild_1976515</i> | NA                                  | <i>Ca_desi_denovo</i> | 1976515                 | C/G  | NA                 | NA                            | NA                 |
| <i>Desi_wild_1976865</i> | NA                                  | <i>Ca_desi_denovo</i> | 1976865                 | C/T  | NA                 | NA                            | NA                 |
| <i>Desi_wild_1976904</i> | NA                                  | <i>Ca_desi_denovo</i> | 1976904                 | G/A  | NA                 | NA                            | NA                 |
| <i>Desi_wild_1976910</i> | NA                                  | <i>Ca_desi_denovo</i> | 1976910                 | C/G  | NA                 | NA                            | NA                 |
| <i>Desi_wild_1977228</i> | NA                                  | <i>Ca_desi_denovo</i> | 1977228                 | A/G  | NA                 | NA                            | NA                 |
| <i>Desi_wild_1977237</i> | NA                                  | <i>Ca_desi_denovo</i> | 1977237                 | T/C  | NA                 | NA                            | NA                 |
| <i>Desi_wild_1979956</i> | NA                                  | <i>Ca_desi_denovo</i> | 1979956                 | G/A  | NA                 | NA                            | NA                 |
| <i>Desi_wild_1979983</i> | NA                                  | <i>Ca_desi_denovo</i> | 1979983                 | G/C  | NA                 | NA                            | NA                 |

| SNP IDs                  | NCBI dbSNP accession IDs (NCBI_SS#) | Chromosomes           | Physical positions (bp) | SNPs | Gene accession IDs | Sequence components of genome | Putative functions |
|--------------------------|-------------------------------------|-----------------------|-------------------------|------|--------------------|-------------------------------|--------------------|
| <i>Desi_wild_1980156</i> | NA                                  | <i>Ca_desi_denovo</i> | 1980156                 | G/A  | NA                 | NA                            | NA                 |
| <i>Desi_wild_1980215</i> | NA                                  | <i>Ca_desi_denovo</i> | 1980215                 | C/T  | NA                 | NA                            | NA                 |
| <i>Desi_wild_1980552</i> | NA                                  | <i>Ca_desi_denovo</i> | 1980552                 | G/A  | NA                 | NA                            | NA                 |
| <i>Desi_wild_1980557</i> | NA                                  | <i>Ca_desi_denovo</i> | 1980557                 | G/A  | NA                 | NA                            | NA                 |
| <i>Desi_wild_1981020</i> | NA                                  | <i>Ca_desi_denovo</i> | 1981020                 | C/G  | NA                 | NA                            | NA                 |
| <i>Desi_wild_1981205</i> | NA                                  | <i>Ca_desi_denovo</i> | 1981205                 | G/A  | NA                 | NA                            | NA                 |
| <i>Desi_wild_1981803</i> | NA                                  | <i>Ca_desi_denovo</i> | 1981803                 | C/T  | NA                 | NA                            | NA                 |
| <i>Desi_wild_1981901</i> | NA                                  | <i>Ca_desi_denovo</i> | 1981901                 | G/C  | NA                 | NA                            | NA                 |
| <i>Desi_wild_1982485</i> | NA                                  | <i>Ca_desi_denovo</i> | 1982485                 | A/G  | NA                 | NA                            | NA                 |
| <i>Desi_wild_1982492</i> | NA                                  | <i>Ca_desi_denovo</i> | 1982492                 | A/C  | NA                 | NA                            | NA                 |
| <i>Desi_wild_1982763</i> | NA                                  | <i>Ca_desi_denovo</i> | 1982763                 | C/A  | NA                 | NA                            | NA                 |
| <i>Desi_wild_1983595</i> | NA                                  | <i>Ca_desi_denovo</i> | 1983595                 | G/T  | NA                 | NA                            | NA                 |
| <i>Desi_wild_1985056</i> | NA                                  | <i>Ca_desi_denovo</i> | 1985056                 | T/C  | NA                 | NA                            | NA                 |
| <i>Desi_wild_1986839</i> | NA                                  | <i>Ca_desi_denovo</i> | 1986839                 | C/G  | NA                 | NA                            | NA                 |
| <i>Desi_wild_1986914</i> | NA                                  | <i>Ca_desi_denovo</i> | 1986914                 | C/G  | NA                 | NA                            | NA                 |
| <i>Desi_wild_1987065</i> | NA                                  | <i>Ca_desi_denovo</i> | 1987065                 | A/G  | NA                 | NA                            | NA                 |
| <i>Desi_wild_1987495</i> | NA                                  | <i>Ca_desi_denovo</i> | 1987495                 | C/G  | NA                 | NA                            | NA                 |
| <i>Desi_wild_1987498</i> | NA                                  | <i>Ca_desi_denovo</i> | 1987498                 | C/G  | NA                 | NA                            | NA                 |
| <i>Desi_wild_1987519</i> | NA                                  | <i>Ca_desi_denovo</i> | 1987519                 | A/G  | NA                 | NA                            | NA                 |
| <i>Desi_wild_1987908</i> | NA                                  | <i>Ca_desi_denovo</i> | 1987908                 | A/C  | NA                 | NA                            | NA                 |
| <i>Desi_wild_1988629</i> | NA                                  | <i>Ca_desi_denovo</i> | 1988629                 | C/T  | NA                 | NA                            | NA                 |
| <i>Desi_wild_1988661</i> | NA                                  | <i>Ca_desi_denovo</i> | 1988661                 | A/G  | NA                 | NA                            | NA                 |
| <i>Desi_wild_1988794</i> | NA                                  | <i>Ca_desi_denovo</i> | 1988794                 | C/T  | NA                 | NA                            | NA                 |
| <i>Desi_wild_1988807</i> | NA                                  | <i>Ca_desi_denovo</i> | 1988807                 | T/C  | NA                 | NA                            | NA                 |
| <i>Desi_wild_1989862</i> | NA                                  | <i>Ca_desi_denovo</i> | 1989862                 | T/C  | NA                 | NA                            | NA                 |
| <i>Desi_wild_1990056</i> | NA                                  | <i>Ca_desi_denovo</i> | 1990056                 | C/T  | NA                 | NA                            | NA                 |
| <i>Desi_wild_1990116</i> | NA                                  | <i>Ca_desi_denovo</i> | 1990116                 | A/G  | NA                 | NA                            | NA                 |
| <i>Desi_wild_1990800</i> | NA                                  | <i>Ca_desi_denovo</i> | 1990800                 | A/C  | NA                 | NA                            | NA                 |
| <i>Desi_wild_1991783</i> | NA                                  | <i>Ca_desi_denovo</i> | 1991783                 | A/G  | NA                 | NA                            | NA                 |
| <i>Desi_wild_1991784</i> | NA                                  | <i>Ca_desi_denovo</i> | 1991784                 | T/C  | NA                 | NA                            | NA                 |
| <i>Desi_wild_1992562</i> | NA                                  | <i>Ca_desi_denovo</i> | 1992562                 | C/T  | NA                 | NA                            | NA                 |
| <i>Desi_wild_1992599</i> | NA                                  | <i>Ca_desi_denovo</i> | 1992599                 | C/T  | NA                 | NA                            | NA                 |
| <i>Desi_wild_1992713</i> | NA                                  | <i>Ca_desi_denovo</i> | 1992713                 | G/A  | NA                 | NA                            | NA                 |
| <i>Desi_wild_1992753</i> | NA                                  | <i>Ca_desi_denovo</i> | 1992753                 | A/G  | NA                 | NA                            | NA                 |
| <i>Desi_wild_1994121</i> | NA                                  | <i>Ca_desi_denovo</i> | 1994121                 | G/A  | NA                 | NA                            | NA                 |
| <i>Desi_wild_1994459</i> | NA                                  | <i>Ca_desi_denovo</i> | 1994459                 | T/G  | NA                 | NA                            | NA                 |
| <i>Desi_wild_1994492</i> | NA                                  | <i>Ca_desi_denovo</i> | 1994492                 | G/A  | NA                 | NA                            | NA                 |
| <i>Desi_wild_1994546</i> | NA                                  | <i>Ca_desi_denovo</i> | 1994546                 | T/C  | NA                 | NA                            | NA                 |
| <i>Desi_wild_1994996</i> | NA                                  | <i>Ca_desi_denovo</i> | 1994996                 | C/T  | NA                 | NA                            | NA                 |
| <i>Desi_wild_1995008</i> | NA                                  | <i>Ca_desi_denovo</i> | 1995008                 | A/G  | NA                 | NA                            | NA                 |
| <i>Desi_wild_1995467</i> | NA                                  | <i>Ca_desi_denovo</i> | 1995467                 | A/T  | NA                 | NA                            | NA                 |
| <i>Desi_wild_1995597</i> | NA                                  | <i>Ca_desi_denovo</i> | 1995597                 | G/A  | NA                 | NA                            | NA                 |
| <i>Desi_wild_1995899</i> | NA                                  | <i>Ca_desi_denovo</i> | 1995899                 | G/A  | NA                 | NA                            | NA                 |
| <i>Desi_wild_1995967</i> | NA                                  | <i>Ca_desi_denovo</i> | 1995967                 | T/G  | NA                 | NA                            | NA                 |

| SNP IDs                  | NCBI dbSNP accession IDs (NCBI_SS#) | Chromosomes           | Physical positions (bp) | SNPs | Gene accession IDs | Sequence components of genome | Putative functions |
|--------------------------|-------------------------------------|-----------------------|-------------------------|------|--------------------|-------------------------------|--------------------|
| <i>Desi_wild_1997525</i> | NA                                  | <i>Ca_desi_denovo</i> | 1997525                 | A/C  | NA                 | NA                            | NA                 |
| <i>Desi_wild_1998577</i> | NA                                  | <i>Ca_desi_denovo</i> | 1998577                 | A/G  | NA                 | NA                            | NA                 |
| <i>Desi_wild_1998771</i> | NA                                  | <i>Ca_desi_denovo</i> | 1998771                 | T/G  | NA                 | NA                            | NA                 |
| <i>Desi_wild_1998928</i> | NA                                  | <i>Ca_desi_denovo</i> | 1998928                 | C/T  | NA                 | NA                            | NA                 |
| <i>Desi_wild_1999291</i> | NA                                  | <i>Ca_desi_denovo</i> | 1999291                 | C/T  | NA                 | NA                            | NA                 |
| <i>Desi_wild_2000043</i> | NA                                  | <i>Ca_desi_denovo</i> | 2000043                 | C/G  | NA                 | NA                            | NA                 |
| <i>Desi_wild_2000843</i> | NA                                  | <i>Ca_desi_denovo</i> | 2000843                 | G/C  | NA                 | NA                            | NA                 |
| <i>Desi_wild_2000865</i> | NA                                  | <i>Ca_desi_denovo</i> | 2000865                 | G/A  | NA                 | NA                            | NA                 |
| <i>Desi_wild_2001119</i> | NA                                  | <i>Ca_desi_denovo</i> | 2001119                 | C/A  | NA                 | NA                            | NA                 |
| <i>Desi_wild_2001190</i> | NA                                  | <i>Ca_desi_denovo</i> | 2001190                 | A/G  | NA                 | NA                            | NA                 |
| <i>Desi_wild_2001206</i> | NA                                  | <i>Ca_desi_denovo</i> | 2001206                 | A/C  | NA                 | NA                            | NA                 |
| <i>Desi_wild_2002325</i> | NA                                  | <i>Ca_desi_denovo</i> | 2002325                 | C/T  | NA                 | NA                            | NA                 |
| <i>Desi_wild_2004083</i> | NA                                  | <i>Ca_desi_denovo</i> | 2004083                 | G/A  | NA                 | NA                            | NA                 |
| <i>Desi_wild_2004119</i> | NA                                  | <i>Ca_desi_denovo</i> | 2004119                 | T/C  | NA                 | NA                            | NA                 |
| <i>Desi_wild_2004123</i> | NA                                  | <i>Ca_desi_denovo</i> | 2004123                 | A/G  | NA                 | NA                            | NA                 |
| <i>Desi_wild_2004513</i> | NA                                  | <i>Ca_desi_denovo</i> | 2004513                 | G/C  | NA                 | NA                            | NA                 |
| <i>Desi_wild_2005230</i> | NA                                  | <i>Ca_desi_denovo</i> | 2005230                 | C/T  | NA                 | NA                            | NA                 |
| <i>Desi_wild_2005233</i> | NA                                  | <i>Ca_desi_denovo</i> | 2005233                 | C/G  | NA                 | NA                            | NA                 |
| <i>Desi_wild_2005671</i> | NA                                  | <i>Ca_desi_denovo</i> | 2005671                 | G/A  | NA                 | NA                            | NA                 |
| <i>Desi_wild_2005683</i> | NA                                  | <i>Ca_desi_denovo</i> | 2005683                 | G/A  | NA                 | NA                            | NA                 |
| <i>Desi_wild_2006812</i> | NA                                  | <i>Ca_desi_denovo</i> | 2006812                 | G/C  | NA                 | NA                            | NA                 |
| <i>Desi_wild_2006836</i> | NA                                  | <i>Ca_desi_denovo</i> | 2006836                 | C/G  | NA                 | NA                            | NA                 |
| <i>Desi_wild_2007301</i> | NA                                  | <i>Ca_desi_denovo</i> | 2007301                 | A/G  | NA                 | NA                            | NA                 |
| <i>Desi_wild_2007307</i> | NA                                  | <i>Ca_desi_denovo</i> | 2007307                 | G/A  | NA                 | NA                            | NA                 |
| <i>Desi_wild_2008183</i> | NA                                  | <i>Ca_desi_denovo</i> | 2008183                 | T/G  | NA                 | NA                            | NA                 |
| <i>Desi_wild_2008195</i> | NA                                  | <i>Ca_desi_denovo</i> | 2008195                 | C/G  | NA                 | NA                            | NA                 |
| <i>Desi_wild_2009166</i> | NA                                  | <i>Ca_desi_denovo</i> | 2009166                 | C/T  | NA                 | NA                            | NA                 |
| <i>Desi_wild_2009456</i> | NA                                  | <i>Ca_desi_denovo</i> | 2009456                 | G/A  | NA                 | NA                            | NA                 |
| <i>Desi_wild_2010160</i> | NA                                  | <i>Ca_desi_denovo</i> | 2010160                 | T/C  | NA                 | NA                            | NA                 |
| <i>Desi_wild_2010214</i> | NA                                  | <i>Ca_desi_denovo</i> | 2010214                 | A/G  | NA                 | NA                            | NA                 |
| <i>Desi_wild_2010268</i> | NA                                  | <i>Ca_desi_denovo</i> | 2010268                 | C/T  | NA                 | NA                            | NA                 |
| <i>Desi_wild_2010621</i> | NA                                  | <i>Ca_desi_denovo</i> | 2010621                 | G/A  | NA                 | NA                            | NA                 |
| <i>Desi_wild_2010998</i> | NA                                  | <i>Ca_desi_denovo</i> | 2010998                 | A/G  | NA                 | NA                            | NA                 |
| <i>Desi_wild_2011646</i> | NA                                  | <i>Ca_desi_denovo</i> | 2011646                 | G/C  | NA                 | NA                            | NA                 |
| <i>Desi_wild_2011785</i> | NA                                  | <i>Ca_desi_denovo</i> | 2011785                 | G/C  | NA                 | NA                            | NA                 |
| <i>Desi_wild_2011919</i> | NA                                  | <i>Ca_desi_denovo</i> | 2011919                 | C/T  | NA                 | NA                            | NA                 |
| <i>Desi_wild_2012260</i> | NA                                  | <i>Ca_desi_denovo</i> | 2012260                 | C/G  | NA                 | NA                            | NA                 |
| <i>Desi_wild_2012263</i> | NA                                  | <i>Ca_desi_denovo</i> | 2012263                 | C/G  | NA                 | NA                            | NA                 |
| <i>Desi_wild_2012490</i> | NA                                  | <i>Ca_desi_denovo</i> | 2012490                 | G/T  | NA                 | NA                            | NA                 |
| <i>Desi_wild_2012517</i> | NA                                  | <i>Ca_desi_denovo</i> | 2012517                 | C/T  | NA                 | NA                            | NA                 |
| <i>Desi_wild_2012759</i> | NA                                  | <i>Ca_desi_denovo</i> | 2012759                 | T/C  | NA                 | NA                            | NA                 |
| <i>Desi_wild_2012813</i> | NA                                  | <i>Ca_desi_denovo</i> | 2012813                 | C/T  | NA                 | NA                            | NA                 |
| <i>Desi_wild_2014454</i> | NA                                  | <i>Ca_desi_denovo</i> | 2014454                 | A/G  | NA                 | NA                            | NA                 |
| <i>Desi_wild_2014757</i> | NA                                  | <i>Ca_desi_denovo</i> | 2014757                 | A/G  | NA                 | NA                            | NA                 |

| SNP IDs                  | NCBI dbSNP accession IDs (NCBI_SS#) | Chromosomes           | Physical positions (bp) | SNPs | Gene accession IDs | Sequence components of genome | Putative functions |
|--------------------------|-------------------------------------|-----------------------|-------------------------|------|--------------------|-------------------------------|--------------------|
| <i>Desi_wild_2014885</i> | NA                                  | <i>Ca_desi_denovo</i> | 2014885                 | G/A  | NA                 | NA                            | NA                 |
| <i>Desi_wild_2015293</i> | NA                                  | <i>Ca_desi_denovo</i> | 2015293                 | T/C  | NA                 | NA                            | NA                 |
| <i>Desi_wild_2015681</i> | NA                                  | <i>Ca_desi_denovo</i> | 2015681                 | G/A  | NA                 | NA                            | NA                 |
| <i>Desi_wild_2015687</i> | NA                                  | <i>Ca_desi_denovo</i> | 2015687                 | A/G  | NA                 | NA                            | NA                 |
| <i>Desi_wild_2016608</i> | NA                                  | <i>Ca_desi_denovo</i> | 2016608                 | G/A  | NA                 | NA                            | NA                 |
| <i>Desi_wild_2016877</i> | NA                                  | <i>Ca_desi_denovo</i> | 2016877                 | T/G  | NA                 | NA                            | NA                 |
| <i>Desi_wild_2017106</i> | NA                                  | <i>Ca_desi_denovo</i> | 2017106                 | G/A  | NA                 | NA                            | NA                 |
| <i>Desi_wild_2017388</i> | NA                                  | <i>Ca_desi_denovo</i> | 2017388                 | T/C  | NA                 | NA                            | NA                 |
| <i>Desi_wild_2017415</i> | NA                                  | <i>Ca_desi_denovo</i> | 2017415                 | G/T  | NA                 | NA                            | NA                 |
| <i>Desi_wild_2017419</i> | NA                                  | <i>Ca_desi_denovo</i> | 2017419                 | A/G  | NA                 | NA                            | NA                 |
| <i>Desi_wild_2017467</i> | NA                                  | <i>Ca_desi_denovo</i> | 2017467                 | T/G  | NA                 | NA                            | NA                 |
| <i>Desi_wild_2017500</i> | NA                                  | <i>Ca_desi_denovo</i> | 2017500                 | C/G  | NA                 | NA                            | NA                 |
| <i>Desi_wild_2017566</i> | NA                                  | <i>Ca_desi_denovo</i> | 2017566                 | T/C  | NA                 | NA                            | NA                 |
| <i>Desi_wild_2017694</i> | NA                                  | <i>Ca_desi_denovo</i> | 2017694                 | C/G  | NA                 | NA                            | NA                 |
| <i>Desi_wild_2017719</i> | NA                                  | <i>Ca_desi_denovo</i> | 2017719                 | C/T  | NA                 | NA                            | NA                 |
| <i>Desi_wild_2018320</i> | NA                                  | <i>Ca_desi_denovo</i> | 2018320                 | C/G  | NA                 | NA                            | NA                 |
| <i>Desi_wild_2018819</i> | NA                                  | <i>Ca_desi_denovo</i> | 2018819                 | T/G  | NA                 | NA                            | NA                 |
| <i>Desi_wild_2019058</i> | NA                                  | <i>Ca_desi_denovo</i> | 2019058                 | A/C  | NA                 | NA                            | NA                 |
| <i>Desi_wild_2019064</i> | NA                                  | <i>Ca_desi_denovo</i> | 2019064                 | T/C  | NA                 | NA                            | NA                 |
| <i>Desi_wild_2019718</i> | NA                                  | <i>Ca_desi_denovo</i> | 2019718                 | C/G  | NA                 | NA                            | NA                 |
| <i>Desi_wild_2020199</i> | NA                                  | <i>Ca_desi_denovo</i> | 2020199                 | A/G  | NA                 | NA                            | NA                 |
| <i>Desi_wild_2020232</i> | NA                                  | <i>Ca_desi_denovo</i> | 2020232                 | G/A  | NA                 | NA                            | NA                 |
| <i>Desi_wild_2020822</i> | NA                                  | <i>Ca_desi_denovo</i> | 2020822                 | G/A  | NA                 | NA                            | NA                 |
| <i>Desi_wild_2021565</i> | NA                                  | <i>Ca_desi_denovo</i> | 2021565                 | C/G  | NA                 | NA                            | NA                 |
| <i>Desi_wild_2022335</i> | NA                                  | <i>Ca_desi_denovo</i> | 2022335                 | C/G  | NA                 | NA                            | NA                 |
| <i>Desi_wild_2023053</i> | NA                                  | <i>Ca_desi_denovo</i> | 2023053                 | T/G  | NA                 | NA                            | NA                 |
| <i>Desi_wild_2023349</i> | NA                                  | <i>Ca_desi_denovo</i> | 2023349                 | C/T  | NA                 | NA                            | NA                 |
| <i>Desi_wild_2023384</i> | NA                                  | <i>Ca_desi_denovo</i> | 2023384                 | A/G  | NA                 | NA                            | NA                 |
| <i>Desi_wild_2024667</i> | NA                                  | <i>Ca_desi_denovo</i> | 2024667                 | G/A  | NA                 | NA                            | NA                 |
| <i>Desi_wild_2025184</i> | NA                                  | <i>Ca_desi_denovo</i> | 2025184                 | C/T  | NA                 | NA                            | NA                 |
| <i>Desi_wild_2027088</i> | NA                                  | <i>Ca_desi_denovo</i> | 2027088                 | T/C  | NA                 | NA                            | NA                 |
| <i>Desi_wild_2027118</i> | NA                                  | <i>Ca_desi_denovo</i> | 2027118                 | C/G  | NA                 | NA                            | NA                 |
| <i>Desi_wild_2028168</i> | NA                                  | <i>Ca_desi_denovo</i> | 2028168                 | C/T  | NA                 | NA                            | NA                 |
| <i>Desi_wild_2030011</i> | NA                                  | <i>Ca_desi_denovo</i> | 2030011                 | A/C  | NA                 | NA                            | NA                 |
| <i>Desi_wild_2030012</i> | NA                                  | <i>Ca_desi_denovo</i> | 2030012                 | A/G  | NA                 | NA                            | NA                 |
| <i>Desi_wild_2031305</i> | NA                                  | <i>Ca_desi_denovo</i> | 2031305                 | C/G  | NA                 | NA                            | NA                 |
| <i>Desi_wild_2031308</i> | NA                                  | <i>Ca_desi_denovo</i> | 2031308                 | C/T  | NA                 | NA                            | NA                 |
| <i>Desi_wild_2032426</i> | NA                                  | <i>Ca_desi_denovo</i> | 2032426                 | C/G  | NA                 | NA                            | NA                 |
| <i>Desi_wild_2032714</i> | NA                                  | <i>Ca_desi_denovo</i> | 2032714                 | A/C  | NA                 | NA                            | NA                 |
| <i>Desi_wild_2032944</i> | NA                                  | <i>Ca_desi_denovo</i> | 2032944                 | T/C  | NA                 | NA                            | NA                 |
| <i>Desi_wild_2033599</i> | NA                                  | <i>Ca_desi_denovo</i> | 2033599                 | A/C  | NA                 | NA                            | NA                 |
| <i>Desi_wild_2033624</i> | NA                                  | <i>Ca_desi_denovo</i> | 2033624                 | A/C  | NA                 | NA                            | NA                 |
| <i>Desi_wild_2033846</i> | NA                                  | <i>Ca_desi_denovo</i> | 2033846                 | T/G  | NA                 | NA                            | NA                 |
| <i>Desi_wild_2033852</i> | NA                                  | <i>Ca_desi_denovo</i> | 2033852                 | T/A  | NA                 | NA                            | NA                 |

| SNP IDs                  | NCBI dbSNP accession IDs (NCBI_SS#) | Chromosomes           | Physical positions (bp) | SNPs | Gene accession IDs | Sequence components of genome | Putative functions |
|--------------------------|-------------------------------------|-----------------------|-------------------------|------|--------------------|-------------------------------|--------------------|
| <i>Desi_wild_2034665</i> | NA                                  | <i>Ca_desi_denovo</i> | 2034665                 | C/G  | NA                 | NA                            | NA                 |
| <i>Desi_wild_2035285</i> | NA                                  | <i>Ca_desi_denovo</i> | 2035285                 | C/T  | NA                 | NA                            | NA                 |
| <i>Desi_wild_2035342</i> | NA                                  | <i>Ca_desi_denovo</i> | 2035342                 | A/G  | NA                 | NA                            | NA                 |
| <i>Desi_wild_2035821</i> | NA                                  | <i>Ca_desi_denovo</i> | 2035821                 | T/A  | NA                 | NA                            | NA                 |
| <i>Desi_wild_2035838</i> | NA                                  | <i>Ca_desi_denovo</i> | 2035838                 | A/G  | NA                 | NA                            | NA                 |
| <i>Desi_wild_2036223</i> | NA                                  | <i>Ca_desi_denovo</i> | 2036223                 | A/G  | NA                 | NA                            | NA                 |
| <i>Desi_wild_2036242</i> | NA                                  | <i>Ca_desi_denovo</i> | 2036242                 | A/C  | NA                 | NA                            | NA                 |
| <i>Desi_wild_2036416</i> | NA                                  | <i>Ca_desi_denovo</i> | 2036416                 | T/G  | NA                 | NA                            | NA                 |
| <i>Desi_wild_2036510</i> | NA                                  | <i>Ca_desi_denovo</i> | 2036510                 | C/A  | NA                 | NA                            | NA                 |
| <i>Desi_wild_2036576</i> | NA                                  | <i>Ca_desi_denovo</i> | 2036576                 | A/G  | NA                 | NA                            | NA                 |
| <i>Desi_wild_2037800</i> | NA                                  | <i>Ca_desi_denovo</i> | 2037800                 | C/T  | NA                 | NA                            | NA                 |
| <i>Desi_wild_2037806</i> | NA                                  | <i>Ca_desi_denovo</i> | 2037806                 | A/G  | NA                 | NA                            | NA                 |
| <i>Desi_wild_2038674</i> | NA                                  | <i>Ca_desi_denovo</i> | 2038674                 | G/C  | NA                 | NA                            | NA                 |
| <i>Desi_wild_2038863</i> | NA                                  | <i>Ca_desi_denovo</i> | 2038863                 | C/T  | NA                 | NA                            | NA                 |
| <i>Desi_wild_2038933</i> | NA                                  | <i>Ca_desi_denovo</i> | 2038933                 | A/G  | NA                 | NA                            | NA                 |
| <i>Desi_wild_2039001</i> | NA                                  | <i>Ca_desi_denovo</i> | 2039001                 | C/T  | NA                 | NA                            | NA                 |
| <i>Desi_wild_2039404</i> | NA                                  | <i>Ca_desi_denovo</i> | 2039404                 | T/C  | NA                 | NA                            | NA                 |
| <i>Desi_wild_2039484</i> | NA                                  | <i>Ca_desi_denovo</i> | 2039484                 | C/T  | NA                 | NA                            | NA                 |
| <i>Desi_wild_2039665</i> | NA                                  | <i>Ca_desi_denovo</i> | 2039665                 | C/T  | NA                 | NA                            | NA                 |
| <i>Desi_wild_2040013</i> | NA                                  | <i>Ca_desi_denovo</i> | 2040013                 | G/T  | NA                 | NA                            | NA                 |
| <i>Desi_wild_2040094</i> | NA                                  | <i>Ca_desi_denovo</i> | 2040094                 | A/G  | NA                 | NA                            | NA                 |
| <i>Desi_wild_2040097</i> | NA                                  | <i>Ca_desi_denovo</i> | 2040097                 | G/C  | NA                 | NA                            | NA                 |
| <i>Desi_wild_2040456</i> | NA                                  | <i>Ca_desi_denovo</i> | 2040456                 | G/A  | NA                 | NA                            | NA                 |
| <i>Desi_wild_2040665</i> | NA                                  | <i>Ca_desi_denovo</i> | 2040665                 | C/T  | NA                 | NA                            | NA                 |
| <i>Desi_wild_2040689</i> | NA                                  | <i>Ca_desi_denovo</i> | 2040689                 | G/C  | NA                 | NA                            | NA                 |
| <i>Desi_wild_2041419</i> | NA                                  | <i>Ca_desi_denovo</i> | 2041419                 | A/G  | NA                 | NA                            | NA                 |
| <i>Desi_wild_2041431</i> | NA                                  | <i>Ca_desi_denovo</i> | 2041431                 | A/T  | NA                 | NA                            | NA                 |
| <i>Desi_wild_2041451</i> | NA                                  | <i>Ca_desi_denovo</i> | 2041451                 | C/T  | NA                 | NA                            | NA                 |
| <i>Desi_wild_2041469</i> | NA                                  | <i>Ca_desi_denovo</i> | 2041469                 | G/A  | NA                 | NA                            | NA                 |
| <i>Desi_wild_2041926</i> | NA                                  | <i>Ca_desi_denovo</i> | 2041926                 | A/G  | NA                 | NA                            | NA                 |
| <i>Desi_wild_2043126</i> | NA                                  | <i>Ca_desi_denovo</i> | 2043126                 | C/A  | NA                 | NA                            | NA                 |
| <i>Desi_wild_2043135</i> | NA                                  | <i>Ca_desi_denovo</i> | 2043135                 | T/C  | NA                 | NA                            | NA                 |
| <i>Desi_wild_2043609</i> | NA                                  | <i>Ca_desi_denovo</i> | 2043609                 | T/C  | NA                 | NA                            | NA                 |
| <i>Desi_wild_2043625</i> | NA                                  | <i>Ca_desi_denovo</i> | 2043625                 | A/G  | NA                 | NA                            | NA                 |
| <i>Desi_wild_2044439</i> | NA                                  | <i>Ca_desi_denovo</i> | 2044439                 | G/C  | NA                 | NA                            | NA                 |
| <i>Desi_wild_2044440</i> | NA                                  | <i>Ca_desi_denovo</i> | 2044440                 | G/C  | NA                 | NA                            | NA                 |
| <i>Desi_wild_2044447</i> | NA                                  | <i>Ca_desi_denovo</i> | 2044447                 | A/G  | NA                 | NA                            | NA                 |
| <i>Desi_wild_2045340</i> | NA                                  | <i>Ca_desi_denovo</i> | 2045340                 | G/A  | NA                 | NA                            | NA                 |
| <i>Desi_wild_2046195</i> | NA                                  | <i>Ca_desi_denovo</i> | 2046195                 | G/T  | NA                 | NA                            | NA                 |
| <i>Desi_wild_2046390</i> | NA                                  | <i>Ca_desi_denovo</i> | 2046390                 | C/G  | NA                 | NA                            | NA                 |
| <i>Desi_wild_2047565</i> | NA                                  | <i>Ca_desi_denovo</i> | 2047565                 | G/A  | NA                 | NA                            | NA                 |
| <i>Desi_wild_2048818</i> | NA                                  | <i>Ca_desi_denovo</i> | 2048818                 | C/T  | NA                 | NA                            | NA                 |
| <i>Desi_wild_2048872</i> | NA                                  | <i>Ca_desi_denovo</i> | 2048872                 | G/A  | NA                 | NA                            | NA                 |
| <i>Desi_wild_2049297</i> | NA                                  | <i>Ca_desi_denovo</i> | 2049297                 | G/C  | NA                 | NA                            | NA                 |

| SNP IDs                  | NCBI dbSNP accession IDs (NCBI_SS#) | Chromosomes           | Physical positions (bp) | SNPs | Gene accession IDs | Sequence components of genome | Putative functions |
|--------------------------|-------------------------------------|-----------------------|-------------------------|------|--------------------|-------------------------------|--------------------|
| <i>Desi_wild_2050251</i> | NA                                  | <i>Ca_desi_denovo</i> | 2050251                 | T/G  | NA                 | NA                            | NA                 |
| <i>Desi_wild_2050659</i> | NA                                  | <i>Ca_desi_denovo</i> | 2050659                 | T/C  | NA                 | NA                            | NA                 |
| <i>Desi_wild_2050765</i> | NA                                  | <i>Ca_desi_denovo</i> | 2050765                 | G/C  | NA                 | NA                            | NA                 |
| <i>Desi_wild_2050956</i> | NA                                  | <i>Ca_desi_denovo</i> | 2050956                 | T/G  | NA                 | NA                            | NA                 |
| <i>Desi_wild_2051025</i> | NA                                  | <i>Ca_desi_denovo</i> | 2051025                 | T/C  | NA                 | NA                            | NA                 |
| <i>Desi_wild_2051675</i> | NA                                  | <i>Ca_desi_denovo</i> | 2051675                 | C/G  | NA                 | NA                            | NA                 |
| <i>Desi_wild_2051901</i> | NA                                  | <i>Ca_desi_denovo</i> | 2051901                 | C/T  | NA                 | NA                            | NA                 |
| <i>Desi_wild_2053686</i> | NA                                  | <i>Ca_desi_denovo</i> | 2053686                 | T/A  | NA                 | NA                            | NA                 |
| <i>Desi_wild_2053701</i> | NA                                  | <i>Ca_desi_denovo</i> | 2053701                 | G/A  | NA                 | NA                            | NA                 |
| <i>Desi_wild_2054256</i> | NA                                  | <i>Ca_desi_denovo</i> | 2054256                 | A/T  | NA                 | NA                            | NA                 |
| <i>Desi_wild_2054265</i> | NA                                  | <i>Ca_desi_denovo</i> | 2054265                 | G/A  | NA                 | NA                            | NA                 |
| <i>Desi_wild_2054415</i> | NA                                  | <i>Ca_desi_denovo</i> | 2054415                 | C/G  | NA                 | NA                            | NA                 |
| <i>Desi_wild_2054459</i> | NA                                  | <i>Ca_desi_denovo</i> | 2054459                 | C/G  | NA                 | NA                            | NA                 |
| <i>Desi_wild_2054507</i> | NA                                  | <i>Ca_desi_denovo</i> | 2054507                 | C/T  | NA                 | NA                            | NA                 |
| <i>Desi_wild_2057204</i> | NA                                  | <i>Ca_desi_denovo</i> | 2057204                 | C/T  | NA                 | NA                            | NA                 |
| <i>Desi_wild_2057520</i> | NA                                  | <i>Ca_desi_denovo</i> | 2057520                 | C/G  | NA                 | NA                            | NA                 |
| <i>Desi_wild_2057841</i> | NA                                  | <i>Ca_desi_denovo</i> | 2057841                 | G/A  | NA                 | NA                            | NA                 |
| <i>Desi_wild_2060025</i> | NA                                  | <i>Ca_desi_denovo</i> | 2060025                 | C/T  | NA                 | NA                            | NA                 |
| <i>Desi_wild_2060043</i> | NA                                  | <i>Ca_desi_denovo</i> | 2060043                 | G/T  | NA                 | NA                            | NA                 |
| <i>Desi_wild_2062774</i> | NA                                  | <i>Ca_desi_denovo</i> | 2062774                 | A/C  | NA                 | NA                            | NA                 |
| <i>Desi_wild_2064369</i> | NA                                  | <i>Ca_desi_denovo</i> | 2064369                 | A/G  | NA                 | NA                            | NA                 |
| <i>Desi_wild_2064613</i> | NA                                  | <i>Ca_desi_denovo</i> | 2064613                 | G/T  | NA                 | NA                            | NA                 |
| <i>Desi_wild_2065116</i> | NA                                  | <i>Ca_desi_denovo</i> | 2065116                 | A/G  | NA                 | NA                            | NA                 |
| <i>Desi_wild_2067922</i> | NA                                  | <i>Ca_desi_denovo</i> | 2067922                 | A/C  | NA                 | NA                            | NA                 |
| <i>Desi_wild_2067925</i> | NA                                  | <i>Ca_desi_denovo</i> | 2067925                 | C/T  | NA                 | NA                            | NA                 |
| <i>Desi_wild_2067991</i> | NA                                  | <i>Ca_desi_denovo</i> | 2067991                 | C/T  | NA                 | NA                            | NA                 |
| <i>Desi_wild_2068006</i> | NA                                  | <i>Ca_desi_denovo</i> | 2068006                 | C/G  | NA                 | NA                            | NA                 |
| <i>Desi_wild_2068079</i> | NA                                  | <i>Ca_desi_denovo</i> | 2068079                 | T/C  | NA                 | NA                            | NA                 |
| <i>Desi_wild_2068106</i> | NA                                  | <i>Ca_desi_denovo</i> | 2068106                 | A/T  | NA                 | NA                            | NA                 |
| <i>Desi_wild_2068636</i> | NA                                  | <i>Ca_desi_denovo</i> | 2068636                 | G/T  | NA                 | NA                            | NA                 |
| <i>Desi_wild_2070590</i> | NA                                  | <i>Ca_desi_denovo</i> | 2070590                 | T/C  | NA                 | NA                            | NA                 |
| <i>Desi_wild_2072299</i> | NA                                  | <i>Ca_desi_denovo</i> | 2072299                 | C/G  | NA                 | NA                            | NA                 |
| <i>Desi_wild_2072302</i> | NA                                  | <i>Ca_desi_denovo</i> | 2072302                 | C/T  | NA                 | NA                            | NA                 |
| <i>Desi_wild_2073453</i> | NA                                  | <i>Ca_desi_denovo</i> | 2073453                 | G/A  | NA                 | NA                            | NA                 |
| <i>Desi_wild_2073845</i> | NA                                  | <i>Ca_desi_denovo</i> | 2073845                 | G/T  | NA                 | NA                            | NA                 |
| <i>Desi_wild_2073848</i> | NA                                  | <i>Ca_desi_denovo</i> | 2073848                 | C/T  | NA                 | NA                            | NA                 |
| <i>Desi_wild_2073866</i> | NA                                  | <i>Ca_desi_denovo</i> | 2073866                 | A/G  | NA                 | NA                            | NA                 |
| <i>Desi_wild_2073916</i> | NA                                  | <i>Ca_desi_denovo</i> | 2073916                 | G/T  | NA                 | NA                            | NA                 |
| <i>Desi_wild_2075036</i> | NA                                  | <i>Ca_desi_denovo</i> | 2075036                 | A/G  | NA                 | NA                            | NA                 |
| <i>Desi_wild_2075057</i> | NA                                  | <i>Ca_desi_denovo</i> | 2075057                 | C/G  | NA                 | NA                            | NA                 |
| <i>Desi_wild_2075495</i> | NA                                  | <i>Ca_desi_denovo</i> | 2075495                 | T/C  | NA                 | NA                            | NA                 |
| <i>Desi_wild_2077167</i> | NA                                  | <i>Ca_desi_denovo</i> | 2077167                 | A/G  | NA                 | NA                            | NA                 |
| <i>Desi_wild_2077177</i> | NA                                  | <i>Ca_desi_denovo</i> | 2077177                 | C/G  | NA                 | NA                            | NA                 |
| <i>Desi_wild_2077919</i> | NA                                  | <i>Ca_desi_denovo</i> | 2077919                 | C/T  | NA                 | NA                            | NA                 |



| SNP IDs                  | NCBI dbSNP accession IDs (NCBI_SS#) | Chromosomes           | Physical positions (bp) | SNPs | Gene accession IDs | Sequence components of genome | Putative functions |
|--------------------------|-------------------------------------|-----------------------|-------------------------|------|--------------------|-------------------------------|--------------------|
| <i>Desi_wild_2077949</i> | NA                                  | <i>Ca_desi_denovo</i> | 2077949                 | C/T  | NA                 | NA                            | NA                 |
| <i>Desi_wild_2077952</i> | NA                                  | <i>Ca_desi_denovo</i> | 2077952                 | T/G  | NA                 | NA                            | NA                 |
| <i>Desi_wild_2078052</i> | NA                                  | <i>Ca_desi_denovo</i> | 2078052                 | A/G  | NA                 | NA                            | NA                 |
| <i>Desi_wild_2078123</i> | NA                                  | <i>Ca_desi_denovo</i> | 2078123                 | A/G  | NA                 | NA                            | NA                 |
| <i>Desi_wild_2078527</i> | NA                                  | <i>Ca_desi_denovo</i> | 2078527                 | A/G  | NA                 | NA                            | NA                 |
| <i>Desi_wild_2078575</i> | NA                                  | <i>Ca_desi_denovo</i> | 2078575                 | G/A  | NA                 | NA                            | NA                 |
| <i>Desi_wild_2079401</i> | NA                                  | <i>Ca_desi_denovo</i> | 2079401                 | T/C  | NA                 | NA                            | NA                 |
| <i>Desi_wild_2079438</i> | NA                                  | <i>Ca_desi_denovo</i> | 2079438                 | G/C  | NA                 | NA                            | NA                 |
| <i>Desi_wild_2080366</i> | NA                                  | <i>Ca_desi_denovo</i> | 2080366                 | A/G  | NA                 | NA                            | NA                 |
| <i>Desi_wild_2080393</i> | NA                                  | <i>Ca_desi_denovo</i> | 2080393                 | C/T  | NA                 | NA                            | NA                 |
| <i>Desi_wild_2080592</i> | NA                                  | <i>Ca_desi_denovo</i> | 2080592                 | A/G  | NA                 | NA                            | NA                 |
| <i>Desi_wild_2082793</i> | NA                                  | <i>Ca_desi_denovo</i> | 2082793                 | T/C  | NA                 | NA                            | NA                 |
| <i>Desi_wild_2082826</i> | NA                                  | <i>Ca_desi_denovo</i> | 2082826                 | G/C  | NA                 | NA                            | NA                 |
| <i>Desi_wild_2083276</i> | NA                                  | <i>Ca_desi_denovo</i> | 2083276                 | T/C  | NA                 | NA                            | NA                 |
| <i>Desi_wild_2083280</i> | NA                                  | <i>Ca_desi_denovo</i> | 2083280                 | T/C  | NA                 | NA                            | NA                 |
| <i>Desi_wild_2084041</i> | NA                                  | <i>Ca_desi_denovo</i> | 2084041                 | C/G  | NA                 | NA                            | NA                 |
| <i>Desi_wild_2084254</i> | NA                                  | <i>Ca_desi_denovo</i> | 2084254                 | C/T  | NA                 | NA                            | NA                 |
| <i>Desi_wild_2084266</i> | NA                                  | <i>Ca_desi_denovo</i> | 2084266                 | T/G  | NA                 | NA                            | NA                 |
| <i>Desi_wild_2085777</i> | NA                                  | <i>Ca_desi_denovo</i> | 2085777                 | A/G  | NA                 | NA                            | NA                 |
| <i>Desi_wild_2087638</i> | NA                                  | <i>Ca_desi_denovo</i> | 2087638                 | T/C  | NA                 | NA                            | NA                 |
| <i>Desi_wild_2087650</i> | NA                                  | <i>Ca_desi_denovo</i> | 2087650                 | T/C  | NA                 | NA                            | NA                 |
| <i>Desi_wild_2087721</i> | NA                                  | <i>Ca_desi_denovo</i> | 2087721                 | A/G  | NA                 | NA                            | NA                 |
| <i>Desi_wild_2088025</i> | NA                                  | <i>Ca_desi_denovo</i> | 2088025                 | A/G  | NA                 | NA                            | NA                 |
| <i>Desi_wild_2088079</i> | NA                                  | <i>Ca_desi_denovo</i> | 2088079                 | A/C  | NA                 | NA                            | NA                 |
| <i>Desi_wild_2088496</i> | NA                                  | <i>Ca_desi_denovo</i> | 2088496                 | G/A  | NA                 | NA                            | NA                 |
| <i>Desi_wild_2088505</i> | NA                                  | <i>Ca_desi_denovo</i> | 2088505                 | G/A  | NA                 | NA                            | NA                 |
| <i>Desi_wild_2088514</i> | NA                                  | <i>Ca_desi_denovo</i> | 2088514                 | C/T  | NA                 | NA                            | NA                 |
| <i>Desi_wild_2089173</i> | NA                                  | <i>Ca_desi_denovo</i> | 2089173                 | C/T  | NA                 | NA                            | NA                 |
| <i>Desi_wild_2089215</i> | NA                                  | <i>Ca_desi_denovo</i> | 2089215                 | A/G  | NA                 | NA                            | NA                 |
| <i>Desi_wild_2090207</i> | NA                                  | <i>Ca_desi_denovo</i> | 2090207                 | G/A  | NA                 | NA                            | NA                 |
| <i>Desi_wild_2094640</i> | NA                                  | <i>Ca_desi_denovo</i> | 2094640                 | G/T  | NA                 | NA                            | NA                 |
| <i>Desi_wild_2094649</i> | NA                                  | <i>Ca_desi_denovo</i> | 2094649                 | G/C  | NA                 | NA                            | NA                 |
| <i>Desi_wild_2094661</i> | NA                                  | <i>Ca_desi_denovo</i> | 2094661                 | A/G  | NA                 | NA                            | NA                 |
| <i>Desi_wild_2094819</i> | NA                                  | <i>Ca_desi_denovo</i> | 2094819                 | A/G  | NA                 | NA                            | NA                 |
| <i>Desi_wild_2096072</i> | NA                                  | <i>Ca_desi_denovo</i> | 2096072                 | C/A  | NA                 | NA                            | NA                 |
| <i>Desi_wild_2096117</i> | NA                                  | <i>Ca_desi_denovo</i> | 2096117                 | C/G  | NA                 | NA                            | NA                 |
| <i>Desi_wild_2096224</i> | NA                                  | <i>Ca_desi_denovo</i> | 2096224                 | G/T  | NA                 | NA                            | NA                 |
| <i>Desi_wild_2097142</i> | NA                                  | <i>Ca_desi_denovo</i> | 2097142                 | A/G  | NA                 | NA                            | NA                 |
| <i>Desi_wild_2097743</i> | NA                                  | <i>Ca_desi_denovo</i> | 2097743                 | T/C  | NA                 | NA                            | NA                 |
| <i>Desi_wild_2098604</i> | NA                                  | <i>Ca_desi_denovo</i> | 2098604                 | T/C  | NA                 | NA                            | NA                 |
| <i>Desi_wild_2098658</i> | NA                                  | <i>Ca_desi_denovo</i> | 2098658                 | C/T  | NA                 | NA                            | NA                 |
| <i>Desi_wild_2098934</i> | NA                                  | <i>Ca_desi_denovo</i> | 2098934                 | C/G  | NA                 | NA                            | NA                 |
| <i>Desi_wild_2098946</i> | NA                                  | <i>Ca_desi_denovo</i> | 2098946                 | C/T  | NA                 | NA                            | NA                 |
| <i>Desi_wild_2099873</i> | NA                                  | <i>Ca_desi_denovo</i> | 2099873                 | A/G  | NA                 | NA                            | NA                 |

| SNP IDs                  | NCBI dbSNP accession IDs (NCBI_SS#) | Chromosomes           | Physical positions (bp) | SNPs | Gene accession IDs | Sequence components of genome | Putative functions |
|--------------------------|-------------------------------------|-----------------------|-------------------------|------|--------------------|-------------------------------|--------------------|
| <i>Desi_wild_2099900</i> | NA                                  | <i>Ca_desi_denovo</i> | 2099900                 | T/G  | NA                 | NA                            | NA                 |
| <i>Desi_wild_2099962</i> | NA                                  | <i>Ca_desi_denovo</i> | 2099962                 | G/T  | NA                 | NA                            | NA                 |
| <i>Desi_wild_2100599</i> | NA                                  | <i>Ca_desi_denovo</i> | 2100599                 | T/G  | NA                 | NA                            | NA                 |
| <i>Desi_wild_2100750</i> | NA                                  | <i>Ca_desi_denovo</i> | 2100750                 | T/C  | NA                 | NA                            | NA                 |
| <i>Desi_wild_2100780</i> | NA                                  | <i>Ca_desi_denovo</i> | 2100780                 | T/G  | NA                 | NA                            | NA                 |
| <i>Desi_wild_2101419</i> | NA                                  | <i>Ca_desi_denovo</i> | 2101419                 | T/C  | NA                 | NA                            | NA                 |
| <i>Desi_wild_2102755</i> | NA                                  | <i>Ca_desi_denovo</i> | 2102755                 | A/G  | NA                 | NA                            | NA                 |
| <i>Desi_wild_2103076</i> | NA                                  | <i>Ca_desi_denovo</i> | 2103076                 | G/T  | NA                 | NA                            | NA                 |
| <i>Desi_wild_2103079</i> | NA                                  | <i>Ca_desi_denovo</i> | 2103079                 | T/C  | NA                 | NA                            | NA                 |
| <i>Desi_wild_2103091</i> | NA                                  | <i>Ca_desi_denovo</i> | 2103091                 | T/G  | NA                 | NA                            | NA                 |
| <i>Desi_wild_2103449</i> | NA                                  | <i>Ca_desi_denovo</i> | 2103449                 | C/G  | NA                 | NA                            | NA                 |
| <i>Desi_wild_2103452</i> | NA                                  | <i>Ca_desi_denovo</i> | 2103452                 | A/G  | NA                 | NA                            | NA                 |
| <i>Desi_wild_2103875</i> | NA                                  | <i>Ca_desi_denovo</i> | 2103875                 | T/G  | NA                 | NA                            | NA                 |
| <i>Desi_wild_2103883</i> | NA                                  | <i>Ca_desi_denovo</i> | 2103883                 | T/C  | NA                 | NA                            | NA                 |
| <i>Desi_wild_2105387</i> | NA                                  | <i>Ca_desi_denovo</i> | 2105387                 | C/T  | NA                 | NA                            | NA                 |
| <i>Desi_wild_2105392</i> | NA                                  | <i>Ca_desi_denovo</i> | 2105392                 | G/A  | NA                 | NA                            | NA                 |
| <i>Desi_wild_2105893</i> | NA                                  | <i>Ca_desi_denovo</i> | 2105893                 | G/T  | NA                 | NA                            | NA                 |
| <i>Desi_wild_2106071</i> | NA                                  | <i>Ca_desi_denovo</i> | 2106071                 | T/C  | NA                 | NA                            | NA                 |
| <i>Desi_wild_2107146</i> | NA                                  | <i>Ca_desi_denovo</i> | 2107146                 | G/C  | NA                 | NA                            | NA                 |
| <i>Desi_wild_2107614</i> | NA                                  | <i>Ca_desi_denovo</i> | 2107614                 | G/C  | NA                 | NA                            | NA                 |
| <i>Desi_wild_2107849</i> | NA                                  | <i>Ca_desi_denovo</i> | 2107849                 | T/C  | NA                 | NA                            | NA                 |
| <i>Desi_wild_2108371</i> | NA                                  | <i>Ca_desi_denovo</i> | 2108371                 | C/G  | NA                 | NA                            | NA                 |
| <i>Desi_wild_2108414</i> | NA                                  | <i>Ca_desi_denovo</i> | 2108414                 | T/G  | NA                 | NA                            | NA                 |
| <i>Desi_wild_2109275</i> | NA                                  | <i>Ca_desi_denovo</i> | 2109275                 | T/G  | NA                 | NA                            | NA                 |
| <i>Desi_wild_2109566</i> | NA                                  | <i>Ca_desi_denovo</i> | 2109566                 | T/C  | NA                 | NA                            | NA                 |
| <i>Desi_wild_2110315</i> | NA                                  | <i>Ca_desi_denovo</i> | 2110315                 | G/T  | NA                 | NA                            | NA                 |
| <i>Desi_wild_2111306</i> | NA                                  | <i>Ca_desi_denovo</i> | 2111306                 | G/C  | NA                 | NA                            | NA                 |
| <i>Desi_wild_2111328</i> | NA                                  | <i>Ca_desi_denovo</i> | 2111328                 | A/G  | NA                 | NA                            | NA                 |
| <i>Desi_wild_2112095</i> | NA                                  | <i>Ca_desi_denovo</i> | 2112095                 | G/A  | NA                 | NA                            | NA                 |
| <i>Desi_wild_2112098</i> | NA                                  | <i>Ca_desi_denovo</i> | 2112098                 | T/G  | NA                 | NA                            | NA                 |
| <i>Desi_wild_2112953</i> | NA                                  | <i>Ca_desi_denovo</i> | 2112953                 | A/G  | NA                 | NA                            | NA                 |
| <i>Desi_wild_2113657</i> | NA                                  | <i>Ca_desi_denovo</i> | 2113657                 | C/T  | NA                 | NA                            | NA                 |
| <i>Desi_wild_2114173</i> | NA                                  | <i>Ca_desi_denovo</i> | 2114173                 | A/T  | NA                 | NA                            | NA                 |
| <i>Desi_wild_2114400</i> | NA                                  | <i>Ca_desi_denovo</i> | 2114400                 | A/G  | NA                 | NA                            | NA                 |
| <i>Desi_wild_2114415</i> | NA                                  | <i>Ca_desi_denovo</i> | 2114415                 | C/A  | NA                 | NA                            | NA                 |
| <i>Desi_wild_2114794</i> | NA                                  | <i>Ca_desi_denovo</i> | 2114794                 | A/G  | NA                 | NA                            | NA                 |
| <i>Desi_wild_2114822</i> | NA                                  | <i>Ca_desi_denovo</i> | 2114822                 | G/A  | NA                 | NA                            | NA                 |
| <i>Desi_wild_2116804</i> | NA                                  | <i>Ca_desi_denovo</i> | 2116804                 | G/T  | NA                 | NA                            | NA                 |
| <i>Desi_wild_2117108</i> | NA                                  | <i>Ca_desi_denovo</i> | 2117108                 | G/C  | NA                 | NA                            | NA                 |
| <i>Desi_wild_2117142</i> | NA                                  | <i>Ca_desi_denovo</i> | 2117142                 | T/A  | NA                 | NA                            | NA                 |
| <i>Desi_wild_2117652</i> | NA                                  | <i>Ca_desi_denovo</i> | 2117652                 | C/T  | NA                 | NA                            | NA                 |
| <i>Desi_wild_2120871</i> | NA                                  | <i>Ca_desi_denovo</i> | 2120871                 | A/C  | NA                 | NA                            | NA                 |
| <i>Desi_wild_2121203</i> | NA                                  | <i>Ca_desi_denovo</i> | 2121203                 | C/A  | NA                 | NA                            | NA                 |
| <i>Desi_wild_2122005</i> | NA                                  | <i>Ca_desi_denovo</i> | 2122005                 | T/C  | NA                 | NA                            | NA                 |

| SNP IDs                  | NCBI dbSNP accession IDs (NCBI_SS#) | Chromosomes           | Physical positions (bp) | SNPs | Gene accession IDs | Sequence components of genome | Putative functions |
|--------------------------|-------------------------------------|-----------------------|-------------------------|------|--------------------|-------------------------------|--------------------|
| <i>Desi_wild_2122388</i> | NA                                  | <i>Ca_desi_denovo</i> | 2122388                 | C/T  | NA                 | NA                            | NA                 |
| <i>Desi_wild_2122832</i> | NA                                  | <i>Ca_desi_denovo</i> | 2122832                 | C/T  | NA                 | NA                            | NA                 |
| <i>Desi_wild_2122983</i> | NA                                  | <i>Ca_desi_denovo</i> | 2122983                 | T/C  | NA                 | NA                            | NA                 |
| <i>Desi_wild_2123337</i> | NA                                  | <i>Ca_desi_denovo</i> | 2123337                 | T/G  | NA                 | NA                            | NA                 |
| <i>Desi_wild_2123614</i> | NA                                  | <i>Ca_desi_denovo</i> | 2123614                 | C/T  | NA                 | NA                            | NA                 |
| <i>Desi_wild_2124098</i> | NA                                  | <i>Ca_desi_denovo</i> | 2124098                 | T/C  | NA                 | NA                            | NA                 |
| <i>Desi_wild_2124137</i> | NA                                  | <i>Ca_desi_denovo</i> | 2124137                 | C/G  | NA                 | NA                            | NA                 |
| <i>Desi_wild_2124246</i> | NA                                  | <i>Ca_desi_denovo</i> | 2124246                 | T/C  | NA                 | NA                            | NA                 |
| <i>Desi_wild_2125073</i> | NA                                  | <i>Ca_desi_denovo</i> | 2125073                 | T/C  | NA                 | NA                            | NA                 |
| <i>Desi_wild_2125166</i> | NA                                  | <i>Ca_desi_denovo</i> | 2125166                 | C/G  | NA                 | NA                            | NA                 |
| <i>Desi_wild_2125169</i> | NA                                  | <i>Ca_desi_denovo</i> | 2125169                 | G/C  | NA                 | NA                            | NA                 |
| <i>Desi_wild_2127041</i> | NA                                  | <i>Ca_desi_denovo</i> | 2127041                 | A/C  | NA                 | NA                            | NA                 |
| <i>Desi_wild_2127376</i> | NA                                  | <i>Ca_desi_denovo</i> | 2127376                 | G/T  | NA                 | NA                            | NA                 |
| <i>Desi_wild_2127407</i> | NA                                  | <i>Ca_desi_denovo</i> | 2127407                 | G/C  | NA                 | NA                            | NA                 |
| <i>Desi_wild_2127416</i> | NA                                  | <i>Ca_desi_denovo</i> | 2127416                 | G/A  | NA                 | NA                            | NA                 |
| <i>Desi_wild_2128864</i> | NA                                  | <i>Ca_desi_denovo</i> | 2128864                 | G/C  | NA                 | NA                            | NA                 |
| <i>Desi_wild_2128873</i> | NA                                  | <i>Ca_desi_denovo</i> | 2128873                 | T/C  | NA                 | NA                            | NA                 |
| <i>Desi_wild_2129062</i> | NA                                  | <i>Ca_desi_denovo</i> | 2129062                 | C/T  | NA                 | NA                            | NA                 |
| <i>Desi_wild_2129140</i> | NA                                  | <i>Ca_desi_denovo</i> | 2129140                 | C/T  | NA                 | NA                            | NA                 |
| <i>Desi_wild_2129964</i> | NA                                  | <i>Ca_desi_denovo</i> | 2129964                 | G/A  | NA                 | NA                            | NA                 |
| <i>Desi_wild_2129970</i> | NA                                  | <i>Ca_desi_denovo</i> | 2129970                 | A/C  | NA                 | NA                            | NA                 |
| <i>Desi_wild_2131251</i> | NA                                  | <i>Ca_desi_denovo</i> | 2131251                 | T/G  | NA                 | NA                            | NA                 |
| <i>Desi_wild_2131948</i> | NA                                  | <i>Ca_desi_denovo</i> | 2131948                 | T/C  | NA                 | NA                            | NA                 |
| <i>Desi_wild_2132758</i> | NA                                  | <i>Ca_desi_denovo</i> | 2132758                 | G/C  | NA                 | NA                            | NA                 |
| <i>Desi_wild_2134339</i> | NA                                  | <i>Ca_desi_denovo</i> | 2134339                 | C/T  | NA                 | NA                            | NA                 |
| <i>Desi_wild_2134342</i> | NA                                  | <i>Ca_desi_denovo</i> | 2134342                 | C/A  | NA                 | NA                            | NA                 |
| <i>Desi_wild_2135059</i> | NA                                  | <i>Ca_desi_denovo</i> | 2135059                 | A/G  | NA                 | NA                            | NA                 |
| <i>Desi_wild_2135119</i> | NA                                  | <i>Ca_desi_denovo</i> | 2135119                 | G/A  | NA                 | NA                            | NA                 |
| <i>Desi_wild_2135940</i> | NA                                  | <i>Ca_desi_denovo</i> | 2135940                 | A/G  | NA                 | NA                            | NA                 |
| <i>Desi_wild_2135980</i> | NA                                  | <i>Ca_desi_denovo</i> | 2135980                 | G/A  | NA                 | NA                            | NA                 |
| <i>Desi_wild_2136286</i> | NA                                  | <i>Ca_desi_denovo</i> | 2136286                 | T/G  | NA                 | NA                            | NA                 |
| <i>Desi_wild_2137749</i> | NA                                  | <i>Ca_desi_denovo</i> | 2137749                 | G/T  | NA                 | NA                            | NA                 |
| <i>Desi_wild_2138440</i> | NA                                  | <i>Ca_desi_denovo</i> | 2138440                 | G/A  | NA                 | NA                            | NA                 |
| <i>Desi_wild_2138766</i> | NA                                  | <i>Ca_desi_denovo</i> | 2138766                 | G/C  | NA                 | NA                            | NA                 |
| <i>Desi_wild_2138808</i> | NA                                  | <i>Ca_desi_denovo</i> | 2138808                 | T/C  | NA                 | NA                            | NA                 |
| <i>Desi_wild_2139031</i> | NA                                  | <i>Ca_desi_denovo</i> | 2139031                 | A/T  | NA                 | NA                            | NA                 |
| <i>Desi_wild_2140253</i> | NA                                  | <i>Ca_desi_denovo</i> | 2140253                 | C/A  | NA                 | NA                            | NA                 |
| <i>Desi_wild_2140402</i> | NA                                  | <i>Ca_desi_denovo</i> | 2140402                 | G/C  | NA                 | NA                            | NA                 |
| <i>Desi_wild_2140664</i> | NA                                  | <i>Ca_desi_denovo</i> | 2140664                 | A/C  | NA                 | NA                            | NA                 |
| <i>Desi_wild_2142572</i> | NA                                  | <i>Ca_desi_denovo</i> | 2142572                 | C/T  | NA                 | NA                            | NA                 |
| <i>Desi_wild_2143395</i> | NA                                  | <i>Ca_desi_denovo</i> | 2143395                 | A/C  | NA                 | NA                            | NA                 |
| <i>Desi_wild_2143397</i> | NA                                  | <i>Ca_desi_denovo</i> | 2143397                 | A/G  | NA                 | NA                            | NA                 |
| <i>Desi_wild_2144709</i> | NA                                  | <i>Ca_desi_denovo</i> | 2144709                 | T/G  | NA                 | NA                            | NA                 |
| <i>Desi_wild_2145195</i> | NA                                  | <i>Ca_desi_denovo</i> | 2145195                 | G/A  | NA                 | NA                            | NA                 |

| SNP IDs                  | NCBI dbSNP accession IDs (NCBI_SS#) | Chromosomes           | Physical positions (bp) | SNPs | Gene accession IDs | Sequence components of genome | Putative functions |
|--------------------------|-------------------------------------|-----------------------|-------------------------|------|--------------------|-------------------------------|--------------------|
| <i>Desi_wild_2146013</i> | NA                                  | <i>Ca_desi_denovo</i> | 2146013                 | A/G  | NA                 | NA                            | NA                 |
| <i>Desi_wild_2147087</i> | NA                                  | <i>Ca_desi_denovo</i> | 2147087                 | T/G  | NA                 | NA                            | NA                 |
| <i>Desi_wild_2147150</i> | NA                                  | <i>Ca_desi_denovo</i> | 2147150                 | C/G  | NA                 | NA                            | NA                 |
| <i>Desi_wild_2148258</i> | NA                                  | <i>Ca_desi_denovo</i> | 2148258                 | C/T  | NA                 | NA                            | NA                 |
| <i>Desi_wild_2148293</i> | NA                                  | <i>Ca_desi_denovo</i> | 2148293                 | G/C  | NA                 | NA                            | NA                 |
| <i>Desi_wild_2149617</i> | NA                                  | <i>Ca_desi_denovo</i> | 2149617                 | G/C  | NA                 | NA                            | NA                 |
| <i>Desi_wild_2149644</i> | NA                                  | <i>Ca_desi_denovo</i> | 2149644                 | T/C  | NA                 | NA                            | NA                 |
| <i>Desi_wild_2149999</i> | NA                                  | <i>Ca_desi_denovo</i> | 2149999                 | A/C  | NA                 | NA                            | NA                 |
| <i>Desi_wild_2150013</i> | NA                                  | <i>Ca_desi_denovo</i> | 2150013                 | G/C  | NA                 | NA                            | NA                 |
| <i>Desi_wild_2150288</i> | NA                                  | <i>Ca_desi_denovo</i> | 2150288                 | C/G  | NA                 | NA                            | NA                 |
| <i>Desi_wild_2150840</i> | NA                                  | <i>Ca_desi_denovo</i> | 2150840                 | T/G  | NA                 | NA                            | NA                 |
| <i>Desi_wild_2151052</i> | NA                                  | <i>Ca_desi_denovo</i> | 2151052                 | T/G  | NA                 | NA                            | NA                 |
| <i>Desi_wild_2151658</i> | NA                                  | <i>Ca_desi_denovo</i> | 2151658                 | C/G  | NA                 | NA                            | NA                 |
| <i>Desi_wild_2151679</i> | NA                                  | <i>Ca_desi_denovo</i> | 2151679                 | C/G  | NA                 | NA                            | NA                 |
| <i>Desi_wild_2151924</i> | NA                                  | <i>Ca_desi_denovo</i> | 2151924                 | G/T  | NA                 | NA                            | NA                 |
| <i>Desi_wild_2152081</i> | NA                                  | <i>Ca_desi_denovo</i> | 2152081                 | A/G  | NA                 | NA                            | NA                 |
| <i>Desi_wild_2154401</i> | NA                                  | <i>Ca_desi_denovo</i> | 2154401                 | A/C  | NA                 | NA                            | NA                 |
| <i>Desi_wild_2154412</i> | NA                                  | <i>Ca_desi_denovo</i> | 2154412                 | C/T  | NA                 | NA                            | NA                 |
| <i>Desi_wild_2154970</i> | NA                                  | <i>Ca_desi_denovo</i> | 2154970                 | T/C  | NA                 | NA                            | NA                 |
| <i>Desi_wild_2155032</i> | NA                                  | <i>Ca_desi_denovo</i> | 2155032                 | T/C  | NA                 | NA                            | NA                 |
| <i>Desi_wild_2157583</i> | NA                                  | <i>Ca_desi_denovo</i> | 2157583                 | C/T  | NA                 | NA                            | NA                 |
| <i>Desi_wild_2158521</i> | NA                                  | <i>Ca_desi_denovo</i> | 2158521                 | A/G  | NA                 | NA                            | NA                 |
| <i>Desi_wild_2158523</i> | NA                                  | <i>Ca_desi_denovo</i> | 2158523                 | T/C  | NA                 | NA                            | NA                 |
| <i>Desi_wild_2158526</i> | NA                                  | <i>Ca_desi_denovo</i> | 2158526                 | T/G  | NA                 | NA                            | NA                 |
| <i>Desi_wild_2158626</i> | NA                                  | <i>Ca_desi_denovo</i> | 2158626                 | C/T  | NA                 | NA                            | NA                 |
| <i>Desi_wild_2160096</i> | NA                                  | <i>Ca_desi_denovo</i> | 2160096                 | A/G  | NA                 | NA                            | NA                 |
| <i>Desi_wild_2161138</i> | NA                                  | <i>Ca_desi_denovo</i> | 2161138                 | T/C  | NA                 | NA                            | NA                 |
| <i>Desi_wild_2161218</i> | NA                                  | <i>Ca_desi_denovo</i> | 2161218                 | C/T  | NA                 | NA                            | NA                 |
| <i>Desi_wild_2161458</i> | NA                                  | <i>Ca_desi_denovo</i> | 2161458                 | C/T  | NA                 | NA                            | NA                 |
| <i>Desi_wild_2162681</i> | NA                                  | <i>Ca_desi_denovo</i> | 2162681                 | C/G  | NA                 | NA                            | NA                 |
| <i>Desi_wild_2164134</i> | NA                                  | <i>Ca_desi_denovo</i> | 2164134                 | T/G  | NA                 | NA                            | NA                 |
| <i>Desi_wild_2164208</i> | NA                                  | <i>Ca_desi_denovo</i> | 2164208                 | C/G  | NA                 | NA                            | NA                 |
| <i>Desi_wild_2164425</i> | NA                                  | <i>Ca_desi_denovo</i> | 2164425                 | T/G  | NA                 | NA                            | NA                 |
| <i>Desi_wild_2164552</i> | NA                                  | <i>Ca_desi_denovo</i> | 2164552                 | T/C  | NA                 | NA                            | NA                 |
| <i>Desi_wild_2164555</i> | NA                                  | <i>Ca_desi_denovo</i> | 2164555                 | A/G  | NA                 | NA                            | NA                 |
| <i>Desi_wild_2164810</i> | NA                                  | <i>Ca_desi_denovo</i> | 2164810                 | C/G  | NA                 | NA                            | NA                 |
| <i>Desi_wild_2164812</i> | NA                                  | <i>Ca_desi_denovo</i> | 2164812                 | T/G  | NA                 | NA                            | NA                 |
| <i>Desi_wild_2165804</i> | NA                                  | <i>Ca_desi_denovo</i> | 2165804                 | C/G  | NA                 | NA                            | NA                 |
| <i>Desi_wild_2166213</i> | NA                                  | <i>Ca_desi_denovo</i> | 2166213                 | C/A  | NA                 | NA                            | NA                 |
| <i>Desi_wild_2166219</i> | NA                                  | <i>Ca_desi_denovo</i> | 2166219                 | T/G  | NA                 | NA                            | NA                 |
| <i>Desi_wild_2168627</i> | NA                                  | <i>Ca_desi_denovo</i> | 2168627                 | T/C  | NA                 | NA                            | NA                 |
| <i>Desi_wild_2168669</i> | NA                                  | <i>Ca_desi_denovo</i> | 2168669                 | T/C  | NA                 | NA                            | NA                 |
| <i>Desi_wild_2168743</i> | NA                                  | <i>Ca_desi_denovo</i> | 2168743                 | T/C  | NA                 | NA                            | NA                 |
| <i>Desi_wild_2169199</i> | NA                                  | <i>Ca_desi_denovo</i> | 2169199                 | C/T  | NA                 | NA                            | NA                 |

| SNP IDs                  | NCBI dbSNP accession IDs (NCBI_SS#) | Chromosomes           | Physical positions (bp) | SNPs | Gene accession IDs | Sequence components of genome | Putative functions |
|--------------------------|-------------------------------------|-----------------------|-------------------------|------|--------------------|-------------------------------|--------------------|
| <i>Desi_wild_2169890</i> | NA                                  | <i>Ca_desi_denovo</i> | 2169890                 | C/G  | NA                 | NA                            | NA                 |
| <i>Desi_wild_2170282</i> | NA                                  | <i>Ca_desi_denovo</i> | 2170282                 | G/T  | NA                 | NA                            | NA                 |
| <i>Desi_wild_2171232</i> | NA                                  | <i>Ca_desi_denovo</i> | 2171232                 | A/G  | NA                 | NA                            | NA                 |
| <i>Desi_wild_2171259</i> | NA                                  | <i>Ca_desi_denovo</i> | 2171259                 | C/T  | NA                 | NA                            | NA                 |
| <i>Desi_wild_2171271</i> | NA                                  | <i>Ca_desi_denovo</i> | 2171271                 | T/C  | NA                 | NA                            | NA                 |
| <i>Desi_wild_2172267</i> | NA                                  | <i>Ca_desi_denovo</i> | 2172267                 | G/A  | NA                 | NA                            | NA                 |
| <i>Desi_wild_2172893</i> | NA                                  | <i>Ca_desi_denovo</i> | 2172893                 | T/C  | NA                 | NA                            | NA                 |
| <i>Desi_wild_2172984</i> | NA                                  | <i>Ca_desi_denovo</i> | 2172984                 | C/T  | NA                 | NA                            | NA                 |
| <i>Desi_wild_2173210</i> | NA                                  | <i>Ca_desi_denovo</i> | 2173210                 | G/A  | NA                 | NA                            | NA                 |
| <i>Desi_wild_2176296</i> | NA                                  | <i>Ca_desi_denovo</i> | 2176296                 | C/G  | NA                 | NA                            | NA                 |
| <i>Desi_wild_2177171</i> | NA                                  | <i>Ca_desi_denovo</i> | 2177171                 | T/C  | NA                 | NA                            | NA                 |
| <i>Desi_wild_2177253</i> | NA                                  | <i>Ca_desi_denovo</i> | 2177253                 | T/G  | NA                 | NA                            | NA                 |
| <i>Desi_wild_2177323</i> | NA                                  | <i>Ca_desi_denovo</i> | 2177323                 | C/G  | NA                 | NA                            | NA                 |
| <i>Desi_wild_2177551</i> | NA                                  | <i>Ca_desi_denovo</i> | 2177551                 | C/T  | NA                 | NA                            | NA                 |
| <i>Desi_wild_2177779</i> | NA                                  | <i>Ca_desi_denovo</i> | 2177779                 | T/C  | NA                 | NA                            | NA                 |
| <i>Desi_wild_2177787</i> | NA                                  | <i>Ca_desi_denovo</i> | 2177787                 | A/G  | NA                 | NA                            | NA                 |
| <i>Desi_wild_2178415</i> | NA                                  | <i>Ca_desi_denovo</i> | 2178415                 | A/G  | NA                 | NA                            | NA                 |
| <i>Desi_wild_2178514</i> | NA                                  | <i>Ca_desi_denovo</i> | 2178514                 | T/C  | NA                 | NA                            | NA                 |
| <i>Desi_wild_2178547</i> | NA                                  | <i>Ca_desi_denovo</i> | 2178547                 | G/T  | NA                 | NA                            | NA                 |
| <i>Desi_wild_2179084</i> | NA                                  | <i>Ca_desi_denovo</i> | 2179084                 | A/T  | NA                 | NA                            | NA                 |
| <i>Desi_wild_2180059</i> | NA                                  | <i>Ca_desi_denovo</i> | 2180059                 | G/T  | NA                 | NA                            | NA                 |
| <i>Desi_wild_2180060</i> | NA                                  | <i>Ca_desi_denovo</i> | 2180060                 | A/G  | NA                 | NA                            | NA                 |
| <i>Desi_wild_2180071</i> | NA                                  | <i>Ca_desi_denovo</i> | 2180071                 | C/T  | NA                 | NA                            | NA                 |
| <i>Desi_wild_2180135</i> | NA                                  | <i>Ca_desi_denovo</i> | 2180135                 | A/G  | NA                 | NA                            | NA                 |
| <i>Desi_wild_2180145</i> | NA                                  | <i>Ca_desi_denovo</i> | 2180145                 | A/T  | NA                 | NA                            | NA                 |
| <i>Desi_wild_2180541</i> | NA                                  | <i>Ca_desi_denovo</i> | 2180541                 | A/G  | NA                 | NA                            | NA                 |
| <i>Desi_wild_2180551</i> | NA                                  | <i>Ca_desi_denovo</i> | 2180551                 | G/C  | NA                 | NA                            | NA                 |
| <i>Desi_wild_2180665</i> | NA                                  | <i>Ca_desi_denovo</i> | 2180665                 | C/T  | NA                 | NA                            | NA                 |
| <i>Desi_wild_2180737</i> | NA                                  | <i>Ca_desi_denovo</i> | 2180737                 | A/G  | NA                 | NA                            | NA                 |
| <i>Desi_wild_2180832</i> | NA                                  | <i>Ca_desi_denovo</i> | 2180832                 | A/G  | NA                 | NA                            | NA                 |
| <i>Desi_wild_2181688</i> | NA                                  | <i>Ca_desi_denovo</i> | 2181688                 | G/A  | NA                 | NA                            | NA                 |
| <i>Desi_wild_2182018</i> | NA                                  | <i>Ca_desi_denovo</i> | 2182018                 | A/C  | NA                 | NA                            | NA                 |
| <i>Desi_wild_2182039</i> | NA                                  | <i>Ca_desi_denovo</i> | 2182039                 | T/C  | NA                 | NA                            | NA                 |
| <i>Desi_wild_2182982</i> | NA                                  | <i>Ca_desi_denovo</i> | 2182982                 | A/G  | NA                 | NA                            | NA                 |
| <i>Desi_wild_2183051</i> | NA                                  | <i>Ca_desi_denovo</i> | 2183051                 | A/C  | NA                 | NA                            | NA                 |
| <i>Desi_wild_2184453</i> | NA                                  | <i>Ca_desi_denovo</i> | 2184453                 | A/G  | NA                 | NA                            | NA                 |
| <i>Desi_wild_2185125</i> | NA                                  | <i>Ca_desi_denovo</i> | 2185125                 | T/C  | NA                 | NA                            | NA                 |
| <i>Desi_wild_2185819</i> | NA                                  | <i>Ca_desi_denovo</i> | 2185819                 | G/C  | NA                 | NA                            | NA                 |
| <i>Desi_wild_2186325</i> | NA                                  | <i>Ca_desi_denovo</i> | 2186325                 | A/G  | NA                 | NA                            | NA                 |
| <i>Desi_wild_2186334</i> | NA                                  | <i>Ca_desi_denovo</i> | 2186334                 | A/G  | NA                 | NA                            | NA                 |
| <i>Desi_wild_2186975</i> | NA                                  | <i>Ca_desi_denovo</i> | 2186975                 | T/C  | NA                 | NA                            | NA                 |
| <i>Desi_wild_2188304</i> | NA                                  | <i>Ca_desi_denovo</i> | 2188304                 | C/G  | NA                 | NA                            | NA                 |
| <i>Desi_wild_2188313</i> | NA                                  | <i>Ca_desi_denovo</i> | 2188313                 | C/G  | NA                 | NA                            | NA                 |
| <i>Desi_wild_2189112</i> | NA                                  | <i>Ca_desi_denovo</i> | 2189112                 | G/A  | NA                 | NA                            | NA                 |

| SNP IDs                  | NCBI dbSNP accession IDs (NCBI_SS#) | Chromosomes           | Physical positions (bp) | SNPs | Gene accession IDs | Sequence components of genome | Putative functions |
|--------------------------|-------------------------------------|-----------------------|-------------------------|------|--------------------|-------------------------------|--------------------|
| <i>Desi_wild_2189304</i> | NA                                  | <i>Ca_desi_denovo</i> | 2189304                 | A/G  | NA                 | NA                            | NA                 |
| <i>Desi_wild_2189369</i> | NA                                  | <i>Ca_desi_denovo</i> | 2189369                 | A/T  | NA                 | NA                            | NA                 |
| <i>Desi_wild_2189399</i> | NA                                  | <i>Ca_desi_denovo</i> | 2189399                 | T/A  | NA                 | NA                            | NA                 |
| <i>Desi_wild_2189473</i> | NA                                  | <i>Ca_desi_denovo</i> | 2189473                 | A/G  | NA                 | NA                            | NA                 |
| <i>Desi_wild_2189479</i> | NA                                  | <i>Ca_desi_denovo</i> | 2189479                 | C/T  | NA                 | NA                            | NA                 |
| <i>Desi_wild_2189585</i> | NA                                  | <i>Ca_desi_denovo</i> | 2189585                 | G/C  | NA                 | NA                            | NA                 |
| <i>Desi_wild_2189947</i> | NA                                  | <i>Ca_desi_denovo</i> | 2189947                 | A/C  | NA                 | NA                            | NA                 |
| <i>Desi_wild_2190559</i> | NA                                  | <i>Ca_desi_denovo</i> | 2190559                 | T/C  | NA                 | NA                            | NA                 |
| <i>Desi_wild_2190567</i> | NA                                  | <i>Ca_desi_denovo</i> | 2190567                 | G/C  | NA                 | NA                            | NA                 |
| <i>Desi_wild_2191034</i> | NA                                  | <i>Ca_desi_denovo</i> | 2191034                 | G/A  | NA                 | NA                            | NA                 |
| <i>Desi_wild_2191040</i> | NA                                  | <i>Ca_desi_denovo</i> | 2191040                 | G/A  | NA                 | NA                            | NA                 |
| <i>Desi_wild_2191123</i> | NA                                  | <i>Ca_desi_denovo</i> | 2191123                 | T/C  | NA                 | NA                            | NA                 |
| <i>Desi_wild_2191198</i> | NA                                  | <i>Ca_desi_denovo</i> | 2191198                 | T/A  | NA                 | NA                            | NA                 |
| <i>Desi_wild_2191312</i> | NA                                  | <i>Ca_desi_denovo</i> | 2191312                 | A/G  | NA                 | NA                            | NA                 |
| <i>Desi_wild_2191710</i> | NA                                  | <i>Ca_desi_denovo</i> | 2191710                 | C/G  | NA                 | NA                            | NA                 |
| <i>Desi_wild_2191714</i> | NA                                  | <i>Ca_desi_denovo</i> | 2191714                 | G/A  | NA                 | NA                            | NA                 |
| <i>Desi_wild_2192100</i> | NA                                  | <i>Ca_desi_denovo</i> | 2192100                 | C/T  | NA                 | NA                            | NA                 |
| <i>Desi_wild_2192157</i> | NA                                  | <i>Ca_desi_denovo</i> | 2192157                 | T/G  | NA                 | NA                            | NA                 |
| <i>Desi_wild_2192451</i> | NA                                  | <i>Ca_desi_denovo</i> | 2192451                 | C/G  | NA                 | NA                            | NA                 |
| <i>Desi_wild_2192664</i> | NA                                  | <i>Ca_desi_denovo</i> | 2192664                 | A/G  | NA                 | NA                            | NA                 |
| <i>Desi_wild_2192881</i> | NA                                  | <i>Ca_desi_denovo</i> | 2192881                 | G/C  | NA                 | NA                            | NA                 |
| <i>Desi_wild_2193150</i> | NA                                  | <i>Ca_desi_denovo</i> | 2193150                 | G/A  | NA                 | NA                            | NA                 |
| <i>Desi_wild_2193236</i> | NA                                  | <i>Ca_desi_denovo</i> | 2193236                 | A/G  | NA                 | NA                            | NA                 |
| <i>Desi_wild_2193940</i> | NA                                  | <i>Ca_desi_denovo</i> | 2193940                 | T/C  | NA                 | NA                            | NA                 |
| <i>Desi_wild_2193947</i> | NA                                  | <i>Ca_desi_denovo</i> | 2193947                 | G/C  | NA                 | NA                            | NA                 |
| <i>Desi_wild_2194217</i> | NA                                  | <i>Ca_desi_denovo</i> | 2194217                 | C/T  | NA                 | NA                            | NA                 |
| <i>Desi_wild_2194820</i> | NA                                  | <i>Ca_desi_denovo</i> | 2194820                 | G/C  | NA                 | NA                            | NA                 |
| <i>Desi_wild_2195073</i> | NA                                  | <i>Ca_desi_denovo</i> | 2195073                 | A/G  | NA                 | NA                            | NA                 |
| <i>Desi_wild_2196596</i> | NA                                  | <i>Ca_desi_denovo</i> | 2196596                 | T/C  | NA                 | NA                            | NA                 |
| <i>Desi_wild_2196629</i> | NA                                  | <i>Ca_desi_denovo</i> | 2196629                 | A/G  | NA                 | NA                            | NA                 |
| <i>Desi_wild_2196672</i> | NA                                  | <i>Ca_desi_denovo</i> | 2196672                 | T/G  | NA                 | NA                            | NA                 |
| <i>Desi_wild_2197437</i> | NA                                  | <i>Ca_desi_denovo</i> | 2197437                 | T/A  | NA                 | NA                            | NA                 |
| <i>Desi_wild_2197439</i> | NA                                  | <i>Ca_desi_denovo</i> | 2197439                 | G/T  | NA                 | NA                            | NA                 |
| <i>Desi_wild_2197686</i> | NA                                  | <i>Ca_desi_denovo</i> | 2197686                 | G/A  | NA                 | NA                            | NA                 |
| <i>Desi_wild_2198903</i> | NA                                  | <i>Ca_desi_denovo</i> | 2198903                 | C/G  | NA                 | NA                            | NA                 |
| <i>Desi_wild_2198909</i> | NA                                  | <i>Ca_desi_denovo</i> | 2198909                 | G/A  | NA                 | NA                            | NA                 |
| <i>Desi_wild_2201651</i> | NA                                  | <i>Ca_desi_denovo</i> | 2201651                 | G/A  | NA                 | NA                            | NA                 |
| <i>Desi_wild_2202448</i> | NA                                  | <i>Ca_desi_denovo</i> | 2202448                 | C/A  | NA                 | NA                            | NA                 |
| <i>Desi_wild_2203196</i> | NA                                  | <i>Ca_desi_denovo</i> | 2203196                 | T/G  | NA                 | NA                            | NA                 |
| <i>Desi_wild_2203200</i> | NA                                  | <i>Ca_desi_denovo</i> | 2203200                 | A/C  | NA                 | NA                            | NA                 |
| <i>Desi_wild_2203976</i> | NA                                  | <i>Ca_desi_denovo</i> | 2203976                 | A/G  | NA                 | NA                            | NA                 |
| <i>Desi_wild_2204016</i> | NA                                  | <i>Ca_desi_denovo</i> | 2204016                 | C/T  | NA                 | NA                            | NA                 |
| <i>Desi_wild_2204031</i> | NA                                  | <i>Ca_desi_denovo</i> | 2204031                 | G/A  | NA                 | NA                            | NA                 |
| <i>Desi_wild_2204076</i> | NA                                  | <i>Ca_desi_denovo</i> | 2204076                 | G/C  | NA                 | NA                            | NA                 |

| SNP IDs                  | NCBI dbSNP accession IDs (NCBI_SS#) | Chromosomes           | Physical positions (bp) | SNPs | Gene accession IDs | Sequence components of genome | Putative functions |
|--------------------------|-------------------------------------|-----------------------|-------------------------|------|--------------------|-------------------------------|--------------------|
| <i>Desi_wild_2204427</i> | NA                                  | <i>Ca_desi_denovo</i> | 2204427                 | C/A  | NA                 | NA                            | NA                 |
| <i>Desi_wild_2204473</i> | NA                                  | <i>Ca_desi_denovo</i> | 2204473                 | C/T  | NA                 | NA                            | NA                 |
| <i>Desi_wild_2205481</i> | NA                                  | <i>Ca_desi_denovo</i> | 2205481                 | G/A  | NA                 | NA                            | NA                 |
| <i>Desi_wild_2206366</i> | NA                                  | <i>Ca_desi_denovo</i> | 2206366                 | A/G  | NA                 | NA                            | NA                 |
| <i>Desi_wild_2207035</i> | NA                                  | <i>Ca_desi_denovo</i> | 2207035                 | T/C  | NA                 | NA                            | NA                 |
| <i>Desi_wild_2207083</i> | NA                                  | <i>Ca_desi_denovo</i> | 2207083                 | C/A  | NA                 | NA                            | NA                 |
| <i>Desi_wild_2207355</i> | NA                                  | <i>Ca_desi_denovo</i> | 2207355                 | T/C  | NA                 | NA                            | NA                 |
| <i>Desi_wild_2208799</i> | NA                                  | <i>Ca_desi_denovo</i> | 2208799                 | T/C  | NA                 | NA                            | NA                 |
| <i>Desi_wild_2210058</i> | NA                                  | <i>Ca_desi_denovo</i> | 2210058                 | A/G  | NA                 | NA                            | NA                 |
| <i>Desi_wild_2211122</i> | NA                                  | <i>Ca_desi_denovo</i> | 2211122                 | T/A  | NA                 | NA                            | NA                 |
| <i>Desi_wild_2211226</i> | NA                                  | <i>Ca_desi_denovo</i> | 2211226                 | C/G  | NA                 | NA                            | NA                 |
| <i>Desi_wild_2211610</i> | NA                                  | <i>Ca_desi_denovo</i> | 2211610                 | G/A  | NA                 | NA                            | NA                 |
| <i>Desi_wild_2212367</i> | NA                                  | <i>Ca_desi_denovo</i> | 2212367                 | T/A  | NA                 | NA                            | NA                 |
| <i>Desi_wild_2212397</i> | NA                                  | <i>Ca_desi_denovo</i> | 2212397                 | G/A  | NA                 | NA                            | NA                 |
| <i>Desi_wild_2212874</i> | NA                                  | <i>Ca_desi_denovo</i> | 2212874                 | T/C  | NA                 | NA                            | NA                 |
| <i>Desi_wild_2214023</i> | NA                                  | <i>Ca_desi_denovo</i> | 2214023                 | G/A  | NA                 | NA                            | NA                 |
| <i>Desi_wild_2214086</i> | NA                                  | <i>Ca_desi_denovo</i> | 2214086                 | G/A  | NA                 | NA                            | NA                 |
| <i>Desi_wild_2214351</i> | NA                                  | <i>Ca_desi_denovo</i> | 2214351                 | A/G  | NA                 | NA                            | NA                 |
| <i>Desi_wild_2214782</i> | NA                                  | <i>Ca_desi_denovo</i> | 2214782                 | G/T  | NA                 | NA                            | NA                 |
| <i>Desi_wild_2216242</i> | NA                                  | <i>Ca_desi_denovo</i> | 2216242                 | T/C  | NA                 | NA                            | NA                 |
| <i>Desi_wild_2216440</i> | NA                                  | <i>Ca_desi_denovo</i> | 2216440                 | T/A  | NA                 | NA                            | NA                 |
| <i>Desi_wild_2216758</i> | NA                                  | <i>Ca_desi_denovo</i> | 2216758                 | G/T  | NA                 | NA                            | NA                 |
| <i>Desi_wild_2216796</i> | NA                                  | <i>Ca_desi_denovo</i> | 2216796                 | T/A  | NA                 | NA                            | NA                 |
| <i>Desi_wild_2219331</i> | NA                                  | <i>Ca_desi_denovo</i> | 2219331                 | A/G  | NA                 | NA                            | NA                 |
| <i>Desi_wild_2219333</i> | NA                                  | <i>Ca_desi_denovo</i> | 2219333                 | G/T  | NA                 | NA                            | NA                 |
| <i>Desi_wild_2220299</i> | NA                                  | <i>Ca_desi_denovo</i> | 2220299                 | C/G  | NA                 | NA                            | NA                 |
| <i>Desi_wild_2220302</i> | NA                                  | <i>Ca_desi_denovo</i> | 2220302                 | A/G  | NA                 | NA                            | NA                 |
| <i>Desi_wild_2220620</i> | NA                                  | <i>Ca_desi_denovo</i> | 2220620                 | G/A  | NA                 | NA                            | NA                 |
| <i>Desi_wild_2220635</i> | NA                                  | <i>Ca_desi_denovo</i> | 2220635                 | G/A  | NA                 | NA                            | NA                 |
| <i>Desi_wild_2221192</i> | NA                                  | <i>Ca_desi_denovo</i> | 2221192                 | G/C  | NA                 | NA                            | NA                 |
| <i>Desi_wild_2221325</i> | NA                                  | <i>Ca_desi_denovo</i> | 2221325                 | A/G  | NA                 | NA                            | NA                 |
| <i>Desi_wild_2221355</i> | NA                                  | <i>Ca_desi_denovo</i> | 2221355                 | T/C  | NA                 | NA                            | NA                 |
| <i>Desi_wild_2223904</i> | NA                                  | <i>Ca_desi_denovo</i> | 2223904                 | G/A  | NA                 | NA                            | NA                 |
| <i>Desi_wild_2223913</i> | NA                                  | <i>Ca_desi_denovo</i> | 2223913                 | C/A  | NA                 | NA                            | NA                 |
| <i>Desi_wild_2225184</i> | NA                                  | <i>Ca_desi_denovo</i> | 2225184                 | T/C  | NA                 | NA                            | NA                 |
| <i>Desi_wild_2225206</i> | NA                                  | <i>Ca_desi_denovo</i> | 2225206                 | T/C  | NA                 | NA                            | NA                 |
| <i>Desi_wild_2225444</i> | NA                                  | <i>Ca_desi_denovo</i> | 2225444                 | G/T  | NA                 | NA                            | NA                 |
| <i>Desi_wild_2225824</i> | NA                                  | <i>Ca_desi_denovo</i> | 2225824                 | A/G  | NA                 | NA                            | NA                 |
| <i>Desi_wild_2226134</i> | NA                                  | <i>Ca_desi_denovo</i> | 2226134                 | C/T  | NA                 | NA                            | NA                 |
| <i>Desi_wild_2226168</i> | NA                                  | <i>Ca_desi_denovo</i> | 2226168                 | C/T  | NA                 | NA                            | NA                 |
| <i>Desi_wild_2227214</i> | NA                                  | <i>Ca_desi_denovo</i> | 2227214                 | C/G  | NA                 | NA                            | NA                 |
| <i>Desi_wild_2227239</i> | NA                                  | <i>Ca_desi_denovo</i> | 2227239                 | A/G  | NA                 | NA                            | NA                 |
| <i>Desi_wild_2228075</i> | NA                                  | <i>Ca_desi_denovo</i> | 2228075                 | G/A  | NA                 | NA                            | NA                 |
| <i>Desi_wild_2228076</i> | NA                                  | <i>Ca_desi_denovo</i> | 2228076                 | T/C  | NA                 | NA                            | NA                 |

| SNP IDs                  | NCBI dbSNP accession IDs (NCBI_SS#) | Chromosomes           | Physical positions (bp) | SNPs | Gene accession IDs | Sequence components of genome | Putative functions |
|--------------------------|-------------------------------------|-----------------------|-------------------------|------|--------------------|-------------------------------|--------------------|
| <i>Desi_wild_2228753</i> | NA                                  | <i>Ca_desi_denovo</i> | 2228753                 | G/T  | NA                 | NA                            | NA                 |
| <i>Desi_wild_2228755</i> | NA                                  | <i>Ca_desi_denovo</i> | 2228755                 | T/C  | NA                 | NA                            | NA                 |
| <i>Desi_wild_2228949</i> | NA                                  | <i>Ca_desi_denovo</i> | 2228949                 | T/C  | NA                 | NA                            | NA                 |
| <i>Desi_wild_2228953</i> | NA                                  | <i>Ca_desi_denovo</i> | 2228953                 | C/T  | NA                 | NA                            | NA                 |
| <i>Desi_wild_2229223</i> | NA                                  | <i>Ca_desi_denovo</i> | 2229223                 | A/T  | NA                 | NA                            | NA                 |
| <i>Desi_wild_2229916</i> | NA                                  | <i>Ca_desi_denovo</i> | 2229916                 | T/G  | NA                 | NA                            | NA                 |
| <i>Desi_wild_2229946</i> | NA                                  | <i>Ca_desi_denovo</i> | 2229946                 | A/G  | NA                 | NA                            | NA                 |
| <i>Desi_wild_2230815</i> | NA                                  | <i>Ca_desi_denovo</i> | 2230815                 | T/C  | NA                 | NA                            | NA                 |
| <i>Desi_wild_2233225</i> | NA                                  | <i>Ca_desi_denovo</i> | 2233225                 | T/C  | NA                 | NA                            | NA                 |
| <i>Desi_wild_2233601</i> | NA                                  | <i>Ca_desi_denovo</i> | 2233601                 | C/T  | NA                 | NA                            | NA                 |
| <i>Desi_wild_2233679</i> | NA                                  | <i>Ca_desi_denovo</i> | 2233679                 | A/G  | NA                 | NA                            | NA                 |
| <i>Desi_wild_2233821</i> | NA                                  | <i>Ca_desi_denovo</i> | 2233821                 | G/C  | NA                 | NA                            | NA                 |
| <i>Desi_wild_2233873</i> | NA                                  | <i>Ca_desi_denovo</i> | 2233873                 | T/C  | NA                 | NA                            | NA                 |
| <i>Desi_wild_2236029</i> | NA                                  | <i>Ca_desi_denovo</i> | 2236029                 | T/C  | NA                 | NA                            | NA                 |
| <i>Desi_wild_2236341</i> | NA                                  | <i>Ca_desi_denovo</i> | 2236341                 | G/C  | NA                 | NA                            | NA                 |
| <i>Desi_wild_2236356</i> | NA                                  | <i>Ca_desi_denovo</i> | 2236356                 | T/C  | NA                 | NA                            | NA                 |
| <i>Desi_wild_2237130</i> | NA                                  | <i>Ca_desi_denovo</i> | 2237130                 | T/C  | NA                 | NA                            | NA                 |
| <i>Desi_wild_2237594</i> | NA                                  | <i>Ca_desi_denovo</i> | 2237594                 | G/A  | NA                 | NA                            | NA                 |
| <i>Desi_wild_2237640</i> | NA                                  | <i>Ca_desi_denovo</i> | 2237640                 | C/A  | NA                 | NA                            | NA                 |
| <i>Desi_wild_2237709</i> | NA                                  | <i>Ca_desi_denovo</i> | 2237709                 | A/G  | NA                 | NA                            | NA                 |
| <i>Desi_wild_2238940</i> | NA                                  | <i>Ca_desi_denovo</i> | 2238940                 | G/T  | NA                 | NA                            | NA                 |
| <i>Desi_wild_2240249</i> | NA                                  | <i>Ca_desi_denovo</i> | 2240249                 | G/T  | NA                 | NA                            | NA                 |
| <i>Desi_wild_2240283</i> | NA                                  | <i>Ca_desi_denovo</i> | 2240283                 | A/G  | NA                 | NA                            | NA                 |
| <i>Desi_wild_2240307</i> | NA                                  | <i>Ca_desi_denovo</i> | 2240307                 | A/G  | NA                 | NA                            | NA                 |
| <i>Desi_wild_2240323</i> | NA                                  | <i>Ca_desi_denovo</i> | 2240323                 | G/C  | NA                 | NA                            | NA                 |
| <i>Desi_wild_2241786</i> | NA                                  | <i>Ca_desi_denovo</i> | 2241786                 | G/A  | NA                 | NA                            | NA                 |
| <i>Desi_wild_2241792</i> | NA                                  | <i>Ca_desi_denovo</i> | 2241792                 | G/C  | NA                 | NA                            | NA                 |
| <i>Desi_wild_2242055</i> | NA                                  | <i>Ca_desi_denovo</i> | 2242055                 | C/T  | NA                 | NA                            | NA                 |
| <i>Desi_wild_2242124</i> | NA                                  | <i>Ca_desi_denovo</i> | 2242124                 | A/G  | NA                 | NA                            | NA                 |
| <i>Desi_wild_2242832</i> | NA                                  | <i>Ca_desi_denovo</i> | 2242832                 | T/A  | NA                 | NA                            | NA                 |
| <i>Desi_wild_2242897</i> | NA                                  | <i>Ca_desi_denovo</i> | 2242897                 | C/G  | NA                 | NA                            | NA                 |
| <i>Desi_wild_2244188</i> | NA                                  | <i>Ca_desi_denovo</i> | 2244188                 | C/T  | NA                 | NA                            | NA                 |
| <i>Desi_wild_2244211</i> | NA                                  | <i>Ca_desi_denovo</i> | 2244211                 | A/G  | NA                 | NA                            | NA                 |
| <i>Desi_wild_2245157</i> | NA                                  | <i>Ca_desi_denovo</i> | 2245157                 | C/T  | NA                 | NA                            | NA                 |
| <i>Desi_wild_2245880</i> | NA                                  | <i>Ca_desi_denovo</i> | 2245880                 | C/T  | NA                 | NA                            | NA                 |
| <i>Desi_wild_2245905</i> | NA                                  | <i>Ca_desi_denovo</i> | 2245905                 | C/G  | NA                 | NA                            | NA                 |
| <i>Desi_wild_2246056</i> | NA                                  | <i>Ca_desi_denovo</i> | 2246056                 | G/C  | NA                 | NA                            | NA                 |
| <i>Desi_wild_2246069</i> | NA                                  | <i>Ca_desi_denovo</i> | 2246069                 | A/T  | NA                 | NA                            | NA                 |
| <i>Desi_wild_2246559</i> | NA                                  | <i>Ca_desi_denovo</i> | 2246559                 | T/G  | NA                 | NA                            | NA                 |
| <i>Desi_wild_2247142</i> | NA                                  | <i>Ca_desi_denovo</i> | 2247142                 | A/G  | NA                 | NA                            | NA                 |
| <i>Desi_wild_2247400</i> | NA                                  | <i>Ca_desi_denovo</i> | 2247400                 | A/G  | NA                 | NA                            | NA                 |
| <i>Desi_wild_2249315</i> | NA                                  | <i>Ca_desi_denovo</i> | 2249315                 | G/T  | NA                 | NA                            | NA                 |
| <i>Desi_wild_2249350</i> | NA                                  | <i>Ca_desi_denovo</i> | 2249350                 | T/C  | NA                 | NA                            | NA                 |
| <i>Desi_wild_2250204</i> | NA                                  | <i>Ca_desi_denovo</i> | 2250204                 | C/T  | NA                 | NA                            | NA                 |



| SNP IDs                  | NCBI dbSNP accession IDs (NCBI_SS#) | Chromosomes           | Physical positions (bp) | SNPs | Gene accession IDs | Sequence components of genome | Putative functions |
|--------------------------|-------------------------------------|-----------------------|-------------------------|------|--------------------|-------------------------------|--------------------|
| <i>Desi_wild_2250877</i> | NA                                  | <i>Ca_desi_denovo</i> | 2250877                 | G/C  | NA                 | NA                            | NA                 |
| <i>Desi_wild_2251393</i> | NA                                  | <i>Ca_desi_denovo</i> | 2251393                 | T/C  | NA                 | NA                            | NA                 |
| <i>Desi_wild_2251744</i> | NA                                  | <i>Ca_desi_denovo</i> | 2251744                 | A/G  | NA                 | NA                            | NA                 |
| <i>Desi_wild_2251781</i> | NA                                  | <i>Ca_desi_denovo</i> | 2251781                 | A/G  | NA                 | NA                            | NA                 |
| <i>Desi_wild_2256687</i> | NA                                  | <i>Ca_desi_denovo</i> | 2256687                 | C/A  | NA                 | NA                            | NA                 |
| <i>Desi_wild_2256735</i> | NA                                  | <i>Ca_desi_denovo</i> | 2256735                 | A/G  | NA                 | NA                            | NA                 |
| <i>Desi_wild_2256801</i> | NA                                  | <i>Ca_desi_denovo</i> | 2256801                 | G/A  | NA                 | NA                            | NA                 |
| <i>Desi_wild_2256903</i> | NA                                  | <i>Ca_desi_denovo</i> | 2256903                 | G/C  | NA                 | NA                            | NA                 |
| <i>Desi_wild_2257372</i> | NA                                  | <i>Ca_desi_denovo</i> | 2257372                 | G/A  | NA                 | NA                            | NA                 |
| <i>Desi_wild_2258862</i> | NA                                  | <i>Ca_desi_denovo</i> | 2258862                 | A/G  | NA                 | NA                            | NA                 |
| <i>Desi_wild_2258869</i> | NA                                  | <i>Ca_desi_denovo</i> | 2258869                 | G/A  | NA                 | NA                            | NA                 |
| <i>Desi_wild_2258891</i> | NA                                  | <i>Ca_desi_denovo</i> | 2258891                 | T/G  | NA                 | NA                            | NA                 |
| <i>Desi_wild_2259242</i> | NA                                  | <i>Ca_desi_denovo</i> | 2259242                 | C/G  | NA                 | NA                            | NA                 |
| <i>Desi_wild_2262127</i> | NA                                  | <i>Ca_desi_denovo</i> | 2262127                 | G/T  | NA                 | NA                            | NA                 |
| <i>Desi_wild_2262145</i> | NA                                  | <i>Ca_desi_denovo</i> | 2262145                 | C/T  | NA                 | NA                            | NA                 |
| <i>Desi_wild_2262613</i> | NA                                  | <i>Ca_desi_denovo</i> | 2262613                 | C/T  | NA                 | NA                            | NA                 |
| <i>Desi_wild_2262894</i> | NA                                  | <i>Ca_desi_denovo</i> | 2262894                 | C/T  | NA                 | NA                            | NA                 |
| <i>Desi_wild_2262967</i> | NA                                  | <i>Ca_desi_denovo</i> | 2262967                 | C/T  | NA                 | NA                            | NA                 |
| <i>Desi_wild_2263103</i> | NA                                  | <i>Ca_desi_denovo</i> | 2263103                 | C/T  | NA                 | NA                            | NA                 |
| <i>Desi_wild_2263145</i> | NA                                  | <i>Ca_desi_denovo</i> | 2263145                 | A/G  | NA                 | NA                            | NA                 |
| <i>Desi_wild_2263203</i> | NA                                  | <i>Ca_desi_denovo</i> | 2263203                 | A/G  | NA                 | NA                            | NA                 |
| <i>Desi_wild_2263489</i> | NA                                  | <i>Ca_desi_denovo</i> | 2263489                 | G/C  | NA                 | NA                            | NA                 |
| <i>Desi_wild_2263516</i> | NA                                  | <i>Ca_desi_denovo</i> | 2263516                 | G/A  | NA                 | NA                            | NA                 |
| <i>Desi_wild_2263531</i> | NA                                  | <i>Ca_desi_denovo</i> | 2263531                 | A/G  | NA                 | NA                            | NA                 |
| <i>Desi_wild_2264711</i> | NA                                  | <i>Ca_desi_denovo</i> | 2264711                 | T/A  | NA                 | NA                            | NA                 |
| <i>Desi_wild_2264722</i> | NA                                  | <i>Ca_desi_denovo</i> | 2264722                 | T/C  | NA                 | NA                            | NA                 |
| <i>Desi_wild_2264802</i> | NA                                  | <i>Ca_desi_denovo</i> | 2264802                 | G/A  | NA                 | NA                            | NA                 |
| <i>Desi_wild_2264933</i> | NA                                  | <i>Ca_desi_denovo</i> | 2264933                 | G/A  | NA                 | NA                            | NA                 |
| <i>Desi_wild_2264939</i> | NA                                  | <i>Ca_desi_denovo</i> | 2264939                 | C/G  | NA                 | NA                            | NA                 |
| <i>Desi_wild_2266029</i> | NA                                  | <i>Ca_desi_denovo</i> | 2266029                 | T/C  | NA                 | NA                            | NA                 |
| <i>Desi_wild_2266051</i> | NA                                  | <i>Ca_desi_denovo</i> | 2266051                 | C/G  | NA                 | NA                            | NA                 |
| <i>Desi_wild_2267133</i> | NA                                  | <i>Ca_desi_denovo</i> | 2267133                 | T/C  | NA                 | NA                            | NA                 |
| <i>Desi_wild_2267144</i> | NA                                  | <i>Ca_desi_denovo</i> | 2267144                 | C/T  | NA                 | NA                            | NA                 |
| <i>Desi_wild_2267844</i> | NA                                  | <i>Ca_desi_denovo</i> | 2267844                 | G/A  | NA                 | NA                            | NA                 |
| <i>Desi_wild_2269155</i> | NA                                  | <i>Ca_desi_denovo</i> | 2269155                 | G/C  | NA                 | NA                            | NA                 |
| <i>Desi_wild_2269156</i> | NA                                  | <i>Ca_desi_denovo</i> | 2269156                 | C/T  | NA                 | NA                            | NA                 |
| <i>Desi_wild_2269591</i> | NA                                  | <i>Ca_desi_denovo</i> | 2269591                 | A/G  | NA                 | NA                            | NA                 |
| <i>Desi_wild_2269806</i> | NA                                  | <i>Ca_desi_denovo</i> | 2269806                 | T/G  | NA                 | NA                            | NA                 |
| <i>Desi_wild_2269886</i> | NA                                  | <i>Ca_desi_denovo</i> | 2269886                 | G/A  | NA                 | NA                            | NA                 |
| <i>Desi_wild_2269948</i> | NA                                  | <i>Ca_desi_denovo</i> | 2269948                 | T/C  | NA                 | NA                            | NA                 |
| <i>Desi_wild_2270017</i> | NA                                  | <i>Ca_desi_denovo</i> | 2270017                 | C/T  | NA                 | NA                            | NA                 |
| <i>Desi_wild_2270032</i> | NA                                  | <i>Ca_desi_denovo</i> | 2270032                 | T/C  | NA                 | NA                            | NA                 |
| <i>Desi_wild_2270216</i> | NA                                  | <i>Ca_desi_denovo</i> | 2270216                 | T/G  | NA                 | NA                            | NA                 |
| <i>Desi_wild_2271333</i> | NA                                  | <i>Ca_desi_denovo</i> | 2271333                 | A/G  | NA                 | NA                            | NA                 |

| SNP IDs                  | NCBI dbSNP accession IDs (NCBI_SS#) | Chromosomes           | Physical positions (bp) | SNPs | Gene accession IDs | Sequence components of genome | Putative functions |
|--------------------------|-------------------------------------|-----------------------|-------------------------|------|--------------------|-------------------------------|--------------------|
| <i>Desi_wild_2271751</i> | NA                                  | <i>Ca_desi_denovo</i> | 2271751                 | A/G  | NA                 | NA                            | NA                 |
| <i>Desi_wild_2271757</i> | NA                                  | <i>Ca_desi_denovo</i> | 2271757                 | T/A  | NA                 | NA                            | NA                 |
| <i>Desi_wild_2271769</i> | NA                                  | <i>Ca_desi_denovo</i> | 2271769                 | T/C  | NA                 | NA                            | NA                 |
| <i>Desi_wild_2272779</i> | NA                                  | <i>Ca_desi_denovo</i> | 2272779                 | A/C  | NA                 | NA                            | NA                 |
| <i>Desi_wild_2273585</i> | NA                                  | <i>Ca_desi_denovo</i> | 2273585                 | G/A  | NA                 | NA                            | NA                 |
| <i>Desi_wild_2273621</i> | NA                                  | <i>Ca_desi_denovo</i> | 2273621                 | T/C  | NA                 | NA                            | NA                 |
| <i>Desi_wild_2274546</i> | NA                                  | <i>Ca_desi_denovo</i> | 2274546                 | G/C  | NA                 | NA                            | NA                 |
| <i>Desi_wild_2274564</i> | NA                                  | <i>Ca_desi_denovo</i> | 2274564                 | T/C  | NA                 | NA                            | NA                 |
| <i>Desi_wild_2274939</i> | NA                                  | <i>Ca_desi_denovo</i> | 2274939                 | A/G  | NA                 | NA                            | NA                 |
| <i>Desi_wild_2275429</i> | NA                                  | <i>Ca_desi_denovo</i> | 2275429                 | A/G  | NA                 | NA                            | NA                 |
| <i>Desi_wild_2275447</i> | NA                                  | <i>Ca_desi_denovo</i> | 2275447                 | C/T  | NA                 | NA                            | NA                 |
| <i>Desi_wild_2275890</i> | NA                                  | <i>Ca_desi_denovo</i> | 2275890                 | C/A  | NA                 | NA                            | NA                 |
| <i>Desi_wild_2275996</i> | NA                                  | <i>Ca_desi_denovo</i> | 2275996                 | A/G  | NA                 | NA                            | NA                 |
| <i>Desi_wild_2276038</i> | NA                                  | <i>Ca_desi_denovo</i> | 2276038                 | G/A  | NA                 | NA                            | NA                 |
| <i>Desi_wild_2276816</i> | NA                                  | <i>Ca_desi_denovo</i> | 2276816                 | A/C  | NA                 | NA                            | NA                 |
| <i>Desi_wild_2277459</i> | NA                                  | <i>Ca_desi_denovo</i> | 2277459                 | G/A  | NA                 | NA                            | NA                 |
| <i>Desi_wild_2277655</i> | NA                                  | <i>Ca_desi_denovo</i> | 2277655                 | C/G  | NA                 | NA                            | NA                 |
| <i>Desi_wild_2277687</i> | NA                                  | <i>Ca_desi_denovo</i> | 2277687                 | G/A  | NA                 | NA                            | NA                 |
| <i>Desi_wild_2278616</i> | NA                                  | <i>Ca_desi_denovo</i> | 2278616                 | T/C  | NA                 | NA                            | NA                 |
| <i>Desi_wild_2278903</i> | NA                                  | <i>Ca_desi_denovo</i> | 2278903                 | A/G  | NA                 | NA                            | NA                 |
| <i>Desi_wild_2278933</i> | NA                                  | <i>Ca_desi_denovo</i> | 2278933                 | C/T  | NA                 | NA                            | NA                 |
| <i>Desi_wild_2279779</i> | NA                                  | <i>Ca_desi_denovo</i> | 2279779                 | A/G  | NA                 | NA                            | NA                 |
| <i>Desi_wild_2280332</i> | NA                                  | <i>Ca_desi_denovo</i> | 2280332                 | G/A  | NA                 | NA                            | NA                 |
| <i>Desi_wild_2280335</i> | NA                                  | <i>Ca_desi_denovo</i> | 2280335                 | G/C  | NA                 | NA                            | NA                 |
| <i>Desi_wild_2280421</i> | NA                                  | <i>Ca_desi_denovo</i> | 2280421                 | A/G  | NA                 | NA                            | NA                 |
| <i>Desi_wild_2280486</i> | NA                                  | <i>Ca_desi_denovo</i> | 2280486                 | G/C  | NA                 | NA                            | NA                 |
| <i>Desi_wild_2281388</i> | NA                                  | <i>Ca_desi_denovo</i> | 2281388                 | T/G  | NA                 | NA                            | NA                 |
| <i>Desi_wild_2281444</i> | NA                                  | <i>Ca_desi_denovo</i> | 2281444                 | A/G  | NA                 | NA                            | NA                 |
| <i>Desi_wild_2281501</i> | NA                                  | <i>Ca_desi_denovo</i> | 2281501                 | T/C  | NA                 | NA                            | NA                 |
| <i>Desi_wild_2281614</i> | NA                                  | <i>Ca_desi_denovo</i> | 2281614                 | G/T  | NA                 | NA                            | NA                 |
| <i>Desi_wild_2282161</i> | NA                                  | <i>Ca_desi_denovo</i> | 2282161                 | G/C  | NA                 | NA                            | NA                 |
| <i>Desi_wild_2282185</i> | NA                                  | <i>Ca_desi_denovo</i> | 2282185                 | A/G  | NA                 | NA                            | NA                 |
| <i>Desi_wild_2282814</i> | NA                                  | <i>Ca_desi_denovo</i> | 2282814                 | C/G  | NA                 | NA                            | NA                 |
| <i>Desi_wild_2283608</i> | NA                                  | <i>Ca_desi_denovo</i> | 2283608                 | C/T  | NA                 | NA                            | NA                 |
| <i>Desi_wild_2283611</i> | NA                                  | <i>Ca_desi_denovo</i> | 2283611                 | A/G  | NA                 | NA                            | NA                 |
| <i>Desi_wild_2284542</i> | NA                                  | <i>Ca_desi_denovo</i> | 2284542                 | T/C  | NA                 | NA                            | NA                 |
| <i>Desi_wild_2285132</i> | NA                                  | <i>Ca_desi_denovo</i> | 2285132                 | G/A  | NA                 | NA                            | NA                 |
| <i>Desi_wild_2285754</i> | NA                                  | <i>Ca_desi_denovo</i> | 2285754                 | C/T  | NA                 | NA                            | NA                 |
| <i>Desi_wild_2285757</i> | NA                                  | <i>Ca_desi_denovo</i> | 2285757                 | A/G  | NA                 | NA                            | NA                 |
| <i>Desi_wild_2286720</i> | NA                                  | <i>Ca_desi_denovo</i> | 2286720                 | C/T  | NA                 | NA                            | NA                 |
| <i>Desi_wild_2286742</i> | NA                                  | <i>Ca_desi_denovo</i> | 2286742                 | C/G  | NA                 | NA                            | NA                 |
| <i>Desi_wild_2287337</i> | NA                                  | <i>Ca_desi_denovo</i> | 2287337                 | A/G  | NA                 | NA                            | NA                 |
| <i>Desi_wild_2287399</i> | NA                                  | <i>Ca_desi_denovo</i> | 2287399                 | C/T  | NA                 | NA                            | NA                 |
| <i>Desi_wild_2288416</i> | NA                                  | <i>Ca_desi_denovo</i> | 2288416                 | G/T  | NA                 | NA                            | NA                 |

| SNP IDs                  | NCBI dbSNP accession IDs (NCBI_SS#) | Chromosomes           | Physical positions (bp) | SNPs | Gene accession IDs | Sequence components of genome | Putative functions |
|--------------------------|-------------------------------------|-----------------------|-------------------------|------|--------------------|-------------------------------|--------------------|
| <i>Desi_wild_2288419</i> | NA                                  | <i>Ca_desi_denovo</i> | 2288419                 | A/G  | NA                 | NA                            | NA                 |
| <i>Desi_wild_2289402</i> | NA                                  | <i>Ca_desi_denovo</i> | 2289402                 | A/G  | NA                 | NA                            | NA                 |
| <i>Desi_wild_2289492</i> | NA                                  | <i>Ca_desi_denovo</i> | 2289492                 | C/T  | NA                 | NA                            | NA                 |
| <i>Desi_wild_2289495</i> | NA                                  | <i>Ca_desi_denovo</i> | 2289495                 | C/T  | NA                 | NA                            | NA                 |
| <i>Desi_wild_2290074</i> | NA                                  | <i>Ca_desi_denovo</i> | 2290074                 | G/C  | NA                 | NA                            | NA                 |
| <i>Desi_wild_2290585</i> | NA                                  | <i>Ca_desi_denovo</i> | 2290585                 | C/G  | NA                 | NA                            | NA                 |
| <i>Desi_wild_2291437</i> | NA                                  | <i>Ca_desi_denovo</i> | 2291437                 | A/G  | NA                 | NA                            | NA                 |
| <i>Desi_wild_2291440</i> | NA                                  | <i>Ca_desi_denovo</i> | 2291440                 | A/G  | NA                 | NA                            | NA                 |
| <i>Desi_wild_2291914</i> | NA                                  | <i>Ca_desi_denovo</i> | 2291914                 | G/A  | NA                 | NA                            | NA                 |
| <i>Desi_wild_2291982</i> | NA                                  | <i>Ca_desi_denovo</i> | 2291982                 | C/T  | NA                 | NA                            | NA                 |
| <i>Desi_wild_2293059</i> | NA                                  | <i>Ca_desi_denovo</i> | 2293059                 | C/T  | NA                 | NA                            | NA                 |
| <i>Desi_wild_2293092</i> | NA                                  | <i>Ca_desi_denovo</i> | 2293092                 | T/C  | NA                 | NA                            | NA                 |
| <i>Desi_wild_2293192</i> | NA                                  | <i>Ca_desi_denovo</i> | 2293192                 | G/T  | NA                 | NA                            | NA                 |
| <i>Desi_wild_2293213</i> | NA                                  | <i>Ca_desi_denovo</i> | 2293213                 | T/A  | NA                 | NA                            | NA                 |
| <i>Desi_wild_2294835</i> | NA                                  | <i>Ca_desi_denovo</i> | 2294835                 | G/C  | NA                 | NA                            | NA                 |
| <i>Desi_wild_2294845</i> | NA                                  | <i>Ca_desi_denovo</i> | 2294845                 | G/A  | NA                 | NA                            | NA                 |
| <i>Desi_wild_2295515</i> | NA                                  | <i>Ca_desi_denovo</i> | 2295515                 | A/G  | NA                 | NA                            | NA                 |
| <i>Desi_wild_2295532</i> | NA                                  | <i>Ca_desi_denovo</i> | 2295532                 | T/C  | NA                 | NA                            | NA                 |
| <i>Desi_wild_2295779</i> | NA                                  | <i>Ca_desi_denovo</i> | 2295779                 | G/T  | NA                 | NA                            | NA                 |
| <i>Desi_wild_2295824</i> | NA                                  | <i>Ca_desi_denovo</i> | 2295824                 | C/G  | NA                 | NA                            | NA                 |
| <i>Desi_wild_2296396</i> | NA                                  | <i>Ca_desi_denovo</i> | 2296396                 | G/C  | NA                 | NA                            | NA                 |
| <i>Desi_wild_2297531</i> | NA                                  | <i>Ca_desi_denovo</i> | 2297531                 | C/G  | NA                 | NA                            | NA                 |
| <i>Desi_wild_2298096</i> | NA                                  | <i>Ca_desi_denovo</i> | 2298096                 | A/G  | NA                 | NA                            | NA                 |
| <i>Desi_wild_2298116</i> | NA                                  | <i>Ca_desi_denovo</i> | 2298116                 | C/G  | NA                 | NA                            | NA                 |
| <i>Desi_wild_2299885</i> | NA                                  | <i>Ca_desi_denovo</i> | 2299885                 | T/G  | NA                 | NA                            | NA                 |
| <i>Desi_wild_2302484</i> | NA                                  | <i>Ca_desi_denovo</i> | 2302484                 | G/A  | NA                 | NA                            | NA                 |
| <i>Desi_wild_2303021</i> | NA                                  | <i>Ca_desi_denovo</i> | 2303021                 | G/A  | NA                 | NA                            | NA                 |
| <i>Desi_wild_2303644</i> | NA                                  | <i>Ca_desi_denovo</i> | 2303644                 | A/T  | NA                 | NA                            | NA                 |
| <i>Desi_wild_2303675</i> | NA                                  | <i>Ca_desi_denovo</i> | 2303675                 | A/G  | NA                 | NA                            | NA                 |
| <i>Desi_wild_2304147</i> | NA                                  | <i>Ca_desi_denovo</i> | 2304147                 | G/A  | NA                 | NA                            | NA                 |
| <i>Desi_wild_2304215</i> | NA                                  | <i>Ca_desi_denovo</i> | 2304215                 | G/C  | NA                 | NA                            | NA                 |
| <i>Desi_wild_2304244</i> | NA                                  | <i>Ca_desi_denovo</i> | 2304244                 | T/C  | NA                 | NA                            | NA                 |
| <i>Desi_wild_2304615</i> | NA                                  | <i>Ca_desi_denovo</i> | 2304615                 | G/A  | NA                 | NA                            | NA                 |
| <i>Desi_wild_2305384</i> | NA                                  | <i>Ca_desi_denovo</i> | 2305384                 | C/T  | NA                 | NA                            | NA                 |
| <i>Desi_wild_2305781</i> | NA                                  | <i>Ca_desi_denovo</i> | 2305781                 | A/G  | NA                 | NA                            | NA                 |
| <i>Desi_wild_2305988</i> | NA                                  | <i>Ca_desi_denovo</i> | 2305988                 | A/G  | NA                 | NA                            | NA                 |
| <i>Desi_wild_2306115</i> | NA                                  | <i>Ca_desi_denovo</i> | 2306115                 | G/A  | NA                 | NA                            | NA                 |
| <i>Desi_wild_2306142</i> | NA                                  | <i>Ca_desi_denovo</i> | 2306142                 | G/A  | NA                 | NA                            | NA                 |
| <i>Desi_wild_2306577</i> | NA                                  | <i>Ca_desi_denovo</i> | 2306577                 | C/T  | NA                 | NA                            | NA                 |
| <i>Desi_wild_2306803</i> | NA                                  | <i>Ca_desi_denovo</i> | 2306803                 | A/C  | NA                 | NA                            | NA                 |
| <i>Desi_wild_2308413</i> | NA                                  | <i>Ca_desi_denovo</i> | 2308413                 | G/C  | NA                 | NA                            | NA                 |
| <i>Desi_wild_2308444</i> | NA                                  | <i>Ca_desi_denovo</i> | 2308444                 | A/G  | NA                 | NA                            | NA                 |
| <i>Desi_wild_2308727</i> | NA                                  | <i>Ca_desi_denovo</i> | 2308727                 | T/C  | NA                 | NA                            | NA                 |
| <i>Desi_wild_2308852</i> | NA                                  | <i>Ca_desi_denovo</i> | 2308852                 | C/T  | NA                 | NA                            | NA                 |

| SNP IDs                  | NCBI dbSNP accession IDs (NCBI_SS#) | Chromosomes           | Physical positions (bp) | SNPs | Gene accession IDs | Sequence components of genome | Putative functions |
|--------------------------|-------------------------------------|-----------------------|-------------------------|------|--------------------|-------------------------------|--------------------|
| <i>Desi_wild_2308860</i> | NA                                  | <i>Ca_desi_denovo</i> | 2308860                 | A/C  | NA                 | NA                            | NA                 |
| <i>Desi_wild_2309840</i> | NA                                  | <i>Ca_desi_denovo</i> | 2309840                 | T/C  | NA                 | NA                            | NA                 |
| <i>Desi_wild_2309890</i> | NA                                  | <i>Ca_desi_denovo</i> | 2309890                 | T/C  | NA                 | NA                            | NA                 |
| <i>Desi_wild_2310228</i> | NA                                  | <i>Ca_desi_denovo</i> | 2310228                 | T/C  | NA                 | NA                            | NA                 |
| <i>Desi_wild_2310528</i> | NA                                  | <i>Ca_desi_denovo</i> | 2310528                 | T/C  | NA                 | NA                            | NA                 |
| <i>Desi_wild_2310910</i> | NA                                  | <i>Ca_desi_denovo</i> | 2310910                 | A/G  | NA                 | NA                            | NA                 |
| <i>Desi_wild_2311498</i> | NA                                  | <i>Ca_desi_denovo</i> | 2311498                 | G/A  | NA                 | NA                            | NA                 |
| <i>Desi_wild_2311559</i> | NA                                  | <i>Ca_desi_denovo</i> | 2311559                 | G/A  | NA                 | NA                            | NA                 |
| <i>Desi_wild_2312451</i> | NA                                  | <i>Ca_desi_denovo</i> | 2312451                 | A/C  | NA                 | NA                            | NA                 |
| <i>Desi_wild_2313647</i> | NA                                  | <i>Ca_desi_denovo</i> | 2313647                 | T/C  | NA                 | NA                            | NA                 |
| <i>Desi_wild_2314182</i> | NA                                  | <i>Ca_desi_denovo</i> | 2314182                 | T/G  | NA                 | NA                            | NA                 |
| <i>Desi_wild_2315467</i> | NA                                  | <i>Ca_desi_denovo</i> | 2315467                 | G/T  | NA                 | NA                            | NA                 |
| <i>Desi_wild_2315763</i> | NA                                  | <i>Ca_desi_denovo</i> | 2315763                 | G/A  | NA                 | NA                            | NA                 |
| <i>Desi_wild_2315806</i> | NA                                  | <i>Ca_desi_denovo</i> | 2315806                 | A/C  | NA                 | NA                            | NA                 |
| <i>Desi_wild_2316084</i> | NA                                  | <i>Ca_desi_denovo</i> | 2316084                 | C/A  | NA                 | NA                            | NA                 |
| <i>Desi_wild_2316715</i> | NA                                  | <i>Ca_desi_denovo</i> | 2316715                 | C/T  | NA                 | NA                            | NA                 |
| <i>Desi_wild_2316857</i> | NA                                  | <i>Ca_desi_denovo</i> | 2316857                 | C/T  | NA                 | NA                            | NA                 |
| <i>Desi_wild_2320443</i> | NA                                  | <i>Ca_desi_denovo</i> | 2320443                 | T/C  | NA                 | NA                            | NA                 |
| <i>Desi_wild_2321401</i> | NA                                  | <i>Ca_desi_denovo</i> | 2321401                 | C/A  | NA                 | NA                            | NA                 |
| <i>Desi_wild_2321407</i> | NA                                  | <i>Ca_desi_denovo</i> | 2321407                 | G/C  | NA                 | NA                            | NA                 |
| <i>Desi_wild_2324032</i> | NA                                  | <i>Ca_desi_denovo</i> | 2324032                 | G/T  | NA                 | NA                            | NA                 |
| <i>Desi_wild_2324226</i> | NA                                  | <i>Ca_desi_denovo</i> | 2324226                 | G/A  | NA                 | NA                            | NA                 |
| <i>Desi_wild_2324300</i> | NA                                  | <i>Ca_desi_denovo</i> | 2324300                 | C/T  | NA                 | NA                            | NA                 |
| <i>Desi_wild_2324357</i> | NA                                  | <i>Ca_desi_denovo</i> | 2324357                 | G/A  | NA                 | NA                            | NA                 |
| <i>Desi_wild_2325703</i> | NA                                  | <i>Ca_desi_denovo</i> | 2325703                 | G/C  | NA                 | NA                            | NA                 |
| <i>Desi_wild_2328098</i> | NA                                  | <i>Ca_desi_denovo</i> | 2328098                 | A/G  | NA                 | NA                            | NA                 |
| <i>Desi_wild_2328419</i> | NA                                  | <i>Ca_desi_denovo</i> | 2328419                 | G/A  | NA                 | NA                            | NA                 |
| <i>Desi_wild_2329243</i> | NA                                  | <i>Ca_desi_denovo</i> | 2329243                 | C/T  | NA                 | NA                            | NA                 |
| <i>Desi_wild_2329313</i> | NA                                  | <i>Ca_desi_denovo</i> | 2329313                 | A/G  | NA                 | NA                            | NA                 |
| <i>Desi_wild_2329755</i> | NA                                  | <i>Ca_desi_denovo</i> | 2329755                 | C/T  | NA                 | NA                            | NA                 |
| <i>Desi_wild_2329775</i> | NA                                  | <i>Ca_desi_denovo</i> | 2329775                 | G/C  | NA                 | NA                            | NA                 |
| <i>Desi_wild_2330040</i> | NA                                  | <i>Ca_desi_denovo</i> | 2330040                 | C/A  | NA                 | NA                            | NA                 |
| <i>Desi_wild_2330897</i> | NA                                  | <i>Ca_desi_denovo</i> | 2330897                 | A/C  | NA                 | NA                            | NA                 |
| <i>Desi_wild_2331486</i> | NA                                  | <i>Ca_desi_denovo</i> | 2331486                 | C/T  | NA                 | NA                            | NA                 |
| <i>Desi_wild_2331555</i> | NA                                  | <i>Ca_desi_denovo</i> | 2331555                 | C/G  | NA                 | NA                            | NA                 |
| <i>Desi_wild_2332138</i> | NA                                  | <i>Ca_desi_denovo</i> | 2332138                 | T/C  | NA                 | NA                            | NA                 |
| <i>Desi_wild_2332660</i> | NA                                  | <i>Ca_desi_denovo</i> | 2332660                 | A/G  | NA                 | NA                            | NA                 |
| <i>Desi_wild_2332672</i> | NA                                  | <i>Ca_desi_denovo</i> | 2332672                 | C/T  | NA                 | NA                            | NA                 |
| <i>Desi_wild_2333333</i> | NA                                  | <i>Ca_desi_denovo</i> | 2333333                 | C/T  | NA                 | NA                            | NA                 |
| <i>Desi_wild_2333495</i> | NA                                  | <i>Ca_desi_denovo</i> | 2333495                 | G/T  | NA                 | NA                            | NA                 |
| <i>Desi_wild_2334064</i> | NA                                  | <i>Ca_desi_denovo</i> | 2334064                 | C/T  | NA                 | NA                            | NA                 |
| <i>Desi_wild_2334077</i> | NA                                  | <i>Ca_desi_denovo</i> | 2334077                 | A/C  | NA                 | NA                            | NA                 |
| <i>Desi_wild_2335035</i> | NA                                  | <i>Ca_desi_denovo</i> | 2335035                 | A/G  | NA                 | NA                            | NA                 |
| <i>Desi_wild_2336979</i> | NA                                  | <i>Ca_desi_denovo</i> | 2336979                 | G/A  | NA                 | NA                            | NA                 |

| SNP IDs                  | NCBI dbSNP accession IDs (NCBI_SS#) | Chromosomes           | Physical positions (bp) | SNPs | Gene accession IDs | Sequence components of genome | Putative functions |
|--------------------------|-------------------------------------|-----------------------|-------------------------|------|--------------------|-------------------------------|--------------------|
| <i>Desi_wild_2337592</i> | NA                                  | <i>Ca_desi_denovo</i> | 2337592                 | C/T  | NA                 | NA                            | NA                 |
| <i>Desi_wild_2337649</i> | NA                                  | <i>Ca_desi_denovo</i> | 2337649                 | G/A  | NA                 | NA                            | NA                 |
| <i>Desi_wild_2338146</i> | NA                                  | <i>Ca_desi_denovo</i> | 2338146                 | G/A  | NA                 | NA                            | NA                 |
| <i>Desi_wild_2338874</i> | NA                                  | <i>Ca_desi_denovo</i> | 2338874                 | G/A  | NA                 | NA                            | NA                 |
| <i>Desi_wild_2340635</i> | NA                                  | <i>Ca_desi_denovo</i> | 2340635                 | T/G  | NA                 | NA                            | NA                 |
| <i>Desi_wild_2340788</i> | NA                                  | <i>Ca_desi_denovo</i> | 2340788                 | A/G  | NA                 | NA                            | NA                 |
| <i>Desi_wild_2341133</i> | NA                                  | <i>Ca_desi_denovo</i> | 2341133                 | G/T  | NA                 | NA                            | NA                 |
| <i>Desi_wild_2341758</i> | NA                                  | <i>Ca_desi_denovo</i> | 2341758                 | T/C  | NA                 | NA                            | NA                 |
| <i>Desi_wild_2341761</i> | NA                                  | <i>Ca_desi_denovo</i> | 2341761                 | A/G  | NA                 | NA                            | NA                 |
| <i>Desi_wild_2342408</i> | NA                                  | <i>Ca_desi_denovo</i> | 2342408                 | T/C  | NA                 | NA                            | NA                 |
| <i>Desi_wild_2344392</i> | NA                                  | <i>Ca_desi_denovo</i> | 2344392                 | A/G  | NA                 | NA                            | NA                 |
| <i>Desi_wild_2344803</i> | NA                                  | <i>Ca_desi_denovo</i> | 2344803                 | C/G  | NA                 | NA                            | NA                 |
| <i>Desi_wild_2345887</i> | NA                                  | <i>Ca_desi_denovo</i> | 2345887                 | G/A  | NA                 | NA                            | NA                 |
| <i>Desi_wild_2346593</i> | NA                                  | <i>Ca_desi_denovo</i> | 2346593                 | C/T  | NA                 | NA                            | NA                 |
| <i>Desi_wild_2347023</i> | NA                                  | <i>Ca_desi_denovo</i> | 2347023                 | G/C  | NA                 | NA                            | NA                 |
| <i>Desi_wild_2347031</i> | NA                                  | <i>Ca_desi_denovo</i> | 2347031                 | T/G  | NA                 | NA                            | NA                 |
| <i>Desi_wild_2347070</i> | NA                                  | <i>Ca_desi_denovo</i> | 2347070                 | A/G  | NA                 | NA                            | NA                 |
| <i>Desi_wild_2347160</i> | NA                                  | <i>Ca_desi_denovo</i> | 2347160                 | C/T  | NA                 | NA                            | NA                 |
| <i>Desi_wild_2347369</i> | NA                                  | <i>Ca_desi_denovo</i> | 2347369                 | C/T  | NA                 | NA                            | NA                 |
| <i>Desi_wild_2348093</i> | NA                                  | <i>Ca_desi_denovo</i> | 2348093                 | C/G  | NA                 | NA                            | NA                 |
| <i>Desi_wild_2348096</i> | NA                                  | <i>Ca_desi_denovo</i> | 2348096                 | A/G  | NA                 | NA                            | NA                 |
| <i>Desi_wild_2348493</i> | NA                                  | <i>Ca_desi_denovo</i> | 2348493                 | C/G  | NA                 | NA                            | NA                 |
| <i>Desi_wild_2348508</i> | NA                                  | <i>Ca_desi_denovo</i> | 2348508                 | G/A  | NA                 | NA                            | NA                 |
| <i>Desi_wild_2348713</i> | NA                                  | <i>Ca_desi_denovo</i> | 2348713                 | T/G  | NA                 | NA                            | NA                 |
| <i>Desi_wild_2348839</i> | NA                                  | <i>Ca_desi_denovo</i> | 2348839                 | G/C  | NA                 | NA                            | NA                 |
| <i>Desi_wild_2348868</i> | NA                                  | <i>Ca_desi_denovo</i> | 2348868                 | T/A  | NA                 | NA                            | NA                 |
| <i>Desi_wild_2348893</i> | NA                                  | <i>Ca_desi_denovo</i> | 2348893                 | G/T  | NA                 | NA                            | NA                 |
| <i>Desi_wild_2348913</i> | NA                                  | <i>Ca_desi_denovo</i> | 2348913                 | C/G  | NA                 | NA                            | NA                 |
| <i>Desi_wild_2349365</i> | NA                                  | <i>Ca_desi_denovo</i> | 2349365                 | C/A  | NA                 | NA                            | NA                 |
| <i>Desi_wild_2349395</i> | NA                                  | <i>Ca_desi_denovo</i> | 2349395                 | G/C  | NA                 | NA                            | NA                 |
| <i>Desi_wild_2349667</i> | NA                                  | <i>Ca_desi_denovo</i> | 2349667                 | A/G  | NA                 | NA                            | NA                 |
| <i>Desi_wild_2349684</i> | NA                                  | <i>Ca_desi_denovo</i> | 2349684                 | C/T  | NA                 | NA                            | NA                 |
| <i>Desi_wild_2350631</i> | NA                                  | <i>Ca_desi_denovo</i> | 2350631                 | A/C  | NA                 | NA                            | NA                 |
| <i>Desi_wild_2350661</i> | NA                                  | <i>Ca_desi_denovo</i> | 2350661                 | G/T  | NA                 | NA                            | NA                 |
| <i>Desi_wild_2350719</i> | NA                                  | <i>Ca_desi_denovo</i> | 2350719                 | G/T  | NA                 | NA                            | NA                 |
| <i>Desi_wild_2350721</i> | NA                                  | <i>Ca_desi_denovo</i> | 2350721                 | T/C  | NA                 | NA                            | NA                 |
| <i>Desi_wild_2351732</i> | NA                                  | <i>Ca_desi_denovo</i> | 2351732                 | T/C  | NA                 | NA                            | NA                 |
| <i>Desi_wild_2352020</i> | NA                                  | <i>Ca_desi_denovo</i> | 2352020                 | A/G  | NA                 | NA                            | NA                 |
| <i>Desi_wild_2353591</i> | NA                                  | <i>Ca_desi_denovo</i> | 2353591                 | C/T  | NA                 | NA                            | NA                 |
| <i>Desi_wild_2353594</i> | NA                                  | <i>Ca_desi_denovo</i> | 2353594                 | C/T  | NA                 | NA                            | NA                 |
| <i>Desi_wild_2354812</i> | NA                                  | <i>Ca_desi_denovo</i> | 2354812                 | G/A  | NA                 | NA                            | NA                 |
| <i>Desi_wild_2354898</i> | NA                                  | <i>Ca_desi_denovo</i> | 2354898                 | C/T  | NA                 | NA                            | NA                 |
| <i>Desi_wild_2355269</i> | NA                                  | <i>Ca_desi_denovo</i> | 2355269                 | C/T  | NA                 | NA                            | NA                 |
| <i>Desi_wild_2355296</i> | NA                                  | <i>Ca_desi_denovo</i> | 2355296                 | A/T  | NA                 | NA                            | NA                 |

| SNP IDs                  | NCBI dbSNP accession IDs (NCBI_SS#) | Chromosomes           | Physical positions (bp) | SNPs | Gene accession IDs | Sequence components of genome | Putative functions |
|--------------------------|-------------------------------------|-----------------------|-------------------------|------|--------------------|-------------------------------|--------------------|
| <i>Desi_wild_2355437</i> | NA                                  | <i>Ca_desi_denovo</i> | 2355437                 | T/C  | NA                 | NA                            | NA                 |
| <i>Desi_wild_2355467</i> | NA                                  | <i>Ca_desi_denovo</i> | 2355467                 | A/G  | NA                 | NA                            | NA                 |
| <i>Desi_wild_2355900</i> | NA                                  | <i>Ca_desi_denovo</i> | 2355900                 | A/G  | NA                 | NA                            | NA                 |
| <i>Desi_wild_2356594</i> | NA                                  | <i>Ca_desi_denovo</i> | 2356594                 | T/A  | NA                 | NA                            | NA                 |
| <i>Desi_wild_2357020</i> | NA                                  | <i>Ca_desi_denovo</i> | 2357020                 | T/C  | NA                 | NA                            | NA                 |
| <i>Desi_wild_2357459</i> | NA                                  | <i>Ca_desi_denovo</i> | 2357459                 | T/G  | NA                 | NA                            | NA                 |
| <i>Desi_wild_2357500</i> | NA                                  | <i>Ca_desi_denovo</i> | 2357500                 | C/T  | NA                 | NA                            | NA                 |
| <i>Desi_wild_2357934</i> | NA                                  | <i>Ca_desi_denovo</i> | 2357934                 | A/G  | NA                 | NA                            | NA                 |
| <i>Desi_wild_2358083</i> | NA                                  | <i>Ca_desi_denovo</i> | 2358083                 | T/G  | NA                 | NA                            | NA                 |
| <i>Desi_wild_2358852</i> | NA                                  | <i>Ca_desi_denovo</i> | 2358852                 | C/T  | NA                 | NA                            | NA                 |
| <i>Desi_wild_2358873</i> | NA                                  | <i>Ca_desi_denovo</i> | 2358873                 | A/G  | NA                 | NA                            | NA                 |
| <i>Desi_wild_2359168</i> | NA                                  | <i>Ca_desi_denovo</i> | 2359168                 | G/A  | NA                 | NA                            | NA                 |
| <i>Desi_wild_2359523</i> | NA                                  | <i>Ca_desi_denovo</i> | 2359523                 | A/G  | NA                 | NA                            | NA                 |
| <i>Desi_wild_2360049</i> | NA                                  | <i>Ca_desi_denovo</i> | 2360049                 | G/A  | NA                 | NA                            | NA                 |
| <i>Desi_wild_2360784</i> | NA                                  | <i>Ca_desi_denovo</i> | 2360784                 | A/G  | NA                 | NA                            | NA                 |
| <i>Desi_wild_2361766</i> | NA                                  | <i>Ca_desi_denovo</i> | 2361766                 | G/A  | NA                 | NA                            | NA                 |
| <i>Desi_wild_2361771</i> | NA                                  | <i>Ca_desi_denovo</i> | 2361771                 | C/T  | NA                 | NA                            | NA                 |
| <i>Desi_wild_2362421</i> | NA                                  | <i>Ca_desi_denovo</i> | 2362421                 | G/C  | NA                 | NA                            | NA                 |
| <i>Desi_wild_2362648</i> | NA                                  | <i>Ca_desi_denovo</i> | 2362648                 | C/T  | NA                 | NA                            | NA                 |
| <i>Desi_wild_2363262</i> | NA                                  | <i>Ca_desi_denovo</i> | 2363262                 | T/C  | NA                 | NA                            | NA                 |
| <i>Desi_wild_2363496</i> | NA                                  | <i>Ca_desi_denovo</i> | 2363496                 | C/T  | NA                 | NA                            | NA                 |
| <i>Desi_wild_2363511</i> | NA                                  | <i>Ca_desi_denovo</i> | 2363511                 | G/C  | NA                 | NA                            | NA                 |
| <i>Desi_wild_2363599</i> | NA                                  | <i>Ca_desi_denovo</i> | 2363599                 | A/T  | NA                 | NA                            | NA                 |
| <i>Desi_wild_2364766</i> | NA                                  | <i>Ca_desi_denovo</i> | 2364766                 | G/C  | NA                 | NA                            | NA                 |
| <i>Desi_wild_2364791</i> | NA                                  | <i>Ca_desi_denovo</i> | 2364791                 | A/G  | NA                 | NA                            | NA                 |
| <i>Desi_wild_2365242</i> | NA                                  | <i>Ca_desi_denovo</i> | 2365242                 | T/G  | NA                 | NA                            | NA                 |
| <i>Desi_wild_2365258</i> | NA                                  | <i>Ca_desi_denovo</i> | 2365258                 | A/G  | NA                 | NA                            | NA                 |
| <i>Desi_wild_2365991</i> | NA                                  | <i>Ca_desi_denovo</i> | 2365991                 | A/T  | NA                 | NA                            | NA                 |
| <i>Desi_wild_2366022</i> | NA                                  | <i>Ca_desi_denovo</i> | 2366022                 | T/C  | NA                 | NA                            | NA                 |
| <i>Desi_wild_2366070</i> | NA                                  | <i>Ca_desi_denovo</i> | 2366070                 | A/G  | NA                 | NA                            | NA                 |
| <i>Desi_wild_2366099</i> | NA                                  | <i>Ca_desi_denovo</i> | 2366099                 | C/G  | NA                 | NA                            | NA                 |
| <i>Desi_wild_2366137</i> | NA                                  | <i>Ca_desi_denovo</i> | 2366137                 | A/G  | NA                 | NA                            | NA                 |
| <i>Desi_wild_2366296</i> | NA                                  | <i>Ca_desi_denovo</i> | 2366296                 | G/T  | NA                 | NA                            | NA                 |
| <i>Desi_wild_2366816</i> | NA                                  | <i>Ca_desi_denovo</i> | 2366816                 | A/G  | NA                 | NA                            | NA                 |
| <i>Desi_wild_2366859</i> | NA                                  | <i>Ca_desi_denovo</i> | 2366859                 | A/C  | NA                 | NA                            | NA                 |
| <i>Desi_wild_2367293</i> | NA                                  | <i>Ca_desi_denovo</i> | 2367293                 | T/C  | NA                 | NA                            | NA                 |
| <i>Desi_wild_2371050</i> | NA                                  | <i>Ca_desi_denovo</i> | 2371050                 | A/C  | NA                 | NA                            | NA                 |
| <i>Desi_wild_2372359</i> | NA                                  | <i>Ca_desi_denovo</i> | 2372359                 | A/G  | NA                 | NA                            | NA                 |
| <i>Desi_wild_2372380</i> | NA                                  | <i>Ca_desi_denovo</i> | 2372380                 | G/C  | NA                 | NA                            | NA                 |
| <i>Desi_wild_2373293</i> | NA                                  | <i>Ca_desi_denovo</i> | 2373293                 | G/C  | NA                 | NA                            | NA                 |
| <i>Desi_wild_2375030</i> | NA                                  | <i>Ca_desi_denovo</i> | 2375030                 | T/C  | NA                 | NA                            | NA                 |
| <i>Desi_wild_2375058</i> | NA                                  | <i>Ca_desi_denovo</i> | 2375058                 | G/C  | NA                 | NA                            | NA                 |
| <i>Desi_wild_2376028</i> | NA                                  | <i>Ca_desi_denovo</i> | 2376028                 | A/G  | NA                 | NA                            | NA                 |
| <i>Desi_wild_2377941</i> | NA                                  | <i>Ca_desi_denovo</i> | 2377941                 | G/A  | NA                 | NA                            | NA                 |

| SNP IDs                  | NCBI dbSNP accession IDs (NCBI_SS#) | Chromosomes           | Physical positions (bp) | SNPs | Gene accession IDs | Sequence components of genome | Putative functions |
|--------------------------|-------------------------------------|-----------------------|-------------------------|------|--------------------|-------------------------------|--------------------|
| <i>Desi_wild_2378555</i> | NA                                  | <i>Ca_desi_denovo</i> | 2378555                 | A/T  | NA                 | NA                            | NA                 |
| <i>Desi_wild_2379205</i> | NA                                  | <i>Ca_desi_denovo</i> | 2379205                 | A/G  | NA                 | NA                            | NA                 |
| <i>Desi_wild_2379763</i> | NA                                  | <i>Ca_desi_denovo</i> | 2379763                 | A/G  | NA                 | NA                            | NA                 |
| <i>Desi_wild_2379786</i> | NA                                  | <i>Ca_desi_denovo</i> | 2379786                 | A/G  | NA                 | NA                            | NA                 |
| <i>Desi_wild_2380126</i> | NA                                  | <i>Ca_desi_denovo</i> | 2380126                 | A/G  | NA                 | NA                            | NA                 |
| <i>Desi_wild_2380131</i> | NA                                  | <i>Ca_desi_denovo</i> | 2380131                 | C/A  | NA                 | NA                            | NA                 |
| <i>Desi_wild_2380787</i> | NA                                  | <i>Ca_desi_denovo</i> | 2380787                 | G/A  | NA                 | NA                            | NA                 |
| <i>Desi_wild_2380827</i> | NA                                  | <i>Ca_desi_denovo</i> | 2380827                 | C/G  | NA                 | NA                            | NA                 |
| <i>Desi_wild_2381096</i> | NA                                  | <i>Ca_desi_denovo</i> | 2381096                 | C/T  | NA                 | NA                            | NA                 |
| <i>Desi_wild_2381102</i> | NA                                  | <i>Ca_desi_denovo</i> | 2381102                 | C/T  | NA                 | NA                            | NA                 |
| <i>Desi_wild_2381527</i> | NA                                  | <i>Ca_desi_denovo</i> | 2381527                 | A/C  | NA                 | NA                            | NA                 |
| <i>Desi_wild_2381584</i> | NA                                  | <i>Ca_desi_denovo</i> | 2381584                 | G/A  | NA                 | NA                            | NA                 |
| <i>Desi_wild_2383148</i> | NA                                  | <i>Ca_desi_denovo</i> | 2383148                 | G/T  | NA                 | NA                            | NA                 |
| <i>Desi_wild_2384064</i> | NA                                  | <i>Ca_desi_denovo</i> | 2384064                 | G/A  | NA                 | NA                            | NA                 |
| <i>Desi_wild_2384460</i> | NA                                  | <i>Ca_desi_denovo</i> | 2384460                 | G/A  | NA                 | NA                            | NA                 |
| <i>Desi_wild_2384465</i> | NA                                  | <i>Ca_desi_denovo</i> | 2384465                 | G/A  | NA                 | NA                            | NA                 |
| <i>Desi_wild_2385528</i> | NA                                  | <i>Ca_desi_denovo</i> | 2385528                 | G/C  | NA                 | NA                            | NA                 |
| <i>Desi_wild_2385536</i> | NA                                  | <i>Ca_desi_denovo</i> | 2385536                 | T/C  | NA                 | NA                            | NA                 |
| <i>Desi_wild_2385631</i> | NA                                  | <i>Ca_desi_denovo</i> | 2385631                 | A/G  | NA                 | NA                            | NA                 |
| <i>Desi_wild_2385655</i> | NA                                  | <i>Ca_desi_denovo</i> | 2385655                 | A/G  | NA                 | NA                            | NA                 |
| <i>Desi_wild_2388623</i> | NA                                  | <i>Ca_desi_denovo</i> | 2388623                 | G/A  | NA                 | NA                            | NA                 |
| <i>Desi_wild_2388637</i> | NA                                  | <i>Ca_desi_denovo</i> | 2388637                 | G/A  | NA                 | NA                            | NA                 |
| <i>Desi_wild_2389431</i> | NA                                  | <i>Ca_desi_denovo</i> | 2389431                 | C/T  | NA                 | NA                            | NA                 |
| <i>Desi_wild_2389595</i> | NA                                  | <i>Ca_desi_denovo</i> | 2389595                 | G/A  | NA                 | NA                            | NA                 |
| <i>Desi_wild_2389680</i> | NA                                  | <i>Ca_desi_denovo</i> | 2389680                 | A/G  | NA                 | NA                            | NA                 |
| <i>Desi_wild_2389683</i> | NA                                  | <i>Ca_desi_denovo</i> | 2389683                 | A/G  | NA                 | NA                            | NA                 |
| <i>Desi_wild_2389845</i> | NA                                  | <i>Ca_desi_denovo</i> | 2389845                 | T/C  | NA                 | NA                            | NA                 |
| <i>Desi_wild_2390389</i> | NA                                  | <i>Ca_desi_denovo</i> | 2390389                 | T/C  | NA                 | NA                            | NA                 |
| <i>Desi_wild_2390754</i> | NA                                  | <i>Ca_desi_denovo</i> | 2390754                 | G/A  | NA                 | NA                            | NA                 |
| <i>Desi_wild_2391617</i> | NA                                  | <i>Ca_desi_denovo</i> | 2391617                 | G/A  | NA                 | NA                            | NA                 |
| <i>Desi_wild_2391656</i> | NA                                  | <i>Ca_desi_denovo</i> | 2391656                 | C/G  | NA                 | NA                            | NA                 |
| <i>Desi_wild_2392499</i> | NA                                  | <i>Ca_desi_denovo</i> | 2392499                 | T/G  | NA                 | NA                            | NA                 |
| <i>Desi_wild_2392512</i> | NA                                  | <i>Ca_desi_denovo</i> | 2392512                 | A/C  | NA                 | NA                            | NA                 |
| <i>Desi_wild_2392584</i> | NA                                  | <i>Ca_desi_denovo</i> | 2392584                 | C/T  | NA                 | NA                            | NA                 |
| <i>Desi_wild_2395307</i> | NA                                  | <i>Ca_desi_denovo</i> | 2395307                 | T/A  | NA                 | NA                            | NA                 |
| <i>Desi_wild_2395330</i> | NA                                  | <i>Ca_desi_denovo</i> | 2395330                 | C/A  | NA                 | NA                            | NA                 |
| <i>Desi_wild_2396085</i> | NA                                  | <i>Ca_desi_denovo</i> | 2396085                 | A/G  | NA                 | NA                            | NA                 |
| <i>Desi_wild_2396086</i> | NA                                  | <i>Ca_desi_denovo</i> | 2396086                 | G/A  | NA                 | NA                            | NA                 |
| <i>Desi_wild_2396136</i> | NA                                  | <i>Ca_desi_denovo</i> | 2396136                 | G/T  | NA                 | NA                            | NA                 |
| <i>Desi_wild_2396148</i> | NA                                  | <i>Ca_desi_denovo</i> | 2396148                 | C/T  | NA                 | NA                            | NA                 |
| <i>Desi_wild_2397146</i> | NA                                  | <i>Ca_desi_denovo</i> | 2397146                 | C/T  | NA                 | NA                            | NA                 |
| <i>Desi_wild_2397170</i> | NA                                  | <i>Ca_desi_denovo</i> | 2397170                 | T/C  | NA                 | NA                            | NA                 |
| <i>Desi_wild_2399079</i> | NA                                  | <i>Ca_desi_denovo</i> | 2399079                 | G/C  | NA                 | NA                            | NA                 |
| <i>Desi_wild_2399138</i> | NA                                  | <i>Ca_desi_denovo</i> | 2399138                 | A/G  | NA                 | NA                            | NA                 |

| SNP IDs                  | NCBI dbSNP accession IDs (NCBI_SS#) | Chromosomes           | Physical positions (bp) | SNPs | Gene accession IDs | Sequence components of genome | Putative functions |
|--------------------------|-------------------------------------|-----------------------|-------------------------|------|--------------------|-------------------------------|--------------------|
| <i>Desi_wild_2399417</i> | NA                                  | <i>Ca_desi_denovo</i> | 2399417                 | A/G  | NA                 | NA                            | NA                 |
| <i>Desi_wild_2400062</i> | NA                                  | <i>Ca_desi_denovo</i> | 2400062                 | C/G  | NA                 | NA                            | NA                 |
| <i>Desi_wild_2400086</i> | NA                                  | <i>Ca_desi_denovo</i> | 2400086                 | T/C  | NA                 | NA                            | NA                 |
| <i>Desi_wild_2400195</i> | NA                                  | <i>Ca_desi_denovo</i> | 2400195                 | G/C  | NA                 | NA                            | NA                 |
| <i>Desi_wild_2400390</i> | NA                                  | <i>Ca_desi_denovo</i> | 2400390                 | G/C  | NA                 | NA                            | NA                 |
| <i>Desi_wild_2400404</i> | NA                                  | <i>Ca_desi_denovo</i> | 2400404                 | G/C  | NA                 | NA                            | NA                 |
| <i>Desi_wild_2400657</i> | NA                                  | <i>Ca_desi_denovo</i> | 2400657                 | T/C  | NA                 | NA                            | NA                 |
| <i>Desi_wild_2400660</i> | NA                                  | <i>Ca_desi_denovo</i> | 2400660                 | C/G  | NA                 | NA                            | NA                 |
| <i>Desi_wild_2402118</i> | NA                                  | <i>Ca_desi_denovo</i> | 2402118                 | G/A  | NA                 | NA                            | NA                 |
| <i>Desi_wild_2402271</i> | NA                                  | <i>Ca_desi_denovo</i> | 2402271                 | G/C  | NA                 | NA                            | NA                 |
| <i>Desi_wild_2403260</i> | NA                                  | <i>Ca_desi_denovo</i> | 2403260                 | C/A  | NA                 | NA                            | NA                 |
| <i>Desi_wild_2403479</i> | NA                                  | <i>Ca_desi_denovo</i> | 2403479                 | G/C  | NA                 | NA                            | NA                 |
| <i>Desi_wild_2405929</i> | NA                                  | <i>Ca_desi_denovo</i> | 2405929                 | C/T  | NA                 | NA                            | NA                 |
| <i>Desi_wild_2406200</i> | NA                                  | <i>Ca_desi_denovo</i> | 2406200                 | C/A  | NA                 | NA                            | NA                 |
| <i>Desi_wild_2406215</i> | NA                                  | <i>Ca_desi_denovo</i> | 2406215                 | A/G  | NA                 | NA                            | NA                 |
| <i>Desi_wild_2407622</i> | NA                                  | <i>Ca_desi_denovo</i> | 2407622                 | G/C  | NA                 | NA                            | NA                 |
| <i>Desi_wild_2407909</i> | NA                                  | <i>Ca_desi_denovo</i> | 2407909                 | G/C  | NA                 | NA                            | NA                 |
| <i>Desi_wild_2407933</i> | NA                                  | <i>Ca_desi_denovo</i> | 2407933                 | T/C  | NA                 | NA                            | NA                 |
| <i>Desi_wild_2409788</i> | NA                                  | <i>Ca_desi_denovo</i> | 2409788                 | C/T  | NA                 | NA                            | NA                 |
| <i>Desi_wild_2410378</i> | NA                                  | <i>Ca_desi_denovo</i> | 2410378                 | A/G  | NA                 | NA                            | NA                 |
| <i>Desi_wild_2410608</i> | NA                                  | <i>Ca_desi_denovo</i> | 2410608                 | G/T  | NA                 | NA                            | NA                 |
| <i>Desi_wild_2411870</i> | NA                                  | <i>Ca_desi_denovo</i> | 2411870                 | C/T  | NA                 | NA                            | NA                 |
| <i>Desi_wild_2412176</i> | NA                                  | <i>Ca_desi_denovo</i> | 2412176                 | T/C  | NA                 | NA                            | NA                 |
| <i>Desi_wild_2412191</i> | NA                                  | <i>Ca_desi_denovo</i> | 2412191                 | C/G  | NA                 | NA                            | NA                 |
| <i>Desi_wild_2412328</i> | NA                                  | <i>Ca_desi_denovo</i> | 2412328                 | G/A  | NA                 | NA                            | NA                 |
| <i>Desi_wild_2412358</i> | NA                                  | <i>Ca_desi_denovo</i> | 2412358                 | G/A  | NA                 | NA                            | NA                 |
| <i>Desi_wild_2412483</i> | NA                                  | <i>Ca_desi_denovo</i> | 2412483                 | C/G  | NA                 | NA                            | NA                 |
| <i>Desi_wild_2412521</i> | NA                                  | <i>Ca_desi_denovo</i> | 2412521                 | T/C  | NA                 | NA                            | NA                 |
| <i>Desi_wild_2413255</i> | NA                                  | <i>Ca_desi_denovo</i> | 2413255                 | A/C  | NA                 | NA                            | NA                 |
| <i>Desi_wild_2413306</i> | NA                                  | <i>Ca_desi_denovo</i> | 2413306                 | T/C  | NA                 | NA                            | NA                 |
| <i>Desi_wild_2413742</i> | NA                                  | <i>Ca_desi_denovo</i> | 2413742                 | A/G  | NA                 | NA                            | NA                 |
| <i>Desi_wild_2413743</i> | NA                                  | <i>Ca_desi_denovo</i> | 2413743                 | C/A  | NA                 | NA                            | NA                 |
| <i>Desi_wild_2414221</i> | NA                                  | <i>Ca_desi_denovo</i> | 2414221                 | A/T  | NA                 | NA                            | NA                 |
| <i>Desi_wild_2414260</i> | NA                                  | <i>Ca_desi_denovo</i> | 2414260                 | A/G  | NA                 | NA                            | NA                 |
| <i>Desi_wild_2414607</i> | NA                                  | <i>Ca_desi_denovo</i> | 2414607                 | A/G  | NA                 | NA                            | NA                 |
| <i>Desi_wild_2414610</i> | NA                                  | <i>Ca_desi_denovo</i> | 2414610                 | G/C  | NA                 | NA                            | NA                 |
| <i>Desi_wild_2414644</i> | NA                                  | <i>Ca_desi_denovo</i> | 2414644                 | C/G  | NA                 | NA                            | NA                 |
| <i>Desi_wild_2418683</i> | NA                                  | <i>Ca_desi_denovo</i> | 2418683                 | C/A  | NA                 | NA                            | NA                 |
| <i>Desi_wild_2419316</i> | NA                                  | <i>Ca_desi_denovo</i> | 2419316                 | A/G  | NA                 | NA                            | NA                 |
| <i>Desi_wild_2421184</i> | NA                                  | <i>Ca_desi_denovo</i> | 2421184                 | C/G  | NA                 | NA                            | NA                 |
| <i>Desi_wild_2422409</i> | NA                                  | <i>Ca_desi_denovo</i> | 2422409                 | T/C  | NA                 | NA                            | NA                 |
| <i>Desi_wild_2422846</i> | NA                                  | <i>Ca_desi_denovo</i> | 2422846                 | G/A  | NA                 | NA                            | NA                 |
| <i>Desi_wild_2422930</i> | NA                                  | <i>Ca_desi_denovo</i> | 2422930                 | A/G  | NA                 | NA                            | NA                 |
| <i>Desi_wild_2422962</i> | NA                                  | <i>Ca_desi_denovo</i> | 2422962                 | T/C  | NA                 | NA                            | NA                 |



| SNP IDs                  | NCBI dbSNP accession IDs (NCBI_SS#) | Chromosomes           | Physical positions (bp) | SNPs | Gene accession IDs | Sequence components of genome | Putative functions |
|--------------------------|-------------------------------------|-----------------------|-------------------------|------|--------------------|-------------------------------|--------------------|
| <i>Desi_wild_2422986</i> | NA                                  | <i>Ca_desi_denovo</i> | 2422986                 | A/G  | NA                 | NA                            | NA                 |
| <i>Desi_wild_2423154</i> | NA                                  | <i>Ca_desi_denovo</i> | 2423154                 | A/C  | NA                 | NA                            | NA                 |
| <i>Desi_wild_2423160</i> | NA                                  | <i>Ca_desi_denovo</i> | 2423160                 | A/G  | NA                 | NA                            | NA                 |
| <i>Desi_wild_2423294</i> | NA                                  | <i>Ca_desi_denovo</i> | 2423294                 | C/G  | NA                 | NA                            | NA                 |
| <i>Desi_wild_2423314</i> | NA                                  | <i>Ca_desi_denovo</i> | 2423314                 | C/T  | NA                 | NA                            | NA                 |
| <i>Desi_wild_2424709</i> | NA                                  | <i>Ca_desi_denovo</i> | 2424709                 | C/T  | NA                 | NA                            | NA                 |
| <i>Desi_wild_2425864</i> | NA                                  | <i>Ca_desi_denovo</i> | 2425864                 | A/G  | NA                 | NA                            | NA                 |
| <i>Desi_wild_2425938</i> | NA                                  | <i>Ca_desi_denovo</i> | 2425938                 | G/A  | NA                 | NA                            | NA                 |
| <i>Desi_wild_2426547</i> | NA                                  | <i>Ca_desi_denovo</i> | 2426547                 | A/G  | NA                 | NA                            | NA                 |
| <i>Desi_wild_2426576</i> | NA                                  | <i>Ca_desi_denovo</i> | 2426576                 | C/T  | NA                 | NA                            | NA                 |
| <i>Desi_wild_2427516</i> | NA                                  | <i>Ca_desi_denovo</i> | 2427516                 | A/G  | NA                 | NA                            | NA                 |
| <i>Desi_wild_2427763</i> | NA                                  | <i>Ca_desi_denovo</i> | 2427763                 | T/C  | NA                 | NA                            | NA                 |
| <i>Desi_wild_2428668</i> | NA                                  | <i>Ca_desi_denovo</i> | 2428668                 | T/C  | NA                 | NA                            | NA                 |
| <i>Desi_wild_2431065</i> | NA                                  | <i>Ca_desi_denovo</i> | 2431065                 | T/C  | NA                 | NA                            | NA                 |
| <i>Desi_wild_2433615</i> | NA                                  | <i>Ca_desi_denovo</i> | 2433615                 | T/G  | NA                 | NA                            | NA                 |
| <i>Desi_wild_2433620</i> | NA                                  | <i>Ca_desi_denovo</i> | 2433620                 | G/C  | NA                 | NA                            | NA                 |
| <i>Desi_wild_2434388</i> | NA                                  | <i>Ca_desi_denovo</i> | 2434388                 | A/C  | NA                 | NA                            | NA                 |
| <i>Desi_wild_2434429</i> | NA                                  | <i>Ca_desi_denovo</i> | 2434429                 | C/G  | NA                 | NA                            | NA                 |
| <i>Desi_wild_2435890</i> | NA                                  | <i>Ca_desi_denovo</i> | 2435890                 | C/T  | NA                 | NA                            | NA                 |
| <i>Desi_wild_2435891</i> | NA                                  | <i>Ca_desi_denovo</i> | 2435891                 | A/G  | NA                 | NA                            | NA                 |
| <i>Desi_wild_2436729</i> | NA                                  | <i>Ca_desi_denovo</i> | 2436729                 | C/G  | NA                 | NA                            | NA                 |
| <i>Desi_wild_2439845</i> | NA                                  | <i>Ca_desi_denovo</i> | 2439845                 | G/A  | NA                 | NA                            | NA                 |
| <i>Desi_wild_2440427</i> | NA                                  | <i>Ca_desi_denovo</i> | 2440427                 | G/A  | NA                 | NA                            | NA                 |
| <i>Desi_wild_2440472</i> | NA                                  | <i>Ca_desi_denovo</i> | 2440472                 | C/G  | NA                 | NA                            | NA                 |
| <i>Desi_wild_2440684</i> | NA                                  | <i>Ca_desi_denovo</i> | 2440684                 | A/C  | NA                 | NA                            | NA                 |
| <i>Desi_wild_2441782</i> | NA                                  | <i>Ca_desi_denovo</i> | 2441782                 | C/T  | NA                 | NA                            | NA                 |
| <i>Desi_wild_2442915</i> | NA                                  | <i>Ca_desi_denovo</i> | 2442915                 | G/T  | NA                 | NA                            | NA                 |
| <i>Desi_wild_2444194</i> | NA                                  | <i>Ca_desi_denovo</i> | 2444194                 | C/G  | NA                 | NA                            | NA                 |
| <i>Desi_wild_2444197</i> | NA                                  | <i>Ca_desi_denovo</i> | 2444197                 | A/G  | NA                 | NA                            | NA                 |
| <i>Desi_wild_2444415</i> | NA                                  | <i>Ca_desi_denovo</i> | 2444415                 | G/C  | NA                 | NA                            | NA                 |
| <i>Desi_wild_2445184</i> | NA                                  | <i>Ca_desi_denovo</i> | 2445184                 | A/C  | NA                 | NA                            | NA                 |
| <i>Desi_wild_2445230</i> | NA                                  | <i>Ca_desi_denovo</i> | 2445230                 | A/C  | NA                 | NA                            | NA                 |
| <i>Desi_wild_2445946</i> | NA                                  | <i>Ca_desi_denovo</i> | 2445946                 | A/G  | NA                 | NA                            | NA                 |
| <i>Desi_wild_2445979</i> | NA                                  | <i>Ca_desi_denovo</i> | 2445979                 | A/G  | NA                 | NA                            | NA                 |
| <i>Desi_wild_2446639</i> | NA                                  | <i>Ca_desi_denovo</i> | 2446639                 | C/G  | NA                 | NA                            | NA                 |
| <i>Desi_wild_2446808</i> | NA                                  | <i>Ca_desi_denovo</i> | 2446808                 | T/G  | NA                 | NA                            | NA                 |
| <i>Desi_wild_2446812</i> | NA                                  | <i>Ca_desi_denovo</i> | 2446812                 | A/C  | NA                 | NA                            | NA                 |
| <i>Desi_wild_2447255</i> | NA                                  | <i>Ca_desi_denovo</i> | 2447255                 | A/C  | NA                 | NA                            | NA                 |
| <i>Desi_wild_2449327</i> | NA                                  | <i>Ca_desi_denovo</i> | 2449327                 | G/A  | NA                 | NA                            | NA                 |
| <i>Desi_wild_2449339</i> | NA                                  | <i>Ca_desi_denovo</i> | 2449339                 | T/C  | NA                 | NA                            | NA                 |
| <i>Desi_wild_2449483</i> | NA                                  | <i>Ca_desi_denovo</i> | 2449483                 | C/T  | NA                 | NA                            | NA                 |
| <i>Desi_wild_2449537</i> | NA                                  | <i>Ca_desi_denovo</i> | 2449537                 | T/C  | NA                 | NA                            | NA                 |
| <i>Desi_wild_2449717</i> | NA                                  | <i>Ca_desi_denovo</i> | 2449717                 | C/T  | NA                 | NA                            | NA                 |
| <i>Desi_wild_2449774</i> | NA                                  | <i>Ca_desi_denovo</i> | 2449774                 | T/C  | NA                 | NA                            | NA                 |

| SNP IDs                  | NCBI dbSNP accession IDs (NCBI_SS#) | Chromosomes           | Physical positions (bp) | SNPs | Gene accession IDs | Sequence components of genome | Putative functions |
|--------------------------|-------------------------------------|-----------------------|-------------------------|------|--------------------|-------------------------------|--------------------|
| <i>Desi_wild_2450685</i> | NA                                  | <i>Ca_desi_denovo</i> | 2450685                 | C/G  | NA                 | NA                            | NA                 |
| <i>Desi_wild_2450742</i> | NA                                  | <i>Ca_desi_denovo</i> | 2450742                 | G/A  | NA                 | NA                            | NA                 |
| <i>Desi_wild_2451031</i> | NA                                  | <i>Ca_desi_denovo</i> | 2451031                 | A/G  | NA                 | NA                            | NA                 |
| <i>Desi_wild_2451561</i> | NA                                  | <i>Ca_desi_denovo</i> | 2451561                 | G/A  | NA                 | NA                            | NA                 |
| <i>Desi_wild_2452448</i> | NA                                  | <i>Ca_desi_denovo</i> | 2452448                 | G/C  | NA                 | NA                            | NA                 |
| <i>Desi_wild_2452465</i> | NA                                  | <i>Ca_desi_denovo</i> | 2452465                 | G/A  | NA                 | NA                            | NA                 |
| <i>Desi_wild_2452470</i> | NA                                  | <i>Ca_desi_denovo</i> | 2452470                 | G/A  | NA                 | NA                            | NA                 |
| <i>Desi_wild_2452548</i> | NA                                  | <i>Ca_desi_denovo</i> | 2452548                 | G/A  | NA                 | NA                            | NA                 |
| <i>Desi_wild_2453304</i> | NA                                  | <i>Ca_desi_denovo</i> | 2453304                 | G/A  | NA                 | NA                            | NA                 |
| <i>Desi_wild_2453328</i> | NA                                  | <i>Ca_desi_denovo</i> | 2453328                 | A/T  | NA                 | NA                            | NA                 |
| <i>Desi_wild_2454283</i> | NA                                  | <i>Ca_desi_denovo</i> | 2454283                 | G/A  | NA                 | NA                            | NA                 |
| <i>Desi_wild_2454307</i> | NA                                  | <i>Ca_desi_denovo</i> | 2454307                 | C/T  | NA                 | NA                            | NA                 |
| <i>Desi_wild_2455827</i> | NA                                  | <i>Ca_desi_denovo</i> | 2455827                 | T/C  | NA                 | NA                            | NA                 |
| <i>Desi_wild_2455873</i> | NA                                  | <i>Ca_desi_denovo</i> | 2455873                 | C/G  | NA                 | NA                            | NA                 |
| <i>Desi_wild_2456013</i> | NA                                  | <i>Ca_desi_denovo</i> | 2456013                 | A/C  | NA                 | NA                            | NA                 |
| <i>Desi_wild_2456224</i> | NA                                  | <i>Ca_desi_denovo</i> | 2456224                 | A/G  | NA                 | NA                            | NA                 |
| <i>Desi_wild_2456355</i> | NA                                  | <i>Ca_desi_denovo</i> | 2456355                 | T/C  | NA                 | NA                            | NA                 |
| <i>Desi_wild_2456970</i> | NA                                  | <i>Ca_desi_denovo</i> | 2456970                 | T/G  | NA                 | NA                            | NA                 |
| <i>Desi_wild_2457090</i> | NA                                  | <i>Ca_desi_denovo</i> | 2457090                 | G/T  | NA                 | NA                            | NA                 |
| <i>Desi_wild_2458452</i> | NA                                  | <i>Ca_desi_denovo</i> | 2458452                 | T/C  | NA                 | NA                            | NA                 |
| <i>Desi_wild_2458494</i> | NA                                  | <i>Ca_desi_denovo</i> | 2458494                 | G/C  | NA                 | NA                            | NA                 |
| <i>Desi_wild_2458935</i> | NA                                  | <i>Ca_desi_denovo</i> | 2458935                 | T/C  | NA                 | NA                            | NA                 |
| <i>Desi_wild_2459978</i> | NA                                  | <i>Ca_desi_denovo</i> | 2459978                 | T/C  | NA                 | NA                            | NA                 |
| <i>Desi_wild_2460010</i> | NA                                  | <i>Ca_desi_denovo</i> | 2460010                 | C/T  | NA                 | NA                            | NA                 |
| <i>Desi_wild_2460047</i> | NA                                  | <i>Ca_desi_denovo</i> | 2460047                 | C/G  | NA                 | NA                            | NA                 |
| <i>Desi_wild_2460176</i> | NA                                  | <i>Ca_desi_denovo</i> | 2460176                 | G/T  | NA                 | NA                            | NA                 |
| <i>Desi_wild_2460183</i> | NA                                  | <i>Ca_desi_denovo</i> | 2460183                 | G/T  | NA                 | NA                            | NA                 |
| <i>Desi_wild_2460385</i> | NA                                  | <i>Ca_desi_denovo</i> | 2460385                 | A/G  | NA                 | NA                            | NA                 |
| <i>Desi_wild_2460414</i> | NA                                  | <i>Ca_desi_denovo</i> | 2460414                 | C/G  | NA                 | NA                            | NA                 |
| <i>Desi_wild_2460889</i> | NA                                  | <i>Ca_desi_denovo</i> | 2460889                 | C/G  | NA                 | NA                            | NA                 |
| <i>Desi_wild_2462818</i> | NA                                  | <i>Ca_desi_denovo</i> | 2462818                 | T/C  | NA                 | NA                            | NA                 |
| <i>Desi_wild_2462821</i> | NA                                  | <i>Ca_desi_denovo</i> | 2462821                 | T/C  | NA                 | NA                            | NA                 |
| <i>Desi_wild_2463632</i> | NA                                  | <i>Ca_desi_denovo</i> | 2463632                 | A/C  | NA                 | NA                            | NA                 |
| <i>Desi_wild_2463669</i> | NA                                  | <i>Ca_desi_denovo</i> | 2463669                 | G/T  | NA                 | NA                            | NA                 |
| <i>Desi_wild_2464195</i> | NA                                  | <i>Ca_desi_denovo</i> | 2464195                 | A/G  | NA                 | NA                            | NA                 |
| <i>Desi_wild_2464252</i> | NA                                  | <i>Ca_desi_denovo</i> | 2464252                 | G/A  | NA                 | NA                            | NA                 |
| <i>Desi_wild_2464459</i> | NA                                  | <i>Ca_desi_denovo</i> | 2464459                 | T/A  | NA                 | NA                            | NA                 |
| <i>Desi_wild_2464516</i> | NA                                  | <i>Ca_desi_denovo</i> | 2464516                 | A/T  | NA                 | NA                            | NA                 |
| <i>Desi_wild_2466494</i> | NA                                  | <i>Ca_desi_denovo</i> | 2466494                 | G/A  | NA                 | NA                            | NA                 |
| <i>Desi_wild_2467965</i> | NA                                  | <i>Ca_desi_denovo</i> | 2467965                 | T/C  | NA                 | NA                            | NA                 |
| <i>Desi_wild_2469908</i> | NA                                  | <i>Ca_desi_denovo</i> | 2469908                 | T/C  | NA                 | NA                            | NA                 |
| <i>Desi_wild_2469917</i> | NA                                  | <i>Ca_desi_denovo</i> | 2469917                 | C/T  | NA                 | NA                            | NA                 |
| <i>Desi_wild_2472136</i> | NA                                  | <i>Ca_desi_denovo</i> | 2472136                 | C/T  | NA                 | NA                            | NA                 |
| <i>Desi_wild_2472181</i> | NA                                  | <i>Ca_desi_denovo</i> | 2472181                 | G/C  | NA                 | NA                            | NA                 |

| SNP IDs                  | NCBI dbSNP accession IDs (NCBI_SS#) | Chromosomes           | Physical positions (bp) | SNPs | Gene accession IDs | Sequence components of genome | Putative functions |
|--------------------------|-------------------------------------|-----------------------|-------------------------|------|--------------------|-------------------------------|--------------------|
| <i>Desi_wild_2473564</i> | NA                                  | <i>Ca_desi_denovo</i> | 2473564                 | A/T  | NA                 | NA                            | NA                 |
| <i>Desi_wild_2474205</i> | NA                                  | <i>Ca_desi_denovo</i> | 2474205                 | A/G  | NA                 | NA                            | NA                 |
| <i>Desi_wild_2474239</i> | NA                                  | <i>Ca_desi_denovo</i> | 2474239                 | G/T  | NA                 | NA                            | NA                 |
| <i>Desi_wild_2474370</i> | NA                                  | <i>Ca_desi_denovo</i> | 2474370                 | A/G  | NA                 | NA                            | NA                 |
| <i>Desi_wild_2474418</i> | NA                                  | <i>Ca_desi_denovo</i> | 2474418                 | A/G  | NA                 | NA                            | NA                 |
| <i>Desi_wild_2474500</i> | NA                                  | <i>Ca_desi_denovo</i> | 2474500                 | G/A  | NA                 | NA                            | NA                 |
| <i>Desi_wild_2475048</i> | NA                                  | <i>Ca_desi_denovo</i> | 2475048                 | C/T  | NA                 | NA                            | NA                 |
| <i>Desi_wild_2475232</i> | NA                                  | <i>Ca_desi_denovo</i> | 2475232                 | G/A  | NA                 | NA                            | NA                 |
| <i>Desi_wild_2476017</i> | NA                                  | <i>Ca_desi_denovo</i> | 2476017                 | G/A  | NA                 | NA                            | NA                 |
| <i>Desi_wild_2476410</i> | NA                                  | <i>Ca_desi_denovo</i> | 2476410                 | G/A  | NA                 | NA                            | NA                 |
| <i>Desi_wild_2476458</i> | NA                                  | <i>Ca_desi_denovo</i> | 2476458                 | C/T  | NA                 | NA                            | NA                 |
| <i>Desi_wild_2477122</i> | NA                                  | <i>Ca_desi_denovo</i> | 2477122                 | C/G  | NA                 | NA                            | NA                 |
| <i>Desi_wild_2477131</i> | NA                                  | <i>Ca_desi_denovo</i> | 2477131                 | T/C  | NA                 | NA                            | NA                 |
| <i>Desi_wild_2478016</i> | NA                                  | <i>Ca_desi_denovo</i> | 2478016                 | C/T  | NA                 | NA                            | NA                 |
| <i>Desi_wild_2478026</i> | NA                                  | <i>Ca_desi_denovo</i> | 2478026                 | T/G  | NA                 | NA                            | NA                 |
| <i>Desi_wild_2478271</i> | NA                                  | <i>Ca_desi_denovo</i> | 2478271                 | C/T  | NA                 | NA                            | NA                 |
| <i>Desi_wild_2479207</i> | NA                                  | <i>Ca_desi_denovo</i> | 2479207                 | G/C  | NA                 | NA                            | NA                 |
| <i>Desi_wild_2479215</i> | NA                                  | <i>Ca_desi_denovo</i> | 2479215                 | C/T  | NA                 | NA                            | NA                 |
| <i>Desi_wild_2480932</i> | NA                                  | <i>Ca_desi_denovo</i> | 2480932                 | A/G  | NA                 | NA                            | NA                 |
| <i>Desi_wild_2481081</i> | NA                                  | <i>Ca_desi_denovo</i> | 2481081                 | G/A  | NA                 | NA                            | NA                 |
| <i>Desi_wild_2481212</i> | NA                                  | <i>Ca_desi_denovo</i> | 2481212                 | A/G  | NA                 | NA                            | NA                 |
| <i>Desi_wild_2481468</i> | NA                                  | <i>Ca_desi_denovo</i> | 2481468                 | T/G  | NA                 | NA                            | NA                 |
| <i>Desi_wild_2481478</i> | NA                                  | <i>Ca_desi_denovo</i> | 2481478                 | T/G  | NA                 | NA                            | NA                 |
| <i>Desi_wild_2481509</i> | NA                                  | <i>Ca_desi_denovo</i> | 2481509                 | C/T  | NA                 | NA                            | NA                 |
| <i>Desi_wild_2481518</i> | NA                                  | <i>Ca_desi_denovo</i> | 2481518                 | G/T  | NA                 | NA                            | NA                 |
| <i>Desi_wild_2482071</i> | NA                                  | <i>Ca_desi_denovo</i> | 2482071                 | T/G  | NA                 | NA                            | NA                 |
| <i>Desi_wild_2483445</i> | NA                                  | <i>Ca_desi_denovo</i> | 2483445                 | T/C  | NA                 | NA                            | NA                 |
| <i>Desi_wild_2483457</i> | NA                                  | <i>Ca_desi_denovo</i> | 2483457                 | C/T  | NA                 | NA                            | NA                 |
| <i>Desi_wild_2483683</i> | NA                                  | <i>Ca_desi_denovo</i> | 2483683                 | T/C  | NA                 | NA                            | NA                 |
| <i>Desi_wild_2483719</i> | NA                                  | <i>Ca_desi_denovo</i> | 2483719                 | A/G  | NA                 | NA                            | NA                 |
| <i>Desi_wild_2484232</i> | NA                                  | <i>Ca_desi_denovo</i> | 2484232                 | T/C  | NA                 | NA                            | NA                 |
| <i>Desi_wild_2485015</i> | NA                                  | <i>Ca_desi_denovo</i> | 2485015                 | A/C  | NA                 | NA                            | NA                 |
| <i>Desi_wild_2485016</i> | NA                                  | <i>Ca_desi_denovo</i> | 2485016                 | A/G  | NA                 | NA                            | NA                 |
| <i>Desi_wild_2486143</i> | NA                                  | <i>Ca_desi_denovo</i> | 2486143                 | C/G  | NA                 | NA                            | NA                 |
| <i>Desi_wild_2486515</i> | NA                                  | <i>Ca_desi_denovo</i> | 2486515                 | T/C  | NA                 | NA                            | NA                 |
| <i>Desi_wild_2487937</i> | NA                                  | <i>Ca_desi_denovo</i> | 2487937                 | G/T  | NA                 | NA                            | NA                 |
| <i>Desi_wild_2487999</i> | NA                                  | <i>Ca_desi_denovo</i> | 2487999                 | G/T  | NA                 | NA                            | NA                 |
| <i>Desi_wild_2488423</i> | NA                                  | <i>Ca_desi_denovo</i> | 2488423                 | C/T  | NA                 | NA                            | NA                 |
| <i>Desi_wild_2488477</i> | NA                                  | <i>Ca_desi_denovo</i> | 2488477                 | G/A  | NA                 | NA                            | NA                 |
| <i>Desi_wild_2488636</i> | NA                                  | <i>Ca_desi_denovo</i> | 2488636                 | T/G  | NA                 | NA                            | NA                 |
| <i>Desi_wild_2490276</i> | NA                                  | <i>Ca_desi_denovo</i> | 2490276                 | T/C  | NA                 | NA                            | NA                 |
| <i>Desi_wild_2490347</i> | NA                                  | <i>Ca_desi_denovo</i> | 2490347                 | C/G  | NA                 | NA                            | NA                 |
| <i>Desi_wild_2490551</i> | NA                                  | <i>Ca_desi_denovo</i> | 2490551                 | C/T  | NA                 | NA                            | NA                 |
| <i>Desi_wild_2490557</i> | NA                                  | <i>Ca_desi_denovo</i> | 2490557                 | C/T  | NA                 | NA                            | NA                 |

| SNP IDs                  | NCBI dbSNP accession IDs (NCBI_SS#) | Chromosomes           | Physical positions (bp) | SNPs | Gene accession IDs | Sequence components of genome | Putative functions |
|--------------------------|-------------------------------------|-----------------------|-------------------------|------|--------------------|-------------------------------|--------------------|
| <i>Desi_wild_2490823</i> | NA                                  | <i>Ca_desi_denovo</i> | 2490823                 | T/G  | NA                 | NA                            | NA                 |
| <i>Desi_wild_2490923</i> | NA                                  | <i>Ca_desi_denovo</i> | 2490923                 | G/T  | NA                 | NA                            | NA                 |
| <i>Desi_wild_2492258</i> | NA                                  | <i>Ca_desi_denovo</i> | 2492258                 | C/T  | NA                 | NA                            | NA                 |
| <i>Desi_wild_2492260</i> | NA                                  | <i>Ca_desi_denovo</i> | 2492260                 | G/A  | NA                 | NA                            | NA                 |
| <i>Desi_wild_2494086</i> | NA                                  | <i>Ca_desi_denovo</i> | 2494086                 | C/T  | NA                 | NA                            | NA                 |
| <i>Desi_wild_2496962</i> | NA                                  | <i>Ca_desi_denovo</i> | 2496962                 | G/C  | NA                 | NA                            | NA                 |
| <i>Desi_wild_2497842</i> | NA                                  | <i>Ca_desi_denovo</i> | 2497842                 | A/G  | NA                 | NA                            | NA                 |
| <i>Desi_wild_2497959</i> | NA                                  | <i>Ca_desi_denovo</i> | 2497959                 | C/T  | NA                 | NA                            | NA                 |
| <i>Desi_wild_2497971</i> | NA                                  | <i>Ca_desi_denovo</i> | 2497971                 | G/A  | NA                 | NA                            | NA                 |
| <i>Desi_wild_2498124</i> | NA                                  | <i>Ca_desi_denovo</i> | 2498124                 | G/A  | NA                 | NA                            | NA                 |
| <i>Desi_wild_2498460</i> | NA                                  | <i>Ca_desi_denovo</i> | 2498460                 | A/G  | NA                 | NA                            | NA                 |
| <i>Desi_wild_2499391</i> | NA                                  | <i>Ca_desi_denovo</i> | 2499391                 | G/A  | NA                 | NA                            | NA                 |
| <i>Desi_wild_2499436</i> | NA                                  | <i>Ca_desi_denovo</i> | 2499436                 | A/G  | NA                 | NA                            | NA                 |
| <i>Desi_wild_2500063</i> | NA                                  | <i>Ca_desi_denovo</i> | 2500063                 | A/G  | NA                 | NA                            | NA                 |
| <i>Desi_wild_2500078</i> | NA                                  | <i>Ca_desi_denovo</i> | 2500078                 | G/C  | NA                 | NA                            | NA                 |
| <i>Desi_wild_2501028</i> | NA                                  | <i>Ca_desi_denovo</i> | 2501028                 | T/C  | NA                 | NA                            | NA                 |
| <i>Desi_wild_2503202</i> | NA                                  | <i>Ca_desi_denovo</i> | 2503202                 | A/G  | NA                 | NA                            | NA                 |
| <i>Desi_wild_2504101</i> | NA                                  | <i>Ca_desi_denovo</i> | 2504101                 | G/C  | NA                 | NA                            | NA                 |
| <i>Desi_wild_2505217</i> | NA                                  | <i>Ca_desi_denovo</i> | 2505217                 | A/G  | NA                 | NA                            | NA                 |
| <i>Desi_wild_2505437</i> | NA                                  | <i>Ca_desi_denovo</i> | 2505437                 | G/T  | NA                 | NA                            | NA                 |
| <i>Desi_wild_2505706</i> | NA                                  | <i>Ca_desi_denovo</i> | 2505706                 | T/C  | NA                 | NA                            | NA                 |
| <i>Desi_wild_2505832</i> | NA                                  | <i>Ca_desi_denovo</i> | 2505832                 | T/G  | NA                 | NA                            | NA                 |
| <i>Desi_wild_2505835</i> | NA                                  | <i>Ca_desi_denovo</i> | 2505835                 | A/G  | NA                 | NA                            | NA                 |
| <i>Desi_wild_2506177</i> | NA                                  | <i>Ca_desi_denovo</i> | 2506177                 | C/G  | NA                 | NA                            | NA                 |
| <i>Desi_wild_2506210</i> | NA                                  | <i>Ca_desi_denovo</i> | 2506210                 | A/G  | NA                 | NA                            | NA                 |
| <i>Desi_wild_2506657</i> | NA                                  | <i>Ca_desi_denovo</i> | 2506657                 | A/C  | NA                 | NA                            | NA                 |
| <i>Desi_wild_2506661</i> | NA                                  | <i>Ca_desi_denovo</i> | 2506661                 | G/A  | NA                 | NA                            | NA                 |
| <i>Desi_wild_2506750</i> | NA                                  | <i>Ca_desi_denovo</i> | 2506750                 | G/A  | NA                 | NA                            | NA                 |
| <i>Desi_wild_2507078</i> | NA                                  | <i>Ca_desi_denovo</i> | 2507078                 | G/A  | NA                 | NA                            | NA                 |
| <i>Desi_wild_2507174</i> | NA                                  | <i>Ca_desi_denovo</i> | 2507174                 | C/T  | NA                 | NA                            | NA                 |
| <i>Desi_wild_2507239</i> | NA                                  | <i>Ca_desi_denovo</i> | 2507239                 | G/A  | NA                 | NA                            | NA                 |
| <i>Desi_wild_2508523</i> | NA                                  | <i>Ca_desi_denovo</i> | 2508523                 | C/T  | NA                 | NA                            | NA                 |
| <i>Desi_wild_2511067</i> | NA                                  | <i>Ca_desi_denovo</i> | 2511067                 | A/G  | NA                 | NA                            | NA                 |
| <i>Desi_wild_2511094</i> | NA                                  | <i>Ca_desi_denovo</i> | 2511094                 | A/G  | NA                 | NA                            | NA                 |
| <i>Desi_wild_2511125</i> | NA                                  | <i>Ca_desi_denovo</i> | 2511125                 | A/G  | NA                 | NA                            | NA                 |
| <i>Desi_wild_2511718</i> | NA                                  | <i>Ca_desi_denovo</i> | 2511718                 | A/T  | NA                 | NA                            | NA                 |
| <i>Desi_wild_2512182</i> | NA                                  | <i>Ca_desi_denovo</i> | 2512182                 | G/C  | NA                 | NA                            | NA                 |
| <i>Desi_wild_2512185</i> | NA                                  | <i>Ca_desi_denovo</i> | 2512185                 | A/G  | NA                 | NA                            | NA                 |
| <i>Desi_wild_2512529</i> | NA                                  | <i>Ca_desi_denovo</i> | 2512529                 | T/C  | NA                 | NA                            | NA                 |
| <i>Desi_wild_2512550</i> | NA                                  | <i>Ca_desi_denovo</i> | 2512550                 | G/A  | NA                 | NA                            | NA                 |
| <i>Desi_wild_2513024</i> | NA                                  | <i>Ca_desi_denovo</i> | 2513024                 | G/A  | NA                 | NA                            | NA                 |
| <i>Desi_wild_2513045</i> | NA                                  | <i>Ca_desi_denovo</i> | 2513045                 | C/T  | NA                 | NA                            | NA                 |
| <i>Desi_wild_2513431</i> | NA                                  | <i>Ca_desi_denovo</i> | 2513431                 | A/G  | NA                 | NA                            | NA                 |
| <i>Desi_wild_2514232</i> | NA                                  | <i>Ca_desi_denovo</i> | 2514232                 | A/G  | NA                 | NA                            | NA                 |

| SNP IDs                  | NCBI dbSNP accession IDs (NCBI_SS#) | Chromosomes           | Physical positions (bp) | SNPs | Gene accession IDs | Sequence components of genome | Putative functions |
|--------------------------|-------------------------------------|-----------------------|-------------------------|------|--------------------|-------------------------------|--------------------|
| <i>Desi_wild_2514267</i> | NA                                  | <i>Ca_desi_denovo</i> | 2514267                 | G/T  | NA                 | NA                            | NA                 |
| <i>Desi_wild_2514571</i> | NA                                  | <i>Ca_desi_denovo</i> | 2514571                 | G/A  | NA                 | NA                            | NA                 |
| <i>Desi_wild_2514611</i> | NA                                  | <i>Ca_desi_denovo</i> | 2514611                 | G/A  | NA                 | NA                            | NA                 |
| <i>Desi_wild_2514628</i> | NA                                  | <i>Ca_desi_denovo</i> | 2514628                 | C/G  | NA                 | NA                            | NA                 |
| <i>Desi_wild_2516842</i> | NA                                  | <i>Ca_desi_denovo</i> | 2516842                 | C/T  | NA                 | NA                            | NA                 |
| <i>Desi_wild_2516905</i> | NA                                  | <i>Ca_desi_denovo</i> | 2516905                 | T/C  | NA                 | NA                            | NA                 |
| <i>Desi_wild_2517038</i> | NA                                  | <i>Ca_desi_denovo</i> | 2517038                 | A/G  | NA                 | NA                            | NA                 |
| <i>Desi_wild_2517430</i> | NA                                  | <i>Ca_desi_denovo</i> | 2517430                 | A/G  | NA                 | NA                            | NA                 |
| <i>Desi_wild_2517431</i> | NA                                  | <i>Ca_desi_denovo</i> | 2517431                 | T/C  | NA                 | NA                            | NA                 |
| <i>Desi_wild_2519236</i> | NA                                  | <i>Ca_desi_denovo</i> | 2519236                 | C/G  | NA                 | NA                            | NA                 |
| <i>Desi_wild_2519247</i> | NA                                  | <i>Ca_desi_denovo</i> | 2519247                 | T/G  | NA                 | NA                            | NA                 |
| <i>Desi_wild_2519248</i> | NA                                  | <i>Ca_desi_denovo</i> | 2519248                 | T/C  | NA                 | NA                            | NA                 |
| <i>Desi_wild_2519451</i> | NA                                  | <i>Ca_desi_denovo</i> | 2519451                 | C/T  | NA                 | NA                            | NA                 |
| <i>Desi_wild_2520206</i> | NA                                  | <i>Ca_desi_denovo</i> | 2520206                 | A/G  | NA                 | NA                            | NA                 |
| <i>Desi_wild_2520564</i> | NA                                  | <i>Ca_desi_denovo</i> | 2520564                 | T/G  | NA                 | NA                            | NA                 |
| <i>Desi_wild_2520576</i> | NA                                  | <i>Ca_desi_denovo</i> | 2520576                 | A/G  | NA                 | NA                            | NA                 |
| <i>Desi_wild_2520937</i> | NA                                  | <i>Ca_desi_denovo</i> | 2520937                 | C/G  | NA                 | NA                            | NA                 |
| <i>Desi_wild_2520955</i> | NA                                  | <i>Ca_desi_denovo</i> | 2520955                 | T/C  | NA                 | NA                            | NA                 |
| <i>Desi_wild_2523200</i> | NA                                  | <i>Ca_desi_denovo</i> | 2523200                 | T/C  | NA                 | NA                            | NA                 |
| <i>Desi_wild_2523974</i> | NA                                  | <i>Ca_desi_denovo</i> | 2523974                 | A/G  | NA                 | NA                            | NA                 |
| <i>Desi_wild_2523977</i> | NA                                  | <i>Ca_desi_denovo</i> | 2523977                 | A/G  | NA                 | NA                            | NA                 |
| <i>Desi_wild_2524811</i> | NA                                  | <i>Ca_desi_denovo</i> | 2524811                 | G/A  | NA                 | NA                            | NA                 |
| <i>Desi_wild_2524931</i> | NA                                  | <i>Ca_desi_denovo</i> | 2524931                 | C/T  | NA                 | NA                            | NA                 |
| <i>Desi_wild_2525391</i> | NA                                  | <i>Ca_desi_denovo</i> | 2525391                 | G/A  | NA                 | NA                            | NA                 |
| <i>Desi_wild_2525399</i> | NA                                  | <i>Ca_desi_denovo</i> | 2525399                 | C/G  | NA                 | NA                            | NA                 |
| <i>Desi_wild_2527133</i> | NA                                  | <i>Ca_desi_denovo</i> | 2527133                 | G/A  | NA                 | NA                            | NA                 |
| <i>Desi_wild_2527265</i> | NA                                  | <i>Ca_desi_denovo</i> | 2527265                 | C/T  | NA                 | NA                            | NA                 |
| <i>Desi_wild_2527996</i> | NA                                  | <i>Ca_desi_denovo</i> | 2527996                 | T/C  | NA                 | NA                            | NA                 |
| <i>Desi_wild_2528023</i> | NA                                  | <i>Ca_desi_denovo</i> | 2528023                 | C/T  | NA                 | NA                            | NA                 |
| <i>Desi_wild_2528162</i> | NA                                  | <i>Ca_desi_denovo</i> | 2528162                 | A/G  | NA                 | NA                            | NA                 |
| <i>Desi_wild_2528247</i> | NA                                  | <i>Ca_desi_denovo</i> | 2528247                 | G/C  | NA                 | NA                            | NA                 |
| <i>Desi_wild_2528351</i> | NA                                  | <i>Ca_desi_denovo</i> | 2528351                 | C/T  | NA                 | NA                            | NA                 |
| <i>Desi_wild_2528363</i> | NA                                  | <i>Ca_desi_denovo</i> | 2528363                 | C/G  | NA                 | NA                            | NA                 |
| <i>Desi_wild_2528485</i> | NA                                  | <i>Ca_desi_denovo</i> | 2528485                 | C/T  | NA                 | NA                            | NA                 |
| <i>Desi_wild_2528494</i> | NA                                  | <i>Ca_desi_denovo</i> | 2528494                 | A/G  | NA                 | NA                            | NA                 |
| <i>Desi_wild_2531134</i> | NA                                  | <i>Ca_desi_denovo</i> | 2531134                 | C/T  | NA                 | NA                            | NA                 |
| <i>Desi_wild_2531140</i> | NA                                  | <i>Ca_desi_denovo</i> | 2531140                 | T/C  | NA                 | NA                            | NA                 |
| <i>Desi_wild_2531259</i> | NA                                  | <i>Ca_desi_denovo</i> | 2531259                 | A/T  | NA                 | NA                            | NA                 |
| <i>Desi_wild_2531409</i> | NA                                  | <i>Ca_desi_denovo</i> | 2531409                 | G/A  | NA                 | NA                            | NA                 |
| <i>Desi_wild_2531575</i> | NA                                  | <i>Ca_desi_denovo</i> | 2531575                 | A/G  | NA                 | NA                            | NA                 |
| <i>Desi_wild_2533253</i> | NA                                  | <i>Ca_desi_denovo</i> | 2533253                 | G/A  | NA                 | NA                            | NA                 |
| <i>Desi_wild_2533822</i> | NA                                  | <i>Ca_desi_denovo</i> | 2533822                 | C/T  | NA                 | NA                            | NA                 |
| <i>Desi_wild_2534369</i> | NA                                  | <i>Ca_desi_denovo</i> | 2534369                 | T/G  | NA                 | NA                            | NA                 |
| <i>Desi_wild_2535760</i> | NA                                  | <i>Ca_desi_denovo</i> | 2535760                 | A/G  | NA                 | NA                            | NA                 |

| SNP IDs                  | NCBI dbSNP accession IDs (NCBI_SS#) | Chromosomes           | Physical positions (bp) | SNPs | Gene accession IDs | Sequence components of genome | Putative functions |
|--------------------------|-------------------------------------|-----------------------|-------------------------|------|--------------------|-------------------------------|--------------------|
| <i>Desi_wild_2535765</i> | NA                                  | <i>Ca_desi_denovo</i> | 2535765                 | C/G  | NA                 | NA                            | NA                 |
| <i>Desi_wild_2535777</i> | NA                                  | <i>Ca_desi_denovo</i> | 2535777                 | C/T  | NA                 | NA                            | NA                 |
| <i>Desi_wild_2536414</i> | NA                                  | <i>Ca_desi_denovo</i> | 2536414                 | C/G  | NA                 | NA                            | NA                 |
| <i>Desi_wild_2537232</i> | NA                                  | <i>Ca_desi_denovo</i> | 2537232                 | G/C  | NA                 | NA                            | NA                 |
| <i>Desi_wild_2537358</i> | NA                                  | <i>Ca_desi_denovo</i> | 2537358                 | C/G  | NA                 | NA                            | NA                 |
| <i>Desi_wild_2537598</i> | NA                                  | <i>Ca_desi_denovo</i> | 2537598                 | C/G  | NA                 | NA                            | NA                 |
| <i>Desi_wild_2537630</i> | NA                                  | <i>Ca_desi_denovo</i> | 2537630                 | T/A  | NA                 | NA                            | NA                 |
| <i>Desi_wild_2537708</i> | NA                                  | <i>Ca_desi_denovo</i> | 2537708                 | C/T  | NA                 | NA                            | NA                 |
| <i>Desi_wild_2537724</i> | NA                                  | <i>Ca_desi_denovo</i> | 2537724                 | T/A  | NA                 | NA                            | NA                 |
| <i>Desi_wild_2537803</i> | NA                                  | <i>Ca_desi_denovo</i> | 2537803                 | G/C  | NA                 | NA                            | NA                 |
| <i>Desi_wild_2538473</i> | NA                                  | <i>Ca_desi_denovo</i> | 2538473                 | C/T  | NA                 | NA                            | NA                 |
| <i>Desi_wild_2538762</i> | NA                                  | <i>Ca_desi_denovo</i> | 2538762                 | A/G  | NA                 | NA                            | NA                 |
| <i>Desi_wild_2538812</i> | NA                                  | <i>Ca_desi_denovo</i> | 2538812                 | A/T  | NA                 | NA                            | NA                 |
| <i>Desi_wild_2539527</i> | NA                                  | <i>Ca_desi_denovo</i> | 2539527                 | G/T  | NA                 | NA                            | NA                 |
| <i>Desi_wild_2539751</i> | NA                                  | <i>Ca_desi_denovo</i> | 2539751                 | G/A  | NA                 | NA                            | NA                 |
| <i>Desi_wild_2541155</i> | NA                                  | <i>Ca_desi_denovo</i> | 2541155                 | T/C  | NA                 | NA                            | NA                 |
| <i>Desi_wild_2543712</i> | NA                                  | <i>Ca_desi_denovo</i> | 2543712                 | C/T  | NA                 | NA                            | NA                 |
| <i>Desi_wild_2544679</i> | NA                                  | <i>Ca_desi_denovo</i> | 2544679                 | C/G  | NA                 | NA                            | NA                 |
| <i>Desi_wild_2545273</i> | NA                                  | <i>Ca_desi_denovo</i> | 2545273                 | C/T  | NA                 | NA                            | NA                 |
| <i>Desi_wild_2545925</i> | NA                                  | <i>Ca_desi_denovo</i> | 2545925                 | T/C  | NA                 | NA                            | NA                 |
| <i>Desi_wild_2545928</i> | NA                                  | <i>Ca_desi_denovo</i> | 2545928                 | C/T  | NA                 | NA                            | NA                 |
| <i>Desi_wild_2547094</i> | NA                                  | <i>Ca_desi_denovo</i> | 2547094                 | T/G  | NA                 | NA                            | NA                 |
| <i>Desi_wild_2547619</i> | NA                                  | <i>Ca_desi_denovo</i> | 2547619                 | G/C  | NA                 | NA                            | NA                 |
| <i>Desi_wild_2547654</i> | NA                                  | <i>Ca_desi_denovo</i> | 2547654                 | G/T  | NA                 | NA                            | NA                 |
| <i>Desi_wild_2548791</i> | NA                                  | <i>Ca_desi_denovo</i> | 2548791                 | G/T  | NA                 | NA                            | NA                 |
| <i>Desi_wild_2548809</i> | NA                                  | <i>Ca_desi_denovo</i> | 2548809                 | T/C  | NA                 | NA                            | NA                 |
| <i>Desi_wild_2549454</i> | NA                                  | <i>Ca_desi_denovo</i> | 2549454                 | C/T  | NA                 | NA                            | NA                 |
| <i>Desi_wild_2549463</i> | NA                                  | <i>Ca_desi_denovo</i> | 2549463                 | A/C  | NA                 | NA                            | NA                 |
| <i>Desi_wild_2551024</i> | NA                                  | <i>Ca_desi_denovo</i> | 2551024                 | C/T  | NA                 | NA                            | NA                 |
| <i>Desi_wild_2551060</i> | NA                                  | <i>Ca_desi_denovo</i> | 2551060                 | T/C  | NA                 | NA                            | NA                 |
| <i>Desi_wild_2551179</i> | NA                                  | <i>Ca_desi_denovo</i> | 2551179                 | C/A  | NA                 | NA                            | NA                 |
| <i>Desi_wild_2552130</i> | NA                                  | <i>Ca_desi_denovo</i> | 2552130                 | G/T  | NA                 | NA                            | NA                 |
| <i>Desi_wild_2553344</i> | NA                                  | <i>Ca_desi_denovo</i> | 2553344                 | G/A  | NA                 | NA                            | NA                 |
| <i>Desi_wild_2553431</i> | NA                                  | <i>Ca_desi_denovo</i> | 2553431                 | C/G  | NA                 | NA                            | NA                 |
| <i>Desi_wild_2554184</i> | NA                                  | <i>Ca_desi_denovo</i> | 2554184                 | T/C  | NA                 | NA                            | NA                 |
| <i>Desi_wild_2554202</i> | NA                                  | <i>Ca_desi_denovo</i> | 2554202                 | A/G  | NA                 | NA                            | NA                 |
| <i>Desi_wild_2555155</i> | NA                                  | <i>Ca_desi_denovo</i> | 2555155                 | G/A  | NA                 | NA                            | NA                 |
| <i>Desi_wild_2557318</i> | NA                                  | <i>Ca_desi_denovo</i> | 2557318                 | T/C  | NA                 | NA                            | NA                 |
| <i>Desi_wild_2557342</i> | NA                                  | <i>Ca_desi_denovo</i> | 2557342                 | T/C  | NA                 | NA                            | NA                 |
| <i>Desi_wild_2558177</i> | NA                                  | <i>Ca_desi_denovo</i> | 2558177                 | T/A  | NA                 | NA                            | NA                 |
| <i>Desi_wild_2558477</i> | NA                                  | <i>Ca_desi_denovo</i> | 2558477                 | C/G  | NA                 | NA                            | NA                 |
| <i>Desi_wild_2559652</i> | NA                                  | <i>Ca_desi_denovo</i> | 2559652                 | T/G  | NA                 | NA                            | NA                 |
| <i>Desi_wild_2559655</i> | NA                                  | <i>Ca_desi_denovo</i> | 2559655                 | G/A  | NA                 | NA                            | NA                 |
| <i>Desi_wild_2560103</i> | NA                                  | <i>Ca_desi_denovo</i> | 2560103                 | A/C  | NA                 | NA                            | NA                 |

| SNP IDs                  | NCBI dbSNP accession IDs (NCBI_SS#) | Chromosomes           | Physical positions (bp) | SNPs | Gene accession IDs | Sequence components of genome | Putative functions |
|--------------------------|-------------------------------------|-----------------------|-------------------------|------|--------------------|-------------------------------|--------------------|
| <i>Desi_wild_2560145</i> | NA                                  | <i>Ca_desi_denovo</i> | 2560145                 | G/T  | NA                 | NA                            | NA                 |
| <i>Desi_wild_2560648</i> | NA                                  | <i>Ca_desi_denovo</i> | 2560648                 | T/C  | NA                 | NA                            | NA                 |
| <i>Desi_wild_2560905</i> | NA                                  | <i>Ca_desi_denovo</i> | 2560905                 | T/C  | NA                 | NA                            | NA                 |
| <i>Desi_wild_2561265</i> | NA                                  | <i>Ca_desi_denovo</i> | 2561265                 | T/C  | NA                 | NA                            | NA                 |
| <i>Desi_wild_2561600</i> | NA                                  | <i>Ca_desi_denovo</i> | 2561600                 | A/G  | NA                 | NA                            | NA                 |
| <i>Desi_wild_2561694</i> | NA                                  | <i>Ca_desi_denovo</i> | 2561694                 | A/T  | NA                 | NA                            | NA                 |
| <i>Desi_wild_2562473</i> | NA                                  | <i>Ca_desi_denovo</i> | 2562473                 | G/C  | NA                 | NA                            | NA                 |
| <i>Desi_wild_2562719</i> | NA                                  | <i>Ca_desi_denovo</i> | 2562719                 | G/A  | NA                 | NA                            | NA                 |
| <i>Desi_wild_2562728</i> | NA                                  | <i>Ca_desi_denovo</i> | 2562728                 | G/A  | NA                 | NA                            | NA                 |
| <i>Desi_wild_2562848</i> | NA                                  | <i>Ca_desi_denovo</i> | 2562848                 | T/C  | NA                 | NA                            | NA                 |
| <i>Desi_wild_2564878</i> | NA                                  | <i>Ca_desi_denovo</i> | 2564878                 | C/G  | NA                 | NA                            | NA                 |
| <i>Desi_wild_2564896</i> | NA                                  | <i>Ca_desi_denovo</i> | 2564896                 | T/C  | NA                 | NA                            | NA                 |
| <i>Desi_wild_2566655</i> | NA                                  | <i>Ca_desi_denovo</i> | 2566655                 | G/C  | NA                 | NA                            | NA                 |
| <i>Desi_wild_2567402</i> | NA                                  | <i>Ca_desi_denovo</i> | 2567402                 | A/C  | NA                 | NA                            | NA                 |
| <i>Desi_wild_2568091</i> | NA                                  | <i>Ca_desi_denovo</i> | 2568091                 | G/A  | NA                 | NA                            | NA                 |
| <i>Desi_wild_2568121</i> | NA                                  | <i>Ca_desi_denovo</i> | 2568121                 | A/G  | NA                 | NA                            | NA                 |
| <i>Desi_wild_2569254</i> | NA                                  | <i>Ca_desi_denovo</i> | 2569254                 | T/C  | NA                 | NA                            | NA                 |
| <i>Desi_wild_2570046</i> | NA                                  | <i>Ca_desi_denovo</i> | 2570046                 | G/A  | NA                 | NA                            | NA                 |
| <i>Desi_wild_2571470</i> | NA                                  | <i>Ca_desi_denovo</i> | 2571470                 | C/T  | NA                 | NA                            | NA                 |
| <i>Desi_wild_2574392</i> | NA                                  | <i>Ca_desi_denovo</i> | 2574392                 | T/C  | NA                 | NA                            | NA                 |
| <i>Desi_wild_2574448</i> | NA                                  | <i>Ca_desi_denovo</i> | 2574448                 | A/C  | NA                 | NA                            | NA                 |
| <i>Desi_wild_2575005</i> | NA                                  | <i>Ca_desi_denovo</i> | 2575005                 | T/C  | NA                 | NA                            | NA                 |
| <i>Desi_wild_2575166</i> | NA                                  | <i>Ca_desi_denovo</i> | 2575166                 | T/C  | NA                 | NA                            | NA                 |
| <i>Desi_wild_2575415</i> | NA                                  | <i>Ca_desi_denovo</i> | 2575415                 | A/C  | NA                 | NA                            | NA                 |
| <i>Desi_wild_2576109</i> | NA                                  | <i>Ca_desi_denovo</i> | 2576109                 | T/C  | NA                 | NA                            | NA                 |
| <i>Desi_wild_2576468</i> | NA                                  | <i>Ca_desi_denovo</i> | 2576468                 | A/T  | NA                 | NA                            | NA                 |
| <i>Desi_wild_2576659</i> | NA                                  | <i>Ca_desi_denovo</i> | 2576659                 | C/T  | NA                 | NA                            | NA                 |
| <i>Desi_wild_2576788</i> | NA                                  | <i>Ca_desi_denovo</i> | 2576788                 | C/A  | NA                 | NA                            | NA                 |
| <i>Desi_wild_2576815</i> | NA                                  | <i>Ca_desi_denovo</i> | 2576815                 | G/C  | NA                 | NA                            | NA                 |
| <i>Desi_wild_2577670</i> | NA                                  | <i>Ca_desi_denovo</i> | 2577670                 | A/G  | NA                 | NA                            | NA                 |
| <i>Desi_wild_2578047</i> | NA                                  | <i>Ca_desi_denovo</i> | 2578047                 | C/T  | NA                 | NA                            | NA                 |
| <i>Desi_wild_2578894</i> | NA                                  | <i>Ca_desi_denovo</i> | 2578894                 | C/T  | NA                 | NA                            | NA                 |
| <i>Desi_wild_2579412</i> | NA                                  | <i>Ca_desi_denovo</i> | 2579412                 | T/C  | NA                 | NA                            | NA                 |
| <i>Desi_wild_2579415</i> | NA                                  | <i>Ca_desi_denovo</i> | 2579415                 | G/A  | NA                 | NA                            | NA                 |
| <i>Desi_wild_2580476</i> | NA                                  | <i>Ca_desi_denovo</i> | 2580476                 | G/A  | NA                 | NA                            | NA                 |
| <i>Desi_wild_2580554</i> | NA                                  | <i>Ca_desi_denovo</i> | 2580554                 | A/G  | NA                 | NA                            | NA                 |
| <i>Desi_wild_2581321</i> | NA                                  | <i>Ca_desi_denovo</i> | 2581321                 | C/G  | NA                 | NA                            | NA                 |
| <i>Desi_wild_2581671</i> | NA                                  | <i>Ca_desi_denovo</i> | 2581671                 | C/T  | NA                 | NA                            | NA                 |
| <i>Desi_wild_2582553</i> | NA                                  | <i>Ca_desi_denovo</i> | 2582553                 | A/G  | NA                 | NA                            | NA                 |
| <i>Desi_wild_2584074</i> | NA                                  | <i>Ca_desi_denovo</i> | 2584074                 | T/G  | NA                 | NA                            | NA                 |
| <i>Desi_wild_2585260</i> | NA                                  | <i>Ca_desi_denovo</i> | 2585260                 | C/G  | NA                 | NA                            | NA                 |
| <i>Desi_wild_2585305</i> | NA                                  | <i>Ca_desi_denovo</i> | 2585305                 | A/G  | NA                 | NA                            | NA                 |
| <i>Desi_wild_2585451</i> | NA                                  | <i>Ca_desi_denovo</i> | 2585451                 | G/A  | NA                 | NA                            | NA                 |
| <i>Desi_wild_2586063</i> | NA                                  | <i>Ca_desi_denovo</i> | 2586063                 | A/G  | NA                 | NA                            | NA                 |

| SNP IDs                  | NCBI dbSNP accession IDs (NCBI_SS#) | Chromosomes           | Physical positions (bp) | SNPs | Gene accession IDs | Sequence components of genome | Putative functions |
|--------------------------|-------------------------------------|-----------------------|-------------------------|------|--------------------|-------------------------------|--------------------|
| <i>Desi_wild_2586520</i> | NA                                  | <i>Ca_desi_denovo</i> | 2586520                 | A/G  | NA                 | NA                            | NA                 |
| <i>Desi_wild_2586559</i> | NA                                  | <i>Ca_desi_denovo</i> | 2586559                 | C/T  | NA                 | NA                            | NA                 |
| <i>Desi_wild_2586779</i> | NA                                  | <i>Ca_desi_denovo</i> | 2586779                 | G/T  | NA                 | NA                            | NA                 |
| <i>Desi_wild_2586785</i> | NA                                  | <i>Ca_desi_denovo</i> | 2586785                 | A/C  | NA                 | NA                            | NA                 |
| <i>Desi_wild_2586981</i> | NA                                  | <i>Ca_desi_denovo</i> | 2586981                 | C/T  | NA                 | NA                            | NA                 |
| <i>Desi_wild_2587609</i> | NA                                  | <i>Ca_desi_denovo</i> | 2587609                 | T/G  | NA                 | NA                            | NA                 |
| <i>Desi_wild_2588243</i> | NA                                  | <i>Ca_desi_denovo</i> | 2588243                 | T/C  | NA                 | NA                            | NA                 |
| <i>Desi_wild_2588252</i> | NA                                  | <i>Ca_desi_denovo</i> | 2588252                 | A/G  | NA                 | NA                            | NA                 |
| <i>Desi_wild_2588844</i> | NA                                  | <i>Ca_desi_denovo</i> | 2588844                 | T/A  | NA                 | NA                            | NA                 |
| <i>Desi_wild_2589654</i> | NA                                  | <i>Ca_desi_denovo</i> | 2589654                 | T/C  | NA                 | NA                            | NA                 |
| <i>Desi_wild_2589865</i> | NA                                  | <i>Ca_desi_denovo</i> | 2589865                 | A/C  | NA                 | NA                            | NA                 |
| <i>Desi_wild_2590912</i> | NA                                  | <i>Ca_desi_denovo</i> | 2590912                 | T/A  | NA                 | NA                            | NA                 |
| <i>Desi_wild_2590955</i> | NA                                  | <i>Ca_desi_denovo</i> | 2590955                 | C/T  | NA                 | NA                            | NA                 |
| <i>Desi_wild_2590967</i> | NA                                  | <i>Ca_desi_denovo</i> | 2590967                 | T/C  | NA                 | NA                            | NA                 |
| <i>Desi_wild_2592513</i> | NA                                  | <i>Ca_desi_denovo</i> | 2592513                 | C/T  | NA                 | NA                            | NA                 |
| <i>Desi_wild_2592563</i> | NA                                  | <i>Ca_desi_denovo</i> | 2592563                 | C/T  | NA                 | NA                            | NA                 |
| <i>Desi_wild_2594069</i> | NA                                  | <i>Ca_desi_denovo</i> | 2594069                 | G/T  | NA                 | NA                            | NA                 |
| <i>Desi_wild_2594093</i> | NA                                  | <i>Ca_desi_denovo</i> | 2594093                 | C/G  | NA                 | NA                            | NA                 |
| <i>Desi_wild_2594163</i> | NA                                  | <i>Ca_desi_denovo</i> | 2594163                 | G/C  | NA                 | NA                            | NA                 |
| <i>Desi_wild_2594182</i> | NA                                  | <i>Ca_desi_denovo</i> | 2594182                 | G/A  | NA                 | NA                            | NA                 |
| <i>Desi_wild_2594648</i> | NA                                  | <i>Ca_desi_denovo</i> | 2594648                 | C/T  | NA                 | NA                            | NA                 |
| <i>Desi_wild_2594743</i> | NA                                  | <i>Ca_desi_denovo</i> | 2594743                 | A/T  | NA                 | NA                            | NA                 |
| <i>Desi_wild_2594786</i> | NA                                  | <i>Ca_desi_denovo</i> | 2594786                 | G/C  | NA                 | NA                            | NA                 |
| <i>Desi_wild_2595023</i> | NA                                  | <i>Ca_desi_denovo</i> | 2595023                 | T/G  | NA                 | NA                            | NA                 |
| <i>Desi_wild_2595051</i> | NA                                  | <i>Ca_desi_denovo</i> | 2595051                 | C/T  | NA                 | NA                            | NA                 |
| <i>Desi_wild_2595191</i> | NA                                  | <i>Ca_desi_denovo</i> | 2595191                 | G/T  | NA                 | NA                            | NA                 |
| <i>Desi_wild_2596171</i> | NA                                  | <i>Ca_desi_denovo</i> | 2596171                 | T/G  | NA                 | NA                            | NA                 |
| <i>Desi_wild_2597108</i> | NA                                  | <i>Ca_desi_denovo</i> | 2597108                 | A/G  | NA                 | NA                            | NA                 |
| <i>Desi_wild_2597649</i> | NA                                  | <i>Ca_desi_denovo</i> | 2597649                 | A/G  | NA                 | NA                            | NA                 |
| <i>Desi_wild_2597931</i> | NA                                  | <i>Ca_desi_denovo</i> | 2597931                 | G/C  | NA                 | NA                            | NA                 |
| <i>Desi_wild_2598300</i> | NA                                  | <i>Ca_desi_denovo</i> | 2598300                 | T/G  | NA                 | NA                            | NA                 |
| <i>Desi_wild_2598833</i> | NA                                  | <i>Ca_desi_denovo</i> | 2598833                 | G/A  | NA                 | NA                            | NA                 |
| <i>Desi_wild_2598857</i> | NA                                  | <i>Ca_desi_denovo</i> | 2598857                 | C/T  | NA                 | NA                            | NA                 |
| <i>Desi_wild_2600002</i> | NA                                  | <i>Ca_desi_denovo</i> | 2600002                 | G/A  | NA                 | NA                            | NA                 |
| <i>Desi_wild_2600044</i> | NA                                  | <i>Ca_desi_denovo</i> | 2600044                 | C/G  | NA                 | NA                            | NA                 |
| <i>Desi_wild_2602013</i> | NA                                  | <i>Ca_desi_denovo</i> | 2602013                 | T/G  | NA                 | NA                            | NA                 |
| <i>Desi_wild_2602014</i> | NA                                  | <i>Ca_desi_denovo</i> | 2602014                 | C/T  | NA                 | NA                            | NA                 |
| <i>Desi_wild_2602795</i> | NA                                  | <i>Ca_desi_denovo</i> | 2602795                 | G/C  | NA                 | NA                            | NA                 |
| <i>Desi_wild_2602801</i> | NA                                  | <i>Ca_desi_denovo</i> | 2602801                 | G/A  | NA                 | NA                            | NA                 |
| <i>Desi_wild_2602805</i> | NA                                  | <i>Ca_desi_denovo</i> | 2602805                 | G/A  | NA                 | NA                            | NA                 |
| <i>Desi_wild_2604062</i> | NA                                  | <i>Ca_desi_denovo</i> | 2604062                 | G/C  | NA                 | NA                            | NA                 |
| <i>Desi_wild_2604065</i> | NA                                  | <i>Ca_desi_denovo</i> | 2604065                 | A/G  | NA                 | NA                            | NA                 |
| <i>Desi_wild_2604077</i> | NA                                  | <i>Ca_desi_denovo</i> | 2604077                 | A/G  | NA                 | NA                            | NA                 |
| <i>Desi_wild_2604104</i> | NA                                  | <i>Ca_desi_denovo</i> | 2604104                 | T/C  | NA                 | NA                            | NA                 |



| SNP IDs                  | NCBI dbSNP accession IDs (NCBI_SS#) | Chromosomes           | Physical positions (bp) | SNPs | Gene accession IDs | Sequence components of genome | Putative functions |
|--------------------------|-------------------------------------|-----------------------|-------------------------|------|--------------------|-------------------------------|--------------------|
| <i>Desi_wild_2604707</i> | NA                                  | <i>Ca_desi_denovo</i> | 2604707                 | T/C  | NA                 | NA                            | NA                 |
| <i>Desi_wild_2604826</i> | NA                                  | <i>Ca_desi_denovo</i> | 2604826                 | G/A  | NA                 | NA                            | NA                 |
| <i>Desi_wild_2604849</i> | NA                                  | <i>Ca_desi_denovo</i> | 2604849                 | G/C  | NA                 | NA                            | NA                 |
| <i>Desi_wild_2605111</i> | NA                                  | <i>Ca_desi_denovo</i> | 2605111                 | C/T  | NA                 | NA                            | NA                 |
| <i>Desi_wild_2605118</i> | NA                                  | <i>Ca_desi_denovo</i> | 2605118                 | G/A  | NA                 | NA                            | NA                 |
| <i>Desi_wild_2606444</i> | NA                                  | <i>Ca_desi_denovo</i> | 2606444                 | C/T  | NA                 | NA                            | NA                 |
| <i>Desi_wild_2606447</i> | NA                                  | <i>Ca_desi_denovo</i> | 2606447                 | T/C  | NA                 | NA                            | NA                 |
| <i>Desi_wild_2607632</i> | NA                                  | <i>Ca_desi_denovo</i> | 2607632                 | T/C  | NA                 | NA                            | NA                 |
| <i>Desi_wild_2608065</i> | NA                                  | <i>Ca_desi_denovo</i> | 2608065                 | A/G  | NA                 | NA                            | NA                 |
| <i>Desi_wild_2608534</i> | NA                                  | <i>Ca_desi_denovo</i> | 2608534                 | C/G  | NA                 | NA                            | NA                 |
| <i>Desi_wild_2608732</i> | NA                                  | <i>Ca_desi_denovo</i> | 2608732                 | C/A  | NA                 | NA                            | NA                 |
| <i>Desi_wild_2609113</i> | NA                                  | <i>Ca_desi_denovo</i> | 2609113                 | A/G  | NA                 | NA                            | NA                 |
| <i>Desi_wild_2609579</i> | NA                                  | <i>Ca_desi_denovo</i> | 2609579                 | C/T  | NA                 | NA                            | NA                 |
| <i>Desi_wild_2610619</i> | NA                                  | <i>Ca_desi_denovo</i> | 2610619                 | T/C  | NA                 | NA                            | NA                 |
| <i>Desi_wild_2611303</i> | NA                                  | <i>Ca_desi_denovo</i> | 2611303                 | T/G  | NA                 | NA                            | NA                 |
| <i>Desi_wild_2612589</i> | NA                                  | <i>Ca_desi_denovo</i> | 2612589                 | C/T  | NA                 | NA                            | NA                 |
| <i>Desi_wild_2612646</i> | NA                                  | <i>Ca_desi_denovo</i> | 2612646                 | C/A  | NA                 | NA                            | NA                 |
| <i>Desi_wild_2612817</i> | NA                                  | <i>Ca_desi_denovo</i> | 2612817                 | G/C  | NA                 | NA                            | NA                 |
| <i>Desi_wild_2612829</i> | NA                                  | <i>Ca_desi_denovo</i> | 2612829                 | C/A  | NA                 | NA                            | NA                 |
| <i>Desi_wild_2612951</i> | NA                                  | <i>Ca_desi_denovo</i> | 2612951                 | C/G  | NA                 | NA                            | NA                 |
| <i>Desi_wild_2613283</i> | NA                                  | <i>Ca_desi_denovo</i> | 2613283                 | T/G  | NA                 | NA                            | NA                 |
| <i>Desi_wild_2613308</i> | NA                                  | <i>Ca_desi_denovo</i> | 2613308                 | T/G  | NA                 | NA                            | NA                 |
| <i>Desi_wild_2613425</i> | NA                                  | <i>Ca_desi_denovo</i> | 2613425                 | T/G  | NA                 | NA                            | NA                 |
| <i>Desi_wild_2614311</i> | NA                                  | <i>Ca_desi_denovo</i> | 2614311                 | T/G  | NA                 | NA                            | NA                 |
| <i>Desi_wild_2614315</i> | NA                                  | <i>Ca_desi_denovo</i> | 2614315                 | A/G  | NA                 | NA                            | NA                 |
| <i>Desi_wild_2614842</i> | NA                                  | <i>Ca_desi_denovo</i> | 2614842                 | C/G  | NA                 | NA                            | NA                 |
| <i>Desi_wild_2615882</i> | NA                                  | <i>Ca_desi_denovo</i> | 2615882                 | G/A  | NA                 | NA                            | NA                 |
| <i>Desi_wild_2615930</i> | NA                                  | <i>Ca_desi_denovo</i> | 2615930                 | C/T  | NA                 | NA                            | NA                 |
| <i>Desi_wild_2616097</i> | NA                                  | <i>Ca_desi_denovo</i> | 2616097                 | C/T  | NA                 | NA                            | NA                 |
| <i>Desi_wild_2616143</i> | NA                                  | <i>Ca_desi_denovo</i> | 2616143                 | T/G  | NA                 | NA                            | NA                 |
| <i>Desi_wild_2617833</i> | NA                                  | <i>Ca_desi_denovo</i> | 2617833                 | C/G  | NA                 | NA                            | NA                 |
| <i>Desi_wild_2617866</i> | NA                                  | <i>Ca_desi_denovo</i> | 2617866                 | T/G  | NA                 | NA                            | NA                 |
| <i>Desi_wild_2618190</i> | NA                                  | <i>Ca_desi_denovo</i> | 2618190                 | C/G  | NA                 | NA                            | NA                 |
| <i>Desi_wild_2618195</i> | NA                                  | <i>Ca_desi_denovo</i> | 2618195                 | A/G  | NA                 | NA                            | NA                 |
| <i>Desi_wild_2619212</i> | NA                                  | <i>Ca_desi_denovo</i> | 2619212                 | T/C  | NA                 | NA                            | NA                 |
| <i>Desi_wild_2620203</i> | NA                                  | <i>Ca_desi_denovo</i> | 2620203                 | C/G  | NA                 | NA                            | NA                 |
| <i>Desi_wild_2620921</i> | NA                                  | <i>Ca_desi_denovo</i> | 2620921                 | T/C  | NA                 | NA                            | NA                 |
| <i>Desi_wild_2621441</i> | NA                                  | <i>Ca_desi_denovo</i> | 2621441                 | T/A  | NA                 | NA                            | NA                 |
| <i>Desi_wild_2621443</i> | NA                                  | <i>Ca_desi_denovo</i> | 2621443                 | T/C  | NA                 | NA                            | NA                 |
| <i>Desi_wild_2622714</i> | NA                                  | <i>Ca_desi_denovo</i> | 2622714                 | A/G  | NA                 | NA                            | NA                 |
| <i>Desi_wild_2622762</i> | NA                                  | <i>Ca_desi_denovo</i> | 2622762                 | C/T  | NA                 | NA                            | NA                 |
| <i>Desi_wild_2622768</i> | NA                                  | <i>Ca_desi_denovo</i> | 2622768                 | T/A  | NA                 | NA                            | NA                 |
| <i>Desi_wild_2623076</i> | NA                                  | <i>Ca_desi_denovo</i> | 2623076                 | A/G  | NA                 | NA                            | NA                 |
| <i>Desi_wild_2623103</i> | NA                                  | <i>Ca_desi_denovo</i> | 2623103                 | T/C  | NA                 | NA                            | NA                 |

| SNP IDs                  | NCBI dbSNP accession IDs (NCBI_SS#) | Chromosomes           | Physical positions (bp) | SNPs | Gene accession IDs | Sequence components of genome | Putative functions |
|--------------------------|-------------------------------------|-----------------------|-------------------------|------|--------------------|-------------------------------|--------------------|
| <i>Desi_wild_2623165</i> | NA                                  | <i>Ca_desi_denovo</i> | 2623165                 | C/T  | NA                 | NA                            | NA                 |
| <i>Desi_wild_2623308</i> | NA                                  | <i>Ca_desi_denovo</i> | 2623308                 | C/A  | NA                 | NA                            | NA                 |
| <i>Desi_wild_2623936</i> | NA                                  | <i>Ca_desi_denovo</i> | 2623936                 | T/C  | NA                 | NA                            | NA                 |
| <i>Desi_wild_2624315</i> | NA                                  | <i>Ca_desi_denovo</i> | 2624315                 | T/C  | NA                 | NA                            | NA                 |
| <i>Desi_wild_2624318</i> | NA                                  | <i>Ca_desi_denovo</i> | 2624318                 | C/G  | NA                 | NA                            | NA                 |
| <i>Desi_wild_2624717</i> | NA                                  | <i>Ca_desi_denovo</i> | 2624717                 | T/C  | NA                 | NA                            | NA                 |
| <i>Desi_wild_2624726</i> | NA                                  | <i>Ca_desi_denovo</i> | 2624726                 | A/C  | NA                 | NA                            | NA                 |
| <i>Desi_wild_2625120</i> | NA                                  | <i>Ca_desi_denovo</i> | 2625120                 | A/C  | NA                 | NA                            | NA                 |
| <i>Desi_wild_2625138</i> | NA                                  | <i>Ca_desi_denovo</i> | 2625138                 | C/G  | NA                 | NA                            | NA                 |
| <i>Desi_wild_2625393</i> | NA                                  | <i>Ca_desi_denovo</i> | 2625393                 | T/C  | NA                 | NA                            | NA                 |
| <i>Desi_wild_2625396</i> | NA                                  | <i>Ca_desi_denovo</i> | 2625396                 | T/G  | NA                 | NA                            | NA                 |
| <i>Desi_wild_2626128</i> | NA                                  | <i>Ca_desi_denovo</i> | 2626128                 | T/G  | NA                 | NA                            | NA                 |
| <i>Desi_wild_2626675</i> | NA                                  | <i>Ca_desi_denovo</i> | 2626675                 | A/G  | NA                 | NA                            | NA                 |
| <i>Desi_wild_2631659</i> | NA                                  | <i>Ca_desi_denovo</i> | 2631659                 | T/G  | NA                 | NA                            | NA                 |
| <i>Desi_wild_2632154</i> | NA                                  | <i>Ca_desi_denovo</i> | 2632154                 | T/G  | NA                 | NA                            | NA                 |
| <i>Desi_wild_2632183</i> | NA                                  | <i>Ca_desi_denovo</i> | 2632183                 | G/A  | NA                 | NA                            | NA                 |
| <i>Desi_wild_2632219</i> | NA                                  | <i>Ca_desi_denovo</i> | 2632219                 | G/A  | NA                 | NA                            | NA                 |
| <i>Desi_wild_2632883</i> | NA                                  | <i>Ca_desi_denovo</i> | 2632883                 | G/A  | NA                 | NA                            | NA                 |
| <i>Desi_wild_2632937</i> | NA                                  | <i>Ca_desi_denovo</i> | 2632937                 | G/A  | NA                 | NA                            | NA                 |
| <i>Desi_wild_2633279</i> | NA                                  | <i>Ca_desi_denovo</i> | 2633279                 | C/T  | NA                 | NA                            | NA                 |
| <i>Desi_wild_2633350</i> | NA                                  | <i>Ca_desi_denovo</i> | 2633350                 | C/T  | NA                 | NA                            | NA                 |
| <i>Desi_wild_2633442</i> | NA                                  | <i>Ca_desi_denovo</i> | 2633442                 | A/G  | NA                 | NA                            | NA                 |
| <i>Desi_wild_2634905</i> | NA                                  | <i>Ca_desi_denovo</i> | 2634905                 | C/G  | NA                 | NA                            | NA                 |
| <i>Desi_wild_2634974</i> | NA                                  | <i>Ca_desi_denovo</i> | 2634974                 | C/G  | NA                 | NA                            | NA                 |
| <i>Desi_wild_2635344</i> | NA                                  | <i>Ca_desi_denovo</i> | 2635344                 | T/G  | NA                 | NA                            | NA                 |
| <i>Desi_wild_2636583</i> | NA                                  | <i>Ca_desi_denovo</i> | 2636583                 | A/G  | NA                 | NA                            | NA                 |
| <i>Desi_wild_2636600</i> | NA                                  | <i>Ca_desi_denovo</i> | 2636600                 | C/G  | NA                 | NA                            | NA                 |
| <i>Desi_wild_2636820</i> | NA                                  | <i>Ca_desi_denovo</i> | 2636820                 | A/C  | NA                 | NA                            | NA                 |
| <i>Desi_wild_2637123</i> | NA                                  | <i>Ca_desi_denovo</i> | 2637123                 | T/C  | NA                 | NA                            | NA                 |
| <i>Desi_wild_2637585</i> | NA                                  | <i>Ca_desi_denovo</i> | 2637585                 | C/T  | NA                 | NA                            | NA                 |
| <i>Desi_wild_2638263</i> | NA                                  | <i>Ca_desi_denovo</i> | 2638263                 | G/T  | NA                 | NA                            | NA                 |
| <i>Desi_wild_2638731</i> | NA                                  | <i>Ca_desi_denovo</i> | 2638731                 | G/A  | NA                 | NA                            | NA                 |
| <i>Desi_wild_2639512</i> | NA                                  | <i>Ca_desi_denovo</i> | 2639512                 | C/T  | NA                 | NA                            | NA                 |
| <i>Desi_wild_2639518</i> | NA                                  | <i>Ca_desi_denovo</i> | 2639518                 | T/C  | NA                 | NA                            | NA                 |
| <i>Desi_wild_2642695</i> | NA                                  | <i>Ca_desi_denovo</i> | 2642695                 | T/C  | NA                 | NA                            | NA                 |
| <i>Desi_wild_2643436</i> | NA                                  | <i>Ca_desi_denovo</i> | 2643436                 | T/C  | NA                 | NA                            | NA                 |
| <i>Desi_wild_2643455</i> | NA                                  | <i>Ca_desi_denovo</i> | 2643455                 | A/G  | NA                 | NA                            | NA                 |
| <i>Desi_wild_2643941</i> | NA                                  | <i>Ca_desi_denovo</i> | 2643941                 | G/A  | NA                 | NA                            | NA                 |
| <i>Desi_wild_2643983</i> | NA                                  | <i>Ca_desi_denovo</i> | 2643983                 | A/G  | NA                 | NA                            | NA                 |
| <i>Desi_wild_2644199</i> | NA                                  | <i>Ca_desi_denovo</i> | 2644199                 | A/G  | NA                 | NA                            | NA                 |
| <i>Desi_wild_2645093</i> | NA                                  | <i>Ca_desi_denovo</i> | 2645093                 | C/T  | NA                 | NA                            | NA                 |
| <i>Desi_wild_2645865</i> | NA                                  | <i>Ca_desi_denovo</i> | 2645865                 | G/A  | NA                 | NA                            | NA                 |
| <i>Desi_wild_2646627</i> | NA                                  | <i>Ca_desi_denovo</i> | 2646627                 | A/G  | NA                 | NA                            | NA                 |
| <i>Desi_wild_2648142</i> | NA                                  | <i>Ca_desi_denovo</i> | 2648142                 | G/A  | NA                 | NA                            | NA                 |

| SNP IDs                  | NCBI dbSNP accession IDs (NCBI_SS#) | Chromosomes           | Physical positions (bp) | SNPs | Gene accession IDs | Sequence components of genome | Putative functions |
|--------------------------|-------------------------------------|-----------------------|-------------------------|------|--------------------|-------------------------------|--------------------|
| <i>Desi_wild_2649813</i> | NA                                  | <i>Ca_desi_denovo</i> | 2649813                 | C/T  | NA                 | NA                            | NA                 |
| <i>Desi_wild_2649980</i> | NA                                  | <i>Ca_desi_denovo</i> | 2649980                 | C/G  | NA                 | NA                            | NA                 |
| <i>Desi_wild_2650250</i> | NA                                  | <i>Ca_desi_denovo</i> | 2650250                 | A/G  | NA                 | NA                            | NA                 |
| <i>Desi_wild_2651086</i> | NA                                  | <i>Ca_desi_denovo</i> | 2651086                 | G/T  | NA                 | NA                            | NA                 |
| <i>Desi_wild_2651155</i> | NA                                  | <i>Ca_desi_denovo</i> | 2651155                 | G/A  | NA                 | NA                            | NA                 |
| <i>Desi_wild_2651349</i> | NA                                  | <i>Ca_desi_denovo</i> | 2651349                 | G/A  | NA                 | NA                            | NA                 |
| <i>Desi_wild_2651404</i> | NA                                  | <i>Ca_desi_denovo</i> | 2651404                 | C/G  | NA                 | NA                            | NA                 |
| <i>Desi_wild_2651464</i> | NA                                  | <i>Ca_desi_denovo</i> | 2651464                 | A/G  | NA                 | NA                            | NA                 |
| <i>Desi_wild_2651766</i> | NA                                  | <i>Ca_desi_denovo</i> | 2651766                 | T/C  | NA                 | NA                            | NA                 |
| <i>Desi_wild_2652064</i> | NA                                  | <i>Ca_desi_denovo</i> | 2652064                 | T/C  | NA                 | NA                            | NA                 |
| <i>Desi_wild_2652121</i> | NA                                  | <i>Ca_desi_denovo</i> | 2652121                 | T/C  | NA                 | NA                            | NA                 |
| <i>Desi_wild_2652204</i> | NA                                  | <i>Ca_desi_denovo</i> | 2652204                 | G/C  | NA                 | NA                            | NA                 |
| <i>Desi_wild_2652231</i> | NA                                  | <i>Ca_desi_denovo</i> | 2652231                 | T/C  | NA                 | NA                            | NA                 |
| <i>Desi_wild_2652551</i> | NA                                  | <i>Ca_desi_denovo</i> | 2652551                 | G/T  | NA                 | NA                            | NA                 |
| <i>Desi_wild_2652554</i> | NA                                  | <i>Ca_desi_denovo</i> | 2652554                 | T/C  | NA                 | NA                            | NA                 |
| <i>Desi_wild_2653099</i> | NA                                  | <i>Ca_desi_denovo</i> | 2653099                 | A/T  | NA                 | NA                            | NA                 |
| <i>Desi_wild_2653834</i> | NA                                  | <i>Ca_desi_denovo</i> | 2653834                 | T/C  | NA                 | NA                            | NA                 |
| <i>Desi_wild_2653918</i> | NA                                  | <i>Ca_desi_denovo</i> | 2653918                 | A/G  | NA                 | NA                            | NA                 |
| <i>Desi_wild_2653936</i> | NA                                  | <i>Ca_desi_denovo</i> | 2653936                 | A/G  | NA                 | NA                            | NA                 |
| <i>Desi_wild_2653942</i> | NA                                  | <i>Ca_desi_denovo</i> | 2653942                 | G/C  | NA                 | NA                            | NA                 |
| <i>Desi_wild_2654929</i> | NA                                  | <i>Ca_desi_denovo</i> | 2654929                 | C/T  | NA                 | NA                            | NA                 |
| <i>Desi_wild_2654946</i> | NA                                  | <i>Ca_desi_denovo</i> | 2654946                 | C/T  | NA                 | NA                            | NA                 |
| <i>Desi_wild_2655066</i> | NA                                  | <i>Ca_desi_denovo</i> | 2655066                 | C/T  | NA                 | NA                            | NA                 |
| <i>Desi_wild_2655067</i> | NA                                  | <i>Ca_desi_denovo</i> | 2655067                 | C/T  | NA                 | NA                            | NA                 |
| <i>Desi_wild_2655070</i> | NA                                  | <i>Ca_desi_denovo</i> | 2655070                 | G/T  | NA                 | NA                            | NA                 |
| <i>Desi_wild_2655087</i> | NA                                  | <i>Ca_desi_denovo</i> | 2655087                 | C/G  | NA                 | NA                            | NA                 |
| <i>Desi_wild_2655245</i> | NA                                  | <i>Ca_desi_denovo</i> | 2655245                 | A/G  | NA                 | NA                            | NA                 |
| <i>Desi_wild_2655427</i> | NA                                  | <i>Ca_desi_denovo</i> | 2655427                 | A/C  | NA                 | NA                            | NA                 |
| <i>Desi_wild_2656432</i> | NA                                  | <i>Ca_desi_denovo</i> | 2656432                 | T/C  | NA                 | NA                            | NA                 |
| <i>Desi_wild_2656451</i> | NA                                  | <i>Ca_desi_denovo</i> | 2656451                 | C/A  | NA                 | NA                            | NA                 |
| <i>Desi_wild_2656813</i> | NA                                  | <i>Ca_desi_denovo</i> | 2656813                 | A/G  | NA                 | NA                            | NA                 |
| <i>Desi_wild_2656891</i> | NA                                  | <i>Ca_desi_denovo</i> | 2656891                 | A/G  | NA                 | NA                            | NA                 |
| <i>Desi_wild_2656893</i> | NA                                  | <i>Ca_desi_denovo</i> | 2656893                 | C/T  | NA                 | NA                            | NA                 |
| <i>Desi_wild_2656894</i> | NA                                  | <i>Ca_desi_denovo</i> | 2656894                 | A/G  | NA                 | NA                            | NA                 |
| <i>Desi_wild_2657003</i> | NA                                  | <i>Ca_desi_denovo</i> | 2657003                 | G/C  | NA                 | NA                            | NA                 |
| <i>Desi_wild_2657005</i> | NA                                  | <i>Ca_desi_denovo</i> | 2657005                 | C/A  | NA                 | NA                            | NA                 |
| <i>Desi_wild_2657024</i> | NA                                  | <i>Ca_desi_denovo</i> | 2657024                 | G/A  | NA                 | NA                            | NA                 |
| <i>Desi_wild_2657202</i> | NA                                  | <i>Ca_desi_denovo</i> | 2657202                 | G/A  | NA                 | NA                            | NA                 |
| <i>Desi_wild_2657215</i> | NA                                  | <i>Ca_desi_denovo</i> | 2657215                 | T/G  | NA                 | NA                            | NA                 |
| <i>Desi_wild_2659226</i> | NA                                  | <i>Ca_desi_denovo</i> | 2659226                 | C/A  | NA                 | NA                            | NA                 |
| <i>Desi_wild_2660232</i> | NA                                  | <i>Ca_desi_denovo</i> | 2660232                 | G/C  | NA                 | NA                            | NA                 |
| <i>Desi_wild_2660238</i> | NA                                  | <i>Ca_desi_denovo</i> | 2660238                 | T/C  | NA                 | NA                            | NA                 |
| <i>Desi_wild_2663140</i> | NA                                  | <i>Ca_desi_denovo</i> | 2663140                 | A/C  | NA                 | NA                            | NA                 |
| <i>Desi_wild_2663412</i> | NA                                  | <i>Ca_desi_denovo</i> | 2663412                 | C/T  | NA                 | NA                            | NA                 |

| SNP IDs                  | NCBI dbSNP accession IDs (NCBI_SS#) | Chromosomes           | Physical positions (bp) | SNPs | Gene accession IDs | Sequence components of genome | Putative functions |
|--------------------------|-------------------------------------|-----------------------|-------------------------|------|--------------------|-------------------------------|--------------------|
| <i>Desi_wild_2663535</i> | NA                                  | <i>Ca_desi_denovo</i> | 2663535                 | T/C  | NA                 | NA                            | NA                 |
| <i>Desi_wild_2664614</i> | NA                                  | <i>Ca_desi_denovo</i> | 2664614                 | T/G  | NA                 | NA                            | NA                 |
| <i>Desi_wild_2665523</i> | NA                                  | <i>Ca_desi_denovo</i> | 2665523                 | G/C  | NA                 | NA                            | NA                 |
| <i>Desi_wild_2666533</i> | NA                                  | <i>Ca_desi_denovo</i> | 2666533                 | G/C  | NA                 | NA                            | NA                 |
| <i>Desi_wild_2668041</i> | NA                                  | <i>Ca_desi_denovo</i> | 2668041                 | T/G  | NA                 | NA                            | NA                 |
| <i>Desi_wild_2668210</i> | NA                                  | <i>Ca_desi_denovo</i> | 2668210                 | A/G  | NA                 | NA                            | NA                 |
| <i>Desi_wild_2668223</i> | NA                                  | <i>Ca_desi_denovo</i> | 2668223                 | C/T  | NA                 | NA                            | NA                 |
| <i>Desi_wild_2669241</i> | NA                                  | <i>Ca_desi_denovo</i> | 2669241                 | T/C  | NA                 | NA                            | NA                 |
| <i>Desi_wild_2669569</i> | NA                                  | <i>Ca_desi_denovo</i> | 2669569                 | A/C  | NA                 | NA                            | NA                 |
| <i>Desi_wild_2670016</i> | NA                                  | <i>Ca_desi_denovo</i> | 2670016                 | G/A  | NA                 | NA                            | NA                 |
| <i>Desi_wild_2670082</i> | NA                                  | <i>Ca_desi_denovo</i> | 2670082                 | C/G  | NA                 | NA                            | NA                 |
| <i>Desi_wild_2671346</i> | NA                                  | <i>Ca_desi_denovo</i> | 2671346                 | C/A  | NA                 | NA                            | NA                 |
| <i>Desi_wild_2672935</i> | NA                                  | <i>Ca_desi_denovo</i> | 2672935                 | G/A  | NA                 | NA                            | NA                 |
| <i>Desi_wild_2672948</i> | NA                                  | <i>Ca_desi_denovo</i> | 2672948                 | C/T  | NA                 | NA                            | NA                 |
| <i>Desi_wild_2674091</i> | NA                                  | <i>Ca_desi_denovo</i> | 2674091                 | C/G  | NA                 | NA                            | NA                 |
| <i>Desi_wild_2674145</i> | NA                                  | <i>Ca_desi_denovo</i> | 2674145                 | C/A  | NA                 | NA                            | NA                 |
| <i>Desi_wild_2675444</i> | NA                                  | <i>Ca_desi_denovo</i> | 2675444                 | A/T  | NA                 | NA                            | NA                 |
| <i>Desi_wild_2676522</i> | NA                                  | <i>Ca_desi_denovo</i> | 2676522                 | C/T  | NA                 | NA                            | NA                 |
| <i>Desi_wild_2676549</i> | NA                                  | <i>Ca_desi_denovo</i> | 2676549                 | C/A  | NA                 | NA                            | NA                 |
| <i>Desi_wild_2676597</i> | NA                                  | <i>Ca_desi_denovo</i> | 2676597                 | C/G  | NA                 | NA                            | NA                 |
| <i>Desi_wild_2676624</i> | NA                                  | <i>Ca_desi_denovo</i> | 2676624                 | G/T  | NA                 | NA                            | NA                 |
| <i>Desi_wild_2679068</i> | NA                                  | <i>Ca_desi_denovo</i> | 2679068                 | A/G  | NA                 | NA                            | NA                 |
| <i>Desi_wild_2679107</i> | NA                                  | <i>Ca_desi_denovo</i> | 2679107                 | A/C  | NA                 | NA                            | NA                 |
| <i>Desi_wild_2679184</i> | NA                                  | <i>Ca_desi_denovo</i> | 2679184                 | C/T  | NA                 | NA                            | NA                 |
| <i>Desi_wild_2679232</i> | NA                                  | <i>Ca_desi_denovo</i> | 2679232                 | T/C  | NA                 | NA                            | NA                 |
| <i>Desi_wild_2679364</i> | NA                                  | <i>Ca_desi_denovo</i> | 2679364                 | C/T  | NA                 | NA                            | NA                 |
| <i>Desi_wild_2680501</i> | NA                                  | <i>Ca_desi_denovo</i> | 2680501                 | T/C  | NA                 | NA                            | NA                 |
| <i>Desi_wild_2680555</i> | NA                                  | <i>Ca_desi_denovo</i> | 2680555                 | A/G  | NA                 | NA                            | NA                 |
| <i>Desi_wild_2680871</i> | NA                                  | <i>Ca_desi_denovo</i> | 2680871                 | C/T  | NA                 | NA                            | NA                 |
| <i>Desi_wild_2681451</i> | NA                                  | <i>Ca_desi_denovo</i> | 2681451                 | G/A  | NA                 | NA                            | NA                 |
| <i>Desi_wild_2682915</i> | NA                                  | <i>Ca_desi_denovo</i> | 2682915                 | T/C  | NA                 | NA                            | NA                 |
| <i>Desi_wild_2684430</i> | NA                                  | <i>Ca_desi_denovo</i> | 2684430                 | G/C  | NA                 | NA                            | NA                 |
| <i>Desi_wild_2685047</i> | NA                                  | <i>Ca_desi_denovo</i> | 2685047                 | G/C  | NA                 | NA                            | NA                 |
| <i>Desi_wild_2685052</i> | NA                                  | <i>Ca_desi_denovo</i> | 2685052                 | T/C  | NA                 | NA                            | NA                 |
| <i>Desi_wild_2685148</i> | NA                                  | <i>Ca_desi_denovo</i> | 2685148                 | T/C  | NA                 | NA                            | NA                 |
| <i>Desi_wild_2685342</i> | NA                                  | <i>Ca_desi_denovo</i> | 2685342                 | T/G  | NA                 | NA                            | NA                 |
| <i>Desi_wild_2685449</i> | NA                                  | <i>Ca_desi_denovo</i> | 2685449                 | G/C  | NA                 | NA                            | NA                 |
| <i>Desi_wild_2685470</i> | NA                                  | <i>Ca_desi_denovo</i> | 2685470                 | C/G  | NA                 | NA                            | NA                 |
| <i>Desi_wild_2685590</i> | NA                                  | <i>Ca_desi_denovo</i> | 2685590                 | C/T  | NA                 | NA                            | NA                 |
| <i>Desi_wild_2685683</i> | NA                                  | <i>Ca_desi_denovo</i> | 2685683                 | A/G  | NA                 | NA                            | NA                 |
| <i>Desi_wild_2685763</i> | NA                                  | <i>Ca_desi_denovo</i> | 2685763                 | C/T  | NA                 | NA                            | NA                 |
| <i>Desi_wild_2685793</i> | NA                                  | <i>Ca_desi_denovo</i> | 2685793                 | G/T  | NA                 | NA                            | NA                 |
| <i>Desi_wild_2685913</i> | NA                                  | <i>Ca_desi_denovo</i> | 2685913                 | C/G  | NA                 | NA                            | NA                 |
| <i>Desi_wild_2685961</i> | NA                                  | <i>Ca_desi_denovo</i> | 2685961                 | C/G  | NA                 | NA                            | NA                 |

| SNP IDs                  | NCBI dbSNP accession IDs (NCBI_SS#) | Chromosomes           | Physical positions (bp) | SNPs | Gene accession IDs | Sequence components of genome | Putative functions |
|--------------------------|-------------------------------------|-----------------------|-------------------------|------|--------------------|-------------------------------|--------------------|
| <i>Desi_wild_2686369</i> | NA                                  | <i>Ca_desi_denovo</i> | 2686369                 | G/A  | NA                 | NA                            | NA                 |
| <i>Desi_wild_2686510</i> | NA                                  | <i>Ca_desi_denovo</i> | 2686510                 | C/T  | NA                 | NA                            | NA                 |
| <i>Desi_wild_2686710</i> | NA                                  | <i>Ca_desi_denovo</i> | 2686710                 | A/G  | NA                 | NA                            | NA                 |
| <i>Desi_wild_2687114</i> | NA                                  | <i>Ca_desi_denovo</i> | 2687114                 | T/G  | NA                 | NA                            | NA                 |
| <i>Desi_wild_2687142</i> | NA                                  | <i>Ca_desi_denovo</i> | 2687142                 | T/C  | NA                 | NA                            | NA                 |
| <i>Desi_wild_2687336</i> | NA                                  | <i>Ca_desi_denovo</i> | 2687336                 | G/T  | NA                 | NA                            | NA                 |
| <i>Desi_wild_2687654</i> | NA                                  | <i>Ca_desi_denovo</i> | 2687654                 | G/T  | NA                 | NA                            | NA                 |
| <i>Desi_wild_2687675</i> | NA                                  | <i>Ca_desi_denovo</i> | 2687675                 | C/G  | NA                 | NA                            | NA                 |
| <i>Desi_wild_2688358</i> | NA                                  | <i>Ca_desi_denovo</i> | 2688358                 | T/C  | NA                 | NA                            | NA                 |
| <i>Desi_wild_2688367</i> | NA                                  | <i>Ca_desi_denovo</i> | 2688367                 | T/C  | NA                 | NA                            | NA                 |
| <i>Desi_wild_2688947</i> | NA                                  | <i>Ca_desi_denovo</i> | 2688947                 | G/C  | NA                 | NA                            | NA                 |
| <i>Desi_wild_2688961</i> | NA                                  | <i>Ca_desi_denovo</i> | 2688961                 | T/G  | NA                 | NA                            | NA                 |
| <i>Desi_wild_2691273</i> | NA                                  | <i>Ca_desi_denovo</i> | 2691273                 | C/T  | NA                 | NA                            | NA                 |
| <i>Desi_wild_2691929</i> | NA                                  | <i>Ca_desi_denovo</i> | 2691929                 | T/G  | NA                 | NA                            | NA                 |
| <i>Desi_wild_2692344</i> | NA                                  | <i>Ca_desi_denovo</i> | 2692344                 | A/G  | NA                 | NA                            | NA                 |
| <i>Desi_wild_2692356</i> | NA                                  | <i>Ca_desi_denovo</i> | 2692356                 | T/C  | NA                 | NA                            | NA                 |
| <i>Desi_wild_2692603</i> | NA                                  | <i>Ca_desi_denovo</i> | 2692603                 | G/A  | NA                 | NA                            | NA                 |
| <i>Desi_wild_2692638</i> | NA                                  | <i>Ca_desi_denovo</i> | 2692638                 | G/T  | NA                 | NA                            | NA                 |
| <i>Desi_wild_2693630</i> | NA                                  | <i>Ca_desi_denovo</i> | 2693630                 | G/C  | NA                 | NA                            | NA                 |
| <i>Desi_wild_2693636</i> | NA                                  | <i>Ca_desi_denovo</i> | 2693636                 | G/A  | NA                 | NA                            | NA                 |
| <i>Desi_wild_2693948</i> | NA                                  | <i>Ca_desi_denovo</i> | 2693948                 | A/C  | NA                 | NA                            | NA                 |
| <i>Desi_wild_2693950</i> | NA                                  | <i>Ca_desi_denovo</i> | 2693950                 | A/G  | NA                 | NA                            | NA                 |
| <i>Desi_wild_2694661</i> | NA                                  | <i>Ca_desi_denovo</i> | 2694661                 | A/G  | NA                 | NA                            | NA                 |
| <i>Desi_wild_2694686</i> | NA                                  | <i>Ca_desi_denovo</i> | 2694686                 | A/G  | NA                 | NA                            | NA                 |
| <i>Desi_wild_2695040</i> | NA                                  | <i>Ca_desi_denovo</i> | 2695040                 | A/C  | NA                 | NA                            | NA                 |
| <i>Desi_wild_2695298</i> | NA                                  | <i>Ca_desi_denovo</i> | 2695298                 | C/T  | NA                 | NA                            | NA                 |
| <i>Desi_wild_2696048</i> | NA                                  | <i>Ca_desi_denovo</i> | 2696048                 | T/C  | NA                 | NA                            | NA                 |
| <i>Desi_wild_2697220</i> | NA                                  | <i>Ca_desi_denovo</i> | 2697220                 | C/A  | NA                 | NA                            | NA                 |
| <i>Desi_wild_2697312</i> | NA                                  | <i>Ca_desi_denovo</i> | 2697312                 | G/T  | NA                 | NA                            | NA                 |
| <i>Desi_wild_2697875</i> | NA                                  | <i>Ca_desi_denovo</i> | 2697875                 | G/A  | NA                 | NA                            | NA                 |
| <i>Desi_wild_2697941</i> | NA                                  | <i>Ca_desi_denovo</i> | 2697941                 | C/T  | NA                 | NA                            | NA                 |
| <i>Desi_wild_2697948</i> | NA                                  | <i>Ca_desi_denovo</i> | 2697948                 | G/A  | NA                 | NA                            | NA                 |
| <i>Desi_wild_2698651</i> | NA                                  | <i>Ca_desi_denovo</i> | 2698651                 | C/T  | NA                 | NA                            | NA                 |
| <i>Desi_wild_2701244</i> | NA                                  | <i>Ca_desi_denovo</i> | 2701244                 | T/C  | NA                 | NA                            | NA                 |
| <i>Desi_wild_2701519</i> | NA                                  | <i>Ca_desi_denovo</i> | 2701519                 | A/C  | NA                 | NA                            | NA                 |
| <i>Desi_wild_2702023</i> | NA                                  | <i>Ca_desi_denovo</i> | 2702023                 | T/C  | NA                 | NA                            | NA                 |
| <i>Desi_wild_2702193</i> | NA                                  | <i>Ca_desi_denovo</i> | 2702193                 | T/C  | NA                 | NA                            | NA                 |
| <i>Desi_wild_2703988</i> | NA                                  | <i>Ca_desi_denovo</i> | 2703988                 | G/T  | NA                 | NA                            | NA                 |
| <i>Desi_wild_2704035</i> | NA                                  | <i>Ca_desi_denovo</i> | 2704035                 | G/T  | NA                 | NA                            | NA                 |
| <i>Desi_wild_2704345</i> | NA                                  | <i>Ca_desi_denovo</i> | 2704345                 | G/A  | NA                 | NA                            | NA                 |
| <i>Desi_wild_2704897</i> | NA                                  | <i>Ca_desi_denovo</i> | 2704897                 | G/C  | NA                 | NA                            | NA                 |
| <i>Desi_wild_2705540</i> | NA                                  | <i>Ca_desi_denovo</i> | 2705540                 | T/A  | NA                 | NA                            | NA                 |
| <i>Desi_wild_2705578</i> | NA                                  | <i>Ca_desi_denovo</i> | 2705578                 | T/C  | NA                 | NA                            | NA                 |
| <i>Desi_wild_2706870</i> | NA                                  | <i>Ca_desi_denovo</i> | 2706870                 | A/G  | NA                 | NA                            | NA                 |

| SNP IDs                  | NCBI dbSNP accession IDs (NCBI_SS#) | Chromosomes           | Physical positions (bp) | SNPs | Gene accession IDs | Sequence components of genome | Putative functions |
|--------------------------|-------------------------------------|-----------------------|-------------------------|------|--------------------|-------------------------------|--------------------|
| <i>Desi_wild_2706941</i> | NA                                  | <i>Ca_desi_denovo</i> | 2706941                 | A/C  | NA                 | NA                            | NA                 |
| <i>Desi_wild_2707289</i> | NA                                  | <i>Ca_desi_denovo</i> | 2707289                 | C/G  | NA                 | NA                            | NA                 |
| <i>Desi_wild_2707299</i> | NA                                  | <i>Ca_desi_denovo</i> | 2707299                 | G/C  | NA                 | NA                            | NA                 |
| <i>Desi_wild_2707552</i> | NA                                  | <i>Ca_desi_denovo</i> | 2707552                 | T/G  | NA                 | NA                            | NA                 |
| <i>Desi_wild_2708041</i> | NA                                  | <i>Ca_desi_denovo</i> | 2708041                 | C/T  | NA                 | NA                            | NA                 |
| <i>Desi_wild_2708092</i> | NA                                  | <i>Ca_desi_denovo</i> | 2708092                 | A/G  | NA                 | NA                            | NA                 |
| <i>Desi_wild_2711757</i> | NA                                  | <i>Ca_desi_denovo</i> | 2711757                 | C/T  | NA                 | NA                            | NA                 |
| <i>Desi_wild_2711766</i> | NA                                  | <i>Ca_desi_denovo</i> | 2711766                 | G/T  | NA                 | NA                            | NA                 |
| <i>Desi_wild_2712315</i> | NA                                  | <i>Ca_desi_denovo</i> | 2712315                 | C/T  | NA                 | NA                            | NA                 |
| <i>Desi_wild_2712780</i> | NA                                  | <i>Ca_desi_denovo</i> | 2712780                 | G/A  | NA                 | NA                            | NA                 |
| <i>Desi_wild_2713224</i> | NA                                  | <i>Ca_desi_denovo</i> | 2713224                 | G/A  | NA                 | NA                            | NA                 |
| <i>Desi_wild_2714649</i> | NA                                  | <i>Ca_desi_denovo</i> | 2714649                 | G/A  | NA                 | NA                            | NA                 |
| <i>Desi_wild_2714670</i> | NA                                  | <i>Ca_desi_denovo</i> | 2714670                 | G/A  | NA                 | NA                            | NA                 |
| <i>Desi_wild_2715060</i> | NA                                  | <i>Ca_desi_denovo</i> | 2715060                 | C/A  | NA                 | NA                            | NA                 |
| <i>Desi_wild_2715063</i> | NA                                  | <i>Ca_desi_denovo</i> | 2715063                 | G/C  | NA                 | NA                            | NA                 |
| <i>Desi_wild_2715420</i> | NA                                  | <i>Ca_desi_denovo</i> | 2715420                 | G/A  | NA                 | NA                            | NA                 |
| <i>Desi_wild_2715421</i> | NA                                  | <i>Ca_desi_denovo</i> | 2715421                 | G/A  | NA                 | NA                            | NA                 |
| <i>Desi_wild_2715615</i> | NA                                  | <i>Ca_desi_denovo</i> | 2715615                 | C/G  | NA                 | NA                            | NA                 |
| <i>Desi_wild_2715675</i> | NA                                  | <i>Ca_desi_denovo</i> | 2715675                 | G/C  | NA                 | NA                            | NA                 |
| <i>Desi_wild_2717779</i> | NA                                  | <i>Ca_desi_denovo</i> | 2717779                 | T/C  | NA                 | NA                            | NA                 |
| <i>Desi_wild_2719377</i> | NA                                  | <i>Ca_desi_denovo</i> | 2719377                 | A/G  | NA                 | NA                            | NA                 |
| <i>Desi_wild_2720010</i> | NA                                  | <i>Ca_desi_denovo</i> | 2720010                 | C/G  | NA                 | NA                            | NA                 |
| <i>Desi_wild_2720844</i> | NA                                  | <i>Ca_desi_denovo</i> | 2720844                 | A/G  | NA                 | NA                            | NA                 |
| <i>Desi_wild_2720874</i> | NA                                  | <i>Ca_desi_denovo</i> | 2720874                 | T/G  | NA                 | NA                            | NA                 |
| <i>Desi_wild_2722406</i> | NA                                  | <i>Ca_desi_denovo</i> | 2722406                 | C/T  | NA                 | NA                            | NA                 |
| <i>Desi_wild_2722451</i> | NA                                  | <i>Ca_desi_denovo</i> | 2722451                 | C/G  | NA                 | NA                            | NA                 |
| <i>Desi_wild_2723987</i> | NA                                  | <i>Ca_desi_denovo</i> | 2723987                 | C/T  | NA                 | NA                            | NA                 |
| <i>Desi_wild_2724011</i> | NA                                  | <i>Ca_desi_denovo</i> | 2724011                 | G/A  | NA                 | NA                            | NA                 |
| <i>Desi_wild_2724491</i> | NA                                  | <i>Ca_desi_denovo</i> | 2724491                 | C/T  | NA                 | NA                            | NA                 |
| <i>Desi_wild_2724500</i> | NA                                  | <i>Ca_desi_denovo</i> | 2724500                 | C/G  | NA                 | NA                            | NA                 |
| <i>Desi_wild_2726247</i> | NA                                  | <i>Ca_desi_denovo</i> | 2726247                 | A/G  | NA                 | NA                            | NA                 |
| <i>Desi_wild_2727057</i> | NA                                  | <i>Ca_desi_denovo</i> | 2727057                 | T/C  | NA                 | NA                            | NA                 |
| <i>Desi_wild_2728181</i> | NA                                  | <i>Ca_desi_denovo</i> | 2728181                 | A/G  | NA                 | NA                            | NA                 |
| <i>Desi_wild_2728184</i> | NA                                  | <i>Ca_desi_denovo</i> | 2728184                 | G/A  | NA                 | NA                            | NA                 |
| <i>Desi_wild_2728228</i> | NA                                  | <i>Ca_desi_denovo</i> | 2728228                 | A/G  | NA                 | NA                            | NA                 |
| <i>Desi_wild_2728617</i> | NA                                  | <i>Ca_desi_denovo</i> | 2728617                 | G/C  | NA                 | NA                            | NA                 |
| <i>Desi_wild_2728626</i> | NA                                  | <i>Ca_desi_denovo</i> | 2728626                 | C/G  | NA                 | NA                            | NA                 |
| <i>Desi_wild_2728852</i> | NA                                  | <i>Ca_desi_denovo</i> | 2728852                 | T/C  | NA                 | NA                            | NA                 |
| <i>Desi_wild_2728861</i> | NA                                  | <i>Ca_desi_denovo</i> | 2728861                 | G/T  | NA                 | NA                            | NA                 |
| <i>Desi_wild_2729375</i> | NA                                  | <i>Ca_desi_denovo</i> | 2729375                 | G/A  | NA                 | NA                            | NA                 |
| <i>Desi_wild_2729465</i> | NA                                  | <i>Ca_desi_denovo</i> | 2729465                 | A/G  | NA                 | NA                            | NA                 |
| <i>Desi_wild_2729766</i> | NA                                  | <i>Ca_desi_denovo</i> | 2729766                 | A/G  | NA                 | NA                            | NA                 |
| <i>Desi_wild_2729838</i> | NA                                  | <i>Ca_desi_denovo</i> | 2729838                 | C/G  | NA                 | NA                            | NA                 |
| <i>Desi_wild_2731180</i> | NA                                  | <i>Ca_desi_denovo</i> | 2731180                 | T/G  | NA                 | NA                            | NA                 |

| SNP IDs                  | NCBI dbSNP accession IDs (NCBI_SS#) | Chromosomes           | Physical positions (bp) | SNPs | Gene accession IDs | Sequence components of genome | Putative functions |
|--------------------------|-------------------------------------|-----------------------|-------------------------|------|--------------------|-------------------------------|--------------------|
| <i>Desi_wild_2731503</i> | NA                                  | <i>Ca_desi_denovo</i> | 2731503                 | A/G  | NA                 | NA                            | NA                 |
| <i>Desi_wild_2731512</i> | NA                                  | <i>Ca_desi_denovo</i> | 2731512                 | G/A  | NA                 | NA                            | NA                 |
| <i>Desi_wild_2731697</i> | NA                                  | <i>Ca_desi_denovo</i> | 2731697                 | G/A  | NA                 | NA                            | NA                 |
| <i>Desi_wild_2732102</i> | NA                                  | <i>Ca_desi_denovo</i> | 2732102                 | G/A  | NA                 | NA                            | NA                 |
| <i>Desi_wild_2732507</i> | NA                                  | <i>Ca_desi_denovo</i> | 2732507                 | A/T  | NA                 | NA                            | NA                 |
| <i>Desi_wild_2732510</i> | NA                                  | <i>Ca_desi_denovo</i> | 2732510                 | T/C  | NA                 | NA                            | NA                 |
| <i>Desi_wild_2735627</i> | NA                                  | <i>Ca_desi_denovo</i> | 2735627                 | G/C  | NA                 | NA                            | NA                 |
| <i>Desi_wild_2735630</i> | NA                                  | <i>Ca_desi_denovo</i> | 2735630                 | C/T  | NA                 | NA                            | NA                 |
| <i>Desi_wild_2737147</i> | NA                                  | <i>Ca_desi_denovo</i> | 2737147                 | T/C  | NA                 | NA                            | NA                 |
| <i>Desi_wild_2737174</i> | NA                                  | <i>Ca_desi_denovo</i> | 2737174                 | C/G  | NA                 | NA                            | NA                 |
| <i>Desi_wild_2737813</i> | NA                                  | <i>Ca_desi_denovo</i> | 2737813                 | T/C  | NA                 | NA                            | NA                 |
| <i>Desi_wild_2740662</i> | NA                                  | <i>Ca_desi_denovo</i> | 2740662                 | C/T  | NA                 | NA                            | NA                 |
| <i>Desi_wild_2740677</i> | NA                                  | <i>Ca_desi_denovo</i> | 2740677                 | T/C  | NA                 | NA                            | NA                 |
| <i>Desi_wild_2741409</i> | NA                                  | <i>Ca_desi_denovo</i> | 2741409                 | A/G  | NA                 | NA                            | NA                 |
| <i>Desi_wild_2741590</i> | NA                                  | <i>Ca_desi_denovo</i> | 2741590                 | G/A  | NA                 | NA                            | NA                 |
| <i>Desi_wild_2742111</i> | NA                                  | <i>Ca_desi_denovo</i> | 2742111                 | C/T  | NA                 | NA                            | NA                 |
| <i>Desi_wild_2742643</i> | NA                                  | <i>Ca_desi_denovo</i> | 2742643                 | A/C  | NA                 | NA                            | NA                 |
| <i>Desi_wild_2743048</i> | NA                                  | <i>Ca_desi_denovo</i> | 2743048                 | T/C  | NA                 | NA                            | NA                 |
| <i>Desi_wild_2743645</i> | NA                                  | <i>Ca_desi_denovo</i> | 2743645                 | G/A  | NA                 | NA                            | NA                 |
| <i>Desi_wild_2743647</i> | NA                                  | <i>Ca_desi_denovo</i> | 2743647                 | G/A  | NA                 | NA                            | NA                 |
| <i>Desi_wild_2743687</i> | NA                                  | <i>Ca_desi_denovo</i> | 2743687                 | T/G  | NA                 | NA                            | NA                 |
| <i>Desi_wild_2744048</i> | NA                                  | <i>Ca_desi_denovo</i> | 2744048                 | G/A  | NA                 | NA                            | NA                 |
| <i>Desi_wild_2744313</i> | NA                                  | <i>Ca_desi_denovo</i> | 2744313                 | C/A  | NA                 | NA                            | NA                 |
| <i>Desi_wild_2744361</i> | NA                                  | <i>Ca_desi_denovo</i> | 2744361                 | C/A  | NA                 | NA                            | NA                 |
| <i>Desi_wild_2745665</i> | NA                                  | <i>Ca_desi_denovo</i> | 2745665                 | T/C  | NA                 | NA                            | NA                 |
| <i>Desi_wild_2746233</i> | NA                                  | <i>Ca_desi_denovo</i> | 2746233                 | G/T  | NA                 | NA                            | NA                 |
| <i>Desi_wild_2746424</i> | NA                                  | <i>Ca_desi_denovo</i> | 2746424                 | A/C  | NA                 | NA                            | NA                 |
| <i>Desi_wild_2746426</i> | NA                                  | <i>Ca_desi_denovo</i> | 2746426                 | G/A  | NA                 | NA                            | NA                 |
| <i>Desi_wild_2746904</i> | NA                                  | <i>Ca_desi_denovo</i> | 2746904                 | A/G  | NA                 | NA                            | NA                 |
| <i>Desi_wild_2747614</i> | NA                                  | <i>Ca_desi_denovo</i> | 2747614                 | A/C  | NA                 | NA                            | NA                 |
| <i>Desi_wild_2747644</i> | NA                                  | <i>Ca_desi_denovo</i> | 2747644                 | G/C  | NA                 | NA                            | NA                 |
| <i>Desi_wild_2747817</i> | NA                                  | <i>Ca_desi_denovo</i> | 2747817                 | G/A  | NA                 | NA                            | NA                 |
| <i>Desi_wild_2747829</i> | NA                                  | <i>Ca_desi_denovo</i> | 2747829                 | A/G  | NA                 | NA                            | NA                 |
| <i>Desi_wild_2748577</i> | NA                                  | <i>Ca_desi_denovo</i> | 2748577                 | C/T  | NA                 | NA                            | NA                 |
| <i>Desi_wild_2748579</i> | NA                                  | <i>Ca_desi_denovo</i> | 2748579                 | A/G  | NA                 | NA                            | NA                 |
| <i>Desi_wild_2749766</i> | NA                                  | <i>Ca_desi_denovo</i> | 2749766                 | G/A  | NA                 | NA                            | NA                 |
| <i>Desi_wild_2749839</i> | NA                                  | <i>Ca_desi_denovo</i> | 2749839                 | T/G  | NA                 | NA                            | NA                 |
| <i>Desi_wild_2751024</i> | NA                                  | <i>Ca_desi_denovo</i> | 2751024                 | G/C  | NA                 | NA                            | NA                 |
| <i>Desi_wild_2752226</i> | NA                                  | <i>Ca_desi_denovo</i> | 2752226                 | C/T  | NA                 | NA                            | NA                 |
| <i>Desi_wild_2752286</i> | NA                                  | <i>Ca_desi_denovo</i> | 2752286                 | A/T  | NA                 | NA                            | NA                 |
| <i>Desi_wild_2752330</i> | NA                                  | <i>Ca_desi_denovo</i> | 2752330                 | G/A  | NA                 | NA                            | NA                 |
| <i>Desi_wild_2752744</i> | NA                                  | <i>Ca_desi_denovo</i> | 2752744                 | C/A  | NA                 | NA                            | NA                 |
| <i>Desi_wild_2752846</i> | NA                                  | <i>Ca_desi_denovo</i> | 2752846                 | G/A  | NA                 | NA                            | NA                 |
| <i>Desi_wild_2753158</i> | NA                                  | <i>Ca_desi_denovo</i> | 2753158                 | G/A  | NA                 | NA                            | NA                 |

| SNP IDs                  | NCBI dbSNP accession IDs (NCBI_SS#) | Chromosomes           | Physical positions (bp) | SNPs | Gene accession IDs | Sequence components of genome | Putative functions |
|--------------------------|-------------------------------------|-----------------------|-------------------------|------|--------------------|-------------------------------|--------------------|
| <i>Desi_wild_2753160</i> | NA                                  | <i>Ca_desi_denovo</i> | 2753160                 | T/C  | NA                 | NA                            | NA                 |
| <i>Desi_wild_2753728</i> | NA                                  | <i>Ca_desi_denovo</i> | 2753728                 | C/T  | NA                 | NA                            | NA                 |
| <i>Desi_wild_2753780</i> | NA                                  | <i>Ca_desi_denovo</i> | 2753780                 | G/A  | NA                 | NA                            | NA                 |
| <i>Desi_wild_2754354</i> | NA                                  | <i>Ca_desi_denovo</i> | 2754354                 | A/G  | NA                 | NA                            | NA                 |
| <i>Desi_wild_2754528</i> | NA                                  | <i>Ca_desi_denovo</i> | 2754528                 | T/G  | NA                 | NA                            | NA                 |
| <i>Desi_wild_2754897</i> | NA                                  | <i>Ca_desi_denovo</i> | 2754897                 | C/G  | NA                 | NA                            | NA                 |
| <i>Desi_wild_2755077</i> | NA                                  | <i>Ca_desi_denovo</i> | 2755077                 | A/G  | NA                 | NA                            | NA                 |
| <i>Desi_wild_2755267</i> | NA                                  | <i>Ca_desi_denovo</i> | 2755267                 | T/C  | NA                 | NA                            | NA                 |
| <i>Desi_wild_2755285</i> | NA                                  | <i>Ca_desi_denovo</i> | 2755285                 | T/C  | NA                 | NA                            | NA                 |
| <i>Desi_wild_2755300</i> | NA                                  | <i>Ca_desi_denovo</i> | 2755300                 | C/T  | NA                 | NA                            | NA                 |
| <i>Desi_wild_2755327</i> | NA                                  | <i>Ca_desi_denovo</i> | 2755327                 | C/A  | NA                 | NA                            | NA                 |
| <i>Desi_wild_2756515</i> | NA                                  | <i>Ca_desi_denovo</i> | 2756515                 | A/C  | NA                 | NA                            | NA                 |
| <i>Desi_wild_2756820</i> | NA                                  | <i>Ca_desi_denovo</i> | 2756820                 | G/A  | NA                 | NA                            | NA                 |
| <i>Desi_wild_2756845</i> | NA                                  | <i>Ca_desi_denovo</i> | 2756845                 | G/C  | NA                 | NA                            | NA                 |
| <i>Desi_wild_2756879</i> | NA                                  | <i>Ca_desi_denovo</i> | 2756879                 | T/C  | NA                 | NA                            | NA                 |
| <i>Desi_wild_2757034</i> | NA                                  | <i>Ca_desi_denovo</i> | 2757034                 | C/G  | NA                 | NA                            | NA                 |
| <i>Desi_wild_2757422</i> | NA                                  | <i>Ca_desi_denovo</i> | 2757422                 | A/G  | NA                 | NA                            | NA                 |
| <i>Desi_wild_2757427</i> | NA                                  | <i>Ca_desi_denovo</i> | 2757427                 | G/A  | NA                 | NA                            | NA                 |
| <i>Desi_wild_2760165</i> | NA                                  | <i>Ca_desi_denovo</i> | 2760165                 | C/A  | NA                 | NA                            | NA                 |
| <i>Desi_wild_2760470</i> | NA                                  | <i>Ca_desi_denovo</i> | 2760470                 | G/A  | NA                 | NA                            | NA                 |
| <i>Desi_wild_2760515</i> | NA                                  | <i>Ca_desi_denovo</i> | 2760515                 | G/C  | NA                 | NA                            | NA                 |
| <i>Desi_wild_2760602</i> | NA                                  | <i>Ca_desi_denovo</i> | 2760602                 | A/T  | NA                 | NA                            | NA                 |
| <i>Desi_wild_2760638</i> | NA                                  | <i>Ca_desi_denovo</i> | 2760638                 | C/T  | NA                 | NA                            | NA                 |
| <i>Desi_wild_2761590</i> | NA                                  | <i>Ca_desi_denovo</i> | 2761590                 | C/T  | NA                 | NA                            | NA                 |
| <i>Desi_wild_2761670</i> | NA                                  | <i>Ca_desi_denovo</i> | 2761670                 | G/A  | NA                 | NA                            | NA                 |
| <i>Desi_wild_2761688</i> | NA                                  | <i>Ca_desi_denovo</i> | 2761688                 | G/A  | NA                 | NA                            | NA                 |
| <i>Desi_wild_2762196</i> | NA                                  | <i>Ca_desi_denovo</i> | 2762196                 | T/C  | NA                 | NA                            | NA                 |
| <i>Desi_wild_2762646</i> | NA                                  | <i>Ca_desi_denovo</i> | 2762646                 | A/C  | NA                 | NA                            | NA                 |
| <i>Desi_wild_2762655</i> | NA                                  | <i>Ca_desi_denovo</i> | 2762655                 | A/G  | NA                 | NA                            | NA                 |
| <i>Desi_wild_2762997</i> | NA                                  | <i>Ca_desi_denovo</i> | 2762997                 | C/T  | NA                 | NA                            | NA                 |
| <i>Desi_wild_2763101</i> | NA                                  | <i>Ca_desi_denovo</i> | 2763101                 | G/C  | NA                 | NA                            | NA                 |
| <i>Desi_wild_2764207</i> | NA                                  | <i>Ca_desi_denovo</i> | 2764207                 | G/A  | NA                 | NA                            | NA                 |
| <i>Desi_wild_2764415</i> | NA                                  | <i>Ca_desi_denovo</i> | 2764415                 | A/G  | NA                 | NA                            | NA                 |
| <i>Desi_wild_2764442</i> | NA                                  | <i>Ca_desi_denovo</i> | 2764442                 | C/T  | NA                 | NA                            | NA                 |
| <i>Desi_wild_2766048</i> | NA                                  | <i>Ca_desi_denovo</i> | 2766048                 | T/C  | NA                 | NA                            | NA                 |
| <i>Desi_wild_2766069</i> | NA                                  | <i>Ca_desi_denovo</i> | 2766069                 | G/T  | NA                 | NA                            | NA                 |
| <i>Desi_wild_2766385</i> | NA                                  | <i>Ca_desi_denovo</i> | 2766385                 | G/A  | NA                 | NA                            | NA                 |
| <i>Desi_wild_2766521</i> | NA                                  | <i>Ca_desi_denovo</i> | 2766521                 | A/C  | NA                 | NA                            | NA                 |
| <i>Desi_wild_2767043</i> | NA                                  | <i>Ca_desi_denovo</i> | 2767043                 | T/A  | NA                 | NA                            | NA                 |
| <i>Desi_wild_2767050</i> | NA                                  | <i>Ca_desi_denovo</i> | 2767050                 | A/G  | NA                 | NA                            | NA                 |
| <i>Desi_wild_2767875</i> | NA                                  | <i>Ca_desi_denovo</i> | 2767875                 | G/T  | NA                 | NA                            | NA                 |
| <i>Desi_wild_2768366</i> | NA                                  | <i>Ca_desi_denovo</i> | 2768366                 | A/G  | NA                 | NA                            | NA                 |
| <i>Desi_wild_2768456</i> | NA                                  | <i>Ca_desi_denovo</i> | 2768456                 | A/G  | NA                 | NA                            | NA                 |
| <i>Desi_wild_2768465</i> | NA                                  | <i>Ca_desi_denovo</i> | 2768465                 | G/A  | NA                 | NA                            | NA                 |



| SNP IDs                  | NCBI dbSNP accession IDs (NCBI_SS#) | Chromosomes           | Physical positions (bp) | SNPs | Gene accession IDs | Sequence components of genome | Putative functions |
|--------------------------|-------------------------------------|-----------------------|-------------------------|------|--------------------|-------------------------------|--------------------|
| <i>Desi_wild_2769306</i> | NA                                  | <i>Ca_desi_denovo</i> | 2769306                 | C/G  | NA                 | NA                            | NA                 |
| <i>Desi_wild_2769307</i> | NA                                  | <i>Ca_desi_denovo</i> | 2769307                 | G/A  | NA                 | NA                            | NA                 |
| <i>Desi_wild_2769503</i> | NA                                  | <i>Ca_desi_denovo</i> | 2769503                 | T/C  | NA                 | NA                            | NA                 |
| <i>Desi_wild_2769860</i> | NA                                  | <i>Ca_desi_denovo</i> | 2769860                 | T/G  | NA                 | NA                            | NA                 |
| <i>Desi_wild_2770189</i> | NA                                  | <i>Ca_desi_denovo</i> | 2770189                 | T/G  | NA                 | NA                            | NA                 |
| <i>Desi_wild_2770563</i> | NA                                  | <i>Ca_desi_denovo</i> | 2770563                 | A/G  | NA                 | NA                            | NA                 |
| <i>Desi_wild_2770701</i> | NA                                  | <i>Ca_desi_denovo</i> | 2770701                 | G/C  | NA                 | NA                            | NA                 |
| <i>Desi_wild_2770714</i> | NA                                  | <i>Ca_desi_denovo</i> | 2770714                 | G/T  | NA                 | NA                            | NA                 |
| <i>Desi_wild_2772833</i> | NA                                  | <i>Ca_desi_denovo</i> | 2772833                 | T/C  | NA                 | NA                            | NA                 |
| <i>Desi_wild_2772944</i> | NA                                  | <i>Ca_desi_denovo</i> | 2772944                 | A/C  | NA                 | NA                            | NA                 |
| <i>Desi_wild_2773046</i> | NA                                  | <i>Ca_desi_denovo</i> | 2773046                 | A/C  | NA                 | NA                            | NA                 |
| <i>Desi_wild_2773509</i> | NA                                  | <i>Ca_desi_denovo</i> | 2773509                 | G/A  | NA                 | NA                            | NA                 |
| <i>Desi_wild_2774082</i> | NA                                  | <i>Ca_desi_denovo</i> | 2774082                 | A/G  | NA                 | NA                            | NA                 |
| <i>Desi_wild_2774122</i> | NA                                  | <i>Ca_desi_denovo</i> | 2774122                 | T/C  | NA                 | NA                            | NA                 |
| <i>Desi_wild_2774296</i> | NA                                  | <i>Ca_desi_denovo</i> | 2774296                 | C/T  | NA                 | NA                            | NA                 |
| <i>Desi_wild_2774333</i> | NA                                  | <i>Ca_desi_denovo</i> | 2774333                 | T/A  | NA                 | NA                            | NA                 |
| <i>Desi_wild_2775647</i> | NA                                  | <i>Ca_desi_denovo</i> | 2775647                 | C/T  | NA                 | NA                            | NA                 |
| <i>Desi_wild_2775656</i> | NA                                  | <i>Ca_desi_denovo</i> | 2775656                 | C/G  | NA                 | NA                            | NA                 |
| <i>Desi_wild_2777399</i> | NA                                  | <i>Ca_desi_denovo</i> | 2777399                 | C/T  | NA                 | NA                            | NA                 |
| <i>Desi_wild_2777456</i> | NA                                  | <i>Ca_desi_denovo</i> | 2777456                 | T/G  | NA                 | NA                            | NA                 |
| <i>Desi_wild_2777470</i> | NA                                  | <i>Ca_desi_denovo</i> | 2777470                 | G/T  | NA                 | NA                            | NA                 |
| <i>Desi_wild_2778378</i> | NA                                  | <i>Ca_desi_denovo</i> | 2778378                 | G/C  | NA                 | NA                            | NA                 |
| <i>Desi_wild_2779901</i> | NA                                  | <i>Ca_desi_denovo</i> | 2779901                 | A/G  | NA                 | NA                            | NA                 |
| <i>Desi_wild_2779938</i> | NA                                  | <i>Ca_desi_denovo</i> | 2779938                 | T/A  | NA                 | NA                            | NA                 |
| <i>Desi_wild_2780591</i> | NA                                  | <i>Ca_desi_denovo</i> | 2780591                 | G/T  | NA                 | NA                            | NA                 |
| <i>Desi_wild_2780596</i> | NA                                  | <i>Ca_desi_denovo</i> | 2780596                 | G/C  | NA                 | NA                            | NA                 |
| <i>Desi_wild_2780781</i> | NA                                  | <i>Ca_desi_denovo</i> | 2780781                 | C/G  | NA                 | NA                            | NA                 |
| <i>Desi_wild_2781349</i> | NA                                  | <i>Ca_desi_denovo</i> | 2781349                 | A/C  | NA                 | NA                            | NA                 |
| <i>Desi_wild_2781647</i> | NA                                  | <i>Ca_desi_denovo</i> | 2781647                 | C/G  | NA                 | NA                            | NA                 |
| <i>Desi_wild_2781674</i> | NA                                  | <i>Ca_desi_denovo</i> | 2781674                 | C/T  | NA                 | NA                            | NA                 |
| <i>Desi_wild_2781877</i> | NA                                  | <i>Ca_desi_denovo</i> | 2781877                 | G/A  | NA                 | NA                            | NA                 |
| <i>Desi_wild_2781882</i> | NA                                  | <i>Ca_desi_denovo</i> | 2781882                 | C/T  | NA                 | NA                            | NA                 |
| <i>Desi_wild_2782915</i> | NA                                  | <i>Ca_desi_denovo</i> | 2782915                 | G/C  | NA                 | NA                            | NA                 |
| <i>Desi_wild_2782926</i> | NA                                  | <i>Ca_desi_denovo</i> | 2782926                 | C/A  | NA                 | NA                            | NA                 |
| <i>Desi_wild_2782933</i> | NA                                  | <i>Ca_desi_denovo</i> | 2782933                 | T/C  | NA                 | NA                            | NA                 |
| <i>Desi_wild_2782954</i> | NA                                  | <i>Ca_desi_denovo</i> | 2782954                 | A/G  | NA                 | NA                            | NA                 |
| <i>Desi_wild_2783839</i> | NA                                  | <i>Ca_desi_denovo</i> | 2783839                 | C/T  | NA                 | NA                            | NA                 |
| <i>Desi_wild_2783866</i> | NA                                  | <i>Ca_desi_denovo</i> | 2783866                 | G/C  | NA                 | NA                            | NA                 |
| <i>Desi_wild_2784179</i> | NA                                  | <i>Ca_desi_denovo</i> | 2784179                 | G/C  | NA                 | NA                            | NA                 |
| <i>Desi_wild_2784194</i> | NA                                  | <i>Ca_desi_denovo</i> | 2784194                 | C/T  | NA                 | NA                            | NA                 |
| <i>Desi_wild_2784648</i> | NA                                  | <i>Ca_desi_denovo</i> | 2784648                 | A/C  | NA                 | NA                            | NA                 |
| <i>Desi_wild_2784649</i> | NA                                  | <i>Ca_desi_denovo</i> | 2784649                 | A/G  | NA                 | NA                            | NA                 |
| <i>Desi_wild_2784863</i> | NA                                  | <i>Ca_desi_denovo</i> | 2784863                 | A/G  | NA                 | NA                            | NA                 |
| <i>Desi_wild_2784864</i> | NA                                  | <i>Ca_desi_denovo</i> | 2784864                 | T/C  | NA                 | NA                            | NA                 |

| SNP IDs                  | NCBI dbSNP accession IDs (NCBI_SS#) | Chromosomes           | Physical positions (bp) | SNPs | Gene accession IDs | Sequence components of genome | Putative functions |
|--------------------------|-------------------------------------|-----------------------|-------------------------|------|--------------------|-------------------------------|--------------------|
| <i>Desi_wild_2784961</i> | NA                                  | <i>Ca_desi_denovo</i> | 2784961                 | T/C  | NA                 | NA                            | NA                 |
| <i>Desi_wild_2784968</i> | NA                                  | <i>Ca_desi_denovo</i> | 2784968                 | A/T  | NA                 | NA                            | NA                 |
| <i>Desi_wild_2785878</i> | NA                                  | <i>Ca_desi_denovo</i> | 2785878                 | T/G  | NA                 | NA                            | NA                 |
| <i>Desi_wild_2785897</i> | NA                                  | <i>Ca_desi_denovo</i> | 2785897                 | T/C  | NA                 | NA                            | NA                 |
| <i>Desi_wild_2787592</i> | NA                                  | <i>Ca_desi_denovo</i> | 2787592                 | G/A  | NA                 | NA                            | NA                 |
| <i>Desi_wild_2788072</i> | NA                                  | <i>Ca_desi_denovo</i> | 2788072                 | A/G  | NA                 | NA                            | NA                 |
| <i>Desi_wild_2789046</i> | NA                                  | <i>Ca_desi_denovo</i> | 2789046                 | C/G  | NA                 | NA                            | NA                 |
| <i>Desi_wild_2789844</i> | NA                                  | <i>Ca_desi_denovo</i> | 2789844                 | C/G  | NA                 | NA                            | NA                 |
| <i>Desi_wild_2791614</i> | NA                                  | <i>Ca_desi_denovo</i> | 2791614                 | G/T  | NA                 | NA                            | NA                 |
| <i>Desi_wild_2792020</i> | NA                                  | <i>Ca_desi_denovo</i> | 2792020                 | A/C  | NA                 | NA                            | NA                 |
| <i>Desi_wild_2793760</i> | NA                                  | <i>Ca_desi_denovo</i> | 2793760                 | A/G  | NA                 | NA                            | NA                 |
| <i>Desi_wild_2794108</i> | NA                                  | <i>Ca_desi_denovo</i> | 2794108                 | G/C  | NA                 | NA                            | NA                 |
| <i>Desi_wild_2794774</i> | NA                                  | <i>Ca_desi_denovo</i> | 2794774                 | A/T  | NA                 | NA                            | NA                 |
| <i>Desi_wild_2794789</i> | NA                                  | <i>Ca_desi_denovo</i> | 2794789                 | G/A  | NA                 | NA                            | NA                 |
| <i>Desi_wild_2795317</i> | NA                                  | <i>Ca_desi_denovo</i> | 2795317                 | A/G  | NA                 | NA                            | NA                 |
| <i>Desi_wild_2795646</i> | NA                                  | <i>Ca_desi_denovo</i> | 2795646                 | G/C  | NA                 | NA                            | NA                 |
| <i>Desi_wild_2795659</i> | NA                                  | <i>Ca_desi_denovo</i> | 2795659                 | G/C  | NA                 | NA                            | NA                 |
| <i>Desi_wild_2795712</i> | NA                                  | <i>Ca_desi_denovo</i> | 2795712                 | A/C  | NA                 | NA                            | NA                 |
| <i>Desi_wild_2795713</i> | NA                                  | <i>Ca_desi_denovo</i> | 2795713                 | A/C  | NA                 | NA                            | NA                 |
| <i>Desi_wild_2795780</i> | NA                                  | <i>Ca_desi_denovo</i> | 2795780                 | T/G  | NA                 | NA                            | NA                 |
| <i>Desi_wild_2797497</i> | NA                                  | <i>Ca_desi_denovo</i> | 2797497                 | C/G  | NA                 | NA                            | NA                 |
| <i>Desi_wild_2797813</i> | NA                                  | <i>Ca_desi_denovo</i> | 2797813                 | A/C  | NA                 | NA                            | NA                 |
| <i>Desi_wild_2798918</i> | NA                                  | <i>Ca_desi_denovo</i> | 2798918                 | G/A  | NA                 | NA                            | NA                 |
| <i>Desi_wild_2799433</i> | NA                                  | <i>Ca_desi_denovo</i> | 2799433                 | A/G  | NA                 | NA                            | NA                 |
| <i>Desi_wild_2799485</i> | NA                                  | <i>Ca_desi_denovo</i> | 2799485                 | C/T  | NA                 | NA                            | NA                 |
| <i>Desi_wild_2799501</i> | NA                                  | <i>Ca_desi_denovo</i> | 2799501                 | C/T  | NA                 | NA                            | NA                 |
| <i>Desi_wild_2800205</i> | NA                                  | <i>Ca_desi_denovo</i> | 2800205                 | C/G  | NA                 | NA                            | NA                 |
| <i>Desi_wild_2800934</i> | NA                                  | <i>Ca_desi_denovo</i> | 2800934                 | C/A  | NA                 | NA                            | NA                 |
| <i>Desi_wild_2802118</i> | NA                                  | <i>Ca_desi_denovo</i> | 2802118                 | G/C  | NA                 | NA                            | NA                 |
| <i>Desi_wild_2803570</i> | NA                                  | <i>Ca_desi_denovo</i> | 2803570                 | T/G  | NA                 | NA                            | NA                 |
| <i>Desi_wild_2804299</i> | NA                                  | <i>Ca_desi_denovo</i> | 2804299                 | C/T  | NA                 | NA                            | NA                 |
| <i>Desi_wild_2808071</i> | NA                                  | <i>Ca_desi_denovo</i> | 2808071                 | C/T  | NA                 | NA                            | NA                 |
| <i>Desi_wild_2808103</i> | NA                                  | <i>Ca_desi_denovo</i> | 2808103                 | A/T  | NA                 | NA                            | NA                 |
| <i>Desi_wild_2808757</i> | NA                                  | <i>Ca_desi_denovo</i> | 2808757                 | G/C  | NA                 | NA                            | NA                 |
| <i>Desi_wild_2809024</i> | NA                                  | <i>Ca_desi_denovo</i> | 2809024                 | G/C  | NA                 | NA                            | NA                 |
| <i>Desi_wild_2809041</i> | NA                                  | <i>Ca_desi_denovo</i> | 2809041                 | T/A  | NA                 | NA                            | NA                 |
| <i>Desi_wild_2809521</i> | NA                                  | <i>Ca_desi_denovo</i> | 2809521                 | T/C  | NA                 | NA                            | NA                 |
| <i>Desi_wild_2809535</i> | NA                                  | <i>Ca_desi_denovo</i> | 2809535                 | C/G  | NA                 | NA                            | NA                 |
| <i>Desi_wild_2809798</i> | NA                                  | <i>Ca_desi_denovo</i> | 2809798                 | A/G  | NA                 | NA                            | NA                 |
| <i>Desi_wild_2810130</i> | NA                                  | <i>Ca_desi_denovo</i> | 2810130                 | C/T  | NA                 | NA                            | NA                 |
| <i>Desi_wild_2810142</i> | NA                                  | <i>Ca_desi_denovo</i> | 2810142                 | A/T  | NA                 | NA                            | NA                 |
| <i>Desi_wild_2810753</i> | NA                                  | <i>Ca_desi_denovo</i> | 2810753                 | C/G  | NA                 | NA                            | NA                 |
| <i>Desi_wild_2810783</i> | NA                                  | <i>Ca_desi_denovo</i> | 2810783                 | T/C  | NA                 | NA                            | NA                 |
| <i>Desi_wild_2811119</i> | NA                                  | <i>Ca_desi_denovo</i> | 2811119                 | C/A  | NA                 | NA                            | NA                 |

| SNP IDs                  | NCBI dbSNP accession IDs (NCBI_SS#) | Chromosomes           | Physical positions (bp) | SNPs | Gene accession IDs | Sequence components of genome | Putative functions |
|--------------------------|-------------------------------------|-----------------------|-------------------------|------|--------------------|-------------------------------|--------------------|
| <i>Desi_wild_2811155</i> | NA                                  | <i>Ca_desi_denovo</i> | 2811155                 | A/G  | NA                 | NA                            | NA                 |
| <i>Desi_wild_2811625</i> | NA                                  | <i>Ca_desi_denovo</i> | 2811625                 | C/T  | NA                 | NA                            | NA                 |
| <i>Desi_wild_2811645</i> | NA                                  | <i>Ca_desi_denovo</i> | 2811645                 | T/G  | NA                 | NA                            | NA                 |
| <i>Desi_wild_2812174</i> | NA                                  | <i>Ca_desi_denovo</i> | 2812174                 | C/T  | NA                 | NA                            | NA                 |
| <i>Desi_wild_2812332</i> | NA                                  | <i>Ca_desi_denovo</i> | 2812332                 | G/C  | NA                 | NA                            | NA                 |
| <i>Desi_wild_2812344</i> | NA                                  | <i>Ca_desi_denovo</i> | 2812344                 | A/G  | NA                 | NA                            | NA                 |
| <i>Desi_wild_2813384</i> | NA                                  | <i>Ca_desi_denovo</i> | 2813384                 | G/C  | NA                 | NA                            | NA                 |
| <i>Desi_wild_2814254</i> | NA                                  | <i>Ca_desi_denovo</i> | 2814254                 | T/C  | NA                 | NA                            | NA                 |
| <i>Desi_wild_2814257</i> | NA                                  | <i>Ca_desi_denovo</i> | 2814257                 | G/A  | NA                 | NA                            | NA                 |
| <i>Desi_wild_2814746</i> | NA                                  | <i>Ca_desi_denovo</i> | 2814746                 | C/T  | NA                 | NA                            | NA                 |
| <i>Desi_wild_2814765</i> | NA                                  | <i>Ca_desi_denovo</i> | 2814765                 | C/G  | NA                 | NA                            | NA                 |
| <i>Desi_wild_2815131</i> | NA                                  | <i>Ca_desi_denovo</i> | 2815131                 | G/A  | NA                 | NA                            | NA                 |
| <i>Desi_wild_2815167</i> | NA                                  | <i>Ca_desi_denovo</i> | 2815167                 | T/C  | NA                 | NA                            | NA                 |
| <i>Desi_wild_2815541</i> | NA                                  | <i>Ca_desi_denovo</i> | 2815541                 | G/T  | NA                 | NA                            | NA                 |
| <i>Desi_wild_2815550</i> | NA                                  | <i>Ca_desi_denovo</i> | 2815550                 | C/T  | NA                 | NA                            | NA                 |
| <i>Desi_wild_2815716</i> | NA                                  | <i>Ca_desi_denovo</i> | 2815716                 | G/A  | NA                 | NA                            | NA                 |
| <i>Desi_wild_2815728</i> | NA                                  | <i>Ca_desi_denovo</i> | 2815728                 | A/G  | NA                 | NA                            | NA                 |
| <i>Desi_wild_2816151</i> | NA                                  | <i>Ca_desi_denovo</i> | 2816151                 | A/T  | NA                 | NA                            | NA                 |
| <i>Desi_wild_2816655</i> | NA                                  | <i>Ca_desi_denovo</i> | 2816655                 | A/G  | NA                 | NA                            | NA                 |
| <i>Desi_wild_2816681</i> | NA                                  | <i>Ca_desi_denovo</i> | 2816681                 | A/C  | NA                 | NA                            | NA                 |
| <i>Desi_wild_2816771</i> | NA                                  | <i>Ca_desi_denovo</i> | 2816771                 | T/C  | NA                 | NA                            | NA                 |
| <i>Desi_wild_2816775</i> | NA                                  | <i>Ca_desi_denovo</i> | 2816775                 | T/C  | NA                 | NA                            | NA                 |
| <i>Desi_wild_2816777</i> | NA                                  | <i>Ca_desi_denovo</i> | 2816777                 | T/C  | NA                 | NA                            | NA                 |
| <i>Desi_wild_2817247</i> | NA                                  | <i>Ca_desi_denovo</i> | 2817247                 | T/C  | NA                 | NA                            | NA                 |
| <i>Desi_wild_2817360</i> | NA                                  | <i>Ca_desi_denovo</i> | 2817360                 | T/G  | NA                 | NA                            | NA                 |
| <i>Desi_wild_2817378</i> | NA                                  | <i>Ca_desi_denovo</i> | 2817378                 | A/G  | NA                 | NA                            | NA                 |
| <i>Desi_wild_2817678</i> | NA                                  | <i>Ca_desi_denovo</i> | 2817678                 | C/T  | NA                 | NA                            | NA                 |
| <i>Desi_wild_2817756</i> | NA                                  | <i>Ca_desi_denovo</i> | 2817756                 | T/A  | NA                 | NA                            | NA                 |
| <i>Desi_wild_2819479</i> | NA                                  | <i>Ca_desi_denovo</i> | 2819479                 | C/T  | NA                 | NA                            | NA                 |
| <i>Desi_wild_2819480</i> | NA                                  | <i>Ca_desi_denovo</i> | 2819480                 | T/C  | NA                 | NA                            | NA                 |
| <i>Desi_wild_2820548</i> | NA                                  | <i>Ca_desi_denovo</i> | 2820548                 | C/T  | NA                 | NA                            | NA                 |
| <i>Desi_wild_2820551</i> | NA                                  | <i>Ca_desi_denovo</i> | 2820551                 | G/T  | NA                 | NA                            | NA                 |
| <i>Desi_wild_2820566</i> | NA                                  | <i>Ca_desi_denovo</i> | 2820566                 | G/T  | NA                 | NA                            | NA                 |
| <i>Desi_wild_2820570</i> | NA                                  | <i>Ca_desi_denovo</i> | 2820570                 | T/A  | NA                 | NA                            | NA                 |
| <i>Desi_wild_2821066</i> | NA                                  | <i>Ca_desi_denovo</i> | 2821066                 | G/A  | NA                 | NA                            | NA                 |
| <i>Desi_wild_2821498</i> | NA                                  | <i>Ca_desi_denovo</i> | 2821498                 | G/C  | NA                 | NA                            | NA                 |
| <i>Desi_wild_2822589</i> | NA                                  | <i>Ca_desi_denovo</i> | 2822589                 | G/A  | NA                 | NA                            | NA                 |
| <i>Desi_wild_2822649</i> | NA                                  | <i>Ca_desi_denovo</i> | 2822649                 | T/C  | NA                 | NA                            | NA                 |
| <i>Desi_wild_2822841</i> | NA                                  | <i>Ca_desi_denovo</i> | 2822841                 | A/C  | NA                 | NA                            | NA                 |
| <i>Desi_wild_2823015</i> | NA                                  | <i>Ca_desi_denovo</i> | 2823015                 | A/G  | NA                 | NA                            | NA                 |
| <i>Desi_wild_2823023</i> | NA                                  | <i>Ca_desi_denovo</i> | 2823023                 | T/C  | NA                 | NA                            | NA                 |
| <i>Desi_wild_2824444</i> | NA                                  | <i>Ca_desi_denovo</i> | 2824444                 | G/A  | NA                 | NA                            | NA                 |
| <i>Desi_wild_2824710</i> | NA                                  | <i>Ca_desi_denovo</i> | 2824710                 | A/C  | NA                 | NA                            | NA                 |
| <i>Desi_wild_2824738</i> | NA                                  | <i>Ca_desi_denovo</i> | 2824738                 | A/G  | NA                 | NA                            | NA                 |

| SNP IDs                  | NCBI dbSNP accession IDs (NCBI_SS#) | Chromosomes           | Physical positions (bp) | SNPs | Gene accession IDs | Sequence components of genome | Putative functions |
|--------------------------|-------------------------------------|-----------------------|-------------------------|------|--------------------|-------------------------------|--------------------|
| <i>Desi_wild_2825498</i> | NA                                  | <i>Ca_desi_denovo</i> | 2825498                 | C/G  | NA                 | NA                            | NA                 |
| <i>Desi_wild_2825500</i> | NA                                  | <i>Ca_desi_denovo</i> | 2825500                 | A/G  | NA                 | NA                            | NA                 |
| <i>Desi_wild_2826986</i> | NA                                  | <i>Ca_desi_denovo</i> | 2826986                 | G/A  | NA                 | NA                            | NA                 |
| <i>Desi_wild_2830305</i> | NA                                  | <i>Ca_desi_denovo</i> | 2830305                 | A/T  | NA                 | NA                            | NA                 |
| <i>Desi_wild_2830618</i> | NA                                  | <i>Ca_desi_denovo</i> | 2830618                 | A/G  | NA                 | NA                            | NA                 |
| <i>Desi_wild_2831716</i> | NA                                  | <i>Ca_desi_denovo</i> | 2831716                 | A/G  | NA                 | NA                            | NA                 |
| <i>Desi_wild_2831719</i> | NA                                  | <i>Ca_desi_denovo</i> | 2831719                 | T/G  | NA                 | NA                            | NA                 |
| <i>Desi_wild_2834344</i> | NA                                  | <i>Ca_desi_denovo</i> | 2834344                 | C/T  | NA                 | NA                            | NA                 |
| <i>Desi_wild_2834404</i> | NA                                  | <i>Ca_desi_denovo</i> | 2834404                 | C/T  | NA                 | NA                            | NA                 |
| <i>Desi_wild_2834759</i> | NA                                  | <i>Ca_desi_denovo</i> | 2834759                 | C/T  | NA                 | NA                            | NA                 |
| <i>Desi_wild_2834768</i> | NA                                  | <i>Ca_desi_denovo</i> | 2834768                 | G/C  | NA                 | NA                            | NA                 |
| <i>Desi_wild_2835773</i> | NA                                  | <i>Ca_desi_denovo</i> | 2835773                 | C/T  | NA                 | NA                            | NA                 |
| <i>Desi_wild_2836337</i> | NA                                  | <i>Ca_desi_denovo</i> | 2836337                 | A/G  | NA                 | NA                            | NA                 |
| <i>Desi_wild_2836769</i> | NA                                  | <i>Ca_desi_denovo</i> | 2836769                 | T/G  | NA                 | NA                            | NA                 |
| <i>Desi_wild_2836806</i> | NA                                  | <i>Ca_desi_denovo</i> | 2836806                 | G/C  | NA                 | NA                            | NA                 |
| <i>Desi_wild_2837044</i> | NA                                  | <i>Ca_desi_denovo</i> | 2837044                 | C/T  | NA                 | NA                            | NA                 |
| <i>Desi_wild_2838369</i> | NA                                  | <i>Ca_desi_denovo</i> | 2838369                 | T/G  | NA                 | NA                            | NA                 |
| <i>Desi_wild_2839818</i> | NA                                  | <i>Ca_desi_denovo</i> | 2839818                 | G/C  | NA                 | NA                            | NA                 |
| <i>Desi_wild_2839829</i> | NA                                  | <i>Ca_desi_denovo</i> | 2839829                 | C/T  | NA                 | NA                            | NA                 |
| <i>Desi_wild_2839982</i> | NA                                  | <i>Ca_desi_denovo</i> | 2839982                 | A/G  | NA                 | NA                            | NA                 |
| <i>Desi_wild_2840083</i> | NA                                  | <i>Ca_desi_denovo</i> | 2840083                 | G/A  | NA                 | NA                            | NA                 |
| <i>Desi_wild_2840158</i> | NA                                  | <i>Ca_desi_denovo</i> | 2840158                 | G/T  | NA                 | NA                            | NA                 |
| <i>Desi_wild_2840939</i> | NA                                  | <i>Ca_desi_denovo</i> | 2840939                 | C/T  | NA                 | NA                            | NA                 |
| <i>Desi_wild_2840958</i> | NA                                  | <i>Ca_desi_denovo</i> | 2840958                 | C/G  | NA                 | NA                            | NA                 |
| <i>Desi_wild_2841994</i> | NA                                  | <i>Ca_desi_denovo</i> | 2841994                 | G/T  | NA                 | NA                            | NA                 |
| <i>Desi_wild_2842048</i> | NA                                  | <i>Ca_desi_denovo</i> | 2842048                 | G/C  | NA                 | NA                            | NA                 |
| <i>Desi_wild_2842594</i> | NA                                  | <i>Ca_desi_denovo</i> | 2842594                 | T/G  | NA                 | NA                            | NA                 |
| <i>Desi_wild_2842792</i> | NA                                  | <i>Ca_desi_denovo</i> | 2842792                 | C/G  | NA                 | NA                            | NA                 |
| <i>Desi_wild_2842833</i> | NA                                  | <i>Ca_desi_denovo</i> | 2842833                 | T/C  | NA                 | NA                            | NA                 |
| <i>Desi_wild_2843280</i> | NA                                  | <i>Ca_desi_denovo</i> | 2843280                 | G/A  | NA                 | NA                            | NA                 |
| <i>Desi_wild_2843445</i> | NA                                  | <i>Ca_desi_denovo</i> | 2843445                 | C/T  | NA                 | NA                            | NA                 |
| <i>Desi_wild_2843451</i> | NA                                  | <i>Ca_desi_denovo</i> | 2843451                 | G/C  | NA                 | NA                            | NA                 |
| <i>Desi_wild_2844783</i> | NA                                  | <i>Ca_desi_denovo</i> | 2844783                 | G/A  | NA                 | NA                            | NA                 |
| <i>Desi_wild_2845767</i> | NA                                  | <i>Ca_desi_denovo</i> | 2845767                 | G/A  | NA                 | NA                            | NA                 |
| <i>Desi_wild_2846657</i> | NA                                  | <i>Ca_desi_denovo</i> | 2846657                 | C/G  | NA                 | NA                            | NA                 |
| <i>Desi_wild_2846950</i> | NA                                  | <i>Ca_desi_denovo</i> | 2846950                 | A/G  | NA                 | NA                            | NA                 |
| <i>Desi_wild_2847622</i> | NA                                  | <i>Ca_desi_denovo</i> | 2847622                 | A/G  | NA                 | NA                            | NA                 |
| <i>Desi_wild_2848583</i> | NA                                  | <i>Ca_desi_denovo</i> | 2848583                 | A/C  | NA                 | NA                            | NA                 |
| <i>Desi_wild_2848610</i> | NA                                  | <i>Ca_desi_denovo</i> | 2848610                 | T/C  | NA                 | NA                            | NA                 |
| <i>Desi_wild_2848983</i> | NA                                  | <i>Ca_desi_denovo</i> | 2848983                 | G/A  | NA                 | NA                            | NA                 |
| <i>Desi_wild_2848997</i> | NA                                  | <i>Ca_desi_denovo</i> | 2848997                 | C/G  | NA                 | NA                            | NA                 |
| <i>Desi_wild_2849152</i> | NA                                  | <i>Ca_desi_denovo</i> | 2849152                 | A/C  | NA                 | NA                            | NA                 |
| <i>Desi_wild_2849853</i> | NA                                  | <i>Ca_desi_denovo</i> | 2849853                 | G/A  | NA                 | NA                            | NA                 |
| <i>Desi_wild_2850143</i> | NA                                  | <i>Ca_desi_denovo</i> | 2850143                 | G/A  | NA                 | NA                            | NA                 |

| SNP IDs                  | NCBI dbSNP accession IDs (NCBI_SS#) | Chromosomes           | Physical positions (bp) | SNPs | Gene accession IDs | Sequence components of genome | Putative functions |
|--------------------------|-------------------------------------|-----------------------|-------------------------|------|--------------------|-------------------------------|--------------------|
| <i>Desi_wild_2850208</i> | NA                                  | <i>Ca_desi_denovo</i> | 2850208                 | C/G  | NA                 | NA                            | NA                 |
| <i>Desi_wild_2851743</i> | NA                                  | <i>Ca_desi_denovo</i> | 2851743                 | A/G  | NA                 | NA                            | NA                 |
| <i>Desi_wild_2853406</i> | NA                                  | <i>Ca_desi_denovo</i> | 2853406                 | T/C  | NA                 | NA                            | NA                 |
| <i>Desi_wild_2853944</i> | NA                                  | <i>Ca_desi_denovo</i> | 2853944                 | G/A  | NA                 | NA                            | NA                 |
| <i>Desi_wild_2853950</i> | NA                                  | <i>Ca_desi_denovo</i> | 2853950                 | C/G  | NA                 | NA                            | NA                 |
| <i>Desi_wild_2854676</i> | NA                                  | <i>Ca_desi_denovo</i> | 2854676                 | C/T  | NA                 | NA                            | NA                 |
| <i>Desi_wild_2855022</i> | NA                                  | <i>Ca_desi_denovo</i> | 2855022                 | C/G  | NA                 | NA                            | NA                 |
| <i>Desi_wild_2855383</i> | NA                                  | <i>Ca_desi_denovo</i> | 2855383                 | A/G  | NA                 | NA                            | NA                 |
| <i>Desi_wild_2855519</i> | NA                                  | <i>Ca_desi_denovo</i> | 2855519                 | G/C  | NA                 | NA                            | NA                 |
| <i>Desi_wild_2856653</i> | NA                                  | <i>Ca_desi_denovo</i> | 2856653                 | T/G  | NA                 | NA                            | NA                 |
| <i>Desi_wild_2856677</i> | NA                                  | <i>Ca_desi_denovo</i> | 2856677                 | G/C  | NA                 | NA                            | NA                 |
| <i>Desi_wild_2856919</i> | NA                                  | <i>Ca_desi_denovo</i> | 2856919                 | G/C  | NA                 | NA                            | NA                 |
| <i>Desi_wild_2856930</i> | NA                                  | <i>Ca_desi_denovo</i> | 2856930                 | A/G  | NA                 | NA                            | NA                 |
| <i>Desi_wild_2857083</i> | NA                                  | <i>Ca_desi_denovo</i> | 2857083                 | G/A  | NA                 | NA                            | NA                 |
| <i>Desi_wild_2857256</i> | NA                                  | <i>Ca_desi_denovo</i> | 2857256                 | A/G  | NA                 | NA                            | NA                 |
| <i>Desi_wild_2857287</i> | NA                                  | <i>Ca_desi_denovo</i> | 2857287                 | A/G  | NA                 | NA                            | NA                 |
| <i>Desi_wild_2857527</i> | NA                                  | <i>Ca_desi_denovo</i> | 2857527                 | G/A  | NA                 | NA                            | NA                 |
| <i>Desi_wild_2857533</i> | NA                                  | <i>Ca_desi_denovo</i> | 2857533                 | C/T  | NA                 | NA                            | NA                 |
| <i>Desi_wild_2858605</i> | NA                                  | <i>Ca_desi_denovo</i> | 2858605                 | G/T  | NA                 | NA                            | NA                 |
| <i>Desi_wild_2859775</i> | NA                                  | <i>Ca_desi_denovo</i> | 2859775                 | G/C  | NA                 | NA                            | NA                 |
| <i>Desi_wild_2860362</i> | NA                                  | <i>Ca_desi_denovo</i> | 2860362                 | C/G  | NA                 | NA                            | NA                 |
| <i>Desi_wild_2860365</i> | NA                                  | <i>Ca_desi_denovo</i> | 2860365                 | T/C  | NA                 | NA                            | NA                 |
| <i>Desi_wild_2861461</i> | NA                                  | <i>Ca_desi_denovo</i> | 2861461                 | C/G  | NA                 | NA                            | NA                 |
| <i>Desi_wild_2861464</i> | NA                                  | <i>Ca_desi_denovo</i> | 2861464                 | T/C  | NA                 | NA                            | NA                 |
| <i>Desi_wild_2862237</i> | NA                                  | <i>Ca_desi_denovo</i> | 2862237                 | T/G  | NA                 | NA                            | NA                 |
| <i>Desi_wild_2863851</i> | NA                                  | <i>Ca_desi_denovo</i> | 2863851                 | G/A  | NA                 | NA                            | NA                 |
| <i>Desi_wild_2863880</i> | NA                                  | <i>Ca_desi_denovo</i> | 2863880                 | C/T  | NA                 | NA                            | NA                 |
| <i>Desi_wild_2864035</i> | NA                                  | <i>Ca_desi_denovo</i> | 2864035                 | T/C  | NA                 | NA                            | NA                 |
| <i>Desi_wild_2864042</i> | NA                                  | <i>Ca_desi_denovo</i> | 2864042                 | G/A  | NA                 | NA                            | NA                 |
| <i>Desi_wild_2864279</i> | NA                                  | <i>Ca_desi_denovo</i> | 2864279                 | T/G  | NA                 | NA                            | NA                 |
| <i>Desi_wild_2865307</i> | NA                                  | <i>Ca_desi_denovo</i> | 2865307                 | A/G  | NA                 | NA                            | NA                 |
| <i>Desi_wild_2865325</i> | NA                                  | <i>Ca_desi_denovo</i> | 2865325                 | A/G  | NA                 | NA                            | NA                 |
| <i>Desi_wild_2865349</i> | NA                                  | <i>Ca_desi_denovo</i> | 2865349                 | T/C  | NA                 | NA                            | NA                 |
| <i>Desi_wild_2865651</i> | NA                                  | <i>Ca_desi_denovo</i> | 2865651                 | A/C  | NA                 | NA                            | NA                 |
| <i>Desi_wild_2865719</i> | NA                                  | <i>Ca_desi_denovo</i> | 2865719                 | A/T  | NA                 | NA                            | NA                 |
| <i>Desi_wild_2865954</i> | NA                                  | <i>Ca_desi_denovo</i> | 2865954                 | G/A  | NA                 | NA                            | NA                 |
| <i>Desi_wild_2865990</i> | NA                                  | <i>Ca_desi_denovo</i> | 2865990                 | G/C  | NA                 | NA                            | NA                 |
| <i>Desi_wild_2866160</i> | NA                                  | <i>Ca_desi_denovo</i> | 2866160                 | A/G  | NA                 | NA                            | NA                 |
| <i>Desi_wild_2866161</i> | NA                                  | <i>Ca_desi_denovo</i> | 2866161                 | A/G  | NA                 | NA                            | NA                 |
| <i>Desi_wild_2868390</i> | NA                                  | <i>Ca_desi_denovo</i> | 2868390                 | G/A  | NA                 | NA                            | NA                 |
| <i>Desi_wild_2868408</i> | NA                                  | <i>Ca_desi_denovo</i> | 2868408                 | A/G  | NA                 | NA                            | NA                 |
| <i>Desi_wild_2869726</i> | NA                                  | <i>Ca_desi_denovo</i> | 2869726                 | A/G  | NA                 | NA                            | NA                 |
| <i>Desi_wild_2870280</i> | NA                                  | <i>Ca_desi_denovo</i> | 2870280                 | C/T  | NA                 | NA                            | NA                 |
| <i>Desi_wild_2870827</i> | NA                                  | <i>Ca_desi_denovo</i> | 2870827                 | A/T  | NA                 | NA                            | NA                 |

| SNP IDs                  | NCBI dbSNP accession IDs (NCBI_SS#) | Chromosomes           | Physical positions (bp) | SNPs | Gene accession IDs | Sequence components of genome | Putative functions |
|--------------------------|-------------------------------------|-----------------------|-------------------------|------|--------------------|-------------------------------|--------------------|
| <i>Desi_wild_2871208</i> | NA                                  | <i>Ca_desi_denovo</i> | 2871208                 | C/A  | NA                 | NA                            | NA                 |
| <i>Desi_wild_2871286</i> | NA                                  | <i>Ca_desi_denovo</i> | 2871286                 | T/C  | NA                 | NA                            | NA                 |
| <i>Desi_wild_2871572</i> | NA                                  | <i>Ca_desi_denovo</i> | 2871572                 | T/A  | NA                 | NA                            | NA                 |
| <i>Desi_wild_2871742</i> | NA                                  | <i>Ca_desi_denovo</i> | 2871742                 | C/T  | NA                 | NA                            | NA                 |
| <i>Desi_wild_2871959</i> | NA                                  | <i>Ca_desi_denovo</i> | 2871959                 | A/G  | NA                 | NA                            | NA                 |
| <i>Desi_wild_2871974</i> | NA                                  | <i>Ca_desi_denovo</i> | 2871974                 | C/G  | NA                 | NA                            | NA                 |
| <i>Desi_wild_2874013</i> | NA                                  | <i>Ca_desi_denovo</i> | 2874013                 | T/A  | NA                 | NA                            | NA                 |
| <i>Desi_wild_2874287</i> | NA                                  | <i>Ca_desi_denovo</i> | 2874287                 | T/C  | NA                 | NA                            | NA                 |
| <i>Desi_wild_2875742</i> | NA                                  | <i>Ca_desi_denovo</i> | 2875742                 | T/C  | NA                 | NA                            | NA                 |
| <i>Desi_wild_2875763</i> | NA                                  | <i>Ca_desi_denovo</i> | 2875763                 | G/A  | NA                 | NA                            | NA                 |
| <i>Desi_wild_2876177</i> | NA                                  | <i>Ca_desi_denovo</i> | 2876177                 | T/C  | NA                 | NA                            | NA                 |
| <i>Desi_wild_2876205</i> | NA                                  | <i>Ca_desi_denovo</i> | 2876205                 | G/A  | NA                 | NA                            | NA                 |
| <i>Desi_wild_2877312</i> | NA                                  | <i>Ca_desi_denovo</i> | 2877312                 | C/T  | NA                 | NA                            | NA                 |
| <i>Desi_wild_2877363</i> | NA                                  | <i>Ca_desi_denovo</i> | 2877363                 | T/C  | NA                 | NA                            | NA                 |
| <i>Desi_wild_2878554</i> | NA                                  | <i>Ca_desi_denovo</i> | 2878554                 | C/T  | NA                 | NA                            | NA                 |
| <i>Desi_wild_2879170</i> | NA                                  | <i>Ca_desi_denovo</i> | 2879170                 | G/A  | NA                 | NA                            | NA                 |
| <i>Desi_wild_2879178</i> | NA                                  | <i>Ca_desi_denovo</i> | 2879178                 | C/T  | NA                 | NA                            | NA                 |
| <i>Desi_wild_2879911</i> | NA                                  | <i>Ca_desi_denovo</i> | 2879911                 | C/G  | NA                 | NA                            | NA                 |
| <i>Desi_wild_2880958</i> | NA                                  | <i>Ca_desi_denovo</i> | 2880958                 | A/G  | NA                 | NA                            | NA                 |
| <i>Desi_wild_2881338</i> | NA                                  | <i>Ca_desi_denovo</i> | 2881338                 | C/T  | NA                 | NA                            | NA                 |
| <i>Desi_wild_2881937</i> | NA                                  | <i>Ca_desi_denovo</i> | 2881937                 | T/G  | NA                 | NA                            | NA                 |
| <i>Desi_wild_2882366</i> | NA                                  | <i>Ca_desi_denovo</i> | 2882366                 | G/A  | NA                 | NA                            | NA                 |
| <i>Desi_wild_2882503</i> | NA                                  | <i>Ca_desi_denovo</i> | 2882503                 | T/G  | NA                 | NA                            | NA                 |
| <i>Desi_wild_2884302</i> | NA                                  | <i>Ca_desi_denovo</i> | 2884302                 | T/C  | NA                 | NA                            | NA                 |
| <i>Desi_wild_2884887</i> | NA                                  | <i>Ca_desi_denovo</i> | 2884887                 | G/A  | NA                 | NA                            | NA                 |
| <i>Desi_wild_2884899</i> | NA                                  | <i>Ca_desi_denovo</i> | 2884899                 | G/A  | NA                 | NA                            | NA                 |
| <i>Desi_wild_2888067</i> | NA                                  | <i>Ca_desi_denovo</i> | 2888067                 | C/T  | NA                 | NA                            | NA                 |
| <i>Desi_wild_2888367</i> | NA                                  | <i>Ca_desi_denovo</i> | 2888367                 | C/G  | NA                 | NA                            | NA                 |
| <i>Desi_wild_2888391</i> | NA                                  | <i>Ca_desi_denovo</i> | 2888391                 | T/C  | NA                 | NA                            | NA                 |
| <i>Desi_wild_2888741</i> | NA                                  | <i>Ca_desi_denovo</i> | 2888741                 | C/G  | NA                 | NA                            | NA                 |
| <i>Desi_wild_2889529</i> | NA                                  | <i>Ca_desi_denovo</i> | 2889529                 | G/A  | NA                 | NA                            | NA                 |
| <i>Desi_wild_2889560</i> | NA                                  | <i>Ca_desi_denovo</i> | 2889560                 | G/C  | NA                 | NA                            | NA                 |
| <i>Desi_wild_2892746</i> | NA                                  | <i>Ca_desi_denovo</i> | 2892746                 | C/G  | NA                 | NA                            | NA                 |
| <i>Desi_wild_2893263</i> | NA                                  | <i>Ca_desi_denovo</i> | 2893263                 | A/G  | NA                 | NA                            | NA                 |
| <i>Desi_wild_2893267</i> | NA                                  | <i>Ca_desi_denovo</i> | 2893267                 | A/G  | NA                 | NA                            | NA                 |
| <i>Desi_wild_2893297</i> | NA                                  | <i>Ca_desi_denovo</i> | 2893297                 | C/T  | NA                 | NA                            | NA                 |
| <i>Desi_wild_2893693</i> | NA                                  | <i>Ca_desi_denovo</i> | 2893693                 | T/C  | NA                 | NA                            | NA                 |
| <i>Desi_wild_2893708</i> | NA                                  | <i>Ca_desi_denovo</i> | 2893708                 | A/G  | NA                 | NA                            | NA                 |
| <i>Desi_wild_2893900</i> | NA                                  | <i>Ca_desi_denovo</i> | 2893900                 | T/C  | NA                 | NA                            | NA                 |
| <i>Desi_wild_2893942</i> | NA                                  | <i>Ca_desi_denovo</i> | 2893942                 | T/C  | NA                 | NA                            | NA                 |
| <i>Desi_wild_2894868</i> | NA                                  | <i>Ca_desi_denovo</i> | 2894868                 | A/G  | NA                 | NA                            | NA                 |
| <i>Desi_wild_2895048</i> | NA                                  | <i>Ca_desi_denovo</i> | 2895048                 | C/T  | NA                 | NA                            | NA                 |
| <i>Desi_wild_2896162</i> | NA                                  | <i>Ca_desi_denovo</i> | 2896162                 | T/C  | NA                 | NA                            | NA                 |
| <i>Desi_wild_2897040</i> | NA                                  | <i>Ca_desi_denovo</i> | 2897040                 | T/C  | NA                 | NA                            | NA                 |

| SNP IDs                  | NCBI dbSNP accession IDs (NCBI_SS#) | Chromosomes           | Physical positions (bp) | SNPs | Gene accession IDs | Sequence components of genome | Putative functions |
|--------------------------|-------------------------------------|-----------------------|-------------------------|------|--------------------|-------------------------------|--------------------|
| <i>Desi_wild_2897218</i> | NA                                  | <i>Ca_desi_denovo</i> | 2897218                 | A/G  | NA                 | NA                            | NA                 |
| <i>Desi_wild_2897370</i> | NA                                  | <i>Ca_desi_denovo</i> | 2897370                 | C/T  | NA                 | NA                            | NA                 |
| <i>Desi_wild_2897384</i> | NA                                  | <i>Ca_desi_denovo</i> | 2897384                 | C/T  | NA                 | NA                            | NA                 |
| <i>Desi_wild_2898670</i> | NA                                  | <i>Ca_desi_denovo</i> | 2898670                 | G/A  | NA                 | NA                            | NA                 |
| <i>Desi_wild_2898673</i> | NA                                  | <i>Ca_desi_denovo</i> | 2898673                 | A/G  | NA                 | NA                            | NA                 |
| <i>Desi_wild_2899275</i> | NA                                  | <i>Ca_desi_denovo</i> | 2899275                 | A/G  | NA                 | NA                            | NA                 |
| <i>Desi_wild_2899276</i> | NA                                  | <i>Ca_desi_denovo</i> | 2899276                 | A/G  | NA                 | NA                            | NA                 |
| <i>Desi_wild_2899718</i> | NA                                  | <i>Ca_desi_denovo</i> | 2899718                 | G/A  | NA                 | NA                            | NA                 |
| <i>Desi_wild_2900172</i> | NA                                  | <i>Ca_desi_denovo</i> | 2900172                 | A/C  | NA                 | NA                            | NA                 |
| <i>Desi_wild_2900188</i> | NA                                  | <i>Ca_desi_denovo</i> | 2900188                 | C/T  | NA                 | NA                            | NA                 |
| <i>Desi_wild_2900682</i> | NA                                  | <i>Ca_desi_denovo</i> | 2900682                 | A/G  | NA                 | NA                            | NA                 |
| <i>Desi_wild_2900687</i> | NA                                  | <i>Ca_desi_denovo</i> | 2900687                 | C/A  | NA                 | NA                            | NA                 |
| <i>Desi_wild_2902811</i> | NA                                  | <i>Ca_desi_denovo</i> | 2902811                 | A/G  | NA                 | NA                            | NA                 |
| <i>Desi_wild_2903188</i> | NA                                  | <i>Ca_desi_denovo</i> | 2903188                 | G/C  | NA                 | NA                            | NA                 |
| <i>Desi_wild_2903396</i> | NA                                  | <i>Ca_desi_denovo</i> | 2903396                 | T/G  | NA                 | NA                            | NA                 |
| <i>Desi_wild_2903454</i> | NA                                  | <i>Ca_desi_denovo</i> | 2903454                 | G/C  | NA                 | NA                            | NA                 |
| <i>Desi_wild_2904075</i> | NA                                  | <i>Ca_desi_denovo</i> | 2904075                 | C/T  | NA                 | NA                            | NA                 |
| <i>Desi_wild_2904142</i> | NA                                  | <i>Ca_desi_denovo</i> | 2904142                 | G/T  | NA                 | NA                            | NA                 |
| <i>Desi_wild_2904354</i> | NA                                  | <i>Ca_desi_denovo</i> | 2904354                 | A/G  | NA                 | NA                            | NA                 |
| <i>Desi_wild_2904762</i> | NA                                  | <i>Ca_desi_denovo</i> | 2904762                 | A/G  | NA                 | NA                            | NA                 |
| <i>Desi_wild_2904763</i> | NA                                  | <i>Ca_desi_denovo</i> | 2904763                 | T/C  | NA                 | NA                            | NA                 |
| <i>Desi_wild_2904957</i> | NA                                  | <i>Ca_desi_denovo</i> | 2904957                 | A/G  | NA                 | NA                            | NA                 |
| <i>Desi_wild_2906021</i> | NA                                  | <i>Ca_desi_denovo</i> | 2906021                 | G/C  | NA                 | NA                            | NA                 |
| <i>Desi_wild_2906042</i> | NA                                  | <i>Ca_desi_denovo</i> | 2906042                 | T/C  | NA                 | NA                            | NA                 |
| <i>Desi_wild_2906428</i> | NA                                  | <i>Ca_desi_denovo</i> | 2906428                 | G/C  | NA                 | NA                            | NA                 |
| <i>Desi_wild_2906797</i> | NA                                  | <i>Ca_desi_denovo</i> | 2906797                 | G/A  | NA                 | NA                            | NA                 |
| <i>Desi_wild_2907040</i> | NA                                  | <i>Ca_desi_denovo</i> | 2907040                 | C/A  | NA                 | NA                            | NA                 |
| <i>Desi_wild_2907300</i> | NA                                  | <i>Ca_desi_denovo</i> | 2907300                 | G/A  | NA                 | NA                            | NA                 |
| <i>Desi_wild_2907336</i> | NA                                  | <i>Ca_desi_denovo</i> | 2907336                 | G/A  | NA                 | NA                            | NA                 |
| <i>Desi_wild_2907943</i> | NA                                  | <i>Ca_desi_denovo</i> | 2907943                 | C/A  | NA                 | NA                            | NA                 |
| <i>Desi_wild_2907993</i> | NA                                  | <i>Ca_desi_denovo</i> | 2907993                 | G/A  | NA                 | NA                            | NA                 |
| <i>Desi_wild_2908359</i> | NA                                  | <i>Ca_desi_denovo</i> | 2908359                 | A/G  | NA                 | NA                            | NA                 |
| <i>Desi_wild_2908419</i> | NA                                  | <i>Ca_desi_denovo</i> | 2908419                 | T/G  | NA                 | NA                            | NA                 |
| <i>Desi_wild_2909548</i> | NA                                  | <i>Ca_desi_denovo</i> | 2909548                 | C/A  | NA                 | NA                            | NA                 |
| <i>Desi_wild_2909860</i> | NA                                  | <i>Ca_desi_denovo</i> | 2909860                 | G/A  | NA                 | NA                            | NA                 |
| <i>Desi_wild_2910244</i> | NA                                  | <i>Ca_desi_denovo</i> | 2910244                 | T/G  | NA                 | NA                            | NA                 |
| <i>Desi_wild_2910380</i> | NA                                  | <i>Ca_desi_denovo</i> | 2910380                 | G/C  | NA                 | NA                            | NA                 |
| <i>Desi_wild_2910382</i> | NA                                  | <i>Ca_desi_denovo</i> | 2910382                 | T/C  | NA                 | NA                            | NA                 |
| <i>Desi_wild_2911560</i> | NA                                  | <i>Ca_desi_denovo</i> | 2911560                 | G/C  | NA                 | NA                            | NA                 |
| <i>Desi_wild_2912523</i> | NA                                  | <i>Ca_desi_denovo</i> | 2912523                 | C/A  | NA                 | NA                            | NA                 |
| <i>Desi_wild_2912901</i> | NA                                  | <i>Ca_desi_denovo</i> | 2912901                 | G/A  | NA                 | NA                            | NA                 |
| <i>Desi_wild_2913374</i> | NA                                  | <i>Ca_desi_denovo</i> | 2913374                 | G/A  | NA                 | NA                            | NA                 |
| <i>Desi_wild_2913404</i> | NA                                  | <i>Ca_desi_denovo</i> | 2913404                 | A/T  | NA                 | NA                            | NA                 |
| <i>Desi_wild_2913790</i> | NA                                  | <i>Ca_desi_denovo</i> | 2913790                 | T/C  | NA                 | NA                            | NA                 |

| SNP IDs                  | NCBI dbSNP accession IDs (NCBI_SS#) | Chromosomes           | Physical positions (bp) | SNPs | Gene accession IDs | Sequence components of genome | Putative functions |
|--------------------------|-------------------------------------|-----------------------|-------------------------|------|--------------------|-------------------------------|--------------------|
| <i>Desi_wild_2914402</i> | NA                                  | <i>Ca_desi_denovo</i> | 2914402                 | A/T  | NA                 | NA                            | NA                 |
| <i>Desi_wild_2914429</i> | NA                                  | <i>Ca_desi_denovo</i> | 2914429                 | A/G  | NA                 | NA                            | NA                 |
| <i>Desi_wild_2914575</i> | NA                                  | <i>Ca_desi_denovo</i> | 2914575                 | C/T  | NA                 | NA                            | NA                 |
| <i>Desi_wild_2914987</i> | NA                                  | <i>Ca_desi_denovo</i> | 2914987                 | G/T  | NA                 | NA                            | NA                 |
| <i>Desi_wild_2915903</i> | NA                                  | <i>Ca_desi_denovo</i> | 2915903                 | T/C  | NA                 | NA                            | NA                 |
| <i>Desi_wild_2916756</i> | NA                                  | <i>Ca_desi_denovo</i> | 2916756                 | G/T  | NA                 | NA                            | NA                 |
| <i>Desi_wild_2917157</i> | NA                                  | <i>Ca_desi_denovo</i> | 2917157                 | C/A  | NA                 | NA                            | NA                 |
| <i>Desi_wild_2917191</i> | NA                                  | <i>Ca_desi_denovo</i> | 2917191                 | T/G  | NA                 | NA                            | NA                 |
| <i>Desi_wild_2917234</i> | NA                                  | <i>Ca_desi_denovo</i> | 2917234                 | C/T  | NA                 | NA                            | NA                 |
| <i>Desi_wild_2917243</i> | NA                                  | <i>Ca_desi_denovo</i> | 2917243                 | A/G  | NA                 | NA                            | NA                 |
| <i>Desi_wild_2917350</i> | NA                                  | <i>Ca_desi_denovo</i> | 2917350                 | G/T  | NA                 | NA                            | NA                 |
| <i>Desi_wild_2919000</i> | NA                                  | <i>Ca_desi_denovo</i> | 2919000                 | T/C  | NA                 | NA                            | NA                 |
| <i>Desi_wild_2919009</i> | NA                                  | <i>Ca_desi_denovo</i> | 2919009                 | C/T  | NA                 | NA                            | NA                 |
| <i>Desi_wild_2919297</i> | NA                                  | <i>Ca_desi_denovo</i> | 2919297                 | T/G  | NA                 | NA                            | NA                 |
| <i>Desi_wild_2920682</i> | NA                                  | <i>Ca_desi_denovo</i> | 2920682                 | G/T  | NA                 | NA                            | NA                 |
| <i>Desi_wild_2920710</i> | NA                                  | <i>Ca_desi_denovo</i> | 2920710                 | A/G  | NA                 | NA                            | NA                 |
| <i>Desi_wild_2921057</i> | NA                                  | <i>Ca_desi_denovo</i> | 2921057                 | G/A  | NA                 | NA                            | NA                 |
| <i>Desi_wild_2921591</i> | NA                                  | <i>Ca_desi_denovo</i> | 2921591                 | C/A  | NA                 | NA                            | NA                 |
| <i>Desi_wild_2921631</i> | NA                                  | <i>Ca_desi_denovo</i> | 2921631                 | A/C  | NA                 | NA                            | NA                 |
| <i>Desi_wild_2922120</i> | NA                                  | <i>Ca_desi_denovo</i> | 2922120                 | C/T  | NA                 | NA                            | NA                 |
| <i>Desi_wild_2922137</i> | NA                                  | <i>Ca_desi_denovo</i> | 2922137                 | A/G  | NA                 | NA                            | NA                 |
| <i>Desi_wild_2922193</i> | NA                                  | <i>Ca_desi_denovo</i> | 2922193                 | T/G  | NA                 | NA                            | NA                 |
| <i>Desi_wild_2922603</i> | NA                                  | <i>Ca_desi_denovo</i> | 2922603                 | A/G  | NA                 | NA                            | NA                 |
| <i>Desi_wild_2923164</i> | NA                                  | <i>Ca_desi_denovo</i> | 2923164                 | G/T  | NA                 | NA                            | NA                 |
| <i>Desi_wild_2923677</i> | NA                                  | <i>Ca_desi_denovo</i> | 2923677                 | C/T  | NA                 | NA                            | NA                 |
| <i>Desi_wild_2923690</i> | NA                                  | <i>Ca_desi_denovo</i> | 2923690                 | A/G  | NA                 | NA                            | NA                 |
| <i>Desi_wild_2923947</i> | NA                                  | <i>Ca_desi_denovo</i> | 2923947                 | T/C  | NA                 | NA                            | NA                 |
| <i>Desi_wild_2924009</i> | NA                                  | <i>Ca_desi_denovo</i> | 2924009                 | A/G  | NA                 | NA                            | NA                 |
| <i>Desi_wild_2924147</i> | NA                                  | <i>Ca_desi_denovo</i> | 2924147                 | C/A  | NA                 | NA                            | NA                 |
| <i>Desi_wild_2924536</i> | NA                                  | <i>Ca_desi_denovo</i> | 2924536                 | A/G  | NA                 | NA                            | NA                 |
| <i>Desi_wild_2924557</i> | NA                                  | <i>Ca_desi_denovo</i> | 2924557                 | C/G  | NA                 | NA                            | NA                 |
| <i>Desi_wild_2924625</i> | NA                                  | <i>Ca_desi_denovo</i> | 2924625                 | C/G  | NA                 | NA                            | NA                 |
| <i>Desi_wild_2924640</i> | NA                                  | <i>Ca_desi_denovo</i> | 2924640                 | A/G  | NA                 | NA                            | NA                 |
| <i>Desi_wild_2925705</i> | NA                                  | <i>Ca_desi_denovo</i> | 2925705                 | C/A  | NA                 | NA                            | NA                 |
| <i>Desi_wild_2925710</i> | NA                                  | <i>Ca_desi_denovo</i> | 2925710                 | G/C  | NA                 | NA                            | NA                 |
| <i>Desi_wild_2925725</i> | NA                                  | <i>Ca_desi_denovo</i> | 2925725                 | C/T  | NA                 | NA                            | NA                 |
| <i>Desi_wild_2926033</i> | NA                                  | <i>Ca_desi_denovo</i> | 2926033                 | A/C  | NA                 | NA                            | NA                 |
| <i>Desi_wild_2926487</i> | NA                                  | <i>Ca_desi_denovo</i> | 2926487                 | C/T  | NA                 | NA                            | NA                 |
| <i>Desi_wild_2926502</i> | NA                                  | <i>Ca_desi_denovo</i> | 2926502                 | C/G  | NA                 | NA                            | NA                 |
| <i>Desi_wild_2930356</i> | NA                                  | <i>Ca_desi_denovo</i> | 2930356                 | G/A  | NA                 | NA                            | NA                 |
| <i>Desi_wild_2930362</i> | NA                                  | <i>Ca_desi_denovo</i> | 2930362                 | G/A  | NA                 | NA                            | NA                 |
| <i>Desi_wild_2931038</i> | NA                                  | <i>Ca_desi_denovo</i> | 2931038                 | C/G  | NA                 | NA                            | NA                 |
| <i>Desi_wild_2931071</i> | NA                                  | <i>Ca_desi_denovo</i> | 2931071                 | T/C  | NA                 | NA                            | NA                 |
| <i>Desi_wild_2931124</i> | NA                                  | <i>Ca_desi_denovo</i> | 2931124                 | T/C  | NA                 | NA                            | NA                 |



| SNP IDs                  | NCBI dbSNP accession IDs (NCBI_SS#) | Chromosomes           | Physical positions (bp) | SNPs | Gene accession IDs | Sequence components of genome | Putative functions |
|--------------------------|-------------------------------------|-----------------------|-------------------------|------|--------------------|-------------------------------|--------------------|
| <i>Desi_wild_2931139</i> | NA                                  | <i>Ca_desi_denovo</i> | 2931139                 | T/C  | NA                 | NA                            | NA                 |
| <i>Desi_wild_2932355</i> | NA                                  | <i>Ca_desi_denovo</i> | 2932355                 | A/G  | NA                 | NA                            | NA                 |
| <i>Desi_wild_2933599</i> | NA                                  | <i>Ca_desi_denovo</i> | 2933599                 | C/G  | NA                 | NA                            | NA                 |
| <i>Desi_wild_2933605</i> | NA                                  | <i>Ca_desi_denovo</i> | 2933605                 | C/G  | NA                 | NA                            | NA                 |
| <i>Desi_wild_2933989</i> | NA                                  | <i>Ca_desi_denovo</i> | 2933989                 | C/T  | NA                 | NA                            | NA                 |
| <i>Desi_wild_2935704</i> | NA                                  | <i>Ca_desi_denovo</i> | 2935704                 | C/T  | NA                 | NA                            | NA                 |
| <i>Desi_wild_2935707</i> | NA                                  | <i>Ca_desi_denovo</i> | 2935707                 | A/G  | NA                 | NA                            | NA                 |
| <i>Desi_wild_2936013</i> | NA                                  | <i>Ca_desi_denovo</i> | 2936013                 | C/T  | NA                 | NA                            | NA                 |
| <i>Desi_wild_2936043</i> | NA                                  | <i>Ca_desi_denovo</i> | 2936043                 | C/G  | NA                 | NA                            | NA                 |
| <i>Desi_wild_2936587</i> | NA                                  | <i>Ca_desi_denovo</i> | 2936587                 | G/T  | NA                 | NA                            | NA                 |
| <i>Desi_wild_2936669</i> | NA                                  | <i>Ca_desi_denovo</i> | 2936669                 | T/C  | NA                 | NA                            | NA                 |
| <i>Desi_wild_2937323</i> | NA                                  | <i>Ca_desi_denovo</i> | 2937323                 | T/G  | NA                 | NA                            | NA                 |
| <i>Desi_wild_2940202</i> | NA                                  | <i>Ca_desi_denovo</i> | 2940202                 | T/G  | NA                 | NA                            | NA                 |
| <i>Desi_wild_2940205</i> | NA                                  | <i>Ca_desi_denovo</i> | 2940205                 | A/C  | NA                 | NA                            | NA                 |
| <i>Desi_wild_2940941</i> | NA                                  | <i>Ca_desi_denovo</i> | 2940941                 | C/G  | NA                 | NA                            | NA                 |
| <i>Desi_wild_2940944</i> | NA                                  | <i>Ca_desi_denovo</i> | 2940944                 | G/A  | NA                 | NA                            | NA                 |
| <i>Desi_wild_2941418</i> | NA                                  | <i>Ca_desi_denovo</i> | 2941418                 | A/T  | NA                 | NA                            | NA                 |
| <i>Desi_wild_2941797</i> | NA                                  | <i>Ca_desi_denovo</i> | 2941797                 | G/A  | NA                 | NA                            | NA                 |
| <i>Desi_wild_2941799</i> | NA                                  | <i>Ca_desi_denovo</i> | 2941799                 | C/T  | NA                 | NA                            | NA                 |
| <i>Desi_wild_2941816</i> | NA                                  | <i>Ca_desi_denovo</i> | 2941816                 | G/C  | NA                 | NA                            | NA                 |
| <i>Desi_wild_2941838</i> | NA                                  | <i>Ca_desi_denovo</i> | 2941838                 | G/A  | NA                 | NA                            | NA                 |
| <i>Desi_wild_2942583</i> | NA                                  | <i>Ca_desi_denovo</i> | 2942583                 | T/A  | NA                 | NA                            | NA                 |
| <i>Desi_wild_2942613</i> | NA                                  | <i>Ca_desi_denovo</i> | 2942613                 | G/A  | NA                 | NA                            | NA                 |
| <i>Desi_wild_2942747</i> | NA                                  | <i>Ca_desi_denovo</i> | 2942747                 | G/T  | NA                 | NA                            | NA                 |
| <i>Desi_wild_2942905</i> | NA                                  | <i>Ca_desi_denovo</i> | 2942905                 | A/C  | NA                 | NA                            | NA                 |
| <i>Desi_wild_2942911</i> | NA                                  | <i>Ca_desi_denovo</i> | 2942911                 | C/A  | NA                 | NA                            | NA                 |
| <i>Desi_wild_2942933</i> | NA                                  | <i>Ca_desi_denovo</i> | 2942933                 | A/G  | NA                 | NA                            | NA                 |
| <i>Desi_wild_2943117</i> | NA                                  | <i>Ca_desi_denovo</i> | 2943117                 | T/G  | NA                 | NA                            | NA                 |
| <i>Desi_wild_2944124</i> | NA                                  | <i>Ca_desi_denovo</i> | 2944124                 | C/T  | NA                 | NA                            | NA                 |
| <i>Desi_wild_2944148</i> | NA                                  | <i>Ca_desi_denovo</i> | 2944148                 | A/G  | NA                 | NA                            | NA                 |
| <i>Desi_wild_2946118</i> | NA                                  | <i>Ca_desi_denovo</i> | 2946118                 | C/A  | NA                 | NA                            | NA                 |
| <i>Desi_wild_2946119</i> | NA                                  | <i>Ca_desi_denovo</i> | 2946119                 | A/G  | NA                 | NA                            | NA                 |
| <i>Desi_wild_2946593</i> | NA                                  | <i>Ca_desi_denovo</i> | 2946593                 | G/T  | NA                 | NA                            | NA                 |
| <i>Desi_wild_2946598</i> | NA                                  | <i>Ca_desi_denovo</i> | 2946598                 | T/C  | NA                 | NA                            | NA                 |
| <i>Desi_wild_2948022</i> | NA                                  | <i>Ca_desi_denovo</i> | 2948022                 | C/G  | NA                 | NA                            | NA                 |
| <i>Desi_wild_2948025</i> | NA                                  | <i>Ca_desi_denovo</i> | 2948025                 | C/A  | NA                 | NA                            | NA                 |
| <i>Desi_wild_2948199</i> | NA                                  | <i>Ca_desi_denovo</i> | 2948199                 | T/C  | NA                 | NA                            | NA                 |
| <i>Desi_wild_2948269</i> | NA                                  | <i>Ca_desi_denovo</i> | 2948269                 | A/G  | NA                 | NA                            | NA                 |
| <i>Desi_wild_2949655</i> | NA                                  | <i>Ca_desi_denovo</i> | 2949655                 | G/C  | NA                 | NA                            | NA                 |
| <i>Desi_wild_2949830</i> | NA                                  | <i>Ca_desi_denovo</i> | 2949830                 | A/G  | NA                 | NA                            | NA                 |
| <i>Desi_wild_2952248</i> | NA                                  | <i>Ca_desi_denovo</i> | 2952248                 | C/G  | NA                 | NA                            | NA                 |
| <i>Desi_wild_2952251</i> | NA                                  | <i>Ca_desi_denovo</i> | 2952251                 | A/G  | NA                 | NA                            | NA                 |
| <i>Desi_wild_2952257</i> | NA                                  | <i>Ca_desi_denovo</i> | 2952257                 | C/T  | NA                 | NA                            | NA                 |
| <i>Desi_wild_2952813</i> | NA                                  | <i>Ca_desi_denovo</i> | 2952813                 | C/T  | NA                 | NA                            | NA                 |

| SNP IDs                  | NCBI dbSNP accession IDs (NCBI_SS#) | Chromosomes           | Physical positions (bp) | SNPs | Gene accession IDs | Sequence components of genome | Putative functions |
|--------------------------|-------------------------------------|-----------------------|-------------------------|------|--------------------|-------------------------------|--------------------|
| <i>Desi_wild_2952935</i> | NA                                  | <i>Ca_desi_denovo</i> | 2952935                 | T/G  | NA                 | NA                            | NA                 |
| <i>Desi_wild_2954322</i> | NA                                  | <i>Ca_desi_denovo</i> | 2954322                 | C/G  | NA                 | NA                            | NA                 |
| <i>Desi_wild_2954382</i> | NA                                  | <i>Ca_desi_denovo</i> | 2954382                 | T/C  | NA                 | NA                            | NA                 |
| <i>Desi_wild_2954656</i> | NA                                  | <i>Ca_desi_denovo</i> | 2954656                 | C/T  | NA                 | NA                            | NA                 |
| <i>Desi_wild_2954661</i> | NA                                  | <i>Ca_desi_denovo</i> | 2954661                 | T/A  | NA                 | NA                            | NA                 |
| <i>Desi_wild_2956468</i> | NA                                  | <i>Ca_desi_denovo</i> | 2956468                 | C/A  | NA                 | NA                            | NA                 |
| <i>Desi_wild_2956823</i> | NA                                  | <i>Ca_desi_denovo</i> | 2956823                 | A/C  | NA                 | NA                            | NA                 |
| <i>Desi_wild_2958205</i> | NA                                  | <i>Ca_desi_denovo</i> | 2958205                 | G/A  | NA                 | NA                            | NA                 |
| <i>Desi_wild_2958262</i> | NA                                  | <i>Ca_desi_denovo</i> | 2958262                 | G/A  | NA                 | NA                            | NA                 |
| <i>Desi_wild_2959066</i> | NA                                  | <i>Ca_desi_denovo</i> | 2959066                 | C/T  | NA                 | NA                            | NA                 |
| <i>Desi_wild_2959098</i> | NA                                  | <i>Ca_desi_denovo</i> | 2959098                 | A/G  | NA                 | NA                            | NA                 |
| <i>Desi_wild_2959546</i> | NA                                  | <i>Ca_desi_denovo</i> | 2959546                 | C/A  | NA                 | NA                            | NA                 |
| <i>Desi_wild_2959563</i> | NA                                  | <i>Ca_desi_denovo</i> | 2959563                 | T/G  | NA                 | NA                            | NA                 |
| <i>Desi_wild_2960170</i> | NA                                  | <i>Ca_desi_denovo</i> | 2960170                 | A/C  | NA                 | NA                            | NA                 |
| <i>Desi_wild_2962013</i> | NA                                  | <i>Ca_desi_denovo</i> | 2962013                 | G/C  | NA                 | NA                            | NA                 |
| <i>Desi_wild_2962168</i> | NA                                  | <i>Ca_desi_denovo</i> | 2962168                 | C/T  | NA                 | NA                            | NA                 |
| <i>Desi_wild_2962757</i> | NA                                  | <i>Ca_desi_denovo</i> | 2962757                 | A/T  | NA                 | NA                            | NA                 |
| <i>Desi_wild_2964215</i> | NA                                  | <i>Ca_desi_denovo</i> | 2964215                 | C/T  | NA                 | NA                            | NA                 |
| <i>Desi_wild_2964785</i> | NA                                  | <i>Ca_desi_denovo</i> | 2964785                 | G/C  | NA                 | NA                            | NA                 |
| <i>Desi_wild_2966114</i> | NA                                  | <i>Ca_desi_denovo</i> | 2966114                 | C/T  | NA                 | NA                            | NA                 |
| <i>Desi_wild_2966254</i> | NA                                  | <i>Ca_desi_denovo</i> | 2966254                 | C/T  | NA                 | NA                            | NA                 |
| <i>Desi_wild_2968994</i> | NA                                  | <i>Ca_desi_denovo</i> | 2968994                 | G/A  | NA                 | NA                            | NA                 |
| <i>Desi_wild_2970885</i> | NA                                  | <i>Ca_desi_denovo</i> | 2970885                 | T/G  | NA                 | NA                            | NA                 |
| <i>Desi_wild_2970905</i> | NA                                  | <i>Ca_desi_denovo</i> | 2970905                 | A/G  | NA                 | NA                            | NA                 |
| <i>Desi_wild_2971326</i> | NA                                  | <i>Ca_desi_denovo</i> | 2971326                 | T/C  | NA                 | NA                            | NA                 |
| <i>Desi_wild_2971429</i> | NA                                  | <i>Ca_desi_denovo</i> | 2971429                 | G/T  | NA                 | NA                            | NA                 |
| <i>Desi_wild_2972696</i> | NA                                  | <i>Ca_desi_denovo</i> | 2972696                 | C/T  | NA                 | NA                            | NA                 |
| <i>Desi_wild_2972851</i> | NA                                  | <i>Ca_desi_denovo</i> | 2972851                 | C/G  | NA                 | NA                            | NA                 |
| <i>Desi_wild_2973103</i> | NA                                  | <i>Ca_desi_denovo</i> | 2973103                 | T/C  | NA                 | NA                            | NA                 |
| <i>Desi_wild_2973246</i> | NA                                  | <i>Ca_desi_denovo</i> | 2973246                 | C/G  | NA                 | NA                            | NA                 |
| <i>Desi_wild_2973458</i> | NA                                  | <i>Ca_desi_denovo</i> | 2973458                 | C/T  | NA                 | NA                            | NA                 |
| <i>Desi_wild_2975191</i> | NA                                  | <i>Ca_desi_denovo</i> | 2975191                 | G/A  | NA                 | NA                            | NA                 |
| <i>Desi_wild_2975210</i> | NA                                  | <i>Ca_desi_denovo</i> | 2975210                 | A/C  | NA                 | NA                            | NA                 |
| <i>Desi_wild_2975221</i> | NA                                  | <i>Ca_desi_denovo</i> | 2975221                 | G/C  | NA                 | NA                            | NA                 |
| <i>Desi_wild_2975442</i> | NA                                  | <i>Ca_desi_denovo</i> | 2975442                 | A/G  | NA                 | NA                            | NA                 |
| <i>Desi_wild_2975727</i> | NA                                  | <i>Ca_desi_denovo</i> | 2975727                 | C/T  | NA                 | NA                            | NA                 |
| <i>Desi_wild_2976610</i> | NA                                  | <i>Ca_desi_denovo</i> | 2976610                 | T/G  | NA                 | NA                            | NA                 |
| <i>Desi_wild_2977154</i> | NA                                  | <i>Ca_desi_denovo</i> | 2977154                 | T/C  | NA                 | NA                            | NA                 |
| <i>Desi_wild_2977264</i> | NA                                  | <i>Ca_desi_denovo</i> | 2977264                 | C/A  | NA                 | NA                            | NA                 |
| <i>Desi_wild_2977310</i> | NA                                  | <i>Ca_desi_denovo</i> | 2977310                 | C/G  | NA                 | NA                            | NA                 |
| <i>Desi_wild_2977961</i> | NA                                  | <i>Ca_desi_denovo</i> | 2977961                 | T/G  | NA                 | NA                            | NA                 |
| <i>Desi_wild_2978413</i> | NA                                  | <i>Ca_desi_denovo</i> | 2978413                 | A/G  | NA                 | NA                            | NA                 |
| <i>Desi_wild_2978422</i> | NA                                  | <i>Ca_desi_denovo</i> | 2978422                 | A/G  | NA                 | NA                            | NA                 |
| <i>Desi_wild_2979438</i> | NA                                  | <i>Ca_desi_denovo</i> | 2979438                 | G/A  | NA                 | NA                            | NA                 |

| SNP IDs                  | NCBI dbSNP accession IDs (NCBI_SS#) | Chromosomes           | Physical positions (bp) | SNPs | Gene accession IDs | Sequence components of genome | Putative functions |
|--------------------------|-------------------------------------|-----------------------|-------------------------|------|--------------------|-------------------------------|--------------------|
| <i>Desi_wild_2979455</i> | NA                                  | <i>Ca_desi_denovo</i> | 2979455                 | C/T  | NA                 | NA                            | NA                 |
| <i>Desi_wild_2979550</i> | NA                                  | <i>Ca_desi_denovo</i> | 2979550                 | C/T  | NA                 | NA                            | NA                 |
| <i>Desi_wild_2980714</i> | NA                                  | <i>Ca_desi_denovo</i> | 2980714                 | A/C  | NA                 | NA                            | NA                 |
| <i>Desi_wild_2980729</i> | NA                                  | <i>Ca_desi_denovo</i> | 2980729                 | A/G  | NA                 | NA                            | NA                 |
| <i>Desi_wild_2981614</i> | NA                                  | <i>Ca_desi_denovo</i> | 2981614                 | C/T  | NA                 | NA                            | NA                 |
| <i>Desi_wild_2983161</i> | NA                                  | <i>Ca_desi_denovo</i> | 2983161                 | T/A  | NA                 | NA                            | NA                 |
| <i>Desi_wild_2983191</i> | NA                                  | <i>Ca_desi_denovo</i> | 2983191                 | C/T  | NA                 | NA                            | NA                 |
| <i>Desi_wild_2983331</i> | NA                                  | <i>Ca_desi_denovo</i> | 2983331                 | C/T  | NA                 | NA                            | NA                 |
| <i>Desi_wild_2983923</i> | NA                                  | <i>Ca_desi_denovo</i> | 2983923                 | A/G  | NA                 | NA                            | NA                 |
| <i>Desi_wild_2984288</i> | NA                                  | <i>Ca_desi_denovo</i> | 2984288                 | A/G  | NA                 | NA                            | NA                 |
| <i>Desi_wild_2984300</i> | NA                                  | <i>Ca_desi_denovo</i> | 2984300                 | G/A  | NA                 | NA                            | NA                 |
| <i>Desi_wild_2984323</i> | NA                                  | <i>Ca_desi_denovo</i> | 2984323                 | T/G  | NA                 | NA                            | NA                 |
| <i>Desi_wild_2985100</i> | NA                                  | <i>Ca_desi_denovo</i> | 2985100                 | A/G  | NA                 | NA                            | NA                 |
| <i>Desi_wild_2985135</i> | NA                                  | <i>Ca_desi_denovo</i> | 2985135                 | C/A  | NA                 | NA                            | NA                 |
| <i>Desi_wild_2986228</i> | NA                                  | <i>Ca_desi_denovo</i> | 2986228                 | G/C  | NA                 | NA                            | NA                 |
| <i>Desi_wild_2986425</i> | NA                                  | <i>Ca_desi_denovo</i> | 2986425                 | G/T  | NA                 | NA                            | NA                 |
| <i>Desi_wild_2987977</i> | NA                                  | <i>Ca_desi_denovo</i> | 2987977                 | T/C  | NA                 | NA                            | NA                 |
| <i>Desi_wild_2988047</i> | NA                                  | <i>Ca_desi_denovo</i> | 2988047                 | C/A  | NA                 | NA                            | NA                 |
| <i>Desi_wild_2990696</i> | NA                                  | <i>Ca_desi_denovo</i> | 2990696                 | G/A  | NA                 | NA                            | NA                 |
| <i>Desi_wild_2990765</i> | NA                                  | <i>Ca_desi_denovo</i> | 2990765                 | C/T  | NA                 | NA                            | NA                 |
| <i>Desi_wild_2990983</i> | NA                                  | <i>Ca_desi_denovo</i> | 2990983                 | T/G  | NA                 | NA                            | NA                 |
| <i>Desi_wild_2991836</i> | NA                                  | <i>Ca_desi_denovo</i> | 2991836                 | A/G  | NA                 | NA                            | NA                 |
| <i>Desi_wild_2992090</i> | NA                                  | <i>Ca_desi_denovo</i> | 2992090                 | G/A  | NA                 | NA                            | NA                 |
| <i>Desi_wild_2992507</i> | NA                                  | <i>Ca_desi_denovo</i> | 2992507                 | C/T  | NA                 | NA                            | NA                 |
| <i>Desi_wild_2992513</i> | NA                                  | <i>Ca_desi_denovo</i> | 2992513                 | C/G  | NA                 | NA                            | NA                 |
| <i>Desi_wild_2993031</i> | NA                                  | <i>Ca_desi_denovo</i> | 2993031                 | C/G  | NA                 | NA                            | NA                 |
| <i>Desi_wild_2993035</i> | NA                                  | <i>Ca_desi_denovo</i> | 2993035                 | A/C  | NA                 | NA                            | NA                 |
| <i>Desi_wild_2993409</i> | NA                                  | <i>Ca_desi_denovo</i> | 2993409                 | A/G  | NA                 | NA                            | NA                 |
| <i>Desi_wild_2995005</i> | NA                                  | <i>Ca_desi_denovo</i> | 2995005                 | T/G  | NA                 | NA                            | NA                 |
| <i>Desi_wild_2995029</i> | NA                                  | <i>Ca_desi_denovo</i> | 2995029                 | C/T  | NA                 | NA                            | NA                 |
| <i>Desi_wild_2995151</i> | NA                                  | <i>Ca_desi_denovo</i> | 2995151                 | C/T  | NA                 | NA                            | NA                 |
| <i>Desi_wild_2995175</i> | NA                                  | <i>Ca_desi_denovo</i> | 2995175                 | T/C  | NA                 | NA                            | NA                 |
| <i>Desi_wild_2997290</i> | NA                                  | <i>Ca_desi_denovo</i> | 2997290                 | G/A  | NA                 | NA                            | NA                 |
| <i>Desi_wild_2997389</i> | NA                                  | <i>Ca_desi_denovo</i> | 2997389                 | C/G  | NA                 | NA                            | NA                 |
| <i>Desi_wild_2997428</i> | NA                                  | <i>Ca_desi_denovo</i> | 2997428                 | A/G  | NA                 | NA                            | NA                 |
| <i>Desi_wild_2997868</i> | NA                                  | <i>Ca_desi_denovo</i> | 2997868                 | C/T  | NA                 | NA                            | NA                 |
| <i>Desi_wild_2997883</i> | NA                                  | <i>Ca_desi_denovo</i> | 2997883                 | T/C  | NA                 | NA                            | NA                 |
| <i>Desi_wild_2998060</i> | NA                                  | <i>Ca_desi_denovo</i> | 2998060                 | A/G  | NA                 | NA                            | NA                 |
| <i>Desi_wild_2998117</i> | NA                                  | <i>Ca_desi_denovo</i> | 2998117                 | G/A  | NA                 | NA                            | NA                 |
| <i>Desi_wild_2999231</i> | NA                                  | <i>Ca_desi_denovo</i> | 2999231                 | C/T  | NA                 | NA                            | NA                 |
| <i>Desi_wild_2999532</i> | NA                                  | <i>Ca_desi_denovo</i> | 2999532                 | T/C  | NA                 | NA                            | NA                 |
| <i>Desi_wild_2999562</i> | NA                                  | <i>Ca_desi_denovo</i> | 2999562                 | A/G  | NA                 | NA                            | NA                 |
| <i>Desi_wild_2999580</i> | NA                                  | <i>Ca_desi_denovo</i> | 2999580                 | G/A  | NA                 | NA                            | NA                 |
| <i>Desi_wild_2999984</i> | NA                                  | <i>Ca_desi_denovo</i> | 2999984                 | A/C  | NA                 | NA                            | NA                 |

| SNP IDs                  | NCBI dbSNP accession IDs (NCBI_SS#) | Chromosomes           | Physical positions (bp) | SNPs | Gene accession IDs | Sequence components of genome | Putative functions |
|--------------------------|-------------------------------------|-----------------------|-------------------------|------|--------------------|-------------------------------|--------------------|
| <i>Desi_wild_3002621</i> | NA                                  | <i>Ca_desi_denovo</i> | 3002621                 | T/C  | NA                 | NA                            | NA                 |
| <i>Desi_wild_3002636</i> | NA                                  | <i>Ca_desi_denovo</i> | 3002636                 | G/A  | NA                 | NA                            | NA                 |
| <i>Desi_wild_3006518</i> | NA                                  | <i>Ca_desi_denovo</i> | 3006518                 | T/C  | NA                 | NA                            | NA                 |
| <i>Desi_wild_3007093</i> | NA                                  | <i>Ca_desi_denovo</i> | 3007093                 | G/A  | NA                 | NA                            | NA                 |
| <i>Desi_wild_3007106</i> | NA                                  | <i>Ca_desi_denovo</i> | 3007106                 | G/T  | NA                 | NA                            | NA                 |
| <i>Desi_wild_3007401</i> | NA                                  | <i>Ca_desi_denovo</i> | 3007401                 | C/G  | NA                 | NA                            | NA                 |
| <i>Desi_wild_3008779</i> | NA                                  | <i>Ca_desi_denovo</i> | 3008779                 | A/G  | NA                 | NA                            | NA                 |
| <i>Desi_wild_3008950</i> | NA                                  | <i>Ca_desi_denovo</i> | 3008950                 | G/A  | NA                 | NA                            | NA                 |
| <i>Desi_wild_3009000</i> | NA                                  | <i>Ca_desi_denovo</i> | 3009000                 | A/C  | NA                 | NA                            | NA                 |
| <i>Desi_wild_3009247</i> | NA                                  | <i>Ca_desi_denovo</i> | 3009247                 | C/T  | NA                 | NA                            | NA                 |
| <i>Desi_wild_3009268</i> | NA                                  | <i>Ca_desi_denovo</i> | 3009268                 | A/C  | NA                 | NA                            | NA                 |
| <i>Desi_wild_3009673</i> | NA                                  | <i>Ca_desi_denovo</i> | 3009673                 | T/G  | NA                 | NA                            | NA                 |
| <i>Desi_wild_3011454</i> | NA                                  | <i>Ca_desi_denovo</i> | 3011454                 | C/A  | NA                 | NA                            | NA                 |
| <i>Desi_wild_3011477</i> | NA                                  | <i>Ca_desi_denovo</i> | 3011477                 | A/G  | NA                 | NA                            | NA                 |
| <i>Desi_wild_3012789</i> | NA                                  | <i>Ca_desi_denovo</i> | 3012789                 | T/C  | NA                 | NA                            | NA                 |
| <i>Desi_wild_3013974</i> | NA                                  | <i>Ca_desi_denovo</i> | 3013974                 | C/T  | NA                 | NA                            | NA                 |
| <i>Desi_wild_3014593</i> | NA                                  | <i>Ca_desi_denovo</i> | 3014593                 | G/A  | NA                 | NA                            | NA                 |
| <i>Desi_wild_3014608</i> | NA                                  | <i>Ca_desi_denovo</i> | 3014608                 | C/G  | NA                 | NA                            | NA                 |
| <i>Desi_wild_3015536</i> | NA                                  | <i>Ca_desi_denovo</i> | 3015536                 | C/T  | NA                 | NA                            | NA                 |
| <i>Desi_wild_3015541</i> | NA                                  | <i>Ca_desi_denovo</i> | 3015541                 | C/T  | NA                 | NA                            | NA                 |
| <i>Desi_wild_3015635</i> | NA                                  | <i>Ca_desi_denovo</i> | 3015635                 | C/T  | NA                 | NA                            | NA                 |
| <i>Desi_wild_3016183</i> | NA                                  | <i>Ca_desi_denovo</i> | 3016183                 | T/C  | NA                 | NA                            | NA                 |
| <i>Desi_wild_3016973</i> | NA                                  | <i>Ca_desi_denovo</i> | 3016973                 | G/A  | NA                 | NA                            | NA                 |
| <i>Desi_wild_3017630</i> | NA                                  | <i>Ca_desi_denovo</i> | 3017630                 | G/T  | NA                 | NA                            | NA                 |
| <i>Desi_wild_3018373</i> | NA                                  | <i>Ca_desi_denovo</i> | 3018373                 | C/G  | NA                 | NA                            | NA                 |
| <i>Desi_wild_3019220</i> | NA                                  | <i>Ca_desi_denovo</i> | 3019220                 | C/A  | NA                 | NA                            | NA                 |
| <i>Desi_wild_3019246</i> | NA                                  | <i>Ca_desi_denovo</i> | 3019246                 | C/T  | NA                 | NA                            | NA                 |
| <i>Desi_wild_3019748</i> | NA                                  | <i>Ca_desi_denovo</i> | 3019748                 | A/G  | NA                 | NA                            | NA                 |
| <i>Desi_wild_3019789</i> | NA                                  | <i>Ca_desi_denovo</i> | 3019789                 | C/G  | NA                 | NA                            | NA                 |
| <i>Desi_wild_3019816</i> | NA                                  | <i>Ca_desi_denovo</i> | 3019816                 | T/C  | NA                 | NA                            | NA                 |
| <i>Desi_wild_3021068</i> | NA                                  | <i>Ca_desi_denovo</i> | 3021068                 | C/T  | NA                 | NA                            | NA                 |
| <i>Desi_wild_3021110</i> | NA                                  | <i>Ca_desi_denovo</i> | 3021110                 | C/T  | NA                 | NA                            | NA                 |
| <i>Desi_wild_3021341</i> | NA                                  | <i>Ca_desi_denovo</i> | 3021341                 | G/A  | NA                 | NA                            | NA                 |
| <i>Desi_wild_3021347</i> | NA                                  | <i>Ca_desi_denovo</i> | 3021347                 | A/G  | NA                 | NA                            | NA                 |
| <i>Desi_wild_3022830</i> | NA                                  | <i>Ca_desi_denovo</i> | 3022830                 | T/G  | NA                 | NA                            | NA                 |
| <i>Desi_wild_3022995</i> | NA                                  | <i>Ca_desi_denovo</i> | 3022995                 | A/G  | NA                 | NA                            | NA                 |
| <i>Desi_wild_3023030</i> | NA                                  | <i>Ca_desi_denovo</i> | 3023030                 | C/A  | NA                 | NA                            | NA                 |
| <i>Desi_wild_3023705</i> | NA                                  | <i>Ca_desi_denovo</i> | 3023705                 | C/T  | NA                 | NA                            | NA                 |
| <i>Desi_wild_3024854</i> | NA                                  | <i>Ca_desi_denovo</i> | 3024854                 | T/G  | NA                 | NA                            | NA                 |
| <i>Desi_wild_3024866</i> | NA                                  | <i>Ca_desi_denovo</i> | 3024866                 | G/C  | NA                 | NA                            | NA                 |
| <i>Desi_wild_3024875</i> | NA                                  | <i>Ca_desi_denovo</i> | 3024875                 | T/C  | NA                 | NA                            | NA                 |
| <i>Desi_wild_3024881</i> | NA                                  | <i>Ca_desi_denovo</i> | 3024881                 | T/C  | NA                 | NA                            | NA                 |
| <i>Desi_wild_3024964</i> | NA                                  | <i>Ca_desi_denovo</i> | 3024964                 | C/T  | NA                 | NA                            | NA                 |
| <i>Desi_wild_3025345</i> | NA                                  | <i>Ca_desi_denovo</i> | 3025345                 | G/T  | NA                 | NA                            | NA                 |

| SNP IDs                  | NCBI dbSNP accession IDs (NCBI_SS#) | Chromosomes           | Physical positions (bp) | SNPs | Gene accession IDs | Sequence components of genome | Putative functions |
|--------------------------|-------------------------------------|-----------------------|-------------------------|------|--------------------|-------------------------------|--------------------|
| <i>Desi_wild_3025346</i> | NA                                  | <i>Ca_desi_denovo</i> | 3025346                 | T/C  | NA                 | NA                            | NA                 |
| <i>Desi_wild_3025417</i> | NA                                  | <i>Ca_desi_denovo</i> | 3025417                 | C/G  | NA                 | NA                            | NA                 |
| <i>Desi_wild_3027091</i> | NA                                  | <i>Ca_desi_denovo</i> | 3027091                 | G/C  | NA                 | NA                            | NA                 |
| <i>Desi_wild_3027262</i> | NA                                  | <i>Ca_desi_denovo</i> | 3027262                 | A/G  | NA                 | NA                            | NA                 |
| <i>Desi_wild_3027744</i> | NA                                  | <i>Ca_desi_denovo</i> | 3027744                 | C/T  | NA                 | NA                            | NA                 |
| <i>Desi_wild_3027774</i> | NA                                  | <i>Ca_desi_denovo</i> | 3027774                 | T/C  | NA                 | NA                            | NA                 |
| <i>Desi_wild_3031633</i> | NA                                  | <i>Ca_desi_denovo</i> | 3031633                 | G/A  | NA                 | NA                            | NA                 |
| <i>Desi_wild_3031704</i> | NA                                  | <i>Ca_desi_denovo</i> | 3031704                 | C/G  | NA                 | NA                            | NA                 |
| <i>Desi_wild_3032332</i> | NA                                  | <i>Ca_desi_denovo</i> | 3032332                 | A/C  | NA                 | NA                            | NA                 |
| <i>Desi_wild_3032712</i> | NA                                  | <i>Ca_desi_denovo</i> | 3032712                 | C/G  | NA                 | NA                            | NA                 |
| <i>Desi_wild_3033000</i> | NA                                  | <i>Ca_desi_denovo</i> | 3033000                 | C/T  | NA                 | NA                            | NA                 |
| <i>Desi_wild_3034087</i> | NA                                  | <i>Ca_desi_denovo</i> | 3034087                 | C/T  | NA                 | NA                            | NA                 |
| <i>Desi_wild_3034117</i> | NA                                  | <i>Ca_desi_denovo</i> | 3034117                 | T/C  | NA                 | NA                            | NA                 |
| <i>Desi_wild_3034926</i> | NA                                  | <i>Ca_desi_denovo</i> | 3034926                 | T/C  | NA                 | NA                            | NA                 |
| <i>Desi_wild_3034956</i> | NA                                  | <i>Ca_desi_denovo</i> | 3034956                 | G/A  | NA                 | NA                            | NA                 |
| <i>Desi_wild_3035890</i> | NA                                  | <i>Ca_desi_denovo</i> | 3035890                 | C/A  | NA                 | NA                            | NA                 |
| <i>Desi_wild_3035960</i> | NA                                  | <i>Ca_desi_denovo</i> | 3035960                 | G/A  | NA                 | NA                            | NA                 |
| <i>Desi_wild_3036495</i> | NA                                  | <i>Ca_desi_denovo</i> | 3036495                 | C/A  | NA                 | NA                            | NA                 |
| <i>Desi_wild_3036694</i> | NA                                  | <i>Ca_desi_denovo</i> | 3036694                 | T/G  | NA                 | NA                            | NA                 |
| <i>Desi_wild_3037926</i> | NA                                  | <i>Ca_desi_denovo</i> | 3037926                 | C/A  | NA                 | NA                            | NA                 |
| <i>Desi_wild_3038047</i> | NA                                  | <i>Ca_desi_denovo</i> | 3038047                 | G/C  | NA                 | NA                            | NA                 |
| <i>Desi_wild_3038074</i> | NA                                  | <i>Ca_desi_denovo</i> | 3038074                 | A/G  | NA                 | NA                            | NA                 |
| <i>Desi_wild_3038335</i> | NA                                  | <i>Ca_desi_denovo</i> | 3038335                 | T/G  | NA                 | NA                            | NA                 |
| <i>Desi_wild_3039348</i> | NA                                  | <i>Ca_desi_denovo</i> | 3039348                 | T/C  | NA                 | NA                            | NA                 |
| <i>Desi_wild_3040616</i> | NA                                  | <i>Ca_desi_denovo</i> | 3040616                 | T/G  | NA                 | NA                            | NA                 |
| <i>Desi_wild_3040769</i> | NA                                  | <i>Ca_desi_denovo</i> | 3040769                 | T/G  | NA                 | NA                            | NA                 |
| <i>Desi_wild_3041046</i> | NA                                  | <i>Ca_desi_denovo</i> | 3041046                 | G/C  | NA                 | NA                            | NA                 |
| <i>Desi_wild_3041229</i> | NA                                  | <i>Ca_desi_denovo</i> | 3041229                 | G/A  | NA                 | NA                            | NA                 |
| <i>Desi_wild_3041535</i> | NA                                  | <i>Ca_desi_denovo</i> | 3041535                 | T/A  | NA                 | NA                            | NA                 |
| <i>Desi_wild_3042517</i> | NA                                  | <i>Ca_desi_denovo</i> | 3042517                 | C/T  | NA                 | NA                            | NA                 |
| <i>Desi_wild_3042549</i> | NA                                  | <i>Ca_desi_denovo</i> | 3042549                 | A/T  | NA                 | NA                            | NA                 |
| <i>Desi_wild_3042676</i> | NA                                  | <i>Ca_desi_denovo</i> | 3042676                 | C/T  | NA                 | NA                            | NA                 |
| <i>Desi_wild_3042682</i> | NA                                  | <i>Ca_desi_denovo</i> | 3042682                 | G/A  | NA                 | NA                            | NA                 |
| <i>Desi_wild_3043070</i> | NA                                  | <i>Ca_desi_denovo</i> | 3043070                 | T/A  | NA                 | NA                            | NA                 |
| <i>Desi_wild_3044600</i> | NA                                  | <i>Ca_desi_denovo</i> | 3044600                 | G/C  | NA                 | NA                            | NA                 |
| <i>Desi_wild_3044658</i> | NA                                  | <i>Ca_desi_denovo</i> | 3044658                 | C/A  | NA                 | NA                            | NA                 |
| <i>Desi_wild_3045136</i> | NA                                  | <i>Ca_desi_denovo</i> | 3045136                 | A/G  | NA                 | NA                            | NA                 |
| <i>Desi_wild_3045311</i> | NA                                  | <i>Ca_desi_denovo</i> | 3045311                 | T/G  | NA                 | NA                            | NA                 |
| <i>Desi_wild_3046007</i> | NA                                  | <i>Ca_desi_denovo</i> | 3046007                 | A/C  | NA                 | NA                            | NA                 |
| <i>Desi_wild_3046759</i> | NA                                  | <i>Ca_desi_denovo</i> | 3046759                 | C/G  | NA                 | NA                            | NA                 |
| <i>Desi_wild_3047049</i> | NA                                  | <i>Ca_desi_denovo</i> | 3047049                 | C/A  | NA                 | NA                            | NA                 |
| <i>Desi_wild_3048237</i> | NA                                  | <i>Ca_desi_denovo</i> | 3048237                 | A/C  | NA                 | NA                            | NA                 |
| <i>Desi_wild_3049379</i> | NA                                  | <i>Ca_desi_denovo</i> | 3049379                 | G/A  | NA                 | NA                            | NA                 |
| <i>Desi_wild_3050260</i> | NA                                  | <i>Ca_desi_denovo</i> | 3050260                 | G/A  | NA                 | NA                            | NA                 |

| SNP IDs                  | NCBI dbSNP accession IDs (NCBI_SS#) | Chromosomes           | Physical positions (bp) | SNPs | Gene accession IDs | Sequence components of genome | Putative functions |
|--------------------------|-------------------------------------|-----------------------|-------------------------|------|--------------------|-------------------------------|--------------------|
| <i>Desi_wild_3051609</i> | NA                                  | <i>Ca_desi_denovo</i> | 3051609                 | C/T  | NA                 | NA                            | NA                 |
| <i>Desi_wild_3054947</i> | NA                                  | <i>Ca_desi_denovo</i> | 3054947                 | C/A  | NA                 | NA                            | NA                 |
| <i>Desi_wild_3056020</i> | NA                                  | <i>Ca_desi_denovo</i> | 3056020                 | T/C  | NA                 | NA                            | NA                 |
| <i>Desi_wild_3056074</i> | NA                                  | <i>Ca_desi_denovo</i> | 3056074                 | C/A  | NA                 | NA                            | NA                 |
| <i>Desi_wild_3056113</i> | NA                                  | <i>Ca_desi_denovo</i> | 3056113                 | C/A  | NA                 | NA                            | NA                 |
| <i>Desi_wild_3057093</i> | NA                                  | <i>Ca_desi_denovo</i> | 3057093                 | G/A  | NA                 | NA                            | NA                 |
| <i>Desi_wild_3057896</i> | NA                                  | <i>Ca_desi_denovo</i> | 3057896                 | T/G  | NA                 | NA                            | NA                 |
| <i>Desi_wild_3058315</i> | NA                                  | <i>Ca_desi_denovo</i> | 3058315                 | G/T  | NA                 | NA                            | NA                 |
| <i>Desi_wild_3059753</i> | NA                                  | <i>Ca_desi_denovo</i> | 3059753                 | G/C  | NA                 | NA                            | NA                 |
| <i>Desi_wild_3059954</i> | NA                                  | <i>Ca_desi_denovo</i> | 3059954                 | T/A  | NA                 | NA                            | NA                 |
| <i>Desi_wild_3060008</i> | NA                                  | <i>Ca_desi_denovo</i> | 3060008                 | G/A  | NA                 | NA                            | NA                 |
| <i>Desi_wild_3060452</i> | NA                                  | <i>Ca_desi_denovo</i> | 3060452                 | C/T  | NA                 | NA                            | NA                 |
| <i>Desi_wild_3060461</i> | NA                                  | <i>Ca_desi_denovo</i> | 3060461                 | C/T  | NA                 | NA                            | NA                 |
| <i>Desi_wild_3061306</i> | NA                                  | <i>Ca_desi_denovo</i> | 3061306                 | T/C  | NA                 | NA                            | NA                 |
| <i>Desi_wild_3061315</i> | NA                                  | <i>Ca_desi_denovo</i> | 3061315                 | G/A  | NA                 | NA                            | NA                 |
| <i>Desi_wild_3061336</i> | NA                                  | <i>Ca_desi_denovo</i> | 3061336                 | T/C  | NA                 | NA                            | NA                 |
| <i>Desi_wild_3061345</i> | NA                                  | <i>Ca_desi_denovo</i> | 3061345                 | A/C  | NA                 | NA                            | NA                 |
| <i>Desi_wild_3061984</i> | NA                                  | <i>Ca_desi_denovo</i> | 3061984                 | G/C  | NA                 | NA                            | NA                 |
| <i>Desi_wild_3062049</i> | NA                                  | <i>Ca_desi_denovo</i> | 3062049                 | C/G  | NA                 | NA                            | NA                 |
| <i>Desi_wild_3062843</i> | NA                                  | <i>Ca_desi_denovo</i> | 3062843                 | A/C  | NA                 | NA                            | NA                 |
| <i>Desi_wild_3062845</i> | NA                                  | <i>Ca_desi_denovo</i> | 3062845                 | A/C  | NA                 | NA                            | NA                 |
| <i>Desi_wild_3063536</i> | NA                                  | <i>Ca_desi_denovo</i> | 3063536                 | C/G  | NA                 | NA                            | NA                 |
| <i>Desi_wild_3064764</i> | NA                                  | <i>Ca_desi_denovo</i> | 3064764                 | A/G  | NA                 | NA                            | NA                 |
| <i>Desi_wild_3065213</i> | NA                                  | <i>Ca_desi_denovo</i> | 3065213                 | T/G  | NA                 | NA                            | NA                 |
| <i>Desi_wild_3065234</i> | NA                                  | <i>Ca_desi_denovo</i> | 3065234                 | C/T  | NA                 | NA                            | NA                 |
| <i>Desi_wild_3065609</i> | NA                                  | <i>Ca_desi_denovo</i> | 3065609                 | T/C  | NA                 | NA                            | NA                 |
| <i>Desi_wild_3066062</i> | NA                                  | <i>Ca_desi_denovo</i> | 3066062                 | T/C  | NA                 | NA                            | NA                 |
| <i>Desi_wild_3066095</i> | NA                                  | <i>Ca_desi_denovo</i> | 3066095                 | C/T  | NA                 | NA                            | NA                 |
| <i>Desi_wild_3067219</i> | NA                                  | <i>Ca_desi_denovo</i> | 3067219                 | C/T  | NA                 | NA                            | NA                 |
| <i>Desi_wild_3067246</i> | NA                                  | <i>Ca_desi_denovo</i> | 3067246                 | G/C  | NA                 | NA                            | NA                 |
| <i>Desi_wild_3067367</i> | NA                                  | <i>Ca_desi_denovo</i> | 3067367                 | G/A  | NA                 | NA                            | NA                 |
| <i>Desi_wild_3068089</i> | NA                                  | <i>Ca_desi_denovo</i> | 3068089                 | G/C  | NA                 | NA                            | NA                 |
| <i>Desi_wild_3068292</i> | NA                                  | <i>Ca_desi_denovo</i> | 3068292                 | C/T  | NA                 | NA                            | NA                 |
| <i>Desi_wild_3068295</i> | NA                                  | <i>Ca_desi_denovo</i> | 3068295                 | A/G  | NA                 | NA                            | NA                 |
| <i>Desi_wild_3068310</i> | NA                                  | <i>Ca_desi_denovo</i> | 3068310                 | T/C  | NA                 | NA                            | NA                 |
| <i>Desi_wild_3069916</i> | NA                                  | <i>Ca_desi_denovo</i> | 3069916                 | C/T  | NA                 | NA                            | NA                 |
| <i>Desi_wild_3069984</i> | NA                                  | <i>Ca_desi_denovo</i> | 3069984                 | C/T  | NA                 | NA                            | NA                 |
| <i>Desi_wild_3070009</i> | NA                                  | <i>Ca_desi_denovo</i> | 3070009                 | C/G  | NA                 | NA                            | NA                 |
| <i>Desi_wild_3070445</i> | NA                                  | <i>Ca_desi_denovo</i> | 3070445                 | C/T  | NA                 | NA                            | NA                 |
| <i>Desi_wild_3070475</i> | NA                                  | <i>Ca_desi_denovo</i> | 3070475                 | A/T  | NA                 | NA                            | NA                 |
| <i>Desi_wild_3070544</i> | NA                                  | <i>Ca_desi_denovo</i> | 3070544                 | T/C  | NA                 | NA                            | NA                 |
| <i>Desi_wild_3070889</i> | NA                                  | <i>Ca_desi_denovo</i> | 3070889                 | A/G  | NA                 | NA                            | NA                 |
| <i>Desi_wild_3071952</i> | NA                                  | <i>Ca_desi_denovo</i> | 3071952                 | C/T  | NA                 | NA                            | NA                 |
| <i>Desi_wild_3072853</i> | NA                                  | <i>Ca_desi_denovo</i> | 3072853                 | C/G  | NA                 | NA                            | NA                 |

| SNP IDs                  | NCBI dbSNP accession IDs (NCBI_SS#) | Chromosomes           | Physical positions (bp) | SNPs | Gene accession IDs | Sequence components of genome | Putative functions |
|--------------------------|-------------------------------------|-----------------------|-------------------------|------|--------------------|-------------------------------|--------------------|
| <i>Desi_wild_3073309</i> | NA                                  | <i>Ca_desi_denovo</i> | 3073309                 | T/G  | NA                 | NA                            | NA                 |
| <i>Desi_wild_3073796</i> | NA                                  | <i>Ca_desi_denovo</i> | 3073796                 | T/C  | NA                 | NA                            | NA                 |
| <i>Desi_wild_3074133</i> | NA                                  | <i>Ca_desi_denovo</i> | 3074133                 | T/C  | NA                 | NA                            | NA                 |
| <i>Desi_wild_3077053</i> | NA                                  | <i>Ca_desi_denovo</i> | 3077053                 | G/A  | NA                 | NA                            | NA                 |
| <i>Desi_wild_3077400</i> | NA                                  | <i>Ca_desi_denovo</i> | 3077400                 | G/C  | NA                 | NA                            | NA                 |
| <i>Desi_wild_3077462</i> | NA                                  | <i>Ca_desi_denovo</i> | 3077462                 | T/C  | NA                 | NA                            | NA                 |
| <i>Desi_wild_3077707</i> | NA                                  | <i>Ca_desi_denovo</i> | 3077707                 | C/T  | NA                 | NA                            | NA                 |
| <i>Desi_wild_3077722</i> | NA                                  | <i>Ca_desi_denovo</i> | 3077722                 | G/C  | NA                 | NA                            | NA                 |
| <i>Desi_wild_3077727</i> | NA                                  | <i>Ca_desi_denovo</i> | 3077727                 | C/T  | NA                 | NA                            | NA                 |
| <i>Desi_wild_3077805</i> | NA                                  | <i>Ca_desi_denovo</i> | 3077805                 | G/A  | NA                 | NA                            | NA                 |
| <i>Desi_wild_3079841</i> | NA                                  | <i>Ca_desi_denovo</i> | 3079841                 | A/G  | NA                 | NA                            | NA                 |
| <i>Desi_wild_3079842</i> | NA                                  | <i>Ca_desi_denovo</i> | 3079842                 | C/A  | NA                 | NA                            | NA                 |
| <i>Desi_wild_3081997</i> | NA                                  | <i>Ca_desi_denovo</i> | 3081997                 | A/G  | NA                 | NA                            | NA                 |
| <i>Desi_wild_3082216</i> | NA                                  | <i>Ca_desi_denovo</i> | 3082216                 | A/G  | NA                 | NA                            | NA                 |
| <i>Desi_wild_3082361</i> | NA                                  | <i>Ca_desi_denovo</i> | 3082361                 | T/G  | NA                 | NA                            | NA                 |
| <i>Desi_wild_3083144</i> | NA                                  | <i>Ca_desi_denovo</i> | 3083144                 | C/T  | NA                 | NA                            | NA                 |
| <i>Desi_wild_3083203</i> | NA                                  | <i>Ca_desi_denovo</i> | 3083203                 | A/G  | NA                 | NA                            | NA                 |
| <i>Desi_wild_3083637</i> | NA                                  | <i>Ca_desi_denovo</i> | 3083637                 | C/G  | NA                 | NA                            | NA                 |
| <i>Desi_wild_3083873</i> | NA                                  | <i>Ca_desi_denovo</i> | 3083873                 | G/A  | NA                 | NA                            | NA                 |
| <i>Desi_wild_3083929</i> | NA                                  | <i>Ca_desi_denovo</i> | 3083929                 | G/A  | NA                 | NA                            | NA                 |
| <i>Desi_wild_3083935</i> | NA                                  | <i>Ca_desi_denovo</i> | 3083935                 | T/C  | NA                 | NA                            | NA                 |
| <i>Desi_wild_3084332</i> | NA                                  | <i>Ca_desi_denovo</i> | 3084332                 | T/C  | NA                 | NA                            | NA                 |
| <i>Desi_wild_3086340</i> | NA                                  | <i>Ca_desi_denovo</i> | 3086340                 | A/G  | NA                 | NA                            | NA                 |
| <i>Desi_wild_3086373</i> | NA                                  | <i>Ca_desi_denovo</i> | 3086373                 | T/C  | NA                 | NA                            | NA                 |
| <i>Desi_wild_3086438</i> | NA                                  | <i>Ca_desi_denovo</i> | 3086438                 | C/T  | NA                 | NA                            | NA                 |
| <i>Desi_wild_3087108</i> | NA                                  | <i>Ca_desi_denovo</i> | 3087108                 | C/T  | NA                 | NA                            | NA                 |
| <i>Desi_wild_3088414</i> | NA                                  | <i>Ca_desi_denovo</i> | 3088414                 | A/G  | NA                 | NA                            | NA                 |
| <i>Desi_wild_3088489</i> | NA                                  | <i>Ca_desi_denovo</i> | 3088489                 | C/T  | NA                 | NA                            | NA                 |
| <i>Desi_wild_3088569</i> | NA                                  | <i>Ca_desi_denovo</i> | 3088569                 | A/G  | NA                 | NA                            | NA                 |
| <i>Desi_wild_3088692</i> | NA                                  | <i>Ca_desi_denovo</i> | 3088692                 | G/T  | NA                 | NA                            | NA                 |
| <i>Desi_wild_3089754</i> | NA                                  | <i>Ca_desi_denovo</i> | 3089754                 | G/A  | NA                 | NA                            | NA                 |
| <i>Desi_wild_3089965</i> | NA                                  | <i>Ca_desi_denovo</i> | 3089965                 | G/A  | NA                 | NA                            | NA                 |
| <i>Desi_wild_3090329</i> | NA                                  | <i>Ca_desi_denovo</i> | 3090329                 | T/C  | NA                 | NA                            | NA                 |
| <i>Desi_wild_3090720</i> | NA                                  | <i>Ca_desi_denovo</i> | 3090720                 | G/A  | NA                 | NA                            | NA                 |
| <i>Desi_wild_3090808</i> | NA                                  | <i>Ca_desi_denovo</i> | 3090808                 | T/C  | NA                 | NA                            | NA                 |
| <i>Desi_wild_3091620</i> | NA                                  | <i>Ca_desi_denovo</i> | 3091620                 | G/A  | NA                 | NA                            | NA                 |
| <i>Desi_wild_3092235</i> | NA                                  | <i>Ca_desi_denovo</i> | 3092235                 | C/G  | NA                 | NA                            | NA                 |
| <i>Desi_wild_3092255</i> | NA                                  | <i>Ca_desi_denovo</i> | 3092255                 | G/A  | NA                 | NA                            | NA                 |
| <i>Desi_wild_3092713</i> | NA                                  | <i>Ca_desi_denovo</i> | 3092713                 | G/T  | NA                 | NA                            | NA                 |
| <i>Desi_wild_3094011</i> | NA                                  | <i>Ca_desi_denovo</i> | 3094011                 | C/G  | NA                 | NA                            | NA                 |
| <i>Desi_wild_3094240</i> | NA                                  | <i>Ca_desi_denovo</i> | 3094240                 | C/A  | NA                 | NA                            | NA                 |
| <i>Desi_wild_3095676</i> | NA                                  | <i>Ca_desi_denovo</i> | 3095676                 | G/A  | NA                 | NA                            | NA                 |
| <i>Desi_wild_3095865</i> | NA                                  | <i>Ca_desi_denovo</i> | 3095865                 | A/G  | NA                 | NA                            | NA                 |
| <i>Desi_wild_3095965</i> | NA                                  | <i>Ca_desi_denovo</i> | 3095965                 | C/T  | NA                 | NA                            | NA                 |

| SNP IDs                  | NCBI dbSNP accession IDs (NCBI_SS#) | Chromosomes           | Physical positions (bp) | SNPs | Gene accession IDs | Sequence components of genome | Putative functions |
|--------------------------|-------------------------------------|-----------------------|-------------------------|------|--------------------|-------------------------------|--------------------|
| <i>Desi_wild_3096101</i> | NA                                  | <i>Ca_desi_denovo</i> | 3096101                 | T/C  | NA                 | NA                            | NA                 |
| <i>Desi_wild_3096347</i> | NA                                  | <i>Ca_desi_denovo</i> | 3096347                 | C/T  | NA                 | NA                            | NA                 |
| <i>Desi_wild_3098123</i> | NA                                  | <i>Ca_desi_denovo</i> | 3098123                 | A/C  | NA                 | NA                            | NA                 |
| <i>Desi_wild_3098865</i> | NA                                  | <i>Ca_desi_denovo</i> | 3098865                 | T/C  | NA                 | NA                            | NA                 |
| <i>Desi_wild_3099500</i> | NA                                  | <i>Ca_desi_denovo</i> | 3099500                 | T/C  | NA                 | NA                            | NA                 |
| <i>Desi_wild_3100230</i> | NA                                  | <i>Ca_desi_denovo</i> | 3100230                 | C/T  | NA                 | NA                            | NA                 |
| <i>Desi_wild_3100257</i> | NA                                  | <i>Ca_desi_denovo</i> | 3100257                 | C/G  | NA                 | NA                            | NA                 |
| <i>Desi_wild_3101651</i> | NA                                  | <i>Ca_desi_denovo</i> | 3101651                 | C/G  | NA                 | NA                            | NA                 |
| <i>Desi_wild_3102041</i> | NA                                  | <i>Ca_desi_denovo</i> | 3102041                 | G/T  | NA                 | NA                            | NA                 |
| <i>Desi_wild_3102087</i> | NA                                  | <i>Ca_desi_denovo</i> | 3102087                 | C/T  | NA                 | NA                            | NA                 |
| <i>Desi_wild_3102352</i> | NA                                  | <i>Ca_desi_denovo</i> | 3102352                 | A/G  | NA                 | NA                            | NA                 |
| <i>Desi_wild_3103042</i> | NA                                  | <i>Ca_desi_denovo</i> | 3103042                 | G/T  | NA                 | NA                            | NA                 |
| <i>Desi_wild_3104406</i> | NA                                  | <i>Ca_desi_denovo</i> | 3104406                 | A/C  | NA                 | NA                            | NA                 |
| <i>Desi_wild_3104759</i> | NA                                  | <i>Ca_desi_denovo</i> | 3104759                 | G/A  | NA                 | NA                            | NA                 |
| <i>Desi_wild_3104761</i> | NA                                  | <i>Ca_desi_denovo</i> | 3104761                 | C/T  | NA                 | NA                            | NA                 |
| <i>Desi_wild_3104764</i> | NA                                  | <i>Ca_desi_denovo</i> | 3104764                 | G/A  | NA                 | NA                            | NA                 |
| <i>Desi_wild_3104801</i> | NA                                  | <i>Ca_desi_denovo</i> | 3104801                 | A/G  | NA                 | NA                            | NA                 |
| <i>Desi_wild_3104990</i> | NA                                  | <i>Ca_desi_denovo</i> | 3104990                 | C/T  | NA                 | NA                            | NA                 |
| <i>Desi_wild_3105249</i> | NA                                  | <i>Ca_desi_denovo</i> | 3105249                 | C/G  | NA                 | NA                            | NA                 |
| <i>Desi_wild_3105598</i> | NA                                  | <i>Ca_desi_denovo</i> | 3105598                 | C/T  | NA                 | NA                            | NA                 |
| <i>Desi_wild_3106130</i> | NA                                  | <i>Ca_desi_denovo</i> | 3106130                 | C/G  | NA                 | NA                            | NA                 |
| <i>Desi_wild_3107455</i> | NA                                  | <i>Ca_desi_denovo</i> | 3107455                 | T/G  | NA                 | NA                            | NA                 |
| <i>Desi_wild_3107875</i> | NA                                  | <i>Ca_desi_denovo</i> | 3107875                 | C/A  | NA                 | NA                            | NA                 |
| <i>Desi_wild_3107896</i> | NA                                  | <i>Ca_desi_denovo</i> | 3107896                 | C/G  | NA                 | NA                            | NA                 |
| <i>Desi_wild_3108845</i> | NA                                  | <i>Ca_desi_denovo</i> | 3108845                 | T/C  | NA                 | NA                            | NA                 |
| <i>Desi_wild_3109382</i> | NA                                  | <i>Ca_desi_denovo</i> | 3109382                 | A/T  | NA                 | NA                            | NA                 |
| <i>Desi_wild_3109385</i> | NA                                  | <i>Ca_desi_denovo</i> | 3109385                 | G/T  | NA                 | NA                            | NA                 |
| <i>Desi_wild_3109388</i> | NA                                  | <i>Ca_desi_denovo</i> | 3109388                 | C/G  | NA                 | NA                            | NA                 |
| <i>Desi_wild_3109390</i> | NA                                  | <i>Ca_desi_denovo</i> | 3109390                 | G/C  | NA                 | NA                            | NA                 |
| <i>Desi_wild_3109393</i> | NA                                  | <i>Ca_desi_denovo</i> | 3109393                 | T/G  | NA                 | NA                            | NA                 |
| <i>Desi_wild_3110568</i> | NA                                  | <i>Ca_desi_denovo</i> | 3110568                 | A/C  | NA                 | NA                            | NA                 |
| <i>Desi_wild_3111581</i> | NA                                  | <i>Ca_desi_denovo</i> | 3111581                 | G/A  | NA                 | NA                            | NA                 |
| <i>Desi_wild_3112743</i> | NA                                  | <i>Ca_desi_denovo</i> | 3112743                 | C/G  | NA                 | NA                            | NA                 |
| <i>Desi_wild_3112828</i> | NA                                  | <i>Ca_desi_denovo</i> | 3112828                 | G/A  | NA                 | NA                            | NA                 |
| <i>Desi_wild_3112990</i> | NA                                  | <i>Ca_desi_denovo</i> | 3112990                 | G/A  | NA                 | NA                            | NA                 |
| <i>Desi_wild_3113121</i> | NA                                  | <i>Ca_desi_denovo</i> | 3113121                 | G/A  | NA                 | NA                            | NA                 |
| <i>Desi_wild_3113238</i> | NA                                  | <i>Ca_desi_denovo</i> | 3113238                 | A/G  | NA                 | NA                            | NA                 |
| <i>Desi_wild_3113670</i> | NA                                  | <i>Ca_desi_denovo</i> | 3113670                 | A/C  | NA                 | NA                            | NA                 |
| <i>Desi_wild_3113672</i> | NA                                  | <i>Ca_desi_denovo</i> | 3113672                 | A/C  | NA                 | NA                            | NA                 |
| <i>Desi_wild_3113673</i> | NA                                  | <i>Ca_desi_denovo</i> | 3113673                 | A/T  | NA                 | NA                            | NA                 |
| <i>Desi_wild_3115207</i> | NA                                  | <i>Ca_desi_denovo</i> | 3115207                 | G/A  | NA                 | NA                            | NA                 |
| <i>Desi_wild_3115358</i> | NA                                  | <i>Ca_desi_denovo</i> | 3115358                 | T/C  | NA                 | NA                            | NA                 |
| <i>Desi_wild_3115379</i> | NA                                  | <i>Ca_desi_denovo</i> | 3115379                 | A/G  | NA                 | NA                            | NA                 |
| <i>Desi_wild_3115437</i> | NA                                  | <i>Ca_desi_denovo</i> | 3115437                 | G/A  | NA                 | NA                            | NA                 |



| SNP IDs                  | NCBI dbSNP accession IDs (NCBI_SS#) | Chromosomes           | Physical positions (bp) | SNPs | Gene accession IDs | Sequence components of genome | Putative functions |
|--------------------------|-------------------------------------|-----------------------|-------------------------|------|--------------------|-------------------------------|--------------------|
| <i>Desi_wild_3115440</i> | NA                                  | <i>Ca_desi_denovo</i> | 3115440                 | G/C  | NA                 | NA                            | NA                 |
| <i>Desi_wild_3115620</i> | NA                                  | <i>Ca_desi_denovo</i> | 3115620                 | T/C  | NA                 | NA                            | NA                 |
| <i>Desi_wild_3115662</i> | NA                                  | <i>Ca_desi_denovo</i> | 3115662                 | G/A  | NA                 | NA                            | NA                 |
| <i>Desi_wild_3115727</i> | NA                                  | <i>Ca_desi_denovo</i> | 3115727                 | C/T  | NA                 | NA                            | NA                 |
| <i>Desi_wild_3116119</i> | NA                                  | <i>Ca_desi_denovo</i> | 3116119                 | C/A  | NA                 | NA                            | NA                 |
| <i>Desi_wild_3116167</i> | NA                                  | <i>Ca_desi_denovo</i> | 3116167                 | T/C  | NA                 | NA                            | NA                 |
| <i>Desi_wild_3117008</i> | NA                                  | <i>Ca_desi_denovo</i> | 3117008                 | T/A  | NA                 | NA                            | NA                 |
| <i>Desi_wild_3117131</i> | NA                                  | <i>Ca_desi_denovo</i> | 3117131                 | G/C  | NA                 | NA                            | NA                 |
| <i>Desi_wild_3117161</i> | NA                                  | <i>Ca_desi_denovo</i> | 3117161                 | A/G  | NA                 | NA                            | NA                 |
| <i>Desi_wild_3118515</i> | NA                                  | <i>Ca_desi_denovo</i> | 3118515                 | G/C  | NA                 | NA                            | NA                 |
| <i>Desi_wild_3118860</i> | NA                                  | <i>Ca_desi_denovo</i> | 3118860                 | T/G  | NA                 | NA                            | NA                 |
| <i>Desi_wild_3118906</i> | NA                                  | <i>Ca_desi_denovo</i> | 3118906                 | T/G  | NA                 | NA                            | NA                 |
| <i>Desi_wild_3119521</i> | NA                                  | <i>Ca_desi_denovo</i> | 3119521                 | T/C  | NA                 | NA                            | NA                 |
| <i>Desi_wild_3120783</i> | NA                                  | <i>Ca_desi_denovo</i> | 3120783                 | G/C  | NA                 | NA                            | NA                 |
| <i>Desi_wild_3120802</i> | NA                                  | <i>Ca_desi_denovo</i> | 3120802                 | C/G  | NA                 | NA                            | NA                 |
| <i>Desi_wild_3120980</i> | NA                                  | <i>Ca_desi_denovo</i> | 3120980                 | G/T  | NA                 | NA                            | NA                 |
| <i>Desi_wild_3121562</i> | NA                                  | <i>Ca_desi_denovo</i> | 3121562                 | T/G  | NA                 | NA                            | NA                 |
| <i>Desi_wild_3121568</i> | NA                                  | <i>Ca_desi_denovo</i> | 3121568                 | T/A  | NA                 | NA                            | NA                 |
| <i>Desi_wild_3121645</i> | NA                                  | <i>Ca_desi_denovo</i> | 3121645                 | T/C  | NA                 | NA                            | NA                 |
| <i>Desi_wild_3121895</i> | NA                                  | <i>Ca_desi_denovo</i> | 3121895                 | C/T  | NA                 | NA                            | NA                 |
| <i>Desi_wild_3122301</i> | NA                                  | <i>Ca_desi_denovo</i> | 3122301                 | A/C  | NA                 | NA                            | NA                 |
| <i>Desi_wild_3122822</i> | NA                                  | <i>Ca_desi_denovo</i> | 3122822                 | C/G  | NA                 | NA                            | NA                 |
| <i>Desi_wild_3122843</i> | NA                                  | <i>Ca_desi_denovo</i> | 3122843                 | A/T  | NA                 | NA                            | NA                 |
| <i>Desi_wild_3124164</i> | NA                                  | <i>Ca_desi_denovo</i> | 3124164                 | C/T  | NA                 | NA                            | NA                 |
| <i>Desi_wild_3124819</i> | NA                                  | <i>Ca_desi_denovo</i> | 3124819                 | C/G  | NA                 | NA                            | NA                 |
| <i>Desi_wild_3124827</i> | NA                                  | <i>Ca_desi_denovo</i> | 3124827                 | C/G  | NA                 | NA                            | NA                 |
| <i>Desi_wild_3124916</i> | NA                                  | <i>Ca_desi_denovo</i> | 3124916                 | T/C  | NA                 | NA                            | NA                 |
| <i>Desi_wild_3124917</i> | NA                                  | <i>Ca_desi_denovo</i> | 3124917                 | C/A  | NA                 | NA                            | NA                 |
| <i>Desi_wild_3125126</i> | NA                                  | <i>Ca_desi_denovo</i> | 3125126                 | T/C  | NA                 | NA                            | NA                 |
| <i>Desi_wild_3128035</i> | NA                                  | <i>Ca_desi_denovo</i> | 3128035                 | C/G  | NA                 | NA                            | NA                 |
| <i>Desi_wild_3128257</i> | NA                                  | <i>Ca_desi_denovo</i> | 3128257                 | C/T  | NA                 | NA                            | NA                 |
| <i>Desi_wild_3128820</i> | NA                                  | <i>Ca_desi_denovo</i> | 3128820                 | C/T  | NA                 | NA                            | NA                 |
| <i>Desi_wild_3128942</i> | NA                                  | <i>Ca_desi_denovo</i> | 3128942                 | T/C  | NA                 | NA                            | NA                 |
| <i>Desi_wild_3129402</i> | NA                                  | <i>Ca_desi_denovo</i> | 3129402                 | T/G  | NA                 | NA                            | NA                 |
| <i>Desi_wild_3129589</i> | NA                                  | <i>Ca_desi_denovo</i> | 3129589                 | C/A  | NA                 | NA                            | NA                 |
| <i>Desi_wild_3130896</i> | NA                                  | <i>Ca_desi_denovo</i> | 3130896                 | G/C  | NA                 | NA                            | NA                 |
| <i>Desi_wild_3130929</i> | NA                                  | <i>Ca_desi_denovo</i> | 3130929                 | C/T  | NA                 | NA                            | NA                 |
| <i>Desi_wild_3131051</i> | NA                                  | <i>Ca_desi_denovo</i> | 3131051                 | A/G  | NA                 | NA                            | NA                 |
| <i>Desi_wild_3131836</i> | NA                                  | <i>Ca_desi_denovo</i> | 3131836                 | T/C  | NA                 | NA                            | NA                 |
| <i>Desi_wild_3131842</i> | NA                                  | <i>Ca_desi_denovo</i> | 3131842                 | C/T  | NA                 | NA                            | NA                 |
| <i>Desi_wild_3131851</i> | NA                                  | <i>Ca_desi_denovo</i> | 3131851                 | C/G  | NA                 | NA                            | NA                 |
| <i>Desi_wild_3132038</i> | NA                                  | <i>Ca_desi_denovo</i> | 3132038                 | C/T  | NA                 | NA                            | NA                 |
| <i>Desi_wild_3132084</i> | NA                                  | <i>Ca_desi_denovo</i> | 3132084                 | A/G  | NA                 | NA                            | NA                 |
| <i>Desi_wild_3132103</i> | NA                                  | <i>Ca_desi_denovo</i> | 3132103                 | G/T  | NA                 | NA                            | NA                 |

| SNP IDs                  | NCBI dbSNP accession IDs (NCBI_SS#) | Chromosomes           | Physical positions (bp) | SNPs | Gene accession IDs | Sequence components of genome | Putative functions |
|--------------------------|-------------------------------------|-----------------------|-------------------------|------|--------------------|-------------------------------|--------------------|
| <i>Desi_wild_3132120</i> | NA                                  | <i>Ca_desi_denovo</i> | 3132120                 | T/C  | NA                 | NA                            | NA                 |
| <i>Desi_wild_3132209</i> | NA                                  | <i>Ca_desi_denovo</i> | 3132209                 | G/C  | NA                 | NA                            | NA                 |
| <i>Desi_wild_3132239</i> | NA                                  | <i>Ca_desi_denovo</i> | 3132239                 | C/T  | NA                 | NA                            | NA                 |
| <i>Desi_wild_3134340</i> | NA                                  | <i>Ca_desi_denovo</i> | 3134340                 | C/T  | NA                 | NA                            | NA                 |
| <i>Desi_wild_3134443</i> | NA                                  | <i>Ca_desi_denovo</i> | 3134443                 | C/G  | NA                 | NA                            | NA                 |
| <i>Desi_wild_3134535</i> | NA                                  | <i>Ca_desi_denovo</i> | 3134535                 | C/T  | NA                 | NA                            | NA                 |
| <i>Desi_wild_3134550</i> | NA                                  | <i>Ca_desi_denovo</i> | 3134550                 | G/C  | NA                 | NA                            | NA                 |
| <i>Desi_wild_3134866</i> | NA                                  | <i>Ca_desi_denovo</i> | 3134866                 | G/A  | NA                 | NA                            | NA                 |
| <i>Desi_wild_3135465</i> | NA                                  | <i>Ca_desi_denovo</i> | 3135465                 | C/T  | NA                 | NA                            | NA                 |
| <i>Desi_wild_3137208</i> | NA                                  | <i>Ca_desi_denovo</i> | 3137208                 | C/T  | NA                 | NA                            | NA                 |
| <i>Desi_wild_3138125</i> | NA                                  | <i>Ca_desi_denovo</i> | 3138125                 | A/G  | NA                 | NA                            | NA                 |
| <i>Desi_wild_3138481</i> | NA                                  | <i>Ca_desi_denovo</i> | 3138481                 | C/A  | NA                 | NA                            | NA                 |
| <i>Desi_wild_3138493</i> | NA                                  | <i>Ca_desi_denovo</i> | 3138493                 | T/C  | NA                 | NA                            | NA                 |
| <i>Desi_wild_3138573</i> | NA                                  | <i>Ca_desi_denovo</i> | 3138573                 | G/A  | NA                 | NA                            | NA                 |
| <i>Desi_wild_3138707</i> | NA                                  | <i>Ca_desi_denovo</i> | 3138707                 | C/T  | NA                 | NA                            | NA                 |
| <i>Desi_wild_3139605</i> | NA                                  | <i>Ca_desi_denovo</i> | 3139605                 | C/T  | NA                 | NA                            | NA                 |
| <i>Desi_wild_3139721</i> | NA                                  | <i>Ca_desi_denovo</i> | 3139721                 | A/T  | NA                 | NA                            | NA                 |
| <i>Desi_wild_3139735</i> | NA                                  | <i>Ca_desi_denovo</i> | 3139735                 | C/T  | NA                 | NA                            | NA                 |
| <i>Desi_wild_3141303</i> | NA                                  | <i>Ca_desi_denovo</i> | 3141303                 | C/G  | NA                 | NA                            | NA                 |
| <i>Desi_wild_3142760</i> | NA                                  | <i>Ca_desi_denovo</i> | 3142760                 | C/T  | NA                 | NA                            | NA                 |
| <i>Desi_wild_3142766</i> | NA                                  | <i>Ca_desi_denovo</i> | 3142766                 | A/G  | NA                 | NA                            | NA                 |
| <i>Desi_wild_3143664</i> | NA                                  | <i>Ca_desi_denovo</i> | 3143664                 | A/G  | NA                 | NA                            | NA                 |
| <i>Desi_wild_3143735</i> | NA                                  | <i>Ca_desi_denovo</i> | 3143735                 | T/G  | NA                 | NA                            | NA                 |
| <i>Desi_wild_3144111</i> | NA                                  | <i>Ca_desi_denovo</i> | 3144111                 | C/T  | NA                 | NA                            | NA                 |
| <i>Desi_wild_3144240</i> | NA                                  | <i>Ca_desi_denovo</i> | 3144240                 | G/T  | NA                 | NA                            | NA                 |
| <i>Desi_wild_3144259</i> | NA                                  | <i>Ca_desi_denovo</i> | 3144259                 | A/G  | NA                 | NA                            | NA                 |
| <i>Desi_wild_3144286</i> | NA                                  | <i>Ca_desi_denovo</i> | 3144286                 | C/G  | NA                 | NA                            | NA                 |
| <i>Desi_wild_3144289</i> | NA                                  | <i>Ca_desi_denovo</i> | 3144289                 | C/T  | NA                 | NA                            | NA                 |
| <i>Desi_wild_3144541</i> | NA                                  | <i>Ca_desi_denovo</i> | 3144541                 | A/G  | NA                 | NA                            | NA                 |
| <i>Desi_wild_3144776</i> | NA                                  | <i>Ca_desi_denovo</i> | 3144776                 | G/A  | NA                 | NA                            | NA                 |
| <i>Desi_wild_3144793</i> | NA                                  | <i>Ca_desi_denovo</i> | 3144793                 | A/C  | NA                 | NA                            | NA                 |
| <i>Desi_wild_3146896</i> | NA                                  | <i>Ca_desi_denovo</i> | 3146896                 | G/T  | NA                 | NA                            | NA                 |
| <i>Desi_wild_3146994</i> | NA                                  | <i>Ca_desi_denovo</i> | 3146994                 | T/C  | NA                 | NA                            | NA                 |
| <i>Desi_wild_3146996</i> | NA                                  | <i>Ca_desi_denovo</i> | 3146996                 | G/C  | NA                 | NA                            | NA                 |
| <i>Desi_wild_3148332</i> | NA                                  | <i>Ca_desi_denovo</i> | 3148332                 | C/G  | NA                 | NA                            | NA                 |
| <i>Desi_wild_3148735</i> | NA                                  | <i>Ca_desi_denovo</i> | 3148735                 | C/T  | NA                 | NA                            | NA                 |
| <i>Desi_wild_3148759</i> | NA                                  | <i>Ca_desi_denovo</i> | 3148759                 | G/T  | NA                 | NA                            | NA                 |
| <i>Desi_wild_3149569</i> | NA                                  | <i>Ca_desi_denovo</i> | 3149569                 | C/A  | NA                 | NA                            | NA                 |
| <i>Desi_wild_3150348</i> | NA                                  | <i>Ca_desi_denovo</i> | 3150348                 | T/C  | NA                 | NA                            | NA                 |
| <i>Desi_wild_3150383</i> | NA                                  | <i>Ca_desi_denovo</i> | 3150383                 | T/C  | NA                 | NA                            | NA                 |
| <i>Desi_wild_3150937</i> | NA                                  | <i>Ca_desi_denovo</i> | 3150937                 | T/C  | NA                 | NA                            | NA                 |
| <i>Desi_wild_3150975</i> | NA                                  | <i>Ca_desi_denovo</i> | 3150975                 | C/T  | NA                 | NA                            | NA                 |
| <i>Desi_wild_3151053</i> | NA                                  | <i>Ca_desi_denovo</i> | 3151053                 | G/C  | NA                 | NA                            | NA                 |
| <i>Desi_wild_3151073</i> | NA                                  | <i>Ca_desi_denovo</i> | 3151073                 | C/T  | NA                 | NA                            | NA                 |

| SNP IDs                  | NCBI dbSNP accession IDs (NCBI_SS#) | Chromosomes           | Physical positions (bp) | SNPs | Gene accession IDs | Sequence components of genome | Putative functions |
|--------------------------|-------------------------------------|-----------------------|-------------------------|------|--------------------|-------------------------------|--------------------|
| <i>Desi_wild_3152974</i> | NA                                  | <i>Ca_desi_denovo</i> | 3152974                 | G/T  | NA                 | NA                            | NA                 |
| <i>Desi_wild_3152986</i> | NA                                  | <i>Ca_desi_denovo</i> | 3152986                 | T/C  | NA                 | NA                            | NA                 |
| <i>Desi_wild_3153008</i> | NA                                  | <i>Ca_desi_denovo</i> | 3153008                 | T/G  | NA                 | NA                            | NA                 |
| <i>Desi_wild_3154337</i> | NA                                  | <i>Ca_desi_denovo</i> | 3154337                 | A/G  | NA                 | NA                            | NA                 |
| <i>Desi_wild_3154846</i> | NA                                  | <i>Ca_desi_denovo</i> | 3154846                 | A/G  | NA                 | NA                            | NA                 |
| <i>Desi_wild_3154877</i> | NA                                  | <i>Ca_desi_denovo</i> | 3154877                 | A/G  | NA                 | NA                            | NA                 |
| <i>Desi_wild_3154918</i> | NA                                  | <i>Ca_desi_denovo</i> | 3154918                 | T/C  | NA                 | NA                            | NA                 |
| <i>Desi_wild_3154973</i> | NA                                  | <i>Ca_desi_denovo</i> | 3154973                 | T/C  | NA                 | NA                            | NA                 |
| <i>Desi_wild_3155426</i> | NA                                  | <i>Ca_desi_denovo</i> | 3155426                 | G/A  | NA                 | NA                            | NA                 |
| <i>Desi_wild_3155432</i> | NA                                  | <i>Ca_desi_denovo</i> | 3155432                 | C/T  | NA                 | NA                            | NA                 |
| <i>Desi_wild_3155509</i> | NA                                  | <i>Ca_desi_denovo</i> | 3155509                 | G/A  | NA                 | NA                            | NA                 |
| <i>Desi_wild_3157983</i> | NA                                  | <i>Ca_desi_denovo</i> | 3157983                 | T/G  | NA                 | NA                            | NA                 |
| <i>Desi_wild_3158400</i> | NA                                  | <i>Ca_desi_denovo</i> | 3158400                 | A/G  | NA                 | NA                            | NA                 |
| <i>Desi_wild_3158403</i> | NA                                  | <i>Ca_desi_denovo</i> | 3158403                 | G/C  | NA                 | NA                            | NA                 |
| <i>Desi_wild_3158511</i> | NA                                  | <i>Ca_desi_denovo</i> | 3158511                 | A/G  | NA                 | NA                            | NA                 |
| <i>Desi_wild_3159189</i> | NA                                  | <i>Ca_desi_denovo</i> | 3159189                 | T/C  | NA                 | NA                            | NA                 |
| <i>Desi_wild_3159194</i> | NA                                  | <i>Ca_desi_denovo</i> | 3159194                 | C/T  | NA                 | NA                            | NA                 |
| <i>Desi_wild_3159432</i> | NA                                  | <i>Ca_desi_denovo</i> | 3159432                 | G/T  | NA                 | NA                            | NA                 |
| <i>Desi_wild_3159444</i> | NA                                  | <i>Ca_desi_denovo</i> | 3159444                 | A/G  | NA                 | NA                            | NA                 |
| <i>Desi_wild_3160563</i> | NA                                  | <i>Ca_desi_denovo</i> | 3160563                 | C/G  | NA                 | NA                            | NA                 |
| <i>Desi_wild_3160569</i> | NA                                  | <i>Ca_desi_denovo</i> | 3160569                 | G/C  | NA                 | NA                            | NA                 |
| <i>Desi_wild_3160572</i> | NA                                  | <i>Ca_desi_denovo</i> | 3160572                 | G/A  | NA                 | NA                            | NA                 |
| <i>Desi_wild_3160660</i> | NA                                  | <i>Ca_desi_denovo</i> | 3160660                 | A/G  | NA                 | NA                            | NA                 |
| <i>Desi_wild_3161411</i> | NA                                  | <i>Ca_desi_denovo</i> | 3161411                 | G/A  | NA                 | NA                            | NA                 |
| <i>Desi_wild_3161438</i> | NA                                  | <i>Ca_desi_denovo</i> | 3161438                 | G/A  | NA                 | NA                            | NA                 |
| <i>Desi_wild_3161447</i> | NA                                  | <i>Ca_desi_denovo</i> | 3161447                 | C/T  | NA                 | NA                            | NA                 |
| <i>Desi_wild_3161636</i> | NA                                  | <i>Ca_desi_denovo</i> | 3161636                 | A/G  | NA                 | NA                            | NA                 |
| <i>Desi_wild_3161661</i> | NA                                  | <i>Ca_desi_denovo</i> | 3161661                 | T/C  | NA                 | NA                            | NA                 |
| <i>Desi_wild_3162603</i> | NA                                  | <i>Ca_desi_denovo</i> | 3162603                 | A/C  | NA                 | NA                            | NA                 |
| <i>Desi_wild_3162611</i> | NA                                  | <i>Ca_desi_denovo</i> | 3162611                 | C/G  | NA                 | NA                            | NA                 |
| <i>Desi_wild_3163183</i> | NA                                  | <i>Ca_desi_denovo</i> | 3163183                 | T/G  | NA                 | NA                            | NA                 |
| <i>Desi_wild_3163196</i> | NA                                  | <i>Ca_desi_denovo</i> | 3163196                 | G/A  | NA                 | NA                            | NA                 |
| <i>Desi_wild_3163350</i> | NA                                  | <i>Ca_desi_denovo</i> | 3163350                 | C/T  | NA                 | NA                            | NA                 |
| <i>Desi_wild_3163680</i> | NA                                  | <i>Ca_desi_denovo</i> | 3163680                 | T/C  | NA                 | NA                            | NA                 |
| <i>Desi_wild_3164149</i> | NA                                  | <i>Ca_desi_denovo</i> | 3164149                 | T/C  | NA                 | NA                            | NA                 |
| <i>Desi_wild_3164161</i> | NA                                  | <i>Ca_desi_denovo</i> | 3164161                 | C/A  | NA                 | NA                            | NA                 |
| <i>Desi_wild_3164337</i> | NA                                  | <i>Ca_desi_denovo</i> | 3164337                 | G/A  | NA                 | NA                            | NA                 |
| <i>Desi_wild_3165773</i> | NA                                  | <i>Ca_desi_denovo</i> | 3165773                 | C/A  | NA                 | NA                            | NA                 |
| <i>Desi_wild_3165965</i> | NA                                  | <i>Ca_desi_denovo</i> | 3165965                 | T/C  | NA                 | NA                            | NA                 |
| <i>Desi_wild_3166013</i> | NA                                  | <i>Ca_desi_denovo</i> | 3166013                 | C/T  | NA                 | NA                            | NA                 |
| <i>Desi_wild_3166158</i> | NA                                  | <i>Ca_desi_denovo</i> | 3166158                 | C/G  | NA                 | NA                            | NA                 |
| <i>Desi_wild_3166176</i> | NA                                  | <i>Ca_desi_denovo</i> | 3166176                 | G/T  | NA                 | NA                            | NA                 |
| <i>Desi_wild_3166564</i> | NA                                  | <i>Ca_desi_denovo</i> | 3166564                 | T/A  | NA                 | NA                            | NA                 |
| <i>Desi_wild_3168196</i> | NA                                  | <i>Ca_desi_denovo</i> | 3168196                 | T/C  | NA                 | NA                            | NA                 |

| SNP IDs                  | NCBI dbSNP accession IDs (NCBI_SS#) | Chromosomes           | Physical positions (bp) | SNPs | Gene accession IDs | Sequence components of genome | Putative functions |
|--------------------------|-------------------------------------|-----------------------|-------------------------|------|--------------------|-------------------------------|--------------------|
| <i>Desi_wild_3168233</i> | NA                                  | <i>Ca_desi_denovo</i> | 3168233                 | A/G  | NA                 | NA                            | NA                 |
| <i>Desi_wild_3168484</i> | NA                                  | <i>Ca_desi_denovo</i> | 3168484                 | A/G  | NA                 | NA                            | NA                 |
| <i>Desi_wild_3168586</i> | NA                                  | <i>Ca_desi_denovo</i> | 3168586                 | T/C  | NA                 | NA                            | NA                 |
| <i>Desi_wild_3168914</i> | NA                                  | <i>Ca_desi_denovo</i> | 3168914                 | C/T  | NA                 | NA                            | NA                 |
| <i>Desi_wild_3168981</i> | NA                                  | <i>Ca_desi_denovo</i> | 3168981                 | T/C  | NA                 | NA                            | NA                 |
| <i>Desi_wild_3169382</i> | NA                                  | <i>Ca_desi_denovo</i> | 3169382                 | C/T  | NA                 | NA                            | NA                 |
| <i>Desi_wild_3169415</i> | NA                                  | <i>Ca_desi_denovo</i> | 3169415                 | A/G  | NA                 | NA                            | NA                 |
| <i>Desi_wild_3169528</i> | NA                                  | <i>Ca_desi_denovo</i> | 3169528                 | T/A  | NA                 | NA                            | NA                 |
| <i>Desi_wild_3169875</i> | NA                                  | <i>Ca_desi_denovo</i> | 3169875                 | C/T  | NA                 | NA                            | NA                 |
| <i>Desi_wild_3169884</i> | NA                                  | <i>Ca_desi_denovo</i> | 3169884                 | T/C  | NA                 | NA                            | NA                 |
| <i>Desi_wild_3170542</i> | NA                                  | <i>Ca_desi_denovo</i> | 3170542                 | A/G  | NA                 | NA                            | NA                 |
| <i>Desi_wild_3170563</i> | NA                                  | <i>Ca_desi_denovo</i> | 3170563                 | G/T  | NA                 | NA                            | NA                 |
| <i>Desi_wild_3171022</i> | NA                                  | <i>Ca_desi_denovo</i> | 3171022                 | C/A  | NA                 | NA                            | NA                 |
| <i>Desi_wild_3171030</i> | NA                                  | <i>Ca_desi_denovo</i> | 3171030                 | C/G  | NA                 | NA                            | NA                 |
| <i>Desi_wild_3171462</i> | NA                                  | <i>Ca_desi_denovo</i> | 3171462                 | G/T  | NA                 | NA                            | NA                 |
| <i>Desi_wild_3172205</i> | NA                                  | <i>Ca_desi_denovo</i> | 3172205                 | T/C  | NA                 | NA                            | NA                 |
| <i>Desi_wild_3172220</i> | NA                                  | <i>Ca_desi_denovo</i> | 3172220                 | G/T  | NA                 | NA                            | NA                 |
| <i>Desi_wild_3172783</i> | NA                                  | <i>Ca_desi_denovo</i> | 3172783                 | A/G  | NA                 | NA                            | NA                 |
| <i>Desi_wild_3173711</i> | NA                                  | <i>Ca_desi_denovo</i> | 3173711                 | A/C  | NA                 | NA                            | NA                 |
| <i>Desi_wild_3173712</i> | NA                                  | <i>Ca_desi_denovo</i> | 3173712                 | G/C  | NA                 | NA                            | NA                 |
| <i>Desi_wild_3173759</i> | NA                                  | <i>Ca_desi_denovo</i> | 3173759                 | G/T  | NA                 | NA                            | NA                 |
| <i>Desi_wild_3173844</i> | NA                                  | <i>Ca_desi_denovo</i> | 3173844                 | T/C  | NA                 | NA                            | NA                 |
| <i>Desi_wild_3173893</i> | NA                                  | <i>Ca_desi_denovo</i> | 3173893                 | C/A  | NA                 | NA                            | NA                 |
| <i>Desi_wild_3174317</i> | NA                                  | <i>Ca_desi_denovo</i> | 3174317                 | A/G  | NA                 | NA                            | NA                 |
| <i>Desi_wild_3174320</i> | NA                                  | <i>Ca_desi_denovo</i> | 3174320                 | T/G  | NA                 | NA                            | NA                 |
| <i>Desi_wild_3174335</i> | NA                                  | <i>Ca_desi_denovo</i> | 3174335                 | G/A  | NA                 | NA                            | NA                 |
| <i>Desi_wild_3174926</i> | NA                                  | <i>Ca_desi_denovo</i> | 3174926                 | A/G  | NA                 | NA                            | NA                 |
| <i>Desi_wild_3175363</i> | NA                                  | <i>Ca_desi_denovo</i> | 3175363                 | A/G  | NA                 | NA                            | NA                 |
| <i>Desi_wild_3175502</i> | NA                                  | <i>Ca_desi_denovo</i> | 3175502                 | A/G  | NA                 | NA                            | NA                 |
| <i>Desi_wild_3175508</i> | NA                                  | <i>Ca_desi_denovo</i> | 3175508                 | A/C  | NA                 | NA                            | NA                 |
| <i>Desi_wild_3175871</i> | NA                                  | <i>Ca_desi_denovo</i> | 3175871                 | C/G  | NA                 | NA                            | NA                 |
| <i>Desi_wild_3176084</i> | NA                                  | <i>Ca_desi_denovo</i> | 3176084                 | C/G  | NA                 | NA                            | NA                 |
| <i>Desi_wild_3176484</i> | NA                                  | <i>Ca_desi_denovo</i> | 3176484                 | C/T  | NA                 | NA                            | NA                 |
| <i>Desi_wild_3176513</i> | NA                                  | <i>Ca_desi_denovo</i> | 3176513                 | A/G  | NA                 | NA                            | NA                 |
| <i>Desi_wild_3176828</i> | NA                                  | <i>Ca_desi_denovo</i> | 3176828                 | C/G  | NA                 | NA                            | NA                 |
| <i>Desi_wild_3177338</i> | NA                                  | <i>Ca_desi_denovo</i> | 3177338                 | A/G  | NA                 | NA                            | NA                 |
| <i>Desi_wild_3177359</i> | NA                                  | <i>Ca_desi_denovo</i> | 3177359                 | G/A  | NA                 | NA                            | NA                 |
| <i>Desi_wild_3177374</i> | NA                                  | <i>Ca_desi_denovo</i> | 3177374                 | A/G  | NA                 | NA                            | NA                 |
| <i>Desi_wild_3177395</i> | NA                                  | <i>Ca_desi_denovo</i> | 3177395                 | G/C  | NA                 | NA                            | NA                 |
| <i>Desi_wild_3178526</i> | NA                                  | <i>Ca_desi_denovo</i> | 3178526                 | C/A  | NA                 | NA                            | NA                 |
| <i>Desi_wild_3182106</i> | NA                                  | <i>Ca_desi_denovo</i> | 3182106                 | T/A  | NA                 | NA                            | NA                 |
| <i>Desi_wild_3184203</i> | NA                                  | <i>Ca_desi_denovo</i> | 3184203                 | C/T  | NA                 | NA                            | NA                 |
| <i>Desi_wild_3184508</i> | NA                                  | <i>Ca_desi_denovo</i> | 3184508                 | A/T  | NA                 | NA                            | NA                 |
| <i>Desi_wild_3184998</i> | NA                                  | <i>Ca_desi_denovo</i> | 3184998                 | T/G  | NA                 | NA                            | NA                 |

| SNP IDs                  | NCBI dbSNP accession IDs (NCBI_SS#) | Chromosomes           | Physical positions (bp) | SNPs | Gene accession IDs | Sequence components of genome | Putative functions |
|--------------------------|-------------------------------------|-----------------------|-------------------------|------|--------------------|-------------------------------|--------------------|
| <i>Desi_wild_3185024</i> | NA                                  | <i>Ca_desi_denovo</i> | 3185024                 | A/G  | NA                 | NA                            | NA                 |
| <i>Desi_wild_3185363</i> | NA                                  | <i>Ca_desi_denovo</i> | 3185363                 | G/C  | NA                 | NA                            | NA                 |
| <i>Desi_wild_3185372</i> | NA                                  | <i>Ca_desi_denovo</i> | 3185372                 | C/G  | NA                 | NA                            | NA                 |
| <i>Desi_wild_3185850</i> | NA                                  | <i>Ca_desi_denovo</i> | 3185850                 | G/C  | NA                 | NA                            | NA                 |
| <i>Desi_wild_3185869</i> | NA                                  | <i>Ca_desi_denovo</i> | 3185869                 | C/G  | NA                 | NA                            | NA                 |
| <i>Desi_wild_3188713</i> | NA                                  | <i>Ca_desi_denovo</i> | 3188713                 | C/T  | NA                 | NA                            | NA                 |
| <i>Desi_wild_3190244</i> | NA                                  | <i>Ca_desi_denovo</i> | 3190244                 | A/G  | NA                 | NA                            | NA                 |
| <i>Desi_wild_3190630</i> | NA                                  | <i>Ca_desi_denovo</i> | 3190630                 | C/T  | NA                 | NA                            | NA                 |
| <i>Desi_wild_3192903</i> | NA                                  | <i>Ca_desi_denovo</i> | 3192903                 | A/G  | NA                 | NA                            | NA                 |
| <i>Desi_wild_3193860</i> | NA                                  | <i>Ca_desi_denovo</i> | 3193860                 | C/T  | NA                 | NA                            | NA                 |
| <i>Desi_wild_3194606</i> | NA                                  | <i>Ca_desi_denovo</i> | 3194606                 | C/T  | NA                 | NA                            | NA                 |
| <i>Desi_wild_3195006</i> | NA                                  | <i>Ca_desi_denovo</i> | 3195006                 | T/G  | NA                 | NA                            | NA                 |
| <i>Desi_wild_3195570</i> | NA                                  | <i>Ca_desi_denovo</i> | 3195570                 | A/C  | NA                 | NA                            | NA                 |
| <i>Desi_wild_3195971</i> | NA                                  | <i>Ca_desi_denovo</i> | 3195971                 | T/C  | NA                 | NA                            | NA                 |
| <i>Desi_wild_3196538</i> | NA                                  | <i>Ca_desi_denovo</i> | 3196538                 | C/T  | NA                 | NA                            | NA                 |
| <i>Desi_wild_3197926</i> | NA                                  | <i>Ca_desi_denovo</i> | 3197926                 | T/G  | NA                 | NA                            | NA                 |
| <i>Desi_wild_3197938</i> | NA                                  | <i>Ca_desi_denovo</i> | 3197938                 | C/G  | NA                 | NA                            | NA                 |
| <i>Desi_wild_3198173</i> | NA                                  | <i>Ca_desi_denovo</i> | 3198173                 | G/A  | NA                 | NA                            | NA                 |
| <i>Desi_wild_3200120</i> | NA                                  | <i>Ca_desi_denovo</i> | 3200120                 | A/C  | NA                 | NA                            | NA                 |
| <i>Desi_wild_3200610</i> | NA                                  | <i>Ca_desi_denovo</i> | 3200610                 | G/A  | NA                 | NA                            | NA                 |
| <i>Desi_wild_3200994</i> | NA                                  | <i>Ca_desi_denovo</i> | 3200994                 | T/G  | NA                 | NA                            | NA                 |
| <i>Desi_wild_3201018</i> | NA                                  | <i>Ca_desi_denovo</i> | 3201018                 | T/G  | NA                 | NA                            | NA                 |
| <i>Desi_wild_3201110</i> | NA                                  | <i>Ca_desi_denovo</i> | 3201110                 | T/G  | NA                 | NA                            | NA                 |
| <i>Desi_wild_3201113</i> | NA                                  | <i>Ca_desi_denovo</i> | 3201113                 | T/G  | NA                 | NA                            | NA                 |
| <i>Desi_wild_3201581</i> | NA                                  | <i>Ca_desi_denovo</i> | 3201581                 | G/T  | NA                 | NA                            | NA                 |
| <i>Desi_wild_3202673</i> | NA                                  | <i>Ca_desi_denovo</i> | 3202673                 | G/A  | NA                 | NA                            | NA                 |
| <i>Desi_wild_3203414</i> | NA                                  | <i>Ca_desi_denovo</i> | 3203414                 | C/T  | NA                 | NA                            | NA                 |
| <i>Desi_wild_3204686</i> | NA                                  | <i>Ca_desi_denovo</i> | 3204686                 | A/G  | NA                 | NA                            | NA                 |
| <i>Desi_wild_3205559</i> | NA                                  | <i>Ca_desi_denovo</i> | 3205559                 | C/T  | NA                 | NA                            | NA                 |
| <i>Desi_wild_3205732</i> | NA                                  | <i>Ca_desi_denovo</i> | 3205732                 | T/C  | NA                 | NA                            | NA                 |
| <i>Desi_wild_3205753</i> | NA                                  | <i>Ca_desi_denovo</i> | 3205753                 | C/T  | NA                 | NA                            | NA                 |
| <i>Desi_wild_3205858</i> | NA                                  | <i>Ca_desi_denovo</i> | 3205858                 | T/C  | NA                 | NA                            | NA                 |
| <i>Desi_wild_3205867</i> | NA                                  | <i>Ca_desi_denovo</i> | 3205867                 | A/G  | NA                 | NA                            | NA                 |
| <i>Desi_wild_3206331</i> | NA                                  | <i>Ca_desi_denovo</i> | 3206331                 | A/G  | NA                 | NA                            | NA                 |
| <i>Desi_wild_3206382</i> | NA                                  | <i>Ca_desi_denovo</i> | 3206382                 | C/A  | NA                 | NA                            | NA                 |
| <i>Desi_wild_3206427</i> | NA                                  | <i>Ca_desi_denovo</i> | 3206427                 | G/T  | NA                 | NA                            | NA                 |
| <i>Desi_wild_3206443</i> | NA                                  | <i>Ca_desi_denovo</i> | 3206443                 | T/C  | NA                 | NA                            | NA                 |
| <i>Desi_wild_3207885</i> | NA                                  | <i>Ca_desi_denovo</i> | 3207885                 | C/G  | NA                 | NA                            | NA                 |
| <i>Desi_wild_3207896</i> | NA                                  | <i>Ca_desi_denovo</i> | 3207896                 | T/C  | NA                 | NA                            | NA                 |
| <i>Desi_wild_3208694</i> | NA                                  | <i>Ca_desi_denovo</i> | 3208694                 | A/T  | NA                 | NA                            | NA                 |
| <i>Desi_wild_3209120</i> | NA                                  | <i>Ca_desi_denovo</i> | 3209120                 | G/T  | NA                 | NA                            | NA                 |
| <i>Desi_wild_3209126</i> | NA                                  | <i>Ca_desi_denovo</i> | 3209126                 | G/A  | NA                 | NA                            | NA                 |
| <i>Desi_wild_3209183</i> | NA                                  | <i>Ca_desi_denovo</i> | 3209183                 | G/A  | NA                 | NA                            | NA                 |
| <i>Desi_wild_3209671</i> | NA                                  | <i>Ca_desi_denovo</i> | 3209671                 | G/A  | NA                 | NA                            | NA                 |

| SNP IDs                  | NCBI dbSNP accession IDs (NCBI_SS#) | Chromosomes           | Physical positions (bp) | SNPs | Gene accession IDs | Sequence components of genome | Putative functions |
|--------------------------|-------------------------------------|-----------------------|-------------------------|------|--------------------|-------------------------------|--------------------|
| <i>Desi_wild_3210809</i> | NA                                  | <i>Ca_desi_denovo</i> | 3210809                 | C/G  | NA                 | NA                            | NA                 |
| <i>Desi_wild_3211085</i> | NA                                  | <i>Ca_desi_denovo</i> | 3211085                 | G/A  | NA                 | NA                            | NA                 |
| <i>Desi_wild_3211097</i> | NA                                  | <i>Ca_desi_denovo</i> | 3211097                 | A/G  | NA                 | NA                            | NA                 |
| <i>Desi_wild_3211657</i> | NA                                  | <i>Ca_desi_denovo</i> | 3211657                 | G/C  | NA                 | NA                            | NA                 |
| <i>Desi_wild_3211704</i> | NA                                  | <i>Ca_desi_denovo</i> | 3211704                 | C/T  | NA                 | NA                            | NA                 |
| <i>Desi_wild_3212349</i> | NA                                  | <i>Ca_desi_denovo</i> | 3212349                 | T/C  | NA                 | NA                            | NA                 |
| <i>Desi_wild_3212621</i> | NA                                  | <i>Ca_desi_denovo</i> | 3212621                 | A/C  | NA                 | NA                            | NA                 |
| <i>Desi_wild_3212702</i> | NA                                  | <i>Ca_desi_denovo</i> | 3212702                 | G/A  | NA                 | NA                            | NA                 |
| <i>Desi_wild_3212918</i> | NA                                  | <i>Ca_desi_denovo</i> | 3212918                 | G/C  | NA                 | NA                            | NA                 |
| <i>Desi_wild_3213348</i> | NA                                  | <i>Ca_desi_denovo</i> | 3213348                 | G/A  | NA                 | NA                            | NA                 |
| <i>Desi_wild_3214412</i> | NA                                  | <i>Ca_desi_denovo</i> | 3214412                 | C/G  | NA                 | NA                            | NA                 |
| <i>Desi_wild_3214716</i> | NA                                  | <i>Ca_desi_denovo</i> | 3214716                 | A/G  | NA                 | NA                            | NA                 |
| <i>Desi_wild_3214760</i> | NA                                  | <i>Ca_desi_denovo</i> | 3214760                 | A/G  | NA                 | NA                            | NA                 |
| <i>Desi_wild_3214983</i> | NA                                  | <i>Ca_desi_denovo</i> | 3214983                 | T/C  | NA                 | NA                            | NA                 |
| <i>Desi_wild_3215647</i> | NA                                  | <i>Ca_desi_denovo</i> | 3215647                 | T/C  | NA                 | NA                            | NA                 |
| <i>Desi_wild_3215823</i> | NA                                  | <i>Ca_desi_denovo</i> | 3215823                 | A/G  | NA                 | NA                            | NA                 |
| <i>Desi_wild_3217139</i> | NA                                  | <i>Ca_desi_denovo</i> | 3217139                 | G/C  | NA                 | NA                            | NA                 |
| <i>Desi_wild_3217146</i> | NA                                  | <i>Ca_desi_denovo</i> | 3217146                 | C/G  | NA                 | NA                            | NA                 |
| <i>Desi_wild_3220768</i> | NA                                  | <i>Ca_desi_denovo</i> | 3220768                 | C/A  | NA                 | NA                            | NA                 |
| <i>Desi_wild_3220792</i> | NA                                  | <i>Ca_desi_denovo</i> | 3220792                 | G/A  | NA                 | NA                            | NA                 |
| <i>Desi_wild_3223019</i> | NA                                  | <i>Ca_desi_denovo</i> | 3223019                 | G/A  | NA                 | NA                            | NA                 |
| <i>Desi_wild_3223302</i> | NA                                  | <i>Ca_desi_denovo</i> | 3223302                 | G/A  | NA                 | NA                            | NA                 |
| <i>Desi_wild_3223374</i> | NA                                  | <i>Ca_desi_denovo</i> | 3223374                 | C/T  | NA                 | NA                            | NA                 |
| <i>Desi_wild_3224304</i> | NA                                  | <i>Ca_desi_denovo</i> | 3224304                 | T/G  | NA                 | NA                            | NA                 |
| <i>Desi_wild_3226696</i> | NA                                  | <i>Ca_desi_denovo</i> | 3226696                 | C/T  | NA                 | NA                            | NA                 |
| <i>Desi_wild_3226704</i> | NA                                  | <i>Ca_desi_denovo</i> | 3226704                 | A/G  | NA                 | NA                            | NA                 |
| <i>Desi_wild_3227319</i> | NA                                  | <i>Ca_desi_denovo</i> | 3227319                 | A/G  | NA                 | NA                            | NA                 |
| <i>Desi_wild_3228075</i> | NA                                  | <i>Ca_desi_denovo</i> | 3228075                 | G/A  | NA                 | NA                            | NA                 |
| <i>Desi_wild_3228076</i> | NA                                  | <i>Ca_desi_denovo</i> | 3228076                 | G/A  | NA                 | NA                            | NA                 |
| <i>Desi_wild_3228085</i> | NA                                  | <i>Ca_desi_denovo</i> | 3228085                 | C/G  | NA                 | NA                            | NA                 |
| <i>Desi_wild_3228294</i> | NA                                  | <i>Ca_desi_denovo</i> | 3228294                 | G/A  | NA                 | NA                            | NA                 |
| <i>Desi_wild_3228312</i> | NA                                  | <i>Ca_desi_denovo</i> | 3228312                 | G/A  | NA                 | NA                            | NA                 |
| <i>Desi_wild_3229200</i> | NA                                  | <i>Ca_desi_denovo</i> | 3229200                 | A/C  | NA                 | NA                            | NA                 |
| <i>Desi_wild_3230566</i> | NA                                  | <i>Ca_desi_denovo</i> | 3230566                 | G/C  | NA                 | NA                            | NA                 |
| <i>Desi_wild_3230587</i> | NA                                  | <i>Ca_desi_denovo</i> | 3230587                 | G/T  | NA                 | NA                            | NA                 |
| <i>Desi_wild_3231871</i> | NA                                  | <i>Ca_desi_denovo</i> | 3231871                 | T/C  | NA                 | NA                            | NA                 |
| <i>Desi_wild_3231912</i> | NA                                  | <i>Ca_desi_denovo</i> | 3231912                 | A/G  | NA                 | NA                            | NA                 |
| <i>Desi_wild_3233716</i> | NA                                  | <i>Ca_desi_denovo</i> | 3233716                 | C/T  | NA                 | NA                            | NA                 |
| <i>Desi_wild_3236620</i> | NA                                  | <i>Ca_desi_denovo</i> | 3236620                 | T/C  | NA                 | NA                            | NA                 |
| <i>Desi_wild_3236909</i> | NA                                  | <i>Ca_desi_denovo</i> | 3236909                 | G/A  | NA                 | NA                            | NA                 |
| <i>Desi_wild_3237176</i> | NA                                  | <i>Ca_desi_denovo</i> | 3237176                 | T/A  | NA                 | NA                            | NA                 |
| <i>Desi_wild_3237581</i> | NA                                  | <i>Ca_desi_denovo</i> | 3237581                 | A/G  | NA                 | NA                            | NA                 |
| <i>Desi_wild_3237617</i> | NA                                  | <i>Ca_desi_denovo</i> | 3237617                 | C/G  | NA                 | NA                            | NA                 |
| <i>Desi_wild_3238643</i> | NA                                  | <i>Ca_desi_denovo</i> | 3238643                 | G/C  | NA                 | NA                            | NA                 |

| SNP IDs                  | NCBI dbSNP accession IDs (NCBI_SS#) | Chromosomes           | Physical positions (bp) | SNPs | Gene accession IDs | Sequence components of genome | Putative functions |
|--------------------------|-------------------------------------|-----------------------|-------------------------|------|--------------------|-------------------------------|--------------------|
| <i>Desi_wild_3238922</i> | NA                                  | <i>Ca_desi_denovo</i> | 3238922                 | T/G  | NA                 | NA                            | NA                 |
| <i>Desi_wild_3241347</i> | NA                                  | <i>Ca_desi_denovo</i> | 3241347                 | T/C  | NA                 | NA                            | NA                 |
| <i>Desi_wild_3241366</i> | NA                                  | <i>Ca_desi_denovo</i> | 3241366                 | G/A  | NA                 | NA                            | NA                 |
| <i>Desi_wild_3241752</i> | NA                                  | <i>Ca_desi_denovo</i> | 3241752                 | A/C  | NA                 | NA                            | NA                 |
| <i>Desi_wild_3241757</i> | NA                                  | <i>Ca_desi_denovo</i> | 3241757                 | G/A  | NA                 | NA                            | NA                 |
| <i>Desi_wild_3241870</i> | NA                                  | <i>Ca_desi_denovo</i> | 3241870                 | A/G  | NA                 | NA                            | NA                 |
| <i>Desi_wild_3244261</i> | NA                                  | <i>Ca_desi_denovo</i> | 3244261                 | G/A  | NA                 | NA                            | NA                 |
| <i>Desi_wild_3244359</i> | NA                                  | <i>Ca_desi_denovo</i> | 3244359                 | G/C  | NA                 | NA                            | NA                 |
| <i>Desi_wild_3245501</i> | NA                                  | <i>Ca_desi_denovo</i> | 3245501                 | C/T  | NA                 | NA                            | NA                 |
| <i>Desi_wild_3246800</i> | NA                                  | <i>Ca_desi_denovo</i> | 3246800                 | A/C  | NA                 | NA                            | NA                 |
| <i>Desi_wild_3246811</i> | NA                                  | <i>Ca_desi_denovo</i> | 3246811                 | G/A  | NA                 | NA                            | NA                 |
| <i>Desi_wild_3246828</i> | NA                                  | <i>Ca_desi_denovo</i> | 3246828                 | T/A  | NA                 | NA                            | NA                 |
| <i>Desi_wild_3247100</i> | NA                                  | <i>Ca_desi_denovo</i> | 3247100                 | C/T  | NA                 | NA                            | NA                 |
| <i>Desi_wild_3247133</i> | NA                                  | <i>Ca_desi_denovo</i> | 3247133                 | T/C  | NA                 | NA                            | NA                 |
| <i>Desi_wild_3247140</i> | NA                                  | <i>Ca_desi_denovo</i> | 3247140                 | C/T  | NA                 | NA                            | NA                 |
| <i>Desi_wild_3248849</i> | NA                                  | <i>Ca_desi_denovo</i> | 3248849                 | T/C  | NA                 | NA                            | NA                 |
| <i>Desi_wild_3250883</i> | NA                                  | <i>Ca_desi_denovo</i> | 3250883                 | A/G  | NA                 | NA                            | NA                 |
| <i>Desi_wild_3251210</i> | NA                                  | <i>Ca_desi_denovo</i> | 3251210                 | G/T  | NA                 | NA                            | NA                 |
| <i>Desi_wild_3252187</i> | NA                                  | <i>Ca_desi_denovo</i> | 3252187                 | G/T  | NA                 | NA                            | NA                 |
| <i>Desi_wild_3254054</i> | NA                                  | <i>Ca_desi_denovo</i> | 3254054                 | G/A  | NA                 | NA                            | NA                 |
| <i>Desi_wild_3254086</i> | NA                                  | <i>Ca_desi_denovo</i> | 3254086                 | T/C  | NA                 | NA                            | NA                 |
| <i>Desi_wild_3254927</i> | NA                                  | <i>Ca_desi_denovo</i> | 3254927                 | A/T  | NA                 | NA                            | NA                 |
| <i>Desi_wild_3254935</i> | NA                                  | <i>Ca_desi_denovo</i> | 3254935                 | T/C  | NA                 | NA                            | NA                 |
| <i>Desi_wild_3255741</i> | NA                                  | <i>Ca_desi_denovo</i> | 3255741                 | G/T  | NA                 | NA                            | NA                 |
| <i>Desi_wild_3257366</i> | NA                                  | <i>Ca_desi_denovo</i> | 3257366                 | T/C  | NA                 | NA                            | NA                 |
| <i>Desi_wild_3257558</i> | NA                                  | <i>Ca_desi_denovo</i> | 3257558                 | A/G  | NA                 | NA                            | NA                 |
| <i>Desi_wild_3257595</i> | NA                                  | <i>Ca_desi_denovo</i> | 3257595                 | A/G  | NA                 | NA                            | NA                 |
| <i>Desi_wild_3258946</i> | NA                                  | <i>Ca_desi_denovo</i> | 3258946                 | T/C  | NA                 | NA                            | NA                 |
| <i>Desi_wild_3258973</i> | NA                                  | <i>Ca_desi_denovo</i> | 3258973                 | T/C  | NA                 | NA                            | NA                 |
| <i>Desi_wild_3260578</i> | NA                                  | <i>Ca_desi_denovo</i> | 3260578                 | C/A  | NA                 | NA                            | NA                 |
| <i>Desi_wild_3260598</i> | NA                                  | <i>Ca_desi_denovo</i> | 3260598                 | C/A  | NA                 | NA                            | NA                 |
| <i>Desi_wild_3260637</i> | NA                                  | <i>Ca_desi_denovo</i> | 3260637                 | A/G  | NA                 | NA                            | NA                 |
| <i>Desi_wild_3260644</i> | NA                                  | <i>Ca_desi_denovo</i> | 3260644                 | A/C  | NA                 | NA                            | NA                 |
| <i>Desi_wild_3260673</i> | NA                                  | <i>Ca_desi_denovo</i> | 3260673                 | A/C  | NA                 | NA                            | NA                 |
| <i>Desi_wild_3261037</i> | NA                                  | <i>Ca_desi_denovo</i> | 3261037                 | G/A  | NA                 | NA                            | NA                 |
| <i>Desi_wild_3261100</i> | NA                                  | <i>Ca_desi_denovo</i> | 3261100                 | A/G  | NA                 | NA                            | NA                 |
| <i>Desi_wild_3261152</i> | NA                                  | <i>Ca_desi_denovo</i> | 3261152                 | C/T  | NA                 | NA                            | NA                 |
| <i>Desi_wild_3264984</i> | NA                                  | <i>Ca_desi_denovo</i> | 3264984                 | T/G  | NA                 | NA                            | NA                 |
| <i>Desi_wild_3266127</i> | NA                                  | <i>Ca_desi_denovo</i> | 3266127                 | T/C  | NA                 | NA                            | NA                 |
| <i>Desi_wild_3266142</i> | NA                                  | <i>Ca_desi_denovo</i> | 3266142                 | A/G  | NA                 | NA                            | NA                 |
| <i>Desi_wild_3268793</i> | NA                                  | <i>Ca_desi_denovo</i> | 3268793                 | T/C  | NA                 | NA                            | NA                 |
| <i>Desi_wild_3269474</i> | NA                                  | <i>Ca_desi_denovo</i> | 3269474                 | C/A  | NA                 | NA                            | NA                 |
| <i>Desi_wild_3269522</i> | NA                                  | <i>Ca_desi_denovo</i> | 3269522                 | A/G  | NA                 | NA                            | NA                 |
| <i>Desi_wild_3270457</i> | NA                                  | <i>Ca_desi_denovo</i> | 3270457                 | G/C  | NA                 | NA                            | NA                 |

| SNP IDs                  | NCBI dbSNP accession IDs (NCBI_SS#) | Chromosomes           | Physical positions (bp) | SNPs | Gene accession IDs | Sequence components of genome | Putative functions |
|--------------------------|-------------------------------------|-----------------------|-------------------------|------|--------------------|-------------------------------|--------------------|
| <i>Desi_wild_3270469</i> | NA                                  | <i>Ca_desi_denovo</i> | 3270469                 | A/G  | NA                 | NA                            | NA                 |
| <i>Desi_wild_3270733</i> | NA                                  | <i>Ca_desi_denovo</i> | 3270733                 | C/T  | NA                 | NA                            | NA                 |
| <i>Desi_wild_3270735</i> | NA                                  | <i>Ca_desi_denovo</i> | 3270735                 | G/T  | NA                 | NA                            | NA                 |
| <i>Desi_wild_3270743</i> | NA                                  | <i>Ca_desi_denovo</i> | 3270743                 | T/C  | NA                 | NA                            | NA                 |
| <i>Desi_wild_3271110</i> | NA                                  | <i>Ca_desi_denovo</i> | 3271110                 | A/C  | NA                 | NA                            | NA                 |
| <i>Desi_wild_3271153</i> | NA                                  | <i>Ca_desi_denovo</i> | 3271153                 | G/A  | NA                 | NA                            | NA                 |
| <i>Desi_wild_3271259</i> | NA                                  | <i>Ca_desi_denovo</i> | 3271259                 | A/G  | NA                 | NA                            | NA                 |
| <i>Desi_wild_3271652</i> | NA                                  | <i>Ca_desi_denovo</i> | 3271652                 | T/C  | NA                 | NA                            | NA                 |
| <i>Desi_wild_3271671</i> | NA                                  | <i>Ca_desi_denovo</i> | 3271671                 | C/T  | NA                 | NA                            | NA                 |
| <i>Desi_wild_3272119</i> | NA                                  | <i>Ca_desi_denovo</i> | 3272119                 | G/T  | NA                 | NA                            | NA                 |
| <i>Desi_wild_3272360</i> | NA                                  | <i>Ca_desi_denovo</i> | 3272360                 | A/C  | NA                 | NA                            | NA                 |
| <i>Desi_wild_3272490</i> | NA                                  | <i>Ca_desi_denovo</i> | 3272490                 | A/G  | NA                 | NA                            | NA                 |
| <i>Desi_wild_3272939</i> | NA                                  | <i>Ca_desi_denovo</i> | 3272939                 | C/T  | NA                 | NA                            | NA                 |
| <i>Desi_wild_3272942</i> | NA                                  | <i>Ca_desi_denovo</i> | 3272942                 | A/C  | NA                 | NA                            | NA                 |
| <i>Desi_wild_3274547</i> | NA                                  | <i>Ca_desi_denovo</i> | 3274547                 | A/C  | NA                 | NA                            | NA                 |
| <i>Desi_wild_3274766</i> | NA                                  | <i>Ca_desi_denovo</i> | 3274766                 | T/C  | NA                 | NA                            | NA                 |
| <i>Desi_wild_3274768</i> | NA                                  | <i>Ca_desi_denovo</i> | 3274768                 | G/A  | NA                 | NA                            | NA                 |
| <i>Desi_wild_3276823</i> | NA                                  | <i>Ca_desi_denovo</i> | 3276823                 | A/C  | NA                 | NA                            | NA                 |
| <i>Desi_wild_3277910</i> | NA                                  | <i>Ca_desi_denovo</i> | 3277910                 | T/A  | NA                 | NA                            | NA                 |
| <i>Desi_wild_3278102</i> | NA                                  | <i>Ca_desi_denovo</i> | 3278102                 | G/A  | NA                 | NA                            | NA                 |
| <i>Desi_wild_3278121</i> | NA                                  | <i>Ca_desi_denovo</i> | 3278121                 | A/G  | NA                 | NA                            | NA                 |
| <i>Desi_wild_3278289</i> | NA                                  | <i>Ca_desi_denovo</i> | 3278289                 | T/C  | NA                 | NA                            | NA                 |
| <i>Desi_wild_3278712</i> | NA                                  | <i>Ca_desi_denovo</i> | 3278712                 | T/C  | NA                 | NA                            | NA                 |
| <i>Desi_wild_3279883</i> | NA                                  | <i>Ca_desi_denovo</i> | 3279883                 | C/T  | NA                 | NA                            | NA                 |
| <i>Desi_wild_3280525</i> | NA                                  | <i>Ca_desi_denovo</i> | 3280525                 | G/C  | NA                 | NA                            | NA                 |
| <i>Desi_wild_3280534</i> | NA                                  | <i>Ca_desi_denovo</i> | 3280534                 | C/A  | NA                 | NA                            | NA                 |
| <i>Desi_wild_3280543</i> | NA                                  | <i>Ca_desi_denovo</i> | 3280543                 | G/A  | NA                 | NA                            | NA                 |
| <i>Desi_wild_3281238</i> | NA                                  | <i>Ca_desi_denovo</i> | 3281238                 | T/G  | NA                 | NA                            | NA                 |
| <i>Desi_wild_3281319</i> | NA                                  | <i>Ca_desi_denovo</i> | 3281319                 | T/C  | NA                 | NA                            | NA                 |
| <i>Desi_wild_3281912</i> | NA                                  | <i>Ca_desi_denovo</i> | 3281912                 | A/C  | NA                 | NA                            | NA                 |
| <i>Desi_wild_3281948</i> | NA                                  | <i>Ca_desi_denovo</i> | 3281948                 | A/C  | NA                 | NA                            | NA                 |
| <i>Desi_wild_3282171</i> | NA                                  | <i>Ca_desi_denovo</i> | 3282171                 | A/G  | NA                 | NA                            | NA                 |
| <i>Desi_wild_3282749</i> | NA                                  | <i>Ca_desi_denovo</i> | 3282749                 | C/G  | NA                 | NA                            | NA                 |
| <i>Desi_wild_3282806</i> | NA                                  | <i>Ca_desi_denovo</i> | 3282806                 | G/A  | NA                 | NA                            | NA                 |
| <i>Desi_wild_3283609</i> | NA                                  | <i>Ca_desi_denovo</i> | 3283609                 | C/T  | NA                 | NA                            | NA                 |
| <i>Desi_wild_3284135</i> | NA                                  | <i>Ca_desi_denovo</i> | 3284135                 | G/C  | NA                 | NA                            | NA                 |
| <i>Desi_wild_3284429</i> | NA                                  | <i>Ca_desi_denovo</i> | 3284429                 | C/G  | NA                 | NA                            | NA                 |
| <i>Desi_wild_3285741</i> | NA                                  | <i>Ca_desi_denovo</i> | 3285741                 | T/C  | NA                 | NA                            | NA                 |
| <i>Desi_wild_3285749</i> | NA                                  | <i>Ca_desi_denovo</i> | 3285749                 | T/G  | NA                 | NA                            | NA                 |
| <i>Desi_wild_3285763</i> | NA                                  | <i>Ca_desi_denovo</i> | 3285763                 | T/C  | NA                 | NA                            | NA                 |
| <i>Desi_wild_3285986</i> | NA                                  | <i>Ca_desi_denovo</i> | 3285986                 | G/C  | NA                 | NA                            | NA                 |
| <i>Desi_wild_3286338</i> | NA                                  | <i>Ca_desi_denovo</i> | 3286338                 | A/G  | NA                 | NA                            | NA                 |
| <i>Desi_wild_3287426</i> | NA                                  | <i>Ca_desi_denovo</i> | 3287426                 | T/C  | NA                 | NA                            | NA                 |
| <i>Desi_wild_3287456</i> | NA                                  | <i>Ca_desi_denovo</i> | 3287456                 | A/G  | NA                 | NA                            | NA                 |



| SNP IDs                  | NCBI dbSNP accession IDs (NCBI_SS#) | Chromosomes           | Physical positions (bp) | SNPs | Gene accession IDs | Sequence components of genome | Putative functions |
|--------------------------|-------------------------------------|-----------------------|-------------------------|------|--------------------|-------------------------------|--------------------|
| <i>Desi_wild_3287680</i> | NA                                  | <i>Ca_desi_denovo</i> | 3287680                 | A/G  | NA                 | NA                            | NA                 |
| <i>Desi_wild_3289611</i> | NA                                  | <i>Ca_desi_denovo</i> | 3289611                 | T/G  | NA                 | NA                            | NA                 |
| <i>Desi_wild_3289873</i> | NA                                  | <i>Ca_desi_denovo</i> | 3289873                 | T/G  | NA                 | NA                            | NA                 |
| <i>Desi_wild_3290025</i> | NA                                  | <i>Ca_desi_denovo</i> | 3290025                 | A/G  | NA                 | NA                            | NA                 |
| <i>Desi_wild_3291692</i> | NA                                  | <i>Ca_desi_denovo</i> | 3291692                 | A/G  | NA                 | NA                            | NA                 |
| <i>Desi_wild_3292167</i> | NA                                  | <i>Ca_desi_denovo</i> | 3292167                 | C/G  | NA                 | NA                            | NA                 |
| <i>Desi_wild_3292331</i> | NA                                  | <i>Ca_desi_denovo</i> | 3292331                 | C/T  | NA                 | NA                            | NA                 |
| <i>Desi_wild_3292502</i> | NA                                  | <i>Ca_desi_denovo</i> | 3292502                 | G/A  | NA                 | NA                            | NA                 |
| <i>Desi_wild_3292561</i> | NA                                  | <i>Ca_desi_denovo</i> | 3292561                 | T/C  | NA                 | NA                            | NA                 |
| <i>Desi_wild_3292894</i> | NA                                  | <i>Ca_desi_denovo</i> | 3292894                 | G/A  | NA                 | NA                            | NA                 |
| <i>Desi_wild_3293444</i> | NA                                  | <i>Ca_desi_denovo</i> | 3293444                 | G/T  | NA                 | NA                            | NA                 |
| <i>Desi_wild_3294305</i> | NA                                  | <i>Ca_desi_denovo</i> | 3294305                 | C/G  | NA                 | NA                            | NA                 |
| <i>Desi_wild_3294332</i> | NA                                  | <i>Ca_desi_denovo</i> | 3294332                 | T/C  | NA                 | NA                            | NA                 |
| <i>Desi_wild_3294793</i> | NA                                  | <i>Ca_desi_denovo</i> | 3294793                 | C/G  | NA                 | NA                            | NA                 |
| <i>Desi_wild_3294840</i> | NA                                  | <i>Ca_desi_denovo</i> | 3294840                 | T/C  | NA                 | NA                            | NA                 |
| <i>Desi_wild_3294996</i> | NA                                  | <i>Ca_desi_denovo</i> | 3294996                 | A/T  | NA                 | NA                            | NA                 |
| <i>Desi_wild_3295253</i> | NA                                  | <i>Ca_desi_denovo</i> | 3295253                 | G/A  | NA                 | NA                            | NA                 |
| <i>Desi_wild_3295388</i> | NA                                  | <i>Ca_desi_denovo</i> | 3295388                 | A/G  | NA                 | NA                            | NA                 |
| <i>Desi_wild_3296330</i> | NA                                  | <i>Ca_desi_denovo</i> | 3296330                 | G/A  | NA                 | NA                            | NA                 |
| <i>Desi_wild_3296346</i> | NA                                  | <i>Ca_desi_denovo</i> | 3296346                 | C/G  | NA                 | NA                            | NA                 |
| <i>Desi_wild_3296445</i> | NA                                  | <i>Ca_desi_denovo</i> | 3296445                 | T/C  | NA                 | NA                            | NA                 |
| <i>Desi_wild_3296455</i> | NA                                  | <i>Ca_desi_denovo</i> | 3296455                 | A/G  | NA                 | NA                            | NA                 |
| <i>Desi_wild_3296567</i> | NA                                  | <i>Ca_desi_denovo</i> | 3296567                 | G/C  | NA                 | NA                            | NA                 |
| <i>Desi_wild_3297276</i> | NA                                  | <i>Ca_desi_denovo</i> | 3297276                 | T/G  | NA                 | NA                            | NA                 |
| <i>Desi_wild_3298705</i> | NA                                  | <i>Ca_desi_denovo</i> | 3298705                 | G/A  | NA                 | NA                            | NA                 |
| <i>Desi_wild_3298706</i> | NA                                  | <i>Ca_desi_denovo</i> | 3298706                 | C/G  | NA                 | NA                            | NA                 |
| <i>Desi_wild_3299532</i> | NA                                  | <i>Ca_desi_denovo</i> | 3299532                 | T/C  | NA                 | NA                            | NA                 |
| <i>Desi_wild_3299637</i> | NA                                  | <i>Ca_desi_denovo</i> | 3299637                 | G/C  | NA                 | NA                            | NA                 |
| <i>Desi_wild_3299712</i> | NA                                  | <i>Ca_desi_denovo</i> | 3299712                 | T/C  | NA                 | NA                            | NA                 |
| <i>Desi_wild_3300650</i> | NA                                  | <i>Ca_desi_denovo</i> | 3300650                 | T/C  | NA                 | NA                            | NA                 |
| <i>Desi_wild_3301373</i> | NA                                  | <i>Ca_desi_denovo</i> | 3301373                 | C/T  | NA                 | NA                            | NA                 |
| <i>Desi_wild_3302239</i> | NA                                  | <i>Ca_desi_denovo</i> | 3302239                 | G/T  | NA                 | NA                            | NA                 |
| <i>Desi_wild_3302565</i> | NA                                  | <i>Ca_desi_denovo</i> | 3302565                 | C/A  | NA                 | NA                            | NA                 |
| <i>Desi_wild_3303445</i> | NA                                  | <i>Ca_desi_denovo</i> | 3303445                 | G/C  | NA                 | NA                            | NA                 |
| <i>Desi_wild_3303899</i> | NA                                  | <i>Ca_desi_denovo</i> | 3303899                 | G/A  | NA                 | NA                            | NA                 |
| <i>Desi_wild_3304108</i> | NA                                  | <i>Ca_desi_denovo</i> | 3304108                 | T/C  | NA                 | NA                            | NA                 |
| <i>Desi_wild_3304129</i> | NA                                  | <i>Ca_desi_denovo</i> | 3304129                 | G/A  | NA                 | NA                            | NA                 |
| <i>Desi_wild_3304174</i> | NA                                  | <i>Ca_desi_denovo</i> | 3304174                 | G/T  | NA                 | NA                            | NA                 |
| <i>Desi_wild_3305584</i> | NA                                  | <i>Ca_desi_denovo</i> | 3305584                 | T/A  | NA                 | NA                            | NA                 |
| <i>Desi_wild_3306368</i> | NA                                  | <i>Ca_desi_denovo</i> | 3306368                 | A/G  | NA                 | NA                            | NA                 |
| <i>Desi_wild_3307030</i> | NA                                  | <i>Ca_desi_denovo</i> | 3307030                 | C/T  | NA                 | NA                            | NA                 |
| <i>Desi_wild_3307704</i> | NA                                  | <i>Ca_desi_denovo</i> | 3307704                 | G/A  | NA                 | NA                            | NA                 |
| <i>Desi_wild_3307906</i> | NA                                  | <i>Ca_desi_denovo</i> | 3307906                 | G/C  | NA                 | NA                            | NA                 |
| <i>Desi_wild_3307922</i> | NA                                  | <i>Ca_desi_denovo</i> | 3307922                 | C/T  | NA                 | NA                            | NA                 |

| SNP IDs                  | NCBI dbSNP accession IDs (NCBI_SS#) | Chromosomes           | Physical positions (bp) | SNPs | Gene accession IDs | Sequence components of genome | Putative functions |
|--------------------------|-------------------------------------|-----------------------|-------------------------|------|--------------------|-------------------------------|--------------------|
| <i>Desi_wild_3310311</i> | NA                                  | <i>Ca_desi_denovo</i> | 3310311                 | A/G  | NA                 | NA                            | NA                 |
| <i>Desi_wild_3310338</i> | NA                                  | <i>Ca_desi_denovo</i> | 3310338                 | G/A  | NA                 | NA                            | NA                 |
| <i>Desi_wild_3310492</i> | NA                                  | <i>Ca_desi_denovo</i> | 3310492                 | G/A  | NA                 | NA                            | NA                 |
| <i>Desi_wild_3311480</i> | NA                                  | <i>Ca_desi_denovo</i> | 3311480                 | T/C  | NA                 | NA                            | NA                 |
| <i>Desi_wild_3312741</i> | NA                                  | <i>Ca_desi_denovo</i> | 3312741                 | T/C  | NA                 | NA                            | NA                 |
| <i>Desi_wild_3312754</i> | NA                                  | <i>Ca_desi_denovo</i> | 3312754                 | C/T  | NA                 | NA                            | NA                 |
| <i>Desi_wild_3314449</i> | NA                                  | <i>Ca_desi_denovo</i> | 3314449                 | C/T  | NA                 | NA                            | NA                 |
| <i>Desi_wild_3314452</i> | NA                                  | <i>Ca_desi_denovo</i> | 3314452                 | A/G  | NA                 | NA                            | NA                 |
| <i>Desi_wild_3314502</i> | NA                                  | <i>Ca_desi_denovo</i> | 3314502                 | C/G  | NA                 | NA                            | NA                 |
| <i>Desi_wild_3314822</i> | NA                                  | <i>Ca_desi_denovo</i> | 3314822                 | C/T  | NA                 | NA                            | NA                 |
| <i>Desi_wild_3314825</i> | NA                                  | <i>Ca_desi_denovo</i> | 3314825                 | T/A  | NA                 | NA                            | NA                 |
| <i>Desi_wild_3315199</i> | NA                                  | <i>Ca_desi_denovo</i> | 3315199                 | G/A  | NA                 | NA                            | NA                 |
| <i>Desi_wild_3315596</i> | NA                                  | <i>Ca_desi_denovo</i> | 3315596                 | G/T  | NA                 | NA                            | NA                 |
| <i>Desi_wild_3315609</i> | NA                                  | <i>Ca_desi_denovo</i> | 3315609                 | T/C  | NA                 | NA                            | NA                 |
| <i>Desi_wild_3315991</i> | NA                                  | <i>Ca_desi_denovo</i> | 3315991                 | T/G  | NA                 | NA                            | NA                 |
| <i>Desi_wild_3316325</i> | NA                                  | <i>Ca_desi_denovo</i> | 3316325                 | G/A  | NA                 | NA                            | NA                 |
| <i>Desi_wild_3316951</i> | NA                                  | <i>Ca_desi_denovo</i> | 3316951                 | G/T  | NA                 | NA                            | NA                 |
| <i>Desi_wild_3318350</i> | NA                                  | <i>Ca_desi_denovo</i> | 3318350                 | A/G  | NA                 | NA                            | NA                 |
| <i>Desi_wild_3318365</i> | NA                                  | <i>Ca_desi_denovo</i> | 3318365                 | C/G  | NA                 | NA                            | NA                 |
| <i>Desi_wild_3318415</i> | NA                                  | <i>Ca_desi_denovo</i> | 3318415                 | C/T  | NA                 | NA                            | NA                 |
| <i>Desi_wild_3319620</i> | NA                                  | <i>Ca_desi_denovo</i> | 3319620                 | G/C  | NA                 | NA                            | NA                 |
| <i>Desi_wild_3319667</i> | NA                                  | <i>Ca_desi_denovo</i> | 3319667                 | A/G  | NA                 | NA                            | NA                 |
| <i>Desi_wild_3321346</i> | NA                                  | <i>Ca_desi_denovo</i> | 3321346                 | A/C  | NA                 | NA                            | NA                 |
| <i>Desi_wild_3321463</i> | NA                                  | <i>Ca_desi_denovo</i> | 3321463                 | C/T  | NA                 | NA                            | NA                 |
| <i>Desi_wild_3321481</i> | NA                                  | <i>Ca_desi_denovo</i> | 3321481                 | G/A  | NA                 | NA                            | NA                 |
| <i>Desi_wild_3321499</i> | NA                                  | <i>Ca_desi_denovo</i> | 3321499                 | C/T  | NA                 | NA                            | NA                 |
| <i>Desi_wild_3321774</i> | NA                                  | <i>Ca_desi_denovo</i> | 3321774                 | T/C  | NA                 | NA                            | NA                 |
| <i>Desi_wild_3321788</i> | NA                                  | <i>Ca_desi_denovo</i> | 3321788                 | T/G  | NA                 | NA                            | NA                 |
| <i>Desi_wild_3321801</i> | NA                                  | <i>Ca_desi_denovo</i> | 3321801                 | A/G  | NA                 | NA                            | NA                 |
| <i>Desi_wild_3321848</i> | NA                                  | <i>Ca_desi_denovo</i> | 3321848                 | A/C  | NA                 | NA                            | NA                 |
| <i>Desi_wild_3321899</i> | NA                                  | <i>Ca_desi_denovo</i> | 3321899                 | C/T  | NA                 | NA                            | NA                 |
| <i>Desi_wild_3325834</i> | NA                                  | <i>Ca_desi_denovo</i> | 3325834                 | C/A  | NA                 | NA                            | NA                 |
| <i>Desi_wild_3325867</i> | NA                                  | <i>Ca_desi_denovo</i> | 3325867                 | A/G  | NA                 | NA                            | NA                 |
| <i>Desi_wild_3326478</i> | NA                                  | <i>Ca_desi_denovo</i> | 3326478                 | C/G  | NA                 | NA                            | NA                 |
| <i>Desi_wild_3326481</i> | NA                                  | <i>Ca_desi_denovo</i> | 3326481                 | G/A  | NA                 | NA                            | NA                 |
| <i>Desi_wild_3329156</i> | NA                                  | <i>Ca_desi_denovo</i> | 3329156                 | C/G  | NA                 | NA                            | NA                 |
| <i>Desi_wild_3329265</i> | NA                                  | <i>Ca_desi_denovo</i> | 3329265                 | T/C  | NA                 | NA                            | NA                 |
| <i>Desi_wild_3329271</i> | NA                                  | <i>Ca_desi_denovo</i> | 3329271                 | C/T  | NA                 | NA                            | NA                 |
| <i>Desi_wild_3331727</i> | NA                                  | <i>Ca_desi_denovo</i> | 3331727                 | T/G  | NA                 | NA                            | NA                 |
| <i>Desi_wild_3333810</i> | NA                                  | <i>Ca_desi_denovo</i> | 3333810                 | G/T  | NA                 | NA                            | NA                 |
| <i>Desi_wild_3333853</i> | NA                                  | <i>Ca_desi_denovo</i> | 3333853                 | G/A  | NA                 | NA                            | NA                 |
| <i>Desi_wild_3334164</i> | NA                                  | <i>Ca_desi_denovo</i> | 3334164                 | A/G  | NA                 | NA                            | NA                 |
| <i>Desi_wild_3334172</i> | NA                                  | <i>Ca_desi_denovo</i> | 3334172                 | C/G  | NA                 | NA                            | NA                 |
| <i>Desi_wild_3334384</i> | NA                                  | <i>Ca_desi_denovo</i> | 3334384                 | G/T  | NA                 | NA                            | NA                 |

| SNP IDs                  | NCBI dbSNP accession IDs (NCBI_SS#) | Chromosomes           | Physical positions (bp) | SNPs | Gene accession IDs | Sequence components of genome | Putative functions |
|--------------------------|-------------------------------------|-----------------------|-------------------------|------|--------------------|-------------------------------|--------------------|
| <i>Desi_wild_3335075</i> | NA                                  | <i>Ca_desi_denovo</i> | 3335075                 | A/C  | NA                 | NA                            | NA                 |
| <i>Desi_wild_3338117</i> | NA                                  | <i>Ca_desi_denovo</i> | 3338117                 | G/A  | NA                 | NA                            | NA                 |
| <i>Desi_wild_3338436</i> | NA                                  | <i>Ca_desi_denovo</i> | 3338436                 | C/T  | NA                 | NA                            | NA                 |
| <i>Desi_wild_3338504</i> | NA                                  | <i>Ca_desi_denovo</i> | 3338504                 | T/C  | NA                 | NA                            | NA                 |
| <i>Desi_wild_3340682</i> | NA                                  | <i>Ca_desi_denovo</i> | 3340682                 | C/G  | NA                 | NA                            | NA                 |
| <i>Desi_wild_3341249</i> | NA                                  | <i>Ca_desi_denovo</i> | 3341249                 | G/T  | NA                 | NA                            | NA                 |
| <i>Desi_wild_3341267</i> | NA                                  | <i>Ca_desi_denovo</i> | 3341267                 | C/G  | NA                 | NA                            | NA                 |
| <i>Desi_wild_3342518</i> | NA                                  | <i>Ca_desi_denovo</i> | 3342518                 | T/G  | NA                 | NA                            | NA                 |
| <i>Desi_wild_3343221</i> | NA                                  | <i>Ca_desi_denovo</i> | 3343221                 | A/G  | NA                 | NA                            | NA                 |
| <i>Desi_wild_3343402</i> | NA                                  | <i>Ca_desi_denovo</i> | 3343402                 | A/G  | NA                 | NA                            | NA                 |
| <i>Desi_wild_3343403</i> | NA                                  | <i>Ca_desi_denovo</i> | 3343403                 | T/C  | NA                 | NA                            | NA                 |
| <i>Desi_wild_3344675</i> | NA                                  | <i>Ca_desi_denovo</i> | 3344675                 | G/A  | NA                 | NA                            | NA                 |
| <i>Desi_wild_3344681</i> | NA                                  | <i>Ca_desi_denovo</i> | 3344681                 | C/T  | NA                 | NA                            | NA                 |
| <i>Desi_wild_3344842</i> | NA                                  | <i>Ca_desi_denovo</i> | 3344842                 | T/A  | NA                 | NA                            | NA                 |
| <i>Desi_wild_3346628</i> | NA                                  | <i>Ca_desi_denovo</i> | 3346628                 | C/T  | NA                 | NA                            | NA                 |
| <i>Desi_wild_3348421</i> | NA                                  | <i>Ca_desi_denovo</i> | 3348421                 | T/C  | NA                 | NA                            | NA                 |
| <i>Desi_wild_3348463</i> | NA                                  | <i>Ca_desi_denovo</i> | 3348463                 | T/C  | NA                 | NA                            | NA                 |
| <i>Desi_wild_3348613</i> | NA                                  | <i>Ca_desi_denovo</i> | 3348613                 | G/A  | NA                 | NA                            | NA                 |
| <i>Desi_wild_3349722</i> | NA                                  | <i>Ca_desi_denovo</i> | 3349722                 | C/G  | NA                 | NA                            | NA                 |
| <i>Desi_wild_3349736</i> | NA                                  | <i>Ca_desi_denovo</i> | 3349736                 | G/T  | NA                 | NA                            | NA                 |
| <i>Desi_wild_3349786</i> | NA                                  | <i>Ca_desi_denovo</i> | 3349786                 | T/C  | NA                 | NA                            | NA                 |
| <i>Desi_wild_3349816</i> | NA                                  | <i>Ca_desi_denovo</i> | 3349816                 | A/C  | NA                 | NA                            | NA                 |
| <i>Desi_wild_3350940</i> | NA                                  | <i>Ca_desi_denovo</i> | 3350940                 | A/G  | NA                 | NA                            | NA                 |
| <i>Desi_wild_3350951</i> | NA                                  | <i>Ca_desi_denovo</i> | 3350951                 | C/G  | NA                 | NA                            | NA                 |
| <i>Desi_wild_3351593</i> | NA                                  | <i>Ca_desi_denovo</i> | 3351593                 | T/C  | NA                 | NA                            | NA                 |
| <i>Desi_wild_3352702</i> | NA                                  | <i>Ca_desi_denovo</i> | 3352702                 | A/G  | NA                 | NA                            | NA                 |
| <i>Desi_wild_3353080</i> | NA                                  | <i>Ca_desi_denovo</i> | 3353080                 | A/T  | NA                 | NA                            | NA                 |
| <i>Desi_wild_3353085</i> | NA                                  | <i>Ca_desi_denovo</i> | 3353085                 | T/C  | NA                 | NA                            | NA                 |
| <i>Desi_wild_3353093</i> | NA                                  | <i>Ca_desi_denovo</i> | 3353093                 | C/T  | NA                 | NA                            | NA                 |
| <i>Desi_wild_3353101</i> | NA                                  | <i>Ca_desi_denovo</i> | 3353101                 | A/T  | NA                 | NA                            | NA                 |
| <i>Desi_wild_3353885</i> | NA                                  | <i>Ca_desi_denovo</i> | 3353885                 | A/G  | NA                 | NA                            | NA                 |
| <i>Desi_wild_3353923</i> | NA                                  | <i>Ca_desi_denovo</i> | 3353923                 | G/C  | NA                 | NA                            | NA                 |
| <i>Desi_wild_3354365</i> | NA                                  | <i>Ca_desi_denovo</i> | 3354365                 | G/T  | NA                 | NA                            | NA                 |
| <i>Desi_wild_3354788</i> | NA                                  | <i>Ca_desi_denovo</i> | 3354788                 | C/A  | NA                 | NA                            | NA                 |
| <i>Desi_wild_3354887</i> | NA                                  | <i>Ca_desi_denovo</i> | 3354887                 | T/A  | NA                 | NA                            | NA                 |
| <i>Desi_wild_3354906</i> | NA                                  | <i>Ca_desi_denovo</i> | 3354906                 | A/C  | NA                 | NA                            | NA                 |
| <i>Desi_wild_3354923</i> | NA                                  | <i>Ca_desi_denovo</i> | 3354923                 | G/A  | NA                 | NA                            | NA                 |
| <i>Desi_wild_3355106</i> | NA                                  | <i>Ca_desi_denovo</i> | 3355106                 | G/T  | NA                 | NA                            | NA                 |
| <i>Desi_wild_3355235</i> | NA                                  | <i>Ca_desi_denovo</i> | 3355235                 | C/T  | NA                 | NA                            | NA                 |
| <i>Desi_wild_3355236</i> | NA                                  | <i>Ca_desi_denovo</i> | 3355236                 | G/T  | NA                 | NA                            | NA                 |
| <i>Desi_wild_3355912</i> | NA                                  | <i>Ca_desi_denovo</i> | 3355912                 | T/G  | NA                 | NA                            | NA                 |
| <i>Desi_wild_3356268</i> | NA                                  | <i>Ca_desi_denovo</i> | 3356268                 | A/C  | NA                 | NA                            | NA                 |
| <i>Desi_wild_3356609</i> | NA                                  | <i>Ca_desi_denovo</i> | 3356609                 | G/T  | NA                 | NA                            | NA                 |
| <i>Desi_wild_3356681</i> | NA                                  | <i>Ca_desi_denovo</i> | 3356681                 | A/G  | NA                 | NA                            | NA                 |

| SNP IDs                  | NCBI dbSNP accession IDs (NCBI_SS#) | Chromosomes           | Physical positions (bp) | SNPs | Gene accession IDs | Sequence components of genome | Putative functions |
|--------------------------|-------------------------------------|-----------------------|-------------------------|------|--------------------|-------------------------------|--------------------|
| <i>Desi_wild_3357000</i> | NA                                  | <i>Ca_desi_denovo</i> | 3357000                 | C/A  | NA                 | NA                            | NA                 |
| <i>Desi_wild_3357077</i> | NA                                  | <i>Ca_desi_denovo</i> | 3357077                 | G/C  | NA                 | NA                            | NA                 |
| <i>Desi_wild_3357832</i> | NA                                  | <i>Ca_desi_denovo</i> | 3357832                 | G/T  | NA                 | NA                            | NA                 |
| <i>Desi_wild_3358841</i> | NA                                  | <i>Ca_desi_denovo</i> | 3358841                 | A/C  | NA                 | NA                            | NA                 |
| <i>Desi_wild_3358844</i> | NA                                  | <i>Ca_desi_denovo</i> | 3358844                 | C/G  | NA                 | NA                            | NA                 |
| <i>Desi_wild_3359914</i> | NA                                  | <i>Ca_desi_denovo</i> | 3359914                 | G/C  | NA                 | NA                            | NA                 |
| <i>Desi_wild_3361513</i> | NA                                  | <i>Ca_desi_denovo</i> | 3361513                 | C/G  | NA                 | NA                            | NA                 |
| <i>Desi_wild_3361747</i> | NA                                  | <i>Ca_desi_denovo</i> | 3361747                 | C/T  | NA                 | NA                            | NA                 |
| <i>Desi_wild_3363013</i> | NA                                  | <i>Ca_desi_denovo</i> | 3363013                 | G/C  | NA                 | NA                            | NA                 |
| <i>Desi_wild_3363104</i> | NA                                  | <i>Ca_desi_denovo</i> | 3363104                 | C/A  | NA                 | NA                            | NA                 |
| <i>Desi_wild_3363438</i> | NA                                  | <i>Ca_desi_denovo</i> | 3363438                 | A/G  | NA                 | NA                            | NA                 |
| <i>Desi_wild_3363481</i> | NA                                  | <i>Ca_desi_denovo</i> | 3363481                 | C/T  | NA                 | NA                            | NA                 |
| <i>Desi_wild_3366984</i> | NA                                  | <i>Ca_desi_denovo</i> | 3366984                 | T/C  | NA                 | NA                            | NA                 |
| <i>Desi_wild_3367030</i> | NA                                  | <i>Ca_desi_denovo</i> | 3367030                 | C/T  | NA                 | NA                            | NA                 |
| <i>Desi_wild_3367431</i> | NA                                  | <i>Ca_desi_denovo</i> | 3367431                 | G/C  | NA                 | NA                            | NA                 |
| <i>Desi_wild_3367434</i> | NA                                  | <i>Ca_desi_denovo</i> | 3367434                 | A/G  | NA                 | NA                            | NA                 |
| <i>Desi_wild_3369510</i> | NA                                  | <i>Ca_desi_denovo</i> | 3369510                 | G/A  | NA                 | NA                            | NA                 |
| <i>Desi_wild_3369516</i> | NA                                  | <i>Ca_desi_denovo</i> | 3369516                 | C/T  | NA                 | NA                            | NA                 |
| <i>Desi_wild_3369996</i> | NA                                  | <i>Ca_desi_denovo</i> | 3369996                 | G/A  | NA                 | NA                            | NA                 |
| <i>Desi_wild_3370004</i> | NA                                  | <i>Ca_desi_denovo</i> | 3370004                 | C/T  | NA                 | NA                            | NA                 |
| <i>Desi_wild_3370450</i> | NA                                  | <i>Ca_desi_denovo</i> | 3370450                 | G/T  | NA                 | NA                            | NA                 |
| <i>Desi_wild_3370459</i> | NA                                  | <i>Ca_desi_denovo</i> | 3370459                 | A/G  | NA                 | NA                            | NA                 |
| <i>Desi_wild_3371477</i> | NA                                  | <i>Ca_desi_denovo</i> | 3371477                 | A/G  | NA                 | NA                            | NA                 |
| <i>Desi_wild_3371925</i> | NA                                  | <i>Ca_desi_denovo</i> | 3371925                 | C/T  | NA                 | NA                            | NA                 |
| <i>Desi_wild_3373543</i> | NA                                  | <i>Ca_desi_denovo</i> | 3373543                 | C/G  | NA                 | NA                            | NA                 |
| <i>Desi_wild_3373554</i> | NA                                  | <i>Ca_desi_denovo</i> | 3373554                 | T/G  | NA                 | NA                            | NA                 |
| <i>Desi_wild_3373573</i> | NA                                  | <i>Ca_desi_denovo</i> | 3373573                 | C/T  | NA                 | NA                            | NA                 |
| <i>Desi_wild_3374904</i> | NA                                  | <i>Ca_desi_denovo</i> | 3374904                 | C/T  | NA                 | NA                            | NA                 |
| <i>Desi_wild_3374989</i> | NA                                  | <i>Ca_desi_denovo</i> | 3374989                 | A/C  | NA                 | NA                            | NA                 |
| <i>Desi_wild_3374990</i> | NA                                  | <i>Ca_desi_denovo</i> | 3374990                 | G/T  | NA                 | NA                            | NA                 |
| <i>Desi_wild_3374991</i> | NA                                  | <i>Ca_desi_denovo</i> | 3374991                 | A/G  | NA                 | NA                            | NA                 |
| <i>Desi_wild_3375625</i> | NA                                  | <i>Ca_desi_denovo</i> | 3375625                 | A/C  | NA                 | NA                            | NA                 |
| <i>Desi_wild_3376053</i> | NA                                  | <i>Ca_desi_denovo</i> | 3376053                 | A/C  | NA                 | NA                            | NA                 |
| <i>Desi_wild_3376129</i> | NA                                  | <i>Ca_desi_denovo</i> | 3376129                 | C/G  | NA                 | NA                            | NA                 |
| <i>Desi_wild_3376137</i> | NA                                  | <i>Ca_desi_denovo</i> | 3376137                 | A/G  | NA                 | NA                            | NA                 |
| <i>Desi_wild_3376142</i> | NA                                  | <i>Ca_desi_denovo</i> | 3376142                 | T/G  | NA                 | NA                            | NA                 |
| <i>Desi_wild_3377331</i> | NA                                  | <i>Ca_desi_denovo</i> | 3377331                 | C/G  | NA                 | NA                            | NA                 |
| <i>Desi_wild_3377358</i> | NA                                  | <i>Ca_desi_denovo</i> | 3377358                 | T/C  | NA                 | NA                            | NA                 |
| <i>Desi_wild_3377785</i> | NA                                  | <i>Ca_desi_denovo</i> | 3377785                 | G/A  | NA                 | NA                            | NA                 |
| <i>Desi_wild_3377911</i> | NA                                  | <i>Ca_desi_denovo</i> | 3377911                 | G/A  | NA                 | NA                            | NA                 |
| <i>Desi_wild_3379846</i> | NA                                  | <i>Ca_desi_denovo</i> | 3379846                 | G/A  | NA                 | NA                            | NA                 |
| <i>Desi_wild_3381869</i> | NA                                  | <i>Ca_desi_denovo</i> | 3381869                 | G/T  | NA                 | NA                            | NA                 |
| <i>Desi_wild_3381873</i> | NA                                  | <i>Ca_desi_denovo</i> | 3381873                 | A/G  | NA                 | NA                            | NA                 |
| <i>Desi_wild_3381958</i> | NA                                  | <i>Ca_desi_denovo</i> | 3381958                 | T/G  | NA                 | NA                            | NA                 |

| SNP IDs                  | NCBI dbSNP accession IDs (NCBI_SS#) | Chromosomes           | Physical positions (bp) | SNPs | Gene accession IDs | Sequence components of genome | Putative functions |
|--------------------------|-------------------------------------|-----------------------|-------------------------|------|--------------------|-------------------------------|--------------------|
| <i>Desi_wild_3382060</i> | NA                                  | <i>Ca_desi_denovo</i> | 3382060                 | A/C  | NA                 | NA                            | NA                 |
| <i>Desi_wild_3382964</i> | NA                                  | <i>Ca_desi_denovo</i> | 3382964                 | C/T  | NA                 | NA                            | NA                 |
| <i>Desi_wild_3384334</i> | NA                                  | <i>Ca_desi_denovo</i> | 3384334                 | T/A  | NA                 | NA                            | NA                 |
| <i>Desi_wild_3385013</i> | NA                                  | <i>Ca_desi_denovo</i> | 3385013                 | G/A  | NA                 | NA                            | NA                 |
| <i>Desi_wild_3385217</i> | NA                                  | <i>Ca_desi_denovo</i> | 3385217                 | A/G  | NA                 | NA                            | NA                 |
| <i>Desi_wild_3385241</i> | NA                                  | <i>Ca_desi_denovo</i> | 3385241                 | A/G  | NA                 | NA                            | NA                 |
| <i>Desi_wild_3385285</i> | NA                                  | <i>Ca_desi_denovo</i> | 3385285                 | T/G  | NA                 | NA                            | NA                 |
| <i>Desi_wild_3387241</i> | NA                                  | <i>Ca_desi_denovo</i> | 3387241                 | A/G  | NA                 | NA                            | NA                 |
| <i>Desi_wild_3387272</i> | NA                                  | <i>Ca_desi_denovo</i> | 3387272                 | A/C  | NA                 | NA                            | NA                 |
| <i>Desi_wild_3387332</i> | NA                                  | <i>Ca_desi_denovo</i> | 3387332                 | C/T  | NA                 | NA                            | NA                 |
| <i>Desi_wild_3387383</i> | NA                                  | <i>Ca_desi_denovo</i> | 3387383                 | T/C  | NA                 | NA                            | NA                 |
| <i>Desi_wild_3388551</i> | NA                                  | <i>Ca_desi_denovo</i> | 3388551                 | C/G  | NA                 | NA                            | NA                 |
| <i>Desi_wild_3389263</i> | NA                                  | <i>Ca_desi_denovo</i> | 3389263                 | T/G  | NA                 | NA                            | NA                 |
| <i>Desi_wild_3389404</i> | NA                                  | <i>Ca_desi_denovo</i> | 3389404                 | G/T  | NA                 | NA                            | NA                 |
| <i>Desi_wild_3389669</i> | NA                                  | <i>Ca_desi_denovo</i> | 3389669                 | C/T  | NA                 | NA                            | NA                 |
| <i>Desi_wild_3390923</i> | NA                                  | <i>Ca_desi_denovo</i> | 3390923                 | G/A  | NA                 | NA                            | NA                 |
| <i>Desi_wild_3391277</i> | NA                                  | <i>Ca_desi_denovo</i> | 3391277                 | T/G  | NA                 | NA                            | NA                 |
| <i>Desi_wild_3391802</i> | NA                                  | <i>Ca_desi_denovo</i> | 3391802                 | C/A  | NA                 | NA                            | NA                 |
| <i>Desi_wild_3392108</i> | NA                                  | <i>Ca_desi_denovo</i> | 3392108                 | T/C  | NA                 | NA                            | NA                 |
| <i>Desi_wild_3393054</i> | NA                                  | <i>Ca_desi_denovo</i> | 3393054                 | C/T  | NA                 | NA                            | NA                 |
| <i>Desi_wild_3394355</i> | NA                                  | <i>Ca_desi_denovo</i> | 3394355                 | C/T  | NA                 | NA                            | NA                 |
| <i>Desi_wild_3395135</i> | NA                                  | <i>Ca_desi_denovo</i> | 3395135                 | C/G  | NA                 | NA                            | NA                 |
| <i>Desi_wild_3396449</i> | NA                                  | <i>Ca_desi_denovo</i> | 3396449                 | G/A  | NA                 | NA                            | NA                 |
| <i>Desi_wild_3398898</i> | NA                                  | <i>Ca_desi_denovo</i> | 3398898                 | T/C  | NA                 | NA                            | NA                 |
| <i>Desi_wild_3399027</i> | NA                                  | <i>Ca_desi_denovo</i> | 3399027                 | A/G  | NA                 | NA                            | NA                 |
| <i>Desi_wild_3400254</i> | NA                                  | <i>Ca_desi_denovo</i> | 3400254                 | C/T  | NA                 | NA                            | NA                 |
| <i>Desi_wild_3402034</i> | NA                                  | <i>Ca_desi_denovo</i> | 3402034                 | T/C  | NA                 | NA                            | NA                 |
| <i>Desi_wild_3402084</i> | NA                                  | <i>Ca_desi_denovo</i> | 3402084                 | T/C  | NA                 | NA                            | NA                 |
| <i>Desi_wild_3402163</i> | NA                                  | <i>Ca_desi_denovo</i> | 3402163                 | A/C  | NA                 | NA                            | NA                 |
| <i>Desi_wild_3402227</i> | NA                                  | <i>Ca_desi_denovo</i> | 3402227                 | C/T  | NA                 | NA                            | NA                 |
| <i>Desi_wild_3403884</i> | NA                                  | <i>Ca_desi_denovo</i> | 3403884                 | T/G  | NA                 | NA                            | NA                 |
| <i>Desi_wild_3403927</i> | NA                                  | <i>Ca_desi_denovo</i> | 3403927                 | G/C  | NA                 | NA                            | NA                 |
| <i>Desi_wild_3404448</i> | NA                                  | <i>Ca_desi_denovo</i> | 3404448                 | T/C  | NA                 | NA                            | NA                 |
| <i>Desi_wild_3404985</i> | NA                                  | <i>Ca_desi_denovo</i> | 3404985                 | A/G  | NA                 | NA                            | NA                 |
| <i>Desi_wild_3405690</i> | NA                                  | <i>Ca_desi_denovo</i> | 3405690                 | G/A  | NA                 | NA                            | NA                 |
| <i>Desi_wild_3406169</i> | NA                                  | <i>Ca_desi_denovo</i> | 3406169                 | T/C  | NA                 | NA                            | NA                 |
| <i>Desi_wild_3406217</i> | NA                                  | <i>Ca_desi_denovo</i> | 3406217                 | A/G  | NA                 | NA                            | NA                 |
| <i>Desi_wild_3406645</i> | NA                                  | <i>Ca_desi_denovo</i> | 3406645                 | C/T  | NA                 | NA                            | NA                 |
| <i>Desi_wild_3407056</i> | NA                                  | <i>Ca_desi_denovo</i> | 3407056                 | T/G  | NA                 | NA                            | NA                 |
| <i>Desi_wild_3407600</i> | NA                                  | <i>Ca_desi_denovo</i> | 3407600                 | C/G  | NA                 | NA                            | NA                 |
| <i>Desi_wild_3407654</i> | NA                                  | <i>Ca_desi_denovo</i> | 3407654                 | G/C  | NA                 | NA                            | NA                 |
| <i>Desi_wild_3410705</i> | NA                                  | <i>Ca_desi_denovo</i> | 3410705                 | T/C  | NA                 | NA                            | NA                 |
| <i>Desi_wild_3410714</i> | NA                                  | <i>Ca_desi_denovo</i> | 3410714                 | T/G  | NA                 | NA                            | NA                 |
| <i>Desi_wild_3410907</i> | NA                                  | <i>Ca_desi_denovo</i> | 3410907                 | A/G  | NA                 | NA                            | NA                 |

| SNP IDs                  | NCBI dbSNP accession IDs (NCBI_SS#) | Chromosomes           | Physical positions (bp) | SNPs | Gene accession IDs | Sequence components of genome | Putative functions |
|--------------------------|-------------------------------------|-----------------------|-------------------------|------|--------------------|-------------------------------|--------------------|
| <i>Desi_wild_3411976</i> | NA                                  | <i>Ca_desi_denovo</i> | 3411976                 | A/G  | NA                 | NA                            | NA                 |
| <i>Desi_wild_3412784</i> | NA                                  | <i>Ca_desi_denovo</i> | 3412784                 | A/G  | NA                 | NA                            | NA                 |
| <i>Desi_wild_3412811</i> | NA                                  | <i>Ca_desi_denovo</i> | 3412811                 | C/G  | NA                 | NA                            | NA                 |
| <i>Desi_wild_3413183</i> | NA                                  | <i>Ca_desi_denovo</i> | 3413183                 | T/C  | NA                 | NA                            | NA                 |
| <i>Desi_wild_3414811</i> | NA                                  | <i>Ca_desi_denovo</i> | 3414811                 | C/T  | NA                 | NA                            | NA                 |
| <i>Desi_wild_3414835</i> | NA                                  | <i>Ca_desi_denovo</i> | 3414835                 | C/G  | NA                 | NA                            | NA                 |
| <i>Desi_wild_3415938</i> | NA                                  | <i>Ca_desi_denovo</i> | 3415938                 | C/T  | NA                 | NA                            | NA                 |
| <i>Desi_wild_3416388</i> | NA                                  | <i>Ca_desi_denovo</i> | 3416388                 | T/G  | NA                 | NA                            | NA                 |
| <i>Desi_wild_3416714</i> | NA                                  | <i>Ca_desi_denovo</i> | 3416714                 | G/T  | NA                 | NA                            | NA                 |
| <i>Desi_wild_3416716</i> | NA                                  | <i>Ca_desi_denovo</i> | 3416716                 | C/G  | NA                 | NA                            | NA                 |
| <i>Desi_wild_3416999</i> | NA                                  | <i>Ca_desi_denovo</i> | 3416999                 | C/T  | NA                 | NA                            | NA                 |
| <i>Desi_wild_3417705</i> | NA                                  | <i>Ca_desi_denovo</i> | 3417705                 | C/G  | NA                 | NA                            | NA                 |
| <i>Desi_wild_3417714</i> | NA                                  | <i>Ca_desi_denovo</i> | 3417714                 | C/G  | NA                 | NA                            | NA                 |
| <i>Desi_wild_3418621</i> | NA                                  | <i>Ca_desi_denovo</i> | 3418621                 | G/A  | NA                 | NA                            | NA                 |
| <i>Desi_wild_3418728</i> | NA                                  | <i>Ca_desi_denovo</i> | 3418728                 | T/G  | NA                 | NA                            | NA                 |
| <i>Desi_wild_3419532</i> | NA                                  | <i>Ca_desi_denovo</i> | 3419532                 | C/G  | NA                 | NA                            | NA                 |
| <i>Desi_wild_3419544</i> | NA                                  | <i>Ca_desi_denovo</i> | 3419544                 | G/T  | NA                 | NA                            | NA                 |
| <i>Desi_wild_3420967</i> | NA                                  | <i>Ca_desi_denovo</i> | 3420967                 | G/T  | NA                 | NA                            | NA                 |
| <i>Desi_wild_3422174</i> | NA                                  | <i>Ca_desi_denovo</i> | 3422174                 | T/C  | NA                 | NA                            | NA                 |
| <i>Desi_wild_3422183</i> | NA                                  | <i>Ca_desi_denovo</i> | 3422183                 | C/A  | NA                 | NA                            | NA                 |
| <i>Desi_wild_3422245</i> | NA                                  | <i>Ca_desi_denovo</i> | 3422245                 | T/C  | NA                 | NA                            | NA                 |
| <i>Desi_wild_3422257</i> | NA                                  | <i>Ca_desi_denovo</i> | 3422257                 | C/G  | NA                 | NA                            | NA                 |
| <i>Desi_wild_3422347</i> | NA                                  | <i>Ca_desi_denovo</i> | 3422347                 | G/A  | NA                 | NA                            | NA                 |
| <i>Desi_wild_3422356</i> | NA                                  | <i>Ca_desi_denovo</i> | 3422356                 | A/C  | NA                 | NA                            | NA                 |
| <i>Desi_wild_3422675</i> | NA                                  | <i>Ca_desi_denovo</i> | 3422675                 | C/G  | NA                 | NA                            | NA                 |
| <i>Desi_wild_3423297</i> | NA                                  | <i>Ca_desi_denovo</i> | 3423297                 | G/T  | NA                 | NA                            | NA                 |
| <i>Desi_wild_3424195</i> | NA                                  | <i>Ca_desi_denovo</i> | 3424195                 | C/T  | NA                 | NA                            | NA                 |
| <i>Desi_wild_3426921</i> | NA                                  | <i>Ca_desi_denovo</i> | 3426921                 | G/A  | NA                 | NA                            | NA                 |
| <i>Desi_wild_3427482</i> | NA                                  | <i>Ca_desi_denovo</i> | 3427482                 | T/G  | NA                 | NA                            | NA                 |
| <i>Desi_wild_3427549</i> | NA                                  | <i>Ca_desi_denovo</i> | 3427549                 | T/C  | NA                 | NA                            | NA                 |
| <i>Desi_wild_3428560</i> | NA                                  | <i>Ca_desi_denovo</i> | 3428560                 | C/T  | NA                 | NA                            | NA                 |
| <i>Desi_wild_3428561</i> | NA                                  | <i>Ca_desi_denovo</i> | 3428561                 | C/T  | NA                 | NA                            | NA                 |
| <i>Desi_wild_3428836</i> | NA                                  | <i>Ca_desi_denovo</i> | 3428836                 | A/G  | NA                 | NA                            | NA                 |
| <i>Desi_wild_3428839</i> | NA                                  | <i>Ca_desi_denovo</i> | 3428839                 | G/T  | NA                 | NA                            | NA                 |
| <i>Desi_wild_3429013</i> | NA                                  | <i>Ca_desi_denovo</i> | 3429013                 | A/G  | NA                 | NA                            | NA                 |
| <i>Desi_wild_3429726</i> | NA                                  | <i>Ca_desi_denovo</i> | 3429726                 | C/A  | NA                 | NA                            | NA                 |
| <i>Desi_wild_3432264</i> | NA                                  | <i>Ca_desi_denovo</i> | 3432264                 | C/A  | NA                 | NA                            | NA                 |
| <i>Desi_wild_3432653</i> | NA                                  | <i>Ca_desi_denovo</i> | 3432653                 | C/T  | NA                 | NA                            | NA                 |
| <i>Desi_wild_3432684</i> | NA                                  | <i>Ca_desi_denovo</i> | 3432684                 | G/A  | NA                 | NA                            | NA                 |
| <i>Desi_wild_3433983</i> | NA                                  | <i>Ca_desi_denovo</i> | 3433983                 | A/G  | NA                 | NA                            | NA                 |
| <i>Desi_wild_3433992</i> | NA                                  | <i>Ca_desi_denovo</i> | 3433992                 | C/G  | NA                 | NA                            | NA                 |
| <i>Desi_wild_3434234</i> | NA                                  | <i>Ca_desi_denovo</i> | 3434234                 | T/G  | NA                 | NA                            | NA                 |
| <i>Desi_wild_3434254</i> | NA                                  | <i>Ca_desi_denovo</i> | 3434254                 | T/G  | NA                 | NA                            | NA                 |
| <i>Desi_wild_3434818</i> | NA                                  | <i>Ca_desi_denovo</i> | 3434818                 | G/A  | NA                 | NA                            | NA                 |

| SNP IDs                  | NCBI dbSNP accession IDs (NCBI_SS#) | Chromosomes           | Physical positions (bp) | SNPs | Gene accession IDs | Sequence components of genome | Putative functions |
|--------------------------|-------------------------------------|-----------------------|-------------------------|------|--------------------|-------------------------------|--------------------|
| <i>Desi_wild_3437770</i> | NA                                  | <i>Ca_desi_denovo</i> | 3437770                 | C/T  | NA                 | NA                            | NA                 |
| <i>Desi_wild_3439388</i> | NA                                  | <i>Ca_desi_denovo</i> | 3439388                 | T/G  | NA                 | NA                            | NA                 |
| <i>Desi_wild_3439604</i> | NA                                  | <i>Ca_desi_denovo</i> | 3439604                 | G/A  | NA                 | NA                            | NA                 |
| <i>Desi_wild_3441106</i> | NA                                  | <i>Ca_desi_denovo</i> | 3441106                 | A/G  | NA                 | NA                            | NA                 |
| <i>Desi_wild_3442855</i> | NA                                  | <i>Ca_desi_denovo</i> | 3442855                 | C/T  | NA                 | NA                            | NA                 |
| <i>Desi_wild_3442867</i> | NA                                  | <i>Ca_desi_denovo</i> | 3442867                 | A/T  | NA                 | NA                            | NA                 |
| <i>Desi_wild_3443022</i> | NA                                  | <i>Ca_desi_denovo</i> | 3443022                 | C/T  | NA                 | NA                            | NA                 |
| <i>Desi_wild_3443031</i> | NA                                  | <i>Ca_desi_denovo</i> | 3443031                 | C/G  | NA                 | NA                            | NA                 |
| <i>Desi_wild_3443399</i> | NA                                  | <i>Ca_desi_denovo</i> | 3443399                 | T/C  | NA                 | NA                            | NA                 |
| <i>Desi_wild_3443408</i> | NA                                  | <i>Ca_desi_denovo</i> | 3443408                 | C/T  | NA                 | NA                            | NA                 |
| <i>Desi_wild_3443530</i> | NA                                  | <i>Ca_desi_denovo</i> | 3443530                 | C/A  | NA                 | NA                            | NA                 |
| <i>Desi_wild_3443879</i> | NA                                  | <i>Ca_desi_denovo</i> | 3443879                 | C/T  | NA                 | NA                            | NA                 |
| <i>Desi_wild_3444034</i> | NA                                  | <i>Ca_desi_denovo</i> | 3444034                 | C/T  | NA                 | NA                            | NA                 |
| <i>Desi_wild_3444055</i> | NA                                  | <i>Ca_desi_denovo</i> | 3444055                 | A/C  | NA                 | NA                            | NA                 |
| <i>Desi_wild_3444646</i> | NA                                  | <i>Ca_desi_denovo</i> | 3444646                 | A/G  | NA                 | NA                            | NA                 |
| <i>Desi_wild_3445034</i> | NA                                  | <i>Ca_desi_denovo</i> | 3445034                 | C/T  | NA                 | NA                            | NA                 |
| <i>Desi_wild_3445086</i> | NA                                  | <i>Ca_desi_denovo</i> | 3445086                 | C/T  | NA                 | NA                            | NA                 |
| <i>Desi_wild_3445720</i> | NA                                  | <i>Ca_desi_denovo</i> | 3445720                 | G/C  | NA                 | NA                            | NA                 |
| <i>Desi_wild_3445790</i> | NA                                  | <i>Ca_desi_denovo</i> | 3445790                 | T/C  | NA                 | NA                            | NA                 |
| <i>Desi_wild_3448247</i> | NA                                  | <i>Ca_desi_denovo</i> | 3448247                 | G/C  | NA                 | NA                            | NA                 |
| <i>Desi_wild_3448271</i> | NA                                  | <i>Ca_desi_denovo</i> | 3448271                 | A/C  | NA                 | NA                            | NA                 |
| <i>Desi_wild_3448565</i> | NA                                  | <i>Ca_desi_denovo</i> | 3448565                 | T/C  | NA                 | NA                            | NA                 |
| <i>Desi_wild_3449595</i> | NA                                  | <i>Ca_desi_denovo</i> | 3449595                 | G/C  | NA                 | NA                            | NA                 |
| <i>Desi_wild_3449804</i> | NA                                  | <i>Ca_desi_denovo</i> | 3449804                 | G/C  | NA                 | NA                            | NA                 |
| <i>Desi_wild_3449807</i> | NA                                  | <i>Ca_desi_denovo</i> | 3449807                 | T/C  | NA                 | NA                            | NA                 |
| <i>Desi_wild_3450199</i> | NA                                  | <i>Ca_desi_denovo</i> | 3450199                 | A/G  | NA                 | NA                            | NA                 |
| <i>Desi_wild_3450214</i> | NA                                  | <i>Ca_desi_denovo</i> | 3450214                 | C/T  | NA                 | NA                            | NA                 |
| <i>Desi_wild_3450384</i> | NA                                  | <i>Ca_desi_denovo</i> | 3450384                 | C/T  | NA                 | NA                            | NA                 |
| <i>Desi_wild_3450420</i> | NA                                  | <i>Ca_desi_denovo</i> | 3450420                 | A/C  | NA                 | NA                            | NA                 |
| <i>Desi_wild_3450783</i> | NA                                  | <i>Ca_desi_denovo</i> | 3450783                 | C/T  | NA                 | NA                            | NA                 |
| <i>Desi_wild_3451551</i> | NA                                  | <i>Ca_desi_denovo</i> | 3451551                 | C/T  | NA                 | NA                            | NA                 |
| <i>Desi_wild_3451603</i> | NA                                  | <i>Ca_desi_denovo</i> | 3451603                 | G/A  | NA                 | NA                            | NA                 |
| <i>Desi_wild_3451778</i> | NA                                  | <i>Ca_desi_denovo</i> | 3451778                 | C/G  | NA                 | NA                            | NA                 |
| <i>Desi_wild_3453121</i> | NA                                  | <i>Ca_desi_denovo</i> | 3453121                 | T/C  | NA                 | NA                            | NA                 |
| <i>Desi_wild_3453510</i> | NA                                  | <i>Ca_desi_denovo</i> | 3453510                 | T/C  | NA                 | NA                            | NA                 |
| <i>Desi_wild_3453570</i> | NA                                  | <i>Ca_desi_denovo</i> | 3453570                 | G/A  | NA                 | NA                            | NA                 |
| <i>Desi_wild_3453882</i> | NA                                  | <i>Ca_desi_denovo</i> | 3453882                 | G/C  | NA                 | NA                            | NA                 |
| <i>Desi_wild_3453938</i> | NA                                  | <i>Ca_desi_denovo</i> | 3453938                 | A/G  | NA                 | NA                            | NA                 |
| <i>Desi_wild_3456089</i> | NA                                  | <i>Ca_desi_denovo</i> | 3456089                 | G/A  | NA                 | NA                            | NA                 |
| <i>Desi_wild_3456102</i> | NA                                  | <i>Ca_desi_denovo</i> | 3456102                 | A/G  | NA                 | NA                            | NA                 |
| <i>Desi_wild_3456188</i> | NA                                  | <i>Ca_desi_denovo</i> | 3456188                 | T/G  | NA                 | NA                            | NA                 |
| <i>Desi_wild_3456300</i> | NA                                  | <i>Ca_desi_denovo</i> | 3456300                 | G/T  | NA                 | NA                            | NA                 |
| <i>Desi_wild_3456869</i> | NA                                  | <i>Ca_desi_denovo</i> | 3456869                 | C/T  | NA                 | NA                            | NA                 |
| <i>Desi_wild_3458527</i> | NA                                  | <i>Ca_desi_denovo</i> | 3458527                 | C/T  | NA                 | NA                            | NA                 |

| SNP IDs                  | NCBI dbSNP accession IDs (NCBI_SS#) | Chromosomes           | Physical positions (bp) | SNPs | Gene accession IDs | Sequence components of genome | Putative functions |
|--------------------------|-------------------------------------|-----------------------|-------------------------|------|--------------------|-------------------------------|--------------------|
| <i>Desi_wild_3458551</i> | NA                                  | <i>Ca_desi_denovo</i> | 3458551                 | G/C  | NA                 | NA                            | NA                 |
| <i>Desi_wild_3458936</i> | NA                                  | <i>Ca_desi_denovo</i> | 3458936                 | A/G  | NA                 | NA                            | NA                 |
| <i>Desi_wild_3459666</i> | NA                                  | <i>Ca_desi_denovo</i> | 3459666                 | A/C  | NA                 | NA                            | NA                 |
| <i>Desi_wild_3459958</i> | NA                                  | <i>Ca_desi_denovo</i> | 3459958                 | G/T  | NA                 | NA                            | NA                 |
| <i>Desi_wild_3460685</i> | NA                                  | <i>Ca_desi_denovo</i> | 3460685                 | T/G  | NA                 | NA                            | NA                 |
| <i>Desi_wild_3460773</i> | NA                                  | <i>Ca_desi_denovo</i> | 3460773                 | T/C  | NA                 | NA                            | NA                 |
| <i>Desi_wild_3461360</i> | NA                                  | <i>Ca_desi_denovo</i> | 3461360                 | C/A  | NA                 | NA                            | NA                 |
| <i>Desi_wild_3461675</i> | NA                                  | <i>Ca_desi_denovo</i> | 3461675                 | G/C  | NA                 | NA                            | NA                 |
| <i>Desi_wild_3461693</i> | NA                                  | <i>Ca_desi_denovo</i> | 3461693                 | A/G  | NA                 | NA                            | NA                 |
| <i>Desi_wild_3461929</i> | NA                                  | <i>Ca_desi_denovo</i> | 3461929                 | C/T  | NA                 | NA                            | NA                 |
| <i>Desi_wild_3461985</i> | NA                                  | <i>Ca_desi_denovo</i> | 3461985                 | C/T  | NA                 | NA                            | NA                 |
| <i>Desi_wild_3462130</i> | NA                                  | <i>Ca_desi_denovo</i> | 3462130                 | G/C  | NA                 | NA                            | NA                 |
| <i>Desi_wild_3462158</i> | NA                                  | <i>Ca_desi_denovo</i> | 3462158                 | G/A  | NA                 | NA                            | NA                 |
| <i>Desi_wild_3462173</i> | NA                                  | <i>Ca_desi_denovo</i> | 3462173                 | A/G  | NA                 | NA                            | NA                 |
| <i>Desi_wild_3463862</i> | NA                                  | <i>Ca_desi_denovo</i> | 3463862                 | C/A  | NA                 | NA                            | NA                 |
| <i>Desi_wild_3463873</i> | NA                                  | <i>Ca_desi_denovo</i> | 3463873                 | A/C  | NA                 | NA                            | NA                 |
| <i>Desi_wild_3465248</i> | NA                                  | <i>Ca_desi_denovo</i> | 3465248                 | A/G  | NA                 | NA                            | NA                 |
| <i>Desi_wild_3466062</i> | NA                                  | <i>Ca_desi_denovo</i> | 3466062                 | T/C  | NA                 | NA                            | NA                 |
| <i>Desi_wild_3466176</i> | NA                                  | <i>Ca_desi_denovo</i> | 3466176                 | T/C  | NA                 | NA                            | NA                 |
| <i>Desi_wild_3466218</i> | NA                                  | <i>Ca_desi_denovo</i> | 3466218                 | A/C  | NA                 | NA                            | NA                 |
| <i>Desi_wild_3466505</i> | NA                                  | <i>Ca_desi_denovo</i> | 3466505                 | C/T  | NA                 | NA                            | NA                 |
| <i>Desi_wild_3467805</i> | NA                                  | <i>Ca_desi_denovo</i> | 3467805                 | A/G  | NA                 | NA                            | NA                 |
| <i>Desi_wild_3468048</i> | NA                                  | <i>Ca_desi_denovo</i> | 3468048                 | G/T  | NA                 | NA                            | NA                 |
| <i>Desi_wild_3468781</i> | NA                                  | <i>Ca_desi_denovo</i> | 3468781                 | G/A  | NA                 | NA                            | NA                 |
| <i>Desi_wild_3469454</i> | NA                                  | <i>Ca_desi_denovo</i> | 3469454                 | T/C  | NA                 | NA                            | NA                 |
| <i>Desi_wild_3469464</i> | NA                                  | <i>Ca_desi_denovo</i> | 3469464                 | G/A  | NA                 | NA                            | NA                 |
| <i>Desi_wild_3471936</i> | NA                                  | <i>Ca_desi_denovo</i> | 3471936                 | A/G  | NA                 | NA                            | NA                 |
| <i>Desi_wild_3472096</i> | NA                                  | <i>Ca_desi_denovo</i> | 3472096                 | G/T  | NA                 | NA                            | NA                 |
| <i>Desi_wild_3472421</i> | NA                                  | <i>Ca_desi_denovo</i> | 3472421                 | T/C  | NA                 | NA                            | NA                 |
| <i>Desi_wild_3472458</i> | NA                                  | <i>Ca_desi_denovo</i> | 3472458                 | A/G  | NA                 | NA                            | NA                 |
| <i>Desi_wild_3473022</i> | NA                                  | <i>Ca_desi_denovo</i> | 3473022                 | A/G  | NA                 | NA                            | NA                 |
| <i>Desi_wild_3476257</i> | NA                                  | <i>Ca_desi_denovo</i> | 3476257                 | G/T  | NA                 | NA                            | NA                 |
| <i>Desi_wild_3476466</i> | NA                                  | <i>Ca_desi_denovo</i> | 3476466                 | T/G  | NA                 | NA                            | NA                 |
| <i>Desi_wild_3476490</i> | NA                                  | <i>Ca_desi_denovo</i> | 3476490                 | C/G  | NA                 | NA                            | NA                 |
| <i>Desi_wild_3477246</i> | NA                                  | <i>Ca_desi_denovo</i> | 3477246                 | G/C  | NA                 | NA                            | NA                 |
| <i>Desi_wild_3477267</i> | NA                                  | <i>Ca_desi_denovo</i> | 3477267                 | T/C  | NA                 | NA                            | NA                 |
| <i>Desi_wild_3477974</i> | NA                                  | <i>Ca_desi_denovo</i> | 3477974                 | G/A  | NA                 | NA                            | NA                 |
| <i>Desi_wild_3478428</i> | NA                                  | <i>Ca_desi_denovo</i> | 3478428                 | C/T  | NA                 | NA                            | NA                 |
| <i>Desi_wild_3478855</i> | NA                                  | <i>Ca_desi_denovo</i> | 3478855                 | T/C  | NA                 | NA                            | NA                 |
| <i>Desi_wild_3480066</i> | NA                                  | <i>Ca_desi_denovo</i> | 3480066                 | C/A  | NA                 | NA                            | NA                 |
| <i>Desi_wild_3480090</i> | NA                                  | <i>Ca_desi_denovo</i> | 3480090                 | G/C  | NA                 | NA                            | NA                 |
| <i>Desi_wild_3481652</i> | NA                                  | <i>Ca_desi_denovo</i> | 3481652                 | G/C  | NA                 | NA                            | NA                 |
| <i>Desi_wild_3481659</i> | NA                                  | <i>Ca_desi_denovo</i> | 3481659                 | A/C  | NA                 | NA                            | NA                 |
| <i>Desi_wild_3482315</i> | NA                                  | <i>Ca_desi_denovo</i> | 3482315                 | G/A  | NA                 | NA                            | NA                 |



| SNP IDs                  | NCBI dbSNP accession IDs (NCBI_SS#) | Chromosomes           | Physical positions (bp) | SNPs | Gene accession IDs | Sequence components of genome | Putative functions |
|--------------------------|-------------------------------------|-----------------------|-------------------------|------|--------------------|-------------------------------|--------------------|
| <i>Desi_wild_3482545</i> | NA                                  | <i>Ca_desi_denovo</i> | 3482545                 | G/A  | NA                 | NA                            | NA                 |
| <i>Desi_wild_3483189</i> | NA                                  | <i>Ca_desi_denovo</i> | 3483189                 | A/T  | NA                 | NA                            | NA                 |
| <i>Desi_wild_3483195</i> | NA                                  | <i>Ca_desi_denovo</i> | 3483195                 | G/A  | NA                 | NA                            | NA                 |
| <i>Desi_wild_3483583</i> | NA                                  | <i>Ca_desi_denovo</i> | 3483583                 | C/T  | NA                 | NA                            | NA                 |
| <i>Desi_wild_3483618</i> | NA                                  | <i>Ca_desi_denovo</i> | 3483618                 | G/C  | NA                 | NA                            | NA                 |
| <i>Desi_wild_3483676</i> | NA                                  | <i>Ca_desi_denovo</i> | 3483676                 | G/A  | NA                 | NA                            | NA                 |
| <i>Desi_wild_3483821</i> | NA                                  | <i>Ca_desi_denovo</i> | 3483821                 | C/T  | NA                 | NA                            | NA                 |
| <i>Desi_wild_3484740</i> | NA                                  | <i>Ca_desi_denovo</i> | 3484740                 | T/G  | NA                 | NA                            | NA                 |
| <i>Desi_wild_3486077</i> | NA                                  | <i>Ca_desi_denovo</i> | 3486077                 | A/G  | NA                 | NA                            | NA                 |
| <i>Desi_wild_3487136</i> | NA                                  | <i>Ca_desi_denovo</i> | 3487136                 | A/G  | NA                 | NA                            | NA                 |
| <i>Desi_wild_3487442</i> | NA                                  | <i>Ca_desi_denovo</i> | 3487442                 | C/A  | NA                 | NA                            | NA                 |
| <i>Desi_wild_3487477</i> | NA                                  | <i>Ca_desi_denovo</i> | 3487477                 | T/C  | NA                 | NA                            | NA                 |
| <i>Desi_wild_3488229</i> | NA                                  | <i>Ca_desi_denovo</i> | 3488229                 | A/G  | NA                 | NA                            | NA                 |
| <i>Desi_wild_3488280</i> | NA                                  | <i>Ca_desi_denovo</i> | 3488280                 | C/T  | NA                 | NA                            | NA                 |
| <i>Desi_wild_3489378</i> | NA                                  | <i>Ca_desi_denovo</i> | 3489378                 | T/C  | NA                 | NA                            | NA                 |
| <i>Desi_wild_3489411</i> | NA                                  | <i>Ca_desi_denovo</i> | 3489411                 | G/C  | NA                 | NA                            | NA                 |
| <i>Desi_wild_3491744</i> | NA                                  | <i>Ca_desi_denovo</i> | 3491744                 | A/C  | NA                 | NA                            | NA                 |
| <i>Desi_wild_3492828</i> | NA                                  | <i>Ca_desi_denovo</i> | 3492828                 | G/C  | NA                 | NA                            | NA                 |
| <i>Desi_wild_3494908</i> | NA                                  | <i>Ca_desi_denovo</i> | 3494908                 | T/C  | NA                 | NA                            | NA                 |
| <i>Desi_wild_3496563</i> | NA                                  | <i>Ca_desi_denovo</i> | 3496563                 | C/A  | NA                 | NA                            | NA                 |
| <i>Desi_wild_3496578</i> | NA                                  | <i>Ca_desi_denovo</i> | 3496578                 | A/G  | NA                 | NA                            | NA                 |
| <i>Desi_wild_3497189</i> | NA                                  | <i>Ca_desi_denovo</i> | 3497189                 | A/G  | NA                 | NA                            | NA                 |
| <i>Desi_wild_3497671</i> | NA                                  | <i>Ca_desi_denovo</i> | 3497671                 | C/A  | NA                 | NA                            | NA                 |
| <i>Desi_wild_3498016</i> | NA                                  | <i>Ca_desi_denovo</i> | 3498016                 | C/A  | NA                 | NA                            | NA                 |
| <i>Desi_wild_3499063</i> | NA                                  | <i>Ca_desi_denovo</i> | 3499063                 | T/C  | NA                 | NA                            | NA                 |
| <i>Desi_wild_3499147</i> | NA                                  | <i>Ca_desi_denovo</i> | 3499147                 | G/T  | NA                 | NA                            | NA                 |
| <i>Desi_wild_3499873</i> | NA                                  | <i>Ca_desi_denovo</i> | 3499873                 | T/C  | NA                 | NA                            | NA                 |
| <i>Desi_wild_3500958</i> | NA                                  | <i>Ca_desi_denovo</i> | 3500958                 | G/C  | NA                 | NA                            | NA                 |
| <i>Desi_wild_3501099</i> | NA                                  | <i>Ca_desi_denovo</i> | 3501099                 | G/A  | NA                 | NA                            | NA                 |
| <i>Desi_wild_3503282</i> | NA                                  | <i>Ca_desi_denovo</i> | 3503282                 | C/T  | NA                 | NA                            | NA                 |
| <i>Desi_wild_3504036</i> | NA                                  | <i>Ca_desi_denovo</i> | 3504036                 | C/T  | NA                 | NA                            | NA                 |
| <i>Desi_wild_3504037</i> | NA                                  | <i>Ca_desi_denovo</i> | 3504037                 | T/C  | NA                 | NA                            | NA                 |
| <i>Desi_wild_3504332</i> | NA                                  | <i>Ca_desi_denovo</i> | 3504332                 | C/A  | NA                 | NA                            | NA                 |
| <i>Desi_wild_3504338</i> | NA                                  | <i>Ca_desi_denovo</i> | 3504338                 | G/C  | NA                 | NA                            | NA                 |
| <i>Desi_wild_3505230</i> | NA                                  | <i>Ca_desi_denovo</i> | 3505230                 | A/G  | NA                 | NA                            | NA                 |
| <i>Desi_wild_3505264</i> | NA                                  | <i>Ca_desi_denovo</i> | 3505264                 | A/T  | NA                 | NA                            | NA                 |
| <i>Desi_wild_3505267</i> | NA                                  | <i>Ca_desi_denovo</i> | 3505267                 | A/C  | NA                 | NA                            | NA                 |
| <i>Desi_wild_3507695</i> | NA                                  | <i>Ca_desi_denovo</i> | 3507695                 | T/G  | NA                 | NA                            | NA                 |
| <i>Desi_wild_3507705</i> | NA                                  | <i>Ca_desi_denovo</i> | 3507705                 | C/G  | NA                 | NA                            | NA                 |
| <i>Desi_wild_3507808</i> | NA                                  | <i>Ca_desi_denovo</i> | 3507808                 | G/C  | NA                 | NA                            | NA                 |
| <i>Desi_wild_3507830</i> | NA                                  | <i>Ca_desi_denovo</i> | 3507830                 | A/G  | NA                 | NA                            | NA                 |
| <i>Desi_wild_3508018</i> | NA                                  | <i>Ca_desi_denovo</i> | 3508018                 | G/A  | NA                 | NA                            | NA                 |
| <i>Desi_wild_3508092</i> | NA                                  | <i>Ca_desi_denovo</i> | 3508092                 | A/G  | NA                 | NA                            | NA                 |
| <i>Desi_wild_3510001</i> | NA                                  | <i>Ca_desi_denovo</i> | 3510001                 | G/A  | NA                 | NA                            | NA                 |

| SNP IDs                  | NCBI dbSNP accession IDs (NCBI_SS#) | Chromosomes           | Physical positions (bp) | SNPs | Gene accession IDs | Sequence components of genome | Putative functions |
|--------------------------|-------------------------------------|-----------------------|-------------------------|------|--------------------|-------------------------------|--------------------|
| <i>Desi_wild_3510118</i> | NA                                  | <i>Ca_desi_denovo</i> | 3510118                 | T/C  | NA                 | NA                            | NA                 |
| <i>Desi_wild_3510199</i> | NA                                  | <i>Ca_desi_denovo</i> | 3510199                 | T/C  | NA                 | NA                            | NA                 |
| <i>Desi_wild_3510259</i> | NA                                  | <i>Ca_desi_denovo</i> | 3510259                 | T/C  | NA                 | NA                            | NA                 |
| <i>Desi_wild_3510286</i> | NA                                  | <i>Ca_desi_denovo</i> | 3510286                 | G/A  | NA                 | NA                            | NA                 |
| <i>Desi_wild_3511248</i> | NA                                  | <i>Ca_desi_denovo</i> | 3511248                 | C/G  | NA                 | NA                            | NA                 |
| <i>Desi_wild_3511310</i> | NA                                  | <i>Ca_desi_denovo</i> | 3511310                 | G/A  | NA                 | NA                            | NA                 |
| <i>Desi_wild_3511489</i> | NA                                  | <i>Ca_desi_denovo</i> | 3511489                 | C/G  | NA                 | NA                            | NA                 |
| <i>Desi_wild_3511715</i> | NA                                  | <i>Ca_desi_denovo</i> | 3511715                 | C/G  | NA                 | NA                            | NA                 |
| <i>Desi_wild_3514320</i> | NA                                  | <i>Ca_desi_denovo</i> | 3514320                 | G/A  | NA                 | NA                            | NA                 |
| <i>Desi_wild_3514625</i> | NA                                  | <i>Ca_desi_denovo</i> | 3514625                 | T/C  | NA                 | NA                            | NA                 |
| <i>Desi_wild_3514904</i> | NA                                  | <i>Ca_desi_denovo</i> | 3514904                 | A/C  | NA                 | NA                            | NA                 |
| <i>Desi_wild_3515075</i> | NA                                  | <i>Ca_desi_denovo</i> | 3515075                 | A/T  | NA                 | NA                            | NA                 |
| <i>Desi_wild_3515099</i> | NA                                  | <i>Ca_desi_denovo</i> | 3515099                 | T/C  | NA                 | NA                            | NA                 |
| <i>Desi_wild_3515554</i> | NA                                  | <i>Ca_desi_denovo</i> | 3515554                 | C/A  | NA                 | NA                            | NA                 |
| <i>Desi_wild_3516349</i> | NA                                  | <i>Ca_desi_denovo</i> | 3516349                 | T/C  | NA                 | NA                            | NA                 |
| <i>Desi_wild_3516882</i> | NA                                  | <i>Ca_desi_denovo</i> | 3516882                 | A/G  | NA                 | NA                            | NA                 |
| <i>Desi_wild_3517478</i> | NA                                  | <i>Ca_desi_denovo</i> | 3517478                 | A/C  | NA                 | NA                            | NA                 |
| <i>Desi_wild_3518767</i> | NA                                  | <i>Ca_desi_denovo</i> | 3518767                 | T/C  | NA                 | NA                            | NA                 |
| <i>Desi_wild_3518816</i> | NA                                  | <i>Ca_desi_denovo</i> | 3518816                 | G/T  | NA                 | NA                            | NA                 |
| <i>Desi_wild_3519023</i> | NA                                  | <i>Ca_desi_denovo</i> | 3519023                 | C/T  | NA                 | NA                            | NA                 |
| <i>Desi_wild_3519243</i> | NA                                  | <i>Ca_desi_denovo</i> | 3519243                 | G/C  | NA                 | NA                            | NA                 |
| <i>Desi_wild_3519296</i> | NA                                  | <i>Ca_desi_denovo</i> | 3519296                 | C/G  | NA                 | NA                            | NA                 |
| <i>Desi_wild_3520709</i> | NA                                  | <i>Ca_desi_denovo</i> | 3520709                 | T/G  | NA                 | NA                            | NA                 |
| <i>Desi_wild_3520719</i> | NA                                  | <i>Ca_desi_denovo</i> | 3520719                 | T/C  | NA                 | NA                            | NA                 |
| <i>Desi_wild_3521012</i> | NA                                  | <i>Ca_desi_denovo</i> | 3521012                 | T/G  | NA                 | NA                            | NA                 |
| <i>Desi_wild_3521093</i> | NA                                  | <i>Ca_desi_denovo</i> | 3521093                 | C/T  | NA                 | NA                            | NA                 |
| <i>Desi_wild_3521322</i> | NA                                  | <i>Ca_desi_denovo</i> | 3521322                 | C/G  | NA                 | NA                            | NA                 |
| <i>Desi_wild_3522304</i> | NA                                  | <i>Ca_desi_denovo</i> | 3522304                 | T/C  | NA                 | NA                            | NA                 |
| <i>Desi_wild_3522322</i> | NA                                  | <i>Ca_desi_denovo</i> | 3522322                 | A/G  | NA                 | NA                            | NA                 |
| <i>Desi_wild_3522376</i> | NA                                  | <i>Ca_desi_denovo</i> | 3522376                 | G/A  | NA                 | NA                            | NA                 |
| <i>Desi_wild_3522659</i> | NA                                  | <i>Ca_desi_denovo</i> | 3522659                 | C/A  | NA                 | NA                            | NA                 |
| <i>Desi_wild_3523150</i> | NA                                  | <i>Ca_desi_denovo</i> | 3523150                 | G/A  | NA                 | NA                            | NA                 |
| <i>Desi_wild_3523175</i> | NA                                  | <i>Ca_desi_denovo</i> | 3523175                 | A/G  | NA                 | NA                            | NA                 |
| <i>Desi_wild_3523748</i> | NA                                  | <i>Ca_desi_denovo</i> | 3523748                 | C/G  | NA                 | NA                            | NA                 |
| <i>Desi_wild_3524648</i> | NA                                  | <i>Ca_desi_denovo</i> | 3524648                 | T/G  | NA                 | NA                            | NA                 |
| <i>Desi_wild_3524717</i> | NA                                  | <i>Ca_desi_denovo</i> | 3524717                 | G/A  | NA                 | NA                            | NA                 |
| <i>Desi_wild_3524726</i> | NA                                  | <i>Ca_desi_denovo</i> | 3524726                 | G/A  | NA                 | NA                            | NA                 |
| <i>Desi_wild_3526145</i> | NA                                  | <i>Ca_desi_denovo</i> | 3526145                 | T/C  | NA                 | NA                            | NA                 |
| <i>Desi_wild_3526149</i> | NA                                  | <i>Ca_desi_denovo</i> | 3526149                 | C/T  | NA                 | NA                            | NA                 |
| <i>Desi_wild_3526927</i> | NA                                  | <i>Ca_desi_denovo</i> | 3526927                 | T/C  | NA                 | NA                            | NA                 |
| <i>Desi_wild_3527585</i> | NA                                  | <i>Ca_desi_denovo</i> | 3527585                 | A/G  | NA                 | NA                            | NA                 |
| <i>Desi_wild_3527868</i> | NA                                  | <i>Ca_desi_denovo</i> | 3527868                 | G/A  | NA                 | NA                            | NA                 |
| <i>Desi_wild_3528095</i> | NA                                  | <i>Ca_desi_denovo</i> | 3528095                 | G/A  | NA                 | NA                            | NA                 |
| <i>Desi_wild_3528125</i> | NA                                  | <i>Ca_desi_denovo</i> | 3528125                 | A/G  | NA                 | NA                            | NA                 |

| SNP IDs                  | NCBI dbSNP accession IDs (NCBI_SS#) | Chromosomes           | Physical positions (bp) | SNPs | Gene accession IDs | Sequence components of genome | Putative functions |
|--------------------------|-------------------------------------|-----------------------|-------------------------|------|--------------------|-------------------------------|--------------------|
| <i>Desi_wild_3528402</i> | NA                                  | <i>Ca_desi_denovo</i> | 3528402                 | C/T  | NA                 | NA                            | NA                 |
| <i>Desi_wild_3528714</i> | NA                                  | <i>Ca_desi_denovo</i> | 3528714                 | G/A  | NA                 | NA                            | NA                 |
| <i>Desi_wild_3530884</i> | NA                                  | <i>Ca_desi_denovo</i> | 3530884                 | A/G  | NA                 | NA                            | NA                 |
| <i>Desi_wild_3531762</i> | NA                                  | <i>Ca_desi_denovo</i> | 3531762                 | T/C  | NA                 | NA                            | NA                 |
| <i>Desi_wild_3532355</i> | NA                                  | <i>Ca_desi_denovo</i> | 3532355                 | T/G  | NA                 | NA                            | NA                 |
| <i>Desi_wild_3532935</i> | NA                                  | <i>Ca_desi_denovo</i> | 3532935                 | G/T  | NA                 | NA                            | NA                 |
| <i>Desi_wild_3532941</i> | NA                                  | <i>Ca_desi_denovo</i> | 3532941                 | G/A  | NA                 | NA                            | NA                 |
| <i>Desi_wild_3534185</i> | NA                                  | <i>Ca_desi_denovo</i> | 3534185                 | C/G  | NA                 | NA                            | NA                 |
| <i>Desi_wild_3534690</i> | NA                                  | <i>Ca_desi_denovo</i> | 3534690                 | A/G  | NA                 | NA                            | NA                 |
| <i>Desi_wild_3534798</i> | NA                                  | <i>Ca_desi_denovo</i> | 3534798                 | T/C  | NA                 | NA                            | NA                 |
| <i>Desi_wild_3534804</i> | NA                                  | <i>Ca_desi_denovo</i> | 3534804                 | G/T  | NA                 | NA                            | NA                 |
| <i>Desi_wild_3534807</i> | NA                                  | <i>Ca_desi_denovo</i> | 3534807                 | T/C  | NA                 | NA                            | NA                 |
| <i>Desi_wild_3534864</i> | NA                                  | <i>Ca_desi_denovo</i> | 3534864                 | T/C  | NA                 | NA                            | NA                 |
| <i>Desi_wild_3536212</i> | NA                                  | <i>Ca_desi_denovo</i> | 3536212                 | G/A  | NA                 | NA                            | NA                 |
| <i>Desi_wild_3536220</i> | NA                                  | <i>Ca_desi_denovo</i> | 3536220                 | C/T  | NA                 | NA                            | NA                 |
| <i>Desi_wild_3537262</i> | NA                                  | <i>Ca_desi_denovo</i> | 3537262                 | T/G  | NA                 | NA                            | NA                 |
| <i>Desi_wild_3539145</i> | NA                                  | <i>Ca_desi_denovo</i> | 3539145                 | T/C  | NA                 | NA                            | NA                 |
| <i>Desi_wild_3539250</i> | NA                                  | <i>Ca_desi_denovo</i> | 3539250                 | T/A  | NA                 | NA                            | NA                 |
| <i>Desi_wild_3539287</i> | NA                                  | <i>Ca_desi_denovo</i> | 3539287                 | G/A  | NA                 | NA                            | NA                 |
| <i>Desi_wild_3539315</i> | NA                                  | <i>Ca_desi_denovo</i> | 3539315                 | G/C  | NA                 | NA                            | NA                 |
| <i>Desi_wild_3539317</i> | NA                                  | <i>Ca_desi_denovo</i> | 3539317                 | G/A  | NA                 | NA                            | NA                 |
| <i>Desi_wild_3539718</i> | NA                                  | <i>Ca_desi_denovo</i> | 3539718                 | C/T  | NA                 | NA                            | NA                 |
| <i>Desi_wild_3539727</i> | NA                                  | <i>Ca_desi_denovo</i> | 3539727                 | C/A  | NA                 | NA                            | NA                 |
| <i>Desi_wild_3540324</i> | NA                                  | <i>Ca_desi_denovo</i> | 3540324                 | A/G  | NA                 | NA                            | NA                 |
| <i>Desi_wild_3540354</i> | NA                                  | <i>Ca_desi_denovo</i> | 3540354                 | G/A  | NA                 | NA                            | NA                 |
| <i>Desi_wild_3540438</i> | NA                                  | <i>Ca_desi_denovo</i> | 3540438                 | G/A  | NA                 | NA                            | NA                 |
| <i>Desi_wild_3540521</i> | NA                                  | <i>Ca_desi_denovo</i> | 3540521                 | T/C  | NA                 | NA                            | NA                 |
| <i>Desi_wild_3540877</i> | NA                                  | <i>Ca_desi_denovo</i> | 3540877                 | G/C  | NA                 | NA                            | NA                 |
| <i>Desi_wild_3542629</i> | NA                                  | <i>Ca_desi_denovo</i> | 3542629                 | A/G  | NA                 | NA                            | NA                 |
| <i>Desi_wild_3542663</i> | NA                                  | <i>Ca_desi_denovo</i> | 3542663                 | G/C  | NA                 | NA                            | NA                 |
| <i>Desi_wild_3542749</i> | NA                                  | <i>Ca_desi_denovo</i> | 3542749                 | G/T  | NA                 | NA                            | NA                 |
| <i>Desi_wild_3543221</i> | NA                                  | <i>Ca_desi_denovo</i> | 3543221                 | C/T  | NA                 | NA                            | NA                 |
| <i>Desi_wild_3543367</i> | NA                                  | <i>Ca_desi_denovo</i> | 3543367                 | T/C  | NA                 | NA                            | NA                 |
| <i>Desi_wild_3543379</i> | NA                                  | <i>Ca_desi_denovo</i> | 3543379                 | T/G  | NA                 | NA                            | NA                 |
| <i>Desi_wild_3543665</i> | NA                                  | <i>Ca_desi_denovo</i> | 3543665                 | C/G  | NA                 | NA                            | NA                 |
| <i>Desi_wild_3543789</i> | NA                                  | <i>Ca_desi_denovo</i> | 3543789                 | C/G  | NA                 | NA                            | NA                 |
| <i>Desi_wild_3543796</i> | NA                                  | <i>Ca_desi_denovo</i> | 3543796                 | T/C  | NA                 | NA                            | NA                 |
| <i>Desi_wild_3544942</i> | NA                                  | <i>Ca_desi_denovo</i> | 3544942                 | T/C  | NA                 | NA                            | NA                 |
| <i>Desi_wild_3547172</i> | NA                                  | <i>Ca_desi_denovo</i> | 3547172                 | T/G  | NA                 | NA                            | NA                 |
| <i>Desi_wild_3547995</i> | NA                                  | <i>Ca_desi_denovo</i> | 3547995                 | A/G  | NA                 | NA                            | NA                 |
| <i>Desi_wild_3548008</i> | NA                                  | <i>Ca_desi_denovo</i> | 3548008                 | G/C  | NA                 | NA                            | NA                 |
| <i>Desi_wild_3548189</i> | NA                                  | <i>Ca_desi_denovo</i> | 3548189                 | T/C  | NA                 | NA                            | NA                 |
| <i>Desi_wild_3548603</i> | NA                                  | <i>Ca_desi_denovo</i> | 3548603                 | C/T  | NA                 | NA                            | NA                 |
| <i>Desi_wild_3548746</i> | NA                                  | <i>Ca_desi_denovo</i> | 3548746                 | C/T  | NA                 | NA                            | NA                 |

| SNP IDs                  | NCBI dbSNP accession IDs (NCBI_SS#) | Chromosomes           | Physical positions (bp) | SNPs | Gene accession IDs | Sequence components of genome | Putative functions |
|--------------------------|-------------------------------------|-----------------------|-------------------------|------|--------------------|-------------------------------|--------------------|
| <i>Desi_wild_3548756</i> | NA                                  | <i>Ca_desi_denovo</i> | 3548756                 | G/A  | NA                 | NA                            | NA                 |
| <i>Desi_wild_3548960</i> | NA                                  | <i>Ca_desi_denovo</i> | 3548960                 | T/C  | NA                 | NA                            | NA                 |
| <i>Desi_wild_3548978</i> | NA                                  | <i>Ca_desi_denovo</i> | 3548978                 | A/C  | NA                 | NA                            | NA                 |
| <i>Desi_wild_3549027</i> | NA                                  | <i>Ca_desi_denovo</i> | 3549027                 | G/C  | NA                 | NA                            | NA                 |
| <i>Desi_wild_3549051</i> | NA                                  | <i>Ca_desi_denovo</i> | 3549051                 | G/A  | NA                 | NA                            | NA                 |
| <i>Desi_wild_3549159</i> | NA                                  | <i>Ca_desi_denovo</i> | 3549159                 | C/G  | NA                 | NA                            | NA                 |
| <i>Desi_wild_3549162</i> | NA                                  | <i>Ca_desi_denovo</i> | 3549162                 | T/C  | NA                 | NA                            | NA                 |
| <i>Desi_wild_3549223</i> | NA                                  | <i>Ca_desi_denovo</i> | 3549223                 | C/G  | NA                 | NA                            | NA                 |
| <i>Desi_wild_3549241</i> | NA                                  | <i>Ca_desi_denovo</i> | 3549241                 | C/T  | NA                 | NA                            | NA                 |
| <i>Desi_wild_3549373</i> | NA                                  | <i>Ca_desi_denovo</i> | 3549373                 | T/C  | NA                 | NA                            | NA                 |
| <i>Desi_wild_3549391</i> | NA                                  | <i>Ca_desi_denovo</i> | 3549391                 | G/A  | NA                 | NA                            | NA                 |
| <i>Desi_wild_3549856</i> | NA                                  | <i>Ca_desi_denovo</i> | 3549856                 | T/G  | NA                 | NA                            | NA                 |
| <i>Desi_wild_3549877</i> | NA                                  | <i>Ca_desi_denovo</i> | 3549877                 | T/G  | NA                 | NA                            | NA                 |
| <i>Desi_wild_3551070</i> | NA                                  | <i>Ca_desi_denovo</i> | 3551070                 | C/T  | NA                 | NA                            | NA                 |
| <i>Desi_wild_3551098</i> | NA                                  | <i>Ca_desi_denovo</i> | 3551098                 | C/G  | NA                 | NA                            | NA                 |
| <i>Desi_wild_3551410</i> | NA                                  | <i>Ca_desi_denovo</i> | 3551410                 | C/T  | NA                 | NA                            | NA                 |
| <i>Desi_wild_3551419</i> | NA                                  | <i>Ca_desi_denovo</i> | 3551419                 | C/T  | NA                 | NA                            | NA                 |
| <i>Desi_wild_3551563</i> | NA                                  | <i>Ca_desi_denovo</i> | 3551563                 | C/G  | NA                 | NA                            | NA                 |
| <i>Desi_wild_3551760</i> | NA                                  | <i>Ca_desi_denovo</i> | 3551760                 | C/T  | NA                 | NA                            | NA                 |
| <i>Desi_wild_3554281</i> | NA                                  | <i>Ca_desi_denovo</i> | 3554281                 | C/T  | NA                 | NA                            | NA                 |
| <i>Desi_wild_3554753</i> | NA                                  | <i>Ca_desi_denovo</i> | 3554753                 | G/A  | NA                 | NA                            | NA                 |
| <i>Desi_wild_3554783</i> | NA                                  | <i>Ca_desi_denovo</i> | 3554783                 | T/C  | NA                 | NA                            | NA                 |
| <i>Desi_wild_3556492</i> | NA                                  | <i>Ca_desi_denovo</i> | 3556492                 | A/G  | NA                 | NA                            | NA                 |
| <i>Desi_wild_3556526</i> | NA                                  | <i>Ca_desi_denovo</i> | 3556526                 | G/C  | NA                 | NA                            | NA                 |
| <i>Desi_wild_3556891</i> | NA                                  | <i>Ca_desi_denovo</i> | 3556891                 | C/G  | NA                 | NA                            | NA                 |
| <i>Desi_wild_3558137</i> | NA                                  | <i>Ca_desi_denovo</i> | 3558137                 | A/G  | NA                 | NA                            | NA                 |
| <i>Desi_wild_3558206</i> | NA                                  | <i>Ca_desi_denovo</i> | 3558206                 | A/G  | NA                 | NA                            | NA                 |
| <i>Desi_wild_3558858</i> | NA                                  | <i>Ca_desi_denovo</i> | 3558858                 | C/T  | NA                 | NA                            | NA                 |
| <i>Desi_wild_3559090</i> | NA                                  | <i>Ca_desi_denovo</i> | 3559090                 | A/C  | NA                 | NA                            | NA                 |
| <i>Desi_wild_3559192</i> | NA                                  | <i>Ca_desi_denovo</i> | 3559192                 | A/C  | NA                 | NA                            | NA                 |
| <i>Desi_wild_3559193</i> | NA                                  | <i>Ca_desi_denovo</i> | 3559193                 | A/G  | NA                 | NA                            | NA                 |
| <i>Desi_wild_3559898</i> | NA                                  | <i>Ca_desi_denovo</i> | 3559898                 | G/C  | NA                 | NA                            | NA                 |
| <i>Desi_wild_3559931</i> | NA                                  | <i>Ca_desi_denovo</i> | 3559931                 | A/G  | NA                 | NA                            | NA                 |
| <i>Desi_wild_3560295</i> | NA                                  | <i>Ca_desi_denovo</i> | 3560295                 | G/C  | NA                 | NA                            | NA                 |
| <i>Desi_wild_3560317</i> | NA                                  | <i>Ca_desi_denovo</i> | 3560317                 | T/C  | NA                 | NA                            | NA                 |
| <i>Desi_wild_3560785</i> | NA                                  | <i>Ca_desi_denovo</i> | 3560785                 | G/A  | NA                 | NA                            | NA                 |
| <i>Desi_wild_3560798</i> | NA                                  | <i>Ca_desi_denovo</i> | 3560798                 | G/C  | NA                 | NA                            | NA                 |
| <i>Desi_wild_3560804</i> | NA                                  | <i>Ca_desi_denovo</i> | 3560804                 | G/A  | NA                 | NA                            | NA                 |
| <i>Desi_wild_3561025</i> | NA                                  | <i>Ca_desi_denovo</i> | 3561025                 | C/T  | NA                 | NA                            | NA                 |
| <i>Desi_wild_3561627</i> | NA                                  | <i>Ca_desi_denovo</i> | 3561627                 | C/G  | NA                 | NA                            | NA                 |
| <i>Desi_wild_3561654</i> | NA                                  | <i>Ca_desi_denovo</i> | 3561654                 | T/C  | NA                 | NA                            | NA                 |
| <i>Desi_wild_3561771</i> | NA                                  | <i>Ca_desi_denovo</i> | 3561771                 | G/A  | NA                 | NA                            | NA                 |
| <i>Desi_wild_3561773</i> | NA                                  | <i>Ca_desi_denovo</i> | 3561773                 | C/G  | NA                 | NA                            | NA                 |
| <i>Desi_wild_3561775</i> | NA                                  | <i>Ca_desi_denovo</i> | 3561775                 | A/C  | NA                 | NA                            | NA                 |

| SNP IDs                  | NCBI dbSNP accession IDs (NCBI_SS#) | Chromosomes           | Physical positions (bp) | SNPs | Gene accession IDs | Sequence components of genome | Putative functions |
|--------------------------|-------------------------------------|-----------------------|-------------------------|------|--------------------|-------------------------------|--------------------|
| <i>Desi_wild_3561777</i> | NA                                  | <i>Ca_desi_denovo</i> | 3561777                 | G/A  | NA                 | NA                            | NA                 |
| <i>Desi_wild_3563872</i> | NA                                  | <i>Ca_desi_denovo</i> | 3563872                 | C/T  | NA                 | NA                            | NA                 |
| <i>Desi_wild_3564306</i> | NA                                  | <i>Ca_desi_denovo</i> | 3564306                 | G/A  | NA                 | NA                            | NA                 |
| <i>Desi_wild_3567100</i> | NA                                  | <i>Ca_desi_denovo</i> | 3567100                 | A/G  | NA                 | NA                            | NA                 |
| <i>Desi_wild_3567542</i> | NA                                  | <i>Ca_desi_denovo</i> | 3567542                 | G/C  | NA                 | NA                            | NA                 |
| <i>Desi_wild_3569597</i> | NA                                  | <i>Ca_desi_denovo</i> | 3569597                 | T/C  | NA                 | NA                            | NA                 |
| <i>Desi_wild_3570571</i> | NA                                  | <i>Ca_desi_denovo</i> | 3570571                 | C/T  | NA                 | NA                            | NA                 |
| <i>Desi_wild_3570749</i> | NA                                  | <i>Ca_desi_denovo</i> | 3570749                 | T/C  | NA                 | NA                            | NA                 |
| <i>Desi_wild_3570786</i> | NA                                  | <i>Ca_desi_denovo</i> | 3570786                 | A/G  | NA                 | NA                            | NA                 |
| <i>Desi_wild_3570887</i> | NA                                  | <i>Ca_desi_denovo</i> | 3570887                 | T/G  | NA                 | NA                            | NA                 |
| <i>Desi_wild_3570918</i> | NA                                  | <i>Ca_desi_denovo</i> | 3570918                 | A/G  | NA                 | NA                            | NA                 |
| <i>Desi_wild_3572983</i> | NA                                  | <i>Ca_desi_denovo</i> | 3572983                 | T/G  | NA                 | NA                            | NA                 |
| <i>Desi_wild_3573131</i> | NA                                  | <i>Ca_desi_denovo</i> | 3573131                 | C/G  | NA                 | NA                            | NA                 |
| <i>Desi_wild_3573969</i> | NA                                  | <i>Ca_desi_denovo</i> | 3573969                 | T/C  | NA                 | NA                            | NA                 |
| <i>Desi_wild_3574060</i> | NA                                  | <i>Ca_desi_denovo</i> | 3574060                 | G/T  | NA                 | NA                            | NA                 |
| <i>Desi_wild_3574069</i> | NA                                  | <i>Ca_desi_denovo</i> | 3574069                 | C/G  | NA                 | NA                            | NA                 |
| <i>Desi_wild_3574315</i> | NA                                  | <i>Ca_desi_denovo</i> | 3574315                 | G/A  | NA                 | NA                            | NA                 |
| <i>Desi_wild_3575221</i> | NA                                  | <i>Ca_desi_denovo</i> | 3575221                 | A/G  | NA                 | NA                            | NA                 |
| <i>Desi_wild_3576155</i> | NA                                  | <i>Ca_desi_denovo</i> | 3576155                 | C/A  | NA                 | NA                            | NA                 |
| <i>Desi_wild_3576377</i> | NA                                  | <i>Ca_desi_denovo</i> | 3576377                 | G/C  | NA                 | NA                            | NA                 |
| <i>Desi_wild_3577017</i> | NA                                  | <i>Ca_desi_denovo</i> | 3577017                 | C/T  | NA                 | NA                            | NA                 |
| <i>Desi_wild_3578423</i> | NA                                  | <i>Ca_desi_denovo</i> | 3578423                 | A/T  | NA                 | NA                            | NA                 |
| <i>Desi_wild_3578626</i> | NA                                  | <i>Ca_desi_denovo</i> | 3578626                 | G/C  | NA                 | NA                            | NA                 |
| <i>Desi_wild_3579186</i> | NA                                  | <i>Ca_desi_denovo</i> | 3579186                 | C/G  | NA                 | NA                            | NA                 |
| <i>Desi_wild_3579670</i> | NA                                  | <i>Ca_desi_denovo</i> | 3579670                 | T/C  | NA                 | NA                            | NA                 |
| <i>Desi_wild_3579713</i> | NA                                  | <i>Ca_desi_denovo</i> | 3579713                 | T/A  | NA                 | NA                            | NA                 |
| <i>Desi_wild_3581551</i> | NA                                  | <i>Ca_desi_denovo</i> | 3581551                 | C/G  | NA                 | NA                            | NA                 |
| <i>Desi_wild_3581613</i> | NA                                  | <i>Ca_desi_denovo</i> | 3581613                 | G/A  | NA                 | NA                            | NA                 |
| <i>Desi_wild_3582513</i> | NA                                  | <i>Ca_desi_denovo</i> | 3582513                 | A/G  | NA                 | NA                            | NA                 |
| <i>Desi_wild_3584912</i> | NA                                  | <i>Ca_desi_denovo</i> | 3584912                 | T/C  | NA                 | NA                            | NA                 |
| <i>Desi_wild_3584924</i> | NA                                  | <i>Ca_desi_denovo</i> | 3584924                 | C/T  | NA                 | NA                            | NA                 |
| <i>Desi_wild_3585508</i> | NA                                  | <i>Ca_desi_denovo</i> | 3585508                 | T/C  | NA                 | NA                            | NA                 |
| <i>Desi_wild_3586170</i> | NA                                  | <i>Ca_desi_denovo</i> | 3586170                 | A/G  | NA                 | NA                            | NA                 |
| <i>Desi_wild_3587860</i> | NA                                  | <i>Ca_desi_denovo</i> | 3587860                 | G/T  | NA                 | NA                            | NA                 |
| <i>Desi_wild_3587882</i> | NA                                  | <i>Ca_desi_denovo</i> | 3587882                 | G/A  | NA                 | NA                            | NA                 |
| <i>Desi_wild_3587920</i> | NA                                  | <i>Ca_desi_denovo</i> | 3587920                 | C/A  | NA                 | NA                            | NA                 |
| <i>Desi_wild_3588401</i> | NA                                  | <i>Ca_desi_denovo</i> | 3588401                 | A/G  | NA                 | NA                            | NA                 |
| <i>Desi_wild_3588447</i> | NA                                  | <i>Ca_desi_denovo</i> | 3588447                 | G/A  | NA                 | NA                            | NA                 |
| <i>Desi_wild_3589127</i> | NA                                  | <i>Ca_desi_denovo</i> | 3589127                 | A/G  | NA                 | NA                            | NA                 |
| <i>Desi_wild_3589305</i> | NA                                  | <i>Ca_desi_denovo</i> | 3589305                 | G/T  | NA                 | NA                            | NA                 |
| <i>Desi_wild_3589348</i> | NA                                  | <i>Ca_desi_denovo</i> | 3589348                 | G/A  | NA                 | NA                            | NA                 |
| <i>Desi_wild_3590956</i> | NA                                  | <i>Ca_desi_denovo</i> | 3590956                 | G/A  | NA                 | NA                            | NA                 |
| <i>Desi_wild_3592100</i> | NA                                  | <i>Ca_desi_denovo</i> | 3592100                 | T/C  | NA                 | NA                            | NA                 |
| <i>Desi_wild_3592104</i> | NA                                  | <i>Ca_desi_denovo</i> | 3592104                 | C/G  | NA                 | NA                            | NA                 |

| SNP IDs                  | NCBI dbSNP accession IDs (NCBI_SS#) | Chromosomes           | Physical positions (bp) | SNPs | Gene accession IDs | Sequence components of genome | Putative functions |
|--------------------------|-------------------------------------|-----------------------|-------------------------|------|--------------------|-------------------------------|--------------------|
| <i>Desi_wild_3593072</i> | NA                                  | <i>Ca_desi_denovo</i> | 3593072                 | A/G  | NA                 | NA                            | NA                 |
| <i>Desi_wild_3593099</i> | NA                                  | <i>Ca_desi_denovo</i> | 3593099                 | C/A  | NA                 | NA                            | NA                 |
| <i>Desi_wild_3593763</i> | NA                                  | <i>Ca_desi_denovo</i> | 3593763                 | G/A  | NA                 | NA                            | NA                 |
| <i>Desi_wild_3593802</i> | NA                                  | <i>Ca_desi_denovo</i> | 3593802                 | A/G  | NA                 | NA                            | NA                 |
| <i>Desi_wild_3594101</i> | NA                                  | <i>Ca_desi_denovo</i> | 3594101                 | C/T  | NA                 | NA                            | NA                 |
| <i>Desi_wild_3595233</i> | NA                                  | <i>Ca_desi_denovo</i> | 3595233                 | G/C  | NA                 | NA                            | NA                 |
| <i>Desi_wild_3595251</i> | NA                                  | <i>Ca_desi_denovo</i> | 3595251                 | T/C  | NA                 | NA                            | NA                 |
| <i>Desi_wild_3596182</i> | NA                                  | <i>Ca_desi_denovo</i> | 3596182                 | T/C  | NA                 | NA                            | NA                 |
| <i>Desi_wild_3596196</i> | NA                                  | <i>Ca_desi_denovo</i> | 3596196                 | G/A  | NA                 | NA                            | NA                 |
| <i>Desi_wild_3596844</i> | NA                                  | <i>Ca_desi_denovo</i> | 3596844                 | C/G  | NA                 | NA                            | NA                 |
| <i>Desi_wild_3598047</i> | NA                                  | <i>Ca_desi_denovo</i> | 3598047                 | G/A  | NA                 | NA                            | NA                 |
| <i>Desi_wild_3598112</i> | NA                                  | <i>Ca_desi_denovo</i> | 3598112                 | A/C  | NA                 | NA                            | NA                 |
| <i>Desi_wild_3598140</i> | NA                                  | <i>Ca_desi_denovo</i> | 3598140                 | C/T  | NA                 | NA                            | NA                 |
| <i>Desi_wild_3598259</i> | NA                                  | <i>Ca_desi_denovo</i> | 3598259                 | C/T  | NA                 | NA                            | NA                 |
| <i>Desi_wild_3598531</i> | NA                                  | <i>Ca_desi_denovo</i> | 3598531                 | C/G  | NA                 | NA                            | NA                 |
| <i>Desi_wild_3598971</i> | NA                                  | <i>Ca_desi_denovo</i> | 3598971                 | G/T  | NA                 | NA                            | NA                 |
| <i>Desi_wild_3599577</i> | NA                                  | <i>Ca_desi_denovo</i> | 3599577                 | A/C  | NA                 | NA                            | NA                 |
| <i>Desi_wild_3600654</i> | NA                                  | <i>Ca_desi_denovo</i> | 3600654                 | A/G  | NA                 | NA                            | NA                 |
| <i>Desi_wild_3600658</i> | NA                                  | <i>Ca_desi_denovo</i> | 3600658                 | G/A  | NA                 | NA                            | NA                 |
| <i>Desi_wild_3601124</i> | NA                                  | <i>Ca_desi_denovo</i> | 3601124                 | A/G  | NA                 | NA                            | NA                 |
| <i>Desi_wild_3601169</i> | NA                                  | <i>Ca_desi_denovo</i> | 3601169                 | G/A  | NA                 | NA                            | NA                 |
| <i>Desi_wild_3601617</i> | NA                                  | <i>Ca_desi_denovo</i> | 3601617                 | T/A  | NA                 | NA                            | NA                 |
| <i>Desi_wild_3602951</i> | NA                                  | <i>Ca_desi_denovo</i> | 3602951                 | A/G  | NA                 | NA                            | NA                 |
| <i>Desi_wild_3602972</i> | NA                                  | <i>Ca_desi_denovo</i> | 3602972                 | A/C  | NA                 | NA                            | NA                 |
| <i>Desi_wild_3603150</i> | NA                                  | <i>Ca_desi_denovo</i> | 3603150                 | C/T  | NA                 | NA                            | NA                 |
| <i>Desi_wild_3603165</i> | NA                                  | <i>Ca_desi_denovo</i> | 3603165                 | T/C  | NA                 | NA                            | NA                 |
| <i>Desi_wild_3603251</i> | NA                                  | <i>Ca_desi_denovo</i> | 3603251                 | T/G  | NA                 | NA                            | NA                 |
| <i>Desi_wild_3603349</i> | NA                                  | <i>Ca_desi_denovo</i> | 3603349                 | C/G  | NA                 | NA                            | NA                 |
| <i>Desi_wild_3603367</i> | NA                                  | <i>Ca_desi_denovo</i> | 3603367                 | C/T  | NA                 | NA                            | NA                 |
| <i>Desi_wild_3604005</i> | NA                                  | <i>Ca_desi_denovo</i> | 3604005                 | T/G  | NA                 | NA                            | NA                 |
| <i>Desi_wild_3604035</i> | NA                                  | <i>Ca_desi_denovo</i> | 3604035                 | C/T  | NA                 | NA                            | NA                 |
| <i>Desi_wild_3604080</i> | NA                                  | <i>Ca_desi_denovo</i> | 3604080                 | C/T  | NA                 | NA                            | NA                 |
| <i>Desi_wild_3605230</i> | NA                                  | <i>Ca_desi_denovo</i> | 3605230                 | A/G  | NA                 | NA                            | NA                 |
| <i>Desi_wild_3608076</i> | NA                                  | <i>Ca_desi_denovo</i> | 3608076                 | T/G  | NA                 | NA                            | NA                 |
| <i>Desi_wild_3608178</i> | NA                                  | <i>Ca_desi_denovo</i> | 3608178                 | A/C  | NA                 | NA                            | NA                 |
| <i>Desi_wild_3609262</i> | NA                                  | <i>Ca_desi_denovo</i> | 3609262                 | C/T  | NA                 | NA                            | NA                 |
| <i>Desi_wild_3609291</i> | NA                                  | <i>Ca_desi_denovo</i> | 3609291                 | T/G  | NA                 | NA                            | NA                 |
| <i>Desi_wild_3609391</i> | NA                                  | <i>Ca_desi_denovo</i> | 3609391                 | C/T  | NA                 | NA                            | NA                 |
| <i>Desi_wild_3609770</i> | NA                                  | <i>Ca_desi_denovo</i> | 3609770                 | A/G  | NA                 | NA                            | NA                 |
| <i>Desi_wild_3609815</i> | NA                                  | <i>Ca_desi_denovo</i> | 3609815                 | A/G  | NA                 | NA                            | NA                 |
| <i>Desi_wild_3609973</i> | NA                                  | <i>Ca_desi_denovo</i> | 3609973                 | T/G  | NA                 | NA                            | NA                 |
| <i>Desi_wild_3609994</i> | NA                                  | <i>Ca_desi_denovo</i> | 3609994                 | T/C  | NA                 | NA                            | NA                 |
| <i>Desi_wild_3610738</i> | NA                                  | <i>Ca_desi_denovo</i> | 3610738                 | A/G  | NA                 | NA                            | NA                 |
| <i>Desi_wild_3610775</i> | NA                                  | <i>Ca_desi_denovo</i> | 3610775                 | A/G  | NA                 | NA                            | NA                 |

| SNP IDs                  | NCBI dbSNP accession IDs (NCBI_SS#) | Chromosomes           | Physical positions (bp) | SNPs | Gene accession IDs | Sequence components of genome | Putative functions |
|--------------------------|-------------------------------------|-----------------------|-------------------------|------|--------------------|-------------------------------|--------------------|
| <i>Desi_wild_3611115</i> | NA                                  | <i>Ca_desi_denovo</i> | 3611115                 | G/C  | NA                 | NA                            | NA                 |
| <i>Desi_wild_3611973</i> | NA                                  | <i>Ca_desi_denovo</i> | 3611973                 | A/T  | NA                 | NA                            | NA                 |
| <i>Desi_wild_3612080</i> | NA                                  | <i>Ca_desi_denovo</i> | 3612080                 | G/A  | NA                 | NA                            | NA                 |
| <i>Desi_wild_3612086</i> | NA                                  | <i>Ca_desi_denovo</i> | 3612086                 | G/A  | NA                 | NA                            | NA                 |
| <i>Desi_wild_3613486</i> | NA                                  | <i>Ca_desi_denovo</i> | 3613486                 | T/C  | NA                 | NA                            | NA                 |
| <i>Desi_wild_3613976</i> | NA                                  | <i>Ca_desi_denovo</i> | 3613976                 | A/G  | NA                 | NA                            | NA                 |
| <i>Desi_wild_3614215</i> | NA                                  | <i>Ca_desi_denovo</i> | 3614215                 | G/T  | NA                 | NA                            | NA                 |
| <i>Desi_wild_3614590</i> | NA                                  | <i>Ca_desi_denovo</i> | 3614590                 | G/C  | NA                 | NA                            | NA                 |
| <i>Desi_wild_3614602</i> | NA                                  | <i>Ca_desi_denovo</i> | 3614602                 | A/G  | NA                 | NA                            | NA                 |
| <i>Desi_wild_3615862</i> | NA                                  | <i>Ca_desi_denovo</i> | 3615862                 | G/C  | NA                 | NA                            | NA                 |
| <i>Desi_wild_3617125</i> | NA                                  | <i>Ca_desi_denovo</i> | 3617125                 | C/A  | NA                 | NA                            | NA                 |
| <i>Desi_wild_3617147</i> | NA                                  | <i>Ca_desi_denovo</i> | 3617147                 | G/C  | NA                 | NA                            | NA                 |
| <i>Desi_wild_3618922</i> | NA                                  | <i>Ca_desi_denovo</i> | 3618922                 | A/G  | NA                 | NA                            | NA                 |
| <i>Desi_wild_3619728</i> | NA                                  | <i>Ca_desi_denovo</i> | 3619728                 | T/G  | NA                 | NA                            | NA                 |
| <i>Desi_wild_3619792</i> | NA                                  | <i>Ca_desi_denovo</i> | 3619792                 | T/C  | NA                 | NA                            | NA                 |
| <i>Desi_wild_3619997</i> | NA                                  | <i>Ca_desi_denovo</i> | 3619997                 | A/T  | NA                 | NA                            | NA                 |
| <i>Desi_wild_3620332</i> | NA                                  | <i>Ca_desi_denovo</i> | 3620332                 | C/T  | NA                 | NA                            | NA                 |
| <i>Desi_wild_3620347</i> | NA                                  | <i>Ca_desi_denovo</i> | 3620347                 | G/A  | NA                 | NA                            | NA                 |
| <i>Desi_wild_3621060</i> | NA                                  | <i>Ca_desi_denovo</i> | 3621060                 | G/T  | NA                 | NA                            | NA                 |
| <i>Desi_wild_3623045</i> | NA                                  | <i>Ca_desi_denovo</i> | 3623045                 | C/G  | NA                 | NA                            | NA                 |
| <i>Desi_wild_3623087</i> | NA                                  | <i>Ca_desi_denovo</i> | 3623087                 | C/T  | NA                 | NA                            | NA                 |
| <i>Desi_wild_3623229</i> | NA                                  | <i>Ca_desi_denovo</i> | 3623229                 | G/T  | NA                 | NA                            | NA                 |
| <i>Desi_wild_3623307</i> | NA                                  | <i>Ca_desi_denovo</i> | 3623307                 | T/C  | NA                 | NA                            | NA                 |
| <i>Desi_wild_3623765</i> | NA                                  | <i>Ca_desi_denovo</i> | 3623765                 | G/T  | NA                 | NA                            | NA                 |
| <i>Desi_wild_3624047</i> | NA                                  | <i>Ca_desi_denovo</i> | 3624047                 | T/C  | NA                 | NA                            | NA                 |
| <i>Desi_wild_3624097</i> | NA                                  | <i>Ca_desi_denovo</i> | 3624097                 | T/G  | NA                 | NA                            | NA                 |
| <i>Desi_wild_3624142</i> | NA                                  | <i>Ca_desi_denovo</i> | 3624142                 | C/T  | NA                 | NA                            | NA                 |
| <i>Desi_wild_3624225</i> | NA                                  | <i>Ca_desi_denovo</i> | 3624225                 | G/T  | NA                 | NA                            | NA                 |
| <i>Desi_wild_3624726</i> | NA                                  | <i>Ca_desi_denovo</i> | 3624726                 | G/A  | NA                 | NA                            | NA                 |
| <i>Desi_wild_3625331</i> | NA                                  | <i>Ca_desi_denovo</i> | 3625331                 | T/C  | NA                 | NA                            | NA                 |
| <i>Desi_wild_3625338</i> | NA                                  | <i>Ca_desi_denovo</i> | 3625338                 | C/A  | NA                 | NA                            | NA                 |
| <i>Desi_wild_3626492</i> | NA                                  | <i>Ca_desi_denovo</i> | 3626492                 | G/T  | NA                 | NA                            | NA                 |
| <i>Desi_wild_3626621</i> | NA                                  | <i>Ca_desi_denovo</i> | 3626621                 | A/C  | NA                 | NA                            | NA                 |
| <i>Desi_wild_3627475</i> | NA                                  | <i>Ca_desi_denovo</i> | 3627475                 | G/T  | NA                 | NA                            | NA                 |
| <i>Desi_wild_3627656</i> | NA                                  | <i>Ca_desi_denovo</i> | 3627656                 | G/T  | NA                 | NA                            | NA                 |
| <i>Desi_wild_3628267</i> | NA                                  | <i>Ca_desi_denovo</i> | 3628267                 | C/T  | NA                 | NA                            | NA                 |
| <i>Desi_wild_3628336</i> | NA                                  | <i>Ca_desi_denovo</i> | 3628336                 | A/C  | NA                 | NA                            | NA                 |
| <i>Desi_wild_3630206</i> | NA                                  | <i>Ca_desi_denovo</i> | 3630206                 | C/T  | NA                 | NA                            | NA                 |
| <i>Desi_wild_3630242</i> | NA                                  | <i>Ca_desi_denovo</i> | 3630242                 | G/C  | NA                 | NA                            | NA                 |
| <i>Desi_wild_3630603</i> | NA                                  | <i>Ca_desi_denovo</i> | 3630603                 | A/G  | NA                 | NA                            | NA                 |
| <i>Desi_wild_3630648</i> | NA                                  | <i>Ca_desi_denovo</i> | 3630648                 | A/C  | NA                 | NA                            | NA                 |
| <i>Desi_wild_3630654</i> | NA                                  | <i>Ca_desi_denovo</i> | 3630654                 | A/G  | NA                 | NA                            | NA                 |
| <i>Desi_wild_3630693</i> | NA                                  | <i>Ca_desi_denovo</i> | 3630693                 | C/G  | NA                 | NA                            | NA                 |
| <i>Desi_wild_3630827</i> | NA                                  | <i>Ca_desi_denovo</i> | 3630827                 | C/A  | NA                 | NA                            | NA                 |

| SNP IDs                  | NCBI dbSNP accession IDs (NCBI_SS#) | Chromosomes           | Physical positions (bp) | SNPs | Gene accession IDs | Sequence components of genome | Putative functions |
|--------------------------|-------------------------------------|-----------------------|-------------------------|------|--------------------|-------------------------------|--------------------|
| <i>Desi_wild_3630947</i> | NA                                  | <i>Ca_desi_denovo</i> | 3630947                 | G/C  | NA                 | NA                            | NA                 |
| <i>Desi_wild_3630961</i> | NA                                  | <i>Ca_desi_denovo</i> | 3630961                 | A/G  | NA                 | NA                            | NA                 |
| <i>Desi_wild_3630998</i> | NA                                  | <i>Ca_desi_denovo</i> | 3630998                 | A/G  | NA                 | NA                            | NA                 |
| <i>Desi_wild_3631042</i> | NA                                  | <i>Ca_desi_denovo</i> | 3631042                 | C/A  | NA                 | NA                            | NA                 |
| <i>Desi_wild_3632210</i> | NA                                  | <i>Ca_desi_denovo</i> | 3632210                 | T/C  | NA                 | NA                            | NA                 |
| <i>Desi_wild_3632219</i> | NA                                  | <i>Ca_desi_denovo</i> | 3632219                 | G/C  | NA                 | NA                            | NA                 |
| <i>Desi_wild_3632751</i> | NA                                  | <i>Ca_desi_denovo</i> | 3632751                 | G/C  | NA                 | NA                            | NA                 |
| <i>Desi_wild_3633677</i> | NA                                  | <i>Ca_desi_denovo</i> | 3633677                 | A/G  | NA                 | NA                            | NA                 |
| <i>Desi_wild_3634504</i> | NA                                  | <i>Ca_desi_denovo</i> | 3634504                 | A/C  | NA                 | NA                            | NA                 |
| <i>Desi_wild_3634510</i> | NA                                  | <i>Ca_desi_denovo</i> | 3634510                 | A/G  | NA                 | NA                            | NA                 |
| <i>Desi_wild_3635660</i> | NA                                  | <i>Ca_desi_denovo</i> | 3635660                 | G/A  | NA                 | NA                            | NA                 |
| <i>Desi_wild_3635716</i> | NA                                  | <i>Ca_desi_denovo</i> | 3635716                 | G/A  | NA                 | NA                            | NA                 |
| <i>Desi_wild_3635844</i> | NA                                  | <i>Ca_desi_denovo</i> | 3635844                 | C/T  | NA                 | NA                            | NA                 |
| <i>Desi_wild_3635898</i> | NA                                  | <i>Ca_desi_denovo</i> | 3635898                 | T/C  | NA                 | NA                            | NA                 |
| <i>Desi_wild_3636154</i> | NA                                  | <i>Ca_desi_denovo</i> | 3636154                 | G/C  | NA                 | NA                            | NA                 |
| <i>Desi_wild_3636187</i> | NA                                  | <i>Ca_desi_denovo</i> | 3636187                 | C/T  | NA                 | NA                            | NA                 |
| <i>Desi_wild_3636325</i> | NA                                  | <i>Ca_desi_denovo</i> | 3636325                 | C/T  | NA                 | NA                            | NA                 |
| <i>Desi_wild_3636395</i> | NA                                  | <i>Ca_desi_denovo</i> | 3636395                 | G/T  | NA                 | NA                            | NA                 |
| <i>Desi_wild_3636801</i> | NA                                  | <i>Ca_desi_denovo</i> | 3636801                 | G/A  | NA                 | NA                            | NA                 |
| <i>Desi_wild_3636810</i> | NA                                  | <i>Ca_desi_denovo</i> | 3636810                 | C/T  | NA                 | NA                            | NA                 |
| <i>Desi_wild_3636828</i> | NA                                  | <i>Ca_desi_denovo</i> | 3636828                 | T/C  | NA                 | NA                            | NA                 |
| <i>Desi_wild_3638859</i> | NA                                  | <i>Ca_desi_denovo</i> | 3638859                 | G/A  | NA                 | NA                            | NA                 |
| <i>Desi_wild_3639062</i> | NA                                  | <i>Ca_desi_denovo</i> | 3639062                 | C/G  | NA                 | NA                            | NA                 |
| <i>Desi_wild_3639101</i> | NA                                  | <i>Ca_desi_denovo</i> | 3639101                 | A/G  | NA                 | NA                            | NA                 |
| <i>Desi_wild_3639770</i> | NA                                  | <i>Ca_desi_denovo</i> | 3639770                 | C/T  | NA                 | NA                            | NA                 |
| <i>Desi_wild_3639815</i> | NA                                  | <i>Ca_desi_denovo</i> | 3639815                 | A/G  | NA                 | NA                            | NA                 |
| <i>Desi_wild_3639924</i> | NA                                  | <i>Ca_desi_denovo</i> | 3639924                 | G/A  | NA                 | NA                            | NA                 |
| <i>Desi_wild_3640506</i> | NA                                  | <i>Ca_desi_denovo</i> | 3640506                 | G/C  | NA                 | NA                            | NA                 |
| <i>Desi_wild_3642332</i> | NA                                  | <i>Ca_desi_denovo</i> | 3642332                 | T/C  | NA                 | NA                            | NA                 |
| <i>Desi_wild_3642526</i> | NA                                  | <i>Ca_desi_denovo</i> | 3642526                 | T/G  | NA                 | NA                            | NA                 |
| <i>Desi_wild_3642532</i> | NA                                  | <i>Ca_desi_denovo</i> | 3642532                 | T/C  | NA                 | NA                            | NA                 |
| <i>Desi_wild_3642783</i> | NA                                  | <i>Ca_desi_denovo</i> | 3642783                 | C/G  | NA                 | NA                            | NA                 |
| <i>Desi_wild_3643474</i> | NA                                  | <i>Ca_desi_denovo</i> | 3643474                 | C/A  | NA                 | NA                            | NA                 |
| <i>Desi_wild_3643939</i> | NA                                  | <i>Ca_desi_denovo</i> | 3643939                 | A/G  | NA                 | NA                            | NA                 |
| <i>Desi_wild_3644306</i> | NA                                  | <i>Ca_desi_denovo</i> | 3644306                 | A/T  | NA                 | NA                            | NA                 |
| <i>Desi_wild_3644313</i> | NA                                  | <i>Ca_desi_denovo</i> | 3644313                 | T/C  | NA                 | NA                            | NA                 |
| <i>Desi_wild_3644694</i> | NA                                  | <i>Ca_desi_denovo</i> | 3644694                 | A/G  | NA                 | NA                            | NA                 |
| <i>Desi_wild_3646597</i> | NA                                  | <i>Ca_desi_denovo</i> | 3646597                 | A/G  | NA                 | NA                            | NA                 |
| <i>Desi_wild_3647019</i> | NA                                  | <i>Ca_desi_denovo</i> | 3647019                 | C/T  | NA                 | NA                            | NA                 |
| <i>Desi_wild_3647997</i> | NA                                  | <i>Ca_desi_denovo</i> | 3647997                 | C/G  | NA                 | NA                            | NA                 |
| <i>Desi_wild_3648476</i> | NA                                  | <i>Ca_desi_denovo</i> | 3648476                 | T/G  | NA                 | NA                            | NA                 |
| <i>Desi_wild_3648638</i> | NA                                  | <i>Ca_desi_denovo</i> | 3648638                 | A/G  | NA                 | NA                            | NA                 |
| <i>Desi_wild_3648653</i> | NA                                  | <i>Ca_desi_denovo</i> | 3648653                 | G/C  | NA                 | NA                            | NA                 |
| <i>Desi_wild_3650023</i> | NA                                  | <i>Ca_desi_denovo</i> | 3650023                 | C/A  | NA                 | NA                            | NA                 |



| SNP IDs                  | NCBI dbSNP accession IDs (NCBI_SS#) | Chromosomes           | Physical positions (bp) | SNPs | Gene accession IDs | Sequence components of genome | Putative functions |
|--------------------------|-------------------------------------|-----------------------|-------------------------|------|--------------------|-------------------------------|--------------------|
| <i>Desi_wild_3650112</i> | NA                                  | <i>Ca_desi_denovo</i> | 3650112                 | T/C  | NA                 | NA                            | NA                 |
| <i>Desi_wild_3650596</i> | NA                                  | <i>Ca_desi_denovo</i> | 3650596                 | T/C  | NA                 | NA                            | NA                 |
| <i>Desi_wild_3650728</i> | NA                                  | <i>Ca_desi_denovo</i> | 3650728                 | G/C  | NA                 | NA                            | NA                 |
| <i>Desi_wild_3650968</i> | NA                                  | <i>Ca_desi_denovo</i> | 3650968                 | C/T  | NA                 | NA                            | NA                 |
| <i>Desi_wild_3651160</i> | NA                                  | <i>Ca_desi_denovo</i> | 3651160                 | G/C  | NA                 | NA                            | NA                 |
| <i>Desi_wild_3651178</i> | NA                                  | <i>Ca_desi_denovo</i> | 3651178                 | A/G  | NA                 | NA                            | NA                 |
| <i>Desi_wild_3651619</i> | NA                                  | <i>Ca_desi_denovo</i> | 3651619                 | A/G  | NA                 | NA                            | NA                 |
| <i>Desi_wild_3651624</i> | NA                                  | <i>Ca_desi_denovo</i> | 3651624                 | G/A  | NA                 | NA                            | NA                 |
| <i>Desi_wild_3652809</i> | NA                                  | <i>Ca_desi_denovo</i> | 3652809                 | G/A  | NA                 | NA                            | NA                 |
| <i>Desi_wild_3652868</i> | NA                                  | <i>Ca_desi_denovo</i> | 3652868                 | C/A  | NA                 | NA                            | NA                 |
| <i>Desi_wild_3653668</i> | NA                                  | <i>Ca_desi_denovo</i> | 3653668                 | T/C  | NA                 | NA                            | NA                 |
| <i>Desi_wild_3654603</i> | NA                                  | <i>Ca_desi_denovo</i> | 3654603                 | A/C  | NA                 | NA                            | NA                 |
| <i>Desi_wild_3654887</i> | NA                                  | <i>Ca_desi_denovo</i> | 3654887                 | G/A  | NA                 | NA                            | NA                 |
| <i>Desi_wild_3654890</i> | NA                                  | <i>Ca_desi_denovo</i> | 3654890                 | A/G  | NA                 | NA                            | NA                 |
| <i>Desi_wild_3655720</i> | NA                                  | <i>Ca_desi_denovo</i> | 3655720                 | A/G  | NA                 | NA                            | NA                 |
| <i>Desi_wild_3655747</i> | NA                                  | <i>Ca_desi_denovo</i> | 3655747                 | T/C  | NA                 | NA                            | NA                 |
| <i>Desi_wild_3656172</i> | NA                                  | <i>Ca_desi_denovo</i> | 3656172                 | A/G  | NA                 | NA                            | NA                 |
| <i>Desi_wild_3656776</i> | NA                                  | <i>Ca_desi_denovo</i> | 3656776                 | A/C  | NA                 | NA                            | NA                 |
| <i>Desi_wild_3660113</i> | NA                                  | <i>Ca_desi_denovo</i> | 3660113                 | C/G  | NA                 | NA                            | NA                 |
| <i>Desi_wild_3660295</i> | NA                                  | <i>Ca_desi_denovo</i> | 3660295                 | G/A  | NA                 | NA                            | NA                 |
| <i>Desi_wild_3660895</i> | NA                                  | <i>Ca_desi_denovo</i> | 3660895                 | C/G  | NA                 | NA                            | NA                 |
| <i>Desi_wild_3661941</i> | NA                                  | <i>Ca_desi_denovo</i> | 3661941                 | C/T  | NA                 | NA                            | NA                 |
| <i>Desi_wild_3662715</i> | NA                                  | <i>Ca_desi_denovo</i> | 3662715                 | G/A  | NA                 | NA                            | NA                 |
| <i>Desi_wild_3664290</i> | NA                                  | <i>Ca_desi_denovo</i> | 3664290                 | G/C  | NA                 | NA                            | NA                 |
| <i>Desi_wild_3664305</i> | NA                                  | <i>Ca_desi_denovo</i> | 3664305                 | C/A  | NA                 | NA                            | NA                 |
| <i>Desi_wild_3664408</i> | NA                                  | <i>Ca_desi_denovo</i> | 3664408                 | G/C  | NA                 | NA                            | NA                 |
| <i>Desi_wild_3665303</i> | NA                                  | <i>Ca_desi_denovo</i> | 3665303                 | C/A  | NA                 | NA                            | NA                 |
| <i>Desi_wild_3665304</i> | NA                                  | <i>Ca_desi_denovo</i> | 3665304                 | T/G  | NA                 | NA                            | NA                 |
| <i>Desi_wild_3667131</i> | NA                                  | <i>Ca_desi_denovo</i> | 3667131                 | T/C  | NA                 | NA                            | NA                 |
| <i>Desi_wild_3667814</i> | NA                                  | <i>Ca_desi_denovo</i> | 3667814                 | A/G  | NA                 | NA                            | NA                 |
| <i>Desi_wild_3668131</i> | NA                                  | <i>Ca_desi_denovo</i> | 3668131                 | C/T  | NA                 | NA                            | NA                 |
| <i>Desi_wild_3668137</i> | NA                                  | <i>Ca_desi_denovo</i> | 3668137                 | C/G  | NA                 | NA                            | NA                 |
| <i>Desi_wild_3668161</i> | NA                                  | <i>Ca_desi_denovo</i> | 3668161                 | A/G  | NA                 | NA                            | NA                 |
| <i>Desi_wild_3668173</i> | NA                                  | <i>Ca_desi_denovo</i> | 3668173                 | A/T  | NA                 | NA                            | NA                 |
| <i>Desi_wild_3669365</i> | NA                                  | <i>Ca_desi_denovo</i> | 3669365                 | C/A  | NA                 | NA                            | NA                 |
| <i>Desi_wild_3670459</i> | NA                                  | <i>Ca_desi_denovo</i> | 3670459                 | G/C  | NA                 | NA                            | NA                 |
| <i>Desi_wild_3670498</i> | NA                                  | <i>Ca_desi_denovo</i> | 3670498                 | G/T  | NA                 | NA                            | NA                 |
| <i>Desi_wild_3670951</i> | NA                                  | <i>Ca_desi_denovo</i> | 3670951                 | C/T  | NA                 | NA                            | NA                 |
| <i>Desi_wild_3672704</i> | NA                                  | <i>Ca_desi_denovo</i> | 3672704                 | C/A  | NA                 | NA                            | NA                 |
| <i>Desi_wild_3672735</i> | NA                                  | <i>Ca_desi_denovo</i> | 3672735                 | T/C  | NA                 | NA                            | NA                 |
| <i>Desi_wild_3672796</i> | NA                                  | <i>Ca_desi_denovo</i> | 3672796                 | A/G  | NA                 | NA                            | NA                 |
| <i>Desi_wild_3672838</i> | NA                                  | <i>Ca_desi_denovo</i> | 3672838                 | G/A  | NA                 | NA                            | NA                 |
| <i>Desi_wild_3672853</i> | NA                                  | <i>Ca_desi_denovo</i> | 3672853                 | G/A  | NA                 | NA                            | NA                 |
| <i>Desi_wild_3673192</i> | NA                                  | <i>Ca_desi_denovo</i> | 3673192                 | C/T  | NA                 | NA                            | NA                 |

| SNP IDs                  | NCBI dbSNP accession IDs (NCBI_SS#) | Chromosomes           | Physical positions (bp) | SNPs | Gene accession IDs | Sequence components of genome | Putative functions |
|--------------------------|-------------------------------------|-----------------------|-------------------------|------|--------------------|-------------------------------|--------------------|
| <i>Desi_wild_3673224</i> | NA                                  | <i>Ca_desi_denovo</i> | 3673224                 | G/A  | NA                 | NA                            | NA                 |
| <i>Desi_wild_3673512</i> | NA                                  | <i>Ca_desi_denovo</i> | 3673512                 | T/C  | NA                 | NA                            | NA                 |
| <i>Desi_wild_3673682</i> | NA                                  | <i>Ca_desi_denovo</i> | 3673682                 | G/A  | NA                 | NA                            | NA                 |
| <i>Desi_wild_3673691</i> | NA                                  | <i>Ca_desi_denovo</i> | 3673691                 | G/A  | NA                 | NA                            | NA                 |
| <i>Desi_wild_3673806</i> | NA                                  | <i>Ca_desi_denovo</i> | 3673806                 | T/C  | NA                 | NA                            | NA                 |
| <i>Desi_wild_3673839</i> | NA                                  | <i>Ca_desi_denovo</i> | 3673839                 | A/G  | NA                 | NA                            | NA                 |
| <i>Desi_wild_3674164</i> | NA                                  | <i>Ca_desi_denovo</i> | 3674164                 | C/G  | NA                 | NA                            | NA                 |
| <i>Desi_wild_3674558</i> | NA                                  | <i>Ca_desi_denovo</i> | 3674558                 | A/G  | NA                 | NA                            | NA                 |
| <i>Desi_wild_3677349</i> | NA                                  | <i>Ca_desi_denovo</i> | 3677349                 | A/G  | NA                 | NA                            | NA                 |
| <i>Desi_wild_3677916</i> | NA                                  | <i>Ca_desi_denovo</i> | 3677916                 | T/C  | NA                 | NA                            | NA                 |
| <i>Desi_wild_3677918</i> | NA                                  | <i>Ca_desi_denovo</i> | 3677918                 | T/G  | NA                 | NA                            | NA                 |
| <i>Desi_wild_3678529</i> | NA                                  | <i>Ca_desi_denovo</i> | 3678529                 | G/A  | NA                 | NA                            | NA                 |
| <i>Desi_wild_3679118</i> | NA                                  | <i>Ca_desi_denovo</i> | 3679118                 | T/C  | NA                 | NA                            | NA                 |
| <i>Desi_wild_3679120</i> | NA                                  | <i>Ca_desi_denovo</i> | 3679120                 | T/G  | NA                 | NA                            | NA                 |
| <i>Desi_wild_3680146</i> | NA                                  | <i>Ca_desi_denovo</i> | 3680146                 | A/C  | NA                 | NA                            | NA                 |
| <i>Desi_wild_3680965</i> | NA                                  | <i>Ca_desi_denovo</i> | 3680965                 | A/T  | NA                 | NA                            | NA                 |
| <i>Desi_wild_3682259</i> | NA                                  | <i>Ca_desi_denovo</i> | 3682259                 | G/A  | NA                 | NA                            | NA                 |
| <i>Desi_wild_3682933</i> | NA                                  | <i>Ca_desi_denovo</i> | 3682933                 | A/G  | NA                 | NA                            | NA                 |
| <i>Desi_wild_3683056</i> | NA                                  | <i>Ca_desi_denovo</i> | 3683056                 | T/G  | NA                 | NA                            | NA                 |
| <i>Desi_wild_3683168</i> | NA                                  | <i>Ca_desi_denovo</i> | 3683168                 | G/A  | NA                 | NA                            | NA                 |
| <i>Desi_wild_3684639</i> | NA                                  | <i>Ca_desi_denovo</i> | 3684639                 | A/G  | NA                 | NA                            | NA                 |
| <i>Desi_wild_3684668</i> | NA                                  | <i>Ca_desi_denovo</i> | 3684668                 | T/C  | NA                 | NA                            | NA                 |
| <i>Desi_wild_3685144</i> | NA                                  | <i>Ca_desi_denovo</i> | 3685144                 | C/A  | NA                 | NA                            | NA                 |
| <i>Desi_wild_3685158</i> | NA                                  | <i>Ca_desi_denovo</i> | 3685158                 | C/G  | NA                 | NA                            | NA                 |
| <i>Desi_wild_3685175</i> | NA                                  | <i>Ca_desi_denovo</i> | 3685175                 | C/T  | NA                 | NA                            | NA                 |
| <i>Desi_wild_3685628</i> | NA                                  | <i>Ca_desi_denovo</i> | 3685628                 | T/G  | NA                 | NA                            | NA                 |
| <i>Desi_wild_3686209</i> | NA                                  | <i>Ca_desi_denovo</i> | 3686209                 | C/T  | NA                 | NA                            | NA                 |
| <i>Desi_wild_3686309</i> | NA                                  | <i>Ca_desi_denovo</i> | 3686309                 | A/G  | NA                 | NA                            | NA                 |
| <i>Desi_wild_3687904</i> | NA                                  | <i>Ca_desi_denovo</i> | 3687904                 | A/G  | NA                 | NA                            | NA                 |
| <i>Desi_wild_3687911</i> | NA                                  | <i>Ca_desi_denovo</i> | 3687911                 | G/T  | NA                 | NA                            | NA                 |
| <i>Desi_wild_3690395</i> | NA                                  | <i>Ca_desi_denovo</i> | 3690395                 | A/G  | NA                 | NA                            | NA                 |
| <i>Desi_wild_3690657</i> | NA                                  | <i>Ca_desi_denovo</i> | 3690657                 | A/G  | NA                 | NA                            | NA                 |
| <i>Desi_wild_3691534</i> | NA                                  | <i>Ca_desi_denovo</i> | 3691534                 | T/C  | NA                 | NA                            | NA                 |
| <i>Desi_wild_3691576</i> | NA                                  | <i>Ca_desi_denovo</i> | 3691576                 | T/A  | NA                 | NA                            | NA                 |
| <i>Desi_wild_3693070</i> | NA                                  | <i>Ca_desi_denovo</i> | 3693070                 | G/C  | NA                 | NA                            | NA                 |
| <i>Desi_wild_3693073</i> | NA                                  | <i>Ca_desi_denovo</i> | 3693073                 | T/G  | NA                 | NA                            | NA                 |
| <i>Desi_wild_3693505</i> | NA                                  | <i>Ca_desi_denovo</i> | 3693505                 | A/G  | NA                 | NA                            | NA                 |
| <i>Desi_wild_3693675</i> | NA                                  | <i>Ca_desi_denovo</i> | 3693675                 | C/G  | NA                 | NA                            | NA                 |
| <i>Desi_wild_3694603</i> | NA                                  | <i>Ca_desi_denovo</i> | 3694603                 | A/G  | NA                 | NA                            | NA                 |
| <i>Desi_wild_3694915</i> | NA                                  | <i>Ca_desi_denovo</i> | 3694915                 | C/G  | NA                 | NA                            | NA                 |
| <i>Desi_wild_3694921</i> | NA                                  | <i>Ca_desi_denovo</i> | 3694921                 | A/C  | NA                 | NA                            | NA                 |
| <i>Desi_wild_3697461</i> | NA                                  | <i>Ca_desi_denovo</i> | 3697461                 | G/A  | NA                 | NA                            | NA                 |
| <i>Desi_wild_3697506</i> | NA                                  | <i>Ca_desi_denovo</i> | 3697506                 | G/A  | NA                 | NA                            | NA                 |
| <i>Desi_wild_3697827</i> | NA                                  | <i>Ca_desi_denovo</i> | 3697827                 | G/A  | NA                 | NA                            | NA                 |

| SNP IDs                  | NCBI dbSNP accession IDs (NCBI_SS#) | Chromosomes           | Physical positions (bp) | SNPs | Gene accession IDs | Sequence components of genome | Putative functions |
|--------------------------|-------------------------------------|-----------------------|-------------------------|------|--------------------|-------------------------------|--------------------|
| <i>Desi_wild_3697845</i> | NA                                  | <i>Ca_desi_denovo</i> | 3697845                 | G/A  | NA                 | NA                            | NA                 |
| <i>Desi_wild_3698256</i> | NA                                  | <i>Ca_desi_denovo</i> | 3698256                 | A/G  | NA                 | NA                            | NA                 |
| <i>Desi_wild_3698644</i> | NA                                  | <i>Ca_desi_denovo</i> | 3698644                 | T/C  | NA                 | NA                            | NA                 |
| <i>Desi_wild_3699497</i> | NA                                  | <i>Ca_desi_denovo</i> | 3699497                 | A/G  | NA                 | NA                            | NA                 |
| <i>Desi_wild_3699532</i> | NA                                  | <i>Ca_desi_denovo</i> | 3699532                 | A/C  | NA                 | NA                            | NA                 |
| <i>Desi_wild_3700238</i> | NA                                  | <i>Ca_desi_denovo</i> | 3700238                 | G/A  | NA                 | NA                            | NA                 |
| <i>Desi_wild_3700249</i> | NA                                  | <i>Ca_desi_denovo</i> | 3700249                 | C/G  | NA                 | NA                            | NA                 |
| <i>Desi_wild_3700334</i> | NA                                  | <i>Ca_desi_denovo</i> | 3700334                 | G/A  | NA                 | NA                            | NA                 |
| <i>Desi_wild_3700548</i> | NA                                  | <i>Ca_desi_denovo</i> | 3700548                 | T/G  | NA                 | NA                            | NA                 |
| <i>Desi_wild_3700552</i> | NA                                  | <i>Ca_desi_denovo</i> | 3700552                 | G/C  | NA                 | NA                            | NA                 |
| <i>Desi_wild_3701506</i> | NA                                  | <i>Ca_desi_denovo</i> | 3701506                 | T/C  | NA                 | NA                            | NA                 |
| <i>Desi_wild_3701515</i> | NA                                  | <i>Ca_desi_denovo</i> | 3701515                 | C/G  | NA                 | NA                            | NA                 |
| <i>Desi_wild_3701609</i> | NA                                  | <i>Ca_desi_denovo</i> | 3701609                 | G/A  | NA                 | NA                            | NA                 |
| <i>Desi_wild_3701663</i> | NA                                  | <i>Ca_desi_denovo</i> | 3701663                 | G/A  | NA                 | NA                            | NA                 |
| <i>Desi_wild_3702087</i> | NA                                  | <i>Ca_desi_denovo</i> | 3702087                 | C/G  | NA                 | NA                            | NA                 |
| <i>Desi_wild_3702096</i> | NA                                  | <i>Ca_desi_denovo</i> | 3702096                 | G/A  | NA                 | NA                            | NA                 |
| <i>Desi_wild_3702105</i> | NA                                  | <i>Ca_desi_denovo</i> | 3702105                 | T/C  | NA                 | NA                            | NA                 |
| <i>Desi_wild_3702132</i> | NA                                  | <i>Ca_desi_denovo</i> | 3702132                 | G/C  | NA                 | NA                            | NA                 |
| <i>Desi_wild_3702228</i> | NA                                  | <i>Ca_desi_denovo</i> | 3702228                 | G/C  | NA                 | NA                            | NA                 |
| <i>Desi_wild_3702241</i> | NA                                  | <i>Ca_desi_denovo</i> | 3702241                 | C/T  | NA                 | NA                            | NA                 |
| <i>Desi_wild_3702469</i> | NA                                  | <i>Ca_desi_denovo</i> | 3702469                 | A/G  | NA                 | NA                            | NA                 |
| <i>Desi_wild_3702698</i> | NA                                  | <i>Ca_desi_denovo</i> | 3702698                 | C/A  | NA                 | NA                            | NA                 |
| <i>Desi_wild_3703939</i> | NA                                  | <i>Ca_desi_denovo</i> | 3703939                 | G/A  | NA                 | NA                            | NA                 |
| <i>Desi_wild_3703987</i> | NA                                  | <i>Ca_desi_denovo</i> | 3703987                 | T/C  | NA                 | NA                            | NA                 |
| <i>Desi_wild_3704334</i> | NA                                  | <i>Ca_desi_denovo</i> | 3704334                 | T/G  | NA                 | NA                            | NA                 |
| <i>Desi_wild_3704730</i> | NA                                  | <i>Ca_desi_denovo</i> | 3704730                 | T/C  | NA                 | NA                            | NA                 |
| <i>Desi_wild_3705721</i> | NA                                  | <i>Ca_desi_denovo</i> | 3705721                 | A/G  | NA                 | NA                            | NA                 |
| <i>Desi_wild_3705722</i> | NA                                  | <i>Ca_desi_denovo</i> | 3705722                 | G/A  | NA                 | NA                            | NA                 |
| <i>Desi_wild_3706325</i> | NA                                  | <i>Ca_desi_denovo</i> | 3706325                 | G/A  | NA                 | NA                            | NA                 |
| <i>Desi_wild_3709501</i> | NA                                  | <i>Ca_desi_denovo</i> | 3709501                 | T/C  | NA                 | NA                            | NA                 |
| <i>Desi_wild_3709733</i> | NA                                  | <i>Ca_desi_denovo</i> | 3709733                 | G/T  | NA                 | NA                            | NA                 |
| <i>Desi_wild_3710546</i> | NA                                  | <i>Ca_desi_denovo</i> | 3710546                 | T/C  | NA                 | NA                            | NA                 |
| <i>Desi_wild_3710637</i> | NA                                  | <i>Ca_desi_denovo</i> | 3710637                 | C/G  | NA                 | NA                            | NA                 |
| <i>Desi_wild_3712974</i> | NA                                  | <i>Ca_desi_denovo</i> | 3712974                 | C/A  | NA                 | NA                            | NA                 |
| <i>Desi_wild_3713458</i> | NA                                  | <i>Ca_desi_denovo</i> | 3713458                 | G/A  | NA                 | NA                            | NA                 |
| <i>Desi_wild_3714406</i> | NA                                  | <i>Ca_desi_denovo</i> | 3714406                 | G/C  | NA                 | NA                            | NA                 |
| <i>Desi_wild_3714409</i> | NA                                  | <i>Ca_desi_denovo</i> | 3714409                 | A/G  | NA                 | NA                            | NA                 |
| <i>Desi_wild_3716243</i> | NA                                  | <i>Ca_desi_denovo</i> | 3716243                 | A/G  | NA                 | NA                            | NA                 |
| <i>Desi_wild_3716373</i> | NA                                  | <i>Ca_desi_denovo</i> | 3716373                 | C/T  | NA                 | NA                            | NA                 |
| <i>Desi_wild_3717504</i> | NA                                  | <i>Ca_desi_denovo</i> | 3717504                 | C/T  | NA                 | NA                            | NA                 |
| <i>Desi_wild_3718474</i> | NA                                  | <i>Ca_desi_denovo</i> | 3718474                 | G/A  | NA                 | NA                            | NA                 |
| <i>Desi_wild_3718479</i> | NA                                  | <i>Ca_desi_denovo</i> | 3718479                 | G/C  | NA                 | NA                            | NA                 |
| <i>Desi_wild_3719367</i> | NA                                  | <i>Ca_desi_denovo</i> | 3719367                 | C/T  | NA                 | NA                            | NA                 |
| <i>Desi_wild_3722760</i> | NA                                  | <i>Ca_desi_denovo</i> | 3722760                 | C/T  | NA                 | NA                            | NA                 |

| SNP IDs                  | NCBI dbSNP accession IDs (NCBI_SS#) | Chromosomes           | Physical positions (bp) | SNPs | Gene accession IDs | Sequence components of genome | Putative functions |
|--------------------------|-------------------------------------|-----------------------|-------------------------|------|--------------------|-------------------------------|--------------------|
| <i>Desi_wild_3723063</i> | NA                                  | <i>Ca_desi_denovo</i> | 3723063                 | G/C  | NA                 | NA                            | NA                 |
| <i>Desi_wild_3723072</i> | NA                                  | <i>Ca_desi_denovo</i> | 3723072                 | C/T  | NA                 | NA                            | NA                 |
| <i>Desi_wild_3723829</i> | NA                                  | <i>Ca_desi_denovo</i> | 3723829                 | G/A  | NA                 | NA                            | NA                 |
| <i>Desi_wild_3724220</i> | NA                                  | <i>Ca_desi_denovo</i> | 3724220                 | G/T  | NA                 | NA                            | NA                 |
| <i>Desi_wild_3724860</i> | NA                                  | <i>Ca_desi_denovo</i> | 3724860                 | A/G  | NA                 | NA                            | NA                 |
| <i>Desi_wild_3725218</i> | NA                                  | <i>Ca_desi_denovo</i> | 3725218                 | C/T  | NA                 | NA                            | NA                 |
| <i>Desi_wild_3726772</i> | NA                                  | <i>Ca_desi_denovo</i> | 3726772                 | G/A  | NA                 | NA                            | NA                 |
| <i>Desi_wild_3727015</i> | NA                                  | <i>Ca_desi_denovo</i> | 3727015                 | A/C  | NA                 | NA                            | NA                 |
| <i>Desi_wild_3727795</i> | NA                                  | <i>Ca_desi_denovo</i> | 3727795                 | T/C  | NA                 | NA                            | NA                 |
| <i>Desi_wild_3727986</i> | NA                                  | <i>Ca_desi_denovo</i> | 3727986                 | G/A  | NA                 | NA                            | NA                 |
| <i>Desi_wild_3728398</i> | NA                                  | <i>Ca_desi_denovo</i> | 3728398                 | A/C  | NA                 | NA                            | NA                 |
| <i>Desi_wild_3731430</i> | NA                                  | <i>Ca_desi_denovo</i> | 3731430                 | A/G  | NA                 | NA                            | NA                 |
| <i>Desi_wild_3731432</i> | NA                                  | <i>Ca_desi_denovo</i> | 3731432                 | G/A  | NA                 | NA                            | NA                 |
| <i>Desi_wild_3731717</i> | NA                                  | <i>Ca_desi_denovo</i> | 3731717                 | C/T  | NA                 | NA                            | NA                 |
| <i>Desi_wild_3732552</i> | NA                                  | <i>Ca_desi_denovo</i> | 3732552                 | T/A  | NA                 | NA                            | NA                 |
| <i>Desi_wild_3733056</i> | NA                                  | <i>Ca_desi_denovo</i> | 3733056                 | T/C  | NA                 | NA                            | NA                 |
| <i>Desi_wild_3734263</i> | NA                                  | <i>Ca_desi_denovo</i> | 3734263                 | C/G  | NA                 | NA                            | NA                 |
| <i>Desi_wild_3734306</i> | NA                                  | <i>Ca_desi_denovo</i> | 3734306                 | C/T  | NA                 | NA                            | NA                 |
| <i>Desi_wild_3734609</i> | NA                                  | <i>Ca_desi_denovo</i> | 3734609                 | G/C  | NA                 | NA                            | NA                 |
| <i>Desi_wild_3735498</i> | NA                                  | <i>Ca_desi_denovo</i> | 3735498                 | G/A  | NA                 | NA                            | NA                 |
| <i>Desi_wild_3735941</i> | NA                                  | <i>Ca_desi_denovo</i> | 3735941                 | A/C  | NA                 | NA                            | NA                 |
| <i>Desi_wild_3736510</i> | NA                                  | <i>Ca_desi_denovo</i> | 3736510                 | A/C  | NA                 | NA                            | NA                 |
| <i>Desi_wild_3737146</i> | NA                                  | <i>Ca_desi_denovo</i> | 3737146                 | G/A  | NA                 | NA                            | NA                 |
| <i>Desi_wild_3737167</i> | NA                                  | <i>Ca_desi_denovo</i> | 3737167                 | G/A  | NA                 | NA                            | NA                 |
| <i>Desi_wild_3737781</i> | NA                                  | <i>Ca_desi_denovo</i> | 3737781                 | G/A  | NA                 | NA                            | NA                 |
| <i>Desi_wild_3737787</i> | NA                                  | <i>Ca_desi_denovo</i> | 3737787                 | G/C  | NA                 | NA                            | NA                 |
| <i>Desi_wild_3739051</i> | NA                                  | <i>Ca_desi_denovo</i> | 3739051                 | A/G  | NA                 | NA                            | NA                 |
| <i>Desi_wild_3739746</i> | NA                                  | <i>Ca_desi_denovo</i> | 3739746                 | C/T  | NA                 | NA                            | NA                 |
| <i>Desi_wild_3739802</i> | NA                                  | <i>Ca_desi_denovo</i> | 3739802                 | G/A  | NA                 | NA                            | NA                 |
| <i>Desi_wild_3740726</i> | NA                                  | <i>Ca_desi_denovo</i> | 3740726                 | G/A  | NA                 | NA                            | NA                 |
| <i>Desi_wild_3740763</i> | NA                                  | <i>Ca_desi_denovo</i> | 3740763                 | C/T  | NA                 | NA                            | NA                 |
| <i>Desi_wild_3740946</i> | NA                                  | <i>Ca_desi_denovo</i> | 3740946                 | G/T  | NA                 | NA                            | NA                 |
| <i>Desi_wild_3740956</i> | NA                                  | <i>Ca_desi_denovo</i> | 3740956                 | C/T  | NA                 | NA                            | NA                 |
| <i>Desi_wild_3740964</i> | NA                                  | <i>Ca_desi_denovo</i> | 3740964                 | A/T  | NA                 | NA                            | NA                 |
| <i>Desi_wild_3740970</i> | NA                                  | <i>Ca_desi_denovo</i> | 3740970                 | A/T  | NA                 | NA                            | NA                 |
| <i>Desi_wild_3741309</i> | NA                                  | <i>Ca_desi_denovo</i> | 3741309                 | G/A  | NA                 | NA                            | NA                 |
| <i>Desi_wild_3742768</i> | NA                                  | <i>Ca_desi_denovo</i> | 3742768                 | G/A  | NA                 | NA                            | NA                 |
| <i>Desi_wild_3742780</i> | NA                                  | <i>Ca_desi_denovo</i> | 3742780                 | G/C  | NA                 | NA                            | NA                 |
| <i>Desi_wild_3743009</i> | NA                                  | <i>Ca_desi_denovo</i> | 3743009                 | A/C  | NA                 | NA                            | NA                 |
| <i>Desi_wild_3743695</i> | NA                                  | <i>Ca_desi_denovo</i> | 3743695                 | T/C  | NA                 | NA                            | NA                 |
| <i>Desi_wild_3743722</i> | NA                                  | <i>Ca_desi_denovo</i> | 3743722                 | T/C  | NA                 | NA                            | NA                 |
| <i>Desi_wild_3743887</i> | NA                                  | <i>Ca_desi_denovo</i> | 3743887                 | G/A  | NA                 | NA                            | NA                 |
| <i>Desi_wild_3743900</i> | NA                                  | <i>Ca_desi_denovo</i> | 3743900                 | C/T  | NA                 | NA                            | NA                 |
| <i>Desi_wild_3744318</i> | NA                                  | <i>Ca_desi_denovo</i> | 3744318                 | T/C  | NA                 | NA                            | NA                 |

| SNP IDs                  | NCBI dbSNP accession IDs (NCBI_SS#) | Chromosomes           | Physical positions (bp) | SNPs | Gene accession IDs | Sequence components of genome | Putative functions |
|--------------------------|-------------------------------------|-----------------------|-------------------------|------|--------------------|-------------------------------|--------------------|
| <i>Desi_wild_3745327</i> | NA                                  | <i>Ca_desi_denovo</i> | 3745327                 | T/C  | NA                 | NA                            | NA                 |
| <i>Desi_wild_3745536</i> | NA                                  | <i>Ca_desi_denovo</i> | 3745536                 | G/T  | NA                 | NA                            | NA                 |
| <i>Desi_wild_3745580</i> | NA                                  | <i>Ca_desi_denovo</i> | 3745580                 | T/C  | NA                 | NA                            | NA                 |
| <i>Desi_wild_3745885</i> | NA                                  | <i>Ca_desi_denovo</i> | 3745885                 | C/G  | NA                 | NA                            | NA                 |
| <i>Desi_wild_3746244</i> | NA                                  | <i>Ca_desi_denovo</i> | 3746244                 | A/C  | NA                 | NA                            | NA                 |
| <i>Desi_wild_3746259</i> | NA                                  | <i>Ca_desi_denovo</i> | 3746259                 | A/G  | NA                 | NA                            | NA                 |
| <i>Desi_wild_3748015</i> | NA                                  | <i>Ca_desi_denovo</i> | 3748015                 | C/T  | NA                 | NA                            | NA                 |
| <i>Desi_wild_3748038</i> | NA                                  | <i>Ca_desi_denovo</i> | 3748038                 | C/T  | NA                 | NA                            | NA                 |
| <i>Desi_wild_3748857</i> | NA                                  | <i>Ca_desi_denovo</i> | 3748857                 | G/A  | NA                 | NA                            | NA                 |
| <i>Desi_wild_3748914</i> | NA                                  | <i>Ca_desi_denovo</i> | 3748914                 | C/G  | NA                 | NA                            | NA                 |
| <i>Desi_wild_3749825</i> | NA                                  | <i>Ca_desi_denovo</i> | 3749825                 | C/T  | NA                 | NA                            | NA                 |
| <i>Desi_wild_3750387</i> | NA                                  | <i>Ca_desi_denovo</i> | 3750387                 | G/C  | NA                 | NA                            | NA                 |
| <i>Desi_wild_3750811</i> | NA                                  | <i>Ca_desi_denovo</i> | 3750811                 | C/G  | NA                 | NA                            | NA                 |
| <i>Desi_wild_3750863</i> | NA                                  | <i>Ca_desi_denovo</i> | 3750863                 | T/G  | NA                 | NA                            | NA                 |
| <i>Desi_wild_3750885</i> | NA                                  | <i>Ca_desi_denovo</i> | 3750885                 | A/G  | NA                 | NA                            | NA                 |
| <i>Desi_wild_3751686</i> | NA                                  | <i>Ca_desi_denovo</i> | 3751686                 | C/T  | NA                 | NA                            | NA                 |
| <i>Desi_wild_3752524</i> | NA                                  | <i>Ca_desi_denovo</i> | 3752524                 | T/C  | NA                 | NA                            | NA                 |
| <i>Desi_wild_3752689</i> | NA                                  | <i>Ca_desi_denovo</i> | 3752689                 | A/G  | NA                 | NA                            | NA                 |
| <i>Desi_wild_3754898</i> | NA                                  | <i>Ca_desi_denovo</i> | 3754898                 | C/A  | NA                 | NA                            | NA                 |
| <i>Desi_wild_3755168</i> | NA                                  | <i>Ca_desi_denovo</i> | 3755168                 | A/G  | NA                 | NA                            | NA                 |
| <i>Desi_wild_3755171</i> | NA                                  | <i>Ca_desi_denovo</i> | 3755171                 | G/C  | NA                 | NA                            | NA                 |
| <i>Desi_wild_3755538</i> | NA                                  | <i>Ca_desi_denovo</i> | 3755538                 | G/A  | NA                 | NA                            | NA                 |
| <i>Desi_wild_3755837</i> | NA                                  | <i>Ca_desi_denovo</i> | 3755837                 | G/A  | NA                 | NA                            | NA                 |
| <i>Desi_wild_3756628</i> | NA                                  | <i>Ca_desi_denovo</i> | 3756628                 | G/A  | NA                 | NA                            | NA                 |
| <i>Desi_wild_3756998</i> | NA                                  | <i>Ca_desi_denovo</i> | 3756998                 | T/C  | NA                 | NA                            | NA                 |
| <i>Desi_wild_3757009</i> | NA                                  | <i>Ca_desi_denovo</i> | 3757009                 | G/A  | NA                 | NA                            | NA                 |
| <i>Desi_wild_3758124</i> | NA                                  | <i>Ca_desi_denovo</i> | 3758124                 | G/A  | NA                 | NA                            | NA                 |
| <i>Desi_wild_3758204</i> | NA                                  | <i>Ca_desi_denovo</i> | 3758204                 | T/C  | NA                 | NA                            | NA                 |
| <i>Desi_wild_3758569</i> | NA                                  | <i>Ca_desi_denovo</i> | 3758569                 | C/T  | NA                 | NA                            | NA                 |
| <i>Desi_wild_3758856</i> | NA                                  | <i>Ca_desi_denovo</i> | 3758856                 | C/G  | NA                 | NA                            | NA                 |
| <i>Desi_wild_3759229</i> | NA                                  | <i>Ca_desi_denovo</i> | 3759229                 | T/C  | NA                 | NA                            | NA                 |
| <i>Desi_wild_3759434</i> | NA                                  | <i>Ca_desi_denovo</i> | 3759434                 | A/C  | NA                 | NA                            | NA                 |
| <i>Desi_wild_3759475</i> | NA                                  | <i>Ca_desi_denovo</i> | 3759475                 | A/G  | NA                 | NA                            | NA                 |
| <i>Desi_wild_3759802</i> | NA                                  | <i>Ca_desi_denovo</i> | 3759802                 | C/A  | NA                 | NA                            | NA                 |
| <i>Desi_wild_3760476</i> | NA                                  | <i>Ca_desi_denovo</i> | 3760476                 | C/T  | NA                 | NA                            | NA                 |
| <i>Desi_wild_3760536</i> | NA                                  | <i>Ca_desi_denovo</i> | 3760536                 | T/C  | NA                 | NA                            | NA                 |
| <i>Desi_wild_3761258</i> | NA                                  | <i>Ca_desi_denovo</i> | 3761258                 | A/G  | NA                 | NA                            | NA                 |
| <i>Desi_wild_3761270</i> | NA                                  | <i>Ca_desi_denovo</i> | 3761270                 | C/G  | NA                 | NA                            | NA                 |
| <i>Desi_wild_3761633</i> | NA                                  | <i>Ca_desi_denovo</i> | 3761633                 | A/C  | NA                 | NA                            | NA                 |
| <i>Desi_wild_3762267</i> | NA                                  | <i>Ca_desi_denovo</i> | 3762267                 | A/C  | NA                 | NA                            | NA                 |
| <i>Desi_wild_3762613</i> | NA                                  | <i>Ca_desi_denovo</i> | 3762613                 | T/C  | NA                 | NA                            | NA                 |
| <i>Desi_wild_3762682</i> | NA                                  | <i>Ca_desi_denovo</i> | 3762682                 | A/T  | NA                 | NA                            | NA                 |
| <i>Desi_wild_3763145</i> | NA                                  | <i>Ca_desi_denovo</i> | 3763145                 | T/C  | NA                 | NA                            | NA                 |
| <i>Desi_wild_3763315</i> | NA                                  | <i>Ca_desi_denovo</i> | 3763315                 | C/T  | NA                 | NA                            | NA                 |

| SNP IDs                  | NCBI dbSNP accession IDs (NCBI_SS#) | Chromosomes           | Physical positions (bp) | SNPs | Gene accession IDs | Sequence components of genome | Putative functions |
|--------------------------|-------------------------------------|-----------------------|-------------------------|------|--------------------|-------------------------------|--------------------|
| <i>Desi_wild_3763955</i> | NA                                  | <i>Ca_desi_denovo</i> | 3763955                 | T/C  | NA                 | NA                            | NA                 |
| <i>Desi_wild_3763956</i> | NA                                  | <i>Ca_desi_denovo</i> | 3763956                 | T/C  | NA                 | NA                            | NA                 |
| <i>Desi_wild_3764625</i> | NA                                  | <i>Ca_desi_denovo</i> | 3764625                 | T/C  | NA                 | NA                            | NA                 |
| <i>Desi_wild_3766836</i> | NA                                  | <i>Ca_desi_denovo</i> | 3766836                 | G/A  | NA                 | NA                            | NA                 |
| <i>Desi_wild_3766883</i> | NA                                  | <i>Ca_desi_denovo</i> | 3766883                 | C/A  | NA                 | NA                            | NA                 |
| <i>Desi_wild_3766940</i> | NA                                  | <i>Ca_desi_denovo</i> | 3766940                 | A/C  | NA                 | NA                            | NA                 |
| <i>Desi_wild_3767430</i> | NA                                  | <i>Ca_desi_denovo</i> | 3767430                 | A/G  | NA                 | NA                            | NA                 |
| <i>Desi_wild_3768141</i> | NA                                  | <i>Ca_desi_denovo</i> | 3768141                 | T/C  | NA                 | NA                            | NA                 |
| <i>Desi_wild_3768772</i> | NA                                  | <i>Ca_desi_denovo</i> | 3768772                 | G/A  | NA                 | NA                            | NA                 |
| <i>Desi_wild_3770139</i> | NA                                  | <i>Ca_desi_denovo</i> | 3770139                 | G/A  | NA                 | NA                            | NA                 |
| <i>Desi_wild_3770154</i> | NA                                  | <i>Ca_desi_denovo</i> | 3770154                 | G/T  | NA                 | NA                            | NA                 |
| <i>Desi_wild_3770163</i> | NA                                  | <i>Ca_desi_denovo</i> | 3770163                 | A/G  | NA                 | NA                            | NA                 |
| <i>Desi_wild_3770176</i> | NA                                  | <i>Ca_desi_denovo</i> | 3770176                 | G/C  | NA                 | NA                            | NA                 |
| <i>Desi_wild_3771060</i> | NA                                  | <i>Ca_desi_denovo</i> | 3771060                 | G/T  | NA                 | NA                            | NA                 |
| <i>Desi_wild_3771104</i> | NA                                  | <i>Ca_desi_denovo</i> | 3771104                 | G/A  | NA                 | NA                            | NA                 |
| <i>Desi_wild_3771719</i> | NA                                  | <i>Ca_desi_denovo</i> | 3771719                 | T/G  | NA                 | NA                            | NA                 |
| <i>Desi_wild_3771825</i> | NA                                  | <i>Ca_desi_denovo</i> | 3771825                 | T/C  | NA                 | NA                            | NA                 |
| <i>Desi_wild_3771972</i> | NA                                  | <i>Ca_desi_denovo</i> | 3771972                 | G/A  | NA                 | NA                            | NA                 |
| <i>Desi_wild_3772328</i> | NA                                  | <i>Ca_desi_denovo</i> | 3772328                 | C/T  | NA                 | NA                            | NA                 |
| <i>Desi_wild_3773021</i> | NA                                  | <i>Ca_desi_denovo</i> | 3773021                 | G/T  | NA                 | NA                            | NA                 |
| <i>Desi_wild_3773548</i> | NA                                  | <i>Ca_desi_denovo</i> | 3773548                 | T/C  | NA                 | NA                            | NA                 |
| <i>Desi_wild_3774688</i> | NA                                  | <i>Ca_desi_denovo</i> | 3774688                 | C/A  | NA                 | NA                            | NA                 |
| <i>Desi_wild_3774691</i> | NA                                  | <i>Ca_desi_denovo</i> | 3774691                 | C/T  | NA                 | NA                            | NA                 |
| <i>Desi_wild_3775131</i> | NA                                  | <i>Ca_desi_denovo</i> | 3775131                 | G/A  | NA                 | NA                            | NA                 |
| <i>Desi_wild_3775149</i> | NA                                  | <i>Ca_desi_denovo</i> | 3775149                 | A/G  | NA                 | NA                            | NA                 |
| <i>Desi_wild_3775164</i> | NA                                  | <i>Ca_desi_denovo</i> | 3775164                 | T/C  | NA                 | NA                            | NA                 |
| <i>Desi_wild_3775203</i> | NA                                  | <i>Ca_desi_denovo</i> | 3775203                 | A/G  | NA                 | NA                            | NA                 |
| <i>Desi_wild_3775424</i> | NA                                  | <i>Ca_desi_denovo</i> | 3775424                 | A/G  | NA                 | NA                            | NA                 |
| <i>Desi_wild_3776404</i> | NA                                  | <i>Ca_desi_denovo</i> | 3776404                 | C/A  | NA                 | NA                            | NA                 |
| <i>Desi_wild_3777943</i> | NA                                  | <i>Ca_desi_denovo</i> | 3777943                 | A/G  | NA                 | NA                            | NA                 |
| <i>Desi_wild_3778423</i> | NA                                  | <i>Ca_desi_denovo</i> | 3778423                 | A/G  | NA                 | NA                            | NA                 |
| <i>Desi_wild_3778453</i> | NA                                  | <i>Ca_desi_denovo</i> | 3778453                 | G/A  | NA                 | NA                            | NA                 |
| <i>Desi_wild_3779014</i> | NA                                  | <i>Ca_desi_denovo</i> | 3779014                 | G/A  | NA                 | NA                            | NA                 |
| <i>Desi_wild_3779018</i> | NA                                  | <i>Ca_desi_denovo</i> | 3779018                 | A/C  | NA                 | NA                            | NA                 |
| <i>Desi_wild_3780021</i> | NA                                  | <i>Ca_desi_denovo</i> | 3780021                 | C/T  | NA                 | NA                            | NA                 |
| <i>Desi_wild_3780305</i> | NA                                  | <i>Ca_desi_denovo</i> | 3780305                 | C/T  | NA                 | NA                            | NA                 |
| <i>Desi_wild_3780655</i> | NA                                  | <i>Ca_desi_denovo</i> | 3780655                 | G/T  | NA                 | NA                            | NA                 |
| <i>Desi_wild_3781438</i> | NA                                  | <i>Ca_desi_denovo</i> | 3781438                 | A/G  | NA                 | NA                            | NA                 |
| <i>Desi_wild_3781449</i> | NA                                  | <i>Ca_desi_denovo</i> | 3781449                 | A/G  | NA                 | NA                            | NA                 |
| <i>Desi_wild_3781778</i> | NA                                  | <i>Ca_desi_denovo</i> | 3781778                 | C/T  | NA                 | NA                            | NA                 |
| <i>Desi_wild_3781952</i> | NA                                  | <i>Ca_desi_denovo</i> | 3781952                 | A/G  | NA                 | NA                            | NA                 |
| <i>Desi_wild_3782015</i> | NA                                  | <i>Ca_desi_denovo</i> | 3782015                 | G/C  | NA                 | NA                            | NA                 |
| <i>Desi_wild_3782084</i> | NA                                  | <i>Ca_desi_denovo</i> | 3782084                 | G/C  | NA                 | NA                            | NA                 |
| <i>Desi_wild_3785364</i> | NA                                  | <i>Ca_desi_denovo</i> | 3785364                 | G/A  | NA                 | NA                            | NA                 |

| SNP IDs                  | NCBI dbSNP accession IDs (NCBI_SS#) | Chromosomes           | Physical positions (bp) | SNPs | Gene accession IDs | Sequence components of genome | Putative functions |
|--------------------------|-------------------------------------|-----------------------|-------------------------|------|--------------------|-------------------------------|--------------------|
| <i>Desi_wild_3785396</i> | NA                                  | <i>Ca_desi_denovo</i> | 3785396                 | G/C  | NA                 | NA                            | NA                 |
| <i>Desi_wild_3785467</i> | NA                                  | <i>Ca_desi_denovo</i> | 3785467                 | G/A  | NA                 | NA                            | NA                 |
| <i>Desi_wild_3785602</i> | NA                                  | <i>Ca_desi_denovo</i> | 3785602                 | G/A  | NA                 | NA                            | NA                 |
| <i>Desi_wild_3785609</i> | NA                                  | <i>Ca_desi_denovo</i> | 3785609                 | G/C  | NA                 | NA                            | NA                 |
| <i>Desi_wild_3785762</i> | NA                                  | <i>Ca_desi_denovo</i> | 3785762                 | C/T  | NA                 | NA                            | NA                 |
| <i>Desi_wild_3785764</i> | NA                                  | <i>Ca_desi_denovo</i> | 3785764                 | G/A  | NA                 | NA                            | NA                 |
| <i>Desi_wild_3785788</i> | NA                                  | <i>Ca_desi_denovo</i> | 3785788                 | A/T  | NA                 | NA                            | NA                 |
| <i>Desi_wild_3785809</i> | NA                                  | <i>Ca_desi_denovo</i> | 3785809                 | C/T  | NA                 | NA                            | NA                 |
| <i>Desi_wild_3786180</i> | NA                                  | <i>Ca_desi_denovo</i> | 3786180                 | T/C  | NA                 | NA                            | NA                 |
| <i>Desi_wild_3786230</i> | NA                                  | <i>Ca_desi_denovo</i> | 3786230                 | A/T  | NA                 | NA                            | NA                 |
| <i>Desi_wild_3786245</i> | NA                                  | <i>Ca_desi_denovo</i> | 3786245                 | T/G  | NA                 | NA                            | NA                 |
| <i>Desi_wild_3786258</i> | NA                                  | <i>Ca_desi_denovo</i> | 3786258                 | G/A  | NA                 | NA                            | NA                 |
| <i>Desi_wild_3787537</i> | NA                                  | <i>Ca_desi_denovo</i> | 3787537                 | A/G  | NA                 | NA                            | NA                 |
| <i>Desi_wild_3788192</i> | NA                                  | <i>Ca_desi_denovo</i> | 3788192                 | G/A  | NA                 | NA                            | NA                 |
| <i>Desi_wild_3788206</i> | NA                                  | <i>Ca_desi_denovo</i> | 3788206                 | G/A  | NA                 | NA                            | NA                 |
| <i>Desi_wild_3788330</i> | NA                                  | <i>Ca_desi_denovo</i> | 3788330                 | A/C  | NA                 | NA                            | NA                 |
| <i>Desi_wild_3788343</i> | NA                                  | <i>Ca_desi_denovo</i> | 3788343                 | C/T  | NA                 | NA                            | NA                 |
| <i>Desi_wild_3788611</i> | NA                                  | <i>Ca_desi_denovo</i> | 3788611                 | T/C  | NA                 | NA                            | NA                 |
| <i>Desi_wild_3788708</i> | NA                                  | <i>Ca_desi_denovo</i> | 3788708                 | A/G  | NA                 | NA                            | NA                 |
| <i>Desi_wild_3788774</i> | NA                                  | <i>Ca_desi_denovo</i> | 3788774                 | C/G  | NA                 | NA                            | NA                 |
| <i>Desi_wild_3789017</i> | NA                                  | <i>Ca_desi_denovo</i> | 3789017                 | T/C  | NA                 | NA                            | NA                 |
| <i>Desi_wild_3790114</i> | NA                                  | <i>Ca_desi_denovo</i> | 3790114                 | G/A  | NA                 | NA                            | NA                 |
| <i>Desi_wild_3790128</i> | NA                                  | <i>Ca_desi_denovo</i> | 3790128                 | T/A  | NA                 | NA                            | NA                 |
| <i>Desi_wild_3790363</i> | NA                                  | <i>Ca_desi_denovo</i> | 3790363                 | T/C  | NA                 | NA                            | NA                 |
| <i>Desi_wild_3790631</i> | NA                                  | <i>Ca_desi_denovo</i> | 3790631                 | A/C  | NA                 | NA                            | NA                 |
| <i>Desi_wild_3790685</i> | NA                                  | <i>Ca_desi_denovo</i> | 3790685                 | A/G  | NA                 | NA                            | NA                 |
| <i>Desi_wild_3790756</i> | NA                                  | <i>Ca_desi_denovo</i> | 3790756                 | C/G  | NA                 | NA                            | NA                 |
| <i>Desi_wild_3791147</i> | NA                                  | <i>Ca_desi_denovo</i> | 3791147                 | C/G  | NA                 | NA                            | NA                 |
| <i>Desi_wild_3791150</i> | NA                                  | <i>Ca_desi_denovo</i> | 3791150                 | G/A  | NA                 | NA                            | NA                 |
| <i>Desi_wild_3792973</i> | NA                                  | <i>Ca_desi_denovo</i> | 3792973                 | A/G  | NA                 | NA                            | NA                 |
| <i>Desi_wild_3792997</i> | NA                                  | <i>Ca_desi_denovo</i> | 3792997                 | G/C  | NA                 | NA                            | NA                 |
| <i>Desi_wild_3793586</i> | NA                                  | <i>Ca_desi_denovo</i> | 3793586                 | A/G  | NA                 | NA                            | NA                 |
| <i>Desi_wild_3793675</i> | NA                                  | <i>Ca_desi_denovo</i> | 3793675                 | G/C  | NA                 | NA                            | NA                 |
| <i>Desi_wild_3793950</i> | NA                                  | <i>Ca_desi_denovo</i> | 3793950                 | G/A  | NA                 | NA                            | NA                 |
| <i>Desi_wild_3794386</i> | NA                                  | <i>Ca_desi_denovo</i> | 3794386                 | T/C  | NA                 | NA                            | NA                 |
| <i>Desi_wild_3795402</i> | NA                                  | <i>Ca_desi_denovo</i> | 3795402                 | T/G  | NA                 | NA                            | NA                 |
| <i>Desi_wild_3796680</i> | NA                                  | <i>Ca_desi_denovo</i> | 3796680                 | C/T  | NA                 | NA                            | NA                 |
| <i>Desi_wild_3797221</i> | NA                                  | <i>Ca_desi_denovo</i> | 3797221                 | C/G  | NA                 | NA                            | NA                 |
| <i>Desi_wild_3797227</i> | NA                                  | <i>Ca_desi_denovo</i> | 3797227                 | C/T  | NA                 | NA                            | NA                 |
| <i>Desi_wild_3798433</i> | NA                                  | <i>Ca_desi_denovo</i> | 3798433                 | T/G  | NA                 | NA                            | NA                 |
| <i>Desi_wild_3800476</i> | NA                                  | <i>Ca_desi_denovo</i> | 3800476                 | T/C  | NA                 | NA                            | NA                 |
| <i>Desi_wild_3801325</i> | NA                                  | <i>Ca_desi_denovo</i> | 3801325                 | A/T  | NA                 | NA                            | NA                 |
| <i>Desi_wild_3801397</i> | NA                                  | <i>Ca_desi_denovo</i> | 3801397                 | G/A  | NA                 | NA                            | NA                 |
| <i>Desi_wild_3802834</i> | NA                                  | <i>Ca_desi_denovo</i> | 3802834                 | G/A  | NA                 | NA                            | NA                 |

| SNP IDs                  | NCBI dbSNP accession IDs (NCBI_SS#) | Chromosomes           | Physical positions (bp) | SNPs | Gene accession IDs | Sequence components of genome | Putative functions |
|--------------------------|-------------------------------------|-----------------------|-------------------------|------|--------------------|-------------------------------|--------------------|
| <i>Desi_wild_3803155</i> | NA                                  | <i>Ca_desi_denovo</i> | 3803155                 | T/C  | NA                 | NA                            | NA                 |
| <i>Desi_wild_3803179</i> | NA                                  | <i>Ca_desi_denovo</i> | 3803179                 | G/C  | NA                 | NA                            | NA                 |
| <i>Desi_wild_3803535</i> | NA                                  | <i>Ca_desi_denovo</i> | 3803535                 | C/G  | NA                 | NA                            | NA                 |
| <i>Desi_wild_3803958</i> | NA                                  | <i>Ca_desi_denovo</i> | 3803958                 | A/G  | NA                 | NA                            | NA                 |
| <i>Desi_wild_3803961</i> | NA                                  | <i>Ca_desi_denovo</i> | 3803961                 | G/A  | NA                 | NA                            | NA                 |
| <i>Desi_wild_3804892</i> | NA                                  | <i>Ca_desi_denovo</i> | 3804892                 | C/T  | NA                 | NA                            | NA                 |
| <i>Desi_wild_3804915</i> | NA                                  | <i>Ca_desi_denovo</i> | 3804915                 | G/A  | NA                 | NA                            | NA                 |
| <i>Desi_wild_3805306</i> | NA                                  | <i>Ca_desi_denovo</i> | 3805306                 | C/T  | NA                 | NA                            | NA                 |
| <i>Desi_wild_3805884</i> | NA                                  | <i>Ca_desi_denovo</i> | 3805884                 | A/G  | NA                 | NA                            | NA                 |
| <i>Desi_wild_3805894</i> | NA                                  | <i>Ca_desi_denovo</i> | 3805894                 | A/G  | NA                 | NA                            | NA                 |
| <i>Desi_wild_3806557</i> | NA                                  | <i>Ca_desi_denovo</i> | 3806557                 | C/T  | NA                 | NA                            | NA                 |
| <i>Desi_wild_3806564</i> | NA                                  | <i>Ca_desi_denovo</i> | 3806564                 | G/A  | NA                 | NA                            | NA                 |
| <i>Desi_wild_3806948</i> | NA                                  | <i>Ca_desi_denovo</i> | 3806948                 | A/G  | NA                 | NA                            | NA                 |
| <i>Desi_wild_3807593</i> | NA                                  | <i>Ca_desi_denovo</i> | 3807593                 | C/T  | NA                 | NA                            | NA                 |
| <i>Desi_wild_3807673</i> | NA                                  | <i>Ca_desi_denovo</i> | 3807673                 | T/C  | NA                 | NA                            | NA                 |
| <i>Desi_wild_3807682</i> | NA                                  | <i>Ca_desi_denovo</i> | 3807682                 | T/C  | NA                 | NA                            | NA                 |
| <i>Desi_wild_3808119</i> | NA                                  | <i>Ca_desi_denovo</i> | 3808119                 | C/G  | NA                 | NA                            | NA                 |
| <i>Desi_wild_3808236</i> | NA                                  | <i>Ca_desi_denovo</i> | 3808236                 | A/G  | NA                 | NA                            | NA                 |
| <i>Desi_wild_3808902</i> | NA                                  | <i>Ca_desi_denovo</i> | 3808902                 | G/A  | NA                 | NA                            | NA                 |
| <i>Desi_wild_3809362</i> | NA                                  | <i>Ca_desi_denovo</i> | 3809362                 | C/A  | NA                 | NA                            | NA                 |
| <i>Desi_wild_3809401</i> | NA                                  | <i>Ca_desi_denovo</i> | 3809401                 | T/C  | NA                 | NA                            | NA                 |
| <i>Desi_wild_3809948</i> | NA                                  | <i>Ca_desi_denovo</i> | 3809948                 | T/C  | NA                 | NA                            | NA                 |
| <i>Desi_wild_3809970</i> | NA                                  | <i>Ca_desi_denovo</i> | 3809970                 | C/A  | NA                 | NA                            | NA                 |
| <i>Desi_wild_3810469</i> | NA                                  | <i>Ca_desi_denovo</i> | 3810469                 | T/C  | NA                 | NA                            | NA                 |
| <i>Desi_wild_3810570</i> | NA                                  | <i>Ca_desi_denovo</i> | 3810570                 | T/C  | NA                 | NA                            | NA                 |
| <i>Desi_wild_3810576</i> | NA                                  | <i>Ca_desi_denovo</i> | 3810576                 | G/A  | NA                 | NA                            | NA                 |
| <i>Desi_wild_3811239</i> | NA                                  | <i>Ca_desi_denovo</i> | 3811239                 | A/G  | NA                 | NA                            | NA                 |
| <i>Desi_wild_3811367</i> | NA                                  | <i>Ca_desi_denovo</i> | 3811367                 | G/A  | NA                 | NA                            | NA                 |
| <i>Desi_wild_3812816</i> | NA                                  | <i>Ca_desi_denovo</i> | 3812816                 | T/G  | NA                 | NA                            | NA                 |
| <i>Desi_wild_3813092</i> | NA                                  | <i>Ca_desi_denovo</i> | 3813092                 | T/C  | NA                 | NA                            | NA                 |
| <i>Desi_wild_3813093</i> | NA                                  | <i>Ca_desi_denovo</i> | 3813093                 | T/G  | NA                 | NA                            | NA                 |
| <i>Desi_wild_3813219</i> | NA                                  | <i>Ca_desi_denovo</i> | 3813219                 | G/T  | NA                 | NA                            | NA                 |
| <i>Desi_wild_3813693</i> | NA                                  | <i>Ca_desi_denovo</i> | 3813693                 | T/C  | NA                 | NA                            | NA                 |
| <i>Desi_wild_3813703</i> | NA                                  | <i>Ca_desi_denovo</i> | 3813703                 | A/G  | NA                 | NA                            | NA                 |
| <i>Desi_wild_3813730</i> | NA                                  | <i>Ca_desi_denovo</i> | 3813730                 | G/A  | NA                 | NA                            | NA                 |
| <i>Desi_wild_3814126</i> | NA                                  | <i>Ca_desi_denovo</i> | 3814126                 | A/G  | NA                 | NA                            | NA                 |
| <i>Desi_wild_3814129</i> | NA                                  | <i>Ca_desi_denovo</i> | 3814129                 | A/G  | NA                 | NA                            | NA                 |
| <i>Desi_wild_3814145</i> | NA                                  | <i>Ca_desi_denovo</i> | 3814145                 | A/G  | NA                 | NA                            | NA                 |
| <i>Desi_wild_3814836</i> | NA                                  | <i>Ca_desi_denovo</i> | 3814836                 | C/G  | NA                 | NA                            | NA                 |
| <i>Desi_wild_3815118</i> | NA                                  | <i>Ca_desi_denovo</i> | 3815118                 | G/A  | NA                 | NA                            | NA                 |
| <i>Desi_wild_3815149</i> | NA                                  | <i>Ca_desi_denovo</i> | 3815149                 | T/C  | NA                 | NA                            | NA                 |
| <i>Desi_wild_3816587</i> | NA                                  | <i>Ca_desi_denovo</i> | 3816587                 | G/A  | NA                 | NA                            | NA                 |
| <i>Desi_wild_3816595</i> | NA                                  | <i>Ca_desi_denovo</i> | 3816595                 | C/T  | NA                 | NA                            | NA                 |
| <i>Desi_wild_3816744</i> | NA                                  | <i>Ca_desi_denovo</i> | 3816744                 | A/G  | NA                 | NA                            | NA                 |



| SNP IDs                  | NCBI dbSNP accession IDs (NCBI_SS#) | Chromosomes           | Physical positions (bp) | SNPs | Gene accession IDs | Sequence components of genome | Putative functions |
|--------------------------|-------------------------------------|-----------------------|-------------------------|------|--------------------|-------------------------------|--------------------|
| <i>Desi_wild_3817108</i> | NA                                  | <i>Ca_desi_denovo</i> | 3817108                 | C/G  | NA                 | NA                            | NA                 |
| <i>Desi_wild_3818032</i> | NA                                  | <i>Ca_desi_denovo</i> | 3818032                 | G/T  | NA                 | NA                            | NA                 |
| <i>Desi_wild_3818232</i> | NA                                  | <i>Ca_desi_denovo</i> | 3818232                 | A/G  | NA                 | NA                            | NA                 |
| <i>Desi_wild_3818241</i> | NA                                  | <i>Ca_desi_denovo</i> | 3818241                 | T/C  | NA                 | NA                            | NA                 |
| <i>Desi_wild_3818738</i> | NA                                  | <i>Ca_desi_denovo</i> | 3818738                 | A/G  | NA                 | NA                            | NA                 |
| <i>Desi_wild_3818747</i> | NA                                  | <i>Ca_desi_denovo</i> | 3818747                 | C/T  | NA                 | NA                            | NA                 |
| <i>Desi_wild_3819971</i> | NA                                  | <i>Ca_desi_denovo</i> | 3819971                 | T/C  | NA                 | NA                            | NA                 |
| <i>Desi_wild_3820015</i> | NA                                  | <i>Ca_desi_denovo</i> | 3820015                 | C/T  | NA                 | NA                            | NA                 |
| <i>Desi_wild_3820150</i> | NA                                  | <i>Ca_desi_denovo</i> | 3820150                 | T/C  | NA                 | NA                            | NA                 |
| <i>Desi_wild_3821119</i> | NA                                  | <i>Ca_desi_denovo</i> | 3821119                 | C/T  | NA                 | NA                            | NA                 |
| <i>Desi_wild_3821140</i> | NA                                  | <i>Ca_desi_denovo</i> | 3821140                 | G/C  | NA                 | NA                            | NA                 |
| <i>Desi_wild_3822529</i> | NA                                  | <i>Ca_desi_denovo</i> | 3822529                 | A/G  | NA                 | NA                            | NA                 |
| <i>Desi_wild_3823456</i> | NA                                  | <i>Ca_desi_denovo</i> | 3823456                 | G/A  | NA                 | NA                            | NA                 |
| <i>Desi_wild_3823720</i> | NA                                  | <i>Ca_desi_denovo</i> | 3823720                 | T/G  | NA                 | NA                            | NA                 |
| <i>Desi_wild_3823756</i> | NA                                  | <i>Ca_desi_denovo</i> | 3823756                 | C/T  | NA                 | NA                            | NA                 |
| <i>Desi_wild_3824234</i> | NA                                  | <i>Ca_desi_denovo</i> | 3824234                 | A/C  | NA                 | NA                            | NA                 |
| <i>Desi_wild_3824246</i> | NA                                  | <i>Ca_desi_denovo</i> | 3824246                 | T/C  | NA                 | NA                            | NA                 |
| <i>Desi_wild_3824502</i> | NA                                  | <i>Ca_desi_denovo</i> | 3824502                 | A/G  | NA                 | NA                            | NA                 |
| <i>Desi_wild_3824505</i> | NA                                  | <i>Ca_desi_denovo</i> | 3824505                 | G/C  | NA                 | NA                            | NA                 |
| <i>Desi_wild_3824650</i> | NA                                  | <i>Ca_desi_denovo</i> | 3824650                 | G/T  | NA                 | NA                            | NA                 |
| <i>Desi_wild_3824667</i> | NA                                  | <i>Ca_desi_denovo</i> | 3824667                 | A/G  | NA                 | NA                            | NA                 |
| <i>Desi_wild_3824698</i> | NA                                  | <i>Ca_desi_denovo</i> | 3824698                 | T/C  | NA                 | NA                            | NA                 |
| <i>Desi_wild_3824813</i> | NA                                  | <i>Ca_desi_denovo</i> | 3824813                 | G/A  | NA                 | NA                            | NA                 |
| <i>Desi_wild_3824843</i> | NA                                  | <i>Ca_desi_denovo</i> | 3824843                 | C/G  | NA                 | NA                            | NA                 |
| <i>Desi_wild_3825023</i> | NA                                  | <i>Ca_desi_denovo</i> | 3825023                 | C/A  | NA                 | NA                            | NA                 |
| <i>Desi_wild_3825254</i> | NA                                  | <i>Ca_desi_denovo</i> | 3825254                 | T/G  | NA                 | NA                            | NA                 |
| <i>Desi_wild_3825587</i> | NA                                  | <i>Ca_desi_denovo</i> | 3825587                 | C/G  | NA                 | NA                            | NA                 |
| <i>Desi_wild_3825632</i> | NA                                  | <i>Ca_desi_denovo</i> | 3825632                 | G/A  | NA                 | NA                            | NA                 |
| <i>Desi_wild_3826318</i> | NA                                  | <i>Ca_desi_denovo</i> | 3826318                 | T/C  | NA                 | NA                            | NA                 |
| <i>Desi_wild_3826650</i> | NA                                  | <i>Ca_desi_denovo</i> | 3826650                 | A/C  | NA                 | NA                            | NA                 |
| <i>Desi_wild_3827057</i> | NA                                  | <i>Ca_desi_denovo</i> | 3827057                 | G/A  | NA                 | NA                            | NA                 |
| <i>Desi_wild_3827098</i> | NA                                  | <i>Ca_desi_denovo</i> | 3827098                 | C/T  | NA                 | NA                            | NA                 |
| <i>Desi_wild_3827229</i> | NA                                  | <i>Ca_desi_denovo</i> | 3827229                 | C/T  | NA                 | NA                            | NA                 |
| <i>Desi_wild_3827383</i> | NA                                  | <i>Ca_desi_denovo</i> | 3827383                 | T/A  | NA                 | NA                            | NA                 |
| <i>Desi_wild_3828245</i> | NA                                  | <i>Ca_desi_denovo</i> | 3828245                 | A/G  | NA                 | NA                            | NA                 |
| <i>Desi_wild_3828516</i> | NA                                  | <i>Ca_desi_denovo</i> | 3828516                 | A/G  | NA                 | NA                            | NA                 |
| <i>Desi_wild_3828800</i> | NA                                  | <i>Ca_desi_denovo</i> | 3828800                 | T/C  | NA                 | NA                            | NA                 |
| <i>Desi_wild_3828881</i> | NA                                  | <i>Ca_desi_denovo</i> | 3828881                 | C/T  | NA                 | NA                            | NA                 |
| <i>Desi_wild_3828896</i> | NA                                  | <i>Ca_desi_denovo</i> | 3828896                 | C/G  | NA                 | NA                            | NA                 |
| <i>Desi_wild_3829045</i> | NA                                  | <i>Ca_desi_denovo</i> | 3829045                 | G/T  | NA                 | NA                            | NA                 |
| <i>Desi_wild_3829583</i> | NA                                  | <i>Ca_desi_denovo</i> | 3829583                 | C/A  | NA                 | NA                            | NA                 |
| <i>Desi_wild_3829838</i> | NA                                  | <i>Ca_desi_denovo</i> | 3829838                 | G/A  | NA                 | NA                            | NA                 |
| <i>Desi_wild_3830810</i> | NA                                  | <i>Ca_desi_denovo</i> | 3830810                 | C/G  | NA                 | NA                            | NA                 |
| <i>Desi_wild_3831017</i> | NA                                  | <i>Ca_desi_denovo</i> | 3831017                 | G/T  | NA                 | NA                            | NA                 |

| SNP IDs                  | NCBI dbSNP accession IDs (NCBI_SS#) | Chromosomes           | Physical positions (bp) | SNPs | Gene accession IDs | Sequence components of genome | Putative functions |
|--------------------------|-------------------------------------|-----------------------|-------------------------|------|--------------------|-------------------------------|--------------------|
| <i>Desi_wild_3831101</i> | NA                                  | <i>Ca_desi_denovo</i> | 3831101                 | T/C  | NA                 | NA                            | NA                 |
| <i>Desi_wild_3831173</i> | NA                                  | <i>Ca_desi_denovo</i> | 3831173                 | C/T  | NA                 | NA                            | NA                 |
| <i>Desi_wild_3832185</i> | NA                                  | <i>Ca_desi_denovo</i> | 3832185                 | C/T  | NA                 | NA                            | NA                 |
| <i>Desi_wild_3832264</i> | NA                                  | <i>Ca_desi_denovo</i> | 3832264                 | T/A  | NA                 | NA                            | NA                 |
| <i>Desi_wild_3832333</i> | NA                                  | <i>Ca_desi_denovo</i> | 3832333                 | C/T  | NA                 | NA                            | NA                 |
| <i>Desi_wild_3832837</i> | NA                                  | <i>Ca_desi_denovo</i> | 3832837                 | A/G  | NA                 | NA                            | NA                 |
| <i>Desi_wild_3832850</i> | NA                                  | <i>Ca_desi_denovo</i> | 3832850                 | C/T  | NA                 | NA                            | NA                 |
| <i>Desi_wild_3832858</i> | NA                                  | <i>Ca_desi_denovo</i> | 3832858                 | C/T  | NA                 | NA                            | NA                 |
| <i>Desi_wild_3833993</i> | NA                                  | <i>Ca_desi_denovo</i> | 3833993                 | A/G  | NA                 | NA                            | NA                 |
| <i>Desi_wild_3834586</i> | NA                                  | <i>Ca_desi_denovo</i> | 3834586                 | T/C  | NA                 | NA                            | NA                 |
| <i>Desi_wild_3834990</i> | NA                                  | <i>Ca_desi_denovo</i> | 3834990                 | G/A  | NA                 | NA                            | NA                 |
| <i>Desi_wild_3836951</i> | NA                                  | <i>Ca_desi_denovo</i> | 3836951                 | G/C  | NA                 | NA                            | NA                 |
| <i>Desi_wild_3837398</i> | NA                                  | <i>Ca_desi_denovo</i> | 3837398                 | G/A  | NA                 | NA                            | NA                 |
| <i>Desi_wild_3837406</i> | NA                                  | <i>Ca_desi_denovo</i> | 3837406                 | A/G  | NA                 | NA                            | NA                 |
| <i>Desi_wild_3837408</i> | NA                                  | <i>Ca_desi_denovo</i> | 3837408                 | C/A  | NA                 | NA                            | NA                 |
| <i>Desi_wild_3837466</i> | NA                                  | <i>Ca_desi_denovo</i> | 3837466                 | A/G  | NA                 | NA                            | NA                 |
| <i>Desi_wild_3838399</i> | NA                                  | <i>Ca_desi_denovo</i> | 3838399                 | C/G  | NA                 | NA                            | NA                 |
| <i>Desi_wild_3838453</i> | NA                                  | <i>Ca_desi_denovo</i> | 3838453                 | C/A  | NA                 | NA                            | NA                 |
| <i>Desi_wild_3839090</i> | NA                                  | <i>Ca_desi_denovo</i> | 3839090                 | T/C  | NA                 | NA                            | NA                 |
| <i>Desi_wild_3839993</i> | NA                                  | <i>Ca_desi_denovo</i> | 3839993                 | C/G  | NA                 | NA                            | NA                 |
| <i>Desi_wild_3840082</i> | NA                                  | <i>Ca_desi_denovo</i> | 3840082                 | G/C  | NA                 | NA                            | NA                 |
| <i>Desi_wild_3841139</i> | NA                                  | <i>Ca_desi_denovo</i> | 3841139                 | A/C  | NA                 | NA                            | NA                 |
| <i>Desi_wild_3841784</i> | NA                                  | <i>Ca_desi_denovo</i> | 3841784                 | G/A  | NA                 | NA                            | NA                 |
| <i>Desi_wild_3846255</i> | NA                                  | <i>Ca_desi_denovo</i> | 3846255                 | G/C  | NA                 | NA                            | NA                 |
| <i>Desi_wild_3846306</i> | NA                                  | <i>Ca_desi_denovo</i> | 3846306                 | C/T  | NA                 | NA                            | NA                 |
| <i>Desi_wild_3846433</i> | NA                                  | <i>Ca_desi_denovo</i> | 3846433                 | G/C  | NA                 | NA                            | NA                 |
| <i>Desi_wild_3846521</i> | NA                                  | <i>Ca_desi_denovo</i> | 3846521                 | C/T  | NA                 | NA                            | NA                 |
| <i>Desi_wild_3846727</i> | NA                                  | <i>Ca_desi_denovo</i> | 3846727                 | G/C  | NA                 | NA                            | NA                 |
| <i>Desi_wild_3846930</i> | NA                                  | <i>Ca_desi_denovo</i> | 3846930                 | C/G  | NA                 | NA                            | NA                 |
| <i>Desi_wild_3847456</i> | NA                                  | <i>Ca_desi_denovo</i> | 3847456                 | C/G  | NA                 | NA                            | NA                 |
| <i>Desi_wild_3847474</i> | NA                                  | <i>Ca_desi_denovo</i> | 3847474                 | C/T  | NA                 | NA                            | NA                 |
| <i>Desi_wild_3848000</i> | NA                                  | <i>Ca_desi_denovo</i> | 3848000                 | C/G  | NA                 | NA                            | NA                 |
| <i>Desi_wild_3848015</i> | NA                                  | <i>Ca_desi_denovo</i> | 3848015                 | G/A  | NA                 | NA                            | NA                 |
| <i>Desi_wild_3848259</i> | NA                                  | <i>Ca_desi_denovo</i> | 3848259                 | A/G  | NA                 | NA                            | NA                 |
| <i>Desi_wild_3848490</i> | NA                                  | <i>Ca_desi_denovo</i> | 3848490                 | A/G  | NA                 | NA                            | NA                 |
| <i>Desi_wild_3848776</i> | NA                                  | <i>Ca_desi_denovo</i> | 3848776                 | T/G  | NA                 | NA                            | NA                 |
| <i>Desi_wild_3848779</i> | NA                                  | <i>Ca_desi_denovo</i> | 3848779                 | T/C  | NA                 | NA                            | NA                 |
| <i>Desi_wild_3850021</i> | NA                                  | <i>Ca_desi_denovo</i> | 3850021                 | C/T  | NA                 | NA                            | NA                 |
| <i>Desi_wild_3850373</i> | NA                                  | <i>Ca_desi_denovo</i> | 3850373                 | A/G  | NA                 | NA                            | NA                 |
| <i>Desi_wild_3854760</i> | NA                                  | <i>Ca_desi_denovo</i> | 3854760                 | G/A  | NA                 | NA                            | NA                 |
| <i>Desi_wild_3856008</i> | NA                                  | <i>Ca_desi_denovo</i> | 3856008                 | C/T  | NA                 | NA                            | NA                 |
| <i>Desi_wild_3856479</i> | NA                                  | <i>Ca_desi_denovo</i> | 3856479                 | C/A  | NA                 | NA                            | NA                 |
| <i>Desi_wild_3857710</i> | NA                                  | <i>Ca_desi_denovo</i> | 3857710                 | A/C  | NA                 | NA                            | NA                 |
| <i>Desi_wild_3858272</i> | NA                                  | <i>Ca_desi_denovo</i> | 3858272                 | C/A  | NA                 | NA                            | NA                 |

| SNP IDs                  | NCBI dbSNP accession IDs (NCBI_SS#) | Chromosomes           | Physical positions (bp) | SNPs | Gene accession IDs | Sequence components of genome | Putative functions |
|--------------------------|-------------------------------------|-----------------------|-------------------------|------|--------------------|-------------------------------|--------------------|
| <i>Desi_wild_3858547</i> | NA                                  | <i>Ca_desi_denovo</i> | 3858547                 | C/T  | NA                 | NA                            | NA                 |
| <i>Desi_wild_3859938</i> | NA                                  | <i>Ca_desi_denovo</i> | 3859938                 | C/G  | NA                 | NA                            | NA                 |
| <i>Desi_wild_3860022</i> | NA                                  | <i>Ca_desi_denovo</i> | 3860022                 | A/T  | NA                 | NA                            | NA                 |
| <i>Desi_wild_3860047</i> | NA                                  | <i>Ca_desi_denovo</i> | 3860047                 | T/C  | NA                 | NA                            | NA                 |
| <i>Desi_wild_3860136</i> | NA                                  | <i>Ca_desi_denovo</i> | 3860136                 | G/C  | NA                 | NA                            | NA                 |
| <i>Desi_wild_3861031</i> | NA                                  | <i>Ca_desi_denovo</i> | 3861031                 | A/T  | NA                 | NA                            | NA                 |
| <i>Desi_wild_3861950</i> | NA                                  | <i>Ca_desi_denovo</i> | 3861950                 | G/T  | NA                 | NA                            | NA                 |
| <i>Desi_wild_3863198</i> | NA                                  | <i>Ca_desi_denovo</i> | 3863198                 | G/A  | NA                 | NA                            | NA                 |
| <i>Desi_wild_3863225</i> | NA                                  | <i>Ca_desi_denovo</i> | 3863225                 | A/G  | NA                 | NA                            | NA                 |
| <i>Desi_wild_3863407</i> | NA                                  | <i>Ca_desi_denovo</i> | 3863407                 | C/T  | NA                 | NA                            | NA                 |
| <i>Desi_wild_3864290</i> | NA                                  | <i>Ca_desi_denovo</i> | 3864290                 | G/A  | NA                 | NA                            | NA                 |
| <i>Desi_wild_3864556</i> | NA                                  | <i>Ca_desi_denovo</i> | 3864556                 | A/G  | NA                 | NA                            | NA                 |
| <i>Desi_wild_3864768</i> | NA                                  | <i>Ca_desi_denovo</i> | 3864768                 | C/T  | NA                 | NA                            | NA                 |
| <i>Desi_wild_3864777</i> | NA                                  | <i>Ca_desi_denovo</i> | 3864777                 | C/T  | NA                 | NA                            | NA                 |
| <i>Desi_wild_3864945</i> | NA                                  | <i>Ca_desi_denovo</i> | 3864945                 | G/A  | NA                 | NA                            | NA                 |
| <i>Desi_wild_3865204</i> | NA                                  | <i>Ca_desi_denovo</i> | 3865204                 | T/C  | NA                 | NA                            | NA                 |
| <i>Desi_wild_3865863</i> | NA                                  | <i>Ca_desi_denovo</i> | 3865863                 | C/T  | NA                 | NA                            | NA                 |
| <i>Desi_wild_3866562</i> | NA                                  | <i>Ca_desi_denovo</i> | 3866562                 | T/C  | NA                 | NA                            | NA                 |
| <i>Desi_wild_3866565</i> | NA                                  | <i>Ca_desi_denovo</i> | 3866565                 | C/T  | NA                 | NA                            | NA                 |
| <i>Desi_wild_3867229</i> | NA                                  | <i>Ca_desi_denovo</i> | 3867229                 | G/T  | NA                 | NA                            | NA                 |
| <i>Desi_wild_3867249</i> | NA                                  | <i>Ca_desi_denovo</i> | 3867249                 | T/G  | NA                 | NA                            | NA                 |
| <i>Desi_wild_3867406</i> | NA                                  | <i>Ca_desi_denovo</i> | 3867406                 | G/A  | NA                 | NA                            | NA                 |
| <i>Desi_wild_3867565</i> | NA                                  | <i>Ca_desi_denovo</i> | 3867565                 | T/C  | NA                 | NA                            | NA                 |
| <i>Desi_wild_3867761</i> | NA                                  | <i>Ca_desi_denovo</i> | 3867761                 | C/G  | NA                 | NA                            | NA                 |
| <i>Desi_wild_3867863</i> | NA                                  | <i>Ca_desi_denovo</i> | 3867863                 | G/C  | NA                 | NA                            | NA                 |
| <i>Desi_wild_3867919</i> | NA                                  | <i>Ca_desi_denovo</i> | 3867919                 | G/C  | NA                 | NA                            | NA                 |
| <i>Desi_wild_3868244</i> | NA                                  | <i>Ca_desi_denovo</i> | 3868244                 | T/G  | NA                 | NA                            | NA                 |
| <i>Desi_wild_3868280</i> | NA                                  | <i>Ca_desi_denovo</i> | 3868280                 | T/G  | NA                 | NA                            | NA                 |
| <i>Desi_wild_3868394</i> | NA                                  | <i>Ca_desi_denovo</i> | 3868394                 | T/C  | NA                 | NA                            | NA                 |
| <i>Desi_wild_3869034</i> | NA                                  | <i>Ca_desi_denovo</i> | 3869034                 | C/T  | NA                 | NA                            | NA                 |
| <i>Desi_wild_3869049</i> | NA                                  | <i>Ca_desi_denovo</i> | 3869049                 | T/C  | NA                 | NA                            | NA                 |
| <i>Desi_wild_3869076</i> | NA                                  | <i>Ca_desi_denovo</i> | 3869076                 | T/C  | NA                 | NA                            | NA                 |
| <i>Desi_wild_3869079</i> | NA                                  | <i>Ca_desi_denovo</i> | 3869079                 | A/G  | NA                 | NA                            | NA                 |
| <i>Desi_wild_3869508</i> | NA                                  | <i>Ca_desi_denovo</i> | 3869508                 | T/G  | NA                 | NA                            | NA                 |
| <i>Desi_wild_3869721</i> | NA                                  | <i>Ca_desi_denovo</i> | 3869721                 | C/T  | NA                 | NA                            | NA                 |
| <i>Desi_wild_3869724</i> | NA                                  | <i>Ca_desi_denovo</i> | 3869724                 | C/A  | NA                 | NA                            | NA                 |
| <i>Desi_wild_3869916</i> | NA                                  | <i>Ca_desi_denovo</i> | 3869916                 | T/C  | NA                 | NA                            | NA                 |
| <i>Desi_wild_3870981</i> | NA                                  | <i>Ca_desi_denovo</i> | 3870981                 | T/G  | NA                 | NA                            | NA                 |
| <i>Desi_wild_3871056</i> | NA                                  | <i>Ca_desi_denovo</i> | 3871056                 | G/A  | NA                 | NA                            | NA                 |
| <i>Desi_wild_3871480</i> | NA                                  | <i>Ca_desi_denovo</i> | 3871480                 | A/G  | NA                 | NA                            | NA                 |
| <i>Desi_wild_3871523</i> | NA                                  | <i>Ca_desi_denovo</i> | 3871523                 | G/A  | NA                 | NA                            | NA                 |
| <i>Desi_wild_3872450</i> | NA                                  | <i>Ca_desi_denovo</i> | 3872450                 | G/T  | NA                 | NA                            | NA                 |
| <i>Desi_wild_3872459</i> | NA                                  | <i>Ca_desi_denovo</i> | 3872459                 | C/T  | NA                 | NA                            | NA                 |
| <i>Desi_wild_3875400</i> | NA                                  | <i>Ca_desi_denovo</i> | 3875400                 | T/A  | NA                 | NA                            | NA                 |

| SNP IDs                  | NCBI dbSNP accession IDs (NCBI_SS#) | Chromosomes           | Physical positions (bp) | SNPs | Gene accession IDs | Sequence components of genome | Putative functions |
|--------------------------|-------------------------------------|-----------------------|-------------------------|------|--------------------|-------------------------------|--------------------|
| <i>Desi_wild_3875729</i> | NA                                  | <i>Ca_desi_denovo</i> | 3875729                 | G/T  | NA                 | NA                            | NA                 |
| <i>Desi_wild_3875730</i> | NA                                  | <i>Ca_desi_denovo</i> | 3875730                 | T/C  | NA                 | NA                            | NA                 |
| <i>Desi_wild_3875988</i> | NA                                  | <i>Ca_desi_denovo</i> | 3875988                 | G/C  | NA                 | NA                            | NA                 |
| <i>Desi_wild_3876235</i> | NA                                  | <i>Ca_desi_denovo</i> | 3876235                 | T/G  | NA                 | NA                            | NA                 |
| <i>Desi_wild_3876444</i> | NA                                  | <i>Ca_desi_denovo</i> | 3876444                 | C/T  | NA                 | NA                            | NA                 |
| <i>Desi_wild_3877005</i> | NA                                  | <i>Ca_desi_denovo</i> | 3877005                 | G/A  | NA                 | NA                            | NA                 |
| <i>Desi_wild_3877014</i> | NA                                  | <i>Ca_desi_denovo</i> | 3877014                 | A/G  | NA                 | NA                            | NA                 |
| <i>Desi_wild_3877478</i> | NA                                  | <i>Ca_desi_denovo</i> | 3877478                 | G/A  | NA                 | NA                            | NA                 |
| <i>Desi_wild_3877490</i> | NA                                  | <i>Ca_desi_denovo</i> | 3877490                 | A/G  | NA                 | NA                            | NA                 |
| <i>Desi_wild_3877499</i> | NA                                  | <i>Ca_desi_denovo</i> | 3877499                 | G/C  | NA                 | NA                            | NA                 |
| <i>Desi_wild_3879421</i> | NA                                  | <i>Ca_desi_denovo</i> | 3879421                 | A/C  | NA                 | NA                            | NA                 |
| <i>Desi_wild_3880270</i> | NA                                  | <i>Ca_desi_denovo</i> | 3880270                 | T/C  | NA                 | NA                            | NA                 |
| <i>Desi_wild_3880287</i> | NA                                  | <i>Ca_desi_denovo</i> | 3880287                 | G/T  | NA                 | NA                            | NA                 |
| <i>Desi_wild_3880327</i> | NA                                  | <i>Ca_desi_denovo</i> | 3880327                 | A/T  | NA                 | NA                            | NA                 |
| <i>Desi_wild_3880869</i> | NA                                  | <i>Ca_desi_denovo</i> | 3880869                 | G/C  | NA                 | NA                            | NA                 |
| <i>Desi_wild_3881274</i> | NA                                  | <i>Ca_desi_denovo</i> | 3881274                 | C/T  | NA                 | NA                            | NA                 |
| <i>Desi_wild_3881292</i> | NA                                  | <i>Ca_desi_denovo</i> | 3881292                 | T/C  | NA                 | NA                            | NA                 |
| <i>Desi_wild_3881503</i> | NA                                  | <i>Ca_desi_denovo</i> | 3881503                 | G/A  | NA                 | NA                            | NA                 |
| <i>Desi_wild_3884453</i> | NA                                  | <i>Ca_desi_denovo</i> | 3884453                 | G/T  | NA                 | NA                            | NA                 |
| <i>Desi_wild_3884507</i> | NA                                  | <i>Ca_desi_denovo</i> | 3884507                 | G/C  | NA                 | NA                            | NA                 |
| <i>Desi_wild_3884759</i> | NA                                  | <i>Ca_desi_denovo</i> | 3884759                 | G/A  | NA                 | NA                            | NA                 |
| <i>Desi_wild_3885153</i> | NA                                  | <i>Ca_desi_denovo</i> | 3885153                 | C/T  | NA                 | NA                            | NA                 |
| <i>Desi_wild_3885177</i> | NA                                  | <i>Ca_desi_denovo</i> | 3885177                 | G/C  | NA                 | NA                            | NA                 |
| <i>Desi_wild_3888230</i> | NA                                  | <i>Ca_desi_denovo</i> | 3888230                 | T/C  | NA                 | NA                            | NA                 |
| <i>Desi_wild_3888242</i> | NA                                  | <i>Ca_desi_denovo</i> | 3888242                 | G/A  | NA                 | NA                            | NA                 |
| <i>Desi_wild_3888278</i> | NA                                  | <i>Ca_desi_denovo</i> | 3888278                 | A/C  | NA                 | NA                            | NA                 |
| <i>Desi_wild_3888376</i> | NA                                  | <i>Ca_desi_denovo</i> | 3888376                 | T/C  | NA                 | NA                            | NA                 |
| <i>Desi_wild_3888726</i> | NA                                  | <i>Ca_desi_denovo</i> | 3888726                 | C/T  | NA                 | NA                            | NA                 |
| <i>Desi_wild_3888729</i> | NA                                  | <i>Ca_desi_denovo</i> | 3888729                 | T/C  | NA                 | NA                            | NA                 |
| <i>Desi_wild_3890557</i> | NA                                  | <i>Ca_desi_denovo</i> | 3890557                 | A/G  | NA                 | NA                            | NA                 |
| <i>Desi_wild_3890575</i> | NA                                  | <i>Ca_desi_denovo</i> | 3890575                 | C/G  | NA                 | NA                            | NA                 |
| <i>Desi_wild_3890870</i> | NA                                  | <i>Ca_desi_denovo</i> | 3890870                 | G/A  | NA                 | NA                            | NA                 |
| <i>Desi_wild_3890885</i> | NA                                  | <i>Ca_desi_denovo</i> | 3890885                 | C/G  | NA                 | NA                            | NA                 |
| <i>Desi_wild_3891157</i> | NA                                  | <i>Ca_desi_denovo</i> | 3891157                 | G/C  | NA                 | NA                            | NA                 |
| <i>Desi_wild_3891177</i> | NA                                  | <i>Ca_desi_denovo</i> | 3891177                 | T/C  | NA                 | NA                            | NA                 |
| <i>Desi_wild_3891465</i> | NA                                  | <i>Ca_desi_denovo</i> | 3891465                 | G/C  | NA                 | NA                            | NA                 |
| <i>Desi_wild_3894218</i> | NA                                  | <i>Ca_desi_denovo</i> | 3894218                 | G/T  | NA                 | NA                            | NA                 |
| <i>Desi_wild_3894521</i> | NA                                  | <i>Ca_desi_denovo</i> | 3894521                 | T/G  | NA                 | NA                            | NA                 |
| <i>Desi_wild_3894750</i> | NA                                  | <i>Ca_desi_denovo</i> | 3894750                 | C/T  | NA                 | NA                            | NA                 |
| <i>Desi_wild_3894824</i> | NA                                  | <i>Ca_desi_denovo</i> | 3894824                 | T/C  | NA                 | NA                            | NA                 |
| <i>Desi_wild_3894847</i> | NA                                  | <i>Ca_desi_denovo</i> | 3894847                 | C/A  | NA                 | NA                            | NA                 |
| <i>Desi_wild_3895223</i> | NA                                  | <i>Ca_desi_denovo</i> | 3895223                 | T/C  | NA                 | NA                            | NA                 |
| <i>Desi_wild_3895253</i> | NA                                  | <i>Ca_desi_denovo</i> | 3895253                 | T/C  | NA                 | NA                            | NA                 |
| <i>Desi_wild_3895324</i> | NA                                  | <i>Ca_desi_denovo</i> | 3895324                 | C/T  | NA                 | NA                            | NA                 |

| SNP IDs                  | NCBI dbSNP accession IDs (NCBI_SS#) | Chromosomes           | Physical positions (bp) | SNPs | Gene accession IDs | Sequence components of genome | Putative functions |
|--------------------------|-------------------------------------|-----------------------|-------------------------|------|--------------------|-------------------------------|--------------------|
| <i>Desi_wild_3895339</i> | NA                                  | <i>Ca_desi_denovo</i> | 3895339                 | G/C  | NA                 | NA                            | NA                 |
| <i>Desi_wild_3895390</i> | NA                                  | <i>Ca_desi_denovo</i> | 3895390                 | G/C  | NA                 | NA                            | NA                 |
| <i>Desi_wild_3895999</i> | NA                                  | <i>Ca_desi_denovo</i> | 3895999                 | A/C  | NA                 | NA                            | NA                 |
| <i>Desi_wild_3897155</i> | NA                                  | <i>Ca_desi_denovo</i> | 3897155                 | G/A  | NA                 | NA                            | NA                 |
| <i>Desi_wild_3897353</i> | NA                                  | <i>Ca_desi_denovo</i> | 3897353                 | A/G  | NA                 | NA                            | NA                 |
| <i>Desi_wild_3897846</i> | NA                                  | <i>Ca_desi_denovo</i> | 3897846                 | G/C  | NA                 | NA                            | NA                 |
| <i>Desi_wild_3897941</i> | NA                                  | <i>Ca_desi_denovo</i> | 3897941                 | T/G  | NA                 | NA                            | NA                 |
| <i>Desi_wild_3898231</i> | NA                                  | <i>Ca_desi_denovo</i> | 3898231                 | C/T  | NA                 | NA                            | NA                 |
| <i>Desi_wild_3898241</i> | NA                                  | <i>Ca_desi_denovo</i> | 3898241                 | G/C  | NA                 | NA                            | NA                 |
| <i>Desi_wild_3898253</i> | NA                                  | <i>Ca_desi_denovo</i> | 3898253                 | T/C  | NA                 | NA                            | NA                 |
| <i>Desi_wild_3898751</i> | NA                                  | <i>Ca_desi_denovo</i> | 3898751                 | C/T  | NA                 | NA                            | NA                 |
| <i>Desi_wild_3899239</i> | NA                                  | <i>Ca_desi_denovo</i> | 3899239                 | T/A  | NA                 | NA                            | NA                 |
| <i>Desi_wild_3899648</i> | NA                                  | <i>Ca_desi_denovo</i> | 3899648                 | G/C  | NA                 | NA                            | NA                 |
| <i>Desi_wild_3901240</i> | NA                                  | <i>Ca_desi_denovo</i> | 3901240                 | T/C  | NA                 | NA                            | NA                 |
| <i>Desi_wild_3901425</i> | NA                                  | <i>Ca_desi_denovo</i> | 3901425                 | T/G  | NA                 | NA                            | NA                 |
| <i>Desi_wild_3901428</i> | NA                                  | <i>Ca_desi_denovo</i> | 3901428                 | G/C  | NA                 | NA                            | NA                 |
| <i>Desi_wild_3902258</i> | NA                                  | <i>Ca_desi_denovo</i> | 3902258                 | T/G  | NA                 | NA                            | NA                 |
| <i>Desi_wild_3902276</i> | NA                                  | <i>Ca_desi_denovo</i> | 3902276                 | G/A  | NA                 | NA                            | NA                 |
| <i>Desi_wild_3902499</i> | NA                                  | <i>Ca_desi_denovo</i> | 3902499                 | C/A  | NA                 | NA                            | NA                 |
| <i>Desi_wild_3902564</i> | NA                                  | <i>Ca_desi_denovo</i> | 3902564                 | G/A  | NA                 | NA                            | NA                 |
| <i>Desi_wild_3902913</i> | NA                                  | <i>Ca_desi_denovo</i> | 3902913                 | T/C  | NA                 | NA                            | NA                 |
| <i>Desi_wild_3904757</i> | NA                                  | <i>Ca_desi_denovo</i> | 3904757                 | A/C  | NA                 | NA                            | NA                 |
| <i>Desi_wild_3904760</i> | NA                                  | <i>Ca_desi_denovo</i> | 3904760                 | C/G  | NA                 | NA                            | NA                 |
| <i>Desi_wild_3905999</i> | NA                                  | <i>Ca_desi_denovo</i> | 3905999                 | C/G  | NA                 | NA                            | NA                 |
| <i>Desi_wild_3906039</i> | NA                                  | <i>Ca_desi_denovo</i> | 3906039                 | G/T  | NA                 | NA                            | NA                 |
| <i>Desi_wild_3907340</i> | NA                                  | <i>Ca_desi_denovo</i> | 3907340                 | C/T  | NA                 | NA                            | NA                 |
| <i>Desi_wild_3907545</i> | NA                                  | <i>Ca_desi_denovo</i> | 3907545                 | G/A  | NA                 | NA                            | NA                 |
| <i>Desi_wild_3909565</i> | NA                                  | <i>Ca_desi_denovo</i> | 3909565                 | G/C  | NA                 | NA                            | NA                 |
| <i>Desi_wild_3910161</i> | NA                                  | <i>Ca_desi_denovo</i> | 3910161                 | A/C  | NA                 | NA                            | NA                 |
| <i>Desi_wild_3910592</i> | NA                                  | <i>Ca_desi_denovo</i> | 3910592                 | A/T  | NA                 | NA                            | NA                 |
| <i>Desi_wild_3910608</i> | NA                                  | <i>Ca_desi_denovo</i> | 3910608                 | C/G  | NA                 | NA                            | NA                 |
| <i>Desi_wild_3910703</i> | NA                                  | <i>Ca_desi_denovo</i> | 3910703                 | C/A  | NA                 | NA                            | NA                 |
| <i>Desi_wild_3911119</i> | NA                                  | <i>Ca_desi_denovo</i> | 3911119                 | C/T  | NA                 | NA                            | NA                 |
| <i>Desi_wild_3911200</i> | NA                                  | <i>Ca_desi_denovo</i> | 3911200                 | C/A  | NA                 | NA                            | NA                 |
| <i>Desi_wild_3911751</i> | NA                                  | <i>Ca_desi_denovo</i> | 3911751                 | G/A  | NA                 | NA                            | NA                 |
| <i>Desi_wild_3913084</i> | NA                                  | <i>Ca_desi_denovo</i> | 3913084                 | G/A  | NA                 | NA                            | NA                 |
| <i>Desi_wild_3913198</i> | NA                                  | <i>Ca_desi_denovo</i> | 3913198                 | G/A  | NA                 | NA                            | NA                 |
| <i>Desi_wild_3913250</i> | NA                                  | <i>Ca_desi_denovo</i> | 3913250                 | A/G  | NA                 | NA                            | NA                 |
| <i>Desi_wild_3913268</i> | NA                                  | <i>Ca_desi_denovo</i> | 3913268                 | G/C  | NA                 | NA                            | NA                 |
| <i>Desi_wild_3915006</i> | NA                                  | <i>Ca_desi_denovo</i> | 3915006                 | C/T  | NA                 | NA                            | NA                 |
| <i>Desi_wild_3915392</i> | NA                                  | <i>Ca_desi_denovo</i> | 3915392                 | G/A  | NA                 | NA                            | NA                 |
| <i>Desi_wild_3915398</i> | NA                                  | <i>Ca_desi_denovo</i> | 3915398                 | G/A  | NA                 | NA                            | NA                 |
| <i>Desi_wild_3916885</i> | NA                                  | <i>Ca_desi_denovo</i> | 3916885                 | A/C  | NA                 | NA                            | NA                 |
| <i>Desi_wild_3918589</i> | NA                                  | <i>Ca_desi_denovo</i> | 3918589                 | G/T  | NA                 | NA                            | NA                 |

| SNP IDs                  | NCBI dbSNP accession IDs (NCBI_SS#) | Chromosomes           | Physical positions (bp) | SNPs | Gene accession IDs | Sequence components of genome | Putative functions |
|--------------------------|-------------------------------------|-----------------------|-------------------------|------|--------------------|-------------------------------|--------------------|
| <i>Desi_wild_3918592</i> | NA                                  | <i>Ca_desi_denovo</i> | 3918592                 | A/G  | NA                 | NA                            | NA                 |
| <i>Desi_wild_3918627</i> | NA                                  | <i>Ca_desi_denovo</i> | 3918627                 | C/T  | NA                 | NA                            | NA                 |
| <i>Desi_wild_3919946</i> | NA                                  | <i>Ca_desi_denovo</i> | 3919946                 | A/G  | NA                 | NA                            | NA                 |
| <i>Desi_wild_3919970</i> | NA                                  | <i>Ca_desi_denovo</i> | 3919970                 | G/C  | NA                 | NA                            | NA                 |
| <i>Desi_wild_3920172</i> | NA                                  | <i>Ca_desi_denovo</i> | 3920172                 | G/A  | NA                 | NA                            | NA                 |
| <i>Desi_wild_3922178</i> | NA                                  | <i>Ca_desi_denovo</i> | 3922178                 | A/T  | NA                 | NA                            | NA                 |
| <i>Desi_wild_3922210</i> | NA                                  | <i>Ca_desi_denovo</i> | 3922210                 | G/C  | NA                 | NA                            | NA                 |
| <i>Desi_wild_3922464</i> | NA                                  | <i>Ca_desi_denovo</i> | 3922464                 | G/A  | NA                 | NA                            | NA                 |
| <i>Desi_wild_3922492</i> | NA                                  | <i>Ca_desi_denovo</i> | 3922492                 | G/T  | NA                 | NA                            | NA                 |
| <i>Desi_wild_3923102</i> | NA                                  | <i>Ca_desi_denovo</i> | 3923102                 | T/C  | NA                 | NA                            | NA                 |
| <i>Desi_wild_3923108</i> | NA                                  | <i>Ca_desi_denovo</i> | 3923108                 | T/G  | NA                 | NA                            | NA                 |
| <i>Desi_wild_3923594</i> | NA                                  | <i>Ca_desi_denovo</i> | 3923594                 | C/T  | NA                 | NA                            | NA                 |
| <i>Desi_wild_3925337</i> | NA                                  | <i>Ca_desi_denovo</i> | 3925337                 | A/T  | NA                 | NA                            | NA                 |
| <i>Desi_wild_3925714</i> | NA                                  | <i>Ca_desi_denovo</i> | 3925714                 | C/G  | NA                 | NA                            | NA                 |
| <i>Desi_wild_3925719</i> | NA                                  | <i>Ca_desi_denovo</i> | 3925719                 | A/C  | NA                 | NA                            | NA                 |
| <i>Desi_wild_3925978</i> | NA                                  | <i>Ca_desi_denovo</i> | 3925978                 | A/G  | NA                 | NA                            | NA                 |
| <i>Desi_wild_3926037</i> | NA                                  | <i>Ca_desi_denovo</i> | 3926037                 | G/A  | NA                 | NA                            | NA                 |
| <i>Desi_wild_3926637</i> | NA                                  | <i>Ca_desi_denovo</i> | 3926637                 | T/C  | NA                 | NA                            | NA                 |
| <i>Desi_wild_3928343</i> | NA                                  | <i>Ca_desi_denovo</i> | 3928343                 | A/G  | NA                 | NA                            | NA                 |
| <i>Desi_wild_3928606</i> | NA                                  | <i>Ca_desi_denovo</i> | 3928606                 | A/C  | NA                 | NA                            | NA                 |
| <i>Desi_wild_3928661</i> | NA                                  | <i>Ca_desi_denovo</i> | 3928661                 | A/G  | NA                 | NA                            | NA                 |
| <i>Desi_wild_3931893</i> | NA                                  | <i>Ca_desi_denovo</i> | 3931893                 | A/G  | NA                 | NA                            | NA                 |
| <i>Desi_wild_3932136</i> | NA                                  | <i>Ca_desi_denovo</i> | 3932136                 | C/A  | NA                 | NA                            | NA                 |
| <i>Desi_wild_3933504</i> | NA                                  | <i>Ca_desi_denovo</i> | 3933504                 | A/G  | NA                 | NA                            | NA                 |
| <i>Desi_wild_3934868</i> | NA                                  | <i>Ca_desi_denovo</i> | 3934868                 | T/G  | NA                 | NA                            | NA                 |
| <i>Desi_wild_3935498</i> | NA                                  | <i>Ca_desi_denovo</i> | 3935498                 | T/C  | NA                 | NA                            | NA                 |
| <i>Desi_wild_3935525</i> | NA                                  | <i>Ca_desi_denovo</i> | 3935525                 | G/A  | NA                 | NA                            | NA                 |
| <i>Desi_wild_3937065</i> | NA                                  | <i>Ca_desi_denovo</i> | 3937065                 | C/T  | NA                 | NA                            | NA                 |
| <i>Desi_wild_3937068</i> | NA                                  | <i>Ca_desi_denovo</i> | 3937068                 | T/C  | NA                 | NA                            | NA                 |
| <i>Desi_wild_3937600</i> | NA                                  | <i>Ca_desi_denovo</i> | 3937600                 | C/T  | NA                 | NA                            | NA                 |
| <i>Desi_wild_3937627</i> | NA                                  | <i>Ca_desi_denovo</i> | 3937627                 | T/C  | NA                 | NA                            | NA                 |
| <i>Desi_wild_3938108</i> | NA                                  | <i>Ca_desi_denovo</i> | 3938108                 | C/A  | NA                 | NA                            | NA                 |
| <i>Desi_wild_3938114</i> | NA                                  | <i>Ca_desi_denovo</i> | 3938114                 | C/G  | NA                 | NA                            | NA                 |
| <i>Desi_wild_3938303</i> | NA                                  | <i>Ca_desi_denovo</i> | 3938303                 | T/C  | NA                 | NA                            | NA                 |
| <i>Desi_wild_3938713</i> | NA                                  | <i>Ca_desi_denovo</i> | 3938713                 | A/G  | NA                 | NA                            | NA                 |
| <i>Desi_wild_3938715</i> | NA                                  | <i>Ca_desi_denovo</i> | 3938715                 | T/A  | NA                 | NA                            | NA                 |
| <i>Desi_wild_3938970</i> | NA                                  | <i>Ca_desi_denovo</i> | 3938970                 | T/G  | NA                 | NA                            | NA                 |
| <i>Desi_wild_3938973</i> | NA                                  | <i>Ca_desi_denovo</i> | 3938973                 | G/C  | NA                 | NA                            | NA                 |
| <i>Desi_wild_3939524</i> | NA                                  | <i>Ca_desi_denovo</i> | 3939524                 | C/G  | NA                 | NA                            | NA                 |
| <i>Desi_wild_3940708</i> | NA                                  | <i>Ca_desi_denovo</i> | 3940708                 | A/G  | NA                 | NA                            | NA                 |
| <i>Desi_wild_3940741</i> | NA                                  | <i>Ca_desi_denovo</i> | 3940741                 | G/T  | NA                 | NA                            | NA                 |
| <i>Desi_wild_3940873</i> | NA                                  | <i>Ca_desi_denovo</i> | 3940873                 | T/C  | NA                 | NA                            | NA                 |
| <i>Desi_wild_3940879</i> | NA                                  | <i>Ca_desi_denovo</i> | 3940879                 | G/T  | NA                 | NA                            | NA                 |
| <i>Desi_wild_3941298</i> | NA                                  | <i>Ca_desi_denovo</i> | 3941298                 | T/C  | NA                 | NA                            | NA                 |

| SNP IDs                  | NCBI dbSNP accession IDs (NCBI_SS#) | Chromosomes           | Physical positions (bp) | SNPs | Gene accession IDs | Sequence components of genome | Putative functions |
|--------------------------|-------------------------------------|-----------------------|-------------------------|------|--------------------|-------------------------------|--------------------|
| <i>Desi_wild_3941433</i> | NA                                  | <i>Ca_desi_denovo</i> | 3941433                 | G/T  | NA                 | NA                            | NA                 |
| <i>Desi_wild_3941439</i> | NA                                  | <i>Ca_desi_denovo</i> | 3941439                 | G/T  | NA                 | NA                            | NA                 |
| <i>Desi_wild_3941444</i> | NA                                  | <i>Ca_desi_denovo</i> | 3941444                 | T/G  | NA                 | NA                            | NA                 |
| <i>Desi_wild_3941461</i> | NA                                  | <i>Ca_desi_denovo</i> | 3941461                 | T/G  | NA                 | NA                            | NA                 |
| <i>Desi_wild_3941529</i> | NA                                  | <i>Ca_desi_denovo</i> | 3941529                 | T/G  | NA                 | NA                            | NA                 |
| <i>Desi_wild_3941782</i> | NA                                  | <i>Ca_desi_denovo</i> | 3941782                 | G/T  | NA                 | NA                            | NA                 |
| <i>Desi_wild_3941791</i> | NA                                  | <i>Ca_desi_denovo</i> | 3941791                 | G/A  | NA                 | NA                            | NA                 |
| <i>Desi_wild_3941908</i> | NA                                  | <i>Ca_desi_denovo</i> | 3941908                 | G/C  | NA                 | NA                            | NA                 |
| <i>Desi_wild_3943814</i> | NA                                  | <i>Ca_desi_denovo</i> | 3943814                 | C/G  | NA                 | NA                            | NA                 |
| <i>Desi_wild_3943859</i> | NA                                  | <i>Ca_desi_denovo</i> | 3943859                 | C/G  | NA                 | NA                            | NA                 |
| <i>Desi_wild_3943886</i> | NA                                  | <i>Ca_desi_denovo</i> | 3943886                 | C/T  | NA                 | NA                            | NA                 |
| <i>Desi_wild_3943889</i> | NA                                  | <i>Ca_desi_denovo</i> | 3943889                 | C/G  | NA                 | NA                            | NA                 |
| <i>Desi_wild_3943910</i> | NA                                  | <i>Ca_desi_denovo</i> | 3943910                 | C/G  | NA                 | NA                            | NA                 |
| <i>Desi_wild_3945399</i> | NA                                  | <i>Ca_desi_denovo</i> | 3945399                 | G/A  | NA                 | NA                            | NA                 |
| <i>Desi_wild_3946555</i> | NA                                  | <i>Ca_desi_denovo</i> | 3946555                 | C/T  | NA                 | NA                            | NA                 |
| <i>Desi_wild_3947303</i> | NA                                  | <i>Ca_desi_denovo</i> | 3947303                 | A/G  | NA                 | NA                            | NA                 |
| <i>Desi_wild_3947351</i> | NA                                  | <i>Ca_desi_denovo</i> | 3947351                 | C/A  | NA                 | NA                            | NA                 |
| <i>Desi_wild_3947363</i> | NA                                  | <i>Ca_desi_denovo</i> | 3947363                 | A/T  | NA                 | NA                            | NA                 |
| <i>Desi_wild_3947366</i> | NA                                  | <i>Ca_desi_denovo</i> | 3947366                 | C/G  | NA                 | NA                            | NA                 |
| <i>Desi_wild_3947976</i> | NA                                  | <i>Ca_desi_denovo</i> | 3947976                 | C/G  | NA                 | NA                            | NA                 |
| <i>Desi_wild_3949367</i> | NA                                  | <i>Ca_desi_denovo</i> | 3949367                 | G/C  | NA                 | NA                            | NA                 |
| <i>Desi_wild_3949917</i> | NA                                  | <i>Ca_desi_denovo</i> | 3949917                 | T/G  | NA                 | NA                            | NA                 |
| <i>Desi_wild_3950112</i> | NA                                  | <i>Ca_desi_denovo</i> | 3950112                 | T/C  | NA                 | NA                            | NA                 |
| <i>Desi_wild_3950113</i> | NA                                  | <i>Ca_desi_denovo</i> | 3950113                 | T/C  | NA                 | NA                            | NA                 |
| <i>Desi_wild_3951275</i> | NA                                  | <i>Ca_desi_denovo</i> | 3951275                 | C/G  | NA                 | NA                            | NA                 |
| <i>Desi_wild_3951652</i> | NA                                  | <i>Ca_desi_denovo</i> | 3951652                 | A/C  | NA                 | NA                            | NA                 |
| <i>Desi_wild_3951664</i> | NA                                  | <i>Ca_desi_denovo</i> | 3951664                 | A/G  | NA                 | NA                            | NA                 |
| <i>Desi_wild_3952857</i> | NA                                  | <i>Ca_desi_denovo</i> | 3952857                 | A/G  | NA                 | NA                            | NA                 |
| <i>Desi_wild_3953078</i> | NA                                  | <i>Ca_desi_denovo</i> | 3953078                 | G/C  | NA                 | NA                            | NA                 |
| <i>Desi_wild_3953085</i> | NA                                  | <i>Ca_desi_denovo</i> | 3953085                 | G/C  | NA                 | NA                            | NA                 |
| <i>Desi_wild_3953418</i> | NA                                  | <i>Ca_desi_denovo</i> | 3953418                 | T/C  | NA                 | NA                            | NA                 |
| <i>Desi_wild_3955757</i> | NA                                  | <i>Ca_desi_denovo</i> | 3955757                 | T/C  | NA                 | NA                            | NA                 |
| <i>Desi_wild_3955775</i> | NA                                  | <i>Ca_desi_denovo</i> | 3955775                 | A/G  | NA                 | NA                            | NA                 |
| <i>Desi_wild_3955845</i> | NA                                  | <i>Ca_desi_denovo</i> | 3955845                 | C/A  | NA                 | NA                            | NA                 |
| <i>Desi_wild_3956404</i> | NA                                  | <i>Ca_desi_denovo</i> | 3956404                 | G/T  | NA                 | NA                            | NA                 |
| <i>Desi_wild_3957198</i> | NA                                  | <i>Ca_desi_denovo</i> | 3957198                 | C/T  | NA                 | NA                            | NA                 |
| <i>Desi_wild_3957206</i> | NA                                  | <i>Ca_desi_denovo</i> | 3957206                 | G/T  | NA                 | NA                            | NA                 |
| <i>Desi_wild_3957803</i> | NA                                  | <i>Ca_desi_denovo</i> | 3957803                 | G/T  | NA                 | NA                            | NA                 |
| <i>Desi_wild_3958034</i> | NA                                  | <i>Ca_desi_denovo</i> | 3958034                 | A/G  | NA                 | NA                            | NA                 |
| <i>Desi_wild_3959120</i> | NA                                  | <i>Ca_desi_denovo</i> | 3959120                 | T/G  | NA                 | NA                            | NA                 |
| <i>Desi_wild_3959975</i> | NA                                  | <i>Ca_desi_denovo</i> | 3959975                 | T/G  | NA                 | NA                            | NA                 |
| <i>Desi_wild_3960404</i> | NA                                  | <i>Ca_desi_denovo</i> | 3960404                 | C/T  | NA                 | NA                            | NA                 |
| <i>Desi_wild_3960904</i> | NA                                  | <i>Ca_desi_denovo</i> | 3960904                 | T/A  | NA                 | NA                            | NA                 |
| <i>Desi_wild_3961215</i> | NA                                  | <i>Ca_desi_denovo</i> | 3961215                 | G/A  | NA                 | NA                            | NA                 |

| SNP IDs                  | NCBI dbSNP accession IDs (NCBI_SS#) | Chromosomes           | Physical positions (bp) | SNPs | Gene accession IDs | Sequence components of genome | Putative functions |
|--------------------------|-------------------------------------|-----------------------|-------------------------|------|--------------------|-------------------------------|--------------------|
| <i>Desi_wild_3961218</i> | NA                                  | <i>Ca_desi_denovo</i> | 3961218                 | G/C  | NA                 | NA                            | NA                 |
| <i>Desi_wild_3962900</i> | NA                                  | <i>Ca_desi_denovo</i> | 3962900                 | G/T  | NA                 | NA                            | NA                 |
| <i>Desi_wild_3963887</i> | NA                                  | <i>Ca_desi_denovo</i> | 3963887                 | C/T  | NA                 | NA                            | NA                 |
| <i>Desi_wild_3963944</i> | NA                                  | <i>Ca_desi_denovo</i> | 3963944                 | A/C  | NA                 | NA                            | NA                 |
| <i>Desi_wild_3964402</i> | NA                                  | <i>Ca_desi_denovo</i> | 3964402                 | A/G  | NA                 | NA                            | NA                 |
| <i>Desi_wild_3964475</i> | NA                                  | <i>Ca_desi_denovo</i> | 3964475                 | G/C  | NA                 | NA                            | NA                 |
| <i>Desi_wild_3964511</i> | NA                                  | <i>Ca_desi_denovo</i> | 3964511                 | G/T  | NA                 | NA                            | NA                 |
| <i>Desi_wild_3965052</i> | NA                                  | <i>Ca_desi_denovo</i> | 3965052                 | C/G  | NA                 | NA                            | NA                 |
| <i>Desi_wild_3965461</i> | NA                                  | <i>Ca_desi_denovo</i> | 3965461                 | G/C  | NA                 | NA                            | NA                 |
| <i>Desi_wild_3965476</i> | NA                                  | <i>Ca_desi_denovo</i> | 3965476                 | C/T  | NA                 | NA                            | NA                 |
| <i>Desi_wild_3966264</i> | NA                                  | <i>Ca_desi_denovo</i> | 3966264                 | C/A  | NA                 | NA                            | NA                 |
| <i>Desi_wild_3966587</i> | NA                                  | <i>Ca_desi_denovo</i> | 3966587                 | T/G  | NA                 | NA                            | NA                 |
| <i>Desi_wild_3967042</i> | NA                                  | <i>Ca_desi_denovo</i> | 3967042                 | C/T  | NA                 | NA                            | NA                 |
| <i>Desi_wild_3967051</i> | NA                                  | <i>Ca_desi_denovo</i> | 3967051                 | T/C  | NA                 | NA                            | NA                 |
| <i>Desi_wild_3969144</i> | NA                                  | <i>Ca_desi_denovo</i> | 3969144                 | A/G  | NA                 | NA                            | NA                 |
| <i>Desi_wild_3969170</i> | NA                                  | <i>Ca_desi_denovo</i> | 3969170                 | T/C  | NA                 | NA                            | NA                 |
| <i>Desi_wild_3969653</i> | NA                                  | <i>Ca_desi_denovo</i> | 3969653                 | C/G  | NA                 | NA                            | NA                 |
| <i>Desi_wild_3970474</i> | NA                                  | <i>Ca_desi_denovo</i> | 3970474                 | A/C  | NA                 | NA                            | NA                 |
| <i>Desi_wild_3972046</i> | NA                                  | <i>Ca_desi_denovo</i> | 3972046                 | G/A  | NA                 | NA                            | NA                 |
| <i>Desi_wild_3972407</i> | NA                                  | <i>Ca_desi_denovo</i> | 3972407                 | G/T  | NA                 | NA                            | NA                 |
| <i>Desi_wild_3973433</i> | NA                                  | <i>Ca_desi_denovo</i> | 3973433                 | A/G  | NA                 | NA                            | NA                 |
| <i>Desi_wild_3973706</i> | NA                                  | <i>Ca_desi_denovo</i> | 3973706                 | G/A  | NA                 | NA                            | NA                 |
| <i>Desi_wild_3973738</i> | NA                                  | <i>Ca_desi_denovo</i> | 3973738                 | C/G  | NA                 | NA                            | NA                 |
| <i>Desi_wild_3974559</i> | NA                                  | <i>Ca_desi_denovo</i> | 3974559                 | A/G  | NA                 | NA                            | NA                 |
| <i>Desi_wild_3974620</i> | NA                                  | <i>Ca_desi_denovo</i> | 3974620                 | G/C  | NA                 | NA                            | NA                 |
| <i>Desi_wild_3974635</i> | NA                                  | <i>Ca_desi_denovo</i> | 3974635                 | T/C  | NA                 | NA                            | NA                 |
| <i>Desi_wild_3975236</i> | NA                                  | <i>Ca_desi_denovo</i> | 3975236                 | G/A  | NA                 | NA                            | NA                 |
| <i>Desi_wild_3975625</i> | NA                                  | <i>Ca_desi_denovo</i> | 3975625                 | C/T  | NA                 | NA                            | NA                 |
| <i>Desi_wild_3975633</i> | NA                                  | <i>Ca_desi_denovo</i> | 3975633                 | G/T  | NA                 | NA                            | NA                 |
| <i>Desi_wild_3975923</i> | NA                                  | <i>Ca_desi_denovo</i> | 3975923                 | G/C  | NA                 | NA                            | NA                 |
| <i>Desi_wild_3977506</i> | NA                                  | <i>Ca_desi_denovo</i> | 3977506                 | T/G  | NA                 | NA                            | NA                 |
| <i>Desi_wild_3978210</i> | NA                                  | <i>Ca_desi_denovo</i> | 3978210                 | G/T  | NA                 | NA                            | NA                 |
| <i>Desi_wild_3979032</i> | NA                                  | <i>Ca_desi_denovo</i> | 3979032                 | A/T  | NA                 | NA                            | NA                 |
| <i>Desi_wild_3981061</i> | NA                                  | <i>Ca_desi_denovo</i> | 3981061                 | C/T  | NA                 | NA                            | NA                 |
| <i>Desi_wild_3981829</i> | NA                                  | <i>Ca_desi_denovo</i> | 3981829                 | A/G  | NA                 | NA                            | NA                 |
| <i>Desi_wild_3982245</i> | NA                                  | <i>Ca_desi_denovo</i> | 3982245                 | G/C  | NA                 | NA                            | NA                 |
| <i>Desi_wild_3982252</i> | NA                                  | <i>Ca_desi_denovo</i> | 3982252                 | C/G  | NA                 | NA                            | NA                 |
| <i>Desi_wild_3984088</i> | NA                                  | <i>Ca_desi_denovo</i> | 3984088                 | A/G  | NA                 | NA                            | NA                 |
| <i>Desi_wild_3986556</i> | NA                                  | <i>Ca_desi_denovo</i> | 3986556                 | G/T  | NA                 | NA                            | NA                 |
| <i>Desi_wild_3986847</i> | NA                                  | <i>Ca_desi_denovo</i> | 3986847                 | G/T  | NA                 | NA                            | NA                 |
| <i>Desi_wild_3987086</i> | NA                                  | <i>Ca_desi_denovo</i> | 3987086                 | C/A  | NA                 | NA                            | NA                 |
| <i>Desi_wild_3987174</i> | NA                                  | <i>Ca_desi_denovo</i> | 3987174                 | T/G  | NA                 | NA                            | NA                 |
| <i>Desi_wild_3987522</i> | NA                                  | <i>Ca_desi_denovo</i> | 3987522                 | C/A  | NA                 | NA                            | NA                 |
| <i>Desi_wild_3987775</i> | NA                                  | <i>Ca_desi_denovo</i> | 3987775                 | T/G  | NA                 | NA                            | NA                 |



| SNP IDs                  | NCBI dbSNP accession IDs (NCBI_SS#) | Chromosomes           | Physical positions (bp) | SNPs | Gene accession IDs | Sequence components of genome | Putative functions |
|--------------------------|-------------------------------------|-----------------------|-------------------------|------|--------------------|-------------------------------|--------------------|
| <i>Desi_wild_3987790</i> | NA                                  | <i>Ca_desi_denovo</i> | 3987790                 | T/G  | NA                 | NA                            | NA                 |
| <i>Desi_wild_3987914</i> | NA                                  | <i>Ca_desi_denovo</i> | 3987914                 | G/T  | NA                 | NA                            | NA                 |
| <i>Desi_wild_3988910</i> | NA                                  | <i>Ca_desi_denovo</i> | 3988910                 | G/C  | NA                 | NA                            | NA                 |
| <i>Desi_wild_3988913</i> | NA                                  | <i>Ca_desi_denovo</i> | 3988913                 | A/G  | NA                 | NA                            | NA                 |
| <i>Desi_wild_3989202</i> | NA                                  | <i>Ca_desi_denovo</i> | 3989202                 | T/C  | NA                 | NA                            | NA                 |
| <i>Desi_wild_3989208</i> | NA                                  | <i>Ca_desi_denovo</i> | 3989208                 | G/C  | NA                 | NA                            | NA                 |
| <i>Desi_wild_3991374</i> | NA                                  | <i>Ca_desi_denovo</i> | 3991374                 | C/T  | NA                 | NA                            | NA                 |
| <i>Desi_wild_3991400</i> | NA                                  | <i>Ca_desi_denovo</i> | 3991400                 | C/A  | NA                 | NA                            | NA                 |
| <i>Desi_wild_3994554</i> | NA                                  | <i>Ca_desi_denovo</i> | 3994554                 | T/C  | NA                 | NA                            | NA                 |
| <i>Desi_wild_3994643</i> | NA                                  | <i>Ca_desi_denovo</i> | 3994643                 | G/A  | NA                 | NA                            | NA                 |
| <i>Desi_wild_3994662</i> | NA                                  | <i>Ca_desi_denovo</i> | 3994662                 | T/A  | NA                 | NA                            | NA                 |
| <i>Desi_wild_3995523</i> | NA                                  | <i>Ca_desi_denovo</i> | 3995523                 | A/C  | NA                 | NA                            | NA                 |
| <i>Desi_wild_3995597</i> | NA                                  | <i>Ca_desi_denovo</i> | 3995597                 | A/C  | NA                 | NA                            | NA                 |
| <i>Desi_wild_3996929</i> | NA                                  | <i>Ca_desi_denovo</i> | 3996929                 | C/G  | NA                 | NA                            | NA                 |
| <i>Desi_wild_3996991</i> | NA                                  | <i>Ca_desi_denovo</i> | 3996991                 | C/A  | NA                 | NA                            | NA                 |
| <i>Desi_wild_3998752</i> | NA                                  | <i>Ca_desi_denovo</i> | 3998752                 | G/C  | NA                 | NA                            | NA                 |
| <i>Desi_wild_3998791</i> | NA                                  | <i>Ca_desi_denovo</i> | 3998791                 | G/T  | NA                 | NA                            | NA                 |
| <i>Desi_wild_3999695</i> | NA                                  | <i>Ca_desi_denovo</i> | 3999695                 | T/C  | NA                 | NA                            | NA                 |
| <i>Desi_wild_3999758</i> | NA                                  | <i>Ca_desi_denovo</i> | 3999758                 | C/T  | NA                 | NA                            | NA                 |
| <i>Desi_wild_3999836</i> | NA                                  | <i>Ca_desi_denovo</i> | 3999836                 | G/A  | NA                 | NA                            | NA                 |
| <i>Desi_wild_3999854</i> | NA                                  | <i>Ca_desi_denovo</i> | 3999854                 | C/A  | NA                 | NA                            | NA                 |
| <i>Desi_wild_4002199</i> | NA                                  | <i>Ca_desi_denovo</i> | 4002199                 | T/C  | NA                 | NA                            | NA                 |
| <i>Desi_wild_4002402</i> | NA                                  | <i>Ca_desi_denovo</i> | 4002402                 | A/G  | NA                 | NA                            | NA                 |
| <i>Desi_wild_4002429</i> | NA                                  | <i>Ca_desi_denovo</i> | 4002429                 | G/A  | NA                 | NA                            | NA                 |
| <i>Desi_wild_4002496</i> | NA                                  | <i>Ca_desi_denovo</i> | 4002496                 | C/G  | NA                 | NA                            | NA                 |
| <i>Desi_wild_4002575</i> | NA                                  | <i>Ca_desi_denovo</i> | 4002575                 | A/C  | NA                 | NA                            | NA                 |
| <i>Desi_wild_4002576</i> | NA                                  | <i>Ca_desi_denovo</i> | 4002576                 | G/T  | NA                 | NA                            | NA                 |
| <i>Desi_wild_4002577</i> | NA                                  | <i>Ca_desi_denovo</i> | 4002577                 | A/T  | NA                 | NA                            | NA                 |
| <i>Desi_wild_4004593</i> | NA                                  | <i>Ca_desi_denovo</i> | 4004593                 | T/G  | NA                 | NA                            | NA                 |
| <i>Desi_wild_4004866</i> | NA                                  | <i>Ca_desi_denovo</i> | 4004866                 | C/T  | NA                 | NA                            | NA                 |
| <i>Desi_wild_4004930</i> | NA                                  | <i>Ca_desi_denovo</i> | 4004930                 | T/C  | NA                 | NA                            | NA                 |
| <i>Desi_wild_4004955</i> | NA                                  | <i>Ca_desi_denovo</i> | 4004955                 | G/A  | NA                 | NA                            | NA                 |
| <i>Desi_wild_4005635</i> | NA                                  | <i>Ca_desi_denovo</i> | 4005635                 | A/G  | NA                 | NA                            | NA                 |
| <i>Desi_wild_4005644</i> | NA                                  | <i>Ca_desi_denovo</i> | 4005644                 | A/G  | NA                 | NA                            | NA                 |
| <i>Desi_wild_4005852</i> | NA                                  | <i>Ca_desi_denovo</i> | 4005852                 | G/T  | NA                 | NA                            | NA                 |
| <i>Desi_wild_4006175</i> | NA                                  | <i>Ca_desi_denovo</i> | 4006175                 | C/T  | NA                 | NA                            | NA                 |
| <i>Desi_wild_4006177</i> | NA                                  | <i>Ca_desi_denovo</i> | 4006177                 | A/G  | NA                 | NA                            | NA                 |
| <i>Desi_wild_4006183</i> | NA                                  | <i>Ca_desi_denovo</i> | 4006183                 | A/G  | NA                 | NA                            | NA                 |
| <i>Desi_wild_4006234</i> | NA                                  | <i>Ca_desi_denovo</i> | 4006234                 | A/G  | NA                 | NA                            | NA                 |
| <i>Desi_wild_4006293</i> | NA                                  | <i>Ca_desi_denovo</i> | 4006293                 | G/T  | NA                 | NA                            | NA                 |
| <i>Desi_wild_4006311</i> | NA                                  | <i>Ca_desi_denovo</i> | 4006311                 | C/T  | NA                 | NA                            | NA                 |
| <i>Desi_wild_4006407</i> | NA                                  | <i>Ca_desi_denovo</i> | 4006407                 | C/T  | NA                 | NA                            | NA                 |
| <i>Desi_wild_4006417</i> | NA                                  | <i>Ca_desi_denovo</i> | 4006417                 | A/C  | NA                 | NA                            | NA                 |
| <i>Desi_wild_4006978</i> | NA                                  | <i>Ca_desi_denovo</i> | 4006978                 | C/T  | NA                 | NA                            | NA                 |

| SNP IDs                  | NCBI dbSNP accession IDs (NCBI_SS#) | Chromosomes           | Physical positions (bp) | SNPs | Gene accession IDs | Sequence components of genome | Putative functions |
|--------------------------|-------------------------------------|-----------------------|-------------------------|------|--------------------|-------------------------------|--------------------|
| <i>Desi_wild_4008020</i> | NA                                  | <i>Ca_desi_denovo</i> | 4008020                 | G/A  | NA                 | NA                            | NA                 |
| <i>Desi_wild_4008760</i> | NA                                  | <i>Ca_desi_denovo</i> | 4008760                 | T/G  | NA                 | NA                            | NA                 |
| <i>Desi_wild_4010433</i> | NA                                  | <i>Ca_desi_denovo</i> | 4010433                 | A/G  | NA                 | NA                            | NA                 |
| <i>Desi_wild_4010948</i> | NA                                  | <i>Ca_desi_denovo</i> | 4010948                 | T/C  | NA                 | NA                            | NA                 |
| <i>Desi_wild_4010984</i> | NA                                  | <i>Ca_desi_denovo</i> | 4010984                 | A/G  | NA                 | NA                            | NA                 |
| <i>Desi_wild_4012986</i> | NA                                  | <i>Ca_desi_denovo</i> | 4012986                 | A/G  | NA                 | NA                            | NA                 |
| <i>Desi_wild_4013335</i> | NA                                  | <i>Ca_desi_denovo</i> | 4013335                 | A/C  | NA                 | NA                            | NA                 |
| <i>Desi_wild_4013824</i> | NA                                  | <i>Ca_desi_denovo</i> | 4013824                 | G/T  | NA                 | NA                            | NA                 |
| <i>Desi_wild_4013827</i> | NA                                  | <i>Ca_desi_denovo</i> | 4013827                 | A/T  | NA                 | NA                            | NA                 |
| <i>Desi_wild_4014654</i> | NA                                  | <i>Ca_desi_denovo</i> | 4014654                 | A/G  | NA                 | NA                            | NA                 |
| <i>Desi_wild_4016167</i> | NA                                  | <i>Ca_desi_denovo</i> | 4016167                 | C/T  | NA                 | NA                            | NA                 |
| <i>Desi_wild_4016173</i> | NA                                  | <i>Ca_desi_denovo</i> | 4016173                 | C/G  | NA                 | NA                            | NA                 |
| <i>Desi_wild_4017374</i> | NA                                  | <i>Ca_desi_denovo</i> | 4017374                 | G/C  | NA                 | NA                            | NA                 |
| <i>Desi_wild_4017386</i> | NA                                  | <i>Ca_desi_denovo</i> | 4017386                 | A/C  | NA                 | NA                            | NA                 |
| <i>Desi_wild_4019174</i> | NA                                  | <i>Ca_desi_denovo</i> | 4019174                 | G/C  | NA                 | NA                            | NA                 |
| <i>Desi_wild_4019186</i> | NA                                  | <i>Ca_desi_denovo</i> | 4019186                 | C/A  | NA                 | NA                            | NA                 |
| <i>Desi_wild_4020161</i> | NA                                  | <i>Ca_desi_denovo</i> | 4020161                 | A/G  | NA                 | NA                            | NA                 |
| <i>Desi_wild_4020582</i> | NA                                  | <i>Ca_desi_denovo</i> | 4020582                 | G/A  | NA                 | NA                            | NA                 |
| <i>Desi_wild_4021483</i> | NA                                  | <i>Ca_desi_denovo</i> | 4021483                 | G/A  | NA                 | NA                            | NA                 |
| <i>Desi_wild_4021566</i> | NA                                  | <i>Ca_desi_denovo</i> | 4021566                 | C/T  | NA                 | NA                            | NA                 |
| <i>Desi_wild_4021700</i> | NA                                  | <i>Ca_desi_denovo</i> | 4021700                 | A/G  | NA                 | NA                            | NA                 |
| <i>Desi_wild_4022958</i> | NA                                  | <i>Ca_desi_denovo</i> | 4022958                 | G/C  | NA                 | NA                            | NA                 |
| <i>Desi_wild_4023641</i> | NA                                  | <i>Ca_desi_denovo</i> | 4023641                 | G/A  | NA                 | NA                            | NA                 |
| <i>Desi_wild_4024452</i> | NA                                  | <i>Ca_desi_denovo</i> | 4024452                 | A/G  | NA                 | NA                            | NA                 |
| <i>Desi_wild_4024535</i> | NA                                  | <i>Ca_desi_denovo</i> | 4024535                 | T/C  | NA                 | NA                            | NA                 |
| <i>Desi_wild_4024556</i> | NA                                  | <i>Ca_desi_denovo</i> | 4024556                 | G/A  | NA                 | NA                            | NA                 |
| <i>Desi_wild_4025843</i> | NA                                  | <i>Ca_desi_denovo</i> | 4025843                 | A/G  | NA                 | NA                            | NA                 |
| <i>Desi_wild_4027053</i> | NA                                  | <i>Ca_desi_denovo</i> | 4027053                 | T/C  | NA                 | NA                            | NA                 |
| <i>Desi_wild_4027361</i> | NA                                  | <i>Ca_desi_denovo</i> | 4027361                 | T/C  | NA                 | NA                            | NA                 |
| <i>Desi_wild_4027820</i> | NA                                  | <i>Ca_desi_denovo</i> | 4027820                 | C/T  | NA                 | NA                            | NA                 |
| <i>Desi_wild_4027845</i> | NA                                  | <i>Ca_desi_denovo</i> | 4027845                 | G/T  | NA                 | NA                            | NA                 |
| <i>Desi_wild_4028221</i> | NA                                  | <i>Ca_desi_denovo</i> | 4028221                 | C/T  | NA                 | NA                            | NA                 |
| <i>Desi_wild_4030101</i> | NA                                  | <i>Ca_desi_denovo</i> | 4030101                 | C/G  | NA                 | NA                            | NA                 |
| <i>Desi_wild_4030141</i> | NA                                  | <i>Ca_desi_denovo</i> | 4030141                 | A/G  | NA                 | NA                            | NA                 |
| <i>Desi_wild_4030187</i> | NA                                  | <i>Ca_desi_denovo</i> | 4030187                 | C/G  | NA                 | NA                            | NA                 |
| <i>Desi_wild_4030329</i> | NA                                  | <i>Ca_desi_denovo</i> | 4030329                 | C/G  | NA                 | NA                            | NA                 |
| <i>Desi_wild_4030338</i> | NA                                  | <i>Ca_desi_denovo</i> | 4030338                 | C/T  | NA                 | NA                            | NA                 |
| <i>Desi_wild_4030344</i> | NA                                  | <i>Ca_desi_denovo</i> | 4030344                 | C/T  | NA                 | NA                            | NA                 |
| <i>Desi_wild_4030371</i> | NA                                  | <i>Ca_desi_denovo</i> | 4030371                 | G/C  | NA                 | NA                            | NA                 |
| <i>Desi_wild_4030735</i> | NA                                  | <i>Ca_desi_denovo</i> | 4030735                 | G/A  | NA                 | NA                            | NA                 |
| <i>Desi_wild_4030785</i> | NA                                  | <i>Ca_desi_denovo</i> | 4030785                 | G/A  | NA                 | NA                            | NA                 |
| <i>Desi_wild_4030802</i> | NA                                  | <i>Ca_desi_denovo</i> | 4030802                 | G/C  | NA                 | NA                            | NA                 |
| <i>Desi_wild_4031115</i> | NA                                  | <i>Ca_desi_denovo</i> | 4031115                 | G/A  | NA                 | NA                            | NA                 |
| <i>Desi_wild_4031181</i> | NA                                  | <i>Ca_desi_denovo</i> | 4031181                 | C/T  | NA                 | NA                            | NA                 |

| SNP IDs                  | NCBI dbSNP accession IDs (NCBI_SS#) | Chromosomes           | Physical positions (bp) | SNPs | Gene accession IDs | Sequence components of genome | Putative functions |
|--------------------------|-------------------------------------|-----------------------|-------------------------|------|--------------------|-------------------------------|--------------------|
| <i>Desi_wild_4032118</i> | NA                                  | <i>Ca_desi_denovo</i> | 4032118                 | A/C  | NA                 | NA                            | NA                 |
| <i>Desi_wild_4032136</i> | NA                                  | <i>Ca_desi_denovo</i> | 4032136                 | G/A  | NA                 | NA                            | NA                 |
| <i>Desi_wild_4033086</i> | NA                                  | <i>Ca_desi_denovo</i> | 4033086                 | A/G  | NA                 | NA                            | NA                 |
| <i>Desi_wild_4033646</i> | NA                                  | <i>Ca_desi_denovo</i> | 4033646                 | T/C  | NA                 | NA                            | NA                 |
| <i>Desi_wild_4033664</i> | NA                                  | <i>Ca_desi_denovo</i> | 4033664                 | G/A  | NA                 | NA                            | NA                 |
| <i>Desi_wild_4033965</i> | NA                                  | <i>Ca_desi_denovo</i> | 4033965                 | A/G  | NA                 | NA                            | NA                 |
| <i>Desi_wild_4033979</i> | NA                                  | <i>Ca_desi_denovo</i> | 4033979                 | T/C  | NA                 | NA                            | NA                 |
| <i>Desi_wild_4034597</i> | NA                                  | <i>Ca_desi_denovo</i> | 4034597                 | A/G  | NA                 | NA                            | NA                 |
| <i>Desi_wild_4034598</i> | NA                                  | <i>Ca_desi_denovo</i> | 4034598                 | A/C  | NA                 | NA                            | NA                 |
| <i>Desi_wild_4034637</i> | NA                                  | <i>Ca_desi_denovo</i> | 4034637                 | C/T  | NA                 | NA                            | NA                 |
| <i>Desi_wild_4034659</i> | NA                                  | <i>Ca_desi_denovo</i> | 4034659                 | C/A  | NA                 | NA                            | NA                 |
| <i>Desi_wild_4034739</i> | NA                                  | <i>Ca_desi_denovo</i> | 4034739                 | A/G  | NA                 | NA                            | NA                 |
| <i>Desi_wild_4034778</i> | NA                                  | <i>Ca_desi_denovo</i> | 4034778                 | C/T  | NA                 | NA                            | NA                 |
| <i>Desi_wild_4034903</i> | NA                                  | <i>Ca_desi_denovo</i> | 4034903                 | C/A  | NA                 | NA                            | NA                 |
| <i>Desi_wild_4036741</i> | NA                                  | <i>Ca_desi_denovo</i> | 4036741                 | G/C  | NA                 | NA                            | NA                 |
| <i>Desi_wild_4037257</i> | NA                                  | <i>Ca_desi_denovo</i> | 4037257                 | G/T  | NA                 | NA                            | NA                 |
| <i>Desi_wild_4037825</i> | NA                                  | <i>Ca_desi_denovo</i> | 4037825                 | A/G  | NA                 | NA                            | NA                 |
| <i>Desi_wild_4038029</i> | NA                                  | <i>Ca_desi_denovo</i> | 4038029                 | A/G  | NA                 | NA                            | NA                 |
| <i>Desi_wild_4038317</i> | NA                                  | <i>Ca_desi_denovo</i> | 4038317                 | G/A  | NA                 | NA                            | NA                 |
| <i>Desi_wild_4038347</i> | NA                                  | <i>Ca_desi_denovo</i> | 4038347                 | A/G  | NA                 | NA                            | NA                 |
| <i>Desi_wild_4043188</i> | NA                                  | <i>Ca_desi_denovo</i> | 4043188                 | G/T  | NA                 | NA                            | NA                 |
| <i>Desi_wild_4043688</i> | NA                                  | <i>Ca_desi_denovo</i> | 4043688                 | A/G  | NA                 | NA                            | NA                 |
| <i>Desi_wild_4046009</i> | NA                                  | <i>Ca_desi_denovo</i> | 4046009                 | A/G  | NA                 | NA                            | NA                 |
| <i>Desi_wild_4046133</i> | NA                                  | <i>Ca_desi_denovo</i> | 4046133                 | C/T  | NA                 | NA                            | NA                 |
| <i>Desi_wild_4046825</i> | NA                                  | <i>Ca_desi_denovo</i> | 4046825                 | C/A  | NA                 | NA                            | NA                 |
| <i>Desi_wild_4046831</i> | NA                                  | <i>Ca_desi_denovo</i> | 4046831                 | A/C  | NA                 | NA                            | NA                 |
| <i>Desi_wild_4047036</i> | NA                                  | <i>Ca_desi_denovo</i> | 4047036                 | A/G  | NA                 | NA                            | NA                 |
| <i>Desi_wild_4047038</i> | NA                                  | <i>Ca_desi_denovo</i> | 4047038                 | T/C  | NA                 | NA                            | NA                 |
| <i>Desi_wild_4047074</i> | NA                                  | <i>Ca_desi_denovo</i> | 4047074                 | A/C  | NA                 | NA                            | NA                 |
| <i>Desi_wild_4047600</i> | NA                                  | <i>Ca_desi_denovo</i> | 4047600                 | A/G  | NA                 | NA                            | NA                 |
| <i>Desi_wild_4048583</i> | NA                                  | <i>Ca_desi_denovo</i> | 4048583                 | A/G  | NA                 | NA                            | NA                 |
| <i>Desi_wild_4048593</i> | NA                                  | <i>Ca_desi_denovo</i> | 4048593                 | T/C  | NA                 | NA                            | NA                 |
| <i>Desi_wild_4050738</i> | NA                                  | <i>Ca_desi_denovo</i> | 4050738                 | T/C  | NA                 | NA                            | NA                 |
| <i>Desi_wild_4050766</i> | NA                                  | <i>Ca_desi_denovo</i> | 4050766                 | T/G  | NA                 | NA                            | NA                 |
| <i>Desi_wild_4051418</i> | NA                                  | <i>Ca_desi_denovo</i> | 4051418                 | C/T  | NA                 | NA                            | NA                 |
| <i>Desi_wild_4051758</i> | NA                                  | <i>Ca_desi_denovo</i> | 4051758                 | A/C  | NA                 | NA                            | NA                 |
| <i>Desi_wild_4051759</i> | NA                                  | <i>Ca_desi_denovo</i> | 4051759                 | G/T  | NA                 | NA                            | NA                 |
| <i>Desi_wild_4052112</i> | NA                                  | <i>Ca_desi_denovo</i> | 4052112                 | A/G  | NA                 | NA                            | NA                 |
| <i>Desi_wild_4053276</i> | NA                                  | <i>Ca_desi_denovo</i> | 4053276                 | A/G  | NA                 | NA                            | NA                 |
| <i>Desi_wild_4053516</i> | NA                                  | <i>Ca_desi_denovo</i> | 4053516                 | A/G  | NA                 | NA                            | NA                 |
| <i>Desi_wild_4053555</i> | NA                                  | <i>Ca_desi_denovo</i> | 4053555                 | G/A  | NA                 | NA                            | NA                 |
| <i>Desi_wild_4053658</i> | NA                                  | <i>Ca_desi_denovo</i> | 4053658                 | A/G  | NA                 | NA                            | NA                 |
| <i>Desi_wild_4053661</i> | NA                                  | <i>Ca_desi_denovo</i> | 4053661                 | C/A  | NA                 | NA                            | NA                 |
| <i>Desi_wild_4053923</i> | NA                                  | <i>Ca_desi_denovo</i> | 4053923                 | T/G  | NA                 | NA                            | NA                 |

| SNP IDs                  | NCBI dbSNP accession IDs (NCBI_SS#) | Chromosomes           | Physical positions (bp) | SNPs | Gene accession IDs | Sequence components of genome | Putative functions |
|--------------------------|-------------------------------------|-----------------------|-------------------------|------|--------------------|-------------------------------|--------------------|
| <i>Desi_wild_4053953</i> | NA                                  | <i>Ca_desi_denovo</i> | 4053953                 | A/G  | NA                 | NA                            | NA                 |
| <i>Desi_wild_4056084</i> | NA                                  | <i>Ca_desi_denovo</i> | 4056084                 | C/G  | NA                 | NA                            | NA                 |
| <i>Desi_wild_4057092</i> | NA                                  | <i>Ca_desi_denovo</i> | 4057092                 | C/A  | NA                 | NA                            | NA                 |
| <i>Desi_wild_4057136</i> | NA                                  | <i>Ca_desi_denovo</i> | 4057136                 | T/C  | NA                 | NA                            | NA                 |
| <i>Desi_wild_4058474</i> | NA                                  | <i>Ca_desi_denovo</i> | 4058474                 | C/G  | NA                 | NA                            | NA                 |
| <i>Desi_wild_4058868</i> | NA                                  | <i>Ca_desi_denovo</i> | 4058868                 | T/C  | NA                 | NA                            | NA                 |
| <i>Desi_wild_4059053</i> | NA                                  | <i>Ca_desi_denovo</i> | 4059053                 | T/C  | NA                 | NA                            | NA                 |
| <i>Desi_wild_4059155</i> | NA                                  | <i>Ca_desi_denovo</i> | 4059155                 | G/T  | NA                 | NA                            | NA                 |
| <i>Desi_wild_4059199</i> | NA                                  | <i>Ca_desi_denovo</i> | 4059199                 | C/G  | NA                 | NA                            | NA                 |
| <i>Desi_wild_4060018</i> | NA                                  | <i>Ca_desi_denovo</i> | 4060018                 | T/C  | NA                 | NA                            | NA                 |
| <i>Desi_wild_4060123</i> | NA                                  | <i>Ca_desi_denovo</i> | 4060123                 | C/G  | NA                 | NA                            | NA                 |
| <i>Desi_wild_4061094</i> | NA                                  | <i>Ca_desi_denovo</i> | 4061094                 | C/G  | NA                 | NA                            | NA                 |
| <i>Desi_wild_4061136</i> | NA                                  | <i>Ca_desi_denovo</i> | 4061136                 | C/G  | NA                 | NA                            | NA                 |
| <i>Desi_wild_4062133</i> | NA                                  | <i>Ca_desi_denovo</i> | 4062133                 | G/T  | NA                 | NA                            | NA                 |
| <i>Desi_wild_4063048</i> | NA                                  | <i>Ca_desi_denovo</i> | 4063048                 | A/C  | NA                 | NA                            | NA                 |
| <i>Desi_wild_4063385</i> | NA                                  | <i>Ca_desi_denovo</i> | 4063385                 | T/A  | NA                 | NA                            | NA                 |
| <i>Desi_wild_4064005</i> | NA                                  | <i>Ca_desi_denovo</i> | 4064005                 | A/C  | NA                 | NA                            | NA                 |
| <i>Desi_wild_4064616</i> | NA                                  | <i>Ca_desi_denovo</i> | 4064616                 | C/A  | NA                 | NA                            | NA                 |
| <i>Desi_wild_4064618</i> | NA                                  | <i>Ca_desi_denovo</i> | 4064618                 | A/G  | NA                 | NA                            | NA                 |
| <i>Desi_wild_4065949</i> | NA                                  | <i>Ca_desi_denovo</i> | 4065949                 | C/T  | NA                 | NA                            | NA                 |
| <i>Desi_wild_4066115</i> | NA                                  | <i>Ca_desi_denovo</i> | 4066115                 | T/G  | NA                 | NA                            | NA                 |
| <i>Desi_wild_4066352</i> | NA                                  | <i>Ca_desi_denovo</i> | 4066352                 | T/C  | NA                 | NA                            | NA                 |
| <i>Desi_wild_4066503</i> | NA                                  | <i>Ca_desi_denovo</i> | 4066503                 | A/C  | NA                 | NA                            | NA                 |
| <i>Desi_wild_4066522</i> | NA                                  | <i>Ca_desi_denovo</i> | 4066522                 | G/C  | NA                 | NA                            | NA                 |
| <i>Desi_wild_4067068</i> | NA                                  | <i>Ca_desi_denovo</i> | 4067068                 | T/C  | NA                 | NA                            | NA                 |
| <i>Desi_wild_4068081</i> | NA                                  | <i>Ca_desi_denovo</i> | 4068081                 | T/C  | NA                 | NA                            | NA                 |
| <i>Desi_wild_4068108</i> | NA                                  | <i>Ca_desi_denovo</i> | 4068108                 | C/G  | NA                 | NA                            | NA                 |
| <i>Desi_wild_4068357</i> | NA                                  | <i>Ca_desi_denovo</i> | 4068357                 | A/C  | NA                 | NA                            | NA                 |
| <i>Desi_wild_4068377</i> | NA                                  | <i>Ca_desi_denovo</i> | 4068377                 | T/C  | NA                 | NA                            | NA                 |
| <i>Desi_wild_4069145</i> | NA                                  | <i>Ca_desi_denovo</i> | 4069145                 | G/A  | NA                 | NA                            | NA                 |
| <i>Desi_wild_4069160</i> | NA                                  | <i>Ca_desi_denovo</i> | 4069160                 | T/C  | NA                 | NA                            | NA                 |
| <i>Desi_wild_4069359</i> | NA                                  | <i>Ca_desi_denovo</i> | 4069359                 | G/C  | NA                 | NA                            | NA                 |
| <i>Desi_wild_4069939</i> | NA                                  | <i>Ca_desi_denovo</i> | 4069939                 | G/C  | NA                 | NA                            | NA                 |
| <i>Desi_wild_4070946</i> | NA                                  | <i>Ca_desi_denovo</i> | 4070946                 | T/C  | NA                 | NA                            | NA                 |
| <i>Desi_wild_4071302</i> | NA                                  | <i>Ca_desi_denovo</i> | 4071302                 | T/C  | NA                 | NA                            | NA                 |
| <i>Desi_wild_4071954</i> | NA                                  | <i>Ca_desi_denovo</i> | 4071954                 | G/C  | NA                 | NA                            | NA                 |
| <i>Desi_wild_4072542</i> | NA                                  | <i>Ca_desi_denovo</i> | 4072542                 | T/C  | NA                 | NA                            | NA                 |
| <i>Desi_wild_4072544</i> | NA                                  | <i>Ca_desi_denovo</i> | 4072544                 | C/T  | NA                 | NA                            | NA                 |
| <i>Desi_wild_4073501</i> | NA                                  | <i>Ca_desi_denovo</i> | 4073501                 | C/T  | NA                 | NA                            | NA                 |
| <i>Desi_wild_4073552</i> | NA                                  | <i>Ca_desi_denovo</i> | 4073552                 | G/A  | NA                 | NA                            | NA                 |
| <i>Desi_wild_4073567</i> | NA                                  | <i>Ca_desi_denovo</i> | 4073567                 | G/A  | NA                 | NA                            | NA                 |
| <i>Desi_wild_4074310</i> | NA                                  | <i>Ca_desi_denovo</i> | 4074310                 | G/T  | NA                 | NA                            | NA                 |
| <i>Desi_wild_4074317</i> | NA                                  | <i>Ca_desi_denovo</i> | 4074317                 | G/C  | NA                 | NA                            | NA                 |
| <i>Desi_wild_4074605</i> | NA                                  | <i>Ca_desi_denovo</i> | 4074605                 | T/C  | NA                 | NA                            | NA                 |

| SNP IDs                  | NCBI dbSNP accession IDs (NCBI_SS#) | Chromosomes           | Physical positions (bp) | SNPs | Gene accession IDs | Sequence components of genome | Putative functions |
|--------------------------|-------------------------------------|-----------------------|-------------------------|------|--------------------|-------------------------------|--------------------|
| <i>Desi_wild_4074610</i> | NA                                  | <i>Ca_desi_denovo</i> | 4074610                 | T/C  | NA                 | NA                            | NA                 |
| <i>Desi_wild_4074700</i> | NA                                  | <i>Ca_desi_denovo</i> | 4074700                 | T/C  | NA                 | NA                            | NA                 |
| <i>Desi_wild_4074727</i> | NA                                  | <i>Ca_desi_denovo</i> | 4074727                 | T/C  | NA                 | NA                            | NA                 |
| <i>Desi_wild_4075264</i> | NA                                  | <i>Ca_desi_denovo</i> | 4075264                 | A/G  | NA                 | NA                            | NA                 |
| <i>Desi_wild_4075319</i> | NA                                  | <i>Ca_desi_denovo</i> | 4075319                 | A/G  | NA                 | NA                            | NA                 |
| <i>Desi_wild_4075426</i> | NA                                  | <i>Ca_desi_denovo</i> | 4075426                 | A/C  | NA                 | NA                            | NA                 |
| <i>Desi_wild_4075548</i> | NA                                  | <i>Ca_desi_denovo</i> | 4075548                 | T/C  | NA                 | NA                            | NA                 |
| <i>Desi_wild_4075559</i> | NA                                  | <i>Ca_desi_denovo</i> | 4075559                 | T/C  | NA                 | NA                            | NA                 |
| <i>Desi_wild_4075843</i> | NA                                  | <i>Ca_desi_denovo</i> | 4075843                 | C/G  | NA                 | NA                            | NA                 |
| <i>Desi_wild_4075876</i> | NA                                  | <i>Ca_desi_denovo</i> | 4075876                 | A/G  | NA                 | NA                            | NA                 |
| <i>Desi_wild_4076270</i> | NA                                  | <i>Ca_desi_denovo</i> | 4076270                 | G/A  | NA                 | NA                            | NA                 |
| <i>Desi_wild_4076271</i> | NA                                  | <i>Ca_desi_denovo</i> | 4076271                 | T/A  | NA                 | NA                            | NA                 |
| <i>Desi_wild_4077884</i> | NA                                  | <i>Ca_desi_denovo</i> | 4077884                 | G/T  | NA                 | NA                            | NA                 |
| <i>Desi_wild_4078037</i> | NA                                  | <i>Ca_desi_denovo</i> | 4078037                 | T/G  | NA                 | NA                            | NA                 |
| <i>Desi_wild_4078777</i> | NA                                  | <i>Ca_desi_denovo</i> | 4078777                 | C/G  | NA                 | NA                            | NA                 |
| <i>Desi_wild_4081163</i> | NA                                  | <i>Ca_desi_denovo</i> | 4081163                 | G/T  | NA                 | NA                            | NA                 |
| <i>Desi_wild_4081182</i> | NA                                  | <i>Ca_desi_denovo</i> | 4081182                 | G/C  | NA                 | NA                            | NA                 |
| <i>Desi_wild_4082126</i> | NA                                  | <i>Ca_desi_denovo</i> | 4082126                 | G/A  | NA                 | NA                            | NA                 |
| <i>Desi_wild_4082442</i> | NA                                  | <i>Ca_desi_denovo</i> | 4082442                 | T/C  | NA                 | NA                            | NA                 |
| <i>Desi_wild_4082529</i> | NA                                  | <i>Ca_desi_denovo</i> | 4082529                 | C/G  | NA                 | NA                            | NA                 |
| <i>Desi_wild_4082556</i> | NA                                  | <i>Ca_desi_denovo</i> | 4082556                 | T/G  | NA                 | NA                            | NA                 |
| <i>Desi_wild_4082645</i> | NA                                  | <i>Ca_desi_denovo</i> | 4082645                 | T/C  | NA                 | NA                            | NA                 |
| <i>Desi_wild_4082741</i> | NA                                  | <i>Ca_desi_denovo</i> | 4082741                 | T/C  | NA                 | NA                            | NA                 |
| <i>Desi_wild_4082807</i> | NA                                  | <i>Ca_desi_denovo</i> | 4082807                 | T/G  | NA                 | NA                            | NA                 |
| <i>Desi_wild_4082947</i> | NA                                  | <i>Ca_desi_denovo</i> | 4082947                 | A/T  | NA                 | NA                            | NA                 |
| <i>Desi_wild_4083693</i> | NA                                  | <i>Ca_desi_denovo</i> | 4083693                 | C/T  | NA                 | NA                            | NA                 |
| <i>Desi_wild_4083704</i> | NA                                  | <i>Ca_desi_denovo</i> | 4083704                 | A/G  | NA                 | NA                            | NA                 |
| <i>Desi_wild_4083906</i> | NA                                  | <i>Ca_desi_denovo</i> | 4083906                 | G/A  | NA                 | NA                            | NA                 |
| <i>Desi_wild_4084016</i> | NA                                  | <i>Ca_desi_denovo</i> | 4084016                 | T/C  | NA                 | NA                            | NA                 |
| <i>Desi_wild_4084409</i> | NA                                  | <i>Ca_desi_denovo</i> | 4084409                 | A/G  | NA                 | NA                            | NA                 |
| <i>Desi_wild_4085829</i> | NA                                  | <i>Ca_desi_denovo</i> | 4085829                 | A/G  | NA                 | NA                            | NA                 |
| <i>Desi_wild_4086601</i> | NA                                  | <i>Ca_desi_denovo</i> | 4086601                 | G/A  | NA                 | NA                            | NA                 |
| <i>Desi_wild_4086654</i> | NA                                  | <i>Ca_desi_denovo</i> | 4086654                 | G/C  | NA                 | NA                            | NA                 |
| <i>Desi_wild_4086695</i> | NA                                  | <i>Ca_desi_denovo</i> | 4086695                 | G/C  | NA                 | NA                            | NA                 |
| <i>Desi_wild_4086713</i> | NA                                  | <i>Ca_desi_denovo</i> | 4086713                 | C/T  | NA                 | NA                            | NA                 |
| <i>Desi_wild_4086942</i> | NA                                  | <i>Ca_desi_denovo</i> | 4086942                 | G/T  | NA                 | NA                            | NA                 |
| <i>Desi_wild_4087473</i> | NA                                  | <i>Ca_desi_denovo</i> | 4087473                 | C/T  | NA                 | NA                            | NA                 |
| <i>Desi_wild_4087773</i> | NA                                  | <i>Ca_desi_denovo</i> | 4087773                 | C/T  | NA                 | NA                            | NA                 |
| <i>Desi_wild_4087823</i> | NA                                  | <i>Ca_desi_denovo</i> | 4087823                 | G/T  | NA                 | NA                            | NA                 |
| <i>Desi_wild_4090478</i> | NA                                  | <i>Ca_desi_denovo</i> | 4090478                 | C/T  | NA                 | NA                            | NA                 |
| <i>Desi_wild_4090837</i> | NA                                  | <i>Ca_desi_denovo</i> | 4090837                 | C/G  | NA                 | NA                            | NA                 |
| <i>Desi_wild_4090846</i> | NA                                  | <i>Ca_desi_denovo</i> | 4090846                 | G/A  | NA                 | NA                            | NA                 |
| <i>Desi_wild_4091766</i> | NA                                  | <i>Ca_desi_denovo</i> | 4091766                 | G/C  | NA                 | NA                            | NA                 |
| <i>Desi_wild_4093326</i> | NA                                  | <i>Ca_desi_denovo</i> | 4093326                 | G/A  | NA                 | NA                            | NA                 |

| SNP IDs                  | NCBI dbSNP accession IDs (NCBI_SS#) | Chromosomes           | Physical positions (bp) | SNPs | Gene accession IDs | Sequence components of genome | Putative functions |
|--------------------------|-------------------------------------|-----------------------|-------------------------|------|--------------------|-------------------------------|--------------------|
| <i>Desi_wild_4093349</i> | NA                                  | <i>Ca_desi_denovo</i> | 4093349                 | G/A  | NA                 | NA                            | NA                 |
| <i>Desi_wild_4093886</i> | NA                                  | <i>Ca_desi_denovo</i> | 4093886                 | T/C  | NA                 | NA                            | NA                 |
| <i>Desi_wild_4093961</i> | NA                                  | <i>Ca_desi_denovo</i> | 4093961                 | C/T  | NA                 | NA                            | NA                 |
| <i>Desi_wild_4093991</i> | NA                                  | <i>Ca_desi_denovo</i> | 4093991                 | T/C  | NA                 | NA                            | NA                 |
| <i>Desi_wild_4095365</i> | NA                                  | <i>Ca_desi_denovo</i> | 4095365                 | T/G  | NA                 | NA                            | NA                 |
| <i>Desi_wild_4095591</i> | NA                                  | <i>Ca_desi_denovo</i> | 4095591                 | G/C  | NA                 | NA                            | NA                 |
| <i>Desi_wild_4095850</i> | NA                                  | <i>Ca_desi_denovo</i> | 4095850                 | T/C  | NA                 | NA                            | NA                 |
| <i>Desi_wild_4096137</i> | NA                                  | <i>Ca_desi_denovo</i> | 4096137                 | T/C  | NA                 | NA                            | NA                 |
| <i>Desi_wild_4096194</i> | NA                                  | <i>Ca_desi_denovo</i> | 4096194                 | G/A  | NA                 | NA                            | NA                 |
| <i>Desi_wild_4096872</i> | NA                                  | <i>Ca_desi_denovo</i> | 4096872                 | T/C  | NA                 | NA                            | NA                 |
| <i>Desi_wild_4097371</i> | NA                                  | <i>Ca_desi_denovo</i> | 4097371                 | G/C  | NA                 | NA                            | NA                 |
| <i>Desi_wild_4097377</i> | NA                                  | <i>Ca_desi_denovo</i> | 4097377                 | C/T  | NA                 | NA                            | NA                 |
| <i>Desi_wild_4097950</i> | NA                                  | <i>Ca_desi_denovo</i> | 4097950                 | A/G  | NA                 | NA                            | NA                 |
| <i>Desi_wild_4097953</i> | NA                                  | <i>Ca_desi_denovo</i> | 4097953                 | T/C  | NA                 | NA                            | NA                 |
| <i>Desi_wild_4098390</i> | NA                                  | <i>Ca_desi_denovo</i> | 4098390                 | G/C  | NA                 | NA                            | NA                 |
| <i>Desi_wild_4099012</i> | NA                                  | <i>Ca_desi_denovo</i> | 4099012                 | C/G  | NA                 | NA                            | NA                 |
| <i>Desi_wild_4099023</i> | NA                                  | <i>Ca_desi_denovo</i> | 4099023                 | A/C  | NA                 | NA                            | NA                 |
| <i>Desi_wild_4099296</i> | NA                                  | <i>Ca_desi_denovo</i> | 4099296                 | T/C  | NA                 | NA                            | NA                 |
| <i>Desi_wild_4099594</i> | NA                                  | <i>Ca_desi_denovo</i> | 4099594                 | C/G  | NA                 | NA                            | NA                 |
| <i>Desi_wild_4100295</i> | NA                                  | <i>Ca_desi_denovo</i> | 4100295                 | C/G  | NA                 | NA                            | NA                 |
| <i>Desi_wild_4100299</i> | NA                                  | <i>Ca_desi_denovo</i> | 4100299                 | G/T  | NA                 | NA                            | NA                 |
| <i>Desi_wild_4102517</i> | NA                                  | <i>Ca_desi_denovo</i> | 4102517                 | G/C  | NA                 | NA                            | NA                 |
| <i>Desi_wild_4104852</i> | NA                                  | <i>Ca_desi_denovo</i> | 4104852                 | T/C  | NA                 | NA                            | NA                 |
| <i>Desi_wild_4105745</i> | NA                                  | <i>Ca_desi_denovo</i> | 4105745                 | A/G  | NA                 | NA                            | NA                 |
| <i>Desi_wild_4105768</i> | NA                                  | <i>Ca_desi_denovo</i> | 4105768                 | A/G  | NA                 | NA                            | NA                 |
| <i>Desi_wild_4106467</i> | NA                                  | <i>Ca_desi_denovo</i> | 4106467                 | A/C  | NA                 | NA                            | NA                 |
| <i>Desi_wild_4106855</i> | NA                                  | <i>Ca_desi_denovo</i> | 4106855                 | T/G  | NA                 | NA                            | NA                 |
| <i>Desi_wild_4109223</i> | NA                                  | <i>Ca_desi_denovo</i> | 4109223                 | T/C  | NA                 | NA                            | NA                 |
| <i>Desi_wild_4109491</i> | NA                                  | <i>Ca_desi_denovo</i> | 4109491                 | C/A  | NA                 | NA                            | NA                 |
| <i>Desi_wild_4110280</i> | NA                                  | <i>Ca_desi_denovo</i> | 4110280                 | C/T  | NA                 | NA                            | NA                 |
| <i>Desi_wild_4111077</i> | NA                                  | <i>Ca_desi_denovo</i> | 4111077                 | C/T  | NA                 | NA                            | NA                 |
| <i>Desi_wild_4111091</i> | NA                                  | <i>Ca_desi_denovo</i> | 4111091                 | C/T  | NA                 | NA                            | NA                 |
| <i>Desi_wild_4111900</i> | NA                                  | <i>Ca_desi_denovo</i> | 4111900                 | C/A  | NA                 | NA                            | NA                 |
| <i>Desi_wild_4112162</i> | NA                                  | <i>Ca_desi_denovo</i> | 4112162                 | G/A  | NA                 | NA                            | NA                 |
| <i>Desi_wild_4112406</i> | NA                                  | <i>Ca_desi_denovo</i> | 4112406                 | T/C  | NA                 | NA                            | NA                 |
| <i>Desi_wild_4112436</i> | NA                                  | <i>Ca_desi_denovo</i> | 4112436                 | C/T  | NA                 | NA                            | NA                 |
| <i>Desi_wild_4112510</i> | NA                                  | <i>Ca_desi_denovo</i> | 4112510                 | C/A  | NA                 | NA                            | NA                 |
| <i>Desi_wild_4112888</i> | NA                                  | <i>Ca_desi_denovo</i> | 4112888                 | T/C  | NA                 | NA                            | NA                 |
| <i>Desi_wild_4113091</i> | NA                                  | <i>Ca_desi_denovo</i> | 4113091                 | C/T  | NA                 | NA                            | NA                 |
| <i>Desi_wild_4113134</i> | NA                                  | <i>Ca_desi_denovo</i> | 4113134                 | C/T  | NA                 | NA                            | NA                 |
| <i>Desi_wild_4113542</i> | NA                                  | <i>Ca_desi_denovo</i> | 4113542                 | A/C  | NA                 | NA                            | NA                 |
| <i>Desi_wild_4114053</i> | NA                                  | <i>Ca_desi_denovo</i> | 4114053                 | C/T  | NA                 | NA                            | NA                 |
| <i>Desi_wild_4115633</i> | NA                                  | <i>Ca_desi_denovo</i> | 4115633                 | A/G  | NA                 | NA                            | NA                 |
| <i>Desi_wild_4115645</i> | NA                                  | <i>Ca_desi_denovo</i> | 4115645                 | C/T  | NA                 | NA                            | NA                 |

| SNP IDs                  | NCBI dbSNP accession IDs (NCBI_SS#) | Chromosomes           | Physical positions (bp) | SNPs | Gene accession IDs | Sequence components of genome | Putative functions |
|--------------------------|-------------------------------------|-----------------------|-------------------------|------|--------------------|-------------------------------|--------------------|
| <i>Desi_wild_4116102</i> | NA                                  | <i>Ca_desi_denovo</i> | 4116102                 | T/C  | NA                 | NA                            | NA                 |
| <i>Desi_wild_4116210</i> | NA                                  | <i>Ca_desi_denovo</i> | 4116210                 | C/T  | NA                 | NA                            | NA                 |
| <i>Desi_wild_4117248</i> | NA                                  | <i>Ca_desi_denovo</i> | 4117248                 | T/C  | NA                 | NA                            | NA                 |
| <i>Desi_wild_4117317</i> | NA                                  | <i>Ca_desi_denovo</i> | 4117317                 | T/G  | NA                 | NA                            | NA                 |
| <i>Desi_wild_4117822</i> | NA                                  | <i>Ca_desi_denovo</i> | 4117822                 | C/T  | NA                 | NA                            | NA                 |
| <i>Desi_wild_4118404</i> | NA                                  | <i>Ca_desi_denovo</i> | 4118404                 | G/C  | NA                 | NA                            | NA                 |
| <i>Desi_wild_4118419</i> | NA                                  | <i>Ca_desi_denovo</i> | 4118419                 | C/T  | NA                 | NA                            | NA                 |
| <i>Desi_wild_4119481</i> | NA                                  | <i>Ca_desi_denovo</i> | 4119481                 | T/C  | NA                 | NA                            | NA                 |
| <i>Desi_wild_4120254</i> | NA                                  | <i>Ca_desi_denovo</i> | 4120254                 | G/T  | NA                 | NA                            | NA                 |
| <i>Desi_wild_4120701</i> | NA                                  | <i>Ca_desi_denovo</i> | 4120701                 | G/A  | NA                 | NA                            | NA                 |
| <i>Desi_wild_4121574</i> | NA                                  | <i>Ca_desi_denovo</i> | 4121574                 | A/G  | NA                 | NA                            | NA                 |
| <i>Desi_wild_4121676</i> | NA                                  | <i>Ca_desi_denovo</i> | 4121676                 | A/G  | NA                 | NA                            | NA                 |
| <i>Desi_wild_4122413</i> | NA                                  | <i>Ca_desi_denovo</i> | 4122413                 | C/G  | NA                 | NA                            | NA                 |
| <i>Desi_wild_4122770</i> | NA                                  | <i>Ca_desi_denovo</i> | 4122770                 | G/C  | NA                 | NA                            | NA                 |
| <i>Desi_wild_4122800</i> | NA                                  | <i>Ca_desi_denovo</i> | 4122800                 | C/T  | NA                 | NA                            | NA                 |
| <i>Desi_wild_4122992</i> | NA                                  | <i>Ca_desi_denovo</i> | 4122992                 | C/G  | NA                 | NA                            | NA                 |
| <i>Desi_wild_4123091</i> | NA                                  | <i>Ca_desi_denovo</i> | 4123091                 | G/T  | NA                 | NA                            | NA                 |
| <i>Desi_wild_4123293</i> | NA                                  | <i>Ca_desi_denovo</i> | 4123293                 | C/A  | NA                 | NA                            | NA                 |
| <i>Desi_wild_4123294</i> | NA                                  | <i>Ca_desi_denovo</i> | 4123294                 | T/G  | NA                 | NA                            | NA                 |
| <i>Desi_wild_4123548</i> | NA                                  | <i>Ca_desi_denovo</i> | 4123548                 | C/A  | NA                 | NA                            | NA                 |
| <i>Desi_wild_4123662</i> | NA                                  | <i>Ca_desi_denovo</i> | 4123662                 | A/G  | NA                 | NA                            | NA                 |
| <i>Desi_wild_4123741</i> | NA                                  | <i>Ca_desi_denovo</i> | 4123741                 | A/G  | NA                 | NA                            | NA                 |
| <i>Desi_wild_4123765</i> | NA                                  | <i>Ca_desi_denovo</i> | 4123765                 | A/G  | NA                 | NA                            | NA                 |
| <i>Desi_wild_4123768</i> | NA                                  | <i>Ca_desi_denovo</i> | 4123768                 | G/A  | NA                 | NA                            | NA                 |
| <i>Desi_wild_4124074</i> | NA                                  | <i>Ca_desi_denovo</i> | 4124074                 | G/T  | NA                 | NA                            | NA                 |
| <i>Desi_wild_4124368</i> | NA                                  | <i>Ca_desi_denovo</i> | 4124368                 | T/G  | NA                 | NA                            | NA                 |
| <i>Desi_wild_4124845</i> | NA                                  | <i>Ca_desi_denovo</i> | 4124845                 | C/G  | NA                 | NA                            | NA                 |
| <i>Desi_wild_4124935</i> | NA                                  | <i>Ca_desi_denovo</i> | 4124935                 | T/G  | NA                 | NA                            | NA                 |
| <i>Desi_wild_4125847</i> | NA                                  | <i>Ca_desi_denovo</i> | 4125847                 | G/A  | NA                 | NA                            | NA                 |
| <i>Desi_wild_4126344</i> | NA                                  | <i>Ca_desi_denovo</i> | 4126344                 | T/G  | NA                 | NA                            | NA                 |
| <i>Desi_wild_4126632</i> | NA                                  | <i>Ca_desi_denovo</i> | 4126632                 | C/A  | NA                 | NA                            | NA                 |
| <i>Desi_wild_4127243</i> | NA                                  | <i>Ca_desi_denovo</i> | 4127243                 | C/G  | NA                 | NA                            | NA                 |
| <i>Desi_wild_4128836</i> | NA                                  | <i>Ca_desi_denovo</i> | 4128836                 | A/C  | NA                 | NA                            | NA                 |
| <i>Desi_wild_4129483</i> | NA                                  | <i>Ca_desi_denovo</i> | 4129483                 | G/C  | NA                 | NA                            | NA                 |
| <i>Desi_wild_4129546</i> | NA                                  | <i>Ca_desi_denovo</i> | 4129546                 | A/C  | NA                 | NA                            | NA                 |
| <i>Desi_wild_4129761</i> | NA                                  | <i>Ca_desi_denovo</i> | 4129761                 | C/T  | NA                 | NA                            | NA                 |
| <i>Desi_wild_4130246</i> | NA                                  | <i>Ca_desi_denovo</i> | 4130246                 | C/A  | NA                 | NA                            | NA                 |
| <i>Desi_wild_4130257</i> | NA                                  | <i>Ca_desi_denovo</i> | 4130257                 | G/A  | NA                 | NA                            | NA                 |
| <i>Desi_wild_4131994</i> | NA                                  | <i>Ca_desi_denovo</i> | 4131994                 | C/T  | NA                 | NA                            | NA                 |
| <i>Desi_wild_4132007</i> | NA                                  | <i>Ca_desi_denovo</i> | 4132007                 | G/A  | NA                 | NA                            | NA                 |
| <i>Desi_wild_4132282</i> | NA                                  | <i>Ca_desi_denovo</i> | 4132282                 | T/G  | NA                 | NA                            | NA                 |
| <i>Desi_wild_4132291</i> | NA                                  | <i>Ca_desi_denovo</i> | 4132291                 | T/C  | NA                 | NA                            | NA                 |
| <i>Desi_wild_4132667</i> | NA                                  | <i>Ca_desi_denovo</i> | 4132667                 | G/C  | NA                 | NA                            | NA                 |
| <i>Desi_wild_4133458</i> | NA                                  | <i>Ca_desi_denovo</i> | 4133458                 | C/T  | NA                 | NA                            | NA                 |

| SNP IDs                  | NCBI dbSNP accession IDs (NCBI_SS#) | Chromosomes           | Physical positions (bp) | SNPs | Gene accession IDs | Sequence components of genome | Putative functions |
|--------------------------|-------------------------------------|-----------------------|-------------------------|------|--------------------|-------------------------------|--------------------|
| <i>Desi_wild_4133488</i> | NA                                  | <i>Ca_desi_denovo</i> | 4133488                 | T/C  | NA                 | NA                            | NA                 |
| <i>Desi_wild_4133636</i> | NA                                  | <i>Ca_desi_denovo</i> | 4133636                 | G/A  | NA                 | NA                            | NA                 |
| <i>Desi_wild_4133672</i> | NA                                  | <i>Ca_desi_denovo</i> | 4133672                 | A/G  | NA                 | NA                            | NA                 |
| <i>Desi_wild_4134239</i> | NA                                  | <i>Ca_desi_denovo</i> | 4134239                 | G/A  | NA                 | NA                            | NA                 |
| <i>Desi_wild_4134263</i> | NA                                  | <i>Ca_desi_denovo</i> | 4134263                 | A/C  | NA                 | NA                            | NA                 |
| <i>Desi_wild_4135179</i> | NA                                  | <i>Ca_desi_denovo</i> | 4135179                 | A/T  | NA                 | NA                            | NA                 |
| <i>Desi_wild_4135214</i> | NA                                  | <i>Ca_desi_denovo</i> | 4135214                 | A/G  | NA                 | NA                            | NA                 |
| <i>Desi_wild_4135426</i> | NA                                  | <i>Ca_desi_denovo</i> | 4135426                 | G/A  | NA                 | NA                            | NA                 |
| <i>Desi_wild_4136869</i> | NA                                  | <i>Ca_desi_denovo</i> | 4136869                 | G/T  | NA                 | NA                            | NA                 |
| <i>Desi_wild_4137224</i> | NA                                  | <i>Ca_desi_denovo</i> | 4137224                 | C/T  | NA                 | NA                            | NA                 |
| <i>Desi_wild_4137441</i> | NA                                  | <i>Ca_desi_denovo</i> | 4137441                 | G/T  | NA                 | NA                            | NA                 |
| <i>Desi_wild_4139534</i> | NA                                  | <i>Ca_desi_denovo</i> | 4139534                 | G/A  | NA                 | NA                            | NA                 |
| <i>Desi_wild_4140101</i> | NA                                  | <i>Ca_desi_denovo</i> | 4140101                 | A/G  | NA                 | NA                            | NA                 |
| <i>Desi_wild_4140340</i> | NA                                  | <i>Ca_desi_denovo</i> | 4140340                 | A/T  | NA                 | NA                            | NA                 |
| <i>Desi_wild_4140343</i> | NA                                  | <i>Ca_desi_denovo</i> | 4140343                 | A/C  | NA                 | NA                            | NA                 |
| <i>Desi_wild_4141941</i> | NA                                  | <i>Ca_desi_denovo</i> | 4141941                 | T/C  | NA                 | NA                            | NA                 |
| <i>Desi_wild_4141962</i> | NA                                  | <i>Ca_desi_denovo</i> | 4141962                 | C/T  | NA                 | NA                            | NA                 |
| <i>Desi_wild_4142755</i> | NA                                  | <i>Ca_desi_denovo</i> | 4142755                 | G/C  | NA                 | NA                            | NA                 |
| <i>Desi_wild_4144219</i> | NA                                  | <i>Ca_desi_denovo</i> | 4144219                 | G/C  | NA                 | NA                            | NA                 |
| <i>Desi_wild_4144502</i> | NA                                  | <i>Ca_desi_denovo</i> | 4144502                 | A/G  | NA                 | NA                            | NA                 |
| <i>Desi_wild_4144789</i> | NA                                  | <i>Ca_desi_denovo</i> | 4144789                 | T/C  | NA                 | NA                            | NA                 |
| <i>Desi_wild_4145283</i> | NA                                  | <i>Ca_desi_denovo</i> | 4145283                 | G/A  | NA                 | NA                            | NA                 |
| <i>Desi_wild_4145319</i> | NA                                  | <i>Ca_desi_denovo</i> | 4145319                 | C/T  | NA                 | NA                            | NA                 |
| <i>Desi_wild_4146937</i> | NA                                  | <i>Ca_desi_denovo</i> | 4146937                 | C/T  | NA                 | NA                            | NA                 |
| <i>Desi_wild_4147033</i> | NA                                  | <i>Ca_desi_denovo</i> | 4147033                 | G/A  | NA                 | NA                            | NA                 |
| <i>Desi_wild_4147089</i> | NA                                  | <i>Ca_desi_denovo</i> | 4147089                 | C/T  | NA                 | NA                            | NA                 |
| <i>Desi_wild_4147706</i> | NA                                  | <i>Ca_desi_denovo</i> | 4147706                 | A/G  | NA                 | NA                            | NA                 |
| <i>Desi_wild_4147739</i> | NA                                  | <i>Ca_desi_denovo</i> | 4147739                 | A/C  | NA                 | NA                            | NA                 |
| <i>Desi_wild_4147903</i> | NA                                  | <i>Ca_desi_denovo</i> | 4147903                 | A/G  | NA                 | NA                            | NA                 |
| <i>Desi_wild_4147941</i> | NA                                  | <i>Ca_desi_denovo</i> | 4147941                 | C/A  | NA                 | NA                            | NA                 |
| <i>Desi_wild_4148096</i> | NA                                  | <i>Ca_desi_denovo</i> | 4148096                 | C/T  | NA                 | NA                            | NA                 |
| <i>Desi_wild_4148099</i> | NA                                  | <i>Ca_desi_denovo</i> | 4148099                 | G/C  | NA                 | NA                            | NA                 |
| <i>Desi_wild_4148680</i> | NA                                  | <i>Ca_desi_denovo</i> | 4148680                 | T/C  | NA                 | NA                            | NA                 |
| <i>Desi_wild_4152403</i> | NA                                  | <i>Ca_desi_denovo</i> | 4152403                 | T/C  | NA                 | NA                            | NA                 |
| <i>Desi_wild_4152410</i> | NA                                  | <i>Ca_desi_denovo</i> | 4152410                 | G/A  | NA                 | NA                            | NA                 |
| <i>Desi_wild_4154728</i> | NA                                  | <i>Ca_desi_denovo</i> | 4154728                 | C/A  | NA                 | NA                            | NA                 |
| <i>Desi_wild_4155316</i> | NA                                  | <i>Ca_desi_denovo</i> | 4155316                 | T/G  | NA                 | NA                            | NA                 |
| <i>Desi_wild_4155334</i> | NA                                  | <i>Ca_desi_denovo</i> | 4155334                 | C/T  | NA                 | NA                            | NA                 |
| <i>Desi_wild_4155437</i> | NA                                  | <i>Ca_desi_denovo</i> | 4155437                 | G/C  | NA                 | NA                            | NA                 |
| <i>Desi_wild_4156263</i> | NA                                  | <i>Ca_desi_denovo</i> | 4156263                 | G/T  | NA                 | NA                            | NA                 |
| <i>Desi_wild_4157125</i> | NA                                  | <i>Ca_desi_denovo</i> | 4157125                 | T/C  | NA                 | NA                            | NA                 |
| <i>Desi_wild_4157167</i> | NA                                  | <i>Ca_desi_denovo</i> | 4157167                 | G/A  | NA                 | NA                            | NA                 |
| <i>Desi_wild_4157413</i> | NA                                  | <i>Ca_desi_denovo</i> | 4157413                 | C/T  | NA                 | NA                            | NA                 |
| <i>Desi_wild_4157812</i> | NA                                  | <i>Ca_desi_denovo</i> | 4157812                 | A/G  | NA                 | NA                            | NA                 |



| SNP IDs                  | NCBI dbSNP accession IDs (NCBI_SS#) | Chromosomes           | Physical positions (bp) | SNPs | Gene accession IDs | Sequence components of genome | Putative functions |
|--------------------------|-------------------------------------|-----------------------|-------------------------|------|--------------------|-------------------------------|--------------------|
| <i>Desi_wild_4157964</i> | NA                                  | <i>Ca_desi_denovo</i> | 4157964                 | T/C  | NA                 | NA                            | NA                 |
| <i>Desi_wild_4158674</i> | NA                                  | <i>Ca_desi_denovo</i> | 4158674                 | C/T  | NA                 | NA                            | NA                 |
| <i>Desi_wild_4160383</i> | NA                                  | <i>Ca_desi_denovo</i> | 4160383                 | A/G  | NA                 | NA                            | NA                 |
| <i>Desi_wild_4161913</i> | NA                                  | <i>Ca_desi_denovo</i> | 4161913                 | G/A  | NA                 | NA                            | NA                 |
| <i>Desi_wild_4163081</i> | NA                                  | <i>Ca_desi_denovo</i> | 4163081                 | G/T  | NA                 | NA                            | NA                 |
| <i>Desi_wild_4163329</i> | NA                                  | <i>Ca_desi_denovo</i> | 4163329                 | T/C  | NA                 | NA                            | NA                 |
| <i>Desi_wild_4164016</i> | NA                                  | <i>Ca_desi_denovo</i> | 4164016                 | C/T  | NA                 | NA                            | NA                 |
| <i>Desi_wild_4164038</i> | NA                                  | <i>Ca_desi_denovo</i> | 4164038                 | G/A  | NA                 | NA                            | NA                 |
| <i>Desi_wild_4165772</i> | NA                                  | <i>Ca_desi_denovo</i> | 4165772                 | G/C  | NA                 | NA                            | NA                 |
| <i>Desi_wild_4166434</i> | NA                                  | <i>Ca_desi_denovo</i> | 4166434                 | A/G  | NA                 | NA                            | NA                 |
| <i>Desi_wild_4166467</i> | NA                                  | <i>Ca_desi_denovo</i> | 4166467                 | C/T  | NA                 | NA                            | NA                 |
| <i>Desi_wild_4167505</i> | NA                                  | <i>Ca_desi_denovo</i> | 4167505                 | T/C  | NA                 | NA                            | NA                 |
| <i>Desi_wild_4168341</i> | NA                                  | <i>Ca_desi_denovo</i> | 4168341                 | T/C  | NA                 | NA                            | NA                 |
| <i>Desi_wild_4170268</i> | NA                                  | <i>Ca_desi_denovo</i> | 4170268                 | T/C  | NA                 | NA                            | NA                 |
| <i>Desi_wild_4170621</i> | NA                                  | <i>Ca_desi_denovo</i> | 4170621                 | T/C  | NA                 | NA                            | NA                 |
| <i>Desi_wild_4170642</i> | NA                                  | <i>Ca_desi_denovo</i> | 4170642                 | C/T  | NA                 | NA                            | NA                 |
| <i>Desi_wild_4170828</i> | NA                                  | <i>Ca_desi_denovo</i> | 4170828                 | C/T  | NA                 | NA                            | NA                 |
| <i>Desi_wild_4171345</i> | NA                                  | <i>Ca_desi_denovo</i> | 4171345                 | C/T  | NA                 | NA                            | NA                 |
| <i>Desi_wild_4171357</i> | NA                                  | <i>Ca_desi_denovo</i> | 4171357                 | C/G  | NA                 | NA                            | NA                 |
| <i>Desi_wild_4173023</i> | NA                                  | <i>Ca_desi_denovo</i> | 4173023                 | C/T  | NA                 | NA                            | NA                 |
| <i>Desi_wild_4173331</i> | NA                                  | <i>Ca_desi_denovo</i> | 4173331                 | G/C  | NA                 | NA                            | NA                 |
| <i>Desi_wild_4173411</i> | NA                                  | <i>Ca_desi_denovo</i> | 4173411                 | C/T  | NA                 | NA                            | NA                 |
| <i>Desi_wild_4176480</i> | NA                                  | <i>Ca_desi_denovo</i> | 4176480                 | C/T  | NA                 | NA                            | NA                 |
| <i>Desi_wild_4176757</i> | NA                                  | <i>Ca_desi_denovo</i> | 4176757                 | G/C  | NA                 | NA                            | NA                 |
| <i>Desi_wild_4177761</i> | NA                                  | <i>Ca_desi_denovo</i> | 4177761                 | A/G  | NA                 | NA                            | NA                 |
| <i>Desi_wild_4178522</i> | NA                                  | <i>Ca_desi_denovo</i> | 4178522                 | C/G  | NA                 | NA                            | NA                 |
| <i>Desi_wild_4178765</i> | NA                                  | <i>Ca_desi_denovo</i> | 4178765                 | G/C  | NA                 | NA                            | NA                 |
| <i>Desi_wild_4178766</i> | NA                                  | <i>Ca_desi_denovo</i> | 4178766                 | G/C  | NA                 | NA                            | NA                 |
| <i>Desi_wild_4178996</i> | NA                                  | <i>Ca_desi_denovo</i> | 4178996                 | T/C  | NA                 | NA                            | NA                 |
| <i>Desi_wild_4179216</i> | NA                                  | <i>Ca_desi_denovo</i> | 4179216                 | T/G  | NA                 | NA                            | NA                 |
| <i>Desi_wild_4180019</i> | NA                                  | <i>Ca_desi_denovo</i> | 4180019                 | C/G  | NA                 | NA                            | NA                 |
| <i>Desi_wild_4180034</i> | NA                                  | <i>Ca_desi_denovo</i> | 4180034                 | C/G  | NA                 | NA                            | NA                 |
| <i>Desi_wild_4180743</i> | NA                                  | <i>Ca_desi_denovo</i> | 4180743                 | G/T  | NA                 | NA                            | NA                 |
| <i>Desi_wild_4181700</i> | NA                                  | <i>Ca_desi_denovo</i> | 4181700                 | G/T  | NA                 | NA                            | NA                 |
| <i>Desi_wild_4181706</i> | NA                                  | <i>Ca_desi_denovo</i> | 4181706                 | G/A  | NA                 | NA                            | NA                 |
| <i>Desi_wild_4182224</i> | NA                                  | <i>Ca_desi_denovo</i> | 4182224                 | A/C  | NA                 | NA                            | NA                 |
| <i>Desi_wild_4182346</i> | NA                                  | <i>Ca_desi_denovo</i> | 4182346                 | C/G  | NA                 | NA                            | NA                 |
| <i>Desi_wild_4182367</i> | NA                                  | <i>Ca_desi_denovo</i> | 4182367                 | C/T  | NA                 | NA                            | NA                 |
| <i>Desi_wild_4182397</i> | NA                                  | <i>Ca_desi_denovo</i> | 4182397                 | G/A  | NA                 | NA                            | NA                 |
| <i>Desi_wild_4182410</i> | NA                                  | <i>Ca_desi_denovo</i> | 4182410                 | T/G  | NA                 | NA                            | NA                 |
| <i>Desi_wild_4182980</i> | NA                                  | <i>Ca_desi_denovo</i> | 4182980                 | T/C  | NA                 | NA                            | NA                 |
| <i>Desi_wild_4183233</i> | NA                                  | <i>Ca_desi_denovo</i> | 4183233                 | T/C  | NA                 | NA                            | NA                 |
| <i>Desi_wild_4183510</i> | NA                                  | <i>Ca_desi_denovo</i> | 4183510                 | C/T  | NA                 | NA                            | NA                 |
| <i>Desi_wild_4183522</i> | NA                                  | <i>Ca_desi_denovo</i> | 4183522                 | G/A  | NA                 | NA                            | NA                 |

| SNP IDs                  | NCBI dbSNP accession IDs (NCBI_SS#) | Chromosomes           | Physical positions (bp) | SNPs | Gene accession IDs | Sequence components of genome | Putative functions |
|--------------------------|-------------------------------------|-----------------------|-------------------------|------|--------------------|-------------------------------|--------------------|
| <i>Desi_wild_4184175</i> | NA                                  | <i>Ca_desi_denovo</i> | 4184175                 | C/T  | NA                 | NA                            | NA                 |
| <i>Desi_wild_4184193</i> | NA                                  | <i>Ca_desi_denovo</i> | 4184193                 | C/T  | NA                 | NA                            | NA                 |
| <i>Desi_wild_4184870</i> | NA                                  | <i>Ca_desi_denovo</i> | 4184870                 | G/T  | NA                 | NA                            | NA                 |
| <i>Desi_wild_4185044</i> | NA                                  | <i>Ca_desi_denovo</i> | 4185044                 | G/C  | NA                 | NA                            | NA                 |
| <i>Desi_wild_4185639</i> | NA                                  | <i>Ca_desi_denovo</i> | 4185639                 | G/A  | NA                 | NA                            | NA                 |
| <i>Desi_wild_4185678</i> | NA                                  | <i>Ca_desi_denovo</i> | 4185678                 | G/A  | NA                 | NA                            | NA                 |
| <i>Desi_wild_4188562</i> | NA                                  | <i>Ca_desi_denovo</i> | 4188562                 | G/A  | NA                 | NA                            | NA                 |
| <i>Desi_wild_4188960</i> | NA                                  | <i>Ca_desi_denovo</i> | 4188960                 | C/G  | NA                 | NA                            | NA                 |
| <i>Desi_wild_4189045</i> | NA                                  | <i>Ca_desi_denovo</i> | 4189045                 | G/A  | NA                 | NA                            | NA                 |
| <i>Desi_wild_4189103</i> | NA                                  | <i>Ca_desi_denovo</i> | 4189103                 | C/T  | NA                 | NA                            | NA                 |
| <i>Desi_wild_4190672</i> | NA                                  | <i>Ca_desi_denovo</i> | 4190672                 | C/G  | NA                 | NA                            | NA                 |
| <i>Desi_wild_4190707</i> | NA                                  | <i>Ca_desi_denovo</i> | 4190707                 | C/G  | NA                 | NA                            | NA                 |
| <i>Desi_wild_4190716</i> | NA                                  | <i>Ca_desi_denovo</i> | 4190716                 | C/T  | NA                 | NA                            | NA                 |
| <i>Desi_wild_4191320</i> | NA                                  | <i>Ca_desi_denovo</i> | 4191320                 | A/G  | NA                 | NA                            | NA                 |
| <i>Desi_wild_4191325</i> | NA                                  | <i>Ca_desi_denovo</i> | 4191325                 | T/C  | NA                 | NA                            | NA                 |
| <i>Desi_wild_4191471</i> | NA                                  | <i>Ca_desi_denovo</i> | 4191471                 | G/T  | NA                 | NA                            | NA                 |
| <i>Desi_wild_4192505</i> | NA                                  | <i>Ca_desi_denovo</i> | 4192505                 | A/C  | NA                 | NA                            | NA                 |
| <i>Desi_wild_4192506</i> | NA                                  | <i>Ca_desi_denovo</i> | 4192506                 | A/G  | NA                 | NA                            | NA                 |
| <i>Desi_wild_4192577</i> | NA                                  | <i>Ca_desi_denovo</i> | 4192577                 | T/C  | NA                 | NA                            | NA                 |
| <i>Desi_wild_4197126</i> | NA                                  | <i>Ca_desi_denovo</i> | 4197126                 | C/T  | NA                 | NA                            | NA                 |
| <i>Desi_wild_4197586</i> | NA                                  | <i>Ca_desi_denovo</i> | 4197586                 | T/A  | NA                 | NA                            | NA                 |
| <i>Desi_wild_4197944</i> | NA                                  | <i>Ca_desi_denovo</i> | 4197944                 | A/G  | NA                 | NA                            | NA                 |
| <i>Desi_wild_4198514</i> | NA                                  | <i>Ca_desi_denovo</i> | 4198514                 | T/C  | NA                 | NA                            | NA                 |
| <i>Desi_wild_4199446</i> | NA                                  | <i>Ca_desi_denovo</i> | 4199446                 | A/G  | NA                 | NA                            | NA                 |
| <i>Desi_wild_4199913</i> | NA                                  | <i>Ca_desi_denovo</i> | 4199913                 | T/C  | NA                 | NA                            | NA                 |
| <i>Desi_wild_4199946</i> | NA                                  | <i>Ca_desi_denovo</i> | 4199946                 | C/G  | NA                 | NA                            | NA                 |
| <i>Desi_wild_4200089</i> | NA                                  | <i>Ca_desi_denovo</i> | 4200089                 | C/T  | NA                 | NA                            | NA                 |
| <i>Desi_wild_4200113</i> | NA                                  | <i>Ca_desi_denovo</i> | 4200113                 | T/C  | NA                 | NA                            | NA                 |
| <i>Desi_wild_4200788</i> | NA                                  | <i>Ca_desi_denovo</i> | 4200788                 | A/C  | NA                 | NA                            | NA                 |
| <i>Desi_wild_4202121</i> | NA                                  | <i>Ca_desi_denovo</i> | 4202121                 | G/A  | NA                 | NA                            | NA                 |
| <i>Desi_wild_4202238</i> | NA                                  | <i>Ca_desi_denovo</i> | 4202238                 | T/C  | NA                 | NA                            | NA                 |
| <i>Desi_wild_4202241</i> | NA                                  | <i>Ca_desi_denovo</i> | 4202241                 | C/G  | NA                 | NA                            | NA                 |
| <i>Desi_wild_4202783</i> | NA                                  | <i>Ca_desi_denovo</i> | 4202783                 | T/C  | NA                 | NA                            | NA                 |
| <i>Desi_wild_4203001</i> | NA                                  | <i>Ca_desi_denovo</i> | 4203001                 | T/C  | NA                 | NA                            | NA                 |
| <i>Desi_wild_4203043</i> | NA                                  | <i>Ca_desi_denovo</i> | 4203043                 | T/C  | NA                 | NA                            | NA                 |
| <i>Desi_wild_4204072</i> | NA                                  | <i>Ca_desi_denovo</i> | 4204072                 | A/G  | NA                 | NA                            | NA                 |
| <i>Desi_wild_4204143</i> | NA                                  | <i>Ca_desi_denovo</i> | 4204143                 | T/C  | NA                 | NA                            | NA                 |
| <i>Desi_wild_4204249</i> | NA                                  | <i>Ca_desi_denovo</i> | 4204249                 | A/G  | NA                 | NA                            | NA                 |
| <i>Desi_wild_4205150</i> | NA                                  | <i>Ca_desi_denovo</i> | 4205150                 | A/G  | NA                 | NA                            | NA                 |
| <i>Desi_wild_4206077</i> | NA                                  | <i>Ca_desi_denovo</i> | 4206077                 | C/T  | NA                 | NA                            | NA                 |
| <i>Desi_wild_4206582</i> | NA                                  | <i>Ca_desi_denovo</i> | 4206582                 | T/C  | NA                 | NA                            | NA                 |
| <i>Desi_wild_4206651</i> | NA                                  | <i>Ca_desi_denovo</i> | 4206651                 | T/G  | NA                 | NA                            | NA                 |
| <i>Desi_wild_4207024</i> | NA                                  | <i>Ca_desi_denovo</i> | 4207024                 | G/T  | NA                 | NA                            | NA                 |
| <i>Desi_wild_4207553</i> | NA                                  | <i>Ca_desi_denovo</i> | 4207553                 | A/G  | NA                 | NA                            | NA                 |

| SNP IDs                  | NCBI dbSNP accession IDs (NCBI_SS#) | Chromosomes           | Physical positions (bp) | SNPs | Gene accession IDs | Sequence components of genome | Putative functions |
|--------------------------|-------------------------------------|-----------------------|-------------------------|------|--------------------|-------------------------------|--------------------|
| <i>Desi_wild_4207678</i> | NA                                  | <i>Ca_desi_denovo</i> | 4207678                 | C/G  | NA                 | NA                            | NA                 |
| <i>Desi_wild_4207681</i> | NA                                  | <i>Ca_desi_denovo</i> | 4207681                 | T/C  | NA                 | NA                            | NA                 |
| <i>Desi_wild_4207711</i> | NA                                  | <i>Ca_desi_denovo</i> | 4207711                 | T/C  | NA                 | NA                            | NA                 |
| <i>Desi_wild_4207730</i> | NA                                  | <i>Ca_desi_denovo</i> | 4207730                 | C/G  | NA                 | NA                            | NA                 |
| <i>Desi_wild_4207902</i> | NA                                  | <i>Ca_desi_denovo</i> | 4207902                 | T/G  | NA                 | NA                            | NA                 |
| <i>Desi_wild_4208440</i> | NA                                  | <i>Ca_desi_denovo</i> | 4208440                 | A/G  | NA                 | NA                            | NA                 |
| <i>Desi_wild_4209211</i> | NA                                  | <i>Ca_desi_denovo</i> | 4209211                 | C/T  | NA                 | NA                            | NA                 |
| <i>Desi_wild_4209891</i> | NA                                  | <i>Ca_desi_denovo</i> | 4209891                 | T/C  | NA                 | NA                            | NA                 |
| <i>Desi_wild_4210081</i> | NA                                  | <i>Ca_desi_denovo</i> | 4210081                 | A/C  | NA                 | NA                            | NA                 |
| <i>Desi_wild_4210570</i> | NA                                  | <i>Ca_desi_denovo</i> | 4210570                 | T/C  | NA                 | NA                            | NA                 |
| <i>Desi_wild_4211144</i> | NA                                  | <i>Ca_desi_denovo</i> | 4211144                 | G/A  | NA                 | NA                            | NA                 |
| <i>Desi_wild_4212461</i> | NA                                  | <i>Ca_desi_denovo</i> | 4212461                 | A/G  | NA                 | NA                            | NA                 |
| <i>Desi_wild_4212585</i> | NA                                  | <i>Ca_desi_denovo</i> | 4212585                 | A/C  | NA                 | NA                            | NA                 |
| <i>Desi_wild_4215505</i> | NA                                  | <i>Ca_desi_denovo</i> | 4215505                 | A/C  | NA                 | NA                            | NA                 |
| <i>Desi_wild_4215529</i> | NA                                  | <i>Ca_desi_denovo</i> | 4215529                 | A/G  | NA                 | NA                            | NA                 |
| <i>Desi_wild_4216865</i> | NA                                  | <i>Ca_desi_denovo</i> | 4216865                 | C/T  | NA                 | NA                            | NA                 |
| <i>Desi_wild_4217694</i> | NA                                  | <i>Ca_desi_denovo</i> | 4217694                 | G/A  | NA                 | NA                            | NA                 |
| <i>Desi_wild_4217905</i> | NA                                  | <i>Ca_desi_denovo</i> | 4217905                 | T/C  | NA                 | NA                            | NA                 |
| <i>Desi_wild_4218078</i> | NA                                  | <i>Ca_desi_denovo</i> | 4218078                 | T/C  | NA                 | NA                            | NA                 |
| <i>Desi_wild_4218105</i> | NA                                  | <i>Ca_desi_denovo</i> | 4218105                 | C/G  | NA                 | NA                            | NA                 |
| <i>Desi_wild_4218236</i> | NA                                  | <i>Ca_desi_denovo</i> | 4218236                 | C/G  | NA                 | NA                            | NA                 |
| <i>Desi_wild_4218242</i> | NA                                  | <i>Ca_desi_denovo</i> | 4218242                 | T/C  | NA                 | NA                            | NA                 |
| <i>Desi_wild_4218245</i> | NA                                  | <i>Ca_desi_denovo</i> | 4218245                 | A/C  | NA                 | NA                            | NA                 |
| <i>Desi_wild_4218372</i> | NA                                  | <i>Ca_desi_denovo</i> | 4218372                 | C/A  | NA                 | NA                            | NA                 |
| <i>Desi_wild_4218378</i> | NA                                  | <i>Ca_desi_denovo</i> | 4218378                 | T/C  | NA                 | NA                            | NA                 |
| <i>Desi_wild_4218911</i> | NA                                  | <i>Ca_desi_denovo</i> | 4218911                 | T/C  | NA                 | NA                            | NA                 |
| <i>Desi_wild_4219979</i> | NA                                  | <i>Ca_desi_denovo</i> | 4219979                 | A/T  | NA                 | NA                            | NA                 |
| <i>Desi_wild_4220315</i> | NA                                  | <i>Ca_desi_denovo</i> | 4220315                 | T/G  | NA                 | NA                            | NA                 |
| <i>Desi_wild_4222325</i> | NA                                  | <i>Ca_desi_denovo</i> | 4222325                 | G/T  | NA                 | NA                            | NA                 |
| <i>Desi_wild_4222617</i> | NA                                  | <i>Ca_desi_denovo</i> | 4222617                 | T/G  | NA                 | NA                            | NA                 |
| <i>Desi_wild_4222998</i> | NA                                  | <i>Ca_desi_denovo</i> | 4222998                 | C/G  | NA                 | NA                            | NA                 |
| <i>Desi_wild_4223010</i> | NA                                  | <i>Ca_desi_denovo</i> | 4223010                 | T/C  | NA                 | NA                            | NA                 |
| <i>Desi_wild_4223094</i> | NA                                  | <i>Ca_desi_denovo</i> | 4223094                 | G/C  | NA                 | NA                            | NA                 |
| <i>Desi_wild_4223150</i> | NA                                  | <i>Ca_desi_denovo</i> | 4223150                 | G/A  | NA                 | NA                            | NA                 |
| <i>Desi_wild_4223531</i> | NA                                  | <i>Ca_desi_denovo</i> | 4223531                 | A/T  | NA                 | NA                            | NA                 |
| <i>Desi_wild_4225454</i> | NA                                  | <i>Ca_desi_denovo</i> | 4225454                 | T/G  | NA                 | NA                            | NA                 |
| <i>Desi_wild_4225455</i> | NA                                  | <i>Ca_desi_denovo</i> | 4225455                 | C/A  | NA                 | NA                            | NA                 |
| <i>Desi_wild_4225560</i> | NA                                  | <i>Ca_desi_denovo</i> | 4225560                 | C/G  | NA                 | NA                            | NA                 |
| <i>Desi_wild_4226007</i> | NA                                  | <i>Ca_desi_denovo</i> | 4226007                 | G/A  | NA                 | NA                            | NA                 |
| <i>Desi_wild_4226022</i> | NA                                  | <i>Ca_desi_denovo</i> | 4226022                 | A/G  | NA                 | NA                            | NA                 |
| <i>Desi_wild_4226211</i> | NA                                  | <i>Ca_desi_denovo</i> | 4226211                 | G/A  | NA                 | NA                            | NA                 |
| <i>Desi_wild_4226219</i> | NA                                  | <i>Ca_desi_denovo</i> | 4226219                 | T/G  | NA                 | NA                            | NA                 |
| <i>Desi_wild_4226231</i> | NA                                  | <i>Ca_desi_denovo</i> | 4226231                 | T/C  | NA                 | NA                            | NA                 |
| <i>Desi_wild_4226386</i> | NA                                  | <i>Ca_desi_denovo</i> | 4226386                 | C/A  | NA                 | NA                            | NA                 |

| SNP IDs                  | NCBI dbSNP accession IDs (NCBI_SS#) | Chromosomes           | Physical positions (bp) | SNPs | Gene accession IDs | Sequence components of genome | Putative functions |
|--------------------------|-------------------------------------|-----------------------|-------------------------|------|--------------------|-------------------------------|--------------------|
| <i>Desi_wild_4226938</i> | NA                                  | <i>Ca_desi_denovo</i> | 4226938                 | T/G  | NA                 | NA                            | NA                 |
| <i>Desi_wild_4227566</i> | NA                                  | <i>Ca_desi_denovo</i> | 4227566                 | A/G  | NA                 | NA                            | NA                 |
| <i>Desi_wild_4227751</i> | NA                                  | <i>Ca_desi_denovo</i> | 4227751                 | G/A  | NA                 | NA                            | NA                 |
| <i>Desi_wild_4227784</i> | NA                                  | <i>Ca_desi_denovo</i> | 4227784                 | G/A  | NA                 | NA                            | NA                 |
| <i>Desi_wild_4228035</i> | NA                                  | <i>Ca_desi_denovo</i> | 4228035                 | C/T  | NA                 | NA                            | NA                 |
| <i>Desi_wild_4228038</i> | NA                                  | <i>Ca_desi_denovo</i> | 4228038                 | A/G  | NA                 | NA                            | NA                 |
| <i>Desi_wild_4228503</i> | NA                                  | <i>Ca_desi_denovo</i> | 4228503                 | G/C  | NA                 | NA                            | NA                 |
| <i>Desi_wild_4228522</i> | NA                                  | <i>Ca_desi_denovo</i> | 4228522                 | C/G  | NA                 | NA                            | NA                 |
| <i>Desi_wild_4228616</i> | NA                                  | <i>Ca_desi_denovo</i> | 4228616                 | C/T  | NA                 | NA                            | NA                 |
| <i>Desi_wild_4228664</i> | NA                                  | <i>Ca_desi_denovo</i> | 4228664                 | T/G  | NA                 | NA                            | NA                 |
| <i>Desi_wild_4229082</i> | NA                                  | <i>Ca_desi_denovo</i> | 4229082                 | T/C  | NA                 | NA                            | NA                 |
| <i>Desi_wild_4229697</i> | NA                                  | <i>Ca_desi_denovo</i> | 4229697                 | C/T  | NA                 | NA                            | NA                 |
| <i>Desi_wild_4229870</i> | NA                                  | <i>Ca_desi_denovo</i> | 4229870                 | C/A  | NA                 | NA                            | NA                 |
| <i>Desi_wild_4229874</i> | NA                                  | <i>Ca_desi_denovo</i> | 4229874                 | A/G  | NA                 | NA                            | NA                 |
| <i>Desi_wild_4230570</i> | NA                                  | <i>Ca_desi_denovo</i> | 4230570                 | G/A  | NA                 | NA                            | NA                 |
| <i>Desi_wild_4230594</i> | NA                                  | <i>Ca_desi_denovo</i> | 4230594                 | A/G  | NA                 | NA                            | NA                 |
| <i>Desi_wild_4231229</i> | NA                                  | <i>Ca_desi_denovo</i> | 4231229                 | C/T  | NA                 | NA                            | NA                 |
| <i>Desi_wild_4231819</i> | NA                                  | <i>Ca_desi_denovo</i> | 4231819                 | C/G  | NA                 | NA                            | NA                 |
| <i>Desi_wild_4231846</i> | NA                                  | <i>Ca_desi_denovo</i> | 4231846                 | A/G  | NA                 | NA                            | NA                 |
| <i>Desi_wild_4233065</i> | NA                                  | <i>Ca_desi_denovo</i> | 4233065                 | G/T  | NA                 | NA                            | NA                 |
| <i>Desi_wild_4233451</i> | NA                                  | <i>Ca_desi_denovo</i> | 4233451                 | A/G  | NA                 | NA                            | NA                 |
| <i>Desi_wild_4233495</i> | NA                                  | <i>Ca_desi_denovo</i> | 4233495                 | T/C  | NA                 | NA                            | NA                 |
| <i>Desi_wild_4233889</i> | NA                                  | <i>Ca_desi_denovo</i> | 4233889                 | C/T  | NA                 | NA                            | NA                 |
| <i>Desi_wild_4233910</i> | NA                                  | <i>Ca_desi_denovo</i> | 4233910                 | T/C  | NA                 | NA                            | NA                 |
| <i>Desi_wild_4234320</i> | NA                                  | <i>Ca_desi_denovo</i> | 4234320                 | A/G  | NA                 | NA                            | NA                 |
| <i>Desi_wild_4234568</i> | NA                                  | <i>Ca_desi_denovo</i> | 4234568                 | A/G  | NA                 | NA                            | NA                 |
| <i>Desi_wild_4234573</i> | NA                                  | <i>Ca_desi_denovo</i> | 4234573                 | C/T  | NA                 | NA                            | NA                 |
| <i>Desi_wild_4235485</i> | NA                                  | <i>Ca_desi_denovo</i> | 4235485                 | G/A  | NA                 | NA                            | NA                 |
| <i>Desi_wild_4235503</i> | NA                                  | <i>Ca_desi_denovo</i> | 4235503                 | A/G  | NA                 | NA                            | NA                 |
| <i>Desi_wild_4236456</i> | NA                                  | <i>Ca_desi_denovo</i> | 4236456                 | T/A  | NA                 | NA                            | NA                 |
| <i>Desi_wild_4237754</i> | NA                                  | <i>Ca_desi_denovo</i> | 4237754                 | C/T  | NA                 | NA                            | NA                 |
| <i>Desi_wild_4238408</i> | NA                                  | <i>Ca_desi_denovo</i> | 4238408                 | A/G  | NA                 | NA                            | NA                 |
| <i>Desi_wild_4238459</i> | NA                                  | <i>Ca_desi_denovo</i> | 4238459                 | G/A  | NA                 | NA                            | NA                 |
| <i>Desi_wild_4239776</i> | NA                                  | <i>Ca_desi_denovo</i> | 4239776                 | T/G  | NA                 | NA                            | NA                 |
| <i>Desi_wild_4239796</i> | NA                                  | <i>Ca_desi_denovo</i> | 4239796                 | A/G  | NA                 | NA                            | NA                 |
| <i>Desi_wild_4239864</i> | NA                                  | <i>Ca_desi_denovo</i> | 4239864                 | G/T  | NA                 | NA                            | NA                 |
| <i>Desi_wild_4240636</i> | NA                                  | <i>Ca_desi_denovo</i> | 4240636                 | G/A  | NA                 | NA                            | NA                 |
| <i>Desi_wild_4241605</i> | NA                                  | <i>Ca_desi_denovo</i> | 4241605                 | T/C  | NA                 | NA                            | NA                 |
| <i>Desi_wild_4241642</i> | NA                                  | <i>Ca_desi_denovo</i> | 4241642                 | A/G  | NA                 | NA                            | NA                 |
| <i>Desi_wild_4241888</i> | NA                                  | <i>Ca_desi_denovo</i> | 4241888                 | G/C  | NA                 | NA                            | NA                 |
| <i>Desi_wild_4241898</i> | NA                                  | <i>Ca_desi_denovo</i> | 4241898                 | T/C  | NA                 | NA                            | NA                 |
| <i>Desi_wild_4242596</i> | NA                                  | <i>Ca_desi_denovo</i> | 4242596                 | G/A  | NA                 | NA                            | NA                 |
| <i>Desi_wild_4243211</i> | NA                                  | <i>Ca_desi_denovo</i> | 4243211                 | T/C  | NA                 | NA                            | NA                 |
| <i>Desi_wild_4244172</i> | NA                                  | <i>Ca_desi_denovo</i> | 4244172                 | G/A  | NA                 | NA                            | NA                 |

| SNP IDs                  | NCBI dbSNP accession IDs (NCBI_SS#) | Chromosomes           | Physical positions (bp) | SNPs | Gene accession IDs | Sequence components of genome | Putative functions |
|--------------------------|-------------------------------------|-----------------------|-------------------------|------|--------------------|-------------------------------|--------------------|
| <i>Desi_wild_4245578</i> | NA                                  | <i>Ca_desi_denovo</i> | 4245578                 | G/C  | NA                 | NA                            | NA                 |
| <i>Desi_wild_4245608</i> | NA                                  | <i>Ca_desi_denovo</i> | 4245608                 | A/G  | NA                 | NA                            | NA                 |
| <i>Desi_wild_4245692</i> | NA                                  | <i>Ca_desi_denovo</i> | 4245692                 | G/A  | NA                 | NA                            | NA                 |
| <i>Desi_wild_4246178</i> | NA                                  | <i>Ca_desi_denovo</i> | 4246178                 | C/T  | NA                 | NA                            | NA                 |
| <i>Desi_wild_4247525</i> | NA                                  | <i>Ca_desi_denovo</i> | 4247525                 | C/G  | NA                 | NA                            | NA                 |
| <i>Desi_wild_4247540</i> | NA                                  | <i>Ca_desi_denovo</i> | 4247540                 | G/A  | NA                 | NA                            | NA                 |
| <i>Desi_wild_4247836</i> | NA                                  | <i>Ca_desi_denovo</i> | 4247836                 | C/G  | NA                 | NA                            | NA                 |
| <i>Desi_wild_4248422</i> | NA                                  | <i>Ca_desi_denovo</i> | 4248422                 | C/T  | NA                 | NA                            | NA                 |
| <i>Desi_wild_4248483</i> | NA                                  | <i>Ca_desi_denovo</i> | 4248483                 | C/G  | NA                 | NA                            | NA                 |
| <i>Desi_wild_4248901</i> | NA                                  | <i>Ca_desi_denovo</i> | 4248901                 | T/C  | NA                 | NA                            | NA                 |
| <i>Desi_wild_4249504</i> | NA                                  | <i>Ca_desi_denovo</i> | 4249504                 | G/A  | NA                 | NA                            | NA                 |
| <i>Desi_wild_4249506</i> | NA                                  | <i>Ca_desi_denovo</i> | 4249506                 | T/C  | NA                 | NA                            | NA                 |
| <i>Desi_wild_4250113</i> | NA                                  | <i>Ca_desi_denovo</i> | 4250113                 | C/T  | NA                 | NA                            | NA                 |
| <i>Desi_wild_4250280</i> | NA                                  | <i>Ca_desi_denovo</i> | 4250280                 | G/T  | NA                 | NA                            | NA                 |
| <i>Desi_wild_4251480</i> | NA                                  | <i>Ca_desi_denovo</i> | 4251480                 | A/C  | NA                 | NA                            | NA                 |
| <i>Desi_wild_4251976</i> | NA                                  | <i>Ca_desi_denovo</i> | 4251976                 | A/G  | NA                 | NA                            | NA                 |
| <i>Desi_wild_4252135</i> | NA                                  | <i>Ca_desi_denovo</i> | 4252135                 | C/T  | NA                 | NA                            | NA                 |
| <i>Desi_wild_4252142</i> | NA                                  | <i>Ca_desi_denovo</i> | 4252142                 | G/A  | NA                 | NA                            | NA                 |
| <i>Desi_wild_4252734</i> | NA                                  | <i>Ca_desi_denovo</i> | 4252734                 | C/G  | NA                 | NA                            | NA                 |
| <i>Desi_wild_4252737</i> | NA                                  | <i>Ca_desi_denovo</i> | 4252737                 | A/G  | NA                 | NA                            | NA                 |
| <i>Desi_wild_4252741</i> | NA                                  | <i>Ca_desi_denovo</i> | 4252741                 | A/G  | NA                 | NA                            | NA                 |
| <i>Desi_wild_4256381</i> | NA                                  | <i>Ca_desi_denovo</i> | 4256381                 | G/C  | NA                 | NA                            | NA                 |
| <i>Desi_wild_4256451</i> | NA                                  | <i>Ca_desi_denovo</i> | 4256451                 | C/T  | NA                 | NA                            | NA                 |
| <i>Desi_wild_4257172</i> | NA                                  | <i>Ca_desi_denovo</i> | 4257172                 | G/C  | NA                 | NA                            | NA                 |
| <i>Desi_wild_4257801</i> | NA                                  | <i>Ca_desi_denovo</i> | 4257801                 | G/A  | NA                 | NA                            | NA                 |
| <i>Desi_wild_4257815</i> | NA                                  | <i>Ca_desi_denovo</i> | 4257815                 | T/C  | NA                 | NA                            | NA                 |
| <i>Desi_wild_4257816</i> | NA                                  | <i>Ca_desi_denovo</i> | 4257816                 | T/C  | NA                 | NA                            | NA                 |
| <i>Desi_wild_4258062</i> | NA                                  | <i>Ca_desi_denovo</i> | 4258062                 | A/G  | NA                 | NA                            | NA                 |
| <i>Desi_wild_4259231</i> | NA                                  | <i>Ca_desi_denovo</i> | 4259231                 | G/C  | NA                 | NA                            | NA                 |
| <i>Desi_wild_4259237</i> | NA                                  | <i>Ca_desi_denovo</i> | 4259237                 | G/A  | NA                 | NA                            | NA                 |
| <i>Desi_wild_4260148</i> | NA                                  | <i>Ca_desi_denovo</i> | 4260148                 | C/T  | NA                 | NA                            | NA                 |
| <i>Desi_wild_4260420</i> | NA                                  | <i>Ca_desi_denovo</i> | 4260420                 | C/T  | NA                 | NA                            | NA                 |
| <i>Desi_wild_4260449</i> | NA                                  | <i>Ca_desi_denovo</i> | 4260449                 | T/G  | NA                 | NA                            | NA                 |
| <i>Desi_wild_4260510</i> | NA                                  | <i>Ca_desi_denovo</i> | 4260510                 | C/T  | NA                 | NA                            | NA                 |
| <i>Desi_wild_4260591</i> | NA                                  | <i>Ca_desi_denovo</i> | 4260591                 | C/A  | NA                 | NA                            | NA                 |
| <i>Desi_wild_4260810</i> | NA                                  | <i>Ca_desi_denovo</i> | 4260810                 | T/C  | NA                 | NA                            | NA                 |
| <i>Desi_wild_4262069</i> | NA                                  | <i>Ca_desi_denovo</i> | 4262069                 | C/G  | NA                 | NA                            | NA                 |
| <i>Desi_wild_4262090</i> | NA                                  | <i>Ca_desi_denovo</i> | 4262090                 | T/C  | NA                 | NA                            | NA                 |
| <i>Desi_wild_4262289</i> | NA                                  | <i>Ca_desi_denovo</i> | 4262289                 | A/T  | NA                 | NA                            | NA                 |
| <i>Desi_wild_4262551</i> | NA                                  | <i>Ca_desi_denovo</i> | 4262551                 | T/C  | NA                 | NA                            | NA                 |
| <i>Desi_wild_4263166</i> | NA                                  | <i>Ca_desi_denovo</i> | 4263166                 | T/G  | NA                 | NA                            | NA                 |
| <i>Desi_wild_4263432</i> | NA                                  | <i>Ca_desi_denovo</i> | 4263432                 | T/C  | NA                 | NA                            | NA                 |
| <i>Desi_wild_4264220</i> | NA                                  | <i>Ca_desi_denovo</i> | 4264220                 | C/T  | NA                 | NA                            | NA                 |
| <i>Desi_wild_4266233</i> | NA                                  | <i>Ca_desi_denovo</i> | 4266233                 | A/G  | NA                 | NA                            | NA                 |

| SNP IDs                  | NCBI dbSNP accession IDs (NCBI_SS#) | Chromosomes           | Physical positions (bp) | SNPs | Gene accession IDs | Sequence components of genome | Putative functions |
|--------------------------|-------------------------------------|-----------------------|-------------------------|------|--------------------|-------------------------------|--------------------|
| <i>Desi_wild_4267248</i> | NA                                  | <i>Ca_desi_denovo</i> | 4267248                 | C/G  | NA                 | NA                            | NA                 |
| <i>Desi_wild_4267576</i> | NA                                  | <i>Ca_desi_denovo</i> | 4267576                 | C/G  | NA                 | NA                            | NA                 |
| <i>Desi_wild_4268383</i> | NA                                  | <i>Ca_desi_denovo</i> | 4268383                 | T/C  | NA                 | NA                            | NA                 |
| <i>Desi_wild_4269353</i> | NA                                  | <i>Ca_desi_denovo</i> | 4269353                 | A/G  | NA                 | NA                            | NA                 |
| <i>Desi_wild_4269355</i> | NA                                  | <i>Ca_desi_denovo</i> | 4269355                 | A/G  | NA                 | NA                            | NA                 |
| <i>Desi_wild_4269870</i> | NA                                  | <i>Ca_desi_denovo</i> | 4269870                 | C/T  | NA                 | NA                            | NA                 |
| <i>Desi_wild_4270158</i> | NA                                  | <i>Ca_desi_denovo</i> | 4270158                 | A/G  | NA                 | NA                            | NA                 |
| <i>Desi_wild_4270220</i> | NA                                  | <i>Ca_desi_denovo</i> | 4270220                 | G/A  | NA                 | NA                            | NA                 |
| <i>Desi_wild_4271288</i> | NA                                  | <i>Ca_desi_denovo</i> | 4271288                 | C/T  | NA                 | NA                            | NA                 |
| <i>Desi_wild_4271681</i> | NA                                  | <i>Ca_desi_denovo</i> | 4271681                 | T/G  | NA                 | NA                            | NA                 |
| <i>Desi_wild_4271876</i> | NA                                  | <i>Ca_desi_denovo</i> | 4271876                 | T/C  | NA                 | NA                            | NA                 |
| <i>Desi_wild_4271887</i> | NA                                  | <i>Ca_desi_denovo</i> | 4271887                 | G/A  | NA                 | NA                            | NA                 |
| <i>Desi_wild_4272027</i> | NA                                  | <i>Ca_desi_denovo</i> | 4272027                 | G/T  | NA                 | NA                            | NA                 |
| <i>Desi_wild_4272045</i> | NA                                  | <i>Ca_desi_denovo</i> | 4272045                 | C/G  | NA                 | NA                            | NA                 |
| <i>Desi_wild_4272654</i> | NA                                  | <i>Ca_desi_denovo</i> | 4272654                 | T/C  | NA                 | NA                            | NA                 |
| <i>Desi_wild_4272669</i> | NA                                  | <i>Ca_desi_denovo</i> | 4272669                 | G/A  | NA                 | NA                            | NA                 |
| <i>Desi_wild_4273236</i> | NA                                  | <i>Ca_desi_denovo</i> | 4273236                 | C/G  | NA                 | NA                            | NA                 |
| <i>Desi_wild_4273537</i> | NA                                  | <i>Ca_desi_denovo</i> | 4273537                 | G/A  | NA                 | NA                            | NA                 |
| <i>Desi_wild_4274032</i> | NA                                  | <i>Ca_desi_denovo</i> | 4274032                 | T/C  | NA                 | NA                            | NA                 |
| <i>Desi_wild_4274044</i> | NA                                  | <i>Ca_desi_denovo</i> | 4274044                 | A/G  | NA                 | NA                            | NA                 |
| <i>Desi_wild_4274102</i> | NA                                  | <i>Ca_desi_denovo</i> | 4274102                 | T/C  | NA                 | NA                            | NA                 |
| <i>Desi_wild_4274110</i> | NA                                  | <i>Ca_desi_denovo</i> | 4274110                 | A/G  | NA                 | NA                            | NA                 |
| <i>Desi_wild_4274421</i> | NA                                  | <i>Ca_desi_denovo</i> | 4274421                 | G/A  | NA                 | NA                            | NA                 |
| <i>Desi_wild_4274826</i> | NA                                  | <i>Ca_desi_denovo</i> | 4274826                 | G/A  | NA                 | NA                            | NA                 |
| <i>Desi_wild_4276258</i> | NA                                  | <i>Ca_desi_denovo</i> | 4276258                 | T/G  | NA                 | NA                            | NA                 |
| <i>Desi_wild_4276652</i> | NA                                  | <i>Ca_desi_denovo</i> | 4276652                 | C/T  | NA                 | NA                            | NA                 |
| <i>Desi_wild_4277034</i> | NA                                  | <i>Ca_desi_denovo</i> | 4277034                 | T/C  | NA                 | NA                            | NA                 |
| <i>Desi_wild_4277982</i> | NA                                  | <i>Ca_desi_denovo</i> | 4277982                 | T/C  | NA                 | NA                            | NA                 |
| <i>Desi_wild_4278664</i> | NA                                  | <i>Ca_desi_denovo</i> | 4278664                 | C/T  | NA                 | NA                            | NA                 |
| <i>Desi_wild_4278730</i> | NA                                  | <i>Ca_desi_denovo</i> | 4278730                 | C/T  | NA                 | NA                            | NA                 |
| <i>Desi_wild_4278988</i> | NA                                  | <i>Ca_desi_denovo</i> | 4278988                 | A/G  | NA                 | NA                            | NA                 |
| <i>Desi_wild_4278999</i> | NA                                  | <i>Ca_desi_denovo</i> | 4278999                 | G/A  | NA                 | NA                            | NA                 |
| <i>Desi_wild_4280447</i> | NA                                  | <i>Ca_desi_denovo</i> | 4280447                 | G/T  | NA                 | NA                            | NA                 |
| <i>Desi_wild_4280703</i> | NA                                  | <i>Ca_desi_denovo</i> | 4280703                 | T/C  | NA                 | NA                            | NA                 |
| <i>Desi_wild_4280743</i> | NA                                  | <i>Ca_desi_denovo</i> | 4280743                 | G/A  | NA                 | NA                            | NA                 |
| <i>Desi_wild_4281720</i> | NA                                  | <i>Ca_desi_denovo</i> | 4281720                 | A/G  | NA                 | NA                            | NA                 |
| <i>Desi_wild_4282360</i> | NA                                  | <i>Ca_desi_denovo</i> | 4282360                 | C/G  | NA                 | NA                            | NA                 |
| <i>Desi_wild_4283174</i> | NA                                  | <i>Ca_desi_denovo</i> | 4283174                 | C/T  | NA                 | NA                            | NA                 |
| <i>Desi_wild_4283555</i> | NA                                  | <i>Ca_desi_denovo</i> | 4283555                 | A/G  | NA                 | NA                            | NA                 |
| <i>Desi_wild_4283556</i> | NA                                  | <i>Ca_desi_denovo</i> | 4283556                 | G/A  | NA                 | NA                            | NA                 |
| <i>Desi_wild_4283766</i> | NA                                  | <i>Ca_desi_denovo</i> | 4283766                 | C/G  | NA                 | NA                            | NA                 |
| <i>Desi_wild_4283896</i> | NA                                  | <i>Ca_desi_denovo</i> | 4283896                 | C/G  | NA                 | NA                            | NA                 |
| <i>Desi_wild_4284384</i> | NA                                  | <i>Ca_desi_denovo</i> | 4284384                 | G/C  | NA                 | NA                            | NA                 |
| <i>Desi_wild_4284786</i> | NA                                  | <i>Ca_desi_denovo</i> | 4284786                 | C/G  | NA                 | NA                            | NA                 |

| SNP IDs                  | NCBI dbSNP accession IDs (NCBI_SS#) | Chromosomes           | Physical positions (bp) | SNPs | Gene accession IDs | Sequence components of genome | Putative functions |
|--------------------------|-------------------------------------|-----------------------|-------------------------|------|--------------------|-------------------------------|--------------------|
| <i>Desi_wild_4284828</i> | NA                                  | <i>Ca_desi_denovo</i> | 4284828                 | T/G  | NA                 | NA                            | NA                 |
| <i>Desi_wild_4285303</i> | NA                                  | <i>Ca_desi_denovo</i> | 4285303                 | T/C  | NA                 | NA                            | NA                 |
| <i>Desi_wild_4285305</i> | NA                                  | <i>Ca_desi_denovo</i> | 4285305                 | A/G  | NA                 | NA                            | NA                 |
| <i>Desi_wild_4285651</i> | NA                                  | <i>Ca_desi_denovo</i> | 4285651                 | T/C  | NA                 | NA                            | NA                 |
| <i>Desi_wild_4285690</i> | NA                                  | <i>Ca_desi_denovo</i> | 4285690                 | C/T  | NA                 | NA                            | NA                 |
| <i>Desi_wild_4287440</i> | NA                                  | <i>Ca_desi_denovo</i> | 4287440                 | T/C  | NA                 | NA                            | NA                 |
| <i>Desi_wild_4287446</i> | NA                                  | <i>Ca_desi_denovo</i> | 4287446                 | T/C  | NA                 | NA                            | NA                 |
| <i>Desi_wild_4288583</i> | NA                                  | <i>Ca_desi_denovo</i> | 4288583                 | A/G  | NA                 | NA                            | NA                 |
| <i>Desi_wild_4288599</i> | NA                                  | <i>Ca_desi_denovo</i> | 4288599                 | G/A  | NA                 | NA                            | NA                 |
| <i>Desi_wild_4289156</i> | NA                                  | <i>Ca_desi_denovo</i> | 4289156                 | G/A  | NA                 | NA                            | NA                 |
| <i>Desi_wild_4289204</i> | NA                                  | <i>Ca_desi_denovo</i> | 4289204                 | G/C  | NA                 | NA                            | NA                 |
| <i>Desi_wild_4290295</i> | NA                                  | <i>Ca_desi_denovo</i> | 4290295                 | A/G  | NA                 | NA                            | NA                 |
| <i>Desi_wild_4290353</i> | NA                                  | <i>Ca_desi_denovo</i> | 4290353                 | G/C  | NA                 | NA                            | NA                 |
| <i>Desi_wild_4290605</i> | NA                                  | <i>Ca_desi_denovo</i> | 4290605                 | G/A  | NA                 | NA                            | NA                 |
| <i>Desi_wild_4290653</i> | NA                                  | <i>Ca_desi_denovo</i> | 4290653                 | T/C  | NA                 | NA                            | NA                 |
| <i>Desi_wild_4291312</i> | NA                                  | <i>Ca_desi_denovo</i> | 4291312                 | A/G  | NA                 | NA                            | NA                 |
| <i>Desi_wild_4291313</i> | NA                                  | <i>Ca_desi_denovo</i> | 4291313                 | T/C  | NA                 | NA                            | NA                 |
| <i>Desi_wild_4291946</i> | NA                                  | <i>Ca_desi_denovo</i> | 4291946                 | G/T  | NA                 | NA                            | NA                 |
| <i>Desi_wild_4292154</i> | NA                                  | <i>Ca_desi_denovo</i> | 4292154                 | A/G  | NA                 | NA                            | NA                 |
| <i>Desi_wild_4292181</i> | NA                                  | <i>Ca_desi_denovo</i> | 4292181                 | G/C  | NA                 | NA                            | NA                 |
| <i>Desi_wild_4295626</i> | NA                                  | <i>Ca_desi_denovo</i> | 4295626                 | C/G  | NA                 | NA                            | NA                 |
| <i>Desi_wild_4295651</i> | NA                                  | <i>Ca_desi_denovo</i> | 4295651                 | C/T  | NA                 | NA                            | NA                 |
| <i>Desi_wild_4296509</i> | NA                                  | <i>Ca_desi_denovo</i> | 4296509                 | C/G  | NA                 | NA                            | NA                 |
| <i>Desi_wild_4296548</i> | NA                                  | <i>Ca_desi_denovo</i> | 4296548                 | T/C  | NA                 | NA                            | NA                 |
| <i>Desi_wild_4297009</i> | NA                                  | <i>Ca_desi_denovo</i> | 4297009                 | A/G  | NA                 | NA                            | NA                 |
| <i>Desi_wild_4297024</i> | NA                                  | <i>Ca_desi_denovo</i> | 4297024                 | A/G  | NA                 | NA                            | NA                 |
| <i>Desi_wild_4297998</i> | NA                                  | <i>Ca_desi_denovo</i> | 4297998                 | C/T  | NA                 | NA                            | NA                 |
| <i>Desi_wild_4298511</i> | NA                                  | <i>Ca_desi_denovo</i> | 4298511                 | C/G  | NA                 | NA                            | NA                 |
| <i>Desi_wild_4298515</i> | NA                                  | <i>Ca_desi_denovo</i> | 4298515                 | T/C  | NA                 | NA                            | NA                 |
| <i>Desi_wild_4298524</i> | NA                                  | <i>Ca_desi_denovo</i> | 4298524                 | T/C  | NA                 | NA                            | NA                 |
| <i>Desi_wild_4300017</i> | NA                                  | <i>Ca_desi_denovo</i> | 4300017                 | C/G  | NA                 | NA                            | NA                 |
| <i>Desi_wild_4300202</i> | NA                                  | <i>Ca_desi_denovo</i> | 4300202                 | G/A  | NA                 | NA                            | NA                 |
| <i>Desi_wild_4300377</i> | NA                                  | <i>Ca_desi_denovo</i> | 4300377                 | A/C  | NA                 | NA                            | NA                 |
| <i>Desi_wild_4300434</i> | NA                                  | <i>Ca_desi_denovo</i> | 4300434                 | T/C  | NA                 | NA                            | NA                 |
| <i>Desi_wild_4301401</i> | NA                                  | <i>Ca_desi_denovo</i> | 4301401                 | C/T  | NA                 | NA                            | NA                 |
| <i>Desi_wild_4301545</i> | NA                                  | <i>Ca_desi_denovo</i> | 4301545                 | C/T  | NA                 | NA                            | NA                 |
| <i>Desi_wild_4301560</i> | NA                                  | <i>Ca_desi_denovo</i> | 4301560                 | A/G  | NA                 | NA                            | NA                 |
| <i>Desi_wild_4302124</i> | NA                                  | <i>Ca_desi_denovo</i> | 4302124                 | T/C  | NA                 | NA                            | NA                 |
| <i>Desi_wild_4302148</i> | NA                                  | <i>Ca_desi_denovo</i> | 4302148                 | T/C  | NA                 | NA                            | NA                 |
| <i>Desi_wild_4303309</i> | NA                                  | <i>Ca_desi_denovo</i> | 4303309                 | A/G  | NA                 | NA                            | NA                 |
| <i>Desi_wild_4303902</i> | NA                                  | <i>Ca_desi_denovo</i> | 4303902                 | T/G  | NA                 | NA                            | NA                 |
| <i>Desi_wild_4303958</i> | NA                                  | <i>Ca_desi_denovo</i> | 4303958                 | C/A  | NA                 | NA                            | NA                 |
| <i>Desi_wild_4304989</i> | NA                                  | <i>Ca_desi_denovo</i> | 4304989                 | C/T  | NA                 | NA                            | NA                 |
| <i>Desi_wild_4304995</i> | NA                                  | <i>Ca_desi_denovo</i> | 4304995                 | C/T  | NA                 | NA                            | NA                 |

| SNP IDs                  | NCBI dbSNP accession IDs (NCBI_SS#) | Chromosomes           | Physical positions (bp) | SNPs | Gene accession IDs | Sequence components of genome | Putative functions |
|--------------------------|-------------------------------------|-----------------------|-------------------------|------|--------------------|-------------------------------|--------------------|
| <i>Desi_wild_4311906</i> | NA                                  | <i>Ca_desi_denovo</i> | 4311906                 | C/T  | NA                 | NA                            | NA                 |
| <i>Desi_wild_4311919</i> | NA                                  | <i>Ca_desi_denovo</i> | 4311919                 | T/C  | NA                 | NA                            | NA                 |
| <i>Desi_wild_4389916</i> | NA                                  | <i>Ca_desi_denovo</i> | 4389916                 | C/G  | NA                 | NA                            | NA                 |
| <i>Desi_wild_4389919</i> | NA                                  | <i>Ca_desi_denovo</i> | 4389919                 | C/T  | NA                 | NA                            | NA                 |
| <i>Desi_wild_4420057</i> | NA                                  | <i>Ca_desi_denovo</i> | 4420057                 | A/G  | NA                 | NA                            | NA                 |
| <i>Desi_wild_4420072</i> | NA                                  | <i>Ca_desi_denovo</i> | 4420072                 | C/T  | NA                 | NA                            | NA                 |
| <i>Desi_wild_4422139</i> | NA                                  | <i>Ca_desi_denovo</i> | 4422139                 | A/G  | NA                 | NA                            | NA                 |
| <i>Desi_wild_4422145</i> | NA                                  | <i>Ca_desi_denovo</i> | 4422145                 | A/T  | NA                 | NA                            | NA                 |
| <i>Desi_wild_4422147</i> | NA                                  | <i>Ca_desi_denovo</i> | 4422147                 | A/G  | NA                 | NA                            | NA                 |
| <i>Desi_wild_4423937</i> | NA                                  | <i>Ca_desi_denovo</i> | 4423937                 | C/G  | NA                 | NA                            | NA                 |
| <i>Desi_wild_4427640</i> | NA                                  | <i>Ca_desi_denovo</i> | 4427640                 | A/G  | NA                 | NA                            | NA                 |
| <i>Desi_wild_4435897</i> | NA                                  | <i>Ca_desi_denovo</i> | 4435897                 | A/G  | NA                 | NA                            | NA                 |
| <i>Desi_wild_4456623</i> | NA                                  | <i>Ca_desi_denovo</i> | 4456623                 | A/G  | NA                 | NA                            | NA                 |
| <i>Desi_wild_4462700</i> | NA                                  | <i>Ca_desi_denovo</i> | 4462700                 | A/G  | NA                 | NA                            | NA                 |
| <i>Desi_wild_4462769</i> | NA                                  | <i>Ca_desi_denovo</i> | 4462769                 | C/G  | NA                 | NA                            | NA                 |
| <i>Desi_wild_4468612</i> | NA                                  | <i>Ca_desi_denovo</i> | 4468612                 | C/G  | NA                 | NA                            | NA                 |
| <i>Desi_wild_4471578</i> | NA                                  | <i>Ca_desi_denovo</i> | 4471578                 | C/G  | NA                 | NA                            | NA                 |
| <i>Desi_wild_4475124</i> | NA                                  | <i>Ca_desi_denovo</i> | 4475124                 | A/C  | NA                 | NA                            | NA                 |
| <i>Desi_wild_4487181</i> | NA                                  | <i>Ca_desi_denovo</i> | 4487181                 | G/T  | NA                 | NA                            | NA                 |
| <i>Desi_wild_4491938</i> | NA                                  | <i>Ca_desi_denovo</i> | 4491938                 | A/C  | NA                 | NA                            | NA                 |
| <i>Desi_wild_4491939</i> | NA                                  | <i>Ca_desi_denovo</i> | 4491939                 | G/T  | NA                 | NA                            | NA                 |
| <i>Desi_wild_4498323</i> | NA                                  | <i>Ca_desi_denovo</i> | 4498323                 | G/C  | NA                 | NA                            | NA                 |
| <i>Desi_wild_4498332</i> | NA                                  | <i>Ca_desi_denovo</i> | 4498332                 | T/C  | NA                 | NA                            | NA                 |
| <i>Desi_wild_4503947</i> | NA                                  | <i>Ca_desi_denovo</i> | 4503947                 | A/G  | NA                 | NA                            | NA                 |
| <i>Desi_wild_4523440</i> | NA                                  | <i>Ca_desi_denovo</i> | 4523440                 | A/C  | NA                 | NA                            | NA                 |
| <i>Desi_wild_4524462</i> | NA                                  | <i>Ca_desi_denovo</i> | 4524462                 | A/G  | NA                 | NA                            | NA                 |
| <i>Desi_wild_4527696</i> | NA                                  | <i>Ca_desi_denovo</i> | 4527696                 | C/T  | NA                 | NA                            | NA                 |
| <i>Desi_wild_4527705</i> | NA                                  | <i>Ca_desi_denovo</i> | 4527705                 | C/T  | NA                 | NA                            | NA                 |
| <i>Desi_wild_4548756</i> | NA                                  | <i>Ca_desi_denovo</i> | 4548756                 | C/T  | NA                 | NA                            | NA                 |
| <i>Desi_wild_4548791</i> | NA                                  | <i>Ca_desi_denovo</i> | 4548791                 | A/T  | NA                 | NA                            | NA                 |
| <i>Desi_wild_4559504</i> | NA                                  | <i>Ca_desi_denovo</i> | 4559504                 | C/T  | NA                 | NA                            | NA                 |
| <i>Desi_wild_4559507</i> | NA                                  | <i>Ca_desi_denovo</i> | 4559507                 | C/G  | NA                 | NA                            | NA                 |
| <i>Desi_wild_4559520</i> | NA                                  | <i>Ca_desi_denovo</i> | 4559520                 | G/T  | NA                 | NA                            | NA                 |
| <i>Desi_wild_4559876</i> | NA                                  | <i>Ca_desi_denovo</i> | 4559876                 | C/G  | NA                 | NA                            | NA                 |
| <i>Desi_wild_4559891</i> | NA                                  | <i>Ca_desi_denovo</i> | 4559891                 | A/G  | NA                 | NA                            | NA                 |
| <i>Desi_wild_4561349</i> | NA                                  | <i>Ca_desi_denovo</i> | 4561349                 | A/G  | NA                 | NA                            | NA                 |
| <i>Desi_wild_4562442</i> | NA                                  | <i>Ca_desi_denovo</i> | 4562442                 | T/C  | NA                 | NA                            | NA                 |
| <i>Desi_wild_4567123</i> | NA                                  | <i>Ca_desi_denovo</i> | 4567123                 | C/G  | NA                 | NA                            | NA                 |
| <i>Desi_wild_4567143</i> | NA                                  | <i>Ca_desi_denovo</i> | 4567143                 | A/T  | NA                 | NA                            | NA                 |
| <i>Desi_wild_4567147</i> | NA                                  | <i>Ca_desi_denovo</i> | 4567147                 | C/G  | NA                 | NA                            | NA                 |
| <i>Desi_wild_4568240</i> | NA                                  | <i>Ca_desi_denovo</i> | 4568240                 | C/G  | NA                 | NA                            | NA                 |
| <i>Desi_wild_4568252</i> | NA                                  | <i>Ca_desi_denovo</i> | 4568252                 | C/G  | NA                 | NA                            | NA                 |
| <i>Desi_wild_4579156</i> | NA                                  | <i>Ca_desi_denovo</i> | 4579156                 | C/T  | NA                 | NA                            | NA                 |
| <i>Desi_wild_4579231</i> | NA                                  | <i>Ca_desi_denovo</i> | 4579231                 | A/G  | NA                 | NA                            | NA                 |



| SNP IDs                  | NCBI dbSNP accession IDs (NCBI_SS#) | Chromosomes           | Physical positions (bp) | SNPs | Gene accession IDs | Sequence components of genome | Putative functions |
|--------------------------|-------------------------------------|-----------------------|-------------------------|------|--------------------|-------------------------------|--------------------|
| <i>Desi_wild_4579240</i> | NA                                  | <i>Ca_desi_denovo</i> | 4579240                 | A/G  | NA                 | NA                            | NA                 |
| <i>Desi_wild_4580615</i> | NA                                  | <i>Ca_desi_denovo</i> | 4580615                 | C/T  | NA                 | NA                            | NA                 |
| <i>Desi_wild_4582223</i> | NA                                  | <i>Ca_desi_denovo</i> | 4582223                 | C/G  | NA                 | NA                            | NA                 |
| <i>Desi_wild_4582227</i> | NA                                  | <i>Ca_desi_denovo</i> | 4582227                 | A/C  | NA                 | NA                            | NA                 |
| <i>Desi_wild_4585441</i> | NA                                  | <i>Ca_desi_denovo</i> | 4585441                 | G/T  | NA                 | NA                            | NA                 |
| <i>Desi_wild_4589873</i> | NA                                  | <i>Ca_desi_denovo</i> | 4589873                 | A/C  | NA                 | NA                            | NA                 |
| <i>Desi_wild_4606091</i> | NA                                  | <i>Ca_desi_denovo</i> | 4606091                 | A/G  | NA                 | NA                            | NA                 |
| <i>Desi_wild_4614909</i> | NA                                  | <i>Ca_desi_denovo</i> | 4614909                 | A/G  | NA                 | NA                            | NA                 |
| <i>Desi_wild_4623373</i> | NA                                  | <i>Ca_desi_denovo</i> | 4623373                 | A/G  | NA                 | NA                            | NA                 |
| <i>Desi_wild_4624179</i> | NA                                  | <i>Ca_desi_denovo</i> | 4624179                 | G/T  | NA                 | NA                            | NA                 |
| <i>Desi_wild_4624477</i> | NA                                  | <i>Ca_desi_denovo</i> | 4624477                 | A/G  | NA                 | NA                            | NA                 |
| <i>Desi_wild_4626097</i> | NA                                  | <i>Ca_desi_denovo</i> | 4626097                 | G/T  | NA                 | NA                            | NA                 |
| <i>Desi_wild_4626098</i> | NA                                  | <i>Ca_desi_denovo</i> | 4626098                 | C/G  | NA                 | NA                            | NA                 |
| <i>Desi_wild_4626101</i> | NA                                  | <i>Ca_desi_denovo</i> | 4626101                 | C/G  | NA                 | NA                            | NA                 |
| <i>Desi_wild_4626214</i> | NA                                  | <i>Ca_desi_denovo</i> | 4626214                 | C/G  | NA                 | NA                            | NA                 |
| <i>Desi_wild_4639889</i> | NA                                  | <i>Ca_desi_denovo</i> | 4639889                 | A/T  | NA                 | NA                            | NA                 |
| <i>Desi_wild_4685022</i> | NA                                  | <i>Ca_desi_denovo</i> | 4685022                 | G/T  | NA                 | NA                            | NA                 |
| <i>Desi_wild_4688156</i> | NA                                  | <i>Ca_desi_denovo</i> | 4688156                 | G/T  | NA                 | NA                            | NA                 |
| <i>Desi_wild_4690041</i> | NA                                  | <i>Ca_desi_denovo</i> | 4690041                 | A/G  | NA                 | NA                            | NA                 |
| <i>Desi_wild_4693173</i> | NA                                  | <i>Ca_desi_denovo</i> | 4693173                 | C/G  | NA                 | NA                            | NA                 |
| <i>Desi_wild_4693221</i> | NA                                  | <i>Ca_desi_denovo</i> | 4693221                 | G/T  | NA                 | NA                            | NA                 |
| <i>Desi_wild_4694988</i> | NA                                  | <i>Ca_desi_denovo</i> | 4694988                 | C/T  | NA                 | NA                            | NA                 |
| <i>Desi_wild_4695005</i> | NA                                  | <i>Ca_desi_denovo</i> | 4695005                 | C/T  | NA                 | NA                            | NA                 |
| <i>Desi_wild_4733178</i> | NA                                  | <i>Ca_desi_denovo</i> | 4733178                 | A/G  | NA                 | NA                            | NA                 |
| <i>Desi_wild_4733223</i> | NA                                  | <i>Ca_desi_denovo</i> | 4733223                 | G/T  | NA                 | NA                            | NA                 |
| <i>Desi_wild_4734243</i> | NA                                  | <i>Ca_desi_denovo</i> | 4734243                 | G/T  | NA                 | NA                            | NA                 |
| <i>Desi_wild_4750556</i> | NA                                  | <i>Ca_desi_denovo</i> | 4750556                 | C/T  | NA                 | NA                            | NA                 |
| <i>Desi_wild_4759091</i> | NA                                  | <i>Ca_desi_denovo</i> | 4759091                 | C/G  | NA                 | NA                            | NA                 |
| <i>Desi_wild_4763076</i> | NA                                  | <i>Ca_desi_denovo</i> | 4763076                 | G/C  | NA                 | NA                            | NA                 |
| <i>Desi_wild_4763085</i> | NA                                  | <i>Ca_desi_denovo</i> | 4763085                 | C/G  | NA                 | NA                            | NA                 |
| <i>Desi_wild_4763091</i> | NA                                  | <i>Ca_desi_denovo</i> | 4763091                 | C/G  | NA                 | NA                            | NA                 |
| <i>Desi_wild_4763103</i> | NA                                  | <i>Ca_desi_denovo</i> | 4763103                 | C/G  | NA                 | NA                            | NA                 |
| <i>Desi_wild_4779810</i> | NA                                  | <i>Ca_desi_denovo</i> | 4779810                 | T/C  | NA                 | NA                            | NA                 |
| <i>Desi_wild_4781989</i> | NA                                  | <i>Ca_desi_denovo</i> | 4781989                 | C/G  | NA                 | NA                            | NA                 |
| <i>Desi_wild_4782004</i> | NA                                  | <i>Ca_desi_denovo</i> | 4782004                 | A/C  | NA                 | NA                            | NA                 |
| <i>Desi_wild_4782007</i> | NA                                  | <i>Ca_desi_denovo</i> | 4782007                 | C/G  | NA                 | NA                            | NA                 |
| <i>Desi_wild_4790343</i> | NA                                  | <i>Ca_desi_denovo</i> | 4790343                 | A/G  | NA                 | NA                            | NA                 |
| <i>Desi_wild_4790346</i> | NA                                  | <i>Ca_desi_denovo</i> | 4790346                 | C/T  | NA                 | NA                            | NA                 |
| <i>Desi_wild_4790352</i> | NA                                  | <i>Ca_desi_denovo</i> | 4790352                 | A/G  | NA                 | NA                            | NA                 |
| <i>Desi_wild_4797926</i> | NA                                  | <i>Ca_desi_denovo</i> | 4797926                 | C/T  | NA                 | NA                            | NA                 |
| <i>Desi_wild_4803805</i> | NA                                  | <i>Ca_desi_denovo</i> | 4803805                 | A/G  | NA                 | NA                            | NA                 |
| <i>Desi_wild_4803808</i> | NA                                  | <i>Ca_desi_denovo</i> | 4803808                 | C/T  | NA                 | NA                            | NA                 |
| <i>Desi_wild_4803810</i> | NA                                  | <i>Ca_desi_denovo</i> | 4803810                 | A/G  | NA                 | NA                            | NA                 |
| <i>Desi_wild_4805927</i> | NA                                  | <i>Ca_desi_denovo</i> | 4805927                 | C/G  | NA                 | NA                            | NA                 |

| SNP IDs                  | NCBI dbSNP accession IDs (NCBI_SS#) | Chromosomes           | Physical positions (bp) | SNPs | Gene accession IDs | Sequence components of genome | Putative functions |
|--------------------------|-------------------------------------|-----------------------|-------------------------|------|--------------------|-------------------------------|--------------------|
| <i>Desi_wild_4823705</i> | NA                                  | <i>Ca_desi_denovo</i> | 4823705                 | C/G  | NA                 | NA                            | NA                 |
| <i>Desi_wild_4825425</i> | NA                                  | <i>Ca_desi_denovo</i> | 4825425                 | C/T  | NA                 | NA                            | NA                 |
| <i>Desi_wild_4828042</i> | NA                                  | <i>Ca_desi_denovo</i> | 4828042                 | C/G  | NA                 | NA                            | NA                 |
| <i>Desi_wild_4830926</i> | NA                                  | <i>Ca_desi_denovo</i> | 4830926                 | C/T  | NA                 | NA                            | NA                 |
| <i>Desi_wild_4837562</i> | NA                                  | <i>Ca_desi_denovo</i> | 4837562                 | G/T  | NA                 | NA                            | NA                 |
| <i>Desi_wild_4837581</i> | NA                                  | <i>Ca_desi_denovo</i> | 4837581                 | C/T  | NA                 | NA                            | NA                 |
| <i>Desi_wild_4837582</i> | NA                                  | <i>Ca_desi_denovo</i> | 4837582                 | C/T  | NA                 | NA                            | NA                 |
| <i>Desi_wild_4838600</i> | NA                                  | <i>Ca_desi_denovo</i> | 4838600                 | C/G  | NA                 | NA                            | NA                 |
| <i>Desi_wild_4838609</i> | NA                                  | <i>Ca_desi_denovo</i> | 4838609                 | C/G  | NA                 | NA                            | NA                 |
| <i>Desi_wild_4838612</i> | NA                                  | <i>Ca_desi_denovo</i> | 4838612                 | A/G  | NA                 | NA                            | NA                 |
| <i>Desi_wild_4843003</i> | NA                                  | <i>Ca_desi_denovo</i> | 4843003                 | G/C  | NA                 | NA                            | NA                 |
| <i>Desi_wild_4843446</i> | NA                                  | <i>Ca_desi_denovo</i> | 4843446                 | C/G  | NA                 | NA                            | NA                 |
| <i>Desi_wild_4843467</i> | NA                                  | <i>Ca_desi_denovo</i> | 4843467                 | C/G  | NA                 | NA                            | NA                 |
| <i>Desi_wild_4845076</i> | NA                                  | <i>Ca_desi_denovo</i> | 4845076                 | A/C  | NA                 | NA                            | NA                 |
| <i>Desi_wild_4845554</i> | NA                                  | <i>Ca_desi_denovo</i> | 4845554                 | A/G  | NA                 | NA                            | NA                 |
| <i>Desi_wild_4845569</i> | NA                                  | <i>Ca_desi_denovo</i> | 4845569                 | C/G  | NA                 | NA                            | NA                 |
| <i>Desi_wild_4845574</i> | NA                                  | <i>Ca_desi_denovo</i> | 4845574                 | C/G  | NA                 | NA                            | NA                 |
| <i>Desi_wild_4847048</i> | NA                                  | <i>Ca_desi_denovo</i> | 4847048                 | A/G  | NA                 | NA                            | NA                 |
| <i>Desi_wild_4871849</i> | NA                                  | <i>Ca_desi_denovo</i> | 4871849                 | T/G  | NA                 | NA                            | NA                 |
| <i>Desi_wild_4879323</i> | NA                                  | <i>Ca_desi_denovo</i> | 4879323                 | A/G  | NA                 | NA                            | NA                 |
| <i>Desi_wild_4889910</i> | NA                                  | <i>Ca_desi_denovo</i> | 4889910                 | G/C  | NA                 | NA                            | NA                 |
| <i>Desi_wild_4889919</i> | NA                                  | <i>Ca_desi_denovo</i> | 4889919                 | A/G  | NA                 | NA                            | NA                 |
| <i>Desi_wild_4890309</i> | NA                                  | <i>Ca_desi_denovo</i> | 4890309                 | A/G  | NA                 | NA                            | NA                 |
| <i>Desi_wild_4919748</i> | NA                                  | <i>Ca_desi_denovo</i> | 4919748                 | G/T  | NA                 | NA                            | NA                 |
| <i>Desi_wild_4919773</i> | NA                                  | <i>Ca_desi_denovo</i> | 4919773                 | A/G  | NA                 | NA                            | NA                 |
| <i>Desi_wild_4923427</i> | NA                                  | <i>Ca_desi_denovo</i> | 4923427                 | A/C  | NA                 | NA                            | NA                 |
| <i>Desi_wild_4923428</i> | NA                                  | <i>Ca_desi_denovo</i> | 4923428                 | G/T  | NA                 | NA                            | NA                 |
| <i>Desi_wild_4923971</i> | NA                                  | <i>Ca_desi_denovo</i> | 4923971                 | A/G  | NA                 | NA                            | NA                 |
| <i>Desi_wild_4930750</i> | NA                                  | <i>Ca_desi_denovo</i> | 4930750                 | C/G  | NA                 | NA                            | NA                 |
| <i>Desi_wild_4930762</i> | NA                                  | <i>Ca_desi_denovo</i> | 4930762                 | C/G  | NA                 | NA                            | NA                 |
| <i>Desi_wild_4937156</i> | NA                                  | <i>Ca_desi_denovo</i> | 4937156                 | A/G  | NA                 | NA                            | NA                 |
| <i>Desi_wild_4937162</i> | NA                                  | <i>Ca_desi_denovo</i> | 4937162                 | C/G  | NA                 | NA                            | NA                 |
| <i>Desi_wild_4942250</i> | NA                                  | <i>Ca_desi_denovo</i> | 4942250                 | A/G  | NA                 | NA                            | NA                 |
| <i>Desi_wild_4942277</i> | NA                                  | <i>Ca_desi_denovo</i> | 4942277                 | C/G  | NA                 | NA                            | NA                 |
| <i>Desi_wild_4944270</i> | NA                                  | <i>Ca_desi_denovo</i> | 4944270                 | C/T  | NA                 | NA                            | NA                 |
| <i>Desi_wild_4946449</i> | NA                                  | <i>Ca_desi_denovo</i> | 4946449                 | C/T  | NA                 | NA                            | NA                 |
| <i>Desi_wild_4947107</i> | NA                                  | <i>Ca_desi_denovo</i> | 4947107                 | C/T  | NA                 | NA                            | NA                 |
| <i>Desi_wild_4947118</i> | NA                                  | <i>Ca_desi_denovo</i> | 4947118                 | C/G  | NA                 | NA                            | NA                 |
| <i>Desi_wild_4952812</i> | NA                                  | <i>Ca_desi_denovo</i> | 4952812                 | A/T  | NA                 | NA                            | NA                 |
| <i>Desi_wild_4952821</i> | NA                                  | <i>Ca_desi_denovo</i> | 4952821                 | G/T  | NA                 | NA                            | NA                 |
| <i>Desi_wild_4975560</i> | NA                                  | <i>Ca_desi_denovo</i> | 4975560                 | C/T  | NA                 | NA                            | NA                 |
| <i>Desi_wild_4982519</i> | NA                                  | <i>Ca_desi_denovo</i> | 4982519                 | G/T  | NA                 | NA                            | NA                 |
| <i>Desi_wild_4986203</i> | NA                                  | <i>Ca_desi_denovo</i> | 4986203                 | G/T  | NA                 | NA                            | NA                 |
| <i>Desi_wild_4990827</i> | NA                                  | <i>Ca_desi_denovo</i> | 4990827                 | T/C  | NA                 | NA                            | NA                 |

| SNP IDs                  | NCBI dbSNP accession IDs (NCBI_SS#) | Chromosomes           | Physical positions (bp) | SNPs | Gene accession IDs | Sequence components of genome | Putative functions |
|--------------------------|-------------------------------------|-----------------------|-------------------------|------|--------------------|-------------------------------|--------------------|
| <i>Desi_wild_4993087</i> | NA                                  | <i>Ca_desi_denovo</i> | 4993087                 | C/T  | NA                 | NA                            | NA                 |
| <i>Desi_wild_4993088</i> | NA                                  | <i>Ca_desi_denovo</i> | 4993088                 | A/G  | NA                 | NA                            | NA                 |
| <i>Desi_wild_5029749</i> | NA                                  | <i>Ca_desi_denovo</i> | 5029749                 | C/G  | NA                 | NA                            | NA                 |
| <i>Desi_wild_5029772</i> | NA                                  | <i>Ca_desi_denovo</i> | 5029772                 | G/T  | NA                 | NA                            | NA                 |
| <i>Desi_wild_5030413</i> | NA                                  | <i>Ca_desi_denovo</i> | 5030413                 | A/C  | NA                 | NA                            | NA                 |
| <i>Desi_wild_5030415</i> | NA                                  | <i>Ca_desi_denovo</i> | 5030415                 | C/T  | NA                 | NA                            | NA                 |
| <i>Desi_wild_5040096</i> | NA                                  | <i>Ca_desi_denovo</i> | 5040096                 | C/G  | NA                 | NA                            | NA                 |
| <i>Desi_wild_5047893</i> | NA                                  | <i>Ca_desi_denovo</i> | 5047893                 | A/T  | NA                 | NA                            | NA                 |
| <i>Desi_wild_5047923</i> | NA                                  | <i>Ca_desi_denovo</i> | 5047923                 | A/G  | NA                 | NA                            | NA                 |
| <i>Desi_wild_5049216</i> | NA                                  | <i>Ca_desi_denovo</i> | 5049216                 | A/G  | NA                 | NA                            | NA                 |
| <i>Desi_wild_5049225</i> | NA                                  | <i>Ca_desi_denovo</i> | 5049225                 | T/C  | NA                 | NA                            | NA                 |
| <i>Desi_wild_5049228</i> | NA                                  | <i>Ca_desi_denovo</i> | 5049228                 | C/A  | NA                 | NA                            | NA                 |
| <i>Desi_wild_5070787</i> | NA                                  | <i>Ca_desi_denovo</i> | 5070787                 | C/T  | NA                 | NA                            | NA                 |
| <i>Desi_wild_5070802</i> | NA                                  | <i>Ca_desi_denovo</i> | 5070802                 | A/G  | NA                 | NA                            | NA                 |
| <i>Desi_wild_5078659</i> | NA                                  | <i>Ca_desi_denovo</i> | 5078659                 | G/T  | NA                 | NA                            | NA                 |
| <i>Desi_wild_5080906</i> | NA                                  | <i>Ca_desi_denovo</i> | 5080906                 | C/T  | NA                 | NA                            | NA                 |
| <i>Desi_wild_5084766</i> | NA                                  | <i>Ca_desi_denovo</i> | 5084766                 | C/T  | NA                 | NA                            | NA                 |
| <i>Desi_wild_5084775</i> | NA                                  | <i>Ca_desi_denovo</i> | 5084775                 | C/G  | NA                 | NA                            | NA                 |
| <i>Desi_wild_5093785</i> | NA                                  | <i>Ca_desi_denovo</i> | 5093785                 | C/T  | NA                 | NA                            | NA                 |
| <i>Desi_wild_5093789</i> | NA                                  | <i>Ca_desi_denovo</i> | 5093789                 | A/C  | NA                 | NA                            | NA                 |
| <i>Desi_wild_5099159</i> | NA                                  | <i>Ca_desi_denovo</i> | 5099159                 | G/T  | NA                 | NA                            | NA                 |
| <i>Desi_wild_5101227</i> | NA                                  | <i>Ca_desi_denovo</i> | 5101227                 | A/C  | NA                 | NA                            | NA                 |
| <i>Desi_wild_5105766</i> | NA                                  | <i>Ca_desi_denovo</i> | 5105766                 | C/T  | NA                 | NA                            | NA                 |
| <i>Desi_wild_5106898</i> | NA                                  | <i>Ca_desi_denovo</i> | 5106898                 | G/A  | NA                 | NA                            | NA                 |
| <i>Desi_wild_5106911</i> | NA                                  | <i>Ca_desi_denovo</i> | 5106911                 | G/A  | NA                 | NA                            | NA                 |
| <i>Desi_wild_5113493</i> | NA                                  | <i>Ca_desi_denovo</i> | 5113493                 | T/C  | NA                 | NA                            | NA                 |
| <i>Desi_wild_5118377</i> | NA                                  | <i>Ca_desi_denovo</i> | 5118377                 | C/T  | NA                 | NA                            | NA                 |
| <i>Desi_wild_5124688</i> | NA                                  | <i>Ca_desi_denovo</i> | 5124688                 | C/T  | NA                 | NA                            | NA                 |
| <i>Desi_wild_5160566</i> | NA                                  | <i>Ca_desi_denovo</i> | 5160566                 | A/G  | NA                 | NA                            | NA                 |
| <i>Desi_wild_5162951</i> | NA                                  | <i>Ca_desi_denovo</i> | 5162951                 | G/A  | NA                 | NA                            | NA                 |
| <i>Desi_wild_5162952</i> | NA                                  | <i>Ca_desi_denovo</i> | 5162952                 | T/C  | NA                 | NA                            | NA                 |
| <i>Desi_wild_5166849</i> | NA                                  | <i>Ca_desi_denovo</i> | 5166849                 | C/T  | NA                 | NA                            | NA                 |
| <i>Desi_wild_5175624</i> | NA                                  | <i>Ca_desi_denovo</i> | 5175624                 | C/T  | NA                 | NA                            | NA                 |
| <i>Desi_wild_5181760</i> | NA                                  | <i>Ca_desi_denovo</i> | 5181760                 | A/G  | NA                 | NA                            | NA                 |
| <i>Desi_wild_5181778</i> | NA                                  | <i>Ca_desi_denovo</i> | 5181778                 | C/T  | NA                 | NA                            | NA                 |
| <i>Desi_wild_5192782</i> | NA                                  | <i>Ca_desi_denovo</i> | 5192782                 | C/T  | NA                 | NA                            | NA                 |
| <i>Desi_wild_5197721</i> | NA                                  | <i>Ca_desi_denovo</i> | 5197721                 | C/G  | NA                 | NA                            | NA                 |
| <i>Desi_wild_5197736</i> | NA                                  | <i>Ca_desi_denovo</i> | 5197736                 | C/G  | NA                 | NA                            | NA                 |
| <i>Desi_wild_5211675</i> | NA                                  | <i>Ca_desi_denovo</i> | 5211675                 | C/T  | NA                 | NA                            | NA                 |
| <i>Desi_wild_5211690</i> | NA                                  | <i>Ca_desi_denovo</i> | 5211690                 | C/G  | NA                 | NA                            | NA                 |
| <i>Desi_wild_5220000</i> | NA                                  | <i>Ca_desi_denovo</i> | 5220000                 | G/T  | NA                 | NA                            | NA                 |
| <i>Desi_wild_5228225</i> | NA                                  | <i>Ca_desi_denovo</i> | 5228225                 | C/T  | NA                 | NA                            | NA                 |
| <i>Desi_wild_5242745</i> | NA                                  | <i>Ca_desi_denovo</i> | 5242745                 | C/G  | NA                 | NA                            | NA                 |
| <i>Desi_wild_5242763</i> | NA                                  | <i>Ca_desi_denovo</i> | 5242763                 | C/G  | NA                 | NA                            | NA                 |

| SNP IDs                  | NCBI dbSNP accession IDs (NCBI_SS#) | Chromosomes           | Physical positions (bp) | SNPs | Gene accession IDs | Sequence components of genome | Putative functions |
|--------------------------|-------------------------------------|-----------------------|-------------------------|------|--------------------|-------------------------------|--------------------|
| <i>Desi_wild_5247899</i> | NA                                  | <i>Ca_desi_denovo</i> | 5247899                 | A/G  | NA                 | NA                            | NA                 |
| <i>Desi_wild_5249577</i> | NA                                  | <i>Ca_desi_denovo</i> | 5249577                 | C/T  | NA                 | NA                            | NA                 |
| <i>Desi_wild_5249583</i> | NA                                  | <i>Ca_desi_denovo</i> | 5249583                 | C/T  | NA                 | NA                            | NA                 |
| <i>Desi_wild_5261948</i> | NA                                  | <i>Ca_desi_denovo</i> | 5261948                 | C/T  | NA                 | NA                            | NA                 |
| <i>Desi_wild_5265784</i> | NA                                  | <i>Ca_desi_denovo</i> | 5265784                 | G/A  | NA                 | NA                            | NA                 |
| <i>Desi_wild_5265796</i> | NA                                  | <i>Ca_desi_denovo</i> | 5265796                 | G/A  | NA                 | NA                            | NA                 |
| <i>Desi_wild_5268169</i> | NA                                  | <i>Ca_desi_denovo</i> | 5268169                 | G/T  | NA                 | NA                            | NA                 |
| <i>Desi_wild_5268966</i> | NA                                  | <i>Ca_desi_denovo</i> | 5268966                 | G/C  | NA                 | NA                            | NA                 |
| <i>Desi_wild_5268975</i> | NA                                  | <i>Ca_desi_denovo</i> | 5268975                 | T/C  | NA                 | NA                            | NA                 |
| <i>Desi_wild_5271539</i> | NA                                  | <i>Ca_desi_denovo</i> | 5271539                 | C/G  | NA                 | NA                            | NA                 |
| <i>Desi_wild_5271559</i> | NA                                  | <i>Ca_desi_denovo</i> | 5271559                 | A/C  | NA                 | NA                            | NA                 |
| <i>Desi_wild_5282729</i> | NA                                  | <i>Ca_desi_denovo</i> | 5282729                 | C/G  | NA                 | NA                            | NA                 |
| <i>Desi_wild_5282732</i> | NA                                  | <i>Ca_desi_denovo</i> | 5282732                 | A/G  | NA                 | NA                            | NA                 |
| <i>Desi_wild_5282744</i> | NA                                  | <i>Ca_desi_denovo</i> | 5282744                 | C/G  | NA                 | NA                            | NA                 |
| <i>Desi_wild_5289799</i> | NA                                  | <i>Ca_desi_denovo</i> | 5289799                 | C/T  | NA                 | NA                            | NA                 |
| <i>Desi_wild_5300306</i> | NA                                  | <i>Ca_desi_denovo</i> | 5300306                 | A/G  | NA                 | NA                            | NA                 |
| <i>Desi_wild_5300889</i> | NA                                  | <i>Ca_desi_denovo</i> | 5300889                 | A/G  | NA                 | NA                            | NA                 |
| <i>Desi_wild_5308359</i> | NA                                  | <i>Ca_desi_denovo</i> | 5308359                 | G/T  | NA                 | NA                            | NA                 |
| <i>Desi_wild_5322730</i> | NA                                  | <i>Ca_desi_denovo</i> | 5322730                 | A/G  | NA                 | NA                            | NA                 |
| <i>Desi_wild_5322736</i> | NA                                  | <i>Ca_desi_denovo</i> | 5322736                 | C/T  | NA                 | NA                            | NA                 |
| <i>Desi_wild_5343398</i> | NA                                  | <i>Ca_desi_denovo</i> | 5343398                 | G/T  | NA                 | NA                            | NA                 |
| <i>Desi_wild_5346787</i> | NA                                  | <i>Ca_desi_denovo</i> | 5346787                 | G/T  | NA                 | NA                            | NA                 |
| <i>Desi_wild_5354329</i> | NA                                  | <i>Ca_desi_denovo</i> | 5354329                 | A/G  | NA                 | NA                            | NA                 |
| <i>Desi_wild_5355334</i> | NA                                  | <i>Ca_desi_denovo</i> | 5355334                 | T/C  | NA                 | NA                            | NA                 |
| <i>Desi_wild_5356914</i> | NA                                  | <i>Ca_desi_denovo</i> | 5356914                 | A/T  | NA                 | NA                            | NA                 |
| <i>Desi_wild_5358813</i> | NA                                  | <i>Ca_desi_denovo</i> | 5358813                 | G/T  | NA                 | NA                            | NA                 |
| <i>Desi_wild_5359516</i> | NA                                  | <i>Ca_desi_denovo</i> | 5359516                 | C/G  | NA                 | NA                            | NA                 |
| <i>Desi_wild_5361603</i> | NA                                  | <i>Ca_desi_denovo</i> | 5361603                 | C/G  | NA                 | NA                            | NA                 |
| <i>Desi_wild_5361605</i> | NA                                  | <i>Ca_desi_denovo</i> | 5361605                 | A/T  | NA                 | NA                            | NA                 |
| <i>Desi_wild_5361606</i> | NA                                  | <i>Ca_desi_denovo</i> | 5361606                 | C/G  | NA                 | NA                            | NA                 |
| <i>Desi_wild_5361624</i> | NA                                  | <i>Ca_desi_denovo</i> | 5361624                 | C/G  | NA                 | NA                            | NA                 |
| <i>Desi_wild_5366661</i> | NA                                  | <i>Ca_desi_denovo</i> | 5366661                 | C/T  | NA                 | NA                            | NA                 |
| <i>Desi_wild_5367577</i> | NA                                  | <i>Ca_desi_denovo</i> | 5367577                 | G/T  | NA                 | NA                            | NA                 |
| <i>Desi_wild_5377645</i> | NA                                  | <i>Ca_desi_denovo</i> | 5377645                 | C/G  | NA                 | NA                            | NA                 |
| <i>Desi_wild_5379903</i> | NA                                  | <i>Ca_desi_denovo</i> | 5379903                 | A/C  | NA                 | NA                            | NA                 |
| <i>Desi_wild_5379904</i> | NA                                  | <i>Ca_desi_denovo</i> | 5379904                 | G/T  | NA                 | NA                            | NA                 |
| <i>Desi_wild_5383812</i> | NA                                  | <i>Ca_desi_denovo</i> | 5383812                 | A/G  | NA                 | NA                            | NA                 |
| <i>Desi_wild_5407773</i> | NA                                  | <i>Ca_desi_denovo</i> | 5407773                 | G/A  | NA                 | NA                            | NA                 |
| <i>Desi_wild_5408744</i> | NA                                  | <i>Ca_desi_denovo</i> | 5408744                 | C/T  | NA                 | NA                            | NA                 |
| <i>Desi_wild_5422205</i> | NA                                  | <i>Ca_desi_denovo</i> | 5422205                 | C/G  | NA                 | NA                            | NA                 |
| <i>Desi_wild_5429690</i> | NA                                  | <i>Ca_desi_denovo</i> | 5429690                 | C/T  | NA                 | NA                            | NA                 |
| <i>Desi_wild_5429698</i> | NA                                  | <i>Ca_desi_denovo</i> | 5429698                 | A/G  | NA                 | NA                            | NA                 |
| <i>Desi_wild_5461863</i> | NA                                  | <i>Ca_desi_denovo</i> | 5461863                 | C/T  | NA                 | NA                            | NA                 |
| <i>Desi_wild_5465288</i> | NA                                  | <i>Ca_desi_denovo</i> | 5465288                 | C/T  | NA                 | NA                            | NA                 |

| SNP IDs                  | NCBI dbSNP accession IDs (NCBI_SS#) | Chromosomes           | Physical positions (bp) | SNPs | Gene accession IDs | Sequence components of genome | Putative functions |
|--------------------------|-------------------------------------|-----------------------|-------------------------|------|--------------------|-------------------------------|--------------------|
| <i>Desi_wild_5473224</i> | NA                                  | <i>Ca_desi_denovo</i> | 5473224                 | C/T  | NA                 | NA                            | NA                 |
| <i>Desi_wild_5479396</i> | NA                                  | <i>Ca_desi_denovo</i> | 5479396                 | C/T  | NA                 | NA                            | NA                 |
| <i>Desi_wild_5485953</i> | NA                                  | <i>Ca_desi_denovo</i> | 5485953                 | T/C  | NA                 | NA                            | NA                 |
| <i>Desi_wild_5488859</i> | NA                                  | <i>Ca_desi_denovo</i> | 5488859                 | C/G  | NA                 | NA                            | NA                 |
| <i>Desi_wild_5490204</i> | NA                                  | <i>Ca_desi_denovo</i> | 5490204                 | G/C  | NA                 | NA                            | NA                 |
| <i>Desi_wild_5501183</i> | NA                                  | <i>Ca_desi_denovo</i> | 5501183                 | C/T  | NA                 | NA                            | NA                 |
| <i>Desi_wild_5503047</i> | NA                                  | <i>Ca_desi_denovo</i> | 5503047                 | A/G  | NA                 | NA                            | NA                 |
| <i>Desi_wild_5503600</i> | NA                                  | <i>Ca_desi_denovo</i> | 5503600                 | A/G  | NA                 | NA                            | NA                 |
| <i>Desi_wild_5518613</i> | NA                                  | <i>Ca_desi_denovo</i> | 5518613                 | A/G  | NA                 | NA                            | NA                 |
| <i>Desi_wild_5518637</i> | NA                                  | <i>Ca_desi_denovo</i> | 5518637                 | C/T  | NA                 | NA                            | NA                 |
| <i>Desi_wild_5525282</i> | NA                                  | <i>Ca_desi_denovo</i> | 5525282                 | A/G  | NA                 | NA                            | NA                 |
| <i>Desi_wild_5525766</i> | NA                                  | <i>Ca_desi_denovo</i> | 5525766                 | A/T  | NA                 | NA                            | NA                 |
| <i>Desi_wild_5525768</i> | NA                                  | <i>Ca_desi_denovo</i> | 5525768                 | C/G  | NA                 | NA                            | NA                 |
| <i>Desi_wild_5525861</i> | NA                                  | <i>Ca_desi_denovo</i> | 5525861                 | A/T  | NA                 | NA                            | NA                 |
| <i>Desi_wild_5526456</i> | NA                                  | <i>Ca_desi_denovo</i> | 5526456                 | A/T  | NA                 | NA                            | NA                 |
| <i>Desi_wild_5526477</i> | NA                                  | <i>Ca_desi_denovo</i> | 5526477                 | A/G  | NA                 | NA                            | NA                 |
| <i>Desi_wild_5537127</i> | NA                                  | <i>Ca_desi_denovo</i> | 5537127                 | A/G  | NA                 | NA                            | NA                 |
| <i>Desi_wild_5542428</i> | NA                                  | <i>Ca_desi_denovo</i> | 5542428                 | A/C  | NA                 | NA                            | NA                 |
| <i>Desi_wild_5542780</i> | NA                                  | <i>Ca_desi_denovo</i> | 5542780                 | C/G  | NA                 | NA                            | NA                 |
| <i>Desi_wild_5542781</i> | NA                                  | <i>Ca_desi_denovo</i> | 5542781                 | G/A  | NA                 | NA                            | NA                 |
| <i>Desi_wild_5545861</i> | NA                                  | <i>Ca_desi_denovo</i> | 5545861                 | G/T  | NA                 | NA                            | NA                 |
| <i>Desi_wild_5553478</i> | NA                                  | <i>Ca_desi_denovo</i> | 5553478                 | C/G  | NA                 | NA                            | NA                 |
| <i>Desi_wild_5553499</i> | NA                                  | <i>Ca_desi_denovo</i> | 5553499                 | C/G  | NA                 | NA                            | NA                 |
| <i>Desi_wild_5562812</i> | NA                                  | <i>Ca_desi_denovo</i> | 5562812                 | C/G  | NA                 | NA                            | NA                 |
| <i>Desi_wild_5565541</i> | NA                                  | <i>Ca_desi_denovo</i> | 5565541                 | A/G  | NA                 | NA                            | NA                 |
| <i>Desi_wild_5583649</i> | NA                                  | <i>Ca_desi_denovo</i> | 5583649                 | G/T  | NA                 | NA                            | NA                 |
| <i>Desi_wild_5587210</i> | NA                                  | <i>Ca_desi_denovo</i> | 5587210                 | C/T  | NA                 | NA                            | NA                 |
| <i>Desi_wild_5587264</i> | NA                                  | <i>Ca_desi_denovo</i> | 5587264                 | A/G  | NA                 | NA                            | NA                 |
| <i>Desi_wild_5587276</i> | NA                                  | <i>Ca_desi_denovo</i> | 5587276                 | A/C  | NA                 | NA                            | NA                 |
| <i>Desi_wild_5587279</i> | NA                                  | <i>Ca_desi_denovo</i> | 5587279                 | C/T  | NA                 | NA                            | NA                 |
| <i>Desi_wild_5588462</i> | NA                                  | <i>Ca_desi_denovo</i> | 5588462                 | C/T  | NA                 | NA                            | NA                 |
| <i>Desi_wild_5588923</i> | NA                                  | <i>Ca_desi_denovo</i> | 5588923                 | C/G  | NA                 | NA                            | NA                 |
| <i>Desi_wild_5599549</i> | NA                                  | <i>Ca_desi_denovo</i> | 5599549                 | A/G  | NA                 | NA                            | NA                 |
| <i>Desi_wild_5599569</i> | NA                                  | <i>Ca_desi_denovo</i> | 5599569                 | G/T  | NA                 | NA                            | NA                 |
| <i>Desi_wild_5607703</i> | NA                                  | <i>Ca_desi_denovo</i> | 5607703                 | A/G  | NA                 | NA                            | NA                 |
| <i>Desi_wild_5621713</i> | NA                                  | <i>Ca_desi_denovo</i> | 5621713                 | C/G  | NA                 | NA                            | NA                 |
| <i>Desi_wild_5621743</i> | NA                                  | <i>Ca_desi_denovo</i> | 5621743                 | G/C  | NA                 | NA                            | NA                 |
| <i>Desi_wild_5624965</i> | NA                                  | <i>Ca_desi_denovo</i> | 5624965                 | A/G  | NA                 | NA                            | NA                 |
| <i>Desi_wild_5647339</i> | NA                                  | <i>Ca_desi_denovo</i> | 5647339                 | A/C  | NA                 | NA                            | NA                 |
| <i>Desi_wild_5649527</i> | NA                                  | <i>Ca_desi_denovo</i> | 5649527                 | A/T  | NA                 | NA                            | NA                 |
| <i>Desi_wild_5652492</i> | NA                                  | <i>Ca_desi_denovo</i> | 5652492                 | C/G  | NA                 | NA                            | NA                 |
| <i>Desi_wild_5652513</i> | NA                                  | <i>Ca_desi_denovo</i> | 5652513                 | C/G  | NA                 | NA                            | NA                 |
| <i>Desi_wild_5652536</i> | NA                                  | <i>Ca_desi_denovo</i> | 5652536                 | G/T  | NA                 | NA                            | NA                 |
| <i>Desi_wild_5657976</i> | NA                                  | <i>Ca_desi_denovo</i> | 5657976                 | C/G  | NA                 | NA                            | NA                 |

| SNP IDs                  | NCBI dbSNP accession IDs (NCBI_SS#) | Chromosomes           | Physical positions (bp) | SNPs | Gene accession IDs | Sequence components of genome | Putative functions |
|--------------------------|-------------------------------------|-----------------------|-------------------------|------|--------------------|-------------------------------|--------------------|
| <i>Desi_wild_5658000</i> | NA                                  | <i>Ca_desi_denovo</i> | 5658000                 | A/G  | NA                 | NA                            | NA                 |
| <i>Desi_wild_5662911</i> | NA                                  | <i>Ca_desi_denovo</i> | 5662911                 | A/T  | NA                 | NA                            | NA                 |
| <i>Desi_wild_5662926</i> | NA                                  | <i>Ca_desi_denovo</i> | 5662926                 | A/G  | NA                 | NA                            | NA                 |
| <i>Desi_wild_5662951</i> | NA                                  | <i>Ca_desi_denovo</i> | 5662951                 | C/G  | NA                 | NA                            | NA                 |
| <i>Desi_wild_5673280</i> | NA                                  | <i>Ca_desi_denovo</i> | 5673280                 | C/G  | NA                 | NA                            | NA                 |
| <i>Desi_wild_5677581</i> | NA                                  | <i>Ca_desi_denovo</i> | 5677581                 | A/T  | NA                 | NA                            | NA                 |
| <i>Desi_wild_5681269</i> | NA                                  | <i>Ca_desi_denovo</i> | 5681269                 | A/C  | NA                 | NA                            | NA                 |
| <i>Desi_wild_5689456</i> | NA                                  | <i>Ca_desi_denovo</i> | 5689456                 | C/G  | NA                 | NA                            | NA                 |
| <i>Desi_wild_5702808</i> | NA                                  | <i>Ca_desi_denovo</i> | 5702808                 | A/C  | NA                 | NA                            | NA                 |
| <i>Desi_wild_5702809</i> | NA                                  | <i>Ca_desi_denovo</i> | 5702809                 | A/G  | NA                 | NA                            | NA                 |
| <i>Desi_wild_5705586</i> | NA                                  | <i>Ca_desi_denovo</i> | 5705586                 | C/G  | NA                 | NA                            | NA                 |
| <i>Desi_wild_5706750</i> | NA                                  | <i>Ca_desi_denovo</i> | 5706750                 | C/G  | NA                 | NA                            | NA                 |
| <i>Desi_wild_5707780</i> | NA                                  | <i>Ca_desi_denovo</i> | 5707780                 | C/T  | NA                 | NA                            | NA                 |
| <i>Desi_wild_5707800</i> | NA                                  | <i>Ca_desi_denovo</i> | 5707800                 | C/T  | NA                 | NA                            | NA                 |
| <i>Desi_wild_5733527</i> | NA                                  | <i>Ca_desi_denovo</i> | 5733527                 | G/T  | NA                 | NA                            | NA                 |
| <i>Desi_wild_5747771</i> | NA                                  | <i>Ca_desi_denovo</i> | 5747771                 | C/T  | NA                 | NA                            | NA                 |
| <i>Desi_wild_5747807</i> | NA                                  | <i>Ca_desi_denovo</i> | 5747807                 | C/T  | NA                 | NA                            | NA                 |
| <i>Desi_wild_5747810</i> | NA                                  | <i>Ca_desi_denovo</i> | 5747810                 | C/G  | NA                 | NA                            | NA                 |
| <i>Desi_wild_5749500</i> | NA                                  | <i>Ca_desi_denovo</i> | 5749500                 | A/G  | NA                 | NA                            | NA                 |
| <i>Desi_wild_5759166</i> | NA                                  | <i>Ca_desi_denovo</i> | 5759166                 | C/G  | NA                 | NA                            | NA                 |
| <i>Desi_wild_5767377</i> | NA                                  | <i>Ca_desi_denovo</i> | 5767377                 | C/T  | NA                 | NA                            | NA                 |
| <i>Desi_wild_5774360</i> | NA                                  | <i>Ca_desi_denovo</i> | 5774360                 | A/T  | NA                 | NA                            | NA                 |
| <i>Desi_wild_5785181</i> | NA                                  | <i>Ca_desi_denovo</i> | 5785181                 | A/T  | NA                 | NA                            | NA                 |
| <i>Desi_wild_5785213</i> | NA                                  | <i>Ca_desi_denovo</i> | 5785213                 | A/T  | NA                 | NA                            | NA                 |
| <i>Desi_wild_5785214</i> | NA                                  | <i>Ca_desi_denovo</i> | 5785214                 | G/T  | NA                 | NA                            | NA                 |
| <i>Desi_wild_5792770</i> | NA                                  | <i>Ca_desi_denovo</i> | 5792770                 | A/C  | NA                 | NA                            | NA                 |
| <i>Desi_wild_5797625</i> | NA                                  | <i>Ca_desi_denovo</i> | 5797625                 | A/G  | NA                 | NA                            | NA                 |
| <i>Desi_wild_5802869</i> | NA                                  | <i>Ca_desi_denovo</i> | 5802869                 | A/G  | NA                 | NA                            | NA                 |
| <i>Desi_wild_5813498</i> | NA                                  | <i>Ca_desi_denovo</i> | 5813498                 | C/G  | NA                 | NA                            | NA                 |
| <i>Desi_wild_5813501</i> | NA                                  | <i>Ca_desi_denovo</i> | 5813501                 | C/T  | NA                 | NA                            | NA                 |
| <i>Desi_wild_5816909</i> | NA                                  | <i>Ca_desi_denovo</i> | 5816909                 | C/T  | NA                 | NA                            | NA                 |
| <i>Desi_wild_5816911</i> | NA                                  | <i>Ca_desi_denovo</i> | 5816911                 | A/C  | NA                 | NA                            | NA                 |
| <i>Desi_wild_5842491</i> | NA                                  | <i>Ca_desi_denovo</i> | 5842491                 | C/T  | NA                 | NA                            | NA                 |
| <i>Desi_wild_5846124</i> | NA                                  | <i>Ca_desi_denovo</i> | 5846124                 | C/T  | NA                 | NA                            | NA                 |
| <i>Desi_wild_5848275</i> | NA                                  | <i>Ca_desi_denovo</i> | 5848275                 | T/C  | NA                 | NA                            | NA                 |
| <i>Desi_wild_5848332</i> | NA                                  | <i>Ca_desi_denovo</i> | 5848332                 | C/T  | NA                 | NA                            | NA                 |
| <i>Desi_wild_5861185</i> | NA                                  | <i>Ca_desi_denovo</i> | 5861185                 | A/T  | NA                 | NA                            | NA                 |
| <i>Desi_wild_5861191</i> | NA                                  | <i>Ca_desi_denovo</i> | 5861191                 | C/G  | NA                 | NA                            | NA                 |
| <i>Desi_wild_5861197</i> | NA                                  | <i>Ca_desi_denovo</i> | 5861197                 | C/G  | NA                 | NA                            | NA                 |
| <i>Desi_wild_5861198</i> | NA                                  | <i>Ca_desi_denovo</i> | 5861198                 | C/A  | NA                 | NA                            | NA                 |
| <i>Desi_wild_5871643</i> | NA                                  | <i>Ca_desi_denovo</i> | 5871643                 | C/T  | NA                 | NA                            | NA                 |
| <i>Desi_wild_5880288</i> | NA                                  | <i>Ca_desi_denovo</i> | 5880288                 | C/G  | NA                 | NA                            | NA                 |
| <i>Desi_wild_5883610</i> | NA                                  | <i>Ca_desi_denovo</i> | 5883610                 | C/T  | NA                 | NA                            | NA                 |
| <i>Desi_wild_5884761</i> | NA                                  | <i>Ca_desi_denovo</i> | 5884761                 | C/T  | NA                 | NA                            | NA                 |

| SNP IDs                  | NCBI dbSNP accession IDs (NCBI_SS#) | Chromosomes           | Physical positions (bp) | SNPs | Gene accession IDs | Sequence components of genome | Putative functions |
|--------------------------|-------------------------------------|-----------------------|-------------------------|------|--------------------|-------------------------------|--------------------|
| <i>Desi_wild_5888483</i> | NA                                  | <i>Ca_desi_denovo</i> | 5888483                 | G/T  | NA                 | NA                            | NA                 |
| <i>Desi_wild_5892724</i> | NA                                  | <i>Ca_desi_denovo</i> | 5892724                 | C/T  | NA                 | NA                            | NA                 |
| <i>Desi_wild_5892725</i> | NA                                  | <i>Ca_desi_denovo</i> | 5892725                 | C/G  | NA                 | NA                            | NA                 |
| <i>Desi_wild_5903086</i> | NA                                  | <i>Ca_desi_denovo</i> | 5903086                 | C/T  | NA                 | NA                            | NA                 |
| <i>Desi_wild_5903089</i> | NA                                  | <i>Ca_desi_denovo</i> | 5903089                 | C/T  | NA                 | NA                            | NA                 |
| <i>Desi_wild_5904399</i> | NA                                  | <i>Ca_desi_denovo</i> | 5904399                 | A/C  | NA                 | NA                            | NA                 |
| <i>Desi_wild_5920657</i> | NA                                  | <i>Ca_desi_denovo</i> | 5920657                 | A/C  | NA                 | NA                            | NA                 |
| <i>Desi_wild_5941553</i> | NA                                  | <i>Ca_desi_denovo</i> | 5941553                 | A/C  | NA                 | NA                            | NA                 |
| <i>Desi_wild_5941554</i> | NA                                  | <i>Ca_desi_denovo</i> | 5941554                 | C/T  | NA                 | NA                            | NA                 |
| <i>Desi_wild_5941562</i> | NA                                  | <i>Ca_desi_denovo</i> | 5941562                 | C/G  | NA                 | NA                            | NA                 |
| <i>Desi_wild_5951186</i> | NA                                  | <i>Ca_desi_denovo</i> | 5951186                 | C/T  | NA                 | NA                            | NA                 |
| <i>Desi_wild_5951220</i> | NA                                  | <i>Ca_desi_denovo</i> | 5951220                 | C/G  | NA                 | NA                            | NA                 |
| <i>Desi_wild_5981554</i> | NA                                  | <i>Ca_desi_denovo</i> | 5981554                 | C/G  | NA                 | NA                            | NA                 |
| <i>Desi_wild_5981563</i> | NA                                  | <i>Ca_desi_denovo</i> | 5981563                 | C/T  | NA                 | NA                            | NA                 |
| <i>Desi_wild_5983939</i> | NA                                  | <i>Ca_desi_denovo</i> | 5983939                 | C/G  | NA                 | NA                            | NA                 |
| <i>Desi_wild_5988402</i> | NA                                  | <i>Ca_desi_denovo</i> | 5988402                 | C/G  | NA                 | NA                            | NA                 |
| <i>Desi_wild_5988404</i> | NA                                  | <i>Ca_desi_denovo</i> | 5988404                 | C/G  | NA                 | NA                            | NA                 |
| <i>Desi_wild_5988407</i> | NA                                  | <i>Ca_desi_denovo</i> | 5988407                 | C/G  | NA                 | NA                            | NA                 |
| <i>Desi_wild_6015944</i> | NA                                  | <i>Ca_desi_denovo</i> | 6015944                 | C/T  | NA                 | NA                            | NA                 |
| <i>Desi_wild_6015950</i> | NA                                  | <i>Ca_desi_denovo</i> | 6015950                 | A/G  | NA                 | NA                            | NA                 |
| <i>Desi_wild_6015959</i> | NA                                  | <i>Ca_desi_denovo</i> | 6015959                 | C/G  | NA                 | NA                            | NA                 |
| <i>Desi_wild_6015977</i> | NA                                  | <i>Ca_desi_denovo</i> | 6015977                 | A/C  | NA                 | NA                            | NA                 |
| <i>Desi_wild_6020866</i> | NA                                  | <i>Ca_desi_denovo</i> | 6020866                 | A/C  | NA                 | NA                            | NA                 |
| <i>Desi_wild_6020867</i> | NA                                  | <i>Ca_desi_denovo</i> | 6020867                 | G/T  | NA                 | NA                            | NA                 |
| <i>Desi_wild_6020868</i> | NA                                  | <i>Ca_desi_denovo</i> | 6020868                 | A/G  | NA                 | NA                            | NA                 |
| <i>Desi_wild_6020869</i> | NA                                  | <i>Ca_desi_denovo</i> | 6020869                 | A/T  | NA                 | NA                            | NA                 |
| <i>Desi_wild_6020989</i> | NA                                  | <i>Ca_desi_denovo</i> | 6020989                 | A/C  | NA                 | NA                            | NA                 |
| <i>Desi_wild_6021302</i> | NA                                  | <i>Ca_desi_denovo</i> | 6021302                 | G/T  | NA                 | NA                            | NA                 |
| <i>Desi_wild_6022716</i> | NA                                  | <i>Ca_desi_denovo</i> | 6022716                 | A/C  | NA                 | NA                            | NA                 |
| <i>Desi_wild_6023351</i> | NA                                  | <i>Ca_desi_denovo</i> | 6023351                 | C/T  | NA                 | NA                            | NA                 |
| <i>Desi_wild_6036856</i> | NA                                  | <i>Ca_desi_denovo</i> | 6036856                 | C/T  | NA                 | NA                            | NA                 |
| <i>Desi_wild_6038461</i> | NA                                  | <i>Ca_desi_denovo</i> | 6038461                 | C/G  | NA                 | NA                            | NA                 |
| <i>Desi_wild_6038469</i> | NA                                  | <i>Ca_desi_denovo</i> | 6038469                 | A/G  | NA                 | NA                            | NA                 |
| <i>Desi_wild_6038470</i> | NA                                  | <i>Ca_desi_denovo</i> | 6038470                 | C/G  | NA                 | NA                            | NA                 |
| <i>Desi_wild_6040636</i> | NA                                  | <i>Ca_desi_denovo</i> | 6040636                 | C/G  | NA                 | NA                            | NA                 |
| <i>Desi_wild_6040638</i> | NA                                  | <i>Ca_desi_denovo</i> | 6040638                 | C/T  | NA                 | NA                            | NA                 |
| <i>Desi_wild_6047570</i> | NA                                  | <i>Ca_desi_denovo</i> | 6047570                 | A/G  | NA                 | NA                            | NA                 |
| <i>Desi_wild_6072273</i> | NA                                  | <i>Ca_desi_denovo</i> | 6072273                 | A/G  | NA                 | NA                            | NA                 |
| <i>Desi_wild_6072368</i> | NA                                  | <i>Ca_desi_denovo</i> | 6072368                 | C/T  | NA                 | NA                            | NA                 |
| <i>Desi_wild_6080450</i> | NA                                  | <i>Ca_desi_denovo</i> | 6080450                 | C/T  | NA                 | NA                            | NA                 |
| <i>Desi_wild_6099177</i> | NA                                  | <i>Ca_desi_denovo</i> | 6099177                 | C/G  | NA                 | NA                            | NA                 |
| <i>Desi_wild_6099183</i> | NA                                  | <i>Ca_desi_denovo</i> | 6099183                 | C/G  | NA                 | NA                            | NA                 |
| <i>Desi_wild_6099725</i> | NA                                  | <i>Ca_desi_denovo</i> | 6099725                 | A/G  | NA                 | NA                            | NA                 |
| <i>Desi_wild_6099737</i> | NA                                  | <i>Ca_desi_denovo</i> | 6099737                 | C/T  | NA                 | NA                            | NA                 |

| SNP IDs                  | NCBI dbSNP accession IDs (NCBI_SS#) | Chromosomes           | Physical positions (bp) | SNPs | Gene accession IDs | Sequence components of genome | Putative functions |
|--------------------------|-------------------------------------|-----------------------|-------------------------|------|--------------------|-------------------------------|--------------------|
| <i>Desi_wild_6099761</i> | NA                                  | <i>Ca_desi_denovo</i> | 6099761                 | G/T  | NA                 | NA                            | NA                 |
| <i>Desi_wild_6117555</i> | NA                                  | <i>Ca_desi_denovo</i> | 6117555                 | A/G  | NA                 | NA                            | NA                 |
| <i>Desi_wild_6122102</i> | NA                                  | <i>Ca_desi_denovo</i> | 6122102                 | G/C  | NA                 | NA                            | NA                 |
| <i>Desi_wild_6144006</i> | NA                                  | <i>Ca_desi_denovo</i> | 6144006                 | C/T  | NA                 | NA                            | NA                 |
| <i>Desi_wild_6144029</i> | NA                                  | <i>Ca_desi_denovo</i> | 6144029                 | A/G  | NA                 | NA                            | NA                 |
| <i>Desi_wild_6146484</i> | NA                                  | <i>Ca_desi_denovo</i> | 6146484                 | C/G  | NA                 | NA                            | NA                 |
| <i>Desi_wild_6146493</i> | NA                                  | <i>Ca_desi_denovo</i> | 6146493                 | C/G  | NA                 | NA                            | NA                 |
| <i>Desi_wild_6161855</i> | NA                                  | <i>Ca_desi_denovo</i> | 6161855                 | A/C  | NA                 | NA                            | NA                 |
| <i>Desi_wild_6161900</i> | NA                                  | <i>Ca_desi_denovo</i> | 6161900                 | A/T  | NA                 | NA                            | NA                 |
| <i>Desi_wild_6166729</i> | NA                                  | <i>Ca_desi_denovo</i> | 6166729                 | G/T  | NA                 | NA                            | NA                 |
| <i>Desi_wild_6177848</i> | NA                                  | <i>Ca_desi_denovo</i> | 6177848                 | C/G  | NA                 | NA                            | NA                 |
| <i>Desi_wild_6177872</i> | NA                                  | <i>Ca_desi_denovo</i> | 6177872                 | C/G  | NA                 | NA                            | NA                 |
| <i>Desi_wild_6177875</i> | NA                                  | <i>Ca_desi_denovo</i> | 6177875                 | C/G  | NA                 | NA                            | NA                 |
| <i>Desi_wild_6181477</i> | NA                                  | <i>Ca_desi_denovo</i> | 6181477                 | A/G  | NA                 | NA                            | NA                 |
| <i>Desi_wild_6196447</i> | NA                                  | <i>Ca_desi_denovo</i> | 6196447                 | C/G  | NA                 | NA                            | NA                 |
| <i>Desi_wild_6197409</i> | NA                                  | <i>Ca_desi_denovo</i> | 6197409                 | T/G  | NA                 | NA                            | NA                 |
| <i>Desi_wild_6198941</i> | NA                                  | <i>Ca_desi_denovo</i> | 6198941                 | C/T  | NA                 | NA                            | NA                 |
| <i>Desi_wild_6202897</i> | NA                                  | <i>Ca_desi_denovo</i> | 6202897                 | A/G  | NA                 | NA                            | NA                 |
| <i>Desi_wild_6202898</i> | NA                                  | <i>Ca_desi_denovo</i> | 6202898                 | A/G  | NA                 | NA                            | NA                 |
| <i>Desi_wild_6202904</i> | NA                                  | <i>Ca_desi_denovo</i> | 6202904                 | A/G  | NA                 | NA                            | NA                 |
| <i>Desi_wild_6202932</i> | NA                                  | <i>Ca_desi_denovo</i> | 6202932                 | A/G  | NA                 | NA                            | NA                 |
| <i>Desi_wild_6203978</i> | NA                                  | <i>Ca_desi_denovo</i> | 6203978                 | A/G  | NA                 | NA                            | NA                 |
| <i>Desi_wild_6203995</i> | NA                                  | <i>Ca_desi_denovo</i> | 6203995                 | C/G  | NA                 | NA                            | NA                 |
| <i>Desi_wild_6204132</i> | NA                                  | <i>Ca_desi_denovo</i> | 6204132                 | A/C  | NA                 | NA                            | NA                 |
| <i>Desi_wild_6204186</i> | NA                                  | <i>Ca_desi_denovo</i> | 6204186                 | A/G  | NA                 | NA                            | NA                 |
| <i>Desi_wild_6212524</i> | NA                                  | <i>Ca_desi_denovo</i> | 6212524                 | G/C  | NA                 | NA                            | NA                 |
| <i>Desi_wild_6212548</i> | NA                                  | <i>Ca_desi_denovo</i> | 6212548                 | G/A  | NA                 | NA                            | NA                 |
| <i>Desi_wild_6214797</i> | NA                                  | <i>Ca_desi_denovo</i> | 6214797                 | A/C  | NA                 | NA                            | NA                 |
| <i>Desi_wild_6214832</i> | NA                                  | <i>Ca_desi_denovo</i> | 6214832                 | A/G  | NA                 | NA                            | NA                 |
| <i>Desi_wild_6214836</i> | NA                                  | <i>Ca_desi_denovo</i> | 6214836                 | C/T  | NA                 | NA                            | NA                 |
| <i>Desi_wild_6215928</i> | NA                                  | <i>Ca_desi_denovo</i> | 6215928                 | C/G  | NA                 | NA                            | NA                 |
| <i>Desi_wild_6215935</i> | NA                                  | <i>Ca_desi_denovo</i> | 6215935                 | A/G  | NA                 | NA                            | NA                 |
| <i>Desi_wild_6219729</i> | NA                                  | <i>Ca_desi_denovo</i> | 6219729                 | C/G  | NA                 | NA                            | NA                 |
| <i>Desi_wild_6221707</i> | NA                                  | <i>Ca_desi_denovo</i> | 6221707                 | C/G  | NA                 | NA                            | NA                 |
| <i>Desi_wild_6221708</i> | NA                                  | <i>Ca_desi_denovo</i> | 6221708                 | C/G  | NA                 | NA                            | NA                 |
| <i>Desi_wild_6221907</i> | NA                                  | <i>Ca_desi_denovo</i> | 6221907                 | A/G  | NA                 | NA                            | NA                 |
| <i>Desi_wild_6223709</i> | NA                                  | <i>Ca_desi_denovo</i> | 6223709                 | C/G  | NA                 | NA                            | NA                 |
| <i>Desi_wild_6223727</i> | NA                                  | <i>Ca_desi_denovo</i> | 6223727                 | A/G  | NA                 | NA                            | NA                 |
| <i>Desi_wild_6228649</i> | NA                                  | <i>Ca_desi_denovo</i> | 6228649                 | A/G  | NA                 | NA                            | NA                 |
| <i>Desi_wild_6239410</i> | NA                                  | <i>Ca_desi_denovo</i> | 6239410                 | G/T  | NA                 | NA                            | NA                 |
| <i>Desi_wild_6246048</i> | NA                                  | <i>Ca_desi_denovo</i> | 6246048                 | A/G  | NA                 | NA                            | NA                 |
| <i>Desi_wild_6246072</i> | NA                                  | <i>Ca_desi_denovo</i> | 6246072                 | C/G  | NA                 | NA                            | NA                 |
| <i>Desi_wild_6247823</i> | NA                                  | <i>Ca_desi_denovo</i> | 6247823                 | C/G  | NA                 | NA                            | NA                 |
| <i>Desi_wild_6250698</i> | NA                                  | <i>Ca_desi_denovo</i> | 6250698                 | A/G  | NA                 | NA                            | NA                 |



| SNP IDs                  | NCBI dbSNP accession IDs (NCBI_SS#) | Chromosomes           | Physical positions (bp) | SNPs | Gene accession IDs | Sequence components of genome | Putative functions |
|--------------------------|-------------------------------------|-----------------------|-------------------------|------|--------------------|-------------------------------|--------------------|
| <i>Desi_wild_6282784</i> | NA                                  | <i>Ca_desi_denovo</i> | 6282784                 | C/T  | NA                 | NA                            | NA                 |
| <i>Desi_wild_6285587</i> | NA                                  | <i>Ca_desi_denovo</i> | 6285587                 | C/G  | NA                 | NA                            | NA                 |
| <i>Desi_wild_6289348</i> | NA                                  | <i>Ca_desi_denovo</i> | 6289348                 | C/G  | NA                 | NA                            | NA                 |
| <i>Desi_wild_6289638</i> | NA                                  | <i>Ca_desi_denovo</i> | 6289638                 | A/G  | NA                 | NA                            | NA                 |
| <i>Desi_wild_6290709</i> | NA                                  | <i>Ca_desi_denovo</i> | 6290709                 | G/T  | NA                 | NA                            | NA                 |
| <i>Desi_wild_6290739</i> | NA                                  | <i>Ca_desi_denovo</i> | 6290739                 | A/G  | NA                 | NA                            | NA                 |
| <i>Desi_wild_6291273</i> | NA                                  | <i>Ca_desi_denovo</i> | 6291273                 | A/G  | NA                 | NA                            | NA                 |
| <i>Desi_wild_6291932</i> | NA                                  | <i>Ca_desi_denovo</i> | 6291932                 | C/G  | NA                 | NA                            | NA                 |
| <i>Desi_wild_6291937</i> | NA                                  | <i>Ca_desi_denovo</i> | 6291937                 | A/C  | NA                 | NA                            | NA                 |
| <i>Desi_wild_6300905</i> | NA                                  | <i>Ca_desi_denovo</i> | 6300905                 | A/C  | NA                 | NA                            | NA                 |
| <i>Desi_wild_6302271</i> | NA                                  | <i>Ca_desi_denovo</i> | 6302271                 | A/G  | NA                 | NA                            | NA                 |
| <i>Desi_wild_6302280</i> | NA                                  | <i>Ca_desi_denovo</i> | 6302280                 | A/C  | NA                 | NA                            | NA                 |
| <i>Desi_wild_6302289</i> | NA                                  | <i>Ca_desi_denovo</i> | 6302289                 | C/T  | NA                 | NA                            | NA                 |
| <i>Desi_wild_6314887</i> | NA                                  | <i>Ca_desi_denovo</i> | 6314887                 | G/T  | NA                 | NA                            | NA                 |
| <i>Desi_wild_6320230</i> | NA                                  | <i>Ca_desi_denovo</i> | 6320230                 | A/G  | NA                 | NA                            | NA                 |
| <i>Desi_wild_6320239</i> | NA                                  | <i>Ca_desi_denovo</i> | 6320239                 | C/G  | NA                 | NA                            | NA                 |
| <i>Desi_wild_6329656</i> | NA                                  | <i>Ca_desi_denovo</i> | 6329656                 | A/G  | NA                 | NA                            | NA                 |
| <i>Desi_wild_6334189</i> | NA                                  | <i>Ca_desi_denovo</i> | 6334189                 | A/G  | NA                 | NA                            | NA                 |
| <i>Desi_wild_6334205</i> | NA                                  | <i>Ca_desi_denovo</i> | 6334205                 | A/T  | NA                 | NA                            | NA                 |
| <i>Desi_wild_6334220</i> | NA                                  | <i>Ca_desi_denovo</i> | 6334220                 | G/T  | NA                 | NA                            | NA                 |
| <i>Desi_wild_6343558</i> | NA                                  | <i>Ca_desi_denovo</i> | 6343558                 | C/T  | NA                 | NA                            | NA                 |
| <i>Desi_wild_6356901</i> | NA                                  | <i>Ca_desi_denovo</i> | 6356901                 | A/C  | NA                 | NA                            | NA                 |
| <i>Desi_wild_6356904</i> | NA                                  | <i>Ca_desi_denovo</i> | 6356904                 | A/C  | NA                 | NA                            | NA                 |
| <i>Desi_wild_6356908</i> | NA                                  | <i>Ca_desi_denovo</i> | 6356908                 | C/G  | NA                 | NA                            | NA                 |
| <i>Desi_wild_6359952</i> | NA                                  | <i>Ca_desi_denovo</i> | 6359952                 | A/G  | NA                 | NA                            | NA                 |
| <i>Desi_wild_6359958</i> | NA                                  | <i>Ca_desi_denovo</i> | 6359958                 | C/G  | NA                 | NA                            | NA                 |
| <i>Desi_wild_6359964</i> | NA                                  | <i>Ca_desi_denovo</i> | 6359964                 | A/G  | NA                 | NA                            | NA                 |
| <i>Desi_wild_6359973</i> | NA                                  | <i>Ca_desi_denovo</i> | 6359973                 | C/G  | NA                 | NA                            | NA                 |
| <i>Desi_wild_6363803</i> | NA                                  | <i>Ca_desi_denovo</i> | 6363803                 | C/T  | NA                 | NA                            | NA                 |
| <i>Desi_wild_6383585</i> | NA                                  | <i>Ca_desi_denovo</i> | 6383585                 | A/T  | NA                 | NA                            | NA                 |
| <i>Desi_wild_6383604</i> | NA                                  | <i>Ca_desi_denovo</i> | 6383604                 | C/G  | NA                 | NA                            | NA                 |
| <i>Desi_wild_6383616</i> | NA                                  | <i>Ca_desi_denovo</i> | 6383616                 | C/G  | NA                 | NA                            | NA                 |
| <i>Desi_wild_6387023</i> | NA                                  | <i>Ca_desi_denovo</i> | 6387023                 | C/G  | NA                 | NA                            | NA                 |
| <i>Desi_wild_6394610</i> | NA                                  | <i>Ca_desi_denovo</i> | 6394610                 | C/T  | NA                 | NA                            | NA                 |
| <i>Desi_wild_6394625</i> | NA                                  | <i>Ca_desi_denovo</i> | 6394625                 | C/G  | NA                 | NA                            | NA                 |
| <i>Desi_wild_6398702</i> | NA                                  | <i>Ca_desi_denovo</i> | 6398702                 | A/T  | NA                 | NA                            | NA                 |
| <i>Desi_wild_6398905</i> | NA                                  | <i>Ca_desi_denovo</i> | 6398905                 | G/T  | NA                 | NA                            | NA                 |
| <i>Desi_wild_6398926</i> | NA                                  | <i>Ca_desi_denovo</i> | 6398926                 | C/G  | NA                 | NA                            | NA                 |
| <i>Desi_wild_6407648</i> | NA                                  | <i>Ca_desi_denovo</i> | 6407648                 | T/C  | NA                 | NA                            | NA                 |
| <i>Desi_wild_6408572</i> | NA                                  | <i>Ca_desi_denovo</i> | 6408572                 | C/G  | NA                 | NA                            | NA                 |
| <i>Desi_wild_6408611</i> | NA                                  | <i>Ca_desi_denovo</i> | 6408611                 | A/G  | NA                 | NA                            | NA                 |
| <i>Desi_wild_6408650</i> | NA                                  | <i>Ca_desi_denovo</i> | 6408650                 | C/G  | NA                 | NA                            | NA                 |
| <i>Desi_wild_6409633</i> | NA                                  | <i>Ca_desi_denovo</i> | 6409633                 | C/T  | NA                 | NA                            | NA                 |
| <i>Desi_wild_6415498</i> | NA                                  | <i>Ca_desi_denovo</i> | 6415498                 | C/G  | NA                 | NA                            | NA                 |

| SNP IDs                  | NCBI dbSNP accession IDs (NCBI_SS#) | Chromosomes           | Physical positions (bp) | SNPs | Gene accession IDs | Sequence components of genome | Putative functions |
|--------------------------|-------------------------------------|-----------------------|-------------------------|------|--------------------|-------------------------------|--------------------|
| <i>Desi_wild_6416222</i> | NA                                  | <i>Ca_desi_denovo</i> | 6416222                 | A/G  | NA                 | NA                            | NA                 |
| <i>Desi_wild_6424548</i> | NA                                  | <i>Ca_desi_denovo</i> | 6424548                 | G/T  | NA                 | NA                            | NA                 |
| <i>Desi_wild_6424550</i> | NA                                  | <i>Ca_desi_denovo</i> | 6424550                 | A/C  | NA                 | NA                            | NA                 |
| <i>Desi_wild_6427229</i> | NA                                  | <i>Ca_desi_denovo</i> | 6427229                 | C/G  | NA                 | NA                            | NA                 |
| <i>Desi_wild_6427259</i> | NA                                  | <i>Ca_desi_denovo</i> | 6427259                 | A/G  | NA                 | NA                            | NA                 |
| <i>Desi_wild_6431371</i> | NA                                  | <i>Ca_desi_denovo</i> | 6431371                 | C/T  | NA                 | NA                            | NA                 |
| <i>Desi_wild_6453444</i> | NA                                  | <i>Ca_desi_denovo</i> | 6453444                 | A/G  | NA                 | NA                            | NA                 |
| <i>Desi_wild_6453455</i> | NA                                  | <i>Ca_desi_denovo</i> | 6453455                 | A/G  | NA                 | NA                            | NA                 |
| <i>Desi_wild_6467967</i> | NA                                  | <i>Ca_desi_denovo</i> | 6467967                 | C/G  | NA                 | NA                            | NA                 |
| <i>Desi_wild_6477171</i> | NA                                  | <i>Ca_desi_denovo</i> | 6477171                 | C/G  | NA                 | NA                            | NA                 |
| <i>Desi_wild_6477174</i> | NA                                  | <i>Ca_desi_denovo</i> | 6477174                 | A/C  | NA                 | NA                            | NA                 |
| <i>Desi_wild_6478912</i> | NA                                  | <i>Ca_desi_denovo</i> | 6478912                 | C/T  | NA                 | NA                            | NA                 |
| <i>Desi_wild_6480062</i> | NA                                  | <i>Ca_desi_denovo</i> | 6480062                 | A/G  | NA                 | NA                            | NA                 |
| <i>Desi_wild_6490185</i> | NA                                  | <i>Ca_desi_denovo</i> | 6490185                 | G/T  | NA                 | NA                            | NA                 |
| <i>Desi_wild_6490194</i> | NA                                  | <i>Ca_desi_denovo</i> | 6490194                 | C/T  | NA                 | NA                            | NA                 |
| <i>Desi_wild_6491318</i> | NA                                  | <i>Ca_desi_denovo</i> | 6491318                 | C/T  | NA                 | NA                            | NA                 |
| <i>Desi_wild_6491352</i> | NA                                  | <i>Ca_desi_denovo</i> | 6491352                 | A/C  | NA                 | NA                            | NA                 |
| <i>Desi_wild_6491358</i> | NA                                  | <i>Ca_desi_denovo</i> | 6491358                 | A/C  | NA                 | NA                            | NA                 |
| <i>Desi_wild_6493522</i> | NA                                  | <i>Ca_desi_denovo</i> | 6493522                 | C/T  | NA                 | NA                            | NA                 |
| <i>Desi_wild_6493525</i> | NA                                  | <i>Ca_desi_denovo</i> | 6493525                 | C/T  | NA                 | NA                            | NA                 |
| <i>Desi_wild_6493531</i> | NA                                  | <i>Ca_desi_denovo</i> | 6493531                 | G/A  | NA                 | NA                            | NA                 |
| <i>Desi_wild_6505376</i> | NA                                  | <i>Ca_desi_denovo</i> | 6505376                 | C/T  | NA                 | NA                            | NA                 |
| <i>Desi_wild_6511584</i> | NA                                  | <i>Ca_desi_denovo</i> | 6511584                 | C/T  | NA                 | NA                            | NA                 |
| <i>Desi_wild_6516424</i> | NA                                  | <i>Ca_desi_denovo</i> | 6516424                 | C/T  | NA                 | NA                            | NA                 |
| <i>Desi_wild_6521817</i> | NA                                  | <i>Ca_desi_denovo</i> | 6521817                 | C/G  | NA                 | NA                            | NA                 |
| <i>Desi_wild_6521820</i> | NA                                  | <i>Ca_desi_denovo</i> | 6521820                 | A/C  | NA                 | NA                            | NA                 |
| <i>Desi_wild_6521835</i> | NA                                  | <i>Ca_desi_denovo</i> | 6521835                 | A/G  | NA                 | NA                            | NA                 |
| <i>Desi_wild_6521844</i> | NA                                  | <i>Ca_desi_denovo</i> | 6521844                 | A/G  | NA                 | NA                            | NA                 |
| <i>Desi_wild_6524853</i> | NA                                  | <i>Ca_desi_denovo</i> | 6524853                 | C/T  | NA                 | NA                            | NA                 |
| <i>Desi_wild_6524863</i> | NA                                  | <i>Ca_desi_denovo</i> | 6524863                 | C/G  | NA                 | NA                            | NA                 |
| <i>Desi_wild_6524883</i> | NA                                  | <i>Ca_desi_denovo</i> | 6524883                 | C/T  | NA                 | NA                            | NA                 |
| <i>Desi_wild_6524897</i> | NA                                  | <i>Ca_desi_denovo</i> | 6524897                 | A/G  | NA                 | NA                            | NA                 |
| <i>Desi_wild_6545401</i> | NA                                  | <i>Ca_desi_denovo</i> | 6545401                 | A/G  | NA                 | NA                            | NA                 |
| <i>Desi_wild_6552408</i> | NA                                  | <i>Ca_desi_denovo</i> | 6552408                 | A/G  | NA                 | NA                            | NA                 |
| <i>Desi_wild_6552409</i> | NA                                  | <i>Ca_desi_denovo</i> | 6552409                 | C/G  | NA                 | NA                            | NA                 |
| <i>Desi_wild_6552410</i> | NA                                  | <i>Ca_desi_denovo</i> | 6552410                 | C/G  | NA                 | NA                            | NA                 |
| <i>Desi_wild_6552428</i> | NA                                  | <i>Ca_desi_denovo</i> | 6552428                 | C/G  | NA                 | NA                            | NA                 |
| <i>Desi_wild_6559249</i> | NA                                  | <i>Ca_desi_denovo</i> | 6559249                 | C/G  | NA                 | NA                            | NA                 |
| <i>Desi_wild_6559286</i> | NA                                  | <i>Ca_desi_denovo</i> | 6559286                 | C/G  | NA                 | NA                            | NA                 |
| <i>Desi_wild_6559289</i> | NA                                  | <i>Ca_desi_denovo</i> | 6559289                 | C/G  | NA                 | NA                            | NA                 |
| <i>Desi_wild_6559309</i> | NA                                  | <i>Ca_desi_denovo</i> | 6559309                 | C/T  | NA                 | NA                            | NA                 |
| <i>Desi_wild_6566189</i> | NA                                  | <i>Ca_desi_denovo</i> | 6566189                 | G/T  | NA                 | NA                            | NA                 |
| <i>Desi_wild_6579286</i> | NA                                  | <i>Ca_desi_denovo</i> | 6579286                 | A/G  | NA                 | NA                            | NA                 |
| <i>Desi_wild_6591953</i> | NA                                  | <i>Ca_desi_denovo</i> | 6591953                 | C/T  | NA                 | NA                            | NA                 |

| SNP IDs                  | NCBI dbSNP accession IDs (NCBI_SS#) | Chromosomes           | Physical positions (bp) | SNPs | Gene accession IDs | Sequence components of genome | Putative functions |
|--------------------------|-------------------------------------|-----------------------|-------------------------|------|--------------------|-------------------------------|--------------------|
| <i>Desi_wild_6591959</i> | NA                                  | <i>Ca_desi_denovo</i> | 6591959                 | C/T  | NA                 | NA                            | NA                 |
| <i>Desi_wild_6591962</i> | NA                                  | <i>Ca_desi_denovo</i> | 6591962                 | A/G  | NA                 | NA                            | NA                 |
| <i>Desi_wild_6592759</i> | NA                                  | <i>Ca_desi_denovo</i> | 6592759                 | G/T  | NA                 | NA                            | NA                 |
| <i>Desi_wild_6602300</i> | NA                                  | <i>Ca_desi_denovo</i> | 6602300                 | C/G  | NA                 | NA                            | NA                 |
| <i>Desi_wild_6602302</i> | NA                                  | <i>Ca_desi_denovo</i> | 6602302                 | C/G  | NA                 | NA                            | NA                 |
| <i>Desi_wild_6602317</i> | NA                                  | <i>Ca_desi_denovo</i> | 6602317                 | C/G  | NA                 | NA                            | NA                 |
| <i>Desi_wild_6602329</i> | NA                                  | <i>Ca_desi_denovo</i> | 6602329                 | C/G  | NA                 | NA                            | NA                 |
| <i>Desi_wild_6612060</i> | NA                                  | <i>Ca_desi_denovo</i> | 6612060                 | A/G  | NA                 | NA                            | NA                 |
| <i>Desi_wild_6612114</i> | NA                                  | <i>Ca_desi_denovo</i> | 6612114                 | A/G  | NA                 | NA                            | NA                 |
| <i>Desi_wild_6612120</i> | NA                                  | <i>Ca_desi_denovo</i> | 6612120                 | A/G  | NA                 | NA                            | NA                 |
| <i>Desi_wild_6613114</i> | NA                                  | <i>Ca_desi_denovo</i> | 6613114                 | C/T  | NA                 | NA                            | NA                 |
| <i>Desi_wild_6615498</i> | NA                                  | <i>Ca_desi_denovo</i> | 6615498                 | C/G  | NA                 | NA                            | NA                 |
| <i>Desi_wild_6623699</i> | NA                                  | <i>Ca_desi_denovo</i> | 6623699                 | A/G  | NA                 | NA                            | NA                 |
| <i>Desi_wild_6636582</i> | NA                                  | <i>Ca_desi_denovo</i> | 6636582                 | C/G  | NA                 | NA                            | NA                 |
| <i>Desi_wild_6636588</i> | NA                                  | <i>Ca_desi_denovo</i> | 6636588                 | T/C  | NA                 | NA                            | NA                 |
| <i>Desi_wild_6636591</i> | NA                                  | <i>Ca_desi_denovo</i> | 6636591                 | A/C  | NA                 | NA                            | NA                 |
| <i>Desi_wild_6636597</i> | NA                                  | <i>Ca_desi_denovo</i> | 6636597                 | A/G  | NA                 | NA                            | NA                 |
| <i>Desi_wild_6645123</i> | NA                                  | <i>Ca_desi_denovo</i> | 6645123                 | C/G  | NA                 | NA                            | NA                 |
| <i>Desi_wild_6645129</i> | NA                                  | <i>Ca_desi_denovo</i> | 6645129                 | C/G  | NA                 | NA                            | NA                 |
| <i>Desi_wild_6649845</i> | NA                                  | <i>Ca_desi_denovo</i> | 6649845                 | G/T  | NA                 | NA                            | NA                 |
| <i>Desi_wild_6654177</i> | NA                                  | <i>Ca_desi_denovo</i> | 6654177                 | A/G  | NA                 | NA                            | NA                 |
| <i>Desi_wild_6662600</i> | NA                                  | <i>Ca_desi_denovo</i> | 6662600                 | G/T  | NA                 | NA                            | NA                 |
| <i>Desi_wild_6665327</i> | NA                                  | <i>Ca_desi_denovo</i> | 6665327                 | C/G  | NA                 | NA                            | NA                 |
| <i>Desi_wild_6668407</i> | NA                                  | <i>Ca_desi_denovo</i> | 6668407                 | G/T  | NA                 | NA                            | NA                 |
| <i>Desi_wild_6670664</i> | NA                                  | <i>Ca_desi_denovo</i> | 6670664                 | C/T  | NA                 | NA                            | NA                 |
| <i>Desi_wild_6680126</i> | NA                                  | <i>Ca_desi_denovo</i> | 6680126                 | G/A  | NA                 | NA                            | NA                 |
| <i>Desi_wild_6696898</i> | NA                                  | <i>Ca_desi_denovo</i> | 6696898                 | G/T  | NA                 | NA                            | NA                 |
| <i>Desi_wild_6700058</i> | NA                                  | <i>Ca_desi_denovo</i> | 6700058                 | A/G  | NA                 | NA                            | NA                 |
| <i>Desi_wild_6711906</i> | NA                                  | <i>Ca_desi_denovo</i> | 6711906                 | T/C  | NA                 | NA                            | NA                 |
| <i>Desi_wild_6711924</i> | NA                                  | <i>Ca_desi_denovo</i> | 6711924                 | C/G  | NA                 | NA                            | NA                 |
| <i>Desi_wild_6711939</i> | NA                                  | <i>Ca_desi_denovo</i> | 6711939                 | T/C  | NA                 | NA                            | NA                 |
| <i>Desi_wild_6711940</i> | NA                                  | <i>Ca_desi_denovo</i> | 6711940                 | T/C  | NA                 | NA                            | NA                 |
| <i>Desi_wild_6713234</i> | NA                                  | <i>Ca_desi_denovo</i> | 6713234                 | G/A  | NA                 | NA                            | NA                 |
| <i>Desi_wild_6713245</i> | NA                                  | <i>Ca_desi_denovo</i> | 6713245                 | T/C  | NA                 | NA                            | NA                 |
| <i>Desi_wild_6713250</i> | NA                                  | <i>Ca_desi_denovo</i> | 6713250                 | T/C  | NA                 | NA                            | NA                 |
| <i>Desi_wild_6713347</i> | NA                                  | <i>Ca_desi_denovo</i> | 6713347                 | A/G  | NA                 | NA                            | NA                 |
| <i>Desi_wild_6713357</i> | NA                                  | <i>Ca_desi_denovo</i> | 6713357                 | C/T  | NA                 | NA                            | NA                 |
| <i>Desi_wild_6715944</i> | NA                                  | <i>Ca_desi_denovo</i> | 6715944                 | C/A  | NA                 | NA                            | NA                 |
| <i>Desi_wild_6731481</i> | NA                                  | <i>Ca_desi_denovo</i> | 6731481                 | C/G  | NA                 | NA                            | NA                 |
| <i>Desi_wild_6731493</i> | NA                                  | <i>Ca_desi_denovo</i> | 6731493                 | C/T  | NA                 | NA                            | NA                 |
| <i>Desi_wild_6734150</i> | NA                                  | <i>Ca_desi_denovo</i> | 6734150                 | T/C  | NA                 | NA                            | NA                 |
| <i>Desi_wild_6737311</i> | NA                                  | <i>Ca_desi_denovo</i> | 6737311                 | G/T  | NA                 | NA                            | NA                 |
| <i>Desi_wild_6757125</i> | NA                                  | <i>Ca_desi_denovo</i> | 6757125                 | C/T  | NA                 | NA                            | NA                 |
| <i>Desi_wild_6757149</i> | NA                                  | <i>Ca_desi_denovo</i> | 6757149                 | G/A  | NA                 | NA                            | NA                 |

| SNP IDs                  | NCBI dbSNP accession IDs (NCBI_SS#) | Chromosomes           | Physical positions (bp) | SNPs | Gene accession IDs | Sequence components of genome | Putative functions |
|--------------------------|-------------------------------------|-----------------------|-------------------------|------|--------------------|-------------------------------|--------------------|
| <i>Desi_wild_6766440</i> | NA                                  | <i>Ca_desi_denovo</i> | 6766440                 | G/A  | NA                 | NA                            | NA                 |
| <i>Desi_wild_6766457</i> | NA                                  | <i>Ca_desi_denovo</i> | 6766457                 | C/T  | NA                 | NA                            | NA                 |
| <i>Desi_wild_6780823</i> | NA                                  | <i>Ca_desi_denovo</i> | 6780823                 | A/C  | NA                 | NA                            | NA                 |
| <i>Desi_wild_6780829</i> | NA                                  | <i>Ca_desi_denovo</i> | 6780829                 | C/T  | NA                 | NA                            | NA                 |
| <i>Desi_wild_6795809</i> | NA                                  | <i>Ca_desi_denovo</i> | 6795809                 | C/T  | NA                 | NA                            | NA                 |
| <i>Desi_wild_6795818</i> | NA                                  | <i>Ca_desi_denovo</i> | 6795818                 | A/G  | NA                 | NA                            | NA                 |
| <i>Desi_wild_6795824</i> | NA                                  | <i>Ca_desi_denovo</i> | 6795824                 | C/G  | NA                 | NA                            | NA                 |
| <i>Desi_wild_6800644</i> | NA                                  | <i>Ca_desi_denovo</i> | 6800644                 | G/A  | NA                 | NA                            | NA                 |
| <i>Desi_wild_6800681</i> | NA                                  | <i>Ca_desi_denovo</i> | 6800681                 | G/C  | NA                 | NA                            | NA                 |
| <i>Desi_wild_6804750</i> | NA                                  | <i>Ca_desi_denovo</i> | 6804750                 | A/C  | NA                 | NA                            | NA                 |
| <i>Desi_wild_6807751</i> | NA                                  | <i>Ca_desi_denovo</i> | 6807751                 | A/C  | NA                 | NA                            | NA                 |
| <i>Desi_wild_6821576</i> | NA                                  | <i>Ca_desi_denovo</i> | 6821576                 | C/G  | NA                 | NA                            | NA                 |
| <i>Desi_wild_6823190</i> | NA                                  | <i>Ca_desi_denovo</i> | 6823190                 | T/A  | NA                 | NA                            | NA                 |
| <i>Desi_wild_6827906</i> | NA                                  | <i>Ca_desi_denovo</i> | 6827906                 | T/C  | NA                 | NA                            | NA                 |
| <i>Desi_wild_6827951</i> | NA                                  | <i>Ca_desi_denovo</i> | 6827951                 | G/C  | NA                 | NA                            | NA                 |
| <i>Desi_wild_6830758</i> | NA                                  | <i>Ca_desi_denovo</i> | 6830758                 | C/T  | NA                 | NA                            | NA                 |
| <i>Desi_wild_6832282</i> | NA                                  | <i>Ca_desi_denovo</i> | 6832282                 | T/C  | NA                 | NA                            | NA                 |
| <i>Desi_wild_6832291</i> | NA                                  | <i>Ca_desi_denovo</i> | 6832291                 | C/G  | NA                 | NA                            | NA                 |
| <i>Desi_wild_6832294</i> | NA                                  | <i>Ca_desi_denovo</i> | 6832294                 | C/G  | NA                 | NA                            | NA                 |
| <i>Desi_wild_6841225</i> | NA                                  | <i>Ca_desi_denovo</i> | 6841225                 | C/A  | NA                 | NA                            | NA                 |
| <i>Desi_wild_6843798</i> | NA                                  | <i>Ca_desi_denovo</i> | 6843798                 | G/T  | NA                 | NA                            | NA                 |
| <i>Desi_wild_6846995</i> | NA                                  | <i>Ca_desi_denovo</i> | 6846995                 | C/T  | NA                 | NA                            | NA                 |
| <i>Desi_wild_6847007</i> | NA                                  | <i>Ca_desi_denovo</i> | 6847007                 | C/T  | NA                 | NA                            | NA                 |
| <i>Desi_wild_6847031</i> | NA                                  | <i>Ca_desi_denovo</i> | 6847031                 | A/G  | NA                 | NA                            | NA                 |
| <i>Desi_wild_6849466</i> | NA                                  | <i>Ca_desi_denovo</i> | 6849466                 | C/G  | NA                 | NA                            | NA                 |
| <i>Desi_wild_6849469</i> | NA                                  | <i>Ca_desi_denovo</i> | 6849469                 | C/G  | NA                 | NA                            | NA                 |
| <i>Desi_wild_6849472</i> | NA                                  | <i>Ca_desi_denovo</i> | 6849472                 | A/T  | NA                 | NA                            | NA                 |
| <i>Desi_wild_6849490</i> | NA                                  | <i>Ca_desi_denovo</i> | 6849490                 | C/G  | NA                 | NA                            | NA                 |
| <i>Desi_wild_6876843</i> | NA                                  | <i>Ca_desi_denovo</i> | 6876843                 | C/G  | NA                 | NA                            | NA                 |
| <i>Desi_wild_6876847</i> | NA                                  | <i>Ca_desi_denovo</i> | 6876847                 | A/G  | NA                 | NA                            | NA                 |
| <i>Desi_wild_6897194</i> | NA                                  | <i>Ca_desi_denovo</i> | 6897194                 | C/T  | NA                 | NA                            | NA                 |
| <i>Desi_wild_6901924</i> | NA                                  | <i>Ca_desi_denovo</i> | 6901924                 | A/G  | NA                 | NA                            | NA                 |
| <i>Desi_wild_6911909</i> | NA                                  | <i>Ca_desi_denovo</i> | 6911909                 | T/C  | NA                 | NA                            | NA                 |
| <i>Desi_wild_6915988</i> | NA                                  | <i>Ca_desi_denovo</i> | 6915988                 | A/C  | NA                 | NA                            | NA                 |
| <i>Desi_wild_6918170</i> | NA                                  | <i>Ca_desi_denovo</i> | 6918170                 | C/T  | NA                 | NA                            | NA                 |
| <i>Desi_wild_6918539</i> | NA                                  | <i>Ca_desi_denovo</i> | 6918539                 | C/G  | NA                 | NA                            | NA                 |
| <i>Desi_wild_6918545</i> | NA                                  | <i>Ca_desi_denovo</i> | 6918545                 | A/C  | NA                 | NA                            | NA                 |
| <i>Desi_wild_6926823</i> | NA                                  | <i>Ca_desi_denovo</i> | 6926823                 | C/T  | NA                 | NA                            | NA                 |
| <i>Desi_wild_6926826</i> | NA                                  | <i>Ca_desi_denovo</i> | 6926826                 | G/C  | NA                 | NA                            | NA                 |
| <i>Desi_wild_6935412</i> | NA                                  | <i>Ca_desi_denovo</i> | 6935412                 | G/A  | NA                 | NA                            | NA                 |
| <i>Desi_wild_6937727</i> | NA                                  | <i>Ca_desi_denovo</i> | 6937727                 | A/C  | NA                 | NA                            | NA                 |
| <i>Desi_wild_6937733</i> | NA                                  | <i>Ca_desi_denovo</i> | 6937733                 | C/G  | NA                 | NA                            | NA                 |
| <i>Desi_wild_6937739</i> | NA                                  | <i>Ca_desi_denovo</i> | 6937739                 | C/G  | NA                 | NA                            | NA                 |
| <i>Desi_wild_6937748</i> | NA                                  | <i>Ca_desi_denovo</i> | 6937748                 | C/G  | NA                 | NA                            | NA                 |

| SNP IDs                  | NCBI dbSNP accession IDs (NCBI_SS#) | Chromosomes           | Physical positions (bp) | SNPs | Gene accession IDs | Sequence components of genome | Putative functions |
|--------------------------|-------------------------------------|-----------------------|-------------------------|------|--------------------|-------------------------------|--------------------|
| <i>Desi_wild_6938897</i> | NA                                  | <i>Ca_desi_denovo</i> | 6938897                 | C/T  | NA                 | NA                            | NA                 |
| <i>Desi_wild_6940397</i> | NA                                  | <i>Ca_desi_denovo</i> | 6940397                 | C/G  | NA                 | NA                            | NA                 |
| <i>Desi_wild_6953845</i> | NA                                  | <i>Ca_desi_denovo</i> | 6953845                 | A/C  | NA                 | NA                            | NA                 |
| <i>Desi_wild_6978107</i> | NA                                  | <i>Ca_desi_denovo</i> | 6978107                 | C/T  | NA                 | NA                            | NA                 |
| <i>Desi_wild_6979148</i> | NA                                  | <i>Ca_desi_denovo</i> | 6979148                 | C/G  | NA                 | NA                            | NA                 |
| <i>Desi_wild_6979149</i> | NA                                  | <i>Ca_desi_denovo</i> | 6979149                 | C/G  | NA                 | NA                            | NA                 |
| <i>Desi_wild_6979168</i> | NA                                  | <i>Ca_desi_denovo</i> | 6979168                 | C/G  | NA                 | NA                            | NA                 |
| <i>Desi_wild_6979169</i> | NA                                  | <i>Ca_desi_denovo</i> | 6979169                 | A/C  | NA                 | NA                            | NA                 |
| <i>Desi_wild_6988261</i> | NA                                  | <i>Ca_desi_denovo</i> | 6988261                 | A/C  | NA                 | NA                            | NA                 |
| <i>Desi_wild_6988267</i> | NA                                  | <i>Ca_desi_denovo</i> | 6988267                 | C/G  | NA                 | NA                            | NA                 |
| <i>Desi_wild_6997016</i> | NA                                  | <i>Ca_desi_denovo</i> | 6997016                 | A/G  | NA                 | NA                            | NA                 |
| <i>Desi_wild_6999304</i> | NA                                  | <i>Ca_desi_denovo</i> | 6999304                 | C/G  | NA                 | NA                            | NA                 |
| <i>Desi_wild_6999306</i> | NA                                  | <i>Ca_desi_denovo</i> | 6999306                 | A/C  | NA                 | NA                            | NA                 |
| <i>Desi_wild_7010141</i> | NA                                  | <i>Ca_desi_denovo</i> | 7010141                 | A/G  | NA                 | NA                            | NA                 |
| <i>Desi_wild_7013872</i> | NA                                  | <i>Ca_desi_denovo</i> | 7013872                 | C/T  | NA                 | NA                            | NA                 |
| <i>Desi_wild_7013881</i> | NA                                  | <i>Ca_desi_denovo</i> | 7013881                 | C/T  | NA                 | NA                            | NA                 |
| <i>Desi_wild_7016423</i> | NA                                  | <i>Ca_desi_denovo</i> | 7016423                 | C/T  | NA                 | NA                            | NA                 |
| <i>Desi_wild_7022020</i> | NA                                  | <i>Ca_desi_denovo</i> | 7022020                 | C/T  | NA                 | NA                            | NA                 |
| <i>Desi_wild_7024221</i> | NA                                  | <i>Ca_desi_denovo</i> | 7024221                 | C/G  | NA                 | NA                            | NA                 |
| <i>Desi_wild_7040794</i> | NA                                  | <i>Ca_desi_denovo</i> | 7040794                 | C/G  | NA                 | NA                            | NA                 |
| <i>Desi_wild_7042322</i> | NA                                  | <i>Ca_desi_denovo</i> | 7042322                 | A/G  | NA                 | NA                            | NA                 |
| <i>Desi_wild_7042335</i> | NA                                  | <i>Ca_desi_denovo</i> | 7042335                 | A/G  | NA                 | NA                            | NA                 |
| <i>Desi_wild_7042351</i> | NA                                  | <i>Ca_desi_denovo</i> | 7042351                 | C/G  | NA                 | NA                            | NA                 |
| <i>Desi_wild_7043393</i> | NA                                  | <i>Ca_desi_denovo</i> | 7043393                 | A/C  | NA                 | NA                            | NA                 |
| <i>Desi_wild_7045115</i> | NA                                  | <i>Ca_desi_denovo</i> | 7045115                 | C/T  | NA                 | NA                            | NA                 |
| <i>Desi_wild_7045627</i> | NA                                  | <i>Ca_desi_denovo</i> | 7045627                 | T/G  | NA                 | NA                            | NA                 |
| <i>Desi_wild_7046473</i> | NA                                  | <i>Ca_desi_denovo</i> | 7046473                 | A/G  | NA                 | NA                            | NA                 |
| <i>Desi_wild_7048111</i> | NA                                  | <i>Ca_desi_denovo</i> | 7048111                 | A/G  | NA                 | NA                            | NA                 |
| <i>Desi_wild_7048117</i> | NA                                  | <i>Ca_desi_denovo</i> | 7048117                 | A/G  | NA                 | NA                            | NA                 |
| <i>Desi_wild_7048156</i> | NA                                  | <i>Ca_desi_denovo</i> | 7048156                 | A/G  | NA                 | NA                            | NA                 |
| <i>Desi_wild_7048180</i> | NA                                  | <i>Ca_desi_denovo</i> | 7048180                 | C/G  | NA                 | NA                            | NA                 |
| <i>Desi_wild_7056463</i> | NA                                  | <i>Ca_desi_denovo</i> | 7056463                 | A/C  | NA                 | NA                            | NA                 |
| <i>Desi_wild_7056464</i> | NA                                  | <i>Ca_desi_denovo</i> | 7056464                 | G/T  | NA                 | NA                            | NA                 |
| <i>Desi_wild_7058360</i> | NA                                  | <i>Ca_desi_denovo</i> | 7058360                 | C/T  | NA                 | NA                            | NA                 |
| <i>Desi_wild_7064477</i> | NA                                  | <i>Ca_desi_denovo</i> | 7064477                 | T/C  | NA                 | NA                            | NA                 |
| <i>Desi_wild_7067705</i> | NA                                  | <i>Ca_desi_denovo</i> | 7067705                 | C/T  | NA                 | NA                            | NA                 |
| <i>Desi_wild_7067726</i> | NA                                  | <i>Ca_desi_denovo</i> | 7067726                 | G/T  | NA                 | NA                            | NA                 |
| <i>Desi_wild_7083117</i> | NA                                  | <i>Ca_desi_denovo</i> | 7083117                 | A/G  | NA                 | NA                            | NA                 |
| <i>Desi_wild_7084027</i> | NA                                  | <i>Ca_desi_denovo</i> | 7084027                 | A/G  | NA                 | NA                            | NA                 |
| <i>Desi_wild_7084042</i> | NA                                  | <i>Ca_desi_denovo</i> | 7084042                 | A/G  | NA                 | NA                            | NA                 |
| <i>Desi_wild_7085454</i> | NA                                  | <i>Ca_desi_denovo</i> | 7085454                 | C/G  | NA                 | NA                            | NA                 |
| <i>Desi_wild_7085463</i> | NA                                  | <i>Ca_desi_denovo</i> | 7085463                 | A/G  | NA                 | NA                            | NA                 |
| <i>Desi_wild_7097053</i> | NA                                  | <i>Ca_desi_denovo</i> | 7097053                 | C/T  | NA                 | NA                            | NA                 |
| <i>Desi_wild_7097062</i> | NA                                  | <i>Ca_desi_denovo</i> | 7097062                 | C/G  | NA                 | NA                            | NA                 |

| SNP IDs                  | NCBI dbSNP accession IDs (NCBI_SS#) | Chromosomes           | Physical positions (bp) | SNPs | Gene accession IDs | Sequence components of genome | Putative functions |
|--------------------------|-------------------------------------|-----------------------|-------------------------|------|--------------------|-------------------------------|--------------------|
| <i>Desi_wild_7103843</i> | NA                                  | <i>Ca_desi_denovo</i> | 7103843                 | T/G  | NA                 | NA                            | NA                 |
| <i>Desi_wild_7105789</i> | NA                                  | <i>Ca_desi_denovo</i> | 7105789                 | T/C  | NA                 | NA                            | NA                 |
| <i>Desi_wild_7118402</i> | NA                                  | <i>Ca_desi_denovo</i> | 7118402                 | A/C  | NA                 | NA                            | NA                 |
| <i>Desi_wild_7170763</i> | NA                                  | <i>Ca_desi_denovo</i> | 7170763                 | C/G  | NA                 | NA                            | NA                 |
| <i>Desi_wild_7171628</i> | NA                                  | <i>Ca_desi_denovo</i> | 7171628                 | A/C  | NA                 | NA                            | NA                 |
| <i>Desi_wild_7207918</i> | NA                                  | <i>Ca_desi_denovo</i> | 7207918                 | A/G  | NA                 | NA                            | NA                 |
| <i>Desi_wild_7210896</i> | NA                                  | <i>Ca_desi_denovo</i> | 7210896                 | C/T  | NA                 | NA                            | NA                 |
| <i>Desi_wild_7220037</i> | NA                                  | <i>Ca_desi_denovo</i> | 7220037                 | C/T  | NA                 | NA                            | NA                 |
| <i>Desi_wild_7227077</i> | NA                                  | <i>Ca_desi_denovo</i> | 7227077                 | A/C  | NA                 | NA                            | NA                 |
| <i>Desi_wild_7228010</i> | NA                                  | <i>Ca_desi_denovo</i> | 7228010                 | C/T  | NA                 | NA                            | NA                 |
| <i>Desi_wild_7274407</i> | NA                                  | <i>Ca_desi_denovo</i> | 7274407                 | A/G  | NA                 | NA                            | NA                 |
| <i>Desi_wild_7274443</i> | NA                                  | <i>Ca_desi_denovo</i> | 7274443                 | A/G  | NA                 | NA                            | NA                 |
| <i>Desi_wild_7274451</i> | NA                                  | <i>Ca_desi_denovo</i> | 7274451                 | C/T  | NA                 | NA                            | NA                 |
| <i>Desi_wild_7285761</i> | NA                                  | <i>Ca_desi_denovo</i> | 7285761                 | C/G  | NA                 | NA                            | NA                 |
| <i>Desi_wild_7294930</i> | NA                                  | <i>Ca_desi_denovo</i> | 7294930                 | C/T  | NA                 | NA                            | NA                 |
| <i>Desi_wild_7294932</i> | NA                                  | <i>Ca_desi_denovo</i> | 7294932                 | A/G  | NA                 | NA                            | NA                 |
| <i>Desi_wild_7294933</i> | NA                                  | <i>Ca_desi_denovo</i> | 7294933                 | A/G  | NA                 | NA                            | NA                 |
| <i>Desi_wild_7297322</i> | NA                                  | <i>Ca_desi_denovo</i> | 7297322                 | C/G  | NA                 | NA                            | NA                 |
| <i>Desi_wild_7297367</i> | NA                                  | <i>Ca_desi_denovo</i> | 7297367                 | G/T  | NA                 | NA                            | NA                 |
| <i>Desi_wild_7299967</i> | NA                                  | <i>Ca_desi_denovo</i> | 7299967                 | C/T  | NA                 | NA                            | NA                 |
| <i>Desi_wild_7299984</i> | NA                                  | <i>Ca_desi_denovo</i> | 7299984                 | A/G  | NA                 | NA                            | NA                 |
| <i>Desi_wild_7301958</i> | NA                                  | <i>Ca_desi_denovo</i> | 7301958                 | C/G  | NA                 | NA                            | NA                 |
| <i>Desi_wild_7301967</i> | NA                                  | <i>Ca_desi_denovo</i> | 7301967                 | G/T  | NA                 | NA                            | NA                 |
| <i>Desi_wild_7303850</i> | NA                                  | <i>Ca_desi_denovo</i> | 7303850                 | C/T  | NA                 | NA                            | NA                 |
| <i>Desi_wild_7323917</i> | NA                                  | <i>Ca_desi_denovo</i> | 7323917                 | C/T  | NA                 | NA                            | NA                 |
| <i>Desi_wild_7328923</i> | NA                                  | <i>Ca_desi_denovo</i> | 7328923                 | A/C  | NA                 | NA                            | NA                 |
| <i>Desi_wild_7328924</i> | NA                                  | <i>Ca_desi_denovo</i> | 7328924                 | G/T  | NA                 | NA                            | NA                 |
| <i>Desi_wild_7333082</i> | NA                                  | <i>Ca_desi_denovo</i> | 7333082                 | A/G  | NA                 | NA                            | NA                 |
| <i>Desi_wild_7333500</i> | NA                                  | <i>Ca_desi_denovo</i> | 7333500                 | A/G  | NA                 | NA                            | NA                 |
| <i>Desi_wild_7339340</i> | NA                                  | <i>Ca_desi_denovo</i> | 7339340                 | C/T  | NA                 | NA                            | NA                 |
| <i>Desi_wild_7352315</i> | NA                                  | <i>Ca_desi_denovo</i> | 7352315                 | C/G  | NA                 | NA                            | NA                 |
| <i>Desi_wild_7352317</i> | NA                                  | <i>Ca_desi_denovo</i> | 7352317                 | C/G  | NA                 | NA                            | NA                 |
| <i>Desi_wild_7355830</i> | NA                                  | <i>Ca_desi_denovo</i> | 7355830                 | G/T  | NA                 | NA                            | NA                 |
| <i>Desi_wild_7356113</i> | NA                                  | <i>Ca_desi_denovo</i> | 7356113                 | C/G  | NA                 | NA                            | NA                 |
| <i>Desi_wild_7356122</i> | NA                                  | <i>Ca_desi_denovo</i> | 7356122                 | C/G  | NA                 | NA                            | NA                 |
| <i>Desi_wild_7356133</i> | NA                                  | <i>Ca_desi_denovo</i> | 7356133                 | A/T  | NA                 | NA                            | NA                 |
| <i>Desi_wild_7363419</i> | NA                                  | <i>Ca_desi_denovo</i> | 7363419                 | A/C  | NA                 | NA                            | NA                 |
| <i>Desi_wild_7373769</i> | NA                                  | <i>Ca_desi_denovo</i> | 7373769                 | C/G  | NA                 | NA                            | NA                 |
| <i>Desi_wild_7373778</i> | NA                                  | <i>Ca_desi_denovo</i> | 7373778                 | A/G  | NA                 | NA                            | NA                 |
| <i>Desi_wild_7373796</i> | NA                                  | <i>Ca_desi_denovo</i> | 7373796                 | C/G  | NA                 | NA                            | NA                 |
| <i>Desi_wild_7375359</i> | NA                                  | <i>Ca_desi_denovo</i> | 7375359                 | C/T  | NA                 | NA                            | NA                 |
| <i>Desi_wild_7382730</i> | NA                                  | <i>Ca_desi_denovo</i> | 7382730                 | C/T  | NA                 | NA                            | NA                 |
| <i>Desi_wild_7387169</i> | NA                                  | <i>Ca_desi_denovo</i> | 7387169                 | C/T  | NA                 | NA                            | NA                 |
| <i>Desi_wild_7389493</i> | NA                                  | <i>Ca_desi_denovo</i> | 7389493                 | G/T  | NA                 | NA                            | NA                 |

| SNP IDs                  | NCBI dbSNP accession IDs (NCBI_SS#) | Chromosomes           | Physical positions (bp) | SNPs | Gene accession IDs | Sequence components of genome | Putative functions |
|--------------------------|-------------------------------------|-----------------------|-------------------------|------|--------------------|-------------------------------|--------------------|
| <i>Desi_wild_7392207</i> | NA                                  | <i>Ca_desi_denovo</i> | 7392207                 | C/T  | NA                 | NA                            | NA                 |
| <i>Desi_wild_7392219</i> | NA                                  | <i>Ca_desi_denovo</i> | 7392219                 | C/G  | NA                 | NA                            | NA                 |
| <i>Desi_wild_7392225</i> | NA                                  | <i>Ca_desi_denovo</i> | 7392225                 | A/C  | NA                 | NA                            | NA                 |
| <i>Desi_wild_7395819</i> | NA                                  | <i>Ca_desi_denovo</i> | 7395819                 | C/T  | NA                 | NA                            | NA                 |
| <i>Desi_wild_7395849</i> | NA                                  | <i>Ca_desi_denovo</i> | 7395849                 | C/G  | NA                 | NA                            | NA                 |
| <i>Desi_wild_7408346</i> | NA                                  | <i>Ca_desi_denovo</i> | 7408346                 | A/T  | NA                 | NA                            | NA                 |
| <i>Desi_wild_7408361</i> | NA                                  | <i>Ca_desi_denovo</i> | 7408361                 | A/T  | NA                 | NA                            | NA                 |
| <i>Desi_wild_7408418</i> | NA                                  | <i>Ca_desi_denovo</i> | 7408418                 | A/T  | NA                 | NA                            | NA                 |
| <i>Desi_wild_7414060</i> | NA                                  | <i>Ca_desi_denovo</i> | 7414060                 | G/T  | NA                 | NA                            | NA                 |
| <i>Desi_wild_7414077</i> | NA                                  | <i>Ca_desi_denovo</i> | 7414077                 | G/T  | NA                 | NA                            | NA                 |
| <i>Desi_wild_7434396</i> | NA                                  | <i>Ca_desi_denovo</i> | 7434396                 | A/G  | NA                 | NA                            | NA                 |
| <i>Desi_wild_7437560</i> | NA                                  | <i>Ca_desi_denovo</i> | 7437560                 | C/G  | NA                 | NA                            | NA                 |
| <i>Desi_wild_7437566</i> | NA                                  | <i>Ca_desi_denovo</i> | 7437566                 | C/T  | NA                 | NA                            | NA                 |
| <i>Desi_wild_7449316</i> | NA                                  | <i>Ca_desi_denovo</i> | 7449316                 | C/G  | NA                 | NA                            | NA                 |
| <i>Desi_wild_7449343</i> | NA                                  | <i>Ca_desi_denovo</i> | 7449343                 | C/G  | NA                 | NA                            | NA                 |
| <i>Desi_wild_7454709</i> | NA                                  | <i>Ca_desi_denovo</i> | 7454709                 | A/T  | NA                 | NA                            | NA                 |
| <i>Desi_wild_7454720</i> | NA                                  | <i>Ca_desi_denovo</i> | 7454720                 | C/T  | NA                 | NA                            | NA                 |
| <i>Desi_wild_7454763</i> | NA                                  | <i>Ca_desi_denovo</i> | 7454763                 | A/T  | NA                 | NA                            | NA                 |
| <i>Desi_wild_7456421</i> | NA                                  | <i>Ca_desi_denovo</i> | 7456421                 | A/C  | NA                 | NA                            | NA                 |
| <i>Desi_wild_7456430</i> | NA                                  | <i>Ca_desi_denovo</i> | 7456430                 | G/T  | NA                 | NA                            | NA                 |
| <i>Desi_wild_7456629</i> | NA                                  | <i>Ca_desi_denovo</i> | 7456629                 | G/A  | NA                 | NA                            | NA                 |
| <i>Desi_wild_7456634</i> | NA                                  | <i>Ca_desi_denovo</i> | 7456634                 | C/T  | NA                 | NA                            | NA                 |
| <i>Desi_wild_7460725</i> | NA                                  | <i>Ca_desi_denovo</i> | 7460725                 | C/T  | NA                 | NA                            | NA                 |
| <i>Desi_wild_7460731</i> | NA                                  | <i>Ca_desi_denovo</i> | 7460731                 | C/G  | NA                 | NA                            | NA                 |
| <i>Desi_wild_7460743</i> | NA                                  | <i>Ca_desi_denovo</i> | 7460743                 | C/G  | NA                 | NA                            | NA                 |
| <i>Desi_wild_7460744</i> | NA                                  | <i>Ca_desi_denovo</i> | 7460744                 | A/C  | NA                 | NA                            | NA                 |
| <i>Desi_wild_7461740</i> | NA                                  | <i>Ca_desi_denovo</i> | 7461740                 | C/G  | NA                 | NA                            | NA                 |
| <i>Desi_wild_7463983</i> | NA                                  | <i>Ca_desi_denovo</i> | 7463983                 | G/T  | NA                 | NA                            | NA                 |
| <i>Desi_wild_7476896</i> | NA                                  | <i>Ca_desi_denovo</i> | 7476896                 | A/G  | NA                 | NA                            | NA                 |
| <i>Desi_wild_7484264</i> | NA                                  | <i>Ca_desi_denovo</i> | 7484264                 | C/G  | NA                 | NA                            | NA                 |
| <i>Desi_wild_7484282</i> | NA                                  | <i>Ca_desi_denovo</i> | 7484282                 | C/T  | NA                 | NA                            | NA                 |
| <i>Desi_wild_7484297</i> | NA                                  | <i>Ca_desi_denovo</i> | 7484297                 | A/G  | NA                 | NA                            | NA                 |
| <i>Desi_wild_7484312</i> | NA                                  | <i>Ca_desi_denovo</i> | 7484312                 | C/T  | NA                 | NA                            | NA                 |
| <i>Desi_wild_7484560</i> | NA                                  | <i>Ca_desi_denovo</i> | 7484560                 | C/T  | NA                 | NA                            | NA                 |
| <i>Desi_wild_7484585</i> | NA                                  | <i>Ca_desi_denovo</i> | 7484585                 | C/T  | NA                 | NA                            | NA                 |
| <i>Desi_wild_7485071</i> | NA                                  | <i>Ca_desi_denovo</i> | 7485071                 | A/G  | NA                 | NA                            | NA                 |
| <i>Desi_wild_7487762</i> | NA                                  | <i>Ca_desi_denovo</i> | 7487762                 | C/T  | NA                 | NA                            | NA                 |
| <i>Desi_wild_7488063</i> | NA                                  | <i>Ca_desi_denovo</i> | 7488063                 | C/T  | NA                 | NA                            | NA                 |
| <i>Desi_wild_7488066</i> | NA                                  | <i>Ca_desi_denovo</i> | 7488066                 | A/C  | NA                 | NA                            | NA                 |
| <i>Desi_wild_7488081</i> | NA                                  | <i>Ca_desi_denovo</i> | 7488081                 | A/T  | NA                 | NA                            | NA                 |
| <i>Desi_wild_7489885</i> | NA                                  | <i>Ca_desi_denovo</i> | 7489885                 | G/T  | NA                 | NA                            | NA                 |
| <i>Desi_wild_7489893</i> | NA                                  | <i>Ca_desi_denovo</i> | 7489893                 | C/G  | NA                 | NA                            | NA                 |
| <i>Desi_wild_7502156</i> | NA                                  | <i>Ca_desi_denovo</i> | 7502156                 | G/T  | NA                 | NA                            | NA                 |
| <i>Desi_wild_7510944</i> | NA                                  | <i>Ca_desi_denovo</i> | 7510944                 | C/G  | NA                 | NA                            | NA                 |

| SNP IDs                  | NCBI dbSNP accession IDs (NCBI_SS#) | Chromosomes           | Physical positions (bp) | SNPs | Gene accession IDs | Sequence components of genome | Putative functions |
|--------------------------|-------------------------------------|-----------------------|-------------------------|------|--------------------|-------------------------------|--------------------|
| <i>Desi_wild_7515436</i> | NA                                  | <i>Ca_desi_denovo</i> | 7515436                 | A/C  | NA                 | NA                            | NA                 |
| <i>Desi_wild_7516580</i> | NA                                  | <i>Ca_desi_denovo</i> | 7516580                 | A/G  | NA                 | NA                            | NA                 |
| <i>Desi_wild_7521296</i> | NA                                  | <i>Ca_desi_denovo</i> | 7521296                 | A/G  | NA                 | NA                            | NA                 |
| <i>Desi_wild_7524357</i> | NA                                  | <i>Ca_desi_denovo</i> | 7524357                 | C/T  | NA                 | NA                            | NA                 |
| <i>Desi_wild_7531290</i> | NA                                  | <i>Ca_desi_denovo</i> | 7531290                 | C/G  | NA                 | NA                            | NA                 |
| <i>Desi_wild_7531305</i> | NA                                  | <i>Ca_desi_denovo</i> | 7531305                 | C/G  | NA                 | NA                            | NA                 |
| <i>Desi_wild_7542777</i> | NA                                  | <i>Ca_desi_denovo</i> | 7542777                 | C/T  | NA                 | NA                            | NA                 |
| <i>Desi_wild_7544240</i> | NA                                  | <i>Ca_desi_denovo</i> | 7544240                 | C/G  | NA                 | NA                            | NA                 |
| <i>Desi_wild_7552451</i> | NA                                  | <i>Ca_desi_denovo</i> | 7552451                 | C/T  | NA                 | NA                            | NA                 |
| <i>Desi_wild_7558955</i> | NA                                  | <i>Ca_desi_denovo</i> | 7558955                 | C/T  | NA                 | NA                            | NA                 |
| <i>Desi_wild_7560259</i> | NA                                  | <i>Ca_desi_denovo</i> | 7560259                 | A/G  | NA                 | NA                            | NA                 |
| <i>Desi_wild_7560280</i> | NA                                  | <i>Ca_desi_denovo</i> | 7560280                 | C/T  | NA                 | NA                            | NA                 |
| <i>Desi_wild_7560286</i> | NA                                  | <i>Ca_desi_denovo</i> | 7560286                 | A/G  | NA                 | NA                            | NA                 |
| <i>Desi_wild_7565176</i> | NA                                  | <i>Ca_desi_denovo</i> | 7565176                 | C/G  | NA                 | NA                            | NA                 |
| <i>Desi_wild_7568820</i> | NA                                  | <i>Ca_desi_denovo</i> | 7568820                 | T/C  | NA                 | NA                            | NA                 |
| <i>Desi_wild_7568859</i> | NA                                  | <i>Ca_desi_denovo</i> | 7568859                 | T/C  | NA                 | NA                            | NA                 |
| <i>Desi_wild_7569094</i> | NA                                  | <i>Ca_desi_denovo</i> | 7569094                 | C/T  | NA                 | NA                            | NA                 |
| <i>Desi_wild_7575216</i> | NA                                  | <i>Ca_desi_denovo</i> | 7575216                 | C/T  | NA                 | NA                            | NA                 |
| <i>Desi_wild_7575250</i> | NA                                  | <i>Ca_desi_denovo</i> | 7575250                 | A/T  | NA                 | NA                            | NA                 |
| <i>Desi_wild_7582593</i> | NA                                  | <i>Ca_desi_denovo</i> | 7582593                 | C/T  | NA                 | NA                            | NA                 |
| <i>Desi_wild_7591417</i> | NA                                  | <i>Ca_desi_denovo</i> | 7591417                 | C/T  | NA                 | NA                            | NA                 |
| <i>Desi_wild_7591428</i> | NA                                  | <i>Ca_desi_denovo</i> | 7591428                 | C/T  | NA                 | NA                            | NA                 |
| <i>Desi_wild_7599376</i> | NA                                  | <i>Ca_desi_denovo</i> | 7599376                 | C/T  | NA                 | NA                            | NA                 |
| <i>Desi_wild_7605944</i> | NA                                  | <i>Ca_desi_denovo</i> | 7605944                 | G/T  | NA                 | NA                            | NA                 |
| <i>Desi_wild_7611676</i> | NA                                  | <i>Ca_desi_denovo</i> | 7611676                 | A/G  | NA                 | NA                            | NA                 |
| <i>Desi_wild_7622468</i> | NA                                  | <i>Ca_desi_denovo</i> | 7622468                 | G/T  | NA                 | NA                            | NA                 |
| <i>Desi_wild_7630657</i> | NA                                  | <i>Ca_desi_denovo</i> | 7630657                 | C/G  | NA                 | NA                            | NA                 |
| <i>Desi_wild_7630675</i> | NA                                  | <i>Ca_desi_denovo</i> | 7630675                 | C/G  | NA                 | NA                            | NA                 |
| <i>Desi_wild_7630687</i> | NA                                  | <i>Ca_desi_denovo</i> | 7630687                 | C/G  | NA                 | NA                            | NA                 |
| <i>Desi_wild_7635669</i> | NA                                  | <i>Ca_desi_denovo</i> | 7635669                 | A/G  | NA                 | NA                            | NA                 |
| <i>Desi_wild_7636463</i> | NA                                  | <i>Ca_desi_denovo</i> | 7636463                 | C/G  | NA                 | NA                            | NA                 |
| <i>Desi_wild_7636475</i> | NA                                  | <i>Ca_desi_denovo</i> | 7636475                 | C/T  | NA                 | NA                            | NA                 |
| <i>Desi_wild_7636490</i> | NA                                  | <i>Ca_desi_denovo</i> | 7636490                 | C/G  | NA                 | NA                            | NA                 |
| <i>Desi_wild_7640190</i> | NA                                  | <i>Ca_desi_denovo</i> | 7640190                 | C/T  | NA                 | NA                            | NA                 |
| <i>Desi_wild_7640462</i> | NA                                  | <i>Ca_desi_denovo</i> | 7640462                 | A/T  | NA                 | NA                            | NA                 |
| <i>Desi_wild_7642357</i> | NA                                  | <i>Ca_desi_denovo</i> | 7642357                 | C/G  | NA                 | NA                            | NA                 |
| <i>Desi_wild_7642360</i> | NA                                  | <i>Ca_desi_denovo</i> | 7642360                 | C/G  | NA                 | NA                            | NA                 |
| <i>Desi_wild_7642372</i> | NA                                  | <i>Ca_desi_denovo</i> | 7642372                 | A/G  | NA                 | NA                            | NA                 |
| <i>Desi_wild_7643494</i> | NA                                  | <i>Ca_desi_denovo</i> | 7643494                 | A/G  | NA                 | NA                            | NA                 |
| <i>Desi_wild_7647943</i> | NA                                  | <i>Ca_desi_denovo</i> | 7647943                 | C/T  | NA                 | NA                            | NA                 |
| <i>Desi_wild_7647976</i> | NA                                  | <i>Ca_desi_denovo</i> | 7647976                 | A/G  | NA                 | NA                            | NA                 |
| <i>Desi_wild_7653077</i> | NA                                  | <i>Ca_desi_denovo</i> | 7653077                 | G/T  | NA                 | NA                            | NA                 |
| <i>Desi_wild_7653082</i> | NA                                  | <i>Ca_desi_denovo</i> | 7653082                 | C/T  | NA                 | NA                            | NA                 |
| <i>Desi_wild_7658014</i> | NA                                  | <i>Ca_desi_denovo</i> | 7658014                 | C/G  | NA                 | NA                            | NA                 |



| SNP IDs                  | NCBI dbSNP accession IDs (NCBI_SS#) | Chromosomes           | Physical positions (bp) | SNPs | Gene accession IDs | Sequence components of genome | Putative functions |
|--------------------------|-------------------------------------|-----------------------|-------------------------|------|--------------------|-------------------------------|--------------------|
| <i>Desi_wild_7658017</i> | NA                                  | <i>Ca_desi_denovo</i> | 7658017                 | C/G  | NA                 | NA                            | NA                 |
| <i>Desi_wild_7664381</i> | NA                                  | <i>Ca_desi_denovo</i> | 7664381                 | C/T  | NA                 | NA                            | NA                 |
| <i>Desi_wild_7664407</i> | NA                                  | <i>Ca_desi_denovo</i> | 7664407                 | C/G  | NA                 | NA                            | NA                 |
| <i>Desi_wild_7671531</i> | NA                                  | <i>Ca_desi_denovo</i> | 7671531                 | A/G  | NA                 | NA                            | NA                 |
| <i>Desi_wild_7674668</i> | NA                                  | <i>Ca_desi_denovo</i> | 7674668                 | C/T  | NA                 | NA                            | NA                 |
| <i>Desi_wild_7674671</i> | NA                                  | <i>Ca_desi_denovo</i> | 7674671                 | A/G  | NA                 | NA                            | NA                 |
| <i>Desi_wild_7675506</i> | NA                                  | <i>Ca_desi_denovo</i> | 7675506                 | G/A  | NA                 | NA                            | NA                 |
| <i>Desi_wild_7678257</i> | NA                                  | <i>Ca_desi_denovo</i> | 7678257                 | C/T  | NA                 | NA                            | NA                 |
| <i>Desi_wild_7678299</i> | NA                                  | <i>Ca_desi_denovo</i> | 7678299                 | C/T  | NA                 | NA                            | NA                 |
| <i>Desi_wild_7687751</i> | NA                                  | <i>Ca_desi_denovo</i> | 7687751                 | A/T  | NA                 | NA                            | NA                 |
| <i>Desi_wild_7687773</i> | NA                                  | <i>Ca_desi_denovo</i> | 7687773                 | A/G  | NA                 | NA                            | NA                 |
| <i>Desi_wild_7687776</i> | NA                                  | <i>Ca_desi_denovo</i> | 7687776                 | C/G  | NA                 | NA                            | NA                 |
| <i>Desi_wild_7689294</i> | NA                                  | <i>Ca_desi_denovo</i> | 7689294                 | C/T  | NA                 | NA                            | NA                 |
| <i>Desi_wild_7691928</i> | NA                                  | <i>Ca_desi_denovo</i> | 7691928                 | G/C  | NA                 | NA                            | NA                 |
| <i>Desi_wild_7691931</i> | NA                                  | <i>Ca_desi_denovo</i> | 7691931                 | G/A  | NA                 | NA                            | NA                 |
| <i>Desi_wild_7691932</i> | NA                                  | <i>Ca_desi_denovo</i> | 7691932                 | G/C  | NA                 | NA                            | NA                 |
| <i>Desi_wild_7692413</i> | NA                                  | <i>Ca_desi_denovo</i> | 7692413                 | A/G  | NA                 | NA                            | NA                 |
| <i>Desi_wild_7692428</i> | NA                                  | <i>Ca_desi_denovo</i> | 7692428                 | C/T  | NA                 | NA                            | NA                 |
| <i>Desi_wild_7698015</i> | NA                                  | <i>Ca_desi_denovo</i> | 7698015                 | C/T  | NA                 | NA                            | NA                 |
| <i>Desi_wild_7698069</i> | NA                                  | <i>Ca_desi_denovo</i> | 7698069                 | A/G  | NA                 | NA                            | NA                 |
| <i>Desi_wild_7698072</i> | NA                                  | <i>Ca_desi_denovo</i> | 7698072                 | G/T  | NA                 | NA                            | NA                 |
| <i>Desi_wild_7698075</i> | NA                                  | <i>Ca_desi_denovo</i> | 7698075                 | A/T  | NA                 | NA                            | NA                 |
| <i>Desi_wild_7698594</i> | NA                                  | <i>Ca_desi_denovo</i> | 7698594                 | C/G  | NA                 | NA                            | NA                 |
| <i>Desi_wild_7706467</i> | NA                                  | <i>Ca_desi_denovo</i> | 7706467                 | C/T  | NA                 | NA                            | NA                 |
| <i>Desi_wild_7706509</i> | NA                                  | <i>Ca_desi_denovo</i> | 7706509                 | A/G  | NA                 | NA                            | NA                 |
| <i>Desi_wild_7756613</i> | NA                                  | <i>Ca_desi_denovo</i> | 7756613                 | A/C  | NA                 | NA                            | NA                 |
| <i>Desi_wild_7756614</i> | NA                                  | <i>Ca_desi_denovo</i> | 7756614                 | G/T  | NA                 | NA                            | NA                 |
| <i>Desi_wild_7757042</i> | NA                                  | <i>Ca_desi_denovo</i> | 7757042                 | G/T  | NA                 | NA                            | NA                 |
| <i>Desi_wild_7768906</i> | NA                                  | <i>Ca_desi_denovo</i> | 7768906                 | C/T  | NA                 | NA                            | NA                 |
| <i>Desi_wild_7779735</i> | NA                                  | <i>Ca_desi_denovo</i> | 7779735                 | C/G  | NA                 | NA                            | NA                 |
| <i>Desi_wild_7779739</i> | NA                                  | <i>Ca_desi_denovo</i> | 7779739                 | A/G  | NA                 | NA                            | NA                 |
| <i>Desi_wild_7779750</i> | NA                                  | <i>Ca_desi_denovo</i> | 7779750                 | C/T  | NA                 | NA                            | NA                 |
| <i>Desi_wild_7788042</i> | NA                                  | <i>Ca_desi_denovo</i> | 7788042                 | G/T  | NA                 | NA                            | NA                 |
| <i>Desi_wild_7798233</i> | NA                                  | <i>Ca_desi_denovo</i> | 7798233                 | C/T  | NA                 | NA                            | NA                 |
| <i>Desi_wild_7803740</i> | NA                                  | <i>Ca_desi_denovo</i> | 7803740                 | C/T  | NA                 | NA                            | NA                 |
| <i>Desi_wild_7803776</i> | NA                                  | <i>Ca_desi_denovo</i> | 7803776                 | C/T  | NA                 | NA                            | NA                 |
| <i>Desi_wild_7810326</i> | NA                                  | <i>Ca_desi_denovo</i> | 7810326                 | C/T  | NA                 | NA                            | NA                 |
| <i>Desi_wild_7816483</i> | NA                                  | <i>Ca_desi_denovo</i> | 7816483                 | C/G  | NA                 | NA                            | NA                 |
| <i>Desi_wild_7816498</i> | NA                                  | <i>Ca_desi_denovo</i> | 7816498                 | C/G  | NA                 | NA                            | NA                 |
| <i>Desi_wild_7816659</i> | NA                                  | <i>Ca_desi_denovo</i> | 7816659                 | C/G  | NA                 | NA                            | NA                 |
| <i>Desi_wild_7823425</i> | NA                                  | <i>Ca_desi_denovo</i> | 7823425                 | A/G  | NA                 | NA                            | NA                 |
| <i>Desi_wild_7829395</i> | NA                                  | <i>Ca_desi_denovo</i> | 7829395                 | G/A  | NA                 | NA                            | NA                 |
| <i>Desi_wild_7829408</i> | NA                                  | <i>Ca_desi_denovo</i> | 7829408                 | C/G  | NA                 | NA                            | NA                 |
| <i>Desi_wild_7829419</i> | NA                                  | <i>Ca_desi_denovo</i> | 7829419                 | C/T  | NA                 | NA                            | NA                 |

| SNP IDs                  | NCBI dbSNP accession IDs (NCBI_SS#) | Chromosomes           | Physical positions (bp) | SNPs | Gene accession IDs | Sequence components of genome | Putative functions |
|--------------------------|-------------------------------------|-----------------------|-------------------------|------|--------------------|-------------------------------|--------------------|
| <i>Desi_wild_7846913</i> | NA                                  | <i>Ca_desi_denovo</i> | 7846913                 | A/G  | NA                 | NA                            | NA                 |
| <i>Desi_wild_7847149</i> | NA                                  | <i>Ca_desi_denovo</i> | 7847149                 | G/T  | NA                 | NA                            | NA                 |
| <i>Desi_wild_7865775</i> | NA                                  | <i>Ca_desi_denovo</i> | 7865775                 | C/G  | NA                 | NA                            | NA                 |
| <i>Desi_wild_7865795</i> | NA                                  | <i>Ca_desi_denovo</i> | 7865795                 | A/G  | NA                 | NA                            | NA                 |
| <i>Desi_wild_7873755</i> | NA                                  | <i>Ca_desi_denovo</i> | 7873755                 | C/G  | NA                 | NA                            | NA                 |
| <i>Desi_wild_7873761</i> | NA                                  | <i>Ca_desi_denovo</i> | 7873761                 | C/T  | NA                 | NA                            | NA                 |
| <i>Desi_wild_7873773</i> | NA                                  | <i>Ca_desi_denovo</i> | 7873773                 | G/A  | NA                 | NA                            | NA                 |
| <i>Desi_wild_7875684</i> | NA                                  | <i>Ca_desi_denovo</i> | 7875684                 | C/T  | NA                 | NA                            | NA                 |
| <i>Desi_wild_7883113</i> | NA                                  | <i>Ca_desi_denovo</i> | 7883113                 | C/G  | NA                 | NA                            | NA                 |
| <i>Desi_wild_7885434</i> | NA                                  | <i>Ca_desi_denovo</i> | 7885434                 | A/G  | NA                 | NA                            | NA                 |
| <i>Desi_wild_7898881</i> | NA                                  | <i>Ca_desi_denovo</i> | 7898881                 | A/C  | NA                 | NA                            | NA                 |
| <i>Desi_wild_7906928</i> | NA                                  | <i>Ca_desi_denovo</i> | 7906928                 | A/C  | NA                 | NA                            | NA                 |
| <i>Desi_wild_7928328</i> | NA                                  | <i>Ca_desi_denovo</i> | 7928328                 | C/G  | NA                 | NA                            | NA                 |
| <i>Desi_wild_7928329</i> | NA                                  | <i>Ca_desi_denovo</i> | 7928329                 | C/G  | NA                 | NA                            | NA                 |
| <i>Desi_wild_7939970</i> | NA                                  | <i>Ca_desi_denovo</i> | 7939970                 | C/G  | NA                 | NA                            | NA                 |
| <i>Desi_wild_7939985</i> | NA                                  | <i>Ca_desi_denovo</i> | 7939985                 | C/G  | NA                 | NA                            | NA                 |
| <i>Desi_wild_7939991</i> | NA                                  | <i>Ca_desi_denovo</i> | 7939991                 | A/C  | NA                 | NA                            | NA                 |
| <i>Desi_wild_7939994</i> | NA                                  | <i>Ca_desi_denovo</i> | 7939994                 | C/G  | NA                 | NA                            | NA                 |
| <i>Desi_wild_7943516</i> | NA                                  | <i>Ca_desi_denovo</i> | 7943516                 | A/G  | NA                 | NA                            | NA                 |
| <i>Desi_wild_7945568</i> | NA                                  | <i>Ca_desi_denovo</i> | 7945568                 | C/T  | NA                 | NA                            | NA                 |
| <i>Desi_wild_7946633</i> | NA                                  | <i>Ca_desi_denovo</i> | 7946633                 | G/T  | NA                 | NA                            | NA                 |
| <i>Desi_wild_7964306</i> | NA                                  | <i>Ca_desi_denovo</i> | 7964306                 | A/G  | NA                 | NA                            | NA                 |
| <i>Desi_wild_7964313</i> | NA                                  | <i>Ca_desi_denovo</i> | 7964313                 | C/T  | NA                 | NA                            | NA                 |
| <i>Desi_wild_7975880</i> | NA                                  | <i>Ca_desi_denovo</i> | 7975880                 | C/T  | NA                 | NA                            | NA                 |
| <i>Desi_wild_7981117</i> | NA                                  | <i>Ca_desi_denovo</i> | 7981117                 | C/T  | NA                 | NA                            | NA                 |
| <i>Desi_wild_7988334</i> | NA                                  | <i>Ca_desi_denovo</i> | 7988334                 | C/G  | NA                 | NA                            | NA                 |
| <i>Desi_wild_7988340</i> | NA                                  | <i>Ca_desi_denovo</i> | 7988340                 | G/T  | NA                 | NA                            | NA                 |
| <i>Desi_wild_8006177</i> | NA                                  | <i>Ca_desi_denovo</i> | 8006177                 | A/C  | NA                 | NA                            | NA                 |
| <i>Desi_wild_8006178</i> | NA                                  | <i>Ca_desi_denovo</i> | 8006178                 | G/T  | NA                 | NA                            | NA                 |
| <i>Desi_wild_8006179</i> | NA                                  | <i>Ca_desi_denovo</i> | 8006179                 | A/G  | NA                 | NA                            | NA                 |
| <i>Desi_wild_8007804</i> | NA                                  | <i>Ca_desi_denovo</i> | 8007804                 | C/T  | NA                 | NA                            | NA                 |
| <i>Desi_wild_8007811</i> | NA                                  | <i>Ca_desi_denovo</i> | 8007811                 | A/G  | NA                 | NA                            | NA                 |
| <i>Desi_wild_8007813</i> | NA                                  | <i>Ca_desi_denovo</i> | 8007813                 | C/G  | NA                 | NA                            | NA                 |
| <i>Desi_wild_8010669</i> | NA                                  | <i>Ca_desi_denovo</i> | 8010669                 | A/G  | NA                 | NA                            | NA                 |
| <i>Desi_wild_8014264</i> | NA                                  | <i>Ca_desi_denovo</i> | 8014264                 | C/T  | NA                 | NA                            | NA                 |
| <i>Desi_wild_8014267</i> | NA                                  | <i>Ca_desi_denovo</i> | 8014267                 | C/T  | NA                 | NA                            | NA                 |
| <i>Desi_wild_8014276</i> | NA                                  | <i>Ca_desi_denovo</i> | 8014276                 | C/T  | NA                 | NA                            | NA                 |
| <i>Desi_wild_8014279</i> | NA                                  | <i>Ca_desi_denovo</i> | 8014279                 | A/G  | NA                 | NA                            | NA                 |
| <i>Desi_wild_8035422</i> | NA                                  | <i>Ca_desi_denovo</i> | 8035422                 | G/T  | NA                 | NA                            | NA                 |
| <i>Desi_wild_8039289</i> | NA                                  | <i>Ca_desi_denovo</i> | 8039289                 | C/T  | NA                 | NA                            | NA                 |
| <i>Desi_wild_8039304</i> | NA                                  | <i>Ca_desi_denovo</i> | 8039304                 | A/G  | NA                 | NA                            | NA                 |
| <i>Desi_wild_8046415</i> | NA                                  | <i>Ca_desi_denovo</i> | 8046415                 | A/G  | NA                 | NA                            | NA                 |
| <i>Desi_wild_8046418</i> | NA                                  | <i>Ca_desi_denovo</i> | 8046418                 | T/G  | NA                 | NA                            | NA                 |
| <i>Desi_wild_8047237</i> | NA                                  | <i>Ca_desi_denovo</i> | 8047237                 | G/C  | NA                 | NA                            | NA                 |

| SNP IDs                  | NCBI dbSNP accession IDs (NCBI_SS#) | Chromosomes           | Physical positions (bp) | SNPs | Gene accession IDs | Sequence components of genome | Putative functions |
|--------------------------|-------------------------------------|-----------------------|-------------------------|------|--------------------|-------------------------------|--------------------|
| <i>Desi_wild_8089162</i> | NA                                  | <i>Ca_desi_denovo</i> | 8089162                 | A/G  | NA                 | NA                            | NA                 |
| <i>Desi_wild_8103891</i> | NA                                  | <i>Ca_desi_denovo</i> | 8103891                 | G/A  | NA                 | NA                            | NA                 |
| <i>Desi_wild_8107731</i> | NA                                  | <i>Ca_desi_denovo</i> | 8107731                 | A/G  | NA                 | NA                            | NA                 |
| <i>Desi_wild_8120185</i> | NA                                  | <i>Ca_desi_denovo</i> | 8120185                 | A/C  | NA                 | NA                            | NA                 |
| <i>Desi_wild_8120202</i> | NA                                  | <i>Ca_desi_denovo</i> | 8120202                 | A/G  | NA                 | NA                            | NA                 |
| <i>Desi_wild_8125805</i> | NA                                  | <i>Ca_desi_denovo</i> | 8125805                 | A/G  | NA                 | NA                            | NA                 |
| <i>Desi_wild_8125808</i> | NA                                  | <i>Ca_desi_denovo</i> | 8125808                 | A/G  | NA                 | NA                            | NA                 |
| <i>Desi_wild_8125832</i> | NA                                  | <i>Ca_desi_denovo</i> | 8125832                 | C/T  | NA                 | NA                            | NA                 |
| <i>Desi_wild_8125853</i> | NA                                  | <i>Ca_desi_denovo</i> | 8125853                 | C/T  | NA                 | NA                            | NA                 |
| <i>Desi_wild_8139577</i> | NA                                  | <i>Ca_desi_denovo</i> | 8139577                 | C/T  | NA                 | NA                            | NA                 |
| <i>Desi_wild_8139578</i> | NA                                  | <i>Ca_desi_denovo</i> | 8139578                 | A/G  | NA                 | NA                            | NA                 |
| <i>Desi_wild_8144886</i> | NA                                  | <i>Ca_desi_denovo</i> | 8144886                 | C/G  | NA                 | NA                            | NA                 |
| <i>Desi_wild_8144889</i> | NA                                  | <i>Ca_desi_denovo</i> | 8144889                 | C/G  | NA                 | NA                            | NA                 |
| <i>Desi_wild_8144907</i> | NA                                  | <i>Ca_desi_denovo</i> | 8144907                 | C/G  | NA                 | NA                            | NA                 |
| <i>Desi_wild_8146803</i> | NA                                  | <i>Ca_desi_denovo</i> | 8146803                 | C/T  | NA                 | NA                            | NA                 |
| <i>Desi_wild_8147080</i> | NA                                  | <i>Ca_desi_denovo</i> | 8147080                 | C/T  | NA                 | NA                            | NA                 |
| <i>Desi_wild_8147105</i> | NA                                  | <i>Ca_desi_denovo</i> | 8147105                 | A/G  | NA                 | NA                            | NA                 |
| <i>Desi_wild_8147106</i> | NA                                  | <i>Ca_desi_denovo</i> | 8147106                 | C/T  | NA                 | NA                            | NA                 |
| <i>Desi_wild_8150307</i> | NA                                  | <i>Ca_desi_denovo</i> | 8150307                 | C/G  | NA                 | NA                            | NA                 |
| <i>Desi_wild_8176567</i> | NA                                  | <i>Ca_desi_denovo</i> | 8176567                 | A/G  | NA                 | NA                            | NA                 |
| <i>Desi_wild_8183654</i> | NA                                  | <i>Ca_desi_denovo</i> | 8183654                 | G/T  | NA                 | NA                            | NA                 |
| <i>Desi_wild_8183658</i> | NA                                  | <i>Ca_desi_denovo</i> | 8183658                 | A/C  | NA                 | NA                            | NA                 |
| <i>Desi_wild_8183678</i> | NA                                  | <i>Ca_desi_denovo</i> | 8183678                 | C/T  | NA                 | NA                            | NA                 |
| <i>Desi_wild_8185367</i> | NA                                  | <i>Ca_desi_denovo</i> | 8185367                 | C/T  | NA                 | NA                            | NA                 |
| <i>Desi_wild_8187369</i> | NA                                  | <i>Ca_desi_denovo</i> | 8187369                 | C/G  | NA                 | NA                            | NA                 |
| <i>Desi_wild_8192139</i> | NA                                  | <i>Ca_desi_denovo</i> | 8192139                 | A/C  | NA                 | NA                            | NA                 |
| <i>Desi_wild_8213896</i> | NA                                  | <i>Ca_desi_denovo</i> | 8213896                 | C/T  | NA                 | NA                            | NA                 |
| <i>Desi_wild_8215120</i> | NA                                  | <i>Ca_desi_denovo</i> | 8215120                 | C/G  | NA                 | NA                            | NA                 |
| <i>Desi_wild_8215123</i> | NA                                  | <i>Ca_desi_denovo</i> | 8215123                 | C/G  | NA                 | NA                            | NA                 |
| <i>Desi_wild_8218898</i> | NA                                  | <i>Ca_desi_denovo</i> | 8218898                 | C/T  | NA                 | NA                            | NA                 |
| <i>Desi_wild_8218931</i> | NA                                  | <i>Ca_desi_denovo</i> | 8218931                 | C/T  | NA                 | NA                            | NA                 |
| <i>Desi_wild_8222374</i> | NA                                  | <i>Ca_desi_denovo</i> | 8222374                 | C/T  | NA                 | NA                            | NA                 |
| <i>Desi_wild_8222635</i> | NA                                  | <i>Ca_desi_denovo</i> | 8222635                 | C/T  | NA                 | NA                            | NA                 |
| <i>Desi_wild_8223860</i> | NA                                  | <i>Ca_desi_denovo</i> | 8223860                 | A/G  | NA                 | NA                            | NA                 |
| <i>Desi_wild_8224044</i> | NA                                  | <i>Ca_desi_denovo</i> | 8224044                 | G/T  | NA                 | NA                            | NA                 |
| <i>Desi_wild_8224055</i> | NA                                  | <i>Ca_desi_denovo</i> | 8224055                 | A/T  | NA                 | NA                            | NA                 |
| <i>Desi_wild_8237624</i> | NA                                  | <i>Ca_desi_denovo</i> | 8237624                 | A/G  | NA                 | NA                            | NA                 |
| <i>Desi_wild_8237654</i> | NA                                  | <i>Ca_desi_denovo</i> | 8237654                 | A/C  | NA                 | NA                            | NA                 |
| <i>Desi_wild_8237656</i> | NA                                  | <i>Ca_desi_denovo</i> | 8237656                 | C/G  | NA                 | NA                            | NA                 |
| <i>Desi_wild_8238467</i> | NA                                  | <i>Ca_desi_denovo</i> | 8238467                 | G/A  | NA                 | NA                            | NA                 |
| <i>Desi_wild_8238470</i> | NA                                  | <i>Ca_desi_denovo</i> | 8238470                 | G/A  | NA                 | NA                            | NA                 |
| <i>Desi_wild_8242682</i> | NA                                  | <i>Ca_desi_denovo</i> | 8242682                 | A/G  | NA                 | NA                            | NA                 |
| <i>Desi_wild_8248544</i> | NA                                  | <i>Ca_desi_denovo</i> | 8248544                 | A/G  | NA                 | NA                            | NA                 |
| <i>Desi_wild_8249039</i> | NA                                  | <i>Ca_desi_denovo</i> | 8249039                 | C/G  | NA                 | NA                            | NA                 |

| SNP IDs                  | NCBI dbSNP accession IDs (NCBI_SS#) | Chromosomes           | Physical positions (bp) | SNPs | Gene accession IDs | Sequence components of genome | Putative functions |
|--------------------------|-------------------------------------|-----------------------|-------------------------|------|--------------------|-------------------------------|--------------------|
| <i>Desi_wild_8249051</i> | NA                                  | <i>Ca_desi_denovo</i> | 8249051                 | A/G  | NA                 | NA                            | NA                 |
| <i>Desi_wild_8249065</i> | NA                                  | <i>Ca_desi_denovo</i> | 8249065                 | A/T  | NA                 | NA                            | NA                 |
| <i>Desi_wild_8255465</i> | NA                                  | <i>Ca_desi_denovo</i> | 8255465                 | A/G  | NA                 | NA                            | NA                 |
| <i>Desi_wild_8255487</i> | NA                                  | <i>Ca_desi_denovo</i> | 8255487                 | A/G  | NA                 | NA                            | NA                 |
| <i>Desi_wild_8255493</i> | NA                                  | <i>Ca_desi_denovo</i> | 8255493                 | A/G  | NA                 | NA                            | NA                 |
| <i>Desi_wild_8260435</i> | NA                                  | <i>Ca_desi_denovo</i> | 8260435                 | C/T  | NA                 | NA                            | NA                 |
| <i>Desi_wild_8262412</i> | NA                                  | <i>Ca_desi_denovo</i> | 8262412                 | A/G  | NA                 | NA                            | NA                 |
| <i>Desi_wild_8262456</i> | NA                                  | <i>Ca_desi_denovo</i> | 8262456                 | C/G  | NA                 | NA                            | NA                 |
| <i>Desi_wild_8267601</i> | NA                                  | <i>Ca_desi_denovo</i> | 8267601                 | A/G  | NA                 | NA                            | NA                 |
| <i>Desi_wild_8297500</i> | NA                                  | <i>Ca_desi_denovo</i> | 8297500                 | T/C  | NA                 | NA                            | NA                 |
| <i>Desi_wild_8301087</i> | NA                                  | <i>Ca_desi_denovo</i> | 8301087                 | C/T  | NA                 | NA                            | NA                 |
| <i>Desi_wild_8301108</i> | NA                                  | <i>Ca_desi_denovo</i> | 8301108                 | G/A  | NA                 | NA                            | NA                 |
| <i>Desi_wild_8301126</i> | NA                                  | <i>Ca_desi_denovo</i> | 8301126                 | C/G  | NA                 | NA                            | NA                 |
| <i>Desi_wild_8301135</i> | NA                                  | <i>Ca_desi_denovo</i> | 8301135                 | G/C  | NA                 | NA                            | NA                 |
| <i>Desi_wild_8305864</i> | NA                                  | <i>Ca_desi_denovo</i> | 8305864                 | A/G  | NA                 | NA                            | NA                 |
| <i>Desi_wild_8311933</i> | NA                                  | <i>Ca_desi_denovo</i> | 8311933                 | C/T  | NA                 | NA                            | NA                 |
| <i>Desi_wild_8315511</i> | NA                                  | <i>Ca_desi_denovo</i> | 8315511                 | C/T  | NA                 | NA                            | NA                 |
| <i>Desi_wild_8315520</i> | NA                                  | <i>Ca_desi_denovo</i> | 8315520                 | A/C  | NA                 | NA                            | NA                 |
| <i>Desi_wild_8322843</i> | NA                                  | <i>Ca_desi_denovo</i> | 8322843                 | C/T  | NA                 | NA                            | NA                 |
| <i>Desi_wild_8325968</i> | NA                                  | <i>Ca_desi_denovo</i> | 8325968                 | A/G  | NA                 | NA                            | NA                 |
| <i>Desi_wild_8355835</i> | NA                                  | <i>Ca_desi_denovo</i> | 8355835                 | A/G  | NA                 | NA                            | NA                 |
| <i>Desi_wild_8359471</i> | NA                                  | <i>Ca_desi_denovo</i> | 8359471                 | C/T  | NA                 | NA                            | NA                 |
| <i>Desi_wild_8368623</i> | NA                                  | <i>Ca_desi_denovo</i> | 8368623                 | A/G  | NA                 | NA                            | NA                 |
| <i>Desi_wild_8369180</i> | NA                                  | <i>Ca_desi_denovo</i> | 8369180                 | A/C  | NA                 | NA                            | NA                 |
| <i>Desi_wild_8369215</i> | NA                                  | <i>Ca_desi_denovo</i> | 8369215                 | C/G  | NA                 | NA                            | NA                 |
| <i>Desi_wild_8371564</i> | NA                                  | <i>Ca_desi_denovo</i> | 8371564                 | C/G  | NA                 | NA                            | NA                 |
| <i>Desi_wild_8371579</i> | NA                                  | <i>Ca_desi_denovo</i> | 8371579                 | G/A  | NA                 | NA                            | NA                 |
| <i>Desi_wild_8399304</i> | NA                                  | <i>Ca_desi_denovo</i> | 8399304                 | C/G  | NA                 | NA                            | NA                 |
| <i>Desi_wild_8399305</i> | NA                                  | <i>Ca_desi_denovo</i> | 8399305                 | A/G  | NA                 | NA                            | NA                 |
| <i>Desi_wild_8399337</i> | NA                                  | <i>Ca_desi_denovo</i> | 8399337                 | C/G  | NA                 | NA                            | NA                 |
| <i>Desi_wild_8399352</i> | NA                                  | <i>Ca_desi_denovo</i> | 8399352                 | C/G  | NA                 | NA                            | NA                 |
| <i>Desi_wild_8417473</i> | NA                                  | <i>Ca_desi_denovo</i> | 8417473                 | C/G  | NA                 | NA                            | NA                 |
| <i>Desi_wild_8417637</i> | NA                                  | <i>Ca_desi_denovo</i> | 8417637                 | C/T  | NA                 | NA                            | NA                 |
| <i>Desi_wild_8417649</i> | NA                                  | <i>Ca_desi_denovo</i> | 8417649                 | C/G  | NA                 | NA                            | NA                 |
| <i>Desi_wild_8449078</i> | NA                                  | <i>Ca_desi_denovo</i> | 8449078                 | C/T  | NA                 | NA                            | NA                 |
| <i>Desi_wild_8449084</i> | NA                                  | <i>Ca_desi_denovo</i> | 8449084                 | C/G  | NA                 | NA                            | NA                 |
| <i>Desi_wild_8449093</i> | NA                                  | <i>Ca_desi_denovo</i> | 8449093                 | C/G  | NA                 | NA                            | NA                 |
| <i>Desi_wild_8470549</i> | NA                                  | <i>Ca_desi_denovo</i> | 8470549                 | C/G  | NA                 | NA                            | NA                 |
| <i>Desi_wild_8470552</i> | NA                                  | <i>Ca_desi_denovo</i> | 8470552                 | C/G  | NA                 | NA                            | NA                 |
| <i>Desi_wild_8470554</i> | NA                                  | <i>Ca_desi_denovo</i> | 8470554                 | A/T  | NA                 | NA                            | NA                 |
| <i>Desi_wild_8480805</i> | NA                                  | <i>Ca_desi_denovo</i> | 8480805                 | C/T  | NA                 | NA                            | NA                 |
| <i>Desi_wild_8480808</i> | NA                                  | <i>Ca_desi_denovo</i> | 8480808                 | A/G  | NA                 | NA                            | NA                 |
| <i>Desi_wild_8480817</i> | NA                                  | <i>Ca_desi_denovo</i> | 8480817                 | C/G  | NA                 | NA                            | NA                 |
| <i>Desi_wild_8487196</i> | NA                                  | <i>Ca_desi_denovo</i> | 8487196                 | C/T  | NA                 | NA                            | NA                 |

| SNP IDs                  | NCBI dbSNP accession IDs (NCBI_SS#) | Chromosomes           | Physical positions (bp) | SNPs | Gene accession IDs | Sequence components of genome | Putative functions |
|--------------------------|-------------------------------------|-----------------------|-------------------------|------|--------------------|-------------------------------|--------------------|
| <i>Desi_wild_8487247</i> | NA                                  | <i>Ca_desi_denovo</i> | 8487247                 | C/T  | NA                 | NA                            | NA                 |
| <i>Desi_wild_8487259</i> | NA                                  | <i>Ca_desi_denovo</i> | 8487259                 | A/G  | NA                 | NA                            | NA                 |
| <i>Desi_wild_8509727</i> | NA                                  | <i>Ca_desi_denovo</i> | 8509727                 | A/G  | NA                 | NA                            | NA                 |
| <i>Desi_wild_8509758</i> | NA                                  | <i>Ca_desi_denovo</i> | 8509758                 | A/G  | NA                 | NA                            | NA                 |
| <i>Desi_wild_8517895</i> | NA                                  | <i>Ca_desi_denovo</i> | 8517895                 | A/G  | NA                 | NA                            | NA                 |
| <i>Desi_wild_8517896</i> | NA                                  | <i>Ca_desi_denovo</i> | 8517896                 | G/T  | NA                 | NA                            | NA                 |
| <i>Desi_wild_8530686</i> | NA                                  | <i>Ca_desi_denovo</i> | 8530686                 | G/A  | NA                 | NA                            | NA                 |
| <i>Desi_wild_8530704</i> | NA                                  | <i>Ca_desi_denovo</i> | 8530704                 | T/C  | NA                 | NA                            | NA                 |
| <i>Desi_wild_8536131</i> | NA                                  | <i>Ca_desi_denovo</i> | 8536131                 | C/G  | NA                 | NA                            | NA                 |
| <i>Desi_wild_8536143</i> | NA                                  | <i>Ca_desi_denovo</i> | 8536143                 | A/C  | NA                 | NA                            | NA                 |
| <i>Desi_wild_8536583</i> | NA                                  | <i>Ca_desi_denovo</i> | 8536583                 | C/G  | NA                 | NA                            | NA                 |
| <i>Desi_wild_8536589</i> | NA                                  | <i>Ca_desi_denovo</i> | 8536589                 | G/C  | NA                 | NA                            | NA                 |
| <i>Desi_wild_8536870</i> | NA                                  | <i>Ca_desi_denovo</i> | 8536870                 | A/C  | NA                 | NA                            | NA                 |
| <i>Desi_wild_8538084</i> | NA                                  | <i>Ca_desi_denovo</i> | 8538084                 | A/C  | NA                 | NA                            | NA                 |
| <i>Desi_wild_8540277</i> | NA                                  | <i>Ca_desi_denovo</i> | 8540277                 | C/G  | NA                 | NA                            | NA                 |
| <i>Desi_wild_8540302</i> | NA                                  | <i>Ca_desi_denovo</i> | 8540302                 | C/G  | NA                 | NA                            | NA                 |
| <i>Desi_wild_8548153</i> | NA                                  | <i>Ca_desi_denovo</i> | 8548153                 | A/C  | NA                 | NA                            | NA                 |
| <i>Desi_wild_8548154</i> | NA                                  | <i>Ca_desi_denovo</i> | 8548154                 | G/T  | NA                 | NA                            | NA                 |
| <i>Desi_wild_8558139</i> | NA                                  | <i>Ca_desi_denovo</i> | 8558139                 | C/G  | NA                 | NA                            | NA                 |
| <i>Desi_wild_8558187</i> | NA                                  | <i>Ca_desi_denovo</i> | 8558187                 | G/C  | NA                 | NA                            | NA                 |
| <i>Desi_wild_8559699</i> | NA                                  | <i>Ca_desi_denovo</i> | 8559699                 | A/T  | NA                 | NA                            | NA                 |
| <i>Desi_wild_8560740</i> | NA                                  | <i>Ca_desi_denovo</i> | 8560740                 | G/T  | NA                 | NA                            | NA                 |
| <i>Desi_wild_8560759</i> | NA                                  | <i>Ca_desi_denovo</i> | 8560759                 | C/T  | NA                 | NA                            | NA                 |
| <i>Desi_wild_8564622</i> | NA                                  | <i>Ca_desi_denovo</i> | 8564622                 | A/G  | NA                 | NA                            | NA                 |
| <i>Desi_wild_8564625</i> | NA                                  | <i>Ca_desi_denovo</i> | 8564625                 | C/G  | NA                 | NA                            | NA                 |
| <i>Desi_wild_8569353</i> | NA                                  | <i>Ca_desi_denovo</i> | 8569353                 | A/G  | NA                 | NA                            | NA                 |
| <i>Desi_wild_8569363</i> | NA                                  | <i>Ca_desi_denovo</i> | 8569363                 | C/T  | NA                 | NA                            | NA                 |
| <i>Desi_wild_8569375</i> | NA                                  | <i>Ca_desi_denovo</i> | 8569375                 | G/C  | NA                 | NA                            | NA                 |
| <i>Desi_wild_8580649</i> | NA                                  | <i>Ca_desi_denovo</i> | 8580649                 | A/G  | NA                 | NA                            | NA                 |
| <i>Desi_wild_8580651</i> | NA                                  | <i>Ca_desi_denovo</i> | 8580651                 | C/G  | NA                 | NA                            | NA                 |
| <i>Desi_wild_8580676</i> | NA                                  | <i>Ca_desi_denovo</i> | 8580676                 | G/T  | NA                 | NA                            | NA                 |
| <i>Desi_wild_8580687</i> | NA                                  | <i>Ca_desi_denovo</i> | 8580687                 | C/G  | NA                 | NA                            | NA                 |
| <i>Desi_wild_8587928</i> | NA                                  | <i>Ca_desi_denovo</i> | 8587928                 | G/T  | NA                 | NA                            | NA                 |
| <i>Desi_wild_8587937</i> | NA                                  | <i>Ca_desi_denovo</i> | 8587937                 | C/T  | NA                 | NA                            | NA                 |
| <i>Desi_wild_8592081</i> | NA                                  | <i>Ca_desi_denovo</i> | 8592081                 | G/T  | NA                 | NA                            | NA                 |
| <i>Desi_wild_8592086</i> | NA                                  | <i>Ca_desi_denovo</i> | 8592086                 | A/G  | NA                 | NA                            | NA                 |
| <i>Desi_wild_8592307</i> | NA                                  | <i>Ca_desi_denovo</i> | 8592307                 | G/T  | NA                 | NA                            | NA                 |
| <i>Desi_wild_8600337</i> | NA                                  | <i>Ca_desi_denovo</i> | 8600337                 | A/G  | NA                 | NA                            | NA                 |
| <i>Desi_wild_8601902</i> | NA                                  | <i>Ca_desi_denovo</i> | 8601902                 | A/C  | NA                 | NA                            | NA                 |
| <i>Desi_wild_8603931</i> | NA                                  | <i>Ca_desi_denovo</i> | 8603931                 | C/T  | NA                 | NA                            | NA                 |
| <i>Desi_wild_8603979</i> | NA                                  | <i>Ca_desi_denovo</i> | 8603979                 | A/C  | NA                 | NA                            | NA                 |
| <i>Desi_wild_8604893</i> | NA                                  | <i>Ca_desi_denovo</i> | 8604893                 | G/T  | NA                 | NA                            | NA                 |
| <i>Desi_wild_8604898</i> | NA                                  | <i>Ca_desi_denovo</i> | 8604898                 | A/G  | NA                 | NA                            | NA                 |
| <i>Desi_wild_8604901</i> | NA                                  | <i>Ca_desi_denovo</i> | 8604901                 | C/G  | NA                 | NA                            | NA                 |

| SNP IDs                  | NCBI dbSNP accession IDs (NCBI_SS#) | Chromosomes           | Physical positions (bp) | SNPs | Gene accession IDs | Sequence components of genome | Putative functions |
|--------------------------|-------------------------------------|-----------------------|-------------------------|------|--------------------|-------------------------------|--------------------|
| <i>Desi_wild_8606236</i> | NA                                  | <i>Ca_desi_denovo</i> | 8606236                 | T/C  | NA                 | NA                            | NA                 |
| <i>Desi_wild_8606239</i> | NA                                  | <i>Ca_desi_denovo</i> | 8606239                 | C/T  | NA                 | NA                            | NA                 |
| <i>Desi_wild_8606974</i> | NA                                  | <i>Ca_desi_denovo</i> | 8606974                 | A/T  | NA                 | NA                            | NA                 |
| <i>Desi_wild_8606982</i> | NA                                  | <i>Ca_desi_denovo</i> | 8606982                 | C/T  | NA                 | NA                            | NA                 |
| <i>Desi_wild_8606983</i> | NA                                  | <i>Ca_desi_denovo</i> | 8606983                 | A/G  | NA                 | NA                            | NA                 |
| <i>Desi_wild_8606984</i> | NA                                  | <i>Ca_desi_denovo</i> | 8606984                 | A/T  | NA                 | NA                            | NA                 |
| <i>Desi_wild_8610620</i> | NA                                  | <i>Ca_desi_denovo</i> | 8610620                 | C/T  | NA                 | NA                            | NA                 |
| <i>Desi_wild_8630297</i> | NA                                  | <i>Ca_desi_denovo</i> | 8630297                 | A/C  | NA                 | NA                            | NA                 |
| <i>Desi_wild_8630321</i> | NA                                  | <i>Ca_desi_denovo</i> | 8630321                 | C/G  | NA                 | NA                            | NA                 |
| <i>Desi_wild_8631389</i> | NA                                  | <i>Ca_desi_denovo</i> | 8631389                 | A/G  | NA                 | NA                            | NA                 |
| <i>Desi_wild_8631402</i> | NA                                  | <i>Ca_desi_denovo</i> | 8631402                 | A/G  | NA                 | NA                            | NA                 |
| <i>Desi_wild_8644360</i> | NA                                  | <i>Ca_desi_denovo</i> | 8644360                 | C/T  | NA                 | NA                            | NA                 |
| <i>Desi_wild_8647936</i> | NA                                  | <i>Ca_desi_denovo</i> | 8647936                 | A/G  | NA                 | NA                            | NA                 |
| <i>Desi_wild_8658553</i> | NA                                  | <i>Ca_desi_denovo</i> | 8658553                 | C/G  | NA                 | NA                            | NA                 |
| <i>Desi_wild_8658578</i> | NA                                  | <i>Ca_desi_denovo</i> | 8658578                 | A/G  | NA                 | NA                            | NA                 |
| <i>Desi_wild_8658645</i> | NA                                  | <i>Ca_desi_denovo</i> | 8658645                 | C/G  | NA                 | NA                            | NA                 |
| <i>Desi_wild_8658664</i> | NA                                  | <i>Ca_desi_denovo</i> | 8658664                 | A/C  | NA                 | NA                            | NA                 |
| <i>Desi_wild_8658673</i> | NA                                  | <i>Ca_desi_denovo</i> | 8658673                 | A/T  | NA                 | NA                            | NA                 |
| <i>Desi_wild_8658674</i> | NA                                  | <i>Ca_desi_denovo</i> | 8658674                 | C/G  | NA                 | NA                            | NA                 |
| <i>Desi_wild_8659209</i> | NA                                  | <i>Ca_desi_denovo</i> | 8659209                 | A/G  | NA                 | NA                            | NA                 |
| <i>Desi_wild_8660830</i> | NA                                  | <i>Ca_desi_denovo</i> | 8660830                 | C/T  | NA                 | NA                            | NA                 |
| <i>Desi_wild_8660849</i> | NA                                  | <i>Ca_desi_denovo</i> | 8660849                 | A/G  | NA                 | NA                            | NA                 |
| <i>Desi_wild_8667606</i> | NA                                  | <i>Ca_desi_denovo</i> | 8667606                 | C/T  | NA                 | NA                            | NA                 |
| <i>Desi_wild_8667621</i> | NA                                  | <i>Ca_desi_denovo</i> | 8667621                 | C/G  | NA                 | NA                            | NA                 |
| <i>Desi_wild_8669385</i> | NA                                  | <i>Ca_desi_denovo</i> | 8669385                 | A/G  | NA                 | NA                            | NA                 |
| <i>Desi_wild_8669387</i> | NA                                  | <i>Ca_desi_denovo</i> | 8669387                 | A/G  | NA                 | NA                            | NA                 |
| <i>Desi_wild_8669395</i> | NA                                  | <i>Ca_desi_denovo</i> | 8669395                 | A/G  | NA                 | NA                            | NA                 |
| <i>Desi_wild_8679962</i> | NA                                  | <i>Ca_desi_denovo</i> | 8679962                 | A/G  | NA                 | NA                            | NA                 |
| <i>Desi_wild_8679968</i> | NA                                  | <i>Ca_desi_denovo</i> | 8679968                 | A/G  | NA                 | NA                            | NA                 |
| <i>Desi_wild_8679971</i> | NA                                  | <i>Ca_desi_denovo</i> | 8679971                 | A/G  | NA                 | NA                            | NA                 |
| <i>Desi_wild_8679974</i> | NA                                  | <i>Ca_desi_denovo</i> | 8679974                 | A/G  | NA                 | NA                            | NA                 |
| <i>Desi_wild_8692942</i> | NA                                  | <i>Ca_desi_denovo</i> | 8692942                 | A/T  | NA                 | NA                            | NA                 |
| <i>Desi_wild_8709001</i> | NA                                  | <i>Ca_desi_denovo</i> | 8709001                 | G/T  | NA                 | NA                            | NA                 |
| <i>Desi_wild_8709005</i> | NA                                  | <i>Ca_desi_denovo</i> | 8709005                 | C/G  | NA                 | NA                            | NA                 |
| <i>Desi_wild_8724986</i> | NA                                  | <i>Ca_desi_denovo</i> | 8724986                 | A/G  | NA                 | NA                            | NA                 |
| <i>Desi_wild_8727748</i> | NA                                  | <i>Ca_desi_denovo</i> | 8727748                 | C/T  | NA                 | NA                            | NA                 |
| <i>Desi_wild_8730952</i> | NA                                  | <i>Ca_desi_denovo</i> | 8730952                 | C/G  | NA                 | NA                            | NA                 |
| <i>Desi_wild_8734658</i> | NA                                  | <i>Ca_desi_denovo</i> | 8734658                 | C/G  | NA                 | NA                            | NA                 |
| <i>Desi_wild_8734659</i> | NA                                  | <i>Ca_desi_denovo</i> | 8734659                 | C/T  | NA                 | NA                            | NA                 |
| <i>Desi_wild_8734673</i> | NA                                  | <i>Ca_desi_denovo</i> | 8734673                 | C/T  | NA                 | NA                            | NA                 |
| <i>Desi_wild_8757556</i> | NA                                  | <i>Ca_desi_denovo</i> | 8757556                 | A/G  | NA                 | NA                            | NA                 |
| <i>Desi_wild_8757559</i> | NA                                  | <i>Ca_desi_denovo</i> | 8757559                 | A/G  | NA                 | NA                            | NA                 |
| <i>Desi_wild_8759806</i> | NA                                  | <i>Ca_desi_denovo</i> | 8759806                 | G/T  | NA                 | NA                            | NA                 |
| <i>Desi_wild_8760125</i> | NA                                  | <i>Ca_desi_denovo</i> | 8760125                 | G/T  | NA                 | NA                            | NA                 |

| SNP IDs                  | NCBI dbSNP accession IDs (NCBI_SS#) | Chromosomes           | Physical positions (bp) | SNPs | Gene accession IDs | Sequence components of genome | Putative functions |
|--------------------------|-------------------------------------|-----------------------|-------------------------|------|--------------------|-------------------------------|--------------------|
| <i>Desi_wild_8761530</i> | NA                                  | <i>Ca_desi_denovo</i> | 8761530                 | A/G  | NA                 | NA                            | NA                 |
| <i>Desi_wild_8761569</i> | NA                                  | <i>Ca_desi_denovo</i> | 8761569                 | A/G  | NA                 | NA                            | NA                 |
| <i>Desi_wild_8764794</i> | NA                                  | <i>Ca_desi_denovo</i> | 8764794                 | A/G  | NA                 | NA                            | NA                 |
| <i>Desi_wild_8764812</i> | NA                                  | <i>Ca_desi_denovo</i> | 8764812                 | A/G  | NA                 | NA                            | NA                 |
| <i>Desi_wild_8764822</i> | NA                                  | <i>Ca_desi_denovo</i> | 8764822                 | A/G  | NA                 | NA                            | NA                 |
| <i>Desi_wild_8764841</i> | NA                                  | <i>Ca_desi_denovo</i> | 8764841                 | G/T  | NA                 | NA                            | NA                 |
| <i>Desi_wild_8766731</i> | NA                                  | <i>Ca_desi_denovo</i> | 8766731                 | T/C  | NA                 | NA                            | NA                 |
| <i>Desi_wild_8778917</i> | NA                                  | <i>Ca_desi_denovo</i> | 8778917                 | A/G  | NA                 | NA                            | NA                 |
| <i>Desi_wild_8778947</i> | NA                                  | <i>Ca_desi_denovo</i> | 8778947                 | G/T  | NA                 | NA                            | NA                 |
| <i>Desi_wild_8782179</i> | NA                                  | <i>Ca_desi_denovo</i> | 8782179                 | T/C  | NA                 | NA                            | NA                 |
| <i>Desi_wild_8783499</i> | NA                                  | <i>Ca_desi_denovo</i> | 8783499                 | C/G  | NA                 | NA                            | NA                 |
| <i>Desi_wild_8789202</i> | NA                                  | <i>Ca_desi_denovo</i> | 8789202                 | C/T  | NA                 | NA                            | NA                 |
| <i>Desi_wild_8789223</i> | NA                                  | <i>Ca_desi_denovo</i> | 8789223                 | G/T  | NA                 | NA                            | NA                 |
| <i>Desi_wild_8800495</i> | NA                                  | <i>Ca_desi_denovo</i> | 8800495                 | A/G  | NA                 | NA                            | NA                 |
| <i>Desi_wild_8800510</i> | NA                                  | <i>Ca_desi_denovo</i> | 8800510                 | C/G  | NA                 | NA                            | NA                 |
| <i>Desi_wild_8800511</i> | NA                                  | <i>Ca_desi_denovo</i> | 8800511                 | A/G  | NA                 | NA                            | NA                 |
| <i>Desi_wild_8800512</i> | NA                                  | <i>Ca_desi_denovo</i> | 8800512                 | A/C  | NA                 | NA                            | NA                 |
| <i>Desi_wild_8807972</i> | NA                                  | <i>Ca_desi_denovo</i> | 8807972                 | A/G  | NA                 | NA                            | NA                 |
| <i>Desi_wild_8811494</i> | NA                                  | <i>Ca_desi_denovo</i> | 8811494                 | A/T  | NA                 | NA                            | NA                 |
| <i>Desi_wild_8818346</i> | NA                                  | <i>Ca_desi_denovo</i> | 8818346                 | A/G  | NA                 | NA                            | NA                 |
| <i>Desi_wild_8818394</i> | NA                                  | <i>Ca_desi_denovo</i> | 8818394                 | C/G  | NA                 | NA                            | NA                 |
| <i>Desi_wild_8825763</i> | NA                                  | <i>Ca_desi_denovo</i> | 8825763                 | A/G  | NA                 | NA                            | NA                 |
| <i>Desi_wild_8825778</i> | NA                                  | <i>Ca_desi_denovo</i> | 8825778                 | A/G  | NA                 | NA                            | NA                 |
| <i>Desi_wild_8834781</i> | NA                                  | <i>Ca_desi_denovo</i> | 8834781                 | C/T  | NA                 | NA                            | NA                 |
| <i>Desi_wild_8836098</i> | NA                                  | <i>Ca_desi_denovo</i> | 8836098                 | A/C  | NA                 | NA                            | NA                 |
| <i>Desi_wild_8837189</i> | NA                                  | <i>Ca_desi_denovo</i> | 8837189                 | C/G  | NA                 | NA                            | NA                 |
| <i>Desi_wild_8837213</i> | NA                                  | <i>Ca_desi_denovo</i> | 8837213                 | C/G  | NA                 | NA                            | NA                 |
| <i>Desi_wild_8837214</i> | NA                                  | <i>Ca_desi_denovo</i> | 8837214                 | A/G  | NA                 | NA                            | NA                 |
| <i>Desi_wild_8865640</i> | NA                                  | <i>Ca_desi_denovo</i> | 8865640                 | A/G  | NA                 | NA                            | NA                 |
| <i>Desi_wild_8867679</i> | NA                                  | <i>Ca_desi_denovo</i> | 8867679                 | C/G  | NA                 | NA                            | NA                 |
| <i>Desi_wild_8867700</i> | NA                                  | <i>Ca_desi_denovo</i> | 8867700                 | A/G  | NA                 | NA                            | NA                 |
| <i>Desi_wild_8867862</i> | NA                                  | <i>Ca_desi_denovo</i> | 8867862                 | A/T  | NA                 | NA                            | NA                 |
| <i>Desi_wild_8867866</i> | NA                                  | <i>Ca_desi_denovo</i> | 8867866                 | C/G  | NA                 | NA                            | NA                 |
| <i>Desi_wild_8868924</i> | NA                                  | <i>Ca_desi_denovo</i> | 8868924                 | A/G  | NA                 | NA                            | NA                 |
| <i>Desi_wild_8874590</i> | NA                                  | <i>Ca_desi_denovo</i> | 8874590                 | A/G  | NA                 | NA                            | NA                 |
| <i>Desi_wild_8874617</i> | NA                                  | <i>Ca_desi_denovo</i> | 8874617                 | A/G  | NA                 | NA                            | NA                 |
| <i>Desi_wild_8879140</i> | NA                                  | <i>Ca_desi_denovo</i> | 8879140                 | A/G  | NA                 | NA                            | NA                 |
| <i>Desi_wild_8879162</i> | NA                                  | <i>Ca_desi_denovo</i> | 8879162                 | A/G  | NA                 | NA                            | NA                 |
| <i>Desi_wild_8881619</i> | NA                                  | <i>Ca_desi_denovo</i> | 8881619                 | A/G  | NA                 | NA                            | NA                 |
| <i>Desi_wild_8881634</i> | NA                                  | <i>Ca_desi_denovo</i> | 8881634                 | A/G  | NA                 | NA                            | NA                 |
| <i>Desi_wild_8881661</i> | NA                                  | <i>Ca_desi_denovo</i> | 8881661                 | C/G  | NA                 | NA                            | NA                 |
| <i>Desi_wild_8887523</i> | NA                                  | <i>Ca_desi_denovo</i> | 8887523                 | C/G  | NA                 | NA                            | NA                 |
| <i>Desi_wild_8890102</i> | NA                                  | <i>Ca_desi_denovo</i> | 8890102                 | G/T  | NA                 | NA                            | NA                 |
| <i>Desi_wild_8890103</i> | NA                                  | <i>Ca_desi_denovo</i> | 8890103                 | C/T  | NA                 | NA                            | NA                 |

| SNP IDs                  | NCBI dbSNP accession IDs (NCBI_SS#) | Chromosomes           | Physical positions (bp) | SNPs | Gene accession IDs | Sequence components of genome | Putative functions |
|--------------------------|-------------------------------------|-----------------------|-------------------------|------|--------------------|-------------------------------|--------------------|
| <i>Desi_wild_8891680</i> | NA                                  | <i>Ca_desi_denovo</i> | 8891680                 | C/G  | NA                 | NA                            | NA                 |
| <i>Desi_wild_8891704</i> | NA                                  | <i>Ca_desi_denovo</i> | 8891704                 | C/G  | NA                 | NA                            | NA                 |
| <i>Desi_wild_8891708</i> | NA                                  | <i>Ca_desi_denovo</i> | 8891708                 | C/G  | NA                 | NA                            | NA                 |
| <i>Desi_wild_8907232</i> | NA                                  | <i>Ca_desi_denovo</i> | 8907232                 | G/A  | NA                 | NA                            | NA                 |
| <i>Desi_wild_8907268</i> | NA                                  | <i>Ca_desi_denovo</i> | 8907268                 | A/C  | NA                 | NA                            | NA                 |
| <i>Desi_wild_8913677</i> | NA                                  | <i>Ca_desi_denovo</i> | 8913677                 | A/G  | NA                 | NA                            | NA                 |
| <i>Desi_wild_8918969</i> | NA                                  | <i>Ca_desi_denovo</i> | 8918969                 | C/G  | NA                 | NA                            | NA                 |
| <i>Desi_wild_8918978</i> | NA                                  | <i>Ca_desi_denovo</i> | 8918978                 | C/T  | NA                 | NA                            | NA                 |
| <i>Desi_wild_8923985</i> | NA                                  | <i>Ca_desi_denovo</i> | 8923985                 | C/T  | NA                 | NA                            | NA                 |
| <i>Desi_wild_8924011</i> | NA                                  | <i>Ca_desi_denovo</i> | 8924011                 | A/G  | NA                 | NA                            | NA                 |
| <i>Desi_wild_8924366</i> | NA                                  | <i>Ca_desi_denovo</i> | 8924366                 | C/G  | NA                 | NA                            | NA                 |
| <i>Desi_wild_8924375</i> | NA                                  | <i>Ca_desi_denovo</i> | 8924375                 | A/G  | NA                 | NA                            | NA                 |
| <i>Desi_wild_8927917</i> | NA                                  | <i>Ca_desi_denovo</i> | 8927917                 | A/G  | NA                 | NA                            | NA                 |
| <i>Desi_wild_8944527</i> | NA                                  | <i>Ca_desi_denovo</i> | 8944527                 | G/C  | NA                 | NA                            | NA                 |
| <i>Desi_wild_8944530</i> | NA                                  | <i>Ca_desi_denovo</i> | 8944530                 | C/T  | NA                 | NA                            | NA                 |
| <i>Desi_wild_8951055</i> | NA                                  | <i>Ca_desi_denovo</i> | 8951055                 | C/G  | NA                 | NA                            | NA                 |
| <i>Desi_wild_8951091</i> | NA                                  | <i>Ca_desi_denovo</i> | 8951091                 | C/T  | NA                 | NA                            | NA                 |
| <i>Desi_wild_8951092</i> | NA                                  | <i>Ca_desi_denovo</i> | 8951092                 | A/C  | NA                 | NA                            | NA                 |
| <i>Desi_wild_8951093</i> | NA                                  | <i>Ca_desi_denovo</i> | 8951093                 | A/C  | NA                 | NA                            | NA                 |
| <i>Desi_wild_8954399</i> | NA                                  | <i>Ca_desi_denovo</i> | 8954399                 | A/G  | NA                 | NA                            | NA                 |
| <i>Desi_wild_8954456</i> | NA                                  | <i>Ca_desi_denovo</i> | 8954456                 | G/A  | NA                 | NA                            | NA                 |
| <i>Desi_wild_8958370</i> | NA                                  | <i>Ca_desi_denovo</i> | 8958370                 | G/T  | NA                 | NA                            | NA                 |
| <i>Desi_wild_8965354</i> | NA                                  | <i>Ca_desi_denovo</i> | 8965354                 | A/G  | NA                 | NA                            | NA                 |
| <i>Desi_wild_8967516</i> | NA                                  | <i>Ca_desi_denovo</i> | 8967516                 | G/T  | NA                 | NA                            | NA                 |
| <i>Desi_wild_8968259</i> | NA                                  | <i>Ca_desi_denovo</i> | 8968259                 | A/G  | NA                 | NA                            | NA                 |
| <i>Desi_wild_8968266</i> | NA                                  | <i>Ca_desi_denovo</i> | 8968266                 | C/T  | NA                 | NA                            | NA                 |
| <i>Desi_wild_8968704</i> | NA                                  | <i>Ca_desi_denovo</i> | 8968704                 | A/G  | NA                 | NA                            | NA                 |
| <i>Desi_wild_8974618</i> | NA                                  | <i>Ca_desi_denovo</i> | 8974618                 | C/G  | NA                 | NA                            | NA                 |
| <i>Desi_wild_8977611</i> | NA                                  | <i>Ca_desi_denovo</i> | 8977611                 | G/A  | NA                 | NA                            | NA                 |
| <i>Desi_wild_8979249</i> | NA                                  | <i>Ca_desi_denovo</i> | 8979249                 | G/T  | NA                 | NA                            | NA                 |
| <i>Desi_wild_8986892</i> | NA                                  | <i>Ca_desi_denovo</i> | 8986892                 | A/G  | NA                 | NA                            | NA                 |
| <i>Desi_wild_8986901</i> | NA                                  | <i>Ca_desi_denovo</i> | 8986901                 | A/G  | NA                 | NA                            | NA                 |
| <i>Desi_wild_8988667</i> | NA                                  | <i>Ca_desi_denovo</i> | 8988667                 | C/T  | NA                 | NA                            | NA                 |
| <i>Desi_wild_8990339</i> | NA                                  | <i>Ca_desi_denovo</i> | 8990339                 | C/G  | NA                 | NA                            | NA                 |
| <i>Desi_wild_8997707</i> | NA                                  | <i>Ca_desi_denovo</i> | 8997707                 | G/T  | NA                 | NA                            | NA                 |
| <i>Desi_wild_8997770</i> | NA                                  | <i>Ca_desi_denovo</i> | 8997770                 | C/T  | NA                 | NA                            | NA                 |
| <i>Desi_wild_9006835</i> | NA                                  | <i>Ca_desi_denovo</i> | 9006835                 | G/A  | NA                 | NA                            | NA                 |
| <i>Desi_wild_9006845</i> | NA                                  | <i>Ca_desi_denovo</i> | 9006845                 | C/G  | NA                 | NA                            | NA                 |
| <i>Desi_wild_9014070</i> | NA                                  | <i>Ca_desi_denovo</i> | 9014070                 | A/G  | NA                 | NA                            | NA                 |
| <i>Desi_wild_9022602</i> | NA                                  | <i>Ca_desi_denovo</i> | 9022602                 | C/G  | NA                 | NA                            | NA                 |
| <i>Desi_wild_9025542</i> | NA                                  | <i>Ca_desi_denovo</i> | 9025542                 | G/A  | NA                 | NA                            | NA                 |
| <i>Desi_wild_9025566</i> | NA                                  | <i>Ca_desi_denovo</i> | 9025566                 | G/C  | NA                 | NA                            | NA                 |
| <i>Desi_wild_9033077</i> | NA                                  | <i>Ca_desi_denovo</i> | 9033077                 | A/G  | NA                 | NA                            | NA                 |
| <i>Desi_wild_9041247</i> | NA                                  | <i>Ca_desi_denovo</i> | 9041247                 | C/T  | NA                 | NA                            | NA                 |



| SNP IDs                  | NCBI dbSNP accession IDs (NCBI_SS#) | Chromosomes           | Physical positions (bp) | SNPs | Gene accession IDs | Sequence components of genome | Putative functions |
|--------------------------|-------------------------------------|-----------------------|-------------------------|------|--------------------|-------------------------------|--------------------|
| <i>Desi_wild_9041252</i> | NA                                  | <i>Ca_desi_denovo</i> | 9041252                 | C/T  | NA                 | NA                            | NA                 |
| <i>Desi_wild_9041446</i> | NA                                  | <i>Ca_desi_denovo</i> | 9041446                 | C/T  | NA                 | NA                            | NA                 |
| <i>Desi_wild_9053443</i> | NA                                  | <i>Ca_desi_denovo</i> | 9053443                 | A/G  | NA                 | NA                            | NA                 |
| <i>Desi_wild_9053451</i> | NA                                  | <i>Ca_desi_denovo</i> | 9053451                 | G/T  | NA                 | NA                            | NA                 |
| <i>Desi_wild_9056126</i> | NA                                  | <i>Ca_desi_denovo</i> | 9056126                 | A/C  | NA                 | NA                            | NA                 |
| <i>Desi_wild_9056129</i> | NA                                  | <i>Ca_desi_denovo</i> | 9056129                 | A/G  | NA                 | NA                            | NA                 |
| <i>Desi_wild_9056180</i> | NA                                  | <i>Ca_desi_denovo</i> | 9056180                 | A/G  | NA                 | NA                            | NA                 |
| <i>Desi_wild_9087466</i> | NA                                  | <i>Ca_desi_denovo</i> | 9087466                 | C/G  | NA                 | NA                            | NA                 |
| <i>Desi_wild_9107776</i> | NA                                  | <i>Ca_desi_denovo</i> | 9107776                 | A/G  | NA                 | NA                            | NA                 |
| <i>Desi_wild_9130912</i> | NA                                  | <i>Ca_desi_denovo</i> | 9130912                 | C/T  | NA                 | NA                            | NA                 |
| <i>Desi_wild_9130917</i> | NA                                  | <i>Ca_desi_denovo</i> | 9130917                 | A/G  | NA                 | NA                            | NA                 |
| <i>Desi_wild_9144692</i> | NA                                  | <i>Ca_desi_denovo</i> | 9144692                 | C/G  | NA                 | NA                            | NA                 |
| <i>Desi_wild_9144695</i> | NA                                  | <i>Ca_desi_denovo</i> | 9144695                 | A/G  | NA                 | NA                            | NA                 |
| <i>Desi_wild_9144702</i> | NA                                  | <i>Ca_desi_denovo</i> | 9144702                 | C/T  | NA                 | NA                            | NA                 |
| <i>Desi_wild_9147916</i> | NA                                  | <i>Ca_desi_denovo</i> | 9147916                 | C/T  | NA                 | NA                            | NA                 |
| <i>Desi_wild_9156265</i> | NA                                  | <i>Ca_desi_denovo</i> | 9156265                 | A/G  | NA                 | NA                            | NA                 |
| <i>Desi_wild_9156292</i> | NA                                  | <i>Ca_desi_denovo</i> | 9156292                 | A/G  | NA                 | NA                            | NA                 |
| <i>Desi_wild_9160643</i> | NA                                  | <i>Ca_desi_denovo</i> | 9160643                 | G/A  | NA                 | NA                            | NA                 |
| <i>Desi_wild_9160646</i> | NA                                  | <i>Ca_desi_denovo</i> | 9160646                 | C/T  | NA                 | NA                            | NA                 |
| <i>Desi_wild_9169503</i> | NA                                  | <i>Ca_desi_denovo</i> | 9169503                 | G/A  | NA                 | NA                            | NA                 |
| <i>Desi_wild_9182664</i> | NA                                  | <i>Ca_desi_denovo</i> | 9182664                 | G/T  | NA                 | NA                            | NA                 |
| <i>Desi_wild_9182681</i> | NA                                  | <i>Ca_desi_denovo</i> | 9182681                 | C/G  | NA                 | NA                            | NA                 |
| <i>Desi_wild_9182696</i> | NA                                  | <i>Ca_desi_denovo</i> | 9182696                 | C/G  | NA                 | NA                            | NA                 |
| <i>Desi_wild_9218009</i> | NA                                  | <i>Ca_desi_denovo</i> | 9218009                 | A/G  | NA                 | NA                            | NA                 |
| <i>Desi_wild_9220138</i> | NA                                  | <i>Ca_desi_denovo</i> | 9220138                 | C/G  | NA                 | NA                            | NA                 |
| <i>Desi_wild_9223901</i> | NA                                  | <i>Ca_desi_denovo</i> | 9223901                 | C/T  | NA                 | NA                            | NA                 |
| <i>Desi_wild_9223910</i> | NA                                  | <i>Ca_desi_denovo</i> | 9223910                 | C/G  | NA                 | NA                            | NA                 |
| <i>Desi_wild_9227638</i> | NA                                  | <i>Ca_desi_denovo</i> | 9227638                 | A/G  | NA                 | NA                            | NA                 |
| <i>Desi_wild_9233738</i> | NA                                  | <i>Ca_desi_denovo</i> | 9233738                 | C/G  | NA                 | NA                            | NA                 |
| <i>Desi_wild_9235174</i> | NA                                  | <i>Ca_desi_denovo</i> | 9235174                 | A/G  | NA                 | NA                            | NA                 |
| <i>Desi_wild_9240130</i> | NA                                  | <i>Ca_desi_denovo</i> | 9240130                 | G/T  | NA                 | NA                            | NA                 |
| <i>Desi_wild_9251540</i> | NA                                  | <i>Ca_desi_denovo</i> | 9251540                 | C/T  | NA                 | NA                            | NA                 |
| <i>Desi_wild_9251543</i> | NA                                  | <i>Ca_desi_denovo</i> | 9251543                 | C/T  | NA                 | NA                            | NA                 |
| <i>Desi_wild_9251546</i> | NA                                  | <i>Ca_desi_denovo</i> | 9251546                 | C/T  | NA                 | NA                            | NA                 |
| <i>Desi_wild_9251552</i> | NA                                  | <i>Ca_desi_denovo</i> | 9251552                 | C/T  | NA                 | NA                            | NA                 |
| <i>Desi_wild_9256896</i> | NA                                  | <i>Ca_desi_denovo</i> | 9256896                 | G/T  | NA                 | NA                            | NA                 |
| <i>Desi_wild_9262659</i> | NA                                  | <i>Ca_desi_denovo</i> | 9262659                 | C/G  | NA                 | NA                            | NA                 |
| <i>Desi_wild_9265102</i> | NA                                  | <i>Ca_desi_denovo</i> | 9265102                 | G/T  | NA                 | NA                            | NA                 |
| <i>Desi_wild_9284516</i> | NA                                  | <i>Ca_desi_denovo</i> | 9284516                 | G/T  | NA                 | NA                            | NA                 |
| <i>Desi_wild_9284550</i> | NA                                  | <i>Ca_desi_denovo</i> | 9284550                 | C/G  | NA                 | NA                            | NA                 |
| <i>Desi_wild_9284556</i> | NA                                  | <i>Ca_desi_denovo</i> | 9284556                 | C/G  | NA                 | NA                            | NA                 |
| <i>Desi_wild_9284559</i> | NA                                  | <i>Ca_desi_denovo</i> | 9284559                 | C/G  | NA                 | NA                            | NA                 |
| <i>Desi_wild_9295911</i> | NA                                  | <i>Ca_desi_denovo</i> | 9295911                 | C/G  | NA                 | NA                            | NA                 |
| <i>Desi_wild_9295914</i> | NA                                  | <i>Ca_desi_denovo</i> | 9295914                 | C/G  | NA                 | NA                            | NA                 |

| SNP IDs                  | NCBI dbSNP accession IDs (NCBI_SS#) | Chromosomes           | Physical positions (bp) | SNPs | Gene accession IDs | Sequence components of genome | Putative functions |
|--------------------------|-------------------------------------|-----------------------|-------------------------|------|--------------------|-------------------------------|--------------------|
| <i>Desi_wild_9295935</i> | NA                                  | <i>Ca_desi_denovo</i> | 9295935                 | G/T  | NA                 | NA                            | NA                 |
| <i>Desi_wild_9310177</i> | NA                                  | <i>Ca_desi_denovo</i> | 9310177                 | C/G  | NA                 | NA                            | NA                 |
| <i>Desi_wild_9314285</i> | NA                                  | <i>Ca_desi_denovo</i> | 9314285                 | C/G  | NA                 | NA                            | NA                 |
| <i>Desi_wild_9324975</i> | NA                                  | <i>Ca_desi_denovo</i> | 9324975                 | A/G  | NA                 | NA                            | NA                 |
| <i>Desi_wild_9324976</i> | NA                                  | <i>Ca_desi_denovo</i> | 9324976                 | A/G  | NA                 | NA                            | NA                 |
| <i>Desi_wild_9325026</i> | NA                                  | <i>Ca_desi_denovo</i> | 9325026                 | A/G  | NA                 | NA                            | NA                 |
| <i>Desi_wild_9332624</i> | NA                                  | <i>Ca_desi_denovo</i> | 9332624                 | C/T  | NA                 | NA                            | NA                 |
| <i>Desi_wild_9348527</i> | NA                                  | <i>Ca_desi_denovo</i> | 9348527                 | A/G  | NA                 | NA                            | NA                 |
| <i>Desi_wild_9351969</i> | NA                                  | <i>Ca_desi_denovo</i> | 9351969                 | C/T  | NA                 | NA                            | NA                 |
| <i>Desi_wild_9351993</i> | NA                                  | <i>Ca_desi_denovo</i> | 9351993                 | C/T  | NA                 | NA                            | NA                 |
| <i>Desi_wild_9352269</i> | NA                                  | <i>Ca_desi_denovo</i> | 9352269                 | C/T  | NA                 | NA                            | NA                 |
| <i>Desi_wild_9356793</i> | NA                                  | <i>Ca_desi_denovo</i> | 9356793                 | A/C  | NA                 | NA                            | NA                 |
| <i>Desi_wild_9370662</i> | NA                                  | <i>Ca_desi_denovo</i> | 9370662                 | C/G  | NA                 | NA                            | NA                 |
| <i>Desi_wild_9370664</i> | NA                                  | <i>Ca_desi_denovo</i> | 9370664                 | A/G  | NA                 | NA                            | NA                 |
| <i>Desi_wild_9405951</i> | NA                                  | <i>Ca_desi_denovo</i> | 9405951                 | C/G  | NA                 | NA                            | NA                 |
| <i>Desi_wild_9408409</i> | NA                                  | <i>Ca_desi_denovo</i> | 9408409                 | C/G  | NA                 | NA                            | NA                 |
| <i>Desi_wild_9408421</i> | NA                                  | <i>Ca_desi_denovo</i> | 9408421                 | A/G  | NA                 | NA                            | NA                 |
| <i>Desi_wild_9419857</i> | NA                                  | <i>Ca_desi_denovo</i> | 9419857                 | C/T  | NA                 | NA                            | NA                 |
| <i>Desi_wild_9423232</i> | NA                                  | <i>Ca_desi_denovo</i> | 9423232                 | C/T  | NA                 | NA                            | NA                 |
| <i>Desi_wild_9459896</i> | NA                                  | <i>Ca_desi_denovo</i> | 9459896                 | C/G  | NA                 | NA                            | NA                 |
| <i>Desi_wild_9461048</i> | NA                                  | <i>Ca_desi_denovo</i> | 9461048                 | T/C  | NA                 | NA                            | NA                 |
| <i>Desi_wild_9461054</i> | NA                                  | <i>Ca_desi_denovo</i> | 9461054                 | C/G  | NA                 | NA                            | NA                 |
| <i>Desi_wild_9461087</i> | NA                                  | <i>Ca_desi_denovo</i> | 9461087                 | G/C  | NA                 | NA                            | NA                 |
| <i>Desi_wild_9469774</i> | NA                                  | <i>Ca_desi_denovo</i> | 9469774                 | C/G  | NA                 | NA                            | NA                 |
| <i>Desi_wild_9469801</i> | NA                                  | <i>Ca_desi_denovo</i> | 9469801                 | A/C  | NA                 | NA                            | NA                 |
| <i>Desi_wild_9469816</i> | NA                                  | <i>Ca_desi_denovo</i> | 9469816                 | C/T  | NA                 | NA                            | NA                 |
| <i>Desi_wild_9476794</i> | NA                                  | <i>Ca_desi_denovo</i> | 9476794                 | C/G  | NA                 | NA                            | NA                 |
| <i>Desi_wild_9476800</i> | NA                                  | <i>Ca_desi_denovo</i> | 9476800                 | C/G  | NA                 | NA                            | NA                 |
| <i>Desi_wild_9482677</i> | NA                                  | <i>Ca_desi_denovo</i> | 9482677                 | C/G  | NA                 | NA                            | NA                 |
| <i>Desi_wild_9496936</i> | NA                                  | <i>Ca_desi_denovo</i> | 9496936                 | C/T  | NA                 | NA                            | NA                 |
| <i>Desi_wild_9496972</i> | NA                                  | <i>Ca_desi_denovo</i> | 9496972                 | C/T  | NA                 | NA                            | NA                 |
| <i>Desi_wild_9500360</i> | NA                                  | <i>Ca_desi_denovo</i> | 9500360                 | C/T  | NA                 | NA                            | NA                 |
| <i>Desi_wild_9500393</i> | NA                                  | <i>Ca_desi_denovo</i> | 9500393                 | C/G  | NA                 | NA                            | NA                 |
| <i>Desi_wild_9502848</i> | NA                                  | <i>Ca_desi_denovo</i> | 9502848                 | C/T  | NA                 | NA                            | NA                 |
| <i>Desi_wild_9522876</i> | NA                                  | <i>Ca_desi_denovo</i> | 9522876                 | A/G  | NA                 | NA                            | NA                 |
| <i>Desi_wild_9522879</i> | NA                                  | <i>Ca_desi_denovo</i> | 9522879                 | A/G  | NA                 | NA                            | NA                 |
| <i>Desi_wild_9539978</i> | NA                                  | <i>Ca_desi_denovo</i> | 9539978                 | C/G  | NA                 | NA                            | NA                 |
| <i>Desi_wild_9539987</i> | NA                                  | <i>Ca_desi_denovo</i> | 9539987                 | C/G  | NA                 | NA                            | NA                 |
| <i>Desi_wild_9540332</i> | NA                                  | <i>Ca_desi_denovo</i> | 9540332                 | A/C  | NA                 | NA                            | NA                 |
| <i>Desi_wild_9540333</i> | NA                                  | <i>Ca_desi_denovo</i> | 9540333                 | C/G  | NA                 | NA                            | NA                 |
| <i>Desi_wild_9541811</i> | NA                                  | <i>Ca_desi_denovo</i> | 9541811                 | A/G  | NA                 | NA                            | NA                 |
| <i>Desi_wild_9541821</i> | NA                                  | <i>Ca_desi_denovo</i> | 9541821                 | G/T  | NA                 | NA                            | NA                 |
| <i>Desi_wild_9553926</i> | NA                                  | <i>Ca_desi_denovo</i> | 9553926                 | C/G  | NA                 | NA                            | NA                 |
| <i>Desi_wild_9557548</i> | NA                                  | <i>Ca_desi_denovo</i> | 9557548                 | C/G  | NA                 | NA                            | NA                 |

| SNP IDs                  | NCBI dbSNP accession IDs (NCBI_SS#) | Chromosomes           | Physical positions (bp) | SNPs | Gene accession IDs | Sequence components of genome | Putative functions |
|--------------------------|-------------------------------------|-----------------------|-------------------------|------|--------------------|-------------------------------|--------------------|
| <i>Desi_wild_9573597</i> | NA                                  | <i>Ca_desi_denovo</i> | 9573597                 | C/G  | NA                 | NA                            | NA                 |
| <i>Desi_wild_9573610</i> | NA                                  | <i>Ca_desi_denovo</i> | 9573610                 | A/C  | NA                 | NA                            | NA                 |
| <i>Desi_wild_9576569</i> | NA                                  | <i>Ca_desi_denovo</i> | 9576569                 | C/G  | NA                 | NA                            | NA                 |
| <i>Desi_wild_9576587</i> | NA                                  | <i>Ca_desi_denovo</i> | 9576587                 | C/G  | NA                 | NA                            | NA                 |
| <i>Desi_wild_9576608</i> | NA                                  | <i>Ca_desi_denovo</i> | 9576608                 | C/G  | NA                 | NA                            | NA                 |
| <i>Desi_wild_9576611</i> | NA                                  | <i>Ca_desi_denovo</i> | 9576611                 | C/G  | NA                 | NA                            | NA                 |
| <i>Desi_wild_9583406</i> | NA                                  | <i>Ca_desi_denovo</i> | 9583406                 | A/G  | NA                 | NA                            | NA                 |
| <i>Desi_wild_9596354</i> | NA                                  | <i>Ca_desi_denovo</i> | 9596354                 | A/G  | NA                 | NA                            | NA                 |
| <i>Desi_wild_9604774</i> | NA                                  | <i>Ca_desi_denovo</i> | 9604774                 | T/C  | NA                 | NA                            | NA                 |
| <i>Desi_wild_9606484</i> | NA                                  | <i>Ca_desi_denovo</i> | 9606484                 | C/T  | NA                 | NA                            | NA                 |
| <i>Desi_wild_9624289</i> | NA                                  | <i>Ca_desi_denovo</i> | 9624289                 | G/T  | NA                 | NA                            | NA                 |
| <i>Desi_wild_9642680</i> | NA                                  | <i>Ca_desi_denovo</i> | 9642680                 | A/G  | NA                 | NA                            | NA                 |
| <i>Desi_wild_9647346</i> | NA                                  | <i>Ca_desi_denovo</i> | 9647346                 | A/G  | NA                 | NA                            | NA                 |
| <i>Desi_wild_9653108</i> | NA                                  | <i>Ca_desi_denovo</i> | 9653108                 | C/T  | NA                 | NA                            | NA                 |
| <i>Desi_wild_9653120</i> | NA                                  | <i>Ca_desi_denovo</i> | 9653120                 | C/T  | NA                 | NA                            | NA                 |
| <i>Desi_wild_9655611</i> | NA                                  | <i>Ca_desi_denovo</i> | 9655611                 | C/T  | NA                 | NA                            | NA                 |
| <i>Desi_wild_9657316</i> | NA                                  | <i>Ca_desi_denovo</i> | 9657316                 | G/T  | NA                 | NA                            | NA                 |
| <i>Desi_wild_9659146</i> | NA                                  | <i>Ca_desi_denovo</i> | 9659146                 | G/T  | NA                 | NA                            | NA                 |
| <i>Desi_wild_9659932</i> | NA                                  | <i>Ca_desi_denovo</i> | 9659932                 | G/T  | NA                 | NA                            | NA                 |
| <i>Desi_wild_9661560</i> | NA                                  | <i>Ca_desi_denovo</i> | 9661560                 | G/T  | NA                 | NA                            | NA                 |
| <i>Desi_wild_9667644</i> | NA                                  | <i>Ca_desi_denovo</i> | 9667644                 | C/G  | NA                 | NA                            | NA                 |
| <i>Desi_wild_9667665</i> | NA                                  | <i>Ca_desi_denovo</i> | 9667665                 | C/G  | NA                 | NA                            | NA                 |
| <i>Desi_wild_9667668</i> | NA                                  | <i>Ca_desi_denovo</i> | 9667668                 | C/G  | NA                 | NA                            | NA                 |
| <i>Desi_wild_9670403</i> | NA                                  | <i>Ca_desi_denovo</i> | 9670403                 | C/G  | NA                 | NA                            | NA                 |
| <i>Desi_wild_9670406</i> | NA                                  | <i>Ca_desi_denovo</i> | 9670406                 | A/G  | NA                 | NA                            | NA                 |
| <i>Desi_wild_9677750</i> | NA                                  | <i>Ca_desi_denovo</i> | 9677750                 | A/G  | NA                 | NA                            | NA                 |
| <i>Desi_wild_9677762</i> | NA                                  | <i>Ca_desi_denovo</i> | 9677762                 | C/G  | NA                 | NA                            | NA                 |
| <i>Desi_wild_9680366</i> | NA                                  | <i>Ca_desi_denovo</i> | 9680366                 | A/T  | NA                 | NA                            | NA                 |
| <i>Desi_wild_9696150</i> | NA                                  | <i>Ca_desi_denovo</i> | 9696150                 | C/T  | NA                 | NA                            | NA                 |
| <i>Desi_wild_9696186</i> | NA                                  | <i>Ca_desi_denovo</i> | 9696186                 | C/G  | NA                 | NA                            | NA                 |
| <i>Desi_wild_9700029</i> | NA                                  | <i>Ca_desi_denovo</i> | 9700029                 | A/C  | NA                 | NA                            | NA                 |
| <i>Desi_wild_9727592</i> | NA                                  | <i>Ca_desi_denovo</i> | 9727592                 | C/G  | NA                 | NA                            | NA                 |
| <i>Desi_wild_9727604</i> | NA                                  | <i>Ca_desi_denovo</i> | 9727604                 | C/G  | NA                 | NA                            | NA                 |
| <i>Desi_wild_9735874</i> | NA                                  | <i>Ca_desi_denovo</i> | 9735874                 | C/T  | NA                 | NA                            | NA                 |
| <i>Desi_wild_9735876</i> | NA                                  | <i>Ca_desi_denovo</i> | 9735876                 | A/C  | NA                 | NA                            | NA                 |
| <i>Desi_wild_9735921</i> | NA                                  | <i>Ca_desi_denovo</i> | 9735921                 | A/T  | NA                 | NA                            | NA                 |
| <i>Desi_wild_9735923</i> | NA                                  | <i>Ca_desi_denovo</i> | 9735923                 | C/T  | NA                 | NA                            | NA                 |
| <i>Desi_wild_9739943</i> | NA                                  | <i>Ca_desi_denovo</i> | 9739943                 | C/G  | NA                 | NA                            | NA                 |
| <i>Desi_wild_9745470</i> | NA                                  | <i>Ca_desi_denovo</i> | 9745470                 | T/C  | NA                 | NA                            | NA                 |
| <i>Desi_wild_9745479</i> | NA                                  | <i>Ca_desi_denovo</i> | 9745479                 | G/C  | NA                 | NA                            | NA                 |
| <i>Desi_wild_9748683</i> | NA                                  | <i>Ca_desi_denovo</i> | 9748683                 | C/T  | NA                 | NA                            | NA                 |
| <i>Desi_wild_9763119</i> | NA                                  | <i>Ca_desi_denovo</i> | 9763119                 | C/T  | NA                 | NA                            | NA                 |
| <i>Desi_wild_9763122</i> | NA                                  | <i>Ca_desi_denovo</i> | 9763122                 | C/T  | NA                 | NA                            | NA                 |
| <i>Desi_wild_9769973</i> | NA                                  | <i>Ca_desi_denovo</i> | 9769973                 | C/T  | NA                 | NA                            | NA                 |

| SNP IDs                  | NCBI dbSNP accession IDs (NCBI_SS#) | Chromosomes           | Physical positions (bp) | SNPs | Gene accession IDs | Sequence components of genome | Putative functions |
|--------------------------|-------------------------------------|-----------------------|-------------------------|------|--------------------|-------------------------------|--------------------|
| <i>Desi_wild_9770002</i> | NA                                  | <i>Ca_desi_denovo</i> | 9770002                 | A/G  | NA                 | NA                            | NA                 |
| <i>Desi_wild_9776904</i> | NA                                  | <i>Ca_desi_denovo</i> | 9776904                 | A/G  | NA                 | NA                            | NA                 |
| <i>Desi_wild_9777695</i> | NA                                  | <i>Ca_desi_denovo</i> | 9777695                 | G/T  | NA                 | NA                            | NA                 |
| <i>Desi_wild_9792005</i> | NA                                  | <i>Ca_desi_denovo</i> | 9792005                 | G/T  | NA                 | NA                            | NA                 |
| <i>Desi_wild_9792310</i> | NA                                  | <i>Ca_desi_denovo</i> | 9792310                 | G/C  | NA                 | NA                            | NA                 |
| <i>Desi_wild_9792569</i> | NA                                  | <i>Ca_desi_denovo</i> | 9792569                 | A/G  | NA                 | NA                            | NA                 |
| <i>Desi_wild_9792626</i> | NA                                  | <i>Ca_desi_denovo</i> | 9792626                 | A/G  | NA                 | NA                            | NA                 |
| <i>Desi_wild_9807980</i> | NA                                  | <i>Ca_desi_denovo</i> | 9807980                 | C/G  | NA                 | NA                            | NA                 |
| <i>Desi_wild_9823936</i> | NA                                  | <i>Ca_desi_denovo</i> | 9823936                 | T/A  | NA                 | NA                            | NA                 |
| <i>Desi_wild_9826787</i> | NA                                  | <i>Ca_desi_denovo</i> | 9826787                 | A/G  | NA                 | NA                            | NA                 |
| <i>Desi_wild_9830123</i> | NA                                  | <i>Ca_desi_denovo</i> | 9830123                 | A/C  | NA                 | NA                            | NA                 |
| <i>Desi_wild_9830144</i> | NA                                  | <i>Ca_desi_denovo</i> | 9830144                 | C/G  | NA                 | NA                            | NA                 |
| <i>Desi_wild_9846424</i> | NA                                  | <i>Ca_desi_denovo</i> | 9846424                 | G/T  | NA                 | NA                            | NA                 |
| <i>Desi_wild_9852161</i> | NA                                  | <i>Ca_desi_denovo</i> | 9852161                 | G/C  | NA                 | NA                            | NA                 |
| <i>Desi_wild_9852164</i> | NA                                  | <i>Ca_desi_denovo</i> | 9852164                 | G/A  | NA                 | NA                            | NA                 |
| <i>Desi_wild_9855041</i> | NA                                  | <i>Ca_desi_denovo</i> | 9855041                 | C/T  | NA                 | NA                            | NA                 |
| <i>Desi_wild_9859921</i> | NA                                  | <i>Ca_desi_denovo</i> | 9859921                 | C/T  | NA                 | NA                            | NA                 |
| <i>Desi_wild_9859924</i> | NA                                  | <i>Ca_desi_denovo</i> | 9859924                 | G/A  | NA                 | NA                            | NA                 |
| <i>Desi_wild_9861848</i> | NA                                  | <i>Ca_desi_denovo</i> | 9861848                 | G/T  | NA                 | NA                            | NA                 |
| <i>Desi_wild_9863636</i> | NA                                  | <i>Ca_desi_denovo</i> | 9863636                 | G/C  | NA                 | NA                            | NA                 |
| <i>Desi_wild_9887193</i> | NA                                  | <i>Ca_desi_denovo</i> | 9887193                 | G/T  | NA                 | NA                            | NA                 |
| <i>Desi_wild_9887219</i> | NA                                  | <i>Ca_desi_denovo</i> | 9887219                 | C/T  | NA                 | NA                            | NA                 |
| <i>Desi_wild_9892444</i> | NA                                  | <i>Ca_desi_denovo</i> | 9892444                 | G/A  | NA                 | NA                            | NA                 |
| <i>Desi_wild_9892626</i> | NA                                  | <i>Ca_desi_denovo</i> | 9892626                 | C/T  | NA                 | NA                            | NA                 |
| <i>Desi_wild_9893076</i> | NA                                  | <i>Ca_desi_denovo</i> | 9893076                 | A/C  | NA                 | NA                            | NA                 |
| <i>Desi_wild_9893090</i> | NA                                  | <i>Ca_desi_denovo</i> | 9893090                 | C/G  | NA                 | NA                            | NA                 |
| <i>Desi_wild_9897266</i> | NA                                  | <i>Ca_desi_denovo</i> | 9897266                 | C/T  | NA                 | NA                            | NA                 |
| <i>Desi_wild_9897275</i> | NA                                  | <i>Ca_desi_denovo</i> | 9897275                 | G/T  | NA                 | NA                            | NA                 |
| <i>Desi_wild_9897296</i> | NA                                  | <i>Ca_desi_denovo</i> | 9897296                 | C/T  | NA                 | NA                            | NA                 |
| <i>Desi_wild_9899361</i> | NA                                  | <i>Ca_desi_denovo</i> | 9899361                 | A/G  | NA                 | NA                            | NA                 |
| <i>Desi_wild_9913595</i> | NA                                  | <i>Ca_desi_denovo</i> | 9913595                 | C/G  | NA                 | NA                            | NA                 |
| <i>Desi_wild_9916356</i> | NA                                  | <i>Ca_desi_denovo</i> | 9916356                 | A/G  | NA                 | NA                            | NA                 |
| <i>Desi_wild_9916358</i> | NA                                  | <i>Ca_desi_denovo</i> | 9916358                 | A/G  | NA                 | NA                            | NA                 |
| <i>Desi_wild_9916364</i> | NA                                  | <i>Ca_desi_denovo</i> | 9916364                 | C/T  | NA                 | NA                            | NA                 |
| <i>Desi_wild_9925093</i> | NA                                  | <i>Ca_desi_denovo</i> | 9925093                 | A/G  | NA                 | NA                            | NA                 |
| <i>Desi_wild_9928528</i> | NA                                  | <i>Ca_desi_denovo</i> | 9928528                 | C/G  | NA                 | NA                            | NA                 |
| <i>Desi_wild_9928531</i> | NA                                  | <i>Ca_desi_denovo</i> | 9928531                 | C/G  | NA                 | NA                            | NA                 |
| <i>Desi_wild_9929651</i> | NA                                  | <i>Ca_desi_denovo</i> | 9929651                 | A/G  | NA                 | NA                            | NA                 |
| <i>Desi_wild_9929669</i> | NA                                  | <i>Ca_desi_denovo</i> | 9929669                 | C/T  | NA                 | NA                            | NA                 |
| <i>Desi_wild_9971735</i> | NA                                  | <i>Ca_desi_denovo</i> | 9971735                 | A/G  | NA                 | NA                            | NA                 |
| <i>Desi_wild_9978045</i> | NA                                  | <i>Ca_desi_denovo</i> | 9978045                 | C/T  | NA                 | NA                            | NA                 |
| <i>Desi_wild_9978199</i> | NA                                  | <i>Ca_desi_denovo</i> | 9978199                 | C/G  | NA                 | NA                            | NA                 |
| <i>Desi_wild_9978201</i> | NA                                  | <i>Ca_desi_denovo</i> | 9978201                 | C/T  | NA                 | NA                            | NA                 |
| <i>Desi_wild_9978202</i> | NA                                  | <i>Ca_desi_denovo</i> | 9978202                 | A/T  | NA                 | NA                            | NA                 |

| SNP IDs                   | NCBI dbSNP accession IDs (NCBI_SS#) | Chromosomes           | Physical positions (bp) | SNPs | Gene accession IDs | Sequence components of genome | Putative functions |
|---------------------------|-------------------------------------|-----------------------|-------------------------|------|--------------------|-------------------------------|--------------------|
| <i>Desi_wild_9985307</i>  | NA                                  | <i>Ca_desi_denovo</i> | 9985307                 | G/T  | NA                 | NA                            | NA                 |
| <i>Desi_wild_9988733</i>  | NA                                  | <i>Ca_desi_denovo</i> | 9988733                 | A/C  | NA                 | NA                            | NA                 |
| <i>Desi_wild_9988734</i>  | NA                                  | <i>Ca_desi_denovo</i> | 9988734                 | G/T  | NA                 | NA                            | NA                 |
| <i>Desi_wild_9993206</i>  | NA                                  | <i>Ca_desi_denovo</i> | 9993206                 | C/T  | NA                 | NA                            | NA                 |
| <i>Desi_wild_9998527</i>  | NA                                  | <i>Ca_desi_denovo</i> | 9998527                 | A/G  | NA                 | NA                            | NA                 |
| <i>Desi_wild_1000989</i>  | NA                                  | <i>Ca_desi_denovo</i> | 1000989                 | G/T  | NA                 | NA                            | NA                 |
| <i>Desi_wild_10007286</i> | NA                                  | <i>Ca_desi_denovo</i> | 10007286                | G/T  | NA                 | NA                            | NA                 |
| <i>Desi_wild_10015968</i> | NA                                  | <i>Ca_desi_denovo</i> | 10015968                | C/G  | NA                 | NA                            | NA                 |
| <i>Desi_wild_10020703</i> | NA                                  | <i>Ca_desi_denovo</i> | 10020703                | C/T  | NA                 | NA                            | NA                 |
| <i>Desi_wild_10025764</i> | NA                                  | <i>Ca_desi_denovo</i> | 10025764                | G/T  | NA                 | NA                            | NA                 |
| <i>Desi_wild_10032096</i> | NA                                  | <i>Ca_desi_denovo</i> | 10032096                | G/T  | NA                 | NA                            | NA                 |
| <i>Desi_wild_10032213</i> | NA                                  | <i>Ca_desi_denovo</i> | 10032213                | G/T  | NA                 | NA                            | NA                 |
| <i>Desi_wild_10033343</i> | NA                                  | <i>Ca_desi_denovo</i> | 10033343                | A/G  | NA                 | NA                            | NA                 |
| <i>Desi_wild_10035608</i> | NA                                  | <i>Ca_desi_denovo</i> | 10035608                | T/A  | NA                 | NA                            | NA                 |
| <i>Desi_wild_10040519</i> | NA                                  | <i>Ca_desi_denovo</i> | 10040519                | C/G  | NA                 | NA                            | NA                 |
| <i>Desi_wild_10050306</i> | NA                                  | <i>Ca_desi_denovo</i> | 10050306                | C/G  | NA                 | NA                            | NA                 |
| <i>Desi_wild_10050324</i> | NA                                  | <i>Ca_desi_denovo</i> | 10050324                | C/G  | NA                 | NA                            | NA                 |
| <i>Desi_wild_10055533</i> | NA                                  | <i>Ca_desi_denovo</i> | 10055533                | C/G  | NA                 | NA                            | NA                 |
| <i>Desi_wild_10056214</i> | NA                                  | <i>Ca_desi_denovo</i> | 10056214                | G/T  | NA                 | NA                            | NA                 |
| <i>Desi_wild_10056230</i> | NA                                  | <i>Ca_desi_denovo</i> | 10056230                | A/G  | NA                 | NA                            | NA                 |
| <i>Desi_wild_10059424</i> | NA                                  | <i>Ca_desi_denovo</i> | 10059424                | A/G  | NA                 | NA                            | NA                 |
| <i>Desi_wild_10059433</i> | NA                                  | <i>Ca_desi_denovo</i> | 10059433                | C/T  | NA                 | NA                            | NA                 |
| <i>Desi_wild_10059439</i> | NA                                  | <i>Ca_desi_denovo</i> | 10059439                | C/T  | NA                 | NA                            | NA                 |
| <i>Desi_wild_10070358</i> | NA                                  | <i>Ca_desi_denovo</i> | 10070358                | A/G  | NA                 | NA                            | NA                 |
| <i>Desi_wild_10070373</i> | NA                                  | <i>Ca_desi_denovo</i> | 10070373                | C/G  | NA                 | NA                            | NA                 |
| <i>Desi_wild_10075374</i> | NA                                  | <i>Ca_desi_denovo</i> | 10075374                | A/G  | NA                 | NA                            | NA                 |
| <i>Desi_wild_10081928</i> | NA                                  | <i>Ca_desi_denovo</i> | 10081928                | G/T  | NA                 | NA                            | NA                 |
| <i>Desi_wild_10083866</i> | NA                                  | <i>Ca_desi_denovo</i> | 10083866                | A/G  | NA                 | NA                            | NA                 |
| <i>Desi_wild_10088312</i> | NA                                  | <i>Ca_desi_denovo</i> | 10088312                | A/G  | NA                 | NA                            | NA                 |
| <i>Desi_wild_10090308</i> | NA                                  | <i>Ca_desi_denovo</i> | 10090308                | A/G  | NA                 | NA                            | NA                 |
| <i>Desi_wild_10090353</i> | NA                                  | <i>Ca_desi_denovo</i> | 10090353                | G/T  | NA                 | NA                            | NA                 |
| <i>Desi_wild_10095238</i> | NA                                  | <i>Ca_desi_denovo</i> | 10095238                | A/G  | NA                 | NA                            | NA                 |
| <i>Desi_wild_10095253</i> | NA                                  | <i>Ca_desi_denovo</i> | 10095253                | A/G  | NA                 | NA                            | NA                 |
| <i>Desi_wild_10103986</i> | NA                                  | <i>Ca_desi_denovo</i> | 10103986                | A/T  | NA                 | NA                            | NA                 |
| <i>Desi_wild_10104009</i> | NA                                  | <i>Ca_desi_denovo</i> | 10104009                | C/T  | NA                 | NA                            | NA                 |
| <i>Desi_wild_10125353</i> | NA                                  | <i>Ca_desi_denovo</i> | 10125353                | C/G  | NA                 | NA                            | NA                 |
| <i>Desi_wild_10125368</i> | NA                                  | <i>Ca_desi_denovo</i> | 10125368                | G/T  | NA                 | NA                            | NA                 |
| <i>Desi_wild_10129729</i> | NA                                  | <i>Ca_desi_denovo</i> | 10129729                | G/A  | NA                 | NA                            | NA                 |
| <i>Desi_wild_10135907</i> | NA                                  | <i>Ca_desi_denovo</i> | 10135907                | C/T  | NA                 | NA                            | NA                 |
| <i>Desi_wild_10135915</i> | NA                                  | <i>Ca_desi_denovo</i> | 10135915                | C/G  | NA                 | NA                            | NA                 |
| <i>Desi_wild_10135918</i> | NA                                  | <i>Ca_desi_denovo</i> | 10135918                | C/G  | NA                 | NA                            | NA                 |
| <i>Desi_wild_10139922</i> | NA                                  | <i>Ca_desi_denovo</i> | 10139922                | G/T  | NA                 | NA                            | NA                 |
| <i>Desi_wild_10140462</i> | NA                                  | <i>Ca_desi_denovo</i> | 10140462                | C/G  | NA                 | NA                            | NA                 |
| <i>Desi_wild_10140465</i> | NA                                  | <i>Ca_desi_denovo</i> | 10140465                | C/G  | NA                 | NA                            | NA                 |

| SNP IDs                   | NCBI dbSNP accession IDs (NCBI_SS#) | Chromosomes           | Physical positions (bp) | SNPs | Gene accession IDs | Sequence components of genome | Putative functions |
|---------------------------|-------------------------------------|-----------------------|-------------------------|------|--------------------|-------------------------------|--------------------|
| <i>Desi_wild_10153114</i> | NA                                  | <i>Ca_desi_denovo</i> | 10153114                | A/G  | NA                 | NA                            | NA                 |
| <i>Desi_wild_10154168</i> | NA                                  | <i>Ca_desi_denovo</i> | 10154168                | A/G  | NA                 | NA                            | NA                 |
| <i>Desi_wild_10164395</i> | NA                                  | <i>Ca_desi_denovo</i> | 10164395                | C/G  | NA                 | NA                            | NA                 |
| <i>Desi_wild_10164447</i> | NA                                  | <i>Ca_desi_denovo</i> | 10164447                | G/T  | NA                 | NA                            | NA                 |
| <i>Desi_wild_10164450</i> | NA                                  | <i>Ca_desi_denovo</i> | 10164450                | A/G  | NA                 | NA                            | NA                 |
| <i>Desi_wild_10173730</i> | NA                                  | <i>Ca_desi_denovo</i> | 10173730                | A/G  | NA                 | NA                            | NA                 |
| <i>Desi_wild_10173736</i> | NA                                  | <i>Ca_desi_denovo</i> | 10173736                | A/G  | NA                 | NA                            | NA                 |
| <i>Desi_wild_10173750</i> | NA                                  | <i>Ca_desi_denovo</i> | 10173750                | A/C  | NA                 | NA                            | NA                 |
| <i>Desi_wild_10173757</i> | NA                                  | <i>Ca_desi_denovo</i> | 10173757                | C/G  | NA                 | NA                            | NA                 |
| <i>Desi_wild_10175039</i> | NA                                  | <i>Ca_desi_denovo</i> | 10175039                | A/G  | NA                 | NA                            | NA                 |
| <i>Desi_wild_10175078</i> | NA                                  | <i>Ca_desi_denovo</i> | 10175078                | G/T  | NA                 | NA                            | NA                 |
| <i>Desi_wild_10192811</i> | NA                                  | <i>Ca_desi_denovo</i> | 10192811                | A/G  | NA                 | NA                            | NA                 |
| <i>Desi_wild_10192826</i> | NA                                  | <i>Ca_desi_denovo</i> | 10192826                | A/G  | NA                 | NA                            | NA                 |
| <i>Desi_wild_10192847</i> | NA                                  | <i>Ca_desi_denovo</i> | 10192847                | C/G  | NA                 | NA                            | NA                 |
| <i>Desi_wild_10192859</i> | NA                                  | <i>Ca_desi_denovo</i> | 10192859                | A/G  | NA                 | NA                            | NA                 |
| <i>Desi_wild_10205181</i> | NA                                  | <i>Ca_desi_denovo</i> | 10205181                | C/G  | NA                 | NA                            | NA                 |
| <i>Desi_wild_10212670</i> | NA                                  | <i>Ca_desi_denovo</i> | 10212670                | C/T  | NA                 | NA                            | NA                 |
| <i>Desi_wild_10212673</i> | NA                                  | <i>Ca_desi_denovo</i> | 10212673                | G/T  | NA                 | NA                            | NA                 |
| <i>Desi_wild_10213816</i> | NA                                  | <i>Ca_desi_denovo</i> | 10213816                | C/T  | NA                 | NA                            | NA                 |
| <i>Desi_wild_10215033</i> | NA                                  | <i>Ca_desi_denovo</i> | 10215033                | A/G  | NA                 | NA                            | NA                 |
| <i>Desi_wild_10215066</i> | NA                                  | <i>Ca_desi_denovo</i> | 10215066                | A/G  | NA                 | NA                            | NA                 |
| <i>Desi_wild_10220734</i> | NA                                  | <i>Ca_desi_denovo</i> | 10220734                | C/G  | NA                 | NA                            | NA                 |
| <i>Desi_wild_10220755</i> | NA                                  | <i>Ca_desi_denovo</i> | 10220755                | A/G  | NA                 | NA                            | NA                 |
| <i>Desi_wild_10221020</i> | NA                                  | <i>Ca_desi_denovo</i> | 10221020                | A/T  | NA                 | NA                            | NA                 |
| <i>Desi_wild_10237944</i> | NA                                  | <i>Ca_desi_denovo</i> | 10237944                | C/T  | NA                 | NA                            | NA                 |
| <i>Desi_wild_10242109</i> | NA                                  | <i>Ca_desi_denovo</i> | 10242109                | A/G  | NA                 | NA                            | NA                 |
| <i>Desi_wild_10242118</i> | NA                                  | <i>Ca_desi_denovo</i> | 10242118                | A/G  | NA                 | NA                            | NA                 |
| <i>Desi_wild_10243406</i> | NA                                  | <i>Ca_desi_denovo</i> | 10243406                | A/G  | NA                 | NA                            | NA                 |
| <i>Desi_wild_10247173</i> | NA                                  | <i>Ca_desi_denovo</i> | 10247173                | C/T  | NA                 | NA                            | NA                 |
| <i>Desi_wild_10247188</i> | NA                                  | <i>Ca_desi_denovo</i> | 10247188                | C/T  | NA                 | NA                            | NA                 |
| <i>Desi_wild_10250086</i> | NA                                  | <i>Ca_desi_denovo</i> | 10250086                | G/T  | NA                 | NA                            | NA                 |
| <i>Desi_wild_10250097</i> | NA                                  | <i>Ca_desi_denovo</i> | 10250097                | C/G  | NA                 | NA                            | NA                 |
| <i>Desi_wild_10250110</i> | NA                                  | <i>Ca_desi_denovo</i> | 10250110                | A/G  | NA                 | NA                            | NA                 |
| <i>Desi_wild_10250112</i> | NA                                  | <i>Ca_desi_denovo</i> | 10250112                | A/C  | NA                 | NA                            | NA                 |
| <i>Desi_wild_10258447</i> | NA                                  | <i>Ca_desi_denovo</i> | 10258447                | C/T  | NA                 | NA                            | NA                 |
| <i>Desi_wild_10258501</i> | NA                                  | <i>Ca_desi_denovo</i> | 10258501                | A/G  | NA                 | NA                            | NA                 |
| <i>Desi_wild_10261207</i> | NA                                  | <i>Ca_desi_denovo</i> | 10261207                | G/A  | NA                 | NA                            | NA                 |
| <i>Desi_wild_10261213</i> | NA                                  | <i>Ca_desi_denovo</i> | 10261213                | G/T  | NA                 | NA                            | NA                 |
| <i>Desi_wild_10261216</i> | NA                                  | <i>Ca_desi_denovo</i> | 10261216                | G/A  | NA                 | NA                            | NA                 |
| <i>Desi_wild_10271399</i> | NA                                  | <i>Ca_desi_denovo</i> | 10271399                | A/G  | NA                 | NA                            | NA                 |
| <i>Desi_wild_10272961</i> | NA                                  | <i>Ca_desi_denovo</i> | 10272961                | G/T  | NA                 | NA                            | NA                 |
| <i>Desi_wild_10276852</i> | NA                                  | <i>Ca_desi_denovo</i> | 10276852                | C/T  | NA                 | NA                            | NA                 |
| <i>Desi_wild_10287965</i> | NA                                  | <i>Ca_desi_denovo</i> | 10287965                | A/C  | NA                 | NA                            | NA                 |
| <i>Desi_wild_10294559</i> | NA                                  | <i>Ca_desi_denovo</i> | 10294559                | A/G  | NA                 | NA                            | NA                 |

| SNP IDs                   | NCBI dbSNP accession IDs (NCBI_SS#) | Chromosomes           | Physical positions (bp) | SNPs | Gene accession IDs | Sequence components of genome | Putative functions |
|---------------------------|-------------------------------------|-----------------------|-------------------------|------|--------------------|-------------------------------|--------------------|
| <i>Desi_wild_10294569</i> | NA                                  | <i>Ca_desi_denovo</i> | 10294569                | A/G  | NA                 | NA                            | NA                 |
| <i>Desi_wild_10299302</i> | NA                                  | <i>Ca_desi_denovo</i> | 10299302                | G/T  | NA                 | NA                            | NA                 |
| <i>Desi_wild_10299383</i> | NA                                  | <i>Ca_desi_denovo</i> | 10299383                | C/G  | NA                 | NA                            | NA                 |
| <i>Desi_wild_10306984</i> | NA                                  | <i>Ca_desi_denovo</i> | 10306984                | A/G  | NA                 | NA                            | NA                 |
| <i>Desi_wild_10311179</i> | NA                                  | <i>Ca_desi_denovo</i> | 10311179                | C/G  | NA                 | NA                            | NA                 |
| <i>Desi_wild_10312801</i> | NA                                  | <i>Ca_desi_denovo</i> | 10312801                | C/G  | NA                 | NA                            | NA                 |
| <i>Desi_wild_10314290</i> | NA                                  | <i>Ca_desi_denovo</i> | 10314290                | G/T  | NA                 | NA                            | NA                 |
| <i>Desi_wild_10316615</i> | NA                                  | <i>Ca_desi_denovo</i> | 10316615                | C/G  | NA                 | NA                            | NA                 |
| <i>Desi_wild_10321054</i> | NA                                  | <i>Ca_desi_denovo</i> | 10321054                | C/T  | NA                 | NA                            | NA                 |
| <i>Desi_wild_10321057</i> | NA                                  | <i>Ca_desi_denovo</i> | 10321057                | G/A  | NA                 | NA                            | NA                 |
| <i>Desi_wild_10321072</i> | NA                                  | <i>Ca_desi_denovo</i> | 10321072                | C/G  | NA                 | NA                            | NA                 |
| <i>Desi_wild_10344484</i> | NA                                  | <i>Ca_desi_denovo</i> | 10344484                | C/T  | NA                 | NA                            | NA                 |
| <i>Desi_wild_10355329</i> | NA                                  | <i>Ca_desi_denovo</i> | 10355329                | G/T  | NA                 | NA                            | NA                 |
| <i>Desi_wild_10365035</i> | NA                                  | <i>Ca_desi_denovo</i> | 10365035                | C/G  | NA                 | NA                            | NA                 |
| <i>Desi_wild_10365060</i> | NA                                  | <i>Ca_desi_denovo</i> | 10365060                | A/G  | NA                 | NA                            | NA                 |
| <i>Desi_wild_10371609</i> | NA                                  | <i>Ca_desi_denovo</i> | 10371609                | G/A  | NA                 | NA                            | NA                 |
| <i>Desi_wild_10371633</i> | NA                                  | <i>Ca_desi_denovo</i> | 10371633                | G/A  | NA                 | NA                            | NA                 |
| <i>Desi_wild_10373724</i> | NA                                  | <i>Ca_desi_denovo</i> | 10373724                | A/G  | NA                 | NA                            | NA                 |
| <i>Desi_wild_10403511</i> | NA                                  | <i>Ca_desi_denovo</i> | 10403511                | C/G  | NA                 | NA                            | NA                 |
| <i>Desi_wild_10403616</i> | NA                                  | <i>Ca_desi_denovo</i> | 10403616                | C/G  | NA                 | NA                            | NA                 |
| <i>Desi_wild_10403626</i> | NA                                  | <i>Ca_desi_denovo</i> | 10403626                | A/G  | NA                 | NA                            | NA                 |
| <i>Desi_wild_10423475</i> | NA                                  | <i>Ca_desi_denovo</i> | 10423475                | C/T  | NA                 | NA                            | NA                 |
| <i>Desi_wild_10423484</i> | NA                                  | <i>Ca_desi_denovo</i> | 10423484                | C/G  | NA                 | NA                            | NA                 |
| <i>Desi_wild_10423496</i> | NA                                  | <i>Ca_desi_denovo</i> | 10423496                | C/T  | NA                 | NA                            | NA                 |
| <i>Desi_wild_10423500</i> | NA                                  | <i>Ca_desi_denovo</i> | 10423500                | C/T  | NA                 | NA                            | NA                 |
| <i>Desi_wild_10438773</i> | NA                                  | <i>Ca_desi_denovo</i> | 10438773                | G/T  | NA                 | NA                            | NA                 |
| <i>Desi_wild_10442651</i> | NA                                  | <i>Ca_desi_denovo</i> | 10442651                | A/G  | NA                 | NA                            | NA                 |
| <i>Desi_wild_10442672</i> | NA                                  | <i>Ca_desi_denovo</i> | 10442672                | C/G  | NA                 | NA                            | NA                 |
| <i>Desi_wild_10444110</i> | NA                                  | <i>Ca_desi_denovo</i> | 10444110                | G/T  | NA                 | NA                            | NA                 |
| <i>Desi_wild_10444116</i> | NA                                  | <i>Ca_desi_denovo</i> | 10444116                | C/T  | NA                 | NA                            | NA                 |
| <i>Desi_wild_10454491</i> | NA                                  | <i>Ca_desi_denovo</i> | 10454491                | C/T  | NA                 | NA                            | NA                 |
| <i>Desi_wild_10454512</i> | NA                                  | <i>Ca_desi_denovo</i> | 10454512                | C/G  | NA                 | NA                            | NA                 |
| <i>Desi_wild_10458706</i> | NA                                  | <i>Ca_desi_denovo</i> | 10458706                | G/A  | NA                 | NA                            | NA                 |
| <i>Desi_wild_10458724</i> | NA                                  | <i>Ca_desi_denovo</i> | 10458724                | A/G  | NA                 | NA                            | NA                 |
| <i>Desi_wild_10458734</i> | NA                                  | <i>Ca_desi_denovo</i> | 10458734                | T/C  | NA                 | NA                            | NA                 |
| <i>Desi_wild_10463945</i> | NA                                  | <i>Ca_desi_denovo</i> | 10463945                | C/G  | NA                 | NA                            | NA                 |
| <i>Desi_wild_10463948</i> | NA                                  | <i>Ca_desi_denovo</i> | 10463948                | C/G  | NA                 | NA                            | NA                 |
| <i>Desi_wild_10463960</i> | NA                                  | <i>Ca_desi_denovo</i> | 10463960                | G/T  | NA                 | NA                            | NA                 |
| <i>Desi_wild_10467267</i> | NA                                  | <i>Ca_desi_denovo</i> | 10467267                | C/T  | NA                 | NA                            | NA                 |
| <i>Desi_wild_10470311</i> | NA                                  | <i>Ca_desi_denovo</i> | 10470311                | C/G  | NA                 | NA                            | NA                 |
| <i>Desi_wild_10470329</i> | NA                                  | <i>Ca_desi_denovo</i> | 10470329                | A/T  | NA                 | NA                            | NA                 |
| <i>Desi_wild_10476946</i> | NA                                  | <i>Ca_desi_denovo</i> | 10476946                | C/G  | NA                 | NA                            | NA                 |
| <i>Desi_wild_10476948</i> | NA                                  | <i>Ca_desi_denovo</i> | 10476948                | G/T  | NA                 | NA                            | NA                 |
| <i>Desi_wild_10476952</i> | NA                                  | <i>Ca_desi_denovo</i> | 10476952                | A/G  | NA                 | NA                            | NA                 |

| SNP IDs                   | NCBI dbSNP accession IDs (NCBI_SS#) | Chromosomes           | Physical positions (bp) | SNPs | Gene accession IDs | Sequence components of genome | Putative functions |
|---------------------------|-------------------------------------|-----------------------|-------------------------|------|--------------------|-------------------------------|--------------------|
| <i>Desi_wild_10479467</i> | NA                                  | <i>Ca_desi_denovo</i> | 10479467                | C/G  | NA                 | NA                            | NA                 |
| <i>Desi_wild_10479485</i> | NA                                  | <i>Ca_desi_denovo</i> | 10479485                | A/G  | NA                 | NA                            | NA                 |
| <i>Desi_wild_10484742</i> | NA                                  | <i>Ca_desi_denovo</i> | 10484742                | C/T  | NA                 | NA                            | NA                 |
| <i>Desi_wild_10484752</i> | NA                                  | <i>Ca_desi_denovo</i> | 10484752                | A/C  | NA                 | NA                            | NA                 |
| <i>Desi_wild_10484755</i> | NA                                  | <i>Ca_desi_denovo</i> | 10484755                | C/G  | NA                 | NA                            | NA                 |
| <i>Desi_wild_10484760</i> | NA                                  | <i>Ca_desi_denovo</i> | 10484760                | C/T  | NA                 | NA                            | NA                 |
| <i>Desi_wild_10485642</i> | NA                                  | <i>Ca_desi_denovo</i> | 10485642                | A/G  | NA                 | NA                            | NA                 |
| <i>Desi_wild_10488378</i> | NA                                  | <i>Ca_desi_denovo</i> | 10488378                | A/C  | NA                 | NA                            | NA                 |
| <i>Desi_wild_10522095</i> | NA                                  | <i>Ca_desi_denovo</i> | 10522095                | C/G  | NA                 | NA                            | NA                 |
| <i>Desi_wild_10529958</i> | NA                                  | <i>Ca_desi_denovo</i> | 10529958                | C/G  | NA                 | NA                            | NA                 |
| <i>Desi_wild_10529959</i> | NA                                  | <i>Ca_desi_denovo</i> | 10529959                | G/T  | NA                 | NA                            | NA                 |
| <i>Desi_wild_10530498</i> | NA                                  | <i>Ca_desi_denovo</i> | 10530498                | C/T  | NA                 | NA                            | NA                 |
| <i>Desi_wild_10532919</i> | NA                                  | <i>Ca_desi_denovo</i> | 10532919                | G/T  | NA                 | NA                            | NA                 |
| <i>Desi_wild_10533470</i> | NA                                  | <i>Ca_desi_denovo</i> | 10533470                | C/G  | NA                 | NA                            | NA                 |
| <i>Desi_wild_10534546</i> | NA                                  | <i>Ca_desi_denovo</i> | 10534546                | A/G  | NA                 | NA                            | NA                 |
| <i>Desi_wild_10534564</i> | NA                                  | <i>Ca_desi_denovo</i> | 10534564                | A/G  | NA                 | NA                            | NA                 |
| <i>Desi_wild_10537187</i> | NA                                  | <i>Ca_desi_denovo</i> | 10537187                | T/C  | NA                 | NA                            | NA                 |
| <i>Desi_wild_10537460</i> | NA                                  | <i>Ca_desi_denovo</i> | 10537460                | A/C  | NA                 | NA                            | NA                 |
| <i>Desi_wild_10550865</i> | NA                                  | <i>Ca_desi_denovo</i> | 10550865                | C/T  | NA                 | NA                            | NA                 |
| <i>Desi_wild_10560756</i> | NA                                  | <i>Ca_desi_denovo</i> | 10560756                | C/G  | NA                 | NA                            | NA                 |
| <i>Desi_wild_10590141</i> | NA                                  | <i>Ca_desi_denovo</i> | 10590141                | C/G  | NA                 | NA                            | NA                 |
| <i>Desi_wild_10597633</i> | NA                                  | <i>Ca_desi_denovo</i> | 10597633                | G/T  | NA                 | NA                            | NA                 |
| <i>Desi_wild_10601041</i> | NA                                  | <i>Ca_desi_denovo</i> | 10601041                | G/T  | NA                 | NA                            | NA                 |
| <i>Desi_wild_10609186</i> | NA                                  | <i>Ca_desi_denovo</i> | 10609186                | A/G  | NA                 | NA                            | NA                 |
| <i>Desi_wild_10609202</i> | NA                                  | <i>Ca_desi_denovo</i> | 10609202                | A/G  | NA                 | NA                            | NA                 |
| <i>Desi_wild_10609228</i> | NA                                  | <i>Ca_desi_denovo</i> | 10609228                | C/G  | NA                 | NA                            | NA                 |
| <i>Desi_wild_10614060</i> | NA                                  | <i>Ca_desi_denovo</i> | 10614060                | C/G  | NA                 | NA                            | NA                 |
| <i>Desi_wild_10622307</i> | NA                                  | <i>Ca_desi_denovo</i> | 10622307                | A/C  | NA                 | NA                            | NA                 |
| <i>Desi_wild_10635571</i> | NA                                  | <i>Ca_desi_denovo</i> | 10635571                | G/T  | NA                 | NA                            | NA                 |
| <i>Desi_wild_10648341</i> | NA                                  | <i>Ca_desi_denovo</i> | 10648341                | C/G  | NA                 | NA                            | NA                 |
| <i>Desi_wild_10650709</i> | NA                                  | <i>Ca_desi_denovo</i> | 10650709                | C/G  | NA                 | NA                            | NA                 |
| <i>Desi_wild_10650712</i> | NA                                  | <i>Ca_desi_denovo</i> | 10650712                | C/G  | NA                 | NA                            | NA                 |
| <i>Desi_wild_10650714</i> | NA                                  | <i>Ca_desi_denovo</i> | 10650714                | A/C  | NA                 | NA                            | NA                 |
| <i>Desi_wild_10669597</i> | NA                                  | <i>Ca_desi_denovo</i> | 10669597                | A/G  | NA                 | NA                            | NA                 |
| <i>Desi_wild_10686163</i> | NA                                  | <i>Ca_desi_denovo</i> | 10686163                | G/C  | NA                 | NA                            | NA                 |
| <i>Desi_wild_10686165</i> | NA                                  | <i>Ca_desi_denovo</i> | 10686165                | G/C  | NA                 | NA                            | NA                 |
| <i>Desi_wild_10686171</i> | NA                                  | <i>Ca_desi_denovo</i> | 10686171                | T/C  | NA                 | NA                            | NA                 |
| <i>Desi_wild_10700635</i> | NA                                  | <i>Ca_desi_denovo</i> | 10700635                | G/T  | NA                 | NA                            | NA                 |
| <i>Desi_wild_10708753</i> | NA                                  | <i>Ca_desi_denovo</i> | 10708753                | A/G  | NA                 | NA                            | NA                 |
| <i>Desi_wild_10708757</i> | NA                                  | <i>Ca_desi_denovo</i> | 10708757                | A/C  | NA                 | NA                            | NA                 |
| <i>Desi_wild_10708758</i> | NA                                  | <i>Ca_desi_denovo</i> | 10708758                | C/T  | NA                 | NA                            | NA                 |
| <i>Desi_wild_10708790</i> | NA                                  | <i>Ca_desi_denovo</i> | 10708790                | C/T  | NA                 | NA                            | NA                 |
| <i>Desi_wild_10712086</i> | NA                                  | <i>Ca_desi_denovo</i> | 10712086                | C/T  | NA                 | NA                            | NA                 |
| <i>Desi_wild_10712288</i> | NA                                  | <i>Ca_desi_denovo</i> | 10712288                | C/T  | NA                 | NA                            | NA                 |



| SNP IDs                   | NCBI dbSNP accession IDs (NCBI_SS#) | Chromosomes           | Physical positions (bp) | SNPs | Gene accession IDs | Sequence components of genome | Putative functions |
|---------------------------|-------------------------------------|-----------------------|-------------------------|------|--------------------|-------------------------------|--------------------|
| <i>Desi_wild_10722323</i> | NA                                  | <i>Ca_desi_denovo</i> | 10722323                | A/C  | NA                 | NA                            | NA                 |
| <i>Desi_wild_10722324</i> | NA                                  | <i>Ca_desi_denovo</i> | 10722324                | C/G  | NA                 | NA                            | NA                 |
| <i>Desi_wild_10725966</i> | NA                                  | <i>Ca_desi_denovo</i> | 10725966                | A/G  | NA                 | NA                            | NA                 |
| <i>Desi_wild_10726797</i> | NA                                  | <i>Ca_desi_denovo</i> | 10726797                | C/G  | NA                 | NA                            | NA                 |
| <i>Desi_wild_10751644</i> | NA                                  | <i>Ca_desi_denovo</i> | 10751644                | C/T  | NA                 | NA                            | NA                 |
| <i>Desi_wild_10758977</i> | NA                                  | <i>Ca_desi_denovo</i> | 10758977                | G/T  | NA                 | NA                            | NA                 |
| <i>Desi_wild_10782431</i> | NA                                  | <i>Ca_desi_denovo</i> | 10782431                | G/T  | NA                 | NA                            | NA                 |
| <i>Desi_wild_10791556</i> | NA                                  | <i>Ca_desi_denovo</i> | 10791556                | C/T  | NA                 | NA                            | NA                 |
| <i>Desi_wild_10792725</i> | NA                                  | <i>Ca_desi_denovo</i> | 10792725                | A/C  | NA                 | NA                            | NA                 |
| <i>Desi_wild_10792734</i> | NA                                  | <i>Ca_desi_denovo</i> | 10792734                | C/T  | NA                 | NA                            | NA                 |
| <i>Desi_wild_10796279</i> | NA                                  | <i>Ca_desi_denovo</i> | 10796279                | C/G  | NA                 | NA                            | NA                 |
| <i>Desi_wild_10797352</i> | NA                                  | <i>Ca_desi_denovo</i> | 10797352                | A/G  | NA                 | NA                            | NA                 |
| <i>Desi_wild_10797361</i> | NA                                  | <i>Ca_desi_denovo</i> | 10797361                | A/G  | NA                 | NA                            | NA                 |
| <i>Desi_wild_10811489</i> | NA                                  | <i>Ca_desi_denovo</i> | 10811489                | C/T  | NA                 | NA                            | NA                 |
| <i>Desi_wild_10811492</i> | NA                                  | <i>Ca_desi_denovo</i> | 10811492                | A/G  | NA                 | NA                            | NA                 |
| <i>Desi_wild_10817748</i> | NA                                  | <i>Ca_desi_denovo</i> | 10817748                | G/T  | NA                 | NA                            | NA                 |
| <i>Desi_wild_10821847</i> | NA                                  | <i>Ca_desi_denovo</i> | 10821847                | A/G  | NA                 | NA                            | NA                 |
| <i>Desi_wild_10821850</i> | NA                                  | <i>Ca_desi_denovo</i> | 10821850                | T/C  | NA                 | NA                            | NA                 |
| <i>Desi_wild_10826953</i> | NA                                  | <i>Ca_desi_denovo</i> | 10826953                | A/G  | NA                 | NA                            | NA                 |
| <i>Desi_wild_10845931</i> | NA                                  | <i>Ca_desi_denovo</i> | 10845931                | C/G  | NA                 | NA                            | NA                 |
| <i>Desi_wild_10845964</i> | NA                                  | <i>Ca_desi_denovo</i> | 10845964                | A/G  | NA                 | NA                            | NA                 |
| <i>Desi_wild_10847740</i> | NA                                  | <i>Ca_desi_denovo</i> | 10847740                | C/G  | NA                 | NA                            | NA                 |
| <i>Desi_wild_10847761</i> | NA                                  | <i>Ca_desi_denovo</i> | 10847761                | C/T  | NA                 | NA                            | NA                 |
| <i>Desi_wild_10857933</i> | NA                                  | <i>Ca_desi_denovo</i> | 10857933                | G/T  | NA                 | NA                            | NA                 |
| <i>Desi_wild_10869495</i> | NA                                  | <i>Ca_desi_denovo</i> | 10869495                | T/C  | NA                 | NA                            | NA                 |
| <i>Desi_wild_10869513</i> | NA                                  | <i>Ca_desi_denovo</i> | 10869513                | T/C  | NA                 | NA                            | NA                 |
| <i>Desi_wild_10870862</i> | NA                                  | <i>Ca_desi_denovo</i> | 10870862                | C/T  | NA                 | NA                            | NA                 |
| <i>Desi_wild_10870895</i> | NA                                  | <i>Ca_desi_denovo</i> | 10870895                | A/G  | NA                 | NA                            | NA                 |
| <i>Desi_wild_10890881</i> | NA                                  | <i>Ca_desi_denovo</i> | 10890881                | A/G  | NA                 | NA                            | NA                 |
| <i>Desi_wild_10890891</i> | NA                                  | <i>Ca_desi_denovo</i> | 10890891                | C/T  | NA                 | NA                            | NA                 |
| <i>Desi_wild_10891092</i> | NA                                  | <i>Ca_desi_denovo</i> | 10891092                | C/G  | NA                 | NA                            | NA                 |
| <i>Desi_wild_10896201</i> | NA                                  | <i>Ca_desi_denovo</i> | 10896201                | C/T  | NA                 | NA                            | NA                 |
| <i>Desi_wild_10896204</i> | NA                                  | <i>Ca_desi_denovo</i> | 10896204                | C/G  | NA                 | NA                            | NA                 |
| <i>Desi_wild_10896984</i> | NA                                  | <i>Ca_desi_denovo</i> | 10896984                | A/G  | NA                 | NA                            | NA                 |
| <i>Desi_wild_10908834</i> | NA                                  | <i>Ca_desi_denovo</i> | 10908834                | C/G  | NA                 | NA                            | NA                 |
| <i>Desi_wild_10910252</i> | NA                                  | <i>Ca_desi_denovo</i> | 10910252                | C/T  | NA                 | NA                            | NA                 |
| <i>Desi_wild_10924291</i> | NA                                  | <i>Ca_desi_denovo</i> | 10924291                | T/C  | NA                 | NA                            | NA                 |
| <i>Desi_wild_10965870</i> | NA                                  | <i>Ca_desi_denovo</i> | 10965870                | A/G  | NA                 | NA                            | NA                 |
| <i>Desi_wild_10970080</i> | NA                                  | <i>Ca_desi_denovo</i> | 10970080                | A/G  | NA                 | NA                            | NA                 |
| <i>Desi_wild_10973229</i> | NA                                  | <i>Ca_desi_denovo</i> | 10973229                | C/T  | NA                 | NA                            | NA                 |
| <i>Desi_wild_10973234</i> | NA                                  | <i>Ca_desi_denovo</i> | 10973234                | C/G  | NA                 | NA                            | NA                 |
| <i>Desi_wild_10979161</i> | NA                                  | <i>Ca_desi_denovo</i> | 10979161                | A/G  | NA                 | NA                            | NA                 |
| <i>Desi_wild_10982181</i> | NA                                  | <i>Ca_desi_denovo</i> | 10982181                | C/T  | NA                 | NA                            | NA                 |
| <i>Desi_wild_10999921</i> | NA                                  | <i>Ca_desi_denovo</i> | 10999921                | C/T  | NA                 | NA                            | NA                 |

| SNP IDs                   | NCBI dbSNP accession IDs (NCBI_SS#) | Chromosomes           | Physical positions (bp) | SNPs | Gene accession IDs | Sequence components of genome | Putative functions |
|---------------------------|-------------------------------------|-----------------------|-------------------------|------|--------------------|-------------------------------|--------------------|
| <i>Desi_wild_10999939</i> | NA                                  | <i>Ca_desi_denovo</i> | 10999939                | A/G  | NA                 | NA                            | NA                 |
| <i>Desi_wild_11012833</i> | NA                                  | <i>Ca_desi_denovo</i> | 11012833                | A/C  | NA                 | NA                            | NA                 |
| <i>Desi_wild_11016248</i> | NA                                  | <i>Ca_desi_denovo</i> | 11016248                | G/T  | NA                 | NA                            | NA                 |
| <i>Desi_wild_11022683</i> | NA                                  | <i>Ca_desi_denovo</i> | 11022683                | G/A  | NA                 | NA                            | NA                 |
| <i>Desi_wild_11022686</i> | NA                                  | <i>Ca_desi_denovo</i> | 11022686                | C/G  | NA                 | NA                            | NA                 |
| <i>Desi_wild_11023962</i> | NA                                  | <i>Ca_desi_denovo</i> | 11023962                | C/G  | NA                 | NA                            | NA                 |
| <i>Desi_wild_11066895</i> | NA                                  | <i>Ca_desi_denovo</i> | 11066895                | C/T  | NA                 | NA                            | NA                 |
| <i>Desi_wild_11066901</i> | NA                                  | <i>Ca_desi_denovo</i> | 11066901                | A/G  | NA                 | NA                            | NA                 |
| <i>Desi_wild_11066911</i> | NA                                  | <i>Ca_desi_denovo</i> | 11066911                | C/T  | NA                 | NA                            | NA                 |
| <i>Desi_wild_11066941</i> | NA                                  | <i>Ca_desi_denovo</i> | 11066941                | A/C  | NA                 | NA                            | NA                 |
| <i>Desi_wild_11075489</i> | NA                                  | <i>Ca_desi_denovo</i> | 11075489                | T/G  | NA                 | NA                            | NA                 |
| <i>Desi_wild_11097794</i> | NA                                  | <i>Ca_desi_denovo</i> | 11097794                | C/G  | NA                 | NA                            | NA                 |
| <i>Desi_wild_11104840</i> | NA                                  | <i>Ca_desi_denovo</i> | 11104840                | C/T  | NA                 | NA                            | NA                 |
| <i>Desi_wild_11107547</i> | NA                                  | <i>Ca_desi_denovo</i> | 11107547                | G/T  | NA                 | NA                            | NA                 |
| <i>Desi_wild_11112986</i> | NA                                  | <i>Ca_desi_denovo</i> | 11112986                | G/C  | NA                 | NA                            | NA                 |
| <i>Desi_wild_11113001</i> | NA                                  | <i>Ca_desi_denovo</i> | 11113001                | G/C  | NA                 | NA                            | NA                 |
| <i>Desi_wild_11128480</i> | NA                                  | <i>Ca_desi_denovo</i> | 11128480                | C/G  | NA                 | NA                            | NA                 |
| <i>Desi_wild_11128483</i> | NA                                  | <i>Ca_desi_denovo</i> | 11128483                | C/G  | NA                 | NA                            | NA                 |
| <i>Desi_wild_11128489</i> | NA                                  | <i>Ca_desi_denovo</i> | 11128489                | C/G  | NA                 | NA                            | NA                 |
| <i>Desi_wild_11147279</i> | NA                                  | <i>Ca_desi_denovo</i> | 11147279                | C/T  | NA                 | NA                            | NA                 |
| <i>Desi_wild_11151724</i> | NA                                  | <i>Ca_desi_denovo</i> | 11151724                | A/G  | NA                 | NA                            | NA                 |
| <i>Desi_wild_11155371</i> | NA                                  | <i>Ca_desi_denovo</i> | 11155371                | C/T  | NA                 | NA                            | NA                 |
| <i>Desi_wild_11155726</i> | NA                                  | <i>Ca_desi_denovo</i> | 11155726                | G/T  | NA                 | NA                            | NA                 |
| <i>Desi_wild_11155746</i> | NA                                  | <i>Ca_desi_denovo</i> | 11155746                | A/G  | NA                 | NA                            | NA                 |
| <i>Desi_wild_11155747</i> | NA                                  | <i>Ca_desi_denovo</i> | 11155747                | C/G  | NA                 | NA                            | NA                 |
| <i>Desi_wild_11162868</i> | NA                                  | <i>Ca_desi_denovo</i> | 11162868                | C/T  | NA                 | NA                            | NA                 |
| <i>Desi_wild_11166841</i> | NA                                  | <i>Ca_desi_denovo</i> | 11166841                | C/A  | NA                 | NA                            | NA                 |
| <i>Desi_wild_11166844</i> | NA                                  | <i>Ca_desi_denovo</i> | 11166844                | C/T  | NA                 | NA                            | NA                 |
| <i>Desi_wild_11168671</i> | NA                                  | <i>Ca_desi_denovo</i> | 11168671                | C/G  | NA                 | NA                            | NA                 |
| <i>Desi_wild_11179581</i> | NA                                  | <i>Ca_desi_denovo</i> | 11179581                | C/G  | NA                 | NA                            | NA                 |
| <i>Desi_wild_11179584</i> | NA                                  | <i>Ca_desi_denovo</i> | 11179584                | C/T  | NA                 | NA                            | NA                 |
| <i>Desi_wild_11179591</i> | NA                                  | <i>Ca_desi_denovo</i> | 11179591                | A/C  | NA                 | NA                            | NA                 |
| <i>Desi_wild_11181048</i> | NA                                  | <i>Ca_desi_denovo</i> | 11181048                | A/G  | NA                 | NA                            | NA                 |
| <i>Desi_wild_11181062</i> | NA                                  | <i>Ca_desi_denovo</i> | 11181062                | C/T  | NA                 | NA                            | NA                 |
| <i>Desi_wild_11181801</i> | NA                                  | <i>Ca_desi_denovo</i> | 11181801                | C/T  | NA                 | NA                            | NA                 |
| <i>Desi_wild_11181807</i> | NA                                  | <i>Ca_desi_denovo</i> | 11181807                | C/G  | NA                 | NA                            | NA                 |
| <i>Desi_wild_11183785</i> | NA                                  | <i>Ca_desi_denovo</i> | 11183785                | A/G  | NA                 | NA                            | NA                 |
| <i>Desi_wild_11192678</i> | NA                                  | <i>Ca_desi_denovo</i> | 11192678                | C/T  | NA                 | NA                            | NA                 |
| <i>Desi_wild_11192708</i> | NA                                  | <i>Ca_desi_denovo</i> | 11192708                | C/T  | NA                 | NA                            | NA                 |
| <i>Desi_wild_11192712</i> | NA                                  | <i>Ca_desi_denovo</i> | 11192712                | A/C  | NA                 | NA                            | NA                 |
| <i>Desi_wild_11196765</i> | NA                                  | <i>Ca_desi_denovo</i> | 11196765                | A/T  | NA                 | NA                            | NA                 |
| <i>Desi_wild_11196766</i> | NA                                  | <i>Ca_desi_denovo</i> | 11196766                | C/G  | NA                 | NA                            | NA                 |
| <i>Desi_wild_11196778</i> | NA                                  | <i>Ca_desi_denovo</i> | 11196778                | C/G  | NA                 | NA                            | NA                 |
| <i>Desi_wild_11203033</i> | NA                                  | <i>Ca_desi_denovo</i> | 11203033                | C/G  | NA                 | NA                            | NA                 |

| SNP IDs                   | NCBI dbSNP accession IDs (NCBI_SS#) | Chromosomes           | Physical positions (bp) | SNPs | Gene accession IDs | Sequence components of genome | Putative functions |
|---------------------------|-------------------------------------|-----------------------|-------------------------|------|--------------------|-------------------------------|--------------------|
| <i>Desi_wild_11215609</i> | NA                                  | <i>Ca_desi_denovo</i> | 11215609                | A/G  | NA                 | NA                            | NA                 |
| <i>Desi_wild_11215612</i> | NA                                  | <i>Ca_desi_denovo</i> | 11215612                | T/C  | NA                 | NA                            | NA                 |
| <i>Desi_wild_11215627</i> | NA                                  | <i>Ca_desi_denovo</i> | 11215627                | A/G  | NA                 | NA                            | NA                 |
| <i>Desi_wild_11220139</i> | NA                                  | <i>Ca_desi_denovo</i> | 11220139                | A/G  | NA                 | NA                            | NA                 |
| <i>Desi_wild_11220148</i> | NA                                  | <i>Ca_desi_denovo</i> | 11220148                | A/C  | NA                 | NA                            | NA                 |
| <i>Desi_wild_11226244</i> | NA                                  | <i>Ca_desi_denovo</i> | 11226244                | C/G  | NA                 | NA                            | NA                 |
| <i>Desi_wild_11234992</i> | NA                                  | <i>Ca_desi_denovo</i> | 11234992                | C/T  | NA                 | NA                            | NA                 |
| <i>Desi_wild_11234995</i> | NA                                  | <i>Ca_desi_denovo</i> | 11234995                | C/T  | NA                 | NA                            | NA                 |
| <i>Desi_wild_11235010</i> | NA                                  | <i>Ca_desi_denovo</i> | 11235010                | C/T  | NA                 | NA                            | NA                 |
| <i>Desi_wild_11246262</i> | NA                                  | <i>Ca_desi_denovo</i> | 11246262                | A/G  | NA                 | NA                            | NA                 |
| <i>Desi_wild_11246305</i> | NA                                  | <i>Ca_desi_denovo</i> | 11246305                | C/T  | NA                 | NA                            | NA                 |
| <i>Desi_wild_11246322</i> | NA                                  | <i>Ca_desi_denovo</i> | 11246322                | C/T  | NA                 | NA                            | NA                 |
| <i>Desi_wild_11251247</i> | NA                                  | <i>Ca_desi_denovo</i> | 11251247                | C/A  | NA                 | NA                            | NA                 |
| <i>Desi_wild_11253693</i> | NA                                  | <i>Ca_desi_denovo</i> | 11253693                | C/T  | NA                 | NA                            | NA                 |
| <i>Desi_wild_11253696</i> | NA                                  | <i>Ca_desi_denovo</i> | 11253696                | C/G  | NA                 | NA                            | NA                 |
| <i>Desi_wild_11254349</i> | NA                                  | <i>Ca_desi_denovo</i> | 11254349                | C/T  | NA                 | NA                            | NA                 |
| <i>Desi_wild_11275243</i> | NA                                  | <i>Ca_desi_denovo</i> | 11275243                | A/G  | NA                 | NA                            | NA                 |
| <i>Desi_wild_11276032</i> | NA                                  | <i>Ca_desi_denovo</i> | 11276032                | C/T  | NA                 | NA                            | NA                 |
| <i>Desi_wild_11290719</i> | NA                                  | <i>Ca_desi_denovo</i> | 11290719                | C/G  | NA                 | NA                            | NA                 |
| <i>Desi_wild_11298355</i> | NA                                  | <i>Ca_desi_denovo</i> | 11298355                | A/G  | NA                 | NA                            | NA                 |
| <i>Desi_wild_11299031</i> | NA                                  | <i>Ca_desi_denovo</i> | 11299031                | C/T  | NA                 | NA                            | NA                 |
| <i>Desi_wild_11301548</i> | NA                                  | <i>Ca_desi_denovo</i> | 11301548                | C/G  | NA                 | NA                            | NA                 |
| <i>Desi_wild_11301549</i> | NA                                  | <i>Ca_desi_denovo</i> | 11301549                | C/T  | NA                 | NA                            | NA                 |
| <i>Desi_wild_11323210</i> | NA                                  | <i>Ca_desi_denovo</i> | 11323210                | A/G  | NA                 | NA                            | NA                 |
| <i>Desi_wild_11323211</i> | NA                                  | <i>Ca_desi_denovo</i> | 11323211                | C/G  | NA                 | NA                            | NA                 |
| <i>Desi_wild_11323226</i> | NA                                  | <i>Ca_desi_denovo</i> | 11323226                | C/G  | NA                 | NA                            | NA                 |
| <i>Desi_wild_11323230</i> | NA                                  | <i>Ca_desi_denovo</i> | 11323230                | A/T  | NA                 | NA                            | NA                 |
| <i>Desi_wild_11326701</i> | NA                                  | <i>Ca_desi_denovo</i> | 11326701                | C/T  | NA                 | NA                            | NA                 |
| <i>Desi_wild_11332334</i> | NA                                  | <i>Ca_desi_denovo</i> | 11332334                | C/T  | NA                 | NA                            | NA                 |
| <i>Desi_wild_11334325</i> | NA                                  | <i>Ca_desi_denovo</i> | 11334325                | C/T  | NA                 | NA                            | NA                 |
| <i>Desi_wild_11334337</i> | NA                                  | <i>Ca_desi_denovo</i> | 11334337                | C/T  | NA                 | NA                            | NA                 |
| <i>Desi_wild_11334342</i> | NA                                  | <i>Ca_desi_denovo</i> | 11334342                | C/G  | NA                 | NA                            | NA                 |
| <i>Desi_wild_11334403</i> | NA                                  | <i>Ca_desi_denovo</i> | 11334403                | C/T  | NA                 | NA                            | NA                 |
| <i>Desi_wild_11342040</i> | NA                                  | <i>Ca_desi_denovo</i> | 11342040                | C/G  | NA                 | NA                            | NA                 |
| <i>Desi_wild_11346780</i> | NA                                  | <i>Ca_desi_denovo</i> | 11346780                | T/C  | NA                 | NA                            | NA                 |
| <i>Desi_wild_11346801</i> | NA                                  | <i>Ca_desi_denovo</i> | 11346801                | C/T  | NA                 | NA                            | NA                 |
| <i>Desi_wild_11359817</i> | NA                                  | <i>Ca_desi_denovo</i> | 11359817                | A/G  | NA                 | NA                            | NA                 |
| <i>Desi_wild_11359820</i> | NA                                  | <i>Ca_desi_denovo</i> | 11359820                | C/T  | NA                 | NA                            | NA                 |
| <i>Desi_wild_11368832</i> | NA                                  | <i>Ca_desi_denovo</i> | 11368832                | G/T  | NA                 | NA                            | NA                 |
| <i>Desi_wild_11383168</i> | NA                                  | <i>Ca_desi_denovo</i> | 11383168                | C/G  | NA                 | NA                            | NA                 |
| <i>Desi_wild_11403632</i> | NA                                  | <i>Ca_desi_denovo</i> | 11403632                | G/T  | NA                 | NA                            | NA                 |
| <i>Desi_wild_11411453</i> | NA                                  | <i>Ca_desi_denovo</i> | 11411453                | G/T  | NA                 | NA                            | NA                 |
| <i>Desi_wild_11415697</i> | NA                                  | <i>Ca_desi_denovo</i> | 11415697                | C/T  | NA                 | NA                            | NA                 |
| <i>Desi_wild_11419456</i> | NA                                  | <i>Ca_desi_denovo</i> | 11419456                | C/T  | NA                 | NA                            | NA                 |

| SNP IDs                   | NCBI dbSNP accession IDs (NCBI_SS#) | Chromosomes           | Physical positions (bp) | SNPs | Gene accession IDs | Sequence components of genome | Putative functions |
|---------------------------|-------------------------------------|-----------------------|-------------------------|------|--------------------|-------------------------------|--------------------|
| <i>Desi_wild_11423989</i> | NA                                  | <i>Ca_desi_denovo</i> | 11423989                | A/C  | NA                 | NA                            | NA                 |
| <i>Desi_wild_11427028</i> | NA                                  | <i>Ca_desi_denovo</i> | 11427028                | C/G  | NA                 | NA                            | NA                 |
| <i>Desi_wild_11437025</i> | NA                                  | <i>Ca_desi_denovo</i> | 11437025                | G/T  | NA                 | NA                            | NA                 |
| <i>Desi_wild_11437031</i> | NA                                  | <i>Ca_desi_denovo</i> | 11437031                | G/T  | NA                 | NA                            | NA                 |
| <i>Desi_wild_11437037</i> | NA                                  | <i>Ca_desi_denovo</i> | 11437037                | A/G  | NA                 | NA                            | NA                 |
| <i>Desi_wild_11439305</i> | NA                                  | <i>Ca_desi_denovo</i> | 11439305                | G/T  | NA                 | NA                            | NA                 |
| <i>Desi_wild_11439326</i> | NA                                  | <i>Ca_desi_denovo</i> | 11439326                | G/A  | NA                 | NA                            | NA                 |
| <i>Desi_wild_11441449</i> | NA                                  | <i>Ca_desi_denovo</i> | 11441449                | G/T  | NA                 | NA                            | NA                 |
| <i>Desi_wild_11442120</i> | NA                                  | <i>Ca_desi_denovo</i> | 11442120                | C/T  | NA                 | NA                            | NA                 |
| <i>Desi_wild_11453368</i> | NA                                  | <i>Ca_desi_denovo</i> | 11453368                | G/T  | NA                 | NA                            | NA                 |
| <i>Desi_wild_11464482</i> | NA                                  | <i>Ca_desi_denovo</i> | 11464482                | C/T  | NA                 | NA                            | NA                 |
| <i>Desi_wild_11464558</i> | NA                                  | <i>Ca_desi_denovo</i> | 11464558                | A/G  | NA                 | NA                            | NA                 |
| <i>Desi_wild_11479467</i> | NA                                  | <i>Ca_desi_denovo</i> | 11479467                | C/G  | NA                 | NA                            | NA                 |
| <i>Desi_wild_11485008</i> | NA                                  | <i>Ca_desi_denovo</i> | 11485008                | G/T  | NA                 | NA                            | NA                 |
| <i>Desi_wild_11498281</i> | NA                                  | <i>Ca_desi_denovo</i> | 11498281                | G/T  | NA                 | NA                            | NA                 |
| <i>Desi_wild_11499548</i> | NA                                  | <i>Ca_desi_denovo</i> | 11499548                | C/T  | NA                 | NA                            | NA                 |
| <i>Desi_wild_11501468</i> | NA                                  | <i>Ca_desi_denovo</i> | 11501468                | C/T  | NA                 | NA                            | NA                 |
| <i>Desi_wild_11502866</i> | NA                                  | <i>Ca_desi_denovo</i> | 11502866                | G/T  | NA                 | NA                            | NA                 |
| <i>Desi_wild_11502874</i> | NA                                  | <i>Ca_desi_denovo</i> | 11502874                | C/G  | NA                 | NA                            | NA                 |
| <i>Desi_wild_11502883</i> | NA                                  | <i>Ca_desi_denovo</i> | 11502883                | C/T  | NA                 | NA                            | NA                 |
| <i>Desi_wild_11502889</i> | NA                                  | <i>Ca_desi_denovo</i> | 11502889                | C/T  | NA                 | NA                            | NA                 |
| <i>Desi_wild_11512645</i> | NA                                  | <i>Ca_desi_denovo</i> | 11512645                | G/T  | NA                 | NA                            | NA                 |
| <i>Desi_wild_11512651</i> | NA                                  | <i>Ca_desi_denovo</i> | 11512651                | C/G  | NA                 | NA                            | NA                 |
| <i>Desi_wild_11512663</i> | NA                                  | <i>Ca_desi_denovo</i> | 11512663                | A/G  | NA                 | NA                            | NA                 |
| <i>Desi_wild_11512947</i> | NA                                  | <i>Ca_desi_denovo</i> | 11512947                | C/G  | NA                 | NA                            | NA                 |
| <i>Desi_wild_11512959</i> | NA                                  | <i>Ca_desi_denovo</i> | 11512959                | C/T  | NA                 | NA                            | NA                 |
| <i>Desi_wild_11513034</i> | NA                                  | <i>Ca_desi_denovo</i> | 11513034                | A/T  | NA                 | NA                            | NA                 |
| <i>Desi_wild_11518846</i> | NA                                  | <i>Ca_desi_denovo</i> | 11518846                | A/G  | NA                 | NA                            | NA                 |
| <i>Desi_wild_11527511</i> | NA                                  | <i>Ca_desi_denovo</i> | 11527511                | A/C  | NA                 | NA                            | NA                 |
| <i>Desi_wild_11535551</i> | NA                                  | <i>Ca_desi_denovo</i> | 11535551                | A/G  | NA                 | NA                            | NA                 |
| <i>Desi_wild_11538583</i> | NA                                  | <i>Ca_desi_denovo</i> | 11538583                | C/G  | NA                 | NA                            | NA                 |
| <i>Desi_wild_11538592</i> | NA                                  | <i>Ca_desi_denovo</i> | 11538592                | C/G  | NA                 | NA                            | NA                 |
| <i>Desi_wild_11538595</i> | NA                                  | <i>Ca_desi_denovo</i> | 11538595                | C/G  | NA                 | NA                            | NA                 |
| <i>Desi_wild_11538606</i> | NA                                  | <i>Ca_desi_denovo</i> | 11538606                | G/T  | NA                 | NA                            | NA                 |
| <i>Desi_wild_11549198</i> | NA                                  | <i>Ca_desi_denovo</i> | 11549198                | G/T  | NA                 | NA                            | NA                 |
| <i>Desi_wild_11552825</i> | NA                                  | <i>Ca_desi_denovo</i> | 11552825                | A/G  | NA                 | NA                            | NA                 |
| <i>Desi_wild_11570435</i> | NA                                  | <i>Ca_desi_denovo</i> | 11570435                | A/G  | NA                 | NA                            | NA                 |
| <i>Desi_wild_11570451</i> | NA                                  | <i>Ca_desi_denovo</i> | 11570451                | A/G  | NA                 | NA                            | NA                 |
| <i>Desi_wild_11583093</i> | NA                                  | <i>Ca_desi_denovo</i> | 11583093                | G/A  | NA                 | NA                            | NA                 |
| <i>Desi_wild_11595306</i> | NA                                  | <i>Ca_desi_denovo</i> | 11595306                | C/G  | NA                 | NA                            | NA                 |
| <i>Desi_wild_11595309</i> | NA                                  | <i>Ca_desi_denovo</i> | 11595309                | A/G  | NA                 | NA                            | NA                 |
| <i>Desi_wild_11596270</i> | NA                                  | <i>Ca_desi_denovo</i> | 11596270                | C/T  | NA                 | NA                            | NA                 |
| <i>Desi_wild_11599574</i> | NA                                  | <i>Ca_desi_denovo</i> | 11599574                | A/C  | NA                 | NA                            | NA                 |
| <i>Desi_wild_11602548</i> | NA                                  | <i>Ca_desi_denovo</i> | 11602548                | C/T  | NA                 | NA                            | NA                 |

| SNP IDs                   | NCBI dbSNP accession IDs (NCBI_SS#) | Chromosomes           | Physical positions (bp) | SNPs | Gene accession IDs | Sequence components of genome | Putative functions |
|---------------------------|-------------------------------------|-----------------------|-------------------------|------|--------------------|-------------------------------|--------------------|
| <i>Desi_wild_11604219</i> | NA                                  | <i>Ca_desi_denovo</i> | 11604219                | A/G  | NA                 | NA                            | NA                 |
| <i>Desi_wild_11604231</i> | NA                                  | <i>Ca_desi_denovo</i> | 11604231                | A/G  | NA                 | NA                            | NA                 |
| <i>Desi_wild_11604232</i> | NA                                  | <i>Ca_desi_denovo</i> | 11604232                | C/T  | NA                 | NA                            | NA                 |
| <i>Desi_wild_11604246</i> | NA                                  | <i>Ca_desi_denovo</i> | 11604246                | C/G  | NA                 | NA                            | NA                 |
| <i>Desi_wild_11605823</i> | NA                                  | <i>Ca_desi_denovo</i> | 11605823                | A/C  | NA                 | NA                            | NA                 |
| <i>Desi_wild_11605824</i> | NA                                  | <i>Ca_desi_denovo</i> | 11605824                | A/G  | NA                 | NA                            | NA                 |
| <i>Desi_wild_11610323</i> | NA                                  | <i>Ca_desi_denovo</i> | 11610323                | C/T  | NA                 | NA                            | NA                 |
| <i>Desi_wild_11612579</i> | NA                                  | <i>Ca_desi_denovo</i> | 11612579                | G/A  | NA                 | NA                            | NA                 |
| <i>Desi_wild_11612636</i> | NA                                  | <i>Ca_desi_denovo</i> | 11612636                | G/A  | NA                 | NA                            | NA                 |
| <i>Desi_wild_11632164</i> | NA                                  | <i>Ca_desi_denovo</i> | 11632164                | A/G  | NA                 | NA                            | NA                 |
| <i>Desi_wild_11632197</i> | NA                                  | <i>Ca_desi_denovo</i> | 11632197                | C/G  | NA                 | NA                            | NA                 |
| <i>Desi_wild_11632200</i> | NA                                  | <i>Ca_desi_denovo</i> | 11632200                | A/C  | NA                 | NA                            | NA                 |
| <i>Desi_wild_11640477</i> | NA                                  | <i>Ca_desi_denovo</i> | 11640477                | G/T  | NA                 | NA                            | NA                 |
| <i>Desi_wild_11653948</i> | NA                                  | <i>Ca_desi_denovo</i> | 11653948                | G/A  | NA                 | NA                            | NA                 |
| <i>Desi_wild_11658116</i> | NA                                  | <i>Ca_desi_denovo</i> | 11658116                | G/T  | NA                 | NA                            | NA                 |
| <i>Desi_wild_11687361</i> | NA                                  | <i>Ca_desi_denovo</i> | 11687361                | C/T  | NA                 | NA                            | NA                 |
| <i>Desi_wild_11687379</i> | NA                                  | <i>Ca_desi_denovo</i> | 11687379                | A/G  | NA                 | NA                            | NA                 |
| <i>Desi_wild_11687416</i> | NA                                  | <i>Ca_desi_denovo</i> | 11687416                | A/G  | NA                 | NA                            | NA                 |
| <i>Desi_wild_11690209</i> | NA                                  | <i>Ca_desi_denovo</i> | 11690209                | A/G  | NA                 | NA                            | NA                 |
| <i>Desi_wild_11697515</i> | NA                                  | <i>Ca_desi_denovo</i> | 11697515                | C/T  | NA                 | NA                            | NA                 |
| <i>Desi_wild_11705727</i> | NA                                  | <i>Ca_desi_denovo</i> | 11705727                | A/G  | NA                 | NA                            | NA                 |
| <i>Desi_wild_11713187</i> | NA                                  | <i>Ca_desi_denovo</i> | 11713187                | C/T  | NA                 | NA                            | NA                 |
| <i>Desi_wild_11713193</i> | NA                                  | <i>Ca_desi_denovo</i> | 11713193                | C/T  | NA                 | NA                            | NA                 |
| <i>Desi_wild_11718997</i> | NA                                  | <i>Ca_desi_denovo</i> | 11718997                | A/G  | NA                 | NA                            | NA                 |
| <i>Desi_wild_11719006</i> | NA                                  | <i>Ca_desi_denovo</i> | 11719006                | C/T  | NA                 | NA                            | NA                 |
| <i>Desi_wild_11726593</i> | NA                                  | <i>Ca_desi_denovo</i> | 11726593                | A/G  | NA                 | NA                            | NA                 |
| <i>Desi_wild_11726609</i> | NA                                  | <i>Ca_desi_denovo</i> | 11726609                | C/T  | NA                 | NA                            | NA                 |
| <i>Desi_wild_11726612</i> | NA                                  | <i>Ca_desi_denovo</i> | 11726612                | C/T  | NA                 | NA                            | NA                 |
| <i>Desi_wild_11746228</i> | NA                                  | <i>Ca_desi_denovo</i> | 11746228                | G/T  | NA                 | NA                            | NA                 |
| <i>Desi_wild_11758024</i> | NA                                  | <i>Ca_desi_denovo</i> | 11758024                | C/G  | NA                 | NA                            | NA                 |
| <i>Desi_wild_11758043</i> | NA                                  | <i>Ca_desi_denovo</i> | 11758043                | A/T  | NA                 | NA                            | NA                 |
| <i>Desi_wild_11763825</i> | NA                                  | <i>Ca_desi_denovo</i> | 11763825                | C/G  | NA                 | NA                            | NA                 |
| <i>Desi_wild_11763840</i> | NA                                  | <i>Ca_desi_denovo</i> | 11763840                | C/G  | NA                 | NA                            | NA                 |
| <i>Desi_wild_11765443</i> | NA                                  | <i>Ca_desi_denovo</i> | 11765443                | G/A  | NA                 | NA                            | NA                 |
| <i>Desi_wild_11765485</i> | NA                                  | <i>Ca_desi_denovo</i> | 11765485                | G/C  | NA                 | NA                            | NA                 |
| <i>Desi_wild_11776954</i> | NA                                  | <i>Ca_desi_denovo</i> | 11776954                | G/T  | NA                 | NA                            | NA                 |
| <i>Desi_wild_11798724</i> | NA                                  | <i>Ca_desi_denovo</i> | 11798724                | C/T  | NA                 | NA                            | NA                 |
| <i>Desi_wild_11798742</i> | NA                                  | <i>Ca_desi_denovo</i> | 11798742                | G/T  | NA                 | NA                            | NA                 |
| <i>Desi_wild_11798762</i> | NA                                  | <i>Ca_desi_denovo</i> | 11798762                | C/T  | NA                 | NA                            | NA                 |
| <i>Desi_wild_11807071</i> | NA                                  | <i>Ca_desi_denovo</i> | 11807071                | C/G  | NA                 | NA                            | NA                 |
| <i>Desi_wild_11807077</i> | NA                                  | <i>Ca_desi_denovo</i> | 11807077                | C/G  | NA                 | NA                            | NA                 |
| <i>Desi_wild_11813499</i> | NA                                  | <i>Ca_desi_denovo</i> | 11813499                | A/G  | NA                 | NA                            | NA                 |
| <i>Desi_wild_11813622</i> | NA                                  | <i>Ca_desi_denovo</i> | 11813622                | C/T  | NA                 | NA                            | NA                 |
| <i>Desi_wild_11827401</i> | NA                                  | <i>Ca_desi_denovo</i> | 11827401                | C/G  | NA                 | NA                            | NA                 |

| SNP IDs                   | NCBI dbSNP accession IDs (NCBI_SS#) | Chromosomes           | Physical positions (bp) | SNPs | Gene accession IDs | Sequence components of genome | Putative functions |
|---------------------------|-------------------------------------|-----------------------|-------------------------|------|--------------------|-------------------------------|--------------------|
| <i>Desi_wild_11827428</i> | NA                                  | <i>Ca_desi_denovo</i> | 11827428                | A/G  | NA                 | NA                            | NA                 |
| <i>Desi_wild_11832335</i> | NA                                  | <i>Ca_desi_denovo</i> | 11832335                | A/G  | NA                 | NA                            | NA                 |
| <i>Desi_wild_11836221</i> | NA                                  | <i>Ca_desi_denovo</i> | 11836221                | A/G  | NA                 | NA                            | NA                 |
| <i>Desi_wild_11836227</i> | NA                                  | <i>Ca_desi_denovo</i> | 11836227                | A/G  | NA                 | NA                            | NA                 |
| <i>Desi_wild_11854677</i> | NA                                  | <i>Ca_desi_denovo</i> | 11854677                | G/T  | NA                 | NA                            | NA                 |
| <i>Desi_wild_11861311</i> | NA                                  | <i>Ca_desi_denovo</i> | 11861311                | C/T  | NA                 | NA                            | NA                 |
| <i>Desi_wild_11861312</i> | NA                                  | <i>Ca_desi_denovo</i> | 11861312                | G/T  | NA                 | NA                            | NA                 |
| <i>Desi_wild_11873947</i> | NA                                  | <i>Ca_desi_denovo</i> | 11873947                | C/G  | NA                 | NA                            | NA                 |
| <i>Desi_wild_11873952</i> | NA                                  | <i>Ca_desi_denovo</i> | 11873952                | G/T  | NA                 | NA                            | NA                 |
| <i>Desi_wild_11874794</i> | NA                                  | <i>Ca_desi_denovo</i> | 11874794                | A/C  | NA                 | NA                            | NA                 |
| <i>Desi_wild_11874807</i> | NA                                  | <i>Ca_desi_denovo</i> | 11874807                | A/T  | NA                 | NA                            | NA                 |
| <i>Desi_wild_11889323</i> | NA                                  | <i>Ca_desi_denovo</i> | 11889323                | T/C  | NA                 | NA                            | NA                 |
| <i>Desi_wild_11889326</i> | NA                                  | <i>Ca_desi_denovo</i> | 11889326                | G/T  | NA                 | NA                            | NA                 |
| <i>Desi_wild_11891543</i> | NA                                  | <i>Ca_desi_denovo</i> | 11891543                | C/T  | NA                 | NA                            | NA                 |
| <i>Desi_wild_11891546</i> | NA                                  | <i>Ca_desi_denovo</i> | 11891546                | C/G  | NA                 | NA                            | NA                 |
| <i>Desi_wild_11891549</i> | NA                                  | <i>Ca_desi_denovo</i> | 11891549                | G/T  | NA                 | NA                            | NA                 |
| <i>Desi_wild_11899504</i> | NA                                  | <i>Ca_desi_denovo</i> | 11899504                | A/C  | NA                 | NA                            | NA                 |
| <i>Desi_wild_11899507</i> | NA                                  | <i>Ca_desi_denovo</i> | 11899507                | C/T  | NA                 | NA                            | NA                 |
| <i>Desi_wild_11899513</i> | NA                                  | <i>Ca_desi_denovo</i> | 11899513                | A/C  | NA                 | NA                            | NA                 |
| <i>Desi_wild_11904701</i> | NA                                  | <i>Ca_desi_denovo</i> | 11904701                | A/G  | NA                 | NA                            | NA                 |
| <i>Desi_wild_11904779</i> | NA                                  | <i>Ca_desi_denovo</i> | 11904779                | A/C  | NA                 | NA                            | NA                 |
| <i>Desi_wild_11904788</i> | NA                                  | <i>Ca_desi_denovo</i> | 11904788                | C/G  | NA                 | NA                            | NA                 |
| <i>Desi_wild_11918016</i> | NA                                  | <i>Ca_desi_denovo</i> | 11918016                | C/G  | NA                 | NA                            | NA                 |
| <i>Desi_wild_11918019</i> | NA                                  | <i>Ca_desi_denovo</i> | 11918019                | C/T  | NA                 | NA                            | NA                 |
| <i>Desi_wild_11922795</i> | NA                                  | <i>Ca_desi_denovo</i> | 11922795                | C/T  | NA                 | NA                            | NA                 |
| <i>Desi_wild_11927902</i> | NA                                  | <i>Ca_desi_denovo</i> | 11927902                | C/G  | NA                 | NA                            | NA                 |
| <i>Desi_wild_11937489</i> | NA                                  | <i>Ca_desi_denovo</i> | 11937489                | C/T  | NA                 | NA                            | NA                 |
| <i>Desi_wild_11937531</i> | NA                                  | <i>Ca_desi_denovo</i> | 11937531                | C/G  | NA                 | NA                            | NA                 |
| <i>Desi_wild_11937540</i> | NA                                  | <i>Ca_desi_denovo</i> | 11937540                | C/T  | NA                 | NA                            | NA                 |
| <i>Desi_wild_11940721</i> | NA                                  | <i>Ca_desi_denovo</i> | 11940721                | C/G  | NA                 | NA                            | NA                 |
| <i>Desi_wild_11946915</i> | NA                                  | <i>Ca_desi_denovo</i> | 11946915                | G/T  | NA                 | NA                            | NA                 |
| <i>Desi_wild_11954993</i> | NA                                  | <i>Ca_desi_denovo</i> | 11954993                | G/T  | NA                 | NA                            | NA                 |
| <i>Desi_wild_11956613</i> | NA                                  | <i>Ca_desi_denovo</i> | 11956613                | A/G  | NA                 | NA                            | NA                 |
| <i>Desi_wild_11960247</i> | NA                                  | <i>Ca_desi_denovo</i> | 11960247                | G/T  | NA                 | NA                            | NA                 |
| <i>Desi_wild_11961692</i> | NA                                  | <i>Ca_desi_denovo</i> | 11961692                | A/C  | NA                 | NA                            | NA                 |
| <i>Desi_wild_11961694</i> | NA                                  | <i>Ca_desi_denovo</i> | 11961694                | A/C  | NA                 | NA                            | NA                 |
| <i>Desi_wild_11983360</i> | NA                                  | <i>Ca_desi_denovo</i> | 11983360                | C/T  | NA                 | NA                            | NA                 |
| <i>Desi_wild_11983367</i> | NA                                  | <i>Ca_desi_denovo</i> | 11983367                | C/T  | NA                 | NA                            | NA                 |
| <i>Desi_wild_11983439</i> | NA                                  | <i>Ca_desi_denovo</i> | 11983439                | G/A  | NA                 | NA                            | NA                 |
| <i>Desi_wild_11984245</i> | NA                                  | <i>Ca_desi_denovo</i> | 11984245                | C/T  | NA                 | NA                            | NA                 |
| <i>Desi_wild_11996513</i> | NA                                  | <i>Ca_desi_denovo</i> | 11996513                | C/T  | NA                 | NA                            | NA                 |
| <i>Desi_wild_11998870</i> | NA                                  | <i>Ca_desi_denovo</i> | 11998870                | A/C  | NA                 | NA                            | NA                 |
| <i>Desi_wild_12003028</i> | NA                                  | <i>Ca_desi_denovo</i> | 12003028                | C/T  | NA                 | NA                            | NA                 |
| <i>Desi_wild_12003053</i> | NA                                  | <i>Ca_desi_denovo</i> | 12003053                | A/C  | NA                 | NA                            | NA                 |

| SNP IDs                   | NCBI dbSNP accession IDs (NCBI_SS#) | Chromosomes           | Physical positions (bp) | SNPs | Gene accession IDs | Sequence components of genome | Putative functions |
|---------------------------|-------------------------------------|-----------------------|-------------------------|------|--------------------|-------------------------------|--------------------|
| <i>Desi_wild_12003061</i> | NA                                  | <i>Ca_desi_denovo</i> | 12003061                | C/T  | NA                 | NA                            | NA                 |
| <i>Desi_wild_12003436</i> | NA                                  | <i>Ca_desi_denovo</i> | 12003436                | T/C  | NA                 | NA                            | NA                 |
| <i>Desi_wild_12004735</i> | NA                                  | <i>Ca_desi_denovo</i> | 12004735                | A/T  | NA                 | NA                            | NA                 |
| <i>Desi_wild_12004741</i> | NA                                  | <i>Ca_desi_denovo</i> | 12004741                | A/C  | NA                 | NA                            | NA                 |
| <i>Desi_wild_12014703</i> | NA                                  | <i>Ca_desi_denovo</i> | 12014703                | A/C  | NA                 | NA                            | NA                 |
| <i>Desi_wild_12014704</i> | NA                                  | <i>Ca_desi_denovo</i> | 12014704                | C/G  | NA                 | NA                            | NA                 |
| <i>Desi_wild_12016887</i> | NA                                  | <i>Ca_desi_denovo</i> | 12016887                | A/C  | NA                 | NA                            | NA                 |
| <i>Desi_wild_12016888</i> | NA                                  | <i>Ca_desi_denovo</i> | 12016888                | A/G  | NA                 | NA                            | NA                 |
| <i>Desi_wild_12021123</i> | NA                                  | <i>Ca_desi_denovo</i> | 12021123                | A/G  | NA                 | NA                            | NA                 |
| <i>Desi_wild_12026603</i> | NA                                  | <i>Ca_desi_denovo</i> | 12026603                | C/T  | NA                 | NA                            | NA                 |
| <i>Desi_wild_12034702</i> | NA                                  | <i>Ca_desi_denovo</i> | 12034702                | C/T  | NA                 | NA                            | NA                 |
| <i>Desi_wild_12044764</i> | NA                                  | <i>Ca_desi_denovo</i> | 12044764                | G/C  | NA                 | NA                            | NA                 |
| <i>Desi_wild_12058610</i> | NA                                  | <i>Ca_desi_denovo</i> | 12058610                | C/G  | NA                 | NA                            | NA                 |
| <i>Desi_wild_12058613</i> | NA                                  | <i>Ca_desi_denovo</i> | 12058613                | C/G  | NA                 | NA                            | NA                 |
| <i>Desi_wild_12058621</i> | NA                                  | <i>Ca_desi_denovo</i> | 12058621                | A/C  | NA                 | NA                            | NA                 |
| <i>Desi_wild_12058637</i> | NA                                  | <i>Ca_desi_denovo</i> | 12058637                | C/G  | NA                 | NA                            | NA                 |
| <i>Desi_wild_12064625</i> | NA                                  | <i>Ca_desi_denovo</i> | 12064625                | C/G  | NA                 | NA                            | NA                 |
| <i>Desi_wild_12064627</i> | NA                                  | <i>Ca_desi_denovo</i> | 12064627                | G/A  | NA                 | NA                            | NA                 |
| <i>Desi_wild_12064680</i> | NA                                  | <i>Ca_desi_denovo</i> | 12064680                | C/G  | NA                 | NA                            | NA                 |
| <i>Desi_wild_12064683</i> | NA                                  | <i>Ca_desi_denovo</i> | 12064683                | A/G  | NA                 | NA                            | NA                 |
| <i>Desi_wild_12064695</i> | NA                                  | <i>Ca_desi_denovo</i> | 12064695                | C/G  | NA                 | NA                            | NA                 |
| <i>Desi_wild_12067913</i> | NA                                  | <i>Ca_desi_denovo</i> | 12067913                | C/G  | NA                 | NA                            | NA                 |
| <i>Desi_wild_12067919</i> | NA                                  | <i>Ca_desi_denovo</i> | 12067919                | C/G  | NA                 | NA                            | NA                 |
| <i>Desi_wild_12067929</i> | NA                                  | <i>Ca_desi_denovo</i> | 12067929                | A/G  | NA                 | NA                            | NA                 |
| <i>Desi_wild_12080263</i> | NA                                  | <i>Ca_desi_denovo</i> | 12080263                | C/T  | NA                 | NA                            | NA                 |
| <i>Desi_wild_12080299</i> | NA                                  | <i>Ca_desi_denovo</i> | 12080299                | A/G  | NA                 | NA                            | NA                 |
| <i>Desi_wild_12086837</i> | NA                                  | <i>Ca_desi_denovo</i> | 12086837                | C/T  | NA                 | NA                            | NA                 |
| <i>Desi_wild_12088356</i> | NA                                  | <i>Ca_desi_denovo</i> | 12088356                | C/T  | NA                 | NA                            | NA                 |
| <i>Desi_wild_12088362</i> | NA                                  | <i>Ca_desi_denovo</i> | 12088362                | A/G  | NA                 | NA                            | NA                 |
| <i>Desi_wild_12088365</i> | NA                                  | <i>Ca_desi_denovo</i> | 12088365                | A/C  | NA                 | NA                            | NA                 |
| <i>Desi_wild_12092931</i> | NA                                  | <i>Ca_desi_denovo</i> | 12092931                | G/T  | NA                 | NA                            | NA                 |
| <i>Desi_wild_12109616</i> | NA                                  | <i>Ca_desi_denovo</i> | 12109616                | C/G  | NA                 | NA                            | NA                 |
| <i>Desi_wild_12109634</i> | NA                                  | <i>Ca_desi_denovo</i> | 12109634                | G/T  | NA                 | NA                            | NA                 |
| <i>Desi_wild_12109637</i> | NA                                  | <i>Ca_desi_denovo</i> | 12109637                | C/G  | NA                 | NA                            | NA                 |
| <i>Desi_wild_12112941</i> | NA                                  | <i>Ca_desi_denovo</i> | 12112941                | A/C  | NA                 | NA                            | NA                 |
| <i>Desi_wild_12112953</i> | NA                                  | <i>Ca_desi_denovo</i> | 12112953                | C/G  | NA                 | NA                            | NA                 |
| <i>Desi_wild_12112962</i> | NA                                  | <i>Ca_desi_denovo</i> | 12112962                | C/G  | NA                 | NA                            | NA                 |
| <i>Desi_wild_12123221</i> | NA                                  | <i>Ca_desi_denovo</i> | 12123221                | T/C  | NA                 | NA                            | NA                 |
| <i>Desi_wild_12123801</i> | NA                                  | <i>Ca_desi_denovo</i> | 12123801                | A/G  | NA                 | NA                            | NA                 |
| <i>Desi_wild_12123804</i> | NA                                  | <i>Ca_desi_denovo</i> | 12123804                | A/G  | NA                 | NA                            | NA                 |
| <i>Desi_wild_12124086</i> | NA                                  | <i>Ca_desi_denovo</i> | 12124086                | C/G  | NA                 | NA                            | NA                 |
| <i>Desi_wild_12124092</i> | NA                                  | <i>Ca_desi_denovo</i> | 12124092                | C/G  | NA                 | NA                            | NA                 |
| <i>Desi_wild_12149899</i> | NA                                  | <i>Ca_desi_denovo</i> | 12149899                | C/G  | NA                 | NA                            | NA                 |
| <i>Desi_wild_12149902</i> | NA                                  | <i>Ca_desi_denovo</i> | 12149902                | C/G  | NA                 | NA                            | NA                 |

| SNP IDs                   | NCBI dbSNP accession IDs (NCBI_SS#) | Chromosomes           | Physical positions (bp) | SNPs | Gene accession IDs | Sequence components of genome | Putative functions |
|---------------------------|-------------------------------------|-----------------------|-------------------------|------|--------------------|-------------------------------|--------------------|
| <i>Desi_wild_12168981</i> | NA                                  | <i>Ca_desi_denovo</i> | 12168981                | A/T  | NA                 | NA                            | NA                 |
| <i>Desi_wild_12168982</i> | NA                                  | <i>Ca_desi_denovo</i> | 12168982                | G/T  | NA                 | NA                            | NA                 |
| <i>Desi_wild_12168983</i> | NA                                  | <i>Ca_desi_denovo</i> | 12168983                | C/G  | NA                 | NA                            | NA                 |
| <i>Desi_wild_12175538</i> | NA                                  | <i>Ca_desi_denovo</i> | 12175538                | C/T  | NA                 | NA                            | NA                 |
| <i>Desi_wild_12201960</i> | NA                                  | <i>Ca_desi_denovo</i> | 12201960                | C/T  | NA                 | NA                            | NA                 |
| <i>Desi_wild_12203962</i> | NA                                  | <i>Ca_desi_denovo</i> | 12203962                | C/G  | NA                 | NA                            | NA                 |
| <i>Desi_wild_12203963</i> | NA                                  | <i>Ca_desi_denovo</i> | 12203963                | A/G  | NA                 | NA                            | NA                 |
| <i>Desi_wild_12208202</i> | NA                                  | <i>Ca_desi_denovo</i> | 12208202                | C/T  | NA                 | NA                            | NA                 |
| <i>Desi_wild_12228963</i> | NA                                  | <i>Ca_desi_denovo</i> | 12228963                | A/C  | NA                 | NA                            | NA                 |
| <i>Desi_wild_12228980</i> | NA                                  | <i>Ca_desi_denovo</i> | 12228980                | A/G  | NA                 | NA                            | NA                 |
| <i>Desi_wild_12253397</i> | NA                                  | <i>Ca_desi_denovo</i> | 12253397                | G/T  | NA                 | NA                            | NA                 |
| <i>Desi_wild_12260291</i> | NA                                  | <i>Ca_desi_denovo</i> | 12260291                | C/G  | NA                 | NA                            | NA                 |
| <i>Desi_wild_12260294</i> | NA                                  | <i>Ca_desi_denovo</i> | 12260294                | G/T  | NA                 | NA                            | NA                 |
| <i>Desi_wild_12260357</i> | NA                                  | <i>Ca_desi_denovo</i> | 12260357                | C/T  | NA                 | NA                            | NA                 |
| <i>Desi_wild_12266847</i> | NA                                  | <i>Ca_desi_denovo</i> | 12266847                | C/G  | NA                 | NA                            | NA                 |
| <i>Desi_wild_12266880</i> | NA                                  | <i>Ca_desi_denovo</i> | 12266880                | A/G  | NA                 | NA                            | NA                 |
| <i>Desi_wild_12284442</i> | NA                                  | <i>Ca_desi_denovo</i> | 12284442                | C/T  | NA                 | NA                            | NA                 |
| <i>Desi_wild_12286607</i> | NA                                  | <i>Ca_desi_denovo</i> | 12286607                | C/G  | NA                 | NA                            | NA                 |
| <i>Desi_wild_12286634</i> | NA                                  | <i>Ca_desi_denovo</i> | 12286634                | C/T  | NA                 | NA                            | NA                 |
| <i>Desi_wild_12290871</i> | NA                                  | <i>Ca_desi_denovo</i> | 12290871                | A/T  | NA                 | NA                            | NA                 |
| <i>Desi_wild_12295741</i> | NA                                  | <i>Ca_desi_denovo</i> | 12295741                | C/T  | NA                 | NA                            | NA                 |
| <i>Desi_wild_12295744</i> | NA                                  | <i>Ca_desi_denovo</i> | 12295744                | C/T  | NA                 | NA                            | NA                 |
| <i>Desi_wild_12295753</i> | NA                                  | <i>Ca_desi_denovo</i> | 12295753                | C/T  | NA                 | NA                            | NA                 |
| <i>Desi_wild_12297623</i> | NA                                  | <i>Ca_desi_denovo</i> | 12297623                | C/G  | NA                 | NA                            | NA                 |
| <i>Desi_wild_12308036</i> | NA                                  | <i>Ca_desi_denovo</i> | 12308036                | A/G  | NA                 | NA                            | NA                 |
| <i>Desi_wild_12313959</i> | NA                                  | <i>Ca_desi_denovo</i> | 12313959                | G/A  | NA                 | NA                            | NA                 |
| <i>Desi_wild_12313960</i> | NA                                  | <i>Ca_desi_denovo</i> | 12313960                | C/T  | NA                 | NA                            | NA                 |
| <i>Desi_wild_12314470</i> | NA                                  | <i>Ca_desi_denovo</i> | 12314470                | G/T  | NA                 | NA                            | NA                 |
| <i>Desi_wild_12325394</i> | NA                                  | <i>Ca_desi_denovo</i> | 12325394                | G/T  | NA                 | NA                            | NA                 |
| <i>Desi_wild_12325471</i> | NA                                  | <i>Ca_desi_denovo</i> | 12325471                | C/G  | NA                 | NA                            | NA                 |
| <i>Desi_wild_12325474</i> | NA                                  | <i>Ca_desi_denovo</i> | 12325474                | A/G  | NA                 | NA                            | NA                 |
| <i>Desi_wild_12327263</i> | NA                                  | <i>Ca_desi_denovo</i> | 12327263                | C/T  | NA                 | NA                            | NA                 |
| <i>Desi_wild_12327269</i> | NA                                  | <i>Ca_desi_denovo</i> | 12327269                | C/T  | NA                 | NA                            | NA                 |
| <i>Desi_wild_12332133</i> | NA                                  | <i>Ca_desi_denovo</i> | 12332133                | C/G  | NA                 | NA                            | NA                 |
| <i>Desi_wild_12339772</i> | NA                                  | <i>Ca_desi_denovo</i> | 12339772                | G/T  | NA                 | NA                            | NA                 |
| <i>Desi_wild_12376406</i> | NA                                  | <i>Ca_desi_denovo</i> | 12376406                | C/G  | NA                 | NA                            | NA                 |
| <i>Desi_wild_12379163</i> | NA                                  | <i>Ca_desi_denovo</i> | 12379163                | C/T  | NA                 | NA                            | NA                 |
| <i>Desi_wild_12381615</i> | NA                                  | <i>Ca_desi_denovo</i> | 12381615                | C/G  | NA                 | NA                            | NA                 |
| <i>Desi_wild_12381621</i> | NA                                  | <i>Ca_desi_denovo</i> | 12381621                | A/G  | NA                 | NA                            | NA                 |
| <i>Desi_wild_12381628</i> | NA                                  | <i>Ca_desi_denovo</i> | 12381628                | C/G  | NA                 | NA                            | NA                 |
| <i>Desi_wild_12397691</i> | NA                                  | <i>Ca_desi_denovo</i> | 12397691                | G/T  | NA                 | NA                            | NA                 |
| <i>Desi_wild_12398232</i> | NA                                  | <i>Ca_desi_denovo</i> | 12398232                | C/G  | NA                 | NA                            | NA                 |
| <i>Desi_wild_12398238</i> | NA                                  | <i>Ca_desi_denovo</i> | 12398238                | C/G  | NA                 | NA                            | NA                 |
| <i>Desi_wild_12398244</i> | NA                                  | <i>Ca_desi_denovo</i> | 12398244                | C/T  | NA                 | NA                            | NA                 |



| SNP IDs                   | NCBI dbSNP accession IDs (NCBI_SS#) | Chromosomes           | Physical positions (bp) | SNPs | Gene accession IDs | Sequence components of genome | Putative functions |
|---------------------------|-------------------------------------|-----------------------|-------------------------|------|--------------------|-------------------------------|--------------------|
| <i>Desi_wild_12398259</i> | NA                                  | <i>Ca_desi_denovo</i> | 12398259                | C/G  | NA                 | NA                            | NA                 |
| <i>Desi_wild_12403396</i> | NA                                  | <i>Ca_desi_denovo</i> | 12403396                | A/G  | NA                 | NA                            | NA                 |
| <i>Desi_wild_12406039</i> | NA                                  | <i>Ca_desi_denovo</i> | 12406039                | G/T  | NA                 | NA                            | NA                 |
| <i>Desi_wild_12434711</i> | NA                                  | <i>Ca_desi_denovo</i> | 12434711                | G/C  | NA                 | NA                            | NA                 |
| <i>Desi_wild_12434744</i> | NA                                  | <i>Ca_desi_denovo</i> | 12434744                | C/A  | NA                 | NA                            | NA                 |
| <i>Desi_wild_12444906</i> | NA                                  | <i>Ca_desi_denovo</i> | 12444906                | G/T  | NA                 | NA                            | NA                 |
| <i>Desi_wild_12459797</i> | NA                                  | <i>Ca_desi_denovo</i> | 12459797                | C/G  | NA                 | NA                            | NA                 |
| <i>Desi_wild_12459820</i> | NA                                  | <i>Ca_desi_denovo</i> | 12459820                | C/G  | NA                 | NA                            | NA                 |
| <i>Desi_wild_12459821</i> | NA                                  | <i>Ca_desi_denovo</i> | 12459821                | C/G  | NA                 | NA                            | NA                 |
| <i>Desi_wild_12473281</i> | NA                                  | <i>Ca_desi_denovo</i> | 12473281                | A/G  | NA                 | NA                            | NA                 |
| <i>Desi_wild_12473329</i> | NA                                  | <i>Ca_desi_denovo</i> | 12473329                | G/T  | NA                 | NA                            | NA                 |
| <i>Desi_wild_12473330</i> | NA                                  | <i>Ca_desi_denovo</i> | 12473330                | A/G  | NA                 | NA                            | NA                 |
| <i>Desi_wild_12478599</i> | NA                                  | <i>Ca_desi_denovo</i> | 12478599                | C/T  | NA                 | NA                            | NA                 |
| <i>Desi_wild_12478600</i> | NA                                  | <i>Ca_desi_denovo</i> | 12478600                | C/T  | NA                 | NA                            | NA                 |
| <i>Desi_wild_12478667</i> | NA                                  | <i>Ca_desi_denovo</i> | 12478667                | C/T  | NA                 | NA                            | NA                 |
| <i>Desi_wild_12480805</i> | NA                                  | <i>Ca_desi_denovo</i> | 12480805                | C/T  | NA                 | NA                            | NA                 |
| <i>Desi_wild_12491687</i> | NA                                  | <i>Ca_desi_denovo</i> | 12491687                | G/T  | NA                 | NA                            | NA                 |
| <i>Desi_wild_12496162</i> | NA                                  | <i>Ca_desi_denovo</i> | 12496162                | A/G  | NA                 | NA                            | NA                 |
| <i>Desi_wild_12504778</i> | NA                                  | <i>Ca_desi_denovo</i> | 12504778                | A/G  | NA                 | NA                            | NA                 |
| <i>Desi_wild_12504781</i> | NA                                  | <i>Ca_desi_denovo</i> | 12504781                | G/A  | NA                 | NA                            | NA                 |
| <i>Desi_wild_12510829</i> | NA                                  | <i>Ca_desi_denovo</i> | 12510829                | G/T  | NA                 | NA                            | NA                 |
| <i>Desi_wild_12522245</i> | NA                                  | <i>Ca_desi_denovo</i> | 12522245                | C/G  | NA                 | NA                            | NA                 |
| <i>Desi_wild_12522266</i> | NA                                  | <i>Ca_desi_denovo</i> | 12522266                | C/G  | NA                 | NA                            | NA                 |
| <i>Desi_wild_12522438</i> | NA                                  | <i>Ca_desi_denovo</i> | 12522438                | A/G  | NA                 | NA                            | NA                 |
| <i>Desi_wild_12522444</i> | NA                                  | <i>Ca_desi_denovo</i> | 12522444                | C/G  | NA                 | NA                            | NA                 |
| <i>Desi_wild_12522967</i> | NA                                  | <i>Ca_desi_denovo</i> | 12522967                | G/C  | NA                 | NA                            | NA                 |
| <i>Desi_wild_12522973</i> | NA                                  | <i>Ca_desi_denovo</i> | 12522973                | A/G  | NA                 | NA                            | NA                 |
| <i>Desi_wild_12522982</i> | NA                                  | <i>Ca_desi_denovo</i> | 12522982                | C/T  | NA                 | NA                            | NA                 |
| <i>Desi_wild_12525432</i> | NA                                  | <i>Ca_desi_denovo</i> | 12525432                | A/G  | NA                 | NA                            | NA                 |
| <i>Desi_wild_12538560</i> | NA                                  | <i>Ca_desi_denovo</i> | 12538560                | A/G  | NA                 | NA                            | NA                 |
| <i>Desi_wild_12543748</i> | NA                                  | <i>Ca_desi_denovo</i> | 12543748                | C/G  | NA                 | NA                            | NA                 |
| <i>Desi_wild_12556133</i> | NA                                  | <i>Ca_desi_denovo</i> | 12556133                | G/A  | NA                 | NA                            | NA                 |
| <i>Desi_wild_12566186</i> | NA                                  | <i>Ca_desi_denovo</i> | 12566186                | C/G  | NA                 | NA                            | NA                 |
| <i>Desi_wild_12572741</i> | NA                                  | <i>Ca_desi_denovo</i> | 12572741                | A/C  | NA                 | NA                            | NA                 |
| <i>Desi_wild_12572777</i> | NA                                  | <i>Ca_desi_denovo</i> | 12572777                | A/G  | NA                 | NA                            | NA                 |
| <i>Desi_wild_12576846</i> | NA                                  | <i>Ca_desi_denovo</i> | 12576846                | C/G  | NA                 | NA                            | NA                 |
| <i>Desi_wild_12576847</i> | NA                                  | <i>Ca_desi_denovo</i> | 12576847                | G/T  | NA                 | NA                            | NA                 |
| <i>Desi_wild_12576849</i> | NA                                  | <i>Ca_desi_denovo</i> | 12576849                | A/G  | NA                 | NA                            | NA                 |
| <i>Desi_wild_12576867</i> | NA                                  | <i>Ca_desi_denovo</i> | 12576867                | A/G  | NA                 | NA                            | NA                 |
| <i>Desi_wild_12590704</i> | NA                                  | <i>Ca_desi_denovo</i> | 12590704                | A/G  | NA                 | NA                            | NA                 |
| <i>Desi_wild_12593899</i> | NA                                  | <i>Ca_desi_denovo</i> | 12593899                | C/G  | NA                 | NA                            | NA                 |
| <i>Desi_wild_12593900</i> | NA                                  | <i>Ca_desi_denovo</i> | 12593900                | C/T  | NA                 | NA                            | NA                 |
| <i>Desi_wild_12610137</i> | NA                                  | <i>Ca_desi_denovo</i> | 12610137                | C/T  | NA                 | NA                            | NA                 |
| <i>Desi_wild_12629391</i> | NA                                  | <i>Ca_desi_denovo</i> | 12629391                | C/G  | NA                 | NA                            | NA                 |

| SNP IDs                   | NCBI dbSNP accession IDs (NCBI_SS#) | Chromosomes           | Physical positions (bp) | SNPs | Gene accession IDs | Sequence components of genome | Putative functions |
|---------------------------|-------------------------------------|-----------------------|-------------------------|------|--------------------|-------------------------------|--------------------|
| <i>Desi_wild_12650186</i> | NA                                  | <i>Ca_desi_denovo</i> | 12650186                | C/T  | NA                 | NA                            | NA                 |
| <i>Desi_wild_12671382</i> | NA                                  | <i>Ca_desi_denovo</i> | 12671382                | A/G  | NA                 | NA                            | NA                 |
| <i>Desi_wild_12682285</i> | NA                                  | <i>Ca_desi_denovo</i> | 12682285                | A/G  | NA                 | NA                            | NA                 |
| <i>Desi_wild_12682300</i> | NA                                  | <i>Ca_desi_denovo</i> | 12682300                | C/G  | NA                 | NA                            | NA                 |
| <i>Desi_wild_12682309</i> | NA                                  | <i>Ca_desi_denovo</i> | 12682309                | C/G  | NA                 | NA                            | NA                 |
| <i>Desi_wild_12695617</i> | NA                                  | <i>Ca_desi_denovo</i> | 12695617                | A/G  | NA                 | NA                            | NA                 |
| <i>Desi_wild_12701130</i> | NA                                  | <i>Ca_desi_denovo</i> | 12701130                | C/G  | NA                 | NA                            | NA                 |
| <i>Desi_wild_12702609</i> | NA                                  | <i>Ca_desi_denovo</i> | 12702609                | C/G  | NA                 | NA                            | NA                 |
| <i>Desi_wild_12702621</i> | NA                                  | <i>Ca_desi_denovo</i> | 12702621                | C/G  | NA                 | NA                            | NA                 |
| <i>Desi_wild_12702624</i> | NA                                  | <i>Ca_desi_denovo</i> | 12702624                | C/G  | NA                 | NA                            | NA                 |
| <i>Desi_wild_12708436</i> | NA                                  | <i>Ca_desi_denovo</i> | 12708436                | T/C  | NA                 | NA                            | NA                 |
| <i>Desi_wild_12710117</i> | NA                                  | <i>Ca_desi_denovo</i> | 12710117                | C/G  | NA                 | NA                            | NA                 |
| <i>Desi_wild_12713238</i> | NA                                  | <i>Ca_desi_denovo</i> | 12713238                | A/C  | NA                 | NA                            | NA                 |
| <i>Desi_wild_12713239</i> | NA                                  | <i>Ca_desi_denovo</i> | 12713239                | A/G  | NA                 | NA                            | NA                 |
| <i>Desi_wild_12713904</i> | NA                                  | <i>Ca_desi_denovo</i> | 12713904                | A/G  | NA                 | NA                            | NA                 |
| <i>Desi_wild_12725326</i> | NA                                  | <i>Ca_desi_denovo</i> | 12725326                | C/T  | NA                 | NA                            | NA                 |
| <i>Desi_wild_12728873</i> | NA                                  | <i>Ca_desi_denovo</i> | 12728873                | T/C  | NA                 | NA                            | NA                 |
| <i>Desi_wild_12729307</i> | NA                                  | <i>Ca_desi_denovo</i> | 12729307                | A/G  | NA                 | NA                            | NA                 |
| <i>Desi_wild_12729374</i> | NA                                  | <i>Ca_desi_denovo</i> | 12729374                | C/T  | NA                 | NA                            | NA                 |
| <i>Desi_wild_12739836</i> | NA                                  | <i>Ca_desi_denovo</i> | 12739836                | C/T  | NA                 | NA                            | NA                 |
| <i>Desi_wild_12757159</i> | NA                                  | <i>Ca_desi_denovo</i> | 12757159                | G/T  | NA                 | NA                            | NA                 |
| <i>Desi_wild_12757168</i> | NA                                  | <i>Ca_desi_denovo</i> | 12757168                | C/T  | NA                 | NA                            | NA                 |
| <i>Desi_wild_12766731</i> | NA                                  | <i>Ca_desi_denovo</i> | 12766731                | C/G  | NA                 | NA                            | NA                 |
| <i>Desi_wild_12766735</i> | NA                                  | <i>Ca_desi_denovo</i> | 12766735                | A/T  | NA                 | NA                            | NA                 |
| <i>Desi_wild_12766746</i> | NA                                  | <i>Ca_desi_denovo</i> | 12766746                | C/G  | NA                 | NA                            | NA                 |
| <i>Desi_wild_12766773</i> | NA                                  | <i>Ca_desi_denovo</i> | 12766773                | C/G  | NA                 | NA                            | NA                 |
| <i>Desi_wild_12772429</i> | NA                                  | <i>Ca_desi_denovo</i> | 12772429                | G/C  | NA                 | NA                            | NA                 |
| <i>Desi_wild_12777179</i> | NA                                  | <i>Ca_desi_denovo</i> | 12777179                | G/A  | NA                 | NA                            | NA                 |
| <i>Desi_wild_12777197</i> | NA                                  | <i>Ca_desi_denovo</i> | 12777197                | G/A  | NA                 | NA                            | NA                 |
| <i>Desi_wild_12777200</i> | NA                                  | <i>Ca_desi_denovo</i> | 12777200                | A/G  | NA                 | NA                            | NA                 |
| <i>Desi_wild_12786687</i> | NA                                  | <i>Ca_desi_denovo</i> | 12786687                | C/G  | NA                 | NA                            | NA                 |
| <i>Desi_wild_12786708</i> | NA                                  | <i>Ca_desi_denovo</i> | 12786708                | C/G  | NA                 | NA                            | NA                 |
| <i>Desi_wild_12788501</i> | NA                                  | <i>Ca_desi_denovo</i> | 12788501                | A/G  | NA                 | NA                            | NA                 |
| <i>Desi_wild_12793049</i> | NA                                  | <i>Ca_desi_denovo</i> | 12793049                | C/T  | NA                 | NA                            | NA                 |
| <i>Desi_wild_12798942</i> | NA                                  | <i>Ca_desi_denovo</i> | 12798942                | A/G  | NA                 | NA                            | NA                 |
| <i>Desi_wild_12802655</i> | NA                                  | <i>Ca_desi_denovo</i> | 12802655                | C/T  | NA                 | NA                            | NA                 |
| <i>Desi_wild_12802664</i> | NA                                  | <i>Ca_desi_denovo</i> | 12802664                | A/G  | NA                 | NA                            | NA                 |
| <i>Desi_wild_12808002</i> | NA                                  | <i>Ca_desi_denovo</i> | 12808002                | A/G  | NA                 | NA                            | NA                 |
| <i>Desi_wild_12811409</i> | NA                                  | <i>Ca_desi_denovo</i> | 12811409                | A/G  | NA                 | NA                            | NA                 |
| <i>Desi_wild_12813862</i> | NA                                  | <i>Ca_desi_denovo</i> | 12813862                | C/T  | NA                 | NA                            | NA                 |
| <i>Desi_wild_12816706</i> | NA                                  | <i>Ca_desi_denovo</i> | 12816706                | C/G  | NA                 | NA                            | NA                 |
| <i>Desi_wild_12816709</i> | NA                                  | <i>Ca_desi_denovo</i> | 12816709                | C/G  | NA                 | NA                            | NA                 |
| <i>Desi_wild_12816730</i> | NA                                  | <i>Ca_desi_denovo</i> | 12816730                | C/G  | NA                 | NA                            | NA                 |
| <i>Desi_wild_12825390</i> | NA                                  | <i>Ca_desi_denovo</i> | 12825390                | A/G  | NA                 | NA                            | NA                 |

| SNP IDs                   | NCBI dbSNP accession IDs (NCBI_SS#) | Chromosomes           | Physical positions (bp) | SNPs | Gene accession IDs | Sequence components of genome | Putative functions |
|---------------------------|-------------------------------------|-----------------------|-------------------------|------|--------------------|-------------------------------|--------------------|
| <i>Desi_wild_12825423</i> | NA                                  | <i>Ca_desi_denovo</i> | 12825423                | C/G  | NA                 | NA                            | NA                 |
| <i>Desi_wild_12825426</i> | NA                                  | <i>Ca_desi_denovo</i> | 12825426                | C/G  | NA                 | NA                            | NA                 |
| <i>Desi_wild_12825429</i> | NA                                  | <i>Ca_desi_denovo</i> | 12825429                | C/T  | NA                 | NA                            | NA                 |
| <i>Desi_wild_12839535</i> | NA                                  | <i>Ca_desi_denovo</i> | 12839535                | G/T  | NA                 | NA                            | NA                 |
| <i>Desi_wild_12842651</i> | NA                                  | <i>Ca_desi_denovo</i> | 12842651                | A/G  | NA                 | NA                            | NA                 |
| <i>Desi_wild_12842662</i> | NA                                  | <i>Ca_desi_denovo</i> | 12842662                | C/T  | NA                 | NA                            | NA                 |
| <i>Desi_wild_12844969</i> | NA                                  | <i>Ca_desi_denovo</i> | 12844969                | A/G  | NA                 | NA                            | NA                 |
| <i>Desi_wild_12844987</i> | NA                                  | <i>Ca_desi_denovo</i> | 12844987                | C/G  | NA                 | NA                            | NA                 |
| <i>Desi_wild_12849191</i> | NA                                  | <i>Ca_desi_denovo</i> | 12849191                | C/G  | NA                 | NA                            | NA                 |
| <i>Desi_wild_12850485</i> | NA                                  | <i>Ca_desi_denovo</i> | 12850485                | C/G  | NA                 | NA                            | NA                 |
| <i>Desi_wild_12863539</i> | NA                                  | <i>Ca_desi_denovo</i> | 12863539                | A/G  | NA                 | NA                            | NA                 |
| <i>Desi_wild_12863542</i> | NA                                  | <i>Ca_desi_denovo</i> | 12863542                | G/A  | NA                 | NA                            | NA                 |
| <i>Desi_wild_12883052</i> | NA                                  | <i>Ca_desi_denovo</i> | 12883052                | C/T  | NA                 | NA                            | NA                 |
| <i>Desi_wild_12886993</i> | NA                                  | <i>Ca_desi_denovo</i> | 12886993                | A/C  | NA                 | NA                            | NA                 |
| <i>Desi_wild_12886994</i> | NA                                  | <i>Ca_desi_denovo</i> | 12886994                | G/T  | NA                 | NA                            | NA                 |
| <i>Desi_wild_12890906</i> | NA                                  | <i>Ca_desi_denovo</i> | 12890906                | C/G  | NA                 | NA                            | NA                 |
| <i>Desi_wild_12892063</i> | NA                                  | <i>Ca_desi_denovo</i> | 12892063                | C/T  | NA                 | NA                            | NA                 |
| <i>Desi_wild_12892108</i> | NA                                  | <i>Ca_desi_denovo</i> | 12892108                | G/T  | NA                 | NA                            | NA                 |
| <i>Desi_wild_12907523</i> | NA                                  | <i>Ca_desi_denovo</i> | 12907523                | A/C  | NA                 | NA                            | NA                 |
| <i>Desi_wild_12907541</i> | NA                                  | <i>Ca_desi_denovo</i> | 12907541                | A/G  | NA                 | NA                            | NA                 |
| <i>Desi_wild_12912562</i> | NA                                  | <i>Ca_desi_denovo</i> | 12912562                | C/A  | NA                 | NA                            | NA                 |
| <i>Desi_wild_12912565</i> | NA                                  | <i>Ca_desi_denovo</i> | 12912565                | A/C  | NA                 | NA                            | NA                 |
| <i>Desi_wild_12912592</i> | NA                                  | <i>Ca_desi_denovo</i> | 12912592                | C/A  | NA                 | NA                            | NA                 |
| <i>Desi_wild_12912593</i> | NA                                  | <i>Ca_desi_denovo</i> | 12912593                | C/T  | NA                 | NA                            | NA                 |
| <i>Desi_wild_12914256</i> | NA                                  | <i>Ca_desi_denovo</i> | 12914256                | A/C  | NA                 | NA                            | NA                 |
| <i>Desi_wild_12922882</i> | NA                                  | <i>Ca_desi_denovo</i> | 12922882                | A/G  | NA                 | NA                            | NA                 |
| <i>Desi_wild_12922894</i> | NA                                  | <i>Ca_desi_denovo</i> | 12922894                | A/G  | NA                 | NA                            | NA                 |
| <i>Desi_wild_12925949</i> | NA                                  | <i>Ca_desi_denovo</i> | 12925949                | G/C  | NA                 | NA                            | NA                 |
| <i>Desi_wild_12925970</i> | NA                                  | <i>Ca_desi_denovo</i> | 12925970                | T/G  | NA                 | NA                            | NA                 |
| <i>Desi_wild_12925982</i> | NA                                  | <i>Ca_desi_denovo</i> | 12925982                | T/C  | NA                 | NA                            | NA                 |
| <i>Desi_wild_12925991</i> | NA                                  | <i>Ca_desi_denovo</i> | 12925991                | T/A  | NA                 | NA                            | NA                 |
| <i>Desi_wild_12929473</i> | NA                                  | <i>Ca_desi_denovo</i> | 12929473                | A/G  | NA                 | NA                            | NA                 |
| <i>Desi_wild_12947539</i> | NA                                  | <i>Ca_desi_denovo</i> | 12947539                | C/G  | NA                 | NA                            | NA                 |
| <i>Desi_wild_12948011</i> | NA                                  | <i>Ca_desi_denovo</i> | 12948011                | A/C  | NA                 | NA                            | NA                 |
| <i>Desi_wild_12949072</i> | NA                                  | <i>Ca_desi_denovo</i> | 12949072                | G/T  | NA                 | NA                            | NA                 |
| <i>Desi_wild_12950767</i> | NA                                  | <i>Ca_desi_denovo</i> | 12950767                | C/T  | NA                 | NA                            | NA                 |
| <i>Desi_wild_12956826</i> | NA                                  | <i>Ca_desi_denovo</i> | 12956826                | C/T  | NA                 | NA                            | NA                 |
| <i>Desi_wild_12956829</i> | NA                                  | <i>Ca_desi_denovo</i> | 12956829                | C/G  | NA                 | NA                            | NA                 |
| <i>Desi_wild_12956831</i> | NA                                  | <i>Ca_desi_denovo</i> | 12956831                | A/G  | NA                 | NA                            | NA                 |
| <i>Desi_wild_12956874</i> | NA                                  | <i>Ca_desi_denovo</i> | 12956874                | A/G  | NA                 | NA                            | NA                 |
| <i>Desi_wild_12958467</i> | NA                                  | <i>Ca_desi_denovo</i> | 12958467                | C/T  | NA                 | NA                            | NA                 |
| <i>Desi_wild_12975826</i> | NA                                  | <i>Ca_desi_denovo</i> | 12975826                | C/T  | NA                 | NA                            | NA                 |
| <i>Desi_wild_12982713</i> | NA                                  | <i>Ca_desi_denovo</i> | 12982713                | A/G  | NA                 | NA                            | NA                 |
| <i>Desi_wild_12987736</i> | NA                                  | <i>Ca_desi_denovo</i> | 12987736                | G/T  | NA                 | NA                            | NA                 |

| SNP IDs                   | NCBI dbSNP accession IDs (NCBI_SS#) | Chromosomes           | Physical positions (bp) | SNPs | Gene accession IDs | Sequence components of genome | Putative functions |
|---------------------------|-------------------------------------|-----------------------|-------------------------|------|--------------------|-------------------------------|--------------------|
| <i>Desi_wild_12987766</i> | NA                                  | <i>Ca_desi_denovo</i> | 12987766                | A/G  | NA                 | NA                            | NA                 |
| <i>Desi_wild_12987770</i> | NA                                  | <i>Ca_desi_denovo</i> | 12987770                | C/T  | NA                 | NA                            | NA                 |
| <i>Desi_wild_12987784</i> | NA                                  | <i>Ca_desi_denovo</i> | 12987784                | A/G  | NA                 | NA                            | NA                 |
| <i>Desi_wild_12987798</i> | NA                                  | <i>Ca_desi_denovo</i> | 12987798                | A/G  | NA                 | NA                            | NA                 |
| <i>Desi_wild_12987825</i> | NA                                  | <i>Ca_desi_denovo</i> | 12987825                | C/G  | NA                 | NA                            | NA                 |
| <i>Desi_wild_12987840</i> | NA                                  | <i>Ca_desi_denovo</i> | 12987840                | C/G  | NA                 | NA                            | NA                 |
| <i>Desi_wild_12988367</i> | NA                                  | <i>Ca_desi_denovo</i> | 12988367                | C/T  | NA                 | NA                            | NA                 |
| <i>Desi_wild_12988384</i> | NA                                  | <i>Ca_desi_denovo</i> | 12988384                | A/G  | NA                 | NA                            | NA                 |
| <i>Desi_wild_12988414</i> | NA                                  | <i>Ca_desi_denovo</i> | 12988414                | C/T  | NA                 | NA                            | NA                 |
| <i>Desi_wild_12988438</i> | NA                                  | <i>Ca_desi_denovo</i> | 12988438                | C/G  | NA                 | NA                            | NA                 |
| <i>Desi_wild_12989420</i> | NA                                  | <i>Ca_desi_denovo</i> | 12989420                | A/G  | NA                 | NA                            | NA                 |
| <i>Desi_wild_12989438</i> | NA                                  | <i>Ca_desi_denovo</i> | 12989438                | C/G  | NA                 | NA                            | NA                 |
| <i>Desi_wild_12990675</i> | NA                                  | <i>Ca_desi_denovo</i> | 12990675                | C/T  | NA                 | NA                            | NA                 |
| <i>Desi_wild_12997583</i> | NA                                  | <i>Ca_desi_denovo</i> | 12997583                | G/T  | NA                 | NA                            | NA                 |
| <i>Desi_wild_13001149</i> | NA                                  | <i>Ca_desi_denovo</i> | 13001149                | A/G  | NA                 | NA                            | NA                 |
| <i>Desi_wild_13001167</i> | NA                                  | <i>Ca_desi_denovo</i> | 13001167                | A/C  | NA                 | NA                            | NA                 |
| <i>Desi_wild_13011300</i> | NA                                  | <i>Ca_desi_denovo</i> | 13011300                | C/G  | NA                 | NA                            | NA                 |
| <i>Desi_wild_13020333</i> | NA                                  | <i>Ca_desi_denovo</i> | 13020333                | C/T  | NA                 | NA                            | NA                 |
| <i>Desi_wild_13040075</i> | NA                                  | <i>Ca_desi_denovo</i> | 13040075                | C/T  | NA                 | NA                            | NA                 |
| <i>Desi_wild_13040114</i> | NA                                  | <i>Ca_desi_denovo</i> | 13040114                | A/G  | NA                 | NA                            | NA                 |
| <i>Desi_wild_13042614</i> | NA                                  | <i>Ca_desi_denovo</i> | 13042614                | C/G  | NA                 | NA                            | NA                 |
| <i>Desi_wild_13047734</i> | NA                                  | <i>Ca_desi_denovo</i> | 13047734                | C/T  | NA                 | NA                            | NA                 |
| <i>Desi_wild_13055342</i> | NA                                  | <i>Ca_desi_denovo</i> | 13055342                | C/G  | NA                 | NA                            | NA                 |
| <i>Desi_wild_13061058</i> | NA                                  | <i>Ca_desi_denovo</i> | 13061058                | C/T  | NA                 | NA                            | NA                 |
| <i>Desi_wild_13063643</i> | NA                                  | <i>Ca_desi_denovo</i> | 13063643                | A/G  | NA                 | NA                            | NA                 |
| <i>Desi_wild_13069122</i> | NA                                  | <i>Ca_desi_denovo</i> | 13069122                | C/G  | NA                 | NA                            | NA                 |
| <i>Desi_wild_13069131</i> | NA                                  | <i>Ca_desi_denovo</i> | 13069131                | C/T  | NA                 | NA                            | NA                 |
| <i>Desi_wild_13069141</i> | NA                                  | <i>Ca_desi_denovo</i> | 13069141                | G/T  | NA                 | NA                            | NA                 |
| <i>Desi_wild_13077847</i> | NA                                  | <i>Ca_desi_denovo</i> | 13077847                | A/C  | NA                 | NA                            | NA                 |
| <i>Desi_wild_13077848</i> | NA                                  | <i>Ca_desi_denovo</i> | 13077848                | G/T  | NA                 | NA                            | NA                 |
| <i>Desi_wild_13077849</i> | NA                                  | <i>Ca_desi_denovo</i> | 13077849                | A/G  | NA                 | NA                            | NA                 |
| <i>Desi_wild_13081110</i> | NA                                  | <i>Ca_desi_denovo</i> | 13081110                | G/T  | NA                 | NA                            | NA                 |
| <i>Desi_wild_13081131</i> | NA                                  | <i>Ca_desi_denovo</i> | 13081131                | A/T  | NA                 | NA                            | NA                 |
| <i>Desi_wild_13086839</i> | NA                                  | <i>Ca_desi_denovo</i> | 13086839                | G/T  | NA                 | NA                            | NA                 |
| <i>Desi_wild_13088323</i> | NA                                  | <i>Ca_desi_denovo</i> | 13088323                | A/G  | NA                 | NA                            | NA                 |
| <i>Desi_wild_13089641</i> | NA                                  | <i>Ca_desi_denovo</i> | 13089641                | C/G  | NA                 | NA                            | NA                 |
| <i>Desi_wild_13089668</i> | NA                                  | <i>Ca_desi_denovo</i> | 13089668                | C/T  | NA                 | NA                            | NA                 |
| <i>Desi_wild_13110483</i> | NA                                  | <i>Ca_desi_denovo</i> | 13110483                | C/T  | NA                 | NA                            | NA                 |
| <i>Desi_wild_13111492</i> | NA                                  | <i>Ca_desi_denovo</i> | 13111492                | A/G  | NA                 | NA                            | NA                 |
| <i>Desi_wild_13111507</i> | NA                                  | <i>Ca_desi_denovo</i> | 13111507                | A/G  | NA                 | NA                            | NA                 |
| <i>Desi_wild_13111516</i> | NA                                  | <i>Ca_desi_denovo</i> | 13111516                | A/G  | NA                 | NA                            | NA                 |
| <i>Desi_wild_13118813</i> | NA                                  | <i>Ca_desi_denovo</i> | 13118813                | C/T  | NA                 | NA                            | NA                 |
| <i>Desi_wild_13118819</i> | NA                                  | <i>Ca_desi_denovo</i> | 13118819                | C/G  | NA                 | NA                            | NA                 |
| <i>Desi_wild_13118852</i> | NA                                  | <i>Ca_desi_denovo</i> | 13118852                | C/T  | NA                 | NA                            | NA                 |

| SNP IDs                   | NCBI dbSNP accession IDs (NCBI_SS#) | Chromosomes           | Physical positions (bp) | SNPs | Gene accession IDs | Sequence components of genome | Putative functions |
|---------------------------|-------------------------------------|-----------------------|-------------------------|------|--------------------|-------------------------------|--------------------|
| <i>Desi_wild_13118855</i> | NA                                  | <i>Ca_desi_denovo</i> | 13118855                | A/G  | NA                 | NA                            | NA                 |
| <i>Desi_wild_13126204</i> | NA                                  | <i>Ca_desi_denovo</i> | 13126204                | A/C  | NA                 | NA                            | NA                 |
| <i>Desi_wild_13155878</i> | NA                                  | <i>Ca_desi_denovo</i> | 13155878                | C/A  | NA                 | NA                            | NA                 |
| <i>Desi_wild_13156033</i> | NA                                  | <i>Ca_desi_denovo</i> | 13156033                | A/C  | NA                 | NA                            | NA                 |
| <i>Desi_wild_13156034</i> | NA                                  | <i>Ca_desi_denovo</i> | 13156034                | G/T  | NA                 | NA                            | NA                 |
| <i>Desi_wild_13174501</i> | NA                                  | <i>Ca_desi_denovo</i> | 13174501                | C/T  | NA                 | NA                            | NA                 |
| <i>Desi_wild_13178280</i> | NA                                  | <i>Ca_desi_denovo</i> | 13178280                | C/T  | NA                 | NA                            | NA                 |
| <i>Desi_wild_13182736</i> | NA                                  | <i>Ca_desi_denovo</i> | 13182736                | C/T  | NA                 | NA                            | NA                 |
| <i>Desi_wild_13188181</i> | NA                                  | <i>Ca_desi_denovo</i> | 13188181                | A/G  | NA                 | NA                            | NA                 |
| <i>Desi_wild_13188184</i> | NA                                  | <i>Ca_desi_denovo</i> | 13188184                | A/G  | NA                 | NA                            | NA                 |
| <i>Desi_wild_13190365</i> | NA                                  | <i>Ca_desi_denovo</i> | 13190365                | A/C  | NA                 | NA                            | NA                 |
| <i>Desi_wild_13190440</i> | NA                                  | <i>Ca_desi_denovo</i> | 13190440                | A/G  | NA                 | NA                            | NA                 |
| <i>Desi_wild_13191669</i> | NA                                  | <i>Ca_desi_denovo</i> | 13191669                | A/G  | NA                 | NA                            | NA                 |
| <i>Desi_wild_13191670</i> | NA                                  | <i>Ca_desi_denovo</i> | 13191670                | C/G  | NA                 | NA                            | NA                 |
| <i>Desi_wild_13191679</i> | NA                                  | <i>Ca_desi_denovo</i> | 13191679                | C/G  | NA                 | NA                            | NA                 |
| <i>Desi_wild_13191683</i> | NA                                  | <i>Ca_desi_denovo</i> | 13191683                | C/G  | NA                 | NA                            | NA                 |
| <i>Desi_wild_13195808</i> | NA                                  | <i>Ca_desi_denovo</i> | 13195808                | G/T  | NA                 | NA                            | NA                 |
| <i>Desi_wild_13199727</i> | NA                                  | <i>Ca_desi_denovo</i> | 13199727                | C/T  | NA                 | NA                            | NA                 |
| <i>Desi_wild_13203446</i> | NA                                  | <i>Ca_desi_denovo</i> | 13203446                | C/G  | NA                 | NA                            | NA                 |
| <i>Desi_wild_13203449</i> | NA                                  | <i>Ca_desi_denovo</i> | 13203449                | C/T  | NA                 | NA                            | NA                 |
| <i>Desi_wild_13203457</i> | NA                                  | <i>Ca_desi_denovo</i> | 13203457                | C/G  | NA                 | NA                            | NA                 |
| <i>Desi_wild_13212764</i> | NA                                  | <i>Ca_desi_denovo</i> | 13212764                | A/G  | NA                 | NA                            | NA                 |
| <i>Desi_wild_13212767</i> | NA                                  | <i>Ca_desi_denovo</i> | 13212767                | G/T  | NA                 | NA                            | NA                 |
| <i>Desi_wild_13219240</i> | NA                                  | <i>Ca_desi_denovo</i> | 13219240                | T/C  | NA                 | NA                            | NA                 |
| <i>Desi_wild_13221320</i> | NA                                  | <i>Ca_desi_denovo</i> | 13221320                | T/C  | NA                 | NA                            | NA                 |
| <i>Desi_wild_13221323</i> | NA                                  | <i>Ca_desi_denovo</i> | 13221323                | C/T  | NA                 | NA                            | NA                 |
| <i>Desi_wild_13221326</i> | NA                                  | <i>Ca_desi_denovo</i> | 13221326                | C/G  | NA                 | NA                            | NA                 |
| <i>Desi_wild_13224915</i> | NA                                  | <i>Ca_desi_denovo</i> | 13224915                | C/T  | NA                 | NA                            | NA                 |
| <i>Desi_wild_13226464</i> | NA                                  | <i>Ca_desi_denovo</i> | 13226464                | G/T  | NA                 | NA                            | NA                 |
| <i>Desi_wild_13226501</i> | NA                                  | <i>Ca_desi_denovo</i> | 13226501                | C/T  | NA                 | NA                            | NA                 |
| <i>Desi_wild_13241072</i> | NA                                  | <i>Ca_desi_denovo</i> | 13241072                | G/A  | NA                 | NA                            | NA                 |
| <i>Desi_wild_13247164</i> | NA                                  | <i>Ca_desi_denovo</i> | 13247164                | C/T  | NA                 | NA                            | NA                 |
| <i>Desi_wild_13251295</i> | NA                                  | <i>Ca_desi_denovo</i> | 13251295                | T/C  | NA                 | NA                            | NA                 |
| <i>Desi_wild_13251301</i> | NA                                  | <i>Ca_desi_denovo</i> | 13251301                | T/G  | NA                 | NA                            | NA                 |
| <i>Desi_wild_13264059</i> | NA                                  | <i>Ca_desi_denovo</i> | 13264059                | A/G  | NA                 | NA                            | NA                 |
| <i>Desi_wild_13264068</i> | NA                                  | <i>Ca_desi_denovo</i> | 13264068                | C/G  | NA                 | NA                            | NA                 |
| <i>Desi_wild_13273654</i> | NA                                  | <i>Ca_desi_denovo</i> | 13273654                | G/C  | NA                 | NA                            | NA                 |
| <i>Desi_wild_13273660</i> | NA                                  | <i>Ca_desi_denovo</i> | 13273660                | G/A  | NA                 | NA                            | NA                 |
| <i>Desi_wild_13273687</i> | NA                                  | <i>Ca_desi_denovo</i> | 13273687                | G/A  | NA                 | NA                            | NA                 |
| <i>Desi_wild_13279180</i> | NA                                  | <i>Ca_desi_denovo</i> | 13279180                | A/T  | NA                 | NA                            | NA                 |
| <i>Desi_wild_13279184</i> | NA                                  | <i>Ca_desi_denovo</i> | 13279184                | C/G  | NA                 | NA                            | NA                 |
| <i>Desi_wild_13279188</i> | NA                                  | <i>Ca_desi_denovo</i> | 13279188                | C/T  | NA                 | NA                            | NA                 |
| <i>Desi_wild_13284695</i> | NA                                  | <i>Ca_desi_denovo</i> | 13284695                | C/T  | NA                 | NA                            | NA                 |
| <i>Desi_wild_13295985</i> | NA                                  | <i>Ca_desi_denovo</i> | 13295985                | C/T  | NA                 | NA                            | NA                 |

| SNP IDs                   | NCBI dbSNP accession IDs (NCBI_SS#) | Chromosomes           | Physical positions (bp) | SNPs | Gene accession IDs | Sequence components of genome | Putative functions |
|---------------------------|-------------------------------------|-----------------------|-------------------------|------|--------------------|-------------------------------|--------------------|
| <i>Desi_wild_13297627</i> | NA                                  | <i>Ca_desi_denovo</i> | 13297627                | C/G  | NA                 | NA                            | NA                 |
| <i>Desi_wild_13297628</i> | NA                                  | <i>Ca_desi_denovo</i> | 13297628                | G/T  | NA                 | NA                            | NA                 |
| <i>Desi_wild_13304358</i> | NA                                  | <i>Ca_desi_denovo</i> | 13304358                | A/G  | NA                 | NA                            | NA                 |
| <i>Desi_wild_13312505</i> | NA                                  | <i>Ca_desi_denovo</i> | 13312505                | C/G  | NA                 | NA                            | NA                 |
| <i>Desi_wild_13312529</i> | NA                                  | <i>Ca_desi_denovo</i> | 13312529                | C/G  | NA                 | NA                            | NA                 |
| <i>Desi_wild_13312535</i> | NA                                  | <i>Ca_desi_denovo</i> | 13312535                | A/G  | NA                 | NA                            | NA                 |
| <i>Desi_wild_13312536</i> | NA                                  | <i>Ca_desi_denovo</i> | 13312536                | G/T  | NA                 | NA                            | NA                 |
| <i>Desi_wild_13317910</i> | NA                                  | <i>Ca_desi_denovo</i> | 13317910                | A/C  | NA                 | NA                            | NA                 |
| <i>Desi_wild_13317911</i> | NA                                  | <i>Ca_desi_denovo</i> | 13317911                | G/T  | NA                 | NA                            | NA                 |
| <i>Desi_wild_13317912</i> | NA                                  | <i>Ca_desi_denovo</i> | 13317912                | A/T  | NA                 | NA                            | NA                 |
| <i>Desi_wild_13330941</i> | NA                                  | <i>Ca_desi_denovo</i> | 13330941                | T/G  | NA                 | NA                            | NA                 |
| <i>Desi_wild_13331501</i> | NA                                  | <i>Ca_desi_denovo</i> | 13331501                | A/T  | NA                 | NA                            | NA                 |
| <i>Desi_wild_13331536</i> | NA                                  | <i>Ca_desi_denovo</i> | 13331536                | A/G  | NA                 | NA                            | NA                 |
| <i>Desi_wild_13331537</i> | NA                                  | <i>Ca_desi_denovo</i> | 13331537                | C/G  | NA                 | NA                            | NA                 |
| <i>Desi_wild_13331545</i> | NA                                  | <i>Ca_desi_denovo</i> | 13331545                | A/G  | NA                 | NA                            | NA                 |
| <i>Desi_wild_13339622</i> | NA                                  | <i>Ca_desi_denovo</i> | 13339622                | C/T  | NA                 | NA                            | NA                 |
| <i>Desi_wild_13340230</i> | NA                                  | <i>Ca_desi_denovo</i> | 13340230                | A/G  | NA                 | NA                            | NA                 |
| <i>Desi_wild_13340231</i> | NA                                  | <i>Ca_desi_denovo</i> | 13340231                | C/G  | NA                 | NA                            | NA                 |
| <i>Desi_wild_13340232</i> | NA                                  | <i>Ca_desi_denovo</i> | 13340232                | C/G  | NA                 | NA                            | NA                 |
| <i>Desi_wild_13343401</i> | NA                                  | <i>Ca_desi_denovo</i> | 13343401                | C/G  | NA                 | NA                            | NA                 |
| <i>Desi_wild_13343413</i> | NA                                  | <i>Ca_desi_denovo</i> | 13343413                | C/T  | NA                 | NA                            | NA                 |
| <i>Desi_wild_13343418</i> | NA                                  | <i>Ca_desi_denovo</i> | 13343418                | C/G  | NA                 | NA                            | NA                 |
| <i>Desi_wild_13345810</i> | NA                                  | <i>Ca_desi_denovo</i> | 13345810                | C/G  | NA                 | NA                            | NA                 |
| <i>Desi_wild_13365562</i> | NA                                  | <i>Ca_desi_denovo</i> | 13365562                | C/G  | NA                 | NA                            | NA                 |
| <i>Desi_wild_13371517</i> | NA                                  | <i>Ca_desi_denovo</i> | 13371517                | C/G  | NA                 | NA                            | NA                 |
| <i>Desi_wild_13371519</i> | NA                                  | <i>Ca_desi_denovo</i> | 13371519                | A/G  | NA                 | NA                            | NA                 |
| <i>Desi_wild_13371567</i> | NA                                  | <i>Ca_desi_denovo</i> | 13371567                | C/G  | NA                 | NA                            | NA                 |
| <i>Desi_wild_13371574</i> | NA                                  | <i>Ca_desi_denovo</i> | 13371574                | A/C  | NA                 | NA                            | NA                 |
| <i>Desi_wild_13381514</i> | NA                                  | <i>Ca_desi_denovo</i> | 13381514                | G/T  | NA                 | NA                            | NA                 |
| <i>Desi_wild_13387467</i> | NA                                  | <i>Ca_desi_denovo</i> | 13387467                | C/G  | NA                 | NA                            | NA                 |
| <i>Desi_wild_13387485</i> | NA                                  | <i>Ca_desi_denovo</i> | 13387485                | G/C  | NA                 | NA                            | NA                 |
| <i>Desi_wild_13387491</i> | NA                                  | <i>Ca_desi_denovo</i> | 13387491                | G/A  | NA                 | NA                            | NA                 |
| <i>Desi_wild_13398511</i> | NA                                  | <i>Ca_desi_denovo</i> | 13398511                | A/G  | NA                 | NA                            | NA                 |
| <i>Desi_wild_13398514</i> | NA                                  | <i>Ca_desi_denovo</i> | 13398514                | G/T  | NA                 | NA                            | NA                 |
| <i>Desi_wild_13420527</i> | NA                                  | <i>Ca_desi_denovo</i> | 13420527                | C/G  | NA                 | NA                            | NA                 |
| <i>Desi_wild_13420536</i> | NA                                  | <i>Ca_desi_denovo</i> | 13420536                | C/G  | NA                 | NA                            | NA                 |
| <i>Desi_wild_13420868</i> | NA                                  | <i>Ca_desi_denovo</i> | 13420868                | C/T  | NA                 | NA                            | NA                 |
| <i>Desi_wild_13420877</i> | NA                                  | <i>Ca_desi_denovo</i> | 13420877                | C/G  | NA                 | NA                            | NA                 |
| <i>Desi_wild_13441817</i> | NA                                  | <i>Ca_desi_denovo</i> | 13441817                | C/T  | NA                 | NA                            | NA                 |
| <i>Desi_wild_13441822</i> | NA                                  | <i>Ca_desi_denovo</i> | 13441822                | A/G  | NA                 | NA                            | NA                 |
| <i>Desi_wild_13442597</i> | NA                                  | <i>Ca_desi_denovo</i> | 13442597                | C/T  | NA                 | NA                            | NA                 |
| <i>Desi_wild_13455005</i> | NA                                  | <i>Ca_desi_denovo</i> | 13455005                | C/T  | NA                 | NA                            | NA                 |
| <i>Desi_wild_13455044</i> | NA                                  | <i>Ca_desi_denovo</i> | 13455044                | A/G  | NA                 | NA                            | NA                 |
| <i>Desi_wild_13469650</i> | NA                                  | <i>Ca_desi_denovo</i> | 13469650                | C/T  | NA                 | NA                            | NA                 |

| SNP IDs                   | NCBI dbSNP accession IDs (NCBI_SS#) | Chromosomes           | Physical positions (bp) | SNPs | Gene accession IDs | Sequence components of genome | Putative functions |
|---------------------------|-------------------------------------|-----------------------|-------------------------|------|--------------------|-------------------------------|--------------------|
| <i>Desi_wild_13469668</i> | NA                                  | <i>Ca_desi_denovo</i> | 13469668                | C/G  | NA                 | NA                            | NA                 |
| <i>Desi_wild_13483358</i> | NA                                  | <i>Ca_desi_denovo</i> | 13483358                | A/G  | NA                 | NA                            | NA                 |
| <i>Desi_wild_13494753</i> | NA                                  | <i>Ca_desi_denovo</i> | 13494753                | C/T  | NA                 | NA                            | NA                 |
| <i>Desi_wild_13510114</i> | NA                                  | <i>Ca_desi_denovo</i> | 13510114                | G/A  | NA                 | NA                            | NA                 |
| <i>Desi_wild_13512238</i> | NA                                  | <i>Ca_desi_denovo</i> | 13512238                | A/C  | NA                 | NA                            | NA                 |
| <i>Desi_wild_13512884</i> | NA                                  | <i>Ca_desi_denovo</i> | 13512884                | C/T  | NA                 | NA                            | NA                 |
| <i>Desi_wild_13523063</i> | NA                                  | <i>Ca_desi_denovo</i> | 13523063                | G/T  | NA                 | NA                            | NA                 |
| <i>Desi_wild_13525267</i> | NA                                  | <i>Ca_desi_denovo</i> | 13525267                | C/T  | NA                 | NA                            | NA                 |
| <i>Desi_wild_13526392</i> | NA                                  | <i>Ca_desi_denovo</i> | 13526392                | C/T  | NA                 | NA                            | NA                 |
| <i>Desi_wild_13526424</i> | NA                                  | <i>Ca_desi_denovo</i> | 13526424                | C/G  | NA                 | NA                            | NA                 |
| <i>Desi_wild_13537620</i> | NA                                  | <i>Ca_desi_denovo</i> | 13537620                | A/C  | NA                 | NA                            | NA                 |
| <i>Desi_wild_13575551</i> | NA                                  | <i>Ca_desi_denovo</i> | 13575551                | A/C  | NA                 | NA                            | NA                 |
| <i>Desi_wild_13579110</i> | NA                                  | <i>Ca_desi_denovo</i> | 13579110                | A/G  | NA                 | NA                            | NA                 |
| <i>Desi_wild_13604224</i> | NA                                  | <i>Ca_desi_denovo</i> | 13604224                | C/G  | NA                 | NA                            | NA                 |
| <i>Desi_wild_13605962</i> | NA                                  | <i>Ca_desi_denovo</i> | 13605962                | C/G  | NA                 | NA                            | NA                 |
| <i>Desi_wild_13609208</i> | NA                                  | <i>Ca_desi_denovo</i> | 13609208                | C/G  | NA                 | NA                            | NA                 |
| <i>Desi_wild_13615262</i> | NA                                  | <i>Ca_desi_denovo</i> | 13615262                | C/T  | NA                 | NA                            | NA                 |
| <i>Desi_wild_13623079</i> | NA                                  | <i>Ca_desi_denovo</i> | 13623079                | C/G  | NA                 | NA                            | NA                 |
| <i>Desi_wild_13634377</i> | NA                                  | <i>Ca_desi_denovo</i> | 13634377                | C/T  | NA                 | NA                            | NA                 |
| <i>Desi_wild_13634380</i> | NA                                  | <i>Ca_desi_denovo</i> | 13634380                | C/G  | NA                 | NA                            | NA                 |
| <i>Desi_wild_13634387</i> | NA                                  | <i>Ca_desi_denovo</i> | 13634387                | A/G  | NA                 | NA                            | NA                 |
| <i>Desi_wild_13638263</i> | NA                                  | <i>Ca_desi_denovo</i> | 13638263                | A/G  | NA                 | NA                            | NA                 |
| <i>Desi_wild_13638266</i> | NA                                  | <i>Ca_desi_denovo</i> | 13638266                | C/G  | NA                 | NA                            | NA                 |
| <i>Desi_wild_13638296</i> | NA                                  | <i>Ca_desi_denovo</i> | 13638296                | T/C  | NA                 | NA                            | NA                 |
| <i>Desi_wild_13639497</i> | NA                                  | <i>Ca_desi_denovo</i> | 13639497                | A/C  | NA                 | NA                            | NA                 |
| <i>Desi_wild_13639501</i> | NA                                  | <i>Ca_desi_denovo</i> | 13639501                | C/G  | NA                 | NA                            | NA                 |
| <i>Desi_wild_13641591</i> | NA                                  | <i>Ca_desi_denovo</i> | 13641591                | G/C  | NA                 | NA                            | NA                 |
| <i>Desi_wild_13641606</i> | NA                                  | <i>Ca_desi_denovo</i> | 13641606                | G/A  | NA                 | NA                            | NA                 |
| <i>Desi_wild_13646639</i> | NA                                  | <i>Ca_desi_denovo</i> | 13646639                | G/T  | NA                 | NA                            | NA                 |
| <i>Desi_wild_13654149</i> | NA                                  | <i>Ca_desi_denovo</i> | 13654149                | C/T  | NA                 | NA                            | NA                 |
| <i>Desi_wild_13662407</i> | NA                                  | <i>Ca_desi_denovo</i> | 13662407                | A/G  | NA                 | NA                            | NA                 |
| <i>Desi_wild_13662408</i> | NA                                  | <i>Ca_desi_denovo</i> | 13662408                | C/G  | NA                 | NA                            | NA                 |
| <i>Desi_wild_13676487</i> | NA                                  | <i>Ca_desi_denovo</i> | 13676487                | A/G  | NA                 | NA                            | NA                 |
| <i>Desi_wild_13691707</i> | NA                                  | <i>Ca_desi_denovo</i> | 13691707                | A/G  | NA                 | NA                            | NA                 |
| <i>Desi_wild_13713228</i> | NA                                  | <i>Ca_desi_denovo</i> | 13713228                | C/G  | NA                 | NA                            | NA                 |
| <i>Desi_wild_13713249</i> | NA                                  | <i>Ca_desi_denovo</i> | 13713249                | C/G  | NA                 | NA                            | NA                 |
| <i>Desi_wild_13713255</i> | NA                                  | <i>Ca_desi_denovo</i> | 13713255                | C/G  | NA                 | NA                            | NA                 |
| <i>Desi_wild_13713261</i> | NA                                  | <i>Ca_desi_denovo</i> | 13713261                | C/T  | NA                 | NA                            | NA                 |
| <i>Desi_wild_13715963</i> | NA                                  | <i>Ca_desi_denovo</i> | 13715963                | C/G  | NA                 | NA                            | NA                 |
| <i>Desi_wild_13716674</i> | NA                                  | <i>Ca_desi_denovo</i> | 13716674                | G/T  | NA                 | NA                            | NA                 |
| <i>Desi_wild_13731390</i> | NA                                  | <i>Ca_desi_denovo</i> | 13731390                | A/G  | NA                 | NA                            | NA                 |
| <i>Desi_wild_13738583</i> | NA                                  | <i>Ca_desi_denovo</i> | 13738583                | C/T  | NA                 | NA                            | NA                 |
| <i>Desi_wild_13738587</i> | NA                                  | <i>Ca_desi_denovo</i> | 13738587                | C/T  | NA                 | NA                            | NA                 |
| <i>Desi_wild_13743909</i> | NA                                  | <i>Ca_desi_denovo</i> | 13743909                | C/T  | NA                 | NA                            | NA                 |

| SNP IDs                   | NCBI dbSNP accession IDs (NCBI_SS#) | Chromosomes           | Physical positions (bp) | SNPs | Gene accession IDs | Sequence components of genome | Putative functions |
|---------------------------|-------------------------------------|-----------------------|-------------------------|------|--------------------|-------------------------------|--------------------|
| <i>Desi_wild_13761024</i> | NA                                  | <i>Ca_desi_denovo</i> | 13761024                | C/T  | NA                 | NA                            | NA                 |
| <i>Desi_wild_13775255</i> | NA                                  | <i>Ca_desi_denovo</i> | 13775255                | A/G  | NA                 | NA                            | NA                 |
| <i>Desi_wild_13776857</i> | NA                                  | <i>Ca_desi_denovo</i> | 13776857                | A/G  | NA                 | NA                            | NA                 |
| <i>Desi_wild_13808009</i> | NA                                  | <i>Ca_desi_denovo</i> | 13808009                | C/G  | NA                 | NA                            | NA                 |
| <i>Desi_wild_13809556</i> | NA                                  | <i>Ca_desi_denovo</i> | 13809556                | A/C  | NA                 | NA                            | NA                 |
| <i>Desi_wild_13810893</i> | NA                                  | <i>Ca_desi_denovo</i> | 13810893                | A/G  | NA                 | NA                            | NA                 |
| <i>Desi_wild_13823036</i> | NA                                  | <i>Ca_desi_denovo</i> | 13823036                | C/T  | NA                 | NA                            | NA                 |
| <i>Desi_wild_13833783</i> | NA                                  | <i>Ca_desi_denovo</i> | 13833783                | A/G  | NA                 | NA                            | NA                 |
| <i>Desi_wild_13833786</i> | NA                                  | <i>Ca_desi_denovo</i> | 13833786                | A/G  | NA                 | NA                            | NA                 |
| <i>Desi_wild_13850322</i> | NA                                  | <i>Ca_desi_denovo</i> | 13850322                | T/C  | NA                 | NA                            | NA                 |
| <i>Desi_wild_13850328</i> | NA                                  | <i>Ca_desi_denovo</i> | 13850328                | G/C  | NA                 | NA                            | NA                 |
| <i>Desi_wild_13869206</i> | NA                                  | <i>Ca_desi_denovo</i> | 13869206                | A/G  | NA                 | NA                            | NA                 |
| <i>Desi_wild_13869239</i> | NA                                  | <i>Ca_desi_denovo</i> | 13869239                | A/G  | NA                 | NA                            | NA                 |
| <i>Desi_wild_13882328</i> | NA                                  | <i>Ca_desi_denovo</i> | 13882328                | A/C  | NA                 | NA                            | NA                 |
| <i>Desi_wild_13882353</i> | NA                                  | <i>Ca_desi_denovo</i> | 13882353                | A/C  | NA                 | NA                            | NA                 |
| <i>Desi_wild_13886812</i> | NA                                  | <i>Ca_desi_denovo</i> | 13886812                | C/G  | NA                 | NA                            | NA                 |
| <i>Desi_wild_13886829</i> | NA                                  | <i>Ca_desi_denovo</i> | 13886829                | A/G  | NA                 | NA                            | NA                 |
| <i>Desi_wild_13898382</i> | NA                                  | <i>Ca_desi_denovo</i> | 13898382                | A/G  | NA                 | NA                            | NA                 |
| <i>Desi_wild_13898394</i> | NA                                  | <i>Ca_desi_denovo</i> | 13898394                | C/G  | NA                 | NA                            | NA                 |
| <i>Desi_wild_13898452</i> | NA                                  | <i>Ca_desi_denovo</i> | 13898452                | G/T  | NA                 | NA                            | NA                 |
| <i>Desi_wild_13902393</i> | NA                                  | <i>Ca_desi_denovo</i> | 13902393                | C/T  | NA                 | NA                            | NA                 |
| <i>Desi_wild_13902406</i> | NA                                  | <i>Ca_desi_denovo</i> | 13902406                | C/T  | NA                 | NA                            | NA                 |
| <i>Desi_wild_13902407</i> | NA                                  | <i>Ca_desi_denovo</i> | 13902407                | G/T  | NA                 | NA                            | NA                 |
| <i>Desi_wild_13902414</i> | NA                                  | <i>Ca_desi_denovo</i> | 13902414                | A/G  | NA                 | NA                            | NA                 |
| <i>Desi_wild_13909896</i> | NA                                  | <i>Ca_desi_denovo</i> | 13909896                | C/T  | NA                 | NA                            | NA                 |
| <i>Desi_wild_13939824</i> | NA                                  | <i>Ca_desi_denovo</i> | 13939824                | C/G  | NA                 | NA                            | NA                 |
| <i>Desi_wild_13943507</i> | NA                                  | <i>Ca_desi_denovo</i> | 13943507                | C/G  | NA                 | NA                            | NA                 |
| <i>Desi_wild_13943519</i> | NA                                  | <i>Ca_desi_denovo</i> | 13943519                | A/C  | NA                 | NA                            | NA                 |
| <i>Desi_wild_13943522</i> | NA                                  | <i>Ca_desi_denovo</i> | 13943522                | A/G  | NA                 | NA                            | NA                 |
| <i>Desi_wild_13968576</i> | NA                                  | <i>Ca_desi_denovo</i> | 13968576                | A/G  | NA                 | NA                            | NA                 |
| <i>Desi_wild_13968624</i> | NA                                  | <i>Ca_desi_denovo</i> | 13968624                | A/G  | NA                 | NA                            | NA                 |
| <i>Desi_wild_13970858</i> | NA                                  | <i>Ca_desi_denovo</i> | 13970858                | C/T  | NA                 | NA                            | NA                 |
| <i>Desi_wild_13971783</i> | NA                                  | <i>Ca_desi_denovo</i> | 13971783                | C/G  | NA                 | NA                            | NA                 |
| <i>Desi_wild_13973806</i> | NA                                  | <i>Ca_desi_denovo</i> | 13973806                | C/G  | NA                 | NA                            | NA                 |
| <i>Desi_wild_13973845</i> | NA                                  | <i>Ca_desi_denovo</i> | 13973845                | G/A  | NA                 | NA                            | NA                 |
| <i>Desi_wild_13982123</i> | NA                                  | <i>Ca_desi_denovo</i> | 13982123                | A/G  | NA                 | NA                            | NA                 |
| <i>Desi_wild_13987687</i> | NA                                  | <i>Ca_desi_denovo</i> | 13987687                | C/G  | NA                 | NA                            | NA                 |
| <i>Desi_wild_13993094</i> | NA                                  | <i>Ca_desi_denovo</i> | 13993094                | C/T  | NA                 | NA                            | NA                 |
| <i>Desi_wild_13995397</i> | NA                                  | <i>Ca_desi_denovo</i> | 13995397                | A/G  | NA                 | NA                            | NA                 |
| <i>Desi_wild_13995674</i> | NA                                  | <i>Ca_desi_denovo</i> | 13995674                | G/C  | NA                 | NA                            | NA                 |
| <i>Desi_wild_13996622</i> | NA                                  | <i>Ca_desi_denovo</i> | 13996622                | C/G  | NA                 | NA                            | NA                 |
| <i>Desi_wild_13996626</i> | NA                                  | <i>Ca_desi_denovo</i> | 13996626                | C/T  | NA                 | NA                            | NA                 |
| <i>Desi_wild_13996702</i> | NA                                  | <i>Ca_desi_denovo</i> | 13996702                | C/G  | NA                 | NA                            | NA                 |
| <i>Desi_wild_13996704</i> | NA                                  | <i>Ca_desi_denovo</i> | 13996704                | C/T  | NA                 | NA                            | NA                 |



| SNP IDs                   | NCBI dbSNP accession IDs (NCBI_SS#) | Chromosomes           | Physical positions (bp) | SNPs | Gene accession IDs | Sequence components of genome | Putative functions |
|---------------------------|-------------------------------------|-----------------------|-------------------------|------|--------------------|-------------------------------|--------------------|
| <i>Desi_wild_13996711</i> | NA                                  | <i>Ca_desi_denovo</i> | 13996711                | C/G  | NA                 | NA                            | NA                 |
| <i>Desi_wild_14006439</i> | NA                                  | <i>Ca_desi_denovo</i> | 14006439                | A/G  | NA                 | NA                            | NA                 |
| <i>Desi_wild_14018575</i> | NA                                  | <i>Ca_desi_denovo</i> | 14018575                | A/G  | NA                 | NA                            | NA                 |
| <i>Desi_wild_14032148</i> | NA                                  | <i>Ca_desi_denovo</i> | 14032148                | A/C  | NA                 | NA                            | NA                 |
| <i>Desi_wild_14036944</i> | NA                                  | <i>Ca_desi_denovo</i> | 14036944                | C/G  | NA                 | NA                            | NA                 |
| <i>Desi_wild_14041079</i> | NA                                  | <i>Ca_desi_denovo</i> | 14041079                | C/T  | NA                 | NA                            | NA                 |
| <i>Desi_wild_14041082</i> | NA                                  | <i>Ca_desi_denovo</i> | 14041082                | C/G  | NA                 | NA                            | NA                 |
| <i>Desi_wild_14049563</i> | NA                                  | <i>Ca_desi_denovo</i> | 14049563                | A/G  | NA                 | NA                            | NA                 |
| <i>Desi_wild_14049591</i> | NA                                  | <i>Ca_desi_denovo</i> | 14049591                | C/T  | NA                 | NA                            | NA                 |
| <i>Desi_wild_14049809</i> | NA                                  | <i>Ca_desi_denovo</i> | 14049809                | C/T  | NA                 | NA                            | NA                 |
| <i>Desi_wild_14056107</i> | NA                                  | <i>Ca_desi_denovo</i> | 14056107                | G/A  | NA                 | NA                            | NA                 |
| <i>Desi_wild_14058468</i> | NA                                  | <i>Ca_desi_denovo</i> | 14058468                | T/C  | NA                 | NA                            | NA                 |
| <i>Desi_wild_14058676</i> | NA                                  | <i>Ca_desi_denovo</i> | 14058676                | G/T  | NA                 | NA                            | NA                 |
| <i>Desi_wild_14070520</i> | NA                                  | <i>Ca_desi_denovo</i> | 14070520                | G/T  | NA                 | NA                            | NA                 |
| <i>Desi_wild_14078128</i> | NA                                  | <i>Ca_desi_denovo</i> | 14078128                | C/G  | NA                 | NA                            | NA                 |
| <i>Desi_wild_14078144</i> | NA                                  | <i>Ca_desi_denovo</i> | 14078144                | A/G  | NA                 | NA                            | NA                 |
| <i>Desi_wild_14086859</i> | NA                                  | <i>Ca_desi_denovo</i> | 14086859                | G/T  | NA                 | NA                            | NA                 |
| <i>Desi_wild_14086872</i> | NA                                  | <i>Ca_desi_denovo</i> | 14086872                | C/G  | NA                 | NA                            | NA                 |
| <i>Desi_wild_14088014</i> | NA                                  | <i>Ca_desi_denovo</i> | 14088014                | A/T  | NA                 | NA                            | NA                 |
| <i>Desi_wild_14088036</i> | NA                                  | <i>Ca_desi_denovo</i> | 14088036                | C/G  | NA                 | NA                            | NA                 |
| <i>Desi_wild_14092816</i> | NA                                  | <i>Ca_desi_denovo</i> | 14092816                | A/G  | NA                 | NA                            | NA                 |
| <i>Desi_wild_14101129</i> | NA                                  | <i>Ca_desi_denovo</i> | 14101129                | C/G  | NA                 | NA                            | NA                 |
| <i>Desi_wild_14112356</i> | NA                                  | <i>Ca_desi_denovo</i> | 14112356                | A/G  | NA                 | NA                            | NA                 |
| <i>Desi_wild_14118783</i> | NA                                  | <i>Ca_desi_denovo</i> | 14118783                | C/G  | NA                 | NA                            | NA                 |
| <i>Desi_wild_14118794</i> | NA                                  | <i>Ca_desi_denovo</i> | 14118794                | C/G  | NA                 | NA                            | NA                 |
| <i>Desi_wild_14118798</i> | NA                                  | <i>Ca_desi_denovo</i> | 14118798                | C/G  | NA                 | NA                            | NA                 |
| <i>Desi_wild_14118805</i> | NA                                  | <i>Ca_desi_denovo</i> | 14118805                | C/G  | NA                 | NA                            | NA                 |
| <i>Desi_wild_14124091</i> | NA                                  | <i>Ca_desi_denovo</i> | 14124091                | A/G  | NA                 | NA                            | NA                 |
| <i>Desi_wild_14135071</i> | NA                                  | <i>Ca_desi_denovo</i> | 14135071                | G/T  | NA                 | NA                            | NA                 |
| <i>Desi_wild_14135506</i> | NA                                  | <i>Ca_desi_denovo</i> | 14135506                | C/G  | NA                 | NA                            | NA                 |
| <i>Desi_wild_14135510</i> | NA                                  | <i>Ca_desi_denovo</i> | 14135510                | A/G  | NA                 | NA                            | NA                 |
| <i>Desi_wild_14135525</i> | NA                                  | <i>Ca_desi_denovo</i> | 14135525                | C/T  | NA                 | NA                            | NA                 |
| <i>Desi_wild_14135529</i> | NA                                  | <i>Ca_desi_denovo</i> | 14135529                | C/G  | NA                 | NA                            | NA                 |
| <i>Desi_wild_14136469</i> | NA                                  | <i>Ca_desi_denovo</i> | 14136469                | C/T  | NA                 | NA                            | NA                 |
| <i>Desi_wild_14143511</i> | NA                                  | <i>Ca_desi_denovo</i> | 14143511                | A/G  | NA                 | NA                            | NA                 |
| <i>Desi_wild_14144639</i> | NA                                  | <i>Ca_desi_denovo</i> | 14144639                | C/T  | NA                 | NA                            | NA                 |
| <i>Desi_wild_14147581</i> | NA                                  | <i>Ca_desi_denovo</i> | 14147581                | C/T  | NA                 | NA                            | NA                 |
| <i>Desi_wild_14147599</i> | NA                                  | <i>Ca_desi_denovo</i> | 14147599                | C/T  | NA                 | NA                            | NA                 |
| <i>Desi_wild_14147602</i> | NA                                  | <i>Ca_desi_denovo</i> | 14147602                | A/G  | NA                 | NA                            | NA                 |
| <i>Desi_wild_14172173</i> | NA                                  | <i>Ca_desi_denovo</i> | 14172173                | C/T  | NA                 | NA                            | NA                 |
| <i>Desi_wild_14172176</i> | NA                                  | <i>Ca_desi_denovo</i> | 14172176                | G/T  | NA                 | NA                            | NA                 |
| <i>Desi_wild_14172212</i> | NA                                  | <i>Ca_desi_denovo</i> | 14172212                | A/G  | NA                 | NA                            | NA                 |
| <i>Desi_wild_14175921</i> | NA                                  | <i>Ca_desi_denovo</i> | 14175921                | C/T  | NA                 | NA                            | NA                 |
| <i>Desi_wild_14187858</i> | NA                                  | <i>Ca_desi_denovo</i> | 14187858                | C/T  | NA                 | NA                            | NA                 |

| SNP IDs                   | NCBI dbSNP accession IDs (NCBI_SS#) | Chromosomes           | Physical positions (bp) | SNPs | Gene accession IDs | Sequence components of genome | Putative functions |
|---------------------------|-------------------------------------|-----------------------|-------------------------|------|--------------------|-------------------------------|--------------------|
| <i>Desi_wild_14187888</i> | NA                                  | <i>Ca_desi_denovo</i> | 14187888                | C/T  | NA                 | NA                            | NA                 |
| <i>Desi_wild_14187972</i> | NA                                  | <i>Ca_desi_denovo</i> | 14187972                | A/G  | NA                 | NA                            | NA                 |
| <i>Desi_wild_14195107</i> | NA                                  | <i>Ca_desi_denovo</i> | 14195107                | A/T  | NA                 | NA                            | NA                 |
| <i>Desi_wild_14197057</i> | NA                                  | <i>Ca_desi_denovo</i> | 14197057                | A/G  | NA                 | NA                            | NA                 |
| <i>Desi_wild_14204846</i> | NA                                  | <i>Ca_desi_denovo</i> | 14204846                | C/T  | NA                 | NA                            | NA                 |
| <i>Desi_wild_14205378</i> | NA                                  | <i>Ca_desi_denovo</i> | 14205378                | G/T  | NA                 | NA                            | NA                 |
| <i>Desi_wild_14205383</i> | NA                                  | <i>Ca_desi_denovo</i> | 14205383                | A/G  | NA                 | NA                            | NA                 |
| <i>Desi_wild_14211589</i> | NA                                  | <i>Ca_desi_denovo</i> | 14211589                | A/G  | NA                 | NA                            | NA                 |
| <i>Desi_wild_14211595</i> | NA                                  | <i>Ca_desi_denovo</i> | 14211595                | C/G  | NA                 | NA                            | NA                 |
| <i>Desi_wild_14212580</i> | NA                                  | <i>Ca_desi_denovo</i> | 14212580                | C/T  | NA                 | NA                            | NA                 |
| <i>Desi_wild_14213710</i> | NA                                  | <i>Ca_desi_denovo</i> | 14213710                | T/C  | NA                 | NA                            | NA                 |
| <i>Desi_wild_14219012</i> | NA                                  | <i>Ca_desi_denovo</i> | 14219012                | C/G  | NA                 | NA                            | NA                 |
| <i>Desi_wild_14219030</i> | NA                                  | <i>Ca_desi_denovo</i> | 14219030                | C/G  | NA                 | NA                            | NA                 |
| <i>Desi_wild_14220236</i> | NA                                  | <i>Ca_desi_denovo</i> | 14220236                | A/G  | NA                 | NA                            | NA                 |
| <i>Desi_wild_14220254</i> | NA                                  | <i>Ca_desi_denovo</i> | 14220254                | G/C  | NA                 | NA                            | NA                 |
| <i>Desi_wild_14222329</i> | NA                                  | <i>Ca_desi_denovo</i> | 14222329                | C/T  | NA                 | NA                            | NA                 |
| <i>Desi_wild_14222353</i> | NA                                  | <i>Ca_desi_denovo</i> | 14222353                | C/T  | NA                 | NA                            | NA                 |
| <i>Desi_wild_14226214</i> | NA                                  | <i>Ca_desi_denovo</i> | 14226214                | G/T  | NA                 | NA                            | NA                 |
| <i>Desi_wild_14247021</i> | NA                                  | <i>Ca_desi_denovo</i> | 14247021                | T/C  | NA                 | NA                            | NA                 |
| <i>Desi_wild_14247029</i> | NA                                  | <i>Ca_desi_denovo</i> | 14247029                | T/C  | NA                 | NA                            | NA                 |
| <i>Desi_wild_14253120</i> | NA                                  | <i>Ca_desi_denovo</i> | 14253120                | C/T  | NA                 | NA                            | NA                 |
| <i>Desi_wild_14255393</i> | NA                                  | <i>Ca_desi_denovo</i> | 14255393                | G/T  | NA                 | NA                            | NA                 |
| <i>Desi_wild_14257261</i> | NA                                  | <i>Ca_desi_denovo</i> | 14257261                | G/T  | NA                 | NA                            | NA                 |
| <i>Desi_wild_14259486</i> | NA                                  | <i>Ca_desi_denovo</i> | 14259486                | C/T  | NA                 | NA                            | NA                 |
| <i>Desi_wild_14259495</i> | NA                                  | <i>Ca_desi_denovo</i> | 14259495                | C/T  | NA                 | NA                            | NA                 |
| <i>Desi_wild_14261464</i> | NA                                  | <i>Ca_desi_denovo</i> | 14261464                | C/T  | NA                 | NA                            | NA                 |
| <i>Desi_wild_14265652</i> | NA                                  | <i>Ca_desi_denovo</i> | 14265652                | C/T  | NA                 | NA                            | NA                 |
| <i>Desi_wild_14273978</i> | NA                                  | <i>Ca_desi_denovo</i> | 14273978                | C/T  | NA                 | NA                            | NA                 |
| <i>Desi_wild_14287228</i> | NA                                  | <i>Ca_desi_denovo</i> | 14287228                | G/T  | NA                 | NA                            | NA                 |
| <i>Desi_wild_14290684</i> | NA                                  | <i>Ca_desi_denovo</i> | 14290684                | C/T  | NA                 | NA                            | NA                 |
| <i>Desi_wild_14312951</i> | NA                                  | <i>Ca_desi_denovo</i> | 14312951                | C/G  | NA                 | NA                            | NA                 |
| <i>Desi_wild_14312962</i> | NA                                  | <i>Ca_desi_denovo</i> | 14312962                | C/G  | NA                 | NA                            | NA                 |
| <i>Desi_wild_14312966</i> | NA                                  | <i>Ca_desi_denovo</i> | 14312966                | C/G  | NA                 | NA                            | NA                 |
| <i>Desi_wild_14321499</i> | NA                                  | <i>Ca_desi_denovo</i> | 14321499                | C/T  | NA                 | NA                            | NA                 |
| <i>Desi_wild_14321504</i> | NA                                  | <i>Ca_desi_denovo</i> | 14321504                | C/G  | NA                 | NA                            | NA                 |
| <i>Desi_wild_14329008</i> | NA                                  | <i>Ca_desi_denovo</i> | 14329008                | G/T  | NA                 | NA                            | NA                 |
| <i>Desi_wild_14329038</i> | NA                                  | <i>Ca_desi_denovo</i> | 14329038                | C/G  | NA                 | NA                            | NA                 |
| <i>Desi_wild_14336998</i> | NA                                  | <i>Ca_desi_denovo</i> | 14336998                | A/T  | NA                 | NA                            | NA                 |
| <i>Desi_wild_14338467</i> | NA                                  | <i>Ca_desi_denovo</i> | 14338467                | C/G  | NA                 | NA                            | NA                 |
| <i>Desi_wild_14340792</i> | NA                                  | <i>Ca_desi_denovo</i> | 14340792                | A/T  | NA                 | NA                            | NA                 |
| <i>Desi_wild_14340824</i> | NA                                  | <i>Ca_desi_denovo</i> | 14340824                | C/G  | NA                 | NA                            | NA                 |
| <i>Desi_wild_14342677</i> | NA                                  | <i>Ca_desi_denovo</i> | 14342677                | A/C  | NA                 | NA                            | NA                 |
| <i>Desi_wild_14342678</i> | NA                                  | <i>Ca_desi_denovo</i> | 14342678                | A/G  | NA                 | NA                            | NA                 |
| <i>Desi_wild_14342679</i> | NA                                  | <i>Ca_desi_denovo</i> | 14342679                | A/G  | NA                 | NA                            | NA                 |

| SNP IDs                   | NCBI dbSNP accession IDs (NCBI_SS#) | Chromosomes           | Physical positions (bp) | SNPs | Gene accession IDs | Sequence components of genome | Putative functions |
|---------------------------|-------------------------------------|-----------------------|-------------------------|------|--------------------|-------------------------------|--------------------|
| <i>Desi_wild_14346630</i> | NA                                  | <i>Ca_desi_denovo</i> | 14346630                | C/G  | NA                 | NA                            | NA                 |
| <i>Desi_wild_14354740</i> | NA                                  | <i>Ca_desi_denovo</i> | 14354740                | G/T  | NA                 | NA                            | NA                 |
| <i>Desi_wild_14362930</i> | NA                                  | <i>Ca_desi_denovo</i> | 14362930                | C/T  | NA                 | NA                            | NA                 |
| <i>Desi_wild_14362970</i> | NA                                  | <i>Ca_desi_denovo</i> | 14362970                | T/C  | NA                 | NA                            | NA                 |
| <i>Desi_wild_14365056</i> | NA                                  | <i>Ca_desi_denovo</i> | 14365056                | C/T  | NA                 | NA                            | NA                 |
| <i>Desi_wild_14365062</i> | NA                                  | <i>Ca_desi_denovo</i> | 14365062                | C/G  | NA                 | NA                            | NA                 |
| <i>Desi_wild_14380972</i> | NA                                  | <i>Ca_desi_denovo</i> | 14380972                | A/T  | NA                 | NA                            | NA                 |
| <i>Desi_wild_14380973</i> | NA                                  | <i>Ca_desi_denovo</i> | 14380973                | C/G  | NA                 | NA                            | NA                 |
| <i>Desi_wild_14380974</i> | NA                                  | <i>Ca_desi_denovo</i> | 14380974                | C/G  | NA                 | NA                            | NA                 |
| <i>Desi_wild_14381004</i> | NA                                  | <i>Ca_desi_denovo</i> | 14381004                | C/G  | NA                 | NA                            | NA                 |
| <i>Desi_wild_14389182</i> | NA                                  | <i>Ca_desi_denovo</i> | 14389182                | A/G  | NA                 | NA                            | NA                 |
| <i>Desi_wild_14391453</i> | NA                                  | <i>Ca_desi_denovo</i> | 14391453                | T/C  | NA                 | NA                            | NA                 |
| <i>Desi_wild_14394781</i> | NA                                  | <i>Ca_desi_denovo</i> | 14394781                | C/G  | NA                 | NA                            | NA                 |
| <i>Desi_wild_14395878</i> | NA                                  | <i>Ca_desi_denovo</i> | 14395878                | A/C  | NA                 | NA                            | NA                 |
| <i>Desi_wild_14395879</i> | NA                                  | <i>Ca_desi_denovo</i> | 14395879                | G/T  | NA                 | NA                            | NA                 |
| <i>Desi_wild_14403285</i> | NA                                  | <i>Ca_desi_denovo</i> | 14403285                | G/T  | NA                 | NA                            | NA                 |
| <i>Desi_wild_14406521</i> | NA                                  | <i>Ca_desi_denovo</i> | 14406521                | A/T  | NA                 | NA                            | NA                 |
| <i>Desi_wild_14406524</i> | NA                                  | <i>Ca_desi_denovo</i> | 14406524                | C/G  | NA                 | NA                            | NA                 |
| <i>Desi_wild_14406597</i> | NA                                  | <i>Ca_desi_denovo</i> | 14406597                | A/C  | NA                 | NA                            | NA                 |
| <i>Desi_wild_14412951</i> | NA                                  | <i>Ca_desi_denovo</i> | 14412951                | G/T  | NA                 | NA                            | NA                 |
| <i>Desi_wild_14414607</i> | NA                                  | <i>Ca_desi_denovo</i> | 14414607                | C/T  | NA                 | NA                            | NA                 |
| <i>Desi_wild_14429590</i> | NA                                  | <i>Ca_desi_denovo</i> | 14429590                | C/G  | NA                 | NA                            | NA                 |
| <i>Desi_wild_14429599</i> | NA                                  | <i>Ca_desi_denovo</i> | 14429599                | A/T  | NA                 | NA                            | NA                 |
| <i>Desi_wild_14440774</i> | NA                                  | <i>Ca_desi_denovo</i> | 14440774                | G/A  | NA                 | NA                            | NA                 |
| <i>Desi_wild_14450728</i> | NA                                  | <i>Ca_desi_denovo</i> | 14450728                | A/G  | NA                 | NA                            | NA                 |
| <i>Desi_wild_14450748</i> | NA                                  | <i>Ca_desi_denovo</i> | 14450748                | A/G  | NA                 | NA                            | NA                 |
| <i>Desi_wild_14450895</i> | NA                                  | <i>Ca_desi_denovo</i> | 14450895                | C/T  | NA                 | NA                            | NA                 |
| <i>Desi_wild_14452881</i> | NA                                  | <i>Ca_desi_denovo</i> | 14452881                | A/T  | NA                 | NA                            | NA                 |
| <i>Desi_wild_14452887</i> | NA                                  | <i>Ca_desi_denovo</i> | 14452887                | A/G  | NA                 | NA                            | NA                 |
| <i>Desi_wild_14452899</i> | NA                                  | <i>Ca_desi_denovo</i> | 14452899                | C/T  | NA                 | NA                            | NA                 |
| <i>Desi_wild_14455151</i> | NA                                  | <i>Ca_desi_denovo</i> | 14455151                | G/T  | NA                 | NA                            | NA                 |
| <i>Desi_wild_14469780</i> | NA                                  | <i>Ca_desi_denovo</i> | 14469780                | G/T  | NA                 | NA                            | NA                 |
| <i>Desi_wild_14482945</i> | NA                                  | <i>Ca_desi_denovo</i> | 14482945                | A/G  | NA                 | NA                            | NA                 |
| <i>Desi_wild_14493665</i> | NA                                  | <i>Ca_desi_denovo</i> | 14493665                | C/G  | NA                 | NA                            | NA                 |
| <i>Desi_wild_14503229</i> | NA                                  | <i>Ca_desi_denovo</i> | 14503229                | A/G  | NA                 | NA                            | NA                 |
| <i>Desi_wild_14510663</i> | NA                                  | <i>Ca_desi_denovo</i> | 14510663                | A/C  | NA                 | NA                            | NA                 |
| <i>Desi_wild_14526923</i> | NA                                  | <i>Ca_desi_denovo</i> | 14526923                | A/G  | NA                 | NA                            | NA                 |
| <i>Desi_wild_14529161</i> | NA                                  | <i>Ca_desi_denovo</i> | 14529161                | A/C  | NA                 | NA                            | NA                 |
| <i>Desi_wild_14529162</i> | NA                                  | <i>Ca_desi_denovo</i> | 14529162                | G/T  | NA                 | NA                            | NA                 |
| <i>Desi_wild_14529163</i> | NA                                  | <i>Ca_desi_denovo</i> | 14529163                | A/G  | NA                 | NA                            | NA                 |
| <i>Desi_wild_14529164</i> | NA                                  | <i>Ca_desi_denovo</i> | 14529164                | A/T  | NA                 | NA                            | NA                 |
| <i>Desi_wild_14535061</i> | NA                                  | <i>Ca_desi_denovo</i> | 14535061                | A/G  | NA                 | NA                            | NA                 |
| <i>Desi_wild_14535070</i> | NA                                  | <i>Ca_desi_denovo</i> | 14535070                | A/G  | NA                 | NA                            | NA                 |
| <i>Desi_wild_14535097</i> | NA                                  | <i>Ca_desi_denovo</i> | 14535097                | A/G  | NA                 | NA                            | NA                 |

| SNP IDs                   | NCBI dbSNP accession IDs (NCBI_SS#) | Chromosomes           | Physical positions (bp) | SNPs | Gene accession IDs | Sequence components of genome | Putative functions |
|---------------------------|-------------------------------------|-----------------------|-------------------------|------|--------------------|-------------------------------|--------------------|
| <i>Desi_wild_14537143</i> | NA                                  | <i>Ca_desi_denovo</i> | 14537143                | C/G  | NA                 | NA                            | NA                 |
| <i>Desi_wild_14541858</i> | NA                                  | <i>Ca_desi_denovo</i> | 14541858                | G/T  | NA                 | NA                            | NA                 |
| <i>Desi_wild_14547550</i> | NA                                  | <i>Ca_desi_denovo</i> | 14547550                | G/T  | NA                 | NA                            | NA                 |
| <i>Desi_wild_14549881</i> | NA                                  | <i>Ca_desi_denovo</i> | 14549881                | A/G  | NA                 | NA                            | NA                 |
| <i>Desi_wild_14549918</i> | NA                                  | <i>Ca_desi_denovo</i> | 14549918                | C/T  | NA                 | NA                            | NA                 |
| <i>Desi_wild_14569498</i> | NA                                  | <i>Ca_desi_denovo</i> | 14569498                | C/G  | NA                 | NA                            | NA                 |
| <i>Desi_wild_14569500</i> | NA                                  | <i>Ca_desi_denovo</i> | 14569500                | A/T  | NA                 | NA                            | NA                 |
| <i>Desi_wild_14569534</i> | NA                                  | <i>Ca_desi_denovo</i> | 14569534                | C/G  | NA                 | NA                            | NA                 |
| <i>Desi_wild_14569681</i> | NA                                  | <i>Ca_desi_denovo</i> | 14569681                | G/T  | NA                 | NA                            | NA                 |
| <i>Desi_wild_14575922</i> | NA                                  | <i>Ca_desi_denovo</i> | 14575922                | A/G  | NA                 | NA                            | NA                 |
| <i>Desi_wild_14575967</i> | NA                                  | <i>Ca_desi_denovo</i> | 14575967                | T/C  | NA                 | NA                            | NA                 |
| <i>Desi_wild_14580875</i> | NA                                  | <i>Ca_desi_denovo</i> | 14580875                | C/G  | NA                 | NA                            | NA                 |
| <i>Desi_wild_14582296</i> | NA                                  | <i>Ca_desi_denovo</i> | 14582296                | C/T  | NA                 | NA                            | NA                 |
| <i>Desi_wild_14590463</i> | NA                                  | <i>Ca_desi_denovo</i> | 14590463                | A/G  | NA                 | NA                            | NA                 |
| <i>Desi_wild_14590493</i> | NA                                  | <i>Ca_desi_denovo</i> | 14590493                | T/C  | NA                 | NA                            | NA                 |
| <i>Desi_wild_14594401</i> | NA                                  | <i>Ca_desi_denovo</i> | 14594401                | C/T  | NA                 | NA                            | NA                 |
| <i>Desi_wild_14598348</i> | NA                                  | <i>Ca_desi_denovo</i> | 14598348                | T/C  | NA                 | NA                            | NA                 |
| <i>Desi_wild_14598364</i> | NA                                  | <i>Ca_desi_denovo</i> | 14598364                | A/G  | NA                 | NA                            | NA                 |
| <i>Desi_wild_14598365</i> | NA                                  | <i>Ca_desi_denovo</i> | 14598365                | G/C  | NA                 | NA                            | NA                 |
| <i>Desi_wild_14598366</i> | NA                                  | <i>Ca_desi_denovo</i> | 14598366                | C/T  | NA                 | NA                            | NA                 |
| <i>Desi_wild_14611692</i> | NA                                  | <i>Ca_desi_denovo</i> | 14611692                | G/T  | NA                 | NA                            | NA                 |
| <i>Desi_wild_14626022</i> | NA                                  | <i>Ca_desi_denovo</i> | 14626022                | C/T  | NA                 | NA                            | NA                 |
| <i>Desi_wild_14626061</i> | NA                                  | <i>Ca_desi_denovo</i> | 14626061                | C/T  | NA                 | NA                            | NA                 |
| <i>Desi_wild_14629706</i> | NA                                  | <i>Ca_desi_denovo</i> | 14629706                | C/T  | NA                 | NA                            | NA                 |
| <i>Desi_wild_14646787</i> | NA                                  | <i>Ca_desi_denovo</i> | 14646787                | A/T  | NA                 | NA                            | NA                 |
| <i>Desi_wild_14646826</i> | NA                                  | <i>Ca_desi_denovo</i> | 14646826                | C/T  | NA                 | NA                            | NA                 |
| <i>Desi_wild_14653526</i> | NA                                  | <i>Ca_desi_denovo</i> | 14653526                | C/G  | NA                 | NA                            | NA                 |
| <i>Desi_wild_14653539</i> | NA                                  | <i>Ca_desi_denovo</i> | 14653539                | C/T  | NA                 | NA                            | NA                 |
| <i>Desi_wild_14653613</i> | NA                                  | <i>Ca_desi_denovo</i> | 14653613                | A/C  | NA                 | NA                            | NA                 |
| <i>Desi_wild_14653614</i> | NA                                  | <i>Ca_desi_denovo</i> | 14653614                | A/G  | NA                 | NA                            | NA                 |
| <i>Desi_wild_14658941</i> | NA                                  | <i>Ca_desi_denovo</i> | 14658941                | A/G  | NA                 | NA                            | NA                 |
| <i>Desi_wild_14659028</i> | NA                                  | <i>Ca_desi_denovo</i> | 14659028                | C/G  | NA                 | NA                            | NA                 |
| <i>Desi_wild_14659029</i> | NA                                  | <i>Ca_desi_denovo</i> | 14659029                | C/G  | NA                 | NA                            | NA                 |
| <i>Desi_wild_14661413</i> | NA                                  | <i>Ca_desi_denovo</i> | 14661413                | A/G  | NA                 | NA                            | NA                 |
| <i>Desi_wild_14661470</i> | NA                                  | <i>Ca_desi_denovo</i> | 14661470                | C/T  | NA                 | NA                            | NA                 |
| <i>Desi_wild_14700580</i> | NA                                  | <i>Ca_desi_denovo</i> | 14700580                | C/G  | NA                 | NA                            | NA                 |
| <i>Desi_wild_14700583</i> | NA                                  | <i>Ca_desi_denovo</i> | 14700583                | T/C  | NA                 | NA                            | NA                 |
| <i>Desi_wild_14706176</i> | NA                                  | <i>Ca_desi_denovo</i> | 14706176                | C/G  | NA                 | NA                            | NA                 |
| <i>Desi_wild_14706182</i> | NA                                  | <i>Ca_desi_denovo</i> | 14706182                | C/T  | NA                 | NA                            | NA                 |
| <i>Desi_wild_14706201</i> | NA                                  | <i>Ca_desi_denovo</i> | 14706201                | C/G  | NA                 | NA                            | NA                 |
| <i>Desi_wild_14720420</i> | NA                                  | <i>Ca_desi_denovo</i> | 14720420                | C/T  | NA                 | NA                            | NA                 |
| <i>Desi_wild_14722389</i> | NA                                  | <i>Ca_desi_denovo</i> | 14722389                | A/C  | NA                 | NA                            | NA                 |
| <i>Desi_wild_14722392</i> | NA                                  | <i>Ca_desi_denovo</i> | 14722392                | C/T  | NA                 | NA                            | NA                 |
| <i>Desi_wild_14722393</i> | NA                                  | <i>Ca_desi_denovo</i> | 14722393                | C/G  | NA                 | NA                            | NA                 |

| SNP IDs                   | NCBI dbSNP accession IDs (NCBI_SS#) | Chromosomes           | Physical positions (bp) | SNPs | Gene accession IDs | Sequence components of genome | Putative functions |
|---------------------------|-------------------------------------|-----------------------|-------------------------|------|--------------------|-------------------------------|--------------------|
| <i>Desi_wild_14722394</i> | NA                                  | <i>Ca_desi_denovo</i> | 14722394                | A/G  | NA                 | NA                            | NA                 |
| <i>Desi_wild_14729544</i> | NA                                  | <i>Ca_desi_denovo</i> | 14729544                | A/G  | NA                 | NA                            | NA                 |
| <i>Desi_wild_14729578</i> | NA                                  | <i>Ca_desi_denovo</i> | 14729578                | A/G  | NA                 | NA                            | NA                 |
| <i>Desi_wild_14736282</i> | NA                                  | <i>Ca_desi_denovo</i> | 14736282                | C/T  | NA                 | NA                            | NA                 |
| <i>Desi_wild_14736288</i> | NA                                  | <i>Ca_desi_denovo</i> | 14736288                | C/T  | NA                 | NA                            | NA                 |
| <i>Desi_wild_14736327</i> | NA                                  | <i>Ca_desi_denovo</i> | 14736327                | G/T  | NA                 | NA                            | NA                 |
| <i>Desi_wild_14736330</i> | NA                                  | <i>Ca_desi_denovo</i> | 14736330                | C/T  | NA                 | NA                            | NA                 |
| <i>Desi_wild_14739912</i> | NA                                  | <i>Ca_desi_denovo</i> | 14739912                | A/C  | NA                 | NA                            | NA                 |
| <i>Desi_wild_14739925</i> | NA                                  | <i>Ca_desi_denovo</i> | 14739925                | G/T  | NA                 | NA                            | NA                 |
| <i>Desi_wild_14744670</i> | NA                                  | <i>Ca_desi_denovo</i> | 14744670                | A/G  | NA                 | NA                            | NA                 |
| <i>Desi_wild_14744673</i> | NA                                  | <i>Ca_desi_denovo</i> | 14744673                | C/G  | NA                 | NA                            | NA                 |
| <i>Desi_wild_14744675</i> | NA                                  | <i>Ca_desi_denovo</i> | 14744675                | A/G  | NA                 | NA                            | NA                 |
| <i>Desi_wild_14751434</i> | NA                                  | <i>Ca_desi_denovo</i> | 14751434                | G/T  | NA                 | NA                            | NA                 |
| <i>Desi_wild_14755949</i> | NA                                  | <i>Ca_desi_denovo</i> | 14755949                | C/T  | NA                 | NA                            | NA                 |
| <i>Desi_wild_14755952</i> | NA                                  | <i>Ca_desi_denovo</i> | 14755952                | C/T  | NA                 | NA                            | NA                 |
| <i>Desi_wild_14756098</i> | NA                                  | <i>Ca_desi_denovo</i> | 14756098                | A/G  | NA                 | NA                            | NA                 |
| <i>Desi_wild_14775224</i> | NA                                  | <i>Ca_desi_denovo</i> | 14775224                | A/G  | NA                 | NA                            | NA                 |
| <i>Desi_wild_14775227</i> | NA                                  | <i>Ca_desi_denovo</i> | 14775227                | A/G  | NA                 | NA                            | NA                 |
| <i>Desi_wild_14775248</i> | NA                                  | <i>Ca_desi_denovo</i> | 14775248                | G/T  | NA                 | NA                            | NA                 |
| <i>Desi_wild_14778178</i> | NA                                  | <i>Ca_desi_denovo</i> | 14778178                | C/T  | NA                 | NA                            | NA                 |
| <i>Desi_wild_14778214</i> | NA                                  | <i>Ca_desi_denovo</i> | 14778214                | A/G  | NA                 | NA                            | NA                 |
| <i>Desi_wild_14778498</i> | NA                                  | <i>Ca_desi_denovo</i> | 14778498                | C/G  | NA                 | NA                            | NA                 |
| <i>Desi_wild_14778501</i> | NA                                  | <i>Ca_desi_denovo</i> | 14778501                | T/C  | NA                 | NA                            | NA                 |
| <i>Desi_wild_14778504</i> | NA                                  | <i>Ca_desi_denovo</i> | 14778504                | C/T  | NA                 | NA                            | NA                 |
| <i>Desi_wild_14778516</i> | NA                                  | <i>Ca_desi_denovo</i> | 14778516                | C/G  | NA                 | NA                            | NA                 |
| <i>Desi_wild_14781585</i> | NA                                  | <i>Ca_desi_denovo</i> | 14781585                | C/G  | NA                 | NA                            | NA                 |
| <i>Desi_wild_14781600</i> | NA                                  | <i>Ca_desi_denovo</i> | 14781600                | A/G  | NA                 | NA                            | NA                 |
| <i>Desi_wild_14799639</i> | NA                                  | <i>Ca_desi_denovo</i> | 14799639                | C/T  | NA                 | NA                            | NA                 |
| <i>Desi_wild_14807363</i> | NA                                  | <i>Ca_desi_denovo</i> | 14807363                | G/T  | NA                 | NA                            | NA                 |
| <i>Desi_wild_14811709</i> | NA                                  | <i>Ca_desi_denovo</i> | 14811709                | C/T  | NA                 | NA                            | NA                 |
| <i>Desi_wild_14820634</i> | NA                                  | <i>Ca_desi_denovo</i> | 14820634                | A/G  | NA                 | NA                            | NA                 |
| <i>Desi_wild_14820640</i> | NA                                  | <i>Ca_desi_denovo</i> | 14820640                | C/T  | NA                 | NA                            | NA                 |
| <i>Desi_wild_14820643</i> | NA                                  | <i>Ca_desi_denovo</i> | 14820643                | C/G  | NA                 | NA                            | NA                 |
| <i>Desi_wild_14821415</i> | NA                                  | <i>Ca_desi_denovo</i> | 14821415                | A/G  | NA                 | NA                            | NA                 |
| <i>Desi_wild_14840156</i> | NA                                  | <i>Ca_desi_denovo</i> | 14840156                | C/T  | NA                 | NA                            | NA                 |
| <i>Desi_wild_14855203</i> | NA                                  | <i>Ca_desi_denovo</i> | 14855203                | A/C  | NA                 | NA                            | NA                 |
| <i>Desi_wild_14855204</i> | NA                                  | <i>Ca_desi_denovo</i> | 14855204                | G/T  | NA                 | NA                            | NA                 |
| <i>Desi_wild_14857081</i> | NA                                  | <i>Ca_desi_denovo</i> | 14857081                | A/G  | NA                 | NA                            | NA                 |
| <i>Desi_wild_14857680</i> | NA                                  | <i>Ca_desi_denovo</i> | 14857680                | A/G  | NA                 | NA                            | NA                 |
| <i>Desi_wild_14857683</i> | NA                                  | <i>Ca_desi_denovo</i> | 14857683                | C/G  | NA                 | NA                            | NA                 |
| <i>Desi_wild_14872405</i> | NA                                  | <i>Ca_desi_denovo</i> | 14872405                | C/T  | NA                 | NA                            | NA                 |
| <i>Desi_wild_14881115</i> | NA                                  | <i>Ca_desi_denovo</i> | 14881115                | A/G  | NA                 | NA                            | NA                 |
| <i>Desi_wild_14887419</i> | NA                                  | <i>Ca_desi_denovo</i> | 14887419                | A/C  | NA                 | NA                            | NA                 |
| <i>Desi_wild_14887440</i> | NA                                  | <i>Ca_desi_denovo</i> | 14887440                | C/G  | NA                 | NA                            | NA                 |

| SNP IDs                   | NCBI dbSNP accession IDs (NCBI_SS#) | Chromosomes           | Physical positions (bp) | SNPs | Gene accession IDs | Sequence components of genome | Putative functions |
|---------------------------|-------------------------------------|-----------------------|-------------------------|------|--------------------|-------------------------------|--------------------|
| <i>Desi_wild_14887449</i> | NA                                  | <i>Ca_desi_denovo</i> | 14887449                | C/G  | NA                 | NA                            | NA                 |
| <i>Desi_wild_14887452</i> | NA                                  | <i>Ca_desi_denovo</i> | 14887452                | A/G  | NA                 | NA                            | NA                 |
| <i>Desi_wild_14893027</i> | NA                                  | <i>Ca_desi_denovo</i> | 14893027                | C/T  | NA                 | NA                            | NA                 |
| <i>Desi_wild_14893030</i> | NA                                  | <i>Ca_desi_denovo</i> | 14893030                | C/T  | NA                 | NA                            | NA                 |
| <i>Desi_wild_14908599</i> | NA                                  | <i>Ca_desi_denovo</i> | 14908599                | A/G  | NA                 | NA                            | NA                 |
| <i>Desi_wild_14912689</i> | NA                                  | <i>Ca_desi_denovo</i> | 14912689                | G/C  | NA                 | NA                            | NA                 |
| <i>Desi_wild_14921236</i> | NA                                  | <i>Ca_desi_denovo</i> | 14921236                | A/G  | NA                 | NA                            | NA                 |
| <i>Desi_wild_14930323</i> | NA                                  | <i>Ca_desi_denovo</i> | 14930323                | C/T  | NA                 | NA                            | NA                 |
| <i>Desi_wild_14930326</i> | NA                                  | <i>Ca_desi_denovo</i> | 14930326                | C/G  | NA                 | NA                            | NA                 |
| <i>Desi_wild_14940900</i> | NA                                  | <i>Ca_desi_denovo</i> | 14940900                | C/G  | NA                 | NA                            | NA                 |
| <i>Desi_wild_14940927</i> | NA                                  | <i>Ca_desi_denovo</i> | 14940927                | C/G  | NA                 | NA                            | NA                 |
| <i>Desi_wild_14940939</i> | NA                                  | <i>Ca_desi_denovo</i> | 14940939                | C/G  | NA                 | NA                            | NA                 |
| <i>Desi_wild_14940945</i> | NA                                  | <i>Ca_desi_denovo</i> | 14940945                | A/G  | NA                 | NA                            | NA                 |
| <i>Desi_wild_14969890</i> | NA                                  | <i>Ca_desi_denovo</i> | 14969890                | C/T  | NA                 | NA                            | NA                 |
| <i>Desi_wild_14969914</i> | NA                                  | <i>Ca_desi_denovo</i> | 14969914                | C/T  | NA                 | NA                            | NA                 |
| <i>Desi_wild_14982624</i> | NA                                  | <i>Ca_desi_denovo</i> | 14982624                | A/G  | NA                 | NA                            | NA                 |
| <i>Desi_wild_14991392</i> | NA                                  | <i>Ca_desi_denovo</i> | 14991392                | G/T  | NA                 | NA                            | NA                 |
| <i>Desi_wild_15012363</i> | NA                                  | <i>Ca_desi_denovo</i> | 15012363                | C/T  | NA                 | NA                            | NA                 |
| <i>Desi_wild_15012364</i> | NA                                  | <i>Ca_desi_denovo</i> | 15012364                | C/T  | NA                 | NA                            | NA                 |
| <i>Desi_wild_15019501</i> | NA                                  | <i>Ca_desi_denovo</i> | 15019501                | G/T  | NA                 | NA                            | NA                 |
| <i>Desi_wild_15024319</i> | NA                                  | <i>Ca_desi_denovo</i> | 15024319                | A/G  | NA                 | NA                            | NA                 |
| <i>Desi_wild_15026505</i> | NA                                  | <i>Ca_desi_denovo</i> | 15026505                | G/T  | NA                 | NA                            | NA                 |
| <i>Desi_wild_15026576</i> | NA                                  | <i>Ca_desi_denovo</i> | 15026576                | A/G  | NA                 | NA                            | NA                 |
| <i>Desi_wild_15034827</i> | NA                                  | <i>Ca_desi_denovo</i> | 15034827                | A/G  | NA                 | NA                            | NA                 |
| <i>Desi_wild_15047585</i> | NA                                  | <i>Ca_desi_denovo</i> | 15047585                | A/G  | NA                 | NA                            | NA                 |
| <i>Desi_wild_15047588</i> | NA                                  | <i>Ca_desi_denovo</i> | 15047588                | C/G  | NA                 | NA                            | NA                 |
| <i>Desi_wild_15048664</i> | NA                                  | <i>Ca_desi_denovo</i> | 15048664                | C/G  | NA                 | NA                            | NA                 |
| <i>Desi_wild_15048675</i> | NA                                  | <i>Ca_desi_denovo</i> | 15048675                | A/C  | NA                 | NA                            | NA                 |
| <i>Desi_wild_15050442</i> | NA                                  | <i>Ca_desi_denovo</i> | 15050442                | A/G  | NA                 | NA                            | NA                 |
| <i>Desi_wild_15051388</i> | NA                                  | <i>Ca_desi_denovo</i> | 15051388                | A/G  | NA                 | NA                            | NA                 |
| <i>Desi_wild_15051400</i> | NA                                  | <i>Ca_desi_denovo</i> | 15051400                | A/G  | NA                 | NA                            | NA                 |
| <i>Desi_wild_15059411</i> | NA                                  | <i>Ca_desi_denovo</i> | 15059411                | A/G  | NA                 | NA                            | NA                 |
| <i>Desi_wild_15059438</i> | NA                                  | <i>Ca_desi_denovo</i> | 15059438                | A/C  | NA                 | NA                            | NA                 |
| <i>Desi_wild_15060699</i> | NA                                  | <i>Ca_desi_denovo</i> | 15060699                | A/G  | NA                 | NA                            | NA                 |
| <i>Desi_wild_15060722</i> | NA                                  | <i>Ca_desi_denovo</i> | 15060722                | C/T  | NA                 | NA                            | NA                 |
| <i>Desi_wild_15071204</i> | NA                                  | <i>Ca_desi_denovo</i> | 15071204                | G/T  | NA                 | NA                            | NA                 |
| <i>Desi_wild_15071930</i> | NA                                  | <i>Ca_desi_denovo</i> | 15071930                | G/T  | NA                 | NA                            | NA                 |
| <i>Desi_wild_15075279</i> | NA                                  | <i>Ca_desi_denovo</i> | 15075279                | G/T  | NA                 | NA                            | NA                 |
| <i>Desi_wild_15081518</i> | NA                                  | <i>Ca_desi_denovo</i> | 15081518                | A/G  | NA                 | NA                            | NA                 |
| <i>Desi_wild_15081665</i> | NA                                  | <i>Ca_desi_denovo</i> | 15081665                | C/T  | NA                 | NA                            | NA                 |
| <i>Desi_wild_15103703</i> | NA                                  | <i>Ca_desi_denovo</i> | 15103703                | G/T  | NA                 | NA                            | NA                 |
| <i>Desi_wild_15103707</i> | NA                                  | <i>Ca_desi_denovo</i> | 15103707                | C/T  | NA                 | NA                            | NA                 |
| <i>Desi_wild_15106727</i> | NA                                  | <i>Ca_desi_denovo</i> | 15106727                | C/G  | NA                 | NA                            | NA                 |
| <i>Desi_wild_15123273</i> | NA                                  | <i>Ca_desi_denovo</i> | 15123273                | G/T  | NA                 | NA                            | NA                 |

| SNP IDs                   | NCBI dbSNP accession IDs (NCBI_SS#) | Chromosomes           | Physical positions (bp) | SNPs | Gene accession IDs | Sequence components of genome | Putative functions |
|---------------------------|-------------------------------------|-----------------------|-------------------------|------|--------------------|-------------------------------|--------------------|
| <i>Desi_wild_15126551</i> | NA                                  | <i>Ca_desi_denovo</i> | 15126551                | C/T  | NA                 | NA                            | NA                 |
| <i>Desi_wild_15129767</i> | NA                                  | <i>Ca_desi_denovo</i> | 15129767                | C/T  | NA                 | NA                            | NA                 |
| <i>Desi_wild_15129791</i> | NA                                  | <i>Ca_desi_denovo</i> | 15129791                | C/T  | NA                 | NA                            | NA                 |
| <i>Desi_wild_15129792</i> | NA                                  | <i>Ca_desi_denovo</i> | 15129792                | G/T  | NA                 | NA                            | NA                 |
| <i>Desi_wild_15134644</i> | NA                                  | <i>Ca_desi_denovo</i> | 15134644                | A/G  | NA                 | NA                            | NA                 |
| <i>Desi_wild_15140814</i> | NA                                  | <i>Ca_desi_denovo</i> | 15140814                | C/T  | NA                 | NA                            | NA                 |
| <i>Desi_wild_15162851</i> | NA                                  | <i>Ca_desi_denovo</i> | 15162851                | C/T  | NA                 | NA                            | NA                 |
| <i>Desi_wild_15162869</i> | NA                                  | <i>Ca_desi_denovo</i> | 15162869                | C/T  | NA                 | NA                            | NA                 |
| <i>Desi_wild_15168742</i> | NA                                  | <i>Ca_desi_denovo</i> | 15168742                | G/T  | NA                 | NA                            | NA                 |
| <i>Desi_wild_15176427</i> | NA                                  | <i>Ca_desi_denovo</i> | 15176427                | C/T  | NA                 | NA                            | NA                 |
| <i>Desi_wild_15176439</i> | NA                                  | <i>Ca_desi_denovo</i> | 15176439                | G/T  | NA                 | NA                            | NA                 |
| <i>Desi_wild_15176466</i> | NA                                  | <i>Ca_desi_denovo</i> | 15176466                | A/C  | NA                 | NA                            | NA                 |
| <i>Desi_wild_15186943</i> | NA                                  | <i>Ca_desi_denovo</i> | 15186943                | A/T  | NA                 | NA                            | NA                 |
| <i>Desi_wild_15194649</i> | NA                                  | <i>Ca_desi_denovo</i> | 15194649                | C/G  | NA                 | NA                            | NA                 |
| <i>Desi_wild_15194651</i> | NA                                  | <i>Ca_desi_denovo</i> | 15194651                | G/T  | NA                 | NA                            | NA                 |
| <i>Desi_wild_15194655</i> | NA                                  | <i>Ca_desi_denovo</i> | 15194655                | C/G  | NA                 | NA                            | NA                 |
| <i>Desi_wild_15194670</i> | NA                                  | <i>Ca_desi_denovo</i> | 15194670                | C/G  | NA                 | NA                            | NA                 |
| <i>Desi_wild_15195405</i> | NA                                  | <i>Ca_desi_denovo</i> | 15195405                | C/G  | NA                 | NA                            | NA                 |
| <i>Desi_wild_15195425</i> | NA                                  | <i>Ca_desi_denovo</i> | 15195425                | C/G  | NA                 | NA                            | NA                 |
| <i>Desi_wild_15211831</i> | NA                                  | <i>Ca_desi_denovo</i> | 15211831                | G/T  | NA                 | NA                            | NA                 |
| <i>Desi_wild_15212607</i> | NA                                  | <i>Ca_desi_denovo</i> | 15212607                | C/T  | NA                 | NA                            | NA                 |
| <i>Desi_wild_15212631</i> | NA                                  | <i>Ca_desi_denovo</i> | 15212631                | C/G  | NA                 | NA                            | NA                 |
| <i>Desi_wild_15223544</i> | NA                                  | <i>Ca_desi_denovo</i> | 15223544                | A/G  | NA                 | NA                            | NA                 |
| <i>Desi_wild_15231015</i> | NA                                  | <i>Ca_desi_denovo</i> | 15231015                | G/T  | NA                 | NA                            | NA                 |
| <i>Desi_wild_15234109</i> | NA                                  | <i>Ca_desi_denovo</i> | 15234109                | C/G  | NA                 | NA                            | NA                 |
| <i>Desi_wild_15234111</i> | NA                                  | <i>Ca_desi_denovo</i> | 15234111                | C/G  | NA                 | NA                            | NA                 |
| <i>Desi_wild_15237103</i> | NA                                  | <i>Ca_desi_denovo</i> | 15237103                | A/C  | NA                 | NA                            | NA                 |
| <i>Desi_wild_15237104</i> | NA                                  | <i>Ca_desi_denovo</i> | 15237104                | A/G  | NA                 | NA                            | NA                 |
| <i>Desi_wild_15238738</i> | NA                                  | <i>Ca_desi_denovo</i> | 15238738                | C/T  | NA                 | NA                            | NA                 |
| <i>Desi_wild_15238786</i> | NA                                  | <i>Ca_desi_denovo</i> | 15238786                | C/T  | NA                 | NA                            | NA                 |
| <i>Desi_wild_15238789</i> | NA                                  | <i>Ca_desi_denovo</i> | 15238789                | A/C  | NA                 | NA                            | NA                 |
| <i>Desi_wild_15238792</i> | NA                                  | <i>Ca_desi_denovo</i> | 15238792                | C/T  | NA                 | NA                            | NA                 |
| <i>Desi_wild_15240626</i> | NA                                  | <i>Ca_desi_denovo</i> | 15240626                | G/C  | NA                 | NA                            | NA                 |
| <i>Desi_wild_15240632</i> | NA                                  | <i>Ca_desi_denovo</i> | 15240632                | T/C  | NA                 | NA                            | NA                 |
| <i>Desi_wild_15243197</i> | NA                                  | <i>Ca_desi_denovo</i> | 15243197                | C/T  | NA                 | NA                            | NA                 |
| <i>Desi_wild_15268330</i> | NA                                  | <i>Ca_desi_denovo</i> | 15268330                | C/T  | NA                 | NA                            | NA                 |
| <i>Desi_wild_15285872</i> | NA                                  | <i>Ca_desi_denovo</i> | 15285872                | G/T  | NA                 | NA                            | NA                 |
| <i>Desi_wild_15308657</i> | NA                                  | <i>Ca_desi_denovo</i> | 15308657                | C/T  | NA                 | NA                            | NA                 |
| <i>Desi_wild_15312841</i> | NA                                  | <i>Ca_desi_denovo</i> | 15312841                | C/T  | NA                 | NA                            | NA                 |
| <i>Desi_wild_15316692</i> | NA                                  | <i>Ca_desi_denovo</i> | 15316692                | C/T  | NA                 | NA                            | NA                 |
| <i>Desi_wild_15317195</i> | NA                                  | <i>Ca_desi_denovo</i> | 15317195                | A/G  | NA                 | NA                            | NA                 |
| <i>Desi_wild_15325004</i> | NA                                  | <i>Ca_desi_denovo</i> | 15325004                | C/G  | NA                 | NA                            | NA                 |
| <i>Desi_wild_15328732</i> | NA                                  | <i>Ca_desi_denovo</i> | 15328732                | A/G  | NA                 | NA                            | NA                 |
| <i>Desi_wild_15334133</i> | NA                                  | <i>Ca_desi_denovo</i> | 15334133                | G/T  | NA                 | NA                            | NA                 |

| SNP IDs                   | NCBI dbSNP accession IDs (NCBI_SS#) | Chromosomes           | Physical positions (bp) | SNPs | Gene accession IDs | Sequence components of genome | Putative functions |
|---------------------------|-------------------------------------|-----------------------|-------------------------|------|--------------------|-------------------------------|--------------------|
| <i>Desi_wild_15334145</i> | NA                                  | <i>Ca_desi_denovo</i> | 15334145                | A/G  | NA                 | NA                            | NA                 |
| <i>Desi_wild_15335328</i> | NA                                  | <i>Ca_desi_denovo</i> | 15335328                | G/T  | NA                 | NA                            | NA                 |
| <i>Desi_wild_15339833</i> | NA                                  | <i>Ca_desi_denovo</i> | 15339833                | C/T  | NA                 | NA                            | NA                 |
| <i>Desi_wild_15346748</i> | NA                                  | <i>Ca_desi_denovo</i> | 15346748                | A/G  | NA                 | NA                            | NA                 |
| <i>Desi_wild_15346760</i> | NA                                  | <i>Ca_desi_denovo</i> | 15346760                | C/T  | NA                 | NA                            | NA                 |
| <i>Desi_wild_15367302</i> | NA                                  | <i>Ca_desi_denovo</i> | 15367302                | C/G  | NA                 | NA                            | NA                 |
| <i>Desi_wild_15367306</i> | NA                                  | <i>Ca_desi_denovo</i> | 15367306                | C/G  | NA                 | NA                            | NA                 |
| <i>Desi_wild_15374340</i> | NA                                  | <i>Ca_desi_denovo</i> | 15374340                | G/T  | NA                 | NA                            | NA                 |
| <i>Desi_wild_15380775</i> | NA                                  | <i>Ca_desi_denovo</i> | 15380775                | C/T  | NA                 | NA                            | NA                 |
| <i>Desi_wild_15384200</i> | NA                                  | <i>Ca_desi_denovo</i> | 15384200                | C/G  | NA                 | NA                            | NA                 |
| <i>Desi_wild_15400796</i> | NA                                  | <i>Ca_desi_denovo</i> | 15400796                | C/T  | NA                 | NA                            | NA                 |
| <i>Desi_wild_15400799</i> | NA                                  | <i>Ca_desi_denovo</i> | 15400799                | C/G  | NA                 | NA                            | NA                 |
| <i>Desi_wild_15400821</i> | NA                                  | <i>Ca_desi_denovo</i> | 15400821                | A/T  | NA                 | NA                            | NA                 |
| <i>Desi_wild_15401597</i> | NA                                  | <i>Ca_desi_denovo</i> | 15401597                | C/T  | NA                 | NA                            | NA                 |
| <i>Desi_wild_15406323</i> | NA                                  | <i>Ca_desi_denovo</i> | 15406323                | C/G  | NA                 | NA                            | NA                 |
| <i>Desi_wild_15407554</i> | NA                                  | <i>Ca_desi_denovo</i> | 15407554                | C/T  | NA                 | NA                            | NA                 |
| <i>Desi_wild_15414304</i> | NA                                  | <i>Ca_desi_denovo</i> | 15414304                | C/A  | NA                 | NA                            | NA                 |
| <i>Desi_wild_15414319</i> | NA                                  | <i>Ca_desi_denovo</i> | 15414319                | A/G  | NA                 | NA                            | NA                 |
| <i>Desi_wild_15414325</i> | NA                                  | <i>Ca_desi_denovo</i> | 15414325                | G/A  | NA                 | NA                            | NA                 |
| <i>Desi_wild_15414529</i> | NA                                  | <i>Ca_desi_denovo</i> | 15414529                | G/T  | NA                 | NA                            | NA                 |
| <i>Desi_wild_15419802</i> | NA                                  | <i>Ca_desi_denovo</i> | 15419802                | C/T  | NA                 | NA                            | NA                 |
| <i>Desi_wild_15419880</i> | NA                                  | <i>Ca_desi_denovo</i> | 15419880                | C/T  | NA                 | NA                            | NA                 |
| <i>Desi_wild_15428167</i> | NA                                  | <i>Ca_desi_denovo</i> | 15428167                | C/T  | NA                 | NA                            | NA                 |
| <i>Desi_wild_15428197</i> | NA                                  | <i>Ca_desi_denovo</i> | 15428197                | A/G  | NA                 | NA                            | NA                 |
| <i>Desi_wild_15428206</i> | NA                                  | <i>Ca_desi_denovo</i> | 15428206                | C/G  | NA                 | NA                            | NA                 |
| <i>Desi_wild_15428242</i> | NA                                  | <i>Ca_desi_denovo</i> | 15428242                | G/T  | NA                 | NA                            | NA                 |
| <i>Desi_wild_15452114</i> | NA                                  | <i>Ca_desi_denovo</i> | 15452114                | C/G  | NA                 | NA                            | NA                 |
| <i>Desi_wild_15461890</i> | NA                                  | <i>Ca_desi_denovo</i> | 15461890                | C/T  | NA                 | NA                            | NA                 |
| <i>Desi_wild_15467339</i> | NA                                  | <i>Ca_desi_denovo</i> | 15467339                | G/T  | NA                 | NA                            | NA                 |
| <i>Desi_wild_15489134</i> | NA                                  | <i>Ca_desi_denovo</i> | 15489134                | A/G  | NA                 | NA                            | NA                 |
| <i>Desi_wild_15493044</i> | NA                                  | <i>Ca_desi_denovo</i> | 15493044                | C/T  | NA                 | NA                            | NA                 |
| <i>Desi_wild_15493050</i> | NA                                  | <i>Ca_desi_denovo</i> | 15493050                | A/G  | NA                 | NA                            | NA                 |
| <i>Desi_wild_15493059</i> | NA                                  | <i>Ca_desi_denovo</i> | 15493059                | G/T  | NA                 | NA                            | NA                 |
| <i>Desi_wild_15493089</i> | NA                                  | <i>Ca_desi_denovo</i> | 15493089                | C/G  | NA                 | NA                            | NA                 |
| <i>Desi_wild_15496755</i> | NA                                  | <i>Ca_desi_denovo</i> | 15496755                | G/T  | NA                 | NA                            | NA                 |
| <i>Desi_wild_15507538</i> | NA                                  | <i>Ca_desi_denovo</i> | 15507538                | C/T  | NA                 | NA                            | NA                 |
| <i>Desi_wild_15507541</i> | NA                                  | <i>Ca_desi_denovo</i> | 15507541                | A/G  | NA                 | NA                            | NA                 |
| <i>Desi_wild_15509898</i> | NA                                  | <i>Ca_desi_denovo</i> | 15509898                | A/C  | NA                 | NA                            | NA                 |
| <i>Desi_wild_15509919</i> | NA                                  | <i>Ca_desi_denovo</i> | 15509919                | A/G  | NA                 | NA                            | NA                 |
| <i>Desi_wild_15509925</i> | NA                                  | <i>Ca_desi_denovo</i> | 15509925                | A/G  | NA                 | NA                            | NA                 |
| <i>Desi_wild_15513845</i> | NA                                  | <i>Ca_desi_denovo</i> | 15513845                | C/T  | NA                 | NA                            | NA                 |
| <i>Desi_wild_15513881</i> | NA                                  | <i>Ca_desi_denovo</i> | 15513881                | C/T  | NA                 | NA                            | NA                 |
| <i>Desi_wild_15513887</i> | NA                                  | <i>Ca_desi_denovo</i> | 15513887                | A/G  | NA                 | NA                            | NA                 |
| <i>Desi_wild_15529872</i> | NA                                  | <i>Ca_desi_denovo</i> | 15529872                | C/T  | NA                 | NA                            | NA                 |



| SNP IDs                   | NCBI dbSNP accession IDs (NCBI_SS#) | Chromosomes           | Physical positions (bp) | SNPs | Gene accession IDs | Sequence components of genome | Putative functions |
|---------------------------|-------------------------------------|-----------------------|-------------------------|------|--------------------|-------------------------------|--------------------|
| <i>Desi_wild_15529873</i> | NA                                  | <i>Ca_desi_denovo</i> | 15529873                | C/T  | NA                 | NA                            | NA                 |
| <i>Desi_wild_15569126</i> | NA                                  | <i>Ca_desi_denovo</i> | 15569126                | G/T  | NA                 | NA                            | NA                 |
| <i>Desi_wild_15578455</i> | NA                                  | <i>Ca_desi_denovo</i> | 15578455                | C/G  | NA                 | NA                            | NA                 |
| <i>Desi_wild_15578485</i> | NA                                  | <i>Ca_desi_denovo</i> | 15578485                | A/G  | NA                 | NA                            | NA                 |
| <i>Desi_wild_15597824</i> | NA                                  | <i>Ca_desi_denovo</i> | 15597824                | A/C  | NA                 | NA                            | NA                 |
| <i>Desi_wild_15597830</i> | NA                                  | <i>Ca_desi_denovo</i> | 15597830                | A/G  | NA                 | NA                            | NA                 |
| <i>Desi_wild_15602195</i> | NA                                  | <i>Ca_desi_denovo</i> | 15602195                | A/G  | NA                 | NA                            | NA                 |
| <i>Desi_wild_15602224</i> | NA                                  | <i>Ca_desi_denovo</i> | 15602224                | C/T  | NA                 | NA                            | NA                 |
| <i>Desi_wild_15614670</i> | NA                                  | <i>Ca_desi_denovo</i> | 15614670                | C/T  | NA                 | NA                            | NA                 |
| <i>Desi_wild_15625607</i> | NA                                  | <i>Ca_desi_denovo</i> | 15625607                | A/C  | NA                 | NA                            | NA                 |
| <i>Desi_wild_15658849</i> | NA                                  | <i>Ca_desi_denovo</i> | 15658849                | C/T  | NA                 | NA                            | NA                 |
| <i>Desi_wild_15667136</i> | NA                                  | <i>Ca_desi_denovo</i> | 15667136                | G/T  | NA                 | NA                            | NA                 |
| <i>Desi_wild_15668151</i> | NA                                  | <i>Ca_desi_denovo</i> | 15668151                | A/G  | NA                 | NA                            | NA                 |
| <i>Desi_wild_15668154</i> | NA                                  | <i>Ca_desi_denovo</i> | 15668154                | T/C  | NA                 | NA                            | NA                 |
| <i>Desi_wild_15676677</i> | NA                                  | <i>Ca_desi_denovo</i> | 15676677                | A/G  | NA                 | NA                            | NA                 |
| <i>Desi_wild_15685612</i> | NA                                  | <i>Ca_desi_denovo</i> | 15685612                | C/T  | NA                 | NA                            | NA                 |
| <i>Desi_wild_15685625</i> | NA                                  | <i>Ca_desi_denovo</i> | 15685625                | A/G  | NA                 | NA                            | NA                 |
| <i>Desi_wild_15687282</i> | NA                                  | <i>Ca_desi_denovo</i> | 15687282                | C/T  | NA                 | NA                            | NA                 |
| <i>Desi_wild_15700615</i> | NA                                  | <i>Ca_desi_denovo</i> | 15700615                | A/G  | NA                 | NA                            | NA                 |
| <i>Desi_wild_15700619</i> | NA                                  | <i>Ca_desi_denovo</i> | 15700619                | C/G  | NA                 | NA                            | NA                 |
| <i>Desi_wild_15700621</i> | NA                                  | <i>Ca_desi_denovo</i> | 15700621                | C/T  | NA                 | NA                            | NA                 |
| <i>Desi_wild_15716671</i> | NA                                  | <i>Ca_desi_denovo</i> | 15716671                | C/G  | NA                 | NA                            | NA                 |
| <i>Desi_wild_15716689</i> | NA                                  | <i>Ca_desi_denovo</i> | 15716689                | A/G  | NA                 | NA                            | NA                 |
| <i>Desi_wild_15716710</i> | NA                                  | <i>Ca_desi_denovo</i> | 15716710                | A/G  | NA                 | NA                            | NA                 |
| <i>Desi_wild_15716713</i> | NA                                  | <i>Ca_desi_denovo</i> | 15716713                | A/G  | NA                 | NA                            | NA                 |
| <i>Desi_wild_15726758</i> | NA                                  | <i>Ca_desi_denovo</i> | 15726758                | C/G  | NA                 | NA                            | NA                 |
| <i>Desi_wild_15729424</i> | NA                                  | <i>Ca_desi_denovo</i> | 15729424                | A/C  | NA                 | NA                            | NA                 |
| <i>Desi_wild_15738986</i> | NA                                  | <i>Ca_desi_denovo</i> | 15738986                | C/G  | NA                 | NA                            | NA                 |
| <i>Desi_wild_15739589</i> | NA                                  | <i>Ca_desi_denovo</i> | 15739589                | G/T  | NA                 | NA                            | NA                 |
| <i>Desi_wild_15750157</i> | NA                                  | <i>Ca_desi_denovo</i> | 15750157                | G/T  | NA                 | NA                            | NA                 |
| <i>Desi_wild_15750175</i> | NA                                  | <i>Ca_desi_denovo</i> | 15750175                | G/T  | NA                 | NA                            | NA                 |
| <i>Desi_wild_15769233</i> | NA                                  | <i>Ca_desi_denovo</i> | 15769233                | C/T  | NA                 | NA                            | NA                 |
| <i>Desi_wild_15769252</i> | NA                                  | <i>Ca_desi_denovo</i> | 15769252                | G/A  | NA                 | NA                            | NA                 |
| <i>Desi_wild_15790905</i> | NA                                  | <i>Ca_desi_denovo</i> | 15790905                | A/G  | NA                 | NA                            | NA                 |
| <i>Desi_wild_15811742</i> | NA                                  | <i>Ca_desi_denovo</i> | 15811742                | C/T  | NA                 | NA                            | NA                 |
| <i>Desi_wild_15813373</i> | NA                                  | <i>Ca_desi_denovo</i> | 15813373                | A/C  | NA                 | NA                            | NA                 |
| <i>Desi_wild_15813374</i> | NA                                  | <i>Ca_desi_denovo</i> | 15813374                | A/G  | NA                 | NA                            | NA                 |
| <i>Desi_wild_15831340</i> | NA                                  | <i>Ca_desi_denovo</i> | 15831340                | A/C  | NA                 | NA                            | NA                 |
| <i>Desi_wild_15831367</i> | NA                                  | <i>Ca_desi_denovo</i> | 15831367                | A/C  | NA                 | NA                            | NA                 |
| <i>Desi_wild_15842428</i> | NA                                  | <i>Ca_desi_denovo</i> | 15842428                | A/G  | NA                 | NA                            | NA                 |
| <i>Desi_wild_15856059</i> | NA                                  | <i>Ca_desi_denovo</i> | 15856059                | C/G  | NA                 | NA                            | NA                 |
| <i>Desi_wild_15873713</i> | NA                                  | <i>Ca_desi_denovo</i> | 15873713                | A/C  | NA                 | NA                            | NA                 |
| <i>Desi_wild_15874377</i> | NA                                  | <i>Ca_desi_denovo</i> | 15874377                | A/C  | NA                 | NA                            | NA                 |
| <i>Desi_wild_15874395</i> | NA                                  | <i>Ca_desi_denovo</i> | 15874395                | G/A  | NA                 | NA                            | NA                 |

| SNP IDs                   | NCBI dbSNP accession IDs (NCBI_SS#) | Chromosomes           | Physical positions (bp) | SNPs | Gene accession IDs | Sequence components of genome | Putative functions |
|---------------------------|-------------------------------------|-----------------------|-------------------------|------|--------------------|-------------------------------|--------------------|
| <i>Desi_wild_15905720</i> | NA                                  | <i>Ca_desi_denovo</i> | 15905720                | C/G  | NA                 | NA                            | NA                 |
| <i>Desi_wild_15905753</i> | NA                                  | <i>Ca_desi_denovo</i> | 15905753                | C/G  | NA                 | NA                            | NA                 |
| <i>Desi_wild_15905789</i> | NA                                  | <i>Ca_desi_denovo</i> | 15905789                | C/G  | NA                 | NA                            | NA                 |
| <i>Desi_wild_15905798</i> | NA                                  | <i>Ca_desi_denovo</i> | 15905798                | C/G  | NA                 | NA                            | NA                 |
| <i>Desi_wild_15909061</i> | NA                                  | <i>Ca_desi_denovo</i> | 15909061                | T/C  | NA                 | NA                            | NA                 |
| <i>Desi_wild_15926202</i> | NA                                  | <i>Ca_desi_denovo</i> | 15926202                | G/T  | NA                 | NA                            | NA                 |
| <i>Desi_wild_15928302</i> | NA                                  | <i>Ca_desi_denovo</i> | 15928302                | G/T  | NA                 | NA                            | NA                 |
| <i>Desi_wild_15941244</i> | NA                                  | <i>Ca_desi_denovo</i> | 15941244                | G/T  | NA                 | NA                            | NA                 |
| <i>Desi_wild_15962386</i> | NA                                  | <i>Ca_desi_denovo</i> | 15962386                | C/G  | NA                 | NA                            | NA                 |
| <i>Desi_wild_15972515</i> | NA                                  | <i>Ca_desi_denovo</i> | 15972515                | C/T  | NA                 | NA                            | NA                 |
| <i>Desi_wild_15973944</i> | NA                                  | <i>Ca_desi_denovo</i> | 15973944                | C/T  | NA                 | NA                            | NA                 |
| <i>Desi_wild_15973963</i> | NA                                  | <i>Ca_desi_denovo</i> | 15973963                | C/G  | NA                 | NA                            | NA                 |
| <i>Desi_wild_15980988</i> | NA                                  | <i>Ca_desi_denovo</i> | 15980988                | G/T  | NA                 | NA                            | NA                 |
| <i>Desi_wild_15988900</i> | NA                                  | <i>Ca_desi_denovo</i> | 15988900                | C/G  | NA                 | NA                            | NA                 |
| <i>Desi_wild_15988933</i> | NA                                  | <i>Ca_desi_denovo</i> | 15988933                | C/G  | NA                 | NA                            | NA                 |
| <i>Desi_wild_15993237</i> | NA                                  | <i>Ca_desi_denovo</i> | 15993237                | A/G  | NA                 | NA                            | NA                 |
| <i>Desi_wild_15993270</i> | NA                                  | <i>Ca_desi_denovo</i> | 15993270                | G/C  | NA                 | NA                            | NA                 |
| <i>Desi_wild_15993288</i> | NA                                  | <i>Ca_desi_denovo</i> | 15993288                | G/A  | NA                 | NA                            | NA                 |
| <i>Desi_wild_15993294</i> | NA                                  | <i>Ca_desi_denovo</i> | 15993294                | A/G  | NA                 | NA                            | NA                 |
| <i>Desi_wild_16000668</i> | NA                                  | <i>Ca_desi_denovo</i> | 16000668                | A/G  | NA                 | NA                            | NA                 |
| <i>Desi_wild_16006714</i> | NA                                  | <i>Ca_desi_denovo</i> | 16006714                | C/T  | NA                 | NA                            | NA                 |
| <i>Desi_wild_16006762</i> | NA                                  | <i>Ca_desi_denovo</i> | 16006762                | C/G  | NA                 | NA                            | NA                 |
| <i>Desi_wild_16015261</i> | NA                                  | <i>Ca_desi_denovo</i> | 16015261                | C/G  | NA                 | NA                            | NA                 |
| <i>Desi_wild_16023140</i> | NA                                  | <i>Ca_desi_denovo</i> | 16023140                | T/C  | NA                 | NA                            | NA                 |
| <i>Desi_wild_16023183</i> | NA                                  | <i>Ca_desi_denovo</i> | 16023183                | T/C  | NA                 | NA                            | NA                 |
| <i>Desi_wild_16023191</i> | NA                                  | <i>Ca_desi_denovo</i> | 16023191                | G/C  | NA                 | NA                            | NA                 |
| <i>Desi_wild_16029315</i> | NA                                  | <i>Ca_desi_denovo</i> | 16029315                | C/T  | NA                 | NA                            | NA                 |
| <i>Desi_wild_16031329</i> | NA                                  | <i>Ca_desi_denovo</i> | 16031329                | G/T  | NA                 | NA                            | NA                 |
| <i>Desi_wild_16031359</i> | NA                                  | <i>Ca_desi_denovo</i> | 16031359                | C/T  | NA                 | NA                            | NA                 |
| <i>Desi_wild_16033028</i> | NA                                  | <i>Ca_desi_denovo</i> | 16033028                | A/G  | NA                 | NA                            | NA                 |
| <i>Desi_wild_16045570</i> | NA                                  | <i>Ca_desi_denovo</i> | 16045570                | C/T  | NA                 | NA                            | NA                 |
| <i>Desi_wild_16045668</i> | NA                                  | <i>Ca_desi_denovo</i> | 16045668                | C/G  | NA                 | NA                            | NA                 |
| <i>Desi_wild_16045675</i> | NA                                  | <i>Ca_desi_denovo</i> | 16045675                | C/G  | NA                 | NA                            | NA                 |
| <i>Desi_wild_16046748</i> | NA                                  | <i>Ca_desi_denovo</i> | 16046748                | A/G  | NA                 | NA                            | NA                 |
| <i>Desi_wild_16048419</i> | NA                                  | <i>Ca_desi_denovo</i> | 16048419                | A/G  | NA                 | NA                            | NA                 |
| <i>Desi_wild_16058487</i> | NA                                  | <i>Ca_desi_denovo</i> | 16058487                | A/G  | NA                 | NA                            | NA                 |
| <i>Desi_wild_16058523</i> | NA                                  | <i>Ca_desi_denovo</i> | 16058523                | A/G  | NA                 | NA                            | NA                 |
| <i>Desi_wild_16067393</i> | NA                                  | <i>Ca_desi_denovo</i> | 16067393                | A/G  | NA                 | NA                            | NA                 |
| <i>Desi_wild_16067403</i> | NA                                  | <i>Ca_desi_denovo</i> | 16067403                | A/C  | NA                 | NA                            | NA                 |
| <i>Desi_wild_16067404</i> | NA                                  | <i>Ca_desi_denovo</i> | 16067404                | A/G  | NA                 | NA                            | NA                 |
| <i>Desi_wild_16070384</i> | NA                                  | <i>Ca_desi_denovo</i> | 16070384                | C/T  | NA                 | NA                            | NA                 |
| <i>Desi_wild_16070386</i> | NA                                  | <i>Ca_desi_denovo</i> | 16070386                | C/G  | NA                 | NA                            | NA                 |
| <i>Desi_wild_16077019</i> | NA                                  | <i>Ca_desi_denovo</i> | 16077019                | C/T  | NA                 | NA                            | NA                 |
| <i>Desi_wild_16077894</i> | NA                                  | <i>Ca_desi_denovo</i> | 16077894                | C/G  | NA                 | NA                            | NA                 |

| SNP IDs                   | NCBI dbSNP accession IDs (NCBI_SS#) | Chromosomes           | Physical positions (bp) | SNPs | Gene accession IDs | Sequence components of genome | Putative functions |
|---------------------------|-------------------------------------|-----------------------|-------------------------|------|--------------------|-------------------------------|--------------------|
| <i>Desi_wild_16078351</i> | NA                                  | <i>Ca_desi_denovo</i> | 16078351                | C/T  | NA                 | NA                            | NA                 |
| <i>Desi_wild_16078355</i> | NA                                  | <i>Ca_desi_denovo</i> | 16078355                | C/T  | NA                 | NA                            | NA                 |
| <i>Desi_wild_16081212</i> | NA                                  | <i>Ca_desi_denovo</i> | 16081212                | G/T  | NA                 | NA                            | NA                 |
| <i>Desi_wild_16082068</i> | NA                                  | <i>Ca_desi_denovo</i> | 16082068                | T/C  | NA                 | NA                            | NA                 |
| <i>Desi_wild_16084389</i> | NA                                  | <i>Ca_desi_denovo</i> | 16084389                | G/T  | NA                 | NA                            | NA                 |
| <i>Desi_wild_16089455</i> | NA                                  | <i>Ca_desi_denovo</i> | 16089455                | A/G  | NA                 | NA                            | NA                 |
| <i>Desi_wild_16089491</i> | NA                                  | <i>Ca_desi_denovo</i> | 16089491                | A/G  | NA                 | NA                            | NA                 |
| <i>Desi_wild_16092981</i> | NA                                  | <i>Ca_desi_denovo</i> | 16092981                | A/G  | NA                 | NA                            | NA                 |
| <i>Desi_wild_16100103</i> | NA                                  | <i>Ca_desi_denovo</i> | 16100103                | A/G  | NA                 | NA                            | NA                 |
| <i>Desi_wild_16114587</i> | NA                                  | <i>Ca_desi_denovo</i> | 16114587                | A/G  | NA                 | NA                            | NA                 |
| <i>Desi_wild_16117966</i> | NA                                  | <i>Ca_desi_denovo</i> | 16117966                | C/G  | NA                 | NA                            | NA                 |
| <i>Desi_wild_16122911</i> | NA                                  | <i>Ca_desi_denovo</i> | 16122911                | C/T  | NA                 | NA                            | NA                 |
| <i>Desi_wild_16126528</i> | NA                                  | <i>Ca_desi_denovo</i> | 16126528                | C/T  | NA                 | NA                            | NA                 |
| <i>Desi_wild_16134575</i> | NA                                  | <i>Ca_desi_denovo</i> | 16134575                | C/G  | NA                 | NA                            | NA                 |
| <i>Desi_wild_16145242</i> | NA                                  | <i>Ca_desi_denovo</i> | 16145242                | G/C  | NA                 | NA                            | NA                 |
| <i>Desi_wild_16148322</i> | NA                                  | <i>Ca_desi_denovo</i> | 16148322                | A/G  | NA                 | NA                            | NA                 |
| <i>Desi_wild_16155254</i> | NA                                  | <i>Ca_desi_denovo</i> | 16155254                | C/T  | NA                 | NA                            | NA                 |
| <i>Desi_wild_16163359</i> | NA                                  | <i>Ca_desi_denovo</i> | 16163359                | A/G  | NA                 | NA                            | NA                 |
| <i>Desi_wild_16170096</i> | NA                                  | <i>Ca_desi_denovo</i> | 16170096                | A/C  | NA                 | NA                            | NA                 |
| <i>Desi_wild_16170097</i> | NA                                  | <i>Ca_desi_denovo</i> | 16170097                | A/G  | NA                 | NA                            | NA                 |
| <i>Desi_wild_16170098</i> | NA                                  | <i>Ca_desi_denovo</i> | 16170098                | A/G  | NA                 | NA                            | NA                 |
| <i>Desi_wild_16170099</i> | NA                                  | <i>Ca_desi_denovo</i> | 16170099                | A/T  | NA                 | NA                            | NA                 |
| <i>Desi_wild_16170497</i> | NA                                  | <i>Ca_desi_denovo</i> | 16170497                | C/T  | NA                 | NA                            | NA                 |
| <i>Desi_wild_16170524</i> | NA                                  | <i>Ca_desi_denovo</i> | 16170524                | C/T  | NA                 | NA                            | NA                 |
| <i>Desi_wild_16170829</i> | NA                                  | <i>Ca_desi_denovo</i> | 16170829                | G/T  | NA                 | NA                            | NA                 |
| <i>Desi_wild_16190537</i> | NA                                  | <i>Ca_desi_denovo</i> | 16190537                | C/T  | NA                 | NA                            | NA                 |
| <i>Desi_wild_16195008</i> | NA                                  | <i>Ca_desi_denovo</i> | 16195008                | C/G  | NA                 | NA                            | NA                 |
| <i>Desi_wild_16202032</i> | NA                                  | <i>Ca_desi_denovo</i> | 16202032                | G/T  | NA                 | NA                            | NA                 |
| <i>Desi_wild_16203374</i> | NA                                  | <i>Ca_desi_denovo</i> | 16203374                | T/C  | NA                 | NA                            | NA                 |
| <i>Desi_wild_16203386</i> | NA                                  | <i>Ca_desi_denovo</i> | 16203386                | T/G  | NA                 | NA                            | NA                 |
| <i>Desi_wild_16211358</i> | NA                                  | <i>Ca_desi_denovo</i> | 16211358                | A/C  | NA                 | NA                            | NA                 |
| <i>Desi_wild_16211359</i> | NA                                  | <i>Ca_desi_denovo</i> | 16211359                | C/G  | NA                 | NA                            | NA                 |
| <i>Desi_wild_16211401</i> | NA                                  | <i>Ca_desi_denovo</i> | 16211401                | T/G  | NA                 | NA                            | NA                 |
| <i>Desi_wild_16212671</i> | NA                                  | <i>Ca_desi_denovo</i> | 16212671                | A/G  | NA                 | NA                            | NA                 |
| <i>Desi_wild_16214091</i> | NA                                  | <i>Ca_desi_denovo</i> | 16214091                | C/G  | NA                 | NA                            | NA                 |
| <i>Desi_wild_16214100</i> | NA                                  | <i>Ca_desi_denovo</i> | 16214100                | A/G  | NA                 | NA                            | NA                 |
| <i>Desi_wild_16214991</i> | NA                                  | <i>Ca_desi_denovo</i> | 16214991                | G/C  | NA                 | NA                            | NA                 |
| <i>Desi_wild_16229374</i> | NA                                  | <i>Ca_desi_denovo</i> | 16229374                | G/T  | NA                 | NA                            | NA                 |
| <i>Desi_wild_16229556</i> | NA                                  | <i>Ca_desi_denovo</i> | 16229556                | C/T  | NA                 | NA                            | NA                 |
| <i>Desi_wild_16237372</i> | NA                                  | <i>Ca_desi_denovo</i> | 16237372                | C/G  | NA                 | NA                            | NA                 |
| <i>Desi_wild_16237396</i> | NA                                  | <i>Ca_desi_denovo</i> | 16237396                | C/G  | NA                 | NA                            | NA                 |
| <i>Desi_wild_16238336</i> | NA                                  | <i>Ca_desi_denovo</i> | 16238336                | C/G  | NA                 | NA                            | NA                 |
| <i>Desi_wild_16238341</i> | NA                                  | <i>Ca_desi_denovo</i> | 16238341                | C/T  | NA                 | NA                            | NA                 |
| <i>Desi_wild_16242701</i> | NA                                  | <i>Ca_desi_denovo</i> | 16242701                | C/G  | NA                 | NA                            | NA                 |

| SNP IDs                   | NCBI dbSNP accession IDs (NCBI_SS#) | Chromosomes           | Physical positions (bp) | SNPs | Gene accession IDs | Sequence components of genome | Putative functions |
|---------------------------|-------------------------------------|-----------------------|-------------------------|------|--------------------|-------------------------------|--------------------|
| <i>Desi_wild_16242710</i> | NA                                  | <i>Ca_desi_denovo</i> | 16242710                | A/G  | NA                 | NA                            | NA                 |
| <i>Desi_wild_16246960</i> | NA                                  | <i>Ca_desi_denovo</i> | 16246960                | A/G  | NA                 | NA                            | NA                 |
| <i>Desi_wild_16246973</i> | NA                                  | <i>Ca_desi_denovo</i> | 16246973                | A/G  | NA                 | NA                            | NA                 |
| <i>Desi_wild_16247740</i> | NA                                  | <i>Ca_desi_denovo</i> | 16247740                | A/C  | NA                 | NA                            | NA                 |
| <i>Desi_wild_16251825</i> | NA                                  | <i>Ca_desi_denovo</i> | 16251825                | A/G  | NA                 | NA                            | NA                 |
| <i>Desi_wild_16254766</i> | NA                                  | <i>Ca_desi_denovo</i> | 16254766                | A/C  | NA                 | NA                            | NA                 |
| <i>Desi_wild_16259028</i> | NA                                  | <i>Ca_desi_denovo</i> | 16259028                | C/T  | NA                 | NA                            | NA                 |
| <i>Desi_wild_16259074</i> | NA                                  | <i>Ca_desi_denovo</i> | 16259074                | C/T  | NA                 | NA                            | NA                 |
| <i>Desi_wild_16277618</i> | NA                                  | <i>Ca_desi_denovo</i> | 16277618                | G/T  | NA                 | NA                            | NA                 |
| <i>Desi_wild_16286489</i> | NA                                  | <i>Ca_desi_denovo</i> | 16286489                | C/G  | NA                 | NA                            | NA                 |
| <i>Desi_wild_16286513</i> | NA                                  | <i>Ca_desi_denovo</i> | 16286513                | C/G  | NA                 | NA                            | NA                 |
| <i>Desi_wild_16287176</i> | NA                                  | <i>Ca_desi_denovo</i> | 16287176                | G/T  | NA                 | NA                            | NA                 |
| <i>Desi_wild_16287179</i> | NA                                  | <i>Ca_desi_denovo</i> | 16287179                | C/G  | NA                 | NA                            | NA                 |
| <i>Desi_wild_16327723</i> | NA                                  | <i>Ca_desi_denovo</i> | 16327723                | A/G  | NA                 | NA                            | NA                 |
| <i>Desi_wild_16329911</i> | NA                                  | <i>Ca_desi_denovo</i> | 16329911                | C/T  | NA                 | NA                            | NA                 |
| <i>Desi_wild_16337896</i> | NA                                  | <i>Ca_desi_denovo</i> | 16337896                | A/G  | NA                 | NA                            | NA                 |
| <i>Desi_wild_16343048</i> | NA                                  | <i>Ca_desi_denovo</i> | 16343048                | C/T  | NA                 | NA                            | NA                 |
| <i>Desi_wild_16345303</i> | NA                                  | <i>Ca_desi_denovo</i> | 16345303                | A/G  | NA                 | NA                            | NA                 |
| <i>Desi_wild_16346638</i> | NA                                  | <i>Ca_desi_denovo</i> | 16346638                | A/T  | NA                 | NA                            | NA                 |
| <i>Desi_wild_16346647</i> | NA                                  | <i>Ca_desi_denovo</i> | 16346647                | A/G  | NA                 | NA                            | NA                 |
| <i>Desi_wild_16347110</i> | NA                                  | <i>Ca_desi_denovo</i> | 16347110                | G/T  | NA                 | NA                            | NA                 |
| <i>Desi_wild_16347141</i> | NA                                  | <i>Ca_desi_denovo</i> | 16347141                | A/G  | NA                 | NA                            | NA                 |
| <i>Desi_wild_16347331</i> | NA                                  | <i>Ca_desi_denovo</i> | 16347331                | C/G  | NA                 | NA                            | NA                 |
| <i>Desi_wild_16347367</i> | NA                                  | <i>Ca_desi_denovo</i> | 16347367                | A/G  | NA                 | NA                            | NA                 |
| <i>Desi_wild_16366695</i> | NA                                  | <i>Ca_desi_denovo</i> | 16366695                | A/G  | NA                 | NA                            | NA                 |
| <i>Desi_wild_16369114</i> | NA                                  | <i>Ca_desi_denovo</i> | 16369114                | G/T  | NA                 | NA                            | NA                 |
| <i>Desi_wild_16370370</i> | NA                                  | <i>Ca_desi_denovo</i> | 16370370                | A/G  | NA                 | NA                            | NA                 |
| <i>Desi_wild_16370374</i> | NA                                  | <i>Ca_desi_denovo</i> | 16370374                | A/C  | NA                 | NA                            | NA                 |
| <i>Desi_wild_16381239</i> | NA                                  | <i>Ca_desi_denovo</i> | 16381239                | G/T  | NA                 | NA                            | NA                 |
| <i>Desi_wild_16382648</i> | NA                                  | <i>Ca_desi_denovo</i> | 16382648                | A/G  | NA                 | NA                            | NA                 |
| <i>Desi_wild_16384427</i> | NA                                  | <i>Ca_desi_denovo</i> | 16384427                | C/G  | NA                 | NA                            | NA                 |
| <i>Desi_wild_16384430</i> | NA                                  | <i>Ca_desi_denovo</i> | 16384430                | A/G  | NA                 | NA                            | NA                 |
| <i>Desi_wild_16384445</i> | NA                                  | <i>Ca_desi_denovo</i> | 16384445                | C/G  | NA                 | NA                            | NA                 |
| <i>Desi_wild_16384448</i> | NA                                  | <i>Ca_desi_denovo</i> | 16384448                | A/G  | NA                 | NA                            | NA                 |
| <i>Desi_wild_16393422</i> | NA                                  | <i>Ca_desi_denovo</i> | 16393422                | A/G  | NA                 | NA                            | NA                 |
| <i>Desi_wild_16399165</i> | NA                                  | <i>Ca_desi_denovo</i> | 16399165                | C/G  | NA                 | NA                            | NA                 |
| <i>Desi_wild_16399222</i> | NA                                  | <i>Ca_desi_denovo</i> | 16399222                | C/T  | NA                 | NA                            | NA                 |
| <i>Desi_wild_16399233</i> | NA                                  | <i>Ca_desi_denovo</i> | 16399233                | C/G  | NA                 | NA                            | NA                 |
| <i>Desi_wild_16403558</i> | NA                                  | <i>Ca_desi_denovo</i> | 16403558                | C/T  | NA                 | NA                            | NA                 |
| <i>Desi_wild_16426225</i> | NA                                  | <i>Ca_desi_denovo</i> | 16426225                | A/G  | NA                 | NA                            | NA                 |
| <i>Desi_wild_16426251</i> | NA                                  | <i>Ca_desi_denovo</i> | 16426251                | A/C  | NA                 | NA                            | NA                 |
| <i>Desi_wild_16432382</i> | NA                                  | <i>Ca_desi_denovo</i> | 16432382                | G/T  | NA                 | NA                            | NA                 |
| <i>Desi_wild_16433565</i> | NA                                  | <i>Ca_desi_denovo</i> | 16433565                | A/G  | NA                 | NA                            | NA                 |
| <i>Desi_wild_16437326</i> | NA                                  | <i>Ca_desi_denovo</i> | 16437326                | A/G  | NA                 | NA                            | NA                 |

| SNP IDs                   | NCBI dbSNP accession IDs (NCBI_SS#) | Chromosomes           | Physical positions (bp) | SNPs | Gene accession IDs | Sequence components of genome | Putative functions |
|---------------------------|-------------------------------------|-----------------------|-------------------------|------|--------------------|-------------------------------|--------------------|
| <i>Desi_wild_16437823</i> | NA                                  | <i>Ca_desi_denovo</i> | 16437823                | A/C  | NA                 | NA                            | NA                 |
| <i>Desi_wild_16441149</i> | NA                                  | <i>Ca_desi_denovo</i> | 16441149                | C/G  | NA                 | NA                            | NA                 |
| <i>Desi_wild_16441150</i> | NA                                  | <i>Ca_desi_denovo</i> | 16441150                | T/C  | NA                 | NA                            | NA                 |
| <i>Desi_wild_16473666</i> | NA                                  | <i>Ca_desi_denovo</i> | 16473666                | C/T  | NA                 | NA                            | NA                 |
| <i>Desi_wild_16477248</i> | NA                                  | <i>Ca_desi_denovo</i> | 16477248                | G/T  | NA                 | NA                            | NA                 |
| <i>Desi_wild_16477269</i> | NA                                  | <i>Ca_desi_denovo</i> | 16477269                | A/G  | NA                 | NA                            | NA                 |
| <i>Desi_wild_16477272</i> | NA                                  | <i>Ca_desi_denovo</i> | 16477272                | C/T  | NA                 | NA                            | NA                 |
| <i>Desi_wild_16486483</i> | NA                                  | <i>Ca_desi_denovo</i> | 16486483                | C/T  | NA                 | NA                            | NA                 |
| <i>Desi_wild_16486484</i> | NA                                  | <i>Ca_desi_denovo</i> | 16486484                | A/G  | NA                 | NA                            | NA                 |
| <i>Desi_wild_16494436</i> | NA                                  | <i>Ca_desi_denovo</i> | 16494436                | C/G  | NA                 | NA                            | NA                 |
| <i>Desi_wild_16499945</i> | NA                                  | <i>Ca_desi_denovo</i> | 16499945                | C/T  | NA                 | NA                            | NA                 |
| <i>Desi_wild_16499972</i> | NA                                  | <i>Ca_desi_denovo</i> | 16499972                | C/T  | NA                 | NA                            | NA                 |
| <i>Desi_wild_16503685</i> | NA                                  | <i>Ca_desi_denovo</i> | 16503685                | A/G  | NA                 | NA                            | NA                 |
| <i>Desi_wild_16503690</i> | NA                                  | <i>Ca_desi_denovo</i> | 16503690                | A/G  | NA                 | NA                            | NA                 |
| <i>Desi_wild_16503691</i> | NA                                  | <i>Ca_desi_denovo</i> | 16503691                | C/G  | NA                 | NA                            | NA                 |
| <i>Desi_wild_16506708</i> | NA                                  | <i>Ca_desi_denovo</i> | 16506708                | A/T  | NA                 | NA                            | NA                 |
| <i>Desi_wild_16510854</i> | NA                                  | <i>Ca_desi_denovo</i> | 16510854                | G/T  | NA                 | NA                            | NA                 |
| <i>Desi_wild_16517521</i> | NA                                  | <i>Ca_desi_denovo</i> | 16517521                | A/G  | NA                 | NA                            | NA                 |
| <i>Desi_wild_16517536</i> | NA                                  | <i>Ca_desi_denovo</i> | 16517536                | C/G  | NA                 | NA                            | NA                 |
| <i>Desi_wild_16517542</i> | NA                                  | <i>Ca_desi_denovo</i> | 16517542                | C/T  | NA                 | NA                            | NA                 |
| <i>Desi_wild_16518096</i> | NA                                  | <i>Ca_desi_denovo</i> | 16518096                | C/G  | NA                 | NA                            | NA                 |
| <i>Desi_wild_16518100</i> | NA                                  | <i>Ca_desi_denovo</i> | 16518100                | A/G  | NA                 | NA                            | NA                 |
| <i>Desi_wild_16518102</i> | NA                                  | <i>Ca_desi_denovo</i> | 16518102                | C/G  | NA                 | NA                            | NA                 |
| <i>Desi_wild_16522061</i> | NA                                  | <i>Ca_desi_denovo</i> | 16522061                | A/G  | NA                 | NA                            | NA                 |
| <i>Desi_wild_16523648</i> | NA                                  | <i>Ca_desi_denovo</i> | 16523648                | C/T  | NA                 | NA                            | NA                 |
| <i>Desi_wild_16526023</i> | NA                                  | <i>Ca_desi_denovo</i> | 16526023                | G/T  | NA                 | NA                            | NA                 |
| <i>Desi_wild_16534544</i> | NA                                  | <i>Ca_desi_denovo</i> | 16534544                | C/G  | NA                 | NA                            | NA                 |
| <i>Desi_wild_16560464</i> | NA                                  | <i>Ca_desi_denovo</i> | 16560464                | C/G  | NA                 | NA                            | NA                 |
| <i>Desi_wild_16564765</i> | NA                                  | <i>Ca_desi_denovo</i> | 16564765                | A/G  | NA                 | NA                            | NA                 |
| <i>Desi_wild_16564778</i> | NA                                  | <i>Ca_desi_denovo</i> | 16564778                | A/G  | NA                 | NA                            | NA                 |
| <i>Desi_wild_16564782</i> | NA                                  | <i>Ca_desi_denovo</i> | 16564782                | T/G  | NA                 | NA                            | NA                 |
| <i>Desi_wild_16564784</i> | NA                                  | <i>Ca_desi_denovo</i> | 16564784                | C/G  | NA                 | NA                            | NA                 |
| <i>Desi_wild_16566751</i> | NA                                  | <i>Ca_desi_denovo</i> | 16566751                | A/G  | NA                 | NA                            | NA                 |
| <i>Desi_wild_16566755</i> | NA                                  | <i>Ca_desi_denovo</i> | 16566755                | C/G  | NA                 | NA                            | NA                 |
| <i>Desi_wild_16567304</i> | NA                                  | <i>Ca_desi_denovo</i> | 16567304                | C/G  | NA                 | NA                            | NA                 |
| <i>Desi_wild_16567310</i> | NA                                  | <i>Ca_desi_denovo</i> | 16567310                | A/G  | NA                 | NA                            | NA                 |
| <i>Desi_wild_16570350</i> | NA                                  | <i>Ca_desi_denovo</i> | 16570350                | C/G  | NA                 | NA                            | NA                 |
| <i>Desi_wild_16570383</i> | NA                                  | <i>Ca_desi_denovo</i> | 16570383                | A/G  | NA                 | NA                            | NA                 |
| <i>Desi_wild_16588783</i> | NA                                  | <i>Ca_desi_denovo</i> | 16588783                | C/G  | NA                 | NA                            | NA                 |
| <i>Desi_wild_16591033</i> | NA                                  | <i>Ca_desi_denovo</i> | 16591033                | A/G  | NA                 | NA                            | NA                 |
| <i>Desi_wild_16608842</i> | NA                                  | <i>Ca_desi_denovo</i> | 16608842                | C/G  | NA                 | NA                            | NA                 |
| <i>Desi_wild_16622329</i> | NA                                  | <i>Ca_desi_denovo</i> | 16622329                | C/G  | NA                 | NA                            | NA                 |
| <i>Desi_wild_16622335</i> | NA                                  | <i>Ca_desi_denovo</i> | 16622335                | G/T  | NA                 | NA                            | NA                 |
| <i>Desi_wild_16622337</i> | NA                                  | <i>Ca_desi_denovo</i> | 16622337                | C/G  | NA                 | NA                            | NA                 |

| SNP IDs                   | NCBI dbSNP accession IDs (NCBI_SS#) | Chromosomes           | Physical positions (bp) | SNPs | Gene accession IDs | Sequence components of genome | Putative functions |
|---------------------------|-------------------------------------|-----------------------|-------------------------|------|--------------------|-------------------------------|--------------------|
| <i>Desi_wild_16622350</i> | NA                                  | <i>Ca_desi_denovo</i> | 16622350                | G/T  | NA                 | NA                            | NA                 |
| <i>Desi_wild_16625879</i> | NA                                  | <i>Ca_desi_denovo</i> | 16625879                | T/G  | NA                 | NA                            | NA                 |
| <i>Desi_wild_16629480</i> | NA                                  | <i>Ca_desi_denovo</i> | 16629480                | C/G  | NA                 | NA                            | NA                 |
| <i>Desi_wild_16630570</i> | NA                                  | <i>Ca_desi_denovo</i> | 16630570                | A/G  | NA                 | NA                            | NA                 |
| <i>Desi_wild_16630621</i> | NA                                  | <i>Ca_desi_denovo</i> | 16630621                | A/C  | NA                 | NA                            | NA                 |
| <i>Desi_wild_16630633</i> | NA                                  | <i>Ca_desi_denovo</i> | 16630633                | A/C  | NA                 | NA                            | NA                 |
| <i>Desi_wild_16630657</i> | NA                                  | <i>Ca_desi_denovo</i> | 16630657                | C/G  | NA                 | NA                            | NA                 |
| <i>Desi_wild_16632599</i> | NA                                  | <i>Ca_desi_denovo</i> | 16632599                | A/G  | NA                 | NA                            | NA                 |
| <i>Desi_wild_16632649</i> | NA                                  | <i>Ca_desi_denovo</i> | 16632649                | A/G  | NA                 | NA                            | NA                 |
| <i>Desi_wild_16634607</i> | NA                                  | <i>Ca_desi_denovo</i> | 16634607                | T/C  | NA                 | NA                            | NA                 |
| <i>Desi_wild_16664013</i> | NA                                  | <i>Ca_desi_denovo</i> | 16664013                | C/T  | NA                 | NA                            | NA                 |
| <i>Desi_wild_16664706</i> | NA                                  | <i>Ca_desi_denovo</i> | 16664706                | A/G  | NA                 | NA                            | NA                 |
| <i>Desi_wild_16672870</i> | NA                                  | <i>Ca_desi_denovo</i> | 16672870                | A/G  | NA                 | NA                            | NA                 |
| <i>Desi_wild_16672966</i> | NA                                  | <i>Ca_desi_denovo</i> | 16672966                | G/T  | NA                 | NA                            | NA                 |
| <i>Desi_wild_16689290</i> | NA                                  | <i>Ca_desi_denovo</i> | 16689290                | A/G  | NA                 | NA                            | NA                 |
| <i>Desi_wild_16689326</i> | NA                                  | <i>Ca_desi_denovo</i> | 16689326                | A/G  | NA                 | NA                            | NA                 |
| <i>Desi_wild_16691589</i> | NA                                  | <i>Ca_desi_denovo</i> | 16691589                | C/G  | NA                 | NA                            | NA                 |
| <i>Desi_wild_16691591</i> | NA                                  | <i>Ca_desi_denovo</i> | 16691591                | A/T  | NA                 | NA                            | NA                 |
| <i>Desi_wild_16692321</i> | NA                                  | <i>Ca_desi_denovo</i> | 16692321                | A/T  | NA                 | NA                            | NA                 |
| <i>Desi_wild_16692330</i> | NA                                  | <i>Ca_desi_denovo</i> | 16692330                | G/T  | NA                 | NA                            | NA                 |
| <i>Desi_wild_16692343</i> | NA                                  | <i>Ca_desi_denovo</i> | 16692343                | C/T  | NA                 | NA                            | NA                 |
| <i>Desi_wild_16702021</i> | NA                                  | <i>Ca_desi_denovo</i> | 16702021                | C/T  | NA                 | NA                            | NA                 |
| <i>Desi_wild_16715797</i> | NA                                  | <i>Ca_desi_denovo</i> | 16715797                | C/T  | NA                 | NA                            | NA                 |
| <i>Desi_wild_16715827</i> | NA                                  | <i>Ca_desi_denovo</i> | 16715827                | C/G  | NA                 | NA                            | NA                 |
| <i>Desi_wild_16715833</i> | NA                                  | <i>Ca_desi_denovo</i> | 16715833                | G/T  | NA                 | NA                            | NA                 |
| <i>Desi_wild_16715866</i> | NA                                  | <i>Ca_desi_denovo</i> | 16715866                | C/G  | NA                 | NA                            | NA                 |
| <i>Desi_wild_16726221</i> | NA                                  | <i>Ca_desi_denovo</i> | 16726221                | C/T  | NA                 | NA                            | NA                 |
| <i>Desi_wild_16731434</i> | NA                                  | <i>Ca_desi_denovo</i> | 16731434                | A/G  | NA                 | NA                            | NA                 |
| <i>Desi_wild_16736591</i> | NA                                  | <i>Ca_desi_denovo</i> | 16736591                | C/T  | NA                 | NA                            | NA                 |
| <i>Desi_wild_16736603</i> | NA                                  | <i>Ca_desi_denovo</i> | 16736603                | C/G  | NA                 | NA                            | NA                 |
| <i>Desi_wild_16736615</i> | NA                                  | <i>Ca_desi_denovo</i> | 16736615                | A/G  | NA                 | NA                            | NA                 |
| <i>Desi_wild_16739823</i> | NA                                  | <i>Ca_desi_denovo</i> | 16739823                | C/T  | NA                 | NA                            | NA                 |
| <i>Desi_wild_16739829</i> | NA                                  | <i>Ca_desi_denovo</i> | 16739829                | A/G  | NA                 | NA                            | NA                 |
| <i>Desi_wild_16739834</i> | NA                                  | <i>Ca_desi_denovo</i> | 16739834                | C/T  | NA                 | NA                            | NA                 |
| <i>Desi_wild_16739836</i> | NA                                  | <i>Ca_desi_denovo</i> | 16739836                | A/C  | NA                 | NA                            | NA                 |
| <i>Desi_wild_16741575</i> | NA                                  | <i>Ca_desi_denovo</i> | 16741575                | G/T  | NA                 | NA                            | NA                 |
| <i>Desi_wild_16745108</i> | NA                                  | <i>Ca_desi_denovo</i> | 16745108                | C/G  | NA                 | NA                            | NA                 |
| <i>Desi_wild_16753702</i> | NA                                  | <i>Ca_desi_denovo</i> | 16753702                | C/T  | NA                 | NA                            | NA                 |
| <i>Desi_wild_16753714</i> | NA                                  | <i>Ca_desi_denovo</i> | 16753714                | C/T  | NA                 | NA                            | NA                 |
| <i>Desi_wild_16757627</i> | NA                                  | <i>Ca_desi_denovo</i> | 16757627                | C/T  | NA                 | NA                            | NA                 |
| <i>Desi_wild_16762445</i> | NA                                  | <i>Ca_desi_denovo</i> | 16762445                | C/T  | NA                 | NA                            | NA                 |
| <i>Desi_wild_16763279</i> | NA                                  | <i>Ca_desi_denovo</i> | 16763279                | G/T  | NA                 | NA                            | NA                 |
| <i>Desi_wild_16769299</i> | NA                                  | <i>Ca_desi_denovo</i> | 16769299                | C/G  | NA                 | NA                            | NA                 |
| <i>Desi_wild_16769304</i> | NA                                  | <i>Ca_desi_denovo</i> | 16769304                | A/C  | NA                 | NA                            | NA                 |

| SNP IDs                   | NCBI dbSNP accession IDs (NCBI_SS#) | Chromosomes           | Physical positions (bp) | SNPs | Gene accession IDs | Sequence components of genome | Putative functions |
|---------------------------|-------------------------------------|-----------------------|-------------------------|------|--------------------|-------------------------------|--------------------|
| <i>Desi_wild_16772726</i> | NA                                  | <i>Ca_desi_denovo</i> | 16772726                | G/T  | NA                 | NA                            | NA                 |
| <i>Desi_wild_16772732</i> | NA                                  | <i>Ca_desi_denovo</i> | 16772732                | A/C  | NA                 | NA                            | NA                 |
| <i>Desi_wild_16772765</i> | NA                                  | <i>Ca_desi_denovo</i> | 16772765                | C/T  | NA                 | NA                            | NA                 |
| <i>Desi_wild_16772863</i> | NA                                  | <i>Ca_desi_denovo</i> | 16772863                | G/T  | NA                 | NA                            | NA                 |
| <i>Desi_wild_16773752</i> | NA                                  | <i>Ca_desi_denovo</i> | 16773752                | C/T  | NA                 | NA                            | NA                 |
| <i>Desi_wild_16779081</i> | NA                                  | <i>Ca_desi_denovo</i> | 16779081                | A/G  | NA                 | NA                            | NA                 |
| <i>Desi_wild_16779102</i> | NA                                  | <i>Ca_desi_denovo</i> | 16779102                | C/G  | NA                 | NA                            | NA                 |
| <i>Desi_wild_16779129</i> | NA                                  | <i>Ca_desi_denovo</i> | 16779129                | A/G  | NA                 | NA                            | NA                 |
| <i>Desi_wild_16781329</i> | NA                                  | <i>Ca_desi_denovo</i> | 16781329                | G/T  | NA                 | NA                            | NA                 |
| <i>Desi_wild_16795220</i> | NA                                  | <i>Ca_desi_denovo</i> | 16795220                | G/A  | NA                 | NA                            | NA                 |
| <i>Desi_wild_16802843</i> | NA                                  | <i>Ca_desi_denovo</i> | 16802843                | G/T  | NA                 | NA                            | NA                 |
| <i>Desi_wild_16802852</i> | NA                                  | <i>Ca_desi_denovo</i> | 16802852                | G/T  | NA                 | NA                            | NA                 |
| <i>Desi_wild_16816718</i> | NA                                  | <i>Ca_desi_denovo</i> | 16816718                | C/T  | NA                 | NA                            | NA                 |
| <i>Desi_wild_16818499</i> | NA                                  | <i>Ca_desi_denovo</i> | 16818499                | A/G  | NA                 | NA                            | NA                 |
| <i>Desi_wild_16822091</i> | NA                                  | <i>Ca_desi_denovo</i> | 16822091                | C/T  | NA                 | NA                            | NA                 |
| <i>Desi_wild_16824754</i> | NA                                  | <i>Ca_desi_denovo</i> | 16824754                | C/T  | NA                 | NA                            | NA                 |
| <i>Desi_wild_16824760</i> | NA                                  | <i>Ca_desi_denovo</i> | 16824760                | C/G  | NA                 | NA                            | NA                 |
| <i>Desi_wild_16824762</i> | NA                                  | <i>Ca_desi_denovo</i> | 16824762                | A/G  | NA                 | NA                            | NA                 |
| <i>Desi_wild_16824772</i> | NA                                  | <i>Ca_desi_denovo</i> | 16824772                | C/T  | NA                 | NA                            | NA                 |
| <i>Desi_wild_16824898</i> | NA                                  | <i>Ca_desi_denovo</i> | 16824898                | G/T  | NA                 | NA                            | NA                 |
| <i>Desi_wild_16826288</i> | NA                                  | <i>Ca_desi_denovo</i> | 16826288                | G/A  | NA                 | NA                            | NA                 |
| <i>Desi_wild_16834264</i> | NA                                  | <i>Ca_desi_denovo</i> | 16834264                | A/G  | NA                 | NA                            | NA                 |
| <i>Desi_wild_16837618</i> | NA                                  | <i>Ca_desi_denovo</i> | 16837618                | A/C  | NA                 | NA                            | NA                 |
| <i>Desi_wild_16837624</i> | NA                                  | <i>Ca_desi_denovo</i> | 16837624                | C/T  | NA                 | NA                            | NA                 |
| <i>Desi_wild_16837648</i> | NA                                  | <i>Ca_desi_denovo</i> | 16837648                | A/G  | NA                 | NA                            | NA                 |
| <i>Desi_wild_16837657</i> | NA                                  | <i>Ca_desi_denovo</i> | 16837657                | G/T  | NA                 | NA                            | NA                 |
| <i>Desi_wild_16841662</i> | NA                                  | <i>Ca_desi_denovo</i> | 16841662                | C/T  | NA                 | NA                            | NA                 |
| <i>Desi_wild_16841678</i> | NA                                  | <i>Ca_desi_denovo</i> | 16841678                | C/G  | NA                 | NA                            | NA                 |
| <i>Desi_wild_16843362</i> | NA                                  | <i>Ca_desi_denovo</i> | 16843362                | G/T  | NA                 | NA                            | NA                 |
| <i>Desi_wild_16845839</i> | NA                                  | <i>Ca_desi_denovo</i> | 16845839                | G/A  | NA                 | NA                            | NA                 |
| <i>Desi_wild_16852556</i> | NA                                  | <i>Ca_desi_denovo</i> | 16852556                | G/T  | NA                 | NA                            | NA                 |
| <i>Desi_wild_16857178</i> | NA                                  | <i>Ca_desi_denovo</i> | 16857178                | A/G  | NA                 | NA                            | NA                 |
| <i>Desi_wild_16857211</i> | NA                                  | <i>Ca_desi_denovo</i> | 16857211                | G/A  | NA                 | NA                            | NA                 |
| <i>Desi_wild_16873889</i> | NA                                  | <i>Ca_desi_denovo</i> | 16873889                | C/T  | NA                 | NA                            | NA                 |
| <i>Desi_wild_16897657</i> | NA                                  | <i>Ca_desi_denovo</i> | 16897657                | C/G  | NA                 | NA                            | NA                 |
| <i>Desi_wild_16899841</i> | NA                                  | <i>Ca_desi_denovo</i> | 16899841                | G/T  | NA                 | NA                            | NA                 |
| <i>Desi_wild_16916236</i> | NA                                  | <i>Ca_desi_denovo</i> | 16916236                | C/G  | NA                 | NA                            | NA                 |
| <i>Desi_wild_16924073</i> | NA                                  | <i>Ca_desi_denovo</i> | 16924073                | C/G  | NA                 | NA                            | NA                 |
| <i>Desi_wild_16924610</i> | NA                                  | <i>Ca_desi_denovo</i> | 16924610                | C/G  | NA                 | NA                            | NA                 |
| <i>Desi_wild_16924613</i> | NA                                  | <i>Ca_desi_denovo</i> | 16924613                | C/T  | NA                 | NA                            | NA                 |
| <i>Desi_wild_16924616</i> | NA                                  | <i>Ca_desi_denovo</i> | 16924616                | C/G  | NA                 | NA                            | NA                 |
| <i>Desi_wild_16925036</i> | NA                                  | <i>Ca_desi_denovo</i> | 16925036                | G/T  | NA                 | NA                            | NA                 |
| <i>Desi_wild_16925364</i> | NA                                  | <i>Ca_desi_denovo</i> | 16925364                | G/T  | NA                 | NA                            | NA                 |
| <i>Desi_wild_16925367</i> | NA                                  | <i>Ca_desi_denovo</i> | 16925367                | C/G  | NA                 | NA                            | NA                 |

| SNP IDs                   | NCBI dbSNP accession IDs (NCBI_SS#) | Chromosomes           | Physical positions (bp) | SNPs | Gene accession IDs | Sequence components of genome | Putative functions |
|---------------------------|-------------------------------------|-----------------------|-------------------------|------|--------------------|-------------------------------|--------------------|
| <i>Desi_wild_16932220</i> | NA                                  | <i>Ca_desi_denovo</i> | 16932220                | C/T  | NA                 | NA                            | NA                 |
| <i>Desi_wild_16942395</i> | NA                                  | <i>Ca_desi_denovo</i> | 16942395                | A/G  | NA                 | NA                            | NA                 |
| <i>Desi_wild_16945116</i> | NA                                  | <i>Ca_desi_denovo</i> | 16945116                | A/G  | NA                 | NA                            | NA                 |
| <i>Desi_wild_16950726</i> | NA                                  | <i>Ca_desi_denovo</i> | 16950726                | A/C  | NA                 | NA                            | NA                 |
| <i>Desi_wild_16950765</i> | NA                                  | <i>Ca_desi_denovo</i> | 16950765                | C/T  | NA                 | NA                            | NA                 |
| <i>Desi_wild_16952632</i> | NA                                  | <i>Ca_desi_denovo</i> | 16952632                | A/G  | NA                 | NA                            | NA                 |
| <i>Desi_wild_16952650</i> | NA                                  | <i>Ca_desi_denovo</i> | 16952650                | A/G  | NA                 | NA                            | NA                 |
| <i>Desi_wild_16965559</i> | NA                                  | <i>Ca_desi_denovo</i> | 16965559                | A/G  | NA                 | NA                            | NA                 |
| <i>Desi_wild_16965571</i> | NA                                  | <i>Ca_desi_denovo</i> | 16965571                | C/T  | NA                 | NA                            | NA                 |
| <i>Desi_wild_16965574</i> | NA                                  | <i>Ca_desi_denovo</i> | 16965574                | C/G  | NA                 | NA                            | NA                 |
| <i>Desi_wild_16976391</i> | NA                                  | <i>Ca_desi_denovo</i> | 16976391                | C/G  | NA                 | NA                            | NA                 |
| <i>Desi_wild_16977795</i> | NA                                  | <i>Ca_desi_denovo</i> | 16977795                | G/T  | NA                 | NA                            | NA                 |
| <i>Desi_wild_16977816</i> | NA                                  | <i>Ca_desi_denovo</i> | 16977816                | A/G  | NA                 | NA                            | NA                 |
| <i>Desi_wild_16984164</i> | NA                                  | <i>Ca_desi_denovo</i> | 16984164                | C/G  | NA                 | NA                            | NA                 |
| <i>Desi_wild_16984170</i> | NA                                  | <i>Ca_desi_denovo</i> | 16984170                | C/G  | NA                 | NA                            | NA                 |
| <i>Desi_wild_16984172</i> | NA                                  | <i>Ca_desi_denovo</i> | 16984172                | G/T  | NA                 | NA                            | NA                 |
| <i>Desi_wild_16984176</i> | NA                                  | <i>Ca_desi_denovo</i> | 16984176                | C/G  | NA                 | NA                            | NA                 |
| <i>Desi_wild_17000042</i> | NA                                  | <i>Ca_desi_denovo</i> | 17000042                | C/T  | NA                 | NA                            | NA                 |
| <i>Desi_wild_17000047</i> | NA                                  | <i>Ca_desi_denovo</i> | 17000047                | G/T  | NA                 | NA                            | NA                 |
| <i>Desi_wild_17000087</i> | NA                                  | <i>Ca_desi_denovo</i> | 17000087                | G/T  | NA                 | NA                            | NA                 |
| <i>Desi_wild_17002499</i> | NA                                  | <i>Ca_desi_denovo</i> | 17002499                | A/T  | NA                 | NA                            | NA                 |
| <i>Desi_wild_17002505</i> | NA                                  | <i>Ca_desi_denovo</i> | 17002505                | C/G  | NA                 | NA                            | NA                 |
| <i>Desi_wild_17002511</i> | NA                                  | <i>Ca_desi_denovo</i> | 17002511                | A/C  | NA                 | NA                            | NA                 |
| <i>Desi_wild_17002520</i> | NA                                  | <i>Ca_desi_denovo</i> | 17002520                | A/G  | NA                 | NA                            | NA                 |
| <i>Desi_wild_17004985</i> | NA                                  | <i>Ca_desi_denovo</i> | 17004985                | A/G  | NA                 | NA                            | NA                 |
| <i>Desi_wild_17005513</i> | NA                                  | <i>Ca_desi_denovo</i> | 17005513                | A/G  | NA                 | NA                            | NA                 |
| <i>Desi_wild_17005527</i> | NA                                  | <i>Ca_desi_denovo</i> | 17005527                | A/C  | NA                 | NA                            | NA                 |
| <i>Desi_wild_17005528</i> | NA                                  | <i>Ca_desi_denovo</i> | 17005528                | G/T  | NA                 | NA                            | NA                 |
| <i>Desi_wild_17005529</i> | NA                                  | <i>Ca_desi_denovo</i> | 17005529                | A/G  | NA                 | NA                            | NA                 |
| <i>Desi_wild_17006607</i> | NA                                  | <i>Ca_desi_denovo</i> | 17006607                | G/A  | NA                 | NA                            | NA                 |
| <i>Desi_wild_17006610</i> | NA                                  | <i>Ca_desi_denovo</i> | 17006610                | G/A  | NA                 | NA                            | NA                 |
| <i>Desi_wild_17006613</i> | NA                                  | <i>Ca_desi_denovo</i> | 17006613                | C/T  | NA                 | NA                            | NA                 |
| <i>Desi_wild_17019129</i> | NA                                  | <i>Ca_desi_denovo</i> | 17019129                | C/G  | NA                 | NA                            | NA                 |
| <i>Desi_wild_17019282</i> | NA                                  | <i>Ca_desi_denovo</i> | 17019282                | C/T  | NA                 | NA                            | NA                 |
| <i>Desi_wild_17021993</i> | NA                                  | <i>Ca_desi_denovo</i> | 17021993                | C/T  | NA                 | NA                            | NA                 |
| <i>Desi_wild_17024916</i> | NA                                  | <i>Ca_desi_denovo</i> | 17024916                | C/T  | NA                 | NA                            | NA                 |
| <i>Desi_wild_17024928</i> | NA                                  | <i>Ca_desi_denovo</i> | 17024928                | C/T  | NA                 | NA                            | NA                 |
| <i>Desi_wild_17024944</i> | NA                                  | <i>Ca_desi_denovo</i> | 17024944                | A/G  | NA                 | NA                            | NA                 |
| <i>Desi_wild_17028587</i> | NA                                  | <i>Ca_desi_denovo</i> | 17028587                | C/T  | NA                 | NA                            | NA                 |
| <i>Desi_wild_17030930</i> | NA                                  | <i>Ca_desi_denovo</i> | 17030930                | G/T  | NA                 | NA                            | NA                 |
| <i>Desi_wild_17032914</i> | NA                                  | <i>Ca_desi_denovo</i> | 17032914                | C/T  | NA                 | NA                            | NA                 |
| <i>Desi_wild_17032941</i> | NA                                  | <i>Ca_desi_denovo</i> | 17032941                | T/C  | NA                 | NA                            | NA                 |
| <i>Desi_wild_17032947</i> | NA                                  | <i>Ca_desi_denovo</i> | 17032947                | C/T  | NA                 | NA                            | NA                 |
| <i>Desi_wild_17043930</i> | NA                                  | <i>Ca_desi_denovo</i> | 17043930                | C/T  | NA                 | NA                            | NA                 |



| SNP IDs                   | NCBI dbSNP accession IDs (NCBI_SS#) | Chromosomes           | Physical positions (bp) | SNPs | Gene accession IDs | Sequence components of genome | Putative functions |
|---------------------------|-------------------------------------|-----------------------|-------------------------|------|--------------------|-------------------------------|--------------------|
| <i>Desi_wild_17043934</i> | NA                                  | <i>Ca_desi_denovo</i> | 17043934                | A/T  | NA                 | NA                            | NA                 |
| <i>Desi_wild_17044489</i> | NA                                  | <i>Ca_desi_denovo</i> | 17044489                | A/C  | NA                 | NA                            | NA                 |
| <i>Desi_wild_17044512</i> | NA                                  | <i>Ca_desi_denovo</i> | 17044512                | C/G  | NA                 | NA                            | NA                 |
| <i>Desi_wild_17069317</i> | NA                                  | <i>Ca_desi_denovo</i> | 17069317                | C/T  | NA                 | NA                            | NA                 |
| <i>Desi_wild_17070049</i> | NA                                  | <i>Ca_desi_denovo</i> | 17070049                | A/G  | NA                 | NA                            | NA                 |
| <i>Desi_wild_17072776</i> | NA                                  | <i>Ca_desi_denovo</i> | 17072776                | G/T  | NA                 | NA                            | NA                 |
| <i>Desi_wild_17076228</i> | NA                                  | <i>Ca_desi_denovo</i> | 17076228                | C/T  | NA                 | NA                            | NA                 |
| <i>Desi_wild_17088791</i> | NA                                  | <i>Ca_desi_denovo</i> | 17088791                | A/G  | NA                 | NA                            | NA                 |
| <i>Desi_wild_17089144</i> | NA                                  | <i>Ca_desi_denovo</i> | 17089144                | A/C  | NA                 | NA                            | NA                 |
| <i>Desi_wild_17089163</i> | NA                                  | <i>Ca_desi_denovo</i> | 17089163                | A/T  | NA                 | NA                            | NA                 |
| <i>Desi_wild_17089176</i> | NA                                  | <i>Ca_desi_denovo</i> | 17089176                | C/T  | NA                 | NA                            | NA                 |
| <i>Desi_wild_17095882</i> | NA                                  | <i>Ca_desi_denovo</i> | 17095882                | A/T  | NA                 | NA                            | NA                 |
| <i>Desi_wild_17110133</i> | NA                                  | <i>Ca_desi_denovo</i> | 17110133                | C/T  | NA                 | NA                            | NA                 |
| <i>Desi_wild_17110181</i> | NA                                  | <i>Ca_desi_denovo</i> | 17110181                | C/T  | NA                 | NA                            | NA                 |
| <i>Desi_wild_17113976</i> | NA                                  | <i>Ca_desi_denovo</i> | 17113976                | G/T  | NA                 | NA                            | NA                 |
| <i>Desi_wild_17116885</i> | NA                                  | <i>Ca_desi_denovo</i> | 17116885                | G/C  | NA                 | NA                            | NA                 |
| <i>Desi_wild_17116894</i> | NA                                  | <i>Ca_desi_denovo</i> | 17116894                | C/T  | NA                 | NA                            | NA                 |
| <i>Desi_wild_17116897</i> | NA                                  | <i>Ca_desi_denovo</i> | 17116897                | G/A  | NA                 | NA                            | NA                 |
| <i>Desi_wild_17117546</i> | NA                                  | <i>Ca_desi_denovo</i> | 17117546                | A/G  | NA                 | NA                            | NA                 |
| <i>Desi_wild_17117599</i> | NA                                  | <i>Ca_desi_denovo</i> | 17117599                | A/G  | NA                 | NA                            | NA                 |
| <i>Desi_wild_17118184</i> | NA                                  | <i>Ca_desi_denovo</i> | 17118184                | G/T  | NA                 | NA                            | NA                 |
| <i>Desi_wild_17118281</i> | NA                                  | <i>Ca_desi_denovo</i> | 17118281                | A/G  | NA                 | NA                            | NA                 |
| <i>Desi_wild_17126101</i> | NA                                  | <i>Ca_desi_denovo</i> | 17126101                | C/G  | NA                 | NA                            | NA                 |
| <i>Desi_wild_17126109</i> | NA                                  | <i>Ca_desi_denovo</i> | 17126109                | C/G  | NA                 | NA                            | NA                 |
| <i>Desi_wild_17127414</i> | NA                                  | <i>Ca_desi_denovo</i> | 17127414                | G/T  | NA                 | NA                            | NA                 |
| <i>Desi_wild_17139619</i> | NA                                  | <i>Ca_desi_denovo</i> | 17139619                | C/T  | NA                 | NA                            | NA                 |
| <i>Desi_wild_17144051</i> | NA                                  | <i>Ca_desi_denovo</i> | 17144051                | C/G  | NA                 | NA                            | NA                 |
| <i>Desi_wild_17144057</i> | NA                                  | <i>Ca_desi_denovo</i> | 17144057                | G/T  | NA                 | NA                            | NA                 |
| <i>Desi_wild_17144068</i> | NA                                  | <i>Ca_desi_denovo</i> | 17144068                | C/T  | NA                 | NA                            | NA                 |
| <i>Desi_wild_17144071</i> | NA                                  | <i>Ca_desi_denovo</i> | 17144071                | A/T  | NA                 | NA                            | NA                 |
| <i>Desi_wild_17151846</i> | NA                                  | <i>Ca_desi_denovo</i> | 17151846                | A/G  | NA                 | NA                            | NA                 |
| <i>Desi_wild_17154353</i> | NA                                  | <i>Ca_desi_denovo</i> | 17154353                | C/T  | NA                 | NA                            | NA                 |
| <i>Desi_wild_17154387</i> | NA                                  | <i>Ca_desi_denovo</i> | 17154387                | C/G  | NA                 | NA                            | NA                 |
| <i>Desi_wild_17154389</i> | NA                                  | <i>Ca_desi_denovo</i> | 17154389                | A/G  | NA                 | NA                            | NA                 |
| <i>Desi_wild_17169320</i> | NA                                  | <i>Ca_desi_denovo</i> | 17169320                | C/G  | NA                 | NA                            | NA                 |
| <i>Desi_wild_17169322</i> | NA                                  | <i>Ca_desi_denovo</i> | 17169322                | C/G  | NA                 | NA                            | NA                 |
| <i>Desi_wild_17175104</i> | NA                                  | <i>Ca_desi_denovo</i> | 17175104                | A/C  | NA                 | NA                            | NA                 |
| <i>Desi_wild_17202007</i> | NA                                  | <i>Ca_desi_denovo</i> | 17202007                | G/T  | NA                 | NA                            | NA                 |
| <i>Desi_wild_17214299</i> | NA                                  | <i>Ca_desi_denovo</i> | 17214299                | A/G  | NA                 | NA                            | NA                 |
| <i>Desi_wild_17215393</i> | NA                                  | <i>Ca_desi_denovo</i> | 17215393                | A/G  | NA                 | NA                            | NA                 |
| <i>Desi_wild_17215408</i> | NA                                  | <i>Ca_desi_denovo</i> | 17215408                | A/G  | NA                 | NA                            | NA                 |
| <i>Desi_wild_17215414</i> | NA                                  | <i>Ca_desi_denovo</i> | 17215414                | A/G  | NA                 | NA                            | NA                 |
| <i>Desi_wild_17222775</i> | NA                                  | <i>Ca_desi_denovo</i> | 17222775                | G/T  | NA                 | NA                            | NA                 |
| <i>Desi_wild_17224816</i> | NA                                  | <i>Ca_desi_denovo</i> | 17224816                | A/G  | NA                 | NA                            | NA                 |

| SNP IDs                   | NCBI dbSNP accession IDs (NCBI_SS#) | Chromosomes           | Physical positions (bp) | SNPs | Gene accession IDs | Sequence components of genome | Putative functions |
|---------------------------|-------------------------------------|-----------------------|-------------------------|------|--------------------|-------------------------------|--------------------|
| <i>Desi_wild_17224825</i> | NA                                  | <i>Ca_desi_denovo</i> | 17224825                | A/G  | NA                 | NA                            | NA                 |
| <i>Desi_wild_17228057</i> | NA                                  | <i>Ca_desi_denovo</i> | 17228057                | G/T  | NA                 | NA                            | NA                 |
| <i>Desi_wild_17269549</i> | NA                                  | <i>Ca_desi_denovo</i> | 17269549                | C/T  | NA                 | NA                            | NA                 |
| <i>Desi_wild_17273670</i> | NA                                  | <i>Ca_desi_denovo</i> | 17273670                | G/A  | NA                 | NA                            | NA                 |
| <i>Desi_wild_17273671</i> | NA                                  | <i>Ca_desi_denovo</i> | 17273671                | G/A  | NA                 | NA                            | NA                 |
| <i>Desi_wild_17275256</i> | NA                                  | <i>Ca_desi_denovo</i> | 17275256                | C/G  | NA                 | NA                            | NA                 |
| <i>Desi_wild_17275257</i> | NA                                  | <i>Ca_desi_denovo</i> | 17275257                | C/G  | NA                 | NA                            | NA                 |
| <i>Desi_wild_17278899</i> | NA                                  | <i>Ca_desi_denovo</i> | 17278899                | C/T  | NA                 | NA                            | NA                 |
| <i>Desi_wild_17290984</i> | NA                                  | <i>Ca_desi_denovo</i> | 17290984                | A/G  | NA                 | NA                            | NA                 |
| <i>Desi_wild_17298166</i> | NA                                  | <i>Ca_desi_denovo</i> | 17298166                | C/G  | NA                 | NA                            | NA                 |
| <i>Desi_wild_17309173</i> | NA                                  | <i>Ca_desi_denovo</i> | 17309173                | C/T  | NA                 | NA                            | NA                 |
| <i>Desi_wild_17309194</i> | NA                                  | <i>Ca_desi_denovo</i> | 17309194                | C/T  | NA                 | NA                            | NA                 |
| <i>Desi_wild_17319361</i> | NA                                  | <i>Ca_desi_denovo</i> | 17319361                | A/G  | NA                 | NA                            | NA                 |
| <i>Desi_wild_17321055</i> | NA                                  | <i>Ca_desi_denovo</i> | 17321055                | A/G  | NA                 | NA                            | NA                 |
| <i>Desi_wild_17329205</i> | NA                                  | <i>Ca_desi_denovo</i> | 17329205                | C/T  | NA                 | NA                            | NA                 |
| <i>Desi_wild_17329232</i> | NA                                  | <i>Ca_desi_denovo</i> | 17329232                | A/T  | NA                 | NA                            | NA                 |
| <i>Desi_wild_17336256</i> | NA                                  | <i>Ca_desi_denovo</i> | 17336256                | A/C  | NA                 | NA                            | NA                 |
| <i>Desi_wild_17338313</i> | NA                                  | <i>Ca_desi_denovo</i> | 17338313                | A/C  | NA                 | NA                            | NA                 |
| <i>Desi_wild_17338314</i> | NA                                  | <i>Ca_desi_denovo</i> | 17338314                | A/G  | NA                 | NA                            | NA                 |
| <i>Desi_wild_17340160</i> | NA                                  | <i>Ca_desi_denovo</i> | 17340160                | G/T  | NA                 | NA                            | NA                 |
| <i>Desi_wild_17350626</i> | NA                                  | <i>Ca_desi_denovo</i> | 17350626                | G/T  | NA                 | NA                            | NA                 |
| <i>Desi_wild_17350629</i> | NA                                  | <i>Ca_desi_denovo</i> | 17350629                | A/G  | NA                 | NA                            | NA                 |
| <i>Desi_wild_17354198</i> | NA                                  | <i>Ca_desi_denovo</i> | 17354198                | A/G  | NA                 | NA                            | NA                 |
| <i>Desi_wild_17357449</i> | NA                                  | <i>Ca_desi_denovo</i> | 17357449                | A/C  | NA                 | NA                            | NA                 |
| <i>Desi_wild_17357490</i> | NA                                  | <i>Ca_desi_denovo</i> | 17357490                | T/C  | NA                 | NA                            | NA                 |
| <i>Desi_wild_17363900</i> | NA                                  | <i>Ca_desi_denovo</i> | 17363900                | C/T  | NA                 | NA                            | NA                 |
| <i>Desi_wild_17371190</i> | NA                                  | <i>Ca_desi_denovo</i> | 17371190                | A/G  | NA                 | NA                            | NA                 |
| <i>Desi_wild_17371221</i> | NA                                  | <i>Ca_desi_denovo</i> | 17371221                | G/A  | NA                 | NA                            | NA                 |
| <i>Desi_wild_17374822</i> | NA                                  | <i>Ca_desi_denovo</i> | 17374822                | A/C  | NA                 | NA                            | NA                 |
| <i>Desi_wild_17378634</i> | NA                                  | <i>Ca_desi_denovo</i> | 17378634                | A/G  | NA                 | NA                            | NA                 |
| <i>Desi_wild_17378670</i> | NA                                  | <i>Ca_desi_denovo</i> | 17378670                | A/G  | NA                 | NA                            | NA                 |
| <i>Desi_wild_17378688</i> | NA                                  | <i>Ca_desi_denovo</i> | 17378688                | C/T  | NA                 | NA                            | NA                 |
| <i>Desi_wild_17397862</i> | NA                                  | <i>Ca_desi_denovo</i> | 17397862                | C/G  | NA                 | NA                            | NA                 |
| <i>Desi_wild_17398562</i> | NA                                  | <i>Ca_desi_denovo</i> | 17398562                | C/T  | NA                 | NA                            | NA                 |
| <i>Desi_wild_17398572</i> | NA                                  | <i>Ca_desi_denovo</i> | 17398572                | C/G  | NA                 | NA                            | NA                 |
| <i>Desi_wild_17398595</i> | NA                                  | <i>Ca_desi_denovo</i> | 17398595                | G/T  | NA                 | NA                            | NA                 |
| <i>Desi_wild_17398610</i> | NA                                  | <i>Ca_desi_denovo</i> | 17398610                | C/G  | NA                 | NA                            | NA                 |
| <i>Desi_wild_17404012</i> | NA                                  | <i>Ca_desi_denovo</i> | 17404012                | C/T  | NA                 | NA                            | NA                 |
| <i>Desi_wild_17406638</i> | NA                                  | <i>Ca_desi_denovo</i> | 17406638                | A/T  | NA                 | NA                            | NA                 |
| <i>Desi_wild_17406651</i> | NA                                  | <i>Ca_desi_denovo</i> | 17406651                | G/T  | NA                 | NA                            | NA                 |
| <i>Desi_wild_17411610</i> | NA                                  | <i>Ca_desi_denovo</i> | 17411610                | T/A  | NA                 | NA                            | NA                 |
| <i>Desi_wild_17411622</i> | NA                                  | <i>Ca_desi_denovo</i> | 17411622                | C/T  | NA                 | NA                            | NA                 |
| <i>Desi_wild_17412457</i> | NA                                  | <i>Ca_desi_denovo</i> | 17412457                | G/T  | NA                 | NA                            | NA                 |
| <i>Desi_wild_17417082</i> | NA                                  | <i>Ca_desi_denovo</i> | 17417082                | G/C  | NA                 | NA                            | NA                 |

| SNP IDs                   | NCBI dbSNP accession IDs (NCBI_SS#) | Chromosomes           | Physical positions (bp) | SNPs | Gene accession IDs | Sequence components of genome | Putative functions |
|---------------------------|-------------------------------------|-----------------------|-------------------------|------|--------------------|-------------------------------|--------------------|
| <i>Desi_wild_17417085</i> | NA                                  | <i>Ca_desi_denovo</i> | 17417085                | C/G  | NA                 | NA                            | NA                 |
| <i>Desi_wild_17432268</i> | NA                                  | <i>Ca_desi_denovo</i> | 17432268                | A/C  | NA                 | NA                            | NA                 |
| <i>Desi_wild_17432269</i> | NA                                  | <i>Ca_desi_denovo</i> | 17432269                | G/T  | NA                 | NA                            | NA                 |
| <i>Desi_wild_17432466</i> | NA                                  | <i>Ca_desi_denovo</i> | 17432466                | C/G  | NA                 | NA                            | NA                 |
| <i>Desi_wild_17434598</i> | NA                                  | <i>Ca_desi_denovo</i> | 17434598                | G/T  | NA                 | NA                            | NA                 |
| <i>Desi_wild_17446334</i> | NA                                  | <i>Ca_desi_denovo</i> | 17446334                | A/G  | NA                 | NA                            | NA                 |
| <i>Desi_wild_17455749</i> | NA                                  | <i>Ca_desi_denovo</i> | 17455749                | C/G  | NA                 | NA                            | NA                 |
| <i>Desi_wild_17455752</i> | NA                                  | <i>Ca_desi_denovo</i> | 17455752                | C/T  | NA                 | NA                            | NA                 |
| <i>Desi_wild_17456778</i> | NA                                  | <i>Ca_desi_denovo</i> | 17456778                | A/C  | NA                 | NA                            | NA                 |
| <i>Desi_wild_17456779</i> | NA                                  | <i>Ca_desi_denovo</i> | 17456779                | G/T  | NA                 | NA                            | NA                 |
| <i>Desi_wild_17460775</i> | NA                                  | <i>Ca_desi_denovo</i> | 17460775                | G/T  | NA                 | NA                            | NA                 |
| <i>Desi_wild_17460786</i> | NA                                  | <i>Ca_desi_denovo</i> | 17460786                | C/T  | NA                 | NA                            | NA                 |
| <i>Desi_wild_17462720</i> | NA                                  | <i>Ca_desi_denovo</i> | 17462720                | G/A  | NA                 | NA                            | NA                 |
| <i>Desi_wild_17474970</i> | NA                                  | <i>Ca_desi_denovo</i> | 17474970                | C/G  | NA                 | NA                            | NA                 |
| <i>Desi_wild_17474991</i> | NA                                  | <i>Ca_desi_denovo</i> | 17474991                | C/G  | NA                 | NA                            | NA                 |
| <i>Desi_wild_17486962</i> | NA                                  | <i>Ca_desi_denovo</i> | 17486962                | G/A  | NA                 | NA                            | NA                 |
| <i>Desi_wild_17496320</i> | NA                                  | <i>Ca_desi_denovo</i> | 17496320                | G/A  | NA                 | NA                            | NA                 |
| <i>Desi_wild_17510846</i> | NA                                  | <i>Ca_desi_denovo</i> | 17510846                | C/G  | NA                 | NA                            | NA                 |
| <i>Desi_wild_17510866</i> | NA                                  | <i>Ca_desi_denovo</i> | 17510866                | A/G  | NA                 | NA                            | NA                 |
| <i>Desi_wild_17510877</i> | NA                                  | <i>Ca_desi_denovo</i> | 17510877                | A/C  | NA                 | NA                            | NA                 |
| <i>Desi_wild_17511220</i> | NA                                  | <i>Ca_desi_denovo</i> | 17511220                | C/G  | NA                 | NA                            | NA                 |
| <i>Desi_wild_17512172</i> | NA                                  | <i>Ca_desi_denovo</i> | 17512172                | A/G  | NA                 | NA                            | NA                 |
| <i>Desi_wild_17512250</i> | NA                                  | <i>Ca_desi_denovo</i> | 17512250                | C/T  | NA                 | NA                            | NA                 |
| <i>Desi_wild_17514348</i> | NA                                  | <i>Ca_desi_denovo</i> | 17514348                | A/G  | NA                 | NA                            | NA                 |
| <i>Desi_wild_17528452</i> | NA                                  | <i>Ca_desi_denovo</i> | 17528452                | C/G  | NA                 | NA                            | NA                 |
| <i>Desi_wild_17528453</i> | NA                                  | <i>Ca_desi_denovo</i> | 17528453                | A/G  | NA                 | NA                            | NA                 |
| <i>Desi_wild_17535887</i> | NA                                  | <i>Ca_desi_denovo</i> | 17535887                | A/G  | NA                 | NA                            | NA                 |
| <i>Desi_wild_17538209</i> | NA                                  | <i>Ca_desi_denovo</i> | 17538209                | G/T  | NA                 | NA                            | NA                 |
| <i>Desi_wild_17538221</i> | NA                                  | <i>Ca_desi_denovo</i> | 17538221                | C/T  | NA                 | NA                            | NA                 |
| <i>Desi_wild_17539619</i> | NA                                  | <i>Ca_desi_denovo</i> | 17539619                | C/T  | NA                 | NA                            | NA                 |
| <i>Desi_wild_17543057</i> | NA                                  | <i>Ca_desi_denovo</i> | 17543057                | C/G  | NA                 | NA                            | NA                 |
| <i>Desi_wild_17548460</i> | NA                                  | <i>Ca_desi_denovo</i> | 17548460                | C/G  | NA                 | NA                            | NA                 |
| <i>Desi_wild_17548496</i> | NA                                  | <i>Ca_desi_denovo</i> | 17548496                | C/T  | NA                 | NA                            | NA                 |
| <i>Desi_wild_17563304</i> | NA                                  | <i>Ca_desi_denovo</i> | 17563304                | C/G  | NA                 | NA                            | NA                 |
| <i>Desi_wild_17564614</i> | NA                                  | <i>Ca_desi_denovo</i> | 17564614                | C/T  | NA                 | NA                            | NA                 |
| <i>Desi_wild_17564620</i> | NA                                  | <i>Ca_desi_denovo</i> | 17564620                | A/G  | NA                 | NA                            | NA                 |
| <i>Desi_wild_17578676</i> | NA                                  | <i>Ca_desi_denovo</i> | 17578676                | A/G  | NA                 | NA                            | NA                 |
| <i>Desi_wild_17583432</i> | NA                                  | <i>Ca_desi_denovo</i> | 17583432                | C/G  | NA                 | NA                            | NA                 |
| <i>Desi_wild_17583444</i> | NA                                  | <i>Ca_desi_denovo</i> | 17583444                | C/G  | NA                 | NA                            | NA                 |
| <i>Desi_wild_17588954</i> | NA                                  | <i>Ca_desi_denovo</i> | 17588954                | C/G  | NA                 | NA                            | NA                 |
| <i>Desi_wild_17597963</i> | NA                                  | <i>Ca_desi_denovo</i> | 17597963                | A/G  | NA                 | NA                            | NA                 |
| <i>Desi_wild_17597966</i> | NA                                  | <i>Ca_desi_denovo</i> | 17597966                | T/C  | NA                 | NA                            | NA                 |
| <i>Desi_wild_17599152</i> | NA                                  | <i>Ca_desi_denovo</i> | 17599152                | C/G  | NA                 | NA                            | NA                 |
| <i>Desi_wild_17599155</i> | NA                                  | <i>Ca_desi_denovo</i> | 17599155                | C/T  | NA                 | NA                            | NA                 |

| SNP IDs                   | NCBI dbSNP accession IDs (NCBI_SS#) | Chromosomes           | Physical positions (bp) | SNPs | Gene accession IDs | Sequence components of genome | Putative functions |
|---------------------------|-------------------------------------|-----------------------|-------------------------|------|--------------------|-------------------------------|--------------------|
| <i>Desi_wild_17618297</i> | NA                                  | <i>Ca_desi_denovo</i> | 17618297                | A/G  | NA                 | NA                            | NA                 |
| <i>Desi_wild_17618330</i> | NA                                  | <i>Ca_desi_denovo</i> | 17618330                | A/G  | NA                 | NA                            | NA                 |
| <i>Desi_wild_17618333</i> | NA                                  | <i>Ca_desi_denovo</i> | 17618333                | A/G  | NA                 | NA                            | NA                 |
| <i>Desi_wild_17620481</i> | NA                                  | <i>Ca_desi_denovo</i> | 17620481                | A/G  | NA                 | NA                            | NA                 |
| <i>Desi_wild_17620484</i> | NA                                  | <i>Ca_desi_denovo</i> | 17620484                | A/T  | NA                 | NA                            | NA                 |
| <i>Desi_wild_17620486</i> | NA                                  | <i>Ca_desi_denovo</i> | 17620486                | A/G  | NA                 | NA                            | NA                 |
| <i>Desi_wild_17622851</i> | NA                                  | <i>Ca_desi_denovo</i> | 17622851                | A/G  | NA                 | NA                            | NA                 |
| <i>Desi_wild_17632725</i> | NA                                  | <i>Ca_desi_denovo</i> | 17632725                | C/T  | NA                 | NA                            | NA                 |
| <i>Desi_wild_17632728</i> | NA                                  | <i>Ca_desi_denovo</i> | 17632728                | C/T  | NA                 | NA                            | NA                 |
| <i>Desi_wild_17632737</i> | NA                                  | <i>Ca_desi_denovo</i> | 17632737                | C/T  | NA                 | NA                            | NA                 |
| <i>Desi_wild_17641863</i> | NA                                  | <i>Ca_desi_denovo</i> | 17641863                | A/C  | NA                 | NA                            | NA                 |
| <i>Desi_wild_17641864</i> | NA                                  | <i>Ca_desi_denovo</i> | 17641864                | C/G  | NA                 | NA                            | NA                 |
| <i>Desi_wild_17641885</i> | NA                                  | <i>Ca_desi_denovo</i> | 17641885                | C/G  | NA                 | NA                            | NA                 |
| <i>Desi_wild_17655654</i> | NA                                  | <i>Ca_desi_denovo</i> | 17655654                | C/T  | NA                 | NA                            | NA                 |
| <i>Desi_wild_17659236</i> | NA                                  | <i>Ca_desi_denovo</i> | 17659236                | C/G  | NA                 | NA                            | NA                 |
| <i>Desi_wild_17674249</i> | NA                                  | <i>Ca_desi_denovo</i> | 17674249                | A/G  | NA                 | NA                            | NA                 |
| <i>Desi_wild_17674282</i> | NA                                  | <i>Ca_desi_denovo</i> | 17674282                | A/G  | NA                 | NA                            | NA                 |
| <i>Desi_wild_17680799</i> | NA                                  | <i>Ca_desi_denovo</i> | 17680799                | A/G  | NA                 | NA                            | NA                 |
| <i>Desi_wild_17684277</i> | NA                                  | <i>Ca_desi_denovo</i> | 17684277                | A/G  | NA                 | NA                            | NA                 |
| <i>Desi_wild_17687877</i> | NA                                  | <i>Ca_desi_denovo</i> | 17687877                | C/G  | NA                 | NA                            | NA                 |
| <i>Desi_wild_17695158</i> | NA                                  | <i>Ca_desi_denovo</i> | 17695158                | A/G  | NA                 | NA                            | NA                 |
| <i>Desi_wild_17709926</i> | NA                                  | <i>Ca_desi_denovo</i> | 17709926                | C/G  | NA                 | NA                            | NA                 |
| <i>Desi_wild_17709950</i> | NA                                  | <i>Ca_desi_denovo</i> | 17709950                | C/G  | NA                 | NA                            | NA                 |
| <i>Desi_wild_17713304</i> | NA                                  | <i>Ca_desi_denovo</i> | 17713304                | C/G  | NA                 | NA                            | NA                 |
| <i>Desi_wild_17753415</i> | NA                                  | <i>Ca_desi_denovo</i> | 17753415                | C/G  | NA                 | NA                            | NA                 |
| <i>Desi_wild_17753418</i> | NA                                  | <i>Ca_desi_denovo</i> | 17753418                | C/G  | NA                 | NA                            | NA                 |
| <i>Desi_wild_17759291</i> | NA                                  | <i>Ca_desi_denovo</i> | 17759291                | A/T  | NA                 | NA                            | NA                 |
| <i>Desi_wild_17759293</i> | NA                                  | <i>Ca_desi_denovo</i> | 17759293                | C/G  | NA                 | NA                            | NA                 |
| <i>Desi_wild_17773453</i> | NA                                  | <i>Ca_desi_denovo</i> | 17773453                | A/G  | NA                 | NA                            | NA                 |
| <i>Desi_wild_17803654</i> | NA                                  | <i>Ca_desi_denovo</i> | 17803654                | C/G  | NA                 | NA                            | NA                 |
| <i>Desi_wild_17813526</i> | NA                                  | <i>Ca_desi_denovo</i> | 17813526                | A/G  | NA                 | NA                            | NA                 |
| <i>Desi_wild_17813535</i> | NA                                  | <i>Ca_desi_denovo</i> | 17813535                | G/T  | NA                 | NA                            | NA                 |
| <i>Desi_wild_17818836</i> | NA                                  | <i>Ca_desi_denovo</i> | 17818836                | G/A  | NA                 | NA                            | NA                 |
| <i>Desi_wild_17824073</i> | NA                                  | <i>Ca_desi_denovo</i> | 17824073                | G/T  | NA                 | NA                            | NA                 |
| <i>Desi_wild_17829232</i> | NA                                  | <i>Ca_desi_denovo</i> | 17829232                | G/T  | NA                 | NA                            | NA                 |
| <i>Desi_wild_17833954</i> | NA                                  | <i>Ca_desi_denovo</i> | 17833954                | C/T  | NA                 | NA                            | NA                 |
| <i>Desi_wild_17833963</i> | NA                                  | <i>Ca_desi_denovo</i> | 17833963                | A/G  | NA                 | NA                            | NA                 |
| <i>Desi_wild_17833969</i> | NA                                  | <i>Ca_desi_denovo</i> | 17833969                | C/T  | NA                 | NA                            | NA                 |
| <i>Desi_wild_17882114</i> | NA                                  | <i>Ca_desi_denovo</i> | 17882114                | A/G  | NA                 | NA                            | NA                 |
| <i>Desi_wild_17884297</i> | NA                                  | <i>Ca_desi_denovo</i> | 17884297                | C/T  | NA                 | NA                            | NA                 |
| <i>Desi_wild_17890875</i> | NA                                  | <i>Ca_desi_denovo</i> | 17890875                | A/G  | NA                 | NA                            | NA                 |
| <i>Desi_wild_17896191</i> | NA                                  | <i>Ca_desi_denovo</i> | 17896191                | A/G  | NA                 | NA                            | NA                 |
| <i>Desi_wild_17901225</i> | NA                                  | <i>Ca_desi_denovo</i> | 17901225                | C/T  | NA                 | NA                            | NA                 |
| <i>Desi_wild_17901237</i> | NA                                  | <i>Ca_desi_denovo</i> | 17901237                | C/T  | NA                 | NA                            | NA                 |

| SNP IDs                   | NCBI dbSNP accession IDs (NCBI_SS#) | Chromosomes           | Physical positions (bp) | SNPs | Gene accession IDs | Sequence components of genome | Putative functions |
|---------------------------|-------------------------------------|-----------------------|-------------------------|------|--------------------|-------------------------------|--------------------|
| <i>Desi_wild_17921695</i> | NA                                  | <i>Ca_desi_denovo</i> | 17921695                | G/T  | NA                 | NA                            | NA                 |
| <i>Desi_wild_17923297</i> | NA                                  | <i>Ca_desi_denovo</i> | 17923297                | C/T  | NA                 | NA                            | NA                 |
| <i>Desi_wild_17923324</i> | NA                                  | <i>Ca_desi_denovo</i> | 17923324                | A/G  | NA                 | NA                            | NA                 |
| <i>Desi_wild_17929077</i> | NA                                  | <i>Ca_desi_denovo</i> | 17929077                | G/T  | NA                 | NA                            | NA                 |
| <i>Desi_wild_17931343</i> | NA                                  | <i>Ca_desi_denovo</i> | 17931343                | G/C  | NA                 | NA                            | NA                 |
| <i>Desi_wild_17937879</i> | NA                                  | <i>Ca_desi_denovo</i> | 17937879                | A/T  | NA                 | NA                            | NA                 |
| <i>Desi_wild_17937896</i> | NA                                  | <i>Ca_desi_denovo</i> | 17937896                | C/T  | NA                 | NA                            | NA                 |
| <i>Desi_wild_17943676</i> | NA                                  | <i>Ca_desi_denovo</i> | 17943676                | A/G  | NA                 | NA                            | NA                 |
| <i>Desi_wild_17943697</i> | NA                                  | <i>Ca_desi_denovo</i> | 17943697                | A/G  | NA                 | NA                            | NA                 |
| <i>Desi_wild_17948974</i> | NA                                  | <i>Ca_desi_denovo</i> | 17948974                | A/C  | NA                 | NA                            | NA                 |
| <i>Desi_wild_17972071</i> | NA                                  | <i>Ca_desi_denovo</i> | 17972071                | A/C  | NA                 | NA                            | NA                 |
| <i>Desi_wild_17972075</i> | NA                                  | <i>Ca_desi_denovo</i> | 17972075                | C/G  | NA                 | NA                            | NA                 |
| <i>Desi_wild_17972096</i> | NA                                  | <i>Ca_desi_denovo</i> | 17972096                | C/G  | NA                 | NA                            | NA                 |
| <i>Desi_wild_17975408</i> | NA                                  | <i>Ca_desi_denovo</i> | 17975408                | G/A  | NA                 | NA                            | NA                 |
| <i>Desi_wild_17990430</i> | NA                                  | <i>Ca_desi_denovo</i> | 17990430                | A/G  | NA                 | NA                            | NA                 |
| <i>Desi_wild_17990448</i> | NA                                  | <i>Ca_desi_denovo</i> | 17990448                | C/G  | NA                 | NA                            | NA                 |
| <i>Desi_wild_17990466</i> | NA                                  | <i>Ca_desi_denovo</i> | 17990466                | C/G  | NA                 | NA                            | NA                 |
| <i>Desi_wild_17990472</i> | NA                                  | <i>Ca_desi_denovo</i> | 17990472                | C/T  | NA                 | NA                            | NA                 |
| <i>Desi_wild_17993259</i> | NA                                  | <i>Ca_desi_denovo</i> | 17993259                | C/G  | NA                 | NA                            | NA                 |
| <i>Desi_wild_17993262</i> | NA                                  | <i>Ca_desi_denovo</i> | 17993262                | A/C  | NA                 | NA                            | NA                 |
| <i>Desi_wild_17997845</i> | NA                                  | <i>Ca_desi_denovo</i> | 17997845                | G/T  | NA                 | NA                            | NA                 |
| <i>Desi_wild_17997851</i> | NA                                  | <i>Ca_desi_denovo</i> | 17997851                | A/G  | NA                 | NA                            | NA                 |
| <i>Desi_wild_17998114</i> | NA                                  | <i>Ca_desi_denovo</i> | 17998114                | A/C  | NA                 | NA                            | NA                 |
| <i>Desi_wild_17998120</i> | NA                                  | <i>Ca_desi_denovo</i> | 17998120                | C/G  | NA                 | NA                            | NA                 |
| <i>Desi_wild_17998168</i> | NA                                  | <i>Ca_desi_denovo</i> | 17998168                | C/T  | NA                 | NA                            | NA                 |
| <i>Desi_wild_18047488</i> | NA                                  | <i>Ca_desi_denovo</i> | 18047488                | A/C  | NA                 | NA                            | NA                 |
| <i>Desi_wild_18047489</i> | NA                                  | <i>Ca_desi_denovo</i> | 18047489                | A/G  | NA                 | NA                            | NA                 |
| <i>Desi_wild_18055669</i> | NA                                  | <i>Ca_desi_denovo</i> | 18055669                | A/G  | NA                 | NA                            | NA                 |
| <i>Desi_wild_18059597</i> | NA                                  | <i>Ca_desi_denovo</i> | 18059597                | C/G  | NA                 | NA                            | NA                 |
| <i>Desi_wild_18065226</i> | NA                                  | <i>Ca_desi_denovo</i> | 18065226                | G/T  | NA                 | NA                            | NA                 |
| <i>Desi_wild_18076185</i> | NA                                  | <i>Ca_desi_denovo</i> | 18076185                | C/T  | NA                 | NA                            | NA                 |
| <i>Desi_wild_18076197</i> | NA                                  | <i>Ca_desi_denovo</i> | 18076197                | C/T  | NA                 | NA                            | NA                 |
| <i>Desi_wild_18076198</i> | NA                                  | <i>Ca_desi_denovo</i> | 18076198                | A/G  | NA                 | NA                            | NA                 |
| <i>Desi_wild_18082408</i> | NA                                  | <i>Ca_desi_denovo</i> | 18082408                | C/G  | NA                 | NA                            | NA                 |
| <i>Desi_wild_18086548</i> | NA                                  | <i>Ca_desi_denovo</i> | 18086548                | C/T  | NA                 | NA                            | NA                 |
| <i>Desi_wild_18090725</i> | NA                                  | <i>Ca_desi_denovo</i> | 18090725                | C/T  | NA                 | NA                            | NA                 |
| <i>Desi_wild_18090736</i> | NA                                  | <i>Ca_desi_denovo</i> | 18090736                | A/G  | NA                 | NA                            | NA                 |
| <i>Desi_wild_18090746</i> | NA                                  | <i>Ca_desi_denovo</i> | 18090746                | A/G  | NA                 | NA                            | NA                 |
| <i>Desi_wild_18090749</i> | NA                                  | <i>Ca_desi_denovo</i> | 18090749                | A/G  | NA                 | NA                            | NA                 |
| <i>Desi_wild_18100632</i> | NA                                  | <i>Ca_desi_denovo</i> | 18100632                | A/C  | NA                 | NA                            | NA                 |
| <i>Desi_wild_18100736</i> | NA                                  | <i>Ca_desi_denovo</i> | 18100736                | C/T  | NA                 | NA                            | NA                 |
| <i>Desi_wild_18101361</i> | NA                                  | <i>Ca_desi_denovo</i> | 18101361                | A/C  | NA                 | NA                            | NA                 |
| <i>Desi_wild_18101394</i> | NA                                  | <i>Ca_desi_denovo</i> | 18101394                | C/T  | NA                 | NA                            | NA                 |
| <i>Desi_wild_18101406</i> | NA                                  | <i>Ca_desi_denovo</i> | 18101406                | G/T  | NA                 | NA                            | NA                 |

| SNP IDs                   | NCBI dbSNP accession IDs (NCBI_SS#) | Chromosomes           | Physical positions (bp) | SNPs | Gene accession IDs | Sequence components of genome | Putative functions |
|---------------------------|-------------------------------------|-----------------------|-------------------------|------|--------------------|-------------------------------|--------------------|
| <i>Desi_wild_18103247</i> | NA                                  | <i>Ca_desi_denovo</i> | 18103247                | A/C  | NA                 | NA                            | NA                 |
| <i>Desi_wild_18127693</i> | NA                                  | <i>Ca_desi_denovo</i> | 18127693                | C/G  | NA                 | NA                            | NA                 |
| <i>Desi_wild_18131113</i> | NA                                  | <i>Ca_desi_denovo</i> | 18131113                | C/T  | NA                 | NA                            | NA                 |
| <i>Desi_wild_18136430</i> | NA                                  | <i>Ca_desi_denovo</i> | 18136430                | C/G  | NA                 | NA                            | NA                 |
| <i>Desi_wild_18137286</i> | NA                                  | <i>Ca_desi_denovo</i> | 18137286                | A/G  | NA                 | NA                            | NA                 |
| <i>Desi_wild_18137292</i> | NA                                  | <i>Ca_desi_denovo</i> | 18137292                | C/G  | NA                 | NA                            | NA                 |
| <i>Desi_wild_18157061</i> | NA                                  | <i>Ca_desi_denovo</i> | 18157061                | A/G  | NA                 | NA                            | NA                 |
| <i>Desi_wild_18169605</i> | NA                                  | <i>Ca_desi_denovo</i> | 18169605                | C/T  | NA                 | NA                            | NA                 |
| <i>Desi_wild_18175678</i> | NA                                  | <i>Ca_desi_denovo</i> | 18175678                | A/G  | NA                 | NA                            | NA                 |
| <i>Desi_wild_18181242</i> | NA                                  | <i>Ca_desi_denovo</i> | 18181242                | A/G  | NA                 | NA                            | NA                 |
| <i>Desi_wild_18204841</i> | NA                                  | <i>Ca_desi_denovo</i> | 18204841                | A/G  | NA                 | NA                            | NA                 |
| <i>Desi_wild_18208244</i> | NA                                  | <i>Ca_desi_denovo</i> | 18208244                | C/T  | NA                 | NA                            | NA                 |
| <i>Desi_wild_18208260</i> | NA                                  | <i>Ca_desi_denovo</i> | 18208260                | C/T  | NA                 | NA                            | NA                 |
| <i>Desi_wild_18208274</i> | NA                                  | <i>Ca_desi_denovo</i> | 18208274                | C/T  | NA                 | NA                            | NA                 |
| <i>Desi_wild_18217643</i> | NA                                  | <i>Ca_desi_denovo</i> | 18217643                | A/G  | NA                 | NA                            | NA                 |
| <i>Desi_wild_18217653</i> | NA                                  | <i>Ca_desi_denovo</i> | 18217653                | G/A  | NA                 | NA                            | NA                 |
| <i>Desi_wild_18219831</i> | NA                                  | <i>Ca_desi_denovo</i> | 18219831                | A/G  | NA                 | NA                            | NA                 |
| <i>Desi_wild_18233920</i> | NA                                  | <i>Ca_desi_denovo</i> | 18233920                | G/T  | NA                 | NA                            | NA                 |
| <i>Desi_wild_18234869</i> | NA                                  | <i>Ca_desi_denovo</i> | 18234869                | C/T  | NA                 | NA                            | NA                 |
| <i>Desi_wild_18235314</i> | NA                                  | <i>Ca_desi_denovo</i> | 18235314                | T/C  | NA                 | NA                            | NA                 |
| <i>Desi_wild_18235326</i> | NA                                  | <i>Ca_desi_denovo</i> | 18235326                | T/C  | NA                 | NA                            | NA                 |
| <i>Desi_wild_18235344</i> | NA                                  | <i>Ca_desi_denovo</i> | 18235344                | C/G  | NA                 | NA                            | NA                 |
| <i>Desi_wild_18235835</i> | NA                                  | <i>Ca_desi_denovo</i> | 18235835                | G/T  | NA                 | NA                            | NA                 |
| <i>Desi_wild_18247011</i> | NA                                  | <i>Ca_desi_denovo</i> | 18247011                | C/G  | NA                 | NA                            | NA                 |
| <i>Desi_wild_18247026</i> | NA                                  | <i>Ca_desi_denovo</i> | 18247026                | C/G  | NA                 | NA                            | NA                 |
| <i>Desi_wild_18266098</i> | NA                                  | <i>Ca_desi_denovo</i> | 18266098                | C/T  | NA                 | NA                            | NA                 |
| <i>Desi_wild_18266143</i> | NA                                  | <i>Ca_desi_denovo</i> | 18266143                | A/C  | NA                 | NA                            | NA                 |
| <i>Desi_wild_18267622</i> | NA                                  | <i>Ca_desi_denovo</i> | 18267622                | A/G  | NA                 | NA                            | NA                 |
| <i>Desi_wild_18267631</i> | NA                                  | <i>Ca_desi_denovo</i> | 18267631                | C/T  | NA                 | NA                            | NA                 |
| <i>Desi_wild_18283025</i> | NA                                  | <i>Ca_desi_denovo</i> | 18283025                | A/G  | NA                 | NA                            | NA                 |
| <i>Desi_wild_18297299</i> | NA                                  | <i>Ca_desi_denovo</i> | 18297299                | A/G  | NA                 | NA                            | NA                 |
| <i>Desi_wild_18305588</i> | NA                                  | <i>Ca_desi_denovo</i> | 18305588                | G/T  | NA                 | NA                            | NA                 |
| <i>Desi_wild_18307915</i> | NA                                  | <i>Ca_desi_denovo</i> | 18307915                | C/G  | NA                 | NA                            | NA                 |
| <i>Desi_wild_18325588</i> | NA                                  | <i>Ca_desi_denovo</i> | 18325588                | G/A  | NA                 | NA                            | NA                 |
| <i>Desi_wild_18328616</i> | NA                                  | <i>Ca_desi_denovo</i> | 18328616                | C/G  | NA                 | NA                            | NA                 |
| <i>Desi_wild_18330140</i> | NA                                  | <i>Ca_desi_denovo</i> | 18330140                | A/C  | NA                 | NA                            | NA                 |
| <i>Desi_wild_18340361</i> | NA                                  | <i>Ca_desi_denovo</i> | 18340361                | G/T  | NA                 | NA                            | NA                 |
| <i>Desi_wild_18353718</i> | NA                                  | <i>Ca_desi_denovo</i> | 18353718                | A/G  | NA                 | NA                            | NA                 |
| <i>Desi_wild_18359529</i> | NA                                  | <i>Ca_desi_denovo</i> | 18359529                | A/G  | NA                 | NA                            | NA                 |
| <i>Desi_wild_18361387</i> | NA                                  | <i>Ca_desi_denovo</i> | 18361387                | G/A  | NA                 | NA                            | NA                 |
| <i>Desi_wild_18361410</i> | NA                                  | <i>Ca_desi_denovo</i> | 18361410                | G/A  | NA                 | NA                            | NA                 |
| <i>Desi_wild_18375626</i> | NA                                  | <i>Ca_desi_denovo</i> | 18375626                | C/T  | NA                 | NA                            | NA                 |
| <i>Desi_wild_18377915</i> | NA                                  | <i>Ca_desi_denovo</i> | 18377915                | A/G  | NA                 | NA                            | NA                 |
| <i>Desi_wild_18377916</i> | NA                                  | <i>Ca_desi_denovo</i> | 18377916                | A/G  | NA                 | NA                            | NA                 |

| SNP IDs                   | NCBI dbSNP accession IDs (NCBI_SS#) | Chromosomes           | Physical positions (bp) | SNPs | Gene accession IDs | Sequence components of genome | Putative functions |
|---------------------------|-------------------------------------|-----------------------|-------------------------|------|--------------------|-------------------------------|--------------------|
| <i>Desi_wild_18377917</i> | NA                                  | <i>Ca_desi_denovo</i> | 18377917                | C/G  | NA                 | NA                            | NA                 |
| <i>Desi_wild_18377920</i> | NA                                  | <i>Ca_desi_denovo</i> | 18377920                | A/G  | NA                 | NA                            | NA                 |
| <i>Desi_wild_18381469</i> | NA                                  | <i>Ca_desi_denovo</i> | 18381469                | C/G  | NA                 | NA                            | NA                 |
| <i>Desi_wild_18389524</i> | NA                                  | <i>Ca_desi_denovo</i> | 18389524                | G/T  | NA                 | NA                            | NA                 |
| <i>Desi_wild_18393262</i> | NA                                  | <i>Ca_desi_denovo</i> | 18393262                | G/T  | NA                 | NA                            | NA                 |
| <i>Desi_wild_18393751</i> | NA                                  | <i>Ca_desi_denovo</i> | 18393751                | G/A  | NA                 | NA                            | NA                 |
| <i>Desi_wild_18406632</i> | NA                                  | <i>Ca_desi_denovo</i> | 18406632                | G/T  | NA                 | NA                            | NA                 |
| <i>Desi_wild_18410092</i> | NA                                  | <i>Ca_desi_denovo</i> | 18410092                | G/T  | NA                 | NA                            | NA                 |
| <i>Desi_wild_18439575</i> | NA                                  | <i>Ca_desi_denovo</i> | 18439575                | T/C  | NA                 | NA                            | NA                 |
| <i>Desi_wild_18442512</i> | NA                                  | <i>Ca_desi_denovo</i> | 18442512                | A/G  | NA                 | NA                            | NA                 |
| <i>Desi_wild_18442515</i> | NA                                  | <i>Ca_desi_denovo</i> | 18442515                | A/G  | NA                 | NA                            | NA                 |
| <i>Desi_wild_18442521</i> | NA                                  | <i>Ca_desi_denovo</i> | 18442521                | A/G  | NA                 | NA                            | NA                 |
| <i>Desi_wild_18442530</i> | NA                                  | <i>Ca_desi_denovo</i> | 18442530                | C/G  | NA                 | NA                            | NA                 |
| <i>Desi_wild_18447695</i> | NA                                  | <i>Ca_desi_denovo</i> | 18447695                | C/T  | NA                 | NA                            | NA                 |
| <i>Desi_wild_18447707</i> | NA                                  | <i>Ca_desi_denovo</i> | 18447707                | A/G  | NA                 | NA                            | NA                 |
| <i>Desi_wild_18447713</i> | NA                                  | <i>Ca_desi_denovo</i> | 18447713                | T/C  | NA                 | NA                            | NA                 |
| <i>Desi_wild_18451155</i> | NA                                  | <i>Ca_desi_denovo</i> | 18451155                | C/G  | NA                 | NA                            | NA                 |
| <i>Desi_wild_18451181</i> | NA                                  | <i>Ca_desi_denovo</i> | 18451181                | C/G  | NA                 | NA                            | NA                 |
| <i>Desi_wild_18451193</i> | NA                                  | <i>Ca_desi_denovo</i> | 18451193                | A/G  | NA                 | NA                            | NA                 |
| <i>Desi_wild_18453059</i> | NA                                  | <i>Ca_desi_denovo</i> | 18453059                | A/C  | NA                 | NA                            | NA                 |
| <i>Desi_wild_18453063</i> | NA                                  | <i>Ca_desi_denovo</i> | 18453063                | C/G  | NA                 | NA                            | NA                 |
| <i>Desi_wild_18453071</i> | NA                                  | <i>Ca_desi_denovo</i> | 18453071                | C/T  | NA                 | NA                            | NA                 |
| <i>Desi_wild_18465988</i> | NA                                  | <i>Ca_desi_denovo</i> | 18465988                | C/G  | NA                 | NA                            | NA                 |
| <i>Desi_wild_18489447</i> | NA                                  | <i>Ca_desi_denovo</i> | 18489447                | C/G  | NA                 | NA                            | NA                 |
| <i>Desi_wild_18489456</i> | NA                                  | <i>Ca_desi_denovo</i> | 18489456                | A/G  | NA                 | NA                            | NA                 |
| <i>Desi_wild_18489531</i> | NA                                  | <i>Ca_desi_denovo</i> | 18489531                | C/G  | NA                 | NA                            | NA                 |
| <i>Desi_wild_18489534</i> | NA                                  | <i>Ca_desi_denovo</i> | 18489534                | C/G  | NA                 | NA                            | NA                 |
| <i>Desi_wild_18489541</i> | NA                                  | <i>Ca_desi_denovo</i> | 18489541                | A/C  | NA                 | NA                            | NA                 |
| <i>Desi_wild_18491604</i> | NA                                  | <i>Ca_desi_denovo</i> | 18491604                | G/T  | NA                 | NA                            | NA                 |
| <i>Desi_wild_18505863</i> | NA                                  | <i>Ca_desi_denovo</i> | 18505863                | A/C  | NA                 | NA                            | NA                 |
| <i>Desi_wild_18505864</i> | NA                                  | <i>Ca_desi_denovo</i> | 18505864                | G/T  | NA                 | NA                            | NA                 |
| <i>Desi_wild_18506982</i> | NA                                  | <i>Ca_desi_denovo</i> | 18506982                | G/T  | NA                 | NA                            | NA                 |
| <i>Desi_wild_18542310</i> | NA                                  | <i>Ca_desi_denovo</i> | 18542310                | G/T  | NA                 | NA                            | NA                 |
| <i>Desi_wild_18543579</i> | NA                                  | <i>Ca_desi_denovo</i> | 18543579                | A/C  | NA                 | NA                            | NA                 |
| <i>Desi_wild_18555060</i> | NA                                  | <i>Ca_desi_denovo</i> | 18555060                | T/G  | NA                 | NA                            | NA                 |
| <i>Desi_wild_18556786</i> | NA                                  | <i>Ca_desi_denovo</i> | 18556786                | G/T  | NA                 | NA                            | NA                 |
| <i>Desi_wild_18563446</i> | NA                                  | <i>Ca_desi_denovo</i> | 18563446                | C/A  | NA                 | NA                            | NA                 |
| <i>Desi_wild_18563447</i> | NA                                  | <i>Ca_desi_denovo</i> | 18563447                | A/G  | NA                 | NA                            | NA                 |
| <i>Desi_wild_18563449</i> | NA                                  | <i>Ca_desi_denovo</i> | 18563449                | G/A  | NA                 | NA                            | NA                 |
| <i>Desi_wild_18576727</i> | NA                                  | <i>Ca_desi_denovo</i> | 18576727                | A/G  | NA                 | NA                            | NA                 |
| <i>Desi_wild_18583570</i> | NA                                  | <i>Ca_desi_denovo</i> | 18583570                | A/G  | NA                 | NA                            | NA                 |
| <i>Desi_wild_18583580</i> | NA                                  | <i>Ca_desi_denovo</i> | 18583580                | A/C  | NA                 | NA                            | NA                 |
| <i>Desi_wild_18586104</i> | NA                                  | <i>Ca_desi_denovo</i> | 18586104                | A/G  | NA                 | NA                            | NA                 |
| <i>Desi_wild_18592756</i> | NA                                  | <i>Ca_desi_denovo</i> | 18592756                | T/G  | NA                 | NA                            | NA                 |

| SNP IDs                   | NCBI dbSNP accession IDs (NCBI_SS#) | Chromosomes           | Physical positions (bp) | SNPs | Gene accession IDs | Sequence components of genome | Putative functions |
|---------------------------|-------------------------------------|-----------------------|-------------------------|------|--------------------|-------------------------------|--------------------|
| <i>Desi_wild_18592781</i> | NA                                  | <i>Ca_desi_denovo</i> | 18592781                | T/G  | NA                 | NA                            | NA                 |
| <i>Desi_wild_18593369</i> | NA                                  | <i>Ca_desi_denovo</i> | 18593369                | G/T  | NA                 | NA                            | NA                 |
| <i>Desi_wild_18597259</i> | NA                                  | <i>Ca_desi_denovo</i> | 18597259                | A/G  | NA                 | NA                            | NA                 |
| <i>Desi_wild_18599906</i> | NA                                  | <i>Ca_desi_denovo</i> | 18599906                | A/C  | NA                 | NA                            | NA                 |
| <i>Desi_wild_18603320</i> | NA                                  | <i>Ca_desi_denovo</i> | 18603320                | A/G  | NA                 | NA                            | NA                 |
| <i>Desi_wild_18603373</i> | NA                                  | <i>Ca_desi_denovo</i> | 18603373                | A/G  | NA                 | NA                            | NA                 |
| <i>Desi_wild_18635605</i> | NA                                  | <i>Ca_desi_denovo</i> | 18635605                | A/C  | NA                 | NA                            | NA                 |
| <i>Desi_wild_18636751</i> | NA                                  | <i>Ca_desi_denovo</i> | 18636751                | A/C  | NA                 | NA                            | NA                 |
| <i>Desi_wild_18639202</i> | NA                                  | <i>Ca_desi_denovo</i> | 18639202                | T/G  | NA                 | NA                            | NA                 |
| <i>Desi_wild_18650171</i> | NA                                  | <i>Ca_desi_denovo</i> | 18650171                | C/G  | NA                 | NA                            | NA                 |
| <i>Desi_wild_18657640</i> | NA                                  | <i>Ca_desi_denovo</i> | 18657640                | T/G  | NA                 | NA                            | NA                 |
| <i>Desi_wild_18657643</i> | NA                                  | <i>Ca_desi_denovo</i> | 18657643                | G/T  | NA                 | NA                            | NA                 |
| <i>Desi_wild_18657655</i> | NA                                  | <i>Ca_desi_denovo</i> | 18657655                | A/G  | NA                 | NA                            | NA                 |
| <i>Desi_wild_18657674</i> | NA                                  | <i>Ca_desi_denovo</i> | 18657674                | C/G  | NA                 | NA                            | NA                 |
| <i>Desi_wild_18662976</i> | NA                                  | <i>Ca_desi_denovo</i> | 18662976                | C/G  | NA                 | NA                            | NA                 |
| <i>Desi_wild_18674895</i> | NA                                  | <i>Ca_desi_denovo</i> | 18674895                | G/A  | NA                 | NA                            | NA                 |
| <i>Desi_wild_18710010</i> | NA                                  | <i>Ca_desi_denovo</i> | 18710010                | A/C  | NA                 | NA                            | NA                 |
| <i>Desi_wild_18711007</i> | NA                                  | <i>Ca_desi_denovo</i> | 18711007                | G/A  | NA                 | NA                            | NA                 |
| <i>Desi_wild_18714893</i> | NA                                  | <i>Ca_desi_denovo</i> | 18714893                | A/G  | NA                 | NA                            | NA                 |
| <i>Desi_wild_18716750</i> | NA                                  | <i>Ca_desi_denovo</i> | 18716750                | G/T  | NA                 | NA                            | NA                 |
| <i>Desi_wild_18716752</i> | NA                                  | <i>Ca_desi_denovo</i> | 18716752                | G/T  | NA                 | NA                            | NA                 |
| <i>Desi_wild_18722428</i> | NA                                  | <i>Ca_desi_denovo</i> | 18722428                | T/G  | NA                 | NA                            | NA                 |
| <i>Desi_wild_18728380</i> | NA                                  | <i>Ca_desi_denovo</i> | 18728380                | C/T  | NA                 | NA                            | NA                 |
| <i>Desi_wild_18728483</i> | NA                                  | <i>Ca_desi_denovo</i> | 18728483                | A/T  | NA                 | NA                            | NA                 |
| <i>Desi_wild_18739604</i> | NA                                  | <i>Ca_desi_denovo</i> | 18739604                | A/G  | NA                 | NA                            | NA                 |
| <i>Desi_wild_18745006</i> | NA                                  | <i>Ca_desi_denovo</i> | 18745006                | A/G  | NA                 | NA                            | NA                 |
| <i>Desi_wild_18750484</i> | NA                                  | <i>Ca_desi_denovo</i> | 18750484                | A/C  | NA                 | NA                            | NA                 |
| <i>Desi_wild_18753159</i> | NA                                  | <i>Ca_desi_denovo</i> | 18753159                | C/G  | NA                 | NA                            | NA                 |
| <i>Desi_wild_18753965</i> | NA                                  | <i>Ca_desi_denovo</i> | 18753965                | G/C  | NA                 | NA                            | NA                 |
| <i>Desi_wild_18754291</i> | NA                                  | <i>Ca_desi_denovo</i> | 18754291                | C/T  | NA                 | NA                            | NA                 |
| <i>Desi_wild_18755159</i> | NA                                  | <i>Ca_desi_denovo</i> | 18755159                | A/G  | NA                 | NA                            | NA                 |
| <i>Desi_wild_18755167</i> | NA                                  | <i>Ca_desi_denovo</i> | 18755167                | A/C  | NA                 | NA                            | NA                 |
| <i>Desi_wild_18755253</i> | NA                                  | <i>Ca_desi_denovo</i> | 18755253                | G/A  | NA                 | NA                            | NA                 |
| <i>Desi_wild_18755284</i> | NA                                  | <i>Ca_desi_denovo</i> | 18755284                | A/G  | NA                 | NA                            | NA                 |
| <i>Desi_wild_18755840</i> | NA                                  | <i>Ca_desi_denovo</i> | 18755840                | C/G  | NA                 | NA                            | NA                 |
| <i>Desi_wild_18757303</i> | NA                                  | <i>Ca_desi_denovo</i> | 18757303                | G/A  | NA                 | NA                            | NA                 |
| <i>Desi_wild_18757326</i> | NA                                  | <i>Ca_desi_denovo</i> | 18757326                | T/G  | NA                 | NA                            | NA                 |
| <i>Desi_wild_18757363</i> | NA                                  | <i>Ca_desi_denovo</i> | 18757363                | C/G  | NA                 | NA                            | NA                 |
| <i>Desi_wild_18760611</i> | NA                                  | <i>Ca_desi_denovo</i> | 18760611                | C/T  | NA                 | NA                            | NA                 |
| <i>Desi_wild_18761012</i> | NA                                  | <i>Ca_desi_denovo</i> | 18761012                | C/T  | NA                 | NA                            | NA                 |
| <i>Desi_wild_18761078</i> | NA                                  | <i>Ca_desi_denovo</i> | 18761078                | A/G  | NA                 | NA                            | NA                 |
| <i>Desi_wild_18761084</i> | NA                                  | <i>Ca_desi_denovo</i> | 18761084                | G/T  | NA                 | NA                            | NA                 |
| <i>Desi_wild_18761088</i> | NA                                  | <i>Ca_desi_denovo</i> | 18761088                | G/T  | NA                 | NA                            | NA                 |
| <i>Desi_wild_18761101</i> | NA                                  | <i>Ca_desi_denovo</i> | 18761101                | G/T  | NA                 | NA                            | NA                 |



| SNP IDs                   | NCBI dbSNP accession IDs (NCBI_SS#) | Chromosomes           | Physical positions (bp) | SNPs | Gene accession IDs | Sequence components of genome | Putative functions |
|---------------------------|-------------------------------------|-----------------------|-------------------------|------|--------------------|-------------------------------|--------------------|
| <i>Desi_wild_18761316</i> | NA                                  | <i>Ca_desi_denovo</i> | 18761316                | G/A  | NA                 | NA                            | NA                 |
| <i>Desi_wild_18761435</i> | NA                                  | <i>Ca_desi_denovo</i> | 18761435                | T/C  | NA                 | NA                            | NA                 |
| <i>Desi_wild_18761453</i> | NA                                  | <i>Ca_desi_denovo</i> | 18761453                | C/T  | NA                 | NA                            | NA                 |
| <i>Desi_wild_18761675</i> | NA                                  | <i>Ca_desi_denovo</i> | 18761675                | T/C  | NA                 | NA                            | NA                 |
| <i>Desi_wild_18761686</i> | NA                                  | <i>Ca_desi_denovo</i> | 18761686                | A/C  | NA                 | NA                            | NA                 |
| <i>Desi_wild_18761740</i> | NA                                  | <i>Ca_desi_denovo</i> | 18761740                | G/T  | NA                 | NA                            | NA                 |
| <i>Desi_wild_18761767</i> | NA                                  | <i>Ca_desi_denovo</i> | 18761767                | A/G  | NA                 | NA                            | NA                 |
| <i>Desi_wild_18761771</i> | NA                                  | <i>Ca_desi_denovo</i> | 18761771                | C/T  | NA                 | NA                            | NA                 |
| <i>Desi_wild_18761773</i> | NA                                  | <i>Ca_desi_denovo</i> | 18761773                | C/T  | NA                 | NA                            | NA                 |
| <i>Desi_wild_18762484</i> | NA                                  | <i>Ca_desi_denovo</i> | 18762484                | A/G  | NA                 | NA                            | NA                 |
| <i>Desi_wild_18762490</i> | NA                                  | <i>Ca_desi_denovo</i> | 18762490                | G/A  | NA                 | NA                            | NA                 |
| <i>Desi_wild_18762493</i> | NA                                  | <i>Ca_desi_denovo</i> | 18762493                | T/A  | NA                 | NA                            | NA                 |
| <i>Desi_wild_18762839</i> | NA                                  | <i>Ca_desi_denovo</i> | 18762839                | A/G  | NA                 | NA                            | NA                 |
| <i>Desi_wild_18762850</i> | NA                                  | <i>Ca_desi_denovo</i> | 18762850                | C/T  | NA                 | NA                            | NA                 |
| <i>Desi_wild_18762952</i> | NA                                  | <i>Ca_desi_denovo</i> | 18762952                | C/T  | NA                 | NA                            | NA                 |
| <i>Desi_wild_18762968</i> | NA                                  | <i>Ca_desi_denovo</i> | 18762968                | C/T  | NA                 | NA                            | NA                 |
| <i>Desi_wild_18763058</i> | NA                                  | <i>Ca_desi_denovo</i> | 18763058                | A/G  | NA                 | NA                            | NA                 |
| <i>Desi_wild_18764760</i> | NA                                  | <i>Ca_desi_denovo</i> | 18764760                | A/G  | NA                 | NA                            | NA                 |
| <i>Desi_wild_18764791</i> | NA                                  | <i>Ca_desi_denovo</i> | 18764791                | A/G  | NA                 | NA                            | NA                 |
| <i>Desi_wild_18765746</i> | NA                                  | <i>Ca_desi_denovo</i> | 18765746                | A/C  | NA                 | NA                            | NA                 |
| <i>Desi_wild_18765799</i> | NA                                  | <i>Ca_desi_denovo</i> | 18765799                | G/A  | NA                 | NA                            | NA                 |
| <i>Desi_wild_18766741</i> | NA                                  | <i>Ca_desi_denovo</i> | 18766741                | T/C  | NA                 | NA                            | NA                 |
| <i>Desi_wild_18767581</i> | NA                                  | <i>Ca_desi_denovo</i> | 18767581                | G/T  | NA                 | NA                            | NA                 |
| <i>Desi_wild_18767794</i> | NA                                  | <i>Ca_desi_denovo</i> | 18767794                | G/A  | NA                 | NA                            | NA                 |
| <i>Desi_wild_18769074</i> | NA                                  | <i>Ca_desi_denovo</i> | 18769074                | C/T  | NA                 | NA                            | NA                 |
| <i>Desi_wild_18769108</i> | NA                                  | <i>Ca_desi_denovo</i> | 18769108                | A/T  | NA                 | NA                            | NA                 |
| <i>Desi_wild_18769125</i> | NA                                  | <i>Ca_desi_denovo</i> | 18769125                | A/G  | NA                 | NA                            | NA                 |
| <i>Desi_wild_18769128</i> | NA                                  | <i>Ca_desi_denovo</i> | 18769128                | A/G  | NA                 | NA                            | NA                 |
| <i>Desi_wild_18769146</i> | NA                                  | <i>Ca_desi_denovo</i> | 18769146                | C/T  | NA                 | NA                            | NA                 |
| <i>Desi_wild_18769149</i> | NA                                  | <i>Ca_desi_denovo</i> | 18769149                | A/G  | NA                 | NA                            | NA                 |
| <i>Desi_wild_18769462</i> | NA                                  | <i>Ca_desi_denovo</i> | 18769462                | C/T  | NA                 | NA                            | NA                 |
| <i>Desi_wild_18770435</i> | NA                                  | <i>Ca_desi_denovo</i> | 18770435                | C/T  | NA                 | NA                            | NA                 |
| <i>Desi_wild_18770710</i> | NA                                  | <i>Ca_desi_denovo</i> | 18770710                | A/G  | NA                 | NA                            | NA                 |
| <i>Desi_wild_18770720</i> | NA                                  | <i>Ca_desi_denovo</i> | 18770720                | A/G  | NA                 | NA                            | NA                 |
| <i>Desi_wild_18771111</i> | NA                                  | <i>Ca_desi_denovo</i> | 18771111                | C/T  | NA                 | NA                            | NA                 |
| <i>Desi_wild_18771128</i> | NA                                  | <i>Ca_desi_denovo</i> | 18771128                | G/A  | NA                 | NA                            | NA                 |
| <i>Desi_wild_18771763</i> | NA                                  | <i>Ca_desi_denovo</i> | 18771763                | C/G  | NA                 | NA                            | NA                 |
| <i>Desi_wild_18773307</i> | NA                                  | <i>Ca_desi_denovo</i> | 18773307                | A/G  | NA                 | NA                            | NA                 |
| <i>Desi_wild_18773782</i> | NA                                  | <i>Ca_desi_denovo</i> | 18773782                | G/T  | NA                 | NA                            | NA                 |
| <i>Desi_wild_18773797</i> | NA                                  | <i>Ca_desi_denovo</i> | 18773797                | C/T  | NA                 | NA                            | NA                 |
| <i>Desi_wild_18773980</i> | NA                                  | <i>Ca_desi_denovo</i> | 18773980                | A/G  | NA                 | NA                            | NA                 |
| <i>Desi_wild_18774075</i> | NA                                  | <i>Ca_desi_denovo</i> | 18774075                | C/T  | NA                 | NA                            | NA                 |
| <i>Desi_wild_18774099</i> | NA                                  | <i>Ca_desi_denovo</i> | 18774099                | A/G  | NA                 | NA                            | NA                 |
| <i>Desi_wild_18774107</i> | NA                                  | <i>Ca_desi_denovo</i> | 18774107                | C/T  | NA                 | NA                            | NA                 |

| SNP IDs                   | NCBI dbSNP accession IDs (NCBI_SS#) | Chromosomes           | Physical positions (bp) | SNPs | Gene accession IDs | Sequence components of genome | Putative functions |
|---------------------------|-------------------------------------|-----------------------|-------------------------|------|--------------------|-------------------------------|--------------------|
| <i>Desi_wild_18774114</i> | NA                                  | <i>Ca_desi_denovo</i> | 18774114                | G/A  | NA                 | NA                            | NA                 |
| <i>Desi_wild_18775795</i> | NA                                  | <i>Ca_desi_denovo</i> | 18775795                | A/G  | NA                 | NA                            | NA                 |
| <i>Desi_wild_18775828</i> | NA                                  | <i>Ca_desi_denovo</i> | 18775828                | A/G  | NA                 | NA                            | NA                 |
| <i>Desi_wild_18776876</i> | NA                                  | <i>Ca_desi_denovo</i> | 18776876                | A/G  | NA                 | NA                            | NA                 |
| <i>Desi_wild_18777863</i> | NA                                  | <i>Ca_desi_denovo</i> | 18777863                | A/G  | NA                 | NA                            | NA                 |
| <i>Desi_wild_18777864</i> | NA                                  | <i>Ca_desi_denovo</i> | 18777864                | C/G  | NA                 | NA                            | NA                 |
| <i>Desi_wild_18778403</i> | NA                                  | <i>Ca_desi_denovo</i> | 18778403                | C/G  | NA                 | NA                            | NA                 |
| <i>Desi_wild_18778406</i> | NA                                  | <i>Ca_desi_denovo</i> | 18778406                | C/G  | NA                 | NA                            | NA                 |
| <i>Desi_wild_18778407</i> | NA                                  | <i>Ca_desi_denovo</i> | 18778407                | C/A  | NA                 | NA                            | NA                 |
| <i>Desi_wild_18778410</i> | NA                                  | <i>Ca_desi_denovo</i> | 18778410                | G/A  | NA                 | NA                            | NA                 |
| <i>Desi_wild_18778506</i> | NA                                  | <i>Ca_desi_denovo</i> | 18778506                | A/G  | NA                 | NA                            | NA                 |
| <i>Desi_wild_18778659</i> | NA                                  | <i>Ca_desi_denovo</i> | 18778659                | G/T  | NA                 | NA                            | NA                 |
| <i>Desi_wild_18778922</i> | NA                                  | <i>Ca_desi_denovo</i> | 18778922                | C/T  | NA                 | NA                            | NA                 |
| <i>Desi_wild_18778926</i> | NA                                  | <i>Ca_desi_denovo</i> | 18778926                | A/G  | NA                 | NA                            | NA                 |
| <i>Desi_wild_18779841</i> | NA                                  | <i>Ca_desi_denovo</i> | 18779841                | G/A  | NA                 | NA                            | NA                 |
| <i>Desi_wild_18779866</i> | NA                                  | <i>Ca_desi_denovo</i> | 18779866                | G/T  | NA                 | NA                            | NA                 |
| <i>Desi_wild_18779879</i> | NA                                  | <i>Ca_desi_denovo</i> | 18779879                | T/C  | NA                 | NA                            | NA                 |
| <i>Desi_wild_18779880</i> | NA                                  | <i>Ca_desi_denovo</i> | 18779880                | T/A  | NA                 | NA                            | NA                 |
| <i>Desi_wild_18781664</i> | NA                                  | <i>Ca_desi_denovo</i> | 18781664                | G/T  | NA                 | NA                            | NA                 |
| <i>Desi_wild_18781665</i> | NA                                  | <i>Ca_desi_denovo</i> | 18781665                | A/C  | NA                 | NA                            | NA                 |
| <i>Desi_wild_18781671</i> | NA                                  | <i>Ca_desi_denovo</i> | 18781671                | T/G  | NA                 | NA                            | NA                 |
| <i>Desi_wild_18781707</i> | NA                                  | <i>Ca_desi_denovo</i> | 18781707                | C/G  | NA                 | NA                            | NA                 |
| <i>Desi_wild_18781769</i> | NA                                  | <i>Ca_desi_denovo</i> | 18781769                | A/G  | NA                 | NA                            | NA                 |
| <i>Desi_wild_18781941</i> | NA                                  | <i>Ca_desi_denovo</i> | 18781941                | C/T  | NA                 | NA                            | NA                 |
| <i>Desi_wild_18781945</i> | NA                                  | <i>Ca_desi_denovo</i> | 18781945                | A/G  | NA                 | NA                            | NA                 |
| <i>Desi_wild_18782822</i> | NA                                  | <i>Ca_desi_denovo</i> | 18782822                | C/T  | NA                 | NA                            | NA                 |
| <i>Desi_wild_18785329</i> | NA                                  | <i>Ca_desi_denovo</i> | 18785329                | A/T  | NA                 | NA                            | NA                 |
| <i>Desi_wild_18786268</i> | NA                                  | <i>Ca_desi_denovo</i> | 18786268                | C/T  | NA                 | NA                            | NA                 |
| <i>Desi_wild_18788149</i> | NA                                  | <i>Ca_desi_denovo</i> | 18788149                | T/A  | NA                 | NA                            | NA                 |
| <i>Desi_wild_18788151</i> | NA                                  | <i>Ca_desi_denovo</i> | 18788151                | G/T  | NA                 | NA                            | NA                 |
| <i>Desi_wild_18789628</i> | NA                                  | <i>Ca_desi_denovo</i> | 18789628                | T/G  | NA                 | NA                            | NA                 |
| <i>Desi_wild_18789667</i> | NA                                  | <i>Ca_desi_denovo</i> | 18789667                | T/G  | NA                 | NA                            | NA                 |
| <i>Desi_wild_18792927</i> | NA                                  | <i>Ca_desi_denovo</i> | 18792927                | A/C  | NA                 | NA                            | NA                 |
| <i>Desi_wild_18794057</i> | NA                                  | <i>Ca_desi_denovo</i> | 18794057                | A/T  | NA                 | NA                            | NA                 |
| <i>Desi_wild_18794297</i> | NA                                  | <i>Ca_desi_denovo</i> | 18794297                | A/G  | NA                 | NA                            | NA                 |
| <i>Desi_wild_18794314</i> | NA                                  | <i>Ca_desi_denovo</i> | 18794314                | C/T  | NA                 | NA                            | NA                 |
| <i>Desi_wild_18795103</i> | NA                                  | <i>Ca_desi_denovo</i> | 18795103                | C/T  | NA                 | NA                            | NA                 |
| <i>Desi_wild_18795162</i> | NA                                  | <i>Ca_desi_denovo</i> | 18795162                | A/G  | NA                 | NA                            | NA                 |
| <i>Desi_wild_18797964</i> | NA                                  | <i>Ca_desi_denovo</i> | 18797964                | A/C  | NA                 | NA                            | NA                 |
| <i>Desi_wild_18797965</i> | NA                                  | <i>Ca_desi_denovo</i> | 18797965                | G/T  | NA                 | NA                            | NA                 |
| <i>Desi_wild_18799699</i> | NA                                  | <i>Ca_desi_denovo</i> | 18799699                | C/G  | NA                 | NA                            | NA                 |
| <i>Desi_wild_18801447</i> | NA                                  | <i>Ca_desi_denovo</i> | 18801447                | T/C  | NA                 | NA                            | NA                 |
| <i>Desi_wild_18802340</i> | NA                                  | <i>Ca_desi_denovo</i> | 18802340                | A/C  | NA                 | NA                            | NA                 |
| <i>Desi_wild_18803075</i> | NA                                  | <i>Ca_desi_denovo</i> | 18803075                | G/C  | NA                 | NA                            | NA                 |

| SNP IDs                   | NCBI dbSNP accession IDs (NCBI_SS#) | Chromosomes           | Physical positions (bp) | SNPs | Gene accession IDs | Sequence components of genome | Putative functions |
|---------------------------|-------------------------------------|-----------------------|-------------------------|------|--------------------|-------------------------------|--------------------|
| <i>Desi_wild_18803076</i> | NA                                  | <i>Ca_desi_denovo</i> | 18803076                | T/C  | NA                 | NA                            | NA                 |
| <i>Desi_wild_18803450</i> | NA                                  | <i>Ca_desi_denovo</i> | 18803450                | C/G  | NA                 | NA                            | NA                 |
| <i>Desi_wild_18803451</i> | NA                                  | <i>Ca_desi_denovo</i> | 18803451                | T/G  | NA                 | NA                            | NA                 |
| <i>Desi_wild_18803458</i> | NA                                  | <i>Ca_desi_denovo</i> | 18803458                | C/G  | NA                 | NA                            | NA                 |
| <i>Desi_wild_18805023</i> | NA                                  | <i>Ca_desi_denovo</i> | 18805023                | C/T  | NA                 | NA                            | NA                 |
| <i>Desi_wild_18805177</i> | NA                                  | <i>Ca_desi_denovo</i> | 18805177                | C/T  | NA                 | NA                            | NA                 |
| <i>Desi_wild_18806091</i> | NA                                  | <i>Ca_desi_denovo</i> | 18806091                | G/T  | NA                 | NA                            | NA                 |
| <i>Desi_wild_18806138</i> | NA                                  | <i>Ca_desi_denovo</i> | 18806138                | A/G  | NA                 | NA                            | NA                 |
| <i>Desi_wild_18806741</i> | NA                                  | <i>Ca_desi_denovo</i> | 18806741                | G/C  | NA                 | NA                            | NA                 |
| <i>Desi_wild_18807157</i> | NA                                  | <i>Ca_desi_denovo</i> | 18807157                | G/C  | NA                 | NA                            | NA                 |
| <i>Desi_wild_18808371</i> | NA                                  | <i>Ca_desi_denovo</i> | 18808371                | T/A  | NA                 | NA                            | NA                 |
| <i>Desi_wild_18809319</i> | NA                                  | <i>Ca_desi_denovo</i> | 18809319                | A/C  | NA                 | NA                            | NA                 |
| <i>Desi_wild_18809325</i> | NA                                  | <i>Ca_desi_denovo</i> | 18809325                | C/G  | NA                 | NA                            | NA                 |
| <i>Desi_wild_18809362</i> | NA                                  | <i>Ca_desi_denovo</i> | 18809362                | G/T  | NA                 | NA                            | NA                 |
| <i>Desi_wild_18809380</i> | NA                                  | <i>Ca_desi_denovo</i> | 18809380                | G/A  | NA                 | NA                            | NA                 |
| <i>Desi_wild_18811815</i> | NA                                  | <i>Ca_desi_denovo</i> | 18811815                | A/T  | NA                 | NA                            | NA                 |
| <i>Desi_wild_18812239</i> | NA                                  | <i>Ca_desi_denovo</i> | 18812239                | A/G  | NA                 | NA                            | NA                 |
| <i>Desi_wild_18814268</i> | NA                                  | <i>Ca_desi_denovo</i> | 18814268                | C/T  | NA                 | NA                            | NA                 |
| <i>Desi_wild_18816608</i> | NA                                  | <i>Ca_desi_denovo</i> | 18816608                | C/T  | NA                 | NA                            | NA                 |
| <i>Desi_wild_18816855</i> | NA                                  | <i>Ca_desi_denovo</i> | 18816855                | C/T  | NA                 | NA                            | NA                 |
| <i>Desi_wild_18817688</i> | NA                                  | <i>Ca_desi_denovo</i> | 18817688                | A/G  | NA                 | NA                            | NA                 |
| <i>Desi_wild_18817843</i> | NA                                  | <i>Ca_desi_denovo</i> | 18817843                | C/G  | NA                 | NA                            | NA                 |
| <i>Desi_wild_18817993</i> | NA                                  | <i>Ca_desi_denovo</i> | 18817993                | C/A  | NA                 | NA                            | NA                 |
| <i>Desi_wild_18818024</i> | NA                                  | <i>Ca_desi_denovo</i> | 18818024                | T/G  | NA                 | NA                            | NA                 |
| <i>Desi_wild_18818153</i> | NA                                  | <i>Ca_desi_denovo</i> | 18818153                | A/C  | NA                 | NA                            | NA                 |
| <i>Desi_wild_18818335</i> | NA                                  | <i>Ca_desi_denovo</i> | 18818335                | A/T  | NA                 | NA                            | NA                 |
| <i>Desi_wild_18818340</i> | NA                                  | <i>Ca_desi_denovo</i> | 18818340                | T/G  | NA                 | NA                            | NA                 |
| <i>Desi_wild_18818469</i> | NA                                  | <i>Ca_desi_denovo</i> | 18818469                | A/C  | NA                 | NA                            | NA                 |
| <i>Desi_wild_18818525</i> | NA                                  | <i>Ca_desi_denovo</i> | 18818525                | C/T  | NA                 | NA                            | NA                 |
| <i>Desi_wild_18818636</i> | NA                                  | <i>Ca_desi_denovo</i> | 18818636                | T/C  | NA                 | NA                            | NA                 |
| <i>Desi_wild_18819346</i> | NA                                  | <i>Ca_desi_denovo</i> | 18819346                | C/A  | NA                 | NA                            | NA                 |
| <i>Desi_wild_18819869</i> | NA                                  | <i>Ca_desi_denovo</i> | 18819869                | T/C  | NA                 | NA                            | NA                 |
| <i>Desi_wild_18820863</i> | NA                                  | <i>Ca_desi_denovo</i> | 18820863                | G/A  | NA                 | NA                            | NA                 |
| <i>Desi_wild_18820870</i> | NA                                  | <i>Ca_desi_denovo</i> | 18820870                | A/G  | NA                 | NA                            | NA                 |
| <i>Desi_wild_18820917</i> | NA                                  | <i>Ca_desi_denovo</i> | 18820917                | G/T  | NA                 | NA                            | NA                 |
| <i>Desi_wild_18822562</i> | NA                                  | <i>Ca_desi_denovo</i> | 18822562                | A/C  | NA                 | NA                            | NA                 |
| <i>Desi_wild_18823140</i> | NA                                  | <i>Ca_desi_denovo</i> | 18823140                | A/G  | NA                 | NA                            | NA                 |
| <i>Desi_wild_18823637</i> | NA                                  | <i>Ca_desi_denovo</i> | 18823637                | T/G  | NA                 | NA                            | NA                 |
| <i>Desi_wild_18825099</i> | NA                                  | <i>Ca_desi_denovo</i> | 18825099                | A/T  | NA                 | NA                            | NA                 |
| <i>Desi_wild_18825384</i> | NA                                  | <i>Ca_desi_denovo</i> | 18825384                | A/G  | NA                 | NA                            | NA                 |
| <i>Desi_wild_18825405</i> | NA                                  | <i>Ca_desi_denovo</i> | 18825405                | A/G  | NA                 | NA                            | NA                 |
| <i>Desi_wild_18825420</i> | NA                                  | <i>Ca_desi_denovo</i> | 18825420                | C/T  | NA                 | NA                            | NA                 |
| <i>Desi_wild_18825458</i> | NA                                  | <i>Ca_desi_denovo</i> | 18825458                | G/A  | NA                 | NA                            | NA                 |
| <i>Desi_wild_18825482</i> | NA                                  | <i>Ca_desi_denovo</i> | 18825482                | G/A  | NA                 | NA                            | NA                 |

| SNP IDs                   | NCBI dbSNP accession IDs (NCBI_SS#) | Chromosomes           | Physical positions (bp) | SNPs | Gene accession IDs | Sequence components of genome | Putative functions |
|---------------------------|-------------------------------------|-----------------------|-------------------------|------|--------------------|-------------------------------|--------------------|
| <i>Desi_wild_18825514</i> | NA                                  | <i>Ca_desi_denovo</i> | 18825514                | A/C  | NA                 | NA                            | NA                 |
| <i>Desi_wild_18825515</i> | NA                                  | <i>Ca_desi_denovo</i> | 18825515                | G/A  | NA                 | NA                            | NA                 |
| <i>Desi_wild_18825579</i> | NA                                  | <i>Ca_desi_denovo</i> | 18825579                | C/T  | NA                 | NA                            | NA                 |
| <i>Desi_wild_18826418</i> | NA                                  | <i>Ca_desi_denovo</i> | 18826418                | T/C  | NA                 | NA                            | NA                 |
| <i>Desi_wild_18826636</i> | NA                                  | <i>Ca_desi_denovo</i> | 18826636                | C/A  | NA                 | NA                            | NA                 |
| <i>Desi_wild_18826659</i> | NA                                  | <i>Ca_desi_denovo</i> | 18826659                | C/T  | NA                 | NA                            | NA                 |
| <i>Desi_wild_18826666</i> | NA                                  | <i>Ca_desi_denovo</i> | 18826666                | A/C  | NA                 | NA                            | NA                 |
| <i>Desi_wild_18826667</i> | NA                                  | <i>Ca_desi_denovo</i> | 18826667                | G/T  | NA                 | NA                            | NA                 |
| <i>Desi_wild_18826702</i> | NA                                  | <i>Ca_desi_denovo</i> | 18826702                | C/G  | NA                 | NA                            | NA                 |
| <i>Desi_wild_18826707</i> | NA                                  | <i>Ca_desi_denovo</i> | 18826707                | C/T  | NA                 | NA                            | NA                 |
| <i>Desi_wild_18827754</i> | NA                                  | <i>Ca_desi_denovo</i> | 18827754                | C/T  | NA                 | NA                            | NA                 |
| <i>Desi_wild_18830630</i> | NA                                  | <i>Ca_desi_denovo</i> | 18830630                | T/A  | NA                 | NA                            | NA                 |
| <i>Desi_wild_18830970</i> | NA                                  | <i>Ca_desi_denovo</i> | 18830970                | A/G  | NA                 | NA                            | NA                 |
| <i>Desi_wild_18831200</i> | NA                                  | <i>Ca_desi_denovo</i> | 18831200                | A/C  | NA                 | NA                            | NA                 |
| <i>Desi_wild_18831610</i> | NA                                  | <i>Ca_desi_denovo</i> | 18831610                | A/T  | NA                 | NA                            | NA                 |
| <i>Desi_wild_18832474</i> | NA                                  | <i>Ca_desi_denovo</i> | 18832474                | A/G  | NA                 | NA                            | NA                 |
| <i>Desi_wild_18833993</i> | NA                                  | <i>Ca_desi_denovo</i> | 18833993                | A/G  | NA                 | NA                            | NA                 |
| <i>Desi_wild_18834672</i> | NA                                  | <i>Ca_desi_denovo</i> | 18834672                | C/T  | NA                 | NA                            | NA                 |
| <i>Desi_wild_18835146</i> | NA                                  | <i>Ca_desi_denovo</i> | 18835146                | C/T  | NA                 | NA                            | NA                 |
| <i>Desi_wild_18835633</i> | NA                                  | <i>Ca_desi_denovo</i> | 18835633                | G/A  | NA                 | NA                            | NA                 |
| <i>Desi_wild_18836604</i> | NA                                  | <i>Ca_desi_denovo</i> | 18836604                | C/T  | NA                 | NA                            | NA                 |
| <i>Desi_wild_18836617</i> | NA                                  | <i>Ca_desi_denovo</i> | 18836617                | G/A  | NA                 | NA                            | NA                 |
| <i>Desi_wild_18836722</i> | NA                                  | <i>Ca_desi_denovo</i> | 18836722                | G/C  | NA                 | NA                            | NA                 |
| <i>Desi_wild_18837660</i> | NA                                  | <i>Ca_desi_denovo</i> | 18837660                | C/T  | NA                 | NA                            | NA                 |
| <i>Desi_wild_18838216</i> | NA                                  | <i>Ca_desi_denovo</i> | 18838216                | A/G  | NA                 | NA                            | NA                 |
| <i>Desi_wild_18839467</i> | NA                                  | <i>Ca_desi_denovo</i> | 18839467                | A/G  | NA                 | NA                            | NA                 |
| <i>Desi_wild_18839476</i> | NA                                  | <i>Ca_desi_denovo</i> | 18839476                | G/A  | NA                 | NA                            | NA                 |
| <i>Desi_wild_18839520</i> | NA                                  | <i>Ca_desi_denovo</i> | 18839520                | T/C  | NA                 | NA                            | NA                 |
| <i>Desi_wild_18839852</i> | NA                                  | <i>Ca_desi_denovo</i> | 18839852                | A/G  | NA                 | NA                            | NA                 |
| <i>Desi_wild_18839871</i> | NA                                  | <i>Ca_desi_denovo</i> | 18839871                | G/T  | NA                 | NA                            | NA                 |
| <i>Desi_wild_18840423</i> | NA                                  | <i>Ca_desi_denovo</i> | 18840423                | G/C  | NA                 | NA                            | NA                 |
| <i>Desi_wild_18841406</i> | NA                                  | <i>Ca_desi_denovo</i> | 18841406                | G/A  | NA                 | NA                            | NA                 |
| <i>Desi_wild_18841436</i> | NA                                  | <i>Ca_desi_denovo</i> | 18841436                | A/T  | NA                 | NA                            | NA                 |
| <i>Desi_wild_18841445</i> | NA                                  | <i>Ca_desi_denovo</i> | 18841445                | A/T  | NA                 | NA                            | NA                 |
| <i>Desi_wild_18841486</i> | NA                                  | <i>Ca_desi_denovo</i> | 18841486                | C/A  | NA                 | NA                            | NA                 |
| <i>Desi_wild_18842678</i> | NA                                  | <i>Ca_desi_denovo</i> | 18842678                | A/G  | NA                 | NA                            | NA                 |
| <i>Desi_wild_18842687</i> | NA                                  | <i>Ca_desi_denovo</i> | 18842687                | G/T  | NA                 | NA                            | NA                 |
| <i>Desi_wild_18842816</i> | NA                                  | <i>Ca_desi_denovo</i> | 18842816                | T/C  | NA                 | NA                            | NA                 |
| <i>Desi_wild_18842826</i> | NA                                  | <i>Ca_desi_denovo</i> | 18842826                | C/A  | NA                 | NA                            | NA                 |
| <i>Desi_wild_18842843</i> | NA                                  | <i>Ca_desi_denovo</i> | 18842843                | A/T  | NA                 | NA                            | NA                 |
| <i>Desi_wild_18843341</i> | NA                                  | <i>Ca_desi_denovo</i> | 18843341                | A/C  | NA                 | NA                            | NA                 |
| <i>Desi_wild_18843642</i> | NA                                  | <i>Ca_desi_denovo</i> | 18843642                | T/G  | NA                 | NA                            | NA                 |
| <i>Desi_wild_18843790</i> | NA                                  | <i>Ca_desi_denovo</i> | 18843790                | C/T  | NA                 | NA                            | NA                 |
| <i>Desi_wild_18843865</i> | NA                                  | <i>Ca_desi_denovo</i> | 18843865                | C/T  | NA                 | NA                            | NA                 |

| SNP IDs                   | NCBI dbSNP accession IDs (NCBI_SS#) | Chromosomes           | Physical positions (bp) | SNPs | Gene accession IDs | Sequence components of genome | Putative functions |
|---------------------------|-------------------------------------|-----------------------|-------------------------|------|--------------------|-------------------------------|--------------------|
| <i>Desi_wild_18843872</i> | NA                                  | <i>Ca_desi_denovo</i> | 18843872                | T/C  | NA                 | NA                            | NA                 |
| <i>Desi_wild_18844089</i> | NA                                  | <i>Ca_desi_denovo</i> | 18844089                | T/C  | NA                 | NA                            | NA                 |
| <i>Desi_wild_18844101</i> | NA                                  | <i>Ca_desi_denovo</i> | 18844101                | C/T  | NA                 | NA                            | NA                 |
| <i>Desi_wild_18844139</i> | NA                                  | <i>Ca_desi_denovo</i> | 18844139                | T/G  | NA                 | NA                            | NA                 |
| <i>Desi_wild_18845144</i> | NA                                  | <i>Ca_desi_denovo</i> | 18845144                | C/T  | NA                 | NA                            | NA                 |
| <i>Desi_wild_18845165</i> | NA                                  | <i>Ca_desi_denovo</i> | 18845165                | A/T  | NA                 | NA                            | NA                 |
| <i>Desi_wild_18845204</i> | NA                                  | <i>Ca_desi_denovo</i> | 18845204                | C/T  | NA                 | NA                            | NA                 |
| <i>Desi_wild_18845267</i> | NA                                  | <i>Ca_desi_denovo</i> | 18845267                | C/T  | NA                 | NA                            | NA                 |
| <i>Desi_wild_18845817</i> | NA                                  | <i>Ca_desi_denovo</i> | 18845817                | A/G  | NA                 | NA                            | NA                 |
| <i>Desi_wild_18845991</i> | NA                                  | <i>Ca_desi_denovo</i> | 18845991                | C/T  | NA                 | NA                            | NA                 |
| <i>Desi_wild_18846008</i> | NA                                  | <i>Ca_desi_denovo</i> | 18846008                | G/A  | NA                 | NA                            | NA                 |
| <i>Desi_wild_18846274</i> | NA                                  | <i>Ca_desi_denovo</i> | 18846274                | C/T  | NA                 | NA                            | NA                 |
| <i>Desi_wild_18846305</i> | NA                                  | <i>Ca_desi_denovo</i> | 18846305                | C/T  | NA                 | NA                            | NA                 |
| <i>Desi_wild_18846489</i> | NA                                  | <i>Ca_desi_denovo</i> | 18846489                | C/T  | NA                 | NA                            | NA                 |
| <i>Desi_wild_18847047</i> | NA                                  | <i>Ca_desi_denovo</i> | 18847047                | T/C  | NA                 | NA                            | NA                 |
| <i>Desi_wild_18847801</i> | NA                                  | <i>Ca_desi_denovo</i> | 18847801                | C/A  | NA                 | NA                            | NA                 |
| <i>Desi_wild_18847811</i> | NA                                  | <i>Ca_desi_denovo</i> | 18847811                | C/T  | NA                 | NA                            | NA                 |
| <i>Desi_wild_18847838</i> | NA                                  | <i>Ca_desi_denovo</i> | 18847838                | C/A  | NA                 | NA                            | NA                 |
| <i>Desi_wild_18847880</i> | NA                                  | <i>Ca_desi_denovo</i> | 18847880                | C/A  | NA                 | NA                            | NA                 |
| <i>Desi_wild_18848635</i> | NA                                  | <i>Ca_desi_denovo</i> | 18848635                | C/T  | NA                 | NA                            | NA                 |
| <i>Desi_wild_18848878</i> | NA                                  | <i>Ca_desi_denovo</i> | 18848878                | C/G  | NA                 | NA                            | NA                 |
| <i>Desi_wild_18849192</i> | NA                                  | <i>Ca_desi_denovo</i> | 18849192                | A/G  | NA                 | NA                            | NA                 |
| <i>Desi_wild_18852458</i> | NA                                  | <i>Ca_desi_denovo</i> | 18852458                | T/C  | NA                 | NA                            | NA                 |
| <i>Desi_wild_18852488</i> | NA                                  | <i>Ca_desi_denovo</i> | 18852488                | T/C  | NA                 | NA                            | NA                 |
| <i>Desi_wild_18852711</i> | NA                                  | <i>Ca_desi_denovo</i> | 18852711                | T/C  | NA                 | NA                            | NA                 |
| <i>Desi_wild_18852915</i> | NA                                  | <i>Ca_desi_denovo</i> | 18852915                | G/T  | NA                 | NA                            | NA                 |
| <i>Desi_wild_18852993</i> | NA                                  | <i>Ca_desi_denovo</i> | 18852993                | G/A  | NA                 | NA                            | NA                 |
| <i>Desi_wild_18852997</i> | NA                                  | <i>Ca_desi_denovo</i> | 18852997                | C/T  | NA                 | NA                            | NA                 |
| <i>Desi_wild_18853007</i> | NA                                  | <i>Ca_desi_denovo</i> | 18853007                | A/G  | NA                 | NA                            | NA                 |
| <i>Desi_wild_18853008</i> | NA                                  | <i>Ca_desi_denovo</i> | 18853008                | C/T  | NA                 | NA                            | NA                 |
| <i>Desi_wild_18854155</i> | NA                                  | <i>Ca_desi_denovo</i> | 18854155                | G/A  | NA                 | NA                            | NA                 |
| <i>Desi_wild_18855617</i> | NA                                  | <i>Ca_desi_denovo</i> | 18855617                | C/T  | NA                 | NA                            | NA                 |
| <i>Desi_wild_18855626</i> | NA                                  | <i>Ca_desi_denovo</i> | 18855626                | A/G  | NA                 | NA                            | NA                 |
| <i>Desi_wild_18855629</i> | NA                                  | <i>Ca_desi_denovo</i> | 18855629                | A/C  | NA                 | NA                            | NA                 |
| <i>Desi_wild_18855716</i> | NA                                  | <i>Ca_desi_denovo</i> | 18855716                | T/A  | NA                 | NA                            | NA                 |
| <i>Desi_wild_18855733</i> | NA                                  | <i>Ca_desi_denovo</i> | 18855733                | C/T  | NA                 | NA                            | NA                 |
| <i>Desi_wild_18856551</i> | NA                                  | <i>Ca_desi_denovo</i> | 18856551                | A/G  | NA                 | NA                            | NA                 |
| <i>Desi_wild_18856783</i> | NA                                  | <i>Ca_desi_denovo</i> | 18856783                | A/G  | NA                 | NA                            | NA                 |
| <i>Desi_wild_18856835</i> | NA                                  | <i>Ca_desi_denovo</i> | 18856835                | A/G  | NA                 | NA                            | NA                 |
| <i>Desi_wild_18856841</i> | NA                                  | <i>Ca_desi_denovo</i> | 18856841                | A/T  | NA                 | NA                            | NA                 |
| <i>Desi_wild_18856889</i> | NA                                  | <i>Ca_desi_denovo</i> | 18856889                | C/G  | NA                 | NA                            | NA                 |
| <i>Desi_wild_18857398</i> | NA                                  | <i>Ca_desi_denovo</i> | 18857398                | G/A  | NA                 | NA                            | NA                 |
| <i>Desi_wild_18857505</i> | NA                                  | <i>Ca_desi_denovo</i> | 18857505                | C/T  | NA                 | NA                            | NA                 |
| <i>Desi_wild_18857508</i> | NA                                  | <i>Ca_desi_denovo</i> | 18857508                | C/A  | NA                 | NA                            | NA                 |

| SNP IDs                   | NCBI dbSNP accession IDs (NCBI_SS#) | Chromosomes           | Physical positions (bp) | SNPs | Gene accession IDs | Sequence components of genome | Putative functions |
|---------------------------|-------------------------------------|-----------------------|-------------------------|------|--------------------|-------------------------------|--------------------|
| <i>Desi_wild_18857515</i> | NA                                  | <i>Ca_desi_denovo</i> | 18857515                | T/C  | NA                 | NA                            | NA                 |
| <i>Desi_wild_18858286</i> | NA                                  | <i>Ca_desi_denovo</i> | 18858286                | A/T  | NA                 | NA                            | NA                 |
| <i>Desi_wild_18858327</i> | NA                                  | <i>Ca_desi_denovo</i> | 18858327                | A/T  | NA                 | NA                            | NA                 |
| <i>Desi_wild_18859220</i> | NA                                  | <i>Ca_desi_denovo</i> | 18859220                | T/A  | NA                 | NA                            | NA                 |
| <i>Desi_wild_18859222</i> | NA                                  | <i>Ca_desi_denovo</i> | 18859222                | G/A  | NA                 | NA                            | NA                 |
| <i>Desi_wild_18859931</i> | NA                                  | <i>Ca_desi_denovo</i> | 18859931                | T/G  | NA                 | NA                            | NA                 |
| <i>Desi_wild_18860309</i> | NA                                  | <i>Ca_desi_denovo</i> | 18860309                | G/T  | NA                 | NA                            | NA                 |
| <i>Desi_wild_18860877</i> | NA                                  | <i>Ca_desi_denovo</i> | 18860877                | G/A  | NA                 | NA                            | NA                 |
| <i>Desi_wild_18861650</i> | NA                                  | <i>Ca_desi_denovo</i> | 18861650                | G/A  | NA                 | NA                            | NA                 |
| <i>Desi_wild_18861665</i> | NA                                  | <i>Ca_desi_denovo</i> | 18861665                | A/C  | NA                 | NA                            | NA                 |
| <i>Desi_wild_18861748</i> | NA                                  | <i>Ca_desi_denovo</i> | 18861748                | A/G  | NA                 | NA                            | NA                 |
| <i>Desi_wild_18861751</i> | NA                                  | <i>Ca_desi_denovo</i> | 18861751                | A/G  | NA                 | NA                            | NA                 |
| <i>Desi_wild_18862408</i> | NA                                  | <i>Ca_desi_denovo</i> | 18862408                | G/T  | NA                 | NA                            | NA                 |
| <i>Desi_wild_18862439</i> | NA                                  | <i>Ca_desi_denovo</i> | 18862439                | A/C  | NA                 | NA                            | NA                 |
| <i>Desi_wild_18862745</i> | NA                                  | <i>Ca_desi_denovo</i> | 18862745                | C/T  | NA                 | NA                            | NA                 |
| <i>Desi_wild_18862750</i> | NA                                  | <i>Ca_desi_denovo</i> | 18862750                | C/T  | NA                 | NA                            | NA                 |
| <i>Desi_wild_18862813</i> | NA                                  | <i>Ca_desi_denovo</i> | 18862813                | G/A  | NA                 | NA                            | NA                 |
| <i>Desi_wild_18864243</i> | NA                                  | <i>Ca_desi_denovo</i> | 18864243                | C/T  | NA                 | NA                            | NA                 |
| <i>Desi_wild_18864290</i> | NA                                  | <i>Ca_desi_denovo</i> | 18864290                | A/T  | NA                 | NA                            | NA                 |
| <i>Desi_wild_18864437</i> | NA                                  | <i>Ca_desi_denovo</i> | 18864437                | G/C  | NA                 | NA                            | NA                 |
| <i>Desi_wild_18865232</i> | NA                                  | <i>Ca_desi_denovo</i> | 18865232                | T/C  | NA                 | NA                            | NA                 |
| <i>Desi_wild_18865496</i> | NA                                  | <i>Ca_desi_denovo</i> | 18865496                | C/T  | NA                 | NA                            | NA                 |
| <i>Desi_wild_18865517</i> | NA                                  | <i>Ca_desi_denovo</i> | 18865517                | A/G  | NA                 | NA                            | NA                 |
| <i>Desi_wild_18865535</i> | NA                                  | <i>Ca_desi_denovo</i> | 18865535                | C/T  | NA                 | NA                            | NA                 |
| <i>Desi_wild_18866768</i> | NA                                  | <i>Ca_desi_denovo</i> | 18866768                | C/T  | NA                 | NA                            | NA                 |
| <i>Desi_wild_18867396</i> | NA                                  | <i>Ca_desi_denovo</i> | 18867396                | G/C  | NA                 | NA                            | NA                 |
| <i>Desi_wild_18867695</i> | NA                                  | <i>Ca_desi_denovo</i> | 18867695                | C/T  | NA                 | NA                            | NA                 |
| <i>Desi_wild_18869725</i> | NA                                  | <i>Ca_desi_denovo</i> | 18869725                | C/T  | NA                 | NA                            | NA                 |
| <i>Desi_wild_18869752</i> | NA                                  | <i>Ca_desi_denovo</i> | 18869752                | A/G  | NA                 | NA                            | NA                 |
| <i>Desi_wild_18870303</i> | NA                                  | <i>Ca_desi_denovo</i> | 18870303                | T/A  | NA                 | NA                            | NA                 |
| <i>Desi_wild_18871704</i> | NA                                  | <i>Ca_desi_denovo</i> | 18871704                | A/C  | NA                 | NA                            | NA                 |
| <i>Desi_wild_18871713</i> | NA                                  | <i>Ca_desi_denovo</i> | 18871713                | C/T  | NA                 | NA                            | NA                 |
| <i>Desi_wild_18871725</i> | NA                                  | <i>Ca_desi_denovo</i> | 18871725                | A/C  | NA                 | NA                            | NA                 |
| <i>Desi_wild_18871749</i> | NA                                  | <i>Ca_desi_denovo</i> | 18871749                | A/G  | NA                 | NA                            | NA                 |
| <i>Desi_wild_18872124</i> | NA                                  | <i>Ca_desi_denovo</i> | 18872124                | C/G  | NA                 | NA                            | NA                 |
| <i>Desi_wild_18872194</i> | NA                                  | <i>Ca_desi_denovo</i> | 18872194                | C/T  | NA                 | NA                            | NA                 |
| <i>Desi_wild_18872225</i> | NA                                  | <i>Ca_desi_denovo</i> | 18872225                | C/T  | NA                 | NA                            | NA                 |
| <i>Desi_wild_18872874</i> | NA                                  | <i>Ca_desi_denovo</i> | 18872874                | G/A  | NA                 | NA                            | NA                 |
| <i>Desi_wild_18873053</i> | NA                                  | <i>Ca_desi_denovo</i> | 18873053                | A/G  | NA                 | NA                            | NA                 |
| <i>Desi_wild_18874231</i> | NA                                  | <i>Ca_desi_denovo</i> | 18874231                | T/C  | NA                 | NA                            | NA                 |
| <i>Desi_wild_18875830</i> | NA                                  | <i>Ca_desi_denovo</i> | 18875830                | C/T  | NA                 | NA                            | NA                 |
| <i>Desi_wild_18875859</i> | NA                                  | <i>Ca_desi_denovo</i> | 18875859                | A/T  | NA                 | NA                            | NA                 |
| <i>Desi_wild_18880125</i> | NA                                  | <i>Ca_desi_denovo</i> | 18880125                | C/T  | NA                 | NA                            | NA                 |
| <i>Desi_wild_18880396</i> | NA                                  | <i>Ca_desi_denovo</i> | 18880396                | G/T  | NA                 | NA                            | NA                 |

| SNP IDs                   | NCBI dbSNP accession IDs (NCBI_SS#) | Chromosomes           | Physical positions (bp) | SNPs | Gene accession IDs | Sequence components of genome | Putative functions |
|---------------------------|-------------------------------------|-----------------------|-------------------------|------|--------------------|-------------------------------|--------------------|
| <i>Desi_wild_18880402</i> | NA                                  | <i>Ca_desi_denovo</i> | 18880402                | A/G  | NA                 | NA                            | NA                 |
| <i>Desi_wild_18880406</i> | NA                                  | <i>Ca_desi_denovo</i> | 18880406                | C/T  | NA                 | NA                            | NA                 |
| <i>Desi_wild_18880408</i> | NA                                  | <i>Ca_desi_denovo</i> | 18880408                | A/C  | NA                 | NA                            | NA                 |
| <i>Desi_wild_18880629</i> | NA                                  | <i>Ca_desi_denovo</i> | 18880629                | G/C  | NA                 | NA                            | NA                 |
| <i>Desi_wild_18880647</i> | NA                                  | <i>Ca_desi_denovo</i> | 18880647                | C/G  | NA                 | NA                            | NA                 |
| <i>Desi_wild_18880650</i> | NA                                  | <i>Ca_desi_denovo</i> | 18880650                | T/C  | NA                 | NA                            | NA                 |
| <i>Desi_wild_18880658</i> | NA                                  | <i>Ca_desi_denovo</i> | 18880658                | T/G  | NA                 | NA                            | NA                 |
| <i>Desi_wild_18881902</i> | NA                                  | <i>Ca_desi_denovo</i> | 18881902                | G/A  | NA                 | NA                            | NA                 |
| <i>Desi_wild_18882560</i> | NA                                  | <i>Ca_desi_denovo</i> | 18882560                | A/G  | NA                 | NA                            | NA                 |
| <i>Desi_wild_18882613</i> | NA                                  | <i>Ca_desi_denovo</i> | 18882613                | A/T  | NA                 | NA                            | NA                 |
| <i>Desi_wild_18883221</i> | NA                                  | <i>Ca_desi_denovo</i> | 18883221                | T/C  | NA                 | NA                            | NA                 |
| <i>Desi_wild_18883338</i> | NA                                  | <i>Ca_desi_denovo</i> | 18883338                | A/G  | NA                 | NA                            | NA                 |
| <i>Desi_wild_18885002</i> | NA                                  | <i>Ca_desi_denovo</i> | 18885002                | A/C  | NA                 | NA                            | NA                 |
| <i>Desi_wild_18885204</i> | NA                                  | <i>Ca_desi_denovo</i> | 18885204                | G/A  | NA                 | NA                            | NA                 |
| <i>Desi_wild_18887852</i> | NA                                  | <i>Ca_desi_denovo</i> | 18887852                | G/A  | NA                 | NA                            | NA                 |
| <i>Desi_wild_18889572</i> | NA                                  | <i>Ca_desi_denovo</i> | 18889572                | C/T  | NA                 | NA                            | NA                 |
| <i>Desi_wild_18889605</i> | NA                                  | <i>Ca_desi_denovo</i> | 18889605                | A/C  | NA                 | NA                            | NA                 |
| <i>Desi_wild_18891722</i> | NA                                  | <i>Ca_desi_denovo</i> | 18891722                | A/G  | NA                 | NA                            | NA                 |
| <i>Desi_wild_18892156</i> | NA                                  | <i>Ca_desi_denovo</i> | 18892156                | G/A  | NA                 | NA                            | NA                 |
| <i>Desi_wild_18892157</i> | NA                                  | <i>Ca_desi_denovo</i> | 18892157                | C/T  | NA                 | NA                            | NA                 |
| <i>Desi_wild_18892915</i> | NA                                  | <i>Ca_desi_denovo</i> | 18892915                | C/G  | NA                 | NA                            | NA                 |
| <i>Desi_wild_18893492</i> | NA                                  | <i>Ca_desi_denovo</i> | 18893492                | A/G  | NA                 | NA                            | NA                 |
| <i>Desi_wild_18893519</i> | NA                                  | <i>Ca_desi_denovo</i> | 18893519                | T/C  | NA                 | NA                            | NA                 |
| <i>Desi_wild_18893822</i> | NA                                  | <i>Ca_desi_denovo</i> | 18893822                | C/T  | NA                 | NA                            | NA                 |
| <i>Desi_wild_18895805</i> | NA                                  | <i>Ca_desi_denovo</i> | 18895805                | G/C  | NA                 | NA                            | NA                 |
| <i>Desi_wild_18897266</i> | NA                                  | <i>Ca_desi_denovo</i> | 18897266                | C/T  | NA                 | NA                            | NA                 |
| <i>Desi_wild_18897293</i> | NA                                  | <i>Ca_desi_denovo</i> | 18897293                | G/A  | NA                 | NA                            | NA                 |
| <i>Desi_wild_18897552</i> | NA                                  | <i>Ca_desi_denovo</i> | 18897552                | G/A  | NA                 | NA                            | NA                 |
| <i>Desi_wild_18897568</i> | NA                                  | <i>Ca_desi_denovo</i> | 18897568                | T/A  | NA                 | NA                            | NA                 |
| <i>Desi_wild_18897619</i> | NA                                  | <i>Ca_desi_denovo</i> | 18897619                | A/G  | NA                 | NA                            | NA                 |
| <i>Desi_wild_18897658</i> | NA                                  | <i>Ca_desi_denovo</i> | 18897658                | A/T  | NA                 | NA                            | NA                 |
| <i>Desi_wild_18898599</i> | NA                                  | <i>Ca_desi_denovo</i> | 18898599                | C/A  | NA                 | NA                            | NA                 |
| <i>Desi_wild_18898607</i> | NA                                  | <i>Ca_desi_denovo</i> | 18898607                | T/C  | NA                 | NA                            | NA                 |
| <i>Desi_wild_18898611</i> | NA                                  | <i>Ca_desi_denovo</i> | 18898611                | A/G  | NA                 | NA                            | NA                 |
| <i>Desi_wild_18898621</i> | NA                                  | <i>Ca_desi_denovo</i> | 18898621                | G/A  | NA                 | NA                            | NA                 |
| <i>Desi_wild_18899166</i> | NA                                  | <i>Ca_desi_denovo</i> | 18899166                | C/G  | NA                 | NA                            | NA                 |
| <i>Desi_wild_18899538</i> | NA                                  | <i>Ca_desi_denovo</i> | 18899538                | A/G  | NA                 | NA                            | NA                 |
| <i>Desi_wild_18899544</i> | NA                                  | <i>Ca_desi_denovo</i> | 18899544                | A/G  | NA                 | NA                            | NA                 |
| <i>Desi_wild_18899574</i> | NA                                  | <i>Ca_desi_denovo</i> | 18899574                | G/T  | NA                 | NA                            | NA                 |
| <i>Desi_wild_18900224</i> | NA                                  | <i>Ca_desi_denovo</i> | 18900224                | G/T  | NA                 | NA                            | NA                 |
| <i>Desi_wild_18900251</i> | NA                                  | <i>Ca_desi_denovo</i> | 18900251                | C/G  | NA                 | NA                            | NA                 |
| <i>Desi_wild_18902138</i> | NA                                  | <i>Ca_desi_denovo</i> | 18902138                | C/T  | NA                 | NA                            | NA                 |
| <i>Desi_wild_18903883</i> | NA                                  | <i>Ca_desi_denovo</i> | 18903883                | T/A  | NA                 | NA                            | NA                 |
| <i>Desi_wild_18904051</i> | NA                                  | <i>Ca_desi_denovo</i> | 18904051                | A/C  | NA                 | NA                            | NA                 |

| SNP IDs                   | NCBI dbSNP accession IDs (NCBI_SS#) | Chromosomes           | Physical positions (bp) | SNPs | Gene accession IDs | Sequence components of genome | Putative functions |
|---------------------------|-------------------------------------|-----------------------|-------------------------|------|--------------------|-------------------------------|--------------------|
| <i>Desi_wild_18904105</i> | NA                                  | <i>Ca_desi_denovo</i> | 18904105                | G/T  | NA                 | NA                            | NA                 |
| <i>Desi_wild_18904136</i> | NA                                  | <i>Ca_desi_denovo</i> | 18904136                | T/C  | NA                 | NA                            | NA                 |
| <i>Desi_wild_18904858</i> | NA                                  | <i>Ca_desi_denovo</i> | 18904858                | G/A  | NA                 | NA                            | NA                 |
| <i>Desi_wild_18904877</i> | NA                                  | <i>Ca_desi_denovo</i> | 18904877                | G/A  | NA                 | NA                            | NA                 |
| <i>Desi_wild_18905206</i> | NA                                  | <i>Ca_desi_denovo</i> | 18905206                | G/A  | NA                 | NA                            | NA                 |
| <i>Desi_wild_18905712</i> | NA                                  | <i>Ca_desi_denovo</i> | 18905712                | A/G  | NA                 | NA                            | NA                 |
| <i>Desi_wild_18907160</i> | NA                                  | <i>Ca_desi_denovo</i> | 18907160                | A/G  | NA                 | NA                            | NA                 |
| <i>Desi_wild_18910602</i> | NA                                  | <i>Ca_desi_denovo</i> | 18910602                | G/T  | NA                 | NA                            | NA                 |
| <i>Desi_wild_18910774</i> | NA                                  | <i>Ca_desi_denovo</i> | 18910774                | C/T  | NA                 | NA                            | NA                 |
| <i>Desi_wild_18910782</i> | NA                                  | <i>Ca_desi_denovo</i> | 18910782                | A/G  | NA                 | NA                            | NA                 |
| <i>Desi_wild_18910799</i> | NA                                  | <i>Ca_desi_denovo</i> | 18910799                | T/C  | NA                 | NA                            | NA                 |
| <i>Desi_wild_18912545</i> | NA                                  | <i>Ca_desi_denovo</i> | 18912545                | T/C  | NA                 | NA                            | NA                 |
| <i>Desi_wild_18912572</i> | NA                                  | <i>Ca_desi_denovo</i> | 18912572                | C/T  | NA                 | NA                            | NA                 |
| <i>Desi_wild_18914649</i> | NA                                  | <i>Ca_desi_denovo</i> | 18914649                | C/T  | NA                 | NA                            | NA                 |
| <i>Desi_wild_18914666</i> | NA                                  | <i>Ca_desi_denovo</i> | 18914666                | G/A  | NA                 | NA                            | NA                 |
| <i>Desi_wild_18915503</i> | NA                                  | <i>Ca_desi_denovo</i> | 18915503                | C/T  | NA                 | NA                            | NA                 |
| <i>Desi_wild_18916643</i> | NA                                  | <i>Ca_desi_denovo</i> | 18916643                | A/G  | NA                 | NA                            | NA                 |
| <i>Desi_wild_18916925</i> | NA                                  | <i>Ca_desi_denovo</i> | 18916925                | A/T  | NA                 | NA                            | NA                 |
| <i>Desi_wild_18917781</i> | NA                                  | <i>Ca_desi_denovo</i> | 18917781                | C/T  | NA                 | NA                            | NA                 |
| <i>Desi_wild_18918073</i> | NA                                  | <i>Ca_desi_denovo</i> | 18918073                | A/G  | NA                 | NA                            | NA                 |
| <i>Desi_wild_18918125</i> | NA                                  | <i>Ca_desi_denovo</i> | 18918125                | A/T  | NA                 | NA                            | NA                 |
| <i>Desi_wild_18918676</i> | NA                                  | <i>Ca_desi_denovo</i> | 18918676                | A/G  | NA                 | NA                            | NA                 |
| <i>Desi_wild_18918703</i> | NA                                  | <i>Ca_desi_denovo</i> | 18918703                | A/G  | NA                 | NA                            | NA                 |
| <i>Desi_wild_18919154</i> | NA                                  | <i>Ca_desi_denovo</i> | 18919154                | G/A  | NA                 | NA                            | NA                 |
| <i>Desi_wild_18921018</i> | NA                                  | <i>Ca_desi_denovo</i> | 18921018                | C/T  | NA                 | NA                            | NA                 |
| <i>Desi_wild_18922303</i> | NA                                  | <i>Ca_desi_denovo</i> | 18922303                | A/C  | NA                 | NA                            | NA                 |
| <i>Desi_wild_18922333</i> | NA                                  | <i>Ca_desi_denovo</i> | 18922333                | G/A  | NA                 | NA                            | NA                 |
| <i>Desi_wild_18923540</i> | NA                                  | <i>Ca_desi_denovo</i> | 18923540                | C/T  | NA                 | NA                            | NA                 |
| <i>Desi_wild_18923847</i> | NA                                  | <i>Ca_desi_denovo</i> | 18923847                | C/T  | NA                 | NA                            | NA                 |
| <i>Desi_wild_18925634</i> | NA                                  | <i>Ca_desi_denovo</i> | 18925634                | C/A  | NA                 | NA                            | NA                 |
| <i>Desi_wild_18925868</i> | NA                                  | <i>Ca_desi_denovo</i> | 18925868                | C/T  | NA                 | NA                            | NA                 |
| <i>Desi_wild_18926877</i> | NA                                  | <i>Ca_desi_denovo</i> | 18926877                | T/C  | NA                 | NA                            | NA                 |
| <i>Desi_wild_18927497</i> | NA                                  | <i>Ca_desi_denovo</i> | 18927497                | G/C  | NA                 | NA                            | NA                 |
| <i>Desi_wild_18927503</i> | NA                                  | <i>Ca_desi_denovo</i> | 18927503                | G/A  | NA                 | NA                            | NA                 |
| <i>Desi_wild_18928088</i> | NA                                  | <i>Ca_desi_denovo</i> | 18928088                | A/T  | NA                 | NA                            | NA                 |
| <i>Desi_wild_18928675</i> | NA                                  | <i>Ca_desi_denovo</i> | 18928675                | C/G  | NA                 | NA                            | NA                 |
| <i>Desi_wild_18928682</i> | NA                                  | <i>Ca_desi_denovo</i> | 18928682                | C/T  | NA                 | NA                            | NA                 |
| <i>Desi_wild_18928695</i> | NA                                  | <i>Ca_desi_denovo</i> | 18928695                | A/C  | NA                 | NA                            | NA                 |
| <i>Desi_wild_18929588</i> | NA                                  | <i>Ca_desi_denovo</i> | 18929588                | A/G  | NA                 | NA                            | NA                 |
| <i>Desi_wild_18930067</i> | NA                                  | <i>Ca_desi_denovo</i> | 18930067                | A/G  | NA                 | NA                            | NA                 |
| <i>Desi_wild_18930074</i> | NA                                  | <i>Ca_desi_denovo</i> | 18930074                | C/G  | NA                 | NA                            | NA                 |
| <i>Desi_wild_18930094</i> | NA                                  | <i>Ca_desi_denovo</i> | 18930094                | C/T  | NA                 | NA                            | NA                 |
| <i>Desi_wild_18930283</i> | NA                                  | <i>Ca_desi_denovo</i> | 18930283                | G/T  | NA                 | NA                            | NA                 |
| <i>Desi_wild_18930285</i> | NA                                  | <i>Ca_desi_denovo</i> | 18930285                | C/G  | NA                 | NA                            | NA                 |



| SNP IDs                   | NCBI dbSNP accession IDs (NCBI_SS#) | Chromosomes           | Physical positions (bp) | SNPs | Gene accession IDs | Sequence components of genome | Putative functions |
|---------------------------|-------------------------------------|-----------------------|-------------------------|------|--------------------|-------------------------------|--------------------|
| <i>Desi_wild_18930318</i> | NA                                  | <i>Ca_desi_denovo</i> | 18930318                | A/G  | NA                 | NA                            | NA                 |
| <i>Desi_wild_18931324</i> | NA                                  | <i>Ca_desi_denovo</i> | 18931324                | G/C  | NA                 | NA                            | NA                 |
| <i>Desi_wild_18931351</i> | NA                                  | <i>Ca_desi_denovo</i> | 18931351                | A/C  | NA                 | NA                            | NA                 |
| <i>Desi_wild_18931356</i> | NA                                  | <i>Ca_desi_denovo</i> | 18931356                | T/A  | NA                 | NA                            | NA                 |
| <i>Desi_wild_18931358</i> | NA                                  | <i>Ca_desi_denovo</i> | 18931358                | G/A  | NA                 | NA                            | NA                 |
| <i>Desi_wild_18932764</i> | NA                                  | <i>Ca_desi_denovo</i> | 18932764                | A/G  | NA                 | NA                            | NA                 |
| <i>Desi_wild_18933149</i> | NA                                  | <i>Ca_desi_denovo</i> | 18933149                | A/G  | NA                 | NA                            | NA                 |
| <i>Desi_wild_18934836</i> | NA                                  | <i>Ca_desi_denovo</i> | 18934836                | A/G  | NA                 | NA                            | NA                 |
| <i>Desi_wild_18936075</i> | NA                                  | <i>Ca_desi_denovo</i> | 18936075                | C/T  | NA                 | NA                            | NA                 |
| <i>Desi_wild_18936216</i> | NA                                  | <i>Ca_desi_denovo</i> | 18936216                | G/A  | NA                 | NA                            | NA                 |
| <i>Desi_wild_18936220</i> | NA                                  | <i>Ca_desi_denovo</i> | 18936220                | C/T  | NA                 | NA                            | NA                 |
| <i>Desi_wild_18936228</i> | NA                                  | <i>Ca_desi_denovo</i> | 18936228                | A/G  | NA                 | NA                            | NA                 |
| <i>Desi_wild_18936237</i> | NA                                  | <i>Ca_desi_denovo</i> | 18936237                | C/T  | NA                 | NA                            | NA                 |
| <i>Desi_wild_18936240</i> | NA                                  | <i>Ca_desi_denovo</i> | 18936240                | G/T  | NA                 | NA                            | NA                 |
| <i>Desi_wild_18936619</i> | NA                                  | <i>Ca_desi_denovo</i> | 18936619                | T/C  | NA                 | NA                            | NA                 |
| <i>Desi_wild_18936967</i> | NA                                  | <i>Ca_desi_denovo</i> | 18936967                | C/T  | NA                 | NA                            | NA                 |
| <i>Desi_wild_18937764</i> | NA                                  | <i>Ca_desi_denovo</i> | 18937764                | C/A  | NA                 | NA                            | NA                 |
| <i>Desi_wild_18937772</i> | NA                                  | <i>Ca_desi_denovo</i> | 18937772                | C/G  | NA                 | NA                            | NA                 |
| <i>Desi_wild_18938428</i> | NA                                  | <i>Ca_desi_denovo</i> | 18938428                | C/T  | NA                 | NA                            | NA                 |
| <i>Desi_wild_18938530</i> | NA                                  | <i>Ca_desi_denovo</i> | 18938530                | A/G  | NA                 | NA                            | NA                 |
| <i>Desi_wild_18938763</i> | NA                                  | <i>Ca_desi_denovo</i> | 18938763                | A/G  | NA                 | NA                            | NA                 |
| <i>Desi_wild_18938772</i> | NA                                  | <i>Ca_desi_denovo</i> | 18938772                | G/T  | NA                 | NA                            | NA                 |
| <i>Desi_wild_18939600</i> | NA                                  | <i>Ca_desi_denovo</i> | 18939600                | C/T  | NA                 | NA                            | NA                 |
| <i>Desi_wild_18939820</i> | NA                                  | <i>Ca_desi_denovo</i> | 18939820                | G/A  | NA                 | NA                            | NA                 |
| <i>Desi_wild_18940619</i> | NA                                  | <i>Ca_desi_denovo</i> | 18940619                | C/G  | NA                 | NA                            | NA                 |
| <i>Desi_wild_18940621</i> | NA                                  | <i>Ca_desi_denovo</i> | 18940621                | A/G  | NA                 | NA                            | NA                 |
| <i>Desi_wild_18941133</i> | NA                                  | <i>Ca_desi_denovo</i> | 18941133                | A/G  | NA                 | NA                            | NA                 |
| <i>Desi_wild_18941359</i> | NA                                  | <i>Ca_desi_denovo</i> | 18941359                | A/G  | NA                 | NA                            | NA                 |
| <i>Desi_wild_18941369</i> | NA                                  | <i>Ca_desi_denovo</i> | 18941369                | C/T  | NA                 | NA                            | NA                 |
| <i>Desi_wild_18941373</i> | NA                                  | <i>Ca_desi_denovo</i> | 18941373                | C/T  | NA                 | NA                            | NA                 |
| <i>Desi_wild_18942466</i> | NA                                  | <i>Ca_desi_denovo</i> | 18942466                | C/T  | NA                 | NA                            | NA                 |
| <i>Desi_wild_18943331</i> | NA                                  | <i>Ca_desi_denovo</i> | 18943331                | T/G  | NA                 | NA                            | NA                 |
| <i>Desi_wild_18943339</i> | NA                                  | <i>Ca_desi_denovo</i> | 18943339                | T/C  | NA                 | NA                            | NA                 |
| <i>Desi_wild_18943457</i> | NA                                  | <i>Ca_desi_denovo</i> | 18943457                | A/G  | NA                 | NA                            | NA                 |
| <i>Desi_wild_18944380</i> | NA                                  | <i>Ca_desi_denovo</i> | 18944380                | T/C  | NA                 | NA                            | NA                 |
| <i>Desi_wild_18945727</i> | NA                                  | <i>Ca_desi_denovo</i> | 18945727                | A/G  | NA                 | NA                            | NA                 |
| <i>Desi_wild_18945730</i> | NA                                  | <i>Ca_desi_denovo</i> | 18945730                | C/T  | NA                 | NA                            | NA                 |
| <i>Desi_wild_18945819</i> | NA                                  | <i>Ca_desi_denovo</i> | 18945819                | C/T  | NA                 | NA                            | NA                 |
| <i>Desi_wild_18946024</i> | NA                                  | <i>Ca_desi_denovo</i> | 18946024                | C/T  | NA                 | NA                            | NA                 |
| <i>Desi_wild_18947399</i> | NA                                  | <i>Ca_desi_denovo</i> | 18947399                | A/C  | NA                 | NA                            | NA                 |
| <i>Desi_wild_18948982</i> | NA                                  | <i>Ca_desi_denovo</i> | 18948982                | G/A  | NA                 | NA                            | NA                 |
| <i>Desi_wild_18949027</i> | NA                                  | <i>Ca_desi_denovo</i> | 18949027                | A/G  | NA                 | NA                            | NA                 |
| <i>Desi_wild_18950061</i> | NA                                  | <i>Ca_desi_denovo</i> | 18950061                | G/T  | NA                 | NA                            | NA                 |
| <i>Desi_wild_18950905</i> | NA                                  | <i>Ca_desi_denovo</i> | 18950905                | A/G  | NA                 | NA                            | NA                 |

| SNP IDs                   | NCBI dbSNP accession IDs (NCBI_SS#) | Chromosomes           | Physical positions (bp) | SNPs | Gene accession IDs | Sequence components of genome | Putative functions |
|---------------------------|-------------------------------------|-----------------------|-------------------------|------|--------------------|-------------------------------|--------------------|
| <i>Desi_wild_18950929</i> | NA                                  | <i>Ca_desi_denovo</i> | 18950929                | A/T  | NA                 | NA                            | NA                 |
| <i>Desi_wild_18951244</i> | NA                                  | <i>Ca_desi_denovo</i> | 18951244                | A/C  | NA                 | NA                            | NA                 |
| <i>Desi_wild_18951275</i> | NA                                  | <i>Ca_desi_denovo</i> | 18951275                | G/A  | NA                 | NA                            | NA                 |
| <i>Desi_wild_18951480</i> | NA                                  | <i>Ca_desi_denovo</i> | 18951480                | A/C  | NA                 | NA                            | NA                 |
| <i>Desi_wild_18951490</i> | NA                                  | <i>Ca_desi_denovo</i> | 18951490                | C/T  | NA                 | NA                            | NA                 |
| <i>Desi_wild_18951493</i> | NA                                  | <i>Ca_desi_denovo</i> | 18951493                | A/G  | NA                 | NA                            | NA                 |
| <i>Desi_wild_18952868</i> | NA                                  | <i>Ca_desi_denovo</i> | 18952868                | C/G  | NA                 | NA                            | NA                 |
| <i>Desi_wild_18953127</i> | NA                                  | <i>Ca_desi_denovo</i> | 18953127                | A/G  | NA                 | NA                            | NA                 |
| <i>Desi_wild_18953216</i> | NA                                  | <i>Ca_desi_denovo</i> | 18953216                | A/G  | NA                 | NA                            | NA                 |
| <i>Desi_wild_18953782</i> | NA                                  | <i>Ca_desi_denovo</i> | 18953782                | C/T  | NA                 | NA                            | NA                 |
| <i>Desi_wild_18953783</i> | NA                                  | <i>Ca_desi_denovo</i> | 18953783                | A/G  | NA                 | NA                            | NA                 |
| <i>Desi_wild_18953808</i> | NA                                  | <i>Ca_desi_denovo</i> | 18953808                | C/T  | NA                 | NA                            | NA                 |
| <i>Desi_wild_18954809</i> | NA                                  | <i>Ca_desi_denovo</i> | 18954809                | G/A  | NA                 | NA                            | NA                 |
| <i>Desi_wild_18954922</i> | NA                                  | <i>Ca_desi_denovo</i> | 18954922                | A/T  | NA                 | NA                            | NA                 |
| <i>Desi_wild_18955868</i> | NA                                  | <i>Ca_desi_denovo</i> | 18955868                | G/T  | NA                 | NA                            | NA                 |
| <i>Desi_wild_18957380</i> | NA                                  | <i>Ca_desi_denovo</i> | 18957380                | T/C  | NA                 | NA                            | NA                 |
| <i>Desi_wild_18959586</i> | NA                                  | <i>Ca_desi_denovo</i> | 18959586                | C/T  | NA                 | NA                            | NA                 |
| <i>Desi_wild_18961751</i> | NA                                  | <i>Ca_desi_denovo</i> | 18961751                | T/C  | NA                 | NA                            | NA                 |
| <i>Desi_wild_18961865</i> | NA                                  | <i>Ca_desi_denovo</i> | 18961865                | C/T  | NA                 | NA                            | NA                 |
| <i>Desi_wild_18962903</i> | NA                                  | <i>Ca_desi_denovo</i> | 18962903                | A/G  | NA                 | NA                            | NA                 |
| <i>Desi_wild_18963890</i> | NA                                  | <i>Ca_desi_denovo</i> | 18963890                | A/G  | NA                 | NA                            | NA                 |
| <i>Desi_wild_18964002</i> | NA                                  | <i>Ca_desi_denovo</i> | 18964002                | T/A  | NA                 | NA                            | NA                 |
| <i>Desi_wild_18968670</i> | NA                                  | <i>Ca_desi_denovo</i> | 18968670                | G/A  | NA                 | NA                            | NA                 |
| <i>Desi_wild_18968691</i> | NA                                  | <i>Ca_desi_denovo</i> | 18968691                | A/C  | NA                 | NA                            | NA                 |
| <i>Desi_wild_18968710</i> | NA                                  | <i>Ca_desi_denovo</i> | 18968710                | G/T  | NA                 | NA                            | NA                 |
| <i>Desi_wild_18970415</i> | NA                                  | <i>Ca_desi_denovo</i> | 18970415                | C/T  | NA                 | NA                            | NA                 |
| <i>Desi_wild_18970421</i> | NA                                  | <i>Ca_desi_denovo</i> | 18970421                | A/C  | NA                 | NA                            | NA                 |
| <i>Desi_wild_18971259</i> | NA                                  | <i>Ca_desi_denovo</i> | 18971259                | C/G  | NA                 | NA                            | NA                 |
| <i>Desi_wild_18972434</i> | NA                                  | <i>Ca_desi_denovo</i> | 18972434                | A/C  | NA                 | NA                            | NA                 |
| <i>Desi_wild_18972436</i> | NA                                  | <i>Ca_desi_denovo</i> | 18972436                | A/T  | NA                 | NA                            | NA                 |
| <i>Desi_wild_18972449</i> | NA                                  | <i>Ca_desi_denovo</i> | 18972449                | A/G  | NA                 | NA                            | NA                 |
| <i>Desi_wild_18976362</i> | NA                                  | <i>Ca_desi_denovo</i> | 18976362                | C/T  | NA                 | NA                            | NA                 |
| <i>Desi_wild_18976685</i> | NA                                  | <i>Ca_desi_denovo</i> | 18976685                | G/C  | NA                 | NA                            | NA                 |
| <i>Desi_wild_18977207</i> | NA                                  | <i>Ca_desi_denovo</i> | 18977207                | C/T  | NA                 | NA                            | NA                 |
| <i>Desi_wild_18978043</i> | NA                                  | <i>Ca_desi_denovo</i> | 18978043                | A/C  | NA                 | NA                            | NA                 |
| <i>Desi_wild_18981350</i> | NA                                  | <i>Ca_desi_denovo</i> | 18981350                | T/C  | NA                 | NA                            | NA                 |
| <i>Desi_wild_18984810</i> | NA                                  | <i>Ca_desi_denovo</i> | 18984810                | G/T  | NA                 | NA                            | NA                 |
| <i>Desi_wild_18984980</i> | NA                                  | <i>Ca_desi_denovo</i> | 18984980                | A/G  | NA                 | NA                            | NA                 |
| <i>Desi_wild_18985007</i> | NA                                  | <i>Ca_desi_denovo</i> | 18985007                | A/G  | NA                 | NA                            | NA                 |
| <i>Desi_wild_18985722</i> | NA                                  | <i>Ca_desi_denovo</i> | 18985722                | A/G  | NA                 | NA                            | NA                 |
| <i>Desi_wild_18986219</i> | NA                                  | <i>Ca_desi_denovo</i> | 18986219                | A/G  | NA                 | NA                            | NA                 |
| <i>Desi_wild_18987539</i> | NA                                  | <i>Ca_desi_denovo</i> | 18987539                | T/G  | NA                 | NA                            | NA                 |
| <i>Desi_wild_18987545</i> | NA                                  | <i>Ca_desi_denovo</i> | 18987545                | A/G  | NA                 | NA                            | NA                 |
| <i>Desi_wild_18987551</i> | NA                                  | <i>Ca_desi_denovo</i> | 18987551                | C/G  | NA                 | NA                            | NA                 |

| SNP IDs                   | NCBI dbSNP accession IDs (NCBI_SS#) | Chromosomes           | Physical positions (bp) | SNPs | Gene accession IDs | Sequence components of genome | Putative functions |
|---------------------------|-------------------------------------|-----------------------|-------------------------|------|--------------------|-------------------------------|--------------------|
| <i>Desi_wild_18987562</i> | NA                                  | <i>Ca_desi_denovo</i> | 18987562                | G/A  | NA                 | NA                            | NA                 |
| <i>Desi_wild_18990848</i> | NA                                  | <i>Ca_desi_denovo</i> | 18990848                | G/T  | NA                 | NA                            | NA                 |
| <i>Desi_wild_18991947</i> | NA                                  | <i>Ca_desi_denovo</i> | 18991947                | A/T  | NA                 | NA                            | NA                 |
| <i>Desi_wild_18993307</i> | NA                                  | <i>Ca_desi_denovo</i> | 18993307                | A/G  | NA                 | NA                            | NA                 |
| <i>Desi_wild_18993327</i> | NA                                  | <i>Ca_desi_denovo</i> | 18993327                | T/G  | NA                 | NA                            | NA                 |
| <i>Desi_wild_18993331</i> | NA                                  | <i>Ca_desi_denovo</i> | 18993331                | C/G  | NA                 | NA                            | NA                 |
| <i>Desi_wild_18994298</i> | NA                                  | <i>Ca_desi_denovo</i> | 18994298                | G/T  | NA                 | NA                            | NA                 |
| <i>Desi_wild_18995666</i> | NA                                  | <i>Ca_desi_denovo</i> | 18995666                | G/T  | NA                 | NA                            | NA                 |
| <i>Desi_wild_18995667</i> | NA                                  | <i>Ca_desi_denovo</i> | 18995667                | A/T  | NA                 | NA                            | NA                 |
| <i>Desi_wild_18999005</i> | NA                                  | <i>Ca_desi_denovo</i> | 18999005                | G/A  | NA                 | NA                            | NA                 |
| <i>Desi_wild_18999031</i> | NA                                  | <i>Ca_desi_denovo</i> | 18999031                | A/G  | NA                 | NA                            | NA                 |
| <i>Desi_wild_18999033</i> | NA                                  | <i>Ca_desi_denovo</i> | 18999033                | T/G  | NA                 | NA                            | NA                 |
| <i>Desi_wild_18999046</i> | NA                                  | <i>Ca_desi_denovo</i> | 18999046                | C/G  | NA                 | NA                            | NA                 |
| <i>Desi_wild_18999083</i> | NA                                  | <i>Ca_desi_denovo</i> | 18999083                | G/C  | NA                 | NA                            | NA                 |
| <i>Desi_wild_19007309</i> | NA                                  | <i>Ca_desi_denovo</i> | 19007309                | A/G  | NA                 | NA                            | NA                 |
| <i>Desi_wild_19007564</i> | NA                                  | <i>Ca_desi_denovo</i> | 19007564                | T/G  | NA                 | NA                            | NA                 |
| <i>Desi_wild_19007576</i> | NA                                  | <i>Ca_desi_denovo</i> | 19007576                | G/T  | NA                 | NA                            | NA                 |
| <i>Desi_wild_19007591</i> | NA                                  | <i>Ca_desi_denovo</i> | 19007591                | T/G  | NA                 | NA                            | NA                 |
| <i>Desi_wild_19007611</i> | NA                                  | <i>Ca_desi_denovo</i> | 19007611                | A/G  | NA                 | NA                            | NA                 |
| <i>Desi_wild_19030941</i> | NA                                  | <i>Ca_desi_denovo</i> | 19030941                | G/T  | NA                 | NA                            | NA                 |
| <i>Desi_wild_19030953</i> | NA                                  | <i>Ca_desi_denovo</i> | 19030953                | C/T  | NA                 | NA                            | NA                 |
| <i>Desi_wild_19032588</i> | NA                                  | <i>Ca_desi_denovo</i> | 19032588                | G/T  | NA                 | NA                            | NA                 |
| <i>Desi_wild_19039758</i> | NA                                  | <i>Ca_desi_denovo</i> | 19039758                | C/G  | NA                 | NA                            | NA                 |
| <i>Desi_wild_19039806</i> | NA                                  | <i>Ca_desi_denovo</i> | 19039806                | A/G  | NA                 | NA                            | NA                 |
| <i>Desi_wild_19047828</i> | NA                                  | <i>Ca_desi_denovo</i> | 19047828                | C/G  | NA                 | NA                            | NA                 |
| <i>Desi_wild_19050334</i> | NA                                  | <i>Ca_desi_denovo</i> | 19050334                | C/T  | NA                 | NA                            | NA                 |
| <i>Desi_wild_19050336</i> | NA                                  | <i>Ca_desi_denovo</i> | 19050336                | C/G  | NA                 | NA                            | NA                 |
| <i>Desi_wild_19050348</i> | NA                                  | <i>Ca_desi_denovo</i> | 19050348                | C/G  | NA                 | NA                            | NA                 |
| <i>Desi_wild_19050362</i> | NA                                  | <i>Ca_desi_denovo</i> | 19050362                | G/T  | NA                 | NA                            | NA                 |
| <i>Desi_wild_19051031</i> | NA                                  | <i>Ca_desi_denovo</i> | 19051031                | C/T  | NA                 | NA                            | NA                 |
| <i>Desi_wild_19051091</i> | NA                                  | <i>Ca_desi_denovo</i> | 19051091                | A/C  | NA                 | NA                            | NA                 |
| <i>Desi_wild_19051722</i> | NA                                  | <i>Ca_desi_denovo</i> | 19051722                | C/T  | NA                 | NA                            | NA                 |
| <i>Desi_wild_19053671</i> | NA                                  | <i>Ca_desi_denovo</i> | 19053671                | G/A  | NA                 | NA                            | NA                 |
| <i>Desi_wild_19055868</i> | NA                                  | <i>Ca_desi_denovo</i> | 19055868                | C/G  | NA                 | NA                            | NA                 |
| <i>Desi_wild_19055895</i> | NA                                  | <i>Ca_desi_denovo</i> | 19055895                | C/G  | NA                 | NA                            | NA                 |
| <i>Desi_wild_19059259</i> | NA                                  | <i>Ca_desi_denovo</i> | 19059259                | A/G  | NA                 | NA                            | NA                 |
| <i>Desi_wild_19063360</i> | NA                                  | <i>Ca_desi_denovo</i> | 19063360                | T/A  | NA                 | NA                            | NA                 |
| <i>Desi_wild_19064431</i> | NA                                  | <i>Ca_desi_denovo</i> | 19064431                | A/G  | NA                 | NA                            | NA                 |
| <i>Desi_wild_19082346</i> | NA                                  | <i>Ca_desi_denovo</i> | 19082346                | A/G  | NA                 | NA                            | NA                 |
| <i>Desi_wild_19100107</i> | NA                                  | <i>Ca_desi_denovo</i> | 19100107                | C/G  | NA                 | NA                            | NA                 |
| <i>Desi_wild_19100119</i> | NA                                  | <i>Ca_desi_denovo</i> | 19100119                | C/G  | NA                 | NA                            | NA                 |
| <i>Desi_wild_19102073</i> | NA                                  | <i>Ca_desi_denovo</i> | 19102073                | C/T  | NA                 | NA                            | NA                 |
| <i>Desi_wild_19122363</i> | NA                                  | <i>Ca_desi_denovo</i> | 19122363                | A/G  | NA                 | NA                            | NA                 |
| <i>Desi_wild_19122364</i> | NA                                  | <i>Ca_desi_denovo</i> | 19122364                | C/G  | NA                 | NA                            | NA                 |

| SNP IDs                   | NCBI dbSNP accession IDs (NCBI_SS#) | Chromosomes           | Physical positions (bp) | SNPs | Gene accession IDs | Sequence components of genome | Putative functions |
|---------------------------|-------------------------------------|-----------------------|-------------------------|------|--------------------|-------------------------------|--------------------|
| <i>Desi_wild_19126978</i> | NA                                  | <i>Ca_desi_denovo</i> | 19126978                | C/T  | NA                 | NA                            | NA                 |
| <i>Desi_wild_19132300</i> | NA                                  | <i>Ca_desi_denovo</i> | 19132300                | T/C  | NA                 | NA                            | NA                 |
| <i>Desi_wild_19134154</i> | NA                                  | <i>Ca_desi_denovo</i> | 19134154                | C/T  | NA                 | NA                            | NA                 |
| <i>Desi_wild_19141963</i> | NA                                  | <i>Ca_desi_denovo</i> | 19141963                | T/C  | NA                 | NA                            | NA                 |
| <i>Desi_wild_19144832</i> | NA                                  | <i>Ca_desi_denovo</i> | 19144832                | C/G  | NA                 | NA                            | NA                 |
| <i>Desi_wild_19149778</i> | NA                                  | <i>Ca_desi_denovo</i> | 19149778                | T/C  | NA                 | NA                            | NA                 |
| <i>Desi_wild_19152422</i> | NA                                  | <i>Ca_desi_denovo</i> | 19152422                | T/C  | NA                 | NA                            | NA                 |
| <i>Desi_wild_19159594</i> | NA                                  | <i>Ca_desi_denovo</i> | 19159594                | G/T  | NA                 | NA                            | NA                 |
| <i>Desi_wild_19192640</i> | NA                                  | <i>Ca_desi_denovo</i> | 19192640                | A/G  | NA                 | NA                            | NA                 |
| <i>Desi_wild_19192673</i> | NA                                  | <i>Ca_desi_denovo</i> | 19192673                | C/T  | NA                 | NA                            | NA                 |
| <i>Desi_wild_19192676</i> | NA                                  | <i>Ca_desi_denovo</i> | 19192676                | C/T  | NA                 | NA                            | NA                 |
| <i>Desi_wild_19196323</i> | NA                                  | <i>Ca_desi_denovo</i> | 19196323                | G/C  | NA                 | NA                            | NA                 |
| <i>Desi_wild_19196419</i> | NA                                  | <i>Ca_desi_denovo</i> | 19196419                | G/T  | NA                 | NA                            | NA                 |
| <i>Desi_wild_19238512</i> | NA                                  | <i>Ca_desi_denovo</i> | 19238512                | C/A  | NA                 | NA                            | NA                 |
| <i>Desi_wild_19238560</i> | NA                                  | <i>Ca_desi_denovo</i> | 19238560                | A/G  | NA                 | NA                            | NA                 |
| <i>Desi_wild_19238564</i> | NA                                  | <i>Ca_desi_denovo</i> | 19238564                | C/T  | NA                 | NA                            | NA                 |
| <i>Desi_wild_19245482</i> | NA                                  | <i>Ca_desi_denovo</i> | 19245482                | C/T  | NA                 | NA                            | NA                 |
| <i>Desi_wild_19270717</i> | NA                                  | <i>Ca_desi_denovo</i> | 19270717                | T/C  | NA                 | NA                            | NA                 |
| <i>Desi_wild_19270765</i> | NA                                  | <i>Ca_desi_denovo</i> | 19270765                | A/G  | NA                 | NA                            | NA                 |
| <i>Desi_wild_19272517</i> | NA                                  | <i>Ca_desi_denovo</i> | 19272517                | T/G  | NA                 | NA                            | NA                 |
| <i>Desi_wild_19272532</i> | NA                                  | <i>Ca_desi_denovo</i> | 19272532                | C/T  | NA                 | NA                            | NA                 |
| <i>Desi_wild_19278807</i> | NA                                  | <i>Ca_desi_denovo</i> | 19278807                | C/G  | NA                 | NA                            | NA                 |
| <i>Desi_wild_19278811</i> | NA                                  | <i>Ca_desi_denovo</i> | 19278811                | G/T  | NA                 | NA                            | NA                 |
| <i>Desi_wild_19281794</i> | NA                                  | <i>Ca_desi_denovo</i> | 19281794                | C/T  | NA                 | NA                            | NA                 |
| <i>Desi_wild_19281798</i> | NA                                  | <i>Ca_desi_denovo</i> | 19281798                | C/G  | NA                 | NA                            | NA                 |
| <i>Desi_wild_19281800</i> | NA                                  | <i>Ca_desi_denovo</i> | 19281800                | C/T  | NA                 | NA                            | NA                 |
| <i>Desi_wild_19281807</i> | NA                                  | <i>Ca_desi_denovo</i> | 19281807                | C/T  | NA                 | NA                            | NA                 |
| <i>Desi_wild_19286142</i> | NA                                  | <i>Ca_desi_denovo</i> | 19286142                | C/T  | NA                 | NA                            | NA                 |
| <i>Desi_wild_19286193</i> | NA                                  | <i>Ca_desi_denovo</i> | 19286193                | G/A  | NA                 | NA                            | NA                 |
| <i>Desi_wild_19300292</i> | NA                                  | <i>Ca_desi_denovo</i> | 19300292                | A/C  | NA                 | NA                            | NA                 |
| <i>Desi_wild_19300293</i> | NA                                  | <i>Ca_desi_denovo</i> | 19300293                | A/G  | NA                 | NA                            | NA                 |
| <i>Desi_wild_19300294</i> | NA                                  | <i>Ca_desi_denovo</i> | 19300294                | A/T  | NA                 | NA                            | NA                 |
| <i>Desi_wild_19300295</i> | NA                                  | <i>Ca_desi_denovo</i> | 19300295                | C/T  | NA                 | NA                            | NA                 |
| <i>Desi_wild_19301512</i> | NA                                  | <i>Ca_desi_denovo</i> | 19301512                | G/A  | NA                 | NA                            | NA                 |
| <i>Desi_wild_19301539</i> | NA                                  | <i>Ca_desi_denovo</i> | 19301539                | T/G  | NA                 | NA                            | NA                 |
| <i>Desi_wild_19324563</i> | NA                                  | <i>Ca_desi_denovo</i> | 19324563                | C/T  | NA                 | NA                            | NA                 |
| <i>Desi_wild_19324564</i> | NA                                  | <i>Ca_desi_denovo</i> | 19324564                | A/T  | NA                 | NA                            | NA                 |
| <i>Desi_wild_19324565</i> | NA                                  | <i>Ca_desi_denovo</i> | 19324565                | G/C  | NA                 | NA                            | NA                 |
| <i>Desi_wild_19324567</i> | NA                                  | <i>Ca_desi_denovo</i> | 19324567                | T/A  | NA                 | NA                            | NA                 |
| <i>Desi_wild_19333257</i> | NA                                  | <i>Ca_desi_denovo</i> | 19333257                | C/T  | NA                 | NA                            | NA                 |
| <i>Desi_wild_19347550</i> | NA                                  | <i>Ca_desi_denovo</i> | 19347550                | G/C  | NA                 | NA                            | NA                 |
| <i>Desi_wild_19347583</i> | NA                                  | <i>Ca_desi_denovo</i> | 19347583                | T/C  | NA                 | NA                            | NA                 |
| <i>Desi_wild_19347588</i> | NA                                  | <i>Ca_desi_denovo</i> | 19347588                | C/G  | NA                 | NA                            | NA                 |
| <i>Desi_wild_19347589</i> | NA                                  | <i>Ca_desi_denovo</i> | 19347589                | G/C  | NA                 | NA                            | NA                 |

| SNP IDs                   | NCBI dbSNP accession IDs (NCBI_SS#) | Chromosomes           | Physical positions (bp) | SNPs | Gene accession IDs | Sequence components of genome | Putative functions |
|---------------------------|-------------------------------------|-----------------------|-------------------------|------|--------------------|-------------------------------|--------------------|
| <i>Desi_wild_19355919</i> | NA                                  | <i>Ca_desi_denovo</i> | 19355919                | C/T  | NA                 | NA                            | NA                 |
| <i>Desi_wild_19378484</i> | NA                                  | <i>Ca_desi_denovo</i> | 19378484                | T/G  | NA                 | NA                            | NA                 |
| <i>Desi_wild_19378487</i> | NA                                  | <i>Ca_desi_denovo</i> | 19378487                | T/A  | NA                 | NA                            | NA                 |
| <i>Desi_wild_19380910</i> | NA                                  | <i>Ca_desi_denovo</i> | 19380910                | A/T  | NA                 | NA                            | NA                 |
| <i>Desi_wild_19380930</i> | NA                                  | <i>Ca_desi_denovo</i> | 19380930                | A/G  | NA                 | NA                            | NA                 |
| <i>Desi_wild_19390020</i> | NA                                  | <i>Ca_desi_denovo</i> | 19390020                | A/C  | NA                 | NA                            | NA                 |
| <i>Desi_wild_19402257</i> | NA                                  | <i>Ca_desi_denovo</i> | 19402257                | A/G  | NA                 | NA                            | NA                 |
| <i>Desi_wild_19403309</i> | NA                                  | <i>Ca_desi_denovo</i> | 19403309                | A/C  | NA                 | NA                            | NA                 |
| <i>Desi_wild_19410914</i> | NA                                  | <i>Ca_desi_denovo</i> | 19410914                | T/G  | NA                 | NA                            | NA                 |
| <i>Desi_wild_19413335</i> | NA                                  | <i>Ca_desi_denovo</i> | 19413335                | A/C  | NA                 | NA                            | NA                 |
| <i>Desi_wild_19417832</i> | NA                                  | <i>Ca_desi_denovo</i> | 19417832                | A/G  | NA                 | NA                            | NA                 |
| <i>Desi_wild_19429930</i> | NA                                  | <i>Ca_desi_denovo</i> | 19429930                | A/G  | NA                 | NA                            | NA                 |
| <i>Desi_wild_19430321</i> | NA                                  | <i>Ca_desi_denovo</i> | 19430321                | A/G  | NA                 | NA                            | NA                 |
| <i>Desi_wild_19435258</i> | NA                                  | <i>Ca_desi_denovo</i> | 19435258                | G/A  | NA                 | NA                            | NA                 |
| <i>Desi_wild_19438744</i> | NA                                  | <i>Ca_desi_denovo</i> | 19438744                | G/C  | NA                 | NA                            | NA                 |
| <i>Desi_wild_19445233</i> | NA                                  | <i>Ca_desi_denovo</i> | 19445233                | C/G  | NA                 | NA                            | NA                 |
| <i>Desi_wild_19445248</i> | NA                                  | <i>Ca_desi_denovo</i> | 19445248                | C/A  | NA                 | NA                            | NA                 |
| <i>Desi_wild_19448711</i> | NA                                  | <i>Ca_desi_denovo</i> | 19448711                | G/C  | NA                 | NA                            | NA                 |
| <i>Desi_wild_19450382</i> | NA                                  | <i>Ca_desi_denovo</i> | 19450382                | A/C  | NA                 | NA                            | NA                 |
| <i>Desi_wild_19450386</i> | NA                                  | <i>Ca_desi_denovo</i> | 19450386                | C/A  | NA                 | NA                            | NA                 |
| <i>Desi_wild_19455915</i> | NA                                  | <i>Ca_desi_denovo</i> | 19455915                | G/C  | NA                 | NA                            | NA                 |
| <i>Desi_wild_19455940</i> | NA                                  | <i>Ca_desi_denovo</i> | 19455940                | A/G  | NA                 | NA                            | NA                 |
| <i>Desi_wild_19458065</i> | NA                                  | <i>Ca_desi_denovo</i> | 19458065                | T/C  | NA                 | NA                            | NA                 |
| <i>Desi_wild_19478593</i> | NA                                  | <i>Ca_desi_denovo</i> | 19478593                | C/G  | NA                 | NA                            | NA                 |
| <i>Desi_wild_19478614</i> | NA                                  | <i>Ca_desi_denovo</i> | 19478614                | T/C  | NA                 | NA                            | NA                 |
| <i>Desi_wild_19488345</i> | NA                                  | <i>Ca_desi_denovo</i> | 19488345                | T/G  | NA                 | NA                            | NA                 |
| <i>Desi_wild_19493031</i> | NA                                  | <i>Ca_desi_denovo</i> | 19493031                | A/C  | NA                 | NA                            | NA                 |
| <i>Desi_wild_19493032</i> | NA                                  | <i>Ca_desi_denovo</i> | 19493032                | C/G  | NA                 | NA                            | NA                 |
| <i>Desi_wild_19493033</i> | NA                                  | <i>Ca_desi_denovo</i> | 19493033                | A/C  | NA                 | NA                            | NA                 |
| <i>Desi_wild_19493417</i> | NA                                  | <i>Ca_desi_denovo</i> | 19493417                | A/C  | NA                 | NA                            | NA                 |
| <i>Desi_wild_19493420</i> | NA                                  | <i>Ca_desi_denovo</i> | 19493420                | C/T  | NA                 | NA                            | NA                 |
| <i>Desi_wild_19493555</i> | NA                                  | <i>Ca_desi_denovo</i> | 19493555                | G/C  | NA                 | NA                            | NA                 |
| <i>Desi_wild_19493560</i> | NA                                  | <i>Ca_desi_denovo</i> | 19493560                | C/T  | NA                 | NA                            | NA                 |
| <i>Desi_wild_19509039</i> | NA                                  | <i>Ca_desi_denovo</i> | 19509039                | A/C  | NA                 | NA                            | NA                 |
| <i>Desi_wild_19515537</i> | NA                                  | <i>Ca_desi_denovo</i> | 19515537                | A/C  | NA                 | NA                            | NA                 |
| <i>Desi_wild_19525159</i> | NA                                  | <i>Ca_desi_denovo</i> | 19525159                | G/A  | NA                 | NA                            | NA                 |
| <i>Desi_wild_19525174</i> | NA                                  | <i>Ca_desi_denovo</i> | 19525174                | T/C  | NA                 | NA                            | NA                 |
| <i>Desi_wild_19527689</i> | NA                                  | <i>Ca_desi_denovo</i> | 19527689                | C/T  | NA                 | NA                            | NA                 |
| <i>Desi_wild_19527745</i> | NA                                  | <i>Ca_desi_denovo</i> | 19527745                | T/C  | NA                 | NA                            | NA                 |
| <i>Desi_wild_19532835</i> | NA                                  | <i>Ca_desi_denovo</i> | 19532835                | C/T  | NA                 | NA                            | NA                 |
| <i>Desi_wild_19532843</i> | NA                                  | <i>Ca_desi_denovo</i> | 19532843                | C/T  | NA                 | NA                            | NA                 |
| <i>Desi_wild_19534742</i> | NA                                  | <i>Ca_desi_denovo</i> | 19534742                | G/T  | NA                 | NA                            | NA                 |
| <i>Desi_wild_19537762</i> | NA                                  | <i>Ca_desi_denovo</i> | 19537762                | T/C  | NA                 | NA                            | NA                 |
| <i>Desi_wild_19538049</i> | NA                                  | <i>Ca_desi_denovo</i> | 19538049                | C/T  | NA                 | NA                            | NA                 |

| SNP IDs                   | NCBI dbSNP accession IDs (NCBI_SS#) | Chromosomes           | Physical positions (bp) | SNPs | Gene accession IDs | Sequence components of genome | Putative functions |
|---------------------------|-------------------------------------|-----------------------|-------------------------|------|--------------------|-------------------------------|--------------------|
| <i>Desi_wild_19539091</i> | NA                                  | <i>Ca_desi_denovo</i> | 19539091                | G/T  | NA                 | NA                            | NA                 |
| <i>Desi_wild_19539104</i> | NA                                  | <i>Ca_desi_denovo</i> | 19539104                | A/C  | NA                 | NA                            | NA                 |
| <i>Desi_wild_19543028</i> | NA                                  | <i>Ca_desi_denovo</i> | 19543028                | C/T  | NA                 | NA                            | NA                 |
| <i>Desi_wild_19547182</i> | NA                                  | <i>Ca_desi_denovo</i> | 19547182                | A/G  | NA                 | NA                            | NA                 |
| <i>Desi_wild_19547193</i> | NA                                  | <i>Ca_desi_denovo</i> | 19547193                | A/C  | NA                 | NA                            | NA                 |
| <i>Desi_wild_19547221</i> | NA                                  | <i>Ca_desi_denovo</i> | 19547221                | A/C  | NA                 | NA                            | NA                 |
| <i>Desi_wild_19547248</i> | NA                                  | <i>Ca_desi_denovo</i> | 19547248                | A/G  | NA                 | NA                            | NA                 |
| <i>Desi_wild_19548436</i> | NA                                  | <i>Ca_desi_denovo</i> | 19548436                | C/T  | NA                 | NA                            | NA                 |
| <i>Desi_wild_19548448</i> | NA                                  | <i>Ca_desi_denovo</i> | 19548448                | C/G  | NA                 | NA                            | NA                 |
| <i>Desi_wild_19562040</i> | NA                                  | <i>Ca_desi_denovo</i> | 19562040                | G/A  | NA                 | NA                            | NA                 |
| <i>Desi_wild_19562047</i> | NA                                  | <i>Ca_desi_denovo</i> | 19562047                | C/T  | NA                 | NA                            | NA                 |
| <i>Desi_wild_19572202</i> | NA                                  | <i>Ca_desi_denovo</i> | 19572202                | A/C  | NA                 | NA                            | NA                 |
| <i>Desi_wild_19582586</i> | NA                                  | <i>Ca_desi_denovo</i> | 19582586                | A/G  | NA                 | NA                            | NA                 |
| <i>Desi_wild_19622166</i> | NA                                  | <i>Ca_desi_denovo</i> | 19622166                | A/C  | NA                 | NA                            | NA                 |
| <i>Desi_wild_19622169</i> | NA                                  | <i>Ca_desi_denovo</i> | 19622169                | C/G  | NA                 | NA                            | NA                 |
| <i>Desi_wild_19627707</i> | NA                                  | <i>Ca_desi_denovo</i> | 19627707                | C/G  | NA                 | NA                            | NA                 |
| <i>Desi_wild_19629138</i> | NA                                  | <i>Ca_desi_denovo</i> | 19629138                | T/C  | NA                 | NA                            | NA                 |
| <i>Desi_wild_19629150</i> | NA                                  | <i>Ca_desi_denovo</i> | 19629150                | G/A  | NA                 | NA                            | NA                 |
| <i>Desi_wild_19634866</i> | NA                                  | <i>Ca_desi_denovo</i> | 19634866                | A/C  | NA                 | NA                            | NA                 |
| <i>Desi_wild_19637691</i> | NA                                  | <i>Ca_desi_denovo</i> | 19637691                | C/A  | NA                 | NA                            | NA                 |
| <i>Desi_wild_19646978</i> | NA                                  | <i>Ca_desi_denovo</i> | 19646978                | A/C  | NA                 | NA                            | NA                 |
| <i>Desi_wild_19659500</i> | NA                                  | <i>Ca_desi_denovo</i> | 19659500                | C/T  | NA                 | NA                            | NA                 |
| <i>Desi_wild_19668909</i> | NA                                  | <i>Ca_desi_denovo</i> | 19668909                | A/C  | NA                 | NA                            | NA                 |
| <i>Desi_wild_19687150</i> | NA                                  | <i>Ca_desi_denovo</i> | 19687150                | T/C  | NA                 | NA                            | NA                 |
| <i>Desi_wild_19689160</i> | NA                                  | <i>Ca_desi_denovo</i> | 19689160                | C/G  | NA                 | NA                            | NA                 |
| <i>Desi_wild_19695585</i> | NA                                  | <i>Ca_desi_denovo</i> | 19695585                | C/T  | NA                 | NA                            | NA                 |
| <i>Desi_wild_19699290</i> | NA                                  | <i>Ca_desi_denovo</i> | 19699290                | G/A  | NA                 | NA                            | NA                 |
| <i>Desi_wild_19706672</i> | NA                                  | <i>Ca_desi_denovo</i> | 19706672                | A/G  | NA                 | NA                            | NA                 |
| <i>Desi_wild_19707432</i> | NA                                  | <i>Ca_desi_denovo</i> | 19707432                | A/C  | NA                 | NA                            | NA                 |
| <i>Desi_wild_19707434</i> | NA                                  | <i>Ca_desi_denovo</i> | 19707434                | C/G  | NA                 | NA                            | NA                 |
| <i>Desi_wild_19707437</i> | NA                                  | <i>Ca_desi_denovo</i> | 19707437                | C/T  | NA                 | NA                            | NA                 |
| <i>Desi_wild_19721289</i> | NA                                  | <i>Ca_desi_denovo</i> | 19721289                | G/T  | NA                 | NA                            | NA                 |
| <i>Desi_wild_19721366</i> | NA                                  | <i>Ca_desi_denovo</i> | 19721366                | C/G  | NA                 | NA                            | NA                 |
| <i>Desi_wild_19721368</i> | NA                                  | <i>Ca_desi_denovo</i> | 19721368                | A/G  | NA                 | NA                            | NA                 |
| <i>Desi_wild_19740115</i> | NA                                  | <i>Ca_desi_denovo</i> | 19740115                | C/T  | NA                 | NA                            | NA                 |
| <i>Desi_wild_19740127</i> | NA                                  | <i>Ca_desi_denovo</i> | 19740127                | C/T  | NA                 | NA                            | NA                 |
| <i>Desi_wild_19787138</i> | NA                                  | <i>Ca_desi_denovo</i> | 19787138                | A/C  | NA                 | NA                            | NA                 |
| <i>Desi_wild_19793060</i> | NA                                  | <i>Ca_desi_denovo</i> | 19793060                | G/C  | NA                 | NA                            | NA                 |
| <i>Desi_wild_19793087</i> | NA                                  | <i>Ca_desi_denovo</i> | 19793087                | A/G  | NA                 | NA                            | NA                 |
| <i>Desi_wild_19793108</i> | NA                                  | <i>Ca_desi_denovo</i> | 19793108                | A/G  | NA                 | NA                            | NA                 |
| <i>Desi_wild_19793111</i> | NA                                  | <i>Ca_desi_denovo</i> | 19793111                | T/C  | NA                 | NA                            | NA                 |
| <i>Desi_wild_19803141</i> | NA                                  | <i>Ca_desi_denovo</i> | 19803141                | A/C  | NA                 | NA                            | NA                 |
| <i>Desi_wild_19803142</i> | NA                                  | <i>Ca_desi_denovo</i> | 19803142                | G/A  | NA                 | NA                            | NA                 |
| <i>Desi_wild_19826633</i> | NA                                  | <i>Ca_desi_denovo</i> | 19826633                | G/A  | NA                 | NA                            | NA                 |

| SNP IDs                   | NCBI dbSNP accession IDs (NCBI_SS#) | Chromosomes           | Physical positions (bp) | SNPs | Gene accession IDs | Sequence components of genome | Putative functions |
|---------------------------|-------------------------------------|-----------------------|-------------------------|------|--------------------|-------------------------------|--------------------|
| <i>Desi_wild_19835009</i> | NA                                  | <i>Ca_desi_denovo</i> | 19835009                | A/T  | NA                 | NA                            | NA                 |
| <i>Desi_wild_19835138</i> | NA                                  | <i>Ca_desi_denovo</i> | 19835138                | C/G  | NA                 | NA                            | NA                 |
| <i>Desi_wild_19844288</i> | NA                                  | <i>Ca_desi_denovo</i> | 19844288                | G/C  | NA                 | NA                            | NA                 |
| <i>Desi_wild_19844305</i> | NA                                  | <i>Ca_desi_denovo</i> | 19844305                | A/C  | NA                 | NA                            | NA                 |
| <i>Desi_wild_19844306</i> | NA                                  | <i>Ca_desi_denovo</i> | 19844306                | A/G  | NA                 | NA                            | NA                 |
| <i>Desi_wild_19844307</i> | NA                                  | <i>Ca_desi_denovo</i> | 19844307                | G/T  | NA                 | NA                            | NA                 |
| <i>Desi_wild_19847196</i> | NA                                  | <i>Ca_desi_denovo</i> | 19847196                | T/G  | NA                 | NA                            | NA                 |
| <i>Desi_wild_19862734</i> | NA                                  | <i>Ca_desi_denovo</i> | 19862734                | A/G  | NA                 | NA                            | NA                 |
| <i>Desi_wild_19862740</i> | NA                                  | <i>Ca_desi_denovo</i> | 19862740                | C/G  | NA                 | NA                            | NA                 |
| <i>Desi_wild_19863490</i> | NA                                  | <i>Ca_desi_denovo</i> | 19863490                | A/G  | NA                 | NA                            | NA                 |
| <i>Desi_wild_19863493</i> | NA                                  | <i>Ca_desi_denovo</i> | 19863493                | A/G  | NA                 | NA                            | NA                 |
| <i>Desi_wild_19863505</i> | NA                                  | <i>Ca_desi_denovo</i> | 19863505                | C/G  | NA                 | NA                            | NA                 |
| <i>Desi_wild_19872440</i> | NA                                  | <i>Ca_desi_denovo</i> | 19872440                | T/C  | NA                 | NA                            | NA                 |
| <i>Desi_wild_19877209</i> | NA                                  | <i>Ca_desi_denovo</i> | 19877209                | T/G  | NA                 | NA                            | NA                 |
| <i>Desi_wild_19880496</i> | NA                                  | <i>Ca_desi_denovo</i> | 19880496                | A/G  | NA                 | NA                            | NA                 |
| <i>Desi_wild_19894839</i> | NA                                  | <i>Ca_desi_denovo</i> | 19894839                | A/G  | NA                 | NA                            | NA                 |
| <i>Desi_wild_19894842</i> | NA                                  | <i>Ca_desi_denovo</i> | 19894842                | C/G  | NA                 | NA                            | NA                 |
| <i>Desi_wild_19897277</i> | NA                                  | <i>Ca_desi_denovo</i> | 19897277                | G/C  | NA                 | NA                            | NA                 |
| <i>Desi_wild_19899089</i> | NA                                  | <i>Ca_desi_denovo</i> | 19899089                | A/G  | NA                 | NA                            | NA                 |
| <i>Desi_wild_19899092</i> | NA                                  | <i>Ca_desi_denovo</i> | 19899092                | A/G  | NA                 | NA                            | NA                 |
| <i>Desi_wild_19899874</i> | NA                                  | <i>Ca_desi_denovo</i> | 19899874                | G/A  | NA                 | NA                            | NA                 |
| <i>Desi_wild_19899883</i> | NA                                  | <i>Ca_desi_denovo</i> | 19899883                | A/G  | NA                 | NA                            | NA                 |
| <i>Desi_wild_19905690</i> | NA                                  | <i>Ca_desi_denovo</i> | 19905690                | T/C  | NA                 | NA                            | NA                 |
| <i>Desi_wild_19905704</i> | NA                                  | <i>Ca_desi_denovo</i> | 19905704                | T/C  | NA                 | NA                            | NA                 |
| <i>Desi_wild_19908446</i> | NA                                  | <i>Ca_desi_denovo</i> | 19908446                | T/C  | NA                 | NA                            | NA                 |
| <i>Desi_wild_19920312</i> | NA                                  | <i>Ca_desi_denovo</i> | 19920312                | A/G  | NA                 | NA                            | NA                 |
| <i>Desi_wild_19921362</i> | NA                                  | <i>Ca_desi_denovo</i> | 19921362                | A/G  | NA                 | NA                            | NA                 |
| <i>Desi_wild_19946148</i> | NA                                  | <i>Ca_desi_denovo</i> | 19946148                | A/G  | NA                 | NA                            | NA                 |
| <i>Desi_wild_19956124</i> | NA                                  | <i>Ca_desi_denovo</i> | 19956124                | T/C  | NA                 | NA                            | NA                 |
| <i>Desi_wild_19961464</i> | NA                                  | <i>Ca_desi_denovo</i> | 19961464                | C/T  | NA                 | NA                            | NA                 |
| <i>Desi_wild_19971367</i> | NA                                  | <i>Ca_desi_denovo</i> | 19971367                | C/G  | NA                 | NA                            | NA                 |
| <i>Desi_wild_19981543</i> | NA                                  | <i>Ca_desi_denovo</i> | 19981543                | A/G  | NA                 | NA                            | NA                 |
| <i>Desi_wild_19985385</i> | NA                                  | <i>Ca_desi_denovo</i> | 19985385                | C/T  | NA                 | NA                            | NA                 |
| <i>Desi_wild_19988563</i> | NA                                  | <i>Ca_desi_denovo</i> | 19988563                | A/G  | NA                 | NA                            | NA                 |
| <i>Desi_wild_19998102</i> | NA                                  | <i>Ca_desi_denovo</i> | 19998102                | A/C  | NA                 | NA                            | NA                 |
| <i>Desi_wild_19998105</i> | NA                                  | <i>Ca_desi_denovo</i> | 19998105                | A/G  | NA                 | NA                            | NA                 |
| <i>Desi_wild_20004061</i> | NA                                  | <i>Ca_desi_denovo</i> | 20004061                | C/T  | NA                 | NA                            | NA                 |
| <i>Desi_wild_20004094</i> | NA                                  | <i>Ca_desi_denovo</i> | 20004094                | A/G  | NA                 | NA                            | NA                 |
| <i>Desi_wild_20004099</i> | NA                                  | <i>Ca_desi_denovo</i> | 20004099                | A/C  | NA                 | NA                            | NA                 |
| <i>Desi_wild_20006125</i> | NA                                  | <i>Ca_desi_denovo</i> | 20006125                | C/T  | NA                 | NA                            | NA                 |
| <i>Desi_wild_20009277</i> | NA                                  | <i>Ca_desi_denovo</i> | 20009277                | G/A  | NA                 | NA                            | NA                 |
| <i>Desi_wild_20028360</i> | NA                                  | <i>Ca_desi_denovo</i> | 20028360                | C/T  | NA                 | NA                            | NA                 |
| <i>Desi_wild_20028684</i> | NA                                  | <i>Ca_desi_denovo</i> | 20028684                | A/G  | NA                 | NA                            | NA                 |
| <i>Desi_wild_20028685</i> | NA                                  | <i>Ca_desi_denovo</i> | 20028685                | A/G  | NA                 | NA                            | NA                 |

| SNP IDs                   | NCBI dbSNP accession IDs (NCBI_SS#) | Chromosomes           | Physical positions (bp) | SNPs | Gene accession IDs | Sequence components of genome | Putative functions |
|---------------------------|-------------------------------------|-----------------------|-------------------------|------|--------------------|-------------------------------|--------------------|
| <i>Desi_wild_20028687</i> | NA                                  | <i>Ca_desi_denovo</i> | 20028687                | A/G  | NA                 | NA                            | NA                 |
| <i>Desi_wild_20028688</i> | NA                                  | <i>Ca_desi_denovo</i> | 20028688                | A/G  | NA                 | NA                            | NA                 |
| <i>Desi_wild_20033158</i> | NA                                  | <i>Ca_desi_denovo</i> | 20033158                | G/A  | NA                 | NA                            | NA                 |
| <i>Desi_wild_20045260</i> | NA                                  | <i>Ca_desi_denovo</i> | 20045260                | G/C  | NA                 | NA                            | NA                 |
| <i>Desi_wild_20047015</i> | NA                                  | <i>Ca_desi_denovo</i> | 20047015                | T/C  | NA                 | NA                            | NA                 |
| <i>Desi_wild_20055855</i> | NA                                  | <i>Ca_desi_denovo</i> | 20055855                | C/A  | NA                 | NA                            | NA                 |
| <i>Desi_wild_20084286</i> | NA                                  | <i>Ca_desi_denovo</i> | 20084286                | A/C  | NA                 | NA                            | NA                 |
| <i>Desi_wild_20134783</i> | NA                                  | <i>Ca_desi_denovo</i> | 20134783                | G/T  | NA                 | NA                            | NA                 |
| <i>Desi_wild_20135201</i> | NA                                  | <i>Ca_desi_denovo</i> | 20135201                | C/G  | NA                 | NA                            | NA                 |
| <i>Desi_wild_20135762</i> | NA                                  | <i>Ca_desi_denovo</i> | 20135762                | C/G  | NA                 | NA                            | NA                 |
| <i>Desi_wild_20153081</i> | NA                                  | <i>Ca_desi_denovo</i> | 20153081                | G/T  | NA                 | NA                            | NA                 |
| <i>Desi_wild_20153222</i> | NA                                  | <i>Ca_desi_denovo</i> | 20153222                | C/T  | NA                 | NA                            | NA                 |
| <i>Desi_wild_20153225</i> | NA                                  | <i>Ca_desi_denovo</i> | 20153225                | T/C  | NA                 | NA                            | NA                 |
| <i>Desi_wild_20159534</i> | NA                                  | <i>Ca_desi_denovo</i> | 20159534                | A/G  | NA                 | NA                            | NA                 |
| <i>Desi_wild_20159555</i> | NA                                  | <i>Ca_desi_denovo</i> | 20159555                | C/G  | NA                 | NA                            | NA                 |
| <i>Desi_wild_20162025</i> | NA                                  | <i>Ca_desi_denovo</i> | 20162025                | A/G  | NA                 | NA                            | NA                 |
| <i>Desi_wild_20173510</i> | NA                                  | <i>Ca_desi_denovo</i> | 20173510                | A/C  | NA                 | NA                            | NA                 |
| <i>Desi_wild_20173543</i> | NA                                  | <i>Ca_desi_denovo</i> | 20173543                | C/G  | NA                 | NA                            | NA                 |
| <i>Desi_wild_20176784</i> | NA                                  | <i>Ca_desi_denovo</i> | 20176784                | A/G  | NA                 | NA                            | NA                 |
| <i>Desi_wild_20178383</i> | NA                                  | <i>Ca_desi_denovo</i> | 20178383                | T/C  | NA                 | NA                            | NA                 |
| <i>Desi_wild_20178400</i> | NA                                  | <i>Ca_desi_denovo</i> | 20178400                | G/A  | NA                 | NA                            | NA                 |
| <i>Desi_wild_20178885</i> | NA                                  | <i>Ca_desi_denovo</i> | 20178885                | A/G  | NA                 | NA                            | NA                 |
| <i>Desi_wild_20183975</i> | NA                                  | <i>Ca_desi_denovo</i> | 20183975                | A/G  | NA                 | NA                            | NA                 |
| <i>Desi_wild_20188728</i> | NA                                  | <i>Ca_desi_denovo</i> | 20188728                | T/C  | NA                 | NA                            | NA                 |
| <i>Desi_wild_20188734</i> | NA                                  | <i>Ca_desi_denovo</i> | 20188734                | T/C  | NA                 | NA                            | NA                 |
| <i>Desi_wild_20188740</i> | NA                                  | <i>Ca_desi_denovo</i> | 20188740                | A/G  | NA                 | NA                            | NA                 |
| <i>Desi_wild_20188757</i> | NA                                  | <i>Ca_desi_denovo</i> | 20188757                | A/T  | NA                 | NA                            | NA                 |
| <i>Desi_wild_20192215</i> | NA                                  | <i>Ca_desi_denovo</i> | 20192215                | G/C  | NA                 | NA                            | NA                 |
| <i>Desi_wild_20192242</i> | NA                                  | <i>Ca_desi_denovo</i> | 20192242                | G/T  | NA                 | NA                            | NA                 |
| <i>Desi_wild_20192244</i> | NA                                  | <i>Ca_desi_denovo</i> | 20192244                | G/A  | NA                 | NA                            | NA                 |
| <i>Desi_wild_20192245</i> | NA                                  | <i>Ca_desi_denovo</i> | 20192245                | G/C  | NA                 | NA                            | NA                 |
| <i>Desi_wild_20203295</i> | NA                                  | <i>Ca_desi_denovo</i> | 20203295                | C/T  | NA                 | NA                            | NA                 |
| <i>Desi_wild_20206399</i> | NA                                  | <i>Ca_desi_denovo</i> | 20206399                | A/G  | NA                 | NA                            | NA                 |
| <i>Desi_wild_20206417</i> | NA                                  | <i>Ca_desi_denovo</i> | 20206417                | C/G  | NA                 | NA                            | NA                 |
| <i>Desi_wild_20206994</i> | NA                                  | <i>Ca_desi_denovo</i> | 20206994                | A/C  | NA                 | NA                            | NA                 |
| <i>Desi_wild_20234401</i> | NA                                  | <i>Ca_desi_denovo</i> | 20234401                | T/C  | NA                 | NA                            | NA                 |
| <i>Desi_wild_20252753</i> | NA                                  | <i>Ca_desi_denovo</i> | 20252753                | C/T  | NA                 | NA                            | NA                 |
| <i>Desi_wild_20252756</i> | NA                                  | <i>Ca_desi_denovo</i> | 20252756                | C/T  | NA                 | NA                            | NA                 |
| <i>Desi_wild_20257717</i> | NA                                  | <i>Ca_desi_denovo</i> | 20257717                | A/T  | NA                 | NA                            | NA                 |
| <i>Desi_wild_20258291</i> | NA                                  | <i>Ca_desi_denovo</i> | 20258291                | T/C  | NA                 | NA                            | NA                 |
| <i>Desi_wild_20258298</i> | NA                                  | <i>Ca_desi_denovo</i> | 20258298                | T/A  | NA                 | NA                            | NA                 |
| <i>Desi_wild_20258306</i> | NA                                  | <i>Ca_desi_denovo</i> | 20258306                | T/C  | NA                 | NA                            | NA                 |
| <i>Desi_wild_20258310</i> | NA                                  | <i>Ca_desi_denovo</i> | 20258310                | A/G  | NA                 | NA                            | NA                 |
| <i>Desi_wild_20261348</i> | NA                                  | <i>Ca_desi_denovo</i> | 20261348                | C/T  | NA                 | NA                            | NA                 |



| SNP IDs                   | NCBI dbSNP accession IDs (NCBI_SS#) | Chromosomes           | Physical positions (bp) | SNPs | Gene accession IDs | Sequence components of genome | Putative functions |
|---------------------------|-------------------------------------|-----------------------|-------------------------|------|--------------------|-------------------------------|--------------------|
| <i>Desi_wild_20269525</i> | NA                                  | <i>Ca_desi_denovo</i> | 20269525                | C/G  | NA                 | NA                            | NA                 |
| <i>Desi_wild_20269559</i> | NA                                  | <i>Ca_desi_denovo</i> | 20269559                | C/G  | NA                 | NA                            | NA                 |
| <i>Desi_wild_20269565</i> | NA                                  | <i>Ca_desi_denovo</i> | 20269565                | T/C  | NA                 | NA                            | NA                 |
| <i>Desi_wild_20274281</i> | NA                                  | <i>Ca_desi_denovo</i> | 20274281                | G/A  | NA                 | NA                            | NA                 |
| <i>Desi_wild_20274290</i> | NA                                  | <i>Ca_desi_denovo</i> | 20274290                | C/T  | NA                 | NA                            | NA                 |
| <i>Desi_wild_20275381</i> | NA                                  | <i>Ca_desi_denovo</i> | 20275381                | C/T  | NA                 | NA                            | NA                 |
| <i>Desi_wild_20275384</i> | NA                                  | <i>Ca_desi_denovo</i> | 20275384                | T/C  | NA                 | NA                            | NA                 |
| <i>Desi_wild_20276122</i> | NA                                  | <i>Ca_desi_denovo</i> | 20276122                | C/T  | NA                 | NA                            | NA                 |
| <i>Desi_wild_20276125</i> | NA                                  | <i>Ca_desi_denovo</i> | 20276125                | A/G  | NA                 | NA                            | NA                 |
| <i>Desi_wild_20276143</i> | NA                                  | <i>Ca_desi_denovo</i> | 20276143                | C/T  | NA                 | NA                            | NA                 |
| <i>Desi_wild_20292647</i> | NA                                  | <i>Ca_desi_denovo</i> | 20292647                | C/G  | NA                 | NA                            | NA                 |
| <i>Desi_wild_20297777</i> | NA                                  | <i>Ca_desi_denovo</i> | 20297777                | C/T  | NA                 | NA                            | NA                 |
| <i>Desi_wild_20298631</i> | NA                                  | <i>Ca_desi_denovo</i> | 20298631                | C/T  | NA                 | NA                            | NA                 |
| <i>Desi_wild_20298636</i> | NA                                  | <i>Ca_desi_denovo</i> | 20298636                | A/T  | NA                 | NA                            | NA                 |
| <i>Desi_wild_20309420</i> | NA                                  | <i>Ca_desi_denovo</i> | 20309420                | T/C  | NA                 | NA                            | NA                 |
| <i>Desi_wild_20326407</i> | NA                                  | <i>Ca_desi_denovo</i> | 20326407                | G/T  | NA                 | NA                            | NA                 |
| <i>Desi_wild_20330075</i> | NA                                  | <i>Ca_desi_denovo</i> | 20330075                | A/G  | NA                 | NA                            | NA                 |
| <i>Desi_wild_20330096</i> | NA                                  | <i>Ca_desi_denovo</i> | 20330096                | C/G  | NA                 | NA                            | NA                 |
| <i>Desi_wild_20330105</i> | NA                                  | <i>Ca_desi_denovo</i> | 20330105                | A/G  | NA                 | NA                            | NA                 |
| <i>Desi_wild_20333680</i> | NA                                  | <i>Ca_desi_denovo</i> | 20333680                | A/G  | NA                 | NA                            | NA                 |
| <i>Desi_wild_20350733</i> | NA                                  | <i>Ca_desi_denovo</i> | 20350733                | C/T  | NA                 | NA                            | NA                 |
| <i>Desi_wild_20351477</i> | NA                                  | <i>Ca_desi_denovo</i> | 20351477                | C/A  | NA                 | NA                            | NA                 |
| <i>Desi_wild_20353431</i> | NA                                  | <i>Ca_desi_denovo</i> | 20353431                | G/A  | NA                 | NA                            | NA                 |
| <i>Desi_wild_20353506</i> | NA                                  | <i>Ca_desi_denovo</i> | 20353506                | C/T  | NA                 | NA                            | NA                 |
| <i>Desi_wild_20353512</i> | NA                                  | <i>Ca_desi_denovo</i> | 20353512                | A/G  | NA                 | NA                            | NA                 |
| <i>Desi_wild_20373316</i> | NA                                  | <i>Ca_desi_denovo</i> | 20373316                | A/C  | NA                 | NA                            | NA                 |
| <i>Desi_wild_20381500</i> | NA                                  | <i>Ca_desi_denovo</i> | 20381500                | C/G  | NA                 | NA                            | NA                 |
| <i>Desi_wild_20385556</i> | NA                                  | <i>Ca_desi_denovo</i> | 20385556                | G/A  | NA                 | NA                            | NA                 |
| <i>Desi_wild_20385772</i> | NA                                  | <i>Ca_desi_denovo</i> | 20385772                | A/G  | NA                 | NA                            | NA                 |
| <i>Desi_wild_20385782</i> | NA                                  | <i>Ca_desi_denovo</i> | 20385782                | A/G  | NA                 | NA                            | NA                 |
| <i>Desi_wild_20391579</i> | NA                                  | <i>Ca_desi_denovo</i> | 20391579                | G/A  | NA                 | NA                            | NA                 |
| <i>Desi_wild_20408326</i> | NA                                  | <i>Ca_desi_denovo</i> | 20408326                | A/C  | NA                 | NA                            | NA                 |
| <i>Desi_wild_20420222</i> | NA                                  | <i>Ca_desi_denovo</i> | 20420222                | G/C  | NA                 | NA                            | NA                 |
| <i>Desi_wild_20424081</i> | NA                                  | <i>Ca_desi_denovo</i> | 20424081                | A/C  | NA                 | NA                            | NA                 |
| <i>Desi_wild_20425037</i> | NA                                  | <i>Ca_desi_denovo</i> | 20425037                | A/G  | NA                 | NA                            | NA                 |
| <i>Desi_wild_20425040</i> | NA                                  | <i>Ca_desi_denovo</i> | 20425040                | G/A  | NA                 | NA                            | NA                 |
| <i>Desi_wild_20425054</i> | NA                                  | <i>Ca_desi_denovo</i> | 20425054                | T/A  | NA                 | NA                            | NA                 |
| <i>Desi_wild_20433425</i> | NA                                  | <i>Ca_desi_denovo</i> | 20433425                | G/T  | NA                 | NA                            | NA                 |
| <i>Desi_wild_20435601</i> | NA                                  | <i>Ca_desi_denovo</i> | 20435601                | C/T  | NA                 | NA                            | NA                 |
| <i>Desi_wild_20464439</i> | NA                                  | <i>Ca_desi_denovo</i> | 20464439                | G/A  | NA                 | NA                            | NA                 |
| <i>Desi_wild_20468487</i> | NA                                  | <i>Ca_desi_denovo</i> | 20468487                | C/T  | NA                 | NA                            | NA                 |
| <i>Desi_wild_20468493</i> | NA                                  | <i>Ca_desi_denovo</i> | 20468493                | A/G  | NA                 | NA                            | NA                 |
| <i>Desi_wild_20468498</i> | NA                                  | <i>Ca_desi_denovo</i> | 20468498                | A/C  | NA                 | NA                            | NA                 |
| <i>Desi_wild_20468499</i> | NA                                  | <i>Ca_desi_denovo</i> | 20468499                | G/C  | NA                 | NA                            | NA                 |

| SNP IDs                   | NCBI dbSNP accession IDs (NCBI_SS#) | Chromosomes           | Physical positions (bp) | SNPs | Gene accession IDs | Sequence components of genome | Putative functions |
|---------------------------|-------------------------------------|-----------------------|-------------------------|------|--------------------|-------------------------------|--------------------|
| <i>Desi_wild_20495639</i> | NA                                  | <i>Ca_desi_denovo</i> | 20495639                | T/G  | NA                 | NA                            | NA                 |
| <i>Desi_wild_20500691</i> | NA                                  | <i>Ca_desi_denovo</i> | 20500691                | C/T  | NA                 | NA                            | NA                 |
| <i>Desi_wild_20500695</i> | NA                                  | <i>Ca_desi_denovo</i> | 20500695                | A/G  | NA                 | NA                            | NA                 |
| <i>Desi_wild_20500706</i> | NA                                  | <i>Ca_desi_denovo</i> | 20500706                | C/G  | NA                 | NA                            | NA                 |
| <i>Desi_wild_20500707</i> | NA                                  | <i>Ca_desi_denovo</i> | 20500707                | A/G  | NA                 | NA                            | NA                 |
| <i>Desi_wild_20505842</i> | NA                                  | <i>Ca_desi_denovo</i> | 20505842                | A/C  | NA                 | NA                            | NA                 |
| <i>Desi_wild_20505848</i> | NA                                  | <i>Ca_desi_denovo</i> | 20505848                | C/T  | NA                 | NA                            | NA                 |
| <i>Desi_wild_20505854</i> | NA                                  | <i>Ca_desi_denovo</i> | 20505854                | C/G  | NA                 | NA                            | NA                 |
| <i>Desi_wild_20511671</i> | NA                                  | <i>Ca_desi_denovo</i> | 20511671                | T/G  | NA                 | NA                            | NA                 |
| <i>Desi_wild_20518523</i> | NA                                  | <i>Ca_desi_denovo</i> | 20518523                | C/T  | NA                 | NA                            | NA                 |
| <i>Desi_wild_20518564</i> | NA                                  | <i>Ca_desi_denovo</i> | 20518564                | C/T  | NA                 | NA                            | NA                 |
| <i>Desi_wild_20522026</i> | NA                                  | <i>Ca_desi_denovo</i> | 20522026                | A/G  | NA                 | NA                            | NA                 |
| <i>Desi_wild_20522027</i> | NA                                  | <i>Ca_desi_denovo</i> | 20522027                | A/G  | NA                 | NA                            | NA                 |
| <i>Desi_wild_20522029</i> | NA                                  | <i>Ca_desi_denovo</i> | 20522029                | A/G  | NA                 | NA                            | NA                 |
| <i>Desi_wild_20522030</i> | NA                                  | <i>Ca_desi_denovo</i> | 20522030                | A/G  | NA                 | NA                            | NA                 |
| <i>Desi_wild_20536014</i> | NA                                  | <i>Ca_desi_denovo</i> | 20536014                | C/T  | NA                 | NA                            | NA                 |
| <i>Desi_wild_20536895</i> | NA                                  | <i>Ca_desi_denovo</i> | 20536895                | T/G  | NA                 | NA                            | NA                 |
| <i>Desi_wild_20538321</i> | NA                                  | <i>Ca_desi_denovo</i> | 20538321                | G/A  | NA                 | NA                            | NA                 |
| <i>Desi_wild_20542424</i> | NA                                  | <i>Ca_desi_denovo</i> | 20542424                | C/G  | NA                 | NA                            | NA                 |
| <i>Desi_wild_20560776</i> | NA                                  | <i>Ca_desi_denovo</i> | 20560776                | C/T  | NA                 | NA                            | NA                 |
| <i>Desi_wild_20561893</i> | NA                                  | <i>Ca_desi_denovo</i> | 20561893                | C/G  | NA                 | NA                            | NA                 |
| <i>Desi_wild_20561896</i> | NA                                  | <i>Ca_desi_denovo</i> | 20561896                | C/G  | NA                 | NA                            | NA                 |
| <i>Desi_wild_20561902</i> | NA                                  | <i>Ca_desi_denovo</i> | 20561902                | C/G  | NA                 | NA                            | NA                 |
| <i>Desi_wild_20571768</i> | NA                                  | <i>Ca_desi_denovo</i> | 20571768                | C/A  | NA                 | NA                            | NA                 |
| <i>Desi_wild_20579938</i> | NA                                  | <i>Ca_desi_denovo</i> | 20579938                | A/G  | NA                 | NA                            | NA                 |
| <i>Desi_wild_20583616</i> | NA                                  | <i>Ca_desi_denovo</i> | 20583616                | C/A  | NA                 | NA                            | NA                 |
| <i>Desi_wild_20583617</i> | NA                                  | <i>Ca_desi_denovo</i> | 20583617                | G/A  | NA                 | NA                            | NA                 |
| <i>Desi_wild_20583618</i> | NA                                  | <i>Ca_desi_denovo</i> | 20583618                | C/G  | NA                 | NA                            | NA                 |
| <i>Desi_wild_20583621</i> | NA                                  | <i>Ca_desi_denovo</i> | 20583621                | T/C  | NA                 | NA                            | NA                 |
| <i>Desi_wild_20583624</i> | NA                                  | <i>Ca_desi_denovo</i> | 20583624                | C/G  | NA                 | NA                            | NA                 |
| <i>Desi_wild_20586253</i> | NA                                  | <i>Ca_desi_denovo</i> | 20586253                | G/C  | NA                 | NA                            | NA                 |
| <i>Desi_wild_20586262</i> | NA                                  | <i>Ca_desi_denovo</i> | 20586262                | G/C  | NA                 | NA                            | NA                 |
| <i>Desi_wild_20590882</i> | NA                                  | <i>Ca_desi_denovo</i> | 20590882                | T/A  | NA                 | NA                            | NA                 |
| <i>Desi_wild_20598268</i> | NA                                  | <i>Ca_desi_denovo</i> | 20598268                | G/T  | NA                 | NA                            | NA                 |
| <i>Desi_wild_20598280</i> | NA                                  | <i>Ca_desi_denovo</i> | 20598280                | C/G  | NA                 | NA                            | NA                 |
| <i>Desi_wild_20608493</i> | NA                                  | <i>Ca_desi_denovo</i> | 20608493                | A/T  | NA                 | NA                            | NA                 |
| <i>Desi_wild_20639402</i> | NA                                  | <i>Ca_desi_denovo</i> | 20639402                | C/T  | NA                 | NA                            | NA                 |
| <i>Desi_wild_20639414</i> | NA                                  | <i>Ca_desi_denovo</i> | 20639414                | C/T  | NA                 | NA                            | NA                 |
| <i>Desi_wild_20639417</i> | NA                                  | <i>Ca_desi_denovo</i> | 20639417                | C/T  | NA                 | NA                            | NA                 |
| <i>Desi_wild_20660666</i> | NA                                  | <i>Ca_desi_denovo</i> | 20660666                | C/T  | NA                 | NA                            | NA                 |
| <i>Desi_wild_20660749</i> | NA                                  | <i>Ca_desi_denovo</i> | 20660749                | G/T  | NA                 | NA                            | NA                 |
| <i>Desi_wild_20667037</i> | NA                                  | <i>Ca_desi_denovo</i> | 20667037                | T/C  | NA                 | NA                            | NA                 |
| <i>Desi_wild_20667097</i> | NA                                  | <i>Ca_desi_denovo</i> | 20667097                | G/A  | NA                 | NA                            | NA                 |
| <i>Desi_wild_20668586</i> | NA                                  | <i>Ca_desi_denovo</i> | 20668586                | C/T  | NA                 | NA                            | NA                 |

| SNP IDs                   | NCBI dbSNP accession IDs (NCBI_SS#) | Chromosomes           | Physical positions (bp) | SNPs | Gene accession IDs | Sequence components of genome | Putative functions |
|---------------------------|-------------------------------------|-----------------------|-------------------------|------|--------------------|-------------------------------|--------------------|
| <i>Desi_wild_20673267</i> | NA                                  | <i>Ca_desi_denovo</i> | 20673267                | G/T  | NA                 | NA                            | NA                 |
| <i>Desi_wild_20684884</i> | NA                                  | <i>Ca_desi_denovo</i> | 20684884                | G/C  | NA                 | NA                            | NA                 |
| <i>Desi_wild_20684894</i> | NA                                  | <i>Ca_desi_denovo</i> | 20684894                | C/A  | NA                 | NA                            | NA                 |
| <i>Desi_wild_20699809</i> | NA                                  | <i>Ca_desi_denovo</i> | 20699809                | C/T  | NA                 | NA                            | NA                 |
| <i>Desi_wild_20699904</i> | NA                                  | <i>Ca_desi_denovo</i> | 20699904                | C/T  | NA                 | NA                            | NA                 |
| <i>Desi_wild_20699969</i> | NA                                  | <i>Ca_desi_denovo</i> | 20699969                | G/T  | NA                 | NA                            | NA                 |
| <i>Desi_wild_20699999</i> | NA                                  | <i>Ca_desi_denovo</i> | 20699999                | C/T  | NA                 | NA                            | NA                 |
| <i>Desi_wild_20700189</i> | NA                                  | <i>Ca_desi_denovo</i> | 20700189                | C/T  | NA                 | NA                            | NA                 |
| <i>Desi_wild_20700284</i> | NA                                  | <i>Ca_desi_denovo</i> | 20700284                | C/T  | NA                 | NA                            | NA                 |
| <i>Desi_wild_20700379</i> | NA                                  | <i>Ca_desi_denovo</i> | 20700379                | C/T  | NA                 | NA                            | NA                 |
| <i>Desi_wild_20700457</i> | NA                                  | <i>Ca_desi_denovo</i> | 20700457                | G/T  | NA                 | NA                            | NA                 |
| <i>Desi_wild_20700474</i> | NA                                  | <i>Ca_desi_denovo</i> | 20700474                | C/T  | NA                 | NA                            | NA                 |
| <i>Desi_wild_20700569</i> | NA                                  | <i>Ca_desi_denovo</i> | 20700569                | C/T  | NA                 | NA                            | NA                 |
| <i>Desi_wild_20700664</i> | NA                                  | <i>Ca_desi_denovo</i> | 20700664                | C/T  | NA                 | NA                            | NA                 |
| <i>Desi_wild_20700759</i> | NA                                  | <i>Ca_desi_denovo</i> | 20700759                | C/T  | NA                 | NA                            | NA                 |
| <i>Desi_wild_20700949</i> | NA                                  | <i>Ca_desi_denovo</i> | 20700949                | C/T  | NA                 | NA                            | NA                 |
| <i>Desi_wild_20701044</i> | NA                                  | <i>Ca_desi_denovo</i> | 20701044                | C/T  | NA                 | NA                            | NA                 |
| <i>Desi_wild_20701234</i> | NA                                  | <i>Ca_desi_denovo</i> | 20701234                | C/T  | NA                 | NA                            | NA                 |
| <i>Desi_wild_20701319</i> | NA                                  | <i>Ca_desi_denovo</i> | 20701319                | G/T  | NA                 | NA                            | NA                 |
| <i>Desi_wild_20701329</i> | NA                                  | <i>Ca_desi_denovo</i> | 20701329                | C/T  | NA                 | NA                            | NA                 |
| <i>Desi_wild_20701424</i> | NA                                  | <i>Ca_desi_denovo</i> | 20701424                | C/T  | NA                 | NA                            | NA                 |
| <i>Desi_wild_20701519</i> | NA                                  | <i>Ca_desi_denovo</i> | 20701519                | C/T  | NA                 | NA                            | NA                 |
| <i>Desi_wild_20701709</i> | NA                                  | <i>Ca_desi_denovo</i> | 20701709                | C/T  | NA                 | NA                            | NA                 |
| <i>Desi_wild_20701940</i> | NA                                  | <i>Ca_desi_denovo</i> | 20701940                | A/G  | NA                 | NA                            | NA                 |
| <i>Desi_wild_20702366</i> | NA                                  | <i>Ca_desi_denovo</i> | 20702366                | A/G  | NA                 | NA                            | NA                 |
| <i>Desi_wild_20702737</i> | NA                                  | <i>Ca_desi_denovo</i> | 20702737                | A/G  | NA                 | NA                            | NA                 |
| <i>Desi_wild_20711788</i> | NA                                  | <i>Ca_desi_denovo</i> | 20711788                | C/G  | NA                 | NA                            | NA                 |
| <i>Desi_wild_20715742</i> | NA                                  | <i>Ca_desi_denovo</i> | 20715742                | G/T  | NA                 | NA                            | NA                 |
| <i>Desi_wild_20715781</i> | NA                                  | <i>Ca_desi_denovo</i> | 20715781                | C/G  | NA                 | NA                            | NA                 |
| <i>Desi_wild_20715814</i> | NA                                  | <i>Ca_desi_denovo</i> | 20715814                | A/G  | NA                 | NA                            | NA                 |
| <i>Desi_wild_20727260</i> | NA                                  | <i>Ca_desi_denovo</i> | 20727260                | C/T  | NA                 | NA                            | NA                 |
| <i>Desi_wild_20727275</i> | NA                                  | <i>Ca_desi_denovo</i> | 20727275                | A/G  | NA                 | NA                            | NA                 |
| <i>Desi_wild_20731893</i> | NA                                  | <i>Ca_desi_denovo</i> | 20731893                | A/G  | NA                 | NA                            | NA                 |
| <i>Desi_wild_20731906</i> | NA                                  | <i>Ca_desi_denovo</i> | 20731906                | A/G  | NA                 | NA                            | NA                 |
| <i>Desi_wild_20731915</i> | NA                                  | <i>Ca_desi_denovo</i> | 20731915                | A/G  | NA                 | NA                            | NA                 |
| <i>Desi_wild_20732463</i> | NA                                  | <i>Ca_desi_denovo</i> | 20732463                | A/G  | NA                 | NA                            | NA                 |
| <i>Desi_wild_20733670</i> | NA                                  | <i>Ca_desi_denovo</i> | 20733670                | A/T  | NA                 | NA                            | NA                 |
| <i>Desi_wild_20734483</i> | NA                                  | <i>Ca_desi_denovo</i> | 20734483                | C/T  | NA                 | NA                            | NA                 |
| <i>Desi_wild_20747302</i> | NA                                  | <i>Ca_desi_denovo</i> | 20747302                | A/G  | NA                 | NA                            | NA                 |
| <i>Desi_wild_20750643</i> | NA                                  | <i>Ca_desi_denovo</i> | 20750643                | G/T  | NA                 | NA                            | NA                 |
| <i>Desi_wild_20767198</i> | NA                                  | <i>Ca_desi_denovo</i> | 20767198                | A/G  | NA                 | NA                            | NA                 |
| <i>Desi_wild_20770109</i> | NA                                  | <i>Ca_desi_denovo</i> | 20770109                | A/C  | NA                 | NA                            | NA                 |
| <i>Desi_wild_20777881</i> | NA                                  | <i>Ca_desi_denovo</i> | 20777881                | A/C  | NA                 | NA                            | NA                 |
| <i>Desi_wild_20777882</i> | NA                                  | <i>Ca_desi_denovo</i> | 20777882                | A/C  | NA                 | NA                            | NA                 |

| SNP IDs                   | NCBI dbSNP accession IDs (NCBI_SS#) | Chromosomes           | Physical positions (bp) | SNPs | Gene accession IDs | Sequence components of genome | Putative functions |
|---------------------------|-------------------------------------|-----------------------|-------------------------|------|--------------------|-------------------------------|--------------------|
| <i>Desi_wild_20780531</i> | NA                                  | <i>Ca_desi_denovo</i> | 20780531                | A/C  | NA                 | NA                            | NA                 |
| <i>Desi_wild_20785099</i> | NA                                  | <i>Ca_desi_denovo</i> | 20785099                | C/T  | NA                 | NA                            | NA                 |
| <i>Desi_wild_20787991</i> | NA                                  | <i>Ca_desi_denovo</i> | 20787991                | A/T  | NA                 | NA                            | NA                 |
| <i>Desi_wild_20788003</i> | NA                                  | <i>Ca_desi_denovo</i> | 20788003                | G/T  | NA                 | NA                            | NA                 |
| <i>Desi_wild_20788005</i> | NA                                  | <i>Ca_desi_denovo</i> | 20788005                | A/C  | NA                 | NA                            | NA                 |
| <i>Desi_wild_20801302</i> | NA                                  | <i>Ca_desi_denovo</i> | 20801302                | C/T  | NA                 | NA                            | NA                 |
| <i>Desi_wild_20801397</i> | NA                                  | <i>Ca_desi_denovo</i> | 20801397                | C/T  | NA                 | NA                            | NA                 |
| <i>Desi_wild_20801492</i> | NA                                  | <i>Ca_desi_denovo</i> | 20801492                | C/T  | NA                 | NA                            | NA                 |
| <i>Desi_wild_20801613</i> | NA                                  | <i>Ca_desi_denovo</i> | 20801613                | A/T  | NA                 | NA                            | NA                 |
| <i>Desi_wild_20801655</i> | NA                                  | <i>Ca_desi_denovo</i> | 20801655                | A/C  | NA                 | NA                            | NA                 |
| <i>Desi_wild_20801682</i> | NA                                  | <i>Ca_desi_denovo</i> | 20801682                | C/T  | NA                 | NA                            | NA                 |
| <i>Desi_wild_20801750</i> | NA                                  | <i>Ca_desi_denovo</i> | 20801750                | C/T  | NA                 | NA                            | NA                 |
| <i>Desi_wild_20801845</i> | NA                                  | <i>Ca_desi_denovo</i> | 20801845                | C/T  | NA                 | NA                            | NA                 |
| <i>Desi_wild_20804474</i> | NA                                  | <i>Ca_desi_denovo</i> | 20804474                | A/T  | NA                 | NA                            | NA                 |
| <i>Desi_wild_20804478</i> | NA                                  | <i>Ca_desi_denovo</i> | 20804478                | C/T  | NA                 | NA                            | NA                 |
| <i>Desi_wild_20806586</i> | NA                                  | <i>Ca_desi_denovo</i> | 20806586                | C/T  | NA                 | NA                            | NA                 |
| <i>Desi_wild_20809823</i> | NA                                  | <i>Ca_desi_denovo</i> | 20809823                | A/G  | NA                 | NA                            | NA                 |
| <i>Desi_wild_20809908</i> | NA                                  | <i>Ca_desi_denovo</i> | 20809908                | G/T  | NA                 | NA                            | NA                 |
| <i>Desi_wild_20809918</i> | NA                                  | <i>Ca_desi_denovo</i> | 20809918                | A/G  | NA                 | NA                            | NA                 |
| <i>Desi_wild_20810013</i> | NA                                  | <i>Ca_desi_denovo</i> | 20810013                | A/G  | NA                 | NA                            | NA                 |
| <i>Desi_wild_20810108</i> | NA                                  | <i>Ca_desi_denovo</i> | 20810108                | A/G  | NA                 | NA                            | NA                 |
| <i>Desi_wild_20810203</i> | NA                                  | <i>Ca_desi_denovo</i> | 20810203                | A/G  | NA                 | NA                            | NA                 |
| <i>Desi_wild_20810298</i> | NA                                  | <i>Ca_desi_denovo</i> | 20810298                | A/G  | NA                 | NA                            | NA                 |
| <i>Desi_wild_20810302</i> | NA                                  | <i>Ca_desi_denovo</i> | 20810302                | A/T  | NA                 | NA                            | NA                 |
| <i>Desi_wild_20810393</i> | NA                                  | <i>Ca_desi_denovo</i> | 20810393                | A/G  | NA                 | NA                            | NA                 |
| <i>Desi_wild_20810488</i> | NA                                  | <i>Ca_desi_denovo</i> | 20810488                | A/G  | NA                 | NA                            | NA                 |
| <i>Desi_wild_20810583</i> | NA                                  | <i>Ca_desi_denovo</i> | 20810583                | A/G  | NA                 | NA                            | NA                 |
| <i>Desi_wild_20810678</i> | NA                                  | <i>Ca_desi_denovo</i> | 20810678                | A/G  | NA                 | NA                            | NA                 |
| <i>Desi_wild_20810773</i> | NA                                  | <i>Ca_desi_denovo</i> | 20810773                | A/G  | NA                 | NA                            | NA                 |
| <i>Desi_wild_20810868</i> | NA                                  | <i>Ca_desi_denovo</i> | 20810868                | A/G  | NA                 | NA                            | NA                 |
| <i>Desi_wild_20811058</i> | NA                                  | <i>Ca_desi_denovo</i> | 20811058                | A/G  | NA                 | NA                            | NA                 |
| <i>Desi_wild_20811248</i> | NA                                  | <i>Ca_desi_denovo</i> | 20811248                | A/G  | NA                 | NA                            | NA                 |
| <i>Desi_wild_20811284</i> | NA                                  | <i>Ca_desi_denovo</i> | 20811284                | A/G  | NA                 | NA                            | NA                 |
| <i>Desi_wild_20811343</i> | NA                                  | <i>Ca_desi_denovo</i> | 20811343                | A/G  | NA                 | NA                            | NA                 |
| <i>Desi_wild_20811438</i> | NA                                  | <i>Ca_desi_denovo</i> | 20811438                | A/G  | NA                 | NA                            | NA                 |
| <i>Desi_wild_20811533</i> | NA                                  | <i>Ca_desi_denovo</i> | 20811533                | A/G  | NA                 | NA                            | NA                 |
| <i>Desi_wild_20811628</i> | NA                                  | <i>Ca_desi_denovo</i> | 20811628                | A/G  | NA                 | NA                            | NA                 |
| <i>Desi_wild_20811702</i> | NA                                  | <i>Ca_desi_denovo</i> | 20811702                | G/T  | NA                 | NA                            | NA                 |
| <i>Desi_wild_20811723</i> | NA                                  | <i>Ca_desi_denovo</i> | 20811723                | A/G  | NA                 | NA                            | NA                 |
| <i>Desi_wild_20811818</i> | NA                                  | <i>Ca_desi_denovo</i> | 20811818                | A/G  | NA                 | NA                            | NA                 |
| <i>Desi_wild_20811913</i> | NA                                  | <i>Ca_desi_denovo</i> | 20811913                | A/G  | NA                 | NA                            | NA                 |
| <i>Desi_wild_20812008</i> | NA                                  | <i>Ca_desi_denovo</i> | 20812008                | A/G  | NA                 | NA                            | NA                 |
| <i>Desi_wild_20812017</i> | NA                                  | <i>Ca_desi_denovo</i> | 20812017                | G/T  | NA                 | NA                            | NA                 |
| <i>Desi_wild_20812103</i> | NA                                  | <i>Ca_desi_denovo</i> | 20812103                | A/G  | NA                 | NA                            | NA                 |

| SNP IDs                   | NCBI dbSNP accession IDs (NCBI_SS#) | Chromosomes           | Physical positions (bp) | SNPs | Gene accession IDs | Sequence components of genome | Putative functions |
|---------------------------|-------------------------------------|-----------------------|-------------------------|------|--------------------|-------------------------------|--------------------|
| <i>Desi_wild_20812347</i> | NA                                  | <i>Ca_desi_denovo</i> | 20812347                | C/T  | NA                 | NA                            | NA                 |
| <i>Desi_wild_20812447</i> | NA                                  | <i>Ca_desi_denovo</i> | 20812447                | C/G  | NA                 | NA                            | NA                 |
| <i>Desi_wild_20812477</i> | NA                                  | <i>Ca_desi_denovo</i> | 20812477                | A/G  | NA                 | NA                            | NA                 |
| <i>Desi_wild_20812483</i> | NA                                  | <i>Ca_desi_denovo</i> | 20812483                | A/G  | NA                 | NA                            | NA                 |
| <i>Desi_wild_20812640</i> | NA                                  | <i>Ca_desi_denovo</i> | 20812640                | A/G  | NA                 | NA                            | NA                 |
| <i>Desi_wild_20812673</i> | NA                                  | <i>Ca_desi_denovo</i> | 20812673                | A/G  | NA                 | NA                            | NA                 |
| <i>Desi_wild_20812758</i> | NA                                  | <i>Ca_desi_denovo</i> | 20812758                | A/T  | NA                 | NA                            | NA                 |
| <i>Desi_wild_20812828</i> | NA                                  | <i>Ca_desi_denovo</i> | 20812828                | A/C  | NA                 | NA                            | NA                 |
| <i>Desi_wild_20812857</i> | NA                                  | <i>Ca_desi_denovo</i> | 20812857                | A/G  | NA                 | NA                            | NA                 |
| <i>Desi_wild_20812952</i> | NA                                  | <i>Ca_desi_denovo</i> | 20812952                | A/G  | NA                 | NA                            | NA                 |
| <i>Desi_wild_20813047</i> | NA                                  | <i>Ca_desi_denovo</i> | 20813047                | A/G  | NA                 | NA                            | NA                 |
| <i>Desi_wild_20823100</i> | NA                                  | <i>Ca_desi_denovo</i> | 20823100                | C/T  | NA                 | NA                            | NA                 |
| <i>Desi_wild_20826822</i> | NA                                  | <i>Ca_desi_denovo</i> | 20826822                | A/C  | NA                 | NA                            | NA                 |
| <i>Desi_wild_20826825</i> | NA                                  | <i>Ca_desi_denovo</i> | 20826825                | G/T  | NA                 | NA                            | NA                 |
| <i>Desi_wild_20829818</i> | NA                                  | <i>Ca_desi_denovo</i> | 20829818                | A/T  | NA                 | NA                            | NA                 |
| <i>Desi_wild_20843608</i> | NA                                  | <i>Ca_desi_denovo</i> | 20843608                | A/G  | NA                 | NA                            | NA                 |
| <i>Desi_wild_20843636</i> | NA                                  | <i>Ca_desi_denovo</i> | 20843636                | G/T  | NA                 | NA                            | NA                 |
| <i>Desi_wild_20847822</i> | NA                                  | <i>Ca_desi_denovo</i> | 20847822                | A/G  | NA                 | NA                            | NA                 |
| <i>Desi_wild_20847843</i> | NA                                  | <i>Ca_desi_denovo</i> | 20847843                | C/T  | NA                 | NA                            | NA                 |
| <i>Desi_wild_20849257</i> | NA                                  | <i>Ca_desi_denovo</i> | 20849257                | C/T  | NA                 | NA                            | NA                 |
| <i>Desi_wild_20849310</i> | NA                                  | <i>Ca_desi_denovo</i> | 20849310                | A/G  | NA                 | NA                            | NA                 |
| <i>Desi_wild_20849321</i> | NA                                  | <i>Ca_desi_denovo</i> | 20849321                | T/C  | NA                 | NA                            | NA                 |
| <i>Desi_wild_20849329</i> | NA                                  | <i>Ca_desi_denovo</i> | 20849329                | C/T  | NA                 | NA                            | NA                 |
| <i>Desi_wild_20851783</i> | NA                                  | <i>Ca_desi_denovo</i> | 20851783                | A/T  | NA                 | NA                            | NA                 |
| <i>Desi_wild_20866168</i> | NA                                  | <i>Ca_desi_denovo</i> | 20866168                | C/G  | NA                 | NA                            | NA                 |
| <i>Desi_wild_20866169</i> | NA                                  | <i>Ca_desi_denovo</i> | 20866169                | A/T  | NA                 | NA                            | NA                 |
| <i>Desi_wild_20872808</i> | NA                                  | <i>Ca_desi_denovo</i> | 20872808                | A/G  | NA                 | NA                            | NA                 |
| <i>Desi_wild_20886040</i> | NA                                  | <i>Ca_desi_denovo</i> | 20886040                | C/T  | NA                 | NA                            | NA                 |
| <i>Desi_wild_20897876</i> | NA                                  | <i>Ca_desi_denovo</i> | 20897876                | C/T  | NA                 | NA                            | NA                 |
| <i>Desi_wild_20908354</i> | NA                                  | <i>Ca_desi_denovo</i> | 20908354                | A/G  | NA                 | NA                            | NA                 |
| <i>Desi_wild_20908359</i> | NA                                  | <i>Ca_desi_denovo</i> | 20908359                | A/G  | NA                 | NA                            | NA                 |
| <i>Desi_wild_20910230</i> | NA                                  | <i>Ca_desi_denovo</i> | 20910230                | C/G  | NA                 | NA                            | NA                 |
| <i>Desi_wild_20913080</i> | NA                                  | <i>Ca_desi_denovo</i> | 20913080                | A/G  | NA                 | NA                            | NA                 |
| <i>Desi_wild_20913824</i> | NA                                  | <i>Ca_desi_denovo</i> | 20913824                | A/G  | NA                 | NA                            | NA                 |
| <i>Desi_wild_20914160</i> | NA                                  | <i>Ca_desi_denovo</i> | 20914160                | G/T  | NA                 | NA                            | NA                 |
| <i>Desi_wild_20914660</i> | NA                                  | <i>Ca_desi_denovo</i> | 20914660                | G/T  | NA                 | NA                            | NA                 |
| <i>Desi_wild_20914876</i> | NA                                  | <i>Ca_desi_denovo</i> | 20914876                | T/G  | NA                 | NA                            | NA                 |
| <i>Desi_wild_20914919</i> | NA                                  | <i>Ca_desi_denovo</i> | 20914919                | A/G  | NA                 | NA                            | NA                 |
| <i>Desi_wild_20919121</i> | NA                                  | <i>Ca_desi_denovo</i> | 20919121                | A/G  | NA                 | NA                            | NA                 |
| <i>Desi_wild_20920507</i> | NA                                  | <i>Ca_desi_denovo</i> | 20920507                | T/C  | NA                 | NA                            | NA                 |
| <i>Desi_wild_20929377</i> | NA                                  | <i>Ca_desi_denovo</i> | 20929377                | A/C  | NA                 | NA                            | NA                 |
| <i>Desi_wild_20942198</i> | NA                                  | <i>Ca_desi_denovo</i> | 20942198                | G/A  | NA                 | NA                            | NA                 |
| <i>Desi_wild_20970119</i> | NA                                  | <i>Ca_desi_denovo</i> | 20970119                | A/G  | NA                 | NA                            | NA                 |
| <i>Desi_wild_20971593</i> | NA                                  | <i>Ca_desi_denovo</i> | 20971593                | T/C  | NA                 | NA                            | NA                 |

| SNP IDs                   | NCBI dbSNP accession IDs (NCBI_SS#) | Chromosomes           | Physical positions (bp) | SNPs | Gene accession IDs | Sequence components of genome | Putative functions |
|---------------------------|-------------------------------------|-----------------------|-------------------------|------|--------------------|-------------------------------|--------------------|
| <i>Desi_wild_20978485</i> | NA                                  | <i>Ca_desi_denovo</i> | 20978485                | C/T  | NA                 | NA                            | NA                 |
| <i>Desi_wild_20986223</i> | NA                                  | <i>Ca_desi_denovo</i> | 20986223                | A/G  | NA                 | NA                            | NA                 |
| <i>Desi_wild_20996770</i> | NA                                  | <i>Ca_desi_denovo</i> | 20996770                | C/G  | NA                 | NA                            | NA                 |
| <i>Desi_wild_20996811</i> | NA                                  | <i>Ca_desi_denovo</i> | 20996811                | G/T  | NA                 | NA                            | NA                 |
| <i>Desi_wild_21008043</i> | NA                                  | <i>Ca_desi_denovo</i> | 21008043                | G/A  | NA                 | NA                            | NA                 |
| <i>Desi_wild_21017953</i> | NA                                  | <i>Ca_desi_denovo</i> | 21017953                | A/T  | NA                 | NA                            | NA                 |
| <i>Desi_wild_21024156</i> | NA                                  | <i>Ca_desi_denovo</i> | 21024156                | T/G  | NA                 | NA                            | NA                 |
| <i>Desi_wild_21042571</i> | NA                                  | <i>Ca_desi_denovo</i> | 21042571                | A/T  | NA                 | NA                            | NA                 |
| <i>Desi_wild_21043364</i> | NA                                  | <i>Ca_desi_denovo</i> | 21043364                | A/C  | NA                 | NA                            | NA                 |
| <i>Desi_wild_21057817</i> | NA                                  | <i>Ca_desi_denovo</i> | 21057817                | A/G  | NA                 | NA                            | NA                 |
| <i>Desi_wild_21062519</i> | NA                                  | <i>Ca_desi_denovo</i> | 21062519                | A/C  | NA                 | NA                            | NA                 |
| <i>Desi_wild_21067605</i> | NA                                  | <i>Ca_desi_denovo</i> | 21067605                | G/T  | NA                 | NA                            | NA                 |
| <i>Desi_wild_21069989</i> | NA                                  | <i>Ca_desi_denovo</i> | 21069989                | G/A  | NA                 | NA                            | NA                 |
| <i>Desi_wild_21073572</i> | NA                                  | <i>Ca_desi_denovo</i> | 21073572                | C/T  | NA                 | NA                            | NA                 |
| <i>Desi_wild_21073581</i> | NA                                  | <i>Ca_desi_denovo</i> | 21073581                | C/T  | NA                 | NA                            | NA                 |
| <i>Desi_wild_21073615</i> | NA                                  | <i>Ca_desi_denovo</i> | 21073615                | A/G  | NA                 | NA                            | NA                 |
| <i>Desi_wild_21073842</i> | NA                                  | <i>Ca_desi_denovo</i> | 21073842                | A/G  | NA                 | NA                            | NA                 |
| <i>Desi_wild_21073861</i> | NA                                  | <i>Ca_desi_denovo</i> | 21073861                | G/T  | NA                 | NA                            | NA                 |
| <i>Desi_wild_21078639</i> | NA                                  | <i>Ca_desi_denovo</i> | 21078639                | A/G  | NA                 | NA                            | NA                 |
| <i>Desi_wild_21080351</i> | NA                                  | <i>Ca_desi_denovo</i> | 21080351                | A/G  | NA                 | NA                            | NA                 |
| <i>Desi_wild_21080426</i> | NA                                  | <i>Ca_desi_denovo</i> | 21080426                | A/G  | NA                 | NA                            | NA                 |
| <i>Desi_wild_21081369</i> | NA                                  | <i>Ca_desi_denovo</i> | 21081369                | C/T  | NA                 | NA                            | NA                 |
| <i>Desi_wild_21081413</i> | NA                                  | <i>Ca_desi_denovo</i> | 21081413                | A/G  | NA                 | NA                            | NA                 |
| <i>Desi_wild_21091021</i> | NA                                  | <i>Ca_desi_denovo</i> | 21091021                | A/G  | NA                 | NA                            | NA                 |
| <i>Desi_wild_21091061</i> | NA                                  | <i>Ca_desi_denovo</i> | 21091061                | T/G  | NA                 | NA                            | NA                 |
| <i>Desi_wild_21093144</i> | NA                                  | <i>Ca_desi_denovo</i> | 21093144                | A/G  | NA                 | NA                            | NA                 |
| <i>Desi_wild_21093533</i> | NA                                  | <i>Ca_desi_denovo</i> | 21093533                | A/C  | NA                 | NA                            | NA                 |
| <i>Desi_wild_21093573</i> | NA                                  | <i>Ca_desi_denovo</i> | 21093573                | T/C  | NA                 | NA                            | NA                 |
| <i>Desi_wild_21106613</i> | NA                                  | <i>Ca_desi_denovo</i> | 21106613                | A/T  | NA                 | NA                            | NA                 |
| <i>Desi_wild_21108396</i> | NA                                  | <i>Ca_desi_denovo</i> | 21108396                | T/C  | NA                 | NA                            | NA                 |
| <i>Desi_wild_21108411</i> | NA                                  | <i>Ca_desi_denovo</i> | 21108411                | A/C  | NA                 | NA                            | NA                 |
| <i>Desi_wild_21113210</i> | NA                                  | <i>Ca_desi_denovo</i> | 21113210                | A/G  | NA                 | NA                            | NA                 |
| <i>Desi_wild_21121938</i> | NA                                  | <i>Ca_desi_denovo</i> | 21121938                | C/T  | NA                 | NA                            | NA                 |
| <i>Desi_wild_21122795</i> | NA                                  | <i>Ca_desi_denovo</i> | 21122795                | G/A  | NA                 | NA                            | NA                 |
| <i>Desi_wild_21123863</i> | NA                                  | <i>Ca_desi_denovo</i> | 21123863                | T/C  | NA                 | NA                            | NA                 |
| <i>Desi_wild_21130534</i> | NA                                  | <i>Ca_desi_denovo</i> | 21130534                | C/T  | NA                 | NA                            | NA                 |
| <i>Desi_wild_21134690</i> | NA                                  | <i>Ca_desi_denovo</i> | 21134690                | C/T  | NA                 | NA                            | NA                 |
| <i>Desi_wild_21142873</i> | NA                                  | <i>Ca_desi_denovo</i> | 21142873                | C/T  | NA                 | NA                            | NA                 |
| <i>Desi_wild_21142881</i> | NA                                  | <i>Ca_desi_denovo</i> | 21142881                | G/T  | NA                 | NA                            | NA                 |
| <i>Desi_wild_21144788</i> | NA                                  | <i>Ca_desi_denovo</i> | 21144788                | A/G  | NA                 | NA                            | NA                 |
| <i>Desi_wild_21152755</i> | NA                                  | <i>Ca_desi_denovo</i> | 21152755                | A/G  | NA                 | NA                            | NA                 |
| <i>Desi_wild_21153612</i> | NA                                  | <i>Ca_desi_denovo</i> | 21153612                | A/G  | NA                 | NA                            | NA                 |
| <i>Desi_wild_21154420</i> | NA                                  | <i>Ca_desi_denovo</i> | 21154420                | C/T  | NA                 | NA                            | NA                 |
| <i>Desi_wild_21155120</i> | NA                                  | <i>Ca_desi_denovo</i> | 21155120                | A/G  | NA                 | NA                            | NA                 |

| SNP IDs                   | NCBI dbSNP accession IDs (NCBI_SS#) | Chromosomes           | Physical positions (bp) | SNPs | Gene accession IDs | Sequence components of genome | Putative functions |
|---------------------------|-------------------------------------|-----------------------|-------------------------|------|--------------------|-------------------------------|--------------------|
| <i>Desi_wild_21156414</i> | NA                                  | <i>Ca_desi_denovo</i> | 21156414                | A/G  | NA                 | NA                            | NA                 |
| <i>Desi_wild_21156449</i> | NA                                  | <i>Ca_desi_denovo</i> | 21156449                | C/G  | NA                 | NA                            | NA                 |
| <i>Desi_wild_21159058</i> | NA                                  | <i>Ca_desi_denovo</i> | 21159058                | A/T  | NA                 | NA                            | NA                 |
| <i>Desi_wild_21159223</i> | NA                                  | <i>Ca_desi_denovo</i> | 21159223                | C/T  | NA                 | NA                            | NA                 |
| <i>Desi_wild_21161377</i> | NA                                  | <i>Ca_desi_denovo</i> | 21161377                | C/T  | NA                 | NA                            | NA                 |
| <i>Desi_wild_21161380</i> | NA                                  | <i>Ca_desi_denovo</i> | 21161380                | C/T  | NA                 | NA                            | NA                 |
| <i>Desi_wild_21161734</i> | NA                                  | <i>Ca_desi_denovo</i> | 21161734                | A/C  | NA                 | NA                            | NA                 |
| <i>Desi_wild_21161749</i> | NA                                  | <i>Ca_desi_denovo</i> | 21161749                | A/G  | NA                 | NA                            | NA                 |
| <i>Desi_wild_21162957</i> | NA                                  | <i>Ca_desi_denovo</i> | 21162957                | C/T  | NA                 | NA                            | NA                 |
| <i>Desi_wild_21163345</i> | NA                                  | <i>Ca_desi_denovo</i> | 21163345                | C/T  | NA                 | NA                            | NA                 |
| <i>Desi_wild_21165542</i> | NA                                  | <i>Ca_desi_denovo</i> | 21165542                | G/T  | NA                 | NA                            | NA                 |
| <i>Desi_wild_21165576</i> | NA                                  | <i>Ca_desi_denovo</i> | 21165576                | C/T  | NA                 | NA                            | NA                 |
| <i>Desi_wild_21165760</i> | NA                                  | <i>Ca_desi_denovo</i> | 21165760                | A/G  | NA                 | NA                            | NA                 |
| <i>Desi_wild_21166627</i> | NA                                  | <i>Ca_desi_denovo</i> | 21166627                | C/G  | NA                 | NA                            | NA                 |
| <i>Desi_wild_21166722</i> | NA                                  | <i>Ca_desi_denovo</i> | 21166722                | A/G  | NA                 | NA                            | NA                 |
| <i>Desi_wild_21167785</i> | NA                                  | <i>Ca_desi_denovo</i> | 21167785                | A/G  | NA                 | NA                            | NA                 |
| <i>Desi_wild_21168915</i> | NA                                  | <i>Ca_desi_denovo</i> | 21168915                | G/T  | NA                 | NA                            | NA                 |
| <i>Desi_wild_21169536</i> | NA                                  | <i>Ca_desi_denovo</i> | 21169536                | C/G  | NA                 | NA                            | NA                 |
| <i>Desi_wild_21172063</i> | NA                                  | <i>Ca_desi_denovo</i> | 21172063                | C/T  | NA                 | NA                            | NA                 |
| <i>Desi_wild_21173191</i> | NA                                  | <i>Ca_desi_denovo</i> | 21173191                | C/A  | NA                 | NA                            | NA                 |
| <i>Desi_wild_21173629</i> | NA                                  | <i>Ca_desi_denovo</i> | 21173629                | C/T  | NA                 | NA                            | NA                 |
| <i>Desi_wild_21174251</i> | NA                                  | <i>Ca_desi_denovo</i> | 21174251                | C/T  | NA                 | NA                            | NA                 |
| <i>Desi_wild_21174334</i> | NA                                  | <i>Ca_desi_denovo</i> | 21174334                | A/C  | NA                 | NA                            | NA                 |
| <i>Desi_wild_21174352</i> | NA                                  | <i>Ca_desi_denovo</i> | 21174352                | C/T  | NA                 | NA                            | NA                 |
| <i>Desi_wild_21174656</i> | NA                                  | <i>Ca_desi_denovo</i> | 21174656                | A/T  | NA                 | NA                            | NA                 |
| <i>Desi_wild_21175420</i> | NA                                  | <i>Ca_desi_denovo</i> | 21175420                | G/T  | NA                 | NA                            | NA                 |
| <i>Desi_wild_21175457</i> | NA                                  | <i>Ca_desi_denovo</i> | 21175457                | A/G  | NA                 | NA                            | NA                 |
| <i>Desi_wild_21175546</i> | NA                                  | <i>Ca_desi_denovo</i> | 21175546                | A/C  | NA                 | NA                            | NA                 |
| <i>Desi_wild_21175548</i> | NA                                  | <i>Ca_desi_denovo</i> | 21175548                | G/T  | NA                 | NA                            | NA                 |
| <i>Desi_wild_21175620</i> | NA                                  | <i>Ca_desi_denovo</i> | 21175620                | C/G  | NA                 | NA                            | NA                 |
| <i>Desi_wild_21175637</i> | NA                                  | <i>Ca_desi_denovo</i> | 21175637                | C/T  | NA                 | NA                            | NA                 |
| <i>Desi_wild_21175693</i> | NA                                  | <i>Ca_desi_denovo</i> | 21175693                | A/G  | NA                 | NA                            | NA                 |
| <i>Desi_wild_21175739</i> | NA                                  | <i>Ca_desi_denovo</i> | 21175739                | A/G  | NA                 | NA                            | NA                 |
| <i>Desi_wild_21177455</i> | NA                                  | <i>Ca_desi_denovo</i> | 21177455                | A/G  | NA                 | NA                            | NA                 |
| <i>Desi_wild_21177473</i> | NA                                  | <i>Ca_desi_denovo</i> | 21177473                | C/T  | NA                 | NA                            | NA                 |
| <i>Desi_wild_21179713</i> | NA                                  | <i>Ca_desi_denovo</i> | 21179713                | G/T  | NA                 | NA                            | NA                 |
| <i>Desi_wild_21179733</i> | NA                                  | <i>Ca_desi_denovo</i> | 21179733                | C/G  | NA                 | NA                            | NA                 |
| <i>Desi_wild_21180295</i> | NA                                  | <i>Ca_desi_denovo</i> | 21180295                | A/G  | NA                 | NA                            | NA                 |
| <i>Desi_wild_21180447</i> | NA                                  | <i>Ca_desi_denovo</i> | 21180447                | C/T  | NA                 | NA                            | NA                 |
| <i>Desi_wild_21181249</i> | NA                                  | <i>Ca_desi_denovo</i> | 21181249                | C/T  | NA                 | NA                            | NA                 |
| <i>Desi_wild_21182907</i> | NA                                  | <i>Ca_desi_denovo</i> | 21182907                | A/G  | NA                 | NA                            | NA                 |
| <i>Desi_wild_21184425</i> | NA                                  | <i>Ca_desi_denovo</i> | 21184425                | A/G  | NA                 | NA                            | NA                 |
| <i>Desi_wild_21184488</i> | NA                                  | <i>Ca_desi_denovo</i> | 21184488                | C/T  | NA                 | NA                            | NA                 |
| <i>Desi_wild_21185240</i> | NA                                  | <i>Ca_desi_denovo</i> | 21185240                | G/T  | NA                 | NA                            | NA                 |

| SNP IDs                   | NCBI dbSNP accession IDs (NCBI_SS#) | Chromosomes           | Physical positions (bp) | SNPs | Gene accession IDs | Sequence components of genome | Putative functions |
|---------------------------|-------------------------------------|-----------------------|-------------------------|------|--------------------|-------------------------------|--------------------|
| <i>Desi_wild_21187726</i> | NA                                  | <i>Ca_desi_denovo</i> | 21187726                | G/T  | NA                 | NA                            | NA                 |
| <i>Desi_wild_21187753</i> | NA                                  | <i>Ca_desi_denovo</i> | 21187753                | C/T  | NA                 | NA                            | NA                 |
| <i>Desi_wild_21187926</i> | NA                                  | <i>Ca_desi_denovo</i> | 21187926                | A/G  | NA                 | NA                            | NA                 |
| <i>Desi_wild_21190495</i> | NA                                  | <i>Ca_desi_denovo</i> | 21190495                | A/G  | NA                 | NA                            | NA                 |
| <i>Desi_wild_21190883</i> | NA                                  | <i>Ca_desi_denovo</i> | 21190883                | A/G  | NA                 | NA                            | NA                 |
| <i>Desi_wild_21191025</i> | NA                                  | <i>Ca_desi_denovo</i> | 21191025                | G/T  | NA                 | NA                            | NA                 |
| <i>Desi_wild_21193839</i> | NA                                  | <i>Ca_desi_denovo</i> | 21193839                | A/C  | NA                 | NA                            | NA                 |
| <i>Desi_wild_21195202</i> | NA                                  | <i>Ca_desi_denovo</i> | 21195202                | A/T  | NA                 | NA                            | NA                 |
| <i>Desi_wild_21197422</i> | NA                                  | <i>Ca_desi_denovo</i> | 21197422                | A/G  | NA                 | NA                            | NA                 |
| <i>Desi_wild_21197447</i> | NA                                  | <i>Ca_desi_denovo</i> | 21197447                | A/T  | NA                 | NA                            | NA                 |
| <i>Desi_wild_21197477</i> | NA                                  | <i>Ca_desi_denovo</i> | 21197477                | A/G  | NA                 | NA                            | NA                 |
| <i>Desi_wild_21199788</i> | NA                                  | <i>Ca_desi_denovo</i> | 21199788                | C/G  | NA                 | NA                            | NA                 |
| <i>Desi_wild_21200702</i> | NA                                  | <i>Ca_desi_denovo</i> | 21200702                | A/G  | NA                 | NA                            | NA                 |
| <i>Desi_wild_21200722</i> | NA                                  | <i>Ca_desi_denovo</i> | 21200722                | G/T  | NA                 | NA                            | NA                 |
| <i>Desi_wild_21200725</i> | NA                                  | <i>Ca_desi_denovo</i> | 21200725                | A/C  | NA                 | NA                            | NA                 |
| <i>Desi_wild_21200732</i> | NA                                  | <i>Ca_desi_denovo</i> | 21200732                | A/C  | NA                 | NA                            | NA                 |
| <i>Desi_wild_21200734</i> | NA                                  | <i>Ca_desi_denovo</i> | 21200734                | A/G  | NA                 | NA                            | NA                 |
| <i>Desi_wild_21200962</i> | NA                                  | <i>Ca_desi_denovo</i> | 21200962                | A/C  | NA                 | NA                            | NA                 |
| <i>Desi_wild_21201440</i> | NA                                  | <i>Ca_desi_denovo</i> | 21201440                | C/T  | NA                 | NA                            | NA                 |
| <i>Desi_wild_21201476</i> | NA                                  | <i>Ca_desi_denovo</i> | 21201476                | C/T  | NA                 | NA                            | NA                 |
| <i>Desi_wild_21201616</i> | NA                                  | <i>Ca_desi_denovo</i> | 21201616                | A/C  | NA                 | NA                            | NA                 |
| <i>Desi_wild_21201619</i> | NA                                  | <i>Ca_desi_denovo</i> | 21201619                | C/T  | NA                 | NA                            | NA                 |
| <i>Desi_wild_21201720</i> | NA                                  | <i>Ca_desi_denovo</i> | 21201720                | C/T  | NA                 | NA                            | NA                 |
| <i>Desi_wild_21202861</i> | NA                                  | <i>Ca_desi_denovo</i> | 21202861                | C/T  | NA                 | NA                            | NA                 |
| <i>Desi_wild_21204259</i> | NA                                  | <i>Ca_desi_denovo</i> | 21204259                | C/T  | NA                 | NA                            | NA                 |
| <i>Desi_wild_21204552</i> | NA                                  | <i>Ca_desi_denovo</i> | 21204552                | A/G  | NA                 | NA                            | NA                 |
| <i>Desi_wild_21204893</i> | NA                                  | <i>Ca_desi_denovo</i> | 21204893                | A/G  | NA                 | NA                            | NA                 |
| <i>Desi_wild_21204946</i> | NA                                  | <i>Ca_desi_denovo</i> | 21204946                | A/G  | NA                 | NA                            | NA                 |
| <i>Desi_wild_21205277</i> | NA                                  | <i>Ca_desi_denovo</i> | 21205277                | A/G  | NA                 | NA                            | NA                 |
| <i>Desi_wild_21205310</i> | NA                                  | <i>Ca_desi_denovo</i> | 21205310                | G/T  | NA                 | NA                            | NA                 |
| <i>Desi_wild_21205319</i> | NA                                  | <i>Ca_desi_denovo</i> | 21205319                | C/T  | NA                 | NA                            | NA                 |
| <i>Desi_wild_21206161</i> | NA                                  | <i>Ca_desi_denovo</i> | 21206161                | A/G  | NA                 | NA                            | NA                 |
| <i>Desi_wild_21206287</i> | NA                                  | <i>Ca_desi_denovo</i> | 21206287                | A/T  | NA                 | NA                            | NA                 |
| <i>Desi_wild_21206319</i> | NA                                  | <i>Ca_desi_denovo</i> | 21206319                | C/T  | NA                 | NA                            | NA                 |
| <i>Desi_wild_21206538</i> | NA                                  | <i>Ca_desi_denovo</i> | 21206538                | A/G  | NA                 | NA                            | NA                 |
| <i>Desi_wild_21206558</i> | NA                                  | <i>Ca_desi_denovo</i> | 21206558                | A/T  | NA                 | NA                            | NA                 |
| <i>Desi_wild_21206926</i> | NA                                  | <i>Ca_desi_denovo</i> | 21206926                | G/T  | NA                 | NA                            | NA                 |
| <i>Desi_wild_21206928</i> | NA                                  | <i>Ca_desi_denovo</i> | 21206928                | A/C  | NA                 | NA                            | NA                 |
| <i>Desi_wild_21207321</i> | NA                                  | <i>Ca_desi_denovo</i> | 21207321                | A/G  | NA                 | NA                            | NA                 |
| <i>Desi_wild_21207527</i> | NA                                  | <i>Ca_desi_denovo</i> | 21207527                | A/G  | NA                 | NA                            | NA                 |
| <i>Desi_wild_21207554</i> | NA                                  | <i>Ca_desi_denovo</i> | 21207554                | C/T  | NA                 | NA                            | NA                 |
| <i>Desi_wild_21208587</i> | NA                                  | <i>Ca_desi_denovo</i> | 21208587                | C/T  | NA                 | NA                            | NA                 |
| <i>Desi_wild_21208617</i> | NA                                  | <i>Ca_desi_denovo</i> | 21208617                | C/T  | NA                 | NA                            | NA                 |
| <i>Desi_wild_21208644</i> | NA                                  | <i>Ca_desi_denovo</i> | 21208644                | A/G  | NA                 | NA                            | NA                 |



| SNP IDs                   | NCBI dbSNP accession IDs (NCBI_SS#) | Chromosomes           | Physical positions (bp) | SNPs | Gene accession IDs | Sequence components of genome | Putative functions |
|---------------------------|-------------------------------------|-----------------------|-------------------------|------|--------------------|-------------------------------|--------------------|
| <i>Desi_wild_21208655</i> | NA                                  | <i>Ca_desi_denovo</i> | 21208655                | A/T  | NA                 | NA                            | NA                 |
| <i>Desi_wild_21208780</i> | NA                                  | <i>Ca_desi_denovo</i> | 21208780                | C/G  | NA                 | NA                            | NA                 |
| <i>Desi_wild_21209082</i> | NA                                  | <i>Ca_desi_denovo</i> | 21209082                | C/G  | NA                 | NA                            | NA                 |
| <i>Desi_wild_21210842</i> | NA                                  | <i>Ca_desi_denovo</i> | 21210842                | C/T  | NA                 | NA                            | NA                 |
| <i>Desi_wild_21211858</i> | NA                                  | <i>Ca_desi_denovo</i> | 21211858                | C/T  | NA                 | NA                            | NA                 |
| <i>Desi_wild_21212746</i> | NA                                  | <i>Ca_desi_denovo</i> | 21212746                | A/G  | NA                 | NA                            | NA                 |
| <i>Desi_wild_21213361</i> | NA                                  | <i>Ca_desi_denovo</i> | 21213361                | A/C  | NA                 | NA                            | NA                 |
| <i>Desi_wild_21213363</i> | NA                                  | <i>Ca_desi_denovo</i> | 21213363                | A/C  | NA                 | NA                            | NA                 |
| <i>Desi_wild_21213672</i> | NA                                  | <i>Ca_desi_denovo</i> | 21213672                | A/C  | NA                 | NA                            | NA                 |
| <i>Desi_wild_21213684</i> | NA                                  | <i>Ca_desi_denovo</i> | 21213684                | A/G  | NA                 | NA                            | NA                 |
| <i>Desi_wild_21213863</i> | NA                                  | <i>Ca_desi_denovo</i> | 21213863                | C/T  | NA                 | NA                            | NA                 |
| <i>Desi_wild_21213871</i> | NA                                  | <i>Ca_desi_denovo</i> | 21213871                | A/T  | NA                 | NA                            | NA                 |
| <i>Desi_wild_21214208</i> | NA                                  | <i>Ca_desi_denovo</i> | 21214208                | C/T  | NA                 | NA                            | NA                 |
| <i>Desi_wild_21214244</i> | NA                                  | <i>Ca_desi_denovo</i> | 21214244                | G/T  | NA                 | NA                            | NA                 |
| <i>Desi_wild_21214983</i> | NA                                  | <i>Ca_desi_denovo</i> | 21214983                | A/G  | NA                 | NA                            | NA                 |
| <i>Desi_wild_21215013</i> | NA                                  | <i>Ca_desi_denovo</i> | 21215013                | A/G  | NA                 | NA                            | NA                 |
| <i>Desi_wild_21215233</i> | NA                                  | <i>Ca_desi_denovo</i> | 21215233                | A/G  | NA                 | NA                            | NA                 |
| <i>Desi_wild_21218372</i> | NA                                  | <i>Ca_desi_denovo</i> | 21218372                | C/G  | NA                 | NA                            | NA                 |
| <i>Desi_wild_21218423</i> | NA                                  | <i>Ca_desi_denovo</i> | 21218423                | C/T  | NA                 | NA                            | NA                 |
| <i>Desi_wild_21218444</i> | NA                                  | <i>Ca_desi_denovo</i> | 21218444                | C/T  | NA                 | NA                            | NA                 |
| <i>Desi_wild_21218479</i> | NA                                  | <i>Ca_desi_denovo</i> | 21218479                | C/T  | NA                 | NA                            | NA                 |
| <i>Desi_wild_21218482</i> | NA                                  | <i>Ca_desi_denovo</i> | 21218482                | C/T  | NA                 | NA                            | NA                 |
| <i>Desi_wild_21219181</i> | NA                                  | <i>Ca_desi_denovo</i> | 21219181                | A/G  | NA                 | NA                            | NA                 |
| <i>Desi_wild_21220227</i> | NA                                  | <i>Ca_desi_denovo</i> | 21220227                | C/T  | NA                 | NA                            | NA                 |
| <i>Desi_wild_21220266</i> | NA                                  | <i>Ca_desi_denovo</i> | 21220266                | C/T  | NA                 | NA                            | NA                 |
| <i>Desi_wild_21220287</i> | NA                                  | <i>Ca_desi_denovo</i> | 21220287                | A/C  | NA                 | NA                            | NA                 |
| <i>Desi_wild_21220296</i> | NA                                  | <i>Ca_desi_denovo</i> | 21220296                | C/G  | NA                 | NA                            | NA                 |
| <i>Desi_wild_21220819</i> | NA                                  | <i>Ca_desi_denovo</i> | 21220819                | A/G  | NA                 | NA                            | NA                 |
| <i>Desi_wild_21220980</i> | NA                                  | <i>Ca_desi_denovo</i> | 21220980                | A/G  | NA                 | NA                            | NA                 |
| <i>Desi_wild_21222684</i> | NA                                  | <i>Ca_desi_denovo</i> | 21222684                | T/G  | NA                 | NA                            | NA                 |
| <i>Desi_wild_21222692</i> | NA                                  | <i>Ca_desi_denovo</i> | 21222692                | G/T  | NA                 | NA                            | NA                 |
| <i>Desi_wild_21222856</i> | NA                                  | <i>Ca_desi_denovo</i> | 21222856                | A/G  | NA                 | NA                            | NA                 |
| <i>Desi_wild_21222903</i> | NA                                  | <i>Ca_desi_denovo</i> | 21222903                | G/T  | NA                 | NA                            | NA                 |
| <i>Desi_wild_21223299</i> | NA                                  | <i>Ca_desi_denovo</i> | 21223299                | C/T  | NA                 | NA                            | NA                 |
| <i>Desi_wild_21223305</i> | NA                                  | <i>Ca_desi_denovo</i> | 21223305                | G/T  | NA                 | NA                            | NA                 |
| <i>Desi_wild_21223879</i> | NA                                  | <i>Ca_desi_denovo</i> | 21223879                | C/T  | NA                 | NA                            | NA                 |
| <i>Desi_wild_21223894</i> | NA                                  | <i>Ca_desi_denovo</i> | 21223894                | C/T  | NA                 | NA                            | NA                 |
| <i>Desi_wild_21223903</i> | NA                                  | <i>Ca_desi_denovo</i> | 21223903                | C/T  | NA                 | NA                            | NA                 |
| <i>Desi_wild_21223925</i> | NA                                  | <i>Ca_desi_denovo</i> | 21223925                | C/G  | NA                 | NA                            | NA                 |
| <i>Desi_wild_21223933</i> | NA                                  | <i>Ca_desi_denovo</i> | 21223933                | A/C  | NA                 | NA                            | NA                 |
| <i>Desi_wild_21223934</i> | NA                                  | <i>Ca_desi_denovo</i> | 21223934                | C/T  | NA                 | NA                            | NA                 |
| <i>Desi_wild_21223937</i> | NA                                  | <i>Ca_desi_denovo</i> | 21223937                | C/G  | NA                 | NA                            | NA                 |
| <i>Desi_wild_21225776</i> | NA                                  | <i>Ca_desi_denovo</i> | 21225776                | A/C  | NA                 | NA                            | NA                 |
| <i>Desi_wild_21226536</i> | NA                                  | <i>Ca_desi_denovo</i> | 21226536                | G/T  | NA                 | NA                            | NA                 |

| SNP IDs                   | NCBI dbSNP accession IDs (NCBI_SS#) | Chromosomes           | Physical positions (bp) | SNPs | Gene accession IDs | Sequence components of genome | Putative functions |
|---------------------------|-------------------------------------|-----------------------|-------------------------|------|--------------------|-------------------------------|--------------------|
| <i>Desi_wild_21226540</i> | NA                                  | <i>Ca_desi_denovo</i> | 21226540                | A/G  | NA                 | NA                            | NA                 |
| <i>Desi_wild_21226560</i> | NA                                  | <i>Ca_desi_denovo</i> | 21226560                | G/T  | NA                 | NA                            | NA                 |
| <i>Desi_wild_21227299</i> | NA                                  | <i>Ca_desi_denovo</i> | 21227299                | C/T  | NA                 | NA                            | NA                 |
| <i>Desi_wild_21227342</i> | NA                                  | <i>Ca_desi_denovo</i> | 21227342                | A/G  | NA                 | NA                            | NA                 |
| <i>Desi_wild_21228576</i> | NA                                  | <i>Ca_desi_denovo</i> | 21228576                | C/T  | NA                 | NA                            | NA                 |
| <i>Desi_wild_21228607</i> | NA                                  | <i>Ca_desi_denovo</i> | 21228607                | A/T  | NA                 | NA                            | NA                 |
| <i>Desi_wild_21232344</i> | NA                                  | <i>Ca_desi_denovo</i> | 21232344                | A/G  | NA                 | NA                            | NA                 |
| <i>Desi_wild_21234701</i> | NA                                  | <i>Ca_desi_denovo</i> | 21234701                | C/T  | NA                 | NA                            | NA                 |
| <i>Desi_wild_21235349</i> | NA                                  | <i>Ca_desi_denovo</i> | 21235349                | A/G  | NA                 | NA                            | NA                 |
| <i>Desi_wild_21235379</i> | NA                                  | <i>Ca_desi_denovo</i> | 21235379                | A/G  | NA                 | NA                            | NA                 |
| <i>Desi_wild_21236359</i> | NA                                  | <i>Ca_desi_denovo</i> | 21236359                | C/T  | NA                 | NA                            | NA                 |
| <i>Desi_wild_21237615</i> | NA                                  | <i>Ca_desi_denovo</i> | 21237615                | A/C  | NA                 | NA                            | NA                 |
| <i>Desi_wild_21237764</i> | NA                                  | <i>Ca_desi_denovo</i> | 21237764                | C/T  | NA                 | NA                            | NA                 |
| <i>Desi_wild_21239105</i> | NA                                  | <i>Ca_desi_denovo</i> | 21239105                | A/T  | NA                 | NA                            | NA                 |
| <i>Desi_wild_21240203</i> | NA                                  | <i>Ca_desi_denovo</i> | 21240203                | C/T  | NA                 | NA                            | NA                 |
| <i>Desi_wild_21240600</i> | NA                                  | <i>Ca_desi_denovo</i> | 21240600                | C/T  | NA                 | NA                            | NA                 |
| <i>Desi_wild_21240717</i> | NA                                  | <i>Ca_desi_denovo</i> | 21240717                | G/T  | NA                 | NA                            | NA                 |
| <i>Desi_wild_21241259</i> | NA                                  | <i>Ca_desi_denovo</i> | 21241259                | A/G  | NA                 | NA                            | NA                 |
| <i>Desi_wild_21241474</i> | NA                                  | <i>Ca_desi_denovo</i> | 21241474                | A/G  | NA                 | NA                            | NA                 |
| <i>Desi_wild_21241866</i> | NA                                  | <i>Ca_desi_denovo</i> | 21241866                | C/G  | NA                 | NA                            | NA                 |
| <i>Desi_wild_21243005</i> | NA                                  | <i>Ca_desi_denovo</i> | 21243005                | A/C  | NA                 | NA                            | NA                 |
| <i>Desi_wild_21244177</i> | NA                                  | <i>Ca_desi_denovo</i> | 21244177                | C/G  | NA                 | NA                            | NA                 |
| <i>Desi_wild_21250654</i> | NA                                  | <i>Ca_desi_denovo</i> | 21250654                | C/T  | NA                 | NA                            | NA                 |
| <i>Desi_wild_21251134</i> | NA                                  | <i>Ca_desi_denovo</i> | 21251134                | C/G  | NA                 | NA                            | NA                 |
| <i>Desi_wild_21251940</i> | NA                                  | <i>Ca_desi_denovo</i> | 21251940                | A/G  | NA                 | NA                            | NA                 |
| <i>Desi_wild_21252264</i> | NA                                  | <i>Ca_desi_denovo</i> | 21252264                | A/T  | NA                 | NA                            | NA                 |
| <i>Desi_wild_21259461</i> | NA                                  | <i>Ca_desi_denovo</i> | 21259461                | C/T  | NA                 | NA                            | NA                 |
| <i>Desi_wild_21262240</i> | NA                                  | <i>Ca_desi_denovo</i> | 21262240                | A/G  | NA                 | NA                            | NA                 |
| <i>Desi_wild_21262281</i> | NA                                  | <i>Ca_desi_denovo</i> | 21262281                | C/T  | NA                 | NA                            | NA                 |
| <i>Desi_wild_21263672</i> | NA                                  | <i>Ca_desi_denovo</i> | 21263672                | A/G  | NA                 | NA                            | NA                 |
| <i>Desi_wild_21263689</i> | NA                                  | <i>Ca_desi_denovo</i> | 21263689                | A/T  | NA                 | NA                            | NA                 |
| <i>Desi_wild_21263706</i> | NA                                  | <i>Ca_desi_denovo</i> | 21263706                | A/G  | NA                 | NA                            | NA                 |
| <i>Desi_wild_21263725</i> | NA                                  | <i>Ca_desi_denovo</i> | 21263725                | G/T  | NA                 | NA                            | NA                 |
| <i>Desi_wild_21263943</i> | NA                                  | <i>Ca_desi_denovo</i> | 21263943                | A/G  | NA                 | NA                            | NA                 |
| <i>Desi_wild_21264731</i> | NA                                  | <i>Ca_desi_denovo</i> | 21264731                | C/T  | NA                 | NA                            | NA                 |
| <i>Desi_wild_21264970</i> | NA                                  | <i>Ca_desi_denovo</i> | 21264970                | C/T  | NA                 | NA                            | NA                 |
| <i>Desi_wild_21264979</i> | NA                                  | <i>Ca_desi_denovo</i> | 21264979                | C/G  | NA                 | NA                            | NA                 |
| <i>Desi_wild_21267785</i> | NA                                  | <i>Ca_desi_denovo</i> | 21267785                | G/T  | NA                 | NA                            | NA                 |
| <i>Desi_wild_21269836</i> | NA                                  | <i>Ca_desi_denovo</i> | 21269836                | A/T  | NA                 | NA                            | NA                 |
| <i>Desi_wild_21270667</i> | NA                                  | <i>Ca_desi_denovo</i> | 21270667                | A/G  | NA                 | NA                            | NA                 |
| <i>Desi_wild_21270670</i> | NA                                  | <i>Ca_desi_denovo</i> | 21270670                | C/T  | NA                 | NA                            | NA                 |
| <i>Desi_wild_21270969</i> | NA                                  | <i>Ca_desi_denovo</i> | 21270969                | A/C  | NA                 | NA                            | NA                 |
| <i>Desi_wild_21271354</i> | NA                                  | <i>Ca_desi_denovo</i> | 21271354                | A/G  | NA                 | NA                            | NA                 |
| <i>Desi_wild_21272128</i> | NA                                  | <i>Ca_desi_denovo</i> | 21272128                | C/T  | NA                 | NA                            | NA                 |

| SNP IDs                   | NCBI dbSNP accession IDs (NCBI_SS#) | Chromosomes           | Physical positions (bp) | SNPs | Gene accession IDs | Sequence components of genome | Putative functions |
|---------------------------|-------------------------------------|-----------------------|-------------------------|------|--------------------|-------------------------------|--------------------|
| <i>Desi_wild_21273590</i> | NA                                  | <i>Ca_desi_denovo</i> | 21273590                | C/T  | NA                 | NA                            | NA                 |
| <i>Desi_wild_21273607</i> | NA                                  | <i>Ca_desi_denovo</i> | 21273607                | C/T  | NA                 | NA                            | NA                 |
| <i>Desi_wild_21273618</i> | NA                                  | <i>Ca_desi_denovo</i> | 21273618                | G/A  | NA                 | NA                            | NA                 |
| <i>Desi_wild_21273637</i> | NA                                  | <i>Ca_desi_denovo</i> | 21273637                | A/G  | NA                 | NA                            | NA                 |
| <i>Desi_wild_21274785</i> | NA                                  | <i>Ca_desi_denovo</i> | 21274785                | C/T  | NA                 | NA                            | NA                 |
| <i>Desi_wild_21281065</i> | NA                                  | <i>Ca_desi_denovo</i> | 21281065                | A/G  | NA                 | NA                            | NA                 |
| <i>Desi_wild_21281144</i> | NA                                  | <i>Ca_desi_denovo</i> | 21281144                | A/G  | NA                 | NA                            | NA                 |
| <i>Desi_wild_21281162</i> | NA                                  | <i>Ca_desi_denovo</i> | 21281162                | A/G  | NA                 | NA                            | NA                 |
| <i>Desi_wild_21281171</i> | NA                                  | <i>Ca_desi_denovo</i> | 21281171                | A/G  | NA                 | NA                            | NA                 |
| <i>Desi_wild_21281176</i> | NA                                  | <i>Ca_desi_denovo</i> | 21281176                | A/G  | NA                 | NA                            | NA                 |
| <i>Desi_wild_21283763</i> | NA                                  | <i>Ca_desi_denovo</i> | 21283763                | C/T  | NA                 | NA                            | NA                 |
| <i>Desi_wild_21283775</i> | NA                                  | <i>Ca_desi_denovo</i> | 21283775                | A/C  | NA                 | NA                            | NA                 |
| <i>Desi_wild_21286116</i> | NA                                  | <i>Ca_desi_denovo</i> | 21286116                | C/T  | NA                 | NA                            | NA                 |
| <i>Desi_wild_21286125</i> | NA                                  | <i>Ca_desi_denovo</i> | 21286125                | C/T  | NA                 | NA                            | NA                 |
| <i>Desi_wild_21286408</i> | NA                                  | <i>Ca_desi_denovo</i> | 21286408                | C/T  | NA                 | NA                            | NA                 |
| <i>Desi_wild_21287263</i> | NA                                  | <i>Ca_desi_denovo</i> | 21287263                | G/T  | NA                 | NA                            | NA                 |
| <i>Desi_wild_21288280</i> | NA                                  | <i>Ca_desi_denovo</i> | 21288280                | A/G  | NA                 | NA                            | NA                 |
| <i>Desi_wild_21288303</i> | NA                                  | <i>Ca_desi_denovo</i> | 21288303                | A/G  | NA                 | NA                            | NA                 |
| <i>Desi_wild_21289701</i> | NA                                  | <i>Ca_desi_denovo</i> | 21289701                | A/G  | NA                 | NA                            | NA                 |
| <i>Desi_wild_21291029</i> | NA                                  | <i>Ca_desi_denovo</i> | 21291029                | A/G  | NA                 | NA                            | NA                 |
| <i>Desi_wild_21291051</i> | NA                                  | <i>Ca_desi_denovo</i> | 21291051                | A/T  | NA                 | NA                            | NA                 |
| <i>Desi_wild_21291074</i> | NA                                  | <i>Ca_desi_denovo</i> | 21291074                | A/G  | NA                 | NA                            | NA                 |
| <i>Desi_wild_21291349</i> | NA                                  | <i>Ca_desi_denovo</i> | 21291349                | A/G  | NA                 | NA                            | NA                 |
| <i>Desi_wild_21291376</i> | NA                                  | <i>Ca_desi_denovo</i> | 21291376                | A/C  | NA                 | NA                            | NA                 |
| <i>Desi_wild_21293102</i> | NA                                  | <i>Ca_desi_denovo</i> | 21293102                | A/C  | NA                 | NA                            | NA                 |
| <i>Desi_wild_21293106</i> | NA                                  | <i>Ca_desi_denovo</i> | 21293106                | C/T  | NA                 | NA                            | NA                 |
| <i>Desi_wild_21293107</i> | NA                                  | <i>Ca_desi_denovo</i> | 21293107                | C/T  | NA                 | NA                            | NA                 |
| <i>Desi_wild_21293132</i> | NA                                  | <i>Ca_desi_denovo</i> | 21293132                | C/G  | NA                 | NA                            | NA                 |
| <i>Desi_wild_21294443</i> | NA                                  | <i>Ca_desi_denovo</i> | 21294443                | G/T  | NA                 | NA                            | NA                 |
| <i>Desi_wild_21294460</i> | NA                                  | <i>Ca_desi_denovo</i> | 21294460                | A/G  | NA                 | NA                            | NA                 |
| <i>Desi_wild_21294478</i> | NA                                  | <i>Ca_desi_denovo</i> | 21294478                | C/G  | NA                 | NA                            | NA                 |
| <i>Desi_wild_21294488</i> | NA                                  | <i>Ca_desi_denovo</i> | 21294488                | A/C  | NA                 | NA                            | NA                 |
| <i>Desi_wild_21295593</i> | NA                                  | <i>Ca_desi_denovo</i> | 21295593                | A/G  | NA                 | NA                            | NA                 |
| <i>Desi_wild_21295596</i> | NA                                  | <i>Ca_desi_denovo</i> | 21295596                | A/T  | NA                 | NA                            | NA                 |
| <i>Desi_wild_21295631</i> | NA                                  | <i>Ca_desi_denovo</i> | 21295631                | A/T  | NA                 | NA                            | NA                 |
| <i>Desi_wild_21296478</i> | NA                                  | <i>Ca_desi_denovo</i> | 21296478                | C/T  | NA                 | NA                            | NA                 |
| <i>Desi_wild_21296508</i> | NA                                  | <i>Ca_desi_denovo</i> | 21296508                | C/T  | NA                 | NA                            | NA                 |
| <i>Desi_wild_21298172</i> | NA                                  | <i>Ca_desi_denovo</i> | 21298172                | C/T  | NA                 | NA                            | NA                 |
| <i>Desi_wild_21298717</i> | NA                                  | <i>Ca_desi_denovo</i> | 21298717                | C/T  | NA                 | NA                            | NA                 |
| <i>Desi_wild_21303934</i> | NA                                  | <i>Ca_desi_denovo</i> | 21303934                | A/T  | NA                 | NA                            | NA                 |
| <i>Desi_wild_21304581</i> | NA                                  | <i>Ca_desi_denovo</i> | 21304581                | G/T  | NA                 | NA                            | NA                 |
| <i>Desi_wild_21306293</i> | NA                                  | <i>Ca_desi_denovo</i> | 21306293                | A/G  | NA                 | NA                            | NA                 |
| <i>Desi_wild_21306656</i> | NA                                  | <i>Ca_desi_denovo</i> | 21306656                | C/G  | NA                 | NA                            | NA                 |
| <i>Desi_wild_21308082</i> | NA                                  | <i>Ca_desi_denovo</i> | 21308082                | G/T  | NA                 | NA                            | NA                 |

| SNP IDs                   | NCBI dbSNP accession IDs (NCBI_SS#) | Chromosomes           | Physical positions (bp) | SNPs | Gene accession IDs | Sequence components of genome | Putative functions |
|---------------------------|-------------------------------------|-----------------------|-------------------------|------|--------------------|-------------------------------|--------------------|
| <i>Desi_wild_21308090</i> | NA                                  | <i>Ca_desi_denovo</i> | 21308090                | A/G  | NA                 | NA                            | NA                 |
| <i>Desi_wild_21308433</i> | NA                                  | <i>Ca_desi_denovo</i> | 21308433                | A/G  | NA                 | NA                            | NA                 |
| <i>Desi_wild_21309481</i> | NA                                  | <i>Ca_desi_denovo</i> | 21309481                | C/T  | NA                 | NA                            | NA                 |
| <i>Desi_wild_21309507</i> | NA                                  | <i>Ca_desi_denovo</i> | 21309507                | A/C  | NA                 | NA                            | NA                 |
| <i>Desi_wild_21312449</i> | NA                                  | <i>Ca_desi_denovo</i> | 21312449                | G/T  | NA                 | NA                            | NA                 |
| <i>Desi_wild_21314901</i> | NA                                  | <i>Ca_desi_denovo</i> | 21314901                | C/G  | NA                 | NA                            | NA                 |
| <i>Desi_wild_21316323</i> | NA                                  | <i>Ca_desi_denovo</i> | 21316323                | A/T  | NA                 | NA                            | NA                 |
| <i>Desi_wild_21316337</i> | NA                                  | <i>Ca_desi_denovo</i> | 21316337                | C/T  | NA                 | NA                            | NA                 |
| <i>Desi_wild_21317150</i> | NA                                  | <i>Ca_desi_denovo</i> | 21317150                | A/T  | NA                 | NA                            | NA                 |
| <i>Desi_wild_21318674</i> | NA                                  | <i>Ca_desi_denovo</i> | 21318674                | A/C  | NA                 | NA                            | NA                 |
| <i>Desi_wild_21318885</i> | NA                                  | <i>Ca_desi_denovo</i> | 21318885                | A/G  | NA                 | NA                            | NA                 |
| <i>Desi_wild_21320836</i> | NA                                  | <i>Ca_desi_denovo</i> | 21320836                | A/T  | NA                 | NA                            | NA                 |
| <i>Desi_wild_21321390</i> | NA                                  | <i>Ca_desi_denovo</i> | 21321390                | C/T  | NA                 | NA                            | NA                 |
| <i>Desi_wild_21321467</i> | NA                                  | <i>Ca_desi_denovo</i> | 21321467                | A/G  | NA                 | NA                            | NA                 |
| <i>Desi_wild_21324723</i> | NA                                  | <i>Ca_desi_denovo</i> | 21324723                | C/T  | NA                 | NA                            | NA                 |
| <i>Desi_wild_21324741</i> | NA                                  | <i>Ca_desi_denovo</i> | 21324741                | G/T  | NA                 | NA                            | NA                 |
| <i>Desi_wild_21325857</i> | NA                                  | <i>Ca_desi_denovo</i> | 21325857                | C/T  | NA                 | NA                            | NA                 |
| <i>Desi_wild_21325902</i> | NA                                  | <i>Ca_desi_denovo</i> | 21325902                | G/T  | NA                 | NA                            | NA                 |
| <i>Desi_wild_21325976</i> | NA                                  | <i>Ca_desi_denovo</i> | 21325976                | C/T  | NA                 | NA                            | NA                 |
| <i>Desi_wild_21325985</i> | NA                                  | <i>Ca_desi_denovo</i> | 21325985                | A/G  | NA                 | NA                            | NA                 |
| <i>Desi_wild_21327992</i> | NA                                  | <i>Ca_desi_denovo</i> | 21327992                | A/G  | NA                 | NA                            | NA                 |
| <i>Desi_wild_21327999</i> | NA                                  | <i>Ca_desi_denovo</i> | 21327999                | C/T  | NA                 | NA                            | NA                 |
| <i>Desi_wild_21328015</i> | NA                                  | <i>Ca_desi_denovo</i> | 21328015                | A/G  | NA                 | NA                            | NA                 |
| <i>Desi_wild_21328794</i> | NA                                  | <i>Ca_desi_denovo</i> | 21328794                | A/G  | NA                 | NA                            | NA                 |
| <i>Desi_wild_21328811</i> | NA                                  | <i>Ca_desi_denovo</i> | 21328811                | A/C  | NA                 | NA                            | NA                 |
| <i>Desi_wild_21329562</i> | NA                                  | <i>Ca_desi_denovo</i> | 21329562                | G/T  | NA                 | NA                            | NA                 |
| <i>Desi_wild_21329563</i> | NA                                  | <i>Ca_desi_denovo</i> | 21329563                | C/T  | NA                 | NA                            | NA                 |
| <i>Desi_wild_21331190</i> | NA                                  | <i>Ca_desi_denovo</i> | 21331190                | C/T  | NA                 | NA                            | NA                 |
| <i>Desi_wild_21331193</i> | NA                                  | <i>Ca_desi_denovo</i> | 21331193                | A/G  | NA                 | NA                            | NA                 |
| <i>Desi_wild_21331205</i> | NA                                  | <i>Ca_desi_denovo</i> | 21331205                | C/G  | NA                 | NA                            | NA                 |
| <i>Desi_wild_21331944</i> | NA                                  | <i>Ca_desi_denovo</i> | 21331944                | C/G  | NA                 | NA                            | NA                 |
| <i>Desi_wild_21331947</i> | NA                                  | <i>Ca_desi_denovo</i> | 21331947                | C/T  | NA                 | NA                            | NA                 |
| <i>Desi_wild_21332933</i> | NA                                  | <i>Ca_desi_denovo</i> | 21332933                | A/G  | NA                 | NA                            | NA                 |
| <i>Desi_wild_21337024</i> | NA                                  | <i>Ca_desi_denovo</i> | 21337024                | A/G  | NA                 | NA                            | NA                 |
| <i>Desi_wild_21337048</i> | NA                                  | <i>Ca_desi_denovo</i> | 21337048                | A/T  | NA                 | NA                            | NA                 |
| <i>Desi_wild_21339457</i> | NA                                  | <i>Ca_desi_denovo</i> | 21339457                | A/C  | NA                 | NA                            | NA                 |
| <i>Desi_wild_21340324</i> | NA                                  | <i>Ca_desi_denovo</i> | 21340324                | A/G  | NA                 | NA                            | NA                 |
| <i>Desi_wild_21342281</i> | NA                                  | <i>Ca_desi_denovo</i> | 21342281                | A/T  | NA                 | NA                            | NA                 |
| <i>Desi_wild_21342290</i> | NA                                  | <i>Ca_desi_denovo</i> | 21342290                | A/T  | NA                 | NA                            | NA                 |
| <i>Desi_wild_21342299</i> | NA                                  | <i>Ca_desi_denovo</i> | 21342299                | A/G  | NA                 | NA                            | NA                 |
| <i>Desi_wild_21342557</i> | NA                                  | <i>Ca_desi_denovo</i> | 21342557                | C/T  | NA                 | NA                            | NA                 |
| <i>Desi_wild_21342598</i> | NA                                  | <i>Ca_desi_denovo</i> | 21342598                | C/T  | NA                 | NA                            | NA                 |
| <i>Desi_wild_21342932</i> | NA                                  | <i>Ca_desi_denovo</i> | 21342932                | C/T  | NA                 | NA                            | NA                 |
| <i>Desi_wild_21343630</i> | NA                                  | <i>Ca_desi_denovo</i> | 21343630                | C/G  | NA                 | NA                            | NA                 |

| SNP IDs                   | NCBI dbSNP accession IDs (NCBI_SS#) | Chromosomes           | Physical positions (bp) | SNPs | Gene accession IDs | Sequence components of genome | Putative functions |
|---------------------------|-------------------------------------|-----------------------|-------------------------|------|--------------------|-------------------------------|--------------------|
| <i>Desi_wild_21343635</i> | NA                                  | <i>Ca_desi_denovo</i> | 21343635                | A/G  | NA                 | NA                            | NA                 |
| <i>Desi_wild_21345766</i> | NA                                  | <i>Ca_desi_denovo</i> | 21345766                | C/T  | NA                 | NA                            | NA                 |
| <i>Desi_wild_21345775</i> | NA                                  | <i>Ca_desi_denovo</i> | 21345775                | A/T  | NA                 | NA                            | NA                 |
| <i>Desi_wild_21347149</i> | NA                                  | <i>Ca_desi_denovo</i> | 21347149                | A/G  | NA                 | NA                            | NA                 |
| <i>Desi_wild_21348212</i> | NA                                  | <i>Ca_desi_denovo</i> | 21348212                | A/G  | NA                 | NA                            | NA                 |
| <i>Desi_wild_21348224</i> | NA                                  | <i>Ca_desi_denovo</i> | 21348224                | C/G  | NA                 | NA                            | NA                 |
| <i>Desi_wild_21351414</i> | NA                                  | <i>Ca_desi_denovo</i> | 21351414                | C/G  | NA                 | NA                            | NA                 |
| <i>Desi_wild_21352868</i> | NA                                  | <i>Ca_desi_denovo</i> | 21352868                | A/G  | NA                 | NA                            | NA                 |
| <i>Desi_wild_21353192</i> | NA                                  | <i>Ca_desi_denovo</i> | 21353192                | A/T  | NA                 | NA                            | NA                 |
| <i>Desi_wild_21353194</i> | NA                                  | <i>Ca_desi_denovo</i> | 21353194                | A/G  | NA                 | NA                            | NA                 |
| <i>Desi_wild_21354186</i> | NA                                  | <i>Ca_desi_denovo</i> | 21354186                | C/T  | NA                 | NA                            | NA                 |
| <i>Desi_wild_21358455</i> | NA                                  | <i>Ca_desi_denovo</i> | 21358455                | C/G  | NA                 | NA                            | NA                 |
| <i>Desi_wild_21359220</i> | NA                                  | <i>Ca_desi_denovo</i> | 21359220                | A/G  | NA                 | NA                            | NA                 |
| <i>Desi_wild_21359235</i> | NA                                  | <i>Ca_desi_denovo</i> | 21359235                | A/C  | NA                 | NA                            | NA                 |
| <i>Desi_wild_21359236</i> | NA                                  | <i>Ca_desi_denovo</i> | 21359236                | C/T  | NA                 | NA                            | NA                 |
| <i>Desi_wild_21359254</i> | NA                                  | <i>Ca_desi_denovo</i> | 21359254                | C/T  | NA                 | NA                            | NA                 |
| <i>Desi_wild_21361980</i> | NA                                  | <i>Ca_desi_denovo</i> | 21361980                | A/G  | NA                 | NA                            | NA                 |
| <i>Desi_wild_21363821</i> | NA                                  | <i>Ca_desi_denovo</i> | 21363821                | C/T  | NA                 | NA                            | NA                 |
| <i>Desi_wild_21364366</i> | NA                                  | <i>Ca_desi_denovo</i> | 21364366                | C/T  | NA                 | NA                            | NA                 |
| <i>Desi_wild_21364381</i> | NA                                  | <i>Ca_desi_denovo</i> | 21364381                | C/T  | NA                 | NA                            | NA                 |
| <i>Desi_wild_21369208</i> | NA                                  | <i>Ca_desi_denovo</i> | 21369208                | A/G  | NA                 | NA                            | NA                 |
| <i>Desi_wild_21369969</i> | NA                                  | <i>Ca_desi_denovo</i> | 21369969                | A/T  | NA                 | NA                            | NA                 |
| <i>Desi_wild_21369970</i> | NA                                  | <i>Ca_desi_denovo</i> | 21369970                | C/T  | NA                 | NA                            | NA                 |
| <i>Desi_wild_21372929</i> | NA                                  | <i>Ca_desi_denovo</i> | 21372929                | A/G  | NA                 | NA                            | NA                 |
| <i>Desi_wild_21374750</i> | NA                                  | <i>Ca_desi_denovo</i> | 21374750                | C/T  | NA                 | NA                            | NA                 |
| <i>Desi_wild_21374754</i> | NA                                  | <i>Ca_desi_denovo</i> | 21374754                | C/T  | NA                 | NA                            | NA                 |
| <i>Desi_wild_21375700</i> | NA                                  | <i>Ca_desi_denovo</i> | 21375700                | A/C  | NA                 | NA                            | NA                 |
| <i>Desi_wild_21376979</i> | NA                                  | <i>Ca_desi_denovo</i> | 21376979                | A/T  | NA                 | NA                            | NA                 |
| <i>Desi_wild_21378400</i> | NA                                  | <i>Ca_desi_denovo</i> | 21378400                | C/T  | NA                 | NA                            | NA                 |
| <i>Desi_wild_21378403</i> | NA                                  | <i>Ca_desi_denovo</i> | 21378403                | A/G  | NA                 | NA                            | NA                 |
| <i>Desi_wild_21380008</i> | NA                                  | <i>Ca_desi_denovo</i> | 21380008                | A/G  | NA                 | NA                            | NA                 |
| <i>Desi_wild_21381485</i> | NA                                  | <i>Ca_desi_denovo</i> | 21381485                | C/T  | NA                 | NA                            | NA                 |
| <i>Desi_wild_21383928</i> | NA                                  | <i>Ca_desi_denovo</i> | 21383928                | C/G  | NA                 | NA                            | NA                 |
| <i>Desi_wild_21383930</i> | NA                                  | <i>Ca_desi_denovo</i> | 21383930                | G/T  | NA                 | NA                            | NA                 |
| <i>Desi_wild_21385067</i> | NA                                  | <i>Ca_desi_denovo</i> | 21385067                | A/T  | NA                 | NA                            | NA                 |
| <i>Desi_wild_21385085</i> | NA                                  | <i>Ca_desi_denovo</i> | 21385085                | C/T  | NA                 | NA                            | NA                 |
| <i>Desi_wild_21389779</i> | NA                                  | <i>Ca_desi_denovo</i> | 21389779                | C/T  | NA                 | NA                            | NA                 |
| <i>Desi_wild_21390003</i> | NA                                  | <i>Ca_desi_denovo</i> | 21390003                | A/G  | NA                 | NA                            | NA                 |
| <i>Desi_wild_21390584</i> | NA                                  | <i>Ca_desi_denovo</i> | 21390584                | A/G  | NA                 | NA                            | NA                 |
| <i>Desi_wild_21390612</i> | NA                                  | <i>Ca_desi_denovo</i> | 21390612                | A/G  | NA                 | NA                            | NA                 |
| <i>Desi_wild_21390651</i> | NA                                  | <i>Ca_desi_denovo</i> | 21390651                | A/G  | NA                 | NA                            | NA                 |
| <i>Desi_wild_21390663</i> | NA                                  | <i>Ca_desi_denovo</i> | 21390663                | A/G  | NA                 | NA                            | NA                 |
| <i>Desi_wild_21394650</i> | NA                                  | <i>Ca_desi_denovo</i> | 21394650                | A/G  | NA                 | NA                            | NA                 |
| <i>Desi_wild_21394658</i> | NA                                  | <i>Ca_desi_denovo</i> | 21394658                | A/G  | NA                 | NA                            | NA                 |

| SNP IDs                   | NCBI dbSNP accession IDs (NCBI_SS#) | Chromosomes           | Physical positions (bp) | SNPs | Gene accession IDs | Sequence components of genome | Putative functions |
|---------------------------|-------------------------------------|-----------------------|-------------------------|------|--------------------|-------------------------------|--------------------|
| <i>Desi_wild_21394843</i> | NA                                  | <i>Ca_desi_denovo</i> | 21394843                | C/T  | NA                 | NA                            | NA                 |
| <i>Desi_wild_21397547</i> | NA                                  | <i>Ca_desi_denovo</i> | 21397547                | A/G  | NA                 | NA                            | NA                 |
| <i>Desi_wild_21399010</i> | NA                                  | <i>Ca_desi_denovo</i> | 21399010                | A/T  | NA                 | NA                            | NA                 |
| <i>Desi_wild_21399028</i> | NA                                  | <i>Ca_desi_denovo</i> | 21399028                | C/T  | NA                 | NA                            | NA                 |
| <i>Desi_wild_21400085</i> | NA                                  | <i>Ca_desi_denovo</i> | 21400085                | G/T  | NA                 | NA                            | NA                 |
| <i>Desi_wild_21400470</i> | NA                                  | <i>Ca_desi_denovo</i> | 21400470                | A/C  | NA                 | NA                            | NA                 |
| <i>Desi_wild_21400944</i> | NA                                  | <i>Ca_desi_denovo</i> | 21400944                | A/G  | NA                 | NA                            | NA                 |
| <i>Desi_wild_21402569</i> | NA                                  | <i>Ca_desi_denovo</i> | 21402569                | A/C  | NA                 | NA                            | NA                 |
| <i>Desi_wild_21403826</i> | NA                                  | <i>Ca_desi_denovo</i> | 21403826                | A/G  | NA                 | NA                            | NA                 |
| <i>Desi_wild_21403828</i> | NA                                  | <i>Ca_desi_denovo</i> | 21403828                | A/G  | NA                 | NA                            | NA                 |
| <i>Desi_wild_21405415</i> | NA                                  | <i>Ca_desi_denovo</i> | 21405415                | A/C  | NA                 | NA                            | NA                 |
| <i>Desi_wild_21406189</i> | NA                                  | <i>Ca_desi_denovo</i> | 21406189                | A/G  | NA                 | NA                            | NA                 |
| <i>Desi_wild_21406288</i> | NA                                  | <i>Ca_desi_denovo</i> | 21406288                | G/T  | NA                 | NA                            | NA                 |
| <i>Desi_wild_21409090</i> | NA                                  | <i>Ca_desi_denovo</i> | 21409090                | A/T  | NA                 | NA                            | NA                 |
| <i>Desi_wild_21413125</i> | NA                                  | <i>Ca_desi_denovo</i> | 21413125                | A/T  | NA                 | NA                            | NA                 |
| <i>Desi_wild_21414125</i> | NA                                  | <i>Ca_desi_denovo</i> | 21414125                | C/T  | NA                 | NA                            | NA                 |
| <i>Desi_wild_21414969</i> | NA                                  | <i>Ca_desi_denovo</i> | 21414969                | A/T  | NA                 | NA                            | NA                 |
| <i>Desi_wild_21415003</i> | NA                                  | <i>Ca_desi_denovo</i> | 21415003                | C/T  | NA                 | NA                            | NA                 |
| <i>Desi_wild_21415018</i> | NA                                  | <i>Ca_desi_denovo</i> | 21415018                | G/T  | NA                 | NA                            | NA                 |
| <i>Desi_wild_21417535</i> | NA                                  | <i>Ca_desi_denovo</i> | 21417535                | A/G  | NA                 | NA                            | NA                 |
| <i>Desi_wild_21418816</i> | NA                                  | <i>Ca_desi_denovo</i> | 21418816                | A/G  | NA                 | NA                            | NA                 |
| <i>Desi_wild_21418941</i> | NA                                  | <i>Ca_desi_denovo</i> | 21418941                | A/G  | NA                 | NA                            | NA                 |
| <i>Desi_wild_21419176</i> | NA                                  | <i>Ca_desi_denovo</i> | 21419176                | A/G  | NA                 | NA                            | NA                 |
| <i>Desi_wild_21419942</i> | NA                                  | <i>Ca_desi_denovo</i> | 21419942                | C/T  | NA                 | NA                            | NA                 |
| <i>Desi_wild_21419955</i> | NA                                  | <i>Ca_desi_denovo</i> | 21419955                | C/G  | NA                 | NA                            | NA                 |
| <i>Desi_wild_21420458</i> | NA                                  | <i>Ca_desi_denovo</i> | 21420458                | A/G  | NA                 | NA                            | NA                 |
| <i>Desi_wild_21420491</i> | NA                                  | <i>Ca_desi_denovo</i> | 21420491                | C/G  | NA                 | NA                            | NA                 |
| <i>Desi_wild_21420910</i> | NA                                  | <i>Ca_desi_denovo</i> | 21420910                | A/G  | NA                 | NA                            | NA                 |
| <i>Desi_wild_21420918</i> | NA                                  | <i>Ca_desi_denovo</i> | 21420918                | A/G  | NA                 | NA                            | NA                 |
| <i>Desi_wild_21422217</i> | NA                                  | <i>Ca_desi_denovo</i> | 21422217                | C/G  | NA                 | NA                            | NA                 |
| <i>Desi_wild_21422225</i> | NA                                  | <i>Ca_desi_denovo</i> | 21422225                | C/G  | NA                 | NA                            | NA                 |
| <i>Desi_wild_21422767</i> | NA                                  | <i>Ca_desi_denovo</i> | 21422767                | C/T  | NA                 | NA                            | NA                 |
| <i>Desi_wild_21424071</i> | NA                                  | <i>Ca_desi_denovo</i> | 21424071                | C/T  | NA                 | NA                            | NA                 |
| <i>Desi_wild_21427666</i> | NA                                  | <i>Ca_desi_denovo</i> | 21427666                | C/T  | NA                 | NA                            | NA                 |
| <i>Desi_wild_21430021</i> | NA                                  | <i>Ca_desi_denovo</i> | 21430021                | A/C  | NA                 | NA                            | NA                 |
| <i>Desi_wild_21432598</i> | NA                                  | <i>Ca_desi_denovo</i> | 21432598                | C/T  | NA                 | NA                            | NA                 |
| <i>Desi_wild_21433741</i> | NA                                  | <i>Ca_desi_denovo</i> | 21433741                | A/G  | NA                 | NA                            | NA                 |
| <i>Desi_wild_21435371</i> | NA                                  | <i>Ca_desi_denovo</i> | 21435371                | C/T  | NA                 | NA                            | NA                 |
| <i>Desi_wild_21435374</i> | NA                                  | <i>Ca_desi_denovo</i> | 21435374                | A/G  | NA                 | NA                            | NA                 |
| <i>Desi_wild_21437606</i> | NA                                  | <i>Ca_desi_denovo</i> | 21437606                | C/T  | NA                 | NA                            | NA                 |
| <i>Desi_wild_21437642</i> | NA                                  | <i>Ca_desi_denovo</i> | 21437642                | C/T  | NA                 | NA                            | NA                 |
| <i>Desi_wild_21439281</i> | NA                                  | <i>Ca_desi_denovo</i> | 21439281                | C/T  | NA                 | NA                            | NA                 |
| <i>Desi_wild_21439350</i> | NA                                  | <i>Ca_desi_denovo</i> | 21439350                | G/A  | NA                 | NA                            | NA                 |
| <i>Desi_wild_21439361</i> | NA                                  | <i>Ca_desi_denovo</i> | 21439361                | C/T  | NA                 | NA                            | NA                 |

| SNP IDs                   | NCBI dbSNP accession IDs (NCBI_SS#) | Chromosomes           | Physical positions (bp) | SNPs | Gene accession IDs | Sequence components of genome | Putative functions |
|---------------------------|-------------------------------------|-----------------------|-------------------------|------|--------------------|-------------------------------|--------------------|
| <i>Desi_wild_21439371</i> | NA                                  | <i>Ca_desi_denovo</i> | 21439371                | C/A  | NA                 | NA                            | NA                 |
| <i>Desi_wild_21443106</i> | NA                                  | <i>Ca_desi_denovo</i> | 21443106                | A/G  | NA                 | NA                            | NA                 |
| <i>Desi_wild_21443113</i> | NA                                  | <i>Ca_desi_denovo</i> | 21443113                | G/T  | NA                 | NA                            | NA                 |
| <i>Desi_wild_21443124</i> | NA                                  | <i>Ca_desi_denovo</i> | 21443124                | C/T  | NA                 | NA                            | NA                 |
| <i>Desi_wild_21443324</i> | NA                                  | <i>Ca_desi_denovo</i> | 21443324                | C/T  | NA                 | NA                            | NA                 |
| <i>Desi_wild_21443657</i> | NA                                  | <i>Ca_desi_denovo</i> | 21443657                | C/T  | NA                 | NA                            | NA                 |
| <i>Desi_wild_21445482</i> | NA                                  | <i>Ca_desi_denovo</i> | 21445482                | C/G  | NA                 | NA                            | NA                 |
| <i>Desi_wild_21445516</i> | NA                                  | <i>Ca_desi_denovo</i> | 21445516                | A/G  | NA                 | NA                            | NA                 |
| <i>Desi_wild_21446378</i> | NA                                  | <i>Ca_desi_denovo</i> | 21446378                | A/T  | NA                 | NA                            | NA                 |
| <i>Desi_wild_21446664</i> | NA                                  | <i>Ca_desi_denovo</i> | 21446664                | A/G  | NA                 | NA                            | NA                 |
| <i>Desi_wild_21446667</i> | NA                                  | <i>Ca_desi_denovo</i> | 21446667                | A/T  | NA                 | NA                            | NA                 |
| <i>Desi_wild_21446980</i> | NA                                  | <i>Ca_desi_denovo</i> | 21446980                | C/T  | NA                 | NA                            | NA                 |
| <i>Desi_wild_21447815</i> | NA                                  | <i>Ca_desi_denovo</i> | 21447815                | A/G  | NA                 | NA                            | NA                 |
| <i>Desi_wild_21447816</i> | NA                                  | <i>Ca_desi_denovo</i> | 21447816                | C/G  | NA                 | NA                            | NA                 |
| <i>Desi_wild_21448070</i> | NA                                  | <i>Ca_desi_denovo</i> | 21448070                | C/G  | NA                 | NA                            | NA                 |
| <i>Desi_wild_21448079</i> | NA                                  | <i>Ca_desi_denovo</i> | 21448079                | A/T  | NA                 | NA                            | NA                 |
| <i>Desi_wild_21448556</i> | NA                                  | <i>Ca_desi_denovo</i> | 21448556                | A/G  | NA                 | NA                            | NA                 |
| <i>Desi_wild_21449771</i> | NA                                  | <i>Ca_desi_denovo</i> | 21449771                | A/G  | NA                 | NA                            | NA                 |
| <i>Desi_wild_21451474</i> | NA                                  | <i>Ca_desi_denovo</i> | 21451474                | C/T  | NA                 | NA                            | NA                 |
| <i>Desi_wild_21452379</i> | NA                                  | <i>Ca_desi_denovo</i> | 21452379                | G/T  | NA                 | NA                            | NA                 |
| <i>Desi_wild_21452387</i> | NA                                  | <i>Ca_desi_denovo</i> | 21452387                | C/T  | NA                 | NA                            | NA                 |
| <i>Desi_wild_21453942</i> | NA                                  | <i>Ca_desi_denovo</i> | 21453942                | A/G  | NA                 | NA                            | NA                 |
| <i>Desi_wild_21453951</i> | NA                                  | <i>Ca_desi_denovo</i> | 21453951                | A/G  | NA                 | NA                            | NA                 |
| <i>Desi_wild_21453966</i> | NA                                  | <i>Ca_desi_denovo</i> | 21453966                | A/G  | NA                 | NA                            | NA                 |
| <i>Desi_wild_21454916</i> | NA                                  | <i>Ca_desi_denovo</i> | 21454916                | A/G  | NA                 | NA                            | NA                 |
| <i>Desi_wild_21454969</i> | NA                                  | <i>Ca_desi_denovo</i> | 21454969                | C/T  | NA                 | NA                            | NA                 |
| <i>Desi_wild_21455045</i> | NA                                  | <i>Ca_desi_denovo</i> | 21455045                | A/G  | NA                 | NA                            | NA                 |
| <i>Desi_wild_21455223</i> | NA                                  | <i>Ca_desi_denovo</i> | 21455223                | A/C  | NA                 | NA                            | NA                 |
| <i>Desi_wild_21455396</i> | NA                                  | <i>Ca_desi_denovo</i> | 21455396                | A/T  | NA                 | NA                            | NA                 |
| <i>Desi_wild_21459627</i> | NA                                  | <i>Ca_desi_denovo</i> | 21459627                | C/T  | NA                 | NA                            | NA                 |
| <i>Desi_wild_21460118</i> | NA                                  | <i>Ca_desi_denovo</i> | 21460118                | A/G  | NA                 | NA                            | NA                 |
| <i>Desi_wild_21460141</i> | NA                                  | <i>Ca_desi_denovo</i> | 21460141                | A/G  | NA                 | NA                            | NA                 |
| <i>Desi_wild_21460979</i> | NA                                  | <i>Ca_desi_denovo</i> | 21460979                | C/T  | NA                 | NA                            | NA                 |
| <i>Desi_wild_21461011</i> | NA                                  | <i>Ca_desi_denovo</i> | 21461011                | C/G  | NA                 | NA                            | NA                 |
| <i>Desi_wild_21463308</i> | NA                                  | <i>Ca_desi_denovo</i> | 21463308                | T/C  | NA                 | NA                            | NA                 |
| <i>Desi_wild_21463321</i> | NA                                  | <i>Ca_desi_denovo</i> | 21463321                | A/G  | NA                 | NA                            | NA                 |
| <i>Desi_wild_21463322</i> | NA                                  | <i>Ca_desi_denovo</i> | 21463322                | C/T  | NA                 | NA                            | NA                 |
| <i>Desi_wild_21463714</i> | NA                                  | <i>Ca_desi_denovo</i> | 21463714                | C/T  | NA                 | NA                            | NA                 |
| <i>Desi_wild_21464026</i> | NA                                  | <i>Ca_desi_denovo</i> | 21464026                | A/C  | NA                 | NA                            | NA                 |
| <i>Desi_wild_21464051</i> | NA                                  | <i>Ca_desi_denovo</i> | 21464051                | A/T  | NA                 | NA                            | NA                 |
| <i>Desi_wild_21464688</i> | NA                                  | <i>Ca_desi_denovo</i> | 21464688                | C/T  | NA                 | NA                            | NA                 |
| <i>Desi_wild_21464824</i> | NA                                  | <i>Ca_desi_denovo</i> | 21464824                | A/C  | NA                 | NA                            | NA                 |
| <i>Desi_wild_21465529</i> | NA                                  | <i>Ca_desi_denovo</i> | 21465529                | C/T  | NA                 | NA                            | NA                 |
| <i>Desi_wild_21465641</i> | NA                                  | <i>Ca_desi_denovo</i> | 21465641                | A/G  | NA                 | NA                            | NA                 |

| SNP IDs                   | NCBI dbSNP accession IDs (NCBI_SS#) | Chromosomes           | Physical positions (bp) | SNPs | Gene accession IDs | Sequence components of genome | Putative functions |
|---------------------------|-------------------------------------|-----------------------|-------------------------|------|--------------------|-------------------------------|--------------------|
| <i>Desi_wild_21465649</i> | NA                                  | <i>Ca_desi_denovo</i> | 21465649                | A/G  | NA                 | NA                            | NA                 |
| <i>Desi_wild_21466032</i> | NA                                  | <i>Ca_desi_denovo</i> | 21466032                | A/G  | NA                 | NA                            | NA                 |
| <i>Desi_wild_21466238</i> | NA                                  | <i>Ca_desi_denovo</i> | 21466238                | T/C  | NA                 | NA                            | NA                 |
| <i>Desi_wild_21466251</i> | NA                                  | <i>Ca_desi_denovo</i> | 21466251                | T/C  | NA                 | NA                            | NA                 |
| <i>Desi_wild_21466253</i> | NA                                  | <i>Ca_desi_denovo</i> | 21466253                | T/C  | NA                 | NA                            | NA                 |
| <i>Desi_wild_21466589</i> | NA                                  | <i>Ca_desi_denovo</i> | 21466589                | C/G  | NA                 | NA                            | NA                 |
| <i>Desi_wild_21466717</i> | NA                                  | <i>Ca_desi_denovo</i> | 21466717                | A/G  | NA                 | NA                            | NA                 |
| <i>Desi_wild_21466737</i> | NA                                  | <i>Ca_desi_denovo</i> | 21466737                | A/T  | NA                 | NA                            | NA                 |
| <i>Desi_wild_21467008</i> | NA                                  | <i>Ca_desi_denovo</i> | 21467008                | C/G  | NA                 | NA                            | NA                 |
| <i>Desi_wild_21467988</i> | NA                                  | <i>Ca_desi_denovo</i> | 21467988                | A/G  | NA                 | NA                            | NA                 |
| <i>Desi_wild_21468083</i> | NA                                  | <i>Ca_desi_denovo</i> | 21468083                | A/T  | NA                 | NA                            | NA                 |
| <i>Desi_wild_21468192</i> | NA                                  | <i>Ca_desi_denovo</i> | 21468192                | C/T  | NA                 | NA                            | NA                 |
| <i>Desi_wild_21468196</i> | NA                                  | <i>Ca_desi_denovo</i> | 21468196                | A/G  | NA                 | NA                            | NA                 |
| <i>Desi_wild_21468844</i> | NA                                  | <i>Ca_desi_denovo</i> | 21468844                | A/G  | NA                 | NA                            | NA                 |
| <i>Desi_wild_21468859</i> | NA                                  | <i>Ca_desi_denovo</i> | 21468859                | C/T  | NA                 | NA                            | NA                 |
| <i>Desi_wild_21470355</i> | NA                                  | <i>Ca_desi_denovo</i> | 21470355                | A/T  | NA                 | NA                            | NA                 |
| <i>Desi_wild_21471182</i> | NA                                  | <i>Ca_desi_denovo</i> | 21471182                | C/T  | NA                 | NA                            | NA                 |
| <i>Desi_wild_21471880</i> | NA                                  | <i>Ca_desi_denovo</i> | 21471880                | C/T  | NA                 | NA                            | NA                 |
| <i>Desi_wild_21472651</i> | NA                                  | <i>Ca_desi_denovo</i> | 21472651                | C/T  | NA                 | NA                            | NA                 |
| <i>Desi_wild_21472841</i> | NA                                  | <i>Ca_desi_denovo</i> | 21472841                | C/T  | NA                 | NA                            | NA                 |
| <i>Desi_wild_21472842</i> | NA                                  | <i>Ca_desi_denovo</i> | 21472842                | A/T  | NA                 | NA                            | NA                 |
| <i>Desi_wild_21473118</i> | NA                                  | <i>Ca_desi_denovo</i> | 21473118                | A/T  | NA                 | NA                            | NA                 |
| <i>Desi_wild_21473127</i> | NA                                  | <i>Ca_desi_denovo</i> | 21473127                | C/T  | NA                 | NA                            | NA                 |
| <i>Desi_wild_21473515</i> | NA                                  | <i>Ca_desi_denovo</i> | 21473515                | C/T  | NA                 | NA                            | NA                 |
| <i>Desi_wild_21474142</i> | NA                                  | <i>Ca_desi_denovo</i> | 21474142                | C/T  | NA                 | NA                            | NA                 |
| <i>Desi_wild_21474215</i> | NA                                  | <i>Ca_desi_denovo</i> | 21474215                | C/T  | NA                 | NA                            | NA                 |
| <i>Desi_wild_21474984</i> | NA                                  | <i>Ca_desi_denovo</i> | 21474984                | C/T  | NA                 | NA                            | NA                 |
| <i>Desi_wild_21475053</i> | NA                                  | <i>Ca_desi_denovo</i> | 21475053                | T/A  | NA                 | NA                            | NA                 |
| <i>Desi_wild_21475073</i> | NA                                  | <i>Ca_desi_denovo</i> | 21475073                | T/G  | NA                 | NA                            | NA                 |
| <i>Desi_wild_21475075</i> | NA                                  | <i>Ca_desi_denovo</i> | 21475075                | C/A  | NA                 | NA                            | NA                 |
| <i>Desi_wild_21477369</i> | NA                                  | <i>Ca_desi_denovo</i> | 21477369                | C/T  | NA                 | NA                            | NA                 |
| <i>Desi_wild_21477592</i> | NA                                  | <i>Ca_desi_denovo</i> | 21477592                | A/C  | NA                 | NA                            | NA                 |
| <i>Desi_wild_21477641</i> | NA                                  | <i>Ca_desi_denovo</i> | 21477641                | A/G  | NA                 | NA                            | NA                 |
| <i>Desi_wild_21478185</i> | NA                                  | <i>Ca_desi_denovo</i> | 21478185                | C/T  | NA                 | NA                            | NA                 |
| <i>Desi_wild_21479802</i> | NA                                  | <i>Ca_desi_denovo</i> | 21479802                | A/C  | NA                 | NA                            | NA                 |
| <i>Desi_wild_21479871</i> | NA                                  | <i>Ca_desi_denovo</i> | 21479871                | A/G  | NA                 | NA                            | NA                 |
| <i>Desi_wild_21479905</i> | NA                                  | <i>Ca_desi_denovo</i> | 21479905                | C/T  | NA                 | NA                            | NA                 |
| <i>Desi_wild_21480786</i> | NA                                  | <i>Ca_desi_denovo</i> | 21480786                | A/G  | NA                 | NA                            | NA                 |
| <i>Desi_wild_21481086</i> | NA                                  | <i>Ca_desi_denovo</i> | 21481086                | C/T  | NA                 | NA                            | NA                 |
| <i>Desi_wild_21481093</i> | NA                                  | <i>Ca_desi_denovo</i> | 21481093                | G/T  | NA                 | NA                            | NA                 |
| <i>Desi_wild_21482116</i> | NA                                  | <i>Ca_desi_denovo</i> | 21482116                | G/T  | NA                 | NA                            | NA                 |
| <i>Desi_wild_21482345</i> | NA                                  | <i>Ca_desi_denovo</i> | 21482345                | C/T  | NA                 | NA                            | NA                 |
| <i>Desi_wild_21482358</i> | NA                                  | <i>Ca_desi_denovo</i> | 21482358                | G/T  | NA                 | NA                            | NA                 |
| <i>Desi_wild_21482359</i> | NA                                  | <i>Ca_desi_denovo</i> | 21482359                | A/G  | NA                 | NA                            | NA                 |



| SNP IDs                   | NCBI dbSNP accession IDs (NCBI_SS#) | Chromosomes           | Physical positions (bp) | SNPs | Gene accession IDs | Sequence components of genome | Putative functions |
|---------------------------|-------------------------------------|-----------------------|-------------------------|------|--------------------|-------------------------------|--------------------|
| <i>Desi_wild_21482442</i> | NA                                  | <i>Ca_desi_denovo</i> | 21482442                | C/T  | NA                 | NA                            | NA                 |
| <i>Desi_wild_21482464</i> | NA                                  | <i>Ca_desi_denovo</i> | 21482464                | C/T  | NA                 | NA                            | NA                 |
| <i>Desi_wild_21483432</i> | NA                                  | <i>Ca_desi_denovo</i> | 21483432                | A/C  | NA                 | NA                            | NA                 |
| <i>Desi_wild_21487259</i> | NA                                  | <i>Ca_desi_denovo</i> | 21487259                | A/C  | NA                 | NA                            | NA                 |
| <i>Desi_wild_21487276</i> | NA                                  | <i>Ca_desi_denovo</i> | 21487276                | C/G  | NA                 | NA                            | NA                 |
| <i>Desi_wild_21487388</i> | NA                                  | <i>Ca_desi_denovo</i> | 21487388                | C/T  | NA                 | NA                            | NA                 |
| <i>Desi_wild_21487391</i> | NA                                  | <i>Ca_desi_denovo</i> | 21487391                | A/G  | NA                 | NA                            | NA                 |
| <i>Desi_wild_21490159</i> | NA                                  | <i>Ca_desi_denovo</i> | 21490159                | C/G  | NA                 | NA                            | NA                 |
| <i>Desi_wild_21490177</i> | NA                                  | <i>Ca_desi_denovo</i> | 21490177                | C/T  | NA                 | NA                            | NA                 |
| <i>Desi_wild_21490182</i> | NA                                  | <i>Ca_desi_denovo</i> | 21490182                | A/T  | NA                 | NA                            | NA                 |
| <i>Desi_wild_21490240</i> | NA                                  | <i>Ca_desi_denovo</i> | 21490240                | C/T  | NA                 | NA                            | NA                 |
| <i>Desi_wild_21490572</i> | NA                                  | <i>Ca_desi_denovo</i> | 21490572                | A/G  | NA                 | NA                            | NA                 |
| <i>Desi_wild_21492601</i> | NA                                  | <i>Ca_desi_denovo</i> | 21492601                | A/G  | NA                 | NA                            | NA                 |
| <i>Desi_wild_21492606</i> | NA                                  | <i>Ca_desi_denovo</i> | 21492606                | C/G  | NA                 | NA                            | NA                 |
| <i>Desi_wild_21492691</i> | NA                                  | <i>Ca_desi_denovo</i> | 21492691                | C/G  | NA                 | NA                            | NA                 |
| <i>Desi_wild_21494317</i> | NA                                  | <i>Ca_desi_denovo</i> | 21494317                | A/T  | NA                 | NA                            | NA                 |
| <i>Desi_wild_21494323</i> | NA                                  | <i>Ca_desi_denovo</i> | 21494323                | A/G  | NA                 | NA                            | NA                 |
| <i>Desi_wild_21497150</i> | NA                                  | <i>Ca_desi_denovo</i> | 21497150                | A/G  | NA                 | NA                            | NA                 |
| <i>Desi_wild_21497152</i> | NA                                  | <i>Ca_desi_denovo</i> | 21497152                | C/T  | NA                 | NA                            | NA                 |
| <i>Desi_wild_21497460</i> | NA                                  | <i>Ca_desi_denovo</i> | 21497460                | C/T  | NA                 | NA                            | NA                 |
| <i>Desi_wild_21497489</i> | NA                                  | <i>Ca_desi_denovo</i> | 21497489                | A/C  | NA                 | NA                            | NA                 |
| <i>Desi_wild_21497502</i> | NA                                  | <i>Ca_desi_denovo</i> | 21497502                | G/A  | NA                 | NA                            | NA                 |
| <i>Desi_wild_21497519</i> | NA                                  | <i>Ca_desi_denovo</i> | 21497519                | T/C  | NA                 | NA                            | NA                 |
| <i>Desi_wild_21498610</i> | NA                                  | <i>Ca_desi_denovo</i> | 21498610                | C/T  | NA                 | NA                            | NA                 |
| <i>Desi_wild_21498646</i> | NA                                  | <i>Ca_desi_denovo</i> | 21498646                | C/G  | NA                 | NA                            | NA                 |
| <i>Desi_wild_21499801</i> | NA                                  | <i>Ca_desi_denovo</i> | 21499801                | A/G  | NA                 | NA                            | NA                 |
| <i>Desi_wild_21500294</i> | NA                                  | <i>Ca_desi_denovo</i> | 21500294                | C/T  | NA                 | NA                            | NA                 |
| <i>Desi_wild_21503961</i> | NA                                  | <i>Ca_desi_denovo</i> | 21503961                | A/C  | NA                 | NA                            | NA                 |
| <i>Desi_wild_21503997</i> | NA                                  | <i>Ca_desi_denovo</i> | 21503997                | A/C  | NA                 | NA                            | NA                 |
| <i>Desi_wild_21504057</i> | NA                                  | <i>Ca_desi_denovo</i> | 21504057                | C/T  | NA                 | NA                            | NA                 |
| <i>Desi_wild_21506121</i> | NA                                  | <i>Ca_desi_denovo</i> | 21506121                | C/G  | NA                 | NA                            | NA                 |
| <i>Desi_wild_21507262</i> | NA                                  | <i>Ca_desi_denovo</i> | 21507262                | A/G  | NA                 | NA                            | NA                 |
| <i>Desi_wild_21507298</i> | NA                                  | <i>Ca_desi_denovo</i> | 21507298                | G/T  | NA                 | NA                            | NA                 |
| <i>Desi_wild_21507301</i> | NA                                  | <i>Ca_desi_denovo</i> | 21507301                | A/T  | NA                 | NA                            | NA                 |
| <i>Desi_wild_21507307</i> | NA                                  | <i>Ca_desi_denovo</i> | 21507307                | A/G  | NA                 | NA                            | NA                 |
| <i>Desi_wild_21508060</i> | NA                                  | <i>Ca_desi_denovo</i> | 21508060                | C/T  | NA                 | NA                            | NA                 |
| <i>Desi_wild_21510345</i> | NA                                  | <i>Ca_desi_denovo</i> | 21510345                | A/G  | NA                 | NA                            | NA                 |
| <i>Desi_wild_21510347</i> | NA                                  | <i>Ca_desi_denovo</i> | 21510347                | A/T  | NA                 | NA                            | NA                 |
| <i>Desi_wild_21510387</i> | NA                                  | <i>Ca_desi_denovo</i> | 21510387                | C/T  | NA                 | NA                            | NA                 |
| <i>Desi_wild_21511016</i> | NA                                  | <i>Ca_desi_denovo</i> | 21511016                | C/T  | NA                 | NA                            | NA                 |
| <i>Desi_wild_21514850</i> | NA                                  | <i>Ca_desi_denovo</i> | 21514850                | A/T  | NA                 | NA                            | NA                 |
| <i>Desi_wild_21515595</i> | NA                                  | <i>Ca_desi_denovo</i> | 21515595                | C/T  | NA                 | NA                            | NA                 |
| <i>Desi_wild_21517035</i> | NA                                  | <i>Ca_desi_denovo</i> | 21517035                | A/G  | NA                 | NA                            | NA                 |
| <i>Desi_wild_21517063</i> | NA                                  | <i>Ca_desi_denovo</i> | 21517063                | A/G  | NA                 | NA                            | NA                 |

| SNP IDs                   | NCBI dbSNP accession IDs (NCBI_SS#) | Chromosomes           | Physical positions (bp) | SNPs | Gene accession IDs | Sequence components of genome | Putative functions |
|---------------------------|-------------------------------------|-----------------------|-------------------------|------|--------------------|-------------------------------|--------------------|
| <i>Desi_wild_21517561</i> | NA                                  | <i>Ca_desi_denovo</i> | 21517561                | A/T  | NA                 | NA                            | NA                 |
| <i>Desi_wild_21517645</i> | NA                                  | <i>Ca_desi_denovo</i> | 21517645                | C/T  | NA                 | NA                            | NA                 |
| <i>Desi_wild_21520091</i> | NA                                  | <i>Ca_desi_denovo</i> | 21520091                | C/T  | NA                 | NA                            | NA                 |
| <i>Desi_wild_21520441</i> | NA                                  | <i>Ca_desi_denovo</i> | 21520441                | C/T  | NA                 | NA                            | NA                 |
| <i>Desi_wild_21520456</i> | NA                                  | <i>Ca_desi_denovo</i> | 21520456                | A/G  | NA                 | NA                            | NA                 |
| <i>Desi_wild_21524362</i> | NA                                  | <i>Ca_desi_denovo</i> | 21524362                | C/T  | NA                 | NA                            | NA                 |
| <i>Desi_wild_21526154</i> | NA                                  | <i>Ca_desi_denovo</i> | 21526154                | A/G  | NA                 | NA                            | NA                 |
| <i>Desi_wild_21526462</i> | NA                                  | <i>Ca_desi_denovo</i> | 21526462                | A/G  | NA                 | NA                            | NA                 |
| <i>Desi_wild_21526496</i> | NA                                  | <i>Ca_desi_denovo</i> | 21526496                | A/G  | NA                 | NA                            | NA                 |
| <i>Desi_wild_21526567</i> | NA                                  | <i>Ca_desi_denovo</i> | 21526567                | T/C  | NA                 | NA                            | NA                 |
| <i>Desi_wild_21526598</i> | NA                                  | <i>Ca_desi_denovo</i> | 21526598                | C/T  | NA                 | NA                            | NA                 |
| <i>Desi_wild_21527352</i> | NA                                  | <i>Ca_desi_denovo</i> | 21527352                | A/G  | NA                 | NA                            | NA                 |
| <i>Desi_wild_21528507</i> | NA                                  | <i>Ca_desi_denovo</i> | 21528507                | A/G  | NA                 | NA                            | NA                 |
| <i>Desi_wild_21529504</i> | NA                                  | <i>Ca_desi_denovo</i> | 21529504                | A/C  | NA                 | NA                            | NA                 |
| <i>Desi_wild_21529532</i> | NA                                  | <i>Ca_desi_denovo</i> | 21529532                | C/T  | NA                 | NA                            | NA                 |
| <i>Desi_wild_21530819</i> | NA                                  | <i>Ca_desi_denovo</i> | 21530819                | C/T  | NA                 | NA                            | NA                 |
| <i>Desi_wild_21532272</i> | NA                                  | <i>Ca_desi_denovo</i> | 21532272                | G/T  | NA                 | NA                            | NA                 |
| <i>Desi_wild_21532311</i> | NA                                  | <i>Ca_desi_denovo</i> | 21532311                | A/C  | NA                 | NA                            | NA                 |
| <i>Desi_wild_21534096</i> | NA                                  | <i>Ca_desi_denovo</i> | 21534096                | A/G  | NA                 | NA                            | NA                 |
| <i>Desi_wild_21535659</i> | NA                                  | <i>Ca_desi_denovo</i> | 21535659                | A/G  | NA                 | NA                            | NA                 |
| <i>Desi_wild_21540802</i> | NA                                  | <i>Ca_desi_denovo</i> | 21540802                | G/T  | NA                 | NA                            | NA                 |
| <i>Desi_wild_21540911</i> | NA                                  | <i>Ca_desi_denovo</i> | 21540911                | A/C  | NA                 | NA                            | NA                 |
| <i>Desi_wild_21541871</i> | NA                                  | <i>Ca_desi_denovo</i> | 21541871                | C/T  | NA                 | NA                            | NA                 |
| <i>Desi_wild_21543270</i> | NA                                  | <i>Ca_desi_denovo</i> | 21543270                | A/G  | NA                 | NA                            | NA                 |
| <i>Desi_wild_21543277</i> | NA                                  | <i>Ca_desi_denovo</i> | 21543277                | G/T  | NA                 | NA                            | NA                 |
| <i>Desi_wild_21543854</i> | NA                                  | <i>Ca_desi_denovo</i> | 21543854                | C/T  | NA                 | NA                            | NA                 |
| <i>Desi_wild_21544893</i> | NA                                  | <i>Ca_desi_denovo</i> | 21544893                | C/T  | NA                 | NA                            | NA                 |
| <i>Desi_wild_21545555</i> | NA                                  | <i>Ca_desi_denovo</i> | 21545555                | G/T  | NA                 | NA                            | NA                 |
| <i>Desi_wild_21545572</i> | NA                                  | <i>Ca_desi_denovo</i> | 21545572                | G/T  | NA                 | NA                            | NA                 |
| <i>Desi_wild_21546262</i> | NA                                  | <i>Ca_desi_denovo</i> | 21546262                | A/G  | NA                 | NA                            | NA                 |
| <i>Desi_wild_21548563</i> | NA                                  | <i>Ca_desi_denovo</i> | 21548563                | C/T  | NA                 | NA                            | NA                 |
| <i>Desi_wild_21548593</i> | NA                                  | <i>Ca_desi_denovo</i> | 21548593                | A/G  | NA                 | NA                            | NA                 |
| <i>Desi_wild_21548608</i> | NA                                  | <i>Ca_desi_denovo</i> | 21548608                | C/T  | NA                 | NA                            | NA                 |
| <i>Desi_wild_21551187</i> | NA                                  | <i>Ca_desi_denovo</i> | 21551187                | A/T  | NA                 | NA                            | NA                 |
| <i>Desi_wild_21551488</i> | NA                                  | <i>Ca_desi_denovo</i> | 21551488                | A/C  | NA                 | NA                            | NA                 |
| <i>Desi_wild_21551770</i> | NA                                  | <i>Ca_desi_denovo</i> | 21551770                | A/G  | NA                 | NA                            | NA                 |
| <i>Desi_wild_21551775</i> | NA                                  | <i>Ca_desi_denovo</i> | 21551775                | A/G  | NA                 | NA                            | NA                 |
| <i>Desi_wild_21551810</i> | NA                                  | <i>Ca_desi_denovo</i> | 21551810                | A/G  | NA                 | NA                            | NA                 |
| <i>Desi_wild_21552255</i> | NA                                  | <i>Ca_desi_denovo</i> | 21552255                | A/G  | NA                 | NA                            | NA                 |
| <i>Desi_wild_21552583</i> | NA                                  | <i>Ca_desi_denovo</i> | 21552583                | C/T  | NA                 | NA                            | NA                 |
| <i>Desi_wild_21552594</i> | NA                                  | <i>Ca_desi_denovo</i> | 21552594                | C/T  | NA                 | NA                            | NA                 |
| <i>Desi_wild_21553128</i> | NA                                  | <i>Ca_desi_denovo</i> | 21553128                | C/T  | NA                 | NA                            | NA                 |
| <i>Desi_wild_21556439</i> | NA                                  | <i>Ca_desi_denovo</i> | 21556439                | A/G  | NA                 | NA                            | NA                 |
| <i>Desi_wild_21556741</i> | NA                                  | <i>Ca_desi_denovo</i> | 21556741                | C/G  | NA                 | NA                            | NA                 |

| SNP IDs                   | NCBI dbSNP accession IDs (NCBI_SS#) | Chromosomes           | Physical positions (bp) | SNPs | Gene accession IDs | Sequence components of genome | Putative functions |
|---------------------------|-------------------------------------|-----------------------|-------------------------|------|--------------------|-------------------------------|--------------------|
| <i>Desi_wild_21557308</i> | NA                                  | <i>Ca_desi_denovo</i> | 21557308                | C/T  | NA                 | NA                            | NA                 |
| <i>Desi_wild_21557322</i> | NA                                  | <i>Ca_desi_denovo</i> | 21557322                | A/C  | NA                 | NA                            | NA                 |
| <i>Desi_wild_21559337</i> | NA                                  | <i>Ca_desi_denovo</i> | 21559337                | A/T  | NA                 | NA                            | NA                 |
| <i>Desi_wild_21561255</i> | NA                                  | <i>Ca_desi_denovo</i> | 21561255                | A/G  | NA                 | NA                            | NA                 |
| <i>Desi_wild_21563533</i> | NA                                  | <i>Ca_desi_denovo</i> | 21563533                | A/G  | NA                 | NA                            | NA                 |
| <i>Desi_wild_21563563</i> | NA                                  | <i>Ca_desi_denovo</i> | 21563563                | G/T  | NA                 | NA                            | NA                 |
| <i>Desi_wild_21563870</i> | NA                                  | <i>Ca_desi_denovo</i> | 21563870                | T/C  | NA                 | NA                            | NA                 |
| <i>Desi_wild_21565267</i> | NA                                  | <i>Ca_desi_denovo</i> | 21565267                | C/T  | NA                 | NA                            | NA                 |
| <i>Desi_wild_21569620</i> | NA                                  | <i>Ca_desi_denovo</i> | 21569620                | C/T  | NA                 | NA                            | NA                 |
| <i>Desi_wild_21570113</i> | NA                                  | <i>Ca_desi_denovo</i> | 21570113                | C/T  | NA                 | NA                            | NA                 |
| <i>Desi_wild_21570311</i> | NA                                  | <i>Ca_desi_denovo</i> | 21570311                | A/G  | NA                 | NA                            | NA                 |
| <i>Desi_wild_21570317</i> | NA                                  | <i>Ca_desi_denovo</i> | 21570317                | A/G  | NA                 | NA                            | NA                 |
| <i>Desi_wild_21570320</i> | NA                                  | <i>Ca_desi_denovo</i> | 21570320                | C/G  | NA                 | NA                            | NA                 |
| <i>Desi_wild_21570326</i> | NA                                  | <i>Ca_desi_denovo</i> | 21570326                | G/T  | NA                 | NA                            | NA                 |
| <i>Desi_wild_21570889</i> | NA                                  | <i>Ca_desi_denovo</i> | 21570889                | G/T  | NA                 | NA                            | NA                 |
| <i>Desi_wild_21570956</i> | NA                                  | <i>Ca_desi_denovo</i> | 21570956                | A/T  | NA                 | NA                            | NA                 |
| <i>Desi_wild_21572084</i> | NA                                  | <i>Ca_desi_denovo</i> | 21572084                | C/T  | NA                 | NA                            | NA                 |
| <i>Desi_wild_21572090</i> | NA                                  | <i>Ca_desi_denovo</i> | 21572090                | C/T  | NA                 | NA                            | NA                 |
| <i>Desi_wild_21572121</i> | NA                                  | <i>Ca_desi_denovo</i> | 21572121                | A/C  | NA                 | NA                            | NA                 |
| <i>Desi_wild_21573295</i> | NA                                  | <i>Ca_desi_denovo</i> | 21573295                | A/C  | NA                 | NA                            | NA                 |
| <i>Desi_wild_21573334</i> | NA                                  | <i>Ca_desi_denovo</i> | 21573334                | A/T  | NA                 | NA                            | NA                 |
| <i>Desi_wild_21573964</i> | NA                                  | <i>Ca_desi_denovo</i> | 21573964                | A/T  | NA                 | NA                            | NA                 |
| <i>Desi_wild_21574385</i> | NA                                  | <i>Ca_desi_denovo</i> | 21574385                | G/T  | NA                 | NA                            | NA                 |
| <i>Desi_wild_21574866</i> | NA                                  | <i>Ca_desi_denovo</i> | 21574866                | A/G  | NA                 | NA                            | NA                 |
| <i>Desi_wild_21575446</i> | NA                                  | <i>Ca_desi_denovo</i> | 21575446                | C/G  | NA                 | NA                            | NA                 |
| <i>Desi_wild_21577040</i> | NA                                  | <i>Ca_desi_denovo</i> | 21577040                | A/G  | NA                 | NA                            | NA                 |
| <i>Desi_wild_21577228</i> | NA                                  | <i>Ca_desi_denovo</i> | 21577228                | C/G  | NA                 | NA                            | NA                 |
| <i>Desi_wild_21578863</i> | NA                                  | <i>Ca_desi_denovo</i> | 21578863                | C/T  | NA                 | NA                            | NA                 |
| <i>Desi_wild_21578867</i> | NA                                  | <i>Ca_desi_denovo</i> | 21578867                | A/C  | NA                 | NA                            | NA                 |
| <i>Desi_wild_21578916</i> | NA                                  | <i>Ca_desi_denovo</i> | 21578916                | A/G  | NA                 | NA                            | NA                 |
| <i>Desi_wild_21580022</i> | NA                                  | <i>Ca_desi_denovo</i> | 21580022                | A/G  | NA                 | NA                            | NA                 |
| <i>Desi_wild_21582671</i> | NA                                  | <i>Ca_desi_denovo</i> | 21582671                | C/T  | NA                 | NA                            | NA                 |
| <i>Desi_wild_21583140</i> | NA                                  | <i>Ca_desi_denovo</i> | 21583140                | A/G  | NA                 | NA                            | NA                 |
| <i>Desi_wild_21584270</i> | NA                                  | <i>Ca_desi_denovo</i> | 21584270                | T/C  | NA                 | NA                            | NA                 |
| <i>Desi_wild_21588430</i> | NA                                  | <i>Ca_desi_denovo</i> | 21588430                | C/T  | NA                 | NA                            | NA                 |
| <i>Desi_wild_21589172</i> | NA                                  | <i>Ca_desi_denovo</i> | 21589172                | C/G  | NA                 | NA                            | NA                 |
| <i>Desi_wild_21589348</i> | NA                                  | <i>Ca_desi_denovo</i> | 21589348                | A/C  | NA                 | NA                            | NA                 |
| <i>Desi_wild_21594745</i> | NA                                  | <i>Ca_desi_denovo</i> | 21594745                | A/G  | NA                 | NA                            | NA                 |
| <i>Desi_wild_21596033</i> | NA                                  | <i>Ca_desi_denovo</i> | 21596033                | A/G  | NA                 | NA                            | NA                 |
| <i>Desi_wild_21596796</i> | NA                                  | <i>Ca_desi_denovo</i> | 21596796                | G/T  | NA                 | NA                            | NA                 |
| <i>Desi_wild_21597305</i> | NA                                  | <i>Ca_desi_denovo</i> | 21597305                | A/T  | NA                 | NA                            | NA                 |
| <i>Desi_wild_21597649</i> | NA                                  | <i>Ca_desi_denovo</i> | 21597649                | A/C  | NA                 | NA                            | NA                 |
| <i>Desi_wild_21598352</i> | NA                                  | <i>Ca_desi_denovo</i> | 21598352                | C/G  | NA                 | NA                            | NA                 |
| <i>Desi_wild_21601566</i> | NA                                  | <i>Ca_desi_denovo</i> | 21601566                | A/G  | NA                 | NA                            | NA                 |

| SNP IDs                   | NCBI dbSNP accession IDs (NCBI_SS#) | Chromosomes           | Physical positions (bp) | SNPs | Gene accession IDs | Sequence components of genome | Putative functions |
|---------------------------|-------------------------------------|-----------------------|-------------------------|------|--------------------|-------------------------------|--------------------|
| <i>Desi_wild_21603021</i> | NA                                  | <i>Ca_desi_denovo</i> | 21603021                | A/G  | NA                 | NA                            | NA                 |
| <i>Desi_wild_21606730</i> | NA                                  | <i>Ca_desi_denovo</i> | 21606730                | A/G  | NA                 | NA                            | NA                 |
| <i>Desi_wild_21607730</i> | NA                                  | <i>Ca_desi_denovo</i> | 21607730                | A/G  | NA                 | NA                            | NA                 |
| <i>Desi_wild_21607738</i> | NA                                  | <i>Ca_desi_denovo</i> | 21607738                | A/C  | NA                 | NA                            | NA                 |
| <i>Desi_wild_21607750</i> | NA                                  | <i>Ca_desi_denovo</i> | 21607750                | A/G  | NA                 | NA                            | NA                 |
| <i>Desi_wild_21607828</i> | NA                                  | <i>Ca_desi_denovo</i> | 21607828                | A/G  | NA                 | NA                            | NA                 |
| <i>Desi_wild_21607869</i> | NA                                  | <i>Ca_desi_denovo</i> | 21607869                | A/G  | NA                 | NA                            | NA                 |
| <i>Desi_wild_21608814</i> | NA                                  | <i>Ca_desi_denovo</i> | 21608814                | C/T  | NA                 | NA                            | NA                 |
| <i>Desi_wild_21609424</i> | NA                                  | <i>Ca_desi_denovo</i> | 21609424                | A/T  | NA                 | NA                            | NA                 |
| <i>Desi_wild_21610679</i> | NA                                  | <i>Ca_desi_denovo</i> | 21610679                | C/T  | NA                 | NA                            | NA                 |
| <i>Desi_wild_21612344</i> | NA                                  | <i>Ca_desi_denovo</i> | 21612344                | A/G  | NA                 | NA                            | NA                 |
| <i>Desi_wild_21612486</i> | NA                                  | <i>Ca_desi_denovo</i> | 21612486                | C/T  | NA                 | NA                            | NA                 |
| <i>Desi_wild_21612488</i> | NA                                  | <i>Ca_desi_denovo</i> | 21612488                | A/G  | NA                 | NA                            | NA                 |
| <i>Desi_wild_21612515</i> | NA                                  | <i>Ca_desi_denovo</i> | 21612515                | A/G  | NA                 | NA                            | NA                 |
| <i>Desi_wild_21612776</i> | NA                                  | <i>Ca_desi_denovo</i> | 21612776                | C/G  | NA                 | NA                            | NA                 |
| <i>Desi_wild_21612789</i> | NA                                  | <i>Ca_desi_denovo</i> | 21612789                | A/G  | NA                 | NA                            | NA                 |
| <i>Desi_wild_21612826</i> | NA                                  | <i>Ca_desi_denovo</i> | 21612826                | A/G  | NA                 | NA                            | NA                 |
| <i>Desi_wild_21615125</i> | NA                                  | <i>Ca_desi_denovo</i> | 21615125                | A/G  | NA                 | NA                            | NA                 |
| <i>Desi_wild_21615143</i> | NA                                  | <i>Ca_desi_denovo</i> | 21615143                | G/T  | NA                 | NA                            | NA                 |
| <i>Desi_wild_21615880</i> | NA                                  | <i>Ca_desi_denovo</i> | 21615880                | A/T  | NA                 | NA                            | NA                 |
| <i>Desi_wild_21617661</i> | NA                                  | <i>Ca_desi_denovo</i> | 21617661                | A/C  | NA                 | NA                            | NA                 |
| <i>Desi_wild_21617692</i> | NA                                  | <i>Ca_desi_denovo</i> | 21617692                | G/T  | NA                 | NA                            | NA                 |
| <i>Desi_wild_21618721</i> | NA                                  | <i>Ca_desi_denovo</i> | 21618721                | A/G  | NA                 | NA                            | NA                 |
| <i>Desi_wild_21620170</i> | NA                                  | <i>Ca_desi_denovo</i> | 21620170                | G/T  | NA                 | NA                            | NA                 |
| <i>Desi_wild_21623496</i> | NA                                  | <i>Ca_desi_denovo</i> | 21623496                | A/C  | NA                 | NA                            | NA                 |
| <i>Desi_wild_21623835</i> | NA                                  | <i>Ca_desi_denovo</i> | 21623835                | A/G  | NA                 | NA                            | NA                 |
| <i>Desi_wild_21626207</i> | NA                                  | <i>Ca_desi_denovo</i> | 21626207                | C/T  | NA                 | NA                            | NA                 |
| <i>Desi_wild_21626843</i> | NA                                  | <i>Ca_desi_denovo</i> | 21626843                | G/T  | NA                 | NA                            | NA                 |
| <i>Desi_wild_21626863</i> | NA                                  | <i>Ca_desi_denovo</i> | 21626863                | A/G  | NA                 | NA                            | NA                 |
| <i>Desi_wild_21627525</i> | NA                                  | <i>Ca_desi_denovo</i> | 21627525                | C/T  | NA                 | NA                            | NA                 |
| <i>Desi_wild_21627785</i> | NA                                  | <i>Ca_desi_denovo</i> | 21627785                | A/T  | NA                 | NA                            | NA                 |
| <i>Desi_wild_21627814</i> | NA                                  | <i>Ca_desi_denovo</i> | 21627814                | C/G  | NA                 | NA                            | NA                 |
| <i>Desi_wild_21629197</i> | NA                                  | <i>Ca_desi_denovo</i> | 21629197                | C/G  | NA                 | NA                            | NA                 |
| <i>Desi_wild_21629202</i> | NA                                  | <i>Ca_desi_denovo</i> | 21629202                | C/T  | NA                 | NA                            | NA                 |
| <i>Desi_wild_21629205</i> | NA                                  | <i>Ca_desi_denovo</i> | 21629205                | C/T  | NA                 | NA                            | NA                 |
| <i>Desi_wild_21629337</i> | NA                                  | <i>Ca_desi_denovo</i> | 21629337                | C/T  | NA                 | NA                            | NA                 |
| <i>Desi_wild_21630086</i> | NA                                  | <i>Ca_desi_denovo</i> | 21630086                | C/T  | NA                 | NA                            | NA                 |
| <i>Desi_wild_21630454</i> | NA                                  | <i>Ca_desi_denovo</i> | 21630454                | A/C  | NA                 | NA                            | NA                 |
| <i>Desi_wild_21631237</i> | NA                                  | <i>Ca_desi_denovo</i> | 21631237                | C/G  | NA                 | NA                            | NA                 |
| <i>Desi_wild_21632489</i> | NA                                  | <i>Ca_desi_denovo</i> | 21632489                | A/G  | NA                 | NA                            | NA                 |
| <i>Desi_wild_21632505</i> | NA                                  | <i>Ca_desi_denovo</i> | 21632505                | A/C  | NA                 | NA                            | NA                 |
| <i>Desi_wild_21632535</i> | NA                                  | <i>Ca_desi_denovo</i> | 21632535                | A/C  | NA                 | NA                            | NA                 |
| <i>Desi_wild_21632557</i> | NA                                  | <i>Ca_desi_denovo</i> | 21632557                | A/T  | NA                 | NA                            | NA                 |
| <i>Desi_wild_21635101</i> | NA                                  | <i>Ca_desi_denovo</i> | 21635101                | A/C  | NA                 | NA                            | NA                 |

| SNP IDs                   | NCBI dbSNP accession IDs (NCBI_SS#) | Chromosomes           | Physical positions (bp) | SNPs | Gene accession IDs | Sequence components of genome | Putative functions |
|---------------------------|-------------------------------------|-----------------------|-------------------------|------|--------------------|-------------------------------|--------------------|
| <i>Desi_wild_21635137</i> | NA                                  | <i>Ca_desi_denovo</i> | 21635137                | C/T  | NA                 | NA                            | NA                 |
| <i>Desi_wild_21635143</i> | NA                                  | <i>Ca_desi_denovo</i> | 21635143                | A/G  | NA                 | NA                            | NA                 |
| <i>Desi_wild_21635600</i> | NA                                  | <i>Ca_desi_denovo</i> | 21635600                | A/C  | NA                 | NA                            | NA                 |
| <i>Desi_wild_21635634</i> | NA                                  | <i>Ca_desi_denovo</i> | 21635634                | C/G  | NA                 | NA                            | NA                 |
| <i>Desi_wild_21636248</i> | NA                                  | <i>Ca_desi_denovo</i> | 21636248                | C/T  | NA                 | NA                            | NA                 |
| <i>Desi_wild_21637939</i> | NA                                  | <i>Ca_desi_denovo</i> | 21637939                | A/G  | NA                 | NA                            | NA                 |
| <i>Desi_wild_21638191</i> | NA                                  | <i>Ca_desi_denovo</i> | 21638191                | G/T  | NA                 | NA                            | NA                 |
| <i>Desi_wild_21638192</i> | NA                                  | <i>Ca_desi_denovo</i> | 21638192                | C/G  | NA                 | NA                            | NA                 |
| <i>Desi_wild_21640444</i> | NA                                  | <i>Ca_desi_denovo</i> | 21640444                | A/G  | NA                 | NA                            | NA                 |
| <i>Desi_wild_21641851</i> | NA                                  | <i>Ca_desi_denovo</i> | 21641851                | A/G  | NA                 | NA                            | NA                 |
| <i>Desi_wild_21641996</i> | NA                                  | <i>Ca_desi_denovo</i> | 21641996                | G/T  | NA                 | NA                            | NA                 |
| <i>Desi_wild_21642007</i> | NA                                  | <i>Ca_desi_denovo</i> | 21642007                | A/C  | NA                 | NA                            | NA                 |
| <i>Desi_wild_21642019</i> | NA                                  | <i>Ca_desi_denovo</i> | 21642019                | C/T  | NA                 | NA                            | NA                 |
| <i>Desi_wild_21642042</i> | NA                                  | <i>Ca_desi_denovo</i> | 21642042                | A/T  | NA                 | NA                            | NA                 |
| <i>Desi_wild_21642058</i> | NA                                  | <i>Ca_desi_denovo</i> | 21642058                | A/C  | NA                 | NA                            | NA                 |
| <i>Desi_wild_21642502</i> | NA                                  | <i>Ca_desi_denovo</i> | 21642502                | C/T  | NA                 | NA                            | NA                 |
| <i>Desi_wild_21642811</i> | NA                                  | <i>Ca_desi_denovo</i> | 21642811                | C/T  | NA                 | NA                            | NA                 |
| <i>Desi_wild_21642947</i> | NA                                  | <i>Ca_desi_denovo</i> | 21642947                | A/T  | NA                 | NA                            | NA                 |
| <i>Desi_wild_21642973</i> | NA                                  | <i>Ca_desi_denovo</i> | 21642973                | G/A  | NA                 | NA                            | NA                 |
| <i>Desi_wild_21645330</i> | NA                                  | <i>Ca_desi_denovo</i> | 21645330                | C/G  | NA                 | NA                            | NA                 |
| <i>Desi_wild_21646278</i> | NA                                  | <i>Ca_desi_denovo</i> | 21646278                | A/G  | NA                 | NA                            | NA                 |
| <i>Desi_wild_21646279</i> | NA                                  | <i>Ca_desi_denovo</i> | 21646279                | C/T  | NA                 | NA                            | NA                 |
| <i>Desi_wild_21647256</i> | NA                                  | <i>Ca_desi_denovo</i> | 21647256                | C/T  | NA                 | NA                            | NA                 |
| <i>Desi_wild_21647258</i> | NA                                  | <i>Ca_desi_denovo</i> | 21647258                | C/T  | NA                 | NA                            | NA                 |
| <i>Desi_wild_21647260</i> | NA                                  | <i>Ca_desi_denovo</i> | 21647260                | C/T  | NA                 | NA                            | NA                 |
| <i>Desi_wild_21647280</i> | NA                                  | <i>Ca_desi_denovo</i> | 21647280                | A/C  | NA                 | NA                            | NA                 |
| <i>Desi_wild_21651971</i> | NA                                  | <i>Ca_desi_denovo</i> | 21651971                | T/C  | NA                 | NA                            | NA                 |
| <i>Desi_wild_21652385</i> | NA                                  | <i>Ca_desi_denovo</i> | 21652385                | A/T  | NA                 | NA                            | NA                 |
| <i>Desi_wild_21653190</i> | NA                                  | <i>Ca_desi_denovo</i> | 21653190                | G/T  | NA                 | NA                            | NA                 |
| <i>Desi_wild_21653223</i> | NA                                  | <i>Ca_desi_denovo</i> | 21653223                | A/G  | NA                 | NA                            | NA                 |
| <i>Desi_wild_21653277</i> | NA                                  | <i>Ca_desi_denovo</i> | 21653277                | C/G  | NA                 | NA                            | NA                 |
| <i>Desi_wild_21653298</i> | NA                                  | <i>Ca_desi_denovo</i> | 21653298                | A/C  | NA                 | NA                            | NA                 |
| <i>Desi_wild_21655759</i> | NA                                  | <i>Ca_desi_denovo</i> | 21655759                | A/C  | NA                 | NA                            | NA                 |
| <i>Desi_wild_21655819</i> | NA                                  | <i>Ca_desi_denovo</i> | 21655819                | A/G  | NA                 | NA                            | NA                 |
| <i>Desi_wild_21655969</i> | NA                                  | <i>Ca_desi_denovo</i> | 21655969                | G/T  | NA                 | NA                            | NA                 |
| <i>Desi_wild_21657311</i> | NA                                  | <i>Ca_desi_denovo</i> | 21657311                | G/T  | NA                 | NA                            | NA                 |
| <i>Desi_wild_21657313</i> | NA                                  | <i>Ca_desi_denovo</i> | 21657313                | C/G  | NA                 | NA                            | NA                 |
| <i>Desi_wild_21658550</i> | NA                                  | <i>Ca_desi_denovo</i> | 21658550                | C/T  | NA                 | NA                            | NA                 |
| <i>Desi_wild_21658961</i> | NA                                  | <i>Ca_desi_denovo</i> | 21658961                | C/T  | NA                 | NA                            | NA                 |
| <i>Desi_wild_21659195</i> | NA                                  | <i>Ca_desi_denovo</i> | 21659195                | C/T  | NA                 | NA                            | NA                 |
| <i>Desi_wild_21659204</i> | NA                                  | <i>Ca_desi_denovo</i> | 21659204                | C/T  | NA                 | NA                            | NA                 |
| <i>Desi_wild_21660723</i> | NA                                  | <i>Ca_desi_denovo</i> | 21660723                | G/T  | NA                 | NA                            | NA                 |
| <i>Desi_wild_21661238</i> | NA                                  | <i>Ca_desi_denovo</i> | 21661238                | A/G  | NA                 | NA                            | NA                 |
| <i>Desi_wild_21662176</i> | NA                                  | <i>Ca_desi_denovo</i> | 21662176                | A/G  | NA                 | NA                            | NA                 |

| SNP IDs                   | NCBI dbSNP accession IDs (NCBI_SS#) | Chromosomes           | Physical positions (bp) | SNPs | Gene accession IDs | Sequence components of genome | Putative functions |
|---------------------------|-------------------------------------|-----------------------|-------------------------|------|--------------------|-------------------------------|--------------------|
| <i>Desi_wild_21663405</i> | NA                                  | <i>Ca_desi_denovo</i> | 21663405                | A/T  | NA                 | NA                            | NA                 |
| <i>Desi_wild_21663537</i> | NA                                  | <i>Ca_desi_denovo</i> | 21663537                | A/G  | NA                 | NA                            | NA                 |
| <i>Desi_wild_21663757</i> | NA                                  | <i>Ca_desi_denovo</i> | 21663757                | C/T  | NA                 | NA                            | NA                 |
| <i>Desi_wild_21663763</i> | NA                                  | <i>Ca_desi_denovo</i> | 21663763                | A/G  | NA                 | NA                            | NA                 |
| <i>Desi_wild_21664656</i> | NA                                  | <i>Ca_desi_denovo</i> | 21664656                | C/T  | NA                 | NA                            | NA                 |
| <i>Desi_wild_21665360</i> | NA                                  | <i>Ca_desi_denovo</i> | 21665360                | C/T  | NA                 | NA                            | NA                 |
| <i>Desi_wild_21665384</i> | NA                                  | <i>Ca_desi_denovo</i> | 21665384                | C/T  | NA                 | NA                            | NA                 |
| <i>Desi_wild_21666087</i> | NA                                  | <i>Ca_desi_denovo</i> | 21666087                | A/G  | NA                 | NA                            | NA                 |
| <i>Desi_wild_21666093</i> | NA                                  | <i>Ca_desi_denovo</i> | 21666093                | G/T  | NA                 | NA                            | NA                 |
| <i>Desi_wild_21666143</i> | NA                                  | <i>Ca_desi_denovo</i> | 21666143                | C/T  | NA                 | NA                            | NA                 |
| <i>Desi_wild_21666152</i> | NA                                  | <i>Ca_desi_denovo</i> | 21666152                | C/T  | NA                 | NA                            | NA                 |
| <i>Desi_wild_21666650</i> | NA                                  | <i>Ca_desi_denovo</i> | 21666650                | A/T  | NA                 | NA                            | NA                 |
| <i>Desi_wild_21668164</i> | NA                                  | <i>Ca_desi_denovo</i> | 21668164                | A/G  | NA                 | NA                            | NA                 |
| <i>Desi_wild_21669046</i> | NA                                  | <i>Ca_desi_denovo</i> | 21669046                | C/T  | NA                 | NA                            | NA                 |
| <i>Desi_wild_21669674</i> | NA                                  | <i>Ca_desi_denovo</i> | 21669674                | C/T  | NA                 | NA                            | NA                 |
| <i>Desi_wild_21669823</i> | NA                                  | <i>Ca_desi_denovo</i> | 21669823                | T/C  | NA                 | NA                            | NA                 |
| <i>Desi_wild_21672068</i> | NA                                  | <i>Ca_desi_denovo</i> | 21672068                | C/G  | NA                 | NA                            | NA                 |
| <i>Desi_wild_21672120</i> | NA                                  | <i>Ca_desi_denovo</i> | 21672120                | C/T  | NA                 | NA                            | NA                 |
| <i>Desi_wild_21672423</i> | NA                                  | <i>Ca_desi_denovo</i> | 21672423                | G/T  | NA                 | NA                            | NA                 |
| <i>Desi_wild_21672424</i> | NA                                  | <i>Ca_desi_denovo</i> | 21672424                | A/C  | NA                 | NA                            | NA                 |
| <i>Desi_wild_21674483</i> | NA                                  | <i>Ca_desi_denovo</i> | 21674483                | A/C  | NA                 | NA                            | NA                 |
| <i>Desi_wild_21675170</i> | NA                                  | <i>Ca_desi_denovo</i> | 21675170                | G/T  | NA                 | NA                            | NA                 |
| <i>Desi_wild_21675939</i> | NA                                  | <i>Ca_desi_denovo</i> | 21675939                | C/T  | NA                 | NA                            | NA                 |
| <i>Desi_wild_21676503</i> | NA                                  | <i>Ca_desi_denovo</i> | 21676503                | G/T  | NA                 | NA                            | NA                 |
| <i>Desi_wild_21677573</i> | NA                                  | <i>Ca_desi_denovo</i> | 21677573                | A/T  | NA                 | NA                            | NA                 |
| <i>Desi_wild_21677601</i> | NA                                  | <i>Ca_desi_denovo</i> | 21677601                | C/G  | NA                 | NA                            | NA                 |
| <i>Desi_wild_21677955</i> | NA                                  | <i>Ca_desi_denovo</i> | 21677955                | A/T  | NA                 | NA                            | NA                 |
| <i>Desi_wild_21678127</i> | NA                                  | <i>Ca_desi_denovo</i> | 21678127                | A/G  | NA                 | NA                            | NA                 |
| <i>Desi_wild_21679477</i> | NA                                  | <i>Ca_desi_denovo</i> | 21679477                | A/G  | NA                 | NA                            | NA                 |
| <i>Desi_wild_21679939</i> | NA                                  | <i>Ca_desi_denovo</i> | 21679939                | A/G  | NA                 | NA                            | NA                 |
| <i>Desi_wild_21680809</i> | NA                                  | <i>Ca_desi_denovo</i> | 21680809                | A/G  | NA                 | NA                            | NA                 |
| <i>Desi_wild_21680819</i> | NA                                  | <i>Ca_desi_denovo</i> | 21680819                | A/G  | NA                 | NA                            | NA                 |
| <i>Desi_wild_21682195</i> | NA                                  | <i>Ca_desi_denovo</i> | 21682195                | A/G  | NA                 | NA                            | NA                 |
| <i>Desi_wild_21682736</i> | NA                                  | <i>Ca_desi_denovo</i> | 21682736                | A/G  | NA                 | NA                            | NA                 |
| <i>Desi_wild_21683615</i> | NA                                  | <i>Ca_desi_denovo</i> | 21683615                | A/G  | NA                 | NA                            | NA                 |
| <i>Desi_wild_21684608</i> | NA                                  | <i>Ca_desi_denovo</i> | 21684608                | A/G  | NA                 | NA                            | NA                 |
| <i>Desi_wild_21689799</i> | NA                                  | <i>Ca_desi_denovo</i> | 21689799                | A/T  | NA                 | NA                            | NA                 |
| <i>Desi_wild_21689832</i> | NA                                  | <i>Ca_desi_denovo</i> | 21689832                | A/T  | NA                 | NA                            | NA                 |
| <i>Desi_wild_21690679</i> | NA                                  | <i>Ca_desi_denovo</i> | 21690679                | C/G  | NA                 | NA                            | NA                 |
| <i>Desi_wild_21693505</i> | NA                                  | <i>Ca_desi_denovo</i> | 21693505                | G/T  | NA                 | NA                            | NA                 |
| <i>Desi_wild_21695724</i> | NA                                  | <i>Ca_desi_denovo</i> | 21695724                | C/G  | NA                 | NA                            | NA                 |
| <i>Desi_wild_21697191</i> | NA                                  | <i>Ca_desi_denovo</i> | 21697191                | C/T  | NA                 | NA                            | NA                 |
| <i>Desi_wild_21697198</i> | NA                                  | <i>Ca_desi_denovo</i> | 21697198                | A/C  | NA                 | NA                            | NA                 |
| <i>Desi_wild_21697743</i> | NA                                  | <i>Ca_desi_denovo</i> | 21697743                | A/T  | NA                 | NA                            | NA                 |

| SNP IDs                   | NCBI dbSNP accession IDs (NCBI_SS#) | Chromosomes           | Physical positions (bp) | SNPs | Gene accession IDs | Sequence components of genome | Putative functions |
|---------------------------|-------------------------------------|-----------------------|-------------------------|------|--------------------|-------------------------------|--------------------|
| <i>Desi_wild_21697811</i> | NA                                  | <i>Ca_desi_denovo</i> | 21697811                | C/T  | NA                 | NA                            | NA                 |
| <i>Desi_wild_21698333</i> | NA                                  | <i>Ca_desi_denovo</i> | 21698333                | A/G  | NA                 | NA                            | NA                 |
| <i>Desi_wild_21698414</i> | NA                                  | <i>Ca_desi_denovo</i> | 21698414                | C/G  | NA                 | NA                            | NA                 |
| <i>Desi_wild_21700184</i> | NA                                  | <i>Ca_desi_denovo</i> | 21700184                | G/T  | NA                 | NA                            | NA                 |
| <i>Desi_wild_21701143</i> | NA                                  | <i>Ca_desi_denovo</i> | 21701143                | A/G  | NA                 | NA                            | NA                 |
| <i>Desi_wild_21702380</i> | NA                                  | <i>Ca_desi_denovo</i> | 21702380                | A/G  | NA                 | NA                            | NA                 |
| <i>Desi_wild_21702765</i> | NA                                  | <i>Ca_desi_denovo</i> | 21702765                | G/T  | NA                 | NA                            | NA                 |
| <i>Desi_wild_21703194</i> | NA                                  | <i>Ca_desi_denovo</i> | 21703194                | C/T  | NA                 | NA                            | NA                 |
| <i>Desi_wild_21703214</i> | NA                                  | <i>Ca_desi_denovo</i> | 21703214                | C/T  | NA                 | NA                            | NA                 |
| <i>Desi_wild_21704054</i> | NA                                  | <i>Ca_desi_denovo</i> | 21704054                | A/G  | NA                 | NA                            | NA                 |
| <i>Desi_wild_21706997</i> | NA                                  | <i>Ca_desi_denovo</i> | 21706997                | C/T  | NA                 | NA                            | NA                 |
| <i>Desi_wild_21707648</i> | NA                                  | <i>Ca_desi_denovo</i> | 21707648                | G/T  | NA                 | NA                            | NA                 |
| <i>Desi_wild_21708954</i> | NA                                  | <i>Ca_desi_denovo</i> | 21708954                | G/A  | NA                 | NA                            | NA                 |
| <i>Desi_wild_21709036</i> | NA                                  | <i>Ca_desi_denovo</i> | 21709036                | A/T  | NA                 | NA                            | NA                 |
| <i>Desi_wild_21709803</i> | NA                                  | <i>Ca_desi_denovo</i> | 21709803                | C/T  | NA                 | NA                            | NA                 |
| <i>Desi_wild_21715122</i> | NA                                  | <i>Ca_desi_denovo</i> | 21715122                | A/G  | NA                 | NA                            | NA                 |
| <i>Desi_wild_21718217</i> | NA                                  | <i>Ca_desi_denovo</i> | 21718217                | C/G  | NA                 | NA                            | NA                 |
| <i>Desi_wild_21720183</i> | NA                                  | <i>Ca_desi_denovo</i> | 21720183                | C/T  | NA                 | NA                            | NA                 |
| <i>Desi_wild_21720216</i> | NA                                  | <i>Ca_desi_denovo</i> | 21720216                | A/G  | NA                 | NA                            | NA                 |
| <i>Desi_wild_21720471</i> | NA                                  | <i>Ca_desi_denovo</i> | 21720471                | C/G  | NA                 | NA                            | NA                 |
| <i>Desi_wild_21722578</i> | NA                                  | <i>Ca_desi_denovo</i> | 21722578                | A/T  | NA                 | NA                            | NA                 |
| <i>Desi_wild_21723853</i> | NA                                  | <i>Ca_desi_denovo</i> | 21723853                | C/T  | NA                 | NA                            | NA                 |
| <i>Desi_wild_21723892</i> | NA                                  | <i>Ca_desi_denovo</i> | 21723892                | C/T  | NA                 | NA                            | NA                 |
| <i>Desi_wild_21723931</i> | NA                                  | <i>Ca_desi_denovo</i> | 21723931                | A/T  | NA                 | NA                            | NA                 |
| <i>Desi_wild_21724522</i> | NA                                  | <i>Ca_desi_denovo</i> | 21724522                | G/T  | NA                 | NA                            | NA                 |
| <i>Desi_wild_21724737</i> | NA                                  | <i>Ca_desi_denovo</i> | 21724737                | G/A  | NA                 | NA                            | NA                 |
| <i>Desi_wild_21728314</i> | NA                                  | <i>Ca_desi_denovo</i> | 21728314                | G/T  | NA                 | NA                            | NA                 |
| <i>Desi_wild_21728342</i> | NA                                  | <i>Ca_desi_denovo</i> | 21728342                | A/C  | NA                 | NA                            | NA                 |
| <i>Desi_wild_21730067</i> | NA                                  | <i>Ca_desi_denovo</i> | 21730067                | C/G  | NA                 | NA                            | NA                 |
| <i>Desi_wild_21730134</i> | NA                                  | <i>Ca_desi_denovo</i> | 21730134                | C/T  | NA                 | NA                            | NA                 |
| <i>Desi_wild_21730138</i> | NA                                  | <i>Ca_desi_denovo</i> | 21730138                | A/C  | NA                 | NA                            | NA                 |
| <i>Desi_wild_21731147</i> | NA                                  | <i>Ca_desi_denovo</i> | 21731147                | C/G  | NA                 | NA                            | NA                 |
| <i>Desi_wild_21733406</i> | NA                                  | <i>Ca_desi_denovo</i> | 21733406                | G/T  | NA                 | NA                            | NA                 |
| <i>Desi_wild_21734164</i> | NA                                  | <i>Ca_desi_denovo</i> | 21734164                | C/G  | NA                 | NA                            | NA                 |
| <i>Desi_wild_21734182</i> | NA                                  | <i>Ca_desi_denovo</i> | 21734182                | C/T  | NA                 | NA                            | NA                 |
| <i>Desi_wild_21734406</i> | NA                                  | <i>Ca_desi_denovo</i> | 21734406                | G/T  | NA                 | NA                            | NA                 |
| <i>Desi_wild_21737473</i> | NA                                  | <i>Ca_desi_denovo</i> | 21737473                | C/T  | NA                 | NA                            | NA                 |
| <i>Desi_wild_21742227</i> | NA                                  | <i>Ca_desi_denovo</i> | 21742227                | A/G  | NA                 | NA                            | NA                 |
| <i>Desi_wild_21742228</i> | NA                                  | <i>Ca_desi_denovo</i> | 21742228                | C/T  | NA                 | NA                            | NA                 |
| <i>Desi_wild_21742388</i> | NA                                  | <i>Ca_desi_denovo</i> | 21742388                | C/G  | NA                 | NA                            | NA                 |
| <i>Desi_wild_21742395</i> | NA                                  | <i>Ca_desi_denovo</i> | 21742395                | C/G  | NA                 | NA                            | NA                 |
| <i>Desi_wild_21746378</i> | NA                                  | <i>Ca_desi_denovo</i> | 21746378                | G/T  | NA                 | NA                            | NA                 |
| <i>Desi_wild_21746394</i> | NA                                  | <i>Ca_desi_denovo</i> | 21746394                | C/T  | NA                 | NA                            | NA                 |
| <i>Desi_wild_21746797</i> | NA                                  | <i>Ca_desi_denovo</i> | 21746797                | G/T  | NA                 | NA                            | NA                 |

| SNP IDs                   | NCBI dbSNP accession IDs (NCBI_SS#) | Chromosomes           | Physical positions (bp) | SNPs | Gene accession IDs | Sequence components of genome | Putative functions |
|---------------------------|-------------------------------------|-----------------------|-------------------------|------|--------------------|-------------------------------|--------------------|
| <i>Desi_wild_21748697</i> | NA                                  | <i>Ca_desi_denovo</i> | 21748697                | A/G  | NA                 | NA                            | NA                 |
| <i>Desi_wild_21749163</i> | NA                                  | <i>Ca_desi_denovo</i> | 21749163                | A/G  | NA                 | NA                            | NA                 |
| <i>Desi_wild_21754231</i> | NA                                  | <i>Ca_desi_denovo</i> | 21754231                | C/G  | NA                 | NA                            | NA                 |
| <i>Desi_wild_21755988</i> | NA                                  | <i>Ca_desi_denovo</i> | 21755988                | C/T  | NA                 | NA                            | NA                 |
| <i>Desi_wild_21756729</i> | NA                                  | <i>Ca_desi_denovo</i> | 21756729                | C/T  | NA                 | NA                            | NA                 |
| <i>Desi_wild_21758389</i> | NA                                  | <i>Ca_desi_denovo</i> | 21758389                | C/T  | NA                 | NA                            | NA                 |
| <i>Desi_wild_21758438</i> | NA                                  | <i>Ca_desi_denovo</i> | 21758438                | A/T  | NA                 | NA                            | NA                 |
| <i>Desi_wild_21758443</i> | NA                                  | <i>Ca_desi_denovo</i> | 21758443                | A/T  | NA                 | NA                            | NA                 |
| <i>Desi_wild_21759946</i> | NA                                  | <i>Ca_desi_denovo</i> | 21759946                | C/T  | NA                 | NA                            | NA                 |
| <i>Desi_wild_21765639</i> | NA                                  | <i>Ca_desi_denovo</i> | 21765639                | G/T  | NA                 | NA                            | NA                 |
| <i>Desi_wild_21766618</i> | NA                                  | <i>Ca_desi_denovo</i> | 21766618                | G/A  | NA                 | NA                            | NA                 |
| <i>Desi_wild_21767993</i> | NA                                  | <i>Ca_desi_denovo</i> | 21767993                | C/G  | NA                 | NA                            | NA                 |
| <i>Desi_wild_21768838</i> | NA                                  | <i>Ca_desi_denovo</i> | 21768838                | C/T  | NA                 | NA                            | NA                 |
| <i>Desi_wild_21770252</i> | NA                                  | <i>Ca_desi_denovo</i> | 21770252                | A/G  | NA                 | NA                            | NA                 |
| <i>Desi_wild_21770282</i> | NA                                  | <i>Ca_desi_denovo</i> | 21770282                | A/G  | NA                 | NA                            | NA                 |
| <i>Desi_wild_21770295</i> | NA                                  | <i>Ca_desi_denovo</i> | 21770295                | A/G  | NA                 | NA                            | NA                 |
| <i>Desi_wild_21771857</i> | NA                                  | <i>Ca_desi_denovo</i> | 21771857                | G/T  | NA                 | NA                            | NA                 |
| <i>Desi_wild_21775548</i> | NA                                  | <i>Ca_desi_denovo</i> | 21775548                | A/C  | NA                 | NA                            | NA                 |
| <i>Desi_wild_21775597</i> | NA                                  | <i>Ca_desi_denovo</i> | 21775597                | A/G  | NA                 | NA                            | NA                 |
| <i>Desi_wild_21775608</i> | NA                                  | <i>Ca_desi_denovo</i> | 21775608                | G/T  | NA                 | NA                            | NA                 |
| <i>Desi_wild_21775871</i> | NA                                  | <i>Ca_desi_denovo</i> | 21775871                | G/T  | NA                 | NA                            | NA                 |
| <i>Desi_wild_21775890</i> | NA                                  | <i>Ca_desi_denovo</i> | 21775890                | A/G  | NA                 | NA                            | NA                 |
| <i>Desi_wild_21775910</i> | NA                                  | <i>Ca_desi_denovo</i> | 21775910                | A/G  | NA                 | NA                            | NA                 |
| <i>Desi_wild_21778526</i> | NA                                  | <i>Ca_desi_denovo</i> | 21778526                | A/C  | NA                 | NA                            | NA                 |
| <i>Desi_wild_21778860</i> | NA                                  | <i>Ca_desi_denovo</i> | 21778860                | A/T  | NA                 | NA                            | NA                 |
| <i>Desi_wild_21788954</i> | NA                                  | <i>Ca_desi_denovo</i> | 21788954                | C/T  | NA                 | NA                            | NA                 |
| <i>Desi_wild_21789048</i> | NA                                  | <i>Ca_desi_denovo</i> | 21789048                | C/T  | NA                 | NA                            | NA                 |
| <i>Desi_wild_21789094</i> | NA                                  | <i>Ca_desi_denovo</i> | 21789094                | A/G  | NA                 | NA                            | NA                 |
| <i>Desi_wild_21790639</i> | NA                                  | <i>Ca_desi_denovo</i> | 21790639                | C/T  | NA                 | NA                            | NA                 |
| <i>Desi_wild_21790807</i> | NA                                  | <i>Ca_desi_denovo</i> | 21790807                | A/T  | NA                 | NA                            | NA                 |
| <i>Desi_wild_21793083</i> | NA                                  | <i>Ca_desi_denovo</i> | 21793083                | C/T  | NA                 | NA                            | NA                 |
| <i>Desi_wild_21796405</i> | NA                                  | <i>Ca_desi_denovo</i> | 21796405                | C/T  | NA                 | NA                            | NA                 |
| <i>Desi_wild_21796422</i> | NA                                  | <i>Ca_desi_denovo</i> | 21796422                | C/T  | NA                 | NA                            | NA                 |
| <i>Desi_wild_21801976</i> | NA                                  | <i>Ca_desi_denovo</i> | 21801976                | A/T  | NA                 | NA                            | NA                 |
| <i>Desi_wild_21802425</i> | NA                                  | <i>Ca_desi_denovo</i> | 21802425                | A/G  | NA                 | NA                            | NA                 |
| <i>Desi_wild_21805575</i> | NA                                  | <i>Ca_desi_denovo</i> | 21805575                | C/T  | NA                 | NA                            | NA                 |
| <i>Desi_wild_21806882</i> | NA                                  | <i>Ca_desi_denovo</i> | 21806882                | C/T  | NA                 | NA                            | NA                 |
| <i>Desi_wild_21806954</i> | NA                                  | <i>Ca_desi_denovo</i> | 21806954                | C/T  | NA                 | NA                            | NA                 |
| <i>Desi_wild_21806957</i> | NA                                  | <i>Ca_desi_denovo</i> | 21806957                | C/T  | NA                 | NA                            | NA                 |
| <i>Desi_wild_21810032</i> | NA                                  | <i>Ca_desi_denovo</i> | 21810032                | G/T  | NA                 | NA                            | NA                 |
| <i>Desi_wild_21812171</i> | NA                                  | <i>Ca_desi_denovo</i> | 21812171                | C/T  | NA                 | NA                            | NA                 |
| <i>Desi_wild_21813116</i> | NA                                  | <i>Ca_desi_denovo</i> | 21813116                | C/T  | NA                 | NA                            | NA                 |
| <i>Desi_wild_21813471</i> | NA                                  | <i>Ca_desi_denovo</i> | 21813471                | C/T  | NA                 | NA                            | NA                 |
| <i>Desi_wild_21814456</i> | NA                                  | <i>Ca_desi_denovo</i> | 21814456                | A/G  | NA                 | NA                            | NA                 |



| SNP IDs                   | NCBI dbSNP accession IDs (NCBI_SS#) | Chromosomes           | Physical positions (bp) | SNPs | Gene accession IDs | Sequence components of genome | Putative functions |
|---------------------------|-------------------------------------|-----------------------|-------------------------|------|--------------------|-------------------------------|--------------------|
| <i>Desi_wild_21814471</i> | NA                                  | <i>Ca_desi_denovo</i> | 21814471                | A/G  | NA                 | NA                            | NA                 |
| <i>Desi_wild_21814486</i> | NA                                  | <i>Ca_desi_denovo</i> | 21814486                | C/T  | NA                 | NA                            | NA                 |
| <i>Desi_wild_21818292</i> | NA                                  | <i>Ca_desi_denovo</i> | 21818292                | A/G  | NA                 | NA                            | NA                 |
| <i>Desi_wild_21818901</i> | NA                                  | <i>Ca_desi_denovo</i> | 21818901                | A/G  | NA                 | NA                            | NA                 |
| <i>Desi_wild_21818946</i> | NA                                  | <i>Ca_desi_denovo</i> | 21818946                | C/T  | NA                 | NA                            | NA                 |
| <i>Desi_wild_21818948</i> | NA                                  | <i>Ca_desi_denovo</i> | 21818948                | G/T  | NA                 | NA                            | NA                 |
| <i>Desi_wild_21819390</i> | NA                                  | <i>Ca_desi_denovo</i> | 21819390                | A/G  | NA                 | NA                            | NA                 |
| <i>Desi_wild_21823655</i> | NA                                  | <i>Ca_desi_denovo</i> | 21823655                | A/G  | NA                 | NA                            | NA                 |
| <i>Desi_wild_21824169</i> | NA                                  | <i>Ca_desi_denovo</i> | 21824169                | C/T  | NA                 | NA                            | NA                 |
| <i>Desi_wild_21824622</i> | NA                                  | <i>Ca_desi_denovo</i> | 21824622                | G/T  | NA                 | NA                            | NA                 |
| <i>Desi_wild_21826596</i> | NA                                  | <i>Ca_desi_denovo</i> | 21826596                | G/T  | NA                 | NA                            | NA                 |
| <i>Desi_wild_21828533</i> | NA                                  | <i>Ca_desi_denovo</i> | 21828533                | C/G  | NA                 | NA                            | NA                 |
| <i>Desi_wild_21830531</i> | NA                                  | <i>Ca_desi_denovo</i> | 21830531                | A/C  | NA                 | NA                            | NA                 |
| <i>Desi_wild_21830833</i> | NA                                  | <i>Ca_desi_denovo</i> | 21830833                | C/T  | NA                 | NA                            | NA                 |
| <i>Desi_wild_21830848</i> | NA                                  | <i>Ca_desi_denovo</i> | 21830848                | G/T  | NA                 | NA                            | NA                 |
| <i>Desi_wild_21830851</i> | NA                                  | <i>Ca_desi_denovo</i> | 21830851                | A/G  | NA                 | NA                            | NA                 |
| <i>Desi_wild_21830869</i> | NA                                  | <i>Ca_desi_denovo</i> | 21830869                | A/G  | NA                 | NA                            | NA                 |
| <i>Desi_wild_21831626</i> | NA                                  | <i>Ca_desi_denovo</i> | 21831626                | C/T  | NA                 | NA                            | NA                 |
| <i>Desi_wild_21831903</i> | NA                                  | <i>Ca_desi_denovo</i> | 21831903                | A/G  | NA                 | NA                            | NA                 |
| <i>Desi_wild_21832509</i> | NA                                  | <i>Ca_desi_denovo</i> | 21832509                | G/T  | NA                 | NA                            | NA                 |
| <i>Desi_wild_21832526</i> | NA                                  | <i>Ca_desi_denovo</i> | 21832526                | A/G  | NA                 | NA                            | NA                 |
| <i>Desi_wild_21832709</i> | NA                                  | <i>Ca_desi_denovo</i> | 21832709                | A/T  | NA                 | NA                            | NA                 |
| <i>Desi_wild_21832801</i> | NA                                  | <i>Ca_desi_denovo</i> | 21832801                | A/G  | NA                 | NA                            | NA                 |
| <i>Desi_wild_21832906</i> | NA                                  | <i>Ca_desi_denovo</i> | 21832906                | A/G  | NA                 | NA                            | NA                 |
| <i>Desi_wild_21832927</i> | NA                                  | <i>Ca_desi_denovo</i> | 21832927                | C/T  | NA                 | NA                            | NA                 |
| <i>Desi_wild_21833577</i> | NA                                  | <i>Ca_desi_denovo</i> | 21833577                | A/G  | NA                 | NA                            | NA                 |
| <i>Desi_wild_21836116</i> | NA                                  | <i>Ca_desi_denovo</i> | 21836116                | G/T  | NA                 | NA                            | NA                 |
| <i>Desi_wild_21840489</i> | NA                                  | <i>Ca_desi_denovo</i> | 21840489                | G/T  | NA                 | NA                            | NA                 |
| <i>Desi_wild_21841307</i> | NA                                  | <i>Ca_desi_denovo</i> | 21841307                | C/T  | NA                 | NA                            | NA                 |
| <i>Desi_wild_21841838</i> | NA                                  | <i>Ca_desi_denovo</i> | 21841838                | C/T  | NA                 | NA                            | NA                 |
| <i>Desi_wild_21841913</i> | NA                                  | <i>Ca_desi_denovo</i> | 21841913                | C/T  | NA                 | NA                            | NA                 |
| <i>Desi_wild_21842598</i> | NA                                  | <i>Ca_desi_denovo</i> | 21842598                | A/C  | NA                 | NA                            | NA                 |
| <i>Desi_wild_21842754</i> | NA                                  | <i>Ca_desi_denovo</i> | 21842754                | A/T  | NA                 | NA                            | NA                 |
| <i>Desi_wild_21844290</i> | NA                                  | <i>Ca_desi_denovo</i> | 21844290                | A/C  | NA                 | NA                            | NA                 |
| <i>Desi_wild_21847445</i> | NA                                  | <i>Ca_desi_denovo</i> | 21847445                | A/C  | NA                 | NA                            | NA                 |
| <i>Desi_wild_21847460</i> | NA                                  | <i>Ca_desi_denovo</i> | 21847460                | C/T  | NA                 | NA                            | NA                 |
| <i>Desi_wild_21849166</i> | NA                                  | <i>Ca_desi_denovo</i> | 21849166                | C/G  | NA                 | NA                            | NA                 |
| <i>Desi_wild_21849227</i> | NA                                  | <i>Ca_desi_denovo</i> | 21849227                | A/G  | NA                 | NA                            | NA                 |
| <i>Desi_wild_21849228</i> | NA                                  | <i>Ca_desi_denovo</i> | 21849228                | A/G  | NA                 | NA                            | NA                 |
| <i>Desi_wild_21849272</i> | NA                                  | <i>Ca_desi_denovo</i> | 21849272                | A/G  | NA                 | NA                            | NA                 |
| <i>Desi_wild_21849298</i> | NA                                  | <i>Ca_desi_denovo</i> | 21849298                | A/G  | NA                 | NA                            | NA                 |
| <i>Desi_wild_21850734</i> | NA                                  | <i>Ca_desi_denovo</i> | 21850734                | A/G  | NA                 | NA                            | NA                 |
| <i>Desi_wild_21850737</i> | NA                                  | <i>Ca_desi_denovo</i> | 21850737                | A/G  | NA                 | NA                            | NA                 |
| <i>Desi_wild_21851166</i> | NA                                  | <i>Ca_desi_denovo</i> | 21851166                | G/T  | NA                 | NA                            | NA                 |

| SNP IDs                   | NCBI dbSNP accession IDs (NCBI_SS#) | Chromosomes           | Physical positions (bp) | SNPs | Gene accession IDs | Sequence components of genome | Putative functions |
|---------------------------|-------------------------------------|-----------------------|-------------------------|------|--------------------|-------------------------------|--------------------|
| <i>Desi_wild_21851917</i> | NA                                  | <i>Ca_desi_denovo</i> | 21851917                | C/T  | NA                 | NA                            | NA                 |
| <i>Desi_wild_21851918</i> | NA                                  | <i>Ca_desi_denovo</i> | 21851918                | A/T  | NA                 | NA                            | NA                 |
| <i>Desi_wild_21854271</i> | NA                                  | <i>Ca_desi_denovo</i> | 21854271                | C/T  | NA                 | NA                            | NA                 |
| <i>Desi_wild_21854273</i> | NA                                  | <i>Ca_desi_denovo</i> | 21854273                | C/T  | NA                 | NA                            | NA                 |
| <i>Desi_wild_21857548</i> | NA                                  | <i>Ca_desi_denovo</i> | 21857548                | C/T  | NA                 | NA                            | NA                 |
| <i>Desi_wild_21858884</i> | NA                                  | <i>Ca_desi_denovo</i> | 21858884                | A/C  | NA                 | NA                            | NA                 |
| <i>Desi_wild_21860177</i> | NA                                  | <i>Ca_desi_denovo</i> | 21860177                | C/T  | NA                 | NA                            | NA                 |
| <i>Desi_wild_21861002</i> | NA                                  | <i>Ca_desi_denovo</i> | 21861002                | C/G  | NA                 | NA                            | NA                 |
| <i>Desi_wild_21861032</i> | NA                                  | <i>Ca_desi_denovo</i> | 21861032                | A/G  | NA                 | NA                            | NA                 |
| <i>Desi_wild_21861079</i> | NA                                  | <i>Ca_desi_denovo</i> | 21861079                | A/C  | NA                 | NA                            | NA                 |
| <i>Desi_wild_21862662</i> | NA                                  | <i>Ca_desi_denovo</i> | 21862662                | A/T  | NA                 | NA                            | NA                 |
| <i>Desi_wild_21863090</i> | NA                                  | <i>Ca_desi_denovo</i> | 21863090                | C/T  | NA                 | NA                            | NA                 |
| <i>Desi_wild_21863102</i> | NA                                  | <i>Ca_desi_denovo</i> | 21863102                | C/G  | NA                 | NA                            | NA                 |
| <i>Desi_wild_21865285</i> | NA                                  | <i>Ca_desi_denovo</i> | 21865285                | C/T  | NA                 | NA                            | NA                 |
| <i>Desi_wild_21865763</i> | NA                                  | <i>Ca_desi_denovo</i> | 21865763                | A/G  | NA                 | NA                            | NA                 |
| <i>Desi_wild_21870056</i> | NA                                  | <i>Ca_desi_denovo</i> | 21870056                | A/C  | NA                 | NA                            | NA                 |
| <i>Desi_wild_21870225</i> | NA                                  | <i>Ca_desi_denovo</i> | 21870225                | C/G  | NA                 | NA                            | NA                 |
| <i>Desi_wild_21871985</i> | NA                                  | <i>Ca_desi_denovo</i> | 21871985                | A/G  | NA                 | NA                            | NA                 |
| <i>Desi_wild_21873253</i> | NA                                  | <i>Ca_desi_denovo</i> | 21873253                | A/G  | NA                 | NA                            | NA                 |
| <i>Desi_wild_21873256</i> | NA                                  | <i>Ca_desi_denovo</i> | 21873256                | A/G  | NA                 | NA                            | NA                 |
| <i>Desi_wild_21873413</i> | NA                                  | <i>Ca_desi_denovo</i> | 21873413                | C/G  | NA                 | NA                            | NA                 |
| <i>Desi_wild_21873416</i> | NA                                  | <i>Ca_desi_denovo</i> | 21873416                | G/T  | NA                 | NA                            | NA                 |
| <i>Desi_wild_21873419</i> | NA                                  | <i>Ca_desi_denovo</i> | 21873419                | C/T  | NA                 | NA                            | NA                 |
| <i>Desi_wild_21873422</i> | NA                                  | <i>Ca_desi_denovo</i> | 21873422                | C/G  | NA                 | NA                            | NA                 |
| <i>Desi_wild_21874274</i> | NA                                  | <i>Ca_desi_denovo</i> | 21874274                | C/G  | NA                 | NA                            | NA                 |
| <i>Desi_wild_21875583</i> | NA                                  | <i>Ca_desi_denovo</i> | 21875583                | G/T  | NA                 | NA                            | NA                 |
| <i>Desi_wild_21875639</i> | NA                                  | <i>Ca_desi_denovo</i> | 21875639                | G/T  | NA                 | NA                            | NA                 |
| <i>Desi_wild_21876905</i> | NA                                  | <i>Ca_desi_denovo</i> | 21876905                | A/G  | NA                 | NA                            | NA                 |
| <i>Desi_wild_21877313</i> | NA                                  | <i>Ca_desi_denovo</i> | 21877313                | A/G  | NA                 | NA                            | NA                 |
| <i>Desi_wild_21878279</i> | NA                                  | <i>Ca_desi_denovo</i> | 21878279                | C/T  | NA                 | NA                            | NA                 |
| <i>Desi_wild_21879525</i> | NA                                  | <i>Ca_desi_denovo</i> | 21879525                | A/G  | NA                 | NA                            | NA                 |
| <i>Desi_wild_21880327</i> | NA                                  | <i>Ca_desi_denovo</i> | 21880327                | G/A  | NA                 | NA                            | NA                 |
| <i>Desi_wild_21881957</i> | NA                                  | <i>Ca_desi_denovo</i> | 21881957                | A/T  | NA                 | NA                            | NA                 |
| <i>Desi_wild_21882414</i> | NA                                  | <i>Ca_desi_denovo</i> | 21882414                | C/T  | NA                 | NA                            | NA                 |
| <i>Desi_wild_21883724</i> | NA                                  | <i>Ca_desi_denovo</i> | 21883724                | A/G  | NA                 | NA                            | NA                 |
| <i>Desi_wild_21883990</i> | NA                                  | <i>Ca_desi_denovo</i> | 21883990                | A/T  | NA                 | NA                            | NA                 |
| <i>Desi_wild_21884820</i> | NA                                  | <i>Ca_desi_denovo</i> | 21884820                | C/T  | NA                 | NA                            | NA                 |
| <i>Desi_wild_21887791</i> | NA                                  | <i>Ca_desi_denovo</i> | 21887791                | A/T  | NA                 | NA                            | NA                 |
| <i>Desi_wild_21887885</i> | NA                                  | <i>Ca_desi_denovo</i> | 21887885                | C/T  | NA                 | NA                            | NA                 |
| <i>Desi_wild_21888097</i> | NA                                  | <i>Ca_desi_denovo</i> | 21888097                | C/T  | NA                 | NA                            | NA                 |
| <i>Desi_wild_21888130</i> | NA                                  | <i>Ca_desi_denovo</i> | 21888130                | G/T  | NA                 | NA                            | NA                 |
| <i>Desi_wild_21888133</i> | NA                                  | <i>Ca_desi_denovo</i> | 21888133                | A/G  | NA                 | NA                            | NA                 |
| <i>Desi_wild_21890024</i> | NA                                  | <i>Ca_desi_denovo</i> | 21890024                | C/T  | NA                 | NA                            | NA                 |
| <i>Desi_wild_21891753</i> | NA                                  | <i>Ca_desi_denovo</i> | 21891753                | A/G  | NA                 | NA                            | NA                 |

| SNP IDs                   | NCBI dbSNP accession IDs (NCBI_SS#) | Chromosomes           | Physical positions (bp) | SNPs | Gene accession IDs | Sequence components of genome | Putative functions |
|---------------------------|-------------------------------------|-----------------------|-------------------------|------|--------------------|-------------------------------|--------------------|
| <i>Desi_wild_21896213</i> | NA                                  | <i>Ca_desi_denovo</i> | 21896213                | C/T  | NA                 | NA                            | NA                 |
| <i>Desi_wild_21896225</i> | NA                                  | <i>Ca_desi_denovo</i> | 21896225                | C/T  | NA                 | NA                            | NA                 |
| <i>Desi_wild_21896277</i> | NA                                  | <i>Ca_desi_denovo</i> | 21896277                | C/T  | NA                 | NA                            | NA                 |
| <i>Desi_wild_21897323</i> | NA                                  | <i>Ca_desi_denovo</i> | 21897323                | A/G  | NA                 | NA                            | NA                 |
| <i>Desi_wild_21897331</i> | NA                                  | <i>Ca_desi_denovo</i> | 21897331                | C/T  | NA                 | NA                            | NA                 |
| <i>Desi_wild_21901460</i> | NA                                  | <i>Ca_desi_denovo</i> | 21901460                | A/G  | NA                 | NA                            | NA                 |
| <i>Desi_wild_21905036</i> | NA                                  | <i>Ca_desi_denovo</i> | 21905036                | C/G  | NA                 | NA                            | NA                 |
| <i>Desi_wild_21905062</i> | NA                                  | <i>Ca_desi_denovo</i> | 21905062                | A/G  | NA                 | NA                            | NA                 |
| <i>Desi_wild_21905249</i> | NA                                  | <i>Ca_desi_denovo</i> | 21905249                | A/T  | NA                 | NA                            | NA                 |
| <i>Desi_wild_21905251</i> | NA                                  | <i>Ca_desi_denovo</i> | 21905251                | A/G  | NA                 | NA                            | NA                 |
| <i>Desi_wild_21905274</i> | NA                                  | <i>Ca_desi_denovo</i> | 21905274                | A/T  | NA                 | NA                            | NA                 |
| <i>Desi_wild_21905873</i> | NA                                  | <i>Ca_desi_denovo</i> | 21905873                | C/T  | NA                 | NA                            | NA                 |
| <i>Desi_wild_21907583</i> | NA                                  | <i>Ca_desi_denovo</i> | 21907583                | C/G  | NA                 | NA                            | NA                 |
| <i>Desi_wild_21908139</i> | NA                                  | <i>Ca_desi_denovo</i> | 21908139                | C/T  | NA                 | NA                            | NA                 |
| <i>Desi_wild_21908154</i> | NA                                  | <i>Ca_desi_denovo</i> | 21908154                | A/G  | NA                 | NA                            | NA                 |
| <i>Desi_wild_21908166</i> | NA                                  | <i>Ca_desi_denovo</i> | 21908166                | A/G  | NA                 | NA                            | NA                 |
| <i>Desi_wild_21908181</i> | NA                                  | <i>Ca_desi_denovo</i> | 21908181                | C/G  | NA                 | NA                            | NA                 |
| <i>Desi_wild_21909249</i> | NA                                  | <i>Ca_desi_denovo</i> | 21909249                | C/T  | NA                 | NA                            | NA                 |
| <i>Desi_wild_21909262</i> | NA                                  | <i>Ca_desi_denovo</i> | 21909262                | C/T  | NA                 | NA                            | NA                 |
| <i>Desi_wild_21912008</i> | NA                                  | <i>Ca_desi_denovo</i> | 21912008                | C/T  | NA                 | NA                            | NA                 |
| <i>Desi_wild_21912708</i> | NA                                  | <i>Ca_desi_denovo</i> | 21912708                | A/G  | NA                 | NA                            | NA                 |
| <i>Desi_wild_21913333</i> | NA                                  | <i>Ca_desi_denovo</i> | 21913333                | A/G  | NA                 | NA                            | NA                 |
| <i>Desi_wild_21913343</i> | NA                                  | <i>Ca_desi_denovo</i> | 21913343                | A/G  | NA                 | NA                            | NA                 |
| <i>Desi_wild_21913382</i> | NA                                  | <i>Ca_desi_denovo</i> | 21913382                | A/G  | NA                 | NA                            | NA                 |
| <i>Desi_wild_21913419</i> | NA                                  | <i>Ca_desi_denovo</i> | 21913419                | A/G  | NA                 | NA                            | NA                 |
| <i>Desi_wild_21913466</i> | NA                                  | <i>Ca_desi_denovo</i> | 21913466                | A/G  | NA                 | NA                            | NA                 |
| <i>Desi_wild_21915720</i> | NA                                  | <i>Ca_desi_denovo</i> | 21915720                | A/G  | NA                 | NA                            | NA                 |
| <i>Desi_wild_21917268</i> | NA                                  | <i>Ca_desi_denovo</i> | 21917268                | C/T  | NA                 | NA                            | NA                 |
| <i>Desi_wild_21919614</i> | NA                                  | <i>Ca_desi_denovo</i> | 21919614                | A/G  | NA                 | NA                            | NA                 |
| <i>Desi_wild_21919674</i> | NA                                  | <i>Ca_desi_denovo</i> | 21919674                | C/T  | NA                 | NA                            | NA                 |
| <i>Desi_wild_21921552</i> | NA                                  | <i>Ca_desi_denovo</i> | 21921552                | C/T  | NA                 | NA                            | NA                 |
| <i>Desi_wild_21924436</i> | NA                                  | <i>Ca_desi_denovo</i> | 21924436                | A/G  | NA                 | NA                            | NA                 |
| <i>Desi_wild_21924444</i> | NA                                  | <i>Ca_desi_denovo</i> | 21924444                | A/G  | NA                 | NA                            | NA                 |
| <i>Desi_wild_21924469</i> | NA                                  | <i>Ca_desi_denovo</i> | 21924469                | C/T  | NA                 | NA                            | NA                 |
| <i>Desi_wild_21924738</i> | NA                                  | <i>Ca_desi_denovo</i> | 21924738                | A/G  | NA                 | NA                            | NA                 |
| <i>Desi_wild_21925116</i> | NA                                  | <i>Ca_desi_denovo</i> | 21925116                | A/G  | NA                 | NA                            | NA                 |
| <i>Desi_wild_21925292</i> | NA                                  | <i>Ca_desi_denovo</i> | 21925292                | A/C  | NA                 | NA                            | NA                 |
| <i>Desi_wild_21926206</i> | NA                                  | <i>Ca_desi_denovo</i> | 21926206                | C/T  | NA                 | NA                            | NA                 |
| <i>Desi_wild_21927055</i> | NA                                  | <i>Ca_desi_denovo</i> | 21927055                | A/G  | NA                 | NA                            | NA                 |
| <i>Desi_wild_21927066</i> | NA                                  | <i>Ca_desi_denovo</i> | 21927066                | G/T  | NA                 | NA                            | NA                 |
| <i>Desi_wild_21927087</i> | NA                                  | <i>Ca_desi_denovo</i> | 21927087                | A/T  | NA                 | NA                            | NA                 |
| <i>Desi_wild_21927357</i> | NA                                  | <i>Ca_desi_denovo</i> | 21927357                | C/G  | NA                 | NA                            | NA                 |
| <i>Desi_wild_21927358</i> | NA                                  | <i>Ca_desi_denovo</i> | 21927358                | C/T  | NA                 | NA                            | NA                 |
| <i>Desi_wild_21927779</i> | NA                                  | <i>Ca_desi_denovo</i> | 21927779                | A/C  | NA                 | NA                            | NA                 |

| SNP IDs                   | NCBI dbSNP accession IDs (NCBI_SS#) | Chromosomes           | Physical positions (bp) | SNPs | Gene accession IDs | Sequence components of genome | Putative functions |
|---------------------------|-------------------------------------|-----------------------|-------------------------|------|--------------------|-------------------------------|--------------------|
| <i>Desi_wild_21929655</i> | NA                                  | <i>Ca_desi_denovo</i> | 21929655                | A/T  | NA                 | NA                            | NA                 |
| <i>Desi_wild_21932514</i> | NA                                  | <i>Ca_desi_denovo</i> | 21932514                | C/T  | NA                 | NA                            | NA                 |
| <i>Desi_wild_21932536</i> | NA                                  | <i>Ca_desi_denovo</i> | 21932536                | A/T  | NA                 | NA                            | NA                 |
| <i>Desi_wild_21932891</i> | NA                                  | <i>Ca_desi_denovo</i> | 21932891                | C/T  | NA                 | NA                            | NA                 |
| <i>Desi_wild_21934019</i> | NA                                  | <i>Ca_desi_denovo</i> | 21934019                | C/T  | NA                 | NA                            | NA                 |
| <i>Desi_wild_21934023</i> | NA                                  | <i>Ca_desi_denovo</i> | 21934023                | C/T  | NA                 | NA                            | NA                 |
| <i>Desi_wild_21935214</i> | NA                                  | <i>Ca_desi_denovo</i> | 21935214                | C/T  | NA                 | NA                            | NA                 |
| <i>Desi_wild_21937642</i> | NA                                  | <i>Ca_desi_denovo</i> | 21937642                | C/T  | NA                 | NA                            | NA                 |
| <i>Desi_wild_21937644</i> | NA                                  | <i>Ca_desi_denovo</i> | 21937644                | C/T  | NA                 | NA                            | NA                 |
| <i>Desi_wild_21941998</i> | NA                                  | <i>Ca_desi_denovo</i> | 21941998                | A/G  | NA                 | NA                            | NA                 |
| <i>Desi_wild_21944400</i> | NA                                  | <i>Ca_desi_denovo</i> | 21944400                | C/G  | NA                 | NA                            | NA                 |
| <i>Desi_wild_21945168</i> | NA                                  | <i>Ca_desi_denovo</i> | 21945168                | A/T  | NA                 | NA                            | NA                 |
| <i>Desi_wild_21946650</i> | NA                                  | <i>Ca_desi_denovo</i> | 21946650                | C/G  | NA                 | NA                            | NA                 |
| <i>Desi_wild_21946666</i> | NA                                  | <i>Ca_desi_denovo</i> | 21946666                | A/C  | NA                 | NA                            | NA                 |
| <i>Desi_wild_21946667</i> | NA                                  | <i>Ca_desi_denovo</i> | 21946667                | C/T  | NA                 | NA                            | NA                 |
| <i>Desi_wild_21951115</i> | NA                                  | <i>Ca_desi_denovo</i> | 21951115                | A/C  | NA                 | NA                            | NA                 |
| <i>Desi_wild_21952178</i> | NA                                  | <i>Ca_desi_denovo</i> | 21952178                | A/G  | NA                 | NA                            | NA                 |
| <i>Desi_wild_21952217</i> | NA                                  | <i>Ca_desi_denovo</i> | 21952217                | C/T  | NA                 | NA                            | NA                 |
| <i>Desi_wild_21954796</i> | NA                                  | <i>Ca_desi_denovo</i> | 21954796                | C/T  | NA                 | NA                            | NA                 |
| <i>Desi_wild_21954812</i> | NA                                  | <i>Ca_desi_denovo</i> | 21954812                | C/T  | NA                 | NA                            | NA                 |
| <i>Desi_wild_21954835</i> | NA                                  | <i>Ca_desi_denovo</i> | 21954835                | C/T  | NA                 | NA                            | NA                 |
| <i>Desi_wild_21955883</i> | NA                                  | <i>Ca_desi_denovo</i> | 21955883                | C/G  | NA                 | NA                            | NA                 |
| <i>Desi_wild_21957084</i> | NA                                  | <i>Ca_desi_denovo</i> | 21957084                | A/G  | NA                 | NA                            | NA                 |
| <i>Desi_wild_21958434</i> | NA                                  | <i>Ca_desi_denovo</i> | 21958434                | A/T  | NA                 | NA                            | NA                 |
| <i>Desi_wild_21962478</i> | NA                                  | <i>Ca_desi_denovo</i> | 21962478                | A/G  | NA                 | NA                            | NA                 |
| <i>Desi_wild_21962481</i> | NA                                  | <i>Ca_desi_denovo</i> | 21962481                | A/G  | NA                 | NA                            | NA                 |
| <i>Desi_wild_21963628</i> | NA                                  | <i>Ca_desi_denovo</i> | 21963628                | T/A  | NA                 | NA                            | NA                 |
| <i>Desi_wild_21963837</i> | NA                                  | <i>Ca_desi_denovo</i> | 21963837                | A/G  | NA                 | NA                            | NA                 |
| <i>Desi_wild_21963843</i> | NA                                  | <i>Ca_desi_denovo</i> | 21963843                | A/G  | NA                 | NA                            | NA                 |
| <i>Desi_wild_21964210</i> | NA                                  | <i>Ca_desi_denovo</i> | 21964210                | G/T  | NA                 | NA                            | NA                 |
| <i>Desi_wild_21964294</i> | NA                                  | <i>Ca_desi_denovo</i> | 21964294                | C/G  | NA                 | NA                            | NA                 |
| <i>Desi_wild_21966136</i> | NA                                  | <i>Ca_desi_denovo</i> | 21966136                | G/T  | NA                 | NA                            | NA                 |
| <i>Desi_wild_21967973</i> | NA                                  | <i>Ca_desi_denovo</i> | 21967973                | G/T  | NA                 | NA                            | NA                 |
| <i>Desi_wild_21968916</i> | NA                                  | <i>Ca_desi_denovo</i> | 21968916                | C/T  | NA                 | NA                            | NA                 |
| <i>Desi_wild_21968953</i> | NA                                  | <i>Ca_desi_denovo</i> | 21968953                | C/T  | NA                 | NA                            | NA                 |
| <i>Desi_wild_21969359</i> | NA                                  | <i>Ca_desi_denovo</i> | 21969359                | C/T  | NA                 | NA                            | NA                 |
| <i>Desi_wild_21969590</i> | NA                                  | <i>Ca_desi_denovo</i> | 21969590                | A/C  | NA                 | NA                            | NA                 |
| <i>Desi_wild_21969600</i> | NA                                  | <i>Ca_desi_denovo</i> | 21969600                | C/G  | NA                 | NA                            | NA                 |
| <i>Desi_wild_21970116</i> | NA                                  | <i>Ca_desi_denovo</i> | 21970116                | A/C  | NA                 | NA                            | NA                 |
| <i>Desi_wild_21970117</i> | NA                                  | <i>Ca_desi_denovo</i> | 21970117                | G/T  | NA                 | NA                            | NA                 |
| <i>Desi_wild_21971613</i> | NA                                  | <i>Ca_desi_denovo</i> | 21971613                | A/C  | NA                 | NA                            | NA                 |
| <i>Desi_wild_21972392</i> | NA                                  | <i>Ca_desi_denovo</i> | 21972392                | C/T  | NA                 | NA                            | NA                 |
| <i>Desi_wild_21973041</i> | NA                                  | <i>Ca_desi_denovo</i> | 21973041                | G/T  | NA                 | NA                            | NA                 |
| <i>Desi_wild_21974044</i> | NA                                  | <i>Ca_desi_denovo</i> | 21974044                | A/T  | NA                 | NA                            | NA                 |

| SNP IDs                   | NCBI dbSNP accession IDs (NCBI_SS#) | Chromosomes           | Physical positions (bp) | SNPs | Gene accession IDs | Sequence components of genome | Putative functions |
|---------------------------|-------------------------------------|-----------------------|-------------------------|------|--------------------|-------------------------------|--------------------|
| <i>Desi_wild_21974304</i> | NA                                  | <i>Ca_desi_denovo</i> | 21974304                | A/G  | NA                 | NA                            | NA                 |
| <i>Desi_wild_21977009</i> | NA                                  | <i>Ca_desi_denovo</i> | 21977009                | A/G  | NA                 | NA                            | NA                 |
| <i>Desi_wild_21977065</i> | NA                                  | <i>Ca_desi_denovo</i> | 21977065                | A/C  | NA                 | NA                            | NA                 |
| <i>Desi_wild_21977236</i> | NA                                  | <i>Ca_desi_denovo</i> | 21977236                | A/G  | NA                 | NA                            | NA                 |
| <i>Desi_wild_21977245</i> | NA                                  | <i>Ca_desi_denovo</i> | 21977245                | A/G  | NA                 | NA                            | NA                 |
| <i>Desi_wild_21977511</i> | NA                                  | <i>Ca_desi_denovo</i> | 21977511                | A/G  | NA                 | NA                            | NA                 |
| <i>Desi_wild_21977571</i> | NA                                  | <i>Ca_desi_denovo</i> | 21977571                | G/T  | NA                 | NA                            | NA                 |
| <i>Desi_wild_21979170</i> | NA                                  | <i>Ca_desi_denovo</i> | 21979170                | A/G  | NA                 | NA                            | NA                 |
| <i>Desi_wild_21980125</i> | NA                                  | <i>Ca_desi_denovo</i> | 21980125                | C/T  | NA                 | NA                            | NA                 |
| <i>Desi_wild_21981180</i> | NA                                  | <i>Ca_desi_denovo</i> | 21981180                | A/G  | NA                 | NA                            | NA                 |
| <i>Desi_wild_21981309</i> | NA                                  | <i>Ca_desi_denovo</i> | 21981309                | A/G  | NA                 | NA                            | NA                 |
| <i>Desi_wild_21982352</i> | NA                                  | <i>Ca_desi_denovo</i> | 21982352                | C/T  | NA                 | NA                            | NA                 |
| <i>Desi_wild_21982362</i> | NA                                  | <i>Ca_desi_denovo</i> | 21982362                | A/G  | NA                 | NA                            | NA                 |
| <i>Desi_wild_21982640</i> | NA                                  | <i>Ca_desi_denovo</i> | 21982640                | C/T  | NA                 | NA                            | NA                 |
| <i>Desi_wild_21983225</i> | NA                                  | <i>Ca_desi_denovo</i> | 21983225                | A/C  | NA                 | NA                            | NA                 |
| <i>Desi_wild_21983232</i> | NA                                  | <i>Ca_desi_denovo</i> | 21983232                | A/G  | NA                 | NA                            | NA                 |
| <i>Desi_wild_21985161</i> | NA                                  | <i>Ca_desi_denovo</i> | 21985161                | A/C  | NA                 | NA                            | NA                 |
| <i>Desi_wild_21985167</i> | NA                                  | <i>Ca_desi_denovo</i> | 21985167                | C/T  | NA                 | NA                            | NA                 |
| <i>Desi_wild_21985673</i> | NA                                  | <i>Ca_desi_denovo</i> | 21985673                | A/G  | NA                 | NA                            | NA                 |
| <i>Desi_wild_21985685</i> | NA                                  | <i>Ca_desi_denovo</i> | 21985685                | A/C  | NA                 | NA                            | NA                 |
| <i>Desi_wild_21985700</i> | NA                                  | <i>Ca_desi_denovo</i> | 21985700                | C/T  | NA                 | NA                            | NA                 |
| <i>Desi_wild_21992146</i> | NA                                  | <i>Ca_desi_denovo</i> | 21992146                | A/G  | NA                 | NA                            | NA                 |
| <i>Desi_wild_21993933</i> | NA                                  | <i>Ca_desi_denovo</i> | 21993933                | A/G  | NA                 | NA                            | NA                 |
| <i>Desi_wild_21993973</i> | NA                                  | <i>Ca_desi_denovo</i> | 21993973                | G/T  | NA                 | NA                            | NA                 |
| <i>Desi_wild_21994351</i> | NA                                  | <i>Ca_desi_denovo</i> | 21994351                | A/T  | NA                 | NA                            | NA                 |
| <i>Desi_wild_21994489</i> | NA                                  | <i>Ca_desi_denovo</i> | 21994489                | C/T  | NA                 | NA                            | NA                 |
| <i>Desi_wild_21996029</i> | NA                                  | <i>Ca_desi_denovo</i> | 21996029                | G/T  | NA                 | NA                            | NA                 |
| <i>Desi_wild_21996040</i> | NA                                  | <i>Ca_desi_denovo</i> | 21996040                | A/G  | NA                 | NA                            | NA                 |
| <i>Desi_wild_21996514</i> | NA                                  | <i>Ca_desi_denovo</i> | 21996514                | A/C  | NA                 | NA                            | NA                 |
| <i>Desi_wild_21997296</i> | NA                                  | <i>Ca_desi_denovo</i> | 21997296                | A/C  | NA                 | NA                            | NA                 |
| <i>Desi_wild_21997325</i> | NA                                  | <i>Ca_desi_denovo</i> | 21997325                | A/G  | NA                 | NA                            | NA                 |
| <i>Desi_wild_21997364</i> | NA                                  | <i>Ca_desi_denovo</i> | 21997364                | C/T  | NA                 | NA                            | NA                 |
| <i>Desi_wild_21999807</i> | NA                                  | <i>Ca_desi_denovo</i> | 21999807                | A/C  | NA                 | NA                            | NA                 |
| <i>Desi_wild_21999875</i> | NA                                  | <i>Ca_desi_denovo</i> | 21999875                | G/T  | NA                 | NA                            | NA                 |
| <i>Desi_wild_22000599</i> | NA                                  | <i>Ca_desi_denovo</i> | 22000599                | A/G  | NA                 | NA                            | NA                 |
| <i>Desi_wild_22000717</i> | NA                                  | <i>Ca_desi_denovo</i> | 22000717                | G/T  | NA                 | NA                            | NA                 |
| <i>Desi_wild_22000750</i> | NA                                  | <i>Ca_desi_denovo</i> | 22000750                | A/G  | NA                 | NA                            | NA                 |
| <i>Desi_wild_22008447</i> | NA                                  | <i>Ca_desi_denovo</i> | 22008447                | A/G  | NA                 | NA                            | NA                 |
| <i>Desi_wild_22008450</i> | NA                                  | <i>Ca_desi_denovo</i> | 22008450                | A/G  | NA                 | NA                            | NA                 |
| <i>Desi_wild_22008465</i> | NA                                  | <i>Ca_desi_denovo</i> | 22008465                | A/T  | NA                 | NA                            | NA                 |
| <i>Desi_wild_22009255</i> | NA                                  | <i>Ca_desi_denovo</i> | 22009255                | A/G  | NA                 | NA                            | NA                 |
| <i>Desi_wild_22013162</i> | NA                                  | <i>Ca_desi_denovo</i> | 22013162                | A/G  | NA                 | NA                            | NA                 |
| <i>Desi_wild_22013615</i> | NA                                  | <i>Ca_desi_denovo</i> | 22013615                | A/G  | NA                 | NA                            | NA                 |
| <i>Desi_wild_22013662</i> | NA                                  | <i>Ca_desi_denovo</i> | 22013662                | C/G  | NA                 | NA                            | NA                 |

| SNP IDs                   | NCBI dbSNP accession IDs (NCBI_SS#) | Chromosomes           | Physical positions (bp) | SNPs | Gene accession IDs | Sequence components of genome | Putative functions |
|---------------------------|-------------------------------------|-----------------------|-------------------------|------|--------------------|-------------------------------|--------------------|
| <i>Desi_wild_22016361</i> | NA                                  | <i>Ca_desi_denovo</i> | 22016361                | A/T  | NA                 | NA                            | NA                 |
| <i>Desi_wild_22016797</i> | NA                                  | <i>Ca_desi_denovo</i> | 22016797                | A/G  | NA                 | NA                            | NA                 |
| <i>Desi_wild_22016814</i> | NA                                  | <i>Ca_desi_denovo</i> | 22016814                | C/T  | NA                 | NA                            | NA                 |
| <i>Desi_wild_22016925</i> | NA                                  | <i>Ca_desi_denovo</i> | 22016925                | C/G  | NA                 | NA                            | NA                 |
| <i>Desi_wild_22018297</i> | NA                                  | <i>Ca_desi_denovo</i> | 22018297                | A/T  | NA                 | NA                            | NA                 |
| <i>Desi_wild_22018306</i> | NA                                  | <i>Ca_desi_denovo</i> | 22018306                | A/T  | NA                 | NA                            | NA                 |
| <i>Desi_wild_22018312</i> | NA                                  | <i>Ca_desi_denovo</i> | 22018312                | A/G  | NA                 | NA                            | NA                 |
| <i>Desi_wild_22019600</i> | NA                                  | <i>Ca_desi_denovo</i> | 22019600                | A/G  | NA                 | NA                            | NA                 |
| <i>Desi_wild_22019642</i> | NA                                  | <i>Ca_desi_denovo</i> | 22019642                | C/T  | NA                 | NA                            | NA                 |
| <i>Desi_wild_22020311</i> | NA                                  | <i>Ca_desi_denovo</i> | 22020311                | A/T  | NA                 | NA                            | NA                 |
| <i>Desi_wild_22021072</i> | NA                                  | <i>Ca_desi_denovo</i> | 22021072                | A/G  | NA                 | NA                            | NA                 |
| <i>Desi_wild_22021074</i> | NA                                  | <i>Ca_desi_denovo</i> | 22021074                | C/G  | NA                 | NA                            | NA                 |
| <i>Desi_wild_22022295</i> | NA                                  | <i>Ca_desi_denovo</i> | 22022295                | C/T  | NA                 | NA                            | NA                 |
| <i>Desi_wild_22022703</i> | NA                                  | <i>Ca_desi_denovo</i> | 22022703                | C/T  | NA                 | NA                            | NA                 |
| <i>Desi_wild_22024691</i> | NA                                  | <i>Ca_desi_denovo</i> | 22024691                | C/T  | NA                 | NA                            | NA                 |
| <i>Desi_wild_22025252</i> | NA                                  | <i>Ca_desi_denovo</i> | 22025252                | A/G  | NA                 | NA                            | NA                 |
| <i>Desi_wild_22025609</i> | NA                                  | <i>Ca_desi_denovo</i> | 22025609                | C/G  | NA                 | NA                            | NA                 |
| <i>Desi_wild_22026391</i> | NA                                  | <i>Ca_desi_denovo</i> | 22026391                | A/G  | NA                 | NA                            | NA                 |
| <i>Desi_wild_22027080</i> | NA                                  | <i>Ca_desi_denovo</i> | 22027080                | A/G  | NA                 | NA                            | NA                 |
| <i>Desi_wild_22027095</i> | NA                                  | <i>Ca_desi_denovo</i> | 22027095                | A/G  | NA                 | NA                            | NA                 |
| <i>Desi_wild_22027550</i> | NA                                  | <i>Ca_desi_denovo</i> | 22027550                | C/G  | NA                 | NA                            | NA                 |
| <i>Desi_wild_22030771</i> | NA                                  | <i>Ca_desi_denovo</i> | 22030771                | C/T  | NA                 | NA                            | NA                 |
| <i>Desi_wild_22032204</i> | NA                                  | <i>Ca_desi_denovo</i> | 22032204                | C/T  | NA                 | NA                            | NA                 |
| <i>Desi_wild_22032282</i> | NA                                  | <i>Ca_desi_denovo</i> | 22032282                | A/C  | NA                 | NA                            | NA                 |
| <i>Desi_wild_22036480</i> | NA                                  | <i>Ca_desi_denovo</i> | 22036480                | A/G  | NA                 | NA                            | NA                 |
| <i>Desi_wild_22037047</i> | NA                                  | <i>Ca_desi_denovo</i> | 22037047                | A/C  | NA                 | NA                            | NA                 |
| <i>Desi_wild_22037926</i> | NA                                  | <i>Ca_desi_denovo</i> | 22037926                | C/T  | NA                 | NA                            | NA                 |
| <i>Desi_wild_22037969</i> | NA                                  | <i>Ca_desi_denovo</i> | 22037969                | C/T  | NA                 | NA                            | NA                 |
| <i>Desi_wild_22038874</i> | NA                                  | <i>Ca_desi_denovo</i> | 22038874                | A/G  | NA                 | NA                            | NA                 |
| <i>Desi_wild_22040289</i> | NA                                  | <i>Ca_desi_denovo</i> | 22040289                | C/G  | NA                 | NA                            | NA                 |
| <i>Desi_wild_22040301</i> | NA                                  | <i>Ca_desi_denovo</i> | 22040301                | C/T  | NA                 | NA                            | NA                 |
| <i>Desi_wild_22040329</i> | NA                                  | <i>Ca_desi_denovo</i> | 22040329                | A/G  | NA                 | NA                            | NA                 |
| <i>Desi_wild_22040904</i> | NA                                  | <i>Ca_desi_denovo</i> | 22040904                | C/A  | NA                 | NA                            | NA                 |
| <i>Desi_wild_22042127</i> | NA                                  | <i>Ca_desi_denovo</i> | 22042127                | A/G  | NA                 | NA                            | NA                 |
| <i>Desi_wild_22042805</i> | NA                                  | <i>Ca_desi_denovo</i> | 22042805                | A/G  | NA                 | NA                            | NA                 |
| <i>Desi_wild_22044534</i> | NA                                  | <i>Ca_desi_denovo</i> | 22044534                | G/T  | NA                 | NA                            | NA                 |
| <i>Desi_wild_22044584</i> | NA                                  | <i>Ca_desi_denovo</i> | 22044584                | A/G  | NA                 | NA                            | NA                 |
| <i>Desi_wild_22044839</i> | NA                                  | <i>Ca_desi_denovo</i> | 22044839                | A/T  | NA                 | NA                            | NA                 |
| <i>Desi_wild_22049003</i> | NA                                  | <i>Ca_desi_denovo</i> | 22049003                | A/G  | NA                 | NA                            | NA                 |
| <i>Desi_wild_22049877</i> | NA                                  | <i>Ca_desi_denovo</i> | 22049877                | C/T  | NA                 | NA                            | NA                 |
| <i>Desi_wild_22049904</i> | NA                                  | <i>Ca_desi_denovo</i> | 22049904                | A/G  | NA                 | NA                            | NA                 |
| <i>Desi_wild_22049911</i> | NA                                  | <i>Ca_desi_denovo</i> | 22049911                | C/T  | NA                 | NA                            | NA                 |
| <i>Desi_wild_22050230</i> | NA                                  | <i>Ca_desi_denovo</i> | 22050230                | C/T  | NA                 | NA                            | NA                 |
| <i>Desi_wild_22050673</i> | NA                                  | <i>Ca_desi_denovo</i> | 22050673                | A/C  | NA                 | NA                            | NA                 |

| SNP IDs                   | NCBI dbSNP accession IDs (NCBI_SS#) | Chromosomes           | Physical positions (bp) | SNPs | Gene accession IDs | Sequence components of genome | Putative functions |
|---------------------------|-------------------------------------|-----------------------|-------------------------|------|--------------------|-------------------------------|--------------------|
| <i>Desi_wild_22050676</i> | NA                                  | <i>Ca_desi_denovo</i> | 22050676                | C/T  | NA                 | NA                            | NA                 |
| <i>Desi_wild_22051384</i> | NA                                  | <i>Ca_desi_denovo</i> | 22051384                | A/T  | NA                 | NA                            | NA                 |
| <i>Desi_wild_22051898</i> | NA                                  | <i>Ca_desi_denovo</i> | 22051898                | C/G  | NA                 | NA                            | NA                 |
| <i>Desi_wild_22051909</i> | NA                                  | <i>Ca_desi_denovo</i> | 22051909                | C/G  | NA                 | NA                            | NA                 |
| <i>Desi_wild_22052968</i> | NA                                  | <i>Ca_desi_denovo</i> | 22052968                | A/C  | NA                 | NA                            | NA                 |
| <i>Desi_wild_22053015</i> | NA                                  | <i>Ca_desi_denovo</i> | 22053015                | C/T  | NA                 | NA                            | NA                 |
| <i>Desi_wild_22053085</i> | NA                                  | <i>Ca_desi_denovo</i> | 22053085                | C/T  | NA                 | NA                            | NA                 |
| <i>Desi_wild_22053689</i> | NA                                  | <i>Ca_desi_denovo</i> | 22053689                | A/G  | NA                 | NA                            | NA                 |
| <i>Desi_wild_22057077</i> | NA                                  | <i>Ca_desi_denovo</i> | 22057077                | C/G  | NA                 | NA                            | NA                 |
| <i>Desi_wild_22057155</i> | NA                                  | <i>Ca_desi_denovo</i> | 22057155                | A/C  | NA                 | NA                            | NA                 |
| <i>Desi_wild_22057560</i> | NA                                  | <i>Ca_desi_denovo</i> | 22057560                | C/T  | NA                 | NA                            | NA                 |
| <i>Desi_wild_22058706</i> | NA                                  | <i>Ca_desi_denovo</i> | 22058706                | A/G  | NA                 | NA                            | NA                 |
| <i>Desi_wild_22058718</i> | NA                                  | <i>Ca_desi_denovo</i> | 22058718                | C/T  | NA                 | NA                            | NA                 |
| <i>Desi_wild_22058721</i> | NA                                  | <i>Ca_desi_denovo</i> | 22058721                | C/T  | NA                 | NA                            | NA                 |
| <i>Desi_wild_22059681</i> | NA                                  | <i>Ca_desi_denovo</i> | 22059681                | A/C  | NA                 | NA                            | NA                 |
| <i>Desi_wild_22059708</i> | NA                                  | <i>Ca_desi_denovo</i> | 22059708                | A/G  | NA                 | NA                            | NA                 |
| <i>Desi_wild_22059726</i> | NA                                  | <i>Ca_desi_denovo</i> | 22059726                | C/T  | NA                 | NA                            | NA                 |
| <i>Desi_wild_22059995</i> | NA                                  | <i>Ca_desi_denovo</i> | 22059995                | C/T  | NA                 | NA                            | NA                 |
| <i>Desi_wild_22062878</i> | NA                                  | <i>Ca_desi_denovo</i> | 22062878                | G/T  | NA                 | NA                            | NA                 |
| <i>Desi_wild_22063348</i> | NA                                  | <i>Ca_desi_denovo</i> | 22063348                | G/T  | NA                 | NA                            | NA                 |
| <i>Desi_wild_22063366</i> | NA                                  | <i>Ca_desi_denovo</i> | 22063366                | C/G  | NA                 | NA                            | NA                 |
| <i>Desi_wild_22063401</i> | NA                                  | <i>Ca_desi_denovo</i> | 22063401                | A/G  | NA                 | NA                            | NA                 |
| <i>Desi_wild_22063560</i> | NA                                  | <i>Ca_desi_denovo</i> | 22063560                | G/T  | NA                 | NA                            | NA                 |
| <i>Desi_wild_22065873</i> | NA                                  | <i>Ca_desi_denovo</i> | 22065873                | C/T  | NA                 | NA                            | NA                 |
| <i>Desi_wild_22066663</i> | NA                                  | <i>Ca_desi_denovo</i> | 22066663                | A/C  | NA                 | NA                            | NA                 |
| <i>Desi_wild_22066664</i> | NA                                  | <i>Ca_desi_denovo</i> | 22066664                | A/G  | NA                 | NA                            | NA                 |
| <i>Desi_wild_22071812</i> | NA                                  | <i>Ca_desi_denovo</i> | 22071812                | C/T  | NA                 | NA                            | NA                 |
| <i>Desi_wild_22071870</i> | NA                                  | <i>Ca_desi_denovo</i> | 22071870                | G/T  | NA                 | NA                            | NA                 |
| <i>Desi_wild_22072579</i> | NA                                  | <i>Ca_desi_denovo</i> | 22072579                | C/T  | NA                 | NA                            | NA                 |
| <i>Desi_wild_22075670</i> | NA                                  | <i>Ca_desi_denovo</i> | 22075670                | A/T  | NA                 | NA                            | NA                 |
| <i>Desi_wild_22075722</i> | NA                                  | <i>Ca_desi_denovo</i> | 22075722                | C/G  | NA                 | NA                            | NA                 |
| <i>Desi_wild_22078979</i> | NA                                  | <i>Ca_desi_denovo</i> | 22078979                | A/G  | NA                 | NA                            | NA                 |
| <i>Desi_wild_22078989</i> | NA                                  | <i>Ca_desi_denovo</i> | 22078989                | C/T  | NA                 | NA                            | NA                 |
| <i>Desi_wild_22079054</i> | NA                                  | <i>Ca_desi_denovo</i> | 22079054                | A/G  | NA                 | NA                            | NA                 |
| <i>Desi_wild_22079057</i> | NA                                  | <i>Ca_desi_denovo</i> | 22079057                | A/G  | NA                 | NA                            | NA                 |
| <i>Desi_wild_22079072</i> | NA                                  | <i>Ca_desi_denovo</i> | 22079072                | A/G  | NA                 | NA                            | NA                 |
| <i>Desi_wild_22080081</i> | NA                                  | <i>Ca_desi_denovo</i> | 22080081                | A/C  | NA                 | NA                            | NA                 |
| <i>Desi_wild_22081083</i> | NA                                  | <i>Ca_desi_denovo</i> | 22081083                | A/C  | NA                 | NA                            | NA                 |
| <i>Desi_wild_22083219</i> | NA                                  | <i>Ca_desi_denovo</i> | 22083219                | C/G  | NA                 | NA                            | NA                 |
| <i>Desi_wild_22084389</i> | NA                                  | <i>Ca_desi_denovo</i> | 22084389                | C/T  | NA                 | NA                            | NA                 |
| <i>Desi_wild_22084416</i> | NA                                  | <i>Ca_desi_denovo</i> | 22084416                | A/G  | NA                 | NA                            | NA                 |
| <i>Desi_wild_22084434</i> | NA                                  | <i>Ca_desi_denovo</i> | 22084434                | C/G  | NA                 | NA                            | NA                 |
| <i>Desi_wild_22084884</i> | NA                                  | <i>Ca_desi_denovo</i> | 22084884                | C/G  | NA                 | NA                            | NA                 |
| <i>Desi_wild_22085170</i> | NA                                  | <i>Ca_desi_denovo</i> | 22085170                | C/T  | NA                 | NA                            | NA                 |

| SNP IDs                   | NCBI dbSNP accession IDs (NCBI_SS#) | Chromosomes           | Physical positions (bp) | SNPs | Gene accession IDs | Sequence components of genome | Putative functions |
|---------------------------|-------------------------------------|-----------------------|-------------------------|------|--------------------|-------------------------------|--------------------|
| <i>Desi_wild_22085312</i> | NA                                  | <i>Ca_desi_denovo</i> | 22085312                | A/T  | NA                 | NA                            | NA                 |
| <i>Desi_wild_22087139</i> | NA                                  | <i>Ca_desi_denovo</i> | 22087139                | A/T  | NA                 | NA                            | NA                 |
| <i>Desi_wild_22090047</i> | NA                                  | <i>Ca_desi_denovo</i> | 22090047                | C/G  | NA                 | NA                            | NA                 |
| <i>Desi_wild_22090050</i> | NA                                  | <i>Ca_desi_denovo</i> | 22090050                | A/T  | NA                 | NA                            | NA                 |
| <i>Desi_wild_22091192</i> | NA                                  | <i>Ca_desi_denovo</i> | 22091192                | A/G  | NA                 | NA                            | NA                 |
| <i>Desi_wild_22091219</i> | NA                                  | <i>Ca_desi_denovo</i> | 22091219                | C/T  | NA                 | NA                            | NA                 |
| <i>Desi_wild_22091487</i> | NA                                  | <i>Ca_desi_denovo</i> | 22091487                | C/T  | NA                 | NA                            | NA                 |
| <i>Desi_wild_22092368</i> | NA                                  | <i>Ca_desi_denovo</i> | 22092368                | C/T  | NA                 | NA                            | NA                 |
| <i>Desi_wild_22092845</i> | NA                                  | <i>Ca_desi_denovo</i> | 22092845                | C/T  | NA                 | NA                            | NA                 |
| <i>Desi_wild_22092973</i> | NA                                  | <i>Ca_desi_denovo</i> | 22092973                | A/C  | NA                 | NA                            | NA                 |
| <i>Desi_wild_22093353</i> | NA                                  | <i>Ca_desi_denovo</i> | 22093353                | A/T  | NA                 | NA                            | NA                 |
| <i>Desi_wild_22094303</i> | NA                                  | <i>Ca_desi_denovo</i> | 22094303                | C/T  | NA                 | NA                            | NA                 |
| <i>Desi_wild_22094309</i> | NA                                  | <i>Ca_desi_denovo</i> | 22094309                | A/G  | NA                 | NA                            | NA                 |
| <i>Desi_wild_22096926</i> | NA                                  | <i>Ca_desi_denovo</i> | 22096926                | A/T  | NA                 | NA                            | NA                 |
| <i>Desi_wild_22097974</i> | NA                                  | <i>Ca_desi_denovo</i> | 22097974                | A/G  | NA                 | NA                            | NA                 |
| <i>Desi_wild_22100612</i> | NA                                  | <i>Ca_desi_denovo</i> | 22100612                | C/T  | NA                 | NA                            | NA                 |
| <i>Desi_wild_22102680</i> | NA                                  | <i>Ca_desi_denovo</i> | 22102680                | C/T  | NA                 | NA                            | NA                 |
| <i>Desi_wild_22102940</i> | NA                                  | <i>Ca_desi_denovo</i> | 22102940                | A/G  | NA                 | NA                            | NA                 |
| <i>Desi_wild_22103325</i> | NA                                  | <i>Ca_desi_denovo</i> | 22103325                | A/T  | NA                 | NA                            | NA                 |
| <i>Desi_wild_22104866</i> | NA                                  | <i>Ca_desi_denovo</i> | 22104866                | C/T  | NA                 | NA                            | NA                 |
| <i>Desi_wild_22104882</i> | NA                                  | <i>Ca_desi_denovo</i> | 22104882                | G/T  | NA                 | NA                            | NA                 |
| <i>Desi_wild_22104886</i> | NA                                  | <i>Ca_desi_denovo</i> | 22104886                | A/T  | NA                 | NA                            | NA                 |
| <i>Desi_wild_22104897</i> | NA                                  | <i>Ca_desi_denovo</i> | 22104897                | A/T  | NA                 | NA                            | NA                 |
| <i>Desi_wild_22105781</i> | NA                                  | <i>Ca_desi_denovo</i> | 22105781                | C/T  | NA                 | NA                            | NA                 |
| <i>Desi_wild_22105783</i> | NA                                  | <i>Ca_desi_denovo</i> | 22105783                | C/T  | NA                 | NA                            | NA                 |
| <i>Desi_wild_22106020</i> | NA                                  | <i>Ca_desi_denovo</i> | 22106020                | A/C  | NA                 | NA                            | NA                 |
| <i>Desi_wild_22106024</i> | NA                                  | <i>Ca_desi_denovo</i> | 22106024                | C/T  | NA                 | NA                            | NA                 |
| <i>Desi_wild_22106032</i> | NA                                  | <i>Ca_desi_denovo</i> | 22106032                | C/G  | NA                 | NA                            | NA                 |
| <i>Desi_wild_22106041</i> | NA                                  | <i>Ca_desi_denovo</i> | 22106041                | A/G  | NA                 | NA                            | NA                 |
| <i>Desi_wild_22108592</i> | NA                                  | <i>Ca_desi_denovo</i> | 22108592                | A/G  | NA                 | NA                            | NA                 |
| <i>Desi_wild_22111453</i> | NA                                  | <i>Ca_desi_denovo</i> | 22111453                | C/T  | NA                 | NA                            | NA                 |
| <i>Desi_wild_22111501</i> | NA                                  | <i>Ca_desi_denovo</i> | 22111501                | A/C  | NA                 | NA                            | NA                 |
| <i>Desi_wild_22113897</i> | NA                                  | <i>Ca_desi_denovo</i> | 22113897                | A/G  | NA                 | NA                            | NA                 |
| <i>Desi_wild_22115243</i> | NA                                  | <i>Ca_desi_denovo</i> | 22115243                | C/T  | NA                 | NA                            | NA                 |
| <i>Desi_wild_22115265</i> | NA                                  | <i>Ca_desi_denovo</i> | 22115265                | A/G  | NA                 | NA                            | NA                 |
| <i>Desi_wild_22116250</i> | NA                                  | <i>Ca_desi_denovo</i> | 22116250                | A/C  | NA                 | NA                            | NA                 |
| <i>Desi_wild_22120703</i> | NA                                  | <i>Ca_desi_denovo</i> | 22120703                | A/G  | NA                 | NA                            | NA                 |
| <i>Desi_wild_22121599</i> | NA                                  | <i>Ca_desi_denovo</i> | 22121599                | C/T  | NA                 | NA                            | NA                 |
| <i>Desi_wild_22124404</i> | NA                                  | <i>Ca_desi_denovo</i> | 22124404                | G/A  | NA                 | NA                            | NA                 |
| <i>Desi_wild_22124407</i> | NA                                  | <i>Ca_desi_denovo</i> | 22124407                | C/G  | NA                 | NA                            | NA                 |
| <i>Desi_wild_22126390</i> | NA                                  | <i>Ca_desi_denovo</i> | 22126390                | A/G  | NA                 | NA                            | NA                 |
| <i>Desi_wild_22126613</i> | NA                                  | <i>Ca_desi_denovo</i> | 22126613                | A/T  | NA                 | NA                            | NA                 |
| <i>Desi_wild_22127075</i> | NA                                  | <i>Ca_desi_denovo</i> | 22127075                | C/T  | NA                 | NA                            | NA                 |
| <i>Desi_wild_22127135</i> | NA                                  | <i>Ca_desi_denovo</i> | 22127135                | A/T  | NA                 | NA                            | NA                 |



| SNP IDs                   | NCBI dbSNP accession IDs (NCBI_SS#) | Chromosomes           | Physical positions (bp) | SNPs | Gene accession IDs | Sequence components of genome | Putative functions |
|---------------------------|-------------------------------------|-----------------------|-------------------------|------|--------------------|-------------------------------|--------------------|
| <i>Desi_wild_22128950</i> | NA                                  | <i>Ca_desi_denovo</i> | 22128950                | A/G  | NA                 | NA                            | NA                 |
| <i>Desi_wild_22128952</i> | NA                                  | <i>Ca_desi_denovo</i> | 22128952                | A/G  | NA                 | NA                            | NA                 |
| <i>Desi_wild_22129358</i> | NA                                  | <i>Ca_desi_denovo</i> | 22129358                | C/T  | NA                 | NA                            | NA                 |
| <i>Desi_wild_22129373</i> | NA                                  | <i>Ca_desi_denovo</i> | 22129373                | A/G  | NA                 | NA                            | NA                 |
| <i>Desi_wild_22129538</i> | NA                                  | <i>Ca_desi_denovo</i> | 22129538                | C/T  | NA                 | NA                            | NA                 |
| <i>Desi_wild_22129561</i> | NA                                  | <i>Ca_desi_denovo</i> | 22129561                | C/G  | NA                 | NA                            | NA                 |
| <i>Desi_wild_22130016</i> | NA                                  | <i>Ca_desi_denovo</i> | 22130016                | C/G  | NA                 | NA                            | NA                 |
| <i>Desi_wild_22130790</i> | NA                                  | <i>Ca_desi_denovo</i> | 22130790                | A/G  | NA                 | NA                            | NA                 |
| <i>Desi_wild_22130803</i> | NA                                  | <i>Ca_desi_denovo</i> | 22130803                | C/G  | NA                 | NA                            | NA                 |
| <i>Desi_wild_22130811</i> | NA                                  | <i>Ca_desi_denovo</i> | 22130811                | C/T  | NA                 | NA                            | NA                 |
| <i>Desi_wild_22130836</i> | NA                                  | <i>Ca_desi_denovo</i> | 22130836                | A/C  | NA                 | NA                            | NA                 |
| <i>Desi_wild_22130897</i> | NA                                  | <i>Ca_desi_denovo</i> | 22130897                | A/G  | NA                 | NA                            | NA                 |
| <i>Desi_wild_22131952</i> | NA                                  | <i>Ca_desi_denovo</i> | 22131952                | A/G  | NA                 | NA                            | NA                 |
| <i>Desi_wild_22132250</i> | NA                                  | <i>Ca_desi_denovo</i> | 22132250                | A/G  | NA                 | NA                            | NA                 |
| <i>Desi_wild_22132992</i> | NA                                  | <i>Ca_desi_denovo</i> | 22132992                | C/G  | NA                 | NA                            | NA                 |
| <i>Desi_wild_22133037</i> | NA                                  | <i>Ca_desi_denovo</i> | 22133037                | A/G  | NA                 | NA                            | NA                 |
| <i>Desi_wild_22133070</i> | NA                                  | <i>Ca_desi_denovo</i> | 22133070                | C/T  | NA                 | NA                            | NA                 |
| <i>Desi_wild_22135518</i> | NA                                  | <i>Ca_desi_denovo</i> | 22135518                | A/G  | NA                 | NA                            | NA                 |
| <i>Desi_wild_22135578</i> | NA                                  | <i>Ca_desi_denovo</i> | 22135578                | C/T  | NA                 | NA                            | NA                 |
| <i>Desi_wild_22138018</i> | NA                                  | <i>Ca_desi_denovo</i> | 22138018                | A/G  | NA                 | NA                            | NA                 |
| <i>Desi_wild_22138045</i> | NA                                  | <i>Ca_desi_denovo</i> | 22138045                | C/T  | NA                 | NA                            | NA                 |
| <i>Desi_wild_22138915</i> | NA                                  | <i>Ca_desi_denovo</i> | 22138915                | A/C  | NA                 | NA                            | NA                 |
| <i>Desi_wild_22138919</i> | NA                                  | <i>Ca_desi_denovo</i> | 22138919                | A/C  | NA                 | NA                            | NA                 |
| <i>Desi_wild_22139738</i> | NA                                  | <i>Ca_desi_denovo</i> | 22139738                | A/G  | NA                 | NA                            | NA                 |
| <i>Desi_wild_22140923</i> | NA                                  | <i>Ca_desi_denovo</i> | 22140923                | C/T  | NA                 | NA                            | NA                 |
| <i>Desi_wild_22145851</i> | NA                                  | <i>Ca_desi_denovo</i> | 22145851                | A/G  | NA                 | NA                            | NA                 |
| <i>Desi_wild_22146185</i> | NA                                  | <i>Ca_desi_denovo</i> | 22146185                | C/T  | NA                 | NA                            | NA                 |
| <i>Desi_wild_22146378</i> | NA                                  | <i>Ca_desi_denovo</i> | 22146378                | A/G  | NA                 | NA                            | NA                 |
| <i>Desi_wild_22146588</i> | NA                                  | <i>Ca_desi_denovo</i> | 22146588                | C/T  | NA                 | NA                            | NA                 |
| <i>Desi_wild_22147842</i> | NA                                  | <i>Ca_desi_denovo</i> | 22147842                | A/G  | NA                 | NA                            | NA                 |
| <i>Desi_wild_22147868</i> | NA                                  | <i>Ca_desi_denovo</i> | 22147868                | A/T  | NA                 | NA                            | NA                 |
| <i>Desi_wild_22147891</i> | NA                                  | <i>Ca_desi_denovo</i> | 22147891                | C/T  | NA                 | NA                            | NA                 |
| <i>Desi_wild_22148645</i> | NA                                  | <i>Ca_desi_denovo</i> | 22148645                | A/G  | NA                 | NA                            | NA                 |
| <i>Desi_wild_22150398</i> | NA                                  | <i>Ca_desi_denovo</i> | 22150398                | C/T  | NA                 | NA                            | NA                 |
| <i>Desi_wild_22150965</i> | NA                                  | <i>Ca_desi_denovo</i> | 22150965                | A/G  | NA                 | NA                            | NA                 |
| <i>Desi_wild_22153690</i> | NA                                  | <i>Ca_desi_denovo</i> | 22153690                | A/G  | NA                 | NA                            | NA                 |
| <i>Desi_wild_22153695</i> | NA                                  | <i>Ca_desi_denovo</i> | 22153695                | C/G  | NA                 | NA                            | NA                 |
| <i>Desi_wild_22157151</i> | NA                                  | <i>Ca_desi_denovo</i> | 22157151                | A/C  | NA                 | NA                            | NA                 |
| <i>Desi_wild_22157164</i> | NA                                  | <i>Ca_desi_denovo</i> | 22157164                | C/T  | NA                 | NA                            | NA                 |
| <i>Desi_wild_22157228</i> | NA                                  | <i>Ca_desi_denovo</i> | 22157228                | A/G  | NA                 | NA                            | NA                 |
| <i>Desi_wild_22158394</i> | NA                                  | <i>Ca_desi_denovo</i> | 22158394                | A/G  | NA                 | NA                            | NA                 |
| <i>Desi_wild_22158940</i> | NA                                  | <i>Ca_desi_denovo</i> | 22158940                | C/T  | NA                 | NA                            | NA                 |
| <i>Desi_wild_22160384</i> | NA                                  | <i>Ca_desi_denovo</i> | 22160384                | C/G  | NA                 | NA                            | NA                 |
| <i>Desi_wild_22160539</i> | NA                                  | <i>Ca_desi_denovo</i> | 22160539                | G/A  | NA                 | NA                            | NA                 |

| SNP IDs                   | NCBI dbSNP accession IDs (NCBI_SS#) | Chromosomes           | Physical positions (bp) | SNPs | Gene accession IDs | Sequence components of genome | Putative functions |
|---------------------------|-------------------------------------|-----------------------|-------------------------|------|--------------------|-------------------------------|--------------------|
| <i>Desi_wild_22167753</i> | NA                                  | <i>Ca_desi_denovo</i> | 22167753                | A/G  | NA                 | NA                            | NA                 |
| <i>Desi_wild_22169507</i> | NA                                  | <i>Ca_desi_denovo</i> | 22169507                | C/T  | NA                 | NA                            | NA                 |
| <i>Desi_wild_22170048</i> | NA                                  | <i>Ca_desi_denovo</i> | 22170048                | C/T  | NA                 | NA                            | NA                 |
| <i>Desi_wild_22170052</i> | NA                                  | <i>Ca_desi_denovo</i> | 22170052                | C/T  | NA                 | NA                            | NA                 |
| <i>Desi_wild_22171405</i> | NA                                  | <i>Ca_desi_denovo</i> | 22171405                | C/G  | NA                 | NA                            | NA                 |
| <i>Desi_wild_22171543</i> | NA                                  | <i>Ca_desi_denovo</i> | 22171543                | C/G  | NA                 | NA                            | NA                 |
| <i>Desi_wild_22172115</i> | NA                                  | <i>Ca_desi_denovo</i> | 22172115                | A/G  | NA                 | NA                            | NA                 |
| <i>Desi_wild_22172391</i> | NA                                  | <i>Ca_desi_denovo</i> | 22172391                | A/C  | NA                 | NA                            | NA                 |
| <i>Desi_wild_22172423</i> | NA                                  | <i>Ca_desi_denovo</i> | 22172423                | C/T  | NA                 | NA                            | NA                 |
| <i>Desi_wild_22173450</i> | NA                                  | <i>Ca_desi_denovo</i> | 22173450                | C/T  | NA                 | NA                            | NA                 |
| <i>Desi_wild_22173543</i> | NA                                  | <i>Ca_desi_denovo</i> | 22173543                | G/T  | NA                 | NA                            | NA                 |
| <i>Desi_wild_22173575</i> | NA                                  | <i>Ca_desi_denovo</i> | 22173575                | C/G  | NA                 | NA                            | NA                 |
| <i>Desi_wild_22175489</i> | NA                                  | <i>Ca_desi_denovo</i> | 22175489                | C/T  | NA                 | NA                            | NA                 |
| <i>Desi_wild_22176549</i> | NA                                  | <i>Ca_desi_denovo</i> | 22176549                | A/G  | NA                 | NA                            | NA                 |
| <i>Desi_wild_22178313</i> | NA                                  | <i>Ca_desi_denovo</i> | 22178313                | A/G  | NA                 | NA                            | NA                 |
| <i>Desi_wild_22179372</i> | NA                                  | <i>Ca_desi_denovo</i> | 22179372                | A/T  | NA                 | NA                            | NA                 |
| <i>Desi_wild_22179432</i> | NA                                  | <i>Ca_desi_denovo</i> | 22179432                | C/G  | NA                 | NA                            | NA                 |
| <i>Desi_wild_22179553</i> | NA                                  | <i>Ca_desi_denovo</i> | 22179553                | C/T  | NA                 | NA                            | NA                 |
| <i>Desi_wild_22181648</i> | NA                                  | <i>Ca_desi_denovo</i> | 22181648                | A/G  | NA                 | NA                            | NA                 |
| <i>Desi_wild_22187175</i> | NA                                  | <i>Ca_desi_denovo</i> | 22187175                | A/G  | NA                 | NA                            | NA                 |
| <i>Desi_wild_22187632</i> | NA                                  | <i>Ca_desi_denovo</i> | 22187632                | C/G  | NA                 | NA                            | NA                 |
| <i>Desi_wild_22189009</i> | NA                                  | <i>Ca_desi_denovo</i> | 22189009                | A/T  | NA                 | NA                            | NA                 |
| <i>Desi_wild_22190769</i> | NA                                  | <i>Ca_desi_denovo</i> | 22190769                | A/T  | NA                 | NA                            | NA                 |
| <i>Desi_wild_22191909</i> | NA                                  | <i>Ca_desi_denovo</i> | 22191909                | A/G  | NA                 | NA                            | NA                 |
| <i>Desi_wild_22193630</i> | NA                                  | <i>Ca_desi_denovo</i> | 22193630                | A/T  | NA                 | NA                            | NA                 |
| <i>Desi_wild_22195191</i> | NA                                  | <i>Ca_desi_denovo</i> | 22195191                | C/T  | NA                 | NA                            | NA                 |
| <i>Desi_wild_22195390</i> | NA                                  | <i>Ca_desi_denovo</i> | 22195390                | C/G  | NA                 | NA                            | NA                 |
| <i>Desi_wild_22195393</i> | NA                                  | <i>Ca_desi_denovo</i> | 22195393                | C/T  | NA                 | NA                            | NA                 |
| <i>Desi_wild_22197282</i> | NA                                  | <i>Ca_desi_denovo</i> | 22197282                | G/T  | NA                 | NA                            | NA                 |
| <i>Desi_wild_22197949</i> | NA                                  | <i>Ca_desi_denovo</i> | 22197949                | A/T  | NA                 | NA                            | NA                 |
| <i>Desi_wild_22198207</i> | NA                                  | <i>Ca_desi_denovo</i> | 22198207                | A/G  | NA                 | NA                            | NA                 |
| <i>Desi_wild_22198218</i> | NA                                  | <i>Ca_desi_denovo</i> | 22198218                | A/G  | NA                 | NA                            | NA                 |
| <i>Desi_wild_22198509</i> | NA                                  | <i>Ca_desi_denovo</i> | 22198509                | C/T  | NA                 | NA                            | NA                 |
| <i>Desi_wild_22198535</i> | NA                                  | <i>Ca_desi_denovo</i> | 22198535                | G/T  | NA                 | NA                            | NA                 |
| <i>Desi_wild_22199721</i> | NA                                  | <i>Ca_desi_denovo</i> | 22199721                | A/G  | NA                 | NA                            | NA                 |
| <i>Desi_wild_22199747</i> | NA                                  | <i>Ca_desi_denovo</i> | 22199747                | C/T  | NA                 | NA                            | NA                 |
| <i>Desi_wild_22200815</i> | NA                                  | <i>Ca_desi_denovo</i> | 22200815                | A/G  | NA                 | NA                            | NA                 |
| <i>Desi_wild_22203809</i> | NA                                  | <i>Ca_desi_denovo</i> | 22203809                | G/T  | NA                 | NA                            | NA                 |
| <i>Desi_wild_22203837</i> | NA                                  | <i>Ca_desi_denovo</i> | 22203837                | G/T  | NA                 | NA                            | NA                 |
| <i>Desi_wild_22203839</i> | NA                                  | <i>Ca_desi_denovo</i> | 22203839                | A/T  | NA                 | NA                            | NA                 |
| <i>Desi_wild_22205953</i> | NA                                  | <i>Ca_desi_denovo</i> | 22205953                | G/T  | NA                 | NA                            | NA                 |
| <i>Desi_wild_22206514</i> | NA                                  | <i>Ca_desi_denovo</i> | 22206514                | A/G  | NA                 | NA                            | NA                 |
| <i>Desi_wild_22207622</i> | NA                                  | <i>Ca_desi_denovo</i> | 22207622                | A/T  | NA                 | NA                            | NA                 |
| <i>Desi_wild_22215263</i> | NA                                  | <i>Ca_desi_denovo</i> | 22215263                | G/T  | NA                 | NA                            | NA                 |

| SNP IDs                   | NCBI dbSNP accession IDs (NCBI_SS#) | Chromosomes           | Physical positions (bp) | SNPs | Gene accession IDs | Sequence components of genome | Putative functions |
|---------------------------|-------------------------------------|-----------------------|-------------------------|------|--------------------|-------------------------------|--------------------|
| <i>Desi_wild_22215278</i> | NA                                  | <i>Ca_desi_denovo</i> | 22215278                | C/T  | NA                 | NA                            | NA                 |
| <i>Desi_wild_22217580</i> | NA                                  | <i>Ca_desi_denovo</i> | 22217580                | A/G  | NA                 | NA                            | NA                 |
| <i>Desi_wild_22220990</i> | NA                                  | <i>Ca_desi_denovo</i> | 22220990                | A/T  | NA                 | NA                            | NA                 |
| <i>Desi_wild_22221006</i> | NA                                  | <i>Ca_desi_denovo</i> | 22221006                | G/T  | NA                 | NA                            | NA                 |
| <i>Desi_wild_22221066</i> | NA                                  | <i>Ca_desi_denovo</i> | 22221066                | A/G  | NA                 | NA                            | NA                 |
| <i>Desi_wild_22221579</i> | NA                                  | <i>Ca_desi_denovo</i> | 22221579                | A/G  | NA                 | NA                            | NA                 |
| <i>Desi_wild_22221592</i> | NA                                  | <i>Ca_desi_denovo</i> | 22221592                | A/C  | NA                 | NA                            | NA                 |
| <i>Desi_wild_22224486</i> | NA                                  | <i>Ca_desi_denovo</i> | 22224486                | A/C  | NA                 | NA                            | NA                 |
| <i>Desi_wild_22224504</i> | NA                                  | <i>Ca_desi_denovo</i> | 22224504                | C/G  | NA                 | NA                            | NA                 |
| <i>Desi_wild_22226333</i> | NA                                  | <i>Ca_desi_denovo</i> | 22226333                | A/G  | NA                 | NA                            | NA                 |
| <i>Desi_wild_22229821</i> | NA                                  | <i>Ca_desi_denovo</i> | 22229821                | A/T  | NA                 | NA                            | NA                 |
| <i>Desi_wild_22232228</i> | NA                                  | <i>Ca_desi_denovo</i> | 22232228                | A/G  | NA                 | NA                            | NA                 |
| <i>Desi_wild_22234749</i> | NA                                  | <i>Ca_desi_denovo</i> | 22234749                | A/G  | NA                 | NA                            | NA                 |
| <i>Desi_wild_22234776</i> | NA                                  | <i>Ca_desi_denovo</i> | 22234776                | A/T  | NA                 | NA                            | NA                 |
| <i>Desi_wild_22235961</i> | NA                                  | <i>Ca_desi_denovo</i> | 22235961                | A/T  | NA                 | NA                            | NA                 |
| <i>Desi_wild_22236021</i> | NA                                  | <i>Ca_desi_denovo</i> | 22236021                | C/T  | NA                 | NA                            | NA                 |
| <i>Desi_wild_22236063</i> | NA                                  | <i>Ca_desi_denovo</i> | 22236063                | C/T  | NA                 | NA                            | NA                 |
| <i>Desi_wild_22237074</i> | NA                                  | <i>Ca_desi_denovo</i> | 22237074                | C/T  | NA                 | NA                            | NA                 |
| <i>Desi_wild_22237104</i> | NA                                  | <i>Ca_desi_denovo</i> | 22237104                | C/T  | NA                 | NA                            | NA                 |
| <i>Desi_wild_22238529</i> | NA                                  | <i>Ca_desi_denovo</i> | 22238529                | C/T  | NA                 | NA                            | NA                 |
| <i>Desi_wild_22238604</i> | NA                                  | <i>Ca_desi_denovo</i> | 22238604                | A/T  | NA                 | NA                            | NA                 |
| <i>Desi_wild_22241840</i> | NA                                  | <i>Ca_desi_denovo</i> | 22241840                | C/T  | NA                 | NA                            | NA                 |
| <i>Desi_wild_22241896</i> | NA                                  | <i>Ca_desi_denovo</i> | 22241896                | A/G  | NA                 | NA                            | NA                 |
| <i>Desi_wild_22242623</i> | NA                                  | <i>Ca_desi_denovo</i> | 22242623                | C/T  | NA                 | NA                            | NA                 |
| <i>Desi_wild_22244142</i> | NA                                  | <i>Ca_desi_denovo</i> | 22244142                | A/G  | NA                 | NA                            | NA                 |
| <i>Desi_wild_22244397</i> | NA                                  | <i>Ca_desi_denovo</i> | 22244397                | A/G  | NA                 | NA                            | NA                 |
| <i>Desi_wild_22244402</i> | NA                                  | <i>Ca_desi_denovo</i> | 22244402                | A/G  | NA                 | NA                            | NA                 |
| <i>Desi_wild_22245715</i> | NA                                  | <i>Ca_desi_denovo</i> | 22245715                | A/G  | NA                 | NA                            | NA                 |
| <i>Desi_wild_22246226</i> | NA                                  | <i>Ca_desi_denovo</i> | 22246226                | A/C  | NA                 | NA                            | NA                 |
| <i>Desi_wild_22246228</i> | NA                                  | <i>Ca_desi_denovo</i> | 22246228                | A/G  | NA                 | NA                            | NA                 |
| <i>Desi_wild_22247573</i> | NA                                  | <i>Ca_desi_denovo</i> | 22247573                | C/T  | NA                 | NA                            | NA                 |
| <i>Desi_wild_22247845</i> | NA                                  | <i>Ca_desi_denovo</i> | 22247845                | A/G  | NA                 | NA                            | NA                 |
| <i>Desi_wild_22248049</i> | NA                                  | <i>Ca_desi_denovo</i> | 22248049                | A/G  | NA                 | NA                            | NA                 |
| <i>Desi_wild_22249985</i> | NA                                  | <i>Ca_desi_denovo</i> | 22249985                | C/G  | NA                 | NA                            | NA                 |
| <i>Desi_wild_22249991</i> | NA                                  | <i>Ca_desi_denovo</i> | 22249991                | C/T  | NA                 | NA                            | NA                 |
| <i>Desi_wild_22250842</i> | NA                                  | <i>Ca_desi_denovo</i> | 22250842                | A/G  | NA                 | NA                            | NA                 |
| <i>Desi_wild_22250875</i> | NA                                  | <i>Ca_desi_denovo</i> | 22250875                | A/G  | NA                 | NA                            | NA                 |
| <i>Desi_wild_22250896</i> | NA                                  | <i>Ca_desi_denovo</i> | 22250896                | A/C  | NA                 | NA                            | NA                 |
| <i>Desi_wild_22251174</i> | NA                                  | <i>Ca_desi_denovo</i> | 22251174                | A/C  | NA                 | NA                            | NA                 |
| <i>Desi_wild_22256896</i> | NA                                  | <i>Ca_desi_denovo</i> | 22256896                | C/T  | NA                 | NA                            | NA                 |
| <i>Desi_wild_22256910</i> | NA                                  | <i>Ca_desi_denovo</i> | 22256910                | A/C  | NA                 | NA                            | NA                 |
| <i>Desi_wild_22259511</i> | NA                                  | <i>Ca_desi_denovo</i> | 22259511                | A/G  | NA                 | NA                            | NA                 |
| <i>Desi_wild_22259524</i> | NA                                  | <i>Ca_desi_denovo</i> | 22259524                | C/T  | NA                 | NA                            | NA                 |
| <i>Desi_wild_22259802</i> | NA                                  | <i>Ca_desi_denovo</i> | 22259802                | C/T  | NA                 | NA                            | NA                 |

| SNP IDs                   | NCBI dbSNP accession IDs (NCBI_SS#) | Chromosomes           | Physical positions (bp) | SNPs | Gene accession IDs | Sequence components of genome | Putative functions |
|---------------------------|-------------------------------------|-----------------------|-------------------------|------|--------------------|-------------------------------|--------------------|
| <i>Desi_wild_22260654</i> | NA                                  | <i>Ca_desi_denovo</i> | 22260654                | C/T  | NA                 | NA                            | NA                 |
| <i>Desi_wild_22260956</i> | NA                                  | <i>Ca_desi_denovo</i> | 22260956                | A/T  | NA                 | NA                            | NA                 |
| <i>Desi_wild_22262194</i> | NA                                  | <i>Ca_desi_denovo</i> | 22262194                | A/G  | NA                 | NA                            | NA                 |
| <i>Desi_wild_22263434</i> | NA                                  | <i>Ca_desi_denovo</i> | 22263434                | C/G  | NA                 | NA                            | NA                 |
| <i>Desi_wild_22263805</i> | NA                                  | <i>Ca_desi_denovo</i> | 22263805                | A/T  | NA                 | NA                            | NA                 |
| <i>Desi_wild_22263806</i> | NA                                  | <i>Ca_desi_denovo</i> | 22263806                | C/G  | NA                 | NA                            | NA                 |
| <i>Desi_wild_22263807</i> | NA                                  | <i>Ca_desi_denovo</i> | 22263807                | A/T  | NA                 | NA                            | NA                 |
| <i>Desi_wild_22263917</i> | NA                                  | <i>Ca_desi_denovo</i> | 22263917                | C/T  | NA                 | NA                            | NA                 |
| <i>Desi_wild_22264815</i> | NA                                  | <i>Ca_desi_denovo</i> | 22264815                | G/T  | NA                 | NA                            | NA                 |
| <i>Desi_wild_22265099</i> | NA                                  | <i>Ca_desi_denovo</i> | 22265099                | C/T  | NA                 | NA                            | NA                 |
| <i>Desi_wild_22265108</i> | NA                                  | <i>Ca_desi_denovo</i> | 22265108                | C/T  | NA                 | NA                            | NA                 |
| <i>Desi_wild_22265126</i> | NA                                  | <i>Ca_desi_denovo</i> | 22265126                | C/T  | NA                 | NA                            | NA                 |
| <i>Desi_wild_22265518</i> | NA                                  | <i>Ca_desi_denovo</i> | 22265518                | A/T  | NA                 | NA                            | NA                 |
| <i>Desi_wild_22265551</i> | NA                                  | <i>Ca_desi_denovo</i> | 22265551                | C/T  | NA                 | NA                            | NA                 |
| <i>Desi_wild_22265596</i> | NA                                  | <i>Ca_desi_denovo</i> | 22265596                | G/T  | NA                 | NA                            | NA                 |
| <i>Desi_wild_22265645</i> | NA                                  | <i>Ca_desi_denovo</i> | 22265645                | C/T  | NA                 | NA                            | NA                 |
| <i>Desi_wild_22265656</i> | NA                                  | <i>Ca_desi_denovo</i> | 22265656                | A/G  | NA                 | NA                            | NA                 |
| <i>Desi_wild_22266961</i> | NA                                  | <i>Ca_desi_denovo</i> | 22266961                | C/T  | NA                 | NA                            | NA                 |
| <i>Desi_wild_22269173</i> | NA                                  | <i>Ca_desi_denovo</i> | 22269173                | C/T  | NA                 | NA                            | NA                 |
| <i>Desi_wild_22269228</i> | NA                                  | <i>Ca_desi_denovo</i> | 22269228                | A/G  | NA                 | NA                            | NA                 |
| <i>Desi_wild_22269229</i> | NA                                  | <i>Ca_desi_denovo</i> | 22269229                | A/C  | NA                 | NA                            | NA                 |
| <i>Desi_wild_22272196</i> | NA                                  | <i>Ca_desi_denovo</i> | 22272196                | C/G  | NA                 | NA                            | NA                 |
| <i>Desi_wild_22272931</i> | NA                                  | <i>Ca_desi_denovo</i> | 22272931                | A/G  | NA                 | NA                            | NA                 |
| <i>Desi_wild_22272937</i> | NA                                  | <i>Ca_desi_denovo</i> | 22272937                | C/T  | NA                 | NA                            | NA                 |
| <i>Desi_wild_22273871</i> | NA                                  | <i>Ca_desi_denovo</i> | 22273871                | A/G  | NA                 | NA                            | NA                 |
| <i>Desi_wild_22273898</i> | NA                                  | <i>Ca_desi_denovo</i> | 22273898                | C/T  | NA                 | NA                            | NA                 |
| <i>Desi_wild_22273941</i> | NA                                  | <i>Ca_desi_denovo</i> | 22273941                | A/G  | NA                 | NA                            | NA                 |
| <i>Desi_wild_22273980</i> | NA                                  | <i>Ca_desi_denovo</i> | 22273980                | A/G  | NA                 | NA                            | NA                 |
| <i>Desi_wild_22274317</i> | NA                                  | <i>Ca_desi_denovo</i> | 22274317                | A/G  | NA                 | NA                            | NA                 |
| <i>Desi_wild_22274329</i> | NA                                  | <i>Ca_desi_denovo</i> | 22274329                | A/G  | NA                 | NA                            | NA                 |
| <i>Desi_wild_22274359</i> | NA                                  | <i>Ca_desi_denovo</i> | 22274359                | A/T  | NA                 | NA                            | NA                 |
| <i>Desi_wild_22274848</i> | NA                                  | <i>Ca_desi_denovo</i> | 22274848                | C/T  | NA                 | NA                            | NA                 |
| <i>Desi_wild_22277669</i> | NA                                  | <i>Ca_desi_denovo</i> | 22277669                | C/T  | NA                 | NA                            | NA                 |
| <i>Desi_wild_22281341</i> | NA                                  | <i>Ca_desi_denovo</i> | 22281341                | C/T  | NA                 | NA                            | NA                 |
| <i>Desi_wild_22281342</i> | NA                                  | <i>Ca_desi_denovo</i> | 22281342                | C/T  | NA                 | NA                            | NA                 |
| <i>Desi_wild_22282799</i> | NA                                  | <i>Ca_desi_denovo</i> | 22282799                | C/T  | NA                 | NA                            | NA                 |
| <i>Desi_wild_22287342</i> | NA                                  | <i>Ca_desi_denovo</i> | 22287342                | A/C  | NA                 | NA                            | NA                 |
| <i>Desi_wild_22289649</i> | NA                                  | <i>Ca_desi_denovo</i> | 22289649                | C/T  | NA                 | NA                            | NA                 |
| <i>Desi_wild_22292523</i> | NA                                  | <i>Ca_desi_denovo</i> | 22292523                | C/T  | NA                 | NA                            | NA                 |
| <i>Desi_wild_22295134</i> | NA                                  | <i>Ca_desi_denovo</i> | 22295134                | A/G  | NA                 | NA                            | NA                 |
| <i>Desi_wild_22295164</i> | NA                                  | <i>Ca_desi_denovo</i> | 22295164                | C/G  | NA                 | NA                            | NA                 |
| <i>Desi_wild_22295499</i> | NA                                  | <i>Ca_desi_denovo</i> | 22295499                | C/G  | NA                 | NA                            | NA                 |
| <i>Desi_wild_22296131</i> | NA                                  | <i>Ca_desi_denovo</i> | 22296131                | A/T  | NA                 | NA                            | NA                 |
| <i>Desi_wild_22299660</i> | NA                                  | <i>Ca_desi_denovo</i> | 22299660                | C/T  | NA                 | NA                            | NA                 |

| SNP IDs                   | NCBI dbSNP accession IDs (NCBI_SS#) | Chromosomes           | Physical positions (bp) | SNPs | Gene accession IDs | Sequence components of genome | Putative functions |
|---------------------------|-------------------------------------|-----------------------|-------------------------|------|--------------------|-------------------------------|--------------------|
| <i>Desi_wild_22299662</i> | NA                                  | <i>Ca_desi_denovo</i> | 22299662                | A/G  | NA                 | NA                            | NA                 |
| <i>Desi_wild_22299664</i> | NA                                  | <i>Ca_desi_denovo</i> | 22299664                | A/G  | NA                 | NA                            | NA                 |
| <i>Desi_wild_22302445</i> | NA                                  | <i>Ca_desi_denovo</i> | 22302445                | C/G  | NA                 | NA                            | NA                 |
| <i>Desi_wild_22304634</i> | NA                                  | <i>Ca_desi_denovo</i> | 22304634                | C/T  | NA                 | NA                            | NA                 |
| <i>Desi_wild_22307652</i> | NA                                  | <i>Ca_desi_denovo</i> | 22307652                | C/T  | NA                 | NA                            | NA                 |
| <i>Desi_wild_22310517</i> | NA                                  | <i>Ca_desi_denovo</i> | 22310517                | A/T  | NA                 | NA                            | NA                 |
| <i>Desi_wild_22315037</i> | NA                                  | <i>Ca_desi_denovo</i> | 22315037                | A/G  | NA                 | NA                            | NA                 |
| <i>Desi_wild_22315068</i> | NA                                  | <i>Ca_desi_denovo</i> | 22315068                | A/G  | NA                 | NA                            | NA                 |
| <i>Desi_wild_22316168</i> | NA                                  | <i>Ca_desi_denovo</i> | 22316168                | A/G  | NA                 | NA                            | NA                 |
| <i>Desi_wild_22316413</i> | NA                                  | <i>Ca_desi_denovo</i> | 22316413                | C/G  | NA                 | NA                            | NA                 |
| <i>Desi_wild_22316425</i> | NA                                  | <i>Ca_desi_denovo</i> | 22316425                | C/T  | NA                 | NA                            | NA                 |
| <i>Desi_wild_22317093</i> | NA                                  | <i>Ca_desi_denovo</i> | 22317093                | C/G  | NA                 | NA                            | NA                 |
| <i>Desi_wild_22317096</i> | NA                                  | <i>Ca_desi_denovo</i> | 22317096                | C/T  | NA                 | NA                            | NA                 |
| <i>Desi_wild_22317140</i> | NA                                  | <i>Ca_desi_denovo</i> | 22317140                | G/T  | NA                 | NA                            | NA                 |
| <i>Desi_wild_22317971</i> | NA                                  | <i>Ca_desi_denovo</i> | 22317971                | A/G  | NA                 | NA                            | NA                 |
| <i>Desi_wild_22321281</i> | NA                                  | <i>Ca_desi_denovo</i> | 22321281                | C/T  | NA                 | NA                            | NA                 |
| <i>Desi_wild_22322728</i> | NA                                  | <i>Ca_desi_denovo</i> | 22322728                | C/T  | NA                 | NA                            | NA                 |
| <i>Desi_wild_22322837</i> | NA                                  | <i>Ca_desi_denovo</i> | 22322837                | A/C  | NA                 | NA                            | NA                 |
| <i>Desi_wild_22325462</i> | NA                                  | <i>Ca_desi_denovo</i> | 22325462                | A/T  | NA                 | NA                            | NA                 |
| <i>Desi_wild_22327894</i> | NA                                  | <i>Ca_desi_denovo</i> | 22327894                | C/T  | NA                 | NA                            | NA                 |
| <i>Desi_wild_22328471</i> | NA                                  | <i>Ca_desi_denovo</i> | 22328471                | A/T  | NA                 | NA                            | NA                 |
| <i>Desi_wild_22328761</i> | NA                                  | <i>Ca_desi_denovo</i> | 22328761                | C/T  | NA                 | NA                            | NA                 |
| <i>Desi_wild_22333715</i> | NA                                  | <i>Ca_desi_denovo</i> | 22333715                | A/G  | NA                 | NA                            | NA                 |
| <i>Desi_wild_22333913</i> | NA                                  | <i>Ca_desi_denovo</i> | 22333913                | C/T  | NA                 | NA                            | NA                 |
| <i>Desi_wild_22335816</i> | NA                                  | <i>Ca_desi_denovo</i> | 22335816                | A/G  | NA                 | NA                            | NA                 |
| <i>Desi_wild_22335836</i> | NA                                  | <i>Ca_desi_denovo</i> | 22335836                | A/G  | NA                 | NA                            | NA                 |
| <i>Desi_wild_22335850</i> | NA                                  | <i>Ca_desi_denovo</i> | 22335850                | A/G  | NA                 | NA                            | NA                 |
| <i>Desi_wild_22338230</i> | NA                                  | <i>Ca_desi_denovo</i> | 22338230                | G/T  | NA                 | NA                            | NA                 |
| <i>Desi_wild_22338231</i> | NA                                  | <i>Ca_desi_denovo</i> | 22338231                | A/G  | NA                 | NA                            | NA                 |
| <i>Desi_wild_22338232</i> | NA                                  | <i>Ca_desi_denovo</i> | 22338232                | A/T  | NA                 | NA                            | NA                 |
| <i>Desi_wild_22339328</i> | NA                                  | <i>Ca_desi_denovo</i> | 22339328                | C/G  | NA                 | NA                            | NA                 |
| <i>Desi_wild_22339332</i> | NA                                  | <i>Ca_desi_denovo</i> | 22339332                | G/T  | NA                 | NA                            | NA                 |
| <i>Desi_wild_22339732</i> | NA                                  | <i>Ca_desi_denovo</i> | 22339732                | A/G  | NA                 | NA                            | NA                 |
| <i>Desi_wild_22339796</i> | NA                                  | <i>Ca_desi_denovo</i> | 22339796                | C/T  | NA                 | NA                            | NA                 |
| <i>Desi_wild_22346905</i> | NA                                  | <i>Ca_desi_denovo</i> | 22346905                | C/G  | NA                 | NA                            | NA                 |
| <i>Desi_wild_22348442</i> | NA                                  | <i>Ca_desi_denovo</i> | 22348442                | A/T  | NA                 | NA                            | NA                 |
| <i>Desi_wild_22348510</i> | NA                                  | <i>Ca_desi_denovo</i> | 22348510                | C/T  | NA                 | NA                            | NA                 |
| <i>Desi_wild_22348537</i> | NA                                  | <i>Ca_desi_denovo</i> | 22348537                | C/G  | NA                 | NA                            | NA                 |
| <i>Desi_wild_22348570</i> | NA                                  | <i>Ca_desi_denovo</i> | 22348570                | A/G  | NA                 | NA                            | NA                 |
| <i>Desi_wild_22350665</i> | NA                                  | <i>Ca_desi_denovo</i> | 22350665                | C/G  | NA                 | NA                            | NA                 |
| <i>Desi_wild_22350680</i> | NA                                  | <i>Ca_desi_denovo</i> | 22350680                | A/G  | NA                 | NA                            | NA                 |
| <i>Desi_wild_22350972</i> | NA                                  | <i>Ca_desi_denovo</i> | 22350972                | A/G  | NA                 | NA                            | NA                 |
| <i>Desi_wild_22350978</i> | NA                                  | <i>Ca_desi_denovo</i> | 22350978                | C/T  | NA                 | NA                            | NA                 |
| <i>Desi_wild_22351923</i> | NA                                  | <i>Ca_desi_denovo</i> | 22351923                | A/G  | NA                 | NA                            | NA                 |

| SNP IDs                   | NCBI dbSNP accession IDs (NCBI_SS#) | Chromosomes           | Physical positions (bp) | SNPs | Gene accession IDs | Sequence components of genome | Putative functions |
|---------------------------|-------------------------------------|-----------------------|-------------------------|------|--------------------|-------------------------------|--------------------|
| <i>Desi_wild_22352921</i> | NA                                  | <i>Ca_desi_denovo</i> | 22352921                | C/G  | NA                 | NA                            | NA                 |
| <i>Desi_wild_22357657</i> | NA                                  | <i>Ca_desi_denovo</i> | 22357657                | A/T  | NA                 | NA                            | NA                 |
| <i>Desi_wild_22358532</i> | NA                                  | <i>Ca_desi_denovo</i> | 22358532                | A/G  | NA                 | NA                            | NA                 |
| <i>Desi_wild_22358551</i> | NA                                  | <i>Ca_desi_denovo</i> | 22358551                | C/T  | NA                 | NA                            | NA                 |
| <i>Desi_wild_22360949</i> | NA                                  | <i>Ca_desi_denovo</i> | 22360949                | C/T  | NA                 | NA                            | NA                 |
| <i>Desi_wild_22360955</i> | NA                                  | <i>Ca_desi_denovo</i> | 22360955                | A/G  | NA                 | NA                            | NA                 |
| <i>Desi_wild_22362315</i> | NA                                  | <i>Ca_desi_denovo</i> | 22362315                | C/T  | NA                 | NA                            | NA                 |
| <i>Desi_wild_22364068</i> | NA                                  | <i>Ca_desi_denovo</i> | 22364068                | A/G  | NA                 | NA                            | NA                 |
| <i>Desi_wild_22364189</i> | NA                                  | <i>Ca_desi_denovo</i> | 22364189                | C/T  | NA                 | NA                            | NA                 |
| <i>Desi_wild_22368349</i> | NA                                  | <i>Ca_desi_denovo</i> | 22368349                | A/C  | NA                 | NA                            | NA                 |
| <i>Desi_wild_22368452</i> | NA                                  | <i>Ca_desi_denovo</i> | 22368452                | C/T  | NA                 | NA                            | NA                 |
| <i>Desi_wild_22368493</i> | NA                                  | <i>Ca_desi_denovo</i> | 22368493                | A/G  | NA                 | NA                            | NA                 |
| <i>Desi_wild_22368624</i> | NA                                  | <i>Ca_desi_denovo</i> | 22368624                | A/G  | NA                 | NA                            | NA                 |
| <i>Desi_wild_22368630</i> | NA                                  | <i>Ca_desi_denovo</i> | 22368630                | C/G  | NA                 | NA                            | NA                 |
| <i>Desi_wild_22370031</i> | NA                                  | <i>Ca_desi_denovo</i> | 22370031                | A/G  | NA                 | NA                            | NA                 |
| <i>Desi_wild_22370396</i> | NA                                  | <i>Ca_desi_denovo</i> | 22370396                | C/G  | NA                 | NA                            | NA                 |
| <i>Desi_wild_22372032</i> | NA                                  | <i>Ca_desi_denovo</i> | 22372032                | C/T  | NA                 | NA                            | NA                 |
| <i>Desi_wild_22374231</i> | NA                                  | <i>Ca_desi_denovo</i> | 22374231                | G/T  | NA                 | NA                            | NA                 |
| <i>Desi_wild_22374251</i> | NA                                  | <i>Ca_desi_denovo</i> | 22374251                | G/T  | NA                 | NA                            | NA                 |
| <i>Desi_wild_22374252</i> | NA                                  | <i>Ca_desi_denovo</i> | 22374252                | A/G  | NA                 | NA                            | NA                 |
| <i>Desi_wild_22374911</i> | NA                                  | <i>Ca_desi_denovo</i> | 22374911                | A/G  | NA                 | NA                            | NA                 |
| <i>Desi_wild_22374947</i> | NA                                  | <i>Ca_desi_denovo</i> | 22374947                | C/T  | NA                 | NA                            | NA                 |
| <i>Desi_wild_22375403</i> | NA                                  | <i>Ca_desi_denovo</i> | 22375403                | A/G  | NA                 | NA                            | NA                 |
| <i>Desi_wild_22376666</i> | NA                                  | <i>Ca_desi_denovo</i> | 22376666                | C/T  | NA                 | NA                            | NA                 |
| <i>Desi_wild_22377260</i> | NA                                  | <i>Ca_desi_denovo</i> | 22377260                | C/T  | NA                 | NA                            | NA                 |
| <i>Desi_wild_22377269</i> | NA                                  | <i>Ca_desi_denovo</i> | 22377269                | C/T  | NA                 | NA                            | NA                 |
| <i>Desi_wild_22379608</i> | NA                                  | <i>Ca_desi_denovo</i> | 22379608                | G/T  | NA                 | NA                            | NA                 |
| <i>Desi_wild_22380456</i> | NA                                  | <i>Ca_desi_denovo</i> | 22380456                | C/T  | NA                 | NA                            | NA                 |
| <i>Desi_wild_22383252</i> | NA                                  | <i>Ca_desi_denovo</i> | 22383252                | A/G  | NA                 | NA                            | NA                 |
| <i>Desi_wild_22383270</i> | NA                                  | <i>Ca_desi_denovo</i> | 22383270                | A/T  | NA                 | NA                            | NA                 |
| <i>Desi_wild_22385214</i> | NA                                  | <i>Ca_desi_denovo</i> | 22385214                | C/T  | NA                 | NA                            | NA                 |
| <i>Desi_wild_22385476</i> | NA                                  | <i>Ca_desi_denovo</i> | 22385476                | C/T  | NA                 | NA                            | NA                 |
| <i>Desi_wild_22385510</i> | NA                                  | <i>Ca_desi_denovo</i> | 22385510                | C/G  | NA                 | NA                            | NA                 |
| <i>Desi_wild_22386045</i> | NA                                  | <i>Ca_desi_denovo</i> | 22386045                | C/T  | NA                 | NA                            | NA                 |
| <i>Desi_wild_22386046</i> | NA                                  | <i>Ca_desi_denovo</i> | 22386046                | C/T  | NA                 | NA                            | NA                 |
| <i>Desi_wild_22387292</i> | NA                                  | <i>Ca_desi_denovo</i> | 22387292                | C/T  | NA                 | NA                            | NA                 |
| <i>Desi_wild_22388290</i> | NA                                  | <i>Ca_desi_denovo</i> | 22388290                | C/T  | NA                 | NA                            | NA                 |
| <i>Desi_wild_22389963</i> | NA                                  | <i>Ca_desi_denovo</i> | 22389963                | A/C  | NA                 | NA                            | NA                 |
| <i>Desi_wild_22389964</i> | NA                                  | <i>Ca_desi_denovo</i> | 22389964                | A/G  | NA                 | NA                            | NA                 |
| <i>Desi_wild_22391878</i> | NA                                  | <i>Ca_desi_denovo</i> | 22391878                | A/G  | NA                 | NA                            | NA                 |
| <i>Desi_wild_22391945</i> | NA                                  | <i>Ca_desi_denovo</i> | 22391945                | C/T  | NA                 | NA                            | NA                 |
| <i>Desi_wild_22391987</i> | NA                                  | <i>Ca_desi_denovo</i> | 22391987                | A/T  | NA                 | NA                            | NA                 |
| <i>Desi_wild_22392393</i> | NA                                  | <i>Ca_desi_denovo</i> | 22392393                | T/C  | NA                 | NA                            | NA                 |
| <i>Desi_wild_22392637</i> | NA                                  | <i>Ca_desi_denovo</i> | 22392637                | C/T  | NA                 | NA                            | NA                 |

| SNP IDs                   | NCBI dbSNP accession IDs (NCBI_SS#) | Chromosomes           | Physical positions (bp) | SNPs | Gene accession IDs | Sequence components of genome | Putative functions |
|---------------------------|-------------------------------------|-----------------------|-------------------------|------|--------------------|-------------------------------|--------------------|
| <i>Desi_wild_22392754</i> | NA                                  | <i>Ca_desi_denovo</i> | 22392754                | A/G  | NA                 | NA                            | NA                 |
| <i>Desi_wild_22394062</i> | NA                                  | <i>Ca_desi_denovo</i> | 22394062                | G/T  | NA                 | NA                            | NA                 |
| <i>Desi_wild_22395690</i> | NA                                  | <i>Ca_desi_denovo</i> | 22395690                | G/T  | NA                 | NA                            | NA                 |
| <i>Desi_wild_22395731</i> | NA                                  | <i>Ca_desi_denovo</i> | 22395731                | A/G  | NA                 | NA                            | NA                 |
| <i>Desi_wild_22397622</i> | NA                                  | <i>Ca_desi_denovo</i> | 22397622                | C/T  | NA                 | NA                            | NA                 |
| <i>Desi_wild_22398441</i> | NA                                  | <i>Ca_desi_denovo</i> | 22398441                | C/T  | NA                 | NA                            | NA                 |
| <i>Desi_wild_22399007</i> | NA                                  | <i>Ca_desi_denovo</i> | 22399007                | A/T  | NA                 | NA                            | NA                 |
| <i>Desi_wild_22400432</i> | NA                                  | <i>Ca_desi_denovo</i> | 22400432                | C/T  | NA                 | NA                            | NA                 |
| <i>Desi_wild_22400439</i> | NA                                  | <i>Ca_desi_denovo</i> | 22400439                | A/C  | NA                 | NA                            | NA                 |
| <i>Desi_wild_22400456</i> | NA                                  | <i>Ca_desi_denovo</i> | 22400456                | C/T  | NA                 | NA                            | NA                 |
| <i>Desi_wild_22401014</i> | NA                                  | <i>Ca_desi_denovo</i> | 22401014                | C/G  | NA                 | NA                            | NA                 |
| <i>Desi_wild_22401395</i> | NA                                  | <i>Ca_desi_denovo</i> | 22401395                | C/T  | NA                 | NA                            | NA                 |
| <i>Desi_wild_22402204</i> | NA                                  | <i>Ca_desi_denovo</i> | 22402204                | C/T  | NA                 | NA                            | NA                 |
| <i>Desi_wild_22402736</i> | NA                                  | <i>Ca_desi_denovo</i> | 22402736                | C/T  | NA                 | NA                            | NA                 |
| <i>Desi_wild_22403083</i> | NA                                  | <i>Ca_desi_denovo</i> | 22403083                | A/T  | NA                 | NA                            | NA                 |
| <i>Desi_wild_22403705</i> | NA                                  | <i>Ca_desi_denovo</i> | 22403705                | A/C  | NA                 | NA                            | NA                 |
| <i>Desi_wild_22404802</i> | NA                                  | <i>Ca_desi_denovo</i> | 22404802                | A/G  | NA                 | NA                            | NA                 |
| <i>Desi_wild_22407566</i> | NA                                  | <i>Ca_desi_denovo</i> | 22407566                | A/G  | NA                 | NA                            | NA                 |
| <i>Desi_wild_22409584</i> | NA                                  | <i>Ca_desi_denovo</i> | 22409584                | C/T  | NA                 | NA                            | NA                 |
| <i>Desi_wild_22411629</i> | NA                                  | <i>Ca_desi_denovo</i> | 22411629                | C/T  | NA                 | NA                            | NA                 |
| <i>Desi_wild_22413616</i> | NA                                  | <i>Ca_desi_denovo</i> | 22413616                | A/C  | NA                 | NA                            | NA                 |
| <i>Desi_wild_22414268</i> | NA                                  | <i>Ca_desi_denovo</i> | 22414268                | A/G  | NA                 | NA                            | NA                 |
| <i>Desi_wild_22414881</i> | NA                                  | <i>Ca_desi_denovo</i> | 22414881                | A/G  | NA                 | NA                            | NA                 |
| <i>Desi_wild_22418673</i> | NA                                  | <i>Ca_desi_denovo</i> | 22418673                | C/T  | NA                 | NA                            | NA                 |
| <i>Desi_wild_22418674</i> | NA                                  | <i>Ca_desi_denovo</i> | 22418674                | A/G  | NA                 | NA                            | NA                 |
| <i>Desi_wild_22418707</i> | NA                                  | <i>Ca_desi_denovo</i> | 22418707                | A/T  | NA                 | NA                            | NA                 |
| <i>Desi_wild_22418754</i> | NA                                  | <i>Ca_desi_denovo</i> | 22418754                | T/C  | NA                 | NA                            | NA                 |
| <i>Desi_wild_22418764</i> | NA                                  | <i>Ca_desi_denovo</i> | 22418764                | T/A  | NA                 | NA                            | NA                 |
| <i>Desi_wild_22418793</i> | NA                                  | <i>Ca_desi_denovo</i> | 22418793                | A/G  | NA                 | NA                            | NA                 |
| <i>Desi_wild_22418832</i> | NA                                  | <i>Ca_desi_denovo</i> | 22418832                | C/T  | NA                 | NA                            | NA                 |
| <i>Desi_wild_22418846</i> | NA                                  | <i>Ca_desi_denovo</i> | 22418846                | A/T  | NA                 | NA                            | NA                 |
| <i>Desi_wild_22418861</i> | NA                                  | <i>Ca_desi_denovo</i> | 22418861                | C/T  | NA                 | NA                            | NA                 |
| <i>Desi_wild_22418897</i> | NA                                  | <i>Ca_desi_denovo</i> | 22418897                | A/T  | NA                 | NA                            | NA                 |
| <i>Desi_wild_22419296</i> | NA                                  | <i>Ca_desi_denovo</i> | 22419296                | C/G  | NA                 | NA                            | NA                 |
| <i>Desi_wild_22419380</i> | NA                                  | <i>Ca_desi_denovo</i> | 22419380                | A/C  | NA                 | NA                            | NA                 |
| <i>Desi_wild_22419583</i> | NA                                  | <i>Ca_desi_denovo</i> | 22419583                | C/T  | NA                 | NA                            | NA                 |
| <i>Desi_wild_22419593</i> | NA                                  | <i>Ca_desi_denovo</i> | 22419593                | G/T  | NA                 | NA                            | NA                 |
| <i>Desi_wild_22419601</i> | NA                                  | <i>Ca_desi_denovo</i> | 22419601                | A/G  | NA                 | NA                            | NA                 |
| <i>Desi_wild_22419603</i> | NA                                  | <i>Ca_desi_denovo</i> | 22419603                | G/T  | NA                 | NA                            | NA                 |
| <i>Desi_wild_22419872</i> | NA                                  | <i>Ca_desi_denovo</i> | 22419872                | C/G  | NA                 | NA                            | NA                 |
| <i>Desi_wild_22422536</i> | NA                                  | <i>Ca_desi_denovo</i> | 22422536                | A/T  | NA                 | NA                            | NA                 |
| <i>Desi_wild_22422543</i> | NA                                  | <i>Ca_desi_denovo</i> | 22422543                | A/T  | NA                 | NA                            | NA                 |
| <i>Desi_wild_22422558</i> | NA                                  | <i>Ca_desi_denovo</i> | 22422558                | C/G  | NA                 | NA                            | NA                 |
| <i>Desi_wild_22422597</i> | NA                                  | <i>Ca_desi_denovo</i> | 22422597                | A/T  | NA                 | NA                            | NA                 |

| SNP IDs                   | NCBI dbSNP accession IDs (NCBI_SS#) | Chromosomes           | Physical positions (bp) | SNPs | Gene accession IDs | Sequence components of genome | Putative functions |
|---------------------------|-------------------------------------|-----------------------|-------------------------|------|--------------------|-------------------------------|--------------------|
| <i>Desi_wild_22423061</i> | NA                                  | <i>Ca_desi_denovo</i> | 22423061                | C/G  | NA                 | NA                            | NA                 |
| <i>Desi_wild_22423797</i> | NA                                  | <i>Ca_desi_denovo</i> | 22423797                | C/G  | NA                 | NA                            | NA                 |
| <i>Desi_wild_22426899</i> | NA                                  | <i>Ca_desi_denovo</i> | 22426899                | A/G  | NA                 | NA                            | NA                 |
| <i>Desi_wild_22427092</i> | NA                                  | <i>Ca_desi_denovo</i> | 22427092                | G/T  | NA                 | NA                            | NA                 |
| <i>Desi_wild_22427104</i> | NA                                  | <i>Ca_desi_denovo</i> | 22427104                | A/C  | NA                 | NA                            | NA                 |
| <i>Desi_wild_22427137</i> | NA                                  | <i>Ca_desi_denovo</i> | 22427137                | C/T  | NA                 | NA                            | NA                 |
| <i>Desi_wild_22429065</i> | NA                                  | <i>Ca_desi_denovo</i> | 22429065                | A/G  | NA                 | NA                            | NA                 |
| <i>Desi_wild_22432627</i> | NA                                  | <i>Ca_desi_denovo</i> | 22432627                | C/T  | NA                 | NA                            | NA                 |
| <i>Desi_wild_22432660</i> | NA                                  | <i>Ca_desi_denovo</i> | 22432660                | G/A  | NA                 | NA                            | NA                 |
| <i>Desi_wild_22432708</i> | NA                                  | <i>Ca_desi_denovo</i> | 22432708                | A/G  | NA                 | NA                            | NA                 |
| <i>Desi_wild_22435198</i> | NA                                  | <i>Ca_desi_denovo</i> | 22435198                | A/T  | NA                 | NA                            | NA                 |
| <i>Desi_wild_22435695</i> | NA                                  | <i>Ca_desi_denovo</i> | 22435695                | C/G  | NA                 | NA                            | NA                 |
| <i>Desi_wild_22435860</i> | NA                                  | <i>Ca_desi_denovo</i> | 22435860                | A/G  | NA                 | NA                            | NA                 |
| <i>Desi_wild_22437486</i> | NA                                  | <i>Ca_desi_denovo</i> | 22437486                | C/T  | NA                 | NA                            | NA                 |
| <i>Desi_wild_22437945</i> | NA                                  | <i>Ca_desi_denovo</i> | 22437945                | G/T  | NA                 | NA                            | NA                 |
| <i>Desi_wild_22439159</i> | NA                                  | <i>Ca_desi_denovo</i> | 22439159                | C/G  | NA                 | NA                            | NA                 |
| <i>Desi_wild_22439328</i> | NA                                  | <i>Ca_desi_denovo</i> | 22439328                | A/G  | NA                 | NA                            | NA                 |
| <i>Desi_wild_22439422</i> | NA                                  | <i>Ca_desi_denovo</i> | 22439422                | C/T  | NA                 | NA                            | NA                 |
| <i>Desi_wild_22439719</i> | NA                                  | <i>Ca_desi_denovo</i> | 22439719                | C/T  | NA                 | NA                            | NA                 |
| <i>Desi_wild_22440114</i> | NA                                  | <i>Ca_desi_denovo</i> | 22440114                | C/T  | NA                 | NA                            | NA                 |
| <i>Desi_wild_22441822</i> | NA                                  | <i>Ca_desi_denovo</i> | 22441822                | C/T  | NA                 | NA                            | NA                 |
| <i>Desi_wild_22444963</i> | NA                                  | <i>Ca_desi_denovo</i> | 22444963                | A/G  | NA                 | NA                            | NA                 |
| <i>Desi_wild_22447229</i> | NA                                  | <i>Ca_desi_denovo</i> | 22447229                | T/G  | NA                 | NA                            | NA                 |
| <i>Desi_wild_22447326</i> | NA                                  | <i>Ca_desi_denovo</i> | 22447326                | G/T  | NA                 | NA                            | NA                 |
| <i>Desi_wild_22447339</i> | NA                                  | <i>Ca_desi_denovo</i> | 22447339                | A/G  | NA                 | NA                            | NA                 |
| <i>Desi_wild_22447341</i> | NA                                  | <i>Ca_desi_denovo</i> | 22447341                | C/G  | NA                 | NA                            | NA                 |
| <i>Desi_wild_22447347</i> | NA                                  | <i>Ca_desi_denovo</i> | 22447347                | A/G  | NA                 | NA                            | NA                 |
| <i>Desi_wild_22448345</i> | NA                                  | <i>Ca_desi_denovo</i> | 22448345                | C/T  | NA                 | NA                            | NA                 |
| <i>Desi_wild_22450294</i> | NA                                  | <i>Ca_desi_denovo</i> | 22450294                | A/C  | NA                 | NA                            | NA                 |
| <i>Desi_wild_22451354</i> | NA                                  | <i>Ca_desi_denovo</i> | 22451354                | A/G  | NA                 | NA                            | NA                 |
| <i>Desi_wild_22451387</i> | NA                                  | <i>Ca_desi_denovo</i> | 22451387                | A/T  | NA                 | NA                            | NA                 |
| <i>Desi_wild_22452151</i> | NA                                  | <i>Ca_desi_denovo</i> | 22452151                | A/G  | NA                 | NA                            | NA                 |
| <i>Desi_wild_22454503</i> | NA                                  | <i>Ca_desi_denovo</i> | 22454503                | C/T  | NA                 | NA                            | NA                 |
| <i>Desi_wild_22456773</i> | NA                                  | <i>Ca_desi_denovo</i> | 22456773                | C/T  | NA                 | NA                            | NA                 |
| <i>Desi_wild_22458848</i> | NA                                  | <i>Ca_desi_denovo</i> | 22458848                | A/G  | NA                 | NA                            | NA                 |
| <i>Desi_wild_22459152</i> | NA                                  | <i>Ca_desi_denovo</i> | 22459152                | A/G  | NA                 | NA                            | NA                 |
| <i>Desi_wild_22460767</i> | NA                                  | <i>Ca_desi_denovo</i> | 22460767                | C/T  | NA                 | NA                            | NA                 |
| <i>Desi_wild_22460806</i> | NA                                  | <i>Ca_desi_denovo</i> | 22460806                | G/T  | NA                 | NA                            | NA                 |
| <i>Desi_wild_22462695</i> | NA                                  | <i>Ca_desi_denovo</i> | 22462695                | A/G  | NA                 | NA                            | NA                 |
| <i>Desi_wild_22462723</i> | NA                                  | <i>Ca_desi_denovo</i> | 22462723                | C/G  | NA                 | NA                            | NA                 |
| <i>Desi_wild_22462799</i> | NA                                  | <i>Ca_desi_denovo</i> | 22462799                | C/T  | NA                 | NA                            | NA                 |
| <i>Desi_wild_22463284</i> | NA                                  | <i>Ca_desi_denovo</i> | 22463284                | A/G  | NA                 | NA                            | NA                 |
| <i>Desi_wild_22463299</i> | NA                                  | <i>Ca_desi_denovo</i> | 22463299                | C/G  | NA                 | NA                            | NA                 |
| <i>Desi_wild_22463302</i> | NA                                  | <i>Ca_desi_denovo</i> | 22463302                | G/T  | NA                 | NA                            | NA                 |



| SNP IDs                   | NCBI dbSNP accession IDs (NCBI_SS#) | Chromosomes           | Physical positions (bp) | SNPs | Gene accession IDs | Sequence components of genome | Putative functions |
|---------------------------|-------------------------------------|-----------------------|-------------------------|------|--------------------|-------------------------------|--------------------|
| <i>Desi_wild_22464602</i> | NA                                  | <i>Ca_desi_denovo</i> | 22464602                | C/G  | NA                 | NA                            | NA                 |
| <i>Desi_wild_22464934</i> | NA                                  | <i>Ca_desi_denovo</i> | 22464934                | A/C  | NA                 | NA                            | NA                 |
| <i>Desi_wild_22465457</i> | NA                                  | <i>Ca_desi_denovo</i> | 22465457                | G/T  | NA                 | NA                            | NA                 |
| <i>Desi_wild_22466660</i> | NA                                  | <i>Ca_desi_denovo</i> | 22466660                | G/T  | NA                 | NA                            | NA                 |
| <i>Desi_wild_22468149</i> | NA                                  | <i>Ca_desi_denovo</i> | 22468149                | G/T  | NA                 | NA                            | NA                 |
| <i>Desi_wild_22468191</i> | NA                                  | <i>Ca_desi_denovo</i> | 22468191                | G/T  | NA                 | NA                            | NA                 |
| <i>Desi_wild_22469219</i> | NA                                  | <i>Ca_desi_denovo</i> | 22469219                | G/T  | NA                 | NA                            | NA                 |
| <i>Desi_wild_22470650</i> | NA                                  | <i>Ca_desi_denovo</i> | 22470650                | C/T  | NA                 | NA                            | NA                 |
| <i>Desi_wild_22470674</i> | NA                                  | <i>Ca_desi_denovo</i> | 22470674                | A/G  | NA                 | NA                            | NA                 |
| <i>Desi_wild_22471528</i> | NA                                  | <i>Ca_desi_denovo</i> | 22471528                | A/G  | NA                 | NA                            | NA                 |
| <i>Desi_wild_22473686</i> | NA                                  | <i>Ca_desi_denovo</i> | 22473686                | G/T  | NA                 | NA                            | NA                 |
| <i>Desi_wild_22474731</i> | NA                                  | <i>Ca_desi_denovo</i> | 22474731                | C/T  | NA                 | NA                            | NA                 |
| <i>Desi_wild_22474732</i> | NA                                  | <i>Ca_desi_denovo</i> | 22474732                | C/G  | NA                 | NA                            | NA                 |
| <i>Desi_wild_22474772</i> | NA                                  | <i>Ca_desi_denovo</i> | 22474772                | C/T  | NA                 | NA                            | NA                 |
| <i>Desi_wild_22474776</i> | NA                                  | <i>Ca_desi_denovo</i> | 22474776                | A/G  | NA                 | NA                            | NA                 |
| <i>Desi_wild_22475246</i> | NA                                  | <i>Ca_desi_denovo</i> | 22475246                | A/G  | NA                 | NA                            | NA                 |
| <i>Desi_wild_22475267</i> | NA                                  | <i>Ca_desi_denovo</i> | 22475267                | A/G  | NA                 | NA                            | NA                 |
| <i>Desi_wild_22478962</i> | NA                                  | <i>Ca_desi_denovo</i> | 22478962                | A/G  | NA                 | NA                            | NA                 |
| <i>Desi_wild_22478979</i> | NA                                  | <i>Ca_desi_denovo</i> | 22478979                | C/T  | NA                 | NA                            | NA                 |
| <i>Desi_wild_22480467</i> | NA                                  | <i>Ca_desi_denovo</i> | 22480467                | A/C  | NA                 | NA                            | NA                 |
| <i>Desi_wild_22481446</i> | NA                                  | <i>Ca_desi_denovo</i> | 22481446                | G/A  | NA                 | NA                            | NA                 |
| <i>Desi_wild_22482509</i> | NA                                  | <i>Ca_desi_denovo</i> | 22482509                | C/T  | NA                 | NA                            | NA                 |
| <i>Desi_wild_22483194</i> | NA                                  | <i>Ca_desi_denovo</i> | 22483194                | G/T  | NA                 | NA                            | NA                 |
| <i>Desi_wild_22483215</i> | NA                                  | <i>Ca_desi_denovo</i> | 22483215                | A/T  | NA                 | NA                            | NA                 |
| <i>Desi_wild_22483244</i> | NA                                  | <i>Ca_desi_denovo</i> | 22483244                | C/T  | NA                 | NA                            | NA                 |
| <i>Desi_wild_22484075</i> | NA                                  | <i>Ca_desi_denovo</i> | 22484075                | C/T  | NA                 | NA                            | NA                 |
| <i>Desi_wild_22484082</i> | NA                                  | <i>Ca_desi_denovo</i> | 22484082                | C/T  | NA                 | NA                            | NA                 |
| <i>Desi_wild_22484183</i> | NA                                  | <i>Ca_desi_denovo</i> | 22484183                | A/T  | NA                 | NA                            | NA                 |
| <i>Desi_wild_22484911</i> | NA                                  | <i>Ca_desi_denovo</i> | 22484911                | C/G  | NA                 | NA                            | NA                 |
| <i>Desi_wild_22485458</i> | NA                                  | <i>Ca_desi_denovo</i> | 22485458                | A/G  | NA                 | NA                            | NA                 |
| <i>Desi_wild_22489211</i> | NA                                  | <i>Ca_desi_denovo</i> | 22489211                | C/T  | NA                 | NA                            | NA                 |
| <i>Desi_wild_22490916</i> | NA                                  | <i>Ca_desi_denovo</i> | 22490916                | A/C  | NA                 | NA                            | NA                 |
| <i>Desi_wild_22494230</i> | NA                                  | <i>Ca_desi_denovo</i> | 22494230                | C/T  | NA                 | NA                            | NA                 |
| <i>Desi_wild_22494231</i> | NA                                  | <i>Ca_desi_denovo</i> | 22494231                | C/T  | NA                 | NA                            | NA                 |
| <i>Desi_wild_22494251</i> | NA                                  | <i>Ca_desi_denovo</i> | 22494251                | C/G  | NA                 | NA                            | NA                 |
| <i>Desi_wild_22497736</i> | NA                                  | <i>Ca_desi_denovo</i> | 22497736                | A/G  | NA                 | NA                            | NA                 |
| <i>Desi_wild_22497737</i> | NA                                  | <i>Ca_desi_denovo</i> | 22497737                | A/G  | NA                 | NA                            | NA                 |
| <i>Desi_wild_22497757</i> | NA                                  | <i>Ca_desi_denovo</i> | 22497757                | G/T  | NA                 | NA                            | NA                 |
| <i>Desi_wild_22497760</i> | NA                                  | <i>Ca_desi_denovo</i> | 22497760                | A/T  | NA                 | NA                            | NA                 |
| <i>Desi_wild_22499007</i> | NA                                  | <i>Ca_desi_denovo</i> | 22499007                | C/G  | NA                 | NA                            | NA                 |
| <i>Desi_wild_22499524</i> | NA                                  | <i>Ca_desi_denovo</i> | 22499524                | C/T  | NA                 | NA                            | NA                 |
| <i>Desi_wild_22500251</i> | NA                                  | <i>Ca_desi_denovo</i> | 22500251                | C/T  | NA                 | NA                            | NA                 |
| <i>Desi_wild_22500257</i> | NA                                  | <i>Ca_desi_denovo</i> | 22500257                | A/T  | NA                 | NA                            | NA                 |
| <i>Desi_wild_22505192</i> | NA                                  | <i>Ca_desi_denovo</i> | 22505192                | G/T  | NA                 | NA                            | NA                 |

| SNP IDs                   | NCBI dbSNP accession IDs (NCBI_SS#) | Chromosomes           | Physical positions (bp) | SNPs | Gene accession IDs | Sequence components of genome | Putative functions |
|---------------------------|-------------------------------------|-----------------------|-------------------------|------|--------------------|-------------------------------|--------------------|
| <i>Desi_wild_22505193</i> | NA                                  | <i>Ca_desi_denovo</i> | 22505193                | A/C  | NA                 | NA                            | NA                 |
| <i>Desi_wild_22505194</i> | NA                                  | <i>Ca_desi_denovo</i> | 22505194                | G/T  | NA                 | NA                            | NA                 |
| <i>Desi_wild_22511452</i> | NA                                  | <i>Ca_desi_denovo</i> | 22511452                | C/T  | NA                 | NA                            | NA                 |
| <i>Desi_wild_22511456</i> | NA                                  | <i>Ca_desi_denovo</i> | 22511456                | G/T  | NA                 | NA                            | NA                 |
| <i>Desi_wild_22511462</i> | NA                                  | <i>Ca_desi_denovo</i> | 22511462                | C/T  | NA                 | NA                            | NA                 |
| <i>Desi_wild_22513096</i> | NA                                  | <i>Ca_desi_denovo</i> | 22513096                | A/G  | NA                 | NA                            | NA                 |
| <i>Desi_wild_22515966</i> | NA                                  | <i>Ca_desi_denovo</i> | 22515966                | C/T  | NA                 | NA                            | NA                 |
| <i>Desi_wild_22516342</i> | NA                                  | <i>Ca_desi_denovo</i> | 22516342                | A/T  | NA                 | NA                            | NA                 |
| <i>Desi_wild_22517651</i> | NA                                  | <i>Ca_desi_denovo</i> | 22517651                | A/T  | NA                 | NA                            | NA                 |
| <i>Desi_wild_22518306</i> | NA                                  | <i>Ca_desi_denovo</i> | 22518306                | C/T  | NA                 | NA                            | NA                 |
| <i>Desi_wild_22518481</i> | NA                                  | <i>Ca_desi_denovo</i> | 22518481                | C/T  | NA                 | NA                            | NA                 |
| <i>Desi_wild_22519051</i> | NA                                  | <i>Ca_desi_denovo</i> | 22519051                | C/G  | NA                 | NA                            | NA                 |
| <i>Desi_wild_22519073</i> | NA                                  | <i>Ca_desi_denovo</i> | 22519073                | A/G  | NA                 | NA                            | NA                 |
| <i>Desi_wild_22519085</i> | NA                                  | <i>Ca_desi_denovo</i> | 22519085                | C/G  | NA                 | NA                            | NA                 |
| <i>Desi_wild_22519185</i> | NA                                  | <i>Ca_desi_denovo</i> | 22519185                | C/G  | NA                 | NA                            | NA                 |
| <i>Desi_wild_22519271</i> | NA                                  | <i>Ca_desi_denovo</i> | 22519271                | A/T  | NA                 | NA                            | NA                 |
| <i>Desi_wild_22519287</i> | NA                                  | <i>Ca_desi_denovo</i> | 22519287                | C/G  | NA                 | NA                            | NA                 |
| <i>Desi_wild_22519459</i> | NA                                  | <i>Ca_desi_denovo</i> | 22519459                | C/T  | NA                 | NA                            | NA                 |
| <i>Desi_wild_22519495</i> | NA                                  | <i>Ca_desi_denovo</i> | 22519495                | C/T  | NA                 | NA                            | NA                 |
| <i>Desi_wild_22521771</i> | NA                                  | <i>Ca_desi_denovo</i> | 22521771                | C/T  | NA                 | NA                            | NA                 |
| <i>Desi_wild_22522658</i> | NA                                  | <i>Ca_desi_denovo</i> | 22522658                | G/C  | NA                 | NA                            | NA                 |
| <i>Desi_wild_22527304</i> | NA                                  | <i>Ca_desi_denovo</i> | 22527304                | C/T  | NA                 | NA                            | NA                 |
| <i>Desi_wild_22527321</i> | NA                                  | <i>Ca_desi_denovo</i> | 22527321                | A/G  | NA                 | NA                            | NA                 |
| <i>Desi_wild_22530808</i> | NA                                  | <i>Ca_desi_denovo</i> | 22530808                | A/C  | NA                 | NA                            | NA                 |
| <i>Desi_wild_22530809</i> | NA                                  | <i>Ca_desi_denovo</i> | 22530809                | C/G  | NA                 | NA                            | NA                 |
| <i>Desi_wild_22530992</i> | NA                                  | <i>Ca_desi_denovo</i> | 22530992                | C/T  | NA                 | NA                            | NA                 |
| <i>Desi_wild_22530994</i> | NA                                  | <i>Ca_desi_denovo</i> | 22530994                | A/G  | NA                 | NA                            | NA                 |
| <i>Desi_wild_22532150</i> | NA                                  | <i>Ca_desi_denovo</i> | 22532150                | A/T  | NA                 | NA                            | NA                 |
| <i>Desi_wild_22532677</i> | NA                                  | <i>Ca_desi_denovo</i> | 22532677                | A/G  | NA                 | NA                            | NA                 |
| <i>Desi_wild_22532691</i> | NA                                  | <i>Ca_desi_denovo</i> | 22532691                | C/T  | NA                 | NA                            | NA                 |
| <i>Desi_wild_22533369</i> | NA                                  | <i>Ca_desi_denovo</i> | 22533369                | C/G  | NA                 | NA                            | NA                 |
| <i>Desi_wild_22533381</i> | NA                                  | <i>Ca_desi_denovo</i> | 22533381                | A/T  | NA                 | NA                            | NA                 |
| <i>Desi_wild_22534582</i> | NA                                  | <i>Ca_desi_denovo</i> | 22534582                | C/T  | NA                 | NA                            | NA                 |
| <i>Desi_wild_22534588</i> | NA                                  | <i>Ca_desi_denovo</i> | 22534588                | C/T  | NA                 | NA                            | NA                 |
| <i>Desi_wild_22538737</i> | NA                                  | <i>Ca_desi_denovo</i> | 22538737                | A/C  | NA                 | NA                            | NA                 |
| <i>Desi_wild_22538775</i> | NA                                  | <i>Ca_desi_denovo</i> | 22538775                | C/T  | NA                 | NA                            | NA                 |
| <i>Desi_wild_22540522</i> | NA                                  | <i>Ca_desi_denovo</i> | 22540522                | C/G  | NA                 | NA                            | NA                 |
| <i>Desi_wild_22541447</i> | NA                                  | <i>Ca_desi_denovo</i> | 22541447                | A/G  | NA                 | NA                            | NA                 |
| <i>Desi_wild_22542199</i> | NA                                  | <i>Ca_desi_denovo</i> | 22542199                | A/T  | NA                 | NA                            | NA                 |
| <i>Desi_wild_22547888</i> | NA                                  | <i>Ca_desi_denovo</i> | 22547888                | A/T  | NA                 | NA                            | NA                 |
| <i>Desi_wild_22550787</i> | NA                                  | <i>Ca_desi_denovo</i> | 22550787                | C/T  | NA                 | NA                            | NA                 |
| <i>Desi_wild_22551608</i> | NA                                  | <i>Ca_desi_denovo</i> | 22551608                | A/T  | NA                 | NA                            | NA                 |
| <i>Desi_wild_22553675</i> | NA                                  | <i>Ca_desi_denovo</i> | 22553675                | C/G  | NA                 | NA                            | NA                 |
| <i>Desi_wild_22555179</i> | NA                                  | <i>Ca_desi_denovo</i> | 22555179                | C/T  | NA                 | NA                            | NA                 |

| SNP IDs                   | NCBI dbSNP accession IDs (NCBI_SS#) | Chromosomes           | Physical positions (bp) | SNPs | Gene accession IDs | Sequence components of genome | Putative functions |
|---------------------------|-------------------------------------|-----------------------|-------------------------|------|--------------------|-------------------------------|--------------------|
| <i>Desi_wild_22556063</i> | NA                                  | <i>Ca_desi_denovo</i> | 22556063                | A/T  | NA                 | NA                            | NA                 |
| <i>Desi_wild_22561046</i> | NA                                  | <i>Ca_desi_denovo</i> | 22561046                | A/T  | NA                 | NA                            | NA                 |
| <i>Desi_wild_22561082</i> | NA                                  | <i>Ca_desi_denovo</i> | 22561082                | G/T  | NA                 | NA                            | NA                 |
| <i>Desi_wild_22564675</i> | NA                                  | <i>Ca_desi_denovo</i> | 22564675                | A/G  | NA                 | NA                            | NA                 |
| <i>Desi_wild_22564702</i> | NA                                  | <i>Ca_desi_denovo</i> | 22564702                | C/T  | NA                 | NA                            | NA                 |
| <i>Desi_wild_22567036</i> | NA                                  | <i>Ca_desi_denovo</i> | 22567036                | A/G  | NA                 | NA                            | NA                 |
| <i>Desi_wild_22567037</i> | NA                                  | <i>Ca_desi_denovo</i> | 22567037                | A/C  | NA                 | NA                            | NA                 |
| <i>Desi_wild_22567041</i> | NA                                  | <i>Ca_desi_denovo</i> | 22567041                | A/C  | NA                 | NA                            | NA                 |
| <i>Desi_wild_22568548</i> | NA                                  | <i>Ca_desi_denovo</i> | 22568548                | C/T  | NA                 | NA                            | NA                 |
| <i>Desi_wild_22568556</i> | NA                                  | <i>Ca_desi_denovo</i> | 22568556                | A/T  | NA                 | NA                            | NA                 |
| <i>Desi_wild_22569412</i> | NA                                  | <i>Ca_desi_denovo</i> | 22569412                | A/G  | NA                 | NA                            | NA                 |
| <i>Desi_wild_22569591</i> | NA                                  | <i>Ca_desi_denovo</i> | 22569591                | G/T  | NA                 | NA                            | NA                 |
| <i>Desi_wild_22569599</i> | NA                                  | <i>Ca_desi_denovo</i> | 22569599                | A/C  | NA                 | NA                            | NA                 |
| <i>Desi_wild_22570905</i> | NA                                  | <i>Ca_desi_denovo</i> | 22570905                | G/T  | NA                 | NA                            | NA                 |
| <i>Desi_wild_22571867</i> | NA                                  | <i>Ca_desi_denovo</i> | 22571867                | C/G  | NA                 | NA                            | NA                 |
| <i>Desi_wild_22572892</i> | NA                                  | <i>Ca_desi_denovo</i> | 22572892                | A/C  | NA                 | NA                            | NA                 |
| <i>Desi_wild_22572913</i> | NA                                  | <i>Ca_desi_denovo</i> | 22572913                | C/T  | NA                 | NA                            | NA                 |
| <i>Desi_wild_22574211</i> | NA                                  | <i>Ca_desi_denovo</i> | 22574211                | A/C  | NA                 | NA                            | NA                 |
| <i>Desi_wild_22575913</i> | NA                                  | <i>Ca_desi_denovo</i> | 22575913                | A/G  | NA                 | NA                            | NA                 |
| <i>Desi_wild_22576969</i> | NA                                  | <i>Ca_desi_denovo</i> | 22576969                | C/T  | NA                 | NA                            | NA                 |
| <i>Desi_wild_22577255</i> | NA                                  | <i>Ca_desi_denovo</i> | 22577255                | C/G  | NA                 | NA                            | NA                 |
| <i>Desi_wild_22581278</i> | NA                                  | <i>Ca_desi_denovo</i> | 22581278                | C/T  | NA                 | NA                            | NA                 |
| <i>Desi_wild_22581617</i> | NA                                  | <i>Ca_desi_denovo</i> | 22581617                | A/G  | NA                 | NA                            | NA                 |
| <i>Desi_wild_22582316</i> | NA                                  | <i>Ca_desi_denovo</i> | 22582316                | A/G  | NA                 | NA                            | NA                 |
| <i>Desi_wild_22582328</i> | NA                                  | <i>Ca_desi_denovo</i> | 22582328                | A/G  | NA                 | NA                            | NA                 |
| <i>Desi_wild_22582334</i> | NA                                  | <i>Ca_desi_denovo</i> | 22582334                | A/G  | NA                 | NA                            | NA                 |
| <i>Desi_wild_22582765</i> | NA                                  | <i>Ca_desi_denovo</i> | 22582765                | C/T  | NA                 | NA                            | NA                 |
| <i>Desi_wild_22582781</i> | NA                                  | <i>Ca_desi_denovo</i> | 22582781                | A/G  | NA                 | NA                            | NA                 |
| <i>Desi_wild_22585153</i> | NA                                  | <i>Ca_desi_denovo</i> | 22585153                | A/G  | NA                 | NA                            | NA                 |
| <i>Desi_wild_22585171</i> | NA                                  | <i>Ca_desi_denovo</i> | 22585171                | A/G  | NA                 | NA                            | NA                 |
| <i>Desi_wild_22585496</i> | NA                                  | <i>Ca_desi_denovo</i> | 22585496                | A/G  | NA                 | NA                            | NA                 |
| <i>Desi_wild_22585606</i> | NA                                  | <i>Ca_desi_denovo</i> | 22585606                | G/T  | NA                 | NA                            | NA                 |
| <i>Desi_wild_22585626</i> | NA                                  | <i>Ca_desi_denovo</i> | 22585626                | A/G  | NA                 | NA                            | NA                 |
| <i>Desi_wild_22585677</i> | NA                                  | <i>Ca_desi_denovo</i> | 22585677                | C/T  | NA                 | NA                            | NA                 |
| <i>Desi_wild_22586481</i> | NA                                  | <i>Ca_desi_denovo</i> | 22586481                | A/G  | NA                 | NA                            | NA                 |
| <i>Desi_wild_22586549</i> | NA                                  | <i>Ca_desi_denovo</i> | 22586549                | G/T  | NA                 | NA                            | NA                 |
| <i>Desi_wild_22586551</i> | NA                                  | <i>Ca_desi_denovo</i> | 22586551                | C/T  | NA                 | NA                            | NA                 |
| <i>Desi_wild_22590002</i> | NA                                  | <i>Ca_desi_denovo</i> | 22590002                | G/T  | NA                 | NA                            | NA                 |
| <i>Desi_wild_22590566</i> | NA                                  | <i>Ca_desi_denovo</i> | 22590566                | C/T  | NA                 | NA                            | NA                 |
| <i>Desi_wild_22590942</i> | NA                                  | <i>Ca_desi_denovo</i> | 22590942                | A/G  | NA                 | NA                            | NA                 |
| <i>Desi_wild_22596167</i> | NA                                  | <i>Ca_desi_denovo</i> | 22596167                | C/G  | NA                 | NA                            | NA                 |
| <i>Desi_wild_22597265</i> | NA                                  | <i>Ca_desi_denovo</i> | 22597265                | A/C  | NA                 | NA                            | NA                 |
| <i>Desi_wild_22597266</i> | NA                                  | <i>Ca_desi_denovo</i> | 22597266                | A/G  | NA                 | NA                            | NA                 |
| <i>Desi_wild_22598624</i> | NA                                  | <i>Ca_desi_denovo</i> | 22598624                | C/T  | NA                 | NA                            | NA                 |

| SNP IDs                   | NCBI dbSNP accession IDs (NCBI_SS#) | Chromosomes           | Physical positions (bp) | SNPs | Gene accession IDs | Sequence components of genome | Putative functions |
|---------------------------|-------------------------------------|-----------------------|-------------------------|------|--------------------|-------------------------------|--------------------|
| <i>Desi_wild_22599710</i> | NA                                  | <i>Ca_desi_denovo</i> | 22599710                | A/T  | NA                 | NA                            | NA                 |
| <i>Desi_wild_22601017</i> | NA                                  | <i>Ca_desi_denovo</i> | 22601017                | A/T  | NA                 | NA                            | NA                 |
| <i>Desi_wild_22601233</i> | NA                                  | <i>Ca_desi_denovo</i> | 22601233                | A/G  | NA                 | NA                            | NA                 |
| <i>Desi_wild_22601636</i> | NA                                  | <i>Ca_desi_denovo</i> | 22601636                | A/T  | NA                 | NA                            | NA                 |
| <i>Desi_wild_22601657</i> | NA                                  | <i>Ca_desi_denovo</i> | 22601657                | A/T  | NA                 | NA                            | NA                 |
| <i>Desi_wild_22605673</i> | NA                                  | <i>Ca_desi_denovo</i> | 22605673                | C/G  | NA                 | NA                            | NA                 |
| <i>Desi_wild_22608501</i> | NA                                  | <i>Ca_desi_denovo</i> | 22608501                | C/T  | NA                 | NA                            | NA                 |
| <i>Desi_wild_22612093</i> | NA                                  | <i>Ca_desi_denovo</i> | 22612093                | A/G  | NA                 | NA                            | NA                 |
| <i>Desi_wild_22612456</i> | NA                                  | <i>Ca_desi_denovo</i> | 22612456                | C/T  | NA                 | NA                            | NA                 |
| <i>Desi_wild_22613691</i> | NA                                  | <i>Ca_desi_denovo</i> | 22613691                | C/T  | NA                 | NA                            | NA                 |
| <i>Desi_wild_22617628</i> | NA                                  | <i>Ca_desi_denovo</i> | 22617628                | G/T  | NA                 | NA                            | NA                 |
| <i>Desi_wild_22617676</i> | NA                                  | <i>Ca_desi_denovo</i> | 22617676                | A/T  | NA                 | NA                            | NA                 |
| <i>Desi_wild_22617689</i> | NA                                  | <i>Ca_desi_denovo</i> | 22617689                | G/T  | NA                 | NA                            | NA                 |
| <i>Desi_wild_22619835</i> | NA                                  | <i>Ca_desi_denovo</i> | 22619835                | A/G  | NA                 | NA                            | NA                 |
| <i>Desi_wild_22620605</i> | NA                                  | <i>Ca_desi_denovo</i> | 22620605                | A/G  | NA                 | NA                            | NA                 |
| <i>Desi_wild_22620841</i> | NA                                  | <i>Ca_desi_denovo</i> | 22620841                | T/C  | NA                 | NA                            | NA                 |
| <i>Desi_wild_22621774</i> | NA                                  | <i>Ca_desi_denovo</i> | 22621774                | A/G  | NA                 | NA                            | NA                 |
| <i>Desi_wild_22621836</i> | NA                                  | <i>Ca_desi_denovo</i> | 22621836                | A/G  | NA                 | NA                            | NA                 |
| <i>Desi_wild_22625616</i> | NA                                  | <i>Ca_desi_denovo</i> | 22625616                | C/G  | NA                 | NA                            | NA                 |
| <i>Desi_wild_22626053</i> | NA                                  | <i>Ca_desi_denovo</i> | 22626053                | C/G  | NA                 | NA                            | NA                 |
| <i>Desi_wild_22626063</i> | NA                                  | <i>Ca_desi_denovo</i> | 22626063                | A/T  | NA                 | NA                            | NA                 |
| <i>Desi_wild_22626163</i> | NA                                  | <i>Ca_desi_denovo</i> | 22626163                | A/G  | NA                 | NA                            | NA                 |
| <i>Desi_wild_22627679</i> | NA                                  | <i>Ca_desi_denovo</i> | 22627679                | G/T  | NA                 | NA                            | NA                 |
| <i>Desi_wild_22629475</i> | NA                                  | <i>Ca_desi_denovo</i> | 22629475                | A/T  | NA                 | NA                            | NA                 |
| <i>Desi_wild_22629562</i> | NA                                  | <i>Ca_desi_denovo</i> | 22629562                | G/T  | NA                 | NA                            | NA                 |
| <i>Desi_wild_22629568</i> | NA                                  | <i>Ca_desi_denovo</i> | 22629568                | C/T  | NA                 | NA                            | NA                 |
| <i>Desi_wild_22630228</i> | NA                                  | <i>Ca_desi_denovo</i> | 22630228                | C/T  | NA                 | NA                            | NA                 |
| <i>Desi_wild_22630832</i> | NA                                  | <i>Ca_desi_denovo</i> | 22630832                | C/G  | NA                 | NA                            | NA                 |
| <i>Desi_wild_22633446</i> | NA                                  | <i>Ca_desi_denovo</i> | 22633446                | G/T  | NA                 | NA                            | NA                 |
| <i>Desi_wild_22635401</i> | NA                                  | <i>Ca_desi_denovo</i> | 22635401                | C/G  | NA                 | NA                            | NA                 |
| <i>Desi_wild_22635550</i> | NA                                  | <i>Ca_desi_denovo</i> | 22635550                | A/G  | NA                 | NA                            | NA                 |
| <i>Desi_wild_22635589</i> | NA                                  | <i>Ca_desi_denovo</i> | 22635589                | C/T  | NA                 | NA                            | NA                 |
| <i>Desi_wild_22637830</i> | NA                                  | <i>Ca_desi_denovo</i> | 22637830                | A/T  | NA                 | NA                            | NA                 |
| <i>Desi_wild_22637999</i> | NA                                  | <i>Ca_desi_denovo</i> | 22637999                | A/G  | NA                 | NA                            | NA                 |
| <i>Desi_wild_22638004</i> | NA                                  | <i>Ca_desi_denovo</i> | 22638004                | A/G  | NA                 | NA                            | NA                 |
| <i>Desi_wild_22638010</i> | NA                                  | <i>Ca_desi_denovo</i> | 22638010                | C/T  | NA                 | NA                            | NA                 |
| <i>Desi_wild_22638014</i> | NA                                  | <i>Ca_desi_denovo</i> | 22638014                | A/T  | NA                 | NA                            | NA                 |
| <i>Desi_wild_22639837</i> | NA                                  | <i>Ca_desi_denovo</i> | 22639837                | A/C  | NA                 | NA                            | NA                 |
| <i>Desi_wild_22640058</i> | NA                                  | <i>Ca_desi_denovo</i> | 22640058                | A/T  | NA                 | NA                            | NA                 |
| <i>Desi_wild_22643962</i> | NA                                  | <i>Ca_desi_denovo</i> | 22643962                | C/G  | NA                 | NA                            | NA                 |
| <i>Desi_wild_22644149</i> | NA                                  | <i>Ca_desi_denovo</i> | 22644149                | C/T  | NA                 | NA                            | NA                 |
| <i>Desi_wild_22646123</i> | NA                                  | <i>Ca_desi_denovo</i> | 22646123                | C/T  | NA                 | NA                            | NA                 |
| <i>Desi_wild_22647002</i> | NA                                  | <i>Ca_desi_denovo</i> | 22647002                | A/G  | NA                 | NA                            | NA                 |
| <i>Desi_wild_22650892</i> | NA                                  | <i>Ca_desi_denovo</i> | 22650892                | G/A  | NA                 | NA                            | NA                 |

| SNP IDs                   | NCBI dbSNP accession IDs (NCBI_SS#) | Chromosomes           | Physical positions (bp) | SNPs | Gene accession IDs | Sequence components of genome | Putative functions |
|---------------------------|-------------------------------------|-----------------------|-------------------------|------|--------------------|-------------------------------|--------------------|
| <i>Desi_wild_22651662</i> | NA                                  | <i>Ca_desi_denovo</i> | 22651662                | C/T  | NA                 | NA                            | NA                 |
| <i>Desi_wild_22652302</i> | NA                                  | <i>Ca_desi_denovo</i> | 22652302                | C/G  | NA                 | NA                            | NA                 |
| <i>Desi_wild_22653988</i> | NA                                  | <i>Ca_desi_denovo</i> | 22653988                | A/G  | NA                 | NA                            | NA                 |
| <i>Desi_wild_22666610</i> | NA                                  | <i>Ca_desi_denovo</i> | 22666610                | C/G  | NA                 | NA                            | NA                 |
| <i>Desi_wild_22667182</i> | NA                                  | <i>Ca_desi_denovo</i> | 22667182                | C/T  | NA                 | NA                            | NA                 |
| <i>Desi_wild_22668435</i> | NA                                  | <i>Ca_desi_denovo</i> | 22668435                | C/T  | NA                 | NA                            | NA                 |
| <i>Desi_wild_22668450</i> | NA                                  | <i>Ca_desi_denovo</i> | 22668450                | A/G  | NA                 | NA                            | NA                 |
| <i>Desi_wild_22668646</i> | NA                                  | <i>Ca_desi_denovo</i> | 22668646                | A/G  | NA                 | NA                            | NA                 |
| <i>Desi_wild_22668647</i> | NA                                  | <i>Ca_desi_denovo</i> | 22668647                | C/G  | NA                 | NA                            | NA                 |
| <i>Desi_wild_22669307</i> | NA                                  | <i>Ca_desi_denovo</i> | 22669307                | A/T  | NA                 | NA                            | NA                 |
| <i>Desi_wild_22669370</i> | NA                                  | <i>Ca_desi_denovo</i> | 22669370                | A/G  | NA                 | NA                            | NA                 |
| <i>Desi_wild_22669409</i> | NA                                  | <i>Ca_desi_denovo</i> | 22669409                | A/G  | NA                 | NA                            | NA                 |
| <i>Desi_wild_22670880</i> | NA                                  | <i>Ca_desi_denovo</i> | 22670880                | C/G  | NA                 | NA                            | NA                 |
| <i>Desi_wild_22670928</i> | NA                                  | <i>Ca_desi_denovo</i> | 22670928                | C/T  | NA                 | NA                            | NA                 |
| <i>Desi_wild_22670941</i> | NA                                  | <i>Ca_desi_denovo</i> | 22670941                | C/T  | NA                 | NA                            | NA                 |
| <i>Desi_wild_22671499</i> | NA                                  | <i>Ca_desi_denovo</i> | 22671499                | A/G  | NA                 | NA                            | NA                 |
| <i>Desi_wild_22671680</i> | NA                                  | <i>Ca_desi_denovo</i> | 22671680                | G/T  | NA                 | NA                            | NA                 |
| <i>Desi_wild_22674846</i> | NA                                  | <i>Ca_desi_denovo</i> | 22674846                | G/T  | NA                 | NA                            | NA                 |
| <i>Desi_wild_22676120</i> | NA                                  | <i>Ca_desi_denovo</i> | 22676120                | A/G  | NA                 | NA                            | NA                 |
| <i>Desi_wild_22676320</i> | NA                                  | <i>Ca_desi_denovo</i> | 22676320                | T/A  | NA                 | NA                            | NA                 |
| <i>Desi_wild_22676326</i> | NA                                  | <i>Ca_desi_denovo</i> | 22676326                | A/G  | NA                 | NA                            | NA                 |
| <i>Desi_wild_22681958</i> | NA                                  | <i>Ca_desi_denovo</i> | 22681958                | A/T  | NA                 | NA                            | NA                 |
| <i>Desi_wild_22683768</i> | NA                                  | <i>Ca_desi_denovo</i> | 22683768                | C/T  | NA                 | NA                            | NA                 |
| <i>Desi_wild_22685065</i> | NA                                  | <i>Ca_desi_denovo</i> | 22685065                | A/G  | NA                 | NA                            | NA                 |
| <i>Desi_wild_22685410</i> | NA                                  | <i>Ca_desi_denovo</i> | 22685410                | G/T  | NA                 | NA                            | NA                 |
| <i>Desi_wild_22685423</i> | NA                                  | <i>Ca_desi_denovo</i> | 22685423                | C/G  | NA                 | NA                            | NA                 |
| <i>Desi_wild_22687251</i> | NA                                  | <i>Ca_desi_denovo</i> | 22687251                | C/T  | NA                 | NA                            | NA                 |
| <i>Desi_wild_22687299</i> | NA                                  | <i>Ca_desi_denovo</i> | 22687299                | C/T  | NA                 | NA                            | NA                 |
| <i>Desi_wild_22687319</i> | NA                                  | <i>Ca_desi_denovo</i> | 22687319                | C/G  | NA                 | NA                            | NA                 |
| <i>Desi_wild_22687605</i> | NA                                  | <i>Ca_desi_denovo</i> | 22687605                | C/T  | NA                 | NA                            | NA                 |
| <i>Desi_wild_22688052</i> | NA                                  | <i>Ca_desi_denovo</i> | 22688052                | A/T  | NA                 | NA                            | NA                 |
| <i>Desi_wild_22688928</i> | NA                                  | <i>Ca_desi_denovo</i> | 22688928                | A/G  | NA                 | NA                            | NA                 |
| <i>Desi_wild_22691139</i> | NA                                  | <i>Ca_desi_denovo</i> | 22691139                | C/T  | NA                 | NA                            | NA                 |
| <i>Desi_wild_22691178</i> | NA                                  | <i>Ca_desi_denovo</i> | 22691178                | A/G  | NA                 | NA                            | NA                 |
| <i>Desi_wild_22691309</i> | NA                                  | <i>Ca_desi_denovo</i> | 22691309                | A/T  | NA                 | NA                            | NA                 |
| <i>Desi_wild_22691312</i> | NA                                  | <i>Ca_desi_denovo</i> | 22691312                | C/T  | NA                 | NA                            | NA                 |
| <i>Desi_wild_22694328</i> | NA                                  | <i>Ca_desi_denovo</i> | 22694328                | A/T  | NA                 | NA                            | NA                 |
| <i>Desi_wild_22694435</i> | NA                                  | <i>Ca_desi_denovo</i> | 22694435                | A/G  | NA                 | NA                            | NA                 |
| <i>Desi_wild_22694476</i> | NA                                  | <i>Ca_desi_denovo</i> | 22694476                | C/T  | NA                 | NA                            | NA                 |
| <i>Desi_wild_22694479</i> | NA                                  | <i>Ca_desi_denovo</i> | 22694479                | C/T  | NA                 | NA                            | NA                 |
| <i>Desi_wild_22695114</i> | NA                                  | <i>Ca_desi_denovo</i> | 22695114                | C/T  | NA                 | NA                            | NA                 |
| <i>Desi_wild_22695580</i> | NA                                  | <i>Ca_desi_denovo</i> | 22695580                | C/G  | NA                 | NA                            | NA                 |
| <i>Desi_wild_22696106</i> | NA                                  | <i>Ca_desi_denovo</i> | 22696106                | C/T  | NA                 | NA                            | NA                 |
| <i>Desi_wild_22696464</i> | NA                                  | <i>Ca_desi_denovo</i> | 22696464                | C/T  | NA                 | NA                            | NA                 |

| SNP IDs                   | NCBI dbSNP accession IDs (NCBI_SS#) | Chromosomes           | Physical positions (bp) | SNPs | Gene accession IDs | Sequence components of genome | Putative functions |
|---------------------------|-------------------------------------|-----------------------|-------------------------|------|--------------------|-------------------------------|--------------------|
| <i>Desi_wild_22697138</i> | NA                                  | <i>Ca_desi_denovo</i> | 22697138                | C/T  | NA                 | NA                            | NA                 |
| <i>Desi_wild_22697153</i> | NA                                  | <i>Ca_desi_denovo</i> | 22697153                | C/T  | NA                 | NA                            | NA                 |
| <i>Desi_wild_22697196</i> | NA                                  | <i>Ca_desi_denovo</i> | 22697196                | C/T  | NA                 | NA                            | NA                 |
| <i>Desi_wild_22697198</i> | NA                                  | <i>Ca_desi_denovo</i> | 22697198                | A/C  | NA                 | NA                            | NA                 |
| <i>Desi_wild_22698226</i> | NA                                  | <i>Ca_desi_denovo</i> | 22698226                | A/C  | NA                 | NA                            | NA                 |
| <i>Desi_wild_22698249</i> | NA                                  | <i>Ca_desi_denovo</i> | 22698249                | C/T  | NA                 | NA                            | NA                 |
| <i>Desi_wild_22698853</i> | NA                                  | <i>Ca_desi_denovo</i> | 22698853                | C/T  | NA                 | NA                            | NA                 |
| <i>Desi_wild_22698947</i> | NA                                  | <i>Ca_desi_denovo</i> | 22698947                | C/T  | NA                 | NA                            | NA                 |
| <i>Desi_wild_22698971</i> | NA                                  | <i>Ca_desi_denovo</i> | 22698971                | A/C  | NA                 | NA                            | NA                 |
| <i>Desi_wild_22699954</i> | NA                                  | <i>Ca_desi_denovo</i> | 22699954                | A/G  | NA                 | NA                            | NA                 |
| <i>Desi_wild_22700537</i> | NA                                  | <i>Ca_desi_denovo</i> | 22700537                | G/A  | NA                 | NA                            | NA                 |
| <i>Desi_wild_22700651</i> | NA                                  | <i>Ca_desi_denovo</i> | 22700651                | A/G  | NA                 | NA                            | NA                 |
| <i>Desi_wild_22701508</i> | NA                                  | <i>Ca_desi_denovo</i> | 22701508                | C/T  | NA                 | NA                            | NA                 |
| <i>Desi_wild_22701537</i> | NA                                  | <i>Ca_desi_denovo</i> | 22701537                | A/G  | NA                 | NA                            | NA                 |
| <i>Desi_wild_22701876</i> | NA                                  | <i>Ca_desi_denovo</i> | 22701876                | C/T  | NA                 | NA                            | NA                 |
| <i>Desi_wild_22701913</i> | NA                                  | <i>Ca_desi_denovo</i> | 22701913                | A/T  | NA                 | NA                            | NA                 |
| <i>Desi_wild_22701928</i> | NA                                  | <i>Ca_desi_denovo</i> | 22701928                | C/T  | NA                 | NA                            | NA                 |
| <i>Desi_wild_22703835</i> | NA                                  | <i>Ca_desi_denovo</i> | 22703835                | A/G  | NA                 | NA                            | NA                 |
| <i>Desi_wild_22703929</i> | NA                                  | <i>Ca_desi_denovo</i> | 22703929                | C/T  | NA                 | NA                            | NA                 |
| <i>Desi_wild_22704157</i> | NA                                  | <i>Ca_desi_denovo</i> | 22704157                | A/C  | NA                 | NA                            | NA                 |
| <i>Desi_wild_22704194</i> | NA                                  | <i>Ca_desi_denovo</i> | 22704194                | A/C  | NA                 | NA                            | NA                 |
| <i>Desi_wild_22706574</i> | NA                                  | <i>Ca_desi_denovo</i> | 22706574                | A/C  | NA                 | NA                            | NA                 |
| <i>Desi_wild_22707420</i> | NA                                  | <i>Ca_desi_denovo</i> | 22707420                | A/G  | NA                 | NA                            | NA                 |
| <i>Desi_wild_22708159</i> | NA                                  | <i>Ca_desi_denovo</i> | 22708159                | A/G  | NA                 | NA                            | NA                 |
| <i>Desi_wild_22708806</i> | NA                                  | <i>Ca_desi_denovo</i> | 22708806                | A/G  | NA                 | NA                            | NA                 |
| <i>Desi_wild_22708901</i> | NA                                  | <i>Ca_desi_denovo</i> | 22708901                | C/T  | NA                 | NA                            | NA                 |
| <i>Desi_wild_22708911</i> | NA                                  | <i>Ca_desi_denovo</i> | 22708911                | C/T  | NA                 | NA                            | NA                 |
| <i>Desi_wild_22708973</i> | NA                                  | <i>Ca_desi_denovo</i> | 22708973                | C/T  | NA                 | NA                            | NA                 |
| <i>Desi_wild_22709096</i> | NA                                  | <i>Ca_desi_denovo</i> | 22709096                | A/G  | NA                 | NA                            | NA                 |
| <i>Desi_wild_22709332</i> | NA                                  | <i>Ca_desi_denovo</i> | 22709332                | C/T  | NA                 | NA                            | NA                 |
| <i>Desi_wild_22709404</i> | NA                                  | <i>Ca_desi_denovo</i> | 22709404                | C/T  | NA                 | NA                            | NA                 |
| <i>Desi_wild_22709473</i> | NA                                  | <i>Ca_desi_denovo</i> | 22709473                | A/G  | NA                 | NA                            | NA                 |
| <i>Desi_wild_22712665</i> | NA                                  | <i>Ca_desi_denovo</i> | 22712665                | G/A  | NA                 | NA                            | NA                 |
| <i>Desi_wild_22712668</i> | NA                                  | <i>Ca_desi_denovo</i> | 22712668                | T/C  | NA                 | NA                            | NA                 |
| <i>Desi_wild_22712671</i> | NA                                  | <i>Ca_desi_denovo</i> | 22712671                | G/A  | NA                 | NA                            | NA                 |
| <i>Desi_wild_22712812</i> | NA                                  | <i>Ca_desi_denovo</i> | 22712812                | C/G  | NA                 | NA                            | NA                 |
| <i>Desi_wild_22712985</i> | NA                                  | <i>Ca_desi_denovo</i> | 22712985                | A/T  | NA                 | NA                            | NA                 |
| <i>Desi_wild_22713599</i> | NA                                  | <i>Ca_desi_denovo</i> | 22713599                | G/T  | NA                 | NA                            | NA                 |
| <i>Desi_wild_22713622</i> | NA                                  | <i>Ca_desi_denovo</i> | 22713622                | G/T  | NA                 | NA                            | NA                 |
| <i>Desi_wild_22713645</i> | NA                                  | <i>Ca_desi_denovo</i> | 22713645                | G/T  | NA                 | NA                            | NA                 |
| <i>Desi_wild_22715776</i> | NA                                  | <i>Ca_desi_denovo</i> | 22715776                | A/T  | NA                 | NA                            | NA                 |
| <i>Desi_wild_22716931</i> | NA                                  | <i>Ca_desi_denovo</i> | 22716931                | C/G  | NA                 | NA                            | NA                 |
| <i>Desi_wild_22716955</i> | NA                                  | <i>Ca_desi_denovo</i> | 22716955                | A/G  | NA                 | NA                            | NA                 |
| <i>Desi_wild_22717336</i> | NA                                  | <i>Ca_desi_denovo</i> | 22717336                | A/G  | NA                 | NA                            | NA                 |

| SNP IDs                   | NCBI dbSNP accession IDs (NCBI_SS#) | Chromosomes           | Physical positions (bp) | SNPs | Gene accession IDs | Sequence components of genome | Putative functions |
|---------------------------|-------------------------------------|-----------------------|-------------------------|------|--------------------|-------------------------------|--------------------|
| <i>Desi_wild_22718187</i> | NA                                  | <i>Ca_desi_denovo</i> | 22718187                | A/G  | NA                 | NA                            | NA                 |
| <i>Desi_wild_22718218</i> | NA                                  | <i>Ca_desi_denovo</i> | 22718218                | C/T  | NA                 | NA                            | NA                 |
| <i>Desi_wild_22719455</i> | NA                                  | <i>Ca_desi_denovo</i> | 22719455                | A/G  | NA                 | NA                            | NA                 |
| <i>Desi_wild_22720419</i> | NA                                  | <i>Ca_desi_denovo</i> | 22720419                | A/G  | NA                 | NA                            | NA                 |
| <i>Desi_wild_22720438</i> | NA                                  | <i>Ca_desi_denovo</i> | 22720438                | C/G  | NA                 | NA                            | NA                 |
| <i>Desi_wild_22720746</i> | NA                                  | <i>Ca_desi_denovo</i> | 22720746                | C/T  | NA                 | NA                            | NA                 |
| <i>Desi_wild_22721521</i> | NA                                  | <i>Ca_desi_denovo</i> | 22721521                | A/T  | NA                 | NA                            | NA                 |
| <i>Desi_wild_22722866</i> | NA                                  | <i>Ca_desi_denovo</i> | 22722866                | A/G  | NA                 | NA                            | NA                 |
| <i>Desi_wild_22723259</i> | NA                                  | <i>Ca_desi_denovo</i> | 22723259                | C/A  | NA                 | NA                            | NA                 |
| <i>Desi_wild_22723934</i> | NA                                  | <i>Ca_desi_denovo</i> | 22723934                | C/T  | NA                 | NA                            | NA                 |
| <i>Desi_wild_22723993</i> | NA                                  | <i>Ca_desi_denovo</i> | 22723993                | C/G  | NA                 | NA                            | NA                 |
| <i>Desi_wild_22727446</i> | NA                                  | <i>Ca_desi_denovo</i> | 22727446                | C/T  | NA                 | NA                            | NA                 |
| <i>Desi_wild_22727643</i> | NA                                  | <i>Ca_desi_denovo</i> | 22727643                | A/G  | NA                 | NA                            | NA                 |
| <i>Desi_wild_22727648</i> | NA                                  | <i>Ca_desi_denovo</i> | 22727648                | A/T  | NA                 | NA                            | NA                 |
| <i>Desi_wild_22727875</i> | NA                                  | <i>Ca_desi_denovo</i> | 22727875                | A/G  | NA                 | NA                            | NA                 |
| <i>Desi_wild_22728586</i> | NA                                  | <i>Ca_desi_denovo</i> | 22728586                | A/G  | NA                 | NA                            | NA                 |
| <i>Desi_wild_22728589</i> | NA                                  | <i>Ca_desi_denovo</i> | 22728589                | C/T  | NA                 | NA                            | NA                 |
| <i>Desi_wild_22728631</i> | NA                                  | <i>Ca_desi_denovo</i> | 22728631                | A/G  | NA                 | NA                            | NA                 |
| <i>Desi_wild_22730631</i> | NA                                  | <i>Ca_desi_denovo</i> | 22730631                | C/T  | NA                 | NA                            | NA                 |
| <i>Desi_wild_22730634</i> | NA                                  | <i>Ca_desi_denovo</i> | 22730634                | A/G  | NA                 | NA                            | NA                 |
| <i>Desi_wild_22731325</i> | NA                                  | <i>Ca_desi_denovo</i> | 22731325                | C/T  | NA                 | NA                            | NA                 |
| <i>Desi_wild_22731370</i> | NA                                  | <i>Ca_desi_denovo</i> | 22731370                | G/T  | NA                 | NA                            | NA                 |
| <i>Desi_wild_22733788</i> | NA                                  | <i>Ca_desi_denovo</i> | 22733788                | A/G  | NA                 | NA                            | NA                 |
| <i>Desi_wild_22733794</i> | NA                                  | <i>Ca_desi_denovo</i> | 22733794                | C/T  | NA                 | NA                            | NA                 |
| <i>Desi_wild_22734034</i> | NA                                  | <i>Ca_desi_denovo</i> | 22734034                | A/C  | NA                 | NA                            | NA                 |
| <i>Desi_wild_22737938</i> | NA                                  | <i>Ca_desi_denovo</i> | 22737938                | C/T  | NA                 | NA                            | NA                 |
| <i>Desi_wild_22739454</i> | NA                                  | <i>Ca_desi_denovo</i> | 22739454                | G/T  | NA                 | NA                            | NA                 |
| <i>Desi_wild_22739464</i> | NA                                  | <i>Ca_desi_denovo</i> | 22739464                | A/G  | NA                 | NA                            | NA                 |
| <i>Desi_wild_22742013</i> | NA                                  | <i>Ca_desi_denovo</i> | 22742013                | A/G  | NA                 | NA                            | NA                 |
| <i>Desi_wild_22742071</i> | NA                                  | <i>Ca_desi_denovo</i> | 22742071                | C/T  | NA                 | NA                            | NA                 |
| <i>Desi_wild_22742088</i> | NA                                  | <i>Ca_desi_denovo</i> | 22742088                | A/G  | NA                 | NA                            | NA                 |
| <i>Desi_wild_22742153</i> | NA                                  | <i>Ca_desi_denovo</i> | 22742153                | C/G  | NA                 | NA                            | NA                 |
| <i>Desi_wild_22742183</i> | NA                                  | <i>Ca_desi_denovo</i> | 22742183                | A/G  | NA                 | NA                            | NA                 |
| <i>Desi_wild_22744280</i> | NA                                  | <i>Ca_desi_denovo</i> | 22744280                | A/G  | NA                 | NA                            | NA                 |
| <i>Desi_wild_22744304</i> | NA                                  | <i>Ca_desi_denovo</i> | 22744304                | A/G  | NA                 | NA                            | NA                 |
| <i>Desi_wild_22744961</i> | NA                                  | <i>Ca_desi_denovo</i> | 22744961                | A/C  | NA                 | NA                            | NA                 |
| <i>Desi_wild_22746611</i> | NA                                  | <i>Ca_desi_denovo</i> | 22746611                | A/G  | NA                 | NA                            | NA                 |
| <i>Desi_wild_22747194</i> | NA                                  | <i>Ca_desi_denovo</i> | 22747194                | A/G  | NA                 | NA                            | NA                 |
| <i>Desi_wild_22748149</i> | NA                                  | <i>Ca_desi_denovo</i> | 22748149                | A/G  | NA                 | NA                            | NA                 |
| <i>Desi_wild_22749262</i> | NA                                  | <i>Ca_desi_denovo</i> | 22749262                | A/G  | NA                 | NA                            | NA                 |
| <i>Desi_wild_22749325</i> | NA                                  | <i>Ca_desi_denovo</i> | 22749325                | A/G  | NA                 | NA                            | NA                 |
| <i>Desi_wild_22749376</i> | NA                                  | <i>Ca_desi_denovo</i> | 22749376                | A/T  | NA                 | NA                            | NA                 |
| <i>Desi_wild_22750521</i> | NA                                  | <i>Ca_desi_denovo</i> | 22750521                | A/G  | NA                 | NA                            | NA                 |
| <i>Desi_wild_22752356</i> | NA                                  | <i>Ca_desi_denovo</i> | 22752356                | A/T  | NA                 | NA                            | NA                 |

| SNP IDs                   | NCBI dbSNP accession IDs (NCBI_SS#) | Chromosomes           | Physical positions (bp) | SNPs | Gene accession IDs | Sequence components of genome | Putative functions |
|---------------------------|-------------------------------------|-----------------------|-------------------------|------|--------------------|-------------------------------|--------------------|
| <i>Desi_wild_22752372</i> | NA                                  | <i>Ca_desi_denovo</i> | 22752372                | A/G  | NA                 | NA                            | NA                 |
| <i>Desi_wild_22752955</i> | NA                                  | <i>Ca_desi_denovo</i> | 22752955                | C/T  | NA                 | NA                            | NA                 |
| <i>Desi_wild_22752958</i> | NA                                  | <i>Ca_desi_denovo</i> | 22752958                | A/G  | NA                 | NA                            | NA                 |
| <i>Desi_wild_22753838</i> | NA                                  | <i>Ca_desi_denovo</i> | 22753838                | C/T  | NA                 | NA                            | NA                 |
| <i>Desi_wild_22753895</i> | NA                                  | <i>Ca_desi_denovo</i> | 22753895                | A/G  | NA                 | NA                            | NA                 |
| <i>Desi_wild_22754115</i> | NA                                  | <i>Ca_desi_denovo</i> | 22754115                | G/T  | NA                 | NA                            | NA                 |
| <i>Desi_wild_22757318</i> | NA                                  | <i>Ca_desi_denovo</i> | 22757318                | A/G  | NA                 | NA                            | NA                 |
| <i>Desi_wild_22758407</i> | NA                                  | <i>Ca_desi_denovo</i> | 22758407                | A/G  | NA                 | NA                            | NA                 |
| <i>Desi_wild_22758749</i> | NA                                  | <i>Ca_desi_denovo</i> | 22758749                | C/T  | NA                 | NA                            | NA                 |
| <i>Desi_wild_22758781</i> | NA                                  | <i>Ca_desi_denovo</i> | 22758781                | A/T  | NA                 | NA                            | NA                 |
| <i>Desi_wild_22759660</i> | NA                                  | <i>Ca_desi_denovo</i> | 22759660                | A/G  | NA                 | NA                            | NA                 |
| <i>Desi_wild_22760774</i> | NA                                  | <i>Ca_desi_denovo</i> | 22760774                | A/G  | NA                 | NA                            | NA                 |
| <i>Desi_wild_22765328</i> | NA                                  | <i>Ca_desi_denovo</i> | 22765328                | A/C  | NA                 | NA                            | NA                 |
| <i>Desi_wild_22771649</i> | NA                                  | <i>Ca_desi_denovo</i> | 22771649                | A/T  | NA                 | NA                            | NA                 |
| <i>Desi_wild_22771708</i> | NA                                  | <i>Ca_desi_denovo</i> | 22771708                | A/G  | NA                 | NA                            | NA                 |
| <i>Desi_wild_22773168</i> | NA                                  | <i>Ca_desi_denovo</i> | 22773168                | C/T  | NA                 | NA                            | NA                 |
| <i>Desi_wild_22775805</i> | NA                                  | <i>Ca_desi_denovo</i> | 22775805                | A/G  | NA                 | NA                            | NA                 |
| <i>Desi_wild_22776445</i> | NA                                  | <i>Ca_desi_denovo</i> | 22776445                | C/T  | NA                 | NA                            | NA                 |
| <i>Desi_wild_22778013</i> | NA                                  | <i>Ca_desi_denovo</i> | 22778013                | C/G  | NA                 | NA                            | NA                 |
| <i>Desi_wild_22781538</i> | NA                                  | <i>Ca_desi_denovo</i> | 22781538                | A/G  | NA                 | NA                            | NA                 |
| <i>Desi_wild_22782129</i> | NA                                  | <i>Ca_desi_denovo</i> | 22782129                | A/G  | NA                 | NA                            | NA                 |
| <i>Desi_wild_22784510</i> | NA                                  | <i>Ca_desi_denovo</i> | 22784510                | A/G  | NA                 | NA                            | NA                 |
| <i>Desi_wild_22784519</i> | NA                                  | <i>Ca_desi_denovo</i> | 22784519                | A/T  | NA                 | NA                            | NA                 |
| <i>Desi_wild_22786405</i> | NA                                  | <i>Ca_desi_denovo</i> | 22786405                | A/G  | NA                 | NA                            | NA                 |
| <i>Desi_wild_22786614</i> | NA                                  | <i>Ca_desi_denovo</i> | 22786614                | C/T  | NA                 | NA                            | NA                 |
| <i>Desi_wild_22786623</i> | NA                                  | <i>Ca_desi_denovo</i> | 22786623                | C/T  | NA                 | NA                            | NA                 |
| <i>Desi_wild_22786624</i> | NA                                  | <i>Ca_desi_denovo</i> | 22786624                | C/T  | NA                 | NA                            | NA                 |
| <i>Desi_wild_22787334</i> | NA                                  | <i>Ca_desi_denovo</i> | 22787334                | A/T  | NA                 | NA                            | NA                 |
| <i>Desi_wild_22787337</i> | NA                                  | <i>Ca_desi_denovo</i> | 22787337                | A/G  | NA                 | NA                            | NA                 |
| <i>Desi_wild_22788354</i> | NA                                  | <i>Ca_desi_denovo</i> | 22788354                | C/T  | NA                 | NA                            | NA                 |
| <i>Desi_wild_22788555</i> | NA                                  | <i>Ca_desi_denovo</i> | 22788555                | C/G  | NA                 | NA                            | NA                 |
| <i>Desi_wild_22788560</i> | NA                                  | <i>Ca_desi_denovo</i> | 22788560                | C/T  | NA                 | NA                            | NA                 |
| <i>Desi_wild_22789486</i> | NA                                  | <i>Ca_desi_denovo</i> | 22789486                | A/G  | NA                 | NA                            | NA                 |
| <i>Desi_wild_22789513</i> | NA                                  | <i>Ca_desi_denovo</i> | 22789513                | C/T  | NA                 | NA                            | NA                 |
| <i>Desi_wild_22789525</i> | NA                                  | <i>Ca_desi_denovo</i> | 22789525                | C/T  | NA                 | NA                            | NA                 |
| <i>Desi_wild_22789537</i> | NA                                  | <i>Ca_desi_denovo</i> | 22789537                | A/G  | NA                 | NA                            | NA                 |
| <i>Desi_wild_22792242</i> | NA                                  | <i>Ca_desi_denovo</i> | 22792242                | C/T  | NA                 | NA                            | NA                 |
| <i>Desi_wild_22794084</i> | NA                                  | <i>Ca_desi_denovo</i> | 22794084                | A/G  | NA                 | NA                            | NA                 |
| <i>Desi_wild_22796465</i> | NA                                  | <i>Ca_desi_denovo</i> | 22796465                | C/G  | NA                 | NA                            | NA                 |
| <i>Desi_wild_22796474</i> | NA                                  | <i>Ca_desi_denovo</i> | 22796474                | G/T  | NA                 | NA                            | NA                 |
| <i>Desi_wild_22796477</i> | NA                                  | <i>Ca_desi_denovo</i> | 22796477                | A/G  | NA                 | NA                            | NA                 |
| <i>Desi_wild_22799367</i> | NA                                  | <i>Ca_desi_denovo</i> | 22799367                | A/C  | NA                 | NA                            | NA                 |
| <i>Desi_wild_22799368</i> | NA                                  | <i>Ca_desi_denovo</i> | 22799368                | A/G  | NA                 | NA                            | NA                 |
| <i>Desi_wild_22799369</i> | NA                                  | <i>Ca_desi_denovo</i> | 22799369                | A/G  | NA                 | NA                            | NA                 |



| SNP IDs                   | NCBI dbSNP accession IDs (NCBI_SS#) | Chromosomes           | Physical positions (bp) | SNPs | Gene accession IDs | Sequence components of genome | Putative functions |
|---------------------------|-------------------------------------|-----------------------|-------------------------|------|--------------------|-------------------------------|--------------------|
| <i>Desi_wild_22799370</i> | NA                                  | <i>Ca_desi_denovo</i> | 22799370                | A/T  | NA                 | NA                            | NA                 |
| <i>Desi_wild_22801808</i> | NA                                  | <i>Ca_desi_denovo</i> | 22801808                | C/T  | NA                 | NA                            | NA                 |
| <i>Desi_wild_22804432</i> | NA                                  | <i>Ca_desi_denovo</i> | 22804432                | C/T  | NA                 | NA                            | NA                 |
| <i>Desi_wild_22804474</i> | NA                                  | <i>Ca_desi_denovo</i> | 22804474                | A/C  | NA                 | NA                            | NA                 |
| <i>Desi_wild_22804813</i> | NA                                  | <i>Ca_desi_denovo</i> | 22804813                | A/T  | NA                 | NA                            | NA                 |
| <i>Desi_wild_22805403</i> | NA                                  | <i>Ca_desi_denovo</i> | 22805403                | A/T  | NA                 | NA                            | NA                 |
| <i>Desi_wild_22805406</i> | NA                                  | <i>Ca_desi_denovo</i> | 22805406                | C/G  | NA                 | NA                            | NA                 |
| <i>Desi_wild_22805675</i> | NA                                  | <i>Ca_desi_denovo</i> | 22805675                | C/T  | NA                 | NA                            | NA                 |
| <i>Desi_wild_22807461</i> | NA                                  | <i>Ca_desi_denovo</i> | 22807461                | C/T  | NA                 | NA                            | NA                 |
| <i>Desi_wild_22812905</i> | NA                                  | <i>Ca_desi_denovo</i> | 22812905                | A/G  | NA                 | NA                            | NA                 |
| <i>Desi_wild_22812933</i> | NA                                  | <i>Ca_desi_denovo</i> | 22812933                | A/G  | NA                 | NA                            | NA                 |
| <i>Desi_wild_22816159</i> | NA                                  | <i>Ca_desi_denovo</i> | 22816159                | C/T  | NA                 | NA                            | NA                 |
| <i>Desi_wild_22816176</i> | NA                                  | <i>Ca_desi_denovo</i> | 22816176                | C/T  | NA                 | NA                            | NA                 |
| <i>Desi_wild_22817820</i> | NA                                  | <i>Ca_desi_denovo</i> | 22817820                | C/T  | NA                 | NA                            | NA                 |
| <i>Desi_wild_22822767</i> | NA                                  | <i>Ca_desi_denovo</i> | 22822767                | A/G  | NA                 | NA                            | NA                 |
| <i>Desi_wild_22823954</i> | NA                                  | <i>Ca_desi_denovo</i> | 22823954                | A/T  | NA                 | NA                            | NA                 |
| <i>Desi_wild_22830913</i> | NA                                  | <i>Ca_desi_denovo</i> | 22830913                | C/G  | NA                 | NA                            | NA                 |
| <i>Desi_wild_22830919</i> | NA                                  | <i>Ca_desi_denovo</i> | 22830919                | A/G  | NA                 | NA                            | NA                 |
| <i>Desi_wild_22830925</i> | NA                                  | <i>Ca_desi_denovo</i> | 22830925                | C/T  | NA                 | NA                            | NA                 |
| <i>Desi_wild_22837800</i> | NA                                  | <i>Ca_desi_denovo</i> | 22837800                | A/G  | NA                 | NA                            | NA                 |
| <i>Desi_wild_22837852</i> | NA                                  | <i>Ca_desi_denovo</i> | 22837852                | A/C  | NA                 | NA                            | NA                 |
| <i>Desi_wild_22837854</i> | NA                                  | <i>Ca_desi_denovo</i> | 22837854                | C/G  | NA                 | NA                            | NA                 |
| <i>Desi_wild_22840739</i> | NA                                  | <i>Ca_desi_denovo</i> | 22840739                | A/G  | NA                 | NA                            | NA                 |
| <i>Desi_wild_22841306</i> | NA                                  | <i>Ca_desi_denovo</i> | 22841306                | A/G  | NA                 | NA                            | NA                 |
| <i>Desi_wild_22853126</i> | NA                                  | <i>Ca_desi_denovo</i> | 22853126                | C/T  | NA                 | NA                            | NA                 |
| <i>Desi_wild_22853129</i> | NA                                  | <i>Ca_desi_denovo</i> | 22853129                | A/C  | NA                 | NA                            | NA                 |
| <i>Desi_wild_22860716</i> | NA                                  | <i>Ca_desi_denovo</i> | 22860716                | A/C  | NA                 | NA                            | NA                 |
| <i>Desi_wild_22863639</i> | NA                                  | <i>Ca_desi_denovo</i> | 22863639                | A/G  | NA                 | NA                            | NA                 |
| <i>Desi_wild_22863641</i> | NA                                  | <i>Ca_desi_denovo</i> | 22863641                | A/G  | NA                 | NA                            | NA                 |
| <i>Desi_wild_22863642</i> | NA                                  | <i>Ca_desi_denovo</i> | 22863642                | A/G  | NA                 | NA                            | NA                 |
| <i>Desi_wild_22864135</i> | NA                                  | <i>Ca_desi_denovo</i> | 22864135                | A/G  | NA                 | NA                            | NA                 |
| <i>Desi_wild_22864376</i> | NA                                  | <i>Ca_desi_denovo</i> | 22864376                | A/G  | NA                 | NA                            | NA                 |
| <i>Desi_wild_22866607</i> | NA                                  | <i>Ca_desi_denovo</i> | 22866607                | A/G  | NA                 | NA                            | NA                 |
| <i>Desi_wild_22866609</i> | NA                                  | <i>Ca_desi_denovo</i> | 22866609                | A/G  | NA                 | NA                            | NA                 |
| <i>Desi_wild_22869462</i> | NA                                  | <i>Ca_desi_denovo</i> | 22869462                | C/T  | NA                 | NA                            | NA                 |
| <i>Desi_wild_22869794</i> | NA                                  | <i>Ca_desi_denovo</i> | 22869794                | A/T  | NA                 | NA                            | NA                 |
| <i>Desi_wild_22870573</i> | NA                                  | <i>Ca_desi_denovo</i> | 22870573                | C/G  | NA                 | NA                            | NA                 |
| <i>Desi_wild_22871316</i> | NA                                  | <i>Ca_desi_denovo</i> | 22871316                | A/T  | NA                 | NA                            | NA                 |
| <i>Desi_wild_22877479</i> | NA                                  | <i>Ca_desi_denovo</i> | 22877479                | C/T  | NA                 | NA                            | NA                 |
| <i>Desi_wild_22879602</i> | NA                                  | <i>Ca_desi_denovo</i> | 22879602                | A/G  | NA                 | NA                            | NA                 |
| <i>Desi_wild_22885907</i> | NA                                  | <i>Ca_desi_denovo</i> | 22885907                | C/T  | NA                 | NA                            | NA                 |
| <i>Desi_wild_22885913</i> | NA                                  | <i>Ca_desi_denovo</i> | 22885913                | C/T  | NA                 | NA                            | NA                 |
| <i>Desi_wild_22887694</i> | NA                                  | <i>Ca_desi_denovo</i> | 22887694                | A/G  | NA                 | NA                            | NA                 |
| <i>Desi_wild_22888039</i> | NA                                  | <i>Ca_desi_denovo</i> | 22888039                | A/G  | NA                 | NA                            | NA                 |

| SNP IDs                   | NCBI dbSNP accession IDs (NCBI_SS#) | Chromosomes           | Physical positions (bp) | SNPs | Gene accession IDs | Sequence components of genome | Putative functions |
|---------------------------|-------------------------------------|-----------------------|-------------------------|------|--------------------|-------------------------------|--------------------|
| <i>Desi_wild_22888095</i> | NA                                  | <i>Ca_desi_denovo</i> | 22888095                | A/C  | NA                 | NA                            | NA                 |
| <i>Desi_wild_22888722</i> | NA                                  | <i>Ca_desi_denovo</i> | 22888722                | A/G  | NA                 | NA                            | NA                 |
| <i>Desi_wild_22888742</i> | NA                                  | <i>Ca_desi_denovo</i> | 22888742                | C/G  | NA                 | NA                            | NA                 |
| <i>Desi_wild_22890229</i> | NA                                  | <i>Ca_desi_denovo</i> | 22890229                | A/G  | NA                 | NA                            | NA                 |
| <i>Desi_wild_22890597</i> | NA                                  | <i>Ca_desi_denovo</i> | 22890597                | C/T  | NA                 | NA                            | NA                 |
| <i>Desi_wild_22890856</i> | NA                                  | <i>Ca_desi_denovo</i> | 22890856                | G/T  | NA                 | NA                            | NA                 |
| <i>Desi_wild_22894172</i> | NA                                  | <i>Ca_desi_denovo</i> | 22894172                | A/T  | NA                 | NA                            | NA                 |
| <i>Desi_wild_22894925</i> | NA                                  | <i>Ca_desi_denovo</i> | 22894925                | C/T  | NA                 | NA                            | NA                 |
| <i>Desi_wild_22896928</i> | NA                                  | <i>Ca_desi_denovo</i> | 22896928                | C/G  | NA                 | NA                            | NA                 |
| <i>Desi_wild_22897564</i> | NA                                  | <i>Ca_desi_denovo</i> | 22897564                | C/T  | NA                 | NA                            | NA                 |
| <i>Desi_wild_22897592</i> | NA                                  | <i>Ca_desi_denovo</i> | 22897592                | C/T  | NA                 | NA                            | NA                 |
| <i>Desi_wild_22898241</i> | NA                                  | <i>Ca_desi_denovo</i> | 22898241                | G/T  | NA                 | NA                            | NA                 |
| <i>Desi_wild_22898246</i> | NA                                  | <i>Ca_desi_denovo</i> | 22898246                | C/T  | NA                 | NA                            | NA                 |
| <i>Desi_wild_22902522</i> | NA                                  | <i>Ca_desi_denovo</i> | 22902522                | C/T  | NA                 | NA                            | NA                 |
| <i>Desi_wild_22904160</i> | NA                                  | <i>Ca_desi_denovo</i> | 22904160                | C/T  | NA                 | NA                            | NA                 |
| <i>Desi_wild_22907566</i> | NA                                  | <i>Ca_desi_denovo</i> | 22907566                | G/T  | NA                 | NA                            | NA                 |
| <i>Desi_wild_22910552</i> | NA                                  | <i>Ca_desi_denovo</i> | 22910552                | G/T  | NA                 | NA                            | NA                 |
| <i>Desi_wild_22910553</i> | NA                                  | <i>Ca_desi_denovo</i> | 22910553                | C/G  | NA                 | NA                            | NA                 |
| <i>Desi_wild_22910945</i> | NA                                  | <i>Ca_desi_denovo</i> | 22910945                | A/G  | NA                 | NA                            | NA                 |
| <i>Desi_wild_22910951</i> | NA                                  | <i>Ca_desi_denovo</i> | 22910951                | C/T  | NA                 | NA                            | NA                 |
| <i>Desi_wild_22912031</i> | NA                                  | <i>Ca_desi_denovo</i> | 22912031                | C/T  | NA                 | NA                            | NA                 |
| <i>Desi_wild_22912482</i> | NA                                  | <i>Ca_desi_denovo</i> | 22912482                | A/G  | NA                 | NA                            | NA                 |
| <i>Desi_wild_22912532</i> | NA                                  | <i>Ca_desi_denovo</i> | 22912532                | A/C  | NA                 | NA                            | NA                 |
| <i>Desi_wild_22912543</i> | NA                                  | <i>Ca_desi_denovo</i> | 22912543                | A/G  | NA                 | NA                            | NA                 |
| <i>Desi_wild_22914435</i> | NA                                  | <i>Ca_desi_denovo</i> | 22914435                | C/T  | NA                 | NA                            | NA                 |
| <i>Desi_wild_22914456</i> | NA                                  | <i>Ca_desi_denovo</i> | 22914456                | C/T  | NA                 | NA                            | NA                 |
| <i>Desi_wild_22914490</i> | NA                                  | <i>Ca_desi_denovo</i> | 22914490                | A/G  | NA                 | NA                            | NA                 |
| <i>Desi_wild_22916363</i> | NA                                  | <i>Ca_desi_denovo</i> | 22916363                | A/G  | NA                 | NA                            | NA                 |
| <i>Desi_wild_22916405</i> | NA                                  | <i>Ca_desi_denovo</i> | 22916405                | A/G  | NA                 | NA                            | NA                 |
| <i>Desi_wild_22918137</i> | NA                                  | <i>Ca_desi_denovo</i> | 22918137                | C/T  | NA                 | NA                            | NA                 |
| <i>Desi_wild_22920364</i> | NA                                  | <i>Ca_desi_denovo</i> | 22920364                | A/G  | NA                 | NA                            | NA                 |
| <i>Desi_wild_22920757</i> | NA                                  | <i>Ca_desi_denovo</i> | 22920757                | A/G  | NA                 | NA                            | NA                 |
| <i>Desi_wild_22923495</i> | NA                                  | <i>Ca_desi_denovo</i> | 22923495                | G/T  | NA                 | NA                            | NA                 |
| <i>Desi_wild_22923506</i> | NA                                  | <i>Ca_desi_denovo</i> | 22923506                | C/T  | NA                 | NA                            | NA                 |
| <i>Desi_wild_22926183</i> | NA                                  | <i>Ca_desi_denovo</i> | 22926183                | C/T  | NA                 | NA                            | NA                 |
| <i>Desi_wild_22927271</i> | NA                                  | <i>Ca_desi_denovo</i> | 22927271                | A/G  | NA                 | NA                            | NA                 |
| <i>Desi_wild_22932597</i> | NA                                  | <i>Ca_desi_denovo</i> | 22932597                | A/G  | NA                 | NA                            | NA                 |
| <i>Desi_wild_22932873</i> | NA                                  | <i>Ca_desi_denovo</i> | 22932873                | A/G  | NA                 | NA                            | NA                 |
| <i>Desi_wild_22940504</i> | NA                                  | <i>Ca_desi_denovo</i> | 22940504                | G/T  | NA                 | NA                            | NA                 |
| <i>Desi_wild_22944690</i> | NA                                  | <i>Ca_desi_denovo</i> | 22944690                | C/T  | NA                 | NA                            | NA                 |
| <i>Desi_wild_22944726</i> | NA                                  | <i>Ca_desi_denovo</i> | 22944726                | A/T  | NA                 | NA                            | NA                 |
| <i>Desi_wild_22946269</i> | NA                                  | <i>Ca_desi_denovo</i> | 22946269                | A/G  | NA                 | NA                            | NA                 |
| <i>Desi_wild_22950256</i> | NA                                  | <i>Ca_desi_denovo</i> | 22950256                | A/T  | NA                 | NA                            | NA                 |
| <i>Desi_wild_22950272</i> | NA                                  | <i>Ca_desi_denovo</i> | 22950272                | C/T  | NA                 | NA                            | NA                 |

| SNP IDs                   | NCBI dbSNP accession IDs (NCBI_SS#) | Chromosomes           | Physical positions (bp) | SNPs | Gene accession IDs | Sequence components of genome | Putative functions |
|---------------------------|-------------------------------------|-----------------------|-------------------------|------|--------------------|-------------------------------|--------------------|
| <i>Desi_wild_22954722</i> | NA                                  | <i>Ca_desi_denovo</i> | 22954722                | C/T  | NA                 | NA                            | NA                 |
| <i>Desi_wild_22954740</i> | NA                                  | <i>Ca_desi_denovo</i> | 22954740                | C/T  | NA                 | NA                            | NA                 |
| <i>Desi_wild_22959241</i> | NA                                  | <i>Ca_desi_denovo</i> | 22959241                | C/T  | NA                 | NA                            | NA                 |
| <i>Desi_wild_22959819</i> | NA                                  | <i>Ca_desi_denovo</i> | 22959819                | C/G  | NA                 | NA                            | NA                 |
| <i>Desi_wild_22959837</i> | NA                                  | <i>Ca_desi_denovo</i> | 22959837                | C/G  | NA                 | NA                            | NA                 |
| <i>Desi_wild_22959840</i> | NA                                  | <i>Ca_desi_denovo</i> | 22959840                | A/C  | NA                 | NA                            | NA                 |
| <i>Desi_wild_22961080</i> | NA                                  | <i>Ca_desi_denovo</i> | 22961080                | A/G  | NA                 | NA                            | NA                 |
| <i>Desi_wild_22961289</i> | NA                                  | <i>Ca_desi_denovo</i> | 22961289                | A/G  | NA                 | NA                            | NA                 |
| <i>Desi_wild_22962048</i> | NA                                  | <i>Ca_desi_denovo</i> | 22962048                | C/T  | NA                 | NA                            | NA                 |
| <i>Desi_wild_22962203</i> | NA                                  | <i>Ca_desi_denovo</i> | 22962203                | C/T  | NA                 | NA                            | NA                 |
| <i>Desi_wild_22962212</i> | NA                                  | <i>Ca_desi_denovo</i> | 22962212                | A/T  | NA                 | NA                            | NA                 |
| <i>Desi_wild_22966223</i> | NA                                  | <i>Ca_desi_denovo</i> | 22966223                | C/G  | NA                 | NA                            | NA                 |
| <i>Desi_wild_22968359</i> | NA                                  | <i>Ca_desi_denovo</i> | 22968359                | C/T  | NA                 | NA                            | NA                 |
| <i>Desi_wild_22968777</i> | NA                                  | <i>Ca_desi_denovo</i> | 22968777                | A/C  | NA                 | NA                            | NA                 |
| <i>Desi_wild_22970899</i> | NA                                  | <i>Ca_desi_denovo</i> | 22970899                | A/G  | NA                 | NA                            | NA                 |
| <i>Desi_wild_22970910</i> | NA                                  | <i>Ca_desi_denovo</i> | 22970910                | A/T  | NA                 | NA                            | NA                 |
| <i>Desi_wild_22970934</i> | NA                                  | <i>Ca_desi_denovo</i> | 22970934                | A/G  | NA                 | NA                            | NA                 |
| <i>Desi_wild_22971551</i> | NA                                  | <i>Ca_desi_denovo</i> | 22971551                | C/T  | NA                 | NA                            | NA                 |
| <i>Desi_wild_22971587</i> | NA                                  | <i>Ca_desi_denovo</i> | 22971587                | C/T  | NA                 | NA                            | NA                 |
| <i>Desi_wild_22972528</i> | NA                                  | <i>Ca_desi_denovo</i> | 22972528                | C/T  | NA                 | NA                            | NA                 |
| <i>Desi_wild_22972556</i> | NA                                  | <i>Ca_desi_denovo</i> | 22972556                | A/G  | NA                 | NA                            | NA                 |
| <i>Desi_wild_22975047</i> | NA                                  | <i>Ca_desi_denovo</i> | 22975047                | C/T  | NA                 | NA                            | NA                 |
| <i>Desi_wild_22978341</i> | NA                                  | <i>Ca_desi_denovo</i> | 22978341                | C/T  | NA                 | NA                            | NA                 |
| <i>Desi_wild_22980728</i> | NA                                  | <i>Ca_desi_denovo</i> | 22980728                | A/T  | NA                 | NA                            | NA                 |
| <i>Desi_wild_22980732</i> | NA                                  | <i>Ca_desi_denovo</i> | 22980732                | A/C  | NA                 | NA                            | NA                 |
| <i>Desi_wild_22980744</i> | NA                                  | <i>Ca_desi_denovo</i> | 22980744                | G/T  | NA                 | NA                            | NA                 |
| <i>Desi_wild_22980758</i> | NA                                  | <i>Ca_desi_denovo</i> | 22980758                | C/T  | NA                 | NA                            | NA                 |
| <i>Desi_wild_22984509</i> | NA                                  | <i>Ca_desi_denovo</i> | 22984509                | A/G  | NA                 | NA                            | NA                 |
| <i>Desi_wild_22984514</i> | NA                                  | <i>Ca_desi_denovo</i> | 22984514                | G/T  | NA                 | NA                            | NA                 |
| <i>Desi_wild_22985166</i> | NA                                  | <i>Ca_desi_denovo</i> | 22985166                | A/G  | NA                 | NA                            | NA                 |
| <i>Desi_wild_22985227</i> | NA                                  | <i>Ca_desi_denovo</i> | 22985227                | A/C  | NA                 | NA                            | NA                 |
| <i>Desi_wild_22985235</i> | NA                                  | <i>Ca_desi_denovo</i> | 22985235                | C/G  | NA                 | NA                            | NA                 |
| <i>Desi_wild_22985272</i> | NA                                  | <i>Ca_desi_denovo</i> | 22985272                | A/G  | NA                 | NA                            | NA                 |
| <i>Desi_wild_22985376</i> | NA                                  | <i>Ca_desi_denovo</i> | 22985376                | A/G  | NA                 | NA                            | NA                 |
| <i>Desi_wild_22986159</i> | NA                                  | <i>Ca_desi_denovo</i> | 22986159                | C/T  | NA                 | NA                            | NA                 |
| <i>Desi_wild_22988908</i> | NA                                  | <i>Ca_desi_denovo</i> | 22988908                | A/C  | NA                 | NA                            | NA                 |
| <i>Desi_wild_22990421</i> | NA                                  | <i>Ca_desi_denovo</i> | 22990421                | A/G  | NA                 | NA                            | NA                 |
| <i>Desi_wild_22992540</i> | NA                                  | <i>Ca_desi_denovo</i> | 22992540                | G/T  | NA                 | NA                            | NA                 |
| <i>Desi_wild_22997744</i> | NA                                  | <i>Ca_desi_denovo</i> | 22997744                | A/C  | NA                 | NA                            | NA                 |
| <i>Desi_wild_22999488</i> | NA                                  | <i>Ca_desi_denovo</i> | 22999488                | A/G  | NA                 | NA                            | NA                 |
| <i>Desi_wild_22999530</i> | NA                                  | <i>Ca_desi_denovo</i> | 22999530                | A/T  | NA                 | NA                            | NA                 |
| <i>Desi_wild_22999542</i> | NA                                  | <i>Ca_desi_denovo</i> | 22999542                | C/T  | NA                 | NA                            | NA                 |
| <i>Desi_wild_23003877</i> | NA                                  | <i>Ca_desi_denovo</i> | 23003877                | C/T  | NA                 | NA                            | NA                 |
| <i>Desi_wild_23003898</i> | NA                                  | <i>Ca_desi_denovo</i> | 23003898                | C/G  | NA                 | NA                            | NA                 |

| SNP IDs                   | NCBI dbSNP accession IDs (NCBI_SS#) | Chromosomes           | Physical positions (bp) | SNPs | Gene accession IDs | Sequence components of genome | Putative functions |
|---------------------------|-------------------------------------|-----------------------|-------------------------|------|--------------------|-------------------------------|--------------------|
| <i>Desi_wild_23007155</i> | NA                                  | <i>Ca_desi_denovo</i> | 23007155                | A/C  | NA                 | NA                            | NA                 |
| <i>Desi_wild_23007156</i> | NA                                  | <i>Ca_desi_denovo</i> | 23007156                | C/G  | NA                 | NA                            | NA                 |
| <i>Desi_wild_23007502</i> | NA                                  | <i>Ca_desi_denovo</i> | 23007502                | G/T  | NA                 | NA                            | NA                 |
| <i>Desi_wild_23007719</i> | NA                                  | <i>Ca_desi_denovo</i> | 23007719                | T/G  | NA                 | NA                            | NA                 |
| <i>Desi_wild_23010955</i> | NA                                  | <i>Ca_desi_denovo</i> | 23010955                | A/G  | NA                 | NA                            | NA                 |
| <i>Desi_wild_23010976</i> | NA                                  | <i>Ca_desi_denovo</i> | 23010976                | C/T  | NA                 | NA                            | NA                 |
| <i>Desi_wild_23011527</i> | NA                                  | <i>Ca_desi_denovo</i> | 23011527                | C/G  | NA                 | NA                            | NA                 |
| <i>Desi_wild_23012005</i> | NA                                  | <i>Ca_desi_denovo</i> | 23012005                | A/G  | NA                 | NA                            | NA                 |
| <i>Desi_wild_23013044</i> | NA                                  | <i>Ca_desi_denovo</i> | 23013044                | C/G  | NA                 | NA                            | NA                 |
| <i>Desi_wild_23016232</i> | NA                                  | <i>Ca_desi_denovo</i> | 23016232                | A/G  | NA                 | NA                            | NA                 |
| <i>Desi_wild_23017456</i> | NA                                  | <i>Ca_desi_denovo</i> | 23017456                | G/T  | NA                 | NA                            | NA                 |
| <i>Desi_wild_23018027</i> | NA                                  | <i>Ca_desi_denovo</i> | 23018027                | C/T  | NA                 | NA                            | NA                 |
| <i>Desi_wild_23020222</i> | NA                                  | <i>Ca_desi_denovo</i> | 23020222                | G/A  | NA                 | NA                            | NA                 |
| <i>Desi_wild_23023104</i> | NA                                  | <i>Ca_desi_denovo</i> | 23023104                | G/T  | NA                 | NA                            | NA                 |
| <i>Desi_wild_23023112</i> | NA                                  | <i>Ca_desi_denovo</i> | 23023112                | C/T  | NA                 | NA                            | NA                 |
| <i>Desi_wild_23023116</i> | NA                                  | <i>Ca_desi_denovo</i> | 23023116                | C/T  | NA                 | NA                            | NA                 |
| <i>Desi_wild_23024708</i> | NA                                  | <i>Ca_desi_denovo</i> | 23024708                | C/T  | NA                 | NA                            | NA                 |
| <i>Desi_wild_23024745</i> | NA                                  | <i>Ca_desi_denovo</i> | 23024745                | C/T  | NA                 | NA                            | NA                 |
| <i>Desi_wild_23024758</i> | NA                                  | <i>Ca_desi_denovo</i> | 23024758                | C/G  | NA                 | NA                            | NA                 |
| <i>Desi_wild_23025038</i> | NA                                  | <i>Ca_desi_denovo</i> | 23025038                | A/G  | NA                 | NA                            | NA                 |
| <i>Desi_wild_23025041</i> | NA                                  | <i>Ca_desi_denovo</i> | 23025041                | G/T  | NA                 | NA                            | NA                 |
| <i>Desi_wild_23025047</i> | NA                                  | <i>Ca_desi_denovo</i> | 23025047                | C/T  | NA                 | NA                            | NA                 |
| <i>Desi_wild_23026059</i> | NA                                  | <i>Ca_desi_denovo</i> | 23026059                | A/G  | NA                 | NA                            | NA                 |
| <i>Desi_wild_23026085</i> | NA                                  | <i>Ca_desi_denovo</i> | 23026085                | C/T  | NA                 | NA                            | NA                 |
| <i>Desi_wild_23026097</i> | NA                                  | <i>Ca_desi_denovo</i> | 23026097                | G/A  | NA                 | NA                            | NA                 |
| <i>Desi_wild_23026960</i> | NA                                  | <i>Ca_desi_denovo</i> | 23026960                | A/G  | NA                 | NA                            | NA                 |
| <i>Desi_wild_23028833</i> | NA                                  | <i>Ca_desi_denovo</i> | 23028833                | A/G  | NA                 | NA                            | NA                 |
| <i>Desi_wild_23028836</i> | NA                                  | <i>Ca_desi_denovo</i> | 23028836                | A/G  | NA                 | NA                            | NA                 |
| <i>Desi_wild_23033381</i> | NA                                  | <i>Ca_desi_denovo</i> | 23033381                | G/T  | NA                 | NA                            | NA                 |
| <i>Desi_wild_23035350</i> | NA                                  | <i>Ca_desi_denovo</i> | 23035350                | G/T  | NA                 | NA                            | NA                 |
| <i>Desi_wild_23035367</i> | NA                                  | <i>Ca_desi_denovo</i> | 23035367                | A/G  | NA                 | NA                            | NA                 |
| <i>Desi_wild_23036414</i> | NA                                  | <i>Ca_desi_denovo</i> | 23036414                | C/G  | NA                 | NA                            | NA                 |
| <i>Desi_wild_23036646</i> | NA                                  | <i>Ca_desi_denovo</i> | 23036646                | A/T  | NA                 | NA                            | NA                 |
| <i>Desi_wild_23037450</i> | NA                                  | <i>Ca_desi_denovo</i> | 23037450                | A/G  | NA                 | NA                            | NA                 |
| <i>Desi_wild_23037802</i> | NA                                  | <i>Ca_desi_denovo</i> | 23037802                | C/G  | NA                 | NA                            | NA                 |
| <i>Desi_wild_23039274</i> | NA                                  | <i>Ca_desi_denovo</i> | 23039274                | A/G  | NA                 | NA                            | NA                 |
| <i>Desi_wild_23039331</i> | NA                                  | <i>Ca_desi_denovo</i> | 23039331                | A/G  | NA                 | NA                            | NA                 |
| <i>Desi_wild_23046668</i> | NA                                  | <i>Ca_desi_denovo</i> | 23046668                | A/G  | NA                 | NA                            | NA                 |
| <i>Desi_wild_23049185</i> | NA                                  | <i>Ca_desi_denovo</i> | 23049185                | C/G  | NA                 | NA                            | NA                 |
| <i>Desi_wild_23049610</i> | NA                                  | <i>Ca_desi_denovo</i> | 23049610                | G/T  | NA                 | NA                            | NA                 |
| <i>Desi_wild_23049636</i> | NA                                  | <i>Ca_desi_denovo</i> | 23049636                | A/G  | NA                 | NA                            | NA                 |
| <i>Desi_wild_23049649</i> | NA                                  | <i>Ca_desi_denovo</i> | 23049649                | A/T  | NA                 | NA                            | NA                 |
| <i>Desi_wild_23049683</i> | NA                                  | <i>Ca_desi_denovo</i> | 23049683                | C/G  | NA                 | NA                            | NA                 |
| <i>Desi_wild_23051314</i> | NA                                  | <i>Ca_desi_denovo</i> | 23051314                | T/C  | NA                 | NA                            | NA                 |

| SNP IDs                   | NCBI dbSNP accession IDs (NCBI_SS#) | Chromosomes           | Physical positions (bp) | SNPs | Gene accession IDs | Sequence components of genome | Putative functions |
|---------------------------|-------------------------------------|-----------------------|-------------------------|------|--------------------|-------------------------------|--------------------|
| <i>Desi_wild_23052930</i> | NA                                  | <i>Ca_desi_denovo</i> | 23052930                | A/T  | NA                 | NA                            | NA                 |
| <i>Desi_wild_23052933</i> | NA                                  | <i>Ca_desi_denovo</i> | 23052933                | A/G  | NA                 | NA                            | NA                 |
| <i>Desi_wild_23053139</i> | NA                                  | <i>Ca_desi_denovo</i> | 23053139                | C/T  | NA                 | NA                            | NA                 |
| <i>Desi_wild_23053148</i> | NA                                  | <i>Ca_desi_denovo</i> | 23053148                | A/C  | NA                 | NA                            | NA                 |
| <i>Desi_wild_23053241</i> | NA                                  | <i>Ca_desi_denovo</i> | 23053241                | C/T  | NA                 | NA                            | NA                 |
| <i>Desi_wild_23053544</i> | NA                                  | <i>Ca_desi_denovo</i> | 23053544                | G/T  | NA                 | NA                            | NA                 |
| <i>Desi_wild_23055111</i> | NA                                  | <i>Ca_desi_denovo</i> | 23055111                | T/A  | NA                 | NA                            | NA                 |
| <i>Desi_wild_23055168</i> | NA                                  | <i>Ca_desi_denovo</i> | 23055168                | A/G  | NA                 | NA                            | NA                 |
| <i>Desi_wild_23055183</i> | NA                                  | <i>Ca_desi_denovo</i> | 23055183                | G/T  | NA                 | NA                            | NA                 |
| <i>Desi_wild_23056198</i> | NA                                  | <i>Ca_desi_denovo</i> | 23056198                | A/G  | NA                 | NA                            | NA                 |
| <i>Desi_wild_23057112</i> | NA                                  | <i>Ca_desi_denovo</i> | 23057112                | A/G  | NA                 | NA                            | NA                 |
| <i>Desi_wild_23057118</i> | NA                                  | <i>Ca_desi_denovo</i> | 23057118                | A/G  | NA                 | NA                            | NA                 |
| <i>Desi_wild_23057154</i> | NA                                  | <i>Ca_desi_denovo</i> | 23057154                | C/T  | NA                 | NA                            | NA                 |
| <i>Desi_wild_23058995</i> | NA                                  | <i>Ca_desi_denovo</i> | 23058995                | A/T  | NA                 | NA                            | NA                 |
| <i>Desi_wild_23059125</i> | NA                                  | <i>Ca_desi_denovo</i> | 23059125                | A/T  | NA                 | NA                            | NA                 |
| <i>Desi_wild_23060042</i> | NA                                  | <i>Ca_desi_denovo</i> | 23060042                | C/T  | NA                 | NA                            | NA                 |
| <i>Desi_wild_23060064</i> | NA                                  | <i>Ca_desi_denovo</i> | 23060064                | A/G  | NA                 | NA                            | NA                 |
| <i>Desi_wild_23061860</i> | NA                                  | <i>Ca_desi_denovo</i> | 23061860                | A/T  | NA                 | NA                            | NA                 |
| <i>Desi_wild_23063335</i> | NA                                  | <i>Ca_desi_denovo</i> | 23063335                | C/T  | NA                 | NA                            | NA                 |
| <i>Desi_wild_23064387</i> | NA                                  | <i>Ca_desi_denovo</i> | 23064387                | A/T  | NA                 | NA                            | NA                 |
| <i>Desi_wild_23064393</i> | NA                                  | <i>Ca_desi_denovo</i> | 23064393                | A/T  | NA                 | NA                            | NA                 |
| <i>Desi_wild_23064606</i> | NA                                  | <i>Ca_desi_denovo</i> | 23064606                | C/G  | NA                 | NA                            | NA                 |
| <i>Desi_wild_23065266</i> | NA                                  | <i>Ca_desi_denovo</i> | 23065266                | C/T  | NA                 | NA                            | NA                 |
| <i>Desi_wild_23065276</i> | NA                                  | <i>Ca_desi_denovo</i> | 23065276                | A/C  | NA                 | NA                            | NA                 |
| <i>Desi_wild_23065649</i> | NA                                  | <i>Ca_desi_denovo</i> | 23065649                | A/C  | NA                 | NA                            | NA                 |
| <i>Desi_wild_23065673</i> | NA                                  | <i>Ca_desi_denovo</i> | 23065673                | C/T  | NA                 | NA                            | NA                 |
| <i>Desi_wild_23065688</i> | NA                                  | <i>Ca_desi_denovo</i> | 23065688                | C/G  | NA                 | NA                            | NA                 |
| <i>Desi_wild_23065718</i> | NA                                  | <i>Ca_desi_denovo</i> | 23065718                | C/T  | NA                 | NA                            | NA                 |
| <i>Desi_wild_23065844</i> | NA                                  | <i>Ca_desi_denovo</i> | 23065844                | A/G  | NA                 | NA                            | NA                 |
| <i>Desi_wild_23065892</i> | NA                                  | <i>Ca_desi_denovo</i> | 23065892                | C/T  | NA                 | NA                            | NA                 |
| <i>Desi_wild_23067320</i> | NA                                  | <i>Ca_desi_denovo</i> | 23067320                | C/T  | NA                 | NA                            | NA                 |
| <i>Desi_wild_23067359</i> | NA                                  | <i>Ca_desi_denovo</i> | 23067359                | A/G  | NA                 | NA                            | NA                 |
| <i>Desi_wild_23069164</i> | NA                                  | <i>Ca_desi_denovo</i> | 23069164                | C/T  | NA                 | NA                            | NA                 |
| <i>Desi_wild_23070397</i> | NA                                  | <i>Ca_desi_denovo</i> | 23070397                | C/T  | NA                 | NA                            | NA                 |
| <i>Desi_wild_23070551</i> | NA                                  | <i>Ca_desi_denovo</i> | 23070551                | C/G  | NA                 | NA                            | NA                 |
| <i>Desi_wild_23072480</i> | NA                                  | <i>Ca_desi_denovo</i> | 23072480                | A/G  | NA                 | NA                            | NA                 |
| <i>Desi_wild_23074283</i> | NA                                  | <i>Ca_desi_denovo</i> | 23074283                | C/G  | NA                 | NA                            | NA                 |
| <i>Desi_wild_23074307</i> | NA                                  | <i>Ca_desi_denovo</i> | 23074307                | C/T  | NA                 | NA                            | NA                 |
| <i>Desi_wild_23075929</i> | NA                                  | <i>Ca_desi_denovo</i> | 23075929                | A/G  | NA                 | NA                            | NA                 |
| <i>Desi_wild_23077488</i> | NA                                  | <i>Ca_desi_denovo</i> | 23077488                | A/G  | NA                 | NA                            | NA                 |
| <i>Desi_wild_23078419</i> | NA                                  | <i>Ca_desi_denovo</i> | 23078419                | C/T  | NA                 | NA                            | NA                 |
| <i>Desi_wild_23078437</i> | NA                                  | <i>Ca_desi_denovo</i> | 23078437                | A/G  | NA                 | NA                            | NA                 |
| <i>Desi_wild_23079106</i> | NA                                  | <i>Ca_desi_denovo</i> | 23079106                | C/G  | NA                 | NA                            | NA                 |
| <i>Desi_wild_23079107</i> | NA                                  | <i>Ca_desi_denovo</i> | 23079107                | C/T  | NA                 | NA                            | NA                 |

| SNP IDs                   | NCBI dbSNP accession IDs (NCBI_SS#) | Chromosomes           | Physical positions (bp) | SNPs | Gene accession IDs | Sequence components of genome | Putative functions |
|---------------------------|-------------------------------------|-----------------------|-------------------------|------|--------------------|-------------------------------|--------------------|
| <i>Desi_wild_23079108</i> | NA                                  | <i>Ca_desi_denovo</i> | 23079108                | C/T  | NA                 | NA                            | NA                 |
| <i>Desi_wild_23079110</i> | NA                                  | <i>Ca_desi_denovo</i> | 23079110                | C/T  | NA                 | NA                            | NA                 |
| <i>Desi_wild_23079614</i> | NA                                  | <i>Ca_desi_denovo</i> | 23079614                | A/G  | NA                 | NA                            | NA                 |
| <i>Desi_wild_23079627</i> | NA                                  | <i>Ca_desi_denovo</i> | 23079627                | A/C  | NA                 | NA                            | NA                 |
| <i>Desi_wild_23079635</i> | NA                                  | <i>Ca_desi_denovo</i> | 23079635                | C/T  | NA                 | NA                            | NA                 |
| <i>Desi_wild_23079650</i> | NA                                  | <i>Ca_desi_denovo</i> | 23079650                | A/G  | NA                 | NA                            | NA                 |
| <i>Desi_wild_23079830</i> | NA                                  | <i>Ca_desi_denovo</i> | 23079830                | G/T  | NA                 | NA                            | NA                 |
| <i>Desi_wild_23079857</i> | NA                                  | <i>Ca_desi_denovo</i> | 23079857                | C/T  | NA                 | NA                            | NA                 |
| <i>Desi_wild_23079923</i> | NA                                  | <i>Ca_desi_denovo</i> | 23079923                | C/T  | NA                 | NA                            | NA                 |
| <i>Desi_wild_23080645</i> | NA                                  | <i>Ca_desi_denovo</i> | 23080645                | A/T  | NA                 | NA                            | NA                 |
| <i>Desi_wild_23080646</i> | NA                                  | <i>Ca_desi_denovo</i> | 23080646                | C/T  | NA                 | NA                            | NA                 |
| <i>Desi_wild_23080649</i> | NA                                  | <i>Ca_desi_denovo</i> | 23080649                | A/G  | NA                 | NA                            | NA                 |
| <i>Desi_wild_23080803</i> | NA                                  | <i>Ca_desi_denovo</i> | 23080803                | A/G  | NA                 | NA                            | NA                 |
| <i>Desi_wild_23081750</i> | NA                                  | <i>Ca_desi_denovo</i> | 23081750                | C/T  | NA                 | NA                            | NA                 |
| <i>Desi_wild_23081762</i> | NA                                  | <i>Ca_desi_denovo</i> | 23081762                | A/G  | NA                 | NA                            | NA                 |
| <i>Desi_wild_23082252</i> | NA                                  | <i>Ca_desi_denovo</i> | 23082252                | A/G  | NA                 | NA                            | NA                 |
| <i>Desi_wild_23082266</i> | NA                                  | <i>Ca_desi_denovo</i> | 23082266                | G/C  | NA                 | NA                            | NA                 |
| <i>Desi_wild_23082276</i> | NA                                  | <i>Ca_desi_denovo</i> | 23082276                | G/A  | NA                 | NA                            | NA                 |
| <i>Desi_wild_23082278</i> | NA                                  | <i>Ca_desi_denovo</i> | 23082278                | G/A  | NA                 | NA                            | NA                 |
| <i>Desi_wild_23082638</i> | NA                                  | <i>Ca_desi_denovo</i> | 23082638                | G/T  | NA                 | NA                            | NA                 |
| <i>Desi_wild_23083020</i> | NA                                  | <i>Ca_desi_denovo</i> | 23083020                | C/T  | NA                 | NA                            | NA                 |
| <i>Desi_wild_23083332</i> | NA                                  | <i>Ca_desi_denovo</i> | 23083332                | A/T  | NA                 | NA                            | NA                 |
| <i>Desi_wild_23085876</i> | NA                                  | <i>Ca_desi_denovo</i> | 23085876                | C/T  | NA                 | NA                            | NA                 |
| <i>Desi_wild_23085973</i> | NA                                  | <i>Ca_desi_denovo</i> | 23085973                | C/T  | NA                 | NA                            | NA                 |
| <i>Desi_wild_23086967</i> | NA                                  | <i>Ca_desi_denovo</i> | 23086967                | C/G  | NA                 | NA                            | NA                 |
| <i>Desi_wild_23087597</i> | NA                                  | <i>Ca_desi_denovo</i> | 23087597                | G/A  | NA                 | NA                            | NA                 |
| <i>Desi_wild_23087599</i> | NA                                  | <i>Ca_desi_denovo</i> | 23087599                | G/T  | NA                 | NA                            | NA                 |
| <i>Desi_wild_23089053</i> | NA                                  | <i>Ca_desi_denovo</i> | 23089053                | A/C  | NA                 | NA                            | NA                 |
| <i>Desi_wild_23089125</i> | NA                                  | <i>Ca_desi_denovo</i> | 23089125                | C/T  | NA                 | NA                            | NA                 |
| <i>Desi_wild_23091148</i> | NA                                  | <i>Ca_desi_denovo</i> | 23091148                | A/T  | NA                 | NA                            | NA                 |
| <i>Desi_wild_23091172</i> | NA                                  | <i>Ca_desi_denovo</i> | 23091172                | A/C  | NA                 | NA                            | NA                 |
| <i>Desi_wild_23091179</i> | NA                                  | <i>Ca_desi_denovo</i> | 23091179                | A/T  | NA                 | NA                            | NA                 |
| <i>Desi_wild_23091966</i> | NA                                  | <i>Ca_desi_denovo</i> | 23091966                | A/C  | NA                 | NA                            | NA                 |
| <i>Desi_wild_23093038</i> | NA                                  | <i>Ca_desi_denovo</i> | 23093038                | C/T  | NA                 | NA                            | NA                 |
| <i>Desi_wild_23093140</i> | NA                                  | <i>Ca_desi_denovo</i> | 23093140                | A/G  | NA                 | NA                            | NA                 |
| <i>Desi_wild_23093354</i> | NA                                  | <i>Ca_desi_denovo</i> | 23093354                | G/T  | NA                 | NA                            | NA                 |
| <i>Desi_wild_23094722</i> | NA                                  | <i>Ca_desi_denovo</i> | 23094722                | A/G  | NA                 | NA                            | NA                 |
| <i>Desi_wild_23096436</i> | NA                                  | <i>Ca_desi_denovo</i> | 23096436                | A/G  | NA                 | NA                            | NA                 |
| <i>Desi_wild_23096444</i> | NA                                  | <i>Ca_desi_denovo</i> | 23096444                | A/C  | NA                 | NA                            | NA                 |
| <i>Desi_wild_23096449</i> | NA                                  | <i>Ca_desi_denovo</i> | 23096449                | A/T  | NA                 | NA                            | NA                 |
| <i>Desi_wild_23098136</i> | NA                                  | <i>Ca_desi_denovo</i> | 23098136                | A/G  | NA                 | NA                            | NA                 |
| <i>Desi_wild_23098143</i> | NA                                  | <i>Ca_desi_denovo</i> | 23098143                | C/T  | NA                 | NA                            | NA                 |
| <i>Desi_wild_23099020</i> | NA                                  | <i>Ca_desi_denovo</i> | 23099020                | C/T  | NA                 | NA                            | NA                 |
| <i>Desi_wild_23099057</i> | NA                                  | <i>Ca_desi_denovo</i> | 23099057                | A/T  | NA                 | NA                            | NA                 |

| SNP IDs                   | NCBI dbSNP accession IDs (NCBI_SS#) | Chromosomes           | Physical positions (bp) | SNPs | Gene accession IDs | Sequence components of genome | Putative functions |
|---------------------------|-------------------------------------|-----------------------|-------------------------|------|--------------------|-------------------------------|--------------------|
| <i>Desi_wild_23100852</i> | NA                                  | <i>Ca_desi_denovo</i> | 23100852                | C/G  | NA                 | NA                            | NA                 |
| <i>Desi_wild_23101854</i> | NA                                  | <i>Ca_desi_denovo</i> | 23101854                | A/G  | NA                 | NA                            | NA                 |
| <i>Desi_wild_23101899</i> | NA                                  | <i>Ca_desi_denovo</i> | 23101899                | C/T  | NA                 | NA                            | NA                 |
| <i>Desi_wild_23101905</i> | NA                                  | <i>Ca_desi_denovo</i> | 23101905                | A/G  | NA                 | NA                            | NA                 |
| <i>Desi_wild_23102156</i> | NA                                  | <i>Ca_desi_denovo</i> | 23102156                | A/T  | NA                 | NA                            | NA                 |
| <i>Desi_wild_23102220</i> | NA                                  | <i>Ca_desi_denovo</i> | 23102220                | A/G  | NA                 | NA                            | NA                 |
| <i>Desi_wild_23102412</i> | NA                                  | <i>Ca_desi_denovo</i> | 23102412                | C/T  | NA                 | NA                            | NA                 |
| <i>Desi_wild_23103702</i> | NA                                  | <i>Ca_desi_denovo</i> | 23103702                | C/T  | NA                 | NA                            | NA                 |
| <i>Desi_wild_23105704</i> | NA                                  | <i>Ca_desi_denovo</i> | 23105704                | A/G  | NA                 | NA                            | NA                 |
| <i>Desi_wild_23107393</i> | NA                                  | <i>Ca_desi_denovo</i> | 23107393                | C/G  | NA                 | NA                            | NA                 |
| <i>Desi_wild_23109484</i> | NA                                  | <i>Ca_desi_denovo</i> | 23109484                | A/G  | NA                 | NA                            | NA                 |
| <i>Desi_wild_23109745</i> | NA                                  | <i>Ca_desi_denovo</i> | 23109745                | A/G  | NA                 | NA                            | NA                 |
| <i>Desi_wild_23110364</i> | NA                                  | <i>Ca_desi_denovo</i> | 23110364                | A/G  | NA                 | NA                            | NA                 |
| <i>Desi_wild_23110406</i> | NA                                  | <i>Ca_desi_denovo</i> | 23110406                | C/T  | NA                 | NA                            | NA                 |
| <i>Desi_wild_23111046</i> | NA                                  | <i>Ca_desi_denovo</i> | 23111046                | A/G  | NA                 | NA                            | NA                 |
| <i>Desi_wild_23111138</i> | NA                                  | <i>Ca_desi_denovo</i> | 23111138                | A/C  | NA                 | NA                            | NA                 |
| <i>Desi_wild_23111140</i> | NA                                  | <i>Ca_desi_denovo</i> | 23111140                | A/T  | NA                 | NA                            | NA                 |
| <i>Desi_wild_23111200</i> | NA                                  | <i>Ca_desi_denovo</i> | 23111200                | A/C  | NA                 | NA                            | NA                 |
| <i>Desi_wild_23111335</i> | NA                                  | <i>Ca_desi_denovo</i> | 23111335                | C/T  | NA                 | NA                            | NA                 |
| <i>Desi_wild_23111918</i> | NA                                  | <i>Ca_desi_denovo</i> | 23111918                | A/T  | NA                 | NA                            | NA                 |
| <i>Desi_wild_23111951</i> | NA                                  | <i>Ca_desi_denovo</i> | 23111951                | C/T  | NA                 | NA                            | NA                 |
| <i>Desi_wild_23112438</i> | NA                                  | <i>Ca_desi_denovo</i> | 23112438                | A/G  | NA                 | NA                            | NA                 |
| <i>Desi_wild_23112788</i> | NA                                  | <i>Ca_desi_denovo</i> | 23112788                | A/G  | NA                 | NA                            | NA                 |
| <i>Desi_wild_23112804</i> | NA                                  | <i>Ca_desi_denovo</i> | 23112804                | A/G  | NA                 | NA                            | NA                 |
| <i>Desi_wild_23113502</i> | NA                                  | <i>Ca_desi_denovo</i> | 23113502                | A/G  | NA                 | NA                            | NA                 |
| <i>Desi_wild_23113508</i> | NA                                  | <i>Ca_desi_denovo</i> | 23113508                | C/G  | NA                 | NA                            | NA                 |
| <i>Desi_wild_23115308</i> | NA                                  | <i>Ca_desi_denovo</i> | 23115308                | C/G  | NA                 | NA                            | NA                 |
| <i>Desi_wild_23115315</i> | NA                                  | <i>Ca_desi_denovo</i> | 23115315                | A/T  | NA                 | NA                            | NA                 |
| <i>Desi_wild_23117649</i> | NA                                  | <i>Ca_desi_denovo</i> | 23117649                | C/T  | NA                 | NA                            | NA                 |
| <i>Desi_wild_23117656</i> | NA                                  | <i>Ca_desi_denovo</i> | 23117656                | C/T  | NA                 | NA                            | NA                 |
| <i>Desi_wild_23117672</i> | NA                                  | <i>Ca_desi_denovo</i> | 23117672                | G/T  | NA                 | NA                            | NA                 |
| <i>Desi_wild_23117674</i> | NA                                  | <i>Ca_desi_denovo</i> | 23117674                | C/T  | NA                 | NA                            | NA                 |
| <i>Desi_wild_23117802</i> | NA                                  | <i>Ca_desi_denovo</i> | 23117802                | C/T  | NA                 | NA                            | NA                 |
| <i>Desi_wild_23119481</i> | NA                                  | <i>Ca_desi_denovo</i> | 23119481                | A/T  | NA                 | NA                            | NA                 |
| <i>Desi_wild_23119915</i> | NA                                  | <i>Ca_desi_denovo</i> | 23119915                | A/T  | NA                 | NA                            | NA                 |
| <i>Desi_wild_23120550</i> | NA                                  | <i>Ca_desi_denovo</i> | 23120550                | C/T  | NA                 | NA                            | NA                 |
| <i>Desi_wild_23121377</i> | NA                                  | <i>Ca_desi_denovo</i> | 23121377                | G/T  | NA                 | NA                            | NA                 |
| <i>Desi_wild_23124862</i> | NA                                  | <i>Ca_desi_denovo</i> | 23124862                | A/G  | NA                 | NA                            | NA                 |
| <i>Desi_wild_23127110</i> | NA                                  | <i>Ca_desi_denovo</i> | 23127110                | C/G  | NA                 | NA                            | NA                 |
| <i>Desi_wild_23127356</i> | NA                                  | <i>Ca_desi_denovo</i> | 23127356                | A/T  | NA                 | NA                            | NA                 |
| <i>Desi_wild_23127394</i> | NA                                  | <i>Ca_desi_denovo</i> | 23127394                | A/G  | NA                 | NA                            | NA                 |
| <i>Desi_wild_23127728</i> | NA                                  | <i>Ca_desi_denovo</i> | 23127728                | C/T  | NA                 | NA                            | NA                 |
| <i>Desi_wild_23127793</i> | NA                                  | <i>Ca_desi_denovo</i> | 23127793                | C/G  | NA                 | NA                            | NA                 |
| <i>Desi_wild_23127939</i> | NA                                  | <i>Ca_desi_denovo</i> | 23127939                | C/T  | NA                 | NA                            | NA                 |

| SNP IDs                   | NCBI dbSNP accession IDs (NCBI_SS#) | Chromosomes           | Physical positions (bp) | SNPs | Gene accession IDs | Sequence components of genome | Putative functions |
|---------------------------|-------------------------------------|-----------------------|-------------------------|------|--------------------|-------------------------------|--------------------|
| <i>Desi_wild_23131120</i> | NA                                  | <i>Ca_desi_denovo</i> | 23131120                | G/T  | NA                 | NA                            | NA                 |
| <i>Desi_wild_23131122</i> | NA                                  | <i>Ca_desi_denovo</i> | 23131122                | G/T  | NA                 | NA                            | NA                 |
| <i>Desi_wild_23131540</i> | NA                                  | <i>Ca_desi_denovo</i> | 23131540                | C/G  | NA                 | NA                            | NA                 |
| <i>Desi_wild_23131574</i> | NA                                  | <i>Ca_desi_denovo</i> | 23131574                | A/G  | NA                 | NA                            | NA                 |
| <i>Desi_wild_23134659</i> | NA                                  | <i>Ca_desi_denovo</i> | 23134659                | A/C  | NA                 | NA                            | NA                 |
| <i>Desi_wild_23136564</i> | NA                                  | <i>Ca_desi_denovo</i> | 23136564                | C/T  | NA                 | NA                            | NA                 |
| <i>Desi_wild_23136602</i> | NA                                  | <i>Ca_desi_denovo</i> | 23136602                | C/T  | NA                 | NA                            | NA                 |
| <i>Desi_wild_23136799</i> | NA                                  | <i>Ca_desi_denovo</i> | 23136799                | A/C  | NA                 | NA                            | NA                 |
| <i>Desi_wild_23136973</i> | NA                                  | <i>Ca_desi_denovo</i> | 23136973                | C/T  | NA                 | NA                            | NA                 |
| <i>Desi_wild_23137072</i> | NA                                  | <i>Ca_desi_denovo</i> | 23137072                | C/T  | NA                 | NA                            | NA                 |
| <i>Desi_wild_23137148</i> | NA                                  | <i>Ca_desi_denovo</i> | 23137148                | G/T  | NA                 | NA                            | NA                 |
| <i>Desi_wild_23137194</i> | NA                                  | <i>Ca_desi_denovo</i> | 23137194                | C/T  | NA                 | NA                            | NA                 |
| <i>Desi_wild_23137856</i> | NA                                  | <i>Ca_desi_denovo</i> | 23137856                | A/C  | NA                 | NA                            | NA                 |
| <i>Desi_wild_23137927</i> | NA                                  | <i>Ca_desi_denovo</i> | 23137927                | A/T  | NA                 | NA                            | NA                 |
| <i>Desi_wild_23137934</i> | NA                                  | <i>Ca_desi_denovo</i> | 23137934                | A/G  | NA                 | NA                            | NA                 |
| <i>Desi_wild_23138161</i> | NA                                  | <i>Ca_desi_denovo</i> | 23138161                | C/G  | NA                 | NA                            | NA                 |
| <i>Desi_wild_23138310</i> | NA                                  | <i>Ca_desi_denovo</i> | 23138310                | C/T  | NA                 | NA                            | NA                 |
| <i>Desi_wild_23138356</i> | NA                                  | <i>Ca_desi_denovo</i> | 23138356                | A/G  | NA                 | NA                            | NA                 |
| <i>Desi_wild_23138709</i> | NA                                  | <i>Ca_desi_denovo</i> | 23138709                | A/G  | NA                 | NA                            | NA                 |
| <i>Desi_wild_23139484</i> | NA                                  | <i>Ca_desi_denovo</i> | 23139484                | A/C  | NA                 | NA                            | NA                 |
| <i>Desi_wild_23140342</i> | NA                                  | <i>Ca_desi_denovo</i> | 23140342                | A/G  | NA                 | NA                            | NA                 |
| <i>Desi_wild_23140357</i> | NA                                  | <i>Ca_desi_denovo</i> | 23140357                | C/T  | NA                 | NA                            | NA                 |
| <i>Desi_wild_23140404</i> | NA                                  | <i>Ca_desi_denovo</i> | 23140404                | A/G  | NA                 | NA                            | NA                 |
| <i>Desi_wild_23140623</i> | NA                                  | <i>Ca_desi_denovo</i> | 23140623                | A/G  | NA                 | NA                            | NA                 |
| <i>Desi_wild_23140638</i> | NA                                  | <i>Ca_desi_denovo</i> | 23140638                | C/T  | NA                 | NA                            | NA                 |
| <i>Desi_wild_23140653</i> | NA                                  | <i>Ca_desi_denovo</i> | 23140653                | A/G  | NA                 | NA                            | NA                 |
| <i>Desi_wild_23141141</i> | NA                                  | <i>Ca_desi_denovo</i> | 23141141                | A/T  | NA                 | NA                            | NA                 |
| <i>Desi_wild_23142175</i> | NA                                  | <i>Ca_desi_denovo</i> | 23142175                | G/T  | NA                 | NA                            | NA                 |
| <i>Desi_wild_23142182</i> | NA                                  | <i>Ca_desi_denovo</i> | 23142182                | C/T  | NA                 | NA                            | NA                 |
| <i>Desi_wild_23143415</i> | NA                                  | <i>Ca_desi_denovo</i> | 23143415                | C/T  | NA                 | NA                            | NA                 |
| <i>Desi_wild_23143546</i> | NA                                  | <i>Ca_desi_denovo</i> | 23143546                | A/G  | NA                 | NA                            | NA                 |
| <i>Desi_wild_23143558</i> | NA                                  | <i>Ca_desi_denovo</i> | 23143558                | C/G  | NA                 | NA                            | NA                 |
| <i>Desi_wild_23143582</i> | NA                                  | <i>Ca_desi_denovo</i> | 23143582                | A/C  | NA                 | NA                            | NA                 |
| <i>Desi_wild_23144252</i> | NA                                  | <i>Ca_desi_denovo</i> | 23144252                | A/T  | NA                 | NA                            | NA                 |
| <i>Desi_wild_23145688</i> | NA                                  | <i>Ca_desi_denovo</i> | 23145688                | A/G  | NA                 | NA                            | NA                 |
| <i>Desi_wild_23146099</i> | NA                                  | <i>Ca_desi_denovo</i> | 23146099                | C/T  | NA                 | NA                            | NA                 |
| <i>Desi_wild_23146118</i> | NA                                  | <i>Ca_desi_denovo</i> | 23146118                | A/G  | NA                 | NA                            | NA                 |
| <i>Desi_wild_23146171</i> | NA                                  | <i>Ca_desi_denovo</i> | 23146171                | A/G  | NA                 | NA                            | NA                 |
| <i>Desi_wild_23147242</i> | NA                                  | <i>Ca_desi_denovo</i> | 23147242                | C/T  | NA                 | NA                            | NA                 |
| <i>Desi_wild_23147244</i> | NA                                  | <i>Ca_desi_denovo</i> | 23147244                | G/T  | NA                 | NA                            | NA                 |
| <i>Desi_wild_23147245</i> | NA                                  | <i>Ca_desi_denovo</i> | 23147245                | C/T  | NA                 | NA                            | NA                 |
| <i>Desi_wild_23148336</i> | NA                                  | <i>Ca_desi_denovo</i> | 23148336                | G/T  | NA                 | NA                            | NA                 |
| <i>Desi_wild_23148360</i> | NA                                  | <i>Ca_desi_denovo</i> | 23148360                | C/G  | NA                 | NA                            | NA                 |
| <i>Desi_wild_23149186</i> | NA                                  | <i>Ca_desi_denovo</i> | 23149186                | A/G  | NA                 | NA                            | NA                 |



| SNP IDs                   | NCBI dbSNP accession IDs (NCBI_SS#) | Chromosomes           | Physical positions (bp) | SNPs | Gene accession IDs | Sequence components of genome | Putative functions |
|---------------------------|-------------------------------------|-----------------------|-------------------------|------|--------------------|-------------------------------|--------------------|
| <i>Desi_wild_23149865</i> | NA                                  | <i>Ca_desi_denovo</i> | 23149865                | A/C  | NA                 | NA                            | NA                 |
| <i>Desi_wild_23149984</i> | NA                                  | <i>Ca_desi_denovo</i> | 23149984                | A/T  | NA                 | NA                            | NA                 |
| <i>Desi_wild_23150045</i> | NA                                  | <i>Ca_desi_denovo</i> | 23150045                | C/T  | NA                 | NA                            | NA                 |
| <i>Desi_wild_23150055</i> | NA                                  | <i>Ca_desi_denovo</i> | 23150055                | A/T  | NA                 | NA                            | NA                 |
| <i>Desi_wild_23150095</i> | NA                                  | <i>Ca_desi_denovo</i> | 23150095                | A/G  | NA                 | NA                            | NA                 |
| <i>Desi_wild_23150155</i> | NA                                  | <i>Ca_desi_denovo</i> | 23150155                | C/T  | NA                 | NA                            | NA                 |
| <i>Desi_wild_23152701</i> | NA                                  | <i>Ca_desi_denovo</i> | 23152701                | A/G  | NA                 | NA                            | NA                 |
| <i>Desi_wild_23153299</i> | NA                                  | <i>Ca_desi_denovo</i> | 23153299                | C/G  | NA                 | NA                            | NA                 |
| <i>Desi_wild_23153633</i> | NA                                  | <i>Ca_desi_denovo</i> | 23153633                | A/T  | NA                 | NA                            | NA                 |
| <i>Desi_wild_23155113</i> | NA                                  | <i>Ca_desi_denovo</i> | 23155113                | G/T  | NA                 | NA                            | NA                 |
| <i>Desi_wild_23155122</i> | NA                                  | <i>Ca_desi_denovo</i> | 23155122                | A/T  | NA                 | NA                            | NA                 |
| <i>Desi_wild_23155161</i> | NA                                  | <i>Ca_desi_denovo</i> | 23155161                | C/T  | NA                 | NA                            | NA                 |
| <i>Desi_wild_23155386</i> | NA                                  | <i>Ca_desi_denovo</i> | 23155386                | A/G  | NA                 | NA                            | NA                 |
| <i>Desi_wild_23156751</i> | NA                                  | <i>Ca_desi_denovo</i> | 23156751                | C/T  | NA                 | NA                            | NA                 |
| <i>Desi_wild_23157060</i> | NA                                  | <i>Ca_desi_denovo</i> | 23157060                | T/C  | NA                 | NA                            | NA                 |
| <i>Desi_wild_23157242</i> | NA                                  | <i>Ca_desi_denovo</i> | 23157242                | A/C  | NA                 | NA                            | NA                 |
| <i>Desi_wild_23157643</i> | NA                                  | <i>Ca_desi_denovo</i> | 23157643                | C/T  | NA                 | NA                            | NA                 |
| <i>Desi_wild_23158471</i> | NA                                  | <i>Ca_desi_denovo</i> | 23158471                | C/T  | NA                 | NA                            | NA                 |
| <i>Desi_wild_23158536</i> | NA                                  | <i>Ca_desi_denovo</i> | 23158536                | C/T  | NA                 | NA                            | NA                 |
| <i>Desi_wild_23158861</i> | NA                                  | <i>Ca_desi_denovo</i> | 23158861                | C/T  | NA                 | NA                            | NA                 |
| <i>Desi_wild_23159022</i> | NA                                  | <i>Ca_desi_denovo</i> | 23159022                | A/C  | NA                 | NA                            | NA                 |
| <i>Desi_wild_23159080</i> | NA                                  | <i>Ca_desi_denovo</i> | 23159080                | C/T  | NA                 | NA                            | NA                 |
| <i>Desi_wild_23159160</i> | NA                                  | <i>Ca_desi_denovo</i> | 23159160                | C/T  | NA                 | NA                            | NA                 |
| <i>Desi_wild_23159255</i> | NA                                  | <i>Ca_desi_denovo</i> | 23159255                | C/T  | NA                 | NA                            | NA                 |
| <i>Desi_wild_23159314</i> | NA                                  | <i>Ca_desi_denovo</i> | 23159314                | A/G  | NA                 | NA                            | NA                 |
| <i>Desi_wild_23159630</i> | NA                                  | <i>Ca_desi_denovo</i> | 23159630                | A/T  | NA                 | NA                            | NA                 |
| <i>Desi_wild_23160338</i> | NA                                  | <i>Ca_desi_denovo</i> | 23160338                | G/T  | NA                 | NA                            | NA                 |
| <i>Desi_wild_23160368</i> | NA                                  | <i>Ca_desi_denovo</i> | 23160368                | C/G  | NA                 | NA                            | NA                 |
| <i>Desi_wild_23161507</i> | NA                                  | <i>Ca_desi_denovo</i> | 23161507                | C/T  | NA                 | NA                            | NA                 |
| <i>Desi_wild_23161978</i> | NA                                  | <i>Ca_desi_denovo</i> | 23161978                | A/T  | NA                 | NA                            | NA                 |
| <i>Desi_wild_23162453</i> | NA                                  | <i>Ca_desi_denovo</i> | 23162453                | A/G  | NA                 | NA                            | NA                 |
| <i>Desi_wild_23163172</i> | NA                                  | <i>Ca_desi_denovo</i> | 23163172                | A/G  | NA                 | NA                            | NA                 |
| <i>Desi_wild_23163210</i> | NA                                  | <i>Ca_desi_denovo</i> | 23163210                | A/G  | NA                 | NA                            | NA                 |
| <i>Desi_wild_23163357</i> | NA                                  | <i>Ca_desi_denovo</i> | 23163357                | A/C  | NA                 | NA                            | NA                 |
| <i>Desi_wild_23163435</i> | NA                                  | <i>Ca_desi_denovo</i> | 23163435                | A/G  | NA                 | NA                            | NA                 |
| <i>Desi_wild_23163542</i> | NA                                  | <i>Ca_desi_denovo</i> | 23163542                | C/T  | NA                 | NA                            | NA                 |
| <i>Desi_wild_23163551</i> | NA                                  | <i>Ca_desi_denovo</i> | 23163551                | A/T  | NA                 | NA                            | NA                 |
| <i>Desi_wild_23164982</i> | NA                                  | <i>Ca_desi_denovo</i> | 23164982                | A/G  | NA                 | NA                            | NA                 |
| <i>Desi_wild_23165024</i> | NA                                  | <i>Ca_desi_denovo</i> | 23165024                | A/T  | NA                 | NA                            | NA                 |
| <i>Desi_wild_23165027</i> | NA                                  | <i>Ca_desi_denovo</i> | 23165027                | A/T  | NA                 | NA                            | NA                 |
| <i>Desi_wild_23165890</i> | NA                                  | <i>Ca_desi_denovo</i> | 23165890                | G/A  | NA                 | NA                            | NA                 |
| <i>Desi_wild_23165943</i> | NA                                  | <i>Ca_desi_denovo</i> | 23165943                | G/T  | NA                 | NA                            | NA                 |
| <i>Desi_wild_23165987</i> | NA                                  | <i>Ca_desi_denovo</i> | 23165987                | A/G  | NA                 | NA                            | NA                 |
| <i>Desi_wild_23165988</i> | NA                                  | <i>Ca_desi_denovo</i> | 23165988                | A/T  | NA                 | NA                            | NA                 |

| SNP IDs                   | NCBI dbSNP accession IDs (NCBI_SS#) | Chromosomes           | Physical positions (bp) | SNPs | Gene accession IDs | Sequence components of genome | Putative functions |
|---------------------------|-------------------------------------|-----------------------|-------------------------|------|--------------------|-------------------------------|--------------------|
| <i>Desi_wild_23166009</i> | NA                                  | <i>Ca_desi_denovo</i> | 23166009                | C/T  | NA                 | NA                            | NA                 |
| <i>Desi_wild_23166017</i> | NA                                  | <i>Ca_desi_denovo</i> | 23166017                | A/T  | NA                 | NA                            | NA                 |
| <i>Desi_wild_23166023</i> | NA                                  | <i>Ca_desi_denovo</i> | 23166023                | C/T  | NA                 | NA                            | NA                 |
| <i>Desi_wild_23167069</i> | NA                                  | <i>Ca_desi_denovo</i> | 23167069                | A/G  | NA                 | NA                            | NA                 |
| <i>Desi_wild_23167395</i> | NA                                  | <i>Ca_desi_denovo</i> | 23167395                | C/T  | NA                 | NA                            | NA                 |
| <i>Desi_wild_23167425</i> | NA                                  | <i>Ca_desi_denovo</i> | 23167425                | A/C  | NA                 | NA                            | NA                 |
| <i>Desi_wild_23167439</i> | NA                                  | <i>Ca_desi_denovo</i> | 23167439                | C/G  | NA                 | NA                            | NA                 |
| <i>Desi_wild_23167452</i> | NA                                  | <i>Ca_desi_denovo</i> | 23167452                | C/T  | NA                 | NA                            | NA                 |
| <i>Desi_wild_23167457</i> | NA                                  | <i>Ca_desi_denovo</i> | 23167457                | A/G  | NA                 | NA                            | NA                 |
| <i>Desi_wild_23167462</i> | NA                                  | <i>Ca_desi_denovo</i> | 23167462                | A/G  | NA                 | NA                            | NA                 |
| <i>Desi_wild_23167472</i> | NA                                  | <i>Ca_desi_denovo</i> | 23167472                | A/T  | NA                 | NA                            | NA                 |
| <i>Desi_wild_23167476</i> | NA                                  | <i>Ca_desi_denovo</i> | 23167476                | G/T  | NA                 | NA                            | NA                 |
| <i>Desi_wild_23167477</i> | NA                                  | <i>Ca_desi_denovo</i> | 23167477                | C/T  | NA                 | NA                            | NA                 |
| <i>Desi_wild_23167478</i> | NA                                  | <i>Ca_desi_denovo</i> | 23167478                | G/T  | NA                 | NA                            | NA                 |
| <i>Desi_wild_23167484</i> | NA                                  | <i>Ca_desi_denovo</i> | 23167484                | A/G  | NA                 | NA                            | NA                 |
| <i>Desi_wild_23169042</i> | NA                                  | <i>Ca_desi_denovo</i> | 23169042                | A/G  | NA                 | NA                            | NA                 |
| <i>Desi_wild_23169048</i> | NA                                  | <i>Ca_desi_denovo</i> | 23169048                | A/G  | NA                 | NA                            | NA                 |
| <i>Desi_wild_23169146</i> | NA                                  | <i>Ca_desi_denovo</i> | 23169146                | C/T  | NA                 | NA                            | NA                 |
| <i>Desi_wild_23169158</i> | NA                                  | <i>Ca_desi_denovo</i> | 23169158                | A/G  | NA                 | NA                            | NA                 |
| <i>Desi_wild_23169827</i> | NA                                  | <i>Ca_desi_denovo</i> | 23169827                | A/G  | NA                 | NA                            | NA                 |
| <i>Desi_wild_23170218</i> | NA                                  | <i>Ca_desi_denovo</i> | 23170218                | C/T  | NA                 | NA                            | NA                 |
| <i>Desi_wild_23171336</i> | NA                                  | <i>Ca_desi_denovo</i> | 23171336                | G/T  | NA                 | NA                            | NA                 |
| <i>Desi_wild_23171343</i> | NA                                  | <i>Ca_desi_denovo</i> | 23171343                | A/G  | NA                 | NA                            | NA                 |
| <i>Desi_wild_23171988</i> | NA                                  | <i>Ca_desi_denovo</i> | 23171988                | C/T  | NA                 | NA                            | NA                 |
| <i>Desi_wild_23172871</i> | NA                                  | <i>Ca_desi_denovo</i> | 23172871                | C/T  | NA                 | NA                            | NA                 |
| <i>Desi_wild_23173065</i> | NA                                  | <i>Ca_desi_denovo</i> | 23173065                | C/T  | NA                 | NA                            | NA                 |
| <i>Desi_wild_23173148</i> | NA                                  | <i>Ca_desi_denovo</i> | 23173148                | G/T  | NA                 | NA                            | NA                 |
| <i>Desi_wild_23174102</i> | NA                                  | <i>Ca_desi_denovo</i> | 23174102                | A/T  | NA                 | NA                            | NA                 |
| <i>Desi_wild_23174479</i> | NA                                  | <i>Ca_desi_denovo</i> | 23174479                | G/T  | NA                 | NA                            | NA                 |
| <i>Desi_wild_23174483</i> | NA                                  | <i>Ca_desi_denovo</i> | 23174483                | A/G  | NA                 | NA                            | NA                 |
| <i>Desi_wild_23174496</i> | NA                                  | <i>Ca_desi_denovo</i> | 23174496                | C/T  | NA                 | NA                            | NA                 |
| <i>Desi_wild_23174500</i> | NA                                  | <i>Ca_desi_denovo</i> | 23174500                | C/T  | NA                 | NA                            | NA                 |
| <i>Desi_wild_23174502</i> | NA                                  | <i>Ca_desi_denovo</i> | 23174502                | C/T  | NA                 | NA                            | NA                 |
| <i>Desi_wild_23174505</i> | NA                                  | <i>Ca_desi_denovo</i> | 23174505                | C/T  | NA                 | NA                            | NA                 |
| <i>Desi_wild_23174507</i> | NA                                  | <i>Ca_desi_denovo</i> | 23174507                | A/C  | NA                 | NA                            | NA                 |
| <i>Desi_wild_23174515</i> | NA                                  | <i>Ca_desi_denovo</i> | 23174515                | A/G  | NA                 | NA                            | NA                 |
| <i>Desi_wild_23174518</i> | NA                                  | <i>Ca_desi_denovo</i> | 23174518                | C/T  | NA                 | NA                            | NA                 |
| <i>Desi_wild_23174520</i> | NA                                  | <i>Ca_desi_denovo</i> | 23174520                | C/T  | NA                 | NA                            | NA                 |
| <i>Desi_wild_23174541</i> | NA                                  | <i>Ca_desi_denovo</i> | 23174541                | A/G  | NA                 | NA                            | NA                 |
| <i>Desi_wild_23174587</i> | NA                                  | <i>Ca_desi_denovo</i> | 23174587                | A/T  | NA                 | NA                            | NA                 |
| <i>Desi_wild_23174593</i> | NA                                  | <i>Ca_desi_denovo</i> | 23174593                | C/T  | NA                 | NA                            | NA                 |
| <i>Desi_wild_23174602</i> | NA                                  | <i>Ca_desi_denovo</i> | 23174602                | C/T  | NA                 | NA                            | NA                 |
| <i>Desi_wild_23174604</i> | NA                                  | <i>Ca_desi_denovo</i> | 23174604                | A/T  | NA                 | NA                            | NA                 |
| <i>Desi_wild_23174615</i> | NA                                  | <i>Ca_desi_denovo</i> | 23174615                | C/T  | NA                 | NA                            | NA                 |

| SNP IDs                   | NCBI dbSNP accession IDs (NCBI_SS#) | Chromosomes           | Physical positions (bp) | SNPs | Gene accession IDs | Sequence components of genome | Putative functions |
|---------------------------|-------------------------------------|-----------------------|-------------------------|------|--------------------|-------------------------------|--------------------|
| <i>Desi_wild_23174618</i> | NA                                  | <i>Ca_desi_denovo</i> | 23174618                | A/G  | NA                 | NA                            | NA                 |
| <i>Desi_wild_23174638</i> | NA                                  | <i>Ca_desi_denovo</i> | 23174638                | A/G  | NA                 | NA                            | NA                 |
| <i>Desi_wild_23174648</i> | NA                                  | <i>Ca_desi_denovo</i> | 23174648                | A/G  | NA                 | NA                            | NA                 |
| <i>Desi_wild_23175883</i> | NA                                  | <i>Ca_desi_denovo</i> | 23175883                | A/G  | NA                 | NA                            | NA                 |
| <i>Desi_wild_23175929</i> | NA                                  | <i>Ca_desi_denovo</i> | 23175929                | A/G  | NA                 | NA                            | NA                 |
| <i>Desi_wild_23177905</i> | NA                                  | <i>Ca_desi_denovo</i> | 23177905                | A/G  | NA                 | NA                            | NA                 |
| <i>Desi_wild_23179013</i> | NA                                  | <i>Ca_desi_denovo</i> | 23179013                | A/T  | NA                 | NA                            | NA                 |
| <i>Desi_wild_23179661</i> | NA                                  | <i>Ca_desi_denovo</i> | 23179661                | C/G  | NA                 | NA                            | NA                 |
| <i>Desi_wild_23179706</i> | NA                                  | <i>Ca_desi_denovo</i> | 23179706                | C/T  | NA                 | NA                            | NA                 |
| <i>Desi_wild_23179728</i> | NA                                  | <i>Ca_desi_denovo</i> | 23179728                | G/A  | NA                 | NA                            | NA                 |
| <i>Desi_wild_23179900</i> | NA                                  | <i>Ca_desi_denovo</i> | 23179900                | G/T  | NA                 | NA                            | NA                 |
| <i>Desi_wild_23180086</i> | NA                                  | <i>Ca_desi_denovo</i> | 23180086                | C/G  | NA                 | NA                            | NA                 |
| <i>Desi_wild_23180214</i> | NA                                  | <i>Ca_desi_denovo</i> | 23180214                | T/C  | NA                 | NA                            | NA                 |
| <i>Desi_wild_23180253</i> | NA                                  | <i>Ca_desi_denovo</i> | 23180253                | A/C  | NA                 | NA                            | NA                 |
| <i>Desi_wild_23180256</i> | NA                                  | <i>Ca_desi_denovo</i> | 23180256                | A/C  | NA                 | NA                            | NA                 |
| <i>Desi_wild_23180550</i> | NA                                  | <i>Ca_desi_denovo</i> | 23180550                | C/T  | NA                 | NA                            | NA                 |
| <i>Desi_wild_23180571</i> | NA                                  | <i>Ca_desi_denovo</i> | 23180571                | G/T  | NA                 | NA                            | NA                 |
| <i>Desi_wild_23180945</i> | NA                                  | <i>Ca_desi_denovo</i> | 23180945                | G/T  | NA                 | NA                            | NA                 |
| <i>Desi_wild_23181010</i> | NA                                  | <i>Ca_desi_denovo</i> | 23181010                | A/T  | NA                 | NA                            | NA                 |
| <i>Desi_wild_23181093</i> | NA                                  | <i>Ca_desi_denovo</i> | 23181093                | A/C  | NA                 | NA                            | NA                 |
| <i>Desi_wild_23182918</i> | NA                                  | <i>Ca_desi_denovo</i> | 23182918                | A/T  | NA                 | NA                            | NA                 |
| <i>Desi_wild_23182954</i> | NA                                  | <i>Ca_desi_denovo</i> | 23182954                | A/G  | NA                 | NA                            | NA                 |
| <i>Desi_wild_23183043</i> | NA                                  | <i>Ca_desi_denovo</i> | 23183043                | C/T  | NA                 | NA                            | NA                 |
| <i>Desi_wild_23183064</i> | NA                                  | <i>Ca_desi_denovo</i> | 23183064                | A/G  | NA                 | NA                            | NA                 |
| <i>Desi_wild_23183990</i> | NA                                  | <i>Ca_desi_denovo</i> | 23183990                | G/C  | NA                 | NA                            | NA                 |
| <i>Desi_wild_23185144</i> | NA                                  | <i>Ca_desi_denovo</i> | 23185144                | A/G  | NA                 | NA                            | NA                 |
| <i>Desi_wild_23185186</i> | NA                                  | <i>Ca_desi_denovo</i> | 23185186                | A/G  | NA                 | NA                            | NA                 |
| <i>Desi_wild_23186348</i> | NA                                  | <i>Ca_desi_denovo</i> | 23186348                | C/T  | NA                 | NA                            | NA                 |
| <i>Desi_wild_23186414</i> | NA                                  | <i>Ca_desi_denovo</i> | 23186414                | A/T  | NA                 | NA                            | NA                 |
| <i>Desi_wild_23186435</i> | NA                                  | <i>Ca_desi_denovo</i> | 23186435                | A/G  | NA                 | NA                            | NA                 |
| <i>Desi_wild_23186624</i> | NA                                  | <i>Ca_desi_denovo</i> | 23186624                | G/T  | NA                 | NA                            | NA                 |
| <i>Desi_wild_23186811</i> | NA                                  | <i>Ca_desi_denovo</i> | 23186811                | C/T  | NA                 | NA                            | NA                 |
| <i>Desi_wild_23187970</i> | NA                                  | <i>Ca_desi_denovo</i> | 23187970                | A/G  | NA                 | NA                            | NA                 |
| <i>Desi_wild_23187985</i> | NA                                  | <i>Ca_desi_denovo</i> | 23187985                | A/G  | NA                 | NA                            | NA                 |
| <i>Desi_wild_23188759</i> | NA                                  | <i>Ca_desi_denovo</i> | 23188759                | A/C  | NA                 | NA                            | NA                 |
| <i>Desi_wild_23188825</i> | NA                                  | <i>Ca_desi_denovo</i> | 23188825                | C/T  | NA                 | NA                            | NA                 |
| <i>Desi_wild_23188971</i> | NA                                  | <i>Ca_desi_denovo</i> | 23188971                | G/T  | NA                 | NA                            | NA                 |
| <i>Desi_wild_23189319</i> | NA                                  | <i>Ca_desi_denovo</i> | 23189319                | A/T  | NA                 | NA                            | NA                 |
| <i>Desi_wild_23189511</i> | NA                                  | <i>Ca_desi_denovo</i> | 23189511                | C/T  | NA                 | NA                            | NA                 |
| <i>Desi_wild_23189614</i> | NA                                  | <i>Ca_desi_denovo</i> | 23189614                | C/T  | NA                 | NA                            | NA                 |
| <i>Desi_wild_23189723</i> | NA                                  | <i>Ca_desi_denovo</i> | 23189723                | C/T  | NA                 | NA                            | NA                 |
| <i>Desi_wild_23189728</i> | NA                                  | <i>Ca_desi_denovo</i> | 23189728                | A/G  | NA                 | NA                            | NA                 |
| <i>Desi_wild_23189746</i> | NA                                  | <i>Ca_desi_denovo</i> | 23189746                | G/T  | NA                 | NA                            | NA                 |
| <i>Desi_wild_23189753</i> | NA                                  | <i>Ca_desi_denovo</i> | 23189753                | A/G  | NA                 | NA                            | NA                 |

| SNP IDs                   | NCBI dbSNP accession IDs (NCBI_SS#) | Chromosomes           | Physical positions (bp) | SNPs | Gene accession IDs | Sequence components of genome | Putative functions |
|---------------------------|-------------------------------------|-----------------------|-------------------------|------|--------------------|-------------------------------|--------------------|
| <i>Desi_wild_23190585</i> | NA                                  | <i>Ca_desi_denovo</i> | 23190585                | A/G  | NA                 | NA                            | NA                 |
| <i>Desi_wild_23191083</i> | NA                                  | <i>Ca_desi_denovo</i> | 23191083                | A/T  | NA                 | NA                            | NA                 |
| <i>Desi_wild_23194861</i> | NA                                  | <i>Ca_desi_denovo</i> | 23194861                | A/G  | NA                 | NA                            | NA                 |
| <i>Desi_wild_23197470</i> | NA                                  | <i>Ca_desi_denovo</i> | 23197470                | A/G  | NA                 | NA                            | NA                 |
| <i>Desi_wild_23198340</i> | NA                                  | <i>Ca_desi_denovo</i> | 23198340                | C/G  | NA                 | NA                            | NA                 |
| <i>Desi_wild_23198402</i> | NA                                  | <i>Ca_desi_denovo</i> | 23198402                | A/G  | NA                 | NA                            | NA                 |
| <i>Desi_wild_23198585</i> | NA                                  | <i>Ca_desi_denovo</i> | 23198585                | A/G  | NA                 | NA                            | NA                 |
| <i>Desi_wild_23198596</i> | NA                                  | <i>Ca_desi_denovo</i> | 23198596                | C/T  | NA                 | NA                            | NA                 |
| <i>Desi_wild_23199718</i> | NA                                  | <i>Ca_desi_denovo</i> | 23199718                | G/T  | NA                 | NA                            | NA                 |
| <i>Desi_wild_23199719</i> | NA                                  | <i>Ca_desi_denovo</i> | 23199719                | A/G  | NA                 | NA                            | NA                 |
| <i>Desi_wild_23199720</i> | NA                                  | <i>Ca_desi_denovo</i> | 23199720                | C/G  | NA                 | NA                            | NA                 |
| <i>Desi_wild_23199721</i> | NA                                  | <i>Ca_desi_denovo</i> | 23199721                | A/G  | NA                 | NA                            | NA                 |
| <i>Desi_wild_23202472</i> | NA                                  | <i>Ca_desi_denovo</i> | 23202472                | C/T  | NA                 | NA                            | NA                 |
| <i>Desi_wild_23202661</i> | NA                                  | <i>Ca_desi_denovo</i> | 23202661                | A/G  | NA                 | NA                            | NA                 |
| <i>Desi_wild_23203339</i> | NA                                  | <i>Ca_desi_denovo</i> | 23203339                | A/C  | NA                 | NA                            | NA                 |
| <i>Desi_wild_23204496</i> | NA                                  | <i>Ca_desi_denovo</i> | 23204496                | C/T  | NA                 | NA                            | NA                 |
| <i>Desi_wild_23205236</i> | NA                                  | <i>Ca_desi_denovo</i> | 23205236                | C/G  | NA                 | NA                            | NA                 |
| <i>Desi_wild_23205267</i> | NA                                  | <i>Ca_desi_denovo</i> | 23205267                | A/G  | NA                 | NA                            | NA                 |
| <i>Desi_wild_23205306</i> | NA                                  | <i>Ca_desi_denovo</i> | 23205306                | A/G  | NA                 | NA                            | NA                 |
| <i>Desi_wild_23205374</i> | NA                                  | <i>Ca_desi_denovo</i> | 23205374                | A/G  | NA                 | NA                            | NA                 |
| <i>Desi_wild_23205642</i> | NA                                  | <i>Ca_desi_denovo</i> | 23205642                | A/T  | NA                 | NA                            | NA                 |
| <i>Desi_wild_23207116</i> | NA                                  | <i>Ca_desi_denovo</i> | 23207116                | A/C  | NA                 | NA                            | NA                 |
| <i>Desi_wild_23208841</i> | NA                                  | <i>Ca_desi_denovo</i> | 23208841                | C/T  | NA                 | NA                            | NA                 |
| <i>Desi_wild_23210647</i> | NA                                  | <i>Ca_desi_denovo</i> | 23210647                | C/G  | NA                 | NA                            | NA                 |
| <i>Desi_wild_23210654</i> | NA                                  | <i>Ca_desi_denovo</i> | 23210654                | C/G  | NA                 | NA                            | NA                 |
| <i>Desi_wild_23211369</i> | NA                                  | <i>Ca_desi_denovo</i> | 23211369                | A/T  | NA                 | NA                            | NA                 |
| <i>Desi_wild_23213605</i> | NA                                  | <i>Ca_desi_denovo</i> | 23213605                | A/G  | NA                 | NA                            | NA                 |
| <i>Desi_wild_23213621</i> | NA                                  | <i>Ca_desi_denovo</i> | 23213621                | C/T  | NA                 | NA                            | NA                 |
| <i>Desi_wild_23214093</i> | NA                                  | <i>Ca_desi_denovo</i> | 23214093                | A/C  | NA                 | NA                            | NA                 |
| <i>Desi_wild_23215700</i> | NA                                  | <i>Ca_desi_denovo</i> | 23215700                | C/T  | NA                 | NA                            | NA                 |
| <i>Desi_wild_23217552</i> | NA                                  | <i>Ca_desi_denovo</i> | 23217552                | A/G  | NA                 | NA                            | NA                 |
| <i>Desi_wild_23217556</i> | NA                                  | <i>Ca_desi_denovo</i> | 23217556                | A/G  | NA                 | NA                            | NA                 |
| <i>Desi_wild_23219524</i> | NA                                  | <i>Ca_desi_denovo</i> | 23219524                | C/T  | NA                 | NA                            | NA                 |
| <i>Desi_wild_23220742</i> | NA                                  | <i>Ca_desi_denovo</i> | 23220742                | C/T  | NA                 | NA                            | NA                 |
| <i>Desi_wild_23221059</i> | NA                                  | <i>Ca_desi_denovo</i> | 23221059                | A/T  | NA                 | NA                            | NA                 |
| <i>Desi_wild_23224430</i> | NA                                  | <i>Ca_desi_denovo</i> | 23224430                | A/C  | NA                 | NA                            | NA                 |
| <i>Desi_wild_23224485</i> | NA                                  | <i>Ca_desi_denovo</i> | 23224485                | A/C  | NA                 | NA                            | NA                 |
| <i>Desi_wild_23230886</i> | NA                                  | <i>Ca_desi_denovo</i> | 23230886                | C/T  | NA                 | NA                            | NA                 |
| <i>Desi_wild_23234006</i> | NA                                  | <i>Ca_desi_denovo</i> | 23234006                | A/G  | NA                 | NA                            | NA                 |
| <i>Desi_wild_23234009</i> | NA                                  | <i>Ca_desi_denovo</i> | 23234009                | A/G  | NA                 | NA                            | NA                 |
| <i>Desi_wild_23239233</i> | NA                                  | <i>Ca_desi_denovo</i> | 23239233                | C/G  | NA                 | NA                            | NA                 |
| <i>Desi_wild_23241221</i> | NA                                  | <i>Ca_desi_denovo</i> | 23241221                | C/T  | NA                 | NA                            | NA                 |
| <i>Desi_wild_23241276</i> | NA                                  | <i>Ca_desi_denovo</i> | 23241276                | A/T  | NA                 | NA                            | NA                 |
| <i>Desi_wild_23241434</i> | NA                                  | <i>Ca_desi_denovo</i> | 23241434                | A/T  | NA                 | NA                            | NA                 |

| SNP IDs                   | NCBI dbSNP accession IDs (NCBI_SS#) | Chromosomes           | Physical positions (bp) | SNPs | Gene accession IDs | Sequence components of genome | Putative functions |
|---------------------------|-------------------------------------|-----------------------|-------------------------|------|--------------------|-------------------------------|--------------------|
| <i>Desi_wild_23242393</i> | NA                                  | <i>Ca_desi_denovo</i> | 23242393                | C/T  | NA                 | NA                            | NA                 |
| <i>Desi_wild_23244749</i> | NA                                  | <i>Ca_desi_denovo</i> | 23244749                | C/T  | NA                 | NA                            | NA                 |
| <i>Desi_wild_23245697</i> | NA                                  | <i>Ca_desi_denovo</i> | 23245697                | C/T  | NA                 | NA                            | NA                 |
| <i>Desi_wild_23245718</i> | NA                                  | <i>Ca_desi_denovo</i> | 23245718                | C/T  | NA                 | NA                            | NA                 |
| <i>Desi_wild_23246677</i> | NA                                  | <i>Ca_desi_denovo</i> | 23246677                | A/G  | NA                 | NA                            | NA                 |
| <i>Desi_wild_23246740</i> | NA                                  | <i>Ca_desi_denovo</i> | 23246740                | A/G  | NA                 | NA                            | NA                 |
| <i>Desi_wild_23246753</i> | NA                                  | <i>Ca_desi_denovo</i> | 23246753                | T/C  | NA                 | NA                            | NA                 |
| <i>Desi_wild_23250110</i> | NA                                  | <i>Ca_desi_denovo</i> | 23250110                | A/G  | NA                 | NA                            | NA                 |
| <i>Desi_wild_23255374</i> | NA                                  | <i>Ca_desi_denovo</i> | 23255374                | A/G  | NA                 | NA                            | NA                 |
| <i>Desi_wild_23255458</i> | NA                                  | <i>Ca_desi_denovo</i> | 23255458                | C/T  | NA                 | NA                            | NA                 |
| <i>Desi_wild_23256538</i> | NA                                  | <i>Ca_desi_denovo</i> | 23256538                | A/C  | NA                 | NA                            | NA                 |
| <i>Desi_wild_23256565</i> | NA                                  | <i>Ca_desi_denovo</i> | 23256565                | A/G  | NA                 | NA                            | NA                 |
| <i>Desi_wild_23258420</i> | NA                                  | <i>Ca_desi_denovo</i> | 23258420                | A/C  | NA                 | NA                            | NA                 |
| <i>Desi_wild_23258443</i> | NA                                  | <i>Ca_desi_denovo</i> | 23258443                | C/G  | NA                 | NA                            | NA                 |
| <i>Desi_wild_23258448</i> | NA                                  | <i>Ca_desi_denovo</i> | 23258448                | G/T  | NA                 | NA                            | NA                 |
| <i>Desi_wild_23260344</i> | NA                                  | <i>Ca_desi_denovo</i> | 23260344                | G/T  | NA                 | NA                            | NA                 |
| <i>Desi_wild_23260897</i> | NA                                  | <i>Ca_desi_denovo</i> | 23260897                | A/G  | NA                 | NA                            | NA                 |
| <i>Desi_wild_23262257</i> | NA                                  | <i>Ca_desi_denovo</i> | 23262257                | C/T  | NA                 | NA                            | NA                 |
| <i>Desi_wild_23268578</i> | NA                                  | <i>Ca_desi_denovo</i> | 23268578                | C/G  | NA                 | NA                            | NA                 |
| <i>Desi_wild_23270258</i> | NA                                  | <i>Ca_desi_denovo</i> | 23270258                | G/T  | NA                 | NA                            | NA                 |
| <i>Desi_wild_23270383</i> | NA                                  | <i>Ca_desi_denovo</i> | 23270383                | A/G  | NA                 | NA                            | NA                 |
| <i>Desi_wild_23271256</i> | NA                                  | <i>Ca_desi_denovo</i> | 23271256                | C/G  | NA                 | NA                            | NA                 |
| <i>Desi_wild_23271263</i> | NA                                  | <i>Ca_desi_denovo</i> | 23271263                | C/T  | NA                 | NA                            | NA                 |
| <i>Desi_wild_23276192</i> | NA                                  | <i>Ca_desi_denovo</i> | 23276192                | A/G  | NA                 | NA                            | NA                 |
| <i>Desi_wild_23276210</i> | NA                                  | <i>Ca_desi_denovo</i> | 23276210                | A/T  | NA                 | NA                            | NA                 |
| <i>Desi_wild_23276212</i> | NA                                  | <i>Ca_desi_denovo</i> | 23276212                | G/A  | NA                 | NA                            | NA                 |
| <i>Desi_wild_23276232</i> | NA                                  | <i>Ca_desi_denovo</i> | 23276232                | C/T  | NA                 | NA                            | NA                 |
| <i>Desi_wild_23276901</i> | NA                                  | <i>Ca_desi_denovo</i> | 23276901                | A/C  | NA                 | NA                            | NA                 |
| <i>Desi_wild_23280040</i> | NA                                  | <i>Ca_desi_denovo</i> | 23280040                | A/C  | NA                 | NA                            | NA                 |
| <i>Desi_wild_23282748</i> | NA                                  | <i>Ca_desi_denovo</i> | 23282748                | A/T  | NA                 | NA                            | NA                 |
| <i>Desi_wild_23284386</i> | NA                                  | <i>Ca_desi_denovo</i> | 23284386                | A/G  | NA                 | NA                            | NA                 |
| <i>Desi_wild_23288185</i> | NA                                  | <i>Ca_desi_denovo</i> | 23288185                | C/T  | NA                 | NA                            | NA                 |
| <i>Desi_wild_23290068</i> | NA                                  | <i>Ca_desi_denovo</i> | 23290068                | A/G  | NA                 | NA                            | NA                 |
| <i>Desi_wild_23291569</i> | NA                                  | <i>Ca_desi_denovo</i> | 23291569                | A/T  | NA                 | NA                            | NA                 |
| <i>Desi_wild_23291592</i> | NA                                  | <i>Ca_desi_denovo</i> | 23291592                | A/T  | NA                 | NA                            | NA                 |
| <i>Desi_wild_23297025</i> | NA                                  | <i>Ca_desi_denovo</i> | 23297025                | G/T  | NA                 | NA                            | NA                 |
| <i>Desi_wild_23297071</i> | NA                                  | <i>Ca_desi_denovo</i> | 23297071                | A/T  | NA                 | NA                            | NA                 |
| <i>Desi_wild_23305070</i> | NA                                  | <i>Ca_desi_denovo</i> | 23305070                | A/T  | NA                 | NA                            | NA                 |
| <i>Desi_wild_23308811</i> | NA                                  | <i>Ca_desi_denovo</i> | 23308811                | A/T  | NA                 | NA                            | NA                 |
| <i>Desi_wild_23308839</i> | NA                                  | <i>Ca_desi_denovo</i> | 23308839                | A/T  | NA                 | NA                            | NA                 |
| <i>Desi_wild_23308849</i> | NA                                  | <i>Ca_desi_denovo</i> | 23308849                | A/T  | NA                 | NA                            | NA                 |
| <i>Desi_wild_23316027</i> | NA                                  | <i>Ca_desi_denovo</i> | 23316027                | A/G  | NA                 | NA                            | NA                 |
| <i>Desi_wild_23316864</i> | NA                                  | <i>Ca_desi_denovo</i> | 23316864                | A/G  | NA                 | NA                            | NA                 |
| <i>Desi_wild_23327390</i> | NA                                  | <i>Ca_desi_denovo</i> | 23327390                | T/C  | NA                 | NA                            | NA                 |

| SNP IDs                   | NCBI dbSNP accession IDs (NCBI_SS#) | Chromosomes           | Physical positions (bp) | SNPs | Gene accession IDs | Sequence components of genome | Putative functions |
|---------------------------|-------------------------------------|-----------------------|-------------------------|------|--------------------|-------------------------------|--------------------|
| <i>Desi_wild_23327917</i> | NA                                  | <i>Ca_desi_denovo</i> | 23327917                | C/T  | NA                 | NA                            | NA                 |
| <i>Desi_wild_23327920</i> | NA                                  | <i>Ca_desi_denovo</i> | 23327920                | T/C  | NA                 | NA                            | NA                 |
| <i>Desi_wild_23327926</i> | NA                                  | <i>Ca_desi_denovo</i> | 23327926                | G/A  | NA                 | NA                            | NA                 |
| <i>Desi_wild_23327956</i> | NA                                  | <i>Ca_desi_denovo</i> | 23327956                | C/T  | NA                 | NA                            | NA                 |
| <i>Desi_wild_23328290</i> | NA                                  | <i>Ca_desi_denovo</i> | 23328290                | A/C  | NA                 | NA                            | NA                 |
| <i>Desi_wild_23328614</i> | NA                                  | <i>Ca_desi_denovo</i> | 23328614                | C/T  | NA                 | NA                            | NA                 |
| <i>Desi_wild_23329045</i> | NA                                  | <i>Ca_desi_denovo</i> | 23329045                | C/T  | NA                 | NA                            | NA                 |
| <i>Desi_wild_23329048</i> | NA                                  | <i>Ca_desi_denovo</i> | 23329048                | C/T  | NA                 | NA                            | NA                 |
| <i>Desi_wild_23332347</i> | NA                                  | <i>Ca_desi_denovo</i> | 23332347                | C/T  | NA                 | NA                            | NA                 |
| <i>Desi_wild_23334498</i> | NA                                  | <i>Ca_desi_denovo</i> | 23334498                | A/G  | NA                 | NA                            | NA                 |
| <i>Desi_wild_23335823</i> | NA                                  | <i>Ca_desi_denovo</i> | 23335823                | A/C  | NA                 | NA                            | NA                 |
| <i>Desi_wild_23335843</i> | NA                                  | <i>Ca_desi_denovo</i> | 23335843                | A/G  | NA                 | NA                            | NA                 |
| <i>Desi_wild_23335866</i> | NA                                  | <i>Ca_desi_denovo</i> | 23335866                | A/C  | NA                 | NA                            | NA                 |
| <i>Desi_wild_23336952</i> | NA                                  | <i>Ca_desi_denovo</i> | 23336952                | C/T  | NA                 | NA                            | NA                 |
| <i>Desi_wild_23336973</i> | NA                                  | <i>Ca_desi_denovo</i> | 23336973                | T/C  | NA                 | NA                            | NA                 |
| <i>Desi_wild_23336978</i> | NA                                  | <i>Ca_desi_denovo</i> | 23336978                | G/C  | NA                 | NA                            | NA                 |
| <i>Desi_wild_23337522</i> | NA                                  | <i>Ca_desi_denovo</i> | 23337522                | C/A  | NA                 | NA                            | NA                 |
| <i>Desi_wild_23337534</i> | NA                                  | <i>Ca_desi_denovo</i> | 23337534                | C/T  | NA                 | NA                            | NA                 |
| <i>Desi_wild_23337544</i> | NA                                  | <i>Ca_desi_denovo</i> | 23337544                | G/T  | NA                 | NA                            | NA                 |
| <i>Desi_wild_23340784</i> | NA                                  | <i>Ca_desi_denovo</i> | 23340784                | A/T  | NA                 | NA                            | NA                 |
| <i>Desi_wild_23340808</i> | NA                                  | <i>Ca_desi_denovo</i> | 23340808                | A/G  | NA                 | NA                            | NA                 |
| <i>Desi_wild_23340843</i> | NA                                  | <i>Ca_desi_denovo</i> | 23340843                | A/C  | NA                 | NA                            | NA                 |
| <i>Desi_wild_23341288</i> | NA                                  | <i>Ca_desi_denovo</i> | 23341288                | A/G  | NA                 | NA                            | NA                 |
| <i>Desi_wild_23344650</i> | NA                                  | <i>Ca_desi_denovo</i> | 23344650                | T/C  | NA                 | NA                            | NA                 |
| <i>Desi_wild_23344651</i> | NA                                  | <i>Ca_desi_denovo</i> | 23344651                | A/T  | NA                 | NA                            | NA                 |
| <i>Desi_wild_23346148</i> | NA                                  | <i>Ca_desi_denovo</i> | 23346148                | A/G  | NA                 | NA                            | NA                 |
| <i>Desi_wild_23346163</i> | NA                                  | <i>Ca_desi_denovo</i> | 23346163                | G/A  | NA                 | NA                            | NA                 |
| <i>Desi_wild_23346181</i> | NA                                  | <i>Ca_desi_denovo</i> | 23346181                | A/C  | NA                 | NA                            | NA                 |
| <i>Desi_wild_23346447</i> | NA                                  | <i>Ca_desi_denovo</i> | 23346447                | A/G  | NA                 | NA                            | NA                 |
| <i>Desi_wild_23346454</i> | NA                                  | <i>Ca_desi_denovo</i> | 23346454                | A/G  | NA                 | NA                            | NA                 |
| <i>Desi_wild_23346579</i> | NA                                  | <i>Ca_desi_denovo</i> | 23346579                | A/G  | NA                 | NA                            | NA                 |
| <i>Desi_wild_23348415</i> | NA                                  | <i>Ca_desi_denovo</i> | 23348415                | C/T  | NA                 | NA                            | NA                 |
| <i>Desi_wild_23348424</i> | NA                                  | <i>Ca_desi_denovo</i> | 23348424                | A/G  | NA                 | NA                            | NA                 |
| <i>Desi_wild_23348433</i> | NA                                  | <i>Ca_desi_denovo</i> | 23348433                | A/T  | NA                 | NA                            | NA                 |
| <i>Desi_wild_23349092</i> | NA                                  | <i>Ca_desi_denovo</i> | 23349092                | A/T  | NA                 | NA                            | NA                 |
| <i>Desi_wild_23349098</i> | NA                                  | <i>Ca_desi_denovo</i> | 23349098                | C/T  | NA                 | NA                            | NA                 |
| <i>Desi_wild_23350126</i> | NA                                  | <i>Ca_desi_denovo</i> | 23350126                | C/T  | NA                 | NA                            | NA                 |
| <i>Desi_wild_23352846</i> | NA                                  | <i>Ca_desi_denovo</i> | 23352846                | A/C  | NA                 | NA                            | NA                 |
| <i>Desi_wild_23352899</i> | NA                                  | <i>Ca_desi_denovo</i> | 23352899                | C/T  | NA                 | NA                            | NA                 |
| <i>Desi_wild_23354334</i> | NA                                  | <i>Ca_desi_denovo</i> | 23354334                | G/A  | NA                 | NA                            | NA                 |
| <i>Desi_wild_23354428</i> | NA                                  | <i>Ca_desi_denovo</i> | 23354428                | C/T  | NA                 | NA                            | NA                 |
| <i>Desi_wild_23356459</i> | NA                                  | <i>Ca_desi_denovo</i> | 23356459                | C/T  | NA                 | NA                            | NA                 |
| <i>Desi_wild_23359560</i> | NA                                  | <i>Ca_desi_denovo</i> | 23359560                | A/G  | NA                 | NA                            | NA                 |
| <i>Desi_wild_23360477</i> | NA                                  | <i>Ca_desi_denovo</i> | 23360477                | G/C  | NA                 | NA                            | NA                 |

| SNP IDs                   | NCBI dbSNP accession IDs (NCBI_SS#) | Chromosomes           | Physical positions (bp) | SNPs | Gene accession IDs | Sequence components of genome | Putative functions |
|---------------------------|-------------------------------------|-----------------------|-------------------------|------|--------------------|-------------------------------|--------------------|
| <i>Desi_wild_23360489</i> | NA                                  | <i>Ca_desi_denovo</i> | 23360489                | C/G  | NA                 | NA                            | NA                 |
| <i>Desi_wild_23362887</i> | NA                                  | <i>Ca_desi_denovo</i> | 23362887                | A/C  | NA                 | NA                            | NA                 |
| <i>Desi_wild_23362906</i> | NA                                  | <i>Ca_desi_denovo</i> | 23362906                | C/T  | NA                 | NA                            | NA                 |
| <i>Desi_wild_23362930</i> | NA                                  | <i>Ca_desi_denovo</i> | 23362930                | A/C  | NA                 | NA                            | NA                 |
| <i>Desi_wild_23363161</i> | NA                                  | <i>Ca_desi_denovo</i> | 23363161                | C/T  | NA                 | NA                            | NA                 |
| <i>Desi_wild_23366398</i> | NA                                  | <i>Ca_desi_denovo</i> | 23366398                | A/G  | NA                 | NA                            | NA                 |
| <i>Desi_wild_23370413</i> | NA                                  | <i>Ca_desi_denovo</i> | 23370413                | C/T  | NA                 | NA                            | NA                 |
| <i>Desi_wild_23370419</i> | NA                                  | <i>Ca_desi_denovo</i> | 23370419                | T/C  | NA                 | NA                            | NA                 |
| <i>Desi_wild_23370460</i> | NA                                  | <i>Ca_desi_denovo</i> | 23370460                | G/A  | NA                 | NA                            | NA                 |
| <i>Desi_wild_23371612</i> | NA                                  | <i>Ca_desi_denovo</i> | 23371612                | G/A  | NA                 | NA                            | NA                 |
| <i>Desi_wild_23374064</i> | NA                                  | <i>Ca_desi_denovo</i> | 23374064                | G/T  | NA                 | NA                            | NA                 |
| <i>Desi_wild_23374076</i> | NA                                  | <i>Ca_desi_denovo</i> | 23374076                | T/G  | NA                 | NA                            | NA                 |
| <i>Desi_wild_23374097</i> | NA                                  | <i>Ca_desi_denovo</i> | 23374097                | T/C  | NA                 | NA                            | NA                 |
| <i>Desi_wild_23374442</i> | NA                                  | <i>Ca_desi_denovo</i> | 23374442                | A/T  | NA                 | NA                            | NA                 |
| <i>Desi_wild_23374489</i> | NA                                  | <i>Ca_desi_denovo</i> | 23374489                | A/G  | NA                 | NA                            | NA                 |
| <i>Desi_wild_23375132</i> | NA                                  | <i>Ca_desi_denovo</i> | 23375132                | G/T  | NA                 | NA                            | NA                 |
| <i>Desi_wild_23375493</i> | NA                                  | <i>Ca_desi_denovo</i> | 23375493                | C/T  | NA                 | NA                            | NA                 |
| <i>Desi_wild_23375536</i> | NA                                  | <i>Ca_desi_denovo</i> | 23375536                | C/T  | NA                 | NA                            | NA                 |
| <i>Desi_wild_23375548</i> | NA                                  | <i>Ca_desi_denovo</i> | 23375548                | A/G  | NA                 | NA                            | NA                 |
| <i>Desi_wild_23378318</i> | NA                                  | <i>Ca_desi_denovo</i> | 23378318                | A/G  | NA                 | NA                            | NA                 |
| <i>Desi_wild_23378494</i> | NA                                  | <i>Ca_desi_denovo</i> | 23378494                | C/T  | NA                 | NA                            | NA                 |
| <i>Desi_wild_23378506</i> | NA                                  | <i>Ca_desi_denovo</i> | 23378506                | G/A  | NA                 | NA                            | NA                 |
| <i>Desi_wild_23378509</i> | NA                                  | <i>Ca_desi_denovo</i> | 23378509                | T/A  | NA                 | NA                            | NA                 |
| <i>Desi_wild_23378532</i> | NA                                  | <i>Ca_desi_denovo</i> | 23378532                | C/T  | NA                 | NA                            | NA                 |
| <i>Desi_wild_23378569</i> | NA                                  | <i>Ca_desi_denovo</i> | 23378569                | G/A  | NA                 | NA                            | NA                 |
| <i>Desi_wild_23378722</i> | NA                                  | <i>Ca_desi_denovo</i> | 23378722                | A/G  | NA                 | NA                            | NA                 |
| <i>Desi_wild_23380394</i> | NA                                  | <i>Ca_desi_denovo</i> | 23380394                | G/A  | NA                 | NA                            | NA                 |
| <i>Desi_wild_23381227</i> | NA                                  | <i>Ca_desi_denovo</i> | 23381227                | T/C  | NA                 | NA                            | NA                 |
| <i>Desi_wild_23382663</i> | NA                                  | <i>Ca_desi_denovo</i> | 23382663                | A/G  | NA                 | NA                            | NA                 |
| <i>Desi_wild_23387183</i> | NA                                  | <i>Ca_desi_denovo</i> | 23387183                | C/G  | NA                 | NA                            | NA                 |
| <i>Desi_wild_23387527</i> | NA                                  | <i>Ca_desi_denovo</i> | 23387527                | A/T  | NA                 | NA                            | NA                 |
| <i>Desi_wild_23388638</i> | NA                                  | <i>Ca_desi_denovo</i> | 23388638                | G/T  | NA                 | NA                            | NA                 |
| <i>Desi_wild_23388647</i> | NA                                  | <i>Ca_desi_denovo</i> | 23388647                | A/G  | NA                 | NA                            | NA                 |
| <i>Desi_wild_23390327</i> | NA                                  | <i>Ca_desi_denovo</i> | 23390327                | A/G  | NA                 | NA                            | NA                 |
| <i>Desi_wild_23395530</i> | NA                                  | <i>Ca_desi_denovo</i> | 23395530                | A/G  | NA                 | NA                            | NA                 |
| <i>Desi_wild_23395533</i> | NA                                  | <i>Ca_desi_denovo</i> | 23395533                | C/G  | NA                 | NA                            | NA                 |
| <i>Desi_wild_23396757</i> | NA                                  | <i>Ca_desi_denovo</i> | 23396757                | A/T  | NA                 | NA                            | NA                 |
| <i>Desi_wild_23402865</i> | NA                                  | <i>Ca_desi_denovo</i> | 23402865                | A/C  | NA                 | NA                            | NA                 |
| <i>Desi_wild_23404297</i> | NA                                  | <i>Ca_desi_denovo</i> | 23404297                | G/A  | NA                 | NA                            | NA                 |
| <i>Desi_wild_23405053</i> | NA                                  | <i>Ca_desi_denovo</i> | 23405053                | T/A  | NA                 | NA                            | NA                 |
| <i>Desi_wild_23405055</i> | NA                                  | <i>Ca_desi_denovo</i> | 23405055                | G/T  | NA                 | NA                            | NA                 |
| <i>Desi_wild_23405078</i> | NA                                  | <i>Ca_desi_denovo</i> | 23405078                | A/C  | NA                 | NA                            | NA                 |
| <i>Desi_wild_23407824</i> | NA                                  | <i>Ca_desi_denovo</i> | 23407824                | T/G  | NA                 | NA                            | NA                 |
| <i>Desi_wild_23407842</i> | NA                                  | <i>Ca_desi_denovo</i> | 23407842                | C/T  | NA                 | NA                            | NA                 |

| SNP IDs                   | NCBI dbSNP accession IDs (NCBI_SS#) | Chromosomes           | Physical positions (bp) | SNPs | Gene accession IDs | Sequence components of genome | Putative functions |
|---------------------------|-------------------------------------|-----------------------|-------------------------|------|--------------------|-------------------------------|--------------------|
| <i>Desi_wild_23409020</i> | NA                                  | <i>Ca_desi_denovo</i> | 23409020                | G/T  | NA                 | NA                            | NA                 |
| <i>Desi_wild_23418717</i> | NA                                  | <i>Ca_desi_denovo</i> | 23418717                | T/G  | NA                 | NA                            | NA                 |
| <i>Desi_wild_23419284</i> | NA                                  | <i>Ca_desi_denovo</i> | 23419284                | A/C  | NA                 | NA                            | NA                 |
| <i>Desi_wild_23420806</i> | NA                                  | <i>Ca_desi_denovo</i> | 23420806                | A/G  | NA                 | NA                            | NA                 |
| <i>Desi_wild_23420854</i> | NA                                  | <i>Ca_desi_denovo</i> | 23420854                | A/G  | NA                 | NA                            | NA                 |
| <i>Desi_wild_23422336</i> | NA                                  | <i>Ca_desi_denovo</i> | 23422336                | A/G  | NA                 | NA                            | NA                 |
| <i>Desi_wild_23422360</i> | NA                                  | <i>Ca_desi_denovo</i> | 23422360                | A/G  | NA                 | NA                            | NA                 |
| <i>Desi_wild_23422502</i> | NA                                  | <i>Ca_desi_denovo</i> | 23422502                | G/C  | NA                 | NA                            | NA                 |
| <i>Desi_wild_23427276</i> | NA                                  | <i>Ca_desi_denovo</i> | 23427276                | T/G  | NA                 | NA                            | NA                 |
| <i>Desi_wild_23427291</i> | NA                                  | <i>Ca_desi_denovo</i> | 23427291                | A/G  | NA                 | NA                            | NA                 |
| <i>Desi_wild_23427558</i> | NA                                  | <i>Ca_desi_denovo</i> | 23427558                | G/T  | NA                 | NA                            | NA                 |
| <i>Desi_wild_23427584</i> | NA                                  | <i>Ca_desi_denovo</i> | 23427584                | A/G  | NA                 | NA                            | NA                 |
| <i>Desi_wild_23430737</i> | NA                                  | <i>Ca_desi_denovo</i> | 23430737                | A/G  | NA                 | NA                            | NA                 |
| <i>Desi_wild_23430738</i> | NA                                  | <i>Ca_desi_denovo</i> | 23430738                | C/T  | NA                 | NA                            | NA                 |
| <i>Desi_wild_23431042</i> | NA                                  | <i>Ca_desi_denovo</i> | 23431042                | C/T  | NA                 | NA                            | NA                 |
| <i>Desi_wild_23431069</i> | NA                                  | <i>Ca_desi_denovo</i> | 23431069                | G/T  | NA                 | NA                            | NA                 |
| <i>Desi_wild_23434227</i> | NA                                  | <i>Ca_desi_denovo</i> | 23434227                | G/A  | NA                 | NA                            | NA                 |
| <i>Desi_wild_23434229</i> | NA                                  | <i>Ca_desi_denovo</i> | 23434229                | C/T  | NA                 | NA                            | NA                 |
| <i>Desi_wild_23434262</i> | NA                                  | <i>Ca_desi_denovo</i> | 23434262                | T/C  | NA                 | NA                            | NA                 |
| <i>Desi_wild_23437421</i> | NA                                  | <i>Ca_desi_denovo</i> | 23437421                | A/G  | NA                 | NA                            | NA                 |
| <i>Desi_wild_23437916</i> | NA                                  | <i>Ca_desi_denovo</i> | 23437916                | A/G  | NA                 | NA                            | NA                 |
| <i>Desi_wild_23437917</i> | NA                                  | <i>Ca_desi_denovo</i> | 23437917                | C/T  | NA                 | NA                            | NA                 |
| <i>Desi_wild_23438016</i> | NA                                  | <i>Ca_desi_denovo</i> | 23438016                | C/T  | NA                 | NA                            | NA                 |
| <i>Desi_wild_23439731</i> | NA                                  | <i>Ca_desi_denovo</i> | 23439731                | C/T  | NA                 | NA                            | NA                 |
| <i>Desi_wild_23444411</i> | NA                                  | <i>Ca_desi_denovo</i> | 23444411                | A/T  | NA                 | NA                            | NA                 |
| <i>Desi_wild_23444417</i> | NA                                  | <i>Ca_desi_denovo</i> | 23444417                | C/T  | NA                 | NA                            | NA                 |
| <i>Desi_wild_23447384</i> | NA                                  | <i>Ca_desi_denovo</i> | 23447384                | A/G  | NA                 | NA                            | NA                 |
| <i>Desi_wild_23447409</i> | NA                                  | <i>Ca_desi_denovo</i> | 23447409                | A/G  | NA                 | NA                            | NA                 |
| <i>Desi_wild_23447430</i> | NA                                  | <i>Ca_desi_denovo</i> | 23447430                | A/C  | NA                 | NA                            | NA                 |
| <i>Desi_wild_23447495</i> | NA                                  | <i>Ca_desi_denovo</i> | 23447495                | A/C  | NA                 | NA                            | NA                 |
| <i>Desi_wild_23448490</i> | NA                                  | <i>Ca_desi_denovo</i> | 23448490                | C/G  | NA                 | NA                            | NA                 |
| <i>Desi_wild_23448712</i> | NA                                  | <i>Ca_desi_denovo</i> | 23448712                | C/T  | NA                 | NA                            | NA                 |
| <i>Desi_wild_23450868</i> | NA                                  | <i>Ca_desi_denovo</i> | 23450868                | G/T  | NA                 | NA                            | NA                 |
| <i>Desi_wild_23452411</i> | NA                                  | <i>Ca_desi_denovo</i> | 23452411                | C/T  | NA                 | NA                            | NA                 |
| <i>Desi_wild_23454100</i> | NA                                  | <i>Ca_desi_denovo</i> | 23454100                | C/T  | NA                 | NA                            | NA                 |
| <i>Desi_wild_23455388</i> | NA                                  | <i>Ca_desi_denovo</i> | 23455388                | C/T  | NA                 | NA                            | NA                 |
| <i>Desi_wild_23455415</i> | NA                                  | <i>Ca_desi_denovo</i> | 23455415                | G/A  | NA                 | NA                            | NA                 |
| <i>Desi_wild_23455416</i> | NA                                  | <i>Ca_desi_denovo</i> | 23455416                | G/A  | NA                 | NA                            | NA                 |
| <i>Desi_wild_23457200</i> | NA                                  | <i>Ca_desi_denovo</i> | 23457200                | C/T  | NA                 | NA                            | NA                 |
| <i>Desi_wild_23458696</i> | NA                                  | <i>Ca_desi_denovo</i> | 23458696                | G/T  | NA                 | NA                            | NA                 |
| <i>Desi_wild_23460772</i> | NA                                  | <i>Ca_desi_denovo</i> | 23460772                | G/A  | NA                 | NA                            | NA                 |
| <i>Desi_wild_23462080</i> | NA                                  | <i>Ca_desi_denovo</i> | 23462080                | C/T  | NA                 | NA                            | NA                 |
| <i>Desi_wild_23462965</i> | NA                                  | <i>Ca_desi_denovo</i> | 23462965                | A/G  | NA                 | NA                            | NA                 |
| <i>Desi_wild_23463271</i> | NA                                  | <i>Ca_desi_denovo</i> | 23463271                | A/G  | NA                 | NA                            | NA                 |



| SNP IDs                   | NCBI dbSNP accession IDs (NCBI_SS#) | Chromosomes           | Physical positions (bp) | SNPs | Gene accession IDs | Sequence components of genome | Putative functions |
|---------------------------|-------------------------------------|-----------------------|-------------------------|------|--------------------|-------------------------------|--------------------|
| <i>Desi_wild_23465747</i> | NA                                  | <i>Ca_desi_denovo</i> | 23465747                | A/G  | NA                 | NA                            | NA                 |
| <i>Desi_wild_23468721</i> | NA                                  | <i>Ca_desi_denovo</i> | 23468721                | A/T  | NA                 | NA                            | NA                 |
| <i>Desi_wild_23470512</i> | NA                                  | <i>Ca_desi_denovo</i> | 23470512                | C/T  | NA                 | NA                            | NA                 |
| <i>Desi_wild_23471093</i> | NA                                  | <i>Ca_desi_denovo</i> | 23471093                | C/G  | NA                 | NA                            | NA                 |
| <i>Desi_wild_23472768</i> | NA                                  | <i>Ca_desi_denovo</i> | 23472768                | A/T  | NA                 | NA                            | NA                 |
| <i>Desi_wild_23473436</i> | NA                                  | <i>Ca_desi_denovo</i> | 23473436                | C/T  | NA                 | NA                            | NA                 |
| <i>Desi_wild_23475127</i> | NA                                  | <i>Ca_desi_denovo</i> | 23475127                | C/G  | NA                 | NA                            | NA                 |
| <i>Desi_wild_23475135</i> | NA                                  | <i>Ca_desi_denovo</i> | 23475135                | A/G  | NA                 | NA                            | NA                 |
| <i>Desi_wild_23475138</i> | NA                                  | <i>Ca_desi_denovo</i> | 23475138                | C/T  | NA                 | NA                            | NA                 |
| <i>Desi_wild_23475406</i> | NA                                  | <i>Ca_desi_denovo</i> | 23475406                | A/G  | NA                 | NA                            | NA                 |
| <i>Desi_wild_23475422</i> | NA                                  | <i>Ca_desi_denovo</i> | 23475422                | C/T  | NA                 | NA                            | NA                 |
| <i>Desi_wild_23475436</i> | NA                                  | <i>Ca_desi_denovo</i> | 23475436                | C/T  | NA                 | NA                            | NA                 |
| <i>Desi_wild_23476902</i> | NA                                  | <i>Ca_desi_denovo</i> | 23476902                | A/G  | NA                 | NA                            | NA                 |
| <i>Desi_wild_23476917</i> | NA                                  | <i>Ca_desi_denovo</i> | 23476917                | A/T  | NA                 | NA                            | NA                 |
| <i>Desi_wild_23477282</i> | NA                                  | <i>Ca_desi_denovo</i> | 23477282                | C/T  | NA                 | NA                            | NA                 |
| <i>Desi_wild_23478225</i> | NA                                  | <i>Ca_desi_denovo</i> | 23478225                | C/G  | NA                 | NA                            | NA                 |
| <i>Desi_wild_23478257</i> | NA                                  | <i>Ca_desi_denovo</i> | 23478257                | C/T  | NA                 | NA                            | NA                 |
| <i>Desi_wild_23479389</i> | NA                                  | <i>Ca_desi_denovo</i> | 23479389                | C/T  | NA                 | NA                            | NA                 |
| <i>Desi_wild_23481489</i> | NA                                  | <i>Ca_desi_denovo</i> | 23481489                | A/G  | NA                 | NA                            | NA                 |
| <i>Desi_wild_23481577</i> | NA                                  | <i>Ca_desi_denovo</i> | 23481577                | C/T  | NA                 | NA                            | NA                 |
| <i>Desi_wild_23484326</i> | NA                                  | <i>Ca_desi_denovo</i> | 23484326                | C/G  | NA                 | NA                            | NA                 |
| <i>Desi_wild_23487367</i> | NA                                  | <i>Ca_desi_denovo</i> | 23487367                | A/G  | NA                 | NA                            | NA                 |
| <i>Desi_wild_23487385</i> | NA                                  | <i>Ca_desi_denovo</i> | 23487385                | A/G  | NA                 | NA                            | NA                 |
| <i>Desi_wild_23487439</i> | NA                                  | <i>Ca_desi_denovo</i> | 23487439                | A/G  | NA                 | NA                            | NA                 |
| <i>Desi_wild_23487440</i> | NA                                  | <i>Ca_desi_denovo</i> | 23487440                | A/T  | NA                 | NA                            | NA                 |
| <i>Desi_wild_23487452</i> | NA                                  | <i>Ca_desi_denovo</i> | 23487452                | A/G  | NA                 | NA                            | NA                 |
| <i>Desi_wild_23491853</i> | NA                                  | <i>Ca_desi_denovo</i> | 23491853                | A/G  | NA                 | NA                            | NA                 |
| <i>Desi_wild_23492229</i> | NA                                  | <i>Ca_desi_denovo</i> | 23492229                | G/T  | NA                 | NA                            | NA                 |
| <i>Desi_wild_23492236</i> | NA                                  | <i>Ca_desi_denovo</i> | 23492236                | A/G  | NA                 | NA                            | NA                 |
| <i>Desi_wild_23492332</i> | NA                                  | <i>Ca_desi_denovo</i> | 23492332                | C/T  | NA                 | NA                            | NA                 |
| <i>Desi_wild_23496547</i> | NA                                  | <i>Ca_desi_denovo</i> | 23496547                | G/A  | NA                 | NA                            | NA                 |
| <i>Desi_wild_23497403</i> | NA                                  | <i>Ca_desi_denovo</i> | 23497403                | C/G  | NA                 | NA                            | NA                 |
| <i>Desi_wild_23500559</i> | NA                                  | <i>Ca_desi_denovo</i> | 23500559                | C/T  | NA                 | NA                            | NA                 |
| <i>Desi_wild_23502579</i> | NA                                  | <i>Ca_desi_denovo</i> | 23502579                | C/G  | NA                 | NA                            | NA                 |
| <i>Desi_wild_23502582</i> | NA                                  | <i>Ca_desi_denovo</i> | 23502582                | C/T  | NA                 | NA                            | NA                 |
| <i>Desi_wild_23506336</i> | NA                                  | <i>Ca_desi_denovo</i> | 23506336                | A/G  | NA                 | NA                            | NA                 |
| <i>Desi_wild_23506342</i> | NA                                  | <i>Ca_desi_denovo</i> | 23506342                | A/G  | NA                 | NA                            | NA                 |
| <i>Desi_wild_23509892</i> | NA                                  | <i>Ca_desi_denovo</i> | 23509892                | C/T  | NA                 | NA                            | NA                 |
| <i>Desi_wild_23514376</i> | NA                                  | <i>Ca_desi_denovo</i> | 23514376                | C/G  | NA                 | NA                            | NA                 |
| <i>Desi_wild_23514377</i> | NA                                  | <i>Ca_desi_denovo</i> | 23514377                | A/G  | NA                 | NA                            | NA                 |
| <i>Desi_wild_23515192</i> | NA                                  | <i>Ca_desi_denovo</i> | 23515192                | A/T  | NA                 | NA                            | NA                 |
| <i>Desi_wild_23515822</i> | NA                                  | <i>Ca_desi_denovo</i> | 23515822                | A/G  | NA                 | NA                            | NA                 |
| <i>Desi_wild_23522601</i> | NA                                  | <i>Ca_desi_denovo</i> | 23522601                | G/T  | NA                 | NA                            | NA                 |
| <i>Desi_wild_23536921</i> | NA                                  | <i>Ca_desi_denovo</i> | 23536921                | A/G  | NA                 | NA                            | NA                 |

| SNP IDs                   | NCBI dbSNP accession IDs (NCBI_SS#) | Chromosomes           | Physical positions (bp) | SNPs | Gene accession IDs | Sequence components of genome | Putative functions |
|---------------------------|-------------------------------------|-----------------------|-------------------------|------|--------------------|-------------------------------|--------------------|
| <i>Desi_wild_23542832</i> | NA                                  | <i>Ca_desi_denovo</i> | 23542832                | A/T  | NA                 | NA                            | NA                 |
| <i>Desi_wild_23554365</i> | NA                                  | <i>Ca_desi_denovo</i> | 23554365                | C/T  | NA                 | NA                            | NA                 |
| <i>Desi_wild_23653046</i> | NA                                  | <i>Ca_desi_denovo</i> | 23653046                | A/T  | NA                 | NA                            | NA                 |
| <i>Desi_wild_23655949</i> | NA                                  | <i>Ca_desi_denovo</i> | 23655949                | G/A  | NA                 | NA                            | NA                 |
| <i>Desi_wild_23665052</i> | NA                                  | <i>Ca_desi_denovo</i> | 23665052                | G/T  | NA                 | NA                            | NA                 |
| <i>Desi_wild_23665053</i> | NA                                  | <i>Ca_desi_denovo</i> | 23665053                | A/T  | NA                 | NA                            | NA                 |
| <i>Desi_wild_23669949</i> | NA                                  | <i>Ca_desi_denovo</i> | 23669949                | A/G  | NA                 | NA                            | NA                 |
| <i>Desi_wild_23676953</i> | NA                                  | <i>Ca_desi_denovo</i> | 23676953                | T/A  | NA                 | NA                            | NA                 |
| <i>Desi_wild_23677906</i> | NA                                  | <i>Ca_desi_denovo</i> | 23677906                | A/T  | NA                 | NA                            | NA                 |
| <i>Desi_wild_23680097</i> | NA                                  | <i>Ca_desi_denovo</i> | 23680097                | A/G  | NA                 | NA                            | NA                 |
| <i>Desi_wild_23680133</i> | NA                                  | <i>Ca_desi_denovo</i> | 23680133                | C/T  | NA                 | NA                            | NA                 |
| <i>Desi_wild_23689728</i> | NA                                  | <i>Ca_desi_denovo</i> | 23689728                | A/G  | NA                 | NA                            | NA                 |
| <i>Desi_wild_23691435</i> | NA                                  | <i>Ca_desi_denovo</i> | 23691435                | C/G  | NA                 | NA                            | NA                 |
| <i>Desi_wild_23694057</i> | NA                                  | <i>Ca_desi_denovo</i> | 23694057                | G/T  | NA                 | NA                            | NA                 |
| <i>Desi_wild_23702483</i> | NA                                  | <i>Ca_desi_denovo</i> | 23702483                | A/C  | NA                 | NA                            | NA                 |
| <i>Desi_wild_23712871</i> | NA                                  | <i>Ca_desi_denovo</i> | 23712871                | G/A  | NA                 | NA                            | NA                 |
| <i>Desi_wild_23718932</i> | NA                                  | <i>Ca_desi_denovo</i> | 23718932                | G/A  | NA                 | NA                            | NA                 |
| <i>Desi_wild_23723017</i> | NA                                  | <i>Ca_desi_denovo</i> | 23723017                | A/T  | NA                 | NA                            | NA                 |
| <i>Desi_wild_23723490</i> | NA                                  | <i>Ca_desi_denovo</i> | 23723490                | C/T  | NA                 | NA                            | NA                 |
| <i>Desi_wild_23723525</i> | NA                                  | <i>Ca_desi_denovo</i> | 23723525                | T/C  | NA                 | NA                            | NA                 |
| <i>Desi_wild_23723544</i> | NA                                  | <i>Ca_desi_denovo</i> | 23723544                | G/A  | NA                 | NA                            | NA                 |
| <i>Desi_wild_23723547</i> | NA                                  | <i>Ca_desi_denovo</i> | 23723547                | T/G  | NA                 | NA                            | NA                 |
| <i>Desi_wild_23724760</i> | NA                                  | <i>Ca_desi_denovo</i> | 23724760                | C/G  | NA                 | NA                            | NA                 |
| <i>Desi_wild_23724764</i> | NA                                  | <i>Ca_desi_denovo</i> | 23724764                | T/C  | NA                 | NA                            | NA                 |
| <i>Desi_wild_23728504</i> | NA                                  | <i>Ca_desi_denovo</i> | 23728504                | A/T  | NA                 | NA                            | NA                 |
| <i>Desi_wild_23730375</i> | NA                                  | <i>Ca_desi_denovo</i> | 23730375                | C/T  | NA                 | NA                            | NA                 |
| <i>Desi_wild_23738376</i> | NA                                  | <i>Ca_desi_denovo</i> | 23738376                | C/T  | NA                 | NA                            | NA                 |
| <i>Desi_wild_23738419</i> | NA                                  | <i>Ca_desi_denovo</i> | 23738419                | G/T  | NA                 | NA                            | NA                 |
| <i>Desi_wild_23745759</i> | NA                                  | <i>Ca_desi_denovo</i> | 23745759                | A/T  | NA                 | NA                            | NA                 |
| <i>Desi_wild_23745762</i> | NA                                  | <i>Ca_desi_denovo</i> | 23745762                | C/T  | NA                 | NA                            | NA                 |
| <i>Desi_wild_23746726</i> | NA                                  | <i>Ca_desi_denovo</i> | 23746726                | G/C  | NA                 | NA                            | NA                 |
| <i>Desi_wild_23746729</i> | NA                                  | <i>Ca_desi_denovo</i> | 23746729                | G/T  | NA                 | NA                            | NA                 |
| <i>Desi_wild_23746752</i> | NA                                  | <i>Ca_desi_denovo</i> | 23746752                | A/G  | NA                 | NA                            | NA                 |
| <i>Desi_wild_23746767</i> | NA                                  | <i>Ca_desi_denovo</i> | 23746767                | G/A  | NA                 | NA                            | NA                 |
| <i>Desi_wild_23746778</i> | NA                                  | <i>Ca_desi_denovo</i> | 23746778                | C/T  | NA                 | NA                            | NA                 |
| <i>Desi_wild_23752329</i> | NA                                  | <i>Ca_desi_denovo</i> | 23752329                | C/T  | NA                 | NA                            | NA                 |
| <i>Desi_wild_23754414</i> | NA                                  | <i>Ca_desi_denovo</i> | 23754414                | A/G  | NA                 | NA                            | NA                 |
| <i>Desi_wild_23757096</i> | NA                                  | <i>Ca_desi_denovo</i> | 23757096                | C/G  | NA                 | NA                            | NA                 |
| <i>Desi_wild_23757116</i> | NA                                  | <i>Ca_desi_denovo</i> | 23757116                | C/G  | NA                 | NA                            | NA                 |
| <i>Desi_wild_23764222</i> | NA                                  | <i>Ca_desi_denovo</i> | 23764222                | C/G  | NA                 | NA                            | NA                 |
| <i>Desi_wild_23769670</i> | NA                                  | <i>Ca_desi_denovo</i> | 23769670                | A/C  | NA                 | NA                            | NA                 |
| <i>Desi_wild_23771495</i> | NA                                  | <i>Ca_desi_denovo</i> | 23771495                | G/A  | NA                 | NA                            | NA                 |
| <i>Desi_wild_23776782</i> | NA                                  | <i>Ca_desi_denovo</i> | 23776782                | C/G  | NA                 | NA                            | NA                 |
| <i>Desi_wild_23776785</i> | NA                                  | <i>Ca_desi_denovo</i> | 23776785                | A/C  | NA                 | NA                            | NA                 |

| SNP IDs                   | NCBI dbSNP accession IDs (NCBI_SS#) | Chromosomes           | Physical positions (bp) | SNPs | Gene accession IDs | Sequence components of genome | Putative functions |
|---------------------------|-------------------------------------|-----------------------|-------------------------|------|--------------------|-------------------------------|--------------------|
| <i>Desi_wild_23781642</i> | NA                                  | <i>Ca_desi_denovo</i> | 23781642                | A/G  | NA                 | NA                            | NA                 |
| <i>Desi_wild_23795782</i> | NA                                  | <i>Ca_desi_denovo</i> | 23795782                | C/G  | NA                 | NA                            | NA                 |
| <i>Desi_wild_23802319</i> | NA                                  | <i>Ca_desi_denovo</i> | 23802319                | C/A  | NA                 | NA                            | NA                 |
| <i>Desi_wild_23802320</i> | NA                                  | <i>Ca_desi_denovo</i> | 23802320                | A/G  | NA                 | NA                            | NA                 |
| <i>Desi_wild_23802322</i> | NA                                  | <i>Ca_desi_denovo</i> | 23802322                | A/G  | NA                 | NA                            | NA                 |
| <i>Desi_wild_23802324</i> | NA                                  | <i>Ca_desi_denovo</i> | 23802324                | T/A  | NA                 | NA                            | NA                 |
| <i>Desi_wild_23802325</i> | NA                                  | <i>Ca_desi_denovo</i> | 23802325                | G/T  | NA                 | NA                            | NA                 |
| <i>Desi_wild_23802414</i> | NA                                  | <i>Ca_desi_denovo</i> | 23802414                | C/T  | NA                 | NA                            | NA                 |
| <i>Desi_wild_23802666</i> | NA                                  | <i>Ca_desi_denovo</i> | 23802666                | A/G  | NA                 | NA                            | NA                 |
| <i>Desi_wild_23805763</i> | NA                                  | <i>Ca_desi_denovo</i> | 23805763                | G/C  | NA                 | NA                            | NA                 |
| <i>Desi_wild_23810560</i> | NA                                  | <i>Ca_desi_denovo</i> | 23810560                | C/T  | NA                 | NA                            | NA                 |
| <i>Desi_wild_23818535</i> | NA                                  | <i>Ca_desi_denovo</i> | 23818535                | C/T  | NA                 | NA                            | NA                 |
| <i>Desi_wild_23823018</i> | NA                                  | <i>Ca_desi_denovo</i> | 23823018                | C/G  | NA                 | NA                            | NA                 |
| <i>Desi_wild_23828851</i> | NA                                  | <i>Ca_desi_denovo</i> | 23828851                | A/T  | NA                 | NA                            | NA                 |
| <i>Desi_wild_23849540</i> | NA                                  | <i>Ca_desi_denovo</i> | 23849540                | C/T  | NA                 | NA                            | NA                 |
| <i>Desi_wild_23849550</i> | NA                                  | <i>Ca_desi_denovo</i> | 23849550                | T/G  | NA                 | NA                            | NA                 |
| <i>Desi_wild_23851206</i> | NA                                  | <i>Ca_desi_denovo</i> | 23851206                | C/T  | NA                 | NA                            | NA                 |
| <i>Desi_wild_23857433</i> | NA                                  | <i>Ca_desi_denovo</i> | 23857433                | C/T  | NA                 | NA                            | NA                 |
| <i>Desi_wild_23869974</i> | NA                                  | <i>Ca_desi_denovo</i> | 23869974                | G/C  | NA                 | NA                            | NA                 |
| <i>Desi_wild_23869980</i> | NA                                  | <i>Ca_desi_denovo</i> | 23869980                | T/G  | NA                 | NA                            | NA                 |
| <i>Desi_wild_23872249</i> | NA                                  | <i>Ca_desi_denovo</i> | 23872249                | T/A  | NA                 | NA                            | NA                 |
| <i>Desi_wild_23881017</i> | NA                                  | <i>Ca_desi_denovo</i> | 23881017                | C/A  | NA                 | NA                            | NA                 |
| <i>Desi_wild_23881034</i> | NA                                  | <i>Ca_desi_denovo</i> | 23881034                | T/A  | NA                 | NA                            | NA                 |
| <i>Desi_wild_23892366</i> | NA                                  | <i>Ca_desi_denovo</i> | 23892366                | T/G  | NA                 | NA                            | NA                 |
| <i>Desi_wild_23908483</i> | NA                                  | <i>Ca_desi_denovo</i> | 23908483                | A/T  | NA                 | NA                            | NA                 |
| <i>Desi_wild_23937265</i> | NA                                  | <i>Ca_desi_denovo</i> | 23937265                | T/C  | NA                 | NA                            | NA                 |
| <i>Desi_wild_23974744</i> | NA                                  | <i>Ca_desi_denovo</i> | 23974744                | A/C  | NA                 | NA                            | NA                 |
| <i>Desi_wild_23976602</i> | NA                                  | <i>Ca_desi_denovo</i> | 23976602                | G/A  | NA                 | NA                            | NA                 |
| <i>Desi_wild_23984823</i> | NA                                  | <i>Ca_desi_denovo</i> | 23984823                | A/T  | NA                 | NA                            | NA                 |
| <i>Desi_wild_23992943</i> | NA                                  | <i>Ca_desi_denovo</i> | 23992943                | G/T  | NA                 | NA                            | NA                 |
| <i>Desi_wild_23999171</i> | NA                                  | <i>Ca_desi_denovo</i> | 23999171                | C/G  | NA                 | NA                            | NA                 |
| <i>Desi_wild_23999172</i> | NA                                  | <i>Ca_desi_denovo</i> | 23999172                | A/T  | NA                 | NA                            | NA                 |
| <i>Desi_wild_24008280</i> | NA                                  | <i>Ca_desi_denovo</i> | 24008280                | A/G  | NA                 | NA                            | NA                 |
| <i>Desi_wild_24008288</i> | NA                                  | <i>Ca_desi_denovo</i> | 24008288                | A/G  | NA                 | NA                            | NA                 |
| <i>Desi_wild_24008309</i> | NA                                  | <i>Ca_desi_denovo</i> | 24008309                | A/T  | NA                 | NA                            | NA                 |
| <i>Desi_wild_24011099</i> | NA                                  | <i>Ca_desi_denovo</i> | 24011099                | A/C  | NA                 | NA                            | NA                 |
| <i>Desi_wild_24011868</i> | NA                                  | <i>Ca_desi_denovo</i> | 24011868                | A/G  | NA                 | NA                            | NA                 |
| <i>Desi_wild_24012614</i> | NA                                  | <i>Ca_desi_denovo</i> | 24012614                | A/T  | NA                 | NA                            | NA                 |
| <i>Desi_wild_24012615</i> | NA                                  | <i>Ca_desi_denovo</i> | 24012615                | C/G  | NA                 | NA                            | NA                 |
| <i>Desi_wild_24013464</i> | NA                                  | <i>Ca_desi_denovo</i> | 24013464                | C/T  | NA                 | NA                            | NA                 |
| <i>Desi_wild_24024701</i> | NA                                  | <i>Ca_desi_denovo</i> | 24024701                | A/G  | NA                 | NA                            | NA                 |
| <i>Desi_wild_24048440</i> | NA                                  | <i>Ca_desi_denovo</i> | 24048440                | C/T  | NA                 | NA                            | NA                 |
| <i>Desi_wild_24048476</i> | NA                                  | <i>Ca_desi_denovo</i> | 24048476                | A/C  | NA                 | NA                            | NA                 |
| <i>Desi_wild_24072341</i> | NA                                  | <i>Ca_desi_denovo</i> | 24072341                | A/G  | NA                 | NA                            | NA                 |

| SNP IDs                   | NCBI dbSNP accession IDs (NCBI_SS#) | Chromosomes           | Physical positions (bp) | SNPs | Gene accession IDs | Sequence components of genome | Putative functions |
|---------------------------|-------------------------------------|-----------------------|-------------------------|------|--------------------|-------------------------------|--------------------|
| <i>Desi_wild_24072343</i> | NA                                  | <i>Ca_desi_denovo</i> | 24072343                | A/G  | NA                 | NA                            | NA                 |
| <i>Desi_wild_24072344</i> | NA                                  | <i>Ca_desi_denovo</i> | 24072344                | A/G  | NA                 | NA                            | NA                 |
| <i>Desi_wild_24080594</i> | NA                                  | <i>Ca_desi_denovo</i> | 24080594                | G/T  | NA                 | NA                            | NA                 |
| <i>Desi_wild_24080596</i> | NA                                  | <i>Ca_desi_denovo</i> | 24080596                | C/T  | NA                 | NA                            | NA                 |
| <i>Desi_wild_24086015</i> | NA                                  | <i>Ca_desi_denovo</i> | 24086015                | G/T  | NA                 | NA                            | NA                 |
| <i>Desi_wild_24086018</i> | NA                                  | <i>Ca_desi_denovo</i> | 24086018                | A/G  | NA                 | NA                            | NA                 |
| <i>Desi_wild_24087345</i> | NA                                  | <i>Ca_desi_denovo</i> | 24087345                | T/C  | NA                 | NA                            | NA                 |
| <i>Desi_wild_24101303</i> | NA                                  | <i>Ca_desi_denovo</i> | 24101303                | A/G  | NA                 | NA                            | NA                 |
| <i>Desi_wild_24109648</i> | NA                                  | <i>Ca_desi_denovo</i> | 24109648                | C/T  | NA                 | NA                            | NA                 |
| <i>Desi_wild_24126431</i> | NA                                  | <i>Ca_desi_denovo</i> | 24126431                | C/T  | NA                 | NA                            | NA                 |
| <i>Desi_wild_24134170</i> | NA                                  | <i>Ca_desi_denovo</i> | 24134170                | T/G  | NA                 | NA                            | NA                 |
| <i>Desi_wild_24137479</i> | NA                                  | <i>Ca_desi_denovo</i> | 24137479                | C/G  | NA                 | NA                            | NA                 |
| <i>Desi_wild_24145427</i> | NA                                  | <i>Ca_desi_denovo</i> | 24145427                | C/G  | NA                 | NA                            | NA                 |
| <i>Desi_wild_24145445</i> | NA                                  | <i>Ca_desi_denovo</i> | 24145445                | T/C  | NA                 | NA                            | NA                 |
| <i>Desi_wild_24167441</i> | NA                                  | <i>Ca_desi_denovo</i> | 24167441                | A/G  | NA                 | NA                            | NA                 |
| <i>Desi_wild_24172794</i> | NA                                  | <i>Ca_desi_denovo</i> | 24172794                | A/G  | NA                 | NA                            | NA                 |
| <i>Desi_wild_24173063</i> | NA                                  | <i>Ca_desi_denovo</i> | 24173063                | A/G  | NA                 | NA                            | NA                 |
| <i>Desi_wild_24173120</i> | NA                                  | <i>Ca_desi_denovo</i> | 24173120                | A/T  | NA                 | NA                            | NA                 |
| <i>Desi_wild_24180900</i> | NA                                  | <i>Ca_desi_denovo</i> | 24180900                | C/T  | NA                 | NA                            | NA                 |
| <i>Desi_wild_24180940</i> | NA                                  | <i>Ca_desi_denovo</i> | 24180940                | A/G  | NA                 | NA                            | NA                 |
| <i>Desi_wild_24181948</i> | NA                                  | <i>Ca_desi_denovo</i> | 24181948                | G/C  | NA                 | NA                            | NA                 |
| <i>Desi_wild_24181952</i> | NA                                  | <i>Ca_desi_denovo</i> | 24181952                | C/T  | NA                 | NA                            | NA                 |
| <i>Desi_wild_24182925</i> | NA                                  | <i>Ca_desi_denovo</i> | 24182925                | A/G  | NA                 | NA                            | NA                 |
| <i>Desi_wild_24182955</i> | NA                                  | <i>Ca_desi_denovo</i> | 24182955                | T/C  | NA                 | NA                            | NA                 |
| <i>Desi_wild_24192044</i> | NA                                  | <i>Ca_desi_denovo</i> | 24192044                | C/G  | NA                 | NA                            | NA                 |
| <i>Desi_wild_24192214</i> | NA                                  | <i>Ca_desi_denovo</i> | 24192214                | A/C  | NA                 | NA                            | NA                 |
| <i>Desi_wild_24193068</i> | NA                                  | <i>Ca_desi_denovo</i> | 24193068                | A/G  | NA                 | NA                            | NA                 |
| <i>Desi_wild_24194855</i> | NA                                  | <i>Ca_desi_denovo</i> | 24194855                | T/C  | NA                 | NA                            | NA                 |
| <i>Desi_wild_24194861</i> | NA                                  | <i>Ca_desi_denovo</i> | 24194861                | C/G  | NA                 | NA                            | NA                 |
| <i>Desi_wild_24200034</i> | NA                                  | <i>Ca_desi_denovo</i> | 24200034                | T/C  | NA                 | NA                            | NA                 |
| <i>Desi_wild_24210369</i> | NA                                  | <i>Ca_desi_denovo</i> | 24210369                | C/G  | NA                 | NA                            | NA                 |
| <i>Desi_wild_24210399</i> | NA                                  | <i>Ca_desi_denovo</i> | 24210399                | A/C  | NA                 | NA                            | NA                 |
| <i>Desi_wild_24213276</i> | NA                                  | <i>Ca_desi_denovo</i> | 24213276                | A/G  | NA                 | NA                            | NA                 |
| <i>Desi_wild_24214332</i> | NA                                  | <i>Ca_desi_denovo</i> | 24214332                | T/C  | NA                 | NA                            | NA                 |
| <i>Desi_wild_24220283</i> | NA                                  | <i>Ca_desi_denovo</i> | 24220283                | A/G  | NA                 | NA                            | NA                 |
| <i>Desi_wild_24224366</i> | NA                                  | <i>Ca_desi_denovo</i> | 24224366                | G/T  | NA                 | NA                            | NA                 |
| <i>Desi_wild_24226341</i> | NA                                  | <i>Ca_desi_denovo</i> | 24226341                | G/T  | NA                 | NA                            | NA                 |
| <i>Desi_wild_24229911</i> | NA                                  | <i>Ca_desi_denovo</i> | 24229911                | T/C  | NA                 | NA                            | NA                 |
| <i>Desi_wild_24229923</i> | NA                                  | <i>Ca_desi_denovo</i> | 24229923                | G/A  | NA                 | NA                            | NA                 |
| <i>Desi_wild_24233194</i> | NA                                  | <i>Ca_desi_denovo</i> | 24233194                | G/T  | NA                 | NA                            | NA                 |
| <i>Desi_wild_24234148</i> | NA                                  | <i>Ca_desi_denovo</i> | 24234148                | C/T  | NA                 | NA                            | NA                 |
| <i>Desi_wild_24234366</i> | NA                                  | <i>Ca_desi_denovo</i> | 24234366                | T/C  | NA                 | NA                            | NA                 |
| <i>Desi_wild_24234391</i> | NA                                  | <i>Ca_desi_denovo</i> | 24234391                | G/A  | NA                 | NA                            | NA                 |
| <i>Desi_wild_24234399</i> | NA                                  | <i>Ca_desi_denovo</i> | 24234399                | T/C  | NA                 | NA                            | NA                 |

| SNP IDs                   | NCBI dbSNP accession IDs (NCBI_SS#) | Chromosomes           | Physical positions (bp) | SNPs | Gene accession IDs | Sequence components of genome | Putative functions |
|---------------------------|-------------------------------------|-----------------------|-------------------------|------|--------------------|-------------------------------|--------------------|
| <i>Desi_wild_24237345</i> | NA                                  | <i>Ca_desi_denovo</i> | 24237345                | A/G  | NA                 | NA                            | NA                 |
| <i>Desi_wild_24237351</i> | NA                                  | <i>Ca_desi_denovo</i> | 24237351                | T/C  | NA                 | NA                            | NA                 |
| <i>Desi_wild_24243701</i> | NA                                  | <i>Ca_desi_denovo</i> | 24243701                | C/G  | NA                 | NA                            | NA                 |
| <i>Desi_wild_24245186</i> | NA                                  | <i>Ca_desi_denovo</i> | 24245186                | T/C  | NA                 | NA                            | NA                 |
| <i>Desi_wild_24246876</i> | NA                                  | <i>Ca_desi_denovo</i> | 24246876                | G/C  | NA                 | NA                            | NA                 |
| <i>Desi_wild_24246930</i> | NA                                  | <i>Ca_desi_denovo</i> | 24246930                | A/C  | NA                 | NA                            | NA                 |
| <i>Desi_wild_24250932</i> | NA                                  | <i>Ca_desi_denovo</i> | 24250932                | G/A  | NA                 | NA                            | NA                 |
| <i>Desi_wild_24252693</i> | NA                                  | <i>Ca_desi_denovo</i> | 24252693                | A/C  | NA                 | NA                            | NA                 |
| <i>Desi_wild_24253968</i> | NA                                  | <i>Ca_desi_denovo</i> | 24253968                | A/G  | NA                 | NA                            | NA                 |
| <i>Desi_wild_24255602</i> | NA                                  | <i>Ca_desi_denovo</i> | 24255602                | T/C  | NA                 | NA                            | NA                 |
| <i>Desi_wild_24256286</i> | NA                                  | <i>Ca_desi_denovo</i> | 24256286                | A/G  | NA                 | NA                            | NA                 |
| <i>Desi_wild_24256310</i> | NA                                  | <i>Ca_desi_denovo</i> | 24256310                | C/T  | NA                 | NA                            | NA                 |
| <i>Desi_wild_24261342</i> | NA                                  | <i>Ca_desi_denovo</i> | 24261342                | C/T  | NA                 | NA                            | NA                 |
| <i>Desi_wild_24264895</i> | NA                                  | <i>Ca_desi_denovo</i> | 24264895                | A/G  | NA                 | NA                            | NA                 |
| <i>Desi_wild_24264934</i> | NA                                  | <i>Ca_desi_denovo</i> | 24264934                | C/A  | NA                 | NA                            | NA                 |
| <i>Desi_wild_24268362</i> | NA                                  | <i>Ca_desi_denovo</i> | 24268362                | A/G  | NA                 | NA                            | NA                 |
| <i>Desi_wild_24269260</i> | NA                                  | <i>Ca_desi_denovo</i> | 24269260                | A/G  | NA                 | NA                            | NA                 |
| <i>Desi_wild_24271932</i> | NA                                  | <i>Ca_desi_denovo</i> | 24271932                | A/G  | NA                 | NA                            | NA                 |
| <i>Desi_wild_24273743</i> | NA                                  | <i>Ca_desi_denovo</i> | 24273743                | A/G  | NA                 | NA                            | NA                 |
| <i>Desi_wild_24273767</i> | NA                                  | <i>Ca_desi_denovo</i> | 24273767                | G/A  | NA                 | NA                            | NA                 |
| <i>Desi_wild_24278225</i> | NA                                  | <i>Ca_desi_denovo</i> | 24278225                | A/G  | NA                 | NA                            | NA                 |
| <i>Desi_wild_24279572</i> | NA                                  | <i>Ca_desi_denovo</i> | 24279572                | A/C  | NA                 | NA                            | NA                 |
| <i>Desi_wild_24280992</i> | NA                                  | <i>Ca_desi_denovo</i> | 24280992                | C/A  | NA                 | NA                            | NA                 |
| <i>Desi_wild_24280998</i> | NA                                  | <i>Ca_desi_denovo</i> | 24280998                | A/G  | NA                 | NA                            | NA                 |
| <i>Desi_wild_24284524</i> | NA                                  | <i>Ca_desi_denovo</i> | 24284524                | G/T  | NA                 | NA                            | NA                 |
| <i>Desi_wild_24286233</i> | NA                                  | <i>Ca_desi_denovo</i> | 24286233                | G/C  | NA                 | NA                            | NA                 |
| <i>Desi_wild_24292530</i> | NA                                  | <i>Ca_desi_denovo</i> | 24292530                | C/T  | NA                 | NA                            | NA                 |
| <i>Desi_wild_24292754</i> | NA                                  | <i>Ca_desi_denovo</i> | 24292754                | A/G  | NA                 | NA                            | NA                 |
| <i>Desi_wild_24292755</i> | NA                                  | <i>Ca_desi_denovo</i> | 24292755                | A/G  | NA                 | NA                            | NA                 |
| <i>Desi_wild_24292766</i> | NA                                  | <i>Ca_desi_denovo</i> | 24292766                | T/G  | NA                 | NA                            | NA                 |
| <i>Desi_wild_24292776</i> | NA                                  | <i>Ca_desi_denovo</i> | 24292776                | C/T  | NA                 | NA                            | NA                 |
| <i>Desi_wild_24294359</i> | NA                                  | <i>Ca_desi_denovo</i> | 24294359                | C/T  | NA                 | NA                            | NA                 |
| <i>Desi_wild_24297579</i> | NA                                  | <i>Ca_desi_denovo</i> | 24297579                | T/C  | NA                 | NA                            | NA                 |
| <i>Desi_wild_24318899</i> | NA                                  | <i>Ca_desi_denovo</i> | 24318899                | T/A  | NA                 | NA                            | NA                 |
| <i>Desi_wild_24319487</i> | NA                                  | <i>Ca_desi_denovo</i> | 24319487                | T/G  | NA                 | NA                            | NA                 |
| <i>Desi_wild_24328438</i> | NA                                  | <i>Ca_desi_denovo</i> | 24328438                | G/T  | NA                 | NA                            | NA                 |
| <i>Desi_wild_24337058</i> | NA                                  | <i>Ca_desi_denovo</i> | 24337058                | G/T  | NA                 | NA                            | NA                 |
| <i>Desi_wild_24340534</i> | NA                                  | <i>Ca_desi_denovo</i> | 24340534                | G/T  | NA                 | NA                            | NA                 |
| <i>Desi_wild_24350519</i> | NA                                  | <i>Ca_desi_denovo</i> | 24350519                | G/T  | NA                 | NA                            | NA                 |
| <i>Desi_wild_24354494</i> | NA                                  | <i>Ca_desi_denovo</i> | 24354494                | A/C  | NA                 | NA                            | NA                 |
| <i>Desi_wild_24359885</i> | NA                                  | <i>Ca_desi_denovo</i> | 24359885                | A/G  | NA                 | NA                            | NA                 |
| <i>Desi_wild_24360149</i> | NA                                  | <i>Ca_desi_denovo</i> | 24360149                | G/C  | NA                 | NA                            | NA                 |
| <i>Desi_wild_24360174</i> | NA                                  | <i>Ca_desi_denovo</i> | 24360174                | A/G  | NA                 | NA                            | NA                 |
| <i>Desi_wild_24366704</i> | NA                                  | <i>Ca_desi_denovo</i> | 24366704                | C/T  | NA                 | NA                            | NA                 |

| SNP IDs                   | NCBI dbSNP accession IDs (NCBI_SS#) | Chromosomes           | Physical positions (bp) | SNPs | Gene accession IDs | Sequence components of genome | Putative functions |
|---------------------------|-------------------------------------|-----------------------|-------------------------|------|--------------------|-------------------------------|--------------------|
| <i>Desi_wild_24367316</i> | NA                                  | <i>Ca_desi_denovo</i> | 24367316                | A/C  | NA                 | NA                            | NA                 |
| <i>Desi_wild_24369250</i> | NA                                  | <i>Ca_desi_denovo</i> | 24369250                | C/G  | NA                 | NA                            | NA                 |
| <i>Desi_wild_24371898</i> | NA                                  | <i>Ca_desi_denovo</i> | 24371898                | A/C  | NA                 | NA                            | NA                 |
| <i>Desi_wild_24378177</i> | NA                                  | <i>Ca_desi_denovo</i> | 24378177                | T/C  | NA                 | NA                            | NA                 |
| <i>Desi_wild_24382631</i> | NA                                  | <i>Ca_desi_denovo</i> | 24382631                | G/C  | NA                 | NA                            | NA                 |
| <i>Desi_wild_24382634</i> | NA                                  | <i>Ca_desi_denovo</i> | 24382634                | G/A  | NA                 | NA                            | NA                 |
| <i>Desi_wild_24385541</i> | NA                                  | <i>Ca_desi_denovo</i> | 24385541                | A/G  | NA                 | NA                            | NA                 |
| <i>Desi_wild_24385542</i> | NA                                  | <i>Ca_desi_denovo</i> | 24385542                | A/G  | NA                 | NA                            | NA                 |
| <i>Desi_wild_24386177</i> | NA                                  | <i>Ca_desi_denovo</i> | 24386177                | G/T  | NA                 | NA                            | NA                 |
| <i>Desi_wild_24388060</i> | NA                                  | <i>Ca_desi_denovo</i> | 24388060                | G/C  | NA                 | NA                            | NA                 |
| <i>Desi_wild_24391308</i> | NA                                  | <i>Ca_desi_denovo</i> | 24391308                | T/C  | NA                 | NA                            | NA                 |
| <i>Desi_wild_24398898</i> | NA                                  | <i>Ca_desi_denovo</i> | 24398898                | A/C  | NA                 | NA                            | NA                 |
| <i>Desi_wild_24398901</i> | NA                                  | <i>Ca_desi_denovo</i> | 24398901                | C/T  | NA                 | NA                            | NA                 |
| <i>Desi_wild_24400314</i> | NA                                  | <i>Ca_desi_denovo</i> | 24400314                | A/G  | NA                 | NA                            | NA                 |
| <i>Desi_wild_24402906</i> | NA                                  | <i>Ca_desi_denovo</i> | 24402906                | A/G  | NA                 | NA                            | NA                 |
| <i>Desi_wild_24402926</i> | NA                                  | <i>Ca_desi_denovo</i> | 24402926                | T/C  | NA                 | NA                            | NA                 |
| <i>Desi_wild_24407358</i> | NA                                  | <i>Ca_desi_denovo</i> | 24407358                | A/G  | NA                 | NA                            | NA                 |
| <i>Desi_wild_24407418</i> | NA                                  | <i>Ca_desi_denovo</i> | 24407418                | G/A  | NA                 | NA                            | NA                 |
| <i>Desi_wild_24411495</i> | NA                                  | <i>Ca_desi_denovo</i> | 24411495                | C/G  | NA                 | NA                            | NA                 |
| <i>Desi_wild_24411819</i> | NA                                  | <i>Ca_desi_denovo</i> | 24411819                | G/C  | NA                 | NA                            | NA                 |
| <i>Desi_wild_24411837</i> | NA                                  | <i>Ca_desi_denovo</i> | 24411837                | T/G  | NA                 | NA                            | NA                 |
| <i>Desi_wild_24413448</i> | NA                                  | <i>Ca_desi_denovo</i> | 24413448                | T/C  | NA                 | NA                            | NA                 |
| <i>Desi_wild_24422105</i> | NA                                  | <i>Ca_desi_denovo</i> | 24422105                | G/A  | NA                 | NA                            | NA                 |
| <i>Desi_wild_24433269</i> | NA                                  | <i>Ca_desi_denovo</i> | 24433269                | A/C  | NA                 | NA                            | NA                 |
| <i>Desi_wild_24433270</i> | NA                                  | <i>Ca_desi_denovo</i> | 24433270                | G/C  | NA                 | NA                            | NA                 |
| <i>Desi_wild_24433703</i> | NA                                  | <i>Ca_desi_denovo</i> | 24433703                | A/G  | NA                 | NA                            | NA                 |
| <i>Desi_wild_24439041</i> | NA                                  | <i>Ca_desi_denovo</i> | 24439041                | G/A  | NA                 | NA                            | NA                 |
| <i>Desi_wild_24439092</i> | NA                                  | <i>Ca_desi_denovo</i> | 24439092                | G/C  | NA                 | NA                            | NA                 |
| <i>Desi_wild_24439740</i> | NA                                  | <i>Ca_desi_denovo</i> | 24439740                | C/T  | NA                 | NA                            | NA                 |
| <i>Desi_wild_24439766</i> | NA                                  | <i>Ca_desi_denovo</i> | 24439766                | A/C  | NA                 | NA                            | NA                 |
| <i>Desi_wild_24451844</i> | NA                                  | <i>Ca_desi_denovo</i> | 24451844                | A/G  | NA                 | NA                            | NA                 |
| <i>Desi_wild_24460876</i> | NA                                  | <i>Ca_desi_denovo</i> | 24460876                | A/G  | NA                 | NA                            | NA                 |
| <i>Desi_wild_24460877</i> | NA                                  | <i>Ca_desi_denovo</i> | 24460877                | A/G  | NA                 | NA                            | NA                 |
| <i>Desi_wild_24470045</i> | NA                                  | <i>Ca_desi_denovo</i> | 24470045                | C/T  | NA                 | NA                            | NA                 |
| <i>Desi_wild_24470048</i> | NA                                  | <i>Ca_desi_denovo</i> | 24470048                | C/T  | NA                 | NA                            | NA                 |
| <i>Desi_wild_24470066</i> | NA                                  | <i>Ca_desi_denovo</i> | 24470066                | C/T  | NA                 | NA                            | NA                 |
| <i>Desi_wild_24470077</i> | NA                                  | <i>Ca_desi_denovo</i> | 24470077                | A/C  | NA                 | NA                            | NA                 |
| <i>Desi_wild_24477071</i> | NA                                  | <i>Ca_desi_denovo</i> | 24477071                | A/C  | NA                 | NA                            | NA                 |
| <i>Desi_wild_24479514</i> | NA                                  | <i>Ca_desi_denovo</i> | 24479514                | C/G  | NA                 | NA                            | NA                 |
| <i>Desi_wild_24479532</i> | NA                                  | <i>Ca_desi_denovo</i> | 24479532                | A/C  | NA                 | NA                            | NA                 |
| <i>Desi_wild_24483229</i> | NA                                  | <i>Ca_desi_denovo</i> | 24483229                | C/T  | NA                 | NA                            | NA                 |
| <i>Desi_wild_24486579</i> | NA                                  | <i>Ca_desi_denovo</i> | 24486579                | A/T  | NA                 | NA                            | NA                 |
| <i>Desi_wild_24486600</i> | NA                                  | <i>Ca_desi_denovo</i> | 24486600                | G/A  | NA                 | NA                            | NA                 |
| <i>Desi_wild_24489996</i> | NA                                  | <i>Ca_desi_denovo</i> | 24489996                | G/T  | NA                 | NA                            | NA                 |

| SNP IDs                   | NCBI dbSNP accession IDs (NCBI_SS#) | Chromosomes           | Physical positions (bp) | SNPs | Gene accession IDs | Sequence components of genome | Putative functions |
|---------------------------|-------------------------------------|-----------------------|-------------------------|------|--------------------|-------------------------------|--------------------|
| <i>Desi_wild_24491561</i> | NA                                  | <i>Ca_desi_denovo</i> | 24491561                | A/G  | NA                 | NA                            | NA                 |
| <i>Desi_wild_24491563</i> | NA                                  | <i>Ca_desi_denovo</i> | 24491563                | A/G  | NA                 | NA                            | NA                 |
| <i>Desi_wild_24491568</i> | NA                                  | <i>Ca_desi_denovo</i> | 24491568                | G/C  | NA                 | NA                            | NA                 |
| <i>Desi_wild_24491570</i> | NA                                  | <i>Ca_desi_denovo</i> | 24491570                | C/G  | NA                 | NA                            | NA                 |
| <i>Desi_wild_24491571</i> | NA                                  | <i>Ca_desi_denovo</i> | 24491571                | A/C  | NA                 | NA                            | NA                 |
| <i>Desi_wild_24491604</i> | NA                                  | <i>Ca_desi_denovo</i> | 24491604                | T/G  | NA                 | NA                            | NA                 |
| <i>Desi_wild_24500706</i> | NA                                  | <i>Ca_desi_denovo</i> | 24500706                | T/G  | NA                 | NA                            | NA                 |
| <i>Desi_wild_24505670</i> | NA                                  | <i>Ca_desi_denovo</i> | 24505670                | C/T  | NA                 | NA                            | NA                 |
| <i>Desi_wild_24505673</i> | NA                                  | <i>Ca_desi_denovo</i> | 24505673                | T/G  | NA                 | NA                            | NA                 |
| <i>Desi_wild_24510308</i> | NA                                  | <i>Ca_desi_denovo</i> | 24510308                | G/T  | NA                 | NA                            | NA                 |
| <i>Desi_wild_24510359</i> | NA                                  | <i>Ca_desi_denovo</i> | 24510359                | G/T  | NA                 | NA                            | NA                 |
| <i>Desi_wild_24513891</i> | NA                                  | <i>Ca_desi_denovo</i> | 24513891                | C/G  | NA                 | NA                            | NA                 |
| <i>Desi_wild_24514610</i> | NA                                  | <i>Ca_desi_denovo</i> | 24514610                | G/A  | NA                 | NA                            | NA                 |
| <i>Desi_wild_24514616</i> | NA                                  | <i>Ca_desi_denovo</i> | 24514616                | A/G  | NA                 | NA                            | NA                 |
| <i>Desi_wild_24518241</i> | NA                                  | <i>Ca_desi_denovo</i> | 24518241                | G/A  | NA                 | NA                            | NA                 |
| <i>Desi_wild_24518246</i> | NA                                  | <i>Ca_desi_denovo</i> | 24518246                | C/G  | NA                 | NA                            | NA                 |
| <i>Desi_wild_24519766</i> | NA                                  | <i>Ca_desi_denovo</i> | 24519766                | A/C  | NA                 | NA                            | NA                 |
| <i>Desi_wild_24519767</i> | NA                                  | <i>Ca_desi_denovo</i> | 24519767                | C/G  | NA                 | NA                            | NA                 |
| <i>Desi_wild_24525535</i> | NA                                  | <i>Ca_desi_denovo</i> | 24525535                | G/A  | NA                 | NA                            | NA                 |
| <i>Desi_wild_24525601</i> | NA                                  | <i>Ca_desi_denovo</i> | 24525601                | A/G  | NA                 | NA                            | NA                 |
| <i>Desi_wild_24526774</i> | NA                                  | <i>Ca_desi_denovo</i> | 24526774                | A/C  | NA                 | NA                            | NA                 |
| <i>Desi_wild_24526775</i> | NA                                  | <i>Ca_desi_denovo</i> | 24526775                | A/G  | NA                 | NA                            | NA                 |
| <i>Desi_wild_24528054</i> | NA                                  | <i>Ca_desi_denovo</i> | 24528054                | T/C  | NA                 | NA                            | NA                 |
| <i>Desi_wild_24528101</i> | NA                                  | <i>Ca_desi_denovo</i> | 24528101                | C/T  | NA                 | NA                            | NA                 |
| <i>Desi_wild_24528110</i> | NA                                  | <i>Ca_desi_denovo</i> | 24528110                | C/G  | NA                 | NA                            | NA                 |
| <i>Desi_wild_24529177</i> | NA                                  | <i>Ca_desi_denovo</i> | 24529177                | T/A  | NA                 | NA                            | NA                 |
| <i>Desi_wild_24529212</i> | NA                                  | <i>Ca_desi_denovo</i> | 24529212                | C/T  | NA                 | NA                            | NA                 |
| <i>Desi_wild_24531245</i> | NA                                  | <i>Ca_desi_denovo</i> | 24531245                | T/G  | NA                 | NA                            | NA                 |
| <i>Desi_wild_24534104</i> | NA                                  | <i>Ca_desi_denovo</i> | 24534104                | T/C  | NA                 | NA                            | NA                 |
| <i>Desi_wild_24534128</i> | NA                                  | <i>Ca_desi_denovo</i> | 24534128                | G/C  | NA                 | NA                            | NA                 |
| <i>Desi_wild_24535049</i> | NA                                  | <i>Ca_desi_denovo</i> | 24535049                | A/C  | NA                 | NA                            | NA                 |
| <i>Desi_wild_24542824</i> | NA                                  | <i>Ca_desi_denovo</i> | 24542824                | A/C  | NA                 | NA                            | NA                 |
| <i>Desi_wild_24543709</i> | NA                                  | <i>Ca_desi_denovo</i> | 24543709                | A/G  | NA                 | NA                            | NA                 |
| <i>Desi_wild_24543724</i> | NA                                  | <i>Ca_desi_denovo</i> | 24543724                | G/C  | NA                 | NA                            | NA                 |
| <i>Desi_wild_24544342</i> | NA                                  | <i>Ca_desi_denovo</i> | 24544342                | A/C  | NA                 | NA                            | NA                 |
| <i>Desi_wild_24544574</i> | NA                                  | <i>Ca_desi_denovo</i> | 24544574                | T/G  | NA                 | NA                            | NA                 |
| <i>Desi_wild_24544701</i> | NA                                  | <i>Ca_desi_denovo</i> | 24544701                | G/A  | NA                 | NA                            | NA                 |
| <i>Desi_wild_24548496</i> | NA                                  | <i>Ca_desi_denovo</i> | 24548496                | T/G  | NA                 | NA                            | NA                 |
| <i>Desi_wild_24551283</i> | NA                                  | <i>Ca_desi_denovo</i> | 24551283                | G/A  | NA                 | NA                            | NA                 |
| <i>Desi_wild_24554952</i> | NA                                  | <i>Ca_desi_denovo</i> | 24554952                | G/T  | NA                 | NA                            | NA                 |
| <i>Desi_wild_24557233</i> | NA                                  | <i>Ca_desi_denovo</i> | 24557233                | C/G  | NA                 | NA                            | NA                 |
| <i>Desi_wild_24557236</i> | NA                                  | <i>Ca_desi_denovo</i> | 24557236                | C/T  | NA                 | NA                            | NA                 |
| <i>Desi_wild_24562306</i> | NA                                  | <i>Ca_desi_denovo</i> | 24562306                | C/A  | NA                 | NA                            | NA                 |
| <i>Desi_wild_24564992</i> | NA                                  | <i>Ca_desi_denovo</i> | 24564992                | C/G  | NA                 | NA                            | NA                 |

| SNP IDs                   | NCBI dbSNP accession IDs (NCBI_SS#) | Chromosomes           | Physical positions (bp) | SNPs | Gene accession IDs | Sequence components of genome | Putative functions |
|---------------------------|-------------------------------------|-----------------------|-------------------------|------|--------------------|-------------------------------|--------------------|
| <i>Desi_wild_24565238</i> | NA                                  | <i>Ca_desi_denovo</i> | 24565238                | C/G  | NA                 | NA                            | NA                 |
| <i>Desi_wild_24578274</i> | NA                                  | <i>Ca_desi_denovo</i> | 24578274                | C/G  | NA                 | NA                            | NA                 |
| <i>Desi_wild_24578313</i> | NA                                  | <i>Ca_desi_denovo</i> | 24578313                | A/G  | NA                 | NA                            | NA                 |
| <i>Desi_wild_24578336</i> | NA                                  | <i>Ca_desi_denovo</i> | 24578336                | A/C  | NA                 | NA                            | NA                 |
| <i>Desi_wild_24578360</i> | NA                                  | <i>Ca_desi_denovo</i> | 24578360                | C/G  | NA                 | NA                            | NA                 |
| <i>Desi_wild_24579338</i> | NA                                  | <i>Ca_desi_denovo</i> | 24579338                | G/T  | NA                 | NA                            | NA                 |
| <i>Desi_wild_24580175</i> | NA                                  | <i>Ca_desi_denovo</i> | 24580175                | T/C  | NA                 | NA                            | NA                 |
| <i>Desi_wild_24580181</i> | NA                                  | <i>Ca_desi_denovo</i> | 24580181                | C/T  | NA                 | NA                            | NA                 |
| <i>Desi_wild_24580217</i> | NA                                  | <i>Ca_desi_denovo</i> | 24580217                | T/C  | NA                 | NA                            | NA                 |
| <i>Desi_wild_24585372</i> | NA                                  | <i>Ca_desi_denovo</i> | 24585372                | G/C  | NA                 | NA                            | NA                 |
| <i>Desi_wild_24585717</i> | NA                                  | <i>Ca_desi_denovo</i> | 24585717                | G/T  | NA                 | NA                            | NA                 |
| <i>Desi_wild_24587668</i> | NA                                  | <i>Ca_desi_denovo</i> | 24587668                | A/G  | NA                 | NA                            | NA                 |
| <i>Desi_wild_24587723</i> | NA                                  | <i>Ca_desi_denovo</i> | 24587723                | C/G  | NA                 | NA                            | NA                 |
| <i>Desi_wild_24587735</i> | NA                                  | <i>Ca_desi_denovo</i> | 24587735                | A/C  | NA                 | NA                            | NA                 |
| <i>Desi_wild_24588886</i> | NA                                  | <i>Ca_desi_denovo</i> | 24588886                | C/G  | NA                 | NA                            | NA                 |
| <i>Desi_wild_24590580</i> | NA                                  | <i>Ca_desi_denovo</i> | 24590580                | C/T  | NA                 | NA                            | NA                 |
| <i>Desi_wild_24592388</i> | NA                                  | <i>Ca_desi_denovo</i> | 24592388                | A/G  | NA                 | NA                            | NA                 |
| <i>Desi_wild_24592932</i> | NA                                  | <i>Ca_desi_denovo</i> | 24592932                | C/T  | NA                 | NA                            | NA                 |
| <i>Desi_wild_24592977</i> | NA                                  | <i>Ca_desi_denovo</i> | 24592977                | T/C  | NA                 | NA                            | NA                 |
| <i>Desi_wild_24593295</i> | NA                                  | <i>Ca_desi_denovo</i> | 24593295                | C/A  | NA                 | NA                            | NA                 |
| <i>Desi_wild_24599612</i> | NA                                  | <i>Ca_desi_denovo</i> | 24599612                | G/T  | NA                 | NA                            | NA                 |
| <i>Desi_wild_24602535</i> | NA                                  | <i>Ca_desi_denovo</i> | 24602535                | G/A  | NA                 | NA                            | NA                 |
| <i>Desi_wild_24605524</i> | NA                                  | <i>Ca_desi_denovo</i> | 24605524                | G/T  | NA                 | NA                            | NA                 |
| <i>Desi_wild_24605540</i> | NA                                  | <i>Ca_desi_denovo</i> | 24605540                | G/T  | NA                 | NA                            | NA                 |
| <i>Desi_wild_24610222</i> | NA                                  | <i>Ca_desi_denovo</i> | 24610222                | C/T  | NA                 | NA                            | NA                 |
| <i>Desi_wild_24611249</i> | NA                                  | <i>Ca_desi_denovo</i> | 24611249                | A/G  | NA                 | NA                            | NA                 |
| <i>Desi_wild_24612207</i> | NA                                  | <i>Ca_desi_denovo</i> | 24612207                | G/T  | NA                 | NA                            | NA                 |
| <i>Desi_wild_24617783</i> | NA                                  | <i>Ca_desi_denovo</i> | 24617783                | G/T  | NA                 | NA                            | NA                 |
| <i>Desi_wild_24620925</i> | NA                                  | <i>Ca_desi_denovo</i> | 24620925                | G/T  | NA                 | NA                            | NA                 |
| <i>Desi_wild_24625077</i> | NA                                  | <i>Ca_desi_denovo</i> | 24625077                | A/C  | NA                 | NA                            | NA                 |
| <i>Desi_wild_24628148</i> | NA                                  | <i>Ca_desi_denovo</i> | 24628148                | G/T  | NA                 | NA                            | NA                 |
| <i>Desi_wild_24640918</i> | NA                                  | <i>Ca_desi_denovo</i> | 24640918                | A/C  | NA                 | NA                            | NA                 |
| <i>Desi_wild_24640919</i> | NA                                  | <i>Ca_desi_denovo</i> | 24640919                | G/T  | NA                 | NA                            | NA                 |
| <i>Desi_wild_24643142</i> | NA                                  | <i>Ca_desi_denovo</i> | 24643142                | G/C  | NA                 | NA                            | NA                 |
| <i>Desi_wild_24643148</i> | NA                                  | <i>Ca_desi_denovo</i> | 24643148                | G/C  | NA                 | NA                            | NA                 |
| <i>Desi_wild_24647639</i> | NA                                  | <i>Ca_desi_denovo</i> | 24647639                | C/G  | NA                 | NA                            | NA                 |
| <i>Desi_wild_24653875</i> | NA                                  | <i>Ca_desi_denovo</i> | 24653875                | A/T  | NA                 | NA                            | NA                 |
| <i>Desi_wild_24674654</i> | NA                                  | <i>Ca_desi_denovo</i> | 24674654                | A/G  | NA                 | NA                            | NA                 |
| <i>Desi_wild_24683041</i> | NA                                  | <i>Ca_desi_denovo</i> | 24683041                | T/C  | NA                 | NA                            | NA                 |
| <i>Desi_wild_24683378</i> | NA                                  | <i>Ca_desi_denovo</i> | 24683378                | G/T  | NA                 | NA                            | NA                 |
| <i>Desi_wild_24683664</i> | NA                                  | <i>Ca_desi_denovo</i> | 24683664                | G/A  | NA                 | NA                            | NA                 |
| <i>Desi_wild_24683850</i> | NA                                  | <i>Ca_desi_denovo</i> | 24683850                | T/C  | NA                 | NA                            | NA                 |
| <i>Desi_wild_24684775</i> | NA                                  | <i>Ca_desi_denovo</i> | 24684775                | C/G  | NA                 | NA                            | NA                 |
| <i>Desi_wild_24687996</i> | NA                                  | <i>Ca_desi_denovo</i> | 24687996                | A/G  | NA                 | NA                            | NA                 |



| SNP IDs                   | NCBI dbSNP accession IDs (NCBI_SS#) | Chromosomes           | Physical positions (bp) | SNPs | Gene accession IDs | Sequence components of genome | Putative functions |
|---------------------------|-------------------------------------|-----------------------|-------------------------|------|--------------------|-------------------------------|--------------------|
| <i>Desi_wild_24688016</i> | NA                                  | <i>Ca_desi_denovo</i> | 24688016                | C/T  | NA                 | NA                            | NA                 |
| <i>Desi_wild_24700178</i> | NA                                  | <i>Ca_desi_denovo</i> | 24700178                | T/C  | NA                 | NA                            | NA                 |
| <i>Desi_wild_24703115</i> | NA                                  | <i>Ca_desi_denovo</i> | 24703115                | G/C  | NA                 | NA                            | NA                 |
| <i>Desi_wild_24703883</i> | NA                                  | <i>Ca_desi_denovo</i> | 24703883                | A/G  | NA                 | NA                            | NA                 |
| <i>Desi_wild_24703884</i> | NA                                  | <i>Ca_desi_denovo</i> | 24703884                | G/A  | NA                 | NA                            | NA                 |
| <i>Desi_wild_24703890</i> | NA                                  | <i>Ca_desi_denovo</i> | 24703890                | A/G  | NA                 | NA                            | NA                 |
| <i>Desi_wild_24705056</i> | NA                                  | <i>Ca_desi_denovo</i> | 24705056                | T/C  | NA                 | NA                            | NA                 |
| <i>Desi_wild_24705104</i> | NA                                  | <i>Ca_desi_denovo</i> | 24705104                | G/A  | NA                 | NA                            | NA                 |
| <i>Desi_wild_24705717</i> | NA                                  | <i>Ca_desi_denovo</i> | 24705717                | A/C  | NA                 | NA                            | NA                 |
| <i>Desi_wild_24714926</i> | NA                                  | <i>Ca_desi_denovo</i> | 24714926                | G/C  | NA                 | NA                            | NA                 |
| <i>Desi_wild_24721022</i> | NA                                  | <i>Ca_desi_denovo</i> | 24721022                | G/T  | NA                 | NA                            | NA                 |
| <i>Desi_wild_24721049</i> | NA                                  | <i>Ca_desi_denovo</i> | 24721049                | G/C  | NA                 | NA                            | NA                 |
| <i>Desi_wild_24721128</i> | NA                                  | <i>Ca_desi_denovo</i> | 24721128                | A/G  | NA                 | NA                            | NA                 |
| <i>Desi_wild_24721130</i> | NA                                  | <i>Ca_desi_denovo</i> | 24721130                | T/C  | NA                 | NA                            | NA                 |
| <i>Desi_wild_24724384</i> | NA                                  | <i>Ca_desi_denovo</i> | 24724384                | C/T  | NA                 | NA                            | NA                 |
| <i>Desi_wild_24724424</i> | NA                                  | <i>Ca_desi_denovo</i> | 24724424                | C/T  | NA                 | NA                            | NA                 |
| <i>Desi_wild_24735845</i> | NA                                  | <i>Ca_desi_denovo</i> | 24735845                | C/T  | NA                 | NA                            | NA                 |
| <i>Desi_wild_24741592</i> | NA                                  | <i>Ca_desi_denovo</i> | 24741592                | G/A  | NA                 | NA                            | NA                 |
| <i>Desi_wild_24745968</i> | NA                                  | <i>Ca_desi_denovo</i> | 24745968                | C/T  | NA                 | NA                            | NA                 |
| <i>Desi_wild_24746428</i> | NA                                  | <i>Ca_desi_denovo</i> | 24746428                | C/T  | NA                 | NA                            | NA                 |
| <i>Desi_wild_24746455</i> | NA                                  | <i>Ca_desi_denovo</i> | 24746455                | G/C  | NA                 | NA                            | NA                 |
| <i>Desi_wild_24748246</i> | NA                                  | <i>Ca_desi_denovo</i> | 24748246                | A/C  | NA                 | NA                            | NA                 |
| <i>Desi_wild_24748247</i> | NA                                  | <i>Ca_desi_denovo</i> | 24748247                | G/T  | NA                 | NA                            | NA                 |
| <i>Desi_wild_24749439</i> | NA                                  | <i>Ca_desi_denovo</i> | 24749439                | C/T  | NA                 | NA                            | NA                 |
| <i>Desi_wild_24750876</i> | NA                                  | <i>Ca_desi_denovo</i> | 24750876                | A/G  | NA                 | NA                            | NA                 |
| <i>Desi_wild_24752047</i> | NA                                  | <i>Ca_desi_denovo</i> | 24752047                | G/T  | NA                 | NA                            | NA                 |
| <i>Desi_wild_24763376</i> | NA                                  | <i>Ca_desi_denovo</i> | 24763376                | A/G  | NA                 | NA                            | NA                 |
| <i>Desi_wild_24763388</i> | NA                                  | <i>Ca_desi_denovo</i> | 24763388                | T/G  | NA                 | NA                            | NA                 |
| <i>Desi_wild_24766868</i> | NA                                  | <i>Ca_desi_denovo</i> | 24766868                | A/G  | NA                 | NA                            | NA                 |
| <i>Desi_wild_24766870</i> | NA                                  | <i>Ca_desi_denovo</i> | 24766870                | A/G  | NA                 | NA                            | NA                 |
| <i>Desi_wild_24773732</i> | NA                                  | <i>Ca_desi_denovo</i> | 24773732                | G/T  | NA                 | NA                            | NA                 |
| <i>Desi_wild_24779667</i> | NA                                  | <i>Ca_desi_denovo</i> | 24779667                | G/A  | NA                 | NA                            | NA                 |
| <i>Desi_wild_24779729</i> | NA                                  | <i>Ca_desi_denovo</i> | 24779729                | C/G  | NA                 | NA                            | NA                 |
| <i>Desi_wild_24780982</i> | NA                                  | <i>Ca_desi_denovo</i> | 24780982                | G/T  | NA                 | NA                            | NA                 |
| <i>Desi_wild_24784550</i> | NA                                  | <i>Ca_desi_denovo</i> | 24784550                | C/T  | NA                 | NA                            | NA                 |
| <i>Desi_wild_24785441</i> | NA                                  | <i>Ca_desi_denovo</i> | 24785441                | G/T  | NA                 | NA                            | NA                 |
| <i>Desi_wild_24786440</i> | NA                                  | <i>Ca_desi_denovo</i> | 24786440                | G/T  | NA                 | NA                            | NA                 |
| <i>Desi_wild_24786760</i> | NA                                  | <i>Ca_desi_denovo</i> | 24786760                | A/T  | NA                 | NA                            | NA                 |
| <i>Desi_wild_24786824</i> | NA                                  | <i>Ca_desi_denovo</i> | 24786824                | G/C  | NA                 | NA                            | NA                 |
| <i>Desi_wild_24786829</i> | NA                                  | <i>Ca_desi_denovo</i> | 24786829                | C/T  | NA                 | NA                            | NA                 |
| <i>Desi_wild_24793230</i> | NA                                  | <i>Ca_desi_denovo</i> | 24793230                | G/A  | NA                 | NA                            | NA                 |
| <i>Desi_wild_24793251</i> | NA                                  | <i>Ca_desi_denovo</i> | 24793251                | C/T  | NA                 | NA                            | NA                 |
| <i>Desi_wild_24800949</i> | NA                                  | <i>Ca_desi_denovo</i> | 24800949                | A/C  | NA                 | NA                            | NA                 |
| <i>Desi_wild_24801453</i> | NA                                  | <i>Ca_desi_denovo</i> | 24801453                | A/G  | NA                 | NA                            | NA                 |

| SNP IDs                   | NCBI dbSNP accession IDs (NCBI_SS#) | Chromosomes           | Physical positions (bp) | SNPs | Gene accession IDs | Sequence components of genome | Putative functions |
|---------------------------|-------------------------------------|-----------------------|-------------------------|------|--------------------|-------------------------------|--------------------|
| <i>Desi_wild_24804912</i> | NA                                  | <i>Ca_desi_denovo</i> | 24804912                | C/T  | NA                 | NA                            | NA                 |
| <i>Desi_wild_24804955</i> | NA                                  | <i>Ca_desi_denovo</i> | 24804955                | C/T  | NA                 | NA                            | NA                 |
| <i>Desi_wild_24807431</i> | NA                                  | <i>Ca_desi_denovo</i> | 24807431                | C/T  | NA                 | NA                            | NA                 |
| <i>Desi_wild_24807476</i> | NA                                  | <i>Ca_desi_denovo</i> | 24807476                | C/T  | NA                 | NA                            | NA                 |
| <i>Desi_wild_24807772</i> | NA                                  | <i>Ca_desi_denovo</i> | 24807772                | A/T  | NA                 | NA                            | NA                 |
| <i>Desi_wild_24807773</i> | NA                                  | <i>Ca_desi_denovo</i> | 24807773                | C/T  | NA                 | NA                            | NA                 |
| <i>Desi_wild_24810620</i> | NA                                  | <i>Ca_desi_denovo</i> | 24810620                | T/C  | NA                 | NA                            | NA                 |
| <i>Desi_wild_24810635</i> | NA                                  | <i>Ca_desi_denovo</i> | 24810635                | C/G  | NA                 | NA                            | NA                 |
| <i>Desi_wild_24817797</i> | NA                                  | <i>Ca_desi_denovo</i> | 24817797                | T/C  | NA                 | NA                            | NA                 |
| <i>Desi_wild_24818499</i> | NA                                  | <i>Ca_desi_denovo</i> | 24818499                | A/C  | NA                 | NA                            | NA                 |
| <i>Desi_wild_24818502</i> | NA                                  | <i>Ca_desi_denovo</i> | 24818502                | A/G  | NA                 | NA                            | NA                 |
| <i>Desi_wild_24824895</i> | NA                                  | <i>Ca_desi_denovo</i> | 24824895                | T/C  | NA                 | NA                            | NA                 |
| <i>Desi_wild_24830719</i> | NA                                  | <i>Ca_desi_denovo</i> | 24830719                | G/A  | NA                 | NA                            | NA                 |
| <i>Desi_wild_24830780</i> | NA                                  | <i>Ca_desi_denovo</i> | 24830780                | G/A  | NA                 | NA                            | NA                 |
| <i>Desi_wild_24838880</i> | NA                                  | <i>Ca_desi_denovo</i> | 24838880                | C/G  | NA                 | NA                            | NA                 |
| <i>Desi_wild_24838883</i> | NA                                  | <i>Ca_desi_denovo</i> | 24838883                | C/G  | NA                 | NA                            | NA                 |
| <i>Desi_wild_24845628</i> | NA                                  | <i>Ca_desi_denovo</i> | 24845628                | C/T  | NA                 | NA                            | NA                 |
| <i>Desi_wild_24847712</i> | NA                                  | <i>Ca_desi_denovo</i> | 24847712                | T/C  | NA                 | NA                            | NA                 |
| <i>Desi_wild_24847757</i> | NA                                  | <i>Ca_desi_denovo</i> | 24847757                | T/C  | NA                 | NA                            | NA                 |
| <i>Desi_wild_24849275</i> | NA                                  | <i>Ca_desi_denovo</i> | 24849275                | A/G  | NA                 | NA                            | NA                 |
| <i>Desi_wild_24850303</i> | NA                                  | <i>Ca_desi_denovo</i> | 24850303                | T/G  | NA                 | NA                            | NA                 |
| <i>Desi_wild_24850327</i> | NA                                  | <i>Ca_desi_denovo</i> | 24850327                | C/T  | NA                 | NA                            | NA                 |
| <i>Desi_wild_24854025</i> | NA                                  | <i>Ca_desi_denovo</i> | 24854025                | T/C  | NA                 | NA                            | NA                 |
| <i>Desi_wild_24856261</i> | NA                                  | <i>Ca_desi_denovo</i> | 24856261                | C/T  | NA                 | NA                            | NA                 |
| <i>Desi_wild_24856282</i> | NA                                  | <i>Ca_desi_denovo</i> | 24856282                | G/C  | NA                 | NA                            | NA                 |
| <i>Desi_wild_24856285</i> | NA                                  | <i>Ca_desi_denovo</i> | 24856285                | G/C  | NA                 | NA                            | NA                 |
| <i>Desi_wild_24856328</i> | NA                                  | <i>Ca_desi_denovo</i> | 24856328                | T/G  | NA                 | NA                            | NA                 |
| <i>Desi_wild_24857111</i> | NA                                  | <i>Ca_desi_denovo</i> | 24857111                | A/C  | NA                 | NA                            | NA                 |
| <i>Desi_wild_24857909</i> | NA                                  | <i>Ca_desi_denovo</i> | 24857909                | A/G  | NA                 | NA                            | NA                 |
| <i>Desi_wild_24857948</i> | NA                                  | <i>Ca_desi_denovo</i> | 24857948                | A/G  | NA                 | NA                            | NA                 |
| <i>Desi_wild_24859230</i> | NA                                  | <i>Ca_desi_denovo</i> | 24859230                | A/G  | NA                 | NA                            | NA                 |
| <i>Desi_wild_24859272</i> | NA                                  | <i>Ca_desi_denovo</i> | 24859272                | C/T  | NA                 | NA                            | NA                 |
| <i>Desi_wild_24862790</i> | NA                                  | <i>Ca_desi_denovo</i> | 24862790                | A/T  | NA                 | NA                            | NA                 |
| <i>Desi_wild_24863638</i> | NA                                  | <i>Ca_desi_denovo</i> | 24863638                | A/C  | NA                 | NA                            | NA                 |
| <i>Desi_wild_24868087</i> | NA                                  | <i>Ca_desi_denovo</i> | 24868087                | T/C  | NA                 | NA                            | NA                 |
| <i>Desi_wild_24868682</i> | NA                                  | <i>Ca_desi_denovo</i> | 24868682                | G/T  | NA                 | NA                            | NA                 |
| <i>Desi_wild_24871528</i> | NA                                  | <i>Ca_desi_denovo</i> | 24871528                | C/T  | NA                 | NA                            | NA                 |
| <i>Desi_wild_24876322</i> | NA                                  | <i>Ca_desi_denovo</i> | 24876322                | G/C  | NA                 | NA                            | NA                 |
| <i>Desi_wild_24876355</i> | NA                                  | <i>Ca_desi_denovo</i> | 24876355                | C/T  | NA                 | NA                            | NA                 |
| <i>Desi_wild_24878310</i> | NA                                  | <i>Ca_desi_denovo</i> | 24878310                | A/G  | NA                 | NA                            | NA                 |
| <i>Desi_wild_24880463</i> | NA                                  | <i>Ca_desi_denovo</i> | 24880463                | C/A  | NA                 | NA                            | NA                 |
| <i>Desi_wild_24880469</i> | NA                                  | <i>Ca_desi_denovo</i> | 24880469                | G/C  | NA                 | NA                            | NA                 |
| <i>Desi_wild_24882998</i> | NA                                  | <i>Ca_desi_denovo</i> | 24882998                | A/G  | NA                 | NA                            | NA                 |
| <i>Desi_wild_24883012</i> | NA                                  | <i>Ca_desi_denovo</i> | 24883012                | T/C  | NA                 | NA                            | NA                 |

| SNP IDs                   | NCBI dbSNP accession IDs (NCBI_SS#) | Chromosomes           | Physical positions (bp) | SNPs | Gene accession IDs | Sequence components of genome | Putative functions |
|---------------------------|-------------------------------------|-----------------------|-------------------------|------|--------------------|-------------------------------|--------------------|
| <i>Desi_wild_24885983</i> | NA                                  | <i>Ca_desi_denovo</i> | 24885983                | G/T  | NA                 | NA                            | NA                 |
| <i>Desi_wild_24888160</i> | NA                                  | <i>Ca_desi_denovo</i> | 24888160                | A/G  | NA                 | NA                            | NA                 |
| <i>Desi_wild_24888543</i> | NA                                  | <i>Ca_desi_denovo</i> | 24888543                | G/C  | NA                 | NA                            | NA                 |
| <i>Desi_wild_24888552</i> | NA                                  | <i>Ca_desi_denovo</i> | 24888552                | G/A  | NA                 | NA                            | NA                 |
| <i>Desi_wild_24891589</i> | NA                                  | <i>Ca_desi_denovo</i> | 24891589                | T/C  | NA                 | NA                            | NA                 |
| <i>Desi_wild_24891596</i> | NA                                  | <i>Ca_desi_denovo</i> | 24891596                | C/T  | NA                 | NA                            | NA                 |
| <i>Desi_wild_24897725</i> | NA                                  | <i>Ca_desi_denovo</i> | 24897725                | T/C  | NA                 | NA                            | NA                 |
| <i>Desi_wild_24897809</i> | NA                                  | <i>Ca_desi_denovo</i> | 24897809                | C/G  | NA                 | NA                            | NA                 |
| <i>Desi_wild_24922122</i> | NA                                  | <i>Ca_desi_denovo</i> | 24922122                | G/A  | NA                 | NA                            | NA                 |
| <i>Desi_wild_24924095</i> | NA                                  | <i>Ca_desi_denovo</i> | 24924095                | A/G  | NA                 | NA                            | NA                 |
| <i>Desi_wild_24924110</i> | NA                                  | <i>Ca_desi_denovo</i> | 24924110                | C/T  | NA                 | NA                            | NA                 |
| <i>Desi_wild_24925006</i> | NA                                  | <i>Ca_desi_denovo</i> | 24925006                | C/T  | NA                 | NA                            | NA                 |
| <i>Desi_wild_24925016</i> | NA                                  | <i>Ca_desi_denovo</i> | 24925016                | A/G  | NA                 | NA                            | NA                 |
| <i>Desi_wild_24926321</i> | NA                                  | <i>Ca_desi_denovo</i> | 24926321                | C/G  | NA                 | NA                            | NA                 |
| <i>Desi_wild_24933511</i> | NA                                  | <i>Ca_desi_denovo</i> | 24933511                | C/T  | NA                 | NA                            | NA                 |
| <i>Desi_wild_24934467</i> | NA                                  | <i>Ca_desi_denovo</i> | 24934467                | G/T  | NA                 | NA                            | NA                 |
| <i>Desi_wild_24950128</i> | NA                                  | <i>Ca_desi_denovo</i> | 24950128                | G/T  | NA                 | NA                            | NA                 |
| <i>Desi_wild_24950739</i> | NA                                  | <i>Ca_desi_denovo</i> | 24950739                | C/T  | NA                 | NA                            | NA                 |
| <i>Desi_wild_24950759</i> | NA                                  | <i>Ca_desi_denovo</i> | 24950759                | C/T  | NA                 | NA                            | NA                 |
| <i>Desi_wild_24958105</i> | NA                                  | <i>Ca_desi_denovo</i> | 24958105                | T/A  | NA                 | NA                            | NA                 |
| <i>Desi_wild_24958685</i> | NA                                  | <i>Ca_desi_denovo</i> | 24958685                | C/A  | NA                 | NA                            | NA                 |
| <i>Desi_wild_24970631</i> | NA                                  | <i>Ca_desi_denovo</i> | 24970631                | G/A  | NA                 | NA                            | NA                 |
| <i>Desi_wild_24970664</i> | NA                                  | <i>Ca_desi_denovo</i> | 24970664                | G/T  | NA                 | NA                            | NA                 |
| <i>Desi_wild_24976181</i> | NA                                  | <i>Ca_desi_denovo</i> | 24976181                | T/C  | NA                 | NA                            | NA                 |
| <i>Desi_wild_24976184</i> | NA                                  | <i>Ca_desi_denovo</i> | 24976184                | C/T  | NA                 | NA                            | NA                 |
| <i>Desi_wild_24977241</i> | NA                                  | <i>Ca_desi_denovo</i> | 24977241                | T/C  | NA                 | NA                            | NA                 |
| <i>Desi_wild_24978582</i> | NA                                  | <i>Ca_desi_denovo</i> | 24978582                | C/T  | NA                 | NA                            | NA                 |
| <i>Desi_wild_24979812</i> | NA                                  | <i>Ca_desi_denovo</i> | 24979812                | T/C  | NA                 | NA                            | NA                 |
| <i>Desi_wild_24979848</i> | NA                                  | <i>Ca_desi_denovo</i> | 24979848                | G/A  | NA                 | NA                            | NA                 |
| <i>Desi_wild_24985004</i> | NA                                  | <i>Ca_desi_denovo</i> | 24985004                | A/G  | NA                 | NA                            | NA                 |
| <i>Desi_wild_24992142</i> | NA                                  | <i>Ca_desi_denovo</i> | 24992142                | C/T  | NA                 | NA                            | NA                 |
| <i>Desi_wild_24994052</i> | NA                                  | <i>Ca_desi_denovo</i> | 24994052                | G/C  | NA                 | NA                            | NA                 |
| <i>Desi_wild_24995062</i> | NA                                  | <i>Ca_desi_denovo</i> | 24995062                | G/T  | NA                 | NA                            | NA                 |
| <i>Desi_wild_24996230</i> | NA                                  | <i>Ca_desi_denovo</i> | 24996230                | C/G  | NA                 | NA                            | NA                 |
| <i>Desi_wild_24996257</i> | NA                                  | <i>Ca_desi_denovo</i> | 24996257                | G/A  | NA                 | NA                            | NA                 |
| <i>Desi_wild_24998039</i> | NA                                  | <i>Ca_desi_denovo</i> | 24998039                | G/T  | NA                 | NA                            | NA                 |
| <i>Desi_wild_24999783</i> | NA                                  | <i>Ca_desi_denovo</i> | 24999783                | C/G  | NA                 | NA                            | NA                 |
| <i>Desi_wild_25008796</i> | NA                                  | <i>Ca_desi_denovo</i> | 25008796                | G/C  | NA                 | NA                            | NA                 |
| <i>Desi_wild_25009620</i> | NA                                  | <i>Ca_desi_denovo</i> | 25009620                | A/T  | NA                 | NA                            | NA                 |
| <i>Desi_wild_25012053</i> | NA                                  | <i>Ca_desi_denovo</i> | 25012053                | A/C  | NA                 | NA                            | NA                 |
| <i>Desi_wild_25012055</i> | NA                                  | <i>Ca_desi_denovo</i> | 25012055                | A/G  | NA                 | NA                            | NA                 |
| <i>Desi_wild_25013825</i> | NA                                  | <i>Ca_desi_denovo</i> | 25013825                | C/T  | NA                 | NA                            | NA                 |
| <i>Desi_wild_25014498</i> | NA                                  | <i>Ca_desi_denovo</i> | 25014498                | T/C  | NA                 | NA                            | NA                 |
| <i>Desi_wild_25014516</i> | NA                                  | <i>Ca_desi_denovo</i> | 25014516                | G/C  | NA                 | NA                            | NA                 |

| SNP IDs                   | NCBI dbSNP accession IDs (NCBI_SS#) | Chromosomes           | Physical positions (bp) | SNPs | Gene accession IDs | Sequence components of genome | Putative functions |
|---------------------------|-------------------------------------|-----------------------|-------------------------|------|--------------------|-------------------------------|--------------------|
| <i>Desi_wild_25014867</i> | NA                                  | <i>Ca_desi_denovo</i> | 25014867                | G/C  | NA                 | NA                            | NA                 |
| <i>Desi_wild_25014880</i> | NA                                  | <i>Ca_desi_denovo</i> | 25014880                | T/C  | NA                 | NA                            | NA                 |
| <i>Desi_wild_25016278</i> | NA                                  | <i>Ca_desi_denovo</i> | 25016278                | A/C  | NA                 | NA                            | NA                 |
| <i>Desi_wild_25022648</i> | NA                                  | <i>Ca_desi_denovo</i> | 25022648                | C/T  | NA                 | NA                            | NA                 |
| <i>Desi_wild_25022681</i> | NA                                  | <i>Ca_desi_denovo</i> | 25022681                | G/C  | NA                 | NA                            | NA                 |
| <i>Desi_wild_25026411</i> | NA                                  | <i>Ca_desi_denovo</i> | 25026411                | T/G  | NA                 | NA                            | NA                 |
| <i>Desi_wild_25029617</i> | NA                                  | <i>Ca_desi_denovo</i> | 25029617                | A/G  | NA                 | NA                            | NA                 |
| <i>Desi_wild_25032239</i> | NA                                  | <i>Ca_desi_denovo</i> | 25032239                | T/C  | NA                 | NA                            | NA                 |
| <i>Desi_wild_25033523</i> | NA                                  | <i>Ca_desi_denovo</i> | 25033523                | T/A  | NA                 | NA                            | NA                 |
| <i>Desi_wild_25033532</i> | NA                                  | <i>Ca_desi_denovo</i> | 25033532                | T/C  | NA                 | NA                            | NA                 |
| <i>Desi_wild_25035309</i> | NA                                  | <i>Ca_desi_denovo</i> | 25035309                | A/G  | NA                 | NA                            | NA                 |
| <i>Desi_wild_25035488</i> | NA                                  | <i>Ca_desi_denovo</i> | 25035488                | C/G  | NA                 | NA                            | NA                 |
| <i>Desi_wild_25036926</i> | NA                                  | <i>Ca_desi_denovo</i> | 25036926                | A/G  | NA                 | NA                            | NA                 |
| <i>Desi_wild_25036956</i> | NA                                  | <i>Ca_desi_denovo</i> | 25036956                | A/T  | NA                 | NA                            | NA                 |
| <i>Desi_wild_25040467</i> | NA                                  | <i>Ca_desi_denovo</i> | 25040467                | G/T  | NA                 | NA                            | NA                 |
| <i>Desi_wild_25043639</i> | NA                                  | <i>Ca_desi_denovo</i> | 25043639                | G/T  | NA                 | NA                            | NA                 |
| <i>Desi_wild_25051262</i> | NA                                  | <i>Ca_desi_denovo</i> | 25051262                | C/A  | NA                 | NA                            | NA                 |
| <i>Desi_wild_25061494</i> | NA                                  | <i>Ca_desi_denovo</i> | 25061494                | A/C  | NA                 | NA                            | NA                 |
| <i>Desi_wild_25061495</i> | NA                                  | <i>Ca_desi_denovo</i> | 25061495                | G/T  | NA                 | NA                            | NA                 |
| <i>Desi_wild_25064708</i> | NA                                  | <i>Ca_desi_denovo</i> | 25064708                | G/C  | NA                 | NA                            | NA                 |
| <i>Desi_wild_25066307</i> | NA                                  | <i>Ca_desi_denovo</i> | 25066307                | T/C  | NA                 | NA                            | NA                 |
| <i>Desi_wild_25066316</i> | NA                                  | <i>Ca_desi_denovo</i> | 25066316                | G/C  | NA                 | NA                            | NA                 |
| <i>Desi_wild_25086296</i> | NA                                  | <i>Ca_desi_denovo</i> | 25086296                | G/C  | NA                 | NA                            | NA                 |
| <i>Desi_wild_25088781</i> | NA                                  | <i>Ca_desi_denovo</i> | 25088781                | G/C  | NA                 | NA                            | NA                 |
| <i>Desi_wild_25089438</i> | NA                                  | <i>Ca_desi_denovo</i> | 25089438                | A/G  | NA                 | NA                            | NA                 |
| <i>Desi_wild_25089459</i> | NA                                  | <i>Ca_desi_denovo</i> | 25089459                | A/G  | NA                 | NA                            | NA                 |
| <i>Desi_wild_25094519</i> | NA                                  | <i>Ca_desi_denovo</i> | 25094519                | G/T  | NA                 | NA                            | NA                 |
| <i>Desi_wild_25098798</i> | NA                                  | <i>Ca_desi_denovo</i> | 25098798                | T/C  | NA                 | NA                            | NA                 |
| <i>Desi_wild_25104268</i> | NA                                  | <i>Ca_desi_denovo</i> | 25104268                | A/G  | NA                 | NA                            | NA                 |
| <i>Desi_wild_25104680</i> | NA                                  | <i>Ca_desi_denovo</i> | 25104680                | G/A  | NA                 | NA                            | NA                 |
| <i>Desi_wild_25104684</i> | NA                                  | <i>Ca_desi_denovo</i> | 25104684                | A/G  | NA                 | NA                            | NA                 |
| <i>Desi_wild_25105723</i> | NA                                  | <i>Ca_desi_denovo</i> | 25105723                | C/T  | NA                 | NA                            | NA                 |
| <i>Desi_wild_25105747</i> | NA                                  | <i>Ca_desi_denovo</i> | 25105747                | G/A  | NA                 | NA                            | NA                 |
| <i>Desi_wild_25105974</i> | NA                                  | <i>Ca_desi_denovo</i> | 25105974                | T/C  | NA                 | NA                            | NA                 |
| <i>Desi_wild_25112139</i> | NA                                  | <i>Ca_desi_denovo</i> | 25112139                | A/T  | NA                 | NA                            | NA                 |
| <i>Desi_wild_25114944</i> | NA                                  | <i>Ca_desi_denovo</i> | 25114944                | A/G  | NA                 | NA                            | NA                 |
| <i>Desi_wild_25117418</i> | NA                                  | <i>Ca_desi_denovo</i> | 25117418                | G/C  | NA                 | NA                            | NA                 |
| <i>Desi_wild_25117447</i> | NA                                  | <i>Ca_desi_denovo</i> | 25117447                | A/T  | NA                 | NA                            | NA                 |
| <i>Desi_wild_25118655</i> | NA                                  | <i>Ca_desi_denovo</i> | 25118655                | G/A  | NA                 | NA                            | NA                 |
| <i>Desi_wild_25121886</i> | NA                                  | <i>Ca_desi_denovo</i> | 25121886                | A/G  | NA                 | NA                            | NA                 |
| <i>Desi_wild_25121901</i> | NA                                  | <i>Ca_desi_denovo</i> | 25121901                | C/A  | NA                 | NA                            | NA                 |
| <i>Desi_wild_25124689</i> | NA                                  | <i>Ca_desi_denovo</i> | 25124689                | G/C  | NA                 | NA                            | NA                 |
| <i>Desi_wild_25124734</i> | NA                                  | <i>Ca_desi_denovo</i> | 25124734                | G/C  | NA                 | NA                            | NA                 |
| <i>Desi_wild_25128882</i> | NA                                  | <i>Ca_desi_denovo</i> | 25128882                | G/T  | NA                 | NA                            | NA                 |

| SNP IDs                   | NCBI dbSNP accession IDs (NCBI_SS#) | Chromosomes           | Physical positions (bp) | SNPs | Gene accession IDs | Sequence components of genome | Putative functions |
|---------------------------|-------------------------------------|-----------------------|-------------------------|------|--------------------|-------------------------------|--------------------|
| <i>Desi_wild_25130430</i> | NA                                  | <i>Ca_desi_denovo</i> | 25130430                | C/T  | NA                 | NA                            | NA                 |
| <i>Desi_wild_25136081</i> | NA                                  | <i>Ca_desi_denovo</i> | 25136081                | A/G  | NA                 | NA                            | NA                 |
| <i>Desi_wild_25139753</i> | NA                                  | <i>Ca_desi_denovo</i> | 25139753                | T/A  | NA                 | NA                            | NA                 |
| <i>Desi_wild_25139818</i> | NA                                  | <i>Ca_desi_denovo</i> | 25139818                | G/A  | NA                 | NA                            | NA                 |
| <i>Desi_wild_25150676</i> | NA                                  | <i>Ca_desi_denovo</i> | 25150676                | G/T  | NA                 | NA                            | NA                 |
| <i>Desi_wild_25156869</i> | NA                                  | <i>Ca_desi_denovo</i> | 25156869                | C/T  | NA                 | NA                            | NA                 |
| <i>Desi_wild_25156919</i> | NA                                  | <i>Ca_desi_denovo</i> | 25156919                | C/G  | NA                 | NA                            | NA                 |
| <i>Desi_wild_25158343</i> | NA                                  | <i>Ca_desi_denovo</i> | 25158343                | G/T  | NA                 | NA                            | NA                 |
| <i>Desi_wild_25167361</i> | NA                                  | <i>Ca_desi_denovo</i> | 25167361                | C/T  | NA                 | NA                            | NA                 |
| <i>Desi_wild_25172399</i> | NA                                  | <i>Ca_desi_denovo</i> | 25172399                | G/T  | NA                 | NA                            | NA                 |
| <i>Desi_wild_25172421</i> | NA                                  | <i>Ca_desi_denovo</i> | 25172421                | G/T  | NA                 | NA                            | NA                 |
| <i>Desi_wild_25172453</i> | NA                                  | <i>Ca_desi_denovo</i> | 25172453                | G/T  | NA                 | NA                            | NA                 |
| <i>Desi_wild_25175097</i> | NA                                  | <i>Ca_desi_denovo</i> | 25175097                | C/G  | NA                 | NA                            | NA                 |
| <i>Desi_wild_25184844</i> | NA                                  | <i>Ca_desi_denovo</i> | 25184844                | T/C  | NA                 | NA                            | NA                 |
| <i>Desi_wild_25187574</i> | NA                                  | <i>Ca_desi_denovo</i> | 25187574                | C/T  | NA                 | NA                            | NA                 |
| <i>Desi_wild_25187586</i> | NA                                  | <i>Ca_desi_denovo</i> | 25187586                | G/T  | NA                 | NA                            | NA                 |
| <i>Desi_wild_25191095</i> | NA                                  | <i>Ca_desi_denovo</i> | 25191095                | G/T  | NA                 | NA                            | NA                 |
| <i>Desi_wild_25194927</i> | NA                                  | <i>Ca_desi_denovo</i> | 25194927                | T/G  | NA                 | NA                            | NA                 |
| <i>Desi_wild_25201019</i> | NA                                  | <i>Ca_desi_denovo</i> | 25201019                | G/T  | NA                 | NA                            | NA                 |
| <i>Desi_wild_25202586</i> | NA                                  | <i>Ca_desi_denovo</i> | 25202586                | C/T  | NA                 | NA                            | NA                 |
| <i>Desi_wild_25206586</i> | NA                                  | <i>Ca_desi_denovo</i> | 25206586                | A/T  | NA                 | NA                            | NA                 |
| <i>Desi_wild_25206591</i> | NA                                  | <i>Ca_desi_denovo</i> | 25206591                | A/C  | NA                 | NA                            | NA                 |
| <i>Desi_wild_25207105</i> | NA                                  | <i>Ca_desi_denovo</i> | 25207105                | C/A  | NA                 | NA                            | NA                 |
| <i>Desi_wild_25208101</i> | NA                                  | <i>Ca_desi_denovo</i> | 25208101                | A/C  | NA                 | NA                            | NA                 |
| <i>Desi_wild_25213088</i> | NA                                  | <i>Ca_desi_denovo</i> | 25213088                | A/G  | NA                 | NA                            | NA                 |
| <i>Desi_wild_25213137</i> | NA                                  | <i>Ca_desi_denovo</i> | 25213137                | T/G  | NA                 | NA                            | NA                 |
| <i>Desi_wild_25213295</i> | NA                                  | <i>Ca_desi_denovo</i> | 25213295                | A/T  | NA                 | NA                            | NA                 |
| <i>Desi_wild_25214805</i> | NA                                  | <i>Ca_desi_denovo</i> | 25214805                | G/T  | NA                 | NA                            | NA                 |
| <i>Desi_wild_25217399</i> | NA                                  | <i>Ca_desi_denovo</i> | 25217399                | A/C  | NA                 | NA                            | NA                 |
| <i>Desi_wild_25218455</i> | NA                                  | <i>Ca_desi_denovo</i> | 25218455                | A/C  | NA                 | NA                            | NA                 |
| <i>Desi_wild_25220884</i> | NA                                  | <i>Ca_desi_denovo</i> | 25220884                | T/C  | NA                 | NA                            | NA                 |
| <i>Desi_wild_25222903</i> | NA                                  | <i>Ca_desi_denovo</i> | 25222903                | T/G  | NA                 | NA                            | NA                 |
| <i>Desi_wild_25224164</i> | NA                                  | <i>Ca_desi_denovo</i> | 25224164                | C/A  | NA                 | NA                            | NA                 |
| <i>Desi_wild_25224183</i> | NA                                  | <i>Ca_desi_denovo</i> | 25224183                | A/G  | NA                 | NA                            | NA                 |
| <i>Desi_wild_25224878</i> | NA                                  | <i>Ca_desi_denovo</i> | 25224878                | T/A  | NA                 | NA                            | NA                 |
| <i>Desi_wild_25226948</i> | NA                                  | <i>Ca_desi_denovo</i> | 25226948                | G/T  | NA                 | NA                            | NA                 |
| <i>Desi_wild_25229295</i> | NA                                  | <i>Ca_desi_denovo</i> | 25229295                | G/T  | NA                 | NA                            | NA                 |
| <i>Desi_wild_25243912</i> | NA                                  | <i>Ca_desi_denovo</i> | 25243912                | G/A  | NA                 | NA                            | NA                 |
| <i>Desi_wild_25243918</i> | NA                                  | <i>Ca_desi_denovo</i> | 25243918                | T/C  | NA                 | NA                            | NA                 |
| <i>Desi_wild_25244220</i> | NA                                  | <i>Ca_desi_denovo</i> | 25244220                | G/T  | NA                 | NA                            | NA                 |
| <i>Desi_wild_25244247</i> | NA                                  | <i>Ca_desi_denovo</i> | 25244247                | C/T  | NA                 | NA                            | NA                 |
| <i>Desi_wild_25244259</i> | NA                                  | <i>Ca_desi_denovo</i> | 25244259                | G/A  | NA                 | NA                            | NA                 |
| <i>Desi_wild_25246963</i> | NA                                  | <i>Ca_desi_denovo</i> | 25246963                | T/G  | NA                 | NA                            | NA                 |
| <i>Desi_wild_25248032</i> | NA                                  | <i>Ca_desi_denovo</i> | 25248032                | T/C  | NA                 | NA                            | NA                 |

| SNP IDs                   | NCBI dbSNP accession IDs (NCBI_SS#) | Chromosomes           | Physical positions (bp) | SNPs | Gene accession IDs | Sequence components of genome | Putative functions |
|---------------------------|-------------------------------------|-----------------------|-------------------------|------|--------------------|-------------------------------|--------------------|
| <i>Desi_wild_25248311</i> | NA                                  | <i>Ca_desi_denovo</i> | 25248311                | C/T  | NA                 | NA                            | NA                 |
| <i>Desi_wild_25250253</i> | NA                                  | <i>Ca_desi_denovo</i> | 25250253                | A/G  | NA                 | NA                            | NA                 |
| <i>Desi_wild_25250281</i> | NA                                  | <i>Ca_desi_denovo</i> | 25250281                | T/G  | NA                 | NA                            | NA                 |
| <i>Desi_wild_25252725</i> | NA                                  | <i>Ca_desi_denovo</i> | 25252725                | A/C  | NA                 | NA                            | NA                 |
| <i>Desi_wild_25254132</i> | NA                                  | <i>Ca_desi_denovo</i> | 25254132                | C/G  | NA                 | NA                            | NA                 |
| <i>Desi_wild_25254152</i> | NA                                  | <i>Ca_desi_denovo</i> | 25254152                | G/T  | NA                 | NA                            | NA                 |
| <i>Desi_wild_25256097</i> | NA                                  | <i>Ca_desi_denovo</i> | 25256097                | C/T  | NA                 | NA                            | NA                 |
| <i>Desi_wild_25257001</i> | NA                                  | <i>Ca_desi_denovo</i> | 25257001                | C/G  | NA                 | NA                            | NA                 |
| <i>Desi_wild_25257022</i> | NA                                  | <i>Ca_desi_denovo</i> | 25257022                | A/G  | NA                 | NA                            | NA                 |
| <i>Desi_wild_25257536</i> | NA                                  | <i>Ca_desi_denovo</i> | 25257536                | T/G  | NA                 | NA                            | NA                 |
| <i>Desi_wild_25257594</i> | NA                                  | <i>Ca_desi_denovo</i> | 25257594                | G/C  | NA                 | NA                            | NA                 |
| <i>Desi_wild_25261013</i> | NA                                  | <i>Ca_desi_denovo</i> | 25261013                | A/T  | NA                 | NA                            | NA                 |
| <i>Desi_wild_25261049</i> | NA                                  | <i>Ca_desi_denovo</i> | 25261049                | G/A  | NA                 | NA                            | NA                 |
| <i>Desi_wild_25261555</i> | NA                                  | <i>Ca_desi_denovo</i> | 25261555                | A/C  | NA                 | NA                            | NA                 |
| <i>Desi_wild_25261557</i> | NA                                  | <i>Ca_desi_denovo</i> | 25261557                | A/G  | NA                 | NA                            | NA                 |
| <i>Desi_wild_25262701</i> | NA                                  | <i>Ca_desi_denovo</i> | 25262701                | G/T  | NA                 | NA                            | NA                 |
| <i>Desi_wild_25279950</i> | NA                                  | <i>Ca_desi_denovo</i> | 25279950                | G/C  | NA                 | NA                            | NA                 |
| <i>Desi_wild_25283059</i> | NA                                  | <i>Ca_desi_denovo</i> | 25283059                | G/T  | NA                 | NA                            | NA                 |
| <i>Desi_wild_25285786</i> | NA                                  | <i>Ca_desi_denovo</i> | 25285786                | T/G  | NA                 | NA                            | NA                 |
| <i>Desi_wild_25285810</i> | NA                                  | <i>Ca_desi_denovo</i> | 25285810                | T/G  | NA                 | NA                            | NA                 |
| <i>Desi_wild_25293478</i> | NA                                  | <i>Ca_desi_denovo</i> | 25293478                | G/T  | NA                 | NA                            | NA                 |
| <i>Desi_wild_25294235</i> | NA                                  | <i>Ca_desi_denovo</i> | 25294235                | C/T  | NA                 | NA                            | NA                 |
| <i>Desi_wild_25301385</i> | NA                                  | <i>Ca_desi_denovo</i> | 25301385                | A/G  | NA                 | NA                            | NA                 |
| <i>Desi_wild_25301394</i> | NA                                  | <i>Ca_desi_denovo</i> | 25301394                | C/G  | NA                 | NA                            | NA                 |
| <i>Desi_wild_25301884</i> | NA                                  | <i>Ca_desi_denovo</i> | 25301884                | A/G  | NA                 | NA                            | NA                 |
| <i>Desi_wild_25308983</i> | NA                                  | <i>Ca_desi_denovo</i> | 25308983                | A/C  | NA                 | NA                            | NA                 |
| <i>Desi_wild_25309117</i> | NA                                  | <i>Ca_desi_denovo</i> | 25309117                | C/T  | NA                 | NA                            | NA                 |
| <i>Desi_wild_25310176</i> | NA                                  | <i>Ca_desi_denovo</i> | 25310176                | T/G  | NA                 | NA                            | NA                 |
| <i>Desi_wild_25312958</i> | NA                                  | <i>Ca_desi_denovo</i> | 25312958                | C/T  | NA                 | NA                            | NA                 |
| <i>Desi_wild_25312959</i> | NA                                  | <i>Ca_desi_denovo</i> | 25312959                | A/G  | NA                 | NA                            | NA                 |
| <i>Desi_wild_25313396</i> | NA                                  | <i>Ca_desi_denovo</i> | 25313396                | A/C  | NA                 | NA                            | NA                 |
| <i>Desi_wild_25314741</i> | NA                                  | <i>Ca_desi_denovo</i> | 25314741                | A/C  | NA                 | NA                            | NA                 |
| <i>Desi_wild_25317887</i> | NA                                  | <i>Ca_desi_denovo</i> | 25317887                | C/A  | NA                 | NA                            | NA                 |
| <i>Desi_wild_25321741</i> | NA                                  | <i>Ca_desi_denovo</i> | 25321741                | G/T  | NA                 | NA                            | NA                 |
| <i>Desi_wild_25322776</i> | NA                                  | <i>Ca_desi_denovo</i> | 25322776                | G/A  | NA                 | NA                            | NA                 |
| <i>Desi_wild_25325118</i> | NA                                  | <i>Ca_desi_denovo</i> | 25325118                | A/G  | NA                 | NA                            | NA                 |
| <i>Desi_wild_25325199</i> | NA                                  | <i>Ca_desi_denovo</i> | 25325199                | C/T  | NA                 | NA                            | NA                 |
| <i>Desi_wild_25328660</i> | NA                                  | <i>Ca_desi_denovo</i> | 25328660                | A/C  | NA                 | NA                            | NA                 |
| <i>Desi_wild_25328663</i> | NA                                  | <i>Ca_desi_denovo</i> | 25328663                | A/T  | NA                 | NA                            | NA                 |
| <i>Desi_wild_25329815</i> | NA                                  | <i>Ca_desi_denovo</i> | 25329815                | A/C  | NA                 | NA                            | NA                 |
| <i>Desi_wild_25332278</i> | NA                                  | <i>Ca_desi_denovo</i> | 25332278                | C/T  | NA                 | NA                            | NA                 |
| <i>Desi_wild_25332297</i> | NA                                  | <i>Ca_desi_denovo</i> | 25332297                | T/C  | NA                 | NA                            | NA                 |
| <i>Desi_wild_25332378</i> | NA                                  | <i>Ca_desi_denovo</i> | 25332378                | A/G  | NA                 | NA                            | NA                 |
| <i>Desi_wild_25335501</i> | NA                                  | <i>Ca_desi_denovo</i> | 25335501                | T/G  | NA                 | NA                            | NA                 |

| SNP IDs                   | NCBI dbSNP accession IDs (NCBI_SS#) | Chromosomes           | Physical positions (bp) | SNPs | Gene accession IDs | Sequence components of genome | Putative functions |
|---------------------------|-------------------------------------|-----------------------|-------------------------|------|--------------------|-------------------------------|--------------------|
| <i>Desi_wild_25335537</i> | NA                                  | <i>Ca_desi_denovo</i> | 25335537                | T/C  | NA                 | NA                            | NA                 |
| <i>Desi_wild_25340455</i> | NA                                  | <i>Ca_desi_denovo</i> | 25340455                | A/G  | NA                 | NA                            | NA                 |
| <i>Desi_wild_25343150</i> | NA                                  | <i>Ca_desi_denovo</i> | 25343150                | T/C  | NA                 | NA                            | NA                 |
| <i>Desi_wild_25344023</i> | NA                                  | <i>Ca_desi_denovo</i> | 25344023                | A/C  | NA                 | NA                            | NA                 |
| <i>Desi_wild_25344149</i> | NA                                  | <i>Ca_desi_denovo</i> | 25344149                | G/T  | NA                 | NA                            | NA                 |
| <i>Desi_wild_25345182</i> | NA                                  | <i>Ca_desi_denovo</i> | 25345182                | A/G  | NA                 | NA                            | NA                 |
| <i>Desi_wild_25351671</i> | NA                                  | <i>Ca_desi_denovo</i> | 25351671                | A/C  | NA                 | NA                            | NA                 |
| <i>Desi_wild_25380921</i> | NA                                  | <i>Ca_desi_denovo</i> | 25380921                | G/A  | NA                 | NA                            | NA                 |
| <i>Desi_wild_25381333</i> | NA                                  | <i>Ca_desi_denovo</i> | 25381333                | G/A  | NA                 | NA                            | NA                 |
| <i>Desi_wild_25386315</i> | NA                                  | <i>Ca_desi_denovo</i> | 25386315                | A/C  | NA                 | NA                            | NA                 |
| <i>Desi_wild_25388994</i> | NA                                  | <i>Ca_desi_denovo</i> | 25388994                | G/T  | NA                 | NA                            | NA                 |
| <i>Desi_wild_25390339</i> | NA                                  | <i>Ca_desi_denovo</i> | 25390339                | C/G  | NA                 | NA                            | NA                 |
| <i>Desi_wild_25390359</i> | NA                                  | <i>Ca_desi_denovo</i> | 25390359                | T/C  | NA                 | NA                            | NA                 |
| <i>Desi_wild_25390376</i> | NA                                  | <i>Ca_desi_denovo</i> | 25390376                | G/T  | NA                 | NA                            | NA                 |
| <i>Desi_wild_25393589</i> | NA                                  | <i>Ca_desi_denovo</i> | 25393589                | G/T  | NA                 | NA                            | NA                 |
| <i>Desi_wild_25393647</i> | NA                                  | <i>Ca_desi_denovo</i> | 25393647                | G/T  | NA                 | NA                            | NA                 |
| <i>Desi_wild_25396575</i> | NA                                  | <i>Ca_desi_denovo</i> | 25396575                | G/T  | NA                 | NA                            | NA                 |
| <i>Desi_wild_25400722</i> | NA                                  | <i>Ca_desi_denovo</i> | 25400722                | A/G  | NA                 | NA                            | NA                 |
| <i>Desi_wild_25405415</i> | NA                                  | <i>Ca_desi_denovo</i> | 25405415                | G/C  | NA                 | NA                            | NA                 |
| <i>Desi_wild_25405452</i> | NA                                  | <i>Ca_desi_denovo</i> | 25405452                | G/C  | NA                 | NA                            | NA                 |
| <i>Desi_wild_25405455</i> | NA                                  | <i>Ca_desi_denovo</i> | 25405455                | A/G  | NA                 | NA                            | NA                 |
| <i>Desi_wild_25408378</i> | NA                                  | <i>Ca_desi_denovo</i> | 25408378                | G/T  | NA                 | NA                            | NA                 |
| <i>Desi_wild_25409972</i> | NA                                  | <i>Ca_desi_denovo</i> | 25409972                | C/G  | NA                 | NA                            | NA                 |
| <i>Desi_wild_25409973</i> | NA                                  | <i>Ca_desi_denovo</i> | 25409973                | A/C  | NA                 | NA                            | NA                 |
| <i>Desi_wild_25443335</i> | NA                                  | <i>Ca_desi_denovo</i> | 25443335                | G/T  | NA                 | NA                            | NA                 |
| <i>Desi_wild_25444559</i> | NA                                  | <i>Ca_desi_denovo</i> | 25444559                | A/G  | NA                 | NA                            | NA                 |
| <i>Desi_wild_25444576</i> | NA                                  | <i>Ca_desi_denovo</i> | 25444576                | A/G  | NA                 | NA                            | NA                 |
| <i>Desi_wild_25446897</i> | NA                                  | <i>Ca_desi_denovo</i> | 25446897                | G/T  | NA                 | NA                            | NA                 |
| <i>Desi_wild_25453866</i> | NA                                  | <i>Ca_desi_denovo</i> | 25453866                | T/C  | NA                 | NA                            | NA                 |
| <i>Desi_wild_25460484</i> | NA                                  | <i>Ca_desi_denovo</i> | 25460484                | A/G  | NA                 | NA                            | NA                 |
| <i>Desi_wild_25460502</i> | NA                                  | <i>Ca_desi_denovo</i> | 25460502                | A/G  | NA                 | NA                            | NA                 |
| <i>Desi_wild_25460529</i> | NA                                  | <i>Ca_desi_denovo</i> | 25460529                | G/A  | NA                 | NA                            | NA                 |
| <i>Desi_wild_25464570</i> | NA                                  | <i>Ca_desi_denovo</i> | 25464570                | G/A  | NA                 | NA                            | NA                 |
| <i>Desi_wild_25464594</i> | NA                                  | <i>Ca_desi_denovo</i> | 25464594                | G/C  | NA                 | NA                            | NA                 |
| <i>Desi_wild_25469968</i> | NA                                  | <i>Ca_desi_denovo</i> | 25469968                | T/G  | NA                 | NA                            | NA                 |
| <i>Desi_wild_25475449</i> | NA                                  | <i>Ca_desi_denovo</i> | 25475449                | T/A  | NA                 | NA                            | NA                 |
| <i>Desi_wild_25475476</i> | NA                                  | <i>Ca_desi_denovo</i> | 25475476                | G/A  | NA                 | NA                            | NA                 |
| <i>Desi_wild_25481255</i> | NA                                  | <i>Ca_desi_denovo</i> | 25481255                | A/G  | NA                 | NA                            | NA                 |
| <i>Desi_wild_25481264</i> | NA                                  | <i>Ca_desi_denovo</i> | 25481264                | T/C  | NA                 | NA                            | NA                 |
| <i>Desi_wild_25481285</i> | NA                                  | <i>Ca_desi_denovo</i> | 25481285                | C/T  | NA                 | NA                            | NA                 |
| <i>Desi_wild_25481491</i> | NA                                  | <i>Ca_desi_denovo</i> | 25481491                | G/T  | NA                 | NA                            | NA                 |
| <i>Desi_wild_25483811</i> | NA                                  | <i>Ca_desi_denovo</i> | 25483811                | A/G  | NA                 | NA                            | NA                 |
| <i>Desi_wild_25483820</i> | NA                                  | <i>Ca_desi_denovo</i> | 25483820                | G/A  | NA                 | NA                            | NA                 |
| <i>Desi_wild_25485069</i> | NA                                  | <i>Ca_desi_denovo</i> | 25485069                | T/C  | NA                 | NA                            | NA                 |

| SNP IDs                   | NCBI dbSNP accession IDs (NCBI_SS#) | Chromosomes           | Physical positions (bp) | SNPs | Gene accession IDs | Sequence components of genome | Putative functions |
|---------------------------|-------------------------------------|-----------------------|-------------------------|------|--------------------|-------------------------------|--------------------|
| <i>Desi_wild_25485093</i> | NA                                  | <i>Ca_desi_denovo</i> | 25485093                | T/G  | NA                 | NA                            | NA                 |
| <i>Desi_wild_25487446</i> | NA                                  | <i>Ca_desi_denovo</i> | 25487446                | C/G  | NA                 | NA                            | NA                 |
| <i>Desi_wild_25495201</i> | NA                                  | <i>Ca_desi_denovo</i> | 25495201                | C/T  | NA                 | NA                            | NA                 |
| <i>Desi_wild_25495641</i> | NA                                  | <i>Ca_desi_denovo</i> | 25495641                | A/G  | NA                 | NA                            | NA                 |
| <i>Desi_wild_25498654</i> | NA                                  | <i>Ca_desi_denovo</i> | 25498654                | G/T  | NA                 | NA                            | NA                 |
| <i>Desi_wild_25503804</i> | NA                                  | <i>Ca_desi_denovo</i> | 25503804                | G/T  | NA                 | NA                            | NA                 |
| <i>Desi_wild_25504540</i> | NA                                  | <i>Ca_desi_denovo</i> | 25504540                | A/G  | NA                 | NA                            | NA                 |
| <i>Desi_wild_25504546</i> | NA                                  | <i>Ca_desi_denovo</i> | 25504546                | T/C  | NA                 | NA                            | NA                 |
| <i>Desi_wild_25507926</i> | NA                                  | <i>Ca_desi_denovo</i> | 25507926                | G/C  | NA                 | NA                            | NA                 |
| <i>Desi_wild_25508106</i> | NA                                  | <i>Ca_desi_denovo</i> | 25508106                | A/G  | NA                 | NA                            | NA                 |
| <i>Desi_wild_25523837</i> | NA                                  | <i>Ca_desi_denovo</i> | 25523837                | T/C  | NA                 | NA                            | NA                 |
| <i>Desi_wild_25525053</i> | NA                                  | <i>Ca_desi_denovo</i> | 25525053                | G/C  | NA                 | NA                            | NA                 |
| <i>Desi_wild_25527020</i> | NA                                  | <i>Ca_desi_denovo</i> | 25527020                | C/T  | NA                 | NA                            | NA                 |
| <i>Desi_wild_25527095</i> | NA                                  | <i>Ca_desi_denovo</i> | 25527095                | A/C  | NA                 | NA                            | NA                 |
| <i>Desi_wild_25529394</i> | NA                                  | <i>Ca_desi_denovo</i> | 25529394                | T/G  | NA                 | NA                            | NA                 |
| <i>Desi_wild_25529636</i> | NA                                  | <i>Ca_desi_denovo</i> | 25529636                | T/A  | NA                 | NA                            | NA                 |
| <i>Desi_wild_25529657</i> | NA                                  | <i>Ca_desi_denovo</i> | 25529657                | T/C  | NA                 | NA                            | NA                 |
| <i>Desi_wild_25534711</i> | NA                                  | <i>Ca_desi_denovo</i> | 25534711                | C/T  | NA                 | NA                            | NA                 |
| <i>Desi_wild_25542825</i> | NA                                  | <i>Ca_desi_denovo</i> | 25542825                | A/C  | NA                 | NA                            | NA                 |
| <i>Desi_wild_25551167</i> | NA                                  | <i>Ca_desi_denovo</i> | 25551167                | A/G  | NA                 | NA                            | NA                 |
| <i>Desi_wild_25559110</i> | NA                                  | <i>Ca_desi_denovo</i> | 25559110                | C/G  | NA                 | NA                            | NA                 |
| <i>Desi_wild_25563873</i> | NA                                  | <i>Ca_desi_denovo</i> | 25563873                | G/A  | NA                 | NA                            | NA                 |
| <i>Desi_wild_25563897</i> | NA                                  | <i>Ca_desi_denovo</i> | 25563897                | C/T  | NA                 | NA                            | NA                 |
| <i>Desi_wild_25571924</i> | NA                                  | <i>Ca_desi_denovo</i> | 25571924                | G/T  | NA                 | NA                            | NA                 |
| <i>Desi_wild_25573490</i> | NA                                  | <i>Ca_desi_denovo</i> | 25573490                | G/C  | NA                 | NA                            | NA                 |
| <i>Desi_wild_25576077</i> | NA                                  | <i>Ca_desi_denovo</i> | 25576077                | T/G  | NA                 | NA                            | NA                 |
| <i>Desi_wild_25578445</i> | NA                                  | <i>Ca_desi_denovo</i> | 25578445                | T/C  | NA                 | NA                            | NA                 |
| <i>Desi_wild_25581476</i> | NA                                  | <i>Ca_desi_denovo</i> | 25581476                | C/T  | NA                 | NA                            | NA                 |
| <i>Desi_wild_25588535</i> | NA                                  | <i>Ca_desi_denovo</i> | 25588535                | A/C  | NA                 | NA                            | NA                 |
| <i>Desi_wild_25588956</i> | NA                                  | <i>Ca_desi_denovo</i> | 25588956                | A/G  | NA                 | NA                            | NA                 |
| <i>Desi_wild_25601302</i> | NA                                  | <i>Ca_desi_denovo</i> | 25601302                | A/C  | NA                 | NA                            | NA                 |
| <i>Desi_wild_25601303</i> | NA                                  | <i>Ca_desi_denovo</i> | 25601303                | A/G  | NA                 | NA                            | NA                 |
| <i>Desi_wild_25601832</i> | NA                                  | <i>Ca_desi_denovo</i> | 25601832                | T/A  | NA                 | NA                            | NA                 |
| <i>Desi_wild_25601854</i> | NA                                  | <i>Ca_desi_denovo</i> | 25601854                | C/A  | NA                 | NA                            | NA                 |
| <i>Desi_wild_25604284</i> | NA                                  | <i>Ca_desi_denovo</i> | 25604284                | C/T  | NA                 | NA                            | NA                 |
| <i>Desi_wild_25604373</i> | NA                                  | <i>Ca_desi_denovo</i> | 25604373                | A/G  | NA                 | NA                            | NA                 |
| <i>Desi_wild_25605267</i> | NA                                  | <i>Ca_desi_denovo</i> | 25605267                | C/T  | NA                 | NA                            | NA                 |
| <i>Desi_wild_25605296</i> | NA                                  | <i>Ca_desi_denovo</i> | 25605296                | A/C  | NA                 | NA                            | NA                 |
| <i>Desi_wild_25606293</i> | NA                                  | <i>Ca_desi_denovo</i> | 25606293                | A/C  | NA                 | NA                            | NA                 |
| <i>Desi_wild_25606294</i> | NA                                  | <i>Ca_desi_denovo</i> | 25606294                | C/G  | NA                 | NA                            | NA                 |
| <i>Desi_wild_25606295</i> | NA                                  | <i>Ca_desi_denovo</i> | 25606295                | A/G  | NA                 | NA                            | NA                 |
| <i>Desi_wild_25617482</i> | NA                                  | <i>Ca_desi_denovo</i> | 25617482                | T/C  | NA                 | NA                            | NA                 |
| <i>Desi_wild_25619632</i> | NA                                  | <i>Ca_desi_denovo</i> | 25619632                | C/T  | NA                 | NA                            | NA                 |
| <i>Desi_wild_25621766</i> | NA                                  | <i>Ca_desi_denovo</i> | 25621766                | C/T  | NA                 | NA                            | NA                 |



| SNP IDs                   | NCBI dbSNP accession IDs (NCBI_SS#) | Chromosomes           | Physical positions (bp) | SNPs | Gene accession IDs | Sequence components of genome | Putative functions |
|---------------------------|-------------------------------------|-----------------------|-------------------------|------|--------------------|-------------------------------|--------------------|
| <i>Desi_wild_25622448</i> | NA                                  | <i>Ca_desi_denovo</i> | 25622448                | C/G  | NA                 | NA                            | NA                 |
| <i>Desi_wild_25623911</i> | NA                                  | <i>Ca_desi_denovo</i> | 25623911                | T/C  | NA                 | NA                            | NA                 |
| <i>Desi_wild_25628183</i> | NA                                  | <i>Ca_desi_denovo</i> | 25628183                | G/T  | NA                 | NA                            | NA                 |
| <i>Desi_wild_25630895</i> | NA                                  | <i>Ca_desi_denovo</i> | 25630895                | A/G  | NA                 | NA                            | NA                 |
| <i>Desi_wild_25630906</i> | NA                                  | <i>Ca_desi_denovo</i> | 25630906                | G/A  | NA                 | NA                            | NA                 |
| <i>Desi_wild_25633428</i> | NA                                  | <i>Ca_desi_denovo</i> | 25633428                | G/T  | NA                 | NA                            | NA                 |
| <i>Desi_wild_25633454</i> | NA                                  | <i>Ca_desi_denovo</i> | 25633454                | C/A  | NA                 | NA                            | NA                 |
| <i>Desi_wild_25636176</i> | NA                                  | <i>Ca_desi_denovo</i> | 25636176                | G/A  | NA                 | NA                            | NA                 |
| <i>Desi_wild_25636209</i> | NA                                  | <i>Ca_desi_denovo</i> | 25636209                | C/G  | NA                 | NA                            | NA                 |
| <i>Desi_wild_25637603</i> | NA                                  | <i>Ca_desi_denovo</i> | 25637603                | T/C  | NA                 | NA                            | NA                 |
| <i>Desi_wild_25637630</i> | NA                                  | <i>Ca_desi_denovo</i> | 25637630                | C/A  | NA                 | NA                            | NA                 |
| <i>Desi_wild_25639918</i> | NA                                  | <i>Ca_desi_denovo</i> | 25639918                | G/A  | NA                 | NA                            | NA                 |
| <i>Desi_wild_25639959</i> | NA                                  | <i>Ca_desi_denovo</i> | 25639959                | G/A  | NA                 | NA                            | NA                 |
| <i>Desi_wild_25641714</i> | NA                                  | <i>Ca_desi_denovo</i> | 25641714                | C/G  | NA                 | NA                            | NA                 |
| <i>Desi_wild_25641717</i> | NA                                  | <i>Ca_desi_denovo</i> | 25641717                | C/G  | NA                 | NA                            | NA                 |
| <i>Desi_wild_25653573</i> | NA                                  | <i>Ca_desi_denovo</i> | 25653573                | G/A  | NA                 | NA                            | NA                 |
| <i>Desi_wild_25655124</i> | NA                                  | <i>Ca_desi_denovo</i> | 25655124                | G/T  | NA                 | NA                            | NA                 |
| <i>Desi_wild_25657583</i> | NA                                  | <i>Ca_desi_denovo</i> | 25657583                | A/G  | NA                 | NA                            | NA                 |
| <i>Desi_wild_25663155</i> | NA                                  | <i>Ca_desi_denovo</i> | 25663155                | G/A  | NA                 | NA                            | NA                 |
| <i>Desi_wild_25672475</i> | NA                                  | <i>Ca_desi_denovo</i> | 25672475                | C/T  | NA                 | NA                            | NA                 |
| <i>Desi_wild_25672479</i> | NA                                  | <i>Ca_desi_denovo</i> | 25672479                | A/G  | NA                 | NA                            | NA                 |
| <i>Desi_wild_25672991</i> | NA                                  | <i>Ca_desi_denovo</i> | 25672991                | G/A  | NA                 | NA                            | NA                 |
| <i>Desi_wild_25673147</i> | NA                                  | <i>Ca_desi_denovo</i> | 25673147                | C/A  | NA                 | NA                            | NA                 |
| <i>Desi_wild_25673159</i> | NA                                  | <i>Ca_desi_denovo</i> | 25673159                | T/C  | NA                 | NA                            | NA                 |
| <i>Desi_wild_25677450</i> | NA                                  | <i>Ca_desi_denovo</i> | 25677450                | A/G  | NA                 | NA                            | NA                 |
| <i>Desi_wild_25677483</i> | NA                                  | <i>Ca_desi_denovo</i> | 25677483                | A/G  | NA                 | NA                            | NA                 |
| <i>Desi_wild_25678736</i> | NA                                  | <i>Ca_desi_denovo</i> | 25678736                | A/G  | NA                 | NA                            | NA                 |
| <i>Desi_wild_25680417</i> | NA                                  | <i>Ca_desi_denovo</i> | 25680417                | G/T  | NA                 | NA                            | NA                 |
| <i>Desi_wild_25680426</i> | NA                                  | <i>Ca_desi_denovo</i> | 25680426                | C/G  | NA                 | NA                            | NA                 |
| <i>Desi_wild_25680450</i> | NA                                  | <i>Ca_desi_denovo</i> | 25680450                | C/G  | NA                 | NA                            | NA                 |
| <i>Desi_wild_25681114</i> | NA                                  | <i>Ca_desi_denovo</i> | 25681114                | T/G  | NA                 | NA                            | NA                 |
| <i>Desi_wild_25685063</i> | NA                                  | <i>Ca_desi_denovo</i> | 25685063                | T/C  | NA                 | NA                            | NA                 |
| <i>Desi_wild_25685495</i> | NA                                  | <i>Ca_desi_denovo</i> | 25685495                | C/G  | NA                 | NA                            | NA                 |
| <i>Desi_wild_25691133</i> | NA                                  | <i>Ca_desi_denovo</i> | 25691133                | G/A  | NA                 | NA                            | NA                 |
| <i>Desi_wild_25694837</i> | NA                                  | <i>Ca_desi_denovo</i> | 25694837                | C/T  | NA                 | NA                            | NA                 |
| <i>Desi_wild_25694838</i> | NA                                  | <i>Ca_desi_denovo</i> | 25694838                | G/A  | NA                 | NA                            | NA                 |
| <i>Desi_wild_25699222</i> | NA                                  | <i>Ca_desi_denovo</i> | 25699222                | C/T  | NA                 | NA                            | NA                 |
| <i>Desi_wild_25701178</i> | NA                                  | <i>Ca_desi_denovo</i> | 25701178                | G/C  | NA                 | NA                            | NA                 |
| <i>Desi_wild_25701543</i> | NA                                  | <i>Ca_desi_denovo</i> | 25701543                | A/C  | NA                 | NA                            | NA                 |
| <i>Desi_wild_25714493</i> | NA                                  | <i>Ca_desi_denovo</i> | 25714493                | C/T  | NA                 | NA                            | NA                 |
| <i>Desi_wild_25714511</i> | NA                                  | <i>Ca_desi_denovo</i> | 25714511                | A/G  | NA                 | NA                            | NA                 |
| <i>Desi_wild_25719818</i> | NA                                  | <i>Ca_desi_denovo</i> | 25719818                | A/G  | NA                 | NA                            | NA                 |
| <i>Desi_wild_25719827</i> | NA                                  | <i>Ca_desi_denovo</i> | 25719827                | T/C  | NA                 | NA                            | NA                 |
| <i>Desi_wild_25720630</i> | NA                                  | <i>Ca_desi_denovo</i> | 25720630                | A/C  | NA                 | NA                            | NA                 |

| SNP IDs                   | NCBI dbSNP accession IDs (NCBI_SS#) | Chromosomes           | Physical positions (bp) | SNPs | Gene accession IDs | Sequence components of genome | Putative functions |
|---------------------------|-------------------------------------|-----------------------|-------------------------|------|--------------------|-------------------------------|--------------------|
| <i>Desi_wild_25725289</i> | NA                                  | <i>Ca_desi_denovo</i> | 25725289                | T/G  | NA                 | NA                            | NA                 |
| <i>Desi_wild_25730905</i> | NA                                  | <i>Ca_desi_denovo</i> | 25730905                | A/T  | NA                 | NA                            | NA                 |
| <i>Desi_wild_25730956</i> | NA                                  | <i>Ca_desi_denovo</i> | 25730956                | T/G  | NA                 | NA                            | NA                 |
| <i>Desi_wild_25740023</i> | NA                                  | <i>Ca_desi_denovo</i> | 25740023                | A/C  | NA                 | NA                            | NA                 |
| <i>Desi_wild_25743720</i> | NA                                  | <i>Ca_desi_denovo</i> | 25743720                | G/T  | NA                 | NA                            | NA                 |
| <i>Desi_wild_25746468</i> | NA                                  | <i>Ca_desi_denovo</i> | 25746468                | A/G  | NA                 | NA                            | NA                 |
| <i>Desi_wild_25746534</i> | NA                                  | <i>Ca_desi_denovo</i> | 25746534                | C/T  | NA                 | NA                            | NA                 |
| <i>Desi_wild_25749462</i> | NA                                  | <i>Ca_desi_denovo</i> | 25749462                | A/G  | NA                 | NA                            | NA                 |
| <i>Desi_wild_25751159</i> | NA                                  | <i>Ca_desi_denovo</i> | 25751159                | C/G  | NA                 | NA                            | NA                 |
| <i>Desi_wild_25751764</i> | NA                                  | <i>Ca_desi_denovo</i> | 25751764                | G/A  | NA                 | NA                            | NA                 |
| <i>Desi_wild_25751776</i> | NA                                  | <i>Ca_desi_denovo</i> | 25751776                | C/T  | NA                 | NA                            | NA                 |
| <i>Desi_wild_25752523</i> | NA                                  | <i>Ca_desi_denovo</i> | 25752523                | C/G  | NA                 | NA                            | NA                 |
| <i>Desi_wild_25752553</i> | NA                                  | <i>Ca_desi_denovo</i> | 25752553                | G/A  | NA                 | NA                            | NA                 |
| <i>Desi_wild_25753558</i> | NA                                  | <i>Ca_desi_denovo</i> | 25753558                | A/C  | NA                 | NA                            | NA                 |
| <i>Desi_wild_25753559</i> | NA                                  | <i>Ca_desi_denovo</i> | 25753559                | G/T  | NA                 | NA                            | NA                 |
| <i>Desi_wild_25768713</i> | NA                                  | <i>Ca_desi_denovo</i> | 25768713                | A/G  | NA                 | NA                            | NA                 |
| <i>Desi_wild_25771146</i> | NA                                  | <i>Ca_desi_denovo</i> | 25771146                | T/A  | NA                 | NA                            | NA                 |
| <i>Desi_wild_25771198</i> | NA                                  | <i>Ca_desi_denovo</i> | 25771198                | C/A  | NA                 | NA                            | NA                 |
| <i>Desi_wild_25773353</i> | NA                                  | <i>Ca_desi_denovo</i> | 25773353                | A/G  | NA                 | NA                            | NA                 |
| <i>Desi_wild_25775112</i> | NA                                  | <i>Ca_desi_denovo</i> | 25775112                | T/C  | NA                 | NA                            | NA                 |
| <i>Desi_wild_25777221</i> | NA                                  | <i>Ca_desi_denovo</i> | 25777221                | C/T  | NA                 | NA                            | NA                 |
| <i>Desi_wild_25787716</i> | NA                                  | <i>Ca_desi_denovo</i> | 25787716                | G/T  | NA                 | NA                            | NA                 |
| <i>Desi_wild_25788711</i> | NA                                  | <i>Ca_desi_denovo</i> | 25788711                | C/T  | NA                 | NA                            | NA                 |
| <i>Desi_wild_25788940</i> | NA                                  | <i>Ca_desi_denovo</i> | 25788940                | A/G  | NA                 | NA                            | NA                 |
| <i>Desi_wild_25791026</i> | NA                                  | <i>Ca_desi_denovo</i> | 25791026                | T/C  | NA                 | NA                            | NA                 |
| <i>Desi_wild_25793752</i> | NA                                  | <i>Ca_desi_denovo</i> | 25793752                | G/A  | NA                 | NA                            | NA                 |
| <i>Desi_wild_25794116</i> | NA                                  | <i>Ca_desi_denovo</i> | 25794116                | G/T  | NA                 | NA                            | NA                 |
| <i>Desi_wild_25802094</i> | NA                                  | <i>Ca_desi_denovo</i> | 25802094                | C/T  | NA                 | NA                            | NA                 |
| <i>Desi_wild_25802589</i> | NA                                  | <i>Ca_desi_denovo</i> | 25802589                | T/C  | NA                 | NA                            | NA                 |
| <i>Desi_wild_25802592</i> | NA                                  | <i>Ca_desi_denovo</i> | 25802592                | G/C  | NA                 | NA                            | NA                 |
| <i>Desi_wild_25805020</i> | NA                                  | <i>Ca_desi_denovo</i> | 25805020                | G/A  | NA                 | NA                            | NA                 |
| <i>Desi_wild_25805082</i> | NA                                  | <i>Ca_desi_denovo</i> | 25805082                | C/T  | NA                 | NA                            | NA                 |
| <i>Desi_wild_25808477</i> | NA                                  | <i>Ca_desi_denovo</i> | 25808477                | A/G  | NA                 | NA                            | NA                 |
| <i>Desi_wild_25808483</i> | NA                                  | <i>Ca_desi_denovo</i> | 25808483                | C/G  | NA                 | NA                            | NA                 |
| <i>Desi_wild_25808974</i> | NA                                  | <i>Ca_desi_denovo</i> | 25808974                | C/T  | NA                 | NA                            | NA                 |
| <i>Desi_wild_25809030</i> | NA                                  | <i>Ca_desi_denovo</i> | 25809030                | C/T  | NA                 | NA                            | NA                 |
| <i>Desi_wild_25809780</i> | NA                                  | <i>Ca_desi_denovo</i> | 25809780                | C/A  | NA                 | NA                            | NA                 |
| <i>Desi_wild_25810229</i> | NA                                  | <i>Ca_desi_denovo</i> | 25810229                | T/C  | NA                 | NA                            | NA                 |
| <i>Desi_wild_25811360</i> | NA                                  | <i>Ca_desi_denovo</i> | 25811360                | G/A  | NA                 | NA                            | NA                 |
| <i>Desi_wild_25812911</i> | NA                                  | <i>Ca_desi_denovo</i> | 25812911                | C/T  | NA                 | NA                            | NA                 |
| <i>Desi_wild_25812968</i> | NA                                  | <i>Ca_desi_denovo</i> | 25812968                | C/G  | NA                 | NA                            | NA                 |
| <i>Desi_wild_25812980</i> | NA                                  | <i>Ca_desi_denovo</i> | 25812980                | T/C  | NA                 | NA                            | NA                 |
| <i>Desi_wild_25819010</i> | NA                                  | <i>Ca_desi_denovo</i> | 25819010                | A/G  | NA                 | NA                            | NA                 |
| <i>Desi_wild_25819019</i> | NA                                  | <i>Ca_desi_denovo</i> | 25819019                | C/T  | NA                 | NA                            | NA                 |

| SNP IDs                   | NCBI dbSNP accession IDs (NCBI_SS#) | Chromosomes           | Physical positions (bp) | SNPs | Gene accession IDs | Sequence components of genome | Putative functions |
|---------------------------|-------------------------------------|-----------------------|-------------------------|------|--------------------|-------------------------------|--------------------|
| <i>Desi_wild_25821620</i> | NA                                  | <i>Ca_desi_denovo</i> | 25821620                | A/C  | NA                 | NA                            | NA                 |
| <i>Desi_wild_25834965</i> | NA                                  | <i>Ca_desi_denovo</i> | 25834965                | A/G  | NA                 | NA                            | NA                 |
| <i>Desi_wild_25841447</i> | NA                                  | <i>Ca_desi_denovo</i> | 25841447                | C/G  | NA                 | NA                            | NA                 |
| <i>Desi_wild_25841600</i> | NA                                  | <i>Ca_desi_denovo</i> | 25841600                | C/T  | NA                 | NA                            | NA                 |
| <i>Desi_wild_25843790</i> | NA                                  | <i>Ca_desi_denovo</i> | 25843790                | C/G  | NA                 | NA                            | NA                 |
| <i>Desi_wild_25843794</i> | NA                                  | <i>Ca_desi_denovo</i> | 25843794                | A/C  | NA                 | NA                            | NA                 |
| <i>Desi_wild_25845163</i> | NA                                  | <i>Ca_desi_denovo</i> | 25845163                | T/C  | NA                 | NA                            | NA                 |
| <i>Desi_wild_25845334</i> | NA                                  | <i>Ca_desi_denovo</i> | 25845334                | A/C  | NA                 | NA                            | NA                 |
| <i>Desi_wild_25845335</i> | NA                                  | <i>Ca_desi_denovo</i> | 25845335                | G/T  | NA                 | NA                            | NA                 |
| <i>Desi_wild_25854295</i> | NA                                  | <i>Ca_desi_denovo</i> | 25854295                | G/A  | NA                 | NA                            | NA                 |
| <i>Desi_wild_25854657</i> | NA                                  | <i>Ca_desi_denovo</i> | 25854657                | T/G  | NA                 | NA                            | NA                 |
| <i>Desi_wild_25854673</i> | NA                                  | <i>Ca_desi_denovo</i> | 25854673                | A/G  | NA                 | NA                            | NA                 |
| <i>Desi_wild_25855293</i> | NA                                  | <i>Ca_desi_denovo</i> | 25855293                | A/C  | NA                 | NA                            | NA                 |
| <i>Desi_wild_25855306</i> | NA                                  | <i>Ca_desi_denovo</i> | 25855306                | T/G  | NA                 | NA                            | NA                 |
| <i>Desi_wild_25856116</i> | NA                                  | <i>Ca_desi_denovo</i> | 25856116                | T/A  | NA                 | NA                            | NA                 |
| <i>Desi_wild_25859402</i> | NA                                  | <i>Ca_desi_denovo</i> | 25859402                | A/T  | NA                 | NA                            | NA                 |
| <i>Desi_wild_25861941</i> | NA                                  | <i>Ca_desi_denovo</i> | 25861941                | A/C  | NA                 | NA                            | NA                 |
| <i>Desi_wild_25861942</i> | NA                                  | <i>Ca_desi_denovo</i> | 25861942                | G/T  | NA                 | NA                            | NA                 |
| <i>Desi_wild_25861943</i> | NA                                  | <i>Ca_desi_denovo</i> | 25861943                | A/G  | NA                 | NA                            | NA                 |
| <i>Desi_wild_25868756</i> | NA                                  | <i>Ca_desi_denovo</i> | 25868756                | C/G  | NA                 | NA                            | NA                 |
| <i>Desi_wild_25871013</i> | NA                                  | <i>Ca_desi_denovo</i> | 25871013                | G/A  | NA                 | NA                            | NA                 |
| <i>Desi_wild_25876004</i> | NA                                  | <i>Ca_desi_denovo</i> | 25876004                | G/T  | NA                 | NA                            | NA                 |
| <i>Desi_wild_25877015</i> | NA                                  | <i>Ca_desi_denovo</i> | 25877015                | G/T  | NA                 | NA                            | NA                 |
| <i>Desi_wild_25881554</i> | NA                                  | <i>Ca_desi_denovo</i> | 25881554                | C/T  | NA                 | NA                            | NA                 |
| <i>Desi_wild_25883750</i> | NA                                  | <i>Ca_desi_denovo</i> | 25883750                | T/C  | NA                 | NA                            | NA                 |
| <i>Desi_wild_25884160</i> | NA                                  | <i>Ca_desi_denovo</i> | 25884160                | G/T  | NA                 | NA                            | NA                 |
| <i>Desi_wild_25895899</i> | NA                                  | <i>Ca_desi_denovo</i> | 25895899                | G/T  | NA                 | NA                            | NA                 |
| <i>Desi_wild_25895904</i> | NA                                  | <i>Ca_desi_denovo</i> | 25895904                | T/G  | NA                 | NA                            | NA                 |
| <i>Desi_wild_25901645</i> | NA                                  | <i>Ca_desi_denovo</i> | 25901645                | A/C  | NA                 | NA                            | NA                 |
| <i>Desi_wild_25901674</i> | NA                                  | <i>Ca_desi_denovo</i> | 25901674                | G/C  | NA                 | NA                            | NA                 |
| <i>Desi_wild_25908533</i> | NA                                  | <i>Ca_desi_denovo</i> | 25908533                | T/C  | NA                 | NA                            | NA                 |
| <i>Desi_wild_25917925</i> | NA                                  | <i>Ca_desi_denovo</i> | 25917925                | C/T  | NA                 | NA                            | NA                 |
| <i>Desi_wild_25917966</i> | NA                                  | <i>Ca_desi_denovo</i> | 25917966                | G/T  | NA                 | NA                            | NA                 |
| <i>Desi_wild_25926287</i> | NA                                  | <i>Ca_desi_denovo</i> | 25926287                | T/C  | NA                 | NA                            | NA                 |
| <i>Desi_wild_25926323</i> | NA                                  | <i>Ca_desi_denovo</i> | 25926323                | G/C  | NA                 | NA                            | NA                 |
| <i>Desi_wild_25927241</i> | NA                                  | <i>Ca_desi_denovo</i> | 25927241                | A/G  | NA                 | NA                            | NA                 |
| <i>Desi_wild_25927311</i> | NA                                  | <i>Ca_desi_denovo</i> | 25927311                | T/C  | NA                 | NA                            | NA                 |
| <i>Desi_wild_25927853</i> | NA                                  | <i>Ca_desi_denovo</i> | 25927853                | C/G  | NA                 | NA                            | NA                 |
| <i>Desi_wild_25929318</i> | NA                                  | <i>Ca_desi_denovo</i> | 25929318                | A/G  | NA                 | NA                            | NA                 |
| <i>Desi_wild_25932311</i> | NA                                  | <i>Ca_desi_denovo</i> | 25932311                | A/G  | NA                 | NA                            | NA                 |
| <i>Desi_wild_25932800</i> | NA                                  | <i>Ca_desi_denovo</i> | 25932800                | C/T  | NA                 | NA                            | NA                 |
| <i>Desi_wild_25936310</i> | NA                                  | <i>Ca_desi_denovo</i> | 25936310                | C/T  | NA                 | NA                            | NA                 |
| <i>Desi_wild_25944714</i> | NA                                  | <i>Ca_desi_denovo</i> | 25944714                | T/C  | NA                 | NA                            | NA                 |
| <i>Desi_wild_25944753</i> | NA                                  | <i>Ca_desi_denovo</i> | 25944753                | C/G  | NA                 | NA                            | NA                 |

| SNP IDs                   | NCBI dbSNP accession IDs (NCBI_SS#) | Chromosomes           | Physical positions (bp) | SNPs | Gene accession IDs | Sequence components of genome | Putative functions |
|---------------------------|-------------------------------------|-----------------------|-------------------------|------|--------------------|-------------------------------|--------------------|
| <i>Desi_wild_25956918</i> | NA                                  | <i>Ca_desi_denovo</i> | 25956918                | A/T  | NA                 | NA                            | NA                 |
| <i>Desi_wild_25956956</i> | NA                                  | <i>Ca_desi_denovo</i> | 25956956                | T/C  | NA                 | NA                            | NA                 |
| <i>Desi_wild_25958937</i> | NA                                  | <i>Ca_desi_denovo</i> | 25958937                | T/C  | NA                 | NA                            | NA                 |
| <i>Desi_wild_25959573</i> | NA                                  | <i>Ca_desi_denovo</i> | 25959573                | A/C  | NA                 | NA                            | NA                 |
| <i>Desi_wild_25965423</i> | NA                                  | <i>Ca_desi_denovo</i> | 25965423                | G/T  | NA                 | NA                            | NA                 |
| <i>Desi_wild_25975350</i> | NA                                  | <i>Ca_desi_denovo</i> | 25975350                | A/C  | NA                 | NA                            | NA                 |
| <i>Desi_wild_25975392</i> | NA                                  | <i>Ca_desi_denovo</i> | 25975392                | A/G  | NA                 | NA                            | NA                 |
| <i>Desi_wild_25980913</i> | NA                                  | <i>Ca_desi_denovo</i> | 25980913                | G/T  | NA                 | NA                            | NA                 |
| <i>Desi_wild_25983062</i> | NA                                  | <i>Ca_desi_denovo</i> | 25983062                | T/G  | NA                 | NA                            | NA                 |
| <i>Desi_wild_25983809</i> | NA                                  | <i>Ca_desi_denovo</i> | 25983809                | C/T  | NA                 | NA                            | NA                 |
| <i>Desi_wild_25985859</i> | NA                                  | <i>Ca_desi_denovo</i> | 25985859                | G/T  | NA                 | NA                            | NA                 |
| <i>Desi_wild_25990357</i> | NA                                  | <i>Ca_desi_denovo</i> | 25990357                | C/T  | NA                 | NA                            | NA                 |
| <i>Desi_wild_25990372</i> | NA                                  | <i>Ca_desi_denovo</i> | 25990372                | A/G  | NA                 | NA                            | NA                 |
| <i>Desi_wild_25990387</i> | NA                                  | <i>Ca_desi_denovo</i> | 25990387                | A/C  | NA                 | NA                            | NA                 |
| <i>Desi_wild_25998979</i> | NA                                  | <i>Ca_desi_denovo</i> | 25998979                | C/T  | NA                 | NA                            | NA                 |
| <i>Desi_wild_26001514</i> | NA                                  | <i>Ca_desi_denovo</i> | 26001514                | C/G  | NA                 | NA                            | NA                 |
| <i>Desi_wild_26002252</i> | NA                                  | <i>Ca_desi_denovo</i> | 26002252                | G/T  | NA                 | NA                            | NA                 |
| <i>Desi_wild_26011334</i> | NA                                  | <i>Ca_desi_denovo</i> | 26011334                | T/C  | NA                 | NA                            | NA                 |
| <i>Desi_wild_26011337</i> | NA                                  | <i>Ca_desi_denovo</i> | 26011337                | G/A  | NA                 | NA                            | NA                 |
| <i>Desi_wild_26016443</i> | NA                                  | <i>Ca_desi_denovo</i> | 26016443                | A/G  | NA                 | NA                            | NA                 |
| <i>Desi_wild_26016465</i> | NA                                  | <i>Ca_desi_denovo</i> | 26016465                | C/T  | NA                 | NA                            | NA                 |
| <i>Desi_wild_26021884</i> | NA                                  | <i>Ca_desi_denovo</i> | 26021884                | G/A  | NA                 | NA                            | NA                 |
| <i>Desi_wild_26021886</i> | NA                                  | <i>Ca_desi_denovo</i> | 26021886                | C/T  | NA                 | NA                            | NA                 |
| <i>Desi_wild_26021919</i> | NA                                  | <i>Ca_desi_denovo</i> | 26021919                | T/C  | NA                 | NA                            | NA                 |
| <i>Desi_wild_26031396</i> | NA                                  | <i>Ca_desi_denovo</i> | 26031396                | A/C  | NA                 | NA                            | NA                 |
| <i>Desi_wild_26031397</i> | NA                                  | <i>Ca_desi_denovo</i> | 26031397                | A/G  | NA                 | NA                            | NA                 |
| <i>Desi_wild_26036110</i> | NA                                  | <i>Ca_desi_denovo</i> | 26036110                | A/G  | NA                 | NA                            | NA                 |
| <i>Desi_wild_26038147</i> | NA                                  | <i>Ca_desi_denovo</i> | 26038147                | A/G  | NA                 | NA                            | NA                 |
| <i>Desi_wild_26048295</i> | NA                                  | <i>Ca_desi_denovo</i> | 26048295                | G/T  | NA                 | NA                            | NA                 |
| <i>Desi_wild_26048307</i> | NA                                  | <i>Ca_desi_denovo</i> | 26048307                | G/C  | NA                 | NA                            | NA                 |
| <i>Desi_wild_26048400</i> | NA                                  | <i>Ca_desi_denovo</i> | 26048400                | A/G  | NA                 | NA                            | NA                 |
| <i>Desi_wild_26049438</i> | NA                                  | <i>Ca_desi_denovo</i> | 26049438                | C/T  | NA                 | NA                            | NA                 |
| <i>Desi_wild_26050038</i> | NA                                  | <i>Ca_desi_denovo</i> | 26050038                | A/C  | NA                 | NA                            | NA                 |
| <i>Desi_wild_26054334</i> | NA                                  | <i>Ca_desi_denovo</i> | 26054334                | A/G  | NA                 | NA                            | NA                 |
| <i>Desi_wild_26054373</i> | NA                                  | <i>Ca_desi_denovo</i> | 26054373                | C/G  | NA                 | NA                            | NA                 |
| <i>Desi_wild_26062157</i> | NA                                  | <i>Ca_desi_denovo</i> | 26062157                | T/C  | NA                 | NA                            | NA                 |
| <i>Desi_wild_26062196</i> | NA                                  | <i>Ca_desi_denovo</i> | 26062196                | G/C  | NA                 | NA                            | NA                 |
| <i>Desi_wild_26091759</i> | NA                                  | <i>Ca_desi_denovo</i> | 26091759                | G/T  | NA                 | NA                            | NA                 |
| <i>Desi_wild_26094544</i> | NA                                  | <i>Ca_desi_denovo</i> | 26094544                | T/C  | NA                 | NA                            | NA                 |
| <i>Desi_wild_26102014</i> | NA                                  | <i>Ca_desi_denovo</i> | 26102014                | A/C  | NA                 | NA                            | NA                 |
| <i>Desi_wild_26103325</i> | NA                                  | <i>Ca_desi_denovo</i> | 26103325                | A/C  | NA                 | NA                            | NA                 |
| <i>Desi_wild_26103695</i> | NA                                  | <i>Ca_desi_denovo</i> | 26103695                | T/C  | NA                 | NA                            | NA                 |
| <i>Desi_wild_26103713</i> | NA                                  | <i>Ca_desi_denovo</i> | 26103713                | A/G  | NA                 | NA                            | NA                 |
| <i>Desi_wild_26109728</i> | NA                                  | <i>Ca_desi_denovo</i> | 26109728                | T/C  | NA                 | NA                            | NA                 |

| SNP IDs                   | NCBI dbSNP accession IDs (NCBI_SS#) | Chromosomes           | Physical positions (bp) | SNPs | Gene accession IDs | Sequence components of genome | Putative functions |
|---------------------------|-------------------------------------|-----------------------|-------------------------|------|--------------------|-------------------------------|--------------------|
| <i>Desi_wild_26112288</i> | NA                                  | <i>Ca_desi_denovo</i> | 26112288                | G/T  | NA                 | NA                            | NA                 |
| <i>Desi_wild_26117961</i> | NA                                  | <i>Ca_desi_denovo</i> | 26117961                | G/T  | NA                 | NA                            | NA                 |
| <i>Desi_wild_26121553</i> | NA                                  | <i>Ca_desi_denovo</i> | 26121553                | T/C  | NA                 | NA                            | NA                 |
| <i>Desi_wild_26124373</i> | NA                                  | <i>Ca_desi_denovo</i> | 26124373                | C/A  | NA                 | NA                            | NA                 |
| <i>Desi_wild_26131809</i> | NA                                  | <i>Ca_desi_denovo</i> | 26131809                | C/T  | NA                 | NA                            | NA                 |
| <i>Desi_wild_26131821</i> | NA                                  | <i>Ca_desi_denovo</i> | 26131821                | G/A  | NA                 | NA                            | NA                 |
| <i>Desi_wild_26131824</i> | NA                                  | <i>Ca_desi_denovo</i> | 26131824                | C/G  | NA                 | NA                            | NA                 |
| <i>Desi_wild_26131827</i> | NA                                  | <i>Ca_desi_denovo</i> | 26131827                | G/T  | NA                 | NA                            | NA                 |
| <i>Desi_wild_26132533</i> | NA                                  | <i>Ca_desi_denovo</i> | 26132533                | G/T  | NA                 | NA                            | NA                 |
| <i>Desi_wild_26147293</i> | NA                                  | <i>Ca_desi_denovo</i> | 26147293                | A/G  | NA                 | NA                            | NA                 |
| <i>Desi_wild_26147330</i> | NA                                  | <i>Ca_desi_denovo</i> | 26147330                | C/T  | NA                 | NA                            | NA                 |
| <i>Desi_wild_26154586</i> | NA                                  | <i>Ca_desi_denovo</i> | 26154586                | C/T  | NA                 | NA                            | NA                 |
| <i>Desi_wild_26154717</i> | NA                                  | <i>Ca_desi_denovo</i> | 26154717                | A/G  | NA                 | NA                            | NA                 |
| <i>Desi_wild_26154726</i> | NA                                  | <i>Ca_desi_denovo</i> | 26154726                | A/G  | NA                 | NA                            | NA                 |
| <i>Desi_wild_26158482</i> | NA                                  | <i>Ca_desi_denovo</i> | 26158482                | T/G  | NA                 | NA                            | NA                 |
| <i>Desi_wild_26165814</i> | NA                                  | <i>Ca_desi_denovo</i> | 26165814                | G/C  | NA                 | NA                            | NA                 |
| <i>Desi_wild_26168445</i> | NA                                  | <i>Ca_desi_denovo</i> | 26168445                | T/C  | NA                 | NA                            | NA                 |
| <i>Desi_wild_26170674</i> | NA                                  | <i>Ca_desi_denovo</i> | 26170674                | G/T  | NA                 | NA                            | NA                 |
| <i>Desi_wild_26170693</i> | NA                                  | <i>Ca_desi_denovo</i> | 26170693                | C/A  | NA                 | NA                            | NA                 |
| <i>Desi_wild_26170708</i> | NA                                  | <i>Ca_desi_denovo</i> | 26170708                | A/G  | NA                 | NA                            | NA                 |
| <i>Desi_wild_26170750</i> | NA                                  | <i>Ca_desi_denovo</i> | 26170750                | G/A  | NA                 | NA                            | NA                 |
| <i>Desi_wild_26175716</i> | NA                                  | <i>Ca_desi_denovo</i> | 26175716                | C/T  | NA                 | NA                            | NA                 |
| <i>Desi_wild_26175719</i> | NA                                  | <i>Ca_desi_denovo</i> | 26175719                | A/G  | NA                 | NA                            | NA                 |
| <i>Desi_wild_26175728</i> | NA                                  | <i>Ca_desi_denovo</i> | 26175728                | G/T  | NA                 | NA                            | NA                 |
| <i>Desi_wild_26183386</i> | NA                                  | <i>Ca_desi_denovo</i> | 26183386                | A/G  | NA                 | NA                            | NA                 |
| <i>Desi_wild_26183423</i> | NA                                  | <i>Ca_desi_denovo</i> | 26183423                | G/A  | NA                 | NA                            | NA                 |
| <i>Desi_wild_26188245</i> | NA                                  | <i>Ca_desi_denovo</i> | 26188245                | G/T  | NA                 | NA                            | NA                 |
| <i>Desi_wild_26188994</i> | NA                                  | <i>Ca_desi_denovo</i> | 26188994                | T/C  | NA                 | NA                            | NA                 |
| <i>Desi_wild_26194263</i> | NA                                  | <i>Ca_desi_denovo</i> | 26194263                | G/A  | NA                 | NA                            | NA                 |
| <i>Desi_wild_26198747</i> | NA                                  | <i>Ca_desi_denovo</i> | 26198747                | G/A  | NA                 | NA                            | NA                 |
| <i>Desi_wild_26198750</i> | NA                                  | <i>Ca_desi_denovo</i> | 26198750                | A/G  | NA                 | NA                            | NA                 |
| <i>Desi_wild_26203633</i> | NA                                  | <i>Ca_desi_denovo</i> | 26203633                | C/A  | NA                 | NA                            | NA                 |
| <i>Desi_wild_26203657</i> | NA                                  | <i>Ca_desi_denovo</i> | 26203657                | C/G  | NA                 | NA                            | NA                 |
| <i>Desi_wild_26205836</i> | NA                                  | <i>Ca_desi_denovo</i> | 26205836                | G/C  | NA                 | NA                            | NA                 |
| <i>Desi_wild_26209702</i> | NA                                  | <i>Ca_desi_denovo</i> | 26209702                | G/T  | NA                 | NA                            | NA                 |
| <i>Desi_wild_26209703</i> | NA                                  | <i>Ca_desi_denovo</i> | 26209703                | C/T  | NA                 | NA                            | NA                 |
| <i>Desi_wild_26217218</i> | NA                                  | <i>Ca_desi_denovo</i> | 26217218                | G/T  | NA                 | NA                            | NA                 |
| <i>Desi_wild_26223534</i> | NA                                  | <i>Ca_desi_denovo</i> | 26223534                | C/T  | NA                 | NA                            | NA                 |
| <i>Desi_wild_26223538</i> | NA                                  | <i>Ca_desi_denovo</i> | 26223538                | C/G  | NA                 | NA                            | NA                 |
| <i>Desi_wild_26224811</i> | NA                                  | <i>Ca_desi_denovo</i> | 26224811                | C/T  | NA                 | NA                            | NA                 |
| <i>Desi_wild_26230816</i> | NA                                  | <i>Ca_desi_denovo</i> | 26230816                | T/C  | NA                 | NA                            | NA                 |
| <i>Desi_wild_26232545</i> | NA                                  | <i>Ca_desi_denovo</i> | 26232545                | C/T  | NA                 | NA                            | NA                 |
| <i>Desi_wild_26232733</i> | NA                                  | <i>Ca_desi_denovo</i> | 26232733                | C/G  | NA                 | NA                            | NA                 |
| <i>Desi_wild_26232782</i> | NA                                  | <i>Ca_desi_denovo</i> | 26232782                | A/G  | NA                 | NA                            | NA                 |

| SNP IDs                   | NCBI dbSNP accession IDs (NCBI_SS#) | Chromosomes           | Physical positions (bp) | SNPs | Gene accession IDs | Sequence components of genome | Putative functions |
|---------------------------|-------------------------------------|-----------------------|-------------------------|------|--------------------|-------------------------------|--------------------|
| <i>Desi_wild_26243652</i> | NA                                  | <i>Ca_desi_denovo</i> | 26243652                | A/G  | NA                 | NA                            | NA                 |
| <i>Desi_wild_26251792</i> | NA                                  | <i>Ca_desi_denovo</i> | 26251792                | G/C  | NA                 | NA                            | NA                 |
| <i>Desi_wild_26262602</i> | NA                                  | <i>Ca_desi_denovo</i> | 26262602                | C/T  | NA                 | NA                            | NA                 |
| <i>Desi_wild_26268982</i> | NA                                  | <i>Ca_desi_denovo</i> | 26268982                | A/C  | NA                 | NA                            | NA                 |
| <i>Desi_wild_26270299</i> | NA                                  | <i>Ca_desi_denovo</i> | 26270299                | G/C  | NA                 | NA                            | NA                 |
| <i>Desi_wild_26270533</i> | NA                                  | <i>Ca_desi_denovo</i> | 26270533                | A/C  | NA                 | NA                            | NA                 |
| <i>Desi_wild_26274810</i> | NA                                  | <i>Ca_desi_denovo</i> | 26274810                | T/C  | NA                 | NA                            | NA                 |
| <i>Desi_wild_26276002</i> | NA                                  | <i>Ca_desi_denovo</i> | 26276002                | T/C  | NA                 | NA                            | NA                 |
| <i>Desi_wild_26276540</i> | NA                                  | <i>Ca_desi_denovo</i> | 26276540                | T/C  | NA                 | NA                            | NA                 |
| <i>Desi_wild_26280594</i> | NA                                  | <i>Ca_desi_denovo</i> | 26280594                | G/T  | NA                 | NA                            | NA                 |
| <i>Desi_wild_26281234</i> | NA                                  | <i>Ca_desi_denovo</i> | 26281234                | T/C  | NA                 | NA                            | NA                 |
| <i>Desi_wild_26289277</i> | NA                                  | <i>Ca_desi_denovo</i> | 26289277                | C/A  | NA                 | NA                            | NA                 |
| <i>Desi_wild_26296577</i> | NA                                  | <i>Ca_desi_denovo</i> | 26296577                | T/C  | NA                 | NA                            | NA                 |
| <i>Desi_wild_26296595</i> | NA                                  | <i>Ca_desi_denovo</i> | 26296595                | C/T  | NA                 | NA                            | NA                 |
| <i>Desi_wild_26297408</i> | NA                                  | <i>Ca_desi_denovo</i> | 26297408                | C/A  | NA                 | NA                            | NA                 |
| <i>Desi_wild_26313113</i> | NA                                  | <i>Ca_desi_denovo</i> | 26313113                | C/G  | NA                 | NA                            | NA                 |
| <i>Desi_wild_26324579</i> | NA                                  | <i>Ca_desi_denovo</i> | 26324579                | A/G  | NA                 | NA                            | NA                 |
| <i>Desi_wild_26327728</i> | NA                                  | <i>Ca_desi_denovo</i> | 26327728                | G/T  | NA                 | NA                            | NA                 |
| <i>Desi_wild_26332206</i> | NA                                  | <i>Ca_desi_denovo</i> | 26332206                | G/T  | NA                 | NA                            | NA                 |
| <i>Desi_wild_26332239</i> | NA                                  | <i>Ca_desi_denovo</i> | 26332239                | T/C  | NA                 | NA                            | NA                 |
| <i>Desi_wild_26334012</i> | NA                                  | <i>Ca_desi_denovo</i> | 26334012                | C/T  | NA                 | NA                            | NA                 |
| <i>Desi_wild_26334061</i> | NA                                  | <i>Ca_desi_denovo</i> | 26334061                | A/T  | NA                 | NA                            | NA                 |
| <i>Desi_wild_26339191</i> | NA                                  | <i>Ca_desi_denovo</i> | 26339191                | G/T  | NA                 | NA                            | NA                 |
| <i>Desi_wild_26345181</i> | NA                                  | <i>Ca_desi_denovo</i> | 26345181                | G/A  | NA                 | NA                            | NA                 |
| <i>Desi_wild_26346048</i> | NA                                  | <i>Ca_desi_denovo</i> | 26346048                | T/G  | NA                 | NA                            | NA                 |
| <i>Desi_wild_26352241</i> | NA                                  | <i>Ca_desi_denovo</i> | 26352241                | G/A  | NA                 | NA                            | NA                 |
| <i>Desi_wild_26352268</i> | NA                                  | <i>Ca_desi_denovo</i> | 26352268                | T/C  | NA                 | NA                            | NA                 |
| <i>Desi_wild_26359703</i> | NA                                  | <i>Ca_desi_denovo</i> | 26359703                | T/G  | NA                 | NA                            | NA                 |
| <i>Desi_wild_26361018</i> | NA                                  | <i>Ca_desi_denovo</i> | 26361018                | C/G  | NA                 | NA                            | NA                 |
| <i>Desi_wild_26361030</i> | NA                                  | <i>Ca_desi_denovo</i> | 26361030                | C/T  | NA                 | NA                            | NA                 |
| <i>Desi_wild_26361377</i> | NA                                  | <i>Ca_desi_denovo</i> | 26361377                | A/G  | NA                 | NA                            | NA                 |
| <i>Desi_wild_26361395</i> | NA                                  | <i>Ca_desi_denovo</i> | 26361395                | T/C  | NA                 | NA                            | NA                 |
| <i>Desi_wild_26364650</i> | NA                                  | <i>Ca_desi_denovo</i> | 26364650                | G/C  | NA                 | NA                            | NA                 |
| <i>Desi_wild_26378363</i> | NA                                  | <i>Ca_desi_denovo</i> | 26378363                | G/C  | NA                 | NA                            | NA                 |
| <i>Desi_wild_26378366</i> | NA                                  | <i>Ca_desi_denovo</i> | 26378366                | T/C  | NA                 | NA                            | NA                 |
| <i>Desi_wild_26378441</i> | NA                                  | <i>Ca_desi_denovo</i> | 26378441                | C/A  | NA                 | NA                            | NA                 |
| <i>Desi_wild_26378442</i> | NA                                  | <i>Ca_desi_denovo</i> | 26378442                | A/C  | NA                 | NA                            | NA                 |
| <i>Desi_wild_26379734</i> | NA                                  | <i>Ca_desi_denovo</i> | 26379734                | C/A  | NA                 | NA                            | NA                 |
| <i>Desi_wild_26379737</i> | NA                                  | <i>Ca_desi_denovo</i> | 26379737                | G/A  | NA                 | NA                            | NA                 |
| <i>Desi_wild_26379756</i> | NA                                  | <i>Ca_desi_denovo</i> | 26379756                | T/C  | NA                 | NA                            | NA                 |
| <i>Desi_wild_26384991</i> | NA                                  | <i>Ca_desi_denovo</i> | 26384991                | A/G  | NA                 | NA                            | NA                 |
| <i>Desi_wild_26385011</i> | NA                                  | <i>Ca_desi_denovo</i> | 26385011                | C/T  | NA                 | NA                            | NA                 |
| <i>Desi_wild_26392708</i> | NA                                  | <i>Ca_desi_denovo</i> | 26392708                | C/G  | NA                 | NA                            | NA                 |
| <i>Desi_wild_26392961</i> | NA                                  | <i>Ca_desi_denovo</i> | 26392961                | T/C  | NA                 | NA                            | NA                 |

| SNP IDs                   | NCBI dbSNP accession IDs (NCBI_SS#) | Chromosomes           | Physical positions (bp) | SNPs | Gene accession IDs | Sequence components of genome | Putative functions |
|---------------------------|-------------------------------------|-----------------------|-------------------------|------|--------------------|-------------------------------|--------------------|
| <i>Desi_wild_26400115</i> | NA                                  | <i>Ca_desi_denovo</i> | 26400115                | A/G  | NA                 | NA                            | NA                 |
| <i>Desi_wild_26400518</i> | NA                                  | <i>Ca_desi_denovo</i> | 26400518                | G/T  | NA                 | NA                            | NA                 |
| <i>Desi_wild_26408797</i> | NA                                  | <i>Ca_desi_denovo</i> | 26408797                | T/C  | NA                 | NA                            | NA                 |
| <i>Desi_wild_26409206</i> | NA                                  | <i>Ca_desi_denovo</i> | 26409206                | C/G  | NA                 | NA                            | NA                 |
| <i>Desi_wild_26413002</i> | NA                                  | <i>Ca_desi_denovo</i> | 26413002                | G/C  | NA                 | NA                            | NA                 |
| <i>Desi_wild_26413017</i> | NA                                  | <i>Ca_desi_denovo</i> | 26413017                | G/C  | NA                 | NA                            | NA                 |
| <i>Desi_wild_26413266</i> | NA                                  | <i>Ca_desi_denovo</i> | 26413266                | C/T  | NA                 | NA                            | NA                 |
| <i>Desi_wild_26415224</i> | NA                                  | <i>Ca_desi_denovo</i> | 26415224                | G/T  | NA                 | NA                            | NA                 |
| <i>Desi_wild_26418366</i> | NA                                  | <i>Ca_desi_denovo</i> | 26418366                | A/G  | NA                 | NA                            | NA                 |
| <i>Desi_wild_26418402</i> | NA                                  | <i>Ca_desi_denovo</i> | 26418402                | A/G  | NA                 | NA                            | NA                 |
| <i>Desi_wild_26422033</i> | NA                                  | <i>Ca_desi_denovo</i> | 26422033                | T/G  | NA                 | NA                            | NA                 |
| <i>Desi_wild_26434582</i> | NA                                  | <i>Ca_desi_denovo</i> | 26434582                | A/C  | NA                 | NA                            | NA                 |
| <i>Desi_wild_26434583</i> | NA                                  | <i>Ca_desi_denovo</i> | 26434583                | A/G  | NA                 | NA                            | NA                 |
| <i>Desi_wild_26435855</i> | NA                                  | <i>Ca_desi_denovo</i> | 26435855                | C/T  | NA                 | NA                            | NA                 |
| <i>Desi_wild_26439792</i> | NA                                  | <i>Ca_desi_denovo</i> | 26439792                | A/G  | NA                 | NA                            | NA                 |
| <i>Desi_wild_26444012</i> | NA                                  | <i>Ca_desi_denovo</i> | 26444012                | G/C  | NA                 | NA                            | NA                 |
| <i>Desi_wild_26450660</i> | NA                                  | <i>Ca_desi_denovo</i> | 26450660                | C/G  | NA                 | NA                            | NA                 |
| <i>Desi_wild_26460175</i> | NA                                  | <i>Ca_desi_denovo</i> | 26460175                | G/A  | NA                 | NA                            | NA                 |
| <i>Desi_wild_26460184</i> | NA                                  | <i>Ca_desi_denovo</i> | 26460184                | C/T  | NA                 | NA                            | NA                 |
| <i>Desi_wild_26466403</i> | NA                                  | <i>Ca_desi_denovo</i> | 26466403                | C/T  | NA                 | NA                            | NA                 |
| <i>Desi_wild_26466411</i> | NA                                  | <i>Ca_desi_denovo</i> | 26466411                | A/G  | NA                 | NA                            | NA                 |
| <i>Desi_wild_26469047</i> | NA                                  | <i>Ca_desi_denovo</i> | 26469047                | A/G  | NA                 | NA                            | NA                 |
| <i>Desi_wild_26470795</i> | NA                                  | <i>Ca_desi_denovo</i> | 26470795                | G/T  | NA                 | NA                            | NA                 |
| <i>Desi_wild_26470804</i> | NA                                  | <i>Ca_desi_denovo</i> | 26470804                | C/G  | NA                 | NA                            | NA                 |
| <i>Desi_wild_26475213</i> | NA                                  | <i>Ca_desi_denovo</i> | 26475213                | T/C  | NA                 | NA                            | NA                 |
| <i>Desi_wild_26484318</i> | NA                                  | <i>Ca_desi_denovo</i> | 26484318                | A/G  | NA                 | NA                            | NA                 |
| <i>Desi_wild_26485453</i> | NA                                  | <i>Ca_desi_denovo</i> | 26485453                | G/T  | NA                 | NA                            | NA                 |
| <i>Desi_wild_26485989</i> | NA                                  | <i>Ca_desi_denovo</i> | 26485989                | T/C  | NA                 | NA                            | NA                 |
| <i>Desi_wild_26488151</i> | NA                                  | <i>Ca_desi_denovo</i> | 26488151                | G/T  | NA                 | NA                            | NA                 |
| <i>Desi_wild_26489853</i> | NA                                  | <i>Ca_desi_denovo</i> | 26489853                | A/G  | NA                 | NA                            | NA                 |
| <i>Desi_wild_26490455</i> | NA                                  | <i>Ca_desi_denovo</i> | 26490455                | G/T  | NA                 | NA                            | NA                 |
| <i>Desi_wild_26493352</i> | NA                                  | <i>Ca_desi_denovo</i> | 26493352                | C/T  | NA                 | NA                            | NA                 |
| <i>Desi_wild_26493410</i> | NA                                  | <i>Ca_desi_denovo</i> | 26493410                | A/G  | NA                 | NA                            | NA                 |
| <i>Desi_wild_26499747</i> | NA                                  | <i>Ca_desi_denovo</i> | 26499747                | C/G  | NA                 | NA                            | NA                 |
| <i>Desi_wild_26508594</i> | NA                                  | <i>Ca_desi_denovo</i> | 26508594                | A/C  | NA                 | NA                            | NA                 |
| <i>Desi_wild_26508597</i> | NA                                  | <i>Ca_desi_denovo</i> | 26508597                | G/T  | NA                 | NA                            | NA                 |
| <i>Desi_wild_26514992</i> | NA                                  | <i>Ca_desi_denovo</i> | 26514992                | G/T  | NA                 | NA                            | NA                 |
| <i>Desi_wild_26519884</i> | NA                                  | <i>Ca_desi_denovo</i> | 26519884                | A/G  | NA                 | NA                            | NA                 |
| <i>Desi_wild_26519923</i> | NA                                  | <i>Ca_desi_denovo</i> | 26519923                | T/C  | NA                 | NA                            | NA                 |
| <i>Desi_wild_26522516</i> | NA                                  | <i>Ca_desi_denovo</i> | 26522516                | T/C  | NA                 | NA                            | NA                 |
| <i>Desi_wild_26524942</i> | NA                                  | <i>Ca_desi_denovo</i> | 26524942                | G/T  | NA                 | NA                            | NA                 |
| <i>Desi_wild_26536112</i> | NA                                  | <i>Ca_desi_denovo</i> | 26536112                | T/C  | NA                 | NA                            | NA                 |
| <i>Desi_wild_26536120</i> | NA                                  | <i>Ca_desi_denovo</i> | 26536120                | C/T  | NA                 | NA                            | NA                 |
| <i>Desi_wild_26539659</i> | NA                                  | <i>Ca_desi_denovo</i> | 26539659                | C/G  | NA                 | NA                            | NA                 |

| SNP IDs                   | NCBI dbSNP accession IDs (NCBI_SS#) | Chromosomes           | Physical positions (bp) | SNPs | Gene accession IDs | Sequence components of genome | Putative functions |
|---------------------------|-------------------------------------|-----------------------|-------------------------|------|--------------------|-------------------------------|--------------------|
| <i>Desi_wild_26549394</i> | NA                                  | <i>Ca_desi_denovo</i> | 26549394                | G/T  | NA                 | NA                            | NA                 |
| <i>Desi_wild_26549820</i> | NA                                  | <i>Ca_desi_denovo</i> | 26549820                | A/G  | NA                 | NA                            | NA                 |
| <i>Desi_wild_26555567</i> | NA                                  | <i>Ca_desi_denovo</i> | 26555567                | C/T  | NA                 | NA                            | NA                 |
| <i>Desi_wild_26561459</i> | NA                                  | <i>Ca_desi_denovo</i> | 26561459                | T/C  | NA                 | NA                            | NA                 |
| <i>Desi_wild_26561558</i> | NA                                  | <i>Ca_desi_denovo</i> | 26561558                | A/G  | NA                 | NA                            | NA                 |
| <i>Desi_wild_26561581</i> | NA                                  | <i>Ca_desi_denovo</i> | 26561581                | G/T  | NA                 | NA                            | NA                 |
| <i>Desi_wild_26568019</i> | NA                                  | <i>Ca_desi_denovo</i> | 26568019                | T/G  | NA                 | NA                            | NA                 |
| <i>Desi_wild_26570014</i> | NA                                  | <i>Ca_desi_denovo</i> | 26570014                | G/T  | NA                 | NA                            | NA                 |
| <i>Desi_wild_26570685</i> | NA                                  | <i>Ca_desi_denovo</i> | 26570685                | T/C  | NA                 | NA                            | NA                 |
| <i>Desi_wild_26570687</i> | NA                                  | <i>Ca_desi_denovo</i> | 26570687                | G/A  | NA                 | NA                            | NA                 |
| <i>Desi_wild_26572844</i> | NA                                  | <i>Ca_desi_denovo</i> | 26572844                | C/T  | NA                 | NA                            | NA                 |
| <i>Desi_wild_26572916</i> | NA                                  | <i>Ca_desi_denovo</i> | 26572916                | A/G  | NA                 | NA                            | NA                 |
| <i>Desi_wild_26574584</i> | NA                                  | <i>Ca_desi_denovo</i> | 26574584                | G/T  | NA                 | NA                            | NA                 |
| <i>Desi_wild_26575920</i> | NA                                  | <i>Ca_desi_denovo</i> | 26575920                | C/T  | NA                 | NA                            | NA                 |
| <i>Desi_wild_26575924</i> | NA                                  | <i>Ca_desi_denovo</i> | 26575924                | T/G  | NA                 | NA                            | NA                 |
| <i>Desi_wild_26576381</i> | NA                                  | <i>Ca_desi_denovo</i> | 26576381                | C/T  | NA                 | NA                            | NA                 |
| <i>Desi_wild_26576396</i> | NA                                  | <i>Ca_desi_denovo</i> | 26576396                | A/G  | NA                 | NA                            | NA                 |
| <i>Desi_wild_26579748</i> | NA                                  | <i>Ca_desi_denovo</i> | 26579748                | A/G  | NA                 | NA                            | NA                 |
| <i>Desi_wild_26579763</i> | NA                                  | <i>Ca_desi_denovo</i> | 26579763                | A/G  | NA                 | NA                            | NA                 |
| <i>Desi_wild_26579939</i> | NA                                  | <i>Ca_desi_denovo</i> | 26579939                | C/T  | NA                 | NA                            | NA                 |
| <i>Desi_wild_26579960</i> | NA                                  | <i>Ca_desi_denovo</i> | 26579960                | C/G  | NA                 | NA                            | NA                 |
| <i>Desi_wild_26583898</i> | NA                                  | <i>Ca_desi_denovo</i> | 26583898                | C/T  | NA                 | NA                            | NA                 |
| <i>Desi_wild_26584526</i> | NA                                  | <i>Ca_desi_denovo</i> | 26584526                | G/T  | NA                 | NA                            | NA                 |
| <i>Desi_wild_26593008</i> | NA                                  | <i>Ca_desi_denovo</i> | 26593008                | A/G  | NA                 | NA                            | NA                 |
| <i>Desi_wild_26596253</i> | NA                                  | <i>Ca_desi_denovo</i> | 26596253                | A/G  | NA                 | NA                            | NA                 |
| <i>Desi_wild_26602295</i> | NA                                  | <i>Ca_desi_denovo</i> | 26602295                | A/G  | NA                 | NA                            | NA                 |
| <i>Desi_wild_26607341</i> | NA                                  | <i>Ca_desi_denovo</i> | 26607341                | T/C  | NA                 | NA                            | NA                 |
| <i>Desi_wild_26612703</i> | NA                                  | <i>Ca_desi_denovo</i> | 26612703                | A/T  | NA                 | NA                            | NA                 |
| <i>Desi_wild_26617647</i> | NA                                  | <i>Ca_desi_denovo</i> | 26617647                | T/G  | NA                 | NA                            | NA                 |
| <i>Desi_wild_26618999</i> | NA                                  | <i>Ca_desi_denovo</i> | 26618999                | C/G  | NA                 | NA                            | NA                 |
| <i>Desi_wild_26621104</i> | NA                                  | <i>Ca_desi_denovo</i> | 26621104                | A/G  | NA                 | NA                            | NA                 |
| <i>Desi_wild_26621805</i> | NA                                  | <i>Ca_desi_denovo</i> | 26621805                | C/G  | NA                 | NA                            | NA                 |
| <i>Desi_wild_26621838</i> | NA                                  | <i>Ca_desi_denovo</i> | 26621838                | C/T  | NA                 | NA                            | NA                 |
| <i>Desi_wild_26623184</i> | NA                                  | <i>Ca_desi_denovo</i> | 26623184                | C/T  | NA                 | NA                            | NA                 |
| <i>Desi_wild_26626903</i> | NA                                  | <i>Ca_desi_denovo</i> | 26626903                | A/G  | NA                 | NA                            | NA                 |
| <i>Desi_wild_26630430</i> | NA                                  | <i>Ca_desi_denovo</i> | 26630430                | A/G  | NA                 | NA                            | NA                 |
| <i>Desi_wild_26632452</i> | NA                                  | <i>Ca_desi_denovo</i> | 26632452                | A/G  | NA                 | NA                            | NA                 |
| <i>Desi_wild_26643974</i> | NA                                  | <i>Ca_desi_denovo</i> | 26643974                | T/C  | NA                 | NA                            | NA                 |
| <i>Desi_wild_26643981</i> | NA                                  | <i>Ca_desi_denovo</i> | 26643981                | C/G  | NA                 | NA                            | NA                 |
| <i>Desi_wild_26657206</i> | NA                                  | <i>Ca_desi_denovo</i> | 26657206                | C/G  | NA                 | NA                            | NA                 |
| <i>Desi_wild_26660265</i> | NA                                  | <i>Ca_desi_denovo</i> | 26660265                | A/C  | NA                 | NA                            | NA                 |
| <i>Desi_wild_26662865</i> | NA                                  | <i>Ca_desi_denovo</i> | 26662865                | G/T  | NA                 | NA                            | NA                 |
| <i>Desi_wild_26673865</i> | NA                                  | <i>Ca_desi_denovo</i> | 26673865                | T/C  | NA                 | NA                            | NA                 |
| <i>Desi_wild_26673887</i> | NA                                  | <i>Ca_desi_denovo</i> | 26673887                | G/C  | NA                 | NA                            | NA                 |



| SNP IDs                   | NCBI dbSNP accession IDs (NCBI_SS#) | Chromosomes           | Physical positions (bp) | SNPs | Gene accession IDs | Sequence components of genome | Putative functions |
|---------------------------|-------------------------------------|-----------------------|-------------------------|------|--------------------|-------------------------------|--------------------|
| <i>Desi_wild_26673894</i> | NA                                  | <i>Ca_desi_denovo</i> | 26673894                | G/T  | NA                 | NA                            | NA                 |
| <i>Desi_wild_26673903</i> | NA                                  | <i>Ca_desi_denovo</i> | 26673903                | A/T  | NA                 | NA                            | NA                 |
| <i>Desi_wild_26674679</i> | NA                                  | <i>Ca_desi_denovo</i> | 26674679                | A/C  | NA                 | NA                            | NA                 |
| <i>Desi_wild_26675369</i> | NA                                  | <i>Ca_desi_denovo</i> | 26675369                | G/A  | NA                 | NA                            | NA                 |
| <i>Desi_wild_26676844</i> | NA                                  | <i>Ca_desi_denovo</i> | 26676844                | G/C  | NA                 | NA                            | NA                 |
| <i>Desi_wild_26677613</i> | NA                                  | <i>Ca_desi_denovo</i> | 26677613                | T/C  | NA                 | NA                            | NA                 |
| <i>Desi_wild_26678804</i> | NA                                  | <i>Ca_desi_denovo</i> | 26678804                | C/G  | NA                 | NA                            | NA                 |
| <i>Desi_wild_26678806</i> | NA                                  | <i>Ca_desi_denovo</i> | 26678806                | T/C  | NA                 | NA                            | NA                 |
| <i>Desi_wild_26681347</i> | NA                                  | <i>Ca_desi_denovo</i> | 26681347                | G/T  | NA                 | NA                            | NA                 |
| <i>Desi_wild_26686199</i> | NA                                  | <i>Ca_desi_denovo</i> | 26686199                | A/C  | NA                 | NA                            | NA                 |
| <i>Desi_wild_26686595</i> | NA                                  | <i>Ca_desi_denovo</i> | 26686595                | A/C  | NA                 | NA                            | NA                 |
| <i>Desi_wild_26686634</i> | NA                                  | <i>Ca_desi_denovo</i> | 26686634                | C/G  | NA                 | NA                            | NA                 |
| <i>Desi_wild_26691809</i> | NA                                  | <i>Ca_desi_denovo</i> | 26691809                | G/T  | NA                 | NA                            | NA                 |
| <i>Desi_wild_26700303</i> | NA                                  | <i>Ca_desi_denovo</i> | 26700303                | G/T  | NA                 | NA                            | NA                 |
| <i>Desi_wild_26702027</i> | NA                                  | <i>Ca_desi_denovo</i> | 26702027                | C/T  | NA                 | NA                            | NA                 |
| <i>Desi_wild_26707577</i> | NA                                  | <i>Ca_desi_denovo</i> | 26707577                | G/T  | NA                 | NA                            | NA                 |
| <i>Desi_wild_26709747</i> | NA                                  | <i>Ca_desi_denovo</i> | 26709747                | T/C  | NA                 | NA                            | NA                 |
| <i>Desi_wild_26712087</i> | NA                                  | <i>Ca_desi_denovo</i> | 26712087                | G/A  | NA                 | NA                            | NA                 |
| <i>Desi_wild_26722160</i> | NA                                  | <i>Ca_desi_denovo</i> | 26722160                | G/T  | NA                 | NA                            | NA                 |
| <i>Desi_wild_26722507</i> | NA                                  | <i>Ca_desi_denovo</i> | 26722507                | C/T  | NA                 | NA                            | NA                 |
| <i>Desi_wild_26723950</i> | NA                                  | <i>Ca_desi_denovo</i> | 26723950                | C/G  | NA                 | NA                            | NA                 |
| <i>Desi_wild_26724001</i> | NA                                  | <i>Ca_desi_denovo</i> | 26724001                | A/G  | NA                 | NA                            | NA                 |
| <i>Desi_wild_26724009</i> | NA                                  | <i>Ca_desi_denovo</i> | 26724009                | T/C  | NA                 | NA                            | NA                 |
| <i>Desi_wild_26725170</i> | NA                                  | <i>Ca_desi_denovo</i> | 26725170                | A/G  | NA                 | NA                            | NA                 |
| <i>Desi_wild_26727926</i> | NA                                  | <i>Ca_desi_denovo</i> | 26727926                | G/A  | NA                 | NA                            | NA                 |
| <i>Desi_wild_26728401</i> | NA                                  | <i>Ca_desi_denovo</i> | 26728401                | C/G  | NA                 | NA                            | NA                 |
| <i>Desi_wild_26728407</i> | NA                                  | <i>Ca_desi_denovo</i> | 26728407                | C/T  | NA                 | NA                            | NA                 |
| <i>Desi_wild_26728724</i> | NA                                  | <i>Ca_desi_denovo</i> | 26728724                | G/T  | NA                 | NA                            | NA                 |
| <i>Desi_wild_26729058</i> | NA                                  | <i>Ca_desi_denovo</i> | 26729058                | C/G  | NA                 | NA                            | NA                 |
| <i>Desi_wild_26729089</i> | NA                                  | <i>Ca_desi_denovo</i> | 26729089                | G/C  | NA                 | NA                            | NA                 |
| <i>Desi_wild_26743302</i> | NA                                  | <i>Ca_desi_denovo</i> | 26743302                | T/G  | NA                 | NA                            | NA                 |
| <i>Desi_wild_26750475</i> | NA                                  | <i>Ca_desi_denovo</i> | 26750475                | T/G  | NA                 | NA                            | NA                 |
| <i>Desi_wild_26755284</i> | NA                                  | <i>Ca_desi_denovo</i> | 26755284                | A/G  | NA                 | NA                            | NA                 |
| <i>Desi_wild_26755535</i> | NA                                  | <i>Ca_desi_denovo</i> | 26755535                | C/T  | NA                 | NA                            | NA                 |
| <i>Desi_wild_26765994</i> | NA                                  | <i>Ca_desi_denovo</i> | 26765994                | G/A  | NA                 | NA                            | NA                 |
| <i>Desi_wild_26768759</i> | NA                                  | <i>Ca_desi_denovo</i> | 26768759                | A/C  | NA                 | NA                            | NA                 |
| <i>Desi_wild_26770379</i> | NA                                  | <i>Ca_desi_denovo</i> | 26770379                | G/A  | NA                 | NA                            | NA                 |
| <i>Desi_wild_26776363</i> | NA                                  | <i>Ca_desi_denovo</i> | 26776363                | C/T  | NA                 | NA                            | NA                 |
| <i>Desi_wild_26776371</i> | NA                                  | <i>Ca_desi_denovo</i> | 26776371                | C/G  | NA                 | NA                            | NA                 |
| <i>Desi_wild_26779264</i> | NA                                  | <i>Ca_desi_denovo</i> | 26779264                | G/A  | NA                 | NA                            | NA                 |
| <i>Desi_wild_26779297</i> | NA                                  | <i>Ca_desi_denovo</i> | 26779297                | T/G  | NA                 | NA                            | NA                 |
| <i>Desi_wild_26780822</i> | NA                                  | <i>Ca_desi_denovo</i> | 26780822                | C/G  | NA                 | NA                            | NA                 |
| <i>Desi_wild_26784707</i> | NA                                  | <i>Ca_desi_denovo</i> | 26784707                | A/G  | NA                 | NA                            | NA                 |
| <i>Desi_wild_26790570</i> | NA                                  | <i>Ca_desi_denovo</i> | 26790570                | G/A  | NA                 | NA                            | NA                 |

| SNP IDs                   | NCBI dbSNP accession IDs (NCBI_SS#) | Chromosomes           | Physical positions (bp) | SNPs | Gene accession IDs | Sequence components of genome | Putative functions |
|---------------------------|-------------------------------------|-----------------------|-------------------------|------|--------------------|-------------------------------|--------------------|
| <i>Desi_wild_26790597</i> | NA                                  | <i>Ca_desi_denovo</i> | 26790597                | C/T  | NA                 | NA                            | NA                 |
| <i>Desi_wild_26790611</i> | NA                                  | <i>Ca_desi_denovo</i> | 26790611                | G/T  | NA                 | NA                            | NA                 |
| <i>Desi_wild_26790638</i> | NA                                  | <i>Ca_desi_denovo</i> | 26790638                | C/A  | NA                 | NA                            | NA                 |
| <i>Desi_wild_26802209</i> | NA                                  | <i>Ca_desi_denovo</i> | 26802209                | T/G  | NA                 | NA                            | NA                 |
| <i>Desi_wild_26806754</i> | NA                                  | <i>Ca_desi_denovo</i> | 26806754                | G/T  | NA                 | NA                            | NA                 |
| <i>Desi_wild_26811594</i> | NA                                  | <i>Ca_desi_denovo</i> | 26811594                | T/A  | NA                 | NA                            | NA                 |
| <i>Desi_wild_26811648</i> | NA                                  | <i>Ca_desi_denovo</i> | 26811648                | A/G  | NA                 | NA                            | NA                 |
| <i>Desi_wild_26813354</i> | NA                                  | <i>Ca_desi_denovo</i> | 26813354                | C/T  | NA                 | NA                            | NA                 |
| <i>Desi_wild_26813369</i> | NA                                  | <i>Ca_desi_denovo</i> | 26813369                | C/G  | NA                 | NA                            | NA                 |
| <i>Desi_wild_26817525</i> | NA                                  | <i>Ca_desi_denovo</i> | 26817525                | A/C  | NA                 | NA                            | NA                 |
| <i>Desi_wild_26823009</i> | NA                                  | <i>Ca_desi_denovo</i> | 26823009                | C/T  | NA                 | NA                            | NA                 |
| <i>Desi_wild_26825658</i> | NA                                  | <i>Ca_desi_denovo</i> | 26825658                | A/G  | NA                 | NA                            | NA                 |
| <i>Desi_wild_26825987</i> | NA                                  | <i>Ca_desi_denovo</i> | 26825987                | A/G  | NA                 | NA                            | NA                 |
| <i>Desi_wild_26826024</i> | NA                                  | <i>Ca_desi_denovo</i> | 26826024                | T/C  | NA                 | NA                            | NA                 |
| <i>Desi_wild_26829311</i> | NA                                  | <i>Ca_desi_denovo</i> | 26829311                | G/A  | NA                 | NA                            | NA                 |
| <i>Desi_wild_26838397</i> | NA                                  | <i>Ca_desi_denovo</i> | 26838397                | C/G  | NA                 | NA                            | NA                 |
| <i>Desi_wild_26838422</i> | NA                                  | <i>Ca_desi_denovo</i> | 26838422                | C/T  | NA                 | NA                            | NA                 |
| <i>Desi_wild_26838550</i> | NA                                  | <i>Ca_desi_denovo</i> | 26838550                | C/G  | NA                 | NA                            | NA                 |
| <i>Desi_wild_26842197</i> | NA                                  | <i>Ca_desi_denovo</i> | 26842197                | C/G  | NA                 | NA                            | NA                 |
| <i>Desi_wild_26845367</i> | NA                                  | <i>Ca_desi_denovo</i> | 26845367                | G/T  | NA                 | NA                            | NA                 |
| <i>Desi_wild_26854996</i> | NA                                  | <i>Ca_desi_denovo</i> | 26854996                | A/C  | NA                 | NA                            | NA                 |
| <i>Desi_wild_26858776</i> | NA                                  | <i>Ca_desi_denovo</i> | 26858776                | C/T  | NA                 | NA                            | NA                 |
| <i>Desi_wild_26858789</i> | NA                                  | <i>Ca_desi_denovo</i> | 26858789                | G/A  | NA                 | NA                            | NA                 |
| <i>Desi_wild_26862217</i> | NA                                  | <i>Ca_desi_denovo</i> | 26862217                | T/G  | NA                 | NA                            | NA                 |
| <i>Desi_wild_26862340</i> | NA                                  | <i>Ca_desi_denovo</i> | 26862340                | T/C  | NA                 | NA                            | NA                 |
| <i>Desi_wild_26868791</i> | NA                                  | <i>Ca_desi_denovo</i> | 26868791                | G/T  | NA                 | NA                            | NA                 |
| <i>Desi_wild_26873280</i> | NA                                  | <i>Ca_desi_denovo</i> | 26873280                | T/G  | NA                 | NA                            | NA                 |
| <i>Desi_wild_26877763</i> | NA                                  | <i>Ca_desi_denovo</i> | 26877763                | C/A  | NA                 | NA                            | NA                 |
| <i>Desi_wild_26877792</i> | NA                                  | <i>Ca_desi_denovo</i> | 26877792                | G/A  | NA                 | NA                            | NA                 |
| <i>Desi_wild_26881695</i> | NA                                  | <i>Ca_desi_denovo</i> | 26881695                | A/G  | NA                 | NA                            | NA                 |
| <i>Desi_wild_26881726</i> | NA                                  | <i>Ca_desi_denovo</i> | 26881726                | T/C  | NA                 | NA                            | NA                 |
| <i>Desi_wild_26882487</i> | NA                                  | <i>Ca_desi_denovo</i> | 26882487                | G/A  | NA                 | NA                            | NA                 |
| <i>Desi_wild_26882511</i> | NA                                  | <i>Ca_desi_denovo</i> | 26882511                | T/C  | NA                 | NA                            | NA                 |
| <i>Desi_wild_26888538</i> | NA                                  | <i>Ca_desi_denovo</i> | 26888538                | A/G  | NA                 | NA                            | NA                 |
| <i>Desi_wild_26894614</i> | NA                                  | <i>Ca_desi_denovo</i> | 26894614                | A/C  | NA                 | NA                            | NA                 |
| <i>Desi_wild_26894615</i> | NA                                  | <i>Ca_desi_denovo</i> | 26894615                | G/T  | NA                 | NA                            | NA                 |
| <i>Desi_wild_26895189</i> | NA                                  | <i>Ca_desi_denovo</i> | 26895189                | G/T  | NA                 | NA                            | NA                 |
| <i>Desi_wild_26896433</i> | NA                                  | <i>Ca_desi_denovo</i> | 26896433                | T/G  | NA                 | NA                            | NA                 |
| <i>Desi_wild_26897606</i> | NA                                  | <i>Ca_desi_denovo</i> | 26897606                | A/C  | NA                 | NA                            | NA                 |
| <i>Desi_wild_26897613</i> | NA                                  | <i>Ca_desi_denovo</i> | 26897613                | G/C  | NA                 | NA                            | NA                 |
| <i>Desi_wild_26900387</i> | NA                                  | <i>Ca_desi_denovo</i> | 26900387                | C/T  | NA                 | NA                            | NA                 |
| <i>Desi_wild_26901527</i> | NA                                  | <i>Ca_desi_denovo</i> | 26901527                | A/G  | NA                 | NA                            | NA                 |
| <i>Desi_wild_26902613</i> | NA                                  | <i>Ca_desi_denovo</i> | 26902613                | A/G  | NA                 | NA                            | NA                 |
| <i>Desi_wild_26902871</i> | NA                                  | <i>Ca_desi_denovo</i> | 26902871                | C/G  | NA                 | NA                            | NA                 |

| SNP IDs                   | NCBI dbSNP accession IDs (NCBI_SS#) | Chromosomes           | Physical positions (bp) | SNPs | Gene accession IDs | Sequence components of genome | Putative functions |
|---------------------------|-------------------------------------|-----------------------|-------------------------|------|--------------------|-------------------------------|--------------------|
| <i>Desi_wild_26910414</i> | NA                                  | <i>Ca_desi_denovo</i> | 26910414                | G/C  | NA                 | NA                            | NA                 |
| <i>Desi_wild_26910432</i> | NA                                  | <i>Ca_desi_denovo</i> | 26910432                | G/C  | NA                 | NA                            | NA                 |
| <i>Desi_wild_26910435</i> | NA                                  | <i>Ca_desi_denovo</i> | 26910435                | G/A  | NA                 | NA                            | NA                 |
| <i>Desi_wild_26917079</i> | NA                                  | <i>Ca_desi_denovo</i> | 26917079                | A/C  | NA                 | NA                            | NA                 |
| <i>Desi_wild_26918346</i> | NA                                  | <i>Ca_desi_denovo</i> | 26918346                | C/T  | NA                 | NA                            | NA                 |
| <i>Desi_wild_26919429</i> | NA                                  | <i>Ca_desi_denovo</i> | 26919429                | C/G  | NA                 | NA                            | NA                 |
| <i>Desi_wild_26919444</i> | NA                                  | <i>Ca_desi_denovo</i> | 26919444                | C/G  | NA                 | NA                            | NA                 |
| <i>Desi_wild_26920176</i> | NA                                  | <i>Ca_desi_denovo</i> | 26920176                | A/G  | NA                 | NA                            | NA                 |
| <i>Desi_wild_26920211</i> | NA                                  | <i>Ca_desi_denovo</i> | 26920211                | C/G  | NA                 | NA                            | NA                 |
| <i>Desi_wild_26938260</i> | NA                                  | <i>Ca_desi_denovo</i> | 26938260                | C/T  | NA                 | NA                            | NA                 |
| <i>Desi_wild_26941207</i> | NA                                  | <i>Ca_desi_denovo</i> | 26941207                | G/T  | NA                 | NA                            | NA                 |
| <i>Desi_wild_26941213</i> | NA                                  | <i>Ca_desi_denovo</i> | 26941213                | G/T  | NA                 | NA                            | NA                 |
| <i>Desi_wild_26941281</i> | NA                                  | <i>Ca_desi_denovo</i> | 26941281                | A/C  | NA                 | NA                            | NA                 |
| <i>Desi_wild_26941285</i> | NA                                  | <i>Ca_desi_denovo</i> | 26941285                | G/A  | NA                 | NA                            | NA                 |
| <i>Desi_wild_26942978</i> | NA                                  | <i>Ca_desi_denovo</i> | 26942978                | G/A  | NA                 | NA                            | NA                 |
| <i>Desi_wild_26942987</i> | NA                                  | <i>Ca_desi_denovo</i> | 26942987                | T/C  | NA                 | NA                            | NA                 |
| <i>Desi_wild_26946158</i> | NA                                  | <i>Ca_desi_denovo</i> | 26946158                | T/G  | NA                 | NA                            | NA                 |
| <i>Desi_wild_26946550</i> | NA                                  | <i>Ca_desi_denovo</i> | 26946550                | A/C  | NA                 | NA                            | NA                 |
| <i>Desi_wild_26946551</i> | NA                                  | <i>Ca_desi_denovo</i> | 26946551                | A/G  | NA                 | NA                            | NA                 |
| <i>Desi_wild_26947698</i> | NA                                  | <i>Ca_desi_denovo</i> | 26947698                | G/T  | NA                 | NA                            | NA                 |
| <i>Desi_wild_26947702</i> | NA                                  | <i>Ca_desi_denovo</i> | 26947702                | G/C  | NA                 | NA                            | NA                 |
| <i>Desi_wild_26951812</i> | NA                                  | <i>Ca_desi_denovo</i> | 26951812                | G/T  | NA                 | NA                            | NA                 |
| <i>Desi_wild_26952863</i> | NA                                  | <i>Ca_desi_denovo</i> | 26952863                | C/T  | NA                 | NA                            | NA                 |
| <i>Desi_wild_26954932</i> | NA                                  | <i>Ca_desi_denovo</i> | 26954932                | G/A  | NA                 | NA                            | NA                 |
| <i>Desi_wild_26958474</i> | NA                                  | <i>Ca_desi_denovo</i> | 26958474                | A/T  | NA                 | NA                            | NA                 |
| <i>Desi_wild_26964534</i> | NA                                  | <i>Ca_desi_denovo</i> | 26964534                | C/G  | NA                 | NA                            | NA                 |
| <i>Desi_wild_26966456</i> | NA                                  | <i>Ca_desi_denovo</i> | 26966456                | A/G  | NA                 | NA                            | NA                 |
| <i>Desi_wild_26979489</i> | NA                                  | <i>Ca_desi_denovo</i> | 26979489                | C/T  | NA                 | NA                            | NA                 |
| <i>Desi_wild_26988159</i> | NA                                  | <i>Ca_desi_denovo</i> | 26988159                | G/C  | NA                 | NA                            | NA                 |
| <i>Desi_wild_26994002</i> | NA                                  | <i>Ca_desi_denovo</i> | 26994002                | G/A  | NA                 | NA                            | NA                 |
| <i>Desi_wild_26996242</i> | NA                                  | <i>Ca_desi_denovo</i> | 26996242                | T/G  | NA                 | NA                            | NA                 |
| <i>Desi_wild_26996931</i> | NA                                  | <i>Ca_desi_denovo</i> | 26996931                | C/G  | NA                 | NA                            | NA                 |
| <i>Desi_wild_26999159</i> | NA                                  | <i>Ca_desi_denovo</i> | 26999159                | G/T  | NA                 | NA                            | NA                 |
| <i>Desi_wild_27000787</i> | NA                                  | <i>Ca_desi_denovo</i> | 27000787                | A/C  | NA                 | NA                            | NA                 |
| <i>Desi_wild_27000789</i> | NA                                  | <i>Ca_desi_denovo</i> | 27000789                | A/C  | NA                 | NA                            | NA                 |
| <i>Desi_wild_27001360</i> | NA                                  | <i>Ca_desi_denovo</i> | 27001360                | A/G  | NA                 | NA                            | NA                 |
| <i>Desi_wild_27002837</i> | NA                                  | <i>Ca_desi_denovo</i> | 27002837                | C/T  | NA                 | NA                            | NA                 |
| <i>Desi_wild_27003257</i> | NA                                  | <i>Ca_desi_denovo</i> | 27003257                | A/G  | NA                 | NA                            | NA                 |
| <i>Desi_wild_27004620</i> | NA                                  | <i>Ca_desi_denovo</i> | 27004620                | G/T  | NA                 | NA                            | NA                 |
| <i>Desi_wild_27006483</i> | NA                                  | <i>Ca_desi_denovo</i> | 27006483                | T/C  | NA                 | NA                            | NA                 |
| <i>Desi_wild_27010481</i> | NA                                  | <i>Ca_desi_denovo</i> | 27010481                | C/G  | NA                 | NA                            | NA                 |
| <i>Desi_wild_27010483</i> | NA                                  | <i>Ca_desi_denovo</i> | 27010483                | T/C  | NA                 | NA                            | NA                 |
| <i>Desi_wild_27010485</i> | NA                                  | <i>Ca_desi_denovo</i> | 27010485                | C/A  | NA                 | NA                            | NA                 |
| <i>Desi_wild_27010486</i> | NA                                  | <i>Ca_desi_denovo</i> | 27010486                | G/T  | NA                 | NA                            | NA                 |

| SNP IDs                   | NCBI dbSNP accession IDs (NCBI_SS#) | Chromosomes           | Physical positions (bp) | SNPs | Gene accession IDs | Sequence components of genome | Putative functions |
|---------------------------|-------------------------------------|-----------------------|-------------------------|------|--------------------|-------------------------------|--------------------|
| <i>Desi_wild_27010487</i> | NA                                  | <i>Ca_desi_denovo</i> | 27010487                | A/G  | NA                 | NA                            | NA                 |
| <i>Desi_wild_27011571</i> | NA                                  | <i>Ca_desi_denovo</i> | 27011571                | C/G  | NA                 | NA                            | NA                 |
| <i>Desi_wild_27011593</i> | NA                                  | <i>Ca_desi_denovo</i> | 27011593                | C/G  | NA                 | NA                            | NA                 |
| <i>Desi_wild_27026645</i> | NA                                  | <i>Ca_desi_denovo</i> | 27026645                | G/A  | NA                 | NA                            | NA                 |
| <i>Desi_wild_27027155</i> | NA                                  | <i>Ca_desi_denovo</i> | 27027155                | G/A  | NA                 | NA                            | NA                 |
| <i>Desi_wild_27033079</i> | NA                                  | <i>Ca_desi_denovo</i> | 27033079                | T/G  | NA                 | NA                            | NA                 |
| <i>Desi_wild_27033110</i> | NA                                  | <i>Ca_desi_denovo</i> | 27033110                | T/C  | NA                 | NA                            | NA                 |
| <i>Desi_wild_27034517</i> | NA                                  | <i>Ca_desi_denovo</i> | 27034517                | C/T  | NA                 | NA                            | NA                 |
| <i>Desi_wild_27039585</i> | NA                                  | <i>Ca_desi_denovo</i> | 27039585                | A/G  | NA                 | NA                            | NA                 |
| <i>Desi_wild_27043292</i> | NA                                  | <i>Ca_desi_denovo</i> | 27043292                | G/T  | NA                 | NA                            | NA                 |
| <i>Desi_wild_27044176</i> | NA                                  | <i>Ca_desi_denovo</i> | 27044176                | G/T  | NA                 | NA                            | NA                 |
| <i>Desi_wild_27044178</i> | NA                                  | <i>Ca_desi_denovo</i> | 27044178                | C/T  | NA                 | NA                            | NA                 |
| <i>Desi_wild_27045244</i> | NA                                  | <i>Ca_desi_denovo</i> | 27045244                | G/T  | NA                 | NA                            | NA                 |
| <i>Desi_wild_27045295</i> | NA                                  | <i>Ca_desi_denovo</i> | 27045295                | C/T  | NA                 | NA                            | NA                 |
| <i>Desi_wild_27048256</i> | NA                                  | <i>Ca_desi_denovo</i> | 27048256                | T/G  | NA                 | NA                            | NA                 |
| <i>Desi_wild_27054064</i> | NA                                  | <i>Ca_desi_denovo</i> | 27054064                | G/T  | NA                 | NA                            | NA                 |
| <i>Desi_wild_27057591</i> | NA                                  | <i>Ca_desi_denovo</i> | 27057591                | C/T  | NA                 | NA                            | NA                 |
| <i>Desi_wild_27058807</i> | NA                                  | <i>Ca_desi_denovo</i> | 27058807                | C/G  | NA                 | NA                            | NA                 |
| <i>Desi_wild_27058815</i> | NA                                  | <i>Ca_desi_denovo</i> | 27058815                | C/T  | NA                 | NA                            | NA                 |
| <i>Desi_wild_27065892</i> | NA                                  | <i>Ca_desi_denovo</i> | 27065892                | A/G  | NA                 | NA                            | NA                 |
| <i>Desi_wild_27065912</i> | NA                                  | <i>Ca_desi_denovo</i> | 27065912                | C/T  | NA                 | NA                            | NA                 |
| <i>Desi_wild_27065929</i> | NA                                  | <i>Ca_desi_denovo</i> | 27065929                | A/T  | NA                 | NA                            | NA                 |
| <i>Desi_wild_27069232</i> | NA                                  | <i>Ca_desi_denovo</i> | 27069232                | A/G  | NA                 | NA                            | NA                 |
| <i>Desi_wild_27069589</i> | NA                                  | <i>Ca_desi_denovo</i> | 27069589                | A/G  | NA                 | NA                            | NA                 |
| <i>Desi_wild_27069920</i> | NA                                  | <i>Ca_desi_denovo</i> | 27069920                | C/T  | NA                 | NA                            | NA                 |
| <i>Desi_wild_27069923</i> | NA                                  | <i>Ca_desi_denovo</i> | 27069923                | A/G  | NA                 | NA                            | NA                 |
| <i>Desi_wild_27070183</i> | NA                                  | <i>Ca_desi_denovo</i> | 27070183                | A/C  | NA                 | NA                            | NA                 |
| <i>Desi_wild_27071178</i> | NA                                  | <i>Ca_desi_denovo</i> | 27071178                | C/G  | NA                 | NA                            | NA                 |
| <i>Desi_wild_27073987</i> | NA                                  | <i>Ca_desi_denovo</i> | 27073987                | G/A  | NA                 | NA                            | NA                 |
| <i>Desi_wild_27074538</i> | NA                                  | <i>Ca_desi_denovo</i> | 27074538                | G/T  | NA                 | NA                            | NA                 |
| <i>Desi_wild_27081219</i> | NA                                  | <i>Ca_desi_denovo</i> | 27081219                | C/T  | NA                 | NA                            | NA                 |
| <i>Desi_wild_27082828</i> | NA                                  | <i>Ca_desi_denovo</i> | 27082828                | G/T  | NA                 | NA                            | NA                 |
| <i>Desi_wild_27083390</i> | NA                                  | <i>Ca_desi_denovo</i> | 27083390                | A/G  | NA                 | NA                            | NA                 |
| <i>Desi_wild_27088853</i> | NA                                  | <i>Ca_desi_denovo</i> | 27088853                | G/A  | NA                 | NA                            | NA                 |
| <i>Desi_wild_27088866</i> | NA                                  | <i>Ca_desi_denovo</i> | 27088866                | C/T  | NA                 | NA                            | NA                 |
| <i>Desi_wild_27095615</i> | NA                                  | <i>Ca_desi_denovo</i> | 27095615                | G/C  | NA                 | NA                            | NA                 |
| <i>Desi_wild_27119390</i> | NA                                  | <i>Ca_desi_denovo</i> | 27119390                | G/A  | NA                 | NA                            | NA                 |
| <i>Desi_wild_27119417</i> | NA                                  | <i>Ca_desi_denovo</i> | 27119417                | T/C  | NA                 | NA                            | NA                 |
| <i>Desi_wild_27119444</i> | NA                                  | <i>Ca_desi_denovo</i> | 27119444                | T/G  | NA                 | NA                            | NA                 |
| <i>Desi_wild_27122350</i> | NA                                  | <i>Ca_desi_denovo</i> | 27122350                | G/A  | NA                 | NA                            | NA                 |
| <i>Desi_wild_27122372</i> | NA                                  | <i>Ca_desi_denovo</i> | 27122372                | A/T  | NA                 | NA                            | NA                 |
| <i>Desi_wild_27122392</i> | NA                                  | <i>Ca_desi_denovo</i> | 27122392                | A/G  | NA                 | NA                            | NA                 |
| <i>Desi_wild_27123961</i> | NA                                  | <i>Ca_desi_denovo</i> | 27123961                | T/A  | NA                 | NA                            | NA                 |
| <i>Desi_wild_27139125</i> | NA                                  | <i>Ca_desi_denovo</i> | 27139125                | A/C  | NA                 | NA                            | NA                 |

| SNP IDs                   | NCBI dbSNP accession IDs (NCBI_SS#) | Chromosomes           | Physical positions (bp) | SNPs | Gene accession IDs | Sequence components of genome | Putative functions |
|---------------------------|-------------------------------------|-----------------------|-------------------------|------|--------------------|-------------------------------|--------------------|
| <i>Desi_wild_27140389</i> | NA                                  | <i>Ca_desi_denovo</i> | 27140389                | A/G  | NA                 | NA                            | NA                 |
| <i>Desi_wild_27140425</i> | NA                                  | <i>Ca_desi_denovo</i> | 27140425                | G/C  | NA                 | NA                            | NA                 |
| <i>Desi_wild_27152047</i> | NA                                  | <i>Ca_desi_denovo</i> | 27152047                | T/C  | NA                 | NA                            | NA                 |
| <i>Desi_wild_27152058</i> | NA                                  | <i>Ca_desi_denovo</i> | 27152058                | C/G  | NA                 | NA                            | NA                 |
| <i>Desi_wild_27157209</i> | NA                                  | <i>Ca_desi_denovo</i> | 27157209                | G/T  | NA                 | NA                            | NA                 |
| <i>Desi_wild_27160808</i> | NA                                  | <i>Ca_desi_denovo</i> | 27160808                | G/A  | NA                 | NA                            | NA                 |
| <i>Desi_wild_27162346</i> | NA                                  | <i>Ca_desi_denovo</i> | 27162346                | G/T  | NA                 | NA                            | NA                 |
| <i>Desi_wild_27163497</i> | NA                                  | <i>Ca_desi_denovo</i> | 27163497                | C/G  | NA                 | NA                            | NA                 |
| <i>Desi_wild_27163500</i> | NA                                  | <i>Ca_desi_denovo</i> | 27163500                | G/C  | NA                 | NA                            | NA                 |
| <i>Desi_wild_27164650</i> | NA                                  | <i>Ca_desi_denovo</i> | 27164650                | T/C  | NA                 | NA                            | NA                 |
| <i>Desi_wild_27164705</i> | NA                                  | <i>Ca_desi_denovo</i> | 27164705                | C/T  | NA                 | NA                            | NA                 |
| <i>Desi_wild_27168565</i> | NA                                  | <i>Ca_desi_denovo</i> | 27168565                | G/T  | NA                 | NA                            | NA                 |
| <i>Desi_wild_27181406</i> | NA                                  | <i>Ca_desi_denovo</i> | 27181406                | G/A  | NA                 | NA                            | NA                 |
| <i>Desi_wild_27182627</i> | NA                                  | <i>Ca_desi_denovo</i> | 27182627                | C/A  | NA                 | NA                            | NA                 |
| <i>Desi_wild_27183664</i> | NA                                  | <i>Ca_desi_denovo</i> | 27183664                | G/T  | NA                 | NA                            | NA                 |
| <i>Desi_wild_27184090</i> | NA                                  | <i>Ca_desi_denovo</i> | 27184090                | A/G  | NA                 | NA                            | NA                 |
| <i>Desi_wild_27184096</i> | NA                                  | <i>Ca_desi_denovo</i> | 27184096                | T/C  | NA                 | NA                            | NA                 |
| <i>Desi_wild_27184144</i> | NA                                  | <i>Ca_desi_denovo</i> | 27184144                | T/C  | NA                 | NA                            | NA                 |
| <i>Desi_wild_27186020</i> | NA                                  | <i>Ca_desi_denovo</i> | 27186020                | G/T  | NA                 | NA                            | NA                 |
| <i>Desi_wild_27188522</i> | NA                                  | <i>Ca_desi_denovo</i> | 27188522                | C/T  | NA                 | NA                            | NA                 |
| <i>Desi_wild_27188611</i> | NA                                  | <i>Ca_desi_denovo</i> | 27188611                | G/T  | NA                 | NA                            | NA                 |
| <i>Desi_wild_27189789</i> | NA                                  | <i>Ca_desi_denovo</i> | 27189789                | C/T  | NA                 | NA                            | NA                 |
| <i>Desi_wild_27194997</i> | NA                                  | <i>Ca_desi_denovo</i> | 27194997                | A/C  | NA                 | NA                            | NA                 |
| <i>Desi_wild_27207476</i> | NA                                  | <i>Ca_desi_denovo</i> | 27207476                | C/T  | NA                 | NA                            | NA                 |
| <i>Desi_wild_27210471</i> | NA                                  | <i>Ca_desi_denovo</i> | 27210471                | C/A  | NA                 | NA                            | NA                 |
| <i>Desi_wild_27210504</i> | NA                                  | <i>Ca_desi_denovo</i> | 27210504                | A/G  | NA                 | NA                            | NA                 |
| <i>Desi_wild_27213428</i> | NA                                  | <i>Ca_desi_denovo</i> | 27213428                | T/G  | NA                 | NA                            | NA                 |
| <i>Desi_wild_27221440</i> | NA                                  | <i>Ca_desi_denovo</i> | 27221440                | C/T  | NA                 | NA                            | NA                 |
| <i>Desi_wild_27221449</i> | NA                                  | <i>Ca_desi_denovo</i> | 27221449                | C/T  | NA                 | NA                            | NA                 |
| <i>Desi_wild_27222146</i> | NA                                  | <i>Ca_desi_denovo</i> | 27222146                | C/G  | NA                 | NA                            | NA                 |
| <i>Desi_wild_27226176</i> | NA                                  | <i>Ca_desi_denovo</i> | 27226176                | G/T  | NA                 | NA                            | NA                 |
| <i>Desi_wild_27229098</i> | NA                                  | <i>Ca_desi_denovo</i> | 27229098                | G/C  | NA                 | NA                            | NA                 |
| <i>Desi_wild_27229099</i> | NA                                  | <i>Ca_desi_denovo</i> | 27229099                | T/C  | NA                 | NA                            | NA                 |
| <i>Desi_wild_27229521</i> | NA                                  | <i>Ca_desi_denovo</i> | 27229521                | G/A  | NA                 | NA                            | NA                 |
| <i>Desi_wild_27231523</i> | NA                                  | <i>Ca_desi_denovo</i> | 27231523                | G/A  | NA                 | NA                            | NA                 |
| <i>Desi_wild_27236092</i> | NA                                  | <i>Ca_desi_denovo</i> | 27236092                | A/G  | NA                 | NA                            | NA                 |
| <i>Desi_wild_27236168</i> | NA                                  | <i>Ca_desi_denovo</i> | 27236168                | C/T  | NA                 | NA                            | NA                 |
| <i>Desi_wild_27239206</i> | NA                                  | <i>Ca_desi_denovo</i> | 27239206                | C/T  | NA                 | NA                            | NA                 |
| <i>Desi_wild_27241893</i> | NA                                  | <i>Ca_desi_denovo</i> | 27241893                | A/C  | NA                 | NA                            | NA                 |
| <i>Desi_wild_27245386</i> | NA                                  | <i>Ca_desi_denovo</i> | 27245386                | G/T  | NA                 | NA                            | NA                 |
| <i>Desi_wild_27250289</i> | NA                                  | <i>Ca_desi_denovo</i> | 27250289                | G/T  | NA                 | NA                            | NA                 |
| <i>Desi_wild_27255741</i> | NA                                  | <i>Ca_desi_denovo</i> | 27255741                | C/G  | NA                 | NA                            | NA                 |
| <i>Desi_wild_27263507</i> | NA                                  | <i>Ca_desi_denovo</i> | 27263507                | C/T  | NA                 | NA                            | NA                 |
| <i>Desi_wild_27264171</i> | NA                                  | <i>Ca_desi_denovo</i> | 27264171                | T/C  | NA                 | NA                            | NA                 |

| SNP IDs                   | NCBI dbSNP accession IDs (NCBI_SS#) | Chromosomes           | Physical positions (bp) | SNPs | Gene accession IDs | Sequence components of genome | Putative functions |
|---------------------------|-------------------------------------|-----------------------|-------------------------|------|--------------------|-------------------------------|--------------------|
| <i>Desi_wild_27266023</i> | NA                                  | <i>Ca_desi_denovo</i> | 27266023                | T/C  | NA                 | NA                            | NA                 |
| <i>Desi_wild_27272489</i> | NA                                  | <i>Ca_desi_denovo</i> | 27272489                | C/G  | NA                 | NA                            | NA                 |
| <i>Desi_wild_27272556</i> | NA                                  | <i>Ca_desi_denovo</i> | 27272556                | C/T  | NA                 | NA                            | NA                 |
| <i>Desi_wild_27274775</i> | NA                                  | <i>Ca_desi_denovo</i> | 27274775                | G/T  | NA                 | NA                            | NA                 |
| <i>Desi_wild_27281430</i> | NA                                  | <i>Ca_desi_denovo</i> | 27281430                | G/A  | NA                 | NA                            | NA                 |
| <i>Desi_wild_27285878</i> | NA                                  | <i>Ca_desi_denovo</i> | 27285878                | G/A  | NA                 | NA                            | NA                 |
| <i>Desi_wild_27285905</i> | NA                                  | <i>Ca_desi_denovo</i> | 27285905                | G/A  | NA                 | NA                            | NA                 |
| <i>Desi_wild_27288879</i> | NA                                  | <i>Ca_desi_denovo</i> | 27288879                | G/T  | NA                 | NA                            | NA                 |
| <i>Desi_wild_27293139</i> | NA                                  | <i>Ca_desi_denovo</i> | 27293139                | C/T  | NA                 | NA                            | NA                 |
| <i>Desi_wild_27293178</i> | NA                                  | <i>Ca_desi_denovo</i> | 27293178                | T/C  | NA                 | NA                            | NA                 |
| <i>Desi_wild_27295037</i> | NA                                  | <i>Ca_desi_denovo</i> | 27295037                | A/G  | NA                 | NA                            | NA                 |
| <i>Desi_wild_27295049</i> | NA                                  | <i>Ca_desi_denovo</i> | 27295049                | A/T  | NA                 | NA                            | NA                 |
| <i>Desi_wild_27295753</i> | NA                                  | <i>Ca_desi_denovo</i> | 27295753                | T/C  | NA                 | NA                            | NA                 |
| <i>Desi_wild_27303790</i> | NA                                  | <i>Ca_desi_denovo</i> | 27303790                | T/C  | NA                 | NA                            | NA                 |
| <i>Desi_wild_27303831</i> | NA                                  | <i>Ca_desi_denovo</i> | 27303831                | C/G  | NA                 | NA                            | NA                 |
| <i>Desi_wild_27305780</i> | NA                                  | <i>Ca_desi_denovo</i> | 27305780                | A/C  | NA                 | NA                            | NA                 |
| <i>Desi_wild_27308602</i> | NA                                  | <i>Ca_desi_denovo</i> | 27308602                | G/T  | NA                 | NA                            | NA                 |
| <i>Desi_wild_27313277</i> | NA                                  | <i>Ca_desi_denovo</i> | 27313277                | T/C  | NA                 | NA                            | NA                 |
| <i>Desi_wild_27316357</i> | NA                                  | <i>Ca_desi_denovo</i> | 27316357                | T/C  | NA                 | NA                            | NA                 |
| <i>Desi_wild_27316384</i> | NA                                  | <i>Ca_desi_denovo</i> | 27316384                | C/G  | NA                 | NA                            | NA                 |
| <i>Desi_wild_27318740</i> | NA                                  | <i>Ca_desi_denovo</i> | 27318740                | A/C  | NA                 | NA                            | NA                 |
| <i>Desi_wild_27318743</i> | NA                                  | <i>Ca_desi_denovo</i> | 27318743                | C/T  | NA                 | NA                            | NA                 |
| <i>Desi_wild_27323942</i> | NA                                  | <i>Ca_desi_denovo</i> | 27323942                | T/C  | NA                 | NA                            | NA                 |
| <i>Desi_wild_27323945</i> | NA                                  | <i>Ca_desi_denovo</i> | 27323945                | A/T  | NA                 | NA                            | NA                 |
| <i>Desi_wild_27327296</i> | NA                                  | <i>Ca_desi_denovo</i> | 27327296                | G/C  | NA                 | NA                            | NA                 |
| <i>Desi_wild_27327376</i> | NA                                  | <i>Ca_desi_denovo</i> | 27327376                | G/C  | NA                 | NA                            | NA                 |
| <i>Desi_wild_27327491</i> | NA                                  | <i>Ca_desi_denovo</i> | 27327491                | T/C  | NA                 | NA                            | NA                 |
| <i>Desi_wild_27327520</i> | NA                                  | <i>Ca_desi_denovo</i> | 27327520                | G/A  | NA                 | NA                            | NA                 |
| <i>Desi_wild_27333441</i> | NA                                  | <i>Ca_desi_denovo</i> | 27333441                | C/A  | NA                 | NA                            | NA                 |
| <i>Desi_wild_27336419</i> | NA                                  | <i>Ca_desi_denovo</i> | 27336419                | A/C  | NA                 | NA                            | NA                 |
| <i>Desi_wild_27338058</i> | NA                                  | <i>Ca_desi_denovo</i> | 27338058                | C/G  | NA                 | NA                            | NA                 |
| <i>Desi_wild_27343147</i> | NA                                  | <i>Ca_desi_denovo</i> | 27343147                | T/C  | NA                 | NA                            | NA                 |
| <i>Desi_wild_27346098</i> | NA                                  | <i>Ca_desi_denovo</i> | 27346098                | G/T  | NA                 | NA                            | NA                 |
| <i>Desi_wild_27346248</i> | NA                                  | <i>Ca_desi_denovo</i> | 27346248                | G/C  | NA                 | NA                            | NA                 |
| <i>Desi_wild_27349845</i> | NA                                  | <i>Ca_desi_denovo</i> | 27349845                | A/C  | NA                 | NA                            | NA                 |
| <i>Desi_wild_27349847</i> | NA                                  | <i>Ca_desi_denovo</i> | 27349847                | A/C  | NA                 | NA                            | NA                 |
| <i>Desi_wild_27350601</i> | NA                                  | <i>Ca_desi_denovo</i> | 27350601                | C/T  | NA                 | NA                            | NA                 |
| <i>Desi_wild_27371946</i> | NA                                  | <i>Ca_desi_denovo</i> | 27371946                | C/T  | NA                 | NA                            | NA                 |
| <i>Desi_wild_27371968</i> | NA                                  | <i>Ca_desi_denovo</i> | 27371968                | A/G  | NA                 | NA                            | NA                 |
| <i>Desi_wild_27377598</i> | NA                                  | <i>Ca_desi_denovo</i> | 27377598                | C/G  | NA                 | NA                            | NA                 |
| <i>Desi_wild_27380049</i> | NA                                  | <i>Ca_desi_denovo</i> | 27380049                | C/T  | NA                 | NA                            | NA                 |
| <i>Desi_wild_27380873</i> | NA                                  | <i>Ca_desi_denovo</i> | 27380873                | G/T  | NA                 | NA                            | NA                 |
| <i>Desi_wild_27380931</i> | NA                                  | <i>Ca_desi_denovo</i> | 27380931                | T/G  | NA                 | NA                            | NA                 |
| <i>Desi_wild_27381549</i> | NA                                  | <i>Ca_desi_denovo</i> | 27381549                | C/G  | NA                 | NA                            | NA                 |

| SNP IDs                   | NCBI dbSNP accession IDs (NCBI_SS#) | Chromosomes           | Physical positions (bp) | SNPs | Gene accession IDs | Sequence components of genome | Putative functions |
|---------------------------|-------------------------------------|-----------------------|-------------------------|------|--------------------|-------------------------------|--------------------|
| <i>Desi_wild_27383019</i> | NA                                  | <i>Ca_desi_denovo</i> | 27383019                | C/T  | NA                 | NA                            | NA                 |
| <i>Desi_wild_27396396</i> | NA                                  | <i>Ca_desi_denovo</i> | 27396396                | G/T  | NA                 | NA                            | NA                 |
| <i>Desi_wild_27413144</i> | NA                                  | <i>Ca_desi_denovo</i> | 27413144                | G/A  | NA                 | NA                            | NA                 |
| <i>Desi_wild_27416092</i> | NA                                  | <i>Ca_desi_denovo</i> | 27416092                | G/C  | NA                 | NA                            | NA                 |
| <i>Desi_wild_27416149</i> | NA                                  | <i>Ca_desi_denovo</i> | 27416149                | T/C  | NA                 | NA                            | NA                 |
| <i>Desi_wild_27418486</i> | NA                                  | <i>Ca_desi_denovo</i> | 27418486                | A/C  | NA                 | NA                            | NA                 |
| <i>Desi_wild_27429203</i> | NA                                  | <i>Ca_desi_denovo</i> | 27429203                | T/C  | NA                 | NA                            | NA                 |
| <i>Desi_wild_27430305</i> | NA                                  | <i>Ca_desi_denovo</i> | 27430305                | C/A  | NA                 | NA                            | NA                 |
| <i>Desi_wild_27432977</i> | NA                                  | <i>Ca_desi_denovo</i> | 27432977                | G/T  | NA                 | NA                            | NA                 |
| <i>Desi_wild_27445300</i> | NA                                  | <i>Ca_desi_denovo</i> | 27445300                | T/A  | NA                 | NA                            | NA                 |
| <i>Desi_wild_27445309</i> | NA                                  | <i>Ca_desi_denovo</i> | 27445309                | A/G  | NA                 | NA                            | NA                 |
| <i>Desi_wild_27446732</i> | NA                                  | <i>Ca_desi_denovo</i> | 27446732                | A/C  | NA                 | NA                            | NA                 |
| <i>Desi_wild_27446735</i> | NA                                  | <i>Ca_desi_denovo</i> | 27446735                | C/T  | NA                 | NA                            | NA                 |
| <i>Desi_wild_27456335</i> | NA                                  | <i>Ca_desi_denovo</i> | 27456335                | G/A  | NA                 | NA                            | NA                 |
| <i>Desi_wild_27457481</i> | NA                                  | <i>Ca_desi_denovo</i> | 27457481                | C/T  | NA                 | NA                            | NA                 |
| <i>Desi_wild_27457535</i> | NA                                  | <i>Ca_desi_denovo</i> | 27457535                | T/C  | NA                 | NA                            | NA                 |
| <i>Desi_wild_27463360</i> | NA                                  | <i>Ca_desi_denovo</i> | 27463360                | C/T  | NA                 | NA                            | NA                 |
| <i>Desi_wild_27463377</i> | NA                                  | <i>Ca_desi_denovo</i> | 27463377                | A/G  | NA                 | NA                            | NA                 |
| <i>Desi_wild_27465044</i> | NA                                  | <i>Ca_desi_denovo</i> | 27465044                | A/G  | NA                 | NA                            | NA                 |
| <i>Desi_wild_27466385</i> | NA                                  | <i>Ca_desi_denovo</i> | 27466385                | C/T  | NA                 | NA                            | NA                 |
| <i>Desi_wild_27471310</i> | NA                                  | <i>Ca_desi_denovo</i> | 27471310                | G/C  | NA                 | NA                            | NA                 |
| <i>Desi_wild_27490556</i> | NA                                  | <i>Ca_desi_denovo</i> | 27490556                | A/G  | NA                 | NA                            | NA                 |
| <i>Desi_wild_27493837</i> | NA                                  | <i>Ca_desi_denovo</i> | 27493837                | G/A  | NA                 | NA                            | NA                 |
| <i>Desi_wild_27499841</i> | NA                                  | <i>Ca_desi_denovo</i> | 27499841                | G/A  | NA                 | NA                            | NA                 |
| <i>Desi_wild_27501189</i> | NA                                  | <i>Ca_desi_denovo</i> | 27501189                | T/G  | NA                 | NA                            | NA                 |
| <i>Desi_wild_27502309</i> | NA                                  | <i>Ca_desi_denovo</i> | 27502309                | C/T  | NA                 | NA                            | NA                 |
| <i>Desi_wild_27509417</i> | NA                                  | <i>Ca_desi_denovo</i> | 27509417                | A/G  | NA                 | NA                            | NA                 |
| <i>Desi_wild_27515328</i> | NA                                  | <i>Ca_desi_denovo</i> | 27515328                | G/T  | NA                 | NA                            | NA                 |
| <i>Desi_wild_27523563</i> | NA                                  | <i>Ca_desi_denovo</i> | 27523563                | G/A  | NA                 | NA                            | NA                 |
| <i>Desi_wild_27523584</i> | NA                                  | <i>Ca_desi_denovo</i> | 27523584                | C/T  | NA                 | NA                            | NA                 |
| <i>Desi_wild_27526047</i> | NA                                  | <i>Ca_desi_denovo</i> | 27526047                | T/G  | NA                 | NA                            | NA                 |
| <i>Desi_wild_27526052</i> | NA                                  | <i>Ca_desi_denovo</i> | 27526052                | T/C  | NA                 | NA                            | NA                 |
| <i>Desi_wild_27528232</i> | NA                                  | <i>Ca_desi_denovo</i> | 27528232                | A/G  | NA                 | NA                            | NA                 |
| <i>Desi_wild_27528268</i> | NA                                  | <i>Ca_desi_denovo</i> | 27528268                | C/A  | NA                 | NA                            | NA                 |
| <i>Desi_wild_27530610</i> | NA                                  | <i>Ca_desi_denovo</i> | 27530610                | A/C  | NA                 | NA                            | NA                 |
| <i>Desi_wild_27530612</i> | NA                                  | <i>Ca_desi_denovo</i> | 27530612                | A/G  | NA                 | NA                            | NA                 |
| <i>Desi_wild_27534818</i> | NA                                  | <i>Ca_desi_denovo</i> | 27534818                | C/T  | NA                 | NA                            | NA                 |
| <i>Desi_wild_27536884</i> | NA                                  | <i>Ca_desi_denovo</i> | 27536884                | A/C  | NA                 | NA                            | NA                 |
| <i>Desi_wild_27536978</i> | NA                                  | <i>Ca_desi_denovo</i> | 27536978                | A/G  | NA                 | NA                            | NA                 |
| <i>Desi_wild_27536988</i> | NA                                  | <i>Ca_desi_denovo</i> | 27536988                | T/C  | NA                 | NA                            | NA                 |
| <i>Desi_wild_27548471</i> | NA                                  | <i>Ca_desi_denovo</i> | 27548471                | A/C  | NA                 | NA                            | NA                 |
| <i>Desi_wild_27551042</i> | NA                                  | <i>Ca_desi_denovo</i> | 27551042                | A/C  | NA                 | NA                            | NA                 |
| <i>Desi_wild_27572565</i> | NA                                  | <i>Ca_desi_denovo</i> | 27572565                | A/C  | NA                 | NA                            | NA                 |
| <i>Desi_wild_27575234</i> | NA                                  | <i>Ca_desi_denovo</i> | 27575234                | C/T  | NA                 | NA                            | NA                 |

| SNP IDs                   | NCBI dbSNP accession IDs (NCBI_SS#) | Chromosomes           | Physical positions (bp) | SNPs | Gene accession IDs | Sequence components of genome | Putative functions |
|---------------------------|-------------------------------------|-----------------------|-------------------------|------|--------------------|-------------------------------|--------------------|
| <i>Desi_wild_27576640</i> | NA                                  | <i>Ca_desi_denovo</i> | 27576640                | G/T  | NA                 | NA                            | NA                 |
| <i>Desi_wild_27576660</i> | NA                                  | <i>Ca_desi_denovo</i> | 27576660                | T/G  | NA                 | NA                            | NA                 |
| <i>Desi_wild_27576990</i> | NA                                  | <i>Ca_desi_denovo</i> | 27576990                | C/G  | NA                 | NA                            | NA                 |
| <i>Desi_wild_27577047</i> | NA                                  | <i>Ca_desi_denovo</i> | 27577047                | T/A  | NA                 | NA                            | NA                 |
| <i>Desi_wild_27578710</i> | NA                                  | <i>Ca_desi_denovo</i> | 27578710                | A/C  | NA                 | NA                            | NA                 |
| <i>Desi_wild_27583421</i> | NA                                  | <i>Ca_desi_denovo</i> | 27583421                | A/G  | NA                 | NA                            | NA                 |
| <i>Desi_wild_27585934</i> | NA                                  | <i>Ca_desi_denovo</i> | 27585934                | C/G  | NA                 | NA                            | NA                 |
| <i>Desi_wild_27585937</i> | NA                                  | <i>Ca_desi_denovo</i> | 27585937                | G/A  | NA                 | NA                            | NA                 |
| <i>Desi_wild_27586553</i> | NA                                  | <i>Ca_desi_denovo</i> | 27586553                | C/G  | NA                 | NA                            | NA                 |
| <i>Desi_wild_27586566</i> | NA                                  | <i>Ca_desi_denovo</i> | 27586566                | G/C  | NA                 | NA                            | NA                 |
| <i>Desi_wild_27591902</i> | NA                                  | <i>Ca_desi_denovo</i> | 27591902                | G/C  | NA                 | NA                            | NA                 |
| <i>Desi_wild_27594372</i> | NA                                  | <i>Ca_desi_denovo</i> | 27594372                | A/G  | NA                 | NA                            | NA                 |
| <i>Desi_wild_27594374</i> | NA                                  | <i>Ca_desi_denovo</i> | 27594374                | C/T  | NA                 | NA                            | NA                 |
| <i>Desi_wild_27596003</i> | NA                                  | <i>Ca_desi_denovo</i> | 27596003                | C/T  | NA                 | NA                            | NA                 |
| <i>Desi_wild_27600131</i> | NA                                  | <i>Ca_desi_denovo</i> | 27600131                | A/G  | NA                 | NA                            | NA                 |
| <i>Desi_wild_27600134</i> | NA                                  | <i>Ca_desi_denovo</i> | 27600134                | A/G  | NA                 | NA                            | NA                 |
| <i>Desi_wild_27605250</i> | NA                                  | <i>Ca_desi_denovo</i> | 27605250                | A/G  | NA                 | NA                            | NA                 |
| <i>Desi_wild_27611265</i> | NA                                  | <i>Ca_desi_denovo</i> | 27611265                | G/T  | NA                 | NA                            | NA                 |
| <i>Desi_wild_27611275</i> | NA                                  | <i>Ca_desi_denovo</i> | 27611275                | G/A  | NA                 | NA                            | NA                 |
| <i>Desi_wild_27614337</i> | NA                                  | <i>Ca_desi_denovo</i> | 27614337                | C/T  | NA                 | NA                            | NA                 |
| <i>Desi_wild_27614394</i> | NA                                  | <i>Ca_desi_denovo</i> | 27614394                | C/G  | NA                 | NA                            | NA                 |
| <i>Desi_wild_27614418</i> | NA                                  | <i>Ca_desi_denovo</i> | 27614418                | G/A  | NA                 | NA                            | NA                 |
| <i>Desi_wild_27617490</i> | NA                                  | <i>Ca_desi_denovo</i> | 27617490                | G/C  | NA                 | NA                            | NA                 |
| <i>Desi_wild_27617532</i> | NA                                  | <i>Ca_desi_denovo</i> | 27617532                | G/C  | NA                 | NA                            | NA                 |
| <i>Desi_wild_27623325</i> | NA                                  | <i>Ca_desi_denovo</i> | 27623325                | G/A  | NA                 | NA                            | NA                 |
| <i>Desi_wild_27626318</i> | NA                                  | <i>Ca_desi_denovo</i> | 27626318                | C/G  | NA                 | NA                            | NA                 |
| <i>Desi_wild_27629495</i> | NA                                  | <i>Ca_desi_denovo</i> | 27629495                | C/G  | NA                 | NA                            | NA                 |
| <i>Desi_wild_27632207</i> | NA                                  | <i>Ca_desi_denovo</i> | 27632207                | A/C  | NA                 | NA                            | NA                 |
| <i>Desi_wild_27633036</i> | NA                                  | <i>Ca_desi_denovo</i> | 27633036                | T/G  | NA                 | NA                            | NA                 |
| <i>Desi_wild_27641109</i> | NA                                  | <i>Ca_desi_denovo</i> | 27641109                | A/C  | NA                 | NA                            | NA                 |
| <i>Desi_wild_27645566</i> | NA                                  | <i>Ca_desi_denovo</i> | 27645566                | C/T  | NA                 | NA                            | NA                 |
| <i>Desi_wild_27645584</i> | NA                                  | <i>Ca_desi_denovo</i> | 27645584                | C/G  | NA                 | NA                            | NA                 |
| <i>Desi_wild_27648107</i> | NA                                  | <i>Ca_desi_denovo</i> | 27648107                | G/T  | NA                 | NA                            | NA                 |
| <i>Desi_wild_27649924</i> | NA                                  | <i>Ca_desi_denovo</i> | 27649924                | G/A  | NA                 | NA                            | NA                 |
| <i>Desi_wild_27662171</i> | NA                                  | <i>Ca_desi_denovo</i> | 27662171                | G/C  | NA                 | NA                            | NA                 |
| <i>Desi_wild_27662184</i> | NA                                  | <i>Ca_desi_denovo</i> | 27662184                | G/C  | NA                 | NA                            | NA                 |
| <i>Desi_wild_27662204</i> | NA                                  | <i>Ca_desi_denovo</i> | 27662204                | G/C  | NA                 | NA                            | NA                 |
| <i>Desi_wild_27662225</i> | NA                                  | <i>Ca_desi_denovo</i> | 27662225                | C/G  | NA                 | NA                            | NA                 |
| <i>Desi_wild_27665300</i> | NA                                  | <i>Ca_desi_denovo</i> | 27665300                | G/T  | NA                 | NA                            | NA                 |
| <i>Desi_wild_27665441</i> | NA                                  | <i>Ca_desi_denovo</i> | 27665441                | A/G  | NA                 | NA                            | NA                 |
| <i>Desi_wild_27671062</i> | NA                                  | <i>Ca_desi_denovo</i> | 27671062                | T/G  | NA                 | NA                            | NA                 |
| <i>Desi_wild_27671093</i> | NA                                  | <i>Ca_desi_denovo</i> | 27671093                | T/G  | NA                 | NA                            | NA                 |
| <i>Desi_wild_27672423</i> | NA                                  | <i>Ca_desi_denovo</i> | 27672423                | G/T  | NA                 | NA                            | NA                 |
| <i>Desi_wild_27674500</i> | NA                                  | <i>Ca_desi_denovo</i> | 27674500                | G/A  | NA                 | NA                            | NA                 |



| SNP IDs                   | NCBI dbSNP accession IDs (NCBI_SS#) | Chromosomes           | Physical positions (bp) | SNPs | Gene accession IDs | Sequence components of genome | Putative functions |
|---------------------------|-------------------------------------|-----------------------|-------------------------|------|--------------------|-------------------------------|--------------------|
| <i>Desi_wild_27686761</i> | NA                                  | <i>Ca_desi_denovo</i> | 27686761                | T/C  | NA                 | NA                            | NA                 |
| <i>Desi_wild_27692567</i> | NA                                  | <i>Ca_desi_denovo</i> | 27692567                | G/T  | NA                 | NA                            | NA                 |
| <i>Desi_wild_27699404</i> | NA                                  | <i>Ca_desi_denovo</i> | 27699404                | T/C  | NA                 | NA                            | NA                 |
| <i>Desi_wild_27699407</i> | NA                                  | <i>Ca_desi_denovo</i> | 27699407                | G/C  | NA                 | NA                            | NA                 |
| <i>Desi_wild_27699891</i> | NA                                  | <i>Ca_desi_denovo</i> | 27699891                | A/G  | NA                 | NA                            | NA                 |
| <i>Desi_wild_27699928</i> | NA                                  | <i>Ca_desi_denovo</i> | 27699928                | A/G  | NA                 | NA                            | NA                 |
| <i>Desi_wild_27701064</i> | NA                                  | <i>Ca_desi_denovo</i> | 27701064                | T/C  | NA                 | NA                            | NA                 |
| <i>Desi_wild_27701905</i> | NA                                  | <i>Ca_desi_denovo</i> | 27701905                | G/C  | NA                 | NA                            | NA                 |
| <i>Desi_wild_27701931</i> | NA                                  | <i>Ca_desi_denovo</i> | 27701931                | C/T  | NA                 | NA                            | NA                 |
| <i>Desi_wild_27702088</i> | NA                                  | <i>Ca_desi_denovo</i> | 27702088                | T/G  | NA                 | NA                            | NA                 |
| <i>Desi_wild_27702148</i> | NA                                  | <i>Ca_desi_denovo</i> | 27702148                | G/A  | NA                 | NA                            | NA                 |
| <i>Desi_wild_27705095</i> | NA                                  | <i>Ca_desi_denovo</i> | 27705095                | C/G  | NA                 | NA                            | NA                 |
| <i>Desi_wild_27705099</i> | NA                                  | <i>Ca_desi_denovo</i> | 27705099                | C/G  | NA                 | NA                            | NA                 |
| <i>Desi_wild_27705111</i> | NA                                  | <i>Ca_desi_denovo</i> | 27705111                | G/C  | NA                 | NA                            | NA                 |
| <i>Desi_wild_27708695</i> | NA                                  | <i>Ca_desi_denovo</i> | 27708695                | T/G  | NA                 | NA                            | NA                 |
| <i>Desi_wild_27709235</i> | NA                                  | <i>Ca_desi_denovo</i> | 27709235                | T/C  | NA                 | NA                            | NA                 |
| <i>Desi_wild_27713065</i> | NA                                  | <i>Ca_desi_denovo</i> | 27713065                | A/G  | NA                 | NA                            | NA                 |
| <i>Desi_wild_27715925</i> | NA                                  | <i>Ca_desi_denovo</i> | 27715925                | G/C  | NA                 | NA                            | NA                 |
| <i>Desi_wild_27715964</i> | NA                                  | <i>Ca_desi_denovo</i> | 27715964                | A/G  | NA                 | NA                            | NA                 |
| <i>Desi_wild_27716622</i> | NA                                  | <i>Ca_desi_denovo</i> | 27716622                | A/G  | NA                 | NA                            | NA                 |
| <i>Desi_wild_27716647</i> | NA                                  | <i>Ca_desi_denovo</i> | 27716647                | G/A  | NA                 | NA                            | NA                 |
| <i>Desi_wild_27716880</i> | NA                                  | <i>Ca_desi_denovo</i> | 27716880                | A/G  | NA                 | NA                            | NA                 |
| <i>Desi_wild_27724228</i> | NA                                  | <i>Ca_desi_denovo</i> | 27724228                | T/G  | NA                 | NA                            | NA                 |
| <i>Desi_wild_27724973</i> | NA                                  | <i>Ca_desi_denovo</i> | 27724973                | G/A  | NA                 | NA                            | NA                 |
| <i>Desi_wild_27724987</i> | NA                                  | <i>Ca_desi_denovo</i> | 27724987                | A/G  | NA                 | NA                            | NA                 |
| <i>Desi_wild_27735204</i> | NA                                  | <i>Ca_desi_denovo</i> | 27735204                | C/T  | NA                 | NA                            | NA                 |
| <i>Desi_wild_27735206</i> | NA                                  | <i>Ca_desi_denovo</i> | 27735206                | G/A  | NA                 | NA                            | NA                 |
| <i>Desi_wild_27735225</i> | NA                                  | <i>Ca_desi_denovo</i> | 27735225                | A/G  | NA                 | NA                            | NA                 |
| <i>Desi_wild_27735243</i> | NA                                  | <i>Ca_desi_denovo</i> | 27735243                | G/C  | NA                 | NA                            | NA                 |
| <i>Desi_wild_27737913</i> | NA                                  | <i>Ca_desi_denovo</i> | 27737913                | A/G  | NA                 | NA                            | NA                 |
| <i>Desi_wild_27737923</i> | NA                                  | <i>Ca_desi_denovo</i> | 27737923                | A/G  | NA                 | NA                            | NA                 |
| <i>Desi_wild_27745994</i> | NA                                  | <i>Ca_desi_denovo</i> | 27745994                | C/T  | NA                 | NA                            | NA                 |
| <i>Desi_wild_27757544</i> | NA                                  | <i>Ca_desi_denovo</i> | 27757544                | T/C  | NA                 | NA                            | NA                 |
| <i>Desi_wild_27757553</i> | NA                                  | <i>Ca_desi_denovo</i> | 27757553                | T/C  | NA                 | NA                            | NA                 |
| <i>Desi_wild_27763719</i> | NA                                  | <i>Ca_desi_denovo</i> | 27763719                | G/C  | NA                 | NA                            | NA                 |
| <i>Desi_wild_27763737</i> | NA                                  | <i>Ca_desi_denovo</i> | 27763737                | C/A  | NA                 | NA                            | NA                 |
| <i>Desi_wild_27763739</i> | NA                                  | <i>Ca_desi_denovo</i> | 27763739                | T/G  | NA                 | NA                            | NA                 |
| <i>Desi_wild_27768165</i> | NA                                  | <i>Ca_desi_denovo</i> | 27768165                | C/T  | NA                 | NA                            | NA                 |
| <i>Desi_wild_27768192</i> | NA                                  | <i>Ca_desi_denovo</i> | 27768192                | G/C  | NA                 | NA                            | NA                 |
| <i>Desi_wild_27770452</i> | NA                                  | <i>Ca_desi_denovo</i> | 27770452                | C/T  | NA                 | NA                            | NA                 |
| <i>Desi_wild_27776487</i> | NA                                  | <i>Ca_desi_denovo</i> | 27776487                | G/A  | NA                 | NA                            | NA                 |
| <i>Desi_wild_27778324</i> | NA                                  | <i>Ca_desi_denovo</i> | 27778324                | C/T  | NA                 | NA                            | NA                 |
| <i>Desi_wild_27779309</i> | NA                                  | <i>Ca_desi_denovo</i> | 27779309                | G/A  | NA                 | NA                            | NA                 |
| <i>Desi_wild_27782485</i> | NA                                  | <i>Ca_desi_denovo</i> | 27782485                | T/C  | NA                 | NA                            | NA                 |

| SNP IDs                   | NCBI dbSNP accession IDs (NCBI_SS#) | Chromosomes           | Physical positions (bp) | SNPs | Gene accession IDs | Sequence components of genome | Putative functions |
|---------------------------|-------------------------------------|-----------------------|-------------------------|------|--------------------|-------------------------------|--------------------|
| <i>Desi_wild_27787370</i> | NA                                  | <i>Ca_desi_denovo</i> | 27787370                | T/G  | NA                 | NA                            | NA                 |
| <i>Desi_wild_27797415</i> | NA                                  | <i>Ca_desi_denovo</i> | 27797415                | C/T  | NA                 | NA                            | NA                 |
| <i>Desi_wild_27801061</i> | NA                                  | <i>Ca_desi_denovo</i> | 27801061                | T/C  | NA                 | NA                            | NA                 |
| <i>Desi_wild_27801078</i> | NA                                  | <i>Ca_desi_denovo</i> | 27801078                | G/C  | NA                 | NA                            | NA                 |
| <i>Desi_wild_27806472</i> | NA                                  | <i>Ca_desi_denovo</i> | 27806472                | G/T  | NA                 | NA                            | NA                 |
| <i>Desi_wild_27814403</i> | NA                                  | <i>Ca_desi_denovo</i> | 27814403                | A/G  | NA                 | NA                            | NA                 |
| <i>Desi_wild_27818361</i> | NA                                  | <i>Ca_desi_denovo</i> | 27818361                | T/C  | NA                 | NA                            | NA                 |
| <i>Desi_wild_27818391</i> | NA                                  | <i>Ca_desi_denovo</i> | 27818391                | A/C  | NA                 | NA                            | NA                 |
| <i>Desi_wild_27819834</i> | NA                                  | <i>Ca_desi_denovo</i> | 27819834                | C/T  | NA                 | NA                            | NA                 |
| <i>Desi_wild_27820940</i> | NA                                  | <i>Ca_desi_denovo</i> | 27820940                | A/G  | NA                 | NA                            | NA                 |
| <i>Desi_wild_27821351</i> | NA                                  | <i>Ca_desi_denovo</i> | 27821351                | A/G  | NA                 | NA                            | NA                 |
| <i>Desi_wild_27821375</i> | NA                                  | <i>Ca_desi_denovo</i> | 27821375                | T/C  | NA                 | NA                            | NA                 |
| <i>Desi_wild_27822680</i> | NA                                  | <i>Ca_desi_denovo</i> | 27822680                | A/T  | NA                 | NA                            | NA                 |
| <i>Desi_wild_27822714</i> | NA                                  | <i>Ca_desi_denovo</i> | 27822714                | T/C  | NA                 | NA                            | NA                 |
| <i>Desi_wild_27825228</i> | NA                                  | <i>Ca_desi_denovo</i> | 27825228                | T/G  | NA                 | NA                            | NA                 |
| <i>Desi_wild_27829093</i> | NA                                  | <i>Ca_desi_denovo</i> | 27829093                | T/G  | NA                 | NA                            | NA                 |
| <i>Desi_wild_27834354</i> | NA                                  | <i>Ca_desi_denovo</i> | 27834354                | T/G  | NA                 | NA                            | NA                 |
| <i>Desi_wild_27835415</i> | NA                                  | <i>Ca_desi_denovo</i> | 27835415                | A/T  | NA                 | NA                            | NA                 |
| <i>Desi_wild_27838386</i> | NA                                  | <i>Ca_desi_denovo</i> | 27838386                | C/G  | NA                 | NA                            | NA                 |
| <i>Desi_wild_27844283</i> | NA                                  | <i>Ca_desi_denovo</i> | 27844283                | G/C  | NA                 | NA                            | NA                 |
| <i>Desi_wild_27844333</i> | NA                                  | <i>Ca_desi_denovo</i> | 27844333                | G/A  | NA                 | NA                            | NA                 |
| <i>Desi_wild_27856045</i> | NA                                  | <i>Ca_desi_denovo</i> | 27856045                | G/T  | NA                 | NA                            | NA                 |
| <i>Desi_wild_27859953</i> | NA                                  | <i>Ca_desi_denovo</i> | 27859953                | G/A  | NA                 | NA                            | NA                 |
| <i>Desi_wild_27865840</i> | NA                                  | <i>Ca_desi_denovo</i> | 27865840                | T/C  | NA                 | NA                            | NA                 |
| <i>Desi_wild_27867881</i> | NA                                  | <i>Ca_desi_denovo</i> | 27867881                | C/T  | NA                 | NA                            | NA                 |
| <i>Desi_wild_27868226</i> | NA                                  | <i>Ca_desi_denovo</i> | 27868226                | C/G  | NA                 | NA                            | NA                 |
| <i>Desi_wild_27871278</i> | NA                                  | <i>Ca_desi_denovo</i> | 27871278                | G/A  | NA                 | NA                            | NA                 |
| <i>Desi_wild_27873778</i> | NA                                  | <i>Ca_desi_denovo</i> | 27873778                | C/A  | NA                 | NA                            | NA                 |
| <i>Desi_wild_27873797</i> | NA                                  | <i>Ca_desi_denovo</i> | 27873797                | A/G  | NA                 | NA                            | NA                 |
| <i>Desi_wild_27874536</i> | NA                                  | <i>Ca_desi_denovo</i> | 27874536                | T/C  | NA                 | NA                            | NA                 |
| <i>Desi_wild_27874539</i> | NA                                  | <i>Ca_desi_denovo</i> | 27874539                | T/C  | NA                 | NA                            | NA                 |
| <i>Desi_wild_27886398</i> | NA                                  | <i>Ca_desi_denovo</i> | 27886398                | T/C  | NA                 | NA                            | NA                 |
| <i>Desi_wild_27902724</i> | NA                                  | <i>Ca_desi_denovo</i> | 27902724                | C/G  | NA                 | NA                            | NA                 |
| <i>Desi_wild_27904869</i> | NA                                  | <i>Ca_desi_denovo</i> | 27904869                | T/G  | NA                 | NA                            | NA                 |
| <i>Desi_wild_27917162</i> | NA                                  | <i>Ca_desi_denovo</i> | 27917162                | C/G  | NA                 | NA                            | NA                 |
| <i>Desi_wild_27917178</i> | NA                                  | <i>Ca_desi_denovo</i> | 27917178                | C/A  | NA                 | NA                            | NA                 |
| <i>Desi_wild_27917937</i> | NA                                  | <i>Ca_desi_denovo</i> | 27917937                | C/T  | NA                 | NA                            | NA                 |
| <i>Desi_wild_27941348</i> | NA                                  | <i>Ca_desi_denovo</i> | 27941348                | C/T  | NA                 | NA                            | NA                 |
| <i>Desi_wild_27944611</i> | NA                                  | <i>Ca_desi_denovo</i> | 27944611                | G/T  | NA                 | NA                            | NA                 |
| <i>Desi_wild_27948304</i> | NA                                  | <i>Ca_desi_denovo</i> | 27948304                | A/G  | NA                 | NA                            | NA                 |
| <i>Desi_wild_27949320</i> | NA                                  | <i>Ca_desi_denovo</i> | 27949320                | T/C  | NA                 | NA                            | NA                 |
| <i>Desi_wild_27949334</i> | NA                                  | <i>Ca_desi_denovo</i> | 27949334                | T/C  | NA                 | NA                            | NA                 |
| <i>Desi_wild_27950223</i> | NA                                  | <i>Ca_desi_denovo</i> | 27950223                | G/T  | NA                 | NA                            | NA                 |
| <i>Desi_wild_27955036</i> | NA                                  | <i>Ca_desi_denovo</i> | 27955036                | C/G  | NA                 | NA                            | NA                 |

| SNP IDs                   | NCBI dbSNP accession IDs (NCBI_SS#) | Chromosomes           | Physical positions (bp) | SNPs | Gene accession IDs | Sequence components of genome | Putative functions |
|---------------------------|-------------------------------------|-----------------------|-------------------------|------|--------------------|-------------------------------|--------------------|
| <i>Desi_wild_27955051</i> | NA                                  | <i>Ca_desi_denovo</i> | 27955051                | G/A  | NA                 | NA                            | NA                 |
| <i>Desi_wild_27957138</i> | NA                                  | <i>Ca_desi_denovo</i> | 27957138                | G/T  | NA                 | NA                            | NA                 |
| <i>Desi_wild_27959524</i> | NA                                  | <i>Ca_desi_denovo</i> | 27959524                | G/T  | NA                 | NA                            | NA                 |
| <i>Desi_wild_27969152</i> | NA                                  | <i>Ca_desi_denovo</i> | 27969152                | A/T  | NA                 | NA                            | NA                 |
| <i>Desi_wild_27969175</i> | NA                                  | <i>Ca_desi_denovo</i> | 27969175                | A/C  | NA                 | NA                            | NA                 |
| <i>Desi_wild_27972749</i> | NA                                  | <i>Ca_desi_denovo</i> | 27972749                | T/C  | NA                 | NA                            | NA                 |
| <i>Desi_wild_27981101</i> | NA                                  | <i>Ca_desi_denovo</i> | 27981101                | T/G  | NA                 | NA                            | NA                 |
| <i>Desi_wild_27981461</i> | NA                                  | <i>Ca_desi_denovo</i> | 27981461                | A/G  | NA                 | NA                            | NA                 |
| <i>Desi_wild_27981491</i> | NA                                  | <i>Ca_desi_denovo</i> | 27981491                | A/G  | NA                 | NA                            | NA                 |
| <i>Desi_wild_27982618</i> | NA                                  | <i>Ca_desi_denovo</i> | 27982618                | G/A  | NA                 | NA                            | NA                 |
| <i>Desi_wild_27982632</i> | NA                                  | <i>Ca_desi_denovo</i> | 27982632                | G/C  | NA                 | NA                            | NA                 |
| <i>Desi_wild_27985135</i> | NA                                  | <i>Ca_desi_denovo</i> | 27985135                | C/T  | NA                 | NA                            | NA                 |
| <i>Desi_wild_27989790</i> | NA                                  | <i>Ca_desi_denovo</i> | 27989790                | T/C  | NA                 | NA                            | NA                 |
| <i>Desi_wild_27991314</i> | NA                                  | <i>Ca_desi_denovo</i> | 27991314                | A/C  | NA                 | NA                            | NA                 |
| <i>Desi_wild_27998993</i> | NA                                  | <i>Ca_desi_denovo</i> | 27998993                | A/T  | NA                 | NA                            | NA                 |
| <i>Desi_wild_27998999</i> | NA                                  | <i>Ca_desi_denovo</i> | 27998999                | G/T  | NA                 | NA                            | NA                 |
| <i>Desi_wild_28001009</i> | NA                                  | <i>Ca_desi_denovo</i> | 28001009                | T/A  | NA                 | NA                            | NA                 |
| <i>Desi_wild_28007184</i> | NA                                  | <i>Ca_desi_denovo</i> | 28007184                | C/G  | NA                 | NA                            | NA                 |
| <i>Desi_wild_28007193</i> | NA                                  | <i>Ca_desi_denovo</i> | 28007193                | A/G  | NA                 | NA                            | NA                 |
| <i>Desi_wild_28019062</i> | NA                                  | <i>Ca_desi_denovo</i> | 28019062                | T/G  | NA                 | NA                            | NA                 |
| <i>Desi_wild_28019117</i> | NA                                  | <i>Ca_desi_denovo</i> | 28019117                | G/A  | NA                 | NA                            | NA                 |
| <i>Desi_wild_28019514</i> | NA                                  | <i>Ca_desi_denovo</i> | 28019514                | T/G  | NA                 | NA                            | NA                 |
| <i>Desi_wild_28026932</i> | NA                                  | <i>Ca_desi_denovo</i> | 28026932                | G/T  | NA                 | NA                            | NA                 |
| <i>Desi_wild_28038934</i> | NA                                  | <i>Ca_desi_denovo</i> | 28038934                | T/G  | NA                 | NA                            | NA                 |
| <i>Desi_wild_28040663</i> | NA                                  | <i>Ca_desi_denovo</i> | 28040663                | A/C  | NA                 | NA                            | NA                 |
| <i>Desi_wild_28041161</i> | NA                                  | <i>Ca_desi_denovo</i> | 28041161                | A/G  | NA                 | NA                            | NA                 |
| <i>Desi_wild_28041185</i> | NA                                  | <i>Ca_desi_denovo</i> | 28041185                | T/C  | NA                 | NA                            | NA                 |
| <i>Desi_wild_28044136</i> | NA                                  | <i>Ca_desi_denovo</i> | 28044136                | G/A  | NA                 | NA                            | NA                 |
| <i>Desi_wild_28044178</i> | NA                                  | <i>Ca_desi_denovo</i> | 28044178                | C/T  | NA                 | NA                            | NA                 |
| <i>Desi_wild_28046222</i> | NA                                  | <i>Ca_desi_denovo</i> | 28046222                | T/C  | NA                 | NA                            | NA                 |
| <i>Desi_wild_28053848</i> | NA                                  | <i>Ca_desi_denovo</i> | 28053848                | G/A  | NA                 | NA                            | NA                 |
| <i>Desi_wild_28053902</i> | NA                                  | <i>Ca_desi_denovo</i> | 28053902                | A/C  | NA                 | NA                            | NA                 |
| <i>Desi_wild_28056567</i> | NA                                  | <i>Ca_desi_denovo</i> | 28056567                | T/C  | NA                 | NA                            | NA                 |
| <i>Desi_wild_28056576</i> | NA                                  | <i>Ca_desi_denovo</i> | 28056576                | T/G  | NA                 | NA                            | NA                 |
| <i>Desi_wild_28058593</i> | NA                                  | <i>Ca_desi_denovo</i> | 28058593                | G/T  | NA                 | NA                            | NA                 |
| <i>Desi_wild_28063124</i> | NA                                  | <i>Ca_desi_denovo</i> | 28063124                | A/C  | NA                 | NA                            | NA                 |
| <i>Desi_wild_28078031</i> | NA                                  | <i>Ca_desi_denovo</i> | 28078031                | T/C  | NA                 | NA                            | NA                 |
| <i>Desi_wild_28078965</i> | NA                                  | <i>Ca_desi_denovo</i> | 28078965                | A/C  | NA                 | NA                            | NA                 |
| <i>Desi_wild_28078966</i> | NA                                  | <i>Ca_desi_denovo</i> | 28078966                | G/C  | NA                 | NA                            | NA                 |
| <i>Desi_wild_28082157</i> | NA                                  | <i>Ca_desi_denovo</i> | 28082157                | C/G  | NA                 | NA                            | NA                 |
| <i>Desi_wild_28086444</i> | NA                                  | <i>Ca_desi_denovo</i> | 28086444                | T/G  | NA                 | NA                            | NA                 |
| <i>Desi_wild_28092599</i> | NA                                  | <i>Ca_desi_denovo</i> | 28092599                | A/C  | NA                 | NA                            | NA                 |
| <i>Desi_wild_28092632</i> | NA                                  | <i>Ca_desi_denovo</i> | 28092632                | G/A  | NA                 | NA                            | NA                 |
| <i>Desi_wild_28092688</i> | NA                                  | <i>Ca_desi_denovo</i> | 28092688                | T/C  | NA                 | NA                            | NA                 |

| SNP IDs                   | NCBI dbSNP accession IDs (NCBI_SS#) | Chromosomes           | Physical positions (bp) | SNPs | Gene accession IDs | Sequence components of genome | Putative functions |
|---------------------------|-------------------------------------|-----------------------|-------------------------|------|--------------------|-------------------------------|--------------------|
| <i>Desi_wild_28095305</i> | NA                                  | <i>Ca_desi_denovo</i> | 28095305                | T/G  | NA                 | NA                            | NA                 |
| <i>Desi_wild_28095377</i> | NA                                  | <i>Ca_desi_denovo</i> | 28095377                | T/G  | NA                 | NA                            | NA                 |
| <i>Desi_wild_28102391</i> | NA                                  | <i>Ca_desi_denovo</i> | 28102391                | A/C  | NA                 | NA                            | NA                 |
| <i>Desi_wild_28102769</i> | NA                                  | <i>Ca_desi_denovo</i> | 28102769                | G/T  | NA                 | NA                            | NA                 |
| <i>Desi_wild_28104281</i> | NA                                  | <i>Ca_desi_denovo</i> | 28104281                | G/T  | NA                 | NA                            | NA                 |
| <i>Desi_wild_28107450</i> | NA                                  | <i>Ca_desi_denovo</i> | 28107450                | A/G  | NA                 | NA                            | NA                 |
| <i>Desi_wild_28107453</i> | NA                                  | <i>Ca_desi_denovo</i> | 28107453                | C/T  | NA                 | NA                            | NA                 |
| <i>Desi_wild_28112564</i> | NA                                  | <i>Ca_desi_denovo</i> | 28112564                | A/C  | NA                 | NA                            | NA                 |
| <i>Desi_wild_28112672</i> | NA                                  | <i>Ca_desi_denovo</i> | 28112672                | C/T  | NA                 | NA                            | NA                 |
| <i>Desi_wild_28112699</i> | NA                                  | <i>Ca_desi_denovo</i> | 28112699                | C/T  | NA                 | NA                            | NA                 |
| <i>Desi_wild_28114039</i> | NA                                  | <i>Ca_desi_denovo</i> | 28114039                | C/G  | NA                 | NA                            | NA                 |
| <i>Desi_wild_28115409</i> | NA                                  | <i>Ca_desi_denovo</i> | 28115409                | G/A  | NA                 | NA                            | NA                 |
| <i>Desi_wild_28115421</i> | NA                                  | <i>Ca_desi_denovo</i> | 28115421                | G/A  | NA                 | NA                            | NA                 |
| <i>Desi_wild_28121245</i> | NA                                  | <i>Ca_desi_denovo</i> | 28121245                | A/G  | NA                 | NA                            | NA                 |
| <i>Desi_wild_28122302</i> | NA                                  | <i>Ca_desi_denovo</i> | 28122302                | G/A  | NA                 | NA                            | NA                 |
| <i>Desi_wild_28122465</i> | NA                                  | <i>Ca_desi_denovo</i> | 28122465                | T/C  | NA                 | NA                            | NA                 |
| <i>Desi_wild_28122507</i> | NA                                  | <i>Ca_desi_denovo</i> | 28122507                | C/G  | NA                 | NA                            | NA                 |
| <i>Desi_wild_28122568</i> | NA                                  | <i>Ca_desi_denovo</i> | 28122568                | C/G  | NA                 | NA                            | NA                 |
| <i>Desi_wild_28129856</i> | NA                                  | <i>Ca_desi_denovo</i> | 28129856                | T/C  | NA                 | NA                            | NA                 |
| <i>Desi_wild_28129925</i> | NA                                  | <i>Ca_desi_denovo</i> | 28129925                | T/G  | NA                 | NA                            | NA                 |
| <i>Desi_wild_28129931</i> | NA                                  | <i>Ca_desi_denovo</i> | 28129931                | C/G  | NA                 | NA                            | NA                 |
| <i>Desi_wild_28131690</i> | NA                                  | <i>Ca_desi_denovo</i> | 28131690                | G/C  | NA                 | NA                            | NA                 |
| <i>Desi_wild_28131763</i> | NA                                  | <i>Ca_desi_denovo</i> | 28131763                | A/G  | NA                 | NA                            | NA                 |
| <i>Desi_wild_28137188</i> | NA                                  | <i>Ca_desi_denovo</i> | 28137188                | G/T  | NA                 | NA                            | NA                 |
| <i>Desi_wild_28137417</i> | NA                                  | <i>Ca_desi_denovo</i> | 28137417                | G/T  | NA                 | NA                            | NA                 |
| <i>Desi_wild_28139541</i> | NA                                  | <i>Ca_desi_denovo</i> | 28139541                | A/C  | NA                 | NA                            | NA                 |
| <i>Desi_wild_28139542</i> | NA                                  | <i>Ca_desi_denovo</i> | 28139542                | G/T  | NA                 | NA                            | NA                 |
| <i>Desi_wild_28139543</i> | NA                                  | <i>Ca_desi_denovo</i> | 28139543                | A/G  | NA                 | NA                            | NA                 |
| <i>Desi_wild_28143150</i> | NA                                  | <i>Ca_desi_denovo</i> | 28143150                | A/G  | NA                 | NA                            | NA                 |
| <i>Desi_wild_28146690</i> | NA                                  | <i>Ca_desi_denovo</i> | 28146690                | G/T  | NA                 | NA                            | NA                 |
| <i>Desi_wild_28154559</i> | NA                                  | <i>Ca_desi_denovo</i> | 28154559                | A/G  | NA                 | NA                            | NA                 |
| <i>Desi_wild_28154562</i> | NA                                  | <i>Ca_desi_denovo</i> | 28154562                | C/T  | NA                 | NA                            | NA                 |
| <i>Desi_wild_28154941</i> | NA                                  | <i>Ca_desi_denovo</i> | 28154941                | T/C  | NA                 | NA                            | NA                 |
| <i>Desi_wild_28155842</i> | NA                                  | <i>Ca_desi_denovo</i> | 28155842                | G/T  | NA                 | NA                            | NA                 |
| <i>Desi_wild_28161718</i> | NA                                  | <i>Ca_desi_denovo</i> | 28161718                | G/T  | NA                 | NA                            | NA                 |
| <i>Desi_wild_28167183</i> | NA                                  | <i>Ca_desi_denovo</i> | 28167183                | G/T  | NA                 | NA                            | NA                 |
| <i>Desi_wild_28172497</i> | NA                                  | <i>Ca_desi_denovo</i> | 28172497                | C/T  | NA                 | NA                            | NA                 |
| <i>Desi_wild_28174239</i> | NA                                  | <i>Ca_desi_denovo</i> | 28174239                | C/T  | NA                 | NA                            | NA                 |
| <i>Desi_wild_28174245</i> | NA                                  | <i>Ca_desi_denovo</i> | 28174245                | T/C  | NA                 | NA                            | NA                 |
| <i>Desi_wild_28175399</i> | NA                                  | <i>Ca_desi_denovo</i> | 28175399                | G/T  | NA                 | NA                            | NA                 |
| <i>Desi_wild_28177087</i> | NA                                  | <i>Ca_desi_denovo</i> | 28177087                | C/G  | NA                 | NA                            | NA                 |
| <i>Desi_wild_28180043</i> | NA                                  | <i>Ca_desi_denovo</i> | 28180043                | A/T  | NA                 | NA                            | NA                 |
| <i>Desi_wild_28180254</i> | NA                                  | <i>Ca_desi_denovo</i> | 28180254                | C/T  | NA                 | NA                            | NA                 |
| <i>Desi_wild_28180264</i> | NA                                  | <i>Ca_desi_denovo</i> | 28180264                | A/G  | NA                 | NA                            | NA                 |

| SNP IDs                   | NCBI dbSNP accession IDs (NCBI_SS#) | Chromosomes           | Physical positions (bp) | SNPs | Gene accession IDs | Sequence components of genome | Putative functions |
|---------------------------|-------------------------------------|-----------------------|-------------------------|------|--------------------|-------------------------------|--------------------|
| <i>Desi_wild_28186385</i> | NA                                  | <i>Ca_desi_denovo</i> | 28186385                | A/C  | NA                 | NA                            | NA                 |
| <i>Desi_wild_28186958</i> | NA                                  | <i>Ca_desi_denovo</i> | 28186958                | T/G  | NA                 | NA                            | NA                 |
| <i>Desi_wild_28188598</i> | NA                                  | <i>Ca_desi_denovo</i> | 28188598                | A/C  | NA                 | NA                            | NA                 |
| <i>Desi_wild_28188599</i> | NA                                  | <i>Ca_desi_denovo</i> | 28188599                | A/G  | NA                 | NA                            | NA                 |
| <i>Desi_wild_28188921</i> | NA                                  | <i>Ca_desi_denovo</i> | 28188921                | C/T  | NA                 | NA                            | NA                 |
| <i>Desi_wild_28190560</i> | NA                                  | <i>Ca_desi_denovo</i> | 28190560                | G/T  | NA                 | NA                            | NA                 |
| <i>Desi_wild_28192919</i> | NA                                  | <i>Ca_desi_denovo</i> | 28192919                | A/C  | NA                 | NA                            | NA                 |
| <i>Desi_wild_28198317</i> | NA                                  | <i>Ca_desi_denovo</i> | 28198317                | C/T  | NA                 | NA                            | NA                 |
| <i>Desi_wild_28198343</i> | NA                                  | <i>Ca_desi_denovo</i> | 28198343                | C/T  | NA                 | NA                            | NA                 |
| <i>Desi_wild_28200264</i> | NA                                  | <i>Ca_desi_denovo</i> | 28200264                | A/G  | NA                 | NA                            | NA                 |
| <i>Desi_wild_28200267</i> | NA                                  | <i>Ca_desi_denovo</i> | 28200267                | T/C  | NA                 | NA                            | NA                 |
| <i>Desi_wild_28200323</i> | NA                                  | <i>Ca_desi_denovo</i> | 28200323                | C/T  | NA                 | NA                            | NA                 |
| <i>Desi_wild_28206083</i> | NA                                  | <i>Ca_desi_denovo</i> | 28206083                | G/A  | NA                 | NA                            | NA                 |
| <i>Desi_wild_28206089</i> | NA                                  | <i>Ca_desi_denovo</i> | 28206089                | T/C  | NA                 | NA                            | NA                 |
| <i>Desi_wild_28207068</i> | NA                                  | <i>Ca_desi_denovo</i> | 28207068                | C/G  | NA                 | NA                            | NA                 |
| <i>Desi_wild_28207893</i> | NA                                  | <i>Ca_desi_denovo</i> | 28207893                | G/T  | NA                 | NA                            | NA                 |
| <i>Desi_wild_28214686</i> | NA                                  | <i>Ca_desi_denovo</i> | 28214686                | G/T  | NA                 | NA                            | NA                 |
| <i>Desi_wild_28216919</i> | NA                                  | <i>Ca_desi_denovo</i> | 28216919                | A/C  | NA                 | NA                            | NA                 |
| <i>Desi_wild_28217782</i> | NA                                  | <i>Ca_desi_denovo</i> | 28217782                | G/T  | NA                 | NA                            | NA                 |
| <i>Desi_wild_28223446</i> | NA                                  | <i>Ca_desi_denovo</i> | 28223446                | A/C  | NA                 | NA                            | NA                 |
| <i>Desi_wild_28223856</i> | NA                                  | <i>Ca_desi_denovo</i> | 28223856                | G/A  | NA                 | NA                            | NA                 |
| <i>Desi_wild_28223916</i> | NA                                  | <i>Ca_desi_denovo</i> | 28223916                | C/T  | NA                 | NA                            | NA                 |
| <i>Desi_wild_28223933</i> | NA                                  | <i>Ca_desi_denovo</i> | 28223933                | C/T  | NA                 | NA                            | NA                 |
| <i>Desi_wild_28223942</i> | NA                                  | <i>Ca_desi_denovo</i> | 28223942                | G/T  | NA                 | NA                            | NA                 |
| <i>Desi_wild_28224152</i> | NA                                  | <i>Ca_desi_denovo</i> | 28224152                | T/C  | NA                 | NA                            | NA                 |
| <i>Desi_wild_28225363</i> | NA                                  | <i>Ca_desi_denovo</i> | 28225363                | A/C  | NA                 | NA                            | NA                 |
| <i>Desi_wild_28228493</i> | NA                                  | <i>Ca_desi_denovo</i> | 28228493                | G/T  | NA                 | NA                            | NA                 |
| <i>Desi_wild_28228836</i> | NA                                  | <i>Ca_desi_denovo</i> | 28228836                | G/A  | NA                 | NA                            | NA                 |
| <i>Desi_wild_28228867</i> | NA                                  | <i>Ca_desi_denovo</i> | 28228867                | T/C  | NA                 | NA                            | NA                 |
| <i>Desi_wild_28231315</i> | NA                                  | <i>Ca_desi_denovo</i> | 28231315                | T/C  | NA                 | NA                            | NA                 |
| <i>Desi_wild_28232946</i> | NA                                  | <i>Ca_desi_denovo</i> | 28232946                | C/T  | NA                 | NA                            | NA                 |
| <i>Desi_wild_28235927</i> | NA                                  | <i>Ca_desi_denovo</i> | 28235927                | G/T  | NA                 | NA                            | NA                 |
| <i>Desi_wild_28237698</i> | NA                                  | <i>Ca_desi_denovo</i> | 28237698                | C/T  | NA                 | NA                            | NA                 |
| <i>Desi_wild_28237719</i> | NA                                  | <i>Ca_desi_denovo</i> | 28237719                | G/C  | NA                 | NA                            | NA                 |
| <i>Desi_wild_28242270</i> | NA                                  | <i>Ca_desi_denovo</i> | 28242270                | G/A  | NA                 | NA                            | NA                 |
| <i>Desi_wild_28242339</i> | NA                                  | <i>Ca_desi_denovo</i> | 28242339                | A/C  | NA                 | NA                            | NA                 |
| <i>Desi_wild_28246963</i> | NA                                  | <i>Ca_desi_denovo</i> | 28246963                | A/C  | NA                 | NA                            | NA                 |
| <i>Desi_wild_28246966</i> | NA                                  | <i>Ca_desi_denovo</i> | 28246966                | C/T  | NA                 | NA                            | NA                 |
| <i>Desi_wild_28247985</i> | NA                                  | <i>Ca_desi_denovo</i> | 28247985                | C/T  | NA                 | NA                            | NA                 |
| <i>Desi_wild_28250519</i> | NA                                  | <i>Ca_desi_denovo</i> | 28250519                | C/G  | NA                 | NA                            | NA                 |
| <i>Desi_wild_28252351</i> | NA                                  | <i>Ca_desi_denovo</i> | 28252351                | C/T  | NA                 | NA                            | NA                 |
| <i>Desi_wild_28260673</i> | NA                                  | <i>Ca_desi_denovo</i> | 28260673                | C/T  | NA                 | NA                            | NA                 |
| <i>Desi_wild_28262831</i> | NA                                  | <i>Ca_desi_denovo</i> | 28262831                | C/G  | NA                 | NA                            | NA                 |
| <i>Desi_wild_28265625</i> | NA                                  | <i>Ca_desi_denovo</i> | 28265625                | A/G  | NA                 | NA                            | NA                 |

| SNP IDs                   | NCBI dbSNP accession IDs (NCBI_SS#) | Chromosomes           | Physical positions (bp) | SNPs | Gene accession IDs | Sequence components of genome | Putative functions |
|---------------------------|-------------------------------------|-----------------------|-------------------------|------|--------------------|-------------------------------|--------------------|
| <i>Desi_wild_28276314</i> | NA                                  | <i>Ca_desi_denovo</i> | 28276314                | C/G  | NA                 | NA                            | NA                 |
| <i>Desi_wild_28290762</i> | NA                                  | <i>Ca_desi_denovo</i> | 28290762                | C/T  | NA                 | NA                            | NA                 |
| <i>Desi_wild_28290828</i> | NA                                  | <i>Ca_desi_denovo</i> | 28290828                | A/G  | NA                 | NA                            | NA                 |
| <i>Desi_wild_28292847</i> | NA                                  | <i>Ca_desi_denovo</i> | 28292847                | G/T  | NA                 | NA                            | NA                 |
| <i>Desi_wild_28292855</i> | NA                                  | <i>Ca_desi_denovo</i> | 28292855                | G/T  | NA                 | NA                            | NA                 |
| <i>Desi_wild_28294617</i> | NA                                  | <i>Ca_desi_denovo</i> | 28294617                | G/A  | NA                 | NA                            | NA                 |
| <i>Desi_wild_28294619</i> | NA                                  | <i>Ca_desi_denovo</i> | 28294619                | G/C  | NA                 | NA                            | NA                 |
| <i>Desi_wild_28295405</i> | NA                                  | <i>Ca_desi_denovo</i> | 28295405                | G/T  | NA                 | NA                            | NA                 |
| <i>Desi_wild_28301255</i> | NA                                  | <i>Ca_desi_denovo</i> | 28301255                | C/T  | NA                 | NA                            | NA                 |
| <i>Desi_wild_28301283</i> | NA                                  | <i>Ca_desi_denovo</i> | 28301283                | C/G  | NA                 | NA                            | NA                 |
| <i>Desi_wild_28304016</i> | NA                                  | <i>Ca_desi_denovo</i> | 28304016                | A/G  | NA                 | NA                            | NA                 |
| <i>Desi_wild_28305713</i> | NA                                  | <i>Ca_desi_denovo</i> | 28305713                | G/T  | NA                 | NA                            | NA                 |
| <i>Desi_wild_28312712</i> | NA                                  | <i>Ca_desi_denovo</i> | 28312712                | G/T  | NA                 | NA                            | NA                 |
| <i>Desi_wild_28312848</i> | NA                                  | <i>Ca_desi_denovo</i> | 28312848                | G/A  | NA                 | NA                            | NA                 |
| <i>Desi_wild_28314385</i> | NA                                  | <i>Ca_desi_denovo</i> | 28314385                | G/T  | NA                 | NA                            | NA                 |
| <i>Desi_wild_28315137</i> | NA                                  | <i>Ca_desi_denovo</i> | 28315137                | A/G  | NA                 | NA                            | NA                 |
| <i>Desi_wild_28315149</i> | NA                                  | <i>Ca_desi_denovo</i> | 28315149                | G/C  | NA                 | NA                            | NA                 |
| <i>Desi_wild_28320301</i> | NA                                  | <i>Ca_desi_denovo</i> | 28320301                | G/T  | NA                 | NA                            | NA                 |
| <i>Desi_wild_28321045</i> | NA                                  | <i>Ca_desi_denovo</i> | 28321045                | C/G  | NA                 | NA                            | NA                 |
| <i>Desi_wild_28321069</i> | NA                                  | <i>Ca_desi_denovo</i> | 28321069                | T/C  | NA                 | NA                            | NA                 |
| <i>Desi_wild_28329112</i> | NA                                  | <i>Ca_desi_denovo</i> | 28329112                | C/A  | NA                 | NA                            | NA                 |
| <i>Desi_wild_28329113</i> | NA                                  | <i>Ca_desi_denovo</i> | 28329113                | G/C  | NA                 | NA                            | NA                 |
| <i>Desi_wild_28332629</i> | NA                                  | <i>Ca_desi_denovo</i> | 28332629                | G/T  | NA                 | NA                            | NA                 |
| <i>Desi_wild_28336196</i> | NA                                  | <i>Ca_desi_denovo</i> | 28336196                | G/T  | NA                 | NA                            | NA                 |
| <i>Desi_wild_28343060</i> | NA                                  | <i>Ca_desi_denovo</i> | 28343060                | A/C  | NA                 | NA                            | NA                 |
| <i>Desi_wild_28343062</i> | NA                                  | <i>Ca_desi_denovo</i> | 28343062                | A/C  | NA                 | NA                            | NA                 |
| <i>Desi_wild_28343063</i> | NA                                  | <i>Ca_desi_denovo</i> | 28343063                | G/T  | NA                 | NA                            | NA                 |
| <i>Desi_wild_28347374</i> | NA                                  | <i>Ca_desi_denovo</i> | 28347374                | A/G  | NA                 | NA                            | NA                 |
| <i>Desi_wild_28351556</i> | NA                                  | <i>Ca_desi_denovo</i> | 28351556                | T/C  | NA                 | NA                            | NA                 |
| <i>Desi_wild_28357902</i> | NA                                  | <i>Ca_desi_denovo</i> | 28357902                | G/A  | NA                 | NA                            | NA                 |
| <i>Desi_wild_28358948</i> | NA                                  | <i>Ca_desi_denovo</i> | 28358948                | C/T  | NA                 | NA                            | NA                 |
| <i>Desi_wild_28359557</i> | NA                                  | <i>Ca_desi_denovo</i> | 28359557                | G/T  | NA                 | NA                            | NA                 |
| <i>Desi_wild_28367947</i> | NA                                  | <i>Ca_desi_denovo</i> | 28367947                | G/C  | NA                 | NA                            | NA                 |
| <i>Desi_wild_28367960</i> | NA                                  | <i>Ca_desi_denovo</i> | 28367960                | G/T  | NA                 | NA                            | NA                 |
| <i>Desi_wild_28378725</i> | NA                                  | <i>Ca_desi_denovo</i> | 28378725                | C/T  | NA                 | NA                            | NA                 |
| <i>Desi_wild_28378746</i> | NA                                  | <i>Ca_desi_denovo</i> | 28378746                | G/A  | NA                 | NA                            | NA                 |
| <i>Desi_wild_28381211</i> | NA                                  | <i>Ca_desi_denovo</i> | 28381211                | A/T  | NA                 | NA                            | NA                 |
| <i>Desi_wild_28381236</i> | NA                                  | <i>Ca_desi_denovo</i> | 28381236                | C/A  | NA                 | NA                            | NA                 |
| <i>Desi_wild_28381264</i> | NA                                  | <i>Ca_desi_denovo</i> | 28381264                | A/G  | NA                 | NA                            | NA                 |
| <i>Desi_wild_28381866</i> | NA                                  | <i>Ca_desi_denovo</i> | 28381866                | A/G  | NA                 | NA                            | NA                 |
| <i>Desi_wild_28384943</i> | NA                                  | <i>Ca_desi_denovo</i> | 28384943                | A/G  | NA                 | NA                            | NA                 |
| <i>Desi_wild_28385450</i> | NA                                  | <i>Ca_desi_denovo</i> | 28385450                | C/T  | NA                 | NA                            | NA                 |
| <i>Desi_wild_28386038</i> | NA                                  | <i>Ca_desi_denovo</i> | 28386038                | C/T  | NA                 | NA                            | NA                 |
| <i>Desi_wild_28394419</i> | NA                                  | <i>Ca_desi_denovo</i> | 28394419                | G/T  | NA                 | NA                            | NA                 |

| SNP IDs                   | NCBI dbSNP accession IDs (NCBI_SS#) | Chromosomes           | Physical positions (bp) | SNPs | Gene accession IDs | Sequence components of genome | Putative functions |
|---------------------------|-------------------------------------|-----------------------|-------------------------|------|--------------------|-------------------------------|--------------------|
| <i>Desi_wild_28397151</i> | NA                                  | <i>Ca_desi_denovo</i> | 28397151                | G/A  | NA                 | NA                            | NA                 |
| <i>Desi_wild_28400765</i> | NA                                  | <i>Ca_desi_denovo</i> | 28400765                | G/A  | NA                 | NA                            | NA                 |
| <i>Desi_wild_28400778</i> | NA                                  | <i>Ca_desi_denovo</i> | 28400778                | A/G  | NA                 | NA                            | NA                 |
| <i>Desi_wild_28405010</i> | NA                                  | <i>Ca_desi_denovo</i> | 28405010                | T/G  | NA                 | NA                            | NA                 |
| <i>Desi_wild_28405040</i> | NA                                  | <i>Ca_desi_denovo</i> | 28405040                | T/C  | NA                 | NA                            | NA                 |
| <i>Desi_wild_28405109</i> | NA                                  | <i>Ca_desi_denovo</i> | 28405109                | C/T  | NA                 | NA                            | NA                 |
| <i>Desi_wild_28405110</i> | NA                                  | <i>Ca_desi_denovo</i> | 28405110                | C/T  | NA                 | NA                            | NA                 |
| <i>Desi_wild_28406190</i> | NA                                  | <i>Ca_desi_denovo</i> | 28406190                | C/G  | NA                 | NA                            | NA                 |
| <i>Desi_wild_28406193</i> | NA                                  | <i>Ca_desi_denovo</i> | 28406193                | C/T  | NA                 | NA                            | NA                 |
| <i>Desi_wild_28407046</i> | NA                                  | <i>Ca_desi_denovo</i> | 28407046                | T/C  | NA                 | NA                            | NA                 |
| <i>Desi_wild_28407376</i> | NA                                  | <i>Ca_desi_denovo</i> | 28407376                | G/C  | NA                 | NA                            | NA                 |
| <i>Desi_wild_28410672</i> | NA                                  | <i>Ca_desi_denovo</i> | 28410672                | A/T  | NA                 | NA                            | NA                 |
| <i>Desi_wild_28410737</i> | NA                                  | <i>Ca_desi_denovo</i> | 28410737                | T/A  | NA                 | NA                            | NA                 |
| <i>Desi_wild_28412977</i> | NA                                  | <i>Ca_desi_denovo</i> | 28412977                | A/G  | NA                 | NA                            | NA                 |
| <i>Desi_wild_28413535</i> | NA                                  | <i>Ca_desi_denovo</i> | 28413535                | G/C  | NA                 | NA                            | NA                 |
| <i>Desi_wild_28413597</i> | NA                                  | <i>Ca_desi_denovo</i> | 28413597                | A/G  | NA                 | NA                            | NA                 |
| <i>Desi_wild_28416807</i> | NA                                  | <i>Ca_desi_denovo</i> | 28416807                | G/A  | NA                 | NA                            | NA                 |
| <i>Desi_wild_28416840</i> | NA                                  | <i>Ca_desi_denovo</i> | 28416840                | T/C  | NA                 | NA                            | NA                 |
| <i>Desi_wild_28417437</i> | NA                                  | <i>Ca_desi_denovo</i> | 28417437                | G/T  | NA                 | NA                            | NA                 |
| <i>Desi_wild_28420223</i> | NA                                  | <i>Ca_desi_denovo</i> | 28420223                | T/G  | NA                 | NA                            | NA                 |
| <i>Desi_wild_28421061</i> | NA                                  | <i>Ca_desi_denovo</i> | 28421061                | A/C  | NA                 | NA                            | NA                 |
| <i>Desi_wild_28422748</i> | NA                                  | <i>Ca_desi_denovo</i> | 28422748                | G/A  | NA                 | NA                            | NA                 |
| <i>Desi_wild_28422750</i> | NA                                  | <i>Ca_desi_denovo</i> | 28422750                | A/C  | NA                 | NA                            | NA                 |
| <i>Desi_wild_28428085</i> | NA                                  | <i>Ca_desi_denovo</i> | 28428085                | G/C  | NA                 | NA                            | NA                 |
| <i>Desi_wild_28428114</i> | NA                                  | <i>Ca_desi_denovo</i> | 28428114                | A/T  | NA                 | NA                            | NA                 |
| <i>Desi_wild_28428572</i> | NA                                  | <i>Ca_desi_denovo</i> | 28428572                | C/G  | NA                 | NA                            | NA                 |
| <i>Desi_wild_28429093</i> | NA                                  | <i>Ca_desi_denovo</i> | 28429093                | C/A  | NA                 | NA                            | NA                 |
| <i>Desi_wild_28431383</i> | NA                                  | <i>Ca_desi_denovo</i> | 28431383                | A/C  | NA                 | NA                            | NA                 |
| <i>Desi_wild_28435252</i> | NA                                  | <i>Ca_desi_denovo</i> | 28435252                | A/T  | NA                 | NA                            | NA                 |
| <i>Desi_wild_28436033</i> | NA                                  | <i>Ca_desi_denovo</i> | 28436033                | A/G  | NA                 | NA                            | NA                 |
| <i>Desi_wild_28436054</i> | NA                                  | <i>Ca_desi_denovo</i> | 28436054                | C/G  | NA                 | NA                            | NA                 |
| <i>Desi_wild_28439008</i> | NA                                  | <i>Ca_desi_denovo</i> | 28439008                | G/T  | NA                 | NA                            | NA                 |
| <i>Desi_wild_28440996</i> | NA                                  | <i>Ca_desi_denovo</i> | 28440996                | C/T  | NA                 | NA                            | NA                 |
| <i>Desi_wild_28442658</i> | NA                                  | <i>Ca_desi_denovo</i> | 28442658                | G/A  | NA                 | NA                            | NA                 |
| <i>Desi_wild_28442663</i> | NA                                  | <i>Ca_desi_denovo</i> | 28442663                | C/T  | NA                 | NA                            | NA                 |
| <i>Desi_wild_28446272</i> | NA                                  | <i>Ca_desi_denovo</i> | 28446272                | T/A  | NA                 | NA                            | NA                 |
| <i>Desi_wild_28446299</i> | NA                                  | <i>Ca_desi_denovo</i> | 28446299                | C/A  | NA                 | NA                            | NA                 |
| <i>Desi_wild_28447347</i> | NA                                  | <i>Ca_desi_denovo</i> | 28447347                | C/T  | NA                 | NA                            | NA                 |
| <i>Desi_wild_28447371</i> | NA                                  | <i>Ca_desi_denovo</i> | 28447371                | T/C  | NA                 | NA                            | NA                 |
| <i>Desi_wild_28447574</i> | NA                                  | <i>Ca_desi_denovo</i> | 28447574                | A/G  | NA                 | NA                            | NA                 |
| <i>Desi_wild_28448833</i> | NA                                  | <i>Ca_desi_denovo</i> | 28448833                | C/T  | NA                 | NA                            | NA                 |
| <i>Desi_wild_28448986</i> | NA                                  | <i>Ca_desi_denovo</i> | 28448986                | A/G  | NA                 | NA                            | NA                 |
| <i>Desi_wild_28452833</i> | NA                                  | <i>Ca_desi_denovo</i> | 28452833                | G/C  | NA                 | NA                            | NA                 |
| <i>Desi_wild_28452872</i> | NA                                  | <i>Ca_desi_denovo</i> | 28452872                | C/G  | NA                 | NA                            | NA                 |

| SNP IDs                   | NCBI dbSNP accession IDs (NCBI_SS#) | Chromosomes           | Physical positions (bp) | SNPs | Gene accession IDs | Sequence components of genome | Putative functions |
|---------------------------|-------------------------------------|-----------------------|-------------------------|------|--------------------|-------------------------------|--------------------|
| <i>Desi_wild_28457213</i> | NA                                  | <i>Ca_desi_denovo</i> | 28457213                | T/G  | NA                 | NA                            | NA                 |
| <i>Desi_wild_28457227</i> | NA                                  | <i>Ca_desi_denovo</i> | 28457227                | C/A  | NA                 | NA                            | NA                 |
| <i>Desi_wild_28460755</i> | NA                                  | <i>Ca_desi_denovo</i> | 28460755                | G/T  | NA                 | NA                            | NA                 |
| <i>Desi_wild_28464259</i> | NA                                  | <i>Ca_desi_denovo</i> | 28464259                | G/T  | NA                 | NA                            | NA                 |
| <i>Desi_wild_28464263</i> | NA                                  | <i>Ca_desi_denovo</i> | 28464263                | G/T  | NA                 | NA                            | NA                 |
| <i>Desi_wild_28465767</i> | NA                                  | <i>Ca_desi_denovo</i> | 28465767                | T/C  | NA                 | NA                            | NA                 |
| <i>Desi_wild_28465820</i> | NA                                  | <i>Ca_desi_denovo</i> | 28465820                | C/G  | NA                 | NA                            | NA                 |
| <i>Desi_wild_28471154</i> | NA                                  | <i>Ca_desi_denovo</i> | 28471154                | A/G  | NA                 | NA                            | NA                 |
| <i>Desi_wild_28471613</i> | NA                                  | <i>Ca_desi_denovo</i> | 28471613                | C/T  | NA                 | NA                            | NA                 |
| <i>Desi_wild_28471637</i> | NA                                  | <i>Ca_desi_denovo</i> | 28471637                | A/T  | NA                 | NA                            | NA                 |
| <i>Desi_wild_28477730</i> | NA                                  | <i>Ca_desi_denovo</i> | 28477730                | A/G  | NA                 | NA                            | NA                 |
| <i>Desi_wild_28478462</i> | NA                                  | <i>Ca_desi_denovo</i> | 28478462                | G/A  | NA                 | NA                            | NA                 |
| <i>Desi_wild_28479517</i> | NA                                  | <i>Ca_desi_denovo</i> | 28479517                | A/G  | NA                 | NA                            | NA                 |
| <i>Desi_wild_28479529</i> | NA                                  | <i>Ca_desi_denovo</i> | 28479529                | A/G  | NA                 | NA                            | NA                 |
| <i>Desi_wild_28483885</i> | NA                                  | <i>Ca_desi_denovo</i> | 28483885                | G/A  | NA                 | NA                            | NA                 |
| <i>Desi_wild_28487733</i> | NA                                  | <i>Ca_desi_denovo</i> | 28487733                | A/C  | NA                 | NA                            | NA                 |
| <i>Desi_wild_28487849</i> | NA                                  | <i>Ca_desi_denovo</i> | 28487849                | C/T  | NA                 | NA                            | NA                 |
| <i>Desi_wild_28490167</i> | NA                                  | <i>Ca_desi_denovo</i> | 28490167                | G/A  | NA                 | NA                            | NA                 |
| <i>Desi_wild_28490194</i> | NA                                  | <i>Ca_desi_denovo</i> | 28490194                | T/C  | NA                 | NA                            | NA                 |
| <i>Desi_wild_28496618</i> | NA                                  | <i>Ca_desi_denovo</i> | 28496618                | G/C  | NA                 | NA                            | NA                 |
| <i>Desi_wild_28500175</i> | NA                                  | <i>Ca_desi_denovo</i> | 28500175                | T/C  | NA                 | NA                            | NA                 |
| <i>Desi_wild_28504050</i> | NA                                  | <i>Ca_desi_denovo</i> | 28504050                | C/G  | NA                 | NA                            | NA                 |
| <i>Desi_wild_28505102</i> | NA                                  | <i>Ca_desi_denovo</i> | 28505102                | C/G  | NA                 | NA                            | NA                 |
| <i>Desi_wild_28506911</i> | NA                                  | <i>Ca_desi_denovo</i> | 28506911                | C/T  | NA                 | NA                            | NA                 |
| <i>Desi_wild_28506960</i> | NA                                  | <i>Ca_desi_denovo</i> | 28506960                | G/T  | NA                 | NA                            | NA                 |
| <i>Desi_wild_28507111</i> | NA                                  | <i>Ca_desi_denovo</i> | 28507111                | T/G  | NA                 | NA                            | NA                 |
| <i>Desi_wild_28510706</i> | NA                                  | <i>Ca_desi_denovo</i> | 28510706                | C/G  | NA                 | NA                            | NA                 |
| <i>Desi_wild_28510752</i> | NA                                  | <i>Ca_desi_denovo</i> | 28510752                | C/T  | NA                 | NA                            | NA                 |
| <i>Desi_wild_28511767</i> | NA                                  | <i>Ca_desi_denovo</i> | 28511767                | C/T  | NA                 | NA                            | NA                 |
| <i>Desi_wild_28513270</i> | NA                                  | <i>Ca_desi_denovo</i> | 28513270                | A/C  | NA                 | NA                            | NA                 |
| <i>Desi_wild_28513271</i> | NA                                  | <i>Ca_desi_denovo</i> | 28513271                | A/G  | NA                 | NA                            | NA                 |
| <i>Desi_wild_28518682</i> | NA                                  | <i>Ca_desi_denovo</i> | 28518682                | G/A  | NA                 | NA                            | NA                 |
| <i>Desi_wild_28518688</i> | NA                                  | <i>Ca_desi_denovo</i> | 28518688                | T/A  | NA                 | NA                            | NA                 |
| <i>Desi_wild_28530339</i> | NA                                  | <i>Ca_desi_denovo</i> | 28530339                | G/T  | NA                 | NA                            | NA                 |
| <i>Desi_wild_28532314</i> | NA                                  | <i>Ca_desi_denovo</i> | 28532314                | A/G  | NA                 | NA                            | NA                 |
| <i>Desi_wild_28532345</i> | NA                                  | <i>Ca_desi_denovo</i> | 28532345                | G/A  | NA                 | NA                            | NA                 |
| <i>Desi_wild_28534799</i> | NA                                  | <i>Ca_desi_denovo</i> | 28534799                | G/C  | NA                 | NA                            | NA                 |
| <i>Desi_wild_28544084</i> | NA                                  | <i>Ca_desi_denovo</i> | 28544084                | A/C  | NA                 | NA                            | NA                 |
| <i>Desi_wild_28547933</i> | NA                                  | <i>Ca_desi_denovo</i> | 28547933                | C/T  | NA                 | NA                            | NA                 |
| <i>Desi_wild_28547983</i> | NA                                  | <i>Ca_desi_denovo</i> | 28547983                | G/A  | NA                 | NA                            | NA                 |
| <i>Desi_wild_28548002</i> | NA                                  | <i>Ca_desi_denovo</i> | 28548002                | G/T  | NA                 | NA                            | NA                 |
| <i>Desi_wild_28551915</i> | NA                                  | <i>Ca_desi_denovo</i> | 28551915                | T/C  | NA                 | NA                            | NA                 |
| <i>Desi_wild_28551929</i> | NA                                  | <i>Ca_desi_denovo</i> | 28551929                | T/C  | NA                 | NA                            | NA                 |
| <i>Desi_wild_28554646</i> | NA                                  | <i>Ca_desi_denovo</i> | 28554646                | A/C  | NA                 | NA                            | NA                 |



| SNP IDs                   | NCBI dbSNP accession IDs (NCBI_SS#) | Chromosomes           | Physical positions (bp) | SNPs | Gene accession IDs | Sequence components of genome | Putative functions |
|---------------------------|-------------------------------------|-----------------------|-------------------------|------|--------------------|-------------------------------|--------------------|
| <i>Desi_wild_28554647</i> | NA                                  | <i>Ca_desi_denovo</i> | 28554647                | G/C  | NA                 | NA                            | NA                 |
| <i>Desi_wild_28562949</i> | NA                                  | <i>Ca_desi_denovo</i> | 28562949                | T/G  | NA                 | NA                            | NA                 |
| <i>Desi_wild_28564461</i> | NA                                  | <i>Ca_desi_denovo</i> | 28564461                | C/T  | NA                 | NA                            | NA                 |
| <i>Desi_wild_28564467</i> | NA                                  | <i>Ca_desi_denovo</i> | 28564467                | G/A  | NA                 | NA                            | NA                 |
| <i>Desi_wild_28564482</i> | NA                                  | <i>Ca_desi_denovo</i> | 28564482                | A/G  | NA                 | NA                            | NA                 |
| <i>Desi_wild_28575863</i> | NA                                  | <i>Ca_desi_denovo</i> | 28575863                | A/C  | NA                 | NA                            | NA                 |
| <i>Desi_wild_28579782</i> | NA                                  | <i>Ca_desi_denovo</i> | 28579782                | G/C  | NA                 | NA                            | NA                 |
| <i>Desi_wild_28582991</i> | NA                                  | <i>Ca_desi_denovo</i> | 28582991                | C/T  | NA                 | NA                            | NA                 |
| <i>Desi_wild_28584871</i> | NA                                  | <i>Ca_desi_denovo</i> | 28584871                | C/T  | NA                 | NA                            | NA                 |
| <i>Desi_wild_28587094</i> | NA                                  | <i>Ca_desi_denovo</i> | 28587094                | G/T  | NA                 | NA                            | NA                 |
| <i>Desi_wild_28589767</i> | NA                                  | <i>Ca_desi_denovo</i> | 28589767                | T/G  | NA                 | NA                            | NA                 |
| <i>Desi_wild_28590637</i> | NA                                  | <i>Ca_desi_denovo</i> | 28590637                | G/A  | NA                 | NA                            | NA                 |
| <i>Desi_wild_28607085</i> | NA                                  | <i>Ca_desi_denovo</i> | 28607085                | A/G  | NA                 | NA                            | NA                 |
| <i>Desi_wild_28613395</i> | NA                                  | <i>Ca_desi_denovo</i> | 28613395                | T/G  | NA                 | NA                            | NA                 |
| <i>Desi_wild_28616178</i> | NA                                  | <i>Ca_desi_denovo</i> | 28616178                | A/G  | NA                 | NA                            | NA                 |
| <i>Desi_wild_28622805</i> | NA                                  | <i>Ca_desi_denovo</i> | 28622805                | G/T  | NA                 | NA                            | NA                 |
| <i>Desi_wild_28624238</i> | NA                                  | <i>Ca_desi_denovo</i> | 28624238                | C/G  | NA                 | NA                            | NA                 |
| <i>Desi_wild_28633915</i> | NA                                  | <i>Ca_desi_denovo</i> | 28633915                | T/C  | NA                 | NA                            | NA                 |
| <i>Desi_wild_28633925</i> | NA                                  | <i>Ca_desi_denovo</i> | 28633925                | G/C  | NA                 | NA                            | NA                 |
| <i>Desi_wild_28642405</i> | NA                                  | <i>Ca_desi_denovo</i> | 28642405                | A/G  | NA                 | NA                            | NA                 |
| <i>Desi_wild_28642414</i> | NA                                  | <i>Ca_desi_denovo</i> | 28642414                | T/C  | NA                 | NA                            | NA                 |
| <i>Desi_wild_28642506</i> | NA                                  | <i>Ca_desi_denovo</i> | 28642506                | G/A  | NA                 | NA                            | NA                 |
| <i>Desi_wild_28644911</i> | NA                                  | <i>Ca_desi_denovo</i> | 28644911                | C/G  | NA                 | NA                            | NA                 |
| <i>Desi_wild_28644963</i> | NA                                  | <i>Ca_desi_denovo</i> | 28644963                | G/A  | NA                 | NA                            | NA                 |
| <i>Desi_wild_28653149</i> | NA                                  | <i>Ca_desi_denovo</i> | 28653149                | G/A  | NA                 | NA                            | NA                 |
| <i>Desi_wild_28653170</i> | NA                                  | <i>Ca_desi_denovo</i> | 28653170                | A/G  | NA                 | NA                            | NA                 |
| <i>Desi_wild_28653189</i> | NA                                  | <i>Ca_desi_denovo</i> | 28653189                | G/T  | NA                 | NA                            | NA                 |
| <i>Desi_wild_28653236</i> | NA                                  | <i>Ca_desi_denovo</i> | 28653236                | A/G  | NA                 | NA                            | NA                 |
| <i>Desi_wild_28659924</i> | NA                                  | <i>Ca_desi_denovo</i> | 28659924                | T/C  | NA                 | NA                            | NA                 |
| <i>Desi_wild_28659931</i> | NA                                  | <i>Ca_desi_denovo</i> | 28659931                | A/G  | NA                 | NA                            | NA                 |
| <i>Desi_wild_28660626</i> | NA                                  | <i>Ca_desi_denovo</i> | 28660626                | G/T  | NA                 | NA                            | NA                 |
| <i>Desi_wild_28660631</i> | NA                                  | <i>Ca_desi_denovo</i> | 28660631                | C/G  | NA                 | NA                            | NA                 |
| <i>Desi_wild_28665152</i> | NA                                  | <i>Ca_desi_denovo</i> | 28665152                | C/T  | NA                 | NA                            | NA                 |
| <i>Desi_wild_28665194</i> | NA                                  | <i>Ca_desi_denovo</i> | 28665194                | T/C  | NA                 | NA                            | NA                 |
| <i>Desi_wild_28665197</i> | NA                                  | <i>Ca_desi_denovo</i> | 28665197                | A/G  | NA                 | NA                            | NA                 |
| <i>Desi_wild_28665227</i> | NA                                  | <i>Ca_desi_denovo</i> | 28665227                | T/G  | NA                 | NA                            | NA                 |
| <i>Desi_wild_28665800</i> | NA                                  | <i>Ca_desi_denovo</i> | 28665800                | C/A  | NA                 | NA                            | NA                 |
| <i>Desi_wild_28668828</i> | NA                                  | <i>Ca_desi_denovo</i> | 28668828                | T/C  | NA                 | NA                            | NA                 |
| <i>Desi_wild_28676889</i> | NA                                  | <i>Ca_desi_denovo</i> | 28676889                | G/A  | NA                 | NA                            | NA                 |
| <i>Desi_wild_28677372</i> | NA                                  | <i>Ca_desi_denovo</i> | 28677372                | C/T  | NA                 | NA                            | NA                 |
| <i>Desi_wild_28678247</i> | NA                                  | <i>Ca_desi_denovo</i> | 28678247                | G/A  | NA                 | NA                            | NA                 |
| <i>Desi_wild_28678637</i> | NA                                  | <i>Ca_desi_denovo</i> | 28678637                | C/T  | NA                 | NA                            | NA                 |
| <i>Desi_wild_28678670</i> | NA                                  | <i>Ca_desi_denovo</i> | 28678670                | C/G  | NA                 | NA                            | NA                 |
| <i>Desi_wild_28681718</i> | NA                                  | <i>Ca_desi_denovo</i> | 28681718                | G/T  | NA                 | NA                            | NA                 |

| SNP IDs                   | NCBI dbSNP accession IDs (NCBI_SS#) | Chromosomes           | Physical positions (bp) | SNPs | Gene accession IDs | Sequence components of genome | Putative functions |
|---------------------------|-------------------------------------|-----------------------|-------------------------|------|--------------------|-------------------------------|--------------------|
| <i>Desi_wild_28686307</i> | NA                                  | <i>Ca_desi_denovo</i> | 28686307                | T/G  | NA                 | NA                            | NA                 |
| <i>Desi_wild_28688107</i> | NA                                  | <i>Ca_desi_denovo</i> | 28688107                | G/T  | NA                 | NA                            | NA                 |
| <i>Desi_wild_28688142</i> | NA                                  | <i>Ca_desi_denovo</i> | 28688142                | A/C  | NA                 | NA                            | NA                 |
| <i>Desi_wild_28696942</i> | NA                                  | <i>Ca_desi_denovo</i> | 28696942                | A/G  | NA                 | NA                            | NA                 |
| <i>Desi_wild_28696970</i> | NA                                  | <i>Ca_desi_denovo</i> | 28696970                | A/G  | NA                 | NA                            | NA                 |
| <i>Desi_wild_28697303</i> | NA                                  | <i>Ca_desi_denovo</i> | 28697303                | A/C  | NA                 | NA                            | NA                 |
| <i>Desi_wild_28698791</i> | NA                                  | <i>Ca_desi_denovo</i> | 28698791                | T/C  | NA                 | NA                            | NA                 |
| <i>Desi_wild_28703166</i> | NA                                  | <i>Ca_desi_denovo</i> | 28703166                | A/T  | NA                 | NA                            | NA                 |
| <i>Desi_wild_28703186</i> | NA                                  | <i>Ca_desi_denovo</i> | 28703186                | C/T  | NA                 | NA                            | NA                 |
| <i>Desi_wild_28703528</i> | NA                                  | <i>Ca_desi_denovo</i> | 28703528                | C/T  | NA                 | NA                            | NA                 |
| <i>Desi_wild_28709058</i> | NA                                  | <i>Ca_desi_denovo</i> | 28709058                | A/G  | NA                 | NA                            | NA                 |
| <i>Desi_wild_28712687</i> | NA                                  | <i>Ca_desi_denovo</i> | 28712687                | G/C  | NA                 | NA                            | NA                 |
| <i>Desi_wild_28713228</i> | NA                                  | <i>Ca_desi_denovo</i> | 28713228                | G/T  | NA                 | NA                            | NA                 |
| <i>Desi_wild_28714887</i> | NA                                  | <i>Ca_desi_denovo</i> | 28714887                | A/G  | NA                 | NA                            | NA                 |
| <i>Desi_wild_28714958</i> | NA                                  | <i>Ca_desi_denovo</i> | 28714958                | A/G  | NA                 | NA                            | NA                 |
| <i>Desi_wild_28716426</i> | NA                                  | <i>Ca_desi_denovo</i> | 28716426                | C/T  | NA                 | NA                            | NA                 |
| <i>Desi_wild_28716460</i> | NA                                  | <i>Ca_desi_denovo</i> | 28716460                | C/T  | NA                 | NA                            | NA                 |
| <i>Desi_wild_28716495</i> | NA                                  | <i>Ca_desi_denovo</i> | 28716495                | G/T  | NA                 | NA                            | NA                 |
| <i>Desi_wild_28718229</i> | NA                                  | <i>Ca_desi_denovo</i> | 28718229                | A/C  | NA                 | NA                            | NA                 |
| <i>Desi_wild_28726374</i> | NA                                  | <i>Ca_desi_denovo</i> | 28726374                | T/C  | NA                 | NA                            | NA                 |
| <i>Desi_wild_28726386</i> | NA                                  | <i>Ca_desi_denovo</i> | 28726386                | A/C  | NA                 | NA                            | NA                 |
| <i>Desi_wild_28728177</i> | NA                                  | <i>Ca_desi_denovo</i> | 28728177                | G/T  | NA                 | NA                            | NA                 |
| <i>Desi_wild_28732928</i> | NA                                  | <i>Ca_desi_denovo</i> | 28732928                | A/G  | NA                 | NA                            | NA                 |
| <i>Desi_wild_28732970</i> | NA                                  | <i>Ca_desi_denovo</i> | 28732970                | C/G  | NA                 | NA                            | NA                 |
| <i>Desi_wild_28738731</i> | NA                                  | <i>Ca_desi_denovo</i> | 28738731                | C/T  | NA                 | NA                            | NA                 |
| <i>Desi_wild_28741224</i> | NA                                  | <i>Ca_desi_denovo</i> | 28741224                | A/G  | NA                 | NA                            | NA                 |
| <i>Desi_wild_28742513</i> | NA                                  | <i>Ca_desi_denovo</i> | 28742513                | T/C  | NA                 | NA                            | NA                 |
| <i>Desi_wild_28742516</i> | NA                                  | <i>Ca_desi_denovo</i> | 28742516                | C/T  | NA                 | NA                            | NA                 |
| <i>Desi_wild_28748951</i> | NA                                  | <i>Ca_desi_denovo</i> | 28748951                | G/T  | NA                 | NA                            | NA                 |
| <i>Desi_wild_28756823</i> | NA                                  | <i>Ca_desi_denovo</i> | 28756823                | C/T  | NA                 | NA                            | NA                 |
| <i>Desi_wild_28761652</i> | NA                                  | <i>Ca_desi_denovo</i> | 28761652                | G/C  | NA                 | NA                            | NA                 |
| <i>Desi_wild_28761667</i> | NA                                  | <i>Ca_desi_denovo</i> | 28761667                | A/C  | NA                 | NA                            | NA                 |
| <i>Desi_wild_28766957</i> | NA                                  | <i>Ca_desi_denovo</i> | 28766957                | T/G  | NA                 | NA                            | NA                 |
| <i>Desi_wild_28768609</i> | NA                                  | <i>Ca_desi_denovo</i> | 28768609                | C/G  | NA                 | NA                            | NA                 |
| <i>Desi_wild_28768615</i> | NA                                  | <i>Ca_desi_denovo</i> | 28768615                | C/G  | NA                 | NA                            | NA                 |
| <i>Desi_wild_28771347</i> | NA                                  | <i>Ca_desi_denovo</i> | 28771347                | G/A  | NA                 | NA                            | NA                 |
| <i>Desi_wild_28771352</i> | NA                                  | <i>Ca_desi_denovo</i> | 28771352                | T/C  | NA                 | NA                            | NA                 |
| <i>Desi_wild_28777982</i> | NA                                  | <i>Ca_desi_denovo</i> | 28777982                | G/T  | NA                 | NA                            | NA                 |
| <i>Desi_wild_28784123</i> | NA                                  | <i>Ca_desi_denovo</i> | 28784123                | C/G  | NA                 | NA                            | NA                 |
| <i>Desi_wild_28784124</i> | NA                                  | <i>Ca_desi_denovo</i> | 28784124                | C/G  | NA                 | NA                            | NA                 |
| <i>Desi_wild_28784141</i> | NA                                  | <i>Ca_desi_denovo</i> | 28784141                | A/G  | NA                 | NA                            | NA                 |
| <i>Desi_wild_28784151</i> | NA                                  | <i>Ca_desi_denovo</i> | 28784151                | A/T  | NA                 | NA                            | NA                 |
| <i>Desi_wild_28790991</i> | NA                                  | <i>Ca_desi_denovo</i> | 28790991                | G/T  | NA                 | NA                            | NA                 |
| <i>Desi_wild_28809163</i> | NA                                  | <i>Ca_desi_denovo</i> | 28809163                | T/C  | NA                 | NA                            | NA                 |

| SNP IDs                   | NCBI dbSNP accession IDs (NCBI_SS#) | Chromosomes           | Physical positions (bp) | SNPs | Gene accession IDs | Sequence components of genome | Putative functions |
|---------------------------|-------------------------------------|-----------------------|-------------------------|------|--------------------|-------------------------------|--------------------|
| <i>Desi_wild_28809166</i> | NA                                  | <i>Ca_desi_denovo</i> | 28809166                | G/A  | NA                 | NA                            | NA                 |
| <i>Desi_wild_28812509</i> | NA                                  | <i>Ca_desi_denovo</i> | 28812509                | A/G  | NA                 | NA                            | NA                 |
| <i>Desi_wild_28820829</i> | NA                                  | <i>Ca_desi_denovo</i> | 28820829                | G/A  | NA                 | NA                            | NA                 |
| <i>Desi_wild_28823836</i> | NA                                  | <i>Ca_desi_denovo</i> | 28823836                | G/A  | NA                 | NA                            | NA                 |
| <i>Desi_wild_28823874</i> | NA                                  | <i>Ca_desi_denovo</i> | 28823874                | C/A  | NA                 | NA                            | NA                 |
| <i>Desi_wild_28826462</i> | NA                                  | <i>Ca_desi_denovo</i> | 28826462                | C/T  | NA                 | NA                            | NA                 |
| <i>Desi_wild_28826469</i> | NA                                  | <i>Ca_desi_denovo</i> | 28826469                | T/G  | NA                 | NA                            | NA                 |
| <i>Desi_wild_28850307</i> | NA                                  | <i>Ca_desi_denovo</i> | 28850307                | C/T  | NA                 | NA                            | NA                 |
| <i>Desi_wild_28853493</i> | NA                                  | <i>Ca_desi_denovo</i> | 28853493                | T/G  | NA                 | NA                            | NA                 |
| <i>Desi_wild_28859310</i> | NA                                  | <i>Ca_desi_denovo</i> | 28859310                | C/G  | NA                 | NA                            | NA                 |
| <i>Desi_wild_28861491</i> | NA                                  | <i>Ca_desi_denovo</i> | 28861491                | G/A  | NA                 | NA                            | NA                 |
| <i>Desi_wild_28861528</i> | NA                                  | <i>Ca_desi_denovo</i> | 28861528                | A/G  | NA                 | NA                            | NA                 |
| <i>Desi_wild_28868852</i> | NA                                  | <i>Ca_desi_denovo</i> | 28868852                | C/T  | NA                 | NA                            | NA                 |
| <i>Desi_wild_28868964</i> | NA                                  | <i>Ca_desi_denovo</i> | 28868964                | A/C  | NA                 | NA                            | NA                 |
| <i>Desi_wild_28869021</i> | NA                                  | <i>Ca_desi_denovo</i> | 28869021                | G/A  | NA                 | NA                            | NA                 |
| <i>Desi_wild_28893917</i> | NA                                  | <i>Ca_desi_denovo</i> | 28893917                | C/G  | NA                 | NA                            | NA                 |
| <i>Desi_wild_28905357</i> | NA                                  | <i>Ca_desi_denovo</i> | 28905357                | A/T  | NA                 | NA                            | NA                 |
| <i>Desi_wild_28911056</i> | NA                                  | <i>Ca_desi_denovo</i> | 28911056                | C/G  | NA                 | NA                            | NA                 |
| <i>Desi_wild_28911082</i> | NA                                  | <i>Ca_desi_denovo</i> | 28911082                | A/G  | NA                 | NA                            | NA                 |
| <i>Desi_wild_28911382</i> | NA                                  | <i>Ca_desi_denovo</i> | 28911382                | G/T  | NA                 | NA                            | NA                 |
| <i>Desi_wild_28913720</i> | NA                                  | <i>Ca_desi_denovo</i> | 28913720                | G/A  | NA                 | NA                            | NA                 |
| <i>Desi_wild_28925628</i> | NA                                  | <i>Ca_desi_denovo</i> | 28925628                | C/A  | NA                 | NA                            | NA                 |
| <i>Desi_wild_28925667</i> | NA                                  | <i>Ca_desi_denovo</i> | 28925667                | C/G  | NA                 | NA                            | NA                 |
| <i>Desi_wild_28934036</i> | NA                                  | <i>Ca_desi_denovo</i> | 28934036                | A/C  | NA                 | NA                            | NA                 |
| <i>Desi_wild_28946644</i> | NA                                  | <i>Ca_desi_denovo</i> | 28946644                | T/G  | NA                 | NA                            | NA                 |
| <i>Desi_wild_28950836</i> | NA                                  | <i>Ca_desi_denovo</i> | 28950836                | A/C  | NA                 | NA                            | NA                 |
| <i>Desi_wild_28951891</i> | NA                                  | <i>Ca_desi_denovo</i> | 28951891                | A/C  | NA                 | NA                            | NA                 |
| <i>Desi_wild_28951892</i> | NA                                  | <i>Ca_desi_denovo</i> | 28951892                | G/T  | NA                 | NA                            | NA                 |
| <i>Desi_wild_28951893</i> | NA                                  | <i>Ca_desi_denovo</i> | 28951893                | A/G  | NA                 | NA                            | NA                 |
| <i>Desi_wild_28958893</i> | NA                                  | <i>Ca_desi_denovo</i> | 28958893                | G/T  | NA                 | NA                            | NA                 |
| <i>Desi_wild_28959289</i> | NA                                  | <i>Ca_desi_denovo</i> | 28959289                | T/A  | NA                 | NA                            | NA                 |
| <i>Desi_wild_28959318</i> | NA                                  | <i>Ca_desi_denovo</i> | 28959318                | C/T  | NA                 | NA                            | NA                 |
| <i>Desi_wild_28961971</i> | NA                                  | <i>Ca_desi_denovo</i> | 28961971                | A/G  | NA                 | NA                            | NA                 |
| <i>Desi_wild_28963809</i> | NA                                  | <i>Ca_desi_denovo</i> | 28963809                | C/G  | NA                 | NA                            | NA                 |
| <i>Desi_wild_28963815</i> | NA                                  | <i>Ca_desi_denovo</i> | 28963815                | G/T  | NA                 | NA                            | NA                 |
| <i>Desi_wild_28971503</i> | NA                                  | <i>Ca_desi_denovo</i> | 28971503                | C/T  | NA                 | NA                            | NA                 |
| <i>Desi_wild_28972074</i> | NA                                  | <i>Ca_desi_denovo</i> | 28972074                | A/G  | NA                 | NA                            | NA                 |
| <i>Desi_wild_28975344</i> | NA                                  | <i>Ca_desi_denovo</i> | 28975344                | C/T  | NA                 | NA                            | NA                 |
| <i>Desi_wild_28975354</i> | NA                                  | <i>Ca_desi_denovo</i> | 28975354                | G/C  | NA                 | NA                            | NA                 |
| <i>Desi_wild_28975375</i> | NA                                  | <i>Ca_desi_denovo</i> | 28975375                | T/A  | NA                 | NA                            | NA                 |
| <i>Desi_wild_28977249</i> | NA                                  | <i>Ca_desi_denovo</i> | 28977249                | A/G  | NA                 | NA                            | NA                 |
| <i>Desi_wild_28980894</i> | NA                                  | <i>Ca_desi_denovo</i> | 28980894                | G/A  | NA                 | NA                            | NA                 |
| <i>Desi_wild_28981190</i> | NA                                  | <i>Ca_desi_denovo</i> | 28981190                | C/T  | NA                 | NA                            | NA                 |
| <i>Desi_wild_28981202</i> | NA                                  | <i>Ca_desi_denovo</i> | 28981202                | G/A  | NA                 | NA                            | NA                 |

| SNP IDs                   | NCBI dbSNP accession IDs (NCBI_SS#) | Chromosomes           | Physical positions (bp) | SNPs | Gene accession IDs | Sequence components of genome | Putative functions |
|---------------------------|-------------------------------------|-----------------------|-------------------------|------|--------------------|-------------------------------|--------------------|
| <i>Desi_wild_29003234</i> | NA                                  | <i>Ca_desi_denovo</i> | 29003234                | G/T  | NA                 | NA                            | NA                 |
| <i>Desi_wild_29004763</i> | NA                                  | <i>Ca_desi_denovo</i> | 29004763                | T/G  | NA                 | NA                            | NA                 |
| <i>Desi_wild_29009217</i> | NA                                  | <i>Ca_desi_denovo</i> | 29009217                | G/C  | NA                 | NA                            | NA                 |
| <i>Desi_wild_29009219</i> | NA                                  | <i>Ca_desi_denovo</i> | 29009219                | T/C  | NA                 | NA                            | NA                 |
| <i>Desi_wild_29015680</i> | NA                                  | <i>Ca_desi_denovo</i> | 29015680                | C/T  | NA                 | NA                            | NA                 |
| <i>Desi_wild_29015686</i> | NA                                  | <i>Ca_desi_denovo</i> | 29015686                | T/G  | NA                 | NA                            | NA                 |
| <i>Desi_wild_29020436</i> | NA                                  | <i>Ca_desi_denovo</i> | 29020436                | A/C  | NA                 | NA                            | NA                 |
| <i>Desi_wild_29032691</i> | NA                                  | <i>Ca_desi_denovo</i> | 29032691                | G/A  | NA                 | NA                            | NA                 |
| <i>Desi_wild_29037623</i> | NA                                  | <i>Ca_desi_denovo</i> | 29037623                | A/C  | NA                 | NA                            | NA                 |
| <i>Desi_wild_29042325</i> | NA                                  | <i>Ca_desi_denovo</i> | 29042325                | A/C  | NA                 | NA                            | NA                 |
| <i>Desi_wild_29044821</i> | NA                                  | <i>Ca_desi_denovo</i> | 29044821                | G/T  | NA                 | NA                            | NA                 |
| <i>Desi_wild_29062110</i> | NA                                  | <i>Ca_desi_denovo</i> | 29062110                | G/C  | NA                 | NA                            | NA                 |
| <i>Desi_wild_29062144</i> | NA                                  | <i>Ca_desi_denovo</i> | 29062144                | G/C  | NA                 | NA                            | NA                 |
| <i>Desi_wild_29069398</i> | NA                                  | <i>Ca_desi_denovo</i> | 29069398                | G/T  | NA                 | NA                            | NA                 |
| <i>Desi_wild_29071557</i> | NA                                  | <i>Ca_desi_denovo</i> | 29071557                | A/C  | NA                 | NA                            | NA                 |
| <i>Desi_wild_29071575</i> | NA                                  | <i>Ca_desi_denovo</i> | 29071575                | C/A  | NA                 | NA                            | NA                 |
| <i>Desi_wild_29080026</i> | NA                                  | <i>Ca_desi_denovo</i> | 29080026                | C/T  | NA                 | NA                            | NA                 |
| <i>Desi_wild_29080875</i> | NA                                  | <i>Ca_desi_denovo</i> | 29080875                | A/G  | NA                 | NA                            | NA                 |
| <i>Desi_wild_29080905</i> | NA                                  | <i>Ca_desi_denovo</i> | 29080905                | A/C  | NA                 | NA                            | NA                 |
| <i>Desi_wild_29084409</i> | NA                                  | <i>Ca_desi_denovo</i> | 29084409                | G/A  | NA                 | NA                            | NA                 |
| <i>Desi_wild_29084765</i> | NA                                  | <i>Ca_desi_denovo</i> | 29084765                | C/T  | NA                 | NA                            | NA                 |
| <i>Desi_wild_29086982</i> | NA                                  | <i>Ca_desi_denovo</i> | 29086982                | C/T  | NA                 | NA                            | NA                 |
| <i>Desi_wild_29088499</i> | NA                                  | <i>Ca_desi_denovo</i> | 29088499                | C/G  | NA                 | NA                            | NA                 |
| <i>Desi_wild_29088501</i> | NA                                  | <i>Ca_desi_denovo</i> | 29088501                | C/G  | NA                 | NA                            | NA                 |
| <i>Desi_wild_29096790</i> | NA                                  | <i>Ca_desi_denovo</i> | 29096790                | C/T  | NA                 | NA                            | NA                 |
| <i>Desi_wild_29100995</i> | NA                                  | <i>Ca_desi_denovo</i> | 29100995                | C/G  | NA                 | NA                            | NA                 |
| <i>Desi_wild_29108496</i> | NA                                  | <i>Ca_desi_denovo</i> | 29108496                | C/G  | NA                 | NA                            | NA                 |
| <i>Desi_wild_29108535</i> | NA                                  | <i>Ca_desi_denovo</i> | 29108535                | C/G  | NA                 | NA                            | NA                 |
| <i>Desi_wild_29110608</i> | NA                                  | <i>Ca_desi_denovo</i> | 29110608                | G/A  | NA                 | NA                            | NA                 |
| <i>Desi_wild_29111306</i> | NA                                  | <i>Ca_desi_denovo</i> | 29111306                | C/T  | NA                 | NA                            | NA                 |
| <i>Desi_wild_29111445</i> | NA                                  | <i>Ca_desi_denovo</i> | 29111445                | A/C  | NA                 | NA                            | NA                 |
| <i>Desi_wild_29113394</i> | NA                                  | <i>Ca_desi_denovo</i> | 29113394                | C/T  | NA                 | NA                            | NA                 |
| <i>Desi_wild_29113403</i> | NA                                  | <i>Ca_desi_denovo</i> | 29113403                | C/G  | NA                 | NA                            | NA                 |
| <i>Desi_wild_29117034</i> | NA                                  | <i>Ca_desi_denovo</i> | 29117034                | G/T  | NA                 | NA                            | NA                 |
| <i>Desi_wild_29117037</i> | NA                                  | <i>Ca_desi_denovo</i> | 29117037                | G/A  | NA                 | NA                            | NA                 |
| <i>Desi_wild_29117040</i> | NA                                  | <i>Ca_desi_denovo</i> | 29117040                | G/C  | NA                 | NA                            | NA                 |
| <i>Desi_wild_29117064</i> | NA                                  | <i>Ca_desi_denovo</i> | 29117064                | T/C  | NA                 | NA                            | NA                 |
| <i>Desi_wild_29122271</i> | NA                                  | <i>Ca_desi_denovo</i> | 29122271                | A/G  | NA                 | NA                            | NA                 |
| <i>Desi_wild_29123803</i> | NA                                  | <i>Ca_desi_denovo</i> | 29123803                | G/T  | NA                 | NA                            | NA                 |
| <i>Desi_wild_29124720</i> | NA                                  | <i>Ca_desi_denovo</i> | 29124720                | A/C  | NA                 | NA                            | NA                 |
| <i>Desi_wild_29125461</i> | NA                                  | <i>Ca_desi_denovo</i> | 29125461                | A/C  | NA                 | NA                            | NA                 |
| <i>Desi_wild_29125463</i> | NA                                  | <i>Ca_desi_denovo</i> | 29125463                | A/G  | NA                 | NA                            | NA                 |
| <i>Desi_wild_29125685</i> | NA                                  | <i>Ca_desi_denovo</i> | 29125685                | C/T  | NA                 | NA                            | NA                 |
| <i>Desi_wild_29125698</i> | NA                                  | <i>Ca_desi_denovo</i> | 29125698                | G/A  | NA                 | NA                            | NA                 |

| SNP IDs                   | NCBI dbSNP accession IDs (NCBI_SS#) | Chromosomes           | Physical positions (bp) | SNPs | Gene accession IDs | Sequence components of genome | Putative functions |
|---------------------------|-------------------------------------|-----------------------|-------------------------|------|--------------------|-------------------------------|--------------------|
| <i>Desi_wild_29142175</i> | NA                                  | <i>Ca_desi_denovo</i> | 29142175                | T/G  | NA                 | NA                            | NA                 |
| <i>Desi_wild_29142203</i> | NA                                  | <i>Ca_desi_denovo</i> | 29142203                | C/T  | NA                 | NA                            | NA                 |
| <i>Desi_wild_29142243</i> | NA                                  | <i>Ca_desi_denovo</i> | 29142243                | A/G  | NA                 | NA                            | NA                 |
| <i>Desi_wild_29142249</i> | NA                                  | <i>Ca_desi_denovo</i> | 29142249                | C/A  | NA                 | NA                            | NA                 |
| <i>Desi_wild_29142257</i> | NA                                  | <i>Ca_desi_denovo</i> | 29142257                | A/C  | NA                 | NA                            | NA                 |
| <i>Desi_wild_29142262</i> | NA                                  | <i>Ca_desi_denovo</i> | 29142262                | C/G  | NA                 | NA                            | NA                 |
| <i>Desi_wild_29143298</i> | NA                                  | <i>Ca_desi_denovo</i> | 29143298                | C/T  | NA                 | NA                            | NA                 |
| <i>Desi_wild_29143769</i> | NA                                  | <i>Ca_desi_denovo</i> | 29143769                | C/G  | NA                 | NA                            | NA                 |
| <i>Desi_wild_29154114</i> | NA                                  | <i>Ca_desi_denovo</i> | 29154114                | G/C  | NA                 | NA                            | NA                 |
| <i>Desi_wild_29156371</i> | NA                                  | <i>Ca_desi_denovo</i> | 29156371                | G/T  | NA                 | NA                            | NA                 |
| <i>Desi_wild_29159728</i> | NA                                  | <i>Ca_desi_denovo</i> | 29159728                | G/T  | NA                 | NA                            | NA                 |
| <i>Desi_wild_29160304</i> | NA                                  | <i>Ca_desi_denovo</i> | 29160304                | G/T  | NA                 | NA                            | NA                 |
| <i>Desi_wild_29166180</i> | NA                                  | <i>Ca_desi_denovo</i> | 29166180                | G/A  | NA                 | NA                            | NA                 |
| <i>Desi_wild_29166543</i> | NA                                  | <i>Ca_desi_denovo</i> | 29166543                | T/G  | NA                 | NA                            | NA                 |
| <i>Desi_wild_29169335</i> | NA                                  | <i>Ca_desi_denovo</i> | 29169335                | C/G  | NA                 | NA                            | NA                 |
| <i>Desi_wild_29176644</i> | NA                                  | <i>Ca_desi_denovo</i> | 29176644                | C/G  | NA                 | NA                            | NA                 |
| <i>Desi_wild_29176659</i> | NA                                  | <i>Ca_desi_denovo</i> | 29176659                | T/C  | NA                 | NA                            | NA                 |
| <i>Desi_wild_29176703</i> | NA                                  | <i>Ca_desi_denovo</i> | 29176703                | G/A  | NA                 | NA                            | NA                 |
| <i>Desi_wild_29176704</i> | NA                                  | <i>Ca_desi_denovo</i> | 29176704                | C/T  | NA                 | NA                            | NA                 |
| <i>Desi_wild_29177405</i> | NA                                  | <i>Ca_desi_denovo</i> | 29177405                | G/A  | NA                 | NA                            | NA                 |
| <i>Desi_wild_29179172</i> | NA                                  | <i>Ca_desi_denovo</i> | 29179172                | C/T  | NA                 | NA                            | NA                 |
| <i>Desi_wild_29187147</i> | NA                                  | <i>Ca_desi_denovo</i> | 29187147                | G/C  | NA                 | NA                            | NA                 |
| <i>Desi_wild_29187154</i> | NA                                  | <i>Ca_desi_denovo</i> | 29187154                | A/G  | NA                 | NA                            | NA                 |
| <i>Desi_wild_29190470</i> | NA                                  | <i>Ca_desi_denovo</i> | 29190470                | T/C  | NA                 | NA                            | NA                 |
| <i>Desi_wild_29202040</i> | NA                                  | <i>Ca_desi_denovo</i> | 29202040                | C/G  | NA                 | NA                            | NA                 |
| <i>Desi_wild_29202049</i> | NA                                  | <i>Ca_desi_denovo</i> | 29202049                | T/C  | NA                 | NA                            | NA                 |
| <i>Desi_wild_29206079</i> | NA                                  | <i>Ca_desi_denovo</i> | 29206079                | C/G  | NA                 | NA                            | NA                 |
| <i>Desi_wild_29206100</i> | NA                                  | <i>Ca_desi_denovo</i> | 29206100                | G/A  | NA                 | NA                            | NA                 |
| <i>Desi_wild_29209604</i> | NA                                  | <i>Ca_desi_denovo</i> | 29209604                | G/T  | NA                 | NA                            | NA                 |
| <i>Desi_wild_29226261</i> | NA                                  | <i>Ca_desi_denovo</i> | 29226261                | A/C  | NA                 | NA                            | NA                 |
| <i>Desi_wild_29227311</i> | NA                                  | <i>Ca_desi_denovo</i> | 29227311                | G/T  | NA                 | NA                            | NA                 |
| <i>Desi_wild_29227864</i> | NA                                  | <i>Ca_desi_denovo</i> | 29227864                | G/C  | NA                 | NA                            | NA                 |
| <i>Desi_wild_29227988</i> | NA                                  | <i>Ca_desi_denovo</i> | 29227988                | A/C  | NA                 | NA                            | NA                 |
| <i>Desi_wild_29228295</i> | NA                                  | <i>Ca_desi_denovo</i> | 29228295                | A/G  | NA                 | NA                            | NA                 |
| <i>Desi_wild_29228366</i> | NA                                  | <i>Ca_desi_denovo</i> | 29228366                | G/A  | NA                 | NA                            | NA                 |
| <i>Desi_wild_29230704</i> | NA                                  | <i>Ca_desi_denovo</i> | 29230704                | T/C  | NA                 | NA                            | NA                 |
| <i>Desi_wild_29230708</i> | NA                                  | <i>Ca_desi_denovo</i> | 29230708                | C/A  | NA                 | NA                            | NA                 |
| <i>Desi_wild_29244256</i> | NA                                  | <i>Ca_desi_denovo</i> | 29244256                | G/T  | NA                 | NA                            | NA                 |
| <i>Desi_wild_29245721</i> | NA                                  | <i>Ca_desi_denovo</i> | 29245721                | C/G  | NA                 | NA                            | NA                 |
| <i>Desi_wild_29251229</i> | NA                                  | <i>Ca_desi_denovo</i> | 29251229                | G/A  | NA                 | NA                            | NA                 |
| <i>Desi_wild_29251310</i> | NA                                  | <i>Ca_desi_denovo</i> | 29251310                | T/C  | NA                 | NA                            | NA                 |
| <i>Desi_wild_29251317</i> | NA                                  | <i>Ca_desi_denovo</i> | 29251317                | A/C  | NA                 | NA                            | NA                 |
| <i>Desi_wild_29272706</i> | NA                                  | <i>Ca_desi_denovo</i> | 29272706                | G/T  | NA                 | NA                            | NA                 |
| <i>Desi_wild_29272860</i> | NA                                  | <i>Ca_desi_denovo</i> | 29272860                | G/C  | NA                 | NA                            | NA                 |

| SNP IDs                   | NCBI dbSNP accession IDs (NCBI_SS#) | Chromosomes           | Physical positions (bp) | SNPs | Gene accession IDs | Sequence components of genome | Putative functions |
|---------------------------|-------------------------------------|-----------------------|-------------------------|------|--------------------|-------------------------------|--------------------|
| <i>Desi_wild_29272917</i> | NA                                  | <i>Ca_desi_denovo</i> | 29272917                | G/T  | NA                 | NA                            | NA                 |
| <i>Desi_wild_29279744</i> | NA                                  | <i>Ca_desi_denovo</i> | 29279744                | T/C  | NA                 | NA                            | NA                 |
| <i>Desi_wild_29279828</i> | NA                                  | <i>Ca_desi_denovo</i> | 29279828                | G/A  | NA                 | NA                            | NA                 |
| <i>Desi_wild_29281053</i> | NA                                  | <i>Ca_desi_denovo</i> | 29281053                | C/T  | NA                 | NA                            | NA                 |
| <i>Desi_wild_29282290</i> | NA                                  | <i>Ca_desi_denovo</i> | 29282290                | T/C  | NA                 | NA                            | NA                 |
| <i>Desi_wild_29297737</i> | NA                                  | <i>Ca_desi_denovo</i> | 29297737                | C/T  | NA                 | NA                            | NA                 |
| <i>Desi_wild_29297749</i> | NA                                  | <i>Ca_desi_denovo</i> | 29297749                | C/T  | NA                 | NA                            | NA                 |
| <i>Desi_wild_29299575</i> | NA                                  | <i>Ca_desi_denovo</i> | 29299575                | G/T  | NA                 | NA                            | NA                 |
| <i>Desi_wild_29301535</i> | NA                                  | <i>Ca_desi_denovo</i> | 29301535                | G/C  | NA                 | NA                            | NA                 |
| <i>Desi_wild_29301556</i> | NA                                  | <i>Ca_desi_denovo</i> | 29301556                | G/A  | NA                 | NA                            | NA                 |
| <i>Desi_wild_29307958</i> | NA                                  | <i>Ca_desi_denovo</i> | 29307958                | G/T  | NA                 | NA                            | NA                 |
| <i>Desi_wild_29308727</i> | NA                                  | <i>Ca_desi_denovo</i> | 29308727                | A/C  | NA                 | NA                            | NA                 |
| <i>Desi_wild_29309022</i> | NA                                  | <i>Ca_desi_denovo</i> | 29309022                | C/G  | NA                 | NA                            | NA                 |
| <i>Desi_wild_29309037</i> | NA                                  | <i>Ca_desi_denovo</i> | 29309037                | A/G  | NA                 | NA                            | NA                 |
| <i>Desi_wild_29317306</i> | NA                                  | <i>Ca_desi_denovo</i> | 29317306                | T/G  | NA                 | NA                            | NA                 |
| <i>Desi_wild_29317307</i> | NA                                  | <i>Ca_desi_denovo</i> | 29317307                | C/A  | NA                 | NA                            | NA                 |
| <i>Desi_wild_29324813</i> | NA                                  | <i>Ca_desi_denovo</i> | 29324813                | C/A  | NA                 | NA                            | NA                 |
| <i>Desi_wild_29334152</i> | NA                                  | <i>Ca_desi_denovo</i> | 29334152                | T/G  | NA                 | NA                            | NA                 |
| <i>Desi_wild_29336318</i> | NA                                  | <i>Ca_desi_denovo</i> | 29336318                | G/A  | NA                 | NA                            | NA                 |
| <i>Desi_wild_29336363</i> | NA                                  | <i>Ca_desi_denovo</i> | 29336363                | C/T  | NA                 | NA                            | NA                 |
| <i>Desi_wild_29342380</i> | NA                                  | <i>Ca_desi_denovo</i> | 29342380                | G/T  | NA                 | NA                            | NA                 |
| <i>Desi_wild_29348208</i> | NA                                  | <i>Ca_desi_denovo</i> | 29348208                | A/G  | NA                 | NA                            | NA                 |
| <i>Desi_wild_29350063</i> | NA                                  | <i>Ca_desi_denovo</i> | 29350063                | A/G  | NA                 | NA                            | NA                 |
| <i>Desi_wild_29350066</i> | NA                                  | <i>Ca_desi_denovo</i> | 29350066                | C/T  | NA                 | NA                            | NA                 |
| <i>Desi_wild_29355158</i> | NA                                  | <i>Ca_desi_denovo</i> | 29355158                | T/C  | NA                 | NA                            | NA                 |
| <i>Desi_wild_29355185</i> | NA                                  | <i>Ca_desi_denovo</i> | 29355185                | C/G  | NA                 | NA                            | NA                 |
| <i>Desi_wild_29355188</i> | NA                                  | <i>Ca_desi_denovo</i> | 29355188                | C/T  | NA                 | NA                            | NA                 |
| <i>Desi_wild_29355806</i> | NA                                  | <i>Ca_desi_denovo</i> | 29355806                | G/T  | NA                 | NA                            | NA                 |
| <i>Desi_wild_29361047</i> | NA                                  | <i>Ca_desi_denovo</i> | 29361047                | G/T  | NA                 | NA                            | NA                 |
| <i>Desi_wild_29374502</i> | NA                                  | <i>Ca_desi_denovo</i> | 29374502                | G/A  | NA                 | NA                            | NA                 |
| <i>Desi_wild_29374523</i> | NA                                  | <i>Ca_desi_denovo</i> | 29374523                | C/A  | NA                 | NA                            | NA                 |
| <i>Desi_wild_29374526</i> | NA                                  | <i>Ca_desi_denovo</i> | 29374526                | T/C  | NA                 | NA                            | NA                 |
| <i>Desi_wild_29386717</i> | NA                                  | <i>Ca_desi_denovo</i> | 29386717                | T/G  | NA                 | NA                            | NA                 |
| <i>Desi_wild_29389380</i> | NA                                  | <i>Ca_desi_denovo</i> | 29389380                | C/G  | NA                 | NA                            | NA                 |
| <i>Desi_wild_29395050</i> | NA                                  | <i>Ca_desi_denovo</i> | 29395050                | A/C  | NA                 | NA                            | NA                 |
| <i>Desi_wild_29398527</i> | NA                                  | <i>Ca_desi_denovo</i> | 29398527                | C/T  | NA                 | NA                            | NA                 |
| <i>Desi_wild_29402538</i> | NA                                  | <i>Ca_desi_denovo</i> | 29402538                | C/G  | NA                 | NA                            | NA                 |
| <i>Desi_wild_29402586</i> | NA                                  | <i>Ca_desi_denovo</i> | 29402586                | G/A  | NA                 | NA                            | NA                 |
| <i>Desi_wild_29403971</i> | NA                                  | <i>Ca_desi_denovo</i> | 29403971                | A/G  | NA                 | NA                            | NA                 |
| <i>Desi_wild_29404028</i> | NA                                  | <i>Ca_desi_denovo</i> | 29404028                | A/G  | NA                 | NA                            | NA                 |
| <i>Desi_wild_29414805</i> | NA                                  | <i>Ca_desi_denovo</i> | 29414805                | A/C  | NA                 | NA                            | NA                 |
| <i>Desi_wild_29414807</i> | NA                                  | <i>Ca_desi_denovo</i> | 29414807                | A/C  | NA                 | NA                            | NA                 |
| <i>Desi_wild_29417622</i> | NA                                  | <i>Ca_desi_denovo</i> | 29417622                | A/C  | NA                 | NA                            | NA                 |
| <i>Desi_wild_29417631</i> | NA                                  | <i>Ca_desi_denovo</i> | 29417631                | A/G  | NA                 | NA                            | NA                 |

| SNP IDs                   | NCBI dbSNP accession IDs (NCBI_SS#) | Chromosomes           | Physical positions (bp) | SNPs | Gene accession IDs | Sequence components of genome | Putative functions |
|---------------------------|-------------------------------------|-----------------------|-------------------------|------|--------------------|-------------------------------|--------------------|
| <i>Desi_wild_29417637</i> | NA                                  | <i>Ca_desi_denovo</i> | 29417637                | C/G  | NA                 | NA                            | NA                 |
| <i>Desi_wild_29419561</i> | NA                                  | <i>Ca_desi_denovo</i> | 29419561                | G/T  | NA                 | NA                            | NA                 |
| <i>Desi_wild_29425991</i> | NA                                  | <i>Ca_desi_denovo</i> | 29425991                | C/T  | NA                 | NA                            | NA                 |
| <i>Desi_wild_29426000</i> | NA                                  | <i>Ca_desi_denovo</i> | 29426000                | C/T  | NA                 | NA                            | NA                 |
| <i>Desi_wild_29426039</i> | NA                                  | <i>Ca_desi_denovo</i> | 29426039                | G/T  | NA                 | NA                            | NA                 |
| <i>Desi_wild_29430933</i> | NA                                  | <i>Ca_desi_denovo</i> | 29430933                | G/T  | NA                 | NA                            | NA                 |
| <i>Desi_wild_29432797</i> | NA                                  | <i>Ca_desi_denovo</i> | 29432797                | G/C  | NA                 | NA                            | NA                 |
| <i>Desi_wild_29432798</i> | NA                                  | <i>Ca_desi_denovo</i> | 29432798                | G/C  | NA                 | NA                            | NA                 |
| <i>Desi_wild_29433095</i> | NA                                  | <i>Ca_desi_denovo</i> | 29433095                | C/G  | NA                 | NA                            | NA                 |
| <i>Desi_wild_29433122</i> | NA                                  | <i>Ca_desi_denovo</i> | 29433122                | C/T  | NA                 | NA                            | NA                 |
| <i>Desi_wild_29438939</i> | NA                                  | <i>Ca_desi_denovo</i> | 29438939                | T/C  | NA                 | NA                            | NA                 |
| <i>Desi_wild_29440849</i> | NA                                  | <i>Ca_desi_denovo</i> | 29440849                | A/G  | NA                 | NA                            | NA                 |
| <i>Desi_wild_29440897</i> | NA                                  | <i>Ca_desi_denovo</i> | 29440897                | C/T  | NA                 | NA                            | NA                 |
| <i>Desi_wild_29444876</i> | NA                                  | <i>Ca_desi_denovo</i> | 29444876                | G/C  | NA                 | NA                            | NA                 |
| <i>Desi_wild_29445865</i> | NA                                  | <i>Ca_desi_denovo</i> | 29445865                | T/C  | NA                 | NA                            | NA                 |
| <i>Desi_wild_29446500</i> | NA                                  | <i>Ca_desi_denovo</i> | 29446500                | C/T  | NA                 | NA                            | NA                 |
| <i>Desi_wild_29462187</i> | NA                                  | <i>Ca_desi_denovo</i> | 29462187                | G/C  | NA                 | NA                            | NA                 |
| <i>Desi_wild_29462213</i> | NA                                  | <i>Ca_desi_denovo</i> | 29462213                | T/C  | NA                 | NA                            | NA                 |
| <i>Desi_wild_29462261</i> | NA                                  | <i>Ca_desi_denovo</i> | 29462261                | G/C  | NA                 | NA                            | NA                 |
| <i>Desi_wild_29464404</i> | NA                                  | <i>Ca_desi_denovo</i> | 29464404                | T/C  | NA                 | NA                            | NA                 |
| <i>Desi_wild_29467431</i> | NA                                  | <i>Ca_desi_denovo</i> | 29467431                | C/T  | NA                 | NA                            | NA                 |
| <i>Desi_wild_29480759</i> | NA                                  | <i>Ca_desi_denovo</i> | 29480759                | G/T  | NA                 | NA                            | NA                 |
| <i>Desi_wild_29480935</i> | NA                                  | <i>Ca_desi_denovo</i> | 29480935                | T/G  | NA                 | NA                            | NA                 |
| <i>Desi_wild_29480936</i> | NA                                  | <i>Ca_desi_denovo</i> | 29480936                | T/A  | NA                 | NA                            | NA                 |
| <i>Desi_wild_29484989</i> | NA                                  | <i>Ca_desi_denovo</i> | 29484989                | C/G  | NA                 | NA                            | NA                 |
| <i>Desi_wild_29485015</i> | NA                                  | <i>Ca_desi_denovo</i> | 29485015                | A/G  | NA                 | NA                            | NA                 |
| <i>Desi_wild_29485580</i> | NA                                  | <i>Ca_desi_denovo</i> | 29485580                | C/T  | NA                 | NA                            | NA                 |
| <i>Desi_wild_29486150</i> | NA                                  | <i>Ca_desi_denovo</i> | 29486150                | T/C  | NA                 | NA                            | NA                 |
| <i>Desi_wild_29487518</i> | NA                                  | <i>Ca_desi_denovo</i> | 29487518                | A/G  | NA                 | NA                            | NA                 |
| <i>Desi_wild_29488272</i> | NA                                  | <i>Ca_desi_denovo</i> | 29488272                | G/C  | NA                 | NA                            | NA                 |
| <i>Desi_wild_29489081</i> | NA                                  | <i>Ca_desi_denovo</i> | 29489081                | T/C  | NA                 | NA                            | NA                 |
| <i>Desi_wild_29492009</i> | NA                                  | <i>Ca_desi_denovo</i> | 29492009                | A/G  | NA                 | NA                            | NA                 |
| <i>Desi_wild_29492054</i> | NA                                  | <i>Ca_desi_denovo</i> | 29492054                | T/G  | NA                 | NA                            | NA                 |
| <i>Desi_wild_29499356</i> | NA                                  | <i>Ca_desi_denovo</i> | 29499356                | G/T  | NA                 | NA                            | NA                 |
| <i>Desi_wild_29500544</i> | NA                                  | <i>Ca_desi_denovo</i> | 29500544                | A/T  | NA                 | NA                            | NA                 |
| <i>Desi_wild_29507529</i> | NA                                  | <i>Ca_desi_denovo</i> | 29507529                | G/A  | NA                 | NA                            | NA                 |
| <i>Desi_wild_29508258</i> | NA                                  | <i>Ca_desi_denovo</i> | 29508258                | T/G  | NA                 | NA                            | NA                 |
| <i>Desi_wild_29512439</i> | NA                                  | <i>Ca_desi_denovo</i> | 29512439                | C/G  | NA                 | NA                            | NA                 |
| <i>Desi_wild_29517662</i> | NA                                  | <i>Ca_desi_denovo</i> | 29517662                | T/C  | NA                 | NA                            | NA                 |
| <i>Desi_wild_29517671</i> | NA                                  | <i>Ca_desi_denovo</i> | 29517671                | G/T  | NA                 | NA                            | NA                 |
| <i>Desi_wild_29524788</i> | NA                                  | <i>Ca_desi_denovo</i> | 29524788                | A/G  | NA                 | NA                            | NA                 |
| <i>Desi_wild_29526743</i> | NA                                  | <i>Ca_desi_denovo</i> | 29526743                | A/C  | NA                 | NA                            | NA                 |
| <i>Desi_wild_29529537</i> | NA                                  | <i>Ca_desi_denovo</i> | 29529537                | G/A  | NA                 | NA                            | NA                 |
| <i>Desi_wild_29529616</i> | NA                                  | <i>Ca_desi_denovo</i> | 29529616                | G/A  | NA                 | NA                            | NA                 |

| SNP IDs                   | NCBI dbSNP accession IDs (NCBI_SS#) | Chromosomes           | Physical positions (bp) | SNPs | Gene accession IDs | Sequence components of genome | Putative functions |
|---------------------------|-------------------------------------|-----------------------|-------------------------|------|--------------------|-------------------------------|--------------------|
| <i>Desi_wild_29534615</i> | NA                                  | <i>Ca_desi_denovo</i> | 29534615                | C/G  | NA                 | NA                            | NA                 |
| <i>Desi_wild_29534710</i> | NA                                  | <i>Ca_desi_denovo</i> | 29534710                | A/C  | NA                 | NA                            | NA                 |
| <i>Desi_wild_29534711</i> | NA                                  | <i>Ca_desi_denovo</i> | 29534711                | G/T  | NA                 | NA                            | NA                 |
| <i>Desi_wild_29536076</i> | NA                                  | <i>Ca_desi_denovo</i> | 29536076                | G/A  | NA                 | NA                            | NA                 |
| <i>Desi_wild_29536084</i> | NA                                  | <i>Ca_desi_denovo</i> | 29536084                | C/G  | NA                 | NA                            | NA                 |
| <i>Desi_wild_29541930</i> | NA                                  | <i>Ca_desi_denovo</i> | 29541930                | T/C  | NA                 | NA                            | NA                 |
| <i>Desi_wild_29541934</i> | NA                                  | <i>Ca_desi_denovo</i> | 29541934                | A/G  | NA                 | NA                            | NA                 |
| <i>Desi_wild_29548481</i> | NA                                  | <i>Ca_desi_denovo</i> | 29548481                | C/G  | NA                 | NA                            | NA                 |
| <i>Desi_wild_29548529</i> | NA                                  | <i>Ca_desi_denovo</i> | 29548529                | C/G  | NA                 | NA                            | NA                 |
| <i>Desi_wild_29573894</i> | NA                                  | <i>Ca_desi_denovo</i> | 29573894                | G/A  | NA                 | NA                            | NA                 |
| <i>Desi_wild_29573897</i> | NA                                  | <i>Ca_desi_denovo</i> | 29573897                | C/T  | NA                 | NA                            | NA                 |
| <i>Desi_wild_29573912</i> | NA                                  | <i>Ca_desi_denovo</i> | 29573912                | C/G  | NA                 | NA                            | NA                 |
| <i>Desi_wild_29573915</i> | NA                                  | <i>Ca_desi_denovo</i> | 29573915                | A/G  | NA                 | NA                            | NA                 |
| <i>Desi_wild_29575661</i> | NA                                  | <i>Ca_desi_denovo</i> | 29575661                | G/T  | NA                 | NA                            | NA                 |
| <i>Desi_wild_29578442</i> | NA                                  | <i>Ca_desi_denovo</i> | 29578442                | T/C  | NA                 | NA                            | NA                 |
| <i>Desi_wild_29578464</i> | NA                                  | <i>Ca_desi_denovo</i> | 29578464                | A/G  | NA                 | NA                            | NA                 |
| <i>Desi_wild_29584252</i> | NA                                  | <i>Ca_desi_denovo</i> | 29584252                | G/C  | NA                 | NA                            | NA                 |
| <i>Desi_wild_29584859</i> | NA                                  | <i>Ca_desi_denovo</i> | 29584859                | T/G  | NA                 | NA                            | NA                 |
| <i>Desi_wild_29587816</i> | NA                                  | <i>Ca_desi_denovo</i> | 29587816                | C/A  | NA                 | NA                            | NA                 |
| <i>Desi_wild_29589079</i> | NA                                  | <i>Ca_desi_denovo</i> | 29589079                | G/T  | NA                 | NA                            | NA                 |
| <i>Desi_wild_29593192</i> | NA                                  | <i>Ca_desi_denovo</i> | 29593192                | G/T  | NA                 | NA                            | NA                 |
| <i>Desi_wild_29597492</i> | NA                                  | <i>Ca_desi_denovo</i> | 29597492                | A/C  | NA                 | NA                            | NA                 |
| <i>Desi_wild_29602965</i> | NA                                  | <i>Ca_desi_denovo</i> | 29602965                | A/C  | NA                 | NA                            | NA                 |
| <i>Desi_wild_29602966</i> | NA                                  | <i>Ca_desi_denovo</i> | 29602966                | G/T  | NA                 | NA                            | NA                 |
| <i>Desi_wild_29602967</i> | NA                                  | <i>Ca_desi_denovo</i> | 29602967                | A/G  | NA                 | NA                            | NA                 |
| <i>Desi_wild_29609910</i> | NA                                  | <i>Ca_desi_denovo</i> | 29609910                | A/G  | NA                 | NA                            | NA                 |
| <i>Desi_wild_29609966</i> | NA                                  | <i>Ca_desi_denovo</i> | 29609966                | C/T  | NA                 | NA                            | NA                 |
| <i>Desi_wild_29612450</i> | NA                                  | <i>Ca_desi_denovo</i> | 29612450                | G/T  | NA                 | NA                            | NA                 |
| <i>Desi_wild_29615234</i> | NA                                  | <i>Ca_desi_denovo</i> | 29615234                | T/A  | NA                 | NA                            | NA                 |
| <i>Desi_wild_29615235</i> | NA                                  | <i>Ca_desi_denovo</i> | 29615235                | G/A  | NA                 | NA                            | NA                 |
| <i>Desi_wild_29624328</i> | NA                                  | <i>Ca_desi_denovo</i> | 29624328                | G/T  | NA                 | NA                            | NA                 |
| <i>Desi_wild_29625044</i> | NA                                  | <i>Ca_desi_denovo</i> | 29625044                | T/G  | NA                 | NA                            | NA                 |
| <i>Desi_wild_29630261</i> | NA                                  | <i>Ca_desi_denovo</i> | 29630261                | C/A  | NA                 | NA                            | NA                 |
| <i>Desi_wild_29633351</i> | NA                                  | <i>Ca_desi_denovo</i> | 29633351                | G/T  | NA                 | NA                            | NA                 |
| <i>Desi_wild_29650598</i> | NA                                  | <i>Ca_desi_denovo</i> | 29650598                | T/C  | NA                 | NA                            | NA                 |
| <i>Desi_wild_29650622</i> | NA                                  | <i>Ca_desi_denovo</i> | 29650622                | A/G  | NA                 | NA                            | NA                 |
| <i>Desi_wild_29653086</i> | NA                                  | <i>Ca_desi_denovo</i> | 29653086                | C/T  | NA                 | NA                            | NA                 |
| <i>Desi_wild_29653118</i> | NA                                  | <i>Ca_desi_denovo</i> | 29653118                | C/G  | NA                 | NA                            | NA                 |
| <i>Desi_wild_29654706</i> | NA                                  | <i>Ca_desi_denovo</i> | 29654706                | C/T  | NA                 | NA                            | NA                 |
| <i>Desi_wild_29655012</i> | NA                                  | <i>Ca_desi_denovo</i> | 29655012                | C/G  | NA                 | NA                            | NA                 |
| <i>Desi_wild_29657433</i> | NA                                  | <i>Ca_desi_denovo</i> | 29657433                | T/C  | NA                 | NA                            | NA                 |
| <i>Desi_wild_29667050</i> | NA                                  | <i>Ca_desi_denovo</i> | 29667050                | C/A  | NA                 | NA                            | NA                 |
| <i>Desi_wild_29678114</i> | NA                                  | <i>Ca_desi_denovo</i> | 29678114                | C/T  | NA                 | NA                            | NA                 |
| <i>Desi_wild_29680821</i> | NA                                  | <i>Ca_desi_denovo</i> | 29680821                | G/T  | NA                 | NA                            | NA                 |



| SNP IDs                   | NCBI dbSNP accession IDs (NCBI_SS#) | Chromosomes           | Physical positions (bp) | SNPs | Gene accession IDs | Sequence components of genome | Putative functions |
|---------------------------|-------------------------------------|-----------------------|-------------------------|------|--------------------|-------------------------------|--------------------|
| <i>Desi_wild_29682849</i> | NA                                  | <i>Ca_desi_denovo</i> | 29682849                | C/G  | NA                 | NA                            | NA                 |
| <i>Desi_wild_29682866</i> | NA                                  | <i>Ca_desi_denovo</i> | 29682866                | T/G  | NA                 | NA                            | NA                 |
| <i>Desi_wild_29682880</i> | NA                                  | <i>Ca_desi_denovo</i> | 29682880                | C/T  | NA                 | NA                            | NA                 |
| <i>Desi_wild_29682890</i> | NA                                  | <i>Ca_desi_denovo</i> | 29682890                | C/A  | NA                 | NA                            | NA                 |
| <i>Desi_wild_29684467</i> | NA                                  | <i>Ca_desi_denovo</i> | 29684467                | T/C  | NA                 | NA                            | NA                 |
| <i>Desi_wild_29690745</i> | NA                                  | <i>Ca_desi_denovo</i> | 29690745                | C/A  | NA                 | NA                            | NA                 |
| <i>Desi_wild_29694090</i> | NA                                  | <i>Ca_desi_denovo</i> | 29694090                | T/C  | NA                 | NA                            | NA                 |
| <i>Desi_wild_29694147</i> | NA                                  | <i>Ca_desi_denovo</i> | 29694147                | A/T  | NA                 | NA                            | NA                 |
| <i>Desi_wild_29694156</i> | NA                                  | <i>Ca_desi_denovo</i> | 29694156                | G/A  | NA                 | NA                            | NA                 |
| <i>Desi_wild_29699609</i> | NA                                  | <i>Ca_desi_denovo</i> | 29699609                | G/A  | NA                 | NA                            | NA                 |
| <i>Desi_wild_29701078</i> | NA                                  | <i>Ca_desi_denovo</i> | 29701078                | A/C  | NA                 | NA                            | NA                 |
| <i>Desi_wild_29702840</i> | NA                                  | <i>Ca_desi_denovo</i> | 29702840                | T/C  | NA                 | NA                            | NA                 |
| <i>Desi_wild_29703276</i> | NA                                  | <i>Ca_desi_denovo</i> | 29703276                | C/A  | NA                 | NA                            | NA                 |
| <i>Desi_wild_29707105</i> | NA                                  | <i>Ca_desi_denovo</i> | 29707105                | G/T  | NA                 | NA                            | NA                 |
| <i>Desi_wild_29710935</i> | NA                                  | <i>Ca_desi_denovo</i> | 29710935                | G/A  | NA                 | NA                            | NA                 |
| <i>Desi_wild_29713191</i> | NA                                  | <i>Ca_desi_denovo</i> | 29713191                | T/C  | NA                 | NA                            | NA                 |
| <i>Desi_wild_29713200</i> | NA                                  | <i>Ca_desi_denovo</i> | 29713200                | G/C  | NA                 | NA                            | NA                 |
| <i>Desi_wild_29714422</i> | NA                                  | <i>Ca_desi_denovo</i> | 29714422                | A/C  | NA                 | NA                            | NA                 |
| <i>Desi_wild_29714423</i> | NA                                  | <i>Ca_desi_denovo</i> | 29714423                | A/G  | NA                 | NA                            | NA                 |
| <i>Desi_wild_29724518</i> | NA                                  | <i>Ca_desi_denovo</i> | 29724518                | C/G  | NA                 | NA                            | NA                 |
| <i>Desi_wild_29724536</i> | NA                                  | <i>Ca_desi_denovo</i> | 29724536                | C/A  | NA                 | NA                            | NA                 |
| <i>Desi_wild_29724983</i> | NA                                  | <i>Ca_desi_denovo</i> | 29724983                | A/G  | NA                 | NA                            | NA                 |
| <i>Desi_wild_29729529</i> | NA                                  | <i>Ca_desi_denovo</i> | 29729529                | C/T  | NA                 | NA                            | NA                 |
| <i>Desi_wild_29729534</i> | NA                                  | <i>Ca_desi_denovo</i> | 29729534                | G/T  | NA                 | NA                            | NA                 |
| <i>Desi_wild_29736420</i> | NA                                  | <i>Ca_desi_denovo</i> | 29736420                | G/A  | NA                 | NA                            | NA                 |
| <i>Desi_wild_29736731</i> | NA                                  | <i>Ca_desi_denovo</i> | 29736731                | C/T  | NA                 | NA                            | NA                 |
| <i>Desi_wild_29737077</i> | NA                                  | <i>Ca_desi_denovo</i> | 29737077                | G/T  | NA                 | NA                            | NA                 |
| <i>Desi_wild_29738775</i> | NA                                  | <i>Ca_desi_denovo</i> | 29738775                | C/T  | NA                 | NA                            | NA                 |
| <i>Desi_wild_29738787</i> | NA                                  | <i>Ca_desi_denovo</i> | 29738787                | C/T  | NA                 | NA                            | NA                 |
| <i>Desi_wild_29740140</i> | NA                                  | <i>Ca_desi_denovo</i> | 29740140                | A/G  | NA                 | NA                            | NA                 |
| <i>Desi_wild_29742357</i> | NA                                  | <i>Ca_desi_denovo</i> | 29742357                | A/C  | NA                 | NA                            | NA                 |
| <i>Desi_wild_29757293</i> | NA                                  | <i>Ca_desi_denovo</i> | 29757293                | C/G  | NA                 | NA                            | NA                 |
| <i>Desi_wild_29764460</i> | NA                                  | <i>Ca_desi_denovo</i> | 29764460                | C/G  | NA                 | NA                            | NA                 |
| <i>Desi_wild_29771174</i> | NA                                  | <i>Ca_desi_denovo</i> | 29771174                | G/A  | NA                 | NA                            | NA                 |
| <i>Desi_wild_29771237</i> | NA                                  | <i>Ca_desi_denovo</i> | 29771237                | A/G  | NA                 | NA                            | NA                 |
| <i>Desi_wild_29772503</i> | NA                                  | <i>Ca_desi_denovo</i> | 29772503                | A/C  | NA                 | NA                            | NA                 |
| <i>Desi_wild_29773952</i> | NA                                  | <i>Ca_desi_denovo</i> | 29773952                | C/T  | NA                 | NA                            | NA                 |
| <i>Desi_wild_29776830</i> | NA                                  | <i>Ca_desi_denovo</i> | 29776830                | A/G  | NA                 | NA                            | NA                 |
| <i>Desi_wild_29776836</i> | NA                                  | <i>Ca_desi_denovo</i> | 29776836                | G/C  | NA                 | NA                            | NA                 |
| <i>Desi_wild_29778292</i> | NA                                  | <i>Ca_desi_denovo</i> | 29778292                | G/T  | NA                 | NA                            | NA                 |
| <i>Desi_wild_29778602</i> | NA                                  | <i>Ca_desi_denovo</i> | 29778602                | A/T  | NA                 | NA                            | NA                 |
| <i>Desi_wild_29787668</i> | NA                                  | <i>Ca_desi_denovo</i> | 29787668                | A/C  | NA                 | NA                            | NA                 |
| <i>Desi_wild_29794275</i> | NA                                  | <i>Ca_desi_denovo</i> | 29794275                | A/C  | NA                 | NA                            | NA                 |
| <i>Desi_wild_29805237</i> | NA                                  | <i>Ca_desi_denovo</i> | 29805237                | A/G  | NA                 | NA                            | NA                 |

| SNP IDs                   | NCBI dbSNP accession IDs (NCBI_SS#) | Chromosomes           | Physical positions (bp) | SNPs | Gene accession IDs | Sequence components of genome | Putative functions |
|---------------------------|-------------------------------------|-----------------------|-------------------------|------|--------------------|-------------------------------|--------------------|
| <i>Desi_wild_29816878</i> | NA                                  | <i>Ca_desi_denovo</i> | 29816878                | C/T  | NA                 | NA                            | NA                 |
| <i>Desi_wild_29816915</i> | NA                                  | <i>Ca_desi_denovo</i> | 29816915                | T/A  | NA                 | NA                            | NA                 |
| <i>Desi_wild_29818858</i> | NA                                  | <i>Ca_desi_denovo</i> | 29818858                | A/G  | NA                 | NA                            | NA                 |
| <i>Desi_wild_29827629</i> | NA                                  | <i>Ca_desi_denovo</i> | 29827629                | G/A  | NA                 | NA                            | NA                 |
| <i>Desi_wild_29844106</i> | NA                                  | <i>Ca_desi_denovo</i> | 29844106                | G/T  | NA                 | NA                            | NA                 |
| <i>Desi_wild_29846848</i> | NA                                  | <i>Ca_desi_denovo</i> | 29846848                | C/G  | NA                 | NA                            | NA                 |
| <i>Desi_wild_29848407</i> | NA                                  | <i>Ca_desi_denovo</i> | 29848407                | G/A  | NA                 | NA                            | NA                 |
| <i>Desi_wild_29861206</i> | NA                                  | <i>Ca_desi_denovo</i> | 29861206                | A/T  | NA                 | NA                            | NA                 |
| <i>Desi_wild_29862794</i> | NA                                  | <i>Ca_desi_denovo</i> | 29862794                | G/T  | NA                 | NA                            | NA                 |
| <i>Desi_wild_29865989</i> | NA                                  | <i>Ca_desi_denovo</i> | 29865989                | C/T  | NA                 | NA                            | NA                 |
| <i>Desi_wild_29877141</i> | NA                                  | <i>Ca_desi_denovo</i> | 29877141                | G/T  | NA                 | NA                            | NA                 |
| <i>Desi_wild_29878133</i> | NA                                  | <i>Ca_desi_denovo</i> | 29878133                | A/G  | NA                 | NA                            | NA                 |
| <i>Desi_wild_29878138</i> | NA                                  | <i>Ca_desi_denovo</i> | 29878138                | A/C  | NA                 | NA                            | NA                 |
| <i>Desi_wild_29881891</i> | NA                                  | <i>Ca_desi_denovo</i> | 29881891                | T/C  | NA                 | NA                            | NA                 |
| <i>Desi_wild_29881892</i> | NA                                  | <i>Ca_desi_denovo</i> | 29881892                | C/T  | NA                 | NA                            | NA                 |
| <i>Desi_wild_29881910</i> | NA                                  | <i>Ca_desi_denovo</i> | 29881910                | T/C  | NA                 | NA                            | NA                 |
| <i>Desi_wild_29881940</i> | NA                                  | <i>Ca_desi_denovo</i> | 29881940                | T/C  | NA                 | NA                            | NA                 |
| <i>Desi_wild_29882372</i> | NA                                  | <i>Ca_desi_denovo</i> | 29882372                | A/G  | NA                 | NA                            | NA                 |
| <i>Desi_wild_29885438</i> | NA                                  | <i>Ca_desi_denovo</i> | 29885438                | G/A  | NA                 | NA                            | NA                 |
| <i>Desi_wild_29894903</i> | NA                                  | <i>Ca_desi_denovo</i> | 29894903                | A/G  | NA                 | NA                            | NA                 |
| <i>Desi_wild_29896320</i> | NA                                  | <i>Ca_desi_denovo</i> | 29896320                | G/T  | NA                 | NA                            | NA                 |
| <i>Desi_wild_29902324</i> | NA                                  | <i>Ca_desi_denovo</i> | 29902324                | G/T  | NA                 | NA                            | NA                 |
| <i>Desi_wild_29902948</i> | NA                                  | <i>Ca_desi_denovo</i> | 29902948                | G/C  | NA                 | NA                            | NA                 |
| <i>Desi_wild_29902964</i> | NA                                  | <i>Ca_desi_denovo</i> | 29902964                | C/T  | NA                 | NA                            | NA                 |
| <i>Desi_wild_29905108</i> | NA                                  | <i>Ca_desi_denovo</i> | 29905108                | A/G  | NA                 | NA                            | NA                 |
| <i>Desi_wild_29913858</i> | NA                                  | <i>Ca_desi_denovo</i> | 29913858                | G/C  | NA                 | NA                            | NA                 |
| <i>Desi_wild_29913867</i> | NA                                  | <i>Ca_desi_denovo</i> | 29913867                | G/A  | NA                 | NA                            | NA                 |
| <i>Desi_wild_29914100</i> | NA                                  | <i>Ca_desi_denovo</i> | 29914100                | A/G  | NA                 | NA                            | NA                 |
| <i>Desi_wild_29915081</i> | NA                                  | <i>Ca_desi_denovo</i> | 29915081                | C/T  | NA                 | NA                            | NA                 |
| <i>Desi_wild_29916280</i> | NA                                  | <i>Ca_desi_denovo</i> | 29916280                | C/T  | NA                 | NA                            | NA                 |
| <i>Desi_wild_29918924</i> | NA                                  | <i>Ca_desi_denovo</i> | 29918924                | T/C  | NA                 | NA                            | NA                 |
| <i>Desi_wild_29918952</i> | NA                                  | <i>Ca_desi_denovo</i> | 29918952                | G/T  | NA                 | NA                            | NA                 |
| <i>Desi_wild_29918967</i> | NA                                  | <i>Ca_desi_denovo</i> | 29918967                | T/C  | NA                 | NA                            | NA                 |
| <i>Desi_wild_29921757</i> | NA                                  | <i>Ca_desi_denovo</i> | 29921757                | G/T  | NA                 | NA                            | NA                 |
| <i>Desi_wild_29923938</i> | NA                                  | <i>Ca_desi_denovo</i> | 29923938                | A/G  | NA                 | NA                            | NA                 |
| <i>Desi_wild_29927836</i> | NA                                  | <i>Ca_desi_denovo</i> | 29927836                | G/C  | NA                 | NA                            | NA                 |
| <i>Desi_wild_29927872</i> | NA                                  | <i>Ca_desi_denovo</i> | 29927872                | C/T  | NA                 | NA                            | NA                 |
| <i>Desi_wild_29933763</i> | NA                                  | <i>Ca_desi_denovo</i> | 29933763                | C/T  | NA                 | NA                            | NA                 |
| <i>Desi_wild_29933778</i> | NA                                  | <i>Ca_desi_denovo</i> | 29933778                | C/T  | NA                 | NA                            | NA                 |
| <i>Desi_wild_29933907</i> | NA                                  | <i>Ca_desi_denovo</i> | 29933907                | C/T  | NA                 | NA                            | NA                 |
| <i>Desi_wild_29938520</i> | NA                                  | <i>Ca_desi_denovo</i> | 29938520                | T/C  | NA                 | NA                            | NA                 |
| <i>Desi_wild_29943282</i> | NA                                  | <i>Ca_desi_denovo</i> | 29943282                | C/T  | NA                 | NA                            | NA                 |
| <i>Desi_wild_29952277</i> | NA                                  | <i>Ca_desi_denovo</i> | 29952277                | C/T  | NA                 | NA                            | NA                 |
| <i>Desi_wild_29960383</i> | NA                                  | <i>Ca_desi_denovo</i> | 29960383                | G/A  | NA                 | NA                            | NA                 |

| SNP IDs                   | NCBI dbSNP accession IDs (NCBI_SS#) | Chromosomes           | Physical positions (bp) | SNPs | Gene accession IDs | Sequence components of genome | Putative functions |
|---------------------------|-------------------------------------|-----------------------|-------------------------|------|--------------------|-------------------------------|--------------------|
| <i>Desi_wild_29960415</i> | NA                                  | <i>Ca_desi_denovo</i> | 29960415                | C/A  | NA                 | NA                            | NA                 |
| <i>Desi_wild_29961327</i> | NA                                  | <i>Ca_desi_denovo</i> | 29961327                | T/C  | NA                 | NA                            | NA                 |
| <i>Desi_wild_29965882</i> | NA                                  | <i>Ca_desi_denovo</i> | 29965882                | A/T  | NA                 | NA                            | NA                 |
| <i>Desi_wild_29966771</i> | NA                                  | <i>Ca_desi_denovo</i> | 29966771                | G/C  | NA                 | NA                            | NA                 |
| <i>Desi_wild_29966789</i> | NA                                  | <i>Ca_desi_denovo</i> | 29966789                | T/C  | NA                 | NA                            | NA                 |
| <i>Desi_wild_29967527</i> | NA                                  | <i>Ca_desi_denovo</i> | 29967527                | G/A  | NA                 | NA                            | NA                 |
| <i>Desi_wild_29971650</i> | NA                                  | <i>Ca_desi_denovo</i> | 29971650                | G/C  | NA                 | NA                            | NA                 |
| <i>Desi_wild_29971691</i> | NA                                  | <i>Ca_desi_denovo</i> | 29971691                | A/G  | NA                 | NA                            | NA                 |
| <i>Desi_wild_29974099</i> | NA                                  | <i>Ca_desi_denovo</i> | 29974099                | A/C  | NA                 | NA                            | NA                 |
| <i>Desi_wild_29974428</i> | NA                                  | <i>Ca_desi_denovo</i> | 29974428                | T/C  | NA                 | NA                            | NA                 |
| <i>Desi_wild_29985521</i> | NA                                  | <i>Ca_desi_denovo</i> | 29985521                | G/C  | NA                 | NA                            | NA                 |
| <i>Desi_wild_29997401</i> | NA                                  | <i>Ca_desi_denovo</i> | 29997401                | T/G  | NA                 | NA                            | NA                 |
| <i>Desi_wild_30002037</i> | NA                                  | <i>Ca_desi_denovo</i> | 30002037                | G/T  | NA                 | NA                            | NA                 |
| <i>Desi_wild_30002038</i> | NA                                  | <i>Ca_desi_denovo</i> | 30002038                | C/G  | NA                 | NA                            | NA                 |
| <i>Desi_wild_30009869</i> | NA                                  | <i>Ca_desi_denovo</i> | 30009869                | A/G  | NA                 | NA                            | NA                 |
| <i>Desi_wild_30010514</i> | NA                                  | <i>Ca_desi_denovo</i> | 30010514                | A/G  | NA                 | NA                            | NA                 |
| <i>Desi_wild_30010562</i> | NA                                  | <i>Ca_desi_denovo</i> | 30010562                | C/A  | NA                 | NA                            | NA                 |
| <i>Desi_wild_30010954</i> | NA                                  | <i>Ca_desi_denovo</i> | 30010954                | C/A  | NA                 | NA                            | NA                 |
| <i>Desi_wild_30019794</i> | NA                                  | <i>Ca_desi_denovo</i> | 30019794                | G/T  | NA                 | NA                            | NA                 |
| <i>Desi_wild_30029667</i> | NA                                  | <i>Ca_desi_denovo</i> | 30029667                | G/C  | NA                 | NA                            | NA                 |
| <i>Desi_wild_30040388</i> | NA                                  | <i>Ca_desi_denovo</i> | 30040388                | T/C  | NA                 | NA                            | NA                 |
| <i>Desi_wild_30048214</i> | NA                                  | <i>Ca_desi_denovo</i> | 30048214                | A/C  | NA                 | NA                            | NA                 |
| <i>Desi_wild_30051773</i> | NA                                  | <i>Ca_desi_denovo</i> | 30051773                | C/T  | NA                 | NA                            | NA                 |
| <i>Desi_wild_30053155</i> | NA                                  | <i>Ca_desi_denovo</i> | 30053155                | C/G  | NA                 | NA                            | NA                 |
| <i>Desi_wild_30057281</i> | NA                                  | <i>Ca_desi_denovo</i> | 30057281                | G/C  | NA                 | NA                            | NA                 |
| <i>Desi_wild_30063591</i> | NA                                  | <i>Ca_desi_denovo</i> | 30063591                | G/A  | NA                 | NA                            | NA                 |
| <i>Desi_wild_30076820</i> | NA                                  | <i>Ca_desi_denovo</i> | 30076820                | A/C  | NA                 | NA                            | NA                 |
| <i>Desi_wild_30089870</i> | NA                                  | <i>Ca_desi_denovo</i> | 30089870                | G/T  | NA                 | NA                            | NA                 |
| <i>Desi_wild_30090145</i> | NA                                  | <i>Ca_desi_denovo</i> | 30090145                | A/G  | NA                 | NA                            | NA                 |
| <i>Desi_wild_30091819</i> | NA                                  | <i>Ca_desi_denovo</i> | 30091819                | C/G  | NA                 | NA                            | NA                 |
| <i>Desi_wild_30091838</i> | NA                                  | <i>Ca_desi_denovo</i> | 30091838                | G/A  | NA                 | NA                            | NA                 |
| <i>Desi_wild_30091861</i> | NA                                  | <i>Ca_desi_denovo</i> | 30091861                | A/G  | NA                 | NA                            | NA                 |
| <i>Desi_wild_30091890</i> | NA                                  | <i>Ca_desi_denovo</i> | 30091890                | A/C  | NA                 | NA                            | NA                 |
| <i>Desi_wild_30098919</i> | NA                                  | <i>Ca_desi_denovo</i> | 30098919                | T/C  | NA                 | NA                            | NA                 |
| <i>Desi_wild_30098957</i> | NA                                  | <i>Ca_desi_denovo</i> | 30098957                | C/T  | NA                 | NA                            | NA                 |
| <i>Desi_wild_30106209</i> | NA                                  | <i>Ca_desi_denovo</i> | 30106209                | T/G  | NA                 | NA                            | NA                 |
| <i>Desi_wild_30106281</i> | NA                                  | <i>Ca_desi_denovo</i> | 30106281                | T/G  | NA                 | NA                            | NA                 |
| <i>Desi_wild_30108516</i> | NA                                  | <i>Ca_desi_denovo</i> | 30108516                | A/T  | NA                 | NA                            | NA                 |
| <i>Desi_wild_30108537</i> | NA                                  | <i>Ca_desi_denovo</i> | 30108537                | T/C  | NA                 | NA                            | NA                 |
| <i>Desi_wild_30110823</i> | NA                                  | <i>Ca_desi_denovo</i> | 30110823                | C/G  | NA                 | NA                            | NA                 |
| <i>Desi_wild_30110844</i> | NA                                  | <i>Ca_desi_denovo</i> | 30110844                | G/A  | NA                 | NA                            | NA                 |
| <i>Desi_wild_30129264</i> | NA                                  | <i>Ca_desi_denovo</i> | 30129264                | T/G  | NA                 | NA                            | NA                 |
| <i>Desi_wild_30129271</i> | NA                                  | <i>Ca_desi_denovo</i> | 30129271                | T/C  | NA                 | NA                            | NA                 |
| <i>Desi_wild_30129324</i> | NA                                  | <i>Ca_desi_denovo</i> | 30129324                | G/A  | NA                 | NA                            | NA                 |

| SNP IDs                   | NCBI dbSNP accession IDs (NCBI_SS#) | Chromosomes           | Physical positions (bp) | SNPs | Gene accession IDs | Sequence components of genome | Putative functions |
|---------------------------|-------------------------------------|-----------------------|-------------------------|------|--------------------|-------------------------------|--------------------|
| <i>Desi_wild_30129424</i> | NA                                  | <i>Ca_desi_denovo</i> | 30129424                | C/T  | NA                 | NA                            | NA                 |
| <i>Desi_wild_30137983</i> | NA                                  | <i>Ca_desi_denovo</i> | 30137983                | A/G  | NA                 | NA                            | NA                 |
| <i>Desi_wild_30138041</i> | NA                                  | <i>Ca_desi_denovo</i> | 30138041                | T/C  | NA                 | NA                            | NA                 |
| <i>Desi_wild_30148987</i> | NA                                  | <i>Ca_desi_denovo</i> | 30148987                | T/A  | NA                 | NA                            | NA                 |
| <i>Desi_wild_30153149</i> | NA                                  | <i>Ca_desi_denovo</i> | 30153149                | G/C  | NA                 | NA                            | NA                 |
| <i>Desi_wild_30153221</i> | NA                                  | <i>Ca_desi_denovo</i> | 30153221                | T/C  | NA                 | NA                            | NA                 |
| <i>Desi_wild_30155914</i> | NA                                  | <i>Ca_desi_denovo</i> | 30155914                | G/A  | NA                 | NA                            | NA                 |
| <i>Desi_wild_30159451</i> | NA                                  | <i>Ca_desi_denovo</i> | 30159451                | G/T  | NA                 | NA                            | NA                 |
| <i>Desi_wild_30160494</i> | NA                                  | <i>Ca_desi_denovo</i> | 30160494                | G/T  | NA                 | NA                            | NA                 |
| <i>Desi_wild_30165707</i> | NA                                  | <i>Ca_desi_denovo</i> | 30165707                | G/T  | NA                 | NA                            | NA                 |
| <i>Desi_wild_30168887</i> | NA                                  | <i>Ca_desi_denovo</i> | 30168887                | C/G  | NA                 | NA                            | NA                 |
| <i>Desi_wild_30173624</i> | NA                                  | <i>Ca_desi_denovo</i> | 30173624                | G/T  | NA                 | NA                            | NA                 |
| <i>Desi_wild_30177830</i> | NA                                  | <i>Ca_desi_denovo</i> | 30177830                | A/G  | NA                 | NA                            | NA                 |
| <i>Desi_wild_30180386</i> | NA                                  | <i>Ca_desi_denovo</i> | 30180386                | T/C  | NA                 | NA                            | NA                 |
| <i>Desi_wild_30180389</i> | NA                                  | <i>Ca_desi_denovo</i> | 30180389                | G/C  | NA                 | NA                            | NA                 |
| <i>Desi_wild_30184170</i> | NA                                  | <i>Ca_desi_denovo</i> | 30184170                | G/C  | NA                 | NA                            | NA                 |
| <i>Desi_wild_30184176</i> | NA                                  | <i>Ca_desi_denovo</i> | 30184176                | C/T  | NA                 | NA                            | NA                 |
| <i>Desi_wild_30185733</i> | NA                                  | <i>Ca_desi_denovo</i> | 30185733                | G/T  | NA                 | NA                            | NA                 |
| <i>Desi_wild_30191135</i> | NA                                  | <i>Ca_desi_denovo</i> | 30191135                | T/C  | NA                 | NA                            | NA                 |
| <i>Desi_wild_30194686</i> | NA                                  | <i>Ca_desi_denovo</i> | 30194686                | A/G  | NA                 | NA                            | NA                 |
| <i>Desi_wild_30196055</i> | NA                                  | <i>Ca_desi_denovo</i> | 30196055                | G/T  | NA                 | NA                            | NA                 |
| <i>Desi_wild_30198354</i> | NA                                  | <i>Ca_desi_denovo</i> | 30198354                | G/T  | NA                 | NA                            | NA                 |
| <i>Desi_wild_30198389</i> | NA                                  | <i>Ca_desi_denovo</i> | 30198389                | A/G  | NA                 | NA                            | NA                 |
| <i>Desi_wild_30198394</i> | NA                                  | <i>Ca_desi_denovo</i> | 30198394                | C/G  | NA                 | NA                            | NA                 |
| <i>Desi_wild_30199172</i> | NA                                  | <i>Ca_desi_denovo</i> | 30199172                | G/C  | NA                 | NA                            | NA                 |
| <i>Desi_wild_30199173</i> | NA                                  | <i>Ca_desi_denovo</i> | 30199173                | G/A  | NA                 | NA                            | NA                 |
| <i>Desi_wild_30199174</i> | NA                                  | <i>Ca_desi_denovo</i> | 30199174                | C/G  | NA                 | NA                            | NA                 |
| <i>Desi_wild_30202032</i> | NA                                  | <i>Ca_desi_denovo</i> | 30202032                | G/A  | NA                 | NA                            | NA                 |
| <i>Desi_wild_30212490</i> | NA                                  | <i>Ca_desi_denovo</i> | 30212490                | A/G  | NA                 | NA                            | NA                 |
| <i>Desi_wild_30212493</i> | NA                                  | <i>Ca_desi_denovo</i> | 30212493                | G/A  | NA                 | NA                            | NA                 |
| <i>Desi_wild_30214056</i> | NA                                  | <i>Ca_desi_denovo</i> | 30214056                | A/G  | NA                 | NA                            | NA                 |
| <i>Desi_wild_30223966</i> | NA                                  | <i>Ca_desi_denovo</i> | 30223966                | G/T  | NA                 | NA                            | NA                 |
| <i>Desi_wild_30225891</i> | NA                                  | <i>Ca_desi_denovo</i> | 30225891                | A/T  | NA                 | NA                            | NA                 |
| <i>Desi_wild_30225894</i> | NA                                  | <i>Ca_desi_denovo</i> | 30225894                | T/C  | NA                 | NA                            | NA                 |
| <i>Desi_wild_30226577</i> | NA                                  | <i>Ca_desi_denovo</i> | 30226577                | G/T  | NA                 | NA                            | NA                 |
| <i>Desi_wild_30228044</i> | NA                                  | <i>Ca_desi_denovo</i> | 30228044                | A/G  | NA                 | NA                            | NA                 |
| <i>Desi_wild_30228116</i> | NA                                  | <i>Ca_desi_denovo</i> | 30228116                | T/C  | NA                 | NA                            | NA                 |
| <i>Desi_wild_30231760</i> | NA                                  | <i>Ca_desi_denovo</i> | 30231760                | G/T  | NA                 | NA                            | NA                 |
| <i>Desi_wild_30233219</i> | NA                                  | <i>Ca_desi_denovo</i> | 30233219                | G/A  | NA                 | NA                            | NA                 |
| <i>Desi_wild_30236950</i> | NA                                  | <i>Ca_desi_denovo</i> | 30236950                | A/C  | NA                 | NA                            | NA                 |
| <i>Desi_wild_30238158</i> | NA                                  | <i>Ca_desi_denovo</i> | 30238158                | G/T  | NA                 | NA                            | NA                 |
| <i>Desi_wild_30239150</i> | NA                                  | <i>Ca_desi_denovo</i> | 30239150                | G/T  | NA                 | NA                            | NA                 |
| <i>Desi_wild_30244684</i> | NA                                  | <i>Ca_desi_denovo</i> | 30244684                | A/G  | NA                 | NA                            | NA                 |
| <i>Desi_wild_30244702</i> | NA                                  | <i>Ca_desi_denovo</i> | 30244702                | T/C  | NA                 | NA                            | NA                 |

| SNP IDs                   | NCBI dbSNP accession IDs (NCBI_SS#) | Chromosomes           | Physical positions (bp) | SNPs | Gene accession IDs | Sequence components of genome | Putative functions |
|---------------------------|-------------------------------------|-----------------------|-------------------------|------|--------------------|-------------------------------|--------------------|
| <i>Desi_wild_30251753</i> | NA                                  | <i>Ca_desi_denovo</i> | 30251753                | A/G  | NA                 | NA                            | NA                 |
| <i>Desi_wild_30251755</i> | NA                                  | <i>Ca_desi_denovo</i> | 30251755                | G/A  | NA                 | NA                            | NA                 |
| <i>Desi_wild_30251760</i> | NA                                  | <i>Ca_desi_denovo</i> | 30251760                | G/C  | NA                 | NA                            | NA                 |
| <i>Desi_wild_30251762</i> | NA                                  | <i>Ca_desi_denovo</i> | 30251762                | C/G  | NA                 | NA                            | NA                 |
| <i>Desi_wild_30251763</i> | NA                                  | <i>Ca_desi_denovo</i> | 30251763                | A/C  | NA                 | NA                            | NA                 |
| <i>Desi_wild_30251793</i> | NA                                  | <i>Ca_desi_denovo</i> | 30251793                | T/G  | NA                 | NA                            | NA                 |
| <i>Desi_wild_30260193</i> | NA                                  | <i>Ca_desi_denovo</i> | 30260193                | C/T  | NA                 | NA                            | NA                 |
| <i>Desi_wild_30260224</i> | NA                                  | <i>Ca_desi_denovo</i> | 30260224                | G/T  | NA                 | NA                            | NA                 |
| <i>Desi_wild_30267227</i> | NA                                  | <i>Ca_desi_denovo</i> | 30267227                | G/A  | NA                 | NA                            | NA                 |
| <i>Desi_wild_30267283</i> | NA                                  | <i>Ca_desi_denovo</i> | 30267283                | T/A  | NA                 | NA                            | NA                 |
| <i>Desi_wild_30271269</i> | NA                                  | <i>Ca_desi_denovo</i> | 30271269                | A/G  | NA                 | NA                            | NA                 |
| <i>Desi_wild_30272778</i> | NA                                  | <i>Ca_desi_denovo</i> | 30272778                | T/C  | NA                 | NA                            | NA                 |
| <i>Desi_wild_30280742</i> | NA                                  | <i>Ca_desi_denovo</i> | 30280742                | C/G  | NA                 | NA                            | NA                 |
| <i>Desi_wild_30282186</i> | NA                                  | <i>Ca_desi_denovo</i> | 30282186                | C/G  | NA                 | NA                            | NA                 |
| <i>Desi_wild_30285822</i> | NA                                  | <i>Ca_desi_denovo</i> | 30285822                | C/T  | NA                 | NA                            | NA                 |
| <i>Desi_wild_30285840</i> | NA                                  | <i>Ca_desi_denovo</i> | 30285840                | A/G  | NA                 | NA                            | NA                 |
| <i>Desi_wild_30288990</i> | NA                                  | <i>Ca_desi_denovo</i> | 30288990                | G/C  | NA                 | NA                            | NA                 |
| <i>Desi_wild_30289029</i> | NA                                  | <i>Ca_desi_denovo</i> | 30289029                | C/T  | NA                 | NA                            | NA                 |
| <i>Desi_wild_30289038</i> | NA                                  | <i>Ca_desi_denovo</i> | 30289038                | A/C  | NA                 | NA                            | NA                 |
| <i>Desi_wild_30289044</i> | NA                                  | <i>Ca_desi_denovo</i> | 30289044                | T/C  | NA                 | NA                            | NA                 |
| <i>Desi_wild_30289847</i> | NA                                  | <i>Ca_desi_denovo</i> | 30289847                | G/T  | NA                 | NA                            | NA                 |
| <i>Desi_wild_30293677</i> | NA                                  | <i>Ca_desi_denovo</i> | 30293677                | A/G  | NA                 | NA                            | NA                 |
| <i>Desi_wild_30295018</i> | NA                                  | <i>Ca_desi_denovo</i> | 30295018                | G/T  | NA                 | NA                            | NA                 |
| <i>Desi_wild_30295629</i> | NA                                  | <i>Ca_desi_denovo</i> | 30295629                | C/G  | NA                 | NA                            | NA                 |
| <i>Desi_wild_30302480</i> | NA                                  | <i>Ca_desi_denovo</i> | 30302480                | C/G  | NA                 | NA                            | NA                 |
| <i>Desi_wild_30307162</i> | NA                                  | <i>Ca_desi_denovo</i> | 30307162                | G/T  | NA                 | NA                            | NA                 |
| <i>Desi_wild_30308468</i> | NA                                  | <i>Ca_desi_denovo</i> | 30308468                | G/T  | NA                 | NA                            | NA                 |
| <i>Desi_wild_30314529</i> | NA                                  | <i>Ca_desi_denovo</i> | 30314529                | G/A  | NA                 | NA                            | NA                 |
| <i>Desi_wild_30314534</i> | NA                                  | <i>Ca_desi_denovo</i> | 30314534                | C/G  | NA                 | NA                            | NA                 |
| <i>Desi_wild_30318890</i> | NA                                  | <i>Ca_desi_denovo</i> | 30318890                | T/C  | NA                 | NA                            | NA                 |
| <i>Desi_wild_30318931</i> | NA                                  | <i>Ca_desi_denovo</i> | 30318931                | C/T  | NA                 | NA                            | NA                 |
| <i>Desi_wild_30331622</i> | NA                                  | <i>Ca_desi_denovo</i> | 30331622                | C/G  | NA                 | NA                            | NA                 |
| <i>Desi_wild_30331650</i> | NA                                  | <i>Ca_desi_denovo</i> | 30331650                | G/A  | NA                 | NA                            | NA                 |
| <i>Desi_wild_30342370</i> | NA                                  | <i>Ca_desi_denovo</i> | 30342370                | G/A  | NA                 | NA                            | NA                 |
| <i>Desi_wild_30343746</i> | NA                                  | <i>Ca_desi_denovo</i> | 30343746                | T/C  | NA                 | NA                            | NA                 |
| <i>Desi_wild_30343791</i> | NA                                  | <i>Ca_desi_denovo</i> | 30343791                | T/C  | NA                 | NA                            | NA                 |
| <i>Desi_wild_30346322</i> | NA                                  | <i>Ca_desi_denovo</i> | 30346322                | G/C  | NA                 | NA                            | NA                 |
| <i>Desi_wild_30347948</i> | NA                                  | <i>Ca_desi_denovo</i> | 30347948                | G/T  | NA                 | NA                            | NA                 |
| <i>Desi_wild_30347951</i> | NA                                  | <i>Ca_desi_denovo</i> | 30347951                | T/A  | NA                 | NA                            | NA                 |
| <i>Desi_wild_30352855</i> | NA                                  | <i>Ca_desi_denovo</i> | 30352855                | G/T  | NA                 | NA                            | NA                 |
| <i>Desi_wild_30353396</i> | NA                                  | <i>Ca_desi_denovo</i> | 30353396                | C/G  | NA                 | NA                            | NA                 |
| <i>Desi_wild_30357244</i> | NA                                  | <i>Ca_desi_denovo</i> | 30357244                | G/A  | NA                 | NA                            | NA                 |
| <i>Desi_wild_30365071</i> | NA                                  | <i>Ca_desi_denovo</i> | 30365071                | C/G  | NA                 | NA                            | NA                 |
| <i>Desi_wild_30369834</i> | NA                                  | <i>Ca_desi_denovo</i> | 30369834                | G/A  | NA                 | NA                            | NA                 |

| SNP IDs                   | NCBI dbSNP accession IDs (NCBI_SS#) | Chromosomes           | Physical positions (bp) | SNPs | Gene accession IDs | Sequence components of genome | Putative functions |
|---------------------------|-------------------------------------|-----------------------|-------------------------|------|--------------------|-------------------------------|--------------------|
| <i>Desi_wild_30390576</i> | NA                                  | <i>Ca_desi_denovo</i> | 30390576                | A/G  | NA                 | NA                            | NA                 |
| <i>Desi_wild_30390609</i> | NA                                  | <i>Ca_desi_denovo</i> | 30390609                | G/A  | NA                 | NA                            | NA                 |
| <i>Desi_wild_30390623</i> | NA                                  | <i>Ca_desi_denovo</i> | 30390623                | C/T  | NA                 | NA                            | NA                 |
| <i>Desi_wild_30392758</i> | NA                                  | <i>Ca_desi_denovo</i> | 30392758                | G/T  | NA                 | NA                            | NA                 |
| <i>Desi_wild_30396117</i> | NA                                  | <i>Ca_desi_denovo</i> | 30396117                | C/G  | NA                 | NA                            | NA                 |
| <i>Desi_wild_30397100</i> | NA                                  | <i>Ca_desi_denovo</i> | 30397100                | C/G  | NA                 | NA                            | NA                 |
| <i>Desi_wild_30403824</i> | NA                                  | <i>Ca_desi_denovo</i> | 30403824                | C/G  | NA                 | NA                            | NA                 |
| <i>Desi_wild_30406598</i> | NA                                  | <i>Ca_desi_denovo</i> | 30406598                | A/C  | NA                 | NA                            | NA                 |
| <i>Desi_wild_30408470</i> | NA                                  | <i>Ca_desi_denovo</i> | 30408470                | A/C  | NA                 | NA                            | NA                 |
| <i>Desi_wild_30408785</i> | NA                                  | <i>Ca_desi_denovo</i> | 30408785                | G/C  | NA                 | NA                            | NA                 |
| <i>Desi_wild_30409118</i> | NA                                  | <i>Ca_desi_denovo</i> | 30409118                | A/G  | NA                 | NA                            | NA                 |
| <i>Desi_wild_30409148</i> | NA                                  | <i>Ca_desi_denovo</i> | 30409148                | G/C  | NA                 | NA                            | NA                 |
| <i>Desi_wild_30409163</i> | NA                                  | <i>Ca_desi_denovo</i> | 30409163                | A/C  | NA                 | NA                            | NA                 |
| <i>Desi_wild_30409984</i> | NA                                  | <i>Ca_desi_denovo</i> | 30409984                | A/G  | NA                 | NA                            | NA                 |
| <i>Desi_wild_30418199</i> | NA                                  | <i>Ca_desi_denovo</i> | 30418199                | C/G  | NA                 | NA                            | NA                 |
| <i>Desi_wild_30421555</i> | NA                                  | <i>Ca_desi_denovo</i> | 30421555                | C/G  | NA                 | NA                            | NA                 |
| <i>Desi_wild_30428730</i> | NA                                  | <i>Ca_desi_denovo</i> | 30428730                | G/T  | NA                 | NA                            | NA                 |
| <i>Desi_wild_30428846</i> | NA                                  | <i>Ca_desi_denovo</i> | 30428846                | G/T  | NA                 | NA                            | NA                 |
| <i>Desi_wild_30428847</i> | NA                                  | <i>Ca_desi_denovo</i> | 30428847                | C/T  | NA                 | NA                            | NA                 |
| <i>Desi_wild_30428975</i> | NA                                  | <i>Ca_desi_denovo</i> | 30428975                | T/A  | NA                 | NA                            | NA                 |
| <i>Desi_wild_30437708</i> | NA                                  | <i>Ca_desi_denovo</i> | 30437708                | C/T  | NA                 | NA                            | NA                 |
| <i>Desi_wild_30437757</i> | NA                                  | <i>Ca_desi_denovo</i> | 30437757                | T/A  | NA                 | NA                            | NA                 |
| <i>Desi_wild_30437778</i> | NA                                  | <i>Ca_desi_denovo</i> | 30437778                | C/T  | NA                 | NA                            | NA                 |
| <i>Desi_wild_30438787</i> | NA                                  | <i>Ca_desi_denovo</i> | 30438787                | G/T  | NA                 | NA                            | NA                 |
| <i>Desi_wild_30441525</i> | NA                                  | <i>Ca_desi_denovo</i> | 30441525                | G/T  | NA                 | NA                            | NA                 |
| <i>Desi_wild_30443964</i> | NA                                  | <i>Ca_desi_denovo</i> | 30443964                | C/G  | NA                 | NA                            | NA                 |
| <i>Desi_wild_30443991</i> | NA                                  | <i>Ca_desi_denovo</i> | 30443991                | C/T  | NA                 | NA                            | NA                 |
| <i>Desi_wild_30445700</i> | NA                                  | <i>Ca_desi_denovo</i> | 30445700                | G/T  | NA                 | NA                            | NA                 |
| <i>Desi_wild_30448859</i> | NA                                  | <i>Ca_desi_denovo</i> | 30448859                | G/A  | NA                 | NA                            | NA                 |
| <i>Desi_wild_30448875</i> | NA                                  | <i>Ca_desi_denovo</i> | 30448875                | A/C  | NA                 | NA                            | NA                 |
| <i>Desi_wild_30453187</i> | NA                                  | <i>Ca_desi_denovo</i> | 30453187                | G/T  | NA                 | NA                            | NA                 |
| <i>Desi_wild_30453726</i> | NA                                  | <i>Ca_desi_denovo</i> | 30453726                | A/G  | NA                 | NA                            | NA                 |
| <i>Desi_wild_30461042</i> | NA                                  | <i>Ca_desi_denovo</i> | 30461042                | A/G  | NA                 | NA                            | NA                 |
| <i>Desi_wild_30461045</i> | NA                                  | <i>Ca_desi_denovo</i> | 30461045                | G/T  | NA                 | NA                            | NA                 |
| <i>Desi_wild_30462882</i> | NA                                  | <i>Ca_desi_denovo</i> | 30462882                | T/C  | NA                 | NA                            | NA                 |
| <i>Desi_wild_30467599</i> | NA                                  | <i>Ca_desi_denovo</i> | 30467599                | A/G  | NA                 | NA                            | NA                 |
| <i>Desi_wild_30467602</i> | NA                                  | <i>Ca_desi_denovo</i> | 30467602                | A/T  | NA                 | NA                            | NA                 |
| <i>Desi_wild_30470466</i> | NA                                  | <i>Ca_desi_denovo</i> | 30470466                | G/A  | NA                 | NA                            | NA                 |
| <i>Desi_wild_30480073</i> | NA                                  | <i>Ca_desi_denovo</i> | 30480073                | G/C  | NA                 | NA                            | NA                 |
| <i>Desi_wild_30490212</i> | NA                                  | <i>Ca_desi_denovo</i> | 30490212                | T/G  | NA                 | NA                            | NA                 |
| <i>Desi_wild_30490241</i> | NA                                  | <i>Ca_desi_denovo</i> | 30490241                | G/A  | NA                 | NA                            | NA                 |
| <i>Desi_wild_30495272</i> | NA                                  | <i>Ca_desi_denovo</i> | 30495272                | G/T  | NA                 | NA                            | NA                 |
| <i>Desi_wild_30497138</i> | NA                                  | <i>Ca_desi_denovo</i> | 30497138                | G/A  | NA                 | NA                            | NA                 |
| <i>Desi_wild_30499742</i> | NA                                  | <i>Ca_desi_denovo</i> | 30499742                | G/A  | NA                 | NA                            | NA                 |

| SNP IDs                   | NCBI dbSNP accession IDs (NCBI_SS#) | Chromosomes           | Physical positions (bp) | SNPs | Gene accession IDs | Sequence components of genome | Putative functions |
|---------------------------|-------------------------------------|-----------------------|-------------------------|------|--------------------|-------------------------------|--------------------|
| <i>Desi_wild_30499745</i> | NA                                  | <i>Ca_desi_denovo</i> | 30499745                | G/A  | NA                 | NA                            | NA                 |
| <i>Desi_wild_30503981</i> | NA                                  | <i>Ca_desi_denovo</i> | 30503981                | T/G  | NA                 | NA                            | NA                 |
| <i>Desi_wild_30504002</i> | NA                                  | <i>Ca_desi_denovo</i> | 30504002                | C/T  | NA                 | NA                            | NA                 |
| <i>Desi_wild_30504486</i> | NA                                  | <i>Ca_desi_denovo</i> | 30504486                | G/T  | NA                 | NA                            | NA                 |
| <i>Desi_wild_30515332</i> | NA                                  | <i>Ca_desi_denovo</i> | 30515332                | A/G  | NA                 | NA                            | NA                 |
| <i>Desi_wild_30527543</i> | NA                                  | <i>Ca_desi_denovo</i> | 30527543                | A/C  | NA                 | NA                            | NA                 |
| <i>Desi_wild_30538929</i> | NA                                  | <i>Ca_desi_denovo</i> | 30538929                | G/C  | NA                 | NA                            | NA                 |
| <i>Desi_wild_30541827</i> | NA                                  | <i>Ca_desi_denovo</i> | 30541827                | T/G  | NA                 | NA                            | NA                 |
| <i>Desi_wild_30548225</i> | NA                                  | <i>Ca_desi_denovo</i> | 30548225                | C/G  | NA                 | NA                            | NA                 |
| <i>Desi_wild_30550437</i> | NA                                  | <i>Ca_desi_denovo</i> | 30550437                | T/C  | NA                 | NA                            | NA                 |
| <i>Desi_wild_30552737</i> | NA                                  | <i>Ca_desi_denovo</i> | 30552737                | C/T  | NA                 | NA                            | NA                 |
| <i>Desi_wild_30552740</i> | NA                                  | <i>Ca_desi_denovo</i> | 30552740                | C/G  | NA                 | NA                            | NA                 |
| <i>Desi_wild_30554303</i> | NA                                  | <i>Ca_desi_denovo</i> | 30554303                | G/C  | NA                 | NA                            | NA                 |
| <i>Desi_wild_30554321</i> | NA                                  | <i>Ca_desi_denovo</i> | 30554321                | T/C  | NA                 | NA                            | NA                 |
| <i>Desi_wild_30554795</i> | NA                                  | <i>Ca_desi_denovo</i> | 30554795                | C/T  | NA                 | NA                            | NA                 |
| <i>Desi_wild_30554800</i> | NA                                  | <i>Ca_desi_denovo</i> | 30554800                | T/C  | NA                 | NA                            | NA                 |
| <i>Desi_wild_30557588</i> | NA                                  | <i>Ca_desi_denovo</i> | 30557588                | A/G  | NA                 | NA                            | NA                 |
| <i>Desi_wild_30565076</i> | NA                                  | <i>Ca_desi_denovo</i> | 30565076                | A/C  | NA                 | NA                            | NA                 |
| <i>Desi_wild_30571541</i> | NA                                  | <i>Ca_desi_denovo</i> | 30571541                | C/G  | NA                 | NA                            | NA                 |
| <i>Desi_wild_30571601</i> | NA                                  | <i>Ca_desi_denovo</i> | 30571601                | C/T  | NA                 | NA                            | NA                 |
| <i>Desi_wild_30574566</i> | NA                                  | <i>Ca_desi_denovo</i> | 30574566                | C/T  | NA                 | NA                            | NA                 |
| <i>Desi_wild_30580186</i> | NA                                  | <i>Ca_desi_denovo</i> | 30580186                | A/G  | NA                 | NA                            | NA                 |
| <i>Desi_wild_30580225</i> | NA                                  | <i>Ca_desi_denovo</i> | 30580225                | T/G  | NA                 | NA                            | NA                 |
| <i>Desi_wild_30586518</i> | NA                                  | <i>Ca_desi_denovo</i> | 30586518                | T/C  | NA                 | NA                            | NA                 |
| <i>Desi_wild_30587651</i> | NA                                  | <i>Ca_desi_denovo</i> | 30587651                | T/A  | NA                 | NA                            | NA                 |
| <i>Desi_wild_30587713</i> | NA                                  | <i>Ca_desi_denovo</i> | 30587713                | C/G  | NA                 | NA                            | NA                 |
| <i>Desi_wild_30599748</i> | NA                                  | <i>Ca_desi_denovo</i> | 30599748                | A/G  | NA                 | NA                            | NA                 |
| <i>Desi_wild_30599769</i> | NA                                  | <i>Ca_desi_denovo</i> | 30599769                | G/C  | NA                 | NA                            | NA                 |
| <i>Desi_wild_30602572</i> | NA                                  | <i>Ca_desi_denovo</i> | 30602572                | G/C  | NA                 | NA                            | NA                 |
| <i>Desi_wild_30602602</i> | NA                                  | <i>Ca_desi_denovo</i> | 30602602                | G/A  | NA                 | NA                            | NA                 |
| <i>Desi_wild_30605874</i> | NA                                  | <i>Ca_desi_denovo</i> | 30605874                | G/T  | NA                 | NA                            | NA                 |
| <i>Desi_wild_30605994</i> | NA                                  | <i>Ca_desi_denovo</i> | 30605994                | G/T  | NA                 | NA                            | NA                 |
| <i>Desi_wild_30606024</i> | NA                                  | <i>Ca_desi_denovo</i> | 30606024                | C/T  | NA                 | NA                            | NA                 |
| <i>Desi_wild_30606066</i> | NA                                  | <i>Ca_desi_denovo</i> | 30606066                | G/T  | NA                 | NA                            | NA                 |
| <i>Desi_wild_30621426</i> | NA                                  | <i>Ca_desi_denovo</i> | 30621426                | C/G  | NA                 | NA                            | NA                 |
| <i>Desi_wild_30621429</i> | NA                                  | <i>Ca_desi_denovo</i> | 30621429                | A/C  | NA                 | NA                            | NA                 |
| <i>Desi_wild_30623157</i> | NA                                  | <i>Ca_desi_denovo</i> | 30623157                | A/C  | NA                 | NA                            | NA                 |
| <i>Desi_wild_30626441</i> | NA                                  | <i>Ca_desi_denovo</i> | 30626441                | A/G  | NA                 | NA                            | NA                 |
| <i>Desi_wild_30626492</i> | NA                                  | <i>Ca_desi_denovo</i> | 30626492                | A/G  | NA                 | NA                            | NA                 |
| <i>Desi_wild_30631392</i> | NA                                  | <i>Ca_desi_denovo</i> | 30631392                | T/C  | NA                 | NA                            | NA                 |
| <i>Desi_wild_30634829</i> | NA                                  | <i>Ca_desi_denovo</i> | 30634829                | T/C  | NA                 | NA                            | NA                 |
| <i>Desi_wild_30635947</i> | NA                                  | <i>Ca_desi_denovo</i> | 30635947                | A/G  | NA                 | NA                            | NA                 |
| <i>Desi_wild_30636015</i> | NA                                  | <i>Ca_desi_denovo</i> | 30636015                | A/G  | NA                 | NA                            | NA                 |
| <i>Desi_wild_30637220</i> | NA                                  | <i>Ca_desi_denovo</i> | 30637220                | T/A  | NA                 | NA                            | NA                 |

| SNP IDs                   | NCBI dbSNP accession IDs (NCBI_SS#) | Chromosomes           | Physical positions (bp) | SNPs | Gene accession IDs | Sequence components of genome | Putative functions |
|---------------------------|-------------------------------------|-----------------------|-------------------------|------|--------------------|-------------------------------|--------------------|
| <i>Desi_wild_30637232</i> | NA                                  | <i>Ca_desi_denovo</i> | 30637232                | T/C  | NA                 | NA                            | NA                 |
| <i>Desi_wild_30638046</i> | NA                                  | <i>Ca_desi_denovo</i> | 30638046                | A/G  | NA                 | NA                            | NA                 |
| <i>Desi_wild_30641849</i> | NA                                  | <i>Ca_desi_denovo</i> | 30641849                | C/A  | NA                 | NA                            | NA                 |
| <i>Desi_wild_30646780</i> | NA                                  | <i>Ca_desi_denovo</i> | 30646780                | T/C  | NA                 | NA                            | NA                 |
| <i>Desi_wild_30648941</i> | NA                                  | <i>Ca_desi_denovo</i> | 30648941                | G/A  | NA                 | NA                            | NA                 |
| <i>Desi_wild_30648950</i> | NA                                  | <i>Ca_desi_denovo</i> | 30648950                | C/G  | NA                 | NA                            | NA                 |
| <i>Desi_wild_30657747</i> | NA                                  | <i>Ca_desi_denovo</i> | 30657747                | G/A  | NA                 | NA                            | NA                 |
| <i>Desi_wild_30659620</i> | NA                                  | <i>Ca_desi_denovo</i> | 30659620                | T/G  | NA                 | NA                            | NA                 |
| <i>Desi_wild_30661750</i> | NA                                  | <i>Ca_desi_denovo</i> | 30661750                | A/C  | NA                 | NA                            | NA                 |
| <i>Desi_wild_30667799</i> | NA                                  | <i>Ca_desi_denovo</i> | 30667799                | G/T  | NA                 | NA                            | NA                 |
| <i>Desi_wild_30668345</i> | NA                                  | <i>Ca_desi_denovo</i> | 30668345                | C/T  | NA                 | NA                            | NA                 |
| <i>Desi_wild_30680792</i> | NA                                  | <i>Ca_desi_denovo</i> | 30680792                | T/C  | NA                 | NA                            | NA                 |
| <i>Desi_wild_30680849</i> | NA                                  | <i>Ca_desi_denovo</i> | 30680849                | C/T  | NA                 | NA                            | NA                 |
| <i>Desi_wild_30681142</i> | NA                                  | <i>Ca_desi_denovo</i> | 30681142                | A/T  | NA                 | NA                            | NA                 |
| <i>Desi_wild_30681143</i> | NA                                  | <i>Ca_desi_denovo</i> | 30681143                | C/T  | NA                 | NA                            | NA                 |
| <i>Desi_wild_30704997</i> | NA                                  | <i>Ca_desi_denovo</i> | 30704997                | T/C  | NA                 | NA                            | NA                 |
| <i>Desi_wild_30705003</i> | NA                                  | <i>Ca_desi_denovo</i> | 30705003                | C/G  | NA                 | NA                            | NA                 |
| <i>Desi_wild_30707157</i> | NA                                  | <i>Ca_desi_denovo</i> | 30707157                | A/C  | NA                 | NA                            | NA                 |
| <i>Desi_wild_30707159</i> | NA                                  | <i>Ca_desi_denovo</i> | 30707159                | A/C  | NA                 | NA                            | NA                 |
| <i>Desi_wild_30709389</i> | NA                                  | <i>Ca_desi_denovo</i> | 30709389                | A/G  | NA                 | NA                            | NA                 |
| <i>Desi_wild_30709390</i> | NA                                  | <i>Ca_desi_denovo</i> | 30709390                | C/T  | NA                 | NA                            | NA                 |
| <i>Desi_wild_30709391</i> | NA                                  | <i>Ca_desi_denovo</i> | 30709391                | C/T  | NA                 | NA                            | NA                 |
| <i>Desi_wild_30709398</i> | NA                                  | <i>Ca_desi_denovo</i> | 30709398                | G/T  | NA                 | NA                            | NA                 |
| <i>Desi_wild_30712243</i> | NA                                  | <i>Ca_desi_denovo</i> | 30712243                | A/C  | NA                 | NA                            | NA                 |
| <i>Desi_wild_30714790</i> | NA                                  | <i>Ca_desi_denovo</i> | 30714790                | G/A  | NA                 | NA                            | NA                 |
| <i>Desi_wild_30714816</i> | NA                                  | <i>Ca_desi_denovo</i> | 30714816                | G/T  | NA                 | NA                            | NA                 |
| <i>Desi_wild_30725443</i> | NA                                  | <i>Ca_desi_denovo</i> | 30725443                | T/C  | NA                 | NA                            | NA                 |
| <i>Desi_wild_30734260</i> | NA                                  | <i>Ca_desi_denovo</i> | 30734260                | G/A  | NA                 | NA                            | NA                 |
| <i>Desi_wild_30734304</i> | NA                                  | <i>Ca_desi_denovo</i> | 30734304                | G/A  | NA                 | NA                            | NA                 |
| <i>Desi_wild_30735632</i> | NA                                  | <i>Ca_desi_denovo</i> | 30735632                | C/G  | NA                 | NA                            | NA                 |
| <i>Desi_wild_30736304</i> | NA                                  | <i>Ca_desi_denovo</i> | 30736304                | C/T  | NA                 | NA                            | NA                 |
| <i>Desi_wild_30736315</i> | NA                                  | <i>Ca_desi_denovo</i> | 30736315                | A/G  | NA                 | NA                            | NA                 |
| <i>Desi_wild_30742342</i> | NA                                  | <i>Ca_desi_denovo</i> | 30742342                | G/T  | NA                 | NA                            | NA                 |
| <i>Desi_wild_30755058</i> | NA                                  | <i>Ca_desi_denovo</i> | 30755058                | C/T  | NA                 | NA                            | NA                 |
| <i>Desi_wild_30755915</i> | NA                                  | <i>Ca_desi_denovo</i> | 30755915                | G/T  | NA                 | NA                            | NA                 |
| <i>Desi_wild_30756711</i> | NA                                  | <i>Ca_desi_denovo</i> | 30756711                | C/G  | NA                 | NA                            | NA                 |
| <i>Desi_wild_30756714</i> | NA                                  | <i>Ca_desi_denovo</i> | 30756714                | A/C  | NA                 | NA                            | NA                 |
| <i>Desi_wild_30756717</i> | NA                                  | <i>Ca_desi_denovo</i> | 30756717                | G/A  | NA                 | NA                            | NA                 |
| <i>Desi_wild_30763893</i> | NA                                  | <i>Ca_desi_denovo</i> | 30763893                | A/C  | NA                 | NA                            | NA                 |
| <i>Desi_wild_30763894</i> | NA                                  | <i>Ca_desi_denovo</i> | 30763894                | A/G  | NA                 | NA                            | NA                 |
| <i>Desi_wild_30763895</i> | NA                                  | <i>Ca_desi_denovo</i> | 30763895                | A/C  | NA                 | NA                            | NA                 |
| <i>Desi_wild_30773126</i> | NA                                  | <i>Ca_desi_denovo</i> | 30773126                | A/G  | NA                 | NA                            | NA                 |
| <i>Desi_wild_30775629</i> | NA                                  | <i>Ca_desi_denovo</i> | 30775629                | C/G  | NA                 | NA                            | NA                 |
| <i>Desi_wild_30780022</i> | NA                                  | <i>Ca_desi_denovo</i> | 30780022                | A/C  | NA                 | NA                            | NA                 |



| SNP IDs                   | NCBI dbSNP accession IDs (NCBI_SS#) | Chromosomes           | Physical positions (bp) | SNPs | Gene accession IDs | Sequence components of genome | Putative functions |
|---------------------------|-------------------------------------|-----------------------|-------------------------|------|--------------------|-------------------------------|--------------------|
| <i>Desi_wild_30785877</i> | NA                                  | <i>Ca_desi_denovo</i> | 30785877                | A/C  | NA                 | NA                            | NA                 |
| <i>Desi_wild_30787883</i> | NA                                  | <i>Ca_desi_denovo</i> | 30787883                | A/G  | NA                 | NA                            | NA                 |
| <i>Desi_wild_30789378</i> | NA                                  | <i>Ca_desi_denovo</i> | 30789378                | T/C  | NA                 | NA                            | NA                 |
| <i>Desi_wild_30789392</i> | NA                                  | <i>Ca_desi_denovo</i> | 30789392                | C/T  | NA                 | NA                            | NA                 |
| <i>Desi_wild_30791030</i> | NA                                  | <i>Ca_desi_denovo</i> | 30791030                | G/T  | NA                 | NA                            | NA                 |
| <i>Desi_wild_30793040</i> | NA                                  | <i>Ca_desi_denovo</i> | 30793040                | T/C  | NA                 | NA                            | NA                 |
| <i>Desi_wild_30805569</i> | NA                                  | <i>Ca_desi_denovo</i> | 30805569                | C/G  | NA                 | NA                            | NA                 |
| <i>Desi_wild_30813163</i> | NA                                  | <i>Ca_desi_denovo</i> | 30813163                | A/G  | NA                 | NA                            | NA                 |
| <i>Desi_wild_30818420</i> | NA                                  | <i>Ca_desi_denovo</i> | 30818420                | C/G  | NA                 | NA                            | NA                 |
| <i>Desi_wild_30818423</i> | NA                                  | <i>Ca_desi_denovo</i> | 30818423                | C/G  | NA                 | NA                            | NA                 |
| <i>Desi_wild_30822130</i> | NA                                  | <i>Ca_desi_denovo</i> | 30822130                | T/G  | NA                 | NA                            | NA                 |
| <i>Desi_wild_30825142</i> | NA                                  | <i>Ca_desi_denovo</i> | 30825142                | A/C  | NA                 | NA                            | NA                 |
| <i>Desi_wild_30825143</i> | NA                                  | <i>Ca_desi_denovo</i> | 30825143                | G/T  | NA                 | NA                            | NA                 |
| <i>Desi_wild_30831492</i> | NA                                  | <i>Ca_desi_denovo</i> | 30831492                | A/C  | NA                 | NA                            | NA                 |
| <i>Desi_wild_30831521</i> | NA                                  | <i>Ca_desi_denovo</i> | 30831521                | G/A  | NA                 | NA                            | NA                 |
| <i>Desi_wild_30839486</i> | NA                                  | <i>Ca_desi_denovo</i> | 30839486                | C/G  | NA                 | NA                            | NA                 |
| <i>Desi_wild_30849025</i> | NA                                  | <i>Ca_desi_denovo</i> | 30849025                | A/G  | NA                 | NA                            | NA                 |
| <i>Desi_wild_30858357</i> | NA                                  | <i>Ca_desi_denovo</i> | 30858357                | A/C  | NA                 | NA                            | NA                 |
| <i>Desi_wild_30858358</i> | NA                                  | <i>Ca_desi_denovo</i> | 30858358                | G/T  | NA                 | NA                            | NA                 |
| <i>Desi_wild_30858359</i> | NA                                  | <i>Ca_desi_denovo</i> | 30858359                | A/G  | NA                 | NA                            | NA                 |
| <i>Desi_wild_30858381</i> | NA                                  | <i>Ca_desi_denovo</i> | 30858381                | G/A  | NA                 | NA                            | NA                 |
| <i>Desi_wild_30864970</i> | NA                                  | <i>Ca_desi_denovo</i> | 30864970                | C/T  | NA                 | NA                            | NA                 |
| <i>Desi_wild_30865856</i> | NA                                  | <i>Ca_desi_denovo</i> | 30865856                | G/C  | NA                 | NA                            | NA                 |
| <i>Desi_wild_30874436</i> | NA                                  | <i>Ca_desi_denovo</i> | 30874436                | G/A  | NA                 | NA                            | NA                 |
| <i>Desi_wild_30878390</i> | NA                                  | <i>Ca_desi_denovo</i> | 30878390                | G/A  | NA                 | NA                            | NA                 |
| <i>Desi_wild_30883694</i> | NA                                  | <i>Ca_desi_denovo</i> | 30883694                | C/T  | NA                 | NA                            | NA                 |
| <i>Desi_wild_30883697</i> | NA                                  | <i>Ca_desi_denovo</i> | 30883697                | C/T  | NA                 | NA                            | NA                 |
| <i>Desi_wild_30883702</i> | NA                                  | <i>Ca_desi_denovo</i> | 30883702                | T/G  | NA                 | NA                            | NA                 |
| <i>Desi_wild_30889584</i> | NA                                  | <i>Ca_desi_denovo</i> | 30889584                | A/G  | NA                 | NA                            | NA                 |
| <i>Desi_wild_30897047</i> | NA                                  | <i>Ca_desi_denovo</i> | 30897047                | G/T  | NA                 | NA                            | NA                 |
| <i>Desi_wild_30899458</i> | NA                                  | <i>Ca_desi_denovo</i> | 30899458                | A/G  | NA                 | NA                            | NA                 |
| <i>Desi_wild_30899460</i> | NA                                  | <i>Ca_desi_denovo</i> | 30899460                | C/T  | NA                 | NA                            | NA                 |
| <i>Desi_wild_30900688</i> | NA                                  | <i>Ca_desi_denovo</i> | 30900688                | G/T  | NA                 | NA                            | NA                 |
| <i>Desi_wild_30900692</i> | NA                                  | <i>Ca_desi_denovo</i> | 30900692                | G/T  | NA                 | NA                            | NA                 |
| <i>Desi_wild_30902379</i> | NA                                  | <i>Ca_desi_denovo</i> | 30902379                | A/G  | NA                 | NA                            | NA                 |
| <i>Desi_wild_30904411</i> | NA                                  | <i>Ca_desi_denovo</i> | 30904411                | G/T  | NA                 | NA                            | NA                 |
| <i>Desi_wild_30913403</i> | NA                                  | <i>Ca_desi_denovo</i> | 30913403                | G/A  | NA                 | NA                            | NA                 |
| <i>Desi_wild_30913421</i> | NA                                  | <i>Ca_desi_denovo</i> | 30913421                | C/T  | NA                 | NA                            | NA                 |
| <i>Desi_wild_30919357</i> | NA                                  | <i>Ca_desi_denovo</i> | 30919357                | G/T  | NA                 | NA                            | NA                 |
| <i>Desi_wild_30920622</i> | NA                                  | <i>Ca_desi_denovo</i> | 30920622                | G/T  | NA                 | NA                            | NA                 |
| <i>Desi_wild_30939984</i> | NA                                  | <i>Ca_desi_denovo</i> | 30939984                | C/G  | NA                 | NA                            | NA                 |
| <i>Desi_wild_30940293</i> | NA                                  | <i>Ca_desi_denovo</i> | 30940293                | G/A  | NA                 | NA                            | NA                 |
| <i>Desi_wild_30940303</i> | NA                                  | <i>Ca_desi_denovo</i> | 30940303                | T/C  | NA                 | NA                            | NA                 |
| <i>Desi_wild_30944260</i> | NA                                  | <i>Ca_desi_denovo</i> | 30944260                | G/T  | NA                 | NA                            | NA                 |

| SNP IDs                   | NCBI dbSNP accession IDs (NCBI_SS#) | Chromosomes           | Physical positions (bp) | SNPs | Gene accession IDs | Sequence components of genome | Putative functions |
|---------------------------|-------------------------------------|-----------------------|-------------------------|------|--------------------|-------------------------------|--------------------|
| <i>Desi_wild_30953037</i> | NA                                  | <i>Ca_desi_denovo</i> | 30953037                | G/T  | NA                 | NA                            | NA                 |
| <i>Desi_wild_30954399</i> | NA                                  | <i>Ca_desi_denovo</i> | 30954399                | G/T  | NA                 | NA                            | NA                 |
| <i>Desi_wild_30956994</i> | NA                                  | <i>Ca_desi_denovo</i> | 30956994                | G/T  | NA                 | NA                            | NA                 |
| <i>Desi_wild_30956995</i> | NA                                  | <i>Ca_desi_denovo</i> | 30956995                | G/A  | NA                 | NA                            | NA                 |
| <i>Desi_wild_30957022</i> | NA                                  | <i>Ca_desi_denovo</i> | 30957022                | A/G  | NA                 | NA                            | NA                 |
| <i>Desi_wild_30972884</i> | NA                                  | <i>Ca_desi_denovo</i> | 30972884                | C/A  | NA                 | NA                            | NA                 |
| <i>Desi_wild_30975198</i> | NA                                  | <i>Ca_desi_denovo</i> | 30975198                | A/G  | NA                 | NA                            | NA                 |
| <i>Desi_wild_30978116</i> | NA                                  | <i>Ca_desi_denovo</i> | 30978116                | C/G  | NA                 | NA                            | NA                 |
| <i>Desi_wild_30982414</i> | NA                                  | <i>Ca_desi_denovo</i> | 30982414                | C/G  | NA                 | NA                            | NA                 |
| <i>Desi_wild_30983210</i> | NA                                  | <i>Ca_desi_denovo</i> | 30983210                | A/T  | NA                 | NA                            | NA                 |
| <i>Desi_wild_30984447</i> | NA                                  | <i>Ca_desi_denovo</i> | 30984447                | C/T  | NA                 | NA                            | NA                 |
| <i>Desi_wild_30984449</i> | NA                                  | <i>Ca_desi_denovo</i> | 30984449                | G/A  | NA                 | NA                            | NA                 |
| <i>Desi_wild_30990577</i> | NA                                  | <i>Ca_desi_denovo</i> | 30990577                | A/G  | NA                 | NA                            | NA                 |
| <i>Desi_wild_30990852</i> | NA                                  | <i>Ca_desi_denovo</i> | 30990852                | C/T  | NA                 | NA                            | NA                 |
| <i>Desi_wild_31002984</i> | NA                                  | <i>Ca_desi_denovo</i> | 31002984                | C/G  | NA                 | NA                            | NA                 |
| <i>Desi_wild_31006185</i> | NA                                  | <i>Ca_desi_denovo</i> | 31006185                | G/T  | NA                 | NA                            | NA                 |
| <i>Desi_wild_31007171</i> | NA                                  | <i>Ca_desi_denovo</i> | 31007171                | G/A  | NA                 | NA                            | NA                 |
| <i>Desi_wild_31007183</i> | NA                                  | <i>Ca_desi_denovo</i> | 31007183                | C/T  | NA                 | NA                            | NA                 |
| <i>Desi_wild_31007236</i> | NA                                  | <i>Ca_desi_denovo</i> | 31007236                | C/G  | NA                 | NA                            | NA                 |
| <i>Desi_wild_31009438</i> | NA                                  | <i>Ca_desi_denovo</i> | 31009438                | T/C  | NA                 | NA                            | NA                 |
| <i>Desi_wild_31010256</i> | NA                                  | <i>Ca_desi_denovo</i> | 31010256                | G/T  | NA                 | NA                            | NA                 |
| <i>Desi_wild_31011390</i> | NA                                  | <i>Ca_desi_denovo</i> | 31011390                | A/G  | NA                 | NA                            | NA                 |
| <i>Desi_wild_31020292</i> | NA                                  | <i>Ca_desi_denovo</i> | 31020292                | T/G  | NA                 | NA                            | NA                 |
| <i>Desi_wild_31021279</i> | NA                                  | <i>Ca_desi_denovo</i> | 31021279                | A/C  | NA                 | NA                            | NA                 |
| <i>Desi_wild_31021362</i> | NA                                  | <i>Ca_desi_denovo</i> | 31021362                | A/C  | NA                 | NA                            | NA                 |
| <i>Desi_wild_31030818</i> | NA                                  | <i>Ca_desi_denovo</i> | 31030818                | A/G  | NA                 | NA                            | NA                 |
| <i>Desi_wild_31030824</i> | NA                                  | <i>Ca_desi_denovo</i> | 31030824                | A/G  | NA                 | NA                            | NA                 |
| <i>Desi_wild_31031278</i> | NA                                  | <i>Ca_desi_denovo</i> | 31031278                | G/A  | NA                 | NA                            | NA                 |
| <i>Desi_wild_31033265</i> | NA                                  | <i>Ca_desi_denovo</i> | 31033265                | G/T  | NA                 | NA                            | NA                 |
| <i>Desi_wild_31043732</i> | NA                                  | <i>Ca_desi_denovo</i> | 31043732                | A/C  | NA                 | NA                            | NA                 |
| <i>Desi_wild_31047879</i> | NA                                  | <i>Ca_desi_denovo</i> | 31047879                | A/C  | NA                 | NA                            | NA                 |
| <i>Desi_wild_31049510</i> | NA                                  | <i>Ca_desi_denovo</i> | 31049510                | T/C  | NA                 | NA                            | NA                 |
| <i>Desi_wild_31049513</i> | NA                                  | <i>Ca_desi_denovo</i> | 31049513                | G/A  | NA                 | NA                            | NA                 |
| <i>Desi_wild_31052882</i> | NA                                  | <i>Ca_desi_denovo</i> | 31052882                | G/T  | NA                 | NA                            | NA                 |
| <i>Desi_wild_31054070</i> | NA                                  | <i>Ca_desi_denovo</i> | 31054070                | T/G  | NA                 | NA                            | NA                 |
| <i>Desi_wild_31054082</i> | NA                                  | <i>Ca_desi_denovo</i> | 31054082                | A/G  | NA                 | NA                            | NA                 |
| <i>Desi_wild_31057872</i> | NA                                  | <i>Ca_desi_denovo</i> | 31057872                | G/C  | NA                 | NA                            | NA                 |
| <i>Desi_wild_31063489</i> | NA                                  | <i>Ca_desi_denovo</i> | 31063489                | T/G  | NA                 | NA                            | NA                 |
| <i>Desi_wild_31064388</i> | NA                                  | <i>Ca_desi_denovo</i> | 31064388                | A/G  | NA                 | NA                            | NA                 |
| <i>Desi_wild_31064409</i> | NA                                  | <i>Ca_desi_denovo</i> | 31064409                | G/C  | NA                 | NA                            | NA                 |
| <i>Desi_wild_31069939</i> | NA                                  | <i>Ca_desi_denovo</i> | 31069939                | C/G  | NA                 | NA                            | NA                 |
| <i>Desi_wild_31069940</i> | NA                                  | <i>Ca_desi_denovo</i> | 31069940                | C/G  | NA                 | NA                            | NA                 |
| <i>Desi_wild_31069941</i> | NA                                  | <i>Ca_desi_denovo</i> | 31069941                | C/G  | NA                 | NA                            | NA                 |
| <i>Desi_wild_31073700</i> | NA                                  | <i>Ca_desi_denovo</i> | 31073700                | A/G  | NA                 | NA                            | NA                 |

| SNP IDs                   | NCBI dbSNP accession IDs (NCBI_SS#) | Chromosomes           | Physical positions (bp) | SNPs | Gene accession IDs | Sequence components of genome | Putative functions |
|---------------------------|-------------------------------------|-----------------------|-------------------------|------|--------------------|-------------------------------|--------------------|
| <i>Desi_wild_31073777</i> | NA                                  | <i>Ca_desi_denovo</i> | 31073777                | T/C  | NA                 | NA                            | NA                 |
| <i>Desi_wild_31073997</i> | NA                                  | <i>Ca_desi_denovo</i> | 31073997                | G/C  | NA                 | NA                            | NA                 |
| <i>Desi_wild_31074003</i> | NA                                  | <i>Ca_desi_denovo</i> | 31074003                | A/G  | NA                 | NA                            | NA                 |
| <i>Desi_wild_31074018</i> | NA                                  | <i>Ca_desi_denovo</i> | 31074018                | A/G  | NA                 | NA                            | NA                 |
| <i>Desi_wild_31084425</i> | NA                                  | <i>Ca_desi_denovo</i> | 31084425                | G/C  | NA                 | NA                            | NA                 |
| <i>Desi_wild_31087828</i> | NA                                  | <i>Ca_desi_denovo</i> | 31087828                | C/A  | NA                 | NA                            | NA                 |
| <i>Desi_wild_31090589</i> | NA                                  | <i>Ca_desi_denovo</i> | 31090589                | A/G  | NA                 | NA                            | NA                 |
| <i>Desi_wild_31090667</i> | NA                                  | <i>Ca_desi_denovo</i> | 31090667                | T/C  | NA                 | NA                            | NA                 |
| <i>Desi_wild_31093349</i> | NA                                  | <i>Ca_desi_denovo</i> | 31093349                | G/T  | NA                 | NA                            | NA                 |
| <i>Desi_wild_31095064</i> | NA                                  | <i>Ca_desi_denovo</i> | 31095064                | T/C  | NA                 | NA                            | NA                 |
| <i>Desi_wild_31099575</i> | NA                                  | <i>Ca_desi_denovo</i> | 31099575                | G/T  | NA                 | NA                            | NA                 |
| <i>Desi_wild_31100243</i> | NA                                  | <i>Ca_desi_denovo</i> | 31100243                | C/T  | NA                 | NA                            | NA                 |
| <i>Desi_wild_31100270</i> | NA                                  | <i>Ca_desi_denovo</i> | 31100270                | A/G  | NA                 | NA                            | NA                 |
| <i>Desi_wild_31101095</i> | NA                                  | <i>Ca_desi_denovo</i> | 31101095                | G/C  | NA                 | NA                            | NA                 |
| <i>Desi_wild_31113732</i> | NA                                  | <i>Ca_desi_denovo</i> | 31113732                | A/C  | NA                 | NA                            | NA                 |
| <i>Desi_wild_31113761</i> | NA                                  | <i>Ca_desi_denovo</i> | 31113761                | G/A  | NA                 | NA                            | NA                 |
| <i>Desi_wild_31117364</i> | NA                                  | <i>Ca_desi_denovo</i> | 31117364                | G/A  | NA                 | NA                            | NA                 |
| <i>Desi_wild_31130476</i> | NA                                  | <i>Ca_desi_denovo</i> | 31130476                | G/T  | NA                 | NA                            | NA                 |
| <i>Desi_wild_31132121</i> | NA                                  | <i>Ca_desi_denovo</i> | 31132121                | G/T  | NA                 | NA                            | NA                 |
| <i>Desi_wild_31132212</i> | NA                                  | <i>Ca_desi_denovo</i> | 31132212                | C/T  | NA                 | NA                            | NA                 |
| <i>Desi_wild_31132227</i> | NA                                  | <i>Ca_desi_denovo</i> | 31132227                | G/T  | NA                 | NA                            | NA                 |
| <i>Desi_wild_31147041</i> | NA                                  | <i>Ca_desi_denovo</i> | 31147041                | A/G  | NA                 | NA                            | NA                 |
| <i>Desi_wild_31147064</i> | NA                                  | <i>Ca_desi_denovo</i> | 31147064                | G/A  | NA                 | NA                            | NA                 |
| <i>Desi_wild_31152131</i> | NA                                  | <i>Ca_desi_denovo</i> | 31152131                | C/T  | NA                 | NA                            | NA                 |
| <i>Desi_wild_31152180</i> | NA                                  | <i>Ca_desi_denovo</i> | 31152180                | T/C  | NA                 | NA                            | NA                 |
| <i>Desi_wild_31175821</i> | NA                                  | <i>Ca_desi_denovo</i> | 31175821                | G/T  | NA                 | NA                            | NA                 |
| <i>Desi_wild_31176418</i> | NA                                  | <i>Ca_desi_denovo</i> | 31176418                | A/C  | NA                 | NA                            | NA                 |
| <i>Desi_wild_31176746</i> | NA                                  | <i>Ca_desi_denovo</i> | 31176746                | C/A  | NA                 | NA                            | NA                 |
| <i>Desi_wild_31176787</i> | NA                                  | <i>Ca_desi_denovo</i> | 31176787                | C/T  | NA                 | NA                            | NA                 |
| <i>Desi_wild_31179383</i> | NA                                  | <i>Ca_desi_denovo</i> | 31179383                | C/G  | NA                 | NA                            | NA                 |
| <i>Desi_wild_31186133</i> | NA                                  | <i>Ca_desi_denovo</i> | 31186133                | C/G  | NA                 | NA                            | NA                 |
| <i>Desi_wild_31192566</i> | NA                                  | <i>Ca_desi_denovo</i> | 31192566                | G/A  | NA                 | NA                            | NA                 |
| <i>Desi_wild_31195317</i> | NA                                  | <i>Ca_desi_denovo</i> | 31195317                | A/C  | NA                 | NA                            | NA                 |
| <i>Desi_wild_31201029</i> | NA                                  | <i>Ca_desi_denovo</i> | 31201029                | G/T  | NA                 | NA                            | NA                 |
| <i>Desi_wild_31204738</i> | NA                                  | <i>Ca_desi_denovo</i> | 31204738                | A/G  | NA                 | NA                            | NA                 |
| <i>Desi_wild_31204860</i> | NA                                  | <i>Ca_desi_denovo</i> | 31204860                | A/G  | NA                 | NA                            | NA                 |
| <i>Desi_wild_31204875</i> | NA                                  | <i>Ca_desi_denovo</i> | 31204875                | G/A  | NA                 | NA                            | NA                 |
| <i>Desi_wild_31220195</i> | NA                                  | <i>Ca_desi_denovo</i> | 31220195                | C/T  | NA                 | NA                            | NA                 |
| <i>Desi_wild_31224335</i> | NA                                  | <i>Ca_desi_denovo</i> | 31224335                | C/A  | NA                 | NA                            | NA                 |
| <i>Desi_wild_31227893</i> | NA                                  | <i>Ca_desi_denovo</i> | 31227893                | C/T  | NA                 | NA                            | NA                 |
| <i>Desi_wild_31227925</i> | NA                                  | <i>Ca_desi_denovo</i> | 31227925                | T/C  | NA                 | NA                            | NA                 |
| <i>Desi_wild_31231795</i> | NA                                  | <i>Ca_desi_denovo</i> | 31231795                | A/T  | NA                 | NA                            | NA                 |
| <i>Desi_wild_31234487</i> | NA                                  | <i>Ca_desi_denovo</i> | 31234487                | A/G  | NA                 | NA                            | NA                 |
| <i>Desi_wild_31243021</i> | NA                                  | <i>Ca_desi_denovo</i> | 31243021                | T/C  | NA                 | NA                            | NA                 |

| SNP IDs                   | NCBI dbSNP accession IDs (NCBI_SS#) | Chromosomes           | Physical positions (bp) | SNPs | Gene accession IDs | Sequence components of genome | Putative functions |
|---------------------------|-------------------------------------|-----------------------|-------------------------|------|--------------------|-------------------------------|--------------------|
| <i>Desi_wild_31244333</i> | NA                                  | <i>Ca_desi_denovo</i> | 31244333                | C/T  | NA                 | NA                            | NA                 |
| <i>Desi_wild_31245751</i> | NA                                  | <i>Ca_desi_denovo</i> | 31245751                | T/G  | NA                 | NA                            | NA                 |
| <i>Desi_wild_31245799</i> | NA                                  | <i>Ca_desi_denovo</i> | 31245799                | C/T  | NA                 | NA                            | NA                 |
| <i>Desi_wild_31249955</i> | NA                                  | <i>Ca_desi_denovo</i> | 31249955                | G/A  | NA                 | NA                            | NA                 |
| <i>Desi_wild_31251724</i> | NA                                  | <i>Ca_desi_denovo</i> | 31251724                | G/T  | NA                 | NA                            | NA                 |
| <i>Desi_wild_31270040</i> | NA                                  | <i>Ca_desi_denovo</i> | 31270040                | G/T  | NA                 | NA                            | NA                 |
| <i>Desi_wild_31270514</i> | NA                                  | <i>Ca_desi_denovo</i> | 31270514                | C/A  | NA                 | NA                            | NA                 |
| <i>Desi_wild_31270517</i> | NA                                  | <i>Ca_desi_denovo</i> | 31270517                | G/A  | NA                 | NA                            | NA                 |
| <i>Desi_wild_31270544</i> | NA                                  | <i>Ca_desi_denovo</i> | 31270544                | G/A  | NA                 | NA                            | NA                 |
| <i>Desi_wild_31270588</i> | NA                                  | <i>Ca_desi_denovo</i> | 31270588                | A/G  | NA                 | NA                            | NA                 |
| <i>Desi_wild_31270620</i> | NA                                  | <i>Ca_desi_denovo</i> | 31270620                | C/T  | NA                 | NA                            | NA                 |
| <i>Desi_wild_31270650</i> | NA                                  | <i>Ca_desi_denovo</i> | 31270650                | T/G  | NA                 | NA                            | NA                 |
| <i>Desi_wild_31272722</i> | NA                                  | <i>Ca_desi_denovo</i> | 31272722                | C/T  | NA                 | NA                            | NA                 |
| <i>Desi_wild_31277028</i> | NA                                  | <i>Ca_desi_denovo</i> | 31277028                | C/G  | NA                 | NA                            | NA                 |
| <i>Desi_wild_31279223</i> | NA                                  | <i>Ca_desi_denovo</i> | 31279223                | A/G  | NA                 | NA                            | NA                 |
| <i>Desi_wild_31287573</i> | NA                                  | <i>Ca_desi_denovo</i> | 31287573                | A/C  | NA                 | NA                            | NA                 |
| <i>Desi_wild_31287574</i> | NA                                  | <i>Ca_desi_denovo</i> | 31287574                | A/G  | NA                 | NA                            | NA                 |
| <i>Desi_wild_31292874</i> | NA                                  | <i>Ca_desi_denovo</i> | 31292874                | T/G  | NA                 | NA                            | NA                 |
| <i>Desi_wild_31292881</i> | NA                                  | <i>Ca_desi_denovo</i> | 31292881                | A/T  | NA                 | NA                            | NA                 |
| <i>Desi_wild_31295223</i> | NA                                  | <i>Ca_desi_denovo</i> | 31295223                | A/G  | NA                 | NA                            | NA                 |
| <i>Desi_wild_31314611</i> | NA                                  | <i>Ca_desi_denovo</i> | 31314611                | C/T  | NA                 | NA                            | NA                 |
| <i>Desi_wild_31319358</i> | NA                                  | <i>Ca_desi_denovo</i> | 31319358                | A/G  | NA                 | NA                            | NA                 |
| <i>Desi_wild_31335012</i> | NA                                  | <i>Ca_desi_denovo</i> | 31335012                | A/G  | NA                 | NA                            | NA                 |
| <i>Desi_wild_31335024</i> | NA                                  | <i>Ca_desi_denovo</i> | 31335024                | G/C  | NA                 | NA                            | NA                 |
| <i>Desi_wild_31336959</i> | NA                                  | <i>Ca_desi_denovo</i> | 31336959                | T/C  | NA                 | NA                            | NA                 |
| <i>Desi_wild_31338214</i> | NA                                  | <i>Ca_desi_denovo</i> | 31338214                | T/C  | NA                 | NA                            | NA                 |
| <i>Desi_wild_31338246</i> | NA                                  | <i>Ca_desi_denovo</i> | 31338246                | C/G  | NA                 | NA                            | NA                 |
| <i>Desi_wild_31340394</i> | NA                                  | <i>Ca_desi_denovo</i> | 31340394                | C/T  | NA                 | NA                            | NA                 |
| <i>Desi_wild_31340430</i> | NA                                  | <i>Ca_desi_denovo</i> | 31340430                | C/G  | NA                 | NA                            | NA                 |
| <i>Desi_wild_31340432</i> | NA                                  | <i>Ca_desi_denovo</i> | 31340432                | C/T  | NA                 | NA                            | NA                 |
| <i>Desi_wild_31350989</i> | NA                                  | <i>Ca_desi_denovo</i> | 31350989                | A/G  | NA                 | NA                            | NA                 |
| <i>Desi_wild_31351078</i> | NA                                  | <i>Ca_desi_denovo</i> | 31351078                | C/G  | NA                 | NA                            | NA                 |
| <i>Desi_wild_31358132</i> | NA                                  | <i>Ca_desi_denovo</i> | 31358132                | A/C  | NA                 | NA                            | NA                 |
| <i>Desi_wild_31358275</i> | NA                                  | <i>Ca_desi_denovo</i> | 31358275                | A/G  | NA                 | NA                            | NA                 |
| <i>Desi_wild_31362743</i> | NA                                  | <i>Ca_desi_denovo</i> | 31362743                | A/C  | NA                 | NA                            | NA                 |
| <i>Desi_wild_31362973</i> | NA                                  | <i>Ca_desi_denovo</i> | 31362973                | T/C  | NA                 | NA                            | NA                 |
| <i>Desi_wild_31371842</i> | NA                                  | <i>Ca_desi_denovo</i> | 31371842                | G/T  | NA                 | NA                            | NA                 |
| <i>Desi_wild_31381212</i> | NA                                  | <i>Ca_desi_denovo</i> | 31381212                | T/C  | NA                 | NA                            | NA                 |
| <i>Desi_wild_31382739</i> | NA                                  | <i>Ca_desi_denovo</i> | 31382739                | C/T  | NA                 | NA                            | NA                 |
| <i>Desi_wild_31382998</i> | NA                                  | <i>Ca_desi_denovo</i> | 31382998                | A/C  | NA                 | NA                            | NA                 |
| <i>Desi_wild_31382999</i> | NA                                  | <i>Ca_desi_denovo</i> | 31382999                | G/T  | NA                 | NA                            | NA                 |
| <i>Desi_wild_31383877</i> | NA                                  | <i>Ca_desi_denovo</i> | 31383877                | A/G  | NA                 | NA                            | NA                 |
| <i>Desi_wild_31384064</i> | NA                                  | <i>Ca_desi_denovo</i> | 31384064                | T/A  | NA                 | NA                            | NA                 |
| <i>Desi_wild_31384079</i> | NA                                  | <i>Ca_desi_denovo</i> | 31384079                | T/C  | NA                 | NA                            | NA                 |

| SNP IDs                   | NCBI dbSNP accession IDs (NCBI_SS#) | Chromosomes           | Physical positions (bp) | SNPs | Gene accession IDs | Sequence components of genome | Putative functions |
|---------------------------|-------------------------------------|-----------------------|-------------------------|------|--------------------|-------------------------------|--------------------|
| <i>Desi_wild_31386384</i> | NA                                  | <i>Ca_desi_denovo</i> | 31386384                | A/G  | NA                 | NA                            | NA                 |
| <i>Desi_wild_31386413</i> | NA                                  | <i>Ca_desi_denovo</i> | 31386413                | C/T  | NA                 | NA                            | NA                 |
| <i>Desi_wild_31387421</i> | NA                                  | <i>Ca_desi_denovo</i> | 31387421                | C/T  | NA                 | NA                            | NA                 |
| <i>Desi_wild_31397520</i> | NA                                  | <i>Ca_desi_denovo</i> | 31397520                | G/C  | NA                 | NA                            | NA                 |
| <i>Desi_wild_31397529</i> | NA                                  | <i>Ca_desi_denovo</i> | 31397529                | G/T  | NA                 | NA                            | NA                 |
| <i>Desi_wild_31399703</i> | NA                                  | <i>Ca_desi_denovo</i> | 31399703                | A/C  | NA                 | NA                            | NA                 |
| <i>Desi_wild_31402673</i> | NA                                  | <i>Ca_desi_denovo</i> | 31402673                | G/A  | NA                 | NA                            | NA                 |
| <i>Desi_wild_31410175</i> | NA                                  | <i>Ca_desi_denovo</i> | 31410175                | G/A  | NA                 | NA                            | NA                 |
| <i>Desi_wild_31411931</i> | NA                                  | <i>Ca_desi_denovo</i> | 31411931                | A/G  | NA                 | NA                            | NA                 |
| <i>Desi_wild_31411953</i> | NA                                  | <i>Ca_desi_denovo</i> | 31411953                | C/T  | NA                 | NA                            | NA                 |
| <i>Desi_wild_31417673</i> | NA                                  | <i>Ca_desi_denovo</i> | 31417673                | G/A  | NA                 | NA                            | NA                 |
| <i>Desi_wild_31418875</i> | NA                                  | <i>Ca_desi_denovo</i> | 31418875                | G/T  | NA                 | NA                            | NA                 |
| <i>Desi_wild_31422596</i> | NA                                  | <i>Ca_desi_denovo</i> | 31422596                | G/T  | NA                 | NA                            | NA                 |
| <i>Desi_wild_31424841</i> | NA                                  | <i>Ca_desi_denovo</i> | 31424841                | G/T  | NA                 | NA                            | NA                 |
| <i>Desi_wild_31425332</i> | NA                                  | <i>Ca_desi_denovo</i> | 31425332                | G/T  | NA                 | NA                            | NA                 |
| <i>Desi_wild_31426528</i> | NA                                  | <i>Ca_desi_denovo</i> | 31426528                | C/T  | NA                 | NA                            | NA                 |
| <i>Desi_wild_31426529</i> | NA                                  | <i>Ca_desi_denovo</i> | 31426529                | C/T  | NA                 | NA                            | NA                 |
| <i>Desi_wild_31426844</i> | NA                                  | <i>Ca_desi_denovo</i> | 31426844                | T/G  | NA                 | NA                            | NA                 |
| <i>Desi_wild_31432638</i> | NA                                  | <i>Ca_desi_denovo</i> | 31432638                | C/T  | NA                 | NA                            | NA                 |
| <i>Desi_wild_31435688</i> | NA                                  | <i>Ca_desi_denovo</i> | 31435688                | C/T  | NA                 | NA                            | NA                 |
| <i>Desi_wild_31435700</i> | NA                                  | <i>Ca_desi_denovo</i> | 31435700                | A/G  | NA                 | NA                            | NA                 |
| <i>Desi_wild_31439553</i> | NA                                  | <i>Ca_desi_denovo</i> | 31439553                | A/G  | NA                 | NA                            | NA                 |
| <i>Desi_wild_31439559</i> | NA                                  | <i>Ca_desi_denovo</i> | 31439559                | A/C  | NA                 | NA                            | NA                 |
| <i>Desi_wild_31441308</i> | NA                                  | <i>Ca_desi_denovo</i> | 31441308                | G/C  | NA                 | NA                            | NA                 |
| <i>Desi_wild_31441341</i> | NA                                  | <i>Ca_desi_denovo</i> | 31441341                | C/T  | NA                 | NA                            | NA                 |
| <i>Desi_wild_31441345</i> | NA                                  | <i>Ca_desi_denovo</i> | 31441345                | A/G  | NA                 | NA                            | NA                 |
| <i>Desi_wild_31450678</i> | NA                                  | <i>Ca_desi_denovo</i> | 31450678                | G/T  | NA                 | NA                            | NA                 |
| <i>Desi_wild_31452948</i> | NA                                  | <i>Ca_desi_denovo</i> | 31452948                | A/G  | NA                 | NA                            | NA                 |
| <i>Desi_wild_31452951</i> | NA                                  | <i>Ca_desi_denovo</i> | 31452951                | A/G  | NA                 | NA                            | NA                 |
| <i>Desi_wild_31458490</i> | NA                                  | <i>Ca_desi_denovo</i> | 31458490                | T/A  | NA                 | NA                            | NA                 |
| <i>Desi_wild_31458513</i> | NA                                  | <i>Ca_desi_denovo</i> | 31458513                | G/A  | NA                 | NA                            | NA                 |
| <i>Desi_wild_31460024</i> | NA                                  | <i>Ca_desi_denovo</i> | 31460024                | G/C  | NA                 | NA                            | NA                 |
| <i>Desi_wild_31460075</i> | NA                                  | <i>Ca_desi_denovo</i> | 31460075                | G/C  | NA                 | NA                            | NA                 |
| <i>Desi_wild_31463307</i> | NA                                  | <i>Ca_desi_denovo</i> | 31463307                | T/C  | NA                 | NA                            | NA                 |
| <i>Desi_wild_31463308</i> | NA                                  | <i>Ca_desi_denovo</i> | 31463308                | T/C  | NA                 | NA                            | NA                 |
| <i>Desi_wild_31468320</i> | NA                                  | <i>Ca_desi_denovo</i> | 31468320                | C/T  | NA                 | NA                            | NA                 |
| <i>Desi_wild_31471277</i> | NA                                  | <i>Ca_desi_denovo</i> | 31471277                | G/C  | NA                 | NA                            | NA                 |
| <i>Desi_wild_31472806</i> | NA                                  | <i>Ca_desi_denovo</i> | 31472806                | C/T  | NA                 | NA                            | NA                 |
| <i>Desi_wild_31475646</i> | NA                                  | <i>Ca_desi_denovo</i> | 31475646                | G/A  | NA                 | NA                            | NA                 |
| <i>Desi_wild_31475658</i> | NA                                  | <i>Ca_desi_denovo</i> | 31475658                | G/A  | NA                 | NA                            | NA                 |
| <i>Desi_wild_31495836</i> | NA                                  | <i>Ca_desi_denovo</i> | 31495836                | A/G  | NA                 | NA                            | NA                 |
| <i>Desi_wild_31506367</i> | NA                                  | <i>Ca_desi_denovo</i> | 31506367                | C/G  | NA                 | NA                            | NA                 |
| <i>Desi_wild_31506383</i> | NA                                  | <i>Ca_desi_denovo</i> | 31506383                | T/C  | NA                 | NA                            | NA                 |
| <i>Desi_wild_31507989</i> | NA                                  | <i>Ca_desi_denovo</i> | 31507989                | A/G  | NA                 | NA                            | NA                 |

| SNP IDs                   | NCBI dbSNP accession IDs (NCBI_SS#) | Chromosomes           | Physical positions (bp) | SNPs | Gene accession IDs | Sequence components of genome | Putative functions |
|---------------------------|-------------------------------------|-----------------------|-------------------------|------|--------------------|-------------------------------|--------------------|
| <i>Desi_wild_31508124</i> | NA                                  | <i>Ca_desi_denovo</i> | 31508124                | C/T  | NA                 | NA                            | NA                 |
| <i>Desi_wild_31511627</i> | NA                                  | <i>Ca_desi_denovo</i> | 31511627                | C/A  | NA                 | NA                            | NA                 |
| <i>Desi_wild_31519693</i> | NA                                  | <i>Ca_desi_denovo</i> | 31519693                | G/T  | NA                 | NA                            | NA                 |
| <i>Desi_wild_31530489</i> | NA                                  | <i>Ca_desi_denovo</i> | 31530489                | T/A  | NA                 | NA                            | NA                 |
| <i>Desi_wild_31532769</i> | NA                                  | <i>Ca_desi_denovo</i> | 31532769                | C/G  | NA                 | NA                            | NA                 |
| <i>Desi_wild_31534228</i> | NA                                  | <i>Ca_desi_denovo</i> | 31534228                | T/C  | NA                 | NA                            | NA                 |
| <i>Desi_wild_31534274</i> | NA                                  | <i>Ca_desi_denovo</i> | 31534274                | C/T  | NA                 | NA                            | NA                 |
| <i>Desi_wild_31539175</i> | NA                                  | <i>Ca_desi_denovo</i> | 31539175                | T/C  | NA                 | NA                            | NA                 |
| <i>Desi_wild_31539187</i> | NA                                  | <i>Ca_desi_denovo</i> | 31539187                | C/T  | NA                 | NA                            | NA                 |
| <i>Desi_wild_31545159</i> | NA                                  | <i>Ca_desi_denovo</i> | 31545159                | A/G  | NA                 | NA                            | NA                 |
| <i>Desi_wild_31547276</i> | NA                                  | <i>Ca_desi_denovo</i> | 31547276                | G/C  | NA                 | NA                            | NA                 |
| <i>Desi_wild_31557614</i> | NA                                  | <i>Ca_desi_denovo</i> | 31557614                | G/T  | NA                 | NA                            | NA                 |
| <i>Desi_wild_31558472</i> | NA                                  | <i>Ca_desi_denovo</i> | 31558472                | G/T  | NA                 | NA                            | NA                 |
| <i>Desi_wild_31567095</i> | NA                                  | <i>Ca_desi_denovo</i> | 31567095                | G/C  | NA                 | NA                            | NA                 |
| <i>Desi_wild_31567818</i> | NA                                  | <i>Ca_desi_denovo</i> | 31567818                | C/T  | NA                 | NA                            | NA                 |
| <i>Desi_wild_31569169</i> | NA                                  | <i>Ca_desi_denovo</i> | 31569169                | T/G  | NA                 | NA                            | NA                 |
| <i>Desi_wild_31569220</i> | NA                                  | <i>Ca_desi_denovo</i> | 31569220                | G/C  | NA                 | NA                            | NA                 |
| <i>Desi_wild_31573976</i> | NA                                  | <i>Ca_desi_denovo</i> | 31573976                | C/A  | NA                 | NA                            | NA                 |
| <i>Desi_wild_31576139</i> | NA                                  | <i>Ca_desi_denovo</i> | 31576139                | G/T  | NA                 | NA                            | NA                 |
| <i>Desi_wild_31576145</i> | NA                                  | <i>Ca_desi_denovo</i> | 31576145                | G/T  | NA                 | NA                            | NA                 |
| <i>Desi_wild_31576881</i> | NA                                  | <i>Ca_desi_denovo</i> | 31576881                | A/G  | NA                 | NA                            | NA                 |
| <i>Desi_wild_31576895</i> | NA                                  | <i>Ca_desi_denovo</i> | 31576895                | T/C  | NA                 | NA                            | NA                 |
| <i>Desi_wild_31593440</i> | NA                                  | <i>Ca_desi_denovo</i> | 31593440                | A/G  | NA                 | NA                            | NA                 |
| <i>Desi_wild_31593485</i> | NA                                  | <i>Ca_desi_denovo</i> | 31593485                | A/G  | NA                 | NA                            | NA                 |
| <i>Desi_wild_31596308</i> | NA                                  | <i>Ca_desi_denovo</i> | 31596308                | A/C  | NA                 | NA                            | NA                 |
| <i>Desi_wild_31597085</i> | NA                                  | <i>Ca_desi_denovo</i> | 31597085                | A/C  | NA                 | NA                            | NA                 |
| <i>Desi_wild_31597092</i> | NA                                  | <i>Ca_desi_denovo</i> | 31597092                | G/A  | NA                 | NA                            | NA                 |
| <i>Desi_wild_31601642</i> | NA                                  | <i>Ca_desi_denovo</i> | 31601642                | G/T  | NA                 | NA                            | NA                 |
| <i>Desi_wild_31601780</i> | NA                                  | <i>Ca_desi_denovo</i> | 31601780                | A/C  | NA                 | NA                            | NA                 |
| <i>Desi_wild_31601781</i> | NA                                  | <i>Ca_desi_denovo</i> | 31601781                | A/G  | NA                 | NA                            | NA                 |
| <i>Desi_wild_31601782</i> | NA                                  | <i>Ca_desi_denovo</i> | 31601782                | A/G  | NA                 | NA                            | NA                 |
| <i>Desi_wild_31601783</i> | NA                                  | <i>Ca_desi_denovo</i> | 31601783                | A/T  | NA                 | NA                            | NA                 |
| <i>Desi_wild_31601875</i> | NA                                  | <i>Ca_desi_denovo</i> | 31601875                | A/C  | NA                 | NA                            | NA                 |
| <i>Desi_wild_31607582</i> | NA                                  | <i>Ca_desi_denovo</i> | 31607582                | G/A  | NA                 | NA                            | NA                 |
| <i>Desi_wild_31607598</i> | NA                                  | <i>Ca_desi_denovo</i> | 31607598                | T/C  | NA                 | NA                            | NA                 |
| <i>Desi_wild_31607620</i> | NA                                  | <i>Ca_desi_denovo</i> | 31607620                | C/G  | NA                 | NA                            | NA                 |
| <i>Desi_wild_31612438</i> | NA                                  | <i>Ca_desi_denovo</i> | 31612438                | T/C  | NA                 | NA                            | NA                 |
| <i>Desi_wild_31614084</i> | NA                                  | <i>Ca_desi_denovo</i> | 31614084                | G/T  | NA                 | NA                            | NA                 |
| <i>Desi_wild_31614149</i> | NA                                  | <i>Ca_desi_denovo</i> | 31614149                | C/A  | NA                 | NA                            | NA                 |
| <i>Desi_wild_31618916</i> | NA                                  | <i>Ca_desi_denovo</i> | 31618916                | G/T  | NA                 | NA                            | NA                 |
| <i>Desi_wild_31624240</i> | NA                                  | <i>Ca_desi_denovo</i> | 31624240                | G/T  | NA                 | NA                            | NA                 |
| <i>Desi_wild_31626863</i> | NA                                  | <i>Ca_desi_denovo</i> | 31626863                | T/G  | NA                 | NA                            | NA                 |
| <i>Desi_wild_31629054</i> | NA                                  | <i>Ca_desi_denovo</i> | 31629054                | T/C  | NA                 | NA                            | NA                 |
| <i>Desi_wild_31631159</i> | NA                                  | <i>Ca_desi_denovo</i> | 31631159                | C/G  | NA                 | NA                            | NA                 |

| SNP IDs                   | NCBI dbSNP accession IDs (NCBI_SS#) | Chromosomes           | Physical positions (bp) | SNPs | Gene accession IDs | Sequence components of genome | Putative functions |
|---------------------------|-------------------------------------|-----------------------|-------------------------|------|--------------------|-------------------------------|--------------------|
| <i>Desi_wild_31643831</i> | NA                                  | <i>Ca_desi_denovo</i> | 31643831                | A/C  | NA                 | NA                            | NA                 |
| <i>Desi_wild_31646237</i> | NA                                  | <i>Ca_desi_denovo</i> | 31646237                | T/C  | NA                 | NA                            | NA                 |
| <i>Desi_wild_31646305</i> | NA                                  | <i>Ca_desi_denovo</i> | 31646305                | C/T  | NA                 | NA                            | NA                 |
| <i>Desi_wild_31651436</i> | NA                                  | <i>Ca_desi_denovo</i> | 31651436                | T/C  | NA                 | NA                            | NA                 |
| <i>Desi_wild_31651437</i> | NA                                  | <i>Ca_desi_denovo</i> | 31651437                | A/T  | NA                 | NA                            | NA                 |
| <i>Desi_wild_31652802</i> | NA                                  | <i>Ca_desi_denovo</i> | 31652802                | C/G  | NA                 | NA                            | NA                 |
| <i>Desi_wild_31658856</i> | NA                                  | <i>Ca_desi_denovo</i> | 31658856                | C/G  | NA                 | NA                            | NA                 |
| <i>Desi_wild_31658881</i> | NA                                  | <i>Ca_desi_denovo</i> | 31658881                | T/C  | NA                 | NA                            | NA                 |
| <i>Desi_wild_31659681</i> | NA                                  | <i>Ca_desi_denovo</i> | 31659681                | C/T  | NA                 | NA                            | NA                 |
| <i>Desi_wild_31659711</i> | NA                                  | <i>Ca_desi_denovo</i> | 31659711                | G/T  | NA                 | NA                            | NA                 |
| <i>Desi_wild_31661104</i> | NA                                  | <i>Ca_desi_denovo</i> | 31661104                | C/T  | NA                 | NA                            | NA                 |
| <i>Desi_wild_31664342</i> | NA                                  | <i>Ca_desi_denovo</i> | 31664342                | T/A  | NA                 | NA                            | NA                 |
| <i>Desi_wild_31664343</i> | NA                                  | <i>Ca_desi_denovo</i> | 31664343                | T/C  | NA                 | NA                            | NA                 |
| <i>Desi_wild_31665141</i> | NA                                  | <i>Ca_desi_denovo</i> | 31665141                | C/G  | NA                 | NA                            | NA                 |
| <i>Desi_wild_31666262</i> | NA                                  | <i>Ca_desi_denovo</i> | 31666262                | C/G  | NA                 | NA                            | NA                 |
| <i>Desi_wild_31666266</i> | NA                                  | <i>Ca_desi_denovo</i> | 31666266                | T/A  | NA                 | NA                            | NA                 |
| <i>Desi_wild_31666283</i> | NA                                  | <i>Ca_desi_denovo</i> | 31666283                | G/A  | NA                 | NA                            | NA                 |
| <i>Desi_wild_31668789</i> | NA                                  | <i>Ca_desi_denovo</i> | 31668789                | A/C  | NA                 | NA                            | NA                 |
| <i>Desi_wild_31669761</i> | NA                                  | <i>Ca_desi_denovo</i> | 31669761                | T/A  | NA                 | NA                            | NA                 |
| <i>Desi_wild_31670556</i> | NA                                  | <i>Ca_desi_denovo</i> | 31670556                | G/C  | NA                 | NA                            | NA                 |
| <i>Desi_wild_31670579</i> | NA                                  | <i>Ca_desi_denovo</i> | 31670579                | C/T  | NA                 | NA                            | NA                 |
| <i>Desi_wild_31670604</i> | NA                                  | <i>Ca_desi_denovo</i> | 31670604                | A/G  | NA                 | NA                            | NA                 |
| <i>Desi_wild_31671893</i> | NA                                  | <i>Ca_desi_denovo</i> | 31671893                | G/C  | NA                 | NA                            | NA                 |
| <i>Desi_wild_31675491</i> | NA                                  | <i>Ca_desi_denovo</i> | 31675491                | T/G  | NA                 | NA                            | NA                 |
| <i>Desi_wild_31678726</i> | NA                                  | <i>Ca_desi_denovo</i> | 31678726                | G/C  | NA                 | NA                            | NA                 |
| <i>Desi_wild_31678763</i> | NA                                  | <i>Ca_desi_denovo</i> | 31678763                | T/G  | NA                 | NA                            | NA                 |
| <i>Desi_wild_31679062</i> | NA                                  | <i>Ca_desi_denovo</i> | 31679062                | A/C  | NA                 | NA                            | NA                 |
| <i>Desi_wild_31681312</i> | NA                                  | <i>Ca_desi_denovo</i> | 31681312                | C/T  | NA                 | NA                            | NA                 |
| <i>Desi_wild_31683373</i> | NA                                  | <i>Ca_desi_denovo</i> | 31683373                | T/C  | NA                 | NA                            | NA                 |
| <i>Desi_wild_31683524</i> | NA                                  | <i>Ca_desi_denovo</i> | 31683524                | G/C  | NA                 | NA                            | NA                 |
| <i>Desi_wild_31693485</i> | NA                                  | <i>Ca_desi_denovo</i> | 31693485                | C/G  | NA                 | NA                            | NA                 |
| <i>Desi_wild_31693520</i> | NA                                  | <i>Ca_desi_denovo</i> | 31693520                | A/G  | NA                 | NA                            | NA                 |
| <i>Desi_wild_31694236</i> | NA                                  | <i>Ca_desi_denovo</i> | 31694236                | C/G  | NA                 | NA                            | NA                 |
| <i>Desi_wild_31694239</i> | NA                                  | <i>Ca_desi_denovo</i> | 31694239                | G/A  | NA                 | NA                            | NA                 |
| <i>Desi_wild_31706456</i> | NA                                  | <i>Ca_desi_denovo</i> | 31706456                | C/T  | NA                 | NA                            | NA                 |
| <i>Desi_wild_31710894</i> | NA                                  | <i>Ca_desi_denovo</i> | 31710894                | A/C  | NA                 | NA                            | NA                 |
| <i>Desi_wild_31712500</i> | NA                                  | <i>Ca_desi_denovo</i> | 31712500                | T/G  | NA                 | NA                            | NA                 |
| <i>Desi_wild_31732332</i> | NA                                  | <i>Ca_desi_denovo</i> | 31732332                | T/G  | NA                 | NA                            | NA                 |
| <i>Desi_wild_31735424</i> | NA                                  | <i>Ca_desi_denovo</i> | 31735424                | G/A  | NA                 | NA                            | NA                 |
| <i>Desi_wild_31735429</i> | NA                                  | <i>Ca_desi_denovo</i> | 31735429                | T/C  | NA                 | NA                            | NA                 |
| <i>Desi_wild_31737506</i> | NA                                  | <i>Ca_desi_denovo</i> | 31737506                | C/T  | NA                 | NA                            | NA                 |
| <i>Desi_wild_31737522</i> | NA                                  | <i>Ca_desi_denovo</i> | 31737522                | T/C  | NA                 | NA                            | NA                 |
| <i>Desi_wild_31744697</i> | NA                                  | <i>Ca_desi_denovo</i> | 31744697                | C/G  | NA                 | NA                            | NA                 |
| <i>Desi_wild_31746449</i> | NA                                  | <i>Ca_desi_denovo</i> | 31746449                | G/C  | NA                 | NA                            | NA                 |

| SNP IDs                   | NCBI dbSNP accession IDs (NCBI_SS#) | Chromosomes           | Physical positions (bp) | SNPs | Gene accession IDs | Sequence components of genome | Putative functions |
|---------------------------|-------------------------------------|-----------------------|-------------------------|------|--------------------|-------------------------------|--------------------|
| <i>Desi_wild_31760660</i> | NA                                  | <i>Ca_desi_denovo</i> | 31760660                | A/C  | NA                 | NA                            | NA                 |
| <i>Desi_wild_31760661</i> | NA                                  | <i>Ca_desi_denovo</i> | 31760661                | G/T  | NA                 | NA                            | NA                 |
| <i>Desi_wild_31760662</i> | NA                                  | <i>Ca_desi_denovo</i> | 31760662                | A/C  | NA                 | NA                            | NA                 |
| <i>Desi_wild_31760663</i> | NA                                  | <i>Ca_desi_denovo</i> | 31760663                | A/T  | NA                 | NA                            | NA                 |
| <i>Desi_wild_31770079</i> | NA                                  | <i>Ca_desi_denovo</i> | 31770079                | G/C  | NA                 | NA                            | NA                 |
| <i>Desi_wild_31770133</i> | NA                                  | <i>Ca_desi_denovo</i> | 31770133                | G/C  | NA                 | NA                            | NA                 |
| <i>Desi_wild_31771337</i> | NA                                  | <i>Ca_desi_denovo</i> | 31771337                | C/G  | NA                 | NA                            | NA                 |
| <i>Desi_wild_31772675</i> | NA                                  | <i>Ca_desi_denovo</i> | 31772675                | G/A  | NA                 | NA                            | NA                 |
| <i>Desi_wild_31794017</i> | NA                                  | <i>Ca_desi_denovo</i> | 31794017                | A/G  | NA                 | NA                            | NA                 |
| <i>Desi_wild_31802695</i> | NA                                  | <i>Ca_desi_denovo</i> | 31802695                | G/A  | NA                 | NA                            | NA                 |
| <i>Desi_wild_31819797</i> | NA                                  | <i>Ca_desi_denovo</i> | 31819797                | A/C  | NA                 | NA                            | NA                 |
| <i>Desi_wild_31820809</i> | NA                                  | <i>Ca_desi_denovo</i> | 31820809                | T/C  | NA                 | NA                            | NA                 |
| <i>Desi_wild_31830279</i> | NA                                  | <i>Ca_desi_denovo</i> | 31830279                | G/T  | NA                 | NA                            | NA                 |
| <i>Desi_wild_31830282</i> | NA                                  | <i>Ca_desi_denovo</i> | 31830282                | T/C  | NA                 | NA                            | NA                 |
| <i>Desi_wild_31832815</i> | NA                                  | <i>Ca_desi_denovo</i> | 31832815                | T/G  | NA                 | NA                            | NA                 |
| <i>Desi_wild_31842977</i> | NA                                  | <i>Ca_desi_denovo</i> | 31842977                | G/A  | NA                 | NA                            | NA                 |
| <i>Desi_wild_31843180</i> | NA                                  | <i>Ca_desi_denovo</i> | 31843180                | A/G  | NA                 | NA                            | NA                 |
| <i>Desi_wild_31852067</i> | NA                                  | <i>Ca_desi_denovo</i> | 31852067                | A/G  | NA                 | NA                            | NA                 |
| <i>Desi_wild_31852144</i> | NA                                  | <i>Ca_desi_denovo</i> | 31852144                | T/C  | NA                 | NA                            | NA                 |
| <i>Desi_wild_31859426</i> | NA                                  | <i>Ca_desi_denovo</i> | 31859426                | A/G  | NA                 | NA                            | NA                 |
| <i>Desi_wild_31860806</i> | NA                                  | <i>Ca_desi_denovo</i> | 31860806                | A/G  | NA                 | NA                            | NA                 |
| <i>Desi_wild_31860811</i> | NA                                  | <i>Ca_desi_denovo</i> | 31860811                | C/G  | NA                 | NA                            | NA                 |
| <i>Desi_wild_31860812</i> | NA                                  | <i>Ca_desi_denovo</i> | 31860812                | A/C  | NA                 | NA                            | NA                 |
| <i>Desi_wild_31860821</i> | NA                                  | <i>Ca_desi_denovo</i> | 31860821                | C/T  | NA                 | NA                            | NA                 |
| <i>Desi_wild_31861292</i> | NA                                  | <i>Ca_desi_denovo</i> | 31861292                | A/G  | NA                 | NA                            | NA                 |
| <i>Desi_wild_31861350</i> | NA                                  | <i>Ca_desi_denovo</i> | 31861350                | A/G  | NA                 | NA                            | NA                 |
| <i>Desi_wild_31861527</i> | NA                                  | <i>Ca_desi_denovo</i> | 31861527                | T/G  | NA                 | NA                            | NA                 |
| <i>Desi_wild_31865111</i> | NA                                  | <i>Ca_desi_denovo</i> | 31865111                | A/C  | NA                 | NA                            | NA                 |
| <i>Desi_wild_31869357</i> | NA                                  | <i>Ca_desi_denovo</i> | 31869357                | T/G  | NA                 | NA                            | NA                 |
| <i>Desi_wild_31869386</i> | NA                                  | <i>Ca_desi_denovo</i> | 31869386                | T/C  | NA                 | NA                            | NA                 |
| <i>Desi_wild_31872318</i> | NA                                  | <i>Ca_desi_denovo</i> | 31872318                | C/T  | NA                 | NA                            | NA                 |
| <i>Desi_wild_31882791</i> | NA                                  | <i>Ca_desi_denovo</i> | 31882791                | A/G  | NA                 | NA                            | NA                 |
| <i>Desi_wild_31887819</i> | NA                                  | <i>Ca_desi_denovo</i> | 31887819                | G/C  | NA                 | NA                            | NA                 |
| <i>Desi_wild_31887843</i> | NA                                  | <i>Ca_desi_denovo</i> | 31887843                | C/G  | NA                 | NA                            | NA                 |
| <i>Desi_wild_31888492</i> | NA                                  | <i>Ca_desi_denovo</i> | 31888492                | G/C  | NA                 | NA                            | NA                 |
| <i>Desi_wild_31888495</i> | NA                                  | <i>Ca_desi_denovo</i> | 31888495                | C/T  | NA                 | NA                            | NA                 |
| <i>Desi_wild_31890783</i> | NA                                  | <i>Ca_desi_denovo</i> | 31890783                | G/A  | NA                 | NA                            | NA                 |
| <i>Desi_wild_31895567</i> | NA                                  | <i>Ca_desi_denovo</i> | 31895567                | C/A  | NA                 | NA                            | NA                 |
| <i>Desi_wild_31903530</i> | NA                                  | <i>Ca_desi_denovo</i> | 31903530                | C/T  | NA                 | NA                            | NA                 |
| <i>Desi_wild_31916056</i> | NA                                  | <i>Ca_desi_denovo</i> | 31916056                | G/T  | NA                 | NA                            | NA                 |
| <i>Desi_wild_31925072</i> | NA                                  | <i>Ca_desi_denovo</i> | 31925072                | A/G  | NA                 | NA                            | NA                 |
| <i>Desi_wild_31925084</i> | NA                                  | <i>Ca_desi_denovo</i> | 31925084                | T/C  | NA                 | NA                            | NA                 |
| <i>Desi_wild_31925316</i> | NA                                  | <i>Ca_desi_denovo</i> | 31925316                | A/C  | NA                 | NA                            | NA                 |
| <i>Desi_wild_31926244</i> | NA                                  | <i>Ca_desi_denovo</i> | 31926244                | C/G  | NA                 | NA                            | NA                 |



| SNP IDs                   | NCBI dbSNP accession IDs (NCBI_SS#) | Chromosomes           | Physical positions (bp) | SNPs | Gene accession IDs | Sequence components of genome | Putative functions |
|---------------------------|-------------------------------------|-----------------------|-------------------------|------|--------------------|-------------------------------|--------------------|
| <i>Desi_wild_31926388</i> | NA                                  | <i>Ca_desi_denovo</i> | 31926388                | G/T  | NA                 | NA                            | NA                 |
| <i>Desi_wild_31926396</i> | NA                                  | <i>Ca_desi_denovo</i> | 31926396                | C/T  | NA                 | NA                            | NA                 |
| <i>Desi_wild_31928581</i> | NA                                  | <i>Ca_desi_denovo</i> | 31928581                | G/C  | NA                 | NA                            | NA                 |
| <i>Desi_wild_31929043</i> | NA                                  | <i>Ca_desi_denovo</i> | 31929043                | A/G  | NA                 | NA                            | NA                 |
| <i>Desi_wild_31930295</i> | NA                                  | <i>Ca_desi_denovo</i> | 31930295                | C/G  | NA                 | NA                            | NA                 |
| <i>Desi_wild_31935189</i> | NA                                  | <i>Ca_desi_denovo</i> | 31935189                | C/A  | NA                 | NA                            | NA                 |
| <i>Desi_wild_31941246</i> | NA                                  | <i>Ca_desi_denovo</i> | 31941246                | T/C  | NA                 | NA                            | NA                 |
| <i>Desi_wild_31955285</i> | NA                                  | <i>Ca_desi_denovo</i> | 31955285                | T/C  | NA                 | NA                            | NA                 |
| <i>Desi_wild_31955291</i> | NA                                  | <i>Ca_desi_denovo</i> | 31955291                | T/G  | NA                 | NA                            | NA                 |
| <i>Desi_wild_31970794</i> | NA                                  | <i>Ca_desi_denovo</i> | 31970794                | T/C  | NA                 | NA                            | NA                 |
| <i>Desi_wild_31979372</i> | NA                                  | <i>Ca_desi_denovo</i> | 31979372                | A/G  | NA                 | NA                            | NA                 |
| <i>Desi_wild_31979405</i> | NA                                  | <i>Ca_desi_denovo</i> | 31979405                | C/A  | NA                 | NA                            | NA                 |
| <i>Desi_wild_31985445</i> | NA                                  | <i>Ca_desi_denovo</i> | 31985445                | A/G  | NA                 | NA                            | NA                 |
| <i>Desi_wild_31986164</i> | NA                                  | <i>Ca_desi_denovo</i> | 31986164                | A/C  | NA                 | NA                            | NA                 |
| <i>Desi_wild_31986165</i> | NA                                  | <i>Ca_desi_denovo</i> | 31986165                | G/T  | NA                 | NA                            | NA                 |
| <i>Desi_wild_31986166</i> | NA                                  | <i>Ca_desi_denovo</i> | 31986166                | A/T  | NA                 | NA                            | NA                 |
| <i>Desi_wild_31986167</i> | NA                                  | <i>Ca_desi_denovo</i> | 31986167                | C/T  | NA                 | NA                            | NA                 |
| <i>Desi_wild_31987908</i> | NA                                  | <i>Ca_desi_denovo</i> | 31987908                | A/G  | NA                 | NA                            | NA                 |
| <i>Desi_wild_31989719</i> | NA                                  | <i>Ca_desi_denovo</i> | 31989719                | A/C  | NA                 | NA                            | NA                 |
| <i>Desi_wild_31991206</i> | NA                                  | <i>Ca_desi_denovo</i> | 31991206                | G/T  | NA                 | NA                            | NA                 |
| <i>Desi_wild_31991231</i> | NA                                  | <i>Ca_desi_denovo</i> | 31991231                | G/C  | NA                 | NA                            | NA                 |
| <i>Desi_wild_31999858</i> | NA                                  | <i>Ca_desi_denovo</i> | 31999858                | A/G  | NA                 | NA                            | NA                 |
| <i>Desi_wild_32000675</i> | NA                                  | <i>Ca_desi_denovo</i> | 32000675                | T/C  | NA                 | NA                            | NA                 |
| <i>Desi_wild_32003024</i> | NA                                  | <i>Ca_desi_denovo</i> | 32003024                | A/G  | NA                 | NA                            | NA                 |
| <i>Desi_wild_32003035</i> | NA                                  | <i>Ca_desi_denovo</i> | 32003035                | G/A  | NA                 | NA                            | NA                 |
| <i>Desi_wild_32003873</i> | NA                                  | <i>Ca_desi_denovo</i> | 32003873                | T/C  | NA                 | NA                            | NA                 |
| <i>Desi_wild_32003876</i> | NA                                  | <i>Ca_desi_denovo</i> | 32003876                | C/T  | NA                 | NA                            | NA                 |
| <i>Desi_wild_32003882</i> | NA                                  | <i>Ca_desi_denovo</i> | 32003882                | G/C  | NA                 | NA                            | NA                 |
| <i>Desi_wild_32006675</i> | NA                                  | <i>Ca_desi_denovo</i> | 32006675                | T/C  | NA                 | NA                            | NA                 |
| <i>Desi_wild_32006690</i> | NA                                  | <i>Ca_desi_denovo</i> | 32006690                | T/G  | NA                 | NA                            | NA                 |
| <i>Desi_wild_32008566</i> | NA                                  | <i>Ca_desi_denovo</i> | 32008566                | G/C  | NA                 | NA                            | NA                 |
| <i>Desi_wild_32008602</i> | NA                                  | <i>Ca_desi_denovo</i> | 32008602                | G/A  | NA                 | NA                            | NA                 |
| <i>Desi_wild_32015850</i> | NA                                  | <i>Ca_desi_denovo</i> | 32015850                | C/G  | NA                 | NA                            | NA                 |
| <i>Desi_wild_32020257</i> | NA                                  | <i>Ca_desi_denovo</i> | 32020257                | A/G  | NA                 | NA                            | NA                 |
| <i>Desi_wild_32020317</i> | NA                                  | <i>Ca_desi_denovo</i> | 32020317                | G/A  | NA                 | NA                            | NA                 |
| <i>Desi_wild_32021856</i> | NA                                  | <i>Ca_desi_denovo</i> | 32021856                | G/C  | NA                 | NA                            | NA                 |
| <i>Desi_wild_32026438</i> | NA                                  | <i>Ca_desi_denovo</i> | 32026438                | G/C  | NA                 | NA                            | NA                 |
| <i>Desi_wild_32026453</i> | NA                                  | <i>Ca_desi_denovo</i> | 32026453                | G/C  | NA                 | NA                            | NA                 |
| <i>Desi_wild_32041280</i> | NA                                  | <i>Ca_desi_denovo</i> | 32041280                | C/G  | NA                 | NA                            | NA                 |
| <i>Desi_wild_32041286</i> | NA                                  | <i>Ca_desi_denovo</i> | 32041286                | G/T  | NA                 | NA                            | NA                 |
| <i>Desi_wild_32054813</i> | NA                                  | <i>Ca_desi_denovo</i> | 32054813                | A/G  | NA                 | NA                            | NA                 |
| <i>Desi_wild_32059526</i> | NA                                  | <i>Ca_desi_denovo</i> | 32059526                | C/A  | NA                 | NA                            | NA                 |
| <i>Desi_wild_32059588</i> | NA                                  | <i>Ca_desi_denovo</i> | 32059588                | C/T  | NA                 | NA                            | NA                 |
| <i>Desi_wild_32059594</i> | NA                                  | <i>Ca_desi_denovo</i> | 32059594                | A/G  | NA                 | NA                            | NA                 |

| SNP IDs                   | NCBI dbSNP accession IDs (NCBI_SS#) | Chromosomes           | Physical positions (bp) | SNPs | Gene accession IDs | Sequence components of genome | Putative functions |
|---------------------------|-------------------------------------|-----------------------|-------------------------|------|--------------------|-------------------------------|--------------------|
| <i>Desi_wild_32070356</i> | NA                                  | <i>Ca_desi_denovo</i> | 32070356                | A/C  | NA                 | NA                            | NA                 |
| <i>Desi_wild_32074879</i> | NA                                  | <i>Ca_desi_denovo</i> | 32074879                | A/G  | NA                 | NA                            | NA                 |
| <i>Desi_wild_32074882</i> | NA                                  | <i>Ca_desi_denovo</i> | 32074882                | T/C  | NA                 | NA                            | NA                 |
| <i>Desi_wild_32076532</i> | NA                                  | <i>Ca_desi_denovo</i> | 32076532                | T/A  | NA                 | NA                            | NA                 |
| <i>Desi_wild_32081489</i> | NA                                  | <i>Ca_desi_denovo</i> | 32081489                | C/G  | NA                 | NA                            | NA                 |
| <i>Desi_wild_32085299</i> | NA                                  | <i>Ca_desi_denovo</i> | 32085299                | C/T  | NA                 | NA                            | NA                 |
| <i>Desi_wild_32085302</i> | NA                                  | <i>Ca_desi_denovo</i> | 32085302                | G/A  | NA                 | NA                            | NA                 |
| <i>Desi_wild_32087542</i> | NA                                  | <i>Ca_desi_denovo</i> | 32087542                | A/C  | NA                 | NA                            | NA                 |
| <i>Desi_wild_32087543</i> | NA                                  | <i>Ca_desi_denovo</i> | 32087543                | A/G  | NA                 | NA                            | NA                 |
| <i>Desi_wild_32088857</i> | NA                                  | <i>Ca_desi_denovo</i> | 32088857                | A/G  | NA                 | NA                            | NA                 |
| <i>Desi_wild_32089034</i> | NA                                  | <i>Ca_desi_denovo</i> | 32089034                | A/G  | NA                 | NA                            | NA                 |
| <i>Desi_wild_32101335</i> | NA                                  | <i>Ca_desi_denovo</i> | 32101335                | G/A  | NA                 | NA                            | NA                 |
| <i>Desi_wild_32114400</i> | NA                                  | <i>Ca_desi_denovo</i> | 32114400                | T/C  | NA                 | NA                            | NA                 |
| <i>Desi_wild_32114418</i> | NA                                  | <i>Ca_desi_denovo</i> | 32114418                | G/T  | NA                 | NA                            | NA                 |
| <i>Desi_wild_32126995</i> | NA                                  | <i>Ca_desi_denovo</i> | 32126995                | A/T  | NA                 | NA                            | NA                 |
| <i>Desi_wild_32126999</i> | NA                                  | <i>Ca_desi_denovo</i> | 32126999                | A/C  | NA                 | NA                            | NA                 |
| <i>Desi_wild_32130919</i> | NA                                  | <i>Ca_desi_denovo</i> | 32130919                | A/G  | NA                 | NA                            | NA                 |
| <i>Desi_wild_32130926</i> | NA                                  | <i>Ca_desi_denovo</i> | 32130926                | A/T  | NA                 | NA                            | NA                 |
| <i>Desi_wild_32131508</i> | NA                                  | <i>Ca_desi_denovo</i> | 32131508                | C/G  | NA                 | NA                            | NA                 |
| <i>Desi_wild_32134127</i> | NA                                  | <i>Ca_desi_denovo</i> | 32134127                | G/T  | NA                 | NA                            | NA                 |
| <i>Desi_wild_32134160</i> | NA                                  | <i>Ca_desi_denovo</i> | 32134160                | G/A  | NA                 | NA                            | NA                 |
| <i>Desi_wild_32153569</i> | NA                                  | <i>Ca_desi_denovo</i> | 32153569                | G/T  | NA                 | NA                            | NA                 |
| <i>Desi_wild_32156712</i> | NA                                  | <i>Ca_desi_denovo</i> | 32156712                | A/G  | NA                 | NA                            | NA                 |
| <i>Desi_wild_32171571</i> | NA                                  | <i>Ca_desi_denovo</i> | 32171571                | A/G  | NA                 | NA                            | NA                 |
| <i>Desi_wild_32171597</i> | NA                                  | <i>Ca_desi_denovo</i> | 32171597                | T/C  | NA                 | NA                            | NA                 |
| <i>Desi_wild_32172357</i> | NA                                  | <i>Ca_desi_denovo</i> | 32172357                | G/A  | NA                 | NA                            | NA                 |
| <i>Desi_wild_32172361</i> | NA                                  | <i>Ca_desi_denovo</i> | 32172361                | C/T  | NA                 | NA                            | NA                 |
| <i>Desi_wild_32173870</i> | NA                                  | <i>Ca_desi_denovo</i> | 32173870                | G/A  | NA                 | NA                            | NA                 |
| <i>Desi_wild_32176029</i> | NA                                  | <i>Ca_desi_denovo</i> | 32176029                | A/T  | NA                 | NA                            | NA                 |
| <i>Desi_wild_32180112</i> | NA                                  | <i>Ca_desi_denovo</i> | 32180112                | A/C  | NA                 | NA                            | NA                 |
| <i>Desi_wild_32190294</i> | NA                                  | <i>Ca_desi_denovo</i> | 32190294                | A/G  | NA                 | NA                            | NA                 |
| <i>Desi_wild_32190299</i> | NA                                  | <i>Ca_desi_denovo</i> | 32190299                | G/A  | NA                 | NA                            | NA                 |
| <i>Desi_wild_32195639</i> | NA                                  | <i>Ca_desi_denovo</i> | 32195639                | G/T  | NA                 | NA                            | NA                 |
| <i>Desi_wild_32210600</i> | NA                                  | <i>Ca_desi_denovo</i> | 32210600                | A/G  | NA                 | NA                            | NA                 |
| <i>Desi_wild_32213602</i> | NA                                  | <i>Ca_desi_denovo</i> | 32213602                | G/C  | NA                 | NA                            | NA                 |
| <i>Desi_wild_32213650</i> | NA                                  | <i>Ca_desi_denovo</i> | 32213650                | C/T  | NA                 | NA                            | NA                 |
| <i>Desi_wild_32224891</i> | NA                                  | <i>Ca_desi_denovo</i> | 32224891                | C/T  | NA                 | NA                            | NA                 |
| <i>Desi_wild_32229194</i> | NA                                  | <i>Ca_desi_denovo</i> | 32229194                | C/T  | NA                 | NA                            | NA                 |
| <i>Desi_wild_32240777</i> | NA                                  | <i>Ca_desi_denovo</i> | 32240777                | T/C  | NA                 | NA                            | NA                 |
| <i>Desi_wild_32243463</i> | NA                                  | <i>Ca_desi_denovo</i> | 32243463                | G/A  | NA                 | NA                            | NA                 |
| <i>Desi_wild_32243525</i> | NA                                  | <i>Ca_desi_denovo</i> | 32243525                | T/C  | NA                 | NA                            | NA                 |
| <i>Desi_wild_32251492</i> | NA                                  | <i>Ca_desi_denovo</i> | 32251492                | C/G  | NA                 | NA                            | NA                 |
| <i>Desi_wild_32253216</i> | NA                                  | <i>Ca_desi_denovo</i> | 32253216                | G/T  | NA                 | NA                            | NA                 |
| <i>Desi_wild_32254005</i> | NA                                  | <i>Ca_desi_denovo</i> | 32254005                | A/C  | NA                 | NA                            | NA                 |

| SNP IDs                   | NCBI dbSNP accession IDs (NCBI_SS#) | Chromosomes           | Physical positions (bp) | SNPs | Gene accession IDs | Sequence components of genome | Putative functions |
|---------------------------|-------------------------------------|-----------------------|-------------------------|------|--------------------|-------------------------------|--------------------|
| <i>Desi_wild_32254950</i> | NA                                  | <i>Ca_desi_denovo</i> | 32254950                | C/G  | NA                 | NA                            | NA                 |
| <i>Desi_wild_32256755</i> | NA                                  | <i>Ca_desi_denovo</i> | 32256755                | C/T  | NA                 | NA                            | NA                 |
| <i>Desi_wild_32257372</i> | NA                                  | <i>Ca_desi_denovo</i> | 32257372                | C/A  | NA                 | NA                            | NA                 |
| <i>Desi_wild_32257432</i> | NA                                  | <i>Ca_desi_denovo</i> | 32257432                | G/C  | NA                 | NA                            | NA                 |
| <i>Desi_wild_32257438</i> | NA                                  | <i>Ca_desi_denovo</i> | 32257438                | A/G  | NA                 | NA                            | NA                 |
| <i>Desi_wild_32257453</i> | NA                                  | <i>Ca_desi_denovo</i> | 32257453                | T/C  | NA                 | NA                            | NA                 |
| <i>Desi_wild_32259780</i> | NA                                  | <i>Ca_desi_denovo</i> | 32259780                | T/C  | NA                 | NA                            | NA                 |
| <i>Desi_wild_32263919</i> | NA                                  | <i>Ca_desi_denovo</i> | 32263919                | C/T  | NA                 | NA                            | NA                 |
| <i>Desi_wild_32266332</i> | NA                                  | <i>Ca_desi_denovo</i> | 32266332                | G/A  | NA                 | NA                            | NA                 |
| <i>Desi_wild_32266338</i> | NA                                  | <i>Ca_desi_denovo</i> | 32266338                | T/C  | NA                 | NA                            | NA                 |
| <i>Desi_wild_32267444</i> | NA                                  | <i>Ca_desi_denovo</i> | 32267444                | A/C  | NA                 | NA                            | NA                 |
| <i>Desi_wild_32267445</i> | NA                                  | <i>Ca_desi_denovo</i> | 32267445                | A/G  | NA                 | NA                            | NA                 |
| <i>Desi_wild_32267446</i> | NA                                  | <i>Ca_desi_denovo</i> | 32267446                | A/G  | NA                 | NA                            | NA                 |
| <i>Desi_wild_32267447</i> | NA                                  | <i>Ca_desi_denovo</i> | 32267447                | A/T  | NA                 | NA                            | NA                 |
| <i>Desi_wild_32269062</i> | NA                                  | <i>Ca_desi_denovo</i> | 32269062                | C/T  | NA                 | NA                            | NA                 |
| <i>Desi_wild_32269068</i> | NA                                  | <i>Ca_desi_denovo</i> | 32269068                | C/G  | NA                 | NA                            | NA                 |
| <i>Desi_wild_32278166</i> | NA                                  | <i>Ca_desi_denovo</i> | 32278166                | T/C  | NA                 | NA                            | NA                 |
| <i>Desi_wild_32278190</i> | NA                                  | <i>Ca_desi_denovo</i> | 32278190                | C/T  | NA                 | NA                            | NA                 |
| <i>Desi_wild_32280747</i> | NA                                  | <i>Ca_desi_denovo</i> | 32280747                | T/C  | NA                 | NA                            | NA                 |
| <i>Desi_wild_32281426</i> | NA                                  | <i>Ca_desi_denovo</i> | 32281426                | T/C  | NA                 | NA                            | NA                 |
| <i>Desi_wild_32288529</i> | NA                                  | <i>Ca_desi_denovo</i> | 32288529                | C/G  | NA                 | NA                            | NA                 |
| <i>Desi_wild_32288559</i> | NA                                  | <i>Ca_desi_denovo</i> | 32288559                | A/G  | NA                 | NA                            | NA                 |
| <i>Desi_wild_32293094</i> | NA                                  | <i>Ca_desi_denovo</i> | 32293094                | T/C  | NA                 | NA                            | NA                 |
| <i>Desi_wild_32294767</i> | NA                                  | <i>Ca_desi_denovo</i> | 32294767                | G/A  | NA                 | NA                            | NA                 |
| <i>Desi_wild_32294777</i> | NA                                  | <i>Ca_desi_denovo</i> | 32294777                | A/T  | NA                 | NA                            | NA                 |
| <i>Desi_wild_32294976</i> | NA                                  | <i>Ca_desi_denovo</i> | 32294976                | T/C  | NA                 | NA                            | NA                 |
| <i>Desi_wild_32298376</i> | NA                                  | <i>Ca_desi_denovo</i> | 32298376                | C/T  | NA                 | NA                            | NA                 |
| <i>Desi_wild_32298403</i> | NA                                  | <i>Ca_desi_denovo</i> | 32298403                | T/C  | NA                 | NA                            | NA                 |
| <i>Desi_wild_32309588</i> | NA                                  | <i>Ca_desi_denovo</i> | 32309588                | A/C  | NA                 | NA                            | NA                 |
| <i>Desi_wild_32326921</i> | NA                                  | <i>Ca_desi_denovo</i> | 32326921                | G/T  | NA                 | NA                            | NA                 |
| <i>Desi_wild_32342222</i> | NA                                  | <i>Ca_desi_denovo</i> | 32342222                | T/G  | NA                 | NA                            | NA                 |
| <i>Desi_wild_32343095</i> | NA                                  | <i>Ca_desi_denovo</i> | 32343095                | A/C  | NA                 | NA                            | NA                 |
| <i>Desi_wild_32352711</i> | NA                                  | <i>Ca_desi_denovo</i> | 32352711                | T/C  | NA                 | NA                            | NA                 |
| <i>Desi_wild_32352731</i> | NA                                  | <i>Ca_desi_denovo</i> | 32352731                | A/G  | NA                 | NA                            | NA                 |
| <i>Desi_wild_32355341</i> | NA                                  | <i>Ca_desi_denovo</i> | 32355341                | G/A  | NA                 | NA                            | NA                 |
| <i>Desi_wild_32356021</i> | NA                                  | <i>Ca_desi_denovo</i> | 32356021                | T/G  | NA                 | NA                            | NA                 |
| <i>Desi_wild_32356024</i> | NA                                  | <i>Ca_desi_denovo</i> | 32356024                | C/T  | NA                 | NA                            | NA                 |
| <i>Desi_wild_32371469</i> | NA                                  | <i>Ca_desi_denovo</i> | 32371469                | T/A  | NA                 | NA                            | NA                 |
| <i>Desi_wild_32377897</i> | NA                                  | <i>Ca_desi_denovo</i> | 32377897                | G/T  | NA                 | NA                            | NA                 |
| <i>Desi_wild_32377908</i> | NA                                  | <i>Ca_desi_denovo</i> | 32377908                | T/G  | NA                 | NA                            | NA                 |
| <i>Desi_wild_32378083</i> | NA                                  | <i>Ca_desi_denovo</i> | 32378083                | G/T  | NA                 | NA                            | NA                 |
| <i>Desi_wild_32379776</i> | NA                                  | <i>Ca_desi_denovo</i> | 32379776                | T/C  | NA                 | NA                            | NA                 |
| <i>Desi_wild_32379843</i> | NA                                  | <i>Ca_desi_denovo</i> | 32379843                | A/G  | NA                 | NA                            | NA                 |
| <i>Desi_wild_32381905</i> | NA                                  | <i>Ca_desi_denovo</i> | 32381905                | C/G  | NA                 | NA                            | NA                 |

| SNP IDs                   | NCBI dbSNP accession IDs (NCBI_SS#) | Chromosomes           | Physical positions (bp) | SNPs | Gene accession IDs | Sequence components of genome | Putative functions |
|---------------------------|-------------------------------------|-----------------------|-------------------------|------|--------------------|-------------------------------|--------------------|
| <i>Desi_wild_32383680</i> | NA                                  | <i>Ca_desi_denovo</i> | 32383680                | T/G  | NA                 | NA                            | NA                 |
| <i>Desi_wild_32383695</i> | NA                                  | <i>Ca_desi_denovo</i> | 32383695                | G/A  | NA                 | NA                            | NA                 |
| <i>Desi_wild_32384670</i> | NA                                  | <i>Ca_desi_denovo</i> | 32384670                | T/G  | NA                 | NA                            | NA                 |
| <i>Desi_wild_32384697</i> | NA                                  | <i>Ca_desi_denovo</i> | 32384697                | C/T  | NA                 | NA                            | NA                 |
| <i>Desi_wild_32387096</i> | NA                                  | <i>Ca_desi_denovo</i> | 32387096                | A/G  | NA                 | NA                            | NA                 |
| <i>Desi_wild_32387116</i> | NA                                  | <i>Ca_desi_denovo</i> | 32387116                | G/A  | NA                 | NA                            | NA                 |
| <i>Desi_wild_32387144</i> | NA                                  | <i>Ca_desi_denovo</i> | 32387144                | C/A  | NA                 | NA                            | NA                 |
| <i>Desi_wild_32387153</i> | NA                                  | <i>Ca_desi_denovo</i> | 32387153                | C/T  | NA                 | NA                            | NA                 |
| <i>Desi_wild_32390823</i> | NA                                  | <i>Ca_desi_denovo</i> | 32390823                | A/T  | NA                 | NA                            | NA                 |
| <i>Desi_wild_32395744</i> | NA                                  | <i>Ca_desi_denovo</i> | 32395744                | C/T  | NA                 | NA                            | NA                 |
| <i>Desi_wild_32402921</i> | NA                                  | <i>Ca_desi_denovo</i> | 32402921                | G/C  | NA                 | NA                            | NA                 |
| <i>Desi_wild_32402947</i> | NA                                  | <i>Ca_desi_denovo</i> | 32402947                | T/C  | NA                 | NA                            | NA                 |
| <i>Desi_wild_32410029</i> | NA                                  | <i>Ca_desi_denovo</i> | 32410029                | G/A  | NA                 | NA                            | NA                 |
| <i>Desi_wild_32410033</i> | NA                                  | <i>Ca_desi_denovo</i> | 32410033                | A/G  | NA                 | NA                            | NA                 |
| <i>Desi_wild_32410061</i> | NA                                  | <i>Ca_desi_denovo</i> | 32410061                | T/G  | NA                 | NA                            | NA                 |
| <i>Desi_wild_32412172</i> | NA                                  | <i>Ca_desi_denovo</i> | 32412172                | G/T  | NA                 | NA                            | NA                 |
| <i>Desi_wild_32412201</i> | NA                                  | <i>Ca_desi_denovo</i> | 32412201                | T/G  | NA                 | NA                            | NA                 |
| <i>Desi_wild_32413827</i> | NA                                  | <i>Ca_desi_denovo</i> | 32413827                | T/G  | NA                 | NA                            | NA                 |
| <i>Desi_wild_32415032</i> | NA                                  | <i>Ca_desi_denovo</i> | 32415032                | A/G  | NA                 | NA                            | NA                 |
| <i>Desi_wild_32416437</i> | NA                                  | <i>Ca_desi_denovo</i> | 32416437                | G/T  | NA                 | NA                            | NA                 |
| <i>Desi_wild_32423566</i> | NA                                  | <i>Ca_desi_denovo</i> | 32423566                | C/G  | NA                 | NA                            | NA                 |
| <i>Desi_wild_32427863</i> | NA                                  | <i>Ca_desi_denovo</i> | 32427863                | C/G  | NA                 | NA                            | NA                 |
| <i>Desi_wild_32431745</i> | NA                                  | <i>Ca_desi_denovo</i> | 32431745                | G/A  | NA                 | NA                            | NA                 |
| <i>Desi_wild_32435349</i> | NA                                  | <i>Ca_desi_denovo</i> | 32435349                | A/C  | NA                 | NA                            | NA                 |
| <i>Desi_wild_32443798</i> | NA                                  | <i>Ca_desi_denovo</i> | 32443798                | G/T  | NA                 | NA                            | NA                 |
| <i>Desi_wild_32448747</i> | NA                                  | <i>Ca_desi_denovo</i> | 32448747                | G/T  | NA                 | NA                            | NA                 |
| <i>Desi_wild_32450555</i> | NA                                  | <i>Ca_desi_denovo</i> | 32450555                | C/T  | NA                 | NA                            | NA                 |
| <i>Desi_wild_32450576</i> | NA                                  | <i>Ca_desi_denovo</i> | 32450576                | A/G  | NA                 | NA                            | NA                 |
| <i>Desi_wild_32457637</i> | NA                                  | <i>Ca_desi_denovo</i> | 32457637                | A/G  | NA                 | NA                            | NA                 |
| <i>Desi_wild_32457643</i> | NA                                  | <i>Ca_desi_denovo</i> | 32457643                | T/G  | NA                 | NA                            | NA                 |
| <i>Desi_wild_32457910</i> | NA                                  | <i>Ca_desi_denovo</i> | 32457910                | A/C  | NA                 | NA                            | NA                 |
| <i>Desi_wild_32457911</i> | NA                                  | <i>Ca_desi_denovo</i> | 32457911                | A/G  | NA                 | NA                            | NA                 |
| <i>Desi_wild_32458176</i> | NA                                  | <i>Ca_desi_denovo</i> | 32458176                | G/T  | NA                 | NA                            | NA                 |
| <i>Desi_wild_32459357</i> | NA                                  | <i>Ca_desi_denovo</i> | 32459357                | C/G  | NA                 | NA                            | NA                 |
| <i>Desi_wild_32464764</i> | NA                                  | <i>Ca_desi_denovo</i> | 32464764                | T/C  | NA                 | NA                            | NA                 |
| <i>Desi_wild_32468559</i> | NA                                  | <i>Ca_desi_denovo</i> | 32468559                | G/T  | NA                 | NA                            | NA                 |
| <i>Desi_wild_32469729</i> | NA                                  | <i>Ca_desi_denovo</i> | 32469729                | A/G  | NA                 | NA                            | NA                 |
| <i>Desi_wild_32470290</i> | NA                                  | <i>Ca_desi_denovo</i> | 32470290                | A/C  | NA                 | NA                            | NA                 |
| <i>Desi_wild_32470294</i> | NA                                  | <i>Ca_desi_denovo</i> | 32470294                | C/T  | NA                 | NA                            | NA                 |
| <i>Desi_wild_32471479</i> | NA                                  | <i>Ca_desi_denovo</i> | 32471479                | C/A  | NA                 | NA                            | NA                 |
| <i>Desi_wild_32471494</i> | NA                                  | <i>Ca_desi_denovo</i> | 32471494                | T/C  | NA                 | NA                            | NA                 |
| <i>Desi_wild_32475476</i> | NA                                  | <i>Ca_desi_denovo</i> | 32475476                | A/C  | NA                 | NA                            | NA                 |
| <i>Desi_wild_32476930</i> | NA                                  | <i>Ca_desi_denovo</i> | 32476930                | T/G  | NA                 | NA                            | NA                 |
| <i>Desi_wild_32476958</i> | NA                                  | <i>Ca_desi_denovo</i> | 32476958                | C/T  | NA                 | NA                            | NA                 |

| SNP IDs                   | NCBI dbSNP accession IDs (NCBI_SS#) | Chromosomes           | Physical positions (bp) | SNPs | Gene accession IDs | Sequence components of genome | Putative functions |
|---------------------------|-------------------------------------|-----------------------|-------------------------|------|--------------------|-------------------------------|--------------------|
| <i>Desi_wild_32477004</i> | NA                                  | <i>Ca_desi_denovo</i> | 32477004                | C/A  | NA                 | NA                            | NA                 |
| <i>Desi_wild_32479071</i> | NA                                  | <i>Ca_desi_denovo</i> | 32479071                | C/T  | NA                 | NA                            | NA                 |
| <i>Desi_wild_32487307</i> | NA                                  | <i>Ca_desi_denovo</i> | 32487307                | G/A  | NA                 | NA                            | NA                 |
| <i>Desi_wild_32493871</i> | NA                                  | <i>Ca_desi_denovo</i> | 32493871                | A/T  | NA                 | NA                            | NA                 |
| <i>Desi_wild_32498888</i> | NA                                  | <i>Ca_desi_denovo</i> | 32498888                | G/T  | NA                 | NA                            | NA                 |
| <i>Desi_wild_32499788</i> | NA                                  | <i>Ca_desi_denovo</i> | 32499788                | G/C  | NA                 | NA                            | NA                 |
| <i>Desi_wild_32499850</i> | NA                                  | <i>Ca_desi_denovo</i> | 32499850                | C/T  | NA                 | NA                            | NA                 |
| <i>Desi_wild_32502249</i> | NA                                  | <i>Ca_desi_denovo</i> | 32502249                | T/G  | NA                 | NA                            | NA                 |
| <i>Desi_wild_32503430</i> | NA                                  | <i>Ca_desi_denovo</i> | 32503430                | G/A  | NA                 | NA                            | NA                 |
| <i>Desi_wild_32508503</i> | NA                                  | <i>Ca_desi_denovo</i> | 32508503                | A/C  | NA                 | NA                            | NA                 |
| <i>Desi_wild_32515019</i> | NA                                  | <i>Ca_desi_denovo</i> | 32515019                | T/G  | NA                 | NA                            | NA                 |
| <i>Desi_wild_32520690</i> | NA                                  | <i>Ca_desi_denovo</i> | 32520690                | A/C  | NA                 | NA                            | NA                 |
| <i>Desi_wild_32520691</i> | NA                                  | <i>Ca_desi_denovo</i> | 32520691                | G/C  | NA                 | NA                            | NA                 |
| <i>Desi_wild_32521823</i> | NA                                  | <i>Ca_desi_denovo</i> | 32521823                | T/A  | NA                 | NA                            | NA                 |
| <i>Desi_wild_32524437</i> | NA                                  | <i>Ca_desi_denovo</i> | 32524437                | A/C  | NA                 | NA                            | NA                 |
| <i>Desi_wild_32526903</i> | NA                                  | <i>Ca_desi_denovo</i> | 32526903                | G/T  | NA                 | NA                            | NA                 |
| <i>Desi_wild_32528969</i> | NA                                  | <i>Ca_desi_denovo</i> | 32528969                | C/T  | NA                 | NA                            | NA                 |
| <i>Desi_wild_32530092</i> | NA                                  | <i>Ca_desi_denovo</i> | 32530092                | T/C  | NA                 | NA                            | NA                 |
| <i>Desi_wild_32531652</i> | NA                                  | <i>Ca_desi_denovo</i> | 32531652                | G/C  | NA                 | NA                            | NA                 |
| <i>Desi_wild_32531708</i> | NA                                  | <i>Ca_desi_denovo</i> | 32531708                | G/T  | NA                 | NA                            | NA                 |
| <i>Desi_wild_32535379</i> | NA                                  | <i>Ca_desi_denovo</i> | 32535379                | C/G  | NA                 | NA                            | NA                 |
| <i>Desi_wild_32536658</i> | NA                                  | <i>Ca_desi_denovo</i> | 32536658                | C/T  | NA                 | NA                            | NA                 |
| <i>Desi_wild_32536670</i> | NA                                  | <i>Ca_desi_denovo</i> | 32536670                | G/A  | NA                 | NA                            | NA                 |
| <i>Desi_wild_32544023</i> | NA                                  | <i>Ca_desi_denovo</i> | 32544023                | A/C  | NA                 | NA                            | NA                 |
| <i>Desi_wild_32544430</i> | NA                                  | <i>Ca_desi_denovo</i> | 32544430                | C/T  | NA                 | NA                            | NA                 |
| <i>Desi_wild_32544434</i> | NA                                  | <i>Ca_desi_denovo</i> | 32544434                | C/T  | NA                 | NA                            | NA                 |
| <i>Desi_wild_32545271</i> | NA                                  | <i>Ca_desi_denovo</i> | 32545271                | T/G  | NA                 | NA                            | NA                 |
| <i>Desi_wild_32549492</i> | NA                                  | <i>Ca_desi_denovo</i> | 32549492                | G/T  | NA                 | NA                            | NA                 |
| <i>Desi_wild_32549728</i> | NA                                  | <i>Ca_desi_denovo</i> | 32549728                | G/C  | NA                 | NA                            | NA                 |
| <i>Desi_wild_32549756</i> | NA                                  | <i>Ca_desi_denovo</i> | 32549756                | C/T  | NA                 | NA                            | NA                 |
| <i>Desi_wild_32552428</i> | NA                                  | <i>Ca_desi_denovo</i> | 32552428                | T/G  | NA                 | NA                            | NA                 |
| <i>Desi_wild_32559733</i> | NA                                  | <i>Ca_desi_denovo</i> | 32559733                | T/C  | NA                 | NA                            | NA                 |
| <i>Desi_wild_32561705</i> | NA                                  | <i>Ca_desi_denovo</i> | 32561705                | C/A  | NA                 | NA                            | NA                 |
| <i>Desi_wild_32561730</i> | NA                                  | <i>Ca_desi_denovo</i> | 32561730                | G/T  | NA                 | NA                            | NA                 |
| <i>Desi_wild_32566768</i> | NA                                  | <i>Ca_desi_denovo</i> | 32566768                | G/T  | NA                 | NA                            | NA                 |
| <i>Desi_wild_32566774</i> | NA                                  | <i>Ca_desi_denovo</i> | 32566774                | A/G  | NA                 | NA                            | NA                 |
| <i>Desi_wild_32579753</i> | NA                                  | <i>Ca_desi_denovo</i> | 32579753                | C/G  | NA                 | NA                            | NA                 |
| <i>Desi_wild_32585923</i> | NA                                  | <i>Ca_desi_denovo</i> | 32585923                | T/G  | NA                 | NA                            | NA                 |
| <i>Desi_wild_32585924</i> | NA                                  | <i>Ca_desi_denovo</i> | 32585924                | T/A  | NA                 | NA                            | NA                 |
| <i>Desi_wild_32588009</i> | NA                                  | <i>Ca_desi_denovo</i> | 32588009                | C/T  | NA                 | NA                            | NA                 |
| <i>Desi_wild_32588051</i> | NA                                  | <i>Ca_desi_denovo</i> | 32588051                | T/C  | NA                 | NA                            | NA                 |
| <i>Desi_wild_32589641</i> | NA                                  | <i>Ca_desi_denovo</i> | 32589641                | C/G  | NA                 | NA                            | NA                 |
| <i>Desi_wild_32589662</i> | NA                                  | <i>Ca_desi_denovo</i> | 32589662                | C/T  | NA                 | NA                            | NA                 |
| <i>Desi_wild_32597156</i> | NA                                  | <i>Ca_desi_denovo</i> | 32597156                | T/C  | NA                 | NA                            | NA                 |

| SNP IDs                   | NCBI dbSNP accession IDs (NCBI_SS#) | Chromosomes           | Physical positions (bp) | SNPs | Gene accession IDs | Sequence components of genome | Putative functions |
|---------------------------|-------------------------------------|-----------------------|-------------------------|------|--------------------|-------------------------------|--------------------|
| <i>Desi_wild_32597324</i> | NA                                  | <i>Ca_desi_denovo</i> | 32597324                | C/A  | NA                 | NA                            | NA                 |
| <i>Desi_wild_32597687</i> | NA                                  | <i>Ca_desi_denovo</i> | 32597687                | A/C  | NA                 | NA                            | NA                 |
| <i>Desi_wild_32601852</i> | NA                                  | <i>Ca_desi_denovo</i> | 32601852                | A/G  | NA                 | NA                            | NA                 |
| <i>Desi_wild_32601867</i> | NA                                  | <i>Ca_desi_denovo</i> | 32601867                | G/A  | NA                 | NA                            | NA                 |
| <i>Desi_wild_32606230</i> | NA                                  | <i>Ca_desi_denovo</i> | 32606230                | G/T  | NA                 | NA                            | NA                 |
| <i>Desi_wild_32607296</i> | NA                                  | <i>Ca_desi_denovo</i> | 32607296                | T/C  | NA                 | NA                            | NA                 |
| <i>Desi_wild_32607376</i> | NA                                  | <i>Ca_desi_denovo</i> | 32607376                | G/C  | NA                 | NA                            | NA                 |
| <i>Desi_wild_32610806</i> | NA                                  | <i>Ca_desi_denovo</i> | 32610806                | C/T  | NA                 | NA                            | NA                 |
| <i>Desi_wild_32611846</i> | NA                                  | <i>Ca_desi_denovo</i> | 32611846                | T/C  | NA                 | NA                            | NA                 |
| <i>Desi_wild_32612546</i> | NA                                  | <i>Ca_desi_denovo</i> | 32612546                | A/G  | NA                 | NA                            | NA                 |
| <i>Desi_wild_32612672</i> | NA                                  | <i>Ca_desi_denovo</i> | 32612672                | A/T  | NA                 | NA                            | NA                 |
| <i>Desi_wild_32612678</i> | NA                                  | <i>Ca_desi_denovo</i> | 32612678                | A/C  | NA                 | NA                            | NA                 |
| <i>Desi_wild_32616714</i> | NA                                  | <i>Ca_desi_denovo</i> | 32616714                | G/C  | NA                 | NA                            | NA                 |
| <i>Desi_wild_32616772</i> | NA                                  | <i>Ca_desi_denovo</i> | 32616772                | C/T  | NA                 | NA                            | NA                 |
| <i>Desi_wild_32617847</i> | NA                                  | <i>Ca_desi_denovo</i> | 32617847                | A/C  | NA                 | NA                            | NA                 |
| <i>Desi_wild_32623587</i> | NA                                  | <i>Ca_desi_denovo</i> | 32623587                | C/G  | NA                 | NA                            | NA                 |
| <i>Desi_wild_32627430</i> | NA                                  | <i>Ca_desi_denovo</i> | 32627430                | G/T  | NA                 | NA                            | NA                 |
| <i>Desi_wild_32629250</i> | NA                                  | <i>Ca_desi_denovo</i> | 32629250                | G/T  | NA                 | NA                            | NA                 |
| <i>Desi_wild_32629877</i> | NA                                  | <i>Ca_desi_denovo</i> | 32629877                | C/T  | NA                 | NA                            | NA                 |
| <i>Desi_wild_32629898</i> | NA                                  | <i>Ca_desi_denovo</i> | 32629898                | G/C  | NA                 | NA                            | NA                 |
| <i>Desi_wild_32633383</i> | NA                                  | <i>Ca_desi_denovo</i> | 32633383                | C/T  | NA                 | NA                            | NA                 |
| <i>Desi_wild_32636522</i> | NA                                  | <i>Ca_desi_denovo</i> | 32636522                | T/C  | NA                 | NA                            | NA                 |
| <i>Desi_wild_32638445</i> | NA                                  | <i>Ca_desi_denovo</i> | 32638445                | A/G  | NA                 | NA                            | NA                 |
| <i>Desi_wild_32638446</i> | NA                                  | <i>Ca_desi_denovo</i> | 32638446                | T/C  | NA                 | NA                            | NA                 |
| <i>Desi_wild_32650543</i> | NA                                  | <i>Ca_desi_denovo</i> | 32650543                | T/G  | NA                 | NA                            | NA                 |
| <i>Desi_wild_32651297</i> | NA                                  | <i>Ca_desi_denovo</i> | 32651297                | C/T  | NA                 | NA                            | NA                 |
| <i>Desi_wild_32654244</i> | NA                                  | <i>Ca_desi_denovo</i> | 32654244                | T/C  | NA                 | NA                            | NA                 |
| <i>Desi_wild_32654315</i> | NA                                  | <i>Ca_desi_denovo</i> | 32654315                | G/A  | NA                 | NA                            | NA                 |
| <i>Desi_wild_32655044</i> | NA                                  | <i>Ca_desi_denovo</i> | 32655044                | T/C  | NA                 | NA                            | NA                 |
| <i>Desi_wild_32660350</i> | NA                                  | <i>Ca_desi_denovo</i> | 32660350                | T/G  | NA                 | NA                            | NA                 |
| <i>Desi_wild_32664323</i> | NA                                  | <i>Ca_desi_denovo</i> | 32664323                | T/C  | NA                 | NA                            | NA                 |
| <i>Desi_wild_32664353</i> | NA                                  | <i>Ca_desi_denovo</i> | 32664353                | T/G  | NA                 | NA                            | NA                 |
| <i>Desi_wild_32672670</i> | NA                                  | <i>Ca_desi_denovo</i> | 32672670                | C/T  | NA                 | NA                            | NA                 |
| <i>Desi_wild_32672673</i> | NA                                  | <i>Ca_desi_denovo</i> | 32672673                | C/T  | NA                 | NA                            | NA                 |
| <i>Desi_wild_32675638</i> | NA                                  | <i>Ca_desi_denovo</i> | 32675638                | A/C  | NA                 | NA                            | NA                 |
| <i>Desi_wild_32675639</i> | NA                                  | <i>Ca_desi_denovo</i> | 32675639                | G/T  | NA                 | NA                            | NA                 |
| <i>Desi_wild_32678074</i> | NA                                  | <i>Ca_desi_denovo</i> | 32678074                | A/G  | NA                 | NA                            | NA                 |
| <i>Desi_wild_32678624</i> | NA                                  | <i>Ca_desi_denovo</i> | 32678624                | C/T  | NA                 | NA                            | NA                 |
| <i>Desi_wild_32680179</i> | NA                                  | <i>Ca_desi_denovo</i> | 32680179                | G/A  | NA                 | NA                            | NA                 |
| <i>Desi_wild_32680206</i> | NA                                  | <i>Ca_desi_denovo</i> | 32680206                | T/C  | NA                 | NA                            | NA                 |
| <i>Desi_wild_32683264</i> | NA                                  | <i>Ca_desi_denovo</i> | 32683264                | G/A  | NA                 | NA                            | NA                 |
| <i>Desi_wild_32687318</i> | NA                                  | <i>Ca_desi_denovo</i> | 32687318                | G/T  | NA                 | NA                            | NA                 |
| <i>Desi_wild_32689486</i> | NA                                  | <i>Ca_desi_denovo</i> | 32689486                | C/G  | NA                 | NA                            | NA                 |
| <i>Desi_wild_32689492</i> | NA                                  | <i>Ca_desi_denovo</i> | 32689492                | C/T  | NA                 | NA                            | NA                 |

| SNP IDs                   | NCBI dbSNP accession IDs (NCBI_SS#) | Chromosomes           | Physical positions (bp) | SNPs | Gene accession IDs | Sequence components of genome | Putative functions |
|---------------------------|-------------------------------------|-----------------------|-------------------------|------|--------------------|-------------------------------|--------------------|
| <i>Desi_wild_32690517</i> | NA                                  | <i>Ca_desi_denovo</i> | 32690517                | A/C  | NA                 | NA                            | NA                 |
| <i>Desi_wild_32690518</i> | NA                                  | <i>Ca_desi_denovo</i> | 32690518                | G/C  | NA                 | NA                            | NA                 |
| <i>Desi_wild_32690519</i> | NA                                  | <i>Ca_desi_denovo</i> | 32690519                | A/G  | NA                 | NA                            | NA                 |
| <i>Desi_wild_32692163</i> | NA                                  | <i>Ca_desi_denovo</i> | 32692163                | T/C  | NA                 | NA                            | NA                 |
| <i>Desi_wild_32712633</i> | NA                                  | <i>Ca_desi_denovo</i> | 32712633                | G/A  | NA                 | NA                            | NA                 |
| <i>Desi_wild_32715385</i> | NA                                  | <i>Ca_desi_denovo</i> | 32715385                | A/T  | NA                 | NA                            | NA                 |
| <i>Desi_wild_32715400</i> | NA                                  | <i>Ca_desi_denovo</i> | 32715400                | A/G  | NA                 | NA                            | NA                 |
| <i>Desi_wild_32715466</i> | NA                                  | <i>Ca_desi_denovo</i> | 32715466                | T/G  | NA                 | NA                            | NA                 |
| <i>Desi_wild_32721236</i> | NA                                  | <i>Ca_desi_denovo</i> | 32721236                | A/C  | NA                 | NA                            | NA                 |
| <i>Desi_wild_32724406</i> | NA                                  | <i>Ca_desi_denovo</i> | 32724406                | A/C  | NA                 | NA                            | NA                 |
| <i>Desi_wild_32732492</i> | NA                                  | <i>Ca_desi_denovo</i> | 32732492                | G/A  | NA                 | NA                            | NA                 |
| <i>Desi_wild_32735265</i> | NA                                  | <i>Ca_desi_denovo</i> | 32735265                | T/C  | NA                 | NA                            | NA                 |
| <i>Desi_wild_32735304</i> | NA                                  | <i>Ca_desi_denovo</i> | 32735304                | A/C  | NA                 | NA                            | NA                 |
| <i>Desi_wild_32736062</i> | NA                                  | <i>Ca_desi_denovo</i> | 32736062                | G/A  | NA                 | NA                            | NA                 |
| <i>Desi_wild_32736086</i> | NA                                  | <i>Ca_desi_denovo</i> | 32736086                | C/T  | NA                 | NA                            | NA                 |
| <i>Desi_wild_32739038</i> | NA                                  | <i>Ca_desi_denovo</i> | 32739038                | G/C  | NA                 | NA                            | NA                 |
| <i>Desi_wild_32741118</i> | NA                                  | <i>Ca_desi_denovo</i> | 32741118                | T/C  | NA                 | NA                            | NA                 |
| <i>Desi_wild_32741145</i> | NA                                  | <i>Ca_desi_denovo</i> | 32741145                | T/C  | NA                 | NA                            | NA                 |
| <i>Desi_wild_32741196</i> | NA                                  | <i>Ca_desi_denovo</i> | 32741196                | A/C  | NA                 | NA                            | NA                 |
| <i>Desi_wild_32756502</i> | NA                                  | <i>Ca_desi_denovo</i> | 32756502                | G/A  | NA                 | NA                            | NA                 |
| <i>Desi_wild_32756535</i> | NA                                  | <i>Ca_desi_denovo</i> | 32756535                | C/G  | NA                 | NA                            | NA                 |
| <i>Desi_wild_32768775</i> | NA                                  | <i>Ca_desi_denovo</i> | 32768775                | A/G  | NA                 | NA                            | NA                 |
| <i>Desi_wild_32774575</i> | NA                                  | <i>Ca_desi_denovo</i> | 32774575                | T/G  | NA                 | NA                            | NA                 |
| <i>Desi_wild_32777217</i> | NA                                  | <i>Ca_desi_denovo</i> | 32777217                | C/T  | NA                 | NA                            | NA                 |
| <i>Desi_wild_32782223</i> | NA                                  | <i>Ca_desi_denovo</i> | 32782223                | G/A  | NA                 | NA                            | NA                 |
| <i>Desi_wild_32782277</i> | NA                                  | <i>Ca_desi_denovo</i> | 32782277                | T/A  | NA                 | NA                            | NA                 |
| <i>Desi_wild_32782826</i> | NA                                  | <i>Ca_desi_denovo</i> | 32782826                | G/T  | NA                 | NA                            | NA                 |
| <i>Desi_wild_32782831</i> | NA                                  | <i>Ca_desi_denovo</i> | 32782831                | T/G  | NA                 | NA                            | NA                 |
| <i>Desi_wild_32787690</i> | NA                                  | <i>Ca_desi_denovo</i> | 32787690                | G/C  | NA                 | NA                            | NA                 |
| <i>Desi_wild_32798115</i> | NA                                  | <i>Ca_desi_denovo</i> | 32798115                | A/T  | NA                 | NA                            | NA                 |
| <i>Desi_wild_32800437</i> | NA                                  | <i>Ca_desi_denovo</i> | 32800437                | G/T  | NA                 | NA                            | NA                 |
| <i>Desi_wild_32802561</i> | NA                                  | <i>Ca_desi_denovo</i> | 32802561                | G/A  | NA                 | NA                            | NA                 |
| <i>Desi_wild_32807082</i> | NA                                  | <i>Ca_desi_denovo</i> | 32807082                | A/G  | NA                 | NA                            | NA                 |
| <i>Desi_wild_32808633</i> | NA                                  | <i>Ca_desi_denovo</i> | 32808633                | A/G  | NA                 | NA                            | NA                 |
| <i>Desi_wild_32808669</i> | NA                                  | <i>Ca_desi_denovo</i> | 32808669                | G/A  | NA                 | NA                            | NA                 |
| <i>Desi_wild_32810846</i> | NA                                  | <i>Ca_desi_denovo</i> | 32810846                | T/G  | NA                 | NA                            | NA                 |
| <i>Desi_wild_32811876</i> | NA                                  | <i>Ca_desi_denovo</i> | 32811876                | C/T  | NA                 | NA                            | NA                 |
| <i>Desi_wild_32818318</i> | NA                                  | <i>Ca_desi_denovo</i> | 32818318                | G/A  | NA                 | NA                            | NA                 |
| <i>Desi_wild_32818349</i> | NA                                  | <i>Ca_desi_denovo</i> | 32818349                | G/C  | NA                 | NA                            | NA                 |
| <i>Desi_wild_32818788</i> | NA                                  | <i>Ca_desi_denovo</i> | 32818788                | T/G  | NA                 | NA                            | NA                 |
| <i>Desi_wild_32818866</i> | NA                                  | <i>Ca_desi_denovo</i> | 32818866                | T/C  | NA                 | NA                            | NA                 |
| <i>Desi_wild_32820416</i> | NA                                  | <i>Ca_desi_denovo</i> | 32820416                | A/G  | NA                 | NA                            | NA                 |
| <i>Desi_wild_32834516</i> | NA                                  | <i>Ca_desi_denovo</i> | 32834516                | A/G  | NA                 | NA                            | NA                 |
| <i>Desi_wild_32841815</i> | NA                                  | <i>Ca_desi_denovo</i> | 32841815                | C/G  | NA                 | NA                            | NA                 |

| SNP IDs                   | NCBI dbSNP accession IDs (NCBI_SS#) | Chromosomes           | Physical positions (bp) | SNPs | Gene accession IDs | Sequence components of genome | Putative functions |
|---------------------------|-------------------------------------|-----------------------|-------------------------|------|--------------------|-------------------------------|--------------------|
| <i>Desi_wild_32842254</i> | NA                                  | <i>Ca_desi_denovo</i> | 32842254                | A/G  | NA                 | NA                            | NA                 |
| <i>Desi_wild_32845673</i> | NA                                  | <i>Ca_desi_denovo</i> | 32845673                | G/C  | NA                 | NA                            | NA                 |
| <i>Desi_wild_32848437</i> | NA                                  | <i>Ca_desi_denovo</i> | 32848437                | A/C  | NA                 | NA                            | NA                 |
| <i>Desi_wild_32848439</i> | NA                                  | <i>Ca_desi_denovo</i> | 32848439                | A/C  | NA                 | NA                            | NA                 |
| <i>Desi_wild_32854805</i> | NA                                  | <i>Ca_desi_denovo</i> | 32854805                | G/T  | NA                 | NA                            | NA                 |
| <i>Desi_wild_32865957</i> | NA                                  | <i>Ca_desi_denovo</i> | 32865957                | A/G  | NA                 | NA                            | NA                 |
| <i>Desi_wild_32867557</i> | NA                                  | <i>Ca_desi_denovo</i> | 32867557                | G/A  | NA                 | NA                            | NA                 |
| <i>Desi_wild_32867587</i> | NA                                  | <i>Ca_desi_denovo</i> | 32867587                | T/G  | NA                 | NA                            | NA                 |
| <i>Desi_wild_32872985</i> | NA                                  | <i>Ca_desi_denovo</i> | 32872985                | T/C  | NA                 | NA                            | NA                 |
| <i>Desi_wild_32879124</i> | NA                                  | <i>Ca_desi_denovo</i> | 32879124                | T/G  | NA                 | NA                            | NA                 |
| <i>Desi_wild_32880309</i> | NA                                  | <i>Ca_desi_denovo</i> | 32880309                | G/T  | NA                 | NA                            | NA                 |
| <i>Desi_wild_32885877</i> | NA                                  | <i>Ca_desi_denovo</i> | 32885877                | A/C  | NA                 | NA                            | NA                 |
| <i>Desi_wild_32885879</i> | NA                                  | <i>Ca_desi_denovo</i> | 32885879                | A/G  | NA                 | NA                            | NA                 |
| <i>Desi_wild_32890897</i> | NA                                  | <i>Ca_desi_denovo</i> | 32890897                | A/G  | NA                 | NA                            | NA                 |
| <i>Desi_wild_32899327</i> | NA                                  | <i>Ca_desi_denovo</i> | 32899327                | T/C  | NA                 | NA                            | NA                 |
| <i>Desi_wild_32914583</i> | NA                                  | <i>Ca_desi_denovo</i> | 32914583                | G/T  | NA                 | NA                            | NA                 |
| <i>Desi_wild_32917011</i> | NA                                  | <i>Ca_desi_denovo</i> | 32917011                | C/A  | NA                 | NA                            | NA                 |
| <i>Desi_wild_32917026</i> | NA                                  | <i>Ca_desi_denovo</i> | 32917026                | A/G  | NA                 | NA                            | NA                 |
| <i>Desi_wild_32920724</i> | NA                                  | <i>Ca_desi_denovo</i> | 32920724                | A/C  | NA                 | NA                            | NA                 |
| <i>Desi_wild_32920726</i> | NA                                  | <i>Ca_desi_denovo</i> | 32920726                | A/C  | NA                 | NA                            | NA                 |
| <i>Desi_wild_32920727</i> | NA                                  | <i>Ca_desi_denovo</i> | 32920727                | C/T  | NA                 | NA                            | NA                 |
| <i>Desi_wild_32921117</i> | NA                                  | <i>Ca_desi_denovo</i> | 32921117                | A/G  | NA                 | NA                            | NA                 |
| <i>Desi_wild_32921131</i> | NA                                  | <i>Ca_desi_denovo</i> | 32921131                | C/T  | NA                 | NA                            | NA                 |
| <i>Desi_wild_32927158</i> | NA                                  | <i>Ca_desi_denovo</i> | 32927158                | A/C  | NA                 | NA                            | NA                 |
| <i>Desi_wild_32927159</i> | NA                                  | <i>Ca_desi_denovo</i> | 32927159                | G/T  | NA                 | NA                            | NA                 |
| <i>Desi_wild_32928278</i> | NA                                  | <i>Ca_desi_denovo</i> | 32928278                | G/T  | NA                 | NA                            | NA                 |
| <i>Desi_wild_32932807</i> | NA                                  | <i>Ca_desi_denovo</i> | 32932807                | T/G  | NA                 | NA                            | NA                 |
| <i>Desi_wild_32938799</i> | NA                                  | <i>Ca_desi_denovo</i> | 32938799                | G/C  | NA                 | NA                            | NA                 |
| <i>Desi_wild_32947042</i> | NA                                  | <i>Ca_desi_denovo</i> | 32947042                | A/T  | NA                 | NA                            | NA                 |
| <i>Desi_wild_32947069</i> | NA                                  | <i>Ca_desi_denovo</i> | 32947069                | A/G  | NA                 | NA                            | NA                 |
| <i>Desi_wild_32947388</i> | NA                                  | <i>Ca_desi_denovo</i> | 32947388                | G/A  | NA                 | NA                            | NA                 |
| <i>Desi_wild_32947402</i> | NA                                  | <i>Ca_desi_denovo</i> | 32947402                | G/C  | NA                 | NA                            | NA                 |
| <i>Desi_wild_32958315</i> | NA                                  | <i>Ca_desi_denovo</i> | 32958315                | A/T  | NA                 | NA                            | NA                 |
| <i>Desi_wild_32958342</i> | NA                                  | <i>Ca_desi_denovo</i> | 32958342                | A/C  | NA                 | NA                            | NA                 |
| <i>Desi_wild_32959121</i> | NA                                  | <i>Ca_desi_denovo</i> | 32959121                | G/T  | NA                 | NA                            | NA                 |
| <i>Desi_wild_32961350</i> | NA                                  | <i>Ca_desi_denovo</i> | 32961350                | T/G  | NA                 | NA                            | NA                 |
| <i>Desi_wild_32973374</i> | NA                                  | <i>Ca_desi_denovo</i> | 32973374                | G/T  | NA                 | NA                            | NA                 |
| <i>Desi_wild_32973814</i> | NA                                  | <i>Ca_desi_denovo</i> | 32973814                | A/C  | NA                 | NA                            | NA                 |
| <i>Desi_wild_32973815</i> | NA                                  | <i>Ca_desi_denovo</i> | 32973815                | A/G  | NA                 | NA                            | NA                 |
| <i>Desi_wild_32983944</i> | NA                                  | <i>Ca_desi_denovo</i> | 32983944                | A/C  | NA                 | NA                            | NA                 |
| <i>Desi_wild_32990978</i> | NA                                  | <i>Ca_desi_denovo</i> | 32990978                | G/T  | NA                 | NA                            | NA                 |
| <i>Desi_wild_32992557</i> | NA                                  | <i>Ca_desi_denovo</i> | 32992557                | G/A  | NA                 | NA                            | NA                 |
| <i>Desi_wild_32992596</i> | NA                                  | <i>Ca_desi_denovo</i> | 32992596                | C/T  | NA                 | NA                            | NA                 |
| <i>Desi_wild_32996741</i> | NA                                  | <i>Ca_desi_denovo</i> | 32996741                | C/T  | NA                 | NA                            | NA                 |



| SNP IDs                   | NCBI dbSNP accession IDs (NCBI_SS#) | Chromosomes           | Physical positions (bp) | SNPs | Gene accession IDs | Sequence components of genome | Putative functions |
|---------------------------|-------------------------------------|-----------------------|-------------------------|------|--------------------|-------------------------------|--------------------|
| <i>Desi_wild_32996743</i> | NA                                  | <i>Ca_desi_denovo</i> | 32996743                | A/T  | NA                 | NA                            | NA                 |
| <i>Desi_wild_32996753</i> | NA                                  | <i>Ca_desi_denovo</i> | 32996753                | C/G  | NA                 | NA                            | NA                 |
| <i>Desi_wild_32999644</i> | NA                                  | <i>Ca_desi_denovo</i> | 32999644                | C/T  | NA                 | NA                            | NA                 |
| <i>Desi_wild_32999666</i> | NA                                  | <i>Ca_desi_denovo</i> | 32999666                | C/T  | NA                 | NA                            | NA                 |
| <i>Desi_wild_33003869</i> | NA                                  | <i>Ca_desi_denovo</i> | 33003869                | T/G  | NA                 | NA                            | NA                 |
| <i>Desi_wild_33003872</i> | NA                                  | <i>Ca_desi_denovo</i> | 33003872                | C/T  | NA                 | NA                            | NA                 |
| <i>Desi_wild_33020868</i> | NA                                  | <i>Ca_desi_denovo</i> | 33020868                | C/G  | NA                 | NA                            | NA                 |
| <i>Desi_wild_33020917</i> | NA                                  | <i>Ca_desi_denovo</i> | 33020917                | C/A  | NA                 | NA                            | NA                 |
| <i>Desi_wild_33030503</i> | NA                                  | <i>Ca_desi_denovo</i> | 33030503                | C/T  | NA                 | NA                            | NA                 |
| <i>Desi_wild_33033332</i> | NA                                  | <i>Ca_desi_denovo</i> | 33033332                | A/C  | NA                 | NA                            | NA                 |
| <i>Desi_wild_33041417</i> | NA                                  | <i>Ca_desi_denovo</i> | 33041417                | C/T  | NA                 | NA                            | NA                 |
| <i>Desi_wild_33041466</i> | NA                                  | <i>Ca_desi_denovo</i> | 33041466                | A/G  | NA                 | NA                            | NA                 |
| <i>Desi_wild_33044183</i> | NA                                  | <i>Ca_desi_denovo</i> | 33044183                | T/G  | NA                 | NA                            | NA                 |
| <i>Desi_wild_33051238</i> | NA                                  | <i>Ca_desi_denovo</i> | 33051238                | C/G  | NA                 | NA                            | NA                 |
| <i>Desi_wild_33051272</i> | NA                                  | <i>Ca_desi_denovo</i> | 33051272                | G/C  | NA                 | NA                            | NA                 |
| <i>Desi_wild_33052655</i> | NA                                  | <i>Ca_desi_denovo</i> | 33052655                | T/C  | NA                 | NA                            | NA                 |
| <i>Desi_wild_33054224</i> | NA                                  | <i>Ca_desi_denovo</i> | 33054224                | G/C  | NA                 | NA                            | NA                 |
| <i>Desi_wild_33054581</i> | NA                                  | <i>Ca_desi_denovo</i> | 33054581                | C/G  | NA                 | NA                            | NA                 |
| <i>Desi_wild_33054615</i> | NA                                  | <i>Ca_desi_denovo</i> | 33054615                | C/G  | NA                 | NA                            | NA                 |
| <i>Desi_wild_33068181</i> | NA                                  | <i>Ca_desi_denovo</i> | 33068181                | A/C  | NA                 | NA                            | NA                 |
| <i>Desi_wild_33069738</i> | NA                                  | <i>Ca_desi_denovo</i> | 33069738                | G/T  | NA                 | NA                            | NA                 |
| <i>Desi_wild_33069762</i> | NA                                  | <i>Ca_desi_denovo</i> | 33069762                | G/C  | NA                 | NA                            | NA                 |
| <i>Desi_wild_33074278</i> | NA                                  | <i>Ca_desi_denovo</i> | 33074278                | C/T  | NA                 | NA                            | NA                 |
| <i>Desi_wild_33074281</i> | NA                                  | <i>Ca_desi_denovo</i> | 33074281                | G/C  | NA                 | NA                            | NA                 |
| <i>Desi_wild_33080630</i> | NA                                  | <i>Ca_desi_denovo</i> | 33080630                | C/T  | NA                 | NA                            | NA                 |
| <i>Desi_wild_33087912</i> | NA                                  | <i>Ca_desi_denovo</i> | 33087912                | G/T  | NA                 | NA                            | NA                 |
| <i>Desi_wild_33092488</i> | NA                                  | <i>Ca_desi_denovo</i> | 33092488                | C/T  | NA                 | NA                            | NA                 |
| <i>Desi_wild_33092531</i> | NA                                  | <i>Ca_desi_denovo</i> | 33092531                | T/G  | NA                 | NA                            | NA                 |
| <i>Desi_wild_33094510</i> | NA                                  | <i>Ca_desi_denovo</i> | 33094510                | A/T  | NA                 | NA                            | NA                 |
| <i>Desi_wild_33094569</i> | NA                                  | <i>Ca_desi_denovo</i> | 33094569                | C/T  | NA                 | NA                            | NA                 |
| <i>Desi_wild_33095656</i> | NA                                  | <i>Ca_desi_denovo</i> | 33095656                | A/G  | NA                 | NA                            | NA                 |
| <i>Desi_wild_33096565</i> | NA                                  | <i>Ca_desi_denovo</i> | 33096565                | C/T  | NA                 | NA                            | NA                 |
| <i>Desi_wild_33097654</i> | NA                                  | <i>Ca_desi_denovo</i> | 33097654                | C/G  | NA                 | NA                            | NA                 |
| <i>Desi_wild_33100823</i> | NA                                  | <i>Ca_desi_denovo</i> | 33100823                | G/C  | NA                 | NA                            | NA                 |
| <i>Desi_wild_33103164</i> | NA                                  | <i>Ca_desi_denovo</i> | 33103164                | T/C  | NA                 | NA                            | NA                 |
| <i>Desi_wild_33112044</i> | NA                                  | <i>Ca_desi_denovo</i> | 33112044                | G/T  | NA                 | NA                            | NA                 |
| <i>Desi_wild_33118151</i> | NA                                  | <i>Ca_desi_denovo</i> | 33118151                | T/C  | NA                 | NA                            | NA                 |
| <i>Desi_wild_33118157</i> | NA                                  | <i>Ca_desi_denovo</i> | 33118157                | G/A  | NA                 | NA                            | NA                 |
| <i>Desi_wild_33124497</i> | NA                                  | <i>Ca_desi_denovo</i> | 33124497                | A/G  | NA                 | NA                            | NA                 |
| <i>Desi_wild_33124500</i> | NA                                  | <i>Ca_desi_denovo</i> | 33124500                | C/G  | NA                 | NA                            | NA                 |
| <i>Desi_wild_33124524</i> | NA                                  | <i>Ca_desi_denovo</i> | 33124524                | C/G  | NA                 | NA                            | NA                 |
| <i>Desi_wild_33124530</i> | NA                                  | <i>Ca_desi_denovo</i> | 33124530                | T/C  | NA                 | NA                            | NA                 |
| <i>Desi_wild_33128086</i> | NA                                  | <i>Ca_desi_denovo</i> | 33128086                | A/C  | NA                 | NA                            | NA                 |
| <i>Desi_wild_33131603</i> | NA                                  | <i>Ca_desi_denovo</i> | 33131603                | G/C  | NA                 | NA                            | NA                 |

| SNP IDs                   | NCBI dbSNP accession IDs (NCBI_SS#) | Chromosomes           | Physical positions (bp) | SNPs | Gene accession IDs | Sequence components of genome | Putative functions |
|---------------------------|-------------------------------------|-----------------------|-------------------------|------|--------------------|-------------------------------|--------------------|
| <i>Desi_wild_33134252</i> | NA                                  | <i>Ca_desi_denovo</i> | 33134252                | G/C  | NA                 | NA                            | NA                 |
| <i>Desi_wild_33134255</i> | NA                                  | <i>Ca_desi_denovo</i> | 33134255                | T/C  | NA                 | NA                            | NA                 |
| <i>Desi_wild_33151284</i> | NA                                  | <i>Ca_desi_denovo</i> | 33151284                | A/G  | NA                 | NA                            | NA                 |
| <i>Desi_wild_33154019</i> | NA                                  | <i>Ca_desi_denovo</i> | 33154019                | T/C  | NA                 | NA                            | NA                 |
| <i>Desi_wild_33154070</i> | NA                                  | <i>Ca_desi_denovo</i> | 33154070                | T/C  | NA                 | NA                            | NA                 |
| <i>Desi_wild_33154398</i> | NA                                  | <i>Ca_desi_denovo</i> | 33154398                | G/A  | NA                 | NA                            | NA                 |
| <i>Desi_wild_33154428</i> | NA                                  | <i>Ca_desi_denovo</i> | 33154428                | C/G  | NA                 | NA                            | NA                 |
| <i>Desi_wild_33157987</i> | NA                                  | <i>Ca_desi_denovo</i> | 33157987                | C/T  | NA                 | NA                            | NA                 |
| <i>Desi_wild_33158034</i> | NA                                  | <i>Ca_desi_denovo</i> | 33158034                | A/C  | NA                 | NA                            | NA                 |
| <i>Desi_wild_33158038</i> | NA                                  | <i>Ca_desi_denovo</i> | 33158038                | G/T  | NA                 | NA                            | NA                 |
| <i>Desi_wild_33163526</i> | NA                                  | <i>Ca_desi_denovo</i> | 33163526                | A/G  | NA                 | NA                            | NA                 |
| <i>Desi_wild_33168395</i> | NA                                  | <i>Ca_desi_denovo</i> | 33168395                | G/A  | NA                 | NA                            | NA                 |
| <i>Desi_wild_33172318</i> | NA                                  | <i>Ca_desi_denovo</i> | 33172318                | C/G  | NA                 | NA                            | NA                 |
| <i>Desi_wild_33178964</i> | NA                                  | <i>Ca_desi_denovo</i> | 33178964                | T/G  | NA                 | NA                            | NA                 |
| <i>Desi_wild_33198504</i> | NA                                  | <i>Ca_desi_denovo</i> | 33198504                | A/G  | NA                 | NA                            | NA                 |
| <i>Desi_wild_33198543</i> | NA                                  | <i>Ca_desi_denovo</i> | 33198543                | G/A  | NA                 | NA                            | NA                 |
| <i>Desi_wild_33198546</i> | NA                                  | <i>Ca_desi_denovo</i> | 33198546                | A/C  | NA                 | NA                            | NA                 |
| <i>Desi_wild_33203144</i> | NA                                  | <i>Ca_desi_denovo</i> | 33203144                | C/T  | NA                 | NA                            | NA                 |
| <i>Desi_wild_33203153</i> | NA                                  | <i>Ca_desi_denovo</i> | 33203153                | C/G  | NA                 | NA                            | NA                 |
| <i>Desi_wild_33203156</i> | NA                                  | <i>Ca_desi_denovo</i> | 33203156                | C/T  | NA                 | NA                            | NA                 |
| <i>Desi_wild_33204919</i> | NA                                  | <i>Ca_desi_denovo</i> | 33204919                | A/G  | NA                 | NA                            | NA                 |
| <i>Desi_wild_33206964</i> | NA                                  | <i>Ca_desi_denovo</i> | 33206964                | A/G  | NA                 | NA                            | NA                 |
| <i>Desi_wild_33206970</i> | NA                                  | <i>Ca_desi_denovo</i> | 33206970                | C/T  | NA                 | NA                            | NA                 |
| <i>Desi_wild_33206989</i> | NA                                  | <i>Ca_desi_denovo</i> | 33206989                | G/T  | NA                 | NA                            | NA                 |
| <i>Desi_wild_33207115</i> | NA                                  | <i>Ca_desi_denovo</i> | 33207115                | A/C  | NA                 | NA                            | NA                 |
| <i>Desi_wild_33208683</i> | NA                                  | <i>Ca_desi_denovo</i> | 33208683                | G/T  | NA                 | NA                            | NA                 |
| <i>Desi_wild_33208841</i> | NA                                  | <i>Ca_desi_denovo</i> | 33208841                | T/C  | NA                 | NA                            | NA                 |
| <i>Desi_wild_33208907</i> | NA                                  | <i>Ca_desi_denovo</i> | 33208907                | C/T  | NA                 | NA                            | NA                 |
| <i>Desi_wild_33209753</i> | NA                                  | <i>Ca_desi_denovo</i> | 33209753                | T/C  | NA                 | NA                            | NA                 |
| <i>Desi_wild_33210417</i> | NA                                  | <i>Ca_desi_denovo</i> | 33210417                | G/C  | NA                 | NA                            | NA                 |
| <i>Desi_wild_33223572</i> | NA                                  | <i>Ca_desi_denovo</i> | 33223572                | C/G  | NA                 | NA                            | NA                 |
| <i>Desi_wild_33223604</i> | NA                                  | <i>Ca_desi_denovo</i> | 33223604                | T/A  | NA                 | NA                            | NA                 |
| <i>Desi_wild_33237186</i> | NA                                  | <i>Ca_desi_denovo</i> | 33237186                | A/G  | NA                 | NA                            | NA                 |
| <i>Desi_wild_33245449</i> | NA                                  | <i>Ca_desi_denovo</i> | 33245449                | T/C  | NA                 | NA                            | NA                 |
| <i>Desi_wild_33258147</i> | NA                                  | <i>Ca_desi_denovo</i> | 33258147                | G/T  | NA                 | NA                            | NA                 |
| <i>Desi_wild_33261906</i> | NA                                  | <i>Ca_desi_denovo</i> | 33261906                | A/C  | NA                 | NA                            | NA                 |
| <i>Desi_wild_33261908</i> | NA                                  | <i>Ca_desi_denovo</i> | 33261908                | A/G  | NA                 | NA                            | NA                 |
| <i>Desi_wild_33262389</i> | NA                                  | <i>Ca_desi_denovo</i> | 33262389                | A/C  | NA                 | NA                            | NA                 |
| <i>Desi_wild_33265911</i> | NA                                  | <i>Ca_desi_denovo</i> | 33265911                | C/G  | NA                 | NA                            | NA                 |
| <i>Desi_wild_33266358</i> | NA                                  | <i>Ca_desi_denovo</i> | 33266358                | T/C  | NA                 | NA                            | NA                 |
| <i>Desi_wild_33266359</i> | NA                                  | <i>Ca_desi_denovo</i> | 33266359                | T/C  | NA                 | NA                            | NA                 |
| <i>Desi_wild_33274116</i> | NA                                  | <i>Ca_desi_denovo</i> | 33274116                | G/C  | NA                 | NA                            | NA                 |
| <i>Desi_wild_33274140</i> | NA                                  | <i>Ca_desi_denovo</i> | 33274140                | G/C  | NA                 | NA                            | NA                 |
| <i>Desi_wild_33284132</i> | NA                                  | <i>Ca_desi_denovo</i> | 33284132                | A/C  | NA                 | NA                            | NA                 |

| SNP IDs                   | NCBI dbSNP accession IDs (NCBI_SS#) | Chromosomes           | Physical positions (bp) | SNPs | Gene accession IDs | Sequence components of genome | Putative functions |
|---------------------------|-------------------------------------|-----------------------|-------------------------|------|--------------------|-------------------------------|--------------------|
| <i>Desi_wild_33288156</i> | NA                                  | <i>Ca_desi_denovo</i> | 33288156                | G/A  | NA                 | NA                            | NA                 |
| <i>Desi_wild_33288162</i> | NA                                  | <i>Ca_desi_denovo</i> | 33288162                | C/G  | NA                 | NA                            | NA                 |
| <i>Desi_wild_33288183</i> | NA                                  | <i>Ca_desi_denovo</i> | 33288183                | G/A  | NA                 | NA                            | NA                 |
| <i>Desi_wild_33288204</i> | NA                                  | <i>Ca_desi_denovo</i> | 33288204                | C/G  | NA                 | NA                            | NA                 |
| <i>Desi_wild_33298729</i> | NA                                  | <i>Ca_desi_denovo</i> | 33298729                | A/G  | NA                 | NA                            | NA                 |
| <i>Desi_wild_33300321</i> | NA                                  | <i>Ca_desi_denovo</i> | 33300321                | G/C  | NA                 | NA                            | NA                 |
| <i>Desi_wild_33300329</i> | NA                                  | <i>Ca_desi_denovo</i> | 33300329                | T/G  | NA                 | NA                            | NA                 |
| <i>Desi_wild_33312147</i> | NA                                  | <i>Ca_desi_denovo</i> | 33312147                | C/A  | NA                 | NA                            | NA                 |
| <i>Desi_wild_33321189</i> | NA                                  | <i>Ca_desi_denovo</i> | 33321189                | A/G  | NA                 | NA                            | NA                 |
| <i>Desi_wild_33321198</i> | NA                                  | <i>Ca_desi_denovo</i> | 33321198                | G/A  | NA                 | NA                            | NA                 |
| <i>Desi_wild_33324903</i> | NA                                  | <i>Ca_desi_denovo</i> | 33324903                | T/C  | NA                 | NA                            | NA                 |
| <i>Desi_wild_33331262</i> | NA                                  | <i>Ca_desi_denovo</i> | 33331262                | G/T  | NA                 | NA                            | NA                 |
| <i>Desi_wild_33333328</i> | NA                                  | <i>Ca_desi_denovo</i> | 33333328                | G/T  | NA                 | NA                            | NA                 |
| <i>Desi_wild_33334672</i> | NA                                  | <i>Ca_desi_denovo</i> | 33334672                | G/C  | NA                 | NA                            | NA                 |
| <i>Desi_wild_33343885</i> | NA                                  | <i>Ca_desi_denovo</i> | 33343885                | A/G  | NA                 | NA                            | NA                 |
| <i>Desi_wild_33343891</i> | NA                                  | <i>Ca_desi_denovo</i> | 33343891                | C/A  | NA                 | NA                            | NA                 |
| <i>Desi_wild_33344404</i> | NA                                  | <i>Ca_desi_denovo</i> | 33344404                | A/G  | NA                 | NA                            | NA                 |
| <i>Desi_wild_33344411</i> | NA                                  | <i>Ca_desi_denovo</i> | 33344411                | A/G  | NA                 | NA                            | NA                 |
| <i>Desi_wild_33344417</i> | NA                                  | <i>Ca_desi_denovo</i> | 33344417                | T/C  | NA                 | NA                            | NA                 |
| <i>Desi_wild_33350128</i> | NA                                  | <i>Ca_desi_denovo</i> | 33350128                | T/G  | NA                 | NA                            | NA                 |
| <i>Desi_wild_33354401</i> | NA                                  | <i>Ca_desi_denovo</i> | 33354401                | C/T  | NA                 | NA                            | NA                 |
| <i>Desi_wild_33355349</i> | NA                                  | <i>Ca_desi_denovo</i> | 33355349                | A/T  | NA                 | NA                            | NA                 |
| <i>Desi_wild_33361076</i> | NA                                  | <i>Ca_desi_denovo</i> | 33361076                | A/C  | NA                 | NA                            | NA                 |
| <i>Desi_wild_33363517</i> | NA                                  | <i>Ca_desi_denovo</i> | 33363517                | G/T  | NA                 | NA                            | NA                 |
| <i>Desi_wild_33365587</i> | NA                                  | <i>Ca_desi_denovo</i> | 33365587                | G/C  | NA                 | NA                            | NA                 |
| <i>Desi_wild_33371542</i> | NA                                  | <i>Ca_desi_denovo</i> | 33371542                | A/C  | NA                 | NA                            | NA                 |
| <i>Desi_wild_33371543</i> | NA                                  | <i>Ca_desi_denovo</i> | 33371543                | G/T  | NA                 | NA                            | NA                 |
| <i>Desi_wild_33375125</i> | NA                                  | <i>Ca_desi_denovo</i> | 33375125                | G/T  | NA                 | NA                            | NA                 |
| <i>Desi_wild_33376978</i> | NA                                  | <i>Ca_desi_denovo</i> | 33376978                | T/C  | NA                 | NA                            | NA                 |
| <i>Desi_wild_33378644</i> | NA                                  | <i>Ca_desi_denovo</i> | 33378644                | C/G  | NA                 | NA                            | NA                 |
| <i>Desi_wild_33381815</i> | NA                                  | <i>Ca_desi_denovo</i> | 33381815                | G/T  | NA                 | NA                            | NA                 |
| <i>Desi_wild_33383071</i> | NA                                  | <i>Ca_desi_denovo</i> | 33383071                | A/T  | NA                 | NA                            | NA                 |
| <i>Desi_wild_33385045</i> | NA                                  | <i>Ca_desi_denovo</i> | 33385045                | C/A  | NA                 | NA                            | NA                 |
| <i>Desi_wild_33385341</i> | NA                                  | <i>Ca_desi_denovo</i> | 33385341                | G/A  | NA                 | NA                            | NA                 |
| <i>Desi_wild_33386211</i> | NA                                  | <i>Ca_desi_denovo</i> | 33386211                | C/A  | NA                 | NA                            | NA                 |
| <i>Desi_wild_33387049</i> | NA                                  | <i>Ca_desi_denovo</i> | 33387049                | T/C  | NA                 | NA                            | NA                 |
| <i>Desi_wild_33392203</i> | NA                                  | <i>Ca_desi_denovo</i> | 33392203                | T/G  | NA                 | NA                            | NA                 |
| <i>Desi_wild_33397795</i> | NA                                  | <i>Ca_desi_denovo</i> | 33397795                | C/G  | NA                 | NA                            | NA                 |
| <i>Desi_wild_33399524</i> | NA                                  | <i>Ca_desi_denovo</i> | 33399524                | T/C  | NA                 | NA                            | NA                 |
| <i>Desi_wild_33400158</i> | NA                                  | <i>Ca_desi_denovo</i> | 33400158                | C/T  | NA                 | NA                            | NA                 |
| <i>Desi_wild_33401408</i> | NA                                  | <i>Ca_desi_denovo</i> | 33401408                | C/G  | NA                 | NA                            | NA                 |
| <i>Desi_wild_33418183</i> | NA                                  | <i>Ca_desi_denovo</i> | 33418183                | G/C  | NA                 | NA                            | NA                 |
| <i>Desi_wild_33420675</i> | NA                                  | <i>Ca_desi_denovo</i> | 33420675                | T/G  | NA                 | NA                            | NA                 |
| <i>Desi_wild_33421282</i> | NA                                  | <i>Ca_desi_denovo</i> | 33421282                | A/C  | NA                 | NA                            | NA                 |

| SNP IDs                   | NCBI dbSNP accession IDs (NCBI_SS#) | Chromosomes           | Physical positions (bp) | SNPs | Gene accession IDs | Sequence components of genome | Putative functions |
|---------------------------|-------------------------------------|-----------------------|-------------------------|------|--------------------|-------------------------------|--------------------|
| <i>Desi_wild_33430523</i> | NA                                  | <i>Ca_desi_denovo</i> | 33430523                | T/C  | NA                 | NA                            | NA                 |
| <i>Desi_wild_33430557</i> | NA                                  | <i>Ca_desi_denovo</i> | 33430557                | C/T  | NA                 | NA                            | NA                 |
| <i>Desi_wild_33436172</i> | NA                                  | <i>Ca_desi_denovo</i> | 33436172                | C/G  | NA                 | NA                            | NA                 |
| <i>Desi_wild_33436175</i> | NA                                  | <i>Ca_desi_denovo</i> | 33436175                | C/T  | NA                 | NA                            | NA                 |
| <i>Desi_wild_33437313</i> | NA                                  | <i>Ca_desi_denovo</i> | 33437313                | T/G  | NA                 | NA                            | NA                 |
| <i>Desi_wild_33437330</i> | NA                                  | <i>Ca_desi_denovo</i> | 33437330                | G/A  | NA                 | NA                            | NA                 |
| <i>Desi_wild_33437892</i> | NA                                  | <i>Ca_desi_denovo</i> | 33437892                | C/T  | NA                 | NA                            | NA                 |
| <i>Desi_wild_33437964</i> | NA                                  | <i>Ca_desi_denovo</i> | 33437964                | T/C  | NA                 | NA                            | NA                 |
| <i>Desi_wild_33439510</i> | NA                                  | <i>Ca_desi_denovo</i> | 33439510                | G/T  | NA                 | NA                            | NA                 |
| <i>Desi_wild_33441929</i> | NA                                  | <i>Ca_desi_denovo</i> | 33441929                | C/T  | NA                 | NA                            | NA                 |
| <i>Desi_wild_33442255</i> | NA                                  | <i>Ca_desi_denovo</i> | 33442255                | G/T  | NA                 | NA                            | NA                 |
| <i>Desi_wild_33443372</i> | NA                                  | <i>Ca_desi_denovo</i> | 33443372                | G/T  | NA                 | NA                            | NA                 |
| <i>Desi_wild_33443421</i> | NA                                  | <i>Ca_desi_denovo</i> | 33443421                | C/G  | NA                 | NA                            | NA                 |
| <i>Desi_wild_33444489</i> | NA                                  | <i>Ca_desi_denovo</i> | 33444489                | G/T  | NA                 | NA                            | NA                 |
| <i>Desi_wild_33449581</i> | NA                                  | <i>Ca_desi_denovo</i> | 33449581                | G/T  | NA                 | NA                            | NA                 |
| <i>Desi_wild_33477244</i> | NA                                  | <i>Ca_desi_denovo</i> | 33477244                | C/T  | NA                 | NA                            | NA                 |
| <i>Desi_wild_33477246</i> | NA                                  | <i>Ca_desi_denovo</i> | 33477246                | C/T  | NA                 | NA                            | NA                 |
| <i>Desi_wild_33482528</i> | NA                                  | <i>Ca_desi_denovo</i> | 33482528                | A/G  | NA                 | NA                            | NA                 |
| <i>Desi_wild_33482542</i> | NA                                  | <i>Ca_desi_denovo</i> | 33482542                | T/C  | NA                 | NA                            | NA                 |
| <i>Desi_wild_33484044</i> | NA                                  | <i>Ca_desi_denovo</i> | 33484044                | C/T  | NA                 | NA                            | NA                 |
| <i>Desi_wild_33494698</i> | NA                                  | <i>Ca_desi_denovo</i> | 33494698                | G/T  | NA                 | NA                            | NA                 |
| <i>Desi_wild_33495224</i> | NA                                  | <i>Ca_desi_denovo</i> | 33495224                | A/G  | NA                 | NA                            | NA                 |
| <i>Desi_wild_33495239</i> | NA                                  | <i>Ca_desi_denovo</i> | 33495239                | C/T  | NA                 | NA                            | NA                 |
| <i>Desi_wild_33496444</i> | NA                                  | <i>Ca_desi_denovo</i> | 33496444                | T/C  | NA                 | NA                            | NA                 |
| <i>Desi_wild_33496485</i> | NA                                  | <i>Ca_desi_denovo</i> | 33496485                | G/A  | NA                 | NA                            | NA                 |
| <i>Desi_wild_33496751</i> | NA                                  | <i>Ca_desi_denovo</i> | 33496751                | T/C  | NA                 | NA                            | NA                 |
| <i>Desi_wild_33512469</i> | NA                                  | <i>Ca_desi_denovo</i> | 33512469                | A/C  | NA                 | NA                            | NA                 |
| <i>Desi_wild_33519572</i> | NA                                  | <i>Ca_desi_denovo</i> | 33519572                | A/C  | NA                 | NA                            | NA                 |
| <i>Desi_wild_33522653</i> | NA                                  | <i>Ca_desi_denovo</i> | 33522653                | A/G  | NA                 | NA                            | NA                 |
| <i>Desi_wild_33522665</i> | NA                                  | <i>Ca_desi_denovo</i> | 33522665                | A/G  | NA                 | NA                            | NA                 |
| <i>Desi_wild_33522666</i> | NA                                  | <i>Ca_desi_denovo</i> | 33522666                | T/C  | NA                 | NA                            | NA                 |
| <i>Desi_wild_33530542</i> | NA                                  | <i>Ca_desi_denovo</i> | 33530542                | G/C  | NA                 | NA                            | NA                 |
| <i>Desi_wild_33532139</i> | NA                                  | <i>Ca_desi_denovo</i> | 33532139                | A/G  | NA                 | NA                            | NA                 |
| <i>Desi_wild_33532148</i> | NA                                  | <i>Ca_desi_denovo</i> | 33532148                | C/A  | NA                 | NA                            | NA                 |
| <i>Desi_wild_33533054</i> | NA                                  | <i>Ca_desi_denovo</i> | 33533054                | A/G  | NA                 | NA                            | NA                 |
| <i>Desi_wild_33547814</i> | NA                                  | <i>Ca_desi_denovo</i> | 33547814                | C/T  | NA                 | NA                            | NA                 |
| <i>Desi_wild_33547842</i> | NA                                  | <i>Ca_desi_denovo</i> | 33547842                | A/G  | NA                 | NA                            | NA                 |
| <i>Desi_wild_33550248</i> | NA                                  | <i>Ca_desi_denovo</i> | 33550248                | T/C  | NA                 | NA                            | NA                 |
| <i>Desi_wild_33555491</i> | NA                                  | <i>Ca_desi_denovo</i> | 33555491                | A/G  | NA                 | NA                            | NA                 |
| <i>Desi_wild_33563445</i> | NA                                  | <i>Ca_desi_denovo</i> | 33563445                | G/T  | NA                 | NA                            | NA                 |
| <i>Desi_wild_33570767</i> | NA                                  | <i>Ca_desi_denovo</i> | 33570767                | C/T  | NA                 | NA                            | NA                 |
| <i>Desi_wild_33570805</i> | NA                                  | <i>Ca_desi_denovo</i> | 33570805                | G/A  | NA                 | NA                            | NA                 |
| <i>Desi_wild_33572178</i> | NA                                  | <i>Ca_desi_denovo</i> | 33572178                | C/T  | NA                 | NA                            | NA                 |
| <i>Desi_wild_33572329</i> | NA                                  | <i>Ca_desi_denovo</i> | 33572329                | T/C  | NA                 | NA                            | NA                 |

| SNP IDs                   | NCBI dbSNP accession IDs (NCBI_SS#) | Chromosomes           | Physical positions (bp) | SNPs | Gene accession IDs | Sequence components of genome | Putative functions |
|---------------------------|-------------------------------------|-----------------------|-------------------------|------|--------------------|-------------------------------|--------------------|
| <i>Desi_wild_33572341</i> | NA                                  | <i>Ca_desi_denovo</i> | 33572341                | T/C  | NA                 | NA                            | NA                 |
| <i>Desi_wild_33575652</i> | NA                                  | <i>Ca_desi_denovo</i> | 33575652                | G/T  | NA                 | NA                            | NA                 |
| <i>Desi_wild_33575716</i> | NA                                  | <i>Ca_desi_denovo</i> | 33575716                | A/C  | NA                 | NA                            | NA                 |
| <i>Desi_wild_33576215</i> | NA                                  | <i>Ca_desi_denovo</i> | 33576215                | A/C  | NA                 | NA                            | NA                 |
| <i>Desi_wild_33577120</i> | NA                                  | <i>Ca_desi_denovo</i> | 33577120                | G/T  | NA                 | NA                            | NA                 |
| <i>Desi_wild_33583895</i> | NA                                  | <i>Ca_desi_denovo</i> | 33583895                | A/C  | NA                 | NA                            | NA                 |
| <i>Desi_wild_33588402</i> | NA                                  | <i>Ca_desi_denovo</i> | 33588402                | G/A  | NA                 | NA                            | NA                 |
| <i>Desi_wild_33596684</i> | NA                                  | <i>Ca_desi_denovo</i> | 33596684                | A/G  | NA                 | NA                            | NA                 |
| <i>Desi_wild_33597455</i> | NA                                  | <i>Ca_desi_denovo</i> | 33597455                | C/T  | NA                 | NA                            | NA                 |
| <i>Desi_wild_33597522</i> | NA                                  | <i>Ca_desi_denovo</i> | 33597522                | C/G  | NA                 | NA                            | NA                 |
| <i>Desi_wild_33597523</i> | NA                                  | <i>Ca_desi_denovo</i> | 33597523                | T/C  | NA                 | NA                            | NA                 |
| <i>Desi_wild_33597526</i> | NA                                  | <i>Ca_desi_denovo</i> | 33597526                | C/G  | NA                 | NA                            | NA                 |
| <i>Desi_wild_33598451</i> | NA                                  | <i>Ca_desi_denovo</i> | 33598451                | C/T  | NA                 | NA                            | NA                 |
| <i>Desi_wild_33599061</i> | NA                                  | <i>Ca_desi_denovo</i> | 33599061                | A/C  | NA                 | NA                            | NA                 |
| <i>Desi_wild_33601926</i> | NA                                  | <i>Ca_desi_denovo</i> | 33601926                | C/T  | NA                 | NA                            | NA                 |
| <i>Desi_wild_33607745</i> | NA                                  | <i>Ca_desi_denovo</i> | 33607745                | G/T  | NA                 | NA                            | NA                 |
| <i>Desi_wild_33610136</i> | NA                                  | <i>Ca_desi_denovo</i> | 33610136                | A/G  | NA                 | NA                            | NA                 |
| <i>Desi_wild_33610175</i> | NA                                  | <i>Ca_desi_denovo</i> | 33610175                | C/G  | NA                 | NA                            | NA                 |
| <i>Desi_wild_33618156</i> | NA                                  | <i>Ca_desi_denovo</i> | 33618156                | A/G  | NA                 | NA                            | NA                 |
| <i>Desi_wild_33620620</i> | NA                                  | <i>Ca_desi_denovo</i> | 33620620                | T/C  | NA                 | NA                            | NA                 |
| <i>Desi_wild_33620648</i> | NA                                  | <i>Ca_desi_denovo</i> | 33620648                | T/G  | NA                 | NA                            | NA                 |
| <i>Desi_wild_33635444</i> | NA                                  | <i>Ca_desi_denovo</i> | 33635444                | G/T  | NA                 | NA                            | NA                 |
| <i>Desi_wild_33636251</i> | NA                                  | <i>Ca_desi_denovo</i> | 33636251                | C/G  | NA                 | NA                            | NA                 |
| <i>Desi_wild_33636272</i> | NA                                  | <i>Ca_desi_denovo</i> | 33636272                | T/G  | NA                 | NA                            | NA                 |
| <i>Desi_wild_33639921</i> | NA                                  | <i>Ca_desi_denovo</i> | 33639921                | A/G  | NA                 | NA                            | NA                 |
| <i>Desi_wild_33639954</i> | NA                                  | <i>Ca_desi_denovo</i> | 33639954                | A/G  | NA                 | NA                            | NA                 |
| <i>Desi_wild_33656174</i> | NA                                  | <i>Ca_desi_denovo</i> | 33656174                | T/A  | NA                 | NA                            | NA                 |
| <i>Desi_wild_33660953</i> | NA                                  | <i>Ca_desi_denovo</i> | 33660953                | C/G  | NA                 | NA                            | NA                 |
| <i>Desi_wild_33662183</i> | NA                                  | <i>Ca_desi_denovo</i> | 33662183                | C/T  | NA                 | NA                            | NA                 |
| <i>Desi_wild_33665860</i> | NA                                  | <i>Ca_desi_denovo</i> | 33665860                | A/C  | NA                 | NA                            | NA                 |
| <i>Desi_wild_33668487</i> | NA                                  | <i>Ca_desi_denovo</i> | 33668487                | C/G  | NA                 | NA                            | NA                 |
| <i>Desi_wild_33668509</i> | NA                                  | <i>Ca_desi_denovo</i> | 33668509                | A/T  | NA                 | NA                            | NA                 |
| <i>Desi_wild_33668567</i> | NA                                  | <i>Ca_desi_denovo</i> | 33668567                | C/G  | NA                 | NA                            | NA                 |
| <i>Desi_wild_33679417</i> | NA                                  | <i>Ca_desi_denovo</i> | 33679417                | A/T  | NA                 | NA                            | NA                 |
| <i>Desi_wild_33685890</i> | NA                                  | <i>Ca_desi_denovo</i> | 33685890                | A/G  | NA                 | NA                            | NA                 |
| <i>Desi_wild_33686168</i> | NA                                  | <i>Ca_desi_denovo</i> | 33686168                | A/G  | NA                 | NA                            | NA                 |
| <i>Desi_wild_33686215</i> | NA                                  | <i>Ca_desi_denovo</i> | 33686215                | A/G  | NA                 | NA                            | NA                 |
| <i>Desi_wild_33688801</i> | NA                                  | <i>Ca_desi_denovo</i> | 33688801                | G/T  | NA                 | NA                            | NA                 |
| <i>Desi_wild_33690934</i> | NA                                  | <i>Ca_desi_denovo</i> | 33690934                | A/C  | NA                 | NA                            | NA                 |
| <i>Desi_wild_33690935</i> | NA                                  | <i>Ca_desi_denovo</i> | 33690935                | G/T  | NA                 | NA                            | NA                 |
| <i>Desi_wild_33696814</i> | NA                                  | <i>Ca_desi_denovo</i> | 33696814                | G/T  | NA                 | NA                            | NA                 |
| <i>Desi_wild_33701708</i> | NA                                  | <i>Ca_desi_denovo</i> | 33701708                | T/G  | NA                 | NA                            | NA                 |
| <i>Desi_wild_33715683</i> | NA                                  | <i>Ca_desi_denovo</i> | 33715683                | C/G  | NA                 | NA                            | NA                 |
| <i>Desi_wild_33723808</i> | NA                                  | <i>Ca_desi_denovo</i> | 33723808                | T/C  | NA                 | NA                            | NA                 |

| SNP IDs                   | NCBI dbSNP accession IDs (NCBI_SS#) | Chromosomes           | Physical positions (bp) | SNPs | Gene accession IDs | Sequence components of genome | Putative functions |
|---------------------------|-------------------------------------|-----------------------|-------------------------|------|--------------------|-------------------------------|--------------------|
| <i>Desi_wild_33723852</i> | NA                                  | <i>Ca_desi_denovo</i> | 33723852                | G/A  | NA                 | NA                            | NA                 |
| <i>Desi_wild_33730921</i> | NA                                  | <i>Ca_desi_denovo</i> | 33730921                | T/G  | NA                 | NA                            | NA                 |
| <i>Desi_wild_33737268</i> | NA                                  | <i>Ca_desi_denovo</i> | 33737268                | C/A  | NA                 | NA                            | NA                 |
| <i>Desi_wild_33739343</i> | NA                                  | <i>Ca_desi_denovo</i> | 33739343                | C/T  | NA                 | NA                            | NA                 |
| <i>Desi_wild_33744695</i> | NA                                  | <i>Ca_desi_denovo</i> | 33744695                | A/C  | NA                 | NA                            | NA                 |
| <i>Desi_wild_33762871</i> | NA                                  | <i>Ca_desi_denovo</i> | 33762871                | T/C  | NA                 | NA                            | NA                 |
| <i>Desi_wild_33763821</i> | NA                                  | <i>Ca_desi_denovo</i> | 33763821                | C/T  | NA                 | NA                            | NA                 |
| <i>Desi_wild_33768997</i> | NA                                  | <i>Ca_desi_denovo</i> | 33768997                | C/T  | NA                 | NA                            | NA                 |
| <i>Desi_wild_33769063</i> | NA                                  | <i>Ca_desi_denovo</i> | 33769063                | G/C  | NA                 | NA                            | NA                 |
| <i>Desi_wild_33771138</i> | NA                                  | <i>Ca_desi_denovo</i> | 33771138                | C/T  | NA                 | NA                            | NA                 |
| <i>Desi_wild_33771142</i> | NA                                  | <i>Ca_desi_denovo</i> | 33771142                | T/A  | NA                 | NA                            | NA                 |
| <i>Desi_wild_33773325</i> | NA                                  | <i>Ca_desi_denovo</i> | 33773325                | G/C  | NA                 | NA                            | NA                 |
| <i>Desi_wild_33779515</i> | NA                                  | <i>Ca_desi_denovo</i> | 33779515                | G/T  | NA                 | NA                            | NA                 |
| <i>Desi_wild_33780691</i> | NA                                  | <i>Ca_desi_denovo</i> | 33780691                | G/T  | NA                 | NA                            | NA                 |
| <i>Desi_wild_33780877</i> | NA                                  | <i>Ca_desi_denovo</i> | 33780877                | G/T  | NA                 | NA                            | NA                 |
| <i>Desi_wild_33780883</i> | NA                                  | <i>Ca_desi_denovo</i> | 33780883                | T/C  | NA                 | NA                            | NA                 |
| <i>Desi_wild_33781479</i> | NA                                  | <i>Ca_desi_denovo</i> | 33781479                | C/A  | NA                 | NA                            | NA                 |
| <i>Desi_wild_33781515</i> | NA                                  | <i>Ca_desi_denovo</i> | 33781515                | T/G  | NA                 | NA                            | NA                 |
| <i>Desi_wild_33781530</i> | NA                                  | <i>Ca_desi_denovo</i> | 33781530                | G/A  | NA                 | NA                            | NA                 |
| <i>Desi_wild_33788549</i> | NA                                  | <i>Ca_desi_denovo</i> | 33788549                | T/G  | NA                 | NA                            | NA                 |
| <i>Desi_wild_33792973</i> | NA                                  | <i>Ca_desi_denovo</i> | 33792973                | G/T  | NA                 | NA                            | NA                 |
| <i>Desi_wild_33796138</i> | NA                                  | <i>Ca_desi_denovo</i> | 33796138                | T/G  | NA                 | NA                            | NA                 |
| <i>Desi_wild_33796144</i> | NA                                  | <i>Ca_desi_denovo</i> | 33796144                | G/T  | NA                 | NA                            | NA                 |
| <i>Desi_wild_33802935</i> | NA                                  | <i>Ca_desi_denovo</i> | 33802935                | G/T  | NA                 | NA                            | NA                 |
| <i>Desi_wild_33802941</i> | NA                                  | <i>Ca_desi_denovo</i> | 33802941                | A/G  | NA                 | NA                            | NA                 |
| <i>Desi_wild_33806285</i> | NA                                  | <i>Ca_desi_denovo</i> | 33806285                | T/C  | NA                 | NA                            | NA                 |
| <i>Desi_wild_33810865</i> | NA                                  | <i>Ca_desi_denovo</i> | 33810865                | C/T  | NA                 | NA                            | NA                 |
| <i>Desi_wild_33811061</i> | NA                                  | <i>Ca_desi_denovo</i> | 33811061                | G/C  | NA                 | NA                            | NA                 |
| <i>Desi_wild_33811148</i> | NA                                  | <i>Ca_desi_denovo</i> | 33811148                | C/G  | NA                 | NA                            | NA                 |
| <i>Desi_wild_33811184</i> | NA                                  | <i>Ca_desi_denovo</i> | 33811184                | C/T  | NA                 | NA                            | NA                 |
| <i>Desi_wild_33816259</i> | NA                                  | <i>Ca_desi_denovo</i> | 33816259                | G/T  | NA                 | NA                            | NA                 |
| <i>Desi_wild_33821549</i> | NA                                  | <i>Ca_desi_denovo</i> | 33821549                | T/G  | NA                 | NA                            | NA                 |
| <i>Desi_wild_33821570</i> | NA                                  | <i>Ca_desi_denovo</i> | 33821570                | T/C  | NA                 | NA                            | NA                 |
| <i>Desi_wild_33825740</i> | NA                                  | <i>Ca_desi_denovo</i> | 33825740                | T/G  | NA                 | NA                            | NA                 |
| <i>Desi_wild_33835674</i> | NA                                  | <i>Ca_desi_denovo</i> | 33835674                | G/T  | NA                 | NA                            | NA                 |
| <i>Desi_wild_33836038</i> | NA                                  | <i>Ca_desi_denovo</i> | 33836038                | A/G  | NA                 | NA                            | NA                 |
| <i>Desi_wild_33837342</i> | NA                                  | <i>Ca_desi_denovo</i> | 33837342                | T/C  | NA                 | NA                            | NA                 |
| <i>Desi_wild_33837351</i> | NA                                  | <i>Ca_desi_denovo</i> | 33837351                | T/A  | NA                 | NA                            | NA                 |
| <i>Desi_wild_33837368</i> | NA                                  | <i>Ca_desi_denovo</i> | 33837368                | C/T  | NA                 | NA                            | NA                 |
| <i>Desi_wild_33838668</i> | NA                                  | <i>Ca_desi_denovo</i> | 33838668                | T/G  | NA                 | NA                            | NA                 |
| <i>Desi_wild_33839414</i> | NA                                  | <i>Ca_desi_denovo</i> | 33839414                | G/T  | NA                 | NA                            | NA                 |
| <i>Desi_wild_33842215</i> | NA                                  | <i>Ca_desi_denovo</i> | 33842215                | T/G  | NA                 | NA                            | NA                 |
| <i>Desi_wild_33850537</i> | NA                                  | <i>Ca_desi_denovo</i> | 33850537                | T/C  | NA                 | NA                            | NA                 |
| <i>Desi_wild_33850579</i> | NA                                  | <i>Ca_desi_denovo</i> | 33850579                | C/T  | NA                 | NA                            | NA                 |

| SNP IDs                   | NCBI dbSNP accession IDs (NCBI_SS#) | Chromosomes           | Physical positions (bp) | SNPs | Gene accession IDs | Sequence components of genome | Putative functions |
|---------------------------|-------------------------------------|-----------------------|-------------------------|------|--------------------|-------------------------------|--------------------|
| <i>Desi_wild_33850984</i> | NA                                  | <i>Ca_desi_denovo</i> | 33850984                | A/C  | NA                 | NA                            | NA                 |
| <i>Desi_wild_33852311</i> | NA                                  | <i>Ca_desi_denovo</i> | 33852311                | T/G  | NA                 | NA                            | NA                 |
| <i>Desi_wild_33856354</i> | NA                                  | <i>Ca_desi_denovo</i> | 33856354                | G/T  | NA                 | NA                            | NA                 |
| <i>Desi_wild_33856362</i> | NA                                  | <i>Ca_desi_denovo</i> | 33856362                | A/G  | NA                 | NA                            | NA                 |
| <i>Desi_wild_33856403</i> | NA                                  | <i>Ca_desi_denovo</i> | 33856403                | C/A  | NA                 | NA                            | NA                 |
| <i>Desi_wild_33860510</i> | NA                                  | <i>Ca_desi_denovo</i> | 33860510                | G/C  | NA                 | NA                            | NA                 |
| <i>Desi_wild_33860511</i> | NA                                  | <i>Ca_desi_denovo</i> | 33860511                | A/G  | NA                 | NA                            | NA                 |
| <i>Desi_wild_33868955</i> | NA                                  | <i>Ca_desi_denovo</i> | 33868955                | C/G  | NA                 | NA                            | NA                 |
| <i>Desi_wild_33868991</i> | NA                                  | <i>Ca_desi_denovo</i> | 33868991                | C/T  | NA                 | NA                            | NA                 |
| <i>Desi_wild_33869930</i> | NA                                  | <i>Ca_desi_denovo</i> | 33869930                | C/T  | NA                 | NA                            | NA                 |
| <i>Desi_wild_33876050</i> | NA                                  | <i>Ca_desi_denovo</i> | 33876050                | C/T  | NA                 | NA                            | NA                 |
| <i>Desi_wild_33876063</i> | NA                                  | <i>Ca_desi_denovo</i> | 33876063                | G/A  | NA                 | NA                            | NA                 |
| <i>Desi_wild_33877166</i> | NA                                  | <i>Ca_desi_denovo</i> | 33877166                | C/T  | NA                 | NA                            | NA                 |
| <i>Desi_wild_33882574</i> | NA                                  | <i>Ca_desi_denovo</i> | 33882574                | G/C  | NA                 | NA                            | NA                 |
| <i>Desi_wild_33882605</i> | NA                                  | <i>Ca_desi_denovo</i> | 33882605                | T/C  | NA                 | NA                            | NA                 |
| <i>Desi_wild_33888674</i> | NA                                  | <i>Ca_desi_denovo</i> | 33888674                | C/T  | NA                 | NA                            | NA                 |
| <i>Desi_wild_33888691</i> | NA                                  | <i>Ca_desi_denovo</i> | 33888691                | G/T  | NA                 | NA                            | NA                 |
| <i>Desi_wild_33888694</i> | NA                                  | <i>Ca_desi_denovo</i> | 33888694                | C/G  | NA                 | NA                            | NA                 |
| <i>Desi_wild_33888695</i> | NA                                  | <i>Ca_desi_denovo</i> | 33888695                | C/T  | NA                 | NA                            | NA                 |
| <i>Desi_wild_33891872</i> | NA                                  | <i>Ca_desi_denovo</i> | 33891872                | C/T  | NA                 | NA                            | NA                 |
| <i>Desi_wild_33892451</i> | NA                                  | <i>Ca_desi_denovo</i> | 33892451                | A/G  | NA                 | NA                            | NA                 |
| <i>Desi_wild_33892478</i> | NA                                  | <i>Ca_desi_denovo</i> | 33892478                | C/T  | NA                 | NA                            | NA                 |
| <i>Desi_wild_33892970</i> | NA                                  | <i>Ca_desi_denovo</i> | 33892970                | G/C  | NA                 | NA                            | NA                 |
| <i>Desi_wild_33893951</i> | NA                                  | <i>Ca_desi_denovo</i> | 33893951                | C/G  | NA                 | NA                            | NA                 |
| <i>Desi_wild_33910404</i> | NA                                  | <i>Ca_desi_denovo</i> | 33910404                | A/G  | NA                 | NA                            | NA                 |
| <i>Desi_wild_33910427</i> | NA                                  | <i>Ca_desi_denovo</i> | 33910427                | G/A  | NA                 | NA                            | NA                 |
| <i>Desi_wild_33916940</i> | NA                                  | <i>Ca_desi_denovo</i> | 33916940                | C/T  | NA                 | NA                            | NA                 |
| <i>Desi_wild_33916962</i> | NA                                  | <i>Ca_desi_denovo</i> | 33916962                | A/G  | NA                 | NA                            | NA                 |
| <i>Desi_wild_33917015</i> | NA                                  | <i>Ca_desi_denovo</i> | 33917015                | G/T  | NA                 | NA                            | NA                 |
| <i>Desi_wild_33921622</i> | NA                                  | <i>Ca_desi_denovo</i> | 33921622                | A/G  | NA                 | NA                            | NA                 |
| <i>Desi_wild_33930707</i> | NA                                  | <i>Ca_desi_denovo</i> | 33930707                | T/C  | NA                 | NA                            | NA                 |
| <i>Desi_wild_33936072</i> | NA                                  | <i>Ca_desi_denovo</i> | 33936072                | C/T  | NA                 | NA                            | NA                 |
| <i>Desi_wild_33940973</i> | NA                                  | <i>Ca_desi_denovo</i> | 33940973                | A/G  | NA                 | NA                            | NA                 |
| <i>Desi_wild_33940974</i> | NA                                  | <i>Ca_desi_denovo</i> | 33940974                | A/G  | NA                 | NA                            | NA                 |
| <i>Desi_wild_33944031</i> | NA                                  | <i>Ca_desi_denovo</i> | 33944031                | C/T  | NA                 | NA                            | NA                 |
| <i>Desi_wild_33944034</i> | NA                                  | <i>Ca_desi_denovo</i> | 33944034                | A/G  | NA                 | NA                            | NA                 |
| <i>Desi_wild_33945460</i> | NA                                  | <i>Ca_desi_denovo</i> | 33945460                | T/C  | NA                 | NA                            | NA                 |
| <i>Desi_wild_33946675</i> | NA                                  | <i>Ca_desi_denovo</i> | 33946675                | T/C  | NA                 | NA                            | NA                 |
| <i>Desi_wild_33962454</i> | NA                                  | <i>Ca_desi_denovo</i> | 33962454                | A/G  | NA                 | NA                            | NA                 |
| <i>Desi_wild_33965831</i> | NA                                  | <i>Ca_desi_denovo</i> | 33965831                | G/A  | NA                 | NA                            | NA                 |
| <i>Desi_wild_33967454</i> | NA                                  | <i>Ca_desi_denovo</i> | 33967454                | C/T  | NA                 | NA                            | NA                 |
| <i>Desi_wild_33968751</i> | NA                                  | <i>Ca_desi_denovo</i> | 33968751                | G/T  | NA                 | NA                            | NA                 |
| <i>Desi_wild_33972519</i> | NA                                  | <i>Ca_desi_denovo</i> | 33972519                | G/A  | NA                 | NA                            | NA                 |
| <i>Desi_wild_33978200</i> | NA                                  | <i>Ca_desi_denovo</i> | 33978200                | T/C  | NA                 | NA                            | NA                 |

| SNP IDs                   | NCBI dbSNP accession IDs (NCBI_SS#) | Chromosomes           | Physical positions (bp) | SNPs | Gene accession IDs | Sequence components of genome | Putative functions |
|---------------------------|-------------------------------------|-----------------------|-------------------------|------|--------------------|-------------------------------|--------------------|
| <i>Desi_wild_33978206</i> | NA                                  | <i>Ca_desi_denovo</i> | 33978206                | A/G  | NA                 | NA                            | NA                 |
| <i>Desi_wild_33978248</i> | NA                                  | <i>Ca_desi_denovo</i> | 33978248                | A/G  | NA                 | NA                            | NA                 |
| <i>Desi_wild_33978251</i> | NA                                  | <i>Ca_desi_denovo</i> | 33978251                | C/T  | NA                 | NA                            | NA                 |
| <i>Desi_wild_33978806</i> | NA                                  | <i>Ca_desi_denovo</i> | 33978806                | A/C  | NA                 | NA                            | NA                 |
| <i>Desi_wild_33978824</i> | NA                                  | <i>Ca_desi_denovo</i> | 33978824                | C/T  | NA                 | NA                            | NA                 |
| <i>Desi_wild_33980300</i> | NA                                  | <i>Ca_desi_denovo</i> | 33980300                | C/T  | NA                 | NA                            | NA                 |
| <i>Desi_wild_33980329</i> | NA                                  | <i>Ca_desi_denovo</i> | 33980329                | A/G  | NA                 | NA                            | NA                 |
| <i>Desi_wild_33982022</i> | NA                                  | <i>Ca_desi_denovo</i> | 33982022                | G/A  | NA                 | NA                            | NA                 |
| <i>Desi_wild_33982079</i> | NA                                  | <i>Ca_desi_denovo</i> | 33982079                | C/T  | NA                 | NA                            | NA                 |
| <i>Desi_wild_33986519</i> | NA                                  | <i>Ca_desi_denovo</i> | 33986519                | G/T  | NA                 | NA                            | NA                 |
| <i>Desi_wild_33996306</i> | NA                                  | <i>Ca_desi_denovo</i> | 33996306                | A/C  | NA                 | NA                            | NA                 |
| <i>Desi_wild_33996310</i> | NA                                  | <i>Ca_desi_denovo</i> | 33996310                | C/G  | NA                 | NA                            | NA                 |
| <i>Desi_wild_33996355</i> | NA                                  | <i>Ca_desi_denovo</i> | 33996355                | A/C  | NA                 | NA                            | NA                 |
| <i>Desi_wild_33996359</i> | NA                                  | <i>Ca_desi_denovo</i> | 33996359                | T/C  | NA                 | NA                            | NA                 |
| <i>Desi_wild_33997253</i> | NA                                  | <i>Ca_desi_denovo</i> | 33997253                | T/C  | NA                 | NA                            | NA                 |
| <i>Desi_wild_33998532</i> | NA                                  | <i>Ca_desi_denovo</i> | 33998532                | T/C  | NA                 | NA                            | NA                 |
| <i>Desi_wild_33999286</i> | NA                                  | <i>Ca_desi_denovo</i> | 33999286                | G/T  | NA                 | NA                            | NA                 |
| <i>Desi_wild_34000512</i> | NA                                  | <i>Ca_desi_denovo</i> | 34000512                | G/T  | NA                 | NA                            | NA                 |
| <i>Desi_wild_34001489</i> | NA                                  | <i>Ca_desi_denovo</i> | 34001489                | C/G  | NA                 | NA                            | NA                 |
| <i>Desi_wild_34001491</i> | NA                                  | <i>Ca_desi_denovo</i> | 34001491                | T/G  | NA                 | NA                            | NA                 |
| <i>Desi_wild_34002606</i> | NA                                  | <i>Ca_desi_denovo</i> | 34002606                | T/G  | NA                 | NA                            | NA                 |
| <i>Desi_wild_34004623</i> | NA                                  | <i>Ca_desi_denovo</i> | 34004623                | G/C  | NA                 | NA                            | NA                 |
| <i>Desi_wild_34004630</i> | NA                                  | <i>Ca_desi_denovo</i> | 34004630                | G/A  | NA                 | NA                            | NA                 |
| <i>Desi_wild_34005867</i> | NA                                  | <i>Ca_desi_denovo</i> | 34005867                | A/G  | NA                 | NA                            | NA                 |
| <i>Desi_wild_34012435</i> | NA                                  | <i>Ca_desi_denovo</i> | 34012435                | G/T  | NA                 | NA                            | NA                 |
| <i>Desi_wild_34028438</i> | NA                                  | <i>Ca_desi_denovo</i> | 34028438                | T/G  | NA                 | NA                            | NA                 |
| <i>Desi_wild_34035670</i> | NA                                  | <i>Ca_desi_denovo</i> | 34035670                | A/C  | NA                 | NA                            | NA                 |
| <i>Desi_wild_34035671</i> | NA                                  | <i>Ca_desi_denovo</i> | 34035671                | G/T  | NA                 | NA                            | NA                 |
| <i>Desi_wild_34039605</i> | NA                                  | <i>Ca_desi_denovo</i> | 34039605                | A/C  | NA                 | NA                            | NA                 |
| <i>Desi_wild_34039606</i> | NA                                  | <i>Ca_desi_denovo</i> | 34039606                | G/T  | NA                 | NA                            | NA                 |
| <i>Desi_wild_34039607</i> | NA                                  | <i>Ca_desi_denovo</i> | 34039607                | A/G  | NA                 | NA                            | NA                 |
| <i>Desi_wild_34043082</i> | NA                                  | <i>Ca_desi_denovo</i> | 34043082                | G/C  | NA                 | NA                            | NA                 |
| <i>Desi_wild_34043086</i> | NA                                  | <i>Ca_desi_denovo</i> | 34043086                | G/C  | NA                 | NA                            | NA                 |
| <i>Desi_wild_34052621</i> | NA                                  | <i>Ca_desi_denovo</i> | 34052621                | G/A  | NA                 | NA                            | NA                 |
| <i>Desi_wild_34052650</i> | NA                                  | <i>Ca_desi_denovo</i> | 34052650                | A/T  | NA                 | NA                            | NA                 |
| <i>Desi_wild_34054599</i> | NA                                  | <i>Ca_desi_denovo</i> | 34054599                | C/T  | NA                 | NA                            | NA                 |
| <i>Desi_wild_34061328</i> | NA                                  | <i>Ca_desi_denovo</i> | 34061328                | A/G  | NA                 | NA                            | NA                 |
| <i>Desi_wild_34062296</i> | NA                                  | <i>Ca_desi_denovo</i> | 34062296                | A/G  | NA                 | NA                            | NA                 |
| <i>Desi_wild_34062323</i> | NA                                  | <i>Ca_desi_denovo</i> | 34062323                | C/T  | NA                 | NA                            | NA                 |
| <i>Desi_wild_34066078</i> | NA                                  | <i>Ca_desi_denovo</i> | 34066078                | C/T  | NA                 | NA                            | NA                 |
| <i>Desi_wild_34066870</i> | NA                                  | <i>Ca_desi_denovo</i> | 34066870                | A/C  | NA                 | NA                            | NA                 |
| <i>Desi_wild_34071872</i> | NA                                  | <i>Ca_desi_denovo</i> | 34071872                | G/A  | NA                 | NA                            | NA                 |
| <i>Desi_wild_34071918</i> | NA                                  | <i>Ca_desi_denovo</i> | 34071918                | T/C  | NA                 | NA                            | NA                 |
| <i>Desi_wild_34072111</i> | NA                                  | <i>Ca_desi_denovo</i> | 34072111                | T/C  | NA                 | NA                            | NA                 |



| SNP IDs                   | NCBI dbSNP accession IDs (NCBI_SS#) | Chromosomes           | Physical positions (bp) | SNPs | Gene accession IDs | Sequence components of genome | Putative functions |
|---------------------------|-------------------------------------|-----------------------|-------------------------|------|--------------------|-------------------------------|--------------------|
| <i>Desi_wild_34072680</i> | NA                                  | <i>Ca_desi_denovo</i> | 34072680                | A/T  | NA                 | NA                            | NA                 |
| <i>Desi_wild_34072715</i> | NA                                  | <i>Ca_desi_denovo</i> | 34072715                | G/A  | NA                 | NA                            | NA                 |
| <i>Desi_wild_34084202</i> | NA                                  | <i>Ca_desi_denovo</i> | 34084202                | G/T  | NA                 | NA                            | NA                 |
| <i>Desi_wild_34085750</i> | NA                                  | <i>Ca_desi_denovo</i> | 34085750                | G/C  | NA                 | NA                            | NA                 |
| <i>Desi_wild_34087518</i> | NA                                  | <i>Ca_desi_denovo</i> | 34087518                | T/C  | NA                 | NA                            | NA                 |
| <i>Desi_wild_34087560</i> | NA                                  | <i>Ca_desi_denovo</i> | 34087560                | C/G  | NA                 | NA                            | NA                 |
| <i>Desi_wild_34088689</i> | NA                                  | <i>Ca_desi_denovo</i> | 34088689                | A/G  | NA                 | NA                            | NA                 |
| <i>Desi_wild_34091350</i> | NA                                  | <i>Ca_desi_denovo</i> | 34091350                | A/C  | NA                 | NA                            | NA                 |
| <i>Desi_wild_34091925</i> | NA                                  | <i>Ca_desi_denovo</i> | 34091925                | A/C  | NA                 | NA                            | NA                 |
| <i>Desi_wild_34091926</i> | NA                                  | <i>Ca_desi_denovo</i> | 34091926                | G/T  | NA                 | NA                            | NA                 |
| <i>Desi_wild_34091927</i> | NA                                  | <i>Ca_desi_denovo</i> | 34091927                | A/G  | NA                 | NA                            | NA                 |
| <i>Desi_wild_34109036</i> | NA                                  | <i>Ca_desi_denovo</i> | 34109036                | T/C  | NA                 | NA                            | NA                 |
| <i>Desi_wild_34109039</i> | NA                                  | <i>Ca_desi_denovo</i> | 34109039                | G/C  | NA                 | NA                            | NA                 |
| <i>Desi_wild_34115090</i> | NA                                  | <i>Ca_desi_denovo</i> | 34115090                | G/A  | NA                 | NA                            | NA                 |
| <i>Desi_wild_34115111</i> | NA                                  | <i>Ca_desi_denovo</i> | 34115111                | C/T  | NA                 | NA                            | NA                 |
| <i>Desi_wild_34116680</i> | NA                                  | <i>Ca_desi_denovo</i> | 34116680                | C/G  | NA                 | NA                            | NA                 |
| <i>Desi_wild_34116692</i> | NA                                  | <i>Ca_desi_denovo</i> | 34116692                | T/C  | NA                 | NA                            | NA                 |
| <i>Desi_wild_34118778</i> | NA                                  | <i>Ca_desi_denovo</i> | 34118778                | T/A  | NA                 | NA                            | NA                 |
| <i>Desi_wild_34123039</i> | NA                                  | <i>Ca_desi_denovo</i> | 34123039                | C/T  | NA                 | NA                            | NA                 |
| <i>Desi_wild_34127141</i> | NA                                  | <i>Ca_desi_denovo</i> | 34127141                | C/A  | NA                 | NA                            | NA                 |
| <i>Desi_wild_34128812</i> | NA                                  | <i>Ca_desi_denovo</i> | 34128812                | A/C  | NA                 | NA                            | NA                 |
| <i>Desi_wild_34128829</i> | NA                                  | <i>Ca_desi_denovo</i> | 34128829                | G/C  | NA                 | NA                            | NA                 |
| <i>Desi_wild_34133215</i> | NA                                  | <i>Ca_desi_denovo</i> | 34133215                | A/G  | NA                 | NA                            | NA                 |
| <i>Desi_wild_34133233</i> | NA                                  | <i>Ca_desi_denovo</i> | 34133233                | C/G  | NA                 | NA                            | NA                 |
| <i>Desi_wild_34140233</i> | NA                                  | <i>Ca_desi_denovo</i> | 34140233                | C/G  | NA                 | NA                            | NA                 |
| <i>Desi_wild_34140245</i> | NA                                  | <i>Ca_desi_denovo</i> | 34140245                | G/C  | NA                 | NA                            | NA                 |
| <i>Desi_wild_34141859</i> | NA                                  | <i>Ca_desi_denovo</i> | 34141859                | G/C  | NA                 | NA                            | NA                 |
| <i>Desi_wild_34142096</i> | NA                                  | <i>Ca_desi_denovo</i> | 34142096                | G/A  | NA                 | NA                            | NA                 |
| <i>Desi_wild_34153269</i> | NA                                  | <i>Ca_desi_denovo</i> | 34153269                | A/C  | NA                 | NA                            | NA                 |
| <i>Desi_wild_34157175</i> | NA                                  | <i>Ca_desi_denovo</i> | 34157175                | A/G  | NA                 | NA                            | NA                 |
| <i>Desi_wild_34157198</i> | NA                                  | <i>Ca_desi_denovo</i> | 34157198                | T/G  | NA                 | NA                            | NA                 |
| <i>Desi_wild_34157969</i> | NA                                  | <i>Ca_desi_denovo</i> | 34157969                | G/T  | NA                 | NA                            | NA                 |
| <i>Desi_wild_34162583</i> | NA                                  | <i>Ca_desi_denovo</i> | 34162583                | G/T  | NA                 | NA                            | NA                 |
| <i>Desi_wild_34162861</i> | NA                                  | <i>Ca_desi_denovo</i> | 34162861                | A/G  | NA                 | NA                            | NA                 |
| <i>Desi_wild_34163722</i> | NA                                  | <i>Ca_desi_denovo</i> | 34163722                | A/G  | NA                 | NA                            | NA                 |
| <i>Desi_wild_34166087</i> | NA                                  | <i>Ca_desi_denovo</i> | 34166087                | G/C  | NA                 | NA                            | NA                 |
| <i>Desi_wild_34166120</i> | NA                                  | <i>Ca_desi_denovo</i> | 34166120                | C/T  | NA                 | NA                            | NA                 |
| <i>Desi_wild_34167199</i> | NA                                  | <i>Ca_desi_denovo</i> | 34167199                | A/G  | NA                 | NA                            | NA                 |
| <i>Desi_wild_34167354</i> | NA                                  | <i>Ca_desi_denovo</i> | 34167354                | T/A  | NA                 | NA                            | NA                 |
| <i>Desi_wild_34169769</i> | NA                                  | <i>Ca_desi_denovo</i> | 34169769                | C/G  | NA                 | NA                            | NA                 |
| <i>Desi_wild_34172775</i> | NA                                  | <i>Ca_desi_denovo</i> | 34172775                | A/G  | NA                 | NA                            | NA                 |
| <i>Desi_wild_34172820</i> | NA                                  | <i>Ca_desi_denovo</i> | 34172820                | T/C  | NA                 | NA                            | NA                 |
| <i>Desi_wild_34177672</i> | NA                                  | <i>Ca_desi_denovo</i> | 34177672                | A/C  | NA                 | NA                            | NA                 |
| <i>Desi_wild_34177700</i> | NA                                  | <i>Ca_desi_denovo</i> | 34177700                | C/T  | NA                 | NA                            | NA                 |

| SNP IDs                   | NCBI dbSNP accession IDs (NCBI_SS#) | Chromosomes           | Physical positions (bp) | SNPs | Gene accession IDs | Sequence components of genome | Putative functions |
|---------------------------|-------------------------------------|-----------------------|-------------------------|------|--------------------|-------------------------------|--------------------|
| <i>Desi_wild_34179091</i> | NA                                  | <i>Ca_desi_denovo</i> | 34179091                | G/T  | NA                 | NA                            | NA                 |
| <i>Desi_wild_34181877</i> | NA                                  | <i>Ca_desi_denovo</i> | 34181877                | T/G  | NA                 | NA                            | NA                 |
| <i>Desi_wild_34182787</i> | NA                                  | <i>Ca_desi_denovo</i> | 34182787                | G/T  | NA                 | NA                            | NA                 |
| <i>Desi_wild_34185158</i> | NA                                  | <i>Ca_desi_denovo</i> | 34185158                | C/T  | NA                 | NA                            | NA                 |
| <i>Desi_wild_34190718</i> | NA                                  | <i>Ca_desi_denovo</i> | 34190718                | A/C  | NA                 | NA                            | NA                 |
| <i>Desi_wild_34190726</i> | NA                                  | <i>Ca_desi_denovo</i> | 34190726                | C/G  | NA                 | NA                            | NA                 |
| <i>Desi_wild_34190765</i> | NA                                  | <i>Ca_desi_denovo</i> | 34190765                | T/G  | NA                 | NA                            | NA                 |
| <i>Desi_wild_34202517</i> | NA                                  | <i>Ca_desi_denovo</i> | 34202517                | A/C  | NA                 | NA                            | NA                 |
| <i>Desi_wild_34203418</i> | NA                                  | <i>Ca_desi_denovo</i> | 34203418                | A/T  | NA                 | NA                            | NA                 |
| <i>Desi_wild_34205224</i> | NA                                  | <i>Ca_desi_denovo</i> | 34205224                | C/T  | NA                 | NA                            | NA                 |
| <i>Desi_wild_34213580</i> | NA                                  | <i>Ca_desi_denovo</i> | 34213580                | C/T  | NA                 | NA                            | NA                 |
| <i>Desi_wild_34213581</i> | NA                                  | <i>Ca_desi_denovo</i> | 34213581                | A/G  | NA                 | NA                            | NA                 |
| <i>Desi_wild_34213623</i> | NA                                  | <i>Ca_desi_denovo</i> | 34213623                | C/G  | NA                 | NA                            | NA                 |
| <i>Desi_wild_34214669</i> | NA                                  | <i>Ca_desi_denovo</i> | 34214669                | A/G  | NA                 | NA                            | NA                 |
| <i>Desi_wild_34222198</i> | NA                                  | <i>Ca_desi_denovo</i> | 34222198                | A/C  | NA                 | NA                            | NA                 |
| <i>Desi_wild_34222686</i> | NA                                  | <i>Ca_desi_denovo</i> | 34222686                | T/G  | NA                 | NA                            | NA                 |
| <i>Desi_wild_34222758</i> | NA                                  | <i>Ca_desi_denovo</i> | 34222758                | A/G  | NA                 | NA                            | NA                 |
| <i>Desi_wild_34223927</i> | NA                                  | <i>Ca_desi_denovo</i> | 34223927                | C/G  | NA                 | NA                            | NA                 |
| <i>Desi_wild_34236976</i> | NA                                  | <i>Ca_desi_denovo</i> | 34236976                | A/C  | NA                 | NA                            | NA                 |
| <i>Desi_wild_34237968</i> | NA                                  | <i>Ca_desi_denovo</i> | 34237968                | A/G  | NA                 | NA                            | NA                 |
| <i>Desi_wild_34237987</i> | NA                                  | <i>Ca_desi_denovo</i> | 34237987                | T/C  | NA                 | NA                            | NA                 |
| <i>Desi_wild_34253520</i> | NA                                  | <i>Ca_desi_denovo</i> | 34253520                | C/T  | NA                 | NA                            | NA                 |
| <i>Desi_wild_34253523</i> | NA                                  | <i>Ca_desi_denovo</i> | 34253523                | A/G  | NA                 | NA                            | NA                 |
| <i>Desi_wild_34254479</i> | NA                                  | <i>Ca_desi_denovo</i> | 34254479                | C/G  | NA                 | NA                            | NA                 |
| <i>Desi_wild_34258921</i> | NA                                  | <i>Ca_desi_denovo</i> | 34258921                | T/A  | NA                 | NA                            | NA                 |
| <i>Desi_wild_34258928</i> | NA                                  | <i>Ca_desi_denovo</i> | 34258928                | A/C  | NA                 | NA                            | NA                 |
| <i>Desi_wild_34264855</i> | NA                                  | <i>Ca_desi_denovo</i> | 34264855                | A/G  | NA                 | NA                            | NA                 |
| <i>Desi_wild_34268493</i> | NA                                  | <i>Ca_desi_denovo</i> | 34268493                | A/G  | NA                 | NA                            | NA                 |
| <i>Desi_wild_34268503</i> | NA                                  | <i>Ca_desi_denovo</i> | 34268503                | G/A  | NA                 | NA                            | NA                 |
| <i>Desi_wild_34270707</i> | NA                                  | <i>Ca_desi_denovo</i> | 34270707                | A/G  | NA                 | NA                            | NA                 |
| <i>Desi_wild_34270733</i> | NA                                  | <i>Ca_desi_denovo</i> | 34270733                | T/C  | NA                 | NA                            | NA                 |
| <i>Desi_wild_34271260</i> | NA                                  | <i>Ca_desi_denovo</i> | 34271260                | C/T  | NA                 | NA                            | NA                 |
| <i>Desi_wild_34271267</i> | NA                                  | <i>Ca_desi_denovo</i> | 34271267                | C/G  | NA                 | NA                            | NA                 |
| <i>Desi_wild_34278451</i> | NA                                  | <i>Ca_desi_denovo</i> | 34278451                | G/A  | NA                 | NA                            | NA                 |
| <i>Desi_wild_34279325</i> | NA                                  | <i>Ca_desi_denovo</i> | 34279325                | C/T  | NA                 | NA                            | NA                 |
| <i>Desi_wild_34279327</i> | NA                                  | <i>Ca_desi_denovo</i> | 34279327                | A/G  | NA                 | NA                            | NA                 |
| <i>Desi_wild_34283061</i> | NA                                  | <i>Ca_desi_denovo</i> | 34283061                | C/G  | NA                 | NA                            | NA                 |
| <i>Desi_wild_34294677</i> | NA                                  | <i>Ca_desi_denovo</i> | 34294677                | A/C  | NA                 | NA                            | NA                 |
| <i>Desi_wild_34294678</i> | NA                                  | <i>Ca_desi_denovo</i> | 34294678                | A/G  | NA                 | NA                            | NA                 |
| <i>Desi_wild_34294679</i> | NA                                  | <i>Ca_desi_denovo</i> | 34294679                | A/G  | NA                 | NA                            | NA                 |
| <i>Desi_wild_34295226</i> | NA                                  | <i>Ca_desi_denovo</i> | 34295226                | A/G  | NA                 | NA                            | NA                 |
| <i>Desi_wild_34295236</i> | NA                                  | <i>Ca_desi_denovo</i> | 34295236                | C/G  | NA                 | NA                            | NA                 |
| <i>Desi_wild_34298927</i> | NA                                  | <i>Ca_desi_denovo</i> | 34298927                | G/A  | NA                 | NA                            | NA                 |
| <i>Desi_wild_34306209</i> | NA                                  | <i>Ca_desi_denovo</i> | 34306209                | C/G  | NA                 | NA                            | NA                 |

| SNP IDs                   | NCBI dbSNP accession IDs (NCBI_SS#) | Chromosomes           | Physical positions (bp) | SNPs | Gene accession IDs | Sequence components of genome | Putative functions |
|---------------------------|-------------------------------------|-----------------------|-------------------------|------|--------------------|-------------------------------|--------------------|
| <i>Desi_wild_34309871</i> | NA                                  | <i>Ca_desi_denovo</i> | 34309871                | C/G  | NA                 | NA                            | NA                 |
| <i>Desi_wild_34309883</i> | NA                                  | <i>Ca_desi_denovo</i> | 34309883                | C/T  | NA                 | NA                            | NA                 |
| <i>Desi_wild_34310658</i> | NA                                  | <i>Ca_desi_denovo</i> | 34310658                | C/G  | NA                 | NA                            | NA                 |
| <i>Desi_wild_34322036</i> | NA                                  | <i>Ca_desi_denovo</i> | 34322036                | G/T  | NA                 | NA                            | NA                 |
| <i>Desi_wild_34323373</i> | NA                                  | <i>Ca_desi_denovo</i> | 34323373                | A/G  | NA                 | NA                            | NA                 |
| <i>Desi_wild_34324145</i> | NA                                  | <i>Ca_desi_denovo</i> | 34324145                | A/G  | NA                 | NA                            | NA                 |
| <i>Desi_wild_34326491</i> | NA                                  | <i>Ca_desi_denovo</i> | 34326491                | G/C  | NA                 | NA                            | NA                 |
| <i>Desi_wild_34330319</i> | NA                                  | <i>Ca_desi_denovo</i> | 34330319                | C/T  | NA                 | NA                            | NA                 |
| <i>Desi_wild_34331843</i> | NA                                  | <i>Ca_desi_denovo</i> | 34331843                | C/T  | NA                 | NA                            | NA                 |
| <i>Desi_wild_34331846</i> | NA                                  | <i>Ca_desi_denovo</i> | 34331846                | A/G  | NA                 | NA                            | NA                 |
| <i>Desi_wild_34331860</i> | NA                                  | <i>Ca_desi_denovo</i> | 34331860                | A/G  | NA                 | NA                            | NA                 |
| <i>Desi_wild_34331881</i> | NA                                  | <i>Ca_desi_denovo</i> | 34331881                | A/G  | NA                 | NA                            | NA                 |
| <i>Desi_wild_34338002</i> | NA                                  | <i>Ca_desi_denovo</i> | 34338002                | C/T  | NA                 | NA                            | NA                 |
| <i>Desi_wild_34348247</i> | NA                                  | <i>Ca_desi_denovo</i> | 34348247                | G/T  | NA                 | NA                            | NA                 |
| <i>Desi_wild_34351296</i> | NA                                  | <i>Ca_desi_denovo</i> | 34351296                | G/T  | NA                 | NA                            | NA                 |
| <i>Desi_wild_34351978</i> | NA                                  | <i>Ca_desi_denovo</i> | 34351978                | C/T  | NA                 | NA                            | NA                 |
| <i>Desi_wild_34358478</i> | NA                                  | <i>Ca_desi_denovo</i> | 34358478                | C/T  | NA                 | NA                            | NA                 |
| <i>Desi_wild_34358493</i> | NA                                  | <i>Ca_desi_denovo</i> | 34358493                | C/T  | NA                 | NA                            | NA                 |
| <i>Desi_wild_34360364</i> | NA                                  | <i>Ca_desi_denovo</i> | 34360364                | T/C  | NA                 | NA                            | NA                 |
| <i>Desi_wild_34372630</i> | NA                                  | <i>Ca_desi_denovo</i> | 34372630                | A/C  | NA                 | NA                            | NA                 |
| <i>Desi_wild_34375241</i> | NA                                  | <i>Ca_desi_denovo</i> | 34375241                | G/C  | NA                 | NA                            | NA                 |
| <i>Desi_wild_34375248</i> | NA                                  | <i>Ca_desi_denovo</i> | 34375248                | T/G  | NA                 | NA                            | NA                 |
| <i>Desi_wild_34375255</i> | NA                                  | <i>Ca_desi_denovo</i> | 34375255                | C/A  | NA                 | NA                            | NA                 |
| <i>Desi_wild_34379647</i> | NA                                  | <i>Ca_desi_denovo</i> | 34379647                | C/T  | NA                 | NA                            | NA                 |
| <i>Desi_wild_34381554</i> | NA                                  | <i>Ca_desi_denovo</i> | 34381554                | G/T  | NA                 | NA                            | NA                 |
| <i>Desi_wild_34396285</i> | NA                                  | <i>Ca_desi_denovo</i> | 34396285                | C/T  | NA                 | NA                            | NA                 |
| <i>Desi_wild_34396302</i> | NA                                  | <i>Ca_desi_denovo</i> | 34396302                | A/G  | NA                 | NA                            | NA                 |
| <i>Desi_wild_34398239</i> | NA                                  | <i>Ca_desi_denovo</i> | 34398239                | G/T  | NA                 | NA                            | NA                 |
| <i>Desi_wild_34401646</i> | NA                                  | <i>Ca_desi_denovo</i> | 34401646                | C/G  | NA                 | NA                            | NA                 |
| <i>Desi_wild_34401647</i> | NA                                  | <i>Ca_desi_denovo</i> | 34401647                | T/C  | NA                 | NA                            | NA                 |
| <i>Desi_wild_34403219</i> | NA                                  | <i>Ca_desi_denovo</i> | 34403219                | G/T  | NA                 | NA                            | NA                 |
| <i>Desi_wild_34406314</i> | NA                                  | <i>Ca_desi_denovo</i> | 34406314                | G/T  | NA                 | NA                            | NA                 |
| <i>Desi_wild_34413857</i> | NA                                  | <i>Ca_desi_denovo</i> | 34413857                | C/G  | NA                 | NA                            | NA                 |
| <i>Desi_wild_34414343</i> | NA                                  | <i>Ca_desi_denovo</i> | 34414343                | C/G  | NA                 | NA                            | NA                 |
| <i>Desi_wild_34415868</i> | NA                                  | <i>Ca_desi_denovo</i> | 34415868                | G/A  | NA                 | NA                            | NA                 |
| <i>Desi_wild_34415895</i> | NA                                  | <i>Ca_desi_denovo</i> | 34415895                | A/G  | NA                 | NA                            | NA                 |
| <i>Desi_wild_34426583</i> | NA                                  | <i>Ca_desi_denovo</i> | 34426583                | G/T  | NA                 | NA                            | NA                 |
| <i>Desi_wild_34433111</i> | NA                                  | <i>Ca_desi_denovo</i> | 34433111                | A/C  | NA                 | NA                            | NA                 |
| <i>Desi_wild_34434085</i> | NA                                  | <i>Ca_desi_denovo</i> | 34434085                | A/C  | NA                 | NA                            | NA                 |
| <i>Desi_wild_34434114</i> | NA                                  | <i>Ca_desi_denovo</i> | 34434114                | C/T  | NA                 | NA                            | NA                 |
| <i>Desi_wild_34437143</i> | NA                                  | <i>Ca_desi_denovo</i> | 34437143                | T/C  | NA                 | NA                            | NA                 |
| <i>Desi_wild_34438317</i> | NA                                  | <i>Ca_desi_denovo</i> | 34438317                | A/G  | NA                 | NA                            | NA                 |
| <i>Desi_wild_34447795</i> | NA                                  | <i>Ca_desi_denovo</i> | 34447795                | C/G  | NA                 | NA                            | NA                 |
| <i>Desi_wild_34456723</i> | NA                                  | <i>Ca_desi_denovo</i> | 34456723                | G/T  | NA                 | NA                            | NA                 |

| SNP IDs                   | NCBI dbSNP accession IDs (NCBI_SS#) | Chromosomes           | Physical positions (bp) | SNPs | Gene accession IDs | Sequence components of genome | Putative functions |
|---------------------------|-------------------------------------|-----------------------|-------------------------|------|--------------------|-------------------------------|--------------------|
| <i>Desi_wild_34457676</i> | NA                                  | <i>Ca_desi_denovo</i> | 34457676                | G/T  | NA                 | NA                            | NA                 |
| <i>Desi_wild_34458374</i> | NA                                  | <i>Ca_desi_denovo</i> | 34458374                | T/C  | NA                 | NA                            | NA                 |
| <i>Desi_wild_34458416</i> | NA                                  | <i>Ca_desi_denovo</i> | 34458416                | A/C  | NA                 | NA                            | NA                 |
| <i>Desi_wild_34460116</i> | NA                                  | <i>Ca_desi_denovo</i> | 34460116                | C/T  | NA                 | NA                            | NA                 |
| <i>Desi_wild_34461601</i> | NA                                  | <i>Ca_desi_denovo</i> | 34461601                | T/C  | NA                 | NA                            | NA                 |
| <i>Desi_wild_34473378</i> | NA                                  | <i>Ca_desi_denovo</i> | 34473378                | G/A  | NA                 | NA                            | NA                 |
| <i>Desi_wild_34473422</i> | NA                                  | <i>Ca_desi_denovo</i> | 34473422                | G/A  | NA                 | NA                            | NA                 |
| <i>Desi_wild_34477392</i> | NA                                  | <i>Ca_desi_denovo</i> | 34477392                | T/G  | NA                 | NA                            | NA                 |
| <i>Desi_wild_34477398</i> | NA                                  | <i>Ca_desi_denovo</i> | 34477398                | C/T  | NA                 | NA                            | NA                 |
| <i>Desi_wild_34477401</i> | NA                                  | <i>Ca_desi_denovo</i> | 34477401                | A/G  | NA                 | NA                            | NA                 |
| <i>Desi_wild_34479043</i> | NA                                  | <i>Ca_desi_denovo</i> | 34479043                | T/G  | NA                 | NA                            | NA                 |
| <i>Desi_wild_34479061</i> | NA                                  | <i>Ca_desi_denovo</i> | 34479061                | G/C  | NA                 | NA                            | NA                 |
| <i>Desi_wild_34485649</i> | NA                                  | <i>Ca_desi_denovo</i> | 34485649                | C/T  | NA                 | NA                            | NA                 |
| <i>Desi_wild_34491389</i> | NA                                  | <i>Ca_desi_denovo</i> | 34491389                | G/A  | NA                 | NA                            | NA                 |
| <i>Desi_wild_34494219</i> | NA                                  | <i>Ca_desi_denovo</i> | 34494219                | G/T  | NA                 | NA                            | NA                 |
| <i>Desi_wild_34494756</i> | NA                                  | <i>Ca_desi_denovo</i> | 34494756                | T/C  | NA                 | NA                            | NA                 |
| <i>Desi_wild_34494768</i> | NA                                  | <i>Ca_desi_denovo</i> | 34494768                | T/C  | NA                 | NA                            | NA                 |
| <i>Desi_wild_34500606</i> | NA                                  | <i>Ca_desi_denovo</i> | 34500606                | A/C  | NA                 | NA                            | NA                 |
| <i>Desi_wild_34500609</i> | NA                                  | <i>Ca_desi_denovo</i> | 34500609                | C/T  | NA                 | NA                            | NA                 |
| <i>Desi_wild_34500618</i> | NA                                  | <i>Ca_desi_denovo</i> | 34500618                | C/T  | NA                 | NA                            | NA                 |
| <i>Desi_wild_34502900</i> | NA                                  | <i>Ca_desi_denovo</i> | 34502900                | T/C  | NA                 | NA                            | NA                 |
| <i>Desi_wild_34507077</i> | NA                                  | <i>Ca_desi_denovo</i> | 34507077                | G/C  | NA                 | NA                            | NA                 |
| <i>Desi_wild_34514318</i> | NA                                  | <i>Ca_desi_denovo</i> | 34514318                | G/T  | NA                 | NA                            | NA                 |
| <i>Desi_wild_34518359</i> | NA                                  | <i>Ca_desi_denovo</i> | 34518359                | A/C  | NA                 | NA                            | NA                 |
| <i>Desi_wild_34521881</i> | NA                                  | <i>Ca_desi_denovo</i> | 34521881                | G/T  | NA                 | NA                            | NA                 |
| <i>Desi_wild_34522025</i> | NA                                  | <i>Ca_desi_denovo</i> | 34522025                | G/C  | NA                 | NA                            | NA                 |
| <i>Desi_wild_34525557</i> | NA                                  | <i>Ca_desi_denovo</i> | 34525557                | A/C  | NA                 | NA                            | NA                 |
| <i>Desi_wild_34526746</i> | NA                                  | <i>Ca_desi_denovo</i> | 34526746                | G/T  | NA                 | NA                            | NA                 |
| <i>Desi_wild_34531302</i> | NA                                  | <i>Ca_desi_denovo</i> | 34531302                | G/T  | NA                 | NA                            | NA                 |
| <i>Desi_wild_34531676</i> | NA                                  | <i>Ca_desi_denovo</i> | 34531676                | T/G  | NA                 | NA                            | NA                 |
| <i>Desi_wild_34531694</i> | NA                                  | <i>Ca_desi_denovo</i> | 34531694                | G/A  | NA                 | NA                            | NA                 |
| <i>Desi_wild_34532789</i> | NA                                  | <i>Ca_desi_denovo</i> | 34532789                | A/G  | NA                 | NA                            | NA                 |
| <i>Desi_wild_34532828</i> | NA                                  | <i>Ca_desi_denovo</i> | 34532828                | A/G  | NA                 | NA                            | NA                 |
| <i>Desi_wild_34534136</i> | NA                                  | <i>Ca_desi_denovo</i> | 34534136                | G/C  | NA                 | NA                            | NA                 |
| <i>Desi_wild_34540357</i> | NA                                  | <i>Ca_desi_denovo</i> | 34540357                | T/C  | NA                 | NA                            | NA                 |
| <i>Desi_wild_34540403</i> | NA                                  | <i>Ca_desi_denovo</i> | 34540403                | A/G  | NA                 | NA                            | NA                 |
| <i>Desi_wild_34549853</i> | NA                                  | <i>Ca_desi_denovo</i> | 34549853                | A/G  | NA                 | NA                            | NA                 |
| <i>Desi_wild_34549901</i> | NA                                  | <i>Ca_desi_denovo</i> | 34549901                | G/A  | NA                 | NA                            | NA                 |
| <i>Desi_wild_34554755</i> | NA                                  | <i>Ca_desi_denovo</i> | 34554755                | T/C  | NA                 | NA                            | NA                 |
| <i>Desi_wild_34554767</i> | NA                                  | <i>Ca_desi_denovo</i> | 34554767                | T/G  | NA                 | NA                            | NA                 |
| <i>Desi_wild_34558782</i> | NA                                  | <i>Ca_desi_denovo</i> | 34558782                | A/G  | NA                 | NA                            | NA                 |
| <i>Desi_wild_34559803</i> | NA                                  | <i>Ca_desi_denovo</i> | 34559803                | A/G  | NA                 | NA                            | NA                 |
| <i>Desi_wild_34559830</i> | NA                                  | <i>Ca_desi_denovo</i> | 34559830                | T/G  | NA                 | NA                            | NA                 |
| <i>Desi_wild_34561071</i> | NA                                  | <i>Ca_desi_denovo</i> | 34561071                | G/T  | NA                 | NA                            | NA                 |

| SNP IDs                   | NCBI dbSNP accession IDs (NCBI_SS#) | Chromosomes           | Physical positions (bp) | SNPs | Gene accession IDs | Sequence components of genome | Putative functions |
|---------------------------|-------------------------------------|-----------------------|-------------------------|------|--------------------|-------------------------------|--------------------|
| <i>Desi_wild_34561075</i> | NA                                  | <i>Ca_desi_denovo</i> | 34561075                | C/G  | NA                 | NA                            | NA                 |
| <i>Desi_wild_34561078</i> | NA                                  | <i>Ca_desi_denovo</i> | 34561078                | C/T  | NA                 | NA                            | NA                 |
| <i>Desi_wild_34563400</i> | NA                                  | <i>Ca_desi_denovo</i> | 34563400                | C/G  | NA                 | NA                            | NA                 |
| <i>Desi_wild_34565241</i> | NA                                  | <i>Ca_desi_denovo</i> | 34565241                | G/A  | NA                 | NA                            | NA                 |
| <i>Desi_wild_34565262</i> | NA                                  | <i>Ca_desi_denovo</i> | 34565262                | C/G  | NA                 | NA                            | NA                 |
| <i>Desi_wild_34571744</i> | NA                                  | <i>Ca_desi_denovo</i> | 34571744                | T/C  | NA                 | NA                            | NA                 |
| <i>Desi_wild_34571777</i> | NA                                  | <i>Ca_desi_denovo</i> | 34571777                | G/A  | NA                 | NA                            | NA                 |
| <i>Desi_wild_34571778</i> | NA                                  | <i>Ca_desi_denovo</i> | 34571778                | C/T  | NA                 | NA                            | NA                 |
| <i>Desi_wild_34573041</i> | NA                                  | <i>Ca_desi_denovo</i> | 34573041                | C/A  | NA                 | NA                            | NA                 |
| <i>Desi_wild_34573062</i> | NA                                  | <i>Ca_desi_denovo</i> | 34573062                | C/T  | NA                 | NA                            | NA                 |
| <i>Desi_wild_34577318</i> | NA                                  | <i>Ca_desi_denovo</i> | 34577318                | A/G  | NA                 | NA                            | NA                 |
| <i>Desi_wild_34577360</i> | NA                                  | <i>Ca_desi_denovo</i> | 34577360                | G/C  | NA                 | NA                            | NA                 |
| <i>Desi_wild_34587914</i> | NA                                  | <i>Ca_desi_denovo</i> | 34587914                | G/T  | NA                 | NA                            | NA                 |
| <i>Desi_wild_34587942</i> | NA                                  | <i>Ca_desi_denovo</i> | 34587942                | G/T  | NA                 | NA                            | NA                 |
| <i>Desi_wild_34589097</i> | NA                                  | <i>Ca_desi_denovo</i> | 34589097                | C/G  | NA                 | NA                            | NA                 |
| <i>Desi_wild_34589206</i> | NA                                  | <i>Ca_desi_denovo</i> | 34589206                | A/C  | NA                 | NA                            | NA                 |
| <i>Desi_wild_34589207</i> | NA                                  | <i>Ca_desi_denovo</i> | 34589207                | G/T  | NA                 | NA                            | NA                 |
| <i>Desi_wild_34590551</i> | NA                                  | <i>Ca_desi_denovo</i> | 34590551                | A/C  | NA                 | NA                            | NA                 |
| <i>Desi_wild_34596353</i> | NA                                  | <i>Ca_desi_denovo</i> | 34596353                | A/T  | NA                 | NA                            | NA                 |
| <i>Desi_wild_34596503</i> | NA                                  | <i>Ca_desi_denovo</i> | 34596503                | A/C  | NA                 | NA                            | NA                 |
| <i>Desi_wild_34599081</i> | NA                                  | <i>Ca_desi_denovo</i> | 34599081                | G/T  | NA                 | NA                            | NA                 |
| <i>Desi_wild_34603453</i> | NA                                  | <i>Ca_desi_denovo</i> | 34603453                | T/C  | NA                 | NA                            | NA                 |
| <i>Desi_wild_34610035</i> | NA                                  | <i>Ca_desi_denovo</i> | 34610035                | T/G  | NA                 | NA                            | NA                 |
| <i>Desi_wild_34611127</i> | NA                                  | <i>Ca_desi_denovo</i> | 34611127                | C/A  | NA                 | NA                            | NA                 |
| <i>Desi_wild_34615410</i> | NA                                  | <i>Ca_desi_denovo</i> | 34615410                | A/C  | NA                 | NA                            | NA                 |
| <i>Desi_wild_34615413</i> | NA                                  | <i>Ca_desi_denovo</i> | 34615413                | C/T  | NA                 | NA                            | NA                 |
| <i>Desi_wild_34619638</i> | NA                                  | <i>Ca_desi_denovo</i> | 34619638                | A/C  | NA                 | NA                            | NA                 |
| <i>Desi_wild_34619639</i> | NA                                  | <i>Ca_desi_denovo</i> | 34619639                | G/T  | NA                 | NA                            | NA                 |
| <i>Desi_wild_34627026</i> | NA                                  | <i>Ca_desi_denovo</i> | 34627026                | A/C  | NA                 | NA                            | NA                 |
| <i>Desi_wild_34627100</i> | NA                                  | <i>Ca_desi_denovo</i> | 34627100                | G/T  | NA                 | NA                            | NA                 |
| <i>Desi_wild_34641922</i> | NA                                  | <i>Ca_desi_denovo</i> | 34641922                | G/A  | NA                 | NA                            | NA                 |
| <i>Desi_wild_34641955</i> | NA                                  | <i>Ca_desi_denovo</i> | 34641955                | G/C  | NA                 | NA                            | NA                 |
| <i>Desi_wild_34644433</i> | NA                                  | <i>Ca_desi_denovo</i> | 34644433                | T/C  | NA                 | NA                            | NA                 |
| <i>Desi_wild_34644499</i> | NA                                  | <i>Ca_desi_denovo</i> | 34644499                | C/G  | NA                 | NA                            | NA                 |
| <i>Desi_wild_34649236</i> | NA                                  | <i>Ca_desi_denovo</i> | 34649236                | C/G  | NA                 | NA                            | NA                 |
| <i>Desi_wild_34649472</i> | NA                                  | <i>Ca_desi_denovo</i> | 34649472                | A/G  | NA                 | NA                            | NA                 |
| <i>Desi_wild_34655213</i> | NA                                  | <i>Ca_desi_denovo</i> | 34655213                | C/T  | NA                 | NA                            | NA                 |
| <i>Desi_wild_34657463</i> | NA                                  | <i>Ca_desi_denovo</i> | 34657463                | A/C  | NA                 | NA                            | NA                 |
| <i>Desi_wild_34661082</i> | NA                                  | <i>Ca_desi_denovo</i> | 34661082                | T/C  | NA                 | NA                            | NA                 |
| <i>Desi_wild_34665335</i> | NA                                  | <i>Ca_desi_denovo</i> | 34665335                | A/C  | NA                 | NA                            | NA                 |
| <i>Desi_wild_34665471</i> | NA                                  | <i>Ca_desi_denovo</i> | 34665471                | T/A  | NA                 | NA                            | NA                 |
| <i>Desi_wild_34665501</i> | NA                                  | <i>Ca_desi_denovo</i> | 34665501                | A/G  | NA                 | NA                            | NA                 |
| <i>Desi_wild_34668732</i> | NA                                  | <i>Ca_desi_denovo</i> | 34668732                | A/T  | NA                 | NA                            | NA                 |
| <i>Desi_wild_34668756</i> | NA                                  | <i>Ca_desi_denovo</i> | 34668756                | T/C  | NA                 | NA                            | NA                 |

| SNP IDs                   | NCBI dbSNP accession IDs (NCBI_SS#) | Chromosomes           | Physical positions (bp) | SNPs | Gene accession IDs | Sequence components of genome | Putative functions |
|---------------------------|-------------------------------------|-----------------------|-------------------------|------|--------------------|-------------------------------|--------------------|
| <i>Desi_wild_34670534</i> | NA                                  | <i>Ca_desi_denovo</i> | 34670534                | A/G  | NA                 | NA                            | NA                 |
| <i>Desi_wild_34674065</i> | NA                                  | <i>Ca_desi_denovo</i> | 34674065                | T/G  | NA                 | NA                            | NA                 |
| <i>Desi_wild_34678006</i> | NA                                  | <i>Ca_desi_denovo</i> | 34678006                | A/C  | NA                 | NA                            | NA                 |
| <i>Desi_wild_34679301</i> | NA                                  | <i>Ca_desi_denovo</i> | 34679301                | C/G  | NA                 | NA                            | NA                 |
| <i>Desi_wild_34683215</i> | NA                                  | <i>Ca_desi_denovo</i> | 34683215                | A/T  | NA                 | NA                            | NA                 |
| <i>Desi_wild_34683237</i> | NA                                  | <i>Ca_desi_denovo</i> | 34683237                | G/A  | NA                 | NA                            | NA                 |
| <i>Desi_wild_34683605</i> | NA                                  | <i>Ca_desi_denovo</i> | 34683605                | A/G  | NA                 | NA                            | NA                 |
| <i>Desi_wild_34685492</i> | NA                                  | <i>Ca_desi_denovo</i> | 34685492                | C/G  | NA                 | NA                            | NA                 |
| <i>Desi_wild_34693091</i> | NA                                  | <i>Ca_desi_denovo</i> | 34693091                | G/T  | NA                 | NA                            | NA                 |
| <i>Desi_wild_34693092</i> | NA                                  | <i>Ca_desi_denovo</i> | 34693092                | C/G  | NA                 | NA                            | NA                 |
| <i>Desi_wild_34697712</i> | NA                                  | <i>Ca_desi_denovo</i> | 34697712                | G/C  | NA                 | NA                            | NA                 |
| <i>Desi_wild_34703155</i> | NA                                  | <i>Ca_desi_denovo</i> | 34703155                | G/T  | NA                 | NA                            | NA                 |
| <i>Desi_wild_34703390</i> | NA                                  | <i>Ca_desi_denovo</i> | 34703390                | T/C  | NA                 | NA                            | NA                 |
| <i>Desi_wild_34704096</i> | NA                                  | <i>Ca_desi_denovo</i> | 34704096                | G/A  | NA                 | NA                            | NA                 |
| <i>Desi_wild_34704116</i> | NA                                  | <i>Ca_desi_denovo</i> | 34704116                | G/T  | NA                 | NA                            | NA                 |
| <i>Desi_wild_34704118</i> | NA                                  | <i>Ca_desi_denovo</i> | 34704118                | T/G  | NA                 | NA                            | NA                 |
| <i>Desi_wild_34705744</i> | NA                                  | <i>Ca_desi_denovo</i> | 34705744                | A/C  | NA                 | NA                            | NA                 |
| <i>Desi_wild_34705750</i> | NA                                  | <i>Ca_desi_denovo</i> | 34705750                | T/C  | NA                 | NA                            | NA                 |
| <i>Desi_wild_34707908</i> | NA                                  | <i>Ca_desi_denovo</i> | 34707908                | T/C  | NA                 | NA                            | NA                 |
| <i>Desi_wild_34707909</i> | NA                                  | <i>Ca_desi_denovo</i> | 34707909                | A/G  | NA                 | NA                            | NA                 |
| <i>Desi_wild_34708085</i> | NA                                  | <i>Ca_desi_denovo</i> | 34708085                | C/T  | NA                 | NA                            | NA                 |
| <i>Desi_wild_34708091</i> | NA                                  | <i>Ca_desi_denovo</i> | 34708091                | A/T  | NA                 | NA                            | NA                 |
| <i>Desi_wild_34714157</i> | NA                                  | <i>Ca_desi_denovo</i> | 34714157                | G/A  | NA                 | NA                            | NA                 |
| <i>Desi_wild_34714169</i> | NA                                  | <i>Ca_desi_denovo</i> | 34714169                | A/G  | NA                 | NA                            | NA                 |
| <i>Desi_wild_34717644</i> | NA                                  | <i>Ca_desi_denovo</i> | 34717644                | A/C  | NA                 | NA                            | NA                 |
| <i>Desi_wild_34720006</i> | NA                                  | <i>Ca_desi_denovo</i> | 34720006                | C/T  | NA                 | NA                            | NA                 |
| <i>Desi_wild_34720240</i> | NA                                  | <i>Ca_desi_denovo</i> | 34720240                | G/T  | NA                 | NA                            | NA                 |
| <i>Desi_wild_34720779</i> | NA                                  | <i>Ca_desi_denovo</i> | 34720779                | C/T  | NA                 | NA                            | NA                 |
| <i>Desi_wild_34722355</i> | NA                                  | <i>Ca_desi_denovo</i> | 34722355                | A/C  | NA                 | NA                            | NA                 |
| <i>Desi_wild_34722356</i> | NA                                  | <i>Ca_desi_denovo</i> | 34722356                | G/A  | NA                 | NA                            | NA                 |
| <i>Desi_wild_34725170</i> | NA                                  | <i>Ca_desi_denovo</i> | 34725170                | C/T  | NA                 | NA                            | NA                 |
| <i>Desi_wild_34727262</i> | NA                                  | <i>Ca_desi_denovo</i> | 34727262                | C/T  | NA                 | NA                            | NA                 |
| <i>Desi_wild_34727296</i> | NA                                  | <i>Ca_desi_denovo</i> | 34727296                | G/A  | NA                 | NA                            | NA                 |
| <i>Desi_wild_34731997</i> | NA                                  | <i>Ca_desi_denovo</i> | 34731997                | G/A  | NA                 | NA                            | NA                 |
| <i>Desi_wild_34733493</i> | NA                                  | <i>Ca_desi_denovo</i> | 34733493                | A/C  | NA                 | NA                            | NA                 |
| <i>Desi_wild_34733495</i> | NA                                  | <i>Ca_desi_denovo</i> | 34733495                | A/G  | NA                 | NA                            | NA                 |
| <i>Desi_wild_34738014</i> | NA                                  | <i>Ca_desi_denovo</i> | 34738014                | G/A  | NA                 | NA                            | NA                 |
| <i>Desi_wild_34738071</i> | NA                                  | <i>Ca_desi_denovo</i> | 34738071                | G/A  | NA                 | NA                            | NA                 |
| <i>Desi_wild_34744217</i> | NA                                  | <i>Ca_desi_denovo</i> | 34744217                | A/G  | NA                 | NA                            | NA                 |
| <i>Desi_wild_34749357</i> | NA                                  | <i>Ca_desi_denovo</i> | 34749357                | T/C  | NA                 | NA                            | NA                 |
| <i>Desi_wild_34749408</i> | NA                                  | <i>Ca_desi_denovo</i> | 34749408                | T/C  | NA                 | NA                            | NA                 |
| <i>Desi_wild_34752705</i> | NA                                  | <i>Ca_desi_denovo</i> | 34752705                | C/T  | NA                 | NA                            | NA                 |
| <i>Desi_wild_34753982</i> | NA                                  | <i>Ca_desi_denovo</i> | 34753982                | G/A  | NA                 | NA                            | NA                 |
| <i>Desi_wild_34754006</i> | NA                                  | <i>Ca_desi_denovo</i> | 34754006                | T/C  | NA                 | NA                            | NA                 |

| SNP IDs                   | NCBI dbSNP accession IDs (NCBI_SS#) | Chromosomes           | Physical positions (bp) | SNPs | Gene accession IDs | Sequence components of genome | Putative functions |
|---------------------------|-------------------------------------|-----------------------|-------------------------|------|--------------------|-------------------------------|--------------------|
| <i>Desi_wild_34755111</i> | NA                                  | <i>Ca_desi_denovo</i> | 34755111                | C/T  | NA                 | NA                            | NA                 |
| <i>Desi_wild_34758262</i> | NA                                  | <i>Ca_desi_denovo</i> | 34758262                | A/G  | NA                 | NA                            | NA                 |
| <i>Desi_wild_34764128</i> | NA                                  | <i>Ca_desi_denovo</i> | 34764128                | C/G  | NA                 | NA                            | NA                 |
| <i>Desi_wild_34764134</i> | NA                                  | <i>Ca_desi_denovo</i> | 34764134                | C/T  | NA                 | NA                            | NA                 |
| <i>Desi_wild_34764143</i> | NA                                  | <i>Ca_desi_denovo</i> | 34764143                | G/T  | NA                 | NA                            | NA                 |
| <i>Desi_wild_34768481</i> | NA                                  | <i>Ca_desi_denovo</i> | 34768481                | A/G  | NA                 | NA                            | NA                 |
| <i>Desi_wild_34774278</i> | NA                                  | <i>Ca_desi_denovo</i> | 34774278                | A/T  | NA                 | NA                            | NA                 |
| <i>Desi_wild_34775461</i> | NA                                  | <i>Ca_desi_denovo</i> | 34775461                | G/C  | NA                 | NA                            | NA                 |
| <i>Desi_wild_34775604</i> | NA                                  | <i>Ca_desi_denovo</i> | 34775604                | G/A  | NA                 | NA                            | NA                 |
| <i>Desi_wild_34778709</i> | NA                                  | <i>Ca_desi_denovo</i> | 34778709                | A/C  | NA                 | NA                            | NA                 |
| <i>Desi_wild_34778710</i> | NA                                  | <i>Ca_desi_denovo</i> | 34778710                | A/G  | NA                 | NA                            | NA                 |
| <i>Desi_wild_34778711</i> | NA                                  | <i>Ca_desi_denovo</i> | 34778711                | A/G  | NA                 | NA                            | NA                 |
| <i>Desi_wild_34782743</i> | NA                                  | <i>Ca_desi_denovo</i> | 34782743                | A/C  | NA                 | NA                            | NA                 |
| <i>Desi_wild_34793393</i> | NA                                  | <i>Ca_desi_denovo</i> | 34793393                | A/C  | NA                 | NA                            | NA                 |
| <i>Desi_wild_34793930</i> | NA                                  | <i>Ca_desi_denovo</i> | 34793930                | C/T  | NA                 | NA                            | NA                 |
| <i>Desi_wild_34794017</i> | NA                                  | <i>Ca_desi_denovo</i> | 34794017                | G/C  | NA                 | NA                            | NA                 |
| <i>Desi_wild_34794053</i> | NA                                  | <i>Ca_desi_denovo</i> | 34794053                | G/A  | NA                 | NA                            | NA                 |
| <i>Desi_wild_34796802</i> | NA                                  | <i>Ca_desi_denovo</i> | 34796802                | T/C  | NA                 | NA                            | NA                 |
| <i>Desi_wild_34809183</i> | NA                                  | <i>Ca_desi_denovo</i> | 34809183                | G/T  | NA                 | NA                            | NA                 |
| <i>Desi_wild_34810452</i> | NA                                  | <i>Ca_desi_denovo</i> | 34810452                | C/T  | NA                 | NA                            | NA                 |
| <i>Desi_wild_34819597</i> | NA                                  | <i>Ca_desi_denovo</i> | 34819597                | T/C  | NA                 | NA                            | NA                 |
| <i>Desi_wild_34822601</i> | NA                                  | <i>Ca_desi_denovo</i> | 34822601                | C/T  | NA                 | NA                            | NA                 |
| <i>Desi_wild_34822640</i> | NA                                  | <i>Ca_desi_denovo</i> | 34822640                | C/T  | NA                 | NA                            | NA                 |
| <i>Desi_wild_34823012</i> | NA                                  | <i>Ca_desi_denovo</i> | 34823012                | A/G  | NA                 | NA                            | NA                 |
| <i>Desi_wild_34823188</i> | NA                                  | <i>Ca_desi_denovo</i> | 34823188                | A/C  | NA                 | NA                            | NA                 |
| <i>Desi_wild_34823192</i> | NA                                  | <i>Ca_desi_denovo</i> | 34823192                | A/G  | NA                 | NA                            | NA                 |
| <i>Desi_wild_34823235</i> | NA                                  | <i>Ca_desi_denovo</i> | 34823235                | C/T  | NA                 | NA                            | NA                 |
| <i>Desi_wild_34823244</i> | NA                                  | <i>Ca_desi_denovo</i> | 34823244                | T/A  | NA                 | NA                            | NA                 |
| <i>Desi_wild_34826132</i> | NA                                  | <i>Ca_desi_denovo</i> | 34826132                | G/C  | NA                 | NA                            | NA                 |
| <i>Desi_wild_34827861</i> | NA                                  | <i>Ca_desi_denovo</i> | 34827861                | T/G  | NA                 | NA                            | NA                 |
| <i>Desi_wild_34829108</i> | NA                                  | <i>Ca_desi_denovo</i> | 34829108                | A/C  | NA                 | NA                            | NA                 |
| <i>Desi_wild_34835573</i> | NA                                  | <i>Ca_desi_denovo</i> | 34835573                | G/C  | NA                 | NA                            | NA                 |
| <i>Desi_wild_34835637</i> | NA                                  | <i>Ca_desi_denovo</i> | 34835637                | G/T  | NA                 | NA                            | NA                 |
| <i>Desi_wild_34836032</i> | NA                                  | <i>Ca_desi_denovo</i> | 34836032                | C/T  | NA                 | NA                            | NA                 |
| <i>Desi_wild_34840916</i> | NA                                  | <i>Ca_desi_denovo</i> | 34840916                | G/T  | NA                 | NA                            | NA                 |
| <i>Desi_wild_34841828</i> | NA                                  | <i>Ca_desi_denovo</i> | 34841828                | G/T  | NA                 | NA                            | NA                 |
| <i>Desi_wild_34843694</i> | NA                                  | <i>Ca_desi_denovo</i> | 34843694                | C/G  | NA                 | NA                            | NA                 |
| <i>Desi_wild_34843700</i> | NA                                  | <i>Ca_desi_denovo</i> | 34843700                | C/G  | NA                 | NA                            | NA                 |
| <i>Desi_wild_34856795</i> | NA                                  | <i>Ca_desi_denovo</i> | 34856795                | T/G  | NA                 | NA                            | NA                 |
| <i>Desi_wild_34861724</i> | NA                                  | <i>Ca_desi_denovo</i> | 34861724                | A/G  | NA                 | NA                            | NA                 |
| <i>Desi_wild_34874726</i> | NA                                  | <i>Ca_desi_denovo</i> | 34874726                | C/T  | NA                 | NA                            | NA                 |
| <i>Desi_wild_34875764</i> | NA                                  | <i>Ca_desi_denovo</i> | 34875764                | G/T  | NA                 | NA                            | NA                 |
| <i>Desi_wild_34878698</i> | NA                                  | <i>Ca_desi_denovo</i> | 34878698                | C/G  | NA                 | NA                            | NA                 |
| <i>Desi_wild_34880194</i> | NA                                  | <i>Ca_desi_denovo</i> | 34880194                | A/T  | NA                 | NA                            | NA                 |

| SNP IDs                   | NCBI dbSNP accession IDs (NCBI_SS#) | Chromosomes           | Physical positions (bp) | SNPs | Gene accession IDs | Sequence components of genome | Putative functions |
|---------------------------|-------------------------------------|-----------------------|-------------------------|------|--------------------|-------------------------------|--------------------|
| <i>Desi_wild_34880480</i> | NA                                  | <i>Ca_desi_denovo</i> | 34880480                | T/C  | NA                 | NA                            | NA                 |
| <i>Desi_wild_34882124</i> | NA                                  | <i>Ca_desi_denovo</i> | 34882124                | T/C  | NA                 | NA                            | NA                 |
| <i>Desi_wild_34882273</i> | NA                                  | <i>Ca_desi_denovo</i> | 34882273                | A/C  | NA                 | NA                            | NA                 |
| <i>Desi_wild_34884597</i> | NA                                  | <i>Ca_desi_denovo</i> | 34884597                | A/G  | NA                 | NA                            | NA                 |
| <i>Desi_wild_34887167</i> | NA                                  | <i>Ca_desi_denovo</i> | 34887167                | G/A  | NA                 | NA                            | NA                 |
| <i>Desi_wild_34896330</i> | NA                                  | <i>Ca_desi_denovo</i> | 34896330                | T/C  | NA                 | NA                            | NA                 |
| <i>Desi_wild_34896342</i> | NA                                  | <i>Ca_desi_denovo</i> | 34896342                | G/A  | NA                 | NA                            | NA                 |
| <i>Desi_wild_34896345</i> | NA                                  | <i>Ca_desi_denovo</i> | 34896345                | T/C  | NA                 | NA                            | NA                 |
| <i>Desi_wild_34896375</i> | NA                                  | <i>Ca_desi_denovo</i> | 34896375                | T/A  | NA                 | NA                            | NA                 |
| <i>Desi_wild_34900436</i> | NA                                  | <i>Ca_desi_denovo</i> | 34900436                | A/C  | NA                 | NA                            | NA                 |
| <i>Desi_wild_34900884</i> | NA                                  | <i>Ca_desi_denovo</i> | 34900884                | T/C  | NA                 | NA                            | NA                 |
| <i>Desi_wild_34900893</i> | NA                                  | <i>Ca_desi_denovo</i> | 34900893                | C/T  | NA                 | NA                            | NA                 |
| <i>Desi_wild_34902669</i> | NA                                  | <i>Ca_desi_denovo</i> | 34902669                | C/G  | NA                 | NA                            | NA                 |
| <i>Desi_wild_34906857</i> | NA                                  | <i>Ca_desi_denovo</i> | 34906857                | C/G  | NA                 | NA                            | NA                 |
| <i>Desi_wild_34912726</i> | NA                                  | <i>Ca_desi_denovo</i> | 34912726                | G/T  | NA                 | NA                            | NA                 |
| <i>Desi_wild_34913985</i> | NA                                  | <i>Ca_desi_denovo</i> | 34913985                | A/C  | NA                 | NA                            | NA                 |
| <i>Desi_wild_34914003</i> | NA                                  | <i>Ca_desi_denovo</i> | 34914003                | A/G  | NA                 | NA                            | NA                 |
| <i>Desi_wild_34914018</i> | NA                                  | <i>Ca_desi_denovo</i> | 34914018                | G/A  | NA                 | NA                            | NA                 |
| <i>Desi_wild_34914935</i> | NA                                  | <i>Ca_desi_denovo</i> | 34914935                | A/C  | NA                 | NA                            | NA                 |
| <i>Desi_wild_34915025</i> | NA                                  | <i>Ca_desi_denovo</i> | 34915025                | A/G  | NA                 | NA                            | NA                 |
| <i>Desi_wild_34915991</i> | NA                                  | <i>Ca_desi_denovo</i> | 34915991                | G/T  | NA                 | NA                            | NA                 |
| <i>Desi_wild_34918929</i> | NA                                  | <i>Ca_desi_denovo</i> | 34918929                | G/T  | NA                 | NA                            | NA                 |
| <i>Desi_wild_34924017</i> | NA                                  | <i>Ca_desi_denovo</i> | 34924017                | G/T  | NA                 | NA                            | NA                 |
| <i>Desi_wild_34933281</i> | NA                                  | <i>Ca_desi_denovo</i> | 34933281                | A/G  | NA                 | NA                            | NA                 |
| <i>Desi_wild_34933296</i> | NA                                  | <i>Ca_desi_denovo</i> | 34933296                | A/G  | NA                 | NA                            | NA                 |
| <i>Desi_wild_34936953</i> | NA                                  | <i>Ca_desi_denovo</i> | 34936953                | G/T  | NA                 | NA                            | NA                 |
| <i>Desi_wild_34936992</i> | NA                                  | <i>Ca_desi_denovo</i> | 34936992                | A/G  | NA                 | NA                            | NA                 |
| <i>Desi_wild_34941266</i> | NA                                  | <i>Ca_desi_denovo</i> | 34941266                | C/A  | NA                 | NA                            | NA                 |
| <i>Desi_wild_34941281</i> | NA                                  | <i>Ca_desi_denovo</i> | 34941281                | T/C  | NA                 | NA                            | NA                 |
| <i>Desi_wild_34943211</i> | NA                                  | <i>Ca_desi_denovo</i> | 34943211                | A/G  | NA                 | NA                            | NA                 |
| <i>Desi_wild_34943224</i> | NA                                  | <i>Ca_desi_denovo</i> | 34943224                | T/C  | NA                 | NA                            | NA                 |
| <i>Desi_wild_34966195</i> | NA                                  | <i>Ca_desi_denovo</i> | 34966195                | G/T  | NA                 | NA                            | NA                 |
| <i>Desi_wild_34971428</i> | NA                                  | <i>Ca_desi_denovo</i> | 34971428                | T/C  | NA                 | NA                            | NA                 |
| <i>Desi_wild_34994734</i> | NA                                  | <i>Ca_desi_denovo</i> | 34994734                | T/G  | NA                 | NA                            | NA                 |
| <i>Desi_wild_34995695</i> | NA                                  | <i>Ca_desi_denovo</i> | 34995695                | T/G  | NA                 | NA                            | NA                 |
| <i>Desi_wild_34996707</i> | NA                                  | <i>Ca_desi_denovo</i> | 34996707                | C/A  | NA                 | NA                            | NA                 |
| <i>Desi_wild_35002315</i> | NA                                  | <i>Ca_desi_denovo</i> | 35002315                | A/G  | NA                 | NA                            | NA                 |
| <i>Desi_wild_35002318</i> | NA                                  | <i>Ca_desi_denovo</i> | 35002318                | A/G  | NA                 | NA                            | NA                 |
| <i>Desi_wild_35002581</i> | NA                                  | <i>Ca_desi_denovo</i> | 35002581                | A/C  | NA                 | NA                            | NA                 |
| <i>Desi_wild_35021055</i> | NA                                  | <i>Ca_desi_denovo</i> | 35021055                | A/G  | NA                 | NA                            | NA                 |
| <i>Desi_wild_35021070</i> | NA                                  | <i>Ca_desi_denovo</i> | 35021070                | G/A  | NA                 | NA                            | NA                 |
| <i>Desi_wild_35025407</i> | NA                                  | <i>Ca_desi_denovo</i> | 35025407                | T/C  | NA                 | NA                            | NA                 |
| <i>Desi_wild_35027202</i> | NA                                  | <i>Ca_desi_denovo</i> | 35027202                | A/G  | NA                 | NA                            | NA                 |
| <i>Desi_wild_35027241</i> | NA                                  | <i>Ca_desi_denovo</i> | 35027241                | G/A  | NA                 | NA                            | NA                 |



| SNP IDs                   | NCBI dbSNP accession IDs (NCBI_SS#) | Chromosomes           | Physical positions (bp) | SNPs | Gene accession IDs | Sequence components of genome | Putative functions |
|---------------------------|-------------------------------------|-----------------------|-------------------------|------|--------------------|-------------------------------|--------------------|
| <i>Desi_wild_35027244</i> | NA                                  | <i>Ca_desi_denovo</i> | 35027244                | T/G  | NA                 | NA                            | NA                 |
| <i>Desi_wild_35028155</i> | NA                                  | <i>Ca_desi_denovo</i> | 35028155                | G/A  | NA                 | NA                            | NA                 |
| <i>Desi_wild_35028167</i> | NA                                  | <i>Ca_desi_denovo</i> | 35028167                | G/A  | NA                 | NA                            | NA                 |
| <i>Desi_wild_35042517</i> | NA                                  | <i>Ca_desi_denovo</i> | 35042517                | A/C  | NA                 | NA                            | NA                 |
| <i>Desi_wild_35042519</i> | NA                                  | <i>Ca_desi_denovo</i> | 35042519                | A/T  | NA                 | NA                            | NA                 |
| <i>Desi_wild_35045286</i> | NA                                  | <i>Ca_desi_denovo</i> | 35045286                | T/C  | NA                 | NA                            | NA                 |
| <i>Desi_wild_35049437</i> | NA                                  | <i>Ca_desi_denovo</i> | 35049437                | A/G  | NA                 | NA                            | NA                 |
| <i>Desi_wild_35052292</i> | NA                                  | <i>Ca_desi_denovo</i> | 35052292                | C/A  | NA                 | NA                            | NA                 |
| <i>Desi_wild_35053805</i> | NA                                  | <i>Ca_desi_denovo</i> | 35053805                | T/G  | NA                 | NA                            | NA                 |
| <i>Desi_wild_35058407</i> | NA                                  | <i>Ca_desi_denovo</i> | 35058407                | G/A  | NA                 | NA                            | NA                 |
| <i>Desi_wild_35060876</i> | NA                                  | <i>Ca_desi_denovo</i> | 35060876                | T/C  | NA                 | NA                            | NA                 |
| <i>Desi_wild_35060932</i> | NA                                  | <i>Ca_desi_denovo</i> | 35060932                | T/C  | NA                 | NA                            | NA                 |
| <i>Desi_wild_35067259</i> | NA                                  | <i>Ca_desi_denovo</i> | 35067259                | T/C  | NA                 | NA                            | NA                 |
| <i>Desi_wild_35076900</i> | NA                                  | <i>Ca_desi_denovo</i> | 35076900                | C/G  | NA                 | NA                            | NA                 |
| <i>Desi_wild_35087279</i> | NA                                  | <i>Ca_desi_denovo</i> | 35087279                | C/A  | NA                 | NA                            | NA                 |
| <i>Desi_wild_35089067</i> | NA                                  | <i>Ca_desi_denovo</i> | 35089067                | G/T  | NA                 | NA                            | NA                 |
| <i>Desi_wild_35096727</i> | NA                                  | <i>Ca_desi_denovo</i> | 35096727                | A/G  | NA                 | NA                            | NA                 |
| <i>Desi_wild_35099065</i> | NA                                  | <i>Ca_desi_denovo</i> | 35099065                | T/A  | NA                 | NA                            | NA                 |
| <i>Desi_wild_35108629</i> | NA                                  | <i>Ca_desi_denovo</i> | 35108629                | A/G  | NA                 | NA                            | NA                 |
| <i>Desi_wild_35108632</i> | NA                                  | <i>Ca_desi_denovo</i> | 35108632                | A/T  | NA                 | NA                            | NA                 |
| <i>Desi_wild_35112498</i> | NA                                  | <i>Ca_desi_denovo</i> | 35112498                | A/C  | NA                 | NA                            | NA                 |
| <i>Desi_wild_35112999</i> | NA                                  | <i>Ca_desi_denovo</i> | 35112999                | C/T  | NA                 | NA                            | NA                 |
| <i>Desi_wild_35123075</i> | NA                                  | <i>Ca_desi_denovo</i> | 35123075                | A/G  | NA                 | NA                            | NA                 |
| <i>Desi_wild_35124512</i> | NA                                  | <i>Ca_desi_denovo</i> | 35124512                | C/T  | NA                 | NA                            | NA                 |
| <i>Desi_wild_35124515</i> | NA                                  | <i>Ca_desi_denovo</i> | 35124515                | C/T  | NA                 | NA                            | NA                 |
| <i>Desi_wild_35128373</i> | NA                                  | <i>Ca_desi_denovo</i> | 35128373                | A/G  | NA                 | NA                            | NA                 |
| <i>Desi_wild_35129319</i> | NA                                  | <i>Ca_desi_denovo</i> | 35129319                | A/G  | NA                 | NA                            | NA                 |
| <i>Desi_wild_35129862</i> | NA                                  | <i>Ca_desi_denovo</i> | 35129862                | T/G  | NA                 | NA                            | NA                 |
| <i>Desi_wild_35129898</i> | NA                                  | <i>Ca_desi_denovo</i> | 35129898                | C/A  | NA                 | NA                            | NA                 |
| <i>Desi_wild_35129931</i> | NA                                  | <i>Ca_desi_denovo</i> | 35129931                | A/G  | NA                 | NA                            | NA                 |
| <i>Desi_wild_35132617</i> | NA                                  | <i>Ca_desi_denovo</i> | 35132617                | T/G  | NA                 | NA                            | NA                 |
| <i>Desi_wild_35135541</i> | NA                                  | <i>Ca_desi_denovo</i> | 35135541                | G/T  | NA                 | NA                            | NA                 |
| <i>Desi_wild_35137800</i> | NA                                  | <i>Ca_desi_denovo</i> | 35137800                | T/G  | NA                 | NA                            | NA                 |
| <i>Desi_wild_35140958</i> | NA                                  | <i>Ca_desi_denovo</i> | 35140958                | G/C  | NA                 | NA                            | NA                 |
| <i>Desi_wild_35145103</i> | NA                                  | <i>Ca_desi_denovo</i> | 35145103                | C/T  | NA                 | NA                            | NA                 |
| <i>Desi_wild_35154491</i> | NA                                  | <i>Ca_desi_denovo</i> | 35154491                | T/C  | NA                 | NA                            | NA                 |
| <i>Desi_wild_35154521</i> | NA                                  | <i>Ca_desi_denovo</i> | 35154521                | A/G  | NA                 | NA                            | NA                 |
| <i>Desi_wild_35167338</i> | NA                                  | <i>Ca_desi_denovo</i> | 35167338                | A/C  | NA                 | NA                            | NA                 |
| <i>Desi_wild_35182211</i> | NA                                  | <i>Ca_desi_denovo</i> | 35182211                | A/G  | NA                 | NA                            | NA                 |
| <i>Desi_wild_35182227</i> | NA                                  | <i>Ca_desi_denovo</i> | 35182227                | C/T  | NA                 | NA                            | NA                 |
| <i>Desi_wild_35184311</i> | NA                                  | <i>Ca_desi_denovo</i> | 35184311                | A/C  | NA                 | NA                            | NA                 |
| <i>Desi_wild_35186633</i> | NA                                  | <i>Ca_desi_denovo</i> | 35186633                | G/A  | NA                 | NA                            | NA                 |
| <i>Desi_wild_35186652</i> | NA                                  | <i>Ca_desi_denovo</i> | 35186652                | C/T  | NA                 | NA                            | NA                 |
| <i>Desi_wild_35202790</i> | NA                                  | <i>Ca_desi_denovo</i> | 35202790                | G/T  | NA                 | NA                            | NA                 |

| SNP IDs                   | NCBI dbSNP accession IDs (NCBI_SS#) | Chromosomes           | Physical positions (bp) | SNPs | Gene accession IDs | Sequence components of genome | Putative functions |
|---------------------------|-------------------------------------|-----------------------|-------------------------|------|--------------------|-------------------------------|--------------------|
| <i>Desi_wild_35202915</i> | NA                                  | <i>Ca_desi_denovo</i> | 35202915                | T/C  | NA                 | NA                            | NA                 |
| <i>Desi_wild_35207131</i> | NA                                  | <i>Ca_desi_denovo</i> | 35207131                | C/T  | NA                 | NA                            | NA                 |
| <i>Desi_wild_35207138</i> | NA                                  | <i>Ca_desi_denovo</i> | 35207138                | G/C  | NA                 | NA                            | NA                 |
| <i>Desi_wild_35207910</i> | NA                                  | <i>Ca_desi_denovo</i> | 35207910                | G/C  | NA                 | NA                            | NA                 |
| <i>Desi_wild_35210082</i> | NA                                  | <i>Ca_desi_denovo</i> | 35210082                | G/T  | NA                 | NA                            | NA                 |
| <i>Desi_wild_35222241</i> | NA                                  | <i>Ca_desi_denovo</i> | 35222241                | C/T  | NA                 | NA                            | NA                 |
| <i>Desi_wild_35222242</i> | NA                                  | <i>Ca_desi_denovo</i> | 35222242                | C/T  | NA                 | NA                            | NA                 |
| <i>Desi_wild_35228373</i> | NA                                  | <i>Ca_desi_denovo</i> | 35228373                | A/C  | NA                 | NA                            | NA                 |
| <i>Desi_wild_35228374</i> | NA                                  | <i>Ca_desi_denovo</i> | 35228374                | G/T  | NA                 | NA                            | NA                 |
| <i>Desi_wild_35235858</i> | NA                                  | <i>Ca_desi_denovo</i> | 35235858                | G/C  | NA                 | NA                            | NA                 |
| <i>Desi_wild_35236281</i> | NA                                  | <i>Ca_desi_denovo</i> | 35236281                | T/C  | NA                 | NA                            | NA                 |
| <i>Desi_wild_35236323</i> | NA                                  | <i>Ca_desi_denovo</i> | 35236323                | G/C  | NA                 | NA                            | NA                 |
| <i>Desi_wild_35238106</i> | NA                                  | <i>Ca_desi_denovo</i> | 35238106                | A/G  | NA                 | NA                            | NA                 |
| <i>Desi_wild_35238107</i> | NA                                  | <i>Ca_desi_denovo</i> | 35238107                | G/A  | NA                 | NA                            | NA                 |
| <i>Desi_wild_35240770</i> | NA                                  | <i>Ca_desi_denovo</i> | 35240770                | T/C  | NA                 | NA                            | NA                 |
| <i>Desi_wild_35240784</i> | NA                                  | <i>Ca_desi_denovo</i> | 35240784                | A/T  | NA                 | NA                            | NA                 |
| <i>Desi_wild_35242563</i> | NA                                  | <i>Ca_desi_denovo</i> | 35242563                | G/T  | NA                 | NA                            | NA                 |
| <i>Desi_wild_35281961</i> | NA                                  | <i>Ca_desi_denovo</i> | 35281961                | A/G  | NA                 | NA                            | NA                 |
| <i>Desi_wild_35290832</i> | NA                                  | <i>Ca_desi_denovo</i> | 35290832                | A/G  | NA                 | NA                            | NA                 |
| <i>Desi_wild_35291070</i> | NA                                  | <i>Ca_desi_denovo</i> | 35291070                | T/C  | NA                 | NA                            | NA                 |
| <i>Desi_wild_35293663</i> | NA                                  | <i>Ca_desi_denovo</i> | 35293663                | A/G  | NA                 | NA                            | NA                 |
| <i>Desi_wild_35293721</i> | NA                                  | <i>Ca_desi_denovo</i> | 35293721                | T/C  | NA                 | NA                            | NA                 |
| <i>Desi_wild_35304533</i> | NA                                  | <i>Ca_desi_denovo</i> | 35304533                | C/T  | NA                 | NA                            | NA                 |
| <i>Desi_wild_35304581</i> | NA                                  | <i>Ca_desi_denovo</i> | 35304581                | C/T  | NA                 | NA                            | NA                 |
| <i>Desi_wild_35304787</i> | NA                                  | <i>Ca_desi_denovo</i> | 35304787                | A/C  | NA                 | NA                            | NA                 |
| <i>Desi_wild_35311565</i> | NA                                  | <i>Ca_desi_denovo</i> | 35311565                | C/T  | NA                 | NA                            | NA                 |
| <i>Desi_wild_35311586</i> | NA                                  | <i>Ca_desi_denovo</i> | 35311586                | T/A  | NA                 | NA                            | NA                 |
| <i>Desi_wild_35316791</i> | NA                                  | <i>Ca_desi_denovo</i> | 35316791                | G/T  | NA                 | NA                            | NA                 |
| <i>Desi_wild_35332960</i> | NA                                  | <i>Ca_desi_denovo</i> | 35332960                | T/G  | NA                 | NA                            | NA                 |
| <i>Desi_wild_35342151</i> | NA                                  | <i>Ca_desi_denovo</i> | 35342151                | C/G  | NA                 | NA                            | NA                 |
| <i>Desi_wild_35342654</i> | NA                                  | <i>Ca_desi_denovo</i> | 35342654                | C/T  | NA                 | NA                            | NA                 |
| <i>Desi_wild_35342658</i> | NA                                  | <i>Ca_desi_denovo</i> | 35342658                | G/A  | NA                 | NA                            | NA                 |
| <i>Desi_wild_35342697</i> | NA                                  | <i>Ca_desi_denovo</i> | 35342697                | C/A  | NA                 | NA                            | NA                 |
| <i>Desi_wild_35345710</i> | NA                                  | <i>Ca_desi_denovo</i> | 35345710                | G/C  | NA                 | NA                            | NA                 |
| <i>Desi_wild_35364509</i> | NA                                  | <i>Ca_desi_denovo</i> | 35364509                | G/T  | NA                 | NA                            | NA                 |
| <i>Desi_wild_35364516</i> | NA                                  | <i>Ca_desi_denovo</i> | 35364516                | A/G  | NA                 | NA                            | NA                 |
| <i>Desi_wild_35365269</i> | NA                                  | <i>Ca_desi_denovo</i> | 35365269                | A/G  | NA                 | NA                            | NA                 |
| <i>Desi_wild_35365463</i> | NA                                  | <i>Ca_desi_denovo</i> | 35365463                | G/T  | NA                 | NA                            | NA                 |
| <i>Desi_wild_35365778</i> | NA                                  | <i>Ca_desi_denovo</i> | 35365778                | T/C  | NA                 | NA                            | NA                 |
| <i>Desi_wild_35365787</i> | NA                                  | <i>Ca_desi_denovo</i> | 35365787                | A/C  | NA                 | NA                            | NA                 |
| <i>Desi_wild_35373678</i> | NA                                  | <i>Ca_desi_denovo</i> | 35373678                | G/A  | NA                 | NA                            | NA                 |
| <i>Desi_wild_35377192</i> | NA                                  | <i>Ca_desi_denovo</i> | 35377192                | A/C  | NA                 | NA                            | NA                 |
| <i>Desi_wild_35377198</i> | NA                                  | <i>Ca_desi_denovo</i> | 35377198                | G/A  | NA                 | NA                            | NA                 |
| <i>Desi_wild_35384110</i> | NA                                  | <i>Ca_desi_denovo</i> | 35384110                | T/G  | NA                 | NA                            | NA                 |

| SNP IDs                   | NCBI dbSNP accession IDs (NCBI_SS#) | Chromosomes           | Physical positions (bp) | SNPs | Gene accession IDs | Sequence components of genome | Putative functions |
|---------------------------|-------------------------------------|-----------------------|-------------------------|------|--------------------|-------------------------------|--------------------|
| <i>Desi_wild_35384370</i> | NA                                  | <i>Ca_desi_denovo</i> | 35384370                | A/C  | NA                 | NA                            | NA                 |
| <i>Desi_wild_35384374</i> | NA                                  | <i>Ca_desi_denovo</i> | 35384374                | C/T  | NA                 | NA                            | NA                 |
| <i>Desi_wild_35385334</i> | NA                                  | <i>Ca_desi_denovo</i> | 35385334                | A/C  | NA                 | NA                            | NA                 |
| <i>Desi_wild_35396041</i> | NA                                  | <i>Ca_desi_denovo</i> | 35396041                | A/C  | NA                 | NA                            | NA                 |
| <i>Desi_wild_35406609</i> | NA                                  | <i>Ca_desi_denovo</i> | 35406609                | C/T  | NA                 | NA                            | NA                 |
| <i>Desi_wild_35406637</i> | NA                                  | <i>Ca_desi_denovo</i> | 35406637                | G/T  | NA                 | NA                            | NA                 |
| <i>Desi_wild_35414326</i> | NA                                  | <i>Ca_desi_denovo</i> | 35414326                | A/C  | NA                 | NA                            | NA                 |
| <i>Desi_wild_35415834</i> | NA                                  | <i>Ca_desi_denovo</i> | 35415834                | T/C  | NA                 | NA                            | NA                 |
| <i>Desi_wild_35422030</i> | NA                                  | <i>Ca_desi_denovo</i> | 35422030                | G/A  | NA                 | NA                            | NA                 |
| <i>Desi_wild_35422036</i> | NA                                  | <i>Ca_desi_denovo</i> | 35422036                | C/T  | NA                 | NA                            | NA                 |
| <i>Desi_wild_35423113</i> | NA                                  | <i>Ca_desi_denovo</i> | 35423113                | T/G  | NA                 | NA                            | NA                 |
| <i>Desi_wild_35423136</i> | NA                                  | <i>Ca_desi_denovo</i> | 35423136                | T/A  | NA                 | NA                            | NA                 |
| <i>Desi_wild_35424610</i> | NA                                  | <i>Ca_desi_denovo</i> | 35424610                | A/G  | NA                 | NA                            | NA                 |
| <i>Desi_wild_35425727</i> | NA                                  | <i>Ca_desi_denovo</i> | 35425727                | G/C  | NA                 | NA                            | NA                 |
| <i>Desi_wild_35426260</i> | NA                                  | <i>Ca_desi_denovo</i> | 35426260                | A/T  | NA                 | NA                            | NA                 |
| <i>Desi_wild_35426284</i> | NA                                  | <i>Ca_desi_denovo</i> | 35426284                | A/G  | NA                 | NA                            | NA                 |
| <i>Desi_wild_35432751</i> | NA                                  | <i>Ca_desi_denovo</i> | 35432751                | G/A  | NA                 | NA                            | NA                 |
| <i>Desi_wild_35447638</i> | NA                                  | <i>Ca_desi_denovo</i> | 35447638                | G/T  | NA                 | NA                            | NA                 |
| <i>Desi_wild_35447756</i> | NA                                  | <i>Ca_desi_denovo</i> | 35447756                | A/C  | NA                 | NA                            | NA                 |
| <i>Desi_wild_35470186</i> | NA                                  | <i>Ca_desi_denovo</i> | 35470186                | A/G  | NA                 | NA                            | NA                 |
| <i>Desi_wild_35470198</i> | NA                                  | <i>Ca_desi_denovo</i> | 35470198                | A/G  | NA                 | NA                            | NA                 |
| <i>Desi_wild_35476246</i> | NA                                  | <i>Ca_desi_denovo</i> | 35476246                | A/C  | NA                 | NA                            | NA                 |
| <i>Desi_wild_35476247</i> | NA                                  | <i>Ca_desi_denovo</i> | 35476247                | A/G  | NA                 | NA                            | NA                 |
| <i>Desi_wild_35476911</i> | NA                                  | <i>Ca_desi_denovo</i> | 35476911                | A/G  | NA                 | NA                            | NA                 |
| <i>Desi_wild_35480546</i> | NA                                  | <i>Ca_desi_denovo</i> | 35480546                | G/T  | NA                 | NA                            | NA                 |
| <i>Desi_wild_35491040</i> | NA                                  | <i>Ca_desi_denovo</i> | 35491040                | C/T  | NA                 | NA                            | NA                 |
| <i>Desi_wild_35491043</i> | NA                                  | <i>Ca_desi_denovo</i> | 35491043                | G/C  | NA                 | NA                            | NA                 |
| <i>Desi_wild_35492991</i> | NA                                  | <i>Ca_desi_denovo</i> | 35492991                | G/T  | NA                 | NA                            | NA                 |
| <i>Desi_wild_35493027</i> | NA                                  | <i>Ca_desi_denovo</i> | 35493027                | G/C  | NA                 | NA                            | NA                 |
| <i>Desi_wild_35500029</i> | NA                                  | <i>Ca_desi_denovo</i> | 35500029                | C/A  | NA                 | NA                            | NA                 |
| <i>Desi_wild_35504757</i> | NA                                  | <i>Ca_desi_denovo</i> | 35504757                | A/C  | NA                 | NA                            | NA                 |
| <i>Desi_wild_35509377</i> | NA                                  | <i>Ca_desi_denovo</i> | 35509377                | A/C  | NA                 | NA                            | NA                 |
| <i>Desi_wild_35509428</i> | NA                                  | <i>Ca_desi_denovo</i> | 35509428                | A/G  | NA                 | NA                            | NA                 |
| <i>Desi_wild_35512653</i> | NA                                  | <i>Ca_desi_denovo</i> | 35512653                | G/A  | NA                 | NA                            | NA                 |
| <i>Desi_wild_35514199</i> | NA                                  | <i>Ca_desi_denovo</i> | 35514199                | A/G  | NA                 | NA                            | NA                 |
| <i>Desi_wild_35514223</i> | NA                                  | <i>Ca_desi_denovo</i> | 35514223                | A/G  | NA                 | NA                            | NA                 |
| <i>Desi_wild_35514263</i> | NA                                  | <i>Ca_desi_denovo</i> | 35514263                | A/C  | NA                 | NA                            | NA                 |
| <i>Desi_wild_35516028</i> | NA                                  | <i>Ca_desi_denovo</i> | 35516028                | G/A  | NA                 | NA                            | NA                 |
| <i>Desi_wild_35516058</i> | NA                                  | <i>Ca_desi_denovo</i> | 35516058                | C/A  | NA                 | NA                            | NA                 |
| <i>Desi_wild_35520822</i> | NA                                  | <i>Ca_desi_denovo</i> | 35520822                | C/T  | NA                 | NA                            | NA                 |
| <i>Desi_wild_35524151</i> | NA                                  | <i>Ca_desi_denovo</i> | 35524151                | A/C  | NA                 | NA                            | NA                 |
| <i>Desi_wild_35527799</i> | NA                                  | <i>Ca_desi_denovo</i> | 35527799                | A/C  | NA                 | NA                            | NA                 |
| <i>Desi_wild_35532719</i> | NA                                  | <i>Ca_desi_denovo</i> | 35532719                | T/C  | NA                 | NA                            | NA                 |
| <i>Desi_wild_35534807</i> | NA                                  | <i>Ca_desi_denovo</i> | 35534807                | G/T  | NA                 | NA                            | NA                 |

| SNP IDs                   | NCBI dbSNP accession IDs (NCBI_SS#) | Chromosomes           | Physical positions (bp) | SNPs | Gene accession IDs | Sequence components of genome | Putative functions |
|---------------------------|-------------------------------------|-----------------------|-------------------------|------|--------------------|-------------------------------|--------------------|
| <i>Desi_wild_35535393</i> | NA                                  | <i>Ca_desi_denovo</i> | 35535393                | A/G  | NA                 | NA                            | NA                 |
| <i>Desi_wild_35535477</i> | NA                                  | <i>Ca_desi_denovo</i> | 35535477                | C/G  | NA                 | NA                            | NA                 |
| <i>Desi_wild_35535479</i> | NA                                  | <i>Ca_desi_denovo</i> | 35535479                | C/G  | NA                 | NA                            | NA                 |
| <i>Desi_wild_35535957</i> | NA                                  | <i>Ca_desi_denovo</i> | 35535957                | A/C  | NA                 | NA                            | NA                 |
| <i>Desi_wild_35536173</i> | NA                                  | <i>Ca_desi_denovo</i> | 35536173                | C/T  | NA                 | NA                            | NA                 |
| <i>Desi_wild_35536791</i> | NA                                  | <i>Ca_desi_denovo</i> | 35536791                | A/G  | NA                 | NA                            | NA                 |
| <i>Desi_wild_35543349</i> | NA                                  | <i>Ca_desi_denovo</i> | 35543349                | T/G  | NA                 | NA                            | NA                 |
| <i>Desi_wild_35549213</i> | NA                                  | <i>Ca_desi_denovo</i> | 35549213                | C/T  | NA                 | NA                            | NA                 |
| <i>Desi_wild_35553306</i> | NA                                  | <i>Ca_desi_denovo</i> | 35553306                | A/G  | NA                 | NA                            | NA                 |
| <i>Desi_wild_35556609</i> | NA                                  | <i>Ca_desi_denovo</i> | 35556609                | G/C  | NA                 | NA                            | NA                 |
| <i>Desi_wild_35556623</i> | NA                                  | <i>Ca_desi_denovo</i> | 35556623                | T/C  | NA                 | NA                            | NA                 |
| <i>Desi_wild_35556627</i> | NA                                  | <i>Ca_desi_denovo</i> | 35556627                | C/A  | NA                 | NA                            | NA                 |
| <i>Desi_wild_35563510</i> | NA                                  | <i>Ca_desi_denovo</i> | 35563510                | A/C  | NA                 | NA                            | NA                 |
| <i>Desi_wild_35566607</i> | NA                                  | <i>Ca_desi_denovo</i> | 35566607                | G/A  | NA                 | NA                            | NA                 |
| <i>Desi_wild_35567708</i> | NA                                  | <i>Ca_desi_denovo</i> | 35567708                | C/G  | NA                 | NA                            | NA                 |
| <i>Desi_wild_35568406</i> | NA                                  | <i>Ca_desi_denovo</i> | 35568406                | A/C  | NA                 | NA                            | NA                 |
| <i>Desi_wild_35568407</i> | NA                                  | <i>Ca_desi_denovo</i> | 35568407                | C/G  | NA                 | NA                            | NA                 |
| <i>Desi_wild_35570612</i> | NA                                  | <i>Ca_desi_denovo</i> | 35570612                | A/C  | NA                 | NA                            | NA                 |
| <i>Desi_wild_35570807</i> | NA                                  | <i>Ca_desi_denovo</i> | 35570807                | A/C  | NA                 | NA                            | NA                 |
| <i>Desi_wild_35570999</i> | NA                                  | <i>Ca_desi_denovo</i> | 35570999                | A/C  | NA                 | NA                            | NA                 |
| <i>Desi_wild_35574803</i> | NA                                  | <i>Ca_desi_denovo</i> | 35574803                | T/G  | NA                 | NA                            | NA                 |
| <i>Desi_wild_35576659</i> | NA                                  | <i>Ca_desi_denovo</i> | 35576659                | G/T  | NA                 | NA                            | NA                 |
| <i>Desi_wild_35577563</i> | NA                                  | <i>Ca_desi_denovo</i> | 35577563                | T/A  | NA                 | NA                            | NA                 |
| <i>Desi_wild_35577591</i> | NA                                  | <i>Ca_desi_denovo</i> | 35577591                | A/G  | NA                 | NA                            | NA                 |
| <i>Desi_wild_35578006</i> | NA                                  | <i>Ca_desi_denovo</i> | 35578006                | A/C  | NA                 | NA                            | NA                 |
| <i>Desi_wild_35578765</i> | NA                                  | <i>Ca_desi_denovo</i> | 35578765                | G/T  | NA                 | NA                            | NA                 |
| <i>Desi_wild_35578825</i> | NA                                  | <i>Ca_desi_denovo</i> | 35578825                | C/T  | NA                 | NA                            | NA                 |
| <i>Desi_wild_35580053</i> | NA                                  | <i>Ca_desi_denovo</i> | 35580053                | C/G  | NA                 | NA                            | NA                 |
| <i>Desi_wild_35581149</i> | NA                                  | <i>Ca_desi_denovo</i> | 35581149                | C/T  | NA                 | NA                            | NA                 |
| <i>Desi_wild_35581158</i> | NA                                  | <i>Ca_desi_denovo</i> | 35581158                | A/G  | NA                 | NA                            | NA                 |
| <i>Desi_wild_35581175</i> | NA                                  | <i>Ca_desi_denovo</i> | 35581175                | G/T  | NA                 | NA                            | NA                 |
| <i>Desi_wild_35582120</i> | NA                                  | <i>Ca_desi_denovo</i> | 35582120                | G/T  | NA                 | NA                            | NA                 |
| <i>Desi_wild_35587413</i> | NA                                  | <i>Ca_desi_denovo</i> | 35587413                | A/C  | NA                 | NA                            | NA                 |
| <i>Desi_wild_35588397</i> | NA                                  | <i>Ca_desi_denovo</i> | 35588397                | G/C  | NA                 | NA                            | NA                 |
| <i>Desi_wild_35588463</i> | NA                                  | <i>Ca_desi_denovo</i> | 35588463                | A/C  | NA                 | NA                            | NA                 |
| <i>Desi_wild_35593963</i> | NA                                  | <i>Ca_desi_denovo</i> | 35593963                | A/C  | NA                 | NA                            | NA                 |
| <i>Desi_wild_35598179</i> | NA                                  | <i>Ca_desi_denovo</i> | 35598179                | C/G  | NA                 | NA                            | NA                 |
| <i>Desi_wild_35598254</i> | NA                                  | <i>Ca_desi_denovo</i> | 35598254                | C/T  | NA                 | NA                            | NA                 |
| <i>Desi_wild_35599504</i> | NA                                  | <i>Ca_desi_denovo</i> | 35599504                | G/T  | NA                 | NA                            | NA                 |
| <i>Desi_wild_35605317</i> | NA                                  | <i>Ca_desi_denovo</i> | 35605317                | C/T  | NA                 | NA                            | NA                 |
| <i>Desi_wild_35616596</i> | NA                                  | <i>Ca_desi_denovo</i> | 35616596                | A/G  | NA                 | NA                            | NA                 |
| <i>Desi_wild_35623331</i> | NA                                  | <i>Ca_desi_denovo</i> | 35623331                | T/G  | NA                 | NA                            | NA                 |
| <i>Desi_wild_35623400</i> | NA                                  | <i>Ca_desi_denovo</i> | 35623400                | T/C  | NA                 | NA                            | NA                 |
| <i>Desi_wild_35623540</i> | NA                                  | <i>Ca_desi_denovo</i> | 35623540                | A/G  | NA                 | NA                            | NA                 |

| SNP IDs                   | NCBI dbSNP accession IDs (NCBI_SS#) | Chromosomes           | Physical positions (bp) | SNPs | Gene accession IDs | Sequence components of genome | Putative functions |
|---------------------------|-------------------------------------|-----------------------|-------------------------|------|--------------------|-------------------------------|--------------------|
| <i>Desi_wild_35627970</i> | NA                                  | <i>Ca_desi_denovo</i> | 35627970                | C/G  | NA                 | NA                            | NA                 |
| <i>Desi_wild_35628006</i> | NA                                  | <i>Ca_desi_denovo</i> | 35628006                | C/T  | NA                 | NA                            | NA                 |
| <i>Desi_wild_35634691</i> | NA                                  | <i>Ca_desi_denovo</i> | 35634691                | G/T  | NA                 | NA                            | NA                 |
| <i>Desi_wild_35634761</i> | NA                                  | <i>Ca_desi_denovo</i> | 35634761                | G/A  | NA                 | NA                            | NA                 |
| <i>Desi_wild_35634833</i> | NA                                  | <i>Ca_desi_denovo</i> | 35634833                | T/C  | NA                 | NA                            | NA                 |
| <i>Desi_wild_35640036</i> | NA                                  | <i>Ca_desi_denovo</i> | 35640036                | C/T  | NA                 | NA                            | NA                 |
| <i>Desi_wild_35640042</i> | NA                                  | <i>Ca_desi_denovo</i> | 35640042                | C/T  | NA                 | NA                            | NA                 |
| <i>Desi_wild_35640215</i> | NA                                  | <i>Ca_desi_denovo</i> | 35640215                | C/G  | NA                 | NA                            | NA                 |
| <i>Desi_wild_35644320</i> | NA                                  | <i>Ca_desi_denovo</i> | 35644320                | A/G  | NA                 | NA                            | NA                 |
| <i>Desi_wild_35644338</i> | NA                                  | <i>Ca_desi_denovo</i> | 35644338                | A/G  | NA                 | NA                            | NA                 |
| <i>Desi_wild_35646875</i> | NA                                  | <i>Ca_desi_denovo</i> | 35646875                | G/T  | NA                 | NA                            | NA                 |
| <i>Desi_wild_35646914</i> | NA                                  | <i>Ca_desi_denovo</i> | 35646914                | C/T  | NA                 | NA                            | NA                 |
| <i>Desi_wild_35650775</i> | NA                                  | <i>Ca_desi_denovo</i> | 35650775                | G/T  | NA                 | NA                            | NA                 |
| <i>Desi_wild_35651265</i> | NA                                  | <i>Ca_desi_denovo</i> | 35651265                | C/T  | NA                 | NA                            | NA                 |
| <i>Desi_wild_35651283</i> | NA                                  | <i>Ca_desi_denovo</i> | 35651283                | C/T  | NA                 | NA                            | NA                 |
| <i>Desi_wild_35653394</i> | NA                                  | <i>Ca_desi_denovo</i> | 35653394                | G/A  | NA                 | NA                            | NA                 |
| <i>Desi_wild_35660488</i> | NA                                  | <i>Ca_desi_denovo</i> | 35660488                | C/T  | NA                 | NA                            | NA                 |
| <i>Desi_wild_35664237</i> | NA                                  | <i>Ca_desi_denovo</i> | 35664237                | A/G  | NA                 | NA                            | NA                 |
| <i>Desi_wild_35664241</i> | NA                                  | <i>Ca_desi_denovo</i> | 35664241                | T/C  | NA                 | NA                            | NA                 |
| <i>Desi_wild_35664285</i> | NA                                  | <i>Ca_desi_denovo</i> | 35664285                | A/C  | NA                 | NA                            | NA                 |
| <i>Desi_wild_35664288</i> | NA                                  | <i>Ca_desi_denovo</i> | 35664288                | G/A  | NA                 | NA                            | NA                 |
| <i>Desi_wild_35664495</i> | NA                                  | <i>Ca_desi_denovo</i> | 35664495                | G/T  | NA                 | NA                            | NA                 |
| <i>Desi_wild_35665557</i> | NA                                  | <i>Ca_desi_denovo</i> | 35665557                | A/C  | NA                 | NA                            | NA                 |
| <i>Desi_wild_35666807</i> | NA                                  | <i>Ca_desi_denovo</i> | 35666807                | C/A  | NA                 | NA                            | NA                 |
| <i>Desi_wild_35667259</i> | NA                                  | <i>Ca_desi_denovo</i> | 35667259                | G/A  | NA                 | NA                            | NA                 |
| <i>Desi_wild_35667265</i> | NA                                  | <i>Ca_desi_denovo</i> | 35667265                | C/G  | NA                 | NA                            | NA                 |
| <i>Desi_wild_35667493</i> | NA                                  | <i>Ca_desi_denovo</i> | 35667493                | A/C  | NA                 | NA                            | NA                 |
| <i>Desi_wild_35667508</i> | NA                                  | <i>Ca_desi_denovo</i> | 35667508                | A/G  | NA                 | NA                            | NA                 |
| <i>Desi_wild_35674127</i> | NA                                  | <i>Ca_desi_denovo</i> | 35674127                | A/G  | NA                 | NA                            | NA                 |
| <i>Desi_wild_35674162</i> | NA                                  | <i>Ca_desi_denovo</i> | 35674162                | C/T  | NA                 | NA                            | NA                 |
| <i>Desi_wild_35676632</i> | NA                                  | <i>Ca_desi_denovo</i> | 35676632                | A/G  | NA                 | NA                            | NA                 |
| <i>Desi_wild_35681388</i> | NA                                  | <i>Ca_desi_denovo</i> | 35681388                | C/T  | NA                 | NA                            | NA                 |
| <i>Desi_wild_35685623</i> | NA                                  | <i>Ca_desi_denovo</i> | 35685623                | G/T  | NA                 | NA                            | NA                 |
| <i>Desi_wild_35688564</i> | NA                                  | <i>Ca_desi_denovo</i> | 35688564                | G/T  | NA                 | NA                            | NA                 |
| <i>Desi_wild_35689298</i> | NA                                  | <i>Ca_desi_denovo</i> | 35689298                | A/G  | NA                 | NA                            | NA                 |
| <i>Desi_wild_35692034</i> | NA                                  | <i>Ca_desi_denovo</i> | 35692034                | T/C  | NA                 | NA                            | NA                 |
| <i>Desi_wild_35698981</i> | NA                                  | <i>Ca_desi_denovo</i> | 35698981                | G/A  | NA                 | NA                            | NA                 |
| <i>Desi_wild_35701960</i> | NA                                  | <i>Ca_desi_denovo</i> | 35701960                | G/T  | NA                 | NA                            | NA                 |
| <i>Desi_wild_35701981</i> | NA                                  | <i>Ca_desi_denovo</i> | 35701981                | A/C  | NA                 | NA                            | NA                 |
| <i>Desi_wild_35701996</i> | NA                                  | <i>Ca_desi_denovo</i> | 35701996                | C/A  | NA                 | NA                            | NA                 |
| <i>Desi_wild_35702005</i> | NA                                  | <i>Ca_desi_denovo</i> | 35702005                | G/C  | NA                 | NA                            | NA                 |
| <i>Desi_wild_35708928</i> | NA                                  | <i>Ca_desi_denovo</i> | 35708928                | G/T  | NA                 | NA                            | NA                 |
| <i>Desi_wild_35709688</i> | NA                                  | <i>Ca_desi_denovo</i> | 35709688                | T/G  | NA                 | NA                            | NA                 |
| <i>Desi_wild_35710129</i> | NA                                  | <i>Ca_desi_denovo</i> | 35710129                | A/G  | NA                 | NA                            | NA                 |

| SNP IDs                   | NCBI dbSNP accession IDs (NCBI_SS#) | Chromosomes           | Physical positions (bp) | SNPs | Gene accession IDs | Sequence components of genome | Putative functions |
|---------------------------|-------------------------------------|-----------------------|-------------------------|------|--------------------|-------------------------------|--------------------|
| <i>Desi_wild_35710452</i> | NA                                  | <i>Ca_desi_denovo</i> | 35710452                | G/C  | NA                 | NA                            | NA                 |
| <i>Desi_wild_35710679</i> | NA                                  | <i>Ca_desi_denovo</i> | 35710679                | G/T  | NA                 | NA                            | NA                 |
| <i>Desi_wild_35712367</i> | NA                                  | <i>Ca_desi_denovo</i> | 35712367                | T/C  | NA                 | NA                            | NA                 |
| <i>Desi_wild_35712523</i> | NA                                  | <i>Ca_desi_denovo</i> | 35712523                | C/G  | NA                 | NA                            | NA                 |
| <i>Desi_wild_35712576</i> | NA                                  | <i>Ca_desi_denovo</i> | 35712576                | C/T  | NA                 | NA                            | NA                 |
| <i>Desi_wild_35718135</i> | NA                                  | <i>Ca_desi_denovo</i> | 35718135                | T/A  | NA                 | NA                            | NA                 |
| <i>Desi_wild_35719458</i> | NA                                  | <i>Ca_desi_denovo</i> | 35719458                | G/T  | NA                 | NA                            | NA                 |
| <i>Desi_wild_35751580</i> | NA                                  | <i>Ca_desi_denovo</i> | 35751580                | T/C  | NA                 | NA                            | NA                 |
| <i>Desi_wild_35751583</i> | NA                                  | <i>Ca_desi_denovo</i> | 35751583                | C/T  | NA                 | NA                            | NA                 |
| <i>Desi_wild_35751643</i> | NA                                  | <i>Ca_desi_denovo</i> | 35751643                | C/T  | NA                 | NA                            | NA                 |
| <i>Desi_wild_35752268</i> | NA                                  | <i>Ca_desi_denovo</i> | 35752268                | C/G  | NA                 | NA                            | NA                 |
| <i>Desi_wild_35752289</i> | NA                                  | <i>Ca_desi_denovo</i> | 35752289                | T/C  | NA                 | NA                            | NA                 |
| <i>Desi_wild_35756274</i> | NA                                  | <i>Ca_desi_denovo</i> | 35756274                | G/A  | NA                 | NA                            | NA                 |
| <i>Desi_wild_35758695</i> | NA                                  | <i>Ca_desi_denovo</i> | 35758695                | A/T  | NA                 | NA                            | NA                 |
| <i>Desi_wild_35759346</i> | NA                                  | <i>Ca_desi_denovo</i> | 35759346                | G/T  | NA                 | NA                            | NA                 |
| <i>Desi_wild_35761611</i> | NA                                  | <i>Ca_desi_denovo</i> | 35761611                | A/G  | NA                 | NA                            | NA                 |
| <i>Desi_wild_35761635</i> | NA                                  | <i>Ca_desi_denovo</i> | 35761635                | T/C  | NA                 | NA                            | NA                 |
| <i>Desi_wild_35764751</i> | NA                                  | <i>Ca_desi_denovo</i> | 35764751                | G/C  | NA                 | NA                            | NA                 |
| <i>Desi_wild_35764813</i> | NA                                  | <i>Ca_desi_denovo</i> | 35764813                | A/G  | NA                 | NA                            | NA                 |
| <i>Desi_wild_35765929</i> | NA                                  | <i>Ca_desi_denovo</i> | 35765929                | G/C  | NA                 | NA                            | NA                 |
| <i>Desi_wild_35765949</i> | NA                                  | <i>Ca_desi_denovo</i> | 35765949                | T/C  | NA                 | NA                            | NA                 |
| <i>Desi_wild_35772629</i> | NA                                  | <i>Ca_desi_denovo</i> | 35772629                | A/G  | NA                 | NA                            | NA                 |
| <i>Desi_wild_35778998</i> | NA                                  | <i>Ca_desi_denovo</i> | 35778998                | A/G  | NA                 | NA                            | NA                 |
| <i>Desi_wild_35780269</i> | NA                                  | <i>Ca_desi_denovo</i> | 35780269                | A/C  | NA                 | NA                            | NA                 |
| <i>Desi_wild_35782117</i> | NA                                  | <i>Ca_desi_denovo</i> | 35782117                | C/A  | NA                 | NA                            | NA                 |
| <i>Desi_wild_35783204</i> | NA                                  | <i>Ca_desi_denovo</i> | 35783204                | G/T  | NA                 | NA                            | NA                 |
| <i>Desi_wild_35790897</i> | NA                                  | <i>Ca_desi_denovo</i> | 35790897                | A/G  | NA                 | NA                            | NA                 |
| <i>Desi_wild_35790910</i> | NA                                  | <i>Ca_desi_denovo</i> | 35790910                | G/C  | NA                 | NA                            | NA                 |
| <i>Desi_wild_35791605</i> | NA                                  | <i>Ca_desi_denovo</i> | 35791605                | C/G  | NA                 | NA                            | NA                 |
| <i>Desi_wild_35794895</i> | NA                                  | <i>Ca_desi_denovo</i> | 35794895                | A/G  | NA                 | NA                            | NA                 |
| <i>Desi_wild_35796653</i> | NA                                  | <i>Ca_desi_denovo</i> | 35796653                | G/A  | NA                 | NA                            | NA                 |
| <i>Desi_wild_35803520</i> | NA                                  | <i>Ca_desi_denovo</i> | 35803520                | G/T  | NA                 | NA                            | NA                 |
| <i>Desi_wild_35803526</i> | NA                                  | <i>Ca_desi_denovo</i> | 35803526                | T/G  | NA                 | NA                            | NA                 |
| <i>Desi_wild_35814297</i> | NA                                  | <i>Ca_desi_denovo</i> | 35814297                | G/A  | NA                 | NA                            | NA                 |
| <i>Desi_wild_35814300</i> | NA                                  | <i>Ca_desi_denovo</i> | 35814300                | A/G  | NA                 | NA                            | NA                 |
| <i>Desi_wild_35816594</i> | NA                                  | <i>Ca_desi_denovo</i> | 35816594                | C/A  | NA                 | NA                            | NA                 |
| <i>Desi_wild_35824429</i> | NA                                  | <i>Ca_desi_denovo</i> | 35824429                | G/T  | NA                 | NA                            | NA                 |
| <i>Desi_wild_35824790</i> | NA                                  | <i>Ca_desi_denovo</i> | 35824790                | C/T  | NA                 | NA                            | NA                 |
| <i>Desi_wild_35824814</i> | NA                                  | <i>Ca_desi_denovo</i> | 35824814                | G/C  | NA                 | NA                            | NA                 |
| <i>Desi_wild_35825489</i> | NA                                  | <i>Ca_desi_denovo</i> | 35825489                | C/A  | NA                 | NA                            | NA                 |
| <i>Desi_wild_35828317</i> | NA                                  | <i>Ca_desi_denovo</i> | 35828317                | G/T  | NA                 | NA                            | NA                 |
| <i>Desi_wild_35833412</i> | NA                                  | <i>Ca_desi_denovo</i> | 35833412                | T/G  | NA                 | NA                            | NA                 |
| <i>Desi_wild_35839586</i> | NA                                  | <i>Ca_desi_denovo</i> | 35839586                | T/C  | NA                 | NA                            | NA                 |
| <i>Desi_wild_35839599</i> | NA                                  | <i>Ca_desi_denovo</i> | 35839599                | G/T  | NA                 | NA                            | NA                 |

| SNP IDs                   | NCBI dbSNP accession IDs (NCBI_SS#) | Chromosomes           | Physical positions (bp) | SNPs | Gene accession IDs | Sequence components of genome | Putative functions |
|---------------------------|-------------------------------------|-----------------------|-------------------------|------|--------------------|-------------------------------|--------------------|
| <i>Desi_wild_35839601</i> | NA                                  | <i>Ca_desi_denovo</i> | 35839601                | C/G  | NA                 | NA                            | NA                 |
| <i>Desi_wild_35839606</i> | NA                                  | <i>Ca_desi_denovo</i> | 35839606                | C/T  | NA                 | NA                            | NA                 |
| <i>Desi_wild_35840567</i> | NA                                  | <i>Ca_desi_denovo</i> | 35840567                | A/C  | NA                 | NA                            | NA                 |
| <i>Desi_wild_35843062</i> | NA                                  | <i>Ca_desi_denovo</i> | 35843062                | A/C  | NA                 | NA                            | NA                 |
| <i>Desi_wild_35845664</i> | NA                                  | <i>Ca_desi_denovo</i> | 35845664                | A/G  | NA                 | NA                            | NA                 |
| <i>Desi_wild_35845724</i> | NA                                  | <i>Ca_desi_denovo</i> | 35845724                | C/T  | NA                 | NA                            | NA                 |
| <i>Desi_wild_35846255</i> | NA                                  | <i>Ca_desi_denovo</i> | 35846255                | G/C  | NA                 | NA                            | NA                 |
| <i>Desi_wild_35849303</i> | NA                                  | <i>Ca_desi_denovo</i> | 35849303                | A/C  | NA                 | NA                            | NA                 |
| <i>Desi_wild_35855176</i> | NA                                  | <i>Ca_desi_denovo</i> | 35855176                | T/A  | NA                 | NA                            | NA                 |
| <i>Desi_wild_35855179</i> | NA                                  | <i>Ca_desi_denovo</i> | 35855179                | T/C  | NA                 | NA                            | NA                 |
| <i>Desi_wild_35860552</i> | NA                                  | <i>Ca_desi_denovo</i> | 35860552                | C/T  | NA                 | NA                            | NA                 |
| <i>Desi_wild_35870565</i> | NA                                  | <i>Ca_desi_denovo</i> | 35870565                | G/T  | NA                 | NA                            | NA                 |
| <i>Desi_wild_35871366</i> | NA                                  | <i>Ca_desi_denovo</i> | 35871366                | C/G  | NA                 | NA                            | NA                 |
| <i>Desi_wild_35873044</i> | NA                                  | <i>Ca_desi_denovo</i> | 35873044                | G/A  | NA                 | NA                            | NA                 |
| <i>Desi_wild_35878404</i> | NA                                  | <i>Ca_desi_denovo</i> | 35878404                | A/G  | NA                 | NA                            | NA                 |
| <i>Desi_wild_35880831</i> | NA                                  | <i>Ca_desi_denovo</i> | 35880831                | C/T  | NA                 | NA                            | NA                 |
| <i>Desi_wild_35880846</i> | NA                                  | <i>Ca_desi_denovo</i> | 35880846                | A/G  | NA                 | NA                            | NA                 |
| <i>Desi_wild_35890547</i> | NA                                  | <i>Ca_desi_denovo</i> | 35890547                | G/A  | NA                 | NA                            | NA                 |
| <i>Desi_wild_35890577</i> | NA                                  | <i>Ca_desi_denovo</i> | 35890577                | T/C  | NA                 | NA                            | NA                 |
| <i>Desi_wild_35893749</i> | NA                                  | <i>Ca_desi_denovo</i> | 35893749                | A/G  | NA                 | NA                            | NA                 |
| <i>Desi_wild_35897176</i> | NA                                  | <i>Ca_desi_denovo</i> | 35897176                | A/T  | NA                 | NA                            | NA                 |
| <i>Desi_wild_35897196</i> | NA                                  | <i>Ca_desi_denovo</i> | 35897196                | T/A  | NA                 | NA                            | NA                 |
| <i>Desi_wild_35899430</i> | NA                                  | <i>Ca_desi_denovo</i> | 35899430                | A/C  | NA                 | NA                            | NA                 |
| <i>Desi_wild_35902610</i> | NA                                  | <i>Ca_desi_denovo</i> | 35902610                | A/C  | NA                 | NA                            | NA                 |
| <i>Desi_wild_35903068</i> | NA                                  | <i>Ca_desi_denovo</i> | 35903068                | C/T  | NA                 | NA                            | NA                 |
| <i>Desi_wild_35903095</i> | NA                                  | <i>Ca_desi_denovo</i> | 35903095                | C/G  | NA                 | NA                            | NA                 |
| <i>Desi_wild_35905280</i> | NA                                  | <i>Ca_desi_denovo</i> | 35905280                | A/C  | NA                 | NA                            | NA                 |
| <i>Desi_wild_35912306</i> | NA                                  | <i>Ca_desi_denovo</i> | 35912306                | T/C  | NA                 | NA                            | NA                 |
| <i>Desi_wild_35918171</i> | NA                                  | <i>Ca_desi_denovo</i> | 35918171                | T/C  | NA                 | NA                            | NA                 |
| <i>Desi_wild_35918204</i> | NA                                  | <i>Ca_desi_denovo</i> | 35918204                | G/C  | NA                 | NA                            | NA                 |
| <i>Desi_wild_35926517</i> | NA                                  | <i>Ca_desi_denovo</i> | 35926517                | C/T  | NA                 | NA                            | NA                 |
| <i>Desi_wild_35929585</i> | NA                                  | <i>Ca_desi_denovo</i> | 35929585                | T/C  | NA                 | NA                            | NA                 |
| <i>Desi_wild_35929618</i> | NA                                  | <i>Ca_desi_denovo</i> | 35929618                | G/C  | NA                 | NA                            | NA                 |
| <i>Desi_wild_35931447</i> | NA                                  | <i>Ca_desi_denovo</i> | 35931447                | A/C  | NA                 | NA                            | NA                 |
| <i>Desi_wild_35935763</i> | NA                                  | <i>Ca_desi_denovo</i> | 35935763                | G/T  | NA                 | NA                            | NA                 |
| <i>Desi_wild_35937807</i> | NA                                  | <i>Ca_desi_denovo</i> | 35937807                | A/C  | NA                 | NA                            | NA                 |
| <i>Desi_wild_35937808</i> | NA                                  | <i>Ca_desi_denovo</i> | 35937808                | C/G  | NA                 | NA                            | NA                 |
| <i>Desi_wild_35937821</i> | NA                                  | <i>Ca_desi_denovo</i> | 35937821                | T/C  | NA                 | NA                            | NA                 |
| <i>Desi_wild_35937824</i> | NA                                  | <i>Ca_desi_denovo</i> | 35937824                | G/T  | NA                 | NA                            | NA                 |
| <i>Desi_wild_35938391</i> | NA                                  | <i>Ca_desi_denovo</i> | 35938391                | A/C  | NA                 | NA                            | NA                 |
| <i>Desi_wild_35950629</i> | NA                                  | <i>Ca_desi_denovo</i> | 35950629                | A/C  | NA                 | NA                            | NA                 |
| <i>Desi_wild_35951667</i> | NA                                  | <i>Ca_desi_denovo</i> | 35951667                | G/A  | NA                 | NA                            | NA                 |
| <i>Desi_wild_35951703</i> | NA                                  | <i>Ca_desi_denovo</i> | 35951703                | T/C  | NA                 | NA                            | NA                 |
| <i>Desi_wild_35954642</i> | NA                                  | <i>Ca_desi_denovo</i> | 35954642                | G/T  | NA                 | NA                            | NA                 |

| SNP IDs                   | NCBI dbSNP accession IDs (NCBI_SS#) | Chromosomes           | Physical positions (bp) | SNPs | Gene accession IDs | Sequence components of genome | Putative functions |
|---------------------------|-------------------------------------|-----------------------|-------------------------|------|--------------------|-------------------------------|--------------------|
| <i>Desi_wild_35954660</i> | NA                                  | <i>Ca_desi_denovo</i> | 35954660                | A/G  | NA                 | NA                            | NA                 |
| <i>Desi_wild_35954661</i> | NA                                  | <i>Ca_desi_denovo</i> | 35954661                | C/T  | NA                 | NA                            | NA                 |
| <i>Desi_wild_35957303</i> | NA                                  | <i>Ca_desi_denovo</i> | 35957303                | A/C  | NA                 | NA                            | NA                 |
| <i>Desi_wild_35964695</i> | NA                                  | <i>Ca_desi_denovo</i> | 35964695                | C/G  | NA                 | NA                            | NA                 |
| <i>Desi_wild_35969987</i> | NA                                  | <i>Ca_desi_denovo</i> | 35969987                | T/C  | NA                 | NA                            | NA                 |
| <i>Desi_wild_35980965</i> | NA                                  | <i>Ca_desi_denovo</i> | 35980965                | G/C  | NA                 | NA                            | NA                 |
| <i>Desi_wild_35981006</i> | NA                                  | <i>Ca_desi_denovo</i> | 35981006                | A/G  | NA                 | NA                            | NA                 |
| <i>Desi_wild_35983618</i> | NA                                  | <i>Ca_desi_denovo</i> | 35983618                | A/G  | NA                 | NA                            | NA                 |
| <i>Desi_wild_35983643</i> | NA                                  | <i>Ca_desi_denovo</i> | 35983643                | A/C  | NA                 | NA                            | NA                 |
| <i>Desi_wild_35985546</i> | NA                                  | <i>Ca_desi_denovo</i> | 35985546                | A/G  | NA                 | NA                            | NA                 |
| <i>Desi_wild_35986965</i> | NA                                  | <i>Ca_desi_denovo</i> | 35986965                | G/T  | NA                 | NA                            | NA                 |
| <i>Desi_wild_35990903</i> | NA                                  | <i>Ca_desi_denovo</i> | 35990903                | T/G  | NA                 | NA                            | NA                 |
| <i>Desi_wild_35994752</i> | NA                                  | <i>Ca_desi_denovo</i> | 35994752                | C/T  | NA                 | NA                            | NA                 |
| <i>Desi_wild_36000695</i> | NA                                  | <i>Ca_desi_denovo</i> | 36000695                | A/C  | NA                 | NA                            | NA                 |
| <i>Desi_wild_36002665</i> | NA                                  | <i>Ca_desi_denovo</i> | 36002665                | G/T  | NA                 | NA                            | NA                 |
| <i>Desi_wild_36003789</i> | NA                                  | <i>Ca_desi_denovo</i> | 36003789                | C/A  | NA                 | NA                            | NA                 |
| <i>Desi_wild_36010102</i> | NA                                  | <i>Ca_desi_denovo</i> | 36010102                | A/C  | NA                 | NA                            | NA                 |
| <i>Desi_wild_36010103</i> | NA                                  | <i>Ca_desi_denovo</i> | 36010103                | G/T  | NA                 | NA                            | NA                 |
| <i>Desi_wild_36014130</i> | NA                                  | <i>Ca_desi_denovo</i> | 36014130                | G/T  | NA                 | NA                            | NA                 |
| <i>Desi_wild_36017346</i> | NA                                  | <i>Ca_desi_denovo</i> | 36017346                | A/G  | NA                 | NA                            | NA                 |
| <i>Desi_wild_36017349</i> | NA                                  | <i>Ca_desi_denovo</i> | 36017349                | C/T  | NA                 | NA                            | NA                 |
| <i>Desi_wild_36018404</i> | NA                                  | <i>Ca_desi_denovo</i> | 36018404                | G/A  | NA                 | NA                            | NA                 |
| <i>Desi_wild_36018419</i> | NA                                  | <i>Ca_desi_denovo</i> | 36018419                | A/C  | NA                 | NA                            | NA                 |
| <i>Desi_wild_36020715</i> | NA                                  | <i>Ca_desi_denovo</i> | 36020715                | C/T  | NA                 | NA                            | NA                 |
| <i>Desi_wild_36020744</i> | NA                                  | <i>Ca_desi_denovo</i> | 36020744                | C/A  | NA                 | NA                            | NA                 |
| <i>Desi_wild_36026029</i> | NA                                  | <i>Ca_desi_denovo</i> | 36026029                | A/G  | NA                 | NA                            | NA                 |
| <i>Desi_wild_36028983</i> | NA                                  | <i>Ca_desi_denovo</i> | 36028983                | A/T  | NA                 | NA                            | NA                 |
| <i>Desi_wild_36032086</i> | NA                                  | <i>Ca_desi_denovo</i> | 36032086                | T/G  | NA                 | NA                            | NA                 |
| <i>Desi_wild_36034880</i> | NA                                  | <i>Ca_desi_denovo</i> | 36034880                | T/C  | NA                 | NA                            | NA                 |
| <i>Desi_wild_36034919</i> | NA                                  | <i>Ca_desi_denovo</i> | 36034919                | C/G  | NA                 | NA                            | NA                 |
| <i>Desi_wild_36034928</i> | NA                                  | <i>Ca_desi_denovo</i> | 36034928                | C/T  | NA                 | NA                            | NA                 |
| <i>Desi_wild_36034937</i> | NA                                  | <i>Ca_desi_denovo</i> | 36034937                | T/C  | NA                 | NA                            | NA                 |
| <i>Desi_wild_36038421</i> | NA                                  | <i>Ca_desi_denovo</i> | 36038421                | A/C  | NA                 | NA                            | NA                 |
| <i>Desi_wild_36038422</i> | NA                                  | <i>Ca_desi_denovo</i> | 36038422                | G/T  | NA                 | NA                            | NA                 |
| <i>Desi_wild_36038423</i> | NA                                  | <i>Ca_desi_denovo</i> | 36038423                | A/G  | NA                 | NA                            | NA                 |
| <i>Desi_wild_36038657</i> | NA                                  | <i>Ca_desi_denovo</i> | 36038657                | G/T  | NA                 | NA                            | NA                 |
| <i>Desi_wild_36041831</i> | NA                                  | <i>Ca_desi_denovo</i> | 36041831                | G/A  | NA                 | NA                            | NA                 |
| <i>Desi_wild_36041834</i> | NA                                  | <i>Ca_desi_denovo</i> | 36041834                | A/G  | NA                 | NA                            | NA                 |
| <i>Desi_wild_36043797</i> | NA                                  | <i>Ca_desi_denovo</i> | 36043797                | A/C  | NA                 | NA                            | NA                 |
| <i>Desi_wild_36043798</i> | NA                                  | <i>Ca_desi_denovo</i> | 36043798                | A/G  | NA                 | NA                            | NA                 |
| <i>Desi_wild_36043799</i> | NA                                  | <i>Ca_desi_denovo</i> | 36043799                | A/G  | NA                 | NA                            | NA                 |
| <i>Desi_wild_36048801</i> | NA                                  | <i>Ca_desi_denovo</i> | 36048801                | A/G  | NA                 | NA                            | NA                 |
| <i>Desi_wild_36048822</i> | NA                                  | <i>Ca_desi_denovo</i> | 36048822                | A/C  | NA                 | NA                            | NA                 |
| <i>Desi_wild_36058473</i> | NA                                  | <i>Ca_desi_denovo</i> | 36058473                | T/G  | NA                 | NA                            | NA                 |



| SNP IDs                   | NCBI dbSNP accession IDs (NCBI_SS#) | Chromosomes           | Physical positions (bp) | SNPs | Gene accession IDs | Sequence components of genome | Putative functions |
|---------------------------|-------------------------------------|-----------------------|-------------------------|------|--------------------|-------------------------------|--------------------|
| <i>Desi_wild_36060527</i> | NA                                  | <i>Ca_desi_denovo</i> | 36060527                | G/C  | NA                 | NA                            | NA                 |
| <i>Desi_wild_36060549</i> | NA                                  | <i>Ca_desi_denovo</i> | 36060549                | A/G  | NA                 | NA                            | NA                 |
| <i>Desi_wild_36060594</i> | NA                                  | <i>Ca_desi_denovo</i> | 36060594                | A/G  | NA                 | NA                            | NA                 |
| <i>Desi_wild_36065302</i> | NA                                  | <i>Ca_desi_denovo</i> | 36065302                | A/C  | NA                 | NA                            | NA                 |
| <i>Desi_wild_36065303</i> | NA                                  | <i>Ca_desi_denovo</i> | 36065303                | G/T  | NA                 | NA                            | NA                 |
| <i>Desi_wild_36067622</i> | NA                                  | <i>Ca_desi_denovo</i> | 36067622                | A/T  | NA                 | NA                            | NA                 |
| <i>Desi_wild_36067671</i> | NA                                  | <i>Ca_desi_denovo</i> | 36067671                | C/T  | NA                 | NA                            | NA                 |
| <i>Desi_wild_36067989</i> | NA                                  | <i>Ca_desi_denovo</i> | 36067989                | A/C  | NA                 | NA                            | NA                 |
| <i>Desi_wild_36072942</i> | NA                                  | <i>Ca_desi_denovo</i> | 36072942                | A/G  | NA                 | NA                            | NA                 |
| <i>Desi_wild_36073007</i> | NA                                  | <i>Ca_desi_denovo</i> | 36073007                | C/T  | NA                 | NA                            | NA                 |
| <i>Desi_wild_36073068</i> | NA                                  | <i>Ca_desi_denovo</i> | 36073068                | C/T  | NA                 | NA                            | NA                 |
| <i>Desi_wild_36087180</i> | NA                                  | <i>Ca_desi_denovo</i> | 36087180                | G/T  | NA                 | NA                            | NA                 |
| <i>Desi_wild_36089870</i> | NA                                  | <i>Ca_desi_denovo</i> | 36089870                | G/T  | NA                 | NA                            | NA                 |
| <i>Desi_wild_36095685</i> | NA                                  | <i>Ca_desi_denovo</i> | 36095685                | C/T  | NA                 | NA                            | NA                 |
| <i>Desi_wild_36097495</i> | NA                                  | <i>Ca_desi_denovo</i> | 36097495                | C/G  | NA                 | NA                            | NA                 |
| <i>Desi_wild_36097536</i> | NA                                  | <i>Ca_desi_denovo</i> | 36097536                | A/T  | NA                 | NA                            | NA                 |
| <i>Desi_wild_36097554</i> | NA                                  | <i>Ca_desi_denovo</i> | 36097554                | G/C  | NA                 | NA                            | NA                 |
| <i>Desi_wild_36100744</i> | NA                                  | <i>Ca_desi_denovo</i> | 36100744                | C/G  | NA                 | NA                            | NA                 |
| <i>Desi_wild_36100753</i> | NA                                  | <i>Ca_desi_denovo</i> | 36100753                | A/G  | NA                 | NA                            | NA                 |
| <i>Desi_wild_36100760</i> | NA                                  | <i>Ca_desi_denovo</i> | 36100760                | G/T  | NA                 | NA                            | NA                 |
| <i>Desi_wild_36105556</i> | NA                                  | <i>Ca_desi_denovo</i> | 36105556                | C/T  | NA                 | NA                            | NA                 |
| <i>Desi_wild_36105571</i> | NA                                  | <i>Ca_desi_denovo</i> | 36105571                | G/C  | NA                 | NA                            | NA                 |
| <i>Desi_wild_36113228</i> | NA                                  | <i>Ca_desi_denovo</i> | 36113228                | G/C  | NA                 | NA                            | NA                 |
| <i>Desi_wild_36119721</i> | NA                                  | <i>Ca_desi_denovo</i> | 36119721                | G/T  | NA                 | NA                            | NA                 |
| <i>Desi_wild_36121088</i> | NA                                  | <i>Ca_desi_denovo</i> | 36121088                | C/T  | NA                 | NA                            | NA                 |
| <i>Desi_wild_36121109</i> | NA                                  | <i>Ca_desi_denovo</i> | 36121109                | C/G  | NA                 | NA                            | NA                 |
| <i>Desi_wild_36127153</i> | NA                                  | <i>Ca_desi_denovo</i> | 36127153                | T/C  | NA                 | NA                            | NA                 |
| <i>Desi_wild_36127185</i> | NA                                  | <i>Ca_desi_denovo</i> | 36127185                | T/A  | NA                 | NA                            | NA                 |
| <i>Desi_wild_36136838</i> | NA                                  | <i>Ca_desi_denovo</i> | 36136838                | C/A  | NA                 | NA                            | NA                 |
| <i>Desi_wild_36136852</i> | NA                                  | <i>Ca_desi_denovo</i> | 36136852                | C/G  | NA                 | NA                            | NA                 |
| <i>Desi_wild_36138980</i> | NA                                  | <i>Ca_desi_denovo</i> | 36138980                | C/T  | NA                 | NA                            | NA                 |
| <i>Desi_wild_36139014</i> | NA                                  | <i>Ca_desi_denovo</i> | 36139014                | T/C  | NA                 | NA                            | NA                 |
| <i>Desi_wild_36141270</i> | NA                                  | <i>Ca_desi_denovo</i> | 36141270                | G/T  | NA                 | NA                            | NA                 |
| <i>Desi_wild_36141320</i> | NA                                  | <i>Ca_desi_denovo</i> | 36141320                | G/A  | NA                 | NA                            | NA                 |
| <i>Desi_wild_36158917</i> | NA                                  | <i>Ca_desi_denovo</i> | 36158917                | C/G  | NA                 | NA                            | NA                 |
| <i>Desi_wild_36161036</i> | NA                                  | <i>Ca_desi_denovo</i> | 36161036                | C/T  | NA                 | NA                            | NA                 |
| <i>Desi_wild_36161074</i> | NA                                  | <i>Ca_desi_denovo</i> | 36161074                | A/C  | NA                 | NA                            | NA                 |
| <i>Desi_wild_36161098</i> | NA                                  | <i>Ca_desi_denovo</i> | 36161098                | A/G  | NA                 | NA                            | NA                 |
| <i>Desi_wild_36165489</i> | NA                                  | <i>Ca_desi_denovo</i> | 36165489                | T/G  | NA                 | NA                            | NA                 |
| <i>Desi_wild_36167537</i> | NA                                  | <i>Ca_desi_denovo</i> | 36167537                | C/T  | NA                 | NA                            | NA                 |
| <i>Desi_wild_36167539</i> | NA                                  | <i>Ca_desi_denovo</i> | 36167539                | G/T  | NA                 | NA                            | NA                 |
| <i>Desi_wild_36174154</i> | NA                                  | <i>Ca_desi_denovo</i> | 36174154                | A/C  | NA                 | NA                            | NA                 |
| <i>Desi_wild_36174162</i> | NA                                  | <i>Ca_desi_denovo</i> | 36174162                | T/C  | NA                 | NA                            | NA                 |
| <i>Desi_wild_36175140</i> | NA                                  | <i>Ca_desi_denovo</i> | 36175140                | G/T  | NA                 | NA                            | NA                 |

| SNP IDs                   | NCBI dbSNP accession IDs (NCBI_SS#) | Chromosomes           | Physical positions (bp) | SNPs | Gene accession IDs | Sequence components of genome | Putative functions |
|---------------------------|-------------------------------------|-----------------------|-------------------------|------|--------------------|-------------------------------|--------------------|
| <i>Desi_wild_36175143</i> | NA                                  | <i>Ca_desi_denovo</i> | 36175143                | C/T  | NA                 | NA                            | NA                 |
| <i>Desi_wild_36175298</i> | NA                                  | <i>Ca_desi_denovo</i> | 36175298                | T/G  | NA                 | NA                            | NA                 |
| <i>Desi_wild_36176086</i> | NA                                  | <i>Ca_desi_denovo</i> | 36176086                | A/G  | NA                 | NA                            | NA                 |
| <i>Desi_wild_36179978</i> | NA                                  | <i>Ca_desi_denovo</i> | 36179978                | A/C  | NA                 | NA                            | NA                 |
| <i>Desi_wild_36179984</i> | NA                                  | <i>Ca_desi_denovo</i> | 36179984                | A/T  | NA                 | NA                            | NA                 |
| <i>Desi_wild_36181242</i> | NA                                  | <i>Ca_desi_denovo</i> | 36181242                | A/G  | NA                 | NA                            | NA                 |
| <i>Desi_wild_36184397</i> | NA                                  | <i>Ca_desi_denovo</i> | 36184397                | C/A  | NA                 | NA                            | NA                 |
| <i>Desi_wild_36184409</i> | NA                                  | <i>Ca_desi_denovo</i> | 36184409                | T/C  | NA                 | NA                            | NA                 |
| <i>Desi_wild_36188165</i> | NA                                  | <i>Ca_desi_denovo</i> | 36188165                | G/C  | NA                 | NA                            | NA                 |
| <i>Desi_wild_36188784</i> | NA                                  | <i>Ca_desi_denovo</i> | 36188784                | A/G  | NA                 | NA                            | NA                 |
| <i>Desi_wild_36190305</i> | NA                                  | <i>Ca_desi_denovo</i> | 36190305                | A/G  | NA                 | NA                            | NA                 |
| <i>Desi_wild_36190918</i> | NA                                  | <i>Ca_desi_denovo</i> | 36190918                | G/T  | NA                 | NA                            | NA                 |
| <i>Desi_wild_36190959</i> | NA                                  | <i>Ca_desi_denovo</i> | 36190959                | G/T  | NA                 | NA                            | NA                 |
| <i>Desi_wild_36192952</i> | NA                                  | <i>Ca_desi_denovo</i> | 36192952                | T/G  | NA                 | NA                            | NA                 |
| <i>Desi_wild_36193367</i> | NA                                  | <i>Ca_desi_denovo</i> | 36193367                | A/C  | NA                 | NA                            | NA                 |
| <i>Desi_wild_36200499</i> | NA                                  | <i>Ca_desi_denovo</i> | 36200499                | G/T  | NA                 | NA                            | NA                 |
| <i>Desi_wild_36201923</i> | NA                                  | <i>Ca_desi_denovo</i> | 36201923                | T/C  | NA                 | NA                            | NA                 |
| <i>Desi_wild_36201935</i> | NA                                  | <i>Ca_desi_denovo</i> | 36201935                | G/A  | NA                 | NA                            | NA                 |
| <i>Desi_wild_36212019</i> | NA                                  | <i>Ca_desi_denovo</i> | 36212019                | G/A  | NA                 | NA                            | NA                 |
| <i>Desi_wild_36213225</i> | NA                                  | <i>Ca_desi_denovo</i> | 36213225                | G/T  | NA                 | NA                            | NA                 |
| <i>Desi_wild_36219552</i> | NA                                  | <i>Ca_desi_denovo</i> | 36219552                | C/T  | NA                 | NA                            | NA                 |
| <i>Desi_wild_36234834</i> | NA                                  | <i>Ca_desi_denovo</i> | 36234834                | C/T  | NA                 | NA                            | NA                 |
| <i>Desi_wild_36240168</i> | NA                                  | <i>Ca_desi_denovo</i> | 36240168                | G/A  | NA                 | NA                            | NA                 |
| <i>Desi_wild_36240198</i> | NA                                  | <i>Ca_desi_denovo</i> | 36240198                | C/T  | NA                 | NA                            | NA                 |
| <i>Desi_wild_36241361</i> | NA                                  | <i>Ca_desi_denovo</i> | 36241361                | G/T  | NA                 | NA                            | NA                 |
| <i>Desi_wild_36242517</i> | NA                                  | <i>Ca_desi_denovo</i> | 36242517                | C/G  | NA                 | NA                            | NA                 |
| <i>Desi_wild_36242519</i> | NA                                  | <i>Ca_desi_denovo</i> | 36242519                | G/T  | NA                 | NA                            | NA                 |
| <i>Desi_wild_36248635</i> | NA                                  | <i>Ca_desi_denovo</i> | 36248635                | G/T  | NA                 | NA                            | NA                 |
| <i>Desi_wild_36253809</i> | NA                                  | <i>Ca_desi_denovo</i> | 36253809                | A/G  | NA                 | NA                            | NA                 |
| <i>Desi_wild_36253830</i> | NA                                  | <i>Ca_desi_denovo</i> | 36253830                | C/G  | NA                 | NA                            | NA                 |
| <i>Desi_wild_36262583</i> | NA                                  | <i>Ca_desi_denovo</i> | 36262583                | C/G  | NA                 | NA                            | NA                 |
| <i>Desi_wild_36272685</i> | NA                                  | <i>Ca_desi_denovo</i> | 36272685                | T/A  | NA                 | NA                            | NA                 |
| <i>Desi_wild_36273142</i> | NA                                  | <i>Ca_desi_denovo</i> | 36273142                | A/C  | NA                 | NA                            | NA                 |
| <i>Desi_wild_36273143</i> | NA                                  | <i>Ca_desi_denovo</i> | 36273143                | G/T  | NA                 | NA                            | NA                 |
| <i>Desi_wild_36275841</i> | NA                                  | <i>Ca_desi_denovo</i> | 36275841                | A/C  | NA                 | NA                            | NA                 |
| <i>Desi_wild_36276073</i> | NA                                  | <i>Ca_desi_denovo</i> | 36276073                | A/G  | NA                 | NA                            | NA                 |
| <i>Desi_wild_36277101</i> | NA                                  | <i>Ca_desi_denovo</i> | 36277101                | A/G  | NA                 | NA                            | NA                 |
| <i>Desi_wild_36277116</i> | NA                                  | <i>Ca_desi_denovo</i> | 36277116                | C/G  | NA                 | NA                            | NA                 |
| <i>Desi_wild_36279896</i> | NA                                  | <i>Ca_desi_denovo</i> | 36279896                | T/C  | NA                 | NA                            | NA                 |
| <i>Desi_wild_36279920</i> | NA                                  | <i>Ca_desi_denovo</i> | 36279920                | G/C  | NA                 | NA                            | NA                 |
| <i>Desi_wild_36285567</i> | NA                                  | <i>Ca_desi_denovo</i> | 36285567                | A/T  | NA                 | NA                            | NA                 |
| <i>Desi_wild_36289173</i> | NA                                  | <i>Ca_desi_denovo</i> | 36289173                | A/C  | NA                 | NA                            | NA                 |
| <i>Desi_wild_36292696</i> | NA                                  | <i>Ca_desi_denovo</i> | 36292696                | T/C  | NA                 | NA                            | NA                 |
| <i>Desi_wild_36297066</i> | NA                                  | <i>Ca_desi_denovo</i> | 36297066                | C/T  | NA                 | NA                            | NA                 |

| SNP IDs                   | NCBI dbSNP accession IDs (NCBI_SS#) | Chromosomes           | Physical positions (bp) | SNPs | Gene accession IDs | Sequence components of genome | Putative functions |
|---------------------------|-------------------------------------|-----------------------|-------------------------|------|--------------------|-------------------------------|--------------------|
| <i>Desi_wild_36311388</i> | NA                                  | <i>Ca_desi_denovo</i> | 36311388                | T/C  | NA                 | NA                            | NA                 |
| <i>Desi_wild_36311403</i> | NA                                  | <i>Ca_desi_denovo</i> | 36311403                | T/C  | NA                 | NA                            | NA                 |
| <i>Desi_wild_36314549</i> | NA                                  | <i>Ca_desi_denovo</i> | 36314549                | A/G  | NA                 | NA                            | NA                 |
| <i>Desi_wild_36315130</i> | NA                                  | <i>Ca_desi_denovo</i> | 36315130                | T/A  | NA                 | NA                            | NA                 |
| <i>Desi_wild_36317997</i> | NA                                  | <i>Ca_desi_denovo</i> | 36317997                | A/G  | NA                 | NA                            | NA                 |
| <i>Desi_wild_36322330</i> | NA                                  | <i>Ca_desi_denovo</i> | 36322330                | G/A  | NA                 | NA                            | NA                 |
| <i>Desi_wild_36323877</i> | NA                                  | <i>Ca_desi_denovo</i> | 36323877                | C/T  | NA                 | NA                            | NA                 |
| <i>Desi_wild_36323911</i> | NA                                  | <i>Ca_desi_denovo</i> | 36323911                | C/T  | NA                 | NA                            | NA                 |
| <i>Desi_wild_36331632</i> | NA                                  | <i>Ca_desi_denovo</i> | 36331632                | A/C  | NA                 | NA                            | NA                 |
| <i>Desi_wild_36344452</i> | NA                                  | <i>Ca_desi_denovo</i> | 36344452                | G/T  | NA                 | NA                            | NA                 |
| <i>Desi_wild_36344610</i> | NA                                  | <i>Ca_desi_denovo</i> | 36344610                | G/T  | NA                 | NA                            | NA                 |
| <i>Desi_wild_36344660</i> | NA                                  | <i>Ca_desi_denovo</i> | 36344660                | C/G  | NA                 | NA                            | NA                 |
| <i>Desi_wild_36344669</i> | NA                                  | <i>Ca_desi_denovo</i> | 36344669                | T/G  | NA                 | NA                            | NA                 |
| <i>Desi_wild_36344689</i> | NA                                  | <i>Ca_desi_denovo</i> | 36344689                | T/C  | NA                 | NA                            | NA                 |
| <i>Desi_wild_36345235</i> | NA                                  | <i>Ca_desi_denovo</i> | 36345235                | A/T  | NA                 | NA                            | NA                 |
| <i>Desi_wild_36351179</i> | NA                                  | <i>Ca_desi_denovo</i> | 36351179                | C/T  | NA                 | NA                            | NA                 |
| <i>Desi_wild_36352266</i> | NA                                  | <i>Ca_desi_denovo</i> | 36352266                | G/A  | NA                 | NA                            | NA                 |
| <i>Desi_wild_36352267</i> | NA                                  | <i>Ca_desi_denovo</i> | 36352267                | T/C  | NA                 | NA                            | NA                 |
| <i>Desi_wild_36352289</i> | NA                                  | <i>Ca_desi_denovo</i> | 36352289                | A/C  | NA                 | NA                            | NA                 |
| <i>Desi_wild_36352765</i> | NA                                  | <i>Ca_desi_denovo</i> | 36352765                | G/T  | NA                 | NA                            | NA                 |
| <i>Desi_wild_36374423</i> | NA                                  | <i>Ca_desi_denovo</i> | 36374423                | A/C  | NA                 | NA                            | NA                 |
| <i>Desi_wild_36379382</i> | NA                                  | <i>Ca_desi_denovo</i> | 36379382                | G/T  | NA                 | NA                            | NA                 |
| <i>Desi_wild_36379730</i> | NA                                  | <i>Ca_desi_denovo</i> | 36379730                | C/G  | NA                 | NA                            | NA                 |
| <i>Desi_wild_36379974</i> | NA                                  | <i>Ca_desi_denovo</i> | 36379974                | A/G  | NA                 | NA                            | NA                 |
| <i>Desi_wild_36382997</i> | NA                                  | <i>Ca_desi_denovo</i> | 36382997                | C/G  | NA                 | NA                            | NA                 |
| <i>Desi_wild_36383966</i> | NA                                  | <i>Ca_desi_denovo</i> | 36383966                | T/G  | NA                 | NA                            | NA                 |
| <i>Desi_wild_36384810</i> | NA                                  | <i>Ca_desi_denovo</i> | 36384810                | C/T  | NA                 | NA                            | NA                 |
| <i>Desi_wild_36384836</i> | NA                                  | <i>Ca_desi_denovo</i> | 36384836                | C/T  | NA                 | NA                            | NA                 |
| <i>Desi_wild_36395843</i> | NA                                  | <i>Ca_desi_denovo</i> | 36395843                | A/G  | NA                 | NA                            | NA                 |
| <i>Desi_wild_36395876</i> | NA                                  | <i>Ca_desi_denovo</i> | 36395876                | A/G  | NA                 | NA                            | NA                 |
| <i>Desi_wild_36395882</i> | NA                                  | <i>Ca_desi_denovo</i> | 36395882                | T/C  | NA                 | NA                            | NA                 |
| <i>Desi_wild_36395918</i> | NA                                  | <i>Ca_desi_denovo</i> | 36395918                | C/T  | NA                 | NA                            | NA                 |
| <i>Desi_wild_36398219</i> | NA                                  | <i>Ca_desi_denovo</i> | 36398219                | C/T  | NA                 | NA                            | NA                 |
| <i>Desi_wild_36398231</i> | NA                                  | <i>Ca_desi_denovo</i> | 36398231                | A/C  | NA                 | NA                            | NA                 |
| <i>Desi_wild_36400821</i> | NA                                  | <i>Ca_desi_denovo</i> | 36400821                | A/C  | NA                 | NA                            | NA                 |
| <i>Desi_wild_36405895</i> | NA                                  | <i>Ca_desi_denovo</i> | 36405895                | T/G  | NA                 | NA                            | NA                 |
| <i>Desi_wild_36412873</i> | NA                                  | <i>Ca_desi_denovo</i> | 36412873                | G/T  | NA                 | NA                            | NA                 |
| <i>Desi_wild_36413091</i> | NA                                  | <i>Ca_desi_denovo</i> | 36413091                | A/C  | NA                 | NA                            | NA                 |
| <i>Desi_wild_36419210</i> | NA                                  | <i>Ca_desi_denovo</i> | 36419210                | G/A  | NA                 | NA                            | NA                 |
| <i>Desi_wild_36419228</i> | NA                                  | <i>Ca_desi_denovo</i> | 36419228                | A/G  | NA                 | NA                            | NA                 |
| <i>Desi_wild_36419240</i> | NA                                  | <i>Ca_desi_denovo</i> | 36419240                | C/A  | NA                 | NA                            | NA                 |
| <i>Desi_wild_36422121</i> | NA                                  | <i>Ca_desi_denovo</i> | 36422121                | T/C  | NA                 | NA                            | NA                 |
| <i>Desi_wild_36422127</i> | NA                                  | <i>Ca_desi_denovo</i> | 36422127                | C/G  | NA                 | NA                            | NA                 |
| <i>Desi_wild_36431364</i> | NA                                  | <i>Ca_desi_denovo</i> | 36431364                | C/A  | NA                 | NA                            | NA                 |

| SNP IDs                   | NCBI dbSNP accession IDs (NCBI_SS#) | Chromosomes           | Physical positions (bp) | SNPs | Gene accession IDs | Sequence components of genome | Putative functions |
|---------------------------|-------------------------------------|-----------------------|-------------------------|------|--------------------|-------------------------------|--------------------|
| <i>Desi_wild_36431423</i> | NA                                  | <i>Ca_desi_denovo</i> | 36431423                | C/T  | NA                 | NA                            | NA                 |
| <i>Desi_wild_36431460</i> | NA                                  | <i>Ca_desi_denovo</i> | 36431460                | A/G  | NA                 | NA                            | NA                 |
| <i>Desi_wild_36436389</i> | NA                                  | <i>Ca_desi_denovo</i> | 36436389                | C/G  | NA                 | NA                            | NA                 |
| <i>Desi_wild_36436401</i> | NA                                  | <i>Ca_desi_denovo</i> | 36436401                | A/G  | NA                 | NA                            | NA                 |
| <i>Desi_wild_36436407</i> | NA                                  | <i>Ca_desi_denovo</i> | 36436407                | A/G  | NA                 | NA                            | NA                 |
| <i>Desi_wild_36439069</i> | NA                                  | <i>Ca_desi_denovo</i> | 36439069                | C/A  | NA                 | NA                            | NA                 |
| <i>Desi_wild_36439084</i> | NA                                  | <i>Ca_desi_denovo</i> | 36439084                | A/G  | NA                 | NA                            | NA                 |
| <i>Desi_wild_36443540</i> | NA                                  | <i>Ca_desi_denovo</i> | 36443540                | A/C  | NA                 | NA                            | NA                 |
| <i>Desi_wild_36443543</i> | NA                                  | <i>Ca_desi_denovo</i> | 36443543                | G/T  | NA                 | NA                            | NA                 |
| <i>Desi_wild_36444221</i> | NA                                  | <i>Ca_desi_denovo</i> | 36444221                | A/G  | NA                 | NA                            | NA                 |
| <i>Desi_wild_36444242</i> | NA                                  | <i>Ca_desi_denovo</i> | 36444242                | T/A  | NA                 | NA                            | NA                 |
| <i>Desi_wild_36446325</i> | NA                                  | <i>Ca_desi_denovo</i> | 36446325                | T/G  | NA                 | NA                            | NA                 |
| <i>Desi_wild_36452562</i> | NA                                  | <i>Ca_desi_denovo</i> | 36452562                | G/T  | NA                 | NA                            | NA                 |
| <i>Desi_wild_36453896</i> | NA                                  | <i>Ca_desi_denovo</i> | 36453896                | G/T  | NA                 | NA                            | NA                 |
| <i>Desi_wild_36455100</i> | NA                                  | <i>Ca_desi_denovo</i> | 36455100                | G/C  | NA                 | NA                            | NA                 |
| <i>Desi_wild_36455145</i> | NA                                  | <i>Ca_desi_denovo</i> | 36455145                | G/C  | NA                 | NA                            | NA                 |
| <i>Desi_wild_36463151</i> | NA                                  | <i>Ca_desi_denovo</i> | 36463151                | C/T  | NA                 | NA                            | NA                 |
| <i>Desi_wild_36463156</i> | NA                                  | <i>Ca_desi_denovo</i> | 36463156                | C/T  | NA                 | NA                            | NA                 |
| <i>Desi_wild_36466432</i> | NA                                  | <i>Ca_desi_denovo</i> | 36466432                | A/G  | NA                 | NA                            | NA                 |
| <i>Desi_wild_36468256</i> | NA                                  | <i>Ca_desi_denovo</i> | 36468256                | C/T  | NA                 | NA                            | NA                 |
| <i>Desi_wild_36468297</i> | NA                                  | <i>Ca_desi_denovo</i> | 36468297                | C/G  | NA                 | NA                            | NA                 |
| <i>Desi_wild_36468463</i> | NA                                  | <i>Ca_desi_denovo</i> | 36468463                | A/G  | NA                 | NA                            | NA                 |
| <i>Desi_wild_36468645</i> | NA                                  | <i>Ca_desi_denovo</i> | 36468645                | G/T  | NA                 | NA                            | NA                 |
| <i>Desi_wild_36474054</i> | NA                                  | <i>Ca_desi_denovo</i> | 36474054                | G/A  | NA                 | NA                            | NA                 |
| <i>Desi_wild_36475731</i> | NA                                  | <i>Ca_desi_denovo</i> | 36475731                | C/T  | NA                 | NA                            | NA                 |
| <i>Desi_wild_36476863</i> | NA                                  | <i>Ca_desi_denovo</i> | 36476863                | T/A  | NA                 | NA                            | NA                 |
| <i>Desi_wild_36476892</i> | NA                                  | <i>Ca_desi_denovo</i> | 36476892                | C/G  | NA                 | NA                            | NA                 |
| <i>Desi_wild_36478857</i> | NA                                  | <i>Ca_desi_denovo</i> | 36478857                | G/T  | NA                 | NA                            | NA                 |
| <i>Desi_wild_36482738</i> | NA                                  | <i>Ca_desi_denovo</i> | 36482738                | A/G  | NA                 | NA                            | NA                 |
| <i>Desi_wild_36485931</i> | NA                                  | <i>Ca_desi_denovo</i> | 36485931                | T/C  | NA                 | NA                            | NA                 |
| <i>Desi_wild_36498493</i> | NA                                  | <i>Ca_desi_denovo</i> | 36498493                | A/C  | NA                 | NA                            | NA                 |
| <i>Desi_wild_36508534</i> | NA                                  | <i>Ca_desi_denovo</i> | 36508534                | T/G  | NA                 | NA                            | NA                 |
| <i>Desi_wild_36510887</i> | NA                                  | <i>Ca_desi_denovo</i> | 36510887                | C/T  | NA                 | NA                            | NA                 |
| <i>Desi_wild_36514051</i> | NA                                  | <i>Ca_desi_denovo</i> | 36514051                | A/G  | NA                 | NA                            | NA                 |
| <i>Desi_wild_36516941</i> | NA                                  | <i>Ca_desi_denovo</i> | 36516941                | A/C  | NA                 | NA                            | NA                 |
| <i>Desi_wild_36519190</i> | NA                                  | <i>Ca_desi_denovo</i> | 36519190                | A/C  | NA                 | NA                            | NA                 |
| <i>Desi_wild_36519191</i> | NA                                  | <i>Ca_desi_denovo</i> | 36519191                | A/G  | NA                 | NA                            | NA                 |
| <i>Desi_wild_36522260</i> | NA                                  | <i>Ca_desi_denovo</i> | 36522260                | A/C  | NA                 | NA                            | NA                 |
| <i>Desi_wild_36522261</i> | NA                                  | <i>Ca_desi_denovo</i> | 36522261                | A/G  | NA                 | NA                            | NA                 |
| <i>Desi_wild_36522262</i> | NA                                  | <i>Ca_desi_denovo</i> | 36522262                | A/G  | NA                 | NA                            | NA                 |
| <i>Desi_wild_36522263</i> | NA                                  | <i>Ca_desi_denovo</i> | 36522263                | A/T  | NA                 | NA                            | NA                 |
| <i>Desi_wild_36525457</i> | NA                                  | <i>Ca_desi_denovo</i> | 36525457                | A/G  | NA                 | NA                            | NA                 |
| <i>Desi_wild_36525519</i> | NA                                  | <i>Ca_desi_denovo</i> | 36525519                | A/G  | NA                 | NA                            | NA                 |
| <i>Desi_wild_36526866</i> | NA                                  | <i>Ca_desi_denovo</i> | 36526866                | G/T  | NA                 | NA                            | NA                 |

| SNP IDs                   | NCBI dbSNP accession IDs (NCBI_SS#) | Chromosomes           | Physical positions (bp) | SNPs | Gene accession IDs | Sequence components of genome | Putative functions |
|---------------------------|-------------------------------------|-----------------------|-------------------------|------|--------------------|-------------------------------|--------------------|
| <i>Desi_wild_36531015</i> | NA                                  | <i>Ca_desi_denovo</i> | 36531015                | A/C  | NA                 | NA                            | NA                 |
| <i>Desi_wild_36531032</i> | NA                                  | <i>Ca_desi_denovo</i> | 36531032                | C/T  | NA                 | NA                            | NA                 |
| <i>Desi_wild_36532685</i> | NA                                  | <i>Ca_desi_denovo</i> | 36532685                | C/T  | NA                 | NA                            | NA                 |
| <i>Desi_wild_36532700</i> | NA                                  | <i>Ca_desi_denovo</i> | 36532700                | C/G  | NA                 | NA                            | NA                 |
| <i>Desi_wild_36538632</i> | NA                                  | <i>Ca_desi_denovo</i> | 36538632                | T/C  | NA                 | NA                            | NA                 |
| <i>Desi_wild_36538676</i> | NA                                  | <i>Ca_desi_denovo</i> | 36538676                | G/C  | NA                 | NA                            | NA                 |
| <i>Desi_wild_36548016</i> | NA                                  | <i>Ca_desi_denovo</i> | 36548016                | T/C  | NA                 | NA                            | NA                 |
| <i>Desi_wild_36548078</i> | NA                                  | <i>Ca_desi_denovo</i> | 36548078                | G/T  | NA                 | NA                            | NA                 |
| <i>Desi_wild_36548086</i> | NA                                  | <i>Ca_desi_denovo</i> | 36548086                | A/G  | NA                 | NA                            | NA                 |
| <i>Desi_wild_36552771</i> | NA                                  | <i>Ca_desi_denovo</i> | 36552771                | T/C  | NA                 | NA                            | NA                 |
| <i>Desi_wild_36552774</i> | NA                                  | <i>Ca_desi_denovo</i> | 36552774                | A/C  | NA                 | NA                            | NA                 |
| <i>Desi_wild_36553269</i> | NA                                  | <i>Ca_desi_denovo</i> | 36553269                | A/C  | NA                 | NA                            | NA                 |
| <i>Desi_wild_36553270</i> | NA                                  | <i>Ca_desi_denovo</i> | 36553270                | C/G  | NA                 | NA                            | NA                 |
| <i>Desi_wild_36553271</i> | NA                                  | <i>Ca_desi_denovo</i> | 36553271                | A/G  | NA                 | NA                            | NA                 |
| <i>Desi_wild_36556859</i> | NA                                  | <i>Ca_desi_denovo</i> | 36556859                | G/T  | NA                 | NA                            | NA                 |
| <i>Desi_wild_36560413</i> | NA                                  | <i>Ca_desi_denovo</i> | 36560413                | A/G  | NA                 | NA                            | NA                 |
| <i>Desi_wild_36560433</i> | NA                                  | <i>Ca_desi_denovo</i> | 36560433                | G/T  | NA                 | NA                            | NA                 |
| <i>Desi_wild_36574313</i> | NA                                  | <i>Ca_desi_denovo</i> | 36574313                | G/A  | NA                 | NA                            | NA                 |
| <i>Desi_wild_36574334</i> | NA                                  | <i>Ca_desi_denovo</i> | 36574334                | C/T  | NA                 | NA                            | NA                 |
| <i>Desi_wild_36575444</i> | NA                                  | <i>Ca_desi_denovo</i> | 36575444                | A/C  | NA                 | NA                            | NA                 |
| <i>Desi_wild_36579527</i> | NA                                  | <i>Ca_desi_denovo</i> | 36579527                | A/G  | NA                 | NA                            | NA                 |
| <i>Desi_wild_36581444</i> | NA                                  | <i>Ca_desi_denovo</i> | 36581444                | G/T  | NA                 | NA                            | NA                 |
| <i>Desi_wild_36581485</i> | NA                                  | <i>Ca_desi_denovo</i> | 36581485                | G/T  | NA                 | NA                            | NA                 |
| <i>Desi_wild_36582904</i> | NA                                  | <i>Ca_desi_denovo</i> | 36582904                | G/C  | NA                 | NA                            | NA                 |
| <i>Desi_wild_36583977</i> | NA                                  | <i>Ca_desi_denovo</i> | 36583977                | T/C  | NA                 | NA                            | NA                 |
| <i>Desi_wild_36583986</i> | NA                                  | <i>Ca_desi_denovo</i> | 36583986                | C/T  | NA                 | NA                            | NA                 |
| <i>Desi_wild_36592142</i> | NA                                  | <i>Ca_desi_denovo</i> | 36592142                | G/T  | NA                 | NA                            | NA                 |
| <i>Desi_wild_36592533</i> | NA                                  | <i>Ca_desi_denovo</i> | 36592533                | A/C  | NA                 | NA                            | NA                 |
| <i>Desi_wild_36597318</i> | NA                                  | <i>Ca_desi_denovo</i> | 36597318                | G/A  | NA                 | NA                            | NA                 |
| <i>Desi_wild_36598620</i> | NA                                  | <i>Ca_desi_denovo</i> | 36598620                | T/C  | NA                 | NA                            | NA                 |
| <i>Desi_wild_36598628</i> | NA                                  | <i>Ca_desi_denovo</i> | 36598628                | C/T  | NA                 | NA                            | NA                 |
| <i>Desi_wild_36599892</i> | NA                                  | <i>Ca_desi_denovo</i> | 36599892                | T/C  | NA                 | NA                            | NA                 |
| <i>Desi_wild_36599906</i> | NA                                  | <i>Ca_desi_denovo</i> | 36599906                | A/G  | NA                 | NA                            | NA                 |
| <i>Desi_wild_36604277</i> | NA                                  | <i>Ca_desi_denovo</i> | 36604277                | C/G  | NA                 | NA                            | NA                 |
| <i>Desi_wild_36604278</i> | NA                                  | <i>Ca_desi_denovo</i> | 36604278                | A/C  | NA                 | NA                            | NA                 |
| <i>Desi_wild_36606546</i> | NA                                  | <i>Ca_desi_denovo</i> | 36606546                | G/C  | NA                 | NA                            | NA                 |
| <i>Desi_wild_36608618</i> | NA                                  | <i>Ca_desi_denovo</i> | 36608618                | G/C  | NA                 | NA                            | NA                 |
| <i>Desi_wild_36608627</i> | NA                                  | <i>Ca_desi_denovo</i> | 36608627                | G/A  | NA                 | NA                            | NA                 |
| <i>Desi_wild_36608964</i> | NA                                  | <i>Ca_desi_denovo</i> | 36608964                | C/T  | NA                 | NA                            | NA                 |
| <i>Desi_wild_36615588</i> | NA                                  | <i>Ca_desi_denovo</i> | 36615588                | G/T  | NA                 | NA                            | NA                 |
| <i>Desi_wild_36615620</i> | NA                                  | <i>Ca_desi_denovo</i> | 36615620                | T/C  | NA                 | NA                            | NA                 |
| <i>Desi_wild_36621074</i> | NA                                  | <i>Ca_desi_denovo</i> | 36621074                | T/A  | NA                 | NA                            | NA                 |
| <i>Desi_wild_36622031</i> | NA                                  | <i>Ca_desi_denovo</i> | 36622031                | A/G  | NA                 | NA                            | NA                 |
| <i>Desi_wild_36622146</i> | NA                                  | <i>Ca_desi_denovo</i> | 36622146                | C/T  | NA                 | NA                            | NA                 |

| SNP IDs                   | NCBI dbSNP accession IDs (NCBI_SS#) | Chromosomes           | Physical positions (bp) | SNPs | Gene accession IDs | Sequence components of genome | Putative functions |
|---------------------------|-------------------------------------|-----------------------|-------------------------|------|--------------------|-------------------------------|--------------------|
| <i>Desi_wild_36622218</i> | NA                                  | <i>Ca_desi_denovo</i> | 36622218                | G/T  | NA                 | NA                            | NA                 |
| <i>Desi_wild_36622229</i> | NA                                  | <i>Ca_desi_denovo</i> | 36622229                | T/G  | NA                 | NA                            | NA                 |
| <i>Desi_wild_36625735</i> | NA                                  | <i>Ca_desi_denovo</i> | 36625735                | A/G  | NA                 | NA                            | NA                 |
| <i>Desi_wild_36625740</i> | NA                                  | <i>Ca_desi_denovo</i> | 36625740                | C/A  | NA                 | NA                            | NA                 |
| <i>Desi_wild_36627037</i> | NA                                  | <i>Ca_desi_denovo</i> | 36627037                | T/G  | NA                 | NA                            | NA                 |
| <i>Desi_wild_36629502</i> | NA                                  | <i>Ca_desi_denovo</i> | 36629502                | A/G  | NA                 | NA                            | NA                 |
| <i>Desi_wild_36632855</i> | NA                                  | <i>Ca_desi_denovo</i> | 36632855                | A/C  | NA                 | NA                            | NA                 |
| <i>Desi_wild_36638020</i> | NA                                  | <i>Ca_desi_denovo</i> | 36638020                | T/C  | NA                 | NA                            | NA                 |
| <i>Desi_wild_36646602</i> | NA                                  | <i>Ca_desi_denovo</i> | 36646602                | G/C  | NA                 | NA                            | NA                 |
| <i>Desi_wild_36646615</i> | NA                                  | <i>Ca_desi_denovo</i> | 36646615                | T/G  | NA                 | NA                            | NA                 |
| <i>Desi_wild_36646627</i> | NA                                  | <i>Ca_desi_denovo</i> | 36646627                | G/T  | NA                 | NA                            | NA                 |
| <i>Desi_wild_36651178</i> | NA                                  | <i>Ca_desi_denovo</i> | 36651178                | A/C  | NA                 | NA                            | NA                 |
| <i>Desi_wild_36658142</i> | NA                                  | <i>Ca_desi_denovo</i> | 36658142                | A/G  | NA                 | NA                            | NA                 |
| <i>Desi_wild_36664183</i> | NA                                  | <i>Ca_desi_denovo</i> | 36664183                | G/A  | NA                 | NA                            | NA                 |
| <i>Desi_wild_36664828</i> | NA                                  | <i>Ca_desi_denovo</i> | 36664828                | A/G  | NA                 | NA                            | NA                 |
| <i>Desi_wild_36664855</i> | NA                                  | <i>Ca_desi_denovo</i> | 36664855                | T/C  | NA                 | NA                            | NA                 |
| <i>Desi_wild_36667616</i> | NA                                  | <i>Ca_desi_denovo</i> | 36667616                | A/G  | NA                 | NA                            | NA                 |
| <i>Desi_wild_36667630</i> | NA                                  | <i>Ca_desi_denovo</i> | 36667630                | T/G  | NA                 | NA                            | NA                 |
| <i>Desi_wild_36668014</i> | NA                                  | <i>Ca_desi_denovo</i> | 36668014                | G/A  | NA                 | NA                            | NA                 |
| <i>Desi_wild_36668036</i> | NA                                  | <i>Ca_desi_denovo</i> | 36668036                | T/C  | NA                 | NA                            | NA                 |
| <i>Desi_wild_36672913</i> | NA                                  | <i>Ca_desi_denovo</i> | 36672913                | T/A  | NA                 | NA                            | NA                 |
| <i>Desi_wild_36672916</i> | NA                                  | <i>Ca_desi_denovo</i> | 36672916                | A/G  | NA                 | NA                            | NA                 |
| <i>Desi_wild_36675940</i> | NA                                  | <i>Ca_desi_denovo</i> | 36675940                | A/G  | NA                 | NA                            | NA                 |
| <i>Desi_wild_36691902</i> | NA                                  | <i>Ca_desi_denovo</i> | 36691902                | C/T  | NA                 | NA                            | NA                 |
| <i>Desi_wild_36693246</i> | NA                                  | <i>Ca_desi_denovo</i> | 36693246                | A/G  | NA                 | NA                            | NA                 |
| <i>Desi_wild_36693311</i> | NA                                  | <i>Ca_desi_denovo</i> | 36693311                | G/T  | NA                 | NA                            | NA                 |
| <i>Desi_wild_36694390</i> | NA                                  | <i>Ca_desi_denovo</i> | 36694390                | A/C  | NA                 | NA                            | NA                 |
| <i>Desi_wild_36694430</i> | NA                                  | <i>Ca_desi_denovo</i> | 36694430                | G/T  | NA                 | NA                            | NA                 |
| <i>Desi_wild_36694454</i> | NA                                  | <i>Ca_desi_denovo</i> | 36694454                | C/T  | NA                 | NA                            | NA                 |
| <i>Desi_wild_36694478</i> | NA                                  | <i>Ca_desi_denovo</i> | 36694478                | T/C  | NA                 | NA                            | NA                 |
| <i>Desi_wild_36709949</i> | NA                                  | <i>Ca_desi_denovo</i> | 36709949                | A/G  | NA                 | NA                            | NA                 |
| <i>Desi_wild_36713417</i> | NA                                  | <i>Ca_desi_denovo</i> | 36713417                | C/G  | NA                 | NA                            | NA                 |
| <i>Desi_wild_36716798</i> | NA                                  | <i>Ca_desi_denovo</i> | 36716798                | A/G  | NA                 | NA                            | NA                 |
| <i>Desi_wild_36716828</i> | NA                                  | <i>Ca_desi_denovo</i> | 36716828                | G/C  | NA                 | NA                            | NA                 |
| <i>Desi_wild_36717249</i> | NA                                  | <i>Ca_desi_denovo</i> | 36717249                | C/A  | NA                 | NA                            | NA                 |
| <i>Desi_wild_36717269</i> | NA                                  | <i>Ca_desi_denovo</i> | 36717269                | C/G  | NA                 | NA                            | NA                 |
| <i>Desi_wild_36717303</i> | NA                                  | <i>Ca_desi_denovo</i> | 36717303                | T/C  | NA                 | NA                            | NA                 |
| <i>Desi_wild_36724677</i> | NA                                  | <i>Ca_desi_denovo</i> | 36724677                | A/G  | NA                 | NA                            | NA                 |
| <i>Desi_wild_36724697</i> | NA                                  | <i>Ca_desi_denovo</i> | 36724697                | A/C  | NA                 | NA                            | NA                 |
| <i>Desi_wild_36727792</i> | NA                                  | <i>Ca_desi_denovo</i> | 36727792                | G/T  | NA                 | NA                            | NA                 |
| <i>Desi_wild_36732787</i> | NA                                  | <i>Ca_desi_denovo</i> | 36732787                | A/G  | NA                 | NA                            | NA                 |
| <i>Desi_wild_36734467</i> | NA                                  | <i>Ca_desi_denovo</i> | 36734467                | T/G  | NA                 | NA                            | NA                 |
| <i>Desi_wild_36734474</i> | NA                                  | <i>Ca_desi_denovo</i> | 36734474                | T/G  | NA                 | NA                            | NA                 |
| <i>Desi_wild_36735226</i> | NA                                  | <i>Ca_desi_denovo</i> | 36735226                | C/A  | NA                 | NA                            | NA                 |

| SNP IDs                   | NCBI dbSNP accession IDs (NCBI_SS#) | Chromosomes           | Physical positions (bp) | SNPs | Gene accession IDs | Sequence components of genome | Putative functions |
|---------------------------|-------------------------------------|-----------------------|-------------------------|------|--------------------|-------------------------------|--------------------|
| <i>Desi_wild_36740031</i> | NA                                  | <i>Ca_desi_denovo</i> | 36740031                | G/T  | NA                 | NA                            | NA                 |
| <i>Desi_wild_36740850</i> | NA                                  | <i>Ca_desi_denovo</i> | 36740850                | T/G  | NA                 | NA                            | NA                 |
| <i>Desi_wild_36741547</i> | NA                                  | <i>Ca_desi_denovo</i> | 36741547                | C/T  | NA                 | NA                            | NA                 |
| <i>Desi_wild_36741577</i> | NA                                  | <i>Ca_desi_denovo</i> | 36741577                | C/T  | NA                 | NA                            | NA                 |
| <i>Desi_wild_36746565</i> | NA                                  | <i>Ca_desi_denovo</i> | 36746565                | G/T  | NA                 | NA                            | NA                 |
| <i>Desi_wild_36747389</i> | NA                                  | <i>Ca_desi_denovo</i> | 36747389                | C/T  | NA                 | NA                            | NA                 |
| <i>Desi_wild_36747473</i> | NA                                  | <i>Ca_desi_denovo</i> | 36747473                | T/A  | NA                 | NA                            | NA                 |
| <i>Desi_wild_36748960</i> | NA                                  | <i>Ca_desi_denovo</i> | 36748960                | G/C  | NA                 | NA                            | NA                 |
| <i>Desi_wild_36749970</i> | NA                                  | <i>Ca_desi_denovo</i> | 36749970                | G/T  | NA                 | NA                            | NA                 |
| <i>Desi_wild_36750475</i> | NA                                  | <i>Ca_desi_denovo</i> | 36750475                | G/A  | NA                 | NA                            | NA                 |
| <i>Desi_wild_36750478</i> | NA                                  | <i>Ca_desi_denovo</i> | 36750478                | T/C  | NA                 | NA                            | NA                 |
| <i>Desi_wild_36759477</i> | NA                                  | <i>Ca_desi_denovo</i> | 36759477                | A/C  | NA                 | NA                            | NA                 |
| <i>Desi_wild_36759479</i> | NA                                  | <i>Ca_desi_denovo</i> | 36759479                | A/C  | NA                 | NA                            | NA                 |
| <i>Desi_wild_36763260</i> | NA                                  | <i>Ca_desi_denovo</i> | 36763260                | C/G  | NA                 | NA                            | NA                 |
| <i>Desi_wild_36763297</i> | NA                                  | <i>Ca_desi_denovo</i> | 36763297                | G/C  | NA                 | NA                            | NA                 |
| <i>Desi_wild_36779168</i> | NA                                  | <i>Ca_desi_denovo</i> | 36779168                | G/A  | NA                 | NA                            | NA                 |
| <i>Desi_wild_36779214</i> | NA                                  | <i>Ca_desi_denovo</i> | 36779214                | A/G  | NA                 | NA                            | NA                 |
| <i>Desi_wild_36779229</i> | NA                                  | <i>Ca_desi_denovo</i> | 36779229                | A/G  | NA                 | NA                            | NA                 |
| <i>Desi_wild_36780073</i> | NA                                  | <i>Ca_desi_denovo</i> | 36780073                | C/T  | NA                 | NA                            | NA                 |
| <i>Desi_wild_36781242</i> | NA                                  | <i>Ca_desi_denovo</i> | 36781242                | G/T  | NA                 | NA                            | NA                 |
| <i>Desi_wild_36781805</i> | NA                                  | <i>Ca_desi_denovo</i> | 36781805                | G/C  | NA                 | NA                            | NA                 |
| <i>Desi_wild_36781820</i> | NA                                  | <i>Ca_desi_denovo</i> | 36781820                | C/G  | NA                 | NA                            | NA                 |
| <i>Desi_wild_36783681</i> | NA                                  | <i>Ca_desi_denovo</i> | 36783681                | G/A  | NA                 | NA                            | NA                 |
| <i>Desi_wild_36783900</i> | NA                                  | <i>Ca_desi_denovo</i> | 36783900                | C/G  | NA                 | NA                            | NA                 |
| <i>Desi_wild_36791747</i> | NA                                  | <i>Ca_desi_denovo</i> | 36791747                | C/T  | NA                 | NA                            | NA                 |
| <i>Desi_wild_36793585</i> | NA                                  | <i>Ca_desi_denovo</i> | 36793585                | A/C  | NA                 | NA                            | NA                 |
| <i>Desi_wild_36794007</i> | NA                                  | <i>Ca_desi_denovo</i> | 36794007                | A/G  | NA                 | NA                            | NA                 |
| <i>Desi_wild_36794022</i> | NA                                  | <i>Ca_desi_denovo</i> | 36794022                | G/A  | NA                 | NA                            | NA                 |
| <i>Desi_wild_36794267</i> | NA                                  | <i>Ca_desi_denovo</i> | 36794267                | G/A  | NA                 | NA                            | NA                 |
| <i>Desi_wild_36794283</i> | NA                                  | <i>Ca_desi_denovo</i> | 36794283                | G/A  | NA                 | NA                            | NA                 |
| <i>Desi_wild_36798465</i> | NA                                  | <i>Ca_desi_denovo</i> | 36798465                | C/T  | NA                 | NA                            | NA                 |
| <i>Desi_wild_36798493</i> | NA                                  | <i>Ca_desi_denovo</i> | 36798493                | C/T  | NA                 | NA                            | NA                 |
| <i>Desi_wild_36799396</i> | NA                                  | <i>Ca_desi_denovo</i> | 36799396                | T/G  | NA                 | NA                            | NA                 |
| <i>Desi_wild_36800702</i> | NA                                  | <i>Ca_desi_denovo</i> | 36800702                | T/C  | NA                 | NA                            | NA                 |
| <i>Desi_wild_36800729</i> | NA                                  | <i>Ca_desi_denovo</i> | 36800729                | G/A  | NA                 | NA                            | NA                 |
| <i>Desi_wild_36806964</i> | NA                                  | <i>Ca_desi_denovo</i> | 36806964                | G/T  | NA                 | NA                            | NA                 |
| <i>Desi_wild_36807090</i> | NA                                  | <i>Ca_desi_denovo</i> | 36807090                | A/C  | NA                 | NA                            | NA                 |
| <i>Desi_wild_36808823</i> | NA                                  | <i>Ca_desi_denovo</i> | 36808823                | A/C  | NA                 | NA                            | NA                 |
| <i>Desi_wild_36811078</i> | NA                                  | <i>Ca_desi_denovo</i> | 36811078                | G/T  | NA                 | NA                            | NA                 |
| <i>Desi_wild_36815955</i> | NA                                  | <i>Ca_desi_denovo</i> | 36815955                | C/T  | NA                 | NA                            | NA                 |
| <i>Desi_wild_36828595</i> | NA                                  | <i>Ca_desi_denovo</i> | 36828595                | G/T  | NA                 | NA                            | NA                 |
| <i>Desi_wild_36828886</i> | NA                                  | <i>Ca_desi_denovo</i> | 36828886                | A/C  | NA                 | NA                            | NA                 |
| <i>Desi_wild_36828887</i> | NA                                  | <i>Ca_desi_denovo</i> | 36828887                | A/G  | NA                 | NA                            | NA                 |
| <i>Desi_wild_36830482</i> | NA                                  | <i>Ca_desi_denovo</i> | 36830482                | T/A  | NA                 | NA                            | NA                 |

| SNP IDs                   | NCBI dbSNP accession IDs (NCBI_SS#) | Chromosomes           | Physical positions (bp) | SNPs | Gene accession IDs | Sequence components of genome | Putative functions |
|---------------------------|-------------------------------------|-----------------------|-------------------------|------|--------------------|-------------------------------|--------------------|
| <i>Desi_wild_36836481</i> | NA                                  | <i>Ca_desi_denovo</i> | 36836481                | G/C  | NA                 | NA                            | NA                 |
| <i>Desi_wild_36836508</i> | NA                                  | <i>Ca_desi_denovo</i> | 36836508                | T/C  | NA                 | NA                            | NA                 |
| <i>Desi_wild_36836511</i> | NA                                  | <i>Ca_desi_denovo</i> | 36836511                | C/A  | NA                 | NA                            | NA                 |
| <i>Desi_wild_36836535</i> | NA                                  | <i>Ca_desi_denovo</i> | 36836535                | A/G  | NA                 | NA                            | NA                 |
| <i>Desi_wild_36840525</i> | NA                                  | <i>Ca_desi_denovo</i> | 36840525                | C/T  | NA                 | NA                            | NA                 |
| <i>Desi_wild_36840563</i> | NA                                  | <i>Ca_desi_denovo</i> | 36840563                | C/T  | NA                 | NA                            | NA                 |
| <i>Desi_wild_36840581</i> | NA                                  | <i>Ca_desi_denovo</i> | 36840581                | C/T  | NA                 | NA                            | NA                 |
| <i>Desi_wild_36842719</i> | NA                                  | <i>Ca_desi_denovo</i> | 36842719                | G/A  | NA                 | NA                            | NA                 |
| <i>Desi_wild_36842748</i> | NA                                  | <i>Ca_desi_denovo</i> | 36842748                | A/T  | NA                 | NA                            | NA                 |
| <i>Desi_wild_36842758</i> | NA                                  | <i>Ca_desi_denovo</i> | 36842758                | C/G  | NA                 | NA                            | NA                 |
| <i>Desi_wild_36843083</i> | NA                                  | <i>Ca_desi_denovo</i> | 36843083                | G/T  | NA                 | NA                            | NA                 |
| <i>Desi_wild_36844167</i> | NA                                  | <i>Ca_desi_denovo</i> | 36844167                | C/G  | NA                 | NA                            | NA                 |
| <i>Desi_wild_36844179</i> | NA                                  | <i>Ca_desi_denovo</i> | 36844179                | C/T  | NA                 | NA                            | NA                 |
| <i>Desi_wild_36844182</i> | NA                                  | <i>Ca_desi_denovo</i> | 36844182                | G/T  | NA                 | NA                            | NA                 |
| <i>Desi_wild_36853325</i> | NA                                  | <i>Ca_desi_denovo</i> | 36853325                | G/T  | NA                 | NA                            | NA                 |
| <i>Desi_wild_36855286</i> | NA                                  | <i>Ca_desi_denovo</i> | 36855286                | A/C  | NA                 | NA                            | NA                 |
| <i>Desi_wild_36855287</i> | NA                                  | <i>Ca_desi_denovo</i> | 36855287                | C/G  | NA                 | NA                            | NA                 |
| <i>Desi_wild_36861043</i> | NA                                  | <i>Ca_desi_denovo</i> | 36861043                | A/G  | NA                 | NA                            | NA                 |
| <i>Desi_wild_36864860</i> | NA                                  | <i>Ca_desi_denovo</i> | 36864860                | C/T  | NA                 | NA                            | NA                 |
| <i>Desi_wild_36864866</i> | NA                                  | <i>Ca_desi_denovo</i> | 36864866                | C/T  | NA                 | NA                            | NA                 |
| <i>Desi_wild_36865310</i> | NA                                  | <i>Ca_desi_denovo</i> | 36865310                | G/T  | NA                 | NA                            | NA                 |
| <i>Desi_wild_36865314</i> | NA                                  | <i>Ca_desi_denovo</i> | 36865314                | A/G  | NA                 | NA                            | NA                 |
| <i>Desi_wild_36865862</i> | NA                                  | <i>Ca_desi_denovo</i> | 36865862                | C/G  | NA                 | NA                            | NA                 |
| <i>Desi_wild_36865868</i> | NA                                  | <i>Ca_desi_denovo</i> | 36865868                | A/T  | NA                 | NA                            | NA                 |
| <i>Desi_wild_36865869</i> | NA                                  | <i>Ca_desi_denovo</i> | 36865869                | C/T  | NA                 | NA                            | NA                 |
| <i>Desi_wild_36875073</i> | NA                                  | <i>Ca_desi_denovo</i> | 36875073                | G/T  | NA                 | NA                            | NA                 |
| <i>Desi_wild_36875079</i> | NA                                  | <i>Ca_desi_denovo</i> | 36875079                | A/C  | NA                 | NA                            | NA                 |
| <i>Desi_wild_36875584</i> | NA                                  | <i>Ca_desi_denovo</i> | 36875584                | T/G  | NA                 | NA                            | NA                 |
| <i>Desi_wild_36879954</i> | NA                                  | <i>Ca_desi_denovo</i> | 36879954                | A/G  | NA                 | NA                            | NA                 |
| <i>Desi_wild_36884393</i> | NA                                  | <i>Ca_desi_denovo</i> | 36884393                | G/C  | NA                 | NA                            | NA                 |
| <i>Desi_wild_36900572</i> | NA                                  | <i>Ca_desi_denovo</i> | 36900572                | G/T  | NA                 | NA                            | NA                 |
| <i>Desi_wild_36903566</i> | NA                                  | <i>Ca_desi_denovo</i> | 36903566                | T/C  | NA                 | NA                            | NA                 |
| <i>Desi_wild_36907757</i> | NA                                  | <i>Ca_desi_denovo</i> | 36907757                | C/G  | NA                 | NA                            | NA                 |
| <i>Desi_wild_36907792</i> | NA                                  | <i>Ca_desi_denovo</i> | 36907792                | G/T  | NA                 | NA                            | NA                 |
| <i>Desi_wild_36915108</i> | NA                                  | <i>Ca_desi_denovo</i> | 36915108                | G/T  | NA                 | NA                            | NA                 |
| <i>Desi_wild_36915110</i> | NA                                  | <i>Ca_desi_denovo</i> | 36915110                | C/G  | NA                 | NA                            | NA                 |
| <i>Desi_wild_36915149</i> | NA                                  | <i>Ca_desi_denovo</i> | 36915149                | G/C  | NA                 | NA                            | NA                 |
| <i>Desi_wild_36916616</i> | NA                                  | <i>Ca_desi_denovo</i> | 36916616                | G/T  | NA                 | NA                            | NA                 |
| <i>Desi_wild_36917433</i> | NA                                  | <i>Ca_desi_denovo</i> | 36917433                | C/G  | NA                 | NA                            | NA                 |
| <i>Desi_wild_36920373</i> | NA                                  | <i>Ca_desi_denovo</i> | 36920373                | A/G  | NA                 | NA                            | NA                 |
| <i>Desi_wild_36923063</i> | NA                                  | <i>Ca_desi_denovo</i> | 36923063                | G/T  | NA                 | NA                            | NA                 |
| <i>Desi_wild_36923480</i> | NA                                  | <i>Ca_desi_denovo</i> | 36923480                | G/A  | NA                 | NA                            | NA                 |
| <i>Desi_wild_36923502</i> | NA                                  | <i>Ca_desi_denovo</i> | 36923502                | C/G  | NA                 | NA                            | NA                 |
| <i>Desi_wild_36928087</i> | NA                                  | <i>Ca_desi_denovo</i> | 36928087                | A/C  | NA                 | NA                            | NA                 |



| SNP IDs                   | NCBI dbSNP accession IDs (NCBI_SS#) | Chromosomes           | Physical positions (bp) | SNPs | Gene accession IDs | Sequence components of genome | Putative functions |
|---------------------------|-------------------------------------|-----------------------|-------------------------|------|--------------------|-------------------------------|--------------------|
| <i>Desi_wild_36932086</i> | NA                                  | <i>Ca_desi_denovo</i> | 36932086                | A/C  | NA                 | NA                            | NA                 |
| <i>Desi_wild_36937610</i> | NA                                  | <i>Ca_desi_denovo</i> | 36937610                | G/T  | NA                 | NA                            | NA                 |
| <i>Desi_wild_36938039</i> | NA                                  | <i>Ca_desi_denovo</i> | 36938039                | G/T  | NA                 | NA                            | NA                 |
| <i>Desi_wild_36939325</i> | NA                                  | <i>Ca_desi_denovo</i> | 36939325                | T/G  | NA                 | NA                            | NA                 |
| <i>Desi_wild_36942475</i> | NA                                  | <i>Ca_desi_denovo</i> | 36942475                | G/A  | NA                 | NA                            | NA                 |
| <i>Desi_wild_36942505</i> | NA                                  | <i>Ca_desi_denovo</i> | 36942505                | C/T  | NA                 | NA                            | NA                 |
| <i>Desi_wild_36946281</i> | NA                                  | <i>Ca_desi_denovo</i> | 36946281                | G/T  | NA                 | NA                            | NA                 |
| <i>Desi_wild_36951019</i> | NA                                  | <i>Ca_desi_denovo</i> | 36951019                | C/G  | NA                 | NA                            | NA                 |
| <i>Desi_wild_36953964</i> | NA                                  | <i>Ca_desi_denovo</i> | 36953964                | G/T  | NA                 | NA                            | NA                 |
| <i>Desi_wild_36956715</i> | NA                                  | <i>Ca_desi_denovo</i> | 36956715                | T/C  | NA                 | NA                            | NA                 |
| <i>Desi_wild_36957079</i> | NA                                  | <i>Ca_desi_denovo</i> | 36957079                | A/G  | NA                 | NA                            | NA                 |
| <i>Desi_wild_36957083</i> | NA                                  | <i>Ca_desi_denovo</i> | 36957083                | G/C  | NA                 | NA                            | NA                 |
| <i>Desi_wild_36957759</i> | NA                                  | <i>Ca_desi_denovo</i> | 36957759                | G/C  | NA                 | NA                            | NA                 |
| <i>Desi_wild_36957780</i> | NA                                  | <i>Ca_desi_denovo</i> | 36957780                | T/C  | NA                 | NA                            | NA                 |
| <i>Desi_wild_36959519</i> | NA                                  | <i>Ca_desi_denovo</i> | 36959519                | A/G  | NA                 | NA                            | NA                 |
| <i>Desi_wild_36960029</i> | NA                                  | <i>Ca_desi_denovo</i> | 36960029                | A/G  | NA                 | NA                            | NA                 |
| <i>Desi_wild_36963434</i> | NA                                  | <i>Ca_desi_denovo</i> | 36963434                | C/T  | NA                 | NA                            | NA                 |
| <i>Desi_wild_36970542</i> | NA                                  | <i>Ca_desi_denovo</i> | 36970542                | G/T  | NA                 | NA                            | NA                 |
| <i>Desi_wild_36973740</i> | NA                                  | <i>Ca_desi_denovo</i> | 36973740                | C/T  | NA                 | NA                            | NA                 |
| <i>Desi_wild_36976589</i> | NA                                  | <i>Ca_desi_denovo</i> | 36976589                | G/T  | NA                 | NA                            | NA                 |
| <i>Desi_wild_36976593</i> | NA                                  | <i>Ca_desi_denovo</i> | 36976593                | C/A  | NA                 | NA                            | NA                 |
| <i>Desi_wild_36977136</i> | NA                                  | <i>Ca_desi_denovo</i> | 36977136                | T/C  | NA                 | NA                            | NA                 |
| <i>Desi_wild_36982772</i> | NA                                  | <i>Ca_desi_denovo</i> | 36982772                | A/C  | NA                 | NA                            | NA                 |
| <i>Desi_wild_36989072</i> | NA                                  | <i>Ca_desi_denovo</i> | 36989072                | G/T  | NA                 | NA                            | NA                 |
| <i>Desi_wild_36990767</i> | NA                                  | <i>Ca_desi_denovo</i> | 36990767                | C/G  | NA                 | NA                            | NA                 |
| <i>Desi_wild_36990800</i> | NA                                  | <i>Ca_desi_denovo</i> | 36990800                | A/G  | NA                 | NA                            | NA                 |
| <i>Desi_wild_36990836</i> | NA                                  | <i>Ca_desi_denovo</i> | 36990836                | A/G  | NA                 | NA                            | NA                 |
| <i>Desi_wild_36995063</i> | NA                                  | <i>Ca_desi_denovo</i> | 36995063                | G/T  | NA                 | NA                            | NA                 |
| <i>Desi_wild_37004162</i> | NA                                  | <i>Ca_desi_denovo</i> | 37004162                | T/G  | NA                 | NA                            | NA                 |
| <i>Desi_wild_37004211</i> | NA                                  | <i>Ca_desi_denovo</i> | 37004211                | C/T  | NA                 | NA                            | NA                 |
| <i>Desi_wild_37004221</i> | NA                                  | <i>Ca_desi_denovo</i> | 37004221                | G/A  | NA                 | NA                            | NA                 |
| <i>Desi_wild_37010805</i> | NA                                  | <i>Ca_desi_denovo</i> | 37010805                | C/G  | NA                 | NA                            | NA                 |
| <i>Desi_wild_37010807</i> | NA                                  | <i>Ca_desi_denovo</i> | 37010807                | C/G  | NA                 | NA                            | NA                 |
| <i>Desi_wild_37015328</i> | NA                                  | <i>Ca_desi_denovo</i> | 37015328                | G/C  | NA                 | NA                            | NA                 |
| <i>Desi_wild_37015370</i> | NA                                  | <i>Ca_desi_denovo</i> | 37015370                | A/G  | NA                 | NA                            | NA                 |
| <i>Desi_wild_37015394</i> | NA                                  | <i>Ca_desi_denovo</i> | 37015394                | T/G  | NA                 | NA                            | NA                 |
| <i>Desi_wild_37015894</i> | NA                                  | <i>Ca_desi_denovo</i> | 37015894                | A/G  | NA                 | NA                            | NA                 |
| <i>Desi_wild_37024616</i> | NA                                  | <i>Ca_desi_denovo</i> | 37024616                | G/A  | NA                 | NA                            | NA                 |
| <i>Desi_wild_37027799</i> | NA                                  | <i>Ca_desi_denovo</i> | 37027799                | A/C  | NA                 | NA                            | NA                 |
| <i>Desi_wild_37028057</i> | NA                                  | <i>Ca_desi_denovo</i> | 37028057                | C/G  | NA                 | NA                            | NA                 |
| <i>Desi_wild_37028061</i> | NA                                  | <i>Ca_desi_denovo</i> | 37028061                | C/G  | NA                 | NA                            | NA                 |
| <i>Desi_wild_37028274</i> | NA                                  | <i>Ca_desi_denovo</i> | 37028274                | G/A  | NA                 | NA                            | NA                 |
| <i>Desi_wild_37042520</i> | NA                                  | <i>Ca_desi_denovo</i> | 37042520                | G/T  | NA                 | NA                            | NA                 |
| <i>Desi_wild_37048753</i> | NA                                  | <i>Ca_desi_denovo</i> | 37048753                | A/G  | NA                 | NA                            | NA                 |

| SNP IDs                   | NCBI dbSNP accession IDs (NCBI_SS#) | Chromosomes           | Physical positions (bp) | SNPs | Gene accession IDs | Sequence components of genome | Putative functions |
|---------------------------|-------------------------------------|-----------------------|-------------------------|------|--------------------|-------------------------------|--------------------|
| <i>Desi_wild_37057813</i> | NA                                  | <i>Ca_desi_denovo</i> | 37057813                | C/G  | NA                 | NA                            | NA                 |
| <i>Desi_wild_37061324</i> | NA                                  | <i>Ca_desi_denovo</i> | 37061324                | T/G  | NA                 | NA                            | NA                 |
| <i>Desi_wild_37062294</i> | NA                                  | <i>Ca_desi_denovo</i> | 37062294                | A/G  | NA                 | NA                            | NA                 |
| <i>Desi_wild_37062306</i> | NA                                  | <i>Ca_desi_denovo</i> | 37062306                | G/T  | NA                 | NA                            | NA                 |
| <i>Desi_wild_37067216</i> | NA                                  | <i>Ca_desi_denovo</i> | 37067216                | A/T  | NA                 | NA                            | NA                 |
| <i>Desi_wild_37067222</i> | NA                                  | <i>Ca_desi_denovo</i> | 37067222                | A/G  | NA                 | NA                            | NA                 |
| <i>Desi_wild_37067223</i> | NA                                  | <i>Ca_desi_denovo</i> | 37067223                | T/C  | NA                 | NA                            | NA                 |
| <i>Desi_wild_37072796</i> | NA                                  | <i>Ca_desi_denovo</i> | 37072796                | C/G  | NA                 | NA                            | NA                 |
| <i>Desi_wild_37072800</i> | NA                                  | <i>Ca_desi_denovo</i> | 37072800                | C/G  | NA                 | NA                            | NA                 |
| <i>Desi_wild_37082384</i> | NA                                  | <i>Ca_desi_denovo</i> | 37082384                | G/C  | NA                 | NA                            | NA                 |
| <i>Desi_wild_37082396</i> | NA                                  | <i>Ca_desi_denovo</i> | 37082396                | G/A  | NA                 | NA                            | NA                 |
| <i>Desi_wild_37084336</i> | NA                                  | <i>Ca_desi_denovo</i> | 37084336                | A/G  | NA                 | NA                            | NA                 |
| <i>Desi_wild_37084339</i> | NA                                  | <i>Ca_desi_denovo</i> | 37084339                | A/C  | NA                 | NA                            | NA                 |
| <i>Desi_wild_37086260</i> | NA                                  | <i>Ca_desi_denovo</i> | 37086260                | G/T  | NA                 | NA                            | NA                 |
| <i>Desi_wild_37086455</i> | NA                                  | <i>Ca_desi_denovo</i> | 37086455                | A/C  | NA                 | NA                            | NA                 |
| <i>Desi_wild_37096966</i> | NA                                  | <i>Ca_desi_denovo</i> | 37096966                | A/G  | NA                 | NA                            | NA                 |
| <i>Desi_wild_37101379</i> | NA                                  | <i>Ca_desi_denovo</i> | 37101379                | A/T  | NA                 | NA                            | NA                 |
| <i>Desi_wild_37101401</i> | NA                                  | <i>Ca_desi_denovo</i> | 37101401                | A/G  | NA                 | NA                            | NA                 |
| <i>Desi_wild_37104076</i> | NA                                  | <i>Ca_desi_denovo</i> | 37104076                | T/C  | NA                 | NA                            | NA                 |
| <i>Desi_wild_37104790</i> | NA                                  | <i>Ca_desi_denovo</i> | 37104790                | G/T  | NA                 | NA                            | NA                 |
| <i>Desi_wild_37110410</i> | NA                                  | <i>Ca_desi_denovo</i> | 37110410                | G/T  | NA                 | NA                            | NA                 |
| <i>Desi_wild_37115733</i> | NA                                  | <i>Ca_desi_denovo</i> | 37115733                | C/T  | NA                 | NA                            | NA                 |
| <i>Desi_wild_37123204</i> | NA                                  | <i>Ca_desi_denovo</i> | 37123204                | G/A  | NA                 | NA                            | NA                 |
| <i>Desi_wild_37123208</i> | NA                                  | <i>Ca_desi_denovo</i> | 37123208                | A/G  | NA                 | NA                            | NA                 |
| <i>Desi_wild_37125157</i> | NA                                  | <i>Ca_desi_denovo</i> | 37125157                | G/C  | NA                 | NA                            | NA                 |
| <i>Desi_wild_37125738</i> | NA                                  | <i>Ca_desi_denovo</i> | 37125738                | T/C  | NA                 | NA                            | NA                 |
| <i>Desi_wild_37125748</i> | NA                                  | <i>Ca_desi_denovo</i> | 37125748                | G/A  | NA                 | NA                            | NA                 |
| <i>Desi_wild_37128173</i> | NA                                  | <i>Ca_desi_denovo</i> | 37128173                | G/T  | NA                 | NA                            | NA                 |
| <i>Desi_wild_37128351</i> | NA                                  | <i>Ca_desi_denovo</i> | 37128351                | T/G  | NA                 | NA                            | NA                 |
| <i>Desi_wild_37130995</i> | NA                                  | <i>Ca_desi_denovo</i> | 37130995                | G/T  | NA                 | NA                            | NA                 |
| <i>Desi_wild_37131053</i> | NA                                  | <i>Ca_desi_denovo</i> | 37131053                | G/A  | NA                 | NA                            | NA                 |
| <i>Desi_wild_37131303</i> | NA                                  | <i>Ca_desi_denovo</i> | 37131303                | G/A  | NA                 | NA                            | NA                 |
| <i>Desi_wild_37131315</i> | NA                                  | <i>Ca_desi_denovo</i> | 37131315                | A/G  | NA                 | NA                            | NA                 |
| <i>Desi_wild_37136657</i> | NA                                  | <i>Ca_desi_denovo</i> | 37136657                | G/C  | NA                 | NA                            | NA                 |
| <i>Desi_wild_37141890</i> | NA                                  | <i>Ca_desi_denovo</i> | 37141890                | G/T  | NA                 | NA                            | NA                 |
| <i>Desi_wild_37143565</i> | NA                                  | <i>Ca_desi_denovo</i> | 37143565                | C/T  | NA                 | NA                            | NA                 |
| <i>Desi_wild_37146182</i> | NA                                  | <i>Ca_desi_denovo</i> | 37146182                | T/A  | NA                 | NA                            | NA                 |
| <i>Desi_wild_37146212</i> | NA                                  | <i>Ca_desi_denovo</i> | 37146212                | A/G  | NA                 | NA                            | NA                 |
| <i>Desi_wild_37149919</i> | NA                                  | <i>Ca_desi_denovo</i> | 37149919                | G/T  | NA                 | NA                            | NA                 |
| <i>Desi_wild_37149984</i> | NA                                  | <i>Ca_desi_denovo</i> | 37149984                | A/G  | NA                 | NA                            | NA                 |
| <i>Desi_wild_37156661</i> | NA                                  | <i>Ca_desi_denovo</i> | 37156661                | C/T  | NA                 | NA                            | NA                 |
| <i>Desi_wild_37157014</i> | NA                                  | <i>Ca_desi_denovo</i> | 37157014                | C/G  | NA                 | NA                            | NA                 |
| <i>Desi_wild_37163855</i> | NA                                  | <i>Ca_desi_denovo</i> | 37163855                | G/A  | NA                 | NA                            | NA                 |
| <i>Desi_wild_37165860</i> | NA                                  | <i>Ca_desi_denovo</i> | 37165860                | C/A  | NA                 | NA                            | NA                 |

| SNP IDs                   | NCBI dbSNP accession IDs (NCBI_SS#) | Chromosomes           | Physical positions (bp) | SNPs | Gene accession IDs | Sequence components of genome | Putative functions |
|---------------------------|-------------------------------------|-----------------------|-------------------------|------|--------------------|-------------------------------|--------------------|
| <i>Desi_wild_37165960</i> | NA                                  | <i>Ca_desi_denovo</i> | 37165960                | T/A  | NA                 | NA                            | NA                 |
| <i>Desi_wild_37173075</i> | NA                                  | <i>Ca_desi_denovo</i> | 37173075                | T/G  | NA                 | NA                            | NA                 |
| <i>Desi_wild_37175780</i> | NA                                  | <i>Ca_desi_denovo</i> | 37175780                | T/C  | NA                 | NA                            | NA                 |
| <i>Desi_wild_37177868</i> | NA                                  | <i>Ca_desi_denovo</i> | 37177868                | A/G  | NA                 | NA                            | NA                 |
| <i>Desi_wild_37187414</i> | NA                                  | <i>Ca_desi_denovo</i> | 37187414                | G/T  | NA                 | NA                            | NA                 |
| <i>Desi_wild_37189515</i> | NA                                  | <i>Ca_desi_denovo</i> | 37189515                | G/A  | NA                 | NA                            | NA                 |
| <i>Desi_wild_37191656</i> | NA                                  | <i>Ca_desi_denovo</i> | 37191656                | C/A  | NA                 | NA                            | NA                 |
| <i>Desi_wild_37191659</i> | NA                                  | <i>Ca_desi_denovo</i> | 37191659                | G/A  | NA                 | NA                            | NA                 |
| <i>Desi_wild_37191667</i> | NA                                  | <i>Ca_desi_denovo</i> | 37191667                | T/C  | NA                 | NA                            | NA                 |
| <i>Desi_wild_37193040</i> | NA                                  | <i>Ca_desi_denovo</i> | 37193040                | A/G  | NA                 | NA                            | NA                 |
| <i>Desi_wild_37198003</i> | NA                                  | <i>Ca_desi_denovo</i> | 37198003                | T/G  | NA                 | NA                            | NA                 |
| <i>Desi_wild_37200545</i> | NA                                  | <i>Ca_desi_denovo</i> | 37200545                | T/C  | NA                 | NA                            | NA                 |
| <i>Desi_wild_37201317</i> | NA                                  | <i>Ca_desi_denovo</i> | 37201317                | G/T  | NA                 | NA                            | NA                 |
| <i>Desi_wild_37215560</i> | NA                                  | <i>Ca_desi_denovo</i> | 37215560                | A/G  | NA                 | NA                            | NA                 |
| <i>Desi_wild_37219991</i> | NA                                  | <i>Ca_desi_denovo</i> | 37219991                | T/G  | NA                 | NA                            | NA                 |
| <i>Desi_wild_37220580</i> | NA                                  | <i>Ca_desi_denovo</i> | 37220580                | A/G  | NA                 | NA                            | NA                 |
| <i>Desi_wild_37228343</i> | NA                                  | <i>Ca_desi_denovo</i> | 37228343                | A/C  | NA                 | NA                            | NA                 |
| <i>Desi_wild_37230467</i> | NA                                  | <i>Ca_desi_denovo</i> | 37230467                | A/G  | NA                 | NA                            | NA                 |
| <i>Desi_wild_37235446</i> | NA                                  | <i>Ca_desi_denovo</i> | 37235446                | G/T  | NA                 | NA                            | NA                 |
| <i>Desi_wild_37238257</i> | NA                                  | <i>Ca_desi_denovo</i> | 37238257                | C/G  | NA                 | NA                            | NA                 |
| <i>Desi_wild_37239258</i> | NA                                  | <i>Ca_desi_denovo</i> | 37239258                | C/T  | NA                 | NA                            | NA                 |
| <i>Desi_wild_37241597</i> | NA                                  | <i>Ca_desi_denovo</i> | 37241597                | C/T  | NA                 | NA                            | NA                 |
| <i>Desi_wild_37241620</i> | NA                                  | <i>Ca_desi_denovo</i> | 37241620                | C/G  | NA                 | NA                            | NA                 |
| <i>Desi_wild_37241658</i> | NA                                  | <i>Ca_desi_denovo</i> | 37241658                | C/A  | NA                 | NA                            | NA                 |
| <i>Desi_wild_37241664</i> | NA                                  | <i>Ca_desi_denovo</i> | 37241664                | C/T  | NA                 | NA                            | NA                 |
| <i>Desi_wild_37242229</i> | NA                                  | <i>Ca_desi_denovo</i> | 37242229                | C/A  | NA                 | NA                            | NA                 |
| <i>Desi_wild_37242239</i> | NA                                  | <i>Ca_desi_denovo</i> | 37242239                | G/C  | NA                 | NA                            | NA                 |
| <i>Desi_wild_37242926</i> | NA                                  | <i>Ca_desi_denovo</i> | 37242926                | A/G  | NA                 | NA                            | NA                 |
| <i>Desi_wild_37250205</i> | NA                                  | <i>Ca_desi_denovo</i> | 37250205                | G/C  | NA                 | NA                            | NA                 |
| <i>Desi_wild_37253465</i> | NA                                  | <i>Ca_desi_denovo</i> | 37253465                | T/G  | NA                 | NA                            | NA                 |
| <i>Desi_wild_37253879</i> | NA                                  | <i>Ca_desi_denovo</i> | 37253879                | C/T  | NA                 | NA                            | NA                 |
| <i>Desi_wild_37264182</i> | NA                                  | <i>Ca_desi_denovo</i> | 37264182                | A/T  | NA                 | NA                            | NA                 |
| <i>Desi_wild_37264212</i> | NA                                  | <i>Ca_desi_denovo</i> | 37264212                | C/T  | NA                 | NA                            | NA                 |
| <i>Desi_wild_37266182</i> | NA                                  | <i>Ca_desi_denovo</i> | 37266182                | C/G  | NA                 | NA                            | NA                 |
| <i>Desi_wild_37266191</i> | NA                                  | <i>Ca_desi_denovo</i> | 37266191                | T/G  | NA                 | NA                            | NA                 |
| <i>Desi_wild_37266257</i> | NA                                  | <i>Ca_desi_denovo</i> | 37266257                | T/C  | NA                 | NA                            | NA                 |
| <i>Desi_wild_37271118</i> | NA                                  | <i>Ca_desi_denovo</i> | 37271118                | T/C  | NA                 | NA                            | NA                 |
| <i>Desi_wild_37271124</i> | NA                                  | <i>Ca_desi_denovo</i> | 37271124                | C/T  | NA                 | NA                            | NA                 |
| <i>Desi_wild_37271350</i> | NA                                  | <i>Ca_desi_denovo</i> | 37271350                | A/G  | NA                 | NA                            | NA                 |
| <i>Desi_wild_37274015</i> | NA                                  | <i>Ca_desi_denovo</i> | 37274015                | C/T  | NA                 | NA                            | NA                 |
| <i>Desi_wild_37278167</i> | NA                                  | <i>Ca_desi_denovo</i> | 37278167                | A/G  | NA                 | NA                            | NA                 |
| <i>Desi_wild_37280407</i> | NA                                  | <i>Ca_desi_denovo</i> | 37280407                | A/G  | NA                 | NA                            | NA                 |
| <i>Desi_wild_37280927</i> | NA                                  | <i>Ca_desi_denovo</i> | 37280927                | C/G  | NA                 | NA                            | NA                 |
| <i>Desi_wild_37285870</i> | NA                                  | <i>Ca_desi_denovo</i> | 37285870                | C/T  | NA                 | NA                            | NA                 |

| SNP IDs                   | NCBI dbSNP accession IDs (NCBI_SS#) | Chromosomes           | Physical positions (bp) | SNPs | Gene accession IDs | Sequence components of genome | Putative functions |
|---------------------------|-------------------------------------|-----------------------|-------------------------|------|--------------------|-------------------------------|--------------------|
| <i>Desi_wild_37285912</i> | NA                                  | <i>Ca_desi_denovo</i> | 37285912                | G/C  | NA                 | NA                            | NA                 |
| <i>Desi_wild_37288428</i> | NA                                  | <i>Ca_desi_denovo</i> | 37288428                | G/T  | NA                 | NA                            | NA                 |
| <i>Desi_wild_37289145</i> | NA                                  | <i>Ca_desi_denovo</i> | 37289145                | A/G  | NA                 | NA                            | NA                 |
| <i>Desi_wild_37289148</i> | NA                                  | <i>Ca_desi_denovo</i> | 37289148                | A/G  | NA                 | NA                            | NA                 |
| <i>Desi_wild_37289388</i> | NA                                  | <i>Ca_desi_denovo</i> | 37289388                | T/C  | NA                 | NA                            | NA                 |
| <i>Desi_wild_37290410</i> | NA                                  | <i>Ca_desi_denovo</i> | 37290410                | G/T  | NA                 | NA                            | NA                 |
| <i>Desi_wild_37292039</i> | NA                                  | <i>Ca_desi_denovo</i> | 37292039                | G/C  | NA                 | NA                            | NA                 |
| <i>Desi_wild_37301841</i> | NA                                  | <i>Ca_desi_denovo</i> | 37301841                | C/T  | NA                 | NA                            | NA                 |
| <i>Desi_wild_37301847</i> | NA                                  | <i>Ca_desi_denovo</i> | 37301847                | C/T  | NA                 | NA                            | NA                 |
| <i>Desi_wild_37302838</i> | NA                                  | <i>Ca_desi_denovo</i> | 37302838                | A/C  | NA                 | NA                            | NA                 |
| <i>Desi_wild_37310172</i> | NA                                  | <i>Ca_desi_denovo</i> | 37310172                | A/C  | NA                 | NA                            | NA                 |
| <i>Desi_wild_37310178</i> | NA                                  | <i>Ca_desi_denovo</i> | 37310178                | A/G  | NA                 | NA                            | NA                 |
| <i>Desi_wild_37311118</i> | NA                                  | <i>Ca_desi_denovo</i> | 37311118                | G/A  | NA                 | NA                            | NA                 |
| <i>Desi_wild_37311169</i> | NA                                  | <i>Ca_desi_denovo</i> | 37311169                | C/T  | NA                 | NA                            | NA                 |
| <i>Desi_wild_37314366</i> | NA                                  | <i>Ca_desi_denovo</i> | 37314366                | G/C  | NA                 | NA                            | NA                 |
| <i>Desi_wild_37314369</i> | NA                                  | <i>Ca_desi_denovo</i> | 37314369                | T/G  | NA                 | NA                            | NA                 |
| <i>Desi_wild_37314384</i> | NA                                  | <i>Ca_desi_denovo</i> | 37314384                | G/C  | NA                 | NA                            | NA                 |
| <i>Desi_wild_37314420</i> | NA                                  | <i>Ca_desi_denovo</i> | 37314420                | G/A  | NA                 | NA                            | NA                 |
| <i>Desi_wild_37316220</i> | NA                                  | <i>Ca_desi_denovo</i> | 37316220                | A/G  | NA                 | NA                            | NA                 |
| <i>Desi_wild_37316235</i> | NA                                  | <i>Ca_desi_denovo</i> | 37316235                | G/A  | NA                 | NA                            | NA                 |
| <i>Desi_wild_37317071</i> | NA                                  | <i>Ca_desi_denovo</i> | 37317071                | C/A  | NA                 | NA                            | NA                 |
| <i>Desi_wild_37322818</i> | NA                                  | <i>Ca_desi_denovo</i> | 37322818                | C/T  | NA                 | NA                            | NA                 |
| <i>Desi_wild_37330935</i> | NA                                  | <i>Ca_desi_denovo</i> | 37330935                | T/G  | NA                 | NA                            | NA                 |
| <i>Desi_wild_37331312</i> | NA                                  | <i>Ca_desi_denovo</i> | 37331312                | T/C  | NA                 | NA                            | NA                 |
| <i>Desi_wild_37331334</i> | NA                                  | <i>Ca_desi_denovo</i> | 37331334                | G/T  | NA                 | NA                            | NA                 |
| <i>Desi_wild_37336065</i> | NA                                  | <i>Ca_desi_denovo</i> | 37336065                | C/G  | NA                 | NA                            | NA                 |
| <i>Desi_wild_37336113</i> | NA                                  | <i>Ca_desi_denovo</i> | 37336113                | G/T  | NA                 | NA                            | NA                 |
| <i>Desi_wild_37341389</i> | NA                                  | <i>Ca_desi_denovo</i> | 37341389                | T/A  | NA                 | NA                            | NA                 |
| <i>Desi_wild_37342994</i> | NA                                  | <i>Ca_desi_denovo</i> | 37342994                | G/A  | NA                 | NA                            | NA                 |
| <i>Desi_wild_37343036</i> | NA                                  | <i>Ca_desi_denovo</i> | 37343036                | G/C  | NA                 | NA                            | NA                 |
| <i>Desi_wild_37346324</i> | NA                                  | <i>Ca_desi_denovo</i> | 37346324                | C/G  | NA                 | NA                            | NA                 |
| <i>Desi_wild_37346327</i> | NA                                  | <i>Ca_desi_denovo</i> | 37346327                | A/G  | NA                 | NA                            | NA                 |
| <i>Desi_wild_37346886</i> | NA                                  | <i>Ca_desi_denovo</i> | 37346886                | T/G  | NA                 | NA                            | NA                 |
| <i>Desi_wild_37353622</i> | NA                                  | <i>Ca_desi_denovo</i> | 37353622                | C/T  | NA                 | NA                            | NA                 |
| <i>Desi_wild_37357748</i> | NA                                  | <i>Ca_desi_denovo</i> | 37357748                | A/G  | NA                 | NA                            | NA                 |
| <i>Desi_wild_37362550</i> | NA                                  | <i>Ca_desi_denovo</i> | 37362550                | A/C  | NA                 | NA                            | NA                 |
| <i>Desi_wild_37362551</i> | NA                                  | <i>Ca_desi_denovo</i> | 37362551                | G/T  | NA                 | NA                            | NA                 |
| <i>Desi_wild_37364044</i> | NA                                  | <i>Ca_desi_denovo</i> | 37364044                | A/T  | NA                 | NA                            | NA                 |
| <i>Desi_wild_37364590</i> | NA                                  | <i>Ca_desi_denovo</i> | 37364590                | A/T  | NA                 | NA                            | NA                 |
| <i>Desi_wild_37364591</i> | NA                                  | <i>Ca_desi_denovo</i> | 37364591                | A/G  | NA                 | NA                            | NA                 |
| <i>Desi_wild_37364633</i> | NA                                  | <i>Ca_desi_denovo</i> | 37364633                | C/G  | NA                 | NA                            | NA                 |
| <i>Desi_wild_37366691</i> | NA                                  | <i>Ca_desi_denovo</i> | 37366691                | A/G  | NA                 | NA                            | NA                 |
| <i>Desi_wild_37366697</i> | NA                                  | <i>Ca_desi_denovo</i> | 37366697                | A/G  | NA                 | NA                            | NA                 |
| <i>Desi_wild_37366796</i> | NA                                  | <i>Ca_desi_denovo</i> | 37366796                | C/T  | NA                 | NA                            | NA                 |

| SNP IDs                   | NCBI dbSNP accession IDs (NCBI_SS#) | Chromosomes           | Physical positions (bp) | SNPs | Gene accession IDs | Sequence components of genome | Putative functions |
|---------------------------|-------------------------------------|-----------------------|-------------------------|------|--------------------|-------------------------------|--------------------|
| <i>Desi_wild_37367639</i> | NA                                  | <i>Ca_desi_denovo</i> | 37367639                | G/A  | NA                 | NA                            | NA                 |
| <i>Desi_wild_37368272</i> | NA                                  | <i>Ca_desi_denovo</i> | 37368272                | C/T  | NA                 | NA                            | NA                 |
| <i>Desi_wild_37368285</i> | NA                                  | <i>Ca_desi_denovo</i> | 37368285                | T/C  | NA                 | NA                            | NA                 |
| <i>Desi_wild_37370326</i> | NA                                  | <i>Ca_desi_denovo</i> | 37370326                | A/C  | NA                 | NA                            | NA                 |
| <i>Desi_wild_37371680</i> | NA                                  | <i>Ca_desi_denovo</i> | 37371680                | A/C  | NA                 | NA                            | NA                 |
| <i>Desi_wild_37379151</i> | NA                                  | <i>Ca_desi_denovo</i> | 37379151                | G/A  | NA                 | NA                            | NA                 |
| <i>Desi_wild_37379152</i> | NA                                  | <i>Ca_desi_denovo</i> | 37379152                | A/T  | NA                 | NA                            | NA                 |
| <i>Desi_wild_37379154</i> | NA                                  | <i>Ca_desi_denovo</i> | 37379154                | G/T  | NA                 | NA                            | NA                 |
| <i>Desi_wild_37379156</i> | NA                                  | <i>Ca_desi_denovo</i> | 37379156                | G/A  | NA                 | NA                            | NA                 |
| <i>Desi_wild_37393484</i> | NA                                  | <i>Ca_desi_denovo</i> | 37393484                | A/G  | NA                 | NA                            | NA                 |
| <i>Desi_wild_37393517</i> | NA                                  | <i>Ca_desi_denovo</i> | 37393517                | A/G  | NA                 | NA                            | NA                 |
| <i>Desi_wild_37393547</i> | NA                                  | <i>Ca_desi_denovo</i> | 37393547                | G/T  | NA                 | NA                            | NA                 |
| <i>Desi_wild_37396911</i> | NA                                  | <i>Ca_desi_denovo</i> | 37396911                | T/C  | NA                 | NA                            | NA                 |
| <i>Desi_wild_37404501</i> | NA                                  | <i>Ca_desi_denovo</i> | 37404501                | A/C  | NA                 | NA                            | NA                 |
| <i>Desi_wild_37404502</i> | NA                                  | <i>Ca_desi_denovo</i> | 37404502                | G/T  | NA                 | NA                            | NA                 |
| <i>Desi_wild_37404503</i> | NA                                  | <i>Ca_desi_denovo</i> | 37404503                | A/G  | NA                 | NA                            | NA                 |
| <i>Desi_wild_37404826</i> | NA                                  | <i>Ca_desi_denovo</i> | 37404826                | G/A  | NA                 | NA                            | NA                 |
| <i>Desi_wild_37406899</i> | NA                                  | <i>Ca_desi_denovo</i> | 37406899                | A/C  | NA                 | NA                            | NA                 |
| <i>Desi_wild_37407284</i> | NA                                  | <i>Ca_desi_denovo</i> | 37407284                | A/C  | NA                 | NA                            | NA                 |
| <i>Desi_wild_37407285</i> | NA                                  | <i>Ca_desi_denovo</i> | 37407285                | A/G  | NA                 | NA                            | NA                 |
| <i>Desi_wild_37407286</i> | NA                                  | <i>Ca_desi_denovo</i> | 37407286                | A/G  | NA                 | NA                            | NA                 |
| <i>Desi_wild_37407495</i> | NA                                  | <i>Ca_desi_denovo</i> | 37407495                | G/C  | NA                 | NA                            | NA                 |
| <i>Desi_wild_37408618</i> | NA                                  | <i>Ca_desi_denovo</i> | 37408618                | A/G  | NA                 | NA                            | NA                 |
| <i>Desi_wild_37414412</i> | NA                                  | <i>Ca_desi_denovo</i> | 37414412                | A/C  | NA                 | NA                            | NA                 |
| <i>Desi_wild_37418066</i> | NA                                  | <i>Ca_desi_denovo</i> | 37418066                | C/G  | NA                 | NA                            | NA                 |
| <i>Desi_wild_37418070</i> | NA                                  | <i>Ca_desi_denovo</i> | 37418070                | A/T  | NA                 | NA                            | NA                 |
| <i>Desi_wild_37418123</i> | NA                                  | <i>Ca_desi_denovo</i> | 37418123                | C/T  | NA                 | NA                            | NA                 |
| <i>Desi_wild_37418130</i> | NA                                  | <i>Ca_desi_denovo</i> | 37418130                | G/T  | NA                 | NA                            | NA                 |
| <i>Desi_wild_37424107</i> | NA                                  | <i>Ca_desi_denovo</i> | 37424107                | A/T  | NA                 | NA                            | NA                 |
| <i>Desi_wild_37427549</i> | NA                                  | <i>Ca_desi_denovo</i> | 37427549                | G/T  | NA                 | NA                            | NA                 |
| <i>Desi_wild_37430195</i> | NA                                  | <i>Ca_desi_denovo</i> | 37430195                | G/A  | NA                 | NA                            | NA                 |
| <i>Desi_wild_37430226</i> | NA                                  | <i>Ca_desi_denovo</i> | 37430226                | C/G  | NA                 | NA                            | NA                 |
| <i>Desi_wild_37434189</i> | NA                                  | <i>Ca_desi_denovo</i> | 37434189                | A/T  | NA                 | NA                            | NA                 |
| <i>Desi_wild_37435617</i> | NA                                  | <i>Ca_desi_denovo</i> | 37435617                | G/A  | NA                 | NA                            | NA                 |
| <i>Desi_wild_37435620</i> | NA                                  | <i>Ca_desi_denovo</i> | 37435620                | G/C  | NA                 | NA                            | NA                 |
| <i>Desi_wild_37440708</i> | NA                                  | <i>Ca_desi_denovo</i> | 37440708                | G/C  | NA                 | NA                            | NA                 |
| <i>Desi_wild_37440747</i> | NA                                  | <i>Ca_desi_denovo</i> | 37440747                | A/G  | NA                 | NA                            | NA                 |
| <i>Desi_wild_37445730</i> | NA                                  | <i>Ca_desi_denovo</i> | 37445730                | A/G  | NA                 | NA                            | NA                 |
| <i>Desi_wild_37456463</i> | NA                                  | <i>Ca_desi_denovo</i> | 37456463                | C/T  | NA                 | NA                            | NA                 |
| <i>Desi_wild_37465565</i> | NA                                  | <i>Ca_desi_denovo</i> | 37465565                | A/G  | NA                 | NA                            | NA                 |
| <i>Desi_wild_37466663</i> | NA                                  | <i>Ca_desi_denovo</i> | 37466663                | G/T  | NA                 | NA                            | NA                 |
| <i>Desi_wild_37467983</i> | NA                                  | <i>Ca_desi_denovo</i> | 37467983                | G/T  | NA                 | NA                            | NA                 |
| <i>Desi_wild_37482601</i> | NA                                  | <i>Ca_desi_denovo</i> | 37482601                | G/T  | NA                 | NA                            | NA                 |
| <i>Desi_wild_37482639</i> | NA                                  | <i>Ca_desi_denovo</i> | 37482639                | G/T  | NA                 | NA                            | NA                 |

| SNP IDs                   | NCBI dbSNP accession IDs (NCBI_SS#) | Chromosomes           | Physical positions (bp) | SNPs | Gene accession IDs | Sequence components of genome | Putative functions |
|---------------------------|-------------------------------------|-----------------------|-------------------------|------|--------------------|-------------------------------|--------------------|
| <i>Desi_wild_37485215</i> | NA                                  | <i>Ca_desi_denovo</i> | 37485215                | G/A  | NA                 | NA                            | NA                 |
| <i>Desi_wild_37488617</i> | NA                                  | <i>Ca_desi_denovo</i> | 37488617                | C/T  | NA                 | NA                            | NA                 |
| <i>Desi_wild_37488646</i> | NA                                  | <i>Ca_desi_denovo</i> | 37488646                | G/T  | NA                 | NA                            | NA                 |
| <i>Desi_wild_37496577</i> | NA                                  | <i>Ca_desi_denovo</i> | 37496577                | A/G  | NA                 | NA                            | NA                 |
| <i>Desi_wild_37496647</i> | NA                                  | <i>Ca_desi_denovo</i> | 37496647                | G/T  | NA                 | NA                            | NA                 |
| <i>Desi_wild_37497153</i> | NA                                  | <i>Ca_desi_denovo</i> | 37497153                | G/A  | NA                 | NA                            | NA                 |
| <i>Desi_wild_37497168</i> | NA                                  | <i>Ca_desi_denovo</i> | 37497168                | C/T  | NA                 | NA                            | NA                 |
| <i>Desi_wild_37498452</i> | NA                                  | <i>Ca_desi_denovo</i> | 37498452                | T/C  | NA                 | NA                            | NA                 |
| <i>Desi_wild_37498476</i> | NA                                  | <i>Ca_desi_denovo</i> | 37498476                | C/T  | NA                 | NA                            | NA                 |
| <i>Desi_wild_37498736</i> | NA                                  | <i>Ca_desi_denovo</i> | 37498736                | C/T  | NA                 | NA                            | NA                 |
| <i>Desi_wild_37499987</i> | NA                                  | <i>Ca_desi_denovo</i> | 37499987                | C/A  | NA                 | NA                            | NA                 |
| <i>Desi_wild_37500011</i> | NA                                  | <i>Ca_desi_denovo</i> | 37500011                | G/T  | NA                 | NA                            | NA                 |
| <i>Desi_wild_37500072</i> | NA                                  | <i>Ca_desi_denovo</i> | 37500072                | T/G  | NA                 | NA                            | NA                 |
| <i>Desi_wild_37501638</i> | NA                                  | <i>Ca_desi_denovo</i> | 37501638                | C/G  | NA                 | NA                            | NA                 |
| <i>Desi_wild_37504027</i> | NA                                  | <i>Ca_desi_denovo</i> | 37504027                | G/C  | NA                 | NA                            | NA                 |
| <i>Desi_wild_37504034</i> | NA                                  | <i>Ca_desi_denovo</i> | 37504034                | A/C  | NA                 | NA                            | NA                 |
| <i>Desi_wild_37504228</i> | NA                                  | <i>Ca_desi_denovo</i> | 37504228                | T/G  | NA                 | NA                            | NA                 |
| <i>Desi_wild_37514363</i> | NA                                  | <i>Ca_desi_denovo</i> | 37514363                | T/C  | NA                 | NA                            | NA                 |
| <i>Desi_wild_37514378</i> | NA                                  | <i>Ca_desi_denovo</i> | 37514378                | C/T  | NA                 | NA                            | NA                 |
| <i>Desi_wild_37514464</i> | NA                                  | <i>Ca_desi_denovo</i> | 37514464                | T/C  | NA                 | NA                            | NA                 |
| <i>Desi_wild_37514573</i> | NA                                  | <i>Ca_desi_denovo</i> | 37514573                | A/G  | NA                 | NA                            | NA                 |
| <i>Desi_wild_37516361</i> | NA                                  | <i>Ca_desi_denovo</i> | 37516361                | A/G  | NA                 | NA                            | NA                 |
| <i>Desi_wild_37518868</i> | NA                                  | <i>Ca_desi_denovo</i> | 37518868                | A/T  | NA                 | NA                            | NA                 |
| <i>Desi_wild_37520001</i> | NA                                  | <i>Ca_desi_denovo</i> | 37520001                | A/G  | NA                 | NA                            | NA                 |
| <i>Desi_wild_37520057</i> | NA                                  | <i>Ca_desi_denovo</i> | 37520057                | C/T  | NA                 | NA                            | NA                 |
| <i>Desi_wild_37520060</i> | NA                                  | <i>Ca_desi_denovo</i> | 37520060                | C/T  | NA                 | NA                            | NA                 |
| <i>Desi_wild_37531619</i> | NA                                  | <i>Ca_desi_denovo</i> | 37531619                | G/T  | NA                 | NA                            | NA                 |
| <i>Desi_wild_37531656</i> | NA                                  | <i>Ca_desi_denovo</i> | 37531656                | A/G  | NA                 | NA                            | NA                 |
| <i>Desi_wild_37532770</i> | NA                                  | <i>Ca_desi_denovo</i> | 37532770                | T/C  | NA                 | NA                            | NA                 |
| <i>Desi_wild_37532835</i> | NA                                  | <i>Ca_desi_denovo</i> | 37532835                | G/A  | NA                 | NA                            | NA                 |
| <i>Desi_wild_37538469</i> | NA                                  | <i>Ca_desi_denovo</i> | 37538469                | A/G  | NA                 | NA                            | NA                 |
| <i>Desi_wild_37541415</i> | NA                                  | <i>Ca_desi_denovo</i> | 37541415                | A/G  | NA                 | NA                            | NA                 |
| <i>Desi_wild_37541472</i> | NA                                  | <i>Ca_desi_denovo</i> | 37541472                | T/C  | NA                 | NA                            | NA                 |
| <i>Desi_wild_37547730</i> | NA                                  | <i>Ca_desi_denovo</i> | 37547730                | G/T  | NA                 | NA                            | NA                 |
| <i>Desi_wild_37560162</i> | NA                                  | <i>Ca_desi_denovo</i> | 37560162                | A/G  | NA                 | NA                            | NA                 |
| <i>Desi_wild_37560210</i> | NA                                  | <i>Ca_desi_denovo</i> | 37560210                | T/C  | NA                 | NA                            | NA                 |
| <i>Desi_wild_37561566</i> | NA                                  | <i>Ca_desi_denovo</i> | 37561566                | G/T  | NA                 | NA                            | NA                 |
| <i>Desi_wild_37573034</i> | NA                                  | <i>Ca_desi_denovo</i> | 37573034                | G/C  | NA                 | NA                            | NA                 |
| <i>Desi_wild_37593060</i> | NA                                  | <i>Ca_desi_denovo</i> | 37593060                | T/C  | NA                 | NA                            | NA                 |
| <i>Desi_wild_37593062</i> | NA                                  | <i>Ca_desi_denovo</i> | 37593062                | T/G  | NA                 | NA                            | NA                 |
| <i>Desi_wild_37593704</i> | NA                                  | <i>Ca_desi_denovo</i> | 37593704                | T/C  | NA                 | NA                            | NA                 |
| <i>Desi_wild_37594343</i> | NA                                  | <i>Ca_desi_denovo</i> | 37594343                | T/G  | NA                 | NA                            | NA                 |
| <i>Desi_wild_37601030</i> | NA                                  | <i>Ca_desi_denovo</i> | 37601030                | A/G  | NA                 | NA                            | NA                 |
| <i>Desi_wild_37602089</i> | NA                                  | <i>Ca_desi_denovo</i> | 37602089                | A/G  | NA                 | NA                            | NA                 |

| SNP IDs                   | NCBI dbSNP accession IDs (NCBI_SS#) | Chromosomes           | Physical positions (bp) | SNPs | Gene accession IDs | Sequence components of genome | Putative functions |
|---------------------------|-------------------------------------|-----------------------|-------------------------|------|--------------------|-------------------------------|--------------------|
| <i>Desi_wild_37602131</i> | NA                                  | <i>Ca_desi_denovo</i> | 37602131                | G/A  | NA                 | NA                            | NA                 |
| <i>Desi_wild_37605659</i> | NA                                  | <i>Ca_desi_denovo</i> | 37605659                | T/C  | NA                 | NA                            | NA                 |
| <i>Desi_wild_37606221</i> | NA                                  | <i>Ca_desi_denovo</i> | 37606221                | G/C  | NA                 | NA                            | NA                 |
| <i>Desi_wild_37606227</i> | NA                                  | <i>Ca_desi_denovo</i> | 37606227                | C/T  | NA                 | NA                            | NA                 |
| <i>Desi_wild_37611975</i> | NA                                  | <i>Ca_desi_denovo</i> | 37611975                | G/A  | NA                 | NA                            | NA                 |
| <i>Desi_wild_37615146</i> | NA                                  | <i>Ca_desi_denovo</i> | 37615146                | C/A  | NA                 | NA                            | NA                 |
| <i>Desi_wild_37615196</i> | NA                                  | <i>Ca_desi_denovo</i> | 37615196                | C/G  | NA                 | NA                            | NA                 |
| <i>Desi_wild_37615218</i> | NA                                  | <i>Ca_desi_denovo</i> | 37615218                | G/T  | NA                 | NA                            | NA                 |
| <i>Desi_wild_37616838</i> | NA                                  | <i>Ca_desi_denovo</i> | 37616838                | A/G  | NA                 | NA                            | NA                 |
| <i>Desi_wild_37618530</i> | NA                                  | <i>Ca_desi_denovo</i> | 37618530                | A/G  | NA                 | NA                            | NA                 |
| <i>Desi_wild_37618578</i> | NA                                  | <i>Ca_desi_denovo</i> | 37618578                | C/G  | NA                 | NA                            | NA                 |
| <i>Desi_wild_37632157</i> | NA                                  | <i>Ca_desi_denovo</i> | 37632157                | C/G  | NA                 | NA                            | NA                 |
| <i>Desi_wild_37632352</i> | NA                                  | <i>Ca_desi_denovo</i> | 37632352                | T/G  | NA                 | NA                            | NA                 |
| <i>Desi_wild_37632812</i> | NA                                  | <i>Ca_desi_denovo</i> | 37632812                | G/A  | NA                 | NA                            | NA                 |
| <i>Desi_wild_37635732</i> | NA                                  | <i>Ca_desi_denovo</i> | 37635732                | C/T  | NA                 | NA                            | NA                 |
| <i>Desi_wild_37637562</i> | NA                                  | <i>Ca_desi_denovo</i> | 37637562                | A/G  | NA                 | NA                            | NA                 |
| <i>Desi_wild_37645679</i> | NA                                  | <i>Ca_desi_denovo</i> | 37645679                | T/C  | NA                 | NA                            | NA                 |
| <i>Desi_wild_37645697</i> | NA                                  | <i>Ca_desi_denovo</i> | 37645697                | G/C  | NA                 | NA                            | NA                 |
| <i>Desi_wild_37645698</i> | NA                                  | <i>Ca_desi_denovo</i> | 37645698                | C/G  | NA                 | NA                            | NA                 |
| <i>Desi_wild_37648839</i> | NA                                  | <i>Ca_desi_denovo</i> | 37648839                | T/C  | NA                 | NA                            | NA                 |
| <i>Desi_wild_37648850</i> | NA                                  | <i>Ca_desi_denovo</i> | 37648850                | C/A  | NA                 | NA                            | NA                 |
| <i>Desi_wild_37648860</i> | NA                                  | <i>Ca_desi_denovo</i> | 37648860                | T/C  | NA                 | NA                            | NA                 |
| <i>Desi_wild_37650285</i> | NA                                  | <i>Ca_desi_denovo</i> | 37650285                | C/A  | NA                 | NA                            | NA                 |
| <i>Desi_wild_37650301</i> | NA                                  | <i>Ca_desi_denovo</i> | 37650301                | A/G  | NA                 | NA                            | NA                 |
| <i>Desi_wild_37652481</i> | NA                                  | <i>Ca_desi_denovo</i> | 37652481                | A/G  | NA                 | NA                            | NA                 |
| <i>Desi_wild_37671092</i> | NA                                  | <i>Ca_desi_denovo</i> | 37671092                | G/T  | NA                 | NA                            | NA                 |
| <i>Desi_wild_37671645</i> | NA                                  | <i>Ca_desi_denovo</i> | 37671645                | A/C  | NA                 | NA                            | NA                 |
| <i>Desi_wild_37672149</i> | NA                                  | <i>Ca_desi_denovo</i> | 37672149                | A/C  | NA                 | NA                            | NA                 |
| <i>Desi_wild_37675900</i> | NA                                  | <i>Ca_desi_denovo</i> | 37675900                | G/A  | NA                 | NA                            | NA                 |
| <i>Desi_wild_37681942</i> | NA                                  | <i>Ca_desi_denovo</i> | 37681942                | A/C  | NA                 | NA                            | NA                 |
| <i>Desi_wild_37681943</i> | NA                                  | <i>Ca_desi_denovo</i> | 37681943                | A/G  | NA                 | NA                            | NA                 |
| <i>Desi_wild_37686371</i> | NA                                  | <i>Ca_desi_denovo</i> | 37686371                | T/A  | NA                 | NA                            | NA                 |
| <i>Desi_wild_37705880</i> | NA                                  | <i>Ca_desi_denovo</i> | 37705880                | T/C  | NA                 | NA                            | NA                 |
| <i>Desi_wild_37707958</i> | NA                                  | <i>Ca_desi_denovo</i> | 37707958                | A/C  | NA                 | NA                            | NA                 |
| <i>Desi_wild_37714821</i> | NA                                  | <i>Ca_desi_denovo</i> | 37714821                | C/G  | NA                 | NA                            | NA                 |
| <i>Desi_wild_37714863</i> | NA                                  | <i>Ca_desi_denovo</i> | 37714863                | G/A  | NA                 | NA                            | NA                 |
| <i>Desi_wild_37717666</i> | NA                                  | <i>Ca_desi_denovo</i> | 37717666                | A/G  | NA                 | NA                            | NA                 |
| <i>Desi_wild_37721440</i> | NA                                  | <i>Ca_desi_denovo</i> | 37721440                | G/C  | NA                 | NA                            | NA                 |
| <i>Desi_wild_37741468</i> | NA                                  | <i>Ca_desi_denovo</i> | 37741468                | G/A  | NA                 | NA                            | NA                 |
| <i>Desi_wild_37741487</i> | NA                                  | <i>Ca_desi_denovo</i> | 37741487                | G/T  | NA                 | NA                            | NA                 |
| <i>Desi_wild_37741543</i> | NA                                  | <i>Ca_desi_denovo</i> | 37741543                | C/T  | NA                 | NA                            | NA                 |
| <i>Desi_wild_37744094</i> | NA                                  | <i>Ca_desi_denovo</i> | 37744094                | G/A  | NA                 | NA                            | NA                 |
| <i>Desi_wild_37744564</i> | NA                                  | <i>Ca_desi_denovo</i> | 37744564                | T/C  | NA                 | NA                            | NA                 |
| <i>Desi_wild_37744576</i> | NA                                  | <i>Ca_desi_denovo</i> | 37744576                | A/C  | NA                 | NA                            | NA                 |

| SNP IDs                   | NCBI dbSNP accession IDs (NCBI_SS#) | Chromosomes           | Physical positions (bp) | SNPs | Gene accession IDs | Sequence components of genome | Putative functions |
|---------------------------|-------------------------------------|-----------------------|-------------------------|------|--------------------|-------------------------------|--------------------|
| <i>Desi_wild_37749317</i> | NA                                  | <i>Ca_desi_denovo</i> | 37749317                | T/C  | NA                 | NA                            | NA                 |
| <i>Desi_wild_37749320</i> | NA                                  | <i>Ca_desi_denovo</i> | 37749320                | C/T  | NA                 | NA                            | NA                 |
| <i>Desi_wild_37762338</i> | NA                                  | <i>Ca_desi_denovo</i> | 37762338                | G/A  | NA                 | NA                            | NA                 |
| <i>Desi_wild_37762374</i> | NA                                  | <i>Ca_desi_denovo</i> | 37762374                | G/A  | NA                 | NA                            | NA                 |
| <i>Desi_wild_37765893</i> | NA                                  | <i>Ca_desi_denovo</i> | 37765893                | G/C  | NA                 | NA                            | NA                 |
| <i>Desi_wild_37765895</i> | NA                                  | <i>Ca_desi_denovo</i> | 37765895                | G/C  | NA                 | NA                            | NA                 |
| <i>Desi_wild_37765908</i> | NA                                  | <i>Ca_desi_denovo</i> | 37765908                | G/A  | NA                 | NA                            | NA                 |
| <i>Desi_wild_37767813</i> | NA                                  | <i>Ca_desi_denovo</i> | 37767813                | A/G  | NA                 | NA                            | NA                 |
| <i>Desi_wild_37770386</i> | NA                                  | <i>Ca_desi_denovo</i> | 37770386                | G/A  | NA                 | NA                            | NA                 |
| <i>Desi_wild_37780972</i> | NA                                  | <i>Ca_desi_denovo</i> | 37780972                | G/T  | NA                 | NA                            | NA                 |
| <i>Desi_wild_37781037</i> | NA                                  | <i>Ca_desi_denovo</i> | 37781037                | C/A  | NA                 | NA                            | NA                 |
| <i>Desi_wild_37814646</i> | NA                                  | <i>Ca_desi_denovo</i> | 37814646                | G/T  | NA                 | NA                            | NA                 |
| <i>Desi_wild_37816930</i> | NA                                  | <i>Ca_desi_denovo</i> | 37816930                | A/G  | NA                 | NA                            | NA                 |
| <i>Desi_wild_37819439</i> | NA                                  | <i>Ca_desi_denovo</i> | 37819439                | C/A  | NA                 | NA                            | NA                 |
| <i>Desi_wild_37827928</i> | NA                                  | <i>Ca_desi_denovo</i> | 37827928                | A/G  | NA                 | NA                            | NA                 |
| <i>Desi_wild_37829429</i> | NA                                  | <i>Ca_desi_denovo</i> | 37829429                | G/T  | NA                 | NA                            | NA                 |
| <i>Desi_wild_37829481</i> | NA                                  | <i>Ca_desi_denovo</i> | 37829481                | T/G  | NA                 | NA                            | NA                 |
| <i>Desi_wild_37829494</i> | NA                                  | <i>Ca_desi_denovo</i> | 37829494                | A/C  | NA                 | NA                            | NA                 |
| <i>Desi_wild_37847549</i> | NA                                  | <i>Ca_desi_denovo</i> | 37847549                | A/C  | NA                 | NA                            | NA                 |
| <i>Desi_wild_37848983</i> | NA                                  | <i>Ca_desi_denovo</i> | 37848983                | A/C  | NA                 | NA                            | NA                 |
| <i>Desi_wild_37852760</i> | NA                                  | <i>Ca_desi_denovo</i> | 37852760                | A/T  | NA                 | NA                            | NA                 |
| <i>Desi_wild_37852774</i> | NA                                  | <i>Ca_desi_denovo</i> | 37852774                | A/C  | NA                 | NA                            | NA                 |
| <i>Desi_wild_37852786</i> | NA                                  | <i>Ca_desi_denovo</i> | 37852786                | A/G  | NA                 | NA                            | NA                 |
| <i>Desi_wild_37858182</i> | NA                                  | <i>Ca_desi_denovo</i> | 37858182                | G/T  | NA                 | NA                            | NA                 |
| <i>Desi_wild_37860386</i> | NA                                  | <i>Ca_desi_denovo</i> | 37860386                | C/T  | NA                 | NA                            | NA                 |
| <i>Desi_wild_37868447</i> | NA                                  | <i>Ca_desi_denovo</i> | 37868447                | A/G  | NA                 | NA                            | NA                 |
| <i>Desi_wild_37877186</i> | NA                                  | <i>Ca_desi_denovo</i> | 37877186                | G/T  | NA                 | NA                            | NA                 |
| <i>Desi_wild_37879169</i> | NA                                  | <i>Ca_desi_denovo</i> | 37879169                | C/T  | NA                 | NA                            | NA                 |
| <i>Desi_wild_37879193</i> | NA                                  | <i>Ca_desi_denovo</i> | 37879193                | T/C  | NA                 | NA                            | NA                 |
| <i>Desi_wild_37879214</i> | NA                                  | <i>Ca_desi_denovo</i> | 37879214                | T/C  | NA                 | NA                            | NA                 |
| <i>Desi_wild_37880765</i> | NA                                  | <i>Ca_desi_denovo</i> | 37880765                | A/G  | NA                 | NA                            | NA                 |
| <i>Desi_wild_37882288</i> | NA                                  | <i>Ca_desi_denovo</i> | 37882288                | G/T  | NA                 | NA                            | NA                 |
| <i>Desi_wild_37882599</i> | NA                                  | <i>Ca_desi_denovo</i> | 37882599                | A/G  | NA                 | NA                            | NA                 |
| <i>Desi_wild_37882632</i> | NA                                  | <i>Ca_desi_denovo</i> | 37882632                | C/T  | NA                 | NA                            | NA                 |
| <i>Desi_wild_37898469</i> | NA                                  | <i>Ca_desi_denovo</i> | 37898469                | A/G  | NA                 | NA                            | NA                 |
| <i>Desi_wild_37905616</i> | NA                                  | <i>Ca_desi_denovo</i> | 37905616                | T/G  | NA                 | NA                            | NA                 |
| <i>Desi_wild_37906012</i> | NA                                  | <i>Ca_desi_denovo</i> | 37906012                | C/G  | NA                 | NA                            | NA                 |
| <i>Desi_wild_37906033</i> | NA                                  | <i>Ca_desi_denovo</i> | 37906033                | T/C  | NA                 | NA                            | NA                 |
| <i>Desi_wild_37908996</i> | NA                                  | <i>Ca_desi_denovo</i> | 37908996                | C/G  | NA                 | NA                            | NA                 |
| <i>Desi_wild_37909032</i> | NA                                  | <i>Ca_desi_denovo</i> | 37909032                | A/G  | NA                 | NA                            | NA                 |
| <i>Desi_wild_37917713</i> | NA                                  | <i>Ca_desi_denovo</i> | 37917713                | G/T  | NA                 | NA                            | NA                 |
| <i>Desi_wild_37919742</i> | NA                                  | <i>Ca_desi_denovo</i> | 37919742                | A/G  | NA                 | NA                            | NA                 |
| <i>Desi_wild_37919760</i> | NA                                  | <i>Ca_desi_denovo</i> | 37919760                | A/G  | NA                 | NA                            | NA                 |
| <i>Desi_wild_37919817</i> | NA                                  | <i>Ca_desi_denovo</i> | 37919817                | C/A  | NA                 | NA                            | NA                 |



| SNP IDs                   | NCBI dbSNP accession IDs (NCBI_SS#) | Chromosomes           | Physical positions (bp) | SNPs | Gene accession IDs | Sequence components of genome | Putative functions |
|---------------------------|-------------------------------------|-----------------------|-------------------------|------|--------------------|-------------------------------|--------------------|
| <i>Desi_wild_37923896</i> | NA                                  | <i>Ca_desi_denovo</i> | 37923896                | A/G  | NA                 | NA                            | NA                 |
| <i>Desi_wild_37927444</i> | NA                                  | <i>Ca_desi_denovo</i> | 37927444                | A/G  | NA                 | NA                            | NA                 |
| <i>Desi_wild_37927481</i> | NA                                  | <i>Ca_desi_denovo</i> | 37927481                | G/A  | NA                 | NA                            | NA                 |
| <i>Desi_wild_37932155</i> | NA                                  | <i>Ca_desi_denovo</i> | 37932155                | A/G  | NA                 | NA                            | NA                 |
| <i>Desi_wild_37934767</i> | NA                                  | <i>Ca_desi_denovo</i> | 37934767                | A/G  | NA                 | NA                            | NA                 |
| <i>Desi_wild_37935574</i> | NA                                  | <i>Ca_desi_denovo</i> | 37935574                | A/C  | NA                 | NA                            | NA                 |
| <i>Desi_wild_37935575</i> | NA                                  | <i>Ca_desi_denovo</i> | 37935575                | C/G  | NA                 | NA                            | NA                 |
| <i>Desi_wild_37936810</i> | NA                                  | <i>Ca_desi_denovo</i> | 37936810                | T/C  | NA                 | NA                            | NA                 |
| <i>Desi_wild_37943552</i> | NA                                  | <i>Ca_desi_denovo</i> | 37943552                | C/T  | NA                 | NA                            | NA                 |
| <i>Desi_wild_37945367</i> | NA                                  | <i>Ca_desi_denovo</i> | 37945367                | A/C  | NA                 | NA                            | NA                 |
| <i>Desi_wild_37946835</i> | NA                                  | <i>Ca_desi_denovo</i> | 37946835                | G/A  | NA                 | NA                            | NA                 |
| <i>Desi_wild_37946851</i> | NA                                  | <i>Ca_desi_denovo</i> | 37946851                | G/T  | NA                 | NA                            | NA                 |
| <i>Desi_wild_37946998</i> | NA                                  | <i>Ca_desi_denovo</i> | 37946998                | T/G  | NA                 | NA                            | NA                 |
| <i>Desi_wild_37948916</i> | NA                                  | <i>Ca_desi_denovo</i> | 37948916                | A/C  | NA                 | NA                            | NA                 |
| <i>Desi_wild_37948919</i> | NA                                  | <i>Ca_desi_denovo</i> | 37948919                | C/T  | NA                 | NA                            | NA                 |
| <i>Desi_wild_37949613</i> | NA                                  | <i>Ca_desi_denovo</i> | 37949613                | G/C  | NA                 | NA                            | NA                 |
| <i>Desi_wild_37949664</i> | NA                                  | <i>Ca_desi_denovo</i> | 37949664                | A/G  | NA                 | NA                            | NA                 |
| <i>Desi_wild_37951504</i> | NA                                  | <i>Ca_desi_denovo</i> | 37951504                | G/T  | NA                 | NA                            | NA                 |
| <i>Desi_wild_37965017</i> | NA                                  | <i>Ca_desi_denovo</i> | 37965017                | A/G  | NA                 | NA                            | NA                 |
| <i>Desi_wild_37965045</i> | NA                                  | <i>Ca_desi_denovo</i> | 37965045                | A/C  | NA                 | NA                            | NA                 |
| <i>Desi_wild_37969556</i> | NA                                  | <i>Ca_desi_denovo</i> | 37969556                | A/C  | NA                 | NA                            | NA                 |
| <i>Desi_wild_37969558</i> | NA                                  | <i>Ca_desi_denovo</i> | 37969558                | A/C  | NA                 | NA                            | NA                 |
| <i>Desi_wild_37972080</i> | NA                                  | <i>Ca_desi_denovo</i> | 37972080                | G/C  | NA                 | NA                            | NA                 |
| <i>Desi_wild_37972095</i> | NA                                  | <i>Ca_desi_denovo</i> | 37972095                | T/C  | NA                 | NA                            | NA                 |
| <i>Desi_wild_37972127</i> | NA                                  | <i>Ca_desi_denovo</i> | 37972127                | A/G  | NA                 | NA                            | NA                 |
| <i>Desi_wild_37972226</i> | NA                                  | <i>Ca_desi_denovo</i> | 37972226                | A/C  | NA                 | NA                            | NA                 |
| <i>Desi_wild_37982794</i> | NA                                  | <i>Ca_desi_denovo</i> | 37982794                | C/T  | NA                 | NA                            | NA                 |
| <i>Desi_wild_37982804</i> | NA                                  | <i>Ca_desi_denovo</i> | 37982804                | G/A  | NA                 | NA                            | NA                 |
| <i>Desi_wild_37983763</i> | NA                                  | <i>Ca_desi_denovo</i> | 37983763                | A/G  | NA                 | NA                            | NA                 |
| <i>Desi_wild_37985986</i> | NA                                  | <i>Ca_desi_denovo</i> | 37985986                | C/T  | NA                 | NA                            | NA                 |
| <i>Desi_wild_37999619</i> | NA                                  | <i>Ca_desi_denovo</i> | 37999619                | C/T  | NA                 | NA                            | NA                 |
| <i>Desi_wild_37999652</i> | NA                                  | <i>Ca_desi_denovo</i> | 37999652                | G/A  | NA                 | NA                            | NA                 |
| <i>Desi_wild_38004215</i> | NA                                  | <i>Ca_desi_denovo</i> | 38004215                | A/C  | NA                 | NA                            | NA                 |
| <i>Desi_wild_38008964</i> | NA                                  | <i>Ca_desi_denovo</i> | 38008964                | G/T  | NA                 | NA                            | NA                 |
| <i>Desi_wild_38011362</i> | NA                                  | <i>Ca_desi_denovo</i> | 38011362                | G/T  | NA                 | NA                            | NA                 |
| <i>Desi_wild_38011478</i> | NA                                  | <i>Ca_desi_denovo</i> | 38011478                | G/T  | NA                 | NA                            | NA                 |
| <i>Desi_wild_38030432</i> | NA                                  | <i>Ca_desi_denovo</i> | 38030432                | G/A  | NA                 | NA                            | NA                 |
| <i>Desi_wild_38030445</i> | NA                                  | <i>Ca_desi_denovo</i> | 38030445                | A/G  | NA                 | NA                            | NA                 |
| <i>Desi_wild_38043455</i> | NA                                  | <i>Ca_desi_denovo</i> | 38043455                | G/C  | NA                 | NA                            | NA                 |
| <i>Desi_wild_38043458</i> | NA                                  | <i>Ca_desi_denovo</i> | 38043458                | G/C  | NA                 | NA                            | NA                 |
| <i>Desi_wild_38048757</i> | NA                                  | <i>Ca_desi_denovo</i> | 38048757                | G/T  | NA                 | NA                            | NA                 |
| <i>Desi_wild_38052983</i> | NA                                  | <i>Ca_desi_denovo</i> | 38052983                | G/T  | NA                 | NA                            | NA                 |
| <i>Desi_wild_38055574</i> | NA                                  | <i>Ca_desi_denovo</i> | 38055574                | G/T  | NA                 | NA                            | NA                 |
| <i>Desi_wild_38064605</i> | NA                                  | <i>Ca_desi_denovo</i> | 38064605                | A/G  | NA                 | NA                            | NA                 |

| SNP IDs                   | NCBI dbSNP accession IDs (NCBI_SS#) | Chromosomes           | Physical positions (bp) | SNPs | Gene accession IDs | Sequence components of genome | Putative functions |
|---------------------------|-------------------------------------|-----------------------|-------------------------|------|--------------------|-------------------------------|--------------------|
| <i>Desi_wild_38064658</i> | NA                                  | <i>Ca_desi_denovo</i> | 38064658                | C/A  | NA                 | NA                            | NA                 |
| <i>Desi_wild_38065832</i> | NA                                  | <i>Ca_desi_denovo</i> | 38065832                | C/T  | NA                 | NA                            | NA                 |
| <i>Desi_wild_38065833</i> | NA                                  | <i>Ca_desi_denovo</i> | 38065833                | G/A  | NA                 | NA                            | NA                 |
| <i>Desi_wild_38066717</i> | NA                                  | <i>Ca_desi_denovo</i> | 38066717                | A/G  | NA                 | NA                            | NA                 |
| <i>Desi_wild_38069837</i> | NA                                  | <i>Ca_desi_denovo</i> | 38069837                | G/T  | NA                 | NA                            | NA                 |
| <i>Desi_wild_38073526</i> | NA                                  | <i>Ca_desi_denovo</i> | 38073526                | A/C  | NA                 | NA                            | NA                 |
| <i>Desi_wild_38080581</i> | NA                                  | <i>Ca_desi_denovo</i> | 38080581                | C/A  | NA                 | NA                            | NA                 |
| <i>Desi_wild_38095549</i> | NA                                  | <i>Ca_desi_denovo</i> | 38095549                | T/A  | NA                 | NA                            | NA                 |
| <i>Desi_wild_38095551</i> | NA                                  | <i>Ca_desi_denovo</i> | 38095551                | T/C  | NA                 | NA                            | NA                 |
| <i>Desi_wild_38098484</i> | NA                                  | <i>Ca_desi_denovo</i> | 38098484                | T/G  | NA                 | NA                            | NA                 |
| <i>Desi_wild_38099497</i> | NA                                  | <i>Ca_desi_denovo</i> | 38099497                | T/C  | NA                 | NA                            | NA                 |
| <i>Desi_wild_38099734</i> | NA                                  | <i>Ca_desi_denovo</i> | 38099734                | A/C  | NA                 | NA                            | NA                 |
| <i>Desi_wild_38102645</i> | NA                                  | <i>Ca_desi_denovo</i> | 38102645                | A/G  | NA                 | NA                            | NA                 |
| <i>Desi_wild_38102669</i> | NA                                  | <i>Ca_desi_denovo</i> | 38102669                | G/A  | NA                 | NA                            | NA                 |
| <i>Desi_wild_38103471</i> | NA                                  | <i>Ca_desi_denovo</i> | 38103471                | T/G  | NA                 | NA                            | NA                 |
| <i>Desi_wild_38111446</i> | NA                                  | <i>Ca_desi_denovo</i> | 38111446                | G/T  | NA                 | NA                            | NA                 |
| <i>Desi_wild_38111659</i> | NA                                  | <i>Ca_desi_denovo</i> | 38111659                | G/C  | NA                 | NA                            | NA                 |
| <i>Desi_wild_38111674</i> | NA                                  | <i>Ca_desi_denovo</i> | 38111674                | C/G  | NA                 | NA                            | NA                 |
| <i>Desi_wild_38116513</i> | NA                                  | <i>Ca_desi_denovo</i> | 38116513                | G/T  | NA                 | NA                            | NA                 |
| <i>Desi_wild_38117352</i> | NA                                  | <i>Ca_desi_denovo</i> | 38117352                | C/T  | NA                 | NA                            | NA                 |
| <i>Desi_wild_38118562</i> | NA                                  | <i>Ca_desi_denovo</i> | 38118562                | A/G  | NA                 | NA                            | NA                 |
| <i>Desi_wild_38129191</i> | NA                                  | <i>Ca_desi_denovo</i> | 38129191                | G/T  | NA                 | NA                            | NA                 |
| <i>Desi_wild_38135181</i> | NA                                  | <i>Ca_desi_denovo</i> | 38135181                | G/C  | NA                 | NA                            | NA                 |
| <i>Desi_wild_38135244</i> | NA                                  | <i>Ca_desi_denovo</i> | 38135244                | T/G  | NA                 | NA                            | NA                 |
| <i>Desi_wild_38138837</i> | NA                                  | <i>Ca_desi_denovo</i> | 38138837                | C/G  | NA                 | NA                            | NA                 |
| <i>Desi_wild_38157038</i> | NA                                  | <i>Ca_desi_denovo</i> | 38157038                | C/G  | NA                 | NA                            | NA                 |
| <i>Desi_wild_38157041</i> | NA                                  | <i>Ca_desi_denovo</i> | 38157041                | A/T  | NA                 | NA                            | NA                 |
| <i>Desi_wild_38158653</i> | NA                                  | <i>Ca_desi_denovo</i> | 38158653                | G/A  | NA                 | NA                            | NA                 |
| <i>Desi_wild_38158656</i> | NA                                  | <i>Ca_desi_denovo</i> | 38158656                | A/C  | NA                 | NA                            | NA                 |
| <i>Desi_wild_38163152</i> | NA                                  | <i>Ca_desi_denovo</i> | 38163152                | A/G  | NA                 | NA                            | NA                 |
| <i>Desi_wild_38163173</i> | NA                                  | <i>Ca_desi_denovo</i> | 38163173                | A/G  | NA                 | NA                            | NA                 |
| <i>Desi_wild_38163734</i> | NA                                  | <i>Ca_desi_denovo</i> | 38163734                | T/G  | NA                 | NA                            | NA                 |
| <i>Desi_wild_38167536</i> | NA                                  | <i>Ca_desi_denovo</i> | 38167536                | A/G  | NA                 | NA                            | NA                 |
| <i>Desi_wild_38179688</i> | NA                                  | <i>Ca_desi_denovo</i> | 38179688                | A/G  | NA                 | NA                            | NA                 |
| <i>Desi_wild_38179691</i> | NA                                  | <i>Ca_desi_denovo</i> | 38179691                | C/G  | NA                 | NA                            | NA                 |
| <i>Desi_wild_38181333</i> | NA                                  | <i>Ca_desi_denovo</i> | 38181333                | A/C  | NA                 | NA                            | NA                 |
| <i>Desi_wild_38183247</i> | NA                                  | <i>Ca_desi_denovo</i> | 38183247                | T/G  | NA                 | NA                            | NA                 |
| <i>Desi_wild_38190207</i> | NA                                  | <i>Ca_desi_denovo</i> | 38190207                | G/T  | NA                 | NA                            | NA                 |
| <i>Desi_wild_38192277</i> | NA                                  | <i>Ca_desi_denovo</i> | 38192277                | G/T  | NA                 | NA                            | NA                 |
| <i>Desi_wild_38192504</i> | NA                                  | <i>Ca_desi_denovo</i> | 38192504                | G/C  | NA                 | NA                            | NA                 |
| <i>Desi_wild_38192509</i> | NA                                  | <i>Ca_desi_denovo</i> | 38192509                | C/T  | NA                 | NA                            | NA                 |
| <i>Desi_wild_38193010</i> | NA                                  | <i>Ca_desi_denovo</i> | 38193010                | T/C  | NA                 | NA                            | NA                 |
| <i>Desi_wild_38193036</i> | NA                                  | <i>Ca_desi_denovo</i> | 38193036                | A/G  | NA                 | NA                            | NA                 |
| <i>Desi_wild_38203028</i> | NA                                  | <i>Ca_desi_denovo</i> | 38203028                | A/C  | NA                 | NA                            | NA                 |

| SNP IDs                   | NCBI dbSNP accession IDs (NCBI_SS#) | Chromosomes           | Physical positions (bp) | SNPs | Gene accession IDs | Sequence components of genome | Putative functions |
|---------------------------|-------------------------------------|-----------------------|-------------------------|------|--------------------|-------------------------------|--------------------|
| <i>Desi_wild_38205043</i> | NA                                  | <i>Ca_desi_denovo</i> | 38205043                | G/T  | NA                 | NA                            | NA                 |
| <i>Desi_wild_38206808</i> | NA                                  | <i>Ca_desi_denovo</i> | 38206808                | C/G  | NA                 | NA                            | NA                 |
| <i>Desi_wild_38206821</i> | NA                                  | <i>Ca_desi_denovo</i> | 38206821                | T/C  | NA                 | NA                            | NA                 |
| <i>Desi_wild_38208453</i> | NA                                  | <i>Ca_desi_denovo</i> | 38208453                | T/G  | NA                 | NA                            | NA                 |
| <i>Desi_wild_38222594</i> | NA                                  | <i>Ca_desi_denovo</i> | 38222594                | T/C  | NA                 | NA                            | NA                 |
| <i>Desi_wild_38223995</i> | NA                                  | <i>Ca_desi_denovo</i> | 38223995                | G/C  | NA                 | NA                            | NA                 |
| <i>Desi_wild_38224010</i> | NA                                  | <i>Ca_desi_denovo</i> | 38224010                | A/G  | NA                 | NA                            | NA                 |
| <i>Desi_wild_38225396</i> | NA                                  | <i>Ca_desi_denovo</i> | 38225396                | C/G  | NA                 | NA                            | NA                 |
| <i>Desi_wild_38228069</i> | NA                                  | <i>Ca_desi_denovo</i> | 38228069                | G/T  | NA                 | NA                            | NA                 |
| <i>Desi_wild_38241462</i> | NA                                  | <i>Ca_desi_denovo</i> | 38241462                | C/G  | NA                 | NA                            | NA                 |
| <i>Desi_wild_38243029</i> | NA                                  | <i>Ca_desi_denovo</i> | 38243029                | A/T  | NA                 | NA                            | NA                 |
| <i>Desi_wild_38250182</i> | NA                                  | <i>Ca_desi_denovo</i> | 38250182                | G/C  | NA                 | NA                            | NA                 |
| <i>Desi_wild_38250190</i> | NA                                  | <i>Ca_desi_denovo</i> | 38250190                | G/A  | NA                 | NA                            | NA                 |
| <i>Desi_wild_38256328</i> | NA                                  | <i>Ca_desi_denovo</i> | 38256328                | A/G  | NA                 | NA                            | NA                 |
| <i>Desi_wild_38256342</i> | NA                                  | <i>Ca_desi_denovo</i> | 38256342                | T/C  | NA                 | NA                            | NA                 |
| <i>Desi_wild_38256558</i> | NA                                  | <i>Ca_desi_denovo</i> | 38256558                | G/T  | NA                 | NA                            | NA                 |
| <i>Desi_wild_38259008</i> | NA                                  | <i>Ca_desi_denovo</i> | 38259008                | C/G  | NA                 | NA                            | NA                 |
| <i>Desi_wild_38259057</i> | NA                                  | <i>Ca_desi_denovo</i> | 38259057                | A/G  | NA                 | NA                            | NA                 |
| <i>Desi_wild_38259069</i> | NA                                  | <i>Ca_desi_denovo</i> | 38259069                | A/C  | NA                 | NA                            | NA                 |
| <i>Desi_wild_38259077</i> | NA                                  | <i>Ca_desi_denovo</i> | 38259077                | G/A  | NA                 | NA                            | NA                 |
| <i>Desi_wild_38267634</i> | NA                                  | <i>Ca_desi_denovo</i> | 38267634                | C/G  | NA                 | NA                            | NA                 |
| <i>Desi_wild_38273794</i> | NA                                  | <i>Ca_desi_denovo</i> | 38273794                | C/T  | NA                 | NA                            | NA                 |
| <i>Desi_wild_38273797</i> | NA                                  | <i>Ca_desi_denovo</i> | 38273797                | A/G  | NA                 | NA                            | NA                 |
| <i>Desi_wild_38279100</i> | NA                                  | <i>Ca_desi_denovo</i> | 38279100                | C/T  | NA                 | NA                            | NA                 |
| <i>Desi_wild_38285302</i> | NA                                  | <i>Ca_desi_denovo</i> | 38285302                | C/T  | NA                 | NA                            | NA                 |
| <i>Desi_wild_38287454</i> | NA                                  | <i>Ca_desi_denovo</i> | 38287454                | G/T  | NA                 | NA                            | NA                 |
| <i>Desi_wild_38288254</i> | NA                                  | <i>Ca_desi_denovo</i> | 38288254                | T/G  | NA                 | NA                            | NA                 |
| <i>Desi_wild_38302574</i> | NA                                  | <i>Ca_desi_denovo</i> | 38302574                | C/T  | NA                 | NA                            | NA                 |
| <i>Desi_wild_38305646</i> | NA                                  | <i>Ca_desi_denovo</i> | 38305646                | C/G  | NA                 | NA                            | NA                 |
| <i>Desi_wild_38311154</i> | NA                                  | <i>Ca_desi_denovo</i> | 38311154                | T/C  | NA                 | NA                            | NA                 |
| <i>Desi_wild_38313811</i> | NA                                  | <i>Ca_desi_denovo</i> | 38313811                | G/T  | NA                 | NA                            | NA                 |
| <i>Desi_wild_38319355</i> | NA                                  | <i>Ca_desi_denovo</i> | 38319355                | A/G  | NA                 | NA                            | NA                 |
| <i>Desi_wild_38321109</i> | NA                                  | <i>Ca_desi_denovo</i> | 38321109                | G/T  | NA                 | NA                            | NA                 |
| <i>Desi_wild_38331369</i> | NA                                  | <i>Ca_desi_denovo</i> | 38331369                | T/C  | NA                 | NA                            | NA                 |
| <i>Desi_wild_38331955</i> | NA                                  | <i>Ca_desi_denovo</i> | 38331955                | G/T  | NA                 | NA                            | NA                 |
| <i>Desi_wild_38334500</i> | NA                                  | <i>Ca_desi_denovo</i> | 38334500                | C/T  | NA                 | NA                            | NA                 |
| <i>Desi_wild_38334535</i> | NA                                  | <i>Ca_desi_denovo</i> | 38334535                | G/A  | NA                 | NA                            | NA                 |
| <i>Desi_wild_38335555</i> | NA                                  | <i>Ca_desi_denovo</i> | 38335555                | G/T  | NA                 | NA                            | NA                 |
| <i>Desi_wild_38342993</i> | NA                                  | <i>Ca_desi_denovo</i> | 38342993                | G/T  | NA                 | NA                            | NA                 |
| <i>Desi_wild_38343240</i> | NA                                  | <i>Ca_desi_denovo</i> | 38343240                | C/G  | NA                 | NA                            | NA                 |
| <i>Desi_wild_38348807</i> | NA                                  | <i>Ca_desi_denovo</i> | 38348807                | G/C  | NA                 | NA                            | NA                 |
| <i>Desi_wild_38348834</i> | NA                                  | <i>Ca_desi_denovo</i> | 38348834                | A/G  | NA                 | NA                            | NA                 |
| <i>Desi_wild_38350384</i> | NA                                  | <i>Ca_desi_denovo</i> | 38350384                | T/G  | NA                 | NA                            | NA                 |
| <i>Desi_wild_38351012</i> | NA                                  | <i>Ca_desi_denovo</i> | 38351012                | T/C  | NA                 | NA                            | NA                 |

| SNP IDs                   | NCBI dbSNP accession IDs (NCBI_SS#) | Chromosomes           | Physical positions (bp) | SNPs | Gene accession IDs | Sequence components of genome | Putative functions |
|---------------------------|-------------------------------------|-----------------------|-------------------------|------|--------------------|-------------------------------|--------------------|
| <i>Desi_wild_38352785</i> | NA                                  | <i>Ca_desi_denovo</i> | 38352785                | C/G  | NA                 | NA                            | NA                 |
| <i>Desi_wild_38352789</i> | NA                                  | <i>Ca_desi_denovo</i> | 38352789                | C/T  | NA                 | NA                            | NA                 |
| <i>Desi_wild_38353384</i> | NA                                  | <i>Ca_desi_denovo</i> | 38353384                | G/T  | NA                 | NA                            | NA                 |
| <i>Desi_wild_38354936</i> | NA                                  | <i>Ca_desi_denovo</i> | 38354936                | C/T  | NA                 | NA                            | NA                 |
| <i>Desi_wild_38359836</i> | NA                                  | <i>Ca_desi_denovo</i> | 38359836                | A/G  | NA                 | NA                            | NA                 |
| <i>Desi_wild_38359845</i> | NA                                  | <i>Ca_desi_denovo</i> | 38359845                | C/A  | NA                 | NA                            | NA                 |
| <i>Desi_wild_38359907</i> | NA                                  | <i>Ca_desi_denovo</i> | 38359907                | G/C  | NA                 | NA                            | NA                 |
| <i>Desi_wild_38359982</i> | NA                                  | <i>Ca_desi_denovo</i> | 38359982                | C/A  | NA                 | NA                            | NA                 |
| <i>Desi_wild_38362826</i> | NA                                  | <i>Ca_desi_denovo</i> | 38362826                | C/T  | NA                 | NA                            | NA                 |
| <i>Desi_wild_38362829</i> | NA                                  | <i>Ca_desi_denovo</i> | 38362829                | T/C  | NA                 | NA                            | NA                 |
| <i>Desi_wild_38363940</i> | NA                                  | <i>Ca_desi_denovo</i> | 38363940                | G/T  | NA                 | NA                            | NA                 |
| <i>Desi_wild_38363971</i> | NA                                  | <i>Ca_desi_denovo</i> | 38363971                | C/T  | NA                 | NA                            | NA                 |
| <i>Desi_wild_38366574</i> | NA                                  | <i>Ca_desi_denovo</i> | 38366574                | A/G  | NA                 | NA                            | NA                 |
| <i>Desi_wild_38370117</i> | NA                                  | <i>Ca_desi_denovo</i> | 38370117                | A/T  | NA                 | NA                            | NA                 |
| <i>Desi_wild_38372128</i> | NA                                  | <i>Ca_desi_denovo</i> | 38372128                | C/A  | NA                 | NA                            | NA                 |
| <i>Desi_wild_38372149</i> | NA                                  | <i>Ca_desi_denovo</i> | 38372149                | T/C  | NA                 | NA                            | NA                 |
| <i>Desi_wild_38373092</i> | NA                                  | <i>Ca_desi_denovo</i> | 38373092                | G/C  | NA                 | NA                            | NA                 |
| <i>Desi_wild_38374358</i> | NA                                  | <i>Ca_desi_denovo</i> | 38374358                | G/C  | NA                 | NA                            | NA                 |
| <i>Desi_wild_38374385</i> | NA                                  | <i>Ca_desi_denovo</i> | 38374385                | C/G  | NA                 | NA                            | NA                 |
| <i>Desi_wild_38374388</i> | NA                                  | <i>Ca_desi_denovo</i> | 38374388                | A/C  | NA                 | NA                            | NA                 |
| <i>Desi_wild_38374591</i> | NA                                  | <i>Ca_desi_denovo</i> | 38374591                | A/C  | NA                 | NA                            | NA                 |
| <i>Desi_wild_38374619</i> | NA                                  | <i>Ca_desi_denovo</i> | 38374619                | A/G  | NA                 | NA                            | NA                 |
| <i>Desi_wild_38375159</i> | NA                                  | <i>Ca_desi_denovo</i> | 38375159                | G/T  | NA                 | NA                            | NA                 |
| <i>Desi_wild_38378612</i> | NA                                  | <i>Ca_desi_denovo</i> | 38378612                | C/T  | NA                 | NA                            | NA                 |
| <i>Desi_wild_38381863</i> | NA                                  | <i>Ca_desi_denovo</i> | 38381863                | G/T  | NA                 | NA                            | NA                 |
| <i>Desi_wild_38382374</i> | NA                                  | <i>Ca_desi_denovo</i> | 38382374                | A/G  | NA                 | NA                            | NA                 |
| <i>Desi_wild_38382389</i> | NA                                  | <i>Ca_desi_denovo</i> | 38382389                | A/T  | NA                 | NA                            | NA                 |
| <i>Desi_wild_38385941</i> | NA                                  | <i>Ca_desi_denovo</i> | 38385941                | G/T  | NA                 | NA                            | NA                 |
| <i>Desi_wild_38396207</i> | NA                                  | <i>Ca_desi_denovo</i> | 38396207                | C/T  | NA                 | NA                            | NA                 |
| <i>Desi_wild_38396208</i> | NA                                  | <i>Ca_desi_denovo</i> | 38396208                | G/A  | NA                 | NA                            | NA                 |
| <i>Desi_wild_38401076</i> | NA                                  | <i>Ca_desi_denovo</i> | 38401076                | C/A  | NA                 | NA                            | NA                 |
| <i>Desi_wild_38416825</i> | NA                                  | <i>Ca_desi_denovo</i> | 38416825                | T/A  | NA                 | NA                            | NA                 |
| <i>Desi_wild_38416843</i> | NA                                  | <i>Ca_desi_denovo</i> | 38416843                | G/T  | NA                 | NA                            | NA                 |
| <i>Desi_wild_38420729</i> | NA                                  | <i>Ca_desi_denovo</i> | 38420729                | C/T  | NA                 | NA                            | NA                 |
| <i>Desi_wild_38430181</i> | NA                                  | <i>Ca_desi_denovo</i> | 38430181                | A/G  | NA                 | NA                            | NA                 |
| <i>Desi_wild_38435948</i> | NA                                  | <i>Ca_desi_denovo</i> | 38435948                | C/G  | NA                 | NA                            | NA                 |
| <i>Desi_wild_38438322</i> | NA                                  | <i>Ca_desi_denovo</i> | 38438322                | C/G  | NA                 | NA                            | NA                 |
| <i>Desi_wild_38438327</i> | NA                                  | <i>Ca_desi_denovo</i> | 38438327                | G/T  | NA                 | NA                            | NA                 |
| <i>Desi_wild_38443150</i> | NA                                  | <i>Ca_desi_denovo</i> | 38443150                | C/T  | NA                 | NA                            | NA                 |
| <i>Desi_wild_38445934</i> | NA                                  | <i>Ca_desi_denovo</i> | 38445934                | T/C  | NA                 | NA                            | NA                 |
| <i>Desi_wild_38445961</i> | NA                                  | <i>Ca_desi_denovo</i> | 38445961                | C/T  | NA                 | NA                            | NA                 |
| <i>Desi_wild_38455139</i> | NA                                  | <i>Ca_desi_denovo</i> | 38455139                | C/T  | NA                 | NA                            | NA                 |
| <i>Desi_wild_38457466</i> | NA                                  | <i>Ca_desi_denovo</i> | 38457466                | C/T  | NA                 | NA                            | NA                 |
| <i>Desi_wild_38458092</i> | NA                                  | <i>Ca_desi_denovo</i> | 38458092                | G/T  | NA                 | NA                            | NA                 |

| SNP IDs                   | NCBI dbSNP accession IDs (NCBI_SS#) | Chromosomes           | Physical positions (bp) | SNPs | Gene accession IDs | Sequence components of genome | Putative functions |
|---------------------------|-------------------------------------|-----------------------|-------------------------|------|--------------------|-------------------------------|--------------------|
| <i>Desi_wild_38462909</i> | NA                                  | <i>Ca_desi_denovo</i> | 38462909                | T/C  | NA                 | NA                            | NA                 |
| <i>Desi_wild_38463614</i> | NA                                  | <i>Ca_desi_denovo</i> | 38463614                | A/G  | NA                 | NA                            | NA                 |
| <i>Desi_wild_38463620</i> | NA                                  | <i>Ca_desi_denovo</i> | 38463620                | C/G  | NA                 | NA                            | NA                 |
| <i>Desi_wild_38467361</i> | NA                                  | <i>Ca_desi_denovo</i> | 38467361                | A/G  | NA                 | NA                            | NA                 |
| <i>Desi_wild_38467364</i> | NA                                  | <i>Ca_desi_denovo</i> | 38467364                | G/T  | NA                 | NA                            | NA                 |
| <i>Desi_wild_38471766</i> | NA                                  | <i>Ca_desi_denovo</i> | 38471766                | A/G  | NA                 | NA                            | NA                 |
| <i>Desi_wild_38471798</i> | NA                                  | <i>Ca_desi_denovo</i> | 38471798                | G/C  | NA                 | NA                            | NA                 |
| <i>Desi_wild_38479041</i> | NA                                  | <i>Ca_desi_denovo</i> | 38479041                | C/G  | NA                 | NA                            | NA                 |
| <i>Desi_wild_38479044</i> | NA                                  | <i>Ca_desi_denovo</i> | 38479044                | C/T  | NA                 | NA                            | NA                 |
| <i>Desi_wild_38479053</i> | NA                                  | <i>Ca_desi_denovo</i> | 38479053                | C/G  | NA                 | NA                            | NA                 |
| <i>Desi_wild_38479080</i> | NA                                  | <i>Ca_desi_denovo</i> | 38479080                | C/G  | NA                 | NA                            | NA                 |
| <i>Desi_wild_38479902</i> | NA                                  | <i>Ca_desi_denovo</i> | 38479902                | C/G  | NA                 | NA                            | NA                 |
| <i>Desi_wild_38481072</i> | NA                                  | <i>Ca_desi_denovo</i> | 38481072                | A/G  | NA                 | NA                            | NA                 |
| <i>Desi_wild_38481075</i> | NA                                  | <i>Ca_desi_denovo</i> | 38481075                | A/G  | NA                 | NA                            | NA                 |
| <i>Desi_wild_38481090</i> | NA                                  | <i>Ca_desi_denovo</i> | 38481090                | G/C  | NA                 | NA                            | NA                 |
| <i>Desi_wild_38481420</i> | NA                                  | <i>Ca_desi_denovo</i> | 38481420                | C/T  | NA                 | NA                            | NA                 |
| <i>Desi_wild_38483061</i> | NA                                  | <i>Ca_desi_denovo</i> | 38483061                | A/C  | NA                 | NA                            | NA                 |
| <i>Desi_wild_38492932</i> | NA                                  | <i>Ca_desi_denovo</i> | 38492932                | A/G  | NA                 | NA                            | NA                 |
| <i>Desi_wild_38492944</i> | NA                                  | <i>Ca_desi_denovo</i> | 38492944                | T/C  | NA                 | NA                            | NA                 |
| <i>Desi_wild_38496807</i> | NA                                  | <i>Ca_desi_denovo</i> | 38496807                | T/A  | NA                 | NA                            | NA                 |
| <i>Desi_wild_38503442</i> | NA                                  | <i>Ca_desi_denovo</i> | 38503442                | G/C  | NA                 | NA                            | NA                 |
| <i>Desi_wild_38505644</i> | NA                                  | <i>Ca_desi_denovo</i> | 38505644                | G/C  | NA                 | NA                            | NA                 |
| <i>Desi_wild_38505704</i> | NA                                  | <i>Ca_desi_denovo</i> | 38505704                | A/G  | NA                 | NA                            | NA                 |
| <i>Desi_wild_38510288</i> | NA                                  | <i>Ca_desi_denovo</i> | 38510288                | C/G  | NA                 | NA                            | NA                 |
| <i>Desi_wild_38510313</i> | NA                                  | <i>Ca_desi_denovo</i> | 38510313                | C/G  | NA                 | NA                            | NA                 |
| <i>Desi_wild_38510423</i> | NA                                  | <i>Ca_desi_denovo</i> | 38510423                | G/T  | NA                 | NA                            | NA                 |
| <i>Desi_wild_38511935</i> | NA                                  | <i>Ca_desi_denovo</i> | 38511935                | C/T  | NA                 | NA                            | NA                 |
| <i>Desi_wild_38515640</i> | NA                                  | <i>Ca_desi_denovo</i> | 38515640                | T/C  | NA                 | NA                            | NA                 |
| <i>Desi_wild_38517533</i> | NA                                  | <i>Ca_desi_denovo</i> | 38517533                | A/C  | NA                 | NA                            | NA                 |
| <i>Desi_wild_38517567</i> | NA                                  | <i>Ca_desi_denovo</i> | 38517567                | A/C  | NA                 | NA                            | NA                 |
| <i>Desi_wild_38519063</i> | NA                                  | <i>Ca_desi_denovo</i> | 38519063                | A/C  | NA                 | NA                            | NA                 |
| <i>Desi_wild_38520455</i> | NA                                  | <i>Ca_desi_denovo</i> | 38520455                | G/T  | NA                 | NA                            | NA                 |
| <i>Desi_wild_38522344</i> | NA                                  | <i>Ca_desi_denovo</i> | 38522344                | G/C  | NA                 | NA                            | NA                 |
| <i>Desi_wild_38522398</i> | NA                                  | <i>Ca_desi_denovo</i> | 38522398                | G/C  | NA                 | NA                            | NA                 |
| <i>Desi_wild_38525397</i> | NA                                  | <i>Ca_desi_denovo</i> | 38525397                | A/C  | NA                 | NA                            | NA                 |
| <i>Desi_wild_38525399</i> | NA                                  | <i>Ca_desi_denovo</i> | 38525399                | A/C  | NA                 | NA                            | NA                 |
| <i>Desi_wild_38527844</i> | NA                                  | <i>Ca_desi_denovo</i> | 38527844                | G/T  | NA                 | NA                            | NA                 |
| <i>Desi_wild_38534078</i> | NA                                  | <i>Ca_desi_denovo</i> | 38534078                | C/T  | NA                 | NA                            | NA                 |
| <i>Desi_wild_38534510</i> | NA                                  | <i>Ca_desi_denovo</i> | 38534510                | A/G  | NA                 | NA                            | NA                 |
| <i>Desi_wild_38538011</i> | NA                                  | <i>Ca_desi_denovo</i> | 38538011                | G/T  | NA                 | NA                            | NA                 |
| <i>Desi_wild_38540964</i> | NA                                  | <i>Ca_desi_denovo</i> | 38540964                | A/G  | NA                 | NA                            | NA                 |
| <i>Desi_wild_38541286</i> | NA                                  | <i>Ca_desi_denovo</i> | 38541286                | T/C  | NA                 | NA                            | NA                 |
| <i>Desi_wild_38542230</i> | NA                                  | <i>Ca_desi_denovo</i> | 38542230                | G/C  | NA                 | NA                            | NA                 |
| <i>Desi_wild_38543124</i> | NA                                  | <i>Ca_desi_denovo</i> | 38543124                | A/G  | NA                 | NA                            | NA                 |

| SNP IDs                   | NCBI dbSNP accession IDs (NCBI_SS#) | Chromosomes           | Physical positions (bp) | SNPs | Gene accession IDs | Sequence components of genome | Putative functions |
|---------------------------|-------------------------------------|-----------------------|-------------------------|------|--------------------|-------------------------------|--------------------|
| <i>Desi_wild_38548915</i> | NA                                  | <i>Ca_desi_denovo</i> | 38548915                | A/C  | NA                 | NA                            | NA                 |
| <i>Desi_wild_38549327</i> | NA                                  | <i>Ca_desi_denovo</i> | 38549327                | C/T  | NA                 | NA                            | NA                 |
| <i>Desi_wild_38549781</i> | NA                                  | <i>Ca_desi_denovo</i> | 38549781                | A/C  | NA                 | NA                            | NA                 |
| <i>Desi_wild_38549782</i> | NA                                  | <i>Ca_desi_denovo</i> | 38549782                | A/G  | NA                 | NA                            | NA                 |
| <i>Desi_wild_38549783</i> | NA                                  | <i>Ca_desi_denovo</i> | 38549783                | A/G  | NA                 | NA                            | NA                 |
| <i>Desi_wild_38550930</i> | NA                                  | <i>Ca_desi_denovo</i> | 38550930                | T/C  | NA                 | NA                            | NA                 |
| <i>Desi_wild_38551372</i> | NA                                  | <i>Ca_desi_denovo</i> | 38551372                | T/C  | NA                 | NA                            | NA                 |
| <i>Desi_wild_38551970</i> | NA                                  | <i>Ca_desi_denovo</i> | 38551970                | T/C  | NA                 | NA                            | NA                 |
| <i>Desi_wild_38558444</i> | NA                                  | <i>Ca_desi_denovo</i> | 38558444                | T/C  | NA                 | NA                            | NA                 |
| <i>Desi_wild_38558480</i> | NA                                  | <i>Ca_desi_denovo</i> | 38558480                | C/T  | NA                 | NA                            | NA                 |
| <i>Desi_wild_38562759</i> | NA                                  | <i>Ca_desi_denovo</i> | 38562759                | A/G  | NA                 | NA                            | NA                 |
| <i>Desi_wild_38573163</i> | NA                                  | <i>Ca_desi_denovo</i> | 38573163                | C/A  | NA                 | NA                            | NA                 |
| <i>Desi_wild_38574043</i> | NA                                  | <i>Ca_desi_denovo</i> | 38574043                | G/T  | NA                 | NA                            | NA                 |
| <i>Desi_wild_38577498</i> | NA                                  | <i>Ca_desi_denovo</i> | 38577498                | A/G  | NA                 | NA                            | NA                 |
| <i>Desi_wild_38577524</i> | NA                                  | <i>Ca_desi_denovo</i> | 38577524                | C/T  | NA                 | NA                            | NA                 |
| <i>Desi_wild_38581530</i> | NA                                  | <i>Ca_desi_denovo</i> | 38581530                | A/T  | NA                 | NA                            | NA                 |
| <i>Desi_wild_38581680</i> | NA                                  | <i>Ca_desi_denovo</i> | 38581680                | G/A  | NA                 | NA                            | NA                 |
| <i>Desi_wild_38581697</i> | NA                                  | <i>Ca_desi_denovo</i> | 38581697                | C/T  | NA                 | NA                            | NA                 |
| <i>Desi_wild_38581712</i> | NA                                  | <i>Ca_desi_denovo</i> | 38581712                | G/A  | NA                 | NA                            | NA                 |
| <i>Desi_wild_38586669</i> | NA                                  | <i>Ca_desi_denovo</i> | 38586669                | G/C  | NA                 | NA                            | NA                 |
| <i>Desi_wild_38586691</i> | NA                                  | <i>Ca_desi_denovo</i> | 38586691                | T/C  | NA                 | NA                            | NA                 |
| <i>Desi_wild_38587436</i> | NA                                  | <i>Ca_desi_denovo</i> | 38587436                | T/C  | NA                 | NA                            | NA                 |
| <i>Desi_wild_38590922</i> | NA                                  | <i>Ca_desi_denovo</i> | 38590922                | C/A  | NA                 | NA                            | NA                 |
| <i>Desi_wild_38590945</i> | NA                                  | <i>Ca_desi_denovo</i> | 38590945                | C/G  | NA                 | NA                            | NA                 |
| <i>Desi_wild_38596055</i> | NA                                  | <i>Ca_desi_denovo</i> | 38596055                | A/C  | NA                 | NA                            | NA                 |
| <i>Desi_wild_38598408</i> | NA                                  | <i>Ca_desi_denovo</i> | 38598408                | A/G  | NA                 | NA                            | NA                 |
| <i>Desi_wild_38598447</i> | NA                                  | <i>Ca_desi_denovo</i> | 38598447                | C/G  | NA                 | NA                            | NA                 |
| <i>Desi_wild_38600000</i> | NA                                  | <i>Ca_desi_denovo</i> | 38600000                | C/G  | NA                 | NA                            | NA                 |
| <i>Desi_wild_38600034</i> | NA                                  | <i>Ca_desi_denovo</i> | 38600034                | C/G  | NA                 | NA                            | NA                 |
| <i>Desi_wild_38606676</i> | NA                                  | <i>Ca_desi_denovo</i> | 38606676                | A/G  | NA                 | NA                            | NA                 |
| <i>Desi_wild_38610741</i> | NA                                  | <i>Ca_desi_denovo</i> | 38610741                | A/C  | NA                 | NA                            | NA                 |
| <i>Desi_wild_38613429</i> | NA                                  | <i>Ca_desi_denovo</i> | 38613429                | T/G  | NA                 | NA                            | NA                 |
| <i>Desi_wild_38614242</i> | NA                                  | <i>Ca_desi_denovo</i> | 38614242                | A/G  | NA                 | NA                            | NA                 |
| <i>Desi_wild_38614245</i> | NA                                  | <i>Ca_desi_denovo</i> | 38614245                | A/G  | NA                 | NA                            | NA                 |
| <i>Desi_wild_38623918</i> | NA                                  | <i>Ca_desi_denovo</i> | 38623918                | C/G  | NA                 | NA                            | NA                 |
| <i>Desi_wild_38628282</i> | NA                                  | <i>Ca_desi_denovo</i> | 38628282                | T/G  | NA                 | NA                            | NA                 |
| <i>Desi_wild_38632489</i> | NA                                  | <i>Ca_desi_denovo</i> | 38632489                | G/T  | NA                 | NA                            | NA                 |
| <i>Desi_wild_38634064</i> | NA                                  | <i>Ca_desi_denovo</i> | 38634064                | G/T  | NA                 | NA                            | NA                 |
| <i>Desi_wild_38637938</i> | NA                                  | <i>Ca_desi_denovo</i> | 38637938                | A/G  | NA                 | NA                            | NA                 |
| <i>Desi_wild_38641575</i> | NA                                  | <i>Ca_desi_denovo</i> | 38641575                | C/G  | NA                 | NA                            | NA                 |
| <i>Desi_wild_38641632</i> | NA                                  | <i>Ca_desi_denovo</i> | 38641632                | T/G  | NA                 | NA                            | NA                 |
| <i>Desi_wild_38645370</i> | NA                                  | <i>Ca_desi_denovo</i> | 38645370                | G/T  | NA                 | NA                            | NA                 |
| <i>Desi_wild_38649281</i> | NA                                  | <i>Ca_desi_denovo</i> | 38649281                | G/T  | NA                 | NA                            | NA                 |
| <i>Desi_wild_38650980</i> | NA                                  | <i>Ca_desi_denovo</i> | 38650980                | T/C  | NA                 | NA                            | NA                 |

| SNP IDs                   | NCBI dbSNP accession IDs (NCBI_SS#) | Chromosomes           | Physical positions (bp) | SNPs | Gene accession IDs | Sequence components of genome | Putative functions |
|---------------------------|-------------------------------------|-----------------------|-------------------------|------|--------------------|-------------------------------|--------------------|
| <i>Desi_wild_38651028</i> | NA                                  | <i>Ca_desi_denovo</i> | 38651028                | T/C  | NA                 | NA                            | NA                 |
| <i>Desi_wild_38656740</i> | NA                                  | <i>Ca_desi_denovo</i> | 38656740                | A/G  | NA                 | NA                            | NA                 |
| <i>Desi_wild_38658118</i> | NA                                  | <i>Ca_desi_denovo</i> | 38658118                | C/T  | NA                 | NA                            | NA                 |
| <i>Desi_wild_38658125</i> | NA                                  | <i>Ca_desi_denovo</i> | 38658125                | C/A  | NA                 | NA                            | NA                 |
| <i>Desi_wild_38667790</i> | NA                                  | <i>Ca_desi_denovo</i> | 38667790                | C/T  | NA                 | NA                            | NA                 |
| <i>Desi_wild_38667816</i> | NA                                  | <i>Ca_desi_denovo</i> | 38667816                | C/G  | NA                 | NA                            | NA                 |
| <i>Desi_wild_38670683</i> | NA                                  | <i>Ca_desi_denovo</i> | 38670683                | A/G  | NA                 | NA                            | NA                 |
| <i>Desi_wild_38672880</i> | NA                                  | <i>Ca_desi_denovo</i> | 38672880                | T/C  | NA                 | NA                            | NA                 |
| <i>Desi_wild_38684382</i> | NA                                  | <i>Ca_desi_denovo</i> | 38684382                | G/A  | NA                 | NA                            | NA                 |
| <i>Desi_wild_38684409</i> | NA                                  | <i>Ca_desi_denovo</i> | 38684409                | G/T  | NA                 | NA                            | NA                 |
| <i>Desi_wild_38684907</i> | NA                                  | <i>Ca_desi_denovo</i> | 38684907                | C/T  | NA                 | NA                            | NA                 |
| <i>Desi_wild_38702021</i> | NA                                  | <i>Ca_desi_denovo</i> | 38702021                | C/T  | NA                 | NA                            | NA                 |
| <i>Desi_wild_38703979</i> | NA                                  | <i>Ca_desi_denovo</i> | 38703979                | C/T  | NA                 | NA                            | NA                 |
| <i>Desi_wild_38704028</i> | NA                                  | <i>Ca_desi_denovo</i> | 38704028                | A/C  | NA                 | NA                            | NA                 |
| <i>Desi_wild_38704859</i> | NA                                  | <i>Ca_desi_denovo</i> | 38704859                | C/T  | NA                 | NA                            | NA                 |
| <i>Desi_wild_38704877</i> | NA                                  | <i>Ca_desi_denovo</i> | 38704877                | G/A  | NA                 | NA                            | NA                 |
| <i>Desi_wild_38707373</i> | NA                                  | <i>Ca_desi_denovo</i> | 38707373                | G/T  | NA                 | NA                            | NA                 |
| <i>Desi_wild_38707654</i> | NA                                  | <i>Ca_desi_denovo</i> | 38707654                | A/G  | NA                 | NA                            | NA                 |
| <i>Desi_wild_38707670</i> | NA                                  | <i>Ca_desi_denovo</i> | 38707670                | G/A  | NA                 | NA                            | NA                 |
| <i>Desi_wild_38715158</i> | NA                                  | <i>Ca_desi_denovo</i> | 38715158                | G/A  | NA                 | NA                            | NA                 |
| <i>Desi_wild_38715517</i> | NA                                  | <i>Ca_desi_denovo</i> | 38715517                | A/G  | NA                 | NA                            | NA                 |
| <i>Desi_wild_38715530</i> | NA                                  | <i>Ca_desi_denovo</i> | 38715530                | A/G  | NA                 | NA                            | NA                 |
| <i>Desi_wild_38716437</i> | NA                                  | <i>Ca_desi_denovo</i> | 38716437                | C/G  | NA                 | NA                            | NA                 |
| <i>Desi_wild_38718662</i> | NA                                  | <i>Ca_desi_denovo</i> | 38718662                | A/G  | NA                 | NA                            | NA                 |
| <i>Desi_wild_38720177</i> | NA                                  | <i>Ca_desi_denovo</i> | 38720177                | C/T  | NA                 | NA                            | NA                 |
| <i>Desi_wild_38722797</i> | NA                                  | <i>Ca_desi_denovo</i> | 38722797                | A/C  | NA                 | NA                            | NA                 |
| <i>Desi_wild_38722810</i> | NA                                  | <i>Ca_desi_denovo</i> | 38722810                | C/T  | NA                 | NA                            | NA                 |
| <i>Desi_wild_38723868</i> | NA                                  | <i>Ca_desi_denovo</i> | 38723868                | G/A  | NA                 | NA                            | NA                 |
| <i>Desi_wild_38723904</i> | NA                                  | <i>Ca_desi_denovo</i> | 38723904                | A/G  | NA                 | NA                            | NA                 |
| <i>Desi_wild_38725669</i> | NA                                  | <i>Ca_desi_denovo</i> | 38725669                | C/G  | NA                 | NA                            | NA                 |
| <i>Desi_wild_38725724</i> | NA                                  | <i>Ca_desi_denovo</i> | 38725724                | G/A  | NA                 | NA                            | NA                 |
| <i>Desi_wild_38729744</i> | NA                                  | <i>Ca_desi_denovo</i> | 38729744                | C/G  | NA                 | NA                            | NA                 |
| <i>Desi_wild_38730839</i> | NA                                  | <i>Ca_desi_denovo</i> | 38730839                | G/T  | NA                 | NA                            | NA                 |
| <i>Desi_wild_38730980</i> | NA                                  | <i>Ca_desi_denovo</i> | 38730980                | C/G  | NA                 | NA                            | NA                 |
| <i>Desi_wild_38748872</i> | NA                                  | <i>Ca_desi_denovo</i> | 38748872                | A/C  | NA                 | NA                            | NA                 |
| <i>Desi_wild_38750916</i> | NA                                  | <i>Ca_desi_denovo</i> | 38750916                | T/C  | NA                 | NA                            | NA                 |
| <i>Desi_wild_38757827</i> | NA                                  | <i>Ca_desi_denovo</i> | 38757827                | A/G  | NA                 | NA                            | NA                 |
| <i>Desi_wild_38757870</i> | NA                                  | <i>Ca_desi_denovo</i> | 38757870                | G/A  | NA                 | NA                            | NA                 |
| <i>Desi_wild_38762538</i> | NA                                  | <i>Ca_desi_denovo</i> | 38762538                | G/C  | NA                 | NA                            | NA                 |
| <i>Desi_wild_38765451</i> | NA                                  | <i>Ca_desi_denovo</i> | 38765451                | G/T  | NA                 | NA                            | NA                 |
| <i>Desi_wild_38777121</i> | NA                                  | <i>Ca_desi_denovo</i> | 38777121                | G/C  | NA                 | NA                            | NA                 |
| <i>Desi_wild_38789189</i> | NA                                  | <i>Ca_desi_denovo</i> | 38789189                | C/T  | NA                 | NA                            | NA                 |
| <i>Desi_wild_38792028</i> | NA                                  | <i>Ca_desi_denovo</i> | 38792028                | A/G  | NA                 | NA                            | NA                 |
| <i>Desi_wild_38792061</i> | NA                                  | <i>Ca_desi_denovo</i> | 38792061                | T/C  | NA                 | NA                            | NA                 |

| SNP IDs                   | NCBI dbSNP accession IDs (NCBI_SS#) | Chromosomes           | Physical positions (bp) | SNPs | Gene accession IDs | Sequence components of genome | Putative functions |
|---------------------------|-------------------------------------|-----------------------|-------------------------|------|--------------------|-------------------------------|--------------------|
| <i>Desi_wild_38793630</i> | NA                                  | <i>Ca_desi_denovo</i> | 38793630                | T/C  | NA                 | NA                            | NA                 |
| <i>Desi_wild_38795368</i> | NA                                  | <i>Ca_desi_denovo</i> | 38795368                | T/C  | NA                 | NA                            | NA                 |
| <i>Desi_wild_38820141</i> | NA                                  | <i>Ca_desi_denovo</i> | 38820141                | A/G  | NA                 | NA                            | NA                 |
| <i>Desi_wild_38820147</i> | NA                                  | <i>Ca_desi_denovo</i> | 38820147                | G/A  | NA                 | NA                            | NA                 |
| <i>Desi_wild_38820201</i> | NA                                  | <i>Ca_desi_denovo</i> | 38820201                | A/G  | NA                 | NA                            | NA                 |
| <i>Desi_wild_38820596</i> | NA                                  | <i>Ca_desi_denovo</i> | 38820596                | A/C  | NA                 | NA                            | NA                 |
| <i>Desi_wild_38820598</i> | NA                                  | <i>Ca_desi_denovo</i> | 38820598                | A/C  | NA                 | NA                            | NA                 |
| <i>Desi_wild_38822144</i> | NA                                  | <i>Ca_desi_denovo</i> | 38822144                | T/C  | NA                 | NA                            | NA                 |
| <i>Desi_wild_38822821</i> | NA                                  | <i>Ca_desi_denovo</i> | 38822821                | G/A  | NA                 | NA                            | NA                 |
| <i>Desi_wild_38824150</i> | NA                                  | <i>Ca_desi_denovo</i> | 38824150                | A/C  | NA                 | NA                            | NA                 |
| <i>Desi_wild_38826084</i> | NA                                  | <i>Ca_desi_denovo</i> | 38826084                | G/A  | NA                 | NA                            | NA                 |
| <i>Desi_wild_38826150</i> | NA                                  | <i>Ca_desi_denovo</i> | 38826150                | C/G  | NA                 | NA                            | NA                 |
| <i>Desi_wild_38826663</i> | NA                                  | <i>Ca_desi_denovo</i> | 38826663                | C/G  | NA                 | NA                            | NA                 |
| <i>Desi_wild_38826691</i> | NA                                  | <i>Ca_desi_denovo</i> | 38826691                | C/T  | NA                 | NA                            | NA                 |
| <i>Desi_wild_38829501</i> | NA                                  | <i>Ca_desi_denovo</i> | 38829501                | G/A  | NA                 | NA                            | NA                 |
| <i>Desi_wild_38836436</i> | NA                                  | <i>Ca_desi_denovo</i> | 38836436                | G/T  | NA                 | NA                            | NA                 |
| <i>Desi_wild_38840232</i> | NA                                  | <i>Ca_desi_denovo</i> | 38840232                | T/C  | NA                 | NA                            | NA                 |
| <i>Desi_wild_38863126</i> | NA                                  | <i>Ca_desi_denovo</i> | 38863126                | A/C  | NA                 | NA                            | NA                 |
| <i>Desi_wild_38863127</i> | NA                                  | <i>Ca_desi_denovo</i> | 38863127                | A/G  | NA                 | NA                            | NA                 |
| <i>Desi_wild_38868960</i> | NA                                  | <i>Ca_desi_denovo</i> | 38868960                | C/G  | NA                 | NA                            | NA                 |
| <i>Desi_wild_38868980</i> | NA                                  | <i>Ca_desi_denovo</i> | 38868980                | C/T  | NA                 | NA                            | NA                 |
| <i>Desi_wild_38870374</i> | NA                                  | <i>Ca_desi_denovo</i> | 38870374                | T/G  | NA                 | NA                            | NA                 |
| <i>Desi_wild_38878261</i> | NA                                  | <i>Ca_desi_denovo</i> | 38878261                | G/T  | NA                 | NA                            | NA                 |
| <i>Desi_wild_38887673</i> | NA                                  | <i>Ca_desi_denovo</i> | 38887673                | A/G  | NA                 | NA                            | NA                 |
| <i>Desi_wild_38887700</i> | NA                                  | <i>Ca_desi_denovo</i> | 38887700                | G/A  | NA                 | NA                            | NA                 |
| <i>Desi_wild_38888893</i> | NA                                  | <i>Ca_desi_denovo</i> | 38888893                | G/C  | NA                 | NA                            | NA                 |
| <i>Desi_wild_38889953</i> | NA                                  | <i>Ca_desi_denovo</i> | 38889953                | C/A  | NA                 | NA                            | NA                 |
| <i>Desi_wild_38889982</i> | NA                                  | <i>Ca_desi_denovo</i> | 38889982                | T/C  | NA                 | NA                            | NA                 |
| <i>Desi_wild_38890142</i> | NA                                  | <i>Ca_desi_denovo</i> | 38890142                | G/A  | NA                 | NA                            | NA                 |
| <i>Desi_wild_38890173</i> | NA                                  | <i>Ca_desi_denovo</i> | 38890173                | A/G  | NA                 | NA                            | NA                 |
| <i>Desi_wild_38890179</i> | NA                                  | <i>Ca_desi_denovo</i> | 38890179                | C/G  | NA                 | NA                            | NA                 |
| <i>Desi_wild_38892812</i> | NA                                  | <i>Ca_desi_denovo</i> | 38892812                | A/G  | NA                 | NA                            | NA                 |
| <i>Desi_wild_38892832</i> | NA                                  | <i>Ca_desi_denovo</i> | 38892832                | A/T  | NA                 | NA                            | NA                 |
| <i>Desi_wild_38895479</i> | NA                                  | <i>Ca_desi_denovo</i> | 38895479                | G/T  | NA                 | NA                            | NA                 |
| <i>Desi_wild_38895529</i> | NA                                  | <i>Ca_desi_denovo</i> | 38895529                | T/G  | NA                 | NA                            | NA                 |
| <i>Desi_wild_38900670</i> | NA                                  | <i>Ca_desi_denovo</i> | 38900670                | T/G  | NA                 | NA                            | NA                 |
| <i>Desi_wild_38900904</i> | NA                                  | <i>Ca_desi_denovo</i> | 38900904                | T/C  | NA                 | NA                            | NA                 |
| <i>Desi_wild_38900921</i> | NA                                  | <i>Ca_desi_denovo</i> | 38900921                | A/G  | NA                 | NA                            | NA                 |
| <i>Desi_wild_38909008</i> | NA                                  | <i>Ca_desi_denovo</i> | 38909008                | T/C  | NA                 | NA                            | NA                 |
| <i>Desi_wild_38910284</i> | NA                                  | <i>Ca_desi_denovo</i> | 38910284                | C/A  | NA                 | NA                            | NA                 |
| <i>Desi_wild_38910295</i> | NA                                  | <i>Ca_desi_denovo</i> | 38910295                | A/G  | NA                 | NA                            | NA                 |
| <i>Desi_wild_38915865</i> | NA                                  | <i>Ca_desi_denovo</i> | 38915865                | A/T  | NA                 | NA                            | NA                 |
| <i>Desi_wild_38915886</i> | NA                                  | <i>Ca_desi_denovo</i> | 38915886                | G/A  | NA                 | NA                            | NA                 |
| <i>Desi_wild_38924001</i> | NA                                  | <i>Ca_desi_denovo</i> | 38924001                | G/A  | NA                 | NA                            | NA                 |



| SNP IDs                   | NCBI dbSNP accession IDs (NCBI_SS#) | Chromosomes           | Physical positions (bp) | SNPs | Gene accession IDs | Sequence components of genome | Putative functions |
|---------------------------|-------------------------------------|-----------------------|-------------------------|------|--------------------|-------------------------------|--------------------|
| <i>Desi_wild_38924037</i> | NA                                  | <i>Ca_desi_denovo</i> | 38924037                | A/G  | NA                 | NA                            | NA                 |
| <i>Desi_wild_38925756</i> | NA                                  | <i>Ca_desi_denovo</i> | 38925756                | A/C  | NA                 | NA                            | NA                 |
| <i>Desi_wild_38931625</i> | NA                                  | <i>Ca_desi_denovo</i> | 38931625                | A/G  | NA                 | NA                            | NA                 |
| <i>Desi_wild_38940050</i> | NA                                  | <i>Ca_desi_denovo</i> | 38940050                | A/G  | NA                 | NA                            | NA                 |
| <i>Desi_wild_38942653</i> | NA                                  | <i>Ca_desi_denovo</i> | 38942653                | A/C  | NA                 | NA                            | NA                 |
| <i>Desi_wild_38970020</i> | NA                                  | <i>Ca_desi_denovo</i> | 38970020                | A/G  | NA                 | NA                            | NA                 |
| <i>Desi_wild_38970029</i> | NA                                  | <i>Ca_desi_denovo</i> | 38970029                | C/T  | NA                 | NA                            | NA                 |
| <i>Desi_wild_38977097</i> | NA                                  | <i>Ca_desi_denovo</i> | 38977097                | A/G  | NA                 | NA                            | NA                 |
| <i>Desi_wild_38977139</i> | NA                                  | <i>Ca_desi_denovo</i> | 38977139                | A/G  | NA                 | NA                            | NA                 |
| <i>Desi_wild_39002518</i> | NA                                  | <i>Ca_desi_denovo</i> | 39002518                | A/C  | NA                 | NA                            | NA                 |
| <i>Desi_wild_39004288</i> | NA                                  | <i>Ca_desi_denovo</i> | 39004288                | A/G  | NA                 | NA                            | NA                 |
| <i>Desi_wild_39012742</i> | NA                                  | <i>Ca_desi_denovo</i> | 39012742                | C/T  | NA                 | NA                            | NA                 |
| <i>Desi_wild_39018271</i> | NA                                  | <i>Ca_desi_denovo</i> | 39018271                | A/C  | NA                 | NA                            | NA                 |
| <i>Desi_wild_39018272</i> | NA                                  | <i>Ca_desi_denovo</i> | 39018272                | G/T  | NA                 | NA                            | NA                 |
| <i>Desi_wild_39031167</i> | NA                                  | <i>Ca_desi_denovo</i> | 39031167                | G/C  | NA                 | NA                            | NA                 |
| <i>Desi_wild_39046817</i> | NA                                  | <i>Ca_desi_denovo</i> | 39046817                | G/T  | NA                 | NA                            | NA                 |
| <i>Desi_wild_39104669</i> | NA                                  | <i>Ca_desi_denovo</i> | 39104669                | A/C  | NA                 | NA                            | NA                 |
| <i>Desi_wild_39111137</i> | NA                                  | <i>Ca_desi_denovo</i> | 39111137                | A/G  | NA                 | NA                            | NA                 |
| <i>Desi_wild_39111139</i> | NA                                  | <i>Ca_desi_denovo</i> | 39111139                | C/G  | NA                 | NA                            | NA                 |
| <i>Desi_wild_39112405</i> | NA                                  | <i>Ca_desi_denovo</i> | 39112405                | T/C  | NA                 | NA                            | NA                 |
| <i>Desi_wild_39121950</i> | NA                                  | <i>Ca_desi_denovo</i> | 39121950                | G/T  | NA                 | NA                            | NA                 |
| <i>Desi_wild_39217298</i> | NA                                  | <i>Ca_desi_denovo</i> | 39217298                | T/C  | NA                 | NA                            | NA                 |
| <i>Desi_wild_39226501</i> | NA                                  | <i>Ca_desi_denovo</i> | 39226501                | G/T  | NA                 | NA                            | NA                 |
| <i>Desi_wild_39226575</i> | NA                                  | <i>Ca_desi_denovo</i> | 39226575                | C/T  | NA                 | NA                            | NA                 |
| <i>Desi_wild_39258705</i> | NA                                  | <i>Ca_desi_denovo</i> | 39258705                | A/G  | NA                 | NA                            | NA                 |
| <i>Desi_wild_39258706</i> | NA                                  | <i>Ca_desi_denovo</i> | 39258706                | C/T  | NA                 | NA                            | NA                 |
| <i>Desi_wild_39284573</i> | NA                                  | <i>Ca_desi_denovo</i> | 39284573                | A/T  | NA                 | NA                            | NA                 |
| <i>Desi_wild_39284626</i> | NA                                  | <i>Ca_desi_denovo</i> | 39284626                | A/G  | NA                 | NA                            | NA                 |
| <i>Desi_wild_39298663</i> | NA                                  | <i>Ca_desi_denovo</i> | 39298663                | C/G  | NA                 | NA                            | NA                 |
| <i>Desi_wild_39305841</i> | NA                                  | <i>Ca_desi_denovo</i> | 39305841                | G/A  | NA                 | NA                            | NA                 |
| <i>Desi_wild_39305854</i> | NA                                  | <i>Ca_desi_denovo</i> | 39305854                | C/T  | NA                 | NA                            | NA                 |
| <i>Desi_wild_39312666</i> | NA                                  | <i>Ca_desi_denovo</i> | 39312666                | C/G  | NA                 | NA                            | NA                 |
| <i>Desi_wild_39312667</i> | NA                                  | <i>Ca_desi_denovo</i> | 39312667                | A/T  | NA                 | NA                            | NA                 |
| <i>Desi_wild_39313043</i> | NA                                  | <i>Ca_desi_denovo</i> | 39313043                | G/A  | NA                 | NA                            | NA                 |
| <i>Desi_wild_39318870</i> | NA                                  | <i>Ca_desi_denovo</i> | 39318870                | C/T  | NA                 | NA                            | NA                 |
| <i>Desi_wild_39321724</i> | NA                                  | <i>Ca_desi_denovo</i> | 39321724                | C/T  | NA                 | NA                            | NA                 |
| <i>Desi_wild_39331714</i> | NA                                  | <i>Ca_desi_denovo</i> | 39331714                | C/G  | NA                 | NA                            | NA                 |
| <i>Desi_wild_39331816</i> | NA                                  | <i>Ca_desi_denovo</i> | 39331816                | C/T  | NA                 | NA                            | NA                 |
| <i>Desi_wild_39358947</i> | NA                                  | <i>Ca_desi_denovo</i> | 39358947                | A/T  | NA                 | NA                            | NA                 |
| <i>Desi_wild_39375598</i> | NA                                  | <i>Ca_desi_denovo</i> | 39375598                | A/G  | NA                 | NA                            | NA                 |
| <i>Desi_wild_39383110</i> | NA                                  | <i>Ca_desi_denovo</i> | 39383110                | C/G  | NA                 | NA                            | NA                 |
| <i>Desi_wild_39383125</i> | NA                                  | <i>Ca_desi_denovo</i> | 39383125                | C/T  | NA                 | NA                            | NA                 |
| <i>Desi_wild_39415648</i> | NA                                  | <i>Ca_desi_denovo</i> | 39415648                | A/C  | NA                 | NA                            | NA                 |
| <i>Desi_wild_39415669</i> | NA                                  | <i>Ca_desi_denovo</i> | 39415669                | A/T  | NA                 | NA                            | NA                 |

| SNP IDs                   | NCBI dbSNP accession IDs (NCBI_SS#) | Chromosomes           | Physical positions (bp) | SNPs | Gene accession IDs | Sequence components of genome | Putative functions |
|---------------------------|-------------------------------------|-----------------------|-------------------------|------|--------------------|-------------------------------|--------------------|
| <i>Desi_wild_39415710</i> | NA                                  | <i>Ca_desi_denovo</i> | 39415710                | A/C  | NA                 | NA                            | NA                 |
| <i>Desi_wild_39425728</i> | NA                                  | <i>Ca_desi_denovo</i> | 39425728                | A/G  | NA                 | NA                            | NA                 |
| <i>Desi_wild_39433604</i> | NA                                  | <i>Ca_desi_denovo</i> | 39433604                | A/T  | NA                 | NA                            | NA                 |
| <i>Desi_wild_39433612</i> | NA                                  | <i>Ca_desi_denovo</i> | 39433612                | A/C  | NA                 | NA                            | NA                 |
| <i>Desi_wild_39434602</i> | NA                                  | <i>Ca_desi_denovo</i> | 39434602                | C/T  | NA                 | NA                            | NA                 |
| <i>Desi_wild_39435659</i> | NA                                  | <i>Ca_desi_denovo</i> | 39435659                | A/G  | NA                 | NA                            | NA                 |
| <i>Desi_wild_39436784</i> | NA                                  | <i>Ca_desi_denovo</i> | 39436784                | C/T  | NA                 | NA                            | NA                 |
| <i>Desi_wild_39439020</i> | NA                                  | <i>Ca_desi_denovo</i> | 39439020                | A/G  | NA                 | NA                            | NA                 |
| <i>Desi_wild_39439034</i> | NA                                  | <i>Ca_desi_denovo</i> | 39439034                | C/T  | NA                 | NA                            | NA                 |
| <i>Desi_wild_39439589</i> | NA                                  | <i>Ca_desi_denovo</i> | 39439589                | T/C  | NA                 | NA                            | NA                 |
| <i>Desi_wild_39439594</i> | NA                                  | <i>Ca_desi_denovo</i> | 39439594                | G/A  | NA                 | NA                            | NA                 |
| <i>Desi_wild_39441085</i> | NA                                  | <i>Ca_desi_denovo</i> | 39441085                | C/T  | NA                 | NA                            | NA                 |
| <i>Desi_wild_39454400</i> | NA                                  | <i>Ca_desi_denovo</i> | 39454400                | G/T  | NA                 | NA                            | NA                 |
| <i>Desi_wild_39459880</i> | NA                                  | <i>Ca_desi_denovo</i> | 39459880                | G/T  | NA                 | NA                            | NA                 |
| <i>Desi_wild_39459907</i> | NA                                  | <i>Ca_desi_denovo</i> | 39459907                | C/G  | NA                 | NA                            | NA                 |
| <i>Desi_wild_39475113</i> | NA                                  | <i>Ca_desi_denovo</i> | 39475113                | T/G  | NA                 | NA                            | NA                 |
| <i>Desi_wild_39475122</i> | NA                                  | <i>Ca_desi_denovo</i> | 39475122                | T/C  | NA                 | NA                            | NA                 |
| <i>Desi_wild_39477151</i> | NA                                  | <i>Ca_desi_denovo</i> | 39477151                | C/G  | NA                 | NA                            | NA                 |
| <i>Desi_wild_39477166</i> | NA                                  | <i>Ca_desi_denovo</i> | 39477166                | G/A  | NA                 | NA                            | NA                 |
| <i>Desi_wild_39477223</i> | NA                                  | <i>Ca_desi_denovo</i> | 39477223                | C/T  | NA                 | NA                            | NA                 |
| <i>Desi_wild_39480000</i> | NA                                  | <i>Ca_desi_denovo</i> | 39480000                | C/T  | NA                 | NA                            | NA                 |
| <i>Desi_wild_39480507</i> | NA                                  | <i>Ca_desi_denovo</i> | 39480507                | A/G  | NA                 | NA                            | NA                 |
| <i>Desi_wild_39480575</i> | NA                                  | <i>Ca_desi_denovo</i> | 39480575                | A/G  | NA                 | NA                            | NA                 |
| <i>Desi_wild_39488317</i> | NA                                  | <i>Ca_desi_denovo</i> | 39488317                | A/G  | NA                 | NA                            | NA                 |
| <i>Desi_wild_39488320</i> | NA                                  | <i>Ca_desi_denovo</i> | 39488320                | A/G  | NA                 | NA                            | NA                 |
| <i>Desi_wild_39497896</i> | NA                                  | <i>Ca_desi_denovo</i> | 39497896                | A/G  | NA                 | NA                            | NA                 |
| <i>Desi_wild_39497951</i> | NA                                  | <i>Ca_desi_denovo</i> | 39497951                | A/G  | NA                 | NA                            | NA                 |
| <i>Desi_wild_39497952</i> | NA                                  | <i>Ca_desi_denovo</i> | 39497952                | C/T  | NA                 | NA                            | NA                 |
| <i>Desi_wild_39502393</i> | NA                                  | <i>Ca_desi_denovo</i> | 39502393                | A/G  | NA                 | NA                            | NA                 |
| <i>Desi_wild_39502405</i> | NA                                  | <i>Ca_desi_denovo</i> | 39502405                | A/G  | NA                 | NA                            | NA                 |
| <i>Desi_wild_39502411</i> | NA                                  | <i>Ca_desi_denovo</i> | 39502411                | A/G  | NA                 | NA                            | NA                 |
| <i>Desi_wild_39502572</i> | NA                                  | <i>Ca_desi_denovo</i> | 39502572                | G/C  | NA                 | NA                            | NA                 |
| <i>Desi_wild_39502578</i> | NA                                  | <i>Ca_desi_denovo</i> | 39502578                | A/G  | NA                 | NA                            | NA                 |
| <i>Desi_wild_39502588</i> | NA                                  | <i>Ca_desi_denovo</i> | 39502588                | T/C  | NA                 | NA                            | NA                 |
| <i>Desi_wild_39508672</i> | NA                                  | <i>Ca_desi_denovo</i> | 39508672                | A/G  | NA                 | NA                            | NA                 |
| <i>Desi_wild_39508684</i> | NA                                  | <i>Ca_desi_denovo</i> | 39508684                | A/G  | NA                 | NA                            | NA                 |
| <i>Desi_wild_39508706</i> | NA                                  | <i>Ca_desi_denovo</i> | 39508706                | G/T  | NA                 | NA                            | NA                 |
| <i>Desi_wild_39508754</i> | NA                                  | <i>Ca_desi_denovo</i> | 39508754                | A/G  | NA                 | NA                            | NA                 |
| <i>Desi_wild_39519545</i> | NA                                  | <i>Ca_desi_denovo</i> | 39519545                | A/C  | NA                 | NA                            | NA                 |
| <i>Desi_wild_39521074</i> | NA                                  | <i>Ca_desi_denovo</i> | 39521074                | C/T  | NA                 | NA                            | NA                 |
| <i>Desi_wild_39522835</i> | NA                                  | <i>Ca_desi_denovo</i> | 39522835                | A/G  | NA                 | NA                            | NA                 |
| <i>Desi_wild_39522850</i> | NA                                  | <i>Ca_desi_denovo</i> | 39522850                | A/G  | NA                 | NA                            | NA                 |
| <i>Desi_wild_39522891</i> | NA                                  | <i>Ca_desi_denovo</i> | 39522891                | C/G  | NA                 | NA                            | NA                 |
| <i>Desi_wild_39534146</i> | NA                                  | <i>Ca_desi_denovo</i> | 39534146                | T/G  | NA                 | NA                            | NA                 |

| SNP IDs                   | NCBI dbSNP accession IDs (NCBI_SS#) | Chromosomes           | Physical positions (bp) | SNPs | Gene accession IDs | Sequence components of genome | Putative functions |
|---------------------------|-------------------------------------|-----------------------|-------------------------|------|--------------------|-------------------------------|--------------------|
| <i>Desi_wild_39535749</i> | NA                                  | <i>Ca_desi_denovo</i> | 39535749                | G/C  | NA                 | NA                            | NA                 |
| <i>Desi_wild_39535782</i> | NA                                  | <i>Ca_desi_denovo</i> | 39535782                | C/G  | NA                 | NA                            | NA                 |
| <i>Desi_wild_39535788</i> | NA                                  | <i>Ca_desi_denovo</i> | 39535788                | C/T  | NA                 | NA                            | NA                 |
| <i>Desi_wild_39543559</i> | NA                                  | <i>Ca_desi_denovo</i> | 39543559                | C/G  | NA                 | NA                            | NA                 |
| <i>Desi_wild_39543578</i> | NA                                  | <i>Ca_desi_denovo</i> | 39543578                | C/T  | NA                 | NA                            | NA                 |
| <i>Desi_wild_39546194</i> | NA                                  | <i>Ca_desi_denovo</i> | 39546194                | A/C  | NA                 | NA                            | NA                 |
| <i>Desi_wild_39546215</i> | NA                                  | <i>Ca_desi_denovo</i> | 39546215                | C/G  | NA                 | NA                            | NA                 |
| <i>Desi_wild_39547598</i> | NA                                  | <i>Ca_desi_denovo</i> | 39547598                | G/A  | NA                 | NA                            | NA                 |
| <i>Desi_wild_39551572</i> | NA                                  | <i>Ca_desi_denovo</i> | 39551572                | C/T  | NA                 | NA                            | NA                 |
| <i>Desi_wild_39553429</i> | NA                                  | <i>Ca_desi_denovo</i> | 39553429                | A/G  | NA                 | NA                            | NA                 |
| <i>Desi_wild_39553453</i> | NA                                  | <i>Ca_desi_denovo</i> | 39553453                | C/T  | NA                 | NA                            | NA                 |
| <i>Desi_wild_39553457</i> | NA                                  | <i>Ca_desi_denovo</i> | 39553457                | A/G  | NA                 | NA                            | NA                 |
| <i>Desi_wild_39554148</i> | NA                                  | <i>Ca_desi_denovo</i> | 39554148                | C/G  | NA                 | NA                            | NA                 |
| <i>Desi_wild_39554221</i> | NA                                  | <i>Ca_desi_denovo</i> | 39554221                | A/G  | NA                 | NA                            | NA                 |
| <i>Desi_wild_39554595</i> | NA                                  | <i>Ca_desi_denovo</i> | 39554595                | A/G  | NA                 | NA                            | NA                 |
| <i>Desi_wild_39554601</i> | NA                                  | <i>Ca_desi_denovo</i> | 39554601                | A/C  | NA                 | NA                            | NA                 |
| <i>Desi_wild_39560042</i> | NA                                  | <i>Ca_desi_denovo</i> | 39560042                | T/C  | NA                 | NA                            | NA                 |
| <i>Desi_wild_39560054</i> | NA                                  | <i>Ca_desi_denovo</i> | 39560054                | A/G  | NA                 | NA                            | NA                 |
| <i>Desi_wild_39560063</i> | NA                                  | <i>Ca_desi_denovo</i> | 39560063                | G/T  | NA                 | NA                            | NA                 |
| <i>Desi_wild_39566146</i> | NA                                  | <i>Ca_desi_denovo</i> | 39566146                | G/T  | NA                 | NA                            | NA                 |
| <i>Desi_wild_39566188</i> | NA                                  | <i>Ca_desi_denovo</i> | 39566188                | C/G  | NA                 | NA                            | NA                 |
| <i>Desi_wild_39566518</i> | NA                                  | <i>Ca_desi_denovo</i> | 39566518                | C/T  | NA                 | NA                            | NA                 |
| <i>Desi_wild_39566536</i> | NA                                  | <i>Ca_desi_denovo</i> | 39566536                | C/T  | NA                 | NA                            | NA                 |
| <i>Desi_wild_39566551</i> | NA                                  | <i>Ca_desi_denovo</i> | 39566551                | A/G  | NA                 | NA                            | NA                 |
| <i>Desi_wild_39566557</i> | NA                                  | <i>Ca_desi_denovo</i> | 39566557                | C/G  | NA                 | NA                            | NA                 |
| <i>Desi_wild_39567117</i> | NA                                  | <i>Ca_desi_denovo</i> | 39567117                | C/T  | NA                 | NA                            | NA                 |
| <i>Desi_wild_39567131</i> | NA                                  | <i>Ca_desi_denovo</i> | 39567131                | C/T  | NA                 | NA                            | NA                 |
| <i>Desi_wild_39570229</i> | NA                                  | <i>Ca_desi_denovo</i> | 39570229                | G/T  | NA                 | NA                            | NA                 |
| <i>Desi_wild_39570231</i> | NA                                  | <i>Ca_desi_denovo</i> | 39570231                | T/C  | NA                 | NA                            | NA                 |
| <i>Desi_wild_39574240</i> | NA                                  | <i>Ca_desi_denovo</i> | 39574240                | T/C  | NA                 | NA                            | NA                 |
| <i>Desi_wild_39586801</i> | NA                                  | <i>Ca_desi_denovo</i> | 39586801                | A/C  | NA                 | NA                            | NA                 |
| <i>Desi_wild_39586831</i> | NA                                  | <i>Ca_desi_denovo</i> | 39586831                | A/G  | NA                 | NA                            | NA                 |
| <i>Desi_wild_39587815</i> | NA                                  | <i>Ca_desi_denovo</i> | 39587815                | C/G  | NA                 | NA                            | NA                 |
| <i>Desi_wild_39588504</i> | NA                                  | <i>Ca_desi_denovo</i> | 39588504                | T/C  | NA                 | NA                            | NA                 |
| <i>Desi_wild_39588517</i> | NA                                  | <i>Ca_desi_denovo</i> | 39588517                | T/C  | NA                 | NA                            | NA                 |
| <i>Desi_wild_39594448</i> | NA                                  | <i>Ca_desi_denovo</i> | 39594448                | C/T  | NA                 | NA                            | NA                 |
| <i>Desi_wild_39594457</i> | NA                                  | <i>Ca_desi_denovo</i> | 39594457                | C/T  | NA                 | NA                            | NA                 |
| <i>Desi_wild_39594502</i> | NA                                  | <i>Ca_desi_denovo</i> | 39594502                | C/T  | NA                 | NA                            | NA                 |
| <i>Desi_wild_39595899</i> | NA                                  | <i>Ca_desi_denovo</i> | 39595899                | G/T  | NA                 | NA                            | NA                 |
| <i>Desi_wild_39597585</i> | NA                                  | <i>Ca_desi_denovo</i> | 39597585                | C/T  | NA                 | NA                            | NA                 |
| <i>Desi_wild_39597586</i> | NA                                  | <i>Ca_desi_denovo</i> | 39597586                | C/T  | NA                 | NA                            | NA                 |
| <i>Desi_wild_39597604</i> | NA                                  | <i>Ca_desi_denovo</i> | 39597604                | A/G  | NA                 | NA                            | NA                 |
| <i>Desi_wild_39597627</i> | NA                                  | <i>Ca_desi_denovo</i> | 39597627                | C/G  | NA                 | NA                            | NA                 |
| <i>Desi_wild_39598150</i> | NA                                  | <i>Ca_desi_denovo</i> | 39598150                | A/C  | NA                 | NA                            | NA                 |

| SNP IDs                   | NCBI dbSNP accession IDs (NCBI_SS#) | Chromosomes           | Physical positions (bp) | SNPs | Gene accession IDs | Sequence components of genome | Putative functions |
|---------------------------|-------------------------------------|-----------------------|-------------------------|------|--------------------|-------------------------------|--------------------|
| <i>Desi_wild_39617203</i> | NA                                  | <i>Ca_desi_denovo</i> | 39617203                | A/C  | NA                 | NA                            | NA                 |
| <i>Desi_wild_39617221</i> | NA                                  | <i>Ca_desi_denovo</i> | 39617221                | A/G  | NA                 | NA                            | NA                 |
| <i>Desi_wild_39618907</i> | NA                                  | <i>Ca_desi_denovo</i> | 39618907                | A/G  | NA                 | NA                            | NA                 |
| <i>Desi_wild_39637123</i> | NA                                  | <i>Ca_desi_denovo</i> | 39637123                | A/G  | NA                 | NA                            | NA                 |
| <i>Desi_wild_39637126</i> | NA                                  | <i>Ca_desi_denovo</i> | 39637126                | C/G  | NA                 | NA                            | NA                 |
| <i>Desi_wild_39637181</i> | NA                                  | <i>Ca_desi_denovo</i> | 39637181                | G/A  | NA                 | NA                            | NA                 |
| <i>Desi_wild_39638340</i> | NA                                  | <i>Ca_desi_denovo</i> | 39638340                | G/C  | NA                 | NA                            | NA                 |
| <i>Desi_wild_39638358</i> | NA                                  | <i>Ca_desi_denovo</i> | 39638358                | T/G  | NA                 | NA                            | NA                 |
| <i>Desi_wild_39638361</i> | NA                                  | <i>Ca_desi_denovo</i> | 39638361                | G/A  | NA                 | NA                            | NA                 |
| <i>Desi_wild_39638394</i> | NA                                  | <i>Ca_desi_denovo</i> | 39638394                | G/A  | NA                 | NA                            | NA                 |
| <i>Desi_wild_39640686</i> | NA                                  | <i>Ca_desi_denovo</i> | 39640686                | C/T  | NA                 | NA                            | NA                 |
| <i>Desi_wild_39640693</i> | NA                                  | <i>Ca_desi_denovo</i> | 39640693                | C/G  | NA                 | NA                            | NA                 |
| <i>Desi_wild_39646125</i> | NA                                  | <i>Ca_desi_denovo</i> | 39646125                | G/C  | NA                 | NA                            | NA                 |
| <i>Desi_wild_39646131</i> | NA                                  | <i>Ca_desi_denovo</i> | 39646131                | T/C  | NA                 | NA                            | NA                 |
| <i>Desi_wild_39646146</i> | NA                                  | <i>Ca_desi_denovo</i> | 39646146                | G/A  | NA                 | NA                            | NA                 |
| <i>Desi_wild_39646164</i> | NA                                  | <i>Ca_desi_denovo</i> | 39646164                | G/A  | NA                 | NA                            | NA                 |
| <i>Desi_wild_39662407</i> | NA                                  | <i>Ca_desi_denovo</i> | 39662407                | C/G  | NA                 | NA                            | NA                 |
| <i>Desi_wild_39662415</i> | NA                                  | <i>Ca_desi_denovo</i> | 39662415                | C/T  | NA                 | NA                            | NA                 |
| <i>Desi_wild_39662446</i> | NA                                  | <i>Ca_desi_denovo</i> | 39662446                | A/G  | NA                 | NA                            | NA                 |
| <i>Desi_wild_39665479</i> | NA                                  | <i>Ca_desi_denovo</i> | 39665479                | T/A  | NA                 | NA                            | NA                 |
| <i>Desi_wild_39665543</i> | NA                                  | <i>Ca_desi_denovo</i> | 39665543                | T/G  | NA                 | NA                            | NA                 |
| <i>Desi_wild_39668089</i> | NA                                  | <i>Ca_desi_denovo</i> | 39668089                | T/G  | NA                 | NA                            | NA                 |
| <i>Desi_wild_39675639</i> | NA                                  | <i>Ca_desi_denovo</i> | 39675639                | C/G  | NA                 | NA                            | NA                 |
| <i>Desi_wild_39675643</i> | NA                                  | <i>Ca_desi_denovo</i> | 39675643                | C/G  | NA                 | NA                            | NA                 |
| <i>Desi_wild_39675678</i> | NA                                  | <i>Ca_desi_denovo</i> | 39675678                | G/T  | NA                 | NA                            | NA                 |
| <i>Desi_wild_39675687</i> | NA                                  | <i>Ca_desi_denovo</i> | 39675687                | C/G  | NA                 | NA                            | NA                 |
| <i>Desi_wild_39677777</i> | NA                                  | <i>Ca_desi_denovo</i> | 39677777                | C/G  | NA                 | NA                            | NA                 |
| <i>Desi_wild_39685017</i> | NA                                  | <i>Ca_desi_denovo</i> | 39685017                | A/G  | NA                 | NA                            | NA                 |
| <i>Desi_wild_39685566</i> | NA                                  | <i>Ca_desi_denovo</i> | 39685566                | G/A  | NA                 | NA                            | NA                 |
| <i>Desi_wild_39685608</i> | NA                                  | <i>Ca_desi_denovo</i> | 39685608                | A/C  | NA                 | NA                            | NA                 |
| <i>Desi_wild_39689205</i> | NA                                  | <i>Ca_desi_denovo</i> | 39689205                | A/G  | NA                 | NA                            | NA                 |
| <i>Desi_wild_39689220</i> | NA                                  | <i>Ca_desi_denovo</i> | 39689220                | A/G  | NA                 | NA                            | NA                 |
| <i>Desi_wild_39689241</i> | NA                                  | <i>Ca_desi_denovo</i> | 39689241                | C/G  | NA                 | NA                            | NA                 |
| <i>Desi_wild_39689476</i> | NA                                  | <i>Ca_desi_denovo</i> | 39689476                | T/C  | NA                 | NA                            | NA                 |
| <i>Desi_wild_39689499</i> | NA                                  | <i>Ca_desi_denovo</i> | 39689499                | C/T  | NA                 | NA                            | NA                 |
| <i>Desi_wild_39690525</i> | NA                                  | <i>Ca_desi_denovo</i> | 39690525                | G/T  | NA                 | NA                            | NA                 |
| <i>Desi_wild_39690527</i> | NA                                  | <i>Ca_desi_denovo</i> | 39690527                | A/C  | NA                 | NA                            | NA                 |
| <i>Desi_wild_39692618</i> | NA                                  | <i>Ca_desi_denovo</i> | 39692618                | A/G  | NA                 | NA                            | NA                 |
| <i>Desi_wild_39699055</i> | NA                                  | <i>Ca_desi_denovo</i> | 39699055                | A/C  | NA                 | NA                            | NA                 |
| <i>Desi_wild_39701437</i> | NA                                  | <i>Ca_desi_denovo</i> | 39701437                | A/G  | NA                 | NA                            | NA                 |
| <i>Desi_wild_39706417</i> | NA                                  | <i>Ca_desi_denovo</i> | 39706417                | A/T  | NA                 | NA                            | NA                 |
| <i>Desi_wild_39706458</i> | NA                                  | <i>Ca_desi_denovo</i> | 39706458                | C/T  | NA                 | NA                            | NA                 |
| <i>Desi_wild_39707982</i> | NA                                  | <i>Ca_desi_denovo</i> | 39707982                | C/G  | NA                 | NA                            | NA                 |
| <i>Desi_wild_39707985</i> | NA                                  | <i>Ca_desi_denovo</i> | 39707985                | A/G  | NA                 | NA                            | NA                 |

| SNP IDs                   | NCBI dbSNP accession IDs (NCBI_SS#) | Chromosomes           | Physical positions (bp) | SNPs | Gene accession IDs | Sequence components of genome | Putative functions |
|---------------------------|-------------------------------------|-----------------------|-------------------------|------|--------------------|-------------------------------|--------------------|
| <i>Desi_wild_39708008</i> | NA                                  | <i>Ca_desi_denovo</i> | 39708008                | C/G  | NA                 | NA                            | NA                 |
| <i>Desi_wild_39729832</i> | NA                                  | <i>Ca_desi_denovo</i> | 39729832                | A/C  | NA                 | NA                            | NA                 |
| <i>Desi_wild_39729856</i> | NA                                  | <i>Ca_desi_denovo</i> | 39729856                | C/T  | NA                 | NA                            | NA                 |
| <i>Desi_wild_39729859</i> | NA                                  | <i>Ca_desi_denovo</i> | 39729859                | C/G  | NA                 | NA                            | NA                 |
| <i>Desi_wild_39736996</i> | NA                                  | <i>Ca_desi_denovo</i> | 39736996                | C/T  | NA                 | NA                            | NA                 |
| <i>Desi_wild_39740706</i> | NA                                  | <i>Ca_desi_denovo</i> | 39740706                | A/C  | NA                 | NA                            | NA                 |
| <i>Desi_wild_39741739</i> | NA                                  | <i>Ca_desi_denovo</i> | 39741739                | C/G  | NA                 | NA                            | NA                 |
| <i>Desi_wild_39741803</i> | NA                                  | <i>Ca_desi_denovo</i> | 39741803                | A/G  | NA                 | NA                            | NA                 |
| <i>Desi_wild_39755520</i> | NA                                  | <i>Ca_desi_denovo</i> | 39755520                | C/T  | NA                 | NA                            | NA                 |
| <i>Desi_wild_39766302</i> | NA                                  | <i>Ca_desi_denovo</i> | 39766302                | C/A  | NA                 | NA                            | NA                 |
| <i>Desi_wild_39766317</i> | NA                                  | <i>Ca_desi_denovo</i> | 39766317                | C/T  | NA                 | NA                            | NA                 |
| <i>Desi_wild_39769164</i> | NA                                  | <i>Ca_desi_denovo</i> | 39769164                | C/G  | NA                 | NA                            | NA                 |
| <i>Desi_wild_39769235</i> | NA                                  | <i>Ca_desi_denovo</i> | 39769235                | A/G  | NA                 | NA                            | NA                 |
| <i>Desi_wild_39773724</i> | NA                                  | <i>Ca_desi_denovo</i> | 39773724                | C/T  | NA                 | NA                            | NA                 |
| <i>Desi_wild_39773791</i> | NA                                  | <i>Ca_desi_denovo</i> | 39773791                | C/T  | NA                 | NA                            | NA                 |
| <i>Desi_wild_39773805</i> | NA                                  | <i>Ca_desi_denovo</i> | 39773805                | A/G  | NA                 | NA                            | NA                 |
| <i>Desi_wild_39775961</i> | NA                                  | <i>Ca_desi_denovo</i> | 39775961                | A/C  | NA                 | NA                            | NA                 |
| <i>Desi_wild_39775962</i> | NA                                  | <i>Ca_desi_denovo</i> | 39775962                | T/C  | NA                 | NA                            | NA                 |
| <i>Desi_wild_39775976</i> | NA                                  | <i>Ca_desi_denovo</i> | 39775976                | C/T  | NA                 | NA                            | NA                 |
| <i>Desi_wild_39779757</i> | NA                                  | <i>Ca_desi_denovo</i> | 39779757                | G/T  | NA                 | NA                            | NA                 |
| <i>Desi_wild_39783710</i> | NA                                  | <i>Ca_desi_denovo</i> | 39783710                | A/C  | NA                 | NA                            | NA                 |
| <i>Desi_wild_39783714</i> | NA                                  | <i>Ca_desi_denovo</i> | 39783714                | C/G  | NA                 | NA                            | NA                 |
| <i>Desi_wild_39784918</i> | NA                                  | <i>Ca_desi_denovo</i> | 39784918                | A/C  | NA                 | NA                            | NA                 |
| <i>Desi_wild_39790095</i> | NA                                  | <i>Ca_desi_denovo</i> | 39790095                | C/T  | NA                 | NA                            | NA                 |
| <i>Desi_wild_39791282</i> | NA                                  | <i>Ca_desi_denovo</i> | 39791282                | A/G  | NA                 | NA                            | NA                 |
| <i>Desi_wild_39799103</i> | NA                                  | <i>Ca_desi_denovo</i> | 39799103                | A/C  | NA                 | NA                            | NA                 |
| <i>Desi_wild_39800514</i> | NA                                  | <i>Ca_desi_denovo</i> | 39800514                | C/G  | NA                 | NA                            | NA                 |
| <i>Desi_wild_39803040</i> | NA                                  | <i>Ca_desi_denovo</i> | 39803040                | G/T  | NA                 | NA                            | NA                 |
| <i>Desi_wild_39804321</i> | NA                                  | <i>Ca_desi_denovo</i> | 39804321                | C/G  | NA                 | NA                            | NA                 |
| <i>Desi_wild_39804354</i> | NA                                  | <i>Ca_desi_denovo</i> | 39804354                | C/T  | NA                 | NA                            | NA                 |
| <i>Desi_wild_39809984</i> | NA                                  | <i>Ca_desi_denovo</i> | 39809984                | A/C  | NA                 | NA                            | NA                 |
| <i>Desi_wild_39809985</i> | NA                                  | <i>Ca_desi_denovo</i> | 39809985                | G/T  | NA                 | NA                            | NA                 |
| <i>Desi_wild_39815592</i> | NA                                  | <i>Ca_desi_denovo</i> | 39815592                | A/C  | NA                 | NA                            | NA                 |
| <i>Desi_wild_39815633</i> | NA                                  | <i>Ca_desi_denovo</i> | 39815633                | C/G  | NA                 | NA                            | NA                 |
| <i>Desi_wild_39831343</i> | NA                                  | <i>Ca_desi_denovo</i> | 39831343                | A/C  | NA                 | NA                            | NA                 |
| <i>Desi_wild_39831586</i> | NA                                  | <i>Ca_desi_denovo</i> | 39831586                | G/A  | NA                 | NA                            | NA                 |
| <i>Desi_wild_39832995</i> | NA                                  | <i>Ca_desi_denovo</i> | 39832995                | A/G  | NA                 | NA                            | NA                 |
| <i>Desi_wild_39833013</i> | NA                                  | <i>Ca_desi_denovo</i> | 39833013                | A/C  | NA                 | NA                            | NA                 |
| <i>Desi_wild_39833019</i> | NA                                  | <i>Ca_desi_denovo</i> | 39833019                | C/T  | NA                 | NA                            | NA                 |
| <i>Desi_wild_39834740</i> | NA                                  | <i>Ca_desi_denovo</i> | 39834740                | C/T  | NA                 | NA                            | NA                 |
| <i>Desi_wild_39837140</i> | NA                                  | <i>Ca_desi_denovo</i> | 39837140                | A/C  | NA                 | NA                            | NA                 |
| <i>Desi_wild_39837141</i> | NA                                  | <i>Ca_desi_denovo</i> | 39837141                | A/G  | NA                 | NA                            | NA                 |
| <i>Desi_wild_39842422</i> | NA                                  | <i>Ca_desi_denovo</i> | 39842422                | A/T  | NA                 | NA                            | NA                 |
| <i>Desi_wild_39857931</i> | NA                                  | <i>Ca_desi_denovo</i> | 39857931                | G/T  | NA                 | NA                            | NA                 |

| SNP IDs                   | NCBI dbSNP accession IDs (NCBI_SS#) | Chromosomes           | Physical positions (bp) | SNPs | Gene accession IDs | Sequence components of genome | Putative functions |
|---------------------------|-------------------------------------|-----------------------|-------------------------|------|--------------------|-------------------------------|--------------------|
| <i>Desi_wild_39898367</i> | NA                                  | <i>Ca_desi_denovo</i> | 39898367                | G/T  | NA                 | NA                            | NA                 |
| <i>Desi_wild_39920956</i> | NA                                  | <i>Ca_desi_denovo</i> | 39920956                | A/G  | NA                 | NA                            | NA                 |
| <i>Desi_wild_39920957</i> | NA                                  | <i>Ca_desi_denovo</i> | 39920957                | A/C  | NA                 | NA                            | NA                 |
| <i>Desi_wild_39920964</i> | NA                                  | <i>Ca_desi_denovo</i> | 39920964                | A/G  | NA                 | NA                            | NA                 |
| <i>Desi_wild_39920965</i> | NA                                  | <i>Ca_desi_denovo</i> | 39920965                | A/C  | NA                 | NA                            | NA                 |
| <i>Desi_wild_39927916</i> | NA                                  | <i>Ca_desi_denovo</i> | 39927916                | A/C  | NA                 | NA                            | NA                 |
| <i>Desi_wild_39948014</i> | NA                                  | <i>Ca_desi_denovo</i> | 39948014                | G/T  | NA                 | NA                            | NA                 |
| <i>Desi_wild_39951264</i> | NA                                  | <i>Ca_desi_denovo</i> | 39951264                | A/T  | NA                 | NA                            | NA                 |
| <i>Desi_wild_40026096</i> | NA                                  | <i>Ca_desi_denovo</i> | 40026096                | A/G  | NA                 | NA                            | NA                 |
| <i>Desi_wild_40026129</i> | NA                                  | <i>Ca_desi_denovo</i> | 40026129                | A/G  | NA                 | NA                            | NA                 |
| <i>Desi_wild_40027887</i> | NA                                  | <i>Ca_desi_denovo</i> | 40027887                | G/T  | NA                 | NA                            | NA                 |
| <i>Desi_wild_40031411</i> | NA                                  | <i>Ca_desi_denovo</i> | 40031411                | A/G  | NA                 | NA                            | NA                 |
| <i>Desi_wild_40040151</i> | NA                                  | <i>Ca_desi_denovo</i> | 40040151                | C/T  | NA                 | NA                            | NA                 |
| <i>Desi_wild_40040157</i> | NA                                  | <i>Ca_desi_denovo</i> | 40040157                | C/T  | NA                 | NA                            | NA                 |
| <i>Desi_wild_40040180</i> | NA                                  | <i>Ca_desi_denovo</i> | 40040180                | A/G  | NA                 | NA                            | NA                 |
| <i>Desi_wild_40040181</i> | NA                                  | <i>Ca_desi_denovo</i> | 40040181                | C/G  | NA                 | NA                            | NA                 |
| <i>Desi_wild_40062080</i> | NA                                  | <i>Ca_desi_denovo</i> | 40062080                | C/G  | NA                 | NA                            | NA                 |
| <i>Desi_wild_40062086</i> | NA                                  | <i>Ca_desi_denovo</i> | 40062086                | C/G  | NA                 | NA                            | NA                 |
| <i>Desi_wild_40062092</i> | NA                                  | <i>Ca_desi_denovo</i> | 40062092                | C/G  | NA                 | NA                            | NA                 |
| <i>Desi_wild_40088402</i> | NA                                  | <i>Ca_desi_denovo</i> | 40088402                | G/C  | NA                 | NA                            | NA                 |
| <i>Desi_wild_40095581</i> | NA                                  | <i>Ca_desi_denovo</i> | 40095581                | C/T  | NA                 | NA                            | NA                 |
| <i>Desi_wild_40111423</i> | NA                                  | <i>Ca_desi_denovo</i> | 40111423                | G/T  | NA                 | NA                            | NA                 |
| <i>Desi_wild_40137849</i> | NA                                  | <i>Ca_desi_denovo</i> | 40137849                | A/G  | NA                 | NA                            | NA                 |
| <i>Desi_wild_40137855</i> | NA                                  | <i>Ca_desi_denovo</i> | 40137855                | A/G  | NA                 | NA                            | NA                 |
| <i>Desi_wild_40147825</i> | NA                                  | <i>Ca_desi_denovo</i> | 40147825                | C/G  | NA                 | NA                            | NA                 |
| <i>Desi_wild_40147846</i> | NA                                  | <i>Ca_desi_denovo</i> | 40147846                | A/G  | NA                 | NA                            | NA                 |
| <i>Desi_wild_40213881</i> | NA                                  | <i>Ca_desi_denovo</i> | 40213881                | C/G  | NA                 | NA                            | NA                 |
| <i>Desi_wild_40213884</i> | NA                                  | <i>Ca_desi_denovo</i> | 40213884                | C/G  | NA                 | NA                            | NA                 |
| <i>Desi_wild_40231565</i> | NA                                  | <i>Ca_desi_denovo</i> | 40231565                | G/T  | NA                 | NA                            | NA                 |
| <i>Desi_wild_40241354</i> | NA                                  | <i>Ca_desi_denovo</i> | 40241354                | C/G  | NA                 | NA                            | NA                 |
| <i>Desi_wild_40244157</i> | NA                                  | <i>Ca_desi_denovo</i> | 40244157                | A/T  | NA                 | NA                            | NA                 |
| <i>Desi_wild_40244166</i> | NA                                  | <i>Ca_desi_denovo</i> | 40244166                | C/G  | NA                 | NA                            | NA                 |
| <i>Desi_wild_40251846</i> | NA                                  | <i>Ca_desi_denovo</i> | 40251846                | A/G  | NA                 | NA                            | NA                 |
| <i>Desi_wild_40291280</i> | NA                                  | <i>Ca_desi_denovo</i> | 40291280                | A/T  | NA                 | NA                            | NA                 |
| <i>Desi_wild_40305450</i> | NA                                  | <i>Ca_desi_denovo</i> | 40305450                | A/G  | NA                 | NA                            | NA                 |
| <i>Desi_wild_40305453</i> | NA                                  | <i>Ca_desi_denovo</i> | 40305453                | A/G  | NA                 | NA                            | NA                 |
| <i>Desi_wild_40305465</i> | NA                                  | <i>Ca_desi_denovo</i> | 40305465                | A/G  | NA                 | NA                            | NA                 |
| <i>Desi_wild_40307050</i> | NA                                  | <i>Ca_desi_denovo</i> | 40307050                | C/T  | NA                 | NA                            | NA                 |
| <i>Desi_wild_40333503</i> | NA                                  | <i>Ca_desi_denovo</i> | 40333503                | C/G  | NA                 | NA                            | NA                 |
| <i>Desi_wild_40365781</i> | NA                                  | <i>Ca_desi_denovo</i> | 40365781                | C/G  | NA                 | NA                            | NA                 |
| <i>Desi_wild_40365790</i> | NA                                  | <i>Ca_desi_denovo</i> | 40365790                | C/G  | NA                 | NA                            | NA                 |
| <i>Desi_wild_40377081</i> | NA                                  | <i>Ca_desi_denovo</i> | 40377081                | G/T  | NA                 | NA                            | NA                 |
| <i>Desi_wild_40390808</i> | NA                                  | <i>Ca_desi_denovo</i> | 40390808                | G/T  | NA                 | NA                            | NA                 |
| <i>Desi_wild_40390809</i> | NA                                  | <i>Ca_desi_denovo</i> | 40390809                | C/G  | NA                 | NA                            | NA                 |

| SNP IDs                   | NCBI dbSNP accession IDs (NCBI_SS#) | Chromosomes           | Physical positions (bp) | SNPs | Gene accession IDs | Sequence components of genome | Putative functions |
|---------------------------|-------------------------------------|-----------------------|-------------------------|------|--------------------|-------------------------------|--------------------|
| <i>Desi_wild_40416114</i> | NA                                  | <i>Ca_desi_denovo</i> | 40416114                | A/C  | NA                 | NA                            | NA                 |
| <i>Desi_wild_40416115</i> | NA                                  | <i>Ca_desi_denovo</i> | 40416115                | A/G  | NA                 | NA                            | NA                 |
| <i>Desi_wild_40416116</i> | NA                                  | <i>Ca_desi_denovo</i> | 40416116                | A/G  | NA                 | NA                            | NA                 |
| <i>Desi_wild_40424195</i> | NA                                  | <i>Ca_desi_denovo</i> | 40424195                | A/G  | NA                 | NA                            | NA                 |
| <i>Desi_wild_40438668</i> | NA                                  | <i>Ca_desi_denovo</i> | 40438668                | G/T  | NA                 | NA                            | NA                 |
| <i>Desi_wild_40453293</i> | NA                                  | <i>Ca_desi_denovo</i> | 40453293                | A/G  | NA                 | NA                            | NA                 |
| <i>Desi_wild_40453308</i> | NA                                  | <i>Ca_desi_denovo</i> | 40453308                | A/G  | NA                 | NA                            | NA                 |
| <i>Desi_wild_40453311</i> | NA                                  | <i>Ca_desi_denovo</i> | 40453311                | C/T  | NA                 | NA                            | NA                 |
| <i>Desi_wild_40487663</i> | NA                                  | <i>Ca_desi_denovo</i> | 40487663                | A/G  | NA                 | NA                            | NA                 |
| <i>Desi_wild_40487672</i> | NA                                  | <i>Ca_desi_denovo</i> | 40487672                | C/T  | NA                 | NA                            | NA                 |
| <i>Desi_wild_40487678</i> | NA                                  | <i>Ca_desi_denovo</i> | 40487678                | C/T  | NA                 | NA                            | NA                 |
| <i>Desi_wild_40497755</i> | NA                                  | <i>Ca_desi_denovo</i> | 40497755                | A/G  | NA                 | NA                            | NA                 |
| <i>Desi_wild_40507663</i> | NA                                  | <i>Ca_desi_denovo</i> | 40507663                | C/T  | NA                 | NA                            | NA                 |
| <i>Desi_wild_40511743</i> | NA                                  | <i>Ca_desi_denovo</i> | 40511743                | C/T  | NA                 | NA                            | NA                 |
| <i>Desi_wild_40512180</i> | NA                                  | <i>Ca_desi_denovo</i> | 40512180                | G/T  | NA                 | NA                            | NA                 |
| <i>Desi_wild_40557501</i> | NA                                  | <i>Ca_desi_denovo</i> | 40557501                | C/T  | NA                 | NA                            | NA                 |
| <i>Desi_wild_40583356</i> | NA                                  | <i>Ca_desi_denovo</i> | 40583356                | C/G  | NA                 | NA                            | NA                 |
| <i>Desi_wild_40583378</i> | NA                                  | <i>Ca_desi_denovo</i> | 40583378                | C/T  | NA                 | NA                            | NA                 |
| <i>Desi_wild_40583381</i> | NA                                  | <i>Ca_desi_denovo</i> | 40583381                | A/G  | NA                 | NA                            | NA                 |
| <i>Desi_wild_40583384</i> | NA                                  | <i>Ca_desi_denovo</i> | 40583384                | C/T  | NA                 | NA                            | NA                 |
| <i>Desi_wild_40602795</i> | NA                                  | <i>Ca_desi_denovo</i> | 40602795                | A/T  | NA                 | NA                            | NA                 |
| <i>Desi_wild_40606954</i> | NA                                  | <i>Ca_desi_denovo</i> | 40606954                | G/T  | NA                 | NA                            | NA                 |
| <i>Desi_wild_40606984</i> | NA                                  | <i>Ca_desi_denovo</i> | 40606984                | C/G  | NA                 | NA                            | NA                 |
| <i>Desi_wild_40629029</i> | NA                                  | <i>Ca_desi_denovo</i> | 40629029                | A/C  | NA                 | NA                            | NA                 |
| <i>Desi_wild_40629030</i> | NA                                  | <i>Ca_desi_denovo</i> | 40629030                | A/G  | NA                 | NA                            | NA                 |
| <i>Desi_wild_40629031</i> | NA                                  | <i>Ca_desi_denovo</i> | 40629031                | A/G  | NA                 | NA                            | NA                 |
| <i>Desi_wild_40629032</i> | NA                                  | <i>Ca_desi_denovo</i> | 40629032                | A/T  | NA                 | NA                            | NA                 |
| <i>Desi_wild_40643795</i> | NA                                  | <i>Ca_desi_denovo</i> | 40643795                | A/G  | NA                 | NA                            | NA                 |
| <i>Desi_wild_40643807</i> | NA                                  | <i>Ca_desi_denovo</i> | 40643807                | C/T  | NA                 | NA                            | NA                 |
| <i>Desi_wild_40643810</i> | NA                                  | <i>Ca_desi_denovo</i> | 40643810                | C/T  | NA                 | NA                            | NA                 |
| <i>Desi_wild_40655203</i> | NA                                  | <i>Ca_desi_denovo</i> | 40655203                | G/T  | NA                 | NA                            | NA                 |
| <i>Desi_wild_40658637</i> | NA                                  | <i>Ca_desi_denovo</i> | 40658637                | C/G  | NA                 | NA                            | NA                 |
| <i>Desi_wild_40661951</i> | NA                                  | <i>Ca_desi_denovo</i> | 40661951                | C/T  | NA                 | NA                            | NA                 |
| <i>Desi_wild_40675748</i> | NA                                  | <i>Ca_desi_denovo</i> | 40675748                | C/T  | NA                 | NA                            | NA                 |
| <i>Desi_wild_40682723</i> | NA                                  | <i>Ca_desi_denovo</i> | 40682723                | G/T  | NA                 | NA                            | NA                 |
| <i>Desi_wild_40700933</i> | NA                                  | <i>Ca_desi_denovo</i> | 40700933                | G/T  | NA                 | NA                            | NA                 |
| <i>Desi_wild_40700943</i> | NA                                  | <i>Ca_desi_denovo</i> | 40700943                | A/G  | NA                 | NA                            | NA                 |
| <i>Desi_wild_40744276</i> | NA                                  | <i>Ca_desi_denovo</i> | 40744276                | C/G  | NA                 | NA                            | NA                 |
| <i>Desi_wild_40744311</i> | NA                                  | <i>Ca_desi_denovo</i> | 40744311                | C/T  | NA                 | NA                            | NA                 |
| <i>Desi_wild_40780283</i> | NA                                  | <i>Ca_desi_denovo</i> | 40780283                | A/G  | NA                 | NA                            | NA                 |
| <i>Desi_wild_40780286</i> | NA                                  | <i>Ca_desi_denovo</i> | 40780286                | C/T  | NA                 | NA                            | NA                 |
| <i>Desi_wild_40793924</i> | NA                                  | <i>Ca_desi_denovo</i> | 40793924                | G/T  | NA                 | NA                            | NA                 |
| <i>Desi_wild_40821477</i> | NA                                  | <i>Ca_desi_denovo</i> | 40821477                | G/T  | NA                 | NA                            | NA                 |
| <i>Desi_wild_40855296</i> | NA                                  | <i>Ca_desi_denovo</i> | 40855296                | C/G  | NA                 | NA                            | NA                 |

| SNP IDs                   | NCBI dbSNP accession IDs (NCBI_SS#) | Chromosomes           | Physical positions (bp) | SNPs | Gene accession IDs | Sequence components of genome | Putative functions |
|---------------------------|-------------------------------------|-----------------------|-------------------------|------|--------------------|-------------------------------|--------------------|
| <i>Desi_wild_40869429</i> | NA                                  | <i>Ca_desi_denovo</i> | 40869429                | A/T  | NA                 | NA                            | NA                 |
| <i>Desi_wild_40869434</i> | NA                                  | <i>Ca_desi_denovo</i> | 40869434                | A/T  | NA                 | NA                            | NA                 |
| <i>Desi_wild_40877641</i> | NA                                  | <i>Ca_desi_denovo</i> | 40877641                | C/T  | NA                 | NA                            | NA                 |
| <i>Desi_wild_40879740</i> | NA                                  | <i>Ca_desi_denovo</i> | 40879740                | A/T  | NA                 | NA                            | NA                 |
| <i>Desi_wild_40908520</i> | NA                                  | <i>Ca_desi_denovo</i> | 40908520                | C/T  | NA                 | NA                            | NA                 |
| <i>Desi_wild_40908542</i> | NA                                  | <i>Ca_desi_denovo</i> | 40908542                | A/T  | NA                 | NA                            | NA                 |
| <i>Desi_wild_40927566</i> | NA                                  | <i>Ca_desi_denovo</i> | 40927566                | G/T  | NA                 | NA                            | NA                 |
| <i>Desi_wild_40946682</i> | NA                                  | <i>Ca_desi_denovo</i> | 40946682                | C/G  | NA                 | NA                            | NA                 |
| <i>Desi_wild_40953821</i> | NA                                  | <i>Ca_desi_denovo</i> | 40953821                | G/T  | NA                 | NA                            | NA                 |
| <i>Desi_wild_40956188</i> | NA                                  | <i>Ca_desi_denovo</i> | 40956188                | G/T  | NA                 | NA                            | NA                 |
| <i>Desi_wild_40956198</i> | NA                                  | <i>Ca_desi_denovo</i> | 40956198                | C/T  | NA                 | NA                            | NA                 |
| <i>Desi_wild_40963877</i> | NA                                  | <i>Ca_desi_denovo</i> | 40963877                | A/T  | NA                 | NA                            | NA                 |
| <i>Desi_wild_40970824</i> | NA                                  | <i>Ca_desi_denovo</i> | 40970824                | A/T  | NA                 | NA                            | NA                 |
| <i>Desi_wild_40970827</i> | NA                                  | <i>Ca_desi_denovo</i> | 40970827                | A/G  | NA                 | NA                            | NA                 |
| <i>Desi_wild_40972626</i> | NA                                  | <i>Ca_desi_denovo</i> | 40972626                | A/G  | NA                 | NA                            | NA                 |
| <i>Desi_wild_40972662</i> | NA                                  | <i>Ca_desi_denovo</i> | 40972662                | A/G  | NA                 | NA                            | NA                 |
| <i>Desi_wild_41007550</i> | NA                                  | <i>Ca_desi_denovo</i> | 41007550                | A/G  | NA                 | NA                            | NA                 |
| <i>Desi_wild_41012026</i> | NA                                  | <i>Ca_desi_denovo</i> | 41012026                | G/A  | NA                 | NA                            | NA                 |
| <i>Desi_wild_41012080</i> | NA                                  | <i>Ca_desi_denovo</i> | 41012080                | G/A  | NA                 | NA                            | NA                 |
| <i>Desi_wild_41013318</i> | NA                                  | <i>Ca_desi_denovo</i> | 41013318                | A/G  | NA                 | NA                            | NA                 |
| <i>Desi_wild_41013331</i> | NA                                  | <i>Ca_desi_denovo</i> | 41013331                | A/T  | NA                 | NA                            | NA                 |
| <i>Desi_wild_41016426</i> | NA                                  | <i>Ca_desi_denovo</i> | 41016426                | C/T  | NA                 | NA                            | NA                 |
| <i>Desi_wild_41020997</i> | NA                                  | <i>Ca_desi_denovo</i> | 41020997                | G/A  | NA                 | NA                            | NA                 |
| <i>Desi_wild_41023371</i> | NA                                  | <i>Ca_desi_denovo</i> | 41023371                | C/T  | NA                 | NA                            | NA                 |
| <i>Desi_wild_41026713</i> | NA                                  | <i>Ca_desi_denovo</i> | 41026713                | C/G  | NA                 | NA                            | NA                 |
| <i>Desi_wild_41026721</i> | NA                                  | <i>Ca_desi_denovo</i> | 41026721                | G/C  | NA                 | NA                            | NA                 |
| <i>Desi_wild_41029207</i> | NA                                  | <i>Ca_desi_denovo</i> | 41029207                | G/A  | NA                 | NA                            | NA                 |
| <i>Desi_wild_41078112</i> | NA                                  | <i>Ca_desi_denovo</i> | 41078112                | A/C  | NA                 | NA                            | NA                 |
| <i>Desi_wild_41084018</i> | NA                                  | <i>Ca_desi_denovo</i> | 41084018                | A/T  | NA                 | NA                            | NA                 |
| <i>Desi_wild_41084027</i> | NA                                  | <i>Ca_desi_denovo</i> | 41084027                | C/T  | NA                 | NA                            | NA                 |
| <i>Desi_wild_41084028</i> | NA                                  | <i>Ca_desi_denovo</i> | 41084028                | C/T  | NA                 | NA                            | NA                 |
| <i>Desi_wild_41092184</i> | NA                                  | <i>Ca_desi_denovo</i> | 41092184                | T/G  | NA                 | NA                            | NA                 |
| <i>Desi_wild_41092187</i> | NA                                  | <i>Ca_desi_denovo</i> | 41092187                | C/G  | NA                 | NA                            | NA                 |
| <i>Desi_wild_41092908</i> | NA                                  | <i>Ca_desi_denovo</i> | 41092908                | A/G  | NA                 | NA                            | NA                 |
| <i>Desi_wild_41100338</i> | NA                                  | <i>Ca_desi_denovo</i> | 41100338                | C/T  | NA                 | NA                            | NA                 |
| <i>Desi_wild_41100396</i> | NA                                  | <i>Ca_desi_denovo</i> | 41100396                | C/T  | NA                 | NA                            | NA                 |
| <i>Desi_wild_41119693</i> | NA                                  | <i>Ca_desi_denovo</i> | 41119693                | C/T  | NA                 | NA                            | NA                 |
| <i>Desi_wild_41119703</i> | NA                                  | <i>Ca_desi_denovo</i> | 41119703                | C/G  | NA                 | NA                            | NA                 |
| <i>Desi_wild_41141987</i> | NA                                  | <i>Ca_desi_denovo</i> | 41141987                | A/G  | NA                 | NA                            | NA                 |
| <i>Desi_wild_41141999</i> | NA                                  | <i>Ca_desi_denovo</i> | 41141999                | A/G  | NA                 | NA                            | NA                 |
| <i>Desi_wild_41145305</i> | NA                                  | <i>Ca_desi_denovo</i> | 41145305                | T/G  | NA                 | NA                            | NA                 |
| <i>Desi_wild_41147106</i> | NA                                  | <i>Ca_desi_denovo</i> | 41147106                | A/G  | NA                 | NA                            | NA                 |
| <i>Desi_wild_41149943</i> | NA                                  | <i>Ca_desi_denovo</i> | 41149943                | C/A  | NA                 | NA                            | NA                 |
| <i>Desi_wild_41149944</i> | NA                                  | <i>Ca_desi_denovo</i> | 41149944                | C/T  | NA                 | NA                            | NA                 |



| SNP IDs                   | NCBI dbSNP accession IDs (NCBI_SS#) | Chromosomes           | Physical positions (bp) | SNPs | Gene accession IDs | Sequence components of genome | Putative functions |
|---------------------------|-------------------------------------|-----------------------|-------------------------|------|--------------------|-------------------------------|--------------------|
| <i>Desi_wild_41154019</i> | NA                                  | <i>Ca_desi_denovo</i> | 41154019                | C/G  | NA                 | NA                            | NA                 |
| <i>Desi_wild_41154039</i> | NA                                  | <i>Ca_desi_denovo</i> | 41154039                | A/G  | NA                 | NA                            | NA                 |
| <i>Desi_wild_41168862</i> | NA                                  | <i>Ca_desi_denovo</i> | 41168862                | T/C  | NA                 | NA                            | NA                 |
| <i>Desi_wild_41182897</i> | NA                                  | <i>Ca_desi_denovo</i> | 41182897                | C/T  | NA                 | NA                            | NA                 |
| <i>Desi_wild_41182906</i> | NA                                  | <i>Ca_desi_denovo</i> | 41182906                | A/G  | NA                 | NA                            | NA                 |
| <i>Desi_wild_41182907</i> | NA                                  | <i>Ca_desi_denovo</i> | 41182907                | C/G  | NA                 | NA                            | NA                 |
| <i>Desi_wild_41186047</i> | NA                                  | <i>Ca_desi_denovo</i> | 41186047                | G/A  | NA                 | NA                            | NA                 |
| <i>Desi_wild_41186089</i> | NA                                  | <i>Ca_desi_denovo</i> | 41186089                | A/G  | NA                 | NA                            | NA                 |
| <i>Desi_wild_41189888</i> | NA                                  | <i>Ca_desi_denovo</i> | 41189888                | C/G  | NA                 | NA                            | NA                 |
| <i>Desi_wild_41189933</i> | NA                                  | <i>Ca_desi_denovo</i> | 41189933                | A/G  | NA                 | NA                            | NA                 |
| <i>Desi_wild_41189939</i> | NA                                  | <i>Ca_desi_denovo</i> | 41189939                | C/G  | NA                 | NA                            | NA                 |
| <i>Desi_wild_41190888</i> | NA                                  | <i>Ca_desi_denovo</i> | 41190888                | C/T  | NA                 | NA                            | NA                 |
| <i>Desi_wild_41190894</i> | NA                                  | <i>Ca_desi_denovo</i> | 41190894                | C/T  | NA                 | NA                            | NA                 |
| <i>Desi_wild_41191652</i> | NA                                  | <i>Ca_desi_denovo</i> | 41191652                | G/T  | NA                 | NA                            | NA                 |
| <i>Desi_wild_41191794</i> | NA                                  | <i>Ca_desi_denovo</i> | 41191794                | C/T  | NA                 | NA                            | NA                 |
| <i>Desi_wild_41193829</i> | NA                                  | <i>Ca_desi_denovo</i> | 41193829                | A/T  | NA                 | NA                            | NA                 |
| <i>Desi_wild_41193882</i> | NA                                  | <i>Ca_desi_denovo</i> | 41193882                | C/G  | NA                 | NA                            | NA                 |
| <i>Desi_wild_41193886</i> | NA                                  | <i>Ca_desi_denovo</i> | 41193886                | A/C  | NA                 | NA                            | NA                 |
| <i>Desi_wild_41208816</i> | NA                                  | <i>Ca_desi_denovo</i> | 41208816                | G/T  | NA                 | NA                            | NA                 |
| <i>Desi_wild_41208822</i> | NA                                  | <i>Ca_desi_denovo</i> | 41208822                | C/T  | NA                 | NA                            | NA                 |
| <i>Desi_wild_41225796</i> | NA                                  | <i>Ca_desi_denovo</i> | 41225796                | A/G  | NA                 | NA                            | NA                 |
| <i>Desi_wild_41231736</i> | NA                                  | <i>Ca_desi_denovo</i> | 41231736                | A/C  | NA                 | NA                            | NA                 |
| <i>Desi_wild_41231739</i> | NA                                  | <i>Ca_desi_denovo</i> | 41231739                | A/G  | NA                 | NA                            | NA                 |
| <i>Desi_wild_41232676</i> | NA                                  | <i>Ca_desi_denovo</i> | 41232676                | A/G  | NA                 | NA                            | NA                 |
| <i>Desi_wild_41261124</i> | NA                                  | <i>Ca_desi_denovo</i> | 41261124                | C/T  | NA                 | NA                            | NA                 |
| <i>Desi_wild_41261164</i> | NA                                  | <i>Ca_desi_denovo</i> | 41261164                | A/G  | NA                 | NA                            | NA                 |
| <i>Desi_wild_41292756</i> | NA                                  | <i>Ca_desi_denovo</i> | 41292756                | C/T  | NA                 | NA                            | NA                 |
| <i>Desi_wild_41354224</i> | NA                                  | <i>Ca_desi_denovo</i> | 41354224                | C/T  | NA                 | NA                            | NA                 |
| <i>Desi_wild_41354290</i> | NA                                  | <i>Ca_desi_denovo</i> | 41354290                | C/T  | NA                 | NA                            | NA                 |
| <i>Desi_wild_41358154</i> | NA                                  | <i>Ca_desi_denovo</i> | 41358154                | G/C  | NA                 | NA                            | NA                 |
| <i>Desi_wild_41396943</i> | NA                                  | <i>Ca_desi_denovo</i> | 41396943                | C/T  | NA                 | NA                            | NA                 |
| <i>Desi_wild_41397240</i> | NA                                  | <i>Ca_desi_denovo</i> | 41397240                | G/T  | NA                 | NA                            | NA                 |
| <i>Desi_wild_41440292</i> | NA                                  | <i>Ca_desi_denovo</i> | 41440292                | C/T  | NA                 | NA                            | NA                 |
| <i>Desi_wild_41440307</i> | NA                                  | <i>Ca_desi_denovo</i> | 41440307                | A/G  | NA                 | NA                            | NA                 |
| <i>Desi_wild_41440319</i> | NA                                  | <i>Ca_desi_denovo</i> | 41440319                | A/G  | NA                 | NA                            | NA                 |
| <i>Desi_wild_41471635</i> | NA                                  | <i>Ca_desi_denovo</i> | 41471635                | G/T  | NA                 | NA                            | NA                 |
| <i>Desi_wild_41480561</i> | NA                                  | <i>Ca_desi_denovo</i> | 41480561                | C/T  | NA                 | NA                            | NA                 |
| <i>Desi_wild_41487527</i> | NA                                  | <i>Ca_desi_denovo</i> | 41487527                | A/G  | NA                 | NA                            | NA                 |
| <i>Desi_wild_41497576</i> | NA                                  | <i>Ca_desi_denovo</i> | 41497576                | C/T  | NA                 | NA                            | NA                 |
| <i>Desi_wild_41501767</i> | NA                                  | <i>Ca_desi_denovo</i> | 41501767                | C/T  | NA                 | NA                            | NA                 |
| <i>Desi_wild_41524599</i> | NA                                  | <i>Ca_desi_denovo</i> | 41524599                | A/C  | NA                 | NA                            | NA                 |
| <i>Desi_wild_41532433</i> | NA                                  | <i>Ca_desi_denovo</i> | 41532433                | A/G  | NA                 | NA                            | NA                 |
| <i>Desi_wild_41532436</i> | NA                                  | <i>Ca_desi_denovo</i> | 41532436                | C/T  | NA                 | NA                            | NA                 |
| <i>Desi_wild_41534729</i> | NA                                  | <i>Ca_desi_denovo</i> | 41534729                | A/C  | NA                 | NA                            | NA                 |

| SNP IDs                   | NCBI dbSNP accession IDs (NCBI_SS#) | Chromosomes           | Physical positions (bp) | SNPs | Gene accession IDs | Sequence components of genome | Putative functions |
|---------------------------|-------------------------------------|-----------------------|-------------------------|------|--------------------|-------------------------------|--------------------|
| <i>Desi_wild_41534738</i> | NA                                  | <i>Ca_desi_denovo</i> | 41534738                | C/G  | NA                 | NA                            | NA                 |
| <i>Desi_wild_41539381</i> | NA                                  | <i>Ca_desi_denovo</i> | 41539381                | C/G  | NA                 | NA                            | NA                 |
| <i>Desi_wild_41547122</i> | NA                                  | <i>Ca_desi_denovo</i> | 41547122                | A/G  | NA                 | NA                            | NA                 |
| <i>Desi_wild_41551821</i> | NA                                  | <i>Ca_desi_denovo</i> | 41551821                | A/G  | NA                 | NA                            | NA                 |
| <i>Desi_wild_41551830</i> | NA                                  | <i>Ca_desi_denovo</i> | 41551830                | A/G  | NA                 | NA                            | NA                 |
| <i>Desi_wild_41551842</i> | NA                                  | <i>Ca_desi_denovo</i> | 41551842                | A/G  | NA                 | NA                            | NA                 |
| <i>Desi_wild_41551844</i> | NA                                  | <i>Ca_desi_denovo</i> | 41551844                | A/G  | NA                 | NA                            | NA                 |
| <i>Desi_wild_41569128</i> | NA                                  | <i>Ca_desi_denovo</i> | 41569128                | A/G  | NA                 | NA                            | NA                 |
| <i>Desi_wild_41588008</i> | NA                                  | <i>Ca_desi_denovo</i> | 41588008                | C/G  | NA                 | NA                            | NA                 |
| <i>Desi_wild_41588011</i> | NA                                  | <i>Ca_desi_denovo</i> | 41588011                | A/C  | NA                 | NA                            | NA                 |
| <i>Desi_wild_41588050</i> | NA                                  | <i>Ca_desi_denovo</i> | 41588050                | C/T  | NA                 | NA                            | NA                 |
| <i>Desi_wild_41588080</i> | NA                                  | <i>Ca_desi_denovo</i> | 41588080                | A/G  | NA                 | NA                            | NA                 |
| <i>Desi_wild_41595515</i> | NA                                  | <i>Ca_desi_denovo</i> | 41595515                | A/G  | NA                 | NA                            | NA                 |
| <i>Desi_wild_41595528</i> | NA                                  | <i>Ca_desi_denovo</i> | 41595528                | C/T  | NA                 | NA                            | NA                 |
| <i>Desi_wild_41598978</i> | NA                                  | <i>Ca_desi_denovo</i> | 41598978                | G/T  | NA                 | NA                            | NA                 |
| <i>Desi_wild_41620797</i> | NA                                  | <i>Ca_desi_denovo</i> | 41620797                | C/T  | NA                 | NA                            | NA                 |
| <i>Desi_wild_41622686</i> | NA                                  | <i>Ca_desi_denovo</i> | 41622686                | C/G  | NA                 | NA                            | NA                 |
| <i>Desi_wild_41645963</i> | NA                                  | <i>Ca_desi_denovo</i> | 41645963                | C/T  | NA                 | NA                            | NA                 |
| <i>Desi_wild_41645977</i> | NA                                  | <i>Ca_desi_denovo</i> | 41645977                | A/G  | NA                 | NA                            | NA                 |
| <i>Desi_wild_41663316</i> | NA                                  | <i>Ca_desi_denovo</i> | 41663316                | A/C  | NA                 | NA                            | NA                 |
| <i>Desi_wild_41663317</i> | NA                                  | <i>Ca_desi_denovo</i> | 41663317                | G/T  | NA                 | NA                            | NA                 |
| <i>Desi_wild_41759508</i> | NA                                  | <i>Ca_desi_denovo</i> | 41759508                | A/C  | NA                 | NA                            | NA                 |
| <i>Desi_wild_41759528</i> | NA                                  | <i>Ca_desi_denovo</i> | 41759528                | A/G  | NA                 | NA                            | NA                 |
| <i>Desi_wild_41813460</i> | NA                                  | <i>Ca_desi_denovo</i> | 41813460                | A/G  | NA                 | NA                            | NA                 |
| <i>Desi_wild_41813473</i> | NA                                  | <i>Ca_desi_denovo</i> | 41813473                | C/T  | NA                 | NA                            | NA                 |
| <i>Desi_wild_41846476</i> | NA                                  | <i>Ca_desi_denovo</i> | 41846476                | A/G  | NA                 | NA                            | NA                 |
| <i>Desi_wild_41846499</i> | NA                                  | <i>Ca_desi_denovo</i> | 41846499                | A/T  | NA                 | NA                            | NA                 |
| <i>Desi_wild_41857539</i> | NA                                  | <i>Ca_desi_denovo</i> | 41857539                | A/G  | NA                 | NA                            | NA                 |
| <i>Desi_wild_41857540</i> | NA                                  | <i>Ca_desi_denovo</i> | 41857540                | A/G  | NA                 | NA                            | NA                 |
| <i>Desi_wild_41862646</i> | NA                                  | <i>Ca_desi_denovo</i> | 41862646                | C/T  | NA                 | NA                            | NA                 |
| <i>Desi_wild_41862658</i> | NA                                  | <i>Ca_desi_denovo</i> | 41862658                | A/T  | NA                 | NA                            | NA                 |
| <i>Desi_wild_41883800</i> | NA                                  | <i>Ca_desi_denovo</i> | 41883800                | A/C  | NA                 | NA                            | NA                 |
| <i>Desi_wild_41906456</i> | NA                                  | <i>Ca_desi_denovo</i> | 41906456                | A/C  | NA                 | NA                            | NA                 |
| <i>Desi_wild_41958121</i> | NA                                  | <i>Ca_desi_denovo</i> | 41958121                | G/T  | NA                 | NA                            | NA                 |
| <i>Desi_wild_41966483</i> | NA                                  | <i>Ca_desi_denovo</i> | 41966483                | G/T  | NA                 | NA                            | NA                 |
| <i>Desi_wild_41979715</i> | NA                                  | <i>Ca_desi_denovo</i> | 41979715                | A/C  | NA                 | NA                            | NA                 |
| <i>Desi_wild_41981995</i> | NA                                  | <i>Ca_desi_denovo</i> | 41981995                | A/C  | NA                 | NA                            | NA                 |
| <i>Desi_wild_41981996</i> | NA                                  | <i>Ca_desi_denovo</i> | 41981996                | G/T  | NA                 | NA                            | NA                 |
| <i>Desi_wild_41995199</i> | NA                                  | <i>Ca_desi_denovo</i> | 41995199                | A/C  | NA                 | NA                            | NA                 |
| <i>Desi_wild_41996056</i> | NA                                  | <i>Ca_desi_denovo</i> | 41996056                | G/T  | NA                 | NA                            | NA                 |
| <i>Desi_wild_42004891</i> | NA                                  | <i>Ca_desi_denovo</i> | 42004891                | G/T  | NA                 | NA                            | NA                 |
| <i>Desi_wild_42009638</i> | NA                                  | <i>Ca_desi_denovo</i> | 42009638                | A/C  | NA                 | NA                            | NA                 |
| <i>Desi_wild_42021991</i> | NA                                  | <i>Ca_desi_denovo</i> | 42021991                | A/C  | NA                 | NA                            | NA                 |
| <i>Desi_wild_42030915</i> | NA                                  | <i>Ca_desi_denovo</i> | 42030915                | C/G  | NA                 | NA                            | NA                 |

| SNP IDs                   | NCBI dbSNP accession IDs (NCBI_SS#) | Chromosomes           | Physical positions (bp) | SNPs | Gene accession IDs | Sequence components of genome | Putative functions |
|---------------------------|-------------------------------------|-----------------------|-------------------------|------|--------------------|-------------------------------|--------------------|
| <i>Desi_wild_42030916</i> | NA                                  | <i>Ca_desi_denovo</i> | 42030916                | C/G  | NA                 | NA                            | NA                 |
| <i>Desi_wild_42030921</i> | NA                                  | <i>Ca_desi_denovo</i> | 42030921                | A/T  | NA                 | NA                            | NA                 |
| <i>Desi_wild_42031331</i> | NA                                  | <i>Ca_desi_denovo</i> | 42031331                | G/T  | NA                 | NA                            | NA                 |
| <i>Desi_wild_42033104</i> | NA                                  | <i>Ca_desi_denovo</i> | 42033104                | G/T  | NA                 | NA                            | NA                 |
| <i>Desi_wild_42049935</i> | NA                                  | <i>Ca_desi_denovo</i> | 42049935                | C/T  | NA                 | NA                            | NA                 |
| <i>Desi_wild_42049947</i> | NA                                  | <i>Ca_desi_denovo</i> | 42049947                | A/T  | NA                 | NA                            | NA                 |
| <i>Desi_wild_42049953</i> | NA                                  | <i>Ca_desi_denovo</i> | 42049953                | A/C  | NA                 | NA                            | NA                 |
| <i>Desi_wild_42050936</i> | NA                                  | <i>Ca_desi_denovo</i> | 42050936                | G/T  | NA                 | NA                            | NA                 |
| <i>Desi_wild_42052764</i> | NA                                  | <i>Ca_desi_denovo</i> | 42052764                | C/T  | NA                 | NA                            | NA                 |
| <i>Desi_wild_42064551</i> | NA                                  | <i>Ca_desi_denovo</i> | 42064551                | A/C  | NA                 | NA                            | NA                 |
| <i>Desi_wild_42068161</i> | NA                                  | <i>Ca_desi_denovo</i> | 42068161                | G/T  | NA                 | NA                            | NA                 |
| <i>Desi_wild_42073678</i> | NA                                  | <i>Ca_desi_denovo</i> | 42073678                | A/G  | NA                 | NA                            | NA                 |
| <i>Desi_wild_42075286</i> | NA                                  | <i>Ca_desi_denovo</i> | 42075286                | A/C  | NA                 | NA                            | NA                 |
| <i>Desi_wild_42105396</i> | NA                                  | <i>Ca_desi_denovo</i> | 42105396                | G/T  | NA                 | NA                            | NA                 |
| <i>Desi_wild_42108169</i> | NA                                  | <i>Ca_desi_denovo</i> | 42108169                | A/T  | NA                 | NA                            | NA                 |
| <i>Desi_wild_42114153</i> | NA                                  | <i>Ca_desi_denovo</i> | 42114153                | C/T  | NA                 | NA                            | NA                 |
| <i>Desi_wild_42116712</i> | NA                                  | <i>Ca_desi_denovo</i> | 42116712                | C/T  | NA                 | NA                            | NA                 |
| <i>Desi_wild_42132386</i> | NA                                  | <i>Ca_desi_denovo</i> | 42132386                | A/G  | NA                 | NA                            | NA                 |
| <i>Desi_wild_42133328</i> | NA                                  | <i>Ca_desi_denovo</i> | 42133328                | A/C  | NA                 | NA                            | NA                 |
| <i>Desi_wild_42143116</i> | NA                                  | <i>Ca_desi_denovo</i> | 42143116                | A/C  | NA                 | NA                            | NA                 |
| <i>Desi_wild_42149100</i> | NA                                  | <i>Ca_desi_denovo</i> | 42149100                | A/G  | NA                 | NA                            | NA                 |
| <i>Desi_wild_42156985</i> | NA                                  | <i>Ca_desi_denovo</i> | 42156985                | A/C  | NA                 | NA                            | NA                 |
| <i>Desi_wild_42159563</i> | NA                                  | <i>Ca_desi_denovo</i> | 42159563                | C/T  | NA                 | NA                            | NA                 |
| <i>Desi_wild_42159569</i> | NA                                  | <i>Ca_desi_denovo</i> | 42159569                | A/T  | NA                 | NA                            | NA                 |
| <i>Desi_wild_42170286</i> | NA                                  | <i>Ca_desi_denovo</i> | 42170286                | A/G  | NA                 | NA                            | NA                 |
| <i>Desi_wild_42175036</i> | NA                                  | <i>Ca_desi_denovo</i> | 42175036                | G/T  | NA                 | NA                            | NA                 |
| <i>Desi_wild_42175089</i> | NA                                  | <i>Ca_desi_denovo</i> | 42175089                | G/T  | NA                 | NA                            | NA                 |
| <i>Desi_wild_42195175</i> | NA                                  | <i>Ca_desi_denovo</i> | 42195175                | A/C  | NA                 | NA                            | NA                 |
| <i>Desi_wild_42195176</i> | NA                                  | <i>Ca_desi_denovo</i> | 42195176                | A/G  | NA                 | NA                            | NA                 |
| <i>Desi_wild_42195745</i> | NA                                  | <i>Ca_desi_denovo</i> | 42195745                | G/T  | NA                 | NA                            | NA                 |
| <i>Desi_wild_42197741</i> | NA                                  | <i>Ca_desi_denovo</i> | 42197741                | G/T  | NA                 | NA                            | NA                 |
| <i>Desi_wild_42206145</i> | NA                                  | <i>Ca_desi_denovo</i> | 42206145                | G/T  | NA                 | NA                            | NA                 |
| <i>Desi_wild_42216543</i> | NA                                  | <i>Ca_desi_denovo</i> | 42216543                | A/G  | NA                 | NA                            | NA                 |
| <i>Desi_wild_42216546</i> | NA                                  | <i>Ca_desi_denovo</i> | 42216546                | A/G  | NA                 | NA                            | NA                 |
| <i>Desi_wild_42224710</i> | NA                                  | <i>Ca_desi_denovo</i> | 42224710                | G/T  | NA                 | NA                            | NA                 |
| <i>Desi_wild_42229087</i> | NA                                  | <i>Ca_desi_denovo</i> | 42229087                | G/T  | NA                 | NA                            | NA                 |
| <i>Desi_wild_42233225</i> | NA                                  | <i>Ca_desi_denovo</i> | 42233225                | G/T  | NA                 | NA                            | NA                 |
| <i>Desi_wild_42261389</i> | NA                                  | <i>Ca_desi_denovo</i> | 42261389                | C/T  | NA                 | NA                            | NA                 |
| <i>Desi_wild_42266265</i> | NA                                  | <i>Ca_desi_denovo</i> | 42266265                | A/G  | NA                 | NA                            | NA                 |
| <i>Desi_wild_42271458</i> | NA                                  | <i>Ca_desi_denovo</i> | 42271458                | C/G  | NA                 | NA                            | NA                 |
| <i>Desi_wild_42271461</i> | NA                                  | <i>Ca_desi_denovo</i> | 42271461                | A/G  | NA                 | NA                            | NA                 |
| <i>Desi_wild_42275095</i> | NA                                  | <i>Ca_desi_denovo</i> | 42275095                | G/A  | NA                 | NA                            | NA                 |
| <i>Desi_wild_42275137</i> | NA                                  | <i>Ca_desi_denovo</i> | 42275137                | C/G  | NA                 | NA                            | NA                 |
| <i>Desi_wild_42303666</i> | NA                                  | <i>Ca_desi_denovo</i> | 42303666                | G/T  | NA                 | NA                            | NA                 |

| SNP IDs                   | NCBI dbSNP accession IDs (NCBI_SS#) | Chromosomes           | Physical positions (bp) | SNPs | Gene accession IDs | Sequence components of genome | Putative functions |
|---------------------------|-------------------------------------|-----------------------|-------------------------|------|--------------------|-------------------------------|--------------------|
| <i>Desi_wild_42307516</i> | NA                                  | <i>Ca_desi_denovo</i> | 42307516                | G/T  | NA                 | NA                            | NA                 |
| <i>Desi_wild_42344799</i> | NA                                  | <i>Ca_desi_denovo</i> | 42344799                | A/G  | NA                 | NA                            | NA                 |
| <i>Desi_wild_42345370</i> | NA                                  | <i>Ca_desi_denovo</i> | 42345370                | G/T  | NA                 | NA                            | NA                 |
| <i>Desi_wild_42346357</i> | NA                                  | <i>Ca_desi_denovo</i> | 42346357                | G/T  | NA                 | NA                            | NA                 |
| <i>Desi_wild_42352063</i> | NA                                  | <i>Ca_desi_denovo</i> | 42352063                | G/T  | NA                 | NA                            | NA                 |
| <i>Desi_wild_42368614</i> | NA                                  | <i>Ca_desi_denovo</i> | 42368614                | C/A  | NA                 | NA                            | NA                 |
| <i>Desi_wild_42370049</i> | NA                                  | <i>Ca_desi_denovo</i> | 42370049                | G/T  | NA                 | NA                            | NA                 |
| <i>Desi_wild_42371359</i> | NA                                  | <i>Ca_desi_denovo</i> | 42371359                | G/T  | NA                 | NA                            | NA                 |
| <i>Desi_wild_42381844</i> | NA                                  | <i>Ca_desi_denovo</i> | 42381844                | C/G  | NA                 | NA                            | NA                 |
| <i>Desi_wild_42381848</i> | NA                                  | <i>Ca_desi_denovo</i> | 42381848                | A/C  | NA                 | NA                            | NA                 |
| <i>Desi_wild_42383559</i> | NA                                  | <i>Ca_desi_denovo</i> | 42383559                | G/T  | NA                 | NA                            | NA                 |
| <i>Desi_wild_42423268</i> | NA                                  | <i>Ca_desi_denovo</i> | 42423268                | A/C  | NA                 | NA                            | NA                 |
| <i>Desi_wild_42430204</i> | NA                                  | <i>Ca_desi_denovo</i> | 42430204                | A/C  | NA                 | NA                            | NA                 |
| <i>Desi_wild_42432009</i> | NA                                  | <i>Ca_desi_denovo</i> | 42432009                | A/G  | NA                 | NA                            | NA                 |
| <i>Desi_wild_42434511</i> | NA                                  | <i>Ca_desi_denovo</i> | 42434511                | A/C  | NA                 | NA                            | NA                 |
| <i>Desi_wild_42439773</i> | NA                                  | <i>Ca_desi_denovo</i> | 42439773                | A/G  | NA                 | NA                            | NA                 |
| <i>Desi_wild_42440706</i> | NA                                  | <i>Ca_desi_denovo</i> | 42440706                | G/T  | NA                 | NA                            | NA                 |
| <i>Desi_wild_42455710</i> | NA                                  | <i>Ca_desi_denovo</i> | 42455710                | G/T  | NA                 | NA                            | NA                 |
| <i>Desi_wild_42471526</i> | NA                                  | <i>Ca_desi_denovo</i> | 42471526                | A/G  | NA                 | NA                            | NA                 |
| <i>Desi_wild_42471529</i> | NA                                  | <i>Ca_desi_denovo</i> | 42471529                | A/G  | NA                 | NA                            | NA                 |
| <i>Desi_wild_42473697</i> | NA                                  | <i>Ca_desi_denovo</i> | 42473697                | G/T  | NA                 | NA                            | NA                 |
| <i>Desi_wild_42479605</i> | NA                                  | <i>Ca_desi_denovo</i> | 42479605                | C/G  | NA                 | NA                            | NA                 |
| <i>Desi_wild_42487697</i> | NA                                  | <i>Ca_desi_denovo</i> | 42487697                | A/C  | NA                 | NA                            | NA                 |
| <i>Desi_wild_42492139</i> | NA                                  | <i>Ca_desi_denovo</i> | 42492139                | A/G  | NA                 | NA                            | NA                 |
| <i>Desi_wild_42504590</i> | NA                                  | <i>Ca_desi_denovo</i> | 42504590                | A/C  | NA                 | NA                            | NA                 |
| <i>Desi_wild_42504591</i> | NA                                  | <i>Ca_desi_denovo</i> | 42504591                | A/G  | NA                 | NA                            | NA                 |
| <i>Desi_wild_42508929</i> | NA                                  | <i>Ca_desi_denovo</i> | 42508929                | C/T  | NA                 | NA                            | NA                 |
| <i>Desi_wild_42512094</i> | NA                                  | <i>Ca_desi_denovo</i> | 42512094                | A/C  | NA                 | NA                            | NA                 |
| <i>Desi_wild_42512096</i> | NA                                  | <i>Ca_desi_denovo</i> | 42512096                | A/G  | NA                 | NA                            | NA                 |
| <i>Desi_wild_42512856</i> | NA                                  | <i>Ca_desi_denovo</i> | 42512856                | A/C  | NA                 | NA                            | NA                 |
| <i>Desi_wild_42518154</i> | NA                                  | <i>Ca_desi_denovo</i> | 42518154                | A/T  | NA                 | NA                            | NA                 |
| <i>Desi_wild_42520835</i> | NA                                  | <i>Ca_desi_denovo</i> | 42520835                | A/C  | NA                 | NA                            | NA                 |
| <i>Desi_wild_42529439</i> | NA                                  | <i>Ca_desi_denovo</i> | 42529439                | G/T  | NA                 | NA                            | NA                 |
| <i>Desi_wild_42530320</i> | NA                                  | <i>Ca_desi_denovo</i> | 42530320                | G/T  | NA                 | NA                            | NA                 |
| <i>Desi_wild_42534706</i> | NA                                  | <i>Ca_desi_denovo</i> | 42534706                | G/T  | NA                 | NA                            | NA                 |
| <i>Desi_wild_42540687</i> | NA                                  | <i>Ca_desi_denovo</i> | 42540687                | G/T  | NA                 | NA                            | NA                 |
| <i>Desi_wild_42545679</i> | NA                                  | <i>Ca_desi_denovo</i> | 42545679                | G/T  | NA                 | NA                            | NA                 |
| <i>Desi_wild_42551899</i> | NA                                  | <i>Ca_desi_denovo</i> | 42551899                | C/G  | NA                 | NA                            | NA                 |
| <i>Desi_wild_42551900</i> | NA                                  | <i>Ca_desi_denovo</i> | 42551900                | C/T  | NA                 | NA                            | NA                 |
| <i>Desi_wild_42575936</i> | NA                                  | <i>Ca_desi_denovo</i> | 42575936                | G/T  | NA                 | NA                            | NA                 |
| <i>Desi_wild_42604151</i> | NA                                  | <i>Ca_desi_denovo</i> | 42604151                | G/T  | NA                 | NA                            | NA                 |
| <i>Desi_wild_42621291</i> | NA                                  | <i>Ca_desi_denovo</i> | 42621291                | A/G  | NA                 | NA                            | NA                 |
| <i>Desi_wild_42641334</i> | NA                                  | <i>Ca_desi_denovo</i> | 42641334                | C/T  | NA                 | NA                            | NA                 |
| <i>Desi_wild_42658434</i> | NA                                  | <i>Ca_desi_denovo</i> | 42658434                | G/T  | NA                 | NA                            | NA                 |

| SNP IDs                   | NCBI dbSNP accession IDs (NCBI_SS#) | Chromosomes           | Physical positions (bp) | SNPs | Gene accession IDs | Sequence components of genome | Putative functions |
|---------------------------|-------------------------------------|-----------------------|-------------------------|------|--------------------|-------------------------------|--------------------|
| <i>Desi_wild_42669509</i> | NA                                  | <i>Ca_desi_denovo</i> | 42669509                | A/G  | NA                 | NA                            | NA                 |
| <i>Desi_wild_42671883</i> | NA                                  | <i>Ca_desi_denovo</i> | 42671883                | A/G  | NA                 | NA                            | NA                 |
| <i>Desi_wild_42672901</i> | NA                                  | <i>Ca_desi_denovo</i> | 42672901                | G/T  | NA                 | NA                            | NA                 |
| <i>Desi_wild_42672922</i> | NA                                  | <i>Ca_desi_denovo</i> | 42672922                | G/T  | NA                 | NA                            | NA                 |
| <i>Desi_wild_42675210</i> | NA                                  | <i>Ca_desi_denovo</i> | 42675210                | A/C  | NA                 | NA                            | NA                 |
| <i>Desi_wild_42683474</i> | NA                                  | <i>Ca_desi_denovo</i> | 42683474                | A/C  | NA                 | NA                            | NA                 |
| <i>Desi_wild_42684615</i> | NA                                  | <i>Ca_desi_denovo</i> | 42684615                | A/C  | NA                 | NA                            | NA                 |
| <i>Desi_wild_42684616</i> | NA                                  | <i>Ca_desi_denovo</i> | 42684616                | A/G  | NA                 | NA                            | NA                 |
| <i>Desi_wild_42710438</i> | NA                                  | <i>Ca_desi_denovo</i> | 42710438                | G/T  | NA                 | NA                            | NA                 |
| <i>Desi_wild_42710930</i> | NA                                  | <i>Ca_desi_denovo</i> | 42710930                | A/C  | NA                 | NA                            | NA                 |
| <i>Desi_wild_42710931</i> | NA                                  | <i>Ca_desi_denovo</i> | 42710931                | A/G  | NA                 | NA                            | NA                 |
| <i>Desi_wild_42713492</i> | NA                                  | <i>Ca_desi_denovo</i> | 42713492                | T/G  | NA                 | NA                            | NA                 |
| <i>Desi_wild_42747791</i> | NA                                  | <i>Ca_desi_denovo</i> | 42747791                | G/T  | NA                 | NA                            | NA                 |
| <i>Desi_wild_42750720</i> | NA                                  | <i>Ca_desi_denovo</i> | 42750720                | A/T  | NA                 | NA                            | NA                 |
| <i>Desi_wild_42750726</i> | NA                                  | <i>Ca_desi_denovo</i> | 42750726                | A/G  | NA                 | NA                            | NA                 |
| <i>Desi_wild_42754806</i> | NA                                  | <i>Ca_desi_denovo</i> | 42754806                | G/T  | NA                 | NA                            | NA                 |
| <i>Desi_wild_42765363</i> | NA                                  | <i>Ca_desi_denovo</i> | 42765363                | G/T  | NA                 | NA                            | NA                 |
| <i>Desi_wild_42765745</i> | NA                                  | <i>Ca_desi_denovo</i> | 42765745                | A/C  | NA                 | NA                            | NA                 |
| <i>Desi_wild_42765746</i> | NA                                  | <i>Ca_desi_denovo</i> | 42765746                | G/T  | NA                 | NA                            | NA                 |
| <i>Desi_wild_42790308</i> | NA                                  | <i>Ca_desi_denovo</i> | 42790308                | C/T  | NA                 | NA                            | NA                 |
| <i>Desi_wild_42790896</i> | NA                                  | <i>Ca_desi_denovo</i> | 42790896                | G/T  | NA                 | NA                            | NA                 |
| <i>Desi_wild_42802794</i> | NA                                  | <i>Ca_desi_denovo</i> | 42802794                | C/G  | NA                 | NA                            | NA                 |
| <i>Desi_wild_42803650</i> | NA                                  | <i>Ca_desi_denovo</i> | 42803650                | A/C  | NA                 | NA                            | NA                 |
| <i>Desi_wild_42803651</i> | NA                                  | <i>Ca_desi_denovo</i> | 42803651                | A/G  | NA                 | NA                            | NA                 |
| <i>Desi_wild_42805169</i> | NA                                  | <i>Ca_desi_denovo</i> | 42805169                | A/C  | NA                 | NA                            | NA                 |
| <i>Desi_wild_42805171</i> | NA                                  | <i>Ca_desi_denovo</i> | 42805171                | A/G  | NA                 | NA                            | NA                 |
| <i>Desi_wild_42823311</i> | NA                                  | <i>Ca_desi_denovo</i> | 42823311                | C/G  | NA                 | NA                            | NA                 |
| <i>Desi_wild_42825202</i> | NA                                  | <i>Ca_desi_denovo</i> | 42825202                | G/T  | NA                 | NA                            | NA                 |
| <i>Desi_wild_42836796</i> | NA                                  | <i>Ca_desi_denovo</i> | 42836796                | G/T  | NA                 | NA                            | NA                 |
| <i>Desi_wild_42840675</i> | NA                                  | <i>Ca_desi_denovo</i> | 42840675                | G/T  | NA                 | NA                            | NA                 |
| <i>Desi_wild_42847955</i> | NA                                  | <i>Ca_desi_denovo</i> | 42847955                | A/G  | NA                 | NA                            | NA                 |
| <i>Desi_wild_42851085</i> | NA                                  | <i>Ca_desi_denovo</i> | 42851085                | A/G  | NA                 | NA                            | NA                 |
| <i>Desi_wild_42854783</i> | NA                                  | <i>Ca_desi_denovo</i> | 42854783                | A/G  | NA                 | NA                            | NA                 |
| <i>Desi_wild_42854798</i> | NA                                  | <i>Ca_desi_denovo</i> | 42854798                | C/G  | NA                 | NA                            | NA                 |
| <i>Desi_wild_42862360</i> | NA                                  | <i>Ca_desi_denovo</i> | 42862360                | A/C  | NA                 | NA                            | NA                 |
| <i>Desi_wild_42865485</i> | NA                                  | <i>Ca_desi_denovo</i> | 42865485                | G/T  | NA                 | NA                            | NA                 |
| <i>Desi_wild_42869784</i> | NA                                  | <i>Ca_desi_denovo</i> | 42869784                | G/T  | NA                 | NA                            | NA                 |
| <i>Desi_wild_42869847</i> | NA                                  | <i>Ca_desi_denovo</i> | 42869847                | A/T  | NA                 | NA                            | NA                 |
| <i>Desi_wild_42870757</i> | NA                                  | <i>Ca_desi_denovo</i> | 42870757                | C/T  | NA                 | NA                            | NA                 |
| <i>Desi_wild_42873256</i> | NA                                  | <i>Ca_desi_denovo</i> | 42873256                | G/T  | NA                 | NA                            | NA                 |
| <i>Desi_wild_42882200</i> | NA                                  | <i>Ca_desi_denovo</i> | 42882200                | G/T  | NA                 | NA                            | NA                 |
| <i>Desi_wild_42886384</i> | NA                                  | <i>Ca_desi_denovo</i> | 42886384                | G/T  | NA                 | NA                            | NA                 |
| <i>Desi_wild_42888581</i> | NA                                  | <i>Ca_desi_denovo</i> | 42888581                | A/C  | NA                 | NA                            | NA                 |
| <i>Desi_wild_42891184</i> | NA                                  | <i>Ca_desi_denovo</i> | 42891184                | A/C  | NA                 | NA                            | NA                 |

| SNP IDs                   | NCBI dbSNP accession IDs (NCBI_SS#) | Chromosomes           | Physical positions (bp) | SNPs | Gene accession IDs | Sequence components of genome | Putative functions |
|---------------------------|-------------------------------------|-----------------------|-------------------------|------|--------------------|-------------------------------|--------------------|
| <i>Desi_wild_42892579</i> | NA                                  | <i>Ca_desi_denovo</i> | 42892579                | A/G  | NA                 | NA                            | NA                 |
| <i>Desi_wild_42917935</i> | NA                                  | <i>Ca_desi_denovo</i> | 42917935                | A/C  | NA                 | NA                            | NA                 |
| <i>Desi_wild_42917936</i> | NA                                  | <i>Ca_desi_denovo</i> | 42917936                | G/T  | NA                 | NA                            | NA                 |
| <i>Desi_wild_42940355</i> | NA                                  | <i>Ca_desi_denovo</i> | 42940355                | A/C  | NA                 | NA                            | NA                 |
| <i>Desi_wild_42940356</i> | NA                                  | <i>Ca_desi_denovo</i> | 42940356                | G/T  | NA                 | NA                            | NA                 |
| <i>Desi_wild_42942160</i> | NA                                  | <i>Ca_desi_denovo</i> | 42942160                | A/C  | NA                 | NA                            | NA                 |
| <i>Desi_wild_42942161</i> | NA                                  | <i>Ca_desi_denovo</i> | 42942161                | A/G  | NA                 | NA                            | NA                 |
| <i>Desi_wild_42946909</i> | NA                                  | <i>Ca_desi_denovo</i> | 42946909                | G/T  | NA                 | NA                            | NA                 |
| <i>Desi_wild_42956655</i> | NA                                  | <i>Ca_desi_denovo</i> | 42956655                | G/T  | NA                 | NA                            | NA                 |
| <i>Desi_wild_42959922</i> | NA                                  | <i>Ca_desi_denovo</i> | 42959922                | G/T  | NA                 | NA                            | NA                 |
| <i>Desi_wild_42974919</i> | NA                                  | <i>Ca_desi_denovo</i> | 42974919                | G/T  | NA                 | NA                            | NA                 |
| <i>Desi_wild_42975030</i> | NA                                  | <i>Ca_desi_denovo</i> | 42975030                | A/C  | NA                 | NA                            | NA                 |
| <i>Desi_wild_42976402</i> | NA                                  | <i>Ca_desi_denovo</i> | 42976402                | G/T  | NA                 | NA                            | NA                 |
| <i>Desi_wild_42979210</i> | NA                                  | <i>Ca_desi_denovo</i> | 42979210                | A/C  | NA                 | NA                            | NA                 |
| <i>Desi_wild_42979211</i> | NA                                  | <i>Ca_desi_denovo</i> | 42979211                | C/G  | NA                 | NA                            | NA                 |
| <i>Desi_wild_42983666</i> | NA                                  | <i>Ca_desi_denovo</i> | 42983666                | C/T  | NA                 | NA                            | NA                 |
| <i>Desi_wild_42987000</i> | NA                                  | <i>Ca_desi_denovo</i> | 42987000                | A/C  | NA                 | NA                            | NA                 |
| <i>Desi_wild_42987001</i> | NA                                  | <i>Ca_desi_denovo</i> | 42987001                | G/T  | NA                 | NA                            | NA                 |
| <i>Desi_wild_43004949</i> | NA                                  | <i>Ca_desi_denovo</i> | 43004949                | G/T  | NA                 | NA                            | NA                 |
| <i>Desi_wild_43007995</i> | NA                                  | <i>Ca_desi_denovo</i> | 43007995                | C/G  | NA                 | NA                            | NA                 |
| <i>Desi_wild_43020947</i> | NA                                  | <i>Ca_desi_denovo</i> | 43020947                | A/G  | NA                 | NA                            | NA                 |
| <i>Desi_wild_43027514</i> | NA                                  | <i>Ca_desi_denovo</i> | 43027514                | G/T  | NA                 | NA                            | NA                 |
| <i>Desi_wild_43031649</i> | NA                                  | <i>Ca_desi_denovo</i> | 43031649                | G/T  | NA                 | NA                            | NA                 |
| <i>Desi_wild_43034596</i> | NA                                  | <i>Ca_desi_denovo</i> | 43034596                | G/T  | NA                 | NA                            | NA                 |
| <i>Desi_wild_43052448</i> | NA                                  | <i>Ca_desi_denovo</i> | 43052448                | C/G  | NA                 | NA                            | NA                 |
| <i>Desi_wild_43054926</i> | NA                                  | <i>Ca_desi_denovo</i> | 43054926                | G/T  | NA                 | NA                            | NA                 |
| <i>Desi_wild_43055550</i> | NA                                  | <i>Ca_desi_denovo</i> | 43055550                | C/T  | NA                 | NA                            | NA                 |
| <i>Desi_wild_43064440</i> | NA                                  | <i>Ca_desi_denovo</i> | 43064440                | A/G  | NA                 | NA                            | NA                 |
| <i>Desi_wild_43064443</i> | NA                                  | <i>Ca_desi_denovo</i> | 43064443                | C/T  | NA                 | NA                            | NA                 |
| <i>Desi_wild_43073640</i> | NA                                  | <i>Ca_desi_denovo</i> | 43073640                | A/G  | NA                 | NA                            | NA                 |
| <i>Desi_wild_43080765</i> | NA                                  | <i>Ca_desi_denovo</i> | 43080765                | A/C  | NA                 | NA                            | NA                 |
| <i>Desi_wild_43080766</i> | NA                                  | <i>Ca_desi_denovo</i> | 43080766                | A/G  | NA                 | NA                            | NA                 |
| <i>Desi_wild_43083602</i> | NA                                  | <i>Ca_desi_denovo</i> | 43083602                | G/T  | NA                 | NA                            | NA                 |
| <i>Desi_wild_43085627</i> | NA                                  | <i>Ca_desi_denovo</i> | 43085627                | C/T  | NA                 | NA                            | NA                 |
| <i>Desi_wild_43098625</i> | NA                                  | <i>Ca_desi_denovo</i> | 43098625                | A/C  | NA                 | NA                            | NA                 |
| <i>Desi_wild_43098626</i> | NA                                  | <i>Ca_desi_denovo</i> | 43098626                | A/G  | NA                 | NA                            | NA                 |
| <i>Desi_wild_43099722</i> | NA                                  | <i>Ca_desi_denovo</i> | 43099722                | G/T  | NA                 | NA                            | NA                 |
| <i>Desi_wild_43112636</i> | NA                                  | <i>Ca_desi_denovo</i> | 43112636                | G/T  | NA                 | NA                            | NA                 |
| <i>Desi_wild_43113540</i> | NA                                  | <i>Ca_desi_denovo</i> | 43113540                | A/C  | NA                 | NA                            | NA                 |
| <i>Desi_wild_43125143</i> | NA                                  | <i>Ca_desi_denovo</i> | 43125143                | A/G  | NA                 | NA                            | NA                 |
| <i>Desi_wild_43125145</i> | NA                                  | <i>Ca_desi_denovo</i> | 43125145                | A/G  | NA                 | NA                            | NA                 |
| <i>Desi_wild_43127525</i> | NA                                  | <i>Ca_desi_denovo</i> | 43127525                | G/A  | NA                 | NA                            | NA                 |
| <i>Desi_wild_43127558</i> | NA                                  | <i>Ca_desi_denovo</i> | 43127558                | T/G  | NA                 | NA                            | NA                 |
| <i>Desi_wild_43127560</i> | NA                                  | <i>Ca_desi_denovo</i> | 43127560                | C/T  | NA                 | NA                            | NA                 |

| SNP IDs                   | NCBI dbSNP accession IDs (NCBI_SS#) | Chromosomes           | Physical positions (bp) | SNPs | Gene accession IDs | Sequence components of genome | Putative functions |
|---------------------------|-------------------------------------|-----------------------|-------------------------|------|--------------------|-------------------------------|--------------------|
| <i>Desi_wild_43127573</i> | NA                                  | <i>Ca_desi_denovo</i> | 43127573                | A/C  | NA                 | NA                            | NA                 |
| <i>Desi_wild_43129440</i> | NA                                  | <i>Ca_desi_denovo</i> | 43129440                | A/C  | NA                 | NA                            | NA                 |
| <i>Desi_wild_43147216</i> | NA                                  | <i>Ca_desi_denovo</i> | 43147216                | G/T  | NA                 | NA                            | NA                 |
| <i>Desi_wild_43147243</i> | NA                                  | <i>Ca_desi_denovo</i> | 43147243                | G/T  | NA                 | NA                            | NA                 |
| <i>Desi_wild_43155151</i> | NA                                  | <i>Ca_desi_denovo</i> | 43155151                | C/G  | NA                 | NA                            | NA                 |
| <i>Desi_wild_43155386</i> | NA                                  | <i>Ca_desi_denovo</i> | 43155386                | A/G  | NA                 | NA                            | NA                 |
| <i>Desi_wild_43156845</i> | NA                                  | <i>Ca_desi_denovo</i> | 43156845                | G/T  | NA                 | NA                            | NA                 |
| <i>Desi_wild_43167593</i> | NA                                  | <i>Ca_desi_denovo</i> | 43167593                | G/T  | NA                 | NA                            | NA                 |
| <i>Desi_wild_43170160</i> | NA                                  | <i>Ca_desi_denovo</i> | 43170160                | A/C  | NA                 | NA                            | NA                 |
| <i>Desi_wild_43183737</i> | NA                                  | <i>Ca_desi_denovo</i> | 43183737                | A/G  | NA                 | NA                            | NA                 |
| <i>Desi_wild_43185424</i> | NA                                  | <i>Ca_desi_denovo</i> | 43185424                | G/T  | NA                 | NA                            | NA                 |
| <i>Desi_wild_43199406</i> | NA                                  | <i>Ca_desi_denovo</i> | 43199406                | A/G  | NA                 | NA                            | NA                 |
| <i>Desi_wild_43199563</i> | NA                                  | <i>Ca_desi_denovo</i> | 43199563                | G/T  | NA                 | NA                            | NA                 |
| <i>Desi_wild_43212021</i> | NA                                  | <i>Ca_desi_denovo</i> | 43212021                | G/T  | NA                 | NA                            | NA                 |
| <i>Desi_wild_43212042</i> | NA                                  | <i>Ca_desi_denovo</i> | 43212042                | G/T  | NA                 | NA                            | NA                 |
| <i>Desi_wild_43224354</i> | NA                                  | <i>Ca_desi_denovo</i> | 43224354                | A/G  | NA                 | NA                            | NA                 |
| <i>Desi_wild_43224357</i> | NA                                  | <i>Ca_desi_denovo</i> | 43224357                | C/G  | NA                 | NA                            | NA                 |
| <i>Desi_wild_43236185</i> | NA                                  | <i>Ca_desi_denovo</i> | 43236185                | A/C  | NA                 | NA                            | NA                 |
| <i>Desi_wild_43236186</i> | NA                                  | <i>Ca_desi_denovo</i> | 43236186                | A/G  | NA                 | NA                            | NA                 |
| <i>Desi_wild_43243781</i> | NA                                  | <i>Ca_desi_denovo</i> | 43243781                | G/T  | NA                 | NA                            | NA                 |
| <i>Desi_wild_43256703</i> | NA                                  | <i>Ca_desi_denovo</i> | 43256703                | G/T  | NA                 | NA                            | NA                 |
| <i>Desi_wild_43259966</i> | NA                                  | <i>Ca_desi_denovo</i> | 43259966                | A/G  | NA                 | NA                            | NA                 |
| <i>Desi_wild_43266629</i> | NA                                  | <i>Ca_desi_denovo</i> | 43266629                | A/G  | NA                 | NA                            | NA                 |
| <i>Desi_wild_43276535</i> | NA                                  | <i>Ca_desi_denovo</i> | 43276535                | T/G  | NA                 | NA                            | NA                 |
| <i>Desi_wild_43285679</i> | NA                                  | <i>Ca_desi_denovo</i> | 43285679                | A/C  | NA                 | NA                            | NA                 |
| <i>Desi_wild_43290619</i> | NA                                  | <i>Ca_desi_denovo</i> | 43290619                | G/T  | NA                 | NA                            | NA                 |
| <i>Desi_wild_43294961</i> | NA                                  | <i>Ca_desi_denovo</i> | 43294961                | A/G  | NA                 | NA                            | NA                 |
| <i>Desi_wild_43318357</i> | NA                                  | <i>Ca_desi_denovo</i> | 43318357                | G/T  | NA                 | NA                            | NA                 |
| <i>Desi_wild_43335745</i> | NA                                  | <i>Ca_desi_denovo</i> | 43335745                | A/C  | NA                 | NA                            | NA                 |
| <i>Desi_wild_43335746</i> | NA                                  | <i>Ca_desi_denovo</i> | 43335746                | G/T  | NA                 | NA                            | NA                 |
| <i>Desi_wild_43353509</i> | NA                                  | <i>Ca_desi_denovo</i> | 43353509                | A/G  | NA                 | NA                            | NA                 |
| <i>Desi_wild_43373153</i> | NA                                  | <i>Ca_desi_denovo</i> | 43373153                | G/T  | NA                 | NA                            | NA                 |
| <i>Desi_wild_43373786</i> | NA                                  | <i>Ca_desi_denovo</i> | 43373786                | A/G  | NA                 | NA                            | NA                 |
| <i>Desi_wild_43381818</i> | NA                                  | <i>Ca_desi_denovo</i> | 43381818                | A/G  | NA                 | NA                            | NA                 |
| <i>Desi_wild_43381819</i> | NA                                  | <i>Ca_desi_denovo</i> | 43381819                | C/G  | NA                 | NA                            | NA                 |
| <i>Desi_wild_43381820</i> | NA                                  | <i>Ca_desi_denovo</i> | 43381820                | C/G  | NA                 | NA                            | NA                 |
| <i>Desi_wild_43382577</i> | NA                                  | <i>Ca_desi_denovo</i> | 43382577                | A/C  | NA                 | NA                            | NA                 |
| <i>Desi_wild_43389800</i> | NA                                  | <i>Ca_desi_denovo</i> | 43389800                | A/C  | NA                 | NA                            | NA                 |
| <i>Desi_wild_43389801</i> | NA                                  | <i>Ca_desi_denovo</i> | 43389801                | A/G  | NA                 | NA                            | NA                 |
| <i>Desi_wild_43398152</i> | NA                                  | <i>Ca_desi_denovo</i> | 43398152                | C/G  | NA                 | NA                            | NA                 |
| <i>Desi_wild_43401194</i> | NA                                  | <i>Ca_desi_denovo</i> | 43401194                | G/T  | NA                 | NA                            | NA                 |
| <i>Desi_wild_43413428</i> | NA                                  | <i>Ca_desi_denovo</i> | 43413428                | G/T  | NA                 | NA                            | NA                 |
| <i>Desi_wild_43480240</i> | NA                                  | <i>Ca_desi_denovo</i> | 43480240                | A/C  | NA                 | NA                            | NA                 |
| <i>Desi_wild_43480241</i> | NA                                  | <i>Ca_desi_denovo</i> | 43480241                | G/T  | NA                 | NA                            | NA                 |

| SNP IDs                   | NCBI dbSNP accession IDs (NCBI_SS#) | Chromosomes           | Physical positions (bp) | SNPs | Gene accession IDs | Sequence components of genome | Putative functions |
|---------------------------|-------------------------------------|-----------------------|-------------------------|------|--------------------|-------------------------------|--------------------|
| <i>Desi_wild_43493206</i> | NA                                  | <i>Ca_desi_denovo</i> | 43493206                | G/T  | NA                 | NA                            | NA                 |
| <i>Desi_wild_43493255</i> | NA                                  | <i>Ca_desi_denovo</i> | 43493255                | G/T  | NA                 | NA                            | NA                 |
| <i>Desi_wild_43503775</i> | NA                                  | <i>Ca_desi_denovo</i> | 43503775                | G/T  | NA                 | NA                            | NA                 |
| <i>Desi_wild_43532680</i> | NA                                  | <i>Ca_desi_denovo</i> | 43532680                | A/C  | NA                 | NA                            | NA                 |
| <i>Desi_wild_43532681</i> | NA                                  | <i>Ca_desi_denovo</i> | 43532681                | G/T  | NA                 | NA                            | NA                 |
| <i>Desi_wild_43548639</i> | NA                                  | <i>Ca_desi_denovo</i> | 43548639                | G/T  | NA                 | NA                            | NA                 |
| <i>Desi_wild_43582658</i> | NA                                  | <i>Ca_desi_denovo</i> | 43582658                | A/G  | NA                 | NA                            | NA                 |
| <i>Desi_wild_43582699</i> | NA                                  | <i>Ca_desi_denovo</i> | 43582699                | C/G  | NA                 | NA                            | NA                 |
| <i>Desi_wild_43586260</i> | NA                                  | <i>Ca_desi_denovo</i> | 43586260                | G/T  | NA                 | NA                            | NA                 |
| <i>Desi_wild_43602023</i> | NA                                  | <i>Ca_desi_denovo</i> | 43602023                | G/T  | NA                 | NA                            | NA                 |
| <i>Desi_wild_43603646</i> | NA                                  | <i>Ca_desi_denovo</i> | 43603646                | A/C  | NA                 | NA                            | NA                 |
| <i>Desi_wild_43687341</i> | NA                                  | <i>Ca_desi_denovo</i> | 43687341                | A/C  | NA                 | NA                            | NA                 |
| <i>Desi_wild_43706020</i> | NA                                  | <i>Ca_desi_denovo</i> | 43706020                | G/T  | NA                 | NA                            | NA                 |
| <i>Desi_wild_43710361</i> | NA                                  | <i>Ca_desi_denovo</i> | 43710361                | C/G  | NA                 | NA                            | NA                 |
| <i>Desi_wild_43750456</i> | NA                                  | <i>Ca_desi_denovo</i> | 43750456                | G/T  | NA                 | NA                            | NA                 |
| <i>Desi_wild_43750512</i> | NA                                  | <i>Ca_desi_denovo</i> | 43750512                | G/T  | NA                 | NA                            | NA                 |
| <i>Desi_wild_43780295</i> | NA                                  | <i>Ca_desi_denovo</i> | 43780295                | G/T  | NA                 | NA                            | NA                 |
| <i>Desi_wild_43796683</i> | NA                                  | <i>Ca_desi_denovo</i> | 43796683                | C/G  | NA                 | NA                            | NA                 |
| <i>Desi_wild_43796775</i> | NA                                  | <i>Ca_desi_denovo</i> | 43796775                | A/C  | NA                 | NA                            | NA                 |
| <i>Desi_wild_43800800</i> | NA                                  | <i>Ca_desi_denovo</i> | 43800800                | G/T  | NA                 | NA                            | NA                 |
| <i>Desi_wild_43803905</i> | NA                                  | <i>Ca_desi_denovo</i> | 43803905                | G/T  | NA                 | NA                            | NA                 |
| <i>Desi_wild_43813204</i> | NA                                  | <i>Ca_desi_denovo</i> | 43813204                | G/T  | NA                 | NA                            | NA                 |
| <i>Desi_wild_43826933</i> | NA                                  | <i>Ca_desi_denovo</i> | 43826933                | C/T  | NA                 | NA                            | NA                 |
| <i>Desi_wild_43838046</i> | NA                                  | <i>Ca_desi_denovo</i> | 43838046                | T/G  | NA                 | NA                            | NA                 |
| <i>Desi_wild_43838071</i> | NA                                  | <i>Ca_desi_denovo</i> | 43838071                | G/T  | NA                 | NA                            | NA                 |
| <i>Desi_wild_43848079</i> | NA                                  | <i>Ca_desi_denovo</i> | 43848079                | A/C  | NA                 | NA                            | NA                 |
| <i>Desi_wild_43856198</i> | NA                                  | <i>Ca_desi_denovo</i> | 43856198                | A/C  | NA                 | NA                            | NA                 |
| <i>Desi_wild_43888169</i> | NA                                  | <i>Ca_desi_denovo</i> | 43888169                | G/T  | NA                 | NA                            | NA                 |
| <i>Desi_wild_43898236</i> | NA                                  | <i>Ca_desi_denovo</i> | 43898236                | G/T  | NA                 | NA                            | NA                 |
| <i>Desi_wild_43906111</i> | NA                                  | <i>Ca_desi_denovo</i> | 43906111                | T/G  | NA                 | NA                            | NA                 |
| <i>Desi_wild_43910441</i> | NA                                  | <i>Ca_desi_denovo</i> | 43910441                | G/T  | NA                 | NA                            | NA                 |
| <i>Desi_wild_43915048</i> | NA                                  | <i>Ca_desi_denovo</i> | 43915048                | G/T  | NA                 | NA                            | NA                 |
| <i>Desi_wild_43915050</i> | NA                                  | <i>Ca_desi_denovo</i> | 43915050                | C/G  | NA                 | NA                            | NA                 |
| <i>Desi_wild_43915056</i> | NA                                  | <i>Ca_desi_denovo</i> | 43915056                | A/C  | NA                 | NA                            | NA                 |
| <i>Desi_wild_43942364</i> | NA                                  | <i>Ca_desi_denovo</i> | 43942364                | G/T  | NA                 | NA                            | NA                 |
| <i>Desi_wild_43942411</i> | NA                                  | <i>Ca_desi_denovo</i> | 43942411                | G/T  | NA                 | NA                            | NA                 |
| <i>Desi_wild_43951251</i> | NA                                  | <i>Ca_desi_denovo</i> | 43951251                | G/T  | NA                 | NA                            | NA                 |
| <i>Desi_wild_43951737</i> | NA                                  | <i>Ca_desi_denovo</i> | 43951737                | G/T  | NA                 | NA                            | NA                 |
| <i>Desi_wild_43961890</i> | NA                                  | <i>Ca_desi_denovo</i> | 43961890                | A/C  | NA                 | NA                            | NA                 |
| <i>Desi_wild_43961891</i> | NA                                  | <i>Ca_desi_denovo</i> | 43961891                | A/G  | NA                 | NA                            | NA                 |
| <i>Desi_wild_43985133</i> | NA                                  | <i>Ca_desi_denovo</i> | 43985133                | G/T  | NA                 | NA                            | NA                 |
| <i>Desi_wild_43985162</i> | NA                                  | <i>Ca_desi_denovo</i> | 43985162                | C/G  | NA                 | NA                            | NA                 |
| <i>Desi_wild_43985165</i> | NA                                  | <i>Ca_desi_denovo</i> | 43985165                | A/C  | NA                 | NA                            | NA                 |
| <i>Desi_wild_44004926</i> | NA                                  | <i>Ca_desi_denovo</i> | 44004926                | A/C  | NA                 | NA                            | NA                 |



| SNP IDs                   | NCBI dbSNP accession IDs (NCBI_SS#) | Chromosomes           | Physical positions (bp) | SNPs | Gene accession IDs | Sequence components of genome | Putative functions |
|---------------------------|-------------------------------------|-----------------------|-------------------------|------|--------------------|-------------------------------|--------------------|
| <i>Desi_wild_44009382</i> | NA                                  | <i>Ca_desi_denovo</i> | 44009382                | G/T  | NA                 | NA                            | NA                 |
| <i>Desi_wild_44017466</i> | NA                                  | <i>Ca_desi_denovo</i> | 44017466                | C/G  | NA                 | NA                            | NA                 |
| <i>Desi_wild_44068891</i> | NA                                  | <i>Ca_desi_denovo</i> | 44068891                | C/T  | NA                 | NA                            | NA                 |
| <i>Desi_wild_44068904</i> | NA                                  | <i>Ca_desi_denovo</i> | 44068904                | A/T  | NA                 | NA                            | NA                 |
| <i>Desi_wild_44072614</i> | NA                                  | <i>Ca_desi_denovo</i> | 44072614                | G/T  | NA                 | NA                            | NA                 |
| <i>Desi_wild_44086529</i> | NA                                  | <i>Ca_desi_denovo</i> | 44086529                | C/G  | NA                 | NA                            | NA                 |
| <i>Desi_wild_44134479</i> | NA                                  | <i>Ca_desi_denovo</i> | 44134479                | G/A  | NA                 | NA                            | NA                 |
| <i>Desi_wild_44144876</i> | NA                                  | <i>Ca_desi_denovo</i> | 44144876                | T/G  | NA                 | NA                            | NA                 |
| <i>Desi_wild_44144878</i> | NA                                  | <i>Ca_desi_denovo</i> | 44144878                | C/A  | NA                 | NA                            | NA                 |
| <i>Desi_wild_44144890</i> | NA                                  | <i>Ca_desi_denovo</i> | 44144890                | T/C  | NA                 | NA                            | NA                 |
| <i>Desi_wild_44215057</i> | NA                                  | <i>Ca_desi_denovo</i> | 44215057                | G/T  | NA                 | NA                            | NA                 |
| <i>Desi_wild_44216179</i> | NA                                  | <i>Ca_desi_denovo</i> | 44216179                | G/T  | NA                 | NA                            | NA                 |
| <i>Desi_wild_44219623</i> | NA                                  | <i>Ca_desi_denovo</i> | 44219623                | C/G  | NA                 | NA                            | NA                 |
| <i>Desi_wild_44251069</i> | NA                                  | <i>Ca_desi_denovo</i> | 44251069                | C/G  | NA                 | NA                            | NA                 |
| <i>Desi_wild_44261122</i> | NA                                  | <i>Ca_desi_denovo</i> | 44261122                | G/T  | NA                 | NA                            | NA                 |
| <i>Desi_wild_44263990</i> | NA                                  | <i>Ca_desi_denovo</i> | 44263990                | G/T  | NA                 | NA                            | NA                 |
| <i>Desi_wild_44272177</i> | NA                                  | <i>Ca_desi_denovo</i> | 44272177                | C/T  | NA                 | NA                            | NA                 |
| <i>Desi_wild_44272195</i> | NA                                  | <i>Ca_desi_denovo</i> | 44272195                | G/T  | NA                 | NA                            | NA                 |
| <i>Desi_wild_44272198</i> | NA                                  | <i>Ca_desi_denovo</i> | 44272198                | A/C  | NA                 | NA                            | NA                 |
| <i>Desi_wild_44272201</i> | NA                                  | <i>Ca_desi_denovo</i> | 44272201                | C/G  | NA                 | NA                            | NA                 |
| <i>Desi_wild_44272919</i> | NA                                  | <i>Ca_desi_denovo</i> | 44272919                | A/C  | NA                 | NA                            | NA                 |
| <i>Desi_wild_44279521</i> | NA                                  | <i>Ca_desi_denovo</i> | 44279521                | G/T  | NA                 | NA                            | NA                 |
| <i>Desi_wild_44285796</i> | NA                                  | <i>Ca_desi_denovo</i> | 44285796                | G/T  | NA                 | NA                            | NA                 |
| <i>Desi_wild_44325832</i> | NA                                  | <i>Ca_desi_denovo</i> | 44325832                | C/G  | NA                 | NA                            | NA                 |
| <i>Desi_wild_44339801</i> | NA                                  | <i>Ca_desi_denovo</i> | 44339801                | A/C  | NA                 | NA                            | NA                 |
| <i>Desi_wild_44355381</i> | NA                                  | <i>Ca_desi_denovo</i> | 44355381                | A/C  | NA                 | NA                            | NA                 |
| <i>Desi_wild_44357851</i> | NA                                  | <i>Ca_desi_denovo</i> | 44357851                | A/C  | NA                 | NA                            | NA                 |
| <i>Desi_wild_44391255</i> | NA                                  | <i>Ca_desi_denovo</i> | 44391255                | G/T  | NA                 | NA                            | NA                 |
| <i>Desi_wild_44421385</i> | NA                                  | <i>Ca_desi_denovo</i> | 44421385                | G/T  | NA                 | NA                            | NA                 |
| <i>Desi_wild_44427075</i> | NA                                  | <i>Ca_desi_denovo</i> | 44427075                | C/T  | NA                 | NA                            | NA                 |
| <i>Desi_wild_44430424</i> | NA                                  | <i>Ca_desi_denovo</i> | 44430424                | G/T  | NA                 | NA                            | NA                 |
| <i>Desi_wild_44435005</i> | NA                                  | <i>Ca_desi_denovo</i> | 44435005                | G/C  | NA                 | NA                            | NA                 |
| <i>Desi_wild_44435041</i> | NA                                  | <i>Ca_desi_denovo</i> | 44435041                | C/T  | NA                 | NA                            | NA                 |
| <i>Desi_wild_44438169</i> | NA                                  | <i>Ca_desi_denovo</i> | 44438169                | G/T  | NA                 | NA                            | NA                 |
| <i>Desi_wild_44451236</i> | NA                                  | <i>Ca_desi_denovo</i> | 44451236                | G/T  | NA                 | NA                            | NA                 |
| <i>Desi_wild_44455612</i> | NA                                  | <i>Ca_desi_denovo</i> | 44455612                | A/G  | NA                 | NA                            | NA                 |
| <i>Desi_wild_44456745</i> | NA                                  | <i>Ca_desi_denovo</i> | 44456745                | A/C  | NA                 | NA                            | NA                 |
| <i>Desi_wild_44456746</i> | NA                                  | <i>Ca_desi_denovo</i> | 44456746                | A/G  | NA                 | NA                            | NA                 |
| <i>Desi_wild_44471851</i> | NA                                  | <i>Ca_desi_denovo</i> | 44471851                | C/T  | NA                 | NA                            | NA                 |
| <i>Desi_wild_44477205</i> | NA                                  | <i>Ca_desi_denovo</i> | 44477205                | G/T  | NA                 | NA                            | NA                 |
| <i>Desi_wild_44484951</i> | NA                                  | <i>Ca_desi_denovo</i> | 44484951                | G/T  | NA                 | NA                            | NA                 |
| <i>Desi_wild_44493320</i> | NA                                  | <i>Ca_desi_denovo</i> | 44493320                | A/C  | NA                 | NA                            | NA                 |
| <i>Desi_wild_44513276</i> | NA                                  | <i>Ca_desi_denovo</i> | 44513276                | C/T  | NA                 | NA                            | NA                 |
| <i>Desi_wild_44513300</i> | NA                                  | <i>Ca_desi_denovo</i> | 44513300                | A/G  | NA                 | NA                            | NA                 |

| SNP IDs                   | NCBI dbSNP accession IDs (NCBI_SS#) | Chromosomes           | Physical positions (bp) | SNPs | Gene accession IDs | Sequence components of genome | Putative functions |
|---------------------------|-------------------------------------|-----------------------|-------------------------|------|--------------------|-------------------------------|--------------------|
| <i>Desi_wild_44513672</i> | NA                                  | <i>Ca_desi_denovo</i> | 44513672                | A/G  | NA                 | NA                            | NA                 |
| <i>Desi_wild_44515961</i> | NA                                  | <i>Ca_desi_denovo</i> | 44515961                | C/T  | NA                 | NA                            | NA                 |
| <i>Desi_wild_44523341</i> | NA                                  | <i>Ca_desi_denovo</i> | 44523341                | G/T  | NA                 | NA                            | NA                 |
| <i>Desi_wild_44542921</i> | NA                                  | <i>Ca_desi_denovo</i> | 44542921                | C/T  | NA                 | NA                            | NA                 |
| <i>Desi_wild_44542937</i> | NA                                  | <i>Ca_desi_denovo</i> | 44542937                | A/G  | NA                 | NA                            | NA                 |
| <i>Desi_wild_44542944</i> | NA                                  | <i>Ca_desi_denovo</i> | 44542944                | G/T  | NA                 | NA                            | NA                 |
| <i>Desi_wild_44542974</i> | NA                                  | <i>Ca_desi_denovo</i> | 44542974                | A/C  | NA                 | NA                            | NA                 |
| <i>Desi_wild_44543100</i> | NA                                  | <i>Ca_desi_denovo</i> | 44543100                | A/C  | NA                 | NA                            | NA                 |
| <i>Desi_wild_44549748</i> | NA                                  | <i>Ca_desi_denovo</i> | 44549748                | G/T  | NA                 | NA                            | NA                 |
| <i>Desi_wild_44556943</i> | NA                                  | <i>Ca_desi_denovo</i> | 44556943                | G/T  | NA                 | NA                            | NA                 |
| <i>Desi_wild_44561529</i> | NA                                  | <i>Ca_desi_denovo</i> | 44561529                | A/C  | NA                 | NA                            | NA                 |
| <i>Desi_wild_44592674</i> | NA                                  | <i>Ca_desi_denovo</i> | 44592674                | A/G  | NA                 | NA                            | NA                 |
| <i>Desi_wild_44592688</i> | NA                                  | <i>Ca_desi_denovo</i> | 44592688                | C/G  | NA                 | NA                            | NA                 |
| <i>Desi_wild_44600421</i> | NA                                  | <i>Ca_desi_denovo</i> | 44600421                | G/T  | NA                 | NA                            | NA                 |
| <i>Desi_wild_44603236</i> | NA                                  | <i>Ca_desi_denovo</i> | 44603236                | A/C  | NA                 | NA                            | NA                 |
| <i>Desi_wild_44607825</i> | NA                                  | <i>Ca_desi_denovo</i> | 44607825                | A/G  | NA                 | NA                            | NA                 |
| <i>Desi_wild_44620997</i> | NA                                  | <i>Ca_desi_denovo</i> | 44620997                | G/T  | NA                 | NA                            | NA                 |
| <i>Desi_wild_44621000</i> | NA                                  | <i>Ca_desi_denovo</i> | 44621000                | C/T  | NA                 | NA                            | NA                 |
| <i>Desi_wild_44628979</i> | NA                                  | <i>Ca_desi_denovo</i> | 44628979                | G/T  | NA                 | NA                            | NA                 |
| <i>Desi_wild_44629052</i> | NA                                  | <i>Ca_desi_denovo</i> | 44629052                | G/T  | NA                 | NA                            | NA                 |
| <i>Desi_wild_44632875</i> | NA                                  | <i>Ca_desi_denovo</i> | 44632875                | A/C  | NA                 | NA                            | NA                 |
| <i>Desi_wild_44632876</i> | NA                                  | <i>Ca_desi_denovo</i> | 44632876                | G/T  | NA                 | NA                            | NA                 |
| <i>Desi_wild_44642750</i> | NA                                  | <i>Ca_desi_denovo</i> | 44642750                | A/C  | NA                 | NA                            | NA                 |
| <i>Desi_wild_44646835</i> | NA                                  | <i>Ca_desi_denovo</i> | 44646835                | G/T  | NA                 | NA                            | NA                 |
| <i>Desi_wild_44647218</i> | NA                                  | <i>Ca_desi_denovo</i> | 44647218                | A/C  | NA                 | NA                            | NA                 |
| <i>Desi_wild_44647219</i> | NA                                  | <i>Ca_desi_denovo</i> | 44647219                | C/G  | NA                 | NA                            | NA                 |
| <i>Desi_wild_44647220</i> | NA                                  | <i>Ca_desi_denovo</i> | 44647220                | A/G  | NA                 | NA                            | NA                 |
| <i>Desi_wild_44647221</i> | NA                                  | <i>Ca_desi_denovo</i> | 44647221                | C/T  | NA                 | NA                            | NA                 |
| <i>Desi_wild_44655577</i> | NA                                  | <i>Ca_desi_denovo</i> | 44655577                | G/T  | NA                 | NA                            | NA                 |
| <i>Desi_wild_44660295</i> | NA                                  | <i>Ca_desi_denovo</i> | 44660295                | C/T  | NA                 | NA                            | NA                 |
| <i>Desi_wild_44660298</i> | NA                                  | <i>Ca_desi_denovo</i> | 44660298                | C/T  | NA                 | NA                            | NA                 |
| <i>Desi_wild_44661946</i> | NA                                  | <i>Ca_desi_denovo</i> | 44661946                | G/T  | NA                 | NA                            | NA                 |
| <i>Desi_wild_44678323</i> | NA                                  | <i>Ca_desi_denovo</i> | 44678323                | A/G  | NA                 | NA                            | NA                 |
| <i>Desi_wild_44684175</i> | NA                                  | <i>Ca_desi_denovo</i> | 44684175                | A/C  | NA                 | NA                            | NA                 |
| <i>Desi_wild_44684176</i> | NA                                  | <i>Ca_desi_denovo</i> | 44684176                | A/G  | NA                 | NA                            | NA                 |
| <i>Desi_wild_44685791</i> | NA                                  | <i>Ca_desi_denovo</i> | 44685791                | G/T  | NA                 | NA                            | NA                 |
| <i>Desi_wild_44705169</i> | NA                                  | <i>Ca_desi_denovo</i> | 44705169                | G/T  | NA                 | NA                            | NA                 |
| <i>Desi_wild_44731676</i> | NA                                  | <i>Ca_desi_denovo</i> | 44731676                | G/T  | NA                 | NA                            | NA                 |
| <i>Desi_wild_44754000</i> | NA                                  | <i>Ca_desi_denovo</i> | 44754000                | A/C  | NA                 | NA                            | NA                 |
| <i>Desi_wild_44754001</i> | NA                                  | <i>Ca_desi_denovo</i> | 44754001                | C/G  | NA                 | NA                            | NA                 |
| <i>Desi_wild_44769483</i> | NA                                  | <i>Ca_desi_denovo</i> | 44769483                | A/G  | NA                 | NA                            | NA                 |
| <i>Desi_wild_44782231</i> | NA                                  | <i>Ca_desi_denovo</i> | 44782231                | C/G  | NA                 | NA                            | NA                 |
| <i>Desi_wild_44782285</i> | NA                                  | <i>Ca_desi_denovo</i> | 44782285                | A/G  | NA                 | NA                            | NA                 |
| <i>Desi_wild_44797951</i> | NA                                  | <i>Ca_desi_denovo</i> | 44797951                | A/G  | NA                 | NA                            | NA                 |

| SNP IDs                   | NCBI dbSNP accession IDs (NCBI_SS#) | Chromosomes           | Physical positions (bp) | SNPs | Gene accession IDs | Sequence components of genome | Putative functions |
|---------------------------|-------------------------------------|-----------------------|-------------------------|------|--------------------|-------------------------------|--------------------|
| <i>Desi_wild_44866193</i> | NA                                  | <i>Ca_desi_denovo</i> | 44866193                | A/G  | NA                 | NA                            | NA                 |
| <i>Desi_wild_44866195</i> | NA                                  | <i>Ca_desi_denovo</i> | 44866195                | C/T  | NA                 | NA                            | NA                 |
| <i>Desi_wild_44882224</i> | NA                                  | <i>Ca_desi_denovo</i> | 44882224                | G/T  | NA                 | NA                            | NA                 |
| <i>Desi_wild_44893834</i> | NA                                  | <i>Ca_desi_denovo</i> | 44893834                | A/G  | NA                 | NA                            | NA                 |
| <i>Desi_wild_44966991</i> | NA                                  | <i>Ca_desi_denovo</i> | 44966991                | G/T  | NA                 | NA                            | NA                 |
| <i>Desi_wild_44976526</i> | NA                                  | <i>Ca_desi_denovo</i> | 44976526                | G/T  | NA                 | NA                            | NA                 |
| <i>Desi_wild_44981050</i> | NA                                  | <i>Ca_desi_denovo</i> | 44981050                | A/C  | NA                 | NA                            | NA                 |
| <i>Desi_wild_44981051</i> | NA                                  | <i>Ca_desi_denovo</i> | 44981051                | A/G  | NA                 | NA                            | NA                 |
| <i>Desi_wild_45016391</i> | NA                                  | <i>Ca_desi_denovo</i> | 45016391                | G/T  | NA                 | NA                            | NA                 |
| <i>Desi_wild_45019796</i> | NA                                  | <i>Ca_desi_denovo</i> | 45019796                | G/T  | NA                 | NA                            | NA                 |
| <i>Desi_wild_45025032</i> | NA                                  | <i>Ca_desi_denovo</i> | 45025032                | A/C  | NA                 | NA                            | NA                 |
| <i>Desi_wild_45025033</i> | NA                                  | <i>Ca_desi_denovo</i> | 45025033                | G/T  | NA                 | NA                            | NA                 |
| <i>Desi_wild_45025034</i> | NA                                  | <i>Ca_desi_denovo</i> | 45025034                | A/C  | NA                 | NA                            | NA                 |
| <i>Desi_wild_45025036</i> | NA                                  | <i>Ca_desi_denovo</i> | 45025036                | A/C  | NA                 | NA                            | NA                 |
| <i>Desi_wild_45035486</i> | NA                                  | <i>Ca_desi_denovo</i> | 45035486                | A/G  | NA                 | NA                            | NA                 |
| <i>Desi_wild_45042326</i> | NA                                  | <i>Ca_desi_denovo</i> | 45042326                | G/T  | NA                 | NA                            | NA                 |
| <i>Desi_wild_45042704</i> | NA                                  | <i>Ca_desi_denovo</i> | 45042704                | G/T  | NA                 | NA                            | NA                 |
| <i>Desi_wild_45047805</i> | NA                                  | <i>Ca_desi_denovo</i> | 45047805                | G/T  | NA                 | NA                            | NA                 |
| <i>Desi_wild_45057043</i> | NA                                  | <i>Ca_desi_denovo</i> | 45057043                | G/T  | NA                 | NA                            | NA                 |
| <i>Desi_wild_45066548</i> | NA                                  | <i>Ca_desi_denovo</i> | 45066548                | C/G  | NA                 | NA                            | NA                 |
| <i>Desi_wild_45075544</i> | NA                                  | <i>Ca_desi_denovo</i> | 45075544                | G/T  | NA                 | NA                            | NA                 |
| <i>Desi_wild_45085167</i> | NA                                  | <i>Ca_desi_denovo</i> | 45085167                | G/T  | NA                 | NA                            | NA                 |
| <i>Desi_wild_45088588</i> | NA                                  | <i>Ca_desi_denovo</i> | 45088588                | A/C  | NA                 | NA                            | NA                 |
| <i>Desi_wild_45088589</i> | NA                                  | <i>Ca_desi_denovo</i> | 45088589                | G/T  | NA                 | NA                            | NA                 |
| <i>Desi_wild_45088590</i> | NA                                  | <i>Ca_desi_denovo</i> | 45088590                | A/C  | NA                 | NA                            | NA                 |
| <i>Desi_wild_45105405</i> | NA                                  | <i>Ca_desi_denovo</i> | 45105405                | A/C  | NA                 | NA                            | NA                 |
| <i>Desi_wild_45105406</i> | NA                                  | <i>Ca_desi_denovo</i> | 45105406                | G/T  | NA                 | NA                            | NA                 |
| <i>Desi_wild_45116365</i> | NA                                  | <i>Ca_desi_denovo</i> | 45116365                | G/T  | NA                 | NA                            | NA                 |
| <i>Desi_wild_45125308</i> | NA                                  | <i>Ca_desi_denovo</i> | 45125308                | C/T  | NA                 | NA                            | NA                 |
| <i>Desi_wild_45125332</i> | NA                                  | <i>Ca_desi_denovo</i> | 45125332                | C/T  | NA                 | NA                            | NA                 |
| <i>Desi_wild_45127918</i> | NA                                  | <i>Ca_desi_denovo</i> | 45127918                | G/T  | NA                 | NA                            | NA                 |
| <i>Desi_wild_45134284</i> | NA                                  | <i>Ca_desi_denovo</i> | 45134284                | A/C  | NA                 | NA                            | NA                 |
| <i>Desi_wild_45151717</i> | NA                                  | <i>Ca_desi_denovo</i> | 45151717                | A/G  | NA                 | NA                            | NA                 |
| <i>Desi_wild_45158032</i> | NA                                  | <i>Ca_desi_denovo</i> | 45158032                | G/T  | NA                 | NA                            | NA                 |
| <i>Desi_wild_45160123</i> | NA                                  | <i>Ca_desi_denovo</i> | 45160123                | G/T  | NA                 | NA                            | NA                 |
| <i>Desi_wild_45185449</i> | NA                                  | <i>Ca_desi_denovo</i> | 45185449                | G/T  | NA                 | NA                            | NA                 |
| <i>Desi_wild_45185585</i> | NA                                  | <i>Ca_desi_denovo</i> | 45185585                | A/C  | NA                 | NA                            | NA                 |
| <i>Desi_wild_45204882</i> | NA                                  | <i>Ca_desi_denovo</i> | 45204882                | A/G  | NA                 | NA                            | NA                 |
| <i>Desi_wild_45209614</i> | NA                                  | <i>Ca_desi_denovo</i> | 45209614                | G/T  | NA                 | NA                            | NA                 |
| <i>Desi_wild_45209618</i> | NA                                  | <i>Ca_desi_denovo</i> | 45209618                | A/G  | NA                 | NA                            | NA                 |
| <i>Desi_wild_45228620</i> | NA                                  | <i>Ca_desi_denovo</i> | 45228620                | A/C  | NA                 | NA                            | NA                 |
| <i>Desi_wild_45236219</i> | NA                                  | <i>Ca_desi_denovo</i> | 45236219                | A/C  | NA                 | NA                            | NA                 |
| <i>Desi_wild_45236353</i> | NA                                  | <i>Ca_desi_denovo</i> | 45236353                | G/T  | NA                 | NA                            | NA                 |
| <i>Desi_wild_45250001</i> | NA                                  | <i>Ca_desi_denovo</i> | 45250001                | A/T  | NA                 | NA                            | NA                 |

| SNP IDs                   | NCBI dbSNP accession IDs (NCBI_SS#) | Chromosomes           | Physical positions (bp) | SNPs | Gene accession IDs | Sequence components of genome | Putative functions |
|---------------------------|-------------------------------------|-----------------------|-------------------------|------|--------------------|-------------------------------|--------------------|
| <i>Desi_wild_45250032</i> | NA                                  | <i>Ca_desi_denovo</i> | 45250032                | A/G  | NA                 | NA                            | NA                 |
| <i>Desi_wild_45260284</i> | NA                                  | <i>Ca_desi_denovo</i> | 45260284                | A/G  | NA                 | NA                            | NA                 |
| <i>Desi_wild_45260304</i> | NA                                  | <i>Ca_desi_denovo</i> | 45260304                | A/G  | NA                 | NA                            | NA                 |
| <i>Desi_wild_45272701</i> | NA                                  | <i>Ca_desi_denovo</i> | 45272701                | A/C  | NA                 | NA                            | NA                 |
| <i>Desi_wild_45275217</i> | NA                                  | <i>Ca_desi_denovo</i> | 45275217                | C/G  | NA                 | NA                            | NA                 |
| <i>Desi_wild_45279634</i> | NA                                  | <i>Ca_desi_denovo</i> | 45279634                | C/G  | NA                 | NA                            | NA                 |
| <i>Desi_wild_45280203</i> | NA                                  | <i>Ca_desi_denovo</i> | 45280203                | A/C  | NA                 | NA                            | NA                 |
| <i>Desi_wild_45280206</i> | NA                                  | <i>Ca_desi_denovo</i> | 45280206                | A/T  | NA                 | NA                            | NA                 |
| <i>Desi_wild_45302626</i> | NA                                  | <i>Ca_desi_denovo</i> | 45302626                | A/C  | NA                 | NA                            | NA                 |
| <i>Desi_wild_45302910</i> | NA                                  | <i>Ca_desi_denovo</i> | 45302910                | G/T  | NA                 | NA                            | NA                 |
| <i>Desi_wild_45305570</i> | NA                                  | <i>Ca_desi_denovo</i> | 45305570                | A/C  | NA                 | NA                            | NA                 |
| <i>Desi_wild_45322556</i> | NA                                  | <i>Ca_desi_denovo</i> | 45322556                | G/T  | NA                 | NA                            | NA                 |
| <i>Desi_wild_45324855</i> | NA                                  | <i>Ca_desi_denovo</i> | 45324855                | C/G  | NA                 | NA                            | NA                 |
| <i>Desi_wild_45329172</i> | NA                                  | <i>Ca_desi_denovo</i> | 45329172                | G/T  | NA                 | NA                            | NA                 |
| <i>Desi_wild_45334069</i> | NA                                  | <i>Ca_desi_denovo</i> | 45334069                | G/T  | NA                 | NA                            | NA                 |
| <i>Desi_wild_45334071</i> | NA                                  | <i>Ca_desi_denovo</i> | 45334071                | C/G  | NA                 | NA                            | NA                 |
| <i>Desi_wild_45339226</i> | NA                                  | <i>Ca_desi_denovo</i> | 45339226                | A/G  | NA                 | NA                            | NA                 |
| <i>Desi_wild_45339227</i> | NA                                  | <i>Ca_desi_denovo</i> | 45339227                | C/T  | NA                 | NA                            | NA                 |
| <i>Desi_wild_45339385</i> | NA                                  | <i>Ca_desi_denovo</i> | 45339385                | G/T  | NA                 | NA                            | NA                 |
| <i>Desi_wild_45360005</i> | NA                                  | <i>Ca_desi_denovo</i> | 45360005                | A/C  | NA                 | NA                            | NA                 |
| <i>Desi_wild_45360006</i> | NA                                  | <i>Ca_desi_denovo</i> | 45360006                | G/T  | NA                 | NA                            | NA                 |
| <i>Desi_wild_45362918</i> | NA                                  | <i>Ca_desi_denovo</i> | 45362918                | G/T  | NA                 | NA                            | NA                 |
| <i>Desi_wild_45367743</i> | NA                                  | <i>Ca_desi_denovo</i> | 45367743                | C/T  | NA                 | NA                            | NA                 |
| <i>Desi_wild_45390498</i> | NA                                  | <i>Ca_desi_denovo</i> | 45390498                | C/G  | NA                 | NA                            | NA                 |
| <i>Desi_wild_45394910</i> | NA                                  | <i>Ca_desi_denovo</i> | 45394910                | G/T  | NA                 | NA                            | NA                 |
| <i>Desi_wild_45395076</i> | NA                                  | <i>Ca_desi_denovo</i> | 45395076                | C/T  | NA                 | NA                            | NA                 |
| <i>Desi_wild_45395079</i> | NA                                  | <i>Ca_desi_denovo</i> | 45395079                | C/T  | NA                 | NA                            | NA                 |
| <i>Desi_wild_45395088</i> | NA                                  | <i>Ca_desi_denovo</i> | 45395088                | C/T  | NA                 | NA                            | NA                 |
| <i>Desi_wild_45400339</i> | NA                                  | <i>Ca_desi_denovo</i> | 45400339                | A/G  | NA                 | NA                            | NA                 |
| <i>Desi_wild_45408835</i> | NA                                  | <i>Ca_desi_denovo</i> | 45408835                | A/C  | NA                 | NA                            | NA                 |
| <i>Desi_wild_45414726</i> | NA                                  | <i>Ca_desi_denovo</i> | 45414726                | G/T  | NA                 | NA                            | NA                 |
| <i>Desi_wild_45425751</i> | NA                                  | <i>Ca_desi_denovo</i> | 45425751                | A/G  | NA                 | NA                            | NA                 |
| <i>Desi_wild_45431016</i> | NA                                  | <i>Ca_desi_denovo</i> | 45431016                | G/T  | NA                 | NA                            | NA                 |
| <i>Desi_wild_45450055</i> | NA                                  | <i>Ca_desi_denovo</i> | 45450055                | G/T  | NA                 | NA                            | NA                 |
| <i>Desi_wild_45450059</i> | NA                                  | <i>Ca_desi_denovo</i> | 45450059                | G/T  | NA                 | NA                            | NA                 |
| <i>Desi_wild_45450658</i> | NA                                  | <i>Ca_desi_denovo</i> | 45450658                | A/G  | NA                 | NA                            | NA                 |
| <i>Desi_wild_45490817</i> | NA                                  | <i>Ca_desi_denovo</i> | 45490817                | G/T  | NA                 | NA                            | NA                 |
| <i>Desi_wild_45496140</i> | NA                                  | <i>Ca_desi_denovo</i> | 45496140                | A/C  | NA                 | NA                            | NA                 |
| <i>Desi_wild_45496805</i> | NA                                  | <i>Ca_desi_denovo</i> | 45496805                | A/C  | NA                 | NA                            | NA                 |
| <i>Desi_wild_45508146</i> | NA                                  | <i>Ca_desi_denovo</i> | 45508146                | G/T  | NA                 | NA                            | NA                 |
| <i>Desi_wild_45518748</i> | NA                                  | <i>Ca_desi_denovo</i> | 45518748                | A/C  | NA                 | NA                            | NA                 |
| <i>Desi_wild_45520329</i> | NA                                  | <i>Ca_desi_denovo</i> | 45520329                | A/G  | NA                 | NA                            | NA                 |
| <i>Desi_wild_45531357</i> | NA                                  | <i>Ca_desi_denovo</i> | 45531357                | G/T  | NA                 | NA                            | NA                 |
| <i>Desi_wild_45536323</i> | NA                                  | <i>Ca_desi_denovo</i> | 45536323                | A/C  | NA                 | NA                            | NA                 |

| SNP IDs                   | NCBI dbSNP accession IDs (NCBI_SS#) | Chromosomes           | Physical positions (bp) | SNPs | Gene accession IDs | Sequence components of genome | Putative functions |
|---------------------------|-------------------------------------|-----------------------|-------------------------|------|--------------------|-------------------------------|--------------------|
| <i>Desi_wild_45540315</i> | NA                                  | <i>Ca_desi_denovo</i> | 45540315                | A/C  | NA                 | NA                            | NA                 |
| <i>Desi_wild_45540316</i> | NA                                  | <i>Ca_desi_denovo</i> | 45540316                | A/G  | NA                 | NA                            | NA                 |
| <i>Desi_wild_45542213</i> | NA                                  | <i>Ca_desi_denovo</i> | 45542213                | A/C  | NA                 | NA                            | NA                 |
| <i>Desi_wild_45554944</i> | NA                                  | <i>Ca_desi_denovo</i> | 45554944                | G/T  | NA                 | NA                            | NA                 |
| <i>Desi_wild_45559393</i> | NA                                  | <i>Ca_desi_denovo</i> | 45559393                | A/C  | NA                 | NA                            | NA                 |
| <i>Desi_wild_45574510</i> | NA                                  | <i>Ca_desi_denovo</i> | 45574510                | C/G  | NA                 | NA                            | NA                 |
| <i>Desi_wild_45577081</i> | NA                                  | <i>Ca_desi_denovo</i> | 45577081                | G/T  | NA                 | NA                            | NA                 |
| <i>Desi_wild_45579915</i> | NA                                  | <i>Ca_desi_denovo</i> | 45579915                | G/T  | NA                 | NA                            | NA                 |
| <i>Desi_wild_45581831</i> | NA                                  | <i>Ca_desi_denovo</i> | 45581831                | A/C  | NA                 | NA                            | NA                 |
| <i>Desi_wild_45594751</i> | NA                                  | <i>Ca_desi_denovo</i> | 45594751                | G/T  | NA                 | NA                            | NA                 |
| <i>Desi_wild_45597598</i> | NA                                  | <i>Ca_desi_denovo</i> | 45597598                | G/T  | NA                 | NA                            | NA                 |
| <i>Desi_wild_45598030</i> | NA                                  | <i>Ca_desi_denovo</i> | 45598030                | G/T  | NA                 | NA                            | NA                 |
| <i>Desi_wild_45604717</i> | NA                                  | <i>Ca_desi_denovo</i> | 45604717                | G/A  | NA                 | NA                            | NA                 |
| <i>Desi_wild_45607057</i> | NA                                  | <i>Ca_desi_denovo</i> | 45607057                | G/T  | NA                 | NA                            | NA                 |
| <i>Desi_wild_45637544</i> | NA                                  | <i>Ca_desi_denovo</i> | 45637544                | A/G  | NA                 | NA                            | NA                 |
| <i>Desi_wild_45650643</i> | NA                                  | <i>Ca_desi_denovo</i> | 45650643                | C/G  | NA                 | NA                            | NA                 |
| <i>Desi_wild_45650655</i> | NA                                  | <i>Ca_desi_denovo</i> | 45650655                | C/G  | NA                 | NA                            | NA                 |
| <i>Desi_wild_45652670</i> | NA                                  | <i>Ca_desi_denovo</i> | 45652670                | C/G  | NA                 | NA                            | NA                 |
| <i>Desi_wild_45658115</i> | NA                                  | <i>Ca_desi_denovo</i> | 45658115                | A/C  | NA                 | NA                            | NA                 |
| <i>Desi_wild_45658116</i> | NA                                  | <i>Ca_desi_denovo</i> | 45658116                | A/G  | NA                 | NA                            | NA                 |
| <i>Desi_wild_45659158</i> | NA                                  | <i>Ca_desi_denovo</i> | 45659158                | C/G  | NA                 | NA                            | NA                 |
| <i>Desi_wild_45666079</i> | NA                                  | <i>Ca_desi_denovo</i> | 45666079                | G/T  | NA                 | NA                            | NA                 |
| <i>Desi_wild_45667992</i> | NA                                  | <i>Ca_desi_denovo</i> | 45667992                | G/T  | NA                 | NA                            | NA                 |
| <i>Desi_wild_45690470</i> | NA                                  | <i>Ca_desi_denovo</i> | 45690470                | G/T  | NA                 | NA                            | NA                 |
| <i>Desi_wild_45715740</i> | NA                                  | <i>Ca_desi_denovo</i> | 45715740                | A/G  | NA                 | NA                            | NA                 |
| <i>Desi_wild_45715750</i> | NA                                  | <i>Ca_desi_denovo</i> | 45715750                | C/T  | NA                 | NA                            | NA                 |
| <i>Desi_wild_45749411</i> | NA                                  | <i>Ca_desi_denovo</i> | 45749411                | G/T  | NA                 | NA                            | NA                 |
| <i>Desi_wild_45768695</i> | NA                                  | <i>Ca_desi_denovo</i> | 45768695                | A/C  | NA                 | NA                            | NA                 |
| <i>Desi_wild_45781613</i> | NA                                  | <i>Ca_desi_denovo</i> | 45781613                | A/C  | NA                 | NA                            | NA                 |
| <i>Desi_wild_45781614</i> | NA                                  | <i>Ca_desi_denovo</i> | 45781614                | A/G  | NA                 | NA                            | NA                 |
| <i>Desi_wild_45781615</i> | NA                                  | <i>Ca_desi_denovo</i> | 45781615                | A/G  | NA                 | NA                            | NA                 |
| <i>Desi_wild_45789368</i> | NA                                  | <i>Ca_desi_denovo</i> | 45789368                | G/T  | NA                 | NA                            | NA                 |
| <i>Desi_wild_45826884</i> | NA                                  | <i>Ca_desi_denovo</i> | 45826884                | G/T  | NA                 | NA                            | NA                 |
| <i>Desi_wild_45827500</i> | NA                                  | <i>Ca_desi_denovo</i> | 45827500                | A/C  | NA                 | NA                            | NA                 |
| <i>Desi_wild_45847071</i> | NA                                  | <i>Ca_desi_denovo</i> | 45847071                | G/T  | NA                 | NA                            | NA                 |
| <i>Desi_wild_45865691</i> | NA                                  | <i>Ca_desi_denovo</i> | 45865691                | G/T  | NA                 | NA                            | NA                 |
| <i>Desi_wild_45882262</i> | NA                                  | <i>Ca_desi_denovo</i> | 45882262                | T/G  | NA                 | NA                            | NA                 |
| <i>Desi_wild_45887306</i> | NA                                  | <i>Ca_desi_denovo</i> | 45887306                | T/G  | NA                 | NA                            | NA                 |
| <i>Desi_wild_45887341</i> | NA                                  | <i>Ca_desi_denovo</i> | 45887341                | T/G  | NA                 | NA                            | NA                 |
| <i>Desi_wild_45920883</i> | NA                                  | <i>Ca_desi_denovo</i> | 45920883                | A/C  | NA                 | NA                            | NA                 |
| <i>Desi_wild_45920884</i> | NA                                  | <i>Ca_desi_denovo</i> | 45920884                | A/G  | NA                 | NA                            | NA                 |
| <i>Desi_wild_45920885</i> | NA                                  | <i>Ca_desi_denovo</i> | 45920885                | A/G  | NA                 | NA                            | NA                 |
| <i>Desi_wild_45920886</i> | NA                                  | <i>Ca_desi_denovo</i> | 45920886                | A/T  | NA                 | NA                            | NA                 |
| <i>Desi_wild_45924925</i> | NA                                  | <i>Ca_desi_denovo</i> | 45924925                | C/T  | NA                 | NA                            | NA                 |

| SNP IDs                   | NCBI dbSNP accession IDs (NCBI_SS#) | Chromosomes           | Physical positions (bp) | SNPs | Gene accession IDs | Sequence components of genome | Putative functions |
|---------------------------|-------------------------------------|-----------------------|-------------------------|------|--------------------|-------------------------------|--------------------|
| <i>Desi_wild_45941262</i> | NA                                  | <i>Ca_desi_denovo</i> | 45941262                | G/T  | NA                 | NA                            | NA                 |
| <i>Desi_wild_45947062</i> | NA                                  | <i>Ca_desi_denovo</i> | 45947062                | G/T  | NA                 | NA                            | NA                 |
| <i>Desi_wild_45950092</i> | NA                                  | <i>Ca_desi_denovo</i> | 45950092                | G/T  | NA                 | NA                            | NA                 |
| <i>Desi_wild_45959708</i> | NA                                  | <i>Ca_desi_denovo</i> | 45959708                | G/T  | NA                 | NA                            | NA                 |
| <i>Desi_wild_45960786</i> | NA                                  | <i>Ca_desi_denovo</i> | 45960786                | G/T  | NA                 | NA                            | NA                 |
| <i>Desi_wild_45998879</i> | NA                                  | <i>Ca_desi_denovo</i> | 45998879                | A/C  | NA                 | NA                            | NA                 |
| <i>Desi_wild_46010090</i> | NA                                  | <i>Ca_desi_denovo</i> | 46010090                | A/C  | NA                 | NA                            | NA                 |
| <i>Desi_wild_46061291</i> | NA                                  | <i>Ca_desi_denovo</i> | 46061291                | C/G  | NA                 | NA                            | NA                 |
| <i>Desi_wild_46061295</i> | NA                                  | <i>Ca_desi_denovo</i> | 46061295                | C/G  | NA                 | NA                            | NA                 |
| <i>Desi_wild_46066585</i> | NA                                  | <i>Ca_desi_denovo</i> | 46066585                | G/T  | NA                 | NA                            | NA                 |
| <i>Desi_wild_46067014</i> | NA                                  | <i>Ca_desi_denovo</i> | 46067014                | C/G  | NA                 | NA                            | NA                 |
| <i>Desi_wild_46076683</i> | NA                                  | <i>Ca_desi_denovo</i> | 46076683                | A/G  | NA                 | NA                            | NA                 |
| <i>Desi_wild_46081825</i> | NA                                  | <i>Ca_desi_denovo</i> | 46081825                | C/T  | NA                 | NA                            | NA                 |
| <i>Desi_wild_46086261</i> | NA                                  | <i>Ca_desi_denovo</i> | 46086261                | G/T  | NA                 | NA                            | NA                 |
| <i>Desi_wild_46087896</i> | NA                                  | <i>Ca_desi_denovo</i> | 46087896                | C/T  | NA                 | NA                            | NA                 |
| <i>Desi_wild_46158011</i> | NA                                  | <i>Ca_desi_denovo</i> | 46158011                | T/A  | NA                 | NA                            | NA                 |
| <i>Desi_wild_46158025</i> | NA                                  | <i>Ca_desi_denovo</i> | 46158025                | G/A  | NA                 | NA                            | NA                 |
| <i>Desi_wild_46192059</i> | NA                                  | <i>Ca_desi_denovo</i> | 46192059                | A/C  | NA                 | NA                            | NA                 |
| <i>Desi_wild_46201988</i> | NA                                  | <i>Ca_desi_denovo</i> | 46201988                | A/C  | NA                 | NA                            | NA                 |
| <i>Desi_wild_46201989</i> | NA                                  | <i>Ca_desi_denovo</i> | 46201989                | A/G  | NA                 | NA                            | NA                 |
| <i>Desi_wild_46201990</i> | NA                                  | <i>Ca_desi_denovo</i> | 46201990                | A/G  | NA                 | NA                            | NA                 |
| <i>Desi_wild_46205651</i> | NA                                  | <i>Ca_desi_denovo</i> | 46205651                | G/T  | NA                 | NA                            | NA                 |
| <i>Desi_wild_46214874</i> | NA                                  | <i>Ca_desi_denovo</i> | 46214874                | G/T  | NA                 | NA                            | NA                 |
| <i>Desi_wild_46215478</i> | NA                                  | <i>Ca_desi_denovo</i> | 46215478                | G/T  | NA                 | NA                            | NA                 |
| <i>Desi_wild_46219468</i> | NA                                  | <i>Ca_desi_denovo</i> | 46219468                | A/G  | NA                 | NA                            | NA                 |
| <i>Desi_wild_46234021</i> | NA                                  | <i>Ca_desi_denovo</i> | 46234021                | A/G  | NA                 | NA                            | NA                 |
| <i>Desi_wild_46234022</i> | NA                                  | <i>Ca_desi_denovo</i> | 46234022                | C/G  | NA                 | NA                            | NA                 |
| <i>Desi_wild_46245388</i> | NA                                  | <i>Ca_desi_denovo</i> | 46245388                | G/T  | NA                 | NA                            | NA                 |
| <i>Desi_wild_46265546</i> | NA                                  | <i>Ca_desi_denovo</i> | 46265546                | A/G  | NA                 | NA                            | NA                 |
| <i>Desi_wild_46280175</i> | NA                                  | <i>Ca_desi_denovo</i> | 46280175                | A/C  | NA                 | NA                            | NA                 |
| <i>Desi_wild_46282828</i> | NA                                  | <i>Ca_desi_denovo</i> | 46282828                | C/G  | NA                 | NA                            | NA                 |
| <i>Desi_wild_46289010</i> | NA                                  | <i>Ca_desi_denovo</i> | 46289010                | A/C  | NA                 | NA                            | NA                 |
| <i>Desi_wild_46289011</i> | NA                                  | <i>Ca_desi_denovo</i> | 46289011                | A/G  | NA                 | NA                            | NA                 |
| <i>Desi_wild_46335358</i> | NA                                  | <i>Ca_desi_denovo</i> | 46335358                | G/T  | NA                 | NA                            | NA                 |
| <i>Desi_wild_46336225</i> | NA                                  | <i>Ca_desi_denovo</i> | 46336225                | A/C  | NA                 | NA                            | NA                 |
| <i>Desi_wild_46336226</i> | NA                                  | <i>Ca_desi_denovo</i> | 46336226                | A/G  | NA                 | NA                            | NA                 |
| <i>Desi_wild_46343066</i> | NA                                  | <i>Ca_desi_denovo</i> | 46343066                | A/C  | NA                 | NA                            | NA                 |
| <i>Desi_wild_46347056</i> | NA                                  | <i>Ca_desi_denovo</i> | 46347056                | A/C  | NA                 | NA                            | NA                 |
| <i>Desi_wild_46371945</i> | NA                                  | <i>Ca_desi_denovo</i> | 46371945                | C/G  | NA                 | NA                            | NA                 |
| <i>Desi_wild_46379621</i> | NA                                  | <i>Ca_desi_denovo</i> | 46379621                | G/T  | NA                 | NA                            | NA                 |
| <i>Desi_wild_46382300</i> | NA                                  | <i>Ca_desi_denovo</i> | 46382300                | G/T  | NA                 | NA                            | NA                 |
| <i>Desi_wild_46411518</i> | NA                                  | <i>Ca_desi_denovo</i> | 46411518                | A/G  | NA                 | NA                            | NA                 |
| <i>Desi_wild_46416974</i> | NA                                  | <i>Ca_desi_denovo</i> | 46416974                | A/G  | NA                 | NA                            | NA                 |
| <i>Desi_wild_46423133</i> | NA                                  | <i>Ca_desi_denovo</i> | 46423133                | A/G  | NA                 | NA                            | NA                 |

| SNP IDs                   | NCBI dbSNP accession IDs (NCBI_SS#) | Chromosomes           | Physical positions (bp) | SNPs | Gene accession IDs | Sequence components of genome | Putative functions |
|---------------------------|-------------------------------------|-----------------------|-------------------------|------|--------------------|-------------------------------|--------------------|
| <i>Desi_wild_46424181</i> | NA                                  | <i>Ca_desi_denovo</i> | 46424181                | G/T  | NA                 | NA                            | NA                 |
| <i>Desi_wild_46435020</i> | NA                                  | <i>Ca_desi_denovo</i> | 46435020                | G/T  | NA                 | NA                            | NA                 |
| <i>Desi_wild_46442530</i> | NA                                  | <i>Ca_desi_denovo</i> | 46442530                | A/C  | NA                 | NA                            | NA                 |
| <i>Desi_wild_46452588</i> | NA                                  | <i>Ca_desi_denovo</i> | 46452588                | G/T  | NA                 | NA                            | NA                 |
| <i>Desi_wild_46481670</i> | NA                                  | <i>Ca_desi_denovo</i> | 46481670                | A/C  | NA                 | NA                            | NA                 |
| <i>Desi_wild_46481671</i> | NA                                  | <i>Ca_desi_denovo</i> | 46481671                | A/G  | NA                 | NA                            | NA                 |
| <i>Desi_wild_46482240</i> | NA                                  | <i>Ca_desi_denovo</i> | 46482240                | C/G  | NA                 | NA                            | NA                 |
| <i>Desi_wild_46490082</i> | NA                                  | <i>Ca_desi_denovo</i> | 46490082                | G/A  | NA                 | NA                            | NA                 |
| <i>Desi_wild_46490083</i> | NA                                  | <i>Ca_desi_denovo</i> | 46490083                | C/A  | NA                 | NA                            | NA                 |
| <i>Desi_wild_46505579</i> | NA                                  | <i>Ca_desi_denovo</i> | 46505579                | C/G  | NA                 | NA                            | NA                 |
| <i>Desi_wild_46509598</i> | NA                                  | <i>Ca_desi_denovo</i> | 46509598                | C/T  | NA                 | NA                            | NA                 |
| <i>Desi_wild_46512070</i> | NA                                  | <i>Ca_desi_denovo</i> | 46512070                | A/C  | NA                 | NA                            | NA                 |
| <i>Desi_wild_46512071</i> | NA                                  | <i>Ca_desi_denovo</i> | 46512071                | G/T  | NA                 | NA                            | NA                 |
| <i>Desi_wild_46524363</i> | NA                                  | <i>Ca_desi_denovo</i> | 46524363                | C/T  | NA                 | NA                            | NA                 |
| <i>Desi_wild_46524390</i> | NA                                  | <i>Ca_desi_denovo</i> | 46524390                | A/G  | NA                 | NA                            | NA                 |
| <i>Desi_wild_46529232</i> | NA                                  | <i>Ca_desi_denovo</i> | 46529232                | G/T  | NA                 | NA                            | NA                 |
| <i>Desi_wild_46538100</i> | NA                                  | <i>Ca_desi_denovo</i> | 46538100                | C/G  | NA                 | NA                            | NA                 |
| <i>Desi_wild_46550785</i> | NA                                  | <i>Ca_desi_denovo</i> | 46550785                | G/T  | NA                 | NA                            | NA                 |
| <i>Desi_wild_46550791</i> | NA                                  | <i>Ca_desi_denovo</i> | 46550791                | G/T  | NA                 | NA                            | NA                 |
| <i>Desi_wild_46550829</i> | NA                                  | <i>Ca_desi_denovo</i> | 46550829                | G/T  | NA                 | NA                            | NA                 |
| <i>Desi_wild_46564890</i> | NA                                  | <i>Ca_desi_denovo</i> | 46564890                | A/C  | NA                 | NA                            | NA                 |
| <i>Desi_wild_46606394</i> | NA                                  | <i>Ca_desi_denovo</i> | 46606394                | G/T  | NA                 | NA                            | NA                 |
| <i>Desi_wild_46616814</i> | NA                                  | <i>Ca_desi_denovo</i> | 46616814                | G/T  | NA                 | NA                            | NA                 |
| <i>Desi_wild_46625026</i> | NA                                  | <i>Ca_desi_denovo</i> | 46625026                | G/T  | NA                 | NA                            | NA                 |
| <i>Desi_wild_46628266</i> | NA                                  | <i>Ca_desi_denovo</i> | 46628266                | C/T  | NA                 | NA                            | NA                 |
| <i>Desi_wild_46633576</i> | NA                                  | <i>Ca_desi_denovo</i> | 46633576                | G/T  | NA                 | NA                            | NA                 |
| <i>Desi_wild_46651772</i> | NA                                  | <i>Ca_desi_denovo</i> | 46651772                | C/T  | NA                 | NA                            | NA                 |
| <i>Desi_wild_46653503</i> | NA                                  | <i>Ca_desi_denovo</i> | 46653503                | G/T  | NA                 | NA                            | NA                 |
| <i>Desi_wild_46659225</i> | NA                                  | <i>Ca_desi_denovo</i> | 46659225                | A/C  | NA                 | NA                            | NA                 |
| <i>Desi_wild_46665697</i> | NA                                  | <i>Ca_desi_denovo</i> | 46665697                | C/T  | NA                 | NA                            | NA                 |
| <i>Desi_wild_46676610</i> | NA                                  | <i>Ca_desi_denovo</i> | 46676610                | A/C  | NA                 | NA                            | NA                 |
| <i>Desi_wild_46680314</i> | NA                                  | <i>Ca_desi_denovo</i> | 46680314                | A/C  | NA                 | NA                            | NA                 |
| <i>Desi_wild_46702641</i> | NA                                  | <i>Ca_desi_denovo</i> | 46702641                | A/G  | NA                 | NA                            | NA                 |
| <i>Desi_wild_46727286</i> | NA                                  | <i>Ca_desi_denovo</i> | 46727286                | G/T  | NA                 | NA                            | NA                 |
| <i>Desi_wild_46730475</i> | NA                                  | <i>Ca_desi_denovo</i> | 46730475                | C/T  | NA                 | NA                            | NA                 |
| <i>Desi_wild_46757737</i> | NA                                  | <i>Ca_desi_denovo</i> | 46757737                | G/T  | NA                 | NA                            | NA                 |
| <i>Desi_wild_46766187</i> | NA                                  | <i>Ca_desi_denovo</i> | 46766187                | G/T  | NA                 | NA                            | NA                 |
| <i>Desi_wild_46774935</i> | NA                                  | <i>Ca_desi_denovo</i> | 46774935                | A/C  | NA                 | NA                            | NA                 |
| <i>Desi_wild_46774936</i> | NA                                  | <i>Ca_desi_denovo</i> | 46774936                | A/G  | NA                 | NA                            | NA                 |
| <i>Desi_wild_46783045</i> | NA                                  | <i>Ca_desi_denovo</i> | 46783045                | A/G  | NA                 | NA                            | NA                 |
| <i>Desi_wild_46783046</i> | NA                                  | <i>Ca_desi_denovo</i> | 46783046                | C/T  | NA                 | NA                            | NA                 |
| <i>Desi_wild_46783257</i> | NA                                  | <i>Ca_desi_denovo</i> | 46783257                | T/G  | NA                 | NA                            | NA                 |
| <i>Desi_wild_46789090</i> | NA                                  | <i>Ca_desi_denovo</i> | 46789090                | A/C  | NA                 | NA                            | NA                 |
| <i>Desi_wild_46789091</i> | NA                                  | <i>Ca_desi_denovo</i> | 46789091                | A/G  | NA                 | NA                            | NA                 |

| SNP IDs                   | NCBI dbSNP accession IDs (NCBI_SS#) | Chromosomes           | Physical positions (bp) | SNPs | Gene accession IDs | Sequence components of genome | Putative functions |
|---------------------------|-------------------------------------|-----------------------|-------------------------|------|--------------------|-------------------------------|--------------------|
| <i>Desi_wild_46791149</i> | NA                                  | <i>Ca_desi_denovo</i> | 46791149                | C/T  | NA                 | NA                            | NA                 |
| <i>Desi_wild_46791158</i> | NA                                  | <i>Ca_desi_denovo</i> | 46791158                | C/T  | NA                 | NA                            | NA                 |
| <i>Desi_wild_46806191</i> | NA                                  | <i>Ca_desi_denovo</i> | 46806191                | C/G  | NA                 | NA                            | NA                 |
| <i>Desi_wild_46815785</i> | NA                                  | <i>Ca_desi_denovo</i> | 46815785                | A/C  | NA                 | NA                            | NA                 |
| <i>Desi_wild_46815786</i> | NA                                  | <i>Ca_desi_denovo</i> | 46815786                | A/G  | NA                 | NA                            | NA                 |
| <i>Desi_wild_46830776</i> | NA                                  | <i>Ca_desi_denovo</i> | 46830776                | G/T  | NA                 | NA                            | NA                 |
| <i>Desi_wild_46832835</i> | NA                                  | <i>Ca_desi_denovo</i> | 46832835                | G/T  | NA                 | NA                            | NA                 |
| <i>Desi_wild_46843620</i> | NA                                  | <i>Ca_desi_denovo</i> | 46843620                | A/C  | NA                 | NA                            | NA                 |
| <i>Desi_wild_46846850</i> | NA                                  | <i>Ca_desi_denovo</i> | 46846850                | A/C  | NA                 | NA                            | NA                 |
| <i>Desi_wild_46846851</i> | NA                                  | <i>Ca_desi_denovo</i> | 46846851                | A/G  | NA                 | NA                            | NA                 |
| <i>Desi_wild_46848424</i> | NA                                  | <i>Ca_desi_denovo</i> | 46848424                | A/G  | NA                 | NA                            | NA                 |
| <i>Desi_wild_46855495</i> | NA                                  | <i>Ca_desi_denovo</i> | 46855495                | C/G  | NA                 | NA                            | NA                 |
| <i>Desi_wild_46862431</i> | NA                                  | <i>Ca_desi_denovo</i> | 46862431                | A/C  | NA                 | NA                            | NA                 |
| <i>Desi_wild_46867085</i> | NA                                  | <i>Ca_desi_denovo</i> | 46867085                | A/C  | NA                 | NA                            | NA                 |
| <i>Desi_wild_46871171</i> | NA                                  | <i>Ca_desi_denovo</i> | 46871171                | G/T  | NA                 | NA                            | NA                 |
| <i>Desi_wild_46878390</i> | NA                                  | <i>Ca_desi_denovo</i> | 46878390                | A/C  | NA                 | NA                            | NA                 |
| <i>Desi_wild_46878391</i> | NA                                  | <i>Ca_desi_denovo</i> | 46878391                | A/G  | NA                 | NA                            | NA                 |
| <i>Desi_wild_46883615</i> | NA                                  | <i>Ca_desi_denovo</i> | 46883615                | A/C  | NA                 | NA                            | NA                 |
| <i>Desi_wild_46883616</i> | NA                                  | <i>Ca_desi_denovo</i> | 46883616                | A/G  | NA                 | NA                            | NA                 |
| <i>Desi_wild_46884913</i> | NA                                  | <i>Ca_desi_denovo</i> | 46884913                | G/T  | NA                 | NA                            | NA                 |
| <i>Desi_wild_46897460</i> | NA                                  | <i>Ca_desi_denovo</i> | 46897460                | T/G  | NA                 | NA                            | NA                 |
| <i>Desi_wild_46906550</i> | NA                                  | <i>Ca_desi_denovo</i> | 46906550                | A/G  | NA                 | NA                            | NA                 |
| <i>Desi_wild_46906586</i> | NA                                  | <i>Ca_desi_denovo</i> | 46906586                | C/T  | NA                 | NA                            | NA                 |
| <i>Desi_wild_46906589</i> | NA                                  | <i>Ca_desi_denovo</i> | 46906589                | C/T  | NA                 | NA                            | NA                 |
| <i>Desi_wild_46909802</i> | NA                                  | <i>Ca_desi_denovo</i> | 46909802                | C/G  | NA                 | NA                            | NA                 |
| <i>Desi_wild_46912604</i> | NA                                  | <i>Ca_desi_denovo</i> | 46912604                | C/G  | NA                 | NA                            | NA                 |
| <i>Desi_wild_46912622</i> | NA                                  | <i>Ca_desi_denovo</i> | 46912622                | A/C  | NA                 | NA                            | NA                 |
| <i>Desi_wild_46912699</i> | NA                                  | <i>Ca_desi_denovo</i> | 46912699                | C/T  | NA                 | NA                            | NA                 |
| <i>Desi_wild_46916390</i> | NA                                  | <i>Ca_desi_denovo</i> | 46916390                | A/C  | NA                 | NA                            | NA                 |
| <i>Desi_wild_46920285</i> | NA                                  | <i>Ca_desi_denovo</i> | 46920285                | A/C  | NA                 | NA                            | NA                 |
| <i>Desi_wild_46920286</i> | NA                                  | <i>Ca_desi_denovo</i> | 46920286                | A/G  | NA                 | NA                            | NA                 |
| <i>Desi_wild_46930471</i> | NA                                  | <i>Ca_desi_denovo</i> | 46930471                | A/C  | NA                 | NA                            | NA                 |
| <i>Desi_wild_46930498</i> | NA                                  | <i>Ca_desi_denovo</i> | 46930498                | A/G  | NA                 | NA                            | NA                 |
| <i>Desi_wild_46931781</i> | NA                                  | <i>Ca_desi_denovo</i> | 46931781                | G/T  | NA                 | NA                            | NA                 |
| <i>Desi_wild_46947551</i> | NA                                  | <i>Ca_desi_denovo</i> | 46947551                | G/T  | NA                 | NA                            | NA                 |
| <i>Desi_wild_46951824</i> | NA                                  | <i>Ca_desi_denovo</i> | 46951824                | C/G  | NA                 | NA                            | NA                 |
| <i>Desi_wild_46960936</i> | NA                                  | <i>Ca_desi_denovo</i> | 46960936                | G/T  | NA                 | NA                            | NA                 |
| <i>Desi_wild_46966169</i> | NA                                  | <i>Ca_desi_denovo</i> | 46966169                | A/C  | NA                 | NA                            | NA                 |
| <i>Desi_wild_46966739</i> | NA                                  | <i>Ca_desi_denovo</i> | 46966739                | G/T  | NA                 | NA                            | NA                 |
| <i>Desi_wild_46966741</i> | NA                                  | <i>Ca_desi_denovo</i> | 46966741                | A/G  | NA                 | NA                            | NA                 |
| <i>Desi_wild_46972053</i> | NA                                  | <i>Ca_desi_denovo</i> | 46972053                | T/G  | NA                 | NA                            | NA                 |
| <i>Desi_wild_46973579</i> | NA                                  | <i>Ca_desi_denovo</i> | 46973579                | G/T  | NA                 | NA                            | NA                 |
| <i>Desi_wild_46996782</i> | NA                                  | <i>Ca_desi_denovo</i> | 46996782                | A/G  | NA                 | NA                            | NA                 |
| <i>Desi_wild_46996783</i> | NA                                  | <i>Ca_desi_denovo</i> | 46996783                | C/T  | NA                 | NA                            | NA                 |



| SNP IDs                   | NCBI dbSNP accession IDs (NCBI_SS#) | Chromosomes           | Physical positions (bp) | SNPs | Gene accession IDs | Sequence components of genome | Putative functions |
|---------------------------|-------------------------------------|-----------------------|-------------------------|------|--------------------|-------------------------------|--------------------|
| <i>Desi_wild_46998468</i> | NA                                  | <i>Ca_desi_denovo</i> | 46998468                | A/C  | NA                 | NA                            | NA                 |
| <i>Desi_wild_46998470</i> | NA                                  | <i>Ca_desi_denovo</i> | 46998470                | A/G  | NA                 | NA                            | NA                 |
| <i>Desi_wild_47010666</i> | NA                                  | <i>Ca_desi_denovo</i> | 47010666                | G/T  | NA                 | NA                            | NA                 |
| <i>Desi_wild_47022696</i> | NA                                  | <i>Ca_desi_denovo</i> | 47022696                | A/C  | NA                 | NA                            | NA                 |
| <i>Desi_wild_47031984</i> | NA                                  | <i>Ca_desi_denovo</i> | 47031984                | C/T  | NA                 | NA                            | NA                 |
| <i>Desi_wild_47070758</i> | NA                                  | <i>Ca_desi_denovo</i> | 47070758                | G/T  | NA                 | NA                            | NA                 |
| <i>Desi_wild_47098892</i> | NA                                  | <i>Ca_desi_denovo</i> | 47098892                | A/G  | NA                 | NA                            | NA                 |
| <i>Desi_wild_47101733</i> | NA                                  | <i>Ca_desi_denovo</i> | 47101733                | C/T  | NA                 | NA                            | NA                 |
| <i>Desi_wild_47103631</i> | NA                                  | <i>Ca_desi_denovo</i> | 47103631                | C/G  | NA                 | NA                            | NA                 |
| <i>Desi_wild_47103633</i> | NA                                  | <i>Ca_desi_denovo</i> | 47103633                | A/G  | NA                 | NA                            | NA                 |
| <i>Desi_wild_47117220</i> | NA                                  | <i>Ca_desi_denovo</i> | 47117220                | A/C  | NA                 | NA                            | NA                 |
| <i>Desi_wild_47117221</i> | NA                                  | <i>Ca_desi_denovo</i> | 47117221                | C/G  | NA                 | NA                            | NA                 |
| <i>Desi_wild_47117314</i> | NA                                  | <i>Ca_desi_denovo</i> | 47117314                | G/T  | NA                 | NA                            | NA                 |
| <i>Desi_wild_47119237</i> | NA                                  | <i>Ca_desi_denovo</i> | 47119237                | G/T  | NA                 | NA                            | NA                 |
| <i>Desi_wild_47120069</i> | NA                                  | <i>Ca_desi_denovo</i> | 47120069                | G/T  | NA                 | NA                            | NA                 |
| <i>Desi_wild_47122061</i> | NA                                  | <i>Ca_desi_denovo</i> | 47122061                | C/G  | NA                 | NA                            | NA                 |
| <i>Desi_wild_47127575</i> | NA                                  | <i>Ca_desi_denovo</i> | 47127575                | G/T  | NA                 | NA                            | NA                 |
| <i>Desi_wild_47151694</i> | NA                                  | <i>Ca_desi_denovo</i> | 47151694                | G/T  | NA                 | NA                            | NA                 |
| <i>Desi_wild_47166048</i> | NA                                  | <i>Ca_desi_denovo</i> | 47166048                | T/G  | NA                 | NA                            | NA                 |
| <i>Desi_wild_47177408</i> | NA                                  | <i>Ca_desi_denovo</i> | 47177408                | A/G  | NA                 | NA                            | NA                 |
| <i>Desi_wild_47177410</i> | NA                                  | <i>Ca_desi_denovo</i> | 47177410                | G/T  | NA                 | NA                            | NA                 |
| <i>Desi_wild_47253852</i> | NA                                  | <i>Ca_desi_denovo</i> | 47253852                | A/G  | NA                 | NA                            | NA                 |
| <i>Desi_wild_47253861</i> | NA                                  | <i>Ca_desi_denovo</i> | 47253861                | A/G  | NA                 | NA                            | NA                 |
| <i>Desi_wild_47260478</i> | NA                                  | <i>Ca_desi_denovo</i> | 47260478                | G/T  | NA                 | NA                            | NA                 |
| <i>Desi_wild_47301233</i> | NA                                  | <i>Ca_desi_denovo</i> | 47301233                | A/C  | NA                 | NA                            | NA                 |
| <i>Desi_wild_47301234</i> | NA                                  | <i>Ca_desi_denovo</i> | 47301234                | G/T  | NA                 | NA                            | NA                 |
| <i>Desi_wild_47332742</i> | NA                                  | <i>Ca_desi_denovo</i> | 47332742                | G/T  | NA                 | NA                            | NA                 |
| <i>Desi_wild_47367257</i> | NA                                  | <i>Ca_desi_denovo</i> | 47367257                | G/T  | NA                 | NA                            | NA                 |
| <i>Desi_wild_47369943</i> | NA                                  | <i>Ca_desi_denovo</i> | 47369943                | C/T  | NA                 | NA                            | NA                 |
| <i>Desi_wild_47369983</i> | NA                                  | <i>Ca_desi_denovo</i> | 47369983                | A/G  | NA                 | NA                            | NA                 |
| <i>Desi_wild_47380863</i> | NA                                  | <i>Ca_desi_denovo</i> | 47380863                | C/T  | NA                 | NA                            | NA                 |
| <i>Desi_wild_47380884</i> | NA                                  | <i>Ca_desi_denovo</i> | 47380884                | A/G  | NA                 | NA                            | NA                 |
| <i>Desi_wild_47402885</i> | NA                                  | <i>Ca_desi_denovo</i> | 47402885                | A/C  | NA                 | NA                            | NA                 |
| <i>Desi_wild_47420404</i> | NA                                  | <i>Ca_desi_denovo</i> | 47420404                | A/G  | NA                 | NA                            | NA                 |
| <i>Desi_wild_47431195</i> | NA                                  | <i>Ca_desi_denovo</i> | 47431195                | A/C  | NA                 | NA                            | NA                 |
| <i>Desi_wild_47431196</i> | NA                                  | <i>Ca_desi_denovo</i> | 47431196                | C/G  | NA                 | NA                            | NA                 |
| <i>Desi_wild_47467373</i> | NA                                  | <i>Ca_desi_denovo</i> | 47467373                | G/T  | NA                 | NA                            | NA                 |
| <i>Desi_wild_47516696</i> | NA                                  | <i>Ca_desi_denovo</i> | 47516696                | A/C  | NA                 | NA                            | NA                 |
| <i>Desi_wild_47520264</i> | NA                                  | <i>Ca_desi_denovo</i> | 47520264                | G/T  | NA                 | NA                            | NA                 |
| <i>Desi_wild_47520586</i> | NA                                  | <i>Ca_desi_denovo</i> | 47520586                | A/G  | NA                 | NA                            | NA                 |
| <i>Desi_wild_47562619</i> | NA                                  | <i>Ca_desi_denovo</i> | 47562619                | G/T  | NA                 | NA                            | NA                 |
| <i>Desi_wild_47575685</i> | NA                                  | <i>Ca_desi_denovo</i> | 47575685                | G/T  | NA                 | NA                            | NA                 |
| <i>Desi_wild_47577106</i> | NA                                  | <i>Ca_desi_denovo</i> | 47577106                | G/T  | NA                 | NA                            | NA                 |
| <i>Desi_wild_47585948</i> | NA                                  | <i>Ca_desi_denovo</i> | 47585948                | G/T  | NA                 | NA                            | NA                 |

| SNP IDs                   | NCBI dbSNP accession IDs (NCBI_SS#) | Chromosomes           | Physical positions (bp) | SNPs | Gene accession IDs | Sequence components of genome | Putative functions |
|---------------------------|-------------------------------------|-----------------------|-------------------------|------|--------------------|-------------------------------|--------------------|
| <i>Desi_wild_47595092</i> | NA                                  | <i>Ca_desi_denovo</i> | 47595092                | G/A  | NA                 | NA                            | NA                 |
| <i>Desi_wild_47596795</i> | NA                                  | <i>Ca_desi_denovo</i> | 47596795                | T/C  | NA                 | NA                            | NA                 |
| <i>Desi_wild_47596851</i> | NA                                  | <i>Ca_desi_denovo</i> | 47596851                | C/G  | NA                 | NA                            | NA                 |
| <i>Desi_wild_47613873</i> | NA                                  | <i>Ca_desi_denovo</i> | 47613873                | G/A  | NA                 | NA                            | NA                 |
| <i>Desi_wild_47641333</i> | NA                                  | <i>Ca_desi_denovo</i> | 47641333                | A/G  | NA                 | NA                            | NA                 |
| <i>Desi_wild_47658338</i> | NA                                  | <i>Ca_desi_denovo</i> | 47658338                | A/C  | NA                 | NA                            | NA                 |
| <i>Desi_wild_47658339</i> | NA                                  | <i>Ca_desi_denovo</i> | 47658339                | G/T  | NA                 | NA                            | NA                 |
| <i>Desi_wild_47658340</i> | NA                                  | <i>Ca_desi_denovo</i> | 47658340                | A/G  | NA                 | NA                            | NA                 |
| <i>Desi_wild_47658341</i> | NA                                  | <i>Ca_desi_denovo</i> | 47658341                | C/T  | NA                 | NA                            | NA                 |
| <i>Desi_wild_47691211</i> | NA                                  | <i>Ca_desi_denovo</i> | 47691211                | G/T  | NA                 | NA                            | NA                 |
| <i>Desi_wild_47702609</i> | NA                                  | <i>Ca_desi_denovo</i> | 47702609                | A/G  | NA                 | NA                            | NA                 |
| <i>Desi_wild_47704786</i> | NA                                  | <i>Ca_desi_denovo</i> | 47704786                | G/T  | NA                 | NA                            | NA                 |
| <i>Desi_wild_47716860</i> | NA                                  | <i>Ca_desi_denovo</i> | 47716860                | A/C  | NA                 | NA                            | NA                 |
| <i>Desi_wild_47798790</i> | NA                                  | <i>Ca_desi_denovo</i> | 47798790                | C/T  | NA                 | NA                            | NA                 |
| <i>Desi_wild_47798816</i> | NA                                  | <i>Ca_desi_denovo</i> | 47798816                | A/G  | NA                 | NA                            | NA                 |
| <i>Desi_wild_47798846</i> | NA                                  | <i>Ca_desi_denovo</i> | 47798846                | A/T  | NA                 | NA                            | NA                 |
| <i>Desi_wild_47802739</i> | NA                                  | <i>Ca_desi_denovo</i> | 47802739                | G/T  | NA                 | NA                            | NA                 |
| <i>Desi_wild_47805666</i> | NA                                  | <i>Ca_desi_denovo</i> | 47805666                | A/G  | NA                 | NA                            | NA                 |
| <i>Desi_wild_47806921</i> | NA                                  | <i>Ca_desi_denovo</i> | 47806921                | G/T  | NA                 | NA                            | NA                 |
| <i>Desi_wild_47822214</i> | NA                                  | <i>Ca_desi_denovo</i> | 47822214                | C/G  | NA                 | NA                            | NA                 |
| <i>Desi_wild_47822215</i> | NA                                  | <i>Ca_desi_denovo</i> | 47822215                | A/G  | NA                 | NA                            | NA                 |
| <i>Desi_wild_47861926</i> | NA                                  | <i>Ca_desi_denovo</i> | 47861926                | G/T  | NA                 | NA                            | NA                 |
| <i>Desi_wild_47868614</i> | NA                                  | <i>Ca_desi_denovo</i> | 47868614                | C/G  | NA                 | NA                            | NA                 |
| <i>Desi_wild_47882377</i> | NA                                  | <i>Ca_desi_denovo</i> | 47882377                | G/A  | NA                 | NA                            | NA                 |
| <i>Desi_wild_47892256</i> | NA                                  | <i>Ca_desi_denovo</i> | 47892256                | T/G  | NA                 | NA                            | NA                 |
| <i>Desi_wild_47894130</i> | NA                                  | <i>Ca_desi_denovo</i> | 47894130                | A/C  | NA                 | NA                            | NA                 |
| <i>Desi_wild_47894312</i> | NA                                  | <i>Ca_desi_denovo</i> | 47894312                | C/G  | NA                 | NA                            | NA                 |
| <i>Desi_wild_47897250</i> | NA                                  | <i>Ca_desi_denovo</i> | 47897250                | G/T  | NA                 | NA                            | NA                 |
| <i>Desi_wild_47916168</i> | NA                                  | <i>Ca_desi_denovo</i> | 47916168                | C/T  | NA                 | NA                            | NA                 |
| <i>Desi_wild_47916171</i> | NA                                  | <i>Ca_desi_denovo</i> | 47916171                | C/G  | NA                 | NA                            | NA                 |
| <i>Desi_wild_47980103</i> | NA                                  | <i>Ca_desi_denovo</i> | 47980103                | A/C  | NA                 | NA                            | NA                 |
| <i>Desi_wild_47980104</i> | NA                                  | <i>Ca_desi_denovo</i> | 47980104                | G/T  | NA                 | NA                            | NA                 |
| <i>Desi_wild_47999766</i> | NA                                  | <i>Ca_desi_denovo</i> | 47999766                | C/G  | NA                 | NA                            | NA                 |
| <i>Desi_wild_47999769</i> | NA                                  | <i>Ca_desi_denovo</i> | 47999769                | C/G  | NA                 | NA                            | NA                 |
| <i>Desi_wild_48100998</i> | NA                                  | <i>Ca_desi_denovo</i> | 48100998                | G/A  | NA                 | NA                            | NA                 |
| <i>Desi_wild_48141749</i> | NA                                  | <i>Ca_desi_denovo</i> | 48141749                | G/T  | NA                 | NA                            | NA                 |
| <i>Desi_wild_48142698</i> | NA                                  | <i>Ca_desi_denovo</i> | 48142698                | G/T  | NA                 | NA                            | NA                 |
| <i>Desi_wild_48176076</i> | NA                                  | <i>Ca_desi_denovo</i> | 48176076                | A/T  | NA                 | NA                            | NA                 |
| <i>Desi_wild_48184579</i> | NA                                  | <i>Ca_desi_denovo</i> | 48184579                | A/G  | NA                 | NA                            | NA                 |
| <i>Desi_wild_48187965</i> | NA                                  | <i>Ca_desi_denovo</i> | 48187965                | A/C  | NA                 | NA                            | NA                 |
| <i>Desi_wild_48188705</i> | NA                                  | <i>Ca_desi_denovo</i> | 48188705                | G/A  | NA                 | NA                            | NA                 |
| <i>Desi_wild_48239491</i> | NA                                  | <i>Ca_desi_denovo</i> | 48239491                | A/T  | NA                 | NA                            | NA                 |
| <i>Desi_wild_48270718</i> | NA                                  | <i>Ca_desi_denovo</i> | 48270718                | T/C  | NA                 | NA                            | NA                 |
| <i>Desi_wild_48270754</i> | NA                                  | <i>Ca_desi_denovo</i> | 48270754                | G/C  | NA                 | NA                            | NA                 |

| SNP IDs                   | NCBI dbSNP accession IDs (NCBI_SS#) | Chromosomes           | Physical positions (bp) | SNPs | Gene accession IDs | Sequence components of genome | Putative functions |
|---------------------------|-------------------------------------|-----------------------|-------------------------|------|--------------------|-------------------------------|--------------------|
| <i>Desi_wild_48270769</i> | NA                                  | <i>Ca_desi_denovo</i> | 48270769                | C/A  | NA                 | NA                            | NA                 |
| <i>Desi_wild_48310117</i> | NA                                  | <i>Ca_desi_denovo</i> | 48310117                | C/G  | NA                 | NA                            | NA                 |
| <i>Desi_wild_48321916</i> | NA                                  | <i>Ca_desi_denovo</i> | 48321916                | C/T  | NA                 | NA                            | NA                 |
| <i>Desi_wild_48331788</i> | NA                                  | <i>Ca_desi_denovo</i> | 48331788                | G/T  | NA                 | NA                            | NA                 |
| <i>Desi_wild_48337211</i> | NA                                  | <i>Ca_desi_denovo</i> | 48337211                | G/T  | NA                 | NA                            | NA                 |
| <i>Desi_wild_48339390</i> | NA                                  | <i>Ca_desi_denovo</i> | 48339390                | A/G  | NA                 | NA                            | NA                 |
| <i>Desi_wild_48345520</i> | NA                                  | <i>Ca_desi_denovo</i> | 48345520                | G/T  | NA                 | NA                            | NA                 |
| <i>Desi_wild_48348419</i> | NA                                  | <i>Ca_desi_denovo</i> | 48348419                | G/C  | NA                 | NA                            | NA                 |
| <i>Desi_wild_48349813</i> | NA                                  | <i>Ca_desi_denovo</i> | 48349813                | G/T  | NA                 | NA                            | NA                 |
| <i>Desi_wild_48353063</i> | NA                                  | <i>Ca_desi_denovo</i> | 48353063                | G/T  | NA                 | NA                            | NA                 |
| <i>Desi_wild_48365425</i> | NA                                  | <i>Ca_desi_denovo</i> | 48365425                | A/C  | NA                 | NA                            | NA                 |
| <i>Desi_wild_48365426</i> | NA                                  | <i>Ca_desi_denovo</i> | 48365426                | A/G  | NA                 | NA                            | NA                 |
| <i>Desi_wild_48383191</i> | NA                                  | <i>Ca_desi_denovo</i> | 48383191                | C/G  | NA                 | NA                            | NA                 |
| <i>Desi_wild_48398768</i> | NA                                  | <i>Ca_desi_denovo</i> | 48398768                | C/G  | NA                 | NA                            | NA                 |
| <i>Desi_wild_48399700</i> | NA                                  | <i>Ca_desi_denovo</i> | 48399700                | A/G  | NA                 | NA                            | NA                 |
| <i>Desi_wild_48416055</i> | NA                                  | <i>Ca_desi_denovo</i> | 48416055                | G/T  | NA                 | NA                            | NA                 |
| <i>Desi_wild_48441423</i> | NA                                  | <i>Ca_desi_denovo</i> | 48441423                | G/T  | NA                 | NA                            | NA                 |
| <i>Desi_wild_48460917</i> | NA                                  | <i>Ca_desi_denovo</i> | 48460917                | C/G  | NA                 | NA                            | NA                 |
| <i>Desi_wild_48463656</i> | NA                                  | <i>Ca_desi_denovo</i> | 48463656                | G/T  | NA                 | NA                            | NA                 |
| <i>Desi_wild_48467265</i> | NA                                  | <i>Ca_desi_denovo</i> | 48467265                | A/C  | NA                 | NA                            | NA                 |
| <i>Desi_wild_48467266</i> | NA                                  | <i>Ca_desi_denovo</i> | 48467266                | A/G  | NA                 | NA                            | NA                 |
| <i>Desi_wild_48473915</i> | NA                                  | <i>Ca_desi_denovo</i> | 48473915                | G/T  | NA                 | NA                            | NA                 |
| <i>Desi_wild_48487112</i> | NA                                  | <i>Ca_desi_denovo</i> | 48487112                | G/T  | NA                 | NA                            | NA                 |
| <i>Desi_wild_48504549</i> | NA                                  | <i>Ca_desi_denovo</i> | 48504549                | G/T  | NA                 | NA                            | NA                 |
| <i>Desi_wild_48504787</i> | NA                                  | <i>Ca_desi_denovo</i> | 48504787                | C/G  | NA                 | NA                            | NA                 |
| <i>Desi_wild_48504816</i> | NA                                  | <i>Ca_desi_denovo</i> | 48504816                | A/G  | NA                 | NA                            | NA                 |
| <i>Desi_wild_48513051</i> | NA                                  | <i>Ca_desi_denovo</i> | 48513051                | C/G  | NA                 | NA                            | NA                 |
| <i>Desi_wild_48533444</i> | NA                                  | <i>Ca_desi_denovo</i> | 48533444                | G/T  | NA                 | NA                            | NA                 |
| <i>Desi_wild_48549571</i> | NA                                  | <i>Ca_desi_denovo</i> | 48549571                | G/T  | NA                 | NA                            | NA                 |
| <i>Desi_wild_48554165</i> | NA                                  | <i>Ca_desi_denovo</i> | 48554165                | G/T  | NA                 | NA                            | NA                 |
| <i>Desi_wild_48562646</i> | NA                                  | <i>Ca_desi_denovo</i> | 48562646                | C/T  | NA                 | NA                            | NA                 |
| <i>Desi_wild_48577980</i> | NA                                  | <i>Ca_desi_denovo</i> | 48577980                | G/T  | NA                 | NA                            | NA                 |
| <i>Desi_wild_48580274</i> | NA                                  | <i>Ca_desi_denovo</i> | 48580274                | T/G  | NA                 | NA                            | NA                 |
| <i>Desi_wild_48588579</i> | NA                                  | <i>Ca_desi_denovo</i> | 48588579                | G/T  | NA                 | NA                            | NA                 |
| <i>Desi_wild_48593892</i> | NA                                  | <i>Ca_desi_denovo</i> | 48593892                | C/G  | NA                 | NA                            | NA                 |
| <i>Desi_wild_48606916</i> | NA                                  | <i>Ca_desi_denovo</i> | 48606916                | C/T  | NA                 | NA                            | NA                 |
| <i>Desi_wild_48612520</i> | NA                                  | <i>Ca_desi_denovo</i> | 48612520                | A/C  | NA                 | NA                            | NA                 |
| <i>Desi_wild_48612521</i> | NA                                  | <i>Ca_desi_denovo</i> | 48612521                | A/G  | NA                 | NA                            | NA                 |
| <i>Desi_wild_48622635</i> | NA                                  | <i>Ca_desi_denovo</i> | 48622635                | G/T  | NA                 | NA                            | NA                 |
| <i>Desi_wild_48625530</i> | NA                                  | <i>Ca_desi_denovo</i> | 48625530                | A/G  | NA                 | NA                            | NA                 |
| <i>Desi_wild_48627625</i> | NA                                  | <i>Ca_desi_denovo</i> | 48627625                | A/C  | NA                 | NA                            | NA                 |
| <i>Desi_wild_48627626</i> | NA                                  | <i>Ca_desi_denovo</i> | 48627626                | A/G  | NA                 | NA                            | NA                 |
| <i>Desi_wild_48628850</i> | NA                                  | <i>Ca_desi_denovo</i> | 48628850                | C/G  | NA                 | NA                            | NA                 |
| <i>Desi_wild_48649855</i> | NA                                  | <i>Ca_desi_denovo</i> | 48649855                | A/C  | NA                 | NA                            | NA                 |

| SNP IDs                   | NCBI dbSNP accession IDs (NCBI_SS#) | Chromosomes           | Physical positions (bp) | SNPs | Gene accession IDs | Sequence components of genome | Putative functions |
|---------------------------|-------------------------------------|-----------------------|-------------------------|------|--------------------|-------------------------------|--------------------|
| <i>Desi_wild_48721294</i> | NA                                  | <i>Ca_desi_denovo</i> | 48721294                | A/C  | NA                 | NA                            | NA                 |
| <i>Desi_wild_48739404</i> | NA                                  | <i>Ca_desi_denovo</i> | 48739404                | G/T  | NA                 | NA                            | NA                 |
| <i>Desi_wild_48748549</i> | NA                                  | <i>Ca_desi_denovo</i> | 48748549                | G/T  | NA                 | NA                            | NA                 |
| <i>Desi_wild_48794921</i> | NA                                  | <i>Ca_desi_denovo</i> | 48794921                | G/T  | NA                 | NA                            | NA                 |
| <i>Desi_wild_48805275</i> | NA                                  | <i>Ca_desi_denovo</i> | 48805275                | A/C  | NA                 | NA                            | NA                 |
| <i>Desi_wild_48807408</i> | NA                                  | <i>Ca_desi_denovo</i> | 48807408                | C/T  | NA                 | NA                            | NA                 |
| <i>Desi_wild_48873390</i> | NA                                  | <i>Ca_desi_denovo</i> | 48873390                | A/C  | NA                 | NA                            | NA                 |
| <i>Desi_wild_48873391</i> | NA                                  | <i>Ca_desi_denovo</i> | 48873391                | G/T  | NA                 | NA                            | NA                 |
| <i>Desi_wild_48907210</i> | NA                                  | <i>Ca_desi_denovo</i> | 48907210                | A/C  | NA                 | NA                            | NA                 |
| <i>Desi_wild_48912528</i> | NA                                  | <i>Ca_desi_denovo</i> | 48912528                | A/T  | NA                 | NA                            | NA                 |
| <i>Desi_wild_48934280</i> | NA                                  | <i>Ca_desi_denovo</i> | 48934280                | G/T  | NA                 | NA                            | NA                 |
| <i>Desi_wild_48934850</i> | NA                                  | <i>Ca_desi_denovo</i> | 48934850                | G/T  | NA                 | NA                            | NA                 |
| <i>Desi_wild_48935615</i> | NA                                  | <i>Ca_desi_denovo</i> | 48935615                | A/C  | NA                 | NA                            | NA                 |
| <i>Desi_wild_48935616</i> | NA                                  | <i>Ca_desi_denovo</i> | 48935616                | A/G  | NA                 | NA                            | NA                 |
| <i>Desi_wild_48936749</i> | NA                                  | <i>Ca_desi_denovo</i> | 48936749                | A/G  | NA                 | NA                            | NA                 |
| <i>Desi_wild_48939321</i> | NA                                  | <i>Ca_desi_denovo</i> | 48939321                | G/T  | NA                 | NA                            | NA                 |
| <i>Desi_wild_48939644</i> | NA                                  | <i>Ca_desi_denovo</i> | 48939644                | G/T  | NA                 | NA                            | NA                 |
| <i>Desi_wild_48939871</i> | NA                                  | <i>Ca_desi_denovo</i> | 48939871                | G/T  | NA                 | NA                            | NA                 |
| <i>Desi_wild_48941793</i> | NA                                  | <i>Ca_desi_denovo</i> | 48941793                | A/T  | NA                 | NA                            | NA                 |
| <i>Desi_wild_48943261</i> | NA                                  | <i>Ca_desi_denovo</i> | 48943261                | G/T  | NA                 | NA                            | NA                 |
| <i>Desi_wild_48948480</i> | NA                                  | <i>Ca_desi_denovo</i> | 48948480                | G/T  | NA                 | NA                            | NA                 |
| <i>Desi_wild_48978080</i> | NA                                  | <i>Ca_desi_denovo</i> | 48978080                | A/C  | NA                 | NA                            | NA                 |
| <i>Desi_wild_48978081</i> | NA                                  | <i>Ca_desi_denovo</i> | 48978081                | A/G  | NA                 | NA                            | NA                 |
| <i>Desi_wild_48990102</i> | NA                                  | <i>Ca_desi_denovo</i> | 48990102                | G/T  | NA                 | NA                            | NA                 |
| <i>Desi_wild_48993952</i> | NA                                  | <i>Ca_desi_denovo</i> | 48993952                | G/A  | NA                 | NA                            | NA                 |
| <i>Desi_wild_48993972</i> | NA                                  | <i>Ca_desi_denovo</i> | 48993972                | T/C  | NA                 | NA                            | NA                 |
| <i>Desi_wild_48993975</i> | NA                                  | <i>Ca_desi_denovo</i> | 48993975                | A/G  | NA                 | NA                            | NA                 |
| <i>Desi_wild_49008386</i> | NA                                  | <i>Ca_desi_denovo</i> | 49008386                | A/G  | NA                 | NA                            | NA                 |
| <i>Desi_wild_49030863</i> | NA                                  | <i>Ca_desi_denovo</i> | 49030863                | G/T  | NA                 | NA                            | NA                 |
| <i>Desi_wild_49033653</i> | NA                                  | <i>Ca_desi_denovo</i> | 49033653                | A/C  | NA                 | NA                            | NA                 |
| <i>Desi_wild_49035229</i> | NA                                  | <i>Ca_desi_denovo</i> | 49035229                | G/T  | NA                 | NA                            | NA                 |
| <i>Desi_wild_49037248</i> | NA                                  | <i>Ca_desi_denovo</i> | 49037248                | G/T  | NA                 | NA                            | NA                 |
| <i>Desi_wild_49041161</i> | NA                                  | <i>Ca_desi_denovo</i> | 49041161                | A/C  | NA                 | NA                            | NA                 |
| <i>Desi_wild_49048951</i> | NA                                  | <i>Ca_desi_denovo</i> | 49048951                | A/C  | NA                 | NA                            | NA                 |
| <i>Desi_wild_49049983</i> | NA                                  | <i>Ca_desi_denovo</i> | 49049983                | G/T  | NA                 | NA                            | NA                 |
| <i>Desi_wild_49056031</i> | NA                                  | <i>Ca_desi_denovo</i> | 49056031                | G/T  | NA                 | NA                            | NA                 |
| <i>Desi_wild_49062344</i> | NA                                  | <i>Ca_desi_denovo</i> | 49062344                | A/C  | NA                 | NA                            | NA                 |
| <i>Desi_wild_49067074</i> | NA                                  | <i>Ca_desi_denovo</i> | 49067074                | C/G  | NA                 | NA                            | NA                 |
| <i>Desi_wild_49068529</i> | NA                                  | <i>Ca_desi_denovo</i> | 49068529                | C/T  | NA                 | NA                            | NA                 |
| <i>Desi_wild_49068595</i> | NA                                  | <i>Ca_desi_denovo</i> | 49068595                | A/C  | NA                 | NA                            | NA                 |
| <i>Desi_wild_49071168</i> | NA                                  | <i>Ca_desi_denovo</i> | 49071168                | G/T  | NA                 | NA                            | NA                 |
| <i>Desi_wild_49071933</i> | NA                                  | <i>Ca_desi_denovo</i> | 49071933                | C/G  | NA                 | NA                            | NA                 |
| <i>Desi_wild_49077546</i> | NA                                  | <i>Ca_desi_denovo</i> | 49077546                | A/C  | NA                 | NA                            | NA                 |
| <i>Desi_wild_49084956</i> | NA                                  | <i>Ca_desi_denovo</i> | 49084956                | G/T  | NA                 | NA                            | NA                 |

| SNP IDs                   | NCBI dbSNP accession IDs (NCBI_SS#) | Chromosomes           | Physical positions (bp) | SNPs | Gene accession IDs | Sequence components of genome | Putative functions |
|---------------------------|-------------------------------------|-----------------------|-------------------------|------|--------------------|-------------------------------|--------------------|
| <i>Desi_wild_49099110</i> | NA                                  | <i>Ca_desi_denovo</i> | 49099110                | A/C  | NA                 | NA                            | NA                 |
| <i>Desi_wild_49099111</i> | NA                                  | <i>Ca_desi_denovo</i> | 49099111                | G/T  | NA                 | NA                            | NA                 |
| <i>Desi_wild_49103720</i> | NA                                  | <i>Ca_desi_denovo</i> | 49103720                | A/G  | NA                 | NA                            | NA                 |
| <i>Desi_wild_49103729</i> | NA                                  | <i>Ca_desi_denovo</i> | 49103729                | C/G  | NA                 | NA                            | NA                 |
| <i>Desi_wild_49118871</i> | NA                                  | <i>Ca_desi_denovo</i> | 49118871                | G/T  | NA                 | NA                            | NA                 |
| <i>Desi_wild_49131829</i> | NA                                  | <i>Ca_desi_denovo</i> | 49131829                | G/T  | NA                 | NA                            | NA                 |
| <i>Desi_wild_49136950</i> | NA                                  | <i>Ca_desi_denovo</i> | 49136950                | G/T  | NA                 | NA                            | NA                 |
| <i>Desi_wild_49143092</i> | NA                                  | <i>Ca_desi_denovo</i> | 49143092                | A/C  | NA                 | NA                            | NA                 |
| <i>Desi_wild_49143665</i> | NA                                  | <i>Ca_desi_denovo</i> | 49143665                | A/C  | NA                 | NA                            | NA                 |
| <i>Desi_wild_49143666</i> | NA                                  | <i>Ca_desi_denovo</i> | 49143666                | A/G  | NA                 | NA                            | NA                 |
| <i>Desi_wild_49145421</i> | NA                                  | <i>Ca_desi_denovo</i> | 49145421                | T/G  | NA                 | NA                            | NA                 |
| <i>Desi_wild_49150979</i> | NA                                  | <i>Ca_desi_denovo</i> | 49150979                | A/C  | NA                 | NA                            | NA                 |
| <i>Desi_wild_49156164</i> | NA                                  | <i>Ca_desi_denovo</i> | 49156164                | A/G  | NA                 | NA                            | NA                 |
| <i>Desi_wild_49159852</i> | NA                                  | <i>Ca_desi_denovo</i> | 49159852                | C/G  | NA                 | NA                            | NA                 |
| <i>Desi_wild_49159893</i> | NA                                  | <i>Ca_desi_denovo</i> | 49159893                | C/T  | NA                 | NA                            | NA                 |
| <i>Desi_wild_49165888</i> | NA                                  | <i>Ca_desi_denovo</i> | 49165888                | G/T  | NA                 | NA                            | NA                 |
| <i>Desi_wild_49172827</i> | NA                                  | <i>Ca_desi_denovo</i> | 49172827                | C/T  | NA                 | NA                            | NA                 |
| <i>Desi_wild_49173021</i> | NA                                  | <i>Ca_desi_denovo</i> | 49173021                | G/T  | NA                 | NA                            | NA                 |
| <i>Desi_wild_49173306</i> | NA                                  | <i>Ca_desi_denovo</i> | 49173306                | C/G  | NA                 | NA                            | NA                 |
| <i>Desi_wild_49176493</i> | NA                                  | <i>Ca_desi_denovo</i> | 49176493                | G/T  | NA                 | NA                            | NA                 |
| <i>Desi_wild_49179267</i> | NA                                  | <i>Ca_desi_denovo</i> | 49179267                | A/T  | NA                 | NA                            | NA                 |
| <i>Desi_wild_49181284</i> | NA                                  | <i>Ca_desi_denovo</i> | 49181284                | C/G  | NA                 | NA                            | NA                 |
| <i>Desi_wild_49181951</i> | NA                                  | <i>Ca_desi_denovo</i> | 49181951                | G/T  | NA                 | NA                            | NA                 |
| <i>Desi_wild_49205225</i> | NA                                  | <i>Ca_desi_denovo</i> | 49205225                | A/C  | NA                 | NA                            | NA                 |
| <i>Desi_wild_49205226</i> | NA                                  | <i>Ca_desi_denovo</i> | 49205226                | A/G  | NA                 | NA                            | NA                 |
| <i>Desi_wild_49209171</i> | NA                                  | <i>Ca_desi_denovo</i> | 49209171                | G/T  | NA                 | NA                            | NA                 |
| <i>Desi_wild_49210256</i> | NA                                  | <i>Ca_desi_denovo</i> | 49210256                | G/T  | NA                 | NA                            | NA                 |
| <i>Desi_wild_49215388</i> | NA                                  | <i>Ca_desi_denovo</i> | 49215388                | A/G  | NA                 | NA                            | NA                 |
| <i>Desi_wild_49217098</i> | NA                                  | <i>Ca_desi_denovo</i> | 49217098                | G/T  | NA                 | NA                            | NA                 |
| <i>Desi_wild_49231846</i> | NA                                  | <i>Ca_desi_denovo</i> | 49231846                | C/G  | NA                 | NA                            | NA                 |
| <i>Desi_wild_49234008</i> | NA                                  | <i>Ca_desi_denovo</i> | 49234008                | G/T  | NA                 | NA                            | NA                 |
| <i>Desi_wild_49241469</i> | NA                                  | <i>Ca_desi_denovo</i> | 49241469                | G/T  | NA                 | NA                            | NA                 |
| <i>Desi_wild_49244149</i> | NA                                  | <i>Ca_desi_denovo</i> | 49244149                | G/T  | NA                 | NA                            | NA                 |
| <i>Desi_wild_49268063</i> | NA                                  | <i>Ca_desi_denovo</i> | 49268063                | G/T  | NA                 | NA                            | NA                 |
| <i>Desi_wild_49284732</i> | NA                                  | <i>Ca_desi_denovo</i> | 49284732                | A/G  | NA                 | NA                            | NA                 |
| <i>Desi_wild_49284735</i> | NA                                  | <i>Ca_desi_denovo</i> | 49284735                | C/G  | NA                 | NA                            | NA                 |
| <i>Desi_wild_49292477</i> | NA                                  | <i>Ca_desi_denovo</i> | 49292477                | G/T  | NA                 | NA                            | NA                 |
| <i>Desi_wild_49325684</i> | NA                                  | <i>Ca_desi_denovo</i> | 49325684                | A/C  | NA                 | NA                            | NA                 |
| <i>Desi_wild_49325685</i> | NA                                  | <i>Ca_desi_denovo</i> | 49325685                | G/T  | NA                 | NA                            | NA                 |
| <i>Desi_wild_49325686</i> | NA                                  | <i>Ca_desi_denovo</i> | 49325686                | A/G  | NA                 | NA                            | NA                 |
| <i>Desi_wild_49334661</i> | NA                                  | <i>Ca_desi_denovo</i> | 49334661                | G/T  | NA                 | NA                            | NA                 |
| <i>Desi_wild_49378857</i> | NA                                  | <i>Ca_desi_denovo</i> | 49378857                | G/T  | NA                 | NA                            | NA                 |
| <i>Desi_wild_49411456</i> | NA                                  | <i>Ca_desi_denovo</i> | 49411456                | A/G  | NA                 | NA                            | NA                 |
| <i>Desi_wild_49411470</i> | NA                                  | <i>Ca_desi_denovo</i> | 49411470                | G/T  | NA                 | NA                            | NA                 |

| SNP IDs                   | NCBI dbSNP accession IDs (NCBI_SS#) | Chromosomes           | Physical positions (bp) | SNPs | Gene accession IDs | Sequence components of genome | Putative functions |
|---------------------------|-------------------------------------|-----------------------|-------------------------|------|--------------------|-------------------------------|--------------------|
| <i>Desi_wild_49423534</i> | NA                                  | <i>Ca_desi_denovo</i> | 49423534                | T/G  | NA                 | NA                            | NA                 |
| <i>Desi_wild_49435075</i> | NA                                  | <i>Ca_desi_denovo</i> | 49435075                | C/G  | NA                 | NA                            | NA                 |
| <i>Desi_wild_49439073</i> | NA                                  | <i>Ca_desi_denovo</i> | 49439073                | G/T  | NA                 | NA                            | NA                 |
| <i>Desi_wild_49551691</i> | NA                                  | <i>Ca_desi_denovo</i> | 49551691                | A/C  | NA                 | NA                            | NA                 |
| <i>Desi_wild_49572116</i> | NA                                  | <i>Ca_desi_denovo</i> | 49572116                | G/T  | NA                 | NA                            | NA                 |
| <i>Desi_wild_49576106</i> | NA                                  | <i>Ca_desi_denovo</i> | 49576106                | A/G  | NA                 | NA                            | NA                 |
| <i>Desi_wild_49576295</i> | NA                                  | <i>Ca_desi_denovo</i> | 49576295                | C/G  | NA                 | NA                            | NA                 |
| <i>Desi_wild_49583516</i> | NA                                  | <i>Ca_desi_denovo</i> | 49583516                | G/T  | NA                 | NA                            | NA                 |
| <i>Desi_wild_49587601</i> | NA                                  | <i>Ca_desi_denovo</i> | 49587601                | G/T  | NA                 | NA                            | NA                 |
| <i>Desi_wild_49590165</i> | NA                                  | <i>Ca_desi_denovo</i> | 49590165                | A/C  | NA                 | NA                            | NA                 |
| <i>Desi_wild_49599170</i> | NA                                  | <i>Ca_desi_denovo</i> | 49599170                | G/T  | NA                 | NA                            | NA                 |
| <i>Desi_wild_49599173</i> | NA                                  | <i>Ca_desi_denovo</i> | 49599173                | G/T  | NA                 | NA                            | NA                 |
| <i>Desi_wild_49608307</i> | NA                                  | <i>Ca_desi_denovo</i> | 49608307                | G/T  | NA                 | NA                            | NA                 |
| <i>Desi_wild_49651726</i> | NA                                  | <i>Ca_desi_denovo</i> | 49651726                | A/C  | NA                 | NA                            | NA                 |
| <i>Desi_wild_49652279</i> | NA                                  | <i>Ca_desi_denovo</i> | 49652279                | G/T  | NA                 | NA                            | NA                 |
| <i>Desi_wild_49659889</i> | NA                                  | <i>Ca_desi_denovo</i> | 49659889                | A/C  | NA                 | NA                            | NA                 |
| <i>Desi_wild_49659892</i> | NA                                  | <i>Ca_desi_denovo</i> | 49659892                | C/G  | NA                 | NA                            | NA                 |
| <i>Desi_wild_49663161</i> | NA                                  | <i>Ca_desi_denovo</i> | 49663161                | G/T  | NA                 | NA                            | NA                 |
| <i>Desi_wild_49663316</i> | NA                                  | <i>Ca_desi_denovo</i> | 49663316                | A/G  | NA                 | NA                            | NA                 |
| <i>Desi_wild_49674332</i> | NA                                  | <i>Ca_desi_denovo</i> | 49674332                | G/T  | NA                 | NA                            | NA                 |
| <i>Desi_wild_49685153</i> | NA                                  | <i>Ca_desi_denovo</i> | 49685153                | G/T  | NA                 | NA                            | NA                 |
| <i>Desi_wild_49690486</i> | NA                                  | <i>Ca_desi_denovo</i> | 49690486                | G/T  | NA                 | NA                            | NA                 |
| <i>Desi_wild_49698449</i> | NA                                  | <i>Ca_desi_denovo</i> | 49698449                | A/T  | NA                 | NA                            | NA                 |
| <i>Desi_wild_49722264</i> | NA                                  | <i>Ca_desi_denovo</i> | 49722264                | A/G  | NA                 | NA                            | NA                 |
| <i>Desi_wild_49722266</i> | NA                                  | <i>Ca_desi_denovo</i> | 49722266                | C/G  | NA                 | NA                            | NA                 |
| <i>Desi_wild_49722274</i> | NA                                  | <i>Ca_desi_denovo</i> | 49722274                | A/T  | NA                 | NA                            | NA                 |
| <i>Desi_wild_49737577</i> | NA                                  | <i>Ca_desi_denovo</i> | 49737577                | G/T  | NA                 | NA                            | NA                 |
| <i>Desi_wild_49743177</i> | NA                                  | <i>Ca_desi_denovo</i> | 49743177                | G/T  | NA                 | NA                            | NA                 |
| <i>Desi_wild_49753083</i> | NA                                  | <i>Ca_desi_denovo</i> | 49753083                | G/T  | NA                 | NA                            | NA                 |
| <i>Desi_wild_49753089</i> | NA                                  | <i>Ca_desi_denovo</i> | 49753089                | A/C  | NA                 | NA                            | NA                 |
| <i>Desi_wild_49753090</i> | NA                                  | <i>Ca_desi_denovo</i> | 49753090                | G/T  | NA                 | NA                            | NA                 |
| <i>Desi_wild_49760812</i> | NA                                  | <i>Ca_desi_denovo</i> | 49760812                | G/T  | NA                 | NA                            | NA                 |
| <i>Desi_wild_49770262</i> | NA                                  | <i>Ca_desi_denovo</i> | 49770262                | C/G  | NA                 | NA                            | NA                 |
| <i>Desi_wild_49773040</i> | NA                                  | <i>Ca_desi_denovo</i> | 49773040                | A/C  | NA                 | NA                            | NA                 |
| <i>Desi_wild_49773041</i> | NA                                  | <i>Ca_desi_denovo</i> | 49773041                | G/T  | NA                 | NA                            | NA                 |
| <i>Desi_wild_49782048</i> | NA                                  | <i>Ca_desi_denovo</i> | 49782048                | A/G  | NA                 | NA                            | NA                 |
| <i>Desi_wild_49782907</i> | NA                                  | <i>Ca_desi_denovo</i> | 49782907                | G/T  | NA                 | NA                            | NA                 |
| <i>Desi_wild_49814763</i> | NA                                  | <i>Ca_desi_denovo</i> | 49814763                | C/T  | NA                 | NA                            | NA                 |
| <i>Desi_wild_49814783</i> | NA                                  | <i>Ca_desi_denovo</i> | 49814783                | C/T  | NA                 | NA                            | NA                 |
| <i>Desi_wild_49819926</i> | NA                                  | <i>Ca_desi_denovo</i> | 49819926                | G/T  | NA                 | NA                            | NA                 |
| <i>Desi_wild_49819958</i> | NA                                  | <i>Ca_desi_denovo</i> | 49819958                | G/T  | NA                 | NA                            | NA                 |
| <i>Desi_wild_49821775</i> | NA                                  | <i>Ca_desi_denovo</i> | 49821775                | A/C  | NA                 | NA                            | NA                 |
| <i>Desi_wild_49821776</i> | NA                                  | <i>Ca_desi_denovo</i> | 49821776                | G/T  | NA                 | NA                            | NA                 |
| <i>Desi_wild_49830420</i> | NA                                  | <i>Ca_desi_denovo</i> | 49830420                | A/C  | NA                 | NA                            | NA                 |

| SNP IDs                   | NCBI dbSNP accession IDs (NCBI_SS#) | Chromosomes           | Physical positions (bp) | SNPs | Gene accession IDs | Sequence components of genome | Putative functions |
|---------------------------|-------------------------------------|-----------------------|-------------------------|------|--------------------|-------------------------------|--------------------|
| <i>Desi_wild_49830421</i> | NA                                  | <i>Ca_desi_denovo</i> | 49830421                | A/G  | NA                 | NA                            | NA                 |
| <i>Desi_wild_49833645</i> | NA                                  | <i>Ca_desi_denovo</i> | 49833645                | A/G  | NA                 | NA                            | NA                 |
| <i>Desi_wild_49839920</i> | NA                                  | <i>Ca_desi_denovo</i> | 49839920                | A/C  | NA                 | NA                            | NA                 |
| <i>Desi_wild_49839921</i> | NA                                  | <i>Ca_desi_denovo</i> | 49839921                | G/T  | NA                 | NA                            | NA                 |
| <i>Desi_wild_49864980</i> | NA                                  | <i>Ca_desi_denovo</i> | 49864980                | G/T  | NA                 | NA                            | NA                 |
| <i>Desi_wild_49872980</i> | NA                                  | <i>Ca_desi_denovo</i> | 49872980                | A/C  | NA                 | NA                            | NA                 |
| <i>Desi_wild_49877541</i> | NA                                  | <i>Ca_desi_denovo</i> | 49877541                | A/G  | NA                 | NA                            | NA                 |
| <i>Desi_wild_49883419</i> | NA                                  | <i>Ca_desi_denovo</i> | 49883419                | G/T  | NA                 | NA                            | NA                 |
| <i>Desi_wild_49883712</i> | NA                                  | <i>Ca_desi_denovo</i> | 49883712                | C/G  | NA                 | NA                            | NA                 |
| <i>Desi_wild_49908110</i> | NA                                  | <i>Ca_desi_denovo</i> | 49908110                | G/T  | NA                 | NA                            | NA                 |
| <i>Desi_wild_49918436</i> | NA                                  | <i>Ca_desi_denovo</i> | 49918436                | C/G  | NA                 | NA                            | NA                 |
| <i>Desi_wild_49941665</i> | NA                                  | <i>Ca_desi_denovo</i> | 49941665                | A/C  | NA                 | NA                            | NA                 |
| <i>Desi_wild_49941666</i> | NA                                  | <i>Ca_desi_denovo</i> | 49941666                | A/G  | NA                 | NA                            | NA                 |
| <i>Desi_wild_49944106</i> | NA                                  | <i>Ca_desi_denovo</i> | 49944106                | A/C  | NA                 | NA                            | NA                 |
| <i>Desi_wild_49945818</i> | NA                                  | <i>Ca_desi_denovo</i> | 49945818                | G/T  | NA                 | NA                            | NA                 |
| <i>Desi_wild_49955219</i> | NA                                  | <i>Ca_desi_denovo</i> | 49955219                | C/G  | NA                 | NA                            | NA                 |
| <i>Desi_wild_49959810</i> | NA                                  | <i>Ca_desi_denovo</i> | 49959810                | A/C  | NA                 | NA                            | NA                 |
| <i>Desi_wild_49959811</i> | NA                                  | <i>Ca_desi_denovo</i> | 49959811                | A/G  | NA                 | NA                            | NA                 |
| <i>Desi_wild_49960240</i> | NA                                  | <i>Ca_desi_denovo</i> | 49960240                | G/T  | NA                 | NA                            | NA                 |
| <i>Desi_wild_49969955</i> | NA                                  | <i>Ca_desi_denovo</i> | 49969955                | G/T  | NA                 | NA                            | NA                 |
| <i>Desi_wild_49973677</i> | NA                                  | <i>Ca_desi_denovo</i> | 49973677                | C/G  | NA                 | NA                            | NA                 |
| <i>Desi_wild_49979089</i> | NA                                  | <i>Ca_desi_denovo</i> | 49979089                | G/T  | NA                 | NA                            | NA                 |
| <i>Desi_wild_50006741</i> | NA                                  | <i>Ca_desi_denovo</i> | 50006741                | G/T  | NA                 | NA                            | NA                 |
| <i>Desi_wild_50010226</i> | NA                                  | <i>Ca_desi_denovo</i> | 50010226                | G/T  | NA                 | NA                            | NA                 |
| <i>Desi_wild_50017000</i> | NA                                  | <i>Ca_desi_denovo</i> | 50017000                | G/T  | NA                 | NA                            | NA                 |
| <i>Desi_wild_50042520</i> | NA                                  | <i>Ca_desi_denovo</i> | 50042520                | G/T  | NA                 | NA                            | NA                 |
| <i>Desi_wild_50052050</i> | NA                                  | <i>Ca_desi_denovo</i> | 50052050                | A/C  | NA                 | NA                            | NA                 |
| <i>Desi_wild_50094703</i> | NA                                  | <i>Ca_desi_denovo</i> | 50094703                | G/T  | NA                 | NA                            | NA                 |
| <i>Desi_wild_50111526</i> | NA                                  | <i>Ca_desi_denovo</i> | 50111526                | G/T  | NA                 | NA                            | NA                 |
| <i>Desi_wild_50130424</i> | NA                                  | <i>Ca_desi_denovo</i> | 50130424                | C/G  | NA                 | NA                            | NA                 |
| <i>Desi_wild_50200917</i> | NA                                  | <i>Ca_desi_denovo</i> | 50200917                | C/G  | NA                 | NA                            | NA                 |
| <i>Desi_wild_50207377</i> | NA                                  | <i>Ca_desi_denovo</i> | 50207377                | C/G  | NA                 | NA                            | NA                 |
| <i>Desi_wild_50274683</i> | NA                                  | <i>Ca_desi_denovo</i> | 50274683                | G/T  | NA                 | NA                            | NA                 |
| <i>Desi_wild_50307033</i> | NA                                  | <i>Ca_desi_denovo</i> | 50307033                | C/G  | NA                 | NA                            | NA                 |
| <i>Desi_wild_50307035</i> | NA                                  | <i>Ca_desi_denovo</i> | 50307035                | A/G  | NA                 | NA                            | NA                 |
| <i>Desi_wild_50351018</i> | NA                                  | <i>Ca_desi_denovo</i> | 50351018                | A/C  | NA                 | NA                            | NA                 |
| <i>Desi_wild_50355201</i> | NA                                  | <i>Ca_desi_denovo</i> | 50355201                | G/T  | NA                 | NA                            | NA                 |
| <i>Desi_wild_50404853</i> | NA                                  | <i>Ca_desi_denovo</i> | 50404853                | G/T  | NA                 | NA                            | NA                 |
| <i>Desi_wild_50407979</i> | NA                                  | <i>Ca_desi_denovo</i> | 50407979                | G/T  | NA                 | NA                            | NA                 |
| <i>Desi_wild_50433191</i> | NA                                  | <i>Ca_desi_denovo</i> | 50433191                | A/C  | NA                 | NA                            | NA                 |
| <i>Desi_wild_50475792</i> | NA                                  | <i>Ca_desi_denovo</i> | 50475792                | C/G  | NA                 | NA                            | NA                 |
| <i>Desi_wild_50475804</i> | NA                                  | <i>Ca_desi_denovo</i> | 50475804                | A/G  | NA                 | NA                            | NA                 |
| <i>Desi_wild_50475809</i> | NA                                  | <i>Ca_desi_denovo</i> | 50475809                | A/T  | NA                 | NA                            | NA                 |
| <i>Desi_wild_50475821</i> | NA                                  | <i>Ca_desi_denovo</i> | 50475821                | G/T  | NA                 | NA                            | NA                 |

| SNP IDs                   | NCBI dbSNP accession IDs (NCBI_SS#) | Chromosomes           | Physical positions (bp) | SNPs | Gene accession IDs | Sequence components of genome | Putative functions |
|---------------------------|-------------------------------------|-----------------------|-------------------------|------|--------------------|-------------------------------|--------------------|
| <i>Desi_wild_50478910</i> | NA                                  | <i>Ca_desi_denovo</i> | 50478910                | G/T  | NA                 | NA                            | NA                 |
| <i>Desi_wild_50484814</i> | NA                                  | <i>Ca_desi_denovo</i> | 50484814                | C/T  | NA                 | NA                            | NA                 |
| <i>Desi_wild_50484859</i> | NA                                  | <i>Ca_desi_denovo</i> | 50484859                | A/G  | NA                 | NA                            | NA                 |
| <i>Desi_wild_50485118</i> | NA                                  | <i>Ca_desi_denovo</i> | 50485118                | C/T  | NA                 | NA                            | NA                 |
| <i>Desi_wild_50491643</i> | NA                                  | <i>Ca_desi_denovo</i> | 50491643                | A/G  | NA                 | NA                            | NA                 |
| <i>Desi_wild_50498131</i> | NA                                  | <i>Ca_desi_denovo</i> | 50498131                | C/G  | NA                 | NA                            | NA                 |
| <i>Desi_wild_50498136</i> | NA                                  | <i>Ca_desi_denovo</i> | 50498136                | C/T  | NA                 | NA                            | NA                 |
| <i>Desi_wild_50509200</i> | NA                                  | <i>Ca_desi_denovo</i> | 50509200                | C/T  | NA                 | NA                            | NA                 |
| <i>Desi_wild_50511504</i> | NA                                  | <i>Ca_desi_denovo</i> | 50511504                | A/G  | NA                 | NA                            | NA                 |
| <i>Desi_wild_50511519</i> | NA                                  | <i>Ca_desi_denovo</i> | 50511519                | C/T  | NA                 | NA                            | NA                 |
| <i>Desi_wild_50513922</i> | NA                                  | <i>Ca_desi_denovo</i> | 50513922                | A/G  | NA                 | NA                            | NA                 |
| <i>Desi_wild_50542092</i> | NA                                  | <i>Ca_desi_denovo</i> | 50542092                | A/G  | NA                 | NA                            | NA                 |
| <i>Desi_wild_50542124</i> | NA                                  | <i>Ca_desi_denovo</i> | 50542124                | A/G  | NA                 | NA                            | NA                 |
| <i>Desi_wild_50542128</i> | NA                                  | <i>Ca_desi_denovo</i> | 50542128                | A/G  | NA                 | NA                            | NA                 |
| <i>Desi_wild_50546933</i> | NA                                  | <i>Ca_desi_denovo</i> | 50546933                | A/T  | NA                 | NA                            | NA                 |
| <i>Desi_wild_50546952</i> | NA                                  | <i>Ca_desi_denovo</i> | 50546952                | C/T  | NA                 | NA                            | NA                 |
| <i>Desi_wild_50546980</i> | NA                                  | <i>Ca_desi_denovo</i> | 50546980                | C/T  | NA                 | NA                            | NA                 |
| <i>Desi_wild_50555040</i> | NA                                  | <i>Ca_desi_denovo</i> | 50555040                | A/G  | NA                 | NA                            | NA                 |
| <i>Desi_wild_50567586</i> | NA                                  | <i>Ca_desi_denovo</i> | 50567586                | A/G  | NA                 | NA                            | NA                 |
| <i>Desi_wild_50587669</i> | NA                                  | <i>Ca_desi_denovo</i> | 50587669                | C/G  | NA                 | NA                            | NA                 |
| <i>Desi_wild_50587696</i> | NA                                  | <i>Ca_desi_denovo</i> | 50587696                | C/T  | NA                 | NA                            | NA                 |
| <i>Desi_wild_50592065</i> | NA                                  | <i>Ca_desi_denovo</i> | 50592065                | C/T  | NA                 | NA                            | NA                 |
| <i>Desi_wild_50592066</i> | NA                                  | <i>Ca_desi_denovo</i> | 50592066                | G/T  | NA                 | NA                            | NA                 |
| <i>Desi_wild_50594475</i> | NA                                  | <i>Ca_desi_denovo</i> | 50594475                | C/T  | NA                 | NA                            | NA                 |
| <i>Desi_wild_50594479</i> | NA                                  | <i>Ca_desi_denovo</i> | 50594479                | C/T  | NA                 | NA                            | NA                 |
| <i>Desi_wild_50594482</i> | NA                                  | <i>Ca_desi_denovo</i> | 50594482                | A/G  | NA                 | NA                            | NA                 |
| <i>Desi_wild_50601444</i> | NA                                  | <i>Ca_desi_denovo</i> | 50601444                | C/T  | NA                 | NA                            | NA                 |
| <i>Desi_wild_50606822</i> | NA                                  | <i>Ca_desi_denovo</i> | 50606822                | C/G  | NA                 | NA                            | NA                 |
| <i>Desi_wild_50622822</i> | NA                                  | <i>Ca_desi_denovo</i> | 50622822                | A/G  | NA                 | NA                            | NA                 |
| <i>Desi_wild_50622832</i> | NA                                  | <i>Ca_desi_denovo</i> | 50622832                | C/G  | NA                 | NA                            | NA                 |
| <i>Desi_wild_50630816</i> | NA                                  | <i>Ca_desi_denovo</i> | 50630816                | A/G  | NA                 | NA                            | NA                 |
| <i>Desi_wild_50630820</i> | NA                                  | <i>Ca_desi_denovo</i> | 50630820                | A/C  | NA                 | NA                            | NA                 |
| <i>Desi_wild_50630821</i> | NA                                  | <i>Ca_desi_denovo</i> | 50630821                | A/G  | NA                 | NA                            | NA                 |
| <i>Desi_wild_50630827</i> | NA                                  | <i>Ca_desi_denovo</i> | 50630827                | C/T  | NA                 | NA                            | NA                 |
| <i>Desi_wild_50635096</i> | NA                                  | <i>Ca_desi_denovo</i> | 50635096                | A/T  | NA                 | NA                            | NA                 |
| <i>Desi_wild_50638926</i> | NA                                  | <i>Ca_desi_denovo</i> | 50638926                | C/G  | NA                 | NA                            | NA                 |
| <i>Desi_wild_50638951</i> | NA                                  | <i>Ca_desi_denovo</i> | 50638951                | A/C  | NA                 | NA                            | NA                 |
| <i>Desi_wild_50654179</i> | NA                                  | <i>Ca_desi_denovo</i> | 50654179                | C/G  | NA                 | NA                            | NA                 |
| <i>Desi_wild_50659766</i> | NA                                  | <i>Ca_desi_denovo</i> | 50659766                | A/G  | NA                 | NA                            | NA                 |
| <i>Desi_wild_50666186</i> | NA                                  | <i>Ca_desi_denovo</i> | 50666186                | C/G  | NA                 | NA                            | NA                 |
| <i>Desi_wild_50666189</i> | NA                                  | <i>Ca_desi_denovo</i> | 50666189                | C/G  | NA                 | NA                            | NA                 |
| <i>Desi_wild_50678066</i> | NA                                  | <i>Ca_desi_denovo</i> | 50678066                | C/G  | NA                 | NA                            | NA                 |
| <i>Desi_wild_50678087</i> | NA                                  | <i>Ca_desi_denovo</i> | 50678087                | C/G  | NA                 | NA                            | NA                 |
| <i>Desi_wild_50778532</i> | NA                                  | <i>Ca_desi_denovo</i> | 50778532                | C/T  | NA                 | NA                            | NA                 |



| SNP IDs                   | NCBI dbSNP accession IDs (NCBI_SS#) | Chromosomes           | Physical positions (bp) | SNPs | Gene accession IDs | Sequence components of genome | Putative functions |
|---------------------------|-------------------------------------|-----------------------|-------------------------|------|--------------------|-------------------------------|--------------------|
| <i>Desi_wild_50783046</i> | NA                                  | <i>Ca_desi_denovo</i> | 50783046                | C/G  | NA                 | NA                            | NA                 |
| <i>Desi_wild_50784044</i> | NA                                  | <i>Ca_desi_denovo</i> | 50784044                | C/G  | NA                 | NA                            | NA                 |
| <i>Desi_wild_50786714</i> | NA                                  | <i>Ca_desi_denovo</i> | 50786714                | C/T  | NA                 | NA                            | NA                 |
| <i>Desi_wild_50786798</i> | NA                                  | <i>Ca_desi_denovo</i> | 50786798                | C/T  | NA                 | NA                            | NA                 |
| <i>Desi_wild_50789194</i> | NA                                  | <i>Ca_desi_denovo</i> | 50789194                | A/G  | NA                 | NA                            | NA                 |
| <i>Desi_wild_50791209</i> | NA                                  | <i>Ca_desi_denovo</i> | 50791209                | A/T  | NA                 | NA                            | NA                 |
| <i>Desi_wild_50791222</i> | NA                                  | <i>Ca_desi_denovo</i> | 50791222                | T/A  | NA                 | NA                            | NA                 |
| <i>Desi_wild_50794668</i> | NA                                  | <i>Ca_desi_denovo</i> | 50794668                | C/T  | NA                 | NA                            | NA                 |
| <i>Desi_wild_50795139</i> | NA                                  | <i>Ca_desi_denovo</i> | 50795139                | A/C  | NA                 | NA                            | NA                 |
| <i>Desi_wild_50801583</i> | NA                                  | <i>Ca_desi_denovo</i> | 50801583                | G/C  | NA                 | NA                            | NA                 |
| <i>Desi_wild_50804928</i> | NA                                  | <i>Ca_desi_denovo</i> | 50804928                | A/T  | NA                 | NA                            | NA                 |
| <i>Desi_wild_50804930</i> | NA                                  | <i>Ca_desi_denovo</i> | 50804930                | A/G  | NA                 | NA                            | NA                 |
| <i>Desi_wild_50805809</i> | NA                                  | <i>Ca_desi_denovo</i> | 50805809                | C/T  | NA                 | NA                            | NA                 |
| <i>Desi_wild_50805994</i> | NA                                  | <i>Ca_desi_denovo</i> | 50805994                | A/C  | NA                 | NA                            | NA                 |
| <i>Desi_wild_50805995</i> | NA                                  | <i>Ca_desi_denovo</i> | 50805995                | C/T  | NA                 | NA                            | NA                 |
| <i>Desi_wild_50807022</i> | NA                                  | <i>Ca_desi_denovo</i> | 50807022                | A/T  | NA                 | NA                            | NA                 |
| <i>Desi_wild_50808637</i> | NA                                  | <i>Ca_desi_denovo</i> | 50808637                | A/G  | NA                 | NA                            | NA                 |
| <i>Desi_wild_50809188</i> | NA                                  | <i>Ca_desi_denovo</i> | 50809188                | C/G  | NA                 | NA                            | NA                 |
| <i>Desi_wild_50809344</i> | NA                                  | <i>Ca_desi_denovo</i> | 50809344                | C/T  | NA                 | NA                            | NA                 |
| <i>Desi_wild_50809415</i> | NA                                  | <i>Ca_desi_denovo</i> | 50809415                | A/T  | NA                 | NA                            | NA                 |
| <i>Desi_wild_50809917</i> | NA                                  | <i>Ca_desi_denovo</i> | 50809917                | A/C  | NA                 | NA                            | NA                 |
| <i>Desi_wild_50810670</i> | NA                                  | <i>Ca_desi_denovo</i> | 50810670                | A/T  | NA                 | NA                            | NA                 |
| <i>Desi_wild_50810695</i> | NA                                  | <i>Ca_desi_denovo</i> | 50810695                | A/C  | NA                 | NA                            | NA                 |
| <i>Desi_wild_50813419</i> | NA                                  | <i>Ca_desi_denovo</i> | 50813419                | G/T  | NA                 | NA                            | NA                 |
| <i>Desi_wild_50813420</i> | NA                                  | <i>Ca_desi_denovo</i> | 50813420                | C/G  | NA                 | NA                            | NA                 |
| <i>Desi_wild_50816159</i> | NA                                  | <i>Ca_desi_denovo</i> | 50816159                | T/C  | NA                 | NA                            | NA                 |
| <i>Desi_wild_50816820</i> | NA                                  | <i>Ca_desi_denovo</i> | 50816820                | A/G  | NA                 | NA                            | NA                 |
| <i>Desi_wild_50818202</i> | NA                                  | <i>Ca_desi_denovo</i> | 50818202                | A/G  | NA                 | NA                            | NA                 |
| <i>Desi_wild_50818625</i> | NA                                  | <i>Ca_desi_denovo</i> | 50818625                | C/T  | NA                 | NA                            | NA                 |
| <i>Desi_wild_50820398</i> | NA                                  | <i>Ca_desi_denovo</i> | 50820398                | A/T  | NA                 | NA                            | NA                 |
| <i>Desi_wild_50822704</i> | NA                                  | <i>Ca_desi_denovo</i> | 50822704                | C/T  | NA                 | NA                            | NA                 |
| <i>Desi_wild_50824447</i> | NA                                  | <i>Ca_desi_denovo</i> | 50824447                | G/T  | NA                 | NA                            | NA                 |
| <i>Desi_wild_50828102</i> | NA                                  | <i>Ca_desi_denovo</i> | 50828102                | G/T  | NA                 | NA                            | NA                 |
| <i>Desi_wild_50830336</i> | NA                                  | <i>Ca_desi_denovo</i> | 50830336                | A/G  | NA                 | NA                            | NA                 |
| <i>Desi_wild_50832105</i> | NA                                  | <i>Ca_desi_denovo</i> | 50832105                | C/T  | NA                 | NA                            | NA                 |
| <i>Desi_wild_50832278</i> | NA                                  | <i>Ca_desi_denovo</i> | 50832278                | A/T  | NA                 | NA                            | NA                 |
| <i>Desi_wild_50832322</i> | NA                                  | <i>Ca_desi_denovo</i> | 50832322                | A/C  | NA                 | NA                            | NA                 |
| <i>Desi_wild_50832372</i> | NA                                  | <i>Ca_desi_denovo</i> | 50832372                | A/T  | NA                 | NA                            | NA                 |
| <i>Desi_wild_50836370</i> | NA                                  | <i>Ca_desi_denovo</i> | 50836370                | C/G  | NA                 | NA                            | NA                 |
| <i>Desi_wild_50837111</i> | NA                                  | <i>Ca_desi_denovo</i> | 50837111                | G/A  | NA                 | NA                            | NA                 |
| <i>Desi_wild_50838034</i> | NA                                  | <i>Ca_desi_denovo</i> | 50838034                | C/T  | NA                 | NA                            | NA                 |
| <i>Desi_wild_50838235</i> | NA                                  | <i>Ca_desi_denovo</i> | 50838235                | C/G  | NA                 | NA                            | NA                 |
| <i>Desi_wild_50840732</i> | NA                                  | <i>Ca_desi_denovo</i> | 50840732                | A/C  | NA                 | NA                            | NA                 |
| <i>Desi_wild_50840761</i> | NA                                  | <i>Ca_desi_denovo</i> | 50840761                | A/G  | NA                 | NA                            | NA                 |

| SNP IDs                   | NCBI dbSNP accession IDs (NCBI_SS#) | Chromosomes           | Physical positions (bp) | SNPs | Gene accession IDs | Sequence components of genome | Putative functions |
|---------------------------|-------------------------------------|-----------------------|-------------------------|------|--------------------|-------------------------------|--------------------|
| <i>Desi_wild_50843307</i> | NA                                  | <i>Ca_desi_denovo</i> | 50843307                | C/G  | NA                 | NA                            | NA                 |
| <i>Desi_wild_50846532</i> | NA                                  | <i>Ca_desi_denovo</i> | 50846532                | A/T  | NA                 | NA                            | NA                 |
| <i>Desi_wild_50847160</i> | NA                                  | <i>Ca_desi_denovo</i> | 50847160                | A/G  | NA                 | NA                            | NA                 |
| <i>Desi_wild_50847795</i> | NA                                  | <i>Ca_desi_denovo</i> | 50847795                | A/G  | NA                 | NA                            | NA                 |
| <i>Desi_wild_50847799</i> | NA                                  | <i>Ca_desi_denovo</i> | 50847799                | A/T  | NA                 | NA                            | NA                 |
| <i>Desi_wild_50854279</i> | NA                                  | <i>Ca_desi_denovo</i> | 50854279                | A/C  | NA                 | NA                            | NA                 |
| <i>Desi_wild_50854304</i> | NA                                  | <i>Ca_desi_denovo</i> | 50854304                | A/T  | NA                 | NA                            | NA                 |
| <i>Desi_wild_50855217</i> | NA                                  | <i>Ca_desi_denovo</i> | 50855217                | A/C  | NA                 | NA                            | NA                 |
| <i>Desi_wild_50855273</i> | NA                                  | <i>Ca_desi_denovo</i> | 50855273                | C/T  | NA                 | NA                            | NA                 |
| <i>Desi_wild_50855275</i> | NA                                  | <i>Ca_desi_denovo</i> | 50855275                | C/G  | NA                 | NA                            | NA                 |
| <i>Desi_wild_50855900</i> | NA                                  | <i>Ca_desi_denovo</i> | 50855900                | C/G  | NA                 | NA                            | NA                 |
| <i>Desi_wild_50857069</i> | NA                                  | <i>Ca_desi_denovo</i> | 50857069                | C/T  | NA                 | NA                            | NA                 |
| <i>Desi_wild_50858952</i> | NA                                  | <i>Ca_desi_denovo</i> | 50858952                | A/T  | NA                 | NA                            | NA                 |
| <i>Desi_wild_50859161</i> | NA                                  | <i>Ca_desi_denovo</i> | 50859161                | C/G  | NA                 | NA                            | NA                 |
| <i>Desi_wild_50860119</i> | NA                                  | <i>Ca_desi_denovo</i> | 50860119                | G/C  | NA                 | NA                            | NA                 |
| <i>Desi_wild_50860127</i> | NA                                  | <i>Ca_desi_denovo</i> | 50860127                | A/G  | NA                 | NA                            | NA                 |
| <i>Desi_wild_50865919</i> | NA                                  | <i>Ca_desi_denovo</i> | 50865919                | C/A  | NA                 | NA                            | NA                 |
| <i>Desi_wild_50865973</i> | NA                                  | <i>Ca_desi_denovo</i> | 50865973                | C/T  | NA                 | NA                            | NA                 |
| <i>Desi_wild_50868293</i> | NA                                  | <i>Ca_desi_denovo</i> | 50868293                | G/A  | NA                 | NA                            | NA                 |
| <i>Desi_wild_50870942</i> | NA                                  | <i>Ca_desi_denovo</i> | 50870942                | G/T  | NA                 | NA                            | NA                 |
| <i>Desi_wild_50871321</i> | NA                                  | <i>Ca_desi_denovo</i> | 50871321                | T/G  | NA                 | NA                            | NA                 |
| <i>Desi_wild_50875124</i> | NA                                  | <i>Ca_desi_denovo</i> | 50875124                | G/T  | NA                 | NA                            | NA                 |
| <i>Desi_wild_50879062</i> | NA                                  | <i>Ca_desi_denovo</i> | 50879062                | A/G  | NA                 | NA                            | NA                 |
| <i>Desi_wild_50879102</i> | NA                                  | <i>Ca_desi_denovo</i> | 50879102                | A/G  | NA                 | NA                            | NA                 |
| <i>Desi_wild_50880169</i> | NA                                  | <i>Ca_desi_denovo</i> | 50880169                | C/G  | NA                 | NA                            | NA                 |
| <i>Desi_wild_50880193</i> | NA                                  | <i>Ca_desi_denovo</i> | 50880193                | C/G  | NA                 | NA                            | NA                 |
| <i>Desi_wild_50880217</i> | NA                                  | <i>Ca_desi_denovo</i> | 50880217                | C/G  | NA                 | NA                            | NA                 |
| <i>Desi_wild_50880937</i> | NA                                  | <i>Ca_desi_denovo</i> | 50880937                | G/A  | NA                 | NA                            | NA                 |
| <i>Desi_wild_50880959</i> | NA                                  | <i>Ca_desi_denovo</i> | 50880959                | T/C  | NA                 | NA                            | NA                 |
| <i>Desi_wild_50884363</i> | NA                                  | <i>Ca_desi_denovo</i> | 50884363                | T/C  | NA                 | NA                            | NA                 |
| <i>Desi_wild_50884376</i> | NA                                  | <i>Ca_desi_denovo</i> | 50884376                | C/T  | NA                 | NA                            | NA                 |
| <i>Desi_wild_50886328</i> | NA                                  | <i>Ca_desi_denovo</i> | 50886328                | A/G  | NA                 | NA                            | NA                 |
| <i>Desi_wild_50888732</i> | NA                                  | <i>Ca_desi_denovo</i> | 50888732                | G/C  | NA                 | NA                            | NA                 |
| <i>Desi_wild_50888756</i> | NA                                  | <i>Ca_desi_denovo</i> | 50888756                | G/T  | NA                 | NA                            | NA                 |
| <i>Desi_wild_50889223</i> | NA                                  | <i>Ca_desi_denovo</i> | 50889223                | T/C  | NA                 | NA                            | NA                 |
| <i>Desi_wild_50889226</i> | NA                                  | <i>Ca_desi_denovo</i> | 50889226                | A/C  | NA                 | NA                            | NA                 |
| <i>Desi_wild_50891555</i> | NA                                  | <i>Ca_desi_denovo</i> | 50891555                | C/G  | NA                 | NA                            | NA                 |
| <i>Desi_wild_50893793</i> | NA                                  | <i>Ca_desi_denovo</i> | 50893793                | A/G  | NA                 | NA                            | NA                 |
| <i>Desi_wild_50897265</i> | NA                                  | <i>Ca_desi_denovo</i> | 50897265                | T/C  | NA                 | NA                            | NA                 |
| <i>Desi_wild_50897274</i> | NA                                  | <i>Ca_desi_denovo</i> | 50897274                | T/C  | NA                 | NA                            | NA                 |
| <i>Desi_wild_50897313</i> | NA                                  | <i>Ca_desi_denovo</i> | 50897313                | G/C  | NA                 | NA                            | NA                 |
| <i>Desi_wild_50906092</i> | NA                                  | <i>Ca_desi_denovo</i> | 50906092                | C/T  | NA                 | NA                            | NA                 |
| <i>Desi_wild_50908193</i> | NA                                  | <i>Ca_desi_denovo</i> | 50908193                | G/A  | NA                 | NA                            | NA                 |
| <i>Desi_wild_50908223</i> | NA                                  | <i>Ca_desi_denovo</i> | 50908223                | T/C  | NA                 | NA                            | NA                 |

| SNP IDs                   | NCBI dbSNP accession IDs (NCBI_SS#) | Chromosomes           | Physical positions (bp) | SNPs | Gene accession IDs | Sequence components of genome | Putative functions |
|---------------------------|-------------------------------------|-----------------------|-------------------------|------|--------------------|-------------------------------|--------------------|
| <i>Desi_wild_50908253</i> | NA                                  | <i>Ca_desi_denovo</i> | 50908253                | T/G  | NA                 | NA                            | NA                 |
| <i>Desi_wild_50908254</i> | NA                                  | <i>Ca_desi_denovo</i> | 50908254                | G/A  | NA                 | NA                            | NA                 |
| <i>Desi_wild_50911380</i> | NA                                  | <i>Ca_desi_denovo</i> | 50911380                | T/C  | NA                 | NA                            | NA                 |
| <i>Desi_wild_50912691</i> | NA                                  | <i>Ca_desi_denovo</i> | 50912691                | G/T  | NA                 | NA                            | NA                 |
| <i>Desi_wild_50916058</i> | NA                                  | <i>Ca_desi_denovo</i> | 50916058                | C/G  | NA                 | NA                            | NA                 |
| <i>Desi_wild_50916069</i> | NA                                  | <i>Ca_desi_denovo</i> | 50916069                | C/G  | NA                 | NA                            | NA                 |
| <i>Desi_wild_50916494</i> | NA                                  | <i>Ca_desi_denovo</i> | 50916494                | G/C  | NA                 | NA                            | NA                 |
| <i>Desi_wild_50916512</i> | NA                                  | <i>Ca_desi_denovo</i> | 50916512                | T/C  | NA                 | NA                            | NA                 |
| <i>Desi_wild_50916534</i> | NA                                  | <i>Ca_desi_denovo</i> | 50916534                | A/G  | NA                 | NA                            | NA                 |
| <i>Desi_wild_50921226</i> | NA                                  | <i>Ca_desi_denovo</i> | 50921226                | C/T  | NA                 | NA                            | NA                 |
| <i>Desi_wild_50921261</i> | NA                                  | <i>Ca_desi_denovo</i> | 50921261                | T/C  | NA                 | NA                            | NA                 |
| <i>Desi_wild_50926895</i> | NA                                  | <i>Ca_desi_denovo</i> | 50926895                | G/T  | NA                 | NA                            | NA                 |
| <i>Desi_wild_50932285</i> | NA                                  | <i>Ca_desi_denovo</i> | 50932285                | C/G  | NA                 | NA                            | NA                 |
| <i>Desi_wild_50933193</i> | NA                                  | <i>Ca_desi_denovo</i> | 50933193                | C/G  | NA                 | NA                            | NA                 |
| <i>Desi_wild_50933208</i> | NA                                  | <i>Ca_desi_denovo</i> | 50933208                | A/G  | NA                 | NA                            | NA                 |
| <i>Desi_wild_50933233</i> | NA                                  | <i>Ca_desi_denovo</i> | 50933233                | C/G  | NA                 | NA                            | NA                 |
| <i>Desi_wild_50933559</i> | NA                                  | <i>Ca_desi_denovo</i> | 50933559                | A/G  | NA                 | NA                            | NA                 |
| <i>Desi_wild_50933712</i> | NA                                  | <i>Ca_desi_denovo</i> | 50933712                | G/T  | NA                 | NA                            | NA                 |
| <i>Desi_wild_50935059</i> | NA                                  | <i>Ca_desi_denovo</i> | 50935059                | C/G  | NA                 | NA                            | NA                 |
| <i>Desi_wild_50935067</i> | NA                                  | <i>Ca_desi_denovo</i> | 50935067                | A/T  | NA                 | NA                            | NA                 |
| <i>Desi_wild_50936508</i> | NA                                  | <i>Ca_desi_denovo</i> | 50936508                | G/A  | NA                 | NA                            | NA                 |
| <i>Desi_wild_50936532</i> | NA                                  | <i>Ca_desi_denovo</i> | 50936532                | A/G  | NA                 | NA                            | NA                 |
| <i>Desi_wild_50936574</i> | NA                                  | <i>Ca_desi_denovo</i> | 50936574                | A/G  | NA                 | NA                            | NA                 |
| <i>Desi_wild_50936585</i> | NA                                  | <i>Ca_desi_denovo</i> | 50936585                | T/A  | NA                 | NA                            | NA                 |
| <i>Desi_wild_50937062</i> | NA                                  | <i>Ca_desi_denovo</i> | 50937062                | G/T  | NA                 | NA                            | NA                 |
| <i>Desi_wild_50937821</i> | NA                                  | <i>Ca_desi_denovo</i> | 50937821                | A/G  | NA                 | NA                            | NA                 |
| <i>Desi_wild_50938518</i> | NA                                  | <i>Ca_desi_denovo</i> | 50938518                | C/T  | NA                 | NA                            | NA                 |
| <i>Desi_wild_50938530</i> | NA                                  | <i>Ca_desi_denovo</i> | 50938530                | T/C  | NA                 | NA                            | NA                 |
| <i>Desi_wild_50942477</i> | NA                                  | <i>Ca_desi_denovo</i> | 50942477                | G/T  | NA                 | NA                            | NA                 |
| <i>Desi_wild_50944651</i> | NA                                  | <i>Ca_desi_denovo</i> | 50944651                | G/T  | NA                 | NA                            | NA                 |
| <i>Desi_wild_50944653</i> | NA                                  | <i>Ca_desi_denovo</i> | 50944653                | C/T  | NA                 | NA                            | NA                 |
| <i>Desi_wild_50944654</i> | NA                                  | <i>Ca_desi_denovo</i> | 50944654                | A/C  | NA                 | NA                            | NA                 |
| <i>Desi_wild_50944655</i> | NA                                  | <i>Ca_desi_denovo</i> | 50944655                | A/G  | NA                 | NA                            | NA                 |
| <i>Desi_wild_50945602</i> | NA                                  | <i>Ca_desi_denovo</i> | 50945602                | G/T  | NA                 | NA                            | NA                 |
| <i>Desi_wild_50947607</i> | NA                                  | <i>Ca_desi_denovo</i> | 50947607                | T/G  | NA                 | NA                            | NA                 |
| <i>Desi_wild_50948454</i> | NA                                  | <i>Ca_desi_denovo</i> | 50948454                | G/T  | NA                 | NA                            | NA                 |
| <i>Desi_wild_50957687</i> | NA                                  | <i>Ca_desi_denovo</i> | 50957687                | T/C  | NA                 | NA                            | NA                 |
| <i>Desi_wild_50957701</i> | NA                                  | <i>Ca_desi_denovo</i> | 50957701                | G/A  | NA                 | NA                            | NA                 |
| <i>Desi_wild_50963181</i> | NA                                  | <i>Ca_desi_denovo</i> | 50963181                | C/G  | NA                 | NA                            | NA                 |
| <i>Desi_wild_50963184</i> | NA                                  | <i>Ca_desi_denovo</i> | 50963184                | C/G  | NA                 | NA                            | NA                 |
| <i>Desi_wild_50963186</i> | NA                                  | <i>Ca_desi_denovo</i> | 50963186                | C/T  | NA                 | NA                            | NA                 |
| <i>Desi_wild_50963687</i> | NA                                  | <i>Ca_desi_denovo</i> | 50963687                | A/G  | NA                 | NA                            | NA                 |
| <i>Desi_wild_50963711</i> | NA                                  | <i>Ca_desi_denovo</i> | 50963711                | G/A  | NA                 | NA                            | NA                 |
| <i>Desi_wild_50963748</i> | NA                                  | <i>Ca_desi_denovo</i> | 50963748                | T/G  | NA                 | NA                            | NA                 |

| SNP IDs                   | NCBI dbSNP accession IDs (NCBI_SS#) | Chromosomes           | Physical positions (bp) | SNPs | Gene accession IDs | Sequence components of genome | Putative functions |
|---------------------------|-------------------------------------|-----------------------|-------------------------|------|--------------------|-------------------------------|--------------------|
| <i>Desi_wild_50963766</i> | NA                                  | <i>Ca_desi_denovo</i> | 50963766                | G/C  | NA                 | NA                            | NA                 |
| <i>Desi_wild_50968408</i> | NA                                  | <i>Ca_desi_denovo</i> | 50968408                | T/C  | NA                 | NA                            | NA                 |
| <i>Desi_wild_50968409</i> | NA                                  | <i>Ca_desi_denovo</i> | 50968409                | G/T  | NA                 | NA                            | NA                 |
| <i>Desi_wild_50968412</i> | NA                                  | <i>Ca_desi_denovo</i> | 50968412                | G/T  | NA                 | NA                            | NA                 |
| <i>Desi_wild_50968503</i> | NA                                  | <i>Ca_desi_denovo</i> | 50968503                | C/G  | NA                 | NA                            | NA                 |
| <i>Desi_wild_50973663</i> | NA                                  | <i>Ca_desi_denovo</i> | 50973663                | C/T  | NA                 | NA                            | NA                 |
| <i>Desi_wild_50973941</i> | NA                                  | <i>Ca_desi_denovo</i> | 50973941                | C/T  | NA                 | NA                            | NA                 |
| <i>Desi_wild_50973968</i> | NA                                  | <i>Ca_desi_denovo</i> | 50973968                | G/A  | NA                 | NA                            | NA                 |
| <i>Desi_wild_50973977</i> | NA                                  | <i>Ca_desi_denovo</i> | 50973977                | C/T  | NA                 | NA                            | NA                 |
| <i>Desi_wild_50978549</i> | NA                                  | <i>Ca_desi_denovo</i> | 50978549                | C/T  | NA                 | NA                            | NA                 |
| <i>Desi_wild_50980077</i> | NA                                  | <i>Ca_desi_denovo</i> | 50980077                | T/G  | NA                 | NA                            | NA                 |
| <i>Desi_wild_50980221</i> | NA                                  | <i>Ca_desi_denovo</i> | 50980221                | A/G  | NA                 | NA                            | NA                 |
| <i>Desi_wild_50980282</i> | NA                                  | <i>Ca_desi_denovo</i> | 50980282                | G/C  | NA                 | NA                            | NA                 |
| <i>Desi_wild_50990358</i> | NA                                  | <i>Ca_desi_denovo</i> | 50990358                | A/T  | NA                 | NA                            | NA                 |
| <i>Desi_wild_50991569</i> | NA                                  | <i>Ca_desi_denovo</i> | 50991569                | A/C  | NA                 | NA                            | NA                 |
| <i>Desi_wild_50991586</i> | NA                                  | <i>Ca_desi_denovo</i> | 50991586                | G/C  | NA                 | NA                            | NA                 |
| <i>Desi_wild_50995030</i> | NA                                  | <i>Ca_desi_denovo</i> | 50995030                | C/G  | NA                 | NA                            | NA                 |
| <i>Desi_wild_50996172</i> | NA                                  | <i>Ca_desi_denovo</i> | 50996172                | T/G  | NA                 | NA                            | NA                 |
| <i>Desi_wild_50996200</i> | NA                                  | <i>Ca_desi_denovo</i> | 50996200                | A/T  | NA                 | NA                            | NA                 |
| <i>Desi_wild_50997265</i> | NA                                  | <i>Ca_desi_denovo</i> | 50997265                | G/A  | NA                 | NA                            | NA                 |
| <i>Desi_wild_50997272</i> | NA                                  | <i>Ca_desi_denovo</i> | 50997272                | C/A  | NA                 | NA                            | NA                 |
| <i>Desi_wild_50998617</i> | NA                                  | <i>Ca_desi_denovo</i> | 50998617                | G/T  | NA                 | NA                            | NA                 |
| <i>Desi_wild_50999614</i> | NA                                  | <i>Ca_desi_denovo</i> | 50999614                | T/C  | NA                 | NA                            | NA                 |
| <i>Desi_wild_51004823</i> | NA                                  | <i>Ca_desi_denovo</i> | 51004823                | T/C  | NA                 | NA                            | NA                 |
| <i>Desi_wild_51017053</i> | NA                                  | <i>Ca_desi_denovo</i> | 51017053                | G/T  | NA                 | NA                            | NA                 |
| <i>Desi_wild_51018595</i> | NA                                  | <i>Ca_desi_denovo</i> | 51018595                | C/G  | NA                 | NA                            | NA                 |
| <i>Desi_wild_51026278</i> | NA                                  | <i>Ca_desi_denovo</i> | 51026278                | C/G  | NA                 | NA                            | NA                 |
| <i>Desi_wild_51026361</i> | NA                                  | <i>Ca_desi_denovo</i> | 51026361                | A/G  | NA                 | NA                            | NA                 |
| <i>Desi_wild_51028193</i> | NA                                  | <i>Ca_desi_denovo</i> | 51028193                | C/T  | NA                 | NA                            | NA                 |
| <i>Desi_wild_51028226</i> | NA                                  | <i>Ca_desi_denovo</i> | 51028226                | A/G  | NA                 | NA                            | NA                 |
| <i>Desi_wild_51028241</i> | NA                                  | <i>Ca_desi_denovo</i> | 51028241                | C/G  | NA                 | NA                            | NA                 |
| <i>Desi_wild_51028262</i> | NA                                  | <i>Ca_desi_denovo</i> | 51028262                | A/G  | NA                 | NA                            | NA                 |
| <i>Desi_wild_51029534</i> | NA                                  | <i>Ca_desi_denovo</i> | 51029534                | T/A  | NA                 | NA                            | NA                 |
| <i>Desi_wild_51035192</i> | NA                                  | <i>Ca_desi_denovo</i> | 51035192                | T/G  | NA                 | NA                            | NA                 |
| <i>Desi_wild_51037383</i> | NA                                  | <i>Ca_desi_denovo</i> | 51037383                | C/G  | NA                 | NA                            | NA                 |
| <i>Desi_wild_51037384</i> | NA                                  | <i>Ca_desi_denovo</i> | 51037384                | C/G  | NA                 | NA                            | NA                 |
| <i>Desi_wild_51042346</i> | NA                                  | <i>Ca_desi_denovo</i> | 51042346                | C/T  | NA                 | NA                            | NA                 |
| <i>Desi_wild_51042906</i> | NA                                  | <i>Ca_desi_denovo</i> | 51042906                | G/A  | NA                 | NA                            | NA                 |
| <i>Desi_wild_51042977</i> | NA                                  | <i>Ca_desi_denovo</i> | 51042977                | G/T  | NA                 | NA                            | NA                 |
| <i>Desi_wild_51043121</i> | NA                                  | <i>Ca_desi_denovo</i> | 51043121                | A/G  | NA                 | NA                            | NA                 |
| <i>Desi_wild_51043142</i> | NA                                  | <i>Ca_desi_denovo</i> | 51043142                | G/A  | NA                 | NA                            | NA                 |
| <i>Desi_wild_51043690</i> | NA                                  | <i>Ca_desi_denovo</i> | 51043690                | A/G  | NA                 | NA                            | NA                 |
| <i>Desi_wild_51043728</i> | NA                                  | <i>Ca_desi_denovo</i> | 51043728                | G/A  | NA                 | NA                            | NA                 |
| <i>Desi_wild_51047589</i> | NA                                  | <i>Ca_desi_denovo</i> | 51047589                | G/A  | NA                 | NA                            | NA                 |

| SNP IDs                   | NCBI dbSNP accession IDs (NCBI_SS#) | Chromosomes           | Physical positions (bp) | SNPs | Gene accession IDs | Sequence components of genome | Putative functions |
|---------------------------|-------------------------------------|-----------------------|-------------------------|------|--------------------|-------------------------------|--------------------|
| <i>Desi_wild_51047601</i> | NA                                  | <i>Ca_desi_denovo</i> | 51047601                | C/G  | NA                 | NA                            | NA                 |
| <i>Desi_wild_51049116</i> | NA                                  | <i>Ca_desi_denovo</i> | 51049116                | G/A  | NA                 | NA                            | NA                 |
| <i>Desi_wild_51050499</i> | NA                                  | <i>Ca_desi_denovo</i> | 51050499                | C/T  | NA                 | NA                            | NA                 |
| <i>Desi_wild_51050523</i> | NA                                  | <i>Ca_desi_denovo</i> | 51050523                | A/G  | NA                 | NA                            | NA                 |
| <i>Desi_wild_51051454</i> | NA                                  | <i>Ca_desi_denovo</i> | 51051454                | C/T  | NA                 | NA                            | NA                 |
| <i>Desi_wild_51057934</i> | NA                                  | <i>Ca_desi_denovo</i> | 51057934                | G/C  | NA                 | NA                            | NA                 |
| <i>Desi_wild_51058619</i> | NA                                  | <i>Ca_desi_denovo</i> | 51058619                | C/T  | NA                 | NA                            | NA                 |
| <i>Desi_wild_51058915</i> | NA                                  | <i>Ca_desi_denovo</i> | 51058915                | G/T  | NA                 | NA                            | NA                 |
| <i>Desi_wild_51061323</i> | NA                                  | <i>Ca_desi_denovo</i> | 51061323                | A/T  | NA                 | NA                            | NA                 |
| <i>Desi_wild_51067096</i> | NA                                  | <i>Ca_desi_denovo</i> | 51067096                | C/G  | NA                 | NA                            | NA                 |
| <i>Desi_wild_51070649</i> | NA                                  | <i>Ca_desi_denovo</i> | 51070649                | T/C  | NA                 | NA                            | NA                 |
| <i>Desi_wild_51072943</i> | NA                                  | <i>Ca_desi_denovo</i> | 51072943                | T/C  | NA                 | NA                            | NA                 |
| <i>Desi_wild_51072964</i> | NA                                  | <i>Ca_desi_denovo</i> | 51072964                | C/G  | NA                 | NA                            | NA                 |
| <i>Desi_wild_51073007</i> | NA                                  | <i>Ca_desi_denovo</i> | 51073007                | C/G  | NA                 | NA                            | NA                 |
| <i>Desi_wild_51080537</i> | NA                                  | <i>Ca_desi_denovo</i> | 51080537                | A/G  | NA                 | NA                            | NA                 |
| <i>Desi_wild_51084488</i> | NA                                  | <i>Ca_desi_denovo</i> | 51084488                | G/A  | NA                 | NA                            | NA                 |
| <i>Desi_wild_51084500</i> | NA                                  | <i>Ca_desi_denovo</i> | 51084500                | A/G  | NA                 | NA                            | NA                 |
| <i>Desi_wild_51090584</i> | NA                                  | <i>Ca_desi_denovo</i> | 51090584                | G/T  | NA                 | NA                            | NA                 |
| <i>Desi_wild_51092873</i> | NA                                  | <i>Ca_desi_denovo</i> | 51092873                | C/T  | NA                 | NA                            | NA                 |
| <i>Desi_wild_51095624</i> | NA                                  | <i>Ca_desi_denovo</i> | 51095624                | G/C  | NA                 | NA                            | NA                 |
| <i>Desi_wild_51095636</i> | NA                                  | <i>Ca_desi_denovo</i> | 51095636                | G/A  | NA                 | NA                            | NA                 |
| <i>Desi_wild_51097319</i> | NA                                  | <i>Ca_desi_denovo</i> | 51097319                | T/C  | NA                 | NA                            | NA                 |
| <i>Desi_wild_51098995</i> | NA                                  | <i>Ca_desi_denovo</i> | 51098995                | A/G  | NA                 | NA                            | NA                 |
| <i>Desi_wild_51100377</i> | NA                                  | <i>Ca_desi_denovo</i> | 51100377                | G/A  | NA                 | NA                            | NA                 |
| <i>Desi_wild_51100405</i> | NA                                  | <i>Ca_desi_denovo</i> | 51100405                | G/C  | NA                 | NA                            | NA                 |
| <i>Desi_wild_51105205</i> | NA                                  | <i>Ca_desi_denovo</i> | 51105205                | A/G  | NA                 | NA                            | NA                 |
| <i>Desi_wild_51124444</i> | NA                                  | <i>Ca_desi_denovo</i> | 51124444                | T/C  | NA                 | NA                            | NA                 |
| <i>Desi_wild_51126174</i> | NA                                  | <i>Ca_desi_denovo</i> | 51126174                | G/A  | NA                 | NA                            | NA                 |
| <i>Desi_wild_51128779</i> | NA                                  | <i>Ca_desi_denovo</i> | 51128779                | G/T  | NA                 | NA                            | NA                 |
| <i>Desi_wild_51128840</i> | NA                                  | <i>Ca_desi_denovo</i> | 51128840                | T/A  | NA                 | NA                            | NA                 |
| <i>Desi_wild_51128864</i> | NA                                  | <i>Ca_desi_denovo</i> | 51128864                | G/A  | NA                 | NA                            | NA                 |
| <i>Desi_wild_51133523</i> | NA                                  | <i>Ca_desi_denovo</i> | 51133523                | A/T  | NA                 | NA                            | NA                 |
| <i>Desi_wild_51133855</i> | NA                                  | <i>Ca_desi_denovo</i> | 51133855                | A/T  | NA                 | NA                            | NA                 |
| <i>Desi_wild_51133875</i> | NA                                  | <i>Ca_desi_denovo</i> | 51133875                | T/C  | NA                 | NA                            | NA                 |
| <i>Desi_wild_51135800</i> | NA                                  | <i>Ca_desi_denovo</i> | 51135800                | A/C  | NA                 | NA                            | NA                 |
| <i>Desi_wild_51136267</i> | NA                                  | <i>Ca_desi_denovo</i> | 51136267                | C/G  | NA                 | NA                            | NA                 |
| <i>Desi_wild_51137169</i> | NA                                  | <i>Ca_desi_denovo</i> | 51137169                | T/C  | NA                 | NA                            | NA                 |
| <i>Desi_wild_51137699</i> | NA                                  | <i>Ca_desi_denovo</i> | 51137699                | G/T  | NA                 | NA                            | NA                 |
| <i>Desi_wild_51139257</i> | NA                                  | <i>Ca_desi_denovo</i> | 51139257                | G/A  | NA                 | NA                            | NA                 |
| <i>Desi_wild_51139259</i> | NA                                  | <i>Ca_desi_denovo</i> | 51139259                | T/C  | NA                 | NA                            | NA                 |
| <i>Desi_wild_51141535</i> | NA                                  | <i>Ca_desi_denovo</i> | 51141535                | C/G  | NA                 | NA                            | NA                 |
| <i>Desi_wild_51144269</i> | NA                                  | <i>Ca_desi_denovo</i> | 51144269                | T/C  | NA                 | NA                            | NA                 |
| <i>Desi_wild_51145111</i> | NA                                  | <i>Ca_desi_denovo</i> | 51145111                | T/C  | NA                 | NA                            | NA                 |
| <i>Desi_wild_51154919</i> | NA                                  | <i>Ca_desi_denovo</i> | 51154919                | G/A  | NA                 | NA                            | NA                 |

| SNP IDs                   | NCBI dbSNP accession IDs (NCBI_SS#) | Chromosomes           | Physical positions (bp) | SNPs | Gene accession IDs | Sequence components of genome | Putative functions |
|---------------------------|-------------------------------------|-----------------------|-------------------------|------|--------------------|-------------------------------|--------------------|
| <i>Desi_wild_51154967</i> | NA                                  | <i>Ca_desi_denovo</i> | 51154967                | G/C  | NA                 | NA                            | NA                 |
| <i>Desi_wild_51159383</i> | NA                                  | <i>Ca_desi_denovo</i> | 51159383                | T/G  | NA                 | NA                            | NA                 |
| <i>Desi_wild_51159390</i> | NA                                  | <i>Ca_desi_denovo</i> | 51159390                | A/T  | NA                 | NA                            | NA                 |
| <i>Desi_wild_51159868</i> | NA                                  | <i>Ca_desi_denovo</i> | 51159868                | T/C  | NA                 | NA                            | NA                 |
| <i>Desi_wild_51159906</i> | NA                                  | <i>Ca_desi_denovo</i> | 51159906                | A/C  | NA                 | NA                            | NA                 |
| <i>Desi_wild_51160720</i> | NA                                  | <i>Ca_desi_denovo</i> | 51160720                | A/C  | NA                 | NA                            | NA                 |
| <i>Desi_wild_51161640</i> | NA                                  | <i>Ca_desi_denovo</i> | 51161640                | C/T  | NA                 | NA                            | NA                 |
| <i>Desi_wild_51163172</i> | NA                                  | <i>Ca_desi_denovo</i> | 51163172                | T/C  | NA                 | NA                            | NA                 |
| <i>Desi_wild_51163197</i> | NA                                  | <i>Ca_desi_denovo</i> | 51163197                | C/G  | NA                 | NA                            | NA                 |
| <i>Desi_wild_51170124</i> | NA                                  | <i>Ca_desi_denovo</i> | 51170124                | C/T  | NA                 | NA                            | NA                 |
| <i>Desi_wild_51170991</i> | NA                                  | <i>Ca_desi_denovo</i> | 51170991                | G/A  | NA                 | NA                            | NA                 |
| <i>Desi_wild_51174350</i> | NA                                  | <i>Ca_desi_denovo</i> | 51174350                | G/T  | NA                 | NA                            | NA                 |
| <i>Desi_wild_51175226</i> | NA                                  | <i>Ca_desi_denovo</i> | 51175226                | G/T  | NA                 | NA                            | NA                 |
| <i>Desi_wild_51175648</i> | NA                                  | <i>Ca_desi_denovo</i> | 51175648                | C/A  | NA                 | NA                            | NA                 |
| <i>Desi_wild_51175687</i> | NA                                  | <i>Ca_desi_denovo</i> | 51175687                | A/C  | NA                 | NA                            | NA                 |
| <i>Desi_wild_51176997</i> | NA                                  | <i>Ca_desi_denovo</i> | 51176997                | A/C  | NA                 | NA                            | NA                 |
| <i>Desi_wild_51177030</i> | NA                                  | <i>Ca_desi_denovo</i> | 51177030                | C/T  | NA                 | NA                            | NA                 |
| <i>Desi_wild_51180240</i> | NA                                  | <i>Ca_desi_denovo</i> | 51180240                | G/T  | NA                 | NA                            | NA                 |
| <i>Desi_wild_51191056</i> | NA                                  | <i>Ca_desi_denovo</i> | 51191056                | C/T  | NA                 | NA                            | NA                 |
| <i>Desi_wild_51202031</i> | NA                                  | <i>Ca_desi_denovo</i> | 51202031                | G/A  | NA                 | NA                            | NA                 |
| <i>Desi_wild_51202067</i> | NA                                  | <i>Ca_desi_denovo</i> | 51202067                | G/A  | NA                 | NA                            | NA                 |
| <i>Desi_wild_51203456</i> | NA                                  | <i>Ca_desi_denovo</i> | 51203456                | C/G  | NA                 | NA                            | NA                 |
| <i>Desi_wild_51203510</i> | NA                                  | <i>Ca_desi_denovo</i> | 51203510                | G/T  | NA                 | NA                            | NA                 |
| <i>Desi_wild_51204499</i> | NA                                  | <i>Ca_desi_denovo</i> | 51204499                | C/A  | NA                 | NA                            | NA                 |
| <i>Desi_wild_51204503</i> | NA                                  | <i>Ca_desi_denovo</i> | 51204503                | G/C  | NA                 | NA                            | NA                 |
| <i>Desi_wild_51206007</i> | NA                                  | <i>Ca_desi_denovo</i> | 51206007                | C/G  | NA                 | NA                            | NA                 |
| <i>Desi_wild_51206532</i> | NA                                  | <i>Ca_desi_denovo</i> | 51206532                | T/C  | NA                 | NA                            | NA                 |
| <i>Desi_wild_51209226</i> | NA                                  | <i>Ca_desi_denovo</i> | 51209226                | C/G  | NA                 | NA                            | NA                 |
| <i>Desi_wild_51209232</i> | NA                                  | <i>Ca_desi_denovo</i> | 51209232                | G/A  | NA                 | NA                            | NA                 |
| <i>Desi_wild_51214577</i> | NA                                  | <i>Ca_desi_denovo</i> | 51214577                | G/C  | NA                 | NA                            | NA                 |
| <i>Desi_wild_51219809</i> | NA                                  | <i>Ca_desi_denovo</i> | 51219809                | C/A  | NA                 | NA                            | NA                 |
| <i>Desi_wild_51219854</i> | NA                                  | <i>Ca_desi_denovo</i> | 51219854                | T/C  | NA                 | NA                            | NA                 |
| <i>Desi_wild_51220475</i> | NA                                  | <i>Ca_desi_denovo</i> | 51220475                | G/C  | NA                 | NA                            | NA                 |
| <i>Desi_wild_51220527</i> | NA                                  | <i>Ca_desi_denovo</i> | 51220527                | G/C  | NA                 | NA                            | NA                 |
| <i>Desi_wild_51225980</i> | NA                                  | <i>Ca_desi_denovo</i> | 51225980                | G/C  | NA                 | NA                            | NA                 |
| <i>Desi_wild_51226992</i> | NA                                  | <i>Ca_desi_denovo</i> | 51226992                | G/A  | NA                 | NA                            | NA                 |
| <i>Desi_wild_51233015</i> | NA                                  | <i>Ca_desi_denovo</i> | 51233015                | A/G  | NA                 | NA                            | NA                 |
| <i>Desi_wild_51235216</i> | NA                                  | <i>Ca_desi_denovo</i> | 51235216                | A/C  | NA                 | NA                            | NA                 |
| <i>Desi_wild_51235243</i> | NA                                  | <i>Ca_desi_denovo</i> | 51235243                | C/G  | NA                 | NA                            | NA                 |
| <i>Desi_wild_51236947</i> | NA                                  | <i>Ca_desi_denovo</i> | 51236947                | G/T  | NA                 | NA                            | NA                 |
| <i>Desi_wild_51236969</i> | NA                                  | <i>Ca_desi_denovo</i> | 51236969                | G/T  | NA                 | NA                            | NA                 |
| <i>Desi_wild_51238910</i> | NA                                  | <i>Ca_desi_denovo</i> | 51238910                | G/T  | NA                 | NA                            | NA                 |
| <i>Desi_wild_51238988</i> | NA                                  | <i>Ca_desi_denovo</i> | 51238988                | C/T  | NA                 | NA                            | NA                 |
| <i>Desi_wild_51238994</i> | NA                                  | <i>Ca_desi_denovo</i> | 51238994                | T/G  | NA                 | NA                            | NA                 |

| SNP IDs                   | NCBI dbSNP accession IDs (NCBI_SS#) | Chromosomes           | Physical positions (bp) | SNPs | Gene accession IDs | Sequence components of genome | Putative functions |
|---------------------------|-------------------------------------|-----------------------|-------------------------|------|--------------------|-------------------------------|--------------------|
| <i>Desi_wild_51243945</i> | NA                                  | <i>Ca_desi_denovo</i> | 51243945                | A/G  | NA                 | NA                            | NA                 |
| <i>Desi_wild_51243966</i> | NA                                  | <i>Ca_desi_denovo</i> | 51243966                | C/G  | NA                 | NA                            | NA                 |
| <i>Desi_wild_51247023</i> | NA                                  | <i>Ca_desi_denovo</i> | 51247023                | C/T  | NA                 | NA                            | NA                 |
| <i>Desi_wild_51247026</i> | NA                                  | <i>Ca_desi_denovo</i> | 51247026                | T/C  | NA                 | NA                            | NA                 |
| <i>Desi_wild_51263762</i> | NA                                  | <i>Ca_desi_denovo</i> | 51263762                | G/T  | NA                 | NA                            | NA                 |
| <i>Desi_wild_51269873</i> | NA                                  | <i>Ca_desi_denovo</i> | 51269873                | C/T  | NA                 | NA                            | NA                 |
| <i>Desi_wild_51270247</i> | NA                                  | <i>Ca_desi_denovo</i> | 51270247                | A/G  | NA                 | NA                            | NA                 |
| <i>Desi_wild_51271566</i> | NA                                  | <i>Ca_desi_denovo</i> | 51271566                | A/G  | NA                 | NA                            | NA                 |
| <i>Desi_wild_51271569</i> | NA                                  | <i>Ca_desi_denovo</i> | 51271569                | A/G  | NA                 | NA                            | NA                 |
| <i>Desi_wild_51271931</i> | NA                                  | <i>Ca_desi_denovo</i> | 51271931                | G/T  | NA                 | NA                            | NA                 |
| <i>Desi_wild_51275908</i> | NA                                  | <i>Ca_desi_denovo</i> | 51275908                | T/C  | NA                 | NA                            | NA                 |
| <i>Desi_wild_51278463</i> | NA                                  | <i>Ca_desi_denovo</i> | 51278463                | G/A  | NA                 | NA                            | NA                 |
| <i>Desi_wild_51279249</i> | NA                                  | <i>Ca_desi_denovo</i> | 51279249                | C/T  | NA                 | NA                            | NA                 |
| <i>Desi_wild_51279250</i> | NA                                  | <i>Ca_desi_denovo</i> | 51279250                | T/C  | NA                 | NA                            | NA                 |
| <i>Desi_wild_51280325</i> | NA                                  | <i>Ca_desi_denovo</i> | 51280325                | C/T  | NA                 | NA                            | NA                 |
| <i>Desi_wild_51284774</i> | NA                                  | <i>Ca_desi_denovo</i> | 51284774                | C/G  | NA                 | NA                            | NA                 |
| <i>Desi_wild_51284903</i> | NA                                  | <i>Ca_desi_denovo</i> | 51284903                | G/T  | NA                 | NA                            | NA                 |
| <i>Desi_wild_51286125</i> | NA                                  | <i>Ca_desi_denovo</i> | 51286125                | G/A  | NA                 | NA                            | NA                 |
| <i>Desi_wild_51286128</i> | NA                                  | <i>Ca_desi_denovo</i> | 51286128                | G/C  | NA                 | NA                            | NA                 |
| <i>Desi_wild_51286164</i> | NA                                  | <i>Ca_desi_denovo</i> | 51286164                | G/A  | NA                 | NA                            | NA                 |
| <i>Desi_wild_51290575</i> | NA                                  | <i>Ca_desi_denovo</i> | 51290575                | C/G  | NA                 | NA                            | NA                 |
| <i>Desi_wild_51290634</i> | NA                                  | <i>Ca_desi_denovo</i> | 51290634                | G/C  | NA                 | NA                            | NA                 |
| <i>Desi_wild_51291198</i> | NA                                  | <i>Ca_desi_denovo</i> | 51291198                | A/G  | NA                 | NA                            | NA                 |
| <i>Desi_wild_51291787</i> | NA                                  | <i>Ca_desi_denovo</i> | 51291787                | G/T  | NA                 | NA                            | NA                 |
| <i>Desi_wild_51296581</i> | NA                                  | <i>Ca_desi_denovo</i> | 51296581                | A/G  | NA                 | NA                            | NA                 |
| <i>Desi_wild_51296582</i> | NA                                  | <i>Ca_desi_denovo</i> | 51296582                | G/A  | NA                 | NA                            | NA                 |
| <i>Desi_wild_51299553</i> | NA                                  | <i>Ca_desi_denovo</i> | 51299553                | C/A  | NA                 | NA                            | NA                 |
| <i>Desi_wild_51301294</i> | NA                                  | <i>Ca_desi_denovo</i> | 51301294                | G/T  | NA                 | NA                            | NA                 |
| <i>Desi_wild_51301452</i> | NA                                  | <i>Ca_desi_denovo</i> | 51301452                | C/G  | NA                 | NA                            | NA                 |
| <i>Desi_wild_51301958</i> | NA                                  | <i>Ca_desi_denovo</i> | 51301958                | G/T  | NA                 | NA                            | NA                 |
| <i>Desi_wild_51304809</i> | NA                                  | <i>Ca_desi_denovo</i> | 51304809                | A/T  | NA                 | NA                            | NA                 |
| <i>Desi_wild_51306335</i> | NA                                  | <i>Ca_desi_denovo</i> | 51306335                | T/G  | NA                 | NA                            | NA                 |
| <i>Desi_wild_51306338</i> | NA                                  | <i>Ca_desi_denovo</i> | 51306338                | A/G  | NA                 | NA                            | NA                 |
| <i>Desi_wild_51308303</i> | NA                                  | <i>Ca_desi_denovo</i> | 51308303                | G/A  | NA                 | NA                            | NA                 |
| <i>Desi_wild_51310885</i> | NA                                  | <i>Ca_desi_denovo</i> | 51310885                | G/T  | NA                 | NA                            | NA                 |
| <i>Desi_wild_51315156</i> | NA                                  | <i>Ca_desi_denovo</i> | 51315156                | C/G  | NA                 | NA                            | NA                 |
| <i>Desi_wild_51315351</i> | NA                                  | <i>Ca_desi_denovo</i> | 51315351                | C/G  | NA                 | NA                            | NA                 |
| <i>Desi_wild_51315828</i> | NA                                  | <i>Ca_desi_denovo</i> | 51315828                | A/T  | NA                 | NA                            | NA                 |
| <i>Desi_wild_51316239</i> | NA                                  | <i>Ca_desi_denovo</i> | 51316239                | G/A  | NA                 | NA                            | NA                 |
| <i>Desi_wild_51316250</i> | NA                                  | <i>Ca_desi_denovo</i> | 51316250                | G/A  | NA                 | NA                            | NA                 |
| <i>Desi_wild_51320701</i> | NA                                  | <i>Ca_desi_denovo</i> | 51320701                | C/T  | NA                 | NA                            | NA                 |
| <i>Desi_wild_51320710</i> | NA                                  | <i>Ca_desi_denovo</i> | 51320710                | C/G  | NA                 | NA                            | NA                 |
| <i>Desi_wild_51323192</i> | NA                                  | <i>Ca_desi_denovo</i> | 51323192                | T/C  | NA                 | NA                            | NA                 |
| <i>Desi_wild_51323206</i> | NA                                  | <i>Ca_desi_denovo</i> | 51323206                | G/A  | NA                 | NA                            | NA                 |

| SNP IDs                   | NCBI dbSNP accession IDs (NCBI_SS#) | Chromosomes           | Physical positions (bp) | SNPs | Gene accession IDs | Sequence components of genome | Putative functions |
|---------------------------|-------------------------------------|-----------------------|-------------------------|------|--------------------|-------------------------------|--------------------|
| <i>Desi_wild_51325802</i> | NA                                  | <i>Ca_desi_denovo</i> | 51325802                | C/G  | NA                 | NA                            | NA                 |
| <i>Desi_wild_51329034</i> | NA                                  | <i>Ca_desi_denovo</i> | 51329034                | G/T  | NA                 | NA                            | NA                 |
| <i>Desi_wild_51333472</i> | NA                                  | <i>Ca_desi_denovo</i> | 51333472                | G/T  | NA                 | NA                            | NA                 |
| <i>Desi_wild_51334748</i> | NA                                  | <i>Ca_desi_denovo</i> | 51334748                | C/G  | NA                 | NA                            | NA                 |
| <i>Desi_wild_51336225</i> | NA                                  | <i>Ca_desi_denovo</i> | 51336225                | G/T  | NA                 | NA                            | NA                 |
| <i>Desi_wild_51342247</i> | NA                                  | <i>Ca_desi_denovo</i> | 51342247                | G/A  | NA                 | NA                            | NA                 |
| <i>Desi_wild_51342702</i> | NA                                  | <i>Ca_desi_denovo</i> | 51342702                | G/T  | NA                 | NA                            | NA                 |
| <i>Desi_wild_51343809</i> | NA                                  | <i>Ca_desi_denovo</i> | 51343809                | G/A  | NA                 | NA                            | NA                 |
| <i>Desi_wild_51343826</i> | NA                                  | <i>Ca_desi_denovo</i> | 51343826                | A/G  | NA                 | NA                            | NA                 |
| <i>Desi_wild_51348229</i> | NA                                  | <i>Ca_desi_denovo</i> | 51348229                | C/G  | NA                 | NA                            | NA                 |
| <i>Desi_wild_51348287</i> | NA                                  | <i>Ca_desi_denovo</i> | 51348287                | A/C  | NA                 | NA                            | NA                 |
| <i>Desi_wild_51348289</i> | NA                                  | <i>Ca_desi_denovo</i> | 51348289                | G/T  | NA                 | NA                            | NA                 |
| <i>Desi_wild_51348311</i> | NA                                  | <i>Ca_desi_denovo</i> | 51348311                | G/T  | NA                 | NA                            | NA                 |
| <i>Desi_wild_51351650</i> | NA                                  | <i>Ca_desi_denovo</i> | 51351650                | A/G  | NA                 | NA                            | NA                 |
| <i>Desi_wild_51351680</i> | NA                                  | <i>Ca_desi_denovo</i> | 51351680                | T/C  | NA                 | NA                            | NA                 |
| <i>Desi_wild_51353662</i> | NA                                  | <i>Ca_desi_denovo</i> | 51353662                | T/C  | NA                 | NA                            | NA                 |
| <i>Desi_wild_51353681</i> | NA                                  | <i>Ca_desi_denovo</i> | 51353681                | A/G  | NA                 | NA                            | NA                 |
| <i>Desi_wild_51356514</i> | NA                                  | <i>Ca_desi_denovo</i> | 51356514                | C/G  | NA                 | NA                            | NA                 |
| <i>Desi_wild_51356564</i> | NA                                  | <i>Ca_desi_denovo</i> | 51356564                | C/G  | NA                 | NA                            | NA                 |
| <i>Desi_wild_51363115</i> | NA                                  | <i>Ca_desi_denovo</i> | 51363115                | C/T  | NA                 | NA                            | NA                 |
| <i>Desi_wild_51368789</i> | NA                                  | <i>Ca_desi_denovo</i> | 51368789                | A/G  | NA                 | NA                            | NA                 |
| <i>Desi_wild_51368838</i> | NA                                  | <i>Ca_desi_denovo</i> | 51368838                | C/T  | NA                 | NA                            | NA                 |
| <i>Desi_wild_51371678</i> | NA                                  | <i>Ca_desi_denovo</i> | 51371678                | C/T  | NA                 | NA                            | NA                 |
| <i>Desi_wild_51372540</i> | NA                                  | <i>Ca_desi_denovo</i> | 51372540                | C/G  | NA                 | NA                            | NA                 |
| <i>Desi_wild_51374508</i> | NA                                  | <i>Ca_desi_denovo</i> | 51374508                | G/A  | NA                 | NA                            | NA                 |
| <i>Desi_wild_51378156</i> | NA                                  | <i>Ca_desi_denovo</i> | 51378156                | G/A  | NA                 | NA                            | NA                 |
| <i>Desi_wild_51378159</i> | NA                                  | <i>Ca_desi_denovo</i> | 51378159                | A/G  | NA                 | NA                            | NA                 |
| <i>Desi_wild_51378449</i> | NA                                  | <i>Ca_desi_denovo</i> | 51378449                | C/T  | NA                 | NA                            | NA                 |
| <i>Desi_wild_51378482</i> | NA                                  | <i>Ca_desi_denovo</i> | 51378482                | G/A  | NA                 | NA                            | NA                 |
| <i>Desi_wild_51380833</i> | NA                                  | <i>Ca_desi_denovo</i> | 51380833                | A/G  | NA                 | NA                            | NA                 |
| <i>Desi_wild_51380842</i> | NA                                  | <i>Ca_desi_denovo</i> | 51380842                | C/T  | NA                 | NA                            | NA                 |
| <i>Desi_wild_51381990</i> | NA                                  | <i>Ca_desi_denovo</i> | 51381990                | G/T  | NA                 | NA                            | NA                 |
| <i>Desi_wild_51384355</i> | NA                                  | <i>Ca_desi_denovo</i> | 51384355                | G/C  | NA                 | NA                            | NA                 |
| <i>Desi_wild_51384367</i> | NA                                  | <i>Ca_desi_denovo</i> | 51384367                | A/G  | NA                 | NA                            | NA                 |
| <i>Desi_wild_51384378</i> | NA                                  | <i>Ca_desi_denovo</i> | 51384378                | T/C  | NA                 | NA                            | NA                 |
| <i>Desi_wild_51384909</i> | NA                                  | <i>Ca_desi_denovo</i> | 51384909                | C/T  | NA                 | NA                            | NA                 |
| <i>Desi_wild_51384916</i> | NA                                  | <i>Ca_desi_denovo</i> | 51384916                | G/A  | NA                 | NA                            | NA                 |
| <i>Desi_wild_51386344</i> | NA                                  | <i>Ca_desi_denovo</i> | 51386344                | A/C  | NA                 | NA                            | NA                 |
| <i>Desi_wild_51386371</i> | NA                                  | <i>Ca_desi_denovo</i> | 51386371                | G/A  | NA                 | NA                            | NA                 |
| <i>Desi_wild_51387037</i> | NA                                  | <i>Ca_desi_denovo</i> | 51387037                | A/G  | NA                 | NA                            | NA                 |
| <i>Desi_wild_51387076</i> | NA                                  | <i>Ca_desi_denovo</i> | 51387076                | C/T  | NA                 | NA                            | NA                 |
| <i>Desi_wild_51395886</i> | NA                                  | <i>Ca_desi_denovo</i> | 51395886                | G/T  | NA                 | NA                            | NA                 |
| <i>Desi_wild_51397423</i> | NA                                  | <i>Ca_desi_denovo</i> | 51397423                | G/C  | NA                 | NA                            | NA                 |
| <i>Desi_wild_51399897</i> | NA                                  | <i>Ca_desi_denovo</i> | 51399897                | G/A  | NA                 | NA                            | NA                 |



| SNP IDs                   | NCBI dbSNP accession IDs (NCBI_SS#) | Chromosomes           | Physical positions (bp) | SNPs | Gene accession IDs | Sequence components of genome | Putative functions |
|---------------------------|-------------------------------------|-----------------------|-------------------------|------|--------------------|-------------------------------|--------------------|
| <i>Desi_wild_51399898</i> | NA                                  | <i>Ca_desi_denovo</i> | 51399898                | C/A  | NA                 | NA                            | NA                 |
| <i>Desi_wild_51401595</i> | NA                                  | <i>Ca_desi_denovo</i> | 51401595                | A/C  | NA                 | NA                            | NA                 |
| <i>Desi_wild_51401596</i> | NA                                  | <i>Ca_desi_denovo</i> | 51401596                | A/G  | NA                 | NA                            | NA                 |
| <i>Desi_wild_51405346</i> | NA                                  | <i>Ca_desi_denovo</i> | 51405346                | A/G  | NA                 | NA                            | NA                 |
| <i>Desi_wild_51409075</i> | NA                                  | <i>Ca_desi_denovo</i> | 51409075                | C/A  | NA                 | NA                            | NA                 |
| <i>Desi_wild_51410603</i> | NA                                  | <i>Ca_desi_denovo</i> | 51410603                | A/C  | NA                 | NA                            | NA                 |
| <i>Desi_wild_51413246</i> | NA                                  | <i>Ca_desi_denovo</i> | 51413246                | T/G  | NA                 | NA                            | NA                 |
| <i>Desi_wild_51415372</i> | NA                                  | <i>Ca_desi_denovo</i> | 51415372                | C/T  | NA                 | NA                            | NA                 |
| <i>Desi_wild_51415387</i> | NA                                  | <i>Ca_desi_denovo</i> | 51415387                | C/A  | NA                 | NA                            | NA                 |
| <i>Desi_wild_51420588</i> | NA                                  | <i>Ca_desi_denovo</i> | 51420588                | G/A  | NA                 | NA                            | NA                 |
| <i>Desi_wild_51429037</i> | NA                                  | <i>Ca_desi_denovo</i> | 51429037                | G/T  | NA                 | NA                            | NA                 |
| <i>Desi_wild_51445750</i> | NA                                  | <i>Ca_desi_denovo</i> | 51445750                | C/G  | NA                 | NA                            | NA                 |
| <i>Desi_wild_51445765</i> | NA                                  | <i>Ca_desi_denovo</i> | 51445765                | G/T  | NA                 | NA                            | NA                 |
| <i>Desi_wild_51447980</i> | NA                                  | <i>Ca_desi_denovo</i> | 51447980                | T/C  | NA                 | NA                            | NA                 |
| <i>Desi_wild_51447993</i> | NA                                  | <i>Ca_desi_denovo</i> | 51447993                | A/G  | NA                 | NA                            | NA                 |
| <i>Desi_wild_51449310</i> | NA                                  | <i>Ca_desi_denovo</i> | 51449310                | A/G  | NA                 | NA                            | NA                 |
| <i>Desi_wild_51449385</i> | NA                                  | <i>Ca_desi_denovo</i> | 51449385                | C/T  | NA                 | NA                            | NA                 |
| <i>Desi_wild_51453381</i> | NA                                  | <i>Ca_desi_denovo</i> | 51453381                | G/T  | NA                 | NA                            | NA                 |
| <i>Desi_wild_51464992</i> | NA                                  | <i>Ca_desi_denovo</i> | 51464992                | G/A  | NA                 | NA                            | NA                 |
| <i>Desi_wild_51465052</i> | NA                                  | <i>Ca_desi_denovo</i> | 51465052                | T/C  | NA                 | NA                            | NA                 |
| <i>Desi_wild_51466222</i> | NA                                  | <i>Ca_desi_denovo</i> | 51466222                | A/C  | NA                 | NA                            | NA                 |
| <i>Desi_wild_51466253</i> | NA                                  | <i>Ca_desi_denovo</i> | 51466253                | A/G  | NA                 | NA                            | NA                 |
| <i>Desi_wild_51471387</i> | NA                                  | <i>Ca_desi_denovo</i> | 51471387                | A/G  | NA                 | NA                            | NA                 |
| <i>Desi_wild_51471426</i> | NA                                  | <i>Ca_desi_denovo</i> | 51471426                | G/C  | NA                 | NA                            | NA                 |
| <i>Desi_wild_51472351</i> | NA                                  | <i>Ca_desi_denovo</i> | 51472351                | G/T  | NA                 | NA                            | NA                 |
| <i>Desi_wild_51472357</i> | NA                                  | <i>Ca_desi_denovo</i> | 51472357                | G/T  | NA                 | NA                            | NA                 |
| <i>Desi_wild_51472386</i> | NA                                  | <i>Ca_desi_denovo</i> | 51472386                | G/T  | NA                 | NA                            | NA                 |
| <i>Desi_wild_51472930</i> | NA                                  | <i>Ca_desi_denovo</i> | 51472930                | A/G  | NA                 | NA                            | NA                 |
| <i>Desi_wild_51476989</i> | NA                                  | <i>Ca_desi_denovo</i> | 51476989                | C/T  | NA                 | NA                            | NA                 |
| <i>Desi_wild_51483712</i> | NA                                  | <i>Ca_desi_denovo</i> | 51483712                | G/C  | NA                 | NA                            | NA                 |
| <i>Desi_wild_51485575</i> | NA                                  | <i>Ca_desi_denovo</i> | 51485575                | G/C  | NA                 | NA                            | NA                 |
| <i>Desi_wild_51485581</i> | NA                                  | <i>Ca_desi_denovo</i> | 51485581                | C/T  | NA                 | NA                            | NA                 |
| <i>Desi_wild_51488525</i> | NA                                  | <i>Ca_desi_denovo</i> | 51488525                | A/C  | NA                 | NA                            | NA                 |
| <i>Desi_wild_51491763</i> | NA                                  | <i>Ca_desi_denovo</i> | 51491763                | T/G  | NA                 | NA                            | NA                 |
| <i>Desi_wild_51495519</i> | NA                                  | <i>Ca_desi_denovo</i> | 51495519                | A/G  | NA                 | NA                            | NA                 |
| <i>Desi_wild_51495535</i> | NA                                  | <i>Ca_desi_denovo</i> | 51495535                | G/C  | NA                 | NA                            | NA                 |
| <i>Desi_wild_51495566</i> | NA                                  | <i>Ca_desi_denovo</i> | 51495566                | C/G  | NA                 | NA                            | NA                 |
| <i>Desi_wild_51496436</i> | NA                                  | <i>Ca_desi_denovo</i> | 51496436                | G/C  | NA                 | NA                            | NA                 |
| <i>Desi_wild_51496508</i> | NA                                  | <i>Ca_desi_denovo</i> | 51496508                | G/A  | NA                 | NA                            | NA                 |
| <i>Desi_wild_51498630</i> | NA                                  | <i>Ca_desi_denovo</i> | 51498630                | G/A  | NA                 | NA                            | NA                 |
| <i>Desi_wild_51498668</i> | NA                                  | <i>Ca_desi_denovo</i> | 51498668                | C/T  | NA                 | NA                            | NA                 |
| <i>Desi_wild_51503262</i> | NA                                  | <i>Ca_desi_denovo</i> | 51503262                | G/T  | NA                 | NA                            | NA                 |
| <i>Desi_wild_51505496</i> | NA                                  | <i>Ca_desi_denovo</i> | 51505496                | G/T  | NA                 | NA                            | NA                 |
| <i>Desi_wild_51505525</i> | NA                                  | <i>Ca_desi_denovo</i> | 51505525                | G/T  | NA                 | NA                            | NA                 |

| SNP IDs                   | NCBI dbSNP accession IDs (NCBI_SS#) | Chromosomes           | Physical positions (bp) | SNPs | Gene accession IDs | Sequence components of genome | Putative functions |
|---------------------------|-------------------------------------|-----------------------|-------------------------|------|--------------------|-------------------------------|--------------------|
| <i>Desi_wild_51507788</i> | NA                                  | <i>Ca_desi_denovo</i> | 51507788                | C/T  | NA                 | NA                            | NA                 |
| <i>Desi_wild_51507798</i> | NA                                  | <i>Ca_desi_denovo</i> | 51507798                | G/T  | NA                 | NA                            | NA                 |
| <i>Desi_wild_51508613</i> | NA                                  | <i>Ca_desi_denovo</i> | 51508613                | C/T  | NA                 | NA                            | NA                 |
| <i>Desi_wild_51508668</i> | NA                                  | <i>Ca_desi_denovo</i> | 51508668                | C/T  | NA                 | NA                            | NA                 |
| <i>Desi_wild_51509249</i> | NA                                  | <i>Ca_desi_denovo</i> | 51509249                | A/G  | NA                 | NA                            | NA                 |
| <i>Desi_wild_51510123</i> | NA                                  | <i>Ca_desi_denovo</i> | 51510123                | C/G  | NA                 | NA                            | NA                 |
| <i>Desi_wild_51511732</i> | NA                                  | <i>Ca_desi_denovo</i> | 51511732                | G/A  | NA                 | NA                            | NA                 |
| <i>Desi_wild_51511801</i> | NA                                  | <i>Ca_desi_denovo</i> | 51511801                | C/T  | NA                 | NA                            | NA                 |
| <i>Desi_wild_51529860</i> | NA                                  | <i>Ca_desi_denovo</i> | 51529860                | A/G  | NA                 | NA                            | NA                 |
| <i>Desi_wild_51534604</i> | NA                                  | <i>Ca_desi_denovo</i> | 51534604                | T/A  | NA                 | NA                            | NA                 |
| <i>Desi_wild_51536259</i> | NA                                  | <i>Ca_desi_denovo</i> | 51536259                | G/T  | NA                 | NA                            | NA                 |
| <i>Desi_wild_51536390</i> | NA                                  | <i>Ca_desi_denovo</i> | 51536390                | T/C  | NA                 | NA                            | NA                 |
| <i>Desi_wild_51542444</i> | NA                                  | <i>Ca_desi_denovo</i> | 51542444                | C/T  | NA                 | NA                            | NA                 |
| <i>Desi_wild_51542491</i> | NA                                  | <i>Ca_desi_denovo</i> | 51542491                | A/C  | NA                 | NA                            | NA                 |
| <i>Desi_wild_51544441</i> | NA                                  | <i>Ca_desi_denovo</i> | 51544441                | G/T  | NA                 | NA                            | NA                 |
| <i>Desi_wild_51551659</i> | NA                                  | <i>Ca_desi_denovo</i> | 51551659                | A/C  | NA                 | NA                            | NA                 |
| <i>Desi_wild_51551714</i> | NA                                  | <i>Ca_desi_denovo</i> | 51551714                | G/T  | NA                 | NA                            | NA                 |
| <i>Desi_wild_51554220</i> | NA                                  | <i>Ca_desi_denovo</i> | 51554220                | A/C  | NA                 | NA                            | NA                 |
| <i>Desi_wild_51555780</i> | NA                                  | <i>Ca_desi_denovo</i> | 51555780                | C/G  | NA                 | NA                            | NA                 |
| <i>Desi_wild_51555792</i> | NA                                  | <i>Ca_desi_denovo</i> | 51555792                | A/G  | NA                 | NA                            | NA                 |
| <i>Desi_wild_51561629</i> | NA                                  | <i>Ca_desi_denovo</i> | 51561629                | G/A  | NA                 | NA                            | NA                 |
| <i>Desi_wild_51561633</i> | NA                                  | <i>Ca_desi_denovo</i> | 51561633                | C/T  | NA                 | NA                            | NA                 |
| <i>Desi_wild_51564347</i> | NA                                  | <i>Ca_desi_denovo</i> | 51564347                | C/T  | NA                 | NA                            | NA                 |
| <i>Desi_wild_51569763</i> | NA                                  | <i>Ca_desi_denovo</i> | 51569763                | A/C  | NA                 | NA                            | NA                 |
| <i>Desi_wild_51570877</i> | NA                                  | <i>Ca_desi_denovo</i> | 51570877                | G/T  | NA                 | NA                            | NA                 |
| <i>Desi_wild_51576897</i> | NA                                  | <i>Ca_desi_denovo</i> | 51576897                | G/T  | NA                 | NA                            | NA                 |
| <i>Desi_wild_51583016</i> | NA                                  | <i>Ca_desi_denovo</i> | 51583016                | G/T  | NA                 | NA                            | NA                 |
| <i>Desi_wild_51583276</i> | NA                                  | <i>Ca_desi_denovo</i> | 51583276                | T/C  | NA                 | NA                            | NA                 |
| <i>Desi_wild_51583293</i> | NA                                  | <i>Ca_desi_denovo</i> | 51583293                | T/G  | NA                 | NA                            | NA                 |
| <i>Desi_wild_51583303</i> | NA                                  | <i>Ca_desi_denovo</i> | 51583303                | T/C  | NA                 | NA                            | NA                 |
| <i>Desi_wild_51583331</i> | NA                                  | <i>Ca_desi_denovo</i> | 51583331                | T/C  | NA                 | NA                            | NA                 |
| <i>Desi_wild_51583646</i> | NA                                  | <i>Ca_desi_denovo</i> | 51583646                | A/G  | NA                 | NA                            | NA                 |
| <i>Desi_wild_51583657</i> | NA                                  | <i>Ca_desi_denovo</i> | 51583657                | T/C  | NA                 | NA                            | NA                 |
| <i>Desi_wild_51583661</i> | NA                                  | <i>Ca_desi_denovo</i> | 51583661                | G/A  | NA                 | NA                            | NA                 |
| <i>Desi_wild_51585209</i> | NA                                  | <i>Ca_desi_denovo</i> | 51585209                | C/G  | NA                 | NA                            | NA                 |
| <i>Desi_wild_51585830</i> | NA                                  | <i>Ca_desi_denovo</i> | 51585830                | G/C  | NA                 | NA                            | NA                 |
| <i>Desi_wild_51590067</i> | NA                                  | <i>Ca_desi_denovo</i> | 51590067                | G/A  | NA                 | NA                            | NA                 |
| <i>Desi_wild_51590107</i> | NA                                  | <i>Ca_desi_denovo</i> | 51590107                | G/A  | NA                 | NA                            | NA                 |
| <i>Desi_wild_51590161</i> | NA                                  | <i>Ca_desi_denovo</i> | 51590161                | A/C  | NA                 | NA                            | NA                 |
| <i>Desi_wild_51595578</i> | NA                                  | <i>Ca_desi_denovo</i> | 51595578                | A/G  | NA                 | NA                            | NA                 |
| <i>Desi_wild_51595587</i> | NA                                  | <i>Ca_desi_denovo</i> | 51595587                | C/T  | NA                 | NA                            | NA                 |
| <i>Desi_wild_51599353</i> | NA                                  | <i>Ca_desi_denovo</i> | 51599353                | T/C  | NA                 | NA                            | NA                 |
| <i>Desi_wild_51609272</i> | NA                                  | <i>Ca_desi_denovo</i> | 51609272                | G/T  | NA                 | NA                            | NA                 |
| <i>Desi_wild_51619137</i> | NA                                  | <i>Ca_desi_denovo</i> | 51619137                | G/T  | NA                 | NA                            | NA                 |

| SNP IDs                   | NCBI dbSNP accession IDs (NCBI_SS#) | Chromosomes           | Physical positions (bp) | SNPs | Gene accession IDs | Sequence components of genome | Putative functions |
|---------------------------|-------------------------------------|-----------------------|-------------------------|------|--------------------|-------------------------------|--------------------|
| <i>Desi_wild_51620283</i> | NA                                  | <i>Ca_desi_denovo</i> | 51620283                | A/G  | NA                 | NA                            | NA                 |
| <i>Desi_wild_51644360</i> | NA                                  | <i>Ca_desi_denovo</i> | 51644360                | C/T  | NA                 | NA                            | NA                 |
| <i>Desi_wild_51655975</i> | NA                                  | <i>Ca_desi_denovo</i> | 51655975                | A/G  | NA                 | NA                            | NA                 |
| <i>Desi_wild_51687034</i> | NA                                  | <i>Ca_desi_denovo</i> | 51687034                | C/T  | NA                 | NA                            | NA                 |
| <i>Desi_wild_51690881</i> | NA                                  | <i>Ca_desi_denovo</i> | 51690881                | C/T  | NA                 | NA                            | NA                 |
| <i>Desi_wild_51690891</i> | NA                                  | <i>Ca_desi_denovo</i> | 51690891                | A/C  | NA                 | NA                            | NA                 |
| <i>Desi_wild_51693555</i> | NA                                  | <i>Ca_desi_denovo</i> | 51693555                | C/G  | NA                 | NA                            | NA                 |
| <i>Desi_wild_51696914</i> | NA                                  | <i>Ca_desi_denovo</i> | 51696914                | C/T  | NA                 | NA                            | NA                 |
| <i>Desi_wild_51696938</i> | NA                                  | <i>Ca_desi_denovo</i> | 51696938                | C/G  | NA                 | NA                            | NA                 |
| <i>Desi_wild_51706239</i> | NA                                  | <i>Ca_desi_denovo</i> | 51706239                | A/C  | NA                 | NA                            | NA                 |
| <i>Desi_wild_51707365</i> | NA                                  | <i>Ca_desi_denovo</i> | 51707365                | A/T  | NA                 | NA                            | NA                 |
| <i>Desi_wild_51707409</i> | NA                                  | <i>Ca_desi_denovo</i> | 51707409                | C/G  | NA                 | NA                            | NA                 |
| <i>Desi_wild_51709462</i> | NA                                  | <i>Ca_desi_denovo</i> | 51709462                | G/T  | NA                 | NA                            | NA                 |
| <i>Desi_wild_51709682</i> | NA                                  | <i>Ca_desi_denovo</i> | 51709682                | A/G  | NA                 | NA                            | NA                 |
| <i>Desi_wild_51710627</i> | NA                                  | <i>Ca_desi_denovo</i> | 51710627                | A/T  | NA                 | NA                            | NA                 |
| <i>Desi_wild_51713273</i> | NA                                  | <i>Ca_desi_denovo</i> | 51713273                | C/T  | NA                 | NA                            | NA                 |
| <i>Desi_wild_51713369</i> | NA                                  | <i>Ca_desi_denovo</i> | 51713369                | C/T  | NA                 | NA                            | NA                 |
| <i>Desi_wild_51715833</i> | NA                                  | <i>Ca_desi_denovo</i> | 51715833                | C/T  | NA                 | NA                            | NA                 |
| <i>Desi_wild_51715865</i> | NA                                  | <i>Ca_desi_denovo</i> | 51715865                | C/T  | NA                 | NA                            | NA                 |
| <i>Desi_wild_51718726</i> | NA                                  | <i>Ca_desi_denovo</i> | 51718726                | C/T  | NA                 | NA                            | NA                 |
| <i>Desi_wild_51718741</i> | NA                                  | <i>Ca_desi_denovo</i> | 51718741                | C/T  | NA                 | NA                            | NA                 |
| <i>Desi_wild_51727512</i> | NA                                  | <i>Ca_desi_denovo</i> | 51727512                | G/T  | NA                 | NA                            | NA                 |
| <i>Desi_wild_51730072</i> | NA                                  | <i>Ca_desi_denovo</i> | 51730072                | G/T  | NA                 | NA                            | NA                 |
| <i>Desi_wild_51740307</i> | NA                                  | <i>Ca_desi_denovo</i> | 51740307                | A/G  | NA                 | NA                            | NA                 |
| <i>Desi_wild_51740315</i> | NA                                  | <i>Ca_desi_denovo</i> | 51740315                | C/T  | NA                 | NA                            | NA                 |
| <i>Desi_wild_51760221</i> | NA                                  | <i>Ca_desi_denovo</i> | 51760221                | A/G  | NA                 | NA                            | NA                 |
| <i>Desi_wild_51760249</i> | NA                                  | <i>Ca_desi_denovo</i> | 51760249                | C/T  | NA                 | NA                            | NA                 |
| <i>Desi_wild_51762473</i> | NA                                  | <i>Ca_desi_denovo</i> | 51762473                | C/G  | NA                 | NA                            | NA                 |
| <i>Desi_wild_51763923</i> | NA                                  | <i>Ca_desi_denovo</i> | 51763923                | C/T  | NA                 | NA                            | NA                 |
| <i>Desi_wild_51763983</i> | NA                                  | <i>Ca_desi_denovo</i> | 51763983                | C/T  | NA                 | NA                            | NA                 |
| <i>Desi_wild_51771584</i> | NA                                  | <i>Ca_desi_denovo</i> | 51771584                | G/T  | NA                 | NA                            | NA                 |
| <i>Desi_wild_51771978</i> | NA                                  | <i>Ca_desi_denovo</i> | 51771978                | A/G  | NA                 | NA                            | NA                 |
| <i>Desi_wild_51772008</i> | NA                                  | <i>Ca_desi_denovo</i> | 51772008                | A/G  | NA                 | NA                            | NA                 |
| <i>Desi_wild_51772177</i> | NA                                  | <i>Ca_desi_denovo</i> | 51772177                | A/C  | NA                 | NA                            | NA                 |
| <i>Desi_wild_51776962</i> | NA                                  | <i>Ca_desi_denovo</i> | 51776962                | G/T  | NA                 | NA                            | NA                 |
| <i>Desi_wild_51795676</i> | NA                                  | <i>Ca_desi_denovo</i> | 51795676                | G/T  | NA                 | NA                            | NA                 |
| <i>Desi_wild_51795977</i> | NA                                  | <i>Ca_desi_denovo</i> | 51795977                | C/G  | NA                 | NA                            | NA                 |
| <i>Desi_wild_51798388</i> | NA                                  | <i>Ca_desi_denovo</i> | 51798388                | C/T  | NA                 | NA                            | NA                 |
| <i>Desi_wild_51798409</i> | NA                                  | <i>Ca_desi_denovo</i> | 51798409                | C/T  | NA                 | NA                            | NA                 |
| <i>Desi_wild_51806526</i> | NA                                  | <i>Ca_desi_denovo</i> | 51806526                | A/C  | NA                 | NA                            | NA                 |
| <i>Desi_wild_51808478</i> | NA                                  | <i>Ca_desi_denovo</i> | 51808478                | C/T  | NA                 | NA                            | NA                 |
| <i>Desi_wild_51814872</i> | NA                                  | <i>Ca_desi_denovo</i> | 51814872                | G/T  | NA                 | NA                            | NA                 |
| <i>Desi_wild_51817236</i> | NA                                  | <i>Ca_desi_denovo</i> | 51817236                | G/T  | NA                 | NA                            | NA                 |
| <i>Desi_wild_51819505</i> | NA                                  | <i>Ca_desi_denovo</i> | 51819505                | C/T  | NA                 | NA                            | NA                 |

| SNP IDs                   | NCBI dbSNP accession IDs (NCBI_SS#) | Chromosomes           | Physical positions (bp) | SNPs | Gene accession IDs | Sequence components of genome | Putative functions |
|---------------------------|-------------------------------------|-----------------------|-------------------------|------|--------------------|-------------------------------|--------------------|
| <i>Desi_wild_51825043</i> | NA                                  | <i>Ca_desi_denovo</i> | 51825043                | C/T  | NA                 | NA                            | NA                 |
| <i>Desi_wild_51843599</i> | NA                                  | <i>Ca_desi_denovo</i> | 51843599                | C/T  | NA                 | NA                            | NA                 |
| <i>Desi_wild_51843604</i> | NA                                  | <i>Ca_desi_denovo</i> | 51843604                | C/T  | NA                 | NA                            | NA                 |
| <i>Desi_wild_51843777</i> | NA                                  | <i>Ca_desi_denovo</i> | 51843777                | A/C  | NA                 | NA                            | NA                 |
| <i>Desi_wild_51849134</i> | NA                                  | <i>Ca_desi_denovo</i> | 51849134                | A/G  | NA                 | NA                            | NA                 |
| <i>Desi_wild_51850399</i> | NA                                  | <i>Ca_desi_denovo</i> | 51850399                | A/C  | NA                 | NA                            | NA                 |
| <i>Desi_wild_51856875</i> | NA                                  | <i>Ca_desi_denovo</i> | 51856875                | C/T  | NA                 | NA                            | NA                 |
| <i>Desi_wild_51856882</i> | NA                                  | <i>Ca_desi_denovo</i> | 51856882                | A/G  | NA                 | NA                            | NA                 |
| <i>Desi_wild_51863658</i> | NA                                  | <i>Ca_desi_denovo</i> | 51863658                | G/T  | NA                 | NA                            | NA                 |
| <i>Desi_wild_51865378</i> | NA                                  | <i>Ca_desi_denovo</i> | 51865378                | A/C  | NA                 | NA                            | NA                 |
| <i>Desi_wild_51865379</i> | NA                                  | <i>Ca_desi_denovo</i> | 51865379                | A/G  | NA                 | NA                            | NA                 |
| <i>Desi_wild_51872623</i> | NA                                  | <i>Ca_desi_denovo</i> | 51872623                | C/G  | NA                 | NA                            | NA                 |
| <i>Desi_wild_51872630</i> | NA                                  | <i>Ca_desi_denovo</i> | 51872630                | A/C  | NA                 | NA                            | NA                 |
| <i>Desi_wild_51872632</i> | NA                                  | <i>Ca_desi_denovo</i> | 51872632                | C/T  | NA                 | NA                            | NA                 |
| <i>Desi_wild_51878105</i> | NA                                  | <i>Ca_desi_denovo</i> | 51878105                | A/G  | NA                 | NA                            | NA                 |
| <i>Desi_wild_51878109</i> | NA                                  | <i>Ca_desi_denovo</i> | 51878109                | C/T  | NA                 | NA                            | NA                 |
| <i>Desi_wild_51887645</i> | NA                                  | <i>Ca_desi_denovo</i> | 51887645                | C/G  | NA                 | NA                            | NA                 |
| <i>Desi_wild_51908109</i> | NA                                  | <i>Ca_desi_denovo</i> | 51908109                | C/G  | NA                 | NA                            | NA                 |
| <i>Desi_wild_51908120</i> | NA                                  | <i>Ca_desi_denovo</i> | 51908120                | A/C  | NA                 | NA                            | NA                 |
| <i>Desi_wild_51908126</i> | NA                                  | <i>Ca_desi_denovo</i> | 51908126                | C/T  | NA                 | NA                            | NA                 |
| <i>Desi_wild_51928731</i> | NA                                  | <i>Ca_desi_denovo</i> | 51928731                | C/T  | NA                 | NA                            | NA                 |
| <i>Desi_wild_51929899</i> | NA                                  | <i>Ca_desi_denovo</i> | 51929899                | G/T  | NA                 | NA                            | NA                 |
| <i>Desi_wild_51929900</i> | NA                                  | <i>Ca_desi_denovo</i> | 51929900                | A/T  | NA                 | NA                            | NA                 |
| <i>Desi_wild_51932780</i> | NA                                  | <i>Ca_desi_denovo</i> | 51932780                | C/G  | NA                 | NA                            | NA                 |
| <i>Desi_wild_51932795</i> | NA                                  | <i>Ca_desi_denovo</i> | 51932795                | C/T  | NA                 | NA                            | NA                 |
| <i>Desi_wild_51937423</i> | NA                                  | <i>Ca_desi_denovo</i> | 51937423                | G/T  | NA                 | NA                            | NA                 |
| <i>Desi_wild_51940673</i> | NA                                  | <i>Ca_desi_denovo</i> | 51940673                | A/T  | NA                 | NA                            | NA                 |
| <i>Desi_wild_51940687</i> | NA                                  | <i>Ca_desi_denovo</i> | 51940687                | A/T  | NA                 | NA                            | NA                 |
| <i>Desi_wild_51947167</i> | NA                                  | <i>Ca_desi_denovo</i> | 51947167                | C/G  | NA                 | NA                            | NA                 |
| <i>Desi_wild_51947171</i> | NA                                  | <i>Ca_desi_denovo</i> | 51947171                | C/G  | NA                 | NA                            | NA                 |
| <i>Desi_wild_51953538</i> | NA                                  | <i>Ca_desi_denovo</i> | 51953538                | A/T  | NA                 | NA                            | NA                 |
| <i>Desi_wild_51953590</i> | NA                                  | <i>Ca_desi_denovo</i> | 51953590                | C/T  | NA                 | NA                            | NA                 |
| <i>Desi_wild_51966036</i> | NA                                  | <i>Ca_desi_denovo</i> | 51966036                | A/T  | NA                 | NA                            | NA                 |
| <i>Desi_wild_51971389</i> | NA                                  | <i>Ca_desi_denovo</i> | 51971389                | G/T  | NA                 | NA                            | NA                 |
| <i>Desi_wild_51976611</i> | NA                                  | <i>Ca_desi_denovo</i> | 51976611                | C/T  | NA                 | NA                            | NA                 |
| <i>Desi_wild_51984617</i> | NA                                  | <i>Ca_desi_denovo</i> | 51984617                | A/C  | NA                 | NA                            | NA                 |
| <i>Desi_wild_51984618</i> | NA                                  | <i>Ca_desi_denovo</i> | 51984618                | A/T  | NA                 | NA                            | NA                 |
| <i>Desi_wild_51984634</i> | NA                                  | <i>Ca_desi_denovo</i> | 51984634                | C/G  | NA                 | NA                            | NA                 |
| <i>Desi_wild_51984643</i> | NA                                  | <i>Ca_desi_denovo</i> | 51984643                | A/C  | NA                 | NA                            | NA                 |
| <i>Desi_wild_51984668</i> | NA                                  | <i>Ca_desi_denovo</i> | 51984668                | A/G  | NA                 | NA                            | NA                 |
| <i>Desi_wild_51985875</i> | NA                                  | <i>Ca_desi_denovo</i> | 51985875                | A/G  | NA                 | NA                            | NA                 |
| <i>Desi_wild_51986094</i> | NA                                  | <i>Ca_desi_denovo</i> | 51986094                | G/T  | NA                 | NA                            | NA                 |
| <i>Desi_wild_51986142</i> | NA                                  | <i>Ca_desi_denovo</i> | 51986142                | G/T  | NA                 | NA                            | NA                 |
| <i>Desi_wild_51990371</i> | NA                                  | <i>Ca_desi_denovo</i> | 51990371                | A/C  | NA                 | NA                            | NA                 |

| SNP IDs                   | NCBI dbSNP accession IDs (NCBI_SS#) | Chromosomes           | Physical positions (bp) | SNPs | Gene accession IDs | Sequence components of genome | Putative functions |
|---------------------------|-------------------------------------|-----------------------|-------------------------|------|--------------------|-------------------------------|--------------------|
| <i>Desi_wild_52009577</i> | NA                                  | <i>Ca_desi_denovo</i> | 52009577                | C/G  | NA                 | NA                            | NA                 |
| <i>Desi_wild_52014161</i> | NA                                  | <i>Ca_desi_denovo</i> | 52014161                | G/T  | NA                 | NA                            | NA                 |
| <i>Desi_wild_52017764</i> | NA                                  | <i>Ca_desi_denovo</i> | 52017764                | G/T  | NA                 | NA                            | NA                 |
| <i>Desi_wild_52029545</i> | NA                                  | <i>Ca_desi_denovo</i> | 52029545                | C/G  | NA                 | NA                            | NA                 |
| <i>Desi_wild_52029557</i> | NA                                  | <i>Ca_desi_denovo</i> | 52029557                | C/G  | NA                 | NA                            | NA                 |
| <i>Desi_wild_52037481</i> | NA                                  | <i>Ca_desi_denovo</i> | 52037481                | C/T  | NA                 | NA                            | NA                 |
| <i>Desi_wild_52042092</i> | NA                                  | <i>Ca_desi_denovo</i> | 52042092                | C/T  | NA                 | NA                            | NA                 |
| <i>Desi_wild_52042305</i> | NA                                  | <i>Ca_desi_denovo</i> | 52042305                | A/G  | NA                 | NA                            | NA                 |
| <i>Desi_wild_52042515</i> | NA                                  | <i>Ca_desi_denovo</i> | 52042515                | C/T  | NA                 | NA                            | NA                 |
| <i>Desi_wild_52042518</i> | NA                                  | <i>Ca_desi_denovo</i> | 52042518                | A/G  | NA                 | NA                            | NA                 |
| <i>Desi_wild_52044419</i> | NA                                  | <i>Ca_desi_denovo</i> | 52044419                | G/T  | NA                 | NA                            | NA                 |
| <i>Desi_wild_52047789</i> | NA                                  | <i>Ca_desi_denovo</i> | 52047789                | G/A  | NA                 | NA                            | NA                 |
| <i>Desi_wild_52047813</i> | NA                                  | <i>Ca_desi_denovo</i> | 52047813                | G/A  | NA                 | NA                            | NA                 |
| <i>Desi_wild_52052418</i> | NA                                  | <i>Ca_desi_denovo</i> | 52052418                | A/G  | NA                 | NA                            | NA                 |
| <i>Desi_wild_52053585</i> | NA                                  | <i>Ca_desi_denovo</i> | 52053585                | C/T  | NA                 | NA                            | NA                 |
| <i>Desi_wild_52057666</i> | NA                                  | <i>Ca_desi_denovo</i> | 52057666                | A/C  | NA                 | NA                            | NA                 |
| <i>Desi_wild_52061603</i> | NA                                  | <i>Ca_desi_denovo</i> | 52061603                | G/T  | NA                 | NA                            | NA                 |
| <i>Desi_wild_52062310</i> | NA                                  | <i>Ca_desi_denovo</i> | 52062310                | C/T  | NA                 | NA                            | NA                 |
| <i>Desi_wild_52062334</i> | NA                                  | <i>Ca_desi_denovo</i> | 52062334                | A/G  | NA                 | NA                            | NA                 |
| <i>Desi_wild_52064588</i> | NA                                  | <i>Ca_desi_denovo</i> | 52064588                | C/G  | NA                 | NA                            | NA                 |
| <i>Desi_wild_52072824</i> | NA                                  | <i>Ca_desi_denovo</i> | 52072824                | A/C  | NA                 | NA                            | NA                 |
| <i>Desi_wild_52082002</i> | NA                                  | <i>Ca_desi_denovo</i> | 52082002                | A/T  | NA                 | NA                            | NA                 |
| <i>Desi_wild_52086943</i> | NA                                  | <i>Ca_desi_denovo</i> | 52086943                | C/G  | NA                 | NA                            | NA                 |
| <i>Desi_wild_52089826</i> | NA                                  | <i>Ca_desi_denovo</i> | 52089826                | G/T  | NA                 | NA                            | NA                 |
| <i>Desi_wild_52091945</i> | NA                                  | <i>Ca_desi_denovo</i> | 52091945                | A/G  | NA                 | NA                            | NA                 |
| <i>Desi_wild_52091995</i> | NA                                  | <i>Ca_desi_denovo</i> | 52091995                | C/T  | NA                 | NA                            | NA                 |
| <i>Desi_wild_52091997</i> | NA                                  | <i>Ca_desi_denovo</i> | 52091997                | C/T  | NA                 | NA                            | NA                 |
| <i>Desi_wild_52092035</i> | NA                                  | <i>Ca_desi_denovo</i> | 52092035                | C/T  | NA                 | NA                            | NA                 |
| <i>Desi_wild_52092254</i> | NA                                  | <i>Ca_desi_denovo</i> | 52092254                | A/G  | NA                 | NA                            | NA                 |
| <i>Desi_wild_52093474</i> | NA                                  | <i>Ca_desi_denovo</i> | 52093474                | A/C  | NA                 | NA                            | NA                 |
| <i>Desi_wild_52094585</i> | NA                                  | <i>Ca_desi_denovo</i> | 52094585                | G/T  | NA                 | NA                            | NA                 |
| <i>Desi_wild_52107971</i> | NA                                  | <i>Ca_desi_denovo</i> | 52107971                | G/T  | NA                 | NA                            | NA                 |
| <i>Desi_wild_52110533</i> | NA                                  | <i>Ca_desi_denovo</i> | 52110533                | C/T  | NA                 | NA                            | NA                 |
| <i>Desi_wild_52116348</i> | NA                                  | <i>Ca_desi_denovo</i> | 52116348                | C/G  | NA                 | NA                            | NA                 |
| <i>Desi_wild_52116360</i> | NA                                  | <i>Ca_desi_denovo</i> | 52116360                | C/G  | NA                 | NA                            | NA                 |
| <i>Desi_wild_52118096</i> | NA                                  | <i>Ca_desi_denovo</i> | 52118096                | C/T  | NA                 | NA                            | NA                 |
| <i>Desi_wild_52122618</i> | NA                                  | <i>Ca_desi_denovo</i> | 52122618                | A/G  | NA                 | NA                            | NA                 |
| <i>Desi_wild_52122619</i> | NA                                  | <i>Ca_desi_denovo</i> | 52122619                | G/T  | NA                 | NA                            | NA                 |
| <i>Desi_wild_52127827</i> | NA                                  | <i>Ca_desi_denovo</i> | 52127827                | G/T  | NA                 | NA                            | NA                 |
| <i>Desi_wild_52133312</i> | NA                                  | <i>Ca_desi_denovo</i> | 52133312                | G/T  | NA                 | NA                            | NA                 |
| <i>Desi_wild_52135619</i> | NA                                  | <i>Ca_desi_denovo</i> | 52135619                | G/T  | NA                 | NA                            | NA                 |
| <i>Desi_wild_52136121</i> | NA                                  | <i>Ca_desi_denovo</i> | 52136121                | C/T  | NA                 | NA                            | NA                 |
| <i>Desi_wild_52152942</i> | NA                                  | <i>Ca_desi_denovo</i> | 52152942                | G/T  | NA                 | NA                            | NA                 |
| <i>Desi_wild_52163238</i> | NA                                  | <i>Ca_desi_denovo</i> | 52163238                | C/T  | NA                 | NA                            | NA                 |

| SNP IDs                   | NCBI dbSNP accession IDs (NCBI_SS#) | Chromosomes           | Physical positions (bp) | SNPs | Gene accession IDs | Sequence components of genome | Putative functions |
|---------------------------|-------------------------------------|-----------------------|-------------------------|------|--------------------|-------------------------------|--------------------|
| <i>Desi_wild_52164280</i> | NA                                  | <i>Ca_desi_denovo</i> | 52164280                | G/T  | NA                 | NA                            | NA                 |
| <i>Desi_wild_52166910</i> | NA                                  | <i>Ca_desi_denovo</i> | 52166910                | G/T  | NA                 | NA                            | NA                 |
| <i>Desi_wild_52173297</i> | NA                                  | <i>Ca_desi_denovo</i> | 52173297                | G/T  | NA                 | NA                            | NA                 |
| <i>Desi_wild_52174423</i> | NA                                  | <i>Ca_desi_denovo</i> | 52174423                | A/G  | NA                 | NA                            | NA                 |
| <i>Desi_wild_52174437</i> | NA                                  | <i>Ca_desi_denovo</i> | 52174437                | A/G  | NA                 | NA                            | NA                 |
| <i>Desi_wild_52189196</i> | NA                                  | <i>Ca_desi_denovo</i> | 52189196                | A/T  | NA                 | NA                            | NA                 |
| <i>Desi_wild_52189248</i> | NA                                  | <i>Ca_desi_denovo</i> | 52189248                | A/G  | NA                 | NA                            | NA                 |
| <i>Desi_wild_52189254</i> | NA                                  | <i>Ca_desi_denovo</i> | 52189254                | G/T  | NA                 | NA                            | NA                 |
| <i>Desi_wild_52189265</i> | NA                                  | <i>Ca_desi_denovo</i> | 52189265                | C/T  | NA                 | NA                            | NA                 |
| <i>Desi_wild_52195892</i> | NA                                  | <i>Ca_desi_denovo</i> | 52195892                | C/T  | NA                 | NA                            | NA                 |
| <i>Desi_wild_52227348</i> | NA                                  | <i>Ca_desi_denovo</i> | 52227348                | G/T  | NA                 | NA                            | NA                 |
| <i>Desi_wild_52228280</i> | NA                                  | <i>Ca_desi_denovo</i> | 52228280                | G/T  | NA                 | NA                            | NA                 |
| <i>Desi_wild_52228309</i> | NA                                  | <i>Ca_desi_denovo</i> | 52228309                | C/T  | NA                 | NA                            | NA                 |
| <i>Desi_wild_52234223</i> | NA                                  | <i>Ca_desi_denovo</i> | 52234223                | A/G  | NA                 | NA                            | NA                 |
| <i>Desi_wild_52234238</i> | NA                                  | <i>Ca_desi_denovo</i> | 52234238                | A/T  | NA                 | NA                            | NA                 |
| <i>Desi_wild_52254303</i> | NA                                  | <i>Ca_desi_denovo</i> | 52254303                | C/G  | NA                 | NA                            | NA                 |
| <i>Desi_wild_52254309</i> | NA                                  | <i>Ca_desi_denovo</i> | 52254309                | A/G  | NA                 | NA                            | NA                 |
| <i>Desi_wild_52254335</i> | NA                                  | <i>Ca_desi_denovo</i> | 52254335                | C/T  | NA                 | NA                            | NA                 |
| <i>Desi_wild_52255918</i> | NA                                  | <i>Ca_desi_denovo</i> | 52255918                | A/G  | NA                 | NA                            | NA                 |
| <i>Desi_wild_52264599</i> | NA                                  | <i>Ca_desi_denovo</i> | 52264599                | A/C  | NA                 | NA                            | NA                 |
| <i>Desi_wild_52264600</i> | NA                                  | <i>Ca_desi_denovo</i> | 52264600                | A/T  | NA                 | NA                            | NA                 |
| <i>Desi_wild_52266579</i> | NA                                  | <i>Ca_desi_denovo</i> | 52266579                | A/G  | NA                 | NA                            | NA                 |
| <i>Desi_wild_52266658</i> | NA                                  | <i>Ca_desi_denovo</i> | 52266658                | A/T  | NA                 | NA                            | NA                 |
| <i>Desi_wild_52275245</i> | NA                                  | <i>Ca_desi_denovo</i> | 52275245                | G/A  | NA                 | NA                            | NA                 |
| <i>Desi_wild_52277315</i> | NA                                  | <i>Ca_desi_denovo</i> | 52277315                | A/C  | NA                 | NA                            | NA                 |
| <i>Desi_wild_52282499</i> | NA                                  | <i>Ca_desi_denovo</i> | 52282499                | A/C  | NA                 | NA                            | NA                 |
| <i>Desi_wild_52296921</i> | NA                                  | <i>Ca_desi_denovo</i> | 52296921                | A/G  | NA                 | NA                            | NA                 |
| <i>Desi_wild_52296927</i> | NA                                  | <i>Ca_desi_denovo</i> | 52296927                | A/G  | NA                 | NA                            | NA                 |
| <i>Desi_wild_52300362</i> | NA                                  | <i>Ca_desi_denovo</i> | 52300362                | C/T  | NA                 | NA                            | NA                 |
| <i>Desi_wild_52305547</i> | NA                                  | <i>Ca_desi_denovo</i> | 52305547                | A/G  | NA                 | NA                            | NA                 |
| <i>Desi_wild_52305624</i> | NA                                  | <i>Ca_desi_denovo</i> | 52305624                | A/G  | NA                 | NA                            | NA                 |
| <i>Desi_wild_52310064</i> | NA                                  | <i>Ca_desi_denovo</i> | 52310064                | C/T  | NA                 | NA                            | NA                 |
| <i>Desi_wild_52310116</i> | NA                                  | <i>Ca_desi_denovo</i> | 52310116                | A/C  | NA                 | NA                            | NA                 |
| <i>Desi_wild_52318190</i> | NA                                  | <i>Ca_desi_denovo</i> | 52318190                | G/A  | NA                 | NA                            | NA                 |
| <i>Desi_wild_52318319</i> | NA                                  | <i>Ca_desi_denovo</i> | 52318319                | C/T  | NA                 | NA                            | NA                 |
| <i>Desi_wild_52318349</i> | NA                                  | <i>Ca_desi_denovo</i> | 52318349                | A/C  | NA                 | NA                            | NA                 |
| <i>Desi_wild_52318933</i> | NA                                  | <i>Ca_desi_denovo</i> | 52318933                | G/T  | NA                 | NA                            | NA                 |
| <i>Desi_wild_52328609</i> | NA                                  | <i>Ca_desi_denovo</i> | 52328609                | A/G  | NA                 | NA                            | NA                 |
| <i>Desi_wild_52335636</i> | NA                                  | <i>Ca_desi_denovo</i> | 52335636                | C/G  | NA                 | NA                            | NA                 |
| <i>Desi_wild_52342745</i> | NA                                  | <i>Ca_desi_denovo</i> | 52342745                | C/G  | NA                 | NA                            | NA                 |
| <i>Desi_wild_52351149</i> | NA                                  | <i>Ca_desi_denovo</i> | 52351149                | G/T  | NA                 | NA                            | NA                 |
| <i>Desi_wild_52354683</i> | NA                                  | <i>Ca_desi_denovo</i> | 52354683                | G/T  | NA                 | NA                            | NA                 |
| <i>Desi_wild_52355106</i> | NA                                  | <i>Ca_desi_denovo</i> | 52355106                | C/T  | NA                 | NA                            | NA                 |
| <i>Desi_wild_52355132</i> | NA                                  | <i>Ca_desi_denovo</i> | 52355132                | C/T  | NA                 | NA                            | NA                 |

| SNP IDs                   | NCBI dbSNP accession IDs (NCBI_SS#) | Chromosomes           | Physical positions (bp) | SNPs | Gene accession IDs | Sequence components of genome | Putative functions |
|---------------------------|-------------------------------------|-----------------------|-------------------------|------|--------------------|-------------------------------|--------------------|
| <i>Desi_wild_52386598</i> | NA                                  | <i>Ca_desi_denovo</i> | 52386598                | A/G  | NA                 | NA                            | NA                 |
| <i>Desi_wild_52405298</i> | NA                                  | <i>Ca_desi_denovo</i> | 52405298                | C/G  | NA                 | NA                            | NA                 |
| <i>Desi_wild_52408917</i> | NA                                  | <i>Ca_desi_denovo</i> | 52408917                | G/T  | NA                 | NA                            | NA                 |
| <i>Desi_wild_52409120</i> | NA                                  | <i>Ca_desi_denovo</i> | 52409120                | A/C  | NA                 | NA                            | NA                 |
| <i>Desi_wild_52419057</i> | NA                                  | <i>Ca_desi_denovo</i> | 52419057                | G/T  | NA                 | NA                            | NA                 |
| <i>Desi_wild_52423055</i> | NA                                  | <i>Ca_desi_denovo</i> | 52423055                | G/A  | NA                 | NA                            | NA                 |
| <i>Desi_wild_52423078</i> | NA                                  | <i>Ca_desi_denovo</i> | 52423078                | C/A  | NA                 | NA                            | NA                 |
| <i>Desi_wild_52438376</i> | NA                                  | <i>Ca_desi_denovo</i> | 52438376                | A/G  | NA                 | NA                            | NA                 |
| <i>Desi_wild_52440839</i> | NA                                  | <i>Ca_desi_denovo</i> | 52440839                | G/T  | NA                 | NA                            | NA                 |
| <i>Desi_wild_52450462</i> | NA                                  | <i>Ca_desi_denovo</i> | 52450462                | A/G  | NA                 | NA                            | NA                 |
| <i>Desi_wild_52464801</i> | NA                                  | <i>Ca_desi_denovo</i> | 52464801                | C/G  | NA                 | NA                            | NA                 |
| <i>Desi_wild_52464802</i> | NA                                  | <i>Ca_desi_denovo</i> | 52464802                | A/C  | NA                 | NA                            | NA                 |
| <i>Desi_wild_52480809</i> | NA                                  | <i>Ca_desi_denovo</i> | 52480809                | G/T  | NA                 | NA                            | NA                 |
| <i>Desi_wild_52487263</i> | NA                                  | <i>Ca_desi_denovo</i> | 52487263                | C/G  | NA                 | NA                            | NA                 |
| <i>Desi_wild_52489570</i> | NA                                  | <i>Ca_desi_denovo</i> | 52489570                | G/T  | NA                 | NA                            | NA                 |
| <i>Desi_wild_52491585</i> | NA                                  | <i>Ca_desi_denovo</i> | 52491585                | A/C  | NA                 | NA                            | NA                 |
| <i>Desi_wild_52496689</i> | NA                                  | <i>Ca_desi_denovo</i> | 52496689                | C/G  | NA                 | NA                            | NA                 |
| <i>Desi_wild_52496727</i> | NA                                  | <i>Ca_desi_denovo</i> | 52496727                | C/T  | NA                 | NA                            | NA                 |
| <i>Desi_wild_52500987</i> | NA                                  | <i>Ca_desi_denovo</i> | 52500987                | A/T  | NA                 | NA                            | NA                 |
| <i>Desi_wild_52501521</i> | NA                                  | <i>Ca_desi_denovo</i> | 52501521                | C/T  | NA                 | NA                            | NA                 |
| <i>Desi_wild_52506559</i> | NA                                  | <i>Ca_desi_denovo</i> | 52506559                | A/G  | NA                 | NA                            | NA                 |
| <i>Desi_wild_52510043</i> | NA                                  | <i>Ca_desi_denovo</i> | 52510043                | A/G  | NA                 | NA                            | NA                 |
| <i>Desi_wild_52510060</i> | NA                                  | <i>Ca_desi_denovo</i> | 52510060                | C/T  | NA                 | NA                            | NA                 |
| <i>Desi_wild_52513798</i> | NA                                  | <i>Ca_desi_denovo</i> | 52513798                | A/G  | NA                 | NA                            | NA                 |
| <i>Desi_wild_52514158</i> | NA                                  | <i>Ca_desi_denovo</i> | 52514158                | A/G  | NA                 | NA                            | NA                 |
| <i>Desi_wild_52514180</i> | NA                                  | <i>Ca_desi_denovo</i> | 52514180                | C/T  | NA                 | NA                            | NA                 |
| <i>Desi_wild_52514181</i> | NA                                  | <i>Ca_desi_denovo</i> | 52514181                | A/C  | NA                 | NA                            | NA                 |
| <i>Desi_wild_52516259</i> | NA                                  | <i>Ca_desi_denovo</i> | 52516259                | A/G  | NA                 | NA                            | NA                 |
| <i>Desi_wild_52523145</i> | NA                                  | <i>Ca_desi_denovo</i> | 52523145                | C/T  | NA                 | NA                            | NA                 |
| <i>Desi_wild_52532570</i> | NA                                  | <i>Ca_desi_denovo</i> | 52532570                | A/C  | NA                 | NA                            | NA                 |
| <i>Desi_wild_52536609</i> | NA                                  | <i>Ca_desi_denovo</i> | 52536609                | G/T  | NA                 | NA                            | NA                 |
| <i>Desi_wild_52536768</i> | NA                                  | <i>Ca_desi_denovo</i> | 52536768                | A/G  | NA                 | NA                            | NA                 |
| <i>Desi_wild_52536792</i> | NA                                  | <i>Ca_desi_denovo</i> | 52536792                | C/T  | NA                 | NA                            | NA                 |
| <i>Desi_wild_52536798</i> | NA                                  | <i>Ca_desi_denovo</i> | 52536798                | A/G  | NA                 | NA                            | NA                 |
| <i>Desi_wild_52536801</i> | NA                                  | <i>Ca_desi_denovo</i> | 52536801                | C/T  | NA                 | NA                            | NA                 |
| <i>Desi_wild_52547639</i> | NA                                  | <i>Ca_desi_denovo</i> | 52547639                | G/T  | NA                 | NA                            | NA                 |
| <i>Desi_wild_52550087</i> | NA                                  | <i>Ca_desi_denovo</i> | 52550087                | C/T  | NA                 | NA                            | NA                 |
| <i>Desi_wild_52556401</i> | NA                                  | <i>Ca_desi_denovo</i> | 52556401                | A/G  | NA                 | NA                            | NA                 |
| <i>Desi_wild_52556428</i> | NA                                  | <i>Ca_desi_denovo</i> | 52556428                | C/T  | NA                 | NA                            | NA                 |
| <i>Desi_wild_52565554</i> | NA                                  | <i>Ca_desi_denovo</i> | 52565554                | A/G  | NA                 | NA                            | NA                 |
| <i>Desi_wild_52565583</i> | NA                                  | <i>Ca_desi_denovo</i> | 52565583                | C/T  | NA                 | NA                            | NA                 |
| <i>Desi_wild_52572463</i> | NA                                  | <i>Ca_desi_denovo</i> | 52572463                | C/T  | NA                 | NA                            | NA                 |
| <i>Desi_wild_52572484</i> | NA                                  | <i>Ca_desi_denovo</i> | 52572484                | A/G  | NA                 | NA                            | NA                 |
| <i>Desi_wild_52572502</i> | NA                                  | <i>Ca_desi_denovo</i> | 52572502                | C/T  | NA                 | NA                            | NA                 |

| SNP IDs                   | NCBI dbSNP accession IDs (NCBI_SS#) | Chromosomes           | Physical positions (bp) | SNPs | Gene accession IDs | Sequence components of genome | Putative functions |
|---------------------------|-------------------------------------|-----------------------|-------------------------|------|--------------------|-------------------------------|--------------------|
| <i>Desi_wild_52572511</i> | NA                                  | <i>Ca_desi_denovo</i> | 52572511                | C/T  | NA                 | NA                            | NA                 |
| <i>Desi_wild_52574893</i> | NA                                  | <i>Ca_desi_denovo</i> | 52574893                | C/T  | NA                 | NA                            | NA                 |
| <i>Desi_wild_52574899</i> | NA                                  | <i>Ca_desi_denovo</i> | 52574899                | C/T  | NA                 | NA                            | NA                 |
| <i>Desi_wild_52575136</i> | NA                                  | <i>Ca_desi_denovo</i> | 52575136                | A/G  | NA                 | NA                            | NA                 |
| <i>Desi_wild_52575853</i> | NA                                  | <i>Ca_desi_denovo</i> | 52575853                | G/T  | NA                 | NA                            | NA                 |
| <i>Desi_wild_52582437</i> | NA                                  | <i>Ca_desi_denovo</i> | 52582437                | A/G  | NA                 | NA                            | NA                 |
| <i>Desi_wild_52585991</i> | NA                                  | <i>Ca_desi_denovo</i> | 52585991                | A/G  | NA                 | NA                            | NA                 |
| <i>Desi_wild_52586006</i> | NA                                  | <i>Ca_desi_denovo</i> | 52586006                | C/T  | NA                 | NA                            | NA                 |
| <i>Desi_wild_52587485</i> | NA                                  | <i>Ca_desi_denovo</i> | 52587485                | C/G  | NA                 | NA                            | NA                 |
| <i>Desi_wild_52589050</i> | NA                                  | <i>Ca_desi_denovo</i> | 52589050                | A/G  | NA                 | NA                            | NA                 |
| <i>Desi_wild_52593633</i> | NA                                  | <i>Ca_desi_denovo</i> | 52593633                | A/C  | NA                 | NA                            | NA                 |
| <i>Desi_wild_52596290</i> | NA                                  | <i>Ca_desi_denovo</i> | 52596290                | C/G  | NA                 | NA                            | NA                 |
| <i>Desi_wild_52598147</i> | NA                                  | <i>Ca_desi_denovo</i> | 52598147                | A/C  | NA                 | NA                            | NA                 |
| <i>Desi_wild_52601370</i> | NA                                  | <i>Ca_desi_denovo</i> | 52601370                | A/T  | NA                 | NA                            | NA                 |
| <i>Desi_wild_52601400</i> | NA                                  | <i>Ca_desi_denovo</i> | 52601400                | C/T  | NA                 | NA                            | NA                 |
| <i>Desi_wild_52604422</i> | NA                                  | <i>Ca_desi_denovo</i> | 52604422                | A/C  | NA                 | NA                            | NA                 |
| <i>Desi_wild_52606430</i> | NA                                  | <i>Ca_desi_denovo</i> | 52606430                | A/C  | NA                 | NA                            | NA                 |
| <i>Desi_wild_52606431</i> | NA                                  | <i>Ca_desi_denovo</i> | 52606431                | A/G  | NA                 | NA                            | NA                 |
| <i>Desi_wild_52606538</i> | NA                                  | <i>Ca_desi_denovo</i> | 52606538                | C/T  | NA                 | NA                            | NA                 |
| <i>Desi_wild_52606898</i> | NA                                  | <i>Ca_desi_denovo</i> | 52606898                | A/G  | NA                 | NA                            | NA                 |
| <i>Desi_wild_52606903</i> | NA                                  | <i>Ca_desi_denovo</i> | 52606903                | C/T  | NA                 | NA                            | NA                 |
| <i>Desi_wild_52606919</i> | NA                                  | <i>Ca_desi_denovo</i> | 52606919                | A/G  | NA                 | NA                            | NA                 |
| <i>Desi_wild_52607274</i> | NA                                  | <i>Ca_desi_denovo</i> | 52607274                | C/T  | NA                 | NA                            | NA                 |
| <i>Desi_wild_52607322</i> | NA                                  | <i>Ca_desi_denovo</i> | 52607322                | A/G  | NA                 | NA                            | NA                 |
| <i>Desi_wild_52608148</i> | NA                                  | <i>Ca_desi_denovo</i> | 52608148                | A/T  | NA                 | NA                            | NA                 |
| <i>Desi_wild_52609333</i> | NA                                  | <i>Ca_desi_denovo</i> | 52609333                | G/T  | NA                 | NA                            | NA                 |
| <i>Desi_wild_52609369</i> | NA                                  | <i>Ca_desi_denovo</i> | 52609369                | G/T  | NA                 | NA                            | NA                 |
| <i>Desi_wild_52612641</i> | NA                                  | <i>Ca_desi_denovo</i> | 52612641                | G/T  | NA                 | NA                            | NA                 |
| <i>Desi_wild_52618523</i> | NA                                  | <i>Ca_desi_denovo</i> | 52618523                | A/G  | NA                 | NA                            | NA                 |
| <i>Desi_wild_52618987</i> | NA                                  | <i>Ca_desi_denovo</i> | 52618987                | A/G  | NA                 | NA                            | NA                 |
| <i>Desi_wild_52621366</i> | NA                                  | <i>Ca_desi_denovo</i> | 52621366                | G/T  | NA                 | NA                            | NA                 |
| <i>Desi_wild_52628950</i> | NA                                  | <i>Ca_desi_denovo</i> | 52628950                | A/G  | NA                 | NA                            | NA                 |
| <i>Desi_wild_52631955</i> | NA                                  | <i>Ca_desi_denovo</i> | 52631955                | C/G  | NA                 | NA                            | NA                 |
| <i>Desi_wild_52631992</i> | NA                                  | <i>Ca_desi_denovo</i> | 52631992                | A/T  | NA                 | NA                            | NA                 |
| <i>Desi_wild_52640373</i> | NA                                  | <i>Ca_desi_denovo</i> | 52640373                | G/T  | NA                 | NA                            | NA                 |
| <i>Desi_wild_52645081</i> | NA                                  | <i>Ca_desi_denovo</i> | 52645081                | G/T  | NA                 | NA                            | NA                 |
| <i>Desi_wild_52646049</i> | NA                                  | <i>Ca_desi_denovo</i> | 52646049                | C/G  | NA                 | NA                            | NA                 |
| <i>Desi_wild_52648855</i> | NA                                  | <i>Ca_desi_denovo</i> | 52648855                | G/T  | NA                 | NA                            | NA                 |
| <i>Desi_wild_52651118</i> | NA                                  | <i>Ca_desi_denovo</i> | 52651118                | G/T  | NA                 | NA                            | NA                 |
| <i>Desi_wild_52667651</i> | NA                                  | <i>Ca_desi_denovo</i> | 52667651                | C/G  | NA                 | NA                            | NA                 |
| <i>Desi_wild_52672629</i> | NA                                  | <i>Ca_desi_denovo</i> | 52672629                | G/T  | NA                 | NA                            | NA                 |
| <i>Desi_wild_52684653</i> | NA                                  | <i>Ca_desi_denovo</i> | 52684653                | A/T  | NA                 | NA                            | NA                 |
| <i>Desi_wild_52684984</i> | NA                                  | <i>Ca_desi_denovo</i> | 52684984                | G/T  | NA                 | NA                            | NA                 |
| <i>Desi_wild_52706348</i> | NA                                  | <i>Ca_desi_denovo</i> | 52706348                | A/G  | NA                 | NA                            | NA                 |



| SNP IDs                   | NCBI dbSNP accession IDs (NCBI_SS#) | Chromosomes           | Physical positions (bp) | SNPs | Gene accession IDs | Sequence components of genome | Putative functions |
|---------------------------|-------------------------------------|-----------------------|-------------------------|------|--------------------|-------------------------------|--------------------|
| <i>Desi_wild_52706349</i> | NA                                  | <i>Ca_desi_denovo</i> | 52706349                | A/G  | NA                 | NA                            | NA                 |
| <i>Desi_wild_52731413</i> | NA                                  | <i>Ca_desi_denovo</i> | 52731413                | A/G  | NA                 | NA                            | NA                 |
| <i>Desi_wild_52731539</i> | NA                                  | <i>Ca_desi_denovo</i> | 52731539                | A/G  | NA                 | NA                            | NA                 |
| <i>Desi_wild_52743212</i> | NA                                  | <i>Ca_desi_denovo</i> | 52743212                | C/G  | NA                 | NA                            | NA                 |
| <i>Desi_wild_52743221</i> | NA                                  | <i>Ca_desi_denovo</i> | 52743221                | C/G  | NA                 | NA                            | NA                 |
| <i>Desi_wild_52750297</i> | NA                                  | <i>Ca_desi_denovo</i> | 52750297                | G/T  | NA                 | NA                            | NA                 |
| <i>Desi_wild_52759867</i> | NA                                  | <i>Ca_desi_denovo</i> | 52759867                | G/T  | NA                 | NA                            | NA                 |
| <i>Desi_wild_52779491</i> | NA                                  | <i>Ca_desi_denovo</i> | 52779491                | G/T  | NA                 | NA                            | NA                 |
| <i>Desi_wild_52784018</i> | NA                                  | <i>Ca_desi_denovo</i> | 52784018                | A/G  | NA                 | NA                            | NA                 |
| <i>Desi_wild_52784024</i> | NA                                  | <i>Ca_desi_denovo</i> | 52784024                | A/G  | NA                 | NA                            | NA                 |
| <i>Desi_wild_52787563</i> | NA                                  | <i>Ca_desi_denovo</i> | 52787563                | C/T  | NA                 | NA                            | NA                 |
| <i>Desi_wild_52795264</i> | NA                                  | <i>Ca_desi_denovo</i> | 52795264                | C/G  | NA                 | NA                            | NA                 |
| <i>Desi_wild_52796687</i> | NA                                  | <i>Ca_desi_denovo</i> | 52796687                | C/G  | NA                 | NA                            | NA                 |
| <i>Desi_wild_52796736</i> | NA                                  | <i>Ca_desi_denovo</i> | 52796736                | A/G  | NA                 | NA                            | NA                 |
| <i>Desi_wild_52806704</i> | NA                                  | <i>Ca_desi_denovo</i> | 52806704                | G/T  | NA                 | NA                            | NA                 |
| <i>Desi_wild_52814203</i> | NA                                  | <i>Ca_desi_denovo</i> | 52814203                | C/T  | NA                 | NA                            | NA                 |
| <i>Desi_wild_52816370</i> | NA                                  | <i>Ca_desi_denovo</i> | 52816370                | A/G  | NA                 | NA                            | NA                 |
| <i>Desi_wild_52817567</i> | NA                                  | <i>Ca_desi_denovo</i> | 52817567                | G/T  | NA                 | NA                            | NA                 |
| <i>Desi_wild_52821194</i> | NA                                  | <i>Ca_desi_denovo</i> | 52821194                | A/T  | NA                 | NA                            | NA                 |
| <i>Desi_wild_52849050</i> | NA                                  | <i>Ca_desi_denovo</i> | 52849050                | G/T  | NA                 | NA                            | NA                 |
| <i>Desi_wild_52862570</i> | NA                                  | <i>Ca_desi_denovo</i> | 52862570                | C/T  | NA                 | NA                            | NA                 |
| <i>Desi_wild_52862574</i> | NA                                  | <i>Ca_desi_denovo</i> | 52862574                | A/C  | NA                 | NA                            | NA                 |
| <i>Desi_wild_52863961</i> | NA                                  | <i>Ca_desi_denovo</i> | 52863961                | A/G  | NA                 | NA                            | NA                 |
| <i>Desi_wild_52863962</i> | NA                                  | <i>Ca_desi_denovo</i> | 52863962                | C/G  | NA                 | NA                            | NA                 |
| <i>Desi_wild_52863963</i> | NA                                  | <i>Ca_desi_denovo</i> | 52863963                | C/G  | NA                 | NA                            | NA                 |
| <i>Desi_wild_52867231</i> | NA                                  | <i>Ca_desi_denovo</i> | 52867231                | G/T  | NA                 | NA                            | NA                 |
| <i>Desi_wild_52867235</i> | NA                                  | <i>Ca_desi_denovo</i> | 52867235                | G/T  | NA                 | NA                            | NA                 |
| <i>Desi_wild_52874951</i> | NA                                  | <i>Ca_desi_denovo</i> | 52874951                | A/G  | NA                 | NA                            | NA                 |
| <i>Desi_wild_52886221</i> | NA                                  | <i>Ca_desi_denovo</i> | 52886221                | C/T  | NA                 | NA                            | NA                 |
| <i>Desi_wild_52886236</i> | NA                                  | <i>Ca_desi_denovo</i> | 52886236                | A/C  | NA                 | NA                            | NA                 |
| <i>Desi_wild_52898051</i> | NA                                  | <i>Ca_desi_denovo</i> | 52898051                | G/T  | NA                 | NA                            | NA                 |
| <i>Desi_wild_52903997</i> | NA                                  | <i>Ca_desi_denovo</i> | 52903997                | C/G  | NA                 | NA                            | NA                 |
| <i>Desi_wild_52908339</i> | NA                                  | <i>Ca_desi_denovo</i> | 52908339                | C/G  | NA                 | NA                            | NA                 |
| <i>Desi_wild_52908348</i> | NA                                  | <i>Ca_desi_denovo</i> | 52908348                | C/G  | NA                 | NA                            | NA                 |
| <i>Desi_wild_52922835</i> | NA                                  | <i>Ca_desi_denovo</i> | 52922835                | A/C  | NA                 | NA                            | NA                 |
| <i>Desi_wild_52922840</i> | NA                                  | <i>Ca_desi_denovo</i> | 52922840                | A/C  | NA                 | NA                            | NA                 |
| <i>Desi_wild_52925347</i> | NA                                  | <i>Ca_desi_denovo</i> | 52925347                | C/T  | NA                 | NA                            | NA                 |
| <i>Desi_wild_52925398</i> | NA                                  | <i>Ca_desi_denovo</i> | 52925398                | A/G  | NA                 | NA                            | NA                 |
| <i>Desi_wild_52926395</i> | NA                                  | <i>Ca_desi_denovo</i> | 52926395                | C/T  | NA                 | NA                            | NA                 |
| <i>Desi_wild_52932504</i> | NA                                  | <i>Ca_desi_denovo</i> | 52932504                | A/T  | NA                 | NA                            | NA                 |
| <i>Desi_wild_52932530</i> | NA                                  | <i>Ca_desi_denovo</i> | 52932530                | A/T  | NA                 | NA                            | NA                 |
| <i>Desi_wild_52933622</i> | NA                                  | <i>Ca_desi_denovo</i> | 52933622                | G/T  | NA                 | NA                            | NA                 |
| <i>Desi_wild_52933857</i> | NA                                  | <i>Ca_desi_denovo</i> | 52933857                | G/T  | NA                 | NA                            | NA                 |
| <i>Desi_wild_52944257</i> | NA                                  | <i>Ca_desi_denovo</i> | 52944257                | A/G  | NA                 | NA                            | NA                 |

| SNP IDs                   | NCBI dbSNP accession IDs (NCBI_SS#) | Chromosomes           | Physical positions (bp) | SNPs | Gene accession IDs | Sequence components of genome | Putative functions |
|---------------------------|-------------------------------------|-----------------------|-------------------------|------|--------------------|-------------------------------|--------------------|
| <i>Desi_wild_52944287</i> | NA                                  | <i>Ca_desi_denovo</i> | 52944287                | C/T  | NA                 | NA                            | NA                 |
| <i>Desi_wild_52944302</i> | NA                                  | <i>Ca_desi_denovo</i> | 52944302                | C/T  | NA                 | NA                            | NA                 |
| <i>Desi_wild_52956995</i> | NA                                  | <i>Ca_desi_denovo</i> | 52956995                | A/C  | NA                 | NA                            | NA                 |
| <i>Desi_wild_52957017</i> | NA                                  | <i>Ca_desi_denovo</i> | 52957017                | G/T  | NA                 | NA                            | NA                 |
| <i>Desi_wild_52957032</i> | NA                                  | <i>Ca_desi_denovo</i> | 52957032                | A/G  | NA                 | NA                            | NA                 |
| <i>Desi_wild_52957038</i> | NA                                  | <i>Ca_desi_denovo</i> | 52957038                | A/T  | NA                 | NA                            | NA                 |
| <i>Desi_wild_52957296</i> | NA                                  | <i>Ca_desi_denovo</i> | 52957296                | A/G  | NA                 | NA                            | NA                 |
| <i>Desi_wild_52961023</i> | NA                                  | <i>Ca_desi_denovo</i> | 52961023                | C/G  | NA                 | NA                            | NA                 |
| <i>Desi_wild_52966909</i> | NA                                  | <i>Ca_desi_denovo</i> | 52966909                | G/T  | NA                 | NA                            | NA                 |
| <i>Desi_wild_52966912</i> | NA                                  | <i>Ca_desi_denovo</i> | 52966912                | C/T  | NA                 | NA                            | NA                 |
| <i>Desi_wild_52967741</i> | NA                                  | <i>Ca_desi_denovo</i> | 52967741                | G/T  | NA                 | NA                            | NA                 |
| <i>Desi_wild_52967747</i> | NA                                  | <i>Ca_desi_denovo</i> | 52967747                | A/C  | NA                 | NA                            | NA                 |
| <i>Desi_wild_52970933</i> | NA                                  | <i>Ca_desi_denovo</i> | 52970933                | A/C  | NA                 | NA                            | NA                 |
| <i>Desi_wild_52972388</i> | NA                                  | <i>Ca_desi_denovo</i> | 52972388                | C/T  | NA                 | NA                            | NA                 |
| <i>Desi_wild_52972414</i> | NA                                  | <i>Ca_desi_denovo</i> | 52972414                | A/G  | NA                 | NA                            | NA                 |
| <i>Desi_wild_52972427</i> | NA                                  | <i>Ca_desi_denovo</i> | 52972427                | G/T  | NA                 | NA                            | NA                 |
| <i>Desi_wild_52976063</i> | NA                                  | <i>Ca_desi_denovo</i> | 52976063                | C/G  | NA                 | NA                            | NA                 |
| <i>Desi_wild_52977590</i> | NA                                  | <i>Ca_desi_denovo</i> | 52977590                | G/T  | NA                 | NA                            | NA                 |
| <i>Desi_wild_52978206</i> | NA                                  | <i>Ca_desi_denovo</i> | 52978206                | C/G  | NA                 | NA                            | NA                 |
| <i>Desi_wild_52979795</i> | NA                                  | <i>Ca_desi_denovo</i> | 52979795                | C/G  | NA                 | NA                            | NA                 |
| <i>Desi_wild_52985133</i> | NA                                  | <i>Ca_desi_denovo</i> | 52985133                | A/G  | NA                 | NA                            | NA                 |
| <i>Desi_wild_52985618</i> | NA                                  | <i>Ca_desi_denovo</i> | 52985618                | A/G  | NA                 | NA                            | NA                 |
| <i>Desi_wild_52991210</i> | NA                                  | <i>Ca_desi_denovo</i> | 52991210                | C/G  | NA                 | NA                            | NA                 |
| <i>Desi_wild_52993257</i> | NA                                  | <i>Ca_desi_denovo</i> | 52993257                | A/G  | NA                 | NA                            | NA                 |
| <i>Desi_wild_52993278</i> | NA                                  | <i>Ca_desi_denovo</i> | 52993278                | C/G  | NA                 | NA                            | NA                 |
| <i>Desi_wild_52994742</i> | NA                                  | <i>Ca_desi_denovo</i> | 52994742                | C/G  | NA                 | NA                            | NA                 |
| <i>Desi_wild_52997614</i> | NA                                  | <i>Ca_desi_denovo</i> | 52997614                | A/G  | NA                 | NA                            | NA                 |
| <i>Desi_wild_52997634</i> | NA                                  | <i>Ca_desi_denovo</i> | 52997634                | A/C  | NA                 | NA                            | NA                 |
| <i>Desi_wild_52997663</i> | NA                                  | <i>Ca_desi_denovo</i> | 52997663                | A/C  | NA                 | NA                            | NA                 |
| <i>Desi_wild_52997744</i> | NA                                  | <i>Ca_desi_denovo</i> | 52997744                | G/T  | NA                 | NA                            | NA                 |
| <i>Desi_wild_53002264</i> | NA                                  | <i>Ca_desi_denovo</i> | 53002264                | C/T  | NA                 | NA                            | NA                 |
| <i>Desi_wild_53013153</i> | NA                                  | <i>Ca_desi_denovo</i> | 53013153                | C/G  | NA                 | NA                            | NA                 |
| <i>Desi_wild_53018811</i> | NA                                  | <i>Ca_desi_denovo</i> | 53018811                | G/T  | NA                 | NA                            | NA                 |
| <i>Desi_wild_53023042</i> | NA                                  | <i>Ca_desi_denovo</i> | 53023042                | G/T  | NA                 | NA                            | NA                 |
| <i>Desi_wild_53031498</i> | NA                                  | <i>Ca_desi_denovo</i> | 53031498                | G/T  | NA                 | NA                            | NA                 |
| <i>Desi_wild_53031509</i> | NA                                  | <i>Ca_desi_denovo</i> | 53031509                | G/T  | NA                 | NA                            | NA                 |
| <i>Desi_wild_53043167</i> | NA                                  | <i>Ca_desi_denovo</i> | 53043167                | G/T  | NA                 | NA                            | NA                 |
| <i>Desi_wild_53046641</i> | NA                                  | <i>Ca_desi_denovo</i> | 53046641                | G/T  | NA                 | NA                            | NA                 |
| <i>Desi_wild_53048612</i> | NA                                  | <i>Ca_desi_denovo</i> | 53048612                | A/G  | NA                 | NA                            | NA                 |
| <i>Desi_wild_53048662</i> | NA                                  | <i>Ca_desi_denovo</i> | 53048662                | G/T  | NA                 | NA                            | NA                 |
| <i>Desi_wild_53049690</i> | NA                                  | <i>Ca_desi_denovo</i> | 53049690                | C/T  | NA                 | NA                            | NA                 |
| <i>Desi_wild_53053667</i> | NA                                  | <i>Ca_desi_denovo</i> | 53053667                | G/T  | NA                 | NA                            | NA                 |
| <i>Desi_wild_53059299</i> | NA                                  | <i>Ca_desi_denovo</i> | 53059299                | A/C  | NA                 | NA                            | NA                 |
| <i>Desi_wild_53059614</i> | NA                                  | <i>Ca_desi_denovo</i> | 53059614                | A/G  | NA                 | NA                            | NA                 |

| SNP IDs                   | NCBI dbSNP accession IDs (NCBI_SS#) | Chromosomes           | Physical positions (bp) | SNPs | Gene accession IDs | Sequence components of genome | Putative functions |
|---------------------------|-------------------------------------|-----------------------|-------------------------|------|--------------------|-------------------------------|--------------------|
| <i>Desi_wild_53059617</i> | NA                                  | <i>Ca_desi_denovo</i> | 53059617                | A/G  | NA                 | NA                            | NA                 |
| <i>Desi_wild_53068228</i> | NA                                  | <i>Ca_desi_denovo</i> | 53068228                | G/T  | NA                 | NA                            | NA                 |
| <i>Desi_wild_53075177</i> | NA                                  | <i>Ca_desi_denovo</i> | 53075177                | C/T  | NA                 | NA                            | NA                 |
| <i>Desi_wild_53075228</i> | NA                                  | <i>Ca_desi_denovo</i> | 53075228                | A/G  | NA                 | NA                            | NA                 |
| <i>Desi_wild_53085133</i> | NA                                  | <i>Ca_desi_denovo</i> | 53085133                | G/T  | NA                 | NA                            | NA                 |
| <i>Desi_wild_53085841</i> | NA                                  | <i>Ca_desi_denovo</i> | 53085841                | C/G  | NA                 | NA                            | NA                 |
| <i>Desi_wild_53085877</i> | NA                                  | <i>Ca_desi_denovo</i> | 53085877                | C/T  | NA                 | NA                            | NA                 |
| <i>Desi_wild_53099478</i> | NA                                  | <i>Ca_desi_denovo</i> | 53099478                | C/T  | NA                 | NA                            | NA                 |
| <i>Desi_wild_53105729</i> | NA                                  | <i>Ca_desi_denovo</i> | 53105729                | G/T  | NA                 | NA                            | NA                 |
| <i>Desi_wild_53106882</i> | NA                                  | <i>Ca_desi_denovo</i> | 53106882                | C/G  | NA                 | NA                            | NA                 |
| <i>Desi_wild_53106883</i> | NA                                  | <i>Ca_desi_denovo</i> | 53106883                | A/G  | NA                 | NA                            | NA                 |
| <i>Desi_wild_53106997</i> | NA                                  | <i>Ca_desi_denovo</i> | 53106997                | C/G  | NA                 | NA                            | NA                 |
| <i>Desi_wild_53114256</i> | NA                                  | <i>Ca_desi_denovo</i> | 53114256                | A/T  | NA                 | NA                            | NA                 |
| <i>Desi_wild_53114308</i> | NA                                  | <i>Ca_desi_denovo</i> | 53114308                | A/G  | NA                 | NA                            | NA                 |
| <i>Desi_wild_53126627</i> | NA                                  | <i>Ca_desi_denovo</i> | 53126627                | G/T  | NA                 | NA                            | NA                 |
| <i>Desi_wild_53139042</i> | NA                                  | <i>Ca_desi_denovo</i> | 53139042                | A/G  | NA                 | NA                            | NA                 |
| <i>Desi_wild_53139801</i> | NA                                  | <i>Ca_desi_denovo</i> | 53139801                | A/G  | NA                 | NA                            | NA                 |
| <i>Desi_wild_53170114</i> | NA                                  | <i>Ca_desi_denovo</i> | 53170114                | A/G  | NA                 | NA                            | NA                 |
| <i>Desi_wild_53173985</i> | NA                                  | <i>Ca_desi_denovo</i> | 53173985                | A/G  | NA                 | NA                            | NA                 |
| <i>Desi_wild_53174051</i> | NA                                  | <i>Ca_desi_denovo</i> | 53174051                | C/T  | NA                 | NA                            | NA                 |
| <i>Desi_wild_53187068</i> | NA                                  | <i>Ca_desi_denovo</i> | 53187068                | G/T  | NA                 | NA                            | NA                 |
| <i>Desi_wild_53187239</i> | NA                                  | <i>Ca_desi_denovo</i> | 53187239                | A/G  | NA                 | NA                            | NA                 |
| <i>Desi_wild_53187262</i> | NA                                  | <i>Ca_desi_denovo</i> | 53187262                | C/T  | NA                 | NA                            | NA                 |
| <i>Desi_wild_53197966</i> | NA                                  | <i>Ca_desi_denovo</i> | 53197966                | A/C  | NA                 | NA                            | NA                 |
| <i>Desi_wild_53198944</i> | NA                                  | <i>Ca_desi_denovo</i> | 53198944                | C/T  | NA                 | NA                            | NA                 |
| <i>Desi_wild_53206203</i> | NA                                  | <i>Ca_desi_denovo</i> | 53206203                | G/T  | NA                 | NA                            | NA                 |
| <i>Desi_wild_53210692</i> | NA                                  | <i>Ca_desi_denovo</i> | 53210692                | C/G  | NA                 | NA                            | NA                 |
| <i>Desi_wild_53212040</i> | NA                                  | <i>Ca_desi_denovo</i> | 53212040                | G/T  | NA                 | NA                            | NA                 |
| <i>Desi_wild_53212893</i> | NA                                  | <i>Ca_desi_denovo</i> | 53212893                | A/G  | NA                 | NA                            | NA                 |
| <i>Desi_wild_53218504</i> | NA                                  | <i>Ca_desi_denovo</i> | 53218504                | A/G  | NA                 | NA                            | NA                 |
| <i>Desi_wild_53218573</i> | NA                                  | <i>Ca_desi_denovo</i> | 53218573                | C/T  | NA                 | NA                            | NA                 |
| <i>Desi_wild_53226893</i> | NA                                  | <i>Ca_desi_denovo</i> | 53226893                | T/C  | NA                 | NA                            | NA                 |
| <i>Desi_wild_53230301</i> | NA                                  | <i>Ca_desi_denovo</i> | 53230301                | G/T  | NA                 | NA                            | NA                 |
| <i>Desi_wild_53231778</i> | NA                                  | <i>Ca_desi_denovo</i> | 53231778                | C/G  | NA                 | NA                            | NA                 |
| <i>Desi_wild_53231781</i> | NA                                  | <i>Ca_desi_denovo</i> | 53231781                | C/G  | NA                 | NA                            | NA                 |
| <i>Desi_wild_53231798</i> | NA                                  | <i>Ca_desi_denovo</i> | 53231798                | C/T  | NA                 | NA                            | NA                 |
| <i>Desi_wild_53240455</i> | NA                                  | <i>Ca_desi_denovo</i> | 53240455                | A/G  | NA                 | NA                            | NA                 |
| <i>Desi_wild_53243547</i> | NA                                  | <i>Ca_desi_denovo</i> | 53243547                | G/T  | NA                 | NA                            | NA                 |
| <i>Desi_wild_53249041</i> | NA                                  | <i>Ca_desi_denovo</i> | 53249041                | A/C  | NA                 | NA                            | NA                 |
| <i>Desi_wild_53249078</i> | NA                                  | <i>Ca_desi_denovo</i> | 53249078                | A/C  | NA                 | NA                            | NA                 |
| <i>Desi_wild_53249082</i> | NA                                  | <i>Ca_desi_denovo</i> | 53249082                | A/C  | NA                 | NA                            | NA                 |
| <i>Desi_wild_53249264</i> | NA                                  | <i>Ca_desi_denovo</i> | 53249264                | G/T  | NA                 | NA                            | NA                 |
| <i>Desi_wild_53250793</i> | NA                                  | <i>Ca_desi_denovo</i> | 53250793                | G/T  | NA                 | NA                            | NA                 |
| <i>Desi_wild_53263915</i> | NA                                  | <i>Ca_desi_denovo</i> | 53263915                | C/T  | NA                 | NA                            | NA                 |

| SNP IDs                   | NCBI dbSNP accession IDs (NCBI_SS#) | Chromosomes           | Physical positions (bp) | SNPs | Gene accession IDs | Sequence components of genome | Putative functions |
|---------------------------|-------------------------------------|-----------------------|-------------------------|------|--------------------|-------------------------------|--------------------|
| <i>Desi_wild_53263934</i> | NA                                  | <i>Ca_desi_denovo</i> | 53263934                | C/G  | NA                 | NA                            | NA                 |
| <i>Desi_wild_53264675</i> | NA                                  | <i>Ca_desi_denovo</i> | 53264675                | A/G  | NA                 | NA                            | NA                 |
| <i>Desi_wild_53271488</i> | NA                                  | <i>Ca_desi_denovo</i> | 53271488                | G/T  | NA                 | NA                            | NA                 |
| <i>Desi_wild_53286149</i> | NA                                  | <i>Ca_desi_denovo</i> | 53286149                | T/C  | NA                 | NA                            | NA                 |
| <i>Desi_wild_53292734</i> | NA                                  | <i>Ca_desi_denovo</i> | 53292734                | A/C  | NA                 | NA                            | NA                 |
| <i>Desi_wild_53299050</i> | NA                                  | <i>Ca_desi_denovo</i> | 53299050                | C/G  | NA                 | NA                            | NA                 |
| <i>Desi_wild_53299067</i> | NA                                  | <i>Ca_desi_denovo</i> | 53299067                | C/G  | NA                 | NA                            | NA                 |
| <i>Desi_wild_53327369</i> | NA                                  | <i>Ca_desi_denovo</i> | 53327369                | C/T  | NA                 | NA                            | NA                 |
| <i>Desi_wild_53328295</i> | NA                                  | <i>Ca_desi_denovo</i> | 53328295                | C/T  | NA                 | NA                            | NA                 |
| <i>Desi_wild_53328318</i> | NA                                  | <i>Ca_desi_denovo</i> | 53328318                | C/T  | NA                 | NA                            | NA                 |
| <i>Desi_wild_53330735</i> | NA                                  | <i>Ca_desi_denovo</i> | 53330735                | A/G  | NA                 | NA                            | NA                 |
| <i>Desi_wild_53337253</i> | NA                                  | <i>Ca_desi_denovo</i> | 53337253                | A/T  | NA                 | NA                            | NA                 |
| <i>Desi_wild_53346495</i> | NA                                  | <i>Ca_desi_denovo</i> | 53346495                | G/T  | NA                 | NA                            | NA                 |
| <i>Desi_wild_53354526</i> | NA                                  | <i>Ca_desi_denovo</i> | 53354526                | G/T  | NA                 | NA                            | NA                 |
| <i>Desi_wild_53364450</i> | NA                                  | <i>Ca_desi_denovo</i> | 53364450                | A/G  | NA                 | NA                            | NA                 |
| <i>Desi_wild_53370699</i> | NA                                  | <i>Ca_desi_denovo</i> | 53370699                | A/G  | NA                 | NA                            | NA                 |
| <i>Desi_wild_53370753</i> | NA                                  | <i>Ca_desi_denovo</i> | 53370753                | A/G  | NA                 | NA                            | NA                 |
| <i>Desi_wild_53372213</i> | NA                                  | <i>Ca_desi_denovo</i> | 53372213                | C/G  | NA                 | NA                            | NA                 |
| <i>Desi_wild_53373404</i> | NA                                  | <i>Ca_desi_denovo</i> | 53373404                | C/T  | NA                 | NA                            | NA                 |
| <i>Desi_wild_53375859</i> | NA                                  | <i>Ca_desi_denovo</i> | 53375859                | A/G  | NA                 | NA                            | NA                 |
| <i>Desi_wild_53383835</i> | NA                                  | <i>Ca_desi_denovo</i> | 53383835                | A/T  | NA                 | NA                            | NA                 |
| <i>Desi_wild_53383888</i> | NA                                  | <i>Ca_desi_denovo</i> | 53383888                | C/T  | NA                 | NA                            | NA                 |
| <i>Desi_wild_53383891</i> | NA                                  | <i>Ca_desi_denovo</i> | 53383891                | A/T  | NA                 | NA                            | NA                 |
| <i>Desi_wild_53391847</i> | NA                                  | <i>Ca_desi_denovo</i> | 53391847                | A/T  | NA                 | NA                            | NA                 |
| <i>Desi_wild_53392274</i> | NA                                  | <i>Ca_desi_denovo</i> | 53392274                | A/C  | NA                 | NA                            | NA                 |
| <i>Desi_wild_53407735</i> | NA                                  | <i>Ca_desi_denovo</i> | 53407735                | A/G  | NA                 | NA                            | NA                 |
| <i>Desi_wild_53407766</i> | NA                                  | <i>Ca_desi_denovo</i> | 53407766                | A/C  | NA                 | NA                            | NA                 |
| <i>Desi_wild_53407770</i> | NA                                  | <i>Ca_desi_denovo</i> | 53407770                | A/C  | NA                 | NA                            | NA                 |
| <i>Desi_wild_53408409</i> | NA                                  | <i>Ca_desi_denovo</i> | 53408409                | C/T  | NA                 | NA                            | NA                 |
| <i>Desi_wild_53408446</i> | NA                                  | <i>Ca_desi_denovo</i> | 53408446                | A/G  | NA                 | NA                            | NA                 |
| <i>Desi_wild_53415570</i> | NA                                  | <i>Ca_desi_denovo</i> | 53415570                | A/C  | NA                 | NA                            | NA                 |
| <i>Desi_wild_53416173</i> | NA                                  | <i>Ca_desi_denovo</i> | 53416173                | C/T  | NA                 | NA                            | NA                 |
| <i>Desi_wild_53416205</i> | NA                                  | <i>Ca_desi_denovo</i> | 53416205                | G/T  | NA                 | NA                            | NA                 |
| <i>Desi_wild_53420143</i> | NA                                  | <i>Ca_desi_denovo</i> | 53420143                | A/G  | NA                 | NA                            | NA                 |
| <i>Desi_wild_53422883</i> | NA                                  | <i>Ca_desi_denovo</i> | 53422883                | G/T  | NA                 | NA                            | NA                 |
| <i>Desi_wild_53428908</i> | NA                                  | <i>Ca_desi_denovo</i> | 53428908                | G/T  | NA                 | NA                            | NA                 |
| <i>Desi_wild_53439237</i> | NA                                  | <i>Ca_desi_denovo</i> | 53439237                | A/G  | NA                 | NA                            | NA                 |
| <i>Desi_wild_53442849</i> | NA                                  | <i>Ca_desi_denovo</i> | 53442849                | G/T  | NA                 | NA                            | NA                 |
| <i>Desi_wild_53453238</i> | NA                                  | <i>Ca_desi_denovo</i> | 53453238                | A/G  | NA                 | NA                            | NA                 |
| <i>Desi_wild_53453283</i> | NA                                  | <i>Ca_desi_denovo</i> | 53453283                | C/T  | NA                 | NA                            | NA                 |
| <i>Desi_wild_53468351</i> | NA                                  | <i>Ca_desi_denovo</i> | 53468351                | C/G  | NA                 | NA                            | NA                 |
| <i>Desi_wild_53468364</i> | NA                                  | <i>Ca_desi_denovo</i> | 53468364                | C/T  | NA                 | NA                            | NA                 |
| <i>Desi_wild_53478261</i> | NA                                  | <i>Ca_desi_denovo</i> | 53478261                | G/T  | NA                 | NA                            | NA                 |
| <i>Desi_wild_53479773</i> | NA                                  | <i>Ca_desi_denovo</i> | 53479773                | A/G  | NA                 | NA                            | NA                 |

| SNP IDs                   | NCBI dbSNP accession IDs (NCBI_SS#) | Chromosomes           | Physical positions (bp) | SNPs | Gene accession IDs | Sequence components of genome | Putative functions |
|---------------------------|-------------------------------------|-----------------------|-------------------------|------|--------------------|-------------------------------|--------------------|
| <i>Desi_wild_53479780</i> | NA                                  | <i>Ca_desi_denovo</i> | 53479780                | G/T  | NA                 | NA                            | NA                 |
| <i>Desi_wild_53487425</i> | NA                                  | <i>Ca_desi_denovo</i> | 53487425                | G/T  | NA                 | NA                            | NA                 |
| <i>Desi_wild_53489681</i> | NA                                  | <i>Ca_desi_denovo</i> | 53489681                | A/G  | NA                 | NA                            | NA                 |
| <i>Desi_wild_53492528</i> | NA                                  | <i>Ca_desi_denovo</i> | 53492528                | A/G  | NA                 | NA                            | NA                 |
| <i>Desi_wild_53492537</i> | NA                                  | <i>Ca_desi_denovo</i> | 53492537                | A/T  | NA                 | NA                            | NA                 |
| <i>Desi_wild_53494522</i> | NA                                  | <i>Ca_desi_denovo</i> | 53494522                | C/T  | NA                 | NA                            | NA                 |
| <i>Desi_wild_53494782</i> | NA                                  | <i>Ca_desi_denovo</i> | 53494782                | C/G  | NA                 | NA                            | NA                 |
| <i>Desi_wild_53494786</i> | NA                                  | <i>Ca_desi_denovo</i> | 53494786                | A/C  | NA                 | NA                            | NA                 |
| <i>Desi_wild_53496077</i> | NA                                  | <i>Ca_desi_denovo</i> | 53496077                | G/T  | NA                 | NA                            | NA                 |
| <i>Desi_wild_53496115</i> | NA                                  | <i>Ca_desi_denovo</i> | 53496115                | G/T  | NA                 | NA                            | NA                 |
| <i>Desi_wild_53498689</i> | NA                                  | <i>Ca_desi_denovo</i> | 53498689                | A/G  | NA                 | NA                            | NA                 |
| <i>Desi_wild_53504119</i> | NA                                  | <i>Ca_desi_denovo</i> | 53504119                | A/G  | NA                 | NA                            | NA                 |
| <i>Desi_wild_53504158</i> | NA                                  | <i>Ca_desi_denovo</i> | 53504158                | A/G  | NA                 | NA                            | NA                 |
| <i>Desi_wild_53504167</i> | NA                                  | <i>Ca_desi_denovo</i> | 53504167                | A/C  | NA                 | NA                            | NA                 |
| <i>Desi_wild_53504171</i> | NA                                  | <i>Ca_desi_denovo</i> | 53504171                | A/G  | NA                 | NA                            | NA                 |
| <i>Desi_wild_53520014</i> | NA                                  | <i>Ca_desi_denovo</i> | 53520014                | G/T  | NA                 | NA                            | NA                 |
| <i>Desi_wild_53525241</i> | NA                                  | <i>Ca_desi_denovo</i> | 53525241                | A/G  | NA                 | NA                            | NA                 |
| <i>Desi_wild_53525251</i> | NA                                  | <i>Ca_desi_denovo</i> | 53525251                | A/G  | NA                 | NA                            | NA                 |
| <i>Desi_wild_53525253</i> | NA                                  | <i>Ca_desi_denovo</i> | 53525253                | A/G  | NA                 | NA                            | NA                 |
| <i>Desi_wild_53525276</i> | NA                                  | <i>Ca_desi_denovo</i> | 53525276                | A/C  | NA                 | NA                            | NA                 |
| <i>Desi_wild_53551566</i> | NA                                  | <i>Ca_desi_denovo</i> | 53551566                | C/T  | NA                 | NA                            | NA                 |
| <i>Desi_wild_53551617</i> | NA                                  | <i>Ca_desi_denovo</i> | 53551617                | A/C  | NA                 | NA                            | NA                 |
| <i>Desi_wild_53551618</i> | NA                                  | <i>Ca_desi_denovo</i> | 53551618                | C/G  | NA                 | NA                            | NA                 |
| <i>Desi_wild_53551619</i> | NA                                  | <i>Ca_desi_denovo</i> | 53551619                | A/C  | NA                 | NA                            | NA                 |
| <i>Desi_wild_53570661</i> | NA                                  | <i>Ca_desi_denovo</i> | 53570661                | A/T  | NA                 | NA                            | NA                 |
| <i>Desi_wild_53574044</i> | NA                                  | <i>Ca_desi_denovo</i> | 53574044                | C/T  | NA                 | NA                            | NA                 |
| <i>Desi_wild_53574049</i> | NA                                  | <i>Ca_desi_denovo</i> | 53574049                | A/G  | NA                 | NA                            | NA                 |
| <i>Desi_wild_53579740</i> | NA                                  | <i>Ca_desi_denovo</i> | 53579740                | G/T  | NA                 | NA                            | NA                 |
| <i>Desi_wild_53592435</i> | NA                                  | <i>Ca_desi_denovo</i> | 53592435                | C/G  | NA                 | NA                            | NA                 |
| <i>Desi_wild_53592468</i> | NA                                  | <i>Ca_desi_denovo</i> | 53592468                | A/G  | NA                 | NA                            | NA                 |
| <i>Desi_wild_53592489</i> | NA                                  | <i>Ca_desi_denovo</i> | 53592489                | A/G  | NA                 | NA                            | NA                 |
| <i>Desi_wild_53593252</i> | NA                                  | <i>Ca_desi_denovo</i> | 53593252                | G/T  | NA                 | NA                            | NA                 |
| <i>Desi_wild_53611529</i> | NA                                  | <i>Ca_desi_denovo</i> | 53611529                | G/T  | NA                 | NA                            | NA                 |
| <i>Desi_wild_53611547</i> | NA                                  | <i>Ca_desi_denovo</i> | 53611547                | C/T  | NA                 | NA                            | NA                 |
| <i>Desi_wild_53611553</i> | NA                                  | <i>Ca_desi_denovo</i> | 53611553                | A/G  | NA                 | NA                            | NA                 |
| <i>Desi_wild_53611562</i> | NA                                  | <i>Ca_desi_denovo</i> | 53611562                | C/T  | NA                 | NA                            | NA                 |
| <i>Desi_wild_53615495</i> | NA                                  | <i>Ca_desi_denovo</i> | 53615495                | C/T  | NA                 | NA                            | NA                 |
| <i>Desi_wild_53624399</i> | NA                                  | <i>Ca_desi_denovo</i> | 53624399                | A/G  | NA                 | NA                            | NA                 |
| <i>Desi_wild_53625024</i> | NA                                  | <i>Ca_desi_denovo</i> | 53625024                | C/G  | NA                 | NA                            | NA                 |
| <i>Desi_wild_53637917</i> | NA                                  | <i>Ca_desi_denovo</i> | 53637917                | G/T  | NA                 | NA                            | NA                 |
| <i>Desi_wild_53646479</i> | NA                                  | <i>Ca_desi_denovo</i> | 53646479                | A/G  | NA                 | NA                            | NA                 |
| <i>Desi_wild_53646483</i> | NA                                  | <i>Ca_desi_denovo</i> | 53646483                | A/T  | NA                 | NA                            | NA                 |
| <i>Desi_wild_53646524</i> | NA                                  | <i>Ca_desi_denovo</i> | 53646524                | C/T  | NA                 | NA                            | NA                 |
| <i>Desi_wild_53651560</i> | NA                                  | <i>Ca_desi_denovo</i> | 53651560                | G/T  | NA                 | NA                            | NA                 |

| SNP IDs                   | NCBI dbSNP accession IDs (NCBI_SS#) | Chromosomes           | Physical positions (bp) | SNPs | Gene accession IDs | Sequence components of genome | Putative functions |
|---------------------------|-------------------------------------|-----------------------|-------------------------|------|--------------------|-------------------------------|--------------------|
| <i>Desi_wild_53651607</i> | NA                                  | <i>Ca_desi_denovo</i> | 53651607                | A/T  | NA                 | NA                            | NA                 |
| <i>Desi_wild_53657121</i> | NA                                  | <i>Ca_desi_denovo</i> | 53657121                | G/T  | NA                 | NA                            | NA                 |
| <i>Desi_wild_53659364</i> | NA                                  | <i>Ca_desi_denovo</i> | 53659364                | A/G  | NA                 | NA                            | NA                 |
| <i>Desi_wild_53659370</i> | NA                                  | <i>Ca_desi_denovo</i> | 53659370                | G/T  | NA                 | NA                            | NA                 |
| <i>Desi_wild_53659381</i> | NA                                  | <i>Ca_desi_denovo</i> | 53659381                | C/G  | NA                 | NA                            | NA                 |
| <i>Desi_wild_53661401</i> | NA                                  | <i>Ca_desi_denovo</i> | 53661401                | A/G  | NA                 | NA                            | NA                 |
| <i>Desi_wild_53665441</i> | NA                                  | <i>Ca_desi_denovo</i> | 53665441                | A/G  | NA                 | NA                            | NA                 |
| <i>Desi_wild_53673121</i> | NA                                  | <i>Ca_desi_denovo</i> | 53673121                | A/C  | NA                 | NA                            | NA                 |
| <i>Desi_wild_53673449</i> | NA                                  | <i>Ca_desi_denovo</i> | 53673449                | A/G  | NA                 | NA                            | NA                 |
| <i>Desi_wild_53676662</i> | NA                                  | <i>Ca_desi_denovo</i> | 53676662                | C/T  | NA                 | NA                            | NA                 |
| <i>Desi_wild_53677961</i> | NA                                  | <i>Ca_desi_denovo</i> | 53677961                | C/T  | NA                 | NA                            | NA                 |
| <i>Desi_wild_53677970</i> | NA                                  | <i>Ca_desi_denovo</i> | 53677970                | A/G  | NA                 | NA                            | NA                 |
| <i>Desi_wild_53680259</i> | NA                                  | <i>Ca_desi_denovo</i> | 53680259                | A/C  | NA                 | NA                            | NA                 |
| <i>Desi_wild_53687331</i> | NA                                  | <i>Ca_desi_denovo</i> | 53687331                | A/G  | NA                 | NA                            | NA                 |
| <i>Desi_wild_53687332</i> | NA                                  | <i>Ca_desi_denovo</i> | 53687332                | A/G  | NA                 | NA                            | NA                 |
| <i>Desi_wild_53687354</i> | NA                                  | <i>Ca_desi_denovo</i> | 53687354                | A/G  | NA                 | NA                            | NA                 |
| <i>Desi_wild_53687362</i> | NA                                  | <i>Ca_desi_denovo</i> | 53687362                | C/T  | NA                 | NA                            | NA                 |
| <i>Desi_wild_53689193</i> | NA                                  | <i>Ca_desi_denovo</i> | 53689193                | C/T  | NA                 | NA                            | NA                 |
| <i>Desi_wild_53689241</i> | NA                                  | <i>Ca_desi_denovo</i> | 53689241                | C/T  | NA                 | NA                            | NA                 |
| <i>Desi_wild_53690005</i> | NA                                  | <i>Ca_desi_denovo</i> | 53690005                | A/T  | NA                 | NA                            | NA                 |
| <i>Desi_wild_53690027</i> | NA                                  | <i>Ca_desi_denovo</i> | 53690027                | C/G  | NA                 | NA                            | NA                 |
| <i>Desi_wild_53691967</i> | NA                                  | <i>Ca_desi_denovo</i> | 53691967                | A/G  | NA                 | NA                            | NA                 |
| <i>Desi_wild_53697718</i> | NA                                  | <i>Ca_desi_denovo</i> | 53697718                | C/T  | NA                 | NA                            | NA                 |
| <i>Desi_wild_53698564</i> | NA                                  | <i>Ca_desi_denovo</i> | 53698564                | C/T  | NA                 | NA                            | NA                 |
| <i>Desi_wild_53698582</i> | NA                                  | <i>Ca_desi_denovo</i> | 53698582                | C/T  | NA                 | NA                            | NA                 |
| <i>Desi_wild_53703716</i> | NA                                  | <i>Ca_desi_denovo</i> | 53703716                | G/T  | NA                 | NA                            | NA                 |
| <i>Desi_wild_53705987</i> | NA                                  | <i>Ca_desi_denovo</i> | 53705987                | G/T  | NA                 | NA                            | NA                 |
| <i>Desi_wild_53708041</i> | NA                                  | <i>Ca_desi_denovo</i> | 53708041                | C/G  | NA                 | NA                            | NA                 |
| <i>Desi_wild_53708283</i> | NA                                  | <i>Ca_desi_denovo</i> | 53708283                | G/T  | NA                 | NA                            | NA                 |
| <i>Desi_wild_53709438</i> | NA                                  | <i>Ca_desi_denovo</i> | 53709438                | G/T  | NA                 | NA                            | NA                 |
| <i>Desi_wild_53709440</i> | NA                                  | <i>Ca_desi_denovo</i> | 53709440                | A/G  | NA                 | NA                            | NA                 |
| <i>Desi_wild_53710839</i> | NA                                  | <i>Ca_desi_denovo</i> | 53710839                | G/T  | NA                 | NA                            | NA                 |
| <i>Desi_wild_53712079</i> | NA                                  | <i>Ca_desi_denovo</i> | 53712079                | C/T  | NA                 | NA                            | NA                 |
| <i>Desi_wild_53716656</i> | NA                                  | <i>Ca_desi_denovo</i> | 53716656                | G/T  | NA                 | NA                            | NA                 |
| <i>Desi_wild_53716711</i> | NA                                  | <i>Ca_desi_denovo</i> | 53716711                | C/T  | NA                 | NA                            | NA                 |
| <i>Desi_wild_53720027</i> | NA                                  | <i>Ca_desi_denovo</i> | 53720027                | C/T  | NA                 | NA                            | NA                 |
| <i>Desi_wild_53720051</i> | NA                                  | <i>Ca_desi_denovo</i> | 53720051                | G/T  | NA                 | NA                            | NA                 |
| <i>Desi_wild_53722150</i> | NA                                  | <i>Ca_desi_denovo</i> | 53722150                | G/T  | NA                 | NA                            | NA                 |
| <i>Desi_wild_53722169</i> | NA                                  | <i>Ca_desi_denovo</i> | 53722169                | A/C  | NA                 | NA                            | NA                 |
| <i>Desi_wild_53722171</i> | NA                                  | <i>Ca_desi_denovo</i> | 53722171                | C/T  | NA                 | NA                            | NA                 |
| <i>Desi_wild_53724950</i> | NA                                  | <i>Ca_desi_denovo</i> | 53724950                | G/T  | NA                 | NA                            | NA                 |
| <i>Desi_wild_53725851</i> | NA                                  | <i>Ca_desi_denovo</i> | 53725851                | G/T  | NA                 | NA                            | NA                 |
| <i>Desi_wild_53726624</i> | NA                                  | <i>Ca_desi_denovo</i> | 53726624                | G/T  | NA                 | NA                            | NA                 |
| <i>Desi_wild_53729985</i> | NA                                  | <i>Ca_desi_denovo</i> | 53729985                | C/T  | NA                 | NA                            | NA                 |

| SNP IDs                   | NCBI dbSNP accession IDs (NCBI_SS#) | Chromosomes           | Physical positions (bp) | SNPs | Gene accession IDs | Sequence components of genome | Putative functions |
|---------------------------|-------------------------------------|-----------------------|-------------------------|------|--------------------|-------------------------------|--------------------|
| <i>Desi_wild_53733426</i> | NA                                  | <i>Ca_desi_denovo</i> | 53733426                | G/T  | NA                 | NA                            | NA                 |
| <i>Desi_wild_53738613</i> | NA                                  | <i>Ca_desi_denovo</i> | 53738613                | G/T  | NA                 | NA                            | NA                 |
| <i>Desi_wild_53739395</i> | NA                                  | <i>Ca_desi_denovo</i> | 53739395                | A/G  | NA                 | NA                            | NA                 |
| <i>Desi_wild_53739870</i> | NA                                  | <i>Ca_desi_denovo</i> | 53739870                | G/T  | NA                 | NA                            | NA                 |
| <i>Desi_wild_53739874</i> | NA                                  | <i>Ca_desi_denovo</i> | 53739874                | A/C  | NA                 | NA                            | NA                 |
| <i>Desi_wild_53741996</i> | NA                                  | <i>Ca_desi_denovo</i> | 53741996                | C/T  | NA                 | NA                            | NA                 |
| <i>Desi_wild_53742023</i> | NA                                  | <i>Ca_desi_denovo</i> | 53742023                | C/T  | NA                 | NA                            | NA                 |
| <i>Desi_wild_53742606</i> | NA                                  | <i>Ca_desi_denovo</i> | 53742606                | C/G  | NA                 | NA                            | NA                 |
| <i>Desi_wild_53742665</i> | NA                                  | <i>Ca_desi_denovo</i> | 53742665                | A/G  | NA                 | NA                            | NA                 |
| <i>Desi_wild_53742670</i> | NA                                  | <i>Ca_desi_denovo</i> | 53742670                | G/T  | NA                 | NA                            | NA                 |
| <i>Desi_wild_53742671</i> | NA                                  | <i>Ca_desi_denovo</i> | 53742671                | C/T  | NA                 | NA                            | NA                 |
| <i>Desi_wild_53742702</i> | NA                                  | <i>Ca_desi_denovo</i> | 53742702                | C/G  | NA                 | NA                            | NA                 |
| <i>Desi_wild_53752670</i> | NA                                  | <i>Ca_desi_denovo</i> | 53752670                | A/G  | NA                 | NA                            | NA                 |
| <i>Desi_wild_53752673</i> | NA                                  | <i>Ca_desi_denovo</i> | 53752673                | C/G  | NA                 | NA                            | NA                 |
| <i>Desi_wild_53753747</i> | NA                                  | <i>Ca_desi_denovo</i> | 53753747                | C/T  | NA                 | NA                            | NA                 |
| <i>Desi_wild_53754769</i> | NA                                  | <i>Ca_desi_denovo</i> | 53754769                | A/G  | NA                 | NA                            | NA                 |
| <i>Desi_wild_53754782</i> | NA                                  | <i>Ca_desi_denovo</i> | 53754782                | C/G  | NA                 | NA                            | NA                 |
| <i>Desi_wild_53754848</i> | NA                                  | <i>Ca_desi_denovo</i> | 53754848                | C/T  | NA                 | NA                            | NA                 |
| <i>Desi_wild_53754865</i> | NA                                  | <i>Ca_desi_denovo</i> | 53754865                | A/G  | NA                 | NA                            | NA                 |
| <i>Desi_wild_53754961</i> | NA                                  | <i>Ca_desi_denovo</i> | 53754961                | A/G  | NA                 | NA                            | NA                 |
| <i>Desi_wild_53754968</i> | NA                                  | <i>Ca_desi_denovo</i> | 53754968                | A/G  | NA                 | NA                            | NA                 |
| <i>Desi_wild_53754996</i> | NA                                  | <i>Ca_desi_denovo</i> | 53754996                | A/G  | NA                 | NA                            | NA                 |
| <i>Desi_wild_53755024</i> | NA                                  | <i>Ca_desi_denovo</i> | 53755024                | A/G  | NA                 | NA                            | NA                 |
| <i>Desi_wild_53755516</i> | NA                                  | <i>Ca_desi_denovo</i> | 53755516                | G/T  | NA                 | NA                            | NA                 |
| <i>Desi_wild_53759167</i> | NA                                  | <i>Ca_desi_denovo</i> | 53759167                | G/T  | NA                 | NA                            | NA                 |
| <i>Desi_wild_53761311</i> | NA                                  | <i>Ca_desi_denovo</i> | 53761311                | G/C  | NA                 | NA                            | NA                 |
| <i>Desi_wild_53767058</i> | NA                                  | <i>Ca_desi_denovo</i> | 53767058                | A/G  | NA                 | NA                            | NA                 |
| <i>Desi_wild_53767064</i> | NA                                  | <i>Ca_desi_denovo</i> | 53767064                | A/G  | NA                 | NA                            | NA                 |
| <i>Desi_wild_53774641</i> | NA                                  | <i>Ca_desi_denovo</i> | 53774641                | A/G  | NA                 | NA                            | NA                 |
| <i>Desi_wild_53774643</i> | NA                                  | <i>Ca_desi_denovo</i> | 53774643                | C/T  | NA                 | NA                            | NA                 |
| <i>Desi_wild_53775490</i> | NA                                  | <i>Ca_desi_denovo</i> | 53775490                | G/T  | NA                 | NA                            | NA                 |
| <i>Desi_wild_53778223</i> | NA                                  | <i>Ca_desi_denovo</i> | 53778223                | C/T  | NA                 | NA                            | NA                 |
| <i>Desi_wild_53779366</i> | NA                                  | <i>Ca_desi_denovo</i> | 53779366                | G/T  | NA                 | NA                            | NA                 |
| <i>Desi_wild_53782111</i> | NA                                  | <i>Ca_desi_denovo</i> | 53782111                | C/G  | NA                 | NA                            | NA                 |
| <i>Desi_wild_53782113</i> | NA                                  | <i>Ca_desi_denovo</i> | 53782113                | C/G  | NA                 | NA                            | NA                 |
| <i>Desi_wild_53786538</i> | NA                                  | <i>Ca_desi_denovo</i> | 53786538                | C/T  | NA                 | NA                            | NA                 |
| <i>Desi_wild_53786682</i> | NA                                  | <i>Ca_desi_denovo</i> | 53786682                | C/G  | NA                 | NA                            | NA                 |
| <i>Desi_wild_53786864</i> | NA                                  | <i>Ca_desi_denovo</i> | 53786864                | C/T  | NA                 | NA                            | NA                 |
| <i>Desi_wild_53786899</i> | NA                                  | <i>Ca_desi_denovo</i> | 53786899                | A/G  | NA                 | NA                            | NA                 |
| <i>Desi_wild_53786991</i> | NA                                  | <i>Ca_desi_denovo</i> | 53786991                | G/T  | NA                 | NA                            | NA                 |
| <i>Desi_wild_53788867</i> | NA                                  | <i>Ca_desi_denovo</i> | 53788867                | G/T  | NA                 | NA                            | NA                 |
| <i>Desi_wild_53789115</i> | NA                                  | <i>Ca_desi_denovo</i> | 53789115                | A/G  | NA                 | NA                            | NA                 |
| <i>Desi_wild_53798053</i> | NA                                  | <i>Ca_desi_denovo</i> | 53798053                | A/T  | NA                 | NA                            | NA                 |
| <i>Desi_wild_53801621</i> | NA                                  | <i>Ca_desi_denovo</i> | 53801621                | A/G  | NA                 | NA                            | NA                 |

| SNP IDs                   | NCBI dbSNP accession IDs (NCBI_SS#) | Chromosomes           | Physical positions (bp) | SNPs | Gene accession IDs | Sequence components of genome | Putative functions |
|---------------------------|-------------------------------------|-----------------------|-------------------------|------|--------------------|-------------------------------|--------------------|
| <i>Desi_wild_53802650</i> | NA                                  | <i>Ca_desi_denovo</i> | 53802650                | G/T  | NA                 | NA                            | NA                 |
| <i>Desi_wild_53803469</i> | NA                                  | <i>Ca_desi_denovo</i> | 53803469                | C/T  | NA                 | NA                            | NA                 |
| <i>Desi_wild_53806786</i> | NA                                  | <i>Ca_desi_denovo</i> | 53806786                | G/T  | NA                 | NA                            | NA                 |
| <i>Desi_wild_53812158</i> | NA                                  | <i>Ca_desi_denovo</i> | 53812158                | C/G  | NA                 | NA                            | NA                 |
| <i>Desi_wild_53812159</i> | NA                                  | <i>Ca_desi_denovo</i> | 53812159                | A/C  | NA                 | NA                            | NA                 |
| <i>Desi_wild_53839538</i> | NA                                  | <i>Ca_desi_denovo</i> | 53839538                | C/T  | NA                 | NA                            | NA                 |
| <i>Desi_wild_53839544</i> | NA                                  | <i>Ca_desi_denovo</i> | 53839544                | A/G  | NA                 | NA                            | NA                 |
| <i>Desi_wild_53839577</i> | NA                                  | <i>Ca_desi_denovo</i> | 53839577                | A/C  | NA                 | NA                            | NA                 |
| <i>Desi_wild_53840762</i> | NA                                  | <i>Ca_desi_denovo</i> | 53840762                | G/T  | NA                 | NA                            | NA                 |
| <i>Desi_wild_53847028</i> | NA                                  | <i>Ca_desi_denovo</i> | 53847028                | A/C  | NA                 | NA                            | NA                 |
| <i>Desi_wild_53849055</i> | NA                                  | <i>Ca_desi_denovo</i> | 53849055                | A/T  | NA                 | NA                            | NA                 |
| <i>Desi_wild_53852498</i> | NA                                  | <i>Ca_desi_denovo</i> | 53852498                | C/T  | NA                 | NA                            | NA                 |
| <i>Desi_wild_53858141</i> | NA                                  | <i>Ca_desi_denovo</i> | 53858141                | C/G  | NA                 | NA                            | NA                 |
| <i>Desi_wild_53866181</i> | NA                                  | <i>Ca_desi_denovo</i> | 53866181                | C/T  | NA                 | NA                            | NA                 |
| <i>Desi_wild_53870389</i> | NA                                  | <i>Ca_desi_denovo</i> | 53870389                | A/G  | NA                 | NA                            | NA                 |
| <i>Desi_wild_53876472</i> | NA                                  | <i>Ca_desi_denovo</i> | 53876472                | C/T  | NA                 | NA                            | NA                 |
| <i>Desi_wild_53876482</i> | NA                                  | <i>Ca_desi_denovo</i> | 53876482                | A/T  | NA                 | NA                            | NA                 |
| <i>Desi_wild_53886754</i> | NA                                  | <i>Ca_desi_denovo</i> | 53886754                | A/C  | NA                 | NA                            | NA                 |
| <i>Desi_wild_53902031</i> | NA                                  | <i>Ca_desi_denovo</i> | 53902031                | C/T  | NA                 | NA                            | NA                 |
| <i>Desi_wild_53917454</i> | NA                                  | <i>Ca_desi_denovo</i> | 53917454                | G/T  | NA                 | NA                            | NA                 |
| <i>Desi_wild_53933233</i> | NA                                  | <i>Ca_desi_denovo</i> | 53933233                | A/G  | NA                 | NA                            | NA                 |
| <i>Desi_wild_53933241</i> | NA                                  | <i>Ca_desi_denovo</i> | 53933241                | A/C  | NA                 | NA                            | NA                 |
| <i>Desi_wild_53951146</i> | NA                                  | <i>Ca_desi_denovo</i> | 53951146                | G/T  | NA                 | NA                            | NA                 |
| <i>Desi_wild_53969727</i> | NA                                  | <i>Ca_desi_denovo</i> | 53969727                | G/T  | NA                 | NA                            | NA                 |
| <i>Desi_wild_53969728</i> | NA                                  | <i>Ca_desi_denovo</i> | 53969728                | A/G  | NA                 | NA                            | NA                 |
| <i>Desi_wild_53975555</i> | NA                                  | <i>Ca_desi_denovo</i> | 53975555                | G/T  | NA                 | NA                            | NA                 |
| <i>Desi_wild_53978810</i> | NA                                  | <i>Ca_desi_denovo</i> | 53978810                | G/T  | NA                 | NA                            | NA                 |
| <i>Desi_wild_53980365</i> | NA                                  | <i>Ca_desi_denovo</i> | 53980365                | C/T  | NA                 | NA                            | NA                 |
| <i>Desi_wild_53981603</i> | NA                                  | <i>Ca_desi_denovo</i> | 53981603                | A/G  | NA                 | NA                            | NA                 |
| <i>Desi_wild_53982474</i> | NA                                  | <i>Ca_desi_denovo</i> | 53982474                | A/G  | NA                 | NA                            | NA                 |
| <i>Desi_wild_53982483</i> | NA                                  | <i>Ca_desi_denovo</i> | 53982483                | A/G  | NA                 | NA                            | NA                 |
| <i>Desi_wild_53982519</i> | NA                                  | <i>Ca_desi_denovo</i> | 53982519                | C/G  | NA                 | NA                            | NA                 |
| <i>Desi_wild_53983351</i> | NA                                  | <i>Ca_desi_denovo</i> | 53983351                | C/G  | NA                 | NA                            | NA                 |
| <i>Desi_wild_53983370</i> | NA                                  | <i>Ca_desi_denovo</i> | 53983370                | A/G  | NA                 | NA                            | NA                 |
| <i>Desi_wild_53984570</i> | NA                                  | <i>Ca_desi_denovo</i> | 53984570                | G/T  | NA                 | NA                            | NA                 |
| <i>Desi_wild_53986629</i> | NA                                  | <i>Ca_desi_denovo</i> | 53986629                | A/G  | NA                 | NA                            | NA                 |
| <i>Desi_wild_54020023</i> | NA                                  | <i>Ca_desi_denovo</i> | 54020023                | A/C  | NA                 | NA                            | NA                 |
| <i>Desi_wild_54027203</i> | NA                                  | <i>Ca_desi_denovo</i> | 54027203                | A/C  | NA                 | NA                            | NA                 |
| <i>Desi_wild_54032560</i> | NA                                  | <i>Ca_desi_denovo</i> | 54032560                | A/G  | NA                 | NA                            | NA                 |
| <i>Desi_wild_54032561</i> | NA                                  | <i>Ca_desi_denovo</i> | 54032561                | A/G  | NA                 | NA                            | NA                 |
| <i>Desi_wild_54040101</i> | NA                                  | <i>Ca_desi_denovo</i> | 54040101                | G/T  | NA                 | NA                            | NA                 |
| <i>Desi_wild_54040106</i> | NA                                  | <i>Ca_desi_denovo</i> | 54040106                | G/T  | NA                 | NA                            | NA                 |
| <i>Desi_wild_54041247</i> | NA                                  | <i>Ca_desi_denovo</i> | 54041247                | C/T  | NA                 | NA                            | NA                 |
| <i>Desi_wild_54041287</i> | NA                                  | <i>Ca_desi_denovo</i> | 54041287                | A/T  | NA                 | NA                            | NA                 |



| SNP IDs                   | NCBI dbSNP accession IDs (NCBI_SS#) | Chromosomes           | Physical positions (bp) | SNPs | Gene accession IDs | Sequence components of genome | Putative functions |
|---------------------------|-------------------------------------|-----------------------|-------------------------|------|--------------------|-------------------------------|--------------------|
| <i>Desi_wild_54053113</i> | NA                                  | <i>Ca_desi_denovo</i> | 54053113                | G/T  | NA                 | NA                            | NA                 |
| <i>Desi_wild_54069433</i> | NA                                  | <i>Ca_desi_denovo</i> | 54069433                | C/T  | NA                 | NA                            | NA                 |
| <i>Desi_wild_54072473</i> | NA                                  | <i>Ca_desi_denovo</i> | 54072473                | G/T  | NA                 | NA                            | NA                 |
| <i>Desi_wild_54076766</i> | NA                                  | <i>Ca_desi_denovo</i> | 54076766                | G/T  | NA                 | NA                            | NA                 |
| <i>Desi_wild_54076776</i> | NA                                  | <i>Ca_desi_denovo</i> | 54076776                | C/T  | NA                 | NA                            | NA                 |
| <i>Desi_wild_54076818</i> | NA                                  | <i>Ca_desi_denovo</i> | 54076818                | C/T  | NA                 | NA                            | NA                 |
| <i>Desi_wild_54096128</i> | NA                                  | <i>Ca_desi_denovo</i> | 54096128                | C/G  | NA                 | NA                            | NA                 |
| <i>Desi_wild_54117160</i> | NA                                  | <i>Ca_desi_denovo</i> | 54117160                | A/G  | NA                 | NA                            | NA                 |
| <i>Desi_wild_54117166</i> | NA                                  | <i>Ca_desi_denovo</i> | 54117166                | G/T  | NA                 | NA                            | NA                 |
| <i>Desi_wild_54117976</i> | NA                                  | <i>Ca_desi_denovo</i> | 54117976                | A/G  | NA                 | NA                            | NA                 |
| <i>Desi_wild_54117994</i> | NA                                  | <i>Ca_desi_denovo</i> | 54117994                | A/G  | NA                 | NA                            | NA                 |
| <i>Desi_wild_54118007</i> | NA                                  | <i>Ca_desi_denovo</i> | 54118007                | A/G  | NA                 | NA                            | NA                 |
| <i>Desi_wild_54118323</i> | NA                                  | <i>Ca_desi_denovo</i> | 54118323                | C/T  | NA                 | NA                            | NA                 |
| <i>Desi_wild_54118326</i> | NA                                  | <i>Ca_desi_denovo</i> | 54118326                | A/G  | NA                 | NA                            | NA                 |
| <i>Desi_wild_54128116</i> | NA                                  | <i>Ca_desi_denovo</i> | 54128116                | C/T  | NA                 | NA                            | NA                 |
| <i>Desi_wild_54131937</i> | NA                                  | <i>Ca_desi_denovo</i> | 54131937                | A/G  | NA                 | NA                            | NA                 |
| <i>Desi_wild_54135610</i> | NA                                  | <i>Ca_desi_denovo</i> | 54135610                | C/T  | NA                 | NA                            | NA                 |
| <i>Desi_wild_54138998</i> | NA                                  | <i>Ca_desi_denovo</i> | 54138998                | G/T  | NA                 | NA                            | NA                 |
| <i>Desi_wild_54142537</i> | NA                                  | <i>Ca_desi_denovo</i> | 54142537                | A/T  | NA                 | NA                            | NA                 |
| <i>Desi_wild_54143218</i> | NA                                  | <i>Ca_desi_denovo</i> | 54143218                | C/G  | NA                 | NA                            | NA                 |
| <i>Desi_wild_54143219</i> | NA                                  | <i>Ca_desi_denovo</i> | 54143219                | A/C  | NA                 | NA                            | NA                 |
| <i>Desi_wild_54147187</i> | NA                                  | <i>Ca_desi_denovo</i> | 54147187                | C/T  | NA                 | NA                            | NA                 |
| <i>Desi_wild_54147265</i> | NA                                  | <i>Ca_desi_denovo</i> | 54147265                | A/G  | NA                 | NA                            | NA                 |
| <i>Desi_wild_54147310</i> | NA                                  | <i>Ca_desi_denovo</i> | 54147310                | A/G  | NA                 | NA                            | NA                 |
| <i>Desi_wild_54153651</i> | NA                                  | <i>Ca_desi_denovo</i> | 54153651                | C/G  | NA                 | NA                            | NA                 |
| <i>Desi_wild_54154347</i> | NA                                  | <i>Ca_desi_denovo</i> | 54154347                | A/G  | NA                 | NA                            | NA                 |
| <i>Desi_wild_54156965</i> | NA                                  | <i>Ca_desi_denovo</i> | 54156965                | T/G  | NA                 | NA                            | NA                 |
| <i>Desi_wild_54156967</i> | NA                                  | <i>Ca_desi_denovo</i> | 54156967                | G/C  | NA                 | NA                            | NA                 |
| <i>Desi_wild_54160555</i> | NA                                  | <i>Ca_desi_denovo</i> | 54160555                | G/T  | NA                 | NA                            | NA                 |
| <i>Desi_wild_54161041</i> | NA                                  | <i>Ca_desi_denovo</i> | 54161041                | A/T  | NA                 | NA                            | NA                 |
| <i>Desi_wild_54161347</i> | NA                                  | <i>Ca_desi_denovo</i> | 54161347                | A/T  | NA                 | NA                            | NA                 |
| <i>Desi_wild_54166158</i> | NA                                  | <i>Ca_desi_denovo</i> | 54166158                | C/T  | NA                 | NA                            | NA                 |
| <i>Desi_wild_54166162</i> | NA                                  | <i>Ca_desi_denovo</i> | 54166162                | A/G  | NA                 | NA                            | NA                 |
| <i>Desi_wild_54167404</i> | NA                                  | <i>Ca_desi_denovo</i> | 54167404                | A/T  | NA                 | NA                            | NA                 |
| <i>Desi_wild_54167432</i> | NA                                  | <i>Ca_desi_denovo</i> | 54167432                | G/T  | NA                 | NA                            | NA                 |
| <i>Desi_wild_54169614</i> | NA                                  | <i>Ca_desi_denovo</i> | 54169614                | C/T  | NA                 | NA                            | NA                 |
| <i>Desi_wild_54169940</i> | NA                                  | <i>Ca_desi_denovo</i> | 54169940                | A/T  | NA                 | NA                            | NA                 |
| <i>Desi_wild_54170005</i> | NA                                  | <i>Ca_desi_denovo</i> | 54170005                | C/T  | NA                 | NA                            | NA                 |
| <i>Desi_wild_54174055</i> | NA                                  | <i>Ca_desi_denovo</i> | 54174055                | A/T  | NA                 | NA                            | NA                 |
| <i>Desi_wild_54177460</i> | NA                                  | <i>Ca_desi_denovo</i> | 54177460                | G/T  | NA                 | NA                            | NA                 |
| <i>Desi_wild_54177556</i> | NA                                  | <i>Ca_desi_denovo</i> | 54177556                | A/G  | NA                 | NA                            | NA                 |
| <i>Desi_wild_54179842</i> | NA                                  | <i>Ca_desi_denovo</i> | 54179842                | A/G  | NA                 | NA                            | NA                 |
| <i>Desi_wild_54179894</i> | NA                                  | <i>Ca_desi_denovo</i> | 54179894                | A/T  | NA                 | NA                            | NA                 |
| <i>Desi_wild_54179897</i> | NA                                  | <i>Ca_desi_denovo</i> | 54179897                | A/C  | NA                 | NA                            | NA                 |

| SNP IDs                   | NCBI dbSNP accession IDs (NCBI_SS#) | Chromosomes           | Physical positions (bp) | SNPs | Gene accession IDs | Sequence components of genome | Putative functions |
|---------------------------|-------------------------------------|-----------------------|-------------------------|------|--------------------|-------------------------------|--------------------|
| <i>Desi_wild_54189139</i> | NA                                  | <i>Ca_desi_denovo</i> | 54189139                | A/G  | NA                 | NA                            | NA                 |
| <i>Desi_wild_54192558</i> | NA                                  | <i>Ca_desi_denovo</i> | 54192558                | G/T  | NA                 | NA                            | NA                 |
| <i>Desi_wild_54193318</i> | NA                                  | <i>Ca_desi_denovo</i> | 54193318                | G/T  | NA                 | NA                            | NA                 |
| <i>Desi_wild_54193319</i> | NA                                  | <i>Ca_desi_denovo</i> | 54193319                | A/C  | NA                 | NA                            | NA                 |
| <i>Desi_wild_54193356</i> | NA                                  | <i>Ca_desi_denovo</i> | 54193356                | A/T  | NA                 | NA                            | NA                 |
| <i>Desi_wild_54194392</i> | NA                                  | <i>Ca_desi_denovo</i> | 54194392                | A/G  | NA                 | NA                            | NA                 |
| <i>Desi_wild_54194412</i> | NA                                  | <i>Ca_desi_denovo</i> | 54194412                | G/T  | NA                 | NA                            | NA                 |
| <i>Desi_wild_54194947</i> | NA                                  | <i>Ca_desi_denovo</i> | 54194947                | A/G  | NA                 | NA                            | NA                 |
| <i>Desi_wild_54195748</i> | NA                                  | <i>Ca_desi_denovo</i> | 54195748                | C/G  | NA                 | NA                            | NA                 |
| <i>Desi_wild_54196231</i> | NA                                  | <i>Ca_desi_denovo</i> | 54196231                | C/G  | NA                 | NA                            | NA                 |
| <i>Desi_wild_54196232</i> | NA                                  | <i>Ca_desi_denovo</i> | 54196232                | A/G  | NA                 | NA                            | NA                 |
| <i>Desi_wild_54196233</i> | NA                                  | <i>Ca_desi_denovo</i> | 54196233                | A/T  | NA                 | NA                            | NA                 |
| <i>Desi_wild_54196846</i> | NA                                  | <i>Ca_desi_denovo</i> | 54196846                | C/T  | NA                 | NA                            | NA                 |
| <i>Desi_wild_54226072</i> | NA                                  | <i>Ca_desi_denovo</i> | 54226072                | C/T  | NA                 | NA                            | NA                 |
| <i>Desi_wild_54226089</i> | NA                                  | <i>Ca_desi_denovo</i> | 54226089                | A/G  | NA                 | NA                            | NA                 |
| <i>Desi_wild_54226671</i> | NA                                  | <i>Ca_desi_denovo</i> | 54226671                | G/T  | NA                 | NA                            | NA                 |
| <i>Desi_wild_54248906</i> | NA                                  | <i>Ca_desi_denovo</i> | 54248906                | C/T  | NA                 | NA                            | NA                 |
| <i>Desi_wild_54260293</i> | NA                                  | <i>Ca_desi_denovo</i> | 54260293                | A/G  | NA                 | NA                            | NA                 |
| <i>Desi_wild_54280252</i> | NA                                  | <i>Ca_desi_denovo</i> | 54280252                | A/T  | NA                 | NA                            | NA                 |
| <i>Desi_wild_54280270</i> | NA                                  | <i>Ca_desi_denovo</i> | 54280270                | A/C  | NA                 | NA                            | NA                 |
| <i>Desi_wild_54327696</i> | NA                                  | <i>Ca_desi_denovo</i> | 54327696                | C/T  | NA                 | NA                            | NA                 |
| <i>Desi_wild_54336492</i> | NA                                  | <i>Ca_desi_denovo</i> | 54336492                | C/T  | NA                 | NA                            | NA                 |
| <i>Desi_wild_54362127</i> | NA                                  | <i>Ca_desi_denovo</i> | 54362127                | C/T  | NA                 | NA                            | NA                 |
| <i>Desi_wild_54388308</i> | NA                                  | <i>Ca_desi_denovo</i> | 54388308                | C/T  | NA                 | NA                            | NA                 |
| <i>Desi_wild_54388314</i> | NA                                  | <i>Ca_desi_denovo</i> | 54388314                | C/T  | NA                 | NA                            | NA                 |
| <i>Desi_wild_54388326</i> | NA                                  | <i>Ca_desi_denovo</i> | 54388326                | C/T  | NA                 | NA                            | NA                 |
| <i>Desi_wild_54433046</i> | NA                                  | <i>Ca_desi_denovo</i> | 54433046                | C/T  | NA                 | NA                            | NA                 |
| <i>Desi_wild_54448245</i> | NA                                  | <i>Ca_desi_denovo</i> | 54448245                | C/T  | NA                 | NA                            | NA                 |
| <i>Desi_wild_54448264</i> | NA                                  | <i>Ca_desi_denovo</i> | 54448264                | A/C  | NA                 | NA                            | NA                 |
| <i>Desi_wild_54450044</i> | NA                                  | <i>Ca_desi_denovo</i> | 54450044                | A/G  | NA                 | NA                            | NA                 |
| <i>Desi_wild_54450094</i> | NA                                  | <i>Ca_desi_denovo</i> | 54450094                | C/T  | NA                 | NA                            | NA                 |
| <i>Desi_wild_54461932</i> | NA                                  | <i>Ca_desi_denovo</i> | 54461932                | C/G  | NA                 | NA                            | NA                 |
| <i>Desi_wild_54461971</i> | NA                                  | <i>Ca_desi_denovo</i> | 54461971                | C/G  | NA                 | NA                            | NA                 |
| <i>Desi_wild_54468958</i> | NA                                  | <i>Ca_desi_denovo</i> | 54468958                | C/T  | NA                 | NA                            | NA                 |
| <i>Desi_wild_54468992</i> | NA                                  | <i>Ca_desi_denovo</i> | 54468992                | C/T  | NA                 | NA                            | NA                 |
| <i>Desi_wild_54470186</i> | NA                                  | <i>Ca_desi_denovo</i> | 54470186                | A/G  | NA                 | NA                            | NA                 |
| <i>Desi_wild_54470196</i> | NA                                  | <i>Ca_desi_denovo</i> | 54470196                | C/T  | NA                 | NA                            | NA                 |
| <i>Desi_wild_54470202</i> | NA                                  | <i>Ca_desi_denovo</i> | 54470202                | C/G  | NA                 | NA                            | NA                 |
| <i>Desi_wild_54473146</i> | NA                                  | <i>Ca_desi_denovo</i> | 54473146                | A/C  | NA                 | NA                            | NA                 |
| <i>Desi_wild_54473149</i> | NA                                  | <i>Ca_desi_denovo</i> | 54473149                | G/T  | NA                 | NA                            | NA                 |
| <i>Desi_wild_54473191</i> | NA                                  | <i>Ca_desi_denovo</i> | 54473191                | C/T  | NA                 | NA                            | NA                 |
| <i>Desi_wild_54473209</i> | NA                                  | <i>Ca_desi_denovo</i> | 54473209                | G/A  | NA                 | NA                            | NA                 |
| <i>Desi_wild_54553251</i> | NA                                  | <i>Ca_desi_denovo</i> | 54553251                | A/G  | NA                 | NA                            | NA                 |
| <i>Desi_wild_54553263</i> | NA                                  | <i>Ca_desi_denovo</i> | 54553263                | C/T  | NA                 | NA                            | NA                 |

| SNP IDs                   | NCBI dbSNP accession IDs (NCBI_SS#) | Chromosomes           | Physical positions (bp) | SNPs | Gene accession IDs | Sequence components of genome | Putative functions |
|---------------------------|-------------------------------------|-----------------------|-------------------------|------|--------------------|-------------------------------|--------------------|
| <i>Desi_wild_54598774</i> | NA                                  | <i>Ca_desi_denovo</i> | 54598774                | A/G  | NA                 | NA                            | NA                 |
| <i>Desi_wild_54600233</i> | NA                                  | <i>Ca_desi_denovo</i> | 54600233                | C/T  | NA                 | NA                            | NA                 |
| <i>Desi_wild_54643285</i> | NA                                  | <i>Ca_desi_denovo</i> | 54643285                | C/T  | NA                 | NA                            | NA                 |
| <i>Desi_wild_54657397</i> | NA                                  | <i>Ca_desi_denovo</i> | 54657397                | G/T  | NA                 | NA                            | NA                 |
| <i>Desi_wild_54692283</i> | NA                                  | <i>Ca_desi_denovo</i> | 54692283                | C/T  | NA                 | NA                            | NA                 |
| <i>Desi_wild_54696945</i> | NA                                  | <i>Ca_desi_denovo</i> | 54696945                | C/T  | NA                 | NA                            | NA                 |
| <i>Desi_wild_54706330</i> | NA                                  | <i>Ca_desi_denovo</i> | 54706330                | T/G  | NA                 | NA                            | NA                 |
| <i>Desi_wild_54716349</i> | NA                                  | <i>Ca_desi_denovo</i> | 54716349                | C/T  | NA                 | NA                            | NA                 |
| <i>Desi_wild_54718227</i> | NA                                  | <i>Ca_desi_denovo</i> | 54718227                | A/G  | NA                 | NA                            | NA                 |
| <i>Desi_wild_54729572</i> | NA                                  | <i>Ca_desi_denovo</i> | 54729572                | C/T  | NA                 | NA                            | NA                 |
| <i>Desi_wild_54745227</i> | NA                                  | <i>Ca_desi_denovo</i> | 54745227                | G/T  | NA                 | NA                            | NA                 |
| <i>Desi_wild_54745275</i> | NA                                  | <i>Ca_desi_denovo</i> | 54745275                | G/T  | NA                 | NA                            | NA                 |
| <i>Desi_wild_54753760</i> | NA                                  | <i>Ca_desi_denovo</i> | 54753760                | A/G  | NA                 | NA                            | NA                 |
| <i>Desi_wild_54753862</i> | NA                                  | <i>Ca_desi_denovo</i> | 54753862                | C/G  | NA                 | NA                            | NA                 |
| <i>Desi_wild_54758118</i> | NA                                  | <i>Ca_desi_denovo</i> | 54758118                | A/C  | NA                 | NA                            | NA                 |
| <i>Desi_wild_54760888</i> | NA                                  | <i>Ca_desi_denovo</i> | 54760888                | A/G  | NA                 | NA                            | NA                 |
| <i>Desi_wild_54775069</i> | NA                                  | <i>Ca_desi_denovo</i> | 54775069                | A/G  | NA                 | NA                            | NA                 |
| <i>Desi_wild_54779019</i> | NA                                  | <i>Ca_desi_denovo</i> | 54779019                | C/T  | NA                 | NA                            | NA                 |
| <i>Desi_wild_54787249</i> | NA                                  | <i>Ca_desi_denovo</i> | 54787249                | A/G  | NA                 | NA                            | NA                 |
| <i>Desi_wild_54787267</i> | NA                                  | <i>Ca_desi_denovo</i> | 54787267                | A/G  | NA                 | NA                            | NA                 |
| <i>Desi_wild_54816072</i> | NA                                  | <i>Ca_desi_denovo</i> | 54816072                | C/G  | NA                 | NA                            | NA                 |
| <i>Desi_wild_54839365</i> | NA                                  | <i>Ca_desi_denovo</i> | 54839365                | A/G  | NA                 | NA                            | NA                 |
| <i>Desi_wild_54842649</i> | NA                                  | <i>Ca_desi_denovo</i> | 54842649                | C/T  | NA                 | NA                            | NA                 |
| <i>Desi_wild_54846632</i> | NA                                  | <i>Ca_desi_denovo</i> | 54846632                | C/T  | NA                 | NA                            | NA                 |
| <i>Desi_wild_54846650</i> | NA                                  | <i>Ca_desi_denovo</i> | 54846650                | C/T  | NA                 | NA                            | NA                 |
| <i>Desi_wild_54852999</i> | NA                                  | <i>Ca_desi_denovo</i> | 54852999                | C/G  | NA                 | NA                            | NA                 |
| <i>Desi_wild_54871151</i> | NA                                  | <i>Ca_desi_denovo</i> | 54871151                | C/T  | NA                 | NA                            | NA                 |
| <i>Desi_wild_54871187</i> | NA                                  | <i>Ca_desi_denovo</i> | 54871187                | A/G  | NA                 | NA                            | NA                 |
| <i>Desi_wild_54919214</i> | NA                                  | <i>Ca_desi_denovo</i> | 54919214                | C/G  | NA                 | NA                            | NA                 |
| <i>Desi_wild_54920345</i> | NA                                  | <i>Ca_desi_denovo</i> | 54920345                | A/G  | NA                 | NA                            | NA                 |
| <i>Desi_wild_54933836</i> | NA                                  | <i>Ca_desi_denovo</i> | 54933836                | G/T  | NA                 | NA                            | NA                 |
| <i>Desi_wild_54946112</i> | NA                                  | <i>Ca_desi_denovo</i> | 54946112                | C/G  | NA                 | NA                            | NA                 |
| <i>Desi_wild_54948471</i> | NA                                  | <i>Ca_desi_denovo</i> | 54948471                | C/G  | NA                 | NA                            | NA                 |
| <i>Desi_wild_54951467</i> | NA                                  | <i>Ca_desi_denovo</i> | 54951467                | A/G  | NA                 | NA                            | NA                 |
| <i>Desi_wild_54951841</i> | NA                                  | <i>Ca_desi_denovo</i> | 54951841                | A/G  | NA                 | NA                            | NA                 |
| <i>Desi_wild_54955113</i> | NA                                  | <i>Ca_desi_denovo</i> | 54955113                | G/T  | NA                 | NA                            | NA                 |
| <i>Desi_wild_54955114</i> | NA                                  | <i>Ca_desi_denovo</i> | 54955114                | C/G  | NA                 | NA                            | NA                 |
| <i>Desi_wild_54964399</i> | NA                                  | <i>Ca_desi_denovo</i> | 54964399                | C/G  | NA                 | NA                            | NA                 |
| <i>Desi_wild_54974439</i> | NA                                  | <i>Ca_desi_denovo</i> | 54974439                | A/C  | NA                 | NA                            | NA                 |
| <i>Desi_wild_54974499</i> | NA                                  | <i>Ca_desi_denovo</i> | 54974499                | A/G  | NA                 | NA                            | NA                 |
| <i>Desi_wild_54977211</i> | NA                                  | <i>Ca_desi_denovo</i> | 54977211                | G/T  | NA                 | NA                            | NA                 |
| <i>Desi_wild_54982244</i> | NA                                  | <i>Ca_desi_denovo</i> | 54982244                | C/G  | NA                 | NA                            | NA                 |
| <i>Desi_wild_54982245</i> | NA                                  | <i>Ca_desi_denovo</i> | 54982245                | A/G  | NA                 | NA                            | NA                 |
| <i>Desi_wild_54986113</i> | NA                                  | <i>Ca_desi_denovo</i> | 54986113                | A/T  | NA                 | NA                            | NA                 |

| SNP IDs                   | NCBI dbSNP accession IDs (NCBI_SS#) | Chromosomes           | Physical positions (bp) | SNPs | Gene accession IDs | Sequence components of genome | Putative functions |
|---------------------------|-------------------------------------|-----------------------|-------------------------|------|--------------------|-------------------------------|--------------------|
| <i>Desi_wild_54987797</i> | NA                                  | <i>Ca_desi_denovo</i> | 54987797                | G/T  | NA                 | NA                            | NA                 |
| <i>Desi_wild_54988071</i> | NA                                  | <i>Ca_desi_denovo</i> | 54988071                | C/T  | NA                 | NA                            | NA                 |
| <i>Desi_wild_54994554</i> | NA                                  | <i>Ca_desi_denovo</i> | 54994554                | G/T  | NA                 | NA                            | NA                 |
| <i>Desi_wild_54994565</i> | NA                                  | <i>Ca_desi_denovo</i> | 54994565                | G/T  | NA                 | NA                            | NA                 |
| <i>Desi_wild_54994878</i> | NA                                  | <i>Ca_desi_denovo</i> | 54994878                | A/G  | NA                 | NA                            | NA                 |
| <i>Desi_wild_54995677</i> | NA                                  | <i>Ca_desi_denovo</i> | 54995677                | A/G  | NA                 | NA                            | NA                 |
| <i>Desi_wild_54998075</i> | NA                                  | <i>Ca_desi_denovo</i> | 54998075                | G/T  | NA                 | NA                            | NA                 |
| <i>Desi_wild_55000012</i> | NA                                  | <i>Ca_desi_denovo</i> | 55000012                | C/T  | NA                 | NA                            | NA                 |
| <i>Desi_wild_55006831</i> | NA                                  | <i>Ca_desi_denovo</i> | 55006831                | C/T  | NA                 | NA                            | NA                 |
| <i>Desi_wild_55008164</i> | NA                                  | <i>Ca_desi_denovo</i> | 55008164                | C/T  | NA                 | NA                            | NA                 |
| <i>Desi_wild_55009668</i> | NA                                  | <i>Ca_desi_denovo</i> | 55009668                | A/C  | NA                 | NA                            | NA                 |
| <i>Desi_wild_55021758</i> | NA                                  | <i>Ca_desi_denovo</i> | 55021758                | A/T  | NA                 | NA                            | NA                 |
| <i>Desi_wild_55024572</i> | NA                                  | <i>Ca_desi_denovo</i> | 55024572                | C/T  | NA                 | NA                            | NA                 |
| <i>Desi_wild_55024581</i> | NA                                  | <i>Ca_desi_denovo</i> | 55024581                | C/G  | NA                 | NA                            | NA                 |
| <i>Desi_wild_55024901</i> | NA                                  | <i>Ca_desi_denovo</i> | 55024901                | G/T  | NA                 | NA                            | NA                 |
| <i>Desi_wild_55025875</i> | NA                                  | <i>Ca_desi_denovo</i> | 55025875                | C/T  | NA                 | NA                            | NA                 |
| <i>Desi_wild_55027523</i> | NA                                  | <i>Ca_desi_denovo</i> | 55027523                | A/G  | NA                 | NA                            | NA                 |
| <i>Desi_wild_55031797</i> | NA                                  | <i>Ca_desi_denovo</i> | 55031797                | A/G  | NA                 | NA                            | NA                 |
| <i>Desi_wild_55032972</i> | NA                                  | <i>Ca_desi_denovo</i> | 55032972                | G/T  | NA                 | NA                            | NA                 |
| <i>Desi_wild_55034683</i> | NA                                  | <i>Ca_desi_denovo</i> | 55034683                | A/C  | NA                 | NA                            | NA                 |
| <i>Desi_wild_55036171</i> | NA                                  | <i>Ca_desi_denovo</i> | 55036171                | A/C  | NA                 | NA                            | NA                 |
| <i>Desi_wild_55040025</i> | NA                                  | <i>Ca_desi_denovo</i> | 55040025                | C/T  | NA                 | NA                            | NA                 |
| <i>Desi_wild_55040028</i> | NA                                  | <i>Ca_desi_denovo</i> | 55040028                | C/T  | NA                 | NA                            | NA                 |
| <i>Desi_wild_55041204</i> | NA                                  | <i>Ca_desi_denovo</i> | 55041204                | A/G  | NA                 | NA                            | NA                 |
| <i>Desi_wild_55043503</i> | NA                                  | <i>Ca_desi_denovo</i> | 55043503                | G/T  | NA                 | NA                            | NA                 |
| <i>Desi_wild_55044170</i> | NA                                  | <i>Ca_desi_denovo</i> | 55044170                | G/T  | NA                 | NA                            | NA                 |
| <i>Desi_wild_55044786</i> | NA                                  | <i>Ca_desi_denovo</i> | 55044786                | G/T  | NA                 | NA                            | NA                 |
| <i>Desi_wild_55049378</i> | NA                                  | <i>Ca_desi_denovo</i> | 55049378                | A/C  | NA                 | NA                            | NA                 |
| <i>Desi_wild_55049379</i> | NA                                  | <i>Ca_desi_denovo</i> | 55049379                | A/G  | NA                 | NA                            | NA                 |
| <i>Desi_wild_55052583</i> | NA                                  | <i>Ca_desi_denovo</i> | 55052583                | G/T  | NA                 | NA                            | NA                 |
| <i>Desi_wild_55053448</i> | NA                                  | <i>Ca_desi_denovo</i> | 55053448                | G/T  | NA                 | NA                            | NA                 |
| <i>Desi_wild_55055660</i> | NA                                  | <i>Ca_desi_denovo</i> | 55055660                | C/T  | NA                 | NA                            | NA                 |
| <i>Desi_wild_55056168</i> | NA                                  | <i>Ca_desi_denovo</i> | 55056168                | G/T  | NA                 | NA                            | NA                 |
| <i>Desi_wild_55057655</i> | NA                                  | <i>Ca_desi_denovo</i> | 55057655                | G/T  | NA                 | NA                            | NA                 |
| <i>Desi_wild_55066249</i> | NA                                  | <i>Ca_desi_denovo</i> | 55066249                | C/G  | NA                 | NA                            | NA                 |
| <i>Desi_wild_55068078</i> | NA                                  | <i>Ca_desi_denovo</i> | 55068078                | A/G  | NA                 | NA                            | NA                 |
| <i>Desi_wild_55068094</i> | NA                                  | <i>Ca_desi_denovo</i> | 55068094                | C/G  | NA                 | NA                            | NA                 |
| <i>Desi_wild_55068150</i> | NA                                  | <i>Ca_desi_denovo</i> | 55068150                | C/T  | NA                 | NA                            | NA                 |
| <i>Desi_wild_55070488</i> | NA                                  | <i>Ca_desi_denovo</i> | 55070488                | A/C  | NA                 | NA                            | NA                 |
| <i>Desi_wild_55076162</i> | NA                                  | <i>Ca_desi_denovo</i> | 55076162                | G/T  | NA                 | NA                            | NA                 |
| <i>Desi_wild_55080025</i> | NA                                  | <i>Ca_desi_denovo</i> | 55080025                | C/G  | NA                 | NA                            | NA                 |
| <i>Desi_wild_55082114</i> | NA                                  | <i>Ca_desi_denovo</i> | 55082114                | A/C  | NA                 | NA                            | NA                 |
| <i>Desi_wild_55082115</i> | NA                                  | <i>Ca_desi_denovo</i> | 55082115                | A/G  | NA                 | NA                            | NA                 |
| <i>Desi_wild_55091210</i> | NA                                  | <i>Ca_desi_denovo</i> | 55091210                | G/T  | NA                 | NA                            | NA                 |

| SNP IDs                   | NCBI dbSNP accession IDs (NCBI_SS#) | Chromosomes           | Physical positions (bp) | SNPs | Gene accession IDs | Sequence components of genome | Putative functions |
|---------------------------|-------------------------------------|-----------------------|-------------------------|------|--------------------|-------------------------------|--------------------|
| <i>Desi_wild_55092058</i> | NA                                  | <i>Ca_desi_denovo</i> | 55092058                | G/T  | NA                 | NA                            | NA                 |
| <i>Desi_wild_55094133</i> | NA                                  | <i>Ca_desi_denovo</i> | 55094133                | C/G  | NA                 | NA                            | NA                 |
| <i>Desi_wild_55094669</i> | NA                                  | <i>Ca_desi_denovo</i> | 55094669                | A/C  | NA                 | NA                            | NA                 |
| <i>Desi_wild_55094670</i> | NA                                  | <i>Ca_desi_denovo</i> | 55094670                | A/G  | NA                 | NA                            | NA                 |
| <i>Desi_wild_55103516</i> | NA                                  | <i>Ca_desi_denovo</i> | 55103516                | A/T  | NA                 | NA                            | NA                 |
| <i>Desi_wild_55109741</i> | NA                                  | <i>Ca_desi_denovo</i> | 55109741                | A/G  | NA                 | NA                            | NA                 |
| <i>Desi_wild_55109762</i> | NA                                  | <i>Ca_desi_denovo</i> | 55109762                | C/T  | NA                 | NA                            | NA                 |
| <i>Desi_wild_55111596</i> | NA                                  | <i>Ca_desi_denovo</i> | 55111596                | A/G  | NA                 | NA                            | NA                 |
| <i>Desi_wild_55113054</i> | NA                                  | <i>Ca_desi_denovo</i> | 55113054                | A/G  | NA                 | NA                            | NA                 |
| <i>Desi_wild_55113060</i> | NA                                  | <i>Ca_desi_denovo</i> | 55113060                | A/G  | NA                 | NA                            | NA                 |
| <i>Desi_wild_55119280</i> | NA                                  | <i>Ca_desi_denovo</i> | 55119280                | A/G  | NA                 | NA                            | NA                 |
| <i>Desi_wild_55119923</i> | NA                                  | <i>Ca_desi_denovo</i> | 55119923                | G/T  | NA                 | NA                            | NA                 |
| <i>Desi_wild_55124994</i> | NA                                  | <i>Ca_desi_denovo</i> | 55124994                | C/T  | NA                 | NA                            | NA                 |
| <i>Desi_wild_55124998</i> | NA                                  | <i>Ca_desi_denovo</i> | 55124998                | C/G  | NA                 | NA                            | NA                 |
| <i>Desi_wild_55129949</i> | NA                                  | <i>Ca_desi_denovo</i> | 55129949                | C/T  | NA                 | NA                            | NA                 |
| <i>Desi_wild_55129974</i> | NA                                  | <i>Ca_desi_denovo</i> | 55129974                | C/T  | NA                 | NA                            | NA                 |
| <i>Desi_wild_55129981</i> | NA                                  | <i>Ca_desi_denovo</i> | 55129981                | A/G  | NA                 | NA                            | NA                 |
| <i>Desi_wild_55129983</i> | NA                                  | <i>Ca_desi_denovo</i> | 55129983                | A/G  | NA                 | NA                            | NA                 |
| <i>Desi_wild_55130568</i> | NA                                  | <i>Ca_desi_denovo</i> | 55130568                | C/G  | NA                 | NA                            | NA                 |
| <i>Desi_wild_55136827</i> | NA                                  | <i>Ca_desi_denovo</i> | 55136827                | A/G  | NA                 | NA                            | NA                 |
| <i>Desi_wild_55138517</i> | NA                                  | <i>Ca_desi_denovo</i> | 55138517                | C/T  | NA                 | NA                            | NA                 |
| <i>Desi_wild_55138559</i> | NA                                  | <i>Ca_desi_denovo</i> | 55138559                | A/T  | NA                 | NA                            | NA                 |
| <i>Desi_wild_55139446</i> | NA                                  | <i>Ca_desi_denovo</i> | 55139446                | G/T  | NA                 | NA                            | NA                 |
| <i>Desi_wild_55141616</i> | NA                                  | <i>Ca_desi_denovo</i> | 55141616                | G/T  | NA                 | NA                            | NA                 |
| <i>Desi_wild_55144315</i> | NA                                  | <i>Ca_desi_denovo</i> | 55144315                | G/T  | NA                 | NA                            | NA                 |
| <i>Desi_wild_55147182</i> | NA                                  | <i>Ca_desi_denovo</i> | 55147182                | G/T  | NA                 | NA                            | NA                 |
| <i>Desi_wild_55150772</i> | NA                                  | <i>Ca_desi_denovo</i> | 55150772                | C/G  | NA                 | NA                            | NA                 |
| <i>Desi_wild_55156050</i> | NA                                  | <i>Ca_desi_denovo</i> | 55156050                | A/C  | NA                 | NA                            | NA                 |
| <i>Desi_wild_55157753</i> | NA                                  | <i>Ca_desi_denovo</i> | 55157753                | A/G  | NA                 | NA                            | NA                 |
| <i>Desi_wild_55165678</i> | NA                                  | <i>Ca_desi_denovo</i> | 55165678                | C/T  | NA                 | NA                            | NA                 |
| <i>Desi_wild_55165687</i> | NA                                  | <i>Ca_desi_denovo</i> | 55165687                | A/T  | NA                 | NA                            | NA                 |
| <i>Desi_wild_55175870</i> | NA                                  | <i>Ca_desi_denovo</i> | 55175870                | C/T  | NA                 | NA                            | NA                 |
| <i>Desi_wild_55175909</i> | NA                                  | <i>Ca_desi_denovo</i> | 55175909                | C/G  | NA                 | NA                            | NA                 |
| <i>Desi_wild_55177881</i> | NA                                  | <i>Ca_desi_denovo</i> | 55177881                | A/G  | NA                 | NA                            | NA                 |
| <i>Desi_wild_55179949</i> | NA                                  | <i>Ca_desi_denovo</i> | 55179949                | G/T  | NA                 | NA                            | NA                 |
| <i>Desi_wild_55184104</i> | NA                                  | <i>Ca_desi_denovo</i> | 55184104                | A/T  | NA                 | NA                            | NA                 |
| <i>Desi_wild_55187483</i> | NA                                  | <i>Ca_desi_denovo</i> | 55187483                | A/G  | NA                 | NA                            | NA                 |
| <i>Desi_wild_55187773</i> | NA                                  | <i>Ca_desi_denovo</i> | 55187773                | A/G  | NA                 | NA                            | NA                 |
| <i>Desi_wild_55187997</i> | NA                                  | <i>Ca_desi_denovo</i> | 55187997                | A/G  | NA                 | NA                            | NA                 |
| <i>Desi_wild_55188011</i> | NA                                  | <i>Ca_desi_denovo</i> | 55188011                | C/T  | NA                 | NA                            | NA                 |
| <i>Desi_wild_55197812</i> | NA                                  | <i>Ca_desi_denovo</i> | 55197812                | A/G  | NA                 | NA                            | NA                 |
| <i>Desi_wild_55197819</i> | NA                                  | <i>Ca_desi_denovo</i> | 55197819                | C/G  | NA                 | NA                            | NA                 |
| <i>Desi_wild_55197884</i> | NA                                  | <i>Ca_desi_denovo</i> | 55197884                | C/G  | NA                 | NA                            | NA                 |
| <i>Desi_wild_55202040</i> | NA                                  | <i>Ca_desi_denovo</i> | 55202040                | G/T  | NA                 | NA                            | NA                 |

| SNP IDs                   | NCBI dbSNP accession IDs (NCBI_SS#) | Chromosomes           | Physical positions (bp) | SNPs | Gene accession IDs | Sequence components of genome | Putative functions |
|---------------------------|-------------------------------------|-----------------------|-------------------------|------|--------------------|-------------------------------|--------------------|
| <i>Desi_wild_55202047</i> | NA                                  | <i>Ca_desi_denovo</i> | 55202047                | C/T  | NA                 | NA                            | NA                 |
| <i>Desi_wild_55210938</i> | NA                                  | <i>Ca_desi_denovo</i> | 55210938                | C/G  | NA                 | NA                            | NA                 |
| <i>Desi_wild_55211375</i> | NA                                  | <i>Ca_desi_denovo</i> | 55211375                | G/T  | NA                 | NA                            | NA                 |
| <i>Desi_wild_55231917</i> | NA                                  | <i>Ca_desi_denovo</i> | 55231917                | C/G  | NA                 | NA                            | NA                 |
| <i>Desi_wild_55234821</i> | NA                                  | <i>Ca_desi_denovo</i> | 55234821                | C/G  | NA                 | NA                            | NA                 |
| <i>Desi_wild_55236712</i> | NA                                  | <i>Ca_desi_denovo</i> | 55236712                | A/G  | NA                 | NA                            | NA                 |
| <i>Desi_wild_55253790</i> | NA                                  | <i>Ca_desi_denovo</i> | 55253790                | A/C  | NA                 | NA                            | NA                 |
| <i>Desi_wild_55253791</i> | NA                                  | <i>Ca_desi_denovo</i> | 55253791                | A/G  | NA                 | NA                            | NA                 |
| <i>Desi_wild_55253793</i> | NA                                  | <i>Ca_desi_denovo</i> | 55253793                | G/T  | NA                 | NA                            | NA                 |
| <i>Desi_wild_55258814</i> | NA                                  | <i>Ca_desi_denovo</i> | 55258814                | G/T  | NA                 | NA                            | NA                 |
| <i>Desi_wild_55272218</i> | NA                                  | <i>Ca_desi_denovo</i> | 55272218                | A/T  | NA                 | NA                            | NA                 |
| <i>Desi_wild_55272231</i> | NA                                  | <i>Ca_desi_denovo</i> | 55272231                | C/G  | NA                 | NA                            | NA                 |
| <i>Desi_wild_55272261</i> | NA                                  | <i>Ca_desi_denovo</i> | 55272261                | C/G  | NA                 | NA                            | NA                 |
| <i>Desi_wild_55272609</i> | NA                                  | <i>Ca_desi_denovo</i> | 55272609                | C/G  | NA                 | NA                            | NA                 |
| <i>Desi_wild_55272624</i> | NA                                  | <i>Ca_desi_denovo</i> | 55272624                | A/C  | NA                 | NA                            | NA                 |
| <i>Desi_wild_55279569</i> | NA                                  | <i>Ca_desi_denovo</i> | 55279569                | A/G  | NA                 | NA                            | NA                 |
| <i>Desi_wild_55283739</i> | NA                                  | <i>Ca_desi_denovo</i> | 55283739                | A/C  | NA                 | NA                            | NA                 |
| <i>Desi_wild_55302580</i> | NA                                  | <i>Ca_desi_denovo</i> | 55302580                | C/T  | NA                 | NA                            | NA                 |
| <i>Desi_wild_55302613</i> | NA                                  | <i>Ca_desi_denovo</i> | 55302613                | G/T  | NA                 | NA                            | NA                 |
| <i>Desi_wild_55311164</i> | NA                                  | <i>Ca_desi_denovo</i> | 55311164                | C/G  | NA                 | NA                            | NA                 |
| <i>Desi_wild_55311165</i> | NA                                  | <i>Ca_desi_denovo</i> | 55311165                | G/T  | NA                 | NA                            | NA                 |
| <i>Desi_wild_55340467</i> | NA                                  | <i>Ca_desi_denovo</i> | 55340467                | A/C  | NA                 | NA                            | NA                 |
| <i>Desi_wild_55344714</i> | NA                                  | <i>Ca_desi_denovo</i> | 55344714                | G/T  | NA                 | NA                            | NA                 |
| <i>Desi_wild_55348929</i> | NA                                  | <i>Ca_desi_denovo</i> | 55348929                | G/T  | NA                 | NA                            | NA                 |
| <i>Desi_wild_55349300</i> | NA                                  | <i>Ca_desi_denovo</i> | 55349300                | G/T  | NA                 | NA                            | NA                 |
| <i>Desi_wild_55367564</i> | NA                                  | <i>Ca_desi_denovo</i> | 55367564                | C/T  | NA                 | NA                            | NA                 |
| <i>Desi_wild_55370295</i> | NA                                  | <i>Ca_desi_denovo</i> | 55370295                | G/T  | NA                 | NA                            | NA                 |
| <i>Desi_wild_55372430</i> | NA                                  | <i>Ca_desi_denovo</i> | 55372430                | A/G  | NA                 | NA                            | NA                 |
| <i>Desi_wild_55372934</i> | NA                                  | <i>Ca_desi_denovo</i> | 55372934                | A/C  | NA                 | NA                            | NA                 |
| <i>Desi_wild_55372972</i> | NA                                  | <i>Ca_desi_denovo</i> | 55372972                | C/G  | NA                 | NA                            | NA                 |
| <i>Desi_wild_55373881</i> | NA                                  | <i>Ca_desi_denovo</i> | 55373881                | A/G  | NA                 | NA                            | NA                 |
| <i>Desi_wild_55373895</i> | NA                                  | <i>Ca_desi_denovo</i> | 55373895                | C/T  | NA                 | NA                            | NA                 |
| <i>Desi_wild_55373896</i> | NA                                  | <i>Ca_desi_denovo</i> | 55373896                | C/T  | NA                 | NA                            | NA                 |
| <i>Desi_wild_55373915</i> | NA                                  | <i>Ca_desi_denovo</i> | 55373915                | C/G  | NA                 | NA                            | NA                 |
| <i>Desi_wild_55374522</i> | NA                                  | <i>Ca_desi_denovo</i> | 55374522                | C/T  | NA                 | NA                            | NA                 |
| <i>Desi_wild_55374967</i> | NA                                  | <i>Ca_desi_denovo</i> | 55374967                | A/T  | NA                 | NA                            | NA                 |
| <i>Desi_wild_55374969</i> | NA                                  | <i>Ca_desi_denovo</i> | 55374969                | C/G  | NA                 | NA                            | NA                 |
| <i>Desi_wild_55380676</i> | NA                                  | <i>Ca_desi_denovo</i> | 55380676                | C/G  | NA                 | NA                            | NA                 |
| <i>Desi_wild_55385379</i> | NA                                  | <i>Ca_desi_denovo</i> | 55385379                | G/T  | NA                 | NA                            | NA                 |
| <i>Desi_wild_55386013</i> | NA                                  | <i>Ca_desi_denovo</i> | 55386013                | C/G  | NA                 | NA                            | NA                 |
| <i>Desi_wild_55394300</i> | NA                                  | <i>Ca_desi_denovo</i> | 55394300                | G/T  | NA                 | NA                            | NA                 |
| <i>Desi_wild_55396215</i> | NA                                  | <i>Ca_desi_denovo</i> | 55396215                | C/G  | NA                 | NA                            | NA                 |
| <i>Desi_wild_55396254</i> | NA                                  | <i>Ca_desi_denovo</i> | 55396254                | C/T  | NA                 | NA                            | NA                 |
| <i>Desi_wild_55396269</i> | NA                                  | <i>Ca_desi_denovo</i> | 55396269                | C/G  | NA                 | NA                            | NA                 |

| SNP IDs                   | NCBI dbSNP accession IDs (NCBI_SS#) | Chromosomes           | Physical positions (bp) | SNPs | Gene accession IDs | Sequence components of genome | Putative functions |
|---------------------------|-------------------------------------|-----------------------|-------------------------|------|--------------------|-------------------------------|--------------------|
| <i>Desi_wild_55396818</i> | NA                                  | <i>Ca_desi_denovo</i> | 55396818                | G/T  | NA                 | NA                            | NA                 |
| <i>Desi_wild_55401903</i> | NA                                  | <i>Ca_desi_denovo</i> | 55401903                | C/T  | NA                 | NA                            | NA                 |
| <i>Desi_wild_55404966</i> | NA                                  | <i>Ca_desi_denovo</i> | 55404966                | A/G  | NA                 | NA                            | NA                 |
| <i>Desi_wild_55405005</i> | NA                                  | <i>Ca_desi_denovo</i> | 55405005                | C/T  | NA                 | NA                            | NA                 |
| <i>Desi_wild_55408497</i> | NA                                  | <i>Ca_desi_denovo</i> | 55408497                | G/T  | NA                 | NA                            | NA                 |
| <i>Desi_wild_55412688</i> | NA                                  | <i>Ca_desi_denovo</i> | 55412688                | G/T  | NA                 | NA                            | NA                 |
| <i>Desi_wild_55414869</i> | NA                                  | <i>Ca_desi_denovo</i> | 55414869                | G/T  | NA                 | NA                            | NA                 |
| <i>Desi_wild_55416983</i> | NA                                  | <i>Ca_desi_denovo</i> | 55416983                | G/T  | NA                 | NA                            | NA                 |
| <i>Desi_wild_55417048</i> | NA                                  | <i>Ca_desi_denovo</i> | 55417048                | C/G  | NA                 | NA                            | NA                 |
| <i>Desi_wild_55417069</i> | NA                                  | <i>Ca_desi_denovo</i> | 55417069                | C/T  | NA                 | NA                            | NA                 |
| <i>Desi_wild_55417072</i> | NA                                  | <i>Ca_desi_denovo</i> | 55417072                | A/C  | NA                 | NA                            | NA                 |
| <i>Desi_wild_55417595</i> | NA                                  | <i>Ca_desi_denovo</i> | 55417595                | A/T  | NA                 | NA                            | NA                 |
| <i>Desi_wild_55419840</i> | NA                                  | <i>Ca_desi_denovo</i> | 55419840                | G/T  | NA                 | NA                            | NA                 |
| <i>Desi_wild_55419868</i> | NA                                  | <i>Ca_desi_denovo</i> | 55419868                | G/T  | NA                 | NA                            | NA                 |
| <i>Desi_wild_55419872</i> | NA                                  | <i>Ca_desi_denovo</i> | 55419872                | A/G  | NA                 | NA                            | NA                 |
| <i>Desi_wild_55423425</i> | NA                                  | <i>Ca_desi_denovo</i> | 55423425                | G/T  | NA                 | NA                            | NA                 |
| <i>Desi_wild_55424076</i> | NA                                  | <i>Ca_desi_denovo</i> | 55424076                | C/T  | NA                 | NA                            | NA                 |
| <i>Desi_wild_55426384</i> | NA                                  | <i>Ca_desi_denovo</i> | 55426384                | C/T  | NA                 | NA                            | NA                 |
| <i>Desi_wild_55430399</i> | NA                                  | <i>Ca_desi_denovo</i> | 55430399                | C/T  | NA                 | NA                            | NA                 |
| <i>Desi_wild_55446380</i> | NA                                  | <i>Ca_desi_denovo</i> | 55446380                | G/T  | NA                 | NA                            | NA                 |
| <i>Desi_wild_55452055</i> | NA                                  | <i>Ca_desi_denovo</i> | 55452055                | A/G  | NA                 | NA                            | NA                 |
| <i>Desi_wild_55454687</i> | NA                                  | <i>Ca_desi_denovo</i> | 55454687                | A/C  | NA                 | NA                            | NA                 |
| <i>Desi_wild_55455605</i> | NA                                  | <i>Ca_desi_denovo</i> | 55455605                | A/T  | NA                 | NA                            | NA                 |
| <i>Desi_wild_55455614</i> | NA                                  | <i>Ca_desi_denovo</i> | 55455614                | A/T  | NA                 | NA                            | NA                 |
| <i>Desi_wild_55455641</i> | NA                                  | <i>Ca_desi_denovo</i> | 55455641                | C/G  | NA                 | NA                            | NA                 |
| <i>Desi_wild_55465467</i> | NA                                  | <i>Ca_desi_denovo</i> | 55465467                | C/G  | NA                 | NA                            | NA                 |
| <i>Desi_wild_55466760</i> | NA                                  | <i>Ca_desi_denovo</i> | 55466760                | A/C  | NA                 | NA                            | NA                 |
| <i>Desi_wild_55466761</i> | NA                                  | <i>Ca_desi_denovo</i> | 55466761                | C/G  | NA                 | NA                            | NA                 |
| <i>Desi_wild_55466762</i> | NA                                  | <i>Ca_desi_denovo</i> | 55466762                | A/C  | NA                 | NA                            | NA                 |
| <i>Desi_wild_55466763</i> | NA                                  | <i>Ca_desi_denovo</i> | 55466763                | C/T  | NA                 | NA                            | NA                 |
| <i>Desi_wild_55467227</i> | NA                                  | <i>Ca_desi_denovo</i> | 55467227                | A/C  | NA                 | NA                            | NA                 |
| <i>Desi_wild_55472521</i> | NA                                  | <i>Ca_desi_denovo</i> | 55472521                | C/G  | NA                 | NA                            | NA                 |
| <i>Desi_wild_55478806</i> | NA                                  | <i>Ca_desi_denovo</i> | 55478806                | C/G  | NA                 | NA                            | NA                 |
| <i>Desi_wild_55480131</i> | NA                                  | <i>Ca_desi_denovo</i> | 55480131                | G/T  | NA                 | NA                            | NA                 |
| <i>Desi_wild_55480146</i> | NA                                  | <i>Ca_desi_denovo</i> | 55480146                | C/G  | NA                 | NA                            | NA                 |
| <i>Desi_wild_55480148</i> | NA                                  | <i>Ca_desi_denovo</i> | 55480148                | A/G  | NA                 | NA                            | NA                 |
| <i>Desi_wild_55480153</i> | NA                                  | <i>Ca_desi_denovo</i> | 55480153                | A/G  | NA                 | NA                            | NA                 |
| <i>Desi_wild_55482819</i> | NA                                  | <i>Ca_desi_denovo</i> | 55482819                | G/T  | NA                 | NA                            | NA                 |
| <i>Desi_wild_55483315</i> | NA                                  | <i>Ca_desi_denovo</i> | 55483315                | C/G  | NA                 | NA                            | NA                 |
| <i>Desi_wild_55486735</i> | NA                                  | <i>Ca_desi_denovo</i> | 55486735                | G/T  | NA                 | NA                            | NA                 |
| <i>Desi_wild_55487087</i> | NA                                  | <i>Ca_desi_denovo</i> | 55487087                | G/T  | NA                 | NA                            | NA                 |
| <i>Desi_wild_55487336</i> | NA                                  | <i>Ca_desi_denovo</i> | 55487336                | A/G  | NA                 | NA                            | NA                 |
| <i>Desi_wild_55488472</i> | NA                                  | <i>Ca_desi_denovo</i> | 55488472                | G/T  | NA                 | NA                            | NA                 |
| <i>Desi_wild_55494270</i> | NA                                  | <i>Ca_desi_denovo</i> | 55494270                | A/C  | NA                 | NA                            | NA                 |

| SNP IDs                   | NCBI dbSNP accession IDs (NCBI_SS#) | Chromosomes           | Physical positions (bp) | SNPs | Gene accession IDs | Sequence components of genome | Putative functions |
|---------------------------|-------------------------------------|-----------------------|-------------------------|------|--------------------|-------------------------------|--------------------|
| <i>Desi_wild_55494900</i> | NA                                  | <i>Ca_desi_denovo</i> | 55494900                | G/T  | NA                 | NA                            | NA                 |
| <i>Desi_wild_55498701</i> | NA                                  | <i>Ca_desi_denovo</i> | 55498701                | G/T  | NA                 | NA                            | NA                 |
| <i>Desi_wild_55502809</i> | NA                                  | <i>Ca_desi_denovo</i> | 55502809                | C/T  | NA                 | NA                            | NA                 |
| <i>Desi_wild_55503752</i> | NA                                  | <i>Ca_desi_denovo</i> | 55503752                | G/T  | NA                 | NA                            | NA                 |
| <i>Desi_wild_55503777</i> | NA                                  | <i>Ca_desi_denovo</i> | 55503777                | A/C  | NA                 | NA                            | NA                 |
| <i>Desi_wild_55504914</i> | NA                                  | <i>Ca_desi_denovo</i> | 55504914                | C/T  | NA                 | NA                            | NA                 |
| <i>Desi_wild_55504916</i> | NA                                  | <i>Ca_desi_denovo</i> | 55504916                | C/G  | NA                 | NA                            | NA                 |
| <i>Desi_wild_55504927</i> | NA                                  | <i>Ca_desi_denovo</i> | 55504927                | C/T  | NA                 | NA                            | NA                 |
| <i>Desi_wild_55513934</i> | NA                                  | <i>Ca_desi_denovo</i> | 55513934                | C/T  | NA                 | NA                            | NA                 |
| <i>Desi_wild_55514134</i> | NA                                  | <i>Ca_desi_denovo</i> | 55514134                | C/T  | NA                 | NA                            | NA                 |
| <i>Desi_wild_55514158</i> | NA                                  | <i>Ca_desi_denovo</i> | 55514158                | C/T  | NA                 | NA                            | NA                 |
| <i>Desi_wild_55517541</i> | NA                                  | <i>Ca_desi_denovo</i> | 55517541                | C/T  | NA                 | NA                            | NA                 |
| <i>Desi_wild_55519415</i> | NA                                  | <i>Ca_desi_denovo</i> | 55519415                | A/G  | NA                 | NA                            | NA                 |
| <i>Desi_wild_55519430</i> | NA                                  | <i>Ca_desi_denovo</i> | 55519430                | A/G  | NA                 | NA                            | NA                 |
| <i>Desi_wild_55519954</i> | NA                                  | <i>Ca_desi_denovo</i> | 55519954                | G/T  | NA                 | NA                            | NA                 |
| <i>Desi_wild_55522183</i> | NA                                  | <i>Ca_desi_denovo</i> | 55522183                | G/T  | NA                 | NA                            | NA                 |
| <i>Desi_wild_55522466</i> | NA                                  | <i>Ca_desi_denovo</i> | 55522466                | A/C  | NA                 | NA                            | NA                 |
| <i>Desi_wild_55523677</i> | NA                                  | <i>Ca_desi_denovo</i> | 55523677                | A/C  | NA                 | NA                            | NA                 |
| <i>Desi_wild_55528252</i> | NA                                  | <i>Ca_desi_denovo</i> | 55528252                | C/T  | NA                 | NA                            | NA                 |
| <i>Desi_wild_55528293</i> | NA                                  | <i>Ca_desi_denovo</i> | 55528293                | C/T  | NA                 | NA                            | NA                 |
| <i>Desi_wild_55528326</i> | NA                                  | <i>Ca_desi_denovo</i> | 55528326                | C/T  | NA                 | NA                            | NA                 |
| <i>Desi_wild_55528374</i> | NA                                  | <i>Ca_desi_denovo</i> | 55528374                | G/T  | NA                 | NA                            | NA                 |
| <i>Desi_wild_55529358</i> | NA                                  | <i>Ca_desi_denovo</i> | 55529358                | C/T  | NA                 | NA                            | NA                 |
| <i>Desi_wild_55531091</i> | NA                                  | <i>Ca_desi_denovo</i> | 55531091                | G/T  | NA                 | NA                            | NA                 |
| <i>Desi_wild_55532792</i> | NA                                  | <i>Ca_desi_denovo</i> | 55532792                | G/T  | NA                 | NA                            | NA                 |
| <i>Desi_wild_55535246</i> | NA                                  | <i>Ca_desi_denovo</i> | 55535246                | G/T  | NA                 | NA                            | NA                 |
| <i>Desi_wild_55537573</i> | NA                                  | <i>Ca_desi_denovo</i> | 55537573                | G/T  | NA                 | NA                            | NA                 |
| <i>Desi_wild_55540279</i> | NA                                  | <i>Ca_desi_denovo</i> | 55540279                | A/G  | NA                 | NA                            | NA                 |
| <i>Desi_wild_55540791</i> | NA                                  | <i>Ca_desi_denovo</i> | 55540791                | A/G  | NA                 | NA                            | NA                 |
| <i>Desi_wild_55550091</i> | NA                                  | <i>Ca_desi_denovo</i> | 55550091                | C/T  | NA                 | NA                            | NA                 |
| <i>Desi_wild_55554273</i> | NA                                  | <i>Ca_desi_denovo</i> | 55554273                | G/T  | NA                 | NA                            | NA                 |
| <i>Desi_wild_55561815</i> | NA                                  | <i>Ca_desi_denovo</i> | 55561815                | A/C  | NA                 | NA                            | NA                 |
| <i>Desi_wild_55563989</i> | NA                                  | <i>Ca_desi_denovo</i> | 55563989                | G/T  | NA                 | NA                            | NA                 |
| <i>Desi_wild_55565064</i> | NA                                  | <i>Ca_desi_denovo</i> | 55565064                | A/G  | NA                 | NA                            | NA                 |
| <i>Desi_wild_55565555</i> | NA                                  | <i>Ca_desi_denovo</i> | 55565555                | C/T  | NA                 | NA                            | NA                 |
| <i>Desi_wild_55566450</i> | NA                                  | <i>Ca_desi_denovo</i> | 55566450                | G/T  | NA                 | NA                            | NA                 |
| <i>Desi_wild_55573710</i> | NA                                  | <i>Ca_desi_denovo</i> | 55573710                | G/T  | NA                 | NA                            | NA                 |
| <i>Desi_wild_55585718</i> | NA                                  | <i>Ca_desi_denovo</i> | 55585718                | C/G  | NA                 | NA                            | NA                 |
| <i>Desi_wild_55585783</i> | NA                                  | <i>Ca_desi_denovo</i> | 55585783                | A/G  | NA                 | NA                            | NA                 |
| <i>Desi_wild_55590348</i> | NA                                  | <i>Ca_desi_denovo</i> | 55590348                | C/T  | NA                 | NA                            | NA                 |
| <i>Desi_wild_55592820</i> | NA                                  | <i>Ca_desi_denovo</i> | 55592820                | C/T  | NA                 | NA                            | NA                 |
| <i>Desi_wild_55592842</i> | NA                                  | <i>Ca_desi_denovo</i> | 55592842                | A/G  | NA                 | NA                            | NA                 |
| <i>Desi_wild_55607757</i> | NA                                  | <i>Ca_desi_denovo</i> | 55607757                | C/G  | NA                 | NA                            | NA                 |
| <i>Desi_wild_55607769</i> | NA                                  | <i>Ca_desi_denovo</i> | 55607769                | A/C  | NA                 | NA                            | NA                 |



| SNP IDs                   | NCBI dbSNP accession IDs (NCBI_SS#) | Chromosomes           | Physical positions (bp) | SNPs | Gene accession IDs | Sequence components of genome | Putative functions |
|---------------------------|-------------------------------------|-----------------------|-------------------------|------|--------------------|-------------------------------|--------------------|
| <i>Desi_wild_55608371</i> | NA                                  | <i>Ca_desi_denovo</i> | 55608371                | C/G  | NA                 | NA                            | NA                 |
| <i>Desi_wild_55610762</i> | NA                                  | <i>Ca_desi_denovo</i> | 55610762                | A/G  | NA                 | NA                            | NA                 |
| <i>Desi_wild_55615431</i> | NA                                  | <i>Ca_desi_denovo</i> | 55615431                | C/T  | NA                 | NA                            | NA                 |
| <i>Desi_wild_55615441</i> | NA                                  | <i>Ca_desi_denovo</i> | 55615441                | A/G  | NA                 | NA                            | NA                 |
| <i>Desi_wild_55622073</i> | NA                                  | <i>Ca_desi_denovo</i> | 55622073                | G/T  | NA                 | NA                            | NA                 |
| <i>Desi_wild_55623460</i> | NA                                  | <i>Ca_desi_denovo</i> | 55623460                | A/G  | NA                 | NA                            | NA                 |
| <i>Desi_wild_55627897</i> | NA                                  | <i>Ca_desi_denovo</i> | 55627897                | C/T  | NA                 | NA                            | NA                 |
| <i>Desi_wild_55628113</i> | NA                                  | <i>Ca_desi_denovo</i> | 55628113                | A/C  | NA                 | NA                            | NA                 |
| <i>Desi_wild_55628292</i> | NA                                  | <i>Ca_desi_denovo</i> | 55628292                | C/G  | NA                 | NA                            | NA                 |
| <i>Desi_wild_55629057</i> | NA                                  | <i>Ca_desi_denovo</i> | 55629057                | C/T  | NA                 | NA                            | NA                 |
| <i>Desi_wild_55629104</i> | NA                                  | <i>Ca_desi_denovo</i> | 55629104                | C/T  | NA                 | NA                            | NA                 |
| <i>Desi_wild_55629138</i> | NA                                  | <i>Ca_desi_denovo</i> | 55629138                | C/G  | NA                 | NA                            | NA                 |
| <i>Desi_wild_55629233</i> | NA                                  | <i>Ca_desi_denovo</i> | 55629233                | A/C  | NA                 | NA                            | NA                 |
| <i>Desi_wild_55629234</i> | NA                                  | <i>Ca_desi_denovo</i> | 55629234                | G/T  | NA                 | NA                            | NA                 |
| <i>Desi_wild_55631410</i> | NA                                  | <i>Ca_desi_denovo</i> | 55631410                | C/T  | NA                 | NA                            | NA                 |
| <i>Desi_wild_55631413</i> | NA                                  | <i>Ca_desi_denovo</i> | 55631413                | C/G  | NA                 | NA                            | NA                 |
| <i>Desi_wild_55632617</i> | NA                                  | <i>Ca_desi_denovo</i> | 55632617                | C/T  | NA                 | NA                            | NA                 |
| <i>Desi_wild_55637936</i> | NA                                  | <i>Ca_desi_denovo</i> | 55637936                | A/G  | NA                 | NA                            | NA                 |
| <i>Desi_wild_55640673</i> | NA                                  | <i>Ca_desi_denovo</i> | 55640673                | A/C  | NA                 | NA                            | NA                 |
| <i>Desi_wild_55646727</i> | NA                                  | <i>Ca_desi_denovo</i> | 55646727                | A/G  | NA                 | NA                            | NA                 |
| <i>Desi_wild_55646774</i> | NA                                  | <i>Ca_desi_denovo</i> | 55646774                | C/G  | NA                 | NA                            | NA                 |
| <i>Desi_wild_55651362</i> | NA                                  | <i>Ca_desi_denovo</i> | 55651362                | A/G  | NA                 | NA                            | NA                 |
| <i>Desi_wild_55660771</i> | NA                                  | <i>Ca_desi_denovo</i> | 55660771                | C/T  | NA                 | NA                            | NA                 |
| <i>Desi_wild_55662235</i> | NA                                  | <i>Ca_desi_denovo</i> | 55662235                | C/G  | NA                 | NA                            | NA                 |
| <i>Desi_wild_55664875</i> | NA                                  | <i>Ca_desi_denovo</i> | 55664875                | A/G  | NA                 | NA                            | NA                 |
| <i>Desi_wild_55664893</i> | NA                                  | <i>Ca_desi_denovo</i> | 55664893                | A/G  | NA                 | NA                            | NA                 |
| <i>Desi_wild_55667371</i> | NA                                  | <i>Ca_desi_denovo</i> | 55667371                | A/C  | NA                 | NA                            | NA                 |
| <i>Desi_wild_55667398</i> | NA                                  | <i>Ca_desi_denovo</i> | 55667398                | C/T  | NA                 | NA                            | NA                 |
| <i>Desi_wild_55667498</i> | NA                                  | <i>Ca_desi_denovo</i> | 55667498                | G/T  | NA                 | NA                            | NA                 |
| <i>Desi_wild_55669154</i> | NA                                  | <i>Ca_desi_denovo</i> | 55669154                | C/T  | NA                 | NA                            | NA                 |
| <i>Desi_wild_55672776</i> | NA                                  | <i>Ca_desi_denovo</i> | 55672776                | C/T  | NA                 | NA                            | NA                 |
| <i>Desi_wild_55676059</i> | NA                                  | <i>Ca_desi_denovo</i> | 55676059                | A/G  | NA                 | NA                            | NA                 |
| <i>Desi_wild_55676073</i> | NA                                  | <i>Ca_desi_denovo</i> | 55676073                | A/G  | NA                 | NA                            | NA                 |
| <i>Desi_wild_55676172</i> | NA                                  | <i>Ca_desi_denovo</i> | 55676172                | C/G  | NA                 | NA                            | NA                 |
| <i>Desi_wild_55677263</i> | NA                                  | <i>Ca_desi_denovo</i> | 55677263                | C/T  | NA                 | NA                            | NA                 |
| <i>Desi_wild_55679870</i> | NA                                  | <i>Ca_desi_denovo</i> | 55679870                | A/G  | NA                 | NA                            | NA                 |
| <i>Desi_wild_55687106</i> | NA                                  | <i>Ca_desi_denovo</i> | 55687106                | C/T  | NA                 | NA                            | NA                 |
| <i>Desi_wild_55688738</i> | NA                                  | <i>Ca_desi_denovo</i> | 55688738                | G/T  | NA                 | NA                            | NA                 |
| <i>Desi_wild_55691403</i> | NA                                  | <i>Ca_desi_denovo</i> | 55691403                | C/G  | NA                 | NA                            | NA                 |
| <i>Desi_wild_55691417</i> | NA                                  | <i>Ca_desi_denovo</i> | 55691417                | C/T  | NA                 | NA                            | NA                 |
| <i>Desi_wild_55693437</i> | NA                                  | <i>Ca_desi_denovo</i> | 55693437                | A/G  | NA                 | NA                            | NA                 |
| <i>Desi_wild_55693443</i> | NA                                  | <i>Ca_desi_denovo</i> | 55693443                | A/G  | NA                 | NA                            | NA                 |
| <i>Desi_wild_55700611</i> | NA                                  | <i>Ca_desi_denovo</i> | 55700611                | A/G  | NA                 | NA                            | NA                 |
| <i>Desi_wild_55703540</i> | NA                                  | <i>Ca_desi_denovo</i> | 55703540                | G/T  | NA                 | NA                            | NA                 |

| SNP IDs                   | NCBI dbSNP accession IDs (NCBI_SS#) | Chromosomes           | Physical positions (bp) | SNPs | Gene accession IDs | Sequence components of genome | Putative functions |
|---------------------------|-------------------------------------|-----------------------|-------------------------|------|--------------------|-------------------------------|--------------------|
| <i>Desi_wild_55707697</i> | NA                                  | <i>Ca_desi_denovo</i> | 55707697                | A/G  | NA                 | NA                            | NA                 |
| <i>Desi_wild_55714507</i> | NA                                  | <i>Ca_desi_denovo</i> | 55714507                | G/T  | NA                 | NA                            | NA                 |
| <i>Desi_wild_55717768</i> | NA                                  | <i>Ca_desi_denovo</i> | 55717768                | A/G  | NA                 | NA                            | NA                 |
| <i>Desi_wild_55717769</i> | NA                                  | <i>Ca_desi_denovo</i> | 55717769                | G/T  | NA                 | NA                            | NA                 |
| <i>Desi_wild_55723986</i> | NA                                  | <i>Ca_desi_denovo</i> | 55723986                | G/T  | NA                 | NA                            | NA                 |
| <i>Desi_wild_55729609</i> | NA                                  | <i>Ca_desi_denovo</i> | 55729609                | C/T  | NA                 | NA                            | NA                 |
| <i>Desi_wild_55738631</i> | NA                                  | <i>Ca_desi_denovo</i> | 55738631                | A/G  | NA                 | NA                            | NA                 |
| <i>Desi_wild_55742254</i> | NA                                  | <i>Ca_desi_denovo</i> | 55742254                | G/T  | NA                 | NA                            | NA                 |
| <i>Desi_wild_55742258</i> | NA                                  | <i>Ca_desi_denovo</i> | 55742258                | C/G  | NA                 | NA                            | NA                 |
| <i>Desi_wild_55743762</i> | NA                                  | <i>Ca_desi_denovo</i> | 55743762                | G/T  | NA                 | NA                            | NA                 |
| <i>Desi_wild_55750783</i> | NA                                  | <i>Ca_desi_denovo</i> | 55750783                | G/T  | NA                 | NA                            | NA                 |
| <i>Desi_wild_55755233</i> | NA                                  | <i>Ca_desi_denovo</i> | 55755233                | C/T  | NA                 | NA                            | NA                 |
| <i>Desi_wild_55756494</i> | NA                                  | <i>Ca_desi_denovo</i> | 55756494                | C/T  | NA                 | NA                            | NA                 |
| <i>Desi_wild_55758036</i> | NA                                  | <i>Ca_desi_denovo</i> | 55758036                | A/C  | NA                 | NA                            | NA                 |
| <i>Desi_wild_55758037</i> | NA                                  | <i>Ca_desi_denovo</i> | 55758037                | A/G  | NA                 | NA                            | NA                 |
| <i>Desi_wild_55758038</i> | NA                                  | <i>Ca_desi_denovo</i> | 55758038                | A/C  | NA                 | NA                            | NA                 |
| <i>Desi_wild_55758039</i> | NA                                  | <i>Ca_desi_denovo</i> | 55758039                | C/T  | NA                 | NA                            | NA                 |
| <i>Desi_wild_55772303</i> | NA                                  | <i>Ca_desi_denovo</i> | 55772303                | A/G  | NA                 | NA                            | NA                 |
| <i>Desi_wild_55776635</i> | NA                                  | <i>Ca_desi_denovo</i> | 55776635                | A/C  | NA                 | NA                            | NA                 |
| <i>Desi_wild_55776638</i> | NA                                  | <i>Ca_desi_denovo</i> | 55776638                | A/T  | NA                 | NA                            | NA                 |
| <i>Desi_wild_55776639</i> | NA                                  | <i>Ca_desi_denovo</i> | 55776639                | C/T  | NA                 | NA                            | NA                 |
| <i>Desi_wild_55798772</i> | NA                                  | <i>Ca_desi_denovo</i> | 55798772                | C/T  | NA                 | NA                            | NA                 |
| <i>Desi_wild_55798773</i> | NA                                  | <i>Ca_desi_denovo</i> | 55798773                | C/G  | NA                 | NA                            | NA                 |
| <i>Desi_wild_55810163</i> | NA                                  | <i>Ca_desi_denovo</i> | 55810163                | C/T  | NA                 | NA                            | NA                 |
| <i>Desi_wild_55820039</i> | NA                                  | <i>Ca_desi_denovo</i> | 55820039                | C/T  | NA                 | NA                            | NA                 |
| <i>Desi_wild_55820048</i> | NA                                  | <i>Ca_desi_denovo</i> | 55820048                | C/T  | NA                 | NA                            | NA                 |
| <i>Desi_wild_55820052</i> | NA                                  | <i>Ca_desi_denovo</i> | 55820052                | C/T  | NA                 | NA                            | NA                 |
| <i>Desi_wild_55829460</i> | NA                                  | <i>Ca_desi_denovo</i> | 55829460                | A/C  | NA                 | NA                            | NA                 |
| <i>Desi_wild_55832392</i> | NA                                  | <i>Ca_desi_denovo</i> | 55832392                | C/G  | NA                 | NA                            | NA                 |
| <i>Desi_wild_55834392</i> | NA                                  | <i>Ca_desi_denovo</i> | 55834392                | A/C  | NA                 | NA                            | NA                 |
| <i>Desi_wild_55839550</i> | NA                                  | <i>Ca_desi_denovo</i> | 55839550                | A/G  | NA                 | NA                            | NA                 |
| <i>Desi_wild_55844259</i> | NA                                  | <i>Ca_desi_denovo</i> | 55844259                | C/G  | NA                 | NA                            | NA                 |
| <i>Desi_wild_55852965</i> | NA                                  | <i>Ca_desi_denovo</i> | 55852965                | G/T  | NA                 | NA                            | NA                 |
| <i>Desi_wild_55865172</i> | NA                                  | <i>Ca_desi_denovo</i> | 55865172                | G/T  | NA                 | NA                            | NA                 |
| <i>Desi_wild_55868786</i> | NA                                  | <i>Ca_desi_denovo</i> | 55868786                | A/C  | NA                 | NA                            | NA                 |
| <i>Desi_wild_55886759</i> | NA                                  | <i>Ca_desi_denovo</i> | 55886759                | C/T  | NA                 | NA                            | NA                 |
| <i>Desi_wild_55887213</i> | NA                                  | <i>Ca_desi_denovo</i> | 55887213                | C/T  | NA                 | NA                            | NA                 |
| <i>Desi_wild_55887214</i> | NA                                  | <i>Ca_desi_denovo</i> | 55887214                | C/T  | NA                 | NA                            | NA                 |
| <i>Desi_wild_55915229</i> | NA                                  | <i>Ca_desi_denovo</i> | 55915229                | A/C  | NA                 | NA                            | NA                 |
| <i>Desi_wild_55915450</i> | NA                                  | <i>Ca_desi_denovo</i> | 55915450                | A/G  | NA                 | NA                            | NA                 |
| <i>Desi_wild_55915481</i> | NA                                  | <i>Ca_desi_denovo</i> | 55915481                | A/G  | NA                 | NA                            | NA                 |
| <i>Desi_wild_55918259</i> | NA                                  | <i>Ca_desi_denovo</i> | 55918259                | G/T  | NA                 | NA                            | NA                 |
| <i>Desi_wild_55921354</i> | NA                                  | <i>Ca_desi_denovo</i> | 55921354                | G/T  | NA                 | NA                            | NA                 |
| <i>Desi_wild_55921405</i> | NA                                  | <i>Ca_desi_denovo</i> | 55921405                | A/G  | NA                 | NA                            | NA                 |

| SNP IDs                   | NCBI dbSNP accession IDs (NCBI_SS#) | Chromosomes           | Physical positions (bp) | SNPs | Gene accession IDs | Sequence components of genome | Putative functions |
|---------------------------|-------------------------------------|-----------------------|-------------------------|------|--------------------|-------------------------------|--------------------|
| <i>Desi_wild_55931069</i> | NA                                  | <i>Ca_desi_denovo</i> | 55931069                | C/T  | NA                 | NA                            | NA                 |
| <i>Desi_wild_55931072</i> | NA                                  | <i>Ca_desi_denovo</i> | 55931072                | C/T  | NA                 | NA                            | NA                 |
| <i>Desi_wild_55956926</i> | NA                                  | <i>Ca_desi_denovo</i> | 55956926                | A/G  | NA                 | NA                            | NA                 |
| <i>Desi_wild_55958689</i> | NA                                  | <i>Ca_desi_denovo</i> | 55958689                | G/T  | NA                 | NA                            | NA                 |
| <i>Desi_wild_55958838</i> | NA                                  | <i>Ca_desi_denovo</i> | 55958838                | C/T  | NA                 | NA                            | NA                 |
| <i>Desi_wild_55970010</i> | NA                                  | <i>Ca_desi_denovo</i> | 55970010                | A/G  | NA                 | NA                            | NA                 |
| <i>Desi_wild_55970026</i> | NA                                  | <i>Ca_desi_denovo</i> | 55970026                | C/T  | NA                 | NA                            | NA                 |
| <i>Desi_wild_55978721</i> | NA                                  | <i>Ca_desi_denovo</i> | 55978721                | A/C  | NA                 | NA                            | NA                 |
| <i>Desi_wild_55978728</i> | NA                                  | <i>Ca_desi_denovo</i> | 55978728                | A/C  | NA                 | NA                            | NA                 |
| <i>Desi_wild_56004127</i> | NA                                  | <i>Ca_desi_denovo</i> | 56004127                | C/G  | NA                 | NA                            | NA                 |
| <i>Desi_wild_56011537</i> | NA                                  | <i>Ca_desi_denovo</i> | 56011537                | A/G  | NA                 | NA                            | NA                 |
| <i>Desi_wild_56020624</i> | NA                                  | <i>Ca_desi_denovo</i> | 56020624                | G/T  | NA                 | NA                            | NA                 |
| <i>Desi_wild_56025428</i> | NA                                  | <i>Ca_desi_denovo</i> | 56025428                | G/T  | NA                 | NA                            | NA                 |
| <i>Desi_wild_56025430</i> | NA                                  | <i>Ca_desi_denovo</i> | 56025430                | C/G  | NA                 | NA                            | NA                 |
| <i>Desi_wild_56025440</i> | NA                                  | <i>Ca_desi_denovo</i> | 56025440                | A/C  | NA                 | NA                            | NA                 |
| <i>Desi_wild_56025927</i> | NA                                  | <i>Ca_desi_denovo</i> | 56025927                | C/T  | NA                 | NA                            | NA                 |
| <i>Desi_wild_56025958</i> | NA                                  | <i>Ca_desi_denovo</i> | 56025958                | A/G  | NA                 | NA                            | NA                 |
| <i>Desi_wild_56025967</i> | NA                                  | <i>Ca_desi_denovo</i> | 56025967                | A/G  | NA                 | NA                            | NA                 |
| <i>Desi_wild_56030694</i> | NA                                  | <i>Ca_desi_denovo</i> | 56030694                | A/G  | NA                 | NA                            | NA                 |
| <i>Desi_wild_56030701</i> | NA                                  | <i>Ca_desi_denovo</i> | 56030701                | C/G  | NA                 | NA                            | NA                 |
| <i>Desi_wild_56034515</i> | NA                                  | <i>Ca_desi_denovo</i> | 56034515                | G/T  | NA                 | NA                            | NA                 |
| <i>Desi_wild_56035134</i> | NA                                  | <i>Ca_desi_denovo</i> | 56035134                | C/T  | NA                 | NA                            | NA                 |
| <i>Desi_wild_56036262</i> | NA                                  | <i>Ca_desi_denovo</i> | 56036262                | A/C  | NA                 | NA                            | NA                 |
| <i>Desi_wild_56038061</i> | NA                                  | <i>Ca_desi_denovo</i> | 56038061                | A/C  | NA                 | NA                            | NA                 |
| <i>Desi_wild_56041430</i> | NA                                  | <i>Ca_desi_denovo</i> | 56041430                | C/T  | NA                 | NA                            | NA                 |
| <i>Desi_wild_56041473</i> | NA                                  | <i>Ca_desi_denovo</i> | 56041473                | G/T  | NA                 | NA                            | NA                 |
| <i>Desi_wild_56047477</i> | NA                                  | <i>Ca_desi_denovo</i> | 56047477                | C/T  | NA                 | NA                            | NA                 |
| <i>Desi_wild_56060009</i> | NA                                  | <i>Ca_desi_denovo</i> | 56060009                | G/T  | NA                 | NA                            | NA                 |
| <i>Desi_wild_56060858</i> | NA                                  | <i>Ca_desi_denovo</i> | 56060858                | A/G  | NA                 | NA                            | NA                 |
| <i>Desi_wild_56066041</i> | NA                                  | <i>Ca_desi_denovo</i> | 56066041                | G/T  | NA                 | NA                            | NA                 |
| <i>Desi_wild_56071632</i> | NA                                  | <i>Ca_desi_denovo</i> | 56071632                | A/C  | NA                 | NA                            | NA                 |
| <i>Desi_wild_56071634</i> | NA                                  | <i>Ca_desi_denovo</i> | 56071634                | A/C  | NA                 | NA                            | NA                 |
| <i>Desi_wild_56072741</i> | NA                                  | <i>Ca_desi_denovo</i> | 56072741                | G/T  | NA                 | NA                            | NA                 |
| <i>Desi_wild_56083083</i> | NA                                  | <i>Ca_desi_denovo</i> | 56083083                | A/C  | NA                 | NA                            | NA                 |
| <i>Desi_wild_56083107</i> | NA                                  | <i>Ca_desi_denovo</i> | 56083107                | A/G  | NA                 | NA                            | NA                 |
| <i>Desi_wild_56084491</i> | NA                                  | <i>Ca_desi_denovo</i> | 56084491                | C/G  | NA                 | NA                            | NA                 |
| <i>Desi_wild_56084527</i> | NA                                  | <i>Ca_desi_denovo</i> | 56084527                | C/T  | NA                 | NA                            | NA                 |
| <i>Desi_wild_56089487</i> | NA                                  | <i>Ca_desi_denovo</i> | 56089487                | A/G  | NA                 | NA                            | NA                 |
| <i>Desi_wild_56089488</i> | NA                                  | <i>Ca_desi_denovo</i> | 56089488                | A/T  | NA                 | NA                            | NA                 |
| <i>Desi_wild_56097334</i> | NA                                  | <i>Ca_desi_denovo</i> | 56097334                | G/T  | NA                 | NA                            | NA                 |
| <i>Desi_wild_56097875</i> | NA                                  | <i>Ca_desi_denovo</i> | 56097875                | A/G  | NA                 | NA                            | NA                 |
| <i>Desi_wild_56115579</i> | NA                                  | <i>Ca_desi_denovo</i> | 56115579                | A/G  | NA                 | NA                            | NA                 |
| <i>Desi_wild_56117530</i> | NA                                  | <i>Ca_desi_denovo</i> | 56117530                | G/T  | NA                 | NA                            | NA                 |
| <i>Desi_wild_56122157</i> | NA                                  | <i>Ca_desi_denovo</i> | 56122157                | A/G  | NA                 | NA                            | NA                 |

| SNP IDs                   | NCBI dbSNP accession IDs (NCBI_SS#) | Chromosomes           | Physical positions (bp) | SNPs | Gene accession IDs | Sequence components of genome | Putative functions |
|---------------------------|-------------------------------------|-----------------------|-------------------------|------|--------------------|-------------------------------|--------------------|
| <i>Desi_wild_56123931</i> | NA                                  | <i>Ca_desi_denovo</i> | 56123931                | C/T  | NA                 | NA                            | NA                 |
| <i>Desi_wild_56134153</i> | NA                                  | <i>Ca_desi_denovo</i> | 56134153                | A/C  | NA                 | NA                            | NA                 |
| <i>Desi_wild_56134725</i> | NA                                  | <i>Ca_desi_denovo</i> | 56134725                | C/G  | NA                 | NA                            | NA                 |
| <i>Desi_wild_56155334</i> | NA                                  | <i>Ca_desi_denovo</i> | 56155334                | A/C  | NA                 | NA                            | NA                 |
| <i>Desi_wild_56155335</i> | NA                                  | <i>Ca_desi_denovo</i> | 56155335                | G/T  | NA                 | NA                            | NA                 |
| <i>Desi_wild_56161338</i> | NA                                  | <i>Ca_desi_denovo</i> | 56161338                | C/G  | NA                 | NA                            | NA                 |
| <i>Desi_wild_56161342</i> | NA                                  | <i>Ca_desi_denovo</i> | 56161342                | C/G  | NA                 | NA                            | NA                 |
| <i>Desi_wild_56165045</i> | NA                                  | <i>Ca_desi_denovo</i> | 56165045                | C/G  | NA                 | NA                            | NA                 |
| <i>Desi_wild_56165054</i> | NA                                  | <i>Ca_desi_denovo</i> | 56165054                | A/G  | NA                 | NA                            | NA                 |
| <i>Desi_wild_56165191</i> | NA                                  | <i>Ca_desi_denovo</i> | 56165191                | G/T  | NA                 | NA                            | NA                 |
| <i>Desi_wild_56171301</i> | NA                                  | <i>Ca_desi_denovo</i> | 56171301                | C/T  | NA                 | NA                            | NA                 |
| <i>Desi_wild_56187920</i> | NA                                  | <i>Ca_desi_denovo</i> | 56187920                | C/G  | NA                 | NA                            | NA                 |
| <i>Desi_wild_56187953</i> | NA                                  | <i>Ca_desi_denovo</i> | 56187953                | C/T  | NA                 | NA                            | NA                 |
| <i>Desi_wild_56199620</i> | NA                                  | <i>Ca_desi_denovo</i> | 56199620                | C/G  | NA                 | NA                            | NA                 |
| <i>Desi_wild_56199622</i> | NA                                  | <i>Ca_desi_denovo</i> | 56199622                | C/T  | NA                 | NA                            | NA                 |
| <i>Desi_wild_56203927</i> | NA                                  | <i>Ca_desi_denovo</i> | 56203927                | A/G  | NA                 | NA                            | NA                 |
| <i>Desi_wild_56203933</i> | NA                                  | <i>Ca_desi_denovo</i> | 56203933                | A/G  | NA                 | NA                            | NA                 |
| <i>Desi_wild_56210103</i> | NA                                  | <i>Ca_desi_denovo</i> | 56210103                | G/T  | NA                 | NA                            | NA                 |
| <i>Desi_wild_56229580</i> | NA                                  | <i>Ca_desi_denovo</i> | 56229580                | C/G  | NA                 | NA                            | NA                 |
| <i>Desi_wild_56229586</i> | NA                                  | <i>Ca_desi_denovo</i> | 56229586                | A/G  | NA                 | NA                            | NA                 |
| <i>Desi_wild_56229592</i> | NA                                  | <i>Ca_desi_denovo</i> | 56229592                | C/G  | NA                 | NA                            | NA                 |
| <i>Desi_wild_56229640</i> | NA                                  | <i>Ca_desi_denovo</i> | 56229640                | A/G  | NA                 | NA                            | NA                 |
| <i>Desi_wild_56232933</i> | NA                                  | <i>Ca_desi_denovo</i> | 56232933                | G/T  | NA                 | NA                            | NA                 |
| <i>Desi_wild_56232967</i> | NA                                  | <i>Ca_desi_denovo</i> | 56232967                | A/T  | NA                 | NA                            | NA                 |
| <i>Desi_wild_56243684</i> | NA                                  | <i>Ca_desi_denovo</i> | 56243684                | C/G  | NA                 | NA                            | NA                 |
| <i>Desi_wild_56248794</i> | NA                                  | <i>Ca_desi_denovo</i> | 56248794                | G/T  | NA                 | NA                            | NA                 |
| <i>Desi_wild_56273442</i> | NA                                  | <i>Ca_desi_denovo</i> | 56273442                | G/T  | NA                 | NA                            | NA                 |
| <i>Desi_wild_56274149</i> | NA                                  | <i>Ca_desi_denovo</i> | 56274149                | A/G  | NA                 | NA                            | NA                 |
| <i>Desi_wild_56274185</i> | NA                                  | <i>Ca_desi_denovo</i> | 56274185                | C/G  | NA                 | NA                            | NA                 |
| <i>Desi_wild_56291580</i> | NA                                  | <i>Ca_desi_denovo</i> | 56291580                | G/T  | NA                 | NA                            | NA                 |
| <i>Desi_wild_56292136</i> | NA                                  | <i>Ca_desi_denovo</i> | 56292136                | A/C  | NA                 | NA                            | NA                 |
| <i>Desi_wild_56293022</i> | NA                                  | <i>Ca_desi_denovo</i> | 56293022                | G/T  | NA                 | NA                            | NA                 |
| <i>Desi_wild_56293712</i> | NA                                  | <i>Ca_desi_denovo</i> | 56293712                | G/T  | NA                 | NA                            | NA                 |
| <i>Desi_wild_56295576</i> | NA                                  | <i>Ca_desi_denovo</i> | 56295576                | G/T  | NA                 | NA                            | NA                 |
| <i>Desi_wild_56300852</i> | NA                                  | <i>Ca_desi_denovo</i> | 56300852                | C/T  | NA                 | NA                            | NA                 |
| <i>Desi_wild_56304691</i> | NA                                  | <i>Ca_desi_denovo</i> | 56304691                | A/C  | NA                 | NA                            | NA                 |
| <i>Desi_wild_56304922</i> | NA                                  | <i>Ca_desi_denovo</i> | 56304922                | G/T  | NA                 | NA                            | NA                 |
| <i>Desi_wild_56305098</i> | NA                                  | <i>Ca_desi_denovo</i> | 56305098                | G/T  | NA                 | NA                            | NA                 |
| <i>Desi_wild_56307811</i> | NA                                  | <i>Ca_desi_denovo</i> | 56307811                | G/T  | NA                 | NA                            | NA                 |
| <i>Desi_wild_56310409</i> | NA                                  | <i>Ca_desi_denovo</i> | 56310409                | A/G  | NA                 | NA                            | NA                 |
| <i>Desi_wild_56313620</i> | NA                                  | <i>Ca_desi_denovo</i> | 56313620                | A/C  | NA                 | NA                            | NA                 |
| <i>Desi_wild_56313621</i> | NA                                  | <i>Ca_desi_denovo</i> | 56313621                | G/T  | NA                 | NA                            | NA                 |
| <i>Desi_wild_56318871</i> | NA                                  | <i>Ca_desi_denovo</i> | 56318871                | A/G  | NA                 | NA                            | NA                 |
| <i>Desi_wild_56319572</i> | NA                                  | <i>Ca_desi_denovo</i> | 56319572                | A/C  | NA                 | NA                            | NA                 |

| SNP IDs                   | NCBI dbSNP accession IDs (NCBI_SS#) | Chromosomes           | Physical positions (bp) | SNPs | Gene accession IDs | Sequence components of genome | Putative functions |
|---------------------------|-------------------------------------|-----------------------|-------------------------|------|--------------------|-------------------------------|--------------------|
| <i>Desi_wild_56331312</i> | NA                                  | <i>Ca_desi_denovo</i> | 56331312                | G/T  | NA                 | NA                            | NA                 |
| <i>Desi_wild_56332983</i> | NA                                  | <i>Ca_desi_denovo</i> | 56332983                | A/T  | NA                 | NA                            | NA                 |
| <i>Desi_wild_56332992</i> | NA                                  | <i>Ca_desi_denovo</i> | 56332992                | A/G  | NA                 | NA                            | NA                 |
| <i>Desi_wild_56333004</i> | NA                                  | <i>Ca_desi_denovo</i> | 56333004                | C/T  | NA                 | NA                            | NA                 |
| <i>Desi_wild_56335783</i> | NA                                  | <i>Ca_desi_denovo</i> | 56335783                | C/T  | NA                 | NA                            | NA                 |
| <i>Desi_wild_56335805</i> | NA                                  | <i>Ca_desi_denovo</i> | 56335805                | C/T  | NA                 | NA                            | NA                 |
| <i>Desi_wild_56339659</i> | NA                                  | <i>Ca_desi_denovo</i> | 56339659                | A/C  | NA                 | NA                            | NA                 |
| <i>Desi_wild_56344113</i> | NA                                  | <i>Ca_desi_denovo</i> | 56344113                | G/T  | NA                 | NA                            | NA                 |
| <i>Desi_wild_56349885</i> | NA                                  | <i>Ca_desi_denovo</i> | 56349885                | A/G  | NA                 | NA                            | NA                 |
| <i>Desi_wild_56352321</i> | NA                                  | <i>Ca_desi_denovo</i> | 56352321                | A/C  | NA                 | NA                            | NA                 |
| <i>Desi_wild_56352377</i> | NA                                  | <i>Ca_desi_denovo</i> | 56352377                | C/G  | NA                 | NA                            | NA                 |
| <i>Desi_wild_56355654</i> | NA                                  | <i>Ca_desi_denovo</i> | 56355654                | C/T  | NA                 | NA                            | NA                 |
| <i>Desi_wild_56356249</i> | NA                                  | <i>Ca_desi_denovo</i> | 56356249                | A/T  | NA                 | NA                            | NA                 |
| <i>Desi_wild_56360767</i> | NA                                  | <i>Ca_desi_denovo</i> | 56360767                | G/T  | NA                 | NA                            | NA                 |
| <i>Desi_wild_56378400</i> | NA                                  | <i>Ca_desi_denovo</i> | 56378400                | A/G  | NA                 | NA                            | NA                 |
| <i>Desi_wild_56378424</i> | NA                                  | <i>Ca_desi_denovo</i> | 56378424                | C/G  | NA                 | NA                            | NA                 |
| <i>Desi_wild_56386945</i> | NA                                  | <i>Ca_desi_denovo</i> | 56386945                | G/T  | NA                 | NA                            | NA                 |
| <i>Desi_wild_56389053</i> | NA                                  | <i>Ca_desi_denovo</i> | 56389053                | C/T  | NA                 | NA                            | NA                 |
| <i>Desi_wild_56392867</i> | NA                                  | <i>Ca_desi_denovo</i> | 56392867                | A/G  | NA                 | NA                            | NA                 |
| <i>Desi_wild_56398401</i> | NA                                  | <i>Ca_desi_denovo</i> | 56398401                | A/G  | NA                 | NA                            | NA                 |
| <i>Desi_wild_56398407</i> | NA                                  | <i>Ca_desi_denovo</i> | 56398407                | C/T  | NA                 | NA                            | NA                 |
| <i>Desi_wild_56401009</i> | NA                                  | <i>Ca_desi_denovo</i> | 56401009                | C/T  | NA                 | NA                            | NA                 |
| <i>Desi_wild_56401037</i> | NA                                  | <i>Ca_desi_denovo</i> | 56401037                | A/G  | NA                 | NA                            | NA                 |
| <i>Desi_wild_56401038</i> | NA                                  | <i>Ca_desi_denovo</i> | 56401038                | A/C  | NA                 | NA                            | NA                 |
| <i>Desi_wild_56401039</i> | NA                                  | <i>Ca_desi_denovo</i> | 56401039                | A/T  | NA                 | NA                            | NA                 |
| <i>Desi_wild_56405332</i> | NA                                  | <i>Ca_desi_denovo</i> | 56405332                | C/T  | NA                 | NA                            | NA                 |
| <i>Desi_wild_56405371</i> | NA                                  | <i>Ca_desi_denovo</i> | 56405371                | A/G  | NA                 | NA                            | NA                 |
| <i>Desi_wild_56414335</i> | NA                                  | <i>Ca_desi_denovo</i> | 56414335                | A/C  | NA                 | NA                            | NA                 |
| <i>Desi_wild_56415782</i> | NA                                  | <i>Ca_desi_denovo</i> | 56415782                | C/T  | NA                 | NA                            | NA                 |
| <i>Desi_wild_56416571</i> | NA                                  | <i>Ca_desi_denovo</i> | 56416571                | G/T  | NA                 | NA                            | NA                 |
| <i>Desi_wild_56422849</i> | NA                                  | <i>Ca_desi_denovo</i> | 56422849                | A/T  | NA                 | NA                            | NA                 |
| <i>Desi_wild_56426058</i> | NA                                  | <i>Ca_desi_denovo</i> | 56426058                | A/G  | NA                 | NA                            | NA                 |
| <i>Desi_wild_56430129</i> | NA                                  | <i>Ca_desi_denovo</i> | 56430129                | G/T  | NA                 | NA                            | NA                 |
| <i>Desi_wild_56437143</i> | NA                                  | <i>Ca_desi_denovo</i> | 56437143                | C/T  | NA                 | NA                            | NA                 |
| <i>Desi_wild_56437218</i> | NA                                  | <i>Ca_desi_denovo</i> | 56437218                | G/T  | NA                 | NA                            | NA                 |
| <i>Desi_wild_56437402</i> | NA                                  | <i>Ca_desi_denovo</i> | 56437402                | A/C  | NA                 | NA                            | NA                 |
| <i>Desi_wild_56441248</i> | NA                                  | <i>Ca_desi_denovo</i> | 56441248                | A/T  | NA                 | NA                            | NA                 |
| <i>Desi_wild_56442930</i> | NA                                  | <i>Ca_desi_denovo</i> | 56442930                | A/T  | NA                 | NA                            | NA                 |
| <i>Desi_wild_56449172</i> | NA                                  | <i>Ca_desi_denovo</i> | 56449172                | C/G  | NA                 | NA                            | NA                 |
| <i>Desi_wild_56449206</i> | NA                                  | <i>Ca_desi_denovo</i> | 56449206                | C/G  | NA                 | NA                            | NA                 |
| <i>Desi_wild_56449304</i> | NA                                  | <i>Ca_desi_denovo</i> | 56449304                | A/C  | NA                 | NA                            | NA                 |
| <i>Desi_wild_56451125</i> | NA                                  | <i>Ca_desi_denovo</i> | 56451125                | A/G  | NA                 | NA                            | NA                 |
| <i>Desi_wild_56453678</i> | NA                                  | <i>Ca_desi_denovo</i> | 56453678                | A/G  | NA                 | NA                            | NA                 |
| <i>Desi_wild_56458876</i> | NA                                  | <i>Ca_desi_denovo</i> | 56458876                | A/G  | NA                 | NA                            | NA                 |

| SNP IDs                   | NCBI dbSNP accession IDs (NCBI_SS#) | Chromosomes           | Physical positions (bp) | SNPs | Gene accession IDs | Sequence components of genome | Putative functions |
|---------------------------|-------------------------------------|-----------------------|-------------------------|------|--------------------|-------------------------------|--------------------|
| <i>Desi_wild_56468897</i> | NA                                  | <i>Ca_desi_denovo</i> | 56468897                | G/T  | NA                 | NA                            | NA                 |
| <i>Desi_wild_56477604</i> | NA                                  | <i>Ca_desi_denovo</i> | 56477604                | A/G  | NA                 | NA                            | NA                 |
| <i>Desi_wild_56477643</i> | NA                                  | <i>Ca_desi_denovo</i> | 56477643                | A/G  | NA                 | NA                            | NA                 |
| <i>Desi_wild_56479849</i> | NA                                  | <i>Ca_desi_denovo</i> | 56479849                | A/T  | NA                 | NA                            | NA                 |
| <i>Desi_wild_56486981</i> | NA                                  | <i>Ca_desi_denovo</i> | 56486981                | A/C  | NA                 | NA                            | NA                 |
| <i>Desi_wild_56492853</i> | NA                                  | <i>Ca_desi_denovo</i> | 56492853                | C/G  | NA                 | NA                            | NA                 |
| <i>Desi_wild_56492872</i> | NA                                  | <i>Ca_desi_denovo</i> | 56492872                | A/C  | NA                 | NA                            | NA                 |
| <i>Desi_wild_56492874</i> | NA                                  | <i>Ca_desi_denovo</i> | 56492874                | C/G  | NA                 | NA                            | NA                 |
| <i>Desi_wild_56492907</i> | NA                                  | <i>Ca_desi_denovo</i> | 56492907                | C/G  | NA                 | NA                            | NA                 |
| <i>Desi_wild_56494418</i> | NA                                  | <i>Ca_desi_denovo</i> | 56494418                | C/T  | NA                 | NA                            | NA                 |
| <i>Desi_wild_56494454</i> | NA                                  | <i>Ca_desi_denovo</i> | 56494454                | C/G  | NA                 | NA                            | NA                 |
| <i>Desi_wild_56501028</i> | NA                                  | <i>Ca_desi_denovo</i> | 56501028                | C/T  | NA                 | NA                            | NA                 |
| <i>Desi_wild_56501044</i> | NA                                  | <i>Ca_desi_denovo</i> | 56501044                | C/T  | NA                 | NA                            | NA                 |
| <i>Desi_wild_56501852</i> | NA                                  | <i>Ca_desi_denovo</i> | 56501852                | C/G  | NA                 | NA                            | NA                 |
| <i>Desi_wild_56501985</i> | NA                                  | <i>Ca_desi_denovo</i> | 56501985                | C/T  | NA                 | NA                            | NA                 |
| <i>Desi_wild_56502021</i> | NA                                  | <i>Ca_desi_denovo</i> | 56502021                | G/T  | NA                 | NA                            | NA                 |
| <i>Desi_wild_56505697</i> | NA                                  | <i>Ca_desi_denovo</i> | 56505697                | A/T  | NA                 | NA                            | NA                 |
| <i>Desi_wild_56508594</i> | NA                                  | <i>Ca_desi_denovo</i> | 56508594                | C/T  | NA                 | NA                            | NA                 |
| <i>Desi_wild_56508603</i> | NA                                  | <i>Ca_desi_denovo</i> | 56508603                | C/T  | NA                 | NA                            | NA                 |
| <i>Desi_wild_56511742</i> | NA                                  | <i>Ca_desi_denovo</i> | 56511742                | A/G  | NA                 | NA                            | NA                 |
| <i>Desi_wild_56511747</i> | NA                                  | <i>Ca_desi_denovo</i> | 56511747                | A/C  | NA                 | NA                            | NA                 |
| <i>Desi_wild_56514674</i> | NA                                  | <i>Ca_desi_denovo</i> | 56514674                | G/T  | NA                 | NA                            | NA                 |
| <i>Desi_wild_56514980</i> | NA                                  | <i>Ca_desi_denovo</i> | 56514980                | C/T  | NA                 | NA                            | NA                 |
| <i>Desi_wild_56519836</i> | NA                                  | <i>Ca_desi_denovo</i> | 56519836                | G/T  | NA                 | NA                            | NA                 |
| <i>Desi_wild_56522645</i> | NA                                  | <i>Ca_desi_denovo</i> | 56522645                | A/C  | NA                 | NA                            | NA                 |
| <i>Desi_wild_56524206</i> | NA                                  | <i>Ca_desi_denovo</i> | 56524206                | C/T  | NA                 | NA                            | NA                 |
| <i>Desi_wild_56524398</i> | NA                                  | <i>Ca_desi_denovo</i> | 56524398                | C/T  | NA                 | NA                            | NA                 |
| <i>Desi_wild_56524477</i> | NA                                  | <i>Ca_desi_denovo</i> | 56524477                | C/T  | NA                 | NA                            | NA                 |
| <i>Desi_wild_56524480</i> | NA                                  | <i>Ca_desi_denovo</i> | 56524480                | C/T  | NA                 | NA                            | NA                 |
| <i>Desi_wild_56524782</i> | NA                                  | <i>Ca_desi_denovo</i> | 56524782                | G/T  | NA                 | NA                            | NA                 |
| <i>Desi_wild_56527800</i> | NA                                  | <i>Ca_desi_denovo</i> | 56527800                | C/G  | NA                 | NA                            | NA                 |
| <i>Desi_wild_56528356</i> | NA                                  | <i>Ca_desi_denovo</i> | 56528356                | G/T  | NA                 | NA                            | NA                 |
| <i>Desi_wild_56536114</i> | NA                                  | <i>Ca_desi_denovo</i> | 56536114                | C/G  | NA                 | NA                            | NA                 |
| <i>Desi_wild_56541414</i> | NA                                  | <i>Ca_desi_denovo</i> | 56541414                | C/T  | NA                 | NA                            | NA                 |
| <i>Desi_wild_56541444</i> | NA                                  | <i>Ca_desi_denovo</i> | 56541444                | A/G  | NA                 | NA                            | NA                 |
| <i>Desi_wild_56541447</i> | NA                                  | <i>Ca_desi_denovo</i> | 56541447                | C/T  | NA                 | NA                            | NA                 |
| <i>Desi_wild_56541471</i> | NA                                  | <i>Ca_desi_denovo</i> | 56541471                | C/T  | NA                 | NA                            | NA                 |
| <i>Desi_wild_56548753</i> | NA                                  | <i>Ca_desi_denovo</i> | 56548753                | A/G  | NA                 | NA                            | NA                 |
| <i>Desi_wild_56548815</i> | NA                                  | <i>Ca_desi_denovo</i> | 56548815                | A/G  | NA                 | NA                            | NA                 |
| <i>Desi_wild_56555975</i> | NA                                  | <i>Ca_desi_denovo</i> | 56555975                | A/C  | NA                 | NA                            | NA                 |
| <i>Desi_wild_56555977</i> | NA                                  | <i>Ca_desi_denovo</i> | 56555977                | A/G  | NA                 | NA                            | NA                 |
| <i>Desi_wild_56555978</i> | NA                                  | <i>Ca_desi_denovo</i> | 56555978                | A/T  | NA                 | NA                            | NA                 |
| <i>Desi_wild_56555979</i> | NA                                  | <i>Ca_desi_denovo</i> | 56555979                | A/C  | NA                 | NA                            | NA                 |
| <i>Desi_wild_56563056</i> | NA                                  | <i>Ca_desi_denovo</i> | 56563056                | A/G  | NA                 | NA                            | NA                 |

| SNP IDs                   | NCBI dbSNP accession IDs (NCBI_SS#) | Chromosomes           | Physical positions (bp) | SNPs | Gene accession IDs | Sequence components of genome | Putative functions |
|---------------------------|-------------------------------------|-----------------------|-------------------------|------|--------------------|-------------------------------|--------------------|
| <i>Desi_wild_56575815</i> | NA                                  | <i>Ca_desi_denovo</i> | 56575815                | G/T  | NA                 | NA                            | NA                 |
| <i>Desi_wild_56575824</i> | NA                                  | <i>Ca_desi_denovo</i> | 56575824                | G/T  | NA                 | NA                            | NA                 |
| <i>Desi_wild_56577810</i> | NA                                  | <i>Ca_desi_denovo</i> | 56577810                | C/G  | NA                 | NA                            | NA                 |
| <i>Desi_wild_56604558</i> | NA                                  | <i>Ca_desi_denovo</i> | 56604558                | C/T  | NA                 | NA                            | NA                 |
| <i>Desi_wild_56612452</i> | NA                                  | <i>Ca_desi_denovo</i> | 56612452                | C/G  | NA                 | NA                            | NA                 |
| <i>Desi_wild_56612455</i> | NA                                  | <i>Ca_desi_denovo</i> | 56612455                | C/T  | NA                 | NA                            | NA                 |
| <i>Desi_wild_56623464</i> | NA                                  | <i>Ca_desi_denovo</i> | 56623464                | C/T  | NA                 | NA                            | NA                 |
| <i>Desi_wild_56625170</i> | NA                                  | <i>Ca_desi_denovo</i> | 56625170                | G/T  | NA                 | NA                            | NA                 |
| <i>Desi_wild_56632953</i> | NA                                  | <i>Ca_desi_denovo</i> | 56632953                | A/C  | NA                 | NA                            | NA                 |
| <i>Desi_wild_56632971</i> | NA                                  | <i>Ca_desi_denovo</i> | 56632971                | C/T  | NA                 | NA                            | NA                 |
| <i>Desi_wild_56633320</i> | NA                                  | <i>Ca_desi_denovo</i> | 56633320                | A/G  | NA                 | NA                            | NA                 |
| <i>Desi_wild_56635215</i> | NA                                  | <i>Ca_desi_denovo</i> | 56635215                | A/C  | NA                 | NA                            | NA                 |
| <i>Desi_wild_56642676</i> | NA                                  | <i>Ca_desi_denovo</i> | 56642676                | G/T  | NA                 | NA                            | NA                 |
| <i>Desi_wild_56642718</i> | NA                                  | <i>Ca_desi_denovo</i> | 56642718                | A/C  | NA                 | NA                            | NA                 |
| <i>Desi_wild_56643304</i> | NA                                  | <i>Ca_desi_denovo</i> | 56643304                | A/C  | NA                 | NA                            | NA                 |
| <i>Desi_wild_56643306</i> | NA                                  | <i>Ca_desi_denovo</i> | 56643306                | A/C  | NA                 | NA                            | NA                 |
| <i>Desi_wild_56645396</i> | NA                                  | <i>Ca_desi_denovo</i> | 56645396                | G/T  | NA                 | NA                            | NA                 |
| <i>Desi_wild_56647677</i> | NA                                  | <i>Ca_desi_denovo</i> | 56647677                | G/T  | NA                 | NA                            | NA                 |
| <i>Desi_wild_56653680</i> | NA                                  | <i>Ca_desi_denovo</i> | 56653680                | A/C  | NA                 | NA                            | NA                 |
| <i>Desi_wild_56653681</i> | NA                                  | <i>Ca_desi_denovo</i> | 56653681                | C/G  | NA                 | NA                            | NA                 |
| <i>Desi_wild_56660659</i> | NA                                  | <i>Ca_desi_denovo</i> | 56660659                | C/T  | NA                 | NA                            | NA                 |
| <i>Desi_wild_56661842</i> | NA                                  | <i>Ca_desi_denovo</i> | 56661842                | C/T  | NA                 | NA                            | NA                 |
| <i>Desi_wild_56667300</i> | NA                                  | <i>Ca_desi_denovo</i> | 56667300                | C/G  | NA                 | NA                            | NA                 |
| <i>Desi_wild_56676686</i> | NA                                  | <i>Ca_desi_denovo</i> | 56676686                | A/G  | NA                 | NA                            | NA                 |
| <i>Desi_wild_56676944</i> | NA                                  | <i>Ca_desi_denovo</i> | 56676944                | G/T  | NA                 | NA                            | NA                 |
| <i>Desi_wild_56681889</i> | NA                                  | <i>Ca_desi_denovo</i> | 56681889                | C/G  | NA                 | NA                            | NA                 |
| <i>Desi_wild_56682654</i> | NA                                  | <i>Ca_desi_denovo</i> | 56682654                | C/T  | NA                 | NA                            | NA                 |
| <i>Desi_wild_56682655</i> | NA                                  | <i>Ca_desi_denovo</i> | 56682655                | A/G  | NA                 | NA                            | NA                 |
| <i>Desi_wild_56689758</i> | NA                                  | <i>Ca_desi_denovo</i> | 56689758                | C/T  | NA                 | NA                            | NA                 |
| <i>Desi_wild_56689775</i> | NA                                  | <i>Ca_desi_denovo</i> | 56689775                | C/G  | NA                 | NA                            | NA                 |
| <i>Desi_wild_56694767</i> | NA                                  | <i>Ca_desi_denovo</i> | 56694767                | C/T  | NA                 | NA                            | NA                 |
| <i>Desi_wild_56709097</i> | NA                                  | <i>Ca_desi_denovo</i> | 56709097                | C/T  | NA                 | NA                            | NA                 |
| <i>Desi_wild_56709936</i> | NA                                  | <i>Ca_desi_denovo</i> | 56709936                | A/G  | NA                 | NA                            | NA                 |
| <i>Desi_wild_56711061</i> | NA                                  | <i>Ca_desi_denovo</i> | 56711061                | C/T  | NA                 | NA                            | NA                 |
| <i>Desi_wild_56711092</i> | NA                                  | <i>Ca_desi_denovo</i> | 56711092                | A/G  | NA                 | NA                            | NA                 |
| <i>Desi_wild_56749833</i> | NA                                  | <i>Ca_desi_denovo</i> | 56749833                | G/T  | NA                 | NA                            | NA                 |
| <i>Desi_wild_56757688</i> | NA                                  | <i>Ca_desi_denovo</i> | 56757688                | C/G  | NA                 | NA                            | NA                 |
| <i>Desi_wild_56771822</i> | NA                                  | <i>Ca_desi_denovo</i> | 56771822                | G/T  | NA                 | NA                            | NA                 |
| <i>Desi_wild_56777062</i> | NA                                  | <i>Ca_desi_denovo</i> | 56777062                | A/T  | NA                 | NA                            | NA                 |
| <i>Desi_wild_56785632</i> | NA                                  | <i>Ca_desi_denovo</i> | 56785632                | C/T  | NA                 | NA                            | NA                 |
| <i>Desi_wild_56786706</i> | NA                                  | <i>Ca_desi_denovo</i> | 56786706                | C/G  | NA                 | NA                            | NA                 |
| <i>Desi_wild_56786711</i> | NA                                  | <i>Ca_desi_denovo</i> | 56786711                | A/C  | NA                 | NA                            | NA                 |
| <i>Desi_wild_56786952</i> | NA                                  | <i>Ca_desi_denovo</i> | 56786952                | A/T  | NA                 | NA                            | NA                 |
| <i>Desi_wild_56786954</i> | NA                                  | <i>Ca_desi_denovo</i> | 56786954                | A/G  | NA                 | NA                            | NA                 |

| SNP IDs                   | NCBI dbSNP accession IDs (NCBI_SS#) | Chromosomes           | Physical positions (bp) | SNPs | Gene accession IDs | Sequence components of genome | Putative functions |
|---------------------------|-------------------------------------|-----------------------|-------------------------|------|--------------------|-------------------------------|--------------------|
| <i>Desi_wild_56786961</i> | NA                                  | <i>Ca_desi_denovo</i> | 56786961                | A/C  | NA                 | NA                            | NA                 |
| <i>Desi_wild_56796133</i> | NA                                  | <i>Ca_desi_denovo</i> | 56796133                | G/T  | NA                 | NA                            | NA                 |
| <i>Desi_wild_56796168</i> | NA                                  | <i>Ca_desi_denovo</i> | 56796168                | C/G  | NA                 | NA                            | NA                 |
| <i>Desi_wild_56802124</i> | NA                                  | <i>Ca_desi_denovo</i> | 56802124                | G/T  | NA                 | NA                            | NA                 |
| <i>Desi_wild_56803356</i> | NA                                  | <i>Ca_desi_denovo</i> | 56803356                | G/T  | NA                 | NA                            | NA                 |
| <i>Desi_wild_56820097</i> | NA                                  | <i>Ca_desi_denovo</i> | 56820097                | G/T  | NA                 | NA                            | NA                 |
| <i>Desi_wild_56822224</i> | NA                                  | <i>Ca_desi_denovo</i> | 56822224                | A/C  | NA                 | NA                            | NA                 |
| <i>Desi_wild_56832653</i> | NA                                  | <i>Ca_desi_denovo</i> | 56832653                | C/G  | NA                 | NA                            | NA                 |
| <i>Desi_wild_56834606</i> | NA                                  | <i>Ca_desi_denovo</i> | 56834606                | G/T  | NA                 | NA                            | NA                 |
| <i>Desi_wild_56840175</i> | NA                                  | <i>Ca_desi_denovo</i> | 56840175                | G/T  | NA                 | NA                            | NA                 |
| <i>Desi_wild_56842139</i> | NA                                  | <i>Ca_desi_denovo</i> | 56842139                | A/G  | NA                 | NA                            | NA                 |
| <i>Desi_wild_56857308</i> | NA                                  | <i>Ca_desi_denovo</i> | 56857308                | A/G  | NA                 | NA                            | NA                 |
| <i>Desi_wild_56857389</i> | NA                                  | <i>Ca_desi_denovo</i> | 56857389                | C/G  | NA                 | NA                            | NA                 |
| <i>Desi_wild_56857813</i> | NA                                  | <i>Ca_desi_denovo</i> | 56857813                | A/T  | NA                 | NA                            | NA                 |
| <i>Desi_wild_56858614</i> | NA                                  | <i>Ca_desi_denovo</i> | 56858614                | C/T  | NA                 | NA                            | NA                 |
| <i>Desi_wild_56858631</i> | NA                                  | <i>Ca_desi_denovo</i> | 56858631                | A/G  | NA                 | NA                            | NA                 |
| <i>Desi_wild_56859437</i> | NA                                  | <i>Ca_desi_denovo</i> | 56859437                | G/T  | NA                 | NA                            | NA                 |
| <i>Desi_wild_56861838</i> | NA                                  | <i>Ca_desi_denovo</i> | 56861838                | G/T  | NA                 | NA                            | NA                 |
| <i>Desi_wild_56881492</i> | NA                                  | <i>Ca_desi_denovo</i> | 56881492                | C/G  | NA                 | NA                            | NA                 |
| <i>Desi_wild_56881504</i> | NA                                  | <i>Ca_desi_denovo</i> | 56881504                | C/G  | NA                 | NA                            | NA                 |
| <i>Desi_wild_56881513</i> | NA                                  | <i>Ca_desi_denovo</i> | 56881513                | C/G  | NA                 | NA                            | NA                 |
| <i>Desi_wild_56881525</i> | NA                                  | <i>Ca_desi_denovo</i> | 56881525                | C/T  | NA                 | NA                            | NA                 |
| <i>Desi_wild_56885674</i> | NA                                  | <i>Ca_desi_denovo</i> | 56885674                | A/G  | NA                 | NA                            | NA                 |
| <i>Desi_wild_56885680</i> | NA                                  | <i>Ca_desi_denovo</i> | 56885680                | C/T  | NA                 | NA                            | NA                 |
| <i>Desi_wild_56887961</i> | NA                                  | <i>Ca_desi_denovo</i> | 56887961                | A/C  | NA                 | NA                            | NA                 |
| <i>Desi_wild_56887963</i> | NA                                  | <i>Ca_desi_denovo</i> | 56887963                | C/G  | NA                 | NA                            | NA                 |
| <i>Desi_wild_56894868</i> | NA                                  | <i>Ca_desi_denovo</i> | 56894868                | A/C  | NA                 | NA                            | NA                 |
| <i>Desi_wild_56908289</i> | NA                                  | <i>Ca_desi_denovo</i> | 56908289                | A/G  | NA                 | NA                            | NA                 |
| <i>Desi_wild_56932365</i> | NA                                  | <i>Ca_desi_denovo</i> | 56932365                | A/G  | NA                 | NA                            | NA                 |
| <i>Desi_wild_56936282</i> | NA                                  | <i>Ca_desi_denovo</i> | 56936282                | C/T  | NA                 | NA                            | NA                 |
| <i>Desi_wild_56936289</i> | NA                                  | <i>Ca_desi_denovo</i> | 56936289                | A/G  | NA                 | NA                            | NA                 |
| <i>Desi_wild_56950748</i> | NA                                  | <i>Ca_desi_denovo</i> | 56950748                | G/T  | NA                 | NA                            | NA                 |
| <i>Desi_wild_56964336</i> | NA                                  | <i>Ca_desi_denovo</i> | 56964336                | A/C  | NA                 | NA                            | NA                 |
| <i>Desi_wild_56973963</i> | NA                                  | <i>Ca_desi_denovo</i> | 56973963                | A/G  | NA                 | NA                            | NA                 |
| <i>Desi_wild_56975779</i> | NA                                  | <i>Ca_desi_denovo</i> | 56975779                | A/C  | NA                 | NA                            | NA                 |
| <i>Desi_wild_56977889</i> | NA                                  | <i>Ca_desi_denovo</i> | 56977889                | A/C  | NA                 | NA                            | NA                 |
| <i>Desi_wild_56983589</i> | NA                                  | <i>Ca_desi_denovo</i> | 56983589                | C/G  | NA                 | NA                            | NA                 |
| <i>Desi_wild_56985808</i> | NA                                  | <i>Ca_desi_denovo</i> | 56985808                | A/G  | NA                 | NA                            | NA                 |
| <i>Desi_wild_56991221</i> | NA                                  | <i>Ca_desi_denovo</i> | 56991221                | A/T  | NA                 | NA                            | NA                 |
| <i>Desi_wild_56992686</i> | NA                                  | <i>Ca_desi_denovo</i> | 56992686                | G/T  | NA                 | NA                            | NA                 |
| <i>Desi_wild_57019623</i> | NA                                  | <i>Ca_desi_denovo</i> | 57019623                | G/T  | NA                 | NA                            | NA                 |
| <i>Desi_wild_57020508</i> | NA                                  | <i>Ca_desi_denovo</i> | 57020508                | A/G  | NA                 | NA                            | NA                 |
| <i>Desi_wild_57023044</i> | NA                                  | <i>Ca_desi_denovo</i> | 57023044                | G/T  | NA                 | NA                            | NA                 |
| <i>Desi_wild_57023056</i> | NA                                  | <i>Ca_desi_denovo</i> | 57023056                | C/G  | NA                 | NA                            | NA                 |



| SNP IDs                   | NCBI dbSNP accession IDs (NCBI_SS#) | Chromosomes           | Physical positions (bp) | SNPs | Gene accession IDs | Sequence components of genome | Putative functions |
|---------------------------|-------------------------------------|-----------------------|-------------------------|------|--------------------|-------------------------------|--------------------|
| <i>Desi_wild_57029365</i> | NA                                  | <i>Ca_desi_denovo</i> | 57029365                | A/C  | NA                 | NA                            | NA                 |
| <i>Desi_wild_57032085</i> | NA                                  | <i>Ca_desi_denovo</i> | 57032085                | A/G  | NA                 | NA                            | NA                 |
| <i>Desi_wild_57032089</i> | NA                                  | <i>Ca_desi_denovo</i> | 57032089                | C/G  | NA                 | NA                            | NA                 |
| <i>Desi_wild_57037802</i> | NA                                  | <i>Ca_desi_denovo</i> | 57037802                | G/T  | NA                 | NA                            | NA                 |
| <i>Desi_wild_57038307</i> | NA                                  | <i>Ca_desi_denovo</i> | 57038307                | C/T  | NA                 | NA                            | NA                 |
| <i>Desi_wild_57038346</i> | NA                                  | <i>Ca_desi_denovo</i> | 57038346                | A/G  | NA                 | NA                            | NA                 |
| <i>Desi_wild_57039875</i> | NA                                  | <i>Ca_desi_denovo</i> | 57039875                | C/T  | NA                 | NA                            | NA                 |
| <i>Desi_wild_57039876</i> | NA                                  | <i>Ca_desi_denovo</i> | 57039876                | A/G  | NA                 | NA                            | NA                 |
| <i>Desi_wild_57058072</i> | NA                                  | <i>Ca_desi_denovo</i> | 57058072                | G/T  | NA                 | NA                            | NA                 |
| <i>Desi_wild_57061914</i> | NA                                  | <i>Ca_desi_denovo</i> | 57061914                | A/G  | NA                 | NA                            | NA                 |
| <i>Desi_wild_57066664</i> | NA                                  | <i>Ca_desi_denovo</i> | 57066664                | C/T  | NA                 | NA                            | NA                 |
| <i>Desi_wild_57068139</i> | NA                                  | <i>Ca_desi_denovo</i> | 57068139                | A/G  | NA                 | NA                            | NA                 |
| <i>Desi_wild_57075417</i> | NA                                  | <i>Ca_desi_denovo</i> | 57075417                | A/G  | NA                 | NA                            | NA                 |
| <i>Desi_wild_57080895</i> | NA                                  | <i>Ca_desi_denovo</i> | 57080895                | C/T  | NA                 | NA                            | NA                 |
| <i>Desi_wild_57080926</i> | NA                                  | <i>Ca_desi_denovo</i> | 57080926                | A/G  | NA                 | NA                            | NA                 |
| <i>Desi_wild_57080950</i> | NA                                  | <i>Ca_desi_denovo</i> | 57080950                | C/G  | NA                 | NA                            | NA                 |
| <i>Desi_wild_57088161</i> | NA                                  | <i>Ca_desi_denovo</i> | 57088161                | C/T  | NA                 | NA                            | NA                 |
| <i>Desi_wild_57088184</i> | NA                                  | <i>Ca_desi_denovo</i> | 57088184                | C/T  | NA                 | NA                            | NA                 |
| <i>Desi_wild_57096308</i> | NA                                  | <i>Ca_desi_denovo</i> | 57096308                | A/C  | NA                 | NA                            | NA                 |
| <i>Desi_wild_57096309</i> | NA                                  | <i>Ca_desi_denovo</i> | 57096309                | C/G  | NA                 | NA                            | NA                 |
| <i>Desi_wild_57097797</i> | NA                                  | <i>Ca_desi_denovo</i> | 57097797                | A/C  | NA                 | NA                            | NA                 |
| <i>Desi_wild_57098627</i> | NA                                  | <i>Ca_desi_denovo</i> | 57098627                | G/T  | NA                 | NA                            | NA                 |
| <i>Desi_wild_57098633</i> | NA                                  | <i>Ca_desi_denovo</i> | 57098633                | G/T  | NA                 | NA                            | NA                 |
| <i>Desi_wild_57101424</i> | NA                                  | <i>Ca_desi_denovo</i> | 57101424                | G/T  | NA                 | NA                            | NA                 |
| <i>Desi_wild_57102959</i> | NA                                  | <i>Ca_desi_denovo</i> | 57102959                | G/T  | NA                 | NA                            | NA                 |
| <i>Desi_wild_57103569</i> | NA                                  | <i>Ca_desi_denovo</i> | 57103569                | A/G  | NA                 | NA                            | NA                 |
| <i>Desi_wild_57108863</i> | NA                                  | <i>Ca_desi_denovo</i> | 57108863                | G/T  | NA                 | NA                            | NA                 |
| <i>Desi_wild_57110477</i> | NA                                  | <i>Ca_desi_denovo</i> | 57110477                | C/G  | NA                 | NA                            | NA                 |
| <i>Desi_wild_57110489</i> | NA                                  | <i>Ca_desi_denovo</i> | 57110489                | G/T  | NA                 | NA                            | NA                 |
| <i>Desi_wild_57118718</i> | NA                                  | <i>Ca_desi_denovo</i> | 57118718                | G/T  | NA                 | NA                            | NA                 |
| <i>Desi_wild_57119416</i> | NA                                  | <i>Ca_desi_denovo</i> | 57119416                | G/T  | NA                 | NA                            | NA                 |
| <i>Desi_wild_57128958</i> | NA                                  | <i>Ca_desi_denovo</i> | 57128958                | C/G  | NA                 | NA                            | NA                 |
| <i>Desi_wild_57130858</i> | NA                                  | <i>Ca_desi_denovo</i> | 57130858                | G/T  | NA                 | NA                            | NA                 |
| <i>Desi_wild_57139077</i> | NA                                  | <i>Ca_desi_denovo</i> | 57139077                | G/T  | NA                 | NA                            | NA                 |
| <i>Desi_wild_57156030</i> | NA                                  | <i>Ca_desi_denovo</i> | 57156030                | C/T  | NA                 | NA                            | NA                 |
| <i>Desi_wild_57158798</i> | NA                                  | <i>Ca_desi_denovo</i> | 57158798                | C/T  | NA                 | NA                            | NA                 |
| <i>Desi_wild_57158800</i> | NA                                  | <i>Ca_desi_denovo</i> | 57158800                | A/C  | NA                 | NA                            | NA                 |
| <i>Desi_wild_57159210</i> | NA                                  | <i>Ca_desi_denovo</i> | 57159210                | A/G  | NA                 | NA                            | NA                 |
| <i>Desi_wild_57160970</i> | NA                                  | <i>Ca_desi_denovo</i> | 57160970                | C/G  | NA                 | NA                            | NA                 |
| <i>Desi_wild_57177924</i> | NA                                  | <i>Ca_desi_denovo</i> | 57177924                | G/T  | NA                 | NA                            | NA                 |
| <i>Desi_wild_57180088</i> | NA                                  | <i>Ca_desi_denovo</i> | 57180088                | C/G  | NA                 | NA                            | NA                 |
| <i>Desi_wild_57186309</i> | NA                                  | <i>Ca_desi_denovo</i> | 57186309                | G/T  | NA                 | NA                            | NA                 |
| <i>Desi_wild_57198446</i> | NA                                  | <i>Ca_desi_denovo</i> | 57198446                | A/T  | NA                 | NA                            | NA                 |
| <i>Desi_wild_57198861</i> | NA                                  | <i>Ca_desi_denovo</i> | 57198861                | G/T  | NA                 | NA                            | NA                 |

| SNP IDs                   | NCBI dbSNP accession IDs (NCBI_SS#) | Chromosomes           | Physical positions (bp) | SNPs | Gene accession IDs | Sequence components of genome | Putative functions |
|---------------------------|-------------------------------------|-----------------------|-------------------------|------|--------------------|-------------------------------|--------------------|
| <i>Desi_wild_57204740</i> | NA                                  | <i>Ca_desi_denovo</i> | 57204740                | G/T  | NA                 | NA                            | NA                 |
| <i>Desi_wild_57208183</i> | NA                                  | <i>Ca_desi_denovo</i> | 57208183                | C/G  | NA                 | NA                            | NA                 |
| <i>Desi_wild_57209796</i> | NA                                  | <i>Ca_desi_denovo</i> | 57209796                | C/G  | NA                 | NA                            | NA                 |
| <i>Desi_wild_57215819</i> | NA                                  | <i>Ca_desi_denovo</i> | 57215819                | C/T  | NA                 | NA                            | NA                 |
| <i>Desi_wild_57217581</i> | NA                                  | <i>Ca_desi_denovo</i> | 57217581                | G/T  | NA                 | NA                            | NA                 |
| <i>Desi_wild_57217874</i> | NA                                  | <i>Ca_desi_denovo</i> | 57217874                | G/T  | NA                 | NA                            | NA                 |
| <i>Desi_wild_57217892</i> | NA                                  | <i>Ca_desi_denovo</i> | 57217892                | C/G  | NA                 | NA                            | NA                 |
| <i>Desi_wild_57218694</i> | NA                                  | <i>Ca_desi_denovo</i> | 57218694                | G/T  | NA                 | NA                            | NA                 |
| <i>Desi_wild_57219202</i> | NA                                  | <i>Ca_desi_denovo</i> | 57219202                | C/G  | NA                 | NA                            | NA                 |
| <i>Desi_wild_57219220</i> | NA                                  | <i>Ca_desi_denovo</i> | 57219220                | A/C  | NA                 | NA                            | NA                 |
| <i>Desi_wild_57223439</i> | NA                                  | <i>Ca_desi_denovo</i> | 57223439                | G/T  | NA                 | NA                            | NA                 |
| <i>Desi_wild_57227569</i> | NA                                  | <i>Ca_desi_denovo</i> | 57227569                | G/T  | NA                 | NA                            | NA                 |
| <i>Desi_wild_57230151</i> | NA                                  | <i>Ca_desi_denovo</i> | 57230151                | C/G  | NA                 | NA                            | NA                 |
| <i>Desi_wild_57230168</i> | NA                                  | <i>Ca_desi_denovo</i> | 57230168                | A/G  | NA                 | NA                            | NA                 |
| <i>Desi_wild_57233585</i> | NA                                  | <i>Ca_desi_denovo</i> | 57233585                | A/G  | NA                 | NA                            | NA                 |
| <i>Desi_wild_57233644</i> | NA                                  | <i>Ca_desi_denovo</i> | 57233644                | A/G  | NA                 | NA                            | NA                 |
| <i>Desi_wild_57234935</i> | NA                                  | <i>Ca_desi_denovo</i> | 57234935                | A/G  | NA                 | NA                            | NA                 |
| <i>Desi_wild_57234958</i> | NA                                  | <i>Ca_desi_denovo</i> | 57234958                | G/T  | NA                 | NA                            | NA                 |
| <i>Desi_wild_57235144</i> | NA                                  | <i>Ca_desi_denovo</i> | 57235144                | G/T  | NA                 | NA                            | NA                 |
| <i>Desi_wild_57235992</i> | NA                                  | <i>Ca_desi_denovo</i> | 57235992                | A/C  | NA                 | NA                            | NA                 |
| <i>Desi_wild_57236738</i> | NA                                  | <i>Ca_desi_denovo</i> | 57236738                | A/G  | NA                 | NA                            | NA                 |
| <i>Desi_wild_57239332</i> | NA                                  | <i>Ca_desi_denovo</i> | 57239332                | G/T  | NA                 | NA                            | NA                 |
| <i>Desi_wild_57241409</i> | NA                                  | <i>Ca_desi_denovo</i> | 57241409                | C/T  | NA                 | NA                            | NA                 |
| <i>Desi_wild_57245375</i> | NA                                  | <i>Ca_desi_denovo</i> | 57245375                | A/C  | NA                 | NA                            | NA                 |
| <i>Desi_wild_57247476</i> | NA                                  | <i>Ca_desi_denovo</i> | 57247476                | C/T  | NA                 | NA                            | NA                 |
| <i>Desi_wild_57249802</i> | NA                                  | <i>Ca_desi_denovo</i> | 57249802                | A/T  | NA                 | NA                            | NA                 |
| <i>Desi_wild_57253032</i> | NA                                  | <i>Ca_desi_denovo</i> | 57253032                | G/T  | NA                 | NA                            | NA                 |
| <i>Desi_wild_57257438</i> | NA                                  | <i>Ca_desi_denovo</i> | 57257438                | T/C  | NA                 | NA                            | NA                 |
| <i>Desi_wild_57257439</i> | NA                                  | <i>Ca_desi_denovo</i> | 57257439                | C/G  | NA                 | NA                            | NA                 |
| <i>Desi_wild_57257469</i> | NA                                  | <i>Ca_desi_denovo</i> | 57257469                | C/A  | NA                 | NA                            | NA                 |
| <i>Desi_wild_57257492</i> | NA                                  | <i>Ca_desi_denovo</i> | 57257492                | G/A  | NA                 | NA                            | NA                 |
| <i>Desi_wild_57258958</i> | NA                                  | <i>Ca_desi_denovo</i> | 57258958                | A/C  | NA                 | NA                            | NA                 |
| <i>Desi_wild_57259758</i> | NA                                  | <i>Ca_desi_denovo</i> | 57259758                | A/G  | NA                 | NA                            | NA                 |
| <i>Desi_wild_57265595</i> | NA                                  | <i>Ca_desi_denovo</i> | 57265595                | A/G  | NA                 | NA                            | NA                 |
| <i>Desi_wild_57265614</i> | NA                                  | <i>Ca_desi_denovo</i> | 57265614                | A/C  | NA                 | NA                            | NA                 |
| <i>Desi_wild_57265616</i> | NA                                  | <i>Ca_desi_denovo</i> | 57265616                | A/G  | NA                 | NA                            | NA                 |
| <i>Desi_wild_57265670</i> | NA                                  | <i>Ca_desi_denovo</i> | 57265670                | A/G  | NA                 | NA                            | NA                 |
| <i>Desi_wild_57266070</i> | NA                                  | <i>Ca_desi_denovo</i> | 57266070                | A/G  | NA                 | NA                            | NA                 |
| <i>Desi_wild_57267799</i> | NA                                  | <i>Ca_desi_denovo</i> | 57267799                | C/T  | NA                 | NA                            | NA                 |
| <i>Desi_wild_57267813</i> | NA                                  | <i>Ca_desi_denovo</i> | 57267813                | A/T  | NA                 | NA                            | NA                 |
| <i>Desi_wild_57269657</i> | NA                                  | <i>Ca_desi_denovo</i> | 57269657                | A/G  | NA                 | NA                            | NA                 |
| <i>Desi_wild_57269687</i> | NA                                  | <i>Ca_desi_denovo</i> | 57269687                | A/G  | NA                 | NA                            | NA                 |
| <i>Desi_wild_57271501</i> | NA                                  | <i>Ca_desi_denovo</i> | 57271501                | C/T  | NA                 | NA                            | NA                 |
| <i>Desi_wild_57279989</i> | NA                                  | <i>Ca_desi_denovo</i> | 57279989                | A/G  | NA                 | NA                            | NA                 |

| SNP IDs                   | NCBI dbSNP accession IDs (NCBI_SS#) | Chromosomes           | Physical positions (bp) | SNPs | Gene accession IDs | Sequence components of genome | Putative functions |
|---------------------------|-------------------------------------|-----------------------|-------------------------|------|--------------------|-------------------------------|--------------------|
| <i>Desi_wild_57279993</i> | NA                                  | <i>Ca_desi_denovo</i> | 57279993                | C/T  | NA                 | NA                            | NA                 |
| <i>Desi_wild_57283542</i> | NA                                  | <i>Ca_desi_denovo</i> | 57283542                | A/T  | NA                 | NA                            | NA                 |
| <i>Desi_wild_57283562</i> | NA                                  | <i>Ca_desi_denovo</i> | 57283562                | A/G  | NA                 | NA                            | NA                 |
| <i>Desi_wild_57289600</i> | NA                                  | <i>Ca_desi_denovo</i> | 57289600                | C/T  | NA                 | NA                            | NA                 |
| <i>Desi_wild_57291435</i> | NA                                  | <i>Ca_desi_denovo</i> | 57291435                | C/T  | NA                 | NA                            | NA                 |
| <i>Desi_wild_57297379</i> | NA                                  | <i>Ca_desi_denovo</i> | 57297379                | A/G  | NA                 | NA                            | NA                 |
| <i>Desi_wild_57297569</i> | NA                                  | <i>Ca_desi_denovo</i> | 57297569                | A/C  | NA                 | NA                            | NA                 |
| <i>Desi_wild_57297591</i> | NA                                  | <i>Ca_desi_denovo</i> | 57297591                | C/T  | NA                 | NA                            | NA                 |
| <i>Desi_wild_57297754</i> | NA                                  | <i>Ca_desi_denovo</i> | 57297754                | C/T  | NA                 | NA                            | NA                 |
| <i>Desi_wild_57297766</i> | NA                                  | <i>Ca_desi_denovo</i> | 57297766                | A/G  | NA                 | NA                            | NA                 |
| <i>Desi_wild_57301986</i> | NA                                  | <i>Ca_desi_denovo</i> | 57301986                | C/T  | NA                 | NA                            | NA                 |
| <i>Desi_wild_57302379</i> | NA                                  | <i>Ca_desi_denovo</i> | 57302379                | A/G  | NA                 | NA                            | NA                 |
| <i>Desi_wild_57309422</i> | NA                                  | <i>Ca_desi_denovo</i> | 57309422                | A/G  | NA                 | NA                            | NA                 |
| <i>Desi_wild_57310037</i> | NA                                  | <i>Ca_desi_denovo</i> | 57310037                | A/T  | NA                 | NA                            | NA                 |
| <i>Desi_wild_57312394</i> | NA                                  | <i>Ca_desi_denovo</i> | 57312394                | A/G  | NA                 | NA                            | NA                 |
| <i>Desi_wild_57312657</i> | NA                                  | <i>Ca_desi_denovo</i> | 57312657                | A/G  | NA                 | NA                            | NA                 |
| <i>Desi_wild_57312673</i> | NA                                  | <i>Ca_desi_denovo</i> | 57312673                | C/G  | NA                 | NA                            | NA                 |
| <i>Desi_wild_57314849</i> | NA                                  | <i>Ca_desi_denovo</i> | 57314849                | A/C  | NA                 | NA                            | NA                 |
| <i>Desi_wild_57314895</i> | NA                                  | <i>Ca_desi_denovo</i> | 57314895                | A/G  | NA                 | NA                            | NA                 |
| <i>Desi_wild_57314908</i> | NA                                  | <i>Ca_desi_denovo</i> | 57314908                | C/T  | NA                 | NA                            | NA                 |
| <i>Desi_wild_57317820</i> | NA                                  | <i>Ca_desi_denovo</i> | 57317820                | A/G  | NA                 | NA                            | NA                 |
| <i>Desi_wild_57321482</i> | NA                                  | <i>Ca_desi_denovo</i> | 57321482                | C/T  | NA                 | NA                            | NA                 |
| <i>Desi_wild_57321515</i> | NA                                  | <i>Ca_desi_denovo</i> | 57321515                | A/G  | NA                 | NA                            | NA                 |
| <i>Desi_wild_57325525</i> | NA                                  | <i>Ca_desi_denovo</i> | 57325525                | A/T  | NA                 | NA                            | NA                 |
| <i>Desi_wild_57331542</i> | NA                                  | <i>Ca_desi_denovo</i> | 57331542                | A/G  | NA                 | NA                            | NA                 |
| <i>Desi_wild_57332451</i> | NA                                  | <i>Ca_desi_denovo</i> | 57332451                | C/T  | NA                 | NA                            | NA                 |
| <i>Desi_wild_57337196</i> | NA                                  | <i>Ca_desi_denovo</i> | 57337196                | A/G  | NA                 | NA                            | NA                 |
| <i>Desi_wild_57338180</i> | NA                                  | <i>Ca_desi_denovo</i> | 57338180                | A/G  | NA                 | NA                            | NA                 |
| <i>Desi_wild_57338205</i> | NA                                  | <i>Ca_desi_denovo</i> | 57338205                | A/G  | NA                 | NA                            | NA                 |
| <i>Desi_wild_57351041</i> | NA                                  | <i>Ca_desi_denovo</i> | 57351041                | G/C  | NA                 | NA                            | NA                 |
| <i>Desi_wild_57351042</i> | NA                                  | <i>Ca_desi_denovo</i> | 57351042                | C/A  | NA                 | NA                            | NA                 |
| <i>Desi_wild_57351043</i> | NA                                  | <i>Ca_desi_denovo</i> | 57351043                | G/A  | NA                 | NA                            | NA                 |
| <i>Desi_wild_57355195</i> | NA                                  | <i>Ca_desi_denovo</i> | 57355195                | A/T  | NA                 | NA                            | NA                 |
| <i>Desi_wild_57357013</i> | NA                                  | <i>Ca_desi_denovo</i> | 57357013                | A/G  | NA                 | NA                            | NA                 |
| <i>Desi_wild_57357019</i> | NA                                  | <i>Ca_desi_denovo</i> | 57357019                | A/G  | NA                 | NA                            | NA                 |
| <i>Desi_wild_57359547</i> | NA                                  | <i>Ca_desi_denovo</i> | 57359547                | A/G  | NA                 | NA                            | NA                 |
| <i>Desi_wild_57367300</i> | NA                                  | <i>Ca_desi_denovo</i> | 57367300                | A/T  | NA                 | NA                            | NA                 |
| <i>Desi_wild_57372461</i> | NA                                  | <i>Ca_desi_denovo</i> | 57372461                | A/G  | NA                 | NA                            | NA                 |
| <i>Desi_wild_57372465</i> | NA                                  | <i>Ca_desi_denovo</i> | 57372465                | A/T  | NA                 | NA                            | NA                 |
| <i>Desi_wild_57376934</i> | NA                                  | <i>Ca_desi_denovo</i> | 57376934                | A/T  | NA                 | NA                            | NA                 |
| <i>Desi_wild_57376956</i> | NA                                  | <i>Ca_desi_denovo</i> | 57376956                | A/C  | NA                 | NA                            | NA                 |
| <i>Desi_wild_57387822</i> | NA                                  | <i>Ca_desi_denovo</i> | 57387822                | C/T  | NA                 | NA                            | NA                 |
| <i>Desi_wild_57388533</i> | NA                                  | <i>Ca_desi_denovo</i> | 57388533                | C/T  | NA                 | NA                            | NA                 |
| <i>Desi_wild_57389223</i> | NA                                  | <i>Ca_desi_denovo</i> | 57389223                | A/T  | NA                 | NA                            | NA                 |

| SNP IDs                   | NCBI dbSNP accession IDs (NCBI_SS#) | Chromosomes           | Physical positions (bp) | SNPs | Gene accession IDs | Sequence components of genome | Putative functions |
|---------------------------|-------------------------------------|-----------------------|-------------------------|------|--------------------|-------------------------------|--------------------|
| <i>Desi_wild_57389970</i> | NA                                  | <i>Ca_desi_denovo</i> | 57389970                | A/G  | NA                 | NA                            | NA                 |
| <i>Desi_wild_57389978</i> | NA                                  | <i>Ca_desi_denovo</i> | 57389978                | C/T  | NA                 | NA                            | NA                 |
| <i>Desi_wild_57389990</i> | NA                                  | <i>Ca_desi_denovo</i> | 57389990                | A/C  | NA                 | NA                            | NA                 |
| <i>Desi_wild_57390008</i> | NA                                  | <i>Ca_desi_denovo</i> | 57390008                | A/C  | NA                 | NA                            | NA                 |
| <i>Desi_wild_57390265</i> | NA                                  | <i>Ca_desi_denovo</i> | 57390265                | A/G  | NA                 | NA                            | NA                 |
| <i>Desi_wild_57397339</i> | NA                                  | <i>Ca_desi_denovo</i> | 57397339                | A/G  | NA                 | NA                            | NA                 |
| <i>Desi_wild_57398149</i> | NA                                  | <i>Ca_desi_denovo</i> | 57398149                | A/T  | NA                 | NA                            | NA                 |
| <i>Desi_wild_57398177</i> | NA                                  | <i>Ca_desi_denovo</i> | 57398177                | A/G  | NA                 | NA                            | NA                 |
| <i>Desi_wild_57401499</i> | NA                                  | <i>Ca_desi_denovo</i> | 57401499                | C/T  | NA                 | NA                            | NA                 |
| <i>Desi_wild_57405948</i> | NA                                  | <i>Ca_desi_denovo</i> | 57405948                | A/G  | NA                 | NA                            | NA                 |
| <i>Desi_wild_57410736</i> | NA                                  | <i>Ca_desi_denovo</i> | 57410736                | A/G  | NA                 | NA                            | NA                 |
| <i>Desi_wild_57412080</i> | NA                                  | <i>Ca_desi_denovo</i> | 57412080                | G/T  | NA                 | NA                            | NA                 |
| <i>Desi_wild_57415487</i> | NA                                  | <i>Ca_desi_denovo</i> | 57415487                | C/T  | NA                 | NA                            | NA                 |
| <i>Desi_wild_57415774</i> | NA                                  | <i>Ca_desi_denovo</i> | 57415774                | A/C  | NA                 | NA                            | NA                 |
| <i>Desi_wild_57416365</i> | NA                                  | <i>Ca_desi_denovo</i> | 57416365                | G/T  | NA                 | NA                            | NA                 |
| <i>Desi_wild_57418269</i> | NA                                  | <i>Ca_desi_denovo</i> | 57418269                | C/T  | NA                 | NA                            | NA                 |
| <i>Desi_wild_57418272</i> | NA                                  | <i>Ca_desi_denovo</i> | 57418272                | C/T  | NA                 | NA                            | NA                 |
| <i>Desi_wild_57420363</i> | NA                                  | <i>Ca_desi_denovo</i> | 57420363                | C/T  | NA                 | NA                            | NA                 |
| <i>Desi_wild_57421115</i> | NA                                  | <i>Ca_desi_denovo</i> | 57421115                | G/T  | NA                 | NA                            | NA                 |
| <i>Desi_wild_57423105</i> | NA                                  | <i>Ca_desi_denovo</i> | 57423105                | A/G  | NA                 | NA                            | NA                 |
| <i>Desi_wild_57425731</i> | NA                                  | <i>Ca_desi_denovo</i> | 57425731                | A/G  | NA                 | NA                            | NA                 |
| <i>Desi_wild_57429205</i> | NA                                  | <i>Ca_desi_denovo</i> | 57429205                | C/T  | NA                 | NA                            | NA                 |
| <i>Desi_wild_57429210</i> | NA                                  | <i>Ca_desi_denovo</i> | 57429210                | C/T  | NA                 | NA                            | NA                 |
| <i>Desi_wild_57429290</i> | NA                                  | <i>Ca_desi_denovo</i> | 57429290                | A/G  | NA                 | NA                            | NA                 |
| <i>Desi_wild_57430237</i> | NA                                  | <i>Ca_desi_denovo</i> | 57430237                | G/T  | NA                 | NA                            | NA                 |
| <i>Desi_wild_57432828</i> | NA                                  | <i>Ca_desi_denovo</i> | 57432828                | A/T  | NA                 | NA                            | NA                 |
| <i>Desi_wild_57432875</i> | NA                                  | <i>Ca_desi_denovo</i> | 57432875                | C/A  | NA                 | NA                            | NA                 |
| <i>Desi_wild_57432881</i> | NA                                  | <i>Ca_desi_denovo</i> | 57432881                | C/T  | NA                 | NA                            | NA                 |
| <i>Desi_wild_57434544</i> | NA                                  | <i>Ca_desi_denovo</i> | 57434544                | C/T  | NA                 | NA                            | NA                 |
| <i>Desi_wild_57434551</i> | NA                                  | <i>Ca_desi_denovo</i> | 57434551                | A/T  | NA                 | NA                            | NA                 |
| <i>Desi_wild_57438441</i> | NA                                  | <i>Ca_desi_denovo</i> | 57438441                | A/G  | NA                 | NA                            | NA                 |
| <i>Desi_wild_57438512</i> | NA                                  | <i>Ca_desi_denovo</i> | 57438512                | C/G  | NA                 | NA                            | NA                 |
| <i>Desi_wild_57438519</i> | NA                                  | <i>Ca_desi_denovo</i> | 57438519                | T/C  | NA                 | NA                            | NA                 |
| <i>Desi_wild_57444712</i> | NA                                  | <i>Ca_desi_denovo</i> | 57444712                | A/G  | NA                 | NA                            | NA                 |
| <i>Desi_wild_57444750</i> | NA                                  | <i>Ca_desi_denovo</i> | 57444750                | A/G  | NA                 | NA                            | NA                 |
| <i>Desi_wild_57446193</i> | NA                                  | <i>Ca_desi_denovo</i> | 57446193                | A/G  | NA                 | NA                            | NA                 |
| <i>Desi_wild_57446198</i> | NA                                  | <i>Ca_desi_denovo</i> | 57446198                | A/G  | NA                 | NA                            | NA                 |
| <i>Desi_wild_57446243</i> | NA                                  | <i>Ca_desi_denovo</i> | 57446243                | A/G  | NA                 | NA                            | NA                 |
| <i>Desi_wild_57454198</i> | NA                                  | <i>Ca_desi_denovo</i> | 57454198                | A/G  | NA                 | NA                            | NA                 |
| <i>Desi_wild_57454207</i> | NA                                  | <i>Ca_desi_denovo</i> | 57454207                | A/C  | NA                 | NA                            | NA                 |
| <i>Desi_wild_57454209</i> | NA                                  | <i>Ca_desi_denovo</i> | 57454209                | C/T  | NA                 | NA                            | NA                 |
| <i>Desi_wild_57455135</i> | NA                                  | <i>Ca_desi_denovo</i> | 57455135                | G/A  | NA                 | NA                            | NA                 |
| <i>Desi_wild_57456162</i> | NA                                  | <i>Ca_desi_denovo</i> | 57456162                | T/A  | NA                 | NA                            | NA                 |
| <i>Desi_wild_57462195</i> | NA                                  | <i>Ca_desi_denovo</i> | 57462195                | C/T  | NA                 | NA                            | NA                 |

| SNP IDs                   | NCBI dbSNP accession IDs (NCBI_SS#) | Chromosomes           | Physical positions (bp) | SNPs | Gene accession IDs | Sequence components of genome | Putative functions |
|---------------------------|-------------------------------------|-----------------------|-------------------------|------|--------------------|-------------------------------|--------------------|
| <i>Desi_wild_57463131</i> | NA                                  | <i>Ca_desi_denovo</i> | 57463131                | C/T  | NA                 | NA                            | NA                 |
| <i>Desi_wild_57466781</i> | NA                                  | <i>Ca_desi_denovo</i> | 57466781                | A/G  | NA                 | NA                            | NA                 |
| <i>Desi_wild_57466797</i> | NA                                  | <i>Ca_desi_denovo</i> | 57466797                | A/G  | NA                 | NA                            | NA                 |
| <i>Desi_wild_57470919</i> | NA                                  | <i>Ca_desi_denovo</i> | 57470919                | A/C  | NA                 | NA                            | NA                 |
| <i>Desi_wild_57473462</i> | NA                                  | <i>Ca_desi_denovo</i> | 57473462                | T/A  | NA                 | NA                            | NA                 |
| <i>Desi_wild_57473723</i> | NA                                  | <i>Ca_desi_denovo</i> | 57473723                | C/T  | NA                 | NA                            | NA                 |
| <i>Desi_wild_57473776</i> | NA                                  | <i>Ca_desi_denovo</i> | 57473776                | T/C  | NA                 | NA                            | NA                 |
| <i>Desi_wild_57477199</i> | NA                                  | <i>Ca_desi_denovo</i> | 57477199                | A/C  | NA                 | NA                            | NA                 |
| <i>Desi_wild_57477930</i> | NA                                  | <i>Ca_desi_denovo</i> | 57477930                | A/T  | NA                 | NA                            | NA                 |
| <i>Desi_wild_57478467</i> | NA                                  | <i>Ca_desi_denovo</i> | 57478467                | A/T  | NA                 | NA                            | NA                 |
| <i>Desi_wild_57507219</i> | NA                                  | <i>Ca_desi_denovo</i> | 57507219                | C/G  | NA                 | NA                            | NA                 |
| <i>Desi_wild_57511047</i> | NA                                  | <i>Ca_desi_denovo</i> | 57511047                | A/G  | NA                 | NA                            | NA                 |
| <i>Desi_wild_57514843</i> | NA                                  | <i>Ca_desi_denovo</i> | 57514843                | G/T  | NA                 | NA                            | NA                 |
| <i>Desi_wild_57515564</i> | NA                                  | <i>Ca_desi_denovo</i> | 57515564                | G/T  | NA                 | NA                            | NA                 |
| <i>Desi_wild_57520479</i> | NA                                  | <i>Ca_desi_denovo</i> | 57520479                | C/G  | NA                 | NA                            | NA                 |
| <i>Desi_wild_57520663</i> | NA                                  | <i>Ca_desi_denovo</i> | 57520663                | A/G  | NA                 | NA                            | NA                 |
| <i>Desi_wild_57520666</i> | NA                                  | <i>Ca_desi_denovo</i> | 57520666                | C/T  | NA                 | NA                            | NA                 |
| <i>Desi_wild_57521785</i> | NA                                  | <i>Ca_desi_denovo</i> | 57521785                | A/G  | NA                 | NA                            | NA                 |
| <i>Desi_wild_57525132</i> | NA                                  | <i>Ca_desi_denovo</i> | 57525132                | C/T  | NA                 | NA                            | NA                 |
| <i>Desi_wild_57526658</i> | NA                                  | <i>Ca_desi_denovo</i> | 57526658                | C/T  | NA                 | NA                            | NA                 |
| <i>Desi_wild_57526661</i> | NA                                  | <i>Ca_desi_denovo</i> | 57526661                | A/G  | NA                 | NA                            | NA                 |
| <i>Desi_wild_57527488</i> | NA                                  | <i>Ca_desi_denovo</i> | 57527488                | C/G  | NA                 | NA                            | NA                 |
| <i>Desi_wild_57527749</i> | NA                                  | <i>Ca_desi_denovo</i> | 57527749                | C/G  | NA                 | NA                            | NA                 |
| <i>Desi_wild_57528525</i> | NA                                  | <i>Ca_desi_denovo</i> | 57528525                | G/T  | NA                 | NA                            | NA                 |
| <i>Desi_wild_57529250</i> | NA                                  | <i>Ca_desi_denovo</i> | 57529250                | A/G  | NA                 | NA                            | NA                 |
| <i>Desi_wild_57530334</i> | NA                                  | <i>Ca_desi_denovo</i> | 57530334                | C/T  | NA                 | NA                            | NA                 |
| <i>Desi_wild_57530337</i> | NA                                  | <i>Ca_desi_denovo</i> | 57530337                | C/G  | NA                 | NA                            | NA                 |
| <i>Desi_wild_57530343</i> | NA                                  | <i>Ca_desi_denovo</i> | 57530343                | A/G  | NA                 | NA                            | NA                 |
| <i>Desi_wild_57530388</i> | NA                                  | <i>Ca_desi_denovo</i> | 57530388                | C/T  | NA                 | NA                            | NA                 |
| <i>Desi_wild_57532038</i> | NA                                  | <i>Ca_desi_denovo</i> | 57532038                | A/G  | NA                 | NA                            | NA                 |
| <i>Desi_wild_57533664</i> | NA                                  | <i>Ca_desi_denovo</i> | 57533664                | C/T  | NA                 | NA                            | NA                 |
| <i>Desi_wild_57533679</i> | NA                                  | <i>Ca_desi_denovo</i> | 57533679                | C/G  | NA                 | NA                            | NA                 |
| <i>Desi_wild_57533709</i> | NA                                  | <i>Ca_desi_denovo</i> | 57533709                | A/G  | NA                 | NA                            | NA                 |
| <i>Desi_wild_57534054</i> | NA                                  | <i>Ca_desi_denovo</i> | 57534054                | A/G  | NA                 | NA                            | NA                 |
| <i>Desi_wild_57534378</i> | NA                                  | <i>Ca_desi_denovo</i> | 57534378                | C/G  | NA                 | NA                            | NA                 |
| <i>Desi_wild_57539692</i> | NA                                  | <i>Ca_desi_denovo</i> | 57539692                | C/G  | NA                 | NA                            | NA                 |
| <i>Desi_wild_57541687</i> | NA                                  | <i>Ca_desi_denovo</i> | 57541687                | C/G  | NA                 | NA                            | NA                 |
| <i>Desi_wild_57548561</i> | NA                                  | <i>Ca_desi_denovo</i> | 57548561                | C/T  | NA                 | NA                            | NA                 |
| <i>Desi_wild_57548605</i> | NA                                  | <i>Ca_desi_denovo</i> | 57548605                | G/T  | NA                 | NA                            | NA                 |
| <i>Desi_wild_57549604</i> | NA                                  | <i>Ca_desi_denovo</i> | 57549604                | C/T  | NA                 | NA                            | NA                 |
| <i>Desi_wild_57554688</i> | NA                                  | <i>Ca_desi_denovo</i> | 57554688                | C/T  | NA                 | NA                            | NA                 |
| <i>Desi_wild_57554712</i> | NA                                  | <i>Ca_desi_denovo</i> | 57554712                | A/G  | NA                 | NA                            | NA                 |
| <i>Desi_wild_57556245</i> | NA                                  | <i>Ca_desi_denovo</i> | 57556245                | A/G  | NA                 | NA                            | NA                 |
| <i>Desi_wild_57559053</i> | NA                                  | <i>Ca_desi_denovo</i> | 57559053                | A/G  | NA                 | NA                            | NA                 |

| SNP IDs                   | NCBI dbSNP accession IDs (NCBI_SS#) | Chromosomes           | Physical positions (bp) | SNPs | Gene accession IDs | Sequence components of genome | Putative functions |
|---------------------------|-------------------------------------|-----------------------|-------------------------|------|--------------------|-------------------------------|--------------------|
| <i>Desi_wild_57559807</i> | NA                                  | <i>Ca_desi_denovo</i> | 57559807                | C/G  | NA                 | NA                            | NA                 |
| <i>Desi_wild_57559819</i> | NA                                  | <i>Ca_desi_denovo</i> | 57559819                | C/G  | NA                 | NA                            | NA                 |
| <i>Desi_wild_57559822</i> | NA                                  | <i>Ca_desi_denovo</i> | 57559822                | C/T  | NA                 | NA                            | NA                 |
| <i>Desi_wild_57559837</i> | NA                                  | <i>Ca_desi_denovo</i> | 57559837                | A/G  | NA                 | NA                            | NA                 |
| <i>Desi_wild_57564393</i> | NA                                  | <i>Ca_desi_denovo</i> | 57564393                | A/G  | NA                 | NA                            | NA                 |
| <i>Desi_wild_57565495</i> | NA                                  | <i>Ca_desi_denovo</i> | 57565495                | C/T  | NA                 | NA                            | NA                 |
| <i>Desi_wild_57565516</i> | NA                                  | <i>Ca_desi_denovo</i> | 57565516                | C/G  | NA                 | NA                            | NA                 |
| <i>Desi_wild_57569179</i> | NA                                  | <i>Ca_desi_denovo</i> | 57569179                | A/G  | NA                 | NA                            | NA                 |
| <i>Desi_wild_57574513</i> | NA                                  | <i>Ca_desi_denovo</i> | 57574513                | C/T  | NA                 | NA                            | NA                 |
| <i>Desi_wild_57574530</i> | NA                                  | <i>Ca_desi_denovo</i> | 57574530                | C/G  | NA                 | NA                            | NA                 |
| <i>Desi_wild_57575365</i> | NA                                  | <i>Ca_desi_denovo</i> | 57575365                | C/T  | NA                 | NA                            | NA                 |
| <i>Desi_wild_57576367</i> | NA                                  | <i>Ca_desi_denovo</i> | 57576367                | C/T  | NA                 | NA                            | NA                 |
| <i>Desi_wild_57576552</i> | NA                                  | <i>Ca_desi_denovo</i> | 57576552                | C/G  | NA                 | NA                            | NA                 |
| <i>Desi_wild_57578491</i> | NA                                  | <i>Ca_desi_denovo</i> | 57578491                | A/G  | NA                 | NA                            | NA                 |
| <i>Desi_wild_57580122</i> | NA                                  | <i>Ca_desi_denovo</i> | 57580122                | C/T  | NA                 | NA                            | NA                 |
| <i>Desi_wild_57580294</i> | NA                                  | <i>Ca_desi_denovo</i> | 57580294                | A/G  | NA                 | NA                            | NA                 |
| <i>Desi_wild_57580375</i> | NA                                  | <i>Ca_desi_denovo</i> | 57580375                | G/T  | NA                 | NA                            | NA                 |
| <i>Desi_wild_57580376</i> | NA                                  | <i>Ca_desi_denovo</i> | 57580376                | A/C  | NA                 | NA                            | NA                 |
| <i>Desi_wild_57580386</i> | NA                                  | <i>Ca_desi_denovo</i> | 57580386                | C/T  | NA                 | NA                            | NA                 |
| <i>Desi_wild_57585390</i> | NA                                  | <i>Ca_desi_denovo</i> | 57585390                | A/G  | NA                 | NA                            | NA                 |
| <i>Desi_wild_57592969</i> | NA                                  | <i>Ca_desi_denovo</i> | 57592969                | C/G  | NA                 | NA                            | NA                 |
| <i>Desi_wild_57595918</i> | NA                                  | <i>Ca_desi_denovo</i> | 57595918                | C/G  | NA                 | NA                            | NA                 |
| <i>Desi_wild_57595939</i> | NA                                  | <i>Ca_desi_denovo</i> | 57595939                | A/G  | NA                 | NA                            | NA                 |
| <i>Desi_wild_57595957</i> | NA                                  | <i>Ca_desi_denovo</i> | 57595957                | C/G  | NA                 | NA                            | NA                 |
| <i>Desi_wild_57599149</i> | NA                                  | <i>Ca_desi_denovo</i> | 57599149                | A/G  | NA                 | NA                            | NA                 |
| <i>Desi_wild_57601248</i> | NA                                  | <i>Ca_desi_denovo</i> | 57601248                | C/T  | NA                 | NA                            | NA                 |
| <i>Desi_wild_57601260</i> | NA                                  | <i>Ca_desi_denovo</i> | 57601260                | C/T  | NA                 | NA                            | NA                 |
| <i>Desi_wild_57603076</i> | NA                                  | <i>Ca_desi_denovo</i> | 57603076                | C/T  | NA                 | NA                            | NA                 |
| <i>Desi_wild_57603079</i> | NA                                  | <i>Ca_desi_denovo</i> | 57603079                | G/T  | NA                 | NA                            | NA                 |
| <i>Desi_wild_57603991</i> | NA                                  | <i>Ca_desi_denovo</i> | 57603991                | C/T  | NA                 | NA                            | NA                 |
| <i>Desi_wild_57604143</i> | NA                                  | <i>Ca_desi_denovo</i> | 57604143                | G/T  | NA                 | NA                            | NA                 |
| <i>Desi_wild_57604929</i> | NA                                  | <i>Ca_desi_denovo</i> | 57604929                | G/T  | NA                 | NA                            | NA                 |
| <i>Desi_wild_57604941</i> | NA                                  | <i>Ca_desi_denovo</i> | 57604941                | C/T  | NA                 | NA                            | NA                 |
| <i>Desi_wild_57605334</i> | NA                                  | <i>Ca_desi_denovo</i> | 57605334                | A/G  | NA                 | NA                            | NA                 |
| <i>Desi_wild_57606208</i> | NA                                  | <i>Ca_desi_denovo</i> | 57606208                | C/T  | NA                 | NA                            | NA                 |
| <i>Desi_wild_57608513</i> | NA                                  | <i>Ca_desi_denovo</i> | 57608513                | C/G  | NA                 | NA                            | NA                 |
| <i>Desi_wild_57609671</i> | NA                                  | <i>Ca_desi_denovo</i> | 57609671                | A/G  | NA                 | NA                            | NA                 |
| <i>Desi_wild_57613275</i> | NA                                  | <i>Ca_desi_denovo</i> | 57613275                | A/G  | NA                 | NA                            | NA                 |
| <i>Desi_wild_57613423</i> | NA                                  | <i>Ca_desi_denovo</i> | 57613423                | A/C  | NA                 | NA                            | NA                 |
| <i>Desi_wild_57614311</i> | NA                                  | <i>Ca_desi_denovo</i> | 57614311                | C/T  | NA                 | NA                            | NA                 |
| <i>Desi_wild_57616824</i> | NA                                  | <i>Ca_desi_denovo</i> | 57616824                | A/G  | NA                 | NA                            | NA                 |
| <i>Desi_wild_57617193</i> | NA                                  | <i>Ca_desi_denovo</i> | 57617193                | C/T  | NA                 | NA                            | NA                 |
| <i>Desi_wild_57617673</i> | NA                                  | <i>Ca_desi_denovo</i> | 57617673                | C/T  | NA                 | NA                            | NA                 |
| <i>Desi_wild_57617730</i> | NA                                  | <i>Ca_desi_denovo</i> | 57617730                | C/T  | NA                 | NA                            | NA                 |

| SNP IDs                   | NCBI dbSNP accession IDs (NCBI_SS#) | Chromosomes           | Physical positions (bp) | SNPs | Gene accession IDs | Sequence components of genome | Putative functions |
|---------------------------|-------------------------------------|-----------------------|-------------------------|------|--------------------|-------------------------------|--------------------|
| <i>Desi_wild_57618468</i> | NA                                  | <i>Ca_desi_denovo</i> | 57618468                | G/T  | NA                 | NA                            | NA                 |
| <i>Desi_wild_57623629</i> | NA                                  | <i>Ca_desi_denovo</i> | 57623629                | C/G  | NA                 | NA                            | NA                 |
| <i>Desi_wild_57628936</i> | NA                                  | <i>Ca_desi_denovo</i> | 57628936                | C/G  | NA                 | NA                            | NA                 |
| <i>Desi_wild_57629267</i> | NA                                  | <i>Ca_desi_denovo</i> | 57629267                | A/G  | NA                 | NA                            | NA                 |
| <i>Desi_wild_57629736</i> | NA                                  | <i>Ca_desi_denovo</i> | 57629736                | C/T  | NA                 | NA                            | NA                 |
| <i>Desi_wild_57629745</i> | NA                                  | <i>Ca_desi_denovo</i> | 57629745                | C/G  | NA                 | NA                            | NA                 |
| <i>Desi_wild_57629766</i> | NA                                  | <i>Ca_desi_denovo</i> | 57629766                | C/T  | NA                 | NA                            | NA                 |
| <i>Desi_wild_57631549</i> | NA                                  | <i>Ca_desi_denovo</i> | 57631549                | A/G  | NA                 | NA                            | NA                 |
| <i>Desi_wild_57632527</i> | NA                                  | <i>Ca_desi_denovo</i> | 57632527                | C/G  | NA                 | NA                            | NA                 |
| <i>Desi_wild_57632566</i> | NA                                  | <i>Ca_desi_denovo</i> | 57632566                | C/G  | NA                 | NA                            | NA                 |
| <i>Desi_wild_57632569</i> | NA                                  | <i>Ca_desi_denovo</i> | 57632569                | C/G  | NA                 | NA                            | NA                 |
| <i>Desi_wild_57635340</i> | NA                                  | <i>Ca_desi_denovo</i> | 57635340                | A/C  | NA                 | NA                            | NA                 |
| <i>Desi_wild_57637921</i> | NA                                  | <i>Ca_desi_denovo</i> | 57637921                | C/G  | NA                 | NA                            | NA                 |
| <i>Desi_wild_57637945</i> | NA                                  | <i>Ca_desi_denovo</i> | 57637945                | C/T  | NA                 | NA                            | NA                 |
| <i>Desi_wild_57638164</i> | NA                                  | <i>Ca_desi_denovo</i> | 57638164                | C/G  | NA                 | NA                            | NA                 |
| <i>Desi_wild_57638176</i> | NA                                  | <i>Ca_desi_denovo</i> | 57638176                | C/G  | NA                 | NA                            | NA                 |
| <i>Desi_wild_57638177</i> | NA                                  | <i>Ca_desi_denovo</i> | 57638177                | A/G  | NA                 | NA                            | NA                 |
| <i>Desi_wild_57644437</i> | NA                                  | <i>Ca_desi_denovo</i> | 57644437                | C/G  | NA                 | NA                            | NA                 |
| <i>Desi_wild_57644446</i> | NA                                  | <i>Ca_desi_denovo</i> | 57644446                | A/G  | NA                 | NA                            | NA                 |
| <i>Desi_wild_57644629</i> | NA                                  | <i>Ca_desi_denovo</i> | 57644629                | C/T  | NA                 | NA                            | NA                 |
| <i>Desi_wild_57646703</i> | NA                                  | <i>Ca_desi_denovo</i> | 57646703                | A/G  | NA                 | NA                            | NA                 |
| <i>Desi_wild_57646717</i> | NA                                  | <i>Ca_desi_denovo</i> | 57646717                | C/T  | NA                 | NA                            | NA                 |
| <i>Desi_wild_57647152</i> | NA                                  | <i>Ca_desi_denovo</i> | 57647152                | A/T  | NA                 | NA                            | NA                 |
| <i>Desi_wild_57647164</i> | NA                                  | <i>Ca_desi_denovo</i> | 57647164                | C/G  | NA                 | NA                            | NA                 |
| <i>Desi_wild_57649732</i> | NA                                  | <i>Ca_desi_denovo</i> | 57649732                | A/G  | NA                 | NA                            | NA                 |
| <i>Desi_wild_57649774</i> | NA                                  | <i>Ca_desi_denovo</i> | 57649774                | A/G  | NA                 | NA                            | NA                 |
| <i>Desi_wild_57656051</i> | NA                                  | <i>Ca_desi_denovo</i> | 57656051                | A/G  | NA                 | NA                            | NA                 |
| <i>Desi_wild_57656062</i> | NA                                  | <i>Ca_desi_denovo</i> | 57656062                | A/G  | NA                 | NA                            | NA                 |
| <i>Desi_wild_57656102</i> | NA                                  | <i>Ca_desi_denovo</i> | 57656102                | A/G  | NA                 | NA                            | NA                 |
| <i>Desi_wild_57656727</i> | NA                                  | <i>Ca_desi_denovo</i> | 57656727                | C/G  | NA                 | NA                            | NA                 |
| <i>Desi_wild_57656736</i> | NA                                  | <i>Ca_desi_denovo</i> | 57656736                | A/G  | NA                 | NA                            | NA                 |
| <i>Desi_wild_57658939</i> | NA                                  | <i>Ca_desi_denovo</i> | 57658939                | C/G  | NA                 | NA                            | NA                 |
| <i>Desi_wild_57658960</i> | NA                                  | <i>Ca_desi_denovo</i> | 57658960                | C/T  | NA                 | NA                            | NA                 |
| <i>Desi_wild_57661284</i> | NA                                  | <i>Ca_desi_denovo</i> | 57661284                | C/T  | NA                 | NA                            | NA                 |
| <i>Desi_wild_57661695</i> | NA                                  | <i>Ca_desi_denovo</i> | 57661695                | A/G  | NA                 | NA                            | NA                 |
| <i>Desi_wild_57671778</i> | NA                                  | <i>Ca_desi_denovo</i> | 57671778                | C/G  | NA                 | NA                            | NA                 |
| <i>Desi_wild_57671808</i> | NA                                  | <i>Ca_desi_denovo</i> | 57671808                | C/G  | NA                 | NA                            | NA                 |
| <i>Desi_wild_57675401</i> | NA                                  | <i>Ca_desi_denovo</i> | 57675401                | A/G  | NA                 | NA                            | NA                 |
| <i>Desi_wild_57676330</i> | NA                                  | <i>Ca_desi_denovo</i> | 57676330                | C/G  | NA                 | NA                            | NA                 |
| <i>Desi_wild_57676339</i> | NA                                  | <i>Ca_desi_denovo</i> | 57676339                | G/T  | NA                 | NA                            | NA                 |
| <i>Desi_wild_57678072</i> | NA                                  | <i>Ca_desi_denovo</i> | 57678072                | C/T  | NA                 | NA                            | NA                 |
| <i>Desi_wild_57681914</i> | NA                                  | <i>Ca_desi_denovo</i> | 57681914                | C/T  | NA                 | NA                            | NA                 |
| <i>Desi_wild_57693140</i> | NA                                  | <i>Ca_desi_denovo</i> | 57693140                | G/T  | NA                 | NA                            | NA                 |
| <i>Desi_wild_57693429</i> | NA                                  | <i>Ca_desi_denovo</i> | 57693429                | C/T  | NA                 | NA                            | NA                 |

| SNP IDs                   | NCBI dbSNP accession IDs (NCBI_SS#) | Chromosomes           | Physical positions (bp) | SNPs | Gene accession IDs | Sequence components of genome | Putative functions |
|---------------------------|-------------------------------------|-----------------------|-------------------------|------|--------------------|-------------------------------|--------------------|
| <i>Desi_wild_57694571</i> | NA                                  | <i>Ca_desi_denovo</i> | 57694571                | C/T  | NA                 | NA                            | NA                 |
| <i>Desi_wild_57694606</i> | NA                                  | <i>Ca_desi_denovo</i> | 57694606                | A/G  | NA                 | NA                            | NA                 |
| <i>Desi_wild_57698182</i> | NA                                  | <i>Ca_desi_denovo</i> | 57698182                | C/G  | NA                 | NA                            | NA                 |
| <i>Desi_wild_57707112</i> | NA                                  | <i>Ca_desi_denovo</i> | 57707112                | C/G  | NA                 | NA                            | NA                 |
| <i>Desi_wild_57708136</i> | NA                                  | <i>Ca_desi_denovo</i> | 57708136                | A/G  | NA                 | NA                            | NA                 |
| <i>Desi_wild_57711123</i> | NA                                  | <i>Ca_desi_denovo</i> | 57711123                | C/T  | NA                 | NA                            | NA                 |
| <i>Desi_wild_57717438</i> | NA                                  | <i>Ca_desi_denovo</i> | 57717438                | C/G  | NA                 | NA                            | NA                 |
| <i>Desi_wild_57717459</i> | NA                                  | <i>Ca_desi_denovo</i> | 57717459                | C/T  | NA                 | NA                            | NA                 |
| <i>Desi_wild_57718834</i> | NA                                  | <i>Ca_desi_denovo</i> | 57718834                | C/G  | NA                 | NA                            | NA                 |
| <i>Desi_wild_57724366</i> | NA                                  | <i>Ca_desi_denovo</i> | 57724366                | A/G  | NA                 | NA                            | NA                 |
| <i>Desi_wild_57724713</i> | NA                                  | <i>Ca_desi_denovo</i> | 57724713                | A/G  | NA                 | NA                            | NA                 |
| <i>Desi_wild_57725160</i> | NA                                  | <i>Ca_desi_denovo</i> | 57725160                | C/T  | NA                 | NA                            | NA                 |
| <i>Desi_wild_57727013</i> | NA                                  | <i>Ca_desi_denovo</i> | 57727013                | A/G  | NA                 | NA                            | NA                 |
| <i>Desi_wild_57727780</i> | NA                                  | <i>Ca_desi_denovo</i> | 57727780                | A/G  | NA                 | NA                            | NA                 |
| <i>Desi_wild_57731575</i> | NA                                  | <i>Ca_desi_denovo</i> | 57731575                | C/G  | NA                 | NA                            | NA                 |
| <i>Desi_wild_57731596</i> | NA                                  | <i>Ca_desi_denovo</i> | 57731596                | C/G  | NA                 | NA                            | NA                 |
| <i>Desi_wild_57733708</i> | NA                                  | <i>Ca_desi_denovo</i> | 57733708                | C/T  | NA                 | NA                            | NA                 |
| <i>Desi_wild_57736453</i> | NA                                  | <i>Ca_desi_denovo</i> | 57736453                | A/G  | NA                 | NA                            | NA                 |
| <i>Desi_wild_57738553</i> | NA                                  | <i>Ca_desi_denovo</i> | 57738553                | C/G  | NA                 | NA                            | NA                 |
| <i>Desi_wild_57739201</i> | NA                                  | <i>Ca_desi_denovo</i> | 57739201                | A/G  | NA                 | NA                            | NA                 |
| <i>Desi_wild_57741613</i> | NA                                  | <i>Ca_desi_denovo</i> | 57741613                | C/T  | NA                 | NA                            | NA                 |
| <i>Desi_wild_57747208</i> | NA                                  | <i>Ca_desi_denovo</i> | 57747208                | A/C  | NA                 | NA                            | NA                 |
| <i>Desi_wild_57747239</i> | NA                                  | <i>Ca_desi_denovo</i> | 57747239                | C/T  | NA                 | NA                            | NA                 |
| <i>Desi_wild_57747240</i> | NA                                  | <i>Ca_desi_denovo</i> | 57747240                | C/T  | NA                 | NA                            | NA                 |
| <i>Desi_wild_57748335</i> | NA                                  | <i>Ca_desi_denovo</i> | 57748335                | C/T  | NA                 | NA                            | NA                 |
| <i>Desi_wild_57751108</i> | NA                                  | <i>Ca_desi_denovo</i> | 57751108                | A/G  | NA                 | NA                            | NA                 |
| <i>Desi_wild_57752978</i> | NA                                  | <i>Ca_desi_denovo</i> | 57752978                | A/G  | NA                 | NA                            | NA                 |
| <i>Desi_wild_57756328</i> | NA                                  | <i>Ca_desi_denovo</i> | 57756328                | C/G  | NA                 | NA                            | NA                 |
| <i>Desi_wild_57756367</i> | NA                                  | <i>Ca_desi_denovo</i> | 57756367                | C/G  | NA                 | NA                            | NA                 |
| <i>Desi_wild_57761145</i> | NA                                  | <i>Ca_desi_denovo</i> | 57761145                | C/T  | NA                 | NA                            | NA                 |
| <i>Desi_wild_57761148</i> | NA                                  | <i>Ca_desi_denovo</i> | 57761148                | C/G  | NA                 | NA                            | NA                 |
| <i>Desi_wild_57761166</i> | NA                                  | <i>Ca_desi_denovo</i> | 57761166                | C/T  | NA                 | NA                            | NA                 |
| <i>Desi_wild_57761529</i> | NA                                  | <i>Ca_desi_denovo</i> | 57761529                | C/T  | NA                 | NA                            | NA                 |
| <i>Desi_wild_57762362</i> | NA                                  | <i>Ca_desi_denovo</i> | 57762362                | G/T  | NA                 | NA                            | NA                 |
| <i>Desi_wild_57771372</i> | NA                                  | <i>Ca_desi_denovo</i> | 57771372                | C/G  | NA                 | NA                            | NA                 |
| <i>Desi_wild_57778186</i> | NA                                  | <i>Ca_desi_denovo</i> | 57778186                | A/G  | NA                 | NA                            | NA                 |
| <i>Desi_wild_57779949</i> | NA                                  | <i>Ca_desi_denovo</i> | 57779949                | C/G  | NA                 | NA                            | NA                 |
| <i>Desi_wild_57780364</i> | NA                                  | <i>Ca_desi_denovo</i> | 57780364                | G/T  | NA                 | NA                            | NA                 |
| <i>Desi_wild_57780366</i> | NA                                  | <i>Ca_desi_denovo</i> | 57780366                | C/G  | NA                 | NA                            | NA                 |
| <i>Desi_wild_57780880</i> | NA                                  | <i>Ca_desi_denovo</i> | 57780880                | A/G  | NA                 | NA                            | NA                 |
| <i>Desi_wild_57780928</i> | NA                                  | <i>Ca_desi_denovo</i> | 57780928                | C/G  | NA                 | NA                            | NA                 |
| <i>Desi_wild_57780940</i> | NA                                  | <i>Ca_desi_denovo</i> | 57780940                | C/G  | NA                 | NA                            | NA                 |
| <i>Desi_wild_57782103</i> | NA                                  | <i>Ca_desi_denovo</i> | 57782103                | C/T  | NA                 | NA                            | NA                 |
| <i>Desi_wild_57785340</i> | NA                                  | <i>Ca_desi_denovo</i> | 57785340                | C/G  | NA                 | NA                            | NA                 |



| SNP IDs                   | NCBI dbSNP accession IDs (NCBI_SS#) | Chromosomes           | Physical positions (bp) | SNPs | Gene accession IDs | Sequence components of genome | Putative functions |
|---------------------------|-------------------------------------|-----------------------|-------------------------|------|--------------------|-------------------------------|--------------------|
| <i>Desi_wild_57787637</i> | NA                                  | <i>Ca_desi_denovo</i> | 57787637                | G/T  | NA                 | NA                            | NA                 |
| <i>Desi_wild_57788859</i> | NA                                  | <i>Ca_desi_denovo</i> | 57788859                | C/T  | NA                 | NA                            | NA                 |
| <i>Desi_wild_57792493</i> | NA                                  | <i>Ca_desi_denovo</i> | 57792493                | C/G  | NA                 | NA                            | NA                 |
| <i>Desi_wild_57792505</i> | NA                                  | <i>Ca_desi_denovo</i> | 57792505                | A/G  | NA                 | NA                            | NA                 |
| <i>Desi_wild_57794759</i> | NA                                  | <i>Ca_desi_denovo</i> | 57794759                | A/C  | NA                 | NA                            | NA                 |
| <i>Desi_wild_57798726</i> | NA                                  | <i>Ca_desi_denovo</i> | 57798726                | A/T  | NA                 | NA                            | NA                 |
| <i>Desi_wild_57798958</i> | NA                                  | <i>Ca_desi_denovo</i> | 57798958                | C/G  | NA                 | NA                            | NA                 |
| <i>Desi_wild_57798960</i> | NA                                  | <i>Ca_desi_denovo</i> | 57798960                | A/C  | NA                 | NA                            | NA                 |
| <i>Desi_wild_57798964</i> | NA                                  | <i>Ca_desi_denovo</i> | 57798964                | C/T  | NA                 | NA                            | NA                 |
| <i>Desi_wild_57798977</i> | NA                                  | <i>Ca_desi_denovo</i> | 57798977                | C/T  | NA                 | NA                            | NA                 |
| <i>Desi_wild_57801807</i> | NA                                  | <i>Ca_desi_denovo</i> | 57801807                | A/G  | NA                 | NA                            | NA                 |
| <i>Desi_wild_57802477</i> | NA                                  | <i>Ca_desi_denovo</i> | 57802477                | G/T  | NA                 | NA                            | NA                 |
| <i>Desi_wild_57809797</i> | NA                                  | <i>Ca_desi_denovo</i> | 57809797                | A/G  | NA                 | NA                            | NA                 |
| <i>Desi_wild_57809800</i> | NA                                  | <i>Ca_desi_denovo</i> | 57809800                | C/G  | NA                 | NA                            | NA                 |
| <i>Desi_wild_57810154</i> | NA                                  | <i>Ca_desi_denovo</i> | 57810154                | A/G  | NA                 | NA                            | NA                 |
| <i>Desi_wild_57810163</i> | NA                                  | <i>Ca_desi_denovo</i> | 57810163                | C/T  | NA                 | NA                            | NA                 |
| <i>Desi_wild_57817088</i> | NA                                  | <i>Ca_desi_denovo</i> | 57817088                | A/G  | NA                 | NA                            | NA                 |
| <i>Desi_wild_57821454</i> | NA                                  | <i>Ca_desi_denovo</i> | 57821454                | C/G  | NA                 | NA                            | NA                 |
| <i>Desi_wild_57821475</i> | NA                                  | <i>Ca_desi_denovo</i> | 57821475                | A/G  | NA                 | NA                            | NA                 |
| <i>Desi_wild_57829927</i> | NA                                  | <i>Ca_desi_denovo</i> | 57829927                | A/G  | NA                 | NA                            | NA                 |
| <i>Desi_wild_57829930</i> | NA                                  | <i>Ca_desi_denovo</i> | 57829930                | C/G  | NA                 | NA                            | NA                 |
| <i>Desi_wild_57831303</i> | NA                                  | <i>Ca_desi_denovo</i> | 57831303                | A/G  | NA                 | NA                            | NA                 |
| <i>Desi_wild_57832962</i> | NA                                  | <i>Ca_desi_denovo</i> | 57832962                | C/T  | NA                 | NA                            | NA                 |
| <i>Desi_wild_57833602</i> | NA                                  | <i>Ca_desi_denovo</i> | 57833602                | C/G  | NA                 | NA                            | NA                 |
| <i>Desi_wild_57835821</i> | NA                                  | <i>Ca_desi_denovo</i> | 57835821                | C/G  | NA                 | NA                            | NA                 |
| <i>Desi_wild_57835863</i> | NA                                  | <i>Ca_desi_denovo</i> | 57835863                | A/G  | NA                 | NA                            | NA                 |
| <i>Desi_wild_57836197</i> | NA                                  | <i>Ca_desi_denovo</i> | 57836197                | C/G  | NA                 | NA                            | NA                 |
| <i>Desi_wild_57836203</i> | NA                                  | <i>Ca_desi_denovo</i> | 57836203                | C/G  | NA                 | NA                            | NA                 |
| <i>Desi_wild_57836205</i> | NA                                  | <i>Ca_desi_denovo</i> | 57836205                | C/G  | NA                 | NA                            | NA                 |
| <i>Desi_wild_57836227</i> | NA                                  | <i>Ca_desi_denovo</i> | 57836227                | C/G  | NA                 | NA                            | NA                 |
| <i>Desi_wild_57836993</i> | NA                                  | <i>Ca_desi_denovo</i> | 57836993                | A/C  | NA                 | NA                            | NA                 |
| <i>Desi_wild_57840984</i> | NA                                  | <i>Ca_desi_denovo</i> | 57840984                | C/G  | NA                 | NA                            | NA                 |
| <i>Desi_wild_57841537</i> | NA                                  | <i>Ca_desi_denovo</i> | 57841537                | A/G  | NA                 | NA                            | NA                 |
| <i>Desi_wild_57841555</i> | NA                                  | <i>Ca_desi_denovo</i> | 57841555                | A/G  | NA                 | NA                            | NA                 |
| <i>Desi_wild_57843273</i> | NA                                  | <i>Ca_desi_denovo</i> | 57843273                | A/G  | NA                 | NA                            | NA                 |
| <i>Desi_wild_57843277</i> | NA                                  | <i>Ca_desi_denovo</i> | 57843277                | C/G  | NA                 | NA                            | NA                 |
| <i>Desi_wild_57843297</i> | NA                                  | <i>Ca_desi_denovo</i> | 57843297                | C/G  | NA                 | NA                            | NA                 |
| <i>Desi_wild_57846802</i> | NA                                  | <i>Ca_desi_denovo</i> | 57846802                | C/T  | NA                 | NA                            | NA                 |
| <i>Desi_wild_57849504</i> | NA                                  | <i>Ca_desi_denovo</i> | 57849504                | C/T  | NA                 | NA                            | NA                 |
| <i>Desi_wild_57850650</i> | NA                                  | <i>Ca_desi_denovo</i> | 57850650                | A/G  | NA                 | NA                            | NA                 |
| <i>Desi_wild_57856842</i> | NA                                  | <i>Ca_desi_denovo</i> | 57856842                | C/G  | NA                 | NA                            | NA                 |
| <i>Desi_wild_57863020</i> | NA                                  | <i>Ca_desi_denovo</i> | 57863020                | C/T  | NA                 | NA                            | NA                 |
| <i>Desi_wild_57863029</i> | NA                                  | <i>Ca_desi_denovo</i> | 57863029                | C/T  | NA                 | NA                            | NA                 |
| <i>Desi_wild_57863030</i> | NA                                  | <i>Ca_desi_denovo</i> | 57863030                | A/G  | NA                 | NA                            | NA                 |

| SNP IDs                   | NCBI dbSNP accession IDs (NCBI_SS#) | Chromosomes           | Physical positions (bp) | SNPs | Gene accession IDs | Sequence components of genome | Putative functions |
|---------------------------|-------------------------------------|-----------------------|-------------------------|------|--------------------|-------------------------------|--------------------|
| <i>Desi_wild_57863057</i> | NA                                  | <i>Ca_desi_denovo</i> | 57863057                | C/G  | NA                 | NA                            | NA                 |
| <i>Desi_wild_57864691</i> | NA                                  | <i>Ca_desi_denovo</i> | 57864691                | C/T  | NA                 | NA                            | NA                 |
| <i>Desi_wild_57865585</i> | NA                                  | <i>Ca_desi_denovo</i> | 57865585                | A/G  | NA                 | NA                            | NA                 |
| <i>Desi_wild_57865639</i> | NA                                  | <i>Ca_desi_denovo</i> | 57865639                | A/G  | NA                 | NA                            | NA                 |
| <i>Desi_wild_57866988</i> | NA                                  | <i>Ca_desi_denovo</i> | 57866988                | C/T  | NA                 | NA                            | NA                 |
| <i>Desi_wild_57867046</i> | NA                                  | <i>Ca_desi_denovo</i> | 57867046                | C/G  | NA                 | NA                            | NA                 |
| <i>Desi_wild_57879584</i> | NA                                  | <i>Ca_desi_denovo</i> | 57879584                | A/G  | NA                 | NA                            | NA                 |
| <i>Desi_wild_57882535</i> | NA                                  | <i>Ca_desi_denovo</i> | 57882535                | C/G  | NA                 | NA                            | NA                 |
| <i>Desi_wild_57882571</i> | NA                                  | <i>Ca_desi_denovo</i> | 57882571                | C/G  | NA                 | NA                            | NA                 |
| <i>Desi_wild_57886160</i> | NA                                  | <i>Ca_desi_denovo</i> | 57886160                | A/G  | NA                 | NA                            | NA                 |
| <i>Desi_wild_57889859</i> | NA                                  | <i>Ca_desi_denovo</i> | 57889859                | C/T  | NA                 | NA                            | NA                 |
| <i>Desi_wild_57889877</i> | NA                                  | <i>Ca_desi_denovo</i> | 57889877                | A/G  | NA                 | NA                            | NA                 |
| <i>Desi_wild_57893130</i> | NA                                  | <i>Ca_desi_denovo</i> | 57893130                | C/G  | NA                 | NA                            | NA                 |
| <i>Desi_wild_57894838</i> | NA                                  | <i>Ca_desi_denovo</i> | 57894838                | A/G  | NA                 | NA                            | NA                 |
| <i>Desi_wild_57895074</i> | NA                                  | <i>Ca_desi_denovo</i> | 57895074                | C/G  | NA                 | NA                            | NA                 |
| <i>Desi_wild_57895086</i> | NA                                  | <i>Ca_desi_denovo</i> | 57895086                | C/G  | NA                 | NA                            | NA                 |
| <i>Desi_wild_57895087</i> | NA                                  | <i>Ca_desi_denovo</i> | 57895087                | A/G  | NA                 | NA                            | NA                 |
| <i>Desi_wild_57895089</i> | NA                                  | <i>Ca_desi_denovo</i> | 57895089                | C/T  | NA                 | NA                            | NA                 |
| <i>Desi_wild_57904370</i> | NA                                  | <i>Ca_desi_denovo</i> | 57904370                | C/G  | NA                 | NA                            | NA                 |
| <i>Desi_wild_57905404</i> | NA                                  | <i>Ca_desi_denovo</i> | 57905404                | A/C  | NA                 | NA                            | NA                 |
| <i>Desi_wild_57905461</i> | NA                                  | <i>Ca_desi_denovo</i> | 57905461                | C/T  | NA                 | NA                            | NA                 |
| <i>Desi_wild_57905464</i> | NA                                  | <i>Ca_desi_denovo</i> | 57905464                | A/G  | NA                 | NA                            | NA                 |
| <i>Desi_wild_57906676</i> | NA                                  | <i>Ca_desi_denovo</i> | 57906676                | C/T  | NA                 | NA                            | NA                 |
| <i>Desi_wild_57910690</i> | NA                                  | <i>Ca_desi_denovo</i> | 57910690                | C/G  | NA                 | NA                            | NA                 |
| <i>Desi_wild_57910699</i> | NA                                  | <i>Ca_desi_denovo</i> | 57910699                | C/G  | NA                 | NA                            | NA                 |
| <i>Desi_wild_57911341</i> | NA                                  | <i>Ca_desi_denovo</i> | 57911341                | C/G  | NA                 | NA                            | NA                 |
| <i>Desi_wild_57911773</i> | NA                                  | <i>Ca_desi_denovo</i> | 57911773                | C/T  | NA                 | NA                            | NA                 |
| <i>Desi_wild_57911812</i> | NA                                  | <i>Ca_desi_denovo</i> | 57911812                | C/T  | NA                 | NA                            | NA                 |
| <i>Desi_wild_57911821</i> | NA                                  | <i>Ca_desi_denovo</i> | 57911821                | C/G  | NA                 | NA                            | NA                 |
| <i>Desi_wild_57914515</i> | NA                                  | <i>Ca_desi_denovo</i> | 57914515                | A/G  | NA                 | NA                            | NA                 |
| <i>Desi_wild_57914518</i> | NA                                  | <i>Ca_desi_denovo</i> | 57914518                | C/G  | NA                 | NA                            | NA                 |
| <i>Desi_wild_57920005</i> | NA                                  | <i>Ca_desi_denovo</i> | 57920005                | A/G  | NA                 | NA                            | NA                 |
| <i>Desi_wild_57920053</i> | NA                                  | <i>Ca_desi_denovo</i> | 57920053                | A/G  | NA                 | NA                            | NA                 |
| <i>Desi_wild_57920430</i> | NA                                  | <i>Ca_desi_denovo</i> | 57920430                | C/G  | NA                 | NA                            | NA                 |
| <i>Desi_wild_57921774</i> | NA                                  | <i>Ca_desi_denovo</i> | 57921774                | C/T  | NA                 | NA                            | NA                 |
| <i>Desi_wild_57921788</i> | NA                                  | <i>Ca_desi_denovo</i> | 57921788                | A/G  | NA                 | NA                            | NA                 |
| <i>Desi_wild_57922786</i> | NA                                  | <i>Ca_desi_denovo</i> | 57922786                | C/T  | NA                 | NA                            | NA                 |
| <i>Desi_wild_57923723</i> | NA                                  | <i>Ca_desi_denovo</i> | 57923723                | G/T  | NA                 | NA                            | NA                 |
| <i>Desi_wild_57923744</i> | NA                                  | <i>Ca_desi_denovo</i> | 57923744                | A/G  | NA                 | NA                            | NA                 |
| <i>Desi_wild_57925215</i> | NA                                  | <i>Ca_desi_denovo</i> | 57925215                | C/T  | NA                 | NA                            | NA                 |
| <i>Desi_wild_57925507</i> | NA                                  | <i>Ca_desi_denovo</i> | 57925507                | A/G  | NA                 | NA                            | NA                 |
| <i>Desi_wild_57925525</i> | NA                                  | <i>Ca_desi_denovo</i> | 57925525                | A/G  | NA                 | NA                            | NA                 |
| <i>Desi_wild_57927062</i> | NA                                  | <i>Ca_desi_denovo</i> | 57927062                | G/T  | NA                 | NA                            | NA                 |
| <i>Desi_wild_57927089</i> | NA                                  | <i>Ca_desi_denovo</i> | 57927089                | C/T  | NA                 | NA                            | NA                 |

| SNP IDs                   | NCBI dbSNP accession IDs (NCBI_SS#) | Chromosomes           | Physical positions (bp) | SNPs | Gene accession IDs | Sequence components of genome | Putative functions |
|---------------------------|-------------------------------------|-----------------------|-------------------------|------|--------------------|-------------------------------|--------------------|
| <i>Desi_wild_57927095</i> | NA                                  | <i>Ca_desi_denovo</i> | 57927095                | A/G  | NA                 | NA                            | NA                 |
| <i>Desi_wild_57928473</i> | NA                                  | <i>Ca_desi_denovo</i> | 57928473                | A/G  | NA                 | NA                            | NA                 |
| <i>Desi_wild_57928474</i> | NA                                  | <i>Ca_desi_denovo</i> | 57928474                | C/T  | NA                 | NA                            | NA                 |
| <i>Desi_wild_57928501</i> | NA                                  | <i>Ca_desi_denovo</i> | 57928501                | C/T  | NA                 | NA                            | NA                 |
| <i>Desi_wild_57928522</i> | NA                                  | <i>Ca_desi_denovo</i> | 57928522                | A/G  | NA                 | NA                            | NA                 |
| <i>Desi_wild_57929763</i> | NA                                  | <i>Ca_desi_denovo</i> | 57929763                | A/G  | NA                 | NA                            | NA                 |
| <i>Desi_wild_57930202</i> | NA                                  | <i>Ca_desi_denovo</i> | 57930202                | A/C  | NA                 | NA                            | NA                 |
| <i>Desi_wild_57930204</i> | NA                                  | <i>Ca_desi_denovo</i> | 57930204                | A/C  | NA                 | NA                            | NA                 |
| <i>Desi_wild_57931062</i> | NA                                  | <i>Ca_desi_denovo</i> | 57931062                | C/T  | NA                 | NA                            | NA                 |
| <i>Desi_wild_57937618</i> | NA                                  | <i>Ca_desi_denovo</i> | 57937618                | A/G  | NA                 | NA                            | NA                 |
| <i>Desi_wild_57937636</i> | NA                                  | <i>Ca_desi_denovo</i> | 57937636                | C/T  | NA                 | NA                            | NA                 |
| <i>Desi_wild_57940228</i> | NA                                  | <i>Ca_desi_denovo</i> | 57940228                | G/T  | NA                 | NA                            | NA                 |
| <i>Desi_wild_57940231</i> | NA                                  | <i>Ca_desi_denovo</i> | 57940231                | C/G  | NA                 | NA                            | NA                 |
| <i>Desi_wild_57945097</i> | NA                                  | <i>Ca_desi_denovo</i> | 57945097                | C/G  | NA                 | NA                            | NA                 |
| <i>Desi_wild_57946872</i> | NA                                  | <i>Ca_desi_denovo</i> | 57946872                | C/T  | NA                 | NA                            | NA                 |
| <i>Desi_wild_57946884</i> | NA                                  | <i>Ca_desi_denovo</i> | 57946884                | C/T  | NA                 | NA                            | NA                 |
| <i>Desi_wild_57946887</i> | NA                                  | <i>Ca_desi_denovo</i> | 57946887                | C/G  | NA                 | NA                            | NA                 |
| <i>Desi_wild_57949100</i> | NA                                  | <i>Ca_desi_denovo</i> | 57949100                | C/T  | NA                 | NA                            | NA                 |
| <i>Desi_wild_57951607</i> | NA                                  | <i>Ca_desi_denovo</i> | 57951607                | C/T  | NA                 | NA                            | NA                 |
| <i>Desi_wild_57951638</i> | NA                                  | <i>Ca_desi_denovo</i> | 57951638                | C/T  | NA                 | NA                            | NA                 |
| <i>Desi_wild_57951652</i> | NA                                  | <i>Ca_desi_denovo</i> | 57951652                | A/G  | NA                 | NA                            | NA                 |
| <i>Desi_wild_57953764</i> | NA                                  | <i>Ca_desi_denovo</i> | 57953764                | C/T  | NA                 | NA                            | NA                 |
| <i>Desi_wild_57953766</i> | NA                                  | <i>Ca_desi_denovo</i> | 57953766                | G/T  | NA                 | NA                            | NA                 |
| <i>Desi_wild_57953784</i> | NA                                  | <i>Ca_desi_denovo</i> | 57953784                | C/G  | NA                 | NA                            | NA                 |
| <i>Desi_wild_57960646</i> | NA                                  | <i>Ca_desi_denovo</i> | 57960646                | A/G  | NA                 | NA                            | NA                 |
| <i>Desi_wild_57960649</i> | NA                                  | <i>Ca_desi_denovo</i> | 57960649                | C/G  | NA                 | NA                            | NA                 |
| <i>Desi_wild_57965500</i> | NA                                  | <i>Ca_desi_denovo</i> | 57965500                | A/G  | NA                 | NA                            | NA                 |
| <i>Desi_wild_57966249</i> | NA                                  | <i>Ca_desi_denovo</i> | 57966249                | C/G  | NA                 | NA                            | NA                 |
| <i>Desi_wild_57967428</i> | NA                                  | <i>Ca_desi_denovo</i> | 57967428                | C/T  | NA                 | NA                            | NA                 |
| <i>Desi_wild_57967437</i> | NA                                  | <i>Ca_desi_denovo</i> | 57967437                | C/G  | NA                 | NA                            | NA                 |
| <i>Desi_wild_57973000</i> | NA                                  | <i>Ca_desi_denovo</i> | 57973000                | A/G  | NA                 | NA                            | NA                 |
| <i>Desi_wild_57973003</i> | NA                                  | <i>Ca_desi_denovo</i> | 57973003                | A/C  | NA                 | NA                            | NA                 |
| <i>Desi_wild_57973015</i> | NA                                  | <i>Ca_desi_denovo</i> | 57973015                | C/G  | NA                 | NA                            | NA                 |
| <i>Desi_wild_57975049</i> | NA                                  | <i>Ca_desi_denovo</i> | 57975049                | A/G  | NA                 | NA                            | NA                 |
| <i>Desi_wild_57975050</i> | NA                                  | <i>Ca_desi_denovo</i> | 57975050                | C/T  | NA                 | NA                            | NA                 |
| <i>Desi_wild_57975060</i> | NA                                  | <i>Ca_desi_denovo</i> | 57975060                | C/G  | NA                 | NA                            | NA                 |
| <i>Desi_wild_57975426</i> | NA                                  | <i>Ca_desi_denovo</i> | 57975426                | A/T  | NA                 | NA                            | NA                 |
| <i>Desi_wild_57975429</i> | NA                                  | <i>Ca_desi_denovo</i> | 57975429                | A/G  | NA                 | NA                            | NA                 |
| <i>Desi_wild_57976825</i> | NA                                  | <i>Ca_desi_denovo</i> | 57976825                | G/T  | NA                 | NA                            | NA                 |
| <i>Desi_wild_57976846</i> | NA                                  | <i>Ca_desi_denovo</i> | 57976846                | C/G  | NA                 | NA                            | NA                 |
| <i>Desi_wild_57976852</i> | NA                                  | <i>Ca_desi_denovo</i> | 57976852                | A/G  | NA                 | NA                            | NA                 |
| <i>Desi_wild_57976883</i> | NA                                  | <i>Ca_desi_denovo</i> | 57976883                | C/G  | NA                 | NA                            | NA                 |
| <i>Desi_wild_57977299</i> | NA                                  | <i>Ca_desi_denovo</i> | 57977299                | C/T  | NA                 | NA                            | NA                 |
| <i>Desi_wild_57981567</i> | NA                                  | <i>Ca_desi_denovo</i> | 57981567                | C/G  | NA                 | NA                            | NA                 |

| SNP IDs                   | NCBI dbSNP accession IDs (NCBI_SS#) | Chromosomes           | Physical positions (bp) | SNPs | Gene accession IDs | Sequence components of genome | Putative functions |
|---------------------------|-------------------------------------|-----------------------|-------------------------|------|--------------------|-------------------------------|--------------------|
| <i>Desi_wild_57981579</i> | NA                                  | <i>Ca_desi_denovo</i> | 57981579                | C/G  | NA                 | NA                            | NA                 |
| <i>Desi_wild_57981601</i> | NA                                  | <i>Ca_desi_denovo</i> | 57981601                | A/G  | NA                 | NA                            | NA                 |
| <i>Desi_wild_57981612</i> | NA                                  | <i>Ca_desi_denovo</i> | 57981612                | C/G  | NA                 | NA                            | NA                 |
| <i>Desi_wild_57985837</i> | NA                                  | <i>Ca_desi_denovo</i> | 57985837                | A/G  | NA                 | NA                            | NA                 |
| <i>Desi_wild_57985857</i> | NA                                  | <i>Ca_desi_denovo</i> | 57985857                | C/T  | NA                 | NA                            | NA                 |
| <i>Desi_wild_57992445</i> | NA                                  | <i>Ca_desi_denovo</i> | 57992445                | C/G  | NA                 | NA                            | NA                 |
| <i>Desi_wild_57998053</i> | NA                                  | <i>Ca_desi_denovo</i> | 57998053                | A/G  | NA                 | NA                            | NA                 |
| <i>Desi_wild_58006896</i> | NA                                  | <i>Ca_desi_denovo</i> | 58006896                | C/G  | NA                 | NA                            | NA                 |
| <i>Desi_wild_58008273</i> | NA                                  | <i>Ca_desi_denovo</i> | 58008273                | C/G  | NA                 | NA                            | NA                 |
| <i>Desi_wild_58008987</i> | NA                                  | <i>Ca_desi_denovo</i> | 58008987                | C/T  | NA                 | NA                            | NA                 |
| <i>Desi_wild_58009047</i> | NA                                  | <i>Ca_desi_denovo</i> | 58009047                | C/T  | NA                 | NA                            | NA                 |
| <i>Desi_wild_58010594</i> | NA                                  | <i>Ca_desi_denovo</i> | 58010594                | A/C  | NA                 | NA                            | NA                 |
| <i>Desi_wild_58011498</i> | NA                                  | <i>Ca_desi_denovo</i> | 58011498                | C/T  | NA                 | NA                            | NA                 |
| <i>Desi_wild_58011570</i> | NA                                  | <i>Ca_desi_denovo</i> | 58011570                | C/T  | NA                 | NA                            | NA                 |
| <i>Desi_wild_58011573</i> | NA                                  | <i>Ca_desi_denovo</i> | 58011573                | A/G  | NA                 | NA                            | NA                 |
| <i>Desi_wild_58013500</i> | NA                                  | <i>Ca_desi_denovo</i> | 58013500                | C/T  | NA                 | NA                            | NA                 |
| <i>Desi_wild_58013521</i> | NA                                  | <i>Ca_desi_denovo</i> | 58013521                | C/G  | NA                 | NA                            | NA                 |
| <i>Desi_wild_58015051</i> | NA                                  | <i>Ca_desi_denovo</i> | 58015051                | A/G  | NA                 | NA                            | NA                 |
| <i>Desi_wild_58015072</i> | NA                                  | <i>Ca_desi_denovo</i> | 58015072                | C/T  | NA                 | NA                            | NA                 |
| <i>Desi_wild_58015683</i> | NA                                  | <i>Ca_desi_denovo</i> | 58015683                | C/T  | NA                 | NA                            | NA                 |
| <i>Desi_wild_58017582</i> | NA                                  | <i>Ca_desi_denovo</i> | 58017582                | A/G  | NA                 | NA                            | NA                 |
| <i>Desi_wild_58019505</i> | NA                                  | <i>Ca_desi_denovo</i> | 58019505                | A/G  | NA                 | NA                            | NA                 |
| <i>Desi_wild_58019511</i> | NA                                  | <i>Ca_desi_denovo</i> | 58019511                | C/G  | NA                 | NA                            | NA                 |
| <i>Desi_wild_58019556</i> | NA                                  | <i>Ca_desi_denovo</i> | 58019556                | C/T  | NA                 | NA                            | NA                 |
| <i>Desi_wild_58022752</i> | NA                                  | <i>Ca_desi_denovo</i> | 58022752                | C/T  | NA                 | NA                            | NA                 |
| <i>Desi_wild_58022764</i> | NA                                  | <i>Ca_desi_denovo</i> | 58022764                | C/G  | NA                 | NA                            | NA                 |
| <i>Desi_wild_58022765</i> | NA                                  | <i>Ca_desi_denovo</i> | 58022765                | A/C  | NA                 | NA                            | NA                 |
| <i>Desi_wild_58026213</i> | NA                                  | <i>Ca_desi_denovo</i> | 58026213                | C/T  | NA                 | NA                            | NA                 |
| <i>Desi_wild_58026718</i> | NA                                  | <i>Ca_desi_denovo</i> | 58026718                | C/G  | NA                 | NA                            | NA                 |
| <i>Desi_wild_58029645</i> | NA                                  | <i>Ca_desi_denovo</i> | 58029645                | C/T  | NA                 | NA                            | NA                 |
| <i>Desi_wild_58029654</i> | NA                                  | <i>Ca_desi_denovo</i> | 58029654                | C/T  | NA                 | NA                            | NA                 |
| <i>Desi_wild_58036193</i> | NA                                  | <i>Ca_desi_denovo</i> | 58036193                | A/G  | NA                 | NA                            | NA                 |
| <i>Desi_wild_58036728</i> | NA                                  | <i>Ca_desi_denovo</i> | 58036728                | C/T  | NA                 | NA                            | NA                 |
| <i>Desi_wild_58036752</i> | NA                                  | <i>Ca_desi_denovo</i> | 58036752                | C/T  | NA                 | NA                            | NA                 |
| <i>Desi_wild_58036770</i> | NA                                  | <i>Ca_desi_denovo</i> | 58036770                | C/T  | NA                 | NA                            | NA                 |
| <i>Desi_wild_58036788</i> | NA                                  | <i>Ca_desi_denovo</i> | 58036788                | C/T  | NA                 | NA                            | NA                 |
| <i>Desi_wild_58040757</i> | NA                                  | <i>Ca_desi_denovo</i> | 58040757                | C/T  | NA                 | NA                            | NA                 |
| <i>Desi_wild_58040763</i> | NA                                  | <i>Ca_desi_denovo</i> | 58040763                | C/G  | NA                 | NA                            | NA                 |
| <i>Desi_wild_58042234</i> | NA                                  | <i>Ca_desi_denovo</i> | 58042234                | A/G  | NA                 | NA                            | NA                 |
| <i>Desi_wild_58042858</i> | NA                                  | <i>Ca_desi_denovo</i> | 58042858                | C/T  | NA                 | NA                            | NA                 |
| <i>Desi_wild_58047067</i> | NA                                  | <i>Ca_desi_denovo</i> | 58047067                | C/G  | NA                 | NA                            | NA                 |
| <i>Desi_wild_58047132</i> | NA                                  | <i>Ca_desi_denovo</i> | 58047132                | C/T  | NA                 | NA                            | NA                 |
| <i>Desi_wild_58048249</i> | NA                                  | <i>Ca_desi_denovo</i> | 58048249                | C/T  | NA                 | NA                            | NA                 |
| <i>Desi_wild_58048918</i> | NA                                  | <i>Ca_desi_denovo</i> | 58048918                | A/G  | NA                 | NA                            | NA                 |

| SNP IDs                   | NCBI dbSNP accession IDs (NCBI_SS#) | Chromosomes           | Physical positions (bp) | SNPs | Gene accession IDs | Sequence components of genome | Putative functions |
|---------------------------|-------------------------------------|-----------------------|-------------------------|------|--------------------|-------------------------------|--------------------|
| <i>Desi_wild_58049413</i> | NA                                  | <i>Ca_desi_denovo</i> | 58049413                | C/G  | NA                 | NA                            | NA                 |
| <i>Desi_wild_58049422</i> | NA                                  | <i>Ca_desi_denovo</i> | 58049422                | A/G  | NA                 | NA                            | NA                 |
| <i>Desi_wild_58051321</i> | NA                                  | <i>Ca_desi_denovo</i> | 58051321                | C/G  | NA                 | NA                            | NA                 |
| <i>Desi_wild_58053117</i> | NA                                  | <i>Ca_desi_denovo</i> | 58053117                | C/G  | NA                 | NA                            | NA                 |
| <i>Desi_wild_58054094</i> | NA                                  | <i>Ca_desi_denovo</i> | 58054094                | C/G  | NA                 | NA                            | NA                 |
| <i>Desi_wild_58054103</i> | NA                                  | <i>Ca_desi_denovo</i> | 58054103                | C/G  | NA                 | NA                            | NA                 |
| <i>Desi_wild_58055859</i> | NA                                  | <i>Ca_desi_denovo</i> | 58055859                | C/G  | NA                 | NA                            | NA                 |
| <i>Desi_wild_58055880</i> | NA                                  | <i>Ca_desi_denovo</i> | 58055880                | C/G  | NA                 | NA                            | NA                 |
| <i>Desi_wild_58055883</i> | NA                                  | <i>Ca_desi_denovo</i> | 58055883                | C/T  | NA                 | NA                            | NA                 |
| <i>Desi_wild_58060531</i> | NA                                  | <i>Ca_desi_denovo</i> | 58060531                | C/G  | NA                 | NA                            | NA                 |
| <i>Desi_wild_58060534</i> | NA                                  | <i>Ca_desi_denovo</i> | 58060534                | A/G  | NA                 | NA                            | NA                 |
| <i>Desi_wild_58060603</i> | NA                                  | <i>Ca_desi_denovo</i> | 58060603                | G/T  | NA                 | NA                            | NA                 |
| <i>Desi_wild_58067688</i> | NA                                  | <i>Ca_desi_denovo</i> | 58067688                | A/C  | NA                 | NA                            | NA                 |
| <i>Desi_wild_58067692</i> | NA                                  | <i>Ca_desi_denovo</i> | 58067692                | A/C  | NA                 | NA                            | NA                 |
| <i>Desi_wild_58067712</i> | NA                                  | <i>Ca_desi_denovo</i> | 58067712                | A/C  | NA                 | NA                            | NA                 |
| <i>Desi_wild_58071231</i> | NA                                  | <i>Ca_desi_denovo</i> | 58071231                | C/T  | NA                 | NA                            | NA                 |
| <i>Desi_wild_58078930</i> | NA                                  | <i>Ca_desi_denovo</i> | 58078930                | A/C  | NA                 | NA                            | NA                 |
| <i>Desi_wild_58079233</i> | NA                                  | <i>Ca_desi_denovo</i> | 58079233                | C/G  | NA                 | NA                            | NA                 |
| <i>Desi_wild_58079272</i> | NA                                  | <i>Ca_desi_denovo</i> | 58079272                | C/T  | NA                 | NA                            | NA                 |
| <i>Desi_wild_58080147</i> | NA                                  | <i>Ca_desi_denovo</i> | 58080147                | C/G  | NA                 | NA                            | NA                 |
| <i>Desi_wild_58080150</i> | NA                                  | <i>Ca_desi_denovo</i> | 58080150                | A/G  | NA                 | NA                            | NA                 |
| <i>Desi_wild_58082014</i> | NA                                  | <i>Ca_desi_denovo</i> | 58082014                | C/T  | NA                 | NA                            | NA                 |
| <i>Desi_wild_58082038</i> | NA                                  | <i>Ca_desi_denovo</i> | 58082038                | C/G  | NA                 | NA                            | NA                 |
| <i>Desi_wild_58084987</i> | NA                                  | <i>Ca_desi_denovo</i> | 58084987                | C/G  | NA                 | NA                            | NA                 |
| <i>Desi_wild_58085008</i> | NA                                  | <i>Ca_desi_denovo</i> | 58085008                | A/G  | NA                 | NA                            | NA                 |
| <i>Desi_wild_58085325</i> | NA                                  | <i>Ca_desi_denovo</i> | 58085325                | G/T  | NA                 | NA                            | NA                 |
| <i>Desi_wild_58088666</i> | NA                                  | <i>Ca_desi_denovo</i> | 58088666                | C/T  | NA                 | NA                            | NA                 |
| <i>Desi_wild_58093087</i> | NA                                  | <i>Ca_desi_denovo</i> | 58093087                | A/C  | NA                 | NA                            | NA                 |
| <i>Desi_wild_58095415</i> | NA                                  | <i>Ca_desi_denovo</i> | 58095415                | A/G  | NA                 | NA                            | NA                 |
| <i>Desi_wild_58101430</i> | NA                                  | <i>Ca_desi_denovo</i> | 58101430                | C/G  | NA                 | NA                            | NA                 |
| <i>Desi_wild_58101475</i> | NA                                  | <i>Ca_desi_denovo</i> | 58101475                | G/T  | NA                 | NA                            | NA                 |
| <i>Desi_wild_58102180</i> | NA                                  | <i>Ca_desi_denovo</i> | 58102180                | A/G  | NA                 | NA                            | NA                 |
| <i>Desi_wild_58107363</i> | NA                                  | <i>Ca_desi_denovo</i> | 58107363                | C/T  | NA                 | NA                            | NA                 |
| <i>Desi_wild_58109592</i> | NA                                  | <i>Ca_desi_denovo</i> | 58109592                | C/G  | NA                 | NA                            | NA                 |
| <i>Desi_wild_58109637</i> | NA                                  | <i>Ca_desi_denovo</i> | 58109637                | A/G  | NA                 | NA                            | NA                 |
| <i>Desi_wild_58109661</i> | NA                                  | <i>Ca_desi_denovo</i> | 58109661                | A/G  | NA                 | NA                            | NA                 |
| <i>Desi_wild_58110379</i> | NA                                  | <i>Ca_desi_denovo</i> | 58110379                | C/G  | NA                 | NA                            | NA                 |
| <i>Desi_wild_58110391</i> | NA                                  | <i>Ca_desi_denovo</i> | 58110391                | A/C  | NA                 | NA                            | NA                 |
| <i>Desi_wild_58117526</i> | NA                                  | <i>Ca_desi_denovo</i> | 58117526                | A/G  | NA                 | NA                            | NA                 |
| <i>Desi_wild_58117553</i> | NA                                  | <i>Ca_desi_denovo</i> | 58117553                | A/T  | NA                 | NA                            | NA                 |
| <i>Desi_wild_58117571</i> | NA                                  | <i>Ca_desi_denovo</i> | 58117571                | A/G  | NA                 | NA                            | NA                 |
| <i>Desi_wild_58119008</i> | NA                                  | <i>Ca_desi_denovo</i> | 58119008                | A/G  | NA                 | NA                            | NA                 |
| <i>Desi_wild_58119586</i> | NA                                  | <i>Ca_desi_denovo</i> | 58119586                | C/G  | NA                 | NA                            | NA                 |
| <i>Desi_wild_58119595</i> | NA                                  | <i>Ca_desi_denovo</i> | 58119595                | C/G  | NA                 | NA                            | NA                 |

| SNP IDs                   | NCBI dbSNP accession IDs (NCBI_SS#) | Chromosomes           | Physical positions (bp) | SNPs | Gene accession IDs | Sequence components of genome | Putative functions |
|---------------------------|-------------------------------------|-----------------------|-------------------------|------|--------------------|-------------------------------|--------------------|
| <i>Desi_wild_58120786</i> | NA                                  | <i>Ca_desi_denovo</i> | 58120786                | C/G  | NA                 | NA                            | NA                 |
| <i>Desi_wild_58120798</i> | NA                                  | <i>Ca_desi_denovo</i> | 58120798                | A/G  | NA                 | NA                            | NA                 |
| <i>Desi_wild_58120837</i> | NA                                  | <i>Ca_desi_denovo</i> | 58120837                | C/G  | NA                 | NA                            | NA                 |
| <i>Desi_wild_58121523</i> | NA                                  | <i>Ca_desi_denovo</i> | 58121523                | C/G  | NA                 | NA                            | NA                 |
| <i>Desi_wild_58121538</i> | NA                                  | <i>Ca_desi_denovo</i> | 58121538                | C/G  | NA                 | NA                            | NA                 |
| <i>Desi_wild_58121541</i> | NA                                  | <i>Ca_desi_denovo</i> | 58121541                | A/G  | NA                 | NA                            | NA                 |
| <i>Desi_wild_58128994</i> | NA                                  | <i>Ca_desi_denovo</i> | 58128994                | A/C  | NA                 | NA                            | NA                 |
| <i>Desi_wild_58134082</i> | NA                                  | <i>Ca_desi_denovo</i> | 58134082                | A/G  | NA                 | NA                            | NA                 |
| <i>Desi_wild_58134148</i> | NA                                  | <i>Ca_desi_denovo</i> | 58134148                | A/G  | NA                 | NA                            | NA                 |
| <i>Desi_wild_58135390</i> | NA                                  | <i>Ca_desi_denovo</i> | 58135390                | C/G  | NA                 | NA                            | NA                 |
| <i>Desi_wild_58136587</i> | NA                                  | <i>Ca_desi_denovo</i> | 58136587                | C/T  | NA                 | NA                            | NA                 |
| <i>Desi_wild_58136632</i> | NA                                  | <i>Ca_desi_denovo</i> | 58136632                | C/T  | NA                 | NA                            | NA                 |
| <i>Desi_wild_58136668</i> | NA                                  | <i>Ca_desi_denovo</i> | 58136668                | A/G  | NA                 | NA                            | NA                 |
| <i>Desi_wild_58136683</i> | NA                                  | <i>Ca_desi_denovo</i> | 58136683                | A/G  | NA                 | NA                            | NA                 |
| <i>Desi_wild_58136709</i> | NA                                  | <i>Ca_desi_denovo</i> | 58136709                | A/G  | NA                 | NA                            | NA                 |
| <i>Desi_wild_58140415</i> | NA                                  | <i>Ca_desi_denovo</i> | 58140415                | A/C  | NA                 | NA                            | NA                 |
| <i>Desi_wild_58140421</i> | NA                                  | <i>Ca_desi_denovo</i> | 58140421                | A/T  | NA                 | NA                            | NA                 |
| <i>Desi_wild_58141796</i> | NA                                  | <i>Ca_desi_denovo</i> | 58141796                | A/C  | NA                 | NA                            | NA                 |
| <i>Desi_wild_58142376</i> | NA                                  | <i>Ca_desi_denovo</i> | 58142376                | C/G  | NA                 | NA                            | NA                 |
| <i>Desi_wild_58142446</i> | NA                                  | <i>Ca_desi_denovo</i> | 58142446                | C/T  | NA                 | NA                            | NA                 |
| <i>Desi_wild_58142935</i> | NA                                  | <i>Ca_desi_denovo</i> | 58142935                | A/G  | NA                 | NA                            | NA                 |
| <i>Desi_wild_58143182</i> | NA                                  | <i>Ca_desi_denovo</i> | 58143182                | A/T  | NA                 | NA                            | NA                 |
| <i>Desi_wild_58143243</i> | NA                                  | <i>Ca_desi_denovo</i> | 58143243                | A/T  | NA                 | NA                            | NA                 |
| <i>Desi_wild_58144238</i> | NA                                  | <i>Ca_desi_denovo</i> | 58144238                | G/T  | NA                 | NA                            | NA                 |
| <i>Desi_wild_58144239</i> | NA                                  | <i>Ca_desi_denovo</i> | 58144239                | C/G  | NA                 | NA                            | NA                 |
| <i>Desi_wild_58146663</i> | NA                                  | <i>Ca_desi_denovo</i> | 58146663                | C/T  | NA                 | NA                            | NA                 |
| <i>Desi_wild_58148242</i> | NA                                  | <i>Ca_desi_denovo</i> | 58148242                | A/G  | NA                 | NA                            | NA                 |
| <i>Desi_wild_58148260</i> | NA                                  | <i>Ca_desi_denovo</i> | 58148260                | A/G  | NA                 | NA                            | NA                 |
| <i>Desi_wild_58148263</i> | NA                                  | <i>Ca_desi_denovo</i> | 58148263                | C/T  | NA                 | NA                            | NA                 |
| <i>Desi_wild_58151018</i> | NA                                  | <i>Ca_desi_denovo</i> | 58151018                | A/G  | NA                 | NA                            | NA                 |
| <i>Desi_wild_58151034</i> | NA                                  | <i>Ca_desi_denovo</i> | 58151034                | A/G  | NA                 | NA                            | NA                 |
| <i>Desi_wild_58151880</i> | NA                                  | <i>Ca_desi_denovo</i> | 58151880                | C/T  | NA                 | NA                            | NA                 |
| <i>Desi_wild_58153924</i> | NA                                  | <i>Ca_desi_denovo</i> | 58153924                | C/T  | NA                 | NA                            | NA                 |
| <i>Desi_wild_58153927</i> | NA                                  | <i>Ca_desi_denovo</i> | 58153927                | C/G  | NA                 | NA                            | NA                 |
| <i>Desi_wild_58156401</i> | NA                                  | <i>Ca_desi_denovo</i> | 58156401                | A/G  | NA                 | NA                            | NA                 |
| <i>Desi_wild_58156403</i> | NA                                  | <i>Ca_desi_denovo</i> | 58156403                | C/G  | NA                 | NA                            | NA                 |
| <i>Desi_wild_58156416</i> | NA                                  | <i>Ca_desi_denovo</i> | 58156416                | C/T  | NA                 | NA                            | NA                 |
| <i>Desi_wild_58158751</i> | NA                                  | <i>Ca_desi_denovo</i> | 58158751                | C/G  | NA                 | NA                            | NA                 |
| <i>Desi_wild_58158838</i> | NA                                  | <i>Ca_desi_denovo</i> | 58158838                | C/T  | NA                 | NA                            | NA                 |
| <i>Desi_wild_58159215</i> | NA                                  | <i>Ca_desi_denovo</i> | 58159215                | A/G  | NA                 | NA                            | NA                 |
| <i>Desi_wild_58159224</i> | NA                                  | <i>Ca_desi_denovo</i> | 58159224                | A/G  | NA                 | NA                            | NA                 |
| <i>Desi_wild_58165168</i> | NA                                  | <i>Ca_desi_denovo</i> | 58165168                | C/T  | NA                 | NA                            | NA                 |
| <i>Desi_wild_58165183</i> | NA                                  | <i>Ca_desi_denovo</i> | 58165183                | C/G  | NA                 | NA                            | NA                 |
| <i>Desi_wild_58165204</i> | NA                                  | <i>Ca_desi_denovo</i> | 58165204                | C/G  | NA                 | NA                            | NA                 |

| SNP IDs                   | NCBI dbSNP accession IDs (NCBI_SS#) | Chromosomes           | Physical positions (bp) | SNPs | Gene accession IDs | Sequence components of genome | Putative functions |
|---------------------------|-------------------------------------|-----------------------|-------------------------|------|--------------------|-------------------------------|--------------------|
| <i>Desi_wild_58166386</i> | NA                                  | <i>Ca_desi_denovo</i> | 58166386                | C/T  | NA                 | NA                            | NA                 |
| <i>Desi_wild_58168795</i> | NA                                  | <i>Ca_desi_denovo</i> | 58168795                | C/T  | NA                 | NA                            | NA                 |
| <i>Desi_wild_58169803</i> | NA                                  | <i>Ca_desi_denovo</i> | 58169803                | A/C  | NA                 | NA                            | NA                 |
| <i>Desi_wild_58173048</i> | NA                                  | <i>Ca_desi_denovo</i> | 58173048                | C/G  | NA                 | NA                            | NA                 |
| <i>Desi_wild_58173081</i> | NA                                  | <i>Ca_desi_denovo</i> | 58173081                | C/T  | NA                 | NA                            | NA                 |
| <i>Desi_wild_58173396</i> | NA                                  | <i>Ca_desi_denovo</i> | 58173396                | A/G  | NA                 | NA                            | NA                 |
| <i>Desi_wild_58174270</i> | NA                                  | <i>Ca_desi_denovo</i> | 58174270                | C/G  | NA                 | NA                            | NA                 |
| <i>Desi_wild_58174281</i> | NA                                  | <i>Ca_desi_denovo</i> | 58174281                | C/G  | NA                 | NA                            | NA                 |
| <i>Desi_wild_58175838</i> | NA                                  | <i>Ca_desi_denovo</i> | 58175838                | A/G  | NA                 | NA                            | NA                 |
| <i>Desi_wild_58175841</i> | NA                                  | <i>Ca_desi_denovo</i> | 58175841                | A/C  | NA                 | NA                            | NA                 |
| <i>Desi_wild_58178207</i> | NA                                  | <i>Ca_desi_denovo</i> | 58178207                | A/C  | NA                 | NA                            | NA                 |
| <i>Desi_wild_58178231</i> | NA                                  | <i>Ca_desi_denovo</i> | 58178231                | A/T  | NA                 | NA                            | NA                 |
| <i>Desi_wild_58178234</i> | NA                                  | <i>Ca_desi_denovo</i> | 58178234                | G/T  | NA                 | NA                            | NA                 |
| <i>Desi_wild_58178487</i> | NA                                  | <i>Ca_desi_denovo</i> | 58178487                | C/G  | NA                 | NA                            | NA                 |
| <i>Desi_wild_58179847</i> | NA                                  | <i>Ca_desi_denovo</i> | 58179847                | A/G  | NA                 | NA                            | NA                 |
| <i>Desi_wild_58179862</i> | NA                                  | <i>Ca_desi_denovo</i> | 58179862                | C/G  | NA                 | NA                            | NA                 |
| <i>Desi_wild_58179934</i> | NA                                  | <i>Ca_desi_denovo</i> | 58179934                | G/T  | NA                 | NA                            | NA                 |
| <i>Desi_wild_58179994</i> | NA                                  | <i>Ca_desi_denovo</i> | 58179994                | G/T  | NA                 | NA                            | NA                 |
| <i>Desi_wild_58180693</i> | NA                                  | <i>Ca_desi_denovo</i> | 58180693                | A/G  | NA                 | NA                            | NA                 |
| <i>Desi_wild_58188737</i> | NA                                  | <i>Ca_desi_denovo</i> | 58188737                | C/T  | NA                 | NA                            | NA                 |
| <i>Desi_wild_58188738</i> | NA                                  | <i>Ca_desi_denovo</i> | 58188738                | A/G  | NA                 | NA                            | NA                 |
| <i>Desi_wild_58188741</i> | NA                                  | <i>Ca_desi_denovo</i> | 58188741                | A/G  | NA                 | NA                            | NA                 |
| <i>Desi_wild_58194171</i> | NA                                  | <i>Ca_desi_denovo</i> | 58194171                | C/G  | NA                 | NA                            | NA                 |
| <i>Desi_wild_58197791</i> | NA                                  | <i>Ca_desi_denovo</i> | 58197791                | A/G  | NA                 | NA                            | NA                 |
| <i>Desi_wild_58200760</i> | NA                                  | <i>Ca_desi_denovo</i> | 58200760                | C/T  | NA                 | NA                            | NA                 |
| <i>Desi_wild_58200778</i> | NA                                  | <i>Ca_desi_denovo</i> | 58200778                | C/G  | NA                 | NA                            | NA                 |
| <i>Desi_wild_58200781</i> | NA                                  | <i>Ca_desi_denovo</i> | 58200781                | A/G  | NA                 | NA                            | NA                 |
| <i>Desi_wild_58201594</i> | NA                                  | <i>Ca_desi_denovo</i> | 58201594                | A/G  | NA                 | NA                            | NA                 |
| <i>Desi_wild_58202064</i> | NA                                  | <i>Ca_desi_denovo</i> | 58202064                | C/G  | NA                 | NA                            | NA                 |
| <i>Desi_wild_58202066</i> | NA                                  | <i>Ca_desi_denovo</i> | 58202066                | A/G  | NA                 | NA                            | NA                 |
| <i>Desi_wild_58202082</i> | NA                                  | <i>Ca_desi_denovo</i> | 58202082                | C/G  | NA                 | NA                            | NA                 |
| <i>Desi_wild_58203737</i> | NA                                  | <i>Ca_desi_denovo</i> | 58203737                | C/G  | NA                 | NA                            | NA                 |
| <i>Desi_wild_58203840</i> | NA                                  | <i>Ca_desi_denovo</i> | 58203840                | A/G  | NA                 | NA                            | NA                 |
| <i>Desi_wild_58204107</i> | NA                                  | <i>Ca_desi_denovo</i> | 58204107                | C/G  | NA                 | NA                            | NA                 |
| <i>Desi_wild_58204116</i> | NA                                  | <i>Ca_desi_denovo</i> | 58204116                | C/G  | NA                 | NA                            | NA                 |
| <i>Desi_wild_58204128</i> | NA                                  | <i>Ca_desi_denovo</i> | 58204128                | A/G  | NA                 | NA                            | NA                 |
| <i>Desi_wild_58205055</i> | NA                                  | <i>Ca_desi_denovo</i> | 58205055                | C/T  | NA                 | NA                            | NA                 |
| <i>Desi_wild_58205064</i> | NA                                  | <i>Ca_desi_denovo</i> | 58205064                | C/G  | NA                 | NA                            | NA                 |
| <i>Desi_wild_58205689</i> | NA                                  | <i>Ca_desi_denovo</i> | 58205689                | C/G  | NA                 | NA                            | NA                 |
| <i>Desi_wild_58208593</i> | NA                                  | <i>Ca_desi_denovo</i> | 58208593                | A/C  | NA                 | NA                            | NA                 |
| <i>Desi_wild_58208648</i> | NA                                  | <i>Ca_desi_denovo</i> | 58208648                | C/G  | NA                 | NA                            | NA                 |
| <i>Desi_wild_58210339</i> | NA                                  | <i>Ca_desi_denovo</i> | 58210339                | A/G  | NA                 | NA                            | NA                 |
| <i>Desi_wild_58210345</i> | NA                                  | <i>Ca_desi_denovo</i> | 58210345                | G/T  | NA                 | NA                            | NA                 |
| <i>Desi_wild_58210548</i> | NA                                  | <i>Ca_desi_denovo</i> | 58210548                | A/C  | NA                 | NA                            | NA                 |

| SNP IDs                   | NCBI dbSNP accession IDs (NCBI_SS#) | Chromosomes           | Physical positions (bp) | SNPs | Gene accession IDs | Sequence components of genome | Putative functions |
|---------------------------|-------------------------------------|-----------------------|-------------------------|------|--------------------|-------------------------------|--------------------|
| <i>Desi_wild_58210636</i> | NA                                  | <i>Ca_desi_denovo</i> | 58210636                | A/G  | NA                 | NA                            | NA                 |
| <i>Desi_wild_58212196</i> | NA                                  | <i>Ca_desi_denovo</i> | 58212196                | C/T  | NA                 | NA                            | NA                 |
| <i>Desi_wild_58212226</i> | NA                                  | <i>Ca_desi_denovo</i> | 58212226                | G/T  | NA                 | NA                            | NA                 |
| <i>Desi_wild_58215933</i> | NA                                  | <i>Ca_desi_denovo</i> | 58215933                | C/G  | NA                 | NA                            | NA                 |
| <i>Desi_wild_58215936</i> | NA                                  | <i>Ca_desi_denovo</i> | 58215936                | A/G  | NA                 | NA                            | NA                 |
| <i>Desi_wild_58217230</i> | NA                                  | <i>Ca_desi_denovo</i> | 58217230                | G/T  | NA                 | NA                            | NA                 |
| <i>Desi_wild_58223359</i> | NA                                  | <i>Ca_desi_denovo</i> | 58223359                | A/G  | NA                 | NA                            | NA                 |
| <i>Desi_wild_58223367</i> | NA                                  | <i>Ca_desi_denovo</i> | 58223367                | A/G  | NA                 | NA                            | NA                 |
| <i>Desi_wild_58223649</i> | NA                                  | <i>Ca_desi_denovo</i> | 58223649                | A/C  | NA                 | NA                            | NA                 |
| <i>Desi_wild_58228020</i> | NA                                  | <i>Ca_desi_denovo</i> | 58228020                | C/T  | NA                 | NA                            | NA                 |
| <i>Desi_wild_58228207</i> | NA                                  | <i>Ca_desi_denovo</i> | 58228207                | A/G  | NA                 | NA                            | NA                 |
| <i>Desi_wild_58228381</i> | NA                                  | <i>Ca_desi_denovo</i> | 58228381                | A/G  | NA                 | NA                            | NA                 |
| <i>Desi_wild_58228384</i> | NA                                  | <i>Ca_desi_denovo</i> | 58228384                | C/G  | NA                 | NA                            | NA                 |
| <i>Desi_wild_58231108</i> | NA                                  | <i>Ca_desi_denovo</i> | 58231108                | G/T  | NA                 | NA                            | NA                 |
| <i>Desi_wild_58233518</i> | NA                                  | <i>Ca_desi_denovo</i> | 58233518                | A/G  | NA                 | NA                            | NA                 |
| <i>Desi_wild_58234023</i> | NA                                  | <i>Ca_desi_denovo</i> | 58234023                | C/T  | NA                 | NA                            | NA                 |
| <i>Desi_wild_58235042</i> | NA                                  | <i>Ca_desi_denovo</i> | 58235042                | A/G  | NA                 | NA                            | NA                 |
| <i>Desi_wild_58238534</i> | NA                                  | <i>Ca_desi_denovo</i> | 58238534                | G/T  | NA                 | NA                            | NA                 |
| <i>Desi_wild_58238992</i> | NA                                  | <i>Ca_desi_denovo</i> | 58238992                | C/G  | NA                 | NA                            | NA                 |
| <i>Desi_wild_58240192</i> | NA                                  | <i>Ca_desi_denovo</i> | 58240192                | C/T  | NA                 | NA                            | NA                 |
| <i>Desi_wild_58240282</i> | NA                                  | <i>Ca_desi_denovo</i> | 58240282                | C/G  | NA                 | NA                            | NA                 |
| <i>Desi_wild_58240297</i> | NA                                  | <i>Ca_desi_denovo</i> | 58240297                | C/T  | NA                 | NA                            | NA                 |
| <i>Desi_wild_58240315</i> | NA                                  | <i>Ca_desi_denovo</i> | 58240315                | C/G  | NA                 | NA                            | NA                 |
| <i>Desi_wild_58240551</i> | NA                                  | <i>Ca_desi_denovo</i> | 58240551                | A/C  | NA                 | NA                            | NA                 |
| <i>Desi_wild_58241050</i> | NA                                  | <i>Ca_desi_denovo</i> | 58241050                | C/T  | NA                 | NA                            | NA                 |
| <i>Desi_wild_58241051</i> | NA                                  | <i>Ca_desi_denovo</i> | 58241051                | G/T  | NA                 | NA                            | NA                 |
| <i>Desi_wild_58241062</i> | NA                                  | <i>Ca_desi_denovo</i> | 58241062                | A/C  | NA                 | NA                            | NA                 |
| <i>Desi_wild_58241894</i> | NA                                  | <i>Ca_desi_denovo</i> | 58241894                | A/G  | NA                 | NA                            | NA                 |
| <i>Desi_wild_58241925</i> | NA                                  | <i>Ca_desi_denovo</i> | 58241925                | C/T  | NA                 | NA                            | NA                 |
| <i>Desi_wild_58242332</i> | NA                                  | <i>Ca_desi_denovo</i> | 58242332                | C/T  | NA                 | NA                            | NA                 |
| <i>Desi_wild_58242333</i> | NA                                  | <i>Ca_desi_denovo</i> | 58242333                | G/T  | NA                 | NA                            | NA                 |
| <i>Desi_wild_58244518</i> | NA                                  | <i>Ca_desi_denovo</i> | 58244518                | A/G  | NA                 | NA                            | NA                 |
| <i>Desi_wild_58248004</i> | NA                                  | <i>Ca_desi_denovo</i> | 58248004                | C/G  | NA                 | NA                            | NA                 |
| <i>Desi_wild_58249249</i> | NA                                  | <i>Ca_desi_denovo</i> | 58249249                | C/T  | NA                 | NA                            | NA                 |
| <i>Desi_wild_58249276</i> | NA                                  | <i>Ca_desi_denovo</i> | 58249276                | A/G  | NA                 | NA                            | NA                 |
| <i>Desi_wild_58252468</i> | NA                                  | <i>Ca_desi_denovo</i> | 58252468                | C/G  | NA                 | NA                            | NA                 |
| <i>Desi_wild_58252489</i> | NA                                  | <i>Ca_desi_denovo</i> | 58252489                | C/T  | NA                 | NA                            | NA                 |
| <i>Desi_wild_58252492</i> | NA                                  | <i>Ca_desi_denovo</i> | 58252492                | A/G  | NA                 | NA                            | NA                 |
| <i>Desi_wild_58253597</i> | NA                                  | <i>Ca_desi_denovo</i> | 58253597                | A/G  | NA                 | NA                            | NA                 |
| <i>Desi_wild_58255816</i> | NA                                  | <i>Ca_desi_denovo</i> | 58255816                | C/G  | NA                 | NA                            | NA                 |
| <i>Desi_wild_58255855</i> | NA                                  | <i>Ca_desi_denovo</i> | 58255855                | A/G  | NA                 | NA                            | NA                 |
| <i>Desi_wild_58256035</i> | NA                                  | <i>Ca_desi_denovo</i> | 58256035                | C/G  | NA                 | NA                            | NA                 |
| <i>Desi_wild_58256038</i> | NA                                  | <i>Ca_desi_denovo</i> | 58256038                | G/T  | NA                 | NA                            | NA                 |
| <i>Desi_wild_58256041</i> | NA                                  | <i>Ca_desi_denovo</i> | 58256041                | C/G  | NA                 | NA                            | NA                 |



| SNP IDs                   | NCBI dbSNP accession IDs (NCBI_SS#) | Chromosomes           | Physical positions (bp) | SNPs | Gene accession IDs | Sequence components of genome | Putative functions |
|---------------------------|-------------------------------------|-----------------------|-------------------------|------|--------------------|-------------------------------|--------------------|
| <i>Desi_wild_58259902</i> | NA                                  | <i>Ca_desi_denovo</i> | 58259902                | A/G  | NA                 | NA                            | NA                 |
| <i>Desi_wild_58259941</i> | NA                                  | <i>Ca_desi_denovo</i> | 58259941                | A/G  | NA                 | NA                            | NA                 |
| <i>Desi_wild_58262338</i> | NA                                  | <i>Ca_desi_denovo</i> | 58262338                | G/T  | NA                 | NA                            | NA                 |
| <i>Desi_wild_58262362</i> | NA                                  | <i>Ca_desi_denovo</i> | 58262362                | A/C  | NA                 | NA                            | NA                 |
| <i>Desi_wild_58264892</i> | NA                                  | <i>Ca_desi_denovo</i> | 58264892                | C/T  | NA                 | NA                            | NA                 |
| <i>Desi_wild_58267569</i> | NA                                  | <i>Ca_desi_denovo</i> | 58267569                | A/G  | NA                 | NA                            | NA                 |
| <i>Desi_wild_58267922</i> | NA                                  | <i>Ca_desi_denovo</i> | 58267922                | C/G  | NA                 | NA                            | NA                 |
| <i>Desi_wild_58268373</i> | NA                                  | <i>Ca_desi_denovo</i> | 58268373                | C/G  | NA                 | NA                            | NA                 |
| <i>Desi_wild_58268391</i> | NA                                  | <i>Ca_desi_denovo</i> | 58268391                | C/T  | NA                 | NA                            | NA                 |
| <i>Desi_wild_58269120</i> | NA                                  | <i>Ca_desi_denovo</i> | 58269120                | C/G  | NA                 | NA                            | NA                 |
| <i>Desi_wild_58269183</i> | NA                                  | <i>Ca_desi_denovo</i> | 58269183                | C/G  | NA                 | NA                            | NA                 |
| <i>Desi_wild_58269480</i> | NA                                  | <i>Ca_desi_denovo</i> | 58269480                | A/G  | NA                 | NA                            | NA                 |
| <i>Desi_wild_58269488</i> | NA                                  | <i>Ca_desi_denovo</i> | 58269488                | A/C  | NA                 | NA                            | NA                 |
| <i>Desi_wild_58269500</i> | NA                                  | <i>Ca_desi_denovo</i> | 58269500                | G/T  | NA                 | NA                            | NA                 |
| <i>Desi_wild_58269507</i> | NA                                  | <i>Ca_desi_denovo</i> | 58269507                | C/G  | NA                 | NA                            | NA                 |
| <i>Desi_wild_58270977</i> | NA                                  | <i>Ca_desi_denovo</i> | 58270977                | A/G  | NA                 | NA                            | NA                 |
| <i>Desi_wild_58270992</i> | NA                                  | <i>Ca_desi_denovo</i> | 58270992                | A/G  | NA                 | NA                            | NA                 |
| <i>Desi_wild_58271712</i> | NA                                  | <i>Ca_desi_denovo</i> | 58271712                | G/T  | NA                 | NA                            | NA                 |
| <i>Desi_wild_58271721</i> | NA                                  | <i>Ca_desi_denovo</i> | 58271721                | A/C  | NA                 | NA                            | NA                 |
| <i>Desi_wild_58274508</i> | NA                                  | <i>Ca_desi_denovo</i> | 58274508                | C/T  | NA                 | NA                            | NA                 |
| <i>Desi_wild_58274512</i> | NA                                  | <i>Ca_desi_denovo</i> | 58274512                | C/T  | NA                 | NA                            | NA                 |
| <i>Desi_wild_58274514</i> | NA                                  | <i>Ca_desi_denovo</i> | 58274514                | C/T  | NA                 | NA                            | NA                 |
| <i>Desi_wild_58274515</i> | NA                                  | <i>Ca_desi_denovo</i> | 58274515                | A/G  | NA                 | NA                            | NA                 |
| <i>Desi_wild_58277377</i> | NA                                  | <i>Ca_desi_denovo</i> | 58277377                | G/T  | NA                 | NA                            | NA                 |
| <i>Desi_wild_58281098</i> | NA                                  | <i>Ca_desi_denovo</i> | 58281098                | C/T  | NA                 | NA                            | NA                 |
| <i>Desi_wild_58282855</i> | NA                                  | <i>Ca_desi_denovo</i> | 58282855                | C/T  | NA                 | NA                            | NA                 |
| <i>Desi_wild_58283812</i> | NA                                  | <i>Ca_desi_denovo</i> | 58283812                | A/G  | NA                 | NA                            | NA                 |
| <i>Desi_wild_58283817</i> | NA                                  | <i>Ca_desi_denovo</i> | 58283817                | C/T  | NA                 | NA                            | NA                 |
| <i>Desi_wild_58283827</i> | NA                                  | <i>Ca_desi_denovo</i> | 58283827                | A/G  | NA                 | NA                            | NA                 |
| <i>Desi_wild_58284367</i> | NA                                  | <i>Ca_desi_denovo</i> | 58284367                | C/T  | NA                 | NA                            | NA                 |
| <i>Desi_wild_58285852</i> | NA                                  | <i>Ca_desi_denovo</i> | 58285852                | C/G  | NA                 | NA                            | NA                 |
| <i>Desi_wild_58292485</i> | NA                                  | <i>Ca_desi_denovo</i> | 58292485                | C/G  | NA                 | NA                            | NA                 |
| <i>Desi_wild_58293967</i> | NA                                  | <i>Ca_desi_denovo</i> | 58293967                | C/G  | NA                 | NA                            | NA                 |
| <i>Desi_wild_58294539</i> | NA                                  | <i>Ca_desi_denovo</i> | 58294539                | C/T  | NA                 | NA                            | NA                 |
| <i>Desi_wild_58298746</i> | NA                                  | <i>Ca_desi_denovo</i> | 58298746                | G/T  | NA                 | NA                            | NA                 |
| <i>Desi_wild_58301937</i> | NA                                  | <i>Ca_desi_denovo</i> | 58301937                | A/G  | NA                 | NA                            | NA                 |
| <i>Desi_wild_58301952</i> | NA                                  | <i>Ca_desi_denovo</i> | 58301952                | C/T  | NA                 | NA                            | NA                 |
| <i>Desi_wild_58302022</i> | NA                                  | <i>Ca_desi_denovo</i> | 58302022                | A/G  | NA                 | NA                            | NA                 |
| <i>Desi_wild_58303432</i> | NA                                  | <i>Ca_desi_denovo</i> | 58303432                | A/G  | NA                 | NA                            | NA                 |
| <i>Desi_wild_58303636</i> | NA                                  | <i>Ca_desi_denovo</i> | 58303636                | C/G  | NA                 | NA                            | NA                 |
| <i>Desi_wild_58303639</i> | NA                                  | <i>Ca_desi_denovo</i> | 58303639                | C/G  | NA                 | NA                            | NA                 |
| <i>Desi_wild_58306314</i> | NA                                  | <i>Ca_desi_denovo</i> | 58306314                | C/G  | NA                 | NA                            | NA                 |
| <i>Desi_wild_58306350</i> | NA                                  | <i>Ca_desi_denovo</i> | 58306350                | C/T  | NA                 | NA                            | NA                 |
| <i>Desi_wild_58306498</i> | NA                                  | <i>Ca_desi_denovo</i> | 58306498                | C/T  | NA                 | NA                            | NA                 |

| SNP IDs                   | NCBI dbSNP accession IDs (NCBI_SS#) | Chromosomes           | Physical positions (bp) | SNPs | Gene accession IDs | Sequence components of genome | Putative functions |
|---------------------------|-------------------------------------|-----------------------|-------------------------|------|--------------------|-------------------------------|--------------------|
| <i>Desi_wild_58308208</i> | NA                                  | <i>Ca_desi_denovo</i> | 58308208                | G/T  | NA                 | NA                            | NA                 |
| <i>Desi_wild_58309311</i> | NA                                  | <i>Ca_desi_denovo</i> | 58309311                | C/G  | NA                 | NA                            | NA                 |
| <i>Desi_wild_58312858</i> | NA                                  | <i>Ca_desi_denovo</i> | 58312858                | A/G  | NA                 | NA                            | NA                 |
| <i>Desi_wild_58312861</i> | NA                                  | <i>Ca_desi_denovo</i> | 58312861                | C/G  | NA                 | NA                            | NA                 |
| <i>Desi_wild_58315909</i> | NA                                  | <i>Ca_desi_denovo</i> | 58315909                | C/T  | NA                 | NA                            | NA                 |
| <i>Desi_wild_58322268</i> | NA                                  | <i>Ca_desi_denovo</i> | 58322268                | C/T  | NA                 | NA                            | NA                 |
| <i>Desi_wild_58332806</i> | NA                                  | <i>Ca_desi_denovo</i> | 58332806                | A/C  | NA                 | NA                            | NA                 |
| <i>Desi_wild_58335519</i> | NA                                  | <i>Ca_desi_denovo</i> | 58335519                | C/T  | NA                 | NA                            | NA                 |
| <i>Desi_wild_58335548</i> | NA                                  | <i>Ca_desi_denovo</i> | 58335548                | A/G  | NA                 | NA                            | NA                 |
| <i>Desi_wild_58339728</i> | NA                                  | <i>Ca_desi_denovo</i> | 58339728                | G/T  | NA                 | NA                            | NA                 |
| <i>Desi_wild_58341853</i> | NA                                  | <i>Ca_desi_denovo</i> | 58341853                | A/G  | NA                 | NA                            | NA                 |
| <i>Desi_wild_58346844</i> | NA                                  | <i>Ca_desi_denovo</i> | 58346844                | C/G  | NA                 | NA                            | NA                 |
| <i>Desi_wild_58347612</i> | NA                                  | <i>Ca_desi_denovo</i> | 58347612                | C/T  | NA                 | NA                            | NA                 |
| <i>Desi_wild_58353091</i> | NA                                  | <i>Ca_desi_denovo</i> | 58353091                | A/G  | NA                 | NA                            | NA                 |
| <i>Desi_wild_58353106</i> | NA                                  | <i>Ca_desi_denovo</i> | 58353106                | A/G  | NA                 | NA                            | NA                 |
| <i>Desi_wild_58353127</i> | NA                                  | <i>Ca_desi_denovo</i> | 58353127                | A/C  | NA                 | NA                            | NA                 |
| <i>Desi_wild_58362576</i> | NA                                  | <i>Ca_desi_denovo</i> | 58362576                | A/G  | NA                 | NA                            | NA                 |
| <i>Desi_wild_58362600</i> | NA                                  | <i>Ca_desi_denovo</i> | 58362600                | C/G  | NA                 | NA                            | NA                 |
| <i>Desi_wild_58362603</i> | NA                                  | <i>Ca_desi_denovo</i> | 58362603                | C/G  | NA                 | NA                            | NA                 |
| <i>Desi_wild_58362624</i> | NA                                  | <i>Ca_desi_denovo</i> | 58362624                | G/T  | NA                 | NA                            | NA                 |
| <i>Desi_wild_58363252</i> | NA                                  | <i>Ca_desi_denovo</i> | 58363252                | A/G  | NA                 | NA                            | NA                 |
| <i>Desi_wild_58363294</i> | NA                                  | <i>Ca_desi_denovo</i> | 58363294                | A/C  | NA                 | NA                            | NA                 |
| <i>Desi_wild_58363617</i> | NA                                  | <i>Ca_desi_denovo</i> | 58363617                | A/G  | NA                 | NA                            | NA                 |
| <i>Desi_wild_58363653</i> | NA                                  | <i>Ca_desi_denovo</i> | 58363653                | A/G  | NA                 | NA                            | NA                 |
| <i>Desi_wild_58374003</i> | NA                                  | <i>Ca_desi_denovo</i> | 58374003                | C/T  | NA                 | NA                            | NA                 |
| <i>Desi_wild_58374140</i> | NA                                  | <i>Ca_desi_denovo</i> | 58374140                | A/G  | NA                 | NA                            | NA                 |
| <i>Desi_wild_58374146</i> | NA                                  | <i>Ca_desi_denovo</i> | 58374146                | C/G  | NA                 | NA                            | NA                 |
| <i>Desi_wild_58377184</i> | NA                                  | <i>Ca_desi_denovo</i> | 58377184                | A/G  | NA                 | NA                            | NA                 |
| <i>Desi_wild_58378319</i> | NA                                  | <i>Ca_desi_denovo</i> | 58378319                | A/G  | NA                 | NA                            | NA                 |
| <i>Desi_wild_58385093</i> | NA                                  | <i>Ca_desi_denovo</i> | 58385093                | C/T  | NA                 | NA                            | NA                 |
| <i>Desi_wild_58385119</i> | NA                                  | <i>Ca_desi_denovo</i> | 58385119                | C/G  | NA                 | NA                            | NA                 |
| <i>Desi_wild_58386210</i> | NA                                  | <i>Ca_desi_denovo</i> | 58386210                | A/G  | NA                 | NA                            | NA                 |
| <i>Desi_wild_58386679</i> | NA                                  | <i>Ca_desi_denovo</i> | 58386679                | C/T  | NA                 | NA                            | NA                 |
| <i>Desi_wild_58387244</i> | NA                                  | <i>Ca_desi_denovo</i> | 58387244                | A/G  | NA                 | NA                            | NA                 |
| <i>Desi_wild_58387288</i> | NA                                  | <i>Ca_desi_denovo</i> | 58387288                | C/G  | NA                 | NA                            | NA                 |
| <i>Desi_wild_58388353</i> | NA                                  | <i>Ca_desi_denovo</i> | 58388353                | A/G  | NA                 | NA                            | NA                 |
| <i>Desi_wild_58388359</i> | NA                                  | <i>Ca_desi_denovo</i> | 58388359                | A/C  | NA                 | NA                            | NA                 |
| <i>Desi_wild_58389384</i> | NA                                  | <i>Ca_desi_denovo</i> | 58389384                | G/T  | NA                 | NA                            | NA                 |
| <i>Desi_wild_58391033</i> | NA                                  | <i>Ca_desi_denovo</i> | 58391033                | A/G  | NA                 | NA                            | NA                 |
| <i>Desi_wild_58391273</i> | NA                                  | <i>Ca_desi_denovo</i> | 58391273                | A/G  | NA                 | NA                            | NA                 |
| <i>Desi_wild_58394941</i> | NA                                  | <i>Ca_desi_denovo</i> | 58394941                | A/G  | NA                 | NA                            | NA                 |
| <i>Desi_wild_58394962</i> | NA                                  | <i>Ca_desi_denovo</i> | 58394962                | A/G  | NA                 | NA                            | NA                 |
| <i>Desi_wild_58394971</i> | NA                                  | <i>Ca_desi_denovo</i> | 58394971                | C/T  | NA                 | NA                            | NA                 |
| <i>Desi_wild_58399458</i> | NA                                  | <i>Ca_desi_denovo</i> | 58399458                | A/G  | NA                 | NA                            | NA                 |

| SNP IDs                   | NCBI dbSNP accession IDs (NCBI_SS#) | Chromosomes           | Physical positions (bp) | SNPs | Gene accession IDs | Sequence components of genome | Putative functions |
|---------------------------|-------------------------------------|-----------------------|-------------------------|------|--------------------|-------------------------------|--------------------|
| <i>Desi_wild_58401646</i> | NA                                  | <i>Ca_desi_denovo</i> | 58401646                | G/T  | NA                 | NA                            | NA                 |
| <i>Desi_wild_58402870</i> | NA                                  | <i>Ca_desi_denovo</i> | 58402870                | A/G  | NA                 | NA                            | NA                 |
| <i>Desi_wild_58404726</i> | NA                                  | <i>Ca_desi_denovo</i> | 58404726                | G/T  | NA                 | NA                            | NA                 |
| <i>Desi_wild_58406299</i> | NA                                  | <i>Ca_desi_denovo</i> | 58406299                | C/G  | NA                 | NA                            | NA                 |
| <i>Desi_wild_58406311</i> | NA                                  | <i>Ca_desi_denovo</i> | 58406311                | A/C  | NA                 | NA                            | NA                 |
| <i>Desi_wild_58410327</i> | NA                                  | <i>Ca_desi_denovo</i> | 58410327                | A/G  | NA                 | NA                            | NA                 |
| <i>Desi_wild_58413733</i> | NA                                  | <i>Ca_desi_denovo</i> | 58413733                | C/G  | NA                 | NA                            | NA                 |
| <i>Desi_wild_58413747</i> | NA                                  | <i>Ca_desi_denovo</i> | 58413747                | A/G  | NA                 | NA                            | NA                 |
| <i>Desi_wild_58413757</i> | NA                                  | <i>Ca_desi_denovo</i> | 58413757                | C/G  | NA                 | NA                            | NA                 |
| <i>Desi_wild_58413766</i> | NA                                  | <i>Ca_desi_denovo</i> | 58413766                | C/G  | NA                 | NA                            | NA                 |
| <i>Desi_wild_58415779</i> | NA                                  | <i>Ca_desi_denovo</i> | 58415779                | C/T  | NA                 | NA                            | NA                 |
| <i>Desi_wild_58418578</i> | NA                                  | <i>Ca_desi_denovo</i> | 58418578                | A/G  | NA                 | NA                            | NA                 |
| <i>Desi_wild_58425442</i> | NA                                  | <i>Ca_desi_denovo</i> | 58425442                | A/G  | NA                 | NA                            | NA                 |
| <i>Desi_wild_58425461</i> | NA                                  | <i>Ca_desi_denovo</i> | 58425461                | C/G  | NA                 | NA                            | NA                 |
| <i>Desi_wild_58431487</i> | NA                                  | <i>Ca_desi_denovo</i> | 58431487                | C/T  | NA                 | NA                            | NA                 |
| <i>Desi_wild_58432047</i> | NA                                  | <i>Ca_desi_denovo</i> | 58432047                | C/T  | NA                 | NA                            | NA                 |
| <i>Desi_wild_58432722</i> | NA                                  | <i>Ca_desi_denovo</i> | 58432722                | C/G  | NA                 | NA                            | NA                 |
| <i>Desi_wild_58433253</i> | NA                                  | <i>Ca_desi_denovo</i> | 58433253                | A/G  | NA                 | NA                            | NA                 |
| <i>Desi_wild_58433256</i> | NA                                  | <i>Ca_desi_denovo</i> | 58433256                | C/G  | NA                 | NA                            | NA                 |
| <i>Desi_wild_58433259</i> | NA                                  | <i>Ca_desi_denovo</i> | 58433259                | A/G  | NA                 | NA                            | NA                 |
| <i>Desi_wild_58436989</i> | NA                                  | <i>Ca_desi_denovo</i> | 58436989                | C/T  | NA                 | NA                            | NA                 |
| <i>Desi_wild_58437196</i> | NA                                  | <i>Ca_desi_denovo</i> | 58437196                | C/G  | NA                 | NA                            | NA                 |
| <i>Desi_wild_58437220</i> | NA                                  | <i>Ca_desi_denovo</i> | 58437220                | A/G  | NA                 | NA                            | NA                 |
| <i>Desi_wild_58437669</i> | NA                                  | <i>Ca_desi_denovo</i> | 58437669                | A/C  | NA                 | NA                            | NA                 |
| <i>Desi_wild_58437710</i> | NA                                  | <i>Ca_desi_denovo</i> | 58437710                | A/C  | NA                 | NA                            | NA                 |
| <i>Desi_wild_58437711</i> | NA                                  | <i>Ca_desi_denovo</i> | 58437711                | A/G  | NA                 | NA                            | NA                 |
| <i>Desi_wild_58439488</i> | NA                                  | <i>Ca_desi_denovo</i> | 58439488                | A/G  | NA                 | NA                            | NA                 |
| <i>Desi_wild_58439494</i> | NA                                  | <i>Ca_desi_denovo</i> | 58439494                | C/G  | NA                 | NA                            | NA                 |
| <i>Desi_wild_58439536</i> | NA                                  | <i>Ca_desi_denovo</i> | 58439536                | A/G  | NA                 | NA                            | NA                 |
| <i>Desi_wild_58440176</i> | NA                                  | <i>Ca_desi_denovo</i> | 58440176                | G/T  | NA                 | NA                            | NA                 |
| <i>Desi_wild_58440178</i> | NA                                  | <i>Ca_desi_denovo</i> | 58440178                | C/G  | NA                 | NA                            | NA                 |
| <i>Desi_wild_58442841</i> | NA                                  | <i>Ca_desi_denovo</i> | 58442841                | A/C  | NA                 | NA                            | NA                 |
| <i>Desi_wild_58443610</i> | NA                                  | <i>Ca_desi_denovo</i> | 58443610                | C/T  | NA                 | NA                            | NA                 |
| <i>Desi_wild_58444444</i> | NA                                  | <i>Ca_desi_denovo</i> | 58444444                | C/T  | NA                 | NA                            | NA                 |
| <i>Desi_wild_58444477</i> | NA                                  | <i>Ca_desi_denovo</i> | 58444477                | C/T  | NA                 | NA                            | NA                 |
| <i>Desi_wild_58453171</i> | NA                                  | <i>Ca_desi_denovo</i> | 58453171                | A/G  | NA                 | NA                            | NA                 |
| <i>Desi_wild_58453192</i> | NA                                  | <i>Ca_desi_denovo</i> | 58453192                | A/G  | NA                 | NA                            | NA                 |
| <i>Desi_wild_58453204</i> | NA                                  | <i>Ca_desi_denovo</i> | 58453204                | C/T  | NA                 | NA                            | NA                 |
| <i>Desi_wild_58455222</i> | NA                                  | <i>Ca_desi_denovo</i> | 58455222                | C/T  | NA                 | NA                            | NA                 |
| <i>Desi_wild_58460147</i> | NA                                  | <i>Ca_desi_denovo</i> | 58460147                | A/G  | NA                 | NA                            | NA                 |
| <i>Desi_wild_58467252</i> | NA                                  | <i>Ca_desi_denovo</i> | 58467252                | C/T  | NA                 | NA                            | NA                 |
| <i>Desi_wild_58467267</i> | NA                                  | <i>Ca_desi_denovo</i> | 58467267                | C/T  | NA                 | NA                            | NA                 |
| <i>Desi_wild_58468045</i> | NA                                  | <i>Ca_desi_denovo</i> | 58468045                | G/T  | NA                 | NA                            | NA                 |
| <i>Desi_wild_58468093</i> | NA                                  | <i>Ca_desi_denovo</i> | 58468093                | A/G  | NA                 | NA                            | NA                 |

| SNP IDs                   | NCBI dbSNP accession IDs (NCBI_SS#) | Chromosomes           | Physical positions (bp) | SNPs | Gene accession IDs | Sequence components of genome | Putative functions |
|---------------------------|-------------------------------------|-----------------------|-------------------------|------|--------------------|-------------------------------|--------------------|
| <i>Desi_wild_58471647</i> | NA                                  | <i>Ca_desi_denovo</i> | 58471647                | A/G  | NA                 | NA                            | NA                 |
| <i>Desi_wild_58472407</i> | NA                                  | <i>Ca_desi_denovo</i> | 58472407                | A/G  | NA                 | NA                            | NA                 |
| <i>Desi_wild_58472413</i> | NA                                  | <i>Ca_desi_denovo</i> | 58472413                | C/T  | NA                 | NA                            | NA                 |
| <i>Desi_wild_58475030</i> | NA                                  | <i>Ca_desi_denovo</i> | 58475030                | A/G  | NA                 | NA                            | NA                 |
| <i>Desi_wild_58479415</i> | NA                                  | <i>Ca_desi_denovo</i> | 58479415                | G/T  | NA                 | NA                            | NA                 |
| <i>Desi_wild_58480885</i> | NA                                  | <i>Ca_desi_denovo</i> | 58480885                | C/G  | NA                 | NA                            | NA                 |
| <i>Desi_wild_58481346</i> | NA                                  | <i>Ca_desi_denovo</i> | 58481346                | C/G  | NA                 | NA                            | NA                 |
| <i>Desi_wild_58481367</i> | NA                                  | <i>Ca_desi_denovo</i> | 58481367                | C/G  | NA                 | NA                            | NA                 |
| <i>Desi_wild_58481761</i> | NA                                  | <i>Ca_desi_denovo</i> | 58481761                | A/G  | NA                 | NA                            | NA                 |
| <i>Desi_wild_58481790</i> | NA                                  | <i>Ca_desi_denovo</i> | 58481790                | A/G  | NA                 | NA                            | NA                 |
| <i>Desi_wild_58483568</i> | NA                                  | <i>Ca_desi_denovo</i> | 58483568                | C/G  | NA                 | NA                            | NA                 |
| <i>Desi_wild_58485172</i> | NA                                  | <i>Ca_desi_denovo</i> | 58485172                | A/G  | NA                 | NA                            | NA                 |
| <i>Desi_wild_58485190</i> | NA                                  | <i>Ca_desi_denovo</i> | 58485190                | C/T  | NA                 | NA                            | NA                 |
| <i>Desi_wild_58485196</i> | NA                                  | <i>Ca_desi_denovo</i> | 58485196                | C/G  | NA                 | NA                            | NA                 |
| <i>Desi_wild_58487668</i> | NA                                  | <i>Ca_desi_denovo</i> | 58487668                | C/T  | NA                 | NA                            | NA                 |
| <i>Desi_wild_58488697</i> | NA                                  | <i>Ca_desi_denovo</i> | 58488697                | A/G  | NA                 | NA                            | NA                 |
| <i>Desi_wild_58492170</i> | NA                                  | <i>Ca_desi_denovo</i> | 58492170                | A/G  | NA                 | NA                            | NA                 |
| <i>Desi_wild_58492719</i> | NA                                  | <i>Ca_desi_denovo</i> | 58492719                | A/G  | NA                 | NA                            | NA                 |
| <i>Desi_wild_58492806</i> | NA                                  | <i>Ca_desi_denovo</i> | 58492806                | C/G  | NA                 | NA                            | NA                 |
| <i>Desi_wild_58496221</i> | NA                                  | <i>Ca_desi_denovo</i> | 58496221                | A/G  | NA                 | NA                            | NA                 |
| <i>Desi_wild_58496251</i> | NA                                  | <i>Ca_desi_denovo</i> | 58496251                | A/G  | NA                 | NA                            | NA                 |
| <i>Desi_wild_58496253</i> | NA                                  | <i>Ca_desi_denovo</i> | 58496253                | C/T  | NA                 | NA                            | NA                 |
| <i>Desi_wild_58499086</i> | NA                                  | <i>Ca_desi_denovo</i> | 58499086                | A/G  | NA                 | NA                            | NA                 |
| <i>Desi_wild_58500399</i> | NA                                  | <i>Ca_desi_denovo</i> | 58500399                | A/C  | NA                 | NA                            | NA                 |
| <i>Desi_wild_58504372</i> | NA                                  | <i>Ca_desi_denovo</i> | 58504372                | A/G  | NA                 | NA                            | NA                 |
| <i>Desi_wild_58504375</i> | NA                                  | <i>Ca_desi_denovo</i> | 58504375                | A/G  | NA                 | NA                            | NA                 |
| <i>Desi_wild_58505181</i> | NA                                  | <i>Ca_desi_denovo</i> | 58505181                | G/T  | NA                 | NA                            | NA                 |
| <i>Desi_wild_58506591</i> | NA                                  | <i>Ca_desi_denovo</i> | 58506591                | A/G  | NA                 | NA                            | NA                 |
| <i>Desi_wild_58508322</i> | NA                                  | <i>Ca_desi_denovo</i> | 58508322                | A/G  | NA                 | NA                            | NA                 |
| <i>Desi_wild_58513485</i> | NA                                  | <i>Ca_desi_denovo</i> | 58513485                | C/T  | NA                 | NA                            | NA                 |
| <i>Desi_wild_58514562</i> | NA                                  | <i>Ca_desi_denovo</i> | 58514562                | C/G  | NA                 | NA                            | NA                 |
| <i>Desi_wild_58515838</i> | NA                                  | <i>Ca_desi_denovo</i> | 58515838                | A/G  | NA                 | NA                            | NA                 |
| <i>Desi_wild_58515849</i> | NA                                  | <i>Ca_desi_denovo</i> | 58515849                | C/G  | NA                 | NA                            | NA                 |
| <i>Desi_wild_58516210</i> | NA                                  | <i>Ca_desi_denovo</i> | 58516210                | A/G  | NA                 | NA                            | NA                 |
| <i>Desi_wild_58516237</i> | NA                                  | <i>Ca_desi_denovo</i> | 58516237                | G/T  | NA                 | NA                            | NA                 |
| <i>Desi_wild_58518551</i> | NA                                  | <i>Ca_desi_denovo</i> | 58518551                | G/T  | NA                 | NA                            | NA                 |
| <i>Desi_wild_58522815</i> | NA                                  | <i>Ca_desi_denovo</i> | 58522815                | C/T  | NA                 | NA                            | NA                 |
| <i>Desi_wild_58522825</i> | NA                                  | <i>Ca_desi_denovo</i> | 58522825                | G/T  | NA                 | NA                            | NA                 |
| <i>Desi_wild_58524778</i> | NA                                  | <i>Ca_desi_denovo</i> | 58524778                | C/G  | NA                 | NA                            | NA                 |
| <i>Desi_wild_58525266</i> | NA                                  | <i>Ca_desi_denovo</i> | 58525266                | C/T  | NA                 | NA                            | NA                 |
| <i>Desi_wild_58525967</i> | NA                                  | <i>Ca_desi_denovo</i> | 58525967                | A/C  | NA                 | NA                            | NA                 |
| <i>Desi_wild_58527555</i> | NA                                  | <i>Ca_desi_denovo</i> | 58527555                | C/G  | NA                 | NA                            | NA                 |
| <i>Desi_wild_58527597</i> | NA                                  | <i>Ca_desi_denovo</i> | 58527597                | C/T  | NA                 | NA                            | NA                 |
| <i>Desi_wild_58528676</i> | NA                                  | <i>Ca_desi_denovo</i> | 58528676                | C/T  | NA                 | NA                            | NA                 |

| SNP IDs                   | NCBI dbSNP accession IDs (NCBI_SS#) | Chromosomes           | Physical positions (bp) | SNPs | Gene accession IDs | Sequence components of genome | Putative functions |
|---------------------------|-------------------------------------|-----------------------|-------------------------|------|--------------------|-------------------------------|--------------------|
| <i>Desi_wild_58529152</i> | NA                                  | <i>Ca_desi_denovo</i> | 58529152                | C/T  | NA                 | NA                            | NA                 |
| <i>Desi_wild_58532430</i> | NA                                  | <i>Ca_desi_denovo</i> | 58532430                | A/C  | NA                 | NA                            | NA                 |
| <i>Desi_wild_58534615</i> | NA                                  | <i>Ca_desi_denovo</i> | 58534615                | A/C  | NA                 | NA                            | NA                 |
| <i>Desi_wild_58534616</i> | NA                                  | <i>Ca_desi_denovo</i> | 58534616                | G/T  | NA                 | NA                            | NA                 |
| <i>Desi_wild_58534617</i> | NA                                  | <i>Ca_desi_denovo</i> | 58534617                | A/G  | NA                 | NA                            | NA                 |
| <i>Desi_wild_58536259</i> | NA                                  | <i>Ca_desi_denovo</i> | 58536259                | C/G  | NA                 | NA                            | NA                 |
| <i>Desi_wild_58536970</i> | NA                                  | <i>Ca_desi_denovo</i> | 58536970                | A/G  | NA                 | NA                            | NA                 |
| <i>Desi_wild_58536994</i> | NA                                  | <i>Ca_desi_denovo</i> | 58536994                | C/T  | NA                 | NA                            | NA                 |
| <i>Desi_wild_58539850</i> | NA                                  | <i>Ca_desi_denovo</i> | 58539850                | A/G  | NA                 | NA                            | NA                 |
| <i>Desi_wild_58539880</i> | NA                                  | <i>Ca_desi_denovo</i> | 58539880                | A/G  | NA                 | NA                            | NA                 |
| <i>Desi_wild_58542078</i> | NA                                  | <i>Ca_desi_denovo</i> | 58542078                | C/T  | NA                 | NA                            | NA                 |
| <i>Desi_wild_58542084</i> | NA                                  | <i>Ca_desi_denovo</i> | 58542084                | A/G  | NA                 | NA                            | NA                 |
| <i>Desi_wild_58542094</i> | NA                                  | <i>Ca_desi_denovo</i> | 58542094                | A/G  | NA                 | NA                            | NA                 |
| <i>Desi_wild_58542108</i> | NA                                  | <i>Ca_desi_denovo</i> | 58542108                | A/C  | NA                 | NA                            | NA                 |
| <i>Desi_wild_58545597</i> | NA                                  | <i>Ca_desi_denovo</i> | 58545597                | A/G  | NA                 | NA                            | NA                 |
| <i>Desi_wild_58546538</i> | NA                                  | <i>Ca_desi_denovo</i> | 58546538                | C/T  | NA                 | NA                            | NA                 |
| <i>Desi_wild_58546546</i> | NA                                  | <i>Ca_desi_denovo</i> | 58546546                | A/G  | NA                 | NA                            | NA                 |
| <i>Desi_wild_58548488</i> | NA                                  | <i>Ca_desi_denovo</i> | 58548488                | A/G  | NA                 | NA                            | NA                 |
| <i>Desi_wild_58548495</i> | NA                                  | <i>Ca_desi_denovo</i> | 58548495                | A/G  | NA                 | NA                            | NA                 |
| <i>Desi_wild_58551430</i> | NA                                  | <i>Ca_desi_denovo</i> | 58551430                | C/T  | NA                 | NA                            | NA                 |
| <i>Desi_wild_58554154</i> | NA                                  | <i>Ca_desi_denovo</i> | 58554154                | C/G  | NA                 | NA                            | NA                 |
| <i>Desi_wild_58554157</i> | NA                                  | <i>Ca_desi_denovo</i> | 58554157                | A/G  | NA                 | NA                            | NA                 |
| <i>Desi_wild_58556985</i> | NA                                  | <i>Ca_desi_denovo</i> | 58556985                | C/G  | NA                 | NA                            | NA                 |
| <i>Desi_wild_58557324</i> | NA                                  | <i>Ca_desi_denovo</i> | 58557324                | C/T  | NA                 | NA                            | NA                 |
| <i>Desi_wild_58560283</i> | NA                                  | <i>Ca_desi_denovo</i> | 58560283                | C/G  | NA                 | NA                            | NA                 |
| <i>Desi_wild_58563918</i> | NA                                  | <i>Ca_desi_denovo</i> | 58563918                | C/G  | NA                 | NA                            | NA                 |
| <i>Desi_wild_58563936</i> | NA                                  | <i>Ca_desi_denovo</i> | 58563936                | C/T  | NA                 | NA                            | NA                 |
| <i>Desi_wild_58563965</i> | NA                                  | <i>Ca_desi_denovo</i> | 58563965                | A/G  | NA                 | NA                            | NA                 |
| <i>Desi_wild_58563969</i> | NA                                  | <i>Ca_desi_denovo</i> | 58563969                | A/T  | NA                 | NA                            | NA                 |
| <i>Desi_wild_58564596</i> | NA                                  | <i>Ca_desi_denovo</i> | 58564596                | A/G  | NA                 | NA                            | NA                 |
| <i>Desi_wild_58564743</i> | NA                                  | <i>Ca_desi_denovo</i> | 58564743                | C/G  | NA                 | NA                            | NA                 |
| <i>Desi_wild_58567374</i> | NA                                  | <i>Ca_desi_denovo</i> | 58567374                | C/T  | NA                 | NA                            | NA                 |
| <i>Desi_wild_58567380</i> | NA                                  | <i>Ca_desi_denovo</i> | 58567380                | G/T  | NA                 | NA                            | NA                 |
| <i>Desi_wild_58567383</i> | NA                                  | <i>Ca_desi_denovo</i> | 58567383                | A/G  | NA                 | NA                            | NA                 |
| <i>Desi_wild_58567416</i> | NA                                  | <i>Ca_desi_denovo</i> | 58567416                | C/T  | NA                 | NA                            | NA                 |
| <i>Desi_wild_58570084</i> | NA                                  | <i>Ca_desi_denovo</i> | 58570084                | C/T  | NA                 | NA                            | NA                 |
| <i>Desi_wild_58570452</i> | NA                                  | <i>Ca_desi_denovo</i> | 58570452                | A/G  | NA                 | NA                            | NA                 |
| <i>Desi_wild_58570453</i> | NA                                  | <i>Ca_desi_denovo</i> | 58570453                | C/G  | NA                 | NA                            | NA                 |
| <i>Desi_wild_58570483</i> | NA                                  | <i>Ca_desi_denovo</i> | 58570483                | A/G  | NA                 | NA                            | NA                 |
| <i>Desi_wild_58571097</i> | NA                                  | <i>Ca_desi_denovo</i> | 58571097                | C/T  | NA                 | NA                            | NA                 |
| <i>Desi_wild_58571106</i> | NA                                  | <i>Ca_desi_denovo</i> | 58571106                | C/T  | NA                 | NA                            | NA                 |
| <i>Desi_wild_58572108</i> | NA                                  | <i>Ca_desi_denovo</i> | 58572108                | A/G  | NA                 | NA                            | NA                 |
| <i>Desi_wild_58572126</i> | NA                                  | <i>Ca_desi_denovo</i> | 58572126                | C/T  | NA                 | NA                            | NA                 |
| <i>Desi_wild_58572158</i> | NA                                  | <i>Ca_desi_denovo</i> | 58572158                | A/G  | NA                 | NA                            | NA                 |

| SNP IDs                   | NCBI dbSNP accession IDs (NCBI_SS#) | Chromosomes           | Physical positions (bp) | SNPs | Gene accession IDs | Sequence components of genome | Putative functions |
|---------------------------|-------------------------------------|-----------------------|-------------------------|------|--------------------|-------------------------------|--------------------|
| <i>Desi_wild_58573065</i> | NA                                  | <i>Ca_desi_denovo</i> | 58573065                | A/C  | NA                 | NA                            | NA                 |
| <i>Desi_wild_58574841</i> | NA                                  | <i>Ca_desi_denovo</i> | 58574841                | C/G  | NA                 | NA                            | NA                 |
| <i>Desi_wild_58575846</i> | NA                                  | <i>Ca_desi_denovo</i> | 58575846                | A/G  | NA                 | NA                            | NA                 |
| <i>Desi_wild_58577044</i> | NA                                  | <i>Ca_desi_denovo</i> | 58577044                | G/T  | NA                 | NA                            | NA                 |
| <i>Desi_wild_58577776</i> | NA                                  | <i>Ca_desi_denovo</i> | 58577776                | C/T  | NA                 | NA                            | NA                 |
| <i>Desi_wild_58577777</i> | NA                                  | <i>Ca_desi_denovo</i> | 58577777                | C/G  | NA                 | NA                            | NA                 |
| <i>Desi_wild_58586426</i> | NA                                  | <i>Ca_desi_denovo</i> | 58586426                | A/T  | NA                 | NA                            | NA                 |
| <i>Desi_wild_58587226</i> | NA                                  | <i>Ca_desi_denovo</i> | 58587226                | A/C  | NA                 | NA                            | NA                 |
| <i>Desi_wild_58587833</i> | NA                                  | <i>Ca_desi_denovo</i> | 58587833                | A/G  | NA                 | NA                            | NA                 |
| <i>Desi_wild_58588954</i> | NA                                  | <i>Ca_desi_denovo</i> | 58588954                | A/G  | NA                 | NA                            | NA                 |
| <i>Desi_wild_58591668</i> | NA                                  | <i>Ca_desi_denovo</i> | 58591668                | C/T  | NA                 | NA                            | NA                 |
| <i>Desi_wild_58591729</i> | NA                                  | <i>Ca_desi_denovo</i> | 58591729                | C/T  | NA                 | NA                            | NA                 |
| <i>Desi_wild_58591748</i> | NA                                  | <i>Ca_desi_denovo</i> | 58591748                | A/G  | NA                 | NA                            | NA                 |
| <i>Desi_wild_58591929</i> | NA                                  | <i>Ca_desi_denovo</i> | 58591929                | C/T  | NA                 | NA                            | NA                 |
| <i>Desi_wild_58591953</i> | NA                                  | <i>Ca_desi_denovo</i> | 58591953                | C/T  | NA                 | NA                            | NA                 |
| <i>Desi_wild_58591954</i> | NA                                  | <i>Ca_desi_denovo</i> | 58591954                | C/G  | NA                 | NA                            | NA                 |
| <i>Desi_wild_58595281</i> | NA                                  | <i>Ca_desi_denovo</i> | 58595281                | A/G  | NA                 | NA                            | NA                 |
| <i>Desi_wild_58595290</i> | NA                                  | <i>Ca_desi_denovo</i> | 58595290                | A/G  | NA                 | NA                            | NA                 |
| <i>Desi_wild_58595566</i> | NA                                  | <i>Ca_desi_denovo</i> | 58595566                | A/G  | NA                 | NA                            | NA                 |
| <i>Desi_wild_58595568</i> | NA                                  | <i>Ca_desi_denovo</i> | 58595568                | A/G  | NA                 | NA                            | NA                 |
| <i>Desi_wild_58595729</i> | NA                                  | <i>Ca_desi_denovo</i> | 58595729                | C/T  | NA                 | NA                            | NA                 |
| <i>Desi_wild_58598959</i> | NA                                  | <i>Ca_desi_denovo</i> | 58598959                | C/T  | NA                 | NA                            | NA                 |
| <i>Desi_wild_58607317</i> | NA                                  | <i>Ca_desi_denovo</i> | 58607317                | A/G  | NA                 | NA                            | NA                 |
| <i>Desi_wild_58607320</i> | NA                                  | <i>Ca_desi_denovo</i> | 58607320                | C/T  | NA                 | NA                            | NA                 |
| <i>Desi_wild_58609512</i> | NA                                  | <i>Ca_desi_denovo</i> | 58609512                | A/C  | NA                 | NA                            | NA                 |
| <i>Desi_wild_58609513</i> | NA                                  | <i>Ca_desi_denovo</i> | 58609513                | A/G  | NA                 | NA                            | NA                 |
| <i>Desi_wild_58615320</i> | NA                                  | <i>Ca_desi_denovo</i> | 58615320                | A/C  | NA                 | NA                            | NA                 |
| <i>Desi_wild_58616838</i> | NA                                  | <i>Ca_desi_denovo</i> | 58616838                | A/G  | NA                 | NA                            | NA                 |
| <i>Desi_wild_58616841</i> | NA                                  | <i>Ca_desi_denovo</i> | 58616841                | A/G  | NA                 | NA                            | NA                 |
| <i>Desi_wild_58618914</i> | NA                                  | <i>Ca_desi_denovo</i> | 58618914                | G/T  | NA                 | NA                            | NA                 |
| <i>Desi_wild_58620132</i> | NA                                  | <i>Ca_desi_denovo</i> | 58620132                | A/G  | NA                 | NA                            | NA                 |
| <i>Desi_wild_58627264</i> | NA                                  | <i>Ca_desi_denovo</i> | 58627264                | C/T  | NA                 | NA                            | NA                 |
| <i>Desi_wild_58627267</i> | NA                                  | <i>Ca_desi_denovo</i> | 58627267                | C/G  | NA                 | NA                            | NA                 |
| <i>Desi_wild_58627309</i> | NA                                  | <i>Ca_desi_denovo</i> | 58627309                | A/G  | NA                 | NA                            | NA                 |
| <i>Desi_wild_58627909</i> | NA                                  | <i>Ca_desi_denovo</i> | 58627909                | C/T  | NA                 | NA                            | NA                 |
| <i>Desi_wild_58627933</i> | NA                                  | <i>Ca_desi_denovo</i> | 58627933                | C/T  | NA                 | NA                            | NA                 |
| <i>Desi_wild_58628278</i> | NA                                  | <i>Ca_desi_denovo</i> | 58628278                | A/G  | NA                 | NA                            | NA                 |
| <i>Desi_wild_58628296</i> | NA                                  | <i>Ca_desi_denovo</i> | 58628296                | A/G  | NA                 | NA                            | NA                 |
| <i>Desi_wild_58628326</i> | NA                                  | <i>Ca_desi_denovo</i> | 58628326                | A/G  | NA                 | NA                            | NA                 |
| <i>Desi_wild_58632679</i> | NA                                  | <i>Ca_desi_denovo</i> | 58632679                | C/G  | NA                 | NA                            | NA                 |
| <i>Desi_wild_58635654</i> | NA                                  | <i>Ca_desi_denovo</i> | 58635654                | A/G  | NA                 | NA                            | NA                 |
| <i>Desi_wild_58636038</i> | NA                                  | <i>Ca_desi_denovo</i> | 58636038                | C/T  | NA                 | NA                            | NA                 |
| <i>Desi_wild_58636576</i> | NA                                  | <i>Ca_desi_denovo</i> | 58636576                | C/T  | NA                 | NA                            | NA                 |
| <i>Desi_wild_58639441</i> | NA                                  | <i>Ca_desi_denovo</i> | 58639441                | C/T  | NA                 | NA                            | NA                 |

| SNP IDs                   | NCBI dbSNP accession IDs (NCBI_SS#) | Chromosomes           | Physical positions (bp) | SNPs | Gene accession IDs | Sequence components of genome | Putative functions |
|---------------------------|-------------------------------------|-----------------------|-------------------------|------|--------------------|-------------------------------|--------------------|
| <i>Desi_wild_58644000</i> | NA                                  | <i>Ca_desi_denovo</i> | 58644000                | C/G  | NA                 | NA                            | NA                 |
| <i>Desi_wild_58644039</i> | NA                                  | <i>Ca_desi_denovo</i> | 58644039                | C/T  | NA                 | NA                            | NA                 |
| <i>Desi_wild_58650644</i> | NA                                  | <i>Ca_desi_denovo</i> | 58650644                | A/G  | NA                 | NA                            | NA                 |
| <i>Desi_wild_58654597</i> | NA                                  | <i>Ca_desi_denovo</i> | 58654597                | A/G  | NA                 | NA                            | NA                 |
| <i>Desi_wild_58654953</i> | NA                                  | <i>Ca_desi_denovo</i> | 58654953                | A/C  | NA                 | NA                            | NA                 |
| <i>Desi_wild_58655344</i> | NA                                  | <i>Ca_desi_denovo</i> | 58655344                | C/G  | NA                 | NA                            | NA                 |
| <i>Desi_wild_58655380</i> | NA                                  | <i>Ca_desi_denovo</i> | 58655380                | C/G  | NA                 | NA                            | NA                 |
| <i>Desi_wild_58655386</i> | NA                                  | <i>Ca_desi_denovo</i> | 58655386                | C/G  | NA                 | NA                            | NA                 |
| <i>Desi_wild_58658412</i> | NA                                  | <i>Ca_desi_denovo</i> | 58658412                | C/T  | NA                 | NA                            | NA                 |
| <i>Desi_wild_58658413</i> | NA                                  | <i>Ca_desi_denovo</i> | 58658413                | C/T  | NA                 | NA                            | NA                 |
| <i>Desi_wild_58659988</i> | NA                                  | <i>Ca_desi_denovo</i> | 58659988                | C/T  | NA                 | NA                            | NA                 |
| <i>Desi_wild_58660036</i> | NA                                  | <i>Ca_desi_denovo</i> | 58660036                | C/T  | NA                 | NA                            | NA                 |
| <i>Desi_wild_58660039</i> | NA                                  | <i>Ca_desi_denovo</i> | 58660039                | C/T  | NA                 | NA                            | NA                 |
| <i>Desi_wild_58661484</i> | NA                                  | <i>Ca_desi_denovo</i> | 58661484                | G/T  | NA                 | NA                            | NA                 |
| <i>Desi_wild_58661774</i> | NA                                  | <i>Ca_desi_denovo</i> | 58661774                | A/G  | NA                 | NA                            | NA                 |
| <i>Desi_wild_58665121</i> | NA                                  | <i>Ca_desi_denovo</i> | 58665121                | C/G  | NA                 | NA                            | NA                 |
| <i>Desi_wild_58665942</i> | NA                                  | <i>Ca_desi_denovo</i> | 58665942                | C/G  | NA                 | NA                            | NA                 |
| <i>Desi_wild_58665944</i> | NA                                  | <i>Ca_desi_denovo</i> | 58665944                | A/G  | NA                 | NA                            | NA                 |
| <i>Desi_wild_58665969</i> | NA                                  | <i>Ca_desi_denovo</i> | 58665969                | A/G  | NA                 | NA                            | NA                 |
| <i>Desi_wild_58665986</i> | NA                                  | <i>Ca_desi_denovo</i> | 58665986                | G/T  | NA                 | NA                            | NA                 |
| <i>Desi_wild_58666354</i> | NA                                  | <i>Ca_desi_denovo</i> | 58666354                | A/G  | NA                 | NA                            | NA                 |
| <i>Desi_wild_58666462</i> | NA                                  | <i>Ca_desi_denovo</i> | 58666462                | C/T  | NA                 | NA                            | NA                 |
| <i>Desi_wild_58666608</i> | NA                                  | <i>Ca_desi_denovo</i> | 58666608                | A/G  | NA                 | NA                            | NA                 |
| <i>Desi_wild_58666612</i> | NA                                  | <i>Ca_desi_denovo</i> | 58666612                | C/T  | NA                 | NA                            | NA                 |
| <i>Desi_wild_58666642</i> | NA                                  | <i>Ca_desi_denovo</i> | 58666642                | C/T  | NA                 | NA                            | NA                 |
| <i>Desi_wild_58668787</i> | NA                                  | <i>Ca_desi_denovo</i> | 58668787                | A/G  | NA                 | NA                            | NA                 |
| <i>Desi_wild_58670565</i> | NA                                  | <i>Ca_desi_denovo</i> | 58670565                | C/G  | NA                 | NA                            | NA                 |
| <i>Desi_wild_58672116</i> | NA                                  | <i>Ca_desi_denovo</i> | 58672116                | A/G  | NA                 | NA                            | NA                 |
| <i>Desi_wild_58675252</i> | NA                                  | <i>Ca_desi_denovo</i> | 58675252                | C/G  | NA                 | NA                            | NA                 |
| <i>Desi_wild_58675303</i> | NA                                  | <i>Ca_desi_denovo</i> | 58675303                | C/G  | NA                 | NA                            | NA                 |
| <i>Desi_wild_58679490</i> | NA                                  | <i>Ca_desi_denovo</i> | 58679490                | A/G  | NA                 | NA                            | NA                 |
| <i>Desi_wild_58679809</i> | NA                                  | <i>Ca_desi_denovo</i> | 58679809                | A/G  | NA                 | NA                            | NA                 |
| <i>Desi_wild_58679827</i> | NA                                  | <i>Ca_desi_denovo</i> | 58679827                | C/T  | NA                 | NA                            | NA                 |
| <i>Desi_wild_58680873</i> | NA                                  | <i>Ca_desi_denovo</i> | 58680873                | C/T  | NA                 | NA                            | NA                 |
| <i>Desi_wild_58681123</i> | NA                                  | <i>Ca_desi_denovo</i> | 58681123                | G/T  | NA                 | NA                            | NA                 |
| <i>Desi_wild_58681479</i> | NA                                  | <i>Ca_desi_denovo</i> | 58681479                | A/G  | NA                 | NA                            | NA                 |
| <i>Desi_wild_58685741</i> | NA                                  | <i>Ca_desi_denovo</i> | 58685741                | A/C  | NA                 | NA                            | NA                 |
| <i>Desi_wild_58685742</i> | NA                                  | <i>Ca_desi_denovo</i> | 58685742                | C/G  | NA                 | NA                            | NA                 |
| <i>Desi_wild_58686696</i> | NA                                  | <i>Ca_desi_denovo</i> | 58686696                | C/T  | NA                 | NA                            | NA                 |
| <i>Desi_wild_58686720</i> | NA                                  | <i>Ca_desi_denovo</i> | 58686720                | C/G  | NA                 | NA                            | NA                 |
| <i>Desi_wild_58686753</i> | NA                                  | <i>Ca_desi_denovo</i> | 58686753                | C/G  | NA                 | NA                            | NA                 |
| <i>Desi_wild_58688022</i> | NA                                  | <i>Ca_desi_denovo</i> | 58688022                | C/G  | NA                 | NA                            | NA                 |
| <i>Desi_wild_58691157</i> | NA                                  | <i>Ca_desi_denovo</i> | 58691157                | A/G  | NA                 | NA                            | NA                 |
| <i>Desi_wild_58692297</i> | NA                                  | <i>Ca_desi_denovo</i> | 58692297                | C/T  | NA                 | NA                            | NA                 |

| SNP IDs                   | NCBI dbSNP accession IDs (NCBI_SS#) | Chromosomes           | Physical positions (bp) | SNPs | Gene accession IDs | Sequence components of genome | Putative functions |
|---------------------------|-------------------------------------|-----------------------|-------------------------|------|--------------------|-------------------------------|--------------------|
| <i>Desi_wild_58692325</i> | NA                                  | <i>Ca_desi_denovo</i> | 58692325                | C/T  | NA                 | NA                            | NA                 |
| <i>Desi_wild_58692326</i> | NA                                  | <i>Ca_desi_denovo</i> | 58692326                | C/G  | NA                 | NA                            | NA                 |
| <i>Desi_wild_58692552</i> | NA                                  | <i>Ca_desi_denovo</i> | 58692552                | A/G  | NA                 | NA                            | NA                 |
| <i>Desi_wild_58694616</i> | NA                                  | <i>Ca_desi_denovo</i> | 58694616                | A/G  | NA                 | NA                            | NA                 |
| <i>Desi_wild_58694640</i> | NA                                  | <i>Ca_desi_denovo</i> | 58694640                | C/T  | NA                 | NA                            | NA                 |
| <i>Desi_wild_58694643</i> | NA                                  | <i>Ca_desi_denovo</i> | 58694643                | C/G  | NA                 | NA                            | NA                 |
| <i>Desi_wild_58703352</i> | NA                                  | <i>Ca_desi_denovo</i> | 58703352                | C/T  | NA                 | NA                            | NA                 |
| <i>Desi_wild_58703361</i> | NA                                  | <i>Ca_desi_denovo</i> | 58703361                | C/T  | NA                 | NA                            | NA                 |
| <i>Desi_wild_58706235</i> | NA                                  | <i>Ca_desi_denovo</i> | 58706235                | C/G  | NA                 | NA                            | NA                 |
| <i>Desi_wild_58706238</i> | NA                                  | <i>Ca_desi_denovo</i> | 58706238                | C/G  | NA                 | NA                            | NA                 |
| <i>Desi_wild_58707604</i> | NA                                  | <i>Ca_desi_denovo</i> | 58707604                | A/G  | NA                 | NA                            | NA                 |
| <i>Desi_wild_58710802</i> | NA                                  | <i>Ca_desi_denovo</i> | 58710802                | A/G  | NA                 | NA                            | NA                 |
| <i>Desi_wild_58712002</i> | NA                                  | <i>Ca_desi_denovo</i> | 58712002                | C/G  | NA                 | NA                            | NA                 |
| <i>Desi_wild_58715791</i> | NA                                  | <i>Ca_desi_denovo</i> | 58715791                | A/G  | NA                 | NA                            | NA                 |
| <i>Desi_wild_58716207</i> | NA                                  | <i>Ca_desi_denovo</i> | 58716207                | A/T  | NA                 | NA                            | NA                 |
| <i>Desi_wild_58716224</i> | NA                                  | <i>Ca_desi_denovo</i> | 58716224                | C/T  | NA                 | NA                            | NA                 |
| <i>Desi_wild_58716240</i> | NA                                  | <i>Ca_desi_denovo</i> | 58716240                | G/T  | NA                 | NA                            | NA                 |
| <i>Desi_wild_58716244</i> | NA                                  | <i>Ca_desi_denovo</i> | 58716244                | C/T  | NA                 | NA                            | NA                 |
| <i>Desi_wild_58718751</i> | NA                                  | <i>Ca_desi_denovo</i> | 58718751                | A/C  | NA                 | NA                            | NA                 |
| <i>Desi_wild_58718754</i> | NA                                  | <i>Ca_desi_denovo</i> | 58718754                | A/G  | NA                 | NA                            | NA                 |
| <i>Desi_wild_58723365</i> | NA                                  | <i>Ca_desi_denovo</i> | 58723365                | C/T  | NA                 | NA                            | NA                 |
| <i>Desi_wild_58723374</i> | NA                                  | <i>Ca_desi_denovo</i> | 58723374                | C/T  | NA                 | NA                            | NA                 |
| <i>Desi_wild_58726404</i> | NA                                  | <i>Ca_desi_denovo</i> | 58726404                | C/G  | NA                 | NA                            | NA                 |
| <i>Desi_wild_58726674</i> | NA                                  | <i>Ca_desi_denovo</i> | 58726674                | A/G  | NA                 | NA                            | NA                 |
| <i>Desi_wild_58726680</i> | NA                                  | <i>Ca_desi_denovo</i> | 58726680                | C/T  | NA                 | NA                            | NA                 |
| <i>Desi_wild_58731867</i> | NA                                  | <i>Ca_desi_denovo</i> | 58731867                | A/C  | NA                 | NA                            | NA                 |
| <i>Desi_wild_58734552</i> | NA                                  | <i>Ca_desi_denovo</i> | 58734552                | C/G  | NA                 | NA                            | NA                 |
| <i>Desi_wild_58736383</i> | NA                                  | <i>Ca_desi_denovo</i> | 58736383                | A/G  | NA                 | NA                            | NA                 |
| <i>Desi_wild_58737278</i> | NA                                  | <i>Ca_desi_denovo</i> | 58737278                | A/G  | NA                 | NA                            | NA                 |
| <i>Desi_wild_58738113</i> | NA                                  | <i>Ca_desi_denovo</i> | 58738113                | A/G  | NA                 | NA                            | NA                 |
| <i>Desi_wild_58738119</i> | NA                                  | <i>Ca_desi_denovo</i> | 58738119                | A/G  | NA                 | NA                            | NA                 |
| <i>Desi_wild_58741756</i> | NA                                  | <i>Ca_desi_denovo</i> | 58741756                | A/G  | NA                 | NA                            | NA                 |
| <i>Desi_wild_58742389</i> | NA                                  | <i>Ca_desi_denovo</i> | 58742389                | A/G  | NA                 | NA                            | NA                 |
| <i>Desi_wild_58744475</i> | NA                                  | <i>Ca_desi_denovo</i> | 58744475                | A/G  | NA                 | NA                            | NA                 |
| <i>Desi_wild_58744648</i> | NA                                  | <i>Ca_desi_denovo</i> | 58744648                | A/G  | NA                 | NA                            | NA                 |
| <i>Desi_wild_58746301</i> | NA                                  | <i>Ca_desi_denovo</i> | 58746301                | A/G  | NA                 | NA                            | NA                 |
| <i>Desi_wild_58748938</i> | NA                                  | <i>Ca_desi_denovo</i> | 58748938                | C/G  | NA                 | NA                            | NA                 |
| <i>Desi_wild_58749153</i> | NA                                  | <i>Ca_desi_denovo</i> | 58749153                | A/G  | NA                 | NA                            | NA                 |
| <i>Desi_wild_58749156</i> | NA                                  | <i>Ca_desi_denovo</i> | 58749156                | C/G  | NA                 | NA                            | NA                 |
| <i>Desi_wild_58749162</i> | NA                                  | <i>Ca_desi_denovo</i> | 58749162                | C/T  | NA                 | NA                            | NA                 |
| <i>Desi_wild_58751627</i> | NA                                  | <i>Ca_desi_denovo</i> | 58751627                | A/G  | NA                 | NA                            | NA                 |
| <i>Desi_wild_58752271</i> | NA                                  | <i>Ca_desi_denovo</i> | 58752271                | C/T  | NA                 | NA                            | NA                 |
| <i>Desi_wild_58752277</i> | NA                                  | <i>Ca_desi_denovo</i> | 58752277                | A/G  | NA                 | NA                            | NA                 |
| <i>Desi_wild_58752280</i> | NA                                  | <i>Ca_desi_denovo</i> | 58752280                | C/G  | NA                 | NA                            | NA                 |



| SNP IDs                   | NCBI dbSNP accession IDs (NCBI_SS#) | Chromosomes           | Physical positions (bp) | SNPs | Gene accession IDs | Sequence components of genome | Putative functions |
|---------------------------|-------------------------------------|-----------------------|-------------------------|------|--------------------|-------------------------------|--------------------|
| <i>Desi_wild_58758846</i> | NA                                  | <i>Ca_desi_denovo</i> | 58758846                | C/G  | NA                 | NA                            | NA                 |
| <i>Desi_wild_58758870</i> | NA                                  | <i>Ca_desi_denovo</i> | 58758870                | C/G  | NA                 | NA                            | NA                 |
| <i>Desi_wild_58759225</i> | NA                                  | <i>Ca_desi_denovo</i> | 58759225                | G/T  | NA                 | NA                            | NA                 |
| <i>Desi_wild_58760737</i> | NA                                  | <i>Ca_desi_denovo</i> | 58760737                | C/T  | NA                 | NA                            | NA                 |
| <i>Desi_wild_58760752</i> | NA                                  | <i>Ca_desi_denovo</i> | 58760752                | C/T  | NA                 | NA                            | NA                 |
| <i>Desi_wild_58760775</i> | NA                                  | <i>Ca_desi_denovo</i> | 58760775                | C/T  | NA                 | NA                            | NA                 |
| <i>Desi_wild_58761574</i> | NA                                  | <i>Ca_desi_denovo</i> | 58761574                | C/T  | NA                 | NA                            | NA                 |
| <i>Desi_wild_58763698</i> | NA                                  | <i>Ca_desi_denovo</i> | 58763698                | A/G  | NA                 | NA                            | NA                 |
| <i>Desi_wild_58763764</i> | NA                                  | <i>Ca_desi_denovo</i> | 58763764                | A/G  | NA                 | NA                            | NA                 |
| <i>Desi_wild_58763766</i> | NA                                  | <i>Ca_desi_denovo</i> | 58763766                | A/C  | NA                 | NA                            | NA                 |
| <i>Desi_wild_58763768</i> | NA                                  | <i>Ca_desi_denovo</i> | 58763768                | A/C  | NA                 | NA                            | NA                 |
| <i>Desi_wild_58768894</i> | NA                                  | <i>Ca_desi_denovo</i> | 58768894                | C/G  | NA                 | NA                            | NA                 |
| <i>Desi_wild_58771587</i> | NA                                  | <i>Ca_desi_denovo</i> | 58771587                | A/T  | NA                 | NA                            | NA                 |
| <i>Desi_wild_58772802</i> | NA                                  | <i>Ca_desi_denovo</i> | 58772802                | G/T  | NA                 | NA                            | NA                 |
| <i>Desi_wild_58772811</i> | NA                                  | <i>Ca_desi_denovo</i> | 58772811                | C/G  | NA                 | NA                            | NA                 |
| <i>Desi_wild_58772814</i> | NA                                  | <i>Ca_desi_denovo</i> | 58772814                | C/T  | NA                 | NA                            | NA                 |
| <i>Desi_wild_58780712</i> | NA                                  | <i>Ca_desi_denovo</i> | 58780712                | A/G  | NA                 | NA                            | NA                 |
| <i>Desi_wild_58782027</i> | NA                                  | <i>Ca_desi_denovo</i> | 58782027                | C/G  | NA                 | NA                            | NA                 |
| <i>Desi_wild_58784200</i> | NA                                  | <i>Ca_desi_denovo</i> | 58784200                | A/G  | NA                 | NA                            | NA                 |
| <i>Desi_wild_58785579</i> | NA                                  | <i>Ca_desi_denovo</i> | 58785579                | C/T  | NA                 | NA                            | NA                 |
| <i>Desi_wild_58790478</i> | NA                                  | <i>Ca_desi_denovo</i> | 58790478                | A/G  | NA                 | NA                            | NA                 |
| <i>Desi_wild_58790526</i> | NA                                  | <i>Ca_desi_denovo</i> | 58790526                | C/T  | NA                 | NA                            | NA                 |
| <i>Desi_wild_58795984</i> | NA                                  | <i>Ca_desi_denovo</i> | 58795984                | C/G  | NA                 | NA                            | NA                 |
| <i>Desi_wild_58795987</i> | NA                                  | <i>Ca_desi_denovo</i> | 58795987                | C/G  | NA                 | NA                            | NA                 |
| <i>Desi_wild_58795990</i> | NA                                  | <i>Ca_desi_denovo</i> | 58795990                | A/G  | NA                 | NA                            | NA                 |
| <i>Desi_wild_58796081</i> | NA                                  | <i>Ca_desi_denovo</i> | 58796081                | C/G  | NA                 | NA                            | NA                 |
| <i>Desi_wild_58797085</i> | NA                                  | <i>Ca_desi_denovo</i> | 58797085                | C/G  | NA                 | NA                            | NA                 |
| <i>Desi_wild_58797090</i> | NA                                  | <i>Ca_desi_denovo</i> | 58797090                | C/G  | NA                 | NA                            | NA                 |
| <i>Desi_wild_58797565</i> | NA                                  | <i>Ca_desi_denovo</i> | 58797565                | A/G  | NA                 | NA                            | NA                 |
| <i>Desi_wild_58799315</i> | NA                                  | <i>Ca_desi_denovo</i> | 58799315                | C/T  | NA                 | NA                            | NA                 |
| <i>Desi_wild_58800793</i> | NA                                  | <i>Ca_desi_denovo</i> | 58800793                | A/G  | NA                 | NA                            | NA                 |
| <i>Desi_wild_58800818</i> | NA                                  | <i>Ca_desi_denovo</i> | 58800818                | C/T  | NA                 | NA                            | NA                 |
| <i>Desi_wild_58802697</i> | NA                                  | <i>Ca_desi_denovo</i> | 58802697                | C/G  | NA                 | NA                            | NA                 |
| <i>Desi_wild_58803165</i> | NA                                  | <i>Ca_desi_denovo</i> | 58803165                | C/T  | NA                 | NA                            | NA                 |
| <i>Desi_wild_58811034</i> | NA                                  | <i>Ca_desi_denovo</i> | 58811034                | C/G  | NA                 | NA                            | NA                 |
| <i>Desi_wild_58811037</i> | NA                                  | <i>Ca_desi_denovo</i> | 58811037                | C/G  | NA                 | NA                            | NA                 |
| <i>Desi_wild_58818589</i> | NA                                  | <i>Ca_desi_denovo</i> | 58818589                | A/C  | NA                 | NA                            | NA                 |
| <i>Desi_wild_58819796</i> | NA                                  | <i>Ca_desi_denovo</i> | 58819796                | G/T  | NA                 | NA                            | NA                 |
| <i>Desi_wild_58820359</i> | NA                                  | <i>Ca_desi_denovo</i> | 58820359                | A/G  | NA                 | NA                            | NA                 |
| <i>Desi_wild_58823768</i> | NA                                  | <i>Ca_desi_denovo</i> | 58823768                | C/G  | NA                 | NA                            | NA                 |
| <i>Desi_wild_58823803</i> | NA                                  | <i>Ca_desi_denovo</i> | 58823803                | C/G  | NA                 | NA                            | NA                 |
| <i>Desi_wild_58827023</i> | NA                                  | <i>Ca_desi_denovo</i> | 58827023                | G/T  | NA                 | NA                            | NA                 |
| <i>Desi_wild_58827025</i> | NA                                  | <i>Ca_desi_denovo</i> | 58827025                | C/T  | NA                 | NA                            | NA                 |
| <i>Desi_wild_58827070</i> | NA                                  | <i>Ca_desi_denovo</i> | 58827070                | A/G  | NA                 | NA                            | NA                 |

| SNP IDs                   | NCBI dbSNP accession IDs (NCBI_SS#) | Chromosomes           | Physical positions (bp) | SNPs | Gene accession IDs | Sequence components of genome | Putative functions |
|---------------------------|-------------------------------------|-----------------------|-------------------------|------|--------------------|-------------------------------|--------------------|
| <i>Desi_wild_58827083</i> | NA                                  | <i>Ca_desi_denovo</i> | 58827083                | C/G  | NA                 | NA                            | NA                 |
| <i>Desi_wild_58827303</i> | NA                                  | <i>Ca_desi_denovo</i> | 58827303                | C/T  | NA                 | NA                            | NA                 |
| <i>Desi_wild_58827339</i> | NA                                  | <i>Ca_desi_denovo</i> | 58827339                | A/G  | NA                 | NA                            | NA                 |
| <i>Desi_wild_58828972</i> | NA                                  | <i>Ca_desi_denovo</i> | 58828972                | C/G  | NA                 | NA                            | NA                 |
| <i>Desi_wild_58832656</i> | NA                                  | <i>Ca_desi_denovo</i> | 58832656                | C/T  | NA                 | NA                            | NA                 |
| <i>Desi_wild_58835003</i> | NA                                  | <i>Ca_desi_denovo</i> | 58835003                | A/G  | NA                 | NA                            | NA                 |
| <i>Desi_wild_58840714</i> | NA                                  | <i>Ca_desi_denovo</i> | 58840714                | C/G  | NA                 | NA                            | NA                 |
| <i>Desi_wild_58841154</i> | NA                                  | <i>Ca_desi_denovo</i> | 58841154                | C/G  | NA                 | NA                            | NA                 |
| <i>Desi_wild_58841166</i> | NA                                  | <i>Ca_desi_denovo</i> | 58841166                | C/T  | NA                 | NA                            | NA                 |
| <i>Desi_wild_58841205</i> | NA                                  | <i>Ca_desi_denovo</i> | 58841205                | C/G  | NA                 | NA                            | NA                 |
| <i>Desi_wild_58841217</i> | NA                                  | <i>Ca_desi_denovo</i> | 58841217                | C/T  | NA                 | NA                            | NA                 |
| <i>Desi_wild_58843306</i> | NA                                  | <i>Ca_desi_denovo</i> | 58843306                | C/G  | NA                 | NA                            | NA                 |
| <i>Desi_wild_58843309</i> | NA                                  | <i>Ca_desi_denovo</i> | 58843309                | C/T  | NA                 | NA                            | NA                 |
| <i>Desi_wild_58843935</i> | NA                                  | <i>Ca_desi_denovo</i> | 58843935                | C/G  | NA                 | NA                            | NA                 |
| <i>Desi_wild_58844451</i> | NA                                  | <i>Ca_desi_denovo</i> | 58844451                | C/G  | NA                 | NA                            | NA                 |
| <i>Desi_wild_58850731</i> | NA                                  | <i>Ca_desi_denovo</i> | 58850731                | C/G  | NA                 | NA                            | NA                 |
| <i>Desi_wild_58850746</i> | NA                                  | <i>Ca_desi_denovo</i> | 58850746                | A/G  | NA                 | NA                            | NA                 |
| <i>Desi_wild_58850761</i> | NA                                  | <i>Ca_desi_denovo</i> | 58850761                | A/G  | NA                 | NA                            | NA                 |
| <i>Desi_wild_58852089</i> | NA                                  | <i>Ca_desi_denovo</i> | 58852089                | C/G  | NA                 | NA                            | NA                 |
| <i>Desi_wild_58853167</i> | NA                                  | <i>Ca_desi_denovo</i> | 58853167                | C/T  | NA                 | NA                            | NA                 |
| <i>Desi_wild_58853171</i> | NA                                  | <i>Ca_desi_denovo</i> | 58853171                | G/T  | NA                 | NA                            | NA                 |
| <i>Desi_wild_58855633</i> | NA                                  | <i>Ca_desi_denovo</i> | 58855633                | C/T  | NA                 | NA                            | NA                 |
| <i>Desi_wild_58856312</i> | NA                                  | <i>Ca_desi_denovo</i> | 58856312                | C/G  | NA                 | NA                            | NA                 |
| <i>Desi_wild_58857620</i> | NA                                  | <i>Ca_desi_denovo</i> | 58857620                | A/G  | NA                 | NA                            | NA                 |
| <i>Desi_wild_58857664</i> | NA                                  | <i>Ca_desi_denovo</i> | 58857664                | A/G  | NA                 | NA                            | NA                 |
| <i>Desi_wild_58857742</i> | NA                                  | <i>Ca_desi_denovo</i> | 58857742                | C/G  | NA                 | NA                            | NA                 |
| <i>Desi_wild_58857751</i> | NA                                  | <i>Ca_desi_denovo</i> | 58857751                | A/G  | NA                 | NA                            | NA                 |
| <i>Desi_wild_58860031</i> | NA                                  | <i>Ca_desi_denovo</i> | 58860031                | C/G  | NA                 | NA                            | NA                 |
| <i>Desi_wild_58862021</i> | NA                                  | <i>Ca_desi_denovo</i> | 58862021                | C/T  | NA                 | NA                            | NA                 |
| <i>Desi_wild_58863409</i> | NA                                  | <i>Ca_desi_denovo</i> | 58863409                | C/T  | NA                 | NA                            | NA                 |
| <i>Desi_wild_58864416</i> | NA                                  | <i>Ca_desi_denovo</i> | 58864416                | A/G  | NA                 | NA                            | NA                 |
| <i>Desi_wild_58864443</i> | NA                                  | <i>Ca_desi_denovo</i> | 58864443                | C/G  | NA                 | NA                            | NA                 |
| <i>Desi_wild_58864446</i> | NA                                  | <i>Ca_desi_denovo</i> | 58864446                | G/T  | NA                 | NA                            | NA                 |
| <i>Desi_wild_58872868</i> | NA                                  | <i>Ca_desi_denovo</i> | 58872868                | A/G  | NA                 | NA                            | NA                 |
| <i>Desi_wild_58872880</i> | NA                                  | <i>Ca_desi_denovo</i> | 58872880                | A/G  | NA                 | NA                            | NA                 |
| <i>Desi_wild_58878456</i> | NA                                  | <i>Ca_desi_denovo</i> | 58878456                | A/G  | NA                 | NA                            | NA                 |
| <i>Desi_wild_58879849</i> | NA                                  | <i>Ca_desi_denovo</i> | 58879849                | G/T  | NA                 | NA                            | NA                 |
| <i>Desi_wild_58883558</i> | NA                                  | <i>Ca_desi_denovo</i> | 58883558                | A/G  | NA                 | NA                            | NA                 |
| <i>Desi_wild_58883580</i> | NA                                  | <i>Ca_desi_denovo</i> | 58883580                | C/T  | NA                 | NA                            | NA                 |
| <i>Desi_wild_58885238</i> | NA                                  | <i>Ca_desi_denovo</i> | 58885238                | G/T  | NA                 | NA                            | NA                 |
| <i>Desi_wild_58885264</i> | NA                                  | <i>Ca_desi_denovo</i> | 58885264                | C/G  | NA                 | NA                            | NA                 |
| <i>Desi_wild_58885822</i> | NA                                  | <i>Ca_desi_denovo</i> | 58885822                | A/G  | NA                 | NA                            | NA                 |
| <i>Desi_wild_58885837</i> | NA                                  | <i>Ca_desi_denovo</i> | 58885837                | G/T  | NA                 | NA                            | NA                 |
| <i>Desi_wild_58886503</i> | NA                                  | <i>Ca_desi_denovo</i> | 58886503                | C/T  | NA                 | NA                            | NA                 |

| SNP IDs                   | NCBI dbSNP accession IDs (NCBI_SS#) | Chromosomes           | Physical positions (bp) | SNPs | Gene accession IDs | Sequence components of genome | Putative functions |
|---------------------------|-------------------------------------|-----------------------|-------------------------|------|--------------------|-------------------------------|--------------------|
| <i>Desi_wild_58888203</i> | NA                                  | <i>Ca_desi_denovo</i> | 58888203                | C/T  | NA                 | NA                            | NA                 |
| <i>Desi_wild_58888228</i> | NA                                  | <i>Ca_desi_denovo</i> | 58888228                | A/G  | NA                 | NA                            | NA                 |
| <i>Desi_wild_58888282</i> | NA                                  | <i>Ca_desi_denovo</i> | 58888282                | A/C  | NA                 | NA                            | NA                 |
| <i>Desi_wild_58894573</i> | NA                                  | <i>Ca_desi_denovo</i> | 58894573                | A/G  | NA                 | NA                            | NA                 |
| <i>Desi_wild_58897363</i> | NA                                  | <i>Ca_desi_denovo</i> | 58897363                | C/G  | NA                 | NA                            | NA                 |
| <i>Desi_wild_58900221</i> | NA                                  | <i>Ca_desi_denovo</i> | 58900221                | A/C  | NA                 | NA                            | NA                 |
| <i>Desi_wild_58900247</i> | NA                                  | <i>Ca_desi_denovo</i> | 58900247                | G/T  | NA                 | NA                            | NA                 |
| <i>Desi_wild_58900251</i> | NA                                  | <i>Ca_desi_denovo</i> | 58900251                | G/T  | NA                 | NA                            | NA                 |
| <i>Desi_wild_58900276</i> | NA                                  | <i>Ca_desi_denovo</i> | 58900276                | C/G  | NA                 | NA                            | NA                 |
| <i>Desi_wild_58905631</i> | NA                                  | <i>Ca_desi_denovo</i> | 58905631                | C/G  | NA                 | NA                            | NA                 |
| <i>Desi_wild_58905664</i> | NA                                  | <i>Ca_desi_denovo</i> | 58905664                | C/G  | NA                 | NA                            | NA                 |
| <i>Desi_wild_58905676</i> | NA                                  | <i>Ca_desi_denovo</i> | 58905676                | C/T  | NA                 | NA                            | NA                 |
| <i>Desi_wild_58909599</i> | NA                                  | <i>Ca_desi_denovo</i> | 58909599                | A/G  | NA                 | NA                            | NA                 |
| <i>Desi_wild_58910004</i> | NA                                  | <i>Ca_desi_denovo</i> | 58910004                | A/T  | NA                 | NA                            | NA                 |
| <i>Desi_wild_58910064</i> | NA                                  | <i>Ca_desi_denovo</i> | 58910064                | A/C  | NA                 | NA                            | NA                 |
| <i>Desi_wild_58910091</i> | NA                                  | <i>Ca_desi_denovo</i> | 58910091                | A/C  | NA                 | NA                            | NA                 |
| <i>Desi_wild_58911447</i> | NA                                  | <i>Ca_desi_denovo</i> | 58911447                | C/T  | NA                 | NA                            | NA                 |
| <i>Desi_wild_58914874</i> | NA                                  | <i>Ca_desi_denovo</i> | 58914874                | C/G  | NA                 | NA                            | NA                 |
| <i>Desi_wild_58918858</i> | NA                                  | <i>Ca_desi_denovo</i> | 58918858                | A/G  | NA                 | NA                            | NA                 |
| <i>Desi_wild_58925074</i> | NA                                  | <i>Ca_desi_denovo</i> | 58925074                | A/G  | NA                 | NA                            | NA                 |
| <i>Desi_wild_58927919</i> | NA                                  | <i>Ca_desi_denovo</i> | 58927919                | A/G  | NA                 | NA                            | NA                 |
| <i>Desi_wild_58929664</i> | NA                                  | <i>Ca_desi_denovo</i> | 58929664                | C/G  | NA                 | NA                            | NA                 |
| <i>Desi_wild_58933425</i> | NA                                  | <i>Ca_desi_denovo</i> | 58933425                | G/T  | NA                 | NA                            | NA                 |
| <i>Desi_wild_58934920</i> | NA                                  | <i>Ca_desi_denovo</i> | 58934920                | C/G  | NA                 | NA                            | NA                 |
| <i>Desi_wild_58938522</i> | NA                                  | <i>Ca_desi_denovo</i> | 58938522                | C/T  | NA                 | NA                            | NA                 |
| <i>Desi_wild_58941330</i> | NA                                  | <i>Ca_desi_denovo</i> | 58941330                | C/T  | NA                 | NA                            | NA                 |
| <i>Desi_wild_58941378</i> | NA                                  | <i>Ca_desi_denovo</i> | 58941378                | G/T  | NA                 | NA                            | NA                 |
| <i>Desi_wild_58942990</i> | NA                                  | <i>Ca_desi_denovo</i> | 58942990                | G/T  | NA                 | NA                            | NA                 |
| <i>Desi_wild_58943011</i> | NA                                  | <i>Ca_desi_denovo</i> | 58943011                | A/G  | NA                 | NA                            | NA                 |
| <i>Desi_wild_58944467</i> | NA                                  | <i>Ca_desi_denovo</i> | 58944467                | A/C  | NA                 | NA                            | NA                 |
| <i>Desi_wild_58944468</i> | NA                                  | <i>Ca_desi_denovo</i> | 58944468                | G/T  | NA                 | NA                            | NA                 |
| <i>Desi_wild_58947825</i> | NA                                  | <i>Ca_desi_denovo</i> | 58947825                | A/G  | NA                 | NA                            | NA                 |
| <i>Desi_wild_58955488</i> | NA                                  | <i>Ca_desi_denovo</i> | 58955488                | A/G  | NA                 | NA                            | NA                 |
| <i>Desi_wild_58955494</i> | NA                                  | <i>Ca_desi_denovo</i> | 58955494                | C/G  | NA                 | NA                            | NA                 |
| <i>Desi_wild_58955496</i> | NA                                  | <i>Ca_desi_denovo</i> | 58955496                | A/G  | NA                 | NA                            | NA                 |
| <i>Desi_wild_58957329</i> | NA                                  | <i>Ca_desi_denovo</i> | 58957329                | C/T  | NA                 | NA                            | NA                 |
| <i>Desi_wild_58957353</i> | NA                                  | <i>Ca_desi_denovo</i> | 58957353                | G/T  | NA                 | NA                            | NA                 |
| <i>Desi_wild_58959819</i> | NA                                  | <i>Ca_desi_denovo</i> | 58959819                | C/G  | NA                 | NA                            | NA                 |
| <i>Desi_wild_58959834</i> | NA                                  | <i>Ca_desi_denovo</i> | 58959834                | C/G  | NA                 | NA                            | NA                 |
| <i>Desi_wild_58973583</i> | NA                                  | <i>Ca_desi_denovo</i> | 58973583                | C/T  | NA                 | NA                            | NA                 |
| <i>Desi_wild_58973595</i> | NA                                  | <i>Ca_desi_denovo</i> | 58973595                | C/T  | NA                 | NA                            | NA                 |
| <i>Desi_wild_58975767</i> | NA                                  | <i>Ca_desi_denovo</i> | 58975767                | G/T  | NA                 | NA                            | NA                 |
| <i>Desi_wild_58980299</i> | NA                                  | <i>Ca_desi_denovo</i> | 58980299                | A/G  | NA                 | NA                            | NA                 |
| <i>Desi_wild_58987375</i> | NA                                  | <i>Ca_desi_denovo</i> | 58987375                | A/G  | NA                 | NA                            | NA                 |

| SNP IDs                   | NCBI dbSNP accession IDs (NCBI_SS#) | Chromosomes           | Physical positions (bp) | SNPs | Gene accession IDs | Sequence components of genome | Putative functions |
|---------------------------|-------------------------------------|-----------------------|-------------------------|------|--------------------|-------------------------------|--------------------|
| <i>Desi_wild_58987396</i> | NA                                  | <i>Ca_desi_denovo</i> | 58987396                | A/G  | NA                 | NA                            | NA                 |
| <i>Desi_wild_58990360</i> | NA                                  | <i>Ca_desi_denovo</i> | 58990360                | C/T  | NA                 | NA                            | NA                 |
| <i>Desi_wild_59007728</i> | NA                                  | <i>Ca_desi_denovo</i> | 59007728                | C/T  | NA                 | NA                            | NA                 |
| <i>Desi_wild_59007731</i> | NA                                  | <i>Ca_desi_denovo</i> | 59007731                | C/T  | NA                 | NA                            | NA                 |
| <i>Desi_wild_59007734</i> | NA                                  | <i>Ca_desi_denovo</i> | 59007734                | A/C  | NA                 | NA                            | NA                 |
| <i>Desi_wild_59007749</i> | NA                                  | <i>Ca_desi_denovo</i> | 59007749                | C/G  | NA                 | NA                            | NA                 |
| <i>Desi_wild_59008756</i> | NA                                  | <i>Ca_desi_denovo</i> | 59008756                | A/G  | NA                 | NA                            | NA                 |
| <i>Desi_wild_59009491</i> | NA                                  | <i>Ca_desi_denovo</i> | 59009491                | A/C  | NA                 | NA                            | NA                 |
| <i>Desi_wild_59009515</i> | NA                                  | <i>Ca_desi_denovo</i> | 59009515                | A/G  | NA                 | NA                            | NA                 |
| <i>Desi_wild_59009521</i> | NA                                  | <i>Ca_desi_denovo</i> | 59009521                | A/G  | NA                 | NA                            | NA                 |
| <i>Desi_wild_59009550</i> | NA                                  | <i>Ca_desi_denovo</i> | 59009550                | A/G  | NA                 | NA                            | NA                 |
| <i>Desi_wild_59013122</i> | NA                                  | <i>Ca_desi_denovo</i> | 59013122                | A/G  | NA                 | NA                            | NA                 |
| <i>Desi_wild_59013128</i> | NA                                  | <i>Ca_desi_denovo</i> | 59013128                | A/G  | NA                 | NA                            | NA                 |
| <i>Desi_wild_59013783</i> | NA                                  | <i>Ca_desi_denovo</i> | 59013783                | A/C  | NA                 | NA                            | NA                 |
| <i>Desi_wild_59013807</i> | NA                                  | <i>Ca_desi_denovo</i> | 59013807                | A/G  | NA                 | NA                            | NA                 |
| <i>Desi_wild_59017594</i> | NA                                  | <i>Ca_desi_denovo</i> | 59017594                | C/T  | NA                 | NA                            | NA                 |
| <i>Desi_wild_59022291</i> | NA                                  | <i>Ca_desi_denovo</i> | 59022291                | A/G  | NA                 | NA                            | NA                 |
| <i>Desi_wild_59028928</i> | NA                                  | <i>Ca_desi_denovo</i> | 59028928                | C/G  | NA                 | NA                            | NA                 |
| <i>Desi_wild_59028934</i> | NA                                  | <i>Ca_desi_denovo</i> | 59028934                | C/G  | NA                 | NA                            | NA                 |
| <i>Desi_wild_59028937</i> | NA                                  | <i>Ca_desi_denovo</i> | 59028937                | C/G  | NA                 | NA                            | NA                 |
| <i>Desi_wild_59029433</i> | NA                                  | <i>Ca_desi_denovo</i> | 59029433                | G/T  | NA                 | NA                            | NA                 |
| <i>Desi_wild_59032659</i> | NA                                  | <i>Ca_desi_denovo</i> | 59032659                | C/G  | NA                 | NA                            | NA                 |
| <i>Desi_wild_59035926</i> | NA                                  | <i>Ca_desi_denovo</i> | 59035926                | C/T  | NA                 | NA                            | NA                 |
| <i>Desi_wild_59038603</i> | NA                                  | <i>Ca_desi_denovo</i> | 59038603                | A/G  | NA                 | NA                            | NA                 |
| <i>Desi_wild_59039164</i> | NA                                  | <i>Ca_desi_denovo</i> | 59039164                | A/G  | NA                 | NA                            | NA                 |
| <i>Desi_wild_59041402</i> | NA                                  | <i>Ca_desi_denovo</i> | 59041402                | C/T  | NA                 | NA                            | NA                 |
| <i>Desi_wild_59041424</i> | NA                                  | <i>Ca_desi_denovo</i> | 59041424                | A/G  | NA                 | NA                            | NA                 |
| <i>Desi_wild_59042230</i> | NA                                  | <i>Ca_desi_denovo</i> | 59042230                | A/T  | NA                 | NA                            | NA                 |
| <i>Desi_wild_59042266</i> | NA                                  | <i>Ca_desi_denovo</i> | 59042266                | A/G  | NA                 | NA                            | NA                 |
| <i>Desi_wild_59044312</i> | NA                                  | <i>Ca_desi_denovo</i> | 59044312                | C/T  | NA                 | NA                            | NA                 |
| <i>Desi_wild_59046051</i> | NA                                  | <i>Ca_desi_denovo</i> | 59046051                | C/G  | NA                 | NA                            | NA                 |
| <i>Desi_wild_59047426</i> | NA                                  | <i>Ca_desi_denovo</i> | 59047426                | C/G  | NA                 | NA                            | NA                 |
| <i>Desi_wild_59051603</i> | NA                                  | <i>Ca_desi_denovo</i> | 59051603                | C/T  | NA                 | NA                            | NA                 |
| <i>Desi_wild_59053149</i> | NA                                  | <i>Ca_desi_denovo</i> | 59053149                | C/T  | NA                 | NA                            | NA                 |
| <i>Desi_wild_59053591</i> | NA                                  | <i>Ca_desi_denovo</i> | 59053591                | A/G  | NA                 | NA                            | NA                 |
| <i>Desi_wild_59054994</i> | NA                                  | <i>Ca_desi_denovo</i> | 59054994                | A/G  | NA                 | NA                            | NA                 |
| <i>Desi_wild_59055730</i> | NA                                  | <i>Ca_desi_denovo</i> | 59055730                | C/T  | NA                 | NA                            | NA                 |
| <i>Desi_wild_59055733</i> | NA                                  | <i>Ca_desi_denovo</i> | 59055733                | A/G  | NA                 | NA                            | NA                 |
| <i>Desi_wild_59055750</i> | NA                                  | <i>Ca_desi_denovo</i> | 59055750                | A/G  | NA                 | NA                            | NA                 |
| <i>Desi_wild_59058412</i> | NA                                  | <i>Ca_desi_denovo</i> | 59058412                | A/G  | NA                 | NA                            | NA                 |
| <i>Desi_wild_59062896</i> | NA                                  | <i>Ca_desi_denovo</i> | 59062896                | C/T  | NA                 | NA                            | NA                 |
| <i>Desi_wild_59063355</i> | NA                                  | <i>Ca_desi_denovo</i> | 59063355                | A/G  | NA                 | NA                            | NA                 |
| <i>Desi_wild_59063359</i> | NA                                  | <i>Ca_desi_denovo</i> | 59063359                | A/G  | NA                 | NA                            | NA                 |
| <i>Desi_wild_59069395</i> | NA                                  | <i>Ca_desi_denovo</i> | 59069395                | A/C  | NA                 | NA                            | NA                 |

| SNP IDs                   | NCBI dbSNP accession IDs (NCBI_SS#) | Chromosomes           | Physical positions (bp) | SNPs | Gene accession IDs | Sequence components of genome | Putative functions |
|---------------------------|-------------------------------------|-----------------------|-------------------------|------|--------------------|-------------------------------|--------------------|
| <i>Desi_wild_59071326</i> | NA                                  | <i>Ca_desi_denovo</i> | 59071326                | C/T  | NA                 | NA                            | NA                 |
| <i>Desi_wild_59071957</i> | NA                                  | <i>Ca_desi_denovo</i> | 59071957                | C/T  | NA                 | NA                            | NA                 |
| <i>Desi_wild_59073867</i> | NA                                  | <i>Ca_desi_denovo</i> | 59073867                | C/T  | NA                 | NA                            | NA                 |
| <i>Desi_wild_59075814</i> | NA                                  | <i>Ca_desi_denovo</i> | 59075814                | C/G  | NA                 | NA                            | NA                 |
| <i>Desi_wild_59075823</i> | NA                                  | <i>Ca_desi_denovo</i> | 59075823                | A/G  | NA                 | NA                            | NA                 |
| <i>Desi_wild_59080378</i> | NA                                  | <i>Ca_desi_denovo</i> | 59080378                | C/G  | NA                 | NA                            | NA                 |
| <i>Desi_wild_59081009</i> | NA                                  | <i>Ca_desi_denovo</i> | 59081009                | C/G  | NA                 | NA                            | NA                 |
| <i>Desi_wild_59081031</i> | NA                                  | <i>Ca_desi_denovo</i> | 59081031                | A/G  | NA                 | NA                            | NA                 |
| <i>Desi_wild_59081046</i> | NA                                  | <i>Ca_desi_denovo</i> | 59081046                | A/G  | NA                 | NA                            | NA                 |
| <i>Desi_wild_59082225</i> | NA                                  | <i>Ca_desi_denovo</i> | 59082225                | C/G  | NA                 | NA                            | NA                 |
| <i>Desi_wild_59082237</i> | NA                                  | <i>Ca_desi_denovo</i> | 59082237                | C/T  | NA                 | NA                            | NA                 |
| <i>Desi_wild_59084088</i> | NA                                  | <i>Ca_desi_denovo</i> | 59084088                | A/G  | NA                 | NA                            | NA                 |
| <i>Desi_wild_59084839</i> | NA                                  | <i>Ca_desi_denovo</i> | 59084839                | C/T  | NA                 | NA                            | NA                 |
| <i>Desi_wild_59084842</i> | NA                                  | <i>Ca_desi_denovo</i> | 59084842                | A/G  | NA                 | NA                            | NA                 |
| <i>Desi_wild_59086145</i> | NA                                  | <i>Ca_desi_denovo</i> | 59086145                | C/G  | NA                 | NA                            | NA                 |
| <i>Desi_wild_59090302</i> | NA                                  | <i>Ca_desi_denovo</i> | 59090302                | A/G  | NA                 | NA                            | NA                 |
| <i>Desi_wild_59090859</i> | NA                                  | <i>Ca_desi_denovo</i> | 59090859                | A/G  | NA                 | NA                            | NA                 |
| <i>Desi_wild_59090898</i> | NA                                  | <i>Ca_desi_denovo</i> | 59090898                | A/G  | NA                 | NA                            | NA                 |
| <i>Desi_wild_59090901</i> | NA                                  | <i>Ca_desi_denovo</i> | 59090901                | G/T  | NA                 | NA                            | NA                 |
| <i>Desi_wild_59094232</i> | NA                                  | <i>Ca_desi_denovo</i> | 59094232                | A/G  | NA                 | NA                            | NA                 |
| <i>Desi_wild_59095240</i> | NA                                  | <i>Ca_desi_denovo</i> | 59095240                | C/G  | NA                 | NA                            | NA                 |
| <i>Desi_wild_59095243</i> | NA                                  | <i>Ca_desi_denovo</i> | 59095243                | C/G  | NA                 | NA                            | NA                 |
| <i>Desi_wild_59097006</i> | NA                                  | <i>Ca_desi_denovo</i> | 59097006                | C/G  | NA                 | NA                            | NA                 |
| <i>Desi_wild_59099248</i> | NA                                  | <i>Ca_desi_denovo</i> | 59099248                | C/G  | NA                 | NA                            | NA                 |
| <i>Desi_wild_59099281</i> | NA                                  | <i>Ca_desi_denovo</i> | 59099281                | A/C  | NA                 | NA                            | NA                 |
| <i>Desi_wild_59100015</i> | NA                                  | <i>Ca_desi_denovo</i> | 59100015                | C/T  | NA                 | NA                            | NA                 |
| <i>Desi_wild_59100023</i> | NA                                  | <i>Ca_desi_denovo</i> | 59100023                | A/T  | NA                 | NA                            | NA                 |
| <i>Desi_wild_59100628</i> | NA                                  | <i>Ca_desi_denovo</i> | 59100628                | C/T  | NA                 | NA                            | NA                 |
| <i>Desi_wild_59107776</i> | NA                                  | <i>Ca_desi_denovo</i> | 59107776                | C/G  | NA                 | NA                            | NA                 |
| <i>Desi_wild_59108164</i> | NA                                  | <i>Ca_desi_denovo</i> | 59108164                | C/T  | NA                 | NA                            | NA                 |
| <i>Desi_wild_59110447</i> | NA                                  | <i>Ca_desi_denovo</i> | 59110447                | C/G  | NA                 | NA                            | NA                 |
| <i>Desi_wild_59110450</i> | NA                                  | <i>Ca_desi_denovo</i> | 59110450                | A/G  | NA                 | NA                            | NA                 |
| <i>Desi_wild_59110453</i> | NA                                  | <i>Ca_desi_denovo</i> | 59110453                | A/G  | NA                 | NA                            | NA                 |
| <i>Desi_wild_59111554</i> | NA                                  | <i>Ca_desi_denovo</i> | 59111554                | C/G  | NA                 | NA                            | NA                 |
| <i>Desi_wild_59111557</i> | NA                                  | <i>Ca_desi_denovo</i> | 59111557                | A/C  | NA                 | NA                            | NA                 |
| <i>Desi_wild_59112562</i> | NA                                  | <i>Ca_desi_denovo</i> | 59112562                | A/G  | NA                 | NA                            | NA                 |
| <i>Desi_wild_59112595</i> | NA                                  | <i>Ca_desi_denovo</i> | 59112595                | A/G  | NA                 | NA                            | NA                 |
| <i>Desi_wild_59115249</i> | NA                                  | <i>Ca_desi_denovo</i> | 59115249                | C/T  | NA                 | NA                            | NA                 |
| <i>Desi_wild_59115260</i> | NA                                  | <i>Ca_desi_denovo</i> | 59115260                | C/T  | NA                 | NA                            | NA                 |
| <i>Desi_wild_59115348</i> | NA                                  | <i>Ca_desi_denovo</i> | 59115348                | A/C  | NA                 | NA                            | NA                 |
| <i>Desi_wild_59117008</i> | NA                                  | <i>Ca_desi_denovo</i> | 59117008                | C/G  | NA                 | NA                            | NA                 |
| <i>Desi_wild_59123234</i> | NA                                  | <i>Ca_desi_denovo</i> | 59123234                | A/G  | NA                 | NA                            | NA                 |
| <i>Desi_wild_59124158</i> | NA                                  | <i>Ca_desi_denovo</i> | 59124158                | C/T  | NA                 | NA                            | NA                 |
| <i>Desi_wild_59124178</i> | NA                                  | <i>Ca_desi_denovo</i> | 59124178                | A/G  | NA                 | NA                            | NA                 |

| SNP IDs                   | NCBI dbSNP accession IDs (NCBI_SS#) | Chromosomes           | Physical positions (bp) | SNPs | Gene accession IDs | Sequence components of genome | Putative functions |
|---------------------------|-------------------------------------|-----------------------|-------------------------|------|--------------------|-------------------------------|--------------------|
| <i>Desi_wild_59124179</i> | NA                                  | <i>Ca_desi_denovo</i> | 59124179                | C/T  | NA                 | NA                            | NA                 |
| <i>Desi_wild_59127259</i> | NA                                  | <i>Ca_desi_denovo</i> | 59127259                | A/G  | NA                 | NA                            | NA                 |
| <i>Desi_wild_59132557</i> | NA                                  | <i>Ca_desi_denovo</i> | 59132557                | C/G  | NA                 | NA                            | NA                 |
| <i>Desi_wild_59135890</i> | NA                                  | <i>Ca_desi_denovo</i> | 59135890                | C/T  | NA                 | NA                            | NA                 |
| <i>Desi_wild_59143894</i> | NA                                  | <i>Ca_desi_denovo</i> | 59143894                | C/G  | NA                 | NA                            | NA                 |
| <i>Desi_wild_59143986</i> | NA                                  | <i>Ca_desi_denovo</i> | 59143986                | C/T  | NA                 | NA                            | NA                 |
| <i>Desi_wild_59145913</i> | NA                                  | <i>Ca_desi_denovo</i> | 59145913                | A/G  | NA                 | NA                            | NA                 |
| <i>Desi_wild_59145916</i> | NA                                  | <i>Ca_desi_denovo</i> | 59145916                | C/G  | NA                 | NA                            | NA                 |
| <i>Desi_wild_59148451</i> | NA                                  | <i>Ca_desi_denovo</i> | 59148451                | C/T  | NA                 | NA                            | NA                 |
| <i>Desi_wild_59150203</i> | NA                                  | <i>Ca_desi_denovo</i> | 59150203                | C/T  | NA                 | NA                            | NA                 |
| <i>Desi_wild_59150212</i> | NA                                  | <i>Ca_desi_denovo</i> | 59150212                | C/T  | NA                 | NA                            | NA                 |
| <i>Desi_wild_59152530</i> | NA                                  | <i>Ca_desi_denovo</i> | 59152530                | G/T  | NA                 | NA                            | NA                 |
| <i>Desi_wild_59153268</i> | NA                                  | <i>Ca_desi_denovo</i> | 59153268                | C/G  | NA                 | NA                            | NA                 |
| <i>Desi_wild_59153292</i> | NA                                  | <i>Ca_desi_denovo</i> | 59153292                | C/G  | NA                 | NA                            | NA                 |
| <i>Desi_wild_59155897</i> | NA                                  | <i>Ca_desi_denovo</i> | 59155897                | C/T  | NA                 | NA                            | NA                 |
| <i>Desi_wild_59155933</i> | NA                                  | <i>Ca_desi_denovo</i> | 59155933                | C/T  | NA                 | NA                            | NA                 |
| <i>Desi_wild_59162292</i> | NA                                  | <i>Ca_desi_denovo</i> | 59162292                | A/G  | NA                 | NA                            | NA                 |
| <i>Desi_wild_59162325</i> | NA                                  | <i>Ca_desi_denovo</i> | 59162325                | A/G  | NA                 | NA                            | NA                 |
| <i>Desi_wild_59162331</i> | NA                                  | <i>Ca_desi_denovo</i> | 59162331                | A/G  | NA                 | NA                            | NA                 |
| <i>Desi_wild_59162467</i> | NA                                  | <i>Ca_desi_denovo</i> | 59162467                | C/G  | NA                 | NA                            | NA                 |
| <i>Desi_wild_59165353</i> | NA                                  | <i>Ca_desi_denovo</i> | 59165353                | C/G  | NA                 | NA                            | NA                 |
| <i>Desi_wild_59165431</i> | NA                                  | <i>Ca_desi_denovo</i> | 59165431                | C/T  | NA                 | NA                            | NA                 |
| <i>Desi_wild_59168700</i> | NA                                  | <i>Ca_desi_denovo</i> | 59168700                | A/G  | NA                 | NA                            | NA                 |
| <i>Desi_wild_59168706</i> | NA                                  | <i>Ca_desi_denovo</i> | 59168706                | C/T  | NA                 | NA                            | NA                 |
| <i>Desi_wild_59168712</i> | NA                                  | <i>Ca_desi_denovo</i> | 59168712                | G/T  | NA                 | NA                            | NA                 |
| <i>Desi_wild_59171701</i> | NA                                  | <i>Ca_desi_denovo</i> | 59171701                | A/G  | NA                 | NA                            | NA                 |
| <i>Desi_wild_59171746</i> | NA                                  | <i>Ca_desi_denovo</i> | 59171746                | A/G  | NA                 | NA                            | NA                 |
| <i>Desi_wild_59172812</i> | NA                                  | <i>Ca_desi_denovo</i> | 59172812                | A/G  | NA                 | NA                            | NA                 |
| <i>Desi_wild_59172815</i> | NA                                  | <i>Ca_desi_denovo</i> | 59172815                | A/G  | NA                 | NA                            | NA                 |
| <i>Desi_wild_59175138</i> | NA                                  | <i>Ca_desi_denovo</i> | 59175138                | A/C  | NA                 | NA                            | NA                 |
| <i>Desi_wild_59175150</i> | NA                                  | <i>Ca_desi_denovo</i> | 59175150                | C/T  | NA                 | NA                            | NA                 |
| <i>Desi_wild_59179218</i> | NA                                  | <i>Ca_desi_denovo</i> | 59179218                | C/G  | NA                 | NA                            | NA                 |
| <i>Desi_wild_59180049</i> | NA                                  | <i>Ca_desi_denovo</i> | 59180049                | C/G  | NA                 | NA                            | NA                 |
| <i>Desi_wild_59180052</i> | NA                                  | <i>Ca_desi_denovo</i> | 59180052                | C/G  | NA                 | NA                            | NA                 |
| <i>Desi_wild_59180060</i> | NA                                  | <i>Ca_desi_denovo</i> | 59180060                | G/T  | NA                 | NA                            | NA                 |
| <i>Desi_wild_59181846</i> | NA                                  | <i>Ca_desi_denovo</i> | 59181846                | G/T  | NA                 | NA                            | NA                 |
| <i>Desi_wild_59187601</i> | NA                                  | <i>Ca_desi_denovo</i> | 59187601                | A/G  | NA                 | NA                            | NA                 |
| <i>Desi_wild_59188009</i> | NA                                  | <i>Ca_desi_denovo</i> | 59188009                | A/G  | NA                 | NA                            | NA                 |
| <i>Desi_wild_59189350</i> | NA                                  | <i>Ca_desi_denovo</i> | 59189350                | C/G  | NA                 | NA                            | NA                 |
| <i>Desi_wild_59193010</i> | NA                                  | <i>Ca_desi_denovo</i> | 59193010                | C/G  | NA                 | NA                            | NA                 |
| <i>Desi_wild_59193022</i> | NA                                  | <i>Ca_desi_denovo</i> | 59193022                | A/G  | NA                 | NA                            | NA                 |
| <i>Desi_wild_59193062</i> | NA                                  | <i>Ca_desi_denovo</i> | 59193062                | C/G  | NA                 | NA                            | NA                 |
| <i>Desi_wild_59193084</i> | NA                                  | <i>Ca_desi_denovo</i> | 59193084                | C/T  | NA                 | NA                            | NA                 |
| <i>Desi_wild_59193090</i> | NA                                  | <i>Ca_desi_denovo</i> | 59193090                | C/T  | NA                 | NA                            | NA                 |

| SNP IDs                   | NCBI dbSNP accession IDs (NCBI_SS#) | Chromosomes           | Physical positions (bp) | SNPs | Gene accession IDs | Sequence components of genome | Putative functions |
|---------------------------|-------------------------------------|-----------------------|-------------------------|------|--------------------|-------------------------------|--------------------|
| <i>Desi_wild_59193102</i> | NA                                  | <i>Ca_desi_denovo</i> | 59193102                | C/G  | NA                 | NA                            | NA                 |
| <i>Desi_wild_59195211</i> | NA                                  | <i>Ca_desi_denovo</i> | 59195211                | C/T  | NA                 | NA                            | NA                 |
| <i>Desi_wild_59195220</i> | NA                                  | <i>Ca_desi_denovo</i> | 59195220                | C/G  | NA                 | NA                            | NA                 |
| <i>Desi_wild_59195954</i> | NA                                  | <i>Ca_desi_denovo</i> | 59195954                | A/T  | NA                 | NA                            | NA                 |
| <i>Desi_wild_59195960</i> | NA                                  | <i>Ca_desi_denovo</i> | 59195960                | A/G  | NA                 | NA                            | NA                 |
| <i>Desi_wild_59198052</i> | NA                                  | <i>Ca_desi_denovo</i> | 59198052                | C/T  | NA                 | NA                            | NA                 |
| <i>Desi_wild_59199976</i> | NA                                  | <i>Ca_desi_denovo</i> | 59199976                | A/G  | NA                 | NA                            | NA                 |
| <i>Desi_wild_59199978</i> | NA                                  | <i>Ca_desi_denovo</i> | 59199978                | C/T  | NA                 | NA                            | NA                 |
| <i>Desi_wild_59199979</i> | NA                                  | <i>Ca_desi_denovo</i> | 59199979                | A/T  | NA                 | NA                            | NA                 |
| <i>Desi_wild_59199980</i> | NA                                  | <i>Ca_desi_denovo</i> | 59199980                | G/T  | NA                 | NA                            | NA                 |
| <i>Desi_wild_59202777</i> | NA                                  | <i>Ca_desi_denovo</i> | 59202777                | C/G  | NA                 | NA                            | NA                 |
| <i>Desi_wild_59205928</i> | NA                                  | <i>Ca_desi_denovo</i> | 59205928                | A/G  | NA                 | NA                            | NA                 |
| <i>Desi_wild_59207769</i> | NA                                  | <i>Ca_desi_denovo</i> | 59207769                | G/T  | NA                 | NA                            | NA                 |
| <i>Desi_wild_59207794</i> | NA                                  | <i>Ca_desi_denovo</i> | 59207794                | A/G  | NA                 | NA                            | NA                 |
| <i>Desi_wild_59209369</i> | NA                                  | <i>Ca_desi_denovo</i> | 59209369                | C/G  | NA                 | NA                            | NA                 |
| <i>Desi_wild_59209372</i> | NA                                  | <i>Ca_desi_denovo</i> | 59209372                | C/G  | NA                 | NA                            | NA                 |
| <i>Desi_wild_59209402</i> | NA                                  | <i>Ca_desi_denovo</i> | 59209402                | A/G  | NA                 | NA                            | NA                 |
| <i>Desi_wild_59211768</i> | NA                                  | <i>Ca_desi_denovo</i> | 59211768                | A/G  | NA                 | NA                            | NA                 |
| <i>Desi_wild_59211816</i> | NA                                  | <i>Ca_desi_denovo</i> | 59211816                | A/G  | NA                 | NA                            | NA                 |
| <i>Desi_wild_59214741</i> | NA                                  | <i>Ca_desi_denovo</i> | 59214741                | C/G  | NA                 | NA                            | NA                 |
| <i>Desi_wild_59222127</i> | NA                                  | <i>Ca_desi_denovo</i> | 59222127                | C/T  | NA                 | NA                            | NA                 |
| <i>Desi_wild_59222148</i> | NA                                  | <i>Ca_desi_denovo</i> | 59222148                | C/G  | NA                 | NA                            | NA                 |
| <i>Desi_wild_59223321</i> | NA                                  | <i>Ca_desi_denovo</i> | 59223321                | A/G  | NA                 | NA                            | NA                 |
| <i>Desi_wild_59225379</i> | NA                                  | <i>Ca_desi_denovo</i> | 59225379                | A/G  | NA                 | NA                            | NA                 |
| <i>Desi_wild_59225843</i> | NA                                  | <i>Ca_desi_denovo</i> | 59225843                | C/G  | NA                 | NA                            | NA                 |
| <i>Desi_wild_59227590</i> | NA                                  | <i>Ca_desi_denovo</i> | 59227590                | C/T  | NA                 | NA                            | NA                 |
| <i>Desi_wild_59230506</i> | NA                                  | <i>Ca_desi_denovo</i> | 59230506                | C/G  | NA                 | NA                            | NA                 |
| <i>Desi_wild_59234026</i> | NA                                  | <i>Ca_desi_denovo</i> | 59234026                | A/G  | NA                 | NA                            | NA                 |
| <i>Desi_wild_59238099</i> | NA                                  | <i>Ca_desi_denovo</i> | 59238099                | C/T  | NA                 | NA                            | NA                 |
| <i>Desi_wild_59240178</i> | NA                                  | <i>Ca_desi_denovo</i> | 59240178                | A/T  | NA                 | NA                            | NA                 |
| <i>Desi_wild_59241282</i> | NA                                  | <i>Ca_desi_denovo</i> | 59241282                | C/G  | NA                 | NA                            | NA                 |
| <i>Desi_wild_59242947</i> | NA                                  | <i>Ca_desi_denovo</i> | 59242947                | A/G  | NA                 | NA                            | NA                 |
| <i>Desi_wild_59247654</i> | NA                                  | <i>Ca_desi_denovo</i> | 59247654                | A/G  | NA                 | NA                            | NA                 |
| <i>Desi_wild_59247666</i> | NA                                  | <i>Ca_desi_denovo</i> | 59247666                | C/G  | NA                 | NA                            | NA                 |
| <i>Desi_wild_59247690</i> | NA                                  | <i>Ca_desi_denovo</i> | 59247690                | C/T  | NA                 | NA                            | NA                 |
| <i>Desi_wild_59252325</i> | NA                                  | <i>Ca_desi_denovo</i> | 59252325                | A/T  | NA                 | NA                            | NA                 |
| <i>Desi_wild_59254852</i> | NA                                  | <i>Ca_desi_denovo</i> | 59254852                | C/G  | NA                 | NA                            | NA                 |
| <i>Desi_wild_59255491</i> | NA                                  | <i>Ca_desi_denovo</i> | 59255491                | C/T  | NA                 | NA                            | NA                 |
| <i>Desi_wild_59256772</i> | NA                                  | <i>Ca_desi_denovo</i> | 59256772                | C/G  | NA                 | NA                            | NA                 |
| <i>Desi_wild_59256787</i> | NA                                  | <i>Ca_desi_denovo</i> | 59256787                | C/T  | NA                 | NA                            | NA                 |
| <i>Desi_wild_59256796</i> | NA                                  | <i>Ca_desi_denovo</i> | 59256796                | C/G  | NA                 | NA                            | NA                 |
| <i>Desi_wild_59257981</i> | NA                                  | <i>Ca_desi_denovo</i> | 59257981                | C/G  | NA                 | NA                            | NA                 |
| <i>Desi_wild_59258290</i> | NA                                  | <i>Ca_desi_denovo</i> | 59258290                | A/G  | NA                 | NA                            | NA                 |
| <i>Desi_wild_59258640</i> | NA                                  | <i>Ca_desi_denovo</i> | 59258640                | C/T  | NA                 | NA                            | NA                 |

| SNP IDs                   | NCBI dbSNP accession IDs (NCBI_SS#) | Chromosomes           | Physical positions (bp) | SNPs | Gene accession IDs | Sequence components of genome | Putative functions |
|---------------------------|-------------------------------------|-----------------------|-------------------------|------|--------------------|-------------------------------|--------------------|
| <i>Desi_wild_59258646</i> | NA                                  | <i>Ca_desi_denovo</i> | 59258646                | C/T  | NA                 | NA                            | NA                 |
| <i>Desi_wild_59265249</i> | NA                                  | <i>Ca_desi_denovo</i> | 59265249                | A/G  | NA                 | NA                            | NA                 |
| <i>Desi_wild_59265258</i> | NA                                  | <i>Ca_desi_denovo</i> | 59265258                | C/T  | NA                 | NA                            | NA                 |
| <i>Desi_wild_59265281</i> | NA                                  | <i>Ca_desi_denovo</i> | 59265281                | A/T  | NA                 | NA                            | NA                 |
| <i>Desi_wild_59271900</i> | NA                                  | <i>Ca_desi_denovo</i> | 59271900                | C/T  | NA                 | NA                            | NA                 |
| <i>Desi_wild_59276885</i> | NA                                  | <i>Ca_desi_denovo</i> | 59276885                | A/G  | NA                 | NA                            | NA                 |
| <i>Desi_wild_59276903</i> | NA                                  | <i>Ca_desi_denovo</i> | 59276903                | G/T  | NA                 | NA                            | NA                 |
| <i>Desi_wild_59276906</i> | NA                                  | <i>Ca_desi_denovo</i> | 59276906                | A/G  | NA                 | NA                            | NA                 |
| <i>Desi_wild_59276918</i> | NA                                  | <i>Ca_desi_denovo</i> | 59276918                | A/T  | NA                 | NA                            | NA                 |
| <i>Desi_wild_59278286</i> | NA                                  | <i>Ca_desi_denovo</i> | 59278286                | A/G  | NA                 | NA                            | NA                 |
| <i>Desi_wild_59279847</i> | NA                                  | <i>Ca_desi_denovo</i> | 59279847                | C/T  | NA                 | NA                            | NA                 |
| <i>Desi_wild_59283311</i> | NA                                  | <i>Ca_desi_denovo</i> | 59283311                | C/T  | NA                 | NA                            | NA                 |
| <i>Desi_wild_59284475</i> | NA                                  | <i>Ca_desi_denovo</i> | 59284475                | C/G  | NA                 | NA                            | NA                 |
| <i>Desi_wild_59285149</i> | NA                                  | <i>Ca_desi_denovo</i> | 59285149                | C/T  | NA                 | NA                            | NA                 |
| <i>Desi_wild_59285175</i> | NA                                  | <i>Ca_desi_denovo</i> | 59285175                | C/T  | NA                 | NA                            | NA                 |
| <i>Desi_wild_59292042</i> | NA                                  | <i>Ca_desi_denovo</i> | 59292042                | C/G  | NA                 | NA                            | NA                 |
| <i>Desi_wild_59292078</i> | NA                                  | <i>Ca_desi_denovo</i> | 59292078                | G/T  | NA                 | NA                            | NA                 |
| <i>Desi_wild_59294119</i> | NA                                  | <i>Ca_desi_denovo</i> | 59294119                | C/G  | NA                 | NA                            | NA                 |
| <i>Desi_wild_59299284</i> | NA                                  | <i>Ca_desi_denovo</i> | 59299284                | A/G  | NA                 | NA                            | NA                 |
| <i>Desi_wild_59299290</i> | NA                                  | <i>Ca_desi_denovo</i> | 59299290                | C/T  | NA                 | NA                            | NA                 |
| <i>Desi_wild_59301435</i> | NA                                  | <i>Ca_desi_denovo</i> | 59301435                | C/T  | NA                 | NA                            | NA                 |
| <i>Desi_wild_59305980</i> | NA                                  | <i>Ca_desi_denovo</i> | 59305980                | G/T  | NA                 | NA                            | NA                 |
| <i>Desi_wild_59307223</i> | NA                                  | <i>Ca_desi_denovo</i> | 59307223                | A/C  | NA                 | NA                            | NA                 |
| <i>Desi_wild_59307240</i> | NA                                  | <i>Ca_desi_denovo</i> | 59307240                | C/G  | NA                 | NA                            | NA                 |
| <i>Desi_wild_59307241</i> | NA                                  | <i>Ca_desi_denovo</i> | 59307241                | C/G  | NA                 | NA                            | NA                 |
| <i>Desi_wild_59307244</i> | NA                                  | <i>Ca_desi_denovo</i> | 59307244                | C/T  | NA                 | NA                            | NA                 |
| <i>Desi_wild_59314291</i> | NA                                  | <i>Ca_desi_denovo</i> | 59314291                | C/T  | NA                 | NA                            | NA                 |
| <i>Desi_wild_59318710</i> | NA                                  | <i>Ca_desi_denovo</i> | 59318710                | C/T  | NA                 | NA                            | NA                 |
| <i>Desi_wild_59318711</i> | NA                                  | <i>Ca_desi_denovo</i> | 59318711                | G/T  | NA                 | NA                            | NA                 |
| <i>Desi_wild_59318746</i> | NA                                  | <i>Ca_desi_denovo</i> | 59318746                | C/G  | NA                 | NA                            | NA                 |
| <i>Desi_wild_59319676</i> | NA                                  | <i>Ca_desi_denovo</i> | 59319676                | C/G  | NA                 | NA                            | NA                 |
| <i>Desi_wild_59321781</i> | NA                                  | <i>Ca_desi_denovo</i> | 59321781                | C/T  | NA                 | NA                            | NA                 |
| <i>Desi_wild_59322259</i> | NA                                  | <i>Ca_desi_denovo</i> | 59322259                | A/C  | NA                 | NA                            | NA                 |
| <i>Desi_wild_59329426</i> | NA                                  | <i>Ca_desi_denovo</i> | 59329426                | C/G  | NA                 | NA                            | NA                 |
| <i>Desi_wild_59330440</i> | NA                                  | <i>Ca_desi_denovo</i> | 59330440                | C/G  | NA                 | NA                            | NA                 |
| <i>Desi_wild_59330443</i> | NA                                  | <i>Ca_desi_denovo</i> | 59330443                | A/G  | NA                 | NA                            | NA                 |
| <i>Desi_wild_59333230</i> | NA                                  | <i>Ca_desi_denovo</i> | 59333230                | C/G  | NA                 | NA                            | NA                 |
| <i>Desi_wild_59338261</i> | NA                                  | <i>Ca_desi_denovo</i> | 59338261                | C/G  | NA                 | NA                            | NA                 |
| <i>Desi_wild_59338303</i> | NA                                  | <i>Ca_desi_denovo</i> | 59338303                | G/T  | NA                 | NA                            | NA                 |
| <i>Desi_wild_59341974</i> | NA                                  | <i>Ca_desi_denovo</i> | 59341974                | C/T  | NA                 | NA                            | NA                 |
| <i>Desi_wild_59341976</i> | NA                                  | <i>Ca_desi_denovo</i> | 59341976                | A/C  | NA                 | NA                            | NA                 |
| <i>Desi_wild_59343742</i> | NA                                  | <i>Ca_desi_denovo</i> | 59343742                | C/G  | NA                 | NA                            | NA                 |
| <i>Desi_wild_59343802</i> | NA                                  | <i>Ca_desi_denovo</i> | 59343802                | A/G  | NA                 | NA                            | NA                 |
| <i>Desi_wild_59345794</i> | NA                                  | <i>Ca_desi_denovo</i> | 59345794                | C/T  | NA                 | NA                            | NA                 |



| SNP IDs                   | NCBI dbSNP accession IDs (NCBI_SS#) | Chromosomes           | Physical positions (bp) | SNPs | Gene accession IDs | Sequence components of genome | Putative functions |
|---------------------------|-------------------------------------|-----------------------|-------------------------|------|--------------------|-------------------------------|--------------------|
| <i>Desi_wild_59345806</i> | NA                                  | <i>Ca_desi_denovo</i> | 59345806                | A/C  | NA                 | NA                            | NA                 |
| <i>Desi_wild_59350618</i> | NA                                  | <i>Ca_desi_denovo</i> | 59350618                | C/G  | NA                 | NA                            | NA                 |
| <i>Desi_wild_59351086</i> | NA                                  | <i>Ca_desi_denovo</i> | 59351086                | C/G  | NA                 | NA                            | NA                 |
| <i>Desi_wild_59354884</i> | NA                                  | <i>Ca_desi_denovo</i> | 59354884                | A/G  | NA                 | NA                            | NA                 |
| <i>Desi_wild_59354920</i> | NA                                  | <i>Ca_desi_denovo</i> | 59354920                | C/T  | NA                 | NA                            | NA                 |
| <i>Desi_wild_59359165</i> | NA                                  | <i>Ca_desi_denovo</i> | 59359165                | C/G  | NA                 | NA                            | NA                 |
| <i>Desi_wild_59362710</i> | NA                                  | <i>Ca_desi_denovo</i> | 59362710                | C/G  | NA                 | NA                            | NA                 |
| <i>Desi_wild_59364408</i> | NA                                  | <i>Ca_desi_denovo</i> | 59364408                | C/G  | NA                 | NA                            | NA                 |
| <i>Desi_wild_59364414</i> | NA                                  | <i>Ca_desi_denovo</i> | 59364414                | C/G  | NA                 | NA                            | NA                 |
| <i>Desi_wild_59370859</i> | NA                                  | <i>Ca_desi_denovo</i> | 59370859                | G/T  | NA                 | NA                            | NA                 |
| <i>Desi_wild_59376724</i> | NA                                  | <i>Ca_desi_denovo</i> | 59376724                | A/G  | NA                 | NA                            | NA                 |
| <i>Desi_wild_59381239</i> | NA                                  | <i>Ca_desi_denovo</i> | 59381239                | G/T  | NA                 | NA                            | NA                 |
| <i>Desi_wild_59381410</i> | NA                                  | <i>Ca_desi_denovo</i> | 59381410                | C/T  | NA                 | NA                            | NA                 |
| <i>Desi_wild_59381498</i> | NA                                  | <i>Ca_desi_denovo</i> | 59381498                | A/G  | NA                 | NA                            | NA                 |
| <i>Desi_wild_59381501</i> | NA                                  | <i>Ca_desi_denovo</i> | 59381501                | A/G  | NA                 | NA                            | NA                 |
| <i>Desi_wild_59381534</i> | NA                                  | <i>Ca_desi_denovo</i> | 59381534                | A/G  | NA                 | NA                            | NA                 |
| <i>Desi_wild_59388703</i> | NA                                  | <i>Ca_desi_denovo</i> | 59388703                | C/T  | NA                 | NA                            | NA                 |
| <i>Desi_wild_59391379</i> | NA                                  | <i>Ca_desi_denovo</i> | 59391379                | C/T  | NA                 | NA                            | NA                 |
| <i>Desi_wild_59391400</i> | NA                                  | <i>Ca_desi_denovo</i> | 59391400                | C/T  | NA                 | NA                            | NA                 |
| <i>Desi_wild_59391403</i> | NA                                  | <i>Ca_desi_denovo</i> | 59391403                | C/G  | NA                 | NA                            | NA                 |
| <i>Desi_wild_59391409</i> | NA                                  | <i>Ca_desi_denovo</i> | 59391409                | A/G  | NA                 | NA                            | NA                 |
| <i>Desi_wild_59394326</i> | NA                                  | <i>Ca_desi_denovo</i> | 59394326                | C/T  | NA                 | NA                            | NA                 |
| <i>Desi_wild_59396556</i> | NA                                  | <i>Ca_desi_denovo</i> | 59396556                | C/T  | NA                 | NA                            | NA                 |
| <i>Desi_wild_59396581</i> | NA                                  | <i>Ca_desi_denovo</i> | 59396581                | A/G  | NA                 | NA                            | NA                 |
| <i>Desi_wild_59396626</i> | NA                                  | <i>Ca_desi_denovo</i> | 59396626                | A/G  | NA                 | NA                            | NA                 |
| <i>Desi_wild_59397205</i> | NA                                  | <i>Ca_desi_denovo</i> | 59397205                | A/C  | NA                 | NA                            | NA                 |
| <i>Desi_wild_59397207</i> | NA                                  | <i>Ca_desi_denovo</i> | 59397207                | G/T  | NA                 | NA                            | NA                 |
| <i>Desi_wild_59397237</i> | NA                                  | <i>Ca_desi_denovo</i> | 59397237                | G/T  | NA                 | NA                            | NA                 |
| <i>Desi_wild_59397240</i> | NA                                  | <i>Ca_desi_denovo</i> | 59397240                | C/T  | NA                 | NA                            | NA                 |
| <i>Desi_wild_59400369</i> | NA                                  | <i>Ca_desi_denovo</i> | 59400369                | A/C  | NA                 | NA                            | NA                 |
| <i>Desi_wild_59400841</i> | NA                                  | <i>Ca_desi_denovo</i> | 59400841                | C/G  | NA                 | NA                            | NA                 |
| <i>Desi_wild_59401854</i> | NA                                  | <i>Ca_desi_denovo</i> | 59401854                | C/G  | NA                 | NA                            | NA                 |
| <i>Desi_wild_59402130</i> | NA                                  | <i>Ca_desi_denovo</i> | 59402130                | C/G  | NA                 | NA                            | NA                 |
| <i>Desi_wild_59402151</i> | NA                                  | <i>Ca_desi_denovo</i> | 59402151                | C/G  | NA                 | NA                            | NA                 |
| <i>Desi_wild_59403192</i> | NA                                  | <i>Ca_desi_denovo</i> | 59403192                | C/G  | NA                 | NA                            | NA                 |
| <i>Desi_wild_59404983</i> | NA                                  | <i>Ca_desi_denovo</i> | 59404983                | A/G  | NA                 | NA                            | NA                 |
| <i>Desi_wild_59408311</i> | NA                                  | <i>Ca_desi_denovo</i> | 59408311                | C/T  | NA                 | NA                            | NA                 |
| <i>Desi_wild_59409109</i> | NA                                  | <i>Ca_desi_denovo</i> | 59409109                | A/C  | NA                 | NA                            | NA                 |
| <i>Desi_wild_59409170</i> | NA                                  | <i>Ca_desi_denovo</i> | 59409170                | A/G  | NA                 | NA                            | NA                 |
| <i>Desi_wild_59415243</i> | NA                                  | <i>Ca_desi_denovo</i> | 59415243                | A/G  | NA                 | NA                            | NA                 |
| <i>Desi_wild_59415339</i> | NA                                  | <i>Ca_desi_denovo</i> | 59415339                | A/G  | NA                 | NA                            | NA                 |
| <i>Desi_wild_59415352</i> | NA                                  | <i>Ca_desi_denovo</i> | 59415352                | A/G  | NA                 | NA                            | NA                 |
| <i>Desi_wild_59416456</i> | NA                                  | <i>Ca_desi_denovo</i> | 59416456                | C/T  | NA                 | NA                            | NA                 |
| <i>Desi_wild_59416505</i> | NA                                  | <i>Ca_desi_denovo</i> | 59416505                | C/T  | NA                 | NA                            | NA                 |

| SNP IDs                   | NCBI dbSNP accession IDs (NCBI_SS#) | Chromosomes           | Physical positions (bp) | SNPs | Gene accession IDs | Sequence components of genome | Putative functions |
|---------------------------|-------------------------------------|-----------------------|-------------------------|------|--------------------|-------------------------------|--------------------|
| <i>Desi_wild_59416522</i> | NA                                  | <i>Ca_desi_denovo</i> | 59416522                | A/G  | NA                 | NA                            | NA                 |
| <i>Desi_wild_59417506</i> | NA                                  | <i>Ca_desi_denovo</i> | 59417506                | C/G  | NA                 | NA                            | NA                 |
| <i>Desi_wild_59419072</i> | NA                                  | <i>Ca_desi_denovo</i> | 59419072                | A/G  | NA                 | NA                            | NA                 |
| <i>Desi_wild_59425333</i> | NA                                  | <i>Ca_desi_denovo</i> | 59425333                | C/G  | NA                 | NA                            | NA                 |
| <i>Desi_wild_59427210</i> | NA                                  | <i>Ca_desi_denovo</i> | 59427210                | A/G  | NA                 | NA                            | NA                 |
| <i>Desi_wild_59428480</i> | NA                                  | <i>Ca_desi_denovo</i> | 59428480                | C/G  | NA                 | NA                            | NA                 |
| <i>Desi_wild_59433376</i> | NA                                  | <i>Ca_desi_denovo</i> | 59433376                | A/G  | NA                 | NA                            | NA                 |
| <i>Desi_wild_59433395</i> | NA                                  | <i>Ca_desi_denovo</i> | 59433395                | C/T  | NA                 | NA                            | NA                 |
| <i>Desi_wild_59433768</i> | NA                                  | <i>Ca_desi_denovo</i> | 59433768                | C/G  | NA                 | NA                            | NA                 |
| <i>Desi_wild_59433774</i> | NA                                  | <i>Ca_desi_denovo</i> | 59433774                | G/T  | NA                 | NA                            | NA                 |
| <i>Desi_wild_59433779</i> | NA                                  | <i>Ca_desi_denovo</i> | 59433779                | A/T  | NA                 | NA                            | NA                 |
| <i>Desi_wild_59439792</i> | NA                                  | <i>Ca_desi_denovo</i> | 59439792                | A/G  | NA                 | NA                            | NA                 |
| <i>Desi_wild_59439816</i> | NA                                  | <i>Ca_desi_denovo</i> | 59439816                | A/G  | NA                 | NA                            | NA                 |
| <i>Desi_wild_59439833</i> | NA                                  | <i>Ca_desi_denovo</i> | 59439833                | C/T  | NA                 | NA                            | NA                 |
| <i>Desi_wild_59439885</i> | NA                                  | <i>Ca_desi_denovo</i> | 59439885                | C/G  | NA                 | NA                            | NA                 |
| <i>Desi_wild_59439903</i> | NA                                  | <i>Ca_desi_denovo</i> | 59439903                | C/G  | NA                 | NA                            | NA                 |
| <i>Desi_wild_59439906</i> | NA                                  | <i>Ca_desi_denovo</i> | 59439906                | C/T  | NA                 | NA                            | NA                 |
| <i>Desi_wild_59440912</i> | NA                                  | <i>Ca_desi_denovo</i> | 59440912                | C/G  | NA                 | NA                            | NA                 |
| <i>Desi_wild_59448951</i> | NA                                  | <i>Ca_desi_denovo</i> | 59448951                | A/G  | NA                 | NA                            | NA                 |
| <i>Desi_wild_59448973</i> | NA                                  | <i>Ca_desi_denovo</i> | 59448973                | C/T  | NA                 | NA                            | NA                 |
| <i>Desi_wild_59452002</i> | NA                                  | <i>Ca_desi_denovo</i> | 59452002                | C/G  | NA                 | NA                            | NA                 |
| <i>Desi_wild_59452013</i> | NA                                  | <i>Ca_desi_denovo</i> | 59452013                | C/T  | NA                 | NA                            | NA                 |
| <i>Desi_wild_59452377</i> | NA                                  | <i>Ca_desi_denovo</i> | 59452377                | C/T  | NA                 | NA                            | NA                 |
| <i>Desi_wild_59454613</i> | NA                                  | <i>Ca_desi_denovo</i> | 59454613                | A/G  | NA                 | NA                            | NA                 |
| <i>Desi_wild_59455276</i> | NA                                  | <i>Ca_desi_denovo</i> | 59455276                | C/T  | NA                 | NA                            | NA                 |
| <i>Desi_wild_59458513</i> | NA                                  | <i>Ca_desi_denovo</i> | 59458513                | C/G  | NA                 | NA                            | NA                 |
| <i>Desi_wild_59458519</i> | NA                                  | <i>Ca_desi_denovo</i> | 59458519                | A/C  | NA                 | NA                            | NA                 |
| <i>Desi_wild_59458525</i> | NA                                  | <i>Ca_desi_denovo</i> | 59458525                | G/T  | NA                 | NA                            | NA                 |
| <i>Desi_wild_59458528</i> | NA                                  | <i>Ca_desi_denovo</i> | 59458528                | C/G  | NA                 | NA                            | NA                 |
| <i>Desi_wild_59460727</i> | NA                                  | <i>Ca_desi_denovo</i> | 59460727                | A/G  | NA                 | NA                            | NA                 |
| <i>Desi_wild_59460759</i> | NA                                  | <i>Ca_desi_denovo</i> | 59460759                | G/T  | NA                 | NA                            | NA                 |
| <i>Desi_wild_59461108</i> | NA                                  | <i>Ca_desi_denovo</i> | 59461108                | A/G  | NA                 | NA                            | NA                 |
| <i>Desi_wild_59461159</i> | NA                                  | <i>Ca_desi_denovo</i> | 59461159                | A/G  | NA                 | NA                            | NA                 |
| <i>Desi_wild_59468644</i> | NA                                  | <i>Ca_desi_denovo</i> | 59468644                | A/G  | NA                 | NA                            | NA                 |
| <i>Desi_wild_59470246</i> | NA                                  | <i>Ca_desi_denovo</i> | 59470246                | C/G  | NA                 | NA                            | NA                 |
| <i>Desi_wild_59471003</i> | NA                                  | <i>Ca_desi_denovo</i> | 59471003                | G/T  | NA                 | NA                            | NA                 |
| <i>Desi_wild_59472574</i> | NA                                  | <i>Ca_desi_denovo</i> | 59472574                | A/G  | NA                 | NA                            | NA                 |
| <i>Desi_wild_59473839</i> | NA                                  | <i>Ca_desi_denovo</i> | 59473839                | C/T  | NA                 | NA                            | NA                 |
| <i>Desi_wild_59473848</i> | NA                                  | <i>Ca_desi_denovo</i> | 59473848                | C/G  | NA                 | NA                            | NA                 |
| <i>Desi_wild_59473863</i> | NA                                  | <i>Ca_desi_denovo</i> | 59473863                | C/T  | NA                 | NA                            | NA                 |
| <i>Desi_wild_59481475</i> | NA                                  | <i>Ca_desi_denovo</i> | 59481475                | C/T  | NA                 | NA                            | NA                 |
| <i>Desi_wild_59483356</i> | NA                                  | <i>Ca_desi_denovo</i> | 59483356                | C/T  | NA                 | NA                            | NA                 |
| <i>Desi_wild_59484538</i> | NA                                  | <i>Ca_desi_denovo</i> | 59484538                | A/G  | NA                 | NA                            | NA                 |
| <i>Desi_wild_59484540</i> | NA                                  | <i>Ca_desi_denovo</i> | 59484540                | A/C  | NA                 | NA                            | NA                 |

| SNP IDs                   | NCBI dbSNP accession IDs (NCBI_SS#) | Chromosomes           | Physical positions (bp) | SNPs | Gene accession IDs | Sequence components of genome | Putative functions |
|---------------------------|-------------------------------------|-----------------------|-------------------------|------|--------------------|-------------------------------|--------------------|
| <i>Desi_wild_59486244</i> | NA                                  | <i>Ca_desi_denovo</i> | 59486244                | C/G  | NA                 | NA                            | NA                 |
| <i>Desi_wild_59486302</i> | NA                                  | <i>Ca_desi_denovo</i> | 59486302                | C/G  | NA                 | NA                            | NA                 |
| <i>Desi_wild_59490571</i> | NA                                  | <i>Ca_desi_denovo</i> | 59490571                | C/G  | NA                 | NA                            | NA                 |
| <i>Desi_wild_59490576</i> | NA                                  | <i>Ca_desi_denovo</i> | 59490576                | A/G  | NA                 | NA                            | NA                 |
| <i>Desi_wild_59492913</i> | NA                                  | <i>Ca_desi_denovo</i> | 59492913                | C/T  | NA                 | NA                            | NA                 |
| <i>Desi_wild_59501269</i> | NA                                  | <i>Ca_desi_denovo</i> | 59501269                | A/G  | NA                 | NA                            | NA                 |
| <i>Desi_wild_59508336</i> | NA                                  | <i>Ca_desi_denovo</i> | 59508336                | A/T  | NA                 | NA                            | NA                 |
| <i>Desi_wild_59508338</i> | NA                                  | <i>Ca_desi_denovo</i> | 59508338                | C/G  | NA                 | NA                            | NA                 |
| <i>Desi_wild_59510674</i> | NA                                  | <i>Ca_desi_denovo</i> | 59510674                | C/G  | NA                 | NA                            | NA                 |
| <i>Desi_wild_59510757</i> | NA                                  | <i>Ca_desi_denovo</i> | 59510757                | A/G  | NA                 | NA                            | NA                 |
| <i>Desi_wild_59511601</i> | NA                                  | <i>Ca_desi_denovo</i> | 59511601                | A/G  | NA                 | NA                            | NA                 |
| <i>Desi_wild_59512764</i> | NA                                  | <i>Ca_desi_denovo</i> | 59512764                | A/G  | NA                 | NA                            | NA                 |
| <i>Desi_wild_59515137</i> | NA                                  | <i>Ca_desi_denovo</i> | 59515137                | A/G  | NA                 | NA                            | NA                 |
| <i>Desi_wild_59515139</i> | NA                                  | <i>Ca_desi_denovo</i> | 59515139                | C/T  | NA                 | NA                            | NA                 |
| <i>Desi_wild_59520241</i> | NA                                  | <i>Ca_desi_denovo</i> | 59520241                | C/G  | NA                 | NA                            | NA                 |
| <i>Desi_wild_59520247</i> | NA                                  | <i>Ca_desi_denovo</i> | 59520247                | A/G  | NA                 | NA                            | NA                 |
| <i>Desi_wild_59520253</i> | NA                                  | <i>Ca_desi_denovo</i> | 59520253                | C/G  | NA                 | NA                            | NA                 |
| <i>Desi_wild_59520256</i> | NA                                  | <i>Ca_desi_denovo</i> | 59520256                | C/G  | NA                 | NA                            | NA                 |
| <i>Desi_wild_59521090</i> | NA                                  | <i>Ca_desi_denovo</i> | 59521090                | A/G  | NA                 | NA                            | NA                 |
| <i>Desi_wild_59524183</i> | NA                                  | <i>Ca_desi_denovo</i> | 59524183                | C/T  | NA                 | NA                            | NA                 |
| <i>Desi_wild_59534440</i> | NA                                  | <i>Ca_desi_denovo</i> | 59534440                | A/G  | NA                 | NA                            | NA                 |
| <i>Desi_wild_59535255</i> | NA                                  | <i>Ca_desi_denovo</i> | 59535255                | C/G  | NA                 | NA                            | NA                 |
| <i>Desi_wild_59535262</i> | NA                                  | <i>Ca_desi_denovo</i> | 59535262                | A/G  | NA                 | NA                            | NA                 |
| <i>Desi_wild_59538022</i> | NA                                  | <i>Ca_desi_denovo</i> | 59538022                | C/G  | NA                 | NA                            | NA                 |
| <i>Desi_wild_59539222</i> | NA                                  | <i>Ca_desi_denovo</i> | 59539222                | C/G  | NA                 | NA                            | NA                 |
| <i>Desi_wild_59539231</i> | NA                                  | <i>Ca_desi_denovo</i> | 59539231                | C/G  | NA                 | NA                            | NA                 |
| <i>Desi_wild_59541914</i> | NA                                  | <i>Ca_desi_denovo</i> | 59541914                | A/T  | NA                 | NA                            | NA                 |
| <i>Desi_wild_59541921</i> | NA                                  | <i>Ca_desi_denovo</i> | 59541921                | C/G  | NA                 | NA                            | NA                 |
| <i>Desi_wild_59542282</i> | NA                                  | <i>Ca_desi_denovo</i> | 59542282                | A/G  | NA                 | NA                            | NA                 |
| <i>Desi_wild_59542339</i> | NA                                  | <i>Ca_desi_denovo</i> | 59542339                | C/G  | NA                 | NA                            | NA                 |
| <i>Desi_wild_59544556</i> | NA                                  | <i>Ca_desi_denovo</i> | 59544556                | C/T  | NA                 | NA                            | NA                 |
| <i>Desi_wild_59544577</i> | NA                                  | <i>Ca_desi_denovo</i> | 59544577                | A/C  | NA                 | NA                            | NA                 |
| <i>Desi_wild_59546400</i> | NA                                  | <i>Ca_desi_denovo</i> | 59546400                | G/T  | NA                 | NA                            | NA                 |
| <i>Desi_wild_59548446</i> | NA                                  | <i>Ca_desi_denovo</i> | 59548446                | C/T  | NA                 | NA                            | NA                 |
| <i>Desi_wild_59548447</i> | NA                                  | <i>Ca_desi_denovo</i> | 59548447                | A/G  | NA                 | NA                            | NA                 |
| <i>Desi_wild_59550475</i> | NA                                  | <i>Ca_desi_denovo</i> | 59550475                | A/G  | NA                 | NA                            | NA                 |
| <i>Desi_wild_59550478</i> | NA                                  | <i>Ca_desi_denovo</i> | 59550478                | C/T  | NA                 | NA                            | NA                 |
| <i>Desi_wild_59552331</i> | NA                                  | <i>Ca_desi_denovo</i> | 59552331                | C/T  | NA                 | NA                            | NA                 |
| <i>Desi_wild_59552343</i> | NA                                  | <i>Ca_desi_denovo</i> | 59552343                | C/T  | NA                 | NA                            | NA                 |
| <i>Desi_wild_59552351</i> | NA                                  | <i>Ca_desi_denovo</i> | 59552351                | A/T  | NA                 | NA                            | NA                 |
| <i>Desi_wild_59553110</i> | NA                                  | <i>Ca_desi_denovo</i> | 59553110                | A/G  | NA                 | NA                            | NA                 |
| <i>Desi_wild_59556757</i> | NA                                  | <i>Ca_desi_denovo</i> | 59556757                | C/T  | NA                 | NA                            | NA                 |
| <i>Desi_wild_59557641</i> | NA                                  | <i>Ca_desi_denovo</i> | 59557641                | C/G  | NA                 | NA                            | NA                 |
| <i>Desi_wild_59560606</i> | NA                                  | <i>Ca_desi_denovo</i> | 59560606                | G/T  | NA                 | NA                            | NA                 |

| SNP IDs                   | NCBI dbSNP accession IDs (NCBI_SS#) | Chromosomes           | Physical positions (bp) | SNPs | Gene accession IDs | Sequence components of genome | Putative functions |
|---------------------------|-------------------------------------|-----------------------|-------------------------|------|--------------------|-------------------------------|--------------------|
| <i>Desi_wild_59560610</i> | NA                                  | <i>Ca_desi_denovo</i> | 59560610                | C/G  | NA                 | NA                            | NA                 |
| <i>Desi_wild_59560612</i> | NA                                  | <i>Ca_desi_denovo</i> | 59560612                | A/C  | NA                 | NA                            | NA                 |
| <i>Desi_wild_59562369</i> | NA                                  | <i>Ca_desi_denovo</i> | 59562369                | G/T  | NA                 | NA                            | NA                 |
| <i>Desi_wild_59562388</i> | NA                                  | <i>Ca_desi_denovo</i> | 59562388                | A/G  | NA                 | NA                            | NA                 |
| <i>Desi_wild_59562394</i> | NA                                  | <i>Ca_desi_denovo</i> | 59562394                | A/G  | NA                 | NA                            | NA                 |
| <i>Desi_wild_59562649</i> | NA                                  | <i>Ca_desi_denovo</i> | 59562649                | C/T  | NA                 | NA                            | NA                 |
| <i>Desi_wild_59562683</i> | NA                                  | <i>Ca_desi_denovo</i> | 59562683                | C/G  | NA                 | NA                            | NA                 |
| <i>Desi_wild_59562709</i> | NA                                  | <i>Ca_desi_denovo</i> | 59562709                | C/T  | NA                 | NA                            | NA                 |
| <i>Desi_wild_59568454</i> | NA                                  | <i>Ca_desi_denovo</i> | 59568454                | C/T  | NA                 | NA                            | NA                 |
| <i>Desi_wild_59571481</i> | NA                                  | <i>Ca_desi_denovo</i> | 59571481                | A/G  | NA                 | NA                            | NA                 |
| <i>Desi_wild_59574496</i> | NA                                  | <i>Ca_desi_denovo</i> | 59574496                | A/G  | NA                 | NA                            | NA                 |
| <i>Desi_wild_59575032</i> | NA                                  | <i>Ca_desi_denovo</i> | 59575032                | C/T  | NA                 | NA                            | NA                 |
| <i>Desi_wild_59575050</i> | NA                                  | <i>Ca_desi_denovo</i> | 59575050                | A/G  | NA                 | NA                            | NA                 |
| <i>Desi_wild_59575973</i> | NA                                  | <i>Ca_desi_denovo</i> | 59575973                | G/T  | NA                 | NA                            | NA                 |
| <i>Desi_wild_59575976</i> | NA                                  | <i>Ca_desi_denovo</i> | 59575976                | A/G  | NA                 | NA                            | NA                 |
| <i>Desi_wild_59576697</i> | NA                                  | <i>Ca_desi_denovo</i> | 59576697                | C/G  | NA                 | NA                            | NA                 |
| <i>Desi_wild_59576700</i> | NA                                  | <i>Ca_desi_denovo</i> | 59576700                | A/G  | NA                 | NA                            | NA                 |
| <i>Desi_wild_59580934</i> | NA                                  | <i>Ca_desi_denovo</i> | 59580934                | A/G  | NA                 | NA                            | NA                 |
| <i>Desi_wild_59580937</i> | NA                                  | <i>Ca_desi_denovo</i> | 59580937                | C/G  | NA                 | NA                            | NA                 |
| <i>Desi_wild_59581995</i> | NA                                  | <i>Ca_desi_denovo</i> | 59581995                | C/T  | NA                 | NA                            | NA                 |
| <i>Desi_wild_59581996</i> | NA                                  | <i>Ca_desi_denovo</i> | 59581996                | A/G  | NA                 | NA                            | NA                 |
| <i>Desi_wild_59582272</i> | NA                                  | <i>Ca_desi_denovo</i> | 59582272                | A/G  | NA                 | NA                            | NA                 |
| <i>Desi_wild_59583223</i> | NA                                  | <i>Ca_desi_denovo</i> | 59583223                | C/T  | NA                 | NA                            | NA                 |
| <i>Desi_wild_59583253</i> | NA                                  | <i>Ca_desi_denovo</i> | 59583253                | C/T  | NA                 | NA                            | NA                 |
| <i>Desi_wild_59583499</i> | NA                                  | <i>Ca_desi_denovo</i> | 59583499                | A/G  | NA                 | NA                            | NA                 |
| <i>Desi_wild_59585815</i> | NA                                  | <i>Ca_desi_denovo</i> | 59585815                | A/G  | NA                 | NA                            | NA                 |
| <i>Desi_wild_59591112</i> | NA                                  | <i>Ca_desi_denovo</i> | 59591112                | C/T  | NA                 | NA                            | NA                 |
| <i>Desi_wild_59591142</i> | NA                                  | <i>Ca_desi_denovo</i> | 59591142                | C/T  | NA                 | NA                            | NA                 |
| <i>Desi_wild_59591346</i> | NA                                  | <i>Ca_desi_denovo</i> | 59591346                | C/T  | NA                 | NA                            | NA                 |
| <i>Desi_wild_59593644</i> | NA                                  | <i>Ca_desi_denovo</i> | 59593644                | A/G  | NA                 | NA                            | NA                 |
| <i>Desi_wild_59593645</i> | NA                                  | <i>Ca_desi_denovo</i> | 59593645                | C/G  | NA                 | NA                            | NA                 |
| <i>Desi_wild_59597556</i> | NA                                  | <i>Ca_desi_denovo</i> | 59597556                | A/G  | NA                 | NA                            | NA                 |
| <i>Desi_wild_59598486</i> | NA                                  | <i>Ca_desi_denovo</i> | 59598486                | C/T  | NA                 | NA                            | NA                 |
| <i>Desi_wild_59598498</i> | NA                                  | <i>Ca_desi_denovo</i> | 59598498                | A/G  | NA                 | NA                            | NA                 |
| <i>Desi_wild_59601894</i> | NA                                  | <i>Ca_desi_denovo</i> | 59601894                | C/G  | NA                 | NA                            | NA                 |
| <i>Desi_wild_59601909</i> | NA                                  | <i>Ca_desi_denovo</i> | 59601909                | C/T  | NA                 | NA                            | NA                 |
| <i>Desi_wild_59601921</i> | NA                                  | <i>Ca_desi_denovo</i> | 59601921                | C/T  | NA                 | NA                            | NA                 |
| <i>Desi_wild_59604505</i> | NA                                  | <i>Ca_desi_denovo</i> | 59604505                | C/G  | NA                 | NA                            | NA                 |
| <i>Desi_wild_59604514</i> | NA                                  | <i>Ca_desi_denovo</i> | 59604514                | C/G  | NA                 | NA                            | NA                 |
| <i>Desi_wild_59604544</i> | NA                                  | <i>Ca_desi_denovo</i> | 59604544                | C/T  | NA                 | NA                            | NA                 |
| <i>Desi_wild_59604545</i> | NA                                  | <i>Ca_desi_denovo</i> | 59604545                | A/G  | NA                 | NA                            | NA                 |
| <i>Desi_wild_59604868</i> | NA                                  | <i>Ca_desi_denovo</i> | 59604868                | C/G  | NA                 | NA                            | NA                 |
| <i>Desi_wild_59610472</i> | NA                                  | <i>Ca_desi_denovo</i> | 59610472                | C/T  | NA                 | NA                            | NA                 |
| <i>Desi_wild_59610528</i> | NA                                  | <i>Ca_desi_denovo</i> | 59610528                | C/T  | NA                 | NA                            | NA                 |

| SNP IDs                   | NCBI dbSNP accession IDs (NCBI_SS#) | Chromosomes           | Physical positions (bp) | SNPs | Gene accession IDs | Sequence components of genome | Putative functions |
|---------------------------|-------------------------------------|-----------------------|-------------------------|------|--------------------|-------------------------------|--------------------|
| <i>Desi_wild_59618765</i> | NA                                  | <i>Ca_desi_denovo</i> | 59618765                | C/T  | NA                 | NA                            | NA                 |
| <i>Desi_wild_59618794</i> | NA                                  | <i>Ca_desi_denovo</i> | 59618794                | A/C  | NA                 | NA                            | NA                 |
| <i>Desi_wild_59618802</i> | NA                                  | <i>Ca_desi_denovo</i> | 59618802                | A/G  | NA                 | NA                            | NA                 |
| <i>Desi_wild_59620407</i> | NA                                  | <i>Ca_desi_denovo</i> | 59620407                | C/T  | NA                 | NA                            | NA                 |
| <i>Desi_wild_59621370</i> | NA                                  | <i>Ca_desi_denovo</i> | 59621370                | C/T  | NA                 | NA                            | NA                 |
| <i>Desi_wild_59621389</i> | NA                                  | <i>Ca_desi_denovo</i> | 59621389                | C/G  | NA                 | NA                            | NA                 |
| <i>Desi_wild_59621398</i> | NA                                  | <i>Ca_desi_denovo</i> | 59621398                | C/G  | NA                 | NA                            | NA                 |
| <i>Desi_wild_59621404</i> | NA                                  | <i>Ca_desi_denovo</i> | 59621404                | C/G  | NA                 | NA                            | NA                 |
| <i>Desi_wild_59622175</i> | NA                                  | <i>Ca_desi_denovo</i> | 59622175                | G/T  | NA                 | NA                            | NA                 |
| <i>Desi_wild_59622177</i> | NA                                  | <i>Ca_desi_denovo</i> | 59622177                | C/G  | NA                 | NA                            | NA                 |
| <i>Desi_wild_59624697</i> | NA                                  | <i>Ca_desi_denovo</i> | 59624697                | C/T  | NA                 | NA                            | NA                 |
| <i>Desi_wild_59626186</i> | NA                                  | <i>Ca_desi_denovo</i> | 59626186                | C/T  | NA                 | NA                            | NA                 |
| <i>Desi_wild_59626189</i> | NA                                  | <i>Ca_desi_denovo</i> | 59626189                | G/T  | NA                 | NA                            | NA                 |
| <i>Desi_wild_59626931</i> | NA                                  | <i>Ca_desi_denovo</i> | 59626931                | C/T  | NA                 | NA                            | NA                 |
| <i>Desi_wild_59627284</i> | NA                                  | <i>Ca_desi_denovo</i> | 59627284                | A/G  | NA                 | NA                            | NA                 |
| <i>Desi_wild_59629742</i> | NA                                  | <i>Ca_desi_denovo</i> | 59629742                | C/T  | NA                 | NA                            | NA                 |
| <i>Desi_wild_59630556</i> | NA                                  | <i>Ca_desi_denovo</i> | 59630556                | C/G  | NA                 | NA                            | NA                 |
| <i>Desi_wild_59634208</i> | NA                                  | <i>Ca_desi_denovo</i> | 59634208                | A/G  | NA                 | NA                            | NA                 |
| <i>Desi_wild_59635296</i> | NA                                  | <i>Ca_desi_denovo</i> | 59635296                | C/T  | NA                 | NA                            | NA                 |
| <i>Desi_wild_59635331</i> | NA                                  | <i>Ca_desi_denovo</i> | 59635331                | A/G  | NA                 | NA                            | NA                 |
| <i>Desi_wild_59635705</i> | NA                                  | <i>Ca_desi_denovo</i> | 59635705                | A/G  | NA                 | NA                            | NA                 |
| <i>Desi_wild_59638630</i> | NA                                  | <i>Ca_desi_denovo</i> | 59638630                | C/T  | NA                 | NA                            | NA                 |
| <i>Desi_wild_59638645</i> | NA                                  | <i>Ca_desi_denovo</i> | 59638645                | C/G  | NA                 | NA                            | NA                 |
| <i>Desi_wild_59639370</i> | NA                                  | <i>Ca_desi_denovo</i> | 59639370                | A/G  | NA                 | NA                            | NA                 |
| <i>Desi_wild_59639424</i> | NA                                  | <i>Ca_desi_denovo</i> | 59639424                | C/T  | NA                 | NA                            | NA                 |
| <i>Desi_wild_59639445</i> | NA                                  | <i>Ca_desi_denovo</i> | 59639445                | C/G  | NA                 | NA                            | NA                 |
| <i>Desi_wild_59639448</i> | NA                                  | <i>Ca_desi_denovo</i> | 59639448                | C/T  | NA                 | NA                            | NA                 |
| <i>Desi_wild_59642562</i> | NA                                  | <i>Ca_desi_denovo</i> | 59642562                | C/T  | NA                 | NA                            | NA                 |
| <i>Desi_wild_59642577</i> | NA                                  | <i>Ca_desi_denovo</i> | 59642577                | C/G  | NA                 | NA                            | NA                 |
| <i>Desi_wild_59644144</i> | NA                                  | <i>Ca_desi_denovo</i> | 59644144                | C/G  | NA                 | NA                            | NA                 |
| <i>Desi_wild_59644146</i> | NA                                  | <i>Ca_desi_denovo</i> | 59644146                | C/T  | NA                 | NA                            | NA                 |
| <i>Desi_wild_59644147</i> | NA                                  | <i>Ca_desi_denovo</i> | 59644147                | C/G  | NA                 | NA                            | NA                 |
| <i>Desi_wild_59644617</i> | NA                                  | <i>Ca_desi_denovo</i> | 59644617                | A/C  | NA                 | NA                            | NA                 |
| <i>Desi_wild_59646615</i> | NA                                  | <i>Ca_desi_denovo</i> | 59646615                | C/T  | NA                 | NA                            | NA                 |
| <i>Desi_wild_59646664</i> | NA                                  | <i>Ca_desi_denovo</i> | 59646664                | A/G  | NA                 | NA                            | NA                 |
| <i>Desi_wild_59649724</i> | NA                                  | <i>Ca_desi_denovo</i> | 59649724                | G/T  | NA                 | NA                            | NA                 |
| <i>Desi_wild_59649726</i> | NA                                  | <i>Ca_desi_denovo</i> | 59649726                | C/T  | NA                 | NA                            | NA                 |
| <i>Desi_wild_59650170</i> | NA                                  | <i>Ca_desi_denovo</i> | 59650170                | C/T  | NA                 | NA                            | NA                 |
| <i>Desi_wild_59650215</i> | NA                                  | <i>Ca_desi_denovo</i> | 59650215                | C/T  | NA                 | NA                            | NA                 |
| <i>Desi_wild_59650221</i> | NA                                  | <i>Ca_desi_denovo</i> | 59650221                | C/T  | NA                 | NA                            | NA                 |
| <i>Desi_wild_59652132</i> | NA                                  | <i>Ca_desi_denovo</i> | 59652132                | C/G  | NA                 | NA                            | NA                 |
| <i>Desi_wild_59652164</i> | NA                                  | <i>Ca_desi_denovo</i> | 59652164                | A/T  | NA                 | NA                            | NA                 |
| <i>Desi_wild_59653891</i> | NA                                  | <i>Ca_desi_denovo</i> | 59653891                | C/G  | NA                 | NA                            | NA                 |
| <i>Desi_wild_59655203</i> | NA                                  | <i>Ca_desi_denovo</i> | 59655203                | A/G  | NA                 | NA                            | NA                 |

| SNP IDs                   | NCBI dbSNP accession IDs (NCBI_SS#) | Chromosomes           | Physical positions (bp) | SNPs | Gene accession IDs | Sequence components of genome | Putative functions |
|---------------------------|-------------------------------------|-----------------------|-------------------------|------|--------------------|-------------------------------|--------------------|
| <i>Desi_wild_59657611</i> | NA                                  | <i>Ca_desi_denovo</i> | 59657611                | C/G  | NA                 | NA                            | NA                 |
| <i>Desi_wild_59657617</i> | NA                                  | <i>Ca_desi_denovo</i> | 59657617                | C/G  | NA                 | NA                            | NA                 |
| <i>Desi_wild_59657620</i> | NA                                  | <i>Ca_desi_denovo</i> | 59657620                | C/G  | NA                 | NA                            | NA                 |
| <i>Desi_wild_59659272</i> | NA                                  | <i>Ca_desi_denovo</i> | 59659272                | C/G  | NA                 | NA                            | NA                 |
| <i>Desi_wild_59659278</i> | NA                                  | <i>Ca_desi_denovo</i> | 59659278                | C/G  | NA                 | NA                            | NA                 |
| <i>Desi_wild_59660358</i> | NA                                  | <i>Ca_desi_denovo</i> | 59660358                | G/T  | NA                 | NA                            | NA                 |
| <i>Desi_wild_59662398</i> | NA                                  | <i>Ca_desi_denovo</i> | 59662398                | C/T  | NA                 | NA                            | NA                 |
| <i>Desi_wild_59662416</i> | NA                                  | <i>Ca_desi_denovo</i> | 59662416                | C/G  | NA                 | NA                            | NA                 |
| <i>Desi_wild_59663233</i> | NA                                  | <i>Ca_desi_denovo</i> | 59663233                | C/G  | NA                 | NA                            | NA                 |
| <i>Desi_wild_59663859</i> | NA                                  | <i>Ca_desi_denovo</i> | 59663859                | A/G  | NA                 | NA                            | NA                 |
| <i>Desi_wild_59667414</i> | NA                                  | <i>Ca_desi_denovo</i> | 59667414                | C/G  | NA                 | NA                            | NA                 |
| <i>Desi_wild_59667937</i> | NA                                  | <i>Ca_desi_denovo</i> | 59667937                | G/T  | NA                 | NA                            | NA                 |
| <i>Desi_wild_59672518</i> | NA                                  | <i>Ca_desi_denovo</i> | 59672518                | A/C  | NA                 | NA                            | NA                 |
| <i>Desi_wild_59672523</i> | NA                                  | <i>Ca_desi_denovo</i> | 59672523                | A/G  | NA                 | NA                            | NA                 |
| <i>Desi_wild_59674870</i> | NA                                  | <i>Ca_desi_denovo</i> | 59674870                | C/G  | NA                 | NA                            | NA                 |
| <i>Desi_wild_59674882</i> | NA                                  | <i>Ca_desi_denovo</i> | 59674882                | C/T  | NA                 | NA                            | NA                 |
| <i>Desi_wild_59674888</i> | NA                                  | <i>Ca_desi_denovo</i> | 59674888                | A/G  | NA                 | NA                            | NA                 |
| <i>Desi_wild_59677257</i> | NA                                  | <i>Ca_desi_denovo</i> | 59677257                | A/C  | NA                 | NA                            | NA                 |
| <i>Desi_wild_59677693</i> | NA                                  | <i>Ca_desi_denovo</i> | 59677693                | C/G  | NA                 | NA                            | NA                 |
| <i>Desi_wild_59679084</i> | NA                                  | <i>Ca_desi_denovo</i> | 59679084                | C/T  | NA                 | NA                            | NA                 |
| <i>Desi_wild_59682441</i> | NA                                  | <i>Ca_desi_denovo</i> | 59682441                | C/T  | NA                 | NA                            | NA                 |
| <i>Desi_wild_59682555</i> | NA                                  | <i>Ca_desi_denovo</i> | 59682555                | C/T  | NA                 | NA                            | NA                 |
| <i>Desi_wild_59682564</i> | NA                                  | <i>Ca_desi_denovo</i> | 59682564                | C/G  | NA                 | NA                            | NA                 |
| <i>Desi_wild_59682575</i> | NA                                  | <i>Ca_desi_denovo</i> | 59682575                | A/G  | NA                 | NA                            | NA                 |
| <i>Desi_wild_59684058</i> | NA                                  | <i>Ca_desi_denovo</i> | 59684058                | C/G  | NA                 | NA                            | NA                 |
| <i>Desi_wild_59689255</i> | NA                                  | <i>Ca_desi_denovo</i> | 59689255                | A/T  | NA                 | NA                            | NA                 |
| <i>Desi_wild_59691586</i> | NA                                  | <i>Ca_desi_denovo</i> | 59691586                | A/G  | NA                 | NA                            | NA                 |
| <i>Desi_wild_59692986</i> | NA                                  | <i>Ca_desi_denovo</i> | 59692986                | C/T  | NA                 | NA                            | NA                 |
| <i>Desi_wild_59694750</i> | NA                                  | <i>Ca_desi_denovo</i> | 59694750                | A/G  | NA                 | NA                            | NA                 |
| <i>Desi_wild_59696523</i> | NA                                  | <i>Ca_desi_denovo</i> | 59696523                | C/G  | NA                 | NA                            | NA                 |
| <i>Desi_wild_59696574</i> | NA                                  | <i>Ca_desi_denovo</i> | 59696574                | C/G  | NA                 | NA                            | NA                 |
| <i>Desi_wild_59699179</i> | NA                                  | <i>Ca_desi_denovo</i> | 59699179                | A/G  | NA                 | NA                            | NA                 |
| <i>Desi_wild_59699188</i> | NA                                  | <i>Ca_desi_denovo</i> | 59699188                | C/T  | NA                 | NA                            | NA                 |
| <i>Desi_wild_59699203</i> | NA                                  | <i>Ca_desi_denovo</i> | 59699203                | A/G  | NA                 | NA                            | NA                 |
| <i>Desi_wild_59699221</i> | NA                                  | <i>Ca_desi_denovo</i> | 59699221                | A/G  | NA                 | NA                            | NA                 |
| <i>Desi_wild_59701014</i> | NA                                  | <i>Ca_desi_denovo</i> | 59701014                | C/T  | NA                 | NA                            | NA                 |
| <i>Desi_wild_59701022</i> | NA                                  | <i>Ca_desi_denovo</i> | 59701022                | C/T  | NA                 | NA                            | NA                 |
| <i>Desi_wild_59703297</i> | NA                                  | <i>Ca_desi_denovo</i> | 59703297                | C/T  | NA                 | NA                            | NA                 |
| <i>Desi_wild_59704657</i> | NA                                  | <i>Ca_desi_denovo</i> | 59704657                | C/G  | NA                 | NA                            | NA                 |
| <i>Desi_wild_59704660</i> | NA                                  | <i>Ca_desi_denovo</i> | 59704660                | C/G  | NA                 | NA                            | NA                 |
| <i>Desi_wild_59704681</i> | NA                                  | <i>Ca_desi_denovo</i> | 59704681                | C/G  | NA                 | NA                            | NA                 |
| <i>Desi_wild_59709225</i> | NA                                  | <i>Ca_desi_denovo</i> | 59709225                | A/C  | NA                 | NA                            | NA                 |
| <i>Desi_wild_59713534</i> | NA                                  | <i>Ca_desi_denovo</i> | 59713534                | C/T  | NA                 | NA                            | NA                 |
| <i>Desi_wild_59718445</i> | NA                                  | <i>Ca_desi_denovo</i> | 59718445                | C/G  | NA                 | NA                            | NA                 |

| SNP IDs                   | NCBI dbSNP accession IDs (NCBI_SS#) | Chromosomes           | Physical positions (bp) | SNPs | Gene accession IDs | Sequence components of genome | Putative functions |
|---------------------------|-------------------------------------|-----------------------|-------------------------|------|--------------------|-------------------------------|--------------------|
| <i>Desi_wild_59718451</i> | NA                                  | <i>Ca_desi_denovo</i> | 59718451                | A/G  | NA                 | NA                            | NA                 |
| <i>Desi_wild_59718457</i> | NA                                  | <i>Ca_desi_denovo</i> | 59718457                | A/G  | NA                 | NA                            | NA                 |
| <i>Desi_wild_59718475</i> | NA                                  | <i>Ca_desi_denovo</i> | 59718475                | A/G  | NA                 | NA                            | NA                 |
| <i>Desi_wild_59721076</i> | NA                                  | <i>Ca_desi_denovo</i> | 59721076                | C/T  | NA                 | NA                            | NA                 |
| <i>Desi_wild_59722539</i> | NA                                  | <i>Ca_desi_denovo</i> | 59722539                | A/G  | NA                 | NA                            | NA                 |
| <i>Desi_wild_59725480</i> | NA                                  | <i>Ca_desi_denovo</i> | 59725480                | A/G  | NA                 | NA                            | NA                 |
| <i>Desi_wild_59727535</i> | NA                                  | <i>Ca_desi_denovo</i> | 59727535                | C/T  | NA                 | NA                            | NA                 |
| <i>Desi_wild_59727552</i> | NA                                  | <i>Ca_desi_denovo</i> | 59727552                | A/C  | NA                 | NA                            | NA                 |
| <i>Desi_wild_59732499</i> | NA                                  | <i>Ca_desi_denovo</i> | 59732499                | A/G  | NA                 | NA                            | NA                 |
| <i>Desi_wild_59733440</i> | NA                                  | <i>Ca_desi_denovo</i> | 59733440                | C/G  | NA                 | NA                            | NA                 |
| <i>Desi_wild_59737408</i> | NA                                  | <i>Ca_desi_denovo</i> | 59737408                | C/T  | NA                 | NA                            | NA                 |
| <i>Desi_wild_59748205</i> | NA                                  | <i>Ca_desi_denovo</i> | 59748205                | A/G  | NA                 | NA                            | NA                 |
| <i>Desi_wild_59748217</i> | NA                                  | <i>Ca_desi_denovo</i> | 59748217                | A/G  | NA                 | NA                            | NA                 |
| <i>Desi_wild_59748229</i> | NA                                  | <i>Ca_desi_denovo</i> | 59748229                | G/T  | NA                 | NA                            | NA                 |
| <i>Desi_wild_59748232</i> | NA                                  | <i>Ca_desi_denovo</i> | 59748232                | A/C  | NA                 | NA                            | NA                 |
| <i>Desi_wild_59748366</i> | NA                                  | <i>Ca_desi_denovo</i> | 59748366                | C/T  | NA                 | NA                            | NA                 |
| <i>Desi_wild_59748402</i> | NA                                  | <i>Ca_desi_denovo</i> | 59748402                | A/G  | NA                 | NA                            | NA                 |
| <i>Desi_wild_59748405</i> | NA                                  | <i>Ca_desi_denovo</i> | 59748405                | C/T  | NA                 | NA                            | NA                 |
| <i>Desi_wild_59749149</i> | NA                                  | <i>Ca_desi_denovo</i> | 59749149                | C/G  | NA                 | NA                            | NA                 |
| <i>Desi_wild_59749954</i> | NA                                  | <i>Ca_desi_denovo</i> | 59749954                | A/C  | NA                 | NA                            | NA                 |
| <i>Desi_wild_59749978</i> | NA                                  | <i>Ca_desi_denovo</i> | 59749978                | A/G  | NA                 | NA                            | NA                 |
| <i>Desi_wild_59752752</i> | NA                                  | <i>Ca_desi_denovo</i> | 59752752                | A/G  | NA                 | NA                            | NA                 |
| <i>Desi_wild_59753041</i> | NA                                  | <i>Ca_desi_denovo</i> | 59753041                | C/T  | NA                 | NA                            | NA                 |
| <i>Desi_wild_59760201</i> | NA                                  | <i>Ca_desi_denovo</i> | 59760201                | A/G  | NA                 | NA                            | NA                 |
| <i>Desi_wild_59765208</i> | NA                                  | <i>Ca_desi_denovo</i> | 59765208                | C/G  | NA                 | NA                            | NA                 |
| <i>Desi_wild_59765214</i> | NA                                  | <i>Ca_desi_denovo</i> | 59765214                | C/T  | NA                 | NA                            | NA                 |
| <i>Desi_wild_59765950</i> | NA                                  | <i>Ca_desi_denovo</i> | 59765950                | C/G  | NA                 | NA                            | NA                 |
| <i>Desi_wild_59769862</i> | NA                                  | <i>Ca_desi_denovo</i> | 59769862                | A/G  | NA                 | NA                            | NA                 |
| <i>Desi_wild_59769865</i> | NA                                  | <i>Ca_desi_denovo</i> | 59769865                | A/G  | NA                 | NA                            | NA                 |
| <i>Desi_wild_59769871</i> | NA                                  | <i>Ca_desi_denovo</i> | 59769871                | C/G  | NA                 | NA                            | NA                 |
| <i>Desi_wild_59769873</i> | NA                                  | <i>Ca_desi_denovo</i> | 59769873                | A/C  | NA                 | NA                            | NA                 |
| <i>Desi_wild_59769946</i> | NA                                  | <i>Ca_desi_denovo</i> | 59769946                | C/T  | NA                 | NA                            | NA                 |
| <i>Desi_wild_59769955</i> | NA                                  | <i>Ca_desi_denovo</i> | 59769955                | C/T  | NA                 | NA                            | NA                 |
| <i>Desi_wild_59771253</i> | NA                                  | <i>Ca_desi_denovo</i> | 59771253                | A/G  | NA                 | NA                            | NA                 |
| <i>Desi_wild_59777421</i> | NA                                  | <i>Ca_desi_denovo</i> | 59777421                | A/G  | NA                 | NA                            | NA                 |
| <i>Desi_wild_59777442</i> | NA                                  | <i>Ca_desi_denovo</i> | 59777442                | A/G  | NA                 | NA                            | NA                 |
| <i>Desi_wild_59779265</i> | NA                                  | <i>Ca_desi_denovo</i> | 59779265                | A/C  | NA                 | NA                            | NA                 |
| <i>Desi_wild_59779282</i> | NA                                  | <i>Ca_desi_denovo</i> | 59779282                | G/T  | NA                 | NA                            | NA                 |
| <i>Desi_wild_59779922</i> | NA                                  | <i>Ca_desi_denovo</i> | 59779922                | A/G  | NA                 | NA                            | NA                 |
| <i>Desi_wild_59786240</i> | NA                                  | <i>Ca_desi_denovo</i> | 59786240                | A/G  | NA                 | NA                            | NA                 |
| <i>Desi_wild_59786244</i> | NA                                  | <i>Ca_desi_denovo</i> | 59786244                | A/G  | NA                 | NA                            | NA                 |
| <i>Desi_wild_59787262</i> | NA                                  | <i>Ca_desi_denovo</i> | 59787262                | C/G  | NA                 | NA                            | NA                 |
| <i>Desi_wild_59789369</i> | NA                                  | <i>Ca_desi_denovo</i> | 59789369                | A/T  | NA                 | NA                            | NA                 |
| <i>Desi_wild_59791299</i> | NA                                  | <i>Ca_desi_denovo</i> | 59791299                | A/G  | NA                 | NA                            | NA                 |

| SNP IDs                   | NCBI dbSNP accession IDs (NCBI_SS#) | Chromosomes           | Physical positions (bp) | SNPs | Gene accession IDs | Sequence components of genome | Putative functions |
|---------------------------|-------------------------------------|-----------------------|-------------------------|------|--------------------|-------------------------------|--------------------|
| <i>Desi_wild_59798052</i> | NA                                  | <i>Ca_desi_denovo</i> | 59798052                | A/G  | NA                 | NA                            | NA                 |
| <i>Desi_wild_59798134</i> | NA                                  | <i>Ca_desi_denovo</i> | 59798134                | A/G  | NA                 | NA                            | NA                 |
| <i>Desi_wild_59801125</i> | NA                                  | <i>Ca_desi_denovo</i> | 59801125                | G/T  | NA                 | NA                            | NA                 |
| <i>Desi_wild_59803429</i> | NA                                  | <i>Ca_desi_denovo</i> | 59803429                | A/G  | NA                 | NA                            | NA                 |
| <i>Desi_wild_59803462</i> | NA                                  | <i>Ca_desi_denovo</i> | 59803462                | A/C  | NA                 | NA                            | NA                 |
| <i>Desi_wild_59803811</i> | NA                                  | <i>Ca_desi_denovo</i> | 59803811                | A/G  | NA                 | NA                            | NA                 |
| <i>Desi_wild_59816286</i> | NA                                  | <i>Ca_desi_denovo</i> | 59816286                | G/T  | NA                 | NA                            | NA                 |
| <i>Desi_wild_59817109</i> | NA                                  | <i>Ca_desi_denovo</i> | 59817109                | C/G  | NA                 | NA                            | NA                 |
| <i>Desi_wild_59817127</i> | NA                                  | <i>Ca_desi_denovo</i> | 59817127                | C/G  | NA                 | NA                            | NA                 |
| <i>Desi_wild_59817130</i> | NA                                  | <i>Ca_desi_denovo</i> | 59817130                | C/G  | NA                 | NA                            | NA                 |
| <i>Desi_wild_59817139</i> | NA                                  | <i>Ca_desi_denovo</i> | 59817139                | C/T  | NA                 | NA                            | NA                 |
| <i>Desi_wild_59818900</i> | NA                                  | <i>Ca_desi_denovo</i> | 59818900                | A/G  | NA                 | NA                            | NA                 |
| <i>Desi_wild_59818915</i> | NA                                  | <i>Ca_desi_denovo</i> | 59818915                | A/G  | NA                 | NA                            | NA                 |
| <i>Desi_wild_59818918</i> | NA                                  | <i>Ca_desi_denovo</i> | 59818918                | A/G  | NA                 | NA                            | NA                 |
| <i>Desi_wild_59818920</i> | NA                                  | <i>Ca_desi_denovo</i> | 59818920                | A/T  | NA                 | NA                            | NA                 |
| <i>Desi_wild_59820385</i> | NA                                  | <i>Ca_desi_denovo</i> | 59820385                | C/T  | NA                 | NA                            | NA                 |
| <i>Desi_wild_59820814</i> | NA                                  | <i>Ca_desi_denovo</i> | 59820814                | A/C  | NA                 | NA                            | NA                 |
| <i>Desi_wild_59825547</i> | NA                                  | <i>Ca_desi_denovo</i> | 59825547                | C/G  | NA                 | NA                            | NA                 |
| <i>Desi_wild_59826341</i> | NA                                  | <i>Ca_desi_denovo</i> | 59826341                | C/T  | NA                 | NA                            | NA                 |
| <i>Desi_wild_59827138</i> | NA                                  | <i>Ca_desi_denovo</i> | 59827138                | C/T  | NA                 | NA                            | NA                 |
| <i>Desi_wild_59827189</i> | NA                                  | <i>Ca_desi_denovo</i> | 59827189                | A/G  | NA                 | NA                            | NA                 |
| <i>Desi_wild_59829201</i> | NA                                  | <i>Ca_desi_denovo</i> | 59829201                | C/G  | NA                 | NA                            | NA                 |
| <i>Desi_wild_59829228</i> | NA                                  | <i>Ca_desi_denovo</i> | 59829228                | C/T  | NA                 | NA                            | NA                 |
| <i>Desi_wild_59829249</i> | NA                                  | <i>Ca_desi_denovo</i> | 59829249                | C/T  | NA                 | NA                            | NA                 |
| <i>Desi_wild_59830980</i> | NA                                  | <i>Ca_desi_denovo</i> | 59830980                | C/G  | NA                 | NA                            | NA                 |
| <i>Desi_wild_59833188</i> | NA                                  | <i>Ca_desi_denovo</i> | 59833188                | A/G  | NA                 | NA                            | NA                 |
| <i>Desi_wild_59833211</i> | NA                                  | <i>Ca_desi_denovo</i> | 59833211                | A/C  | NA                 | NA                            | NA                 |
| <i>Desi_wild_59833215</i> | NA                                  | <i>Ca_desi_denovo</i> | 59833215                | C/G  | NA                 | NA                            | NA                 |
| <i>Desi_wild_59833218</i> | NA                                  | <i>Ca_desi_denovo</i> | 59833218                | G/T  | NA                 | NA                            | NA                 |
| <i>Desi_wild_59834020</i> | NA                                  | <i>Ca_desi_denovo</i> | 59834020                | A/C  | NA                 | NA                            | NA                 |
| <i>Desi_wild_59835619</i> | NA                                  | <i>Ca_desi_denovo</i> | 59835619                | C/T  | NA                 | NA                            | NA                 |
| <i>Desi_wild_59844830</i> | NA                                  | <i>Ca_desi_denovo</i> | 59844830                | A/C  | NA                 | NA                            | NA                 |
| <i>Desi_wild_59847841</i> | NA                                  | <i>Ca_desi_denovo</i> | 59847841                | A/G  | NA                 | NA                            | NA                 |
| <i>Desi_wild_59849931</i> | NA                                  | <i>Ca_desi_denovo</i> | 59849931                | C/T  | NA                 | NA                            | NA                 |
| <i>Desi_wild_59853736</i> | NA                                  | <i>Ca_desi_denovo</i> | 59853736                | G/T  | NA                 | NA                            | NA                 |
| <i>Desi_wild_59853739</i> | NA                                  | <i>Ca_desi_denovo</i> | 59853739                | C/G  | NA                 | NA                            | NA                 |
| <i>Desi_wild_59855853</i> | NA                                  | <i>Ca_desi_denovo</i> | 59855853                | C/T  | NA                 | NA                            | NA                 |
| <i>Desi_wild_59856250</i> | NA                                  | <i>Ca_desi_denovo</i> | 59856250                | C/G  | NA                 | NA                            | NA                 |
| <i>Desi_wild_59856252</i> | NA                                  | <i>Ca_desi_denovo</i> | 59856252                | C/G  | NA                 | NA                            | NA                 |
| <i>Desi_wild_59856267</i> | NA                                  | <i>Ca_desi_denovo</i> | 59856267                | C/G  | NA                 | NA                            | NA                 |
| <i>Desi_wild_59859791</i> | NA                                  | <i>Ca_desi_denovo</i> | 59859791                | C/T  | NA                 | NA                            | NA                 |
| <i>Desi_wild_59859857</i> | NA                                  | <i>Ca_desi_denovo</i> | 59859857                | C/G  | NA                 | NA                            | NA                 |
| <i>Desi_wild_59861491</i> | NA                                  | <i>Ca_desi_denovo</i> | 59861491                | G/T  | NA                 | NA                            | NA                 |
| <i>Desi_wild_59861494</i> | NA                                  | <i>Ca_desi_denovo</i> | 59861494                | C/T  | NA                 | NA                            | NA                 |



| SNP IDs                   | NCBI dbSNP accession IDs (NCBI_SS#) | Chromosomes           | Physical positions (bp) | SNPs | Gene accession IDs | Sequence components of genome | Putative functions |
|---------------------------|-------------------------------------|-----------------------|-------------------------|------|--------------------|-------------------------------|--------------------|
| <i>Desi_wild_59862792</i> | NA                                  | <i>Ca_desi_denovo</i> | 59862792                | A/G  | NA                 | NA                            | NA                 |
| <i>Desi_wild_59866666</i> | NA                                  | <i>Ca_desi_denovo</i> | 59866666                | C/T  | NA                 | NA                            | NA                 |
| <i>Desi_wild_59866681</i> | NA                                  | <i>Ca_desi_denovo</i> | 59866681                | C/T  | NA                 | NA                            | NA                 |
| <i>Desi_wild_59866708</i> | NA                                  | <i>Ca_desi_denovo</i> | 59866708                | C/T  | NA                 | NA                            | NA                 |
| <i>Desi_wild_59866747</i> | NA                                  | <i>Ca_desi_denovo</i> | 59866747                | A/C  | NA                 | NA                            | NA                 |
| <i>Desi_wild_59866867</i> | NA                                  | <i>Ca_desi_denovo</i> | 59866867                | C/G  | NA                 | NA                            | NA                 |
| <i>Desi_wild_59866870</i> | NA                                  | <i>Ca_desi_denovo</i> | 59866870                | A/G  | NA                 | NA                            | NA                 |
| <i>Desi_wild_59866906</i> | NA                                  | <i>Ca_desi_denovo</i> | 59866906                | A/C  | NA                 | NA                            | NA                 |
| <i>Desi_wild_59868988</i> | NA                                  | <i>Ca_desi_denovo</i> | 59868988                | C/G  | NA                 | NA                            | NA                 |
| <i>Desi_wild_59868992</i> | NA                                  | <i>Ca_desi_denovo</i> | 59868992                | A/C  | NA                 | NA                            | NA                 |
| <i>Desi_wild_59869057</i> | NA                                  | <i>Ca_desi_denovo</i> | 59869057                | C/T  | NA                 | NA                            | NA                 |
| <i>Desi_wild_59869756</i> | NA                                  | <i>Ca_desi_denovo</i> | 59869756                | A/G  | NA                 | NA                            | NA                 |
| <i>Desi_wild_59871833</i> | NA                                  | <i>Ca_desi_denovo</i> | 59871833                | C/G  | NA                 | NA                            | NA                 |
| <i>Desi_wild_59873926</i> | NA                                  | <i>Ca_desi_denovo</i> | 59873926                | C/G  | NA                 | NA                            | NA                 |
| <i>Desi_wild_59873929</i> | NA                                  | <i>Ca_desi_denovo</i> | 59873929                | A/G  | NA                 | NA                            | NA                 |
| <i>Desi_wild_59873932</i> | NA                                  | <i>Ca_desi_denovo</i> | 59873932                | A/G  | NA                 | NA                            | NA                 |
| <i>Desi_wild_59873956</i> | NA                                  | <i>Ca_desi_denovo</i> | 59873956                | A/G  | NA                 | NA                            | NA                 |
| <i>Desi_wild_59876892</i> | NA                                  | <i>Ca_desi_denovo</i> | 59876892                | C/T  | NA                 | NA                            | NA                 |
| <i>Desi_wild_59876916</i> | NA                                  | <i>Ca_desi_denovo</i> | 59876916                | A/G  | NA                 | NA                            | NA                 |
| <i>Desi_wild_59876929</i> | NA                                  | <i>Ca_desi_denovo</i> | 59876929                | A/G  | NA                 | NA                            | NA                 |
| <i>Desi_wild_59880831</i> | NA                                  | <i>Ca_desi_denovo</i> | 59880831                | C/T  | NA                 | NA                            | NA                 |
| <i>Desi_wild_59883042</i> | NA                                  | <i>Ca_desi_denovo</i> | 59883042                | A/C  | NA                 | NA                            | NA                 |
| <i>Desi_wild_59885665</i> | NA                                  | <i>Ca_desi_denovo</i> | 59885665                | A/G  | NA                 | NA                            | NA                 |
| <i>Desi_wild_59885668</i> | NA                                  | <i>Ca_desi_denovo</i> | 59885668                | A/G  | NA                 | NA                            | NA                 |
| <i>Desi_wild_59885713</i> | NA                                  | <i>Ca_desi_denovo</i> | 59885713                | A/G  | NA                 | NA                            | NA                 |
| <i>Desi_wild_59886165</i> | NA                                  | <i>Ca_desi_denovo</i> | 59886165                | C/T  | NA                 | NA                            | NA                 |
| <i>Desi_wild_59886186</i> | NA                                  | <i>Ca_desi_denovo</i> | 59886186                | A/G  | NA                 | NA                            | NA                 |
| <i>Desi_wild_59888276</i> | NA                                  | <i>Ca_desi_denovo</i> | 59888276                | C/T  | NA                 | NA                            | NA                 |
| <i>Desi_wild_59889181</i> | NA                                  | <i>Ca_desi_denovo</i> | 59889181                | C/T  | NA                 | NA                            | NA                 |
| <i>Desi_wild_59889190</i> | NA                                  | <i>Ca_desi_denovo</i> | 59889190                | A/G  | NA                 | NA                            | NA                 |
| <i>Desi_wild_59889196</i> | NA                                  | <i>Ca_desi_denovo</i> | 59889196                | C/G  | NA                 | NA                            | NA                 |
| <i>Desi_wild_59893365</i> | NA                                  | <i>Ca_desi_denovo</i> | 59893365                | C/T  | NA                 | NA                            | NA                 |
| <i>Desi_wild_59893378</i> | NA                                  | <i>Ca_desi_denovo</i> | 59893378                | C/G  | NA                 | NA                            | NA                 |
| <i>Desi_wild_59893385</i> | NA                                  | <i>Ca_desi_denovo</i> | 59893385                | C/T  | NA                 | NA                            | NA                 |
| <i>Desi_wild_59899314</i> | NA                                  | <i>Ca_desi_denovo</i> | 59899314                | C/G  | NA                 | NA                            | NA                 |
| <i>Desi_wild_59905664</i> | NA                                  | <i>Ca_desi_denovo</i> | 59905664                | A/G  | NA                 | NA                            | NA                 |
| <i>Desi_wild_59906283</i> | NA                                  | <i>Ca_desi_denovo</i> | 59906283                | C/G  | NA                 | NA                            | NA                 |
| <i>Desi_wild_59908435</i> | NA                                  | <i>Ca_desi_denovo</i> | 59908435                | A/G  | NA                 | NA                            | NA                 |
| <i>Desi_wild_59908459</i> | NA                                  | <i>Ca_desi_denovo</i> | 59908459                | G/T  | NA                 | NA                            | NA                 |
| <i>Desi_wild_59908893</i> | NA                                  | <i>Ca_desi_denovo</i> | 59908893                | G/T  | NA                 | NA                            | NA                 |
| <i>Desi_wild_59908925</i> | NA                                  | <i>Ca_desi_denovo</i> | 59908925                | A/G  | NA                 | NA                            | NA                 |
| <i>Desi_wild_59908926</i> | NA                                  | <i>Ca_desi_denovo</i> | 59908926                | A/T  | NA                 | NA                            | NA                 |
| <i>Desi_wild_59908993</i> | NA                                  | <i>Ca_desi_denovo</i> | 59908993                | A/C  | NA                 | NA                            | NA                 |
| <i>Desi_wild_59910711</i> | NA                                  | <i>Ca_desi_denovo</i> | 59910711                | A/G  | NA                 | NA                            | NA                 |

| SNP IDs                   | NCBI dbSNP accession IDs (NCBI_SS#) | Chromosomes           | Physical positions (bp) | SNPs | Gene accession IDs | Sequence components of genome | Putative functions |
|---------------------------|-------------------------------------|-----------------------|-------------------------|------|--------------------|-------------------------------|--------------------|
| <i>Desi_wild_59915925</i> | NA                                  | <i>Ca_desi_denovo</i> | 59915925                | C/T  | NA                 | NA                            | NA                 |
| <i>Desi_wild_59915928</i> | NA                                  | <i>Ca_desi_denovo</i> | 59915928                | C/G  | NA                 | NA                            | NA                 |
| <i>Desi_wild_59915931</i> | NA                                  | <i>Ca_desi_denovo</i> | 59915931                | A/G  | NA                 | NA                            | NA                 |
| <i>Desi_wild_59919123</i> | NA                                  | <i>Ca_desi_denovo</i> | 59919123                | C/G  | NA                 | NA                            | NA                 |
| <i>Desi_wild_59919129</i> | NA                                  | <i>Ca_desi_denovo</i> | 59919129                | C/G  | NA                 | NA                            | NA                 |
| <i>Desi_wild_59919135</i> | NA                                  | <i>Ca_desi_denovo</i> | 59919135                | A/G  | NA                 | NA                            | NA                 |
| <i>Desi_wild_59919144</i> | NA                                  | <i>Ca_desi_denovo</i> | 59919144                | A/C  | NA                 | NA                            | NA                 |
| <i>Desi_wild_59919597</i> | NA                                  | <i>Ca_desi_denovo</i> | 59919597                | G/T  | NA                 | NA                            | NA                 |
| <i>Desi_wild_59924409</i> | NA                                  | <i>Ca_desi_denovo</i> | 59924409                | A/C  | NA                 | NA                            | NA                 |
| <i>Desi_wild_59925242</i> | NA                                  | <i>Ca_desi_denovo</i> | 59925242                | A/G  | NA                 | NA                            | NA                 |
| <i>Desi_wild_59925243</i> | NA                                  | <i>Ca_desi_denovo</i> | 59925243                | A/T  | NA                 | NA                            | NA                 |
| <i>Desi_wild_59926866</i> | NA                                  | <i>Ca_desi_denovo</i> | 59926866                | C/T  | NA                 | NA                            | NA                 |
| <i>Desi_wild_59927581</i> | NA                                  | <i>Ca_desi_denovo</i> | 59927581                | A/C  | NA                 | NA                            | NA                 |
| <i>Desi_wild_59927626</i> | NA                                  | <i>Ca_desi_denovo</i> | 59927626                | C/G  | NA                 | NA                            | NA                 |
| <i>Desi_wild_59938015</i> | NA                                  | <i>Ca_desi_denovo</i> | 59938015                | G/T  | NA                 | NA                            | NA                 |
| <i>Desi_wild_59938072</i> | NA                                  | <i>Ca_desi_denovo</i> | 59938072                | C/G  | NA                 | NA                            | NA                 |
| <i>Desi_wild_59940337</i> | NA                                  | <i>Ca_desi_denovo</i> | 59940337                | C/T  | NA                 | NA                            | NA                 |
| <i>Desi_wild_59940382</i> | NA                                  | <i>Ca_desi_denovo</i> | 59940382                | C/G  | NA                 | NA                            | NA                 |
| <i>Desi_wild_59941212</i> | NA                                  | <i>Ca_desi_denovo</i> | 59941212                | C/T  | NA                 | NA                            | NA                 |
| <i>Desi_wild_59942364</i> | NA                                  | <i>Ca_desi_denovo</i> | 59942364                | A/G  | NA                 | NA                            | NA                 |
| <i>Desi_wild_59942391</i> | NA                                  | <i>Ca_desi_denovo</i> | 59942391                | C/G  | NA                 | NA                            | NA                 |
| <i>Desi_wild_59944066</i> | NA                                  | <i>Ca_desi_denovo</i> | 59944066                | C/G  | NA                 | NA                            | NA                 |
| <i>Desi_wild_59944173</i> | NA                                  | <i>Ca_desi_denovo</i> | 59944173                | A/G  | NA                 | NA                            | NA                 |
| <i>Desi_wild_59944574</i> | NA                                  | <i>Ca_desi_denovo</i> | 59944574                | A/G  | NA                 | NA                            | NA                 |
| <i>Desi_wild_59944884</i> | NA                                  | <i>Ca_desi_denovo</i> | 59944884                | G/T  | NA                 | NA                            | NA                 |
| <i>Desi_wild_59944899</i> | NA                                  | <i>Ca_desi_denovo</i> | 59944899                | C/G  | NA                 | NA                            | NA                 |
| <i>Desi_wild_59948620</i> | NA                                  | <i>Ca_desi_denovo</i> | 59948620                | C/T  | NA                 | NA                            | NA                 |
| <i>Desi_wild_59948639</i> | NA                                  | <i>Ca_desi_denovo</i> | 59948639                | A/G  | NA                 | NA                            | NA                 |
| <i>Desi_wild_59948648</i> | NA                                  | <i>Ca_desi_denovo</i> | 59948648                | A/G  | NA                 | NA                            | NA                 |
| <i>Desi_wild_59949655</i> | NA                                  | <i>Ca_desi_denovo</i> | 59949655                | C/T  | NA                 | NA                            | NA                 |
| <i>Desi_wild_59951296</i> | NA                                  | <i>Ca_desi_denovo</i> | 59951296                | C/T  | NA                 | NA                            | NA                 |
| <i>Desi_wild_59951670</i> | NA                                  | <i>Ca_desi_denovo</i> | 59951670                | C/G  | NA                 | NA                            | NA                 |
| <i>Desi_wild_59951697</i> | NA                                  | <i>Ca_desi_denovo</i> | 59951697                | C/T  | NA                 | NA                            | NA                 |
| <i>Desi_wild_59954466</i> | NA                                  | <i>Ca_desi_denovo</i> | 59954466                | C/T  | NA                 | NA                            | NA                 |
| <i>Desi_wild_59954503</i> | NA                                  | <i>Ca_desi_denovo</i> | 59954503                | A/C  | NA                 | NA                            | NA                 |
| <i>Desi_wild_59954505</i> | NA                                  | <i>Ca_desi_denovo</i> | 59954505                | G/T  | NA                 | NA                            | NA                 |
| <i>Desi_wild_59955483</i> | NA                                  | <i>Ca_desi_denovo</i> | 59955483                | C/T  | NA                 | NA                            | NA                 |
| <i>Desi_wild_59955558</i> | NA                                  | <i>Ca_desi_denovo</i> | 59955558                | C/T  | NA                 | NA                            | NA                 |
| <i>Desi_wild_59956315</i> | NA                                  | <i>Ca_desi_denovo</i> | 59956315                | A/G  | NA                 | NA                            | NA                 |
| <i>Desi_wild_59960643</i> | NA                                  | <i>Ca_desi_denovo</i> | 59960643                | C/G  | NA                 | NA                            | NA                 |
| <i>Desi_wild_59965714</i> | NA                                  | <i>Ca_desi_denovo</i> | 59965714                | C/T  | NA                 | NA                            | NA                 |
| <i>Desi_wild_59969545</i> | NA                                  | <i>Ca_desi_denovo</i> | 59969545                | A/C  | NA                 | NA                            | NA                 |
| <i>Desi_wild_59971132</i> | NA                                  | <i>Ca_desi_denovo</i> | 59971132                | C/G  | NA                 | NA                            | NA                 |
| <i>Desi_wild_59975053</i> | NA                                  | <i>Ca_desi_denovo</i> | 59975053                | C/T  | NA                 | NA                            | NA                 |

| SNP IDs                   | NCBI dbSNP accession IDs (NCBI_SS#) | Chromosomes           | Physical positions (bp) | SNPs | Gene accession IDs | Sequence components of genome | Putative functions |
|---------------------------|-------------------------------------|-----------------------|-------------------------|------|--------------------|-------------------------------|--------------------|
| <i>Desi_wild_59975437</i> | NA                                  | <i>Ca_desi_denovo</i> | 59975437                | A/G  | NA                 | NA                            | NA                 |
| <i>Desi_wild_59976592</i> | NA                                  | <i>Ca_desi_denovo</i> | 59976592                | A/G  | NA                 | NA                            | NA                 |
| <i>Desi_wild_59977058</i> | NA                                  | <i>Ca_desi_denovo</i> | 59977058                | C/T  | NA                 | NA                            | NA                 |
| <i>Desi_wild_59985025</i> | NA                                  | <i>Ca_desi_denovo</i> | 59985025                | A/G  | NA                 | NA                            | NA                 |
| <i>Desi_wild_59985028</i> | NA                                  | <i>Ca_desi_denovo</i> | 59985028                | C/G  | NA                 | NA                            | NA                 |
| <i>Desi_wild_59986836</i> | NA                                  | <i>Ca_desi_denovo</i> | 59986836                | C/T  | NA                 | NA                            | NA                 |
| <i>Desi_wild_59986848</i> | NA                                  | <i>Ca_desi_denovo</i> | 59986848                | C/T  | NA                 | NA                            | NA                 |
| <i>Desi_wild_59991843</i> | NA                                  | <i>Ca_desi_denovo</i> | 59991843                | A/G  | NA                 | NA                            | NA                 |
| <i>Desi_wild_59991925</i> | NA                                  | <i>Ca_desi_denovo</i> | 59991925                | C/G  | NA                 | NA                            | NA                 |
| <i>Desi_wild_59993004</i> | NA                                  | <i>Ca_desi_denovo</i> | 59993004                | A/G  | NA                 | NA                            | NA                 |
| <i>Desi_wild_59999190</i> | NA                                  | <i>Ca_desi_denovo</i> | 59999190                | C/G  | NA                 | NA                            | NA                 |
| <i>Desi_wild_59999238</i> | NA                                  | <i>Ca_desi_denovo</i> | 59999238                | C/T  | NA                 | NA                            | NA                 |
| <i>Desi_wild_60001267</i> | NA                                  | <i>Ca_desi_denovo</i> | 60001267                | A/G  | NA                 | NA                            | NA                 |
| <i>Desi_wild_60001273</i> | NA                                  | <i>Ca_desi_denovo</i> | 60001273                | C/T  | NA                 | NA                            | NA                 |
| <i>Desi_wild_60006867</i> | NA                                  | <i>Ca_desi_denovo</i> | 60006867                | A/C  | NA                 | NA                            | NA                 |
| <i>Desi_wild_60010086</i> | NA                                  | <i>Ca_desi_denovo</i> | 60010086                | C/T  | NA                 | NA                            | NA                 |
| <i>Desi_wild_60010092</i> | NA                                  | <i>Ca_desi_denovo</i> | 60010092                | C/T  | NA                 | NA                            | NA                 |
| <i>Desi_wild_60011844</i> | NA                                  | <i>Ca_desi_denovo</i> | 60011844                | C/T  | NA                 | NA                            | NA                 |
| <i>Desi_wild_60011890</i> | NA                                  | <i>Ca_desi_denovo</i> | 60011890                | A/G  | NA                 | NA                            | NA                 |
| <i>Desi_wild_60013654</i> | NA                                  | <i>Ca_desi_denovo</i> | 60013654                | C/G  | NA                 | NA                            | NA                 |
| <i>Desi_wild_60015504</i> | NA                                  | <i>Ca_desi_denovo</i> | 60015504                | A/G  | NA                 | NA                            | NA                 |
| <i>Desi_wild_60017730</i> | NA                                  | <i>Ca_desi_denovo</i> | 60017730                | G/T  | NA                 | NA                            | NA                 |
| <i>Desi_wild_60021918</i> | NA                                  | <i>Ca_desi_denovo</i> | 60021918                | C/G  | NA                 | NA                            | NA                 |
| <i>Desi_wild_60022167</i> | NA                                  | <i>Ca_desi_denovo</i> | 60022167                | C/T  | NA                 | NA                            | NA                 |
| <i>Desi_wild_60022196</i> | NA                                  | <i>Ca_desi_denovo</i> | 60022196                | A/G  | NA                 | NA                            | NA                 |
| <i>Desi_wild_60023181</i> | NA                                  | <i>Ca_desi_denovo</i> | 60023181                | C/T  | NA                 | NA                            | NA                 |
| <i>Desi_wild_60023184</i> | NA                                  | <i>Ca_desi_denovo</i> | 60023184                | A/G  | NA                 | NA                            | NA                 |
| <i>Desi_wild_60023890</i> | NA                                  | <i>Ca_desi_denovo</i> | 60023890                | A/G  | NA                 | NA                            | NA                 |
| <i>Desi_wild_60023905</i> | NA                                  | <i>Ca_desi_denovo</i> | 60023905                | C/G  | NA                 | NA                            | NA                 |
| <i>Desi_wild_60024112</i> | NA                                  | <i>Ca_desi_denovo</i> | 60024112                | C/T  | NA                 | NA                            | NA                 |
| <i>Desi_wild_60024133</i> | NA                                  | <i>Ca_desi_denovo</i> | 60024133                | A/G  | NA                 | NA                            | NA                 |
| <i>Desi_wild_60024139</i> | NA                                  | <i>Ca_desi_denovo</i> | 60024139                | C/T  | NA                 | NA                            | NA                 |
| <i>Desi_wild_60024915</i> | NA                                  | <i>Ca_desi_denovo</i> | 60024915                | C/T  | NA                 | NA                            | NA                 |
| <i>Desi_wild_60025448</i> | NA                                  | <i>Ca_desi_denovo</i> | 60025448                | G/T  | NA                 | NA                            | NA                 |
| <i>Desi_wild_60025531</i> | NA                                  | <i>Ca_desi_denovo</i> | 60025531                | C/T  | NA                 | NA                            | NA                 |
| <i>Desi_wild_60037878</i> | NA                                  | <i>Ca_desi_denovo</i> | 60037878                | C/G  | NA                 | NA                            | NA                 |
| <i>Desi_wild_60037887</i> | NA                                  | <i>Ca_desi_denovo</i> | 60037887                | C/G  | NA                 | NA                            | NA                 |
| <i>Desi_wild_60042730</i> | NA                                  | <i>Ca_desi_denovo</i> | 60042730                | C/T  | NA                 | NA                            | NA                 |
| <i>Desi_wild_60044501</i> | NA                                  | <i>Ca_desi_denovo</i> | 60044501                | A/G  | NA                 | NA                            | NA                 |
| <i>Desi_wild_60044504</i> | NA                                  | <i>Ca_desi_denovo</i> | 60044504                | G/T  | NA                 | NA                            | NA                 |
| <i>Desi_wild_60044510</i> | NA                                  | <i>Ca_desi_denovo</i> | 60044510                | C/T  | NA                 | NA                            | NA                 |
| <i>Desi_wild_60045595</i> | NA                                  | <i>Ca_desi_denovo</i> | 60045595                | A/C  | NA                 | NA                            | NA                 |
| <i>Desi_wild_60045649</i> | NA                                  | <i>Ca_desi_denovo</i> | 60045649                | C/G  | NA                 | NA                            | NA                 |
| <i>Desi_wild_60049418</i> | NA                                  | <i>Ca_desi_denovo</i> | 60049418                | C/G  | NA                 | NA                            | NA                 |

| SNP IDs                   | NCBI dbSNP accession IDs (NCBI_SS#) | Chromosomes           | Physical positions (bp) | SNPs | Gene accession IDs | Sequence components of genome | Putative functions |
|---------------------------|-------------------------------------|-----------------------|-------------------------|------|--------------------|-------------------------------|--------------------|
| <i>Desi_wild_60051752</i> | NA                                  | <i>Ca_desi_denovo</i> | 60051752                | C/G  | NA                 | NA                            | NA                 |
| <i>Desi_wild_60054070</i> | NA                                  | <i>Ca_desi_denovo</i> | 60054070                | C/G  | NA                 | NA                            | NA                 |
| <i>Desi_wild_60057142</i> | NA                                  | <i>Ca_desi_denovo</i> | 60057142                | C/G  | NA                 | NA                            | NA                 |
| <i>Desi_wild_60059926</i> | NA                                  | <i>Ca_desi_denovo</i> | 60059926                | A/G  | NA                 | NA                            | NA                 |
| <i>Desi_wild_60060648</i> | NA                                  | <i>Ca_desi_denovo</i> | 60060648                | G/T  | NA                 | NA                            | NA                 |
| <i>Desi_wild_60063005</i> | NA                                  | <i>Ca_desi_denovo</i> | 60063005                | G/T  | NA                 | NA                            | NA                 |
| <i>Desi_wild_60063006</i> | NA                                  | <i>Ca_desi_denovo</i> | 60063006                | C/G  | NA                 | NA                            | NA                 |
| <i>Desi_wild_60064473</i> | NA                                  | <i>Ca_desi_denovo</i> | 60064473                | A/G  | NA                 | NA                            | NA                 |
| <i>Desi_wild_60064491</i> | NA                                  | <i>Ca_desi_denovo</i> | 60064491                | G/T  | NA                 | NA                            | NA                 |
| <i>Desi_wild_60064523</i> | NA                                  | <i>Ca_desi_denovo</i> | 60064523                | C/G  | NA                 | NA                            | NA                 |
| <i>Desi_wild_60065030</i> | NA                                  | <i>Ca_desi_denovo</i> | 60065030                | A/T  | NA                 | NA                            | NA                 |
| <i>Desi_wild_60065056</i> | NA                                  | <i>Ca_desi_denovo</i> | 60065056                | C/G  | NA                 | NA                            | NA                 |
| <i>Desi_wild_60065590</i> | NA                                  | <i>Ca_desi_denovo</i> | 60065590                | C/G  | NA                 | NA                            | NA                 |
| <i>Desi_wild_60065606</i> | NA                                  | <i>Ca_desi_denovo</i> | 60065606                | C/T  | NA                 | NA                            | NA                 |
| <i>Desi_wild_60066835</i> | NA                                  | <i>Ca_desi_denovo</i> | 60066835                | C/T  | NA                 | NA                            | NA                 |
| <i>Desi_wild_60069337</i> | NA                                  | <i>Ca_desi_denovo</i> | 60069337                | G/T  | NA                 | NA                            | NA                 |
| <i>Desi_wild_60069340</i> | NA                                  | <i>Ca_desi_denovo</i> | 60069340                | C/T  | NA                 | NA                            | NA                 |
| <i>Desi_wild_60069343</i> | NA                                  | <i>Ca_desi_denovo</i> | 60069343                | C/G  | NA                 | NA                            | NA                 |
| <i>Desi_wild_60069979</i> | NA                                  | <i>Ca_desi_denovo</i> | 60069979                | A/G  | NA                 | NA                            | NA                 |
| <i>Desi_wild_60069984</i> | NA                                  | <i>Ca_desi_denovo</i> | 60069984                | A/G  | NA                 | NA                            | NA                 |
| <i>Desi_wild_60070146</i> | NA                                  | <i>Ca_desi_denovo</i> | 60070146                | C/G  | NA                 | NA                            | NA                 |
| <i>Desi_wild_60077993</i> | NA                                  | <i>Ca_desi_denovo</i> | 60077993                | C/T  | NA                 | NA                            | NA                 |
| <i>Desi_wild_60078004</i> | NA                                  | <i>Ca_desi_denovo</i> | 60078004                | C/T  | NA                 | NA                            | NA                 |
| <i>Desi_wild_60078011</i> | NA                                  | <i>Ca_desi_denovo</i> | 60078011                | A/G  | NA                 | NA                            | NA                 |
| <i>Desi_wild_60079546</i> | NA                                  | <i>Ca_desi_denovo</i> | 60079546                | C/G  | NA                 | NA                            | NA                 |
| <i>Desi_wild_60081122</i> | NA                                  | <i>Ca_desi_denovo</i> | 60081122                | C/T  | NA                 | NA                            | NA                 |
| <i>Desi_wild_60084576</i> | NA                                  | <i>Ca_desi_denovo</i> | 60084576                | C/G  | NA                 | NA                            | NA                 |
| <i>Desi_wild_60084597</i> | NA                                  | <i>Ca_desi_denovo</i> | 60084597                | C/T  | NA                 | NA                            | NA                 |
| <i>Desi_wild_60084600</i> | NA                                  | <i>Ca_desi_denovo</i> | 60084600                | C/T  | NA                 | NA                            | NA                 |
| <i>Desi_wild_60092561</i> | NA                                  | <i>Ca_desi_denovo</i> | 60092561                | A/C  | NA                 | NA                            | NA                 |
| <i>Desi_wild_60093778</i> | NA                                  | <i>Ca_desi_denovo</i> | 60093778                | A/G  | NA                 | NA                            | NA                 |
| <i>Desi_wild_60093868</i> | NA                                  | <i>Ca_desi_denovo</i> | 60093868                | C/T  | NA                 | NA                            | NA                 |
| <i>Desi_wild_60093871</i> | NA                                  | <i>Ca_desi_denovo</i> | 60093871                | C/G  | NA                 | NA                            | NA                 |
| <i>Desi_wild_60093892</i> | NA                                  | <i>Ca_desi_denovo</i> | 60093892                | C/G  | NA                 | NA                            | NA                 |
| <i>Desi_wild_60093922</i> | NA                                  | <i>Ca_desi_denovo</i> | 60093922                | C/G  | NA                 | NA                            | NA                 |
| <i>Desi_wild_60094144</i> | NA                                  | <i>Ca_desi_denovo</i> | 60094144                | A/G  | NA                 | NA                            | NA                 |
| <i>Desi_wild_60094167</i> | NA                                  | <i>Ca_desi_denovo</i> | 60094167                | C/G  | NA                 | NA                            | NA                 |
| <i>Desi_wild_60095640</i> | NA                                  | <i>Ca_desi_denovo</i> | 60095640                | G/T  | NA                 | NA                            | NA                 |
| <i>Desi_wild_60095652</i> | NA                                  | <i>Ca_desi_denovo</i> | 60095652                | A/G  | NA                 | NA                            | NA                 |
| <i>Desi_wild_60096062</i> | NA                                  | <i>Ca_desi_denovo</i> | 60096062                | C/T  | NA                 | NA                            | NA                 |
| <i>Desi_wild_60097042</i> | NA                                  | <i>Ca_desi_denovo</i> | 60097042                | C/G  | NA                 | NA                            | NA                 |
| <i>Desi_wild_60105304</i> | NA                                  | <i>Ca_desi_denovo</i> | 60105304                | A/G  | NA                 | NA                            | NA                 |
| <i>Desi_wild_60106332</i> | NA                                  | <i>Ca_desi_denovo</i> | 60106332                | A/G  | NA                 | NA                            | NA                 |
| <i>Desi_wild_60106855</i> | NA                                  | <i>Ca_desi_denovo</i> | 60106855                | A/G  | NA                 | NA                            | NA                 |

| SNP IDs                   | NCBI dbSNP accession IDs (NCBI_SS#) | Chromosomes           | Physical positions (bp) | SNPs | Gene accession IDs | Sequence components of genome | Putative functions |
|---------------------------|-------------------------------------|-----------------------|-------------------------|------|--------------------|-------------------------------|--------------------|
| <i>Desi_wild_60106863</i> | NA                                  | <i>Ca_desi_denovo</i> | 60106863                | G/T  | NA                 | NA                            | NA                 |
| <i>Desi_wild_60107658</i> | NA                                  | <i>Ca_desi_denovo</i> | 60107658                | G/T  | NA                 | NA                            | NA                 |
| <i>Desi_wild_60109024</i> | NA                                  | <i>Ca_desi_denovo</i> | 60109024                | A/G  | NA                 | NA                            | NA                 |
| <i>Desi_wild_60111930</i> | NA                                  | <i>Ca_desi_denovo</i> | 60111930                | A/G  | NA                 | NA                            | NA                 |
| <i>Desi_wild_60111936</i> | NA                                  | <i>Ca_desi_denovo</i> | 60111936                | A/G  | NA                 | NA                            | NA                 |
| <i>Desi_wild_60111960</i> | NA                                  | <i>Ca_desi_denovo</i> | 60111960                | A/G  | NA                 | NA                            | NA                 |
| <i>Desi_wild_60112021</i> | NA                                  | <i>Ca_desi_denovo</i> | 60112021                | G/T  | NA                 | NA                            | NA                 |
| <i>Desi_wild_60113158</i> | NA                                  | <i>Ca_desi_denovo</i> | 60113158                | A/G  | NA                 | NA                            | NA                 |
| <i>Desi_wild_60121302</i> | NA                                  | <i>Ca_desi_denovo</i> | 60121302                | C/G  | NA                 | NA                            | NA                 |
| <i>Desi_wild_60126352</i> | NA                                  | <i>Ca_desi_denovo</i> | 60126352                | C/G  | NA                 | NA                            | NA                 |
| <i>Desi_wild_60126360</i> | NA                                  | <i>Ca_desi_denovo</i> | 60126360                | G/T  | NA                 | NA                            | NA                 |
| <i>Desi_wild_60126445</i> | NA                                  | <i>Ca_desi_denovo</i> | 60126445                | C/T  | NA                 | NA                            | NA                 |
| <i>Desi_wild_60132543</i> | NA                                  | <i>Ca_desi_denovo</i> | 60132543                | A/C  | NA                 | NA                            | NA                 |
| <i>Desi_wild_60138231</i> | NA                                  | <i>Ca_desi_denovo</i> | 60138231                | C/T  | NA                 | NA                            | NA                 |
| <i>Desi_wild_60138234</i> | NA                                  | <i>Ca_desi_denovo</i> | 60138234                | C/G  | NA                 | NA                            | NA                 |
| <i>Desi_wild_60138388</i> | NA                                  | <i>Ca_desi_denovo</i> | 60138388                | A/G  | NA                 | NA                            | NA                 |
| <i>Desi_wild_60138391</i> | NA                                  | <i>Ca_desi_denovo</i> | 60138391                | C/G  | NA                 | NA                            | NA                 |
| <i>Desi_wild_60138397</i> | NA                                  | <i>Ca_desi_denovo</i> | 60138397                | C/T  | NA                 | NA                            | NA                 |
| <i>Desi_wild_60140650</i> | NA                                  | <i>Ca_desi_denovo</i> | 60140650                | A/G  | NA                 | NA                            | NA                 |
| <i>Desi_wild_60144830</i> | NA                                  | <i>Ca_desi_denovo</i> | 60144830                | A/T  | NA                 | NA                            | NA                 |
| <i>Desi_wild_60144831</i> | NA                                  | <i>Ca_desi_denovo</i> | 60144831                | G/T  | NA                 | NA                            | NA                 |
| <i>Desi_wild_60144856</i> | NA                                  | <i>Ca_desi_denovo</i> | 60144856                | A/G  | NA                 | NA                            | NA                 |
| <i>Desi_wild_60145416</i> | NA                                  | <i>Ca_desi_denovo</i> | 60145416                | A/G  | NA                 | NA                            | NA                 |
| <i>Desi_wild_60145663</i> | NA                                  | <i>Ca_desi_denovo</i> | 60145663                | C/G  | NA                 | NA                            | NA                 |
| <i>Desi_wild_60146130</i> | NA                                  | <i>Ca_desi_denovo</i> | 60146130                | A/G  | NA                 | NA                            | NA                 |
| <i>Desi_wild_60146748</i> | NA                                  | <i>Ca_desi_denovo</i> | 60146748                | G/T  | NA                 | NA                            | NA                 |
| <i>Desi_wild_60149761</i> | NA                                  | <i>Ca_desi_denovo</i> | 60149761                | C/T  | NA                 | NA                            | NA                 |
| <i>Desi_wild_60149824</i> | NA                                  | <i>Ca_desi_denovo</i> | 60149824                | A/G  | NA                 | NA                            | NA                 |
| <i>Desi_wild_60149830</i> | NA                                  | <i>Ca_desi_denovo</i> | 60149830                | C/T  | NA                 | NA                            | NA                 |
| <i>Desi_wild_60151907</i> | NA                                  | <i>Ca_desi_denovo</i> | 60151907                | C/G  | NA                 | NA                            | NA                 |
| <i>Desi_wild_60153970</i> | NA                                  | <i>Ca_desi_denovo</i> | 60153970                | C/T  | NA                 | NA                            | NA                 |
| <i>Desi_wild_60154019</i> | NA                                  | <i>Ca_desi_denovo</i> | 60154019                | A/G  | NA                 | NA                            | NA                 |
| <i>Desi_wild_60154143</i> | NA                                  | <i>Ca_desi_denovo</i> | 60154143                | C/T  | NA                 | NA                            | NA                 |
| <i>Desi_wild_60154615</i> | NA                                  | <i>Ca_desi_denovo</i> | 60154615                | C/T  | NA                 | NA                            | NA                 |
| <i>Desi_wild_60155058</i> | NA                                  | <i>Ca_desi_denovo</i> | 60155058                | C/T  | NA                 | NA                            | NA                 |
| <i>Desi_wild_60158598</i> | NA                                  | <i>Ca_desi_denovo</i> | 60158598                | A/G  | NA                 | NA                            | NA                 |
| <i>Desi_wild_60163369</i> | NA                                  | <i>Ca_desi_denovo</i> | 60163369                | G/T  | NA                 | NA                            | NA                 |
| <i>Desi_wild_60164183</i> | NA                                  | <i>Ca_desi_denovo</i> | 60164183                | C/G  | NA                 | NA                            | NA                 |
| <i>Desi_wild_60165694</i> | NA                                  | <i>Ca_desi_denovo</i> | 60165694                | A/G  | NA                 | NA                            | NA                 |
| <i>Desi_wild_60166711</i> | NA                                  | <i>Ca_desi_denovo</i> | 60166711                | A/G  | NA                 | NA                            | NA                 |
| <i>Desi_wild_60172563</i> | NA                                  | <i>Ca_desi_denovo</i> | 60172563                | C/G  | NA                 | NA                            | NA                 |
| <i>Desi_wild_60172564</i> | NA                                  | <i>Ca_desi_denovo</i> | 60172564                | C/T  | NA                 | NA                            | NA                 |
| <i>Desi_wild_60176509</i> | NA                                  | <i>Ca_desi_denovo</i> | 60176509                | C/G  | NA                 | NA                            | NA                 |
| <i>Desi_wild_60179149</i> | NA                                  | <i>Ca_desi_denovo</i> | 60179149                | C/G  | NA                 | NA                            | NA                 |

| SNP IDs                   | NCBI dbSNP accession IDs (NCBI_SS#) | Chromosomes           | Physical positions (bp) | SNPs | Gene accession IDs | Sequence components of genome | Putative functions |
|---------------------------|-------------------------------------|-----------------------|-------------------------|------|--------------------|-------------------------------|--------------------|
| <i>Desi_wild_60179154</i> | NA                                  | <i>Ca_desi_denovo</i> | 60179154                | C/T  | NA                 | NA                            | NA                 |
| <i>Desi_wild_60179191</i> | NA                                  | <i>Ca_desi_denovo</i> | 60179191                | G/T  | NA                 | NA                            | NA                 |
| <i>Desi_wild_60184920</i> | NA                                  | <i>Ca_desi_denovo</i> | 60184920                | G/T  | NA                 | NA                            | NA                 |
| <i>Desi_wild_60188643</i> | NA                                  | <i>Ca_desi_denovo</i> | 60188643                | G/T  | NA                 | NA                            | NA                 |
| <i>Desi_wild_60189190</i> | NA                                  | <i>Ca_desi_denovo</i> | 60189190                | C/G  | NA                 | NA                            | NA                 |
| <i>Desi_wild_60189205</i> | NA                                  | <i>Ca_desi_denovo</i> | 60189205                | C/T  | NA                 | NA                            | NA                 |
| <i>Desi_wild_60189247</i> | NA                                  | <i>Ca_desi_denovo</i> | 60189247                | C/T  | NA                 | NA                            | NA                 |
| <i>Desi_wild_60191407</i> | NA                                  | <i>Ca_desi_denovo</i> | 60191407                | G/T  | NA                 | NA                            | NA                 |
| <i>Desi_wild_60191608</i> | NA                                  | <i>Ca_desi_denovo</i> | 60191608                | A/G  | NA                 | NA                            | NA                 |
| <i>Desi_wild_60191617</i> | NA                                  | <i>Ca_desi_denovo</i> | 60191617                | C/G  | NA                 | NA                            | NA                 |
| <i>Desi_wild_60193029</i> | NA                                  | <i>Ca_desi_denovo</i> | 60193029                | C/G  | NA                 | NA                            | NA                 |
| <i>Desi_wild_60194011</i> | NA                                  | <i>Ca_desi_denovo</i> | 60194011                | C/T  | NA                 | NA                            | NA                 |
| <i>Desi_wild_60195352</i> | NA                                  | <i>Ca_desi_denovo</i> | 60195352                | A/G  | NA                 | NA                            | NA                 |
| <i>Desi_wild_60195702</i> | NA                                  | <i>Ca_desi_denovo</i> | 60195702                | G/T  | NA                 | NA                            | NA                 |
| <i>Desi_wild_60195726</i> | NA                                  | <i>Ca_desi_denovo</i> | 60195726                | C/T  | NA                 | NA                            | NA                 |
| <i>Desi_wild_60197772</i> | NA                                  | <i>Ca_desi_denovo</i> | 60197772                | C/G  | NA                 | NA                            | NA                 |
| <i>Desi_wild_60201187</i> | NA                                  | <i>Ca_desi_denovo</i> | 60201187                | C/G  | NA                 | NA                            | NA                 |
| <i>Desi_wild_60201199</i> | NA                                  | <i>Ca_desi_denovo</i> | 60201199                | A/G  | NA                 | NA                            | NA                 |
| <i>Desi_wild_60210067</i> | NA                                  | <i>Ca_desi_denovo</i> | 60210067                | C/T  | NA                 | NA                            | NA                 |
| <i>Desi_wild_60217033</i> | NA                                  | <i>Ca_desi_denovo</i> | 60217033                | G/T  | NA                 | NA                            | NA                 |
| <i>Desi_wild_60219061</i> | NA                                  | <i>Ca_desi_denovo</i> | 60219061                | A/G  | NA                 | NA                            | NA                 |
| <i>Desi_wild_60219882</i> | NA                                  | <i>Ca_desi_denovo</i> | 60219882                | C/T  | NA                 | NA                            | NA                 |
| <i>Desi_wild_60219903</i> | NA                                  | <i>Ca_desi_denovo</i> | 60219903                | A/G  | NA                 | NA                            | NA                 |
| <i>Desi_wild_60220732</i> | NA                                  | <i>Ca_desi_denovo</i> | 60220732                | A/G  | NA                 | NA                            | NA                 |
| <i>Desi_wild_60220900</i> | NA                                  | <i>Ca_desi_denovo</i> | 60220900                | C/G  | NA                 | NA                            | NA                 |
| <i>Desi_wild_60220945</i> | NA                                  | <i>Ca_desi_denovo</i> | 60220945                | A/G  | NA                 | NA                            | NA                 |
| <i>Desi_wild_60221551</i> | NA                                  | <i>Ca_desi_denovo</i> | 60221551                | C/T  | NA                 | NA                            | NA                 |
| <i>Desi_wild_60222064</i> | NA                                  | <i>Ca_desi_denovo</i> | 60222064                | C/T  | NA                 | NA                            | NA                 |
| <i>Desi_wild_60223599</i> | NA                                  | <i>Ca_desi_denovo</i> | 60223599                | C/G  | NA                 | NA                            | NA                 |
| <i>Desi_wild_60223602</i> | NA                                  | <i>Ca_desi_denovo</i> | 60223602                | C/G  | NA                 | NA                            | NA                 |
| <i>Desi_wild_60225834</i> | NA                                  | <i>Ca_desi_denovo</i> | 60225834                | C/G  | NA                 | NA                            | NA                 |
| <i>Desi_wild_60230801</i> | NA                                  | <i>Ca_desi_denovo</i> | 60230801                | C/T  | NA                 | NA                            | NA                 |
| <i>Desi_wild_60230839</i> | NA                                  | <i>Ca_desi_denovo</i> | 60230839                | A/C  | NA                 | NA                            | NA                 |
| <i>Desi_wild_60233777</i> | NA                                  | <i>Ca_desi_denovo</i> | 60233777                | A/G  | NA                 | NA                            | NA                 |
| <i>Desi_wild_60237828</i> | NA                                  | <i>Ca_desi_denovo</i> | 60237828                | C/G  | NA                 | NA                            | NA                 |
| <i>Desi_wild_60237840</i> | NA                                  | <i>Ca_desi_denovo</i> | 60237840                | C/G  | NA                 | NA                            | NA                 |
| <i>Desi_wild_60237849</i> | NA                                  | <i>Ca_desi_denovo</i> | 60237849                | C/T  | NA                 | NA                            | NA                 |
| <i>Desi_wild_60241762</i> | NA                                  | <i>Ca_desi_denovo</i> | 60241762                | A/G  | NA                 | NA                            | NA                 |
| <i>Desi_wild_60241801</i> | NA                                  | <i>Ca_desi_denovo</i> | 60241801                | A/G  | NA                 | NA                            | NA                 |
| <i>Desi_wild_60245399</i> | NA                                  | <i>Ca_desi_denovo</i> | 60245399                | A/G  | NA                 | NA                            | NA                 |
| <i>Desi_wild_60246888</i> | NA                                  | <i>Ca_desi_denovo</i> | 60246888                | A/G  | NA                 | NA                            | NA                 |
| <i>Desi_wild_60251524</i> | NA                                  | <i>Ca_desi_denovo</i> | 60251524                | A/G  | NA                 | NA                            | NA                 |
| <i>Desi_wild_60251791</i> | NA                                  | <i>Ca_desi_denovo</i> | 60251791                | A/G  | NA                 | NA                            | NA                 |
| <i>Desi_wild_60252273</i> | NA                                  | <i>Ca_desi_denovo</i> | 60252273                | C/G  | NA                 | NA                            | NA                 |

| SNP IDs                   | NCBI dbSNP accession IDs (NCBI_SS#) | Chromosomes           | Physical positions (bp) | SNPs | Gene accession IDs | Sequence components of genome | Putative functions |
|---------------------------|-------------------------------------|-----------------------|-------------------------|------|--------------------|-------------------------------|--------------------|
| <i>Desi_wild_60252276</i> | NA                                  | <i>Ca_desi_denovo</i> | 60252276                | C/G  | NA                 | NA                            | NA                 |
| <i>Desi_wild_60252312</i> | NA                                  | <i>Ca_desi_denovo</i> | 60252312                | C/T  | NA                 | NA                            | NA                 |
| <i>Desi_wild_60252520</i> | NA                                  | <i>Ca_desi_denovo</i> | 60252520                | A/T  | NA                 | NA                            | NA                 |
| <i>Desi_wild_60252537</i> | NA                                  | <i>Ca_desi_denovo</i> | 60252537                | A/G  | NA                 | NA                            | NA                 |
| <i>Desi_wild_60252567</i> | NA                                  | <i>Ca_desi_denovo</i> | 60252567                | C/G  | NA                 | NA                            | NA                 |
| <i>Desi_wild_60252573</i> | NA                                  | <i>Ca_desi_denovo</i> | 60252573                | C/T  | NA                 | NA                            | NA                 |
| <i>Desi_wild_60253720</i> | NA                                  | <i>Ca_desi_denovo</i> | 60253720                | G/T  | NA                 | NA                            | NA                 |
| <i>Desi_wild_60255051</i> | NA                                  | <i>Ca_desi_denovo</i> | 60255051                | C/T  | NA                 | NA                            | NA                 |
| <i>Desi_wild_60256054</i> | NA                                  | <i>Ca_desi_denovo</i> | 60256054                | C/T  | NA                 | NA                            | NA                 |
| <i>Desi_wild_60257747</i> | NA                                  | <i>Ca_desi_denovo</i> | 60257747                | A/G  | NA                 | NA                            | NA                 |
| <i>Desi_wild_60258475</i> | NA                                  | <i>Ca_desi_denovo</i> | 60258475                | C/T  | NA                 | NA                            | NA                 |
| <i>Desi_wild_60258487</i> | NA                                  | <i>Ca_desi_denovo</i> | 60258487                | C/T  | NA                 | NA                            | NA                 |
| <i>Desi_wild_60258490</i> | NA                                  | <i>Ca_desi_denovo</i> | 60258490                | G/T  | NA                 | NA                            | NA                 |
| <i>Desi_wild_60258493</i> | NA                                  | <i>Ca_desi_denovo</i> | 60258493                | A/G  | NA                 | NA                            | NA                 |
| <i>Desi_wild_60262867</i> | NA                                  | <i>Ca_desi_denovo</i> | 60262867                | C/G  | NA                 | NA                            | NA                 |
| <i>Desi_wild_60264345</i> | NA                                  | <i>Ca_desi_denovo</i> | 60264345                | C/T  | NA                 | NA                            | NA                 |
| <i>Desi_wild_60264390</i> | NA                                  | <i>Ca_desi_denovo</i> | 60264390                | C/T  | NA                 | NA                            | NA                 |
| <i>Desi_wild_60264408</i> | NA                                  | <i>Ca_desi_denovo</i> | 60264408                | C/T  | NA                 | NA                            | NA                 |
| <i>Desi_wild_60266292</i> | NA                                  | <i>Ca_desi_denovo</i> | 60266292                | C/T  | NA                 | NA                            | NA                 |
| <i>Desi_wild_60266319</i> | NA                                  | <i>Ca_desi_denovo</i> | 60266319                | C/T  | NA                 | NA                            | NA                 |
| <i>Desi_wild_60266355</i> | NA                                  | <i>Ca_desi_denovo</i> | 60266355                | C/T  | NA                 | NA                            | NA                 |
| <i>Desi_wild_60266655</i> | NA                                  | <i>Ca_desi_denovo</i> | 60266655                | A/C  | NA                 | NA                            | NA                 |
| <i>Desi_wild_60266676</i> | NA                                  | <i>Ca_desi_denovo</i> | 60266676                | C/G  | NA                 | NA                            | NA                 |
| <i>Desi_wild_60267492</i> | NA                                  | <i>Ca_desi_denovo</i> | 60267492                | C/T  | NA                 | NA                            | NA                 |
| <i>Desi_wild_60267511</i> | NA                                  | <i>Ca_desi_denovo</i> | 60267511                | C/T  | NA                 | NA                            | NA                 |
| <i>Desi_wild_60268335</i> | NA                                  | <i>Ca_desi_denovo</i> | 60268335                | C/G  | NA                 | NA                            | NA                 |
| <i>Desi_wild_60275793</i> | NA                                  | <i>Ca_desi_denovo</i> | 60275793                | A/T  | NA                 | NA                            | NA                 |
| <i>Desi_wild_60281367</i> | NA                                  | <i>Ca_desi_denovo</i> | 60281367                | A/G  | NA                 | NA                            | NA                 |
| <i>Desi_wild_60282204</i> | NA                                  | <i>Ca_desi_denovo</i> | 60282204                | C/T  | NA                 | NA                            | NA                 |
| <i>Desi_wild_60282216</i> | NA                                  | <i>Ca_desi_denovo</i> | 60282216                | C/G  | NA                 | NA                            | NA                 |
| <i>Desi_wild_60283534</i> | NA                                  | <i>Ca_desi_denovo</i> | 60283534                | C/T  | NA                 | NA                            | NA                 |
| <i>Desi_wild_60284976</i> | NA                                  | <i>Ca_desi_denovo</i> | 60284976                | A/G  | NA                 | NA                            | NA                 |
| <i>Desi_wild_60285108</i> | NA                                  | <i>Ca_desi_denovo</i> | 60285108                | C/T  | NA                 | NA                            | NA                 |
| <i>Desi_wild_60286567</i> | NA                                  | <i>Ca_desi_denovo</i> | 60286567                | A/G  | NA                 | NA                            | NA                 |
| <i>Desi_wild_60287794</i> | NA                                  | <i>Ca_desi_denovo</i> | 60287794                | C/G  | NA                 | NA                            | NA                 |
| <i>Desi_wild_60293098</i> | NA                                  | <i>Ca_desi_denovo</i> | 60293098                | C/T  | NA                 | NA                            | NA                 |
| <i>Desi_wild_60296625</i> | NA                                  | <i>Ca_desi_denovo</i> | 60296625                | C/T  | NA                 | NA                            | NA                 |
| <i>Desi_wild_60299710</i> | NA                                  | <i>Ca_desi_denovo</i> | 60299710                | A/G  | NA                 | NA                            | NA                 |
| <i>Desi_wild_60299731</i> | NA                                  | <i>Ca_desi_denovo</i> | 60299731                | G/T  | NA                 | NA                            | NA                 |
| <i>Desi_wild_60300616</i> | NA                                  | <i>Ca_desi_denovo</i> | 60300616                | C/T  | NA                 | NA                            | NA                 |
| <i>Desi_wild_60302024</i> | NA                                  | <i>Ca_desi_denovo</i> | 60302024                | G/T  | NA                 | NA                            | NA                 |
| <i>Desi_wild_60303519</i> | NA                                  | <i>Ca_desi_denovo</i> | 60303519                | A/G  | NA                 | NA                            | NA                 |
| <i>Desi_wild_60305494</i> | NA                                  | <i>Ca_desi_denovo</i> | 60305494                | C/T  | NA                 | NA                            | NA                 |
| <i>Desi_wild_60308237</i> | NA                                  | <i>Ca_desi_denovo</i> | 60308237                | C/G  | NA                 | NA                            | NA                 |

| SNP IDs                   | NCBI dbSNP accession IDs (NCBI_SS#) | Chromosomes           | Physical positions (bp) | SNPs | Gene accession IDs | Sequence components of genome | Putative functions |
|---------------------------|-------------------------------------|-----------------------|-------------------------|------|--------------------|-------------------------------|--------------------|
| <i>Desi_wild_60310756</i> | NA                                  | <i>Ca_desi_denovo</i> | 60310756                | C/G  | NA                 | NA                            | NA                 |
| <i>Desi_wild_60311310</i> | NA                                  | <i>Ca_desi_denovo</i> | 60311310                | C/T  | NA                 | NA                            | NA                 |
| <i>Desi_wild_60311329</i> | NA                                  | <i>Ca_desi_denovo</i> | 60311329                | A/G  | NA                 | NA                            | NA                 |
| <i>Desi_wild_60315490</i> | NA                                  | <i>Ca_desi_denovo</i> | 60315490                | A/G  | NA                 | NA                            | NA                 |
| <i>Desi_wild_60315918</i> | NA                                  | <i>Ca_desi_denovo</i> | 60315918                | C/T  | NA                 | NA                            | NA                 |
| <i>Desi_wild_60315924</i> | NA                                  | <i>Ca_desi_denovo</i> | 60315924                | A/G  | NA                 | NA                            | NA                 |
| <i>Desi_wild_60315939</i> | NA                                  | <i>Ca_desi_denovo</i> | 60315939                | C/T  | NA                 | NA                            | NA                 |
| <i>Desi_wild_60317184</i> | NA                                  | <i>Ca_desi_denovo</i> | 60317184                | A/G  | NA                 | NA                            | NA                 |
| <i>Desi_wild_60319050</i> | NA                                  | <i>Ca_desi_denovo</i> | 60319050                | C/G  | NA                 | NA                            | NA                 |
| <i>Desi_wild_60321717</i> | NA                                  | <i>Ca_desi_denovo</i> | 60321717                | C/T  | NA                 | NA                            | NA                 |
| <i>Desi_wild_60324321</i> | NA                                  | <i>Ca_desi_denovo</i> | 60324321                | C/G  | NA                 | NA                            | NA                 |
| <i>Desi_wild_60324338</i> | NA                                  | <i>Ca_desi_denovo</i> | 60324338                | A/G  | NA                 | NA                            | NA                 |
| <i>Desi_wild_60324339</i> | NA                                  | <i>Ca_desi_denovo</i> | 60324339                | A/G  | NA                 | NA                            | NA                 |
| <i>Desi_wild_60325528</i> | NA                                  | <i>Ca_desi_denovo</i> | 60325528                | A/G  | NA                 | NA                            | NA                 |
| <i>Desi_wild_60328220</i> | NA                                  | <i>Ca_desi_denovo</i> | 60328220                | C/G  | NA                 | NA                            | NA                 |
| <i>Desi_wild_60328241</i> | NA                                  | <i>Ca_desi_denovo</i> | 60328241                | C/T  | NA                 | NA                            | NA                 |
| <i>Desi_wild_60328249</i> | NA                                  | <i>Ca_desi_denovo</i> | 60328249                | C/T  | NA                 | NA                            | NA                 |
| <i>Desi_wild_60328258</i> | NA                                  | <i>Ca_desi_denovo</i> | 60328258                | G/T  | NA                 | NA                            | NA                 |
| <i>Desi_wild_60335546</i> | NA                                  | <i>Ca_desi_denovo</i> | 60335546                | G/T  | NA                 | NA                            | NA                 |
| <i>Desi_wild_60340536</i> | NA                                  | <i>Ca_desi_denovo</i> | 60340536                | A/G  | NA                 | NA                            | NA                 |
| <i>Desi_wild_60340975</i> | NA                                  | <i>Ca_desi_denovo</i> | 60340975                | A/C  | NA                 | NA                            | NA                 |
| <i>Desi_wild_60340978</i> | NA                                  | <i>Ca_desi_denovo</i> | 60340978                | A/G  | NA                 | NA                            | NA                 |
| <i>Desi_wild_60340987</i> | NA                                  | <i>Ca_desi_denovo</i> | 60340987                | G/T  | NA                 | NA                            | NA                 |
| <i>Desi_wild_60351205</i> | NA                                  | <i>Ca_desi_denovo</i> | 60351205                | A/G  | NA                 | NA                            | NA                 |
| <i>Desi_wild_60351493</i> | NA                                  | <i>Ca_desi_denovo</i> | 60351493                | A/C  | NA                 | NA                            | NA                 |
| <i>Desi_wild_60351495</i> | NA                                  | <i>Ca_desi_denovo</i> | 60351495                | C/G  | NA                 | NA                            | NA                 |
| <i>Desi_wild_60351527</i> | NA                                  | <i>Ca_desi_denovo</i> | 60351527                | C/G  | NA                 | NA                            | NA                 |
| <i>Desi_wild_60351658</i> | NA                                  | <i>Ca_desi_denovo</i> | 60351658                | C/G  | NA                 | NA                            | NA                 |
| <i>Desi_wild_60351664</i> | NA                                  | <i>Ca_desi_denovo</i> | 60351664                | C/G  | NA                 | NA                            | NA                 |
| <i>Desi_wild_60351673</i> | NA                                  | <i>Ca_desi_denovo</i> | 60351673                | C/T  | NA                 | NA                            | NA                 |
| <i>Desi_wild_60353240</i> | NA                                  | <i>Ca_desi_denovo</i> | 60353240                | C/T  | NA                 | NA                            | NA                 |
| <i>Desi_wild_60353427</i> | NA                                  | <i>Ca_desi_denovo</i> | 60353427                | G/T  | NA                 | NA                            | NA                 |
| <i>Desi_wild_60353456</i> | NA                                  | <i>Ca_desi_denovo</i> | 60353456                | C/G  | NA                 | NA                            | NA                 |
| <i>Desi_wild_60353463</i> | NA                                  | <i>Ca_desi_denovo</i> | 60353463                | C/T  | NA                 | NA                            | NA                 |
| <i>Desi_wild_60356400</i> | NA                                  | <i>Ca_desi_denovo</i> | 60356400                | C/T  | NA                 | NA                            | NA                 |
| <i>Desi_wild_60356421</i> | NA                                  | <i>Ca_desi_denovo</i> | 60356421                | A/G  | NA                 | NA                            | NA                 |
| <i>Desi_wild_60356427</i> | NA                                  | <i>Ca_desi_denovo</i> | 60356427                | C/T  | NA                 | NA                            | NA                 |
| <i>Desi_wild_60356430</i> | NA                                  | <i>Ca_desi_denovo</i> | 60356430                | C/G  | NA                 | NA                            | NA                 |
| <i>Desi_wild_60360502</i> | NA                                  | <i>Ca_desi_denovo</i> | 60360502                | C/T  | NA                 | NA                            | NA                 |
| <i>Desi_wild_60363576</i> | NA                                  | <i>Ca_desi_denovo</i> | 60363576                | A/G  | NA                 | NA                            | NA                 |
| <i>Desi_wild_60363606</i> | NA                                  | <i>Ca_desi_denovo</i> | 60363606                | C/T  | NA                 | NA                            | NA                 |
| <i>Desi_wild_60364849</i> | NA                                  | <i>Ca_desi_denovo</i> | 60364849                | C/T  | NA                 | NA                            | NA                 |
| <i>Desi_wild_60364942</i> | NA                                  | <i>Ca_desi_denovo</i> | 60364942                | C/G  | NA                 | NA                            | NA                 |
| <i>Desi_wild_60364946</i> | NA                                  | <i>Ca_desi_denovo</i> | 60364946                | A/C  | NA                 | NA                            | NA                 |



| SNP IDs                   | NCBI dbSNP accession IDs (NCBI_SS#) | Chromosomes           | Physical positions (bp) | SNPs | Gene accession IDs | Sequence components of genome | Putative functions |
|---------------------------|-------------------------------------|-----------------------|-------------------------|------|--------------------|-------------------------------|--------------------|
| <i>Desi_wild_60366634</i> | NA                                  | <i>Ca_desi_denovo</i> | 60366634                | A/G  | NA                 | NA                            | NA                 |
| <i>Desi_wild_60366643</i> | NA                                  | <i>Ca_desi_denovo</i> | 60366643                | A/T  | NA                 | NA                            | NA                 |
| <i>Desi_wild_60366691</i> | NA                                  | <i>Ca_desi_denovo</i> | 60366691                | C/G  | NA                 | NA                            | NA                 |
| <i>Desi_wild_60369631</i> | NA                                  | <i>Ca_desi_denovo</i> | 60369631                | C/G  | NA                 | NA                            | NA                 |
| <i>Desi_wild_60369649</i> | NA                                  | <i>Ca_desi_denovo</i> | 60369649                | C/T  | NA                 | NA                            | NA                 |
| <i>Desi_wild_60372045</i> | NA                                  | <i>Ca_desi_denovo</i> | 60372045                | C/G  | NA                 | NA                            | NA                 |
| <i>Desi_wild_60372418</i> | NA                                  | <i>Ca_desi_denovo</i> | 60372418                | A/G  | NA                 | NA                            | NA                 |
| <i>Desi_wild_60372421</i> | NA                                  | <i>Ca_desi_denovo</i> | 60372421                | C/G  | NA                 | NA                            | NA                 |
| <i>Desi_wild_60372430</i> | NA                                  | <i>Ca_desi_denovo</i> | 60372430                | C/G  | NA                 | NA                            | NA                 |
| <i>Desi_wild_60372463</i> | NA                                  | <i>Ca_desi_denovo</i> | 60372463                | C/G  | NA                 | NA                            | NA                 |
| <i>Desi_wild_60373869</i> | NA                                  | <i>Ca_desi_denovo</i> | 60373869                | A/G  | NA                 | NA                            | NA                 |
| <i>Desi_wild_60375126</i> | NA                                  | <i>Ca_desi_denovo</i> | 60375126                | C/G  | NA                 | NA                            | NA                 |
| <i>Desi_wild_60375144</i> | NA                                  | <i>Ca_desi_denovo</i> | 60375144                | C/T  | NA                 | NA                            | NA                 |
| <i>Desi_wild_60386128</i> | NA                                  | <i>Ca_desi_denovo</i> | 60386128                | C/G  | NA                 | NA                            | NA                 |
| <i>Desi_wild_60386140</i> | NA                                  | <i>Ca_desi_denovo</i> | 60386140                | C/T  | NA                 | NA                            | NA                 |
| <i>Desi_wild_60386176</i> | NA                                  | <i>Ca_desi_denovo</i> | 60386176                | G/T  | NA                 | NA                            | NA                 |
| <i>Desi_wild_60386658</i> | NA                                  | <i>Ca_desi_denovo</i> | 60386658                | C/T  | NA                 | NA                            | NA                 |
| <i>Desi_wild_60391848</i> | NA                                  | <i>Ca_desi_denovo</i> | 60391848                | C/G  | NA                 | NA                            | NA                 |
| <i>Desi_wild_60391878</i> | NA                                  | <i>Ca_desi_denovo</i> | 60391878                | A/G  | NA                 | NA                            | NA                 |
| <i>Desi_wild_60399187</i> | NA                                  | <i>Ca_desi_denovo</i> | 60399187                | G/T  | NA                 | NA                            | NA                 |
| <i>Desi_wild_60399193</i> | NA                                  | <i>Ca_desi_denovo</i> | 60399193                | C/T  | NA                 | NA                            | NA                 |
| <i>Desi_wild_60403938</i> | NA                                  | <i>Ca_desi_denovo</i> | 60403938                | C/T  | NA                 | NA                            | NA                 |
| <i>Desi_wild_60409711</i> | NA                                  | <i>Ca_desi_denovo</i> | 60409711                | A/G  | NA                 | NA                            | NA                 |
| <i>Desi_wild_60409735</i> | NA                                  | <i>Ca_desi_denovo</i> | 60409735                | A/G  | NA                 | NA                            | NA                 |
| <i>Desi_wild_60412522</i> | NA                                  | <i>Ca_desi_denovo</i> | 60412522                | A/C  | NA                 | NA                            | NA                 |
| <i>Desi_wild_60412571</i> | NA                                  | <i>Ca_desi_denovo</i> | 60412571                | G/T  | NA                 | NA                            | NA                 |
| <i>Desi_wild_60414356</i> | NA                                  | <i>Ca_desi_denovo</i> | 60414356                | A/C  | NA                 | NA                            | NA                 |
| <i>Desi_wild_60416083</i> | NA                                  | <i>Ca_desi_denovo</i> | 60416083                | A/G  | NA                 | NA                            | NA                 |
| <i>Desi_wild_60416099</i> | NA                                  | <i>Ca_desi_denovo</i> | 60416099                | C/G  | NA                 | NA                            | NA                 |
| <i>Desi_wild_60417910</i> | NA                                  | <i>Ca_desi_denovo</i> | 60417910                | C/G  | NA                 | NA                            | NA                 |
| <i>Desi_wild_60420226</i> | NA                                  | <i>Ca_desi_denovo</i> | 60420226                | C/G  | NA                 | NA                            | NA                 |
| <i>Desi_wild_60420247</i> | NA                                  | <i>Ca_desi_denovo</i> | 60420247                | C/G  | NA                 | NA                            | NA                 |
| <i>Desi_wild_60421088</i> | NA                                  | <i>Ca_desi_denovo</i> | 60421088                | C/G  | NA                 | NA                            | NA                 |
| <i>Desi_wild_60423761</i> | NA                                  | <i>Ca_desi_denovo</i> | 60423761                | A/G  | NA                 | NA                            | NA                 |
| <i>Desi_wild_60424117</i> | NA                                  | <i>Ca_desi_denovo</i> | 60424117                | A/G  | NA                 | NA                            | NA                 |
| <i>Desi_wild_60424669</i> | NA                                  | <i>Ca_desi_denovo</i> | 60424669                | A/G  | NA                 | NA                            | NA                 |
| <i>Desi_wild_60438078</i> | NA                                  | <i>Ca_desi_denovo</i> | 60438078                | C/G  | NA                 | NA                            | NA                 |
| <i>Desi_wild_60439381</i> | NA                                  | <i>Ca_desi_denovo</i> | 60439381                | C/G  | NA                 | NA                            | NA                 |
| <i>Desi_wild_60439405</i> | NA                                  | <i>Ca_desi_denovo</i> | 60439405                | C/T  | NA                 | NA                            | NA                 |
| <i>Desi_wild_60439417</i> | NA                                  | <i>Ca_desi_denovo</i> | 60439417                | C/G  | NA                 | NA                            | NA                 |
| <i>Desi_wild_60439420</i> | NA                                  | <i>Ca_desi_denovo</i> | 60439420                | C/G  | NA                 | NA                            | NA                 |
| <i>Desi_wild_60440955</i> | NA                                  | <i>Ca_desi_denovo</i> | 60440955                | C/G  | NA                 | NA                            | NA                 |
| <i>Desi_wild_60440973</i> | NA                                  | <i>Ca_desi_denovo</i> | 60440973                | C/T  | NA                 | NA                            | NA                 |
| <i>Desi_wild_60440979</i> | NA                                  | <i>Ca_desi_denovo</i> | 60440979                | C/T  | NA                 | NA                            | NA                 |

| SNP IDs                   | NCBI dbSNP accession IDs (NCBI_SS#) | Chromosomes           | Physical positions (bp) | SNPs | Gene accession IDs | Sequence components of genome | Putative functions |
|---------------------------|-------------------------------------|-----------------------|-------------------------|------|--------------------|-------------------------------|--------------------|
| <i>Desi_wild_60442244</i> | NA                                  | <i>Ca_desi_denovo</i> | 60442244                | A/C  | NA                 | NA                            | NA                 |
| <i>Desi_wild_60443192</i> | NA                                  | <i>Ca_desi_denovo</i> | 60443192                | A/T  | NA                 | NA                            | NA                 |
| <i>Desi_wild_60443422</i> | NA                                  | <i>Ca_desi_denovo</i> | 60443422                | G/T  | NA                 | NA                            | NA                 |
| <i>Desi_wild_60443470</i> | NA                                  | <i>Ca_desi_denovo</i> | 60443470                | C/G  | NA                 | NA                            | NA                 |
| <i>Desi_wild_60443646</i> | NA                                  | <i>Ca_desi_denovo</i> | 60443646                | G/T  | NA                 | NA                            | NA                 |
| <i>Desi_wild_60447660</i> | NA                                  | <i>Ca_desi_denovo</i> | 60447660                | G/T  | NA                 | NA                            | NA                 |
| <i>Desi_wild_60447921</i> | NA                                  | <i>Ca_desi_denovo</i> | 60447921                | C/T  | NA                 | NA                            | NA                 |
| <i>Desi_wild_60449775</i> | NA                                  | <i>Ca_desi_denovo</i> | 60449775                | C/G  | NA                 | NA                            | NA                 |
| <i>Desi_wild_60451410</i> | NA                                  | <i>Ca_desi_denovo</i> | 60451410                | A/G  | NA                 | NA                            | NA                 |
| <i>Desi_wild_60455076</i> | NA                                  | <i>Ca_desi_denovo</i> | 60455076                | A/G  | NA                 | NA                            | NA                 |
| <i>Desi_wild_60455136</i> | NA                                  | <i>Ca_desi_denovo</i> | 60455136                | A/G  | NA                 | NA                            | NA                 |
| <i>Desi_wild_60459582</i> | NA                                  | <i>Ca_desi_denovo</i> | 60459582                | C/G  | NA                 | NA                            | NA                 |
| <i>Desi_wild_60462147</i> | NA                                  | <i>Ca_desi_denovo</i> | 60462147                | C/T  | NA                 | NA                            | NA                 |
| <i>Desi_wild_60462579</i> | NA                                  | <i>Ca_desi_denovo</i> | 60462579                | A/G  | NA                 | NA                            | NA                 |
| <i>Desi_wild_60463464</i> | NA                                  | <i>Ca_desi_denovo</i> | 60463464                | C/T  | NA                 | NA                            | NA                 |
| <i>Desi_wild_60463470</i> | NA                                  | <i>Ca_desi_denovo</i> | 60463470                | C/T  | NA                 | NA                            | NA                 |
| <i>Desi_wild_60463479</i> | NA                                  | <i>Ca_desi_denovo</i> | 60463479                | C/G  | NA                 | NA                            | NA                 |
| <i>Desi_wild_60463506</i> | NA                                  | <i>Ca_desi_denovo</i> | 60463506                | C/G  | NA                 | NA                            | NA                 |
| <i>Desi_wild_60465604</i> | NA                                  | <i>Ca_desi_denovo</i> | 60465604                | A/G  | NA                 | NA                            | NA                 |
| <i>Desi_wild_60465612</i> | NA                                  | <i>Ca_desi_denovo</i> | 60465612                | A/G  | NA                 | NA                            | NA                 |
| <i>Desi_wild_60475830</i> | NA                                  | <i>Ca_desi_denovo</i> | 60475830                | A/C  | NA                 | NA                            | NA                 |
| <i>Desi_wild_60476141</i> | NA                                  | <i>Ca_desi_denovo</i> | 60476141                | A/T  | NA                 | NA                            | NA                 |
| <i>Desi_wild_60479918</i> | NA                                  | <i>Ca_desi_denovo</i> | 60479918                | A/C  | NA                 | NA                            | NA                 |
| <i>Desi_wild_60482449</i> | NA                                  | <i>Ca_desi_denovo</i> | 60482449                | C/G  | NA                 | NA                            | NA                 |
| <i>Desi_wild_60482464</i> | NA                                  | <i>Ca_desi_denovo</i> | 60482464                | C/G  | NA                 | NA                            | NA                 |
| <i>Desi_wild_60484297</i> | NA                                  | <i>Ca_desi_denovo</i> | 60484297                | C/T  | NA                 | NA                            | NA                 |
| <i>Desi_wild_60484871</i> | NA                                  | <i>Ca_desi_denovo</i> | 60484871                | G/T  | NA                 | NA                            | NA                 |
| <i>Desi_wild_60485869</i> | NA                                  | <i>Ca_desi_denovo</i> | 60485869                | C/T  | NA                 | NA                            | NA                 |
| <i>Desi_wild_60486050</i> | NA                                  | <i>Ca_desi_denovo</i> | 60486050                | C/T  | NA                 | NA                            | NA                 |
| <i>Desi_wild_60486515</i> | NA                                  | <i>Ca_desi_denovo</i> | 60486515                | A/G  | NA                 | NA                            | NA                 |
| <i>Desi_wild_60486550</i> | NA                                  | <i>Ca_desi_denovo</i> | 60486550                | C/G  | NA                 | NA                            | NA                 |
| <i>Desi_wild_60486563</i> | NA                                  | <i>Ca_desi_denovo</i> | 60486563                | A/G  | NA                 | NA                            | NA                 |
| <i>Desi_wild_60486566</i> | NA                                  | <i>Ca_desi_denovo</i> | 60486566                | C/T  | NA                 | NA                            | NA                 |
| <i>Desi_wild_60488094</i> | NA                                  | <i>Ca_desi_denovo</i> | 60488094                | C/T  | NA                 | NA                            | NA                 |
| <i>Desi_wild_60490057</i> | NA                                  | <i>Ca_desi_denovo</i> | 60490057                | A/G  | NA                 | NA                            | NA                 |
| <i>Desi_wild_60494413</i> | NA                                  | <i>Ca_desi_denovo</i> | 60494413                | A/C  | NA                 | NA                            | NA                 |
| <i>Desi_wild_60494415</i> | NA                                  | <i>Ca_desi_denovo</i> | 60494415                | G/T  | NA                 | NA                            | NA                 |
| <i>Desi_wild_60494424</i> | NA                                  | <i>Ca_desi_denovo</i> | 60494424                | C/T  | NA                 | NA                            | NA                 |
| <i>Desi_wild_60495285</i> | NA                                  | <i>Ca_desi_denovo</i> | 60495285                | C/T  | NA                 | NA                            | NA                 |
| <i>Desi_wild_60496032</i> | NA                                  | <i>Ca_desi_denovo</i> | 60496032                | C/G  | NA                 | NA                            | NA                 |
| <i>Desi_wild_60496387</i> | NA                                  | <i>Ca_desi_denovo</i> | 60496387                | C/G  | NA                 | NA                            | NA                 |
| <i>Desi_wild_60496402</i> | NA                                  | <i>Ca_desi_denovo</i> | 60496402                | C/T  | NA                 | NA                            | NA                 |
| <i>Desi_wild_60496420</i> | NA                                  | <i>Ca_desi_denovo</i> | 60496420                | A/G  | NA                 | NA                            | NA                 |
| <i>Desi_wild_60496450</i> | NA                                  | <i>Ca_desi_denovo</i> | 60496450                | A/G  | NA                 | NA                            | NA                 |

| SNP IDs                   | NCBI dbSNP accession IDs (NCBI_SS#) | Chromosomes           | Physical positions (bp) | SNPs | Gene accession IDs | Sequence components of genome | Putative functions |
|---------------------------|-------------------------------------|-----------------------|-------------------------|------|--------------------|-------------------------------|--------------------|
| <i>Desi_wild_60496698</i> | NA                                  | <i>Ca_desi_denovo</i> | 60496698                | C/T  | NA                 | NA                            | NA                 |
| <i>Desi_wild_60496710</i> | NA                                  | <i>Ca_desi_denovo</i> | 60496710                | G/T  | NA                 | NA                            | NA                 |
| <i>Desi_wild_60496722</i> | NA                                  | <i>Ca_desi_denovo</i> | 60496722                | C/T  | NA                 | NA                            | NA                 |
| <i>Desi_wild_60498717</i> | NA                                  | <i>Ca_desi_denovo</i> | 60498717                | C/T  | NA                 | NA                            | NA                 |
| <i>Desi_wild_60498727</i> | NA                                  | <i>Ca_desi_denovo</i> | 60498727                | C/G  | NA                 | NA                            | NA                 |
| <i>Desi_wild_60501294</i> | NA                                  | <i>Ca_desi_denovo</i> | 60501294                | A/G  | NA                 | NA                            | NA                 |
| <i>Desi_wild_60501302</i> | NA                                  | <i>Ca_desi_denovo</i> | 60501302                | C/G  | NA                 | NA                            | NA                 |
| <i>Desi_wild_60501303</i> | NA                                  | <i>Ca_desi_denovo</i> | 60501303                | C/G  | NA                 | NA                            | NA                 |
| <i>Desi_wild_60501322</i> | NA                                  | <i>Ca_desi_denovo</i> | 60501322                | C/G  | NA                 | NA                            | NA                 |
| <i>Desi_wild_60503008</i> | NA                                  | <i>Ca_desi_denovo</i> | 60503008                | C/T  | NA                 | NA                            | NA                 |
| <i>Desi_wild_60504270</i> | NA                                  | <i>Ca_desi_denovo</i> | 60504270                | A/G  | NA                 | NA                            | NA                 |
| <i>Desi_wild_60504274</i> | NA                                  | <i>Ca_desi_denovo</i> | 60504274                | A/G  | NA                 | NA                            | NA                 |
| <i>Desi_wild_60504279</i> | NA                                  | <i>Ca_desi_denovo</i> | 60504279                | C/T  | NA                 | NA                            | NA                 |
| <i>Desi_wild_60505108</i> | NA                                  | <i>Ca_desi_denovo</i> | 60505108                | C/G  | NA                 | NA                            | NA                 |
| <i>Desi_wild_60505572</i> | NA                                  | <i>Ca_desi_denovo</i> | 60505572                | C/G  | NA                 | NA                            | NA                 |
| <i>Desi_wild_60505576</i> | NA                                  | <i>Ca_desi_denovo</i> | 60505576                | A/G  | NA                 | NA                            | NA                 |
| <i>Desi_wild_60505578</i> | NA                                  | <i>Ca_desi_denovo</i> | 60505578                | C/G  | NA                 | NA                            | NA                 |
| <i>Desi_wild_60505594</i> | NA                                  | <i>Ca_desi_denovo</i> | 60505594                | A/G  | NA                 | NA                            | NA                 |
| <i>Desi_wild_60505861</i> | NA                                  | <i>Ca_desi_denovo</i> | 60505861                | A/G  | NA                 | NA                            | NA                 |
| <i>Desi_wild_60506133</i> | NA                                  | <i>Ca_desi_denovo</i> | 60506133                | C/T  | NA                 | NA                            | NA                 |
| <i>Desi_wild_60506769</i> | NA                                  | <i>Ca_desi_denovo</i> | 60506769                | C/T  | NA                 | NA                            | NA                 |
| <i>Desi_wild_60507901</i> | NA                                  | <i>Ca_desi_denovo</i> | 60507901                | C/T  | NA                 | NA                            | NA                 |
| <i>Desi_wild_60511480</i> | NA                                  | <i>Ca_desi_denovo</i> | 60511480                | A/G  | NA                 | NA                            | NA                 |
| <i>Desi_wild_60512841</i> | NA                                  | <i>Ca_desi_denovo</i> | 60512841                | A/G  | NA                 | NA                            | NA                 |
| <i>Desi_wild_60513153</i> | NA                                  | <i>Ca_desi_denovo</i> | 60513153                | C/T  | NA                 | NA                            | NA                 |
| <i>Desi_wild_60514878</i> | NA                                  | <i>Ca_desi_denovo</i> | 60514878                | C/T  | NA                 | NA                            | NA                 |
| <i>Desi_wild_60516845</i> | NA                                  | <i>Ca_desi_denovo</i> | 60516845                | A/T  | NA                 | NA                            | NA                 |
| <i>Desi_wild_60516869</i> | NA                                  | <i>Ca_desi_denovo</i> | 60516869                | C/T  | NA                 | NA                            | NA                 |
| <i>Desi_wild_60517873</i> | NA                                  | <i>Ca_desi_denovo</i> | 60517873                | C/T  | NA                 | NA                            | NA                 |
| <i>Desi_wild_60517892</i> | NA                                  | <i>Ca_desi_denovo</i> | 60517892                | A/G  | NA                 | NA                            | NA                 |
| <i>Desi_wild_60517894</i> | NA                                  | <i>Ca_desi_denovo</i> | 60517894                | C/T  | NA                 | NA                            | NA                 |
| <i>Desi_wild_60522523</i> | NA                                  | <i>Ca_desi_denovo</i> | 60522523                | C/T  | NA                 | NA                            | NA                 |
| <i>Desi_wild_60522533</i> | NA                                  | <i>Ca_desi_denovo</i> | 60522533                | C/T  | NA                 | NA                            | NA                 |
| <i>Desi_wild_60524656</i> | NA                                  | <i>Ca_desi_denovo</i> | 60524656                | C/G  | NA                 | NA                            | NA                 |
| <i>Desi_wild_60524692</i> | NA                                  | <i>Ca_desi_denovo</i> | 60524692                | C/T  | NA                 | NA                            | NA                 |
| <i>Desi_wild_60525941</i> | NA                                  | <i>Ca_desi_denovo</i> | 60525941                | A/G  | NA                 | NA                            | NA                 |
| <i>Desi_wild_60527070</i> | NA                                  | <i>Ca_desi_denovo</i> | 60527070                | A/G  | NA                 | NA                            | NA                 |
| <i>Desi_wild_60527088</i> | NA                                  | <i>Ca_desi_denovo</i> | 60527088                | C/T  | NA                 | NA                            | NA                 |
| <i>Desi_wild_60528951</i> | NA                                  | <i>Ca_desi_denovo</i> | 60528951                | A/G  | NA                 | NA                            | NA                 |
| <i>Desi_wild_60528961</i> | NA                                  | <i>Ca_desi_denovo</i> | 60528961                | A/G  | NA                 | NA                            | NA                 |
| <i>Desi_wild_60529024</i> | NA                                  | <i>Ca_desi_denovo</i> | 60529024                | C/G  | NA                 | NA                            | NA                 |
| <i>Desi_wild_60529035</i> | NA                                  | <i>Ca_desi_denovo</i> | 60529035                | C/T  | NA                 | NA                            | NA                 |
| <i>Desi_wild_60529063</i> | NA                                  | <i>Ca_desi_denovo</i> | 60529063                | A/G  | NA                 | NA                            | NA                 |
| <i>Desi_wild_60529072</i> | NA                                  | <i>Ca_desi_denovo</i> | 60529072                | G/T  | NA                 | NA                            | NA                 |

| SNP IDs                   | NCBI dbSNP accession IDs (NCBI_SS#) | Chromosomes           | Physical positions (bp) | SNPs | Gene accession IDs | Sequence components of genome | Putative functions |
|---------------------------|-------------------------------------|-----------------------|-------------------------|------|--------------------|-------------------------------|--------------------|
| <i>Desi_wild_60529290</i> | NA                                  | <i>Ca_desi_denovo</i> | 60529290                | C/G  | NA                 | NA                            | NA                 |
| <i>Desi_wild_60529332</i> | NA                                  | <i>Ca_desi_denovo</i> | 60529332                | C/T  | NA                 | NA                            | NA                 |
| <i>Desi_wild_60529338</i> | NA                                  | <i>Ca_desi_denovo</i> | 60529338                | C/T  | NA                 | NA                            | NA                 |
| <i>Desi_wild_60534367</i> | NA                                  | <i>Ca_desi_denovo</i> | 60534367                | C/T  | NA                 | NA                            | NA                 |
| <i>Desi_wild_60536826</i> | NA                                  | <i>Ca_desi_denovo</i> | 60536826                | A/G  | NA                 | NA                            | NA                 |
| <i>Desi_wild_60536829</i> | NA                                  | <i>Ca_desi_denovo</i> | 60536829                | C/G  | NA                 | NA                            | NA                 |
| <i>Desi_wild_60537228</i> | NA                                  | <i>Ca_desi_denovo</i> | 60537228                | C/T  | NA                 | NA                            | NA                 |
| <i>Desi_wild_60538518</i> | NA                                  | <i>Ca_desi_denovo</i> | 60538518                | C/T  | NA                 | NA                            | NA                 |
| <i>Desi_wild_60539266</i> | NA                                  | <i>Ca_desi_denovo</i> | 60539266                | A/G  | NA                 | NA                            | NA                 |
| <i>Desi_wild_60539296</i> | NA                                  | <i>Ca_desi_denovo</i> | 60539296                | A/G  | NA                 | NA                            | NA                 |
| <i>Desi_wild_60539308</i> | NA                                  | <i>Ca_desi_denovo</i> | 60539308                | C/G  | NA                 | NA                            | NA                 |
| <i>Desi_wild_60541135</i> | NA                                  | <i>Ca_desi_denovo</i> | 60541135                | A/G  | NA                 | NA                            | NA                 |
| <i>Desi_wild_60547331</i> | NA                                  | <i>Ca_desi_denovo</i> | 60547331                | A/G  | NA                 | NA                            | NA                 |
| <i>Desi_wild_60547711</i> | NA                                  | <i>Ca_desi_denovo</i> | 60547711                | A/G  | NA                 | NA                            | NA                 |
| <i>Desi_wild_60547750</i> | NA                                  | <i>Ca_desi_denovo</i> | 60547750                | A/G  | NA                 | NA                            | NA                 |
| <i>Desi_wild_60547983</i> | NA                                  | <i>Ca_desi_denovo</i> | 60547983                | G/T  | NA                 | NA                            | NA                 |
| <i>Desi_wild_60548734</i> | NA                                  | <i>Ca_desi_denovo</i> | 60548734                | A/G  | NA                 | NA                            | NA                 |
| <i>Desi_wild_60550973</i> | NA                                  | <i>Ca_desi_denovo</i> | 60550973                | G/T  | NA                 | NA                            | NA                 |
| <i>Desi_wild_60551801</i> | NA                                  | <i>Ca_desi_denovo</i> | 60551801                | C/G  | NA                 | NA                            | NA                 |
| <i>Desi_wild_60551824</i> | NA                                  | <i>Ca_desi_denovo</i> | 60551824                | C/G  | NA                 | NA                            | NA                 |
| <i>Desi_wild_60551827</i> | NA                                  | <i>Ca_desi_denovo</i> | 60551827                | A/G  | NA                 | NA                            | NA                 |
| <i>Desi_wild_60554684</i> | NA                                  | <i>Ca_desi_denovo</i> | 60554684                | C/T  | NA                 | NA                            | NA                 |
| <i>Desi_wild_60557004</i> | NA                                  | <i>Ca_desi_denovo</i> | 60557004                | C/T  | NA                 | NA                            | NA                 |
| <i>Desi_wild_60557200</i> | NA                                  | <i>Ca_desi_denovo</i> | 60557200                | C/T  | NA                 | NA                            | NA                 |
| <i>Desi_wild_60566951</i> | NA                                  | <i>Ca_desi_denovo</i> | 60566951                | A/G  | NA                 | NA                            | NA                 |
| <i>Desi_wild_60570042</i> | NA                                  | <i>Ca_desi_denovo</i> | 60570042                | C/T  | NA                 | NA                            | NA                 |
| <i>Desi_wild_60570090</i> | NA                                  | <i>Ca_desi_denovo</i> | 60570090                | C/T  | NA                 | NA                            | NA                 |
| <i>Desi_wild_60572852</i> | NA                                  | <i>Ca_desi_denovo</i> | 60572852                | A/G  | NA                 | NA                            | NA                 |
| <i>Desi_wild_60572864</i> | NA                                  | <i>Ca_desi_denovo</i> | 60572864                | G/T  | NA                 | NA                            | NA                 |
| <i>Desi_wild_60574609</i> | NA                                  | <i>Ca_desi_denovo</i> | 60574609                | C/T  | NA                 | NA                            | NA                 |
| <i>Desi_wild_60574612</i> | NA                                  | <i>Ca_desi_denovo</i> | 60574612                | C/G  | NA                 | NA                            | NA                 |
| <i>Desi_wild_60574614</i> | NA                                  | <i>Ca_desi_denovo</i> | 60574614                | C/T  | NA                 | NA                            | NA                 |
| <i>Desi_wild_60574620</i> | NA                                  | <i>Ca_desi_denovo</i> | 60574620                | A/C  | NA                 | NA                            | NA                 |
| <i>Desi_wild_60575815</i> | NA                                  | <i>Ca_desi_denovo</i> | 60575815                | A/G  | NA                 | NA                            | NA                 |
| <i>Desi_wild_60575818</i> | NA                                  | <i>Ca_desi_denovo</i> | 60575818                | C/G  | NA                 | NA                            | NA                 |
| <i>Desi_wild_60575821</i> | NA                                  | <i>Ca_desi_denovo</i> | 60575821                | A/G  | NA                 | NA                            | NA                 |
| <i>Desi_wild_60575831</i> | NA                                  | <i>Ca_desi_denovo</i> | 60575831                | A/T  | NA                 | NA                            | NA                 |
| <i>Desi_wild_60578108</i> | NA                                  | <i>Ca_desi_denovo</i> | 60578108                | A/T  | NA                 | NA                            | NA                 |
| <i>Desi_wild_60578788</i> | NA                                  | <i>Ca_desi_denovo</i> | 60578788                | C/T  | NA                 | NA                            | NA                 |
| <i>Desi_wild_60578789</i> | NA                                  | <i>Ca_desi_denovo</i> | 60578789                | A/G  | NA                 | NA                            | NA                 |
| <i>Desi_wild_60578791</i> | NA                                  | <i>Ca_desi_denovo</i> | 60578791                | C/G  | NA                 | NA                            | NA                 |
| <i>Desi_wild_60579892</i> | NA                                  | <i>Ca_desi_denovo</i> | 60579892                | A/G  | NA                 | NA                            | NA                 |
| <i>Desi_wild_60579895</i> | NA                                  | <i>Ca_desi_denovo</i> | 60579895                | C/G  | NA                 | NA                            | NA                 |
| <i>Desi_wild_60582227</i> | NA                                  | <i>Ca_desi_denovo</i> | 60582227                | A/G  | NA                 | NA                            | NA                 |

| SNP IDs                   | NCBI dbSNP accession IDs (NCBI_SS#) | Chromosomes           | Physical positions (bp) | SNPs | Gene accession IDs | Sequence components of genome | Putative functions |
|---------------------------|-------------------------------------|-----------------------|-------------------------|------|--------------------|-------------------------------|--------------------|
| <i>Desi_wild_60582237</i> | NA                                  | <i>Ca_desi_denovo</i> | 60582237                | C/G  | NA                 | NA                            | NA                 |
| <i>Desi_wild_60583784</i> | NA                                  | <i>Ca_desi_denovo</i> | 60583784                | A/C  | NA                 | NA                            | NA                 |
| <i>Desi_wild_60583826</i> | NA                                  | <i>Ca_desi_denovo</i> | 60583826                | C/G  | NA                 | NA                            | NA                 |
| <i>Desi_wild_60583835</i> | NA                                  | <i>Ca_desi_denovo</i> | 60583835                | A/G  | NA                 | NA                            | NA                 |
| <i>Desi_wild_60584002</i> | NA                                  | <i>Ca_desi_denovo</i> | 60584002                | C/T  | NA                 | NA                            | NA                 |
| <i>Desi_wild_60584004</i> | NA                                  | <i>Ca_desi_denovo</i> | 60584004                | A/T  | NA                 | NA                            | NA                 |
| <i>Desi_wild_60587682</i> | NA                                  | <i>Ca_desi_denovo</i> | 60587682                | C/T  | NA                 | NA                            | NA                 |
| <i>Desi_wild_60587830</i> | NA                                  | <i>Ca_desi_denovo</i> | 60587830                | A/C  | NA                 | NA                            | NA                 |
| <i>Desi_wild_60588912</i> | NA                                  | <i>Ca_desi_denovo</i> | 60588912                | A/C  | NA                 | NA                            | NA                 |
| <i>Desi_wild_60589386</i> | NA                                  | <i>Ca_desi_denovo</i> | 60589386                | C/T  | NA                 | NA                            | NA                 |
| <i>Desi_wild_60591237</i> | NA                                  | <i>Ca_desi_denovo</i> | 60591237                | A/G  | NA                 | NA                            | NA                 |
| <i>Desi_wild_60591249</i> | NA                                  | <i>Ca_desi_denovo</i> | 60591249                | C/G  | NA                 | NA                            | NA                 |
| <i>Desi_wild_60594238</i> | NA                                  | <i>Ca_desi_denovo</i> | 60594238                | C/T  | NA                 | NA                            | NA                 |
| <i>Desi_wild_60595825</i> | NA                                  | <i>Ca_desi_denovo</i> | 60595825                | A/G  | NA                 | NA                            | NA                 |
| <i>Desi_wild_60602901</i> | NA                                  | <i>Ca_desi_denovo</i> | 60602901                | A/G  | NA                 | NA                            | NA                 |
| <i>Desi_wild_60611241</i> | NA                                  | <i>Ca_desi_denovo</i> | 60611241                | C/G  | NA                 | NA                            | NA                 |
| <i>Desi_wild_60611244</i> | NA                                  | <i>Ca_desi_denovo</i> | 60611244                | C/G  | NA                 | NA                            | NA                 |
| <i>Desi_wild_60611443</i> | NA                                  | <i>Ca_desi_denovo</i> | 60611443                | C/G  | NA                 | NA                            | NA                 |
| <i>Desi_wild_60612186</i> | NA                                  | <i>Ca_desi_denovo</i> | 60612186                | C/G  | NA                 | NA                            | NA                 |
| <i>Desi_wild_60612451</i> | NA                                  | <i>Ca_desi_denovo</i> | 60612451                | A/G  | NA                 | NA                            | NA                 |
| <i>Desi_wild_60614386</i> | NA                                  | <i>Ca_desi_denovo</i> | 60614386                | A/G  | NA                 | NA                            | NA                 |
| <i>Desi_wild_60614683</i> | NA                                  | <i>Ca_desi_denovo</i> | 60614683                | C/G  | NA                 | NA                            | NA                 |
| <i>Desi_wild_60614725</i> | NA                                  | <i>Ca_desi_denovo</i> | 60614725                | A/C  | NA                 | NA                            | NA                 |
| <i>Desi_wild_60614743</i> | NA                                  | <i>Ca_desi_denovo</i> | 60614743                | C/G  | NA                 | NA                            | NA                 |
| <i>Desi_wild_60621081</i> | NA                                  | <i>Ca_desi_denovo</i> | 60621081                | C/T  | NA                 | NA                            | NA                 |
| <i>Desi_wild_60621084</i> | NA                                  | <i>Ca_desi_denovo</i> | 60621084                | C/T  | NA                 | NA                            | NA                 |
| <i>Desi_wild_60621096</i> | NA                                  | <i>Ca_desi_denovo</i> | 60621096                | C/G  | NA                 | NA                            | NA                 |
| <i>Desi_wild_60626569</i> | NA                                  | <i>Ca_desi_denovo</i> | 60626569                | C/G  | NA                 | NA                            | NA                 |
| <i>Desi_wild_60627485</i> | NA                                  | <i>Ca_desi_denovo</i> | 60627485                | A/C  | NA                 | NA                            | NA                 |
| <i>Desi_wild_60627486</i> | NA                                  | <i>Ca_desi_denovo</i> | 60627486                | A/G  | NA                 | NA                            | NA                 |
| <i>Desi_wild_60627488</i> | NA                                  | <i>Ca_desi_denovo</i> | 60627488                | C/T  | NA                 | NA                            | NA                 |
| <i>Desi_wild_60627489</i> | NA                                  | <i>Ca_desi_denovo</i> | 60627489                | A/C  | NA                 | NA                            | NA                 |
| <i>Desi_wild_60629383</i> | NA                                  | <i>Ca_desi_denovo</i> | 60629383                | A/G  | NA                 | NA                            | NA                 |
| <i>Desi_wild_60629471</i> | NA                                  | <i>Ca_desi_denovo</i> | 60629471                | G/T  | NA                 | NA                            | NA                 |
| <i>Desi_wild_60629691</i> | NA                                  | <i>Ca_desi_denovo</i> | 60629691                | C/G  | NA                 | NA                            | NA                 |
| <i>Desi_wild_60629709</i> | NA                                  | <i>Ca_desi_denovo</i> | 60629709                | C/G  | NA                 | NA                            | NA                 |
| <i>Desi_wild_60631417</i> | NA                                  | <i>Ca_desi_denovo</i> | 60631417                | A/G  | NA                 | NA                            | NA                 |
| <i>Desi_wild_60631480</i> | NA                                  | <i>Ca_desi_denovo</i> | 60631480                | C/G  | NA                 | NA                            | NA                 |
| <i>Desi_wild_60631726</i> | NA                                  | <i>Ca_desi_denovo</i> | 60631726                | C/T  | NA                 | NA                            | NA                 |
| <i>Desi_wild_60632925</i> | NA                                  | <i>Ca_desi_denovo</i> | 60632925                | A/T  | NA                 | NA                            | NA                 |
| <i>Desi_wild_60632926</i> | NA                                  | <i>Ca_desi_denovo</i> | 60632926                | G/T  | NA                 | NA                            | NA                 |
| <i>Desi_wild_60637926</i> | NA                                  | <i>Ca_desi_denovo</i> | 60637926                | G/T  | NA                 | NA                            | NA                 |
| <i>Desi_wild_60641361</i> | NA                                  | <i>Ca_desi_denovo</i> | 60641361                | A/G  | NA                 | NA                            | NA                 |
| <i>Desi_wild_60641376</i> | NA                                  | <i>Ca_desi_denovo</i> | 60641376                | C/T  | NA                 | NA                            | NA                 |

| SNP IDs                   | NCBI dbSNP accession IDs (NCBI_SS#) | Chromosomes           | Physical positions (bp) | SNPs | Gene accession IDs | Sequence components of genome | Putative functions |
|---------------------------|-------------------------------------|-----------------------|-------------------------|------|--------------------|-------------------------------|--------------------|
| <i>Desi_wild_60641382</i> | NA                                  | <i>Ca_desi_denovo</i> | 60641382                | C/T  | NA                 | NA                            | NA                 |
| <i>Desi_wild_60641421</i> | NA                                  | <i>Ca_desi_denovo</i> | 60641421                | A/G  | NA                 | NA                            | NA                 |
| <i>Desi_wild_60646317</i> | NA                                  | <i>Ca_desi_denovo</i> | 60646317                | C/G  | NA                 | NA                            | NA                 |
| <i>Desi_wild_60647779</i> | NA                                  | <i>Ca_desi_denovo</i> | 60647779                | A/G  | NA                 | NA                            | NA                 |
| <i>Desi_wild_60647788</i> | NA                                  | <i>Ca_desi_denovo</i> | 60647788                | C/T  | NA                 | NA                            | NA                 |
| <i>Desi_wild_60650008</i> | NA                                  | <i>Ca_desi_denovo</i> | 60650008                | C/G  | NA                 | NA                            | NA                 |
| <i>Desi_wild_60651408</i> | NA                                  | <i>Ca_desi_denovo</i> | 60651408                | C/G  | NA                 | NA                            | NA                 |
| <i>Desi_wild_60651418</i> | NA                                  | <i>Ca_desi_denovo</i> | 60651418                | C/T  | NA                 | NA                            | NA                 |
| <i>Desi_wild_60651432</i> | NA                                  | <i>Ca_desi_denovo</i> | 60651432                | C/G  | NA                 | NA                            | NA                 |
| <i>Desi_wild_60652273</i> | NA                                  | <i>Ca_desi_denovo</i> | 60652273                | C/T  | NA                 | NA                            | NA                 |
| <i>Desi_wild_60652289</i> | NA                                  | <i>Ca_desi_denovo</i> | 60652289                | C/T  | NA                 | NA                            | NA                 |
| <i>Desi_wild_60662718</i> | NA                                  | <i>Ca_desi_denovo</i> | 60662718                | A/G  | NA                 | NA                            | NA                 |
| <i>Desi_wild_60663046</i> | NA                                  | <i>Ca_desi_denovo</i> | 60663046                | C/T  | NA                 | NA                            | NA                 |
| <i>Desi_wild_60668237</i> | NA                                  | <i>Ca_desi_denovo</i> | 60668237                | C/T  | NA                 | NA                            | NA                 |
| <i>Desi_wild_60668899</i> | NA                                  | <i>Ca_desi_denovo</i> | 60668899                | C/G  | NA                 | NA                            | NA                 |
| <i>Desi_wild_60672231</i> | NA                                  | <i>Ca_desi_denovo</i> | 60672231                | C/T  | NA                 | NA                            | NA                 |
| <i>Desi_wild_60672264</i> | NA                                  | <i>Ca_desi_denovo</i> | 60672264                | C/T  | NA                 | NA                            | NA                 |
| <i>Desi_wild_60676720</i> | NA                                  | <i>Ca_desi_denovo</i> | 60676720                | C/T  | NA                 | NA                            | NA                 |
| <i>Desi_wild_60676762</i> | NA                                  | <i>Ca_desi_denovo</i> | 60676762                | A/G  | NA                 | NA                            | NA                 |
| <i>Desi_wild_60679763</i> | NA                                  | <i>Ca_desi_denovo</i> | 60679763                | A/C  | NA                 | NA                            | NA                 |
| <i>Desi_wild_60679774</i> | NA                                  | <i>Ca_desi_denovo</i> | 60679774                | C/G  | NA                 | NA                            | NA                 |
| <i>Desi_wild_60679776</i> | NA                                  | <i>Ca_desi_denovo</i> | 60679776                | A/C  | NA                 | NA                            | NA                 |
| <i>Desi_wild_60682387</i> | NA                                  | <i>Ca_desi_denovo</i> | 60682387                | C/T  | NA                 | NA                            | NA                 |
| <i>Desi_wild_60682393</i> | NA                                  | <i>Ca_desi_denovo</i> | 60682393                | C/G  | NA                 | NA                            | NA                 |
| <i>Desi_wild_60682417</i> | NA                                  | <i>Ca_desi_denovo</i> | 60682417                | A/G  | NA                 | NA                            | NA                 |
| <i>Desi_wild_60683398</i> | NA                                  | <i>Ca_desi_denovo</i> | 60683398                | A/G  | NA                 | NA                            | NA                 |
| <i>Desi_wild_60683410</i> | NA                                  | <i>Ca_desi_denovo</i> | 60683410                | A/G  | NA                 | NA                            | NA                 |
| <i>Desi_wild_60686484</i> | NA                                  | <i>Ca_desi_denovo</i> | 60686484                | C/G  | NA                 | NA                            | NA                 |
| <i>Desi_wild_60686520</i> | NA                                  | <i>Ca_desi_denovo</i> | 60686520                | A/C  | NA                 | NA                            | NA                 |
| <i>Desi_wild_60694929</i> | NA                                  | <i>Ca_desi_denovo</i> | 60694929                | C/T  | NA                 | NA                            | NA                 |
| <i>Desi_wild_60694947</i> | NA                                  | <i>Ca_desi_denovo</i> | 60694947                | C/G  | NA                 | NA                            | NA                 |
| <i>Desi_wild_60694977</i> | NA                                  | <i>Ca_desi_denovo</i> | 60694977                | G/T  | NA                 | NA                            | NA                 |
| <i>Desi_wild_60695530</i> | NA                                  | <i>Ca_desi_denovo</i> | 60695530                | C/T  | NA                 | NA                            | NA                 |
| <i>Desi_wild_60696721</i> | NA                                  | <i>Ca_desi_denovo</i> | 60696721                | A/G  | NA                 | NA                            | NA                 |
| <i>Desi_wild_60696726</i> | NA                                  | <i>Ca_desi_denovo</i> | 60696726                | A/G  | NA                 | NA                            | NA                 |
| <i>Desi_wild_60696975</i> | NA                                  | <i>Ca_desi_denovo</i> | 60696975                | C/T  | NA                 | NA                            | NA                 |
| <i>Desi_wild_60697805</i> | NA                                  | <i>Ca_desi_denovo</i> | 60697805                | A/T  | NA                 | NA                            | NA                 |
| <i>Desi_wild_60697816</i> | NA                                  | <i>Ca_desi_denovo</i> | 60697816                | A/C  | NA                 | NA                            | NA                 |
| <i>Desi_wild_60697819</i> | NA                                  | <i>Ca_desi_denovo</i> | 60697819                | A/G  | NA                 | NA                            | NA                 |
| <i>Desi_wild_60701341</i> | NA                                  | <i>Ca_desi_denovo</i> | 60701341                | C/T  | NA                 | NA                            | NA                 |
| <i>Desi_wild_60701356</i> | NA                                  | <i>Ca_desi_denovo</i> | 60701356                | A/G  | NA                 | NA                            | NA                 |
| <i>Desi_wild_60703765</i> | NA                                  | <i>Ca_desi_denovo</i> | 60703765                | C/T  | NA                 | NA                            | NA                 |
| <i>Desi_wild_60703786</i> | NA                                  | <i>Ca_desi_denovo</i> | 60703786                | A/G  | NA                 | NA                            | NA                 |
| <i>Desi_wild_60706732</i> | NA                                  | <i>Ca_desi_denovo</i> | 60706732                | C/G  | NA                 | NA                            | NA                 |

| SNP IDs                   | NCBI dbSNP accession IDs (NCBI_SS#) | Chromosomes           | Physical positions (bp) | SNPs | Gene accession IDs | Sequence components of genome | Putative functions |
|---------------------------|-------------------------------------|-----------------------|-------------------------|------|--------------------|-------------------------------|--------------------|
| <i>Desi_wild_60706762</i> | NA                                  | <i>Ca_desi_denovo</i> | 60706762                | A/C  | NA                 | NA                            | NA                 |
| <i>Desi_wild_60710265</i> | NA                                  | <i>Ca_desi_denovo</i> | 60710265                | A/G  | NA                 | NA                            | NA                 |
| <i>Desi_wild_60710661</i> | NA                                  | <i>Ca_desi_denovo</i> | 60710661                | A/G  | NA                 | NA                            | NA                 |
| <i>Desi_wild_60710668</i> | NA                                  | <i>Ca_desi_denovo</i> | 60710668                | C/G  | NA                 | NA                            | NA                 |
| <i>Desi_wild_60711244</i> | NA                                  | <i>Ca_desi_denovo</i> | 60711244                | A/G  | NA                 | NA                            | NA                 |
| <i>Desi_wild_60711247</i> | NA                                  | <i>Ca_desi_denovo</i> | 60711247                | C/G  | NA                 | NA                            | NA                 |
| <i>Desi_wild_60711250</i> | NA                                  | <i>Ca_desi_denovo</i> | 60711250                | A/G  | NA                 | NA                            | NA                 |
| <i>Desi_wild_60711309</i> | NA                                  | <i>Ca_desi_denovo</i> | 60711309                | A/G  | NA                 | NA                            | NA                 |
| <i>Desi_wild_60711939</i> | NA                                  | <i>Ca_desi_denovo</i> | 60711939                | C/G  | NA                 | NA                            | NA                 |
| <i>Desi_wild_60711954</i> | NA                                  | <i>Ca_desi_denovo</i> | 60711954                | C/G  | NA                 | NA                            | NA                 |
| <i>Desi_wild_60711957</i> | NA                                  | <i>Ca_desi_denovo</i> | 60711957                | C/T  | NA                 | NA                            | NA                 |
| <i>Desi_wild_60711963</i> | NA                                  | <i>Ca_desi_denovo</i> | 60711963                | C/G  | NA                 | NA                            | NA                 |
| <i>Desi_wild_60712365</i> | NA                                  | <i>Ca_desi_denovo</i> | 60712365                | G/T  | NA                 | NA                            | NA                 |
| <i>Desi_wild_60713340</i> | NA                                  | <i>Ca_desi_denovo</i> | 60713340                | C/T  | NA                 | NA                            | NA                 |
| <i>Desi_wild_60713349</i> | NA                                  | <i>Ca_desi_denovo</i> | 60713349                | A/G  | NA                 | NA                            | NA                 |
| <i>Desi_wild_60714082</i> | NA                                  | <i>Ca_desi_denovo</i> | 60714082                | C/T  | NA                 | NA                            | NA                 |
| <i>Desi_wild_60716161</i> | NA                                  | <i>Ca_desi_denovo</i> | 60716161                | G/T  | NA                 | NA                            | NA                 |
| <i>Desi_wild_60716206</i> | NA                                  | <i>Ca_desi_denovo</i> | 60716206                | A/C  | NA                 | NA                            | NA                 |
| <i>Desi_wild_60717794</i> | NA                                  | <i>Ca_desi_denovo</i> | 60717794                | A/T  | NA                 | NA                            | NA                 |
| <i>Desi_wild_60717850</i> | NA                                  | <i>Ca_desi_denovo</i> | 60717850                | C/G  | NA                 | NA                            | NA                 |
| <i>Desi_wild_60717851</i> | NA                                  | <i>Ca_desi_denovo</i> | 60717851                | A/T  | NA                 | NA                            | NA                 |
| <i>Desi_wild_60723292</i> | NA                                  | <i>Ca_desi_denovo</i> | 60723292                | C/G  | NA                 | NA                            | NA                 |
| <i>Desi_wild_60723310</i> | NA                                  | <i>Ca_desi_denovo</i> | 60723310                | C/G  | NA                 | NA                            | NA                 |
| <i>Desi_wild_60726189</i> | NA                                  | <i>Ca_desi_denovo</i> | 60726189                | C/G  | NA                 | NA                            | NA                 |
| <i>Desi_wild_60727355</i> | NA                                  | <i>Ca_desi_denovo</i> | 60727355                | C/G  | NA                 | NA                            | NA                 |
| <i>Desi_wild_60727364</i> | NA                                  | <i>Ca_desi_denovo</i> | 60727364                | A/C  | NA                 | NA                            | NA                 |
| <i>Desi_wild_60728132</i> | NA                                  | <i>Ca_desi_denovo</i> | 60728132                | A/G  | NA                 | NA                            | NA                 |
| <i>Desi_wild_60732909</i> | NA                                  | <i>Ca_desi_denovo</i> | 60732909                | C/G  | NA                 | NA                            | NA                 |
| <i>Desi_wild_60735664</i> | NA                                  | <i>Ca_desi_denovo</i> | 60735664                | C/T  | NA                 | NA                            | NA                 |
| <i>Desi_wild_60739111</i> | NA                                  | <i>Ca_desi_denovo</i> | 60739111                | A/T  | NA                 | NA                            | NA                 |
| <i>Desi_wild_60739135</i> | NA                                  | <i>Ca_desi_denovo</i> | 60739135                | A/G  | NA                 | NA                            | NA                 |
| <i>Desi_wild_60739138</i> | NA                                  | <i>Ca_desi_denovo</i> | 60739138                | G/T  | NA                 | NA                            | NA                 |
| <i>Desi_wild_60739281</i> | NA                                  | <i>Ca_desi_denovo</i> | 60739281                | C/G  | NA                 | NA                            | NA                 |
| <i>Desi_wild_60739344</i> | NA                                  | <i>Ca_desi_denovo</i> | 60739344                | G/T  | NA                 | NA                            | NA                 |
| <i>Desi_wild_60739347</i> | NA                                  | <i>Ca_desi_denovo</i> | 60739347                | A/G  | NA                 | NA                            | NA                 |
| <i>Desi_wild_60742420</i> | NA                                  | <i>Ca_desi_denovo</i> | 60742420                | A/G  | NA                 | NA                            | NA                 |
| <i>Desi_wild_60743377</i> | NA                                  | <i>Ca_desi_denovo</i> | 60743377                | C/T  | NA                 | NA                            | NA                 |
| <i>Desi_wild_60745054</i> | NA                                  | <i>Ca_desi_denovo</i> | 60745054                | C/G  | NA                 | NA                            | NA                 |
| <i>Desi_wild_60745057</i> | NA                                  | <i>Ca_desi_denovo</i> | 60745057                | A/G  | NA                 | NA                            | NA                 |
| <i>Desi_wild_60745066</i> | NA                                  | <i>Ca_desi_denovo</i> | 60745066                | C/T  | NA                 | NA                            | NA                 |
| <i>Desi_wild_60745075</i> | NA                                  | <i>Ca_desi_denovo</i> | 60745075                | A/G  | NA                 | NA                            | NA                 |
| <i>Desi_wild_60749409</i> | NA                                  | <i>Ca_desi_denovo</i> | 60749409                | C/T  | NA                 | NA                            | NA                 |
| <i>Desi_wild_60750079</i> | NA                                  | <i>Ca_desi_denovo</i> | 60750079                | C/T  | NA                 | NA                            | NA                 |
| <i>Desi_wild_60750091</i> | NA                                  | <i>Ca_desi_denovo</i> | 60750091                | C/G  | NA                 | NA                            | NA                 |

| SNP IDs                   | NCBI dbSNP accession IDs (NCBI_SS#) | Chromosomes           | Physical positions (bp) | SNPs | Gene accession IDs | Sequence components of genome | Putative functions |
|---------------------------|-------------------------------------|-----------------------|-------------------------|------|--------------------|-------------------------------|--------------------|
| <i>Desi_wild_60752209</i> | NA                                  | <i>Ca_desi_denovo</i> | 60752209                | C/T  | NA                 | NA                            | NA                 |
| <i>Desi_wild_60752239</i> | NA                                  | <i>Ca_desi_denovo</i> | 60752239                | C/T  | NA                 | NA                            | NA                 |
| <i>Desi_wild_60752386</i> | NA                                  | <i>Ca_desi_denovo</i> | 60752386                | A/C  | NA                 | NA                            | NA                 |
| <i>Desi_wild_60752387</i> | NA                                  | <i>Ca_desi_denovo</i> | 60752387                | A/G  | NA                 | NA                            | NA                 |
| <i>Desi_wild_60752388</i> | NA                                  | <i>Ca_desi_denovo</i> | 60752388                | A/G  | NA                 | NA                            | NA                 |
| <i>Desi_wild_60753357</i> | NA                                  | <i>Ca_desi_denovo</i> | 60753357                | C/G  | NA                 | NA                            | NA                 |
| <i>Desi_wild_60753556</i> | NA                                  | <i>Ca_desi_denovo</i> | 60753556                | C/G  | NA                 | NA                            | NA                 |
| <i>Desi_wild_60753559</i> | NA                                  | <i>Ca_desi_denovo</i> | 60753559                | C/T  | NA                 | NA                            | NA                 |
| <i>Desi_wild_60753609</i> | NA                                  | <i>Ca_desi_denovo</i> | 60753609                | C/T  | NA                 | NA                            | NA                 |
| <i>Desi_wild_60753657</i> | NA                                  | <i>Ca_desi_denovo</i> | 60753657                | A/G  | NA                 | NA                            | NA                 |
| <i>Desi_wild_60753669</i> | NA                                  | <i>Ca_desi_denovo</i> | 60753669                | C/G  | NA                 | NA                            | NA                 |
| <i>Desi_wild_60753678</i> | NA                                  | <i>Ca_desi_denovo</i> | 60753678                | C/G  | NA                 | NA                            | NA                 |
| <i>Desi_wild_60755022</i> | NA                                  | <i>Ca_desi_denovo</i> | 60755022                | C/T  | NA                 | NA                            | NA                 |
| <i>Desi_wild_60755653</i> | NA                                  | <i>Ca_desi_denovo</i> | 60755653                | C/T  | NA                 | NA                            | NA                 |
| <i>Desi_wild_60755682</i> | NA                                  | <i>Ca_desi_denovo</i> | 60755682                | C/T  | NA                 | NA                            | NA                 |
| <i>Desi_wild_60756175</i> | NA                                  | <i>Ca_desi_denovo</i> | 60756175                | A/G  | NA                 | NA                            | NA                 |
| <i>Desi_wild_60762309</i> | NA                                  | <i>Ca_desi_denovo</i> | 60762309                | C/G  | NA                 | NA                            | NA                 |
| <i>Desi_wild_60762312</i> | NA                                  | <i>Ca_desi_denovo</i> | 60762312                | C/T  | NA                 | NA                            | NA                 |
| <i>Desi_wild_60762337</i> | NA                                  | <i>Ca_desi_denovo</i> | 60762337                | C/T  | NA                 | NA                            | NA                 |
| <i>Desi_wild_60762930</i> | NA                                  | <i>Ca_desi_denovo</i> | 60762930                | A/C  | NA                 | NA                            | NA                 |
| <i>Desi_wild_60767029</i> | NA                                  | <i>Ca_desi_denovo</i> | 60767029                | C/G  | NA                 | NA                            | NA                 |
| <i>Desi_wild_60777060</i> | NA                                  | <i>Ca_desi_denovo</i> | 60777060                | C/G  | NA                 | NA                            | NA                 |
| <i>Desi_wild_60777069</i> | NA                                  | <i>Ca_desi_denovo</i> | 60777069                | A/G  | NA                 | NA                            | NA                 |
| <i>Desi_wild_60778156</i> | NA                                  | <i>Ca_desi_denovo</i> | 60778156                | G/T  | NA                 | NA                            | NA                 |
| <i>Desi_wild_60778171</i> | NA                                  | <i>Ca_desi_denovo</i> | 60778171                | C/T  | NA                 | NA                            | NA                 |
| <i>Desi_wild_60778192</i> | NA                                  | <i>Ca_desi_denovo</i> | 60778192                | A/G  | NA                 | NA                            | NA                 |
| <i>Desi_wild_60778222</i> | NA                                  | <i>Ca_desi_denovo</i> | 60778222                | A/G  | NA                 | NA                            | NA                 |
| <i>Desi_wild_60779181</i> | NA                                  | <i>Ca_desi_denovo</i> | 60779181                | A/G  | NA                 | NA                            | NA                 |
| <i>Desi_wild_60779196</i> | NA                                  | <i>Ca_desi_denovo</i> | 60779196                | C/T  | NA                 | NA                            | NA                 |
| <i>Desi_wild_60779874</i> | NA                                  | <i>Ca_desi_denovo</i> | 60779874                | C/T  | NA                 | NA                            | NA                 |
| <i>Desi_wild_60780253</i> | NA                                  | <i>Ca_desi_denovo</i> | 60780253                | C/T  | NA                 | NA                            | NA                 |
| <i>Desi_wild_60781440</i> | NA                                  | <i>Ca_desi_denovo</i> | 60781440                | C/G  | NA                 | NA                            | NA                 |
| <i>Desi_wild_60783508</i> | NA                                  | <i>Ca_desi_denovo</i> | 60783508                | C/G  | NA                 | NA                            | NA                 |
| <i>Desi_wild_60783784</i> | NA                                  | <i>Ca_desi_denovo</i> | 60783784                | A/G  | NA                 | NA                            | NA                 |
| <i>Desi_wild_60783787</i> | NA                                  | <i>Ca_desi_denovo</i> | 60783787                | A/G  | NA                 | NA                            | NA                 |
| <i>Desi_wild_60784432</i> | NA                                  | <i>Ca_desi_denovo</i> | 60784432                | C/G  | NA                 | NA                            | NA                 |
| <i>Desi_wild_60785692</i> | NA                                  | <i>Ca_desi_denovo</i> | 60785692                | C/T  | NA                 | NA                            | NA                 |
| <i>Desi_wild_60785707</i> | NA                                  | <i>Ca_desi_denovo</i> | 60785707                | A/C  | NA                 | NA                            | NA                 |
| <i>Desi_wild_60788391</i> | NA                                  | <i>Ca_desi_denovo</i> | 60788391                | C/T  | NA                 | NA                            | NA                 |
| <i>Desi_wild_60788427</i> | NA                                  | <i>Ca_desi_denovo</i> | 60788427                | A/C  | NA                 | NA                            | NA                 |
| <i>Desi_wild_60789907</i> | NA                                  | <i>Ca_desi_denovo</i> | 60789907                | C/G  | NA                 | NA                            | NA                 |
| <i>Desi_wild_60789931</i> | NA                                  | <i>Ca_desi_denovo</i> | 60789931                | C/T  | NA                 | NA                            | NA                 |
| <i>Desi_wild_60790077</i> | NA                                  | <i>Ca_desi_denovo</i> | 60790077                | C/T  | NA                 | NA                            | NA                 |
| <i>Desi_wild_60790133</i> | NA                                  | <i>Ca_desi_denovo</i> | 60790133                | C/G  | NA                 | NA                            | NA                 |



| SNP IDs                   | NCBI dbSNP accession IDs (NCBI_SS#) | Chromosomes           | Physical positions (bp) | SNPs | Gene accession IDs | Sequence components of genome | Putative functions |
|---------------------------|-------------------------------------|-----------------------|-------------------------|------|--------------------|-------------------------------|--------------------|
| <i>Desi_wild_60793692</i> | NA                                  | <i>Ca_desi_denovo</i> | 60793692                | G/T  | NA                 | NA                            | NA                 |
| <i>Desi_wild_60794094</i> | NA                                  | <i>Ca_desi_denovo</i> | 60794094                | C/T  | NA                 | NA                            | NA                 |
| <i>Desi_wild_60794130</i> | NA                                  | <i>Ca_desi_denovo</i> | 60794130                | C/T  | NA                 | NA                            | NA                 |
| <i>Desi_wild_60805156</i> | NA                                  | <i>Ca_desi_denovo</i> | 60805156                | C/T  | NA                 | NA                            | NA                 |
| <i>Desi_wild_60805202</i> | NA                                  | <i>Ca_desi_denovo</i> | 60805202                | A/G  | NA                 | NA                            | NA                 |
| <i>Desi_wild_60805206</i> | NA                                  | <i>Ca_desi_denovo</i> | 60805206                | C/G  | NA                 | NA                            | NA                 |
| <i>Desi_wild_60805336</i> | NA                                  | <i>Ca_desi_denovo</i> | 60805336                | A/G  | NA                 | NA                            | NA                 |
| <i>Desi_wild_60806907</i> | NA                                  | <i>Ca_desi_denovo</i> | 60806907                | C/T  | NA                 | NA                            | NA                 |
| <i>Desi_wild_60808379</i> | NA                                  | <i>Ca_desi_denovo</i> | 60808379                | A/T  | NA                 | NA                            | NA                 |
| <i>Desi_wild_60812509</i> | NA                                  | <i>Ca_desi_denovo</i> | 60812509                | A/G  | NA                 | NA                            | NA                 |
| <i>Desi_wild_60815169</i> | NA                                  | <i>Ca_desi_denovo</i> | 60815169                | C/G  | NA                 | NA                            | NA                 |
| <i>Desi_wild_60815181</i> | NA                                  | <i>Ca_desi_denovo</i> | 60815181                | A/T  | NA                 | NA                            | NA                 |
| <i>Desi_wild_60815541</i> | NA                                  | <i>Ca_desi_denovo</i> | 60815541                | C/G  | NA                 | NA                            | NA                 |
| <i>Desi_wild_60815547</i> | NA                                  | <i>Ca_desi_denovo</i> | 60815547                | C/T  | NA                 | NA                            | NA                 |
| <i>Desi_wild_60819486</i> | NA                                  | <i>Ca_desi_denovo</i> | 60819486                | A/G  | NA                 | NA                            | NA                 |
| <i>Desi_wild_60821031</i> | NA                                  | <i>Ca_desi_denovo</i> | 60821031                | C/G  | NA                 | NA                            | NA                 |
| <i>Desi_wild_60821047</i> | NA                                  | <i>Ca_desi_denovo</i> | 60821047                | A/C  | NA                 | NA                            | NA                 |
| <i>Desi_wild_60821049</i> | NA                                  | <i>Ca_desi_denovo</i> | 60821049                | C/T  | NA                 | NA                            | NA                 |
| <i>Desi_wild_60821052</i> | NA                                  | <i>Ca_desi_denovo</i> | 60821052                | A/C  | NA                 | NA                            | NA                 |
| <i>Desi_wild_60821805</i> | NA                                  | <i>Ca_desi_denovo</i> | 60821805                | C/G  | NA                 | NA                            | NA                 |
| <i>Desi_wild_60822273</i> | NA                                  | <i>Ca_desi_denovo</i> | 60822273                | C/G  | NA                 | NA                            | NA                 |
| <i>Desi_wild_60825730</i> | NA                                  | <i>Ca_desi_denovo</i> | 60825730                | G/T  | NA                 | NA                            | NA                 |
| <i>Desi_wild_60826464</i> | NA                                  | <i>Ca_desi_denovo</i> | 60826464                | G/T  | NA                 | NA                            | NA                 |
| <i>Desi_wild_60831283</i> | NA                                  | <i>Ca_desi_denovo</i> | 60831283                | C/G  | NA                 | NA                            | NA                 |
| <i>Desi_wild_60831284</i> | NA                                  | <i>Ca_desi_denovo</i> | 60831284                | A/T  | NA                 | NA                            | NA                 |
| <i>Desi_wild_60831285</i> | NA                                  | <i>Ca_desi_denovo</i> | 60831285                | C/G  | NA                 | NA                            | NA                 |
| <i>Desi_wild_60831289</i> | NA                                  | <i>Ca_desi_denovo</i> | 60831289                | C/T  | NA                 | NA                            | NA                 |
| <i>Desi_wild_60834292</i> | NA                                  | <i>Ca_desi_denovo</i> | 60834292                | C/T  | NA                 | NA                            | NA                 |
| <i>Desi_wild_60836049</i> | NA                                  | <i>Ca_desi_denovo</i> | 60836049                | C/T  | NA                 | NA                            | NA                 |
| <i>Desi_wild_60838528</i> | NA                                  | <i>Ca_desi_denovo</i> | 60838528                | C/G  | NA                 | NA                            | NA                 |
| <i>Desi_wild_60838537</i> | NA                                  | <i>Ca_desi_denovo</i> | 60838537                | C/G  | NA                 | NA                            | NA                 |
| <i>Desi_wild_60839940</i> | NA                                  | <i>Ca_desi_denovo</i> | 60839940                | A/G  | NA                 | NA                            | NA                 |
| <i>Desi_wild_60839943</i> | NA                                  | <i>Ca_desi_denovo</i> | 60839943                | C/G  | NA                 | NA                            | NA                 |
| <i>Desi_wild_60839958</i> | NA                                  | <i>Ca_desi_denovo</i> | 60839958                | C/G  | NA                 | NA                            | NA                 |
| <i>Desi_wild_60841974</i> | NA                                  | <i>Ca_desi_denovo</i> | 60841974                | C/G  | NA                 | NA                            | NA                 |
| <i>Desi_wild_60841980</i> | NA                                  | <i>Ca_desi_denovo</i> | 60841980                | C/G  | NA                 | NA                            | NA                 |
| <i>Desi_wild_60848470</i> | NA                                  | <i>Ca_desi_denovo</i> | 60848470                | A/G  | NA                 | NA                            | NA                 |
| <i>Desi_wild_60848508</i> | NA                                  | <i>Ca_desi_denovo</i> | 60848508                | C/T  | NA                 | NA                            | NA                 |
| <i>Desi_wild_60848517</i> | NA                                  | <i>Ca_desi_denovo</i> | 60848517                | C/G  | NA                 | NA                            | NA                 |
| <i>Desi_wild_60848533</i> | NA                                  | <i>Ca_desi_denovo</i> | 60848533                | C/T  | NA                 | NA                            | NA                 |
| <i>Desi_wild_60849336</i> | NA                                  | <i>Ca_desi_denovo</i> | 60849336                | C/T  | NA                 | NA                            | NA                 |
| <i>Desi_wild_60852698</i> | NA                                  | <i>Ca_desi_denovo</i> | 60852698                | C/T  | NA                 | NA                            | NA                 |
| <i>Desi_wild_60855601</i> | NA                                  | <i>Ca_desi_denovo</i> | 60855601                | C/G  | NA                 | NA                            | NA                 |
| <i>Desi_wild_60855811</i> | NA                                  | <i>Ca_desi_denovo</i> | 60855811                | C/T  | NA                 | NA                            | NA                 |

| SNP IDs                   | NCBI dbSNP accession IDs (NCBI_SS#) | Chromosomes           | Physical positions (bp) | SNPs | Gene accession IDs | Sequence components of genome | Putative functions |
|---------------------------|-------------------------------------|-----------------------|-------------------------|------|--------------------|-------------------------------|--------------------|
| <i>Desi_wild_60855815</i> | NA                                  | <i>Ca_desi_denovo</i> | 60855815                | C/T  | NA                 | NA                            | NA                 |
| <i>Desi_wild_60855825</i> | NA                                  | <i>Ca_desi_denovo</i> | 60855825                | C/G  | NA                 | NA                            | NA                 |
| <i>Desi_wild_60855858</i> | NA                                  | <i>Ca_desi_denovo</i> | 60855858                | C/G  | NA                 | NA                            | NA                 |
| <i>Desi_wild_60858508</i> | NA                                  | <i>Ca_desi_denovo</i> | 60858508                | C/G  | NA                 | NA                            | NA                 |
| <i>Desi_wild_60858517</i> | NA                                  | <i>Ca_desi_denovo</i> | 60858517                | C/G  | NA                 | NA                            | NA                 |
| <i>Desi_wild_60862599</i> | NA                                  | <i>Ca_desi_denovo</i> | 60862599                | A/G  | NA                 | NA                            | NA                 |
| <i>Desi_wild_60862602</i> | NA                                  | <i>Ca_desi_denovo</i> | 60862602                | C/T  | NA                 | NA                            | NA                 |
| <i>Desi_wild_60862614</i> | NA                                  | <i>Ca_desi_denovo</i> | 60862614                | C/T  | NA                 | NA                            | NA                 |
| <i>Desi_wild_60867648</i> | NA                                  | <i>Ca_desi_denovo</i> | 60867648                | A/G  | NA                 | NA                            | NA                 |
| <i>Desi_wild_60867666</i> | NA                                  | <i>Ca_desi_denovo</i> | 60867666                | A/G  | NA                 | NA                            | NA                 |
| <i>Desi_wild_60868693</i> | NA                                  | <i>Ca_desi_denovo</i> | 60868693                | A/G  | NA                 | NA                            | NA                 |
| <i>Desi_wild_60869311</i> | NA                                  | <i>Ca_desi_denovo</i> | 60869311                | C/T  | NA                 | NA                            | NA                 |
| <i>Desi_wild_60869671</i> | NA                                  | <i>Ca_desi_denovo</i> | 60869671                | A/G  | NA                 | NA                            | NA                 |
| <i>Desi_wild_60869704</i> | NA                                  | <i>Ca_desi_denovo</i> | 60869704                | C/G  | NA                 | NA                            | NA                 |
| <i>Desi_wild_60869707</i> | NA                                  | <i>Ca_desi_denovo</i> | 60869707                | A/G  | NA                 | NA                            | NA                 |
| <i>Desi_wild_60872371</i> | NA                                  | <i>Ca_desi_denovo</i> | 60872371                | A/C  | NA                 | NA                            | NA                 |
| <i>Desi_wild_60873516</i> | NA                                  | <i>Ca_desi_denovo</i> | 60873516                | A/G  | NA                 | NA                            | NA                 |
| <i>Desi_wild_60874616</i> | NA                                  | <i>Ca_desi_denovo</i> | 60874616                | C/T  | NA                 | NA                            | NA                 |
| <i>Desi_wild_60874923</i> | NA                                  | <i>Ca_desi_denovo</i> | 60874923                | C/T  | NA                 | NA                            | NA                 |
| <i>Desi_wild_60874932</i> | NA                                  | <i>Ca_desi_denovo</i> | 60874932                | A/C  | NA                 | NA                            | NA                 |
| <i>Desi_wild_60874933</i> | NA                                  | <i>Ca_desi_denovo</i> | 60874933                | C/G  | NA                 | NA                            | NA                 |
| <i>Desi_wild_60874987</i> | NA                                  | <i>Ca_desi_denovo</i> | 60874987                | C/G  | NA                 | NA                            | NA                 |
| <i>Desi_wild_60875517</i> | NA                                  | <i>Ca_desi_denovo</i> | 60875517                | C/G  | NA                 | NA                            | NA                 |
| <i>Desi_wild_60875520</i> | NA                                  | <i>Ca_desi_denovo</i> | 60875520                | C/T  | NA                 | NA                            | NA                 |
| <i>Desi_wild_60877230</i> | NA                                  | <i>Ca_desi_denovo</i> | 60877230                | C/G  | NA                 | NA                            | NA                 |
| <i>Desi_wild_60878413</i> | NA                                  | <i>Ca_desi_denovo</i> | 60878413                | C/G  | NA                 | NA                            | NA                 |
| <i>Desi_wild_60878431</i> | NA                                  | <i>Ca_desi_denovo</i> | 60878431                | A/G  | NA                 | NA                            | NA                 |
| <i>Desi_wild_60880116</i> | NA                                  | <i>Ca_desi_denovo</i> | 60880116                | C/T  | NA                 | NA                            | NA                 |
| <i>Desi_wild_60887436</i> | NA                                  | <i>Ca_desi_denovo</i> | 60887436                | A/T  | NA                 | NA                            | NA                 |
| <i>Desi_wild_60887508</i> | NA                                  | <i>Ca_desi_denovo</i> | 60887508                | C/G  | NA                 | NA                            | NA                 |
| <i>Desi_wild_60887725</i> | NA                                  | <i>Ca_desi_denovo</i> | 60887725                | C/G  | NA                 | NA                            | NA                 |
| <i>Desi_wild_60888842</i> | NA                                  | <i>Ca_desi_denovo</i> | 60888842                | C/G  | NA                 | NA                            | NA                 |
| <i>Desi_wild_60888843</i> | NA                                  | <i>Ca_desi_denovo</i> | 60888843                | A/T  | NA                 | NA                            | NA                 |
| <i>Desi_wild_60888907</i> | NA                                  | <i>Ca_desi_denovo</i> | 60888907                | C/G  | NA                 | NA                            | NA                 |
| <i>Desi_wild_60888909</i> | NA                                  | <i>Ca_desi_denovo</i> | 60888909                | G/T  | NA                 | NA                            | NA                 |
| <i>Desi_wild_60890221</i> | NA                                  | <i>Ca_desi_denovo</i> | 60890221                | A/G  | NA                 | NA                            | NA                 |
| <i>Desi_wild_60890233</i> | NA                                  | <i>Ca_desi_denovo</i> | 60890233                | C/G  | NA                 | NA                            | NA                 |
| <i>Desi_wild_60890251</i> | NA                                  | <i>Ca_desi_denovo</i> | 60890251                | A/G  | NA                 | NA                            | NA                 |
| <i>Desi_wild_60897871</i> | NA                                  | <i>Ca_desi_denovo</i> | 60897871                | C/G  | NA                 | NA                            | NA                 |
| <i>Desi_wild_60897874</i> | NA                                  | <i>Ca_desi_denovo</i> | 60897874                | C/G  | NA                 | NA                            | NA                 |
| <i>Desi_wild_60899843</i> | NA                                  | <i>Ca_desi_denovo</i> | 60899843                | A/G  | NA                 | NA                            | NA                 |
| <i>Desi_wild_60901978</i> | NA                                  | <i>Ca_desi_denovo</i> | 60901978                | C/T  | NA                 | NA                            | NA                 |
| <i>Desi_wild_60905114</i> | NA                                  | <i>Ca_desi_denovo</i> | 60905114                | A/G  | NA                 | NA                            | NA                 |
| <i>Desi_wild_60905122</i> | NA                                  | <i>Ca_desi_denovo</i> | 60905122                | A/G  | NA                 | NA                            | NA                 |

| SNP IDs                   | NCBI dbSNP accession IDs (NCBI_SS#) | Chromosomes           | Physical positions (bp) | SNPs | Gene accession IDs | Sequence components of genome | Putative functions |
|---------------------------|-------------------------------------|-----------------------|-------------------------|------|--------------------|-------------------------------|--------------------|
| <i>Desi_wild_60909457</i> | NA                                  | <i>Ca_desi_denovo</i> | 60909457                | C/G  | NA                 | NA                            | NA                 |
| <i>Desi_wild_60909460</i> | NA                                  | <i>Ca_desi_denovo</i> | 60909460                | C/G  | NA                 | NA                            | NA                 |
| <i>Desi_wild_60910432</i> | NA                                  | <i>Ca_desi_denovo</i> | 60910432                | G/T  | NA                 | NA                            | NA                 |
| <i>Desi_wild_60910435</i> | NA                                  | <i>Ca_desi_denovo</i> | 60910435                | A/G  | NA                 | NA                            | NA                 |
| <i>Desi_wild_60913492</i> | NA                                  | <i>Ca_desi_denovo</i> | 60913492                | C/G  | NA                 | NA                            | NA                 |
| <i>Desi_wild_60913495</i> | NA                                  | <i>Ca_desi_denovo</i> | 60913495                | C/T  | NA                 | NA                            | NA                 |
| <i>Desi_wild_60916309</i> | NA                                  | <i>Ca_desi_denovo</i> | 60916309                | A/G  | NA                 | NA                            | NA                 |
| <i>Desi_wild_60917040</i> | NA                                  | <i>Ca_desi_denovo</i> | 60917040                | C/T  | NA                 | NA                            | NA                 |
| <i>Desi_wild_60917608</i> | NA                                  | <i>Ca_desi_denovo</i> | 60917608                | A/G  | NA                 | NA                            | NA                 |
| <i>Desi_wild_60917614</i> | NA                                  | <i>Ca_desi_denovo</i> | 60917614                | A/G  | NA                 | NA                            | NA                 |
| <i>Desi_wild_60918033</i> | NA                                  | <i>Ca_desi_denovo</i> | 60918033                | A/G  | NA                 | NA                            | NA                 |
| <i>Desi_wild_60918042</i> | NA                                  | <i>Ca_desi_denovo</i> | 60918042                | C/T  | NA                 | NA                            | NA                 |
| <i>Desi_wild_60918054</i> | NA                                  | <i>Ca_desi_denovo</i> | 60918054                | C/G  | NA                 | NA                            | NA                 |
| <i>Desi_wild_60918058</i> | NA                                  | <i>Ca_desi_denovo</i> | 60918058                | C/G  | NA                 | NA                            | NA                 |
| <i>Desi_wild_60918403</i> | NA                                  | <i>Ca_desi_denovo</i> | 60918403                | C/G  | NA                 | NA                            | NA                 |
| <i>Desi_wild_60918418</i> | NA                                  | <i>Ca_desi_denovo</i> | 60918418                | C/T  | NA                 | NA                            | NA                 |
| <i>Desi_wild_60919720</i> | NA                                  | <i>Ca_desi_denovo</i> | 60919720                | C/T  | NA                 | NA                            | NA                 |
| <i>Desi_wild_60919731</i> | NA                                  | <i>Ca_desi_denovo</i> | 60919731                | C/G  | NA                 | NA                            | NA                 |
| <i>Desi_wild_60920655</i> | NA                                  | <i>Ca_desi_denovo</i> | 60920655                | C/G  | NA                 | NA                            | NA                 |
| <i>Desi_wild_60924168</i> | NA                                  | <i>Ca_desi_denovo</i> | 60924168                | G/T  | NA                 | NA                            | NA                 |
| <i>Desi_wild_60924419</i> | NA                                  | <i>Ca_desi_denovo</i> | 60924419                | C/T  | NA                 | NA                            | NA                 |
| <i>Desi_wild_60928434</i> | NA                                  | <i>Ca_desi_denovo</i> | 60928434                | C/T  | NA                 | NA                            | NA                 |
| <i>Desi_wild_60928773</i> | NA                                  | <i>Ca_desi_denovo</i> | 60928773                | C/G  | NA                 | NA                            | NA                 |
| <i>Desi_wild_60930712</i> | NA                                  | <i>Ca_desi_denovo</i> | 60930712                | A/G  | NA                 | NA                            | NA                 |
| <i>Desi_wild_60930715</i> | NA                                  | <i>Ca_desi_denovo</i> | 60930715                | C/G  | NA                 | NA                            | NA                 |
| <i>Desi_wild_60931185</i> | NA                                  | <i>Ca_desi_denovo</i> | 60931185                | A/G  | NA                 | NA                            | NA                 |
| <i>Desi_wild_60934889</i> | NA                                  | <i>Ca_desi_denovo</i> | 60934889                | G/T  | NA                 | NA                            | NA                 |
| <i>Desi_wild_60934922</i> | NA                                  | <i>Ca_desi_denovo</i> | 60934922                | A/T  | NA                 | NA                            | NA                 |
| <i>Desi_wild_60935151</i> | NA                                  | <i>Ca_desi_denovo</i> | 60935151                | C/T  | NA                 | NA                            | NA                 |
| <i>Desi_wild_60935172</i> | NA                                  | <i>Ca_desi_denovo</i> | 60935172                | A/G  | NA                 | NA                            | NA                 |
| <i>Desi_wild_60935187</i> | NA                                  | <i>Ca_desi_denovo</i> | 60935187                | C/G  | NA                 | NA                            | NA                 |
| <i>Desi_wild_60937705</i> | NA                                  | <i>Ca_desi_denovo</i> | 60937705                | A/G  | NA                 | NA                            | NA                 |
| <i>Desi_wild_60946771</i> | NA                                  | <i>Ca_desi_denovo</i> | 60946771                | G/T  | NA                 | NA                            | NA                 |
| <i>Desi_wild_60946792</i> | NA                                  | <i>Ca_desi_denovo</i> | 60946792                | C/T  | NA                 | NA                            | NA                 |
| <i>Desi_wild_60946795</i> | NA                                  | <i>Ca_desi_denovo</i> | 60946795                | A/G  | NA                 | NA                            | NA                 |
| <i>Desi_wild_60952267</i> | NA                                  | <i>Ca_desi_denovo</i> | 60952267                | C/G  | NA                 | NA                            | NA                 |
| <i>Desi_wild_60952273</i> | NA                                  | <i>Ca_desi_denovo</i> | 60952273                | C/G  | NA                 | NA                            | NA                 |
| <i>Desi_wild_60952351</i> | NA                                  | <i>Ca_desi_denovo</i> | 60952351                | A/G  | NA                 | NA                            | NA                 |
| <i>Desi_wild_60952362</i> | NA                                  | <i>Ca_desi_denovo</i> | 60952362                | C/T  | NA                 | NA                            | NA                 |
| <i>Desi_wild_60952382</i> | NA                                  | <i>Ca_desi_denovo</i> | 60952382                | C/G  | NA                 | NA                            | NA                 |
| <i>Desi_wild_60957087</i> | NA                                  | <i>Ca_desi_denovo</i> | 60957087                | A/G  | NA                 | NA                            | NA                 |
| <i>Desi_wild_60957843</i> | NA                                  | <i>Ca_desi_denovo</i> | 60957843                | A/G  | NA                 | NA                            | NA                 |
| <i>Desi_wild_60957864</i> | NA                                  | <i>Ca_desi_denovo</i> | 60957864                | A/C  | NA                 | NA                            | NA                 |
| <i>Desi_wild_60958681</i> | NA                                  | <i>Ca_desi_denovo</i> | 60958681                | C/T  | NA                 | NA                            | NA                 |

| SNP IDs                   | NCBI dbSNP accession IDs (NCBI_SS#) | Chromosomes           | Physical positions (bp) | SNPs | Gene accession IDs | Sequence components of genome | Putative functions |
|---------------------------|-------------------------------------|-----------------------|-------------------------|------|--------------------|-------------------------------|--------------------|
| <i>Desi_wild_60958690</i> | NA                                  | <i>Ca_desi_denovo</i> | 60958690                | C/T  | NA                 | NA                            | NA                 |
| <i>Desi_wild_60958761</i> | NA                                  | <i>Ca_desi_denovo</i> | 60958761                | C/G  | NA                 | NA                            | NA                 |
| <i>Desi_wild_60958765</i> | NA                                  | <i>Ca_desi_denovo</i> | 60958765                | C/T  | NA                 | NA                            | NA                 |
| <i>Desi_wild_60960824</i> | NA                                  | <i>Ca_desi_denovo</i> | 60960824                | A/G  | NA                 | NA                            | NA                 |
| <i>Desi_wild_60962032</i> | NA                                  | <i>Ca_desi_denovo</i> | 60962032                | C/T  | NA                 | NA                            | NA                 |
| <i>Desi_wild_60962035</i> | NA                                  | <i>Ca_desi_denovo</i> | 60962035                | A/G  | NA                 | NA                            | NA                 |
| <i>Desi_wild_60962059</i> | NA                                  | <i>Ca_desi_denovo</i> | 60962059                | C/G  | NA                 | NA                            | NA                 |
| <i>Desi_wild_60962062</i> | NA                                  | <i>Ca_desi_denovo</i> | 60962062                | C/G  | NA                 | NA                            | NA                 |
| <i>Desi_wild_60966501</i> | NA                                  | <i>Ca_desi_denovo</i> | 60966501                | C/T  | NA                 | NA                            | NA                 |
| <i>Desi_wild_60966534</i> | NA                                  | <i>Ca_desi_denovo</i> | 60966534                | A/G  | NA                 | NA                            | NA                 |
| <i>Desi_wild_60966567</i> | NA                                  | <i>Ca_desi_denovo</i> | 60966567                | C/T  | NA                 | NA                            | NA                 |
| <i>Desi_wild_60969497</i> | NA                                  | <i>Ca_desi_denovo</i> | 60969497                | C/T  | NA                 | NA                            | NA                 |
| <i>Desi_wild_60971153</i> | NA                                  | <i>Ca_desi_denovo</i> | 60971153                | C/T  | NA                 | NA                            | NA                 |
| <i>Desi_wild_60971175</i> | NA                                  | <i>Ca_desi_denovo</i> | 60971175                | A/G  | NA                 | NA                            | NA                 |
| <i>Desi_wild_60972164</i> | NA                                  | <i>Ca_desi_denovo</i> | 60972164                | C/T  | NA                 | NA                            | NA                 |
| <i>Desi_wild_60973219</i> | NA                                  | <i>Ca_desi_denovo</i> | 60973219                | A/C  | NA                 | NA                            | NA                 |
| <i>Desi_wild_60975700</i> | NA                                  | <i>Ca_desi_denovo</i> | 60975700                | C/G  | NA                 | NA                            | NA                 |
| <i>Desi_wild_60976912</i> | NA                                  | <i>Ca_desi_denovo</i> | 60976912                | C/T  | NA                 | NA                            | NA                 |
| <i>Desi_wild_60976918</i> | NA                                  | <i>Ca_desi_denovo</i> | 60976918                | C/G  | NA                 | NA                            | NA                 |
| <i>Desi_wild_60976921</i> | NA                                  | <i>Ca_desi_denovo</i> | 60976921                | C/G  | NA                 | NA                            | NA                 |
| <i>Desi_wild_60976924</i> | NA                                  | <i>Ca_desi_denovo</i> | 60976924                | A/G  | NA                 | NA                            | NA                 |
| <i>Desi_wild_60977462</i> | NA                                  | <i>Ca_desi_denovo</i> | 60977462                | A/G  | NA                 | NA                            | NA                 |
| <i>Desi_wild_60977736</i> | NA                                  | <i>Ca_desi_denovo</i> | 60977736                | C/T  | NA                 | NA                            | NA                 |
| <i>Desi_wild_60978450</i> | NA                                  | <i>Ca_desi_denovo</i> | 60978450                | G/T  | NA                 | NA                            | NA                 |
| <i>Desi_wild_60984558</i> | NA                                  | <i>Ca_desi_denovo</i> | 60984558                | A/G  | NA                 | NA                            | NA                 |
| <i>Desi_wild_60987789</i> | NA                                  | <i>Ca_desi_denovo</i> | 60987789                | C/T  | NA                 | NA                            | NA                 |
| <i>Desi_wild_60990155</i> | NA                                  | <i>Ca_desi_denovo</i> | 60990155                | C/T  | NA                 | NA                            | NA                 |
| <i>Desi_wild_60990156</i> | NA                                  | <i>Ca_desi_denovo</i> | 60990156                | C/T  | NA                 | NA                            | NA                 |
| <i>Desi_wild_60993646</i> | NA                                  | <i>Ca_desi_denovo</i> | 60993646                | A/G  | NA                 | NA                            | NA                 |
| <i>Desi_wild_60994119</i> | NA                                  | <i>Ca_desi_denovo</i> | 60994119                | C/T  | NA                 | NA                            | NA                 |
| <i>Desi_wild_60994155</i> | NA                                  | <i>Ca_desi_denovo</i> | 60994155                | A/C  | NA                 | NA                            | NA                 |
| <i>Desi_wild_60995914</i> | NA                                  | <i>Ca_desi_denovo</i> | 60995914                | A/G  | NA                 | NA                            | NA                 |
| <i>Desi_wild_60995946</i> | NA                                  | <i>Ca_desi_denovo</i> | 60995946                | A/G  | NA                 | NA                            | NA                 |
| <i>Desi_wild_60997870</i> | NA                                  | <i>Ca_desi_denovo</i> | 60997870                | C/G  | NA                 | NA                            | NA                 |
| <i>Desi_wild_61001283</i> | NA                                  | <i>Ca_desi_denovo</i> | 61001283                | A/G  | NA                 | NA                            | NA                 |
| <i>Desi_wild_61001301</i> | NA                                  | <i>Ca_desi_denovo</i> | 61001301                | C/G  | NA                 | NA                            | NA                 |
| <i>Desi_wild_61003252</i> | NA                                  | <i>Ca_desi_denovo</i> | 61003252                | A/G  | NA                 | NA                            | NA                 |
| <i>Desi_wild_61005561</i> | NA                                  | <i>Ca_desi_denovo</i> | 61005561                | C/G  | NA                 | NA                            | NA                 |
| <i>Desi_wild_61009949</i> | NA                                  | <i>Ca_desi_denovo</i> | 61009949                | A/G  | NA                 | NA                            | NA                 |
| <i>Desi_wild_61011906</i> | NA                                  | <i>Ca_desi_denovo</i> | 61011906                | C/G  | NA                 | NA                            | NA                 |
| <i>Desi_wild_61014498</i> | NA                                  | <i>Ca_desi_denovo</i> | 61014498                | A/G  | NA                 | NA                            | NA                 |
| <i>Desi_wild_61014511</i> | NA                                  | <i>Ca_desi_denovo</i> | 61014511                | A/G  | NA                 | NA                            | NA                 |
| <i>Desi_wild_61016152</i> | NA                                  | <i>Ca_desi_denovo</i> | 61016152                | C/T  | NA                 | NA                            | NA                 |
| <i>Desi_wild_61017642</i> | NA                                  | <i>Ca_desi_denovo</i> | 61017642                | C/T  | NA                 | NA                            | NA                 |

| SNP IDs                   | NCBI dbSNP accession IDs (NCBI_SS#) | Chromosomes           | Physical positions (bp) | SNPs | Gene accession IDs | Sequence components of genome | Putative functions |
|---------------------------|-------------------------------------|-----------------------|-------------------------|------|--------------------|-------------------------------|--------------------|
| <i>Desi_wild_61019052</i> | NA                                  | <i>Ca_desi_denovo</i> | 61019052                | C/T  | NA                 | NA                            | NA                 |
| <i>Desi_wild_61019146</i> | NA                                  | <i>Ca_desi_denovo</i> | 61019146                | A/G  | NA                 | NA                            | NA                 |
| <i>Desi_wild_61019148</i> | NA                                  | <i>Ca_desi_denovo</i> | 61019148                | C/T  | NA                 | NA                            | NA                 |
| <i>Desi_wild_61020885</i> | NA                                  | <i>Ca_desi_denovo</i> | 61020885                | C/G  | NA                 | NA                            | NA                 |
| <i>Desi_wild_61020915</i> | NA                                  | <i>Ca_desi_denovo</i> | 61020915                | A/C  | NA                 | NA                            | NA                 |
| <i>Desi_wild_61020921</i> | NA                                  | <i>Ca_desi_denovo</i> | 61020921                | C/G  | NA                 | NA                            | NA                 |
| <i>Desi_wild_61020927</i> | NA                                  | <i>Ca_desi_denovo</i> | 61020927                | C/G  | NA                 | NA                            | NA                 |
| <i>Desi_wild_61027422</i> | NA                                  | <i>Ca_desi_denovo</i> | 61027422                | G/T  | NA                 | NA                            | NA                 |
| <i>Desi_wild_61028790</i> | NA                                  | <i>Ca_desi_denovo</i> | 61028790                | C/G  | NA                 | NA                            | NA                 |
| <i>Desi_wild_61028826</i> | NA                                  | <i>Ca_desi_denovo</i> | 61028826                | A/G  | NA                 | NA                            | NA                 |
| <i>Desi_wild_61029450</i> | NA                                  | <i>Ca_desi_denovo</i> | 61029450                | C/G  | NA                 | NA                            | NA                 |
| <i>Desi_wild_61029465</i> | NA                                  | <i>Ca_desi_denovo</i> | 61029465                | C/G  | NA                 | NA                            | NA                 |
| <i>Desi_wild_61033638</i> | NA                                  | <i>Ca_desi_denovo</i> | 61033638                | C/G  | NA                 | NA                            | NA                 |
| <i>Desi_wild_61033645</i> | NA                                  | <i>Ca_desi_denovo</i> | 61033645                | C/T  | NA                 | NA                            | NA                 |
| <i>Desi_wild_61033647</i> | NA                                  | <i>Ca_desi_denovo</i> | 61033647                | C/G  | NA                 | NA                            | NA                 |
| <i>Desi_wild_61033910</i> | NA                                  | <i>Ca_desi_denovo</i> | 61033910                | C/G  | NA                 | NA                            | NA                 |
| <i>Desi_wild_61034579</i> | NA                                  | <i>Ca_desi_denovo</i> | 61034579                | A/C  | NA                 | NA                            | NA                 |
| <i>Desi_wild_61035124</i> | NA                                  | <i>Ca_desi_denovo</i> | 61035124                | C/G  | NA                 | NA                            | NA                 |
| <i>Desi_wild_61035172</i> | NA                                  | <i>Ca_desi_denovo</i> | 61035172                | C/G  | NA                 | NA                            | NA                 |
| <i>Desi_wild_61038025</i> | NA                                  | <i>Ca_desi_denovo</i> | 61038025                | C/T  | NA                 | NA                            | NA                 |
| <i>Desi_wild_61038864</i> | NA                                  | <i>Ca_desi_denovo</i> | 61038864                | C/T  | NA                 | NA                            | NA                 |
| <i>Desi_wild_61039284</i> | NA                                  | <i>Ca_desi_denovo</i> | 61039284                | A/G  | NA                 | NA                            | NA                 |
| <i>Desi_wild_61040074</i> | NA                                  | <i>Ca_desi_denovo</i> | 61040074                | A/G  | NA                 | NA                            | NA                 |
| <i>Desi_wild_61040509</i> | NA                                  | <i>Ca_desi_denovo</i> | 61040509                | C/T  | NA                 | NA                            | NA                 |
| <i>Desi_wild_61040530</i> | NA                                  | <i>Ca_desi_denovo</i> | 61040530                | A/T  | NA                 | NA                            | NA                 |
| <i>Desi_wild_61043554</i> | NA                                  | <i>Ca_desi_denovo</i> | 61043554                | C/T  | NA                 | NA                            | NA                 |
| <i>Desi_wild_61050202</i> | NA                                  | <i>Ca_desi_denovo</i> | 61050202                | A/G  | NA                 | NA                            | NA                 |
| <i>Desi_wild_61050215</i> | NA                                  | <i>Ca_desi_denovo</i> | 61050215                | A/T  | NA                 | NA                            | NA                 |
| <i>Desi_wild_61052903</i> | NA                                  | <i>Ca_desi_denovo</i> | 61052903                | A/C  | NA                 | NA                            | NA                 |
| <i>Desi_wild_61057545</i> | NA                                  | <i>Ca_desi_denovo</i> | 61057545                | C/G  | NA                 | NA                            | NA                 |
| <i>Desi_wild_61058656</i> | NA                                  | <i>Ca_desi_denovo</i> | 61058656                | C/T  | NA                 | NA                            | NA                 |
| <i>Desi_wild_61058659</i> | NA                                  | <i>Ca_desi_denovo</i> | 61058659                | C/G  | NA                 | NA                            | NA                 |
| <i>Desi_wild_61058662</i> | NA                                  | <i>Ca_desi_denovo</i> | 61058662                | C/G  | NA                 | NA                            | NA                 |
| <i>Desi_wild_61060752</i> | NA                                  | <i>Ca_desi_denovo</i> | 61060752                | C/T  | NA                 | NA                            | NA                 |
| <i>Desi_wild_61065944</i> | NA                                  | <i>Ca_desi_denovo</i> | 61065944                | A/C  | NA                 | NA                            | NA                 |
| <i>Desi_wild_61065983</i> | NA                                  | <i>Ca_desi_denovo</i> | 61065983                | C/G  | NA                 | NA                            | NA                 |
| <i>Desi_wild_61068990</i> | NA                                  | <i>Ca_desi_denovo</i> | 61068990                | C/G  | NA                 | NA                            | NA                 |
| <i>Desi_wild_61070043</i> | NA                                  | <i>Ca_desi_denovo</i> | 61070043                | A/G  | NA                 | NA                            | NA                 |
| <i>Desi_wild_61070075</i> | NA                                  | <i>Ca_desi_denovo</i> | 61070075                | C/T  | NA                 | NA                            | NA                 |
| <i>Desi_wild_61077004</i> | NA                                  | <i>Ca_desi_denovo</i> | 61077004                | C/G  | NA                 | NA                            | NA                 |
| <i>Desi_wild_61077022</i> | NA                                  | <i>Ca_desi_denovo</i> | 61077022                | A/C  | NA                 | NA                            | NA                 |
| <i>Desi_wild_61079224</i> | NA                                  | <i>Ca_desi_denovo</i> | 61079224                | A/C  | NA                 | NA                            | NA                 |
| <i>Desi_wild_61080223</i> | NA                                  | <i>Ca_desi_denovo</i> | 61080223                | C/T  | NA                 | NA                            | NA                 |
| <i>Desi_wild_61080226</i> | NA                                  | <i>Ca_desi_denovo</i> | 61080226                | C/T  | NA                 | NA                            | NA                 |

| SNP IDs                   | NCBI dbSNP accession IDs (NCBI_SS#) | Chromosomes           | Physical positions (bp) | SNPs | Gene accession IDs | Sequence components of genome | Putative functions |
|---------------------------|-------------------------------------|-----------------------|-------------------------|------|--------------------|-------------------------------|--------------------|
| <i>Desi_wild_61080238</i> | NA                                  | <i>Ca_desi_denovo</i> | 61080238                | A/G  | NA                 | NA                            | NA                 |
| <i>Desi_wild_61080244</i> | NA                                  | <i>Ca_desi_denovo</i> | 61080244                | C/T  | NA                 | NA                            | NA                 |
| <i>Desi_wild_61081076</i> | NA                                  | <i>Ca_desi_denovo</i> | 61081076                | C/T  | NA                 | NA                            | NA                 |
| <i>Desi_wild_61086198</i> | NA                                  | <i>Ca_desi_denovo</i> | 61086198                | A/G  | NA                 | NA                            | NA                 |
| <i>Desi_wild_61086204</i> | NA                                  | <i>Ca_desi_denovo</i> | 61086204                | C/G  | NA                 | NA                            | NA                 |
| <i>Desi_wild_61086756</i> | NA                                  | <i>Ca_desi_denovo</i> | 61086756                | C/T  | NA                 | NA                            | NA                 |
| <i>Desi_wild_61086762</i> | NA                                  | <i>Ca_desi_denovo</i> | 61086762                | C/T  | NA                 | NA                            | NA                 |
| <i>Desi_wild_61089363</i> | NA                                  | <i>Ca_desi_denovo</i> | 61089363                | C/T  | NA                 | NA                            | NA                 |
| <i>Desi_wild_61089393</i> | NA                                  | <i>Ca_desi_denovo</i> | 61089393                | C/T  | NA                 | NA                            | NA                 |
| <i>Desi_wild_61091785</i> | NA                                  | <i>Ca_desi_denovo</i> | 61091785                | C/G  | NA                 | NA                            | NA                 |
| <i>Desi_wild_61091793</i> | NA                                  | <i>Ca_desi_denovo</i> | 61091793                | A/G  | NA                 | NA                            | NA                 |
| <i>Desi_wild_61091800</i> | NA                                  | <i>Ca_desi_denovo</i> | 61091800                | C/G  | NA                 | NA                            | NA                 |
| <i>Desi_wild_61092538</i> | NA                                  | <i>Ca_desi_denovo</i> | 61092538                | A/G  | NA                 | NA                            | NA                 |
| <i>Desi_wild_61097989</i> | NA                                  | <i>Ca_desi_denovo</i> | 61097989                | A/G  | NA                 | NA                            | NA                 |
| <i>Desi_wild_61100100</i> | NA                                  | <i>Ca_desi_denovo</i> | 61100100                | A/G  | NA                 | NA                            | NA                 |
| <i>Desi_wild_61103206</i> | NA                                  | <i>Ca_desi_denovo</i> | 61103206                | C/G  | NA                 | NA                            | NA                 |
| <i>Desi_wild_61103229</i> | NA                                  | <i>Ca_desi_denovo</i> | 61103229                | A/G  | NA                 | NA                            | NA                 |
| <i>Desi_wild_61103260</i> | NA                                  | <i>Ca_desi_denovo</i> | 61103260                | C/G  | NA                 | NA                            | NA                 |
| <i>Desi_wild_61107597</i> | NA                                  | <i>Ca_desi_denovo</i> | 61107597                | C/G  | NA                 | NA                            | NA                 |
| <i>Desi_wild_61107618</i> | NA                                  | <i>Ca_desi_denovo</i> | 61107618                | C/T  | NA                 | NA                            | NA                 |
| <i>Desi_wild_61107642</i> | NA                                  | <i>Ca_desi_denovo</i> | 61107642                | C/T  | NA                 | NA                            | NA                 |
| <i>Desi_wild_61112479</i> | NA                                  | <i>Ca_desi_denovo</i> | 61112479                | A/G  | NA                 | NA                            | NA                 |
| <i>Desi_wild_61116213</i> | NA                                  | <i>Ca_desi_denovo</i> | 61116213                | A/C  | NA                 | NA                            | NA                 |
| <i>Desi_wild_61116214</i> | NA                                  | <i>Ca_desi_denovo</i> | 61116214                | C/G  | NA                 | NA                            | NA                 |
| <i>Desi_wild_61116226</i> | NA                                  | <i>Ca_desi_denovo</i> | 61116226                | A/G  | NA                 | NA                            | NA                 |
| <i>Desi_wild_61130500</i> | NA                                  | <i>Ca_desi_denovo</i> | 61130500                | A/G  | NA                 | NA                            | NA                 |
| <i>Desi_wild_61131381</i> | NA                                  | <i>Ca_desi_denovo</i> | 61131381                | C/T  | NA                 | NA                            | NA                 |
| <i>Desi_wild_61131390</i> | NA                                  | <i>Ca_desi_denovo</i> | 61131390                | A/C  | NA                 | NA                            | NA                 |
| <i>Desi_wild_61133520</i> | NA                                  | <i>Ca_desi_denovo</i> | 61133520                | C/T  | NA                 | NA                            | NA                 |
| <i>Desi_wild_61133547</i> | NA                                  | <i>Ca_desi_denovo</i> | 61133547                | C/T  | NA                 | NA                            | NA                 |
| <i>Desi_wild_61133562</i> | NA                                  | <i>Ca_desi_denovo</i> | 61133562                | C/T  | NA                 | NA                            | NA                 |
| <i>Desi_wild_61133592</i> | NA                                  | <i>Ca_desi_denovo</i> | 61133592                | A/G  | NA                 | NA                            | NA                 |
| <i>Desi_wild_61137798</i> | NA                                  | <i>Ca_desi_denovo</i> | 61137798                | C/G  | NA                 | NA                            | NA                 |
| <i>Desi_wild_61150443</i> | NA                                  | <i>Ca_desi_denovo</i> | 61150443                | C/T  | NA                 | NA                            | NA                 |
| <i>Desi_wild_61151651</i> | NA                                  | <i>Ca_desi_denovo</i> | 61151651                | A/T  | NA                 | NA                            | NA                 |
| <i>Desi_wild_61151652</i> | NA                                  | <i>Ca_desi_denovo</i> | 61151652                | G/T  | NA                 | NA                            | NA                 |
| <i>Desi_wild_61151663</i> | NA                                  | <i>Ca_desi_denovo</i> | 61151663                | A/G  | NA                 | NA                            | NA                 |
| <i>Desi_wild_61152070</i> | NA                                  | <i>Ca_desi_denovo</i> | 61152070                | C/G  | NA                 | NA                            | NA                 |
| <i>Desi_wild_61156983</i> | NA                                  | <i>Ca_desi_denovo</i> | 61156983                | A/G  | NA                 | NA                            | NA                 |
| <i>Desi_wild_61159116</i> | NA                                  | <i>Ca_desi_denovo</i> | 61159116                | A/G  | NA                 | NA                            | NA                 |
| <i>Desi_wild_61159119</i> | NA                                  | <i>Ca_desi_denovo</i> | 61159119                | C/G  | NA                 | NA                            | NA                 |
| <i>Desi_wild_61168083</i> | NA                                  | <i>Ca_desi_denovo</i> | 61168083                | C/T  | NA                 | NA                            | NA                 |
| <i>Desi_wild_61168092</i> | NA                                  | <i>Ca_desi_denovo</i> | 61168092                | G/T  | NA                 | NA                            | NA                 |
| <i>Desi_wild_61168792</i> | NA                                  | <i>Ca_desi_denovo</i> | 61168792                | A/G  | NA                 | NA                            | NA                 |

| SNP IDs                   | NCBI dbSNP accession IDs (NCBI_SS#) | Chromosomes           | Physical positions (bp) | SNPs | Gene accession IDs | Sequence components of genome | Putative functions |
|---------------------------|-------------------------------------|-----------------------|-------------------------|------|--------------------|-------------------------------|--------------------|
| <i>Desi_wild_61169035</i> | NA                                  | <i>Ca_desi_denovo</i> | 61169035                | A/G  | NA                 | NA                            | NA                 |
| <i>Desi_wild_61169062</i> | NA                                  | <i>Ca_desi_denovo</i> | 61169062                | A/G  | NA                 | NA                            | NA                 |
| <i>Desi_wild_61169155</i> | NA                                  | <i>Ca_desi_denovo</i> | 61169155                | C/G  | NA                 | NA                            | NA                 |
| <i>Desi_wild_61176569</i> | NA                                  | <i>Ca_desi_denovo</i> | 61176569                | C/G  | NA                 | NA                            | NA                 |
| <i>Desi_wild_61176589</i> | NA                                  | <i>Ca_desi_denovo</i> | 61176589                | C/G  | NA                 | NA                            | NA                 |
| <i>Desi_wild_61176591</i> | NA                                  | <i>Ca_desi_denovo</i> | 61176591                | C/T  | NA                 | NA                            | NA                 |
| <i>Desi_wild_61176604</i> | NA                                  | <i>Ca_desi_denovo</i> | 61176604                | C/G  | NA                 | NA                            | NA                 |
| <i>Desi_wild_61190457</i> | NA                                  | <i>Ca_desi_denovo</i> | 61190457                | C/T  | NA                 | NA                            | NA                 |
| <i>Desi_wild_61190472</i> | NA                                  | <i>Ca_desi_denovo</i> | 61190472                | A/G  | NA                 | NA                            | NA                 |
| <i>Desi_wild_61198336</i> | NA                                  | <i>Ca_desi_denovo</i> | 61198336                | C/G  | NA                 | NA                            | NA                 |
| <i>Desi_wild_61198378</i> | NA                                  | <i>Ca_desi_denovo</i> | 61198378                | C/G  | NA                 | NA                            | NA                 |
| <i>Desi_wild_61201512</i> | NA                                  | <i>Ca_desi_denovo</i> | 61201512                | C/T  | NA                 | NA                            | NA                 |
| <i>Desi_wild_61201518</i> | NA                                  | <i>Ca_desi_denovo</i> | 61201518                | C/G  | NA                 | NA                            | NA                 |
| <i>Desi_wild_61206144</i> | NA                                  | <i>Ca_desi_denovo</i> | 61206144                | C/G  | NA                 | NA                            | NA                 |
| <i>Desi_wild_61206147</i> | NA                                  | <i>Ca_desi_denovo</i> | 61206147                | A/G  | NA                 | NA                            | NA                 |
| <i>Desi_wild_61206156</i> | NA                                  | <i>Ca_desi_denovo</i> | 61206156                | C/G  | NA                 | NA                            | NA                 |
| <i>Desi_wild_61206993</i> | NA                                  | <i>Ca_desi_denovo</i> | 61206993                | C/T  | NA                 | NA                            | NA                 |
| <i>Desi_wild_61211452</i> | NA                                  | <i>Ca_desi_denovo</i> | 61211452                | A/C  | NA                 | NA                            | NA                 |
| <i>Desi_wild_61212107</i> | NA                                  | <i>Ca_desi_denovo</i> | 61212107                | A/C  | NA                 | NA                            | NA                 |
| <i>Desi_wild_61212109</i> | NA                                  | <i>Ca_desi_denovo</i> | 61212109                | C/G  | NA                 | NA                            | NA                 |
| <i>Desi_wild_61213865</i> | NA                                  | <i>Ca_desi_denovo</i> | 61213865                | C/G  | NA                 | NA                            | NA                 |
| <i>Desi_wild_61213866</i> | NA                                  | <i>Ca_desi_denovo</i> | 61213866                | A/T  | NA                 | NA                            | NA                 |
| <i>Desi_wild_61213873</i> | NA                                  | <i>Ca_desi_denovo</i> | 61213873                | C/G  | NA                 | NA                            | NA                 |
| <i>Desi_wild_61213879</i> | NA                                  | <i>Ca_desi_denovo</i> | 61213879                | C/T  | NA                 | NA                            | NA                 |
| <i>Desi_wild_61217024</i> | NA                                  | <i>Ca_desi_denovo</i> | 61217024                | G/T  | NA                 | NA                            | NA                 |
| <i>Desi_wild_61217026</i> | NA                                  | <i>Ca_desi_denovo</i> | 61217026                | C/G  | NA                 | NA                            | NA                 |
| <i>Desi_wild_61217493</i> | NA                                  | <i>Ca_desi_denovo</i> | 61217493                | C/T  | NA                 | NA                            | NA                 |
| <i>Desi_wild_61217517</i> | NA                                  | <i>Ca_desi_denovo</i> | 61217517                | C/G  | NA                 | NA                            | NA                 |
| <i>Desi_wild_61217714</i> | NA                                  | <i>Ca_desi_denovo</i> | 61217714                | G/T  | NA                 | NA                            | NA                 |
| <i>Desi_wild_61219542</i> | NA                                  | <i>Ca_desi_denovo</i> | 61219542                | C/G  | NA                 | NA                            | NA                 |
| <i>Desi_wild_61219557</i> | NA                                  | <i>Ca_desi_denovo</i> | 61219557                | C/G  | NA                 | NA                            | NA                 |
| <i>Desi_wild_61220118</i> | NA                                  | <i>Ca_desi_denovo</i> | 61220118                | A/G  | NA                 | NA                            | NA                 |
| <i>Desi_wild_61221256</i> | NA                                  | <i>Ca_desi_denovo</i> | 61221256                | A/G  | NA                 | NA                            | NA                 |
| <i>Desi_wild_61221786</i> | NA                                  | <i>Ca_desi_denovo</i> | 61221786                | C/G  | NA                 | NA                            | NA                 |
| <i>Desi_wild_61221787</i> | NA                                  | <i>Ca_desi_denovo</i> | 61221787                | C/T  | NA                 | NA                            | NA                 |
| <i>Desi_wild_61221808</i> | NA                                  | <i>Ca_desi_denovo</i> | 61221808                | A/G  | NA                 | NA                            | NA                 |
| <i>Desi_wild_61222336</i> | NA                                  | <i>Ca_desi_denovo</i> | 61222336                | C/T  | NA                 | NA                            | NA                 |
| <i>Desi_wild_61222911</i> | NA                                  | <i>Ca_desi_denovo</i> | 61222911                | C/G  | NA                 | NA                            | NA                 |
| <i>Desi_wild_61224245</i> | NA                                  | <i>Ca_desi_denovo</i> | 61224245                | C/T  | NA                 | NA                            | NA                 |
| <i>Desi_wild_61224651</i> | NA                                  | <i>Ca_desi_denovo</i> | 61224651                | C/T  | NA                 | NA                            | NA                 |
| <i>Desi_wild_61226235</i> | NA                                  | <i>Ca_desi_denovo</i> | 61226235                | C/G  | NA                 | NA                            | NA                 |
| <i>Desi_wild_61229634</i> | NA                                  | <i>Ca_desi_denovo</i> | 61229634                | C/G  | NA                 | NA                            | NA                 |
| <i>Desi_wild_61229636</i> | NA                                  | <i>Ca_desi_denovo</i> | 61229636                | A/C  | NA                 | NA                            | NA                 |
| <i>Desi_wild_61230231</i> | NA                                  | <i>Ca_desi_denovo</i> | 61230231                | C/G  | NA                 | NA                            | NA                 |

| SNP IDs                   | NCBI dbSNP accession IDs (NCBI_SS#) | Chromosomes           | Physical positions (bp) | SNPs | Gene accession IDs | Sequence components of genome | Putative functions |
|---------------------------|-------------------------------------|-----------------------|-------------------------|------|--------------------|-------------------------------|--------------------|
| <i>Desi_wild_61230291</i> | NA                                  | <i>Ca_desi_denovo</i> | 61230291                | C/T  | NA                 | NA                            | NA                 |
| <i>Desi_wild_61230300</i> | NA                                  | <i>Ca_desi_denovo</i> | 61230300                | A/G  | NA                 | NA                            | NA                 |
| <i>Desi_wild_61230310</i> | NA                                  | <i>Ca_desi_denovo</i> | 61230310                | G/T  | NA                 | NA                            | NA                 |
| <i>Desi_wild_61230581</i> | NA                                  | <i>Ca_desi_denovo</i> | 61230581                | C/T  | NA                 | NA                            | NA                 |
| <i>Desi_wild_61233024</i> | NA                                  | <i>Ca_desi_denovo</i> | 61233024                | C/T  | NA                 | NA                            | NA                 |
| <i>Desi_wild_61233039</i> | NA                                  | <i>Ca_desi_denovo</i> | 61233039                | C/T  | NA                 | NA                            | NA                 |
| <i>Desi_wild_61233730</i> | NA                                  | <i>Ca_desi_denovo</i> | 61233730                | A/C  | NA                 | NA                            | NA                 |
| <i>Desi_wild_61233736</i> | NA                                  | <i>Ca_desi_denovo</i> | 61233736                | C/G  | NA                 | NA                            | NA                 |
| <i>Desi_wild_61233885</i> | NA                                  | <i>Ca_desi_denovo</i> | 61233885                | C/G  | NA                 | NA                            | NA                 |
| <i>Desi_wild_61233895</i> | NA                                  | <i>Ca_desi_denovo</i> | 61233895                | C/G  | NA                 | NA                            | NA                 |
| <i>Desi_wild_61234808</i> | NA                                  | <i>Ca_desi_denovo</i> | 61234808                | C/T  | NA                 | NA                            | NA                 |
| <i>Desi_wild_61236249</i> | NA                                  | <i>Ca_desi_denovo</i> | 61236249                | C/T  | NA                 | NA                            | NA                 |
| <i>Desi_wild_61236744</i> | NA                                  | <i>Ca_desi_denovo</i> | 61236744                | A/C  | NA                 | NA                            | NA                 |
| <i>Desi_wild_61236756</i> | NA                                  | <i>Ca_desi_denovo</i> | 61236756                | C/T  | NA                 | NA                            | NA                 |
| <i>Desi_wild_61236889</i> | NA                                  | <i>Ca_desi_denovo</i> | 61236889                | C/G  | NA                 | NA                            | NA                 |
| <i>Desi_wild_61238448</i> | NA                                  | <i>Ca_desi_denovo</i> | 61238448                | A/G  | NA                 | NA                            | NA                 |
| <i>Desi_wild_61242192</i> | NA                                  | <i>Ca_desi_denovo</i> | 61242192                | C/G  | NA                 | NA                            | NA                 |
| <i>Desi_wild_61243807</i> | NA                                  | <i>Ca_desi_denovo</i> | 61243807                | C/T  | NA                 | NA                            | NA                 |
| <i>Desi_wild_61251741</i> | NA                                  | <i>Ca_desi_denovo</i> | 61251741                | A/C  | NA                 | NA                            | NA                 |
| <i>Desi_wild_61256248</i> | NA                                  | <i>Ca_desi_denovo</i> | 61256248                | C/G  | NA                 | NA                            | NA                 |
| <i>Desi_wild_61258625</i> | NA                                  | <i>Ca_desi_denovo</i> | 61258625                | C/T  | NA                 | NA                            | NA                 |
| <i>Desi_wild_61258648</i> | NA                                  | <i>Ca_desi_denovo</i> | 61258648                | A/T  | NA                 | NA                            | NA                 |
| <i>Desi_wild_61258651</i> | NA                                  | <i>Ca_desi_denovo</i> | 61258651                | C/G  | NA                 | NA                            | NA                 |
| <i>Desi_wild_61259147</i> | NA                                  | <i>Ca_desi_denovo</i> | 61259147                | A/T  | NA                 | NA                            | NA                 |
| <i>Desi_wild_61262378</i> | NA                                  | <i>Ca_desi_denovo</i> | 61262378                | C/G  | NA                 | NA                            | NA                 |
| <i>Desi_wild_61264548</i> | NA                                  | <i>Ca_desi_denovo</i> | 61264548                | A/G  | NA                 | NA                            | NA                 |
| <i>Desi_wild_61264828</i> | NA                                  | <i>Ca_desi_denovo</i> | 61264828                | A/G  | NA                 | NA                            | NA                 |
| <i>Desi_wild_61267629</i> | NA                                  | <i>Ca_desi_denovo</i> | 61267629                | C/T  | NA                 | NA                            | NA                 |
| <i>Desi_wild_61273252</i> | NA                                  | <i>Ca_desi_denovo</i> | 61273252                | C/T  | NA                 | NA                            | NA                 |
| <i>Desi_wild_61273521</i> | NA                                  | <i>Ca_desi_denovo</i> | 61273521                | A/G  | NA                 | NA                            | NA                 |
| <i>Desi_wild_61273549</i> | NA                                  | <i>Ca_desi_denovo</i> | 61273549                | A/G  | NA                 | NA                            | NA                 |
| <i>Desi_wild_61273552</i> | NA                                  | <i>Ca_desi_denovo</i> | 61273552                | A/C  | NA                 | NA                            | NA                 |
| <i>Desi_wild_61273556</i> | NA                                  | <i>Ca_desi_denovo</i> | 61273556                | C/T  | NA                 | NA                            | NA                 |
| <i>Desi_wild_61274962</i> | NA                                  | <i>Ca_desi_denovo</i> | 61274962                | C/G  | NA                 | NA                            | NA                 |
| <i>Desi_wild_61274968</i> | NA                                  | <i>Ca_desi_denovo</i> | 61274968                | A/G  | NA                 | NA                            | NA                 |
| <i>Desi_wild_61275445</i> | NA                                  | <i>Ca_desi_denovo</i> | 61275445                | C/G  | NA                 | NA                            | NA                 |
| <i>Desi_wild_61277550</i> | NA                                  | <i>Ca_desi_denovo</i> | 61277550                | C/T  | NA                 | NA                            | NA                 |
| <i>Desi_wild_61281193</i> | NA                                  | <i>Ca_desi_denovo</i> | 61281193                | C/T  | NA                 | NA                            | NA                 |
| <i>Desi_wild_61281205</i> | NA                                  | <i>Ca_desi_denovo</i> | 61281205                | C/T  | NA                 | NA                            | NA                 |
| <i>Desi_wild_61285941</i> | NA                                  | <i>Ca_desi_denovo</i> | 61285941                | A/G  | NA                 | NA                            | NA                 |
| <i>Desi_wild_61285965</i> | NA                                  | <i>Ca_desi_denovo</i> | 61285965                | A/G  | NA                 | NA                            | NA                 |
| <i>Desi_wild_61286526</i> | NA                                  | <i>Ca_desi_denovo</i> | 61286526                | C/T  | NA                 | NA                            | NA                 |
| <i>Desi_wild_61289143</i> | NA                                  | <i>Ca_desi_denovo</i> | 61289143                | C/G  | NA                 | NA                            | NA                 |
| <i>Desi_wild_61289569</i> | NA                                  | <i>Ca_desi_denovo</i> | 61289569                | A/G  | NA                 | NA                            | NA                 |



| SNP IDs                   | NCBI dbSNP accession IDs (NCBI_SS#) | Chromosomes           | Physical positions (bp) | SNPs | Gene accession IDs | Sequence components of genome | Putative functions |
|---------------------------|-------------------------------------|-----------------------|-------------------------|------|--------------------|-------------------------------|--------------------|
| <i>Desi_wild_61291625</i> | NA                                  | <i>Ca_desi_denovo</i> | 61291625                | A/G  | NA                 | NA                            | NA                 |
| <i>Desi_wild_61292647</i> | NA                                  | <i>Ca_desi_denovo</i> | 61292647                | A/G  | NA                 | NA                            | NA                 |
| <i>Desi_wild_61294319</i> | NA                                  | <i>Ca_desi_denovo</i> | 61294319                | G/T  | NA                 | NA                            | NA                 |
| <i>Desi_wild_61295181</i> | NA                                  | <i>Ca_desi_denovo</i> | 61295181                | C/T  | NA                 | NA                            | NA                 |
| <i>Desi_wild_61295625</i> | NA                                  | <i>Ca_desi_denovo</i> | 61295625                | C/T  | NA                 | NA                            | NA                 |
| <i>Desi_wild_61295628</i> | NA                                  | <i>Ca_desi_denovo</i> | 61295628                | G/T  | NA                 | NA                            | NA                 |
| <i>Desi_wild_61299004</i> | NA                                  | <i>Ca_desi_denovo</i> | 61299004                | A/G  | NA                 | NA                            | NA                 |
| <i>Desi_wild_61299007</i> | NA                                  | <i>Ca_desi_denovo</i> | 61299007                | A/G  | NA                 | NA                            | NA                 |
| <i>Desi_wild_61300180</i> | NA                                  | <i>Ca_desi_denovo</i> | 61300180                | C/T  | NA                 | NA                            | NA                 |
| <i>Desi_wild_61300189</i> | NA                                  | <i>Ca_desi_denovo</i> | 61300189                | A/T  | NA                 | NA                            | NA                 |
| <i>Desi_wild_61303455</i> | NA                                  | <i>Ca_desi_denovo</i> | 61303455                | G/T  | NA                 | NA                            | NA                 |
| <i>Desi_wild_61304196</i> | NA                                  | <i>Ca_desi_denovo</i> | 61304196                | C/G  | NA                 | NA                            | NA                 |
| <i>Desi_wild_61308537</i> | NA                                  | <i>Ca_desi_denovo</i> | 61308537                | A/C  | NA                 | NA                            | NA                 |
| <i>Desi_wild_61308540</i> | NA                                  | <i>Ca_desi_denovo</i> | 61308540                | A/G  | NA                 | NA                            | NA                 |
| <i>Desi_wild_61310788</i> | NA                                  | <i>Ca_desi_denovo</i> | 61310788                | A/T  | NA                 | NA                            | NA                 |
| <i>Desi_wild_61310804</i> | NA                                  | <i>Ca_desi_denovo</i> | 61310804                | A/C  | NA                 | NA                            | NA                 |
| <i>Desi_wild_61310844</i> | NA                                  | <i>Ca_desi_denovo</i> | 61310844                | C/G  | NA                 | NA                            | NA                 |
| <i>Desi_wild_61310846</i> | NA                                  | <i>Ca_desi_denovo</i> | 61310846                | C/T  | NA                 | NA                            | NA                 |
| <i>Desi_wild_61316599</i> | NA                                  | <i>Ca_desi_denovo</i> | 61316599                | C/G  | NA                 | NA                            | NA                 |
| <i>Desi_wild_61316611</i> | NA                                  | <i>Ca_desi_denovo</i> | 61316611                | C/T  | NA                 | NA                            | NA                 |
| <i>Desi_wild_61316904</i> | NA                                  | <i>Ca_desi_denovo</i> | 61316904                | C/T  | NA                 | NA                            | NA                 |
| <i>Desi_wild_61317837</i> | NA                                  | <i>Ca_desi_denovo</i> | 61317837                | C/T  | NA                 | NA                            | NA                 |
| <i>Desi_wild_61317843</i> | NA                                  | <i>Ca_desi_denovo</i> | 61317843                | A/G  | NA                 | NA                            | NA                 |
| <i>Desi_wild_61321090</i> | NA                                  | <i>Ca_desi_denovo</i> | 61321090                | C/T  | NA                 | NA                            | NA                 |
| <i>Desi_wild_61321091</i> | NA                                  | <i>Ca_desi_denovo</i> | 61321091                | A/G  | NA                 | NA                            | NA                 |
| <i>Desi_wild_61323077</i> | NA                                  | <i>Ca_desi_denovo</i> | 61323077                | C/T  | NA                 | NA                            | NA                 |
| <i>Desi_wild_61323268</i> | NA                                  | <i>Ca_desi_denovo</i> | 61323268                | C/T  | NA                 | NA                            | NA                 |
| <i>Desi_wild_61326778</i> | NA                                  | <i>Ca_desi_denovo</i> | 61326778                | A/G  | NA                 | NA                            | NA                 |
| <i>Desi_wild_61326790</i> | NA                                  | <i>Ca_desi_denovo</i> | 61326790                | A/C  | NA                 | NA                            | NA                 |
| <i>Desi_wild_61326796</i> | NA                                  | <i>Ca_desi_denovo</i> | 61326796                | A/G  | NA                 | NA                            | NA                 |
| <i>Desi_wild_61326808</i> | NA                                  | <i>Ca_desi_denovo</i> | 61326808                | C/T  | NA                 | NA                            | NA                 |
| <i>Desi_wild_61330299</i> | NA                                  | <i>Ca_desi_denovo</i> | 61330299                | C/G  | NA                 | NA                            | NA                 |
| <i>Desi_wild_61330309</i> | NA                                  | <i>Ca_desi_denovo</i> | 61330309                | C/G  | NA                 | NA                            | NA                 |
| <i>Desi_wild_61330317</i> | NA                                  | <i>Ca_desi_denovo</i> | 61330317                | A/G  | NA                 | NA                            | NA                 |
| <i>Desi_wild_61331549</i> | NA                                  | <i>Ca_desi_denovo</i> | 61331549                | C/T  | NA                 | NA                            | NA                 |
| <i>Desi_wild_61331550</i> | NA                                  | <i>Ca_desi_denovo</i> | 61331550                | A/G  | NA                 | NA                            | NA                 |
| <i>Desi_wild_61332540</i> | NA                                  | <i>Ca_desi_denovo</i> | 61332540                | C/G  | NA                 | NA                            | NA                 |
| <i>Desi_wild_61332573</i> | NA                                  | <i>Ca_desi_denovo</i> | 61332573                | A/G  | NA                 | NA                            | NA                 |
| <i>Desi_wild_61335662</i> | NA                                  | <i>Ca_desi_denovo</i> | 61335662                | G/T  | NA                 | NA                            | NA                 |
| <i>Desi_wild_61337781</i> | NA                                  | <i>Ca_desi_denovo</i> | 61337781                | C/G  | NA                 | NA                            | NA                 |
| <i>Desi_wild_61338666</i> | NA                                  | <i>Ca_desi_denovo</i> | 61338666                | A/G  | NA                 | NA                            | NA                 |
| <i>Desi_wild_61339418</i> | NA                                  | <i>Ca_desi_denovo</i> | 61339418                | A/G  | NA                 | NA                            | NA                 |
| <i>Desi_wild_61344874</i> | NA                                  | <i>Ca_desi_denovo</i> | 61344874                | G/T  | NA                 | NA                            | NA                 |
| <i>Desi_wild_61345109</i> | NA                                  | <i>Ca_desi_denovo</i> | 61345109                | C/G  | NA                 | NA                            | NA                 |

| SNP IDs                   | NCBI dbSNP accession IDs (NCBI_SS#) | Chromosomes           | Physical positions (bp) | SNPs | Gene accession IDs | Sequence components of genome | Putative functions |
|---------------------------|-------------------------------------|-----------------------|-------------------------|------|--------------------|-------------------------------|--------------------|
| <i>Desi_wild_61345885</i> | NA                                  | <i>Ca_desi_denovo</i> | 61345885                | A/G  | NA                 | NA                            | NA                 |
| <i>Desi_wild_61346592</i> | NA                                  | <i>Ca_desi_denovo</i> | 61346592                | A/G  | NA                 | NA                            | NA                 |
| <i>Desi_wild_61346836</i> | NA                                  | <i>Ca_desi_denovo</i> | 61346836                | G/T  | NA                 | NA                            | NA                 |
| <i>Desi_wild_61347792</i> | NA                                  | <i>Ca_desi_denovo</i> | 61347792                | C/G  | NA                 | NA                            | NA                 |
| <i>Desi_wild_61348167</i> | NA                                  | <i>Ca_desi_denovo</i> | 61348167                | C/G  | NA                 | NA                            | NA                 |
| <i>Desi_wild_61348441</i> | NA                                  | <i>Ca_desi_denovo</i> | 61348441                | C/T  | NA                 | NA                            | NA                 |
| <i>Desi_wild_61348804</i> | NA                                  | <i>Ca_desi_denovo</i> | 61348804                | C/T  | NA                 | NA                            | NA                 |
| <i>Desi_wild_61348903</i> | NA                                  | <i>Ca_desi_denovo</i> | 61348903                | A/G  | NA                 | NA                            | NA                 |
| <i>Desi_wild_61348921</i> | NA                                  | <i>Ca_desi_denovo</i> | 61348921                | A/G  | NA                 | NA                            | NA                 |
| <i>Desi_wild_61348927</i> | NA                                  | <i>Ca_desi_denovo</i> | 61348927                | A/G  | NA                 | NA                            | NA                 |
| <i>Desi_wild_61348939</i> | NA                                  | <i>Ca_desi_denovo</i> | 61348939                | C/T  | NA                 | NA                            | NA                 |
| <i>Desi_wild_61349192</i> | NA                                  | <i>Ca_desi_denovo</i> | 61349192                | G/T  | NA                 | NA                            | NA                 |
| <i>Desi_wild_61350900</i> | NA                                  | <i>Ca_desi_denovo</i> | 61350900                | C/T  | NA                 | NA                            | NA                 |
| <i>Desi_wild_61351147</i> | NA                                  | <i>Ca_desi_denovo</i> | 61351147                | C/G  | NA                 | NA                            | NA                 |
| <i>Desi_wild_61351165</i> | NA                                  | <i>Ca_desi_denovo</i> | 61351165                | A/G  | NA                 | NA                            | NA                 |
| <i>Desi_wild_61354540</i> | NA                                  | <i>Ca_desi_denovo</i> | 61354540                | A/G  | NA                 | NA                            | NA                 |
| <i>Desi_wild_61355041</i> | NA                                  | <i>Ca_desi_denovo</i> | 61355041                | C/T  | NA                 | NA                            | NA                 |
| <i>Desi_wild_61356027</i> | NA                                  | <i>Ca_desi_denovo</i> | 61356027                | A/G  | NA                 | NA                            | NA                 |
| <i>Desi_wild_61357098</i> | NA                                  | <i>Ca_desi_denovo</i> | 61357098                | C/T  | NA                 | NA                            | NA                 |
| <i>Desi_wild_61359692</i> | NA                                  | <i>Ca_desi_denovo</i> | 61359692                | C/T  | NA                 | NA                            | NA                 |
| <i>Desi_wild_61359707</i> | NA                                  | <i>Ca_desi_denovo</i> | 61359707                | G/T  | NA                 | NA                            | NA                 |
| <i>Desi_wild_61359811</i> | NA                                  | <i>Ca_desi_denovo</i> | 61359811                | A/C  | NA                 | NA                            | NA                 |
| <i>Desi_wild_61360539</i> | NA                                  | <i>Ca_desi_denovo</i> | 61360539                | A/G  | NA                 | NA                            | NA                 |
| <i>Desi_wild_61362583</i> | NA                                  | <i>Ca_desi_denovo</i> | 61362583                | C/G  | NA                 | NA                            | NA                 |
| <i>Desi_wild_61363057</i> | NA                                  | <i>Ca_desi_denovo</i> | 61363057                | C/G  | NA                 | NA                            | NA                 |
| <i>Desi_wild_61363090</i> | NA                                  | <i>Ca_desi_denovo</i> | 61363090                | C/G  | NA                 | NA                            | NA                 |
| <i>Desi_wild_61364988</i> | NA                                  | <i>Ca_desi_denovo</i> | 61364988                | A/G  | NA                 | NA                            | NA                 |
| <i>Desi_wild_61365057</i> | NA                                  | <i>Ca_desi_denovo</i> | 61365057                | C/G  | NA                 | NA                            | NA                 |
| <i>Desi_wild_61367607</i> | NA                                  | <i>Ca_desi_denovo</i> | 61367607                | C/T  | NA                 | NA                            | NA                 |
| <i>Desi_wild_61367610</i> | NA                                  | <i>Ca_desi_denovo</i> | 61367610                | C/G  | NA                 | NA                            | NA                 |
| <i>Desi_wild_61367625</i> | NA                                  | <i>Ca_desi_denovo</i> | 61367625                | C/G  | NA                 | NA                            | NA                 |
| <i>Desi_wild_61367631</i> | NA                                  | <i>Ca_desi_denovo</i> | 61367631                | C/G  | NA                 | NA                            | NA                 |
| <i>Desi_wild_61369916</i> | NA                                  | <i>Ca_desi_denovo</i> | 61369916                | A/G  | NA                 | NA                            | NA                 |
| <i>Desi_wild_61369932</i> | NA                                  | <i>Ca_desi_denovo</i> | 61369932                | A/G  | NA                 | NA                            | NA                 |
| <i>Desi_wild_61378165</i> | NA                                  | <i>Ca_desi_denovo</i> | 61378165                | A/G  | NA                 | NA                            | NA                 |
| <i>Desi_wild_61383547</i> | NA                                  | <i>Ca_desi_denovo</i> | 61383547                | C/G  | NA                 | NA                            | NA                 |
| <i>Desi_wild_61384240</i> | NA                                  | <i>Ca_desi_denovo</i> | 61384240                | C/T  | NA                 | NA                            | NA                 |
| <i>Desi_wild_61384243</i> | NA                                  | <i>Ca_desi_denovo</i> | 61384243                | C/T  | NA                 | NA                            | NA                 |
| <i>Desi_wild_61386285</i> | NA                                  | <i>Ca_desi_denovo</i> | 61386285                | C/T  | NA                 | NA                            | NA                 |
| <i>Desi_wild_61386763</i> | NA                                  | <i>Ca_desi_denovo</i> | 61386763                | C/T  | NA                 | NA                            | NA                 |
| <i>Desi_wild_61386769</i> | NA                                  | <i>Ca_desi_denovo</i> | 61386769                | C/G  | NA                 | NA                            | NA                 |
| <i>Desi_wild_61386991</i> | NA                                  | <i>Ca_desi_denovo</i> | 61386991                | C/T  | NA                 | NA                            | NA                 |
| <i>Desi_wild_61387689</i> | NA                                  | <i>Ca_desi_denovo</i> | 61387689                | C/T  | NA                 | NA                            | NA                 |
| <i>Desi_wild_61388614</i> | NA                                  | <i>Ca_desi_denovo</i> | 61388614                | C/G  | NA                 | NA                            | NA                 |

| SNP IDs                   | NCBI dbSNP accession IDs (NCBI_SS#) | Chromosomes           | Physical positions (bp) | SNPs | Gene accession IDs | Sequence components of genome | Putative functions |
|---------------------------|-------------------------------------|-----------------------|-------------------------|------|--------------------|-------------------------------|--------------------|
| <i>Desi_wild_61388635</i> | NA                                  | <i>Ca_desi_denovo</i> | 61388635                | A/G  | NA                 | NA                            | NA                 |
| <i>Desi_wild_61390675</i> | NA                                  | <i>Ca_desi_denovo</i> | 61390675                | G/T  | NA                 | NA                            | NA                 |
| <i>Desi_wild_61391863</i> | NA                                  | <i>Ca_desi_denovo</i> | 61391863                | C/T  | NA                 | NA                            | NA                 |
| <i>Desi_wild_61391875</i> | NA                                  | <i>Ca_desi_denovo</i> | 61391875                | C/G  | NA                 | NA                            | NA                 |
| <i>Desi_wild_61392723</i> | NA                                  | <i>Ca_desi_denovo</i> | 61392723                | A/G  | NA                 | NA                            | NA                 |
| <i>Desi_wild_61396425</i> | NA                                  | <i>Ca_desi_denovo</i> | 61396425                | A/G  | NA                 | NA                            | NA                 |
| <i>Desi_wild_61396461</i> | NA                                  | <i>Ca_desi_denovo</i> | 61396461                | C/G  | NA                 | NA                            | NA                 |
| <i>Desi_wild_61396537</i> | NA                                  | <i>Ca_desi_denovo</i> | 61396537                | A/G  | NA                 | NA                            | NA                 |
| <i>Desi_wild_61399321</i> | NA                                  | <i>Ca_desi_denovo</i> | 61399321                | A/G  | NA                 | NA                            | NA                 |
| <i>Desi_wild_61399336</i> | NA                                  | <i>Ca_desi_denovo</i> | 61399336                | C/T  | NA                 | NA                            | NA                 |
| <i>Desi_wild_61399701</i> | NA                                  | <i>Ca_desi_denovo</i> | 61399701                | C/T  | NA                 | NA                            | NA                 |
| <i>Desi_wild_61399704</i> | NA                                  | <i>Ca_desi_denovo</i> | 61399704                | C/G  | NA                 | NA                            | NA                 |
| <i>Desi_wild_61399719</i> | NA                                  | <i>Ca_desi_denovo</i> | 61399719                | C/T  | NA                 | NA                            | NA                 |
| <i>Desi_wild_61402869</i> | NA                                  | <i>Ca_desi_denovo</i> | 61402869                | C/T  | NA                 | NA                            | NA                 |
| <i>Desi_wild_61403308</i> | NA                                  | <i>Ca_desi_denovo</i> | 61403308                | A/G  | NA                 | NA                            | NA                 |
| <i>Desi_wild_61403311</i> | NA                                  | <i>Ca_desi_denovo</i> | 61403311                | C/G  | NA                 | NA                            | NA                 |
| <i>Desi_wild_61403731</i> | NA                                  | <i>Ca_desi_denovo</i> | 61403731                | A/G  | NA                 | NA                            | NA                 |
| <i>Desi_wild_61407022</i> | NA                                  | <i>Ca_desi_denovo</i> | 61407022                | A/G  | NA                 | NA                            | NA                 |
| <i>Desi_wild_61407394</i> | NA                                  | <i>Ca_desi_denovo</i> | 61407394                | A/G  | NA                 | NA                            | NA                 |
| <i>Desi_wild_61408123</i> | NA                                  | <i>Ca_desi_denovo</i> | 61408123                | C/T  | NA                 | NA                            | NA                 |
| <i>Desi_wild_61410658</i> | NA                                  | <i>Ca_desi_denovo</i> | 61410658                | C/T  | NA                 | NA                            | NA                 |
| <i>Desi_wild_61410670</i> | NA                                  | <i>Ca_desi_denovo</i> | 61410670                | A/G  | NA                 | NA                            | NA                 |
| <i>Desi_wild_61410684</i> | NA                                  | <i>Ca_desi_denovo</i> | 61410684                | C/T  | NA                 | NA                            | NA                 |
| <i>Desi_wild_61411344</i> | NA                                  | <i>Ca_desi_denovo</i> | 61411344                | A/T  | NA                 | NA                            | NA                 |
| <i>Desi_wild_61411354</i> | NA                                  | <i>Ca_desi_denovo</i> | 61411354                | C/G  | NA                 | NA                            | NA                 |
| <i>Desi_wild_61411360</i> | NA                                  | <i>Ca_desi_denovo</i> | 61411360                | C/G  | NA                 | NA                            | NA                 |
| <i>Desi_wild_61411375</i> | NA                                  | <i>Ca_desi_denovo</i> | 61411375                | C/G  | NA                 | NA                            | NA                 |
| <i>Desi_wild_61411402</i> | NA                                  | <i>Ca_desi_denovo</i> | 61411402                | A/G  | NA                 | NA                            | NA                 |
| <i>Desi_wild_61412527</i> | NA                                  | <i>Ca_desi_denovo</i> | 61412527                | C/G  | NA                 | NA                            | NA                 |
| <i>Desi_wild_61412531</i> | NA                                  | <i>Ca_desi_denovo</i> | 61412531                | A/C  | NA                 | NA                            | NA                 |
| <i>Desi_wild_61412561</i> | NA                                  | <i>Ca_desi_denovo</i> | 61412561                | C/G  | NA                 | NA                            | NA                 |
| <i>Desi_wild_61412570</i> | NA                                  | <i>Ca_desi_denovo</i> | 61412570                | C/T  | NA                 | NA                            | NA                 |
| <i>Desi_wild_61414865</i> | NA                                  | <i>Ca_desi_denovo</i> | 61414865                | C/T  | NA                 | NA                            | NA                 |
| <i>Desi_wild_61420257</i> | NA                                  | <i>Ca_desi_denovo</i> | 61420257                | A/G  | NA                 | NA                            | NA                 |
| <i>Desi_wild_61420281</i> | NA                                  | <i>Ca_desi_denovo</i> | 61420281                | A/C  | NA                 | NA                            | NA                 |
| <i>Desi_wild_61420701</i> | NA                                  | <i>Ca_desi_denovo</i> | 61420701                | C/T  | NA                 | NA                            | NA                 |
| <i>Desi_wild_61423446</i> | NA                                  | <i>Ca_desi_denovo</i> | 61423446                | A/G  | NA                 | NA                            | NA                 |
| <i>Desi_wild_61423975</i> | NA                                  | <i>Ca_desi_denovo</i> | 61423975                | A/G  | NA                 | NA                            | NA                 |
| <i>Desi_wild_61424259</i> | NA                                  | <i>Ca_desi_denovo</i> | 61424259                | C/T  | NA                 | NA                            | NA                 |
| <i>Desi_wild_61425446</i> | NA                                  | <i>Ca_desi_denovo</i> | 61425446                | C/G  | NA                 | NA                            | NA                 |
| <i>Desi_wild_61425448</i> | NA                                  | <i>Ca_desi_denovo</i> | 61425448                | A/C  | NA                 | NA                            | NA                 |
| <i>Desi_wild_61425468</i> | NA                                  | <i>Ca_desi_denovo</i> | 61425468                | C/G  | NA                 | NA                            | NA                 |
| <i>Desi_wild_61429282</i> | NA                                  | <i>Ca_desi_denovo</i> | 61429282                | C/T  | NA                 | NA                            | NA                 |
| <i>Desi_wild_61430877</i> | NA                                  | <i>Ca_desi_denovo</i> | 61430877                | C/T  | NA                 | NA                            | NA                 |

| SNP IDs                   | NCBI dbSNP accession IDs (NCBI_SS#) | Chromosomes           | Physical positions (bp) | SNPs | Gene accession IDs | Sequence components of genome | Putative functions |
|---------------------------|-------------------------------------|-----------------------|-------------------------|------|--------------------|-------------------------------|--------------------|
| <i>Desi_wild_61433527</i> | NA                                  | <i>Ca_desi_denovo</i> | 61433527                | C/T  | NA                 | NA                            | NA                 |
| <i>Desi_wild_61434279</i> | NA                                  | <i>Ca_desi_denovo</i> | 61434279                | A/G  | NA                 | NA                            | NA                 |
| <i>Desi_wild_61434300</i> | NA                                  | <i>Ca_desi_denovo</i> | 61434300                | C/G  | NA                 | NA                            | NA                 |
| <i>Desi_wild_61436427</i> | NA                                  | <i>Ca_desi_denovo</i> | 61436427                | C/G  | NA                 | NA                            | NA                 |
| <i>Desi_wild_61436428</i> | NA                                  | <i>Ca_desi_denovo</i> | 61436428                | C/G  | NA                 | NA                            | NA                 |
| <i>Desi_wild_61436429</i> | NA                                  | <i>Ca_desi_denovo</i> | 61436429                | A/T  | NA                 | NA                            | NA                 |
| <i>Desi_wild_61438751</i> | NA                                  | <i>Ca_desi_denovo</i> | 61438751                | C/T  | NA                 | NA                            | NA                 |
| <i>Desi_wild_61442475</i> | NA                                  | <i>Ca_desi_denovo</i> | 61442475                | C/T  | NA                 | NA                            | NA                 |
| <i>Desi_wild_61444789</i> | NA                                  | <i>Ca_desi_denovo</i> | 61444789                | A/G  | NA                 | NA                            | NA                 |
| <i>Desi_wild_61444852</i> | NA                                  | <i>Ca_desi_denovo</i> | 61444852                | C/G  | NA                 | NA                            | NA                 |
| <i>Desi_wild_61444855</i> | NA                                  | <i>Ca_desi_denovo</i> | 61444855                | A/G  | NA                 | NA                            | NA                 |
| <i>Desi_wild_61444858</i> | NA                                  | <i>Ca_desi_denovo</i> | 61444858                | C/T  | NA                 | NA                            | NA                 |
| <i>Desi_wild_61445812</i> | NA                                  | <i>Ca_desi_denovo</i> | 61445812                | A/G  | NA                 | NA                            | NA                 |
| <i>Desi_wild_61445824</i> | NA                                  | <i>Ca_desi_denovo</i> | 61445824                | G/T  | NA                 | NA                            | NA                 |
| <i>Desi_wild_61445925</i> | NA                                  | <i>Ca_desi_denovo</i> | 61445925                | C/T  | NA                 | NA                            | NA                 |
| <i>Desi_wild_61445929</i> | NA                                  | <i>Ca_desi_denovo</i> | 61445929                | A/G  | NA                 | NA                            | NA                 |
| <i>Desi_wild_61445961</i> | NA                                  | <i>Ca_desi_denovo</i> | 61445961                | A/G  | NA                 | NA                            | NA                 |
| <i>Desi_wild_61445969</i> | NA                                  | <i>Ca_desi_denovo</i> | 61445969                | C/T  | NA                 | NA                            | NA                 |
| <i>Desi_wild_61450084</i> | NA                                  | <i>Ca_desi_denovo</i> | 61450084                | C/T  | NA                 | NA                            | NA                 |
| <i>Desi_wild_61450117</i> | NA                                  | <i>Ca_desi_denovo</i> | 61450117                | A/G  | NA                 | NA                            | NA                 |
| <i>Desi_wild_61450210</i> | NA                                  | <i>Ca_desi_denovo</i> | 61450210                | C/G  | NA                 | NA                            | NA                 |
| <i>Desi_wild_61451025</i> | NA                                  | <i>Ca_desi_denovo</i> | 61451025                | G/T  | NA                 | NA                            | NA                 |
| <i>Desi_wild_61457356</i> | NA                                  | <i>Ca_desi_denovo</i> | 61457356                | C/G  | NA                 | NA                            | NA                 |
| <i>Desi_wild_61457923</i> | NA                                  | <i>Ca_desi_denovo</i> | 61457923                | C/T  | NA                 | NA                            | NA                 |
| <i>Desi_wild_61460128</i> | NA                                  | <i>Ca_desi_denovo</i> | 61460128                | C/G  | NA                 | NA                            | NA                 |
| <i>Desi_wild_61460133</i> | NA                                  | <i>Ca_desi_denovo</i> | 61460133                | C/T  | NA                 | NA                            | NA                 |
| <i>Desi_wild_61460143</i> | NA                                  | <i>Ca_desi_denovo</i> | 61460143                | C/T  | NA                 | NA                            | NA                 |
| <i>Desi_wild_61463194</i> | NA                                  | <i>Ca_desi_denovo</i> | 61463194                | C/G  | NA                 | NA                            | NA                 |
| <i>Desi_wild_61465147</i> | NA                                  | <i>Ca_desi_denovo</i> | 61465147                | A/C  | NA                 | NA                            | NA                 |
| <i>Desi_wild_61465168</i> | NA                                  | <i>Ca_desi_denovo</i> | 61465168                | A/C  | NA                 | NA                            | NA                 |
| <i>Desi_wild_61465897</i> | NA                                  | <i>Ca_desi_denovo</i> | 61465897                | C/G  | NA                 | NA                            | NA                 |
| <i>Desi_wild_61465918</i> | NA                                  | <i>Ca_desi_denovo</i> | 61465918                | A/G  | NA                 | NA                            | NA                 |
| <i>Desi_wild_61465921</i> | NA                                  | <i>Ca_desi_denovo</i> | 61465921                | A/G  | NA                 | NA                            | NA                 |
| <i>Desi_wild_61473097</i> | NA                                  | <i>Ca_desi_denovo</i> | 61473097                | A/G  | NA                 | NA                            | NA                 |
| <i>Desi_wild_61475032</i> | NA                                  | <i>Ca_desi_denovo</i> | 61475032                | C/G  | NA                 | NA                            | NA                 |
| <i>Desi_wild_61476034</i> | NA                                  | <i>Ca_desi_denovo</i> | 61476034                | C/G  | NA                 | NA                            | NA                 |
| <i>Desi_wild_61476042</i> | NA                                  | <i>Ca_desi_denovo</i> | 61476042                | A/G  | NA                 | NA                            | NA                 |
| <i>Desi_wild_61477254</i> | NA                                  | <i>Ca_desi_denovo</i> | 61477254                | A/C  | NA                 | NA                            | NA                 |
| <i>Desi_wild_61477257</i> | NA                                  | <i>Ca_desi_denovo</i> | 61477257                | C/T  | NA                 | NA                            | NA                 |
| <i>Desi_wild_61479024</i> | NA                                  | <i>Ca_desi_denovo</i> | 61479024                | C/T  | NA                 | NA                            | NA                 |
| <i>Desi_wild_61479027</i> | NA                                  | <i>Ca_desi_denovo</i> | 61479027                | C/G  | NA                 | NA                            | NA                 |
| <i>Desi_wild_61479376</i> | NA                                  | <i>Ca_desi_denovo</i> | 61479376                | C/G  | NA                 | NA                            | NA                 |
| <i>Desi_wild_61480213</i> | NA                                  | <i>Ca_desi_denovo</i> | 61480213                | C/G  | NA                 | NA                            | NA                 |
| <i>Desi_wild_61480234</i> | NA                                  | <i>Ca_desi_denovo</i> | 61480234                | A/G  | NA                 | NA                            | NA                 |

| SNP IDs                   | NCBI dbSNP accession IDs (NCBI_SS#) | Chromosomes           | Physical positions (bp) | SNPs | Gene accession IDs | Sequence components of genome | Putative functions |
|---------------------------|-------------------------------------|-----------------------|-------------------------|------|--------------------|-------------------------------|--------------------|
| <i>Desi_wild_61483348</i> | NA                                  | <i>Ca_desi_denovo</i> | 61483348                | A/G  | NA                 | NA                            | NA                 |
| <i>Desi_wild_61485699</i> | NA                                  | <i>Ca_desi_denovo</i> | 61485699                | A/G  | NA                 | NA                            | NA                 |
| <i>Desi_wild_61485700</i> | NA                                  | <i>Ca_desi_denovo</i> | 61485700                | C/T  | NA                 | NA                            | NA                 |
| <i>Desi_wild_61485704</i> | NA                                  | <i>Ca_desi_denovo</i> | 61485704                | A/G  | NA                 | NA                            | NA                 |
| <i>Desi_wild_61485711</i> | NA                                  | <i>Ca_desi_denovo</i> | 61485711                | C/G  | NA                 | NA                            | NA                 |
| <i>Desi_wild_61485978</i> | NA                                  | <i>Ca_desi_denovo</i> | 61485978                | G/T  | NA                 | NA                            | NA                 |
| <i>Desi_wild_61485987</i> | NA                                  | <i>Ca_desi_denovo</i> | 61485987                | C/T  | NA                 | NA                            | NA                 |
| <i>Desi_wild_61486014</i> | NA                                  | <i>Ca_desi_denovo</i> | 61486014                | A/G  | NA                 | NA                            | NA                 |
| <i>Desi_wild_61491201</i> | NA                                  | <i>Ca_desi_denovo</i> | 61491201                | C/T  | NA                 | NA                            | NA                 |
| <i>Desi_wild_61491217</i> | NA                                  | <i>Ca_desi_denovo</i> | 61491217                | C/T  | NA                 | NA                            | NA                 |
| <i>Desi_wild_61491283</i> | NA                                  | <i>Ca_desi_denovo</i> | 61491283                | A/C  | NA                 | NA                            | NA                 |
| <i>Desi_wild_61491298</i> | NA                                  | <i>Ca_desi_denovo</i> | 61491298                | C/G  | NA                 | NA                            | NA                 |
| <i>Desi_wild_61491334</i> | NA                                  | <i>Ca_desi_denovo</i> | 61491334                | C/G  | NA                 | NA                            | NA                 |
| <i>Desi_wild_61491951</i> | NA                                  | <i>Ca_desi_denovo</i> | 61491951                | C/T  | NA                 | NA                            | NA                 |
| <i>Desi_wild_61493232</i> | NA                                  | <i>Ca_desi_denovo</i> | 61493232                | C/G  | NA                 | NA                            | NA                 |
| <i>Desi_wild_61493250</i> | NA                                  | <i>Ca_desi_denovo</i> | 61493250                | A/G  | NA                 | NA                            | NA                 |
| <i>Desi_wild_61497514</i> | NA                                  | <i>Ca_desi_denovo</i> | 61497514                | A/G  | NA                 | NA                            | NA                 |
| <i>Desi_wild_61500190</i> | NA                                  | <i>Ca_desi_denovo</i> | 61500190                | C/G  | NA                 | NA                            | NA                 |
| <i>Desi_wild_61500191</i> | NA                                  | <i>Ca_desi_denovo</i> | 61500191                | A/G  | NA                 | NA                            | NA                 |
| <i>Desi_wild_61502818</i> | NA                                  | <i>Ca_desi_denovo</i> | 61502818                | C/T  | NA                 | NA                            | NA                 |
| <i>Desi_wild_61502839</i> | NA                                  | <i>Ca_desi_denovo</i> | 61502839                | A/G  | NA                 | NA                            | NA                 |
| <i>Desi_wild_61502857</i> | NA                                  | <i>Ca_desi_denovo</i> | 61502857                | C/T  | NA                 | NA                            | NA                 |
| <i>Desi_wild_61502878</i> | NA                                  | <i>Ca_desi_denovo</i> | 61502878                | C/T  | NA                 | NA                            | NA                 |
| <i>Desi_wild_61510268</i> | NA                                  | <i>Ca_desi_denovo</i> | 61510268                | A/G  | NA                 | NA                            | NA                 |
| <i>Desi_wild_61516126</i> | NA                                  | <i>Ca_desi_denovo</i> | 61516126                | G/T  | NA                 | NA                            | NA                 |
| <i>Desi_wild_61518733</i> | NA                                  | <i>Ca_desi_denovo</i> | 61518733                | C/G  | NA                 | NA                            | NA                 |
| <i>Desi_wild_61518757</i> | NA                                  | <i>Ca_desi_denovo</i> | 61518757                | C/T  | NA                 | NA                            | NA                 |
| <i>Desi_wild_61521225</i> | NA                                  | <i>Ca_desi_denovo</i> | 61521225                | A/G  | NA                 | NA                            | NA                 |
| <i>Desi_wild_61523681</i> | NA                                  | <i>Ca_desi_denovo</i> | 61523681                | C/T  | NA                 | NA                            | NA                 |
| <i>Desi_wild_61524504</i> | NA                                  | <i>Ca_desi_denovo</i> | 61524504                | A/G  | NA                 | NA                            | NA                 |
| <i>Desi_wild_61528079</i> | NA                                  | <i>Ca_desi_denovo</i> | 61528079                | A/G  | NA                 | NA                            | NA                 |
| <i>Desi_wild_61528083</i> | NA                                  | <i>Ca_desi_denovo</i> | 61528083                | A/T  | NA                 | NA                            | NA                 |
| <i>Desi_wild_61532209</i> | NA                                  | <i>Ca_desi_denovo</i> | 61532209                | C/T  | NA                 | NA                            | NA                 |
| <i>Desi_wild_61532260</i> | NA                                  | <i>Ca_desi_denovo</i> | 61532260                | A/G  | NA                 | NA                            | NA                 |
| <i>Desi_wild_61532275</i> | NA                                  | <i>Ca_desi_denovo</i> | 61532275                | C/T  | NA                 | NA                            | NA                 |
| <i>Desi_wild_61534757</i> | NA                                  | <i>Ca_desi_denovo</i> | 61534757                | C/T  | NA                 | NA                            | NA                 |
| <i>Desi_wild_61538680</i> | NA                                  | <i>Ca_desi_denovo</i> | 61538680                | A/G  | NA                 | NA                            | NA                 |
| <i>Desi_wild_61538684</i> | NA                                  | <i>Ca_desi_denovo</i> | 61538684                | C/T  | NA                 | NA                            | NA                 |
| <i>Desi_wild_61539804</i> | NA                                  | <i>Ca_desi_denovo</i> | 61539804                | A/G  | NA                 | NA                            | NA                 |
| <i>Desi_wild_61541816</i> | NA                                  | <i>Ca_desi_denovo</i> | 61541816                | G/T  | NA                 | NA                            | NA                 |
| <i>Desi_wild_61542544</i> | NA                                  | <i>Ca_desi_denovo</i> | 61542544                | C/G  | NA                 | NA                            | NA                 |
| <i>Desi_wild_61542547</i> | NA                                  | <i>Ca_desi_denovo</i> | 61542547                | A/T  | NA                 | NA                            | NA                 |
| <i>Desi_wild_61542553</i> | NA                                  | <i>Ca_desi_denovo</i> | 61542553                | A/G  | NA                 | NA                            | NA                 |
| <i>Desi_wild_61542554</i> | NA                                  | <i>Ca_desi_denovo</i> | 61542554                | C/T  | NA                 | NA                            | NA                 |

| SNP IDs                   | NCBI dbSNP accession IDs (NCBI_SS#) | Chromosomes           | Physical positions (bp) | SNPs | Gene accession IDs | Sequence components of genome | Putative functions |
|---------------------------|-------------------------------------|-----------------------|-------------------------|------|--------------------|-------------------------------|--------------------|
| <i>Desi_wild_61543182</i> | NA                                  | <i>Ca_desi_denovo</i> | 61543182                | A/G  | NA                 | NA                            | NA                 |
| <i>Desi_wild_61543185</i> | NA                                  | <i>Ca_desi_denovo</i> | 61543185                | C/G  | NA                 | NA                            | NA                 |
| <i>Desi_wild_61543236</i> | NA                                  | <i>Ca_desi_denovo</i> | 61543236                | C/T  | NA                 | NA                            | NA                 |
| <i>Desi_wild_61543361</i> | NA                                  | <i>Ca_desi_denovo</i> | 61543361                | C/T  | NA                 | NA                            | NA                 |
| <i>Desi_wild_61548048</i> | NA                                  | <i>Ca_desi_denovo</i> | 61548048                | C/G  | NA                 | NA                            | NA                 |
| <i>Desi_wild_61549404</i> | NA                                  | <i>Ca_desi_denovo</i> | 61549404                | G/T  | NA                 | NA                            | NA                 |
| <i>Desi_wild_61551108</i> | NA                                  | <i>Ca_desi_denovo</i> | 61551108                | C/T  | NA                 | NA                            | NA                 |
| <i>Desi_wild_61551114</i> | NA                                  | <i>Ca_desi_denovo</i> | 61551114                | C/T  | NA                 | NA                            | NA                 |
| <i>Desi_wild_61551135</i> | NA                                  | <i>Ca_desi_denovo</i> | 61551135                | A/G  | NA                 | NA                            | NA                 |
| <i>Desi_wild_61551485</i> | NA                                  | <i>Ca_desi_denovo</i> | 61551485                | C/T  | NA                 | NA                            | NA                 |
| <i>Desi_wild_61551500</i> | NA                                  | <i>Ca_desi_denovo</i> | 61551500                | C/G  | NA                 | NA                            | NA                 |
| <i>Desi_wild_61551501</i> | NA                                  | <i>Ca_desi_denovo</i> | 61551501                | A/T  | NA                 | NA                            | NA                 |
| <i>Desi_wild_61551503</i> | NA                                  | <i>Ca_desi_denovo</i> | 61551503                | C/T  | NA                 | NA                            | NA                 |
| <i>Desi_wild_61555730</i> | NA                                  | <i>Ca_desi_denovo</i> | 61555730                | C/T  | NA                 | NA                            | NA                 |
| <i>Desi_wild_61555755</i> | NA                                  | <i>Ca_desi_denovo</i> | 61555755                | C/T  | NA                 | NA                            | NA                 |
| <i>Desi_wild_61555794</i> | NA                                  | <i>Ca_desi_denovo</i> | 61555794                | C/G  | NA                 | NA                            | NA                 |
| <i>Desi_wild_61555800</i> | NA                                  | <i>Ca_desi_denovo</i> | 61555800                | C/T  | NA                 | NA                            | NA                 |
| <i>Desi_wild_61559281</i> | NA                                  | <i>Ca_desi_denovo</i> | 61559281                | C/T  | NA                 | NA                            | NA                 |
| <i>Desi_wild_61561401</i> | NA                                  | <i>Ca_desi_denovo</i> | 61561401                | C/T  | NA                 | NA                            | NA                 |
| <i>Desi_wild_61561408</i> | NA                                  | <i>Ca_desi_denovo</i> | 61561408                | C/G  | NA                 | NA                            | NA                 |
| <i>Desi_wild_61561410</i> | NA                                  | <i>Ca_desi_denovo</i> | 61561410                | A/G  | NA                 | NA                            | NA                 |
| <i>Desi_wild_61561440</i> | NA                                  | <i>Ca_desi_denovo</i> | 61561440                | C/T  | NA                 | NA                            | NA                 |
| <i>Desi_wild_61564698</i> | NA                                  | <i>Ca_desi_denovo</i> | 61564698                | C/T  | NA                 | NA                            | NA                 |
| <i>Desi_wild_61564701</i> | NA                                  | <i>Ca_desi_denovo</i> | 61564701                | C/G  | NA                 | NA                            | NA                 |
| <i>Desi_wild_61564948</i> | NA                                  | <i>Ca_desi_denovo</i> | 61564948                | A/G  | NA                 | NA                            | NA                 |
| <i>Desi_wild_61570927</i> | NA                                  | <i>Ca_desi_denovo</i> | 61570927                | C/T  | NA                 | NA                            | NA                 |
| <i>Desi_wild_61572670</i> | NA                                  | <i>Ca_desi_denovo</i> | 61572670                | C/T  | NA                 | NA                            | NA                 |
| <i>Desi_wild_61572712</i> | NA                                  | <i>Ca_desi_denovo</i> | 61572712                | A/G  | NA                 | NA                            | NA                 |
| <i>Desi_wild_61572715</i> | NA                                  | <i>Ca_desi_denovo</i> | 61572715                | C/G  | NA                 | NA                            | NA                 |
| <i>Desi_wild_61576957</i> | NA                                  | <i>Ca_desi_denovo</i> | 61576957                | C/G  | NA                 | NA                            | NA                 |
| <i>Desi_wild_61576966</i> | NA                                  | <i>Ca_desi_denovo</i> | 61576966                | G/T  | NA                 | NA                            | NA                 |
| <i>Desi_wild_61576969</i> | NA                                  | <i>Ca_desi_denovo</i> | 61576969                | A/G  | NA                 | NA                            | NA                 |
| <i>Desi_wild_61576990</i> | NA                                  | <i>Ca_desi_denovo</i> | 61576990                | C/G  | NA                 | NA                            | NA                 |
| <i>Desi_wild_61581504</i> | NA                                  | <i>Ca_desi_denovo</i> | 61581504                | C/G  | NA                 | NA                            | NA                 |
| <i>Desi_wild_61584187</i> | NA                                  | <i>Ca_desi_denovo</i> | 61584187                | A/G  | NA                 | NA                            | NA                 |
| <i>Desi_wild_61584193</i> | NA                                  | <i>Ca_desi_denovo</i> | 61584193                | A/G  | NA                 | NA                            | NA                 |
| <i>Desi_wild_61584753</i> | NA                                  | <i>Ca_desi_denovo</i> | 61584753                | C/G  | NA                 | NA                            | NA                 |
| <i>Desi_wild_61586766</i> | NA                                  | <i>Ca_desi_denovo</i> | 61586766                | C/T  | NA                 | NA                            | NA                 |
| <i>Desi_wild_61601213</i> | NA                                  | <i>Ca_desi_denovo</i> | 61601213                | C/G  | NA                 | NA                            | NA                 |
| <i>Desi_wild_61601260</i> | NA                                  | <i>Ca_desi_denovo</i> | 61601260                | C/G  | NA                 | NA                            | NA                 |
| <i>Desi_wild_61604743</i> | NA                                  | <i>Ca_desi_denovo</i> | 61604743                | A/G  | NA                 | NA                            | NA                 |
| <i>Desi_wild_61605226</i> | NA                                  | <i>Ca_desi_denovo</i> | 61605226                | C/G  | NA                 | NA                            | NA                 |
| <i>Desi_wild_61605244</i> | NA                                  | <i>Ca_desi_denovo</i> | 61605244                | C/G  | NA                 | NA                            | NA                 |
| <i>Desi_wild_61606230</i> | NA                                  | <i>Ca_desi_denovo</i> | 61606230                | C/T  | NA                 | NA                            | NA                 |

| SNP IDs                   | NCBI dbSNP accession IDs (NCBI_SS#) | Chromosomes           | Physical positions (bp) | SNPs | Gene accession IDs | Sequence components of genome | Putative functions |
|---------------------------|-------------------------------------|-----------------------|-------------------------|------|--------------------|-------------------------------|--------------------|
| <i>Desi_wild_61606999</i> | NA                                  | <i>Ca_desi_denovo</i> | 61606999                | A/G  | NA                 | NA                            | NA                 |
| <i>Desi_wild_61610413</i> | NA                                  | <i>Ca_desi_denovo</i> | 61610413                | C/T  | NA                 | NA                            | NA                 |
| <i>Desi_wild_61610443</i> | NA                                  | <i>Ca_desi_denovo</i> | 61610443                | A/G  | NA                 | NA                            | NA                 |
| <i>Desi_wild_61610479</i> | NA                                  | <i>Ca_desi_denovo</i> | 61610479                | C/T  | NA                 | NA                            | NA                 |
| <i>Desi_wild_61610491</i> | NA                                  | <i>Ca_desi_denovo</i> | 61610491                | C/T  | NA                 | NA                            | NA                 |
| <i>Desi_wild_61611130</i> | NA                                  | <i>Ca_desi_denovo</i> | 61611130                | A/G  | NA                 | NA                            | NA                 |
| <i>Desi_wild_61612311</i> | NA                                  | <i>Ca_desi_denovo</i> | 61612311                | G/T  | NA                 | NA                            | NA                 |
| <i>Desi_wild_61612347</i> | NA                                  | <i>Ca_desi_denovo</i> | 61612347                | A/G  | NA                 | NA                            | NA                 |
| <i>Desi_wild_61617031</i> | NA                                  | <i>Ca_desi_denovo</i> | 61617031                | A/G  | NA                 | NA                            | NA                 |
| <i>Desi_wild_61617417</i> | NA                                  | <i>Ca_desi_denovo</i> | 61617417                | A/G  | NA                 | NA                            | NA                 |
| <i>Desi_wild_61617418</i> | NA                                  | <i>Ca_desi_denovo</i> | 61617418                | C/G  | NA                 | NA                            | NA                 |
| <i>Desi_wild_61619635</i> | NA                                  | <i>Ca_desi_denovo</i> | 61619635                | A/G  | NA                 | NA                            | NA                 |
| <i>Desi_wild_61619651</i> | NA                                  | <i>Ca_desi_denovo</i> | 61619651                | C/T  | NA                 | NA                            | NA                 |
| <i>Desi_wild_61619659</i> | NA                                  | <i>Ca_desi_denovo</i> | 61619659                | A/C  | NA                 | NA                            | NA                 |
| <i>Desi_wild_61620753</i> | NA                                  | <i>Ca_desi_denovo</i> | 61620753                | A/G  | NA                 | NA                            | NA                 |
| <i>Desi_wild_61620807</i> | NA                                  | <i>Ca_desi_denovo</i> | 61620807                | C/T  | NA                 | NA                            | NA                 |
| <i>Desi_wild_61621206</i> | NA                                  | <i>Ca_desi_denovo</i> | 61621206                | A/G  | NA                 | NA                            | NA                 |
| <i>Desi_wild_61621215</i> | NA                                  | <i>Ca_desi_denovo</i> | 61621215                | C/G  | NA                 | NA                            | NA                 |
| <i>Desi_wild_61621236</i> | NA                                  | <i>Ca_desi_denovo</i> | 61621236                | C/G  | NA                 | NA                            | NA                 |
| <i>Desi_wild_61621245</i> | NA                                  | <i>Ca_desi_denovo</i> | 61621245                | A/G  | NA                 | NA                            | NA                 |
| <i>Desi_wild_61626235</i> | NA                                  | <i>Ca_desi_denovo</i> | 61626235                | A/C  | NA                 | NA                            | NA                 |
| <i>Desi_wild_61626246</i> | NA                                  | <i>Ca_desi_denovo</i> | 61626246                | A/C  | NA                 | NA                            | NA                 |
| <i>Desi_wild_61631886</i> | NA                                  | <i>Ca_desi_denovo</i> | 61631886                | C/T  | NA                 | NA                            | NA                 |
| <i>Desi_wild_61633956</i> | NA                                  | <i>Ca_desi_denovo</i> | 61633956                | A/G  | NA                 | NA                            | NA                 |
| <i>Desi_wild_61638238</i> | NA                                  | <i>Ca_desi_denovo</i> | 61638238                | C/G  | NA                 | NA                            | NA                 |
| <i>Desi_wild_61638241</i> | NA                                  | <i>Ca_desi_denovo</i> | 61638241                | C/T  | NA                 | NA                            | NA                 |
| <i>Desi_wild_61638321</i> | NA                                  | <i>Ca_desi_denovo</i> | 61638321                | C/G  | NA                 | NA                            | NA                 |
| <i>Desi_wild_61638331</i> | NA                                  | <i>Ca_desi_denovo</i> | 61638331                | A/G  | NA                 | NA                            | NA                 |
| <i>Desi_wild_61638366</i> | NA                                  | <i>Ca_desi_denovo</i> | 61638366                | C/T  | NA                 | NA                            | NA                 |
| <i>Desi_wild_61641204</i> | NA                                  | <i>Ca_desi_denovo</i> | 61641204                | C/T  | NA                 | NA                            | NA                 |
| <i>Desi_wild_61641210</i> | NA                                  | <i>Ca_desi_denovo</i> | 61641210                | A/G  | NA                 | NA                            | NA                 |
| <i>Desi_wild_61645489</i> | NA                                  | <i>Ca_desi_denovo</i> | 61645489                | A/G  | NA                 | NA                            | NA                 |
| <i>Desi_wild_61645505</i> | NA                                  | <i>Ca_desi_denovo</i> | 61645505                | C/T  | NA                 | NA                            | NA                 |
| <i>Desi_wild_61646378</i> | NA                                  | <i>Ca_desi_denovo</i> | 61646378                | C/G  | NA                 | NA                            | NA                 |
| <i>Desi_wild_61646794</i> | NA                                  | <i>Ca_desi_denovo</i> | 61646794                | C/T  | NA                 | NA                            | NA                 |
| <i>Desi_wild_61646818</i> | NA                                  | <i>Ca_desi_denovo</i> | 61646818                | C/T  | NA                 | NA                            | NA                 |
| <i>Desi_wild_61651132</i> | NA                                  | <i>Ca_desi_denovo</i> | 61651132                | G/T  | NA                 | NA                            | NA                 |
| <i>Desi_wild_61657284</i> | NA                                  | <i>Ca_desi_denovo</i> | 61657284                | C/G  | NA                 | NA                            | NA                 |
| <i>Desi_wild_61657296</i> | NA                                  | <i>Ca_desi_denovo</i> | 61657296                | C/G  | NA                 | NA                            | NA                 |
| <i>Desi_wild_61657485</i> | NA                                  | <i>Ca_desi_denovo</i> | 61657485                | C/G  | NA                 | NA                            | NA                 |
| <i>Desi_wild_61657504</i> | NA                                  | <i>Ca_desi_denovo</i> | 61657504                | C/T  | NA                 | NA                            | NA                 |
| <i>Desi_wild_61661765</i> | NA                                  | <i>Ca_desi_denovo</i> | 61661765                | A/G  | NA                 | NA                            | NA                 |
| <i>Desi_wild_61661766</i> | NA                                  | <i>Ca_desi_denovo</i> | 61661766                | A/G  | NA                 | NA                            | NA                 |
| <i>Desi_wild_61663797</i> | NA                                  | <i>Ca_desi_denovo</i> | 61663797                | C/T  | NA                 | NA                            | NA                 |

| SNP IDs                   | NCBI dbSNP accession IDs (NCBI_SS#) | Chromosomes           | Physical positions (bp) | SNPs | Gene accession IDs | Sequence components of genome | Putative functions |
|---------------------------|-------------------------------------|-----------------------|-------------------------|------|--------------------|-------------------------------|--------------------|
| <i>Desi_wild_61664016</i> | NA                                  | <i>Ca_desi_denovo</i> | 61664016                | A/G  | NA                 | NA                            | NA                 |
| <i>Desi_wild_61666075</i> | NA                                  | <i>Ca_desi_denovo</i> | 61666075                | C/T  | NA                 | NA                            | NA                 |
| <i>Desi_wild_61668579</i> | NA                                  | <i>Ca_desi_denovo</i> | 61668579                | C/G  | NA                 | NA                            | NA                 |
| <i>Desi_wild_61669395</i> | NA                                  | <i>Ca_desi_denovo</i> | 61669395                | C/T  | NA                 | NA                            | NA                 |
| <i>Desi_wild_61670439</i> | NA                                  | <i>Ca_desi_denovo</i> | 61670439                | C/G  | NA                 | NA                            | NA                 |
| <i>Desi_wild_61670484</i> | NA                                  | <i>Ca_desi_denovo</i> | 61670484                | A/G  | NA                 | NA                            | NA                 |
| <i>Desi_wild_61671778</i> | NA                                  | <i>Ca_desi_denovo</i> | 61671778                | A/G  | NA                 | NA                            | NA                 |
| <i>Desi_wild_61673385</i> | NA                                  | <i>Ca_desi_denovo</i> | 61673385                | A/G  | NA                 | NA                            | NA                 |
| <i>Desi_wild_61673388</i> | NA                                  | <i>Ca_desi_denovo</i> | 61673388                | C/G  | NA                 | NA                            | NA                 |
| <i>Desi_wild_61674482</i> | NA                                  | <i>Ca_desi_denovo</i> | 61674482                | A/G  | NA                 | NA                            | NA                 |
| <i>Desi_wild_61675057</i> | NA                                  | <i>Ca_desi_denovo</i> | 61675057                | C/G  | NA                 | NA                            | NA                 |
| <i>Desi_wild_61675075</i> | NA                                  | <i>Ca_desi_denovo</i> | 61675075                | A/G  | NA                 | NA                            | NA                 |
| <i>Desi_wild_61677070</i> | NA                                  | <i>Ca_desi_denovo</i> | 61677070                | C/G  | NA                 | NA                            | NA                 |
| <i>Desi_wild_61678538</i> | NA                                  | <i>Ca_desi_denovo</i> | 61678538                | C/T  | NA                 | NA                            | NA                 |
| <i>Desi_wild_61680829</i> | NA                                  | <i>Ca_desi_denovo</i> | 61680829                | C/G  | NA                 | NA                            | NA                 |
| <i>Desi_wild_61680832</i> | NA                                  | <i>Ca_desi_denovo</i> | 61680832                | C/G  | NA                 | NA                            | NA                 |
| <i>Desi_wild_61680833</i> | NA                                  | <i>Ca_desi_denovo</i> | 61680833                | A/G  | NA                 | NA                            | NA                 |
| <i>Desi_wild_61680919</i> | NA                                  | <i>Ca_desi_denovo</i> | 61680919                | C/G  | NA                 | NA                            | NA                 |
| <i>Desi_wild_61680921</i> | NA                                  | <i>Ca_desi_denovo</i> | 61680921                | G/T  | NA                 | NA                            | NA                 |
| <i>Desi_wild_61680932</i> | NA                                  | <i>Ca_desi_denovo</i> | 61680932                | C/G  | NA                 | NA                            | NA                 |
| <i>Desi_wild_61680975</i> | NA                                  | <i>Ca_desi_denovo</i> | 61680975                | C/G  | NA                 | NA                            | NA                 |
| <i>Desi_wild_61683703</i> | NA                                  | <i>Ca_desi_denovo</i> | 61683703                | A/G  | NA                 | NA                            | NA                 |
| <i>Desi_wild_61683706</i> | NA                                  | <i>Ca_desi_denovo</i> | 61683706                | A/G  | NA                 | NA                            | NA                 |
| <i>Desi_wild_61683712</i> | NA                                  | <i>Ca_desi_denovo</i> | 61683712                | C/T  | NA                 | NA                            | NA                 |
| <i>Desi_wild_61687057</i> | NA                                  | <i>Ca_desi_denovo</i> | 61687057                | A/G  | NA                 | NA                            | NA                 |
| <i>Desi_wild_61687087</i> | NA                                  | <i>Ca_desi_denovo</i> | 61687087                | C/G  | NA                 | NA                            | NA                 |
| <i>Desi_wild_61688997</i> | NA                                  | <i>Ca_desi_denovo</i> | 61688997                | C/T  | NA                 | NA                            | NA                 |
| <i>Desi_wild_61689045</i> | NA                                  | <i>Ca_desi_denovo</i> | 61689045                | C/T  | NA                 | NA                            | NA                 |
| <i>Desi_wild_61689100</i> | NA                                  | <i>Ca_desi_denovo</i> | 61689100                | C/G  | NA                 | NA                            | NA                 |
| <i>Desi_wild_61689685</i> | NA                                  | <i>Ca_desi_denovo</i> | 61689685                | C/G  | NA                 | NA                            | NA                 |
| <i>Desi_wild_61689693</i> | NA                                  | <i>Ca_desi_denovo</i> | 61689693                | C/T  | NA                 | NA                            | NA                 |
| <i>Desi_wild_61691089</i> | NA                                  | <i>Ca_desi_denovo</i> | 61691089                | C/G  | NA                 | NA                            | NA                 |
| <i>Desi_wild_61695705</i> | NA                                  | <i>Ca_desi_denovo</i> | 61695705                | C/T  | NA                 | NA                            | NA                 |
| <i>Desi_wild_61695723</i> | NA                                  | <i>Ca_desi_denovo</i> | 61695723                | C/T  | NA                 | NA                            | NA                 |
| <i>Desi_wild_61695725</i> | NA                                  | <i>Ca_desi_denovo</i> | 61695725                | A/G  | NA                 | NA                            | NA                 |
| <i>Desi_wild_61695787</i> | NA                                  | <i>Ca_desi_denovo</i> | 61695787                | C/G  | NA                 | NA                            | NA                 |
| <i>Desi_wild_61695856</i> | NA                                  | <i>Ca_desi_denovo</i> | 61695856                | C/G  | NA                 | NA                            | NA                 |
| <i>Desi_wild_61696908</i> | NA                                  | <i>Ca_desi_denovo</i> | 61696908                | G/T  | NA                 | NA                            | NA                 |
| <i>Desi_wild_61696933</i> | NA                                  | <i>Ca_desi_denovo</i> | 61696933                | C/T  | NA                 | NA                            | NA                 |
| <i>Desi_wild_61697979</i> | NA                                  | <i>Ca_desi_denovo</i> | 61697979                | A/G  | NA                 | NA                            | NA                 |
| <i>Desi_wild_61698235</i> | NA                                  | <i>Ca_desi_denovo</i> | 61698235                | C/T  | NA                 | NA                            | NA                 |
| <i>Desi_wild_61698239</i> | NA                                  | <i>Ca_desi_denovo</i> | 61698239                | A/G  | NA                 | NA                            | NA                 |
| <i>Desi_wild_61698244</i> | NA                                  | <i>Ca_desi_denovo</i> | 61698244                | C/T  | NA                 | NA                            | NA                 |
| <i>Desi_wild_61698247</i> | NA                                  | <i>Ca_desi_denovo</i> | 61698247                | A/C  | NA                 | NA                            | NA                 |



| SNP IDs                   | NCBI dbSNP accession IDs (NCBI_SS#) | Chromosomes           | Physical positions (bp) | SNPs | Gene accession IDs | Sequence components of genome | Putative functions |
|---------------------------|-------------------------------------|-----------------------|-------------------------|------|--------------------|-------------------------------|--------------------|
| <i>Desi_wild_61706112</i> | NA                                  | <i>Ca_desi_denovo</i> | 61706112                | C/G  | NA                 | NA                            | NA                 |
| <i>Desi_wild_61706494</i> | NA                                  | <i>Ca_desi_denovo</i> | 61706494                | C/T  | NA                 | NA                            | NA                 |
| <i>Desi_wild_61706503</i> | NA                                  | <i>Ca_desi_denovo</i> | 61706503                | A/G  | NA                 | NA                            | NA                 |
| <i>Desi_wild_61706515</i> | NA                                  | <i>Ca_desi_denovo</i> | 61706515                | C/T  | NA                 | NA                            | NA                 |
| <i>Desi_wild_61715346</i> | NA                                  | <i>Ca_desi_denovo</i> | 61715346                | C/G  | NA                 | NA                            | NA                 |
| <i>Desi_wild_61717747</i> | NA                                  | <i>Ca_desi_denovo</i> | 61717747                | A/G  | NA                 | NA                            | NA                 |
| <i>Desi_wild_61717762</i> | NA                                  | <i>Ca_desi_denovo</i> | 61717762                | A/G  | NA                 | NA                            | NA                 |
| <i>Desi_wild_61717785</i> | NA                                  | <i>Ca_desi_denovo</i> | 61717785                | A/G  | NA                 | NA                            | NA                 |
| <i>Desi_wild_61719999</i> | NA                                  | <i>Ca_desi_denovo</i> | 61719999                | A/G  | NA                 | NA                            | NA                 |
| <i>Desi_wild_61720151</i> | NA                                  | <i>Ca_desi_denovo</i> | 61720151                | C/T  | NA                 | NA                            | NA                 |
| <i>Desi_wild_61720213</i> | NA                                  | <i>Ca_desi_denovo</i> | 61720213                | A/G  | NA                 | NA                            | NA                 |
| <i>Desi_wild_61720236</i> | NA                                  | <i>Ca_desi_denovo</i> | 61720236                | C/T  | NA                 | NA                            | NA                 |
| <i>Desi_wild_61721016</i> | NA                                  | <i>Ca_desi_denovo</i> | 61721016                | C/T  | NA                 | NA                            | NA                 |
| <i>Desi_wild_61723704</i> | NA                                  | <i>Ca_desi_denovo</i> | 61723704                | G/T  | NA                 | NA                            | NA                 |
| <i>Desi_wild_61725083</i> | NA                                  | <i>Ca_desi_denovo</i> | 61725083                | C/T  | NA                 | NA                            | NA                 |
| <i>Desi_wild_61725093</i> | NA                                  | <i>Ca_desi_denovo</i> | 61725093                | A/G  | NA                 | NA                            | NA                 |
| <i>Desi_wild_61725127</i> | NA                                  | <i>Ca_desi_denovo</i> | 61725127                | A/C  | NA                 | NA                            | NA                 |
| <i>Desi_wild_61725130</i> | NA                                  | <i>Ca_desi_denovo</i> | 61725130                | C/T  | NA                 | NA                            | NA                 |
| <i>Desi_wild_61725844</i> | NA                                  | <i>Ca_desi_denovo</i> | 61725844                | C/T  | NA                 | NA                            | NA                 |
| <i>Desi_wild_61725856</i> | NA                                  | <i>Ca_desi_denovo</i> | 61725856                | C/G  | NA                 | NA                            | NA                 |
| <i>Desi_wild_61726216</i> | NA                                  | <i>Ca_desi_denovo</i> | 61726216                | C/G  | NA                 | NA                            | NA                 |
| <i>Desi_wild_61726243</i> | NA                                  | <i>Ca_desi_denovo</i> | 61726243                | A/G  | NA                 | NA                            | NA                 |
| <i>Desi_wild_61726291</i> | NA                                  | <i>Ca_desi_denovo</i> | 61726291                | C/T  | NA                 | NA                            | NA                 |
| <i>Desi_wild_61726764</i> | NA                                  | <i>Ca_desi_denovo</i> | 61726764                | A/G  | NA                 | NA                            | NA                 |
| <i>Desi_wild_61726836</i> | NA                                  | <i>Ca_desi_denovo</i> | 61726836                | C/T  | NA                 | NA                            | NA                 |
| <i>Desi_wild_61729653</i> | NA                                  | <i>Ca_desi_denovo</i> | 61729653                | C/T  | NA                 | NA                            | NA                 |
| <i>Desi_wild_61731441</i> | NA                                  | <i>Ca_desi_denovo</i> | 61731441                | C/G  | NA                 | NA                            | NA                 |
| <i>Desi_wild_61735065</i> | NA                                  | <i>Ca_desi_denovo</i> | 61735065                | C/T  | NA                 | NA                            | NA                 |
| <i>Desi_wild_61735086</i> | NA                                  | <i>Ca_desi_denovo</i> | 61735086                | C/T  | NA                 | NA                            | NA                 |
| <i>Desi_wild_61737270</i> | NA                                  | <i>Ca_desi_denovo</i> | 61737270                | C/T  | NA                 | NA                            | NA                 |
| <i>Desi_wild_61737287</i> | NA                                  | <i>Ca_desi_denovo</i> | 61737287                | C/G  | NA                 | NA                            | NA                 |
| <i>Desi_wild_61737325</i> | NA                                  | <i>Ca_desi_denovo</i> | 61737325                | G/T  | NA                 | NA                            | NA                 |
| <i>Desi_wild_61741384</i> | NA                                  | <i>Ca_desi_denovo</i> | 61741384                | C/T  | NA                 | NA                            | NA                 |
| <i>Desi_wild_61741396</i> | NA                                  | <i>Ca_desi_denovo</i> | 61741396                | C/T  | NA                 | NA                            | NA                 |
| <i>Desi_wild_61742386</i> | NA                                  | <i>Ca_desi_denovo</i> | 61742386                | C/G  | NA                 | NA                            | NA                 |
| <i>Desi_wild_61744265</i> | NA                                  | <i>Ca_desi_denovo</i> | 61744265                | A/C  | NA                 | NA                            | NA                 |
| <i>Desi_wild_61744266</i> | NA                                  | <i>Ca_desi_denovo</i> | 61744266                | C/G  | NA                 | NA                            | NA                 |
| <i>Desi_wild_61744296</i> | NA                                  | <i>Ca_desi_denovo</i> | 61744296                | C/G  | NA                 | NA                            | NA                 |
| <i>Desi_wild_61746033</i> | NA                                  | <i>Ca_desi_denovo</i> | 61746033                | A/G  | NA                 | NA                            | NA                 |
| <i>Desi_wild_61746297</i> | NA                                  | <i>Ca_desi_denovo</i> | 61746297                | C/G  | NA                 | NA                            | NA                 |
| <i>Desi_wild_61746321</i> | NA                                  | <i>Ca_desi_denovo</i> | 61746321                | A/G  | NA                 | NA                            | NA                 |
| <i>Desi_wild_61748811</i> | NA                                  | <i>Ca_desi_denovo</i> | 61748811                | C/T  | NA                 | NA                            | NA                 |
| <i>Desi_wild_61749111</i> | NA                                  | <i>Ca_desi_denovo</i> | 61749111                | C/T  | NA                 | NA                            | NA                 |
| <i>Desi_wild_61749126</i> | NA                                  | <i>Ca_desi_denovo</i> | 61749126                | C/T  | NA                 | NA                            | NA                 |

| SNP IDs                   | NCBI dbSNP accession IDs (NCBI_SS#) | Chromosomes           | Physical positions (bp) | SNPs | Gene accession IDs | Sequence components of genome | Putative functions |
|---------------------------|-------------------------------------|-----------------------|-------------------------|------|--------------------|-------------------------------|--------------------|
| <i>Desi_wild_61749135</i> | NA                                  | <i>Ca_desi_denovo</i> | 61749135                | C/G  | NA                 | NA                            | NA                 |
| <i>Desi_wild_61749172</i> | NA                                  | <i>Ca_desi_denovo</i> | 61749172                | C/G  | NA                 | NA                            | NA                 |
| <i>Desi_wild_61749190</i> | NA                                  | <i>Ca_desi_denovo</i> | 61749190                | A/C  | NA                 | NA                            | NA                 |
| <i>Desi_wild_61751316</i> | NA                                  | <i>Ca_desi_denovo</i> | 61751316                | A/G  | NA                 | NA                            | NA                 |
| <i>Desi_wild_61751334</i> | NA                                  | <i>Ca_desi_denovo</i> | 61751334                | C/G  | NA                 | NA                            | NA                 |
| <i>Desi_wild_61758955</i> | NA                                  | <i>Ca_desi_denovo</i> | 61758955                | C/T  | NA                 | NA                            | NA                 |
| <i>Desi_wild_61761675</i> | NA                                  | <i>Ca_desi_denovo</i> | 61761675                | C/T  | NA                 | NA                            | NA                 |
| <i>Desi_wild_61770334</i> | NA                                  | <i>Ca_desi_denovo</i> | 61770334                | A/G  | NA                 | NA                            | NA                 |
| <i>Desi_wild_61770355</i> | NA                                  | <i>Ca_desi_denovo</i> | 61770355                | A/C  | NA                 | NA                            | NA                 |
| <i>Desi_wild_61771635</i> | NA                                  | <i>Ca_desi_denovo</i> | 61771635                | G/T  | NA                 | NA                            | NA                 |
| <i>Desi_wild_61771642</i> | NA                                  | <i>Ca_desi_denovo</i> | 61771642                | A/G  | NA                 | NA                            | NA                 |
| <i>Desi_wild_61772911</i> | NA                                  | <i>Ca_desi_denovo</i> | 61772911                | C/G  | NA                 | NA                            | NA                 |
| <i>Desi_wild_61773355</i> | NA                                  | <i>Ca_desi_denovo</i> | 61773355                | A/G  | NA                 | NA                            | NA                 |
| <i>Desi_wild_61774767</i> | NA                                  | <i>Ca_desi_denovo</i> | 61774767                | A/G  | NA                 | NA                            | NA                 |
| <i>Desi_wild_61776513</i> | NA                                  | <i>Ca_desi_denovo</i> | 61776513                | C/T  | NA                 | NA                            | NA                 |
| <i>Desi_wild_61776516</i> | NA                                  | <i>Ca_desi_denovo</i> | 61776516                | A/G  | NA                 | NA                            | NA                 |
| <i>Desi_wild_61778183</i> | NA                                  | <i>Ca_desi_denovo</i> | 61778183                | A/G  | NA                 | NA                            | NA                 |
| <i>Desi_wild_61780020</i> | NA                                  | <i>Ca_desi_denovo</i> | 61780020                | A/G  | NA                 | NA                            | NA                 |
| <i>Desi_wild_61780023</i> | NA                                  | <i>Ca_desi_denovo</i> | 61780023                | C/G  | NA                 | NA                            | NA                 |
| <i>Desi_wild_61790611</i> | NA                                  | <i>Ca_desi_denovo</i> | 61790611                | C/G  | NA                 | NA                            | NA                 |
| <i>Desi_wild_61793281</i> | NA                                  | <i>Ca_desi_denovo</i> | 61793281                | C/T  | NA                 | NA                            | NA                 |
| <i>Desi_wild_61793835</i> | NA                                  | <i>Ca_desi_denovo</i> | 61793835                | C/T  | NA                 | NA                            | NA                 |
| <i>Desi_wild_61793866</i> | NA                                  | <i>Ca_desi_denovo</i> | 61793866                | C/T  | NA                 | NA                            | NA                 |
| <i>Desi_wild_61796705</i> | NA                                  | <i>Ca_desi_denovo</i> | 61796705                | A/G  | NA                 | NA                            | NA                 |
| <i>Desi_wild_61798657</i> | NA                                  | <i>Ca_desi_denovo</i> | 61798657                | A/G  | NA                 | NA                            | NA                 |
| <i>Desi_wild_61798666</i> | NA                                  | <i>Ca_desi_denovo</i> | 61798666                | A/G  | NA                 | NA                            | NA                 |
| <i>Desi_wild_61798693</i> | NA                                  | <i>Ca_desi_denovo</i> | 61798693                | C/T  | NA                 | NA                            | NA                 |
| <i>Desi_wild_61802764</i> | NA                                  | <i>Ca_desi_denovo</i> | 61802764                | C/G  | NA                 | NA                            | NA                 |
| <i>Desi_wild_61802794</i> | NA                                  | <i>Ca_desi_denovo</i> | 61802794                | C/G  | NA                 | NA                            | NA                 |
| <i>Desi_wild_61805809</i> | NA                                  | <i>Ca_desi_denovo</i> | 61805809                | C/T  | NA                 | NA                            | NA                 |
| <i>Desi_wild_61805860</i> | NA                                  | <i>Ca_desi_denovo</i> | 61805860                | C/T  | NA                 | NA                            | NA                 |
| <i>Desi_wild_61805881</i> | NA                                  | <i>Ca_desi_denovo</i> | 61805881                | C/T  | NA                 | NA                            | NA                 |
| <i>Desi_wild_61806088</i> | NA                                  | <i>Ca_desi_denovo</i> | 61806088                | A/G  | NA                 | NA                            | NA                 |
| <i>Desi_wild_61806177</i> | NA                                  | <i>Ca_desi_denovo</i> | 61806177                | C/G  | NA                 | NA                            | NA                 |
| <i>Desi_wild_61807757</i> | NA                                  | <i>Ca_desi_denovo</i> | 61807757                | A/C  | NA                 | NA                            | NA                 |
| <i>Desi_wild_61811790</i> | NA                                  | <i>Ca_desi_denovo</i> | 61811790                | C/G  | NA                 | NA                            | NA                 |
| <i>Desi_wild_61822314</i> | NA                                  | <i>Ca_desi_denovo</i> | 61822314                | C/G  | NA                 | NA                            | NA                 |
| <i>Desi_wild_61830144</i> | NA                                  | <i>Ca_desi_denovo</i> | 61830144                | A/G  | NA                 | NA                            | NA                 |
| <i>Desi_wild_61840523</i> | NA                                  | <i>Ca_desi_denovo</i> | 61840523                | C/T  | NA                 | NA                            | NA                 |
| <i>Desi_wild_61849944</i> | NA                                  | <i>Ca_desi_denovo</i> | 61849944                | C/T  | NA                 | NA                            | NA                 |
| <i>Desi_wild_61852817</i> | NA                                  | <i>Ca_desi_denovo</i> | 61852817                | A/G  | NA                 | NA                            | NA                 |
| <i>Desi_wild_61854587</i> | NA                                  | <i>Ca_desi_denovo</i> | 61854587                | A/C  | NA                 | NA                            | NA                 |
| <i>Desi_wild_61858635</i> | NA                                  | <i>Ca_desi_denovo</i> | 61858635                | C/T  | NA                 | NA                            | NA                 |
| <i>Desi_wild_61861260</i> | NA                                  | <i>Ca_desi_denovo</i> | 61861260                | C/T  | NA                 | NA                            | NA                 |

| SNP IDs                   | NCBI dbSNP accession IDs (NCBI_SS#) | Chromosomes           | Physical positions (bp) | SNPs | Gene accession IDs | Sequence components of genome | Putative functions |
|---------------------------|-------------------------------------|-----------------------|-------------------------|------|--------------------|-------------------------------|--------------------|
| <i>Desi_wild_61861276</i> | NA                                  | <i>Ca_desi_denovo</i> | 61861276                | C/T  | NA                 | NA                            | NA                 |
| <i>Desi_wild_61866171</i> | NA                                  | <i>Ca_desi_denovo</i> | 61866171                | A/T  | NA                 | NA                            | NA                 |
| <i>Desi_wild_61876243</i> | NA                                  | <i>Ca_desi_denovo</i> | 61876243                | C/G  | NA                 | NA                            | NA                 |
| <i>Desi_wild_61892106</i> | NA                                  | <i>Ca_desi_denovo</i> | 61892106                | C/G  | NA                 | NA                            | NA                 |
| <i>Desi_wild_61903455</i> | NA                                  | <i>Ca_desi_denovo</i> | 61903455                | A/C  | NA                 | NA                            | NA                 |
| <i>Desi_wild_61907150</i> | NA                                  | <i>Ca_desi_denovo</i> | 61907150                | A/G  | NA                 | NA                            | NA                 |
| <i>Desi_wild_61907186</i> | NA                                  | <i>Ca_desi_denovo</i> | 61907186                | C/T  | NA                 | NA                            | NA                 |
| <i>Desi_wild_61908721</i> | NA                                  | <i>Ca_desi_denovo</i> | 61908721                | C/G  | NA                 | NA                            | NA                 |
| <i>Desi_wild_61908724</i> | NA                                  | <i>Ca_desi_denovo</i> | 61908724                | G/T  | NA                 | NA                            | NA                 |
| <i>Desi_wild_61916002</i> | NA                                  | <i>Ca_desi_denovo</i> | 61916002                | G/T  | NA                 | NA                            | NA                 |
| <i>Desi_wild_61917996</i> | NA                                  | <i>Ca_desi_denovo</i> | 61917996                | A/C  | NA                 | NA                            | NA                 |
| <i>Desi_wild_61918044</i> | NA                                  | <i>Ca_desi_denovo</i> | 61918044                | C/G  | NA                 | NA                            | NA                 |
| <i>Desi_wild_61918074</i> | NA                                  | <i>Ca_desi_denovo</i> | 61918074                | A/G  | NA                 | NA                            | NA                 |
| <i>Desi_wild_61920817</i> | NA                                  | <i>Ca_desi_denovo</i> | 61920817                | C/T  | NA                 | NA                            | NA                 |
| <i>Desi_wild_61920822</i> | NA                                  | <i>Ca_desi_denovo</i> | 61920822                | A/G  | NA                 | NA                            | NA                 |
| <i>Desi_wild_61920850</i> | NA                                  | <i>Ca_desi_denovo</i> | 61920850                | A/T  | NA                 | NA                            | NA                 |
| <i>Desi_wild_61922963</i> | NA                                  | <i>Ca_desi_denovo</i> | 61922963                | C/G  | NA                 | NA                            | NA                 |
| <i>Desi_wild_61927223</i> | NA                                  | <i>Ca_desi_denovo</i> | 61927223                | C/T  | NA                 | NA                            | NA                 |
| <i>Desi_wild_61927260</i> | NA                                  | <i>Ca_desi_denovo</i> | 61927260                | A/G  | NA                 | NA                            | NA                 |
| <i>Desi_wild_61934903</i> | NA                                  | <i>Ca_desi_denovo</i> | 61934903                | A/T  | NA                 | NA                            | NA                 |
| <i>Desi_wild_61935414</i> | NA                                  | <i>Ca_desi_denovo</i> | 61935414                | A/G  | NA                 | NA                            | NA                 |
| <i>Desi_wild_61943286</i> | NA                                  | <i>Ca_desi_denovo</i> | 61943286                | A/G  | NA                 | NA                            | NA                 |
| <i>Desi_wild_61944589</i> | NA                                  | <i>Ca_desi_denovo</i> | 61944589                | C/T  | NA                 | NA                            | NA                 |
| <i>Desi_wild_61944603</i> | NA                                  | <i>Ca_desi_denovo</i> | 61944603                | A/G  | NA                 | NA                            | NA                 |
| <i>Desi_wild_61944627</i> | NA                                  | <i>Ca_desi_denovo</i> | 61944627                | T/C  | NA                 | NA                            | NA                 |
| <i>Desi_wild_61945351</i> | NA                                  | <i>Ca_desi_denovo</i> | 61945351                | T/A  | NA                 | NA                            | NA                 |
| <i>Desi_wild_61945352</i> | NA                                  | <i>Ca_desi_denovo</i> | 61945352                | C/T  | NA                 | NA                            | NA                 |
| <i>Desi_wild_61945406</i> | NA                                  | <i>Ca_desi_denovo</i> | 61945406                | G/A  | NA                 | NA                            | NA                 |
| <i>Desi_wild_61946755</i> | NA                                  | <i>Ca_desi_denovo</i> | 61946755                | A/G  | NA                 | NA                            | NA                 |
| <i>Desi_wild_61947316</i> | NA                                  | <i>Ca_desi_denovo</i> | 61947316                | C/T  | NA                 | NA                            | NA                 |
| <i>Desi_wild_61949824</i> | NA                                  | <i>Ca_desi_denovo</i> | 61949824                | A/G  | NA                 | NA                            | NA                 |
| <i>Desi_wild_61949863</i> | NA                                  | <i>Ca_desi_denovo</i> | 61949863                | A/T  | NA                 | NA                            | NA                 |
| <i>Desi_wild_61952380</i> | NA                                  | <i>Ca_desi_denovo</i> | 61952380                | C/G  | NA                 | NA                            | NA                 |
| <i>Desi_wild_61952384</i> | NA                                  | <i>Ca_desi_denovo</i> | 61952384                | A/G  | NA                 | NA                            | NA                 |
| <i>Desi_wild_61958601</i> | NA                                  | <i>Ca_desi_denovo</i> | 61958601                | C/T  | NA                 | NA                            | NA                 |
| <i>Desi_wild_61959930</i> | NA                                  | <i>Ca_desi_denovo</i> | 61959930                | A/T  | NA                 | NA                            | NA                 |
| <i>Desi_wild_61961130</i> | NA                                  | <i>Ca_desi_denovo</i> | 61961130                | C/T  | NA                 | NA                            | NA                 |
| <i>Desi_wild_61962162</i> | NA                                  | <i>Ca_desi_denovo</i> | 61962162                | A/G  | NA                 | NA                            | NA                 |
| <i>Desi_wild_61962165</i> | NA                                  | <i>Ca_desi_denovo</i> | 61962165                | G/C  | NA                 | NA                            | NA                 |
| <i>Desi_wild_61962207</i> | NA                                  | <i>Ca_desi_denovo</i> | 61962207                | A/T  | NA                 | NA                            | NA                 |
| <i>Desi_wild_61962208</i> | NA                                  | <i>Ca_desi_denovo</i> | 61962208                | G/T  | NA                 | NA                            | NA                 |
| <i>Desi_wild_61963969</i> | NA                                  | <i>Ca_desi_denovo</i> | 61963969                | C/G  | NA                 | NA                            | NA                 |
| <i>Desi_wild_61968764</i> | NA                                  | <i>Ca_desi_denovo</i> | 61968764                | A/T  | NA                 | NA                            | NA                 |
| <i>Desi_wild_61973436</i> | NA                                  | <i>Ca_desi_denovo</i> | 61973436                | C/T  | NA                 | NA                            | NA                 |

| SNP IDs                   | NCBI dbSNP accession IDs (NCBI_SS#) | Chromosomes           | Physical positions (bp) | SNPs | Gene accession IDs | Sequence components of genome | Putative functions |
|---------------------------|-------------------------------------|-----------------------|-------------------------|------|--------------------|-------------------------------|--------------------|
| <i>Desi_wild_61981464</i> | NA                                  | <i>Ca_desi_denovo</i> | 61981464                | A/C  | NA                 | NA                            | NA                 |
| <i>Desi_wild_61981504</i> | NA                                  | <i>Ca_desi_denovo</i> | 61981504                | C/T  | NA                 | NA                            | NA                 |
| <i>Desi_wild_61981854</i> | NA                                  | <i>Ca_desi_denovo</i> | 61981854                | A/C  | NA                 | NA                            | NA                 |
| <i>Desi_wild_61981881</i> | NA                                  | <i>Ca_desi_denovo</i> | 61981881                | A/G  | NA                 | NA                            | NA                 |
| <i>Desi_wild_61982617</i> | NA                                  | <i>Ca_desi_denovo</i> | 61982617                | A/C  | NA                 | NA                            | NA                 |
| <i>Desi_wild_61982618</i> | NA                                  | <i>Ca_desi_denovo</i> | 61982618                | A/T  | NA                 | NA                            | NA                 |
| <i>Desi_wild_61984389</i> | NA                                  | <i>Ca_desi_denovo</i> | 61984389                | A/G  | NA                 | NA                            | NA                 |
| <i>Desi_wild_61984446</i> | NA                                  | <i>Ca_desi_denovo</i> | 61984446                | G/A  | NA                 | NA                            | NA                 |
| <i>Desi_wild_61991894</i> | NA                                  | <i>Ca_desi_denovo</i> | 61991894                | C/T  | NA                 | NA                            | NA                 |
| <i>Desi_wild_61992669</i> | NA                                  | <i>Ca_desi_denovo</i> | 61992669                | A/C  | NA                 | NA                            | NA                 |
| <i>Desi_wild_61996282</i> | NA                                  | <i>Ca_desi_denovo</i> | 61996282                | C/T  | NA                 | NA                            | NA                 |
| <i>Desi_wild_61996306</i> | NA                                  | <i>Ca_desi_denovo</i> | 61996306                | A/C  | NA                 | NA                            | NA                 |
| <i>Desi_wild_61997937</i> | NA                                  | <i>Ca_desi_denovo</i> | 61997937                | A/G  | NA                 | NA                            | NA                 |
| <i>Desi_wild_61999171</i> | NA                                  | <i>Ca_desi_denovo</i> | 61999171                | A/C  | NA                 | NA                            | NA                 |
| <i>Desi_wild_62001405</i> | NA                                  | <i>Ca_desi_denovo</i> | 62001405                | C/T  | NA                 | NA                            | NA                 |
| <i>Desi_wild_62001528</i> | NA                                  | <i>Ca_desi_denovo</i> | 62001528                | C/T  | NA                 | NA                            | NA                 |
| <i>Desi_wild_62010908</i> | NA                                  | <i>Ca_desi_denovo</i> | 62010908                | A/G  | NA                 | NA                            | NA                 |
| <i>Desi_wild_62010915</i> | NA                                  | <i>Ca_desi_denovo</i> | 62010915                | A/G  | NA                 | NA                            | NA                 |
| <i>Desi_wild_62011185</i> | NA                                  | <i>Ca_desi_denovo</i> | 62011185                | A/T  | NA                 | NA                            | NA                 |
| <i>Desi_wild_62011235</i> | NA                                  | <i>Ca_desi_denovo</i> | 62011235                | C/T  | NA                 | NA                            | NA                 |
| <i>Desi_wild_62015270</i> | NA                                  | <i>Ca_desi_denovo</i> | 62015270                | C/T  | NA                 | NA                            | NA                 |
| <i>Desi_wild_62015288</i> | NA                                  | <i>Ca_desi_denovo</i> | 62015288                | C/T  | NA                 | NA                            | NA                 |
| <i>Desi_wild_62015303</i> | NA                                  | <i>Ca_desi_denovo</i> | 62015303                | A/G  | NA                 | NA                            | NA                 |
| <i>Desi_wild_62017509</i> | NA                                  | <i>Ca_desi_denovo</i> | 62017509                | A/G  | NA                 | NA                            | NA                 |
| <i>Desi_wild_62019255</i> | NA                                  | <i>Ca_desi_denovo</i> | 62019255                | A/G  | NA                 | NA                            | NA                 |
| <i>Desi_wild_62019358</i> | NA                                  | <i>Ca_desi_denovo</i> | 62019358                | G/T  | NA                 | NA                            | NA                 |
| <i>Desi_wild_62019378</i> | NA                                  | <i>Ca_desi_denovo</i> | 62019378                | T/A  | NA                 | NA                            | NA                 |
| <i>Desi_wild_62019405</i> | NA                                  | <i>Ca_desi_denovo</i> | 62019405                | A/C  | NA                 | NA                            | NA                 |
| <i>Desi_wild_62019507</i> | NA                                  | <i>Ca_desi_denovo</i> | 62019507                | C/T  | NA                 | NA                            | NA                 |
| <i>Desi_wild_62024304</i> | NA                                  | <i>Ca_desi_denovo</i> | 62024304                | A/T  | NA                 | NA                            | NA                 |
| <i>Desi_wild_62024553</i> | NA                                  | <i>Ca_desi_denovo</i> | 62024553                | G/T  | NA                 | NA                            | NA                 |
| <i>Desi_wild_62033315</i> | NA                                  | <i>Ca_desi_denovo</i> | 62033315                | C/T  | NA                 | NA                            | NA                 |
| <i>Desi_wild_62033393</i> | NA                                  | <i>Ca_desi_denovo</i> | 62033393                | A/G  | NA                 | NA                            | NA                 |
| <i>Desi_wild_62043646</i> | NA                                  | <i>Ca_desi_denovo</i> | 62043646                | C/T  | NA                 | NA                            | NA                 |
| <i>Desi_wild_62043869</i> | NA                                  | <i>Ca_desi_denovo</i> | 62043869                | G/T  | NA                 | NA                            | NA                 |
| <i>Desi_wild_62046831</i> | NA                                  | <i>Ca_desi_denovo</i> | 62046831                | A/G  | NA                 | NA                            | NA                 |
| <i>Desi_wild_62046944</i> | NA                                  | <i>Ca_desi_denovo</i> | 62046944                | C/G  | NA                 | NA                            | NA                 |
| <i>Desi_wild_62048895</i> | NA                                  | <i>Ca_desi_denovo</i> | 62048895                | A/T  | NA                 | NA                            | NA                 |
| <i>Desi_wild_62052165</i> | NA                                  | <i>Ca_desi_denovo</i> | 62052165                | G/T  | NA                 | NA                            | NA                 |
| <i>Desi_wild_62057331</i> | NA                                  | <i>Ca_desi_denovo</i> | 62057331                | G/T  | NA                 | NA                            | NA                 |
| <i>Desi_wild_62064214</i> | NA                                  | <i>Ca_desi_denovo</i> | 62064214                | A/G  | NA                 | NA                            | NA                 |
| <i>Desi_wild_62064699</i> | NA                                  | <i>Ca_desi_denovo</i> | 62064699                | A/G  | NA                 | NA                            | NA                 |
| <i>Desi_wild_62064704</i> | NA                                  | <i>Ca_desi_denovo</i> | 62064704                | A/C  | NA                 | NA                            | NA                 |
| <i>Desi_wild_62065727</i> | NA                                  | <i>Ca_desi_denovo</i> | 62065727                | C/G  | NA                 | NA                            | NA                 |

| SNP IDs                   | NCBI dbSNP accession IDs (NCBI_SS#) | Chromosomes           | Physical positions (bp) | SNPs | Gene accession IDs | Sequence components of genome | Putative functions |
|---------------------------|-------------------------------------|-----------------------|-------------------------|------|--------------------|-------------------------------|--------------------|
| <i>Desi_wild_62065892</i> | NA                                  | <i>Ca_desi_denovo</i> | 62065892                | A/T  | NA                 | NA                            | NA                 |
| <i>Desi_wild_62066114</i> | NA                                  | <i>Ca_desi_denovo</i> | 62066114                | T/C  | NA                 | NA                            | NA                 |
| <i>Desi_wild_62067460</i> | NA                                  | <i>Ca_desi_denovo</i> | 62067460                | A/T  | NA                 | NA                            | NA                 |
| <i>Desi_wild_62072644</i> | NA                                  | <i>Ca_desi_denovo</i> | 62072644                | A/G  | NA                 | NA                            | NA                 |
| <i>Desi_wild_62072687</i> | NA                                  | <i>Ca_desi_denovo</i> | 62072687                | A/G  | NA                 | NA                            | NA                 |
| <i>Desi_wild_62074822</i> | NA                                  | <i>Ca_desi_denovo</i> | 62074822                | A/C  | NA                 | NA                            | NA                 |
| <i>Desi_wild_62076652</i> | NA                                  | <i>Ca_desi_denovo</i> | 62076652                | A/G  | NA                 | NA                            | NA                 |
| <i>Desi_wild_62080300</i> | NA                                  | <i>Ca_desi_denovo</i> | 62080300                | A/T  | NA                 | NA                            | NA                 |
| <i>Desi_wild_62082383</i> | NA                                  | <i>Ca_desi_denovo</i> | 62082383                | A/G  | NA                 | NA                            | NA                 |
| <i>Desi_wild_62082410</i> | NA                                  | <i>Ca_desi_denovo</i> | 62082410                | C/G  | NA                 | NA                            | NA                 |
| <i>Desi_wild_62088063</i> | NA                                  | <i>Ca_desi_denovo</i> | 62088063                | C/T  | NA                 | NA                            | NA                 |
| <i>Desi_wild_62090850</i> | NA                                  | <i>Ca_desi_denovo</i> | 62090850                | A/G  | NA                 | NA                            | NA                 |
| <i>Desi_wild_62091315</i> | NA                                  | <i>Ca_desi_denovo</i> | 62091315                | A/G  | NA                 | NA                            | NA                 |
| <i>Desi_wild_62091399</i> | NA                                  | <i>Ca_desi_denovo</i> | 62091399                | A/G  | NA                 | NA                            | NA                 |
| <i>Desi_wild_62091827</i> | NA                                  | <i>Ca_desi_denovo</i> | 62091827                | A/T  | NA                 | NA                            | NA                 |
| <i>Desi_wild_62091828</i> | NA                                  | <i>Ca_desi_denovo</i> | 62091828                | G/T  | NA                 | NA                            | NA                 |
| <i>Desi_wild_62094511</i> | NA                                  | <i>Ca_desi_denovo</i> | 62094511                | A/G  | NA                 | NA                            | NA                 |
| <i>Desi_wild_62094537</i> | NA                                  | <i>Ca_desi_denovo</i> | 62094537                | G/T  | NA                 | NA                            | NA                 |
| <i>Desi_wild_62100730</i> | NA                                  | <i>Ca_desi_denovo</i> | 62100730                | G/T  | NA                 | NA                            | NA                 |
| <i>Desi_wild_62100733</i> | NA                                  | <i>Ca_desi_denovo</i> | 62100733                | A/G  | NA                 | NA                            | NA                 |
| <i>Desi_wild_62100760</i> | NA                                  | <i>Ca_desi_denovo</i> | 62100760                | C/T  | NA                 | NA                            | NA                 |
| <i>Desi_wild_62101607</i> | NA                                  | <i>Ca_desi_denovo</i> | 62101607                | A/G  | NA                 | NA                            | NA                 |
| <i>Desi_wild_62102307</i> | NA                                  | <i>Ca_desi_denovo</i> | 62102307                | C/T  | NA                 | NA                            | NA                 |
| <i>Desi_wild_62102355</i> | NA                                  | <i>Ca_desi_denovo</i> | 62102355                | A/G  | NA                 | NA                            | NA                 |
| <i>Desi_wild_62102363</i> | NA                                  | <i>Ca_desi_denovo</i> | 62102363                | C/T  | NA                 | NA                            | NA                 |
| <i>Desi_wild_62103141</i> | NA                                  | <i>Ca_desi_denovo</i> | 62103141                | C/T  | NA                 | NA                            | NA                 |
| <i>Desi_wild_62105539</i> | NA                                  | <i>Ca_desi_denovo</i> | 62105539                | C/T  | NA                 | NA                            | NA                 |
| <i>Desi_wild_62106063</i> | NA                                  | <i>Ca_desi_denovo</i> | 62106063                | C/T  | NA                 | NA                            | NA                 |
| <i>Desi_wild_62106072</i> | NA                                  | <i>Ca_desi_denovo</i> | 62106072                | C/T  | NA                 | NA                            | NA                 |
| <i>Desi_wild_62106532</i> | NA                                  | <i>Ca_desi_denovo</i> | 62106532                | C/T  | NA                 | NA                            | NA                 |
| <i>Desi_wild_62106819</i> | NA                                  | <i>Ca_desi_denovo</i> | 62106819                | C/T  | NA                 | NA                            | NA                 |
| <i>Desi_wild_62109540</i> | NA                                  | <i>Ca_desi_denovo</i> | 62109540                | C/T  | NA                 | NA                            | NA                 |
| <i>Desi_wild_62111501</i> | NA                                  | <i>Ca_desi_denovo</i> | 62111501                | A/G  | NA                 | NA                            | NA                 |
| <i>Desi_wild_62111528</i> | NA                                  | <i>Ca_desi_denovo</i> | 62111528                | C/T  | NA                 | NA                            | NA                 |
| <i>Desi_wild_62111531</i> | NA                                  | <i>Ca_desi_denovo</i> | 62111531                | A/C  | NA                 | NA                            | NA                 |
| <i>Desi_wild_62113144</i> | NA                                  | <i>Ca_desi_denovo</i> | 62113144                | A/G  | NA                 | NA                            | NA                 |
| <i>Desi_wild_62116118</i> | NA                                  | <i>Ca_desi_denovo</i> | 62116118                | A/G  | NA                 | NA                            | NA                 |
| <i>Desi_wild_62116161</i> | NA                                  | <i>Ca_desi_denovo</i> | 62116161                | A/T  | NA                 | NA                            | NA                 |
| <i>Desi_wild_62116187</i> | NA                                  | <i>Ca_desi_denovo</i> | 62116187                | A/T  | NA                 | NA                            | NA                 |
| <i>Desi_wild_62120059</i> | NA                                  | <i>Ca_desi_denovo</i> | 62120059                | A/T  | NA                 | NA                            | NA                 |
| <i>Desi_wild_62123364</i> | NA                                  | <i>Ca_desi_denovo</i> | 62123364                | C/T  | NA                 | NA                            | NA                 |
| <i>Desi_wild_62124015</i> | NA                                  | <i>Ca_desi_denovo</i> | 62124015                | A/T  | NA                 | NA                            | NA                 |
| <i>Desi_wild_62124215</i> | NA                                  | <i>Ca_desi_denovo</i> | 62124215                | A/G  | NA                 | NA                            | NA                 |
| <i>Desi_wild_62124222</i> | NA                                  | <i>Ca_desi_denovo</i> | 62124222                | G/T  | NA                 | NA                            | NA                 |

| SNP IDs                   | NCBI dbSNP accession IDs (NCBI_SS#) | Chromosomes           | Physical positions (bp) | SNPs | Gene accession IDs | Sequence components of genome | Putative functions |
|---------------------------|-------------------------------------|-----------------------|-------------------------|------|--------------------|-------------------------------|--------------------|
| <i>Desi_wild_62126916</i> | NA                                  | <i>Ca_desi_denovo</i> | 62126916                | C/T  | NA                 | NA                            | NA                 |
| <i>Desi_wild_62128885</i> | NA                                  | <i>Ca_desi_denovo</i> | 62128885                | C/T  | NA                 | NA                            | NA                 |
| <i>Desi_wild_62130496</i> | NA                                  | <i>Ca_desi_denovo</i> | 62130496                | A/G  | NA                 | NA                            | NA                 |
| <i>Desi_wild_62131758</i> | NA                                  | <i>Ca_desi_denovo</i> | 62131758                | C/G  | NA                 | NA                            | NA                 |
| <i>Desi_wild_62132088</i> | NA                                  | <i>Ca_desi_denovo</i> | 62132088                | A/G  | NA                 | NA                            | NA                 |
| <i>Desi_wild_62132121</i> | NA                                  | <i>Ca_desi_denovo</i> | 62132121                | C/T  | NA                 | NA                            | NA                 |
| <i>Desi_wild_62132126</i> | NA                                  | <i>Ca_desi_denovo</i> | 62132126                | A/G  | NA                 | NA                            | NA                 |
| <i>Desi_wild_62132133</i> | NA                                  | <i>Ca_desi_denovo</i> | 62132133                | C/G  | NA                 | NA                            | NA                 |
| <i>Desi_wild_62138103</i> | NA                                  | <i>Ca_desi_denovo</i> | 62138103                | C/G  | NA                 | NA                            | NA                 |
| <i>Desi_wild_62138145</i> | NA                                  | <i>Ca_desi_denovo</i> | 62138145                | G/T  | NA                 | NA                            | NA                 |
| <i>Desi_wild_62139718</i> | NA                                  | <i>Ca_desi_denovo</i> | 62139718                | C/T  | NA                 | NA                            | NA                 |
| <i>Desi_wild_62144724</i> | NA                                  | <i>Ca_desi_denovo</i> | 62144724                | A/G  | NA                 | NA                            | NA                 |
| <i>Desi_wild_62147610</i> | NA                                  | <i>Ca_desi_denovo</i> | 62147610                | G/T  | NA                 | NA                            | NA                 |
| <i>Desi_wild_62147674</i> | NA                                  | <i>Ca_desi_denovo</i> | 62147674                | A/T  | NA                 | NA                            | NA                 |
| <i>Desi_wild_62155507</i> | NA                                  | <i>Ca_desi_denovo</i> | 62155507                | A/G  | NA                 | NA                            | NA                 |
| <i>Desi_wild_62155552</i> | NA                                  | <i>Ca_desi_denovo</i> | 62155552                | A/C  | NA                 | NA                            | NA                 |
| <i>Desi_wild_62156742</i> | NA                                  | <i>Ca_desi_denovo</i> | 62156742                | C/T  | NA                 | NA                            | NA                 |
| <i>Desi_wild_62157582</i> | NA                                  | <i>Ca_desi_denovo</i> | 62157582                | A/G  | NA                 | NA                            | NA                 |
| <i>Desi_wild_62158139</i> | NA                                  | <i>Ca_desi_denovo</i> | 62158139                | C/T  | NA                 | NA                            | NA                 |
| <i>Desi_wild_62158159</i> | NA                                  | <i>Ca_desi_denovo</i> | 62158159                | A/G  | NA                 | NA                            | NA                 |
| <i>Desi_wild_62158204</i> | NA                                  | <i>Ca_desi_denovo</i> | 62158204                | C/T  | NA                 | NA                            | NA                 |
| <i>Desi_wild_62158239</i> | NA                                  | <i>Ca_desi_denovo</i> | 62158239                | A/T  | NA                 | NA                            | NA                 |
| <i>Desi_wild_62160100</i> | NA                                  | <i>Ca_desi_denovo</i> | 62160100                | A/G  | NA                 | NA                            | NA                 |
| <i>Desi_wild_62160103</i> | NA                                  | <i>Ca_desi_denovo</i> | 62160103                | A/G  | NA                 | NA                            | NA                 |
| <i>Desi_wild_62160116</i> | NA                                  | <i>Ca_desi_denovo</i> | 62160116                | A/G  | NA                 | NA                            | NA                 |
| <i>Desi_wild_62160122</i> | NA                                  | <i>Ca_desi_denovo</i> | 62160122                | G/T  | NA                 | NA                            | NA                 |
| <i>Desi_wild_62162473</i> | NA                                  | <i>Ca_desi_denovo</i> | 62162473                | G/T  | NA                 | NA                            | NA                 |
| <i>Desi_wild_62165550</i> | NA                                  | <i>Ca_desi_denovo</i> | 62165550                | A/T  | NA                 | NA                            | NA                 |
| <i>Desi_wild_62165572</i> | NA                                  | <i>Ca_desi_denovo</i> | 62165572                | A/G  | NA                 | NA                            | NA                 |
| <i>Desi_wild_62166125</i> | NA                                  | <i>Ca_desi_denovo</i> | 62166125                | A/G  | NA                 | NA                            | NA                 |
| <i>Desi_wild_62166184</i> | NA                                  | <i>Ca_desi_denovo</i> | 62166184                | C/T  | NA                 | NA                            | NA                 |
| <i>Desi_wild_62166189</i> | NA                                  | <i>Ca_desi_denovo</i> | 62166189                | C/T  | NA                 | NA                            | NA                 |
| <i>Desi_wild_62166200</i> | NA                                  | <i>Ca_desi_denovo</i> | 62166200                | A/T  | NA                 | NA                            | NA                 |
| <i>Desi_wild_62166375</i> | NA                                  | <i>Ca_desi_denovo</i> | 62166375                | A/G  | NA                 | NA                            | NA                 |
| <i>Desi_wild_62169038</i> | NA                                  | <i>Ca_desi_denovo</i> | 62169038                | A/C  | NA                 | NA                            | NA                 |
| <i>Desi_wild_62172313</i> | NA                                  | <i>Ca_desi_denovo</i> | 62172313                | C/T  | NA                 | NA                            | NA                 |
| <i>Desi_wild_62173736</i> | NA                                  | <i>Ca_desi_denovo</i> | 62173736                | A/T  | NA                 | NA                            | NA                 |
| <i>Desi_wild_62174721</i> | NA                                  | <i>Ca_desi_denovo</i> | 62174721                | A/T  | NA                 | NA                            | NA                 |
| <i>Desi_wild_62175155</i> | NA                                  | <i>Ca_desi_denovo</i> | 62175155                | C/T  | NA                 | NA                            | NA                 |
| <i>Desi_wild_62175173</i> | NA                                  | <i>Ca_desi_denovo</i> | 62175173                | A/G  | NA                 | NA                            | NA                 |
| <i>Desi_wild_62177492</i> | NA                                  | <i>Ca_desi_denovo</i> | 62177492                | C/T  | NA                 | NA                            | NA                 |
| <i>Desi_wild_62189634</i> | NA                                  | <i>Ca_desi_denovo</i> | 62189634                | A/G  | NA                 | NA                            | NA                 |
| <i>Desi_wild_62190279</i> | NA                                  | <i>Ca_desi_denovo</i> | 62190279                | A/G  | NA                 | NA                            | NA                 |
| <i>Desi_wild_62190659</i> | NA                                  | <i>Ca_desi_denovo</i> | 62190659                | A/C  | NA                 | NA                            | NA                 |

| SNP IDs                   | NCBI dbSNP accession IDs (NCBI_SS#) | Chromosomes           | Physical positions (bp) | SNPs | Gene accession IDs | Sequence components of genome | Putative functions |
|---------------------------|-------------------------------------|-----------------------|-------------------------|------|--------------------|-------------------------------|--------------------|
| <i>Desi_wild_62190662</i> | NA                                  | <i>Ca_desi_denovo</i> | 62190662                | A/G  | NA                 | NA                            | NA                 |
| <i>Desi_wild_62190671</i> | NA                                  | <i>Ca_desi_denovo</i> | 62190671                | C/T  | NA                 | NA                            | NA                 |
| <i>Desi_wild_62190689</i> | NA                                  | <i>Ca_desi_denovo</i> | 62190689                | C/T  | NA                 | NA                            | NA                 |
| <i>Desi_wild_62196858</i> | NA                                  | <i>Ca_desi_denovo</i> | 62196858                | A/T  | NA                 | NA                            | NA                 |
| <i>Desi_wild_62200462</i> | NA                                  | <i>Ca_desi_denovo</i> | 62200462                | C/T  | NA                 | NA                            | NA                 |
| <i>Desi_wild_62200467</i> | NA                                  | <i>Ca_desi_denovo</i> | 62200467                | C/A  | NA                 | NA                            | NA                 |
| <i>Desi_wild_62200477</i> | NA                                  | <i>Ca_desi_denovo</i> | 62200477                | C/G  | NA                 | NA                            | NA                 |
| <i>Desi_wild_62201217</i> | NA                                  | <i>Ca_desi_denovo</i> | 62201217                | C/G  | NA                 | NA                            | NA                 |
| <i>Desi_wild_62206542</i> | NA                                  | <i>Ca_desi_denovo</i> | 62206542                | A/G  | NA                 | NA                            | NA                 |
| <i>Desi_wild_62208550</i> | NA                                  | <i>Ca_desi_denovo</i> | 62208550                | C/T  | NA                 | NA                            | NA                 |
| <i>Desi_wild_62208561</i> | NA                                  | <i>Ca_desi_denovo</i> | 62208561                | C/T  | NA                 | NA                            | NA                 |
| <i>Desi_wild_62213038</i> | NA                                  | <i>Ca_desi_denovo</i> | 62213038                | A/C  | NA                 | NA                            | NA                 |
| <i>Desi_wild_62214267</i> | NA                                  | <i>Ca_desi_denovo</i> | 62214267                | A/G  | NA                 | NA                            | NA                 |
| <i>Desi_wild_62214361</i> | NA                                  | <i>Ca_desi_denovo</i> | 62214361                | A/G  | NA                 | NA                            | NA                 |
| <i>Desi_wild_62214479</i> | NA                                  | <i>Ca_desi_denovo</i> | 62214479                | A/C  | NA                 | NA                            | NA                 |
| <i>Desi_wild_62214737</i> | NA                                  | <i>Ca_desi_denovo</i> | 62214737                | A/G  | NA                 | NA                            | NA                 |
| <i>Desi_wild_62214738</i> | NA                                  | <i>Ca_desi_denovo</i> | 62214738                | C/T  | NA                 | NA                            | NA                 |
| <i>Desi_wild_62214913</i> | NA                                  | <i>Ca_desi_denovo</i> | 62214913                | C/G  | NA                 | NA                            | NA                 |
| <i>Desi_wild_62215358</i> | NA                                  | <i>Ca_desi_denovo</i> | 62215358                | A/G  | NA                 | NA                            | NA                 |
| <i>Desi_wild_62218871</i> | NA                                  | <i>Ca_desi_denovo</i> | 62218871                | C/G  | NA                 | NA                            | NA                 |
| <i>Desi_wild_62218872</i> | NA                                  | <i>Ca_desi_denovo</i> | 62218872                | C/T  | NA                 | NA                            | NA                 |
| <i>Desi_wild_62219792</i> | NA                                  | <i>Ca_desi_denovo</i> | 62219792                | A/T  | NA                 | NA                            | NA                 |
| <i>Desi_wild_62219845</i> | NA                                  | <i>Ca_desi_denovo</i> | 62219845                | A/C  | NA                 | NA                            | NA                 |
| <i>Desi_wild_62229993</i> | NA                                  | <i>Ca_desi_denovo</i> | 62229993                | C/T  | NA                 | NA                            | NA                 |
| <i>Desi_wild_62230624</i> | NA                                  | <i>Ca_desi_denovo</i> | 62230624                | A/C  | NA                 | NA                            | NA                 |
| <i>Desi_wild_62232437</i> | NA                                  | <i>Ca_desi_denovo</i> | 62232437                | A/G  | NA                 | NA                            | NA                 |
| <i>Desi_wild_62232471</i> | NA                                  | <i>Ca_desi_denovo</i> | 62232471                | C/T  | NA                 | NA                            | NA                 |
| <i>Desi_wild_62235479</i> | NA                                  | <i>Ca_desi_denovo</i> | 62235479                | C/T  | NA                 | NA                            | NA                 |
| <i>Desi_wild_62237792</i> | NA                                  | <i>Ca_desi_denovo</i> | 62237792                | C/T  | NA                 | NA                            | NA                 |
| <i>Desi_wild_62239830</i> | NA                                  | <i>Ca_desi_denovo</i> | 62239830                | C/T  | NA                 | NA                            | NA                 |
| <i>Desi_wild_62242986</i> | NA                                  | <i>Ca_desi_denovo</i> | 62242986                | G/T  | NA                 | NA                            | NA                 |
| <i>Desi_wild_62244982</i> | NA                                  | <i>Ca_desi_denovo</i> | 62244982                | G/T  | NA                 | NA                            | NA                 |
| <i>Desi_wild_62245000</i> | NA                                  | <i>Ca_desi_denovo</i> | 62245000                | A/G  | NA                 | NA                            | NA                 |
| <i>Desi_wild_62247076</i> | NA                                  | <i>Ca_desi_denovo</i> | 62247076                | C/T  | NA                 | NA                            | NA                 |
| <i>Desi_wild_62248378</i> | NA                                  | <i>Ca_desi_denovo</i> | 62248378                | A/T  | NA                 | NA                            | NA                 |
| <i>Desi_wild_62254222</i> | NA                                  | <i>Ca_desi_denovo</i> | 62254222                | C/T  | NA                 | NA                            | NA                 |
| <i>Desi_wild_62256666</i> | NA                                  | <i>Ca_desi_denovo</i> | 62256666                | A/G  | NA                 | NA                            | NA                 |
| <i>Desi_wild_62256675</i> | NA                                  | <i>Ca_desi_denovo</i> | 62256675                | A/T  | NA                 | NA                            | NA                 |
| <i>Desi_wild_62257299</i> | NA                                  | <i>Ca_desi_denovo</i> | 62257299                | A/G  | NA                 | NA                            | NA                 |
| <i>Desi_wild_62258375</i> | NA                                  | <i>Ca_desi_denovo</i> | 62258375                | A/G  | NA                 | NA                            | NA                 |
| <i>Desi_wild_62268688</i> | NA                                  | <i>Ca_desi_denovo</i> | 62268688                | G/T  | NA                 | NA                            | NA                 |
| <i>Desi_wild_62269844</i> | NA                                  | <i>Ca_desi_denovo</i> | 62269844                | A/G  | NA                 | NA                            | NA                 |
| <i>Desi_wild_62269848</i> | NA                                  | <i>Ca_desi_denovo</i> | 62269848                | A/G  | NA                 | NA                            | NA                 |
| <i>Desi_wild_62284902</i> | NA                                  | <i>Ca_desi_denovo</i> | 62284902                | A/G  | NA                 | NA                            | NA                 |

| SNP IDs                   | NCBI dbSNP accession IDs (NCBI_SS#) | Chromosomes           | Physical positions (bp) | SNPs | Gene accession IDs | Sequence components of genome | Putative functions |
|---------------------------|-------------------------------------|-----------------------|-------------------------|------|--------------------|-------------------------------|--------------------|
| <i>Desi_wild_62284920</i> | NA                                  | <i>Ca_desi_denovo</i> | 62284920                | C/T  | NA                 | NA                            | NA                 |
| <i>Desi_wild_62293120</i> | NA                                  | <i>Ca_desi_denovo</i> | 62293120                | C/T  | NA                 | NA                            | NA                 |
| <i>Desi_wild_62293123</i> | NA                                  | <i>Ca_desi_denovo</i> | 62293123                | C/T  | NA                 | NA                            | NA                 |
| <i>Desi_wild_62304367</i> | NA                                  | <i>Ca_desi_denovo</i> | 62304367                | G/T  | NA                 | NA                            | NA                 |
| <i>Desi_wild_62304387</i> | NA                                  | <i>Ca_desi_denovo</i> | 62304387                | C/G  | NA                 | NA                            | NA                 |
| <i>Desi_wild_62304408</i> | NA                                  | <i>Ca_desi_denovo</i> | 62304408                | C/T  | NA                 | NA                            | NA                 |
| <i>Desi_wild_62304411</i> | NA                                  | <i>Ca_desi_denovo</i> | 62304411                | C/G  | NA                 | NA                            | NA                 |
| <i>Desi_wild_62305677</i> | NA                                  | <i>Ca_desi_denovo</i> | 62305677                | C/G  | NA                 | NA                            | NA                 |
| <i>Desi_wild_62305994</i> | NA                                  | <i>Ca_desi_denovo</i> | 62305994                | A/G  | NA                 | NA                            | NA                 |
| <i>Desi_wild_62316679</i> | NA                                  | <i>Ca_desi_denovo</i> | 62316679                | G/T  | NA                 | NA                            | NA                 |
| <i>Desi_wild_62321247</i> | NA                                  | <i>Ca_desi_denovo</i> | 62321247                | C/G  | NA                 | NA                            | NA                 |
| <i>Desi_wild_62321259</i> | NA                                  | <i>Ca_desi_denovo</i> | 62321259                | A/G  | NA                 | NA                            | NA                 |
| <i>Desi_wild_62321283</i> | NA                                  | <i>Ca_desi_denovo</i> | 62321283                | A/C  | NA                 | NA                            | NA                 |
| <i>Desi_wild_62321310</i> | NA                                  | <i>Ca_desi_denovo</i> | 62321310                | A/G  | NA                 | NA                            | NA                 |
| <i>Desi_wild_62322000</i> | NA                                  | <i>Ca_desi_denovo</i> | 62322000                | C/T  | NA                 | NA                            | NA                 |
| <i>Desi_wild_62322012</i> | NA                                  | <i>Ca_desi_denovo</i> | 62322012                | A/G  | NA                 | NA                            | NA                 |
| <i>Desi_wild_62322018</i> | NA                                  | <i>Ca_desi_denovo</i> | 62322018                | A/G  | NA                 | NA                            | NA                 |
| <i>Desi_wild_62322036</i> | NA                                  | <i>Ca_desi_denovo</i> | 62322036                | C/T  | NA                 | NA                            | NA                 |
| <i>Desi_wild_62337468</i> | NA                                  | <i>Ca_desi_denovo</i> | 62337468                | C/T  | NA                 | NA                            | NA                 |
| <i>Desi_wild_62337515</i> | NA                                  | <i>Ca_desi_denovo</i> | 62337515                | C/G  | NA                 | NA                            | NA                 |
| <i>Desi_wild_62340446</i> | NA                                  | <i>Ca_desi_denovo</i> | 62340446                | C/G  | NA                 | NA                            | NA                 |
| <i>Desi_wild_62346956</i> | NA                                  | <i>Ca_desi_denovo</i> | 62346956                | G/T  | NA                 | NA                            | NA                 |
| <i>Desi_wild_62346957</i> | NA                                  | <i>Ca_desi_denovo</i> | 62346957                | A/G  | NA                 | NA                            | NA                 |
| <i>Desi_wild_62346959</i> | NA                                  | <i>Ca_desi_denovo</i> | 62346959                | C/G  | NA                 | NA                            | NA                 |
| <i>Desi_wild_62351125</i> | NA                                  | <i>Ca_desi_denovo</i> | 62351125                | C/T  | NA                 | NA                            | NA                 |
| <i>Desi_wild_62351131</i> | NA                                  | <i>Ca_desi_denovo</i> | 62351131                | C/T  | NA                 | NA                            | NA                 |
| <i>Desi_wild_62358117</i> | NA                                  | <i>Ca_desi_denovo</i> | 62358117                | A/G  | NA                 | NA                            | NA                 |
| <i>Desi_wild_62364242</i> | NA                                  | <i>Ca_desi_denovo</i> | 62364242                | C/T  | NA                 | NA                            | NA                 |
| <i>Desi_wild_62387793</i> | NA                                  | <i>Ca_desi_denovo</i> | 62387793                | C/T  | NA                 | NA                            | NA                 |
| <i>Desi_wild_62387805</i> | NA                                  | <i>Ca_desi_denovo</i> | 62387805                | C/T  | NA                 | NA                            | NA                 |
| <i>Desi_wild_62390342</i> | NA                                  | <i>Ca_desi_denovo</i> | 62390342                | A/C  | NA                 | NA                            | NA                 |
| <i>Desi_wild_62394581</i> | NA                                  | <i>Ca_desi_denovo</i> | 62394581                | G/T  | NA                 | NA                            | NA                 |
| <i>Desi_wild_62394584</i> | NA                                  | <i>Ca_desi_denovo</i> | 62394584                | C/G  | NA                 | NA                            | NA                 |
| <i>Desi_wild_62419961</i> | NA                                  | <i>Ca_desi_denovo</i> | 62419961                | A/G  | NA                 | NA                            | NA                 |
| <i>Desi_wild_62425877</i> | NA                                  | <i>Ca_desi_denovo</i> | 62425877                | C/T  | NA                 | NA                            | NA                 |
| <i>Desi_wild_62425883</i> | NA                                  | <i>Ca_desi_denovo</i> | 62425883                | C/G  | NA                 | NA                            | NA                 |
| <i>Desi_wild_62425911</i> | NA                                  | <i>Ca_desi_denovo</i> | 62425911                | A/T  | NA                 | NA                            | NA                 |
| <i>Desi_wild_62428793</i> | NA                                  | <i>Ca_desi_denovo</i> | 62428793                | C/T  | NA                 | NA                            | NA                 |
| <i>Desi_wild_62431089</i> | NA                                  | <i>Ca_desi_denovo</i> | 62431089                | A/G  | NA                 | NA                            | NA                 |
| <i>Desi_wild_62448642</i> | NA                                  | <i>Ca_desi_denovo</i> | 62448642                | C/T  | NA                 | NA                            | NA                 |
| <i>Desi_wild_62466207</i> | NA                                  | <i>Ca_desi_denovo</i> | 62466207                | A/T  | NA                 | NA                            | NA                 |
| <i>Desi_wild_62466221</i> | NA                                  | <i>Ca_desi_denovo</i> | 62466221                | A/G  | NA                 | NA                            | NA                 |
| <i>Desi_wild_62475993</i> | NA                                  | <i>Ca_desi_denovo</i> | 62475993                | C/T  | NA                 | NA                            | NA                 |
| <i>Desi_wild_62476023</i> | NA                                  | <i>Ca_desi_denovo</i> | 62476023                | C/T  | NA                 | NA                            | NA                 |



| SNP IDs                   | NCBI dbSNP accession IDs (NCBI_SS#) | Chromosomes           | Physical positions (bp) | SNPs | Gene accession IDs | Sequence components of genome | Putative functions |
|---------------------------|-------------------------------------|-----------------------|-------------------------|------|--------------------|-------------------------------|--------------------|
| <i>Desi_wild_62477624</i> | NA                                  | <i>Ca_desi_denovo</i> | 62477624                | A/G  | NA                 | NA                            | NA                 |
| <i>Desi_wild_62477672</i> | NA                                  | <i>Ca_desi_denovo</i> | 62477672                | A/C  | NA                 | NA                            | NA                 |
| <i>Desi_wild_62481086</i> | NA                                  | <i>Ca_desi_denovo</i> | 62481086                | C/T  | NA                 | NA                            | NA                 |
| <i>Desi_wild_62481125</i> | NA                                  | <i>Ca_desi_denovo</i> | 62481125                | C/T  | NA                 | NA                            | NA                 |
| <i>Desi_wild_62486469</i> | NA                                  | <i>Ca_desi_denovo</i> | 62486469                | C/T  | NA                 | NA                            | NA                 |
| <i>Desi_wild_62497714</i> | NA                                  | <i>Ca_desi_denovo</i> | 62497714                | A/G  | NA                 | NA                            | NA                 |
| <i>Desi_wild_62513036</i> | NA                                  | <i>Ca_desi_denovo</i> | 62513036                | C/T  | NA                 | NA                            | NA                 |
| <i>Desi_wild_62516066</i> | NA                                  | <i>Ca_desi_denovo</i> | 62516066                | A/T  | NA                 | NA                            | NA                 |
| <i>Desi_wild_62516071</i> | NA                                  | <i>Ca_desi_denovo</i> | 62516071                | A/C  | NA                 | NA                            | NA                 |
| <i>Desi_wild_62520557</i> | NA                                  | <i>Ca_desi_denovo</i> | 62520557                | C/T  | NA                 | NA                            | NA                 |
| <i>Desi_wild_62522460</i> | NA                                  | <i>Ca_desi_denovo</i> | 62522460                | C/T  | NA                 | NA                            | NA                 |
| <i>Desi_wild_62527649</i> | NA                                  | <i>Ca_desi_denovo</i> | 62527649                | C/G  | NA                 | NA                            | NA                 |
| <i>Desi_wild_62527658</i> | NA                                  | <i>Ca_desi_denovo</i> | 62527658                | A/G  | NA                 | NA                            | NA                 |
| <i>Desi_wild_62528337</i> | NA                                  | <i>Ca_desi_denovo</i> | 62528337                | A/G  | NA                 | NA                            | NA                 |
| <i>Desi_wild_62533596</i> | NA                                  | <i>Ca_desi_denovo</i> | 62533596                | A/G  | NA                 | NA                            | NA                 |
| <i>Desi_wild_62535050</i> | NA                                  | <i>Ca_desi_denovo</i> | 62535050                | C/G  | NA                 | NA                            | NA                 |
| <i>Desi_wild_62538839</i> | NA                                  | <i>Ca_desi_denovo</i> | 62538839                | G/T  | NA                 | NA                            | NA                 |
| <i>Desi_wild_62539263</i> | NA                                  | <i>Ca_desi_denovo</i> | 62539263                | A/G  | NA                 | NA                            | NA                 |
| <i>Desi_wild_62540617</i> | NA                                  | <i>Ca_desi_denovo</i> | 62540617                | A/G  | NA                 | NA                            | NA                 |
| <i>Desi_wild_62559084</i> | NA                                  | <i>Ca_desi_denovo</i> | 62559084                | C/G  | NA                 | NA                            | NA                 |
| <i>Desi_wild_62563737</i> | NA                                  | <i>Ca_desi_denovo</i> | 62563737                | A/G  | NA                 | NA                            | NA                 |
| <i>Desi_wild_62568736</i> | NA                                  | <i>Ca_desi_denovo</i> | 62568736                | C/T  | NA                 | NA                            | NA                 |
| <i>Desi_wild_62570606</i> | NA                                  | <i>Ca_desi_denovo</i> | 62570606                | C/G  | NA                 | NA                            | NA                 |
| <i>Desi_wild_62574600</i> | NA                                  | <i>Ca_desi_denovo</i> | 62574600                | C/G  | NA                 | NA                            | NA                 |
| <i>Desi_wild_62589578</i> | NA                                  | <i>Ca_desi_denovo</i> | 62589578                | G/T  | NA                 | NA                            | NA                 |
| <i>Desi_wild_62589579</i> | NA                                  | <i>Ca_desi_denovo</i> | 62589579                | A/G  | NA                 | NA                            | NA                 |
| <i>Desi_wild_62596317</i> | NA                                  | <i>Ca_desi_denovo</i> | 62596317                | C/G  | NA                 | NA                            | NA                 |
| <i>Desi_wild_62596730</i> | NA                                  | <i>Ca_desi_denovo</i> | 62596730                | C/G  | NA                 | NA                            | NA                 |
| <i>Desi_wild_62606660</i> | NA                                  | <i>Ca_desi_denovo</i> | 62606660                | C/G  | NA                 | NA                            | NA                 |
| <i>Desi_wild_62606661</i> | NA                                  | <i>Ca_desi_denovo</i> | 62606661                | A/G  | NA                 | NA                            | NA                 |
| <i>Desi_wild_62622868</i> | NA                                  | <i>Ca_desi_denovo</i> | 62622868                | A/G  | NA                 | NA                            | NA                 |
| <i>Desi_wild_62622876</i> | NA                                  | <i>Ca_desi_denovo</i> | 62622876                | C/T  | NA                 | NA                            | NA                 |
| <i>Desi_wild_62624252</i> | NA                                  | <i>Ca_desi_denovo</i> | 62624252                | C/T  | NA                 | NA                            | NA                 |
| <i>Desi_wild_62636413</i> | NA                                  | <i>Ca_desi_denovo</i> | 62636413                | C/G  | NA                 | NA                            | NA                 |
| <i>Desi_wild_62637511</i> | NA                                  | <i>Ca_desi_denovo</i> | 62637511                | A/G  | NA                 | NA                            | NA                 |
| <i>Desi_wild_62644956</i> | NA                                  | <i>Ca_desi_denovo</i> | 62644956                | C/T  | NA                 | NA                            | NA                 |
| <i>Desi_wild_62644968</i> | NA                                  | <i>Ca_desi_denovo</i> | 62644968                | C/T  | NA                 | NA                            | NA                 |
| <i>Desi_wild_62649285</i> | NA                                  | <i>Ca_desi_denovo</i> | 62649285                | C/G  | NA                 | NA                            | NA                 |
| <i>Desi_wild_62650128</i> | NA                                  | <i>Ca_desi_denovo</i> | 62650128                | A/G  | NA                 | NA                            | NA                 |
| <i>Desi_wild_62650170</i> | NA                                  | <i>Ca_desi_denovo</i> | 62650170                | A/G  | NA                 | NA                            | NA                 |
| <i>Desi_wild_62651659</i> | NA                                  | <i>Ca_desi_denovo</i> | 62651659                | A/G  | NA                 | NA                            | NA                 |
| <i>Desi_wild_62651701</i> | NA                                  | <i>Ca_desi_denovo</i> | 62651701                | A/T  | NA                 | NA                            | NA                 |
| <i>Desi_wild_62660597</i> | NA                                  | <i>Ca_desi_denovo</i> | 62660597                | C/G  | NA                 | NA                            | NA                 |
| <i>Desi_wild_62660609</i> | NA                                  | <i>Ca_desi_denovo</i> | 62660609                | C/T  | NA                 | NA                            | NA                 |

| SNP IDs                   | NCBI dbSNP accession IDs (NCBI_SS#) | Chromosomes           | Physical positions (bp) | SNPs | Gene accession IDs | Sequence components of genome | Putative functions |
|---------------------------|-------------------------------------|-----------------------|-------------------------|------|--------------------|-------------------------------|--------------------|
| <i>Desi_wild_62664168</i> | NA                                  | <i>Ca_desi_denovo</i> | 62664168                | A/G  | NA                 | NA                            | NA                 |
| <i>Desi_wild_62664177</i> | NA                                  | <i>Ca_desi_denovo</i> | 62664177                | A/G  | NA                 | NA                            | NA                 |
| <i>Desi_wild_62672505</i> | NA                                  | <i>Ca_desi_denovo</i> | 62672505                | C/T  | NA                 | NA                            | NA                 |
| <i>Desi_wild_62678869</i> | NA                                  | <i>Ca_desi_denovo</i> | 62678869                | C/T  | NA                 | NA                            | NA                 |
| <i>Desi_wild_62694590</i> | NA                                  | <i>Ca_desi_denovo</i> | 62694590                | A/C  | NA                 | NA                            | NA                 |
| <i>Desi_wild_62699083</i> | NA                                  | <i>Ca_desi_denovo</i> | 62699083                | A/G  | NA                 | NA                            | NA                 |
| <i>Desi_wild_62716668</i> | NA                                  | <i>Ca_desi_denovo</i> | 62716668                | A/G  | NA                 | NA                            | NA                 |
| <i>Desi_wild_62716671</i> | NA                                  | <i>Ca_desi_denovo</i> | 62716671                | A/G  | NA                 | NA                            | NA                 |
| <i>Desi_wild_62716734</i> | NA                                  | <i>Ca_desi_denovo</i> | 62716734                | C/T  | NA                 | NA                            | NA                 |
| <i>Desi_wild_62744176</i> | NA                                  | <i>Ca_desi_denovo</i> | 62744176                | C/T  | NA                 | NA                            | NA                 |
| <i>Desi_wild_62748928</i> | NA                                  | <i>Ca_desi_denovo</i> | 62748928                | C/T  | NA                 | NA                            | NA                 |
| <i>Desi_wild_62748962</i> | NA                                  | <i>Ca_desi_denovo</i> | 62748962                | A/T  | NA                 | NA                            | NA                 |
| <i>Desi_wild_62748983</i> | NA                                  | <i>Ca_desi_denovo</i> | 62748983                | C/G  | NA                 | NA                            | NA                 |
| <i>Desi_wild_62756114</i> | NA                                  | <i>Ca_desi_denovo</i> | 62756114                | C/T  | NA                 | NA                            | NA                 |
| <i>Desi_wild_62756138</i> | NA                                  | <i>Ca_desi_denovo</i> | 62756138                | A/G  | NA                 | NA                            | NA                 |
| <i>Desi_wild_62762119</i> | NA                                  | <i>Ca_desi_denovo</i> | 62762119                | A/G  | NA                 | NA                            | NA                 |
| <i>Desi_wild_62762552</i> | NA                                  | <i>Ca_desi_denovo</i> | 62762552                | C/G  | NA                 | NA                            | NA                 |
| <i>Desi_wild_62783800</i> | NA                                  | <i>Ca_desi_denovo</i> | 62783800                | C/T  | NA                 | NA                            | NA                 |
| <i>Desi_wild_62785881</i> | NA                                  | <i>Ca_desi_denovo</i> | 62785881                | C/T  | NA                 | NA                            | NA                 |
| <i>Desi_wild_62787638</i> | NA                                  | <i>Ca_desi_denovo</i> | 62787638                | C/T  | NA                 | NA                            | NA                 |
| <i>Desi_wild_62792654</i> | NA                                  | <i>Ca_desi_denovo</i> | 62792654                | A/G  | NA                 | NA                            | NA                 |
| <i>Desi_wild_62793581</i> | NA                                  | <i>Ca_desi_denovo</i> | 62793581                | A/G  | NA                 | NA                            | NA                 |
| <i>Desi_wild_62816112</i> | NA                                  | <i>Ca_desi_denovo</i> | 62816112                | A/G  | NA                 | NA                            | NA                 |
| <i>Desi_wild_62816115</i> | NA                                  | <i>Ca_desi_denovo</i> | 62816115                | C/G  | NA                 | NA                            | NA                 |
| <i>Desi_wild_62816138</i> | NA                                  | <i>Ca_desi_denovo</i> | 62816138                | C/T  | NA                 | NA                            | NA                 |
| <i>Desi_wild_62816163</i> | NA                                  | <i>Ca_desi_denovo</i> | 62816163                | G/T  | NA                 | NA                            | NA                 |
| <i>Desi_wild_62826941</i> | NA                                  | <i>Ca_desi_denovo</i> | 62826941                | C/T  | NA                 | NA                            | NA                 |
| <i>Desi_wild_62842838</i> | NA                                  | <i>Ca_desi_denovo</i> | 62842838                | C/G  | NA                 | NA                            | NA                 |
| <i>Desi_wild_62853779</i> | NA                                  | <i>Ca_desi_denovo</i> | 62853779                | A/G  | NA                 | NA                            | NA                 |
| <i>Desi_wild_62853864</i> | NA                                  | <i>Ca_desi_denovo</i> | 62853864                | C/T  | NA                 | NA                            | NA                 |
| <i>Desi_wild_62854616</i> | NA                                  | <i>Ca_desi_denovo</i> | 62854616                | A/G  | NA                 | NA                            | NA                 |
| <i>Desi_wild_62854628</i> | NA                                  | <i>Ca_desi_denovo</i> | 62854628                | A/G  | NA                 | NA                            | NA                 |
| <i>Desi_wild_62857025</i> | NA                                  | <i>Ca_desi_denovo</i> | 62857025                | C/T  | NA                 | NA                            | NA                 |
| <i>Desi_wild_62858550</i> | NA                                  | <i>Ca_desi_denovo</i> | 62858550                | A/G  | NA                 | NA                            | NA                 |
| <i>Desi_wild_62858559</i> | NA                                  | <i>Ca_desi_denovo</i> | 62858559                | A/G  | NA                 | NA                            | NA                 |
| <i>Desi_wild_62858601</i> | NA                                  | <i>Ca_desi_denovo</i> | 62858601                | C/G  | NA                 | NA                            | NA                 |
| <i>Desi_wild_62888022</i> | NA                                  | <i>Ca_desi_denovo</i> | 62888022                | C/T  | NA                 | NA                            | NA                 |
| <i>Desi_wild_62919156</i> | NA                                  | <i>Ca_desi_denovo</i> | 62919156                | A/G  | NA                 | NA                            | NA                 |
| <i>Desi_wild_62919165</i> | NA                                  | <i>Ca_desi_denovo</i> | 62919165                | A/C  | NA                 | NA                            | NA                 |
| <i>Desi_wild_62924054</i> | NA                                  | <i>Ca_desi_denovo</i> | 62924054                | C/G  | NA                 | NA                            | NA                 |
| <i>Desi_wild_62934495</i> | NA                                  | <i>Ca_desi_denovo</i> | 62934495                | C/G  | NA                 | NA                            | NA                 |
| <i>Desi_wild_62940449</i> | NA                                  | <i>Ca_desi_denovo</i> | 62940449                | A/G  | NA                 | NA                            | NA                 |
| <i>Desi_wild_62940459</i> | NA                                  | <i>Ca_desi_denovo</i> | 62940459                | C/T  | NA                 | NA                            | NA                 |
| <i>Desi_wild_62945476</i> | NA                                  | <i>Ca_desi_denovo</i> | 62945476                | A/G  | NA                 | NA                            | NA                 |

| SNP IDs                   | NCBI dbSNP accession IDs (NCBI_SS#) | Chromosomes           | Physical positions (bp) | SNPs | Gene accession IDs | Sequence components of genome | Putative functions |
|---------------------------|-------------------------------------|-----------------------|-------------------------|------|--------------------|-------------------------------|--------------------|
| <i>Desi_wild_62948685</i> | NA                                  | <i>Ca_desi_denovo</i> | 62948685                | C/T  | NA                 | NA                            | NA                 |
| <i>Desi_wild_62948712</i> | NA                                  | <i>Ca_desi_denovo</i> | 62948712                | C/T  | NA                 | NA                            | NA                 |
| <i>Desi_wild_62970957</i> | NA                                  | <i>Ca_desi_denovo</i> | 62970957                | A/G  | NA                 | NA                            | NA                 |
| <i>Desi_wild_62974901</i> | NA                                  | <i>Ca_desi_denovo</i> | 62974901                | A/G  | NA                 | NA                            | NA                 |
| <i>Desi_wild_62980470</i> | NA                                  | <i>Ca_desi_denovo</i> | 62980470                | A/T  | NA                 | NA                            | NA                 |
| <i>Desi_wild_62980867</i> | NA                                  | <i>Ca_desi_denovo</i> | 62980867                | A/G  | NA                 | NA                            | NA                 |
| <i>Desi_wild_62986515</i> | NA                                  | <i>Ca_desi_denovo</i> | 62986515                | C/G  | NA                 | NA                            | NA                 |
| <i>Desi_wild_62986518</i> | NA                                  | <i>Ca_desi_denovo</i> | 62986518                | A/G  | NA                 | NA                            | NA                 |
| <i>Desi_wild_62986521</i> | NA                                  | <i>Ca_desi_denovo</i> | 62986521                | A/G  | NA                 | NA                            | NA                 |
| <i>Desi_wild_62986525</i> | NA                                  | <i>Ca_desi_denovo</i> | 62986525                | C/T  | NA                 | NA                            | NA                 |
| <i>Desi_wild_62995342</i> | NA                                  | <i>Ca_desi_denovo</i> | 62995342                | A/G  | NA                 | NA                            | NA                 |
| <i>Desi_wild_62995345</i> | NA                                  | <i>Ca_desi_denovo</i> | 62995345                | A/G  | NA                 | NA                            | NA                 |
| <i>Desi_wild_62995381</i> | NA                                  | <i>Ca_desi_denovo</i> | 62995381                | A/G  | NA                 | NA                            | NA                 |
| <i>Desi_wild_62996912</i> | NA                                  | <i>Ca_desi_denovo</i> | 62996912                | A/G  | NA                 | NA                            | NA                 |
| <i>Desi_wild_62996926</i> | NA                                  | <i>Ca_desi_denovo</i> | 62996926                | C/T  | NA                 | NA                            | NA                 |
| <i>Desi_wild_62996982</i> | NA                                  | <i>Ca_desi_denovo</i> | 62996982                | A/C  | NA                 | NA                            | NA                 |
| <i>Desi_wild_62996994</i> | NA                                  | <i>Ca_desi_denovo</i> | 62996994                | A/G  | NA                 | NA                            | NA                 |
| <i>Desi_wild_62997047</i> | NA                                  | <i>Ca_desi_denovo</i> | 62997047                | A/T  | NA                 | NA                            | NA                 |
| <i>Desi_wild_63001160</i> | NA                                  | <i>Ca_desi_denovo</i> | 63001160                | A/T  | NA                 | NA                            | NA                 |
| <i>Desi_wild_63001163</i> | NA                                  | <i>Ca_desi_denovo</i> | 63001163                | A/T  | NA                 | NA                            | NA                 |
| <i>Desi_wild_63001824</i> | NA                                  | <i>Ca_desi_denovo</i> | 63001824                | A/T  | NA                 | NA                            | NA                 |
| <i>Desi_wild_63009934</i> | NA                                  | <i>Ca_desi_denovo</i> | 63009934                | A/T  | NA                 | NA                            | NA                 |
| <i>Desi_wild_63010104</i> | NA                                  | <i>Ca_desi_denovo</i> | 63010104                | G/T  | NA                 | NA                            | NA                 |
| <i>Desi_wild_63010203</i> | NA                                  | <i>Ca_desi_denovo</i> | 63010203                | A/C  | NA                 | NA                            | NA                 |
| <i>Desi_wild_63011579</i> | NA                                  | <i>Ca_desi_denovo</i> | 63011579                | A/C  | NA                 | NA                            | NA                 |
| <i>Desi_wild_63011581</i> | NA                                  | <i>Ca_desi_denovo</i> | 63011581                | G/T  | NA                 | NA                            | NA                 |
| <i>Desi_wild_63015154</i> | NA                                  | <i>Ca_desi_denovo</i> | 63015154                | A/G  | NA                 | NA                            | NA                 |
| <i>Desi_wild_63016223</i> | NA                                  | <i>Ca_desi_denovo</i> | 63016223                | C/T  | NA                 | NA                            | NA                 |
| <i>Desi_wild_63040560</i> | NA                                  | <i>Ca_desi_denovo</i> | 63040560                | A/G  | NA                 | NA                            | NA                 |
| <i>Desi_wild_63040561</i> | NA                                  | <i>Ca_desi_denovo</i> | 63040561                | A/G  | NA                 | NA                            | NA                 |
| <i>Desi_wild_63040562</i> | NA                                  | <i>Ca_desi_denovo</i> | 63040562                | A/G  | NA                 | NA                            | NA                 |
| <i>Desi_wild_63042654</i> | NA                                  | <i>Ca_desi_denovo</i> | 63042654                | C/T  | NA                 | NA                            | NA                 |
| <i>Desi_wild_63102836</i> | NA                                  | <i>Ca_desi_denovo</i> | 63102836                | A/C  | NA                 | NA                            | NA                 |
| <i>Desi_wild_63102862</i> | NA                                  | <i>Ca_desi_denovo</i> | 63102862                | C/T  | NA                 | NA                            | NA                 |
| <i>Desi_wild_63102868</i> | NA                                  | <i>Ca_desi_denovo</i> | 63102868                | C/T  | NA                 | NA                            | NA                 |
| <i>Desi_wild_63102893</i> | NA                                  | <i>Ca_desi_denovo</i> | 63102893                | A/C  | NA                 | NA                            | NA                 |

SNPs within the functional domains-encoding SNP-carrying *desi* and *kabuli* genes are marked with red colour.

**Table S3:** Genomic distribution and nucleotide diversity potential of *desi* reference genome- and *de novo*-based GBS-SNPs among 93 wild and cultivated *Cicer* accessions

| Chromosomes                      | Size (Mb) of chromosomes (pseudomolecules) | Number (%) of SNPs mapped | Average map density (kb) | Nucleotide diversity |                |
|----------------------------------|--------------------------------------------|---------------------------|--------------------------|----------------------|----------------|
|                                  |                                            |                           |                          | $\theta\pi$          | $\theta\omega$ |
| Ca- <i>desi</i> -Chr01           | 14.79                                      | 593 (12.7)                | 24.9                     | 0.28                 | 0.33           |
| Ca- <i>desi</i> -Chr02           | 17.30                                      | 588 (12.6)                | 29.4                     | 0.27                 | 0.31           |
| Ca- <i>desi</i> -Chr03           | 23.38                                      | 923 (19.8)                | 25.3                     | 0.28                 | 0.32           |
| Ca- <i>desi</i> -Chr04           | 22.09                                      | 930 (19.9)                | 23.8                     | 0.31                 | 0.30           |
| Ca- <i>desi</i> -Chr05           | 16.30                                      | 453 (9.7)                 | 35.9                     | 0.22                 | 0.33           |
| Ca- <i>desi</i> -Chr06           | 11.48                                      | 517 (11.1)                | 22.2                     | 0.27                 | 0.33           |
| Ca- <i>desi</i> -Chr07           | 8.46                                       | 313 (6.7)                 | 27.0                     | 0.24                 | 0.31           |
| Ca- <i>desi</i> -Chr08           | 10.57                                      | 355 (7.6)                 | 29.8                     | 0.34                 | 0.33           |
| <b>Total</b>                     | <b>124.37</b>                              | <b>4672</b>               | <b>26.6</b>              | <b>0.28</b>          | <b>0.33</b>    |
| Ca- <i>desi</i> -Scaffold        | NA                                         | 7440                      | NA                       | 0.29                 | 0.34           |
| Ca- <i>desi</i> - <i>de novo</i> | NA                                         | 26399                     | NA                       | 0.17                 | 0.15           |
| <b>Total</b>                     | <b>NA</b>                                  | <b>38511</b>              | <b>NA</b>                | <b>0.27</b>          | <b>0.32</b>    |

Ca-*desi*-Chr: *Cicer arietinum desi* chromosome

$\theta\pi$ : Average pair-wise nucleotide diversity

$\theta\omega$ : Watterson's estimator of segregating sites

**Table S4:** Proportionate distribution of transition and transversion SNPs discovered from 93 wild and cultivated *Cicer* accessions through GBS assay

| <b>Transitions</b>  |              | <b>Transversions</b> |              |              |              | <b>Total SNPs discovered</b> |
|---------------------|--------------|----------------------|--------------|--------------|--------------|------------------------------|
| <b>(A/G)</b>        | <b>(C/T)</b> | <b>(A/C)</b>         | <b>(A/T)</b> | <b>(C/G)</b> | <b>(G/T)</b> |                              |
| 23108 (51.2)        | 21991 (48.8) | 9234 (24.7)          | 5356 (14.3)  | 11510 (30.8) | 11290 (30.2) |                              |
| <b>45099 (54.7)</b> |              | <b>37390 (45.3)</b>  |              |              |              | <b>82489</b>                 |

**Table S5:** Validation success rate of genome-wide SNPs identified through GBS assay with previously discovered SNPs among four *Cicer* accessions

| <b>Accessions</b>                       | <b>Whole genome resequencing-based SNPs*</b> | <b>GBS-based SNPs</b> | <b>Number (%) of same common SNPs validated</b> |
|-----------------------------------------|----------------------------------------------|-----------------------|-------------------------------------------------|
| ICC 4958/ICC 17160                      | 10490                                        | 7762                  | 831 (10.7)                                      |
| ICC 4958/ICC 12968                      | 10047                                        | 8002                  | 471 (5.9)                                       |
| ICC 4958/ICC 4951                       | 10482                                        | 7800                  | 414 (5.3)                                       |
| <b>All three accession combinations</b> | <b>31019</b>                                 | <b>23564</b>          | <b>1716 (7.3)</b>                               |

\*Whole genome resequence-based SNPs identified among four *Cicer* accessions were obtained from Jain et al.<sup>22</sup>

**Table S6:** Polymorphic potential detected by GBS-based genome-wide SNPs among 93 wild and cultivated *Cicer* accessions

| Species/accessions                     | Number (%) of SNPs within accessions | PIC (Polymorphism information content) | Nucleotide diversity |                |
|----------------------------------------|--------------------------------------|----------------------------------------|----------------------|----------------|
|                                        |                                      |                                        | $\theta\pi$          | $\theta\omega$ |
| <i>C. arietinum</i> (12 accessions)    | 10602 (38.1)                         | 0.08-0.38 (0.27)                       | 0.16                 | 0.18           |
| <i>C. reticulatum</i> (16 accessions)  | 12595 (45.2)                         | 0.06-0.42 (0.37)                       | 0.27                 | 0.28           |
| <i>C. echinospermum</i> (8 accessions) | 8492 (30.5)                          | 0.11-0.38 (0.34)                       | 0.28                 | 0.30           |
| <i>C. judaicum</i> (22 accessions)     | 13302 (47.7)                         | 0.04-0.45 (0.39)                       | 0.30                 | 0.29           |
| <i>C. bijugum</i> (19 accessions)      | 12055 (43.3)                         | 0.05-0.38 (0.35)                       | 0.26                 | 0.27           |
| <i>C. pinnatifidum</i> (15 accessions) | 10803 (38.8)                         | 0.06-0.37 (0.30)                       | 0.25                 | 0.26           |
| <i>C. microphyllum</i> (1 accession)   | NA                                   | NA                                     | NA                   | NA             |
| <b>Total (93 accessions)</b>           | <b>27862</b>                         | <b>0.01-0.45 (0.35)</b>                | <b>0.26</b>          | <b>0.25</b>    |

| Species/accessions                  | Number (%) of SNP within accessions | PIC (Polymorphism information content) | Nucleotide diversity |                |
|-------------------------------------|-------------------------------------|----------------------------------------|----------------------|----------------|
|                                     |                                     |                                        | $\theta\pi$          | $\theta\omega$ |
| Primary gene pool (36 accessions)   | 18306 (65.7)                        | 0.03-0.38 (0.31)                       | 0.27                 | 0.30           |
| Secondary gene Pool (56 accessions) | 20566 (73.8)                        | 0.02-0.43 (0.39)                       | 0.36                 | 0.33           |

| Species/accessions                                     | Number (%) of SNP within accessions | PIC (Polymorphism information content) | Nucleotide diversity |                |
|--------------------------------------------------------|-------------------------------------|----------------------------------------|----------------------|----------------|
|                                                        |                                     |                                        | $\theta\pi$          | $\theta\omega$ |
| Geographical origin (Central Asia) (17 accessions)     | 12269 (44.1)                        | 0.06-0.38 (0.26)                       | 0.24                 | 0.28           |
| Geographical origin (Fertile Crescent) (76 accessions) | 25190 (90.4)                        | 0.01-0.41 (0.37)                       | 0.37                 | 0.35           |

**Table S7:** Molecular diversity potential estimated among six structured populations using GBS-based genome-wide SNPs

| Between populations | Genetic distance         |                                        |      |
|---------------------|--------------------------|----------------------------------------|------|
|                     | Minimum                  | Maximum                                | Mean |
| POP I-POP II        | 0.06 (ICC4951-ICCV92311) | 0.62 (ICC4951-ILWC245)                 | 0.44 |
| POP I-POP III       | 0.06 (ICC4951-ICCV92311) | 0.62 (IC296132-ILWC49)                 | 0.41 |
| POP I-POP IV        | 0.06 (ICC4951-ICCV92311) | 0.64 (IC296132-ILWC32)                 | 0.40 |
| POP I-POP V         | 0.06 (ICC4951-ICCV92311) | 0.62 (ICCV96329-ILWC30)                | 0.42 |
| POP I-POP VI        | 0.06 (ICC4951-ICCV92311) | 0.58 ( <i>Microphyllum</i> -ICCV96970) | 0.29 |
| POP II-POP III      | 0.09 (ILWC233-ILWC219)   | 0.59 (ILWC237-ILWC9)                   | 0.42 |
| POP II-POP IV       | 0.07 (IG136796-ILWC285)  | 0.57 (ILWC258-ILWC32)                  | 0.40 |
| POP II-POP V        | 0.09 (ILWC233-ILWC219)   | 0.57 (ILWC218-ILWC283)                 | 0.41 |
| POP II-POP VI       | 0.09 (ILWC233-ILWC219)   | 0.64 ( <i>Microphyllum</i> -ILWC288)   | 0.42 |
| POP III-POP IV      | 0.06 (IG136796-ILWC285)  | 0.52 (ILWC42-ILWC9)                    | 0.35 |
| POP III-POP V       | 0.11 (ILWC9-ILWC22)      | 0.53 (ILWC48-ILWC9)                    | 0.38 |
| POP III-POP VI      | 0.11 (ILWC9-ILWC22)      | 0.58 ( <i>Microphyllum</i> -ILWC251)   | 0.35 |
| POP IV-POP V        | 0.07 (IG136796-ILWC285)  | 0.55 (ILWC42-ILWC283)                  | 0.36 |
| POP IV-POP VI       | 0.07 (IG136796-ILWC285)  | 0.63 ( <i>Microphyllum</i> -ILWC42)    | 0.33 |
| POP V-POP VI        | 0.12 (ICC182-ILWC20)     | 0.60 ( <i>Microphyllum</i> -ILWC48)    | 0.37 |



**Table S8:** Statistical measures estimated for three yield-contributing quantitative traits in 93 wild and cultivated *Cicer* accessions belonging to a structured population

| Traits                       | POP I   |           | POP II |             | POP III |             | POP IV   |             | POP V   |             |
|------------------------------|---------|-----------|--------|-------------|---------|-------------|----------|-------------|---------|-------------|
|                              | Range   | Mean      | Range  | Mean        | Range   | Mean        | Range    | Mean        | Range   | Mean        |
| Branch number per plant (BN) | 20-23   | 20.9±1    | 5.8-64 | 24.3 ± 12.2 | 5.5-42  | 19.9 ± 9.5  | 5-35     | 21.03 ± 8.9 | 7.6-28  | 17 ± 6.7    |
| Pod number per plant (PN)    | 35-130  | 72.4±33.6 | 1-150  | 31.8 ± 6.0  | 7-309   | 90.6 ± 36.7 | 1.7-27.5 | 16.5 ± 7.4  | 3.5-234 | 39.7 ± 54   |
| 100-seed weight (g) (SW)     | 17.5-70 | 33.8±16   | 2-12.5 | 7.3 ± 3.0   | 1-3     | 1.8 ± 0.4   | 4-11     | 7.7 ± 1.5   | 1.6-3.4 | 2.53 ± 0.53 |

**Table S9:** Chromosome-wise LD estimates in 93 wild and cultivated *Cicer* accessions using *desi* reference genome-based GBS-SNPs

| <b>Chromosomes</b>       | <b>Number of marker-pairs used</b> | <b><sup>a</sup>Number of significant marker-pairs in LD</b> | <b><sup>b</sup>Significant LD (%)</b> | <b>Extent of LD (r<sup>2</sup>)</b> |
|--------------------------|------------------------------------|-------------------------------------------------------------|---------------------------------------|-------------------------------------|
| Ca- <i>desi</i> -Chr01   | 175528                             | 13097                                                       | 7.5                                   | 0.60                                |
| Ca- <i>desi</i> -Chr02   | 172578                             | 9944                                                        | 5.8                                   | 0.67                                |
| Ca- <i>desi</i> -Chr03   | 425503                             | 20091                                                       | 4.7                                   | 0.45                                |
| Ca- <i>desi</i> -Chr04   | 431985                             | 57417                                                       | 13.3                                  | 0.36                                |
| Ca- <i>desi</i> -Chr05   | 102378                             | 1689                                                        | 1.6                                   | 0.64                                |
| Ca- <i>desi</i> -Chr06   | 133386                             | 9947                                                        | 7.5                                   | 0.59                                |
| Ca- <i>desi</i> -Chr07   | 48828                              | 2081                                                        | 4.3                                   | 0.36                                |
| Ca- <i>desi</i> -Chr08   | 62835                              | 5143                                                        | 8.2                                   | 0.48                                |
| <b>Total chromosomes</b> | <b>194125</b>                      | <b>14925</b>                                                | <b>6.6</b>                            | <b>0.52</b>                         |

<sup>a</sup>Percentage of SNP marker locus-pairs in significant ( $P < 0.001$ ) LD

<sup>b</sup>Significant threshold ( $P < 0.001$ ) at which pair-wise LD estimates is significant statistically
